# Supplementary material for: Profiling of Selected MicroRNAs in Proliferative Eutopic Endometrium of Women with Ovarian Endometriosis
Source: Hindawi journal article supplement (doi:10.1155/2015/760698), 2015-01-01
Supplement: f1 [file 760698.f1.zip]

Table I supplement

Table presents names of miRNAs significantly differentially expressed between eutopic endometrium of patients with endometriosis (study group) vs eutopic endometrium of patients without endometriosis (control). The columns contain miRNAs' ID, log-expression ratio ( $\log_2(\text{endometriosis/control})$ ) adjusted p-values and fold-change values, respectively.

| ID                | $\log_2(\text{endometriosis/control})$ | adj.P.Val | Fold change |
|-------------------|----------------------------------------|-----------|-------------|
| hsa-miR-4717-3p   | -0.557                                 | 0.002*    | 0.67971412  |
| hsa-miR-3127-3p   | -0.373                                 | 0.001     | 0.77217513  |
| hsa-miR-5705      | -0.406                                 | 0.001     | 0.75471298  |
| hsa-miR-4667-3p   | -0.35                                  | 0.001     | 0.7845841   |
| hsa-miR-4454      | 0.6                                    | 0.001     | 1.51571657  |
| hsa-miR-4515      | -0.43                                  | 0.002     | 0.74226179  |
| hsa-miR-4529-3p   | -0.38                                  | 0.002     | 0.76843759  |
| hsa-miR-5193      | 0.955                                  | 0.002     | 1.93857963  |
| hsa-miR-548f      | -0.325                                 | 0.002     | 0.79829839  |
| hiv1-miR-TAR-3p   | -0.345                                 | 0.002     | 0.78730798  |
| hsa-miR-518a-3p   | -0.348                                 | 0.002     | 0.78567252  |
| hsa-miR-3157-5p   | -0.52                                  | 0.002     | 0.69737183  |
| hsa-miR-4527      | -0.299                                 | 0.002     | 0.8128156   |
| hsa-miR-632       | -0.335                                 | 0.002     | 0.79278414  |
| hsa-miR-4477a     | -0.307                                 | 0.002     | 0.80832087  |
| hsa-miR-3619-3p   | -0.323                                 | 0.002     | 0.79940583  |
| hsa-miR-3140-5p   | -0.333                                 | 0.002     | 0.79388393  |
| hsa-miR-4685-3p   | -0.323                                 | 0.002     | 0.79940583  |
| hsa-miR-378f      | -0.379                                 | 0.002     | 0.76897042  |
| hsa-miR-5703      | -0.54                                  | 0.002     | 0.68777091  |
| kshv-miR-K12-2-3p | -0.283                                 | 0.002     | 0.82188019  |
| hsa-miR-548am-3p  | -0.293                                 | 0.002     | 0.81620305  |
| hsa-miR-566       | -0.353                                 | 0.002     | 0.7829543   |
| hsa-miR-1193      | -0.409                                 | 0.002     | 0.75314523  |
| hsa-miR-4683      | -0.395                                 | 0.002     | 0.76048938  |
| hsa-miR-3116      | -0.384                                 | 0.002     | 0.76630998  |
| hsa-miR-3912      | -0.289                                 | 0.002     | 0.81846918  |
| hsa-miR-3190-5p   | -0.392                                 | 0.002     | 0.76207242  |
| hsa-miR-3191-5p   | -0.237                                 | 0.002     | 0.8485079   |
| hsa-miR-410       | -0.355                                 | 0.002     | 0.78186964  |
| hsa-miR-4777-3p   | -0.314                                 | 0.002     | 0.80440837  |
| hsa-miR-770-5p    | -0.297                                 | 0.002     | 0.81394319  |
| hsa-miR-4714-5p   | 0.899                                  | 0.002     | 1.86477297  |
| hsa-miR-4446-3p   | -0.282                                 | 0.002     | 0.82245007  |
| hsa-miR-4481      | -0.414                                 | 0.002     | 0.75053955  |
| hsa-miR-5187-3p   | 0.5                                    | 0.002     | 1.41421356  |
| hsa-miR-3187-5p   | -0.367                                 | 0.002     | 0.77539321  |
| hsa-miR-4685-5p   | -0.409                                 | 0.002     | 0.75314523  |
| hsa-miR-525-5p    | -0.363                                 | 0.002     | 0.77754604  |
| hsa-miR-3173-5p   | -0.338                                 | 0.002     | 0.7911373   |
| hsa-miR-3152-5p   | 0.534                                  | 0.002     | 1.44793817  |
| hsa-miR-518c-3p   | -0.296                                 | 0.002     | 0.81450756  |
| hsa-miR-26a-2-3p  | -0.258                                 | 0.002     | 0.8362464   |
| hsa-miR-5197-3p   | -0.395                                 | 0.002     | 0.76048938  |

|                    |        |       |            |
|--------------------|--------|-------|------------|
| hsa-miR-4252       | -0.323 | 0.002 | 0.79940583 |
| hsa-miR-541-5p     | -0.314 | 0.002 | 0.80440837 |
| hsa-miR-1269b      | -0.358 | 0.002 | 0.78024548 |
| hsa-miR-1207-5p    | -0.437 | 0.002 | 0.73866903 |
| hsa-miR-4465       | -0.392 | 0.002 | 0.76207242 |
| hsa-miR-5011-3p    | -0.323 | 0.002 | 0.79940583 |
| hsa-miR-658        | -0.309 | 0.002 | 0.80720107 |
| hsa-miR-3155a      | -0.415 | 0.002 | 0.75001949 |
| hsa-miR-551b-5p    | -0.347 | 0.002 | 0.78621729 |
| hsa-miR-302f       | -0.318 | 0.002 | 0.80218117 |
| hsa-miR-654-5p     | -0.353 | 0.002 | 0.7829543  |
| hsa-miR-518c-5p    | -0.252 | 0.002 | 0.83973149 |
| hsa-miR-150-3p     | -0.304 | 0.002 | 0.81000347 |
| hsa-miR-4767       | -0.384 | 0.002 | 0.76630998 |
| hsa-miR-5706       | -0.362 | 0.002 | 0.77808518 |
| hsa-miR-5190       | -0.371 | 0.003 | 0.77324634 |
| hsa-miR-3974       | -0.267 | 0.003 | 0.83104586 |
| hsa-miR-4675       | -0.407 | 0.003 | 0.75419004 |
| hsa-miR-548a-3p    | -0.345 | 0.003 | 0.78730798 |
| hsa-miR-1248       | 0.87   | 0.003 | 1.8276629  |
| hsa-miR-1273c      | -0.294 | 0.003 | 0.81563749 |
| hsa-miR-4475       | 0.908  | 0.003 | 1.87644239 |
| hsa-miR-3122       | -0.314 | 0.003 | 0.80440837 |
| hsa-miR-583        | -0.279 | 0.003 | 0.82416208 |
| hsa-miR-302d-5p    | -0.35  | 0.003 | 0.7845841  |
| hsa-miR-3163       | -0.286 | 0.003 | 0.82017291 |
| hsa-miR-92a-3p     | 0.713  | 0.003 | 1.63920922 |
| hsa-miR-181a-3p    | -0.286 | 0.003 | 0.82017291 |
| hsa-miR-4537       | -0.377 | 0.003 | 0.77003717 |
| hsa-miR-1229-3p    | -0.26  | 0.003 | 0.83508792 |
| hsa-miR-4763-5p    | -0.275 | 0.003 | 0.82645032 |
| hsa-miR-3978       | -0.336 | 0.003 | 0.79223481 |
| hsa-miR-3180-3p    | -0.389 | 0.003 | 0.76365875 |
| hsa-miR-619        | -0.377 | 0.003 | 0.77003717 |
| hsa-miR-1539       | -0.261 | 0.003 | 0.83450928 |
| hsa-miRPlus-C1087  | -0.249 | 0.003 | 0.84147948 |
| hsa-miR-3129-3p    | -0.303 | 0.003 | 0.81056512 |
| hsa-miR-4281       | -0.367 | 0.003 | 0.77539321 |
| hsa-miR-548au-3p   | -0.267 | 0.003 | 0.83104586 |
| hsa-miR-1296       | -0.43  | 0.003 | 0.74226179 |
| hsa-miR-3186-3p    | -0.268 | 0.003 | 0.83047002 |
| hsa-miR-4678       | -0.404 | 0.003 | 0.75575996 |
| hsa-miR-4709-5p    | -0.328 | 0.003 | 0.7966401  |
| hsa-miR-4647       | -0.367 | 0.003 | 0.77539321 |
| hsa-miR-4671-3p    | -0.347 | 0.003 | 0.78621729 |
| hsa-miR-4720-5p    | -0.285 | 0.003 | 0.82074161 |
| hsa-miR-3917       | -0.304 | 0.003 | 0.81000347 |
| hsa-miR-4315       | -0.342 | 0.003 | 0.78894684 |
| hsa-miR-129-2-3p   | -0.304 | 0.003 | 0.81000347 |
| hsa-miR-3187-3p    | -0.412 | 0.003 | 0.75158074 |
| ebv-miR-BART17-3p  | -0.266 | 0.003 | 0.8316221  |
| hsa-miR-4272       | -0.308 | 0.003 | 0.80776078 |
| hsa-miR-1237-3p    | -0.361 | 0.003 | 0.77862469 |
| hsa-miR-744-3p     | -0.277 | 0.003 | 0.82530541 |
| hsa-miR-3928       | -0.303 | 0.003 | 0.81056512 |
| hsa-miR-30d-3p     | -0.291 | 0.003 | 0.81733533 |
| ebv-miR-BHRF1-2-5p | -0.269 | 0.003 | 0.82989459 |
| hsa-miR-548g-3p    | -0.443 | 0.003 | 0.73560337 |

|                  |        |       |            |
|------------------|--------|-------|------------|
| hsa-miR-1265     | 0.316  | 0.003 | 1.24487424 |
| hsa-miR-3913-5p  | -0.243 | 0.003 | 0.84498638 |
| hsa-miR-1266     | -0.378 | 0.003 | 0.76950361 |
| hsa-miR-137      | -0.31  | 0.003 | 0.80664176 |
| hsa-miR-4726-3p  | -0.394 | 0.003 | 0.76101669 |
| hsa-miR-548a1    | -0.324 | 0.003 | 0.79885192 |
| hsa-miR-5195-5p  | -0.347 | 0.003 | 0.78621729 |
| hsa-miR-4746-3p  | -0.356 | 0.003 | 0.78132788 |
| hsa-miR-5579-3p  | -0.32  | 0.003 | 0.80106988 |
| hsa-miR-4525     | -0.302 | 0.003 | 0.81112716 |
| hsa-miR-3677-3p  | -0.375 | 0.003 | 0.77110541 |
| hsa-miR-5092     | -0.28  | 0.003 | 0.82359102 |
| hsa-miR-558      | -0.311 | 0.003 | 0.80608283 |
| ebv-miR-BHRF1-3  | -0.249 | 0.003 | 0.84147948 |
| hsa-miR-3065-3p  | -0.311 | 0.003 | 0.80608283 |
| hsa-miR-937-3p   | -0.301 | 0.003 | 0.81168958 |
| hsa-miR-5011-5p  | -0.354 | 0.003 | 0.78241178 |
| hsa-miR-661      | -0.294 | 0.003 | 0.81563749 |
| hcmv-miR-US33-5p | -0.338 | 0.003 | 0.7911373  |
| hsa-miR-3124-3p  | 0.739  | 0.003 | 1.66901856 |
| hsa-miR-611      | -0.342 | 0.003 | 0.78894684 |
| hsa-miR-5047     | -0.277 | 0.003 | 0.82530541 |
| hsa-miR-520g     | -0.289 | 0.003 | 0.81846918 |
| hsa-miR-545-5p   | -0.255 | 0.003 | 0.83798713 |
| hsa-miR-4487     | -0.303 | 0.003 | 0.81056512 |
| hsa-miR-3674     | -0.303 | 0.003 | 0.81056512 |
| hsa-miR-133a     | -0.309 | 0.003 | 0.80720107 |
| ebv-miR-BART22   | -0.262 | 0.003 | 0.83393104 |
| hsa-miR-4638-3p  | -0.4   | 0.003 | 0.75785828 |
| hsa-miR-4524b-3p | -0.343 | 0.003 | 0.78840017 |
| hsa-miR-941      | -0.343 | 0.003 | 0.78840017 |
| hsa-miR-4740-5p  | -0.371 | 0.003 | 0.77324634 |
| hsa-miR-5007-5p  | -0.283 | 0.003 | 0.82188019 |
| hsa-miR-600      | 0.32   | 0.003 | 1.24833055 |
| kshv-miR-K12-10b | -0.327 | 0.004 | 0.79719248 |
| hsa-miR-4512     | -0.324 | 0.004 | 0.79885192 |
| hsa-miR-197-3p   | 0.306  | 0.004 | 1.23627526 |
| hsa-miR-4493     | -0.258 | 0.004 | 0.8362464  |
| hsa-miR-130a-5p  | -0.24  | 0.004 | 0.84674531 |
| hsa-miR-4423-5p  | 0.754  | 0.004 | 1.68646222 |
| hsa-miR-4656     | -0.316 | 0.004 | 0.803294   |
| hsa-miR-1292-5p  | -0.336 | 0.004 | 0.79223481 |
| hsa-miR-4280     | -0.323 | 0.004 | 0.79940583 |
| hcmv-miR-UL70-3p | -0.514 | 0.004 | 0.70027816 |
| hsa-miR-548at-5p | -0.251 | 0.004 | 0.84031375 |
| SNORD38B         | 1.04   | 0.004 | 2.05622765 |
| hsa-miR-1910     | -0.269 | 0.004 | 0.82989459 |
| hsa-miR-3678-3p  | -0.282 | 0.004 | 0.82245007 |
| hsa-miR-1911-5p  | -0.292 | 0.004 | 0.81676899 |
| hsa-miR-519c-3p  | -0.317 | 0.004 | 0.80273739 |
| hsa-miR-190b     | -0.275 | 0.004 | 0.82645032 |
| hsa-miR-212-5p   | -0.269 | 0.004 | 0.82989459 |
| hsa-miR-4690-3p  | -0.244 | 0.004 | 0.84440089 |
| hsa-miR-330-5p   | -0.233 | 0.004 | 0.85086373 |
| hsa-miR-1208     | -0.352 | 0.004 | 0.78349719 |
| hsa-miR-3607-5p  | 0.663  | 0.004 | 1.58337173 |
| hsa-miR-202-3p   | -0.411 | 0.004 | 0.75210188 |
| hsa-miR-5089-5p  | -0.333 | 0.004 | 0.79388393 |

|                    |        |       |            |
|--------------------|--------|-------|------------|
| hsa-miR-4761-5p    | -0.305 | 0.004 | 0.80944222 |
| hsa-miR-4318       | -0.242 | 0.004 | 0.84557229 |
| hsa-miR-371a-5p    | -0.286 | 0.004 | 0.82017291 |
| SNORD2             | 0.674  | 0.004 | 1.59549048 |
| hsa-miR-181b-3p    | -0.289 | 0.004 | 0.81846918 |
| hsa-miR-331-3p     | 0.334  | 0.004 | 1.26050339 |
| hsa-miR-3184-5p    | -0.266 | 0.004 | 0.8316221  |
| hsa-miR-4727-5p    | -0.265 | 0.004 | 0.83219873 |
| hsa-miR-3150b-3p   | -0.299 | 0.004 | 0.8128156  |
| hsa-miR-3615       | -0.353 | 0.004 | 0.7829543  |
| hsa-miR-129-5p     | -0.402 | 0.004 | 0.7568084  |
| hsa-miR-3929       | -0.241 | 0.004 | 0.8461586  |
| hsa-miR-4690-5p    | -0.448 | 0.004 | 0.73305838 |
| hsa-miR-4693-5p    | -0.263 | 0.004 | 0.83335321 |
| hsa-miRPlus-J1002  | -0.209 | 0.004 | 0.86513669 |
| hsa-miR-4775       | -0.236 | 0.004 | 0.84909625 |
| hsa-miR-4791       | 0.759  | 0.004 | 1.69231719 |
| hsa-miR-2909       | -0.306 | 0.004 | 0.80888135 |
| hsa-miR-5571-3p    | -0.286 | 0.004 | 0.82017291 |
| hsa-miR-544a       | -0.301 | 0.004 | 0.81168958 |
| hsa-miR-3689d      | -0.357 | 0.004 | 0.78078649 |
| hsa-miR-4689       | -0.437 | 0.004 | 0.73866903 |
| hsa-miR-423-3p     | 0.436  | 0.004 | 1.35284823 |
| hsa-miR-3649       | -0.301 | 0.004 | 0.81168958 |
| hsa-miR-4278       | -0.253 | 0.004 | 0.83914964 |
| hsa-miR-5589-5p    | -0.288 | 0.004 | 0.8190367  |
| hsa-miR-1301       | -0.337 | 0.004 | 0.79168587 |
| hsa-miR-1254       | -0.204 | 0.004 | 0.86814023 |
| hsa-miR-5702       | -0.39  | 0.004 | 0.7631296  |
| hsa-miR-4741       | -0.25  | 0.004 | 0.84089642 |
| hsa-miR-3130-3p    | -0.31  | 0.004 | 0.80664176 |
| hsa-miR-3685       | 1.421  | 0.004 | 2.67771051 |
| hsa-miR-1228-3p    | -0.294 | 0.005 | 0.81563749 |
| hsa-miR-4665-5p    | -0.258 | 0.005 | 0.8362464  |
| hsa-miR-4742-5p    | -0.392 | 0.005 | 0.76207242 |
| hsa-miR-4704-3p    | -0.385 | 0.005 | 0.765779   |
| hsa-miR-572        | -0.359 | 0.005 | 0.77970484 |
| hsa-miRPlus-J1003  | -0.213 | 0.005 | 0.86274134 |
| hsa-miR-4802-5p    | -0.356 | 0.005 | 0.78132788 |
| hsa-miR-5586-3p    | -0.265 | 0.005 | 0.83219873 |
| hsa-miR-1343       | -0.308 | 0.005 | 0.80776078 |
| hsa-miR-1323       | -0.282 | 0.005 | 0.82245007 |
| kshv-miR-K12-11-3p | -0.235 | 0.005 | 0.849685   |
| hsa-miR-646        | -0.22  | 0.005 | 0.85856544 |
| hsa-miR-5586-5p    | -0.286 | 0.005 | 0.82017291 |
| hsa-miR-5701       | 0.582  | 0.005 | 1.49692299 |
| hsa-miR-595        | -0.345 | 0.005 | 0.78730798 |
| hsa-miR-548ah-5p   | -0.412 | 0.005 | 0.75158074 |
| hsa-miR-4650-5p    | -0.303 | 0.005 | 0.81056512 |
| SNORD4A            | 0.607  | 0.005 | 1.52308874 |
| hsa-miR-33b-5p     | -0.209 | 0.005 | 0.86513669 |
| hsa-miR-3129-5p    | -0.304 | 0.005 | 0.81000347 |
| hsa-miR-634        | 0.814  | 0.005 | 1.75807912 |
| hsa-miR-3650       | -0.208 | 0.005 | 0.86573657 |
| hsa-miR-1914-5p    | -0.279 | 0.005 | 0.82416208 |
| hsa-miR-4437       | -0.317 | 0.005 | 0.80273739 |
| hsa-miR-185-3p     | -0.247 | 0.005 | 0.84264683 |
| hsa-miR-3135b      | -0.289 | 0.005 | 0.81846918 |

|                    |        |       |            |
|--------------------|--------|-------|------------|
| hsa-miR-1255b-2-3p | 0.585  | 0.005 | 1.50003899 |
| hsa-miR-2277-3p    | -0.259 | 0.005 | 0.83566696 |
| hsa-miR-662        | -0.294 | 0.005 | 0.81563749 |
| hsa-miR-4676-3p    | -0.279 | 0.005 | 0.82416208 |
| hsa-miR-5589-3p    | -0.373 | 0.005 | 0.77217513 |
| hsa-miR-3921       | -0.214 | 0.005 | 0.86214355 |
| ebv-miR-BART7-3p   | -0.356 | 0.005 | 0.78132788 |
| hsa-miR-4462       | -0.322 | 0.005 | 0.79996013 |
| hsa-miR-4740-3p    | -0.529 | 0.005 | 0.69303494 |
| hsa-miR-3655       | -0.274 | 0.005 | 0.82702337 |
| hsa-miR-516a-5p    | -0.265 | 0.005 | 0.83219873 |
| hsa-miR-3156-5p    | -0.274 | 0.005 | 0.82702337 |
| hsa-miR-520a-3p    | -0.309 | 0.005 | 0.80720107 |
| hsa-miR-3182       | 0.784  | 0.005 | 1.72189838 |
| hsa-miR-211-5p     | -0.303 | 0.005 | 0.81056512 |
| hsa-miR-548ao-3p   | -0.214 | 0.005 | 0.86214355 |
| hcmv-miR-US33-3p   | -0.308 | 0.005 | 0.80776078 |
| hsa-miR-635        | -0.316 | 0.005 | 0.803294   |
| hsa-miR-889        | -0.328 | 0.005 | 0.7966401  |
| hsa-miR-346        | -0.263 | 0.005 | 0.83335321 |
| hsa-miR-892b       | -0.232 | 0.005 | 0.85145371 |
| hsa-miR-5590-3p    | -0.319 | 0.005 | 0.80162533 |
| hsa-miR-637        | -0.402 | 0.005 | 0.7568084  |
| hsa-miR-5581-5p    | -0.485 | 0.005 | 0.71449707 |
| hsa-miR-451b       | 0.242  | 0.005 | 1.182631   |
| hsa-miR-4330       | -0.192 | 0.005 | 0.87539133 |
| kshv-miR-K12-8-3p  | -0.261 | 0.005 | 0.83450928 |
| hsa-miR-4639-3p    | 1.084  | 0.005 | 2.11990557 |
| hsa-miR-1228-5p    | -0.373 | 0.005 | 0.77217513 |
| hsa-miR-1204       | -0.189 | 0.005 | 0.87721355 |
| hsa-miR-615-5p     | -0.339 | 0.005 | 0.79058912 |
| hsa-miR-4768-5p    | 0.374  | 0.005 | 1.29594097 |
| hsa-miR-1911-3p    | -0.334 | 0.005 | 0.79333384 |
| SNORD10            | 0.616  | 0.005 | 1.53261996 |
| hsa-miR-4752       | -0.32  | 0.005 | 0.80106988 |
| hsa-miR-602        | -0.328 | 0.006 | 0.7966401  |
| hsa-miR-4312       | -0.181 | 0.006 | 0.88209137 |
| hsa-miR-628-3p     | -0.226 | 0.006 | 0.85500218 |
| hsa-miR-3648       | -0.25  | 0.006 | 0.84089642 |
| hsa-miR-3149       | 0.476  | 0.006 | 1.39088197 |
| SNORD3@            | 0.552  | 0.006 | 1.46611676 |
| hsa-miR-3681-5p    | -0.277 | 0.006 | 0.82530541 |
| hsa-miR-613        | -0.336 | 0.006 | 0.79223481 |
| RNU5               | 1.21   | 0.006 | 2.31337637 |
| hsa-miR-3605-3p    | -0.203 | 0.006 | 0.86874219 |
| hsa-miR-371a-3p    | -0.293 | 0.006 | 0.81620305 |
| hsv2-miR-H2        | -0.301 | 0.006 | 0.81168958 |
| hsa-miR-4452       | -0.307 | 0.006 | 0.80832087 |
| hsa-miR-4327       | -0.258 | 0.006 | 0.8362464  |
| hsa-miR-486-3p     | -0.256 | 0.006 | 0.83740649 |
| hsa-miR-1225-3p    | -0.279 | 0.006 | 0.82416208 |
| hsa-miR-4433-5p    | -0.33  | 0.006 | 0.79553648 |
| hsa-miR-764        | -0.236 | 0.006 | 0.84909625 |
| hsa-miR-520e       | -0.313 | 0.006 | 0.80496614 |
| hsa-miR-5584-3p    | 0.381  | 0.006 | 1.30224419 |
| hsa-miR-3684       | -0.314 | 0.006 | 0.80440837 |
| hsa-miR-4304       | -0.244 | 0.006 | 0.84440089 |
| hsa-miR-3972       | -0.301 | 0.006 | 0.81168958 |

|                   |        |       |            |
|-------------------|--------|-------|------------|
| hcmv-miR-US4      | -0.281 | 0.006 | 0.82302035 |
| hsa-miR-4640-5p   | -0.316 | 0.006 | 0.803294   |
| ebv-miR-BART18-3p | -0.211 | 0.006 | 0.86393819 |
| hsa-miR-154-3p    | -0.232 | 0.006 | 0.85145371 |
| hsa-miR-200a-5p   | -0.206 | 0.006 | 0.86693756 |
| hsa-miR-551a      | -0.222 | 0.006 | 0.85737604 |
| ebv-miR-BART11-5p | -0.337 | 0.006 | 0.79168587 |
| hsa-miR-3691-3p   | -0.323 | 0.006 | 0.79940583 |
| hsa-miR-4275      | -0.277 | 0.006 | 0.82530541 |
| hsa-miR-3622b-3p  | -0.295 | 0.006 | 0.81507233 |
| hsa-miR-525-3p    | -0.232 | 0.006 | 0.85145371 |
| hsa-miR-323b-5p   | -0.285 | 0.006 | 0.82074161 |
| hsa-miR-1282      | -0.285 | 0.006 | 0.82074161 |
| hsa-miR-5587-5p   | -0.309 | 0.006 | 0.80720107 |
| hsa-miR-5687      | -0.245 | 0.006 | 0.8438158  |
| hsa-miR-4696      | -0.319 | 0.006 | 0.80162533 |
| hsa-miR-3925-3p   | -0.33  | 0.006 | 0.79553648 |
| hsa-miR-200b-3p   | 0.53   | 0.006 | 1.4439292  |
| hsa-miR-1255b-5p  | -0.256 | 0.006 | 0.83740649 |
| hsa-miR-4420      | -0.259 | 0.006 | 0.83566696 |
| hsa-miR-562       | -0.273 | 0.007 | 0.82759682 |
| hsa-miR-4650-3p   | -0.356 | 0.007 | 0.78132788 |
| hsa-let-7f-2-3p   | -0.271 | 0.007 | 0.8287449  |
| hsa-miR-5685      | -0.311 | 0.007 | 0.80608283 |
| hsa-miR-4786-3p   | -0.247 | 0.007 | 0.84264683 |
| hsa-miR-4742-3p   | 0.419  | 0.007 | 1.3370005  |
| hsa-miR-371b-3p   | -0.22  | 0.007 | 0.85856544 |
| hsa-miR-4676-5p   | -0.243 | 0.007 | 0.84498638 |
| hsa-miR-1261      | -0.369 | 0.007 | 0.77431903 |
| hsa-miR-5188      | -0.484 | 0.007 | 0.71499249 |
| hsa-miR-4498      | -0.29  | 0.007 | 0.81790206 |
| hsa-miR-1825      | -0.311 | 0.007 | 0.80608283 |
| hsa-miR-1238-3p   | -0.266 | 0.007 | 0.8316221  |
| hsa-miR-671-5p    | -0.425 | 0.007 | 0.74483873 |
| hsa-miR-383       | -0.263 | 0.007 | 0.83335321 |
| RNU1              | 0.94   | 0.007 | 1.91852824 |
| hsa-miR-891a      | -0.335 | 0.007 | 0.79278414 |
| hsv2-miR-H23-5p   | -0.246 | 0.007 | 0.84323111 |
| hsa-miR-543       | -0.25  | 0.007 | 0.84089642 |
| hsa-miR-4681      | -0.291 | 0.007 | 0.81733533 |
| hsa-miR-588       | -0.228 | 0.007 | 0.85381771 |
| hsa-miR-1200      | -0.231 | 0.007 | 0.8520441  |
| hsa-miR-3941      | 0.787  | 0.007 | 1.72548269 |
| hsa-miR-509-3-5p  | -0.276 | 0.007 | 0.82587766 |
| hsa-miR-549a      | -0.436 | 0.007 | 0.73918122 |
| hsa-miR-548c-3p   | -0.279 | 0.007 | 0.82416208 |
| hsa-miR-4781-3p   | -0.322 | 0.007 | 0.79996013 |
| hsa-miR-1207-3p   | -0.255 | 0.007 | 0.83798713 |
| hsa-miR-34a-3p    | -0.189 | 0.007 | 0.87721355 |
| hcmv-miR-UL36-3p  | -0.242 | 0.007 | 0.84557229 |
| hsa-miR-5006-3p   | 0.38   | 0.007 | 1.30134186 |
| hsa-miR-539-3p    | -0.355 | 0.007 | 0.78186964 |
| kshv-miR-K12-4-3p | -0.188 | 0.007 | 0.8778218  |
| hsa-miR-326       | -0.237 | 0.007 | 0.8485079  |
| hcmv-miR-US5-2    | -0.339 | 0.007 | 0.79058912 |
| kshv-miR-K12-9-5p | -0.222 | 0.007 | 0.85737604 |
| ebv-miR-BART19-5p | -0.22  | 0.007 | 0.85856544 |
| hsa-miR-3124-5p   | -0.48  | 0.007 | 0.71697762 |

|                   |        |       |            |
|-------------------|--------|-------|------------|
| hcmv-miR-UL36-5p  | -0.262 | 0.007 | 0.83393104 |
| hsa-miR-3121-5p   | -0.275 | 0.007 | 0.82645032 |
| hsa-miR-3909      | -0.252 | 0.007 | 0.83973149 |
| hsa-miR-621       | -0.271 | 0.007 | 0.8287449  |
| hsa-miR-924       | -0.342 | 0.007 | 0.78894684 |
| hsa-miR-300       | -0.308 | 0.007 | 0.80776078 |
| hsa-miR-4732-5p   | -0.602 | 0.007 | 0.65883998 |
| ebv-miR-BART4-3p  | -0.246 | 0.007 | 0.84323111 |
| hsa-miR-362-5p    | -0.335 | 0.007 | 0.79278414 |
| hsa-miR-4668-3p   | -0.26  | 0.007 | 0.83508792 |
| hsa-miR-4728-3p   | 0.304  | 0.007 | 1.23456261 |
| hsa-miR-548x-3p   | -0.366 | 0.007 | 0.77593085 |
| hsa-miR-4528      | -0.25  | 0.007 | 0.84089642 |
| hsa-miR-3680-5p   | 1.148  | 0.007 | 2.2160647  |
| hsa-miR-642b-5p   | 0.652  | 0.007 | 1.57134503 |
| hsa-miR-3148      | 0.527  | 0.007 | 1.44092975 |
| SNORD13           | 0.934  | 0.007 | 1.91056587 |
| hsa-miR-3916      | -0.222 | 0.007 | 0.85737604 |
| hsa-miR-1471      | -0.249 | 0.007 | 0.84147948 |
| hsa-miR-5581-3p   | 0.224  | 0.007 | 1.16796739 |
| hsa-miR-19a-5p    | -0.273 | 0.007 | 0.82759682 |
| hsa-miR-653       | -0.268 | 0.008 | 0.83047002 |
| hsa-miR-4273      | -0.25  | 0.008 | 0.84089642 |
| hsa-miR-3937      | -0.316 | 0.008 | 0.803294   |
| SNORD48           | 0.814  | 0.008 | 1.75807912 |
| hsa-miR-524-3p    | -0.243 | 0.008 | 0.84498638 |
| hiv1-miR-H1       | -0.335 | 0.008 | 0.79278414 |
| hsa-miR-940       | -0.216 | 0.008 | 0.86094919 |
| hsa-miR-4302      | -0.24  | 0.008 | 0.84674531 |
| hsa-miR-3591-5p   | 0.389  | 0.008 | 1.30948542 |
| hsv1-miR-H3-5p    | -0.17  | 0.008 | 0.88884268 |
| hsa-miR-4667-5p   | 0.652  | 0.008 | 1.57134503 |
| hsa-miR-302d-3p   | -0.231 | 0.008 | 0.8520441  |
| hsa-miR-670       | -0.26  | 0.008 | 0.83508792 |
| hsa-miR-4722-3p   | -0.248 | 0.008 | 0.84206295 |
| SNORD44           | 1.149  | 0.008 | 2.21760129 |
| hsv1-miR-H4-3p    | 0.236  | 0.008 | 1.17772279 |
| hsa-miR-520c-3p   | -0.252 | 0.008 | 0.83973149 |
| hsa-miR-515-5p    | -0.277 | 0.008 | 0.82530541 |
| hsa-miR-523-3p    | -0.229 | 0.008 | 0.8532261  |
| hsa-miR-4670-3p   | -0.219 | 0.008 | 0.85916075 |
| hsa-miR-4637      | -0.221 | 0.008 | 0.85797053 |
| hsa-miR-200c-3p   | 0.541  | 0.008 | 1.45498068 |
| hsa-miR-148b-5p   | -0.251 | 0.008 | 0.84031375 |
| hsa-miR-3176      | -0.275 | 0.008 | 0.82645032 |
| hsa-miR-571       | -0.224 | 0.008 | 0.85618828 |
| hsa-miR-4730      | -0.447 | 0.008 | 0.73356667 |
| hsa-miR-4783-5p   | -0.31  | 0.008 | 0.80664176 |
| hsa-miR-579       | -0.309 | 0.008 | 0.80720107 |
| hsa-miR-1233-3p   | -0.239 | 0.008 | 0.84733243 |
| hsa-miR-4500      | 0.725  | 0.008 | 1.65290064 |
| hsa-miR-4519      | -0.172 | 0.008 | 0.88761134 |
| hsa-miR-548ab     | -0.256 | 0.008 | 0.83740649 |
| hsa-miR-4632-3p   | -0.255 | 0.008 | 0.83798713 |
| hsa-miR-4799-5p   | -0.341 | 0.008 | 0.78949389 |
| hsa-miR-2355-5p   | -0.296 | 0.008 | 0.81450756 |
| kshv-miR-K12-7-5p | -0.276 | 0.008 | 0.82587766 |
| hsa-miR-188-3p    | -0.353 | 0.008 | 0.7829543  |

|                   |        |       |            |
|-------------------|--------|-------|------------|
| hsa-miR-524-5p    | -0.309 | 0.008 | 0.80720107 |
| hsa-miR-4269      | -0.22  | 0.008 | 0.85856544 |
| hsa-miR-4308      | -0.156 | 0.008 | 0.89751005 |
| hsa-miR-3199      | -0.319 | 0.008 | 0.80162533 |
| hsa-miR-339-3p    | -0.349 | 0.008 | 0.78512812 |
| hsa-miR-4684-5p   | -0.268 | 0.008 | 0.83047002 |
| hsa-miR-554       | -0.182 | 0.008 | 0.88148016 |
| hsa-miR-331-5p    | -0.361 | 0.008 | 0.77862469 |
| hsa-miR-522-3p    | -0.223 | 0.008 | 0.85678195 |
| hsa-miR-1294      | -0.233 | 0.008 | 0.85086373 |
| hsa-miR-2682-5p   | -0.226 | 0.008 | 0.85500218 |
| hsa-miR-511       | -0.215 | 0.008 | 0.86154616 |
| hsa-miR-5708      | -0.417 | 0.008 | 0.74898047 |
| hsa-miR-4536-3p   | -0.278 | 0.008 | 0.82473355 |
| hsa-miR-4539      | -0.299 | 0.008 | 0.8128156  |
| hsa-miR-4760-5p   | -0.237 | 0.008 | 0.8485079  |
| hsa-miR-1182      | -0.329 | 0.008 | 0.7960881  |
| hsa-miR-3193      | -0.193 | 0.008 | 0.87478476 |
| hsa-miR-4699-3p   | -0.238 | 0.008 | 0.84791996 |
| SNORD110          | 0.613  | 0.008 | 1.52943628 |
| hsa-miR-3191-3p   | -0.276 | 0.008 | 0.82587766 |
| hsa-miR-548b-3p   | -0.339 | 0.008 | 0.79058912 |
| hsa-miR-33b-3p    | -0.232 | 0.008 | 0.85145371 |
| hsa-miR-4466      | -0.289 | 0.009 | 0.81846918 |
| sv40-miR-S1-3p    | -0.316 | 0.009 | 0.803294   |
| hsa-miR-3919      | -0.311 | 0.009 | 0.80608283 |
| hsa-miR-767-3p    | -0.329 | 0.009 | 0.7960881  |
| hsa-miR-490-5p    | -0.267 | 0.009 | 0.83104586 |
| hsa-miR-4727-3p   | -0.317 | 0.009 | 0.80273739 |
| hsa-miR-5186      | -0.314 | 0.009 | 0.80440837 |
| hsa-miR-514a-5p   | -0.216 | 0.009 | 0.86094919 |
| hcmv-miR-UL22A-5p | -0.389 | 0.009 | 0.76365875 |
| hsa-miR-4422      | -0.346 | 0.009 | 0.78676245 |
| hsa-miR-541-3p    | -0.309 | 0.009 | 0.80720107 |
| hsa-miR-561-5p    | -0.242 | 0.009 | 0.84557229 |
| hsa-miR-182-3p    | -0.301 | 0.009 | 0.81168958 |
| hsa-miR-574-5p    | 0.55   | 0.009 | 1.4640857  |
| hsa-miR-526b-3p   | -0.196 | 0.009 | 0.87296759 |
| hsa-miR-199b-5p   | 0.986  | 0.009 | 1.98068574 |
| hsa-miRPlus-D1058 | -0.324 | 0.009 | 0.79885192 |
| hsa-miR-548as-5p  | -0.257 | 0.009 | 0.83682624 |
| hsa-miR-3140-3p   | -0.236 | 0.009 | 0.84909625 |
| hsa-miR-4524a-5p  | -0.261 | 0.009 | 0.83450928 |
| hsa-miR-3167      | -0.237 | 0.009 | 0.8485079  |
| hsa-miR-219-5p    | -0.263 | 0.009 | 0.83335321 |
| hsa-miR-4520b-3p  | -0.372 | 0.009 | 0.77271055 |
| hsa-miR-4711-5p   | -0.324 | 0.009 | 0.79885192 |
| hcmv-miR-UL22A-3p | -0.247 | 0.009 | 0.84264683 |
| hsa-miR-4482-5p   | -0.25  | 0.009 | 0.84089642 |
| hsa-miR-370       | -0.279 | 0.009 | 0.82416208 |
| hsa-miR-5579-5p   | -0.236 | 0.009 | 0.84909625 |
| hsa-miR-2861      | -0.258 | 0.009 | 0.8362464  |
| hsa-miR-4686      | -0.265 | 0.009 | 0.83219873 |
| hsa-miR-218-2-3p  | -0.277 | 0.009 | 0.82530541 |
| hsa-miR-3177-3p   | -0.223 | 0.009 | 0.85678195 |
| hsa-miR-4469      | -0.252 | 0.009 | 0.83973149 |
| hsa-miR-4662a-5p  | -0.245 | 0.009 | 0.8438158  |
| hsa-miR-4471      | -0.295 | 0.009 | 0.81507233 |



|                    |        |       |            |
|--------------------|--------|-------|------------|
| hsa-miR-2116-3p    | -0.171 | 0.009 | 0.8882268  |
| hsa-miR-603        | -0.332 | 0.009 | 0.7944344  |
| hsa-miR-187-5p     | -0.392 | 0.009 | 0.76207242 |
| hsa-miR-4440       | -0.31  | 0.009 | 0.80664176 |
| hsa-miR-649        | -0.236 | 0.009 | 0.84909625 |
| hsv2-miR-H19       | -0.177 | 0.009 | 0.88454044 |
| hsa-miR-183-5p     | 0.202  | 0.009 | 1.15029189 |
| hsa-miR-2277-5p    | -0.299 | 0.009 | 0.8128156  |
| hsa-miR-448        | -0.238 | 0.009 | 0.84791996 |
| hsa-miR-640        | -0.23  | 0.009 | 0.85263489 |
| hsa-miR-3170       | -0.232 | 0.009 | 0.85145371 |
| hsa-miR-4697-3p    | -0.319 | 0.009 | 0.80162533 |
| hsa-let-7i-3p      | -0.215 | 0.009 | 0.86154616 |
| hsa-miR-1537       | -0.271 | 0.009 | 0.8287449  |
| hsv2-miR-H6-3p     | 0.403  | 0.009 | 1.32225461 |
| hsa-miR-564        | -0.313 | 0.009 | 0.80496614 |
| hsa-miR-769-5p     | -0.184 | 0.01  | 0.88025901 |
| hsa-miR-3939       | -0.249 | 0.01  | 0.84147948 |
| hsa-miR-1185-1-3p  | -0.285 | 0.01  | 0.82074161 |
| hsa-miR-5700       | -0.268 | 0.01  | 0.83047002 |
| hsa-miR-639        | -0.261 | 0.01  | 0.83450928 |
| hsa-miR-1205       | -0.374 | 0.01  | 0.77164009 |
| hsa-miR-3667-5p    | 1.203  | 0.01  | 2.30217898 |
| kshv-miR-K12-12-5p | -0.281 | 0.01  | 0.82302035 |
| hsa-miR-5008-3p    | -0.414 | 0.01  | 0.75053955 |
| hsa-miR-378c       | -0.231 | 0.01  | 0.8520441  |
| hsa-miR-1306-3p    | -0.23  | 0.01  | 0.85263489 |
| hsa-miR-3713       | -0.345 | 0.01  | 0.78730798 |
| hsa-miR-642a-5p    | -0.215 | 0.01  | 0.86154616 |
| hsa-miR-5582-3p    | -0.247 | 0.01  | 0.84264683 |
| hsa-miR-4691-5p    | -0.377 | 0.01  | 0.77003717 |
| hsa-miR-15b-3p     | -0.26  | 0.01  | 0.83508792 |
| jcv-miR-J1-5p      | -0.277 | 0.01  | 0.82530541 |
| hsa-miR-3907       | -0.248 | 0.01  | 0.84206295 |
| hsa-miR-4759       | -0.267 | 0.01  | 0.83104586 |
| hsa-miR-365b-5p    | -0.188 | 0.01  | 0.8778218  |
| hsa-miR-4733-5p    | -0.337 | 0.01  | 0.79168587 |
| hcmv-miR-UL70-5p   | -0.235 | 0.01  | 0.849685   |
| ebv-miR-BART3-5p   | -0.293 | 0.01  | 0.81620305 |
| hsa-miR-4268       | 0.709  | 0.01  | 1.63467066 |
| hsa-miR-4787-3p    | -0.188 | 0.01  | 0.8778218  |
| hsa-miR-1305       | -0.243 | 0.01  | 0.84498638 |
| hsa-miR-4263       | -0.253 | 0.01  | 0.83914964 |
| hsa-miR-5583-3p    | -0.224 | 0.01  | 0.85618828 |
| hsa-miR-30b-5p     | 0.896  | 0.01  | 1.86089932 |
| hsa-miR-4659b-5p   | -0.205 | 0.01  | 0.86753869 |
| hsa-miR-548j       | -0.28  | 0.01  | 0.82359102 |
| RNU6-1_RNU6-2      | 0.391  | 0.01  | 1.31130201 |
| hsa-miR-4697-5p    | -0.244 | 0.01  | 0.84440089 |
| hsa-miR-23c        | 0.811  | 0.01  | 1.7544271  |
| hsa-miR-660-5p     | 0.391  | 0.01  | 1.31130201 |
| hsa-miR-548a-5p    | -0.21  | 0.01  | 0.86453723 |
| hsa-miR-875-3p     | -0.153 | 0.011 | 0.89937831 |
| hsa-miR-548ak      | -0.295 | 0.011 | 0.81507233 |
| hsa-miR-3074-3p    | -0.375 | 0.011 | 0.77110541 |
| hsa-miR-4283       | -0.347 | 0.011 | 0.78621729 |
| hsa-miR-3616-3p    | -0.226 | 0.011 | 0.85500218 |
| hsa-miR-4295       | -0.244 | 0.011 | 0.84440089 |

|                      |        |       |            |
|----------------------|--------|-------|------------|
| hsa-miR-4431         | -0.302 | 0.011 | 0.81112716 |
| kshv-miR-K12-3-3p    | -0.244 | 0.011 | 0.84440089 |
| hsa-miR-1322         | -0.343 | 0.011 | 0.78840017 |
| hsa-miR-4538         | -0.245 | 0.011 | 0.8438158  |
| hsa-miR-4762-3p      | -0.313 | 0.011 | 0.80496614 |
| hsa-miR-15b-5p       | 0.691  | 0.011 | 1.61440215 |
| hsa-miR-4743-5p      | -0.197 | 0.011 | 0.87236271 |
| hsa-miR-548aq-5p     | -0.247 | 0.011 | 0.84264683 |
| hsa-miR-3186-5p      | -0.262 | 0.011 | 0.83393104 |
| hsa-miR-563          | -0.259 | 0.011 | 0.83566696 |
| hsa-miR-196a-3p      | 0.285  | 0.011 | 1.21841026 |
| hsa-miR-939-5p       | -0.277 | 0.011 | 0.82530541 |
| hsa-miR-548o-3p      | -0.175 | 0.011 | 0.88576752 |
| hsa-miR-378h         | -0.231 | 0.011 | 0.8520441  |
| hsa-miR-4455         | 0.555  | 0.011 | 1.46916863 |
| hsa-miR-548ah-3p     | -0.252 | 0.011 | 0.83973149 |
| hsa-miRPlus-G1065-5p | -0.231 | 0.011 | 0.8520441  |
| hsa-miR-200a-3p      | 0.7    | 0.011 | 1.62450479 |
| hsa-miR-651          | -0.393 | 0.011 | 0.76154437 |
| hsa-miR-2053         | -0.26  | 0.011 | 0.83508792 |
| hsa-miR-4446-5p      | -0.306 | 0.011 | 0.80888135 |
| hsa-miR-4766-3p      | -0.231 | 0.011 | 0.8520441  |
| hsa-miR-483-3p       | 0.472  | 0.011 | 1.38703097 |
| hsa-miR-4661-5p      | -0.17  | 0.011 | 0.88884268 |
| hsa-miR-103b         | -0.168 | 0.011 | 0.89007573 |
| hsa-miR-128          | -0.17  | 0.011 | 0.88884268 |
| hsa-miR-1538         | -0.195 | 0.011 | 0.8735729  |
| hsa-miR-4486         | -0.291 | 0.011 | 0.81733533 |
| hsa-miR-1293         | -0.215 | 0.011 | 0.86154616 |
| hsa-miR-10a-5p       | 0.911  | 0.011 | 1.88034841 |
| hsa-miR-4290         | 0.626  | 0.011 | 1.54328018 |
| hsa-miR-1251         | -0.309 | 0.011 | 0.80720107 |
| hsa-miR-433          | -0.241 | 0.011 | 0.8461586  |
| hsa-miR-1468         | -0.277 | 0.011 | 0.82530541 |
| hsa-miR-570-3p       | -0.239 | 0.011 | 0.84733243 |
| hsa-miR-519b-3p      | -0.182 | 0.011 | 0.88148016 |
| kshv-miR-K12-10a-3p  | -0.278 | 0.011 | 0.82473355 |
| hsv2-miR-H23-3p      | -0.248 | 0.011 | 0.84206295 |
| hsa-miR-584-3p       | -0.296 | 0.011 | 0.81450756 |
| hsa-miR-568          | -0.228 | 0.011 | 0.85381771 |
| kshv-miR-K12-9-3p    | -0.181 | 0.011 | 0.88209137 |
| hsa-miR-5583-5p      | -0.271 | 0.011 | 0.8287449  |
| hsa-miR-4642         | -0.232 | 0.011 | 0.85145371 |
| hsa-miR-1245b-3p     | -0.21  | 0.011 | 0.86453723 |
| hsa-miR-4771         | -0.232 | 0.011 | 0.85145371 |
| hsa-miR-3977         | -0.292 | 0.011 | 0.81676899 |
| hsa-miR-195-3p       | -0.289 | 0.011 | 0.81846918 |
| hsa-miR-4786-5p      | -0.308 | 0.011 | 0.80776078 |
| hsa-miR-198          | -0.217 | 0.011 | 0.86035263 |
| hsa-miR-3156-3p      | 1.199  | 0.012 | 2.29580483 |
| hsa-miR-3675-5p      | -0.262 | 0.012 | 0.83393104 |
| hsa-miR-4325         | -0.155 | 0.012 | 0.89813237 |
| hsa-miR-517c-3p      | -0.208 | 0.012 | 0.86573657 |
| hsa-miR-548e         | -0.189 | 0.012 | 0.87721355 |
| hsa-miR-671-3p       | -0.272 | 0.012 | 0.82817066 |
| hsa-miRPlus-A1086    | 0.921  | 0.012 | 1.89342726 |
| hsa-miR-4670-5p      | -0.22  | 0.012 | 0.85856544 |

|                   |        |       |            |
|-------------------|--------|-------|------------|
| hsa-miR-3153      | -0.328 | 0.012 | 0.7966401  |
| hsa-miR-330-3p    | -0.235 | 0.012 | 0.849685   |
| hsa-miR-548b-5p   | -0.239 | 0.012 | 0.84733243 |
| hsa-miR-4798-3p   | -0.3   | 0.012 | 0.8122524  |
| hsa-miR-4703-3p   | -0.23  | 0.012 | 0.85263489 |
| hsa-miR-557       | -0.179 | 0.012 | 0.88331505 |
| hsa-miR-660-3p    | 0.697  | 0.012 | 1.62113024 |
| hsa-miRPlus-J1005 | -0.2   | 0.012 | 0.87055056 |
| hsa-miR-3664-5p   | 0.191  | 0.012 | 1.14155471 |
| hsa-miR-450a-5p   | -0.19  | 0.012 | 0.87660572 |
| ebv-miR-BART21-3p | -0.222 | 0.012 | 0.85737604 |
| hsa-miR-363-5p    | 0.381  | 0.012 | 1.30224419 |
| hsa-miR-412       | -0.163 | 0.012 | 0.89316585 |
| hsa-miR-548ax     | -0.249 | 0.012 | 0.84147948 |
| hsa-miR-1295b-3p  | -0.264 | 0.012 | 0.83277577 |
| hsa-miR-3194-5p   | -0.246 | 0.012 | 0.84323111 |
| hsa-miR-526b-5p   | -0.243 | 0.013 | 0.84498638 |
| hsa-miRPlus-A1031 | -0.264 | 0.013 | 0.83277577 |
| hsa-miR-550b-2-5p | -0.242 | 0.013 | 0.84557229 |
| hsa-miR-4313      | -0.233 | 0.013 | 0.85086373 |
| hsa-miR-296-5p    | -0.18  | 0.013 | 0.882703   |
| hsa-miR-5009-5p   | -0.294 | 0.013 | 0.81563749 |
| hsa-miR-4692      | -0.289 | 0.013 | 0.81846918 |
| hsa-miR-4254      | -0.232 | 0.013 | 0.85145371 |
| hsa-miR-5693      | -0.244 | 0.013 | 0.84440089 |
| hsa-miR-615-3p    | -0.173 | 0.013 | 0.88699631 |
| hsa-miR-4442      | -0.253 | 0.013 | 0.83914964 |
| hsa-miR-4671-5p   | -0.178 | 0.013 | 0.88392753 |
| hsa-miR-210       | 0.262  | 0.013 | 1.19913991 |
| hsa-miR-5008-5p   | -0.294 | 0.013 | 0.81563749 |
| hsa-miR-5704      | 1.08   | 0.013 | 2.11403608 |
| hsa-miR-3677-5p   | -0.292 | 0.013 | 0.81676899 |
| hsa-miR-548ao-5p  | -0.45  | 0.013 | 0.73204285 |
| ebv-miR-BART12    | -0.183 | 0.013 | 0.88086937 |
| hsa-miR-362-3p    | 0.309  | 0.013 | 1.2388487  |
| hsa-miR-888-3p    | -0.211 | 0.013 | 0.86393819 |
| hsa-miR-935       | -0.201 | 0.013 | 0.86994735 |
| hsa-miR-4499      | -0.242 | 0.013 | 0.84557229 |
| hsa-miR-3659      | -0.256 | 0.013 | 0.83740649 |
| hsa-miR-4738-3p   | -0.273 | 0.013 | 0.82759682 |
| hsa-miR-3131      | -0.197 | 0.013 | 0.87236271 |
| hsa-miR-548m      | -0.263 | 0.013 | 0.83335321 |
| ebv-miR-BART20-3p | -0.278 | 0.013 | 0.82473355 |
| hsa-miR-5003-3p   | -0.193 | 0.013 | 0.87478476 |
| hsa-miR-518d-3p   | -0.314 | 0.013 | 0.80440837 |
| hsa-miR-5580-3p   | -0.227 | 0.013 | 0.85440974 |
| hsa-miR-1269a     | -0.281 | 0.014 | 0.82302035 |
| hsa-miR-655       | -0.194 | 0.014 | 0.87417862 |
| hsa-miR-548l      | -0.16  | 0.014 | 0.89502507 |
| ebv-miR-BART2-5p  | -0.18  | 0.014 | 0.882703   |
| hsa-miR-610       | -0.221 | 0.014 | 0.85797053 |
| hsa-miR-3120-5p   | -0.213 | 0.014 | 0.86274134 |
| hsa-miR-3189-5p   | -0.177 | 0.014 | 0.88454044 |
| hsa-miR-1324      | -0.188 | 0.014 | 0.8778218  |
| hsa-miR-514b-3p   | -0.27  | 0.014 | 0.82931955 |
| hsa-miR-4259      | -0.196 | 0.014 | 0.87296759 |
| hsa-miR-4713-3p   | -0.187 | 0.014 | 0.87843047 |
| hsa-miR-3610      | -0.238 | 0.014 | 0.84791996 |

|                   |        |       |            |
|-------------------|--------|-------|------------|
| hsa-miR-1185-5p   | -0.171 | 0.014 | 0.8882268  |
| hsa-miR-4461      | -0.257 | 0.014 | 0.83682624 |
| hsa-miRPlus-J1004 | -0.199 | 0.014 | 0.87115419 |
| hsa-miR-4677-5p   | -0.291 | 0.014 | 0.81733533 |
| hsa-miR-663b      | -0.28  | 0.014 | 0.82359102 |
| hsa-miR-4758-5p   | -0.425 | 0.014 | 0.74483873 |
| hsa-miR-500a-3p   | 0.246  | 0.014 | 1.1859145  |
| hsa-let-7f-5p     | 0.558  | 0.014 | 1.47222686 |
| hsa-miR-4492      | -0.266 | 0.014 | 0.8316221  |
| hsa-miR-3922-5p   | -0.245 | 0.014 | 0.8438158  |
| hsa-miR-29b-3p    | 0.585  | 0.014 | 1.50003899 |
| hsa-miR-5682      | -0.297 | 0.014 | 0.81394319 |
| hsa-miR-1183      | -0.272 | 0.014 | 0.82817066 |
| hsa-miR-3664-3p   | -0.322 | 0.014 | 0.79996013 |
| hsa-miR-2276      | -0.274 | 0.014 | 0.82702337 |
| hsa-miR-130b-5p   | 0.249  | 0.014 | 1.18838311 |
| hsa-miR-4782-3p   | -0.22  | 0.015 | 0.85856544 |
| hsa-miR-4796-5p   | -0.222 | 0.015 | 0.85737604 |
| hsa-miR-1206      | -0.356 | 0.015 | 0.78132788 |
| hsa-miR-4284      | 1.195  | 0.015 | 2.28944832 |
| hsa-miR-491-3p    | 0.371  | 0.015 | 1.29324893 |
| hsa-miR-4780      | 0.71   | 0.015 | 1.63580412 |
| hsa-miR-4310      | -0.215 | 0.015 | 0.86154616 |
| hsa-miR-548y      | -0.25  | 0.015 | 0.84089642 |
| hsa-miR-550a-5p   | -0.274 | 0.015 | 0.82702337 |
| hsa-miR-4712-5p   | -0.352 | 0.015 | 0.78349719 |
| hsa-miR-4319      | -0.202 | 0.015 | 0.86934456 |
| hsa-miR-3197      | -0.279 | 0.015 | 0.82416208 |
| hsa-miR-378g      | -0.262 | 0.015 | 0.83393104 |
| hsa-miR-124-5p    | -0.194 | 0.015 | 0.87417862 |
| hsa-miR-4473      | 0.351  | 0.015 | 1.27544439 |
| SNORD6            | 0.491  | 0.015 | 1.4054187  |
| hsa-miR-4745-3p   | -0.271 | 0.015 | 0.8287449  |
| ebv-miR-BART2-3p  | -0.335 | 0.015 | 0.79278414 |
| hsa-miR-4634      | -0.287 | 0.015 | 0.81960461 |
| hsa-miR-624-5p    | -0.172 | 0.015 | 0.88761134 |
| hsa-miR-5686      | -0.192 | 0.015 | 0.87539133 |
| hsa-miR-4774-3p   | -0.264 | 0.015 | 0.83277577 |
| kshv-miR-K12-1-5p | -0.181 | 0.015 | 0.88209137 |
| hsa-miR-224-5p    | -0.191 | 0.015 | 0.87599832 |
| hsa-miR-4435      | -0.209 | 0.015 | 0.86513669 |
| hsa-miR-181d      | 0.388  | 0.015 | 1.30857807 |
| hsa-miR-367-3p    | -0.322 | 0.015 | 0.79996013 |
| hsa-miR-3200-5p   | -0.219 | 0.015 | 0.85916075 |
| hsa-miR-96-3p     | -0.23  | 0.015 | 0.85263489 |
| hsa-miR-212-3p    | -0.184 | 0.015 | 0.88025901 |
| hsa-miR-30c-2-3p  | -0.216 | 0.015 | 0.86094919 |
| hsa-miR-1470      | -0.205 | 0.015 | 0.86753869 |
| hsa-miR-3652      | -0.24  | 0.015 | 0.84674531 |
| hsa-miR-106a-5p   | 0.539  | 0.015 | 1.45296505 |
| hsa-miR-4680-3p   | -0.16  | 0.015 | 0.89502507 |
| hsv2-miR-H22      | -0.263 | 0.015 | 0.83335321 |
| hsa-miR-584-5p    | -0.148 | 0.015 | 0.90250073 |
| hsa-miR-4707-3p   | -0.214 | 0.015 | 0.86214355 |
| ebv-miR-BART4-5p  | -0.244 | 0.015 | 0.84440089 |
| hsv2-miR-H3       | -0.219 | 0.016 | 0.85916075 |
| hsa-miR-3147      | -0.286 | 0.016 | 0.82017291 |
| hsa-miR-4688      | -0.222 | 0.016 | 0.85737604 |

|                   |        |       |            |
|-------------------|--------|-------|------------|
| hsa-miR-181a-5p   | 0.417  | 0.016 | 1.3351483  |
| hsa-miR-4477b     | -0.289 | 0.016 | 0.81846918 |
| hsa-miR-1255a     | 0.583  | 0.016 | 1.49796093 |
| hsa-miR-3692-5p   | -0.301 | 0.016 | 0.81168958 |
| hsa-miR-506-5p    | -0.261 | 0.016 | 0.83450928 |
| hsa-miR-556-5p    | -0.192 | 0.016 | 0.87539133 |
| hsa-miR-4501      | -0.391 | 0.016 | 0.76260083 |
| hsv1-miR-H8-3p    | -0.156 | 0.016 | 0.89751005 |
| hsa-miR-507       | -0.191 | 0.016 | 0.87599832 |
| hsa-miR-936       | -0.258 | 0.016 | 0.8362464  |
| hsa-miR-4763-3p   | -0.233 | 0.016 | 0.85086373 |
| hsa-miR-361-3p    | -0.234 | 0.016 | 0.85027416 |
| hsa-miR-4655-3p   | -0.275 | 0.016 | 0.82645032 |
| hsa-miR-555       | -0.196 | 0.016 | 0.87296759 |
| hsa-miR-4754      | -0.188 | 0.016 | 0.8778218  |
| hsa-miR-1914-3p   | -0.24  | 0.016 | 0.84674531 |
| hsa-miR-138-5p    | -0.167 | 0.016 | 0.8906929  |
| hsa-miR-5680      | -0.209 | 0.016 | 0.86513669 |
| ebv-miR-BART7-5p  | -0.233 | 0.016 | 0.85086373 |
| hsa-miR-624-3p    | -0.217 | 0.016 | 0.86035263 |
| hsa-miR-544b      | -0.259 | 0.016 | 0.83566696 |
| hsa-miR-4639-5p   | -0.199 | 0.016 | 0.87115419 |
| hsa-miR-5587-3p   | -0.201 | 0.016 | 0.86994735 |
| hsa-miR-150-5p    | 0.32   | 0.016 | 1.24833055 |
| hsa-miR-4768-3p   | -0.349 | 0.016 | 0.78512812 |
| hsa-miR-24-3p     | 0.84   | 0.016 | 1.79005014 |
| hsa-miR-30a-5p    | 0.502  | 0.016 | 1.41617544 |
| hsa-miR-4460      | -0.257 | 0.016 | 0.83682624 |
| hsa-miR-876-5p    | -0.223 | 0.017 | 0.85678195 |
| hsa-miR-4320      | -0.185 | 0.017 | 0.87964908 |
| hsa-miR-4489      | -0.314 | 0.017 | 0.80440837 |
| hsa-miR-873-5p    | -0.196 | 0.017 | 0.87296759 |
| hsa-miR-488-3p    | -0.228 | 0.017 | 0.85381771 |
| hsa-let-7d-5p     | 0.607  | 0.017 | 1.52308874 |
| hsa-miR-5591-3p   | -0.158 | 0.017 | 0.8962667  |
| hsa-miR-4745-5p   | -0.279 | 0.017 | 0.82416208 |
| hsa-miR-432-5p    | -0.348 | 0.017 | 0.78567252 |
| hsa-miR-4673      | -0.316 | 0.017 | 0.803294   |
| ebv-miR-BART16    | 0.349  | 0.017 | 1.27367748 |
| hsa-miR-548n      | -0.248 | 0.017 | 0.84206295 |
| hsa-miR-3192      | -0.309 | 0.017 | 0.80720107 |
| hsa-miR-4264      | -0.185 | 0.017 | 0.87964908 |
| hsa-miR-718       | -0.195 | 0.017 | 0.8735729  |
| hsa-miR-520d-5p   | -0.321 | 0.017 | 0.80051481 |
| hsa-miR-4718      | -0.251 | 0.017 | 0.84031375 |
| hsa-miR-1245a     | -0.306 | 0.017 | 0.80888135 |
| hsa-miR-4684-3p   | -0.245 | 0.017 | 0.8438158  |
| hsa-miR-4506      | -0.275 | 0.017 | 0.82645032 |
| hsa-miR-3115      | -0.208 | 0.017 | 0.86573657 |
| hsa-miR-3944-5p   | -0.224 | 0.017 | 0.85618828 |
| hsa-miR-489       | -0.131 | 0.018 | 0.91319825 |
| hsa-miR-1263      | -0.176 | 0.018 | 0.88515376 |
| hsa-miR-3158-3p   | -0.223 | 0.018 | 0.85678195 |
| ebv-miR-BART10-5p | -0.21  | 0.018 | 0.86453723 |
| hsa-miR-5694      | -0.193 | 0.018 | 0.87478476 |
| hsa-miR-129-1-3p  | 0.245  | 0.018 | 1.18509277 |
| hsa-miR-650       | -0.189 | 0.018 | 0.87721355 |
| hsa-miR-1181      | -0.232 | 0.018 | 0.85145371 |

|                    |        |       |            |
|--------------------|--------|-------|------------|
| hsa-miR-148a-5p    | -0.172 | 0.018 | 0.88761134 |
| hsa-miR-3607-3p    | 0.518  | 0.018 | 1.43196874 |
| hsa-miR-4276       | -0.183 | 0.018 | 0.88086937 |
| hsa-miR-4789-3p    | -0.23  | 0.018 | 0.85263489 |
| hsa-miR-3189-3p    | -0.144 | 0.018 | 0.90500646 |
| ebv-miR-BART9-3p   | -0.313 | 0.018 | 0.80496614 |
| hsa-miR-4665-3p    | -0.197 | 0.018 | 0.87236271 |
| hsa-miR-4494       | -0.227 | 0.018 | 0.85440974 |
| hsa-miR-2467-3p    | -0.249 | 0.018 | 0.84147948 |
| hsa-miR-411-3p     | -0.211 | 0.018 | 0.86393819 |
| hsa-miR-4450       | 0.247  | 0.018 | 1.1867368  |
| hsa-miR-23b-3p     | 1.068  | 0.018 | 2.09652495 |
| hsa-miR-1972       | -0.211 | 0.018 | 0.86393819 |
| hsa-miR-325        | -0.233 | 0.019 | 0.85086373 |
| hsa-miR-514a-3p    | -0.178 | 0.019 | 0.88392753 |
| hsa-miR-539-5p     | -0.199 | 0.019 | 0.87115419 |
| hsa-miR-302a-5p    | -0.342 | 0.019 | 0.78894684 |
| hsa-miR-4427       | -0.194 | 0.019 | 0.87417862 |
| hsv2-miR-H9-5p     | -0.199 | 0.019 | 0.87115419 |
| hsa-miR-1295a      | -0.164 | 0.019 | 0.89254697 |
| hsa-miR-4517       | -0.222 | 0.019 | 0.85737604 |
| hsa-miR-3689a-3p   | -0.233 | 0.019 | 0.85086373 |
| hsa-miR-636        | -0.191 | 0.019 | 0.87599832 |
| hsa-miR-19b-2-5p   | -0.181 | 0.019 | 0.88209137 |
| hsa-miR-23a-3p     | 0.634  | 0.019 | 1.55186171 |
| hsa-miR-4703-5p    | -0.268 | 0.019 | 0.83047002 |
| hsa-miR-596        | -0.221 | 0.019 | 0.85797053 |
| hsa-miR-141-3p     | 0.534  | 0.019 | 1.44793817 |
| hsa-miR-643        | -0.277 | 0.019 | 0.82530541 |
| hsa-miR-607        | -0.225 | 0.019 | 0.85559503 |
| hsv1-miR-H3-3p     | -0.19  | 0.019 | 0.87660572 |
| hsa-miR-4749-3p    | -0.188 | 0.019 | 0.8778218  |
| hsa-miR-367-5p     | -0.213 | 0.019 | 0.86274134 |
| hsa-miR-342-3p     | 0.566  | 0.019 | 1.4804133  |
| hsa-miR-3942-3p    | -0.247 | 0.019 | 0.84264683 |
| hsa-miR-4753-5p    | -0.311 | 0.019 | 0.80608283 |
| hsa-miR-592        | -0.217 | 0.019 | 0.86035263 |
| hsa-miR-19a-3p     | 0.476  | 0.019 | 1.39088197 |
| hsa-miR-3666       | -0.244 | 0.019 | 0.84440089 |
| hsa-miRPlus-K1303* | -0.193 | 0.019 | 0.87478476 |
| hsa-miR-4641       | -0.222 | 0.019 | 0.85737604 |
| hsa-miR-499b-5p    | -0.198 | 0.019 | 0.87175824 |
| hsa-miR-105-5p     | -0.168 | 0.019 | 0.89007573 |
| hsa-miR-1245b-5p   | -0.328 | 0.019 | 0.7966401  |
| hsa-miR-548s       | -0.174 | 0.019 | 0.8863817  |
| hsa-miR-499a-5p    | -0.247 | 0.02  | 0.84264683 |
| hsa-miR-922        | -0.142 | 0.02  | 0.90626194 |
| hsa-miR-618        | -0.181 | 0.02  | 0.88209137 |
| hsa-miR-4326       | -0.186 | 0.02  | 0.87903956 |
| hsa-miR-515-3p     | -0.3   | 0.02  | 0.8122524  |
| hsa-miR-4482-3p    | -0.302 | 0.02  | 0.81112716 |
| hsa-miR-518f-5p    | -0.183 | 0.02  | 0.88086937 |
| hsa-miR-4257       | -0.224 | 0.02  | 0.85618828 |
| hsa-miR-452-3p     | -0.252 | 0.02  | 0.83973149 |
| hsa-miR-5681b      | 0.574  | 0.02  | 1.48864526 |
| SNORD68            | 0.584  | 0.02  | 1.4989996  |
| hsa-miR-642a-3p    | -0.325 | 0.02  | 0.79829839 |
| hsa-miR-338-5p     | -0.197 | 0.02  | 0.87236271 |

|                   |        |       |            |
|-------------------|--------|-------|------------|
| hsa-miR-4776-5p   | -0.238 | 0.02  | 0.84791996 |
| hsa-miR-503-3p    | -0.174 | 0.02  | 0.8863817  |
| hsa-miR-4731-3p   | -0.288 | 0.02  | 0.8190367  |
| hsa-miR-4705      | -0.172 | 0.02  | 0.88761134 |
| hsa-miR-4680-5p   | -0.229 | 0.02  | 0.8532261  |
| hsa-miR-297       | -0.156 | 0.02  | 0.89751005 |
| hsa-miR-508-3p    | -0.159 | 0.02  | 0.89564567 |
| hsa-miR-4418      | -0.282 | 0.02  | 0.82245007 |
| hsa-miR-30d-5p    | 0.463  | 0.02  | 1.37840515 |
| hsa-miR-107       | 0.348  | 0.02  | 1.27279494 |
| hsa-miR-487a      | -0.234 | 0.02  | 0.85027416 |
| hsa-miR-3169      | -0.216 | 0.02  | 0.86094919 |
| hsa-miR-4737      | -0.274 | 0.02  | 0.82702337 |
| hsa-miR-3064-5p   | -0.201 | 0.02  | 0.86994735 |
| hsa-miR-4534      | -0.392 | 0.02  | 0.76207242 |
| hsa-miR-3613-5p   | -0.138 | 0.02  | 0.90877812 |
| hsa-miR-4292      | -0.215 | 0.02  | 0.86154616 |
| hsa-miR-30c-5p    | 0.756  | 0.021 | 1.68880177 |
| hsa-let-7a-2-3p   | -0.169 | 0.021 | 0.88945899 |
| hsv2-miR-H21      | -0.189 | 0.021 | 0.87721355 |
| hsa-miR-191-3p    | -0.164 | 0.021 | 0.89254697 |
| hsa-miR-518f-3p   | -0.221 | 0.021 | 0.85797053 |
| hsa-miR-1224-5p   | -0.258 | 0.021 | 0.8362464  |
| hsa-miR-1267      | -0.216 | 0.021 | 0.86094919 |
| ebv-miR-BART5-5p  | -0.216 | 0.021 | 0.86094919 |
| hsa-miR-1285-5p   | 0.296  | 0.021 | 1.22773568 |
| hsa-miR-4772-3p   | -0.259 | 0.021 | 0.83566696 |
| hsa-miR-103a-2-5p | -0.136 | 0.021 | 0.91003882 |
| hsa-miR-3200-3p   | -0.279 | 0.021 | 0.82416208 |
| hsa-miR-1271-3p   | -0.31  | 0.021 | 0.80664176 |
| hsa-miR-3127-5p   | -0.292 | 0.021 | 0.81676899 |
| hsa-miR-5195-3p   | -0.172 | 0.021 | 0.88761134 |
| hsa-miR-4643      | -0.231 | 0.021 | 0.8520441  |
| hsa-miR-1299      | 0.259  | 0.021 | 1.19664896 |
| hsa-miR-223-5p    | -0.182 | 0.021 | 0.88148016 |
| hsv2-miR-H5       | -0.185 | 0.021 | 0.87964908 |
| hsa-miR-4672      | -0.173 | 0.021 | 0.88699631 |
| hsa-miR-146b-3p   | -0.185 | 0.021 | 0.87964908 |
| hsa-miR-373-5p    | -0.134 | 0.021 | 0.91130128 |
| hsa-miR-3136-5p   | -0.211 | 0.022 | 0.86393819 |
| hsa-miR-219-2-3p  | -0.612 | 0.022 | 0.65428904 |
| hsa-miR-31-5p     | 0.287  | 0.022 | 1.22010051 |
| hsa-miR-3663-3p   | -0.205 | 0.022 | 0.86753869 |
| hsa-miR-379-3p    | -0.296 | 0.022 | 0.81450756 |
| hsa-miR-599       | -0.209 | 0.022 | 0.86513669 |
| SNORD15A          | -0.309 | 0.022 | 0.80720107 |
| hsa-miR-676-3p    | -0.158 | 0.022 | 0.8962667  |
| hsa-miR-520a-5p   | -0.226 | 0.022 | 0.85500218 |
| hsa-miR-338-3p    | -0.138 | 0.022 | 0.90877812 |
| hsa-miR-762       | -0.229 | 0.022 | 0.8532261  |
| hsa-miR-302b-5p   | -0.154 | 0.022 | 0.89875513 |
| hsa-miR-340-3p    | 0.207  | 0.022 | 1.15428542 |
| hsa-miR-3074-5p   | -0.173 | 0.023 | 0.88699631 |
| hsa-miR-3138      | -0.254 | 0.023 | 0.83856818 |
| hsa-miR-4715-3p   | -0.217 | 0.023 | 0.86035263 |
| hsa-miR-3136-3p   | 1.08   | 0.023 | 2.11403608 |
| hsa-miR-548ar-3p  | -0.181 | 0.023 | 0.88209137 |
| hsa-miR-4457      | -0.256 | 0.023 | 0.83740649 |

|                    |        |       |            |
|--------------------|--------|-------|------------|
| hsa-miR-3908       | -0.219 | 0.023 | 0.85916075 |
| hsa-miR-4480       | -0.33  | 0.024 | 0.79553648 |
| hsa-miR-499b-3p    | -0.216 | 0.024 | 0.86094919 |
| hsa-miR-3665       | -0.304 | 0.024 | 0.81000347 |
| hsa-miR-3185       | -0.234 | 0.024 | 0.85027416 |
| hsa-miR-4522       | -0.319 | 0.024 | 0.80162533 |
| hsa-miR-3618       | -0.204 | 0.024 | 0.86814023 |
| hsa-miR-18a-3p     | -0.17  | 0.024 | 0.88884268 |
| hsa-miR-548ag      | -0.293 | 0.024 | 0.81620305 |
| kshv-miR-K12-4-5p  | -0.151 | 0.024 | 0.90062598 |
| hsa-miR-1253       | -0.171 | 0.024 | 0.8882268  |
| RNU6-1             | 0.363  | 0.024 | 1.28609748 |
| hsa-miR-5009-3p    | -0.173 | 0.024 | 0.88699631 |
| SNORD49A           | 0.592  | 0.024 | 1.50733491 |
| hsa-miR-548w       | -0.209 | 0.025 | 0.86513669 |
| hsa-miR-3663-5p    | -0.218 | 0.025 | 0.85975649 |
| hsa-miR-890        | -0.238 | 0.025 | 0.84791996 |
| hsv2-miR-H13       | -0.231 | 0.025 | 0.8520441  |
| hsa-miR-3139       | -0.131 | 0.025 | 0.91319825 |
| hsa-miR-877-3p     | 0.232  | 0.025 | 1.17446197 |
| hsa-miR-1203       | -0.248 | 0.025 | 0.84206295 |
| hsa-miR-4287       | -0.155 | 0.025 | 0.89813237 |
| hcmv-miR-US25-2-5p | -0.282 | 0.025 | 0.82245007 |
| hsa-miR-3188       | -0.176 | 0.025 | 0.88515376 |
| hsa-miR-497-5p     | 0.461  | 0.025 | 1.3764956  |
| hsa-miR-30e-5p     | 0.681  | 0.025 | 1.60325066 |
| kshv-miR-K12-2-5p  | -0.242 | 0.025 | 0.84557229 |
| hsa-miR-4766-5p    | -0.235 | 0.025 | 0.849685   |
| hsa-miR-222-5p     | -0.181 | 0.025 | 0.88209137 |
| hsa-miR-4291       | 0.333  | 0.025 | 1.25962998 |
| hsv2-miR-H11-5p    | -0.162 | 0.025 | 0.89378516 |
| kshv-miR-K12-8-5p  | -0.21  | 0.025 | 0.86453723 |
| hsa-miR-3943       | -0.234 | 0.025 | 0.85027416 |
| hsa-miR-1234-3p    | -0.214 | 0.025 | 0.86214355 |
| hsa-miR-3605-5p    | -0.308 | 0.025 | 0.80776078 |
| hsa-miR-4274       | -0.177 | 0.025 | 0.88454044 |
| hsa-miR-5588-3p    | -0.206 | 0.025 | 0.86693756 |
| hsa-miR-4445-5p    | -0.234 | 0.025 | 0.85027416 |
| hsa-miR-548k       | -0.188 | 0.025 | 0.8778218  |
| hsv2-miR-H12       | -0.168 | 0.025 | 0.89007573 |
| hsa-miR-4764-3p    | 1.159  | 0.026 | 2.23302592 |
| hsa-miR-19b-3p     | 0.492  | 0.026 | 1.4063932  |
| hsa-miR-582-3p     | -0.209 | 0.026 | 0.86513669 |
| hsa-miR-505-3p     | -0.153 | 0.026 | 0.89937831 |
| ebv-miR-BART20-5p  | -0.192 | 0.026 | 0.87539133 |
| hsa-miR-2117       | -0.314 | 0.026 | 0.80440837 |
| hsa-miR-512-5p     | -0.139 | 0.026 | 0.90814842 |
| hsa-miR-141-5p     | -0.183 | 0.026 | 0.88086937 |
| hsa-miR-4677-3p    | 0.279  | 0.026 | 1.21335356 |
| hsa-miR-4293       | -0.174 | 0.026 | 0.8863817  |
| hsa-miR-15a-3p     | -0.229 | 0.026 | 0.8532261  |
| hsa-miR-760        | -0.152 | 0.027 | 0.90000193 |
| hsa-miR-7-1-3p     | -0.199 | 0.027 | 0.87115419 |
| hsa-miR-449c-3p    | -0.216 | 0.027 | 0.86094919 |
| hsa-miR-4286       | 0.266  | 0.027 | 1.20246925 |
| hsa-miR-105-3p     | -0.227 | 0.027 | 0.85440974 |
| hsa-miR-1827       | 0.475  | 0.027 | 1.38991822 |
| hsa-miR-4520a-3p   | -0.189 | 0.027 | 0.87721355 |



|                   |        |       |            |
|-------------------|--------|-------|------------|
| hsa-miR-214-3p    | 0.512  | 0.027 | 1.42602572 |
| hsa-let-7c        | 0.503  | 0.027 | 1.4171574  |
| hsa-miR-4479      | -0.186 | 0.027 | 0.87903956 |
| hsa-miR-1225-5p   | -0.19  | 0.027 | 0.87660572 |
| hsv1-miR-H12      | -0.218 | 0.027 | 0.85975649 |
| hsa-miR-642b-3p   | -0.237 | 0.027 | 0.8485079  |
| hsa-miR-4526      | -0.21  | 0.027 | 0.86453723 |
| hsa-miR-1247-5p   | -0.131 | 0.027 | 0.91319825 |
| hsa-miR-4803      | -0.168 | 0.027 | 0.89007573 |
| hsa-miR-625-3p    | -0.16  | 0.027 | 0.89502507 |
| hsa-miR-5100      | 0.325  | 0.027 | 1.25266444 |
| hsa-miR-574-3p    | 0.231  | 0.027 | 1.17364818 |
| hsa-miR-4666a-3p  | -0.193 | 0.027 | 0.87478476 |
| hsa-miR-323b-3p   | -0.178 | 0.027 | 0.88392753 |
| hsa-let-7a-3p     | 0.272  | 0.027 | 1.20748059 |
| hsa-miR-3130-5p   | -0.26  | 0.027 | 0.83508792 |
| hsa-miR-4529-5p   | -0.198 | 0.027 | 0.87175824 |
| hsa-miR-7-2-3p    | -0.178 | 0.028 | 0.88392753 |
| hsa-miR-216b      | -0.178 | 0.028 | 0.88392753 |
| hsa-miRPlus-B1114 | -0.195 | 0.028 | 0.8735729  |
| hsa-miR-208a      | -0.183 | 0.028 | 0.88086937 |
| hsa-miR-4633-3p   | -0.249 | 0.028 | 0.84147948 |
| hsa-miR-4770      | -0.204 | 0.028 | 0.86814023 |
| hsa-miR-103a-3p   | 0.508  | 0.029 | 1.42207741 |
| hsa-miR-4700-3p   | -0.155 | 0.029 | 0.89813237 |
| hsa-miR-4722-5p   | -0.178 | 0.029 | 0.88392753 |
| hsa-miR-30e-3p    | 0.517  | 0.029 | 1.43097652 |
| hsv1-miR-H2-5p    | -0.215 | 0.029 | 0.86154616 |
| hsa-miR-1298      | -0.26  | 0.029 | 0.83508792 |
| hsa-miR-26a-1-3p  | -0.157 | 0.029 | 0.89688816 |
| hsv2-miR-H4-5p    | -0.155 | 0.029 | 0.89813237 |
| hsa-miR-4265      | -0.169 | 0.029 | 0.88945899 |
| hsa-miR-4317      | 0.432  | 0.029 | 1.34910253 |
| hsa-miR-5001-3p   | -0.206 | 0.029 | 0.86693756 |
| hsa-miR-4757-5p   | -0.179 | 0.029 | 0.88331505 |
| hsa-miR-296-3p    | -0.191 | 0.029 | 0.87599832 |
| hsa-miR-4470      | -0.234 | 0.029 | 0.85027416 |
| hsa-miR-4509      | -0.307 | 0.029 | 0.80832087 |
| hsa-miR-124-3p    | -0.214 | 0.029 | 0.86214355 |
| hsa-miR-374c-3p   | -0.161 | 0.029 | 0.8944049  |
| hsa-miR-3529-3p   | -0.23  | 0.029 | 0.85263489 |
| hsa-miR-5006-5p   | -0.198 | 0.03  | 0.87175824 |
| hsa-miR-3944-3p   | -0.265 | 0.03  | 0.83219873 |
| hsa-miR-4645-3p   | -0.152 | 0.03  | 0.90000193 |
| hsa-miR-3174      | -0.146 | 0.03  | 0.90375273 |
| hsa-miR-616-3p    | -0.213 | 0.03  | 0.86274134 |
| hsa-miR-548u      | -0.237 | 0.03  | 0.8485079  |
| hsa-miR-431-3p    | -0.272 | 0.03  | 0.82817066 |
| hsa-miR-4756-5p   | -0.158 | 0.03  | 0.8962667  |
| hsa-miR-373-3p    | -0.161 | 0.03  | 0.8944049  |
| hsa-miR-2467-5p   | -0.252 | 0.03  | 0.83973149 |
| hsa-miR-4715-5p   | -0.284 | 0.03  | 0.8213107  |
| hsa-miR-302b-3p   | -0.166 | 0.03  | 0.8913105  |
| hsa-miR-1321      | 0.247  | 0.03  | 1.1867368  |
| hsa-miR-3118      | -0.245 | 0.03  | 0.8438158  |
| hsa-miR-4695-5p   | -0.346 | 0.03  | 0.78676245 |
| hsa-miR-589-3p    | -0.16  | 0.03  | 0.89502507 |
| hsa-miR-3126-3p   | -0.232 | 0.03  | 0.85145371 |

|                      |        |       |            |
|----------------------|--------|-------|------------|
| hsa-miR-4289         | 0.356  | 0.031 | 1.27987241 |
| hsa-miR-4804-3p      | -0.237 | 0.031 | 0.8485079  |
| hsa-miR-4483         | -0.285 | 0.031 | 0.82074161 |
| hsa-miR-3150b-5p     | -0.192 | 0.031 | 0.87539133 |
| hsa-miR-4640-3p      | -0.202 | 0.031 | 0.86934456 |
| hsa-miR-3150a-3p     | -0.185 | 0.031 | 0.87964908 |
| hsa-miR-1303         | -0.231 | 0.031 | 0.8520441  |
| hsa-miRPlus-G1246-3p | -0.172 | 0.031 | 0.88761134 |
| hsa-miR-5696         | -0.181 | 0.031 | 0.88209137 |
| hsv2-miR-H6-5p       | -0.305 | 0.031 | 0.80944222 |
| hsa-miR-614          | -0.146 | 0.031 | 0.90375273 |
| hsa-miR-4491         | -0.194 | 0.031 | 0.87417862 |
| hsa-miR-4748         | -0.307 | 0.031 | 0.80832087 |
| hsa-miR-10b-5p       | 0.819  | 0.031 | 1.76418273 |
| hsa-miR-4468         | 0.771  | 0.031 | 1.7064522  |
| hsa-miR-654-3p       | -0.144 | 0.031 | 0.90500646 |
| hsa-miR-372          | -0.192 | 0.031 | 0.87539133 |
| hsa-miR-4797-3p      | -0.184 | 0.031 | 0.88025901 |
| hsa-miR-4635         | -0.279 | 0.031 | 0.82416208 |
| hsa-miR-369-5p       | -0.145 | 0.031 | 0.90437938 |
| hsa-miR-4691-3p      | -0.168 | 0.031 | 0.89007573 |
| hsv1-miR-H2-3p       | -0.113 | 0.031 | 0.92466328 |
| hsa-miR-4659a-5p     | -0.343 | 0.031 | 0.78840017 |
| hsa-miR-548i         | -0.159 | 0.031 | 0.89564567 |
| hsa-miR-3670         | -0.192 | 0.032 | 0.87539133 |
| hsa-miR-5007-3p      | -0.174 | 0.032 | 0.8863817  |
| hsa-miR-5094         | -0.157 | 0.032 | 0.89688816 |
| hsa-miR-561-3p       | -0.125 | 0.032 | 0.91700404 |
| hsa-miR-98-5p        | 0.468  | 0.032 | 1.38319063 |
| hsa-miR-519d         | -0.15  | 0.032 | 0.90125046 |
| hsa-miR-100-3p       | -0.23  | 0.032 | 0.85263489 |
| hsa-miR-3622b-5p     | -0.273 | 0.032 | 0.82759682 |
| hsa-miR-3162-5p      | -0.37  | 0.032 | 0.7737825  |
| hsa-miR-4251         | -0.18  | 0.033 | 0.882703   |
| hsa-miR-4660         | -0.149 | 0.033 | 0.90187538 |
| ebv-miR-BART6-5p     | -0.212 | 0.033 | 0.86333956 |
| hsa-miR-92b-5p       | -0.23  | 0.033 | 0.85263489 |
| hsa-miR-4719         | -0.223 | 0.033 | 0.85678195 |
| hsa-miR-4649-3p      | -0.153 | 0.033 | 0.89937831 |
| hsa-miR-4267         | -0.178 | 0.033 | 0.88392753 |
| hsa-miR-4778-3p      | 0.158  | 0.033 | 1.11573932 |
| hsa-miR-4802-3p      | -0.196 | 0.033 | 0.87296759 |
| hsa-miR-96-5p        | 0.269  | 0.033 | 1.20497231 |
| hsa-miR-485-5p       | -0.249 | 0.033 | 0.84147948 |
| ebv-miR-BART18-5p    | -0.252 | 0.033 | 0.83973149 |
| hsa-miR-3938         | 0.559  | 0.033 | 1.47324769 |
| hsa-miR-1231         | -0.211 | 0.034 | 0.86393819 |
| hsa-miR-5197-5p      | -0.243 | 0.034 | 0.84498638 |
| hsa-miR-27a-3p       | 0.963  | 0.034 | 1.94935926 |
| hsa-miR-3126-5p      | -0.178 | 0.034 | 0.88392753 |
| hsa-miR-519a-3p      | -0.141 | 0.034 | 0.90689033 |
| hsa-miR-612          | -0.22  | 0.034 | 0.85856544 |
| hsa-miR-155-3p       | -0.182 | 0.034 | 0.88148016 |
| hsa-miR-577          | -0.213 | 0.034 | 0.86274134 |
| hsa-miR-758-3p       | -0.23  | 0.034 | 0.85263489 |
| hsa-let-7a-5p        | 0.839  | 0.034 | 1.7888098  |
| hsa-miR-135b-3p      | -0.219 | 0.034 | 0.85916075 |

|                    |        |       |            |
|--------------------|--------|-------|------------|
| hsa-miR-4790-3p    | -0.29  | 0.034 | 0.81790206 |
| hsa-let-7i-5p      | 0.628  | 0.035 | 1.5454211  |
| hsa-miR-513a-3p    | -0.146 | 0.035 | 0.90375273 |
| hsa-let-7e-3p      | -0.162 | 0.035 | 0.89378516 |
| ebv-miR-BART11-3p  | -0.227 | 0.035 | 0.85440974 |
| hsa-miR-622        | -0.223 | 0.035 | 0.85678195 |
| hsa-miR-3117-3p    | -0.262 | 0.035 | 0.83393104 |
| hsa-miR-5697       | -0.342 | 0.035 | 0.78894684 |
| hsa-miR-196b-5p    | 0.43   | 0.035 | 1.34723358 |
| hsa-miR-4424       | -0.215 | 0.035 | 0.86154616 |
| hsa-miR-509-5p     | -0.259 | 0.035 | 0.83566696 |
| hsa-miR-449b-3p    | -0.231 | 0.035 | 0.8520441  |
| hsa-miR-4795-5p    | 0.468  | 0.035 | 1.38319063 |
| hsa-miR-1909-3p    | -0.287 | 0.035 | 0.81960461 |
| hsa-miR-3616-5p    | -0.123 | 0.035 | 0.91827616 |
| hsa-miR-587        | -0.289 | 0.035 | 0.81846918 |
| hsa-miR-146a-3p    | -0.179 | 0.035 | 0.88331505 |
| hsa-miR-130a-3p    | 0.736  | 0.035 | 1.66555154 |
| hsa-miR-421        | -0.174 | 0.035 | 0.8863817  |
| hsa-miR-3134       | -0.143 | 0.035 | 0.90563398 |
| hcmv-miR-US25-1-5p | -0.227 | 0.035 | 0.85440974 |
| hsa-miR-3668       | -0.148 | 0.035 | 0.90250073 |
| hsa-miR-374a-5p    | 0.431  | 0.036 | 1.34816773 |
| hsa-miR-200c-5p    | -0.225 | 0.036 | 0.85559503 |
| hsa-miR-512-3p     | -0.174 | 0.036 | 0.8863817  |
| hsa-miR-3667-3p    | -0.166 | 0.036 | 0.8913105  |
| hsa-miR-182-5p     | 0.319  | 0.036 | 1.24746557 |
| hsa-miR-382-5p     | -0.156 | 0.036 | 0.89751005 |
| hsa-miR-302e       | -0.128 | 0.036 | 0.91509917 |
| hsa-miR-520d-3p    | -0.167 | 0.036 | 0.8906929  |
| hsa-miR-181b-5p    | 0.206  | 0.036 | 1.15348561 |
| hsa-miR-491-5p     | -0.124 | 0.037 | 0.91763988 |
| hsa-miR-2964a-5p   | 0.313  | 0.037 | 1.24228828 |
| hsa-miR-365a-5p    | -0.193 | 0.037 | 0.87478476 |
| hsa-miR-148b-3p    | 0.216  | 0.037 | 1.16150873 |
| hsa-miR-27b-3p     | 0.839  | 0.037 | 1.7888098  |
| hsa-miR-1256       | -0.183 | 0.037 | 0.88086937 |
| hsa-miR-125a-5p    | 0.682  | 0.037 | 1.60436233 |
| hsa-miR-4804-5p    | -0.251 | 0.037 | 0.84031375 |
| hsa-miR-4774-5p    | -0.166 | 0.037 | 0.8913105  |
| hsa-miR-3681-3p    | -0.171 | 0.037 | 0.8882268  |
| hsa-miR-4447       | -0.332 | 0.037 | 0.7944344  |
| hsa-miR-4793-5p    | -0.242 | 0.038 | 0.84557229 |
| hsa-miR-605        | -0.18  | 0.038 | 0.882703   |
| hsa-miR-4729       | -0.179 | 0.038 | 0.88331505 |
| hsa-miR-1250       | -0.217 | 0.038 | 0.86035263 |
| hsa-miR-202-5p     | -0.137 | 0.038 | 0.90940825 |
| hsa-miR-542-3p     | 0.354  | 0.038 | 1.27809936 |
| hcmv-miR-US25-2-3p | -0.287 | 0.038 | 0.81960461 |
| hsa-miR-4664-5p    | -0.151 | 0.038 | 0.90062598 |
| hsa-miR-501-5p     | -0.146 | 0.038 | 0.90375273 |
| hsa-miR-548ad      | -0.169 | 0.038 | 0.88945899 |
| hsa-miR-4652-5p    | -0.195 | 0.038 | 0.8735729  |
| hsa-miR-4796-3p    | 0.203  | 0.038 | 1.15108949 |
| hsa-miR-3662       | -0.168 | 0.038 | 0.89007573 |
| hsa-miR-3675-3p    | -0.197 | 0.038 | 0.87236271 |
| hsa-miR-135b-5p    | 0.314  | 0.038 | 1.24314967 |
| hsa-miR-29c-3p     | 0.607  | 0.038 | 1.52308874 |

|                    |        |       |            |
|--------------------|--------|-------|------------|
| hsa-miR-335-3p     | 0.334  | 0.038 | 1.26050339 |
| hsa-miR-145-5p     | 0.6    | 0.038 | 1.51571657 |
| hsa-miR-4307       | -0.165 | 0.038 | 0.89192852 |
| hsa-miR-4300       | -0.165 | 0.038 | 0.89192852 |
| ebv-miR-BART5-3p   | -0.144 | 0.038 | 0.90500646 |
| hsa-miR-1179       | -0.154 | 0.039 | 0.89875513 |
| hsa-miR-203b-3p    | -0.174 | 0.039 | 0.8863817  |
| ebv-miR-BART10-3p  | -0.187 | 0.039 | 0.87843047 |
| hsa-miR-631        | -0.241 | 0.039 | 0.8461586  |
| hsa-miR-3609       | 0.377  | 0.039 | 1.2986386  |
| hsa-miR-195-5p     | 0.908  | 0.039 | 1.87644239 |
| hsa-miR-450a-3p    | 0.169  | 0.039 | 1.12427892 |
| hsa-miR-3913-3p    | -0.157 | 0.039 | 0.89688816 |
| hsv1-miR-H14-3p    | -0.168 | 0.039 | 0.89007573 |
| hsa-miR-34b-5p     | 0.718  | 0.039 | 1.64490014 |
| hsa-miR-153        | -0.161 | 0.039 | 0.8944049  |
| hsa-let-7g-5p      | 0.839  | 0.04  | 1.7888098  |
| hsa-miR-548an      | 0.187  | 0.04  | 1.13839403 |
| hsa-miR-4714-3p    | -0.151 | 0.04  | 0.90062598 |
| hsa-miR-1224-3p    | -0.133 | 0.04  | 0.91193317 |
| hsa-miR-520f       | -0.217 | 0.04  | 0.86035263 |
| hsa-miR-122-5p     | -0.186 | 0.04  | 0.87903956 |
| hsa-miR-3942-5p    | -0.182 | 0.04  | 0.88148016 |
| hsa-miR-1226-3p    | -0.138 | 0.04  | 0.90877812 |
| hsa-miR-1227-3p    | -0.123 | 0.04  | 0.91827616 |
| hsa-miR-4659a-3p   | -0.197 | 0.04  | 0.87236271 |
| hsa-miR-626        | -0.167 | 0.04  | 0.8906929  |
| hsa-miR-143-5p     | -0.164 | 0.04  | 0.89254697 |
| hsa-miR-4294       | -0.195 | 0.04  | 0.8735729  |
| hsa-miR-3923       | -0.164 | 0.04  | 0.89254697 |
| hsa-miR-27a-5p     | -0.139 | 0.041 | 0.90814842 |
| ebv-miR-BART14-5p  | -0.232 | 0.041 | 0.85145371 |
| hsa-miR-548h-5p    | -0.217 | 0.041 | 0.86035263 |
| hsa-miR-186-5p     | 0.18   | 0.041 | 1.13288389 |
| hsa-miR-3529-5p    | -0.27  | 0.041 | 0.82931955 |
| hsa-miR-217        | -0.145 | 0.041 | 0.90437938 |
| kshv-miR-K12-12-3p | -0.223 | 0.041 | 0.85678195 |
| hsa-miR-145-3p     | 0.351  | 0.041 | 1.27544439 |
| hsa-miR-92b-3p     | 0.218  | 0.042 | 1.16312004 |
| hsa-miR-4255       | -0.152 | 0.042 | 0.90000193 |
| hsa-miR-32-3p      | 0.353  | 0.042 | 1.27721376 |
| hsa-miR-519e-5p    | -0.237 | 0.042 | 0.8485079  |
| hsa-miR-4666a-5p   | -0.24  | 0.042 | 0.84674531 |
| hsa-miR-4258       | -0.167 | 0.042 | 0.8906929  |
| hsa-miR-4453       | -0.148 | 0.042 | 0.90250073 |
| mcv-miR-M1-3p      | -0.156 | 0.042 | 0.89751005 |
| hsa-miR-4797-5p    | -0.404 | 0.042 | 0.75575996 |
| hsa-miR-3918       | -0.163 | 0.042 | 0.89316585 |
| mcv-miR-M1-5p      | -0.221 | 0.042 | 0.85797053 |
| hsa-miR-517-5p     | -0.179 | 0.042 | 0.88331505 |
| hsa-miR-495-5p     | 0.2    | 0.042 | 1.14869835 |
| hsa-miR-3688-5p    | 0.287  | 0.042 | 1.22010051 |
| hsa-miR-609        | -0.231 | 0.043 | 0.8520441  |
| hsa-miR-92a-2-5p   | -0.166 | 0.043 | 0.8913105  |
| hsa-miR-4279       | 0.468  | 0.043 | 1.38319063 |
| hsa-miR-93-3p      | -0.167 | 0.043 | 0.8906929  |
| hsa-miR-3162-3p    | -0.159 | 0.043 | 0.89564567 |
| hsa-miR-4507       | -0.252 | 0.043 | 0.83973149 |

|                   |        |       |            |
|-------------------|--------|-------|------------|
| hsa-miR-4724-3p   | -0.222 | 0.043 | 0.85737604 |
| hsa-miR-187-3p    | 0.147  | 0.043 | 1.10726458 |
| hsa-miR-3680-3p   | -0.133 | 0.043 | 0.91193317 |
| hsa-miR-5093      | -0.256 | 0.043 | 0.83740649 |
| hsa-miR-4654      | -0.247 | 0.043 | 0.84264683 |
| hsa-miR-1262      | -0.237 | 0.043 | 0.8485079  |
| hsa-miR-26b-3p    | -0.121 | 0.043 | 0.91955005 |
| hsa-miR-1185-2-3p | -0.152 | 0.044 | 0.90000193 |
| kshv-miR-K12-7-3p | -0.162 | 0.044 | 0.89378516 |
| hsa-miR-221-3p    | 0.366  | 0.044 | 1.28877463 |
| hsa-miR-26b-5p    | 0.915  | 0.044 | 1.88556907 |
| hsa-miR-885-3p    | -0.212 | 0.044 | 0.86333956 |
| hsa-miR-4495      | -0.258 | 0.044 | 0.8362464  |
| hsa-miR-1180      | -0.26  | 0.045 | 0.83508792 |
| hsa-miR-580       | -0.183 | 0.045 | 0.88086937 |
| ebv-miR-BART13-5p | -0.15  | 0.045 | 0.90125046 |
| hsa-miR-648       | -0.147 | 0.045 | 0.90312651 |
| hsa-miR-545-3p    | -0.102 | 0.045 | 0.93174043 |
| hsa-miR-1915-3p   | -0.138 | 0.045 | 0.90877812 |
| hsv1-miR-H15      | -0.239 | 0.045 | 0.84733243 |
| hsa-miR-4513      | -0.272 | 0.045 | 0.82817066 |
| hsa-miR-4436a     | -0.161 | 0.045 | 0.8944049  |
| hsa-miR-5585-5p   | -0.192 | 0.045 | 0.87539133 |
| SNORA66           | -0.171 | 0.046 | 0.8882268  |
| hsa-miR-1249      | -0.132 | 0.046 | 0.91256549 |
| hsa-miR-4299      | 0.462  | 0.046 | 1.37745005 |
| hsa-miR-4789-5p   | -0.21  | 0.046 | 0.86453723 |
| hsa-miR-633       | -0.169 | 0.046 | 0.88945899 |
| hsv1-miR-H17      | -0.254 | 0.047 | 0.83856818 |
| hsa-miR-4309      | -0.157 | 0.047 | 0.89688816 |
| hsa-miR-3926      | -0.198 | 0.047 | 0.87175824 |
| hsa-miR-4474-5p   | -0.152 | 0.047 | 0.90000193 |
| hsa-miR-3689f     | -0.178 | 0.047 | 0.88392753 |
| hsa-miR-4746-5p   | -0.125 | 0.047 | 0.91700404 |
| hsa-miR-3914      | -0.208 | 0.047 | 0.86573657 |
| hsa-miR-345-3p    | -0.164 | 0.048 | 0.89254697 |
| hsa-miR-573       | -0.117 | 0.048 | 0.92210312 |
| hsa-miR-1283      | -0.21  | 0.048 | 0.86453723 |
| hsa-miR-548p      | -0.151 | 0.048 | 0.90062598 |
| hsa-miR-3975      | -0.151 | 0.048 | 0.90062598 |
| hsa-miR-3165      | -0.157 | 0.048 | 0.89688816 |
| hsa-miR-3692-3p   | -0.155 | 0.049 | 0.89813237 |
| hsa-miR-4792      | -0.266 | 0.049 | 0.8316221  |
| hsa-miR-548aq-3p  | -0.236 | 0.049 | 0.84909625 |
| hsa-miR-644a      | -0.227 | 0.049 | 0.85440974 |
| hsa-miR-378b      | -0.193 | 0.049 | 0.87478476 |
| hsa-miR-320d      | 0.423  | 0.049 | 1.34071259 |
| hsa-miR-4429      | 0.498  | 0.049 | 1.4122544  |
| hsa-miR-567       | -0.258 | 0.049 | 0.8362464  |
| hsa-miR-4734      | -0.253 | 0.049 | 0.83914964 |
| hsa-miR-4438      | -0.194 | 0.049 | 0.87417862 |
| hsa-miR-885-5p    | -0.184 | 0.049 | 0.88025901 |
| hsa-miR-2114-3p   | -0.192 | 0.049 | 0.87539133 |
| hsa-miR-3683      | -0.169 | 0.049 | 0.88945899 |
| ebv-miR-BART1-5p  | -0.114 | 0.05  | 0.92402257 |
| hsa-miR-4711-3p   | 0.179  | 0.05  | 1.1320989  |
| hsa-miR-3132      | -0.171 | 0.05  | 0.8882268  |
| hsa-miR-1197      | -0.221 | 0.05  | 0.85797053 |

|                 |        |      |            |
|-----------------|--------|------|------------|
| hsa-miR-518b    | -0.146 | 0.05 | 0.90375273 |
| hsa-miR-5571-5p | -0.177 | 0.05 | 0.88454044 |
| hsa-miR-1307-3p | -0.155 | 0.05 | 0.89813237 |
| hsa-miR-4701-5p | -0.143 | 0.05 | 0.90563398 |
| hsa-miR-509-3p  | -0.235 | 0.05 | 0.849685   |
| hsa-miR-4664-3p | -0.146 | 0.05 | 0.90375273 |

\*value of less than 0.05 is statistically significant
