# Supplementary material for: Profiling of Selected MicroRNAs in Proliferative Eutopic Endometrium of Women with Ovarian Endometriosis
Source: Hindawi journal article supplement (doi:10.1155/2015/760698), 2015-01-01
Supplement: f1 [file 760698.f1.zip]

## Legend to Tab II. supplement

Each file in this directory contains a table showing association of a particular miRNA to different mRNAs. Rows represent genes. First column shows name of a particular miRNA, the next six columns correspond to 6 databases (1 means that association was found, 0 that it was not), and the last two columns contain gene symbol and gene name, respectively.
