# Supplementary material for: Profiling of Selected MicroRNAs in Proliferative Eutopic Endometrium of Women with Ovarian Endometriosis
Source: Biomed Res Int. 2015 Aug 20;2015:760698. doi: 10.1155/2015/760698 (PMC4558423; doi:10.1155/2015/760698)
Supplement: Supplementary file 1 — Table I: The names of miRNAs significantly differentially expressed between eutopic endometrium of patients with endometriosis vs eutopic endometrium of patients without endometriosis. Table II: The associations between miRNA and mRNA, which presents detailed results of the search of six major databases i.e targetscan, tarbase, miranda, mirbase, mirtarget2 and pictar. [file 760698.f1.zip]

Archive with 252 entries (250 files):
- 760698.f1/
- 760698.f1/Table I.pdf
- 760698.f1/Table II/
- 760698.f1/Table II/hsa-let-7c.tsv
- 760698.f1/Table II/hsa-miR-107.tsv
- 760698.f1/Table II/hsa-miR-1179.tsv
- 760698.f1/Table II/hsa-miR-1180.tsv
- 760698.f1/Table II/hsa-miR-1181.tsv
- 760698.f1/Table II/hsa-miR-1182.tsv
- 760698.f1/Table II/hsa-miR-1183.tsv
- 760698.f1/Table II/hsa-miR-1197.tsv
- 760698.f1/Table II/hsa-miR-1200.tsv
- 760698.f1/Table II/hsa-miR-1203.tsv
- 760698.f1/Table II/hsa-miR-1204.tsv
- 760698.f1/Table II/hsa-miR-1205.tsv
- 760698.f1/Table II/hsa-miR-1206.tsv
- 760698.f1/Table II/hsa-miR-1207-3p.tsv
- 760698.f1/Table II/hsa-miR-1207-5p.tsv
- 760698.f1/Table II/hsa-miR-1208.tsv
- 760698.f1/Table II/hsa-miR-1224-3p.tsv
- 760698.f1/Table II/hsa-miR-1224-5p.tsv
- 760698.f1/Table II/hsa-miR-1225-3p.tsv
- 760698.f1/Table II/hsa-miR-1225-5p.tsv
- 760698.f1/Table II/hsa-miR-1231.tsv
- 760698.f1/Table II/hsa-miR-1248.tsv
- 760698.f1/Table II/hsa-miR-1249.tsv
- 760698.f1/Table II/hsa-miR-1250.tsv
- 760698.f1/Table II/hsa-miR-1251.tsv
- 760698.f1/Table II/hsa-miR-1253.tsv
- 760698.f1/Table II/hsa-miR-1254.tsv
- 760698.f1/Table II/hsa-miR-1255a.tsv
- 760698.f1/Table II/hsa-miR-1256.tsv
- 760698.f1/Table II/hsa-miR-125a-5p.tsv
- 760698.f1/Table II/hsa-miR-1261.tsv
- 760698.f1/Table II/hsa-miR-1262.tsv
- 760698.f1/Table II/hsa-miR-1263.tsv
- 760698.f1/Table II/hsa-miR-1265.tsv
- 760698.f1/Table II/hsa-miR-1266.tsv
- 760698.f1/Table II/hsa-miR-1267.tsv
- 760698.f1/Table II/hsa-miR-128.tsv
- 760698.f1/Table II/hsa-miR-1282.tsv
- 760698.f1/Table II/hsa-miR-1283.tsv
- 760698.f1/Table II/hsa-miR-129-5p.tsv
- 760698.f1/Table II/hsa-miR-1293.tsv
- 760698.f1/Table II/hsa-miR-1294.tsv
- 760698.f1/Table II/hsa-miR-1296.tsv
- 760698.f1/Table II/hsa-miR-1298.tsv
- 760698.f1/Table II/hsa-miR-1299.tsv
- 760698.f1/Table II/hsa-miR-1301.tsv
- 760698.f1/Table II/hsa-miR-1303.tsv
- 760698.f1/Table II/hsa-miR-1305.tsv
- 760698.f1/Table II/hsa-miR-1321.tsv
- 760698.f1/Table II/hsa-miR-1322.tsv
- 760698.f1/Table II/hsa-miR-1323.tsv
- 760698.f1/Table II/hsa-miR-1324.tsv
- 760698.f1/Table II/hsa-miR-133a.tsv
- 760698.f1/Table II/hsa-miR-137.tsv
- 760698.f1/Table II/hsa-miR-146b-3p.tsv
- 760698.f1/Table II/hsa-miR-153.tsv
- 760698.f1/Table II/hsa-miR-181d.tsv
- 760698.f1/Table II/hsa-miR-1825.tsv
- 760698.f1/Table II/hsa-miR-1827.tsv
- 760698.f1/Table II/hsa-miR-188-3p.tsv
- 760698.f1/Table II/hsa-miR-190b.tsv
- 760698.f1/Table II/hsa-miR-198.tsv
- 760698.f1/Table II/hsa-miR-199b-5p.tsv
- 760698.f1/Table II/hsa-miR-208a.tsv
- 760698.f1/Table II/hsa-miR-210.tsv
- 760698.f1/Table II/hsa-miR-216b.tsv
- 760698.f1/Table II/hsa-miR-217.tsv
- 760698.f1/Table II/hsa-miR-219-2-3p.tsv
- 760698.f1/Table II/hsa-miR-219-5p.tsv
- 760698.f1/Table II/hsa-miR-296-3p.tsv
- 760698.f1/Table II/hsa-miR-296-5p.tsv
- 760698.f1/Table II/hsa-miR-297.tsv
- 760698.f1/Table II/hsa-miR-300.tsv
- 760698.f1/Table II/hsa-miR-302e.tsv
- 760698.f1/Table II/hsa-miR-302f.tsv
- 760698.f1/Table II/hsa-miR-30a-5p.tsv
- 760698.f1/Table II/hsa-miR-30e-3p.tsv
- 760698.f1/Table II/hsa-miR-30e-5p.tsv
- 760698.f1/Table II/hsa-miR-320d.tsv
- 760698.f1/Table II/hsa-miR-325.tsv
- 760698.f1/Table II/hsa-miR-326.tsv
- 760698.f1/Table II/hsa-miR-330-3p.tsv
- 760698.f1/Table II/hsa-miR-330-5p.tsv
- 760698.f1/Table II/hsa-miR-331-3p.tsv
- 760698.f1/Table II/hsa-miR-331-5p.tsv
- 760698.f1/Table II/hsa-miR-338-3p.tsv
- 760698.f1/Table II/hsa-miR-338-5p.tsv
- 760698.f1/Table II/hsa-miR-339-3p.tsv
- 760698.f1/Table II/hsa-miR-342-3p.tsv
- 760698.f1/Table II/hsa-miR-346.tsv
- 760698.f1/Table II/hsa-miR-361-3p.tsv
- 760698.f1/Table II/hsa-miR-362-3p.tsv
- 760698.f1/Table II/hsa-miR-362-5p.tsv
- 760698.f1/Table II/hsa-miR-369-5p.tsv
- 760698.f1/Table II/hsa-miR-370.tsv
- 760698.f1/Table II/hsa-miR-372.tsv
- 760698.f1/Table II/hsa-miR-383.tsv
- 760698.f1/Table II/hsa-miR-410.tsv
- 760698.f1/Table II/hsa-miR-412.tsv
- 760698.f1/Table II/hsa-miR-421.tsv
- 760698.f1/Table II/hsa-miR-423-3p.tsv
- 760698.f1/Table II/hsa-miR-433.tsv
- 760698.f1/Table II/hsa-miR-448.tsv
- 760698.f1/Table II/hsa-miR-483-3p.tsv
- 760698.f1/Table II/hsa-miR-485-5p.tsv
- 760698.f1/Table II/hsa-miR-486-3p.tsv
- 760698.f1/Table II/hsa-miR-487a.tsv
- 760698.f1/Table II/hsa-miR-489.tsv
- 760698.f1/Table II/hsa-miR-490-5p.tsv
- 760698.f1/Table II/hsa-miR-491-3p.tsv
- 760698.f1/Table II/hsa-miR-491-5p.tsv
- 760698.f1/Table II/hsa-miR-501-5p.tsv
- 760698.f1/Table II/hsa-miR-507.tsv
- 760698.f1/Table II/hsa-miR-508-3p.tsv
- 760698.f1/Table II/hsa-miR-509-3-5p.tsv
- 760698.f1/Table II/hsa-miR-509-3p.tsv
- 760698.f1/Table II/hsa-miR-509-5p.tsv
- 760698.f1/Table II/hsa-miR-511.tsv
- 760698.f1/Table II/hsa-miR-512-3p.tsv
- 760698.f1/Table II/hsa-miR-512-5p.tsv
- 760698.f1/Table II/hsa-miR-513a-3p.tsv
- 760698.f1/Table II/hsa-miR-515-3p.tsv
- 760698.f1/Table II/hsa-miR-515-5p.tsv
- 760698.f1/Table II/hsa-miR-516a-5p.tsv
- 760698.f1/Table II/hsa-miR-518a-3p.tsv
- 760698.f1/Table II/hsa-miR-518b.tsv
- 760698.f1/Table II/hsa-miR-518d-3p.tsv
- 760698.f1/Table II/hsa-miR-519b-3p.tsv
- 760698.f1/Table II/hsa-miR-519c-3p.tsv
- 760698.f1/Table II/hsa-miR-519d.tsv
- 760698.f1/Table II/hsa-miR-520a-3p.tsv
- 760698.f1/Table II/hsa-miR-520a-5p.tsv
- 760698.f1/Table II/hsa-miR-520c-3p.tsv
- 760698.f1/Table II/hsa-miR-520d-3p.tsv
- 760698.f1/Table II/hsa-miR-520d-5p.tsv
- 760698.f1/Table II/hsa-miR-520e.tsv
- 760698.f1/Table II/hsa-miR-520f.tsv
- 760698.f1/Table II/hsa-miR-520g.tsv
- 760698.f1/Table II/hsa-miR-524-3p.tsv
- 760698.f1/Table II/hsa-miR-524-5p.tsv
- 760698.f1/Table II/hsa-miR-525-3p.tsv
- 760698.f1/Table II/hsa-miR-525-5p.tsv
- 760698.f1/Table II/hsa-miR-542-3p.tsv
- 760698.f1/Table II/hsa-miR-543.tsv
- 760698.f1/Table II/hsa-miR-548a-3p.tsv
- 760698.f1/Table II/hsa-miR-548a-5p.tsv
- 760698.f1/Table II/hsa-miR-548b-3p.tsv
- 760698.f1/Table II/hsa-miR-548b-5p.tsv
- 760698.f1/Table II/hsa-miR-548c-3p.tsv
- 760698.f1/Table II/hsa-miR-548e.tsv
- 760698.f1/Table II/hsa-miR-548f.tsv
- 760698.f1/Table II/hsa-miR-548i.tsv
- 760698.f1/Table II/hsa-miR-548j.tsv
- 760698.f1/Table II/hsa-miR-548k.tsv
- 760698.f1/Table II/hsa-miR-548l.tsv
- 760698.f1/Table II/hsa-miR-548m.tsv
- 760698.f1/Table II/hsa-miR-548n.tsv
- 760698.f1/Table II/hsa-miR-548p.tsv
- 760698.f1/Table II/hsa-miR-551a.tsv
- 760698.f1/Table II/hsa-miR-554.tsv
- 760698.f1/Table II/hsa-miR-555.tsv
- 760698.f1/Table II/hsa-miR-556-5p.tsv
- 760698.f1/Table II/hsa-miR-557.tsv
- 760698.f1/Table II/hsa-miR-558.tsv
- 760698.f1/Table II/hsa-miR-562.tsv
- 760698.f1/Table II/hsa-miR-563.tsv
- 760698.f1/Table II/hsa-miR-564.tsv
- 760698.f1/Table II/hsa-miR-566.tsv
- 760698.f1/Table II/hsa-miR-567.tsv
- 760698.f1/Table II/hsa-miR-568.tsv
- 760698.f1/Table II/hsa-miR-571.tsv
- 760698.f1/Table II/hsa-miR-572.tsv
- 760698.f1/Table II/hsa-miR-573.tsv
- 760698.f1/Table II/hsa-miR-574-3p.tsv
- 760698.f1/Table II/hsa-miR-574-5p.tsv
- 760698.f1/Table II/hsa-miR-577.tsv
- 760698.f1/Table II/hsa-miR-579.tsv
- 760698.f1/Table II/hsa-miR-580.tsv
- 760698.f1/Table II/hsa-miR-582-3p.tsv
- 760698.f1/Table II/hsa-miR-583.tsv
- 760698.f1/Table II/hsa-miR-587.tsv
- 760698.f1/Table II/hsa-miR-588.tsv
- 760698.f1/Table II/hsa-miR-592.tsv
- 760698.f1/Table II/hsa-miR-595.tsv
- 760698.f1/Table II/hsa-miR-596.tsv
- 760698.f1/Table II/hsa-miR-599.tsv
- 760698.f1/Table II/hsa-miR-600.tsv
- 760698.f1/Table II/hsa-miR-602.tsv
- 760698.f1/Table II/hsa-miR-603.tsv
- 760698.f1/Table II/hsa-miR-605.tsv
- 760698.f1/Table II/hsa-miR-607.tsv
- 760698.f1/Table II/hsa-miR-609.tsv
- 760698.f1/Table II/hsa-miR-610.tsv
- 760698.f1/Table II/hsa-miR-611.tsv
- 760698.f1/Table II/hsa-miR-612.tsv
- 760698.f1/Table II/hsa-miR-613.tsv
- 760698.f1/Table II/hsa-miR-614.tsv
- 760698.f1/Table II/hsa-miR-615-3p.tsv
- 760698.f1/Table II/hsa-miR-615-5p.tsv
- 760698.f1/Table II/hsa-miR-618.tsv
- 760698.f1/Table II/hsa-miR-619.tsv
- 760698.f1/Table II/hsa-miR-621.tsv
- 760698.f1/Table II/hsa-miR-622.tsv
- 760698.f1/Table II/hsa-miR-626.tsv
- 760698.f1/Table II/hsa-miR-628-3p.tsv
- 760698.f1/Table II/hsa-miR-631.tsv
- 760698.f1/Table II/hsa-miR-632.tsv
- 760698.f1/Table II/hsa-miR-633.tsv
- 760698.f1/Table II/hsa-miR-634.tsv
- 760698.f1/Table II/hsa-miR-635.tsv
- 760698.f1/Table II/hsa-miR-636.tsv
- 760698.f1/Table II/hsa-miR-637.tsv
- 760698.f1/Table II/hsa-miR-639.tsv
- 760698.f1/Table II/hsa-miR-640.tsv
- 760698.f1/Table II/hsa-miR-643.tsv
- 760698.f1/Table II/hsa-miR-646.tsv
- 760698.f1/Table II/hsa-miR-648.tsv
- 760698.f1/Table II/hsa-miR-649.tsv
- 760698.f1/Table II/hsa-miR-650.tsv
- 760698.f1/Table II/hsa-miR-651.tsv
- 760698.f1/Table II/hsa-miR-653.tsv
- 760698.f1/Table II/hsa-miR-654-3p.tsv
- 760698.f1/Table II/hsa-miR-654-5p.tsv
- 760698.f1/Table II/hsa-miR-655.tsv
- 760698.f1/Table II/hsa-miR-658.tsv
- 760698.f1/Table II/hsa-miR-661.tsv
- 760698.f1/Table II/hsa-miR-662.tsv
- 760698.f1/Table II/hsa-miR-663b.tsv
- 760698.f1/Table II/hsa-miR-671-3p.tsv
- 760698.f1/Table II/hsa-miR-671-5p.tsv
- 760698.f1/Table II/hsa-miR-760.tsv
- 760698.f1/Table II/hsa-miR-767-3p.tsv
- 760698.f1/Table II/hsa-miR-769-5p.tsv
- 760698.f1/Table II/hsa-miR-770-5p.tsv
- 760698.f1/Table II/hsa-miR-875-3p.tsv
- 760698.f1/Table II/hsa-miR-876-5p.tsv
- 760698.f1/Table II/hsa-miR-885-3p.tsv
- 760698.f1/Table II/hsa-miR-885-5p.tsv
- 760698.f1/Table II/hsa-miR-889.tsv
- 760698.f1/Table II/hsa-miR-890.tsv
- 760698.f1/Table II/hsa-miR-891a.tsv
- 760698.f1/Table II/hsa-miR-892b.tsv
- 760698.f1/Table II/hsa-miR-922.tsv
- 760698.f1/Table II/hsa-miR-924.tsv
- 760698.f1/Table II/hsa-miR-935.tsv
- 760698.f1/Table II/hsa-miR-936.tsv
- 760698.f1/Table II/hsa-miR-940.tsv
- 760698.f1/Table II/hsa-miR-941.tsv
- 760698.f1/Table II/Legend of Table II.pdf
