# Supplementary material for: Profiling of Selected MicroRNAs in Proliferative Eutopic Endometrium of Women with Ovarian Endometriosis
Source: Biomed Res Int. 2015 Aug 20;2015:760698. doi: 10.1155/2015/760698 (PMC4558423; doi:10.1155/2015/760698)
Supplement: Supplementary file 1 — Table I: The names of miRNAs significantly differentially expressed between eutopic endometrium of patients with endometriosis vs eutopic endometrium of patients without endometriosis. Table II: The associations between miRNA and mRNA, which presents detailed results of the search of six major databases i.e targetscan, tarbase, miranda, mirbase, mirtarget2 and pictar. [file 760698.f1.zip › 760698.f1/Table II/hsa-let-7c.tsv]

miR	targetscan	tarbase	miranda	mirbase	mirtarget2	pictar	GeneSymbol	GeneName
hsa-let-7c	1	0	1	1	1	1	SEC24C	SEC24 family, member C (S. cerevisiae)
hsa-let-7c	1	0	1	0	1	1	ACVR2A	activin A receptor, type IIA
hsa-let-7c	1	0	1	1	1	1	SEC31B	SEC31 homolog B (S. cerevisiae)
hsa-let-7c	1	0	1	1	0	0	ADRB3	adrenoceptor beta 3
hsa-let-7c	1	0	1	1	1	1	LGR4	leucine-rich repeat containing G protein-coupled receptor 4
hsa-let-7c	1	0	1	1	1	1	SLC4A4	solute carrier family 4, sodium bicarbonate cotransporter, member 4
hsa-let-7c	1	0	1	1	0	0	CHD4	chromodomain helicase DNA binding protein 4
hsa-let-7c	1	0	1	1	0	0	OTUD3	OTU domain containing 3
hsa-let-7c	1	0	1	0	1	1	BACH1	BTB and CNC homology 1, basic leucine zipper transcription factor 1
hsa-let-7c	1	0	1	1	1	1	SCN11A	sodium channel, voltage-gated, type XI, alpha subunit
hsa-let-7c	1	0	1	1	0	0	PLXNA4	plexin A4
hsa-let-7c	1	0	1	1	1	1	VSNL1	visinin-like 1
hsa-let-7c	1	0	1	1	0	0	PACS2	phosphofurin acidic cluster sorting protein 2
hsa-let-7c	1	0	0	0	0	0	AAK1	AP2 associated kinase 1
hsa-let-7c	1	0	1	1	1	1	TEX261	testis expressed 261
hsa-let-7c	1	0	1	1	1	1	TPP1	tripeptidyl peptidase I
hsa-let-7c	1	0	1	0	1	1	INTS2	integrator complex subunit 2
hsa-let-7c	1	0	1	1	0	0	TIMM17B	translocase of inner mitochondrial membrane 17 homolog B (yeast)
hsa-let-7c	1	0	1	1	1	1	CCNF	cyclin F
hsa-let-7c	1	0	1	0	1	1	PCGF3	polycomb group ring finger 3
hsa-let-7c	1	0	1	1	1	1	GGA3	golgi-associated, gamma adaptin ear containing, ARF binding protein 3
hsa-let-7c	1	0	1	1	1	1	ST8SIA1	ST8 alpha-N-acetyl-neuraminide alpha-2,8-sialyltransferase 1
hsa-let-7c	1	0	1	1	1	1	SEC14L1	SEC14-like 1 (S. cerevisiae)
hsa-let-7c	1	0	1	1	1	1	ICOS	inducible T-cell co-stimulator
hsa-let-7c	1	0	0	1	1	1	COL9A3	collagen, type IX, alpha 3
hsa-let-7c	1	0	1	0	1	1	SREK1IP1	SREK1-interacting protein 1
hsa-let-7c	1	0	1	1	0	0	AWAT2	acyl-CoA wax alcohol acyltransferase 2
hsa-let-7c	1	0	1	1	1	1	IGF1	insulin-like growth factor 1 (somatomedin C)
hsa-let-7c	1	0	1	1	1	1	SLC12A9	solute carrier family 12 (potassium/chloride transporters), member 9
hsa-let-7c	1	0	1	1	1	1	FGD6	FYVE, RhoGEF and PH domain containing 6
hsa-let-7c	1	0	1	1	1	1	C11orf57	chromosome 11 open reading frame 57
hsa-let-7c	1	0	1	1	1	1	MON2	MON2 homolog (S. cerevisiae)
hsa-let-7c	1	0	1	1	1	1	NAGA	N-acetylgalactosaminidase, alpha-
hsa-let-7c	1	0	1	1	1	1	MIB1	mindbomb E3 ubiquitin protein ligase 1
hsa-let-7c	1	0	1	1	1	1	RGS16	regulator of G-protein signaling 16
hsa-let-7c	1	0	1	1	1	1	PBX2	pre-B-cell leukemia homeobox 2
hsa-let-7c	1	0	1	1	1	1	B3GNT1	UDP-GlcNAc:betaGal beta-1,3-N-acetylglucosaminyltransferase 1
hsa-let-7c	1	0	1	1	1	1	KCNC4	potassium voltage-gated channel, Shaw-related subfamily, member 4
hsa-let-7c	1	0	1	1	1	1	POU2F2	POU class 2 homeobox 2
hsa-let-7c	1	0	0	1	0	0	BTBD9	BTB (POZ) domain containing 9
hsa-let-7c	1	0	1	1	1	1	MEIS3	Meis homeobox 3
hsa-let-7c	1	0	1	0	1	1	CDYL	chromodomain protein, Y-like
hsa-let-7c	1	0	0	1	0	0	P2RX1	purinergic receptor P2X, ligand-gated ion channel, 1
hsa-let-7c	1	0	1	1	1	1	SENP5	SUMO1/sentrin specific peptidase 5
hsa-let-7c	1	0	1	1	1	1	MLLT10	myeloid/lymphoid or mixed-lineage leukemia (trithorax homolog, Drosophila); translocated to, 10
hsa-let-7c	1	0	1	1	1	1	LUC7L3	LUC7-like 3 (S. cerevisiae)
hsa-let-7c	1	0	1	1	1	1	DAGLA	diacylglycerol lipase, alpha
hsa-let-7c	1	0	1	0	1	1	EIF2S2	eukaryotic translation initiation factor 2, subunit 2 beta, 38kDa
hsa-let-7c	1	0	1	1	1	1	HDHD1	haloacid dehalogenase-like hydrolase domain containing 1
hsa-let-7c	1	0	1	1	1	1	STARD13	StAR-related lipid transfer (START) domain containing 13
hsa-let-7c	1	0	1	0	1	1	STK40	serine/threonine kinase 40
hsa-let-7c	1	0	1	1	1	1	FIGN	fidgetin
hsa-let-7c	1	0	1	1	1	1	CACNG4	calcium channel, voltage-dependent, gamma subunit 4
hsa-let-7c	1	0	1	1	1	1	TRIB2	tribbles homolog 2 (Drosophila)
hsa-let-7c	1	0	1	1	1	1	PLEKHH1	pleckstrin homology domain containing, family H (with MyTH4 domain) member 1
hsa-let-7c	1	0	1	1	1	1	CD200R1	CD200 receptor 1
hsa-let-7c	1	0	1	1	1	1	RPS6KA3	ribosomal protein S6 kinase, 90kDa, polypeptide 3
hsa-let-7c	1	0	1	1	1	1	ARRDC4	arrestin domain containing 4
hsa-let-7c	1	0	1	0	1	1	ACVR1B	activin A receptor, type IB
hsa-let-7c	1	0	1	1	1	1	PHF8	PHD finger protein 8
hsa-let-7c	1	0	1	1	1	1	CAPN3	calpain 3, (p94)
hsa-let-7c	1	0	1	1	1	1	IKZF2	IKAROS family zinc finger 2 (Helios)
hsa-let-7c	1	0	0	1	1	1	SSH1	slingshot homolog 1 (Drosophila)
hsa-let-7c	1	0	1	0	1	1	GAS7	growth arrest-specific 7
hsa-let-7c	1	0	1	1	1	1	LCOR	ligand dependent nuclear receptor corepressor
hsa-let-7c	1	0	1	1	1	1	SLC35D2	solute carrier family 35, member D2
hsa-let-7c	1	0	1	1	1	1	PTPRU	protein tyrosine phosphatase, receptor type, U
hsa-let-7c	1	0	1	0	1	1	LIN28B	lin-28 homolog B (C. elegans)
hsa-let-7c	1	0	1	1	1	1	DZIP1	DAZ interacting protein 1
hsa-let-7c	1	0	1	0	0	0	ANKRD52	ankyrin repeat domain 52
hsa-let-7c	1	0	1	0	0	0	TRANK1	tetratricopeptide repeat and ankyrin repeat containing 1
hsa-let-7c	1	0	1	1	1	1	MAPK1IP1L	mitogen-activated protein kinase 1 interacting protein 1-like
hsa-let-7c	1	0	0	1	1	1	SWT1	SWT1 RNA endoribonuclease homolog (S. cerevisiae)
hsa-let-7c	1	0	0	1	0	0	ERCC4	excision repair cross-complementing rodent repair deficiency, complementation group 4
hsa-let-7c	1	0	1	1	1	1	DLC1	deleted in liver cancer 1
hsa-let-7c	1	0	1	1	1	1	RB1	retinoblastoma 1
hsa-let-7c	1	0	1	1	1	1	CCR7	chemokine (C-C motif) receptor 7
hsa-let-7c	1	0	1	0	1	1	BLOC1S6	biogenesis of lysosomal organelles complex-1, subunit 6, pallidin
hsa-let-7c	1	0	1	0	1	1	ITGB3	integrin, beta 3 (platelet glycoprotein IIIa, antigen CD61)
hsa-let-7c	1	0	1	1	0	0	KIAA0895L	KIAA0895-like
hsa-let-7c	1	0	1	1	0	0	IGDCC3	immunoglobulin superfamily, DCC subclass, member 3
hsa-let-7c	1	0	1	0	1	1	PRKAB2	protein kinase, AMP-activated, beta 2 non-catalytic subunit
hsa-let-7c	1	0	0	1	0	0	PQLC2	PQ loop repeat containing 2
hsa-let-7c	1	0	1	1	1	1	PRDM1	PR domain containing 1, with ZNF domain
hsa-let-7c	1	0	0	1	1	1	ADRBK2	adrenergic, beta, receptor kinase 2
hsa-let-7c	1	0	1	1	1	1	CDC25A	cell division cycle 25 homolog A (S. pombe)
hsa-let-7c	1	0	1	1	0	0	TET3	tet methylcytosine dioxygenase 3
hsa-let-7c	1	0	1	1	1	1	COL4A2	collagen, type IV, alpha 2
hsa-let-7c	1	0	1	1	1	1	TSC22D2	TSC22 domain family, member 2
hsa-let-7c	1	0	0	1	1	1	ATG16L1	autophagy related 16-like 1 (S. cerevisiae)
hsa-let-7c	1	0	1	1	1	1	LOXL4	lysyl oxidase-like 4
hsa-let-7c	1	0	0	1	1	1	CACFD1	calcium channel flower domain containing 1
hsa-let-7c	1	0	1	1	1	1	RNF7	ring finger protein 7
hsa-let-7c	1	0	1	1	1	1	DMP1	dentin matrix acidic phosphoprotein 1
hsa-let-7c	1	0	1	1	1	1	FAS	Fas (TNF receptor superfamily, member 6)
hsa-let-7c	1	0	1	1	1	1	HMGA2	high mobility group AT-hook 2
hsa-let-7c	1	0	1	1	1	1	CDCA8	cell division cycle associated 8
hsa-let-7c	1	0	1	0	1	1	MXD1	MAX dimerization protein 1
hsa-let-7c	1	0	1	1	0	0	GPR137	G protein-coupled receptor 137
hsa-let-7c	1	0	1	0	1	1	IGF2BP1	insulin-like growth factor 2 mRNA binding protein 1
hsa-let-7c	1	0	1	1	1	1	SIM2	single-minded homolog 2 (Drosophila)
hsa-let-7c	1	0	1	1	1	1	COL1A2	collagen, type I, alpha 2
hsa-let-7c	1	0	1	1	1	1	TNFRSF1B	tumor necrosis factor receptor superfamily, member 1B
hsa-let-7c	1	0	1	0	1	1	GPCPD1	glycerophosphocholine phosphodiesterase GDE1 homolog (S. cerevisiae)
hsa-let-7c	1	0	1	1	0	0	CCL3	chemokine (C-C motif) ligand 3
hsa-let-7c	1	0	1	0	1	1	GDF6	growth differentiation factor 6
hsa-let-7c	1	0	1	1	1	1	EEA1	early endosome antigen 1
hsa-let-7c	1	0	1	0	1	1	CLASP2	cytoplasmic linker associated protein 2
hsa-let-7c	1	0	1	0	1	1	PPARA	peroxisome proliferator-activated receptor alpha
hsa-let-7c	1	1	1	1	1	1	CDKN1A	cyclin-dependent kinase inhibitor 1A (p21, Cip1)
hsa-let-7c	1	0	1	1	1	1	HIF3A	hypoxia inducible factor 3, alpha subunit
hsa-let-7c	1	0	1	0	1	1	WASL	Wiskott-Aldrich syndrome-like
hsa-let-7c	1	0	1	0	1	1	C5orf62	chromosome 5 open reading frame 62
hsa-let-7c	1	0	1	1	0	0	LOR	loricrin
hsa-let-7c	1	0	1	1	1	1	WIPI2	WD repeat domain, phosphoinositide interacting 2
hsa-let-7c	1	0	1	1	0	0	MARCH9	membrane-associated ring finger (C3HC4) 9
hsa-let-7c	1	0	1	1	1	1	BLOC1S5	biogenesis of lysosomal organelles complex-1, subunit 5, muted
hsa-let-7c	1	0	1	1	1	1	MTMR12	myotubularin related protein 12
hsa-let-7c	1	0	1	1	0	0	USP21	ubiquitin specific peptidase 21
hsa-let-7c	1	0	1	1	0	0	AEN	apoptosis enhancing nuclease
hsa-let-7c	1	0	0	1	1	1	NID2	nidogen 2 (osteonidogen)
hsa-let-7c	1	0	1	1	1	1	TAB2	TGF-beta activated kinase 1/MAP3K7 binding protein 2
hsa-let-7c	1	0	1	1	0	0	AP1S1	adaptor-related protein complex 1, sigma 1 subunit
hsa-let-7c	1	0	1	1	1	1	NAA30	N(alpha)-acetyltransferase 30, NatC catalytic subunit
hsa-let-7c	1	0	1	0	1	1	DOCK3	dedicator of cytokinesis 3
hsa-let-7c	1	0	1	1	1	1	TTC31	tetratricopeptide repeat domain 31
hsa-let-7c	1	0	1	1	1	1	ZNF280B	zinc finger protein 280B
hsa-let-7c	1	0	1	1	1	1	NME4	NME/NM23 nucleoside diphosphate kinase 4
hsa-let-7c	1	0	1	0	1	1	MAP4K4	mitogen-activated protein kinase kinase kinase kinase 4
hsa-let-7c	1	0	1	1	0	0	RNF5	ring finger protein 5, E3 ubiquitin protein ligase
hsa-let-7c	1	0	1	1	1	1	TGDS	TDP-glucose 4,6-dehydratase
hsa-let-7c	1	0	1	1	1	1	EPB41	erythrocyte membrane protein band 4.1 (elliptocytosis 1, RH-linked)
hsa-let-7c	1	0	1	1	1	1	DUSP1	dual specificity phosphatase 1
hsa-let-7c	1	0	1	0	1	1	CCND2	cyclin D2
hsa-let-7c	1	0	0	1	1	1	CEP135	centrosomal protein 135kDa
hsa-let-7c	1	0	1	0	1	1	SCD	stearoyl-CoA desaturase (delta-9-desaturase)
hsa-let-7c	1	0	1	0	1	1	COL5A2	collagen, type V, alpha 2
hsa-let-7c	1	0	1	1	1	1	CCNJL	cyclin J-like
hsa-let-7c	1	0	1	1	1	1	ARID3B	AT rich interactive domain 3B (BRIGHT-like)
hsa-let-7c	1	0	1	1	1	1	HOOK1	hook homolog 1 (Drosophila)
hsa-let-7c	1	0	0	1	0	0	FAM123C	family with sequence similarity 123C
hsa-let-7c	1	0	1	1	0	0	SNX30	sorting nexin family member 30
hsa-let-7c	1	0	1	1	1	1	NME6	NME/NM23 nucleoside diphosphate kinase 6
hsa-let-7c	1	0	1	1	1	1	CALM1	calmodulin 1 (phosphorylase kinase, delta)
hsa-let-7c	1	0	1	1	0	0	HTR1E	5-hydroxytryptamine (serotonin) receptor 1E, G protein-coupled
hsa-let-7c	1	0	1	1	1	1	NAP1L1	nucleosome assembly protein 1-like 1
hsa-let-7c	1	1	1	1	1	1	TRIM71	tripartite motif containing 71, E3 ubiquitin protein ligase
hsa-let-7c	1	0	1	1	1	1	C9orf40	chromosome 9 open reading frame 40
hsa-let-7c	1	0	1	0	1	1	RNF165	ring finger protein 165
hsa-let-7c	1	0	1	1	1	1	ERO1L	ERO1-like (S. cerevisiae)
hsa-let-7c	1	0	1	1	1	1	ULK2	unc-51-like kinase 2 (C. elegans)
hsa-let-7c	1	0	1	1	1	1	SBK1	SH3-binding domain kinase 1
hsa-let-7c	1	0	0	0	0	0	LOC646227	cAMP-regulated phosphoprotein 19 pseudogene
hsa-let-7c	1	0	1	1	1	1	ZBTB5	zinc finger and BTB domain containing 5
hsa-let-7c	1	0	1	1	1	1	CEP164	centrosomal protein 164kDa
hsa-let-7c	1	0	1	1	1	1	EZH1	enhancer of zeste homolog 1 (Drosophila)
hsa-let-7c	1	0	1	0	1	1	MOB3B	MOB kinase activator 3B
hsa-let-7c	1	0	1	0	1	1	LBH	limb bud and heart development homolog (mouse)
hsa-let-7c	1	0	1	0	1	1	SYT11	synaptotagmin XI
hsa-let-7c	1	0	1	1	1	1	STARD3NL	STARD3 N-terminal like
hsa-let-7c	1	0	1	1	0	0	UNC5A	unc-5 homolog A (C. elegans)
hsa-let-7c	1	0	1	1	1	1	DDX26B	DEAD/H (Asp-Glu-Ala-Asp/His) box polypeptide 26B
hsa-let-7c	1	0	0	1	1	1	GYG2	glycogenin 2
hsa-let-7c	1	0	1	1	1	1	PBX3	pre-B-cell leukemia homeobox 3
hsa-let-7c	1	0	0	1	1	1	ZNF354A	zinc finger protein 354A
hsa-let-7c	1	0	1	1	1	1	NNT	nicotinamide nucleotide transhydrogenase
hsa-let-7c	1	0	1	1	1	1	MYRIP	myosin VIIA and Rab interacting protein
hsa-let-7c	1	0	1	0	1	1	KIF21B	kinesin family member 21B
hsa-let-7c	1	0	1	1	1	1	ZNF583	zinc finger protein 583
hsa-let-7c	1	0	1	0	1	1	CRTAP	cartilage associated protein
hsa-let-7c	1	0	1	1	1	1	FGF11	fibroblast growth factor 11
hsa-let-7c	1	0	1	1	1	1	AKT2	v-akt murine thymoma viral oncogene homolog 2
hsa-let-7c	1	0	1	1	1	1	ATG4B	autophagy related 4B, cysteine peptidase
hsa-let-7c	1	0	1	1	1	1	SLC30A4	solute carrier family 30 (zinc transporter), member 4
hsa-let-7c	1	0	1	1	1	1	ZNF275	zinc finger protein 275
hsa-let-7c	1	0	1	1	1	1	ANKRD49	ankyrin repeat domain 49
hsa-let-7c	1	0	1	1	1	1	PALD1	phosphatase domain containing, paladin 1
hsa-let-7c	1	0	1	1	1	1	UTP15	UTP15, U3 small nucleolar ribonucleoprotein, homolog (S. cerevisiae)
hsa-let-7c	1	0	1	1	1	1	EZH2	enhancer of zeste homolog 2 (Drosophila)
hsa-let-7c	1	0	1	0	1	1	SLC6A1	solute carrier family 6 (neurotransmitter transporter, GABA), member 1
hsa-let-7c	1	0	1	0	1	1	GOPC	golgi-associated PDZ and coiled-coil motif containing
hsa-let-7c	1	0	1	1	0	0	APBB3	amyloid beta (A4) precursor protein-binding, family B, member 3
hsa-let-7c	1	0	1	1	1	1	GRPEL2	GrpE-like 2, mitochondrial (E. coli)
hsa-let-7c	1	0	1	1	1	1	CERCAM	cerebral endothelial cell adhesion molecule
hsa-let-7c	1	0	1	0	1	1	CACNA1E	calcium channel, voltage-dependent, R type, alpha 1E subunit
hsa-let-7c	1	0	1	1	1	1	MAPK6	mitogen-activated protein kinase 6
hsa-let-7c	1	0	1	1	0	0	B3GAT3	beta-1,3-glucuronyltransferase 3 (glucuronosyltransferase I)
hsa-let-7c	1	0	1	1	1	1	AHCTF1	AT hook containing transcription factor 1
hsa-let-7c	1	0	1	1	1	1	L2HGDH	L-2-hydroxyglutarate dehydrogenase
hsa-let-7c	1	0	1	0	1	1	TGFBR1	transforming growth factor, beta receptor 1
hsa-let-7c	1	0	1	0	1	1	FGF5	fibroblast growth factor 5
hsa-let-7c	1	0	1	1	1	1	SCN4B	sodium channel, voltage-gated, type IV, beta subunit
hsa-let-7c	1	0	1	0	0	0	NYNRIN	NYN domain and retroviral integrase containing
hsa-let-7c	1	0	1	1	1	1	TAF9B	TAF9B RNA polymerase II, TATA box binding protein (TBP)-associated factor, 31kDa
hsa-let-7c	1	0	0	1	0	0	GNG5	guanine nucleotide binding protein (G protein), gamma 5
hsa-let-7c	1	0	1	1	1	1	CYP46A1	cytochrome P450, family 46, subfamily A, polypeptide 1
hsa-let-7c	1	0	1	0	1	1	ACVR1C	activin A receptor, type IC
hsa-let-7c	1	0	1	0	1	1	XK	X-linked Kx blood group (McLeod syndrome)
hsa-let-7c	1	0	1	1	1	1	C7orf60	chromosome 7 open reading frame 60
hsa-let-7c	1	0	1	1	1	1	RALGPS1	Ral GEF with PH domain and SH3 binding motif 1
hsa-let-7c	1	0	1	1	1	1	UHRF2	ubiquitin-like with PHD and ring finger domains 2, E3 ubiquitin protein ligase
hsa-let-7c	1	0	1	1	0	0	ETNK2	ethanolamine kinase 2
hsa-let-7c	1	0	1	1	1	1	ADRB2	adrenoceptor beta 2, surface
hsa-let-7c	1	0	1	0	1	1	MTPN	myotrophin
hsa-let-7c	1	0	0	1	1	1	ZNF710	zinc finger protein 710
hsa-let-7c	1	0	1	1	0	0	QARS	glutaminyl-tRNA synthetase
hsa-let-7c	1	0	1	1	1	1	RALB	v-ral simian leukemia viral oncogene homolog B (ras related; GTP binding protein)
hsa-let-7c	1	0	1	0	1	1	CEBPD	CCAAT/enhancer binding protein (C/EBP), delta
hsa-let-7c	1	0	1	1	1	1	MESDC1	mesoderm development candidate 1
hsa-let-7c	1	0	1	0	1	1	CCND1	cyclin D1
hsa-let-7c	1	0	1	1	0	0	INO80D	INO80 complex subunit D
hsa-let-7c	1	0	1	1	1	1	NAPEPLD	N-acyl phosphatidylethanolamine phospholipase D
hsa-let-7c	1	0	1	1	1	1	GIPC1	GIPC PDZ domain containing family, member 1
hsa-let-7c	1	0	1	0	1	1	LIMD1	LIM domains containing 1
hsa-let-7c	1	0	1	1	1	1	CAP1	CAP, adenylate cyclase-associated protein 1 (yeast)
hsa-let-7c	1	0	1	1	1	1	E2F5	E2F transcription factor 5, p130-binding
hsa-let-7c	1	0	1	1	1	1	MYCN	v-myc myelocytomatosis viral related oncogene, neuroblastoma derived (avian)
hsa-let-7c	1	0	1	0	1	1	GNS	glucosamine (N-acetyl)-6-sulfatase
hsa-let-7c	1	0	1	1	1	1	BTG2	BTG family, member 2
hsa-let-7c	1	0	1	1	1	1	SMC1A	structural maintenance of chromosomes 1A
hsa-let-7c	1	0	1	1	1	1	PCYT1B	phosphate cytidylyltransferase 1, choline, beta
hsa-let-7c	1	0	1	1	1	1	EGR3	early growth response 3
hsa-let-7c	1	0	1	0	0	0	RAB15	RAB15, member RAS oncogene family
hsa-let-7c	1	0	1	1	1	1	TMED5	transmembrane emp24 protein transport domain containing 5
hsa-let-7c	1	0	1	1	1	1	CCSAP	centriole, cilia and spindle-associated protein
hsa-let-7c	1	0	1	0	1	1	UBFD1	ubiquitin family domain containing 1
hsa-let-7c	1	0	0	1	1	1	CTHRC1	collagen triple helix repeat containing 1
hsa-let-7c	1	0	1	1	1	1	DHX57	DEAH (Asp-Glu-Ala-Asp/His) box polypeptide 57
hsa-let-7c	1	0	1	1	1	1	COL4A1	collagen, type IV, alpha 1
hsa-let-7c	1	0	1	1	1	1	ARL4D	ADP-ribosylation factor-like 4D
hsa-let-7c	1	0	1	1	0	0	RGS6	regulator of G-protein signaling 6
hsa-let-7c	1	0	1	1	1	1	ZFYVE26	zinc finger, FYVE domain containing 26
hsa-let-7c	1	0	1	1	1	1	FARP1	FERM, RhoGEF (ARHGEF) and pleckstrin domain protein 1 (chondrocyte-derived)
hsa-let-7c	1	0	1	1	1	1	FNDC3A	fibronectin type III domain containing 3A
hsa-let-7c	1	0	1	1	1	1	SNX1	sorting nexin 1
hsa-let-7c	1	0	0	1	0	0	HIC1	hypermethylated in cancer 1
hsa-let-7c	1	0	1	1	1	1	REEP1	receptor accessory protein 1
hsa-let-7c	1	0	1	1	1	1	KLHDC8B	kelch domain containing 8B
hsa-let-7c	1	0	1	1	1	1	ONECUT2	one cut homeobox 2
hsa-let-7c	1	0	1	1	1	1	POGLUT1	protein O-glucosyltransferase 1
hsa-let-7c	1	0	1	1	1	1	PHC3	polyhomeotic homolog 3 (Drosophila)
hsa-let-7c	1	0	1	1	1	1	FAM208A	family with sequence similarity 208, member A
hsa-let-7c	1	0	1	1	1	1	EOGT	EGF domain-specific O-linked N-acetylglucosamine (GlcNAc) transferase
hsa-let-7c	1	0	0	0	1	1	TMPPE	transmembrane protein with metallophosphoesterase domain
hsa-let-7c	1	0	1	1	1	1	EPHA4	EPH receptor A4
hsa-let-7c	1	0	1	1	1	1	PLA2G15	phospholipase A2, group XV
hsa-let-7c	1	0	1	0	1	1	SRGAP3	SLIT-ROBO Rho GTPase activating protein 3
hsa-let-7c	1	0	1	0	1	1	CHST3	carbohydrate (chondroitin 6) sulfotransferase 3
hsa-let-7c	1	0	1	1	1	1	IKBKAP	inhibitor of kappa light polypeptide gene enhancer in B-cells, kinase complex-associated protein
hsa-let-7c	1	0	1	1	1	1	FAM118A	family with sequence similarity 118, member A
hsa-let-7c	1	0	0	1	0	0	ZNF516	zinc finger protein 516
hsa-let-7c	1	0	1	0	1	1	MAP3K3	mitogen-activated protein kinase kinase kinase 3
hsa-let-7c	1	0	1	0	1	1	AMMECR1L	AMME chromosomal region gene 1-like
hsa-let-7c	1	0	1	0	1	1	YPEL2	yippee-like 2 (Drosophila)
hsa-let-7c	1	0	1	1	1	1	C15orf29	chromosome 15 open reading frame 29
hsa-let-7c	1	0	1	1	1	1	BCL2L1	BCL2-like 1
hsa-let-7c	1	0	1	1	1	1	VGLL3	vestigial like 3 (Drosophila)
hsa-let-7c	1	0	1	0	1	1	RASGRP1	RAS guanyl releasing protein 1 (calcium and DAG-regulated)
hsa-let-7c	1	0	1	1	1	1	PARD6B	par-6 partitioning defective 6 homolog beta (C. elegans)
hsa-let-7c	1	0	1	1	1	1	SUCLG2	succinate-CoA ligase, GDP-forming, beta subunit
hsa-let-7c	1	0	1	1	1	1	SENP2	SUMO1/sentrin/SMT3 specific peptidase 2
hsa-let-7c	1	0	1	1	1	1	TMEM26	transmembrane protein 26
hsa-let-7c	1	0	1	0	1	1	TNFAIP3	tumor necrosis factor, alpha-induced protein 3
hsa-let-7c	1	0	1	1	1	1	PIGA	phosphatidylinositol glycan anchor biosynthesis, class A
hsa-let-7c	1	0	1	1	1	1	NXT2	nuclear transport factor 2-like export factor 2
hsa-let-7c	1	0	1	1	1	1	KPNA1	karyopherin alpha 1 (importin alpha 5)
hsa-let-7c	1	0	1	1	1	1	NTRK3	neurotrophic tyrosine kinase, receptor, type 3
hsa-let-7c	1	0	1	0	1	1	IRS2	insulin receptor substrate 2
hsa-let-7c	1	0	1	0	1	1	BEND4	BEN domain containing 4
hsa-let-7c	1	0	1	1	1	1	GJC1	gap junction protein, gamma 1, 45kDa
hsa-let-7c	1	0	1	1	0	0	DPP3	dipeptidyl-peptidase 3
hsa-let-7c	1	0	1	0	1	1	PPP1R15B	protein phosphatase 1, regulatory subunit 15B
hsa-let-7c	1	0	1	0	1	1	CCDC93	coiled-coil domain containing 93
hsa-let-7c	1	0	1	1	1	1	LPGAT1	lysophosphatidylglycerol acyltransferase 1
hsa-let-7c	1	0	1	1	0	0	KIAA1549	KIAA1549
hsa-let-7c	1	0	1	0	1	1	SNN	stannin
hsa-let-7c	1	0	1	1	0	0	PLEKHG6	pleckstrin homology domain containing, family G (with RhoGef domain) member 6
hsa-let-7c	1	0	1	1	1	1	C14orf28	chromosome 14 open reading frame 28
hsa-let-7c	1	0	1	1	1	1	ATP8B4	ATPase, class I, type 8B, member 4
hsa-let-7c	1	0	1	1	0	0	TTLL4	tubulin tyrosine ligase-like family, member 4
hsa-let-7c	1	0	1	1	1	1	SEMA4F	sema domain, immunoglobulin domain (Ig), transmembrane domain (TM) and short cytoplasmic domain, (semaphorin) 4F
hsa-let-7c	1	0	1	1	1	1	THOC2	THO complex 2
hsa-let-7c	1	0	1	0	1	1	BSN	bassoon (presynaptic cytomatrix protein)
hsa-let-7c	1	0	1	0	1	1	TTL	tubulin tyrosine ligase
hsa-let-7c	1	0	1	0	1	1	GHR	growth hormone receptor
hsa-let-7c	1	0	1	0	1	1	MAP4K3	mitogen-activated protein kinase kinase kinase kinase 3
hsa-let-7c	1	0	1	1	1	1	PRPF38B	PRP38 pre-mRNA processing factor 38 (yeast) domain containing B
hsa-let-7c	1	0	1	0	1	1	FAM125B	family with sequence similarity 125, member B
hsa-let-7c	1	0	1	1	1	1	OLR1	oxidized low density lipoprotein (lectin-like) receptor 1
hsa-let-7c	1	0	1	1	1	1	CRCT1	cysteine-rich C-terminal 1
hsa-let-7c	1	0	1	1	1	1	EEF2K	eukaryotic elongation factor-2 kinase
hsa-let-7c	1	0	1	1	1	1	CBL	Cbl proto-oncogene, E3 ubiquitin protein ligase
hsa-let-7c	1	0	1	1	1	1	EIF4G2	eukaryotic translation initiation factor 4 gamma, 2
hsa-let-7c	1	0	1	1	0	0	FRMD4B	FERM domain containing 4B
hsa-let-7c	1	0	1	1	1	1	CNOT2	CCR4-NOT transcription complex, subunit 2
hsa-let-7c	1	0	1	1	1	1	RSPO2	R-spondin 2
hsa-let-7c	1	0	1	1	0	0	LIPH	lipase, member H
hsa-let-7c	1	0	1	1	1	1	SLC9A9	solute carrier family 9, subfamily A (NHE9, cation proton antiporter 9), member 9
hsa-let-7c	1	0	1	1	1	1	NEFM	neurofilament, medium polypeptide
hsa-let-7c	1	0	1	0	1	1	ADRB1	adrenoceptor beta 1
hsa-let-7c	1	0	1	1	1	1	NRARP	NOTCH-regulated ankyrin repeat protein
hsa-let-7c	1	0	1	1	1	1	HOXA9	homeobox A9
hsa-let-7c	1	0	1	1	1	1	ARID3A	AT rich interactive domain 3A (BRIGHT-like)
hsa-let-7c	1	0	1	1	1	1	RICTOR	RPTOR independent companion of MTOR, complex 2
hsa-let-7c	1	0	1	1	1	1	SPRYD4	SPRY domain containing 4
hsa-let-7c	1	0	1	1	1	1	MYCL1	v-myc myelocytomatosis viral oncogene homolog 1, lung carcinoma derived (avian)
hsa-let-7c	1	0	1	0	1	1	PEG10	paternally expressed 10
hsa-let-7c	1	0	1	1	0	0	SMCR8	Smith-Magenis syndrome chromosome region, candidate 8
hsa-let-7c	1	0	1	1	1	1	MASP1	mannan-binding lectin serine peptidase 1 (C4/C2 activating component of Ra-reactive factor)
hsa-let-7c	1	0	1	1	1	1	HIC2	hypermethylated in cancer 2
hsa-let-7c	1	0	1	1	1	1	RRM2	ribonucleotide reductase M2
hsa-let-7c	1	0	1	1	1	1	RORC	RAR-related orphan receptor C
hsa-let-7c	1	0	1	1	1	1	CHIC1	cysteine-rich hydrophobic domain 1
hsa-let-7c	1	0	1	1	1	1	PXT1	peroxisomal, testis specific 1
hsa-let-7c	1	0	1	1	1	1	XYLT1	xylosyltransferase I
hsa-let-7c	1	0	1	0	1	1	ZCCHC3	zinc finger, CCHC domain containing 3
hsa-let-7c	1	0	1	0	1	1	YOD1	YOD1 OTU deubiquinating enzyme 1 homolog (S. cerevisiae)
hsa-let-7c	1	0	1	1	1	1	RDH10	retinol dehydrogenase 10 (all-trans)
hsa-let-7c	1	0	1	1	1	1	LRRC20	leucine rich repeat containing 20
hsa-let-7c	1	0	1	1	1	1	CYP19A1	cytochrome P450, family 19, subfamily A, polypeptide 1
hsa-let-7c	1	0	1	1	1	1	FAM178A	family with sequence similarity 178, member A
hsa-let-7c	1	0	1	1	1	1	GALNTL2	UDP-N-acetyl-alpha-D-galactosamine:polypeptide N-acetylgalactosaminyltransferase-like 2
hsa-let-7c	1	0	1	1	1	1	PIK3IP1	phosphoinositide-3-kinase interacting protein 1
hsa-let-7c	1	0	1	1	1	1	TMPRSS2	transmembrane protease, serine 2
hsa-let-7c	1	0	1	1	1	1	KIAA1467	KIAA1467
hsa-let-7c	1	0	1	1	1	1	NEK3	NIMA (never in mitosis gene a)-related kinase 3
hsa-let-7c	1	0	1	1	1	1	RBM38	RNA binding motif protein 38
hsa-let-7c	1	0	1	1	1	1	RIOK3	RIO kinase 3 (yeast)
hsa-let-7c	1	0	1	0	1	1	GALNT4	UDP-N-acetyl-alpha-D-galactosamine:polypeptide N-acetylgalactosaminyltransferase 4 (GalNAc-T4)
hsa-let-7c	1	0	1	1	1	1	DLST	dihydrolipoamide S-succinyltransferase (E2 component of 2-oxo-glutarate complex)
hsa-let-7c	1	0	1	1	1	1	TMEM2	transmembrane protein 2
hsa-let-7c	1	0	1	1	0	0	PDGFB	platelet-derived growth factor beta polypeptide
hsa-let-7c	1	0	0	1	0	0	TRAPPC1	trafficking protein particle complex 1
hsa-let-7c	1	0	1	0	1	1	KIAA2022	KIAA2022
hsa-let-7c	1	0	1	0	1	1	PAPPA	pregnancy-associated plasma protein A, pappalysin 1
hsa-let-7c	1	0	1	0	1	1	GAN	gigaxonin
hsa-let-7c	1	0	1	1	1	1	GATM	glycine amidinotransferase (L-arginine:glycine amidinotransferase)
hsa-let-7c	1	0	0	1	0	0	XKR8	XK, Kell blood group complex subunit-related family, member 8
hsa-let-7c	1	0	1	1	1	1	C2orf88	chromosome 2 open reading frame 88
hsa-let-7c	1	0	1	1	1	1	AMT	aminomethyltransferase
hsa-let-7c	1	0	1	1	1	1	C8orf58	chromosome 8 open reading frame 58
hsa-let-7c	1	0	1	0	1	1	ADIPOR2	adiponectin receptor 2
hsa-let-7c	1	0	1	0	1	1	BTBD3	BTB (POZ) domain containing 3
hsa-let-7c	1	0	1	1	1	1	NKD1	naked cuticle homolog 1 (Drosophila)
hsa-let-7c	1	0	1	0	0	0	HECTD4	HECT domain containing E3 ubiquitin protein ligase 4
hsa-let-7c	1	0	1	1	0	0	FAM43A	family with sequence similarity 43, member A
hsa-let-7c	1	0	1	1	1	1	RCN1	reticulocalbin 1, EF-hand calcium binding domain
hsa-let-7c	1	0	1	1	1	1	IQCB1	IQ motif containing B1
hsa-let-7c	1	0	1	1	1	1	LTN1	listerin E3 ubiquitin protein ligase 1
hsa-let-7c	1	0	1	1	1	1	KCNA6	potassium voltage-gated channel, shaker-related subfamily, member 6
hsa-let-7c	1	0	1	1	0	0	SLC45A4	solute carrier family 45, member 4
hsa-let-7c	1	0	1	1	1	1	GABBR2	gamma-aminobutyric acid (GABA) B receptor, 2
hsa-let-7c	1	0	1	1	1	1	PRRX1	paired related homeobox 1
hsa-let-7c	1	0	1	1	1	1	EFHD2	EF-hand domain family, member D2
hsa-let-7c	1	0	1	1	1	1	TRIOBP	TRIO and F-actin binding protein
hsa-let-7c	1	0	1	0	0	0	FAM189A1	family with sequence similarity 189, member A1
hsa-let-7c	1	0	1	1	0	0	MMP11	matrix metallopeptidase 11 (stromelysin 3)
hsa-let-7c	1	0	1	0	1	1	NHLRC3	NHL repeat containing 3
hsa-let-7c	1	0	1	1	0	0	UBN2	ubinuclein 2
hsa-let-7c	1	0	1	0	1	1	TRHDE	thyrotropin-releasing hormone degrading enzyme
hsa-let-7c	1	0	1	0	1	1	YAF2	YY1 associated factor 2
hsa-let-7c	1	0	1	1	1	1	LRIG2	leucine-rich repeats and immunoglobulin-like domains 2
hsa-let-7c	1	0	1	1	1	1	ZFYVE16	zinc finger, FYVE domain containing 16
hsa-let-7c	1	0	1	1	1	1	CGNL1	cingulin-like 1
hsa-let-7c	1	0	1	0	0	0	SH3RF3	SH3 domain containing ring finger 3
hsa-let-7c	1	0	1	1	1	1	WARS2	tryptophanyl tRNA synthetase 2, mitochondrial
hsa-let-7c	1	0	1	0	1	1	CHD7	chromodomain helicase DNA binding protein 7
hsa-let-7c	1	0	1	1	1	1	CREM	cAMP responsive element modulator
hsa-let-7c	1	0	1	1	1	1	KCNJ11	potassium inwardly-rectifying channel, subfamily J, member 11
hsa-let-7c	1	0	1	1	1	1	BAHD1	bromo adjacent homology domain containing 1
hsa-let-7c	1	0	1	1	1	1	SGCD	sarcoglycan, delta (35kDa dystrophin-associated glycoprotein)
hsa-let-7c	1	0	1	1	1	1	SREK1	splicing regulatory glutamine/lysine-rich protein 1
hsa-let-7c	1	0	1	1	1	1	ACER2	alkaline ceramidase 2
hsa-let-7c	1	0	1	0	1	1	PGM2L1	phosphoglucomutase 2-like 1
hsa-let-7c	1	0	1	1	1	1	USP38	ubiquitin specific peptidase 38
hsa-let-7c	1	0	1	1	1	1	PLA2G3	phospholipase A2, group III
hsa-let-7c	1	0	1	1	1	1	HLF	hepatic leukemia factor
hsa-let-7c	1	0	0	1	1	1	TECPR2	tectonin beta-propeller repeat containing 2
hsa-let-7c	1	0	1	1	1	1	CTSC	cathepsin C
hsa-let-7c	1	0	1	1	1	1	BRD3	bromodomain containing 3
hsa-let-7c	1	0	1	1	1	1	ATP2B4	ATPase, Ca++ transporting, plasma membrane 4
hsa-let-7c	1	0	1	1	0	0	PPARGC1B	peroxisome proliferator-activated receptor gamma, coactivator 1 beta
hsa-let-7c	1	0	1	1	1	1	GDAP2	ganglioside induced differentiation associated protein 2
hsa-let-7c	1	0	1	1	1	1	DCUN1D3	DCN1, defective in cullin neddylation 1, domain containing 3 (S. cerevisiae)
hsa-let-7c	1	0	1	1	1	1	PEX11B	peroxisomal biogenesis factor 11 beta
hsa-let-7c	1	0	1	1	1	1	PPTC7	PTC7 protein phosphatase homolog (S. cerevisiae)
hsa-let-7c	1	0	1	1	1	1	SLC16A10	solute carrier family 16, member 10 (aromatic amino acid transporter)
hsa-let-7c	1	0	1	1	1	1	RPUSD3	RNA pseudouridylate synthase domain containing 3
hsa-let-7c	1	0	1	1	1	1	SLCO5A1	solute carrier organic anion transporter family, member 5A1
hsa-let-7c	1	0	1	1	1	1	PTPRD	protein tyrosine phosphatase, receptor type, D
hsa-let-7c	1	0	1	1	0	0	ATAD2B	ATPase family, AAA domain containing 2B
hsa-let-7c	1	0	1	1	1	1	DUSP9	dual specificity phosphatase 9
hsa-let-7c	1	0	1	1	1	1	DNAJB9	DnaJ (Hsp40) homolog, subfamily B, member 9
hsa-let-7c	1	0	1	1	1	1	SNAP23	synaptosomal-associated protein, 23kDa
hsa-let-7c	1	0	1	1	1	1	COL24A1	collagen, type XXIV, alpha 1
hsa-let-7c	1	0	1	1	1	1	SPIRE1	spire homolog 1 (Drosophila)
hsa-let-7c	1	0	1	1	1	1	POGZ	pogo transposable element with ZNF domain
hsa-let-7c	1	0	1	1	1	1	SCUBE3	signal peptide, CUB domain, EGF-like 3
hsa-let-7c	1	0	1	0	1	1	PRKAA2	protein kinase, AMP-activated, alpha 2 catalytic subunit
hsa-let-7c	1	0	1	1	1	1	ACTR10	actin-related protein 10 homolog (S. cerevisiae)
hsa-let-7c	1	0	1	1	1	1	CLCN5	chloride channel, voltage-sensitive 5
hsa-let-7c	1	0	1	1	1	1	ARHGAP20	Rho GTPase activating protein 20
hsa-let-7c	1	0	1	1	1	1	ADCY9	adenylate cyclase 9
hsa-let-7c	1	0	1	1	1	1	ZNF644	zinc finger protein 644
hsa-let-7c	1	0	1	1	1	1	GNPTAB	N-acetylglucosamine-1-phosphate transferase, alpha and beta subunits
hsa-let-7c	1	0	1	1	1	1	SNX16	sorting nexin 16
hsa-let-7c	1	0	1	1	1	1	YTHDF3	YTH domain family, member 3
hsa-let-7c	1	0	1	1	1	1	ADAMTS1	ADAM metallopeptidase with thrombospondin type 1 motif, 1
hsa-let-7c	1	0	1	1	1	1	RANBP2	RAN binding protein 2
hsa-let-7c	1	0	1	1	1	1	AFF2	AF4/FMR2 family, member 2
hsa-let-7c	1	0	1	1	0	0	CANT1	calcium activated nucleotidase 1
hsa-let-7c	1	0	1	0	1	1	RAG1	recombination activating gene 1
hsa-let-7c	1	0	1	1	1	1	CACNA1D	calcium channel, voltage-dependent, L type, alpha 1D subunit
hsa-let-7c	1	0	1	1	1	1	ITGB8	integrin, beta 8
hsa-let-7c	1	0	1	0	1	1	NRAS	neuroblastoma RAS viral (v-ras) oncogene homolog
hsa-let-7c	1	0	1	1	1	1	ZNF512B	zinc finger protein 512B
hsa-let-7c	1	0	1	1	1	1	TMC7	transmembrane channel-like 7
hsa-let-7c	1	0	0	1	1	1	TNFSF9	tumor necrosis factor (ligand) superfamily, member 9
hsa-let-7c	1	0	1	1	0	0	ADAMTS14	ADAM metallopeptidase with thrombospondin type 1 motif, 14
hsa-let-7c	1	0	0	1	0	0	GPATCH3	G patch domain containing 3
hsa-let-7c	1	0	1	1	0	0	GEMIN7	gem (nuclear organelle) associated protein 7
hsa-let-7c	1	0	0	1	1	1	SFT2D3	SFT2 domain containing 3
hsa-let-7c	1	0	1	1	0	0	ABL2	v-abl Abelson murine leukemia viral oncogene homolog 2
hsa-let-7c	1	0	1	1	1	1	MEGF11	multiple EGF-like-domains 11
hsa-let-7c	1	0	1	1	1	1	IGF2BP2	insulin-like growth factor 2 mRNA binding protein 2
hsa-let-7c	1	0	1	1	1	1	VASH2	vasohibin 2
hsa-let-7c	1	0	1	1	1	1	TMEM65	transmembrane protein 65
hsa-let-7c	1	0	1	0	1	1	MLL2	myeloid/lymphoid or mixed-lineage leukemia 2
hsa-let-7c	1	0	1	1	1	1	SLC1A4	solute carrier family 1 (glutamate/neutral amino acid transporter), member 4
hsa-let-7c	1	0	1	0	0	0	NTN1	netrin 1
hsa-let-7c	1	0	1	1	1	1	BCAP29	B-cell receptor-associated protein 29
hsa-let-7c	1	0	1	0	0	0	NPEPL1	aminopeptidase-like 1
hsa-let-7c	1	0	1	1	1	1	GNAL	guanine nucleotide binding protein (G protein), alpha activating activity polypeptide, olfactory type
hsa-let-7c	1	0	1	1	1	1	EIF2C1	eukaryotic translation initiation factor 2C, 1
hsa-let-7c	1	0	0	1	0	0	STAB2	stabilin 2
hsa-let-7c	1	0	0	1	1	1	CNTRL	centriolin
hsa-let-7c	1	0	1	1	0	0	MDFI	MyoD family inhibitor
hsa-let-7c	1	0	1	1	1	1	COL4A5	collagen, type IV, alpha 5
hsa-let-7c	1	0	1	0	1	1	GRIN3A	glutamate receptor, ionotropic, N-methyl-D-aspartate 3A
hsa-let-7c	1	0	1	1	1	1	PNKD	paroxysmal nonkinesigenic dyskinesia
hsa-let-7c	1	0	1	1	1	1	EDA	ectodysplasin A
hsa-let-7c	1	0	1	1	1	1	BNC2	basonuclin 2
hsa-let-7c	1	0	1	1	1	1	STXBP5	syntaxin binding protein 5 (tomosyn)
hsa-let-7c	1	0	1	1	1	1	DYRK1A	dual-specificity tyrosine-(Y)-phosphorylation regulated kinase 1A
hsa-let-7c	1	0	1	0	1	1	AKAP6	A kinase (PRKA) anchor protein 6
hsa-let-7c	1	0	1	1	1	1	PDPR	pyruvate dehydrogenase phosphatase regulatory subunit
hsa-let-7c	1	0	1	0	1	1	CPEB2	cytoplasmic polyadenylation element binding protein 2
hsa-let-7c	1	0	1	1	1	1	GOLGA4	golgin A4
hsa-let-7c	1	0	1	1	1	1	KLHL31	kelch-like 31 (Drosophila)
hsa-let-7c	1	0	1	1	0	0	NIPAL4	NIPA-like domain containing 4
hsa-let-7c	1	0	0	1	1	1	SLC5A9	solute carrier family 5 (sodium/glucose cotransporter), member 9
hsa-let-7c	1	0	1	1	1	1	GTF2I	general transcription factor IIi
hsa-let-7c	1	0	0	1	1	1	CDC34	cell division cycle 34 homolog (S. cerevisiae)
hsa-let-7c	1	0	1	1	1	1	HOXD1	homeobox D1
hsa-let-7c	1	0	1	1	1	1	TP53	tumor protein p53
hsa-let-7c	1	0	1	1	1	1	SLC25A24	solute carrier family 25 (mitochondrial carrier; phosphate carrier), member 24
hsa-let-7c	1	0	1	0	1	1	BCL7A	B-cell CLL/lymphoma 7A
hsa-let-7c	1	0	1	0	1	1	LIN28A	lin-28 homolog A (C. elegans)
hsa-let-7c	1	0	1	1	1	1	RAB11FIP4	RAB11 family interacting protein 4 (class II)
hsa-let-7c	1	0	1	0	1	1	SPATA2	spermatogenesis associated 2
hsa-let-7c	1	0	1	1	1	1	LAMP2	lysosomal-associated membrane protein 2
hsa-let-7c	1	0	1	1	1	1	LRIG1	leucine-rich repeats and immunoglobulin-like domains 1
hsa-let-7c	1	0	1	0	1	1	SLC16A9	solute carrier family 16, member 9 (monocarboxylic acid transporter 9)
hsa-let-7c	1	0	1	1	1	1	FBXL12	F-box and leucine-rich repeat protein 12
hsa-let-7c	1	0	1	1	1	1	CRY2	cryptochrome 2 (photolyase-like)
hsa-let-7c	1	0	1	1	1	1	P4HA2	prolyl 4-hydroxylase, alpha polypeptide II
hsa-let-7c	1	0	1	1	1	1	TBKBP1	TBK1 binding protein 1
hsa-let-7c	1	0	1	1	1	1	FAM214B	family with sequence similarity 214, member B
hsa-let-7c	1	0	1	1	1	1	ZNF689	zinc finger protein 689
hsa-let-7c	1	0	1	1	1	1	FAM104A	family with sequence similarity 104, member A
hsa-let-7c	1	0	1	0	1	1	KCTD16	potassium channel tetramerisation domain containing 16
hsa-let-7c	1	0	0	1	1	1	ZNF566	zinc finger protein 566
hsa-let-7c	1	0	1	1	0	0	MEX3A	mex-3 homolog A (C. elegans)
hsa-let-7c	1	0	1	1	1	1	KCTD17	potassium channel tetramerisation domain containing 17
hsa-let-7c	1	0	1	1	1	1	GOLT1B	golgi transport 1B
hsa-let-7c	1	0	0	1	0	0	CPSF4	cleavage and polyadenylation specific factor 4, 30kDa
hsa-let-7c	1	0	1	1	1	1	LSM11	LSM11, U7 small nuclear RNA associated
hsa-let-7c	1	0	1	0	1	1	MYO5B	myosin VB
hsa-let-7c	1	0	1	1	1	1	RUFY3	RUN and FYVE domain containing 3
hsa-let-7c	1	0	1	1	1	1	GABPA	GA binding protein transcription factor, alpha subunit 60kDa
hsa-let-7c	1	0	1	1	1	1	HAS2	hyaluronan synthase 2
hsa-let-7c	1	0	1	1	1	1	SNX6	sorting nexin 6
hsa-let-7c	1	0	1	1	1	1	COL1A1	collagen, type I, alpha 1
hsa-let-7c	1	0	1	1	1	1	SLC8A2	solute carrier family 8 (sodium/calcium exchanger), member 2
hsa-let-7c	1	0	1	1	1	1	ACSL6	acyl-CoA synthetase long-chain family member 6
hsa-let-7c	1	0	1	0	1	1	GPR26	G protein-coupled receptor 26
hsa-let-7c	1	0	1	1	1	1	SMCR7L	Smith-Magenis syndrome chromosome region, candidate 7-like
hsa-let-7c	1	0	1	1	1	1	WNT1	wingless-type MMTV integration site family, member 1
hsa-let-7c	1	0	1	0	1	1	CPD	carboxypeptidase D
hsa-let-7c	1	0	1	1	1	1	RBFOX1	RNA binding protein, fox-1 homolog (C. elegans) 1
hsa-let-7c	1	0	0	0	1	1	STX3	syntaxin 3
hsa-let-7c	1	0	1	0	1	1	CPM	carboxypeptidase M
hsa-let-7c	1	0	1	1	1	1	ELF4	E74-like factor 4 (ets domain transcription factor)
hsa-let-7c	1	0	1	0	1	1	MFAP3L	microfibrillar-associated protein 3-like
hsa-let-7c	1	0	1	1	1	1	COL15A1	collagen, type XV, alpha 1
hsa-let-7c	1	0	1	1	1	1	ARHGAP28	Rho GTPase activating protein 28
hsa-let-7c	1	0	1	1	1	1	ATP7B	ATPase, Cu++ transporting, beta polypeptide
hsa-let-7c	1	0	1	1	0	0	SEC14L5	SEC14-like 5 (S. cerevisiae)
hsa-let-7c	1	0	1	1	1	1	PAG1	phosphoprotein associated with glycosphingolipid microdomains 1
hsa-let-7c	1	0	1	0	1	1	PDE12	phosphodiesterase 12
hsa-let-7c	1	0	1	1	1	1	CDC14B	CDC14 cell division cycle 14 homolog B (S. cerevisiae)
hsa-let-7c	1	0	1	1	1	1	TARBP2	TAR (HIV-1) RNA binding protein 2
hsa-let-7c	1	0	1	1	0	0	SMUG1	single-strand-selective monofunctional uracil-DNA glycosylase 1
hsa-let-7c	1	0	1	1	1	1	SYT1	synaptotagmin I
hsa-let-7c	1	0	1	1	0	0	SEMA4C	sema domain, immunoglobulin domain (Ig), transmembrane domain (TM) and short cytoplasmic domain, (semaphorin) 4C
hsa-let-7c	1	0	1	0	1	1	DICER1	dicer 1, ribonuclease type III
hsa-let-7c	1	0	1	1	0	0	BEGAIN	brain-enriched guanylate kinase-associated homolog (rat)
hsa-let-7c	1	0	0	1	1	1	GLRX	glutaredoxin (thioltransferase)
hsa-let-7c	1	0	1	1	1	1	GABRA6	gamma-aminobutyric acid (GABA) A receptor, alpha 6
hsa-let-7c	1	0	1	0	1	1	CPEB4	cytoplasmic polyadenylation element binding protein 4
hsa-let-7c	1	0	1	1	1	1	MEF2D	myocyte enhancer factor 2D
hsa-let-7c	1	0	1	1	1	1	OPRM1	opioid receptor, mu 1
hsa-let-7c	1	0	1	0	1	1	CDC42SE1	CDC42 small effector 1
hsa-let-7c	1	0	1	1	1	1	ADAMTS8	ADAM metallopeptidase with thrombospondin type 1 motif, 8
hsa-let-7c	1	0	1	0	1	1	MYCBP	c-myc binding protein
hsa-let-7c	1	0	1	0	1	1	CCNJ	cyclin J
hsa-let-7c	1	0	1	1	1	1	GCNT4	glucosaminyl (N-acetyl) transferase 4, core 2
hsa-let-7c	1	0	1	0	1	1	PXDN	peroxidasin homolog (Drosophila)
hsa-let-7c	1	0	1	1	1	1	RNF38	ring finger protein 38
hsa-let-7c	1	0	1	1	1	1	NUMBL	numb homolog (Drosophila)-like
hsa-let-7c	1	0	1	1	1	1	MTUS1	microtubule associated tumor suppressor 1
hsa-let-7c	1	0	1	1	1	1	IGF1R	insulin-like growth factor 1 receptor
hsa-let-7c	1	0	1	1	1	1	SCYL3	SCY1-like 3 (S. cerevisiae)
hsa-let-7c	1	0	1	1	1	1	CPEB1	cytoplasmic polyadenylation element binding protein 1
hsa-let-7c	1	0	1	1	1	1	CCL7	chemokine (C-C motif) ligand 7
hsa-let-7c	1	0	1	1	1	1	ZNF200	zinc finger protein 200
hsa-let-7c	1	0	1	0	1	1	IGDCC4	immunoglobulin superfamily, DCC subclass, member 4
hsa-let-7c	1	0	1	1	1	1	IL13	interleukin 13
hsa-let-7c	1	0	1	1	1	1	FOPNL	FGFR1OP N-terminal like
hsa-let-7c	1	0	1	1	1	1	ZBTB39	zinc finger and BTB domain containing 39
hsa-let-7c	1	0	1	1	1	1	LMX1A	LIM homeobox transcription factor 1, alpha
hsa-let-7c	1	0	1	1	1	1	ABCC5	ATP-binding cassette, sub-family C (CFTR/MRP), member 5
hsa-let-7c	1	0	1	1	1	1	USP47	ubiquitin specific peptidase 47
hsa-let-7c	1	0	1	1	0	0	GXYLT1	glucoside xylosyltransferase 1
hsa-let-7c	1	0	1	1	0	0	PAK1	p21 protein (Cdc42/Rac)-activated kinase 1
hsa-let-7c	1	0	1	1	1	1	HMGA1	high mobility group AT-hook 1
hsa-let-7c	1	0	1	1	1	1	LCORL	ligand dependent nuclear receptor corepressor-like
hsa-let-7c	1	0	1	1	1	1	SP8	Sp8 transcription factor
hsa-let-7c	1	0	1	1	1	1	SOWAHA	sosondowah ankyrin repeat domain family member A
hsa-let-7c	1	0	1	1	1	1	DYRK2	dual-specificity tyrosine-(Y)-phosphorylation regulated kinase 2
hsa-let-7c	1	0	1	1	1	1	ANKRD46	ankyrin repeat domain 46
hsa-let-7c	1	0	1	0	1	1	ALPK3	alpha-kinase 3
hsa-let-7c	1	0	0	1	0	0	ERCC6	excision repair cross-complementing rodent repair deficiency, complementation group 6
hsa-let-7c	1	0	1	1	1	1	TBX5	T-box 5
hsa-let-7c	1	0	1	1	1	1	RIMS3	regulating synaptic membrane exocytosis 3
hsa-let-7c	1	0	1	1	1	1	LINGO1	leucine rich repeat and Ig domain containing 1
hsa-let-7c	1	0	1	1	1	1	DAPK1	death-associated protein kinase 1
hsa-let-7c	1	0	1	1	0	0	PYGO2	pygopus homolog 2 (Drosophila)
hsa-let-7c	1	0	0	1	0	0	AKAP5	A kinase (PRKA) anchor protein 5
hsa-let-7c	1	0	1	1	1	1	CASP3	caspase 3, apoptosis-related cysteine peptidase
hsa-let-7c	1	0	0	1	0	0	ZNF784	zinc finger protein 784
hsa-let-7c	1	0	1	1	1	1	COIL	coilin
hsa-let-7c	1	0	1	0	0	0	IGLON5	IgLON family member 5
hsa-let-7c	1	0	1	1	1	1	MTMR3	myotubularin related protein 3
hsa-let-7c	1	0	1	1	1	1	C3orf52	chromosome 3 open reading frame 52
hsa-let-7c	1	0	0	1	1	1	NPHP3	nephronophthisis 3 (adolescent)
hsa-let-7c	1	0	1	0	1	1	CCDC71L	coiled-coil domain containing 71-like
hsa-let-7c	1	0	0	1	1	1	KCTD10	potassium channel tetramerisation domain containing 10
hsa-let-7c	1	0	1	1	1	1	SPTBN4	spectrin, beta, non-erythrocytic 4
hsa-let-7c	1	0	0	1	1	1	TMEM234	transmembrane protein 234
hsa-let-7c	1	0	1	1	1	1	HAND1	heart and neural crest derivatives expressed 1
hsa-let-7c	1	0	1	0	1	1	USP32	ubiquitin specific peptidase 32
hsa-let-7c	1	0	1	1	0	0	LRFN4	leucine rich repeat and fibronectin type III domain containing 4
hsa-let-7c	1	0	1	1	0	0	YBX2	Y box binding protein 2
hsa-let-7c	1	0	1	1	1	1	GDPD1	glycerophosphodiester phosphodiesterase domain containing 1
hsa-let-7c	1	0	1	0	1	1	SYT2	synaptotagmin II
hsa-let-7c	1	0	1	1	1	1	STRBP	spermatid perinuclear RNA binding protein
hsa-let-7c	1	0	1	1	0	0	HOXC11	homeobox C11
hsa-let-7c	1	0	1	0	1	1	BZW1	basic leucine zipper and W2 domains 1
hsa-let-7c	1	0	1	1	1	1	RNF44	ring finger protein 44
hsa-let-7c	1	0	1	1	1	1	CEP120	centrosomal protein 120kDa
hsa-let-7c	1	0	1	1	1	1	RASL10B	RAS-like, family 10, member B
hsa-let-7c	1	0	1	1	1	1	FAM160B2	family with sequence similarity 160, member B2
hsa-let-7c	1	0	1	1	0	0	POLL	polymerase (DNA directed), lambda
hsa-let-7c	1	0	1	1	1	1	DDX19A	DEAD (Asp-Glu-Ala-Asp) box polypeptide 19A
hsa-let-7c	1	0	1	0	1	1	FIGNL2	fidgetin-like 2
hsa-let-7c	1	0	0	0	1	1	ZNF473	zinc finger protein 473
hsa-let-7c	1	0	1	1	0	0	PLD3	phospholipase D family, member 3
hsa-let-7c	1	0	0	0	1	1	PLEKHG7	pleckstrin homology domain containing, family G (with RhoGef domain) member 7
hsa-let-7c	1	0	1	1	1	1	KATNAL1	katanin p60 subunit A-like 1
hsa-let-7c	1	0	0	1	1	1	USP44	ubiquitin specific peptidase 44
hsa-let-7c	1	0	1	1	1	1	BCAT1	branched chain amino-acid transaminase 1, cytosolic
hsa-let-7c	1	0	1	1	1	1	LOXL3	lysyl oxidase-like 3
hsa-let-7c	1	0	1	1	1	1	PHACTR2	phosphatase and actin regulator 2
hsa-let-7c	1	0	1	0	1	1	IPO9	importin 9
hsa-let-7c	1	0	1	1	1	1	LRIG3	leucine-rich repeats and immunoglobulin-like domains 3
hsa-let-7c	1	0	1	1	0	0	KCNC1	potassium voltage-gated channel, Shaw-related subfamily, member 1
hsa-let-7c	1	0	1	1	1	1	PANX2	pannexin 2
hsa-let-7c	1	0	1	1	1	1	SLC31A1	solute carrier family 31 (copper transporters), member 1
hsa-let-7c	1	0	1	1	0	0	CPA4	carboxypeptidase A4
hsa-let-7c	1	0	1	0	1	1	ICMT	isoprenylcysteine carboxyl methyltransferase
hsa-let-7c	1	0	1	0	1	1	THBS1	thrombospondin 1
hsa-let-7c	1	0	0	0	1	1	ZNF322	zinc finger protein 322
hsa-let-7c	1	0	1	1	0	0	FBXL19	F-box and leucine-rich repeat protein 19
hsa-let-7c	1	0	1	1	1	1	FAM135A	family with sequence similarity 135, member A
hsa-let-7c	1	0	1	1	1	1	CPED1	cadherin-like and PC-esterase domain containing 1
hsa-let-7c	1	0	1	1	1	1	DUSP4	dual specificity phosphatase 4
hsa-let-7c	1	0	1	1	1	1	BACE2	beta-site APP-cleaving enzyme 2
hsa-let-7c	1	0	1	1	1	1	KCTD21	potassium channel tetramerisation domain containing 21
hsa-let-7c	1	0	1	1	0	0	PTAR1	protein prenyltransferase alpha subunit repeat containing 1
hsa-let-7c	1	0	1	0	1	1	ZNF740	zinc finger protein 740
hsa-let-7c	1	0	0	1	1	1	DCUN1D2	DCN1, defective in cullin neddylation 1, domain containing 2 (S. cerevisiae)
hsa-let-7c	1	0	1	1	1	1	DVL3	dishevelled, dsh homolog 3 (Drosophila)
hsa-let-7c	1	0	1	0	1	1	C5orf51	chromosome 5 open reading frame 51
hsa-let-7c	1	0	1	1	1	1	ARHGEF15	Rho guanine nucleotide exchange factor (GEF) 15
hsa-let-7c	1	0	1	1	1	1	KLHL6	kelch-like 6 (Drosophila)
hsa-let-7c	1	0	1	0	1	1	CACNA1I	calcium channel, voltage-dependent, T type, alpha 1I subunit
hsa-let-7c	1	0	1	0	1	1	TMEM194A	transmembrane protein 194A
hsa-let-7c	1	0	1	1	1	1	HK2	hexokinase 2
hsa-let-7c	1	0	1	1	1	1	INPP5A	inositol polyphosphate-5-phosphatase, 40kDa
hsa-let-7c	1	0	1	1	1	1	STK24	serine/threonine kinase 24
hsa-let-7c	1	0	1	1	1	1	BZW2	basic leucine zipper and W2 domains 2
hsa-let-7c	1	0	1	1	1	1	FASLG	Fas ligand (TNF superfamily, member 6)
hsa-let-7c	1	0	1	1	1	1	GREB1	growth regulation by estrogen in breast cancer 1
hsa-let-7c	1	0	1	1	1	1	DDI2	DNA-damage inducible 1 homolog 2 (S. cerevisiae)
hsa-let-7c	1	0	1	1	1	1	PPP1R12B	protein phosphatase 1, regulatory subunit 12B
hsa-let-7c	1	0	1	0	1	1	E2F2	E2F transcription factor 2
hsa-let-7c	1	0	0	1	1	1	HABP4	hyaluronan binding protein 4
hsa-let-7c	1	0	1	0	1	1	UBXN4	UBX domain protein 4
hsa-let-7c	1	0	1	1	1	1	DKK3	dickkopf 3 homolog (Xenopus laevis)
hsa-let-7c	1	0	1	1	1	1	ACVR2B	activin A receptor, type IIB
hsa-let-7c	1	0	1	0	1	1	TXLNA	taxilin alpha
hsa-let-7c	1	0	1	1	1	1	INSR	insulin receptor
hsa-let-7c	1	0	1	1	0	0	NRTN	neurturin
hsa-let-7c	1	0	1	1	1	1	RFX6	regulatory factor X, 6
hsa-let-7c	1	0	1	1	0	0	B3GAT1	beta-1,3-glucuronyltransferase 1 (glucuronosyltransferase P)
hsa-let-7c	1	0	1	1	0	0	FBXO45	F-box protein 45
hsa-let-7c	1	0	0	1	1	1	SLC25A18	solute carrier family 25 (glutamate carrier), member 18
hsa-let-7c	1	0	1	0	1	1	CYTH3	cytohesin 3
hsa-let-7c	1	0	1	1	1	1	UTRN	utrophin
hsa-let-7c	1	0	1	1	0	0	SLC5A6	solute carrier family 5 (sodium-dependent vitamin transporter), member 6
hsa-let-7c	1	0	1	1	1	1	ATPAF1	ATP synthase mitochondrial F1 complex assembly factor 1
hsa-let-7c	1	0	1	0	1	1	MNT	MAX binding protein
hsa-let-7c	1	0	1	1	1	1	PMAIP1	phorbol-12-myristate-13-acetate-induced protein 1
hsa-let-7c	1	0	1	1	1	1	SMARCAD1	SWI/SNF-related, matrix-associated actin-dependent regulator of chromatin, subfamily a, containing DEAD/H box 1
hsa-let-7c	1	0	1	1	0	0	STX17	syntaxin 17
hsa-let-7c	1	0	1	1	1	1	GALC	galactosylceramidase
hsa-let-7c	1	0	1	0	1	1	ANKFY1	ankyrin repeat and FYVE domain containing 1
hsa-let-7c	1	0	1	1	1	1	GOLGA7	golgin A7
hsa-let-7c	1	0	1	1	1	1	DUSP16	dual specificity phosphatase 16
hsa-let-7c	1	0	1	1	1	1	GALE	UDP-galactose-4-epimerase
hsa-let-7c	1	0	1	0	1	1	KCMF1	potassium channel modulatory factor 1
hsa-let-7c	1	0	1	1	0	0	ZSWIM5	zinc finger, SWIM-type containing 5
hsa-let-7c	1	0	1	1	1	1	RAB40C	RAB40C, member RAS oncogene family
hsa-let-7c	1	0	1	0	1	1	ARL5A	ADP-ribosylation factor-like 5A
hsa-let-7c	1	0	1	1	1	1	GRIK2	glutamate receptor, ionotropic, kainate 2
hsa-let-7c	1	0	1	1	0	0	POLR3D	polymerase (RNA) III (DNA directed) polypeptide D, 44kDa
hsa-let-7c	1	0	1	0	1	1	CLDN12	claudin 12
hsa-let-7c	1	0	1	1	1	1	HIF1AN	hypoxia inducible factor 1, alpha subunit inhibitor
hsa-let-7c	1	0	0	1	1	1	TRIM67	tripartite motif containing 67
hsa-let-7c	1	0	1	1	1	1	PLAGL2	pleiomorphic adenoma gene-like 2
hsa-let-7c	1	0	1	1	1	1	SLC16A14	solute carrier family 16, member 14 (monocarboxylic acid transporter 14)
hsa-let-7c	1	0	1	1	1	1	GALNT1	UDP-N-acetyl-alpha-D-galactosamine:polypeptide N-acetylgalactosaminyltransferase 1 (GalNAc-T1)
hsa-let-7c	1	0	1	1	1	1	IGSF1	immunoglobulin superfamily, member 1
hsa-let-7c	1	0	0	1	1	1	THRSP	thyroid hormone responsive
hsa-let-7c	1	0	1	1	1	1	NLK	nemo-like kinase
hsa-let-7c	1	0	0	1	1	1	SOX13	SRY (sex determining region Y)-box 13
hsa-let-7c	1	0	1	1	1	1	E2F6	E2F transcription factor 6
hsa-let-7c	1	0	1	1	1	1	NIPA1	non imprinted in Prader-Willi/Angelman syndrome 1
hsa-let-7c	1	0	1	0	0	0	DTX2	deltex homolog 2 (Drosophila)
hsa-let-7c	1	0	1	1	1	1	EIF2C3	eukaryotic translation initiation factor 2C, 3
hsa-let-7c	1	0	1	1	0	0	NDST2	N-deacetylase/N-sulfotransferase (heparan glucosaminyl) 2
hsa-let-7c	1	0	1	0	1	1	KLF9	Kruppel-like factor 9
hsa-let-7c	1	0	1	1	1	1	SURF4	surfeit 4
hsa-let-7c	1	0	1	0	1	1	OSBPL3	oxysterol binding protein-like 3
hsa-let-7c	1	0	1	1	1	1	DNA2	DNA replication helicase 2 homolog (yeast)
hsa-let-7c	1	0	1	1	1	1	UGGT1	UDP-glucose glycoprotein glucosyltransferase 1
hsa-let-7c	1	0	1	1	1	1	PKN2	protein kinase N2
hsa-let-7c	1	0	1	1	1	1	TOB2	transducer of ERBB2, 2
hsa-let-7c	1	0	1	1	0	0	C11orf84	chromosome 11 open reading frame 84
hsa-let-7c	1	0	1	1	1	1	ETNK1	ethanolamine kinase 1
hsa-let-7c	1	0	1	1	0	0	MYO1F	myosin IF
hsa-let-7c	1	0	0	1	0	0	PLEKHO1	pleckstrin homology domain containing, family O member 1
hsa-let-7c	1	0	0	1	0	0	IKBKE	inhibitor of kappa light polypeptide gene enhancer in B-cells, kinase epsilon
hsa-let-7c	1	0	1	1	1	1	SLC30A7	solute carrier family 30 (zinc transporter), member 7
hsa-let-7c	1	0	1	0	1	1	TEAD3	TEA domain family member 3
hsa-let-7c	1	0	1	1	0	0	SPEG	SPEG complex locus
hsa-let-7c	1	0	1	0	1	1	CNOT6L	CCR4-NOT transcription complex, subunit 6-like
hsa-let-7c	1	0	1	1	1	1	CPEB3	cytoplasmic polyadenylation element binding protein 3
hsa-let-7c	1	0	1	1	1	1	VAV3	vav 3 guanine nucleotide exchange factor
hsa-let-7c	1	0	1	1	1	1	TRIB1	tribbles homolog 1 (Drosophila)
hsa-let-7c	1	0	1	1	1	1	SYT7	synaptotagmin VII
hsa-let-7c	1	0	1	0	1	1	EIF2C4	eukaryotic translation initiation factor 2C, 4
hsa-let-7c	1	0	1	1	1	1	CBFA2T3	core-binding factor, runt domain, alpha subunit 2; translocated to, 3
hsa-let-7c	1	0	1	0	1	1	SOCS4	suppressor of cytokine signaling 4
hsa-let-7c	1	0	1	1	1	1	DMD	dystrophin
hsa-let-7c	1	0	1	0	1	1	BTF3L4	basic transcription factor 3-like 4
hsa-let-7c	1	0	1	1	1	1	DIAPH2	diaphanous homolog 2 (Drosophila)
hsa-let-7c	1	0	0	1	1	1	CRB2	crumbs homolog 2 (Drosophila)
hsa-let-7c	1	0	1	0	1	1	SCRT2	scratch homolog 2, zinc finger protein (Drosophila)
hsa-let-7c	1	0	1	0	1	1	PPP1R16B	protein phosphatase 1, regulatory subunit 16B
hsa-let-7c	1	0	1	1	1	1	CALN1	calneuron 1
hsa-let-7c	1	0	1	1	0	0	OSMR	oncostatin M receptor
hsa-let-7c	1	0	1	1	1	1	RAB22A	RAB22A, member RAS oncogene family
hsa-let-7c	1	0	1	1	1	1	PRTG	protogenin
hsa-let-7c	1	0	1	0	1	1	KIAA0930	KIAA0930
hsa-let-7c	1	0	1	1	1	1	HS2ST1	heparan sulfate 2-O-sulfotransferase 1
hsa-let-7c	1	0	1	1	1	1	DLGAP4	discs, large (Drosophila) homolog-associated protein 4
hsa-let-7c	1	0	1	0	1	1	FNDC3B	fibronectin type III domain containing 3B
hsa-let-7c	1	0	1	0	1	1	SEMA4G	sema domain, immunoglobulin domain (Ig), transmembrane domain (TM) and short cytoplasmic domain, (semaphorin) 4G
hsa-let-7c	1	0	0	1	1	1	UHRF1	ubiquitin-like with PHD and ring finger domains 1
hsa-let-7c	1	0	1	1	1	1	SAMD12	sterile alpha motif domain containing 12
hsa-let-7c	1	0	1	1	1	1	SULF1	sulfatase 1
hsa-let-7c	1	0	1	1	1	1	ZNF362	zinc finger protein 362
hsa-let-7c	1	0	1	1	1	1	LY75	lymphocyte antigen 75
hsa-let-7c	1	0	1	1	1	1	MARS2	methionyl-tRNA synthetase 2, mitochondrial
hsa-let-7c	1	0	1	1	1	1	ZPLD1	zona pellucida-like domain containing 1
hsa-let-7c	1	0	1	1	0	0	NKIRAS2	NFKB inhibitor interacting Ras-like 2
hsa-let-7c	1	0	1	1	1	1	PLXND1	plexin D1
hsa-let-7c	1	0	1	0	1	1	FAXC	failed axon connections homolog (Drosophila)
hsa-let-7c	1	0	1	1	1	1	CASKIN1	CASK interacting protein 1
hsa-let-7c	1	0	1	1	0	0	C15orf39	chromosome 15 open reading frame 39
hsa-let-7c	1	0	0	1	0	0	TRABD	TraB domain containing
hsa-let-7c	1	0	1	1	1	1	PGRMC1	progesterone receptor membrane component 1
hsa-let-7c	1	0	1	1	1	1	IL10	interleukin 10
hsa-let-7c	1	0	1	0	1	1	ARPP19	cAMP-regulated phosphoprotein, 19kDa
hsa-let-7c	1	0	1	0	1	1	ELOVL4	ELOVL fatty acid elongase 4
hsa-let-7c	1	0	1	0	1	1	SMAD2	SMAD family member 2
hsa-let-7c	1	0	1	1	1	1	SLC25A27	solute carrier family 25, member 27
hsa-let-7c	1	0	1	0	1	1	PURB	purine-rich element binding protein B
hsa-let-7c	1	0	1	1	1	1	PTPRO	protein tyrosine phosphatase, receptor type, O
hsa-let-7c	1	0	1	1	1	1	MLLT4	myeloid/lymphoid or mixed-lineage leukemia (trithorax homolog, Drosophila); translocated to, 4
hsa-let-7c	1	0	1	1	0	0	ANGPTL2	angiopoietin-like 2
hsa-let-7c	1	0	1	1	1	1	RDX	radixin
hsa-let-7c	1	0	1	1	1	1	FOXP1	forkhead box P1
hsa-let-7c	1	0	1	1	1	1	FNIP1	folliculin interacting protein 1
hsa-let-7c	1	0	1	1	1	1	LBR	lamin B receptor
hsa-let-7c	1	0	1	1	1	1	DNAL1	dynein, axonemal, light chain 1
hsa-let-7c	1	0	1	1	1	1	WDR37	WD repeat domain 37
hsa-let-7c	1	0	1	1	1	1	DDN	dendrin
hsa-let-7c	1	0	1	1	1	1	SMAP2	small ArfGAP2
hsa-let-7c	1	0	1	1	1	1	PPAPDC2	phosphatidic acid phosphatase type 2 domain containing 2
hsa-let-7c	1	0	1	1	0	0	EGLN2	egl nine homolog 2 (C. elegans)
hsa-let-7c	1	0	1	1	1	1	TRPM6	transient receptor potential cation channel, subfamily M, member 6
hsa-let-7c	1	0	0	1	1	1	PDP2	pyruvate dehyrogenase phosphatase catalytic subunit 2
hsa-let-7c	1	0	1	0	1	1	ANKRD28	ankyrin repeat domain 28
hsa-let-7c	1	0	1	1	1	1	COL4A6	collagen, type IV, alpha 6
hsa-let-7c	1	0	1	0	1	1	IGF2BP3	insulin-like growth factor 2 mRNA binding protein 3
hsa-let-7c	1	0	1	1	1	1	MGLL	monoglyceride lipase
hsa-let-7c	1	0	1	1	1	1	USP6	ubiquitin specific peptidase 6 (Tre-2 oncogene)
hsa-let-7c	1	0	1	1	1	1	MGAT4A	mannosyl (alpha-1,3-)-glycoprotein beta-1,4-N-acetylglucosaminyltransferase, isozyme A
hsa-let-7c	1	0	1	1	1	1	MECP2	methyl CpG binding protein 2 (Rett syndrome)
hsa-let-7c	1	0	1	1	1	1	SCN5A	sodium channel, voltage-gated, type V, alpha subunit
hsa-let-7c	1	0	1	1	1	1	MRS2	MRS2 magnesium homeostasis factor homolog (S. cerevisiae)
hsa-let-7c	1	0	0	1	0	0	APC2	adenomatosis polyposis coli 2
hsa-let-7c	1	0	1	1	0	0	USP24	ubiquitin specific peptidase 24
hsa-let-7c	1	0	1	1	0	0	ALKBH1	alkB, alkylation repair homolog 1 (E. coli)
hsa-let-7c	1	0	1	1	1	1	RRP1B	ribosomal RNA processing 1 homolog B (S. cerevisiae)
hsa-let-7c	1	0	1	1	1	1	CECR6	cat eye syndrome chromosome region, candidate 6
hsa-let-7c	1	0	1	1	0	0	HIPK2	homeodomain interacting protein kinase 2
hsa-let-7c	1	0	1	1	1	1	ZNF697	zinc finger protein 697
hsa-let-7c	1	0	1	1	1	1	STEAP3	STEAP family member 3, metalloreductase
hsa-let-7c	1	0	1	1	1	1	MED6	mediator complex subunit 6
hsa-let-7c	1	0	1	1	1	1	MGA	MAX gene associated
hsa-let-7c	1	0	1	1	0	0	DNAJC1	DnaJ (Hsp40) homolog, subfamily C, member 1
hsa-let-7c	1	0	1	1	1	1	SKIDA1	SKI/DACH domain containing 1
hsa-let-7c	1	0	1	1	1	1	CD86	CD86 molecule
hsa-let-7c	1	0	1	0	1	1	KIAA1147	KIAA1147
hsa-let-7c	1	0	1	1	1	1	TMEM143	transmembrane protein 143
hsa-let-7c	1	0	1	1	1	1	PARM1	prostate androgen-regulated mucin-like protein 1
hsa-let-7c	1	0	1	1	1	1	ABCB9	ATP-binding cassette, sub-family B (MDR/TAP), member 9
hsa-let-7c	1	0	1	1	1	1	KREMEN1	kringle containing transmembrane protein 1
hsa-let-7c	1	0	1	1	1	1	DPF2	D4, zinc and double PHD fingers family 2
hsa-let-7c	1	0	1	0	1	1	DPYSL3	dihydropyrimidinase-like 3
hsa-let-7c	1	0	1	1	1	1	CBX2	chromobox homolog 2
hsa-let-7c	1	0	1	1	1	1	MOB4	MOB family member 4, phocein
hsa-let-7c	1	0	1	1	0	0	C20orf194	chromosome 20 open reading frame 194
hsa-let-7c	1	0	1	1	1	1	LDB3	LIM domain binding 3
hsa-let-7c	1	0	1	0	1	1	NRK	Nik related kinase
hsa-let-7c	1	0	1	1	1	1	DDX19B	DEAD (Asp-Glu-Ala-Asp) box polypeptide 19B
hsa-let-7c	1	0	1	0	1	1	GALNT2	UDP-N-acetyl-alpha-D-galactosamine:polypeptide N-acetylgalactosaminyltransferase 2 (GalNAc-T2)
hsa-let-7c	1	0	1	1	1	1	BRF2	BRF2, subunit of RNA polymerase III transcription initiation factor, BRF1-like
hsa-let-7c	1	0	1	0	1	1	EDEM3	ER degradation enhancer, mannosidase alpha-like 3
hsa-let-7c	1	0	1	1	1	1	UFM1	ubiquitin-fold modifier 1
hsa-let-7c	1	0	1	1	1	1	NOVA1	neuro-oncological ventral antigen 1
hsa-let-7c	1	0	1	1	1	1	BIN3	bridging integrator 3
hsa-let-7c	1	0	1	1	1	1	NGF	nerve growth factor (beta polypeptide)
hsa-let-7c	1	0	1	1	1	1	ADAMTS6	ADAM metallopeptidase with thrombospondin type 1 motif, 6
hsa-let-7c	1	0	1	1	1	1	TMEM110	transmembrane protein 110
hsa-let-7c	1	0	1	1	1	1	FREM2	FRAS1 related extracellular matrix protein 2
hsa-let-7c	1	0	1	0	1	1	UBE2G2	ubiquitin-conjugating enzyme E2G 2
hsa-let-7c	1	0	1	1	1	1	PCDH19	protocadherin 19
hsa-let-7c	1	0	1	0	0	0	DTX4	deltex homolog 4 (Drosophila)
hsa-let-7c	1	0	1	1	1	1	SOST	sclerostin
hsa-let-7c	1	0	1	1	1	1	CDV3	CDV3 homolog (mouse)
hsa-let-7c	1	0	1	1	1	1	PPARGC1A	peroxisome proliferator-activated receptor gamma, coactivator 1 alpha
hsa-let-7c	1	0	1	0	1	1	VANGL2	vang-like 2 (van gogh, Drosophila)
hsa-let-7c	1	0	1	1	1	1	CALU	calumenin
hsa-let-7c	1	0	1	0	1	1	GAB2	GRB2-associated binding protein 2
hsa-let-7c	1	0	1	1	1	1	EDN1	endothelin 1
hsa-let-7c	1	0	1	1	1	1	CTNS	cystinosin, lysosomal cystine transporter
hsa-let-7c	1	0	1	1	1	1	MEIS2	Meis homeobox 2
hsa-let-7c	1	0	1	1	1	1	SH2B3	SH2B adaptor protein 3
hsa-let-7c	1	0	1	0	1	1	KLHL24	kelch-like 24 (Drosophila)
hsa-let-7c	1	0	1	0	1	1	TSC1	tuberous sclerosis 1
hsa-let-7c	1	0	1	1	0	0	HDLBP	high density lipoprotein binding protein
hsa-let-7c	1	0	1	1	1	1	SLC2A12	solute carrier family 2 (facilitated glucose transporter), member 12
hsa-let-7c	1	0	1	1	1	1	ZNF282	zinc finger protein 282
hsa-let-7c	1	0	1	1	1	1	COL3A1	collagen, type III, alpha 1
hsa-let-7c	1	0	1	1	1	1	TUSC2	tumor suppressor candidate 2
hsa-let-7c	1	0	1	1	1	1	POLR2D	polymerase (RNA) II (DNA directed) polypeptide D
hsa-let-7c	1	0	0	1	0	0	MAPK11	mitogen-activated protein kinase 11
hsa-let-7c	1	0	1	1	0	0	DCAF15	DDB1 and CUL4 associated factor 15
hsa-let-7c	1	0	1	1	0	0	ZC3H3	zinc finger CCCH-type containing 3
hsa-let-7c	1	0	1	1	1	1	PRSS22	protease, serine, 22
hsa-let-7c	1	0	1	1	1	1	FRAS1	Fraser syndrome 1
hsa-let-7c	1	0	1	1	1	1	ADAMTS5	ADAM metallopeptidase with thrombospondin type 1 motif, 5
hsa-let-7c	1	0	1	0	1	1	TSPAN2	tetraspanin 2
hsa-let-7c	1	0	1	1	0	0	DOT1L	DOT1-like, histone H3 methyltransferase (S. cerevisiae)
hsa-let-7c	1	0	1	0	0	0	MAP3K1	mitogen-activated protein kinase kinase kinase 1, E3 ubiquitin protein ligase
hsa-let-7c	1	0	1	1	1	1	SLAMF6	SLAM family member 6
hsa-let-7c	1	0	1	1	1	1	HTR4	5-hydroxytryptamine (serotonin) receptor 4, G protein-coupled
hsa-let-7c	1	0	1	1	1	1	MAN2A2	mannosidase, alpha, class 2A, member 2
hsa-let-7c	1	0	1	1	1	1	FRS2	fibroblast growth factor receptor substrate 2
hsa-let-7c	1	0	1	0	1	1	FZD4	frizzled family receptor 4
hsa-let-7c	1	0	1	1	1	1	LIMD2	LIM domain containing 2
hsa-let-7c	1	0	1	1	1	1	RBFOX2	RNA binding protein, fox-1 homolog (C. elegans) 2
hsa-let-7c	1	0	1	1	1	1	VPS26B	vacuolar protein sorting 26 homolog B (S. pombe)
hsa-let-7c	1	0	1	1	1	1	FAM103A1	family with sequence similarity 103, member A1
hsa-let-7c	1	0	1	1	1	1	SMARCC1	SWI/SNF related, matrix associated, actin dependent regulator of chromatin, subfamily c, member 1
hsa-let-7c	1	0	1	1	1	1	PLAU	plasminogen activator, urokinase
hsa-let-7c	1	0	1	1	1	1	CHD9	chromodomain helicase DNA binding protein 9
hsa-let-7c	1	0	1	1	0	0	SRCAP	Snf2-related CREBBP activator protein
hsa-let-7c	1	0	1	0	1	1	PTPRT	protein tyrosine phosphatase, receptor type, T
hsa-let-7c	0	0	1	1	0	0	PLXNB1	plexin B1
hsa-let-7c	1	0	1	1	1	1	NUPL1	nucleoporin like 1
hsa-let-7c	1	0	1	0	1	1	MTSS1	metastasis suppressor 1
hsa-let-7c	1	0	1	1	0	0	DENND4B	DENN/MADD domain containing 4B
hsa-let-7c	1	0	1	0	1	1	CEP350	centrosomal protein 350kDa
hsa-let-7c	0	0	1	0	0	0	FAM91A2	family with sequence similarity 91, member A2
hsa-let-7c	0	0	1	1	1	1	NEU3	sialidase 3 (membrane sialidase)
hsa-let-7c	1	0	1	1	1	1	IQSEC2	IQ motif and Sec7 domain 2
hsa-let-7c	0	0	1	1	0	0	ZNF862	zinc finger protein 862
hsa-let-7c	1	0	1	1	1	1	GPATCH8	G patch domain containing 8
hsa-let-7c	1	0	1	1	1	1	KIF1B	kinesin family member 1B
hsa-let-7c	0	0	1	1	0	0	ARHGEF2	Rho/Rac guanine nucleotide exchange factor (GEF) 2
hsa-let-7c	0	0	1	1	0	0	ATP10B	ATPase, class V, type 10B
hsa-let-7c	1	0	1	0	1	1	RBM12	RNA binding motif protein 12
hsa-let-7c	1	0	1	1	1	1	CALCR	calcitonin receptor
hsa-let-7c	1	0	1	1	1	1	RNMT	RNA (guanine-7-) methyltransferase
hsa-let-7c	0	0	1	0	0	0	THSD7A	thrombospondin, type I, domain containing 7A
hsa-let-7c	1	0	1	1	1	1	PALLD	palladin, cytoskeletal associated protein
hsa-let-7c	1	0	1	1	0	0	KIAA1045	KIAA1045
hsa-let-7c	1	0	1	1	1	1	PRRC2C	proline-rich coiled-coil 2C
hsa-let-7c	1	0	1	0	1	1	ODZ2	odz, odd Oz/ten-m homolog 2 (Drosophila)
hsa-let-7c	0	0	1	1	0	0	ZC4H2	zinc finger, C4H2 domain containing
hsa-let-7c	1	0	1	1	0	0	KIAA1210	KIAA1210
hsa-let-7c	1	0	1	1	1	1	RALGAPB	Ral GTPase activating protein, beta subunit (non-catalytic)
hsa-let-7c	0	0	1	1	1	1	COPS7A	COP9 constitutive photomorphogenic homolog subunit 7A (Arabidopsis)
hsa-let-7c	0	0	1	1	1	1	KLHL13	kelch-like 13 (Drosophila)
hsa-let-7c	1	0	1	1	1	1	LRRC7	leucine rich repeat containing 7
hsa-let-7c	1	0	1	1	0	0	KIAA1462	KIAA1462
hsa-let-7c	0	0	1	0	0	0	LOC440792	proline dehydrogenase (oxidase) 1 pseudogene
hsa-let-7c	1	0	1	1	1	1	DDHD1	DDHD domain containing 1
hsa-let-7c	1	0	1	1	0	0	TMCO7	transmembrane and coiled-coil domains 7
hsa-let-7c	0	0	1	1	1	1	UNC80	unc-80 homolog (C. elegans)
hsa-let-7c	0	0	1	1	0	0	NTNG2	netrin G2
hsa-let-7c	1	0	1	1	1	1	CSRNP1	cysteine-serine-rich nuclear protein 1
hsa-let-7c	0	0	1	1	0	0	SEC16B	SEC16 homolog B (S. cerevisiae)
hsa-let-7c	0	0	1	1	1	1	LENG8	leukocyte receptor cluster (LRC) member 8
hsa-let-7c	1	0	1	1	1	1	BCL2L11	BCL2-like 11 (apoptosis facilitator)
hsa-let-7c	1	0	1	1	1	1	SH3TC2	SH3 domain and tetratricopeptide repeats 2
hsa-let-7c	0	0	1	1	0	0	SLC22A10	solute carrier family 22, member 10
hsa-let-7c	1	0	1	1	1	1	RFX4	regulatory factor X, 4 (influences HLA class II expression)
hsa-let-7c	0	0	1	1	1	1	ACPP	acid phosphatase, prostate
hsa-let-7c	1	1	1	1	1	1	BACE1	beta-site APP-cleaving enzyme 1
hsa-let-7c	0	0	1	1	0	0	MPST	mercaptopyruvate sulfurtransferase
hsa-let-7c	1	0	1	1	0	0	ELN	elastin
hsa-let-7c	0	0	1	1	0	0	STON2	stonin 2
hsa-let-7c	1	0	1	1	1	1	MKNK2	MAP kinase interacting serine/threonine kinase 2
hsa-let-7c	1	0	1	1	1	1	SYNCRIP	synaptotagmin binding, cytoplasmic RNA interacting protein
hsa-let-7c	1	0	1	1	1	1	DTNA	dystrobrevin, alpha
hsa-let-7c	1	0	1	0	1	1	MAML1	mastermind-like 1 (Drosophila)
hsa-let-7c	1	0	1	1	0	0	TSPYL2	TSPY-like 2
hsa-let-7c	0	0	1	1	1	1	DDX39B	DEAD (Asp-Glu-Ala-Asp) box polypeptide 39B
hsa-let-7c	1	0	1	1	1	1	EPHA7	EPH receptor A7
hsa-let-7c	1	0	1	0	1	1	CHL1	cell adhesion molecule with homology to L1CAM (close homolog of L1)
hsa-let-7c	1	0	1	0	1	1	CDON	Cdon homolog (mouse)
hsa-let-7c	0	0	1	1	1	1	ACO1	aconitase 1, soluble
hsa-let-7c	1	0	1	1	1	1	PDLIM5	PDZ and LIM domain 5
hsa-let-7c	0	0	1	1	0	0	EIF2B4	eukaryotic translation initiation factor 2B, subunit 4 delta, 67kDa
hsa-let-7c	0	0	1	1	1	1	HLA-DQA1	major histocompatibility complex, class II, DQ alpha 1
hsa-let-7c	0	0	1	1	0	0	SLC22A8	solute carrier family 22 (organic anion transporter), member 8
hsa-let-7c	1	0	1	1	1	1	SLC6A8	solute carrier family 6 (neurotransmitter transporter, creatine), member 8
hsa-let-7c	1	0	1	1	1	1	CRTAM	cytotoxic and regulatory T cell molecule
hsa-let-7c	1	0	1	1	1	1	TEAD1	TEA domain family member 1 (SV40 transcriptional enhancer factor)
hsa-let-7c	1	0	1	0	1	1	PDE7B	phosphodiesterase 7B
hsa-let-7c	0	0	1	1	0	0	MUC3A	mucin 3A, cell surface associated
hsa-let-7c	0	0	1	1	0	0	SPTBN2	spectrin, beta, non-erythrocytic 2
hsa-let-7c	1	0	1	1	1	1	TMBIM6	transmembrane BAX inhibitor motif containing 6
hsa-let-7c	0	0	1	1	1	1	SESN1	sestrin 1
hsa-let-7c	0	0	1	1	1	1	CREB3L1	cAMP responsive element binding protein 3-like 1
hsa-let-7c	0	0	1	1	0	0	MRPS22	mitochondrial ribosomal protein S22
hsa-let-7c	1	0	1	1	1	1	TP63	tumor protein p63
hsa-let-7c	1	0	1	1	1	1	DMTF1	cyclin D binding myb-like transcription factor 1
hsa-let-7c	1	0	1	0	1	1	CELF2	CUGBP, Elav-like family member 2
hsa-let-7c	0	0	1	1	1	1	PCBP4	poly(rC) binding protein 4
hsa-let-7c	1	0	1	1	1	1	GLS	glutaminase
hsa-let-7c	1	0	1	1	1	1	SLMAP	sarcolemma associated protein
hsa-let-7c	0	0	1	1	1	1	ACIN1	apoptotic chromatin condensation inducer 1
hsa-let-7c	0	0	1	1	1	1	DMRT2	doublesex and mab-3 related transcription factor 2
hsa-let-7c	1	0	1	1	1	1	USP15	ubiquitin specific peptidase 15
hsa-let-7c	0	0	1	1	0	0	FXYD5	FXYD domain containing ion transport regulator 5
hsa-let-7c	0	0	1	0	0	0	BPESC1	blepharophimosis, epicanthus inversus and ptosis, candidate 1 (non-protein coding)
hsa-let-7c	1	0	1	1	1	1	AXIN2	axin 2
hsa-let-7c	1	0	1	1	1	1	FAM49B	family with sequence similarity 49, member B
hsa-let-7c	0	0	1	1	1	1	CHRD	chordin
hsa-let-7c	0	0	1	1	1	1	CHST12	carbohydrate (chondroitin 4) sulfotransferase 12
hsa-let-7c	0	0	1	1	1	1	DAZ2	deleted in azoospermia 2
hsa-let-7c	0	0	1	0	1	1	DAZ3	deleted in azoospermia 3
hsa-let-7c	0	0	1	1	0	0	TRIM41	tripartite motif containing 41
hsa-let-7c	1	0	1	1	1	1	ERGIC1	endoplasmic reticulum-golgi intermediate compartment (ERGIC) 1
hsa-let-7c	0	0	1	1	1	1	DAZ1	deleted in azoospermia 1
hsa-let-7c	0	0	1	1	0	0	KCNK6	potassium channel, subfamily K, member 6
hsa-let-7c	0	0	1	1	1	1	LRTOMT	leucine rich transmembrane and 0-methyltransferase domain containing
hsa-let-7c	1	0	1	1	1	1	DCLRE1B	DNA cross-link repair 1B
hsa-let-7c	1	0	1	1	1	1	LETMD1	LETM1 domain containing 1
hsa-let-7c	1	0	1	1	1	1	LARP4	La ribonucleoprotein domain family, member 4
hsa-let-7c	0	0	1	0	1	1	MYO3B	myosin IIIB
hsa-let-7c	0	0	1	0	0	0	MYO15B	myosin XVB pseudogene
hsa-let-7c	0	0	1	0	0	0	ABCC13	ATP-binding cassette, sub-family C (CFTR/MRP), member 13, pseudogene
hsa-let-7c	0	0	1	0	0	0	RMST	rhabdomyosarcoma 2 associated transcript (non-protein coding)
hsa-let-7c	0	0	1	1	0	0	RASGEF1C	RasGEF domain family, member 1C
hsa-let-7c	1	0	1	1	0	0	FOXP2	forkhead box P2
hsa-let-7c	1	0	1	1	1	1	CACNB2	calcium channel, voltage-dependent, beta 2 subunit
hsa-let-7c	1	0	1	1	0	0	ST3GAL4	ST3 beta-galactoside alpha-2,3-sialyltransferase 4
hsa-let-7c	0	0	1	1	1	1	TTLL11	tubulin tyrosine ligase-like family, member 11
hsa-let-7c	0	0	1	1	0	0	TREML1	triggering receptor expressed on myeloid cells-like 1
hsa-let-7c	1	0	1	1	1	1	GPR64	G protein-coupled receptor 64
hsa-let-7c	0	0	1	0	0	0	SNHG4	small nucleolar RNA host gene 4 (non-protein coding)
hsa-let-7c	0	0	1	1	1	1	MTHFR	methylenetetrahydrofolate reductase (NAD(P)H)
hsa-let-7c	1	0	1	1	1	1	UBAP2L	ubiquitin associated protein 2-like
hsa-let-7c	0	0	1	0	0	0	CACNA2D3	calcium channel, voltage-dependent, alpha 2/delta subunit 3
hsa-let-7c	0	0	1	1	1	1	RANBP17	RAN binding protein 17
hsa-let-7c	0	0	1	1	1	1	RNASE7	ribonuclease, RNase A family, 7
hsa-let-7c	1	0	1	1	1	1	PALM2	paralemmin 2
hsa-let-7c	1	0	1	1	1	1	NRXN3	neurexin 3
hsa-let-7c	0	0	1	1	1	1	ZNF248	zinc finger protein 248
hsa-let-7c	0	0	1	1	0	0	ANKAR	ankyrin and armadillo repeat containing
hsa-let-7c	0	0	1	1	0	0	ACSS2	acyl-CoA synthetase short-chain family member 2
hsa-let-7c	1	0	1	0	1	1	NFAT5	nuclear factor of activated T-cells 5, tonicity-responsive
hsa-let-7c	0	0	1	1	1	1	PARP16	poly (ADP-ribose) polymerase family, member 16
hsa-let-7c	0	0	1	0	0	0	TUG1	taurine upregulated 1 (non-protein coding)
hsa-let-7c	0	0	1	0	0	0	RNF31	ring finger protein 31
hsa-let-7c	1	0	1	1	1	1	ARHGAP17	Rho GTPase activating protein 17
hsa-let-7c	0	0	1	0	0	0	TPTEP1	transmembrane phosphatase with tensin homology pseudogene 1
hsa-let-7c	0	0	1	1	1	1	STOX2	storkhead box 2
hsa-let-7c	1	0	1	0	1	1	CLIC4	chloride intracellular channel 4
hsa-let-7c	0	0	1	1	0	0	CARD14	caspase recruitment domain family, member 14
hsa-let-7c	1	0	1	1	1	1	HNRNPUL1	heterogeneous nuclear ribonucleoprotein U-like 1
hsa-let-7c	0	0	1	1	0	0	C17orf53	chromosome 17 open reading frame 53
hsa-let-7c	1	0	1	1	1	1	PGAP1	post-GPI attachment to proteins 1
hsa-let-7c	1	0	1	1	1	1	S100PBP	S100P binding protein
hsa-let-7c	1	0	1	1	1	1	WDTC1	WD and tetratricopeptide repeats 1
hsa-let-7c	1	0	1	1	0	0	FASTK	Fas-activated serine/threonine kinase
hsa-let-7c	1	0	1	0	1	1	UBP1	upstream binding protein 1 (LBP-1a)
hsa-let-7c	1	0	1	1	1	1	MACF1	microtubule-actin crosslinking factor 1
hsa-let-7c	1	0	1	1	1	1	USP33	ubiquitin specific peptidase 33
hsa-let-7c	0	0	1	0	0	0	LOC284561	uncharacterized LOC284561
hsa-let-7c	0	0	1	1	0	0	PFDN5	prefoldin subunit 5
hsa-let-7c	0	0	1	0	1	1	FLJ14186	uncharacterized LOC401149
hsa-let-7c	1	0	1	1	1	1	COPS7B	COP9 constitutive photomorphogenic homolog subunit 7B (Arabidopsis)
hsa-let-7c	1	0	1	1	1	1	ZNF385A	zinc finger protein 385A
hsa-let-7c	0	0	1	0	0	0	RASAL3	RAS protein activator like 3
hsa-let-7c	1	0	1	1	1	1	GBF1	golgi brefeldin A resistant guanine nucleotide exchange factor 1
hsa-let-7c	0	0	1	0	1	1	ATXN1L	ataxin 1-like
hsa-let-7c	1	0	1	0	1	1	REPIN1	replication initiator 1
hsa-let-7c	0	0	1	0	1	1	FLJ22763	uncharacterized LOC401081
hsa-let-7c	1	0	1	1	1	1	DCAF8	DDB1 and CUL4 associated factor 8
hsa-let-7c	0	0	1	0	0	0	NEURL1B	neuralized homolog 1B (Drosophila)
hsa-let-7c	0	0	1	0	0	0	LOC729852	uncharacterized LOC729852
hsa-let-7c	0	0	1	1	0	0	CCDC142	coiled-coil domain containing 142
hsa-let-7c	1	0	1	1	1	1	NFASC	neurofascin
hsa-let-7c	0	0	1	1	1	1	NETO2	neuropilin (NRP) and tolloid (TLL)-like 2
hsa-let-7c	1	0	1	1	1	1	GPD2	glycerol-3-phosphate dehydrogenase 2 (mitochondrial)
hsa-let-7c	1	0	1	1	1	1	KCTD15	potassium channel tetramerisation domain containing 15
hsa-let-7c	1	0	1	0	1	1	ELMOD1	ELMO/CED-12 domain containing 1
hsa-let-7c	0	0	1	0	0	0	LOC283508	uncharacterized LOC283508
hsa-let-7c	0	0	1	1	1	1	C8orf46	chromosome 8 open reading frame 46
hsa-let-7c	0	0	1	0	0	0	CHST9-AS1	CHST9 antisense RNA 1
hsa-let-7c	0	0	1	0	0	0	CASC2	cancer susceptibility candidate 2 (non-protein coding)
hsa-let-7c	0	0	1	1	0	0	SLC26A8	solute carrier family 26, member 8
hsa-let-7c	0	0	1	1	1	1	GLYATL1	glycine-N-acyltransferase-like 1
hsa-let-7c	1	0	1	1	1	1	ZNF664	zinc finger protein 664
hsa-let-7c	0	0	1	1	0	0	BEAN1	brain expressed, associated with NEDD4, 1
hsa-let-7c	1	0	1	1	1	1	LMNA	lamin A/C
hsa-let-7c	0	0	1	0	0	0	JPX	JPX transcript, XIST activator (non-protein coding)
hsa-let-7c	1	0	1	1	1	1	TMEM25	transmembrane protein 25
hsa-let-7c	0	0	1	0	1	1	FAM70A	family with sequence similarity 70, member A
hsa-let-7c	0	0	1	1	1	1	IFT43	intraflagellar transport 43 homolog (Chlamydomonas)
hsa-let-7c	0	0	1	0	0	0	LOC255187	hCG1980447
hsa-let-7c	1	0	1	1	1	1	GABARAPL1	GABA(A) receptor-associated protein like 1
hsa-let-7c	1	0	1	1	1	1	TPM3	tropomyosin 3
hsa-let-7c	0	0	1	0	0	0	LOC157381	uncharacterized LOC157381
hsa-let-7c	1	0	1	1	1	1	ZBTB10	zinc finger and BTB domain containing 10
hsa-let-7c	0	0	1	0	1	1	ZNF498	zinc finger protein 498
hsa-let-7c	0	0	1	1	1	1	C14orf79	chromosome 14 open reading frame 79
hsa-let-7c	0	0	1	1	0	0	NXF2	nuclear RNA export factor 2
hsa-let-7c	0	0	1	1	1	1	MS4A14	membrane-spanning 4-domains, subfamily A, member 14
hsa-let-7c	0	0	1	1	0	0	FAM156A	family with sequence similarity 156, member A
hsa-let-7c	0	0	1	0	0	0	INTS4L1	integrator complex subunit 4-like 1
hsa-let-7c	0	0	1	1	1	1	ZNF385B	zinc finger protein 385B
hsa-let-7c	0	0	1	1	1	1	ZBTB26	zinc finger and BTB domain containing 26
hsa-let-7c	0	0	1	0	0	0	LINC00301	long intergenic non-protein coding RNA 301
hsa-let-7c	0	0	1	1	0	0	SYTL1	synaptotagmin-like 1
hsa-let-7c	0	0	1	1	1	1	PDZRN3	PDZ domain containing ring finger 3
hsa-let-7c	0	0	1	0	0	0	SDHAP2	succinate dehydrogenase complex, subunit A, flavoprotein pseudogene 2
hsa-let-7c	1	0	1	0	1	1	TPBG	trophoblast glycoprotein
hsa-let-7c	0	0	1	1	0	0	PIGO	phosphatidylinositol glycan anchor biosynthesis, class O
hsa-let-7c	1	0	1	0	0	0	YLPM1	YLP motif containing 1
hsa-let-7c	0	0	1	1	1	1	STBD1	starch binding domain 1
hsa-let-7c	0	0	1	0	0	0	LOC643837	uncharacterized LOC643837
hsa-let-7c	1	0	1	1	1	1	AMMECR1	Alport syndrome, mental retardation, midface hypoplasia and elliptocytosis chromosomal region gene 1
hsa-let-7c	1	0	1	1	1	1	FBXW2	F-box and WD repeat domain containing 2
hsa-let-7c	0	0	1	1	1	1	CD34	CD34 molecule
hsa-let-7c	0	0	1	1	1	1	SP100	SP100 nuclear antigen
hsa-let-7c	0	0	1	1	1	1	NRCAM	neuronal cell adhesion molecule
hsa-let-7c	0	0	1	1	0	0	CDC25B	cell division cycle 25 homolog B (S. pombe)
hsa-let-7c	0	0	1	1	1	1	CHPT1	choline phosphotransferase 1
hsa-let-7c	0	0	1	1	1	1	XPNPEP1	X-prolyl aminopeptidase (aminopeptidase P) 1, soluble
hsa-let-7c	1	0	1	1	1	1	SPTBN1	spectrin, beta, non-erythrocytic 1
hsa-let-7c	1	0	1	0	1	1	MAGIX	MAGI family member, X-linked
hsa-let-7c	0	0	1	0	1	1	KANSL2	KAT8 regulatory NSL complex subunit 2
hsa-let-7c	0	0	1	0	0	0	ZNF806	zinc finger protein 806
hsa-let-7c	1	0	1	0	1	1	GATAD2B	GATA zinc finger domain containing 2B
hsa-let-7c	0	0	1	1	0	0	CES4A	carboxylesterase 4A
hsa-let-7c	1	0	1	0	1	1	IL1RAP	interleukin 1 receptor accessory protein
hsa-let-7c	0	0	1	1	1	1	FUT11	fucosyltransferase 11 (alpha (1,3) fucosyltransferase)
hsa-let-7c	0	0	1	1	1	1	SIRPB2	signal-regulatory protein beta 2
hsa-let-7c	0	0	1	0	1	1	NBPF3	neuroblastoma breakpoint family, member 3
hsa-let-7c	1	0	1	1	1	1	CS	citrate synthase
hsa-let-7c	0	0	1	1	0	0	KDM5D	lysine (K)-specific demethylase 5D
hsa-let-7c	0	0	1	1	1	1	VDAC1	voltage-dependent anion channel 1
hsa-let-7c	1	0	1	1	1	1	ACSL1	acyl-CoA synthetase long-chain family member 1
hsa-let-7c	1	0	1	1	0	0	CHD3	chromodomain helicase DNA binding protein 3
hsa-let-7c	1	0	1	1	1	1	SYT6	synaptotagmin VI
hsa-let-7c	0	0	1	1	0	0	CHCHD5	coiled-coil-helix-coiled-coil-helix domain containing 5
hsa-let-7c	0	0	1	1	1	1	UBA1	ubiquitin-like modifier activating enzyme 1
hsa-let-7c	0	0	1	0	0	0	LOC400680	uncharacterized LOC400680
hsa-let-7c	0	0	1	1	0	0	ACAD10	acyl-CoA dehydrogenase family, member 10
hsa-let-7c	1	0	1	1	1	1	NSUN4	NOP2/Sun domain family, member 4
hsa-let-7c	0	0	1	1	1	1	RBM4	RNA binding motif protein 4
hsa-let-7c	1	0	1	1	1	1	ST7L	suppression of tumorigenicity 7 like
hsa-let-7c	0	0	1	1	0	0	CORO1A	coronin, actin binding protein, 1A
hsa-let-7c	1	0	1	0	1	1	UNC5D	unc-5 homolog D (C. elegans)
hsa-let-7c	0	0	1	1	0	0	KIAA0146	KIAA0146
hsa-let-7c	1	0	1	1	0	0	CACNB3	calcium channel, voltage-dependent, beta 3 subunit
hsa-let-7c	0	0	1	1	0	0	MARS	methionyl-tRNA synthetase
hsa-let-7c	1	0	1	1	1	1	ZBTB4	zinc finger and BTB domain containing 4
hsa-let-7c	1	0	1	1	1	1	KALRN	kalirin, RhoGEF kinase
hsa-let-7c	1	0	1	1	1	1	EGLN3	egl nine homolog 3 (C. elegans)
hsa-let-7c	0	0	1	1	1	1	FAM19A2	family with sequence similarity 19 (chemokine (C-C motif)-like), member A2
hsa-let-7c	0	0	1	1	1	1	NOSTRIN	nitric oxide synthase trafficker
hsa-let-7c	1	0	1	1	1	1	EPAS1	endothelial PAS domain protein 1
hsa-let-7c	1	0	1	1	1	1	FAM219A	family with sequence similarity 219, member A
hsa-let-7c	0	0	1	0	0	0	IL10RB	interleukin 10 receptor, beta
hsa-let-7c	0	0	1	0	0	0	DKFZP434H168	uncharacterized LOC26077
hsa-let-7c	1	0	1	1	1	1	VPS54	vacuolar protein sorting 54 homolog (S. cerevisiae)
hsa-let-7c	0	0	1	1	0	0	NPIP	nuclear pore complex interacting protein
hsa-let-7c	0	0	1	1	0	0	SSPO	SCO-spondin homolog (Bos taurus)
hsa-let-7c	1	0	1	1	1	1	DAB2IP	DAB2 interacting protein
hsa-let-7c	0	0	1	1	1	1	IDS	iduronate 2-sulfatase
hsa-let-7c	1	0	1	1	1	1	CELF6	CUGBP, Elav-like family member 6
hsa-let-7c	0	0	1	1	0	0	PPP1R18	protein phosphatase 1, regulatory subunit 18
hsa-let-7c	0	0	1	1	1	1	CTPS2	CTP synthase 2
hsa-let-7c	0	0	1	0	1	1	RASGRP3	RAS guanyl releasing protein 3 (calcium and DAG-regulated)
hsa-let-7c	0	0	1	1	1	1	CYB5D1	cytochrome b5 domain containing 1
hsa-let-7c	0	0	1	1	0	0	RPRD2	regulation of nuclear pre-mRNA domain containing 2
hsa-let-7c	0	0	1	1	1	1	EPPIN	epididymal peptidase inhibitor
hsa-let-7c	0	0	1	1	0	0	C20orf141	chromosome 20 open reading frame 141
hsa-let-7c	0	0	1	1	0	0	FSIP2	fibrous sheath interacting protein 2
hsa-let-7c	1	0	1	1	1	1	SACM1L	SAC1 suppressor of actin mutations 1-like (yeast)
hsa-let-7c	0	0	1	1	0	0	LLGL2	lethal giant larvae homolog 2 (Drosophila)
hsa-let-7c	0	0	1	1	1	1	ZFYVE28	zinc finger, FYVE domain containing 28
hsa-let-7c	1	0	1	1	1	1	DLG2	discs, large homolog 2 (Drosophila)
hsa-let-7c	1	0	1	1	1	1	NIPBL	Nipped-B homolog (Drosophila)
hsa-let-7c	0	0	1	0	0	0	RPL23AP53	ribosomal protein L23a pseudogene 53
hsa-let-7c	0	0	1	0	1	1	NPHP4	nephronophthisis 4
hsa-let-7c	1	0	1	0	1	1	SP6	Sp6 transcription factor
hsa-let-7c	0	0	1	0	1	1	LOC401321	uncharacterized LOC401321
hsa-let-7c	0	0	1	1	1	1	SLC35F2	solute carrier family 35, member F2
hsa-let-7c	0	0	1	1	0	0	LOC100128682	uncharacterized LOC100128682
hsa-let-7c	1	0	1	1	1	1	SLC12A6	solute carrier family 12 (potassium/chloride transporters), member 6
hsa-let-7c	0	0	1	0	0	0	FAM205B	transmembrane protein C9orf144B pseudogene
hsa-let-7c	1	0	1	1	0	0	SMCR7	Smith-Magenis syndrome chromosome region, candidate 7
hsa-let-7c	0	0	1	0	0	0	LOC440993	uncharacterized LOC440993
hsa-let-7c	0	0	1	1	1	1	CD160	CD160 molecule
hsa-let-7c	1	0	1	1	1	1	SDCBP	syndecan binding protein (syntenin)
hsa-let-7c	0	0	1	1	1	1	ZNF662	zinc finger protein 662
hsa-let-7c	0	0	1	0	0	0	IDO2	indoleamine 2,3-dioxygenase 2
hsa-let-7c	0	0	1	0	0	0	EMBP1	embigin pseudogene 1
hsa-let-7c	1	0	1	0	1	1	CYB561D1	cytochrome b-561 domain containing 1
hsa-let-7c	1	0	1	1	1	1	RBM24	RNA binding motif protein 24
hsa-let-7c	0	0	1	0	0	0	LOC399491	GPS, PLAT and transmembrane domain-containing protein
hsa-let-7c	0	0	1	0	1	1	GALNT13	UDP-N-acetyl-alpha-D-galactosamine:polypeptide N-acetylgalactosaminyltransferase 13 (GalNAc-T13)
hsa-let-7c	0	0	1	1	0	0	DNASE1L3	deoxyribonuclease I-like 3
hsa-let-7c	0	0	1	1	1	1	SYPL2	synaptophysin-like 2
hsa-let-7c	0	0	1	1	1	1	ZNF346	zinc finger protein 346
hsa-let-7c	0	0	1	1	1	1	PDE2A	phosphodiesterase 2A, cGMP-stimulated
hsa-let-7c	0	0	1	0	0	0	AGAP9	ArfGAP with GTPase domain, ankyrin repeat and PH domain 9
hsa-let-7c	1	0	1	1	1	1	CTSA	cathepsin A
hsa-let-7c	1	0	1	1	1	1	TAP2	transporter 2, ATP-binding cassette, sub-family B (MDR/TAP)
hsa-let-7c	1	0	1	1	1	1	GATA6	GATA binding protein 6
hsa-let-7c	1	0	1	1	1	1	COBLL1	COBL-like 1
hsa-let-7c	0	0	1	1	0	0	HSPB11	heat shock protein family B (small), member 11
hsa-let-7c	0	0	1	1	1	1	RNF135	ring finger protein 135
hsa-let-7c	1	0	1	1	1	1	NCOA1	nuclear receptor coactivator 1
hsa-let-7c	1	0	1	1	1	1	DUSP3	dual specificity phosphatase 3
hsa-let-7c	0	0	1	0	0	0	NBPF10	neuroblastoma breakpoint family, member 10
hsa-let-7c	0	0	1	0	0	0	TPTE2P6	transmembrane phosphoinositide 3-phosphatase and tensin homolog 2 pseudogene 6
hsa-let-7c	0	0	1	0	0	0	DNAJC5B	DnaJ (Hsp40) homolog, subfamily C, member 5 beta
hsa-let-7c	0	0	1	1	1	1	STAG3L1	stromal antigen 3-like 1
hsa-let-7c	1	0	1	1	1	1	ERI1	exoribonuclease 1
hsa-let-7c	0	0	1	1	0	0	DDX49	DEAD (Asp-Glu-Ala-Asp) box polypeptide 49
hsa-let-7c	0	0	1	1	1	1	AQP6	aquaporin 6, kidney specific
hsa-let-7c	1	0	1	1	1	1	KIAA1033	KIAA1033
hsa-let-7c	0	0	1	1	0	0	DOPEY1	dopey family member 1
hsa-let-7c	1	0	1	1	0	0	FAM108C1	family with sequence similarity 108, member C1
hsa-let-7c	0	0	1	0	0	0	FAM66D	family with sequence similarity 66, member D
hsa-let-7c	1	0	1	0	1	1	BRPF1	bromodomain and PHD finger containing, 1
hsa-let-7c	1	0	1	0	0	0	BAHCC1	BAH domain and coiled-coil containing 1
hsa-let-7c	0	0	1	1	0	0	KRBA1	KRAB-A domain containing 1
hsa-let-7c	1	0	1	1	1	1	LIMCH1	LIM and calponin homology domains 1
hsa-let-7c	0	0	1	1	1	1	FILIP1	filamin A interacting protein 1
hsa-let-7c	1	0	1	1	1	1	LYPD3	LY6/PLAUR domain containing 3
hsa-let-7c	0	0	1	1	1	1	BEND7	BEN domain containing 7
hsa-let-7c	1	0	1	1	1	1	SBF2	SET binding factor 2
hsa-let-7c	0	0	1	1	1	1	DAZ4	deleted in azoospermia 4
hsa-let-7c	0	0	1	1	0	0	TMEM91	transmembrane protein 91
hsa-let-7c	0	0	1	0	1	1	PAPD4	PAP associated domain containing 4
hsa-let-7c	1	0	1	1	1	1	LPP	LIM domain containing preferred translocation partner in lipoma
hsa-let-7c	1	0	1	1	1	1	FAM126A	family with sequence similarity 126, member A
hsa-let-7c	0	0	1	1	0	0	TMEM116	transmembrane protein 116
hsa-let-7c	1	0	1	0	1	1	CLINT1	clathrin interactor 1
hsa-let-7c	0	0	1	1	0	0	PPIE	peptidylprolyl isomerase E (cyclophilin E)
hsa-let-7c	1	0	1	0	1	1	CNOT7	CCR4-NOT transcription complex, subunit 7
hsa-let-7c	1	0	1	1	1	1	MARCH7	membrane-associated ring finger (C3HC4) 7, E3 ubiquitin protein ligase
hsa-let-7c	1	0	1	0	1	1	EXOC5	exocyst complex component 5
hsa-let-7c	0	0	1	1	1	1	PCDH20	protocadherin 20
hsa-let-7c	1	0	1	1	1	1	IL17RD	interleukin 17 receptor D
hsa-let-7c	0	0	1	1	0	0	TTLL6	tubulin tyrosine ligase-like family, member 6
hsa-let-7c	1	0	1	1	1	1	CAPRIN2	caprin family member 2
hsa-let-7c	1	0	1	1	1	1	MBD6	methyl-CpG binding domain protein 6
hsa-let-7c	1	0	1	0	1	1	JAZF1	JAZF zinc finger 1
hsa-let-7c	1	0	1	1	1	1	C1orf131	chromosome 1 open reading frame 131
hsa-let-7c	1	0	1	0	1	1	PATL1	protein associated with topoisomerase II homolog 1 (yeast)
hsa-let-7c	0	0	1	1	1	1	TMEM130	transmembrane protein 130
hsa-let-7c	0	0	1	1	1	1	MTMR14	myotubularin related protein 14
hsa-let-7c	0	0	1	0	0	0	PMCHL2	pro-melanin-concentrating hormone-like 2, pseudogene
hsa-let-7c	1	0	1	1	1	1	RCAN2	regulator of calcineurin 2
hsa-let-7c	1	0	1	1	1	1	TACC1	transforming, acidic coiled-coil containing protein 1
hsa-let-7c	0	0	1	1	1	1	CD209	CD209 molecule
hsa-let-7c	0	0	1	1	1	1	CRB1	crumbs homolog 1 (Drosophila)
hsa-let-7c	1	0	1	1	1	1	USF2	upstream transcription factor 2, c-fos interacting
hsa-let-7c	1	0	1	1	1	1	LUZP2	leucine zipper protein 2
hsa-let-7c	1	0	1	1	1	1	WDR26	WD repeat domain 26
hsa-let-7c	0	0	1	1	0	0	CUZD1	CUB and zona pellucida-like domains 1
hsa-let-7c	0	0	1	1	1	1	KLK6	kallikrein-related peptidase 6
hsa-let-7c	0	0	1	1	1	1	CRISP2	cysteine-rich secretory protein 2
hsa-let-7c	0	0	1	0	0	0	MEG3	maternally expressed 3 (non-protein coding)
hsa-let-7c	1	0	1	1	1	1	IQGAP2	IQ motif containing GTPase activating protein 2
hsa-let-7c	0	0	1	1	0	0	EGFL8	EGF-like-domain, multiple 8
hsa-let-7c	1	0	1	1	1	1	TMCC2	transmembrane and coiled-coil domain family 2
hsa-let-7c	0	0	1	1	0	0	VSIG4	V-set and immunoglobulin domain containing 4
hsa-let-7c	0	0	1	1	1	1	GPR114	G protein-coupled receptor 114
hsa-let-7c	1	0	1	1	1	1	FGD4	FYVE, RhoGEF and PH domain containing 4
hsa-let-7c	0	0	1	1	1	1	PAQR5	progestin and adipoQ receptor family member V
hsa-let-7c	0	0	1	1	1	1	PTPRC	protein tyrosine phosphatase, receptor type, C
hsa-let-7c	1	0	1	1	0	0	ADAM15	ADAM metallopeptidase domain 15
hsa-let-7c	0	0	1	1	1	1	IL24	interleukin 24
hsa-let-7c	1	0	1	1	1	1	BHLHE41	basic helix-loop-helix family, member e41
hsa-let-7c	0	0	1	1	1	1	RHD	Rh blood group, D antigen
hsa-let-7c	1	0	1	1	1	1	NTNG1	netrin G1
hsa-let-7c	1	0	1	1	1	1	MYB	v-myb myeloblastosis viral oncogene homolog (avian)
hsa-let-7c	0	0	1	1	1	1	IYD	iodotyrosine deiodinase
hsa-let-7c	1	0	1	1	1	1	AMOT	angiomotin
hsa-let-7c	1	0	1	0	1	1	FAM46A	family with sequence similarity 46, member A
hsa-let-7c	0	0	1	1	1	1	SNX11	sorting nexin 11
hsa-let-7c	0	0	1	1	0	0	ACOT11	acyl-CoA thioesterase 11
hsa-let-7c	1	0	1	1	1	1	PPP5C	protein phosphatase 5, catalytic subunit
hsa-let-7c	0	0	1	1	1	1	PTDSS1	phosphatidylserine synthase 1
hsa-let-7c	0	0	1	1	1	1	RLIM	ring finger protein, LIM domain interacting
hsa-let-7c	0	0	1	1	1	1	WDR55	WD repeat domain 55
hsa-let-7c	1	0	1	0	0	0	VGLL4	vestigial like 4 (Drosophila)
hsa-let-7c	1	0	1	1	1	1	PPP1R11	protein phosphatase 1, regulatory (inhibitor) subunit 11
hsa-let-7c	0	0	1	1	1	1	FTO	fat mass and obesity associated
hsa-let-7c	0	0	1	1	1	1	CHEK1	checkpoint kinase 1
hsa-let-7c	1	0	1	1	1	1	SMO	smoothened, frizzled family receptor
hsa-let-7c	1	0	1	1	1	1	ZNF410	zinc finger protein 410
hsa-let-7c	1	0	1	1	1	1	TSEN34	tRNA splicing endonuclease 34 homolog (S. cerevisiae)
hsa-let-7c	0	0	1	0	0	0	DNM1P33	DNM1 pseudogene 33
hsa-let-7c	0	0	1	1	0	0	CBX5	chromobox homolog 5
hsa-let-7c	1	0	1	1	1	1	DYNC2LI1	dynein, cytoplasmic 2, light intermediate chain 1
hsa-let-7c	1	0	1	0	1	1	VAMP4	vesicle-associated membrane protein 4
hsa-let-7c	0	0	1	1	0	0	RBM14	RNA binding motif protein 14
hsa-let-7c	1	0	1	1	1	1	UBE2O	ubiquitin-conjugating enzyme E2O
hsa-let-7c	1	0	1	1	1	1	SZRD1	SUZ RNA binding domain containing 1
hsa-let-7c	0	0	1	1	0	0	NDUFA3	NADH dehydrogenase (ubiquinone) 1 alpha subcomplex, 3, 9kDa
hsa-let-7c	0	0	1	1	1	1	ZNF587	zinc finger protein 587
hsa-let-7c	0	0	1	0	0	0	GRAMD1B	GRAM domain containing 1B
hsa-let-7c	1	0	1	1	1	1	DPH1	DPH1 homolog (S. cerevisiae)
hsa-let-7c	0	0	1	1	1	1	KLHL29	kelch-like 29 (Drosophila)
hsa-let-7c	0	0	1	1	0	0	C9orf11	chromosome 9 open reading frame 11
hsa-let-7c	0	0	1	1	0	0	C8orf44	chromosome 8 open reading frame 44
hsa-let-7c	1	0	1	1	1	1	PAPOLA	poly(A) polymerase alpha
hsa-let-7c	1	0	1	1	1	1	ZNF512	zinc finger protein 512
hsa-let-7c	1	0	1	1	1	1	NRF1	nuclear respiratory factor 1
hsa-let-7c	1	0	1	1	0	0	USP53	ubiquitin specific peptidase 53
hsa-let-7c	0	0	1	1	1	1	PARP9	poly (ADP-ribose) polymerase family, member 9
hsa-let-7c	0	0	1	1	0	0	ZBTB32	zinc finger and BTB domain containing 32
hsa-let-7c	0	0	1	1	1	1	PEX14	peroxisomal biogenesis factor 14
hsa-let-7c	0	0	1	1	1	1	GLIPR2	GLI pathogenesis-related 2
hsa-let-7c	1	0	1	1	1	1	ARHGEF9	Cdc42 guanine nucleotide exchange factor (GEF) 9
hsa-let-7c	1	0	1	0	1	1	SLC19A2	solute carrier family 19 (thiamine transporter), member 2
hsa-let-7c	0	0	1	0	0	0	LOC100130776	uncharacterized LOC100130776
hsa-let-7c	0	0	1	1	1	1	PRMT3	protein arginine methyltransferase 3
hsa-let-7c	0	0	1	1	1	1	LRRK1	leucine-rich repeat kinase 1
hsa-let-7c	0	0	1	0	1	1	ZNF718	zinc finger protein 718
hsa-let-7c	0	0	1	1	1	1	HLA-G	major histocompatibility complex, class I, G
hsa-let-7c	0	0	1	0	0	0	KIAA0664L3	KIAA0664-like 3
hsa-let-7c	0	0	1	0	0	0	LOC284260	uncharacterized LOC284260
hsa-let-7c	0	0	1	0	0	0	NBR2	neighbor of BRCA1 gene 2 (non-protein coding)
hsa-let-7c	1	0	1	1	1	1	SPRYD7	SPRY domain containing 7
hsa-let-7c	1	0	1	0	1	1	CDK19	cyclin-dependent kinase 19
hsa-let-7c	0	0	1	0	0	0	SNX29P2	sorting nexin 29 pseudogene 2
hsa-let-7c	0	0	1	1	1	1	TLR4	toll-like receptor 4
hsa-let-7c	0	0	1	1	0	0	MEI1	meiosis inhibitor 1
hsa-let-7c	1	0	1	1	1	1	DDX6	DEAD (Asp-Glu-Ala-Asp) box helicase 6
hsa-let-7c	1	0	1	1	1	1	CRKL	v-crk sarcoma virus CT10 oncogene homolog (avian)-like
hsa-let-7c	0	0	1	0	0	0	EVPLL	envoplakin-like
hsa-let-7c	0	0	1	0	1	1	FHAD1	forkhead-associated (FHA) phosphopeptide binding domain 1
hsa-let-7c	0	0	1	1	1	1	LY9	lymphocyte antigen 9
hsa-let-7c	1	0	1	1	1	1	APPL2	adaptor protein, phosphotyrosine interaction, PH domain and leucine zipper containing 2
hsa-let-7c	1	0	1	1	1	1	B3GNT5	UDP-GlcNAc:betaGal beta-1,3-N-acetylglucosaminyltransferase 5
hsa-let-7c	0	0	1	1	0	0	PLSCR3	phospholipid scramblase 3
hsa-let-7c	0	0	1	1	1	1	ZNF589	zinc finger protein 589
hsa-let-7c	0	0	1	0	1	1	VEZT	vezatin, adherens junctions transmembrane protein
hsa-let-7c	0	0	1	1	1	1	KIAA1755	KIAA1755
hsa-let-7c	0	0	1	0	0	0	LOC100130950	uncharacterized LOC100130950
hsa-let-7c	0	0	1	1	1	1	SEMA3D	sema domain, immunoglobulin domain (Ig), short basic domain, secreted, (semaphorin) 3D
hsa-let-7c	0	0	1	1	1	1	LRRC27	leucine rich repeat containing 27
hsa-let-7c	0	0	1	1	1	1	PIK3AP1	phosphoinositide-3-kinase adaptor protein 1
hsa-let-7c	1	0	1	0	1	1	SV2B	synaptic vesicle glycoprotein 2B
hsa-let-7c	1	0	1	1	1	1	GCFC1	GC-rich sequence DNA-binding factor 1
hsa-let-7c	1	0	1	1	1	1	ZNF518A	zinc finger protein 518A
hsa-let-7c	0	0	1	1	1	1	ZNF100	zinc finger protein 100
hsa-let-7c	1	0	1	1	1	1	GLUL	glutamate-ammonia ligase
hsa-let-7c	1	0	1	1	0	0	ANKRD13B	ankyrin repeat domain 13B
hsa-let-7c	0	0	1	0	0	0	LOC643648	uncharacterized LOC643648
hsa-let-7c	1	0	1	1	1	1	TTC39C	tetratricopeptide repeat domain 39C
hsa-let-7c	1	0	1	1	1	1	RAB5B	RAB5B, member RAS oncogene family
hsa-let-7c	0	0	1	1	0	0	WASIR2	WASH and IL9R antisense RNA 2
hsa-let-7c	0	0	1	0	0	0	BCAS3	breast carcinoma amplified sequence 3
hsa-let-7c	0	0	1	0	0	0	MGC45922	uncharacterized LOC284365
hsa-let-7c	1	0	1	0	1	1	KCTD2	potassium channel tetramerisation domain containing 2
hsa-let-7c	1	0	1	1	0	0	TMEM181	transmembrane protein 181
hsa-let-7c	1	0	1	1	1	1	FAM189B	family with sequence similarity 189, member B
hsa-let-7c	1	0	1	1	1	1	PML	promyelocytic leukemia
hsa-let-7c	0	0	1	1	1	1	HEXA	hexosaminidase A (alpha polypeptide)
hsa-let-7c	0	0	1	0	1	1	DKFZP434I0714	uncharacterized protein DKFZP434I0714
hsa-let-7c	1	0	1	0	1	1	DDX3Y	DEAD (Asp-Glu-Ala-Asp) box polypeptide 3, Y-linked
hsa-let-7c	0	0	1	1	1	1	SLC6A16	solute carrier family 6, member 16
hsa-let-7c	0	0	1	0	1	1	GPR155	G protein-coupled receptor 155
hsa-let-7c	1	0	1	1	1	1	ZZZ3	zinc finger, ZZ-type containing 3
hsa-let-7c	0	0	1	1	1	1	PAK6	p21 protein (Cdc42/Rac)-activated kinase 6
hsa-let-7c	1	0	1	1	1	1	GRIA4	glutamate receptor, ionotropic, AMPA 4
hsa-let-7c	0	0	1	0	1	1	TMSB15B	thymosin beta 15B
hsa-let-7c	0	0	1	1	0	0	PGS1	phosphatidylglycerophosphate synthase 1
hsa-let-7c	0	0	1	0	1	1	FAM72A	family with sequence similarity 72, member A
hsa-let-7c	0	0	1	1	1	1	TMEM139	transmembrane protein 139
hsa-let-7c	1	0	1	1	1	1	DPP6	dipeptidyl-peptidase 6
hsa-let-7c	1	0	1	1	1	1	ZNF618	zinc finger protein 618
hsa-let-7c	0	0	1	0	0	0	SPATA3	spermatogenesis associated 3
hsa-let-7c	0	0	1	0	0	0	LINC00642	long intergenic non-protein coding RNA 642
hsa-let-7c	0	0	1	1	0	0	FAM3B	family with sequence similarity 3, member B
hsa-let-7c	1	0	1	1	1	1	SMG7	smg-7 homolog, nonsense mediated mRNA decay factor (C. elegans)
hsa-let-7c	1	0	1	1	1	1	SLC35G1	solute carrier family 35, member G1
hsa-let-7c	1	0	1	1	1	1	MACROD2	MACRO domain containing 2
hsa-let-7c	1	0	1	1	1	1	MEIS1	Meis homeobox 1
hsa-let-7c	0	0	1	0	0	0	LOC286184	uncharacterized LOC286184
hsa-let-7c	0	0	1	0	0	0	CRYBB2P1	crystallin, beta B2 pseudogene 1
hsa-let-7c	1	0	1	1	1	1	DAAM1	dishevelled associated activator of morphogenesis 1
hsa-let-7c	0	0	1	1	0	0	HSPA14	heat shock 70kDa protein 14
hsa-let-7c	0	0	1	0	1	1	APOL6	apolipoprotein L, 6
hsa-let-7c	0	0	1	0	0	0	FLJ36000	uncharacterized FLJ36000
hsa-let-7c	0	0	1	0	0	0	USP32P1	ubiquitin specific peptidase 32 pseudogene 1
hsa-let-7c	1	0	1	1	1	1	MARCKS	myristoylated alanine-rich protein kinase C substrate
hsa-let-7c	0	0	1	0	1	1	LINC00634	long intergenic non-protein coding RNA 634
hsa-let-7c	1	0	1	1	1	1	IL16	interleukin 16
hsa-let-7c	0	0	1	0	0	0	SLC7A11-AS1	SLC7A11 antisense RNA 1
hsa-let-7c	0	0	1	0	1	1	FAM13B	family with sequence similarity 13, member B
hsa-let-7c	1	0	1	1	1	1	ARPP21	cAMP-regulated phosphoprotein, 21kDa
hsa-let-7c	0	0	1	0	0	0	LOC154822	uncharacterized LOC154822
hsa-let-7c	1	0	1	1	1	1	PRRG1	proline rich Gla (G-carboxyglutamic acid) 1
hsa-let-7c	0	0	1	1	1	1	CARD8	caspase recruitment domain family, member 8
hsa-let-7c	1	0	1	1	1	1	ROCK1	Rho-associated, coiled-coil containing protein kinase 1
hsa-let-7c	0	0	1	1	1	1	GOLGA6L9	golgin A6 family-like 9
hsa-let-7c	0	0	1	0	0	0	C10orf108	chromosome 10 open reading frame 108
hsa-let-7c	0	0	1	0	0	0	LOC338579	ankyrin repeat domain-containing protein 30B pseudogene
hsa-let-7c	0	0	1	0	0	0	DKFZp686O1327	uncharacterized LOC401014
hsa-let-7c	0	0	1	1	1	1	TMEM200A	transmembrane protein 200A
hsa-let-7c	1	0	1	0	1	1	PSD3	pleckstrin and Sec7 domain containing 3
hsa-let-7c	0	0	1	1	0	0	FAM72B	family with sequence similarity 72, member B
hsa-let-7c	0	0	1	0	0	0	LOC348120	uncharacterized LOC348120
hsa-let-7c	0	0	1	0	0	0	DPY19L2P4	dpy-19-like 2 pseudogene 4 (C. elegans)
hsa-let-7c	1	0	1	0	1	1	KDM2A	lysine (K)-specific demethylase 2A
hsa-let-7c	1	0	1	1	1	1	SLC39A9	solute carrier family 39 (zinc transporter), member 9
hsa-let-7c	0	0	1	1	0	0	FKBP11	FK506 binding protein 11, 19 kDa
hsa-let-7c	0	0	1	1	0	0	CCDC107	coiled-coil domain containing 107
hsa-let-7c	1	0	1	1	1	1	ZFP91	zinc finger protein 91 homolog (mouse)
hsa-let-7c	1	0	1	0	1	1	C14orf43	chromosome 14 open reading frame 43
hsa-let-7c	0	0	1	1	0	0	EDC4	enhancer of mRNA decapping 4
hsa-let-7c	0	0	1	0	0	0	LINC00265	long intergenic non-protein coding RNA 265
hsa-let-7c	1	0	1	1	1	1	RCC2	regulator of chromosome condensation 2
hsa-let-7c	0	0	1	1	0	0	LYZL6	lysozyme-like 6
hsa-let-7c	0	0	1	1	0	0	CRYM-AS1	CRYM antisense RNA 1
hsa-let-7c	0	0	1	1	0	0	BCL7C	B-cell CLL/lymphoma 7C
hsa-let-7c	0	0	1	0	0	0	LOC550643	uncharacterized LOC550643
hsa-let-7c	0	0	1	1	1	1	SCRIB	scribbled homolog (Drosophila)
hsa-let-7c	0	0	1	1	0	0	PDSS1	prenyl (decaprenyl) diphosphate synthase, subunit 1
hsa-let-7c	1	0	1	1	1	1	MYLK	myosin light chain kinase
hsa-let-7c	0	0	1	0	0	0	LOC158435	uncharacterized LOC158435
hsa-let-7c	1	0	1	1	1	1	GANAB	glucosidase, alpha; neutral AB
hsa-let-7c	1	0	1	1	1	1	VTCN1	V-set domain containing T cell activation inhibitor 1
hsa-let-7c	0	0	1	1	1	1	TAGLN	transgelin
hsa-let-7c	0	0	1	1	0	0	TTYH1	tweety homolog 1 (Drosophila)
hsa-let-7c	1	0	1	1	1	1	AP3M1	adaptor-related protein complex 3, mu 1 subunit
hsa-let-7c	1	0	1	1	1	1	NRSN1	neurensin 1
hsa-let-7c	0	0	1	0	0	0	LINC00442	long intergenic non-protein coding RNA 442
hsa-let-7c	0	0	1	0	0	0	RNF216P1	ring finger protein 216 pseudogene 1
hsa-let-7c	1	0	1	1	1	1	MAPKAPK3	mitogen-activated protein kinase-activated protein kinase 3
hsa-let-7c	1	0	1	1	1	1	BAZ2B	bromodomain adjacent to zinc finger domain, 2B
hsa-let-7c	0	0	1	0	0	0	FLJ12334	uncharacterized LOC400946
hsa-let-7c	0	0	1	0	0	0	C17orf69	chromosome 17 open reading frame 69
hsa-let-7c	0	0	1	1	0	0	CYP4F30P	cytochrome P450, family 4, subfamily F, polypeptide 30, pseudogene
hsa-let-7c	1	0	1	1	0	0	CHTOP	chromatin target of PRMT1
hsa-let-7c	0	0	1	0	0	0	LOC100147773	uncharacterized LOC100147773
hsa-let-7c	0	0	1	1	1	1	CTXN3	cortexin 3
hsa-let-7c	0	0	1	1	1	1	ABHD14B	abhydrolase domain containing 14B
hsa-let-7c	0	0	1	1	0	0	TRIM73	tripartite motif containing 73
hsa-let-7c	1	0	1	1	1	1	OPCML	opioid binding protein/cell adhesion molecule-like
hsa-let-7c	1	0	1	1	1	1	NTRK2	neurotrophic tyrosine kinase, receptor, type 2
hsa-let-7c	0	0	1	0	0	0	LINC00537	long intergenic non-protein coding RNA 537
hsa-let-7c	1	0	1	1	1	1	SAMD4B	sterile alpha motif domain containing 4B
hsa-let-7c	0	0	1	1	0	0	DNHD1	dynein heavy chain domain 1
hsa-let-7c	1	0	1	1	1	1	ZMYND11	zinc finger, MYND-type containing 11
hsa-let-7c	0	0	1	1	1	1	ABCG2	ATP-binding cassette, sub-family G (WHITE), member 2
hsa-let-7c	0	0	1	1	1	1	ZCWPW2	zinc finger, CW type with PWWP domain 2
hsa-let-7c	1	0	1	1	1	1	TRPM3	transient receptor potential cation channel, subfamily M, member 3
hsa-let-7c	1	0	1	1	1	1	SLC26A7	solute carrier family 26, member 7
hsa-let-7c	1	0	1	1	1	1	ST8SIA2	ST8 alpha-N-acetyl-neuraminide alpha-2,8-sialyltransferase 2
hsa-let-7c	0	0	1	1	1	1	TMEM52B	transmembrane protein 52B
hsa-let-7c	0	0	1	1	1	1	XG	Xg blood group
hsa-let-7c	1	0	1	0	1	1	RBM23	RNA binding motif protein 23
hsa-let-7c	1	0	1	1	1	1	PNISR	PNN-interacting serine/arginine-rich protein
hsa-let-7c	1	0	1	0	1	1	DNAJC6	DnaJ (Hsp40) homolog, subfamily C, member 6
hsa-let-7c	0	0	1	1	0	0	SH2D6	SH2 domain containing 6
hsa-let-7c	1	0	1	1	1	1	SLK	STE20-like kinase
hsa-let-7c	0	0	1	1	0	0	RNF123	ring finger protein 123
hsa-let-7c	0	0	1	1	1	1	FSHB	follicle stimulating hormone, beta polypeptide
hsa-let-7c	0	0	1	1	0	0	C14orf178	chromosome 14 open reading frame 178
hsa-let-7c	1	0	1	1	0	0	MAPKBP1	mitogen-activated protein kinase binding protein 1
hsa-let-7c	0	0	1	1	0	0	SOCS7	suppressor of cytokine signaling 7
hsa-let-7c	0	0	1	0	0	0	TUBA4B	tubulin, alpha 4b (pseudogene)
hsa-let-7c	0	0	1	0	0	0	OR1D4	olfactory receptor, family 1, subfamily D, member 4 (gene/pseudogene)
hsa-let-7c	1	0	1	0	1	1	LRCH2	leucine-rich repeats and calponin homology (CH) domain containing 2
hsa-let-7c	0	0	1	1	0	0	HSF4	heat shock transcription factor 4
hsa-let-7c	0	0	1	0	0	0	FAM225B	family with sequence similarity 225, member B (non-protein coding)
hsa-let-7c	0	0	1	1	0	0	C5orf60	chromosome 5 open reading frame 60
hsa-let-7c	0	0	1	0	0	0	LILRP2	leukocyte immunoglobulin-like receptor pseudogene 2
hsa-let-7c	1	0	1	1	1	1	EXD2	exonuclease 3'-5' domain containing 2
hsa-let-7c	0	0	1	1	1	1	TINF2	TERF1 (TRF1)-interacting nuclear factor 2
hsa-let-7c	0	0	1	1	1	1	HAUS4	HAUS augmin-like complex, subunit 4
hsa-let-7c	0	0	1	1	1	1	CNIH	cornichon homolog (Drosophila)
hsa-let-7c	0	0	1	1	1	1	RAD17	RAD17 homolog (S. pombe)
hsa-let-7c	0	0	1	1	0	0	C2	complement component 2
hsa-let-7c	1	0	1	1	1	1	LITAF	lipopolysaccharide-induced TNF factor
hsa-let-7c	1	0	1	1	1	1	JPH1	junctophilin 1
hsa-let-7c	1	0	1	1	1	1	MIER3	mesoderm induction early response 1, family member 3
hsa-let-7c	0	0	1	0	1	1	GPX8	glutathione peroxidase 8 (putative)
hsa-let-7c	0	0	1	1	0	0	CCDC171	coiled-coil domain containing 171
hsa-let-7c	0	0	1	1	1	1	DSG3	desmoglein 3
hsa-let-7c	0	0	1	1	1	1	PDZRN4	PDZ domain containing ring finger 4
hsa-let-7c	1	0	1	1	1	1	SLC35F1	solute carrier family 35, member F1
hsa-let-7c	0	0	1	1	1	1	DEPDC5	DEP domain containing 5
hsa-let-7c	0	0	1	1	1	1	SLC26A3	solute carrier family 26, member 3
hsa-let-7c	0	0	1	1	0	0	RPS24	ribosomal protein S24
hsa-let-7c	1	0	1	1	1	1	PRDM2	PR domain containing 2, with ZNF domain
hsa-let-7c	0	0	1	0	0	0	SMG1P1	smg-1 homolog, phosphatidylinositol 3-kinase-related kinase pseudogene 1
hsa-let-7c	0	0	1	1	1	1	B4GALT4	UDP-Gal:betaGlcNAc beta 1,4- galactosyltransferase, polypeptide 4
hsa-let-7c	0	0	1	1	1	1	PPP1R1C	protein phosphatase 1, regulatory (inhibitor) subunit 1C
hsa-let-7c	1	0	1	1	1	1	VPS26A	vacuolar protein sorting 26 homolog A (S. pombe)
hsa-let-7c	1	0	1	1	1	1	CYB5B	cytochrome b5 type B (outer mitochondrial membrane)
hsa-let-7c	0	0	1	1	0	0	TMEM41A	transmembrane protein 41A
hsa-let-7c	1	0	1	1	1	1	PPFIA1	protein tyrosine phosphatase, receptor type, f polypeptide (PTPRF), interacting protein (liprin), alpha 1
hsa-let-7c	1	0	1	1	1	1	GDI2	GDP dissociation inhibitor 2
hsa-let-7c	0	0	1	1	1	1	ATP2A2	ATPase, Ca++ transporting, cardiac muscle, slow twitch 2
hsa-let-7c	1	0	1	1	1	1	NFIB	nuclear factor I/B
hsa-let-7c	1	0	1	1	1	1	SOGA2	SOGA family member 2
hsa-let-7c	1	0	1	1	1	1	NAV1	neuron navigator 1
hsa-let-7c	1	0	1	1	1	1	ZKSCAN5	zinc finger with KRAB and SCAN domains 5
hsa-let-7c	1	0	1	1	1	1	TMEM135	transmembrane protein 135
hsa-let-7c	0	0	1	0	0	0	ZNRD1-AS1	ZNRD1 antisense RNA 1
hsa-let-7c	0	0	1	1	1	1	SSFA2	sperm specific antigen 2
hsa-let-7c	0	0	1	0	1	1	CD59	CD59 molecule, complement regulatory protein
hsa-let-7c	1	0	1	1	1	1	ADD2	adducin 2 (beta)
hsa-let-7c	0	0	1	1	0	0	SREBF2	sterol regulatory element binding transcription factor 2
hsa-let-7c	0	0	1	1	0	0	PPT2	palmitoyl-protein thioesterase 2
hsa-let-7c	0	0	1	1	0	0	HSD3B1	hydroxy-delta-5-steroid dehydrogenase, 3 beta- and steroid delta-isomerase 1
hsa-let-7c	0	0	1	0	0	0	RPS16P10	ribosomal protein S16 pseudogene 10
hsa-let-7c	1	0	1	1	1	1	PCGF2	polycomb group ring finger 2
hsa-let-7c	1	0	1	1	1	1	POU2F3	POU class 2 homeobox 3
hsa-let-7c	0	0	1	1	0	0	TPST2	tyrosylprotein sulfotransferase 2
hsa-let-7c	0	0	1	1	1	1	CYTH2	cytohesin 2
hsa-let-7c	1	0	1	1	1	1	PTN	pleiotrophin
hsa-let-7c	1	0	1	1	1	1	DOLPP1	dolichyl pyrophosphate phosphatase 1
hsa-let-7c	1	0	1	1	1	1	ADM	adrenomedullin
hsa-let-7c	0	0	1	1	0	0	DNAJB2	DnaJ (Hsp40) homolog, subfamily B, member 2
hsa-let-7c	0	0	1	1	1	1	MRPS36	mitochondrial ribosomal protein S36
hsa-let-7c	0	0	1	1	0	0	ESD	esterase D
hsa-let-7c	1	0	1	1	1	1	CDK18	cyclin-dependent kinase 18
hsa-let-7c	0	0	1	1	1	1	PLAUR	plasminogen activator, urokinase receptor
hsa-let-7c	1	0	1	1	1	1	EI24	etoposide induced 2.4 mRNA
hsa-let-7c	1	0	1	1	1	1	COPZ1	coatomer protein complex, subunit zeta 1
hsa-let-7c	0	0	1	1	0	0	TMEM183A	transmembrane protein 183A
hsa-let-7c	0	0	1	1	1	1	ANKRD53	ankyrin repeat domain 53
hsa-let-7c	0	0	1	1	0	0	ASNA1	arsA arsenite transporter, ATP-binding, homolog 1 (bacterial)
hsa-let-7c	0	0	1	1	1	1	C17orf76-AS1	C17orf76 antisense RNA 1
hsa-let-7c	0	0	1	1	1	1	TRIM68	tripartite motif containing 68
hsa-let-7c	1	0	1	1	1	1	LYPLA2	lysophospholipase II
hsa-let-7c	1	0	1	1	1	1	CCDC25	coiled-coil domain containing 25
hsa-let-7c	1	0	1	1	1	1	NUP160	nucleoporin 160kDa
hsa-let-7c	0	0	1	1	0	0	NDUFS7	NADH dehydrogenase (ubiquinone) Fe-S protein 7, 20kDa (NADH-coenzyme Q reductase)
hsa-let-7c	0	0	1	1	1	1	EIF3J	eukaryotic translation initiation factor 3, subunit J
hsa-let-7c	0	0	1	0	0	0	LOC150568	uncharacterized LOC150568
hsa-let-7c	1	0	1	1	1	1	SSBP3	single stranded DNA binding protein 3
hsa-let-7c	0	0	1	0	0	0	LOC729059	uncharacterized LOC729059
hsa-let-7c	0	0	1	1	1	1	GLRX3	glutaredoxin 3
hsa-let-7c	1	0	1	1	1	1	TMEM66	transmembrane protein 66
hsa-let-7c	1	0	1	1	1	1	PEX2	peroxisomal biogenesis factor 2
hsa-let-7c	0	0	1	1	1	1	NARS	asparaginyl-tRNA synthetase
hsa-let-7c	0	0	1	1	1	1	ZDHHC16	zinc finger, DHHC-type containing 16
hsa-let-7c	0	0	1	1	0	0	NOX5	NADPH oxidase, EF-hand calcium binding domain 5
hsa-let-7c	0	0	1	0	0	0	ZNF720	zinc finger protein 720
hsa-let-7c	0	0	1	1	0	0	FAM64A	family with sequence similarity 64, member A
hsa-let-7c	1	0	1	1	1	1	ARNTL	aryl hydrocarbon receptor nuclear translocator-like
hsa-let-7c	0	0	1	1	1	1	PEX19	peroxisomal biogenesis factor 19
hsa-let-7c	0	0	1	1	0	0	C11orf48	chromosome 11 open reading frame 48
hsa-let-7c	1	0	1	0	1	1	C15orf41	chromosome 15 open reading frame 41
hsa-let-7c	1	0	1	1	1	1	NT5DC1	5'-nucleotidase domain containing 1
hsa-let-7c	0	0	1	1	0	0	PLB1	phospholipase B1
hsa-let-7c	0	0	1	1	0	0	C9orf114	chromosome 9 open reading frame 114
hsa-let-7c	1	0	1	1	1	1	F11R	F11 receptor
hsa-let-7c	1	0	1	1	0	0	CRELD1	cysteine-rich with EGF-like domains 1
hsa-let-7c	1	0	1	1	1	1	ARHGEF40	Rho guanine nucleotide exchange factor (GEF) 40
hsa-let-7c	0	0	1	1	1	1	NFKBIB	nuclear factor of kappa light polypeptide gene enhancer in B-cells inhibitor, beta
hsa-let-7c	0	0	1	0	0	0	ZNF674-AS1	ZNF674 antisense RNA 1
hsa-let-7c	1	0	1	1	0	0	STAG3L4	stromal antigen 3-like 4
hsa-let-7c	1	0	1	1	1	1	MFSD2A	major facilitator superfamily domain containing 2A
hsa-let-7c	0	0	1	0	0	0	PRMT1	protein arginine methyltransferase 1
hsa-let-7c	1	0	1	1	1	1	RUNX1	runt-related transcription factor 1
hsa-let-7c	1	0	1	1	1	1	YWHAE	tyrosine 3-monooxygenase/tryptophan 5-monooxygenase activation protein, epsilon polypeptide
hsa-let-7c	1	0	1	1	0	0	CGREF1	cell growth regulator with EF-hand domain 1
hsa-let-7c	1	0	1	1	0	0	PPP4C	protein phosphatase 4, catalytic subunit
hsa-let-7c	0	0	1	1	1	1	CDKAL1	CDK5 regulatory subunit associated protein 1-like 1
hsa-let-7c	0	0	1	0	0	0	LOC100132984	uncharacterized LOC100132984
hsa-let-7c	0	0	1	1	0	0	KAT8	K(lysine) acetyltransferase 8
hsa-let-7c	0	0	1	1	1	1	COPS4	COP9 constitutive photomorphogenic homolog subunit 4 (Arabidopsis)
hsa-let-7c	1	0	1	1	1	1	JUNB	jun B proto-oncogene
hsa-let-7c	1	0	1	1	1	1	TFPI	tissue factor pathway inhibitor (lipoprotein-associated coagulation inhibitor)
hsa-let-7c	1	0	1	1	1	1	SERF2	small EDRK-rich factor 2
hsa-let-7c	0	0	1	1	1	1	SYNE2	spectrin repeat containing, nuclear envelope 2
hsa-let-7c	0	0	1	1	1	1	UPRT	uracil phosphoribosyltransferase (FUR1) homolog (S. cerevisiae)
hsa-let-7c	0	0	1	1	1	1	MRPL42	mitochondrial ribosomal protein L42
hsa-let-7c	1	0	1	1	1	1	KIAA2018	KIAA2018
hsa-let-7c	1	0	1	0	1	1	SLC7A6	solute carrier family 7 (amino acid transporter light chain, y+L system), member 6
hsa-let-7c	0	0	1	1	0	0	FMN1	formin 1
hsa-let-7c	0	0	1	0	0	0	MUC19	mucin 19, oligomeric
hsa-let-7c	0	0	1	0	0	0	DNAJC27-AS1	DNAJC27 antisense RNA 1
hsa-let-7c	0	0	1	1	0	0	KHDC1	KH homology domain containing 1
hsa-let-7c	0	0	1	1	0	0	TENC1	tensin like C1 domain containing phosphatase (tensin 2)
hsa-let-7c	1	0	1	1	1	1	RBPJ	recombination signal binding protein for immunoglobulin kappa J region
hsa-let-7c	0	0	1	1	0	0	SETDB1	SET domain, bifurcated 1
hsa-let-7c	0	0	1	1	1	1	UBXN8	UBX domain protein 8
hsa-let-7c	1	0	1	1	1	1	RB1CC1	RB1-inducible coiled-coil 1
hsa-let-7c	1	0	1	1	0	0	DPY19L1	dpy-19-like 1 (C. elegans)
hsa-let-7c	1	0	1	1	1	1	QKI	QKI, KH domain containing, RNA binding
hsa-let-7c	1	0	1	1	1	1	GLIS3	GLIS family zinc finger 3
hsa-let-7c	1	0	1	0	1	1	MAP2K7	mitogen-activated protein kinase kinase 7
hsa-let-7c	1	0	1	1	1	1	ITSN1	intersectin 1 (SH3 domain protein)
hsa-let-7c	0	0	1	0	0	0	PILRB	paired immunoglobin-like type 2 receptor beta
hsa-let-7c	1	0	1	0	1	1	RBBP5	retinoblastoma binding protein 5
hsa-let-7c	0	0	1	1	0	0	SLCO3A1	solute carrier organic anion transporter family, member 3A1
hsa-let-7c	0	0	1	1	1	1	ADPRH	ADP-ribosylarginine hydrolase
hsa-let-7c	1	0	1	1	1	1	AFF1	AF4/FMR2 family, member 1
hsa-let-7c	1	0	1	0	1	1	STAT3	signal transducer and activator of transcription 3 (acute-phase response factor)
hsa-let-7c	0	0	1	1	1	1	PLCB4	phospholipase C, beta 4
hsa-let-7c	1	0	1	1	1	1	ELK1	ELK1, member of ETS oncogene family
hsa-let-7c	1	0	1	0	1	1	SLC26A2	solute carrier family 26 (sulfate transporter), member 2
hsa-let-7c	1	0	1	1	1	1	ESR1	estrogen receptor 1
hsa-let-7c	0	0	1	1	1	1	FXN	frataxin
hsa-let-7c	0	0	1	1	0	0	GJB1	gap junction protein, beta 1, 32kDa
hsa-let-7c	1	0	1	0	1	1	GLI3	GLI family zinc finger 3
hsa-let-7c	0	0	1	0	1	1	KAL1	Kallmann syndrome 1 sequence
hsa-let-7c	1	0	1	1	1	1	KCNA1	potassium voltage-gated channel, shaker-related subfamily, member 1 (episodic ataxia with myokymia)
hsa-let-7c	1	0	1	0	1	1	SGCB	sarcoglycan, beta (43kDa dystrophin-associated glycoprotein)
hsa-let-7c	1	0	1	1	1	1	MITF	microphthalmia-associated transcription factor
hsa-let-7c	0	0	1	1	1	1	MTR	5-methyltetrahydrofolate-homocysteine methyltransferase
hsa-let-7c	1	0	1	1	1	1	OCRL	oculocerebrorenal syndrome of Lowe
hsa-let-7c	0	0	1	1	1	1	PKP1	plakophilin 1 (ectodermal dysplasia/skin fragility syndrome)
hsa-let-7c	0	0	1	1	1	1	SLC25A20	solute carrier family 25 (carnitine/acylcarnitine translocase), member 20
hsa-let-7c	1	0	1	1	1	1	CHM	choroideremia (Rab escort protein 1)
hsa-let-7c	1	0	1	1	1	1	HLCS	holocarboxylase synthetase (biotin-(proprionyl-CoA-carboxylase (ATP-hydrolysing)) ligase)
hsa-let-7c	0	0	1	1	0	0	KRT5	keratin 5
hsa-let-7c	0	0	1	1	1	1	PLEC	plectin
hsa-let-7c	1	0	1	1	1	1	RFX5	regulatory factor X, 5 (influences HLA class II expression)
hsa-let-7c	1	0	1	1	1	1	APP	amyloid beta (A4) precursor protein
hsa-let-7c	1	0	1	1	1	1	DCX	doublecortin
hsa-let-7c	1	0	1	1	1	1	CR1	complement component (3b/4b) receptor 1 (Knops blood group)
hsa-let-7c	0	0	1	1	1	1	IL2	interleukin 2
hsa-let-7c	0	0	1	1	1	1	C7	complement component 7
hsa-let-7c	1	0	1	1	1	1	TNF	tumor necrosis factor
hsa-let-7c	0	0	1	1	1	1	GSR	glutathione reductase
hsa-let-7c	1	0	1	1	0	0	GRIN2A	glutamate receptor, ionotropic, N-methyl D-aspartate 2A
hsa-let-7c	0	0	1	1	1	1	ITGAX	integrin, alpha X (complement component 3 receptor 4 subunit)
hsa-let-7c	1	0	1	0	1	1	KCNJ2	potassium inwardly-rectifying channel, subfamily J, member 2
hsa-let-7c	1	0	1	1	1	1	PPP3R1	protein phosphatase 3, regulatory subunit B, alpha
hsa-let-7c	1	0	1	1	1	1	PTGFR	prostaglandin F receptor (FP)
hsa-let-7c	0	0	1	0	1	1	PTGIS	prostaglandin I2 (prostacyclin) synthase
hsa-let-7c	1	0	1	0	1	1	ATP2B1	ATPase, Ca++ transporting, plasma membrane 1
hsa-let-7c	0	0	1	1	1	1	BLOC1S2	biogenesis of lysosomal organelles complex-1, subunit 2
hsa-let-7c	0	0	1	1	1	1	MED11	mediator complex subunit 11
hsa-let-7c	1	0	1	1	1	1	FAM13C	family with sequence similarity 13, member C
hsa-let-7c	0	0	1	1	1	1	CCDC144NL	coiled-coil domain containing 144 family, N-terminal like
hsa-let-7c	0	0	1	0	0	0	FLJ42842	uncharacterized FLJ42842
hsa-let-7c	1	0	1	1	1	1	NCK2	NCK adaptor protein 2
hsa-let-7c	1	0	1	0	1	1	LRRC55	leucine rich repeat containing 55
hsa-let-7c	0	0	1	1	1	1	PRR13	proline rich 13
hsa-let-7c	1	0	1	1	1	1	EBF3	early B-cell factor 3
hsa-let-7c	1	0	1	1	1	1	PLCXD3	phosphatidylinositol-specific phospholipase C, X domain containing 3
hsa-let-7c	1	0	1	1	1	1	TCEAL8	transcription elongation factor A (SII)-like 8
hsa-let-7c	0	0	1	1	1	1	SCP2	sterol carrier protein 2
hsa-let-7c	1	0	1	1	1	1	BRWD1	bromodomain and WD repeat domain containing 1
hsa-let-7c	0	0	1	1	1	1	TRIM13	tripartite motif containing 13
hsa-let-7c	0	0	1	1	1	1	RASL10A	RAS-like, family 10, member A
hsa-let-7c	0	0	1	1	0	0	F8A3	coagulation factor VIII-associated 3
hsa-let-7c	1	0	1	1	1	1	CNOT4	CCR4-NOT transcription complex, subunit 4
hsa-let-7c	1	0	1	0	1	1	C18orf25	chromosome 18 open reading frame 25
hsa-let-7c	0	0	1	1	0	0	REG3G	regenerating islet-derived 3 gamma
hsa-let-7c	0	0	1	1	1	1	MXRA7	matrix-remodelling associated 7
hsa-let-7c	0	0	1	1	1	1	TCHHL1	trichohyalin-like 1
hsa-let-7c	0	0	1	1	1	1	FBXO47	F-box protein 47
hsa-let-7c	0	0	1	1	1	1	TMEM230	transmembrane protein 230
hsa-let-7c	1	0	1	0	1	1	ERMN	ermin, ERM-like protein
hsa-let-7c	0	0	1	1	1	1	SPIN3	spindlin family, member 3
hsa-let-7c	1	0	1	0	1	1	ZC3H12B	zinc finger CCCH-type containing 12B
hsa-let-7c	1	0	1	0	1	1	MTX3	metaxin 3
hsa-let-7c	0	0	1	1	1	1	NCMAP	noncompact myelin associated protein
hsa-let-7c	1	0	1	1	1	1	SLC25A53	solute carrier family 25, member 53
hsa-let-7c	1	0	1	1	1	1	DISC1	disrupted in schizophrenia 1
hsa-let-7c	1	0	1	1	1	1	SORCS1	sortilin-related VPS10 domain containing receptor 1
hsa-let-7c	0	0	1	1	1	1	C2orf68	chromosome 2 open reading frame 68
hsa-let-7c	0	0	1	0	1	1	LINC00268	long intergenic non-protein coding RNA 268
hsa-let-7c	1	0	1	1	1	1	RUNX2	runt-related transcription factor 2
hsa-let-7c	0	0	1	1	0	0	RTKN	rhotekin
hsa-let-7c	0	0	1	1	1	1	PURG	purine-rich element binding protein G
hsa-let-7c	1	0	1	0	1	1	KCNK2	potassium channel, subfamily K, member 2
hsa-let-7c	0	0	1	1	0	0	DAPL1	death associated protein-like 1
hsa-let-7c	1	0	1	1	1	1	SH3PXD2B	SH3 and PX domains 2B
hsa-let-7c	1	0	1	1	1	1	PFKFB2	6-phosphofructo-2-kinase/fructose-2,6-biphosphatase 2
hsa-let-7c	0	0	1	1	1	1	NARG2	NMDA receptor regulated 2
hsa-let-7c	1	0	1	0	1	1	TNRC6B	trinucleotide repeat containing 6B
hsa-let-7c	1	0	1	1	1	1	FNBP1L	formin binding protein 1-like
hsa-let-7c	1	0	1	1	1	1	TPD52	tumor protein D52
hsa-let-7c	0	0	1	0	1	1	C6orf120	chromosome 6 open reading frame 120
hsa-let-7c	1	0	1	0	1	1	C2orf71	chromosome 2 open reading frame 71
hsa-let-7c	1	0	1	0	1	1	SAMD5	sterile alpha motif domain containing 5
hsa-let-7c	0	0	1	1	1	1	SLC35A2	solute carrier family 35 (UDP-galactose transporter), member A2
hsa-let-7c	1	0	1	1	1	1	AMD1	adenosylmethionine decarboxylase 1
hsa-let-7c	0	0	1	1	1	1	ERP29	endoplasmic reticulum protein 29
hsa-let-7c	0	0	1	1	1	1	KCNIP1	Kv channel interacting protein 1
hsa-let-7c	1	0	1	1	1	1	SCD5	stearoyl-CoA desaturase 5
hsa-let-7c	0	0	1	1	1	1	ATAD3C	ATPase family, AAA domain containing 3C
hsa-let-7c	0	0	1	1	1	1	SIRPG	signal-regulatory protein gamma
hsa-let-7c	0	0	1	1	1	1	SKA1	spindle and kinetochore associated complex subunit 1
hsa-let-7c	1	0	1	1	1	1	AP1S3	adaptor-related protein complex 1, sigma 3 subunit
hsa-let-7c	1	0	1	0	1	1	CCNL2	cyclin L2
hsa-let-7c	1	0	1	0	1	1	USP9X	ubiquitin specific peptidase 9, X-linked
hsa-let-7c	1	0	1	1	1	1	CHTF8	CTF8, chromosome transmission fidelity factor 8 homolog (S. cerevisiae)
hsa-let-7c	1	0	1	1	1	1	CBLN3	cerebellin 3 precursor
hsa-let-7c	0	0	1	0	1	1	SCN3B	sodium channel, voltage-gated, type III, beta subunit
hsa-let-7c	0	0	1	1	1	1	ZXDC	ZXD family zinc finger C
hsa-let-7c	0	0	1	0	1	1	STEAP2	STEAP family member 2, metalloreductase
hsa-let-7c	1	0	1	1	1	1	HMGCLL1	3-hydroxymethyl-3-methylglutaryl-CoA lyase-like 1
hsa-let-7c	1	0	1	1	1	1	DIAPH3	diaphanous homolog 3 (Drosophila)
hsa-let-7c	1	0	1	1	1	1	SLC9A6	solute carrier family 9, subfamily A (NHE6, cation proton antiporter 6), member 6
hsa-let-7c	1	0	1	1	1	1	NSL1	NSL1, MIND kinetochore complex component, homolog (S. cerevisiae)
hsa-let-7c	0	0	1	1	1	1	TTC14	tetratricopeptide repeat domain 14
hsa-let-7c	1	0	1	0	1	1	SRGAP2	SLIT-ROBO Rho GTPase activating protein 2
hsa-let-7c	1	0	1	1	1	1	ZNF436	zinc finger protein 436
hsa-let-7c	1	0	1	1	1	1	ATG9A	autophagy related 9A
hsa-let-7c	1	0	1	1	1	1	PHF16	PHD finger protein 16
hsa-let-7c	1	0	1	1	1	1	PRR3	proline rich 3
hsa-let-7c	1	0	1	0	0	0	FAM127B	family with sequence similarity 127, member B
hsa-let-7c	0	0	1	0	0	0	TMEM183B	transmembrane protein 183B
hsa-let-7c	1	0	1	1	1	1	HAP1	huntingtin-associated protein 1
hsa-let-7c	0	0	1	1	1	1	C15orf57	chromosome 15 open reading frame 57
hsa-let-7c	1	0	1	1	1	1	REPS2	RALBP1 associated Eps domain containing 2
hsa-let-7c	1	0	1	1	1	1	ASIC1	acid-sensing (proton-gated) ion channel 1
hsa-let-7c	0	0	1	1	1	1	ACTA1	actin, alpha 1, skeletal muscle
hsa-let-7c	1	0	1	1	1	1	ADAM10	ADAM metallopeptidase domain 10
hsa-let-7c	0	0	1	1	1	1	PLIN2	perilipin 2
hsa-let-7c	1	0	1	0	1	1	XIAP	X-linked inhibitor of apoptosis
hsa-let-7c	0	0	1	1	1	1	BUB1B	budding uninhibited by benzimidazoles 1 homolog beta (yeast)
hsa-let-7c	0	0	1	1	0	0	CDC6	cell division cycle 6 homolog (S. cerevisiae)
hsa-let-7c	0	0	1	1	1	1	CHUK	conserved helix-loop-helix ubiquitous kinase
hsa-let-7c	0	0	1	1	0	0	DIO3	deiodinase, iodothyronine, type III
hsa-let-7c	0	0	1	1	1	1	DSCAM	Down syndrome cell adhesion molecule
hsa-let-7c	1	0	1	1	1	1	CELSR3	cadherin, EGF LAG seven-pass G-type receptor 3 (flamingo homolog, Drosophila)
hsa-let-7c	0	0	1	0	1	1	FMO2	flavin containing monooxygenase 2 (non-functional)
hsa-let-7c	0	0	1	1	0	0	HSPB2	heat shock 27kDa protein 2
hsa-let-7c	1	0	1	1	1	1	NDST1	N-deacetylase/N-sulfotransferase (heparan glucosaminyl) 1
hsa-let-7c	1	0	1	1	1	1	AHNAK	AHNAK nucleoprotein
hsa-let-7c	1	0	1	1	1	1	AQP4	aquaporin 4
hsa-let-7c	1	0	1	0	1	1	ARCN1	archain 1
hsa-let-7c	0	0	1	1	0	0	RHOG	ras homolog family member G
hsa-let-7c	1	0	1	1	1	1	ATP6V1A	ATPase, H+ transporting, lysosomal 70kDa, V1 subunit A
hsa-let-7c	1	0	1	1	1	1	BAAT	bile acid CoA: amino acid N-acyltransferase (glycine N-choloyltransferase)
hsa-let-7c	0	0	1	1	1	1	BTN1A1	butyrophilin, subfamily 1, member A1
hsa-let-7c	0	0	1	1	1	1	CEACAM8	carcinoembryonic antigen-related cell adhesion molecule 8
hsa-let-7c	1	0	1	1	1	1	CSNK2A1	casein kinase 2, alpha 1 polypeptide
hsa-let-7c	0	0	1	1	1	1	DLAT	dihydrolipoamide S-acetyltransferase
hsa-let-7c	0	0	1	1	1	1	DSG1	desmoglein 1
hsa-let-7c	1	0	1	1	1	1	HBEGF	heparin-binding EGF-like growth factor
hsa-let-7c	1	0	1	1	1	1	DUSP6	dual specificity phosphatase 6
hsa-let-7c	1	0	1	1	1	1	E2F3	E2F transcription factor 3
hsa-let-7c	1	0	1	1	1	1	ENPEP	glutamyl aminopeptidase (aminopeptidase A)
hsa-let-7c	0	0	1	1	1	1	HMGCS1	3-hydroxy-3-methylglutaryl-CoA synthase 1 (soluble)
hsa-let-7c	0	0	1	0	1	1	ITGAV	integrin, alpha V
hsa-let-7c	1	0	1	1	1	1	KCNJ10	potassium inwardly-rectifying channel, subfamily J, member 10
hsa-let-7c	0	0	1	1	0	0	KRT4	keratin 4
hsa-let-7c	1	0	1	0	1	1	LAMC1	laminin, gamma 1 (formerly LAMB2)
hsa-let-7c	0	0	1	1	0	0	LGALS1	lectin, galactoside-binding, soluble, 1
hsa-let-7c	1	0	1	1	1	1	MSN	moesin
hsa-let-7c	1	0	1	1	1	1	MSR1	macrophage scavenger receptor 1
hsa-let-7c	0	0	1	1	1	1	MTAP	methylthioadenosine phosphorylase
hsa-let-7c	0	0	1	1	0	0	MYOG	myogenin (myogenic factor 4)
hsa-let-7c	0	0	1	1	0	0	NMBR	neuromedin B receptor
hsa-let-7c	1	0	1	1	1	1	NPTX1	neuronal pentraxin I
hsa-let-7c	0	0	1	0	1	1	OAZ2	ornithine decarboxylase antizyme 2
hsa-let-7c	0	0	1	0	1	1	OPHN1	oligophrenin 1
hsa-let-7c	1	0	1	1	1	1	PCSK6	proprotein convertase subtilisin/kexin type 6
hsa-let-7c	0	0	1	1	1	1	PCK1	phosphoenolpyruvate carboxykinase 1 (soluble)
hsa-let-7c	0	0	1	1	1	1	PDE7A	phosphodiesterase 7A
hsa-let-7c	0	0	1	1	1	1	POLR2G	polymerase (RNA) II (DNA directed) polypeptide G
hsa-let-7c	1	0	1	1	1	1	PRPS1	phosphoribosyl pyrophosphate synthetase 1
hsa-let-7c	1	0	1	1	1	1	PTPN9	protein tyrosine phosphatase, non-receptor type 9
hsa-let-7c	1	0	1	1	0	0	RFX1	regulatory factor X, 1 (influences HLA class II expression)
hsa-let-7c	1	0	1	0	1	1	CCL22	chemokine (C-C motif) ligand 22
hsa-let-7c	0	0	1	1	1	1	XCL1	chemokine (C motif) ligand 1
hsa-let-7c	1	0	1	0	1	1	ST6GAL1	ST6 beta-galactosamide alpha-2,6-sialyltranferase 1
hsa-let-7c	0	0	1	1	1	1	SMARCA1	SWI/SNF related, matrix associated, actin dependent regulator of chromatin, subfamily a, member 1
hsa-let-7c	1	0	1	0	1	1	STC1	stanniocalcin 1
hsa-let-7c	0	0	1	1	1	1	SULT2A1	sulfotransferase family, cytosolic, 2A, dehydroepiandrosterone (DHEA)-preferring, member 1
hsa-let-7c	0	0	1	1	1	1	SUPT6H	suppressor of Ty 6 homolog (S. cerevisiae)
hsa-let-7c	1	0	1	1	1	1	SVIL	supervillin
hsa-let-7c	0	0	1	1	1	1	TAF2	TAF2 RNA polymerase II, TATA box binding protein (TBP)-associated factor, 150kDa
hsa-let-7c	1	0	1	0	1	1	SEC62	SEC62 homolog (S. cerevisiae)
hsa-let-7c	1	0	1	0	1	1	TSPYL1	TSPY-like 1
hsa-let-7c	1	0	1	0	1	1	ZIC1	Zic family member 1
hsa-let-7c	0	0	1	1	1	1	FAM193A	family with sequence similarity 193, member A
hsa-let-7c	0	0	1	1	0	0	SOCS1	suppressor of cytokine signaling 1
hsa-let-7c	1	0	1	0	1	1	TNKS	tankyrase, TRF1-interacting ankyrin-related ADP-ribose polymerase
hsa-let-7c	1	0	1	1	1	1	IQGAP1	IQ motif containing GTPase activating protein 1
hsa-let-7c	1	0	1	1	1	1	NRP2	neuropilin 2
hsa-let-7c	0	0	1	1	1	1	PRPF4B	PRP4 pre-mRNA processing factor 4 homolog B (yeast)
hsa-let-7c	0	0	1	1	1	1	RNF8	ring finger protein 8, E3 ubiquitin protein ligase
hsa-let-7c	0	0	1	0	1	1	RHOB	ras homolog family member B
hsa-let-7c	1	0	1	1	1	1	BCL2L2	BCL2-like 2
hsa-let-7c	0	0	1	1	0	0	AP2S1	adaptor-related protein complex 2, sigma 1 subunit
hsa-let-7c	0	0	1	0	1	1	EIF4EBP2	eukaryotic translation initiation factor 4E binding protein 2
hsa-let-7c	0	0	1	1	1	1	FKBP1B	FK506 binding protein 1B, 12.6 kDa
hsa-let-7c	0	0	1	1	0	0	ATP6V1F	ATPase, H+ transporting, lysosomal 14kDa, V1 subunit F
hsa-let-7c	0	0	1	1	1	1	HOMER1	homer homolog 1 (Drosophila)
hsa-let-7c	0	0	1	1	1	1	ACTL6A	actin-like 6A
hsa-let-7c	1	0	1	1	1	1	ARL3	ADP-ribosylation factor-like 3
hsa-let-7c	1	0	1	1	1	1	DAG1	dystroglycan 1 (dystrophin-associated glycoprotein 1)
hsa-let-7c	1	0	1	1	1	1	EFNB1	ephrin-B1
hsa-let-7c	1	0	1	1	1	1	ACSL3	acyl-CoA synthetase long-chain family member 3
hsa-let-7c	1	0	1	0	1	1	ACSL4	acyl-CoA synthetase long-chain family member 4
hsa-let-7c	1	0	1	0	1	1	SCN2B	sodium channel, voltage-gated, type II, beta subunit
hsa-let-7c	1	0	1	1	1	1	RABEP1	rabaptin, RAB GTPase binding effector protein 1
hsa-let-7c	0	0	1	1	0	0	ZW10	ZW10, kinetochore associated, homolog (Drosophila)
hsa-let-7c	1	0	1	1	1	1	LARGE	like-glycosyltransferase
hsa-let-7c	0	0	1	1	1	1	ATP6V1G1	ATPase, H+ transporting, lysosomal 13kDa, V1 subunit G1
hsa-let-7c	0	0	1	1	1	1	MRPL33	mitochondrial ribosomal protein L33
hsa-let-7c	1	0	1	0	1	1	SEC22B	SEC22 vesicle trafficking protein homolog B (S. cerevisiae) (gene/pseudogene)
hsa-let-7c	0	0	1	1	1	1	CALB1	calbindin 1, 28kDa
hsa-let-7c	0	0	1	1	1	1	CDH6	cadherin 6, type 2, K-cadherin (fetal kidney)
hsa-let-7c	1	0	1	1	1	1	KDM5A	lysine (K)-specific demethylase 5A
hsa-let-7c	0	0	1	1	1	1	SIM1	single-minded homolog 1 (Drosophila)
hsa-let-7c	0	0	1	1	0	0	ALDOC	aldolase C, fructose-bisphosphate
hsa-let-7c	1	0	1	0	1	1	CALM3	calmodulin 3 (phosphorylase kinase, delta)
hsa-let-7c	1	0	1	1	1	1	FOXN3	forkhead box N3
hsa-let-7c	0	0	1	1	1	1	CSN3	casein kappa
hsa-let-7c	0	0	1	0	1	1	EPHA3	EPH receptor A3
hsa-let-7c	0	0	1	0	1	1	FOSL2	FOS-like antigen 2
hsa-let-7c	0	0	1	1	1	1	PDIA3	protein disulfide isomerase family A, member 3
hsa-let-7c	1	0	1	1	0	0	NNAT	neuronatin
hsa-let-7c	0	0	1	1	1	1	NUP98	nucleoporin 98kDa
hsa-let-7c	1	0	1	1	1	1	PDCL	phosducin-like
hsa-let-7c	0	0	1	1	1	1	SLC20A1	solute carrier family 20 (phosphate transporter), member 1
hsa-let-7c	1	0	1	0	1	1	CCDC6	coiled-coil domain containing 6
hsa-let-7c	0	0	1	1	1	1	FOSL1	FOS-like antigen 1
hsa-let-7c	0	0	1	1	1	1	SMC3	structural maintenance of chromosomes 3
hsa-let-7c	1	0	1	1	1	1	AKT3	v-akt murine thymoma viral oncogene homolog 3 (protein kinase B, gamma)
hsa-let-7c	0	0	1	1	1	1	LIMK2	LIM domain kinase 2
hsa-let-7c	0	0	1	0	1	1	POU3F2	POU class 3 homeobox 2
hsa-let-7c	0	0	1	1	1	1	TSPAN3	tetraspanin 3
hsa-let-7c	1	0	1	1	1	1	ACTR1A	ARP1 actin-related protein 1 homolog A, centractin alpha (yeast)
hsa-let-7c	1	0	1	1	1	1	LHFP	lipoma HMGIC fusion partner
hsa-let-7c	1	0	1	0	1	1	CALCRL	calcitonin receptor-like
hsa-let-7c	0	0	1	1	1	1	LRRC17	leucine rich repeat containing 17
hsa-let-7c	1	0	1	0	1	1	SPRY3	sprouty homolog 3 (Drosophila)
hsa-let-7c	1	0	1	1	1	1	MAN1A1	mannosidase, alpha, class 1A, member 1
hsa-let-7c	1	0	1	1	1	1	NR4A2	nuclear receptor subfamily 4, group A, member 2
hsa-let-7c	0	0	1	0	1	1	OAS3	2'-5'-oligoadenylate synthetase 3, 100kDa
hsa-let-7c	1	0	1	1	1	1	ORC2	origin recognition complex, subunit 2
hsa-let-7c	1	0	1	0	1	1	PPP1R2	protein phosphatase 1, regulatory (inhibitor) subunit 2
hsa-let-7c	0	0	1	1	1	1	TYRO3	TYRO3 protein tyrosine kinase
hsa-let-7c	1	0	1	1	1	1	BASP1	brain abundant, membrane attached signal protein 1
hsa-let-7c	1	0	1	1	1	1	VAT1	vesicle amine transport protein 1 homolog (T. californica)
hsa-let-7c	1	0	1	0	1	1	APPBP2	amyloid beta precursor protein (cytoplasmic tail) binding protein 2
hsa-let-7c	0	0	1	1	0	0	ALX3	ALX homeobox 3
hsa-let-7c	1	0	1	1	1	1	CORIN	corin, serine peptidase
hsa-let-7c	0	0	1	1	1	1	POLD3	polymerase (DNA-directed), delta 3, accessory subunit
hsa-let-7c	0	0	1	1	1	1	TBR1	T-box, brain, 1
hsa-let-7c	0	0	1	1	1	1	LYVE1	lymphatic vessel endothelial hyaluronan receptor 1
hsa-let-7c	1	0	1	1	1	1	HIVEP2	human immunodeficiency virus type I enhancer binding protein 2
hsa-let-7c	1	0	1	1	0	0	PSKH1	protein serine kinase H1
hsa-let-7c	0	0	1	1	1	1	PKIA	protein kinase (cAMP-dependent, catalytic) inhibitor alpha
hsa-let-7c	0	0	1	1	0	0	PIM2	pim-2 oncogene
hsa-let-7c	1	0	1	0	1	1	SOX12	SRY (sex determining region Y)-box 12
hsa-let-7c	1	0	1	1	1	1	ABHD2	abhydrolase domain containing 2
hsa-let-7c	0	0	1	1	1	1	FAF1	Fas (TNFRSF6) associated factor 1
hsa-let-7c	0	0	1	1	1	1	POLR3A	polymerase (RNA) III (DNA directed) polypeptide A, 155kDa
hsa-let-7c	1	0	1	1	1	1	KAT7	K(lysine) acetyltransferase 7
hsa-let-7c	1	0	1	1	1	1	UTY	ubiquitously transcribed tetratricopeptide repeat gene, Y-linked
hsa-let-7c	1	0	1	1	1	1	ERLIN2	ER lipid raft associated 2
hsa-let-7c	1	0	1	1	1	1	KLF12	Kruppel-like factor 12
hsa-let-7c	0	0	1	0	1	1	PAXIP1	PAX interacting (with transcription-activation domain) protein 1
hsa-let-7c	1	0	1	1	1	1	CASC3	cancer susceptibility candidate 3
hsa-let-7c	0	0	1	1	0	0	LTB	lymphotoxin beta (TNF superfamily, member 3)
hsa-let-7c	1	0	1	0	1	1	ZFPM2	zinc finger protein, multitype 2
hsa-let-7c	1	0	1	1	1	1	APPL1	adaptor protein, phosphotyrosine interaction, PH domain and leucine zipper containing 1
hsa-let-7c	1	0	1	1	1	1	ARL2BP	ADP-ribosylation factor-like 2 binding protein
hsa-let-7c	0	0	1	1	1	1	EHF	ets homologous factor
hsa-let-7c	0	0	1	1	1	1	HARS2	histidyl-tRNA synthetase 2, mitochondrial
hsa-let-7c	0	0	1	1	0	0	TPSD1	tryptase delta 1
hsa-let-7c	1	0	1	1	1	1	RHOQ	ras homolog family member Q
hsa-let-7c	1	0	1	1	1	1	KCND2	potassium voltage-gated channel, Shal-related subfamily, member 2
hsa-let-7c	1	0	1	0	1	1	RAPGEF5	Rap guanine nucleotide exchange factor (GEF) 5
hsa-let-7c	1	0	1	1	1	1	MMD	monocyte to macrophage differentiation-associated
hsa-let-7c	1	0	1	1	1	1	BAMBI	BMP and activin membrane-bound inhibitor homolog (Xenopus laevis)
hsa-let-7c	1	0	1	1	1	1	ZNF281	zinc finger protein 281
hsa-let-7c	1	0	1	1	1	1	STK39	serine threonine kinase 39
hsa-let-7c	0	0	1	1	1	1	DNAJC15	DnaJ (Hsp40) homolog, subfamily C, member 15
hsa-let-7c	0	0	1	1	1	1	N6AMT1	N-6 adenine-specific DNA methyltransferase 1 (putative)
hsa-let-7c	1	0	1	1	1	1	ZNF215	zinc finger protein 215
hsa-let-7c	1	0	1	1	0	0	SNX15	sorting nexin 15
hsa-let-7c	0	0	1	0	1	1	EMR2	egf-like module containing, mucin-like, hormone receptor-like 2
hsa-let-7c	1	0	1	0	1	1	C16orf72	chromosome 16 open reading frame 72
hsa-let-7c	0	0	1	1	1	1	CCDC113	coiled-coil domain containing 113
hsa-let-7c	0	0	1	1	1	1	DNAJC8	DnaJ (Hsp40) homolog, subfamily C, member 8
hsa-let-7c	0	0	1	1	1	1	CAPN6	calpain 6
hsa-let-7c	1	0	1	1	0	0	BRD4	bromodomain containing 4
hsa-let-7c	1	0	1	1	1	1	SLC7A11	solute carrier family 7 (anionic amino acid transporter light chain, xc- system), member 11
hsa-let-7c	0	0	1	1	1	1	ZNF318	zinc finger protein 318
hsa-let-7c	0	0	1	1	0	0	CLEC4E	C-type lectin domain family 4, member E
hsa-let-7c	1	0	1	1	1	1	LHX6	LIM homeobox 6
hsa-let-7c	1	0	1	1	1	1	AFF4	AF4/FMR2 family, member 4
hsa-let-7c	1	0	1	1	1	1	SERP1	stress-associated endoplasmic reticulum protein 1
hsa-let-7c	1	0	1	1	1	1	RND1	Rho family GTPase 1
hsa-let-7c	0	0	1	1	1	1	SOX8	SRY (sex determining region Y)-box 8
hsa-let-7c	0	0	1	1	0	0	SETD1A	SET domain containing 1A
hsa-let-7c	1	0	1	1	1	1	RASSF2	Ras association (RalGDS/AF-6) domain family member 2
hsa-let-7c	1	0	1	0	1	1	KIAA0494	KIAA0494
hsa-let-7c	1	0	1	1	1	1	SV2A	synaptic vesicle glycoprotein 2A
hsa-let-7c	1	0	1	0	1	1	ZBTB40	zinc finger and BTB domain containing 40
hsa-let-7c	1	0	1	1	1	1	JOSD1	Josephin domain containing 1
hsa-let-7c	1	0	1	1	1	1	SMG1	smg-1 homolog, phosphatidylinositol 3-kinase-related kinase (C. elegans)
hsa-let-7c	1	0	1	0	1	1	KIAA1024	KIAA1024
hsa-let-7c	1	0	1	1	1	1	CUX2	cut-like homeobox 2
hsa-let-7c	0	0	1	1	1	1	ANGEL1	angel homolog 1 (Drosophila)
hsa-let-7c	1	0	1	0	1	1	LARP1	La ribonucleoprotein domain family, member 1
hsa-let-7c	1	0	1	1	1	1	MED13L	mediator complex subunit 13-like
hsa-let-7c	1	0	1	1	1	1	ASXL1	additional sex combs like 1 (Drosophila)
hsa-let-7c	1	0	1	1	1	1	RIMBP2	RIMS binding protein 2
hsa-let-7c	0	0	1	1	1	1	ANAPC13	anaphase promoting complex subunit 13
hsa-let-7c	0	0	1	1	1	1	ZNF10	zinc finger protein 10
hsa-let-7c	1	0	1	1	1	1	PHF19	PHD finger protein 19
hsa-let-7c	1	0	1	1	1	1	ST8SIA3	ST8 alpha-N-acetyl-neuraminide alpha-2,8-sialyltransferase 3
hsa-let-7c	0	0	1	1	1	1	APH1A	anterior pharynx defective 1 homolog A (C. elegans)
hsa-let-7c	0	0	1	0	1	1	OTUD6B	OTU domain containing 6B
hsa-let-7c	1	0	1	1	1	1	AKAP11	A kinase (PRKA) anchor protein 11
hsa-let-7c	0	0	1	1	1	1	FBXO40	F-box protein 40
hsa-let-7c	1	0	1	1	1	1	RAB14	RAB14, member RAS oncogene family
hsa-let-7c	0	0	1	1	1	1	UFC1	ubiquitin-fold modifier conjugating enzyme 1
hsa-let-7c	0	0	1	1	1	1	TCEB3B	transcription elongation factor B polypeptide 3B (elongin A2)
hsa-let-7c	1	0	1	1	1	1	VTA1	Vps20-associated 1 homolog (S. cerevisiae)
hsa-let-7c	1	0	1	0	1	1	RAB8B	RAB8B, member RAS oncogene family
hsa-let-7c	1	0	1	0	1	1	KLF3	Kruppel-like factor 3 (basic)
hsa-let-7c	1	0	1	0	1	1	KLHL3	kelch-like 3 (Drosophila)
hsa-let-7c	1	0	1	1	1	1	SIX4	SIX homeobox 4
hsa-let-7c	0	0	1	1	1	1	POLE3	polymerase (DNA directed), epsilon 3, accessory subunit
hsa-let-7c	0	0	1	1	1	1	KIF27	kinesin family member 27
hsa-let-7c	1	0	1	1	1	1	TBC1D8B	TBC1 domain family, member 8B (with GRAM domain)
hsa-let-7c	1	0	1	1	1	1	LPPR1	lipid phosphate phosphatase-related protein type 1
hsa-let-7c	1	0	1	0	1	1	CMTM6	CKLF-like MARVEL transmembrane domain containing 6
hsa-let-7c	1	0	1	0	1	1	MARCH5	membrane-associated ring finger (C3HC4) 5
hsa-let-7c	1	0	1	1	1	1	FAM120C	family with sequence similarity 120C
hsa-let-7c	0	0	1	1	0	0	THG1L	tRNA-histidine guanylyltransferase 1-like (S. cerevisiae)
hsa-let-7c	0	0	1	1	0	0	CEP55	centrosomal protein 55kDa
hsa-let-7c	0	0	1	1	1	1	TMLHE	trimethyllysine hydroxylase, epsilon
hsa-let-7c	0	0	1	1	1	1	TRIM62	tripartite motif containing 62
hsa-let-7c	1	0	1	1	1	1	UBA6	ubiquitin-like modifier activating enzyme 6
hsa-let-7c	0	0	1	1	1	1	C1orf106	chromosome 1 open reading frame 106
hsa-let-7c	1	0	1	1	1	1	PI4K2B	phosphatidylinositol 4-kinase type 2 beta
hsa-let-7c	1	0	1	1	1	1	DRAM1	DNA-damage regulated autophagy modulator 1
hsa-let-7c	1	0	1	1	1	1	EPB41L4B	erythrocyte membrane protein band 4.1 like 4B
hsa-let-7c	1	0	1	1	1	1	ASH1L	ash1 (absent, small, or homeotic)-like (Drosophila)
hsa-let-7c	1	0	1	1	1	1	LRRC59	leucine rich repeat containing 59
hsa-let-7c	1	0	1	0	1	1	LRP1B	low density lipoprotein receptor-related protein 1B
hsa-let-7c	0	0	1	1	1	1	GNL3L	guanine nucleotide binding protein-like 3 (nucleolar)-like
hsa-let-7c	0	0	1	1	1	1	RNF20	ring finger protein 20, E3 ubiquitin protein ligase
hsa-let-7c	0	0	1	1	1	1	UBQLN4	ubiquilin 4
hsa-let-7c	0	0	1	1	0	0	NDUFA4L2	NADH dehydrogenase (ubiquinone) 1 alpha subcomplex, 4-like 2
hsa-let-7c	1	0	1	1	1	1	SAR1A	SAR1 homolog A (S. cerevisiae)
hsa-let-7c	1	0	1	1	1	1	NMUR2	neuromedin U receptor 2
hsa-let-7c	0	0	1	1	1	1	PRTFDC1	phosphoribosyl transferase domain containing 1
hsa-let-7c	0	0	1	1	1	1	AKR1B10	aldo-keto reductase family 1, member B10 (aldose reductase)
hsa-let-7c	1	0	1	1	1	1	ANKRD50	ankyrin repeat domain 50
hsa-let-7c	0	0	1	1	0	0	XAGE1D	X antigen family, member 1D
hsa-let-7c	1	0	1	1	0	0	JPH2	junctophilin 2
hsa-let-7c	1	0	1	1	1	1	PTGFRN	prostaglandin F2 receptor negative regulator
hsa-let-7c	1	0	1	1	1	1	LYRM2	LYR motif containing 2
hsa-let-7c	1	0	1	1	1	1	SLC12A5	solute carrier family 12 (potassium/chloride transporter), member 5
hsa-let-7c	0	0	1	0	1	1	ZNF490	zinc finger protein 490
hsa-let-7c	1	0	1	1	1	1	USP31	ubiquitin specific peptidase 31
hsa-let-7c	1	0	1	1	1	1	RGAG1	retrotransposon gag domain containing 1
hsa-let-7c	1	0	1	0	1	1	KLHDC5	kelch domain containing 5
hsa-let-7c	1	0	1	1	1	1	NLGN2	neuroligin 2
hsa-let-7c	1	0	1	1	1	1	SEMA6A	sema domain, transmembrane domain (TM), and cytoplasmic domain, (semaphorin) 6A
hsa-let-7c	0	0	1	0	1	1	SYT13	synaptotagmin XIII
hsa-let-7c	1	0	1	0	1	1	WDFY1	WD repeat and FYVE domain containing 1
hsa-let-7c	1	0	1	1	1	1	HOMEZ	homeobox and leucine zipper encoding
hsa-let-7c	1	0	1	1	1	1	RANBP10	RAN binding protein 10
hsa-let-7c	0	0	1	1	1	1	KLHL1	kelch-like 1 (Drosophila)
hsa-let-7c	1	0	1	1	1	1	CNTN3	contactin 3 (plasmacytoma associated)
hsa-let-7c	1	0	1	1	1	1	FAM160B1	family with sequence similarity 160, member B1
hsa-let-7c	0	0	1	1	1	1	PRX	periaxin
hsa-let-7c	0	0	1	1	1	1	AQP9	aquaporin 9
hsa-let-7c	0	0	1	1	0	0	CCL3L1	chemokine (C-C motif) ligand 3-like 1
hsa-let-7c	1	0	1	1	1	1	CLDN1	claudin 1
hsa-let-7c	0	0	1	1	0	0	TRIB3	tribbles homolog 3 (Drosophila)
hsa-let-7c	1	0	1	1	1	1	NTN4	netrin 4
hsa-let-7c	1	0	1	1	1	1	FAM60A	family with sequence similarity 60, member A
hsa-let-7c	1	0	1	1	1	1	CDH22	cadherin 22, type 2
hsa-let-7c	0	0	1	1	1	1	IL22RA1	interleukin 22 receptor, alpha 1
hsa-let-7c	1	0	1	1	1	1	ZFYVE1	zinc finger, FYVE domain containing 1
hsa-let-7c	1	0	1	1	1	1	SLC5A7	solute carrier family 5 (choline transporter), member 7
hsa-let-7c	0	0	1	0	1	1	CFL2	cofilin 2 (muscle)
hsa-let-7c	1	0	1	1	1	1	ATP2B3	ATPase, Ca++ transporting, plasma membrane 3
hsa-let-7c	1	0	1	0	1	1	CERS2	ceramide synthase 2
hsa-let-7c	1	0	1	1	1	1	CLSTN2	calsyntenin 2
hsa-let-7c	1	0	1	1	1	1	ABCG4	ATP-binding cassette, sub-family G (WHITE), member 4
hsa-let-7c	0	0	1	1	1	1	RHBDF1	rhomboid 5 homolog 1 (Drosophila)
hsa-let-7c	1	0	1	1	1	1	TMEM168	transmembrane protein 168
hsa-let-7c	1	0	1	0	1	1	HOXC8	homeobox C8
hsa-let-7c	1	0	1	1	1	1	AIDA	axin interactor, dorsalization associated
hsa-let-7c	0	0	1	1	1	1	MARCKSL1	MARCKS-like 1
hsa-let-7c	0	0	1	0	1	1	ANKRA2	ankyrin repeat, family A (RFXANK-like), 2
hsa-let-7c	1	0	1	1	1	1	HOXB4	homeobox B4
hsa-let-7c	0	0	1	1	1	1	CHST5	carbohydrate (N-acetylglucosamine 6-O) sulfotransferase 5
hsa-let-7c	1	0	1	1	1	1	RNF128	ring finger protein 128, E3 ubiquitin protein ligase
hsa-let-7c	0	0	1	0	1	1	C14orf169	chromosome 14 open reading frame 169
hsa-let-7c	0	0	1	1	0	0	NARS2	asparaginyl-tRNA synthetase 2, mitochondrial (putative)
hsa-let-7c	1	0	1	0	1	1	ZFHX4	zinc finger homeobox 4
hsa-let-7c	0	0	1	1	1	1	ZNF767	zinc finger family member 767
hsa-let-7c	1	0	1	1	1	1	POF1B	premature ovarian failure, 1B
hsa-let-7c	0	0	1	1	0	0	NRSN2	neurensin 2
hsa-let-7c	1	0	1	0	1	1	VCPIP1	valosin containing protein (p97)/p47 complex interacting protein 1
hsa-let-7c	0	0	1	1	1	1	MED28	mediator complex subunit 28
hsa-let-7c	1	0	1	0	1	1	SETD7	SET domain containing (lysine methyltransferase) 7
hsa-let-7c	1	0	1	1	1	1	MAP4	microtubule-associated protein 4
hsa-let-7c	0	0	1	1	1	1	TRMT1L	tRNA methyltransferase 1 homolog (S. cerevisiae)-like
hsa-let-7c	1	0	1	1	0	0	SCRT1	scratch homolog 1, zinc finger protein (Drosophila)
hsa-let-7c	1	0	1	1	1	1	ANO3	anoctamin 3
hsa-let-7c	1	0	1	0	1	1	SH3BGRL2	SH3 domain binding glutamic acid-rich protein like 2
hsa-let-7c	0	0	1	1	1	1	CRISPLD2	cysteine-rich secretory protein LCCL domain containing 2
hsa-let-7c	0	0	1	0	1	1	ENAM	enamelin
hsa-let-7c	1	0	1	0	1	1	SRSF8	serine/arginine-rich splicing factor 8
hsa-let-7c	0	0	1	1	1	1	MAGT1	magnesium transporter 1
hsa-let-7c	1	0	1	1	1	1	ANTXR1	anthrax toxin receptor 1
hsa-let-7c	1	0	1	1	1	1	ZNRF1	zinc and ring finger 1, E3 ubiquitin protein ligase
hsa-let-7c	1	0	1	0	1	1	PSD2	pleckstrin and Sec7 domain containing 2
hsa-let-7c	0	0	1	0	1	1	TMEM246	transmembrane protein 246
hsa-let-7c	1	0	1	1	1	1	BRMS1L	breast cancer metastasis-suppressor 1-like
hsa-let-7c	0	0	1	1	1	1	VPS25	vacuolar protein sorting 25 homolog (S. cerevisiae)
hsa-let-7c	0	0	1	1	1	1	CYSTM1	cysteine-rich transmembrane module containing 1
hsa-let-7c	0	0	1	1	1	1	MAML2	mastermind-like 2 (Drosophila)
hsa-let-7c	1	0	1	1	1	1	PCDH7	protocadherin 7
hsa-let-7c	0	0	1	1	1	1	SPZ1	spermatogenic leucine zipper 1
hsa-let-7c	0	0	1	1	1	1	INSM2	insulinoma-associated 2
hsa-let-7c	0	0	1	1	1	1	ADTRP	androgen-dependent TFPI-regulating protein
hsa-let-7c	1	0	1	1	1	1	RSPO3	R-spondin 3
hsa-let-7c	1	0	1	1	1	1	SPRYD3	SPRY domain containing 3
hsa-let-7c	0	0	1	0	1	1	WDR73	WD repeat domain 73
hsa-let-7c	1	0	1	1	1	1	ARHGAP19	Rho GTPase activating protein 19
hsa-let-7c	0	0	1	1	1	1	POLR2J2	polymerase (RNA) II (DNA directed) polypeptide J2
hsa-let-7c	0	0	1	0	1	1	TSLP	thymic stromal lymphopoietin
hsa-let-7c	1	0	1	1	1	1	SSH2	slingshot homolog 2 (Drosophila)
hsa-let-7c	1	0	1	1	0	0	FCHSD1	FCH and double SH3 domains 1
hsa-let-7c	1	0	1	1	1	1	TSPYL5	TSPY-like 5
hsa-let-7c	1	0	1	1	1	1	MAL2	mal, T-cell differentiation protein 2 (gene/pseudogene)
hsa-let-7c	0	0	1	1	1	1	PLEKHG4B	pleckstrin homology domain containing, family G (with RhoGef domain) member 4B
hsa-let-7c	1	0	1	0	0	0	SMYD4	SET and MYND domain containing 4
hsa-let-7c	1	0	1	0	1	1	FAM129A	family with sequence similarity 129, member A
hsa-let-7c	0	0	1	1	0	0	RPL39L	ribosomal protein L39-like
hsa-let-7c	0	0	1	1	0	0	THEM4	thioesterase superfamily member 4
hsa-let-7c	0	0	1	1	1	1	UNC119	unc-119 homolog (C. elegans)
hsa-let-7c	1	0	1	1	1	1	NAA15	N(alpha)-acetyltransferase 15, NatA auxiliary subunit
hsa-let-7c	1	0	1	1	1	1	SPSB4	splA/ryanodine receptor domain and SOCS box containing 4
hsa-let-7c	0	0	1	1	1	1	ZNF431	zinc finger protein 431
hsa-let-7c	1	0	1	1	1	1	FAM122A	family with sequence similarity 122A
hsa-let-7c	0	0	1	1	1	1	MRAP2	melanocortin 2 receptor accessory protein 2
hsa-let-7c	0	0	1	1	1	1	CASC4	cancer susceptibility candidate 4
hsa-let-7c	1	0	1	1	1	1	KCTD12	potassium channel tetramerisation domain containing 12
hsa-let-7c	1	0	1	0	1	1	NUS1	nuclear undecaprenyl pyrophosphate synthase 1 homolog (S. cerevisiae)
hsa-let-7c	1	0	1	0	1	1	SP1	Sp1 transcription factor
hsa-let-7c	0	0	1	1	1	1	C1orf105	chromosome 1 open reading frame 105
hsa-let-7c	1	0	1	1	1	1	TSTD2	thiosulfate sulfurtransferase (rhodanese)-like domain containing 2
hsa-let-7c	1	0	1	1	1	1	ZMAT2	zinc finger, matrin-type 2
hsa-let-7c	0	0	1	1	1	1	VWA3B	von Willebrand factor A domain containing 3B
hsa-let-7c	0	0	1	1	1	1	TMEM106A	transmembrane protein 106A
hsa-let-7c	0	0	1	1	0	0	CISH	cytokine inducible SH2-containing protein
hsa-let-7c	0	0	1	1	1	1	APOBEC3F	apolipoprotein B mRNA editing enzyme, catalytic polypeptide-like 3F
hsa-let-7c	0	0	1	1	0	0	WFDC5	WAP four-disulfide core domain 5
hsa-let-7c	0	0	1	1	0	0	IL11RA	interleukin 11 receptor, alpha
hsa-let-7c	0	0	1	1	1	1	WFDC9	WAP four-disulfide core domain 9
hsa-let-7c	0	0	1	1	1	1	TCEAL7	transcription elongation factor A (SII)-like 7
hsa-let-7c	0	0	1	1	1	1	ATP1A3	ATPase, Na+/K+ transporting, alpha 3 polypeptide
hsa-let-7c	0	0	1	0	0	0	ZNF285	zinc finger protein 285
hsa-let-7c	0	0	1	1	1	1	C1orf172	chromosome 1 open reading frame 172
hsa-let-7c	1	0	1	1	1	1	TBX15	T-box 15
hsa-let-7c	0	0	1	0	1	1	KBTBD3	kelch repeat and BTB (POZ) domain containing 3
hsa-let-7c	0	0	1	1	1	1	PM20D1	peptidase M20 domain containing 1
hsa-let-7c	0	0	1	1	0	0	FAM81B	family with sequence similarity 81, member B
hsa-let-7c	0	0	1	1	1	1	DAND5	DAN domain family, member 5
hsa-let-7c	1	0	1	0	1	1	FAM116A	family with sequence similarity 116, member A
hsa-let-7c	1	0	1	0	1	1	TMEM154	transmembrane protein 154
hsa-let-7c	0	0	1	1	1	1	GAPT	GRB2-binding adaptor protein, transmembrane
hsa-let-7c	1	0	1	1	1	1	ZCCHC5	zinc finger, CCHC domain containing 5
hsa-let-7c	0	0	1	1	0	0	DOK6	docking protein 6
hsa-let-7c	1	0	1	1	1	1	BEND6	BEN domain containing 6
hsa-let-7c	1	0	1	1	1	1	NXPH1	neurexophilin 1
hsa-let-7c	0	0	1	1	1	1	SLC22A7	solute carrier family 22 (organic anion transporter), member 7
hsa-let-7c	1	0	1	1	1	1	HS6ST3	heparan sulfate 6-O-sulfotransferase 3
hsa-let-7c	0	0	1	0	1	1	RTP1	receptor (chemosensory) transporter protein 1
hsa-let-7c	1	0	1	1	1	1	FNDC5	fibronectin type III domain containing 5
hsa-let-7c	0	0	1	1	1	1	TAPBP	TAP binding protein (tapasin)
hsa-let-7c	0	0	1	1	0	0	SSX6	synovial sarcoma, X breakpoint 6 (pseudogene)
hsa-let-7c	0	0	1	1	0	0	DEFB119	defensin, beta 119
hsa-let-7c	0	0	1	1	0	0	COL23A1	collagen, type XXIII, alpha 1
hsa-let-7c	1	0	1	0	1	1	GABRG1	gamma-aminobutyric acid (GABA) A receptor, gamma 1
hsa-let-7c	1	0	1	0	1	1	C3orf58	chromosome 3 open reading frame 58
hsa-let-7c	1	0	1	1	1	1	ARL10	ADP-ribosylation factor-like 10
hsa-let-7c	0	0	1	1	1	1	NSMCE2	non-SMC element 2, MMS21 homolog (S. cerevisiae)
hsa-let-7c	0	0	1	0	1	1	NKAIN3	Na+/K+ transporting ATPase interacting 3
hsa-let-7c	0	0	1	1	1	1	PLAC1L	placenta-specific 1-like
hsa-let-7c	1	0	1	0	1	1	FAM84B	family with sequence similarity 84, member B
hsa-let-7c	1	0	1	1	1	1	SYT9	synaptotagmin IX
hsa-let-7c	1	0	1	1	1	1	SWSAP1	SWIM-type zinc finger 7 associated protein 1
hsa-let-7c	1	0	1	1	1	1	EXOC8	exocyst complex component 8
hsa-let-7c	0	0	1	1	1	1	S100A7A	S100 calcium binding protein A7A
hsa-let-7c	0	0	1	1	1	1	LYNX1	Ly6/neurotoxin 1
hsa-let-7c	1	0	1	1	1	1	ASB6	ankyrin repeat and SOCS box containing 6
hsa-let-7c	1	0	1	1	1	1	FAM134C	family with sequence similarity 134, member C
hsa-let-7c	0	0	1	1	1	1	GPIHBP1	glycosylphosphatidylinositol anchored high density lipoprotein binding protein 1
hsa-let-7c	0	0	1	1	1	1	MRPL52	mitochondrial ribosomal protein L52
hsa-let-7c	1	0	1	1	1	1	MB21D2	Mab-21 domain containing 2
hsa-let-7c	0	0	1	1	1	1	STXBP4	syntaxin binding protein 4
hsa-let-7c	0	0	1	1	0	0	C7orf34	chromosome 7 open reading frame 34
hsa-let-7c	1	0	1	1	0	0	KCTD13	potassium channel tetramerisation domain containing 13
hsa-let-7c	1	0	1	0	1	1	IL6R	interleukin 6 receptor
hsa-let-7c	0	0	1	1	1	1	NAA20	N(alpha)-acetyltransferase 20, NatB catalytic subunit
hsa-let-7c	0	0	1	0	1	1	PITPNC1	phosphatidylinositol transfer protein, cytoplasmic 1
hsa-let-7c	0	0	1	0	1	1	HCG27	HLA complex group 27 (non-protein coding)
hsa-let-7c	1	0	1	1	1	1	SPRED2	sprouty-related, EVH1 domain containing 2
[truncated: 661 more rows]
