# Supplementary material for: Profiling of Selected MicroRNAs in Proliferative Eutopic Endometrium of Women with Ovarian Endometriosis
Source: Biomed Res Int. 2015 Aug 20;2015:760698. doi: 10.1155/2015/760698 (PMC4558423; doi:10.1155/2015/760698)
Supplement: Supplementary file 1 — Table I: The names of miRNAs significantly differentially expressed between eutopic endometrium of patients with endometriosis vs eutopic endometrium of patients without endometriosis. Table II: The associations between miRNA and mRNA, which presents detailed results of the search of six major databases i.e targetscan, tarbase, miranda, mirbase, mirtarget2 and pictar. [file 760698.f1.zip › 760698.f1/Table II/hsa-miR-30a-5p.tsv]

miR	targetscan	tarbase	miranda	mirbase	mirtarget2	pictar	GeneSymbol	GeneName
hsa-miR-30a-5p	1	0	1	1	1	1	ADRB2	adrenoceptor beta 2, surface
hsa-miR-30a-5p	1	0	1	1	1	1	DMD	dystrophin
hsa-miR-30a-5p	1	0	1	1	1	1	EDNRB	endothelin receptor type B
hsa-miR-30a-5p	1	0	1	1	1	1	GJA1	gap junction protein, alpha 1, 43kDa
hsa-miR-30a-5p	0	0	1	1	1	1	GLDC	glycine dehydrogenase (decarboxylating)
hsa-miR-30a-5p	1	0	1	0	1	1	NR3C1	nuclear receptor subfamily 3, group C, member 1 (glucocorticoid receptor)
hsa-miR-30a-5p	1	0	1	1	1	1	ITGA6	integrin, alpha 6
hsa-miR-30a-5p	1	0	1	0	1	1	ITGB3	integrin, beta 3 (platelet glycoprotein IIIa, antigen CD61)
hsa-miR-30a-5p	1	0	1	0	1	1	SGCB	sarcoglycan, beta (43kDa dystrophin-associated glycoprotein)
hsa-miR-30a-5p	0	0	1	0	1	1	MTTP	microsomal triglyceride transfer protein
hsa-miR-30a-5p	0	0	1	1	1	1	PON2	paraoxonase 2
hsa-miR-30a-5p	1	0	1	1	1	1	ATXN1	ataxin 1
hsa-miR-30a-5p	1	0	1	1	1	1	SOX9	SRY (sex determining region Y)-box 9
hsa-miR-30a-5p	1	0	1	1	1	1	TIMP3	TIMP metallopeptidase inhibitor 3
hsa-miR-30a-5p	0	0	1	1	0	0	PSEN2	presenilin 2 (Alzheimer disease 4)
hsa-miR-30a-5p	1	0	1	1	1	1	DCX	doublecortin
hsa-miR-30a-5p	1	0	1	1	1	1	IL1A	interleukin 1, alpha
hsa-miR-30a-5p	1	0	1	1	0	0	SERPINE1	serpin peptidase inhibitor, clade E (nexin, plasminogen activator inhibitor type 1), member 1
hsa-miR-30a-5p	1	0	1	0	1	1	BCL2	B-cell CLL/lymphoma 2
hsa-miR-30a-5p	0	0	1	0	1	1	ADRA2A	adrenoceptor alpha 2A
hsa-miR-30a-5p	1	0	1	0	1	1	ADRB1	adrenoceptor beta 1
hsa-miR-30a-5p	1	0	1	1	1	1	CACNB2	calcium channel, voltage-dependent, beta 2 subunit
hsa-miR-30a-5p	1	0	1	1	1	1	DIO2	deiodinase, iodothyronine, type II
hsa-miR-30a-5p	0	0	1	1	1	1	GABRA5	gamma-aminobutyric acid (GABA) A receptor, alpha 5
hsa-miR-30a-5p	0	0	1	1	1	1	GRM3	glutamate receptor, metabotropic 3
hsa-miR-30a-5p	1	0	1	1	1	1	GRM5	glutamate receptor, metabotropic 5
hsa-miR-30a-5p	1	0	1	1	1	1	IGF2R	insulin-like growth factor 2 receptor
hsa-miR-30a-5p	1	0	1	1	1	1	NR3C2	nuclear receptor subfamily 3, group C, member 2
hsa-miR-30a-5p	0	0	1	1	1	1	P4HA1	prolyl 4-hydroxylase, alpha polypeptide I
hsa-miR-30a-5p	0	0	1	1	1	1	PLCB4	phospholipase C, beta 4
hsa-miR-30a-5p	1	0	1	1	1	1	PPP3CA	protein phosphatase 3, catalytic subunit, alpha isozyme
hsa-miR-30a-5p	1	0	1	1	1	1	PPP3R1	protein phosphatase 3, regulatory subunit B, alpha
hsa-miR-30a-5p	0	0	0	1	1	1	PRLR	prolactin receptor
hsa-miR-30a-5p	1	0	1	1	1	1	RARB	retinoic acid receptor, beta
hsa-miR-30a-5p	1	0	1	1	1	1	RARG	retinoic acid receptor, gamma
hsa-miR-30a-5p	1	0	1	0	1	1	ATP2B1	ATPase, Ca++ transporting, plasma membrane 1
hsa-miR-30a-5p	1	0	1	1	1	1	REEP3	receptor accessory protein 3
hsa-miR-30a-5p	1	0	1	1	1	1	ATP2B2	ATPase, Ca++ transporting, plasma membrane 2
hsa-miR-30a-5p	0	0	1	1	1	1	C16orf87	chromosome 16 open reading frame 87
hsa-miR-30a-5p	1	0	1	0	1	1	GRB10	growth factor receptor-bound protein 10
hsa-miR-30a-5p	0	0	1	1	0	0	TOMM5	translocase of outer mitochondrial membrane 5 homolog (yeast)
hsa-miR-30a-5p	1	0	1	1	1	1	RUNX1	runt-related transcription factor 1
hsa-miR-30a-5p	1	0	1	1	1	1	LHX8	LIM homeobox 8
hsa-miR-30a-5p	1	0	1	1	1	1	AFAP1L2	actin filament associated protein 1-like 2
hsa-miR-30a-5p	1	0	1	1	1	1	LCLAT1	lysocardiolipin acyltransferase 1
hsa-miR-30a-5p	0	0	1	1	1	1	SMAD1	SMAD family member 1
hsa-miR-30a-5p	1	0	1	0	1	1	OSBPL8	oxysterol binding protein-like 8
hsa-miR-30a-5p	1	0	1	0	1	1	LIN28B	lin-28 homolog B (C. elegans)
hsa-miR-30a-5p	1	0	1	1	1	1	EBF3	early B-cell factor 3
hsa-miR-30a-5p	1	0	1	1	1	1	PLCXD3	phosphatidylinositol-specific phospholipase C, X domain containing 3
hsa-miR-30a-5p	1	0	1	1	1	1	ACTN1	actinin, alpha 1
hsa-miR-30a-5p	1	0	1	1	1	1	ACVR1	activin A receptor, type I
hsa-miR-30a-5p	1	0	1	0	1	1	BACH1	BTB and CNC homology 1, basic leucine zipper transcription factor 1
hsa-miR-30a-5p	1	0	1	1	1	1	PRDM1	PR domain containing 1, with ZNF domain
hsa-miR-30a-5p	1	0	1	0	1	1	KLF9	Kruppel-like factor 9
hsa-miR-30a-5p	1	0	1	1	1	1	CALU	calumenin
hsa-miR-30a-5p	0	0	1	1	1	1	CCNT2	cyclin T2
hsa-miR-30a-5p	1	0	1	1	1	1	CDH13	cadherin 13, H-cadherin (heart)
hsa-miR-30a-5p	1	0	1	1	1	1	AP3S1	adaptor-related protein complex 3, sigma 1 subunit
hsa-miR-30a-5p	1	0	1	1	1	1	CTNND2	catenin (cadherin-associated protein), delta 2
hsa-miR-30a-5p	1	0	1	0	1	1	DPYSL2	dihydropyrimidinase-like 2
hsa-miR-30a-5p	1	0	1	1	1	1	DTNA	dystrobrevin, alpha
hsa-miR-30a-5p	1	0	1	1	1	1	CELSR3	cadherin, EGF LAG seven-pass G-type receptor 3 (flamingo homolog, Drosophila)
hsa-miR-30a-5p	1	0	1	0	1	1	ESRRG	estrogen-related receptor gamma
hsa-miR-30a-5p	0	0	1	1	1	1	EXTL2	exostoses (multiple)-like 2
hsa-miR-30a-5p	1	0	1	1	0	0	FOXO3	forkhead box O3
hsa-miR-30a-5p	1	0	1	1	1	1	GATM	glycine amidinotransferase (L-arginine:glycine amidinotransferase)
hsa-miR-30a-5p	1	0	1	1	1	1	NR6A1	nuclear receptor subfamily 6, group A, member 1
hsa-miR-30a-5p	0	0	1	1	1	1	ARF4	ADP-ribosylation factor 4
hsa-miR-30a-5p	1	0	1	1	1	1	BCL6	B-cell CLL/lymphoma 6
hsa-miR-30a-5p	1	0	1	0	1	1	BDNF	brain-derived neurotrophic factor
hsa-miR-30a-5p	1	0	1	1	1	1	BNC1	basonuclin 1
hsa-miR-30a-5p	0	0	1	1	1	1	CALB2	calbindin 2
hsa-miR-30a-5p	1	0	1	1	1	1	CALCR	calcitonin receptor
hsa-miR-30a-5p	0	0	1	1	0	0	CARS	cysteinyl-tRNA synthetase
hsa-miR-30a-5p	1	0	1	1	1	1	CBFB	core-binding factor, beta subunit
hsa-miR-30a-5p	0	0	1	0	1	1	SEPT7	septin 7
hsa-miR-30a-5p	0	0	1	1	1	1	CSNK1A1	casein kinase 1, alpha 1
hsa-miR-30a-5p	1	0	1	1	1	1	E2F3	E2F transcription factor 3
hsa-miR-30a-5p	0	0	1	1	1	1	EDNRA	endothelin receptor type A
hsa-miR-30a-5p	0	0	1	0	1	1	STX2	syntaxin 2
hsa-miR-30a-5p	0	0	1	1	0	0	FKBP3	FK506 binding protein 3, 25kDa
hsa-miR-30a-5p	1	0	1	1	1	1	FRK	fyn-related kinase
hsa-miR-30a-5p	0	0	1	1	1	1	GNAI2	guanine nucleotide binding protein (G protein), alpha inhibiting activity polypeptide 2
hsa-miR-30a-5p	1	0	1	1	1	1	GOLGA1	golgin A1
hsa-miR-30a-5p	1	0	1	1	1	1	GOLGA4	golgin A4
hsa-miR-30a-5p	1	0	1	1	1	1	GOT2	glutamic-oxaloacetic transaminase 2, mitochondrial (aspartate aminotransferase 2)
hsa-miR-30a-5p	0	0	1	1	1	1	GTF2E2	general transcription factor IIE, polypeptide 2, beta 34kDa
hsa-miR-30a-5p	1	0	1	1	1	1	HLF	hepatic leukemia factor
hsa-miR-30a-5p	0	0	1	1	1	1	FOXN2	forkhead box N2
hsa-miR-30a-5p	1	0	1	1	1	1	ITGA5	integrin, alpha 5 (fibronectin receptor, alpha polypeptide)
hsa-miR-30a-5p	1	0	1	1	1	1	JAG2	jagged 2
hsa-miR-30a-5p	1	0	1	1	1	1	JUNB	jun B proto-oncogene
hsa-miR-30a-5p	1	0	1	1	1	1	KCNJ3	potassium inwardly-rectifying channel, subfamily J, member 3
hsa-miR-30a-5p	1	0	1	1	1	1	KPNA3	karyopherin alpha 3 (importin alpha 4)
hsa-miR-30a-5p	1	0	1	1	1	1	MARCKS	myristoylated alanine-rich protein kinase C substrate
hsa-miR-30a-5p	1	0	1	1	1	1	MARK3	MAP/microtubule affinity-regulating kinase 3
hsa-miR-30a-5p	1	0	1	1	1	1	MEIS2	Meis homeobox 2
hsa-miR-30a-5p	1	0	1	0	1	1	IRF4	interferon regulatory factor 4
hsa-miR-30a-5p	0	0	1	1	0	0	MYBL2	v-myb myeloblastosis viral oncogene homolog (avian)-like 2
hsa-miR-30a-5p	1	0	1	1	1	1	MYH9	myosin, heavy chain 9, non-muscle
hsa-miR-30a-5p	1	0	1	0	1	1	PPP1R12A	protein phosphatase 1, regulatory subunit 12A
hsa-miR-30a-5p	1	0	1	1	1	1	NEUROD1	neuronal differentiation 1
hsa-miR-30a-5p	1	0	1	1	1	1	NKX2-2	NK2 homeobox 2
hsa-miR-30a-5p	1	0	1	1	1	1	NOVA1	neuro-oncological ventral antigen 1
hsa-miR-30a-5p	0	0	0	1	1	1	NT5E	5'-nucleotidase, ecto (CD73)
hsa-miR-30a-5p	0	0	1	1	1	1	OMG	oligodendrocyte myelin glycoprotein
hsa-miR-30a-5p	1	0	1	1	1	1	PAWR	PRKC, apoptosis, WT1, regulator
hsa-miR-30a-5p	0	0	1	1	0	0	PDGFRB	platelet-derived growth factor receptor, beta polypeptide
hsa-miR-30a-5p	1	0	1	1	1	1	PFN2	profilin 2
hsa-miR-30a-5p	0	0	1	1	0	0	PGM1	phosphoglucomutase 1
hsa-miR-30a-5p	0	0	1	1	1	1	PITX1	paired-like homeodomain 1
hsa-miR-30a-5p	1	0	1	0	1	1	PLAG1	pleiomorphic adenoma gene 1
hsa-miR-30a-5p	1	0	1	1	1	1	PLCG1	phospholipase C, gamma 1
hsa-miR-30a-5p	1	0	1	1	1	1	PLS1	plastin 1
hsa-miR-30a-5p	0	0	1	1	1	1	PNN	pinin, desmosome associated protein
hsa-miR-30a-5p	1	0	1	1	1	1	PPP2R1B	protein phosphatase 2, regulatory subunit A, beta
hsa-miR-30a-5p	1	0	1	1	0	0	PSMD7	proteasome (prosome, macropain) 26S subunit, non-ATPase, 7
hsa-miR-30a-5p	1	0	1	1	1	1	RAD23B	RAD23 homolog B (S. cerevisiae)
hsa-miR-30a-5p	1	0	1	1	1	1	RASA1	RAS p21 protein activator (GTPase activating protein) 1
hsa-miR-30a-5p	1	0	1	1	1	1	ARID4A	AT rich interactive domain 4A (RBP1-like)
hsa-miR-30a-5p	0	0	1	1	1	1	RGS2	regulator of G-protein signaling 2, 24kDa
hsa-miR-30a-5p	1	0	1	1	1	1	SATB1	SATB homeobox 1
hsa-miR-30a-5p	0	0	1	1	0	0	SBF1	SET binding factor 1
hsa-miR-30a-5p	1	0	1	1	1	1	MAP2K4	mitogen-activated protein kinase kinase 4
hsa-miR-30a-5p	1	0	1	0	1	1	SLC6A6	solute carrier family 6 (neurotransmitter transporter, taurine), member 6
hsa-miR-30a-5p	1	0	1	1	1	1	SNAI2	snail homolog 2 (Drosophila)
hsa-miR-30a-5p	1	0	1	1	1	1	SMARCD2	SWI/SNF related, matrix associated, actin dependent regulator of chromatin, subfamily d, member 2
hsa-miR-30a-5p	1	0	1	0	1	1	SOX4	SRY (sex determining region Y)-box 4
hsa-miR-30a-5p	1	0	1	1	1	1	SP4	Sp4 transcription factor
hsa-miR-30a-5p	1	0	1	1	1	1	STAC	SH3 and cysteine rich domain
hsa-miR-30a-5p	1	0	1	0	1	1	STC1	stanniocalcin 1
hsa-miR-30a-5p	0	0	1	1	1	1	NEK4	NIMA (never in mitosis gene a)-related kinase 4
hsa-miR-30a-5p	1	0	1	1	1	1	TDG	thymine-DNA glycosylase
hsa-miR-30a-5p	0	0	1	1	1	1	THBS2	thrombospondin 2
hsa-miR-30a-5p	1	0	1	0	1	1	UBE2D2	ubiquitin-conjugating enzyme E2D 2
hsa-miR-30a-5p	0	0	1	1	1	1	UBE2I	ubiquitin-conjugating enzyme E2I
hsa-miR-30a-5p	0	0	1	1	1	1	UBE2V2	ubiquitin-conjugating enzyme E2 variant 2
hsa-miR-30a-5p	1	0	1	1	1	1	VIM	vimentin
hsa-miR-30a-5p	0	0	0	1	1	1	VIP	vasoactive intestinal peptide
hsa-miR-30a-5p	1	0	1	1	1	1	WIPF1	WAS/WASL interacting protein family, member 1
hsa-miR-30a-5p	1	0	1	1	1	1	XPO1	exportin 1 (CRM1 homolog, yeast)
hsa-miR-30a-5p	1	0	1	1	1	1	YWHAZ	tyrosine 3-monooxygenase/tryptophan 5-monooxygenase activation protein, zeta polypeptide
hsa-miR-30a-5p	1	0	1	0	1	1	PTP4A1	protein tyrosine phosphatase type IVA, member 1
hsa-miR-30a-5p	1	0	1	1	1	1	NRIP1	nuclear receptor interacting protein 1
hsa-miR-30a-5p	0	0	1	1	1	1	PIP5K1B	phosphatidylinositol-4-phosphate 5-kinase, type I, beta
hsa-miR-30a-5p	1	0	1	1	1	1	DOC2A	double C2-like domains, alpha
hsa-miR-30a-5p	1	0	1	1	1	1	CUL2	cullin 2
hsa-miR-30a-5p	1	0	1	1	1	1	KLF11	Kruppel-like factor 11
hsa-miR-30a-5p	1	0	1	1	1	1	SORBS2	sorbin and SH3 domain containing 2
hsa-miR-30a-5p	1	0	1	1	1	1	SLC4A7	solute carrier family 4, sodium bicarbonate cotransporter, member 7
hsa-miR-30a-5p	0	0	1	1	0	0	DGKZ	diacylglycerol kinase, zeta
hsa-miR-30a-5p	1	0	1	1	1	1	CSDA	cold shock domain protein A
hsa-miR-30a-5p	0	0	1	1	1	1	CHST1	carbohydrate (keratan sulfate Gal-6) sulfotransferase 1
hsa-miR-30a-5p	1	0	1	1	1	1	TMEFF1	transmembrane protein with EGF-like and two follistatin-like domains 1
hsa-miR-30a-5p	1	0	1	1	1	1	CADPS	Ca++-dependent secretion activator
hsa-miR-30a-5p	0	0	1	1	1	1	UNC5C	unc-5 homolog C (C. elegans)
hsa-miR-30a-5p	0	0	1	1	0	0	SOCS1	suppressor of cytokine signaling 1
hsa-miR-30a-5p	1	0	1	0	1	1	IRS2	insulin receptor substrate 2
hsa-miR-30a-5p	1	0	1	0	1	1	BECN1	beclin 1, autophagy related
hsa-miR-30a-5p	1	0	1	1	1	1	EED	embryonic ectoderm development
hsa-miR-30a-5p	1	0	1	1	1	1	ADAM9	ADAM metallopeptidase domain 9
hsa-miR-30a-5p	1	0	1	1	1	1	NR5A2	nuclear receptor subfamily 5, group A, member 2
hsa-miR-30a-5p	1	0	1	1	1	1	CCNK	cyclin K
hsa-miR-30a-5p	0	0	1	1	0	0	SAP30	Sin3A-associated protein, 30kDa
hsa-miR-30a-5p	1	0	1	1	1	1	NRP1	neuropilin 1
hsa-miR-30a-5p	1	0	1	1	1	1	KALRN	kalirin, RhoGEF kinase
hsa-miR-30a-5p	0	0	1	1	1	1	SLC25A14	solute carrier family 25 (mitochondrial carrier, brain), member 14
hsa-miR-30a-5p	1	0	1	1	1	1	SOCS3	suppressor of cytokine signaling 3
hsa-miR-30a-5p	0	0	1	0	1	1	RHOB	ras homolog family member B
hsa-miR-30a-5p	1	0	0	1	1	1	CAPN5	calpain 5
hsa-miR-30a-5p	0	0	1	1	0	0	RRAD	Ras-related associated with diabetes
hsa-miR-30a-5p	1	0	1	0	1	1	SLC1A2	solute carrier family 1 (glial high affinity glutamate transporter), member 2
hsa-miR-30a-5p	1	0	1	1	1	1	P4HA2	prolyl 4-hydroxylase, alpha polypeptide II
hsa-miR-30a-5p	1	0	1	1	0	0	SYNGR3	synaptogyrin 3
hsa-miR-30a-5p	1	0	1	1	1	1	SOCS6	suppressor of cytokine signaling 6
hsa-miR-30a-5p	0	0	1	1	1	1	CHST2	carbohydrate (N-acetylglucosamine-6-O) sulfotransferase 2
hsa-miR-30a-5p	1	0	1	1	1	1	BCL9	B-cell CLL/lymphoma 9
hsa-miR-30a-5p	1	0	1	0	1	1	BNIP3L	BCL2/adenovirus E1B 19kDa interacting protein 3-like
hsa-miR-30a-5p	1	0	1	1	1	1	CASP3	caspase 3, apoptosis-related cysteine peptidase
hsa-miR-30a-5p	1	0	1	1	1	1	DAG1	dystroglycan 1 (dystrophin-associated glycoprotein 1)
hsa-miR-30a-5p	1	0	1	1	1	1	EGR3	early growth response 3
hsa-miR-30a-5p	1	0	1	1	1	1	ELAVL2	ELAV (embryonic lethal, abnormal vision, Drosophila)-like 2 (Hu antigen B)
hsa-miR-30a-5p	1	0	1	1	1	1	EML1	echinoderm microtubule associated protein like 1
hsa-miR-30a-5p	1	0	1	1	1	1	EPHB2	EPH receptor B2
hsa-miR-30a-5p	1	0	1	1	1	1	ERG	v-ets erythroblastosis virus E26 oncogene homolog (avian)
hsa-miR-30a-5p	0	0	0	1	1	1	FAP	fibroblast activation protein, alpha
hsa-miR-30a-5p	1	0	1	0	1	1	FOXD1	forkhead box D1
hsa-miR-30a-5p	1	0	1	0	1	1	GALNT2	UDP-N-acetyl-alpha-D-galactosamine:polypeptide N-acetylgalactosaminyltransferase 2 (GalNAc-T2)
hsa-miR-30a-5p	0	0	1	0	1	1	GALNT3	UDP-N-acetyl-alpha-D-galactosamine:polypeptide N-acetylgalactosaminyltransferase 3 (GalNAc-T3)
hsa-miR-30a-5p	0	0	1	1	1	1	FOXA1	forkhead box A1
hsa-miR-30a-5p	1	0	0	1	1	1	KIF5B	kinesin family member 5B
hsa-miR-30a-5p	1	0	1	1	1	1	YBX1	Y box binding protein 1
hsa-miR-30a-5p	0	0	1	0	1	1	POU4F2	POU class 4 homeobox 2
hsa-miR-30a-5p	1	0	1	1	1	1	RAB11A	RAB11A, member RAS oncogene family
hsa-miR-30a-5p	1	0	1	1	1	1	HERC2	HECT and RLD domain containing E3 ubiquitin protein ligase 2
hsa-miR-30a-5p	1	0	1	1	1	1	XPR1	xenotropic and polytropic retrovirus receptor 1
hsa-miR-30a-5p	1	0	1	1	1	1	LARGE	like-glycosyltransferase
hsa-miR-30a-5p	1	0	1	1	1	1	DLG5	discs, large homolog 5 (Drosophila)
hsa-miR-30a-5p	1	0	1	1	1	1	NREP	neuronal regeneration related protein homolog (rat)
hsa-miR-30a-5p	1	0	1	1	1	1	B4GALT5	UDP-Gal:betaGlcNAc beta 1,4- galactosyltransferase, polypeptide 5
hsa-miR-30a-5p	1	0	1	1	1	1	NRXN3	neurexin 3
hsa-miR-30a-5p	1	0	1	0	1	1	ARHGEF6	Rac/Cdc42 guanine nucleotide exchange factor (GEF) 6
hsa-miR-30a-5p	0	0	1	1	1	1	RASAL2	RAS protein activator like 2
hsa-miR-30a-5p	0	0	1	1	1	1	ATG5	autophagy related 5
hsa-miR-30a-5p	1	0	1	1	1	1	TBPL1	TBP-like 1
hsa-miR-30a-5p	1	0	1	1	1	1	SCAMP1	secretory carrier membrane protein 1
hsa-miR-30a-5p	1	0	1	1	1	1	CLOCK	clock homolog (mouse)
hsa-miR-30a-5p	1	0	1	1	0	0	IER2	immediate early response 2
hsa-miR-30a-5p	1	1	1	1	0	0	EFNA3	ephrin-A3
hsa-miR-30a-5p	1	0	1	1	1	1	JARID2	jumonji, AT rich interactive domain 2
hsa-miR-30a-5p	1	0	1	0	1	1	KRAS	v-Ki-ras2 Kirsten rat sarcoma viral oncogene homolog
hsa-miR-30a-5p	1	0	1	1	1	1	MECP2	methyl CpG binding protein 2 (Rett syndrome)
hsa-miR-30a-5p	1	0	1	1	1	1	PGGT1B	protein geranylgeranyltransferase type I, beta subunit
hsa-miR-30a-5p	0	0	0	1	1	1	PIK3R2	phosphoinositide-3-kinase, regulatory subunit 2 (beta)
hsa-miR-30a-5p	1	0	1	1	0	0	PIP4K2A	phosphatidylinositol-5-phosphate 4-kinase, type II, alpha
hsa-miR-30a-5p	1	0	1	1	1	1	SIAH2	siah E3 ubiquitin protein ligase 2
hsa-miR-30a-5p	1	0	1	1	1	1	FXR1	fragile X mental retardation, autosomal homolog 1
hsa-miR-30a-5p	0	0	1	1	1	1	LGI1	leucine-rich, glioma inactivated 1
hsa-miR-30a-5p	1	0	1	1	1	1	GFPT2	glutamine-fructose-6-phosphate transaminase 2
hsa-miR-30a-5p	1	0	1	1	1	1	PTBP3	polypyrimidine tract binding protein 3
hsa-miR-30a-5p	0	0	0	1	1	1	ABL1	c-abl oncogene 1, non-receptor tyrosine kinase
hsa-miR-30a-5p	1	0	1	1	1	1	ACTC1	actin, alpha, cardiac muscle 1
hsa-miR-30a-5p	1	0	1	1	1	1	RND3	Rho family GTPase 3
hsa-miR-30a-5p	0	0	1	0	1	1	COL13A1	collagen, type XIII, alpha 1
hsa-miR-30a-5p	1	0	1	1	1	1	CRKL	v-crk sarcoma virus CT10 oncogene homolog (avian)-like
hsa-miR-30a-5p	1	0	1	1	1	1	ARID3A	AT rich interactive domain 3A (BRIGHT-like)
hsa-miR-30a-5p	1	0	1	1	1	1	EYA2	eyes absent homolog 2 (Drosophila)
hsa-miR-30a-5p	1	0	1	1	1	1	FOXG1	forkhead box G1
hsa-miR-30a-5p	1	0	1	1	1	1	GAS2	growth arrest-specific 2
hsa-miR-30a-5p	0	0	1	1	1	1	GRK5	G protein-coupled receptor kinase 5
hsa-miR-30a-5p	0	0	1	1	1	1	GTF2H1	general transcription factor IIH, polypeptide 1, 62kDa
hsa-miR-30a-5p	1	0	1	0	1	1	HMGB3	high mobility group box 3
hsa-miR-30a-5p	1	0	1	1	1	1	HSPA5	heat shock 70kDa protein 5 (glucose-regulated protein, 78kDa)
hsa-miR-30a-5p	0	0	1	1	1	1	MCF2	MCF.2 cell line derived transforming sequence
hsa-miR-30a-5p	1	0	1	1	1	1	RAB8A	RAB8A, member RAS oncogene family
hsa-miR-30a-5p	1	0	1	1	1	1	PDCL	phosducin-like
hsa-miR-30a-5p	0	0	1	1	1	1	ZRANB2	zinc finger, RAN-binding domain containing 2
hsa-miR-30a-5p	1	0	1	1	1	1	RANBP9	RAN binding protein 9
hsa-miR-30a-5p	1	0	1	1	1	1	HOXA1	homeobox A1
hsa-miR-30a-5p	1	0	1	1	1	1	HOXA11	homeobox A11
hsa-miR-30a-5p	1	0	1	1	1	1	IRS1	insulin receptor substrate 1
hsa-miR-30a-5p	1	0	1	1	1	1	LPP	LIM domain containing preferred translocation partner in lipoma
hsa-miR-30a-5p	1	0	1	1	1	1	MAB21L1	mab-21-like 1 (C. elegans)
hsa-miR-30a-5p	1	0	1	1	1	1	NFIB	nuclear factor I/B
hsa-miR-30a-5p	1	0	1	1	1	1	NHLH2	nescient helix loop helix 2
hsa-miR-30a-5p	1	0	1	1	1	1	KLF10	Kruppel-like factor 10
hsa-miR-30a-5p	0	0	1	1	1	1	MKRN3	makorin ring finger protein 3
hsa-miR-30a-5p	1	0	1	1	1	1	ST8SIA4	ST8 alpha-N-acetyl-neuraminide alpha-2,8-sialyltransferase 4
hsa-miR-30a-5p	1	0	1	0	1	1	TSPAN2	tetraspanin 2
hsa-miR-30a-5p	1	0	1	1	1	1	ACTR1A	ARP1 actin-related protein 1 homolog A, centractin alpha (yeast)
hsa-miR-30a-5p	1	0	1	1	1	1	ARL4C	ADP-ribosylation factor-like 4C
hsa-miR-30a-5p	0	0	1	1	1	1	PSME3	proteasome (prosome, macropain) activator subunit 3 (PA28 gamma; Ki)
hsa-miR-30a-5p	0	0	1	1	1	1	LRRC17	leucine rich repeat containing 17
hsa-miR-30a-5p	1	0	1	1	1	1	KCNMB2	potassium large conductance calcium-activated channel, subfamily M, beta member 2
hsa-miR-30a-5p	1	0	1	1	1	1	MARCH6	membrane-associated ring finger (C3HC4) 6, E3 ubiquitin protein ligase
hsa-miR-30a-5p	1	0	1	1	1	1	IDH1	isocitrate dehydrogenase 1 (NADP+), soluble
hsa-miR-30a-5p	1	0	1	1	1	1	MAT2A	methionine adenosyltransferase II, alpha
hsa-miR-30a-5p	1	0	1	1	1	1	MAP3K5	mitogen-activated protein kinase kinase kinase 5
hsa-miR-30a-5p	1	0	1	1	1	1	MEOX2	mesenchyme homeobox 2
hsa-miR-30a-5p	1	0	1	1	1	1	MYH10	myosin, heavy chain 10, non-muscle
hsa-miR-30a-5p	1	0	1	1	1	1	SNAI1	snail homolog 1 (Drosophila)
hsa-miR-30a-5p	1	0	1	1	1	1	ZFAND5	zinc finger, AN1-type domain 5
hsa-miR-30a-5p	0	0	1	1	1	1	ARID1A	AT rich interactive domain 1A (SWI-like)
hsa-miR-30a-5p	0	0	0	0	1	1	PROM1	prominin 1
hsa-miR-30a-5p	1	0	1	1	1	1	SEMA3A	sema domain, immunoglobulin domain (Ig), short basic domain, secreted, (semaphorin) 3A
hsa-miR-30a-5p	1	0	1	1	1	1	DAGLA	diacylglycerol lipase, alpha
hsa-miR-30a-5p	1	0	1	1	1	1	CAPZA1	capping protein (actin filament) muscle Z-line, alpha 1
hsa-miR-30a-5p	1	0	0	1	1	1	NEDD4	neural precursor cell expressed, developmentally down-regulated 4, E3 ubiquitin protein ligase
hsa-miR-30a-5p	1	0	1	1	1	1	NEUROG1	neurogenin 1
hsa-miR-30a-5p	1	0	1	1	1	1	NR4A2	nuclear receptor subfamily 4, group A, member 2
hsa-miR-30a-5p	1	0	1	0	1	1	PDE4D	phosphodiesterase 4D, cAMP-specific
hsa-miR-30a-5p	0	0	1	0	0	0	PTPN13	protein tyrosine phosphatase, non-receptor type 13 (APO-1/CD95 (Fas)-associated phosphatase)
hsa-miR-30a-5p	1	0	1	1	1	1	MAP3K12	mitogen-activated protein kinase kinase kinase 12
hsa-miR-30a-5p	1	0	1	1	1	1	NCOR2	nuclear receptor corepressor 2
hsa-miR-30a-5p	1	0	1	1	1	1	USP15	ubiquitin specific peptidase 15
hsa-miR-30a-5p	1	0	1	0	1	1	PCGF3	polycomb group ring finger 3
hsa-miR-30a-5p	1	0	1	1	1	1	TUBGCP3	tubulin, gamma complex associated protein 3
hsa-miR-30a-5p	1	0	1	1	1	1	SEC23A	Sec23 homolog A (S. cerevisiae)
hsa-miR-30a-5p	1	0	1	1	1	1	VAT1	vesicle amine transport protein 1 homolog (T. californica)
hsa-miR-30a-5p	1	0	1	1	1	1	ENOX2	ecto-NOX disulfide-thiol exchanger 2
hsa-miR-30a-5p	1	0	1	1	1	1	ERLIN1	ER lipid raft associated 1
hsa-miR-30a-5p	1	0	1	1	1	1	ELL	elongation factor RNA polymerase II
hsa-miR-30a-5p	1	0	1	1	1	1	BCL2L11	BCL2-like 11 (apoptosis facilitator)
hsa-miR-30a-5p	1	0	1	1	1	1	CAMKK2	calcium/calmodulin-dependent protein kinase kinase 2, beta
hsa-miR-30a-5p	1	0	1	0	1	1	CELF2	CUGBP, Elav-like family member 2
hsa-miR-30a-5p	1	0	1	0	1	1	GNA13	guanine nucleotide binding protein (G protein), alpha 13
hsa-miR-30a-5p	1	0	1	0	1	1	NFAT5	nuclear factor of activated T-cells 5, tonicity-responsive
hsa-miR-30a-5p	1	0	1	1	1	1	STAG2	stromal antigen 2
hsa-miR-30a-5p	1	0	1	0	1	1	CHL1	cell adhesion molecule with homology to L1CAM (close homolog of L1)
hsa-miR-30a-5p	1	0	1	1	1	1	SRSF10	serine/arginine-rich splicing factor 10
hsa-miR-30a-5p	1	0	1	0	1	1	ARPP19	cAMP-regulated phosphoprotein, 19kDa
hsa-miR-30a-5p	1	0	1	1	1	1	MAN1A2	mannosidase, alpha, class 1A, member 2
hsa-miR-30a-5p	0	0	1	1	1	1	SYPL1	synaptophysin-like 1
hsa-miR-30a-5p	0	0	1	1	1	1	TMED2	transmembrane emp24 domain trafficking protein 2
hsa-miR-30a-5p	0	0	1	1	1	1	ASCC3	activating signal cointegrator 1 complex subunit 3
hsa-miR-30a-5p	0	0	0	1	1	1	RAB32	RAB32, member RAS oncogene family
hsa-miR-30a-5p	1	0	1	1	1	1	PRRX1	paired related homeobox 1
hsa-miR-30a-5p	1	0	1	0	1	1	SCN3A	sodium channel, voltage-gated, type III, alpha subunit
hsa-miR-30a-5p	1	0	1	0	1	1	SOX12	SRY (sex determining region Y)-box 12
hsa-miR-30a-5p	1	0	1	1	1	1	CPSF6	cleavage and polyadenylation specific factor 6, 68kDa
hsa-miR-30a-5p	1	0	1	1	1	1	RAPGEF4	Rap guanine nucleotide exchange factor (GEF) 4
hsa-miR-30a-5p	1	0	1	1	1	1	PTPN21	protein tyrosine phosphatase, non-receptor type 21
hsa-miR-30a-5p	1	0	1	1	1	1	ZIC2	Zic family member 2
hsa-miR-30a-5p	1	0	1	1	1	1	CIT	citron (rho-interacting, serine/threonine kinase 21)
hsa-miR-30a-5p	0	0	1	1	0	0	CELF3	CUGBP, Elav-like family member 3
hsa-miR-30a-5p	1	0	1	1	1	1	PDCD10	programmed cell death 10
hsa-miR-30a-5p	0	0	1	0	1	1	AP4E1	adaptor-related protein complex 4, epsilon 1 subunit
hsa-miR-30a-5p	0	0	1	1	1	1	COG2	component of oligomeric golgi complex 2
hsa-miR-30a-5p	1	0	0	1	1	1	NID2	nidogen 2 (osteonidogen)
hsa-miR-30a-5p	1	0	1	1	1	1	ELL2	elongation factor, RNA polymerase II, 2
hsa-miR-30a-5p	1	0	1	1	1	1	AP3M1	adaptor-related protein complex 3, mu 1 subunit
hsa-miR-30a-5p	1	0	1	1	1	1	DDAH1	dimethylarginine dimethylaminohydrolase 1
hsa-miR-30a-5p	1	0	1	1	1	1	EIF2C1	eukaryotic translation initiation factor 2C, 1
hsa-miR-30a-5p	1	0	1	1	1	1	SIRT1	sirtuin 1
hsa-miR-30a-5p	0	0	1	1	1	1	RRAS2	related RAS viral (r-ras) oncogene homolog 2
hsa-miR-30a-5p	1	0	1	0	1	1	ACAP2	ArfGAP with coiled-coil, ankyrin repeat and PH domains 2
hsa-miR-30a-5p	1	0	1	0	1	1	MAGI2	membrane associated guanylate kinase, WW and PDZ domain containing 2
hsa-miR-30a-5p	1	0	1	1	1	1	MAPRE1	microtubule-associated protein, RP/EB family, member 1
hsa-miR-30a-5p	1	0	1	1	1	1	MMD	monocyte to macrophage differentiation-associated
hsa-miR-30a-5p	0	0	1	1	1	1	GMEB2	glucocorticoid modulatory element binding protein 2
hsa-miR-30a-5p	1	0	1	1	1	1	ZMYND8	zinc finger, MYND-type containing 8
hsa-miR-30a-5p	0	0	1	1	1	1	SSBP2	single-stranded DNA binding protein 2
hsa-miR-30a-5p	1	0	1	1	1	1	TLL2	tolloid-like 2
hsa-miR-30a-5p	1	0	1	1	1	1	YWHAG	tyrosine 3-monooxygenase/tryptophan 5-monooxygenase activation protein, gamma polypeptide
hsa-miR-30a-5p	1	0	1	1	1	1	STK39	serine threonine kinase 39
hsa-miR-30a-5p	1	0	1	1	1	1	CLCF1	cardiotrophin-like cytokine factor 1
hsa-miR-30a-5p	1	0	1	1	1	1	SGK3	serum/glucocorticoid regulated kinase family, member 3
hsa-miR-30a-5p	1	0	1	1	1	1	PPARGC1A	peroxisome proliferator-activated receptor gamma, coactivator 1 alpha
hsa-miR-30a-5p	1	0	1	1	1	1	BAZ2B	bromodomain adjacent to zinc finger domain, 2B
hsa-miR-30a-5p	1	0	1	1	0	0	DEXI	Dexi homolog (mouse)
hsa-miR-30a-5p	1	0	1	1	1	1	SSX2IP	synovial sarcoma, X breakpoint 2 interacting protein
hsa-miR-30a-5p	1	0	1	0	1	1	CHMP2B	charged multivesicular body protein 2B
hsa-miR-30a-5p	1	0	1	1	1	1	MKL2	MKL/myocardin-like 2
hsa-miR-30a-5p	1	0	1	1	1	1	RGCC	regulator of cell cycle
hsa-miR-30a-5p	1	0	1	0	1	1	TRPS1	trichorhinophalangeal syndrome I
hsa-miR-30a-5p	0	0	1	0	1	1	SCN8A	sodium channel, voltage gated, type VIII, alpha subunit
hsa-miR-30a-5p	0	0	1	0	1	1	AP2A1	adaptor-related protein complex 2, alpha 1 subunit
hsa-miR-30a-5p	1	0	1	1	1	1	ITPK1	inositol-tetrakisphosphate 1-kinase
hsa-miR-30a-5p	0	0	1	0	1	1	ADAMTS3	ADAM metallopeptidase with thrombospondin type 1 motif, 3
hsa-miR-30a-5p	1	0	1	1	1	1	NCS1	neuronal calcium sensor 1
hsa-miR-30a-5p	1	0	0	1	1	1	CAPN7	calpain 7
hsa-miR-30a-5p	0	0	1	1	0	0	PDSS1	prenyl (decaprenyl) diphosphate synthase, subunit 1
hsa-miR-30a-5p	1	0	1	1	1	1	KLHL20	kelch-like 20 (Drosophila)
hsa-miR-30a-5p	1	0	1	1	1	1	TNRC6A	trinucleotide repeat containing 6A
hsa-miR-30a-5p	0	0	1	1	1	1	TMOD2	tropomodulin 2 (neuronal)
hsa-miR-30a-5p	1	0	1	1	1	1	GRHL1	grainyhead-like 1 (Drosophila)
hsa-miR-30a-5p	1	0	1	1	1	1	BRD1	bromodomain containing 1
hsa-miR-30a-5p	1	0	1	1	1	1	FAF2	Fas associated factor family member 2
hsa-miR-30a-5p	1	0	1	0	1	1	KIAA0355	KIAA0355
hsa-miR-30a-5p	1	0	1	0	1	1	FAM131B	family with sequence similarity 131, member B
hsa-miR-30a-5p	0	0	1	0	1	1	HDAC9	histone deacetylase 9
hsa-miR-30a-5p	1	0	1	1	1	1	PHF16	PHD finger protein 16
hsa-miR-30a-5p	1	0	1	0	1	1	MAML1	mastermind-like 1 (Drosophila)
hsa-miR-30a-5p	1	0	1	1	1	1	JAKMIP2	janus kinase and microtubule interacting protein 2
hsa-miR-30a-5p	1	0	1	1	1	1	ZEB2	zinc finger E-box binding homeobox 2
hsa-miR-30a-5p	1	0	1	1	1	1	ELMO1	engulfment and cell motility 1
hsa-miR-30a-5p	0	0	1	1	1	1	SEC24D	SEC24 family, member D (S. cerevisiae)
hsa-miR-30a-5p	1	0	1	0	1	1	DDX46	DEAD (Asp-Glu-Ala-Asp) box polypeptide 46
hsa-miR-30a-5p	1	0	1	0	1	1	LPPR4	lipid phosphate phosphatase-related protein type 4
hsa-miR-30a-5p	1	0	1	1	1	1	NUAK1	NUAK family, SNF1-like kinase, 1
hsa-miR-30a-5p	1	0	1	0	1	1	SRGAP3	SLIT-ROBO Rho GTPase activating protein 3
hsa-miR-30a-5p	1	0	1	1	1	1	JOSD1	Josephin domain containing 1
hsa-miR-30a-5p	1	0	1	1	1	1	RNF44	ring finger protein 44
hsa-miR-30a-5p	1	0	1	1	1	1	DLGAP4	discs, large (Drosophila) homolog-associated protein 4
hsa-miR-30a-5p	1	0	1	1	1	1	NAV3	neuron navigator 3
hsa-miR-30a-5p	0	0	0	1	0	0	FRMPD1	FERM and PDZ domain containing 1
hsa-miR-30a-5p	1	0	1	1	1	1	CPEB3	cytoplasmic polyadenylation element binding protein 3
hsa-miR-30a-5p	1	0	1	0	1	1	ICK	intestinal cell (MAK-like) kinase
hsa-miR-30a-5p	1	0	1	1	1	1	FNDC3A	fibronectin type III domain containing 3A
hsa-miR-30a-5p	1	0	1	1	1	1	NLGN1	neuroligin 1
hsa-miR-30a-5p	1	0	1	1	1	1	SPAST	spastin
hsa-miR-30a-5p	1	0	1	1	1	1	BAHD1	bromo adjacent homology domain containing 1
hsa-miR-30a-5p	1	0	1	1	1	1	SORCS3	sortilin-related VPS10 domain containing receptor 3
hsa-miR-30a-5p	1	0	1	1	1	1	SPEN	spen homolog, transcriptional regulator (Drosophila)
hsa-miR-30a-5p	1	0	1	1	1	1	TMCC1	transmembrane and coiled-coil domain family 1
hsa-miR-30a-5p	1	0	1	0	1	1	CDK19	cyclin-dependent kinase 19
hsa-miR-30a-5p	1	0	1	1	1	1	HIC2	hypermethylated in cancer 2
hsa-miR-30a-5p	1	0	1	1	1	1	RGL1	ral guanine nucleotide dissociation stimulator-like 1
hsa-miR-30a-5p	1	0	1	1	1	1	TRIM9	tripartite motif containing 9
hsa-miR-30a-5p	1	0	1	1	1	1	SEL1L3	sel-1 suppressor of lin-12-like 3 (C. elegans)
hsa-miR-30a-5p	1	0	1	1	1	1	CAMTA1	calmodulin binding transcription activator 1
hsa-miR-30a-5p	1	0	1	0	1	1	LPHN3	latrophilin 3
hsa-miR-30a-5p	0	0	1	1	1	1	EHBP1	EH domain binding protein 1
hsa-miR-30a-5p	1	0	1	1	1	1	SATB2	SATB homeobox 2
hsa-miR-30a-5p	1	0	0	0	1	1	SLC9A8	solute carrier family 9, subfamily A (NHE8, cation proton antiporter 8), member 8
hsa-miR-30a-5p	1	0	1	1	1	1	DNAJC13	DnaJ (Hsp40) homolog, subfamily C, member 13
hsa-miR-30a-5p	1	0	1	1	1	1	KIAA1033	KIAA1033
hsa-miR-30a-5p	1	0	1	0	1	1	NEDD4L	neural precursor cell expressed, developmentally down-regulated 4-like, E3 ubiquitin protein ligase
hsa-miR-30a-5p	1	0	1	1	1	1	WDR7	WD repeat domain 7
hsa-miR-30a-5p	1	0	1	1	1	1	PHF15	PHD finger protein 15
hsa-miR-30a-5p	0	0	1	0	1	1	ZDHHC17	zinc finger, DHHC-type containing 17
hsa-miR-30a-5p	1	0	1	1	1	1	ZFYVE26	zinc finger, FYVE domain containing 26
hsa-miR-30a-5p	1	0	1	1	1	1	R3HDM1	R3H domain containing 1
hsa-miR-30a-5p	1	0	1	1	1	1	DSTYK	dual serine/threonine and tyrosine protein kinase
hsa-miR-30a-5p	1	0	1	1	1	1	MXRA5	matrix-remodelling associated 5
hsa-miR-30a-5p	1	0	1	1	1	1	CNOT6	CCR4-NOT transcription complex, subunit 6
hsa-miR-30a-5p	1	0	1	1	1	1	ZNF521	zinc finger protein 521
hsa-miR-30a-5p	1	0	1	1	1	1	PNKD	paroxysmal nonkinesigenic dyskinesia
hsa-miR-30a-5p	0	0	1	1	1	1	TMEM87A	transmembrane protein 87A
hsa-miR-30a-5p	1	0	1	1	1	1	NECAP1	NECAP endocytosis associated 1
hsa-miR-30a-5p	0	0	1	1	0	0	TBC1D10B	TBC1 domain family, member 10B
hsa-miR-30a-5p	1	0	1	1	1	1	GORASP2	golgi reassembly stacking protein 2, 55kDa
hsa-miR-30a-5p	1	0	1	1	1	1	UPF2	UPF2 regulator of nonsense transcripts homolog (yeast)
hsa-miR-30a-5p	1	0	1	0	1	1	GLCE	glucuronic acid epimerase
hsa-miR-30a-5p	1	0	1	1	1	1	GIGYF2	GRB10 interacting GYF protein 2
hsa-miR-30a-5p	1	0	1	0	1	1	ERC2	ELKS/RAB6-interacting/CAST family member 2
hsa-miR-30a-5p	1	0	1	1	1	1	RAI14	retinoic acid induced 14
hsa-miR-30a-5p	1	0	1	1	1	1	EPC2	enhancer of polycomb homolog 2 (Drosophila)
hsa-miR-30a-5p	1	0	1	1	1	1	RAP1B	RAP1B, member of RAS oncogene family
hsa-miR-30a-5p	1	0	1	1	1	1	WT1-AS	WT1 antisense RNA
hsa-miR-30a-5p	1	0	1	1	1	1	AZIN1	antizyme inhibitor 1
hsa-miR-30a-5p	1	0	1	1	1	1	ZBTB7A	zinc finger and BTB domain containing 7A
hsa-miR-30a-5p	1	0	1	0	1	1	KLF13	Kruppel-like factor 13
hsa-miR-30a-5p	1	0	1	1	1	1	UBE2J1	ubiquitin-conjugating enzyme E2, J1
hsa-miR-30a-5p	1	0	1	1	1	1	YPEL5	yippee-like 5 (Drosophila)
hsa-miR-30a-5p	1	0	1	1	1	1	DESI2	desumoylating isopeptidase 2
hsa-miR-30a-5p	1	0	1	0	1	1	CNR1	cannabinoid receptor 1 (brain)
hsa-miR-30a-5p	1	0	1	1	1	1	RASD1	RAS, dexamethasone-induced 1
hsa-miR-30a-5p	1	0	1	1	1	1	ZNF706	zinc finger protein 706
hsa-miR-30a-5p	0	0	1	1	0	0	ASB3	ankyrin repeat and SOCS box containing 3
hsa-miR-30a-5p	0	0	1	1	1	1	KCTD3	potassium channel tetramerisation domain containing 3
hsa-miR-30a-5p	0	0	1	1	1	1	RAB10	RAB10, member RAS oncogene family
hsa-miR-30a-5p	1	0	1	1	1	1	INSIG2	insulin induced gene 2
hsa-miR-30a-5p	1	0	1	0	1	1	AMOTL2	angiomotin like 2
hsa-miR-30a-5p	1	0	1	1	0	0	MAN1B1	mannosidase, alpha, class 1B, member 1
hsa-miR-30a-5p	0	0	0	1	0	0	NAGPA	N-acetylglucosamine-1-phosphodiester alpha-N-acetylglucosaminidase
hsa-miR-30a-5p	1	0	1	1	1	1	IKZF2	IKAROS family zinc finger 2 (Helios)
hsa-miR-30a-5p	0	0	1	1	1	1	REV1	REV1, polymerase (DNA directed)
hsa-miR-30a-5p	0	0	1	1	1	1	ADAM22	ADAM metallopeptidase domain 22
hsa-miR-30a-5p	1	0	1	1	0	0	IRX4	iroquois homeobox 4
hsa-miR-30a-5p	1	0	1	1	1	1	ARID4B	AT rich interactive domain 4B (RBP1-like)
hsa-miR-30a-5p	1	0	1	1	1	1	NTM	neurotrimin
hsa-miR-30a-5p	1	0	1	1	1	1	IER5	immediate early response 5
hsa-miR-30a-5p	1	0	1	1	1	1	RASL12	RAS-like, family 12
hsa-miR-30a-5p	1	0	1	1	1	1	ZNF644	zinc finger protein 644
hsa-miR-30a-5p	1	0	1	1	1	1	MEX3C	mex-3 homolog C (C. elegans)
hsa-miR-30a-5p	1	0	1	1	1	1	GALNT7	UDP-N-acetyl-alpha-D-galactosamine:polypeptide N-acetylgalactosaminyltransferase 7 (GalNAc-T7)
hsa-miR-30a-5p	1	0	1	1	1	1	NOTCH1	notch 1
hsa-miR-30a-5p	1	0	1	0	1	1	EIF2C4	eukaryotic translation initiation factor 2C, 4
hsa-miR-30a-5p	1	0	1	1	1	1	BNC2	basonuclin 2
hsa-miR-30a-5p	0	0	1	1	1	1	TRPM7	transient receptor potential cation channel, subfamily M, member 7
hsa-miR-30a-5p	1	0	0	1	1	1	SWT1	SWT1 RNA endoribonuclease homolog (S. cerevisiae)
hsa-miR-30a-5p	1	0	1	1	1	1	MFSD6	major facilitator superfamily domain containing 6
hsa-miR-30a-5p	1	0	1	0	1	1	FAM46C	family with sequence similarity 46, member C
hsa-miR-30a-5p	0	0	1	1	1	1	TASP1	taspase, threonine aspartase, 1
hsa-miR-30a-5p	1	0	1	1	1	1	ZCCHC2	zinc finger, CCHC domain containing 2
hsa-miR-30a-5p	0	0	1	1	1	1	BCOR	BCL6 corepressor
hsa-miR-30a-5p	0	0	1	1	1	1	ANKHD1	ankyrin repeat and KH domain containing 1
hsa-miR-30a-5p	1	0	1	0	1	1	CHD7	chromodomain helicase DNA binding protein 7
hsa-miR-30a-5p	1	0	1	1	1	1	CDC37L1	cell division cycle 37 homolog (S. cerevisiae)-like 1
hsa-miR-30a-5p	0	0	1	1	1	1	DET1	de-etiolated homolog 1 (Arabidopsis)
hsa-miR-30a-5p	1	0	1	1	1	1	FRMD4A	FERM domain containing 4A
hsa-miR-30a-5p	1	0	1	1	1	1	LRRC8D	leucine rich repeat containing 8 family, member D
hsa-miR-30a-5p	1	0	1	1	1	1	LMBR1L	limb region 1 homolog (mouse)-like
hsa-miR-30a-5p	0	0	1	1	1	1	SEC61A2	Sec61 alpha 2 subunit (S. cerevisiae)
hsa-miR-30a-5p	0	0	1	1	1	1	RNF220	ring finger protein 220
hsa-miR-30a-5p	1	0	1	0	1	1	ARL8B	ADP-ribosylation factor-like 8B
hsa-miR-30a-5p	1	0	1	1	1	1	CHFR	checkpoint with forkhead and ring finger domains, E3 ubiquitin protein ligase
hsa-miR-30a-5p	0	0	1	1	0	0	SLC38A7	solute carrier family 38, member 7
hsa-miR-30a-5p	1	0	1	1	1	1	C7orf43	chromosome 7 open reading frame 43
hsa-miR-30a-5p	1	0	1	1	1	1	C9orf72	chromosome 9 open reading frame 72
hsa-miR-30a-5p	0	0	1	1	1	1	SLC29A3	solute carrier family 29 (nucleoside transporters), member 3
hsa-miR-30a-5p	0	0	1	1	1	1	MBNL3	muscleblind-like splicing regulator 3
hsa-miR-30a-5p	0	0	1	1	1	1	TCP11L1	t-complex 11 (mouse)-like 1
hsa-miR-30a-5p	0	0	1	0	0	0	KDM3A	lysine (K)-specific demethylase 3A
hsa-miR-30a-5p	0	0	1	1	1	1	CAND1	cullin-associated and neddylation-dissociated 1
hsa-miR-30a-5p	1	0	1	1	1	1	ASAP1	ArfGAP with SH3 domain, ankyrin repeat and PH domain 1
hsa-miR-30a-5p	1	0	1	1	1	1	NRP2	neuropilin 2
hsa-miR-30a-5p	0	0	1	1	1	1	CEP41	centrosomal protein 41kDa
hsa-miR-30a-5p	1	0	1	1	1	1	MATR3	matrin 3
hsa-miR-30a-5p	1	0	1	1	1	1	SLC38A2	solute carrier family 38, member 2
hsa-miR-30a-5p	1	0	1	1	1	1	KCTD5	potassium channel tetramerisation domain containing 5
hsa-miR-30a-5p	1	0	1	1	1	1	WDR44	WD repeat domain 44
hsa-miR-30a-5p	1	0	1	1	1	1	DDIT4	DNA-damage-inducible transcript 4
hsa-miR-30a-5p	1	0	1	0	1	1	EML4	echinoderm microtubule associated protein like 4
hsa-miR-30a-5p	1	0	1	1	1	1	DLL4	delta-like 4 (Drosophila)
hsa-miR-30a-5p	1	0	1	1	0	0	TNXB	tenascin XB
hsa-miR-30a-5p	1	0	1	1	1	1	ARHGEF3	Rho guanine nucleotide exchange factor (GEF) 3
hsa-miR-30a-5p	1	0	1	1	1	1	SLC7A10	solute carrier family 7 (neutral amino acid transporter light chain, asc system), member 10
hsa-miR-30a-5p	0	0	1	1	1	1	CLDND1	claudin domain containing 1
hsa-miR-30a-5p	1	0	1	0	1	1	PAPOLB	poly(A) polymerase beta (testis specific)
hsa-miR-30a-5p	0	0	1	1	1	1	CA10	carbonic anhydrase X
hsa-miR-30a-5p	0	0	1	1	0	0	PARP6	poly (ADP-ribose) polymerase family, member 6
hsa-miR-30a-5p	1	0	1	1	1	1	TULP4	tubby like protein 4
hsa-miR-30a-5p	1	0	1	0	1	1	MNT	MAX binding protein
hsa-miR-30a-5p	1	0	1	0	1	1	EIF5A2	eukaryotic translation initiation factor 5A2
hsa-miR-30a-5p	1	0	1	1	1	1	SCYL3	SCY1-like 3 (S. cerevisiae)
hsa-miR-30a-5p	1	0	1	1	1	1	PHTF2	putative homeodomain transcription factor 2
hsa-miR-30a-5p	1	0	1	1	1	1	DOLPP1	dolichyl pyrophosphate phosphatase 1
hsa-miR-30a-5p	1	0	1	1	1	1	PTGFRN	prostaglandin F2 receptor negative regulator
hsa-miR-30a-5p	1	0	1	1	1	1	NAV1	neuron navigator 1
hsa-miR-30a-5p	1	0	1	1	1	1	GALNT1	UDP-N-acetyl-alpha-D-galactosamine:polypeptide N-acetylgalactosaminyltransferase 1 (GalNAc-T1)
hsa-miR-30a-5p	1	0	1	1	1	1	PELI1	pellino E3 ubiquitin protein ligase 1
hsa-miR-30a-5p	1	0	1	1	1	1	RAB22A	RAB22A, member RAS oncogene family
hsa-miR-30a-5p	0	0	1	1	1	1	CCPG1	cell cycle progression 1
hsa-miR-30a-5p	1	0	1	0	1	1	NUFIP2	nuclear fragile X mental retardation protein interacting protein 2
hsa-miR-30a-5p	1	0	1	0	1	1	ALPK3	alpha-kinase 3
hsa-miR-30a-5p	1	0	0	1	1	1	PDP2	pyruvate dehyrogenase phosphatase catalytic subunit 2
hsa-miR-30a-5p	1	0	1	1	1	1	TAOK1	TAO kinase 1
hsa-miR-30a-5p	1	0	1	1	1	1	SEMA6A	sema domain, transmembrane domain (TM), and cytoplasmic domain, (semaphorin) 6A
hsa-miR-30a-5p	1	0	1	1	1	1	RANBP10	RAN binding protein 10
hsa-miR-30a-5p	1	0	1	0	1	1	SEMA6D	sema domain, transmembrane domain (TM), and cytoplasmic domain, (semaphorin) 6D
hsa-miR-30a-5p	1	0	1	1	1	1	STIM2	stromal interaction molecule 2
hsa-miR-30a-5p	1	0	1	0	1	1	SH3RF1	SH3 domain containing ring finger 1
hsa-miR-30a-5p	1	0	1	1	1	1	VAT1L	vesicle amine transport protein 1 homolog (T. californica)-like
hsa-miR-30a-5p	1	0	1	0	1	1	USP37	ubiquitin specific peptidase 37
hsa-miR-30a-5p	0	0	1	1	1	1	GNAO1	guanine nucleotide binding protein (G protein), alpha activating activity polypeptide O
hsa-miR-30a-5p	1	0	1	1	1	1	NR2F2	nuclear receptor subfamily 2, group F, member 2
hsa-miR-30a-5p	1	0	1	1	1	1	SCN2A	sodium channel, voltage-gated, type II, alpha subunit
hsa-miR-30a-5p	1	0	1	1	1	1	KCNJ12	potassium inwardly-rectifying channel, subfamily J, member 12
hsa-miR-30a-5p	1	0	1	1	1	1	PPP3CB	protein phosphatase 3, catalytic subunit, beta isozyme
hsa-miR-30a-5p	1	0	1	1	1	1	DMTF1	cyclin D binding myb-like transcription factor 1
hsa-miR-30a-5p	0	0	1	0	1	1	COTL1	coactosin-like 1 (Dictyostelium)
hsa-miR-30a-5p	1	0	1	1	1	1	RAP2C	RAP2C, member of RAS oncogene family
hsa-miR-30a-5p	1	0	1	1	1	1	BACH2	BTB and CNC homology 1, basic leucine zipper transcription factor 2
hsa-miR-30a-5p	0	0	1	1	1	1	ELOVL5	ELOVL fatty acid elongase 5
hsa-miR-30a-5p	0	0	1	0	1	1	CFL2	cofilin 2 (muscle)
hsa-miR-30a-5p	1	0	1	1	0	0	HLX	H2.0-like homeobox
hsa-miR-30a-5p	1	0	1	1	1	1	TIA1	TIA1 cytotoxic granule-associated RNA binding protein
hsa-miR-30a-5p	1	0	1	0	1	1	CSNK1G1	casein kinase 1, gamma 1
hsa-miR-30a-5p	1	0	1	1	1	1	UBE2O	ubiquitin-conjugating enzyme E2O
hsa-miR-30a-5p	1	0	1	1	1	1	SNX16	sorting nexin 16
hsa-miR-30a-5p	0	0	1	1	1	1	RAB38	RAB38, member RAS oncogene family
hsa-miR-30a-5p	1	0	0	0	1	1	GZF1	GDNF-inducible zinc finger protein 1
hsa-miR-30a-5p	1	0	1	0	1	1	DNMT3A	DNA (cytosine-5-)-methyltransferase 3 alpha
hsa-miR-30a-5p	1	0	1	1	1	1	NEUROD6	neuronal differentiation 6
hsa-miR-30a-5p	1	0	1	1	1	1	COPS7B	COP9 constitutive photomorphogenic homolog subunit 7B (Arabidopsis)
hsa-miR-30a-5p	1	0	1	1	1	1	SMAP2	small ArfGAP2
hsa-miR-30a-5p	1	0	1	0	1	1	FNDC3B	fibronectin type III domain containing 3B
hsa-miR-30a-5p	0	0	0	1	1	1	MICAL1	microtubule associated monoxygenase, calponin and LIM domain containing 1
hsa-miR-30a-5p	1	0	1	1	1	1	TBC1D15	TBC1 domain family, member 15
hsa-miR-30a-5p	1	0	1	1	1	1	PER2	period homolog 2 (Drosophila)
hsa-miR-30a-5p	1	0	1	1	1	1	FBXL17	F-box and leucine-rich repeat protein 17
hsa-miR-30a-5p	0	0	1	1	1	1	PCDH20	protocadherin 20
hsa-miR-30a-5p	1	0	1	1	1	1	BCL11A	B-cell CLL/lymphoma 11A (zinc finger protein)
hsa-miR-30a-5p	1	0	1	0	1	1	BCL11B	B-cell CLL/lymphoma 11B (zinc finger protein)
hsa-miR-30a-5p	1	0	0	1	1	1	NADK	NAD kinase
hsa-miR-30a-5p	0	0	1	0	1	1	ANKRA2	ankyrin repeat, family A (RFXANK-like), 2
hsa-miR-30a-5p	1	0	1	1	1	1	HOXB8	homeobox B8
hsa-miR-30a-5p	0	0	1	1	1	1	MFSD11	major facilitator superfamily domain containing 11
hsa-miR-30a-5p	1	0	1	1	1	1	PSTPIP2	proline-serine-threonine phosphatase interacting protein 2
hsa-miR-30a-5p	1	0	1	1	1	1	FYCO1	FYVE and coiled-coil domain containing 1
hsa-miR-30a-5p	1	0	1	1	1	1	C10orf76	chromosome 10 open reading frame 76
hsa-miR-30a-5p	1	0	1	1	1	1	DHX40	DEAH (Asp-Glu-Ala-His) box polypeptide 40
hsa-miR-30a-5p	1	0	1	0	1	1	LIN28A	lin-28 homolog A (C. elegans)
hsa-miR-30a-5p	0	0	1	1	1	1	TTLL7	tubulin tyrosine ligase-like family, member 7
hsa-miR-30a-5p	0	0	1	1	1	1	KIF16B	kinesin family member 16B
hsa-miR-30a-5p	1	0	1	1	1	1	C15orf29	chromosome 15 open reading frame 29
hsa-miR-30a-5p	1	0	1	1	0	0	RABL6	RAB, member RAS oncogene family-like 6
hsa-miR-30a-5p	0	0	1	1	0	0	RNF122	ring finger protein 122
hsa-miR-30a-5p	1	0	1	1	1	1	EIF2C3	eukaryotic translation initiation factor 2C, 3
hsa-miR-30a-5p	1	0	1	1	1	1	GRHL2	grainyhead-like 2 (Drosophila)
hsa-miR-30a-5p	1	0	1	0	1	1	NAA25	N(alpha)-acetyltransferase 25, NatB auxiliary subunit
hsa-miR-30a-5p	1	0	1	1	1	1	EDC3	enhancer of mRNA decapping 3 homolog (S. cerevisiae)
hsa-miR-30a-5p	0	0	1	1	0	0	KIAA0226L	KIAA0226-like
hsa-miR-30a-5p	1	0	1	1	1	1	CHD9	chromodomain helicase DNA binding protein 9
hsa-miR-30a-5p	1	0	1	1	1	1	PROSER1	proline and serine rich 1
hsa-miR-30a-5p	1	0	1	1	1	1	SIK3	SIK family kinase 3
hsa-miR-30a-5p	1	0	1	0	1	1	EDEM3	ER degradation enhancer, mannosidase alpha-like 3
hsa-miR-30a-5p	0	0	0	1	1	1	TMEM121	transmembrane protein 121
hsa-miR-30a-5p	1	0	1	0	1	1	CPEB4	cytoplasmic polyadenylation element binding protein 4
hsa-miR-30a-5p	1	0	1	1	1	1	NRBF2	nuclear receptor binding factor 2
hsa-miR-30a-5p	1	0	1	0	1	1	VOPP1	vesicular, overexpressed in cancer, prosurvival protein 1
hsa-miR-30a-5p	0	0	1	0	0	0	FAM49A	family with sequence similarity 49, member A
hsa-miR-30a-5p	1	0	1	1	1	1	NDEL1	nudE nuclear distribution E homolog (A. nidulans)-like 1
hsa-miR-30a-5p	0	0	1	1	0	0	URM1	ubiquitin related modifier 1
hsa-miR-30a-5p	1	0	1	1	1	1	SNX27	sorting nexin family member 27
hsa-miR-30a-5p	1	0	1	1	1	1	PPP1R14C	protein phosphatase 1, regulatory (inhibitor) subunit 14C
hsa-miR-30a-5p	0	0	1	1	1	1	SEH1L	SEH1-like (S. cerevisiae)
hsa-miR-30a-5p	1	0	1	0	1	1	TMEM47	transmembrane protein 47
hsa-miR-30a-5p	0	0	1	1	0	0	ESPN	espin
hsa-miR-30a-5p	1	0	1	1	1	1	CECR6	cat eye syndrome chromosome region, candidate 6
hsa-miR-30a-5p	1	0	1	1	1	1	TMEM245	transmembrane protein 245
hsa-miR-30a-5p	1	0	1	1	1	1	NCALD	neurocalcin delta
hsa-miR-30a-5p	1	0	1	1	1	1	B3GNT5	UDP-GlcNAc:betaGal beta-1,3-N-acetylglucosaminyltransferase 5
hsa-miR-30a-5p	0	0	0	1	1	1	SEMA6B	sema domain, transmembrane domain (TM), and cytoplasmic domain, (semaphorin) 6B
hsa-miR-30a-5p	1	0	0	1	1	1	USP44	ubiquitin specific peptidase 44
hsa-miR-30a-5p	0	0	1	1	1	1	SLC41A2	solute carrier family 41, member 2
hsa-miR-30a-5p	1	0	1	1	1	1	ANKRD17	ankyrin repeat domain 17
hsa-miR-30a-5p	1	0	1	1	1	1	SETD3	SET domain containing 3
hsa-miR-30a-5p	0	0	1	1	1	1	USP48	ubiquitin specific peptidase 48
hsa-miR-30a-5p	1	0	1	0	1	1	PLXNA1	plexin A1
hsa-miR-30a-5p	1	0	1	1	1	1	MEX3B	mex-3 homolog B (C. elegans)
hsa-miR-30a-5p	1	0	1	1	1	1	ZNRF1	zinc and ring finger 1, E3 ubiquitin protein ligase
hsa-miR-30a-5p	1	0	1	1	1	1	BTBD10	BTB (POZ) domain containing 10
hsa-miR-30a-5p	1	0	1	1	1	1	PCGF5	polycomb group ring finger 5
hsa-miR-30a-5p	1	0	1	0	1	1	JPH4	junctophilin 4
hsa-miR-30a-5p	1	0	1	1	1	1	PHF6	PHD finger protein 6
hsa-miR-30a-5p	1	0	1	1	1	1	PAPOLA	poly(A) polymerase alpha
hsa-miR-30a-5p	1	0	1	1	1	1	GPR124	G protein-coupled receptor 124
hsa-miR-30a-5p	1	0	1	0	1	1	ADO	2-aminoethanethiol (cysteamine) dioxygenase
hsa-miR-30a-5p	0	0	1	1	1	1	FBXL20	F-box and leucine-rich repeat protein 20
hsa-miR-30a-5p	1	0	1	1	1	1	PCDH10	protocadherin 10
hsa-miR-30a-5p	1	0	1	1	1	1	HIAT1	hippocampus abundant transcript 1
hsa-miR-30a-5p	1	0	1	0	1	1	EAF1	ELL associated factor 1
hsa-miR-30a-5p	1	0	1	1	1	1	FAM40A	family with sequence similarity 40, member A
hsa-miR-30a-5p	1	0	1	0	1	1	ZCCHC3	zinc finger, CCHC domain containing 3
hsa-miR-30a-5p	1	0	1	1	1	1	ADAM19	ADAM metallopeptidase domain 19
hsa-miR-30a-5p	1	0	1	1	1	1	TP53INP1	tumor protein p53 inducible nuclear protein 1
hsa-miR-30a-5p	1	0	1	1	1	1	SSH2	slingshot homolog 2 (Drosophila)
hsa-miR-30a-5p	1	0	1	1	1	1	DOCK7	dedicator of cytokinesis 7
hsa-miR-30a-5p	1	0	1	1	0	0	CCDC120	coiled-coil domain containing 120
hsa-miR-30a-5p	0	0	1	0	1	1	CCDC97	coiled-coil domain containing 97
hsa-miR-30a-5p	1	0	1	1	1	1	MBD6	methyl-CpG binding domain protein 6
hsa-miR-30a-5p	1	0	1	1	1	1	ESCO1	establishment of cohesion 1 homolog 1 (S. cerevisiae)
hsa-miR-30a-5p	0	0	0	1	0	0	SLC5A11	solute carrier family 5 (sodium/glucose cotransporter), member 11
hsa-miR-30a-5p	0	0	1	1	1	1	IP6K3	inositol hexakisphosphate kinase 3
hsa-miR-30a-5p	0	0	1	1	1	1	CCNE2	cyclin E2
hsa-miR-30a-5p	0	0	1	1	1	1	PPP4R4	protein phosphatase 4, regulatory subunit 4
hsa-miR-30a-5p	0	0	1	0	1	1	SLC36A1	solute carrier family 36 (proton/amino acid symporter), member 1
hsa-miR-30a-5p	1	0	1	1	1	1	PTPN2	protein tyrosine phosphatase, non-receptor type 2
hsa-miR-30a-5p	0	0	1	1	1	1	UBE2F	ubiquitin-conjugating enzyme E2F (putative)
hsa-miR-30a-5p	1	0	1	1	1	1	ZNF280B	zinc finger protein 280B
hsa-miR-30a-5p	1	0	1	1	1	1	FAM210B	family with sequence similarity 210, member B
hsa-miR-30a-5p	1	0	1	0	1	1	STK35	serine/threonine kinase 35
hsa-miR-30a-5p	1	0	1	0	1	1	UNC5D	unc-5 homolog D (C. elegans)
hsa-miR-30a-5p	1	0	1	1	1	1	JDP2	Jun dimerization protein 2
hsa-miR-30a-5p	1	0	1	1	0	0	PPARGC1B	peroxisome proliferator-activated receptor gamma, coactivator 1 beta
hsa-miR-30a-5p	1	0	1	1	1	1	YTHDC1	YTH domain containing 1
hsa-miR-30a-5p	0	0	1	1	1	1	GPT2	glutamic pyruvate transaminase (alanine aminotransferase) 2
hsa-miR-30a-5p	1	0	1	1	0	0	FAM83F	family with sequence similarity 83, member F
hsa-miR-30a-5p	1	0	1	1	1	1	FOXP4	forkhead box P4
hsa-miR-30a-5p	1	0	1	0	1	1	NUS1	nuclear undecaprenyl pyrophosphate synthase 1 homolog (S. cerevisiae)
hsa-miR-30a-5p	1	0	1	1	1	1	SON	SON DNA binding protein
hsa-miR-30a-5p	1	0	1	0	1	1	SLC39A11	solute carrier family 39 (metal ion transporter), member 11
hsa-miR-30a-5p	1	0	1	1	1	1	PPTC7	PTC7 protein phosphatase homolog (S. cerevisiae)
hsa-miR-30a-5p	0	0	1	1	1	1	RHEBL1	Ras homolog enriched in brain like 1
hsa-miR-30a-5p	1	0	1	1	1	1	SLAIN1	SLAIN motif family, member 1
hsa-miR-30a-5p	0	0	1	1	1	1	C15orf40	chromosome 15 open reading frame 40
hsa-miR-30a-5p	1	0	1	1	1	1	CCDC43	coiled-coil domain containing 43
hsa-miR-30a-5p	0	0	0	1	1	1	FAM109A	family with sequence similarity 109, member A
hsa-miR-30a-5p	1	0	1	1	1	1	MBNL2	muscleblind-like splicing regulator 2
hsa-miR-30a-5p	0	0	1	1	1	1	ZFC3H1	zinc finger, C3H1-type containing
hsa-miR-30a-5p	1	0	1	1	1	1	PRRT2	proline-rich transmembrane protein 2
hsa-miR-30a-5p	0	0	1	1	1	1	C7orf33	chromosome 7 open reading frame 33
hsa-miR-30a-5p	1	0	1	1	1	1	RASGEF1A	RasGEF domain family, member 1A
hsa-miR-30a-5p	1	0	1	1	1	1	RBFOX1	RNA binding protein, fox-1 homolog (C. elegans) 1
hsa-miR-30a-5p	1	0	1	1	1	1	FAM110B	family with sequence similarity 110, member B
hsa-miR-30a-5p	0	0	1	1	1	1	LONRF1	LON peptidase N-terminal domain and ring finger 1
hsa-miR-30a-5p	1	0	1	1	1	1	FRMD6	FERM domain containing 6
hsa-miR-30a-5p	1	0	1	0	1	1	ARL6IP6	ADP-ribosylation-like factor 6 interacting protein 6
hsa-miR-30a-5p	1	0	1	1	1	1	C7orf60	chromosome 7 open reading frame 60
hsa-miR-30a-5p	0	0	1	1	1	1	ZNF746	zinc finger protein 746
hsa-miR-30a-5p	1	0	1	1	1	1	CNST	consortin, connexin sorting protein
hsa-miR-30a-5p	1	0	1	1	1	1	MIER3	mesoderm induction early response 1, family member 3
hsa-miR-30a-5p	1	0	1	0	1	1	DCP2	DCP2 decapping enzyme homolog (S. cerevisiae)
hsa-miR-30a-5p	1	0	1	1	1	1	YTHDF3	YTH domain family, member 3
hsa-miR-30a-5p	1	0	1	1	1	1	TAB3	TGF-beta activated kinase 1/MAP3K7 binding protein 3
hsa-miR-30a-5p	0	0	1	1	0	0	PRICKLE1	prickle homolog 1 (Drosophila)
hsa-miR-30a-5p	0	0	1	0	1	1	KCTD7	potassium channel tetramerisation domain containing 7
hsa-miR-30a-5p	1	0	1	1	1	1	CADM2	cell adhesion molecule 2
hsa-miR-30a-5p	0	0	0	1	1	1	SNX33	sorting nexin 33
hsa-miR-30a-5p	1	0	1	1	1	1	TMEM161B	transmembrane protein 161B
hsa-miR-30a-5p	1	0	1	0	1	1	ZCCHC24	zinc finger, CCHC domain containing 24
hsa-miR-30a-5p	1	0	1	1	1	1	CPNE8	copine VIII
hsa-miR-30a-5p	1	0	1	1	0	0	FAM43A	family with sequence similarity 43, member A
hsa-miR-30a-5p	1	0	1	1	1	1	ELMOD2	ELMO/CED-12 domain containing 2
hsa-miR-30a-5p	1	0	1	1	1	1	PHF13	PHD finger protein 13
hsa-miR-30a-5p	1	0	1	1	1	1	CBLB	Cbl proto-oncogene, E3 ubiquitin protein ligase B
hsa-miR-30a-5p	0	0	1	1	1	1	ATP2A2	ATPase, Ca++ transporting, cardiac muscle, slow twitch 2
hsa-miR-30a-5p	1	0	1	1	1	1	CAMK2D	calcium/calmodulin-dependent protein kinase II delta
hsa-miR-30a-5p	1	0	1	1	1	1	DCUN1D3	DCN1, defective in cullin neddylation 1, domain containing 3 (S. cerevisiae)
hsa-miR-30a-5p	1	0	1	1	1	1	CNTD1	cyclin N-terminal domain containing 1
hsa-miR-30a-5p	1	0	1	1	1	1	SLC35F3	solute carrier family 35, member F3
hsa-miR-30a-5p	1	0	1	1	1	1	CCDC117	coiled-coil domain containing 117
hsa-miR-30a-5p	1	0	1	1	1	1	VKORC1L1	vitamin K epoxide reductase complex, subunit 1-like 1
hsa-miR-30a-5p	1	0	1	1	1	1	RFX6	regulatory factor X, 6
hsa-miR-30a-5p	0	0	1	0	1	1	PAPD4	PAP associated domain containing 4
hsa-miR-30a-5p	1	0	1	0	1	1	NEGR1	neuronal growth regulator 1
hsa-miR-30a-5p	0	0	1	1	1	1	SCARA5	scavenger receptor class A, member 5 (putative)
hsa-miR-30a-5p	1	0	1	1	1	1	C4orf34	chromosome 4 open reading frame 34
hsa-miR-30a-5p	1	0	1	1	1	1	CNTN4	contactin 4
hsa-miR-30a-5p	1	0	1	0	1	1	CCDC71L	coiled-coil domain containing 71-like
hsa-miR-30a-5p	1	0	0	1	1	1	TSPAN33	tetraspanin 33
hsa-miR-30a-5p	1	0	1	0	1	1	ZDHHC21	zinc finger, DHHC-type containing 21
hsa-miR-30a-5p	1	0	1	1	1	1	MTDH	metadherin
hsa-miR-30a-5p	1	0	1	1	1	1	ANO4	anoctamin 4
hsa-miR-30a-5p	1	0	1	0	1	1	NCAM1	neural cell adhesion molecule 1
hsa-miR-30a-5p	1	0	1	1	1	1	SUPT3H	suppressor of Ty 3 homolog (S. cerevisiae)
hsa-miR-30a-5p	1	0	1	1	1	1	HIPK1	homeodomain interacting protein kinase 1
hsa-miR-30a-5p	1	0	1	1	1	1	PAX3	paired box 3
hsa-miR-30a-5p	1	0	1	0	1	1	CPEB2	cytoplasmic polyadenylation element binding protein 2
hsa-miR-30a-5p	1	0	1	1	1	1	HECTD2	HECT domain containing E3 ubiquitin protein ligase 2
hsa-miR-30a-5p	0	0	1	1	1	1	SLC6A15	solute carrier family 6 (neutral amino acid transporter), member 15
hsa-miR-30a-5p	1	0	1	0	1	1	ADAMTS9	ADAM metallopeptidase with thrombospondin type 1 motif, 9
hsa-miR-30a-5p	1	0	1	1	1	1	SPTY2D1	SPT2, Suppressor of Ty, domain containing 1 (S. cerevisiae)
hsa-miR-30a-5p	1	0	1	1	1	1	ADAMTS6	ADAM metallopeptidase with thrombospondin type 1 motif, 6
hsa-miR-30a-5p	1	0	1	0	1	1	UBE2L3	ubiquitin-conjugating enzyme E2L 3
hsa-miR-30a-5p	1	0	1	0	1	1	NHS	Nance-Horan syndrome (congenital cataracts and dental anomalies)
hsa-miR-30a-5p	0	0	1	1	0	0	KCTD8	potassium channel tetramerisation domain containing 8
hsa-miR-30a-5p	0	0	0	1	1	1	DENND2C	DENN/MADD domain containing 2C
hsa-miR-30a-5p	1	0	1	0	1	1	NRK	Nik related kinase
hsa-miR-30a-5p	1	0	1	0	0	0	RAB15	RAB15, member RAS oncogene family
hsa-miR-30a-5p	1	0	1	1	1	1	OTUD4	OTU domain containing 4
hsa-miR-30a-5p	1	0	1	1	1	1	E2F7	E2F transcription factor 7
hsa-miR-30a-5p	1	0	1	0	1	1	NAALADL2	N-acetylated alpha-linked acidic dipeptidase-like 2
hsa-miR-30a-5p	0	0	1	1	0	0	KIAA1211L	KIAA1211-like
hsa-miR-30a-5p	1	0	1	1	1	1	SKIDA1	SKI/DACH domain containing 1
hsa-miR-30a-5p	1	0	1	1	1	1	RAPH1	Ras association (RalGDS/AF-6) and pleckstrin homology domains 1
