# Supplementary material for: Profiling of Selected MicroRNAs in Proliferative Eutopic Endometrium of Women with Ovarian Endometriosis
Source: Biomed Res Int. 2015 Aug 20;2015:760698. doi: 10.1155/2015/760698 (PMC4558423; doi:10.1155/2015/760698)
Supplement: Supplementary file 1 — Table I: The names of miRNAs significantly differentially expressed between eutopic endometrium of patients with endometriosis vs eutopic endometrium of patients without endometriosis. Table II: The associations between miRNA and mRNA, which presents detailed results of the search of six major databases i.e targetscan, tarbase, miranda, mirbase, mirtarget2 and pictar. [file 760698.f1.zip › 760698.f1/Table II/hsa-miR-30e-3p.tsv]

miR	targetscan	tarbase	miranda	mirbase	mirtarget2	pictar	GeneSymbol	GeneName
hsa-miR-30e-3p	1	0	1	1	1	1	APC	adenomatous polyposis coli
hsa-miR-30e-3p	1	0	1	0	1	1	NR3C1	nuclear receptor subfamily 3, group C, member 1 (glucocorticoid receptor)
hsa-miR-30e-3p	1	0	1	1	1	1	PMP22	peripheral myelin protein 22
hsa-miR-30e-3p	1	0	1	0	1	1	PTEN	phosphatase and tensin homolog
hsa-miR-30e-3p	0	0	1	1	1	1	PITX2	paired-like homeodomain 2
hsa-miR-30e-3p	1	0	1	1	1	1	ATXN1	ataxin 1
hsa-miR-30e-3p	1	0	1	1	1	1	HNF1B	HNF1 homeobox B
hsa-miR-30e-3p	0	0	1	1	1	1	ATP1A1	ATPase, Na+/K+ transporting, alpha 1 polypeptide
hsa-miR-30e-3p	0	0	1	1	1	1	NPY2R	neuropeptide Y receptor Y2
hsa-miR-30e-3p	1	0	1	1	1	1	RARB	retinoic acid receptor, beta
hsa-miR-30e-3p	1	0	1	1	1	1	REEP3	receptor accessory protein 3
hsa-miR-30e-3p	1	0	1	0	1	1	UBE2W	ubiquitin-conjugating enzyme E2W (putative)
hsa-miR-30e-3p	1	0	1	0	1	1	GDF6	growth differentiation factor 6
hsa-miR-30e-3p	1	0	1	1	1	1	LHX8	LIM homeobox 8
hsa-miR-30e-3p	0	0	1	1	1	1	DBX2	developing brain homeobox 2
hsa-miR-30e-3p	1	0	1	1	1	1	DPP10	dipeptidyl-peptidase 10 (non-functional)
hsa-miR-30e-3p	1	0	1	0	1	1	RYR3	ryanodine receptor 3
hsa-miR-30e-3p	1	0	1	0	1	1	AP1G1	adaptor-related protein complex 1, gamma 1 subunit
hsa-miR-30e-3p	1	0	1	0	1	1	AP2B1	adaptor-related protein complex 2, beta 1 subunit
hsa-miR-30e-3p	0	0	1	1	1	1	DSCAM	Down syndrome cell adhesion molecule
hsa-miR-30e-3p	1	0	1	1	1	1	EP300	E1A binding protein p300
hsa-miR-30e-3p	1	0	1	1	1	1	EPAS1	endothelial PAS domain protein 1
hsa-miR-30e-3p	1	0	1	1	1	1	ARF6	ADP-ribosylation factor 6
hsa-miR-30e-3p	1	0	1	1	1	1	CANX	calnexin
hsa-miR-30e-3p	1	0	1	0	1	1	CAV1	caveolin 1, caveolae protein, 22kDa
hsa-miR-30e-3p	1	0	1	0	1	1	CSNK1E	casein kinase 1, epsilon
hsa-miR-30e-3p	1	0	1	1	1	1	DLST	dihydrolipoamide S-succinyltransferase (E2 component of 2-oxo-glutarate complex)
hsa-miR-30e-3p	1	0	1	1	1	1	EGR1	early growth response 1
hsa-miR-30e-3p	1	0	1	1	1	1	FGF7	fibroblast growth factor 7
hsa-miR-30e-3p	1	0	1	1	1	1	KCNA3	potassium voltage-gated channel, shaker-related subfamily, member 3
hsa-miR-30e-3p	1	0	1	0	1	1	MEF2C	myocyte enhancer factor 2C
hsa-miR-30e-3p	1	0	1	1	1	1	NOVA1	neuro-oncological ventral antigen 1
hsa-miR-30e-3p	1	0	1	1	1	1	ORC5	origin recognition complex, subunit 5
hsa-miR-30e-3p	1	0	1	1	1	1	ARID4A	AT rich interactive domain 4A (RBP1-like)
hsa-miR-30e-3p	0	0	1	1	1	1	RGS7	regulator of G-protein signaling 7
hsa-miR-30e-3p	1	0	1	0	1	1	ROBO1	roundabout, axon guidance receptor, homolog 1 (Drosophila)
hsa-miR-30e-3p	0	0	1	0	0	0	SEPW1	selenoprotein W, 1
hsa-miR-30e-3p	1	0	1	0	1	1	SFRP1	secreted frizzled-related protein 1
hsa-miR-30e-3p	0	0	1	1	1	1	SH3GL3	SH3-domain GRB2-like 3
hsa-miR-30e-3p	1	0	1	1	1	1	SIAH1	siah E3 ubiquitin protein ligase 1
hsa-miR-30e-3p	1	0	1	1	1	1	SP3	Sp3 transcription factor
hsa-miR-30e-3p	1	0	1	1	1	1	TOP1	topoisomerase (DNA) I
hsa-miR-30e-3p	0	0	1	1	0	0	HIRA	HIR histone cell cycle regulation defective homolog A (S. cerevisiae)
hsa-miR-30e-3p	1	0	1	0	1	1	UBE2G1	ubiquitin-conjugating enzyme E2G 1
hsa-miR-30e-3p	0	0	1	1	1	1	USP1	ubiquitin specific peptidase 1
hsa-miR-30e-3p	1	0	1	0	1	1	CORO2A	coronin, actin binding protein, 2A
hsa-miR-30e-3p	1	0	1	1	1	1	ZNF207	zinc finger protein 207
hsa-miR-30e-3p	1	0	1	1	1	1	HMGA2	high mobility group AT-hook 2
hsa-miR-30e-3p	1	0	1	1	1	1	FGF18	fibroblast growth factor 18
hsa-miR-30e-3p	1	0	0	0	1	1	STX3	syntaxin 3
hsa-miR-30e-3p	1	0	1	1	0	0	SYNGR3	synaptogyrin 3
hsa-miR-30e-3p	1	0	1	1	1	1	ARL3	ADP-ribosylation factor-like 3
hsa-miR-30e-3p	1	0	1	0	1	1	RUNX1T1	runt-related transcription factor 1; translocated to, 1 (cyclin D-related)
hsa-miR-30e-3p	0	0	1	1	1	1	COL12A1	collagen, type XII, alpha 1
hsa-miR-30e-3p	1	0	1	1	1	1	CREBBP	CREB binding protein
hsa-miR-30e-3p	1	0	1	1	1	1	DUSP8	dual specificity phosphatase 8
hsa-miR-30e-3p	1	0	1	1	1	1	DVL3	dishevelled, dsh homolog 3 (Drosophila)
hsa-miR-30e-3p	1	0	1	1	1	1	EGR3	early growth response 3
hsa-miR-30e-3p	1	0	1	1	1	1	USP6	ubiquitin specific peptidase 6 (Tre-2 oncogene)
hsa-miR-30e-3p	1	0	1	1	1	1	FOXK2	forkhead box K2
hsa-miR-30e-3p	1	0	1	1	1	1	MLLT10	myeloid/lymphoid or mixed-lineage leukemia (trithorax homolog, Drosophila); translocated to, 10
hsa-miR-30e-3p	1	0	0	0	0	0	PCSK7	proprotein convertase subtilisin/kexin type 7
hsa-miR-30e-3p	1	0	1	0	1	1	CYTH1	cytohesin 1
hsa-miR-30e-3p	1	0	1	1	1	1	NREP	neuronal regeneration related protein homolog (rat)
hsa-miR-30e-3p	1	0	1	1	1	1	SCAMP1	secretory carrier membrane protein 1
hsa-miR-30e-3p	1	0	1	1	1	1	CLOCK	clock homolog (mouse)
hsa-miR-30e-3p	1	0	1	0	1	1	KRAS	v-Ki-ras2 Kirsten rat sarcoma viral oncogene homolog
hsa-miR-30e-3p	1	0	1	1	1	1	MECP2	methyl CpG binding protein 2 (Rett syndrome)
hsa-miR-30e-3p	0	0	1	1	1	1	NRCAM	neuronal cell adhesion molecule
hsa-miR-30e-3p	1	0	1	1	1	1	ELK3	ELK3, ETS-domain protein (SRF accessory protein 2)
hsa-miR-30e-3p	1	0	1	1	1	1	ERBB4	v-erb-a erythroblastic leukemia viral oncogene homolog 4 (avian)
hsa-miR-30e-3p	1	0	1	1	1	1	RALA	v-ral simian leukemia viral oncogene homolog A (ras related)
hsa-miR-30e-3p	1	0	1	0	0	0	FRAT1	frequently rearranged in advanced T-cell lymphomas
hsa-miR-30e-3p	0	0	1	0	1	1	LCP2	lymphocyte cytosolic protein 2 (SH2 domain containing leukocyte protein of 76kDa)
hsa-miR-30e-3p	0	0	1	1	1	1	LIMK2	LIM domain kinase 2
hsa-miR-30e-3p	0	0	1	1	0	0	LMNB1	lamin B1
hsa-miR-30e-3p	0	0	1	1	1	1	SRSF4	serine/arginine-rich splicing factor 4
hsa-miR-30e-3p	1	0	1	0	1	1	SS18	synovial sarcoma translocation, chromosome 18
hsa-miR-30e-3p	1	0	1	1	1	1	CTDSP2	CTD (carboxy-terminal domain, RNA polymerase II, polypeptide A) small phosphatase 2
hsa-miR-30e-3p	0	0	1	1	1	1	TOB1	transducer of ERBB2, 1
hsa-miR-30e-3p	1	0	1	1	1	1	AKAP9	A kinase (PRKA) anchor protein (yotiao) 9
hsa-miR-30e-3p	1	0	1	1	1	1	EIF1	eukaryotic translation initiation factor 1
hsa-miR-30e-3p	1	0	1	1	1	1	MEF2D	myocyte enhancer factor 2D
hsa-miR-30e-3p	1	0	1	1	1	1	MEOX2	mesenchyme homeobox 2
hsa-miR-30e-3p	1	0	1	1	1	1	ZFAND5	zinc finger, AN1-type domain 5
hsa-miR-30e-3p	1	0	1	1	1	1	POU4F1	POU class 4 homeobox 1
hsa-miR-30e-3p	1	0	1	1	1	1	PPP2R5E	protein phosphatase 2, regulatory subunit B', epsilon isoform
hsa-miR-30e-3p	1	0	1	1	1	1	PRKAA1	protein kinase, AMP-activated, alpha 1 catalytic subunit
hsa-miR-30e-3p	1	0	1	1	1	1	BASP1	brain abundant, membrane attached signal protein 1
hsa-miR-30e-3p	1	0	1	1	1	1	ZNF238	zinc finger protein 238
hsa-miR-30e-3p	1	0	1	1	1	1	SEMA3C	sema domain, immunoglobulin domain (Ig), short basic domain, secreted, (semaphorin) 3C
hsa-miR-30e-3p	1	0	1	0	1	1	CELF2	CUGBP, Elav-like family member 2
hsa-miR-30e-3p	1	0	1	0	1	1	ARPP19	cAMP-regulated phosphoprotein, 19kDa
hsa-miR-30e-3p	0	0	1	1	1	1	DBF4	DBF4 homolog (S. cerevisiae)
hsa-miR-30e-3p	1	0	1	1	1	1	YWHAE	tyrosine 3-monooxygenase/tryptophan 5-monooxygenase activation protein, epsilon polypeptide
hsa-miR-30e-3p	1	0	1	1	1	1	ZBTB33	zinc finger and BTB domain containing 33
hsa-miR-30e-3p	1	0	1	1	1	1	PRRX1	paired related homeobox 1
hsa-miR-30e-3p	1	0	1	1	1	1	HSPA13	heat shock protein 70kDa family, member 13
hsa-miR-30e-3p	0	0	0	0	1	1	ZNF22	zinc finger protein 22
hsa-miR-30e-3p	0	0	1	1	1	1	LECT1	leukocyte cell derived chemotaxin 1
hsa-miR-30e-3p	0	0	1	1	1	1	DNAJB4	DnaJ (Hsp40) homolog, subfamily B, member 4
hsa-miR-30e-3p	1	0	1	1	1	1	KLF12	Kruppel-like factor 12
hsa-miR-30e-3p	1	0	1	1	1	1	ZFYVE9	zinc finger, FYVE domain containing 9
hsa-miR-30e-3p	0	0	1	0	1	1	AP4E1	adaptor-related protein complex 4, epsilon 1 subunit
hsa-miR-30e-3p	1	0	1	0	1	1	ARL5A	ADP-ribosylation factor-like 5A
hsa-miR-30e-3p	1	0	1	1	1	1	LAMP5	lysosomal-associated membrane protein family, member 5
hsa-miR-30e-3p	1	0	1	1	1	1	DNAJB9	DnaJ (Hsp40) homolog, subfamily B, member 9
hsa-miR-30e-3p	1	0	1	1	1	1	TNPO3	transportin 3
hsa-miR-30e-3p	0	0	1	1	0	0	WBP1	WW domain binding protein 1
hsa-miR-30e-3p	1	0	1	1	1	1	CLCF1	cardiotrophin-like cytokine factor 1
hsa-miR-30e-3p	1	0	1	1	1	1	ZBTB43	zinc finger and BTB domain containing 43
hsa-miR-30e-3p	1	0	1	0	1	1	VAMP2	vesicle-associated membrane protein 2 (synaptobrevin 2)
hsa-miR-30e-3p	0	0	1	1	0	0	CNPY2	canopy 2 homolog (zebrafish)
hsa-miR-30e-3p	1	0	1	1	1	1	ISCU	iron-sulfur cluster scaffold homolog (E. coli)
hsa-miR-30e-3p	1	0	1	1	1	1	PATZ1	POZ (BTB) and AT hook containing zinc finger 1
hsa-miR-30e-3p	1	0	1	1	1	1	TSC22D2	TSC22 domain family, member 2
hsa-miR-30e-3p	1	0	1	1	1	1	ZEB2	zinc finger E-box binding homeobox 2
hsa-miR-30e-3p	1	0	1	1	1	1	TOMM70A	translocase of outer mitochondrial membrane 70 homolog A (S. cerevisiae)
hsa-miR-30e-3p	1	0	1	1	1	1	NUAK1	NUAK family, SNF1-like kinase, 1
hsa-miR-30e-3p	1	0	1	1	1	1	COBLL1	COBL-like 1
hsa-miR-30e-3p	1	0	1	1	1	1	SLITRK3	SLIT and NTRK-like family, member 3
hsa-miR-30e-3p	1	0	1	1	1	1	FOXJ3	forkhead box J3
hsa-miR-30e-3p	1	0	1	1	1	1	TBC1D9B	TBC1 domain family, member 9B (with GRAM domain)
hsa-miR-30e-3p	1	0	1	1	1	1	RTF1	Rtf1, Paf1/RNA polymerase II complex component, homolog (S. cerevisiae)
hsa-miR-30e-3p	1	0	1	1	1	1	TRIM2	tripartite motif containing 2
hsa-miR-30e-3p	0	0	1	1	0	0	VPS8	vacuolar protein sorting 8 homolog (S. cerevisiae)
hsa-miR-30e-3p	1	0	1	1	1	1	PUM2	pumilio homolog 2 (Drosophila)
hsa-miR-30e-3p	1	0	1	1	1	1	AHCYL2	adenosylhomocysteinase-like 2
hsa-miR-30e-3p	1	0	1	1	1	1	SUN2	Sad1 and UNC84 domain containing 2
hsa-miR-30e-3p	0	0	1	1	1	1	IPCEF1	interaction protein for cytohesin exchange factors 1
hsa-miR-30e-3p	1	0	1	1	1	1	MINK1	misshapen-like kinase 1
hsa-miR-30e-3p	1	0	1	1	1	1	CDC40	cell division cycle 40 homolog (S. cerevisiae)
hsa-miR-30e-3p	1	0	1	1	1	1	SH3GLB1	SH3-domain GRB2-like endophilin B1
hsa-miR-30e-3p	1	0	1	1	1	1	UBE2J1	ubiquitin-conjugating enzyme E2, J1
hsa-miR-30e-3p	1	0	1	1	1	1	YPEL5	yippee-like 5 (Drosophila)
hsa-miR-30e-3p	0	0	1	1	1	1	RAB10	RAB10, member RAS oncogene family
hsa-miR-30e-3p	1	0	1	1	1	1	PAIP2	poly(A) binding protein interacting protein 2
hsa-miR-30e-3p	1	0	1	0	1	1	RAB8B	RAB8B, member RAS oncogene family
hsa-miR-30e-3p	1	0	1	1	1	1	DNAJC27	DnaJ (Hsp40) homolog, subfamily C, member 27
hsa-miR-30e-3p	0	0	1	0	1	1	FAM13B	family with sequence similarity 13, member B
hsa-miR-30e-3p	0	0	1	1	1	1	SPOCK3	sparc/osteonectin, cwcv and kazal-like domains proteoglycan (testican) 3
hsa-miR-30e-3p	1	0	1	1	1	1	GALNT7	UDP-N-acetyl-alpha-D-galactosamine:polypeptide N-acetylgalactosaminyltransferase 7 (GalNAc-T7)
hsa-miR-30e-3p	1	0	1	1	1	1	IL17RD	interleukin 17 receptor D
hsa-miR-30e-3p	1	0	1	1	1	1	ZNF3	zinc finger protein 3
hsa-miR-30e-3p	0	0	1	1	0	0	FOCAD	focadhesin
hsa-miR-30e-3p	1	0	1	1	1	1	CDC37L1	cell division cycle 37 homolog (S. cerevisiae)-like 1
hsa-miR-30e-3p	1	0	1	1	1	1	STEAP3	STEAP family member 3, metalloreductase
hsa-miR-30e-3p	1	0	1	1	1	1	MARK1	MAP/microtubule affinity-regulating kinase 1
hsa-miR-30e-3p	0	0	1	1	1	1	HNRNPH2	heterogeneous nuclear ribonucleoprotein H2 (H')
hsa-miR-30e-3p	1	0	1	1	1	1	CCBL2	cysteine conjugate-beta lyase 2
hsa-miR-30e-3p	0	0	1	1	0	0	ENY2	enhancer of yellow 2 homolog (Drosophila)
hsa-miR-30e-3p	1	0	1	0	1	1	MNT	MAX binding protein
hsa-miR-30e-3p	0	0	1	0	1	1	CLDN2	claudin 2
hsa-miR-30e-3p	1	0	1	1	1	1	GALNT1	UDP-N-acetyl-alpha-D-galactosamine:polypeptide N-acetylgalactosaminyltransferase 1 (GalNAc-T1)
hsa-miR-30e-3p	1	0	1	0	1	1	ZNF295	zinc finger protein 295
hsa-miR-30e-3p	0	0	0	1	1	1	SPINT2	serine peptidase inhibitor, Kunitz type, 2
hsa-miR-30e-3p	1	0	1	1	1	1	ADCY1	adenylate cyclase 1 (brain)
hsa-miR-30e-3p	1	0	1	1	1	1	PSIP1	PC4 and SFRS1 interacting protein 1
hsa-miR-30e-3p	0	0	0	1	0	0	OVOL2	ovo-like 2 (Drosophila)
hsa-miR-30e-3p	1	0	1	1	1	1	OTX2	orthodenticle homeobox 2
hsa-miR-30e-3p	0	0	1	1	1	1	CHP2	calcineurin-like EF hand protein 2
hsa-miR-30e-3p	0	0	1	1	1	1	OSBPL11	oxysterol binding protein-like 11
hsa-miR-30e-3p	0	0	1	0	1	1	PAPOLG	poly(A) polymerase gamma
hsa-miR-30e-3p	1	0	1	1	1	1	IRF2BPL	interferon regulatory factor 2 binding protein-like
hsa-miR-30e-3p	0	0	1	1	1	1	SAP130	Sin3A-associated protein, 130kDa
hsa-miR-30e-3p	0	0	1	1	1	1	MORC4	MORC family CW-type zinc finger 4
hsa-miR-30e-3p	0	0	1	1	1	1	ZMYM1	zinc finger, MYM-type 1
hsa-miR-30e-3p	1	0	1	1	0	0	DHDDS	dehydrodolichyl diphosphate synthase
hsa-miR-30e-3p	1	0	1	0	1	1	NAA25	N(alpha)-acetyltransferase 25, NatB auxiliary subunit
hsa-miR-30e-3p	1	0	1	0	1	1	VCPIP1	valosin containing protein (p97)/p47 complex interacting protein 1
hsa-miR-30e-3p	1	0	1	1	1	1	FBXO11	F-box protein 11
hsa-miR-30e-3p	0	0	1	0	0	0	FAM49A	family with sequence similarity 49, member A
hsa-miR-30e-3p	1	0	1	1	1	1	TSPAN14	tetraspanin 14
hsa-miR-30e-3p	1	0	1	1	1	1	C6orf62	chromosome 6 open reading frame 62
hsa-miR-30e-3p	1	0	1	1	0	0	TCF7L1	transcription factor 7-like 1 (T-cell specific, HMG-box)
hsa-miR-30e-3p	1	0	1	1	1	1	PPP1R12B	protein phosphatase 1, regulatory subunit 12B
hsa-miR-30e-3p	1	0	1	1	1	1	ZIC4	Zic family member 4
hsa-miR-30e-3p	1	0	1	1	1	1	FAM175B	family with sequence similarity 175, member B
hsa-miR-30e-3p	1	0	1	0	1	1	FYTTD1	forty-two-three domain containing 1
hsa-miR-30e-3p	0	0	1	1	0	0	SLC25A33	solute carrier family 25 (pyrimidine nucleotide carrier), member 33
hsa-miR-30e-3p	0	0	1	1	1	1	ZNF397	zinc finger protein 397
hsa-miR-30e-3p	1	0	1	1	1	1	ZNF512	zinc finger protein 512
hsa-miR-30e-3p	1	0	1	1	1	1	LCOR	ligand dependent nuclear receptor corepressor
hsa-miR-30e-3p	1	0	1	1	1	1	MEGF11	multiple EGF-like-domains 11
hsa-miR-30e-3p	1	0	1	1	1	1	OSBPL6	oxysterol binding protein-like 6
hsa-miR-30e-3p	0	0	1	1	1	1	AGPAT9	1-acylglycerol-3-phosphate O-acyltransferase 9
hsa-miR-30e-3p	0	0	1	1	0	0	FIZ1	FLT3-interacting zinc finger 1
hsa-miR-30e-3p	1	0	1	1	1	1	FAM104A	family with sequence similarity 104, member A
hsa-miR-30e-3p	1	0	1	0	1	1	UBASH3B	ubiquitin associated and SH3 domain containing B
hsa-miR-30e-3p	1	0	1	1	1	1	PCDH11X	protocadherin 11 X-linked
hsa-miR-30e-3p	1	0	1	1	1	1	PCDH11Y	protocadherin 11 Y-linked
hsa-miR-30e-3p	1	0	1	1	1	1	C5orf30	chromosome 5 open reading frame 30
hsa-miR-30e-3p	1	0	1	0	1	1	KIAA1737	KIAA1737
hsa-miR-30e-3p	1	0	1	1	1	1	MED12L	mediator complex subunit 12-like
hsa-miR-30e-3p	1	0	1	1	1	1	ZFP91	zinc finger protein 91 homolog (mouse)
hsa-miR-30e-3p	1	0	1	1	1	1	SRSF10	serine/arginine-rich splicing factor 10
hsa-miR-30e-3p	0	0	1	1	1	1	KLHL4	kelch-like 4 (Drosophila)
hsa-miR-30e-3p	1	0	1	0	1	1	ANTXR2	anthrax toxin receptor 2
hsa-miR-30e-3p	1	0	1	1	1	1	ZNF280B	zinc finger protein 280B
hsa-miR-30e-3p	0	0	0	1	1	1	ACYP2	acylphosphatase 2, muscle type
hsa-miR-30e-3p	1	0	1	0	1	1	SP1	Sp1 transcription factor
hsa-miR-30e-3p	0	0	0	1	0	0	CCDC74A	coiled-coil domain containing 74A
hsa-miR-30e-3p	1	0	0	1	1	1	TMEM45B	transmembrane protein 45B
hsa-miR-30e-3p	0	0	1	1	1	1	ZDHHC15	zinc finger, DHHC-type containing 15
hsa-miR-30e-3p	0	0	1	1	1	1	UPRT	uracil phosphoribosyltransferase (FUR1) homolog (S. cerevisiae)
hsa-miR-30e-3p	0	0	1	0	1	1	ZNF498	zinc finger protein 498
hsa-miR-30e-3p	0	0	1	1	1	1	CRYZL1	crystallin, zeta (quinone reductase)-like 1
hsa-miR-30e-3p	1	0	1	1	1	1	C5orf24	chromosome 5 open reading frame 24
hsa-miR-30e-3p	1	0	1	1	1	1	BHLHE22	basic helix-loop-helix family, member e22
hsa-miR-30e-3p	1	0	1	0	1	1	RNF165	ring finger protein 165
hsa-miR-30e-3p	1	0	1	1	1	1	C7orf60	chromosome 7 open reading frame 60
hsa-miR-30e-3p	1	0	1	1	1	1	KIAA1324L	KIAA1324-like
hsa-miR-30e-3p	0	0	0	1	0	0	RBM45	RNA binding motif protein 45
hsa-miR-30e-3p	1	0	1	1	1	1	TCEANC2	transcription elongation factor A (SII) N-terminal and central domain containing 2
hsa-miR-30e-3p	0	0	1	1	1	1	TDRD9	tudor domain containing 9
hsa-miR-30e-3p	1	0	1	1	1	1	FNDC5	fibronectin type III domain containing 5
hsa-miR-30e-3p	0	0	1	1	1	1	DZIP1L	DAZ interacting protein 1-like
hsa-miR-30e-3p	1	0	1	1	1	1	IFT20	intraflagellar transport 20 homolog (Chlamydomonas)
hsa-miR-30e-3p	0	0	1	1	1	1	CCKBR	cholecystokinin B receptor
hsa-miR-30e-3p	1	0	1	1	1	1	LRRTM1	leucine rich repeat transmembrane neuronal 1
hsa-miR-30e-3p	1	0	1	0	1	1	CPEB2	cytoplasmic polyadenylation element binding protein 2
hsa-miR-30e-3p	0	0	0	1	0	0	SEC13	SEC13 homolog (S. cerevisiae)
hsa-miR-30e-3p	1	0	1	0	1	1	NHS	Nance-Horan syndrome (congenital cataracts and dental anomalies)
hsa-miR-30e-3p	0	0	1	1	0	0	C1orf122	chromosome 1 open reading frame 122
hsa-miR-30e-3p	1	0	1	1	1	1	RSBN1L	round spermatid basic protein 1-like
hsa-miR-30e-3p	1	0	1	0	1	1	CAPRIN1	cell cycle associated protein 1
hsa-miR-30e-3p	0	0	0	1	0	0	CCDC74B	coiled-coil domain containing 74B
hsa-miR-30e-3p	1	0	1	1	1	1	SKIDA1	SKI/DACH domain containing 1
hsa-miR-30e-3p	0	0	1	0	1	1	FSD1L	fibronectin type III and SPRY domain containing 1-like
hsa-miR-30e-3p	1	0	1	1	1	1	CAPN3	calpain 3, (p94)
