# Supplementary material for: Profiling of Selected MicroRNAs in Proliferative Eutopic Endometrium of Women with Ovarian Endometriosis
Source: Biomed Res Int. 2015 Aug 20;2015:760698. doi: 10.1155/2015/760698 (PMC4558423; doi:10.1155/2015/760698)
Supplement: Supplementary file 1 — Table I: The names of miRNAs significantly differentially expressed between eutopic endometrium of patients with endometriosis vs eutopic endometrium of patients without endometriosis. Table II: The associations between miRNA and mRNA, which presents detailed results of the search of six major databases i.e targetscan, tarbase, miranda, mirbase, mirtarget2 and pictar. [file 760698.f1.zip › 760698.f1/Table II/hsa-miR-107.tsv]

miR	targetscan	tarbase	miranda	mirbase	mirtarget2	pictar	GeneSymbol	GeneName
hsa-miR-107	1	0	1	1	1	1	HIGD1A	HIG1 hypoxia inducible domain family, member 1A
hsa-miR-107	1	0	1	1	1	1	ANO3	anoctamin 3
hsa-miR-107	1	0	1	1	1	1	CUL4A	cullin 4A
hsa-miR-107	1	0	1	1	1	1	ABHD2	abhydrolase domain containing 2
hsa-miR-107	1	0	1	1	1	1	SLITRK3	SLIT and NTRK-like family, member 3
hsa-miR-107	1	0	1	0	1	1	TNS3	tensin 3
hsa-miR-107	1	0	1	1	0	0	INO80D	INO80 complex subunit D
hsa-miR-107	1	0	1	1	1	1	FAM189B	family with sequence similarity 189, member B
hsa-miR-107	1	0	1	1	1	1	ETNK1	ethanolamine kinase 1
hsa-miR-107	1	0	1	0	0	0	RAB15	RAB15, member RAS oncogene family
hsa-miR-107	1	0	1	0	1	1	PRKCE	protein kinase C, epsilon
hsa-miR-107	1	0	1	0	1	1	SPRY3	sprouty homolog 3 (Drosophila)
hsa-miR-107	1	0	1	1	1	1	YWHAH	tyrosine 3-monooxygenase/tryptophan 5-monooxygenase activation protein, eta polypeptide
hsa-miR-107	1	0	1	1	1	1	PLCB1	phospholipase C, beta 1 (phosphoinositide-specific)
hsa-miR-107	1	0	1	0	1	1	KIF5A	kinesin family member 5A
hsa-miR-107	1	0	1	1	1	1	KANK4	KN motif and ankyrin repeat domains 4
hsa-miR-107	1	0	1	1	1	1	NOVA1	neuro-oncological ventral antigen 1
hsa-miR-107	1	0	1	1	1	1	LCOR	ligand dependent nuclear receptor corepressor
hsa-miR-107	1	0	1	1	0	0	SH2D2A	SH2 domain containing 2A
hsa-miR-107	1	0	0	1	1	1	ARL8A	ADP-ribosylation factor-like 8A
hsa-miR-107	1	0	1	1	1	1	FRYL	FRY-like
hsa-miR-107	1	0	1	1	1	1	PAPD5	PAP associated domain containing 5
hsa-miR-107	1	0	1	0	1	1	DCP1A	DCP1 decapping enzyme homolog A (S. cerevisiae)
hsa-miR-107	1	0	1	1	1	1	FURIN	furin (paired basic amino acid cleaving enzyme)
hsa-miR-107	1	0	1	1	1	1	RCAN1	regulator of calcineurin 1
hsa-miR-107	1	0	1	1	1	1	SIPA1L2	signal-induced proliferation-associated 1 like 2
hsa-miR-107	1	0	1	1	1	1	KPNA4	karyopherin alpha 4 (importin alpha 3)
hsa-miR-107	1	0	1	0	1	1	PLEKHF2	pleckstrin homology domain containing, family F (with FYVE domain) member 2
hsa-miR-107	1	0	1	0	1	1	DCUN1D4	DCN1, defective in cullin neddylation 1, domain containing 4 (S. cerevisiae)
hsa-miR-107	1	0	1	1	1	1	PCDH17	protocadherin 17
hsa-miR-107	1	0	1	1	1	1	AK2	adenylate kinase 2
hsa-miR-107	1	0	1	1	1	1	C12orf76	chromosome 12 open reading frame 76
hsa-miR-107	1	0	1	1	1	1	RAB11FIP4	RAB11 family interacting protein 4 (class II)
hsa-miR-107	1	0	1	1	1	1	SLC35G1	solute carrier family 35, member G1
hsa-miR-107	1	0	1	1	1	1	ZBTB39	zinc finger and BTB domain containing 39
hsa-miR-107	1	0	1	1	0	0	THY1	Thy-1 cell surface antigen
hsa-miR-107	1	0	1	1	1	1	ABCF2	ATP-binding cassette, sub-family F (GCN20), member 2
hsa-miR-107	1	0	1	1	1	1	NRIP1	nuclear receptor interacting protein 1
hsa-miR-107	1	0	1	1	1	1	SCML4	sex comb on midleg-like 4 (Drosophila)
hsa-miR-107	1	0	1	1	1	1	CC2D1B	coiled-coil and C2 domain containing 1B
hsa-miR-107	1	0	1	0	1	1	PSMF1	proteasome (prosome, macropain) inhibitor subunit 1 (PI31)
hsa-miR-107	1	0	1	1	1	1	BACH2	BTB and CNC homology 1, basic leucine zipper transcription factor 2
hsa-miR-107	1	0	1	1	1	1	PER3	period homolog 3 (Drosophila)
hsa-miR-107	1	0	1	0	1	1	CENPBD1	CENPB DNA-binding domains containing 1
hsa-miR-107	1	0	1	0	1	1	CCNJ	cyclin J
hsa-miR-107	1	0	1	1	0	0	ATP13A3	ATPase type 13A3
hsa-miR-107	1	0	1	1	1	1	SNX3	sorting nexin 3
hsa-miR-107	1	0	1	0	1	1	TMEM184B	transmembrane protein 184B
hsa-miR-107	1	0	0	1	0	0	SYDE2	synapse defective 1, Rho GTPase, homolog 2 (C. elegans)
hsa-miR-107	1	0	1	1	1	1	PDE3B	phosphodiesterase 3B, cGMP-inhibited
hsa-miR-107	1	0	1	1	1	1	USP47	ubiquitin specific peptidase 47
hsa-miR-107	1	0	1	1	1	1	ZDHHC3	zinc finger, DHHC-type containing 3
hsa-miR-107	1	0	1	0	1	1	SPATS2L	spermatogenesis associated, serine-rich 2-like
hsa-miR-107	1	0	1	1	1	1	WASF3	WAS protein family, member 3
hsa-miR-107	1	0	1	1	1	1	ST8SIA4	ST8 alpha-N-acetyl-neuraminide alpha-2,8-sialyltransferase 4
hsa-miR-107	1	0	1	1	1	1	PRKG1	protein kinase, cGMP-dependent, type I
hsa-miR-107	1	0	1	1	1	1	UBE2R2	ubiquitin-conjugating enzyme E2R 2
hsa-miR-107	1	0	1	0	1	1	CNTNAP1	contactin associated protein 1
hsa-miR-107	1	0	1	0	1	1	IRS2	insulin receptor substrate 2
hsa-miR-107	1	0	1	1	1	1	NR2C2	nuclear receptor subfamily 2, group C, member 2
hsa-miR-107	1	0	1	0	1	1	PTPLB	protein tyrosine phosphatase-like (proline instead of catalytic arginine), member b
hsa-miR-107	1	0	1	1	1	1	ARHGAP17	Rho GTPase activating protein 17
hsa-miR-107	1	0	1	1	1	1	CTNND1	catenin (cadherin-associated protein), delta 1
hsa-miR-107	1	0	1	1	1	1	CNNM2	cyclin M2
hsa-miR-107	1	0	1	1	1	1	PPP3R1	protein phosphatase 3, regulatory subunit B, alpha
hsa-miR-107	1	0	1	1	1	1	GPR124	G protein-coupled receptor 124
hsa-miR-107	1	0	1	1	1	1	KLHL18	kelch-like 18 (Drosophila)
hsa-miR-107	1	0	1	1	1	1	GALNT7	UDP-N-acetyl-alpha-D-galactosamine:polypeptide N-acetylgalactosaminyltransferase 7 (GalNAc-T7)
hsa-miR-107	1	0	1	0	1	1	VCL	vinculin
hsa-miR-107	1	0	1	1	1	1	SPTBN4	spectrin, beta, non-erythrocytic 4
hsa-miR-107	1	0	1	0	1	1	TMEM47	transmembrane protein 47
hsa-miR-107	1	0	1	1	1	1	KIAA1033	KIAA1033
hsa-miR-107	1	0	1	1	1	1	GALNTL6	UDP-N-acetyl-alpha-D-galactosamine:polypeptide N-acetylgalactosaminyltransferase-like 6
hsa-miR-107	1	0	0	1	0	0	TGM3	transglutaminase 3 (E polypeptide, protein-glutamine-gamma-glutamyltransferase)
hsa-miR-107	1	0	1	1	1	1	CARM1	coactivator-associated arginine methyltransferase 1
hsa-miR-107	1	0	1	1	1	1	RFWD3	ring finger and WD repeat domain 3
hsa-miR-107	1	0	1	1	1	1	C18orf34	chromosome 18 open reading frame 34
hsa-miR-107	1	0	1	1	1	1	NF1	neurofibromin 1
hsa-miR-107	1	0	1	1	1	1	PRRT2	proline-rich transmembrane protein 2
hsa-miR-107	1	0	1	1	1	1	RNMT	RNA (guanine-7-) methyltransferase
hsa-miR-107	1	0	1	1	1	1	FEM1C	fem-1 homolog c (C. elegans)
hsa-miR-107	1	0	1	1	1	1	ZCCHC2	zinc finger, CCHC domain containing 2
hsa-miR-107	1	0	1	0	1	1	PITPNA	phosphatidylinositol transfer protein, alpha
hsa-miR-107	1	0	1	1	1	1	CLOCK	clock homolog (mouse)
hsa-miR-107	1	0	1	1	1	1	IRF2BP2	interferon regulatory factor 2 binding protein 2
hsa-miR-107	1	0	1	0	1	1	YAF2	YY1 associated factor 2
hsa-miR-107	1	0	1	1	1	1	CPEB3	cytoplasmic polyadenylation element binding protein 3
hsa-miR-107	1	0	1	1	1	1	NDEL1	nudE nuclear distribution E homolog (A. nidulans)-like 1
hsa-miR-107	1	0	1	1	1	1	TWF1	twinfilin, actin-binding protein, homolog 1 (Drosophila)
hsa-miR-107	1	0	1	1	0	0	SYNDIG1	synapse differentiation inducing 1
hsa-miR-107	1	0	1	0	1	1	RAB11FIP2	RAB11 family interacting protein 2 (class I)
hsa-miR-107	1	0	1	1	1	1	GGA3	golgi-associated, gamma adaptin ear containing, ARF binding protein 3
hsa-miR-107	1	0	0	1	1	1	DDX18	DEAD (Asp-Glu-Ala-Asp) box polypeptide 18
hsa-miR-107	1	0	1	1	1	1	KIAA0247	KIAA0247
hsa-miR-107	1	0	1	1	1	1	RASSF5	Ras association (RalGDS/AF-6) domain family member 5
hsa-miR-107	1	0	1	1	1	1	RNF38	ring finger protein 38
hsa-miR-107	1	0	1	1	1	1	FAF2	Fas associated factor family member 2
hsa-miR-107	1	0	1	1	1	1	CORO2B	coronin, actin binding protein, 2B
hsa-miR-107	1	0	1	1	1	1	VAMP8	vesicle-associated membrane protein 8 (endobrevin)
hsa-miR-107	1	0	1	1	1	1	FAM81A	family with sequence similarity 81, member A
hsa-miR-107	1	0	1	0	1	1	PURB	purine-rich element binding protein B
hsa-miR-107	1	0	1	1	1	1	BLMH	bleomycin hydrolase
hsa-miR-107	1	0	1	0	1	1	SYT2	synaptotagmin II
hsa-miR-107	1	0	1	1	1	1	PELI2	pellino E3 ubiquitin protein ligase family member 2
hsa-miR-107	1	0	0	1	0	0	TRIM26	tripartite motif containing 26
hsa-miR-107	1	0	1	1	1	1	AKAP2	A kinase (PRKA) anchor protein 2
hsa-miR-107	1	0	1	0	1	1	AGFG1	ArfGAP with FG repeats 1
hsa-miR-107	1	0	1	1	1	1	FBXW7	F-box and WD repeat domain containing 7, E3 ubiquitin protein ligase
hsa-miR-107	1	0	1	1	1	1	CLCN5	chloride channel, voltage-sensitive 5
hsa-miR-107	1	0	1	1	1	1	JOSD1	Josephin domain containing 1
hsa-miR-107	1	0	1	1	1	1	SNRK	SNF related kinase
hsa-miR-107	1	0	1	1	1	1	SLC2A13	solute carrier family 2 (facilitated glucose transporter), member 13
hsa-miR-107	1	0	1	1	1	1	DCAF5	DDB1 and CUL4 associated factor 5
hsa-miR-107	1	0	1	0	1	1	ZFPM2	zinc finger protein, multitype 2
hsa-miR-107	1	0	1	1	1	1	SH3BP4	SH3-domain binding protein 4
hsa-miR-107	1	0	1	1	1	1	PIK3R1	phosphoinositide-3-kinase, regulatory subunit 1 (alpha)
hsa-miR-107	1	0	1	1	1	1	FOXP1	forkhead box P1
hsa-miR-107	1	0	1	1	1	1	ESR1	estrogen receptor 1
hsa-miR-107	1	0	1	1	0	0	TSPAN5	tetraspanin 5
hsa-miR-107	1	0	1	1	1	1	ANK1	ankyrin 1, erythrocytic
hsa-miR-107	1	0	1	0	1	1	ZC3H12B	zinc finger CCCH-type containing 12B
hsa-miR-107	1	0	1	1	1	1	EIF4B	eukaryotic translation initiation factor 4B
hsa-miR-107	1	0	1	1	0	0	HCFC1	host cell factor C1 (VP16-accessory protein)
hsa-miR-107	1	0	1	0	1	1	CDK14	cyclin-dependent kinase 14
hsa-miR-107	1	0	1	1	1	1	LRRC8D	leucine rich repeat containing 8 family, member D
hsa-miR-107	1	0	0	0	0	0	C9orf69	chromosome 9 open reading frame 69
hsa-miR-107	1	0	1	1	1	1	KPNA1	karyopherin alpha 1 (importin alpha 5)
hsa-miR-107	1	0	1	1	1	1	VAV3	vav 3 guanine nucleotide exchange factor
hsa-miR-107	1	0	1	1	1	1	MAP4	microtubule-associated protein 4
hsa-miR-107	1	0	1	1	1	1	SOWAHC	sosondowah ankyrin repeat domain family member C
hsa-miR-107	1	0	1	1	1	1	DLG5	discs, large homolog 5 (Drosophila)
hsa-miR-107	1	0	1	1	1	1	YTHDC1	YTH domain containing 1
hsa-miR-107	1	0	1	1	1	1	KPNA3	karyopherin alpha 3 (importin alpha 4)
hsa-miR-107	1	0	1	1	1	1	IGSF3	immunoglobulin superfamily, member 3
hsa-miR-107	1	0	1	0	1	1	CCDC6	coiled-coil domain containing 6
hsa-miR-107	1	0	1	0	1	1	MLL2	myeloid/lymphoid or mixed-lineage leukemia 2
hsa-miR-107	1	0	1	1	1	1	MEF2D	myocyte enhancer factor 2D
hsa-miR-107	1	0	1	1	1	1	KIF21A	kinesin family member 21A
hsa-miR-107	1	0	1	0	1	1	GREM2	gremlin 2
hsa-miR-107	1	0	1	0	1	1	PLAG1	pleiomorphic adenoma gene 1
hsa-miR-107	1	0	1	1	1	1	PPP2R5C	protein phosphatase 2, regulatory subunit B', gamma
hsa-miR-107	1	0	1	1	1	1	PVRL1	poliovirus receptor-related 1 (herpesvirus entry mediator C)
hsa-miR-107	1	0	1	1	1	1	ACVR2B	activin A receptor, type IIB
hsa-miR-107	1	0	1	1	1	1	SCAF11	SR-related CTD-associated factor 11
hsa-miR-107	1	0	1	1	1	1	TLK1	tousled-like kinase 1
hsa-miR-107	1	0	1	1	1	1	MTMR4	myotubularin related protein 4
hsa-miR-107	1	0	1	1	1	1	FOXJ3	forkhead box J3
hsa-miR-107	1	0	1	1	1	1	MED26	mediator complex subunit 26
hsa-miR-107	1	0	1	1	1	1	ATL2	atlastin GTPase 2
hsa-miR-107	1	0	1	1	1	1	KCNC4	potassium voltage-gated channel, Shaw-related subfamily, member 4
hsa-miR-107	1	0	1	1	1	1	ZBTB10	zinc finger and BTB domain containing 10
hsa-miR-107	1	0	1	0	1	1	GPCPD1	glycerophosphocholine phosphodiesterase GDE1 homolog (S. cerevisiae)
hsa-miR-107	1	0	1	1	1	1	ADCYAP1	adenylate cyclase activating polypeptide 1 (pituitary)
hsa-miR-107	1	0	1	1	1	1	EFNB2	ephrin-B2
hsa-miR-107	1	0	1	1	1	1	CELSR2	cadherin, EGF LAG seven-pass G-type receptor 2 (flamingo homolog, Drosophila)
hsa-miR-107	1	0	1	1	1	1	AJUBA	ajuba LIM protein
hsa-miR-107	1	0	1	1	1	1	TGFBR2	transforming growth factor, beta receptor II (70/80kDa)
hsa-miR-107	1	0	1	1	1	1	HIATL1	hippocampus abundant transcript-like 1
hsa-miR-107	1	0	1	1	1	1	NTRK2	neurotrophic tyrosine kinase, receptor, type 2
hsa-miR-107	1	0	1	1	1	1	TMEM25	transmembrane protein 25
hsa-miR-107	1	0	1	0	1	1	ARNT	aryl hydrocarbon receptor nuclear translocator
hsa-miR-107	1	0	1	1	1	1	AFF4	AF4/FMR2 family, member 4
hsa-miR-107	1	0	1	1	1	1	VAMP1	vesicle-associated membrane protein 1 (synaptobrevin 1)
hsa-miR-107	1	0	1	1	1	1	PPP6C	protein phosphatase 6, catalytic subunit
hsa-miR-107	1	0	1	0	1	1	PLEKHA1	pleckstrin homology domain containing, family A (phosphoinositide binding specific) member 1
hsa-miR-107	1	0	0	1	1	1	EOMES	eomesodermin
hsa-miR-107	1	0	1	1	1	1	MTF1	metal-regulatory transcription factor 1
hsa-miR-107	1	0	1	1	1	1	SALL1	sal-like 1 (Drosophila)
hsa-miR-107	1	0	1	1	1	1	FAM176A	family with sequence similarity 176, member A
hsa-miR-107	1	0	1	1	1	1	RIMS3	regulating synaptic membrane exocytosis 3
hsa-miR-107	1	0	1	1	1	1	RAN	RAN, member RAS oncogene family
hsa-miR-107	1	0	1	0	1	1	AKAP13	A kinase (PRKA) anchor protein 13
hsa-miR-107	1	0	1	1	1	1	HSDL1	hydroxysteroid dehydrogenase like 1
hsa-miR-107	1	0	1	1	1	1	GSTCD	glutathione S-transferase, C-terminal domain containing
hsa-miR-107	1	0	1	1	1	1	SLC8A2	solute carrier family 8 (sodium/calcium exchanger), member 2
hsa-miR-107	1	0	1	1	1	1	SUN2	Sad1 and UNC84 domain containing 2
hsa-miR-107	1	0	1	1	1	1	NFIB	nuclear factor I/B
hsa-miR-107	1	0	1	1	1	1	CHD1	chromodomain helicase DNA binding protein 1
hsa-miR-107	1	0	1	1	1	1	BCL11A	B-cell CLL/lymphoma 11A (zinc finger protein)
hsa-miR-107	1	0	1	1	1	1	RGS4	regulator of G-protein signaling 4
hsa-miR-107	1	0	1	1	0	0	HIPK2	homeodomain interacting protein kinase 2
hsa-miR-107	1	0	1	0	1	1	DICER1	dicer 1, ribonuclease type III
hsa-miR-107	1	0	1	1	0	0	POLDIP2	polymerase (DNA-directed), delta interacting protein 2
hsa-miR-107	1	0	1	0	1	1	PEG10	paternally expressed 10
hsa-miR-107	1	0	1	0	1	1	PTPLAD1	protein tyrosine phosphatase-like A domain containing 1
hsa-miR-107	1	0	1	1	0	0	WNT4	wingless-type MMTV integration site family, member 4
hsa-miR-107	1	0	1	1	1	1	AMOT	angiomotin
hsa-miR-107	1	0	1	1	1	1	APPL1	adaptor protein, phosphotyrosine interaction, PH domain and leucine zipper containing 1
hsa-miR-107	1	0	1	0	1	1	NUFIP2	nuclear fragile X mental retardation protein interacting protein 2
hsa-miR-107	1	0	1	0	1	1	BDNF	brain-derived neurotrophic factor
hsa-miR-107	1	0	1	1	1	1	POGLUT1	protein O-glucosyltransferase 1
hsa-miR-107	1	0	1	1	1	1	MGA	MAX gene associated
hsa-miR-107	1	0	1	0	1	1	LRRC55	leucine rich repeat containing 55
hsa-miR-107	1	0	1	1	1	1	CDC14A	CDC14 cell division cycle 14 homolog A (S. cerevisiae)
hsa-miR-107	1	0	1	0	1	1	KCMF1	potassium channel modulatory factor 1
hsa-miR-107	1	0	1	1	1	1	SCN2A	sodium channel, voltage-gated, type II, alpha subunit
hsa-miR-107	1	0	1	1	1	1	HERC2	HECT and RLD domain containing E3 ubiquitin protein ligase 2
hsa-miR-107	1	0	1	1	0	0	SLAIN2	SLAIN motif family, member 2
hsa-miR-107	1	0	1	0	1	1	LRP1B	low density lipoprotein receptor-related protein 1B
hsa-miR-107	1	0	1	1	1	1	MBNL1	muscleblind-like splicing regulator 1
hsa-miR-107	1	0	1	1	1	1	CAB39	calcium binding protein 39
hsa-miR-107	1	0	1	1	1	1	ZNF449	zinc finger protein 449
hsa-miR-107	1	0	1	1	1	1	NAV1	neuron navigator 1
hsa-miR-107	1	0	1	1	1	1	GRIA4	glutamate receptor, ionotropic, AMPA 4
hsa-miR-107	1	0	1	1	0	0	KRTAP11-1	keratin associated protein 11-1
hsa-miR-107	1	0	1	0	1	1	GOPC	golgi-associated PDZ and coiled-coil motif containing
hsa-miR-107	1	0	1	1	0	0	IGSF9B	immunoglobulin superfamily, member 9B
hsa-miR-107	1	0	1	1	1	1	MYNN	myoneurin
hsa-miR-107	1	0	1	1	1	1	CAPZA2	capping protein (actin filament) muscle Z-line, alpha 2
hsa-miR-107	1	0	1	0	1	1	GPC6	glypican 6
hsa-miR-107	1	0	1	1	1	1	DCLK1	doublecortin-like kinase 1
hsa-miR-107	1	0	0	1	0	0	SOS1	son of sevenless homolog 1 (Drosophila)
hsa-miR-107	1	0	1	1	0	0	WNT3A	wingless-type MMTV integration site family, member 3A
hsa-miR-107	1	0	1	1	1	1	JAKMIP2	janus kinase and microtubule interacting protein 2
hsa-miR-107	1	0	1	1	1	1	UBE4A	ubiquitination factor E4A
hsa-miR-107	1	0	1	1	1	1	ADAMTSL3	ADAMTS-like 3
hsa-miR-107	1	0	1	1	1	1	ACTG1	actin, gamma 1
hsa-miR-107	1	0	1	0	1	1	ANKFY1	ankyrin repeat and FYVE domain containing 1
hsa-miR-107	1	0	1	1	1	1	SLC26A7	solute carrier family 26, member 7
hsa-miR-107	1	0	1	0	1	1	ARMC1	armadillo repeat containing 1
hsa-miR-107	1	0	1	1	1	1	RC3H1	ring finger and CCCH-type domains 1
hsa-miR-107	1	0	1	1	1	1	COBLL1	COBL-like 1
hsa-miR-107	1	0	1	1	0	0	ST3GAL2	ST3 beta-galactoside alpha-2,3-sialyltransferase 2
hsa-miR-107	1	0	1	0	1	1	THRB	thyroid hormone receptor, beta
hsa-miR-107	1	0	1	0	1	1	HTT	huntingtin
hsa-miR-107	1	0	1	1	1	1	USP42	ubiquitin specific peptidase 42
hsa-miR-107	1	0	1	1	0	0	CLASRP	CLK4-associating serine/arginine rich protein
hsa-miR-107	1	0	1	1	1	1	BTG2	BTG family, member 2
hsa-miR-107	1	0	1	0	1	1	DCBLD2	discoidin, CUB and LCCL domain containing 2
hsa-miR-107	1	0	1	1	1	1	RPS6KA3	ribosomal protein S6 kinase, 90kDa, polypeptide 3
hsa-miR-107	1	0	1	1	0	0	WNK1	WNK lysine deficient protein kinase 1
hsa-miR-107	1	0	1	1	0	0	CSNK1G2	casein kinase 1, gamma 2
hsa-miR-107	1	0	1	0	1	1	RUNX1T1	runt-related transcription factor 1; translocated to, 1 (cyclin D-related)
hsa-miR-107	1	0	1	1	1	1	NREP	neuronal regeneration related protein homolog (rat)
hsa-miR-107	1	0	1	0	1	1	FSTL4	follistatin-like 4
hsa-miR-107	1	0	1	1	1	1	OTUD4	OTU domain containing 4
hsa-miR-107	1	0	1	1	1	1	TPD52	tumor protein D52
hsa-miR-107	1	0	1	1	1	1	SLC20A2	solute carrier family 20 (phosphate transporter), member 2
hsa-miR-107	1	0	1	1	1	1	BCL2L13	BCL2-like 13 (apoptosis facilitator)
hsa-miR-107	1	0	1	1	1	1	SMARCE1	SWI/SNF related, matrix associated, actin dependent regulator of chromatin, subfamily e, member 1
hsa-miR-107	1	0	1	1	1	1	FAM117B	family with sequence similarity 117, member B
hsa-miR-107	1	0	1	1	1	1	CCNE1	cyclin E1
hsa-miR-107	1	0	1	1	1	1	KIAA2018	KIAA2018
hsa-miR-107	1	0	1	0	1	1	KRTAP4-4	keratin associated protein 4-4
hsa-miR-107	1	0	1	1	1	1	COPS2	COP9 constitutive photomorphogenic homolog subunit 2 (Arabidopsis)
hsa-miR-107	1	0	1	1	1	1	ACTR2	ARP2 actin-related protein 2 homolog (yeast)
hsa-miR-107	1	0	1	1	1	1	FLOT2	flotillin 2
hsa-miR-107	1	0	1	0	1	1	ARHGAP5	Rho GTPase activating protein 5
hsa-miR-107	1	0	1	1	1	1	FNBP1L	formin binding protein 1-like
hsa-miR-107	1	0	1	0	1	1	SLC5A3	solute carrier family 5 (sodium/myo-inositol cotransporter), member 3
hsa-miR-107	1	0	1	1	1	1	RSPO3	R-spondin 3
hsa-miR-107	1	0	1	1	1	1	AMMECR1	Alport syndrome, mental retardation, midface hypoplasia and elliptocytosis chromosomal region gene 1
hsa-miR-107	1	0	1	1	1	1	CLIP1	CAP-GLY domain containing linker protein 1
hsa-miR-107	1	0	1	1	1	1	SUFU	suppressor of fused homolog (Drosophila)
hsa-miR-107	1	0	1	0	1	1	KIAA0232	KIAA0232
hsa-miR-107	1	0	1	1	1	1	SMEK2	SMEK homolog 2, suppressor of mek1 (Dictyostelium)
hsa-miR-107	1	0	1	1	1	1	RBM24	RNA binding motif protein 24
hsa-miR-107	1	0	1	1	1	1	TGFBR3	transforming growth factor, beta receptor III
hsa-miR-107	1	0	1	1	1	1	KIF3B	kinesin family member 3B
hsa-miR-107	1	0	1	1	1	1	UBE2J1	ubiquitin-conjugating enzyme E2, J1
hsa-miR-107	1	0	1	1	1	1	SSH2	slingshot homolog 2 (Drosophila)
hsa-miR-107	1	0	1	1	1	1	ZNF711	zinc finger protein 711
hsa-miR-107	1	0	1	1	1	1	AXIN2	axin 2
hsa-miR-107	1	0	1	1	1	1	KIAA1804	mixed lineage kinase 4
hsa-miR-107	1	0	1	1	0	0	CRELD1	cysteine-rich with EGF-like domains 1
hsa-miR-107	1	0	1	1	1	1	AGPAT1	1-acylglycerol-3-phosphate O-acyltransferase 1 (lysophosphatidic acid acyltransferase, alpha)
hsa-miR-107	1	0	1	0	1	1	BTRC	beta-transducin repeat containing E3 ubiquitin protein ligase
hsa-miR-107	1	0	1	1	1	1	MFN2	mitofusin 2
hsa-miR-107	1	0	1	1	0	0	SVEP1	sushi, von Willebrand factor type A, EGF and pentraxin domain containing 1
hsa-miR-107	1	0	1	1	1	1	UBR3	ubiquitin protein ligase E3 component n-recognin 3 (putative)
hsa-miR-107	1	0	1	1	1	1	ZBTB8A	zinc finger and BTB domain containing 8A
hsa-miR-107	1	0	0	1	1	1	LANCL3	LanC lantibiotic synthetase component C-like 3 (bacterial)
hsa-miR-107	1	0	1	1	1	1	SLC12A6	solute carrier family 12 (potassium/chloride transporters), member 6
hsa-miR-107	1	0	1	0	1	1	TFCP2L1	transcription factor CP2-like 1
hsa-miR-107	1	0	1	1	1	1	DYRK2	dual-specificity tyrosine-(Y)-phosphorylation regulated kinase 2
hsa-miR-107	1	0	1	1	1	1	HELZ	helicase with zinc finger
hsa-miR-107	1	0	0	1	1	1	C3P1	complement component 3 precursor pseudogene
hsa-miR-107	1	0	1	1	1	1	ENSA	endosulfine alpha
hsa-miR-107	1	0	1	0	1	1	DCAF10	DDB1 and CUL4 associated factor 10
hsa-miR-107	1	0	1	1	1	1	PPIP5K2	diphosphoinositol pentakisphosphate kinase 2
hsa-miR-107	1	0	1	1	1	1	KIF23	kinesin family member 23
hsa-miR-107	1	0	1	0	1	1	FBXO10	F-box protein 10
hsa-miR-107	1	0	0	1	1	1	SYT10	synaptotagmin X
hsa-miR-107	1	0	1	0	1	1	MYBL1	v-myb myeloblastosis viral oncogene homolog (avian)-like 1
hsa-miR-107	1	0	1	1	1	1	MECP2	methyl CpG binding protein 2 (Rett syndrome)
hsa-miR-107	1	0	1	0	1	1	ATP1B2	ATPase, Na+/K+ transporting, beta 2 polypeptide
hsa-miR-107	1	0	1	1	1	1	FAM40A	family with sequence similarity 40, member A
hsa-miR-107	1	0	1	1	1	1	CHD2	chromodomain helicase DNA binding protein 2
hsa-miR-107	1	0	1	1	1	1	SIX4	SIX homeobox 4
hsa-miR-107	1	0	1	1	0	0	CD164L2	CD164 sialomucin-like 2
hsa-miR-107	1	0	1	1	1	1	BAZ2A	bromodomain adjacent to zinc finger domain, 2A
hsa-miR-107	1	0	1	0	1	1	GNPNAT1	glucosamine-phosphate N-acetyltransferase 1
hsa-miR-107	1	0	1	1	1	1	PALM2-AKAP2	PALM2-AKAP2 readthrough
hsa-miR-107	1	0	1	1	1	1	HIC2	hypermethylated in cancer 2
hsa-miR-107	1	0	1	1	1	1	GABRB1	gamma-aminobutyric acid (GABA) A receptor, beta 1
hsa-miR-107	1	0	1	0	1	1	GNAI3	guanine nucleotide binding protein (G protein), alpha inhibiting activity polypeptide 3
hsa-miR-107	1	0	1	1	1	1	KLF4	Kruppel-like factor 4 (gut)
hsa-miR-107	1	0	1	1	1	1	ZC3H7B	zinc finger CCCH-type containing 7B
hsa-miR-107	1	0	1	1	1	1	BAI3	brain-specific angiogenesis inhibitor 3
hsa-miR-107	1	0	1	0	1	1	C14orf101	chromosome 14 open reading frame 101
hsa-miR-107	1	0	1	0	0	0	CD207	CD207 molecule, langerin
hsa-miR-107	1	0	1	1	1	1	EN2	engrailed homeobox 2
hsa-miR-107	1	1	1	1	1	1	NFIA	nuclear factor I/A
hsa-miR-107	1	0	1	0	1	1	VOPP1	vesicular, overexpressed in cancer, prosurvival protein 1
hsa-miR-107	1	0	1	1	1	1	ST8SIA3	ST8 alpha-N-acetyl-neuraminide alpha-2,8-sialyltransferase 3
hsa-miR-107	1	0	1	1	1	1	EIF2C1	eukaryotic translation initiation factor 2C, 1
hsa-miR-107	1	0	1	0	1	1	CACNA1C	calcium channel, voltage-dependent, L type, alpha 1C subunit
hsa-miR-107	1	0	1	0	1	1	WNT16	wingless-type MMTV integration site family, member 16
hsa-miR-107	1	0	1	1	1	1	FAM219A	family with sequence similarity 219, member A
hsa-miR-107	1	0	1	1	1	1	PHF20	PHD finger protein 20
hsa-miR-107	1	0	1	1	1	1	CHRM1	cholinergic receptor, muscarinic 1
hsa-miR-107	1	0	1	1	1	1	SH3GL2	SH3-domain GRB2-like 2
hsa-miR-107	1	0	1	0	0	0	ZNRF3	zinc and ring finger 3
hsa-miR-107	1	0	1	0	1	1	PRKAB2	protein kinase, AMP-activated, beta 2 non-catalytic subunit
hsa-miR-107	1	0	1	1	1	1	BSDC1	BSD domain containing 1
hsa-miR-107	1	0	1	1	1	1	CDV3	CDV3 homolog (mouse)
hsa-miR-107	1	0	1	1	0	0	PI4KB	phosphatidylinositol 4-kinase, catalytic, beta
hsa-miR-107	1	0	1	0	1	1	G3BP2	GTPase activating protein (SH3 domain) binding protein 2
hsa-miR-107	1	0	1	1	1	1	OGT	O-linked N-acetylglucosamine (GlcNAc) transferase
hsa-miR-107	1	0	1	1	1	1	HLF	hepatic leukemia factor
hsa-miR-107	1	0	1	1	1	1	RNF125	ring finger protein 125, E3 ubiquitin protein ligase
hsa-miR-107	1	0	1	1	1	1	CEP85L	centrosomal protein 85kDa-like
hsa-miR-107	1	0	1	1	0	0	PRMT8	protein arginine methyltransferase 8
hsa-miR-107	1	0	1	1	1	1	GABRG2	gamma-aminobutyric acid (GABA) A receptor, gamma 2
hsa-miR-107	1	0	1	1	1	1	RNF19A	ring finger protein 19A, E3 ubiquitin protein ligase
hsa-miR-107	1	0	0	1	0	0	SNCG	synuclein, gamma (breast cancer-specific protein 1)
hsa-miR-107	1	0	1	1	1	1	EIF5	eukaryotic translation initiation factor 5
hsa-miR-107	1	0	1	1	1	1	SCN1A	sodium channel, voltage-gated, type I, alpha subunit
hsa-miR-107	1	0	1	1	1	1	TLE4	transducin-like enhancer of split 4 (E(sp1) homolog, Drosophila)
hsa-miR-107	1	0	1	1	1	1	SLC35A3	solute carrier family 35 (UDP-N-acetylglucosamine (UDP-GlcNAc) transporter), member A3
hsa-miR-107	1	0	1	1	1	1	KIAA0528	KIAA0528
hsa-miR-107	1	0	1	1	1	1	DKK1	dickkopf 1 homolog (Xenopus laevis)
hsa-miR-107	1	0	1	1	1	1	RTKN2	rhotekin 2
hsa-miR-107	1	0	1	1	1	1	EIF1AX	eukaryotic translation initiation factor 1A, X-linked
hsa-miR-107	1	0	1	0	1	1	CNOT6L	CCR4-NOT transcription complex, subunit 6-like
hsa-miR-107	1	0	1	1	1	1	UMOD	uromodulin
hsa-miR-107	1	0	1	1	1	1	EBF1	early B-cell factor 1
hsa-miR-107	1	0	1	1	1	1	HNRNPA2B1	heterogeneous nuclear ribonucleoprotein A2/B1
hsa-miR-107	1	0	1	1	1	1	FERMT2	fermitin family member 2
hsa-miR-107	1	0	1	0	0	0	ANKRD52	ankyrin repeat domain 52
hsa-miR-107	1	0	1	1	1	1	SUZ12	suppressor of zeste 12 homolog (Drosophila)
hsa-miR-107	1	0	1	0	1	1	GNS	glucosamine (N-acetyl)-6-sulfatase
hsa-miR-107	1	0	1	1	1	1	LONRF3	LON peptidase N-terminal domain and ring finger 3
hsa-miR-107	1	0	1	1	1	1	PHF5A	PHD finger protein 5A
hsa-miR-107	1	0	1	1	1	1	HMGA1	high mobility group AT-hook 1
hsa-miR-107	1	0	1	1	0	0	FCHSD1	FCH and double SH3 domains 1
hsa-miR-107	1	0	1	1	1	1	PPP6R2	protein phosphatase 6, regulatory subunit 2
hsa-miR-107	1	0	1	0	1	1	UBE2W	ubiquitin-conjugating enzyme E2W (putative)
hsa-miR-107	1	0	1	1	1	1	SEMA6A	sema domain, transmembrane domain (TM), and cytoplasmic domain, (semaphorin) 6A
hsa-miR-107	1	0	1	0	1	1	EXOC5	exocyst complex component 5
hsa-miR-107	1	0	1	0	1	1	LIN28A	lin-28 homolog A (C. elegans)
hsa-miR-107	1	0	1	1	1	1	VCP	valosin containing protein
hsa-miR-107	1	0	1	1	1	1	TMEM35	transmembrane protein 35
hsa-miR-107	1	0	1	1	1	1	ATXN7L1	ataxin 7-like 1
hsa-miR-107	1	0	1	1	1	1	CAMK2G	calcium/calmodulin-dependent protein kinase II gamma
hsa-miR-107	1	0	1	1	0	0	SLN	sarcolipin
hsa-miR-107	1	0	1	1	1	1	DUS1L	dihydrouridine synthase 1-like (S. cerevisiae)
hsa-miR-107	1	0	1	1	1	1	DLL1	delta-like 1 (Drosophila)
hsa-miR-107	1	0	1	1	1	1	LRP2	low density lipoprotein receptor-related protein 2
hsa-miR-107	1	0	1	0	1	1	NOTCH2	notch 2
hsa-miR-107	1	0	1	1	1	1	DSEL	dermatan sulfate epimerase-like
hsa-miR-107	1	0	1	1	1	1	CACNA2D1	calcium channel, voltage-dependent, alpha 2/delta subunit 1
hsa-miR-107	1	0	1	1	1	1	NEDD9	neural precursor cell expressed, developmentally down-regulated 9
hsa-miR-107	1	0	1	1	1	1	ZHX3	zinc fingers and homeoboxes 3
hsa-miR-107	1	0	1	1	1	1	WHSC1	Wolf-Hirschhorn syndrome candidate 1
hsa-miR-107	1	1	1	1	1	1	LATS2	LATS, large tumor suppressor, homolog 2 (Drosophila)
hsa-miR-107	1	0	1	0	0	0	KIAA0947	KIAA0947
hsa-miR-107	1	0	1	1	1	1	TSPAN9	tetraspanin 9
hsa-miR-107	1	0	1	0	0	0	ZC3H12C	zinc finger CCCH-type containing 12C
hsa-miR-107	1	0	1	1	1	1	LRP1	low density lipoprotein receptor-related protein 1
hsa-miR-107	1	0	1	0	1	1	N4BP1	NEDD4 binding protein 1
hsa-miR-107	1	0	1	1	1	1	PDCD10	programmed cell death 10
hsa-miR-107	1	0	1	0	0	0	DLG4	discs, large homolog 4 (Drosophila)
hsa-miR-107	1	0	1	1	1	1	RAI14	retinoic acid induced 14
hsa-miR-107	1	0	1	0	1	1	FOXJ2	forkhead box J2
hsa-miR-107	1	0	1	1	1	1	NAV2	neuron navigator 2
hsa-miR-107	1	0	1	1	0	0	CDK8	cyclin-dependent kinase 8
hsa-miR-107	1	0	1	0	1	1	CREB5	cAMP responsive element binding protein 5
hsa-miR-107	1	0	1	1	1	1	SCAMP5	secretory carrier membrane protein 5
hsa-miR-107	1	0	1	1	1	1	MYH9	myosin, heavy chain 9, non-muscle
hsa-miR-107	1	0	1	0	1	1	ZKSCAN1	zinc finger with KRAB and SCAN domains 1
hsa-miR-107	1	0	1	0	1	1	PDE4D	phosphodiesterase 4D, cAMP-specific
hsa-miR-107	1	0	1	1	1	1	RAB1B	RAB1B, member RAS oncogene family
hsa-miR-107	1	0	1	1	1	1	SPTBN1	spectrin, beta, non-erythrocytic 1
hsa-miR-107	1	0	0	1	0	0	FBXL18	F-box and leucine-rich repeat protein 18
hsa-miR-107	1	0	1	0	1	1	TNRC6B	trinucleotide repeat containing 6B
hsa-miR-107	1	0	1	0	1	1	GIT2	G protein-coupled receptor kinase interacting ArfGAP 2
hsa-miR-107	1	0	1	1	1	1	TGIF2	TGFB-induced factor homeobox 2
hsa-miR-107	1	0	1	1	1	1	RPGRIP1L	RPGRIP1-like
hsa-miR-107	1	0	1	1	1	1	ANK3	ankyrin 3, node of Ranvier (ankyrin G)
hsa-miR-107	1	0	1	1	1	1	ITSN1	intersectin 1 (SH3 domain protein)
hsa-miR-107	1	0	1	1	1	1	TARDBP	TAR DNA binding protein
hsa-miR-107	1	0	1	1	1	1	NAA15	N(alpha)-acetyltransferase 15, NatA auxiliary subunit
hsa-miR-107	1	0	1	1	1	1	CAMKK1	calcium/calmodulin-dependent protein kinase kinase 1, alpha
hsa-miR-107	1	0	1	0	1	1	VAMP4	vesicle-associated membrane protein 4
hsa-miR-107	1	0	1	1	1	1	MARCH3	membrane-associated ring finger (C3HC4) 3, E3 ubiquitin protein ligase
hsa-miR-107	1	0	1	1	1	1	AP3M1	adaptor-related protein complex 3, mu 1 subunit
hsa-miR-107	1	0	1	1	0	0	SNX30	sorting nexin family member 30
hsa-miR-107	1	0	1	1	1	1	CDK12	cyclin-dependent kinase 12
hsa-miR-107	1	0	1	1	0	0	SRGAP1	SLIT-ROBO Rho GTPase activating protein 1
hsa-miR-107	1	0	1	1	1	1	CDC23	cell division cycle 23 homolog (S. cerevisiae)
hsa-miR-107	1	0	1	1	1	1	GPATCH8	G patch domain containing 8
hsa-miR-107	1	0	1	1	1	1	CDC27	cell division cycle 27 homolog (S. cerevisiae)
hsa-miR-107	1	0	1	1	1	1	NPAS2	neuronal PAS domain protein 2
hsa-miR-107	1	0	1	1	1	1	JHDM1D	jumonji C domain containing histone demethylase 1 homolog D (S. cerevisiae)
hsa-miR-107	1	0	1	0	1	1	EIF2C4	eukaryotic translation initiation factor 2C, 4
hsa-miR-107	1	0	1	1	0	0	ABL2	v-abl Abelson murine leukemia viral oncogene homolog 2
hsa-miR-107	1	0	1	0	1	1	NUP50	nucleoporin 50kDa
hsa-miR-107	1	0	1	1	0	0	SEPT8	septin 8
hsa-miR-107	1	0	1	0	1	1	VPS4A	vacuolar protein sorting 4 homolog A (S. cerevisiae)
hsa-miR-107	1	0	1	1	1	1	TULP4	tubby like protein 4
hsa-miR-107	1	0	1	1	1	1	PTH	parathyroid hormone
hsa-miR-107	1	0	1	0	1	1	CDK5R1	cyclin-dependent kinase 5, regulatory subunit 1 (p35)
hsa-miR-107	1	0	1	1	1	1	FGF7	fibroblast growth factor 7
hsa-miR-107	1	0	1	1	0	0	IHH	Indian hedgehog
hsa-miR-107	1	0	1	1	1	1	CHIC1	cysteine-rich hydrophobic domain 1
hsa-miR-107	1	0	1	1	1	1	GK	glycerol kinase
hsa-miR-107	1	0	1	0	1	1	CDK6	cyclin-dependent kinase 6
hsa-miR-107	1	0	1	1	1	1	NMT2	N-myristoyltransferase 2
hsa-miR-107	1	0	1	1	1	1	TBKBP1	TBK1 binding protein 1
hsa-miR-107	1	0	1	0	1	1	ETV6	ets variant 6
hsa-miR-107	1	0	1	1	1	1	SATB2	SATB homeobox 2
hsa-miR-107	1	0	1	1	1	1	SYT6	synaptotagmin VI
hsa-miR-107	1	0	1	1	1	1	BAZ2B	bromodomain adjacent to zinc finger domain, 2B
hsa-miR-107	1	0	1	1	1	1	NKTR	natural killer-tumor recognition sequence
hsa-miR-107	1	0	1	1	1	1	PCGF5	polycomb group ring finger 5
hsa-miR-107	1	0	1	1	1	1	PAG1	phosphoprotein associated with glycosphingolipid microdomains 1
hsa-miR-107	1	0	1	1	1	1	SDCBP	syndecan binding protein (syntenin)
hsa-miR-107	1	0	1	1	1	1	TDG	thymine-DNA glycosylase
hsa-miR-107	1	0	1	0	1	1	C16orf72	chromosome 16 open reading frame 72
hsa-miR-107	1	0	1	1	1	1	HTR4	5-hydroxytryptamine (serotonin) receptor 4, G protein-coupled
hsa-miR-107	1	0	1	1	1	1	AQP11	aquaporin 11
hsa-miR-107	1	0	1	0	0	0	ZBTB34	zinc finger and BTB domain containing 34
hsa-miR-107	1	0	1	0	1	1	PACSIN1	protein kinase C and casein kinase substrate in neurons 1
hsa-miR-107	1	0	1	1	1	1	PCGF2	polycomb group ring finger 2
hsa-miR-107	1	0	1	1	0	0	MAF1	MAF1 homolog (S. cerevisiae)
hsa-miR-107	1	0	1	1	1	1	DISC1	disrupted in schizophrenia 1
hsa-miR-107	1	0	1	1	1	1	RASL12	RAS-like, family 12
hsa-miR-107	1	0	1	0	1	1	FAM73A	family with sequence similarity 73, member A
hsa-miR-107	1	0	1	0	1	1	MAML1	mastermind-like 1 (Drosophila)
hsa-miR-107	1	0	1	1	1	1	MMP24	matrix metallopeptidase 24 (membrane-inserted)
hsa-miR-107	1	0	1	0	1	1	C2orf71	chromosome 2 open reading frame 71
hsa-miR-107	1	0	1	1	1	1	ADD2	adducin 2 (beta)
hsa-miR-107	1	0	1	1	1	1	APBA1	amyloid beta (A4) precursor protein-binding, family A, member 1
hsa-miR-107	1	0	0	1	1	1	ZNRF2	zinc and ring finger 2
hsa-miR-107	1	0	1	1	1	1	FAM60A	family with sequence similarity 60, member A
hsa-miR-107	1	0	1	1	1	1	NUAK1	NUAK family, SNF1-like kinase, 1
hsa-miR-107	1	0	1	1	1	1	NEK10	NIMA (never in mitosis gene a)- related kinase 10
hsa-miR-107	1	0	1	1	1	1	UBL3	ubiquitin-like 3
hsa-miR-107	1	0	1	1	1	1	ASH1L	ash1 (absent, small, or homeotic)-like (Drosophila)
hsa-miR-107	1	0	1	1	1	1	CECR6	cat eye syndrome chromosome region, candidate 6
hsa-miR-107	1	0	1	1	0	0	KY	kyphoscoliosis peptidase
hsa-miR-107	1	0	1	1	1	1	BCL2L2	BCL2-like 2
hsa-miR-107	1	0	1	1	1	1	UPF2	UPF2 regulator of nonsense transcripts homolog (yeast)
hsa-miR-107	1	0	1	1	1	1	CHD6	chromodomain helicase DNA binding protein 6
hsa-miR-107	1	0	1	1	1	1	SLITRK1	SLIT and NTRK-like family, member 1
hsa-miR-107	1	0	1	1	1	1	ERLIN1	ER lipid raft associated 1
hsa-miR-107	1	0	1	1	1	1	ARIH2	ariadne homolog 2 (Drosophila)
hsa-miR-107	1	0	1	0	1	1	IPO9	importin 9
hsa-miR-107	1	0	1	1	1	1	ZNF654	zinc finger protein 654
hsa-miR-107	1	0	1	0	1	1	PHYHIPL	phytanoyl-CoA 2-hydroxylase interacting protein-like
hsa-miR-107	1	0	1	1	1	1	RAP2C	RAP2C, member of RAS oncogene family
hsa-miR-107	1	0	1	0	1	1	ST13	suppression of tumorigenicity 13 (colon carcinoma) (Hsp70 interacting protein)
hsa-miR-107	1	0	1	0	1	1	FZD4	frizzled family receptor 4
hsa-miR-107	1	0	1	1	1	1	BTLA	B and T lymphocyte associated
hsa-miR-107	1	0	1	1	1	1	CREBRF	CREB3 regulatory factor
hsa-miR-107	1	0	1	1	1	1	FAM104A	family with sequence similarity 104, member A
hsa-miR-107	1	0	1	1	1	1	SIK2	salt-inducible kinase 2
hsa-miR-107	1	0	1	1	1	1	GLUD1	glutamate dehydrogenase 1
hsa-miR-107	1	0	1	0	1	1	KIF5C	kinesin family member 5C
hsa-miR-107	1	0	1	0	0	0	TNPO1	transportin 1
hsa-miR-107	1	0	1	1	1	1	CXorf23	chromosome X open reading frame 23
hsa-miR-107	1	1	1	1	1	1	BACE1	beta-site APP-cleaving enzyme 1
hsa-miR-107	1	0	1	0	0	0	TRANK1	tetratricopeptide repeat and ankyrin repeat containing 1
hsa-miR-107	1	0	1	0	1	1	PTPRT	protein tyrosine phosphatase, receptor type, T
hsa-miR-107	0	0	1	1	1	1	PEG3	paternally expressed 3
hsa-miR-107	1	0	1	1	1	1	SGSM2	small G protein signaling modulator 2
hsa-miR-107	1	0	1	0	1	1	MTSS1	metastasis suppressor 1
hsa-miR-107	0	0	1	1	1	1	PDE4DIP	phosphodiesterase 4D interacting protein
hsa-miR-107	1	0	1	0	1	1	CEP350	centrosomal protein 350kDa
hsa-miR-107	0	0	1	1	0	0	ZNF862	zinc finger protein 862
hsa-miR-107	1	0	1	0	0	0	HECTD4	HECT domain containing E3 ubiquitin protein ligase 4
hsa-miR-107	1	0	1	1	1	1	HIPK1	homeodomain interacting protein kinase 1
hsa-miR-107	1	0	1	0	1	1	MAGI2	membrane associated guanylate kinase, WW and PDZ domain containing 2
hsa-miR-107	1	0	1	1	1	1	TP63	tumor protein p63
hsa-miR-107	1	0	1	0	1	1	RBM12	RNA binding motif protein 12
hsa-miR-107	1	0	1	0	1	1	LPHN3	latrophilin 3
hsa-miR-107	1	0	1	0	0	0	MICAL3	microtubule associated monoxygenase, calponin and LIM domain containing 3
hsa-miR-107	0	0	1	1	1	1	MAN2B2	mannosidase, alpha, class 2B, member 2
hsa-miR-107	1	0	1	1	1	1	CIT	citron (rho-interacting, serine/threonine kinase 21)
hsa-miR-107	1	0	1	1	1	1	NLGN4Y	neuroligin 4, Y-linked
hsa-miR-107	0	0	1	0	0	0	THSD7A	thrombospondin, type I, domain containing 7A
hsa-miR-107	0	0	1	1	1	1	FASTKD2	FAST kinase domains 2
hsa-miR-107	0	0	1	1	1	1	AGTPBP1	ATP/GTP binding protein 1
hsa-miR-107	1	0	1	1	0	0	KIAA1045	KIAA1045
hsa-miR-107	1	0	1	1	1	1	NLGN1	neuroligin 1
hsa-miR-107	1	0	1	0	1	1	ZNF507	zinc finger protein 507
hsa-miR-107	1	0	1	1	1	1	NDRG4	NDRG family member 4
hsa-miR-107	1	0	1	1	0	0	KIAA1210	KIAA1210
hsa-miR-107	1	0	1	1	1	1	RIMKLB	ribosomal modification protein rimK-like family member B
hsa-miR-107	1	0	1	1	1	1	MKL2	MKL/myocardin-like 2
hsa-miR-107	0	0	1	0	0	0	MTA3	metastasis associated 1 family, member 3
hsa-miR-107	0	0	1	1	1	1	COPS7A	COP9 constitutive photomorphogenic homolog subunit 7A (Arabidopsis)
hsa-miR-107	0	0	1	1	1	1	KLHL13	kelch-like 13 (Drosophila)
hsa-miR-107	1	0	1	1	1	1	PCDH19	protocadherin 19
hsa-miR-107	0	0	1	0	1	1	KIAA1468	KIAA1468
hsa-miR-107	1	0	1	1	1	1	FRAS1	Fraser syndrome 1
hsa-miR-107	0	0	1	0	0	0	COL20A1	collagen, type XX, alpha 1
hsa-miR-107	1	0	1	1	1	1	USP28	ubiquitin specific peptidase 28
hsa-miR-107	1	0	1	1	1	1	ITPRIP	inositol 1,4,5-trisphosphate receptor interacting protein
hsa-miR-107	1	0	1	0	1	1	RIMS1	regulating synaptic membrane exocytosis 1
hsa-miR-107	1	0	1	1	1	1	IKZF4	IKAROS family zinc finger 4 (Eos)
hsa-miR-107	0	0	1	1	1	1	C3orf15	chromosome 3 open reading frame 15
hsa-miR-107	0	0	1	1	0	0	SEC16B	SEC16 homolog B (S. cerevisiae)
hsa-miR-107	1	0	1	1	1	1	BCL2L11	BCL2-like 11 (apoptosis facilitator)
hsa-miR-107	1	0	1	1	1	1	TET2	tet methylcytosine dioxygenase 2
hsa-miR-107	1	0	1	1	1	1	OXR1	oxidation resistance 1
hsa-miR-107	1	0	1	1	1	1	SH3TC2	SH3 domain and tetratricopeptide repeats 2
hsa-miR-107	1	0	1	0	0	0	FAT3	FAT tumor suppressor homolog 3 (Drosophila)
hsa-miR-107	0	0	1	1	1	1	NELL1	NEL-like 1 (chicken)
hsa-miR-107	0	0	1	0	1	1	RASSF8	Ras association (RalGDS/AF-6) domain family (N-terminal) member 8
hsa-miR-107	0	0	1	1	0	0	CNTNAP4	contactin associated protein-like 4
hsa-miR-107	0	0	1	1	0	0	SSPO	SCO-spondin homolog (Bos taurus)
hsa-miR-107	0	0	1	1	0	0	PTPRF	protein tyrosine phosphatase, receptor type, F
hsa-miR-107	0	0	1	0	1	1	ITPR1	inositol 1,4,5-trisphosphate receptor, type 1
hsa-miR-107	1	0	1	1	1	1	PML	promyelocytic leukemia
hsa-miR-107	0	0	1	1	0	0	SMARCC2	SWI/SNF related, matrix associated, actin dependent regulator of chromatin, subfamily c, member 2
hsa-miR-107	1	0	1	1	1	1	SLC8A1	solute carrier family 8 (sodium/calcium exchanger), member 1
hsa-miR-107	1	0	1	1	1	1	DTNA	dystrobrevin, alpha
hsa-miR-107	0	0	1	1	1	1	DGKI	diacylglycerol kinase, iota
hsa-miR-107	1	0	1	1	1	1	PRKACB	protein kinase, cAMP-dependent, catalytic, beta
hsa-miR-107	1	0	1	0	1	1	ETV1	ets variant 1
hsa-miR-107	0	0	1	1	1	1	DVL1	dishevelled, dsh homolog 1 (Drosophila)
hsa-miR-107	0	0	1	0	1	1	NPY1R	neuropeptide Y receptor Y1
hsa-miR-107	1	0	1	1	1	1	EPHA7	EPH receptor A7
hsa-miR-107	1	0	1	1	1	1	TBX2	T-box 2
hsa-miR-107	1	0	1	1	1	1	AEBP2	AE binding protein 2
hsa-miR-107	0	0	1	1	0	0	ASIC3	acid-sensing (proton-gated) ion channel 3
hsa-miR-107	0	0	1	1	1	1	ACO1	aconitase 1, soluble
hsa-miR-107	0	0	1	1	0	0	HLA-DMB	major histocompatibility complex, class II, DM beta
hsa-miR-107	0	0	1	1	0	0	CFLAR	CASP8 and FADD-like apoptosis regulator
hsa-miR-107	0	0	1	1	0	0	MCM5	minichromosome maintenance complex component 5
hsa-miR-107	0	0	1	1	1	1	ALDH3B1	aldehyde dehydrogenase 3 family, member B1
hsa-miR-107	0	0	1	1	0	0	SLC22A8	solute carrier family 22 (organic anion transporter), member 8
hsa-miR-107	0	0	1	1	1	1	ELOVL5	ELOVL fatty acid elongase 5
hsa-miR-107	1	0	1	1	1	1	TEAD1	TEA domain family member 1 (SV40 transcriptional enhancer factor)
hsa-miR-107	1	0	1	1	0	0	PPP2R5D	protein phosphatase 2, regulatory subunit B', delta
hsa-miR-107	0	0	1	1	1	1	PLD1	phospholipase D1, phosphatidylcholine-specific
hsa-miR-107	1	0	1	1	1	1	APC	adenomatous polyposis coli
hsa-miR-107	1	0	1	1	1	1	MDM4	Mdm4 p53 binding protein homolog (mouse)
hsa-miR-107	1	0	1	1	1	1	SLC4A4	solute carrier family 4, sodium bicarbonate cotransporter, member 4
hsa-miR-107	0	0	1	0	1	1	ZMYM2	zinc finger, MYM-type 2
hsa-miR-107	0	0	1	0	0	0	ALOX12P2	arachidonate 12-lipoxygenase pseudogene 2
hsa-miR-107	0	0	1	1	1	1	SESN1	sestrin 1
hsa-miR-107	0	0	1	1	0	0	BMX	BMX non-receptor tyrosine kinase
hsa-miR-107	0	0	1	1	1	1	ZMYM6	zinc finger, MYM-type 6
hsa-miR-107	1	0	1	1	1	1	MBNL2	muscleblind-like splicing regulator 2
hsa-miR-107	1	0	1	1	1	1	CBFA2T2	core-binding factor, runt domain, alpha subunit 2; translocated to, 2
hsa-miR-107	0	0	1	1	1	1	LYPLA1	lysophospholipase I
hsa-miR-107	0	0	1	1	1	1	RGS7	regulator of G-protein signaling 7
hsa-miR-107	0	0	1	1	1	1	GUCA1C	guanylate cyclase activator 1C
hsa-miR-107	0	0	1	1	0	0	COPB1	coatomer protein complex, subunit beta 1
hsa-miR-107	0	0	1	1	1	1	TMEM176B	transmembrane protein 176B
hsa-miR-107	0	0	1	1	1	1	TIAM2	T-cell lymphoma invasion and metastasis 2
hsa-miR-107	0	0	1	1	0	0	CNTROB	centrobin, centrosomal BRCA2 interacting protein
hsa-miR-107	1	0	1	1	1	1	HMG20A	high mobility group 20A
hsa-miR-107	1	0	1	1	1	1	C14orf129	chromosome 14 open reading frame 129
hsa-miR-107	1	0	1	1	1	1	ANKRD13A	ankyrin repeat domain 13A
hsa-miR-107	0	0	1	1	1	1	LMBRD1	LMBR1 domain containing 1
hsa-miR-107	0	0	1	1	1	1	SPG21	spastic paraplegia 21 (autosomal recessive, Mast syndrome)
hsa-miR-107	0	0	1	1	1	1	CSNK1A1	casein kinase 1, alpha 1
hsa-miR-107	0	0	1	1	1	1	CD28	CD28 molecule
hsa-miR-107	1	0	1	1	1	1	DESI2	desumoylating isopeptidase 2
hsa-miR-107	1	0	1	1	1	1	C21orf91	chromosome 21 open reading frame 91
hsa-miR-107	1	0	1	1	1	1	SNTB2	syntrophin, beta 2 (dystrophin-associated protein A1, 59kDa, basic component 2)
hsa-miR-107	1	0	1	1	1	1	SH3GLB1	SH3-domain GRB2-like endophilin B1
hsa-miR-107	1	0	1	0	1	1	PARP11	poly (ADP-ribose) polymerase family, member 11
hsa-miR-107	1	0	1	0	1	1	TRPS1	trichorhinophalangeal syndrome I
hsa-miR-107	0	0	1	1	1	1	RANGRF	RAN guanine nucleotide release factor
hsa-miR-107	1	0	1	1	1	1	TAGLN3	transgelin 3
hsa-miR-107	1	0	1	1	1	1	KLHL12	kelch-like 12 (Drosophila)
hsa-miR-107	1	0	1	1	1	1	CALU	calumenin
hsa-miR-107	1	0	1	1	1	1	LARP4	La ribonucleoprotein domain family, member 4
hsa-miR-107	0	0	1	0	1	1	MYO3B	myosin IIIB
hsa-miR-107	0	0	1	1	1	1	RAPGEF6	Rap guanine nucleotide exchange factor (GEF) 6
hsa-miR-107	0	0	1	1	0	0	SNRPN	small nuclear ribonucleoprotein polypeptide N
hsa-miR-107	0	0	1	0	0	0	MYO15B	myosin XVB pseudogene
hsa-miR-107	1	0	1	1	1	1	ST3GAL3	ST3 beta-galactoside alpha-2,3-sialyltransferase 3
hsa-miR-107	0	0	1	0	0	0	ANKRD30BP2	ankyrin repeat domain 30B pseudogene 2
hsa-miR-107	1	0	1	1	1	1	SLC35A4	solute carrier family 35, member A4
hsa-miR-107	0	0	1	1	0	0	RASGEF1C	RasGEF domain family, member 1C
hsa-miR-107	1	0	1	0	1	1	PPP1R12A	protein phosphatase 1, regulatory subunit 12A
hsa-miR-107	1	0	1	1	1	1	HNRNPU	heterogeneous nuclear ribonucleoprotein U (scaffold attachment factor A)
hsa-miR-107	1	0	1	1	0	0	POLR2J3	polymerase (RNA) II (DNA directed) polypeptide J3
hsa-miR-107	0	0	1	1	1	1	SAMD9L	sterile alpha motif domain containing 9-like
hsa-miR-107	0	0	1	1	1	1	SLC2A14	solute carrier family 2 (facilitated glucose transporter), member 14
hsa-miR-107	1	0	1	0	1	1	IL1RAP	interleukin 1 receptor accessory protein
hsa-miR-107	1	0	1	1	1	1	AFF2	AF4/FMR2 family, member 2
hsa-miR-107	1	0	1	1	1	1	PLAGL1	pleiomorphic adenoma gene-like 1
hsa-miR-107	0	0	1	1	1	1	HIRIP3	HIRA interacting protein 3
hsa-miR-107	0	0	1	0	0	0	SNHG4	small nucleolar RNA host gene 4 (non-protein coding)
hsa-miR-107	0	0	1	1	1	1	TCFL5	transcription factor-like 5 (basic helix-loop-helix)
hsa-miR-107	0	0	1	1	1	1	CD1E	CD1e molecule
hsa-miR-107	0	0	1	1	1	1	CHST11	carbohydrate (chondroitin 4) sulfotransferase 11
hsa-miR-107	0	0	1	1	1	1	DMRTC1	DMRT-like family C1
hsa-miR-107	0	0	1	1	0	0	DMRTC1B	DMRT-like family C1B
hsa-miR-107	1	0	1	1	1	1	SAV1	salvador homolog 1 (Drosophila)
hsa-miR-107	1	0	1	1	1	1	PALM2	paralemmin 2
hsa-miR-107	1	0	1	1	1	1	NRXN3	neurexin 3
hsa-miR-107	0	0	1	0	0	0	CASC2	cancer susceptibility candidate 2 (non-protein coding)
hsa-miR-107	1	0	1	1	1	1	PNISR	PNN-interacting serine/arginine-rich protein
hsa-miR-107	1	0	1	1	1	1	ARL4C	ADP-ribosylation factor-like 4C
hsa-miR-107	0	0	1	1	1	1	UBE2Q2	ubiquitin-conjugating enzyme E2Q family member 2
hsa-miR-107	0	0	1	0	0	0	TUG1	taurine upregulated 1 (non-protein coding)
hsa-miR-107	0	0	1	1	1	1	OLFM4	olfactomedin 4
hsa-miR-107	0	0	1	0	0	0	RNF31	ring finger protein 31
hsa-miR-107	0	0	1	1	1	1	STOX2	storkhead box 2
hsa-miR-107	1	0	1	1	1	1	RIC8B	resistance to inhibitors of cholinesterase 8 homolog B (C. elegans)
hsa-miR-107	1	0	1	1	1	1	PTBP3	polypyrimidine tract binding protein 3
hsa-miR-107	1	0	1	1	1	1	ARMC8	armadillo repeat containing 8
hsa-miR-107	1	0	1	1	1	1	LRRN3	leucine rich repeat neuronal 3
hsa-miR-107	1	0	1	1	1	1	ACER3	alkaline ceramidase 3
hsa-miR-107	0	0	1	1	0	0	C17orf53	chromosome 17 open reading frame 53
hsa-miR-107	1	0	1	1	0	0	UQCC	ubiquinol-cytochrome c reductase complex chaperone
hsa-miR-107	0	0	1	0	0	0	LOC149134	uncharacterized LOC149134
hsa-miR-107	0	0	1	0	0	0	DUXAP10	double homeobox A pseudogene 10
hsa-miR-107	1	0	1	1	1	1	STARD7	StAR-related lipid transfer (START) domain containing 7
hsa-miR-107	0	0	1	1	1	1	LRRN1	leucine rich repeat neuronal 1
hsa-miR-107	1	0	1	1	1	1	MACF1	microtubule-actin crosslinking factor 1
hsa-miR-107	1	0	1	1	1	1	SRP72	signal recognition particle 72kDa
hsa-miR-107	0	0	1	0	0	0	LOC284561	uncharacterized LOC284561
hsa-miR-107	0	0	1	1	1	1	AMFR	autocrine motility factor receptor, E3 ubiquitin protein ligase
hsa-miR-107	1	0	1	1	1	1	CEP85	centrosomal protein 85kDa
hsa-miR-107	0	0	1	1	1	1	CDKAL1	CDK5 regulatory subunit associated protein 1-like 1
hsa-miR-107	1	0	1	1	1	1	FAM131A	family with sequence similarity 131, member A
hsa-miR-107	1	0	1	0	1	1	MYO5B	myosin VB
hsa-miR-107	0	0	1	0	1	1	ATXN1L	ataxin 1-like
hsa-miR-107	0	0	1	0	1	1	FLJ22447	uncharacterized LOC400221
hsa-miR-107	0	0	1	1	1	1	MYEOV	myeloma overexpressed (in a subset of t(11;14) positive multiple myelomas)
hsa-miR-107	0	0	1	0	0	0	LINC00340	long intergenic non-protein coding RNA 340
hsa-miR-107	1	0	1	1	0	0	MAGI3	membrane associated guanylate kinase, WW and PDZ domain containing 3
hsa-miR-107	0	0	1	1	1	1	NETO2	neuropilin (NRP) and tolloid (TLL)-like 2
hsa-miR-107	0	0	1	1	1	1	STMN1	stathmin 1
hsa-miR-107	0	0	1	1	0	0	CYP21A2	cytochrome P450, family 21, subfamily A, polypeptide 2
hsa-miR-107	1	0	1	1	1	1	SGK1	serum/glucocorticoid regulated kinase 1
hsa-miR-107	1	0	1	0	1	1	AP1G1	adaptor-related protein complex 1, gamma 1 subunit
hsa-miR-107	1	0	1	1	1	1	TPM1	tropomyosin 1 (alpha)
hsa-miR-107	0	0	1	1	0	0	ABHD16A	abhydrolase domain containing 16A
hsa-miR-107	1	0	1	1	0	0	SPEG	SPEG complex locus
hsa-miR-107	0	0	1	0	0	0	SNHG11	small nucleolar RNA host gene 11 (non-protein coding)
hsa-miR-107	0	0	1	0	0	0	LOC157273	uncharacterized LOC157273
hsa-miR-107	1	0	1	0	1	1	RNF165	ring finger protein 165
hsa-miR-107	0	0	1	1	1	1	ANKRD36B	ankyrin repeat domain 36B
hsa-miR-107	1	0	1	0	1	1	PTPRE	protein tyrosine phosphatase, receptor type, E
hsa-miR-107	0	0	1	1	1	1	SEPT5	septin 5
hsa-miR-107	0	0	1	0	1	1	FAM70A	family with sequence similarity 70, member A
hsa-miR-107	0	0	1	1	1	1	BRD2	bromodomain containing 2
hsa-miR-107	0	0	1	0	1	1	SNRNP48	small nuclear ribonucleoprotein 48kDa (U11/U12)
hsa-miR-107	0	0	1	1	1	1	COQ10A	coenzyme Q10 homolog A (S. cerevisiae)
hsa-miR-107	0	0	1	1	0	0	RELT	RELT tumor necrosis factor receptor
hsa-miR-107	1	0	1	1	1	1	MGAT1	mannosyl (alpha-1,3-)-glycoprotein beta-1,2-N-acetylglucosaminyltransferase
hsa-miR-107	0	0	1	1	1	1	PSME3	proteasome (prosome, macropain) activator subunit 3 (PA28 gamma; Ki)
hsa-miR-107	1	0	1	0	1	1	NCAM1	neural cell adhesion molecule 1
hsa-miR-107	0	0	1	1	0	0	FAM156A	family with sequence similarity 156, member A
hsa-miR-107	1	0	1	1	1	1	ANKRD29	ankyrin repeat domain 29
hsa-miR-107	1	0	1	1	1	1	C6orf89	chromosome 6 open reading frame 89
hsa-miR-107	0	0	1	1	0	0	CD37	CD37 molecule
hsa-miR-107	0	0	1	0	0	0	LINC00301	long intergenic non-protein coding RNA 301
hsa-miR-107	0	0	1	0	1	1	UHMK1	U2AF homology motif (UHM) kinase 1
hsa-miR-107	0	0	1	1	0	0	TRIM41	tripartite motif containing 41
hsa-miR-107	0	0	1	0	0	0	C10orf105	chromosome 10 open reading frame 105
hsa-miR-107	1	0	1	1	0	0	LRCH4	leucine-rich repeats and calponin homology (CH) domain containing 4
hsa-miR-107	0	0	1	0	1	1	CDHR3	cadherin-related family member 3
hsa-miR-107	0	0	1	0	0	0	SDHAP2	succinate dehydrogenase complex, subunit A, flavoprotein pseudogene 2
hsa-miR-107	0	0	1	1	0	0	NISCH	nischarin
hsa-miR-107	0	0	1	1	1	1	CAMKV	CaM kinase-like vesicle-associated
hsa-miR-107	1	0	1	1	0	0	MMP11	matrix metallopeptidase 11 (stromelysin 3)
hsa-miR-107	0	0	1	1	0	0	PIGO	phosphatidylinositol glycan anchor biosynthesis, class O
hsa-miR-107	0	0	1	0	0	0	LOC643837	uncharacterized LOC643837
hsa-miR-107	0	0	1	1	0	0	ACOT11	acyl-CoA thioesterase 11
hsa-miR-107	1	0	1	1	1	1	FRY	furry homolog (Drosophila)
hsa-miR-107	1	0	1	1	1	1	RBMX	RNA binding motif protein, X-linked
hsa-miR-107	0	0	1	1	1	1	GPATCH1	G patch domain containing 1
hsa-miR-107	1	0	1	1	1	1	LUC7L2	LUC7-like 2 (S. cerevisiae)
hsa-miR-107	0	0	1	1	0	0	MSANTD3	Myb/SANT-like DNA-binding domain containing 3
hsa-miR-107	0	0	1	1	0	0	TRMT44	tRNA methyltransferase 44 homolog (S. cerevisiae)
hsa-miR-107	0	0	1	1	1	1	NRBP1	nuclear receptor binding protein 1
hsa-miR-107	0	0	1	0	0	0	PMEL	premelanosome protein
hsa-miR-107	1	0	1	1	1	1	IVNS1ABP	influenza virus NS1A binding protein
hsa-miR-107	0	0	1	1	0	0	C6orf163	chromosome 6 open reading frame 163
hsa-miR-107	0	0	1	1	1	1	ITGB1BP1	integrin beta 1 binding protein 1
hsa-miR-107	1	0	1	1	1	1	GPD2	glycerol-3-phosphate dehydrogenase 2 (mitochondrial)
hsa-miR-107	1	0	1	1	1	1	GCFC1	GC-rich sequence DNA-binding factor 1
hsa-miR-107	1	0	1	1	0	0	TOE1	target of EGR1, member 1 (nuclear)
hsa-miR-107	0	0	1	1	1	1	AP5S1	adaptor-related protein complex 5, sigma 1 subunit
hsa-miR-107	0	0	1	1	0	0	ARPC2	actin related protein 2/3 complex, subunit 2, 34kDa
hsa-miR-107	1	0	1	1	1	1	MCMBP	minichromosome maintenance complex binding protein
hsa-miR-107	1	0	1	1	0	0	RABL6	RAB, member RAS oncogene family-like 6
hsa-miR-107	1	0	1	1	1	1	NSG1	neuron specific gene family member 1
hsa-miR-107	1	0	1	0	1	1	GATAD2B	GATA zinc finger domain containing 2B
hsa-miR-107	0	0	1	1	1	1	TMEM170A	transmembrane protein 170A
hsa-miR-107	0	0	1	1	1	1	AQP3	aquaporin 3 (Gill blood group)
hsa-miR-107	0	0	1	1	1	1	GPR115	G protein-coupled receptor 115
hsa-miR-107	1	0	1	1	1	1	CNEP1R1	CTD nuclear envelope phosphatase 1 regulatory subunit 1
hsa-miR-107	0	0	1	1	1	1	SETD2	SET domain containing 2
hsa-miR-107	1	0	1	1	1	1	KCNIP3	Kv channel interacting protein 3, calsenilin
hsa-miR-107	0	0	1	0	0	0	LOC100129620	uncharacterized LOC100129620
hsa-miR-107	1	0	1	1	1	1	SPATS2	spermatogenesis associated, serine-rich 2
hsa-miR-107	1	0	1	0	1	1	STC2	stanniocalcin 2
hsa-miR-107	0	0	1	0	0	0	LOC100133029	sirtuin 5 pseudogene
hsa-miR-107	0	0	1	1	0	0	TRIM46	tripartite motif containing 46
hsa-miR-107	1	0	1	1	1	1	GAPVD1	GTPase activating protein and VPS9 domains 1
hsa-miR-107	1	0	1	1	1	1	SLITRK2	SLIT and NTRK-like family, member 2
hsa-miR-107	0	0	1	1	1	1	ZNF673	zinc finger family member 673
hsa-miR-107	1	0	1	0	0	0	PID1	phosphotyrosine interaction domain containing 1
hsa-miR-107	0	0	1	1	1	1	IL17RE	interleukin 17 receptor E
hsa-miR-107	1	0	1	1	1	1	EPB41L1	erythrocyte membrane protein band 4.1-like 1
hsa-miR-107	0	0	1	0	1	1	FLJ39639	uncharacterized protein FLJ39639
hsa-miR-107	0	0	1	0	0	0	LOC400680	uncharacterized LOC400680
hsa-miR-107	0	0	1	1	1	1	MED20	mediator complex subunit 20
hsa-miR-107	0	0	1	1	0	0	ACAD10	acyl-CoA dehydrogenase family, member 10
hsa-miR-107	0	0	1	1	1	1	PPFIBP2	PTPRF interacting protein, binding protein 2 (liprin beta 2)
hsa-miR-107	0	0	1	0	0	0	LOC284385	uncharacterized LOC284385
hsa-miR-107	1	0	1	1	0	0	CFL1	cofilin 1 (non-muscle)
hsa-miR-107	0	0	1	0	1	1	TNFAIP8	tumor necrosis factor, alpha-induced protein 8
hsa-miR-107	1	0	1	1	0	0	DNM2	dynamin 2
hsa-miR-107	0	0	1	1	0	0	LUC7L	LUC7-like (S. cerevisiae)
hsa-miR-107	0	0	1	1	0	0	ZNF283	zinc finger protein 283
hsa-miR-107	1	0	1	1	0	0	ENTPD1	ectonucleoside triphosphate diphosphohydrolase 1
hsa-miR-107	1	0	1	0	1	1	UNC5D	unc-5 homolog D (C. elegans)
hsa-miR-107	0	0	1	1	0	0	ZACN	zinc activated ligand-gated ion channel
hsa-miR-107	1	0	1	1	1	1	HBP1	HMG-box transcription factor 1
hsa-miR-107	1	0	1	1	1	1	WEE1	WEE1 homolog (S. pombe)
hsa-miR-107	0	0	1	1	0	0	DGKA	diacylglycerol kinase, alpha 80kDa
hsa-miR-107	0	0	1	1	0	0	SLC26A10	solute carrier family 26, member 10
hsa-miR-107	0	0	1	1	1	1	FRMPD2	FERM and PDZ domain containing 2
hsa-miR-107	0	0	1	0	1	1	PATE4	prostate and testis expressed 4
hsa-miR-107	1	0	1	1	1	1	KALRN	kalirin, RhoGEF kinase
hsa-miR-107	0	0	1	1	1	1	FAM5B	family with sequence similarity 5, member B
hsa-miR-107	1	0	1	1	1	1	ARHGEF10L	Rho guanine nucleotide exchange factor (GEF) 10-like
hsa-miR-107	1	0	1	1	1	1	SBF2	SET binding factor 2
hsa-miR-107	1	0	1	1	1	1	EPAS1	endothelial PAS domain protein 1
hsa-miR-107	1	0	1	0	1	1	WDR82	WD repeat domain 82
hsa-miR-107	1	0	1	1	1	1	ESYT2	extended synaptotagmin-like protein 2
hsa-miR-107	0	0	1	1	0	0	C6orf201	chromosome 6 open reading frame 201
hsa-miR-107	1	0	1	1	0	0	KCNC1	potassium voltage-gated channel, Shaw-related subfamily, member 1
hsa-miR-107	0	0	1	1	0	0	C20orf27	chromosome 20 open reading frame 27
hsa-miR-107	1	0	1	1	1	1	ABR	active BCR-related
hsa-miR-107	1	0	1	1	1	1	DAB2IP	DAB2 interacting protein
hsa-miR-107	1	0	1	1	1	1	FAM122B	family with sequence similarity 122B
hsa-miR-107	0	0	1	1	1	1	IDS	iduronate 2-sulfatase
hsa-miR-107	0	0	1	1	1	1	C2orf91	chromosome 2 open reading frame 91
hsa-miR-107	0	0	1	1	1	1	ATPBD4	ATP binding domain 4
hsa-miR-107	0	0	1	1	0	0	CPNE6	copine VI (neuronal)
hsa-miR-107	1	0	1	1	1	1	METAP2	methionyl aminopeptidase 2
hsa-miR-107	0	0	1	1	1	1	MKX	mohawk homeobox
hsa-miR-107	0	0	1	1	1	1	SRPX	sushi-repeat containing protein, X-linked
hsa-miR-107	0	0	1	1	1	1	CYB5D1	cytochrome b5 domain containing 1
hsa-miR-107	0	0	1	1	1	1	C11orf45	chromosome 11 open reading frame 45
hsa-miR-107	0	0	1	0	1	1	C17orf105	chromosome 17 open reading frame 105
hsa-miR-107	0	0	1	1	0	0	RPRD2	regulation of nuclear pre-mRNA domain containing 2
hsa-miR-107	0	0	1	1	1	1	EPPIN	epididymal peptidase inhibitor
hsa-miR-107	0	0	1	1	0	0	C20orf141	chromosome 20 open reading frame 141
hsa-miR-107	1	0	1	1	1	1	COPS7B	COP9 constitutive photomorphogenic homolog subunit 7B (Arabidopsis)
hsa-miR-107	0	0	1	0	1	1	LOC388942	uncharacterized LOC388942
hsa-miR-107	1	0	1	1	1	1	SACM1L	SAC1 suppressor of actin mutations 1-like (yeast)
hsa-miR-107	0	0	1	1	0	0	LLGL2	lethal giant larvae homolog 2 (Drosophila)
hsa-miR-107	0	0	1	0	0	0	PLEKHD1	pleckstrin homology domain containing, family D (with coiled-coil domains) member 1
hsa-miR-107	1	0	1	1	1	1	NIPBL	Nipped-B homolog (Drosophila)
hsa-miR-107	0	0	1	1	1	1	SPICE1	spindle and centriole associated protein 1
hsa-miR-107	0	0	1	0	0	0	RPL23AP53	ribosomal protein L23a pseudogene 53
hsa-miR-107	0	0	1	1	1	1	MOBP	myelin-associated oligodendrocyte basic protein
hsa-miR-107	0	0	1	0	0	0	LOC100127955	uncharacterized LOC100127955
hsa-miR-107	0	0	1	1	0	0	FAM54B	family with sequence similarity 54, member B
hsa-miR-107	1	0	1	1	1	1	MFSD6	major facilitator superfamily domain containing 6
hsa-miR-107	1	0	1	1	1	1	UBE3C	ubiquitin protein ligase E3C
hsa-miR-107	1	0	1	1	1	1	SLC26A9	solute carrier family 26, member 9
hsa-miR-107	1	0	1	1	1	1	ENAH	enabled homolog (Drosophila)
hsa-miR-107	1	0	1	1	0	0	PPP1CA	protein phosphatase 1, catalytic subunit, alpha isozyme
hsa-miR-107	0	0	1	1	0	0	GRINA	glutamate receptor, ionotropic, N-methyl D-aspartate-associated protein 1 (glutamate binding)
hsa-miR-107	1	0	1	1	1	1	PLA2G15	phospholipase A2, group XV
hsa-miR-107	1	0	1	0	1	1	CAPRIN1	cell cycle associated protein 1
hsa-miR-107	0	0	1	1	0	0	TMEM136	transmembrane protein 136
hsa-miR-107	1	0	1	1	1	1	NSUN4	NOP2/Sun domain family, member 4
hsa-miR-107	1	0	1	1	1	1	KCTD12	potassium channel tetramerisation domain containing 12
hsa-miR-107	0	0	1	1	1	1	CD160	CD160 molecule
hsa-miR-107	1	0	1	0	1	1	PLSCR4	phospholipid scramblase 4
hsa-miR-107	1	0	1	1	0	0	NBEAL1	neurobeachin-like 1
hsa-miR-107	0	0	1	1	1	1	SHROOM3	shroom family member 3
hsa-miR-107	1	0	1	1	1	1	ADAMTS19	ADAM metallopeptidase with thrombospondin type 1 motif, 19
hsa-miR-107	0	0	1	1	0	0	WFIKKN1	WAP, follistatin/kazal, immunoglobulin, kunitz and netrin domain containing 1
hsa-miR-107	1	0	1	1	1	1	DPY19L3	dpy-19-like 3 (C. elegans)
hsa-miR-107	0	0	1	1	0	0	HEATR8	HEAT repeat containing 8
hsa-miR-107	0	0	1	1	1	1	ENPP2	ectonucleotide pyrophosphatase/phosphodiesterase 2
hsa-miR-107	1	0	1	0	1	1	RXRA	retinoid X receptor, alpha
hsa-miR-107	0	0	1	0	1	1	GALNT13	UDP-N-acetyl-alpha-D-galactosamine:polypeptide N-acetylgalactosaminyltransferase 13 (GalNAc-T13)
hsa-miR-107	1	0	1	1	0	0	FOXP2	forkhead box P2
hsa-miR-107	0	0	1	1	0	0	MAMSTR	MEF2 activating motif and SAP domain containing transcriptional regulator
hsa-miR-107	1	0	1	0	1	1	ZNF607	zinc finger protein 607
hsa-miR-107	0	0	1	1	1	1	ARID1A	AT rich interactive domain 1A (SWI-like)
hsa-miR-107	1	0	1	1	1	1	CYYR1	cysteine/tyrosine-rich 1
hsa-miR-107	0	0	1	0	1	1	PEX5	peroxisomal biogenesis factor 5
hsa-miR-107	1	0	1	1	1	1	MEAF6	MYST/Esa1-associated factor 6
hsa-miR-107	0	0	1	0	0	0	RRN3P2	RNA polymerase I transcription factor homolog (S. cerevisiae) pseudogene 2
hsa-miR-107	1	0	1	1	1	1	SETX	senataxin
hsa-miR-107	1	0	1	1	1	1	NECAP1	NECAP endocytosis associated 1
hsa-miR-107	0	0	1	1	0	0	FAAH	fatty acid amide hydrolase
hsa-miR-107	0	0	1	1	1	1	PGAP2	post-GPI attachment to proteins 2
hsa-miR-107	1	0	1	0	1	1	SLC2A3	solute carrier family 2 (facilitated glucose transporter), member 3
hsa-miR-107	0	0	1	0	0	0	POM121L9P	POM121 transmembrane nucleoporin-like 9, pseudogene
hsa-miR-107	1	0	1	1	1	1	TAB2	TGF-beta activated kinase 1/MAP3K7 binding protein 2
hsa-miR-107	1	0	1	1	1	1	ZNF608	zinc finger protein 608
hsa-miR-107	1	0	1	1	1	1	ARF6	ADP-ribosylation factor 6
hsa-miR-107	0	0	1	1	0	0	FAM153B	family with sequence similarity 153, member B
hsa-miR-107	0	0	1	1	1	1	ARIH1	ariadne homolog, ubiquitin-conjugating enzyme E2 binding protein, 1 (Drosophila)
hsa-miR-107	0	0	1	1	1	1	KIDINS220	kinase D-interacting substrate, 220kDa
hsa-miR-107	0	0	1	1	0	0	ODF3	outer dense fiber of sperm tails 3
hsa-miR-107	0	0	1	0	0	0	KIAA0913	KIAA0913
hsa-miR-107	0	0	1	1	1	1	MIOS	missing oocyte, meiosis regulator, homolog (Drosophila)
hsa-miR-107	1	0	1	0	1	1	DNAJC5	DnaJ (Hsp40) homolog, subfamily C, member 5
hsa-miR-107	0	0	1	1	0	0	DNAI2	dynein, axonemal, intermediate chain 2
hsa-miR-107	0	0	1	1	0	0	LRCH3	leucine-rich repeats and calponin homology (CH) domain containing 3
hsa-miR-107	1	0	1	1	1	1	NEO1	neogenin 1
hsa-miR-107	0	0	1	1	1	1	SLC30A10	solute carrier family 30, member 10
hsa-miR-107	1	0	1	1	1	1	TRIM3	tripartite motif containing 3
hsa-miR-107	0	0	1	0	0	0	FAM66D	family with sequence similarity 66, member D
hsa-miR-107	0	0	1	1	1	1	COBL	cordon-bleu homolog (mouse)
hsa-miR-107	1	0	1	1	1	1	SLC30A8	solute carrier family 30 (zinc transporter), member 8
hsa-miR-107	0	0	1	1	0	0	KRBA1	KRAB-A domain containing 1
hsa-miR-107	1	0	1	1	1	1	KDM6A	lysine (K)-specific demethylase 6A
hsa-miR-107	0	0	1	1	1	1	BEND7	BEN domain containing 7
hsa-miR-107	1	0	1	1	0	0	USP24	ubiquitin specific peptidase 24
hsa-miR-107	0	0	1	1	1	1	C10orf57	chromosome 10 open reading frame 57
hsa-miR-107	1	0	1	1	1	1	RNF180	ring finger protein 180
hsa-miR-107	0	0	1	1	1	1	YAP1	Yes-associated protein 1
hsa-miR-107	0	0	1	1	1	1	CYR61	cysteine-rich, angiogenic inducer, 61
hsa-miR-107	0	0	1	1	1	1	INPP5B	inositol polyphosphate-5-phosphatase, 75kDa
hsa-miR-107	0	0	1	1	1	1	CCDC132	coiled-coil domain containing 132
hsa-miR-107	0	0	1	1	1	1	C12orf50	chromosome 12 open reading frame 50
hsa-miR-107	0	0	1	0	0	0	C1RL-AS1	C1RL antisense RNA 1
hsa-miR-107	0	0	1	0	0	0	EPHA1-AS1	EPHA1 antisense RNA 1
hsa-miR-107	1	0	1	0	0	0	NPEPL1	aminopeptidase-like 1
hsa-miR-107	1	0	1	1	1	1	STXBP5	syntaxin binding protein 5 (tomosyn)
hsa-miR-107	0	0	1	1	1	1	TEX2	testis expressed 2
hsa-miR-107	0	0	1	1	0	0	SCAF4	SR-related CTD-associated factor 4
hsa-miR-107	0	0	1	1	1	1	C8orf34	chromosome 8 open reading frame 34
hsa-miR-107	1	0	1	0	1	1	NR3C1	nuclear receptor subfamily 3, group C, member 1 (glucocorticoid receptor)
hsa-miR-107	0	0	1	1	1	1	LMAN2L	lectin, mannose-binding 2-like
hsa-miR-107	1	0	1	1	1	1	SET	SET nuclear oncogene
hsa-miR-107	0	0	1	0	1	1	USO1	USO1 vesicle docking protein homolog (yeast)
hsa-miR-107	0	0	1	1	0	0	TMEM134	transmembrane protein 134
hsa-miR-107	0	0	1	1	1	1	OSR2	odd-skipped related 2 (Drosophila)
hsa-miR-107	0	0	1	1	1	1	CRB1	crumbs homolog 1 (Drosophila)
hsa-miR-107	1	0	1	1	1	1	TXNRD1	thioredoxin reductase 1
hsa-miR-107	1	0	1	1	1	1	MIPOL1	mirror-image polydactyly 1
hsa-miR-107	0	0	1	0	0	0	KGFLP1	fibroblast growth factor 7 pseudogene
hsa-miR-107	0	0	1	0	0	0	CLCN1	chloride channel, voltage-sensitive 1
hsa-miR-107	1	0	1	1	1	1	KIAA0907	KIAA0907
hsa-miR-107	1	0	1	1	1	1	MARK4	MAP/microtubule affinity-regulating kinase 4
hsa-miR-107	0	0	1	1	1	1	SYNJ2	synaptojanin 2
hsa-miR-107	0	0	1	1	1	1	CEP41	centrosomal protein 41kDa
hsa-miR-107	1	0	1	0	1	1	SS18L1	synovial sarcoma translocation gene on chromosome 18-like 1
hsa-miR-107	0	0	1	1	0	0	ESPN	espin
hsa-miR-107	0	0	1	1	1	1	IYD	iodotyrosine deiodinase
hsa-miR-107	1	0	1	1	1	1	TPP1	tripeptidyl peptidase I
hsa-miR-107	1	0	1	1	1	1	TAB3	TGF-beta activated kinase 1/MAP3K7 binding protein 3
hsa-miR-107	0	0	1	1	1	1	MFAP5	microfibrillar associated protein 5
hsa-miR-107	1	0	1	0	1	1	AP2B1	adaptor-related protein complex 2, beta 1 subunit
hsa-miR-107	0	0	1	0	0	0	FAM138C	family with sequence similarity 138, member C
hsa-miR-107	1	0	1	1	1	1	CAMTA1	calmodulin binding transcription activator 1
hsa-miR-107	0	0	1	1	1	1	IL20	interleukin 20
hsa-miR-107	0	0	1	1	1	1	TMPRSS4	transmembrane protease, serine 4
hsa-miR-107	0	0	1	1	1	1	VWA5A	von Willebrand factor A domain containing 5A
hsa-miR-107	1	0	1	0	1	1	ANKRD28	ankyrin repeat domain 28
hsa-miR-107	0	0	1	0	0	0	CACNA1B	calcium channel, voltage-dependent, N type, alpha 1B subunit
hsa-miR-107	1	0	1	1	1	1	SP3	Sp3 transcription factor
hsa-miR-107	1	0	1	1	1	1	FAM120A	family with sequence similarity 120A
hsa-miR-107	0	0	1	1	0	0	ART3	ADP-ribosyltransferase 3
hsa-miR-107	0	0	1	1	0	0	ASB16	ankyrin repeat and SOCS box containing 16
hsa-miR-107	0	0	1	1	1	1	IDNK	idnK, gluconokinase homolog (E. coli)
hsa-miR-107	0	0	1	1	0	0	DHRS4	dehydrogenase/reductase (SDR family) member 4
hsa-miR-107	0	0	1	1	1	1	SMPD1	sphingomyelin phosphodiesterase 1, acid lysosomal
hsa-miR-107	0	0	1	1	1	1	ILDR1	immunoglobulin-like domain containing receptor 1
hsa-miR-107	1	0	1	1	1	1	RTN3	reticulon 3
hsa-miR-107	1	0	1	1	1	1	QKI	QKI, KH domain containing, RNA binding
hsa-miR-107	1	0	1	1	1	1	MYB	v-myb myeloblastosis viral oncogene homolog (avian)
hsa-miR-107	0	0	1	0	0	0	PTPRVP	protein tyrosine phosphatase, receptor type, V, pseudogene
hsa-miR-107	0	0	1	1	1	1	STOX1	storkhead box 1
hsa-miR-107	0	0	1	1	0	0	DDX49	DEAD (Asp-Glu-Ala-Asp) box polypeptide 49
hsa-miR-107	0	0	1	1	1	1	SLC43A1	solute carrier family 43, member 1
hsa-miR-107	0	0	1	1	1	1	C20orf24	chromosome 20 open reading frame 24
hsa-miR-107	0	0	1	1	1	1	MRRF	mitochondrial ribosome recycling factor
hsa-miR-107	0	0	1	1	1	1	BOD1	biorientation of chromosomes in cell division 1
hsa-miR-107	0	0	1	1	1	1	REXO2	REX2, RNA exonuclease 2 homolog (S. cerevisiae)
hsa-miR-107	0	0	1	0	1	1	HAUS3	HAUS augmin-like complex, subunit 3
hsa-miR-107	1	0	1	0	1	1	CGGBP1	CGG triplet repeat binding protein 1
hsa-miR-107	1	0	1	0	0	0	TGFA	transforming growth factor, alpha
hsa-miR-107	0	0	1	0	0	0	LOC93622	Morf4 family associated protein 1-like 1 pseudogene
hsa-miR-107	1	0	1	1	0	0	EIF4A1	eukaryotic translation initiation factor 4A1
hsa-miR-107	1	0	1	0	1	1	C15orf41	chromosome 15 open reading frame 41
hsa-miR-107	1	0	1	1	1	1	U2SURP	U2 snRNP-associated SURP domain containing
hsa-miR-107	0	0	1	1	0	0	NDUFB10	NADH dehydrogenase (ubiquinone) 1 beta subcomplex, 10, 22kDa
hsa-miR-107	1	0	1	1	1	1	CALM1	calmodulin 1 (phosphorylase kinase, delta)
hsa-miR-107	0	0	1	1	0	0	STAC3	SH3 and cysteine rich domain 3
hsa-miR-107	0	0	1	1	1	1	MLIP	muscular LMNA-interacting protein
hsa-miR-107	0	0	1	0	0	0	ATXN7L3B	ataxin 7-like 3B
hsa-miR-107	1	0	1	1	0	0	MARCH9	membrane-associated ring finger (C3HC4) 9
hsa-miR-107	0	0	1	1	1	1	PIGQ	phosphatidylinositol glycan anchor biosynthesis, class Q
hsa-miR-107	1	0	1	1	1	1	LRRFIP1	leucine rich repeat (in FLII) interacting protein 1
hsa-miR-107	1	0	1	0	1	1	CNP	2',3'-cyclic nucleotide 3' phosphodiesterase
hsa-miR-107	1	0	1	1	1	1	TRIM2	tripartite motif containing 2
hsa-miR-107	0	0	1	0	0	0	LRRC14	leucine rich repeat containing 14
hsa-miR-107	0	0	1	1	1	1	GNL3L	guanine nucleotide binding protein-like 3 (nucleolar)-like
hsa-miR-107	0	0	1	1	0	0	KLHDC3	kelch domain containing 3
hsa-miR-107	0	0	1	1	1	1	KLHL29	kelch-like 29 (Drosophila)
hsa-miR-107	1	0	1	1	0	0	CAPN12	calpain 12
hsa-miR-107	1	0	1	1	1	1	YY1	YY1 transcription factor
hsa-miR-107	1	0	1	1	0	0	FHL3	four and a half LIM domains 3
hsa-miR-107	0	0	1	1	0	0	MCCC2	methylcrotonoyl-CoA carboxylase 2 (beta)
hsa-miR-107	0	0	1	1	0	0	USP19	ubiquitin specific peptidase 19
hsa-miR-107	0	0	1	1	0	0	CCDC36	coiled-coil domain containing 36
hsa-miR-107	0	0	1	0	0	0	MGC21881	uncharacterized locus MGC21881
hsa-miR-107	0	0	1	1	1	1	C8orf33	chromosome 8 open reading frame 33
hsa-miR-107	0	0	1	0	1	1	ZNF37A	zinc finger protein 37A
hsa-miR-107	1	0	1	0	1	1	NR1D2	nuclear receptor subfamily 1, group D, member 2
hsa-miR-107	1	0	1	1	1	1	SCAMP1	secretory carrier membrane protein 1
hsa-miR-107	1	0	1	1	1	1	NRF1	nuclear respiratory factor 1
hsa-miR-107	0	0	1	1	1	1	CSDE1	cold shock domain containing E1, RNA-binding
hsa-miR-107	0	0	1	1	1	1	PLSCR1	phospholipid scramblase 1
hsa-miR-107	1	0	1	1	1	1	WWC2	WW and C2 domain containing 2
hsa-miR-107	0	0	1	1	0	0	LRRC36	leucine rich repeat containing 36
hsa-miR-107	0	0	1	1	1	1	LRRK1	leucine-rich repeat kinase 1
hsa-miR-107	0	0	1	0	0	0	ENTPD5	ectonucleoside triphosphate diphosphohydrolase 5
hsa-miR-107	1	0	1	1	1	1	C11orf30	chromosome 11 open reading frame 30
hsa-miR-107	0	0	1	1	1	1	FMNL1	formin-like 1
hsa-miR-107	0	0	1	1	1	1	ZCCHC10	zinc finger, CCHC domain containing 10
hsa-miR-107	1	0	1	1	1	1	SPRYD7	SPRY domain containing 7
hsa-miR-107	0	0	1	1	1	1	CDC42SE2	CDC42 small effector 2
hsa-miR-107	1	0	1	0	1	1	CDK19	cyclin-dependent kinase 19
hsa-miR-107	0	0	1	1	1	1	TLR4	toll-like receptor 4
hsa-miR-107	0	0	1	1	0	0	GLS2	glutaminase 2 (liver, mitochondrial)
hsa-miR-107	0	0	1	0	0	0	TRAV20	T cell receptor alpha variable 20
hsa-miR-107	1	0	1	1	1	1	CNTN4	contactin 4
hsa-miR-107	1	0	1	0	1	1	CERS3	ceramide synthase 3
hsa-miR-107	1	0	1	1	1	1	SMYD2	SET and MYND domain containing 2
hsa-miR-107	0	0	1	1	1	1	CASC1	cancer susceptibility candidate 1
hsa-miR-107	1	0	1	1	1	1	TMEM127	transmembrane protein 127
hsa-miR-107	0	0	1	0	1	1	PAPOLG	poly(A) polymerase gamma
hsa-miR-107	0	0	1	0	1	1	KIAA0895	KIAA0895
hsa-miR-107	0	0	1	1	1	1	KIAA1755	KIAA1755
hsa-miR-107	1	0	1	1	1	1	GIGYF2	GRB10 interacting GYF protein 2
hsa-miR-107	1	0	1	1	1	1	SYT9	synaptotagmin IX
hsa-miR-107	1	0	1	1	1	1	PPARGC1A	peroxisome proliferator-activated receptor gamma, coactivator 1 alpha
hsa-miR-107	1	0	1	0	1	1	TFEC	transcription factor EC
hsa-miR-107	0	0	1	1	1	1	PIK3AP1	phosphoinositide-3-kinase adaptor protein 1
hsa-miR-107	1	0	1	1	1	1	WFS1	Wolfram syndrome 1 (wolframin)
hsa-miR-107	0	0	1	1	1	1	CCP110	centriolar coiled coil protein 110kDa
hsa-miR-107	0	0	1	0	0	0	LOC729307	uncharacterized LOC729307
hsa-miR-107	1	0	1	1	1	1	ZPLD1	zona pellucida-like domain containing 1
hsa-miR-107	0	0	1	0	1	1	FLJ25328	uncharacterized LOC148231
hsa-miR-107	1	0	1	1	1	1	CCNG2	cyclin G2
hsa-miR-107	0	0	1	0	0	0	LOC643648	uncharacterized LOC643648
hsa-miR-107	1	0	1	0	1	1	LYPD6	LY6/PLAUR domain containing 6
hsa-miR-107	0	0	1	0	1	1	TTC23L	tetratricopeptide repeat domain 23-like
hsa-miR-107	1	0	1	1	1	1	MAK	male germ cell-associated kinase
hsa-miR-107	0	0	1	0	0	0	BCAS3	breast carcinoma amplified sequence 3
hsa-miR-107	0	0	1	0	0	0	MGC45922	uncharacterized LOC284365
hsa-miR-107	1	0	1	1	1	1	HMGCR	3-hydroxy-3-methylglutaryl-CoA reductase
hsa-miR-107	1	0	1	0	1	1	TBC1D2B	TBC1 domain family, member 2B
hsa-miR-107	0	0	1	1	1	1	ZNF337	zinc finger protein 337
hsa-miR-107	0	0	1	0	0	0	FAM66C	family with sequence similarity 66, member C
hsa-miR-107	0	0	1	0	1	1	DKFZP434I0714	uncharacterized protein DKFZP434I0714
hsa-miR-107	1	0	1	0	1	1	RHOBTB2	Rho-related BTB domain containing 2
hsa-miR-107	0	0	1	1	1	1	SLC6A16	solute carrier family 6, member 16
hsa-miR-107	1	0	1	1	1	1	NKAIN2	Na+/K+ transporting ATPase interacting 2
hsa-miR-107	0	0	1	1	0	0	PGS1	phosphatidylglycerophosphate synthase 1
hsa-miR-107	0	0	1	0	0	0	HOXA-AS2	HOXA cluster antisense RNA 2
hsa-miR-107	1	0	1	1	1	1	ZNF618	zinc finger protein 618
hsa-miR-107	1	0	1	1	1	1	SLC38A9	solute carrier family 38, member 9
hsa-miR-107	1	0	1	1	1	1	MACROD2	MACRO domain containing 2
hsa-miR-107	0	0	1	1	1	1	FAM171B	family with sequence similarity 171, member B
hsa-miR-107	1	0	1	1	0	0	RASGEF1B	RasGEF domain family, member 1B
hsa-miR-107	1	0	1	1	1	1	BNC2	basonuclin 2
hsa-miR-107	0	0	1	0	0	0	LOC286184	uncharacterized LOC286184
hsa-miR-107	1	0	1	1	1	1	CTBP2	C-terminal binding protein 2
hsa-miR-107	1	0	1	1	1	1	C4orf19	chromosome 4 open reading frame 19
hsa-miR-107	1	0	1	0	1	1	KIAA0930	KIAA0930
hsa-miR-107	1	0	1	1	1	1	PLS3	plastin 3
hsa-miR-107	1	0	1	1	1	1	FGFR2	fibroblast growth factor receptor 2
hsa-miR-107	0	0	1	0	0	0	LOC401074	uncharacterized LOC401074
hsa-miR-107	1	0	1	1	1	1	TIMP2	TIMP metallopeptidase inhibitor 2
hsa-miR-107	0	0	1	1	1	1	SLC14A1	solute carrier family 14 (urea transporter), member 1 (Kidd blood group)
hsa-miR-107	1	0	1	1	1	1	FOSB	FBJ murine osteosarcoma viral oncogene homolog B
hsa-miR-107	0	0	1	1	1	1	ZFP90	zinc finger protein 90 homolog (mouse)
hsa-miR-107	1	0	1	1	1	1	BVES	blood vessel epicardial substance
hsa-miR-107	1	0	1	1	0	0	ZNF292	zinc finger protein 292
hsa-miR-107	1	0	1	1	1	1	UNC13C	unc-13 homolog C (C. elegans)
hsa-miR-107	0	0	1	0	1	1	FAM13B	family with sequence similarity 13, member B
hsa-miR-107	1	0	1	1	1	1	FAM123A	family with sequence similarity 123A
hsa-miR-107	0	0	1	0	0	0	LOC154822	uncharacterized LOC154822
hsa-miR-107	0	0	1	1	0	0	AQP12B	aquaporin 12B
hsa-miR-107	0	0	1	1	0	0	FAM159A	family with sequence similarity 159, member A
hsa-miR-107	1	0	1	1	1	1	ROCK1	Rho-associated, coiled-coil containing protein kinase 1
hsa-miR-107	0	0	1	0	0	0	SMIM1	small integral membrane protein 1
hsa-miR-107	1	0	1	0	1	1	USP6NL	USP6 N-terminal like
hsa-miR-107	1	0	1	1	1	1	ADD1	adducin 1 (alpha)
hsa-miR-107	0	0	1	0	0	0	LOC338579	ankyrin repeat domain-containing protein 30B pseudogene
hsa-miR-107	0	0	1	0	0	0	LOC339260	uncharacterized LOC339260
hsa-miR-107	0	0	1	1	1	1	STRADA	STE20-related kinase adaptor alpha
hsa-miR-107	0	0	1	0	0	0	FAM27E3	family with sequence similarity 27, member E3
hsa-miR-107	0	0	1	1	1	1	MYO3A	myosin IIIA
hsa-miR-107	0	0	1	1	1	1	MGC57346	uncharacterized LOC401884
hsa-miR-107	1	0	1	0	1	1	KDM2A	lysine (K)-specific demethylase 2A
hsa-miR-107	0	0	1	0	1	1	LOC401021	uncharacterized LOC401021
hsa-miR-107	1	0	1	1	0	0	TTC9	tetratricopeptide repeat domain 9
hsa-miR-107	0	0	1	1	1	1	ZNF589	zinc finger protein 589
hsa-miR-107	1	0	1	1	1	1	PTPRG	protein tyrosine phosphatase, receptor type, G
hsa-miR-107	0	0	1	0	0	0	AURKAPS1	aurora kinase A pseudogene 1
hsa-miR-107	0	0	1	1	1	1	RHOT1	ras homolog family member T1
hsa-miR-107	1	0	1	1	1	1	PRRG1	proline rich Gla (G-carboxyglutamic acid) 1
hsa-miR-107	0	0	1	1	0	0	LRRIQ3	leucine-rich repeats and IQ motif containing 3
hsa-miR-107	1	0	1	1	1	1	MTMR10	myotubularin related protein 10
hsa-miR-107	0	0	1	1	0	0	DHX30	DEAH (Asp-Glu-Ala-His) box polypeptide 30
hsa-miR-107	1	0	1	0	0	0	PRRT4	proline-rich transmembrane protein 4
hsa-miR-107	0	0	1	1	0	0	UBOX5	U-box domain containing 5
hsa-miR-107	0	0	1	1	1	1	VNN2	vanin 2
hsa-miR-107	1	0	1	1	1	1	MYLK	myosin light chain kinase
hsa-miR-107	1	0	1	1	1	1	IARS	isoleucyl-tRNA synthetase
hsa-miR-107	1	0	1	1	1	1	LMO4	LIM domain only 4
hsa-miR-107	1	0	1	1	1	1	CCDC149	coiled-coil domain containing 149
hsa-miR-107	1	0	1	0	1	1	MAGIX	MAGI family member, X-linked
hsa-miR-107	0	0	1	1	0	0	CELF3	CUGBP, Elav-like family member 3
hsa-miR-107	1	0	1	1	1	1	MAPKAPK3	mitogen-activated protein kinase-activated protein kinase 3
hsa-miR-107	1	0	1	1	1	1	SRPK2	SRSF protein kinase 2
hsa-miR-107	0	0	1	0	0	0	FLJ12334	uncharacterized LOC400946
hsa-miR-107	0	0	1	0	0	0	SPDYE8P	speedy homolog E8 (Xenopus laevis), pseudogene
hsa-miR-107	0	0	1	0	0	0	C17orf69	chromosome 17 open reading frame 69
hsa-miR-107	0	0	1	1	1	1	MSTO1	misato homolog 1 (Drosophila)
hsa-miR-107	0	0	1	1	1	1	TSPAN8	tetraspanin 8
hsa-miR-107	1	0	1	0	1	1	TMEM194A	transmembrane protein 194A
hsa-miR-107	1	0	1	1	1	1	RARG	retinoic acid receptor, gamma
hsa-miR-107	1	0	1	1	1	1	WBP1L	WW domain binding protein 1-like
hsa-miR-107	1	0	1	0	1	1	DPYSL3	dihydropyrimidinase-like 3
hsa-miR-107	0	0	1	0	0	0	LOC642846	DEAD/H (Asp-Glu-Ala-Asp/His) box polypeptide 11-like
hsa-miR-107	1	0	1	0	1	1	AMMECR1L	AMME chromosomal region gene 1-like
hsa-miR-107	0	0	1	0	0	0	LINC00537	long intergenic non-protein coding RNA 537
hsa-miR-107	0	0	1	0	0	0	TBC1D25	TBC1 domain family, member 25
hsa-miR-107	0	0	1	0	0	0	LOC554249	uncharacterized LOC554249
hsa-miR-107	1	0	1	0	1	1	MEST	mesoderm specific transcript homolog (mouse)
hsa-miR-107	1	0	1	1	0	0	SLC45A4	solute carrier family 45, member 4
hsa-miR-107	0	0	1	0	1	1	CCL4L2	chemokine (C-C motif) ligand 4-like 2
hsa-miR-107	0	0	1	1	1	1	CCL4L1	chemokine (C-C motif) ligand 4-like 1
hsa-miR-107	1	0	1	1	1	1	ESRRA	estrogen-related receptor alpha
hsa-miR-107	1	0	1	1	1	1	STK38	serine/threonine kinase 38
hsa-miR-107	0	0	1	0	0	0	FRG1B	FSHD region gene 1 family, member B
hsa-miR-107	0	0	1	0	0	0	ABCA11P	ATP-binding cassette, sub-family A (ABC1), member 11, pseudogene
hsa-miR-107	1	0	1	1	1	1	SYNJ1	synaptojanin 1
hsa-miR-107	0	0	1	1	1	1	HMGB2	high mobility group box 2
hsa-miR-107	1	0	1	1	1	1	LRRC15	leucine rich repeat containing 15
hsa-miR-107	0	0	1	1	1	1	ZNF365	zinc finger protein 365
hsa-miR-107	1	0	1	1	1	1	IL28RA	interleukin 28 receptor, alpha (interferon, lambda receptor)
hsa-miR-107	1	0	1	0	1	1	KCNT2	potassium channel, subfamily T, member 2
hsa-miR-107	0	0	1	1	1	1	TTLL9	tubulin tyrosine ligase-like family, member 9
hsa-miR-107	1	0	1	1	0	0	KIAA1644	KIAA1644
hsa-miR-107	0	0	1	1	1	1	CCDC126	coiled-coil domain containing 126
hsa-miR-107	0	0	1	0	0	0	LOC150577	uncharacterized LOC150577
hsa-miR-107	1	0	1	1	1	1	PTPRD	protein tyrosine phosphatase, receptor type, D
hsa-miR-107	0	0	1	1	0	0	BEAN1	brain expressed, associated with NEDD4, 1
hsa-miR-107	1	0	1	1	1	1	SUV420H1	suppressor of variegation 4-20 homolog 1 (Drosophila)
hsa-miR-107	0	0	1	1	0	0	C9orf153	chromosome 9 open reading frame 153
hsa-miR-107	1	0	1	1	1	1	TBP	TATA box binding protein
hsa-miR-107	1	0	1	1	1	1	CERS6	ceramide synthase 6
hsa-miR-107	1	0	1	1	1	1	SP4	Sp4 transcription factor
hsa-miR-107	1	0	1	1	1	1	TCF3	transcription factor 3 (E2A immunoglobulin enhancer binding factors E12/E47)
hsa-miR-107	0	0	1	1	1	1	RBM25	RNA binding motif protein 25
hsa-miR-107	1	0	1	1	1	1	PAX3	paired box 3
hsa-miR-107	1	0	1	1	0	0	MAPKBP1	mitogen-activated protein kinase binding protein 1
hsa-miR-107	1	0	1	1	0	0	GRIN2A	glutamate receptor, ionotropic, N-methyl D-aspartate 2A
hsa-miR-107	0	0	1	1	1	1	C14orf105	chromosome 14 open reading frame 105
hsa-miR-107	1	0	1	0	1	1	PRDM10	PR domain containing 10
hsa-miR-107	1	0	1	1	1	1	FKBP1A	FK506 binding protein 1A, 12kDa
hsa-miR-107	0	0	1	1	0	0	RGSL1	regulator of G-protein signaling like 1
hsa-miR-107	0	0	1	0	0	0	LINC00486	long intergenic non-protein coding RNA 486
hsa-miR-107	1	0	1	0	1	1	LRCH2	leucine-rich repeats and calponin homology (CH) domain containing 2
hsa-miR-107	1	0	1	0	1	1	CAMSAP2	calmodulin regulated spectrin-associated protein family, member 2
hsa-miR-107	1	0	1	1	1	1	COLQ	collagen-like tail subunit (single strand of homotrimer) of asymmetric acetylcholinesterase
hsa-miR-107	0	0	1	0	1	1	C20orf202	chromosome 20 open reading frame 202
hsa-miR-107	0	0	1	1	1	1	HSF2	heat shock transcription factor 2
hsa-miR-107	0	0	1	1	0	0	HSF4	heat shock transcription factor 4
hsa-miR-107	1	0	1	1	1	1	FNDC3A	fibronectin type III domain containing 3A
hsa-miR-107	0	0	1	0	0	0	LOC100133207	uncharacterized LOC100133207
hsa-miR-107	1	0	1	1	1	1	CHGA	chromogranin A (parathyroid secretory protein 1)
hsa-miR-107	1	0	1	1	1	1	DLST	dihydrolipoamide S-succinyltransferase (E2 component of 2-oxo-glutarate complex)
hsa-miR-107	1	0	1	0	1	1	HMGB3	high mobility group box 3
hsa-miR-107	1	0	1	1	1	1	ATP2B4	ATPase, Ca++ transporting, plasma membrane 4
hsa-miR-107	1	0	1	1	1	1	TRIM37	tripartite motif containing 37
hsa-miR-107	1	0	1	0	1	1	MTX3	metaxin 3
hsa-miR-107	0	0	1	1	1	1	AIG1	androgen-induced 1
hsa-miR-107	0	0	1	1	1	1	DEPDC5	DEP domain containing 5
hsa-miR-107	1	0	1	1	1	1	TJP1	tight junction protein 1
hsa-miR-107	0	0	1	1	1	1	PSMA2	proteasome (prosome, macropain) subunit, alpha type, 2
hsa-miR-107	0	0	1	0	1	1	PRH2	proline-rich protein HaeIII subfamily 2
hsa-miR-107	0	0	1	1	1	1	TSGA10	testis specific, 10
hsa-miR-107	1	0	1	1	1	1	MYCBP2	MYC binding protein 2, E3 ubiquitin protein ligase
hsa-miR-107	0	0	1	0	1	1	NHSL1	NHS-like 1
hsa-miR-107	0	0	1	1	1	1	PRR14L	proline rich 14-like
hsa-miR-107	0	0	1	1	1	1	ADH1B	alcohol dehydrogenase 1B (class I), beta polypeptide
hsa-miR-107	0	0	1	0	1	1	THAP6	THAP domain containing 6
hsa-miR-107	0	0	1	1	0	0	PRKCQ	protein kinase C, theta
hsa-miR-107	0	0	1	0	1	1	ANKRD36	ankyrin repeat domain 36
hsa-miR-107	0	0	1	1	0	0	TMEM41A	transmembrane protein 41A
hsa-miR-107	0	0	1	0	1	1	B3GALTL	beta 1,3-galactosyltransferase-like
hsa-miR-107	0	0	1	1	1	1	EXT2	exostosin 2
hsa-miR-107	1	0	1	1	1	1	LCA5	Leber congenital amaurosis 5
hsa-miR-107	0	0	1	1	1	1	CCNT2	cyclin T2
hsa-miR-107	1	0	1	0	1	1	PCGF3	polycomb group ring finger 3
hsa-miR-107	0	0	1	0	0	0	LOC286299	uncharacterized LOC286299
hsa-miR-107	1	0	1	1	1	1	C5orf24	chromosome 5 open reading frame 24
hsa-miR-107	0	0	1	1	1	1	DAZL	deleted in azoospermia-like
hsa-miR-107	1	0	1	1	1	1	PGAP1	post-GPI attachment to proteins 1
hsa-miR-107	1	0	1	1	1	1	TMEM135	transmembrane protein 135
hsa-miR-107	1	0	1	1	1	1	CACNB4	calcium channel, voltage-dependent, beta 4 subunit
hsa-miR-107	1	0	1	1	1	1	HIF1A	hypoxia inducible factor 1, alpha subunit (basic helix-loop-helix transcription factor)
hsa-miR-107	1	0	1	0	1	1	TBL1XR1	transducin (beta)-like 1 X-linked receptor 1
hsa-miR-107	1	0	1	1	1	1	CREB3L2	cAMP responsive element binding protein 3-like 2
hsa-miR-107	1	0	1	0	1	1	TTL	tubulin tyrosine ligase
hsa-miR-107	1	0	1	1	1	1	PCMT1	protein-L-isoaspartate (D-aspartate) O-methyltransferase
hsa-miR-107	0	0	1	1	1	1	CHEK1	checkpoint kinase 1
hsa-miR-107	0	0	1	1	0	0	SLC39A7	solute carrier family 39 (zinc transporter), member 7
hsa-miR-107	1	0	1	1	1	1	FUT9	fucosyltransferase 9 (alpha (1,3) fucosyltransferase)
hsa-miR-107	0	0	1	1	1	1	DGCR14	DiGeorge syndrome critical region gene 14
hsa-miR-107	1	0	1	1	1	1	TARBP2	TAR (HIV-1) RNA binding protein 2
hsa-miR-107	1	0	1	1	1	1	CLDN11	claudin 11
hsa-miR-107	1	0	1	1	0	0	PHGDH	phosphoglycerate dehydrogenase
hsa-miR-107	0	0	1	1	0	0	SRM	spermidine synthase
hsa-miR-107	0	0	1	1	1	1	PISD	phosphatidylserine decarboxylase
hsa-miR-107	1	0	1	1	1	1	AP3S1	adaptor-related protein complex 3, sigma 1 subunit
hsa-miR-107	1	0	1	1	1	1	POLR2D	polymerase (RNA) II (DNA directed) polypeptide D
hsa-miR-107	0	0	1	1	0	0	FCHO1	FCH domain only 1
hsa-miR-107	0	0	1	1	0	0	MIF4GD	MIF4G domain containing
hsa-miR-107	0	0	1	1	0	0	CKMT1A	creatine kinase, mitochondrial 1A
hsa-miR-107	1	0	1	1	1	1	FGF11	fibroblast growth factor 11
hsa-miR-107	1	0	1	0	1	1	BNIP3L	BCL2/adenovirus E1B 19kDa interacting protein 3-like
hsa-miR-107	0	0	1	1	1	1	CHCHD4	coiled-coil-helix-coiled-coil-helix domain containing 4
hsa-miR-107	1	0	1	1	1	1	SSR1	signal sequence receptor, alpha
hsa-miR-107	0	0	1	1	1	1	SORD	sorbitol dehydrogenase
hsa-miR-107	1	0	1	1	1	1	HMGN1	high mobility group nucleosome binding domain 1
hsa-miR-107	1	0	1	1	1	1	DRAM2	DNA-damage regulated autophagy modulator 2
hsa-miR-107	0	0	1	1	0	0	NDUFV1	NADH dehydrogenase (ubiquinone) flavoprotein 1, 51kDa
hsa-miR-107	1	0	1	1	1	1	TRA2B	transformer 2 beta homolog (Drosophila)
hsa-miR-107	1	0	1	1	1	1	TFDP1	transcription factor Dp-1
hsa-miR-107	0	0	1	1	0	0	IKBKG	inhibitor of kappa light polypeptide gene enhancer in B-cells, kinase gamma
hsa-miR-107	0	0	1	1	1	1	GRAP2	GRB2-related adaptor protein 2
hsa-miR-107	1	0	1	0	1	1	RPS6KB1	ribosomal protein S6 kinase, 70kDa, polypeptide 1
hsa-miR-107	0	0	1	1	1	1	ANKRD53	ankyrin repeat domain 53
hsa-miR-107	0	0	1	0	0	0	LOC729678	uncharacterized LOC729678
hsa-miR-107	0	0	1	1	1	1	TRIM68	tripartite motif containing 68
hsa-miR-107	0	0	1	0	1	1	MMAA	methylmalonic aciduria (cobalamin deficiency) cblA type
hsa-miR-107	1	0	1	1	1	1	STK38L	serine/threonine kinase 38 like
hsa-miR-107	0	0	1	1	1	1	POLR2G	polymerase (RNA) II (DNA directed) polypeptide G
hsa-miR-107	0	0	1	1	1	1	KLC1	kinesin light chain 1
hsa-miR-107	0	0	1	0	0	0	SBDSP1	Shwachman-Bodian-Diamond syndrome pseudogene 1
hsa-miR-107	0	0	1	1	0	0	C11orf68	chromosome 11 open reading frame 68
hsa-miR-107	0	0	1	1	1	1	TRIM38	tripartite motif containing 38
hsa-miR-107	0	0	1	1	1	1	NFATC4	nuclear factor of activated T-cells, cytoplasmic, calcineurin-dependent 4
hsa-miR-107	0	0	1	1	0	0	SETDB2	SET domain, bifurcated 2
hsa-miR-107	0	0	1	1	1	1	ZDHHC16	zinc finger, DHHC-type containing 16
hsa-miR-107	1	0	1	1	1	1	KCNIP4	Kv channel interacting protein 4
hsa-miR-107	1	0	1	1	0	0	FAT4	FAT tumor suppressor homolog 4 (Drosophila)
hsa-miR-107	1	0	1	1	1	1	NRN1	neuritin 1
hsa-miR-107	0	0	1	1	1	1	SAP130	Sin3A-associated protein, 130kDa
hsa-miR-107	1	0	1	1	1	1	LAMTOR3	late endosomal/lysosomal adaptor, MAPK and MTOR activator 3
hsa-miR-107	1	0	1	1	1	1	TAGLN2	transgelin 2
hsa-miR-107	1	0	1	1	1	1	ARNTL	aryl hydrocarbon receptor nuclear translocator-like
hsa-miR-107	0	0	1	1	1	1	PEX19	peroxisomal biogenesis factor 19
hsa-miR-107	1	0	1	1	1	1	TLE1	transducin-like enhancer of split 1 (E(sp1) homolog, Drosophila)
hsa-miR-107	1	0	1	1	1	1	PRDM2	PR domain containing 2, with ZNF domain
hsa-miR-107	0	0	1	1	1	1	SMNDC1	survival motor neuron domain containing 1
hsa-miR-107	1	0	1	1	1	1	NT5DC1	5'-nucleotidase domain containing 1
hsa-miR-107	1	0	1	1	1	1	PPP3CB	protein phosphatase 3, catalytic subunit, beta isozyme
hsa-miR-107	0	0	1	1	0	0	PLB1	phospholipase B1
hsa-miR-107	0	0	1	0	1	1	VSTM2A	V-set and transmembrane domain containing 2A
hsa-miR-107	0	0	1	0	1	1	RPL10	ribosomal protein L10
hsa-miR-107	0	0	1	1	0	0	FAM57B	family with sequence similarity 57, member B
hsa-miR-107	1	0	1	1	1	1	ANAPC16	anaphase promoting complex subunit 16
hsa-miR-107	1	0	1	1	0	0	ATP6V1B2	ATPase, H+ transporting, lysosomal 56/58kDa, V1 subunit B2
hsa-miR-107	1	0	1	1	1	1	LAPTM4A	lysosomal protein transmembrane 4 alpha
hsa-miR-107	0	0	1	1	1	1	FAM18B1	family with sequence similarity 18, member B1
hsa-miR-107	0	0	1	1	0	0	GPC3	glypican 3
hsa-miR-107	0	0	1	1	1	1	TBRG1	transforming growth factor beta regulator 1
hsa-miR-107	1	0	1	1	0	0	STAG3L4	stromal antigen 3-like 4
hsa-miR-107	1	0	1	1	1	1	SRSF2	serine/arginine-rich splicing factor 2
hsa-miR-107	1	0	1	1	1	1	UBE2K	ubiquitin-conjugating enzyme E2K
hsa-miR-107	0	0	1	1	0	0	OLFM1	olfactomedin 1
hsa-miR-107	1	0	1	1	0	0	CCM2	cerebral cavernous malformation 2
hsa-miR-107	1	0	1	0	1	1	CD47	CD47 molecule
hsa-miR-107	1	0	1	1	1	1	RUNX1	runt-related transcription factor 1
hsa-miR-107	0	0	1	0	1	1	DENR	density-regulated protein
hsa-miR-107	1	0	1	1	1	1	ID2	inhibitor of DNA binding 2, dominant negative helix-loop-helix protein
hsa-miR-107	1	0	1	1	1	1	WIPI2	WD repeat domain, phosphoinositide interacting 2
hsa-miR-107	0	0	1	1	0	0	ARVCF	armadillo repeat gene deleted in velocardiofacial syndrome
hsa-miR-107	0	0	1	0	0	0	LOC100132984	uncharacterized LOC100132984
hsa-miR-107	0	0	1	0	1	1	TSPAN7	tetraspanin 7
hsa-miR-107	0	0	1	1	1	1	SUGT1	SGT1, suppressor of G2 allele of SKP1 (S. cerevisiae)
hsa-miR-107	0	0	1	1	0	0	KAT8	K(lysine) acetyltransferase 8
hsa-miR-107	1	0	1	1	1	1	LGALSL	lectin, galactoside-binding-like
hsa-miR-107	0	0	1	1	1	1	C10orf2	chromosome 10 open reading frame 2
hsa-miR-107	1	0	1	1	1	1	GABPB2	GA binding protein transcription factor, beta subunit 2
hsa-miR-107	0	0	1	0	0	0	LOC731789	uncharacterized LOC731789
hsa-miR-107	1	0	1	1	1	1	ANKS6	ankyrin repeat and sterile alpha motif domain containing 6
hsa-miR-107	0	0	1	0	1	1	USP10	ubiquitin specific peptidase 10
hsa-miR-107	1	0	1	0	1	1	XRN1	5'-3' exoribonuclease 1
hsa-miR-107	1	0	1	1	0	0	POMGNT1	protein O-linked mannose beta1,2-N-acetylglucosaminyltransferase
hsa-miR-107	1	0	1	1	1	1	SLC39A10	solute carrier family 39 (zinc transporter), member 10
hsa-miR-107	0	0	1	0	0	0	DNAJC27-AS1	DNAJC27 antisense RNA 1
hsa-miR-107	0	0	1	1	0	0	GSTT2	glutathione S-transferase theta 2
hsa-miR-107	1	0	1	1	1	1	ZFHX3	zinc finger homeobox 3
hsa-miR-107	0	0	1	1	1	1	SLC39A14	solute carrier family 39 (zinc transporter), member 14
hsa-miR-107	1	0	1	1	1	1	MAN2A2	mannosidase, alpha, class 2A, member 2
hsa-miR-107	0	0	1	1	0	0	SPINK5	serine peptidase inhibitor, Kazal type 5
hsa-miR-107	0	0	1	1	1	1	PTGS1	prostaglandin-endoperoxide synthase 1 (prostaglandin G/H synthase and cyclooxygenase)
hsa-miR-107	0	0	1	0	0	0	PILRB	paired immunoglobin-like type 2 receptor beta
hsa-miR-107	1	0	1	0	1	1	DAPP1	dual adaptor of phosphotyrosine and 3-phosphoinositides
hsa-miR-107	1	0	1	1	1	1	SLC4A8	solute carrier family 4, sodium bicarbonate cotransporter, member 8
hsa-miR-107	1	0	1	1	1	1	MLL	myeloid/lymphoid or mixed-lineage leukemia (trithorax homolog, Drosophila)
hsa-miR-107	0	0	1	1	1	1	VDAC2	voltage-dependent anion channel 2
hsa-miR-107	0	0	1	0	0	0	CELP	carboxyl ester lipase pseudogene
hsa-miR-107	1	0	1	1	1	1	GRM1	glutamate receptor, metabotropic 1
hsa-miR-107	1	0	1	0	1	1	BCL2	B-cell CLL/lymphoma 2
hsa-miR-107	0	0	1	0	0	0	TRD@	T cell receptor delta locus
hsa-miR-107	0	0	1	1	1	1	ELF1	E74-like factor 1 (ets domain transcription factor)
hsa-miR-107	1	0	1	0	1	1	ACVR2A	activin A receptor, type IIA
hsa-miR-107	1	0	1	0	1	1	ALAD	aminolevulinate dehydratase
hsa-miR-107	1	0	1	1	1	1	FAS	Fas (TNF receptor superfamily, member 6)
hsa-miR-107	0	0	1	1	1	1	ATP7A	ATPase, Cu++ transporting, alpha polypeptide
hsa-miR-107	0	0	1	1	1	1	CA2	carbonic anhydrase II
hsa-miR-107	1	0	1	1	1	1	COL1A1	collagen, type I, alpha 1
hsa-miR-107	1	0	1	1	1	1	COL4A3	collagen, type IV, alpha 3 (Goodpasture antigen)
hsa-miR-107	1	0	1	0	1	1	SLC26A2	solute carrier family 26 (sulfate transporter), member 2
hsa-miR-107	1	0	1	1	1	1	GALC	galactosylceramidase
hsa-miR-107	1	0	1	0	1	1	GLI3	GLI family zinc finger 3
hsa-miR-107	1	0	1	1	1	1	ITGA6	integrin, alpha 6
hsa-miR-107	1	0	1	1	1	1	KCNA1	potassium voltage-gated channel, shaker-related subfamily, member 1 (episodic ataxia with myokymia)
hsa-miR-107	1	0	1	1	1	1	MITF	microphthalmia-associated transcription factor
hsa-miR-107	0	0	1	1	1	1	MTM1	myotubularin 1
hsa-miR-107	0	0	1	0	1	1	MYO7A	myosin VIIA
hsa-miR-107	0	0	1	1	0	0	NCF1	neutrophil cytosolic factor 1
hsa-miR-107	0	0	1	1	1	1	NDP	Norrie disease (pseudoglioma)
hsa-miR-107	0	0	1	1	0	0	PHKG2	phosphorylase kinase, gamma 2 (testis)
hsa-miR-107	1	0	1	0	1	1	PTEN	phosphatase and tensin homolog
hsa-miR-107	0	0	1	1	1	1	RHAG	Rh-associated glycoprotein
hsa-miR-107	1	0	1	1	1	1	ATXN1	ataxin 1
hsa-miR-107	0	0	1	1	1	1	SRD5A2	steroid-5-alpha-reductase, alpha polypeptide 2 (3-oxo-5 alpha-steroid delta 4-dehydrogenase alpha 2)
hsa-miR-107	1	0	1	1	1	1	TIMP3	TIMP metallopeptidase inhibitor 3
hsa-miR-107	0	0	1	1	1	1	WAS	Wiskott-Aldrich syndrome
hsa-miR-107	0	0	1	1	1	1	XDH	xanthine dehydrogenase
hsa-miR-107	0	0	1	1	1	1	SLC25A20	solute carrier family 25 (carnitine/acylcarnitine translocase), member 20
hsa-miR-107	1	1	1	1	1	1	CDKN1A	cyclin-dependent kinase inhibitor 1A (p21, Cip1)
hsa-miR-107	0	0	1	1	1	1	LTBP2	latent transforming growth factor beta binding protein 2
hsa-miR-107	0	0	1	1	1	1	PECAM1	platelet/endothelial cell adhesion molecule 1
hsa-miR-107	1	0	1	1	1	1	AQP2	aquaporin 2 (collecting duct)
hsa-miR-107	1	0	1	1	1	1	ATRX	alpha thalassemia/mental retardation syndrome X-linked
hsa-miR-107	0	0	1	1	0	0	C1QB	complement component 1, q subcomponent, B chain
hsa-miR-107	1	0	1	1	1	1	HOXD13	homeobox D13
hsa-miR-107	1	0	1	1	1	1	KCNJ11	potassium inwardly-rectifying channel, subfamily J, member 11
hsa-miR-107	1	0	1	1	1	1	PLP1	proteolipid protein 1
hsa-miR-107	0	0	1	1	0	0	SAG	S-antigen; retina and pineal gland (arrestin)
hsa-miR-107	0	0	1	1	0	0	VWF	von Willebrand factor
hsa-miR-107	1	0	1	1	1	1	DCX	doublecortin
hsa-miR-107	0	0	1	1	1	1	FCGR1A	Fc fragment of IgG, high affinity Ia, receptor (CD64)
hsa-miR-107	0	0	1	1	1	1	GPX1	glutathione peroxidase 1
hsa-miR-107	1	0	1	1	1	1	TNF	tumor necrosis factor
hsa-miR-107	0	0	1	1	1	1	AGTR1	angiotensin II receptor, type 1
hsa-miR-107	0	0	1	1	1	1	ALDH1B1	aldehyde dehydrogenase 1 family, member B1
hsa-miR-107	1	0	1	1	1	1	DRD1	dopamine receptor D1
hsa-miR-107	1	0	1	0	1	1	GABRA4	gamma-aminobutyric acid (GABA) A receptor, alpha 4
hsa-miR-107	1	0	1	1	1	1	GAD1	glutamate decarboxylase 1 (brain, 67kDa)
hsa-miR-107	0	0	1	1	1	1	HTR7	5-hydroxytryptamine (serotonin) receptor 7, adenylate cyclase-coupled
hsa-miR-107	0	0	1	1	0	0	MGP	matrix Gla protein
hsa-miR-107	1	0	1	1	1	1	MME	membrane metallo-endopeptidase
hsa-miR-107	1	0	1	0	1	1	SMAD5	SMAD family member 5
hsa-miR-107	1	0	1	1	0	0	SLC35E4	solute carrier family 35, member E4
hsa-miR-107	1	0	1	1	1	1	RORC	RAR-related orphan receptor C
hsa-miR-107	0	0	1	1	1	1	CYP27C1	cytochrome P450, family 27, subfamily C, polypeptide 1
hsa-miR-107	0	0	1	1	1	1	MED11	mediator complex subunit 11
hsa-miR-107	0	0	1	1	1	1	CC2D2B	coiled-coil and C2 domain containing 2B
hsa-miR-107	1	0	1	1	1	1	ATP1B1	ATPase, Na+/K+ transporting, beta 1 polypeptide
hsa-miR-107	1	0	1	1	0	0	UBASH3A	ubiquitin associated and SH3 domain containing A
hsa-miR-107	0	0	1	0	0	0	KLK2	kallikrein-related peptidase 2
hsa-miR-107	1	0	1	1	1	1	LCLAT1	lysocardiolipin acyltransferase 1
hsa-miR-107	0	0	1	1	1	1	FCGR2B	Fc fragment of IgG, low affinity IIb, receptor (CD32)
hsa-miR-107	1	0	1	1	1	1	LEPR	leptin receptor
hsa-miR-107	1	0	1	1	1	1	TMEM200B	transmembrane protein 200B
hsa-miR-107	1	0	1	1	1	1	BICD2	bicaudal D homolog 2 (Drosophila)
hsa-miR-107	0	0	1	1	1	1	SP5	Sp5 transcription factor
hsa-miR-107	1	0	1	0	1	1	BMF	Bcl2 modifying factor
hsa-miR-107	1	0	1	0	1	1	LIN28B	lin-28 homolog B (C. elegans)
hsa-miR-107	1	0	1	1	1	1	EDA	ectodysplasin A
hsa-miR-107	0	0	1	1	0	0	SPIN2B	spindlin family, member 2B
hsa-miR-107	1	0	1	1	0	0	SDC1	syndecan 1
hsa-miR-107	1	0	1	0	1	1	GOSR1	golgi SNAP receptor complex member 1
hsa-miR-107	1	0	1	1	1	1	ATN1	atrophin 1
hsa-miR-107	1	0	1	1	1	1	L3MBTL3	l(3)mbt-like 3 (Drosophila)
hsa-miR-107	0	0	1	0	0	0	FSD2	fibronectin type III and SPRY domain containing 2
hsa-miR-107	0	0	1	0	1	1	C8orf22	chromosome 8 open reading frame 22
hsa-miR-107	1	0	1	0	1	1	CPLX2	complexin 2
hsa-miR-107	1	0	1	0	1	1	C18orf25	chromosome 18 open reading frame 25
hsa-miR-107	1	0	1	1	1	1	RBM33	RNA binding motif protein 33
hsa-miR-107	1	0	1	1	1	1	STEAP3	STEAP family member 3, metalloreductase
hsa-miR-107	0	0	1	1	1	1	MXRA7	matrix-remodelling associated 7
hsa-miR-107	1	0	1	0	1	1	KIAA2022	KIAA2022
hsa-miR-107	1	0	1	1	1	1	FNIP1	folliculin interacting protein 1
hsa-miR-107	1	0	1	0	1	1	ERMN	ermin, ERM-like protein
hsa-miR-107	1	0	1	1	1	1	SHE	Src homology 2 domain containing E
hsa-miR-107	0	0	1	0	1	1	LPPR5	lipid phosphate phosphatase-related protein type 5
hsa-miR-107	0	0	1	1	1	1	SPIN3	spindlin family, member 3
hsa-miR-107	1	0	1	1	1	1	SLC6A17	solute carrier family 6, member 17
hsa-miR-107	0	0	1	1	1	1	C1QL3	complement component 1, q subcomponent-like 3
hsa-miR-107	1	0	1	1	1	1	FAM171A1	family with sequence similarity 171, member A1
hsa-miR-107	0	0	1	1	1	1	SAMD13	sterile alpha motif domain containing 13
hsa-miR-107	0	0	1	1	1	1	NCMAP	noncompact myelin associated protein
hsa-miR-107	1	0	1	1	1	1	CENPP	centromere protein P
hsa-miR-107	0	0	1	0	1	1	ARGFX	arginine-fifty homeobox
hsa-miR-107	1	0	1	1	1	1	SLC25A53	solute carrier family 25, member 53
hsa-miR-107	1	0	1	1	1	1	PABPC1L2A	poly(A) binding protein, cytoplasmic 1-like 2A
hsa-miR-107	0	0	1	1	1	1	CCNC	cyclin C
hsa-miR-107	1	0	1	1	1	1	FXR1	fragile X mental retardation, autosomal homolog 1
hsa-miR-107	0	0	1	0	1	1	LINC00268	long intergenic non-protein coding RNA 268
hsa-miR-107	1	0	1	1	1	1	TMCC1	transmembrane and coiled-coil domain family 1
hsa-miR-107	1	0	1	1	1	1	ZHX1	zinc fingers and homeoboxes 1
hsa-miR-107	0	0	1	1	1	1	MTCP1	mature T-cell proliferation 1
hsa-miR-107	1	0	1	1	1	1	PODXL	podocalyxin-like
hsa-miR-107	0	0	1	1	0	0	ABCF1	ATP-binding cassette, sub-family F (GCN20), member 1
hsa-miR-107	1	0	1	0	1	1	C3orf70	chromosome 3 open reading frame 70
hsa-miR-107	1	0	1	1	1	1	VEGFA	vascular endothelial growth factor A
hsa-miR-107	1	0	1	1	1	1	SLC10A7	solute carrier family 10 (sodium/bile acid cotransporter family), member 7
hsa-miR-107	0	0	1	1	0	0	GRB7	growth factor receptor-bound protein 7
hsa-miR-107	1	0	1	1	1	1	UBE2V1	ubiquitin-conjugating enzyme E2 variant 1
hsa-miR-107	0	0	1	1	1	1	PLGLB1	plasminogen-like B1
hsa-miR-107	1	0	1	1	1	1	MYCL1	v-myc myelocytomatosis viral oncogene homolog 1, lung carcinoma derived (avian)
hsa-miR-107	0	0	1	1	1	1	CSTF3	cleavage stimulation factor, 3' pre-RNA, subunit 3, 77kDa
hsa-miR-107	1	0	1	1	0	0	MTUS2	microtubule associated tumor suppressor candidate 2
hsa-miR-107	0	0	1	1	1	1	KCNIP1	Kv channel interacting protein 1
hsa-miR-107	1	0	1	1	1	1	DLX1	distal-less homeobox 1
hsa-miR-107	0	0	1	0	1	1	FER1L6-AS1	FER1L6 antisense RNA 1
hsa-miR-107	1	0	1	1	1	1	THEMIS2	thymocyte selection associated family member 2
hsa-miR-107	1	0	1	1	1	1	KIAA0317	KIAA0317
hsa-miR-107	0	0	1	1	1	1	MAP9	microtubule-associated protein 9
hsa-miR-107	1	0	1	1	1	1	PTGFR	prostaglandin F receptor (FP)
hsa-miR-107	1	0	1	1	1	1	CHTF8	CTF8, chromosome transmission fidelity factor 8 homolog (S. cerevisiae)
hsa-miR-107	1	0	1	1	1	1	CBLN3	cerebellin 3 precursor
hsa-miR-107	0	0	1	1	0	0	LOC643923	uncharacterized LOC643923
hsa-miR-107	0	0	1	1	1	1	AIM1L	absent in melanoma 1-like
hsa-miR-107	1	0	1	0	1	1	FAM133B	family with sequence similarity 133, member B
hsa-miR-107	1	0	1	1	1	1	SPTSSB	serine palmitoyltransferase, small subunit B
hsa-miR-107	0	0	1	1	1	1	MCHR2	melanin-concentrating hormone receptor 2
hsa-miR-107	1	0	1	1	1	1	MTMR12	myotubularin related protein 12
hsa-miR-107	0	0	1	1	0	0	GAGE1	G antigen 1
hsa-miR-107	0	0	1	0	1	1	ABCE1	ATP-binding cassette, sub-family E (OABP), member 1
hsa-miR-107	1	0	1	1	1	1	PPP4R1	protein phosphatase 4, regulatory subunit 1
hsa-miR-107	1	0	1	1	1	1	GLIS3	GLIS family zinc finger 3
hsa-miR-107	1	0	1	1	1	1	PABPC1L2B	poly(A) binding protein, cytoplasmic 1-like 2B
hsa-miR-107	1	0	1	1	1	1	DIAPH3	diaphanous homolog 3 (Drosophila)
hsa-miR-107	0	0	1	1	1	1	FRMPD2P1	FERM and PDZ domain containing 2 pseudogene 1
hsa-miR-107	1	0	1	1	1	1	NSL1	NSL1, MIND kinetochore complex component, homolog (S. cerevisiae)
hsa-miR-107	1	0	1	1	1	1	FRS2	fibroblast growth factor receptor substrate 2
hsa-miR-107	1	0	1	1	1	1	ERBB4	v-erb-a erythroblastic leukemia viral oncogene homolog 4 (avian)
hsa-miR-107	0	0	1	1	1	1	TTC14	tetratricopeptide repeat domain 14
hsa-miR-107	1	0	1	1	1	1	KDM5A	lysine (K)-specific demethylase 5A
hsa-miR-107	1	0	1	0	1	1	SLC12A2	solute carrier family 12 (sodium/potassium/chloride transporters), member 2
hsa-miR-107	0	0	1	0	1	1	SSTR1	somatostatin receptor 1
hsa-miR-107	1	0	1	1	1	1	METTL9	methyltransferase like 9
hsa-miR-107	1	0	1	1	1	1	PDE11A	phosphodiesterase 11A
hsa-miR-107	1	0	1	1	1	1	ATG9A	autophagy related 9A
hsa-miR-107	1	0	1	1	1	1	SREK1	splicing regulatory glutamine/lysine-rich protein 1
hsa-miR-107	0	0	1	1	0	0	EXOC3L4	exocyst complex component 3-like 4
hsa-miR-107	1	0	1	1	1	1	ALG9	asparagine-linked glycosylation 9, alpha-1,2-mannosyltransferase homolog (S. cerevisiae)
hsa-miR-107	1	0	1	1	1	1	N4BP2L1	NEDD4 binding protein 2-like 1
hsa-miR-107	1	0	1	1	1	1	CREBBP	CREB binding protein
hsa-miR-107	1	0	1	0	1	1	ODZ3	odz, odd Oz/ten-m homolog 3 (Drosophila)
hsa-miR-107	1	0	1	1	1	1	MBOAT1	membrane bound O-acyltransferase domain containing 1
hsa-miR-107	1	0	1	0	1	1	MEGF9	multiple EGF-like-domains 9
hsa-miR-107	1	0	1	1	1	1	DGKG	diacylglycerol kinase, gamma 90kDa
hsa-miR-107	0	0	1	1	1	1	C15orf57	chromosome 15 open reading frame 57
hsa-miR-107	0	0	1	1	0	0	GSTT2B	glutathione S-transferase theta 2B (gene/pseudogene)
hsa-miR-107	1	0	1	1	1	1	REPS2	RALBP1 associated Eps domain containing 2
hsa-miR-107	0	0	1	1	0	0	C14orf166B	chromosome 14 open reading frame 166B
hsa-miR-107	1	0	1	0	1	1	SCN3A	sodium channel, voltage-gated, type III, alpha subunit
hsa-miR-107	1	0	1	1	1	1	ASIC1	acid-sensing (proton-gated) ion channel 1
hsa-miR-107	0	0	1	1	1	1	CRISP1	cysteine-rich secretory protein 1
hsa-miR-107	0	0	1	1	1	1	ARHGAP6	Rho GTPase activating protein 6
hsa-miR-107	1	0	1	0	1	1	BMPR2	bone morphogenetic protein receptor, type II (serine/threonine kinase)
hsa-miR-107	0	0	1	1	1	1	CDC5L	CDC5 cell division cycle 5-like (S. pombe)
hsa-miR-107	0	0	1	1	1	1	CHUK	conserved helix-loop-helix ubiquitous kinase
hsa-miR-107	1	0	1	0	1	1	CPD	carboxypeptidase D
hsa-miR-107	1	0	1	0	1	1	EFNB3	ephrin-B3
hsa-miR-107	1	0	1	1	1	1	CELSR3	cadherin, EGF LAG seven-pass G-type receptor 3 (flamingo homolog, Drosophila)
hsa-miR-107	1	0	1	1	1	1	GTF2B	general transcription factor IIB
hsa-miR-107	1	0	1	0	1	1	MPPED2	metallophosphoesterase domain containing 2
hsa-miR-107	0	0	1	1	1	1	AOAH	acyloxyacyl hydrolase (neutrophil)
hsa-miR-107	1	0	1	1	1	1	AQP4	aquaporin 4
hsa-miR-107	0	0	1	1	1	1	ARF4	ADP-ribosylation factor 4
hsa-miR-107	0	0	1	0	0	0	BAI1	brain-specific angiogenesis inhibitor 1
hsa-miR-107	0	0	1	1	1	1	BTN1A1	butyrophilin, subfamily 1, member A1
hsa-miR-107	1	0	1	1	1	1	CBFB	core-binding factor, beta subunit
hsa-miR-107	0	0	1	1	1	1	CD1D	CD1d molecule
hsa-miR-107	0	0	1	1	0	0	CD19	CD19 molecule
hsa-miR-107	0	0	1	1	1	1	CD48	CD48 molecule
hsa-miR-107	1	0	1	1	1	1	CD69	CD69 molecule
hsa-miR-107	1	0	1	1	1	1	CDC25A	cell division cycle 25 homolog A (S. pombe)
hsa-miR-107	1	0	1	1	1	1	CLCN3	chloride channel, voltage-sensitive 3
hsa-miR-107	0	0	1	1	0	0	CLPS	colipase, pancreatic
hsa-miR-107	0	0	1	1	1	1	SLC31A2	solute carrier family 31 (copper transporters), member 2
hsa-miR-107	1	0	1	1	1	1	MASP1	mannan-binding lectin serine peptidase 1 (C4/C2 activating component of Ra-reactive factor)
hsa-miR-107	1	0	1	1	1	1	EGR1	early growth response 1
hsa-miR-107	0	0	1	0	1	1	FGF2	fibroblast growth factor 2 (basic)
hsa-miR-107	1	0	1	1	1	1	GAB1	GRB2-associated binding protein 1
hsa-miR-107	1	0	1	1	1	1	GBP1	guanylate binding protein 1, interferon-inducible
hsa-miR-107	0	0	1	1	1	1	GFAP	glial fibrillary acidic protein
hsa-miR-107	1	0	1	1	1	1	GLRA2	glycine receptor, alpha 2
hsa-miR-107	0	0	1	0	1	1	GYPE	glycophorin E (MNS blood group)
hsa-miR-107	0	0	1	1	1	1	GZMK	granzyme K (granzyme 3; tryptase II)
hsa-miR-107	0	0	1	1	1	1	HOXA4	homeobox A4
hsa-miR-107	1	0	1	1	0	0	HSPE1	heat shock 10kDa protein 1 (chaperonin 10)
hsa-miR-107	1	0	1	1	1	1	ITGA2	integrin, alpha 2 (CD49B, alpha 2 subunit of VLA-2 receptor)
hsa-miR-107	1	0	1	1	1	1	ITGA5	integrin, alpha 5 (fibronectin receptor, alpha polypeptide)
hsa-miR-107	1	0	1	1	1	1	ITGB8	integrin, beta 8
hsa-miR-107	1	0	1	1	1	1	JAK1	Janus kinase 1
hsa-miR-107	0	0	1	1	1	1	KCNK1	potassium channel, subfamily K, member 1
hsa-miR-107	1	0	1	1	1	1	KDR	kinase insert domain receptor (a type III receptor tyrosine kinase)
hsa-miR-107	1	0	1	0	1	1	LAMC1	laminin, gamma 1 (formerly LAMB2)
hsa-miR-107	0	0	1	1	1	1	TACSTD2	tumor-associated calcium signal transducer 2
hsa-miR-107	1	0	1	1	1	1	M6PR	mannose-6-phosphate receptor (cation dependent)
hsa-miR-107	1	0	1	1	1	1	MN1	meningioma (disrupted in balanced translocation) 1
hsa-miR-107	0	0	1	0	1	1	OPHN1	oligophrenin 1
hsa-miR-107	1	0	1	1	1	1	PAWR	PRKC, apoptosis, WT1, regulator
hsa-miR-107	1	0	1	1	1	1	PCDH8	protocadherin 8
hsa-miR-107	0	0	1	1	1	1	PIM1	pim-1 oncogene
hsa-miR-107	0	0	1	1	1	1	PLGLB2	plasminogen-like B2
hsa-miR-107	0	0	1	1	1	1	PNN	pinin, desmosome associated protein
hsa-miR-107	1	0	1	1	1	1	PPP1CB	protein phosphatase 1, catalytic subunit, beta isozyme
hsa-miR-107	1	0	1	1	1	1	PPP1CC	protein phosphatase 1, catalytic subunit, gamma isozyme
hsa-miR-107	0	0	1	1	1	1	PRKCB	protein kinase C, beta
hsa-miR-107	0	0	1	1	1	1	MAPK9	mitogen-activated protein kinase 9
hsa-miR-107	0	0	1	1	1	1	MAP2K1	mitogen-activated protein kinase kinase 1
hsa-miR-107	0	0	1	0	1	1	PSMD3	proteasome (prosome, macropain) 26S subunit, non-ATPase, 3
hsa-miR-107	1	0	1	1	1	1	PTPN4	protein tyrosine phosphatase, non-receptor type 4 (megakaryocyte)
hsa-miR-107	1	0	1	1	1	1	PTPRK	protein tyrosine phosphatase, receptor type, K
hsa-miR-107	0	0	1	1	1	1	PTPRM	protein tyrosine phosphatase, receptor type, M
hsa-miR-107	1	0	1	1	1	1	PTX3	pentraxin 3, long
hsa-miR-107	1	0	1	1	1	1	PVALB	parvalbumin
hsa-miR-107	0	0	1	1	1	1	RPA1	replication protein A1, 70kDa
hsa-miR-107	0	0	1	0	1	1	CXCL5	chemokine (C-X-C motif) ligand 5
hsa-miR-107	0	0	1	1	1	1	SDC4	syndecan 4
hsa-miR-107	1	0	1	1	1	1	SRSF3	serine/arginine-rich splicing factor 3
hsa-miR-107	1	0	1	0	1	1	ST6GAL1	ST6 beta-galactosamide alpha-2,6-sialyltranferase 1
hsa-miR-107	1	0	1	1	1	1	ST8SIA1	ST8 alpha-N-acetyl-neuraminide alpha-2,8-sialyltransferase 1
hsa-miR-107	0	0	1	1	1	1	SLAMF1	signaling lymphocytic activation molecule family member 1
hsa-miR-107	0	0	1	1	0	0	SNRPC	small nuclear ribonucleoprotein polypeptide C
hsa-miR-107	1	0	1	0	1	1	SOX11	SRY (sex determining region Y)-box 11
hsa-miR-107	0	0	1	1	1	1	SQLE	squalene epoxidase
hsa-miR-107	1	0	1	0	1	1	STC1	stanniocalcin 1
hsa-miR-107	1	0	1	1	1	1	SYN2	synapsin II
hsa-miR-107	1	0	1	0	1	1	TAL1	T-cell acute lymphocytic leukemia 1
hsa-miR-107	1	0	1	1	1	1	LEFTY2	left-right determination factor 2
hsa-miR-107	0	0	1	1	0	0	TGM4	transglutaminase 4 (prostate)
hsa-miR-107	1	0	1	0	1	1	SEC62	SEC62 homolog (S. cerevisiae)
hsa-miR-107	0	0	1	1	1	1	TPR	translocated promoter region, nuclear basket protein
hsa-miR-107	1	0	1	1	1	1	UBE2D3	ubiquitin-conjugating enzyme E2D 3
hsa-miR-107	0	0	1	1	1	1	XPNPEP2	X-prolyl aminopeptidase (aminopeptidase P) 2, membrane-bound
hsa-miR-107	1	0	1	0	1	1	YWHAB	tyrosine 3-monooxygenase/tryptophan 5-monooxygenase activation protein, beta polypeptide
hsa-miR-107	0	0	1	0	1	1	ZFY	zinc finger protein, Y-linked
hsa-miR-107	1	0	1	0	1	1	ZIC1	Zic family member 1
hsa-miR-107	1	0	1	1	1	1	FZD5	frizzled family receptor 5
hsa-miR-107	1	0	1	1	1	1	DEK	DEK oncogene
hsa-miR-107	1	0	1	1	1	1	CUL5	cullin 5
hsa-miR-107	1	0	1	1	1	1	HMGA2	high mobility group AT-hook 2
hsa-miR-107	1	0	1	1	1	1	EEA1	early endosome antigen 1
hsa-miR-107	0	0	1	1	1	1	RGS5	regulator of G-protein signaling 5
hsa-miR-107	0	0	1	1	1	1	ITGA10	integrin, alpha 10
hsa-miR-107	0	0	1	1	1	1	CHST1	carbohydrate (keratan sulfate Gal-6) sulfotransferase 1
hsa-miR-107	0	0	1	1	1	1	PRPF18	PRP18 pre-mRNA processing factor 18 homolog (S. cerevisiae)
hsa-miR-107	0	0	1	1	0	0	ADAM7	ADAM metallopeptidase domain 7
hsa-miR-107	1	0	1	1	1	1	IQGAP1	IQ motif containing GTPase activating protein 1
hsa-miR-107	1	0	1	1	1	1	ALDH1A2	aldehyde dehydrogenase 1 family, member A2
hsa-miR-107	0	0	1	1	1	1	PRPF4B	PRP4 pre-mRNA processing factor 4 homolog B (yeast)
hsa-miR-107	0	0	1	0	1	1	AP1S2	adaptor-related protein complex 1, sigma 2 subunit
hsa-miR-107	1	0	1	0	1	1	WASL	Wiskott-Aldrich syndrome-like
hsa-miR-107	1	0	1	1	1	1	BTAF1	BTAF1 RNA polymerase II, B-TFIID transcription factor-associated, 170kDa (Mot1 homolog, S. cerevisiae)
hsa-miR-107	1	0	1	1	1	1	ACOX1	acyl-CoA oxidase 1, palmitoyl
hsa-miR-107	0	0	1	0	1	1	FASN	fatty acid synthase
hsa-miR-107	1	0	1	0	1	1	SLC1A2	solute carrier family 1 (glial high affinity glutamate transporter), member 2
hsa-miR-107	0	0	1	0	1	1	TMSB4Y	thymosin beta 4, Y-linked
hsa-miR-107	0	0	1	1	0	0	SLC6A5	solute carrier family 6 (neurotransmitter transporter, glycine), member 5
hsa-miR-107	1	0	1	1	1	1	SOCS6	suppressor of cytokine signaling 6
hsa-miR-107	1	0	1	1	1	1	GDA	guanine deaminase
hsa-miR-107	0	0	1	1	1	1	BST1	bone marrow stromal cell antigen 1
hsa-miR-107	0	0	1	1	0	0	CPT1B	carnitine palmitoyltransferase 1B (muscle)
hsa-miR-107	1	0	1	1	1	1	CREB1	cAMP responsive element binding protein 1
hsa-miR-107	0	0	1	1	1	1	CSK	c-src tyrosine kinase
hsa-miR-107	1	0	1	1	1	1	DACH1	dachshund homolog 1 (Drosophila)
hsa-miR-107	1	0	1	1	1	1	DUSP5	dual specificity phosphatase 5
hsa-miR-107	1	0	1	0	1	1	ETV5	ets variant 5
hsa-miR-107	1	0	1	1	0	0	FIGF	c-fos induced growth factor (vascular endothelial growth factor D)
hsa-miR-107	1	0	1	0	1	1	ARHGAP35	Rho GTPase activating protein 35
hsa-miR-107	0	0	1	1	1	1	HOXB7	homeobox B7
hsa-miR-107	0	0	1	0	1	1	POU4F2	POU class 4 homeobox 2
hsa-miR-107	0	0	1	1	1	1	SMS	spermine synthase
hsa-miR-107	0	0	1	0	0	0	XKRY	XK, Kell blood group complex subunit-related, Y-linked
hsa-miR-107	1	0	1	1	1	1	RABEP1	rabaptin, RAB GTPase binding effector protein 1
hsa-miR-107	1	0	1	1	1	1	BZRAP1	benzodiazapine receptor (peripheral) associated protein 1
hsa-miR-107	1	0	1	1	0	0	RAB33A	RAB33A, member RAS oncogene family
hsa-miR-107	1	0	1	1	1	1	NRXN1	neurexin 1
hsa-miR-107	1	0	1	1	1	1	ONECUT2	one cut homeobox 2
hsa-miR-107	0	0	1	1	1	1	CD8B	CD8b molecule
hsa-miR-107	1	0	1	0	1	1	DOCK3	dedicator of cytokinesis 3
hsa-miR-107	1	0	1	1	1	1	GABRE	gamma-aminobutyric acid (GABA) A receptor, epsilon
hsa-miR-107	1	0	1	1	1	1	MYO1E	myosin IE
hsa-miR-107	0	0	1	1	1	1	PTH2R	parathyroid hormone 2 receptor
hsa-miR-107	1	0	1	0	1	1	SEL1L	sel-1 suppressor of lin-12-like (C. elegans)
hsa-miR-107	1	0	1	1	1	1	MED13	mediator complex subunit 13
hsa-miR-107	1	0	1	0	1	1	CALM3	calmodulin 3 (phosphorylase kinase, delta)
hsa-miR-107	1	0	1	1	1	1	CRKL	v-crk sarcoma virus CT10 oncogene homolog (avian)-like
hsa-miR-107	1	0	1	0	1	1	DLX6	distal-less homeobox 6
hsa-miR-107	1	0	1	1	1	1	ETS1	v-ets erythroblastosis virus E26 oncogene homolog 1 (avian)
hsa-miR-107	0	0	1	0	1	1	FOSL2	FOS-like antigen 2
hsa-miR-107	1	0	1	1	1	1	GFRA1	GDNF family receptor alpha 1
hsa-miR-107	0	0	1	1	0	0	NCKAP1L	NCK-associated protein 1-like
hsa-miR-107	1	0	1	1	1	1	HIP1	huntingtin interacting protein 1
hsa-miR-107	0	0	1	1	1	1	NFIL3	nuclear factor, interleukin 3 regulated
hsa-miR-107	0	0	1	1	1	1	ST5	suppression of tumorigenicity 5
hsa-miR-107	1	0	1	1	1	1	AKT3	v-akt murine thymoma viral oncogene homolog 3 (protein kinase B, gamma)
hsa-miR-107	0	0	1	1	1	1	INSL5	insulin-like 5
hsa-miR-107	0	0	1	1	1	1	DNAJB6	DnaJ (Hsp40) homolog, subfamily B, member 6
hsa-miR-107	0	0	1	0	1	1	POU3F2	POU class 3 homeobox 2
hsa-miR-107	1	0	1	0	1	1	REEP5	receptor accessory protein 5
hsa-miR-107	0	0	1	1	0	0	KCNK7	potassium channel, subfamily K, member 7
hsa-miR-107	1	0	1	0	1	1	CLEC3A	C-type lectin domain family 3, member A
hsa-miR-107	1	0	1	1	1	1	LHFPL2	lipoma HMGIC fusion partner-like 2
hsa-miR-107	0	0	1	1	1	1	KLRG1	killer cell lectin-like receptor subfamily G, member 1
hsa-miR-107	1	0	1	1	1	1	PRKD3	protein kinase D3
hsa-miR-107	1	0	1	1	1	1	MAN1A1	mannosidase, alpha, class 1A, member 1
hsa-miR-107	1	0	1	1	1	1	FOXO4	forkhead box O4
hsa-miR-107	1	0	1	1	1	1	MMP16	matrix metallopeptidase 16 (membrane-inserted)
hsa-miR-107	0	0	1	1	1	1	SMYD5	SMYD family member 5
hsa-miR-107	1	0	1	1	1	1	DAGLA	diacylglycerol lipase, alpha
hsa-miR-107	1	0	1	1	1	1	DYNC1LI2	dynein, cytoplasmic 1, light intermediate chain 2
hsa-miR-107	0	0	1	0	1	1	OAS3	2'-5'-oligoadenylate synthetase 3, 100kDa
hsa-miR-107	0	0	1	1	1	1	PA2G4	proliferation-associated 2G4, 38kDa
hsa-miR-107	1	0	1	1	1	1	PDGFRA	platelet-derived growth factor receptor, alpha polypeptide
hsa-miR-107	1	0	1	1	1	1	PKN2	protein kinase N2
hsa-miR-107	1	0	1	1	1	1	RAD21	RAD21 homolog (S. pombe)
hsa-miR-107	1	0	1	1	1	1	TACC1	transforming, acidic coiled-coil containing protein 1
hsa-miR-107	0	0	1	1	1	1	PGRMC2	progesterone receptor membrane component 2
hsa-miR-107	1	0	1	1	1	1	ZNF238	zinc finger protein 238
hsa-miR-107	0	0	1	1	1	1	HMGN4	high mobility group nucleosomal binding domain 4
hsa-miR-107	0	0	1	0	0	0	CREB3	cAMP responsive element binding protein 3
hsa-miR-107	1	0	1	0	1	1	APPBP2	amyloid beta precursor protein (cytoplasmic tail) binding protein 2
hsa-miR-107	1	0	1	1	1	1	DYNLT3	dynein, light chain, Tctex-type 3
hsa-miR-107	0	0	1	1	0	0	YEATS4	YEATS domain containing 4
hsa-miR-107	1	0	1	0	1	1	IGF2BP1	insulin-like growth factor 2 mRNA binding protein 1
hsa-miR-107	1	0	1	1	1	1	B3GNT2	UDP-GlcNAc:betaGal beta-1,3-N-acetylglucosaminyltransferase 2
hsa-miR-107	0	0	1	1	1	1	POLD3	polymerase (DNA-directed), delta 3, accessory subunit
hsa-miR-107	0	0	1	1	1	1	PPP1R17	protein phosphatase 1, regulatory subunit 17
hsa-miR-107	0	0	1	1	1	1	NUDT3	nudix (nucleoside diphosphate linked moiety X)-type motif 3
hsa-miR-107	1	0	1	1	1	1	SPIN1	spindlin 1
hsa-miR-107	1	0	1	1	1	1	DIAPH2	diaphanous homolog 2 (Drosophila)
hsa-miR-107	0	0	1	1	0	0	DNAJB2	DnaJ (Hsp40) homolog, subfamily B, member 2
hsa-miR-107	1	0	1	1	1	1	MORF4L1	mortality factor 4 like 1
hsa-miR-107	0	0	1	1	1	1	TMED2	transmembrane emp24 domain trafficking protein 2
hsa-miR-107	0	0	1	1	1	1	PKIA	protein kinase (cAMP-dependent, catalytic) inhibitor alpha
hsa-miR-107	0	0	1	1	1	1	ASCC3	activating signal cointegrator 1 complex subunit 3
hsa-miR-107	0	0	1	1	1	1	CEACAM7	carcinoembryonic antigen-related cell adhesion molecule 7
hsa-miR-107	1	0	1	1	1	1	PRRX1	paired related homeobox 1
hsa-miR-107	0	0	1	1	1	1	TAF5	TAF5 RNA polymerase II, TATA box binding protein (TBP)-associated factor, 100kDa
hsa-miR-107	1	0	1	1	1	1	NR4A3	nuclear receptor subfamily 4, group A, member 3
hsa-miR-107	1	0	1	0	1	1	WASF2	WAS protein family, member 2
hsa-miR-107	1	0	1	1	1	1	DDX52	DEAD (Asp-Glu-Ala-Asp) box polypeptide 52
hsa-miR-107	1	0	1	1	1	1	WWP1	WW domain containing E3 ubiquitin protein ligase 1
hsa-miR-107	0	0	1	1	1	1	DNAJB4	DnaJ (Hsp40) homolog, subfamily B, member 4
hsa-miR-107	1	0	1	0	1	1	BTN3A2	butyrophilin, subfamily 3, member A2
hsa-miR-107	1	0	1	1	1	1	KAT7	K(lysine) acetyltransferase 7
hsa-miR-107	1	0	1	1	1	1	TRIO	trio Rho guanine nucleotide exchange factor
hsa-miR-107	1	0	1	1	1	1	UTRN	utrophin
hsa-miR-107	1	0	1	1	1	1	UTY	ubiquitously transcribed tetratricopeptide repeat gene, Y-linked
hsa-miR-107	1	0	1	0	1	1	CHP1	calcineurin-like EF hand protein 1
hsa-miR-107	1	0	1	1	1	1	KLF12	Kruppel-like factor 12
hsa-miR-107	1	0	1	1	1	1	RNF13	ring finger protein 13
hsa-miR-107	1	0	1	1	1	1	PHLDA1	pleckstrin homology-like domain, family A, member 1
hsa-miR-107	0	0	1	1	1	1	KLRK1	killer cell lectin-like receptor subfamily K, member 1
hsa-miR-107	1	0	1	1	1	1	ELL2	elongation factor, RNA polymerase II, 2
hsa-miR-107	0	0	1	1	1	1	GLUD2	glutamate dehydrogenase 2
hsa-miR-107	1	0	1	1	1	1	ICOS	inducible T-cell co-stimulator
hsa-miR-107	1	0	1	0	1	1	CD2AP	CD2-associated protein
hsa-miR-107	0	0	1	1	1	1	COPG2	coatomer protein complex, subunit gamma 2
hsa-miR-107	0	0	1	1	1	1	RAB3GAP1	RAB3 GTPase activating protein subunit 1 (catalytic)
hsa-miR-107	1	0	1	1	1	1	RYBP	RING1 and YY1 binding protein
hsa-miR-107	0	0	1	1	0	0	SNW1	SNW domain containing 1
hsa-miR-107	1	0	1	1	1	1	HEY2	hairy/enhancer-of-split related with YRPW motif 2
hsa-miR-107	1	0	1	1	1	1	KCND2	potassium voltage-gated channel, Shal-related subfamily, member 2
hsa-miR-107	1	0	1	1	1	1	MAPRE1	microtubule-associated protein, RP/EB family, member 1
hsa-miR-107	1	0	1	1	1	1	MMD	monocyte to macrophage differentiation-associated
hsa-miR-107	1	0	1	1	1	1	TSPAN12	tetraspanin 12
hsa-miR-107	1	0	1	0	1	1	BLOC1S6	biogenesis of lysosomal organelles complex-1, subunit 6, pallidin
hsa-miR-107	1	0	1	1	1	1	YWHAG	tyrosine 3-monooxygenase/tryptophan 5-monooxygenase activation protein, gamma polypeptide
hsa-miR-107	1	0	1	0	1	1	FLRT2	fibronectin leucine rich transmembrane protein 2
hsa-miR-107	1	0	1	1	1	1	STK39	serine threonine kinase 39
hsa-miR-107	0	0	1	1	1	1	N6AMT1	N-6 adenine-specific DNA methyltransferase 1 (putative)
hsa-miR-107	0	0	1	1	0	0	TBX21	T-box 21
hsa-miR-107	0	0	1	1	0	0	ZDHHC8	zinc finger, DHHC-type containing 8
hsa-miR-107	1	0	1	1	1	1	LRP12	low density lipoprotein receptor-related protein 12
hsa-miR-107	0	0	1	0	1	1	EMR2	egf-like module containing, mucin-like, hormone receptor-like 2
hsa-miR-107	1	0	1	1	1	1	NRG1	neuregulin 1
hsa-miR-107	1	0	1	1	1	1	LAMP2	lysosomal-associated membrane protein 2
hsa-miR-107	1	0	1	0	1	1	OSTM1	osteopetrosis associated transmembrane protein 1
hsa-miR-107	0	0	1	0	1	1	SCN8A	sodium channel, voltage gated, type VIII, alpha subunit
hsa-miR-107	1	0	1	0	1	1	ODZ1	odz, odd Oz/ten-m homolog 1 (Drosophila)
hsa-miR-107	1	0	1	1	1	1	YME1L1	YME1-like 1 (S. cerevisiae)
hsa-miR-107	0	0	1	1	1	1	TRAM1	translocation associated membrane protein 1
hsa-miR-107	1	0	1	1	1	1	LEMD3	LEM domain containing 3
hsa-miR-107	1	0	1	0	1	1	DIEXF	digestive organ expansion factor homolog (zebrafish)
hsa-miR-107	0	0	1	0	0	0	SND1-IT1	SND1 intronic transcript 1 (non-protein coding)
hsa-miR-107	0	0	1	1	1	1	MCAT	malonyl CoA:ACP acyltransferase (mitochondrial)
hsa-miR-107	0	0	1	1	0	0	APOBEC3C	apolipoprotein B mRNA editing enzyme, catalytic polypeptide-like 3C
hsa-miR-107	1	0	1	1	1	1	EHD3	EH-domain containing 3
hsa-miR-107	1	0	1	1	1	1	ZNF592	zinc finger protein 592
hsa-miR-107	1	0	1	0	1	1	SH3PXD2A	SH3 and PX domains 2A
hsa-miR-107	1	0	1	1	1	1	RALGPS1	Ral GEF with PH domain and SH3 binding motif 1
hsa-miR-107	1	0	1	1	1	1	KDM4A	lysine (K)-specific demethylase 4A
hsa-miR-107	1	0	1	0	1	1	BZW1	basic leucine zipper and W2 domains 1
hsa-miR-107	1	0	1	0	1	1	TOX	thymocyte selection-associated high mobility group box
hsa-miR-107	1	0	1	0	1	1	SERTAD2	SERTA domain containing 2
hsa-miR-107	1	0	1	1	1	1	KIAA0753	KIAA0753
hsa-miR-107	1	0	1	1	1	1	RUSC2	RUN and SH3 domain containing 2
hsa-miR-107	1	0	1	1	1	1	TOMM70A	translocase of outer mitochondrial membrane 70 homolog A (S. cerevisiae)
hsa-miR-107	0	0	1	1	1	1	KIAA0196	KIAA0196
hsa-miR-107	1	0	1	1	1	1	SV2A	synaptic vesicle glycoprotein 2A
hsa-miR-107	1	0	1	1	1	1	ZBTB5	zinc finger and BTB domain containing 5
hsa-miR-107	1	0	1	0	1	1	PDAP1	PDGFA associated protein 1
hsa-miR-107	0	0	1	0	1	1	PPM1E	protein phosphatase, Mg2+/Mn2+ dependent, 1E
hsa-miR-107	1	0	1	1	1	1	PLEKHA6	pleckstrin homology domain containing, family A member 6
hsa-miR-107	1	0	1	0	1	1	PDS5B	PDS5, regulator of cohesion maintenance, homolog B (S. cerevisiae)
hsa-miR-107	0	0	1	1	1	1	FTSJD2	FtsJ methyltransferase domain containing 2
hsa-miR-107	1	0	1	1	1	1	SMG1	smg-1 homolog, phosphatidylinositol 3-kinase-related kinase (C. elegans)
hsa-miR-107	1	0	1	1	1	1	TBC1D9	TBC1 domain family, member 9 (with GRAM domain)
hsa-miR-107	1	0	1	0	1	1	SNX13	sorting nexin 13
hsa-miR-107	1	0	1	1	1	1	RCOR1	REST corepressor 1
hsa-miR-107	1	0	1	1	1	1	TRIM9	tripartite motif containing 9
hsa-miR-107	1	0	1	1	1	1	PRRC2C	proline-rich coiled-coil 2C
hsa-miR-107	1	0	1	1	1	1	PDS5A	PDS5, regulator of cohesion maintenance, homolog A (S. cerevisiae)
hsa-miR-107	1	0	1	1	1	1	ARAP2	ArfGAP with RhoGAP domain, ankyrin repeat and PH domain 2
hsa-miR-107	1	0	1	1	1	1	CSTF2T	cleavage stimulation factor, 3' pre-RNA, subunit 2, 64kDa, tau variant
hsa-miR-107	1	0	1	0	1	1	LARP1	La ribonucleoprotein domain family, member 1
hsa-miR-107	1	0	1	0	1	1	SRGAP2	SLIT-ROBO Rho GTPase activating protein 2
hsa-miR-107	1	0	1	1	1	1	AHCYL2	adenosylhomocysteinase-like 2
hsa-miR-107	0	0	1	0	1	1	ZDHHC17	zinc finger, DHHC-type containing 17
hsa-miR-107	1	0	1	1	1	1	ASXL1	additional sex combs like 1 (Drosophila)
hsa-miR-107	0	0	1	1	1	1	ADNP	activity-dependent neuroprotector homeobox
hsa-miR-107	1	0	1	0	1	1	KCTD2	potassium channel tetramerisation domain containing 2
hsa-miR-107	1	0	1	1	1	1	PARM1	prostate androgen-regulated mucin-like protein 1
hsa-miR-107	0	0	1	1	1	1	ZNF10	zinc finger protein 10
hsa-miR-107	1	0	1	1	1	1	CNOT6	CCR4-NOT transcription complex, subunit 6
hsa-miR-107	1	0	1	1	1	1	MYRIP	myosin VIIA and Rab interacting protein
hsa-miR-107	1	0	1	0	1	1	OSBPL3	oxysterol binding protein-like 3
hsa-miR-107	1	0	1	0	1	1	ERC2	ELKS/RAB6-interacting/CAST family member 2
hsa-miR-107	0	0	1	1	1	1	RSL1D1	ribosomal L1 domain containing 1
hsa-miR-107	1	0	1	0	1	1	TRIM33	tripartite motif containing 33
hsa-miR-107	1	0	1	1	1	1	TAF9B	TAF9B RNA polymerase II, TATA box binding protein (TBP)-associated factor, 31kDa
hsa-miR-107	0	0	1	1	1	1	SBDS	Shwachman-Bodian-Diamond syndrome
hsa-miR-107	0	0	1	1	1	1	HDGFRP3	hepatoma-derived growth factor, related protein 3
hsa-miR-107	1	0	1	0	1	1	CNR1	cannabinoid receptor 1 (brain)
hsa-miR-107	0	0	1	1	1	1	RAB10	RAB10, member RAS oncogene family
hsa-miR-107	0	0	1	1	1	1	HSD17B12	hydroxysteroid (17-beta) dehydrogenase 12
hsa-miR-107	1	0	1	1	1	1	CERCAM	cerebral endothelial cell adhesion molecule
hsa-miR-107	1	0	1	1	1	1	VGLL3	vestigial like 3 (Drosophila)
hsa-miR-107	1	0	1	1	1	1	AKAP11	A kinase (PRKA) anchor protein 11
hsa-miR-107	1	0	1	1	1	1	TOB2	transducer of ERBB2, 2
hsa-miR-107	0	0	1	1	1	1	WBP11	WW domain binding protein 11
hsa-miR-107	1	0	1	1	1	1	ZDHHC2	zinc finger, DHHC-type containing 2
hsa-miR-107	0	0	1	1	1	1	CD244	CD244 molecule, natural killer cell receptor 2B4
hsa-miR-107	0	0	1	1	0	0	NCKIPSD	NCK interacting protein with SH3 domain
hsa-miR-107	1	0	1	1	1	1	MEX3C	mex-3 homolog C (C. elegans)
hsa-miR-107	0	0	1	1	1	1	PRKAG3	protein kinase, AMP-activated, gamma 3 non-catalytic subunit
hsa-miR-107	1	0	1	1	0	0	DUOX1	dual oxidase 1
hsa-miR-107	0	0	1	1	1	1	POLE3	polymerase (DNA directed), epsilon 3, accessory subunit
hsa-miR-107	1	0	1	0	1	1	UBE2Q1	ubiquitin-conjugating enzyme E2Q family member 1
hsa-miR-107	0	0	1	0	1	1	TRIM44	tripartite motif containing 44
hsa-miR-107	1	0	1	1	1	1	DIRAS2	DIRAS family, GTP-binding RAS-like 2
hsa-miR-107	1	0	1	1	0	0	C17orf59	chromosome 17 open reading frame 59
hsa-miR-107	1	0	1	1	1	1	HAUS6	HAUS augmin-like complex, subunit 6
hsa-miR-107	0	0	1	1	1	1	MTMR8	myotubularin related protein 8
hsa-miR-107	0	0	1	1	0	0	NUP62CL	nucleoporin 62kDa C-terminal like
hsa-miR-107	1	0	1	1	1	1	GDAP2	ganglioside induced differentiation associated protein 2
hsa-miR-107	1	0	1	0	1	1	DCAF16	DDB1 and CUL4 associated factor 16
hsa-miR-107	1	0	1	1	1	1	YTHDF1	YTH domain family, member 1
hsa-miR-107	0	0	1	1	1	1	RHBDL2	rhomboid, veinlet-like 2 (Drosophila)
hsa-miR-107	0	0	1	1	1	1	C2orf42	chromosome 2 open reading frame 42
hsa-miR-107	0	0	1	1	1	1	ACSM5	acyl-CoA synthetase medium-chain family member 5
hsa-miR-107	1	0	1	1	1	1	FBXO34	F-box protein 34
hsa-miR-107	0	0	1	1	1	1	FKBP14	FK506 binding protein 14, 22 kDa
hsa-miR-107	0	0	1	1	1	1	KDM4D	lysine (K)-specific demethylase 4D
hsa-miR-107	1	0	1	0	1	1	CCDC88A	coiled-coil domain containing 88A
hsa-miR-107	1	0	1	0	1	1	MSL2	male-specific lethal 2 homolog (Drosophila)
hsa-miR-107	0	0	1	1	1	1	SEC61A2	Sec61 alpha 2 subunit (S. cerevisiae)
hsa-miR-107	0	0	1	1	1	1	TRIM62	tripartite motif containing 62
hsa-miR-107	1	0	1	1	1	1	UBA6	ubiquitin-like modifier activating enzyme 6
hsa-miR-107	1	0	1	1	1	1	TBC1D19	TBC1 domain family, member 19
hsa-miR-107	1	0	1	1	1	1	RSBN1	round spermatid basic protein 1
hsa-miR-107	1	0	1	1	1	1	EPB41L4B	erythrocyte membrane protein band 4.1 like 4B
hsa-miR-107	0	0	1	1	1	1	CISD1	CDGSH iron sulfur domain 1
hsa-miR-107	1	0	1	1	1	1	TBX4	T-box 4
hsa-miR-107	1	0	1	1	1	1	NRP2	neuropilin 2
hsa-miR-107	1	0	1	1	1	1	CAMK2N1	calcium/calmodulin-dependent protein kinase II inhibitor 1
hsa-miR-107	1	0	1	0	1	1	TMEM55A	transmembrane protein 55A
hsa-miR-107	1	0	1	0	1	1	MAML3	mastermind-like 3 (Drosophila)
hsa-miR-107	1	0	1	0	1	1	KLHL9	kelch-like 9 (Drosophila)
hsa-miR-107	0	0	1	1	1	1	TERF2IP	telomeric repeat binding factor 2, interacting protein
hsa-miR-107	0	0	1	1	0	0	SPIN2A	spindlin family, member 2A
hsa-miR-107	1	0	1	1	1	1	GTPBP2	GTP binding protein 2
hsa-miR-107	1	0	1	1	1	1	SEPT3	septin 3
hsa-miR-107	1	0	1	0	1	1	UBFD1	ubiquitin family domain containing 1
hsa-miR-107	0	0	1	1	1	1	KLHL4	kelch-like 4 (Drosophila)
hsa-miR-107	1	0	1	1	1	1	CCBL2	cysteine conjugate-beta lyase 2
hsa-miR-107	1	0	1	1	1	1	WDR45L	WDR45-like
hsa-miR-107	0	0	1	1	1	1	IFNK	interferon, kappa
hsa-miR-107	1	0	1	1	1	1	SAR1A	SAR1 homolog A (S. cerevisiae)
hsa-miR-107	0	0	1	1	1	1	PNPLA2	patatin-like phospholipase domain containing 2
hsa-miR-107	0	0	1	1	1	1	CYSLTR2	cysteinyl leukotriene receptor 2
hsa-miR-107	1	0	1	0	1	1	EIF5A2	eukaryotic translation initiation factor 5A2
hsa-miR-107	1	0	1	1	0	0	JPH2	junctophilin 2
hsa-miR-107	0	0	1	1	1	1	TCL6	T-cell leukemia/lymphoma 6 (non-protein coding)
hsa-miR-107	1	0	1	0	1	1	DCUN1D1	DCN1, defective in cullin neddylation 1, domain containing 1 (S. cerevisiae)
hsa-miR-107	1	0	1	1	1	1	NRIP3	nuclear receptor interacting protein 3
hsa-miR-107	1	0	1	1	1	1	RAB22A	RAB22A, member RAS oncogene family
hsa-miR-107	1	0	1	1	1	1	SLC24A3	solute carrier family 24 (sodium/potassium/calcium exchanger), member 3
hsa-miR-107	1	0	1	0	1	1	KCNS2	potassium voltage-gated channel, delayed-rectifier, subfamily S, member 2
hsa-miR-107	0	0	1	1	1	1	SHROOM4	shroom family member 4
hsa-miR-107	1	0	1	1	1	1	USP31	ubiquitin specific peptidase 31
hsa-miR-107	1	0	1	1	1	1	MIB1	mindbomb E3 ubiquitin protein ligase 1
hsa-miR-107	1	0	1	1	1	1	NLGN2	neuroligin 2
hsa-miR-107	1	0	1	1	1	1	CNTN3	contactin 3 (plasmacytoma associated)
hsa-miR-107	1	0	1	0	1	1	GPAM	glycerol-3-phosphate acyltransferase, mitochondrial
hsa-miR-107	1	0	1	1	1	1	NIN	ninein (GSK3B interacting protein)
hsa-miR-107	0	0	1	1	1	1	BCOR	BCL6 corepressor
hsa-miR-107	1	0	1	1	1	1	VAT1L	vesicle amine transport protein 1 homolog (T. californica)-like
hsa-miR-107	0	0	1	1	1	1	PPP4R4	protein phosphatase 4, regulatory subunit 4
hsa-miR-107	0	0	1	1	0	0	CKMT1B	creatine kinase, mitochondrial 1B
hsa-miR-107	1	0	1	1	1	1	SNTB1	syntrophin, beta 1 (dystrophin-associated protein A1, 59kDa, basic component 1)
hsa-miR-107	1	0	1	1	1	1	ZNFX1	zinc finger, NFX1-type containing 1
hsa-miR-107	0	0	1	1	1	1	SLC15A2	solute carrier family 15 (H+/peptide transporter), member 2
hsa-miR-107	1	0	1	1	1	1	ADCY1	adenylate cyclase 1 (brain)
hsa-miR-107	0	0	1	1	1	1	RNASEL	ribonuclease L (2',5'-oligoisoadenylate synthetase-dependent)
hsa-miR-107	0	0	1	0	1	1	MS4A7	membrane-spanning 4-domains, subfamily A, member 7
hsa-miR-107	0	0	1	1	0	0	PRODH2	proline dehydrogenase (oxidase) 2
hsa-miR-107	0	0	1	1	0	0	FCGR2A	Fc fragment of IgG, low affinity IIa, receptor (CD32)
hsa-miR-107	0	0	1	1	1	1	DNAJC12	DnaJ (Hsp40) homolog, subfamily C, member 12
hsa-miR-107	0	0	1	1	1	1	RINT1	RAD50 interactor 1
hsa-miR-107	1	0	1	1	1	1	DHX35	DEAH (Asp-Glu-Ala-His) box polypeptide 35
hsa-miR-107	1	0	1	1	1	1	SEC24A	SEC24 family, member A (S. cerevisiae)
hsa-miR-107	1	0	1	0	1	1	CSNK1G1	casein kinase 1, gamma 1
hsa-miR-107	1	0	1	1	1	1	GOLPH3	golgi phosphoprotein 3 (coat-protein)
hsa-miR-107	1	0	1	1	1	1	SNX16	sorting nexin 16
hsa-miR-107	0	0	1	1	1	1	NOD2	nucleotide-binding oligomerization domain containing 2
hsa-miR-107	0	0	1	1	0	0	KIF9	kinesin family member 9
hsa-miR-107	1	0	1	1	1	1	XPO4	exportin 4
hsa-miR-107	1	0	1	1	1	1	HIF3A	hypoxia inducible factor 3, alpha subunit
hsa-miR-107	0	0	1	1	1	1	SFXN1	sideroflexin 1
hsa-miR-107	1	0	1	1	1	1	C6orf106	chromosome 6 open reading frame 106
hsa-miR-107	1	0	1	1	1	1	FNDC4	fibronectin type III domain containing 4
hsa-miR-107	1	0	1	1	1	1	AIDA	axin interactor, dorsalization associated
hsa-miR-107	0	0	1	1	1	1	METTL4	methyltransferase like 4
hsa-miR-107	1	0	1	1	1	1	RFX7	regulatory factor X, 7
hsa-miR-107	1	0	1	0	1	1	BCL11B	B-cell CLL/lymphoma 11B (zinc finger protein)
hsa-miR-107	1	0	1	1	1	1	REEP1	receptor accessory protein 1
hsa-miR-107	0	0	1	0	1	1	FUNDC2	FUN14 domain containing 2
hsa-miR-107	1	0	1	1	1	1	GDAP1L1	ganglioside induced differentiation associated protein 1-like 1
hsa-miR-107	0	0	1	1	1	1	PDYN	prodynorphin
hsa-miR-107	1	0	1	1	1	1	DSC3	desmocollin 3
hsa-miR-107	1	0	1	1	1	1	PSTPIP2	proline-serine-threonine phosphatase interacting protein 2
hsa-miR-107	1	0	1	1	1	1	GCC1	GRIP and coiled-coil domain containing 1
hsa-miR-107	1	0	1	1	1	1	CCNJL	cyclin J-like
hsa-miR-107	1	0	1	1	1	1	USB1	U6 snRNA biogenesis 1
hsa-miR-107	1	0	1	1	1	1	ZNF329	zinc finger protein 329
hsa-miR-107	1	0	1	1	1	1	YRDC	yrdC domain containing (E. coli)
hsa-miR-107	1	0	1	0	1	1	MOB3B	MOB kinase activator 3B
hsa-miR-107	0	0	1	1	1	1	AGBL2	ATP/GTP binding protein-like 2
hsa-miR-107	0	0	1	1	1	1	PLEKHS1	pleckstrin homology domain containing, family S member 1
hsa-miR-107	0	0	1	1	1	1	ZNF767	zinc finger family member 767
hsa-miR-107	1	0	1	1	1	1	POF1B	premature ovarian failure, 1B
hsa-miR-107	0	0	1	1	1	1	ZNF606	zinc finger protein 606
hsa-miR-107	0	0	1	1	1	1	GPR110	G protein-coupled receptor 110
hsa-miR-107	1	0	1	0	1	1	VCPIP1	valosin containing protein (p97)/p47 complex interacting protein 1
hsa-miR-107	1	0	1	1	1	1	PROSER1	proline and serine rich 1
hsa-miR-107	1	0	1	0	1	1	EDEM3	ER degradation enhancer, mannosidase alpha-like 3
hsa-miR-107	0	0	1	1	1	1	BCL2L14	BCL2-like 14 (apoptosis facilitator)
hsa-miR-107	1	0	1	0	1	1	C1orf21	chromosome 1 open reading frame 21
hsa-miR-107	1	0	1	0	1	1	CSRNP2	cysteine-serine-rich nuclear protein 2
hsa-miR-107	1	0	1	1	0	0	PVRL4	poliovirus receptor-related 4
hsa-miR-107	0	0	1	0	1	1	PHACTR1	phosphatase and actin regulator 1
hsa-miR-107	0	0	1	1	1	1	SPACA1	sperm acrosome associated 1
hsa-miR-107	0	0	1	1	1	1	SEH1L	SEH1-like (S. cerevisiae)
hsa-miR-107	0	0	1	1	1	1	SLC25A31	solute carrier family 25 (mitochondrial carrier; adenine nucleotide translocator), member 31
hsa-miR-107	1	0	1	1	1	1	GABARAPL1	GABA(A) receptor-associated protein like 1
hsa-miR-107	1	0	1	0	1	1	THAP2	THAP domain containing, apoptosis associated protein 2
hsa-miR-107	1	0	1	0	1	1	ITCH	itchy E3 ubiquitin protein ligase
hsa-miR-107	1	0	1	0	1	1	FAM172A	family with sequence similarity 172, member A
hsa-miR-107	1	0	1	0	1	1	SRSF8	serine/arginine-rich splicing factor 8
hsa-miR-107	1	0	1	1	1	1	PHF20L1	PHD finger protein 20-like 1
hsa-miR-107	1	0	1	1	1	1	ANTXR1	anthrax toxin receptor 1
hsa-miR-107	1	0	1	1	1	1	SLITRK6	SLIT and NTRK-like family, member 6
hsa-miR-107	0	0	1	1	1	1	ATP13A4	ATPase type 13A4
hsa-miR-107	1	0	1	0	1	1	PSD2	pleckstrin and Sec7 domain containing 2
hsa-miR-107	0	0	1	1	0	0	NICN1	nicolin 1
hsa-miR-107	0	0	1	1	1	1	MAML2	mastermind-like 2 (Drosophila)
hsa-miR-107	1	0	1	1	1	1	DCTN5	dynactin 5 (p25)
hsa-miR-107	0	0	1	1	0	0	KIF2B	kinesin family member 2B
hsa-miR-107	0	0	1	1	1	1	FAM136A	family with sequence similarity 136, member A
hsa-miR-107	1	0	1	1	1	1	ABHD13	abhydrolase domain containing 13
hsa-miR-107	1	0	1	0	1	1	UBASH3B	ubiquitin associated and SH3 domain containing B
hsa-miR-107	1	0	1	0	1	1	C5orf62	chromosome 5 open reading frame 62
hsa-miR-107	0	0	1	1	1	1	TRIM4	tripartite motif containing 4
hsa-miR-107	1	0	1	0	1	1	ZCCHC3	zinc finger, CCHC domain containing 3
hsa-miR-107	0	0	1	1	1	1	UCN2	urocortin 2
hsa-miR-107	1	0	1	1	1	1	RASL10B	RAS-like, family 10, member B
hsa-miR-107	1	0	1	1	1	1	C19orf6	chromosome 19 open reading frame 6
hsa-miR-107	1	0	1	1	1	1	EPT1	ethanolaminephosphotransferase 1 (CDP-ethanolamine-specific)
hsa-miR-107	1	0	1	1	1	1	TSPYL5	TSPY-like 5
hsa-miR-107	0	0	1	1	1	1	ARHGAP18	Rho GTPase activating protein 18
hsa-miR-107	1	0	1	0	1	1	TMEM123	transmembrane protein 123
hsa-miR-107	1	0	1	1	1	1	SRSF10	serine/arginine-rich splicing factor 10
hsa-miR-107	0	0	1	1	1	1	BCCIP	BRCA2 and CDKN1A interacting protein
hsa-miR-107	1	0	1	1	1	1	SLC44A1	solute carrier family 44, member 1
hsa-miR-107	0	0	1	1	1	1	C20orf118	chromosome 20 open reading frame 118
hsa-miR-107	0	0	1	1	1	1	UBE2F	ubiquitin-conjugating enzyme E2F (putative)
hsa-miR-107	1	0	1	1	1	1	ZNF280B	zinc finger protein 280B
hsa-miR-107	1	0	1	0	1	1	SOCS4	suppressor of cytokine signaling 4
hsa-miR-107	1	0	1	1	1	1	KLHL6	kelch-like 6 (Drosophila)
hsa-miR-107	0	0	1	1	1	1	KCNG3	potassium voltage-gated channel, subfamily G, member 3
hsa-miR-107	0	0	1	0	1	1	PAQR8	progestin and adipoQ receptor family member VIII
hsa-miR-107	1	0	1	1	0	0	UNC5A	unc-5 homolog A (C. elegans)
hsa-miR-107	1	0	1	1	1	1	GLCCI1	glucocorticoid induced transcript 1
hsa-miR-107	1	0	1	0	1	1	NUS1	nuclear undecaprenyl pyrophosphate synthase 1 homolog (S. cerevisiae)
hsa-miR-107	0	0	1	1	1	1	PPIL4	peptidylprolyl isomerase (cyclophilin)-like 4
hsa-miR-107	0	0	1	1	1	1	C15orf40	chromosome 15 open reading frame 40
hsa-miR-107	1	0	1	1	1	1	UBQLNL	ubiquilin-like
hsa-miR-107	0	0	1	1	0	0	CSNK1A1L	casein kinase 1, alpha 1-like
hsa-miR-107	0	0	1	0	1	1	NUDCD2	NudC domain containing 2
hsa-miR-107	1	0	1	1	1	1	SEPT6	septin 6
hsa-miR-107	1	0	1	1	1	1	FAM110B	family with sequence similarity 110, member B
hsa-miR-107	0	0	1	1	1	1	LONRF1	LON peptidase N-terminal domain and ring finger 1
hsa-miR-107	0	0	1	1	1	1	TTC30A	tetratricopeptide repeat domain 30A
hsa-miR-107	0	0	1	1	1	1	CHMP4C	charged multivesicular body protein 4C
hsa-miR-107	1	0	1	1	1	1	FAM123B	family with sequence similarity 123B
hsa-miR-107	1	0	1	1	1	1	ZSCAN29	zinc finger and SCAN domain containing 29
hsa-miR-107	0	0	1	1	1	1	CNIH3	cornichon homolog 3 (Drosophila)
hsa-miR-107	0	0	1	0	1	1	HORMAD2	HORMA domain containing 2
hsa-miR-107	1	0	1	1	1	1	SPRED1	sprouty-related, EVH1 domain containing 1
hsa-miR-107	1	0	1	0	1	1	DCP2	DCP2 decapping enzyme homolog (S. cerevisiae)
hsa-miR-107	0	0	1	1	1	1	CCER1	coiled-coil glutamate-rich protein 1
hsa-miR-107	1	0	1	0	1	1	RWDD4	RWD domain containing 4
hsa-miR-107	1	0	1	1	1	1	PDIK1L	PDLIM1 interacting kinase 1 like
hsa-miR-107	1	0	1	1	1	1	EED	embryonic ectoderm development
hsa-miR-107	0	0	1	0	1	1	TMEM92	transmembrane protein 92
hsa-miR-107	1	0	1	1	1	1	TXLNB	taxilin beta
hsa-miR-107	1	0	1	1	0	0	TMEM86A	transmembrane protein 86A
hsa-miR-107	1	0	1	1	1	1	FBXL16	F-box and leucine-rich repeat protein 16
hsa-miR-107	1	0	1	0	1	1	TAPT1	transmembrane anterior posterior transformation 1
hsa-miR-107	1	0	1	0	1	1	ZCCHC24	zinc finger, CCHC domain containing 24
hsa-miR-107	1	0	1	1	1	1	HS6ST3	heparan sulfate 6-O-sulfotransferase 3
hsa-miR-107	1	0	1	1	1	1	LCORL	ligand dependent nuclear receptor corepressor-like
hsa-miR-107	1	0	1	1	1	1	C2orf69	chromosome 2 open reading frame 69
hsa-miR-107	1	0	1	1	0	0	FAM43A	family with sequence similarity 43, member A
hsa-miR-107	0	0	1	1	1	1	SALL3	sal-like 3 (Drosophila)
hsa-miR-107	1	0	1	1	1	1	POM121	POM121 transmembrane nucleoporin
hsa-miR-107	1	0	1	0	1	1	PLEKHH2	pleckstrin homology domain containing, family H (with MyTH4 domain) member 2
hsa-miR-107	0	0	1	1	1	1	REXO1L1	REX1, RNA exonuclease 1 homolog (S. cerevisiae)-like 1
hsa-miR-107	1	0	1	1	1	1	SMG7	smg-7 homolog, nonsense mediated mRNA decay factor (C. elegans)
hsa-miR-107	1	0	1	1	1	1	DCUN1D3	DCN1, defective in cullin neddylation 1, domain containing 3 (S. cerevisiae)
hsa-miR-107	0	0	1	1	1	1	KLF17	Kruppel-like factor 17
hsa-miR-107	1	0	1	1	1	1	CCDC117	coiled-coil domain containing 117
hsa-miR-107	0	0	1	1	1	1	OTOGL	otogelin-like
hsa-miR-107	1	0	1	1	1	1	DIP2B	DIP2 disco-interacting protein 2 homolog B (Drosophila)
hsa-miR-107	0	0	1	1	1	1	C17orf78	chromosome 17 open reading frame 78
hsa-miR-107	1	0	1	1	1	1	XKR6	XK, Kell blood group complex subunit-related family, member 6
hsa-miR-107	0	0	1	1	0	0	TIGIT	T cell immunoreceptor with Ig and ITIM domains
hsa-miR-107	0	0	1	1	1	1	AQPEP	laeverin
hsa-miR-107	0	0	1	1	1	1	C1orf101	chromosome 1 open reading frame 101
hsa-miR-107	1	0	1	1	1	1	RABL3	RAB, member of RAS oncogene family-like 3
hsa-miR-107	0	0	1	1	1	1	CCDC50	coiled-coil domain containing 50
hsa-miR-107	1	0	1	1	1	1	UBR1	ubiquitin protein ligase E3 component n-recognin 1
hsa-miR-107	1	0	1	1	1	1	ZADH2	zinc binding alcohol dehydrogenase domain containing 2
hsa-miR-107	1	0	1	1	1	1	PDLIM2	PDZ and LIM domain 2 (mystique)
hsa-miR-107	1	0	1	1	1	1	INADL	InaD-like (Drosophila)
hsa-miR-107	0	0	1	1	1	1	PRNT	prion protein (testis specific)
hsa-miR-107	0	0	1	1	1	1	ZNF831	zinc finger protein 831
hsa-miR-107	1	0	1	0	1	1	ZDHHC21	zinc finger, DHHC-type containing 21
hsa-miR-107	0	0	1	1	1	1	NPAS4	neuronal PAS domain protein 4
hsa-miR-107	1	0	1	1	1	1	ERAS	ES cell expressed Ras
hsa-miR-107	0	0	1	0	1	1	HCG27	HLA complex group 27 (non-protein coding)
hsa-miR-107	1	0	1	1	1	1	DPY19L4	dpy-19-like 4 (C. elegans)
hsa-miR-107	0	0	1	1	0	0	UBE2C	ubiquitin-conjugating enzyme E2C
hsa-miR-107	1	0	1	1	1	1	ZSCAN22	zinc finger and SCAN domain containing 22
hsa-miR-107	0	0	1	0	1	1	BAGE5	B melanoma antigen family, member 5
hsa-miR-107	0	0	1	1	1	1	USP12	ubiquitin specific peptidase 12
hsa-miR-107	1	0	1	1	1	1	FAM216B	family with sequence similarity 216, member B
hsa-miR-107	1	0	1	1	1	1	ISM2	isthmin 2 homolog (zebrafish)
hsa-miR-107	0	0	1	1	0	0	BPIFB4	BPI fold containing family B, member 4
hsa-miR-107	0	0	1	1	1	1	ZNF326	zinc finger protein 326
hsa-miR-107	0	0	1	1	0	0	C7orf55	chromosome 7 open reading frame 55
hsa-miR-107	1	0	1	1	1	1	ASB7	ankyrin repeat and SOCS box containing 7
hsa-miR-107	1	0	1	1	1	1	E2F6	E2F transcription factor 6
hsa-miR-107	1	0	1	0	1	1	ZC3H6	zinc finger CCCH-type containing 6
hsa-miR-107	1	0	1	0	1	1	DLEU7	deleted in lymphocytic leukemia, 7
hsa-miR-107	0	0	1	0	1	1	WASH3P	WAS protein family homolog 3 pseudogene
hsa-miR-107	1	0	1	1	1	1	TMEM189-UBE2V1	TMEM189-UBE2V1 readthrough
hsa-miR-107	1	0	1	1	1	1	WARS2	tryptophanyl tRNA synthetase 2, mitochondrial
hsa-miR-107	0	0	1	1	0	0	LCN15	lipocalin 15
hsa-miR-107	0	0	1	1	0	0	KRTAP26-1	keratin associated protein 26-1
hsa-miR-107	1	0	1	1	1	1	PPAPDC2	phosphatidic acid phosphatase type 2 domain containing 2
hsa-miR-107	0	0	1	1	1	1	ZNF474	zinc finger protein 474
hsa-miR-107	1	0	1	1	1	1	FREM2	FRAS1 related extracellular matrix protein 2
hsa-miR-107	0	0	1	1	0	0	AMTN	amelotin
hsa-miR-107	0	0	1	0	0	0	SNORD55	small nucleolar RNA, C/D box 55
hsa-miR-107	0	0	1	0	0	0	ESRRAP2	estrogen-related receptor alpha pseudogene 2
hsa-miR-107	0	0	1	0	0	0	PCDHB19P	protocadherin beta 19 pseudogene
hsa-miR-107	0	0	1	0	0	0	TTTY1	testis-specific transcript, Y-linked 1 (non-protein coding)
hsa-miR-107	0	0	1	0	0	0	TTTY19	testis-specific transcript, Y-linked 19 (non-protein coding)
hsa-miR-107	0	0	1	0	0	0	HBBP1	hemoglobin, beta pseudogene 1
hsa-miR-107	0	0	1	0	0	0	DKFZP586I1420	uncharacterized protein DKFZp586I1420
hsa-miR-107	0	0	1	0	0	0	RBMXP3	RNA binding motif protein, X-linked pseudogene 3
hsa-miR-107	0	0	1	0	0	0	DEFB122	defensin, beta 122 (pseudogene)
hsa-miR-107	0	0	1	0	0	0	TRIM78P	tripartite motif containing 78, pseudogene
hsa-miR-107	0	0	1	0	0	0	TPTE2P6	transmembrane phosphoinositide 3-phosphatase and tensin homolog 2 pseudogene 6
hsa-miR-107	0	0	1	0	0	0	HERC2P8	hect domain and RLD 2 pseudogene 8
hsa-miR-107	0	0	1	0	0	0	SNX29P2	sorting nexin 29 pseudogene 2
hsa-miR-107	0	0	1	0	0	0	NUDT16P1	nudix (nucleoside diphosphate linked moiety X)-type motif 16 pseudogene 1
hsa-miR-107	0	0	1	0	0	0	SNORA60	small nucleolar RNA, H/ACA box 60
hsa-miR-107	0	0	1	0	0	0	SCARNA6	small Cajal body-specific RNA 6
hsa-miR-107	0	0	1	0	0	0	SCARNA16	small Cajal body-specific RNA 16
hsa-miR-107	0	0	1	0	0	0	SNORA53	small nucleolar RNA, H/ACA box 53
hsa-miR-107	0	0	1	0	0	0	TUBA4B	tubulin, alpha 4b (pseudogene)
hsa-miR-107	0	0	1	0	0	0	HAR1A	highly accelerated region 1A (non-protein coding)
hsa-miR-107	0	0	1	0	0	0	SNORD116-28	small nucleolar RNA, C/D box 116-28
hsa-miR-107	1	0	1	1	0	0	KIAA1549L	KIAA1549-like
hsa-miR-107	0	0	1	0	1	1	DDX12P	DEAD/H (Asp-Glu-Ala-Asp/His) box polypeptide 12, pseudogene
hsa-miR-107	1	0	1	1	1	1	FBN2	fibrillin 2
hsa-miR-107	0	0	1	0	0	0	MUC5AC	mucin 5AC, oligomeric mucus/gel-forming
hsa-miR-107	0	0	1	1	0	0	GPR17	G protein-coupled receptor 17
hsa-miR-107	0	0	0	1	1	1	PDK4	pyruvate dehydrogenase kinase, isozyme 4
hsa-miR-107	1	0	1	1	1	1	LRRC7	leucine rich repeat containing 7
hsa-miR-107	0	0	1	1	1	1	NSMAF	neutral sphingomyelinase (N-SMase) activation associated factor
hsa-miR-107	0	0	1	1	1	1	CREB3L3	cAMP responsive element binding protein 3-like 3
hsa-miR-107	0	0	0	1	0	0	TMEM161A	transmembrane protein 161A
hsa-miR-107	0	0	1	1	1	1	PIGB	phosphatidylinositol glycan anchor biosynthesis, class B
hsa-miR-107	0	0	0	1	1	1	KRT20	keratin 20
hsa-miR-107	0	0	1	1	0	0	MAP2K5	mitogen-activated protein kinase kinase 5
hsa-miR-107	0	0	1	1	0	0	ZW10	ZW10, kinetochore associated, homolog (Drosophila)
hsa-miR-107	0	0	0	1	0	0	TRIP6	thyroid hormone receptor interactor 6
hsa-miR-107	0	0	1	1	0	0	SPAG7	sperm associated antigen 7
hsa-miR-107	0	0	0	1	0	0	LMF2	lipase maturation factor 2
hsa-miR-107	0	0	0	1	1	1	RHBDD3	rhomboid domain containing 3
hsa-miR-107	0	0	0	1	1	1	PLEK2	pleckstrin 2
hsa-miR-107	1	0	0	1	1	1	SALL4	sal-like 4 (Drosophila)
hsa-miR-107	0	0	0	1	0	0	RAB40AL	RAB40A, member RAS oncogene family-like
hsa-miR-107	0	0	1	1	0	0	PRSS54	protease, serine, 54
hsa-miR-107	1	0	1	1	1	1	GSPT1	G1 to S phase transition 1
hsa-miR-107	1	0	1	1	1	1	HMOX2	heme oxygenase (decycling) 2
hsa-miR-107	0	0	1	1	0	0	GML	glycosylphosphatidylinositol anchored molecule like protein
hsa-miR-107	0	0	1	1	0	0	FCGRT	Fc fragment of IgG, receptor, transporter, alpha
hsa-miR-107	0	0	0	1	1	1	NOD1	nucleotide-binding oligomerization domain containing 1
hsa-miR-107	0	0	1	1	1	1	RLN1	relaxin 1
hsa-miR-107	0	0	1	1	0	0	AATF	apoptosis antagonizing transcription factor
hsa-miR-107	0	0	1	1	1	1	CCL13	chemokine (C-C motif) ligand 13
hsa-miR-107	0	0	1	1	1	1	KRT32	keratin 32
hsa-miR-107	0	0	0	1	1	1	MANBA	mannosidase, beta A, lysosomal
hsa-miR-107	0	0	1	1	0	0	CRYAB	crystallin, alpha B
hsa-miR-107	0	0	1	1	0	0	CYP27B1	cytochrome P450, family 27, subfamily B, polypeptide 1
hsa-miR-107	1	0	0	1	1	1	VDR	vitamin D (1,25- dihydroxyvitamin D3) receptor
hsa-miR-107	0	0	1	1	1	1	GPR63	G protein-coupled receptor 63
hsa-miR-107	0	0	0	1	1	1	EXOC2	exocyst complex component 2
hsa-miR-107	0	0	1	1	0	0	MDH1	malate dehydrogenase 1, NAD (soluble)
hsa-miR-107	1	0	1	1	1	1	SLC1A4	solute carrier family 1 (glutamate/neutral amino acid transporter), member 4
hsa-miR-107	0	0	0	1	0	0	OSCP1	organic solute carrier partner 1
hsa-miR-107	0	0	0	1	0	0	NT5C1A	5'-nucleotidase, cytosolic IA
hsa-miR-107	0	0	1	1	0	0	ARMC4	armadillo repeat containing 4
hsa-miR-107	0	0	0	1	0	0	TAS2R7	taste receptor, type 2, member 7
hsa-miR-107	0	0	1	1	0	0	MRPS2	mitochondrial ribosomal protein S2
hsa-miR-107	0	0	0	1	0	0	PEPD	peptidase D
hsa-miR-107	0	0	0	1	1	1	APOBEC2	apolipoprotein B mRNA editing enzyme, catalytic polypeptide-like 2
hsa-miR-107	0	0	1	1	0	0	IDUA	iduronidase, alpha-L-
hsa-miR-107	0	0	0	1	1	1	ARHGAP22	Rho GTPase activating protein 22
hsa-miR-107	0	0	0	1	0	0	ISLR	immunoglobulin superfamily containing leucine-rich repeat
hsa-miR-107	0	0	1	1	1	1	TRPC4AP	transient receptor potential cation channel, subfamily C, member 4 associated protein
hsa-miR-107	0	0	0	1	0	0	EXOC3L2	exocyst complex component 3-like 2
hsa-miR-107	1	0	0	1	0	0	GADD45G	growth arrest and DNA-damage-inducible, gamma
hsa-miR-107	0	0	0	1	1	1	ACSBG2	acyl-CoA synthetase bubblegum family member 2
hsa-miR-107	1	0	1	1	1	1	SLC7A10	solute carrier family 7 (neutral amino acid transporter light chain, asc system), member 10
hsa-miR-107	0	0	1	1	1	1	LATS1	LATS, large tumor suppressor, homolog 1 (Drosophila)
hsa-miR-107	0	0	1	1	0	0	NXT1	NTF2-like export factor 1
[truncated: 767 more rows]
