# Supplementary material for: Profiling of Selected MicroRNAs in Proliferative Eutopic Endometrium of Women with Ovarian Endometriosis
Source: Biomed Res Int. 2015 Aug 20;2015:760698. doi: 10.1155/2015/760698 (PMC4558423; doi:10.1155/2015/760698)
Supplement: Supplementary file 1 — Table I: The names of miRNAs significantly differentially expressed between eutopic endometrium of patients with endometriosis vs eutopic endometrium of patients without endometriosis. Table II: The associations between miRNA and mRNA, which presents detailed results of the search of six major databases i.e targetscan, tarbase, miranda, mirbase, mirtarget2 and pictar. [file 760698.f1.zip › 760698.f1/Table II/hsa-miR-125a-5p.tsv]

miR	targetscan	tarbase	miranda	mirbase	mirtarget2	pictar	GeneSymbol	GeneName
hsa-miR-125a-5p	1	0	1	1	1	1	ZNF385A	zinc finger protein 385A
hsa-miR-125a-5p	1	0	1	0	1	1	SEMA4B	sema domain, immunoglobulin domain (Ig), transmembrane domain (TM) and short cytoplasmic domain, (semaphorin) 4B
hsa-miR-125a-5p	1	0	1	1	1	1	SERTAD3	SERTA domain containing 3
hsa-miR-125a-5p	1	0	1	1	0	0	GRIN2A	glutamate receptor, ionotropic, N-methyl D-aspartate 2A
hsa-miR-125a-5p	1	0	1	0	1	1	UBE2G1	ubiquitin-conjugating enzyme E2G 1
hsa-miR-125a-5p	1	0	0	1	0	0	PGAP3	post-GPI attachment to proteins 3
hsa-miR-125a-5p	1	0	1	1	1	1	ZC3H7B	zinc finger CCCH-type containing 7B
hsa-miR-125a-5p	1	0	1	0	1	1	FAM131B	family with sequence similarity 131, member B
hsa-miR-125a-5p	1	0	1	1	1	1	SCN5A	sodium channel, voltage-gated, type V, alpha subunit
hsa-miR-125a-5p	1	0	1	1	0	0	ASPHD1	aspartate beta-hydroxylase domain containing 1
hsa-miR-125a-5p	1	0	1	1	1	1	SUV39H1	suppressor of variegation 3-9 homolog 1 (Drosophila)
hsa-miR-125a-5p	1	0	1	1	1	1	RASL10B	RAS-like, family 10, member B
hsa-miR-125a-5p	1	0	1	1	1	1	PHC2	polyhomeotic homolog 2 (Drosophila)
hsa-miR-125a-5p	1	0	1	1	1	1	SNTB2	syntrophin, beta 2 (dystrophin-associated protein A1, 59kDa, basic component 2)
hsa-miR-125a-5p	1	0	1	1	1	1	SCN4B	sodium channel, voltage-gated, type IV, beta subunit
hsa-miR-125a-5p	1	0	1	1	1	1	TGOLN2	trans-golgi network protein 2
hsa-miR-125a-5p	1	0	1	1	1	1	ZNF395	zinc finger protein 395
hsa-miR-125a-5p	1	0	1	1	0	0	NIPAL4	NIPA-like domain containing 4
hsa-miR-125a-5p	1	0	1	1	1	1	TBC1D8B	TBC1 domain family, member 8B (with GRAM domain)
hsa-miR-125a-5p	1	0	1	1	1	1	SH3BP4	SH3-domain binding protein 4
hsa-miR-125a-5p	1	0	1	0	0	0	SP7	Sp7 transcription factor
hsa-miR-125a-5p	1	0	1	0	1	1	DOCK3	dedicator of cytokinesis 3
hsa-miR-125a-5p	1	0	0	1	0	0	ABTB1	ankyrin repeat and BTB (POZ) domain containing 1
hsa-miR-125a-5p	1	0	1	1	1	1	COPS7B	COP9 constitutive photomorphogenic homolog subunit 7B (Arabidopsis)
hsa-miR-125a-5p	1	0	1	1	0	0	SLC35C1	solute carrier family 35, member C1
hsa-miR-125a-5p	1	0	1	1	1	1	KCTD21	potassium channel tetramerisation domain containing 21
hsa-miR-125a-5p	1	0	0	0	0	0	PCSK7	proprotein convertase subtilisin/kexin type 7
hsa-miR-125a-5p	1	0	1	0	1	1	LBH	limb bud and heart development homolog (mouse)
hsa-miR-125a-5p	1	0	1	0	1	1	SLC7A6	solute carrier family 7 (amino acid transporter light chain, y+L system), member 6
hsa-miR-125a-5p	1	0	1	0	1	1	KLF13	Kruppel-like factor 13
hsa-miR-125a-5p	1	0	1	1	0	0	STXBP5L	syntaxin binding protein 5-like
hsa-miR-125a-5p	1	0	0	1	0	0	DGAT1	diacylglycerol O-acyltransferase 1
hsa-miR-125a-5p	1	0	1	1	1	1	C2orf88	chromosome 2 open reading frame 88
hsa-miR-125a-5p	1	0	0	1	1	1	TTC7A	tetratricopeptide repeat domain 7A
hsa-miR-125a-5p	1	0	1	0	1	1	GOPC	golgi-associated PDZ and coiled-coil motif containing
hsa-miR-125a-5p	1	0	1	1	1	1	NPL	N-acetylneuraminate pyruvate lyase (dihydrodipicolinate synthase)
hsa-miR-125a-5p	1	0	1	0	1	1	EIF5A2	eukaryotic translation initiation factor 5A2
hsa-miR-125a-5p	1	0	1	0	0	0	ZBTB34	zinc finger and BTB domain containing 34
hsa-miR-125a-5p	1	0	1	1	1	1	MEMO1	mediator of cell motility 1
hsa-miR-125a-5p	1	0	1	1	1	1	ZNF148	zinc finger protein 148
hsa-miR-125a-5p	1	0	1	1	1	1	HOXD1	homeobox D1
hsa-miR-125a-5p	1	0	1	1	1	1	KLF16	Kruppel-like factor 16
hsa-miR-125a-5p	1	0	1	1	1	1	ZNF12	zinc finger protein 12
hsa-miR-125a-5p	1	0	1	1	1	1	LFNG	LFNG O-fucosylpeptide 3-beta-N-acetylglucosaminyltransferase
hsa-miR-125a-5p	1	0	1	1	0	0	ADAMTS4	ADAM metallopeptidase with thrombospondin type 1 motif, 4
hsa-miR-125a-5p	1	0	1	0	1	1	LYPD6	LY6/PLAUR domain containing 6
hsa-miR-125a-5p	1	0	1	1	1	1	UBE2J1	ubiquitin-conjugating enzyme E2, J1
hsa-miR-125a-5p	1	0	1	0	1	1	UBE2L3	ubiquitin-conjugating enzyme E2L 3
hsa-miR-125a-5p	1	0	1	1	1	1	PLAGL1	pleiomorphic adenoma gene-like 1
hsa-miR-125a-5p	1	0	1	1	1	1	KIAA1522	KIAA1522
hsa-miR-125a-5p	1	0	1	1	0	0	MAP3K10	mitogen-activated protein kinase kinase kinase 10
hsa-miR-125a-5p	1	0	1	1	1	1	CCNJL	cyclin J-like
hsa-miR-125a-5p	1	0	1	1	1	1	ARID3A	AT rich interactive domain 3A (BRIGHT-like)
hsa-miR-125a-5p	1	0	1	1	1	1	SRF	serum response factor (c-fos serum response element-binding transcription factor)
hsa-miR-125a-5p	1	0	1	0	1	1	KPNA6	karyopherin alpha 6 (importin alpha 7)
hsa-miR-125a-5p	1	0	1	1	1	1	SLC38A9	solute carrier family 38, member 9
hsa-miR-125a-5p	1	0	1	1	1	1	CHTF8	CTF8, chromosome transmission fidelity factor 8 homolog (S. cerevisiae)
hsa-miR-125a-5p	1	0	1	1	1	1	PODXL	podocalyxin-like
hsa-miR-125a-5p	1	0	1	1	0	0	IER2	immediate early response 2
hsa-miR-125a-5p	1	0	1	1	1	1	OLFML2A	olfactomedin-like 2A
hsa-miR-125a-5p	1	0	1	0	1	1	GRB10	growth factor receptor-bound protein 10
hsa-miR-125a-5p	1	0	0	1	0	0	KCNH3	potassium voltage-gated channel, subfamily H (eag-related), member 3
hsa-miR-125a-5p	1	0	1	1	1	1	SULT4A1	sulfotransferase family 4A, member 1
hsa-miR-125a-5p	1	0	1	1	0	0	UBR7	ubiquitin protein ligase E3 component n-recognin 7 (putative)
hsa-miR-125a-5p	1	0	1	1	1	1	PPP2R5C	protein phosphatase 2, regulatory subunit B', gamma
hsa-miR-125a-5p	1	0	1	1	1	1	PHF15	PHD finger protein 15
hsa-miR-125a-5p	1	0	1	1	1	1	FAM123A	family with sequence similarity 123A
hsa-miR-125a-5p	1	0	1	1	1	1	MKNK2	MAP kinase interacting serine/threonine kinase 2
hsa-miR-125a-5p	1	0	1	1	1	1	GALNT7	UDP-N-acetyl-alpha-D-galactosamine:polypeptide N-acetylgalactosaminyltransferase 7 (GalNAc-T7)
hsa-miR-125a-5p	1	0	1	1	1	1	FAM176A	family with sequence similarity 176, member A
hsa-miR-125a-5p	1	0	1	1	1	1	DDX42	DEAD (Asp-Glu-Ala-Asp) box polypeptide 42
hsa-miR-125a-5p	1	0	1	1	1	1	IER3IP1	immediate early response 3 interacting protein 1
hsa-miR-125a-5p	1	0	1	1	1	1	ZNF624	zinc finger protein 624
hsa-miR-125a-5p	1	0	1	1	1	1	WDR1	WD repeat domain 1
hsa-miR-125a-5p	1	0	1	1	1	1	MTMR3	myotubularin related protein 3
hsa-miR-125a-5p	1	0	1	1	1	1	ANPEP	alanyl (membrane) aminopeptidase
hsa-miR-125a-5p	1	0	1	1	1	1	KIAA1598	KIAA1598
hsa-miR-125a-5p	1	0	1	1	1	1	CASP2	caspase 2, apoptosis-related cysteine peptidase
hsa-miR-125a-5p	1	0	1	1	1	1	ACACB	acetyl-CoA carboxylase beta
hsa-miR-125a-5p	1	0	1	1	1	1	ASIC1	acid-sensing (proton-gated) ion channel 1
hsa-miR-125a-5p	1	0	1	1	1	1	TNFSF4	tumor necrosis factor (ligand) superfamily, member 4
hsa-miR-125a-5p	1	0	1	1	1	1	CDR2L	cerebellar degeneration-related protein 2-like
hsa-miR-125a-5p	1	0	1	1	1	1	NIPA1	non imprinted in Prader-Willi/Angelman syndrome 1
hsa-miR-125a-5p	1	0	1	1	1	1	ACER2	alkaline ceramidase 2
hsa-miR-125a-5p	1	0	1	1	1	1	IL16	interleukin 16
hsa-miR-125a-5p	1	0	1	1	1	1	GGT7	gamma-glutamyltransferase 7
hsa-miR-125a-5p	1	0	1	1	1	1	FOXN3	forkhead box N3
hsa-miR-125a-5p	1	0	1	1	1	1	GANC	glucosidase, alpha; neutral C
hsa-miR-125a-5p	1	0	1	1	1	1	NT5DC1	5'-nucleotidase domain containing 1
hsa-miR-125a-5p	1	0	1	1	1	1	RAPGEFL1	Rap guanine nucleotide exchange factor (GEF)-like 1
hsa-miR-125a-5p	1	0	1	0	1	1	ARCN1	archain 1
hsa-miR-125a-5p	1	0	1	1	1	1	CTDSP2	CTD (carboxy-terminal domain, RNA polymerase II, polypeptide A) small phosphatase 2
hsa-miR-125a-5p	1	0	1	1	1	1	ATXN1	ataxin 1
hsa-miR-125a-5p	1	0	1	1	1	1	HIC2	hypermethylated in cancer 2
hsa-miR-125a-5p	1	0	1	1	1	1	ZNF518A	zinc finger protein 518A
hsa-miR-125a-5p	1	0	1	1	1	1	DVL3	dishevelled, dsh homolog 3 (Drosophila)
hsa-miR-125a-5p	1	0	1	1	0	0	TMEM86A	transmembrane protein 86A
hsa-miR-125a-5p	1	0	1	1	1	1	GJC1	gap junction protein, gamma 1, 45kDa
hsa-miR-125a-5p	1	0	1	1	0	0	ZBTB37	zinc finger and BTB domain containing 37
hsa-miR-125a-5p	1	0	0	1	1	1	C16orf88	chromosome 16 open reading frame 88
hsa-miR-125a-5p	1	0	1	0	1	1	USP37	ubiquitin specific peptidase 37
hsa-miR-125a-5p	1	0	1	1	1	1	VAV3	vav 3 guanine nucleotide exchange factor
hsa-miR-125a-5p	1	0	1	1	1	1	SMEK1	SMEK homolog 1, suppressor of mek1 (Dictyostelium)
hsa-miR-125a-5p	1	0	1	1	0	0	ABL2	v-abl Abelson murine leukemia viral oncogene homolog 2
hsa-miR-125a-5p	1	0	1	1	1	1	NCAN	neurocan
hsa-miR-125a-5p	1	0	1	1	1	1	SLC7A1	solute carrier family 7 (cationic amino acid transporter, y+ system), member 1
hsa-miR-125a-5p	1	0	1	1	1	1	ZNF76	zinc finger protein 76
hsa-miR-125a-5p	1	0	1	1	1	1	ONECUT2	one cut homeobox 2
hsa-miR-125a-5p	1	0	1	1	1	1	ZDHHC9	zinc finger, DHHC-type containing 9
hsa-miR-125a-5p	1	0	1	1	0	0	KCNH7	potassium voltage-gated channel, subfamily H (eag-related), member 7
hsa-miR-125a-5p	1	0	1	1	1	1	ENPEP	glutamyl aminopeptidase (aminopeptidase A)
hsa-miR-125a-5p	1	0	1	1	0	0	EBF4	early B-cell factor 4
hsa-miR-125a-5p	1	0	1	0	1	1	PLXNA1	plexin A1
hsa-miR-125a-5p	1	0	1	1	0	0	PTAR1	protein prenyltransferase alpha subunit repeat containing 1
hsa-miR-125a-5p	1	0	1	1	1	1	USP38	ubiquitin specific peptidase 38
hsa-miR-125a-5p	1	0	1	1	1	1	QSOX2	quiescin Q6 sulfhydryl oxidase 2
hsa-miR-125a-5p	1	0	1	1	1	1	FOXQ1	forkhead box Q1
hsa-miR-125a-5p	1	0	1	1	1	1	RBM38	RNA binding motif protein 38
hsa-miR-125a-5p	1	0	1	0	1	1	MCL1	myeloid cell leukemia sequence 1 (BCL2-related)
hsa-miR-125a-5p	1	0	1	1	1	1	FAM65B	family with sequence similarity 65, member B
hsa-miR-125a-5p	1	0	1	1	0	0	HDDC3	HD domain containing 3
hsa-miR-125a-5p	1	0	1	1	0	0	NCLN	nicalin
hsa-miR-125a-5p	1	0	1	1	1	1	UBN1	ubinuclein 1
hsa-miR-125a-5p	1	0	1	0	1	1	ANTXR2	anthrax toxin receptor 2
hsa-miR-125a-5p	1	0	1	1	1	1	PSTPIP2	proline-serine-threonine phosphatase interacting protein 2
hsa-miR-125a-5p	1	0	1	1	1	1	ELAVL1	ELAV (embryonic lethal, abnormal vision, Drosophila)-like 1 (Hu antigen R)
hsa-miR-125a-5p	1	0	1	1	0	0	ETNK2	ethanolamine kinase 2
hsa-miR-125a-5p	1	0	0	1	0	0	PMM2	phosphomannomutase 2
hsa-miR-125a-5p	1	0	1	0	1	1	SCN2B	sodium channel, voltage-gated, type II, beta subunit
hsa-miR-125a-5p	1	0	1	1	1	1	ESRRA	estrogen-related receptor alpha
hsa-miR-125a-5p	1	0	1	1	1	1	SLC6A17	solute carrier family 6, member 17
hsa-miR-125a-5p	1	0	1	1	1	1	SLC25A53	solute carrier family 25, member 53
hsa-miR-125a-5p	1	0	1	1	1	1	SLC39A13	solute carrier family 39 (zinc transporter), member 13
hsa-miR-125a-5p	1	0	1	1	1	1	NCOR2	nuclear receptor corepressor 2
hsa-miR-125a-5p	1	0	0	1	0	0	EMID1	EMI domain containing 1
hsa-miR-125a-5p	1	0	1	1	1	1	TSPAN12	tetraspanin 12
hsa-miR-125a-5p	1	0	1	1	1	1	ZNF512B	zinc finger protein 512B
hsa-miR-125a-5p	1	0	1	1	1	1	PRSS35	protease, serine, 35
hsa-miR-125a-5p	1	0	1	0	1	1	ZC3H12B	zinc finger CCCH-type containing 12B
hsa-miR-125a-5p	1	0	1	1	1	1	DEM1	defects in morphology 1 homolog (S. cerevisiae)
hsa-miR-125a-5p	1	0	1	1	0	0	EIF2B5	eukaryotic translation initiation factor 2B, subunit 5 epsilon, 82kDa
hsa-miR-125a-5p	1	0	1	0	1	1	BSN	bassoon (presynaptic cytomatrix protein)
hsa-miR-125a-5p	1	0	1	1	1	1	CORO1C	coronin, actin binding protein, 1C
hsa-miR-125a-5p	1	0	1	1	1	1	MAPK1IP1L	mitogen-activated protein kinase 1 interacting protein 1-like
hsa-miR-125a-5p	1	0	0	1	1	1	SSTR3	somatostatin receptor 3
hsa-miR-125a-5p	1	0	1	0	1	1	BMPR2	bone morphogenetic protein receptor, type II (serine/threonine kinase)
hsa-miR-125a-5p	1	0	1	1	1	1	TAT	tyrosine aminotransferase
hsa-miR-125a-5p	1	0	1	1	1	1	DAAM2	dishevelled associated activator of morphogenesis 2
hsa-miR-125a-5p	1	0	1	1	0	0	SLC26A6	solute carrier family 26, member 6
hsa-miR-125a-5p	1	0	1	1	1	1	DIS3L2	DIS3 mitotic control homolog (S. cerevisiae)-like 2
hsa-miR-125a-5p	1	0	1	1	1	1	E2F3	E2F transcription factor 3
hsa-miR-125a-5p	1	0	1	1	0	0	CDC42BPG	CDC42 binding protein kinase gamma (DMPK-like)
hsa-miR-125a-5p	1	0	1	1	1	1	C11orf57	chromosome 11 open reading frame 57
hsa-miR-125a-5p	1	0	1	1	1	1	SZRD1	SUZ RNA binding domain containing 1
hsa-miR-125a-5p	1	0	1	1	1	1	ZNF704	zinc finger protein 704
hsa-miR-125a-5p	1	0	1	1	0	0	MAN1B1	mannosidase, alpha, class 1B, member 1
hsa-miR-125a-5p	1	0	1	1	1	1	FAM210B	family with sequence similarity 210, member B
hsa-miR-125a-5p	1	0	1	0	1	1	VANGL2	vang-like 2 (van gogh, Drosophila)
hsa-miR-125a-5p	1	0	1	1	1	1	UBE2R2	ubiquitin-conjugating enzyme E2R 2
hsa-miR-125a-5p	1	0	1	1	1	1	PPP2CA	protein phosphatase 2, catalytic subunit, alpha isozyme
hsa-miR-125a-5p	1	0	1	1	1	1	ZDHHC7	zinc finger, DHHC-type containing 7
hsa-miR-125a-5p	1	0	1	1	1	1	PCGF6	polycomb group ring finger 6
hsa-miR-125a-5p	1	0	0	1	1	1	RBAK	RB-associated KRAB zinc finger
hsa-miR-125a-5p	1	0	1	1	1	1	ZNF304	zinc finger protein 304
hsa-miR-125a-5p	1	0	0	1	1	1	ABCC4	ATP-binding cassette, sub-family C (CFTR/MRP), member 4
hsa-miR-125a-5p	1	0	1	1	0	0	FBXO45	F-box protein 45
hsa-miR-125a-5p	1	0	1	0	1	1	SMAD2	SMAD family member 2
hsa-miR-125a-5p	1	0	0	1	1	1	ZSWIM4	zinc finger, SWIM-type containing 4
hsa-miR-125a-5p	1	0	1	0	1	1	VPS36	vacuolar protein sorting 36 homolog (S. cerevisiae)
hsa-miR-125a-5p	1	0	1	1	1	1	RYBP	RING1 and YY1 binding protein
hsa-miR-125a-5p	1	0	1	1	1	1	MUL1	mitochondrial E3 ubiquitin protein ligase 1
hsa-miR-125a-5p	1	0	1	1	0	0	EIF4EBP1	eukaryotic translation initiation factor 4E binding protein 1
hsa-miR-125a-5p	1	0	1	1	1	1	PRDM1	PR domain containing 1, with ZNF domain
hsa-miR-125a-5p	1	0	1	1	1	1	RIT1	Ras-like without CAAX 1
hsa-miR-125a-5p	1	0	1	1	1	1	SPTB	spectrin, beta, erythrocytic
hsa-miR-125a-5p	1	0	1	1	1	1	SLC4A8	solute carrier family 4, sodium bicarbonate cotransporter, member 8
hsa-miR-125a-5p	1	0	0	1	1	1	PPAT	phosphoribosyl pyrophosphate amidotransferase
hsa-miR-125a-5p	1	0	0	1	1	1	ASB13	ankyrin repeat and SOCS box containing 13
hsa-miR-125a-5p	1	0	1	1	1	1	NFIB	nuclear factor I/B
hsa-miR-125a-5p	1	0	1	1	1	1	ST8SIA4	ST8 alpha-N-acetyl-neuraminide alpha-2,8-sialyltransferase 4
hsa-miR-125a-5p	1	0	1	1	0	0	RABL6	RAB, member RAS oncogene family-like 6
hsa-miR-125a-5p	1	0	1	1	1	1	SMARCD2	SWI/SNF related, matrix associated, actin dependent regulator of chromatin, subfamily d, member 2
hsa-miR-125a-5p	1	0	1	1	1	1	LRP4	low density lipoprotein receptor-related protein 4
hsa-miR-125a-5p	1	0	1	1	1	1	ZSCAN29	zinc finger and SCAN domain containing 29
hsa-miR-125a-5p	1	0	0	1	1	1	CRB2	crumbs homolog 2 (Drosophila)
hsa-miR-125a-5p	1	0	1	0	1	1	TRIL	TLR4 interactor with leucine-rich repeats
hsa-miR-125a-5p	1	0	1	0	1	1	UBE2W	ubiquitin-conjugating enzyme E2W (putative)
hsa-miR-125a-5p	1	0	1	0	1	1	FAM46A	family with sequence similarity 46, member A
hsa-miR-125a-5p	1	0	1	1	1	1	PHF20	PHD finger protein 20
hsa-miR-125a-5p	1	0	1	0	1	1	BRPF1	bromodomain and PHD finger containing, 1
hsa-miR-125a-5p	1	0	1	1	1	1	RHOQ	ras homolog family member Q
hsa-miR-125a-5p	1	0	1	0	1	1	KHNYN	KH and NYN domain containing
hsa-miR-125a-5p	1	0	1	1	0	0	SLC17A7	solute carrier family 17 (sodium-dependent inorganic phosphate cotransporter), member 7
hsa-miR-125a-5p	1	0	1	1	0	0	SEMA4C	sema domain, immunoglobulin domain (Ig), transmembrane domain (TM) and short cytoplasmic domain, (semaphorin) 4C
hsa-miR-125a-5p	1	0	1	1	1	1	CPSF6	cleavage and polyadenylation specific factor 6, 68kDa
hsa-miR-125a-5p	1	0	1	1	0	0	CACNB1	calcium channel, voltage-dependent, beta 1 subunit
hsa-miR-125a-5p	1	0	1	1	0	0	PACS2	phosphofurin acidic cluster sorting protein 2
hsa-miR-125a-5p	1	0	1	0	1	1	GAB2	GRB2-associated binding protein 2
hsa-miR-125a-5p	1	0	1	1	1	1	MGAT4A	mannosyl (alpha-1,3-)-glycoprotein beta-1,4-N-acetylglucosaminyltransferase, isozyme A
hsa-miR-125a-5p	1	0	1	1	0	0	UBTD1	ubiquitin domain containing 1
hsa-miR-125a-5p	1	0	1	0	1	1	WIPF2	WAS/WASL interacting protein family, member 2
hsa-miR-125a-5p	1	0	1	0	1	1	SLCO2A1	solute carrier organic anion transporter family, member 2A1
hsa-miR-125a-5p	1	0	0	1	0	0	NRM	nurim (nuclear envelope membrane protein)
hsa-miR-125a-5p	1	0	1	1	1	1	ERBB4	v-erb-a erythroblastic leukemia viral oncogene homolog 4 (avian)
hsa-miR-125a-5p	1	0	0	1	0	0	MICALL1	MICAL-like 1
hsa-miR-125a-5p	1	0	0	1	1	1	MSI1	musashi homolog 1 (Drosophila)
hsa-miR-125a-5p	1	0	1	0	1	1	GRSF1	G-rich RNA sequence binding factor 1
hsa-miR-125a-5p	1	0	1	1	1	1	FOXK2	forkhead box K2
hsa-miR-125a-5p	1	0	0	1	1	1	IFFO1	intermediate filament family orphan 1
hsa-miR-125a-5p	1	0	1	1	1	1	TMEM161B	transmembrane protein 161B
hsa-miR-125a-5p	1	0	1	0	1	1	GPR107	G protein-coupled receptor 107
hsa-miR-125a-5p	1	0	1	1	1	1	KIAA0247	KIAA0247
hsa-miR-125a-5p	1	0	0	0	0	0	ULK3	unc-51-like kinase 3 (C. elegans)
hsa-miR-125a-5p	1	0	1	1	1	1	YWHAG	tyrosine 3-monooxygenase/tryptophan 5-monooxygenase activation protein, gamma polypeptide
hsa-miR-125a-5p	1	0	1	1	1	1	ORC2	origin recognition complex, subunit 2
hsa-miR-125a-5p	1	0	1	1	0	0	ESYT1	extended synaptotagmin-like protein 1
hsa-miR-125a-5p	1	0	1	0	1	1	SOX11	SRY (sex determining region Y)-box 11
hsa-miR-125a-5p	1	0	0	1	0	0	GLB1L2	galactosidase, beta 1-like 2
hsa-miR-125a-5p	1	0	1	1	1	1	SYVN1	synovial apoptosis inhibitor 1, synoviolin
hsa-miR-125a-5p	1	0	1	0	1	1	FNDC3B	fibronectin type III domain containing 3B
hsa-miR-125a-5p	1	0	1	1	0	0	ST6GALNAC6	ST6 (alpha-N-acetyl-neuraminyl-2,3-beta-galactosyl-1,3)-N-acetylgalactosaminide alpha-2,6-sialyltransferase 6
hsa-miR-125a-5p	1	0	0	1	1	1	LIPA	lipase A, lysosomal acid, cholesterol esterase
hsa-miR-125a-5p	1	0	1	1	1	1	MTUS1	microtubule associated tumor suppressor 1
hsa-miR-125a-5p	1	0	0	1	1	1	C1orf210	chromosome 1 open reading frame 210
hsa-miR-125a-5p	1	0	1	0	1	1	DICER1	dicer 1, ribonuclease type III
hsa-miR-125a-5p	1	0	1	1	1	1	NUMBL	numb homolog (Drosophila)-like
hsa-miR-125a-5p	1	0	1	1	1	1	OVOL1	ovo-like 1(Drosophila)
hsa-miR-125a-5p	1	0	1	1	1	1	GCNT1	glucosaminyl (N-acetyl) transferase 1, core 2
hsa-miR-125a-5p	1	0	1	1	1	1	GALNT14	UDP-N-acetyl-alpha-D-galactosamine:polypeptide N-acetylgalactosaminyltransferase 14 (GalNAc-T14)
hsa-miR-125a-5p	1	0	1	1	1	1	TMBIM6	transmembrane BAX inhibitor motif containing 6
hsa-miR-125a-5p	1	0	1	1	0	0	ATP13A3	ATPase type 13A3
hsa-miR-125a-5p	1	0	1	1	1	1	ZBTB7A	zinc finger and BTB domain containing 7A
hsa-miR-125a-5p	1	0	1	1	1	1	C6orf47	chromosome 6 open reading frame 47
hsa-miR-125a-5p	1	0	1	1	1	1	MTF1	metal-regulatory transcription factor 1
hsa-miR-125a-5p	1	0	1	0	1	1	CCDC71L	coiled-coil domain containing 71-like
hsa-miR-125a-5p	1	0	1	1	1	1	LUZP1	leucine zipper protein 1
hsa-miR-125a-5p	1	0	1	1	1	1	THEMIS2	thymocyte selection associated family member 2
hsa-miR-125a-5p	1	0	1	0	1	1	TNFAIP3	tumor necrosis factor, alpha-induced protein 3
hsa-miR-125a-5p	1	0	1	0	1	1	ESRRG	estrogen-related receptor gamma
hsa-miR-125a-5p	1	0	1	0	1	1	KLF3	Kruppel-like factor 3 (basic)
hsa-miR-125a-5p	1	0	1	1	1	1	NIN	ninein (GSK3B interacting protein)
hsa-miR-125a-5p	1	0	1	0	1	1	FLJ33360	FLJ33360 protein
hsa-miR-125a-5p	1	0	1	1	0	0	WIZ	widely interspaced zinc finger motifs
hsa-miR-125a-5p	1	0	1	1	1	1	ELOVL6	ELOVL fatty acid elongase 6
hsa-miR-125a-5p	1	0	1	1	1	1	GLS	glutaminase
hsa-miR-125a-5p	1	0	1	0	1	1	DCP1A	DCP1 decapping enzyme homolog A (S. cerevisiae)
hsa-miR-125a-5p	1	0	1	0	1	1	CLEC16A	C-type lectin domain family 16, member A
hsa-miR-125a-5p	1	0	1	1	1	1	ARID3B	AT rich interactive domain 3B (BRIGHT-like)
hsa-miR-125a-5p	1	0	1	1	1	1	PHYHIP	phytanoyl-CoA 2-hydroxylase interacting protein
hsa-miR-125a-5p	1	0	1	0	1	1	FAM116A	family with sequence similarity 116, member A
hsa-miR-125a-5p	1	0	1	1	1	1	TMCC2	transmembrane and coiled-coil domain family 2
hsa-miR-125a-5p	1	0	1	0	1	1	TRAPPC6B	trafficking protein particle complex 6B
hsa-miR-125a-5p	1	0	1	1	1	1	ACHE	acetylcholinesterase
hsa-miR-125a-5p	1	0	1	0	1	1	SCD	stearoyl-CoA desaturase (delta-9-desaturase)
hsa-miR-125a-5p	1	0	1	1	0	0	ANKRD13B	ankyrin repeat domain 13B
hsa-miR-125a-5p	1	0	1	1	1	1	PPT1	palmitoyl-protein thioesterase 1
hsa-miR-125a-5p	1	0	1	1	1	1	SWSAP1	SWIM-type zinc finger 7 associated protein 1
hsa-miR-125a-5p	1	0	1	1	1	1	BCAT1	branched chain amino-acid transaminase 1, cytosolic
hsa-miR-125a-5p	1	0	1	1	1	1	TMEM229B	transmembrane protein 229B
hsa-miR-125a-5p	1	0	0	1	0	0	NBEAL2	neurobeachin-like 2
hsa-miR-125a-5p	1	0	1	1	1	1	DPF2	D4, zinc and double PHD fingers family 2
hsa-miR-125a-5p	1	0	1	1	1	1	TMEM26	transmembrane protein 26
hsa-miR-125a-5p	1	0	1	1	1	1	TDG	thymine-DNA glycosylase
hsa-miR-125a-5p	1	0	1	1	1	1	PARM1	prostate androgen-regulated mucin-like protein 1
hsa-miR-125a-5p	1	0	1	1	1	1	ITGA9	integrin, alpha 9
hsa-miR-125a-5p	1	0	1	0	1	1	SREK1IP1	SREK1-interacting protein 1
hsa-miR-125a-5p	1	0	1	1	1	1	TMEM135	transmembrane protein 135
hsa-miR-125a-5p	1	0	1	1	0	0	NCKAP5L	NCK-associated protein 5-like
hsa-miR-125a-5p	1	0	1	1	1	1	B4GALT6	UDP-Gal:betaGlcNAc beta 1,4- galactosyltransferase, polypeptide 6
hsa-miR-125a-5p	1	0	1	1	1	1	CELSR2	cadherin, EGF LAG seven-pass G-type receptor 2 (flamingo homolog, Drosophila)
hsa-miR-125a-5p	1	0	1	0	0	0	ZNRF3	zinc and ring finger 3
hsa-miR-125a-5p	1	0	0	1	0	0	TSTA3	tissue specific transplantation antigen P35B
hsa-miR-125a-5p	1	0	1	1	0	0	HINFP	histone H4 transcription factor
hsa-miR-125a-5p	1	0	1	1	1	1	RAB3D	RAB3D, member RAS oncogene family
hsa-miR-125a-5p	1	0	1	1	1	1	KCNA1	potassium voltage-gated channel, shaker-related subfamily, member 1 (episodic ataxia with myokymia)
hsa-miR-125a-5p	1	0	1	0	1	1	AKAP13	A kinase (PRKA) anchor protein 13
hsa-miR-125a-5p	1	0	1	1	1	1	EPB41	erythrocyte membrane protein band 4.1 (elliptocytosis 1, RH-linked)
hsa-miR-125a-5p	1	0	1	1	1	1	FAM135B	family with sequence similarity 135, member B
hsa-miR-125a-5p	1	0	1	0	1	1	EIF2C2	eukaryotic translation initiation factor 2C, 2
hsa-miR-125a-5p	1	0	1	0	1	1	EDEM1	ER degradation enhancer, mannosidase alpha-like 1
hsa-miR-125a-5p	1	0	1	0	1	1	GGA2	golgi-associated, gamma adaptin ear containing, ARF binding protein 2
hsa-miR-125a-5p	1	0	1	1	1	1	MIB1	mindbomb E3 ubiquitin protein ligase 1
hsa-miR-125a-5p	1	0	1	1	0	0	SNX18	sorting nexin 18
hsa-miR-125a-5p	1	0	1	1	1	1	RAB22A	RAB22A, member RAS oncogene family
hsa-miR-125a-5p	1	0	1	0	1	1	TMEM194A	transmembrane protein 194A
hsa-miR-125a-5p	1	0	1	1	1	1	BAK1	BCL2-antagonist/killer 1
hsa-miR-125a-5p	1	0	1	1	1	1	PAPOLA	poly(A) polymerase alpha
hsa-miR-125a-5p	1	0	0	1	1	1	SCARB1	scavenger receptor class B, member 1
hsa-miR-125a-5p	1	0	1	0	1	1	FLVCR2	feline leukemia virus subgroup C cellular receptor family, member 2
hsa-miR-125a-5p	1	0	1	0	1	1	CNNM1	cyclin M1
hsa-miR-125a-5p	1	0	1	0	1	1	UVRAG	UV radiation resistance associated gene
hsa-miR-125a-5p	1	0	0	1	0	0	ARHGEF1	Rho guanine nucleotide exchange factor (GEF) 1
hsa-miR-125a-5p	1	0	1	1	1	1	BIN2	bridging integrator 2
hsa-miR-125a-5p	1	0	1	1	0	0	LOXL1	lysyl oxidase-like 1
hsa-miR-125a-5p	1	0	1	1	0	0	INO80D	INO80 complex subunit D
hsa-miR-125a-5p	1	0	1	1	1	1	TP53INP1	tumor protein p53 inducible nuclear protein 1
hsa-miR-125a-5p	1	0	0	1	0	0	RABEP2	rabaptin, RAB GTPase binding effector protein 2
hsa-miR-125a-5p	1	0	1	1	1	1	TRIAP1	TP53 regulated inhibitor of apoptosis 1
hsa-miR-125a-5p	1	0	1	1	1	1	NEU1	sialidase 1 (lysosomal sialidase)
hsa-miR-125a-5p	1	0	0	1	1	1	PGP	phosphoglycolate phosphatase
hsa-miR-125a-5p	1	0	1	0	1	1	PRKAA2	protein kinase, AMP-activated, alpha 2 catalytic subunit
hsa-miR-125a-5p	1	0	1	1	1	1	ZKSCAN5	zinc finger with KRAB and SCAN domains 5
hsa-miR-125a-5p	1	0	1	1	1	1	SMG1	smg-1 homolog, phosphatidylinositol 3-kinase-related kinase (C. elegans)
hsa-miR-125a-5p	1	0	1	1	1	1	ZBTB38	zinc finger and BTB domain containing 38
hsa-miR-125a-5p	1	0	1	1	1	1	BAZ2A	bromodomain adjacent to zinc finger domain, 2A
hsa-miR-125a-5p	1	0	0	1	1	1	CYP24A1	cytochrome P450, family 24, subfamily A, polypeptide 1
hsa-miR-125a-5p	1	0	1	1	1	1	CDH5	cadherin 5, type 2 (vascular endothelium)
hsa-miR-125a-5p	1	0	1	0	1	1	CDK19	cyclin-dependent kinase 19
hsa-miR-125a-5p	1	0	1	1	1	1	PDPR	pyruvate dehydrogenase phosphatase regulatory subunit
hsa-miR-125a-5p	1	0	1	1	0	0	TSEN54	tRNA splicing endonuclease 54 homolog (S. cerevisiae)
hsa-miR-125a-5p	1	0	1	1	1	1	PPP1R12B	protein phosphatase 1, regulatory subunit 12B
hsa-miR-125a-5p	1	0	0	1	1	1	VDR	vitamin D (1,25- dihydroxyvitamin D3) receptor
hsa-miR-125a-5p	1	0	1	1	1	1	CDK16	cyclin-dependent kinase 16
hsa-miR-125a-5p	1	0	1	1	1	1	SARM1	sterile alpha and TIR motif containing 1
hsa-miR-125a-5p	1	1	1	1	1	1	TRIM71	tripartite motif containing 71, E3 ubiquitin protein ligase
hsa-miR-125a-5p	1	0	1	1	1	1	KCNJ12	potassium inwardly-rectifying channel, subfamily J, member 12
hsa-miR-125a-5p	1	0	1	1	1	1	SNX27	sorting nexin family member 27
hsa-miR-125a-5p	1	0	1	0	1	1	RHOBTB2	Rho-related BTB domain containing 2
hsa-miR-125a-5p	1	0	0	1	1	1	C19orf54	chromosome 19 open reading frame 54
hsa-miR-125a-5p	1	0	1	1	1	1	FLOT2	flotillin 2
hsa-miR-125a-5p	1	0	1	0	0	0	RNF40	ring finger protein 40, E3 ubiquitin protein ligase
hsa-miR-125a-5p	1	0	1	0	1	1	LIN28A	lin-28 homolog A (C. elegans)
hsa-miR-125a-5p	1	0	1	1	0	0	KIAA0556	KIAA0556
hsa-miR-125a-5p	1	0	1	1	1	1	KLHL6	kelch-like 6 (Drosophila)
hsa-miR-125a-5p	1	0	1	1	1	1	RBM7	RNA binding motif protein 7
hsa-miR-125a-5p	1	0	1	1	1	1	RNF44	ring finger protein 44
hsa-miR-125a-5p	1	0	1	1	0	0	BMPR1B	bone morphogenetic protein receptor, type IB
hsa-miR-125a-5p	1	0	1	0	1	1	MAPKAPK2	mitogen-activated protein kinase-activated protein kinase 2
hsa-miR-125a-5p	1	0	1	0	1	1	KSR2	kinase suppressor of ras 2
hsa-miR-125a-5p	1	0	1	1	1	1	ANKRD50	ankyrin repeat domain 50
hsa-miR-125a-5p	1	0	1	0	1	1	BACH1	BTB and CNC homology 1, basic leucine zipper transcription factor 1
hsa-miR-125a-5p	1	0	1	0	1	1	LGI2	leucine-rich repeat LGI family, member 2
hsa-miR-125a-5p	1	0	1	1	1	1	FAM129B	family with sequence similarity 129, member B
hsa-miR-125a-5p	1	0	1	0	1	1	IL6R	interleukin 6 receptor
hsa-miR-125a-5p	1	0	1	1	1	1	CEP85	centrosomal protein 85kDa
hsa-miR-125a-5p	1	0	1	1	1	1	PCTP	phosphatidylcholine transfer protein
hsa-miR-125a-5p	1	0	1	1	1	1	VTCN1	V-set domain containing T cell activation inhibitor 1
hsa-miR-125a-5p	1	0	1	0	1	1	IP6K1	inositol hexakisphosphate kinase 1
hsa-miR-125a-5p	1	0	1	1	1	1	PRRC1	proline-rich coiled-coil 1
hsa-miR-125a-5p	1	0	1	1	1	1	GPC4	glypican 4
hsa-miR-125a-5p	1	0	1	1	1	1	LIMD2	LIM domain containing 2
hsa-miR-125a-5p	1	0	1	0	1	1	MDGA1	MAM domain containing glycosylphosphatidylinositol anchor 1
hsa-miR-125a-5p	1	0	1	1	1	1	WARS	tryptophanyl-tRNA synthetase
hsa-miR-125a-5p	1	0	1	1	1	1	M6PR	mannose-6-phosphate receptor (cation dependent)
hsa-miR-125a-5p	1	0	1	1	1	1	FUT1	fucosyltransferase 1 (galactoside 2-alpha-L-fucosyltransferase, H blood group)
hsa-miR-125a-5p	1	0	1	1	1	1	FAM213A	family with sequence similarity 213, member A
hsa-miR-125a-5p	1	0	1	0	1	1	RNF144A	ring finger protein 144A
hsa-miR-125a-5p	1	0	1	1	1	1	TAZ	tafazzin
hsa-miR-125a-5p	1	0	1	0	1	1	FUT4	fucosyltransferase 4 (alpha (1,3) fucosyltransferase, myeloid-specific)
hsa-miR-125a-5p	1	0	1	0	1	1	SEL1L	sel-1 suppressor of lin-12-like (C. elegans)
hsa-miR-125a-5p	1	0	0	1	1	1	MFN1	mitofusin 1
hsa-miR-125a-5p	1	0	1	1	1	1	ADRBK1	adrenergic, beta, receptor kinase 1
hsa-miR-125a-5p	1	0	1	1	1	1	ENPP1	ectonucleotide pyrophosphatase/phosphodiesterase 1
hsa-miR-125a-5p	1	0	1	1	1	1	GRHL1	grainyhead-like 1 (Drosophila)
hsa-miR-125a-5p	1	0	1	1	1	1	TRIB2	tribbles homolog 2 (Drosophila)
hsa-miR-125a-5p	1	0	1	1	0	0	VPS37B	vacuolar protein sorting 37 homolog B (S. cerevisiae)
hsa-miR-125a-5p	1	0	1	0	1	1	LIN28B	lin-28 homolog B (C. elegans)
hsa-miR-125a-5p	1	0	1	1	1	1	RND2	Rho family GTPase 2
hsa-miR-125a-5p	1	0	1	1	1	1	TLK2	tousled-like kinase 2
hsa-miR-125a-5p	1	0	1	1	1	1	MAMDC2	MAM domain containing 2
hsa-miR-125a-5p	1	0	1	1	1	1	COPZ1	coatomer protein complex, subunit zeta 1
hsa-miR-125a-5p	1	0	0	1	0	0	FAM92B	family with sequence similarity 92, member B
hsa-miR-125a-5p	1	0	1	1	1	1	MAPK14	mitogen-activated protein kinase 14
hsa-miR-125a-5p	1	0	1	1	1	1	VANGL1	vang-like 1 (van gogh, Drosophila)
hsa-miR-125a-5p	1	0	1	0	1	1	FAM73A	family with sequence similarity 73, member A
hsa-miR-125a-5p	1	0	1	0	1	1	ALPK3	alpha-kinase 3
hsa-miR-125a-5p	1	0	1	1	1	1	CD300LF	CD300 molecule-like family member f
hsa-miR-125a-5p	1	0	1	1	1	1	KCNIP3	Kv channel interacting protein 3, calsenilin
hsa-miR-125a-5p	1	0	1	1	0	0	AKT1S1	AKT1 substrate 1 (proline-rich)
hsa-miR-125a-5p	1	0	1	1	1	1	SMAD4	SMAD family member 4
hsa-miR-125a-5p	1	0	1	1	1	1	SLC25A15	solute carrier family 25 (mitochondrial carrier; ornithine transporter) member 15
hsa-miR-125a-5p	1	0	1	1	1	1	RASGEF1A	RasGEF domain family, member 1A
hsa-miR-125a-5p	1	0	1	1	1	1	GOLGA5	golgin A5
hsa-miR-125a-5p	1	0	1	1	1	1	CCDC149	coiled-coil domain containing 149
hsa-miR-125a-5p	1	0	1	1	1	1	BRWD1	bromodomain and WD repeat domain containing 1
hsa-miR-125a-5p	1	0	1	0	1	1	ATP10D	ATPase, class V, type 10D
hsa-miR-125a-5p	1	0	0	1	0	0	MED15	mediator complex subunit 15
hsa-miR-125a-5p	1	0	1	1	0	0	PPP1CA	protein phosphatase 1, catalytic subunit, alpha isozyme
hsa-miR-125a-5p	1	0	0	1	0	0	C7orf26	chromosome 7 open reading frame 26
hsa-miR-125a-5p	1	0	1	1	1	1	HCN4	hyperpolarization activated cyclic nucleotide-gated potassium channel 4
hsa-miR-125a-5p	1	0	1	1	1	1	NAIF1	nuclear apoptosis inducing factor 1
hsa-miR-125a-5p	1	0	1	1	0	0	SRRM3	serine/arginine repetitive matrix 3
hsa-miR-125a-5p	1	0	1	1	0	0	ATG4D	autophagy related 4D, cysteine peptidase
hsa-miR-125a-5p	1	0	1	1	1	1	NEO1	neogenin 1
hsa-miR-125a-5p	1	0	1	1	1	1	MAF	v-maf musculoaponeurotic fibrosarcoma oncogene homolog (avian)
hsa-miR-125a-5p	1	0	1	1	1	1	RAB6B	RAB6B, member RAS oncogene family
hsa-miR-125a-5p	1	0	1	1	0	0	KIAA1644	KIAA1644
hsa-miR-125a-5p	1	0	1	1	1	1	BBC3	BCL2 binding component 3
hsa-miR-125a-5p	1	0	1	1	1	1	PHOX2B	paired-like homeobox 2b
hsa-miR-125a-5p	1	0	1	1	1	1	NDRG3	NDRG family member 3
hsa-miR-125a-5p	1	0	1	1	0	0	SMCR8	Smith-Magenis syndrome chromosome region, candidate 8
hsa-miR-125a-5p	1	0	1	1	1	1	SUN1	Sad1 and UNC84 domain containing 1
hsa-miR-125a-5p	1	0	1	1	0	0	DCTN1	dynactin 1
hsa-miR-125a-5p	1	0	1	0	1	1	MSRB3	methionine sulfoxide reductase B3
hsa-miR-125a-5p	1	0	1	1	1	1	RNF121	ring finger protein 121
hsa-miR-125a-5p	1	0	1	0	1	1	C14orf43	chromosome 14 open reading frame 43
hsa-miR-125a-5p	1	0	1	0	1	1	HMGB3	high mobility group box 3
hsa-miR-125a-5p	1	0	1	1	1	1	FGFR1	fibroblast growth factor receptor 1
hsa-miR-125a-5p	1	0	1	1	1	1	ETS1	v-ets erythroblastosis virus E26 oncogene homolog 1 (avian)
hsa-miR-125a-5p	1	0	1	0	1	1	CBX7	chromobox homolog 7
hsa-miR-125a-5p	1	0	1	1	1	1	TSPAN14	tetraspanin 14
hsa-miR-125a-5p	1	0	1	0	1	1	ANKH	ankylosis, progressive homolog (mouse)
hsa-miR-125a-5p	1	0	1	1	1	1	DYNLT3	dynein, light chain, Tctex-type 3
hsa-miR-125a-5p	1	0	1	1	1	1	DUS1L	dihydrouridine synthase 1-like (S. cerevisiae)
hsa-miR-125a-5p	1	0	1	1	1	1	AGGF1	angiogenic factor with G patch and FHA domains 1
hsa-miR-125a-5p	1	0	1	1	1	1	TMPRSS13	transmembrane protease, serine 13
hsa-miR-125a-5p	1	0	1	0	1	1	EAF1	ELL associated factor 1
hsa-miR-125a-5p	1	0	1	1	1	1	MYT1	myelin transcription factor 1
hsa-miR-125a-5p	1	0	1	0	1	1	PAFAH1B1	platelet-activating factor acetylhydrolase 1b, regulatory subunit 1 (45kDa)
hsa-miR-125a-5p	1	0	1	1	1	1	IGSF11	immunoglobulin superfamily, member 11
hsa-miR-125a-5p	1	0	1	1	1	1	PELI2	pellino E3 ubiquitin protein ligase family member 2
hsa-miR-125a-5p	1	0	1	1	1	1	SH3BP5L	SH3-binding domain protein 5-like
hsa-miR-125a-5p	1	0	1	1	1	1	IKZF4	IKAROS family zinc finger 4 (Eos)
hsa-miR-125a-5p	1	0	1	1	1	1	SLC35A4	solute carrier family 35, member A4
hsa-miR-125a-5p	1	0	1	1	1	1	VAX1	ventral anterior homeobox 1
hsa-miR-125a-5p	1	0	0	1	0	0	CAMSAP3	calmodulin regulated spectrin-associated protein family, member 3
hsa-miR-125a-5p	1	0	0	1	0	0	SAMD10	sterile alpha motif domain containing 10
hsa-miR-125a-5p	1	0	1	1	0	0	PSMD7	proteasome (prosome, macropain) 26S subunit, non-ATPase, 7
hsa-miR-125a-5p	1	0	1	0	1	1	YOD1	YOD1 OTU deubiquinating enzyme 1 homolog (S. cerevisiae)
hsa-miR-125a-5p	1	0	1	0	1	1	SORT1	sortilin 1
hsa-miR-125a-5p	1	0	1	1	1	1	FAM118A	family with sequence similarity 118, member A
hsa-miR-125a-5p	1	0	1	0	1	1	ST6GAL1	ST6 beta-galactosamide alpha-2,6-sialyltranferase 1
hsa-miR-125a-5p	1	0	1	0	1	1	RAPGEF5	Rap guanine nucleotide exchange factor (GEF) 5
hsa-miR-125a-5p	1	0	1	1	1	1	LNPEP	leucyl/cystinyl aminopeptidase
hsa-miR-125a-5p	1	0	1	1	1	1	HCN1	hyperpolarization activated cyclic nucleotide-gated potassium channel 1
hsa-miR-125a-5p	1	0	1	1	1	1	KDM4B	lysine (K)-specific demethylase 4B
hsa-miR-125a-5p	1	0	1	1	1	1	KCNH4	potassium voltage-gated channel, subfamily H (eag-related), member 4
hsa-miR-125a-5p	1	0	1	1	1	1	SGSM2	small G protein signaling modulator 2
hsa-miR-125a-5p	1	0	1	1	1	1	GPATCH8	G patch domain containing 8
hsa-miR-125a-5p	1	0	0	1	0	0	ECE1	endothelin converting enzyme 1
hsa-miR-125a-5p	1	0	1	1	1	1	ABCC5	ATP-binding cassette, sub-family C (CFTR/MRP), member 5
hsa-miR-125a-5p	1	0	1	1	1	1	APC	adenomatous polyposis coli
hsa-miR-125a-5p	1	0	1	1	0	0	RPS6KA1	ribosomal protein S6 kinase, 90kDa, polypeptide 1
hsa-miR-125a-5p	1	0	1	0	1	1	CPM	carboxypeptidase M
hsa-miR-125a-5p	1	0	1	1	1	1	FRAS1	Fraser syndrome 1
hsa-miR-125a-5p	1	0	1	0	1	1	ACVR1C	activin A receptor, type IC
hsa-miR-125a-5p	1	0	1	0	1	1	DIRAS1	DIRAS family, GTP-binding RAS-like 1
hsa-miR-125a-5p	1	0	1	1	1	1	PPP2R1B	protein phosphatase 2, regulatory subunit A, beta
hsa-miR-125a-5p	1	0	1	1	0	0	BRSK2	BR serine/threonine kinase 2
hsa-miR-125a-5p	1	0	0	1	1	1	SLC1A5	solute carrier family 1 (neutral amino acid transporter), member 5
hsa-miR-125a-5p	1	0	1	0	1	1	LURAP1L	leucine rich adaptor protein 1-like
hsa-miR-125a-5p	1	0	1	1	0	0	ENTPD1	ectonucleoside triphosphate diphosphohydrolase 1
hsa-miR-125a-5p	1	0	1	1	1	1	ZNF618	zinc finger protein 618
hsa-miR-125a-5p	1	0	1	1	1	1	HOXB3	homeobox B3
hsa-miR-125a-5p	1	0	1	1	1	1	AHRR	aryl-hydrocarbon receptor repressor
hsa-miR-125a-5p	1	0	1	1	1	1	DAGLA	diacylglycerol lipase, alpha
hsa-miR-125a-5p	1	0	1	1	1	1	PLAGL2	pleiomorphic adenoma gene-like 2
hsa-miR-125a-5p	1	0	1	1	1	1	KIAA1467	KIAA1467
hsa-miR-125a-5p	1	0	1	1	1	1	ZFYVE1	zinc finger, FYVE domain containing 1
hsa-miR-125a-5p	1	0	1	1	1	1	COL4A3	collagen, type IV, alpha 3 (Goodpasture antigen)
hsa-miR-125a-5p	1	0	1	1	1	1	MASP1	mannan-binding lectin serine peptidase 1 (C4/C2 activating component of Ra-reactive factor)
hsa-miR-125a-5p	1	0	0	1	0	0	LRFN2	leucine rich repeat and fibronectin type III domain containing 2
hsa-miR-125a-5p	1	0	1	1	0	0	CGREF1	cell growth regulator with EF-hand domain 1
hsa-miR-125a-5p	1	0	0	0	1	1	ZNF792	zinc finger protein 792
hsa-miR-125a-5p	1	0	1	1	0	0	TMEM198	transmembrane protein 198
hsa-miR-125a-5p	1	0	1	1	1	1	TBX4	T-box 4
hsa-miR-125a-5p	1	0	1	1	1	1	FAM53C	family with sequence similarity 53, member C
hsa-miR-125a-5p	1	0	0	1	0	0	PSMB8	proteasome (prosome, macropain) subunit, beta type, 8 (large multifunctional peptidase 7)
hsa-miR-125a-5p	1	0	1	1	1	1	MAP3K11	mitogen-activated protein kinase kinase kinase 11
hsa-miR-125a-5p	1	0	1	1	1	1	SUV420H2	suppressor of variegation 4-20 homolog 2 (Drosophila)
hsa-miR-125a-5p	1	0	1	1	1	1	MEF2D	myocyte enhancer factor 2D
hsa-miR-125a-5p	1	0	1	0	1	1	MYO18A	myosin XVIIIA
hsa-miR-125a-5p	1	0	1	1	1	1	DNAL4	dynein, axonemal, light chain 4
hsa-miR-125a-5p	1	0	1	1	0	0	MAPK12	mitogen-activated protein kinase 12
hsa-miR-125a-5p	1	0	1	0	1	1	TMEM123	transmembrane protein 123
hsa-miR-125a-5p	1	0	1	1	1	1	NUP210	nucleoporin 210kDa
hsa-miR-125a-5p	1	0	1	1	1	1	FURIN	furin (paired basic amino acid cleaving enzyme)
hsa-miR-125a-5p	1	0	1	0	1	1	DIS3	DIS3 mitotic control homolog (S. cerevisiae)
hsa-miR-125a-5p	1	0	1	1	1	1	DAZAP2	DAZ associated protein 2
hsa-miR-125a-5p	1	0	1	1	1	1	ENTPD4	ectonucleoside triphosphate diphosphohydrolase 4
hsa-miR-125a-5p	1	0	1	1	1	1	BAP1	BRCA1 associated protein-1 (ubiquitin carboxy-terminal hydrolase)
hsa-miR-125a-5p	1	0	1	0	1	1	SGPL1	sphingosine-1-phosphate lyase 1
hsa-miR-125a-5p	1	0	1	1	1	1	SLC23A2	solute carrier family 23 (nucleobase transporters), member 2
hsa-miR-125a-5p	1	0	1	1	0	0	PEAK1	NKF3 kinase family member
hsa-miR-125a-5p	1	0	1	0	1	1	IRF4	interferon regulatory factor 4
hsa-miR-125a-5p	1	0	1	1	1	1	VPS4B	vacuolar protein sorting 4 homolog B (S. cerevisiae)
hsa-miR-125a-5p	1	0	1	1	0	0	BCL2L12	BCL2-like 12 (proline rich)
hsa-miR-125a-5p	1	0	1	1	1	1	TMED9	transmembrane emp24 protein transport domain containing 9
hsa-miR-125a-5p	1	0	1	0	1	1	BCL2	B-cell CLL/lymphoma 2
hsa-miR-125a-5p	1	0	1	1	0	0	TET3	tet methylcytosine dioxygenase 3
hsa-miR-125a-5p	1	0	1	1	1	1	SEMA4D	sema domain, immunoglobulin domain (Ig), transmembrane domain (TM) and short cytoplasmic domain, (semaphorin) 4D
hsa-miR-125a-5p	1	0	1	1	1	1	STARD13	StAR-related lipid transfer (START) domain containing 13
hsa-miR-125a-5p	1	0	1	0	1	1	RNF144B	ring finger protein 144B
hsa-miR-125a-5p	1	0	1	1	1	1	RIMKLA	ribosomal modification protein rimK-like family member A
hsa-miR-125a-5p	1	0	1	1	1	1	SH3TC2	SH3 domain and tetratricopeptide repeats 2
hsa-miR-125a-5p	1	0	1	1	1	1	RFXANK	regulatory factor X-associated ankyrin-containing protein
hsa-miR-125a-5p	1	0	1	0	1	1	CDC42SE1	CDC42 small effector 1
hsa-miR-125a-5p	1	0	1	0	1	1	VCPIP1	valosin containing protein (p97)/p47 complex interacting protein 1
hsa-miR-125a-5p	1	0	1	0	1	1	BAGE2	B melanoma antigen family, member 2
hsa-miR-125a-5p	1	0	1	1	0	0	TIMM17B	translocase of inner mitochondrial membrane 17 homolog B (yeast)
hsa-miR-125a-5p	1	0	1	1	1	1	TBC1D1	TBC1 (tre-2/USP6, BUB2, cdc16) domain family, member 1
hsa-miR-125a-5p	1	0	1	1	1	1	FAM134A	family with sequence similarity 134, member A
hsa-miR-125a-5p	1	0	1	0	1	1	CCNJ	cyclin J
hsa-miR-125a-5p	1	0	1	1	1	1	TOMM40	translocase of outer mitochondrial membrane 40 homolog (yeast)
hsa-miR-125a-5p	1	0	1	0	1	1	SMURF1	SMAD specific E3 ubiquitin protein ligase 1
hsa-miR-125a-5p	1	0	1	1	1	1	USP45	ubiquitin specific peptidase 45
hsa-miR-125a-5p	1	0	1	1	1	1	MAPRE2	microtubule-associated protein, RP/EB family, member 2
hsa-miR-125a-5p	1	0	1	1	1	1	DNAJC14	DnaJ (Hsp40) homolog, subfamily C, member 14
hsa-miR-125a-5p	1	0	1	1	1	1	RFX5	regulatory factor X, 5 (influences HLA class II expression)
hsa-miR-125a-5p	1	0	1	0	1	1	YES1	v-yes-1 Yamaguchi sarcoma viral oncogene homolog 1
hsa-miR-125a-5p	1	0	1	0	0	0	DTX4	deltex homolog 4 (Drosophila)
hsa-miR-125a-5p	1	0	1	0	1	1	LACTB	lactamase, beta
hsa-miR-125a-5p	1	0	1	1	0	0	FAM83F	family with sequence similarity 83, member F
hsa-miR-125a-5p	1	0	0	0	0	0	TMEM170B	transmembrane protein 170B
hsa-miR-125a-5p	1	0	1	1	1	1	NXF1	nuclear RNA export factor 1
hsa-miR-125a-5p	1	0	1	1	1	1	LPP	LIM domain containing preferred translocation partner in lipoma
hsa-miR-125a-5p	1	0	0	1	1	1	EPHA10	EPH receptor A10
hsa-miR-125a-5p	1	0	1	1	1	1	ADAM9	ADAM metallopeptidase domain 9
hsa-miR-125a-5p	1	0	1	0	1	1	RAB8B	RAB8B, member RAS oncogene family
hsa-miR-125a-5p	1	0	1	1	1	1	PI4K2B	phosphatidylinositol 4-kinase type 2 beta
hsa-miR-125a-5p	1	0	1	1	1	1	LCLAT1	lysocardiolipin acyltransferase 1
hsa-miR-125a-5p	1	0	1	0	1	1	BMF	Bcl2 modifying factor
hsa-miR-125a-5p	1	0	1	1	0	0	PHF23	PHD finger protein 23
hsa-miR-125a-5p	1	0	1	1	1	1	IST1	increased sodium tolerance 1 homolog (yeast)
hsa-miR-125a-5p	1	0	1	0	1	1	B4GALT1	UDP-Gal:betaGlcNAc beta 1,4- galactosyltransferase, polypeptide 1
hsa-miR-125a-5p	1	0	0	1	0	0	TMEM180	transmembrane protein 180
hsa-miR-125a-5p	1	0	1	1	1	1	KIAA1244	KIAA1244
hsa-miR-125a-5p	1	0	1	1	0	0	C17orf59	chromosome 17 open reading frame 59
hsa-miR-125a-5p	1	0	1	1	1	1	TSTD2	thiosulfate sulfurtransferase (rhodanese)-like domain containing 2
hsa-miR-125a-5p	1	0	1	0	1	1	SOCS4	suppressor of cytokine signaling 4
hsa-miR-125a-5p	1	0	1	1	0	0	ATOH8	atonal homolog 8 (Drosophila)
hsa-miR-125a-5p	1	0	1	1	1	1	HOMEZ	homeobox and leucine zipper encoding
hsa-miR-125a-5p	1	0	1	1	1	1	SH2B3	SH2B adaptor protein 3
hsa-miR-125a-5p	1	0	0	0	0	0	TLE3	transducin-like enhancer of split 3 (E(sp1) homolog, Drosophila)
hsa-miR-125a-5p	1	0	1	1	0	0	NKIRAS2	NFKB inhibitor interacting Ras-like 2
hsa-miR-125a-5p	1	0	1	0	1	1	NUP50	nucleoporin 50kDa
hsa-miR-125a-5p	1	0	1	1	1	1	GTPBP2	GTP binding protein 2
hsa-miR-125a-5p	1	0	1	1	0	0	HOXD9	homeobox D9
hsa-miR-125a-5p	1	0	1	1	1	1	XKRX	XK, Kell blood group complex subunit-related, X-linked
hsa-miR-125a-5p	1	0	1	0	1	1	CORO2A	coronin, actin binding protein, 2A
hsa-miR-125a-5p	1	0	1	1	1	1	BCL2L2	BCL2-like 2
hsa-miR-125a-5p	1	0	1	1	0	0	MEGF8	multiple EGF-like-domains 8
hsa-miR-125a-5p	1	0	1	1	1	1	TMEM132E	transmembrane protein 132E
hsa-miR-125a-5p	1	0	1	1	1	1	SLC39A9	solute carrier family 39 (zinc transporter), member 9
hsa-miR-125a-5p	1	0	1	1	1	1	CGN	cingulin
hsa-miR-125a-5p	1	0	1	1	1	1	LIFR	leukemia inhibitory factor receptor alpha
hsa-miR-125a-5p	1	0	1	1	1	1	SLC8A2	solute carrier family 8 (sodium/calcium exchanger), member 2
hsa-miR-125a-5p	1	0	0	1	1	1	STMN3	stathmin-like 3
hsa-miR-125a-5p	1	0	1	1	1	1	NECAB3	N-terminal EF-hand calcium binding protein 3
hsa-miR-125a-5p	1	0	1	1	0	0	PCNX	pecanex homolog (Drosophila)
hsa-miR-125a-5p	1	0	1	1	1	1	KIAA0317	KIAA0317
hsa-miR-125a-5p	1	0	1	1	1	1	DRAM2	DNA-damage regulated autophagy modulator 2
hsa-miR-125a-5p	1	0	1	0	1	1	E2F2	E2F transcription factor 2
hsa-miR-125a-5p	1	0	1	0	1	1	MEGF9	multiple EGF-like-domains 9
hsa-miR-125a-5p	1	0	1	1	1	1	PIP4K2B	phosphatidylinositol-5-phosphate 4-kinase, type II, beta
hsa-miR-125a-5p	1	0	1	0	1	1	STAT3	signal transducer and activator of transcription 3 (acute-phase response factor)
hsa-miR-125a-5p	1	0	1	1	1	1	DPP9	dipeptidyl-peptidase 9
hsa-miR-125a-5p	1	0	1	1	1	1	PTPN18	protein tyrosine phosphatase, non-receptor type 18 (brain-derived)
hsa-miR-125a-5p	1	0	1	1	1	1	SLITRK6	SLIT and NTRK-like family, member 6
hsa-miR-125a-5p	1	0	1	0	0	0	PPME1	protein phosphatase methylesterase 1
hsa-miR-125a-5p	1	0	1	1	1	1	ADAM11	ADAM metallopeptidase domain 11
hsa-miR-125a-5p	1	0	1	1	1	1	ABHD3	abhydrolase domain containing 3
hsa-miR-125a-5p	1	0	1	1	1	1	FAM134C	family with sequence similarity 134, member C
hsa-miR-125a-5p	1	0	1	0	1	1	MXD4	MAX dimerization protein 4
hsa-miR-125a-5p	1	0	1	1	1	1	DUSP6	dual specificity phosphatase 6
hsa-miR-125a-5p	1	0	1	0	1	1	TEF	thyrotrophic embryonic factor
hsa-miR-125a-5p	1	0	1	1	1	1	HCN3	hyperpolarization activated cyclic nucleotide-gated potassium channel 3
hsa-miR-125a-5p	1	0	1	1	0	0	MTUS2	microtubule associated tumor suppressor candidate 2
hsa-miR-125a-5p	1	0	1	1	1	1	ZNF691	zinc finger protein 691
hsa-miR-125a-5p	1	0	1	1	1	1	ATXN3	ataxin 3
hsa-miR-125a-5p	1	0	1	1	1	1	ATP2B3	ATPase, Ca++ transporting, plasma membrane 3
hsa-miR-125a-5p	1	0	1	0	1	1	SLC4A10	solute carrier family 4, sodium bicarbonate transporter, member 10
hsa-miR-125a-5p	1	0	1	1	1	1	MLF2	myeloid leukemia factor 2
hsa-miR-125a-5p	1	0	0	1	0	0	UBL4B	ubiquitin-like 4B
hsa-miR-125a-5p	1	0	1	1	1	1	ADCY1	adenylate cyclase 1 (brain)
hsa-miR-125a-5p	1	0	1	1	1	1	LYPLA2	lysophospholipase II
hsa-miR-125a-5p	1	0	1	0	1	1	ALDH1A3	aldehyde dehydrogenase 1 family, member A3
hsa-miR-125a-5p	1	0	1	1	1	1	ANKRD42	ankyrin repeat domain 42
hsa-miR-125a-5p	1	0	1	1	0	0	TMEM219	transmembrane protein 219
hsa-miR-125a-5p	1	0	0	1	1	1	SLC46A3	solute carrier family 46, member 3
hsa-miR-125a-5p	1	0	1	1	1	1	KLC2	kinesin light chain 2
hsa-miR-125a-5p	1	0	1	0	1	1	TRPS1	trichorhinophalangeal syndrome I
hsa-miR-125a-5p	1	0	1	1	1	1	ANAPC16	anaphase promoting complex subunit 16
hsa-miR-125a-5p	1	0	1	0	1	1	CYTH1	cytohesin 1
hsa-miR-125a-5p	1	0	1	1	1	1	KCNS3	potassium voltage-gated channel, delayed-rectifier, subfamily S, member 3
hsa-miR-125a-5p	1	0	1	1	1	1	ABHD6	abhydrolase domain containing 6
hsa-miR-125a-5p	1	0	1	1	1	1	TAF9B	TAF9B RNA polymerase II, TATA box binding protein (TBP)-associated factor, 31kDa
hsa-miR-125a-5p	1	0	1	1	0	0	TYSND1	trypsin domain containing 1
hsa-miR-125a-5p	1	0	1	1	1	1	FBXW4	F-box and WD repeat domain containing 4
hsa-miR-125a-5p	1	0	1	0	1	1	MAP2K7	mitogen-activated protein kinase kinase 7
hsa-miR-125a-5p	1	0	1	1	1	1	TXNRD1	thioredoxin reductase 1
hsa-miR-125a-5p	1	0	1	1	1	1	SLC4A4	solute carrier family 4, sodium bicarbonate cotransporter, member 4
hsa-miR-125a-5p	1	0	1	0	1	1	CRAMP1L	Crm, cramped-like (Drosophila)
hsa-miR-125a-5p	1	0	1	1	1	1	NEDD9	neural precursor cell expressed, developmentally down-regulated 9
hsa-miR-125a-5p	1	0	1	1	1	1	RUSC2	RUN and SH3 domain containing 2
hsa-miR-125a-5p	1	0	1	0	1	1	ZBTB47	zinc finger and BTB domain containing 47
hsa-miR-125a-5p	1	0	1	1	1	1	TMEM168	transmembrane protein 168
hsa-miR-125a-5p	1	0	1	1	0	0	CACNB3	calcium channel, voltage-dependent, beta 3 subunit
hsa-miR-125a-5p	1	0	1	0	1	1	UBASH3B	ubiquitin associated and SH3 domain containing B
hsa-miR-125a-5p	1	0	1	1	1	1	ELL	elongation factor RNA polymerase II
hsa-miR-125a-5p	1	0	1	0	1	1	EIF1AD	eukaryotic translation initiation factor 1A domain containing
hsa-miR-125a-5p	1	0	1	0	1	1	ETV6	ets variant 6
hsa-miR-125a-5p	1	0	1	1	1	1	OSBPL9	oxysterol binding protein-like 9
hsa-miR-125a-5p	1	0	1	0	1	1	KLHL24	kelch-like 24 (Drosophila)
hsa-miR-125a-5p	1	0	1	1	1	1	MFHAS1	malignant fibrous histiocytoma amplified sequence 1
hsa-miR-125a-5p	1	0	1	1	1	1	HK2	hexokinase 2
hsa-miR-125a-5p	1	0	1	1	1	1	CDC14B	CDC14 cell division cycle 14 homolog B (S. cerevisiae)
hsa-miR-125a-5p	1	0	1	1	1	1	RHOT2	ras homolog family member T2
hsa-miR-125a-5p	1	0	1	1	1	1	C4orf19	chromosome 4 open reading frame 19
hsa-miR-125a-5p	1	0	1	0	0	0	TADA2B	transcriptional adaptor 2B
hsa-miR-125a-5p	1	0	0	0	1	1	BAGE3	B melanoma antigen family, member 3
hsa-miR-125a-5p	1	0	1	1	0	0	ZSWIM5	zinc finger, SWIM-type containing 5
hsa-miR-125a-5p	1	0	1	1	1	1	CXorf23	chromosome X open reading frame 23
hsa-miR-125a-5p	1	0	1	1	1	1	FOXD2	forkhead box D2
hsa-miR-125a-5p	1	0	1	1	1	1	PLAU	plasminogen activator, urokinase
hsa-miR-125a-5p	0	0	1	1	0	0	SIPA1	signal-induced proliferation-associated 1
hsa-miR-125a-5p	1	0	1	0	1	1	PTPRT	protein tyrosine phosphatase, receptor type, T
hsa-miR-125a-5p	1	0	1	1	0	0	SEC14L5	SEC14-like 5 (S. cerevisiae)
hsa-miR-125a-5p	1	0	1	1	1	1	CDC42BPA	CDC42 binding protein kinase alpha (DMPK-like)
hsa-miR-125a-5p	1	0	1	1	1	1	GREB1	growth regulation by estrogen in breast cancer 1
hsa-miR-125a-5p	1	0	1	1	1	1	HIPK1	homeodomain interacting protein kinase 1
hsa-miR-125a-5p	0	0	1	1	0	0	PAN2	PAN2 poly(A) specific ribonuclease subunit homolog (S. cerevisiae)
hsa-miR-125a-5p	1	0	1	1	1	1	ARHGEF15	Rho guanine nucleotide exchange factor (GEF) 15
hsa-miR-125a-5p	1	0	1	1	1	1	SEMA4F	sema domain, immunoglobulin domain (Ig), transmembrane domain (TM) and short cytoplasmic domain, (semaphorin) 4F
hsa-miR-125a-5p	1	0	1	1	1	1	CALCR	calcitonin receptor
hsa-miR-125a-5p	0	0	1	1	1	1	MAN2B2	mannosidase, alpha, class 2B, member 2
hsa-miR-125a-5p	1	0	1	1	1	1	CPEB3	cytoplasmic polyadenylation element binding protein 3
hsa-miR-125a-5p	1	0	1	1	1	1	BAHD1	bromo adjacent homology domain containing 1
hsa-miR-125a-5p	1	0	1	1	1	1	CIT	citron (rho-interacting, serine/threonine kinase 21)
hsa-miR-125a-5p	1	0	1	1	1	1	C11orf9	chromosome 11 open reading frame 9
hsa-miR-125a-5p	0	0	1	1	0	0	FAM149B1	family with sequence similarity 149, member B1
hsa-miR-125a-5p	1	0	1	1	0	0	IGSF9B	immunoglobulin superfamily, member 9B
hsa-miR-125a-5p	0	0	1	0	0	0	MTA3	metastasis associated 1 family, member 3
hsa-miR-125a-5p	1	0	1	1	1	1	PPP6R3	protein phosphatase 6, regulatory subunit 3
hsa-miR-125a-5p	0	0	1	0	1	1	ZSWIM6	zinc finger, SWIM-type containing 6
hsa-miR-125a-5p	1	0	1	0	0	0	TANC2	tetratricopeptide repeat, ankyrin repeat and coiled-coil containing 2
hsa-miR-125a-5p	0	0	1	1	1	1	BHLHB9	basic helix-loop-helix domain containing, class B, 9
hsa-miR-125a-5p	0	0	1	1	1	1	CNTNAP3	contactin associated protein-like 3
hsa-miR-125a-5p	0	0	1	1	1	1	MPP4	membrane protein, palmitoylated 4 (MAGUK p55 subfamily member 4)
hsa-miR-125a-5p	1	0	1	1	1	1	CSRNP1	cysteine-serine-rich nuclear protein 1
hsa-miR-125a-5p	0	0	1	1	0	0	CIRH1A	cirrhosis, autosomal recessive 1A (cirhin)
hsa-miR-125a-5p	1	0	1	0	0	0	RNF169	ring finger protein 169
hsa-miR-125a-5p	1	0	1	0	0	0	ZC3H12C	zinc finger CCCH-type containing 12C
hsa-miR-125a-5p	0	0	1	1	1	1	ACPP	acid phosphatase, prostate
hsa-miR-125a-5p	0	0	1	1	0	0	SSPO	SCO-spondin homolog (Bos taurus)
hsa-miR-125a-5p	1	0	1	1	1	1	KCNMA1	potassium large conductance calcium-activated channel, subfamily M, alpha member 1
hsa-miR-125a-5p	1	0	1	1	1	1	HIF3A	hypoxia inducible factor 3, alpha subunit
hsa-miR-125a-5p	0	0	1	0	0	0	TIFAB	TRAF-interacting protein with forkhead-associated domain, family member B
hsa-miR-125a-5p	1	1	1	1	1	1	BACE1	beta-site APP-cleaving enzyme 1
hsa-miR-125a-5p	0	0	1	1	0	0	PTPRF	protein tyrosine phosphatase, receptor type, F
hsa-miR-125a-5p	1	0	1	1	1	1	NRXN2	neurexin 2
hsa-miR-125a-5p	0	0	1	1	0	0	APH1B	anterior pharynx defective 1 homolog B (C. elegans)
hsa-miR-125a-5p	1	0	1	1	1	1	ADARB1	adenosine deaminase, RNA-specific, B1
hsa-miR-125a-5p	0	0	1	1	0	0	KCNC3	potassium voltage-gated channel, Shaw-related subfamily, member 3
hsa-miR-125a-5p	1	0	1	1	1	1	PML	promyelocytic leukemia
hsa-miR-125a-5p	0	0	1	1	1	1	MAZ	MYC-associated zinc finger protein (purine-binding transcription factor)
hsa-miR-125a-5p	1	0	1	0	1	1	MPPED2	metallophosphoesterase domain containing 2
hsa-miR-125a-5p	1	0	1	0	1	1	SLC6A6	solute carrier family 6 (neurotransmitter transporter, taurine), member 6
hsa-miR-125a-5p	1	0	1	0	1	1	KIF5C	kinesin family member 5C
hsa-miR-125a-5p	1	0	1	1	1	1	ZNF207	zinc finger protein 207
hsa-miR-125a-5p	1	0	1	1	1	1	SATB2	SATB homeobox 2
hsa-miR-125a-5p	0	0	1	1	1	1	RYR1	ryanodine receptor 1 (skeletal)
hsa-miR-125a-5p	0	0	1	1	0	0	PSMB2	proteasome (prosome, macropain) subunit, beta type, 2
hsa-miR-125a-5p	1	0	1	1	1	1	LIMA1	LIM domain and actin binding 1
hsa-miR-125a-5p	0	0	1	1	0	0	BMP1	bone morphogenetic protein 1
hsa-miR-125a-5p	0	0	1	1	1	1	IL10RA	interleukin 10 receptor, alpha
hsa-miR-125a-5p	1	0	1	1	1	1	COL24A1	collagen, type XXIV, alpha 1
hsa-miR-125a-5p	0	0	1	1	0	0	SLC22A8	solute carrier family 22 (organic anion transporter), member 8
hsa-miR-125a-5p	1	0	1	1	1	1	TLE1	transducin-like enhancer of split 1 (E(sp1) homolog, Drosophila)
hsa-miR-125a-5p	1	0	1	0	1	1	PDE7B	phosphodiesterase 7B
hsa-miR-125a-5p	1	0	1	1	0	0	TNPO2	transportin 2
hsa-miR-125a-5p	1	0	1	1	1	1	SDHC	succinate dehydrogenase complex, subunit C, integral membrane protein, 15kDa
hsa-miR-125a-5p	0	0	1	1	0	0	ITGA7	integrin, alpha 7
hsa-miR-125a-5p	0	0	1	1	0	0	PLA1A	phospholipase A1 member A
hsa-miR-125a-5p	1	0	1	0	0	0	MAP3K1	mitogen-activated protein kinase kinase kinase 1, E3 ubiquitin protein ligase
hsa-miR-125a-5p	0	0	1	1	1	1	MICAL2	microtubule associated monoxygenase, calponin and LIM domain containing 2
hsa-miR-125a-5p	1	0	1	1	1	1	CBFA2T2	core-binding factor, runt domain, alpha subunit 2; translocated to, 2
hsa-miR-125a-5p	1	0	1	1	1	1	TMEM159	transmembrane protein 159
hsa-miR-125a-5p	1	0	1	1	0	0	PRRC2A	proline-rich coiled-coil 2A
hsa-miR-125a-5p	0	0	1	1	0	0	RBM5	RNA binding motif protein 5
hsa-miR-125a-5p	1	0	1	1	1	1	NF2	neurofibromin 2 (merlin)
hsa-miR-125a-5p	0	0	1	0	1	1	CLEC5A	C-type lectin domain family 5, member A
hsa-miR-125a-5p	0	0	1	1	1	1	FAM114A2	family with sequence similarity 114, member A2
hsa-miR-125a-5p	0	0	1	0	1	1	CLDN2	claudin 2
hsa-miR-125a-5p	0	0	1	1	1	1	SLCO2B1	solute carrier organic anion transporter family, member 2B1
hsa-miR-125a-5p	1	0	1	1	1	1	SYDE1	synapse defective 1, Rho GTPase, homolog 1 (C. elegans)
hsa-miR-125a-5p	0	0	1	1	1	1	CD28	CD28 molecule
hsa-miR-125a-5p	1	0	1	1	0	0	TDRKH	tudor and KH domain containing
hsa-miR-125a-5p	1	0	1	1	1	1	C21orf91	chromosome 21 open reading frame 91
hsa-miR-125a-5p	1	0	1	1	0	0	LMO2	LIM domain only 2 (rhombotin-like 1)
hsa-miR-125a-5p	1	0	1	0	1	1	PARP11	poly (ADP-ribose) polymerase family, member 11
hsa-miR-125a-5p	0	0	1	1	0	0	ARL6IP4	ADP-ribosylation-like factor 6 interacting protein 4
hsa-miR-125a-5p	1	0	1	1	1	1	ERGIC1	endoplasmic reticulum-golgi intermediate compartment (ERGIC) 1
hsa-miR-125a-5p	1	0	1	1	0	0	RAB34	RAB34, member RAS oncogene family
hsa-miR-125a-5p	1	0	1	1	1	1	CPEB1	cytoplasmic polyadenylation element binding protein 1
hsa-miR-125a-5p	1	0	1	1	1	1	CALCOCO1	calcium binding and coiled-coil domain 1
hsa-miR-125a-5p	0	0	1	0	0	0	NBPF10	neuroblastoma breakpoint family, member 10
hsa-miR-125a-5p	1	0	1	1	1	1	RCAN1	regulator of calcineurin 1
hsa-miR-125a-5p	0	0	1	0	0	0	MYO15B	myosin XVB pseudogene
hsa-miR-125a-5p	1	0	1	1	1	1	STX16	syntaxin 16
hsa-miR-125a-5p	0	0	1	1	1	1	CARD8	caspase recruitment domain family, member 8
hsa-miR-125a-5p	0	0	1	1	1	1	DMRTC1	DMRT-like family C1
hsa-miR-125a-5p	0	0	1	1	0	0	DMRTC1B	DMRT-like family C1B
hsa-miR-125a-5p	1	0	1	1	1	1	PDE1B	phosphodiesterase 1B, calmodulin-dependent
hsa-miR-125a-5p	0	0	1	0	1	1	AHI1	Abelson helper integration site 1
hsa-miR-125a-5p	0	0	1	1	1	1	ZNF248	zinc finger protein 248
hsa-miR-125a-5p	1	0	1	1	1	1	NRXN3	neurexin 3
hsa-miR-125a-5p	0	0	1	1	0	0	RPP21	ribonuclease P/MRP 21kDa subunit
hsa-miR-125a-5p	0	0	1	1	0	0	SIRT2	sirtuin 2
hsa-miR-125a-5p	1	0	1	1	1	1	ARL4C	ADP-ribosylation factor-like 4C
hsa-miR-125a-5p	1	0	1	0	1	1	NAALADL2	N-acetylated alpha-linked acidic dipeptidase-like 2
hsa-miR-125a-5p	0	0	1	1	1	1	TFEB	transcription factor EB
hsa-miR-125a-5p	1	0	1	1	1	1	PPP1R9A	protein phosphatase 1, regulatory subunit 9A
hsa-miR-125a-5p	1	0	1	1	0	0	SENP3	SUMO1/sentrin/SMT3 specific peptidase 3
hsa-miR-125a-5p	0	0	1	1	1	1	STOX2	storkhead box 2
hsa-miR-125a-5p	1	0	1	0	1	1	VPS13D	vacuolar protein sorting 13 homolog D (S. cerevisiae)
hsa-miR-125a-5p	1	0	1	1	1	1	EIF2C1	eukaryotic translation initiation factor 2C, 1
hsa-miR-125a-5p	1	0	1	1	1	1	WDTC1	WD and tetratricopeptide repeats 1
hsa-miR-125a-5p	1	0	1	1	0	0	SMUG1	single-strand-selective monofunctional uracil-DNA glycosylase 1
hsa-miR-125a-5p	1	0	1	1	1	1	ACER3	alkaline ceramidase 3
hsa-miR-125a-5p	0	0	1	1	1	1	SNRNP200	small nuclear ribonucleoprotein 200kDa (U5)
hsa-miR-125a-5p	1	0	1	1	1	1	RIC3	resistance to inhibitors of cholinesterase 3 homolog (C. elegans)
hsa-miR-125a-5p	0	0	1	1	0	0	UBR4	ubiquitin protein ligase E3 component n-recognin 4
hsa-miR-125a-5p	1	0	1	1	0	0	YPEL3	yippee-like 3 (Drosophila)
hsa-miR-125a-5p	0	0	1	0	0	0	LOC149134	uncharacterized LOC149134
hsa-miR-125a-5p	0	0	1	0	0	0	SOX2-OT	SOX2 overlapping transcript (non-protein coding)
hsa-miR-125a-5p	0	0	1	1	0	0	GMEB1	glucocorticoid modulatory element binding protein 1
hsa-miR-125a-5p	1	0	1	1	1	1	SMEK2	SMEK homolog 2, suppressor of mek1 (Dictyostelium)
hsa-miR-125a-5p	1	0	1	1	1	1	SRP72	signal recognition particle 72kDa
hsa-miR-125a-5p	0	0	1	0	0	0	LOC284561	uncharacterized LOC284561
hsa-miR-125a-5p	0	0	1	0	1	1	FLJ14186	uncharacterized LOC401149
hsa-miR-125a-5p	0	0	1	0	0	0	LOC286059	tumor necrosis factor receptor superfamily, member 10d, decoy with truncated death domain pseudogene
hsa-miR-125a-5p	0	0	1	0	0	0	IFFO2	intermediate filament family orphan 2
hsa-miR-125a-5p	0	0	1	1	1	1	C12orf65	chromosome 12 open reading frame 65
hsa-miR-125a-5p	0	0	1	0	1	1	HEMK1	HemK methyltransferase family member 1
hsa-miR-125a-5p	0	0	1	1	1	1	MYEOV	myeloma overexpressed (in a subset of t(11;14) positive multiple myelomas)
hsa-miR-125a-5p	0	0	1	0	1	1	FLJ22763	uncharacterized LOC401081
hsa-miR-125a-5p	1	0	1	1	0	0	SLC44A2	solute carrier family 44, member 2
hsa-miR-125a-5p	1	0	1	1	1	1	TMEM2	transmembrane protein 2
hsa-miR-125a-5p	1	0	1	1	1	1	KCTD15	potassium channel tetramerisation domain containing 15
hsa-miR-125a-5p	0	0	1	1	1	1	PAQR4	progestin and adipoQ receptor family member IV
hsa-miR-125a-5p	0	0	1	1	1	1	SNAP47	synaptosomal-associated protein, 47kDa
hsa-miR-125a-5p	0	0	1	1	1	1	RAB37	RAB37, member RAS oncogene family
hsa-miR-125a-5p	1	0	1	1	0	0	C15orf27	chromosome 15 open reading frame 27
hsa-miR-125a-5p	1	0	1	1	1	1	C7orf43	chromosome 7 open reading frame 43
hsa-miR-125a-5p	0	0	1	1	1	1	GABRP	gamma-aminobutyric acid (GABA) A receptor, pi
hsa-miR-125a-5p	1	0	1	1	0	0	SPEG	SPEG complex locus
hsa-miR-125a-5p	1	0	1	1	0	0	MEPCE	methylphosphate capping enzyme
hsa-miR-125a-5p	1	0	1	0	1	1	PTPRE	protein tyrosine phosphatase, receptor type, E
hsa-miR-125a-5p	0	0	1	1	0	0	BEAN1	brain expressed, associated with NEDD4, 1
hsa-miR-125a-5p	0	0	1	0	0	0	JPX	JPX transcript, XIST activator (non-protein coding)
hsa-miR-125a-5p	1	0	1	0	1	1	FSTL4	follistatin-like 4
hsa-miR-125a-5p	0	0	1	1	0	0	CHRM3	cholinergic receptor, muscarinic 3
hsa-miR-125a-5p	1	0	1	1	1	1	SCAMP5	secretory carrier membrane protein 5
hsa-miR-125a-5p	1	0	1	1	1	1	PUM1	pumilio homolog 1 (Drosophila)
hsa-miR-125a-5p	0	0	1	0	0	0	ERVV-1	endogenous retrovirus group V, member 1
hsa-miR-125a-5p	0	0	1	1	0	0	HECTD3	HECT domain containing E3 ubiquitin protein ligase 3
hsa-miR-125a-5p	0	0	1	1	1	1	MS4A14	membrane-spanning 4-domains, subfamily A, member 14
hsa-miR-125a-5p	0	0	1	1	1	1	RANBP17	RAN binding protein 17
hsa-miR-125a-5p	0	0	1	1	0	0	UBAP2	ubiquitin associated protein 2
hsa-miR-125a-5p	1	0	1	1	1	1	ANKRD29	ankyrin repeat domain 29
hsa-miR-125a-5p	0	0	1	1	1	1	A2ML1	alpha-2-macroglobulin-like 1
hsa-miR-125a-5p	0	0	1	0	0	0	C10orf105	chromosome 10 open reading frame 105
hsa-miR-125a-5p	0	0	1	1	1	1	GALNT6	UDP-N-acetyl-alpha-D-galactosamine:polypeptide N-acetylgalactosaminyltransferase 6 (GalNAc-T6)
hsa-miR-125a-5p	0	0	1	1	0	0	NISCH	nischarin
hsa-miR-125a-5p	0	0	1	1	1	1	KDELR1	KDEL (Lys-Asp-Glu-Leu) endoplasmic reticulum protein retention receptor 1
hsa-miR-125a-5p	0	0	1	1	0	0	C9orf9	chromosome 9 open reading frame 9
hsa-miR-125a-5p	0	0	1	1	1	1	CAMKV	CaM kinase-like vesicle-associated
hsa-miR-125a-5p	0	0	1	1	0	0	LGR5	leucine-rich repeat containing G protein-coupled receptor 5
hsa-miR-125a-5p	0	0	1	1	0	0	PIGO	phosphatidylinositol glycan anchor biosynthesis, class O
hsa-miR-125a-5p	1	0	1	1	1	1	DPH1	DPH1 homolog (S. cerevisiae)
hsa-miR-125a-5p	0	0	1	0	0	0	LOC152225	uncharacterized LOC152225
hsa-miR-125a-5p	0	0	1	1	1	1	MAPK10	mitogen-activated protein kinase 10
hsa-miR-125a-5p	1	0	1	1	1	1	SYN2	synapsin II
hsa-miR-125a-5p	1	0	1	1	1	1	FBXW2	F-box and WD repeat domain containing 2
hsa-miR-125a-5p	1	0	1	1	1	1	GCFC1	GC-rich sequence DNA-binding factor 1
hsa-miR-125a-5p	0	0	1	1	1	1	PRKRA	protein kinase, interferon-inducible double stranded RNA dependent activator
hsa-miR-125a-5p	0	0	1	1	0	0	AXDND1	axonemal dynein light chain domain containing 1
hsa-miR-125a-5p	0	0	1	1	0	0	SERPINH1	serpin peptidase inhibitor, clade H (heat shock protein 47), member 1, (collagen binding protein 1)
hsa-miR-125a-5p	0	0	1	1	0	0	WBP1	WW domain binding protein 1
hsa-miR-125a-5p	0	0	1	0	0	0	PART1	prostate androgen-regulated transcript 1 (non-protein coding)
hsa-miR-125a-5p	0	0	1	0	1	1	KANSL2	KAT8 regulatory NSL complex subunit 2
hsa-miR-125a-5p	0	0	1	1	1	1	CORO7	coronin 7
hsa-miR-125a-5p	1	0	1	0	1	1	GATAD2B	GATA zinc finger domain containing 2B
hsa-miR-125a-5p	0	0	1	1	0	0	PPOX	protoporphyrinogen oxidase
hsa-miR-125a-5p	1	0	1	1	1	1	LPPR2	lipid phosphate phosphatase-related protein type 2
hsa-miR-125a-5p	0	0	1	1	1	1	CHRM5	cholinergic receptor, muscarinic 5
hsa-miR-125a-5p	0	0	1	0	0	0	LOC147670	uncharacterized LOC147670
hsa-miR-125a-5p	0	0	1	1	1	1	AQP3	aquaporin 3 (Gill blood group)
hsa-miR-125a-5p	1	0	1	1	1	1	CECR6	cat eye syndrome chromosome region, candidate 6
hsa-miR-125a-5p	1	0	1	1	1	1	ZC3H11A	zinc finger CCCH-type containing 11A
hsa-miR-125a-5p	1	0	1	0	1	1	STC2	stanniocalcin 2
hsa-miR-125a-5p	0	0	1	1	0	0	MAP7D1	MAP7 domain containing 1
hsa-miR-125a-5p	1	0	1	1	1	1	AMT	aminomethyltransferase
hsa-miR-125a-5p	0	0	1	0	0	0	ZNF815P	zinc finger protein 815, pseudogene
hsa-miR-125a-5p	1	0	1	1	1	1	SNRNP70	small nuclear ribonucleoprotein 70kDa (U1)
hsa-miR-125a-5p	1	0	1	1	1	1	CA12	carbonic anhydrase XII
hsa-miR-125a-5p	0	0	1	0	0	0	FLJ39534	uncharacterized FLJ39534
hsa-miR-125a-5p	0	0	1	1	0	0	CHCHD5	coiled-coil-helix-coiled-coil-helix domain containing 5
hsa-miR-125a-5p	1	0	1	0	1	1	YPEL2	yippee-like 2 (Drosophila)
hsa-miR-125a-5p	0	0	1	0	0	0	LOC400680	uncharacterized LOC400680
hsa-miR-125a-5p	0	0	1	1	1	1	PPFIBP2	PTPRF interacting protein, binding protein 2 (liprin beta 2)
hsa-miR-125a-5p	0	0	1	1	1	1	TEX35	testis expressed 35
hsa-miR-125a-5p	0	0	1	1	0	0	PSAPL1	prosaposin-like 1 (gene/pseudogene)
hsa-miR-125a-5p	0	0	1	1	1	1	CKAP2L	cytoskeleton associated protein 2-like
hsa-miR-125a-5p	0	0	1	1	0	0	HNRNPL	heterogeneous nuclear ribonucleoprotein L
hsa-miR-125a-5p	0	0	1	0	0	0	HLA-DQB2	major histocompatibility complex, class II, DQ beta 2
hsa-miR-125a-5p	0	0	1	0	0	0	LOC100130954	uncharacterized LOC100130954
hsa-miR-125a-5p	0	0	1	1	1	1	ARFGAP2	ADP-ribosylation factor GTPase activating protein 2
hsa-miR-125a-5p	1	0	1	1	1	1	THTPA	thiamine triphosphatase
hsa-miR-125a-5p	0	0	1	1	1	1	GGA1	golgi-associated, gamma adaptin ear containing, ARF binding protein 1
hsa-miR-125a-5p	0	0	1	1	1	1	ZNF546	zinc finger protein 546
hsa-miR-125a-5p	1	0	1	1	1	1	ZBTB4	zinc finger and BTB domain containing 4
hsa-miR-125a-5p	0	0	1	0	1	1	PATE4	prostate and testis expressed 4
hsa-miR-125a-5p	1	0	1	1	1	1	PLEKHH1	pleckstrin homology domain containing, family H (with MyTH4 domain) member 1
hsa-miR-125a-5p	0	0	1	1	1	1	RGS3	regulator of G-protein signaling 3
hsa-miR-125a-5p	0	0	1	1	0	0	TJAP1	tight junction associated protein 1 (peripheral)
hsa-miR-125a-5p	0	0	1	0	0	0	LOC650368	asparagine-linked glycosylation 1-like pseudogene
hsa-miR-125a-5p	0	0	1	1	0	0	KRT37	keratin 37
hsa-miR-125a-5p	0	0	1	1	1	1	BTN2A2	butyrophilin, subfamily 2, member A2
hsa-miR-125a-5p	1	0	1	1	0	0	KCNC1	potassium voltage-gated channel, Shaw-related subfamily, member 1
hsa-miR-125a-5p	0	0	1	1	0	0	NMI	N-myc (and STAT) interactor
hsa-miR-125a-5p	1	0	1	1	0	0	KIAA1549L	KIAA1549-like
hsa-miR-125a-5p	1	0	1	1	1	1	ERBB3	v-erb-b2 erythroblastic leukemia viral oncogene homolog 3 (avian)
hsa-miR-125a-5p	0	0	1	0	0	0	TMEM232	transmembrane protein 232
hsa-miR-125a-5p	1	0	1	0	0	0	MSL1	male-specific lethal 1 homolog (Drosophila)
hsa-miR-125a-5p	0	0	1	1	0	0	ANKHD1-EIF4EBP3	ANKHD1-EIF4EBP3 readthrough
hsa-miR-125a-5p	0	0	1	0	0	0	FAM75D4	family with sequence similarity 75, member D4
hsa-miR-125a-5p	0	0	1	0	0	0	FAM95B1	family with sequence similarity 95, member B1
hsa-miR-125a-5p	0	0	1	1	1	1	EPPIN	epididymal peptidase inhibitor
hsa-miR-125a-5p	0	0	1	1	0	0	C20orf141	chromosome 20 open reading frame 141
hsa-miR-125a-5p	1	0	1	1	0	0	ATXN7L3	ataxin 7-like 3
hsa-miR-125a-5p	1	0	1	0	1	1	PLEKHH2	pleckstrin homology domain containing, family H (with MyTH4 domain) member 2
hsa-miR-125a-5p	0	0	1	1	1	1	ZFYVE28	zinc finger, FYVE domain containing 28
hsa-miR-125a-5p	1	0	1	1	0	0	TNK2	tyrosine kinase, non-receptor, 2
hsa-miR-125a-5p	0	0	1	1	0	0	CCDC88B	coiled-coil domain containing 88B
hsa-miR-125a-5p	0	0	1	0	0	0	PLEKHD1	pleckstrin homology domain containing, family D (with coiled-coil domains) member 1
hsa-miR-125a-5p	0	0	1	1	0	0	TMEM151B	transmembrane protein 151B
hsa-miR-125a-5p	0	0	1	0	0	0	RPL23AP53	ribosomal protein L23a pseudogene 53
hsa-miR-125a-5p	0	0	1	1	1	1	MOBP	myelin-associated oligodendrocyte basic protein
hsa-miR-125a-5p	1	0	1	0	1	1	N4BP3	NEDD4 binding protein 3
hsa-miR-125a-5p	0	0	1	1	0	0	GSTM5	glutathione S-transferase mu 5
hsa-miR-125a-5p	0	0	1	0	0	0	LOC619207	scavenger receptor protein family member
hsa-miR-125a-5p	1	0	1	1	1	1	ZDHHC23	zinc finger, DHHC-type containing 23
hsa-miR-125a-5p	1	0	1	1	1	1	SLC26A9	solute carrier family 26, member 9
hsa-miR-125a-5p	0	0	1	0	0	0	LOC100128262	uncharacterized LOC100128262
hsa-miR-125a-5p	1	0	1	0	1	1	CAPRIN1	cell cycle associated protein 1
hsa-miR-125a-5p	0	0	1	0	0	0	FAM71E2	family with sequence similarity 71, member E2
hsa-miR-125a-5p	0	0	1	1	0	0	TMEM136	transmembrane protein 136
hsa-miR-125a-5p	0	0	1	1	0	0	TRIM46	tripartite motif containing 46
hsa-miR-125a-5p	1	0	1	1	1	1	WDR37	WD repeat domain 37
hsa-miR-125a-5p	0	0	1	0	0	0	FLJ46361	deleted in malignant brain tumors 1 pseudogene
hsa-miR-125a-5p	0	0	1	0	0	0	EMBP1	embigin pseudogene 1
hsa-miR-125a-5p	0	0	1	0	0	0	FLJ26245	uncharacterized LOC400533
hsa-miR-125a-5p	1	0	1	1	1	1	GPD1	glycerol-3-phosphate dehydrogenase 1 (soluble)
hsa-miR-125a-5p	0	0	1	0	0	0	LOC654433	uncharacterized LOC654433
hsa-miR-125a-5p	0	0	1	0	0	0	FAM27A	family with sequence similarity 27, member A
hsa-miR-125a-5p	0	0	1	1	1	1	TMEM202	transmembrane protein 202
hsa-miR-125a-5p	0	0	1	1	1	1	SLTM	SAFB-like, transcription modulator
hsa-miR-125a-5p	0	0	1	0	1	1	RUFY4	RUN and FYVE domain containing 4
hsa-miR-125a-5p	0	0	1	1	0	0	CYP4X1	cytochrome P450, family 4, subfamily X, polypeptide 1
hsa-miR-125a-5p	0	0	1	0	0	0	AGAP9	ArfGAP with GTPase domain, ankyrin repeat and PH domain 9
hsa-miR-125a-5p	0	0	1	0	1	1	ATP6V0E2	ATPase, H+ transporting V0 subunit e2
hsa-miR-125a-5p	1	0	1	1	1	1	SYS1	SYS1 Golgi-localized integral membrane protein homolog (S. cerevisiae)
hsa-miR-125a-5p	0	0	1	1	0	0	SCNN1A	sodium channel, non-voltage-gated 1 alpha subunit
hsa-miR-125a-5p	0	0	1	1	0	0	ANAPC15	anaphase promoting complex subunit 15
hsa-miR-125a-5p	0	0	1	1	1	1	AKTIP	AKT interacting protein
hsa-miR-125a-5p	1	0	1	0	1	1	SEZ6	seizure related 6 homolog (mouse)
hsa-miR-125a-5p	1	0	1	1	1	1	ATL2	atlastin GTPase 2
hsa-miR-125a-5p	0	0	1	1	0	0	FERMT1	fermitin family member 1
hsa-miR-125a-5p	0	0	1	1	0	0	NAT9	N-acetyltransferase 9 (GCN5-related, putative)
hsa-miR-125a-5p	1	0	1	0	1	1	MAP3K3	mitogen-activated protein kinase kinase kinase 3
hsa-miR-125a-5p	1	0	1	1	0	0	ZNF219	zinc finger protein 219
hsa-miR-125a-5p	0	0	1	1	0	0	FAAH	fatty acid amide hydrolase
hsa-miR-125a-5p	1	0	1	1	1	1	RIF1	RAP1 interacting factor homolog (yeast)
hsa-miR-125a-5p	0	0	1	0	0	0	POM121L9P	POM121 transmembrane nucleoporin-like 9, pseudogene
hsa-miR-125a-5p	0	0	1	0	0	0	TPTE2P6	transmembrane phosphoinositide 3-phosphatase and tensin homolog 2 pseudogene 6
hsa-miR-125a-5p	0	0	1	1	1	1	WDR52	WD repeat domain 52
hsa-miR-125a-5p	0	0	1	1	0	0	H2AFJ	H2A histone family, member J
hsa-miR-125a-5p	0	0	1	1	0	0	LRCH3	leucine-rich repeats and calponin homology (CH) domain containing 3
hsa-miR-125a-5p	1	0	1	1	1	1	NBEA	neurobeachin
hsa-miR-125a-5p	0	0	1	1	0	0	NOL12	nucleolar protein 12
hsa-miR-125a-5p	1	0	1	1	1	1	CTTNBP2NL	CTTNBP2 N-terminal like
hsa-miR-125a-5p	1	0	1	0	1	1	GRIN3A	glutamate receptor, ionotropic, N-methyl-D-aspartate 3A
hsa-miR-125a-5p	0	0	1	0	0	0	FAM66D	family with sequence similarity 66, member D
hsa-miR-125a-5p	1	0	1	1	1	1	SLC30A8	solute carrier family 30 (zinc transporter), member 8
hsa-miR-125a-5p	0	0	1	0	1	1	GAB3	GRB2-associated binding protein 3
hsa-miR-125a-5p	1	0	1	1	1	1	FAM126B	family with sequence similarity 126, member B
hsa-miR-125a-5p	1	0	1	1	1	1	KANK1	KN motif and ankyrin repeat domains 1
hsa-miR-125a-5p	0	0	1	1	0	0	HEATR8	HEAT repeat containing 8
hsa-miR-125a-5p	0	0	1	1	1	1	VWA3B	von Willebrand factor A domain containing 3B
hsa-miR-125a-5p	1	0	1	1	1	1	SBF2	SET binding factor 2
hsa-miR-125a-5p	0	0	1	1	1	1	INPP5B	inositol polyphosphate-5-phosphatase, 75kDa
hsa-miR-125a-5p	0	0	1	1	1	1	C12orf50	chromosome 12 open reading frame 50
hsa-miR-125a-5p	1	0	1	1	1	1	CEP164	centrosomal protein 164kDa
hsa-miR-125a-5p	0	0	1	1	0	0	PPIE	peptidylprolyl isomerase E (cyclophilin E)
hsa-miR-125a-5p	0	0	1	1	1	1	KIAA1841	KIAA1841
hsa-miR-125a-5p	1	0	1	1	1	1	MARCH7	membrane-associated ring finger (C3HC4) 7, E3 ubiquitin protein ligase
hsa-miR-125a-5p	1	0	1	1	1	1	MBD6	methyl-CpG binding domain protein 6
hsa-miR-125a-5p	0	0	1	1	1	1	PNMAL1	paraneoplastic Ma antigen family-like 1
hsa-miR-125a-5p	1	0	1	1	1	1	SET	SET nuclear oncogene
hsa-miR-125a-5p	0	0	1	1	1	1	MTMR14	myotubularin related protein 14
hsa-miR-125a-5p	0	0	1	1	0	0	TMEM134	transmembrane protein 134
hsa-miR-125a-5p	1	0	1	1	1	1	IKZF2	IKAROS family zinc finger 2 (Helios)
hsa-miR-125a-5p	0	0	1	1	0	0	IL1F10	interleukin 1 family, member 10 (theta)
hsa-miR-125a-5p	0	0	1	1	0	0	TP73	tumor protein p73
hsa-miR-125a-5p	1	0	1	1	1	1	RFFL	ring finger and FYVE-like domain containing E3 ubiquitin protein ligase
hsa-miR-125a-5p	1	0	1	1	1	1	LUZP2	leucine zipper protein 2
hsa-miR-125a-5p	0	0	1	1	0	0	CMTM1	CKLF-like MARVEL transmembrane domain containing 1
hsa-miR-125a-5p	1	0	1	0	1	1	SS18L1	synovial sarcoma translocation gene on chromosome 18-like 1
hsa-miR-125a-5p	0	0	1	0	0	0	MEG3	maternally expressed 3 (non-protein coding)
hsa-miR-125a-5p	0	0	1	1	0	0	PIGU	phosphatidylinositol glycan anchor biosynthesis, class U
hsa-miR-125a-5p	0	0	1	1	1	1	ITGA10	integrin, alpha 10
hsa-miR-125a-5p	0	0	1	1	0	0	VSIG4	V-set and immunoglobulin domain containing 4
hsa-miR-125a-5p	0	0	1	1	1	1	PIGG	phosphatidylinositol glycan anchor biosynthesis, class G
hsa-miR-125a-5p	1	0	1	1	1	1	FGD4	FYVE, RhoGEF and PH domain containing 4
hsa-miR-125a-5p	1	0	1	1	1	1	MECP2	methyl CpG binding protein 2 (Rett syndrome)
hsa-miR-125a-5p	1	0	1	0	1	1	LRAT	lecithin retinol acyltransferase (phosphatidylcholine--retinol O-acyltransferase)
hsa-miR-125a-5p	1	0	1	1	0	0	ADAM15	ADAM metallopeptidase domain 15
hsa-miR-125a-5p	0	0	1	1	1	1	KANK2	KN motif and ankyrin repeat domains 2
hsa-miR-125a-5p	0	0	1	1	1	1	FCRLB	Fc receptor-like B
hsa-miR-125a-5p	1	0	1	1	1	1	QKI	QKI, KH domain containing, RNA binding
hsa-miR-125a-5p	0	0	1	0	0	0	LOC100128076	protein tyrosine phosphatase pseudogene
hsa-miR-125a-5p	0	0	1	1	0	0	NBPF8	neuroblastoma breakpoint family, member 8
hsa-miR-125a-5p	1	0	1	1	1	1	TBC1D22B	TBC1 domain family, member 22B
hsa-miR-125a-5p	0	0	1	1	1	1	LY86	lymphocyte antigen 86
hsa-miR-125a-5p	0	0	1	1	1	1	IYD	iodotyrosine deiodinase
hsa-miR-125a-5p	0	0	1	1	1	1	CDH6	cadherin 6, type 2, K-cadherin (fetal kidney)
hsa-miR-125a-5p	0	0	1	1	0	0	GFOD2	glucose-fructose oxidoreductase domain containing 2
hsa-miR-125a-5p	0	0	1	1	1	1	WDR55	WD repeat domain 55
hsa-miR-125a-5p	1	0	1	1	1	1	HOXC13	homeobox C13
hsa-miR-125a-5p	1	0	1	1	1	1	RIMS3	regulating synaptic membrane exocytosis 3
hsa-miR-125a-5p	0	0	1	1	0	0	SNRPB	small nuclear ribonucleoprotein polypeptides B and B1
hsa-miR-125a-5p	1	0	1	1	1	1	TSEN34	tRNA splicing endonuclease 34 homolog (S. cerevisiae)
hsa-miR-125a-5p	0	0	1	1	1	1	ZNF589	zinc finger protein 589
hsa-miR-125a-5p	1	0	1	0	1	1	ATM	ataxia telangiectasia mutated
hsa-miR-125a-5p	0	0	1	1	0	0	AGBL5	ATP/GTP binding protein-like 5
hsa-miR-125a-5p	1	0	1	1	0	0	SAP30BP	SAP30 binding protein
hsa-miR-125a-5p	0	0	1	1	0	0	RBM14	RNA binding motif protein 14
hsa-miR-125a-5p	0	0	1	1	0	0	MYLK2	myosin light chain kinase 2
hsa-miR-125a-5p	0	0	1	1	0	0	PANK2	pantothenate kinase 2
hsa-miR-125a-5p	1	0	1	1	1	1	RELL2	RELT-like 2
hsa-miR-125a-5p	1	0	1	1	1	1	B4GALT3	UDP-Gal:betaGlcNAc beta 1,4- galactosyltransferase, polypeptide 3
hsa-miR-125a-5p	0	0	1	1	0	0	MEF2BNB-MEF2B	MEF2BNB-MEF2B readthrough
hsa-miR-125a-5p	0	0	1	0	0	0	LRRC14	leucine rich repeat containing 14
hsa-miR-125a-5p	1	0	1	0	0	0	XPNPEP3	X-prolyl aminopeptidase (aminopeptidase P) 3, putative
hsa-miR-125a-5p	0	0	1	1	1	1	KEAP1	kelch-like ECH-associated protein 1
hsa-miR-125a-5p	1	0	1	1	1	1	PRDM2	PR domain containing 2, with ZNF domain
hsa-miR-125a-5p	0	0	1	1	1	1	PTK7	PTK7 protein tyrosine kinase 7
hsa-miR-125a-5p	0	0	1	1	1	1	TOMM40L	translocase of outer mitochondrial membrane 40 homolog (yeast)-like
hsa-miR-125a-5p	0	0	1	1	0	0	STAP1	signal transducing adaptor family member 1
hsa-miR-125a-5p	0	0	1	1	0	0	CCDC36	coiled-coil domain containing 36
hsa-miR-125a-5p	0	0	1	0	0	0	MGC21881	uncharacterized locus MGC21881
hsa-miR-125a-5p	0	0	1	1	0	0	UCK1	uridine-cytidine kinase 1
hsa-miR-125a-5p	1	0	1	1	1	1	FAM199X	family with sequence similarity 199, X-linked
hsa-miR-125a-5p	1	0	1	0	1	1	ZNF24	zinc finger protein 24
hsa-miR-125a-5p	1	0	1	1	1	1	ELF4	E74-like factor 4 (ets domain transcription factor)
hsa-miR-125a-5p	0	0	1	1	1	1	CSDE1	cold shock domain containing E1, RNA-binding
hsa-miR-125a-5p	0	0	1	1	1	1	GLIPR2	GLI pathogenesis-related 2
hsa-miR-125a-5p	1	0	1	1	1	1	TM9SF4	transmembrane 9 superfamily protein member 4
hsa-miR-125a-5p	0	0	1	1	0	0	FAM89B	family with sequence similarity 89, member B
hsa-miR-125a-5p	0	0	1	0	0	0	LOC728485	uncharacterized LOC728485
hsa-miR-125a-5p	0	0	1	1	0	0	KRBA2	KRAB-A domain containing 2
hsa-miR-125a-5p	1	0	1	1	1	1	CNTN4	contactin 4
hsa-miR-125a-5p	1	0	1	0	1	1	CERS3	ceramide synthase 3
hsa-miR-125a-5p	0	0	1	1	1	1	ANKZF1	ankyrin repeat and zinc finger domain containing 1
hsa-miR-125a-5p	1	0	1	1	1	1	UHRF2	ubiquitin-like with PHD and ring finger domains 2, E3 ubiquitin protein ligase
hsa-miR-125a-5p	0	0	1	1	1	1	TFAM	transcription factor A, mitochondrial
hsa-miR-125a-5p	1	0	1	0	1	1	PSMF1	proteasome (prosome, macropain) inhibitor subunit 1 (PI31)
hsa-miR-125a-5p	1	0	1	0	1	1	TFEC	transcription factor EC
hsa-miR-125a-5p	0	0	1	0	1	1	MYO7A	myosin VIIA
hsa-miR-125a-5p	0	0	1	1	1	1	CD48	CD48 molecule
hsa-miR-125a-5p	0	0	1	1	1	1	TMEM117	transmembrane protein 117
hsa-miR-125a-5p	0	0	1	0	0	0	CFL1P1	cofilin 1 (non-muscle) pseudogene 1
hsa-miR-125a-5p	0	0	1	1	0	0	ASIC4	acid-sensing (proton-gated) ion channel family member 4
hsa-miR-125a-5p	1	0	1	1	1	1	BRD3	bromodomain containing 3
hsa-miR-125a-5p	0	0	1	1	1	1	FBXO24	F-box protein 24
hsa-miR-125a-5p	1	0	1	1	1	1	RAB5B	RAB5B, member RAS oncogene family
hsa-miR-125a-5p	0	0	1	1	1	1	IL20RB	interleukin 20 receptor beta
hsa-miR-125a-5p	0	0	1	0	0	0	HILS1	histone linker H1 domain, spermatid-specific 1, pseudogene
hsa-miR-125a-5p	1	0	1	1	1	1	HMGCR	3-hydroxy-3-methylglutaryl-CoA reductase
hsa-miR-125a-5p	0	0	1	0	0	0	LINC00486	long intergenic non-protein coding RNA 486
hsa-miR-125a-5p	0	0	1	0	0	0	LINC00494	long intergenic non-protein coding RNA 494
hsa-miR-125a-5p	0	0	1	0	0	0	LOC643529	hCG2024094
hsa-miR-125a-5p	0	0	1	0	1	1	TMSB15B	thymosin beta 15B
hsa-miR-125a-5p	1	0	1	1	1	1	ZEB2	zinc finger E-box binding homeobox 2
hsa-miR-125a-5p	0	0	1	0	0	0	TMEM235	transmembrane protein 235
hsa-miR-125a-5p	0	0	1	1	1	1	ZNF141	zinc finger protein 141
hsa-miR-125a-5p	0	0	1	1	1	1	EFCAB13	EF-hand calcium binding domain 13
hsa-miR-125a-5p	0	0	1	0	0	0	CRYBB2P1	crystallin, beta B2 pseudogene 1
hsa-miR-125a-5p	0	0	1	0	0	0	INHBA-AS1	INHBA antisense RNA 1
hsa-miR-125a-5p	0	0	1	0	0	0	LOC415056	uncharacterized LOC415056
hsa-miR-125a-5p	1	0	1	1	1	1	PLS3	plastin 3
hsa-miR-125a-5p	0	0	1	0	0	0	FLJ36000	uncharacterized FLJ36000
hsa-miR-125a-5p	0	0	1	0	0	0	LOC401074	uncharacterized LOC401074
hsa-miR-125a-5p	1	0	1	1	1	1	DACH2	dachshund homolog 2 (Drosophila)
hsa-miR-125a-5p	1	0	1	1	1	1	PDPK1	3-phosphoinositide dependent protein kinase-1
hsa-miR-125a-5p	0	0	1	0	1	1	METTL12	methyltransferase like 12
hsa-miR-125a-5p	1	0	1	0	1	1	HSPA12A	heat shock 70kDa protein 12A
hsa-miR-125a-5p	0	0	1	1	0	0	NT5DC4	5'-nucleotidase domain containing 4
hsa-miR-125a-5p	0	0	1	1	1	1	ACAD9	acyl-CoA dehydrogenase family, member 9
hsa-miR-125a-5p	1	0	1	1	1	1	ROCK1	Rho-associated, coiled-coil containing protein kinase 1
hsa-miR-125a-5p	0	0	1	1	1	1	RABGAP1L	RAB GTPase activating protein 1-like
hsa-miR-125a-5p	0	0	1	1	1	1	MTHFD2L	methylenetetrahydrofolate dehydrogenase (NADP+ dependent) 2-like
hsa-miR-125a-5p	0	0	1	1	1	1	FAM90A1	family with sequence similarity 90, member A1
hsa-miR-125a-5p	0	0	1	0	0	0	LOC646168	uncharacterized LOC646168
hsa-miR-125a-5p	0	0	1	0	0	0	DKFZp686O1327	uncharacterized LOC401014
hsa-miR-125a-5p	1	0	1	0	1	1	PSD3	pleckstrin and Sec7 domain containing 3
hsa-miR-125a-5p	0	0	1	0	0	0	LOC283914	uncharacterized LOC283914
hsa-miR-125a-5p	0	0	1	1	1	1	DOCK8	dedicator of cytokinesis 8
hsa-miR-125a-5p	0	0	1	0	0	0	LOC348120	uncharacterized LOC348120
hsa-miR-125a-5p	0	0	1	1	1	1	ANKDD1A	ankyrin repeat and death domain containing 1A
hsa-miR-125a-5p	0	0	1	1	0	0	NLRC5	NLR family, CARD domain containing 5
hsa-miR-125a-5p	1	0	1	1	1	1	PDCD6	programmed cell death 6
hsa-miR-125a-5p	0	0	1	0	0	0	AURKAPS1	aurora kinase A pseudogene 1
hsa-miR-125a-5p	1	0	1	1	1	1	SCUBE3	signal peptide, CUB domain, EGF-like 3
hsa-miR-125a-5p	0	0	1	1	0	0	LYZL6	lysozyme-like 6
hsa-miR-125a-5p	1	0	1	1	0	0	DALRD3	DALR anticodon binding domain containing 3
hsa-miR-125a-5p	0	0	1	1	0	0	BCL7C	B-cell CLL/lymphoma 7C
hsa-miR-125a-5p	1	0	1	1	1	1	DUSP9	dual specificity phosphatase 9
hsa-miR-125a-5p	0	0	1	1	0	0	WDR90	WD repeat domain 90
hsa-miR-125a-5p	0	0	1	1	1	1	GPATCH2	G patch domain containing 2
hsa-miR-125a-5p	0	0	1	1	0	0	TM6SF1	transmembrane 6 superfamily member 1
hsa-miR-125a-5p	0	0	1	1	0	0	DHX30	DEAH (Asp-Glu-Ala-His) box polypeptide 30
hsa-miR-125a-5p	0	0	1	1	1	1	VNN2	vanin 2
hsa-miR-125a-5p	0	0	1	1	0	0	TSNARE1	t-SNARE domain containing 1
hsa-miR-125a-5p	0	0	1	1	1	1	AQPEP	laeverin
hsa-miR-125a-5p	0	0	1	0	0	0	PTGER4P2	prostaglandin E receptor 4 (subtype EP4) pseudogene 2
hsa-miR-125a-5p	0	0	1	1	0	0	CYP4F30P	cytochrome P450, family 4, subfamily F, polypeptide 30, pseudogene
hsa-miR-125a-5p	0	0	1	1	1	1	MSTO1	misato homolog 1 (Drosophila)
hsa-miR-125a-5p	0	0	1	1	0	0	SLAMF9	SLAM family member 9
hsa-miR-125a-5p	0	0	1	1	0	0	NDUFAF2	NADH dehydrogenase (ubiquinone) complex I, assembly factor 2
hsa-miR-125a-5p	0	0	1	1	1	1	SLC11A1	solute carrier family 11 (proton-coupled divalent metal ion transporters), member 1
hsa-miR-125a-5p	0	0	1	0	0	0	ULK4P1	unc-51-like kinase 4 (C. elegans) pseudogene 1
hsa-miR-125a-5p	0	0	1	0	0	0	ULK4P3	unc-51-like kinase 4 (C. elegans) pseudogene 3
hsa-miR-125a-5p	0	0	1	1	0	0	PER1	period homolog 1 (Drosophila)
hsa-miR-125a-5p	0	0	1	1	1	1	GNG10	guanine nucleotide binding protein (G protein), gamma 10
hsa-miR-125a-5p	0	0	1	1	0	0	C8orf31	chromosome 8 open reading frame 31
hsa-miR-125a-5p	1	0	1	1	1	1	OPCML	opioid binding protein/cell adhesion molecule-like
hsa-miR-125a-5p	1	0	1	0	1	1	AMMECR1L	AMME chromosomal region gene 1-like
hsa-miR-125a-5p	0	0	1	0	0	0	LINC00537	long intergenic non-protein coding RNA 537
hsa-miR-125a-5p	0	0	1	0	0	0	TBC1D25	TBC1 domain family, member 25
hsa-miR-125a-5p	0	0	1	0	0	0	LOC554249	uncharacterized LOC554249
hsa-miR-125a-5p	1	0	1	1	1	1	GBF1	golgi brefeldin A resistant guanine nucleotide exchange factor 1
hsa-miR-125a-5p	1	0	1	1	1	1	PLXNA2	plexin A2
hsa-miR-125a-5p	1	0	1	1	1	1	STK38	serine/threonine kinase 38
hsa-miR-125a-5p	0	0	1	1	1	1	NELL1	NEL-like 1 (chicken)
hsa-miR-125a-5p	0	0	1	1	1	1	KLRF1	killer cell lectin-like receptor subfamily F, member 1
hsa-miR-125a-5p	1	0	1	0	1	1	ARPP19	cAMP-regulated phosphoprotein, 19kDa
hsa-miR-125a-5p	1	0	1	1	1	1	LRRC15	leucine rich repeat containing 15
hsa-miR-125a-5p	0	0	1	1	1	1	ZNF365	zinc finger protein 365
hsa-miR-125a-5p	1	0	1	1	1	1	GABRB2	gamma-aminobutyric acid (GABA) A receptor, beta 2
hsa-miR-125a-5p	0	0	1	1	1	1	MUC21	mucin 21, cell surface associated
hsa-miR-125a-5p	0	0	1	1	1	1	SLC25A35	solute carrier family 25, member 35
hsa-miR-125a-5p	0	0	1	1	0	0	TMEM126B	transmembrane protein 126B
hsa-miR-125a-5p	0	0	1	1	0	0	SH2D6	SH2 domain containing 6
hsa-miR-125a-5p	1	0	1	0	1	1	MAP3K9	mitogen-activated protein kinase kinase kinase 9
hsa-miR-125a-5p	0	0	1	1	0	0	PRAMEF10	PRAME family member 10
hsa-miR-125a-5p	1	0	1	1	1	1	ITSN1	intersectin 1 (SH3 domain protein)
hsa-miR-125a-5p	1	0	1	0	1	1	PRDM10	PR domain containing 10
hsa-miR-125a-5p	0	0	1	1	0	0	RGSL1	regulator of G-protein signaling like 1
hsa-miR-125a-5p	1	0	1	1	1	1	MEGF11	multiple EGF-like-domains 11
hsa-miR-125a-5p	0	0	1	1	0	0	DZANK1	double zinc ribbon and ankyrin repeat domains 1
hsa-miR-125a-5p	0	0	1	0	0	0	FAM225B	family with sequence similarity 225, member B (non-protein coding)
hsa-miR-125a-5p	0	0	1	0	0	0	FLJ38723	uncharacterized FLJ38723
hsa-miR-125a-5p	0	0	1	1	1	1	TINF2	TERF1 (TRF1)-interacting nuclear factor 2
hsa-miR-125a-5p	0	0	1	1	0	0	NDRG2	NDRG family member 2
hsa-miR-125a-5p	0	0	1	1	0	0	PSMB5	proteasome (prosome, macropain) subunit, beta type, 5
hsa-miR-125a-5p	0	0	1	0	0	0	LINC00643	long intergenic non-protein coding RNA 643
hsa-miR-125a-5p	1	0	1	1	1	1	ATP2B4	ATPase, Ca++ transporting, plasma membrane 4
hsa-miR-125a-5p	0	0	1	1	1	1	APTX	aprataxin
hsa-miR-125a-5p	0	0	1	1	1	1	STAT2	signal transducer and activator of transcription 2, 113kDa
hsa-miR-125a-5p	0	0	1	1	1	1	DEPDC5	DEP domain containing 5
hsa-miR-125a-5p	0	0	1	0	0	0	SMG1P1	smg-1 homolog, phosphatidylinositol 3-kinase-related kinase pseudogene 1
hsa-miR-125a-5p	0	0	1	1	1	1	ADH1B	alcohol dehydrogenase 1B (class I), beta polypeptide
hsa-miR-125a-5p	1	0	1	1	1	1	GTDC1	glycosyltransferase-like domain containing 1
hsa-miR-125a-5p	0	0	1	1	1	1	HTR2A	5-hydroxytryptamine (serotonin) receptor 2A, G protein-coupled
hsa-miR-125a-5p	1	0	1	1	1	1	TSC22D3	TSC22 domain family, member 3
hsa-miR-125a-5p	1	0	1	1	1	1	HDAC1	histone deacetylase 1
hsa-miR-125a-5p	1	0	1	1	1	1	PTPN3	protein tyrosine phosphatase, non-receptor type 3
hsa-miR-125a-5p	1	0	1	1	1	1	AZI2	5-azacytidine induced 2
hsa-miR-125a-5p	0	0	1	0	0	0	ZNRD1-AS1	ZNRD1 antisense RNA 1
hsa-miR-125a-5p	1	0	1	1	1	1	ASB6	ankyrin repeat and SOCS box containing 6
hsa-miR-125a-5p	1	0	1	1	1	1	CREB3L2	cAMP responsive element binding protein 3-like 2
hsa-miR-125a-5p	0	0	1	0	1	1	CD59	CD59 molecule, complement regulatory protein
hsa-miR-125a-5p	0	0	1	1	0	0	SREBF2	sterol regulatory element binding transcription factor 2
hsa-miR-125a-5p	0	0	1	1	1	1	SLC25A11	solute carrier family 25 (mitochondrial carrier; oxoglutarate carrier), member 11
hsa-miR-125a-5p	0	0	1	1	0	0	SLC39A7	solute carrier family 39 (zinc transporter), member 7
hsa-miR-125a-5p	0	0	1	1	1	1	GTPBP3	GTP binding protein 3 (mitochondrial)
hsa-miR-125a-5p	0	0	1	1	1	1	FBXO36	F-box protein 36
hsa-miR-125a-5p	0	0	1	1	0	0	TMEM62	transmembrane protein 62
hsa-miR-125a-5p	1	0	1	1	1	1	DDX19B	DEAD (Asp-Glu-Ala-Asp) box polypeptide 19B
hsa-miR-125a-5p	0	0	1	1	1	1	NR2C2AP	nuclear receptor 2C2-associated protein
hsa-miR-125a-5p	0	0	1	1	0	0	SLC25A33	solute carrier family 25 (pyrimidine nucleotide carrier), member 33
hsa-miR-125a-5p	0	0	1	1	0	0	PSG8	pregnancy specific beta-1-glycoprotein 8
hsa-miR-125a-5p	0	0	1	1	0	0	CYGB	cytoglobin
hsa-miR-125a-5p	0	0	1	1	0	0	FCGRT	Fc fragment of IgG, receptor, transporter, alpha
hsa-miR-125a-5p	1	0	1	1	0	0	ELOVL1	ELOVL fatty acid elongase 1
hsa-miR-125a-5p	0	0	1	1	1	1	TASP1	taspase, threonine aspartase, 1
hsa-miR-125a-5p	1	0	1	1	1	1	ADM	adrenomedullin
hsa-miR-125a-5p	0	0	1	1	1	1	BLZF1	basic leucine zipper nuclear factor 1
hsa-miR-125a-5p	1	0	1	1	1	1	ASPH	aspartate beta-hydroxylase
hsa-miR-125a-5p	1	0	1	0	1	1	PTPLAD1	protein tyrosine phosphatase-like A domain containing 1
hsa-miR-125a-5p	0	0	1	1	1	1	CCDC115	coiled-coil domain containing 115
hsa-miR-125a-5p	0	0	1	1	0	0	RPL7L1	ribosomal protein L7-like 1
hsa-miR-125a-5p	0	0	1	1	1	1	CYB5R3	cytochrome b5 reductase 3
hsa-miR-125a-5p	1	0	1	1	1	1	PLEKHB2	pleckstrin homology domain containing, family B (evectins) member 2
hsa-miR-125a-5p	0	0	1	1	1	1	GRAP2	GRB2-related adaptor protein 2
hsa-miR-125a-5p	0	0	1	1	0	0	KIAA0100	KIAA0100
hsa-miR-125a-5p	0	0	1	1	1	1	ANKRD53	ankyrin repeat domain 53
hsa-miR-125a-5p	0	0	1	1	1	1	STON1	stonin 1
hsa-miR-125a-5p	0	0	1	1	1	1	TRIM68	tripartite motif containing 68
hsa-miR-125a-5p	0	0	1	1	0	0	B9D1	B9 protein domain 1
hsa-miR-125a-5p	0	0	1	1	1	1	MS4A6A	membrane-spanning 4-domains, subfamily A, member 6A
hsa-miR-125a-5p	1	0	1	1	1	1	TMEM245	transmembrane protein 245
hsa-miR-125a-5p	0	0	1	1	1	1	VPS16	vacuolar protein sorting 16 homolog (S. cerevisiae)
hsa-miR-125a-5p	0	0	1	1	0	0	MAST1	microtubule associated serine/threonine kinase 1
hsa-miR-125a-5p	0	0	1	1	1	1	HADHB	hydroxyacyl-CoA dehydrogenase/3-ketoacyl-CoA thiolase/enoyl-CoA hydratase (trifunctional protein), beta subunit
hsa-miR-125a-5p	0	0	1	1	0	0	RPS3	ribosomal protein S3
hsa-miR-125a-5p	0	0	1	1	0	0	PTGDS	prostaglandin D2 synthase 21kDa (brain)
hsa-miR-125a-5p	1	0	1	1	1	1	DOK4	docking protein 4
hsa-miR-125a-5p	0	0	1	0	0	0	LOC100130353	hippocampus abundant transcript-like 1 pseudogene
hsa-miR-125a-5p	0	0	1	1	0	0	CCDC22	coiled-coil domain containing 22
hsa-miR-125a-5p	0	0	1	1	1	1	SERP2	stress-associated endoplasmic reticulum protein family member 2
hsa-miR-125a-5p	1	0	1	1	1	1	ARNTL	aryl hydrocarbon receptor nuclear translocator-like
hsa-miR-125a-5p	0	0	1	1	1	1	PEX19	peroxisomal biogenesis factor 19
hsa-miR-125a-5p	0	0	1	1	1	1	FKBP1B	FK506 binding protein 1B, 12.6 kDa
hsa-miR-125a-5p	0	0	1	1	1	1	CD1C	CD1c molecule
hsa-miR-125a-5p	0	0	1	1	1	1	TCTN3	tectonic family member 3
hsa-miR-125a-5p	0	0	1	1	1	1	FUS	fused in sarcoma
hsa-miR-125a-5p	0	0	1	1	1	1	SLCO4A1	solute carrier organic anion transporter family, member 4A1
hsa-miR-125a-5p	0	0	1	1	1	1	ZNF333	zinc finger protein 333
hsa-miR-125a-5p	0	0	1	1	0	0	BCKDK	branched chain ketoacid dehydrogenase kinase
hsa-miR-125a-5p	1	0	1	1	0	0	CCM2	cerebral cavernous malformation 2
hsa-miR-125a-5p	1	0	1	0	1	1	CD47	CD47 molecule
hsa-miR-125a-5p	0	0	1	1	0	0	TESK1	testis-specific kinase 1
hsa-miR-125a-5p	0	0	1	1	1	1	OTOR	otoraplin
hsa-miR-125a-5p	0	0	1	1	1	1	CIRBP	cold inducible RNA binding protein
hsa-miR-125a-5p	1	0	1	1	1	1	JUNB	jun B proto-oncogene
hsa-miR-125a-5p	0	0	1	1	0	0	CD2BP2	CD2 (cytoplasmic tail) binding protein 2
hsa-miR-125a-5p	1	0	1	0	1	1	DNMT3A	DNA (cytosine-5-)-methyltransferase 3 alpha
hsa-miR-125a-5p	0	0	1	1	0	0	IL11RA	interleukin 11 receptor, alpha
hsa-miR-125a-5p	0	0	1	1	1	1	BDH1	3-hydroxybutyrate dehydrogenase, type 1
hsa-miR-125a-5p	1	0	1	1	0	0	MMP11	matrix metallopeptidase 11 (stromelysin 3)
hsa-miR-125a-5p	0	0	1	1	0	0	CD38	CD38 molecule
hsa-miR-125a-5p	0	0	1	0	0	0	MYSM1	Myb-like, SWIRM and MPN domains 1
hsa-miR-125a-5p	1	0	1	1	1	1	AGPAT4	1-acylglycerol-3-phosphate O-acyltransferase 4 (lysophosphatidic acid acyltransferase, delta)
hsa-miR-125a-5p	0	0	1	0	0	0	LOC731789	uncharacterized LOC731789
hsa-miR-125a-5p	0	0	1	0	0	0	LINC00661	long intergenic non-protein coding RNA 661
hsa-miR-125a-5p	1	0	1	1	1	1	HECW2	HECT, C2 and WW domain containing E3 ubiquitin protein ligase 2
hsa-miR-125a-5p	0	0	1	0	0	0	DANCR	differentiation antagonizing non-protein coding RNA
hsa-miR-125a-5p	1	0	1	0	1	1	KLHDC10	kelch domain containing 10
hsa-miR-125a-5p	0	0	1	1	1	1	PARP14	poly (ADP-ribose) polymerase family, member 14
hsa-miR-125a-5p	0	0	1	1	1	1	PTGS1	prostaglandin-endoperoxide synthase 1 (prostaglandin G/H synthase and cyclooxygenase)
hsa-miR-125a-5p	1	0	1	1	1	1	TRIOBP	TRIO and F-actin binding protein
hsa-miR-125a-5p	0	0	1	1	0	0	GPR111	G protein-coupled receptor 111
hsa-miR-125a-5p	1	0	1	1	1	1	CAPZA2	capping protein (actin filament) muscle Z-line, alpha 2
hsa-miR-125a-5p	0	0	1	0	0	0	PILRB	paired immunoglobin-like type 2 receptor beta
hsa-miR-125a-5p	0	0	1	1	1	1	PROS1	protein S (alpha)
hsa-miR-125a-5p	1	0	1	1	1	1	TNFAIP1	tumor necrosis factor, alpha-induced protein 1 (endothelial)
hsa-miR-125a-5p	1	0	1	1	1	1	IRF1	interferon regulatory factor 1
hsa-miR-125a-5p	0	0	1	1	1	1	ADPRH	ADP-ribosylarginine hydrolase
hsa-miR-125a-5p	1	0	1	1	1	1	ELK1	ELK1, member of ETS oncogene family
hsa-miR-125a-5p	0	0	1	0	0	0	PVT1	Pvt1 oncogene (non-protein coding)
hsa-miR-125a-5p	0	0	1	1	1	1	GSS	glutathione synthetase
hsa-miR-125a-5p	1	0	1	0	1	1	ITGB3	integrin, beta 3 (platelet glycoprotein IIIa, antigen CD61)
hsa-miR-125a-5p	1	0	1	1	1	1	LEP	leptin
hsa-miR-125a-5p	1	0	1	1	1	1	PTCH1	patched 1
hsa-miR-125a-5p	0	0	1	1	1	1	RS1	retinoschisin 1
hsa-miR-125a-5p	1	0	1	0	1	1	CYBB	cytochrome b-245, beta polypeptide
hsa-miR-125a-5p	1	0	1	1	1	1	AQP2	aquaporin 2 (collecting duct)
hsa-miR-125a-5p	1	0	1	1	1	1	ATRX	alpha thalassemia/mental retardation syndrome X-linked
hsa-miR-125a-5p	0	0	1	1	1	1	CYP11B2	cytochrome P450, family 11, subfamily B, polypeptide 2
hsa-miR-125a-5p	1	0	1	1	1	1	HOXA13	homeobox A13
hsa-miR-125a-5p	1	0	1	1	1	1	DCX	doublecortin
hsa-miR-125a-5p	0	0	1	0	1	1	CCR5	chemokine (C-C motif) receptor 5 (gene/pseudogene)
hsa-miR-125a-5p	0	0	1	1	1	1	C7	complement component 7
hsa-miR-125a-5p	0	0	1	1	1	1	IFNG	interferon, gamma
hsa-miR-125a-5p	0	0	1	1	1	1	EPO	erythropoietin
hsa-miR-125a-5p	1	0	1	1	1	1	GABRB3	gamma-aminobutyric acid (GABA) A receptor, beta 3
hsa-miR-125a-5p	1	0	1	1	1	1	HTR4	5-hydroxytryptamine (serotonin) receptor 4, G protein-coupled
hsa-miR-125a-5p	0	0	1	1	1	1	HTR7	5-hydroxytryptamine (serotonin) receptor 7, adenylate cyclase-coupled
hsa-miR-125a-5p	1	0	1	0	1	1	SMAD5	SMAD family member 5
hsa-miR-125a-5p	0	0	1	1	1	1	C16orf87	chromosome 16 open reading frame 87
hsa-miR-125a-5p	0	0	1	1	1	1	DDI1	DNA-damage inducible 1 homolog 1 (S. cerevisiae)
hsa-miR-125a-5p	1	0	1	0	1	1	PPARA	peroxisome proliferator-activated receptor alpha
hsa-miR-125a-5p	0	0	1	1	1	1	ATP5G2	ATP synthase, H+ transporting, mitochondrial Fo complex, subunit C2 (subunit 9)
hsa-miR-125a-5p	1	0	1	1	1	1	WNK3	WNK lysine deficient protein kinase 3
hsa-miR-125a-5p	1	0	1	1	1	1	KLHL31	kelch-like 31 (Drosophila)
hsa-miR-125a-5p	1	0	1	1	1	1	BICD2	bicaudal D homolog 2 (Drosophila)
hsa-miR-125a-5p	0	0	1	1	1	1	SP5	Sp5 transcription factor
hsa-miR-125a-5p	0	0	1	1	0	0	MANBAL	mannosidase, beta A, lysosomal-like
hsa-miR-125a-5p	0	0	1	1	1	1	CCDC144NL	coiled-coil domain containing 144 family, N-terminal like
hsa-miR-125a-5p	0	0	1	1	1	1	CLEC2D	C-type lectin domain family 2, member D
hsa-miR-125a-5p	1	0	1	1	1	1	NCK2	NCK adaptor protein 2
hsa-miR-125a-5p	1	0	1	1	1	1	PLCXD3	phosphatidylinositol-specific phospholipase C, X domain containing 3
hsa-miR-125a-5p	0	0	1	0	1	1	WDR35	WD repeat domain 35
hsa-miR-125a-5p	1	0	1	1	0	0	SDC1	syndecan 1
hsa-miR-125a-5p	1	0	1	0	1	1	C18orf25	chromosome 18 open reading frame 25
hsa-miR-125a-5p	1	0	1	0	1	1	KIAA2022	KIAA2022
hsa-miR-125a-5p	1	0	1	1	1	1	LPHN1	latrophilin 1
hsa-miR-125a-5p	1	0	1	1	1	1	RBPMS	RNA binding protein with multiple splicing
hsa-miR-125a-5p	1	0	1	1	1	1	FNIP1	folliculin interacting protein 1
hsa-miR-125a-5p	0	0	1	1	1	1	GEMIN2	gem (nuclear organelle) associated protein 2
hsa-miR-125a-5p	1	0	1	0	1	1	RCHY1	ring finger and CHY zinc finger domain containing 1, E3 ubiquitin protein ligase
hsa-miR-125a-5p	1	0	1	0	1	1	ERMN	ermin, ERM-like protein
hsa-miR-125a-5p	1	0	1	1	1	1	BCL2L15	BCL2-like 15
hsa-miR-125a-5p	1	0	1	0	1	1	CREB5	cAMP responsive element binding protein 5
hsa-miR-125a-5p	0	0	1	1	1	1	CHCHD7	coiled-coil-helix-coiled-coil-helix domain containing 7
hsa-miR-125a-5p	0	0	1	1	0	0	RGR	retinal G protein coupled receptor
hsa-miR-125a-5p	1	0	1	0	1	1	ZKSCAN2	zinc finger with KRAB and SCAN domains 2
hsa-miR-125a-5p	1	0	1	1	1	1	SORCS1	sortilin-related VPS10 domain containing receptor 1
hsa-miR-125a-5p	1	0	1	1	1	1	C12orf68	chromosome 12 open reading frame 68
hsa-miR-125a-5p	0	0	1	1	1	1	BTBD11	BTB (POZ) domain containing 11
hsa-miR-125a-5p	1	0	1	0	1	1	BRCC3	BRCA1/BRCA2-containing complex, subunit 3
hsa-miR-125a-5p	0	0	1	1	1	1	HAX1	HCLS1 associated protein X-1
hsa-miR-125a-5p	1	0	1	1	1	1	SBK1	SH3-binding domain kinase 1
hsa-miR-125a-5p	0	0	1	1	1	1	VNN3	vanin 3
hsa-miR-125a-5p	0	0	1	1	0	0	BRMS1	breast cancer metastasis suppressor 1
hsa-miR-125a-5p	1	0	1	0	1	1	CELF2	CUGBP, Elav-like family member 2
hsa-miR-125a-5p	1	0	1	0	1	1	ANO6	anoctamin 6
hsa-miR-125a-5p	1	0	1	1	1	1	VEGFA	vascular endothelial growth factor A
hsa-miR-125a-5p	0	0	1	0	0	0	NPS	neuropeptide S
hsa-miR-125a-5p	0	0	1	1	1	1	COX19	COX19 cytochrome c oxidase assembly homolog (S. cerevisiae)
hsa-miR-125a-5p	1	0	1	1	1	1	MYCL1	v-myc myelocytomatosis viral oncogene homolog 1, lung carcinoma derived (avian)
hsa-miR-125a-5p	1	0	1	1	1	1	PPM1B	protein phosphatase, Mg2+/Mn2+ dependent, 1B
hsa-miR-125a-5p	1	0	1	0	1	1	RYR2	ryanodine receptor 2 (cardiac)
hsa-miR-125a-5p	0	0	1	1	1	1	SKA1	spindle and kinetochore associated complex subunit 1
hsa-miR-125a-5p	1	0	1	0	1	1	CCNL2	cyclin L2
hsa-miR-125a-5p	0	0	1	1	0	0	DPH2	DPH2 homolog (S. cerevisiae)
hsa-miR-125a-5p	0	0	1	0	1	1	OPALIN	oligodendrocytic myelin paranodal and inner loop protein
hsa-miR-125a-5p	1	0	1	0	1	1	CD83	CD83 molecule
hsa-miR-125a-5p	1	0	1	1	1	1	CRCP	CGRP receptor component
hsa-miR-125a-5p	0	0	1	1	1	1	C10orf53	chromosome 10 open reading frame 53
hsa-miR-125a-5p	0	0	1	1	1	1	GEMIN8	gem (nuclear organelle) associated protein 8
hsa-miR-125a-5p	1	0	1	1	1	1	SLC9A6	solute carrier family 9, subfamily A (NHE6, cation proton antiporter 6), member 6
hsa-miR-125a-5p	1	0	1	1	1	1	NSL1	NSL1, MIND kinetochore complex component, homolog (S. cerevisiae)
hsa-miR-125a-5p	1	0	1	1	1	1	FRS2	fibroblast growth factor receptor substrate 2
hsa-miR-125a-5p	0	0	1	1	1	1	TMEM8B	transmembrane protein 8B
hsa-miR-125a-5p	1	0	1	1	1	1	PVRL2	poliovirus receptor-related 2 (herpesvirus entry mediator B)
hsa-miR-125a-5p	0	0	1	1	1	1	PPCS	phosphopantothenoylcysteine synthetase
hsa-miR-125a-5p	0	0	1	1	1	1	KLK5	kallikrein-related peptidase 5
hsa-miR-125a-5p	0	0	1	1	1	1	FKTN	fukutin
hsa-miR-125a-5p	1	0	1	1	1	1	DMP1	dentin matrix acidic phosphoprotein 1
hsa-miR-125a-5p	1	0	1	1	1	1	ZNF697	zinc finger protein 697
hsa-miR-125a-5p	0	0	1	0	1	1	RBM44	RNA binding motif protein 44
hsa-miR-125a-5p	1	0	1	1	1	1	DGKG	diacylglycerol kinase, gamma 90kDa
hsa-miR-125a-5p	1	0	1	1	1	1	REPS2	RALBP1 associated Eps domain containing 2
hsa-miR-125a-5p	0	0	1	1	1	1	AMELY	amelogenin, Y-linked
hsa-miR-125a-5p	0	0	1	1	1	1	ENTPD3	ectonucleoside triphosphate diphosphohydrolase 3
hsa-miR-125a-5p	0	0	1	1	1	1	DNAH8	dynein, axonemal, heavy chain 8
hsa-miR-125a-5p	0	0	1	0	1	1	FMO2	flavin containing monooxygenase 2 (non-functional)
hsa-miR-125a-5p	0	0	1	1	0	0	HSPB2	heat shock 27kDa protein 2
hsa-miR-125a-5p	1	0	1	1	1	1	NDST1	N-deacetylase/N-sulfotransferase (heparan glucosaminyl) 1
hsa-miR-125a-5p	0	0	1	1	1	1	IL13RA1	interleukin 13 receptor, alpha 1
hsa-miR-125a-5p	1	0	1	1	1	1	ADD2	adducin 2 (beta)
hsa-miR-125a-5p	1	0	1	1	1	1	ARF3	ADP-ribosylation factor 3
hsa-miR-125a-5p	0	0	1	1	0	0	RHOG	ras homolog family member G
hsa-miR-125a-5p	0	0	1	1	1	1	AXL	AXL receptor tyrosine kinase
hsa-miR-125a-5p	0	0	1	0	0	0	BAI1	brain-specific angiogenesis inhibitor 1
hsa-miR-125a-5p	0	0	1	1	1	1	BTN1A1	butyrophilin, subfamily 1, member A1
hsa-miR-125a-5p	0	0	1	1	1	1	CD34	CD34 molecule
hsa-miR-125a-5p	1	0	1	1	1	1	CDC25A	cell division cycle 25 homolog A (S. pombe)
hsa-miR-125a-5p	1	0	1	1	1	1	CENPB	centromere protein B, 80kDa
hsa-miR-125a-5p	0	0	1	1	0	0	CNTFR	ciliary neurotrophic factor receptor
hsa-miR-125a-5p	1	0	1	1	1	1	COL4A1	collagen, type IV, alpha 1
hsa-miR-125a-5p	1	0	1	1	1	1	SLC31A1	solute carrier family 31 (copper transporters), member 1
hsa-miR-125a-5p	1	0	1	1	1	1	CSNK2A1	casein kinase 2, alpha 1 polypeptide
hsa-miR-125a-5p	1	0	1	1	0	0	DES	desmin
hsa-miR-125a-5p	1	0	1	1	1	1	DPP4	dipeptidyl-peptidase 4
hsa-miR-125a-5p	0	0	1	1	1	1	DSG1	desmoglein 1
hsa-miR-125a-5p	0	0	1	1	0	0	IGFBP6	insulin-like growth factor binding protein 6
hsa-miR-125a-5p	1	0	1	1	1	1	IL13	interleukin 13
hsa-miR-125a-5p	1	0	1	1	1	1	KCNJ3	potassium inwardly-rectifying channel, subfamily J, member 3
hsa-miR-125a-5p	1	0	1	1	1	1	KCNJ10	potassium inwardly-rectifying channel, subfamily J, member 10
hsa-miR-125a-5p	0	0	1	1	1	1	KLRC2	killer cell lectin-like receptor subfamily C, member 2
hsa-miR-125a-5p	1	0	1	1	1	1	KPNA4	karyopherin alpha 4 (importin alpha 3)
hsa-miR-125a-5p	1	0	1	1	1	1	LIF	leukemia inhibitory factor
hsa-miR-125a-5p	1	0	1	1	1	1	LIMK1	LIM domain kinase 1
hsa-miR-125a-5p	1	0	1	1	1	1	MSN	moesin
hsa-miR-125a-5p	0	0	1	1	1	1	MTAP	methylthioadenosine phosphorylase
hsa-miR-125a-5p	0	0	1	1	0	0	MYOG	myogenin (myogenic factor 4)
hsa-miR-125a-5p	1	0	1	1	1	1	NPTX1	neuronal pentraxin I
hsa-miR-125a-5p	0	0	1	0	1	1	OAZ2	ornithine decarboxylase antizyme 2
hsa-miR-125a-5p	0	0	1	0	1	1	OPHN1	oligophrenin 1
hsa-miR-125a-5p	1	0	1	1	1	1	PBX2	pre-B-cell leukemia homeobox 2
hsa-miR-125a-5p	1	0	1	0	1	1	PCDHGC3	protocadherin gamma subfamily C, 3
hsa-miR-125a-5p	0	0	1	1	1	1	PIM1	pim-1 oncogene
hsa-miR-125a-5p	0	0	1	1	1	1	PPP1R3A	protein phosphatase 1, regulatory subunit 3A
hsa-miR-125a-5p	0	0	1	1	1	1	MAP2K6	mitogen-activated protein kinase kinase 6
hsa-miR-125a-5p	1	0	1	1	1	1	PROX1	prospero homeobox 1
hsa-miR-125a-5p	1	0	1	1	1	1	PTPN2	protein tyrosine phosphatase, non-receptor type 2
hsa-miR-125a-5p	1	0	1	1	1	1	PTPRK	protein tyrosine phosphatase, receptor type, K
hsa-miR-125a-5p	1	0	1	1	1	1	CCL21	chemokine (C-C motif) ligand 21
hsa-miR-125a-5p	1	0	1	0	1	1	CCL22	chemokine (C-C motif) ligand 22
hsa-miR-125a-5p	1	0	1	1	1	1	SHB	Src homology 2 domain containing adaptor protein B
hsa-miR-125a-5p	1	0	1	1	1	1	SMARCC1	SWI/SNF related, matrix associated, actin dependent regulator of chromatin, subfamily c, member 1
hsa-miR-125a-5p	1	0	1	1	1	1	SSR2	signal sequence receptor, beta (translocon-associated protein beta)
hsa-miR-125a-5p	0	0	1	1	0	0	SSX2	synovial sarcoma, X breakpoint 2
hsa-miR-125a-5p	1	0	1	0	1	1	STC1	stanniocalcin 1
hsa-miR-125a-5p	0	0	1	1	1	1	SUPT6H	suppressor of Ty 6 homolog (S. cerevisiae)
hsa-miR-125a-5p	0	0	1	0	1	1	ZFY	zinc finger protein, Y-linked
hsa-miR-125a-5p	1	0	1	0	1	1	ZIC1	Zic family member 1
hsa-miR-125a-5p	0	0	1	1	0	0	HIST1H4G	histone cluster 1, H4g
hsa-miR-125a-5p	0	0	1	1	1	1	PIP5K1A	phosphatidylinositol-4-phosphate 5-kinase, type I, alpha
hsa-miR-125a-5p	0	0	1	1	0	0	EIF4EBP3	eukaryotic translation initiation factor 4E binding protein 3
hsa-miR-125a-5p	1	0	1	0	1	1	PCDHGA12	protocadherin gamma subfamily A, 12
hsa-miR-125a-5p	1	0	1	0	1	1	PCDHGB4	protocadherin gamma subfamily B, 4
hsa-miR-125a-5p	1	0	1	1	1	1	B3GALT2	UDP-Gal:betaGlcNAc beta 1,3-galactosyltransferase, polypeptide 2
hsa-miR-125a-5p	1	0	1	1	1	1	NRP2	neuropilin 2
hsa-miR-125a-5p	0	0	1	0	1	1	EIF4EBP2	eukaryotic translation initiation factor 4E binding protein 2
hsa-miR-125a-5p	1	0	1	0	1	1	SLC1A2	solute carrier family 1 (glial high affinity glutamate transporter), member 2
hsa-miR-125a-5p	1	0	1	0	1	1	MED14	mediator complex subunit 14
hsa-miR-125a-5p	1	0	1	0	1	1	AKAP6	A kinase (PRKA) anchor protein 6
hsa-miR-125a-5p	1	0	1	0	1	1	CEBPA	CCAAT/enhancer binding protein (C/EBP), alpha
hsa-miR-125a-5p	1	0	1	1	1	1	DAG1	dystroglycan 1 (dystrophin-associated glycoprotein 1)
hsa-miR-125a-5p	1	0	1	1	1	1	DUSP5	dual specificity phosphatase 5
hsa-miR-125a-5p	1	0	1	1	1	1	DVL2	dishevelled, dsh homolog 2 (Drosophila)
hsa-miR-125a-5p	1	0	1	1	1	1	EGR3	early growth response 3
hsa-miR-125a-5p	1	0	1	1	1	1	EPHB3	EPH receptor B3
hsa-miR-125a-5p	1	0	1	0	1	1	FOXD1	forkhead box D1
hsa-miR-125a-5p	1	0	1	1	0	0	HOXC6	homeobox C6
hsa-miR-125a-5p	0	0	1	1	0	0	NFKBIE	nuclear factor of kappa light polypeptide gene enhancer in B-cells inhibitor, epsilon
hsa-miR-125a-5p	0	0	1	1	1	1	SMS	spermine synthase
hsa-miR-125a-5p	1	0	1	1	1	1	COIL	coilin
hsa-miR-125a-5p	1	0	1	1	0	0	MMP14	matrix metallopeptidase 14 (membrane-inserted)
hsa-miR-125a-5p	0	0	1	1	1	1	SIM1	single-minded homolog 1 (Drosophila)
hsa-miR-125a-5p	1	0	1	1	0	0	ZMYM3	zinc finger, MYM-type 3
hsa-miR-125a-5p	0	0	1	1	1	1	CLEC2B	C-type lectin domain family 2, member B
hsa-miR-125a-5p	0	0	1	0	1	1	FOSL2	FOS-like antigen 2
hsa-miR-125a-5p	0	0	1	1	1	1	PDIA3	protein disulfide isomerase family A, member 3
hsa-miR-125a-5p	1	0	1	1	1	1	NEFM	neurofilament, medium polypeptide
hsa-miR-125a-5p	1	0	1	1	1	1	RALA	v-ral simian leukemia viral oncogene homolog A (ras related)
hsa-miR-125a-5p	1	0	1	0	0	0	FRAT1	frequently rearranged in advanced T-cell lymphomas
hsa-miR-125a-5p	1	0	1	1	1	1	SCARB2	scavenger receptor class B, member 2
hsa-miR-125a-5p	1	0	1	1	1	1	HOXA1	homeobox A1
hsa-miR-125a-5p	1	0	1	1	1	1	LAMC2	laminin, gamma 2
hsa-miR-125a-5p	0	0	1	0	1	1	POU3F2	POU class 3 homeobox 2
hsa-miR-125a-5p	1	0	1	1	1	1	RGS4	regulator of G-protein signaling 4
hsa-miR-125a-5p	0	0	1	1	1	1	SOX3	SRY (sex determining region Y)-box 3
hsa-miR-125a-5p	1	0	1	1	1	1	UST	uronyl-2-sulfotransferase
hsa-miR-125a-5p	1	0	1	0	1	1	DCAF7	DDB1 and CUL4 associated factor 7
hsa-miR-125a-5p	0	0	1	0	1	1	CALCOCO2	calcium binding and coiled-coil domain 2
hsa-miR-125a-5p	1	0	1	1	0	0	TRAIP	TRAF interacting protein
hsa-miR-125a-5p	0	0	1	1	1	1	CD5L	CD5 molecule-like
hsa-miR-125a-5p	1	0	1	1	0	0	NAB2	NGFI-A binding protein 2 (EGR1 binding protein 2)
hsa-miR-125a-5p	0	0	1	0	1	1	HCAR3	hydroxycarboxylic acid receptor 3
hsa-miR-125a-5p	0	0	1	1	1	1	NTF4	neurotrophin 4
hsa-miR-125a-5p	1	0	1	1	1	1	PDGFRA	platelet-derived growth factor receptor, alpha polypeptide
hsa-miR-125a-5p	1	0	1	1	1	1	PRKAA1	protein kinase, AMP-activated, alpha 1 catalytic subunit
hsa-miR-125a-5p	1	0	1	1	1	1	SMC1A	structural maintenance of chromosomes 1A
hsa-miR-125a-5p	1	0	1	1	1	1	ZER1	zer-1 homolog (C. elegans)
hsa-miR-125a-5p	1	0	1	1	1	1	CDRT1	CMT1A duplicated region transcript 1
hsa-miR-125a-5p	1	0	1	1	1	1	MAB21L2	mab-21-like 2 (C. elegans)
hsa-miR-125a-5p	0	0	1	1	0	0	SAA4	serum amyloid A4, constitutive
hsa-miR-125a-5p	1	0	1	0	1	1	IGF2BP1	insulin-like growth factor 2 mRNA binding protein 1
hsa-miR-125a-5p	0	0	1	1	0	0	WNK2	WNK lysine deficient protein kinase 2
hsa-miR-125a-5p	1	0	1	1	1	1	DIAPH2	diaphanous homolog 2 (Drosophila)
hsa-miR-125a-5p	1	0	1	1	1	1	HIVEP2	human immunodeficiency virus type I enhancer binding protein 2
hsa-miR-125a-5p	0	0	1	1	0	0	DNAJB2	DnaJ (Hsp40) homolog, subfamily B, member 2
hsa-miR-125a-5p	1	0	1	1	1	1	BTG2	BTG family, member 2
hsa-miR-125a-5p	1	0	1	1	1	1	RAB35	RAB35, member RAS oncogene family
hsa-miR-125a-5p	1	0	1	1	1	1	B3GNT1	UDP-GlcNAc:betaGal beta-1,3-N-acetylglucosaminyltransferase 1
hsa-miR-125a-5p	1	0	1	0	1	1	SLC2A3	solute carrier family 2 (facilitated glucose transporter), member 3
hsa-miR-125a-5p	1	0	1	0	1	1	SOX12	SRY (sex determining region Y)-box 12
hsa-miR-125a-5p	1	0	1	0	1	1	WASF2	WAS protein family, member 2
hsa-miR-125a-5p	1	0	1	1	1	1	SOX30	SRY (sex determining region Y)-box 30
hsa-miR-125a-5p	1	0	1	1	1	1	TMF1	TATA element modulatory factor 1
hsa-miR-125a-5p	0	0	1	1	0	0	USF1	upstream transcription factor 1
hsa-miR-125a-5p	1	0	1	1	1	1	ZNF81	zinc finger protein 81
hsa-miR-125a-5p	1	0	1	1	1	1	VEZF1	vascular endothelial zinc finger 1
hsa-miR-125a-5p	0	0	1	1	1	1	HRH3	histamine receptor H3
hsa-miR-125a-5p	0	0	1	0	1	1	AP4E1	adaptor-related protein complex 4, epsilon 1 subunit
hsa-miR-125a-5p	1	0	1	1	1	1	CASC3	cancer susceptibility candidate 3
hsa-miR-125a-5p	1	0	1	1	1	1	TARDBP	TAR DNA binding protein
hsa-miR-125a-5p	0	0	1	1	1	1	FRAT2	frequently rearranged in advanced T-cell lymphomas 2
hsa-miR-125a-5p	0	0	1	1	1	1	LMOD1	leiomodin 1 (smooth muscle)
hsa-miR-125a-5p	1	0	1	0	1	1	FZD4	frizzled family receptor 4
hsa-miR-125a-5p	1	0	1	1	1	1	MGEA5	meningioma expressed antigen 5 (hyaluronidase)
hsa-miR-125a-5p	1	0	1	1	1	1	KCNE1L	KCNE1-like
hsa-miR-125a-5p	1	0	1	0	1	1	PXDN	peroxidasin homolog (Drosophila)
hsa-miR-125a-5p	1	0	1	1	1	1	FBXW11	F-box and WD repeat domain containing 11
hsa-miR-125a-5p	0	0	1	1	1	1	SLC39A6	solute carrier family 39 (zinc transporter), member 6
hsa-miR-125a-5p	1	0	1	0	1	1	FLRT2	fibronectin leucine rich transmembrane protein 2
hsa-miR-125a-5p	0	0	1	1	1	1	SERTAD1	SERTA domain containing 1
hsa-miR-125a-5p	1	0	1	1	1	1	LAMP2	lysosomal-associated membrane protein 2
hsa-miR-125a-5p	1	0	1	1	1	1	LHX6	LIM homeobox 6
hsa-miR-125a-5p	0	0	1	1	1	1	TCL6	T-cell leukemia/lymphoma 6 (non-protein coding)
hsa-miR-125a-5p	0	0	1	1	0	0	SIT1	signaling threshold regulating transmembrane adaptor 1
hsa-miR-125a-5p	0	0	1	1	0	0	APOBEC3C	apolipoprotein B mRNA editing enzyme, catalytic polypeptide-like 3C
hsa-miR-125a-5p	0	0	1	1	1	1	ARFGAP3	ADP-ribosylation factor GTPase activating protein 3
hsa-miR-125a-5p	1	0	1	1	1	1	RALGPS1	Ral GEF with PH domain and SH3 binding motif 1
hsa-miR-125a-5p	1	0	1	1	1	1	ULK2	unc-51-like kinase 2 (C. elegans)
hsa-miR-125a-5p	0	0	1	1	0	0	SETD1A	SET domain containing 1A
hsa-miR-125a-5p	1	0	1	0	1	1	MLEC	malectin
hsa-miR-125a-5p	1	0	1	1	1	1	RASSF2	Ras association (RalGDS/AF-6) domain family member 2
hsa-miR-125a-5p	1	0	1	0	1	1	KIAA0494	KIAA0494
hsa-miR-125a-5p	0	0	1	1	1	1	ZBED4	zinc finger, BED-type containing 4
hsa-miR-125a-5p	1	0	1	1	1	1	JOSD1	Josephin domain containing 1
hsa-miR-125a-5p	1	0	1	0	1	1	PDAP1	PDGFA associated protein 1
hsa-miR-125a-5p	1	0	1	1	1	1	ERP44	endoplasmic reticulum protein 44
hsa-miR-125a-5p	1	0	1	0	1	1	SNX13	sorting nexin 13
hsa-miR-125a-5p	1	0	1	0	1	1	LARP1	La ribonucleoprotein domain family, member 1
hsa-miR-125a-5p	1	0	1	0	1	1	SRGAP2	SLIT-ROBO Rho GTPase activating protein 2
hsa-miR-125a-5p	1	0	1	1	1	1	AHCYL2	adenosylhomocysteinase-like 2
hsa-miR-125a-5p	1	0	1	1	1	1	DSTYK	dual serine/threonine and tyrosine protein kinase
hsa-miR-125a-5p	0	0	1	1	1	1	NBPF14	neuroblastoma breakpoint family, member 14
hsa-miR-125a-5p	0	0	1	1	1	1	POLR1A	polymerase (RNA) I polypeptide A, 194kDa
hsa-miR-125a-5p	1	0	1	0	1	1	PPP1R16B	protein phosphatase 1, regulatory subunit 16B
hsa-miR-125a-5p	1	0	1	1	1	1	FAM155B	family with sequence similarity 155, member B
hsa-miR-125a-5p	0	0	1	1	1	1	BRPF3	bromodomain and PHD finger containing, 3
hsa-miR-125a-5p	1	0	1	1	1	1	AKAP11	A kinase (PRKA) anchor protein 11
hsa-miR-125a-5p	1	0	1	1	1	1	TOB2	transducer of ERBB2, 2
hsa-miR-125a-5p	0	0	1	1	0	0	GP6	glycoprotein VI (platelet)
hsa-miR-125a-5p	0	0	1	1	1	1	CD244	CD244 molecule, natural killer cell receptor 2B4
hsa-miR-125a-5p	0	0	1	1	1	1	AMBN	ameloblastin (enamel matrix protein)
hsa-miR-125a-5p	1	0	1	1	1	1	DNAJC27	DnaJ (Hsp40) homolog, subfamily C, member 27
hsa-miR-125a-5p	0	0	1	1	0	0	AHSP	alpha hemoglobin stabilizing protein
hsa-miR-125a-5p	0	0	1	1	1	1	POLE3	polymerase (DNA directed), epsilon 3, accessory subunit
hsa-miR-125a-5p	1	0	1	1	1	1	ARID1B	AT rich interactive domain 1B (SWI1-like)
hsa-miR-125a-5p	0	0	1	0	1	1	TRIM44	tripartite motif containing 44
hsa-miR-125a-5p	0	0	1	0	1	1	OTUB1	OTU domain, ubiquitin aldehyde binding 1
hsa-miR-125a-5p	1	0	1	1	1	1	VPS13C	vacuolar protein sorting 13 homolog C (S. cerevisiae)
hsa-miR-125a-5p	1	0	1	0	1	1	FAM46C	family with sequence similarity 46, member C
hsa-miR-125a-5p	1	0	1	1	1	1	ALKBH5	alkB, alkylation repair homolog 5 (E. coli)
hsa-miR-125a-5p	1	0	1	0	1	1	CMTM6	CKLF-like MARVEL transmembrane domain containing 6
hsa-miR-125a-5p	1	0	1	1	1	1	IMPAD1	inositol monophosphatase domain containing 1
hsa-miR-125a-5p	1	0	1	1	1	1	RNF125	ring finger protein 125, E3 ubiquitin protein ligase
hsa-miR-125a-5p	1	0	1	1	1	1	HIF1AN	hypoxia inducible factor 1, alpha subunit inhibitor
hsa-miR-125a-5p	0	0	1	1	0	0	VPS37C	vacuolar protein sorting 37 homolog C (S. cerevisiae)
hsa-miR-125a-5p	0	0	1	0	1	1	MREG	melanoregulin
hsa-miR-125a-5p	1	0	1	1	1	1	RFWD3	ring finger and WD repeat domain 3
hsa-miR-125a-5p	0	0	1	1	1	1	MRPS10	mitochondrial ribosomal protein S10
hsa-miR-125a-5p	0	0	1	1	1	1	TMLHE	trimethyllysine hydroxylase, epsilon
hsa-miR-125a-5p	0	0	1	1	1	1	TRIM62	tripartite motif containing 62
hsa-miR-125a-5p	0	0	1	1	1	1	QRSL1	glutaminyl-tRNA synthase (glutamine-hydrolyzing)-like 1
hsa-miR-125a-5p	0	0	1	1	1	1	STK32B	serine/threonine kinase 32B
hsa-miR-125a-5p	1	0	1	1	1	1	EPB41L4B	erythrocyte membrane protein band 4.1 like 4B
hsa-miR-125a-5p	0	0	1	1	1	1	HDAC8	histone deacetylase 8
hsa-miR-125a-5p	0	0	1	0	0	0	APOBR	apolipoprotein B receptor
hsa-miR-125a-5p	1	0	1	1	1	1	PCDHGA1	protocadherin gamma subfamily A, 1
hsa-miR-125a-5p	1	0	1	0	1	1	PCDHGA10	protocadherin gamma subfamily A, 10
hsa-miR-125a-5p	1	0	1	0	1	1	PCDHGA11	protocadherin gamma subfamily A, 11
hsa-miR-125a-5p	1	0	1	1	1	1	PCDHGA2	protocadherin gamma subfamily A, 2
hsa-miR-125a-5p	1	0	1	0	1	1	PCDHGA3	protocadherin gamma subfamily A, 3
hsa-miR-125a-5p	1	0	1	0	1	1	PCDHGA4	protocadherin gamma subfamily A, 4
hsa-miR-125a-5p	1	0	1	0	1	1	PCDHGA5	protocadherin gamma subfamily A, 5
hsa-miR-125a-5p	1	0	1	0	1	1	PCDHGA6	protocadherin gamma subfamily A, 6
hsa-miR-125a-5p	1	0	1	0	1	1	PCDHGA7	protocadherin gamma subfamily A, 7
hsa-miR-125a-5p	1	0	1	0	1	1	PCDHGA9	protocadherin gamma subfamily A, 9
hsa-miR-125a-5p	1	0	1	0	1	1	PCDHGB1	protocadherin gamma subfamily B, 1
hsa-miR-125a-5p	1	0	1	0	1	1	PCDHGB2	protocadherin gamma subfamily B, 2
hsa-miR-125a-5p	1	0	1	0	1	1	PCDHGB3	protocadherin gamma subfamily B, 3
hsa-miR-125a-5p	1	0	1	0	1	1	PCDHGB5	protocadherin gamma subfamily B, 5
hsa-miR-125a-5p	1	0	1	0	1	1	PCDHGB6	protocadherin gamma subfamily B, 6
hsa-miR-125a-5p	1	0	1	0	1	1	PCDHGB7	protocadherin gamma subfamily B, 7
hsa-miR-125a-5p	1	0	1	0	1	1	PCDHGC4	protocadherin gamma subfamily C, 4
hsa-miR-125a-5p	1	0	1	0	1	1	PCDHGC5	protocadherin gamma subfamily C, 5
hsa-miR-125a-5p	1	0	1	0	1	1	GFOD1	glucose-fructose oxidoreductase domain containing 1
hsa-miR-125a-5p	1	0	1	1	1	1	ERO1LB	ERO1-like beta (S. cerevisiae)
hsa-miR-125a-5p	1	0	1	0	1	1	PAPOLB	poly(A) polymerase beta (testis specific)
hsa-miR-125a-5p	0	0	1	1	1	1	RALGAPA2	Ral GTPase activating protein, alpha subunit 2 (catalytic)
hsa-miR-125a-5p	1	0	1	1	1	1	EPHA8	EPH receptor A8
hsa-miR-125a-5p	1	0	1	1	1	1	RET	ret proto-oncogene
hsa-miR-125a-5p	0	0	1	1	1	1	S100A14	S100 calcium binding protein A14
hsa-miR-125a-5p	0	0	1	1	1	1	SHROOM4	shroom family member 4
hsa-miR-125a-5p	1	0	1	0	1	1	NUFIP2	nuclear fragile X mental retardation protein interacting protein 2
hsa-miR-125a-5p	0	0	1	1	1	1	PRX	periaxin
hsa-miR-125a-5p	1	0	1	1	1	1	ZNFX1	zinc finger, NFX1-type containing 1
hsa-miR-125a-5p	1	0	1	0	1	1	XK	X-linked Kx blood group (McLeod syndrome)
hsa-miR-125a-5p	1	0	1	0	1	1	TP53INP2	tumor protein p53 inducible nuclear protein 2
hsa-miR-125a-5p	1	0	1	1	1	1	FAM60A	family with sequence similarity 60, member A
hsa-miR-125a-5p	0	0	1	1	0	0	LMAN1L	lectin, mannose-binding, 1 like
hsa-miR-125a-5p	0	0	1	1	0	0	PPCDC	phosphopantothenoylcysteine decarboxylase
hsa-miR-125a-5p	1	0	1	0	1	1	CSNK1G1	casein kinase 1, gamma 1
hsa-miR-125a-5p	0	0	1	1	0	0	ABHD4	abhydrolase domain containing 4
hsa-miR-125a-5p	0	0	1	1	1	1	TCTA	T-cell leukemia translocation altered
hsa-miR-125a-5p	1	0	1	1	1	1	GIGYF1	GRB10 interacting GYF protein 1
hsa-miR-125a-5p	1	0	1	1	1	1	PRRX1	paired related homeobox 1
hsa-miR-125a-5p	1	0	1	1	1	1	FAM160B2	family with sequence similarity 160, member B2
hsa-miR-125a-5p	1	0	1	1	1	1	FBXL17	F-box and leucine-rich repeat protein 17
hsa-miR-125a-5p	0	0	1	1	0	0	DCTPP1	dCTP pyrophosphatase 1
hsa-miR-125a-5p	0	0	1	1	0	0	DHRS11	dehydrogenase/reductase (SDR family) member 11
hsa-miR-125a-5p	1	0	1	0	1	1	NOTCH2	notch 2
hsa-miR-125a-5p	1	0	1	1	1	1	DSC3	desmocollin 3
hsa-miR-125a-5p	1	0	1	1	1	1	LRRC2	leucine rich repeat containing 2
hsa-miR-125a-5p	1	0	1	1	1	1	C10orf76	chromosome 10 open reading frame 76
hsa-miR-125a-5p	0	0	1	1	1	1	TREML2	triggering receptor expressed on myeloid cells-like 2
hsa-miR-125a-5p	0	0	1	1	1	1	CCDC134	coiled-coil domain containing 134
hsa-miR-125a-5p	0	0	1	1	1	1	ZNF767	zinc finger family member 767
hsa-miR-125a-5p	1	0	1	0	1	1	NAA25	N(alpha)-acetyltransferase 25, NatB auxiliary subunit
hsa-miR-125a-5p	0	0	1	1	0	0	NRSN2	neurensin 2
hsa-miR-125a-5p	0	0	1	1	0	0	CENPT	centromere protein T
hsa-miR-125a-5p	1	0	1	0	1	1	DNAJC5	DnaJ (Hsp40) homolog, subfamily C, member 5
hsa-miR-125a-5p	1	0	1	0	1	1	SRCIN1	SRC kinase signaling inhibitor 1
hsa-miR-125a-5p	0	0	1	1	1	1	BCL2L14	BCL2-like 14 (apoptosis facilitator)
hsa-miR-125a-5p	0	0	1	1	0	0	HM13	histocompatibility (minor) 13
hsa-miR-125a-5p	1	0	1	1	1	1	RAB1B	RAB1B, member RAS oncogene family
hsa-miR-125a-5p	1	0	1	1	0	0	TCF7L1	transcription factor 7-like 1 (T-cell specific, HMG-box)
hsa-miR-125a-5p	1	0	1	1	1	1	ANO3	anoctamin 3
hsa-miR-125a-5p	0	0	1	1	0	0	SLC4A11	solute carrier family 4, sodium borate transporter, member 11
hsa-miR-125a-5p	1	0	1	1	1	1	PATZ1	POZ (BTB) and AT hook containing zinc finger 1
hsa-miR-125a-5p	1	0	1	0	1	1	PCDHGA8	protocadherin gamma subfamily A, 8
hsa-miR-125a-5p	0	0	1	1	1	1	RNASEH2C	ribonuclease H2, subunit C
hsa-miR-125a-5p	1	0	1	1	1	1	ZDHHC18	zinc finger, DHHC-type containing 18
hsa-miR-125a-5p	1	0	1	1	1	1	CAMKK1	calcium/calmodulin-dependent protein kinase kinase 1, alpha
hsa-miR-125a-5p	0	0	1	1	0	0	NICN1	nicolin 1
hsa-miR-125a-5p	0	0	1	1	1	1	CHAMP1	chromosome alignment maintaining phosphoprotein 1
hsa-miR-125a-5p	0	0	1	1	1	1	MAP1LC3A	microtubule-associated protein 1 light chain 3 alpha
hsa-miR-125a-5p	1	0	1	1	1	1	ARHGEF39	Rho guanine nucleotide exchange factor (GEF) 39
hsa-miR-125a-5p	1	0	1	1	1	1	PCDH10	protocadherin 10
hsa-miR-125a-5p	0	0	1	1	0	0	LMLN	leishmanolysin-like (metallopeptidase M8 family)
hsa-miR-125a-5p	0	0	1	0	1	1	TSLP	thymic stromal lymphopoietin
hsa-miR-125a-5p	1	0	1	1	1	1	SLC45A3	solute carrier family 45, member 3
hsa-miR-125a-5p	1	0	1	0	1	1	PURB	purine-rich element binding protein B
hsa-miR-125a-5p	1	0	1	1	0	0	FCHSD1	FCH and double SH3 domains 1
hsa-miR-125a-5p	0	0	1	1	0	0	STK11IP	serine/threonine kinase 11 interacting protein
hsa-miR-125a-5p	0	0	1	1	1	1	PLEKHG4B	pleckstrin homology domain containing, family G (with RhoGef domain) member 4B
hsa-miR-125a-5p	1	0	1	1	1	1	TRIM9	tripartite motif containing 9
hsa-miR-125a-5p	1	0	1	1	0	0	AP1S1	adaptor-related protein complex 1, sigma 1 subunit
hsa-miR-125a-5p	1	0	1	1	0	0	BRD4	bromodomain containing 4
hsa-miR-125a-5p	1	0	1	1	1	1	SLC44A1	solute carrier family 44, member 1
hsa-miR-125a-5p	1	0	1	1	1	1	COL11A2	collagen, type XI, alpha 2
hsa-miR-125a-5p	1	0	1	1	0	0	ADAMTS14	ADAM metallopeptidase with thrombospondin type 1 motif, 14
hsa-miR-125a-5p	0	0	1	1	0	0	ZSWIM3	zinc finger, SWIM-type containing 3
hsa-miR-125a-5p	1	0	1	1	0	0	MADD	MAP-kinase activating death domain
hsa-miR-125a-5p	0	0	1	0	1	1	PAQR8	progestin and adipoQ receptor family member VIII
hsa-miR-125a-5p	0	0	1	0	1	1	SYNPO2	synaptopodin 2
hsa-miR-125a-5p	0	0	1	0	1	1	SP140L	SP140 nuclear body protein-like
hsa-miR-125a-5p	0	0	1	0	1	1	PRELID2	PRELI domain containing 2
hsa-miR-125a-5p	1	0	1	0	1	1	FCHO2	FCH domain only 2
hsa-miR-125a-5p	1	0	1	1	0	0	LIPH	lipase, member H
hsa-miR-125a-5p	0	0	1	1	1	1	SGK494	uncharacterized serine/threonine-protein kinase SgK494
hsa-miR-125a-5p	0	0	1	1	0	0	ANKRD35	ankyrin repeat domain 35
hsa-miR-125a-5p	0	0	1	1	1	1	TMEM106A	transmembrane protein 106A
hsa-miR-125a-5p	1	0	1	1	1	1	MRPL30	mitochondrial ribosomal protein L30
hsa-miR-125a-5p	0	0	1	1	1	1	OMA1	OMA1 zinc metallopeptidase homolog (S. cerevisiae)
hsa-miR-125a-5p	0	0	1	1	0	0	NKX2-3	NK2 homeobox 3
hsa-miR-125a-5p	0	0	1	1	1	1	SCARF1	scavenger receptor class F, member 1
hsa-miR-125a-5p	0	0	1	1	0	0	TCEB3C	transcription elongation factor B polypeptide 3C (elongin A3)
hsa-miR-125a-5p	0	0	1	0	1	1	CHKB	choline kinase beta
hsa-miR-125a-5p	0	0	1	1	0	0	C19orf40	chromosome 19 open reading frame 40
hsa-miR-125a-5p	1	0	1	1	1	1	POGLUT1	protein O-glucosyltransferase 1
hsa-miR-125a-5p	1	0	1	1	1	1	FAM123B	family with sequence similarity 123B
hsa-miR-125a-5p	0	0	1	1	1	1	DNAJC18	DnaJ (Hsp40) homolog, subfamily C, member 18
hsa-miR-125a-5p	1	0	1	0	1	1	ZBTB9	zinc finger and BTB domain containing 9
hsa-miR-125a-5p	0	0	1	0	1	1	KCTD7	potassium channel tetramerisation domain containing 7
hsa-miR-125a-5p	1	0	1	1	1	1	TCEANC2	transcription elongation factor A (SII) N-terminal and central domain containing 2
hsa-miR-125a-5p	0	0	1	0	1	1	TMEM92	transmembrane protein 92
hsa-miR-125a-5p	1	0	1	1	1	1	TMEM151A	transmembrane protein 151A
hsa-miR-125a-5p	0	0	1	1	0	0	DEFB119	defensin, beta 119
hsa-miR-125a-5p	0	0	1	1	0	0	SCARF2	scavenger receptor class F, member 2
hsa-miR-125a-5p	1	0	1	1	1	1	HS6ST3	heparan sulfate 6-O-sulfotransferase 3
hsa-miR-125a-5p	1	0	1	1	0	0	LPCAT4	lysophosphatidylcholine acyltransferase 4
hsa-miR-125a-5p	0	0	1	0	1	1	RTP1	receptor (chemosensory) transporter protein 1
hsa-miR-125a-5p	1	0	1	1	1	1	FNDC5	fibronectin type III domain containing 5
hsa-miR-125a-5p	0	0	1	1	1	1	SIAE	sialic acid acetylesterase
hsa-miR-125a-5p	0	0	1	1	0	0	MLX	MAX-like protein X
hsa-miR-125a-5p	0	0	1	1	1	1	REXO1L1	REX1, RNA exonuclease 1 homolog (S. cerevisiae)-like 1
hsa-miR-125a-5p	1	0	1	1	1	1	IL28RA	interleukin 28 receptor, alpha (interferon, lambda receptor)
hsa-miR-125a-5p	0	0	1	1	0	0	SSX6	synovial sarcoma, X breakpoint 6 (pseudogene)
hsa-miR-125a-5p	1	0	1	1	1	1	PIP5KL1	phosphatidylinositol-4-phosphate 5-kinase-like 1
hsa-miR-125a-5p	0	0	1	1	1	1	FNDC7	fibronectin type III domain containing 7
hsa-miR-125a-5p	1	0	1	0	1	1	PGM2L1	phosphoglucomutase 2-like 1
hsa-miR-125a-5p	1	0	1	1	1	1	IGSF22	immunoglobulin superfamily, member 22
hsa-miR-125a-5p	1	0	1	1	1	1	SLC9A9	solute carrier family 9, subfamily A (NHE9, cation proton antiporter 9), member 9
hsa-miR-125a-5p	1	0	1	1	1	1	ATG9B	autophagy related 9B
hsa-miR-125a-5p	0	0	1	1	0	0	FAM151A	family with sequence similarity 151, member A
hsa-miR-125a-5p	0	0	1	1	1	1	MRPL43	mitochondrial ribosomal protein L43
hsa-miR-125a-5p	0	0	1	1	1	1	GPIHBP1	glycosylphosphatidylinositol anchored high density lipoprotein binding protein 1
hsa-miR-125a-5p	0	0	1	1	0	0	TBC1D26	TBC1 domain family, member 26
hsa-miR-125a-5p	1	0	1	1	1	1	TCF20	transcription factor 20 (AR1)
hsa-miR-125a-5p	1	0	1	1	1	1	CREM	cAMP responsive element modulator
hsa-miR-125a-5p	0	0	1	0	1	1	HCG27	HLA complex group 27 (non-protein coding)
hsa-miR-125a-5p	0	0	1	1	0	0	PRDX2	peroxiredoxin 2
hsa-miR-125a-5p	1	0	1	1	1	1	ZSCAN22	zinc finger and SCAN domain containing 22
hsa-miR-125a-5p	0	0	1	1	1	1	USP12	ubiquitin specific peptidase 12
hsa-miR-125a-5p	0	0	1	1	1	1	C1QL2	complement component 1, q subcomponent-like 2
hsa-miR-125a-5p	0	0	1	0	1	1	FAM169B	family with sequence similarity 169, member B
hsa-miR-125a-5p	0	0	1	0	1	1	NBPF11	neuroblastoma breakpoint family, member 11
hsa-miR-125a-5p	1	0	1	1	1	1	RAB43	RAB43, member RAS oncogene family
hsa-miR-125a-5p	0	0	1	0	1	1	SIAH3	siah E3 ubiquitin protein ligase family member 3
hsa-miR-125a-5p	0	0	1	1	1	1	UBE3D	ubiquitin protein ligase E3D
hsa-miR-125a-5p	1	0	1	1	1	1	NSUN4	NOP2/Sun domain family, member 4
hsa-miR-125a-5p	1	0	1	1	1	1	FBXO33	F-box protein 33
hsa-miR-125a-5p	0	0	1	1	1	1	ZCCHC13	zinc finger, CCHC domain containing 13
hsa-miR-125a-5p	1	0	1	1	1	1	RBM12B	RNA binding motif protein 12B
hsa-miR-125a-5p	0	0	1	1	1	1	APOBEC4	apolipoprotein B mRNA editing enzyme, catalytic polypeptide-like 4 (putative)
hsa-miR-125a-5p	1	0	1	1	1	1	CYP4V2	cytochrome P450, family 4, subfamily V, polypeptide 2
hsa-miR-125a-5p	1	0	1	1	1	1	TNFAIP8L3	tumor necrosis factor, alpha-induced protein 8-like 3
hsa-miR-125a-5p	0	0	1	0	0	0	C16orf47	chromosome 16 open reading frame 47
hsa-miR-125a-5p	0	0	1	1	0	0	TMPRSS11F	transmembrane protease, serine 11F
hsa-miR-125a-5p	0	0	1	1	1	1	C15orf53	chromosome 15 open reading frame 53
hsa-miR-125a-5p	0	0	1	1	1	1	C15orf54	chromosome 15 open reading frame 54
hsa-miR-125a-5p	1	0	1	1	1	1	TEX19	testis expressed 19
hsa-miR-125a-5p	0	0	1	1	1	1	PATE2	prostate and testis expressed 2
hsa-miR-125a-5p	0	0	1	0	0	0	ESRRAP2	estrogen-related receptor alpha pseudogene 2
hsa-miR-125a-5p	0	0	1	0	0	0	CELP	carboxyl ester lipase pseudogene
hsa-miR-125a-5p	0	0	1	0	0	0	TTTY6	testis-specific transcript, Y-linked 6 (non-protein coding)
hsa-miR-125a-5p	0	0	1	0	0	0	TTTY1	testis-specific transcript, Y-linked 1 (non-protein coding)
hsa-miR-125a-5p	0	0	1	0	0	0	TTTY15	testis-specific transcript, Y-linked 15 (non-protein coding)
hsa-miR-125a-5p	0	0	1	0	0	0	TTTY6B	testis-specific transcript, Y-linked 6B (non-protein coding)
hsa-miR-125a-5p	0	0	1	0	0	0	PDIA3P	protein disulfide isomerase family A, member 3 pseudogene
hsa-miR-125a-5p	0	0	1	0	0	0	SNORA6	small nucleolar RNA, H/ACA box 6
hsa-miR-125a-5p	0	0	1	0	0	0	MBL1P	mannose-binding lectin (protein A) 1, pseudogene
hsa-miR-125a-5p	0	0	1	0	0	0	RPL29P2	ribosomal protein L29 pseudogene 2
hsa-miR-125a-5p	0	0	1	0	0	0	HOXA11-AS	HOXA11 antisense RNA
hsa-miR-125a-5p	0	0	1	0	0	0	LOC256880	uncharacterized LOC256880
hsa-miR-125a-5p	0	0	1	0	0	0	AQP7P1	aquaporin 7 pseudogene 1
hsa-miR-125a-5p	0	0	1	0	0	0	PTPRVP	protein tyrosine phosphatase, receptor type, V, pseudogene
hsa-miR-125a-5p	0	0	1	0	0	0	LOC285359	phosducin-like 3 pseudogene
hsa-miR-125a-5p	0	0	1	0	0	0	TCAM1P	testicular cell adhesion molecule 1 homolog (mouse), pseudogene
hsa-miR-125a-5p	0	0	1	0	0	0	SCARNA6	small Cajal body-specific RNA 6
hsa-miR-125a-5p	0	0	1	0	0	0	LILRP2	leukocyte immunoglobulin-like receptor pseudogene 2
hsa-miR-125a-5p	0	0	1	0	0	0	ANP32AP1	acidic (leucine-rich) nuclear phosphoprotein 32 family, member A pseudogene 1
hsa-miR-125a-5p	0	0	1	0	0	0	LOC729603	calcium binding protein P22 pseudogene
hsa-miR-125a-5p	1	0	1	1	1	1	TRIO	trio Rho guanine nucleotide exchange factor
hsa-miR-125a-5p	0	0	1	1	1	1	PEG3	paternally expressed 3
hsa-miR-125a-5p	0	0	1	1	1	1	CD84	CD84 molecule
hsa-miR-125a-5p	1	0	1	1	1	1	POU6F1	POU class 6 homeobox 1
hsa-miR-125a-5p	0	0	0	1	0	0	CRLF1	cytokine receptor-like factor 1
hsa-miR-125a-5p	0	0	0	1	0	0	SCTR	secretin receptor
hsa-miR-125a-5p	0	0	0	1	0	0	THAP3	THAP domain containing, apoptosis associated protein 3
hsa-miR-125a-5p	0	0	0	1	0	0	PSMC4	proteasome (prosome, macropain) 26S subunit, ATPase, 4
hsa-miR-125a-5p	0	0	1	1	0	0	FNDC8	fibronectin type III domain containing 8
hsa-miR-125a-5p	1	0	1	1	1	1	PANX2	pannexin 2
hsa-miR-125a-5p	0	0	0	1	0	0	NMRK2	nicotinamide riboside kinase 2
hsa-miR-125a-5p	0	0	0	1	0	0	DRD4	dopamine receptor D4
hsa-miR-125a-5p	1	0	1	1	0	0	KHSRP	KH-type splicing regulatory protein
hsa-miR-125a-5p	0	0	0	1	0	0	GMIP	GEM interacting protein
hsa-miR-125a-5p	0	0	1	1	1	1	TMEM101	transmembrane protein 101
hsa-miR-125a-5p	0	0	1	1	0	0	PSMD8	proteasome (prosome, macropain) 26S subunit, non-ATPase, 8
hsa-miR-125a-5p	0	0	0	1	0	0	IGFALS	insulin-like growth factor binding protein, acid labile subunit
hsa-miR-125a-5p	0	0	1	1	0	0	MARCH2	membrane-associated ring finger (C3HC4) 2, E3 ubiquitin protein ligase
hsa-miR-125a-5p	0	0	0	1	1	1	BIK	BCL2-interacting killer (apoptosis-inducing)
hsa-miR-125a-5p	0	0	0	1	1	1	HMOX1	heme oxygenase (decycling) 1
hsa-miR-125a-5p	0	0	1	1	0	0	CTSG	cathepsin G
hsa-miR-125a-5p	0	0	0	1	0	0	SRMS	src-related kinase lacking C-terminal regulatory tyrosine and N-terminal myristylation sites
hsa-miR-125a-5p	1	0	0	1	1	1	MMP15	matrix metallopeptidase 15 (membrane-inserted)
hsa-miR-125a-5p	0	0	1	1	1	1	SETD6	SET domain containing 6
hsa-miR-125a-5p	0	0	1	1	1	1	CDIPT	CDP-diacylglycerol--inositol 3-phosphatidyltransferase
hsa-miR-125a-5p	0	0	0	1	0	0	PAF1	Paf1, RNA polymerase II associated factor, homolog (S. cerevisiae)
hsa-miR-125a-5p	0	0	1	1	0	0	TULP2	tubby like protein 2
hsa-miR-125a-5p	0	0	0	1	1	1	PEX11G	peroxisomal biogenesis factor 11 gamma
hsa-miR-125a-5p	1	0	0	1	1	1	ZNF419	zinc finger protein 419
hsa-miR-125a-5p	0	0	1	1	0	0	CCDC9	coiled-coil domain containing 9
hsa-miR-125a-5p	0	0	1	1	0	0	HAS1	hyaluronan synthase 1
hsa-miR-125a-5p	0	0	0	1	1	1	COMP	cartilage oligomeric matrix protein
hsa-miR-125a-5p	0	0	0	1	0	0	HOXA6	homeobox A6
hsa-miR-125a-5p	0	0	1	1	0	0	TFR2	transferrin receptor 2
hsa-miR-125a-5p	0	0	1	1	0	0	PLOD3	procollagen-lysine, 2-oxoglutarate 5-dioxygenase 3
hsa-miR-125a-5p	1	0	1	1	0	0	RUNDC3A	RUN domain containing 3A
hsa-miR-125a-5p	0	0	0	1	0	0	ICAM2	intercellular adhesion molecule 2
hsa-miR-125a-5p	0	0	1	1	1	1	SPA17	sperm autoantigenic protein 17
hsa-miR-125a-5p	0	0	1	1	1	1	USP5	ubiquitin specific peptidase 5 (isopeptidase T)
hsa-miR-125a-5p	0	0	0	1	1	1	RSPH4A	radial spoke head 4 homolog A (Chlamydomonas)
hsa-miR-125a-5p	0	0	1	1	0	0	SLC4A9	solute carrier family 4, sodium bicarbonate cotransporter, member 9
hsa-miR-125a-5p	0	0	0	1	1	1	DOK1	docking protein 1, 62kDa (downstream of tyrosine kinase 1)
hsa-miR-125a-5p	0	0	0	1	1	1	WNT6	wingless-type MMTV integration site family, member 6
hsa-miR-125a-5p	0	0	0	1	1	1	IL1RL1	interleukin 1 receptor-like 1
hsa-miR-125a-5p	0	0	1	1	1	1	ATP6V0B	ATPase, H+ transporting, lysosomal 21kDa, V0 subunit b
hsa-miR-125a-5p	0	0	1	1	1	1	SPACA1	sperm acrosome associated 1
hsa-miR-125a-5p	0	0	1	1	1	1	RARRES1	retinoic acid receptor responder (tazarotene induced) 1
hsa-miR-125a-5p	0	0	0	1	0	0	ADCK1	aarF domain containing kinase 1
hsa-miR-125a-5p	0	0	1	1	1	1	NPC2	Niemann-Pick disease, type C2
hsa-miR-125a-5p	0	0	1	1	1	1	HOXB7	homeobox B7
hsa-miR-125a-5p	0	0	1	1	1	1	ARAP3	ArfGAP with RhoGAP domain, ankyrin repeat and PH domain 3
hsa-miR-125a-5p	0	0	1	1	0	0	TNFSF18	tumor necrosis factor (ligand) superfamily, member 18
hsa-miR-125a-5p	1	0	1	1	0	0	ST3GAL4	ST3 beta-galactoside alpha-2,3-sialyltransferase 4
hsa-miR-125a-5p	0	0	0	1	1	1	NEUROG3	neurogenin 3
hsa-miR-125a-5p	0	0	0	1	0	0	ACADS	acyl-CoA dehydrogenase, C-2 to C-3 short chain
hsa-miR-125a-5p	0	0	1	1	0	0	STX10	syntaxin 10
hsa-miR-125a-5p	1	0	1	1	1	1	C1orf63	chromosome 1 open reading frame 63
hsa-miR-125a-5p	0	0	0	1	0	0	B9D2	B9 protein domain 2
hsa-miR-125a-5p	1	0	1	1	0	0	RNF39	ring finger protein 39
hsa-miR-125a-5p	0	0	0	1	1	1	LILRB3	leukocyte immunoglobulin-like receptor, subfamily B (with TM and ITIM domains), member 3
hsa-miR-125a-5p	0	0	0	1	1	1	LILRA6	leukocyte immunoglobulin-like receptor, subfamily A (with TM domain), member 6
hsa-miR-125a-5p	0	0	0	1	0	0	TNFSF14	tumor necrosis factor (ligand) superfamily, member 14
hsa-miR-125a-5p	1	0	1	1	1	1	RALY	RNA binding protein, autoantigenic (hnRNP-associated with lethal yellow homolog (mouse))
hsa-miR-125a-5p	0	0	0	1	0	0	SLURP1	secreted LY6/PLAUR domain containing 1
hsa-miR-125a-5p	1	0	1	1	1	1	CCR7	chemokine (C-C motif) receptor 7
hsa-miR-125a-5p	0	0	0	1	1	1	KRT9	keratin 9
hsa-miR-125a-5p	0	0	1	1	1	1	RRAS	related RAS viral (r-ras) oncogene homolog
hsa-miR-125a-5p	0	0	1	1	0	0	CTAG2	cancer/testis antigen 2
hsa-miR-125a-5p	1	0	1	1	1	1	FBXL12	F-box and leucine-rich repeat protein 12
hsa-miR-125a-5p	0	0	0	1	0	0	TICAM1	toll-like receptor adaptor molecule 1
hsa-miR-125a-5p	0	0	1	1	0	0	GCAT	glycine C-acetyltransferase
hsa-miR-125a-5p	0	0	1	1	0	0	FAM64A	family with sequence similarity 64, member A
hsa-miR-125a-5p	0	0	1	1	0	0	CCL4	chemokine (C-C motif) ligand 4
hsa-miR-125a-5p	0	0	1	1	0	0	DHRS2	dehydrogenase/reductase (SDR family) member 2
hsa-miR-125a-5p	0	0	1	1	0	0	CHRNA10	cholinergic receptor, nicotinic, alpha 10 (neuronal)
hsa-miR-125a-5p	0	0	1	1	0	0	PAM16	presequence translocase-associated motor 16 homolog (S. cerevisiae)
hsa-miR-125a-5p	0	0	0	1	0	0	LILRA2	leukocyte immunoglobulin-like receptor, subfamily A (with TM domain), member 2
hsa-miR-125a-5p	0	0	1	1	0	0	NDUFA2	NADH dehydrogenase (ubiquinone) 1 alpha subcomplex, 2, 8kDa
hsa-miR-125a-5p	0	0	0	1	0	0	INF2	inverted formin, FH2 and WH2 domain containing
hsa-miR-125a-5p	0	0	0	1	1	1	ACSBG2	acyl-CoA synthetase bubblegum family member 2
hsa-miR-125a-5p	0	0	0	1	0	0	KLHDC7B	kelch domain containing 7B
hsa-miR-125a-5p	0	0	0	1	0	0	SCO2	SCO cytochrome oxidase deficient homolog 2 (yeast)
hsa-miR-125a-5p	0	0	0	1	0	0	GDF15	growth differentiation factor 15
hsa-miR-125a-5p	0	0	0	1	1	1	LSM4	LSM4 homolog, U6 small nuclear RNA associated (S. cerevisiae)
hsa-miR-125a-5p	1	0	1	1	0	0	JUND	jun D proto-oncogene
hsa-miR-125a-5p	1	0	1	1	0	0	TRPM4	transient receptor potential cation channel, subfamily M, member 4
hsa-miR-125a-5p	0	0	0	1	0	0	C20orf151	chromosome 20 open reading frame 151
hsa-miR-125a-5p	0	0	0	1	1	1	HIP1R	huntingtin interacting protein 1 related
hsa-miR-125a-5p	0	0	0	1	0	0	F12	coagulation factor XII (Hageman factor)
hsa-miR-125a-5p	0	0	1	1	0	0	HSH2D	hematopoietic SH2 domain containing
hsa-miR-125a-5p	0	0	1	1	1	1	C19orf12	chromosome 19 open reading frame 12
hsa-miR-125a-5p	1	0	1	1	0	0	DCAF15	DDB1 and CUL4 associated factor 15
hsa-miR-125a-5p	0	0	0	1	0	0	PEMT	phosphatidylethanolamine N-methyltransferase
hsa-miR-125a-5p	0	0	1	1	0	0	HSPBP1	HSPA (heat shock 70kDa) binding protein, cytoplasmic cochaperone 1
hsa-miR-125a-5p	1	0	1	1	0	0	CSNK1G2	casein kinase 1, gamma 2
hsa-miR-125a-5p	0	0	1	1	0	0	CAMK1	calcium/calmodulin-dependent protein kinase I
hsa-miR-125a-5p	0	0	1	1	0	0	SAA2	serum amyloid A2
hsa-miR-125a-5p	0	0	1	1	0	0	MTNR1B	melatonin receptor 1B
hsa-miR-125a-5p	0	0	0	1	0	0	CARS2	cysteinyl-tRNA synthetase 2, mitochondrial (putative)
hsa-miR-125a-5p	1	0	0	1	1	1	DBNL	drebrin-like
hsa-miR-125a-5p	0	0	0	1	0	0	ZFHX2	zinc finger homeobox 2
hsa-miR-125a-5p	0	0	1	1	1	1	ACTL6A	actin-like 6A
hsa-miR-125a-5p	1	0	1	1	1	1	LRRC32	leucine rich repeat containing 32
hsa-miR-125a-5p	0	0	0	1	1	1	BCL2L10	BCL2-like 10 (apoptosis facilitator)
hsa-miR-125a-5p	0	0	1	1	1	1	THUMPD2	THUMP domain containing 2
hsa-miR-125a-5p	1	0	0	1	1	1	CENPO	centromere protein O
hsa-miR-125a-5p	0	0	0	1	0	0	GPR133	G protein-coupled receptor 133
hsa-miR-125a-5p	0	0	1	1	1	1	PSMD9	proteasome (prosome, macropain) 26S subunit, non-ATPase, 9
hsa-miR-125a-5p	0	0	0	1	0	0	CCDC124	coiled-coil domain containing 124
hsa-miR-125a-5p	0	0	0	1	0	0	MPND	MPN domain containing
hsa-miR-125a-5p	0	0	0	1	0	0	TJP3	tight junction protein 3
hsa-miR-125a-5p	1	0	1	1	1	1	MAPK3	mitogen-activated protein kinase 3
hsa-miR-125a-5p	0	0	0	1	0	0	PLEKHA4	pleckstrin homology domain containing, family A (phosphoinositide binding specific) member 4
hsa-miR-125a-5p	0	0	0	1	0	0	CCDC61	coiled-coil domain containing 61
hsa-miR-125a-5p	0	0	1	1	1	1	FAM32A	family with sequence similarity 32, member A
hsa-miR-125a-5p	0	0	1	1	1	1	NLRP2	NLR family, pyrin domain containing 2
hsa-miR-125a-5p	0	0	1	1	1	1	DVL1	dishevelled, dsh homolog 1 (Drosophila)
hsa-miR-125a-5p	1	0	1	1	1	1	CRY2	cryptochrome 2 (photolyase-like)
hsa-miR-125a-5p	0	0	0	1	1	1	GTF3C3	general transcription factor IIIC, polypeptide 3, 102kDa
hsa-miR-125a-5p	0	0	1	1	0	0	IFT46	intraflagellar transport 46 homolog (Chlamydomonas)
hsa-miR-125a-5p	0	0	0	1	1	1	HERC6	HECT and RLD domain containing E3 ubiquitin protein ligase family member 6
hsa-miR-125a-5p	0	0	0	1	0	0	LYL1	lymphoblastic leukemia derived sequence 1
hsa-miR-125a-5p	0	0	1	1	0	0	ZAP70	zeta-chain (TCR) associated protein kinase 70kDa
hsa-miR-125a-5p	0	0	1	1	0	0	RASGRF2	Ras protein-specific guanine nucleotide-releasing factor 2
hsa-miR-125a-5p	0	0	1	1	0	0	MAD1L1	MAD1 mitotic arrest deficient-like 1 (yeast)
hsa-miR-125a-5p	0	0	1	1	1	1	MAPKAP1	mitogen-activated protein kinase associated protein 1
hsa-miR-125a-5p	0	0	0	1	0	0	SFRP5	secreted frizzled-related protein 5
hsa-miR-125a-5p	1	0	1	1	1	1	CHCHD10	coiled-coil-helix-coiled-coil-helix domain containing 10
hsa-miR-125a-5p	0	0	1	1	1	1	MTFP1	mitochondrial fission process 1
hsa-miR-125a-5p	0	0	1	1	0	0	CLSTN3	calsyntenin 3
hsa-miR-125a-5p	0	0	1	1	0	0	REM2	RAS (RAD and GEM)-like GTP binding 2
hsa-miR-125a-5p	0	0	1	1	1	1	SORD	sorbitol dehydrogenase
hsa-miR-125a-5p	0	0	1	1	1	1	HDC	histidine decarboxylase
hsa-miR-125a-5p	0	0	0	1	0	0	CYP11A1	cytochrome P450, family 11, subfamily A, polypeptide 1
hsa-miR-125a-5p	0	0	1	1	1	1	ARMC5	armadillo repeat containing 5
hsa-miR-125a-5p	0	0	1	1	0	0	GALNS	galactosamine (N-acetyl)-6-sulfate sulfatase
hsa-miR-125a-5p	0	0	0	1	0	0	LRRC46	leucine rich repeat containing 46
hsa-miR-125a-5p	0	0	1	1	0	0	SLC25A52	solute carrier family 25, member 52
hsa-miR-125a-5p	0	0	0	1	1	1	NLRP1	NLR family, pyrin domain containing 1
hsa-miR-125a-5p	0	0	0	1	0	0	PIK3R5	phosphoinositide-3-kinase, regulatory subunit 5
hsa-miR-125a-5p	0	0	0	1	1	1	ERBB2	v-erb-b2 erythroblastic leukemia viral oncogene homolog 2, neuro/glioblastoma derived oncogene homolog (avian)
hsa-miR-125a-5p	0	0	0	1	1	1	FEM1A	fem-1 homolog a (C. elegans)
hsa-miR-125a-5p	0	0	0	1	0	0	IFITM3	interferon induced transmembrane protein 3
hsa-miR-125a-5p	0	0	1	1	1	1	SAE1	SUMO1 activating enzyme subunit 1
hsa-miR-125a-5p	0	0	0	1	1	1	FAM71E1	family with sequence similarity 71, member E1
hsa-miR-125a-5p	0	0	0	1	0	0	RCN3	reticulocalbin 3, EF-hand calcium binding domain
hsa-miR-125a-5p	0	0	1	1	1	1	IL22RA1	interleukin 22 receptor, alpha 1
hsa-miR-125a-5p	0	0	0	1	0	0	FAM176B	family with sequence similarity 176, member B
hsa-miR-125a-5p	1	0	1	1	1	1	POGZ	pogo transposable element with ZNF domain
hsa-miR-125a-5p	0	0	1	1	0	0	CRNN	cornulin
hsa-miR-125a-5p	0	0	0	1	0	0	SLC27A3	solute carrier family 27 (fatty acid transporter), member 3
hsa-miR-125a-5p	0	0	1	1	0	0	CREB3L4	cAMP responsive element binding protein 3-like 4
hsa-miR-125a-5p	0	0	1	1	1	1	DQX1	DEAQ box RNA-dependent ATPase 1
hsa-miR-125a-5p	0	0	1	1	1	1	TMEM177	transmembrane protein 177
hsa-miR-125a-5p	0	0	0	1	1	1	METTL21A	methyltransferase like 21A
hsa-miR-125a-5p	0	0	0	1	0	0	ANKMY1	ankyrin repeat and MYND domain containing 1
hsa-miR-125a-5p	0	0	1	1	0	0	SLC4A3	solute carrier family 4, anion exchanger, member 3
hsa-miR-125a-5p	0	0	1	1	1	1	FARS2	phenylalanyl-tRNA synthetase 2, mitochondrial
hsa-miR-125a-5p	0	0	0	1	0	0	TAAR6	trace amine associated receptor 6
hsa-miR-125a-5p	0	0	1	1	0	0	SRCRB4D	scavenger receptor cysteine rich domain containing, group B (4 domains)
hsa-miR-125a-5p	0	0	0	1	0	0	WDR85	WD repeat domain 85
hsa-miR-125a-5p	1	0	0	1	1	1	PPRC1	peroxisome proliferator-activated receptor gamma, coactivator-related 1
hsa-miR-125a-5p	1	0	1	1	1	1	FADS1	fatty acid desaturase 1
hsa-miR-125a-5p	0	0	1	1	0	0	FADS3	fatty acid desaturase 3
hsa-miR-125a-5p	0	0	0	1	0	0	ROM1	retinal outer segment membrane protein 1
hsa-miR-125a-5p	0	0	1	1	1	1	MS4A3	membrane-spanning 4-domains, subfamily A, member 3 (hematopoietic cell-specific)
hsa-miR-125a-5p	1	0	1	1	1	1	SIDT2	SID1 transmembrane family, member 2
hsa-miR-125a-5p	0	0	0	1	0	0	MYL9	myosin, light chain 9, regulatory
hsa-miR-125a-5p	0	0	0	1	0	0	PLCB3	phospholipase C, beta 3 (phosphatidylinositol-specific)
hsa-miR-125a-5p	1	0	1	1	1	1	ABCB9	ATP-binding cassette, sub-family B (MDR/TAP), member 9
hsa-miR-125a-5p	0	0	0	1	0	0	ZSCAN1	zinc finger and SCAN domain containing 1
hsa-miR-125a-5p	0	0	0	1	0	0	FRMD1	FERM domain containing 1
hsa-miR-125a-5p	1	0	1	1	1	1	ATP8B1	ATPase, aminophospholipid transporter, class I, type 8B, member 1
hsa-miR-125a-5p	0	0	0	1	0	0	C16orf74	chromosome 16 open reading frame 74
hsa-miR-125a-5p	1	0	1	1	1	1	CDH12	cadherin 12, type 2 (N-cadherin 2)
hsa-miR-125a-5p	0	0	0	1	0	0	C17orf50	chromosome 17 open reading frame 50
hsa-miR-125a-5p	0	0	1	1	0	0	CSF1R	colony stimulating factor 1 receptor
hsa-miR-125a-5p	0	0	1	1	0	0	SLC26A10	solute carrier family 26, member 10
hsa-miR-125a-5p	0	0	1	1	1	1	ARHGEF25	Rho guanine nucleotide exchange factor (GEF) 25
hsa-miR-125a-5p	0	0	1	1	1	1	SLC28A1	solute carrier family 28 (sodium-coupled nucleoside transporter), member 1
hsa-miR-125a-5p	0	0	1	1	1	1	KBTBD5	kelch repeat and BTB (POZ) domain containing 5
hsa-miR-125a-5p	0	0	0	1	0	0	PSMG3	proteasome (prosome, macropain) assembly chaperone 3
hsa-miR-125a-5p	1	0	1	1	0	0	DTNB	dystrobrevin, beta
hsa-miR-125a-5p	0	0	0	1	0	0	NPM2	nucleophosmin/nucleoplasmin 2
hsa-miR-125a-5p	0	0	1	1	0	0	SCRN2	secernin 2
hsa-miR-125a-5p	0	0	0	1	0	0	OGFR	opioid growth factor receptor
hsa-miR-125a-5p	0	0	1	1	1	1	DERL3	derlin 3
hsa-miR-125a-5p	0	0	1	1	0	0	CRYAA	crystallin, alpha A
hsa-miR-125a-5p	0	0	0	1	0	0	PWP2	PWP2 periodic tryptophan protein homolog (yeast)
hsa-miR-125a-5p	0	0	0	1	0	0	CLDND2	claudin domain containing 2
hsa-miR-125a-5p	0	0	0	1	0	0	FCN2	ficolin (collagen/fibrinogen domain containing lectin) 2 (hucolin)
hsa-miR-125a-5p	0	0	1	1	0	0	SHKBP1	SH3KBP1 binding protein 1
hsa-miR-125a-5p	0	0	1	1	1	1	IKZF3	IKAROS family zinc finger 3 (Aiolos)
hsa-miR-125a-5p	0	0	0	1	1	1	FDXR	ferredoxin reductase
hsa-miR-125a-5p	1	0	1	1	1	1	UNK	unkempt homolog (Drosophila)
hsa-miR-125a-5p	0	0	1	1	0	0	NCKIPSD	NCK interacting protein with SH3 domain
hsa-miR-125a-5p	0	0	0	1	0	0	PTCHD2	patched domain containing 2
hsa-miR-125a-5p	0	0	1	1	1	1	ARHGAP25	Rho GTPase activating protein 25
hsa-miR-125a-5p	0	0	0	1	1	1	TMEM79	transmembrane protein 79
hsa-miR-125a-5p	0	0	1	1	0	0	MON1A	MON1 homolog A (yeast)
hsa-miR-125a-5p	0	0	1	1	1	1	ANKHD1	ankyrin repeat and KH domain containing 1
hsa-miR-125a-5p	1	0	1	1	1	1	COL4A2	collagen, type IV, alpha 2
hsa-miR-125a-5p	0	0	1	1	1	1	AMBRA1	autophagy/beclin-1 regulator 1
hsa-miR-125a-5p	0	0	1	1	0	0	PACSIN3	protein kinase C and casein kinase substrate in neurons 3
hsa-miR-125a-5p	0	0	0	1	1	1	MOAP1	modulator of apoptosis 1
hsa-miR-125a-5p	0	0	0	1	0	0	SPATA19	spermatogenesis associated 19
hsa-miR-125a-5p	0	0	0	1	0	0	TRMT61A	tRNA methyltransferase 61 homolog A (S. cerevisiae)
hsa-miR-125a-5p	0	0	0	1	0	0	TBATA	thymus, brain and testes associated
hsa-miR-125a-5p	0	0	1	1	1	1	CDYL2	chromodomain protein, Y-like 2
hsa-miR-125a-5p	0	0	1	1	0	0	RRAD	Ras-related associated with diabetes
hsa-miR-125a-5p	1	0	1	1	1	1	SLC27A4	solute carrier family 27 (fatty acid transporter), member 4
hsa-miR-125a-5p	0	0	1	1	1	1	C17orf78	chromosome 17 open reading frame 78
hsa-miR-125a-5p	0	0	0	1	1	1	ENTHD2	ENTH domain containing 2
hsa-miR-125a-5p	0	0	0	1	0	0	IZUMO4	IZUMO family member 4
hsa-miR-125a-5p	0	0	0	1	0	0	TRAPPC2L	trafficking protein particle complex 2-like
hsa-miR-125a-5p	0	0	0	1	0	0	PROCA1	protein interacting with cyclin A1
hsa-miR-125a-5p	1	0	1	1	0	0	KIFC2	kinesin family member C2
hsa-miR-125a-5p	0	0	1	1	0	0	KLK1	kallikrein 1
hsa-miR-125a-5p	1	0	0	1	1	1	RCOR2	REST corepressor 2
hsa-miR-125a-5p	0	0	1	1	1	1	SOAT2	sterol O-acyltransferase 2
hsa-miR-125a-5p	1	0	0	1	1	1	RNF157	ring finger protein 157
hsa-miR-125a-5p	1	0	1	1	0	0	ASRGL1	asparaginase like 1
hsa-miR-125a-5p	0	0	0	1	0	0	BATF2	basic leucine zipper transcription factor, ATF-like 2
hsa-miR-125a-5p	0	0	1	1	0	0	CD14	CD14 molecule
hsa-miR-125a-5p	0	0	0	1	0	0	AURKC	aurora kinase C
hsa-miR-125a-5p	0	0	0	1	1	1	MRAP	melanocortin 2 receptor accessory protein
hsa-miR-125a-5p	0	0	1	1	1	1	SDR16C5	short chain dehydrogenase/reductase family 16C, member 5
hsa-miR-125a-5p	1	0	1	1	0	0	EGLN2	egl nine homolog 2 (C. elegans)
hsa-miR-125a-5p	1	0	1	1	1	1	GPRIN1	G protein regulated inducer of neurite outgrowth 1
hsa-miR-125a-5p	0	0	1	1	1	1	SEC61A2	Sec61 alpha 2 subunit (S. cerevisiae)
hsa-miR-125a-5p	0	0	0	1	1	1	CDKN2A	cyclin-dependent kinase inhibitor 2A
hsa-miR-125a-5p	0	0	0	1	0	0	BHLHA9	basic helix-loop-helix family, member a9
hsa-miR-125a-5p	1	0	1	1	1	1	RRM2	ribonucleotide reductase M2
hsa-miR-125a-5p	0	0	0	1	0	0	OR9K2	olfactory receptor, family 9, subfamily K, member 2
hsa-miR-125a-5p	0	0	1	1	1	1	FAM22G	family with sequence similarity 22, member G
hsa-miR-125a-5p	0	0	0	1	1	1	DDX54	DEAD (Asp-Glu-Ala-Asp) box polypeptide 54
hsa-miR-125a-5p	0	0	1	1	1	1	TMEM37	transmembrane protein 37
hsa-miR-125a-5p	0	0	1	1	1	1	ROBO4	roundabout, axon guidance receptor, homolog 4 (Drosophila)
hsa-miR-125a-5p	0	0	1	1	1	1	RAC3	ras-related C3 botulinum toxin substrate 3 (rho family, small GTP binding protein Rac3)
hsa-miR-125a-5p	0	0	0	1	0	0	KRTAP5-8	keratin associated protein 5-8
hsa-miR-125a-5p	0	0	1	1	0	0	KRTAP5-7	keratin associated protein 5-7
hsa-miR-125a-5p	0	0	0	1	0	0	SNX32	sorting nexin 32
hsa-miR-125a-5p	0	0	0	1	0	0	CLDN15	claudin 15
hsa-miR-125a-5p	0	0	1	1	0	0	TPT1	tumor protein, translationally-controlled 1
hsa-miR-125a-5p	0	0	0	1	0	0	MRPL38	mitochondrial ribosomal protein L38
hsa-miR-125a-5p	0	0	1	1	0	0	VEGFB	vascular endothelial growth factor B
hsa-miR-125a-5p	1	0	1	1	1	1	IQCA1	IQ motif containing with AAA domain 1
hsa-miR-125a-5p	1	0	0	1	1	1	CTSF	cathepsin F
hsa-miR-125a-5p	1	0	1	1	0	0	HDLBP	high density lipoprotein binding protein
hsa-miR-125a-5p	0	0	0	1	1	1	TMEM52	transmembrane protein 52
hsa-miR-125a-5p	0	0	1	1	1	1	TTLL9	tubulin tyrosine ligase-like family, member 9
hsa-miR-125a-5p	0	0	1	1	0	0	SPNS1	spinster homolog 1 (Drosophila)
hsa-miR-125a-5p	0	0	1	1	0	0	RIN1	Ras and Rab interactor 1
hsa-miR-125a-5p	0	0	1	1	0	0	CD248	CD248 molecule, endosialin
hsa-miR-125a-5p	1	0	1	1	1	1	ADPGK	ADP-dependent glucokinase
hsa-miR-125a-5p	1	0	1	1	1	1	RBFOX1	RNA binding protein, fox-1 homolog (C. elegans) 1
hsa-miR-125a-5p	0	0	1	1	1	1	FAM71D	family with sequence similarity 71, member D
hsa-miR-125a-5p	0	0	0	1	0	0	ATHL1	ATH1, acid trehalase-like 1 (yeast)
hsa-miR-125a-5p	1	0	1	1	1	1	RACGAP1	Rac GTPase activating protein 1
hsa-miR-125a-5p	1	0	1	1	0	0	TBC1D10C	TBC1 domain family, member 10C
hsa-miR-125a-5p	1	0	1	1	1	1	PTH1R	parathyroid hormone 1 receptor
hsa-miR-125a-5p	0	0	1	1	0	0	GRINA	glutamate receptor, ionotropic, N-methyl D-aspartate-associated protein 1 (glutamate binding)
hsa-miR-125a-5p	1	0	1	1	1	1	GALE	UDP-galactose-4-epimerase
hsa-miR-125a-5p	0	0	1	1	1	1	EPSTI1	epithelial stromal interaction 1 (breast)
hsa-miR-125a-5p	0	0	0	1	0	0	BHLHA15	basic helix-loop-helix family, member a15
hsa-miR-125a-5p	0	0	0	1	0	0	FUT7	fucosyltransferase 7 (alpha (1,3) fucosyltransferase)
hsa-miR-125a-5p	0	0	0	1	1	1	LILRB2	leukocyte immunoglobulin-like receptor, subfamily B (with TM and ITIM domains), member 2
hsa-miR-125a-5p	0	0	1	1	0	0	KCNH6	potassium voltage-gated channel, subfamily H (eag-related), member 6
hsa-miR-125a-5p	0	0	1	1	1	1	TNIP2	TNFAIP3 interacting protein 2
hsa-miR-125a-5p	0	0	1	1	1	1	AQP6	aquaporin 6, kidney specific
hsa-miR-125a-5p	0	0	0	1	1	1	GDPD4	glycerophosphodiester phosphodiesterase domain containing 4
hsa-miR-125a-5p	0	0	0	1	1	1	ASB2	ankyrin repeat and SOCS box containing 2
hsa-miR-125a-5p	0	0	0	1	0	0	MAMDC4	MAM domain containing 4
hsa-miR-125a-5p	0	0	0	1	0	0	PGAM5	phosphoglycerate mutase family member 5
hsa-miR-125a-5p	1	0	1	1	1	1	SIX5	SIX homeobox 5
hsa-miR-125a-5p	0	0	0	1	1	1	PROM2	prominin 2
hsa-miR-125a-5p	0	0	0	1	0	0	S1PR2	sphingosine-1-phosphate receptor 2
hsa-miR-125a-5p	0	0	1	1	0	0	SYTL1	synaptotagmin-like 1
hsa-miR-125a-5p	0	0	0	1	1	1	BOK	BCL2-related ovarian killer
hsa-miR-125a-5p	0	1	1	1	0	0	PKM	pyruvate kinase, muscle
hsa-miR-125a-5p	0	0	0	1	1	1	ITGB2	integrin, beta 2 (complement component 3 receptor 3 and 4 subunit)
hsa-miR-125a-5p	0	0	0	1	0	0	SLC16A8	solute carrier family 16, member 8 (monocarboxylic acid transporter 3)
hsa-miR-125a-5p	0	0	1	1	0	0	RPLP2	ribosomal protein, large, P2
hsa-miR-125a-5p	0	0	0	1	1	1	NUDC	nuclear distribution C homolog (A. nidulans)
hsa-miR-125a-5p	1	0	1	1	0	0	DUOX1	dual oxidase 1
hsa-miR-125a-5p	0	0	1	1	1	1	ZNF543	zinc finger protein 543
hsa-miR-125a-5p	0	0	0	1	0	0	ACBD4	acyl-CoA binding domain containing 4
hsa-miR-125a-5p	1	0	0	1	0	0	HIC1	hypermethylated in cancer 1
hsa-miR-125a-5p	0	0	0	1	0	0	AGXT2L2	alanine-glyoxylate aminotransferase 2-like 2
hsa-miR-125a-5p	1	0	1	1	1	1	DDHD1	DDHD domain containing 1
hsa-miR-125a-5p	1	0	1	1	1	1	PXN	paxillin
hsa-miR-125a-5p	0	0	0	1	0	0	ZNF687	zinc finger protein 687
hsa-miR-125a-5p	0	0	0	1	0	0	H1FOO	H1 histone family, member O, oocyte-specific
hsa-miR-125a-5p	0	0	1	1	0	0	HERC2P3	hect domain and RLD 2 pseudogene 3
hsa-miR-125a-5p	0	0	1	1	0	0	ADCK4	aarF domain containing kinase 4
hsa-miR-125a-5p	1	0	1	1	1	1	ZNF580	zinc finger protein 580
hsa-miR-125a-5p	0	0	1	1	0	0	HEATR7A	HEAT repeat containing 7A
hsa-miR-125a-5p	0	0	0	1	0	0	THOC6	THO complex 6 homolog (Drosophila)
hsa-miR-125a-5p	0	0	0	1	1	1	FLII	flightless I homolog (Drosophila)
hsa-miR-125a-5p	0	0	1	1	0	0	TMEM86B	transmembrane protein 86B
hsa-miR-125a-5p	0	0	0	1	0	0	OXCT2	3-oxoacid CoA transferase 2
hsa-miR-125a-5p	1	0	0	1	0	0	KRT81	keratin 81
hsa-miR-125a-5p	0	0	1	1	1	1	FAM178B	family with sequence similarity 178, member B
hsa-miR-125a-5p	0	0	0	1	0	0	HSF1	heat shock transcription factor 1
hsa-miR-125a-5p	0	0	0	1	0	0	TNFRSF18	tumor necrosis factor receptor superfamily, member 18
hsa-miR-125a-5p	1	0	0	1	1	1	SIRT7	sirtuin 7
hsa-miR-125a-5p	0	0	0	1	0	0	KLHL22	kelch-like 22 (Drosophila)
hsa-miR-125a-5p	0	0	0	1	0	0	HCAR2	hydroxycarboxylic acid receptor 2
hsa-miR-125a-5p	0	0	0	1	0	0	NKX2-5	NK2 homeobox 5
hsa-miR-125a-5p	0	0	0	1	0	0	ZNF683	zinc finger protein 683
hsa-miR-125a-5p	0	0	0	1	0	0	PRSS57	protease, serine, 57
hsa-miR-125a-5p	0	0	1	1	0	0	GPR39	G protein-coupled receptor 39
hsa-miR-125a-5p	0	0	0	1	0	0	ADAT3	adenosine deaminase, tRNA-specific 3
hsa-miR-125a-5p	1	0	0	1	0	0	FAM193B	family with sequence similarity 193, member B
hsa-miR-125a-5p	1	0	1	1	1	1	IL25	interleukin 25
hsa-miR-125a-5p	0	0	0	1	0	0	GDF3	growth differentiation factor 3
hsa-miR-125a-5p	0	0	1	1	0	0	TMEM44	transmembrane protein 44
hsa-miR-125a-5p	0	0	0	1	0	0	ZNF696	zinc finger protein 696
hsa-miR-125a-5p	1	0	1	1	0	0	FAT4	FAT tumor suppressor homolog 4 (Drosophila)
hsa-miR-125a-5p	0	0	1	1	1	1	GATSL3	GATS protein-like 3
hsa-miR-125a-5p	0	0	0	1	0	0	SAMD14	sterile alpha motif domain containing 14
hsa-miR-125a-5p	0	0	0	1	0	0	NOC4L	nucleolar complex associated 4 homolog (S. cerevisiae)
hsa-miR-125a-5p	0	0	1	1	0	0	LYRM4	LYR motif containing 4
hsa-miR-125a-5p	0	0	0	1	0	0	ALG12	asparagine-linked glycosylation 12, alpha-1,6-mannosyltransferase homolog (S. cerevisiae)
hsa-miR-125a-5p	0	0	0	1	0	0	PCYT2	phosphate cytidylyltransferase 2, ethanolamine
hsa-miR-125a-5p	0	0	1	1	1	1	BMP8A	bone morphogenetic protein 8a
hsa-miR-125a-5p	0	0	0	1	0	0	SYNDIG1L	synapse differentiation inducing 1-like
hsa-miR-125a-5p	0	0	1	1	1	1	SPRR3	small proline-rich protein 3
hsa-miR-125a-5p	0	0	1	1	0	0	NXF5	nuclear RNA export factor 5
hsa-miR-125a-5p	0	0	1	1	0	0	SIGIRR	single immunoglobulin and toll-interleukin 1 receptor (TIR) domain
hsa-miR-125a-5p	0	0	0	1	1	1	ANO9	anoctamin 9
hsa-miR-125a-5p	0	0	1	1	0	0	CKLF	chemokine-like factor
hsa-miR-125a-5p	0	0	1	1	1	1	POFUT2	protein O-fucosyltransferase 2
hsa-miR-125a-5p	0	0	0	1	0	0	YJEFN3	YjeF N-terminal domain containing 3
hsa-miR-125a-5p	0	0	0	1	1	1	C14orf80	chromosome 14 open reading frame 80
hsa-miR-125a-5p	0	0	0	1	0	0	JMJD7-PLA2G4B	JMJD7-PLA2G4B readthrough
hsa-miR-125a-5p	0	0	0	1	0	0	PES1	pescadillo ribosomal biogenesis factor 1
hsa-miR-125a-5p	0	0	1	1	1	1	SELV	selenoprotein V
hsa-miR-125a-5p	0	0	1	1	0	0	C2orf53	chromosome 2 open reading frame 53
hsa-miR-125a-5p	0	0	1	1	1	1	IFRD2	interferon-related developmental regulator 2
hsa-miR-125a-5p	0	0	0	1	0	0	TMEM39B	transmembrane protein 39B
hsa-miR-125a-5p	0	0	1	1	0	0	SIRT6	sirtuin 6
hsa-miR-125a-5p	0	0	1	1	0	0	SNURF	SNRPN upstream reading frame
hsa-miR-125a-5p	0	0	1	1	1	1	FIBP	fibroblast growth factor (acidic) intracellular binding protein
hsa-miR-125a-5p	0	0	1	1	0	0	HTATIP2	HIV-1 Tat interactive protein 2, 30kDa
hsa-miR-125a-5p	1	0	1	1	1	1	MTSS1L	metastasis suppressor 1-like
hsa-miR-125a-5p	1	0	0	1	0	0	CRTC1	CREB regulated transcription coactivator 1
hsa-miR-125a-5p	0	0	1	1	0	0	RGS12	regulator of G-protein signaling 12
hsa-miR-125a-5p	0	0	1	1	1	1	MMP28	matrix metallopeptidase 28
hsa-miR-125a-5p	0	0	0	1	0	0	PTGES2	prostaglandin E synthase 2
hsa-miR-125a-5p	0	0	1	1	1	1	TMPRSS4	transmembrane protease, serine 4
hsa-miR-125a-5p	0	0	0	1	0	0	DNAJB13	DnaJ (Hsp40) homolog, subfamily B, member 13
hsa-miR-125a-5p	0	0	0	1	0	0	NAALADL1	N-acetylated alpha-linked acidic dipeptidase-like 1
hsa-miR-125a-5p	0	0	1	1	0	0	SPAG8	sperm associated antigen 8
hsa-miR-125a-5p	0	0	0	1	1	1	PNCK	pregnancy up-regulated non-ubiquitously expressed CaM kinase
hsa-miR-125a-5p	1	0	0	1	1	1	MGAT3	mannosyl (beta-1,4-)-glycoprotein beta-1,4-N-acetylglucosaminyltransferase
hsa-miR-125a-5p	0	0	0	1	0	0	WDR86	WD repeat domain 86
hsa-miR-125a-5p	0	0	1	1	0	0	HAGHL	hydroxyacylglutathione hydrolase-like
hsa-miR-125a-5p	0	0	0	1	1	1	ZKSCAN3	zinc finger with KRAB and SCAN domains 3
hsa-miR-125a-5p	0	0	1	1	1	1	ING4	inhibitor of growth family, member 4
hsa-miR-125a-5p	0	0	0	1	0	0	ARHGAP11B	Rho GTPase activating protein 11B
hsa-miR-125a-5p	0	0	1	1	1	1	CHRD	chordin
hsa-miR-125a-5p	0	0	0	1	0	0	ALKBH2	alkB, alkylation repair homolog 2 (E. coli)
hsa-miR-125a-5p	0	0	1	1	0	0	SLC6A13	solute carrier family 6 (neurotransmitter transporter, GABA), member 13
hsa-miR-125a-5p	0	0	0	1	0	0	CDHR4	cadherin-related family member 4
hsa-miR-125a-5p	0	0	1	1	0	0	THNSL2	threonine synthase-like 2 (S. cerevisiae)
hsa-miR-125a-5p	0	0	0	1	0	0	SOWAHD	sosondowah ankyrin repeat domain family member D
hsa-miR-125a-5p	1	0	1	1	0	0	XRRA1	X-ray radiation resistance associated 1
hsa-miR-125a-5p	1	0	0	1	0	0	TSPAN4	tetraspanin 4
hsa-miR-125a-5p	0	0	1	1	1	1	CTH	cystathionase (cystathionine gamma-lyase)
hsa-miR-125a-5p	0	0	1	1	0	0	SLC28A2	solute carrier family 28 (sodium-coupled nucleoside transporter), member 2
hsa-miR-125a-5p	0	0	1	1	1	1	PQLC1	PQ loop repeat containing 1
hsa-miR-125a-5p	1	0	1	1	0	0	ECE2	endothelin converting enzyme 2
hsa-miR-125a-5p	0	0	0	1	0	0	PSMD13	proteasome (prosome, macropain) 26S subunit, non-ATPase, 13
hsa-miR-125a-5p	0	0	0	1	0	0	RHBDL1	rhomboid, veinlet-like 1 (Drosophila)
hsa-miR-125a-5p	0	0	1	1	1	1	PKP1	plakophilin 1 (ectodermal dysplasia/skin fragility syndrome)
hsa-miR-125a-5p	0	0	1	1	0	0	RBCK1	RanBP-type and C3HC4-type zinc finger containing 1
hsa-miR-125a-5p	0	0	1	1	0	0	MCM7	minichromosome maintenance complex component 7
hsa-miR-125a-5p	1	0	1	1	1	1	HNF4G	hepatocyte nuclear factor 4, gamma
hsa-miR-125a-5p	1	0	1	1	0	0	ADAMTSL2	ADAMTS-like 2
hsa-miR-125a-5p	0	0	0	1	0	0	ENTPD2	ectonucleoside triphosphate diphosphohydrolase 2
hsa-miR-125a-5p	0	0	1	1	1	1	C10orf32	chromosome 10 open reading frame 32
hsa-miR-125a-5p	1	0	1	1	1	1	ANO1	anoctamin 1, calcium activated chloride channel
hsa-miR-125a-5p	1	0	1	1	1	1	COL5A1	collagen, type V, alpha 1
hsa-miR-125a-5p	0	0	1	1	0	0	TMEM116	transmembrane protein 116
hsa-miR-125a-5p	0	0	0	1	0	0	SPNS3	spinster homolog 3 (Drosophila)
hsa-miR-125a-5p	1	0	1	1	0	0	DNM2	dynamin 2
hsa-miR-125a-5p	0	0	1	1	1	1	PLGLB1	plasminogen-like B1
hsa-miR-125a-5p	0	0	1	1	1	1	UBE2I	ubiquitin-conjugating enzyme E2I
hsa-miR-125a-5p	0	0	0	1	0	0	WDR88	WD repeat domain 88
hsa-miR-125a-5p	0	0	1	1	0	0	PORCN	porcupine homolog (Drosophila)
hsa-miR-125a-5p	0	0	0	1	1	1	EMC1	ER membrane protein complex subunit 1
hsa-miR-125a-5p	0	0	0	1	0	0	ARSA	arylsulfatase A
[truncated: 204 more rows]
