# Supplementary material for: Profiling of Selected MicroRNAs in Proliferative Eutopic Endometrium of Women with Ovarian Endometriosis
Source: Biomed Res Int. 2015 Aug 20;2015:760698. doi: 10.1155/2015/760698 (PMC4558423; doi:10.1155/2015/760698)
Supplement: Supplementary file 1 — Table I: The names of miRNAs significantly differentially expressed between eutopic endometrium of patients with endometriosis vs eutopic endometrium of patients without endometriosis. Table II: The associations between miRNA and mRNA, which presents detailed results of the search of six major databases i.e targetscan, tarbase, miranda, mirbase, mirtarget2 and pictar. [file 760698.f1.zip › 760698.f1/Table II/hsa-miR-128.tsv]

miR	targetscan	tarbase	miranda	mirbase	mirtarget2	pictar	GeneSymbol	GeneName
hsa-miR-128	1	0	1	0	0	0	TNRC18	trinucleotide repeat containing 18
hsa-miR-128	1	0	1	1	0	0	FOXP2	forkhead box P2
hsa-miR-128	1	0	1	1	1	1	SEC61A1	Sec61 alpha 1 subunit (S. cerevisiae)
hsa-miR-128	1	0	1	1	1	1	HBEGF	heparin-binding EGF-like growth factor
hsa-miR-128	1	0	1	0	1	1	RXRA	retinoid X receptor, alpha
hsa-miR-128	1	0	1	1	0	0	RGS6	regulator of G-protein signaling 6
hsa-miR-128	1	0	1	1	1	1	UNC13C	unc-13 homolog C (C. elegans)
hsa-miR-128	1	0	1	1	1	1	NAV3	neuron navigator 3
hsa-miR-128	1	0	1	1	1	1	TBC1D13	TBC1 domain family, member 13
hsa-miR-128	1	0	1	1	1	1	IKZF2	IKAROS family zinc finger 2 (Helios)
hsa-miR-128	1	0	1	0	1	1	GPR126	G protein-coupled receptor 126
hsa-miR-128	1	0	1	1	1	1	CCNG1	cyclin G1
hsa-miR-128	1	0	1	1	0	0	RAPGEF2	Rap guanine nucleotide exchange factor (GEF) 2
hsa-miR-128	1	0	1	0	1	1	SRGAP2	SLIT-ROBO Rho GTPase activating protein 2
hsa-miR-128	1	0	1	1	1	1	SMG1	smg-1 homolog, phosphatidylinositol 3-kinase-related kinase (C. elegans)
hsa-miR-128	1	0	1	1	1	1	UBE4A	ubiquitination factor E4A
hsa-miR-128	1	0	1	1	1	1	ADAM19	ADAM metallopeptidase domain 19
hsa-miR-128	1	0	1	0	1	1	IRF4	interferon regulatory factor 4
hsa-miR-128	1	0	1	1	1	1	UBE2N	ubiquitin-conjugating enzyme E2N
hsa-miR-128	1	0	1	0	1	1	MARCH5	membrane-associated ring finger (C3HC4) 5
hsa-miR-128	1	0	1	1	1	1	KCTD4	potassium channel tetramerisation domain containing 4
hsa-miR-128	1	0	1	1	1	1	FAM108B1	family with sequence similarity 108, member B1
hsa-miR-128	1	0	0	1	0	0	ECE1	endothelin converting enzyme 1
hsa-miR-128	1	0	1	0	0	0	TANC2	tetratricopeptide repeat, ankyrin repeat and coiled-coil containing 2
hsa-miR-128	1	0	1	1	1	1	KIAA1551	KIAA1551
hsa-miR-128	1	0	1	1	1	1	MTDH	metadherin
hsa-miR-128	1	0	1	1	1	1	FAM184A	family with sequence similarity 184, member A
hsa-miR-128	1	0	1	0	1	1	RAB33B	RAB33B, member RAS oncogene family
hsa-miR-128	1	0	0	1	0	0	NEUROD4	neuronal differentiation 4
hsa-miR-128	1	0	1	0	1	1	RPS6KB1	ribosomal protein S6 kinase, 70kDa, polypeptide 1
hsa-miR-128	1	0	1	1	1	1	HIP1	huntingtin interacting protein 1
hsa-miR-128	1	0	1	0	1	1	UBE2W	ubiquitin-conjugating enzyme E2W (putative)
hsa-miR-128	1	0	1	0	1	1	GPAM	glycerol-3-phosphate acyltransferase, mitochondrial
hsa-miR-128	1	0	1	1	0	0	PROSAPIP1	ProSAPiP1 protein
hsa-miR-128	1	0	1	1	1	1	RCAN2	regulator of calcineurin 2
hsa-miR-128	1	0	1	1	1	1	GLT25D2	glycosyltransferase 25 domain containing 2
hsa-miR-128	1	0	1	1	1	1	UNKL	unkempt homolog (Drosophila)-like
hsa-miR-128	1	0	1	1	1	1	MIPOL1	mirror-image polydactyly 1
hsa-miR-128	1	0	1	1	1	1	PDE1B	phosphodiesterase 1B, calmodulin-dependent
hsa-miR-128	1	0	1	1	1	1	SPTY2D1	SPT2, Suppressor of Ty, domain containing 1 (S. cerevisiae)
hsa-miR-128	1	0	1	0	1	1	TNRC6B	trinucleotide repeat containing 6B
hsa-miR-128	1	0	1	1	1	1	MAP2K4	mitogen-activated protein kinase kinase 4
hsa-miR-128	1	0	1	1	0	0	C17orf70	chromosome 17 open reading frame 70
hsa-miR-128	1	0	1	1	1	1	RNF38	ring finger protein 38
hsa-miR-128	1	0	1	0	1	1	RAB11FIP1	RAB11 family interacting protein 1 (class I)
hsa-miR-128	1	0	1	1	1	1	DTX1	deltex homolog 1 (Drosophila)
hsa-miR-128	1	0	1	1	0	0	NIPAL4	NIPA-like domain containing 4
hsa-miR-128	1	0	1	1	1	1	GATAD2A	GATA zinc finger domain containing 2A
hsa-miR-128	1	0	1	1	1	1	ALG9	asparagine-linked glycosylation 9, alpha-1,2-mannosyltransferase homolog (S. cerevisiae)
hsa-miR-128	1	0	1	1	1	1	C20orf111	chromosome 20 open reading frame 111
hsa-miR-128	1	0	1	0	1	1	AMMECR1L	AMME chromosomal region gene 1-like
hsa-miR-128	1	0	1	1	1	1	JAG1	jagged 1
hsa-miR-128	1	0	1	1	1	1	DUSP5	dual specificity phosphatase 5
hsa-miR-128	1	0	1	1	1	1	FURIN	furin (paired basic amino acid cleaving enzyme)
hsa-miR-128	1	0	1	1	1	1	PAIP2	poly(A) binding protein interacting protein 2
hsa-miR-128	1	0	1	1	1	1	MTSS1L	metastasis suppressor 1-like
hsa-miR-128	1	0	0	1	0	0	HIC1	hypermethylated in cancer 1
hsa-miR-128	1	0	1	0	1	1	FAM133B	family with sequence similarity 133, member B
hsa-miR-128	1	0	1	1	0	0	CCM2	cerebral cavernous malformation 2
hsa-miR-128	1	0	1	1	1	1	TLX1	T-cell leukemia homeobox 1
hsa-miR-128	1	0	1	1	1	1	TBC1D22B	TBC1 domain family, member 22B
hsa-miR-128	1	0	1	1	1	1	CORO1C	coronin, actin binding protein, 1C
hsa-miR-128	1	0	1	1	1	1	ANK1	ankyrin 1, erythrocytic
hsa-miR-128	1	0	1	1	1	1	ZNF385A	zinc finger protein 385A
hsa-miR-128	1	0	1	1	1	1	SIRT1	sirtuin 1
hsa-miR-128	1	0	1	1	1	1	FAM126A	family with sequence similarity 126, member A
hsa-miR-128	1	0	1	1	1	1	AFF3	AF4/FMR2 family, member 3
hsa-miR-128	1	0	1	1	1	1	VAV3	vav 3 guanine nucleotide exchange factor
hsa-miR-128	1	0	1	1	0	0	SMARCA2	SWI/SNF related, matrix associated, actin dependent regulator of chromatin, subfamily a, member 2
hsa-miR-128	1	0	1	1	1	1	GABBR2	gamma-aminobutyric acid (GABA) B receptor, 2
hsa-miR-128	1	0	1	1	1	1	TMX1	thioredoxin-related transmembrane protein 1
hsa-miR-128	1	0	1	1	1	1	PARD6B	par-6 partitioning defective 6 homolog beta (C. elegans)
hsa-miR-128	1	0	1	0	1	1	HTT	huntingtin
hsa-miR-128	1	0	0	1	1	1	CCNI2	cyclin I family, member 2
hsa-miR-128	1	0	1	1	0	0	GRK6	G protein-coupled receptor kinase 6
hsa-miR-128	1	0	1	0	1	1	N4BP1	NEDD4 binding protein 1
hsa-miR-128	1	0	1	1	1	1	NF1	neurofibromin 1
hsa-miR-128	1	0	1	1	1	1	DROSHA	drosha, ribonuclease type III
hsa-miR-128	1	0	1	1	1	1	CDR2L	cerebellar degeneration-related protein 2-like
hsa-miR-128	1	0	1	0	1	1	KCNK2	potassium channel, subfamily K, member 2
hsa-miR-128	1	0	1	1	1	1	BTG2	BTG family, member 2
hsa-miR-128	1	0	1	1	1	1	PCM1	pericentriolar material 1
hsa-miR-128	1	0	1	1	1	1	C2CD2	C2 calcium-dependent domain containing 2
hsa-miR-128	1	0	1	1	1	1	RARA	retinoic acid receptor, alpha
hsa-miR-128	1	0	1	1	1	1	ULK1	unc-51-like kinase 1 (C. elegans)
hsa-miR-128	1	0	1	1	1	1	ARHGEF11	Rho guanine nucleotide exchange factor (GEF) 11
hsa-miR-128	1	0	1	1	1	1	BHLHE41	basic helix-loop-helix family, member e41
hsa-miR-128	1	0	1	1	1	1	RUNX1	runt-related transcription factor 1
hsa-miR-128	1	0	1	1	1	1	LYPD3	LY6/PLAUR domain containing 3
hsa-miR-128	1	0	1	1	1	1	ARFGEF1	ADP-ribosylation factor guanine nucleotide-exchange factor 1 (brefeldin A-inhibited)
hsa-miR-128	1	0	1	1	1	1	CA7	carbonic anhydrase VII
hsa-miR-128	1	0	1	1	1	1	TMEM248	transmembrane protein 248
hsa-miR-128	1	0	1	1	1	1	PIK3R1	phosphoinositide-3-kinase, regulatory subunit 1 (alpha)
hsa-miR-128	1	0	1	1	1	1	SNAI1	snail homolog 1 (Drosophila)
hsa-miR-128	1	0	1	1	1	1	ZFHX3	zinc finger homeobox 3
hsa-miR-128	1	0	1	1	1	1	DPY19L3	dpy-19-like 3 (C. elegans)
hsa-miR-128	1	0	1	1	1	1	ELL2	elongation factor, RNA polymerase II, 2
hsa-miR-128	1	0	1	1	0	0	SH2D3C	SH2 domain containing 3C
hsa-miR-128	1	0	1	0	0	0	TNPO1	transportin 1
hsa-miR-128	1	0	1	1	1	1	CDC14B	CDC14 cell division cycle 14 homolog B (S. cerevisiae)
hsa-miR-128	1	0	1	1	1	1	TFPI	tissue factor pathway inhibitor (lipoprotein-associated coagulation inhibitor)
hsa-miR-128	1	0	1	1	1	1	MLL	myeloid/lymphoid or mixed-lineage leukemia (trithorax homolog, Drosophila)
hsa-miR-128	1	0	1	1	1	1	ZZZ3	zinc finger, ZZ-type containing 3
hsa-miR-128	1	0	0	1	1	1	CAPN7	calpain 7
hsa-miR-128	1	0	1	1	1	1	RPS6KA5	ribosomal protein S6 kinase, 90kDa, polypeptide 5
hsa-miR-128	1	0	1	1	1	1	CYP39A1	cytochrome P450, family 39, subfamily A, polypeptide 1
hsa-miR-128	1	0	1	1	1	1	CSF1	colony stimulating factor 1 (macrophage)
hsa-miR-128	1	0	1	1	1	1	MOSPD3	motile sperm domain containing 3
hsa-miR-128	1	0	1	0	1	1	PRKX	protein kinase, X-linked
hsa-miR-128	1	0	1	1	0	0	NEK2	NIMA (never in mitosis gene a)-related kinase 2
hsa-miR-128	1	0	1	0	1	1	CNTN2	contactin 2 (axonal)
hsa-miR-128	1	0	1	0	1	1	LBH	limb bud and heart development homolog (mouse)
hsa-miR-128	1	0	1	1	0	0	TTC9	tetratricopeptide repeat domain 9
hsa-miR-128	1	0	1	1	1	1	ONECUT2	one cut homeobox 2
hsa-miR-128	1	0	1	1	1	1	MOB1B	MOB kinase activator 1B
hsa-miR-128	1	0	1	1	0	0	KIAA1549L	KIAA1549-like
hsa-miR-128	1	0	1	1	0	0	CCDC92	coiled-coil domain containing 92
hsa-miR-128	1	0	1	1	1	1	FAM126B	family with sequence similarity 126, member B
hsa-miR-128	1	0	1	0	0	0	ZC3H12C	zinc finger CCCH-type containing 12C
hsa-miR-128	1	0	1	1	0	0	NDUFS4	NADH dehydrogenase (ubiquinone) Fe-S protein 4, 18kDa (NADH-coenzyme Q reductase)
hsa-miR-128	1	0	1	1	1	1	PTCH1	patched 1
hsa-miR-128	1	0	1	1	1	1	CXCL2	chemokine (C-X-C motif) ligand 2
hsa-miR-128	1	0	1	1	1	1	HNF4G	hepatocyte nuclear factor 4, gamma
hsa-miR-128	1	0	1	0	1	1	SP1	Sp1 transcription factor
hsa-miR-128	1	0	1	1	1	1	CLSTN2	calsyntenin 2
hsa-miR-128	1	0	1	1	1	1	COL11A2	collagen, type XI, alpha 2
hsa-miR-128	1	0	1	0	1	1	ZNF24	zinc finger protein 24
hsa-miR-128	1	0	1	1	1	1	AGPAT3	1-acylglycerol-3-phosphate O-acyltransferase 3
hsa-miR-128	1	0	1	1	1	1	KIAA1033	KIAA1033
hsa-miR-128	1	0	1	0	1	1	NHS	Nance-Horan syndrome (congenital cataracts and dental anomalies)
hsa-miR-128	1	0	1	1	1	1	CDS1	CDP-diacylglycerol synthase (phosphatidate cytidylyltransferase) 1
hsa-miR-128	1	0	1	1	0	0	KIAA1549	KIAA1549
hsa-miR-128	1	0	1	1	1	1	NAP1L5	nucleosome assembly protein 1-like 5
hsa-miR-128	1	0	1	1	1	1	TNPO3	transportin 3
hsa-miR-128	1	0	1	1	1	1	NCS1	neuronal calcium sensor 1
hsa-miR-128	1	0	1	0	1	1	SMAD5	SMAD family member 5
hsa-miR-128	1	0	1	1	0	0	ABL2	v-abl Abelson murine leukemia viral oncogene homolog 2
hsa-miR-128	1	0	1	0	1	1	TGFBR1	transforming growth factor, beta receptor 1
hsa-miR-128	1	0	1	0	1	1	C1orf21	chromosome 1 open reading frame 21
hsa-miR-128	1	0	1	1	1	1	ABCA12	ATP-binding cassette, sub-family A (ABC1), member 12
hsa-miR-128	1	0	1	1	1	1	SMAP1	small ArfGAP 1
hsa-miR-128	1	0	1	1	1	1	NCAN	neurocan
hsa-miR-128	1	0	1	1	1	1	MLL3	myeloid/lymphoid or mixed-lineage leukemia 3
hsa-miR-128	1	0	1	1	1	1	LETMD1	LETM1 domain containing 1
hsa-miR-128	1	0	1	1	1	1	UST	uronyl-2-sulfotransferase
hsa-miR-128	1	0	1	1	1	1	ELOVL6	ELOVL fatty acid elongase 6
hsa-miR-128	1	0	1	0	1	1	DCP2	DCP2 decapping enzyme homolog (S. cerevisiae)
hsa-miR-128	1	0	1	1	1	1	KLHL18	kelch-like 18 (Drosophila)
hsa-miR-128	1	0	1	0	1	1	YWHAB	tyrosine 3-monooxygenase/tryptophan 5-monooxygenase activation protein, beta polypeptide
hsa-miR-128	1	0	1	0	1	1	SS18	synovial sarcoma translocation, chromosome 18
hsa-miR-128	1	0	1	1	1	1	MARCKS	myristoylated alanine-rich protein kinase C substrate
hsa-miR-128	1	0	0	1	1	1	LPCAT1	lysophosphatidylcholine acyltransferase 1
hsa-miR-128	1	0	1	1	1	1	VEGFC	vascular endothelial growth factor C
hsa-miR-128	1	0	1	1	0	0	C10orf137	chromosome 10 open reading frame 137
hsa-miR-128	1	0	1	0	1	1	SH3RF1	SH3 domain containing ring finger 1
hsa-miR-128	1	0	0	1	1	1	ITPKC	inositol-trisphosphate 3-kinase C
hsa-miR-128	1	0	1	0	1	1	GNS	glucosamine (N-acetyl)-6-sulfatase
hsa-miR-128	1	0	1	0	1	1	SFRP1	secreted frizzled-related protein 1
hsa-miR-128	1	0	1	0	1	1	BMPR2	bone morphogenetic protein receptor, type II (serine/threonine kinase)
hsa-miR-128	1	0	1	0	1	1	NFAT5	nuclear factor of activated T-cells 5, tonicity-responsive
hsa-miR-128	1	0	1	1	1	1	CNN3	calponin 3, acidic
hsa-miR-128	1	0	1	1	1	1	USP42	ubiquitin specific peptidase 42
hsa-miR-128	1	0	1	1	1	1	FUT9	fucosyltransferase 9 (alpha (1,3) fucosyltransferase)
hsa-miR-128	1	0	1	1	1	1	CRKL	v-crk sarcoma virus CT10 oncogene homolog (avian)-like
hsa-miR-128	1	0	1	1	1	1	TXNDC5	thioredoxin domain containing 5 (endoplasmic reticulum)
hsa-miR-128	1	0	1	1	1	1	RNGTT	RNA guanylyltransferase and 5'-phosphatase
hsa-miR-128	1	0	1	0	1	1	DCUN1D4	DCN1, defective in cullin neddylation 1, domain containing 4 (S. cerevisiae)
hsa-miR-128	1	0	1	1	1	1	TEAD1	TEA domain family member 1 (SV40 transcriptional enhancer factor)
hsa-miR-128	1	0	1	1	1	1	EML1	echinoderm microtubule associated protein like 1
hsa-miR-128	1	0	1	1	1	1	TPD52L2	tumor protein D52-like 2
hsa-miR-128	1	0	1	1	1	1	C17orf85	chromosome 17 open reading frame 85
hsa-miR-128	1	0	1	1	0	0	ADAMTS10	ADAM metallopeptidase with thrombospondin type 1 motif, 10
hsa-miR-128	1	0	1	1	1	1	TET2	tet methylcytosine dioxygenase 2
hsa-miR-128	1	0	1	1	1	1	ZHX1	zinc fingers and homeoboxes 1
hsa-miR-128	1	0	1	1	1	1	TGIF2	TGFB-induced factor homeobox 2
hsa-miR-128	1	0	1	0	0	0	NKX3-2	NK3 homeobox 2
hsa-miR-128	1	0	1	1	1	1	AK2	adenylate kinase 2
hsa-miR-128	1	0	1	0	1	1	KITLG	KIT ligand
hsa-miR-128	1	0	1	1	1	1	TROVE2	TROVE domain family, member 2
hsa-miR-128	1	0	1	0	1	1	SMPD3	sphingomyelin phosphodiesterase 3, neutral membrane (neutral sphingomyelinase II)
hsa-miR-128	1	0	1	1	1	1	NAA50	N(alpha)-acetyltransferase 50, NatE catalytic subunit
hsa-miR-128	1	0	1	1	1	1	KLHL31	kelch-like 31 (Drosophila)
hsa-miR-128	1	0	1	0	1	1	TMTC2	transmembrane and tetratricopeptide repeat containing 2
hsa-miR-128	1	0	1	1	1	1	KLF4	Kruppel-like factor 4 (gut)
hsa-miR-128	1	0	1	0	1	1	ITCH	itchy E3 ubiquitin protein ligase
hsa-miR-128	1	0	1	1	1	1	UPF1	UPF1 regulator of nonsense transcripts homolog (yeast)
hsa-miR-128	1	0	1	1	1	1	RCOR3	REST corepressor 3
hsa-miR-128	1	0	1	1	1	1	PDE8B	phosphodiesterase 8B
hsa-miR-128	1	0	1	1	1	1	BMP3	bone morphogenetic protein 3
hsa-miR-128	1	0	1	1	1	1	PTGDR	prostaglandin D2 receptor (DP)
hsa-miR-128	1	0	1	1	1	1	TMED5	transmembrane emp24 protein transport domain containing 5
hsa-miR-128	1	0	1	1	1	1	RERE	arginine-glutamic acid dipeptide (RE) repeats
hsa-miR-128	1	0	1	0	1	1	HDAC4	histone deacetylase 4
hsa-miR-128	1	0	0	1	1	1	FAM177A1	family with sequence similarity 177, member A1
hsa-miR-128	1	0	1	0	1	1	SMURF2	SMAD specific E3 ubiquitin protein ligase 2
hsa-miR-128	1	0	1	1	1	1	ZNF827	zinc finger protein 827
hsa-miR-128	1	0	1	0	1	1	LIN7C	lin-7 homolog C (C. elegans)
hsa-miR-128	1	0	1	1	1	1	SZRD1	SUZ RNA binding domain containing 1
hsa-miR-128	1	0	1	1	0	0	AGFG2	ArfGAP with FG repeats 2
hsa-miR-128	1	0	1	1	1	1	ATXN10	ataxin 10
hsa-miR-128	1	0	1	1	1	1	EVI5	ecotropic viral integration site 5
hsa-miR-128	1	0	1	1	1	1	IGSF3	immunoglobulin superfamily, member 3
hsa-miR-128	1	0	1	1	1	1	FAM155B	family with sequence similarity 155, member B
hsa-miR-128	1	0	1	1	1	1	ADORA2B	adenosine A2b receptor
hsa-miR-128	1	0	0	1	1	1	NEDD4	neural precursor cell expressed, developmentally down-regulated 4, E3 ubiquitin protein ligase
hsa-miR-128	1	0	1	1	1	1	KCNK10	potassium channel, subfamily K, member 10
hsa-miR-128	1	0	1	0	1	1	KPNA6	karyopherin alpha 6 (importin alpha 7)
hsa-miR-128	1	0	1	0	1	1	GGA2	golgi-associated, gamma adaptin ear containing, ARF binding protein 2
hsa-miR-128	1	0	1	1	0	0	THAP11	THAP domain containing 11
hsa-miR-128	1	0	1	1	1	1	ARRDC4	arrestin domain containing 4
hsa-miR-128	1	0	0	1	1	1	BAG2	BCL2-associated athanogene 2
hsa-miR-128	1	0	1	1	1	1	RAP1B	RAP1B, member of RAS oncogene family
hsa-miR-128	1	0	1	0	1	1	RNF141	ring finger protein 141
hsa-miR-128	1	0	1	1	1	1	EYA4	eyes absent homolog 4 (Drosophila)
hsa-miR-128	1	0	1	1	1	1	SLC39A13	solute carrier family 39 (zinc transporter), member 13
hsa-miR-128	1	0	1	1	1	1	TMCC1	transmembrane and coiled-coil domain family 1
hsa-miR-128	1	0	1	1	1	1	OSBPL10	oxysterol binding protein-like 10
hsa-miR-128	1	0	1	1	1	1	RNF139	ring finger protein 139
hsa-miR-128	1	0	1	1	1	1	H3F3C	H3 histone, family 3C
hsa-miR-128	1	0	1	1	1	1	BMI1	BMI1 polycomb ring finger oncogene
hsa-miR-128	1	0	1	0	1	1	ACVR2A	activin A receptor, type IIA
hsa-miR-128	1	0	1	1	1	1	FBXO33	F-box protein 33
hsa-miR-128	1	0	1	0	1	1	DCAF7	DDB1 and CUL4 associated factor 7
hsa-miR-128	1	0	1	1	1	1	E2F6	E2F transcription factor 6
hsa-miR-128	1	0	1	1	1	1	ANKS1A	ankyrin repeat and sterile alpha motif domain containing 1A
hsa-miR-128	1	0	1	0	1	1	TAL1	T-cell acute lymphocytic leukemia 1
hsa-miR-128	1	0	1	1	1	1	STK24	serine/threonine kinase 24
hsa-miR-128	1	0	1	1	1	1	CLCN5	chloride channel, voltage-sensitive 5
hsa-miR-128	1	0	1	1	1	1	ATP6V1A	ATPase, H+ transporting, lysosomal 70kDa, V1 subunit A
hsa-miR-128	1	0	0	1	0	0	ACTA2	actin, alpha 2, smooth muscle, aorta
hsa-miR-128	1	0	1	0	1	1	C7orf41	chromosome 7 open reading frame 41
hsa-miR-128	1	0	1	1	1	1	FRYL	FRY-like
hsa-miR-128	1	0	1	1	1	1	VANGL1	vang-like 1 (van gogh, Drosophila)
hsa-miR-128	1	0	1	0	1	1	KBTBD11	kelch repeat and BTB (POZ) domain containing 11
hsa-miR-128	1	0	1	0	1	1	ATP8A1	ATPase, aminophospholipid transporter (APLT), class I, type 8A, member 1
hsa-miR-128	1	0	1	1	0	0	SYNDIG1	synapse differentiation inducing 1
hsa-miR-128	1	0	1	0	0	0	DTX4	deltex homolog 4 (Drosophila)
hsa-miR-128	1	0	1	1	1	1	NUP210	nucleoporin 210kDa
hsa-miR-128	1	0	1	1	1	1	TXNIP	thioredoxin interacting protein
hsa-miR-128	1	0	1	1	1	1	NOVA1	neuro-oncological ventral antigen 1
hsa-miR-128	1	0	1	1	0	0	C15orf27	chromosome 15 open reading frame 27
hsa-miR-128	1	0	1	1	1	1	DNAJC13	DnaJ (Hsp40) homolog, subfamily C, member 13
hsa-miR-128	1	0	1	1	1	1	SERBP1	SERPINE1 mRNA binding protein 1
hsa-miR-128	1	0	1	1	1	1	C1orf173	chromosome 1 open reading frame 173
hsa-miR-128	1	0	1	1	1	1	FAM102A	family with sequence similarity 102, member A
hsa-miR-128	1	0	1	1	1	1	GRB2	growth factor receptor-bound protein 2
hsa-miR-128	1	0	1	1	1	1	CTDSP2	CTD (carboxy-terminal domain, RNA polymerase II, polypeptide A) small phosphatase 2
hsa-miR-128	1	0	1	1	1	1	ING5	inhibitor of growth family, member 5
hsa-miR-128	1	0	1	1	1	1	WBP1L	WW domain binding protein 1-like
hsa-miR-128	1	0	1	1	1	1	NTRK3	neurotrophic tyrosine kinase, receptor, type 3
hsa-miR-128	1	0	1	1	1	1	NMUR2	neuromedin U receptor 2
hsa-miR-128	1	0	1	1	0	0	SMCR8	Smith-Magenis syndrome chromosome region, candidate 8
hsa-miR-128	1	0	1	1	1	1	PELI2	pellino E3 ubiquitin protein ligase family member 2
hsa-miR-128	1	0	1	1	0	0	ECE2	endothelin converting enzyme 2
hsa-miR-128	1	0	1	0	1	1	PEG10	paternally expressed 10
hsa-miR-128	1	0	1	1	1	1	TMEM189-UBE2V1	TMEM189-UBE2V1 readthrough
hsa-miR-128	1	0	1	0	1	1	SPATA2	spermatogenesis associated 2
hsa-miR-128	1	0	1	1	1	1	KAT7	K(lysine) acetyltransferase 7
hsa-miR-128	1	0	1	0	1	1	FAM84B	family with sequence similarity 84, member B
hsa-miR-128	1	0	1	0	1	1	THRB	thyroid hormone receptor, beta
hsa-miR-128	1	0	1	1	1	1	SHE	Src homology 2 domain containing E
hsa-miR-128	1	0	1	1	1	1	ZMYM4	zinc finger, MYM-type 4
hsa-miR-128	1	0	1	1	1	1	HOXB3	homeobox B3
hsa-miR-128	1	0	1	1	1	1	F3	coagulation factor III (thromboplastin, tissue factor)
hsa-miR-128	1	0	1	0	1	1	ZC3H12B	zinc finger CCCH-type containing 12B
hsa-miR-128	1	0	1	1	0	0	RUNDC3A	RUN domain containing 3A
hsa-miR-128	1	0	1	1	1	1	TAB3	TGF-beta activated kinase 1/MAP3K7 binding protein 3
hsa-miR-128	1	0	1	1	1	1	PPP1R9A	protein phosphatase 1, regulatory subunit 9A
hsa-miR-128	1	0	1	1	1	1	VAT1L	vesicle amine transport protein 1 homolog (T. californica)-like
hsa-miR-128	1	0	1	0	1	1	CD2AP	CD2-associated protein
hsa-miR-128	1	0	1	0	1	1	HUNK	hormonally up-regulated Neu-associated kinase
hsa-miR-128	1	0	1	1	0	0	GRIK3	glutamate receptor, ionotropic, kainate 3
hsa-miR-128	1	0	1	1	0	0	INO80D	INO80 complex subunit D
hsa-miR-128	1	0	1	1	1	1	DDX6	DEAD (Asp-Glu-Ala-Asp) box helicase 6
hsa-miR-128	1	0	1	1	0	0	PTPN5	protein tyrosine phosphatase, non-receptor type 5 (striatum-enriched)
hsa-miR-128	1	0	1	1	1	1	ZADH2	zinc binding alcohol dehydrogenase domain containing 2
hsa-miR-128	1	0	1	1	1	1	MED1	mediator complex subunit 1
hsa-miR-128	1	0	1	1	1	1	NXT2	nuclear transport factor 2-like export factor 2
hsa-miR-128	1	0	1	1	1	1	ARHGAP12	Rho GTPase activating protein 12
hsa-miR-128	1	0	1	1	1	1	TMEM64	transmembrane protein 64
hsa-miR-128	1	0	1	0	1	1	SOX11	SRY (sex determining region Y)-box 11
hsa-miR-128	1	0	1	1	1	1	CDH11	cadherin 11, type 2, OB-cadherin (osteoblast)
hsa-miR-128	1	0	1	1	1	1	C7orf60	chromosome 7 open reading frame 60
hsa-miR-128	1	0	1	1	1	1	TGOLN2	trans-golgi network protein 2
hsa-miR-128	1	0	0	1	1	1	IKZF1	IKAROS family zinc finger 1 (Ikaros)
hsa-miR-128	1	0	1	1	0	0	RASGEF1B	RasGEF domain family, member 1B
hsa-miR-128	1	0	1	0	1	1	NRK	Nik related kinase
hsa-miR-128	1	0	1	1	1	1	RSBN1	round spermatid basic protein 1
hsa-miR-128	1	0	1	1	1	1	UBE2NL	ubiquitin-conjugating enzyme E2N-like
hsa-miR-128	1	0	1	1	1	1	GALNT7	UDP-N-acetyl-alpha-D-galactosamine:polypeptide N-acetylgalactosaminyltransferase 7 (GalNAc-T7)
hsa-miR-128	1	0	1	1	1	1	CABLES2	Cdk5 and Abl enzyme substrate 2
hsa-miR-128	1	0	1	0	1	1	DCP1A	DCP1 decapping enzyme homolog A (S. cerevisiae)
hsa-miR-128	1	0	1	1	1	1	SATB2	SATB homeobox 2
hsa-miR-128	1	0	1	1	1	1	COL5A1	collagen, type V, alpha 1
hsa-miR-128	1	0	1	0	1	1	PDPN	podoplanin
hsa-miR-128	1	0	1	1	1	1	HAO1	hydroxyacid oxidase (glycolate oxidase) 1
hsa-miR-128	1	0	1	1	1	1	PDGFRA	platelet-derived growth factor receptor, alpha polypeptide
hsa-miR-128	1	0	1	1	1	1	CABLES1	Cdk5 and Abl enzyme substrate 1
hsa-miR-128	1	0	1	1	1	1	FXR2	fragile X mental retardation, autosomal homolog 2
hsa-miR-128	1	0	1	1	1	1	E2F3	E2F transcription factor 3
hsa-miR-128	1	0	0	0	1	1	MATN3	matrilin 3
hsa-miR-128	1	0	1	0	1	1	BEND4	BEN domain containing 4
hsa-miR-128	1	0	1	1	1	1	ABCA1	ATP-binding cassette, sub-family A (ABC1), member 1
hsa-miR-128	1	0	1	1	1	1	SMCR7L	Smith-Magenis syndrome chromosome region, candidate 7-like
hsa-miR-128	1	0	1	0	1	1	PCGF3	polycomb group ring finger 3
hsa-miR-128	1	0	1	1	1	1	PLK2	polo-like kinase 2
hsa-miR-128	1	0	1	0	1	1	ATP2B1	ATPase, Ca++ transporting, plasma membrane 1
hsa-miR-128	1	0	1	1	1	1	ENAH	enabled homolog (Drosophila)
hsa-miR-128	1	0	1	0	1	1	ARHGEF6	Rac/Cdc42 guanine nucleotide exchange factor (GEF) 6
hsa-miR-128	1	0	1	1	1	1	NAIF1	nuclear apoptosis inducing factor 1
hsa-miR-128	1	0	1	0	1	1	SLC39A11	solute carrier family 39 (metal ion transporter), member 11
hsa-miR-128	1	0	1	0	1	1	SEMA6D	sema domain, transmembrane domain (TM), and cytoplasmic domain, (semaphorin) 6D
hsa-miR-128	1	0	1	1	1	1	NREP	neuronal regeneration related protein homolog (rat)
hsa-miR-128	1	0	1	0	1	1	ZNF652	zinc finger protein 652
hsa-miR-128	1	0	1	1	1	1	LDLR	low density lipoprotein receptor
hsa-miR-128	1	0	1	1	1	1	PTPRB	protein tyrosine phosphatase, receptor type, B
hsa-miR-128	1	0	1	0	1	1	EIF2S2	eukaryotic translation initiation factor 2, subunit 2 beta, 38kDa
hsa-miR-128	1	0	1	0	1	1	EDEM3	ER degradation enhancer, mannosidase alpha-like 3
hsa-miR-128	1	0	1	0	1	1	CPD	carboxypeptidase D
hsa-miR-128	1	0	1	1	1	1	SEC24A	SEC24 family, member A (S. cerevisiae)
hsa-miR-128	1	0	1	1	1	1	POU2F3	POU class 2 homeobox 3
hsa-miR-128	1	0	1	1	1	1	GRIA4	glutamate receptor, ionotropic, AMPA 4
hsa-miR-128	1	0	1	1	1	1	BAHD1	bromo adjacent homology domain containing 1
hsa-miR-128	1	0	1	0	1	1	MNT	MAX binding protein
hsa-miR-128	1	0	1	0	1	1	CCNJ	cyclin J
hsa-miR-128	1	0	1	0	1	1	CNR1	cannabinoid receptor 1 (brain)
hsa-miR-128	1	0	1	1	1	1	CABP1	calcium binding protein 1
hsa-miR-128	1	0	1	0	1	1	RNF182	ring finger protein 182
hsa-miR-128	1	0	1	1	1	1	TCEANC2	transcription elongation factor A (SII) N-terminal and central domain containing 2
hsa-miR-128	1	0	1	1	1	1	RGS17	regulator of G-protein signaling 17
hsa-miR-128	1	0	1	1	1	1	FAM120C	family with sequence similarity 120C
hsa-miR-128	1	0	0	0	1	1	CCDC88C	coiled-coil domain containing 88C
hsa-miR-128	1	0	0	1	1	1	RAB20	RAB20, member RAS oncogene family
hsa-miR-128	1	0	1	1	1	1	ABCC5	ATP-binding cassette, sub-family C (CFTR/MRP), member 5
hsa-miR-128	1	0	1	1	1	1	FOXO4	forkhead box O4
hsa-miR-128	1	0	1	1	1	1	SOCS6	suppressor of cytokine signaling 6
hsa-miR-128	1	0	1	1	1	1	HOXA10	homeobox A10
hsa-miR-128	1	0	1	1	1	1	FAM134C	family with sequence similarity 134, member C
hsa-miR-128	1	0	1	0	1	1	ZKSCAN2	zinc finger with KRAB and SCAN domains 2
hsa-miR-128	1	0	1	1	1	1	DCX	doublecortin
hsa-miR-128	1	0	1	0	1	1	KCMF1	potassium channel modulatory factor 1
hsa-miR-128	1	0	1	1	1	1	BAZ2B	bromodomain adjacent to zinc finger domain, 2B
hsa-miR-128	1	0	1	1	1	1	NAPEPLD	N-acyl phosphatidylethanolamine phospholipase D
hsa-miR-128	1	0	1	1	1	1	LSM12	LSM12 homolog (S. cerevisiae)
hsa-miR-128	1	0	1	1	1	1	MAPK6	mitogen-activated protein kinase 6
hsa-miR-128	1	0	1	1	0	0	SRL	sarcalumenin
hsa-miR-128	1	0	0	1	0	0	RAP1BL	RAP1B, member of RAS oncogene family pseudogene
hsa-miR-128	1	0	1	0	0	0	PITPNM2	phosphatidylinositol transfer protein, membrane-associated 2
hsa-miR-128	1	0	1	1	1	1	EN2	engrailed homeobox 2
hsa-miR-128	1	0	1	1	0	0	HIPK2	homeodomain interacting protein kinase 2
hsa-miR-128	1	0	1	0	0	0	CACNA1A	calcium channel, voltage-dependent, P/Q type, alpha 1A subunit
hsa-miR-128	1	0	1	1	1	1	SASH1	SAM and SH3 domain containing 1
hsa-miR-128	1	0	1	1	1	1	PRDM16	PR domain containing 16
hsa-miR-128	1	0	1	0	0	0	SCAMP3	secretory carrier membrane protein 3
hsa-miR-128	1	0	1	1	0	0	EBF4	early B-cell factor 4
hsa-miR-128	1	0	1	0	1	1	ERC2	ELKS/RAB6-interacting/CAST family member 2
hsa-miR-128	1	0	1	1	1	1	C1orf52	chromosome 1 open reading frame 52
hsa-miR-128	1	0	1	1	1	1	EPB41L4A	erythrocyte membrane protein band 4.1 like 4A
hsa-miR-128	1	0	1	0	1	1	RNF144A	ring finger protein 144A
hsa-miR-128	1	0	1	1	0	0	AGRN	agrin
hsa-miR-128	1	0	0	0	1	1	OPA1	optic atrophy 1 (autosomal dominant)
hsa-miR-128	1	0	1	1	1	1	GLTP	glycolipid transfer protein
hsa-miR-128	1	0	1	1	1	1	PTGER3	prostaglandin E receptor 3 (subtype EP3)
hsa-miR-128	1	0	1	1	1	1	C11orf87	chromosome 11 open reading frame 87
hsa-miR-128	1	0	0	0	0	0	TMEM170B	transmembrane protein 170B
hsa-miR-128	1	0	1	1	1	1	ZBTB39	zinc finger and BTB domain containing 39
hsa-miR-128	1	0	1	1	0	0	DOT1L	DOT1-like, histone H3 methyltransferase (S. cerevisiae)
hsa-miR-128	1	0	1	0	1	1	YPEL2	yippee-like 2 (Drosophila)
hsa-miR-128	1	0	1	1	1	1	TTC39A	tetratricopeptide repeat domain 39A
hsa-miR-128	1	0	1	1	1	1	RND3	Rho family GTPase 3
hsa-miR-128	1	0	1	0	1	1	TMEM123	transmembrane protein 123
hsa-miR-128	1	0	1	1	1	1	SP2	Sp2 transcription factor
hsa-miR-128	1	0	1	1	1	1	ADCY3	adenylate cyclase 3
hsa-miR-128	1	0	1	0	1	1	STK35	serine/threonine kinase 35
hsa-miR-128	1	0	1	0	1	1	TSC1	tuberous sclerosis 1
hsa-miR-128	1	0	1	1	0	0	CCDC28B	coiled-coil domain containing 28B
hsa-miR-128	1	0	1	1	1	1	PLEKHH1	pleckstrin homology domain containing, family H (with MyTH4 domain) member 1
hsa-miR-128	1	0	1	1	1	1	DDAH1	dimethylarginine dimethylaminohydrolase 1
hsa-miR-128	1	0	1	1	1	1	CALN1	calneuron 1
hsa-miR-128	1	0	1	1	1	1	FBXW7	F-box and WD repeat domain containing 7, E3 ubiquitin protein ligase
hsa-miR-128	1	0	1	1	1	1	UBR5	ubiquitin protein ligase E3 component n-recognin 5
hsa-miR-128	1	0	1	1	1	1	PHC2	polyhomeotic homolog 2 (Drosophila)
hsa-miR-128	1	0	1	0	1	1	FOXO1	forkhead box O1
hsa-miR-128	1	0	0	1	0	0	SAMD10	sterile alpha motif domain containing 10
hsa-miR-128	1	0	1	0	1	1	SERTAD2	SERTA domain containing 2
hsa-miR-128	1	0	1	1	1	1	PHF15	PHD finger protein 15
hsa-miR-128	1	0	1	1	1	1	ATPAF1	ATP synthase mitochondrial F1 complex assembly factor 1
hsa-miR-128	1	0	1	0	1	1	FLRT2	fibronectin leucine rich transmembrane protein 2
hsa-miR-128	1	0	1	1	1	1	HOXB8	homeobox B8
hsa-miR-128	1	0	1	1	1	1	MET	met proto-oncogene (hepatocyte growth factor receptor)
hsa-miR-128	1	0	1	1	1	1	NEO1	neogenin 1
hsa-miR-128	1	0	1	1	0	0	HAND2	heart and neural crest derivatives expressed 2
hsa-miR-128	1	0	1	1	1	1	DAZAP2	DAZ associated protein 2
hsa-miR-128	1	0	1	1	1	1	ARID1B	AT rich interactive domain 1B (SWI1-like)
hsa-miR-128	1	0	1	0	1	1	EFHA2	EF-hand domain family, member A2
hsa-miR-128	1	0	1	1	1	1	SGCD	sarcoglycan, delta (35kDa dystrophin-associated glycoprotein)
hsa-miR-128	1	0	1	0	1	1	EFR3A	EFR3 homolog A (S. cerevisiae)
hsa-miR-128	1	0	1	1	1	1	PXN	paxillin
hsa-miR-128	1	0	1	0	1	1	GFOD1	glucose-fructose oxidoreductase domain containing 1
hsa-miR-128	1	0	1	1	1	1	FAM155A	family with sequence similarity 155, member A
hsa-miR-128	1	0	1	1	1	1	RICTOR	RPTOR independent companion of MTOR, complex 2
hsa-miR-128	1	0	1	1	0	0	HOXC6	homeobox C6
hsa-miR-128	1	0	1	1	1	1	NFX1	nuclear transcription factor, X-box binding 1
hsa-miR-128	1	0	1	1	1	1	PHF20	PHD finger protein 20
hsa-miR-128	1	0	1	1	0	0	CDH24	cadherin 24, type 2
hsa-miR-128	1	0	1	1	1	1	PNRC2	proline-rich nuclear receptor coactivator 2
hsa-miR-128	1	0	1	1	1	1	IRS1	insulin receptor substrate 1
hsa-miR-128	1	0	1	1	1	1	ZNF618	zinc finger protein 618
hsa-miR-128	1	0	1	1	1	1	HCN4	hyperpolarization activated cyclic nucleotide-gated potassium channel 4
hsa-miR-128	1	0	1	1	1	1	EPB41	erythrocyte membrane protein band 4.1 (elliptocytosis 1, RH-linked)
hsa-miR-128	1	0	1	1	1	1	SV2A	synaptic vesicle glycoprotein 2A
hsa-miR-128	1	0	1	1	1	1	CSRNP1	cysteine-serine-rich nuclear protein 1
hsa-miR-128	1	0	1	1	1	1	EHD3	EH-domain containing 3
hsa-miR-128	1	0	1	1	1	1	INSR	insulin receptor
hsa-miR-128	1	0	1	1	1	1	FAM65B	family with sequence similarity 65, member B
hsa-miR-128	1	0	1	1	1	1	LMBR1L	limb region 1 homolog (mouse)-like
hsa-miR-128	1	0	1	1	1	1	NPTX1	neuronal pentraxin I
hsa-miR-128	1	0	1	1	1	1	MFSD2A	major facilitator superfamily domain containing 2A
hsa-miR-128	1	0	1	1	1	1	SYT1	synaptotagmin I
hsa-miR-128	1	0	1	1	1	1	ITGA2	integrin, alpha 2 (CD49B, alpha 2 subunit of VLA-2 receptor)
hsa-miR-128	1	0	1	1	1	1	MMD	monocyte to macrophage differentiation-associated
hsa-miR-128	1	0	1	1	1	1	UBE2K	ubiquitin-conjugating enzyme E2K
hsa-miR-128	1	0	1	1	0	0	MANEAL	mannosidase, endo-alpha-like
hsa-miR-128	1	0	1	1	1	1	TRIM23	tripartite motif containing 23
hsa-miR-128	1	0	1	1	1	1	FAM105B	family with sequence similarity 105, member B
hsa-miR-128	1	1	1	1	1	1	BACE1	beta-site APP-cleaving enzyme 1
hsa-miR-128	1	0	1	1	1	1	PDPK1	3-phosphoinositide dependent protein kinase-1
hsa-miR-128	1	0	1	1	1	1	PTGFRN	prostaglandin F2 receptor negative regulator
hsa-miR-128	1	0	1	1	1	1	ADCY6	adenylate cyclase 6
hsa-miR-128	1	0	1	0	1	1	FAM78A	family with sequence similarity 78, member A
hsa-miR-128	1	0	1	0	1	1	C18orf25	chromosome 18 open reading frame 25
hsa-miR-128	1	0	1	1	1	1	NAA15	N(alpha)-acetyltransferase 15, NatA auxiliary subunit
hsa-miR-128	1	0	1	0	1	1	SLC6A1	solute carrier family 6 (neurotransmitter transporter, GABA), member 1
hsa-miR-128	1	0	0	0	0	0	PAIP2B	poly(A) binding protein interacting protein 2B
hsa-miR-128	1	0	1	0	1	1	ZFHX4	zinc finger homeobox 4
hsa-miR-128	1	0	1	0	1	1	NCAM1	neural cell adhesion molecule 1
hsa-miR-128	1	0	1	1	1	1	TCF4	transcription factor 4
hsa-miR-128	1	0	1	1	1	1	PPIF	peptidylprolyl isomerase F
hsa-miR-128	1	0	1	1	1	1	NXF1	nuclear RNA export factor 1
hsa-miR-128	1	0	1	1	1	1	TMEM25	transmembrane protein 25
hsa-miR-128	1	0	1	0	1	1	C17orf102	chromosome 17 open reading frame 102
hsa-miR-128	1	0	1	1	1	1	ARMC8	armadillo repeat containing 8
hsa-miR-128	1	0	1	1	1	1	SAR1A	SAR1 homolog A (S. cerevisiae)
hsa-miR-128	1	0	1	0	1	1	PDE7B	phosphodiesterase 7B
hsa-miR-128	1	0	0	1	0	0	APBA3	amyloid beta (A4) precursor protein-binding, family A, member 3
hsa-miR-128	1	0	1	1	0	0	FRS3	fibroblast growth factor receptor substrate 3
hsa-miR-128	1	0	1	0	1	1	HDAC5	histone deacetylase 5
hsa-miR-128	1	0	1	1	1	1	TACC1	transforming, acidic coiled-coil containing protein 1
hsa-miR-128	1	0	1	1	1	1	TMEFF1	transmembrane protein with EGF-like and two follistatin-like domains 1
hsa-miR-128	1	0	1	1	1	1	MAPK14	mitogen-activated protein kinase 14
hsa-miR-128	1	0	1	1	1	1	WDTC1	WD and tetratricopeptide repeats 1
hsa-miR-128	1	0	1	1	1	1	RPS6KA4	ribosomal protein S6 kinase, 90kDa, polypeptide 4
hsa-miR-128	1	0	1	1	1	1	MAN2A2	mannosidase, alpha, class 2A, member 2
hsa-miR-128	1	0	1	0	1	1	PLAG1	pleiomorphic adenoma gene 1
hsa-miR-128	1	0	1	1	1	1	MPP2	membrane protein, palmitoylated 2 (MAGUK p55 subfamily member 2)
hsa-miR-128	1	0	1	1	1	1	DLL4	delta-like 4 (Drosophila)
hsa-miR-128	1	0	1	1	1	1	LRP2BP	LRP2 binding protein
hsa-miR-128	1	0	1	0	1	1	LIN28A	lin-28 homolog A (C. elegans)
hsa-miR-128	1	0	1	1	1	1	RBPMS2	RNA binding protein with multiple splicing 2
hsa-miR-128	1	0	1	1	1	1	FLRT3	fibronectin leucine rich transmembrane protein 3
hsa-miR-128	1	0	1	1	1	1	ORC5	origin recognition complex, subunit 5
hsa-miR-128	1	0	1	1	0	0	G6PC3	glucose 6 phosphatase, catalytic, 3
hsa-miR-128	1	0	1	1	1	1	POGLUT1	protein O-glucosyltransferase 1
hsa-miR-128	1	0	1	0	1	1	CLIC4	chloride intracellular channel 4
hsa-miR-128	1	0	1	1	1	1	EGR3	early growth response 3
hsa-miR-128	1	0	1	0	1	1	ACVR1C	activin A receptor, type IC
hsa-miR-128	1	0	1	1	1	1	NPTX2	neuronal pentraxin II
hsa-miR-128	1	0	1	1	1	1	DLG2	discs, large homolog 2 (Drosophila)
hsa-miR-128	1	0	1	0	1	1	EDAR	ectodysplasin A receptor
hsa-miR-128	1	0	1	1	0	0	DLGAP3	discs, large (Drosophila) homolog-associated protein 3
hsa-miR-128	1	0	1	1	1	1	HAPLN1	hyaluronan and proteoglycan link protein 1
hsa-miR-128	1	0	1	1	0	0	HLX	H2.0-like homeobox
hsa-miR-128	1	0	1	1	1	1	LMTK2	lemur tyrosine kinase 2
hsa-miR-128	1	0	1	1	1	1	LIMK1	LIM domain kinase 1
hsa-miR-128	1	0	1	1	0	0	PDIA5	protein disulfide isomerase family A, member 5
hsa-miR-128	1	0	1	1	1	1	SUZ12	suppressor of zeste 12 homolog (Drosophila)
hsa-miR-128	1	0	1	1	0	0	UBN2	ubinuclein 2
hsa-miR-128	1	0	1	0	1	1	KLF3	Kruppel-like factor 3 (basic)
hsa-miR-128	1	0	1	1	1	1	SP4	Sp4 transcription factor
hsa-miR-128	1	0	1	1	1	1	VPS4B	vacuolar protein sorting 4 homolog B (S. cerevisiae)
hsa-miR-128	1	0	1	0	1	1	ADCY2	adenylate cyclase 2 (brain)
hsa-miR-128	1	0	1	1	1	1	GATA6	GATA binding protein 6
hsa-miR-128	1	0	1	1	1	1	CREBRF	CREB3 regulatory factor
hsa-miR-128	1	0	0	1	1	1	TRIM67	tripartite motif containing 67
hsa-miR-128	1	0	1	1	1	1	SUCO	SUN domain containing ossification factor
hsa-miR-128	1	0	1	1	1	1	SURF4	surfeit 4
hsa-miR-128	1	0	1	1	1	1	NR5A2	nuclear receptor subfamily 5, group A, member 2
hsa-miR-128	1	0	1	1	1	1	CSDC2	cold shock domain containing C2, RNA binding
hsa-miR-128	1	0	1	1	1	1	FOXQ1	forkhead box Q1
hsa-miR-128	1	0	1	1	1	1	MAPK8IP3	mitogen-activated protein kinase 8 interacting protein 3
hsa-miR-128	1	0	1	0	1	1	NCOA7	nuclear receptor coactivator 7
hsa-miR-128	1	0	1	1	1	1	SRSF1	serine/arginine-rich splicing factor 1
hsa-miR-128	1	0	1	1	1	1	DIRAS2	DIRAS family, GTP-binding RAS-like 2
hsa-miR-128	1	0	1	1	1	1	MEGF11	multiple EGF-like-domains 11
hsa-miR-128	1	0	1	0	0	0	HEG1	HEG homolog 1 (zebrafish)
hsa-miR-128	1	0	1	1	1	1	GORASP1	golgi reassembly stacking protein 1, 65kDa
hsa-miR-128	1	0	1	1	0	0	PEAK1	NKF3 kinase family member
hsa-miR-128	1	0	1	1	1	1	C10orf114	chromosome 10 open reading frame 114
hsa-miR-128	1	0	1	1	1	1	JMJD1C	jumonji domain containing 1C
hsa-miR-128	1	0	1	0	1	1	ST6GALNAC3	ST6 (alpha-N-acetyl-neuraminyl-2,3-beta-galactosyl-1,3)-N-acetylgalactosaminide alpha-2,6-sialyltransferase 3
hsa-miR-128	1	0	0	1	0	0	PRR12	proline rich 12
hsa-miR-128	1	0	0	1	0	0	SOS1	son of sevenless homolog 1 (Drosophila)
hsa-miR-128	1	0	1	1	1	1	C5orf15	chromosome 5 open reading frame 15
hsa-miR-128	1	0	1	1	1	1	NR2F2	nuclear receptor subfamily 2, group F, member 2
hsa-miR-128	1	0	1	1	0	0	MDFI	MyoD family inhibitor
hsa-miR-128	1	0	1	0	1	1	PTPRT	protein tyrosine phosphatase, receptor type, T
hsa-miR-128	1	0	1	1	1	1	ITGA5	integrin, alpha 5 (fibronectin receptor, alpha polypeptide)
hsa-miR-128	1	0	1	1	1	1	UBE2V1	ubiquitin-conjugating enzyme E2 variant 1
hsa-miR-128	1	0	1	1	0	0	REPS1	RALBP1 associated Eps domain containing 1
hsa-miR-128	1	0	1	1	1	1	CDK18	cyclin-dependent kinase 18
hsa-miR-128	1	0	1	1	1	1	SRPK2	SRSF protein kinase 2
hsa-miR-128	1	0	1	0	1	1	FAM125B	family with sequence similarity 125, member B
hsa-miR-128	1	0	1	1	1	1	FZD7	frizzled family receptor 7
hsa-miR-128	1	0	1	1	1	1	LRP6	low density lipoprotein receptor-related protein 6
hsa-miR-128	1	0	1	1	1	1	SLC39A10	solute carrier family 39 (zinc transporter), member 10
hsa-miR-128	1	0	1	1	1	1	PLCH1	phospholipase C, eta 1
hsa-miR-128	1	0	1	1	1	1	SPRY2	sprouty homolog 2 (Drosophila)
hsa-miR-128	1	0	1	1	1	1	EPHB2	EPH receptor B2
hsa-miR-128	1	0	1	1	0	0	C16orf5	chromosome 16 open reading frame 5
hsa-miR-128	1	0	1	1	1	1	SIK1	salt-inducible kinase 1
hsa-miR-128	1	0	1	0	1	1	FAM172A	family with sequence similarity 172, member A
hsa-miR-128	1	0	1	1	0	0	RGL2	ral guanine nucleotide dissociation stimulator-like 2
hsa-miR-128	1	0	1	1	0	0	C20orf194	chromosome 20 open reading frame 194
hsa-miR-128	1	0	1	0	1	1	APPBP2	amyloid beta precursor protein (cytoplasmic tail) binding protein 2
hsa-miR-128	1	0	0	1	0	0	FAM193B	family with sequence similarity 193, member B
hsa-miR-128	1	0	0	1	1	1	PIGZ	phosphatidylinositol glycan anchor biosynthesis, class Z
hsa-miR-128	1	0	1	1	0	0	PAX9	paired box 9
hsa-miR-128	1	0	1	0	1	1	TRIL	TLR4 interactor with leucine-rich repeats
hsa-miR-128	1	0	1	0	0	0	MSL1	male-specific lethal 1 homolog (Drosophila)
hsa-miR-128	1	0	1	1	1	1	GRAMD2	GRAM domain containing 2
hsa-miR-128	1	0	1	1	1	1	PTPN3	protein tyrosine phosphatase, non-receptor type 3
hsa-miR-128	1	0	1	1	1	1	TBC1D9B	TBC1 domain family, member 9B (with GRAM domain)
hsa-miR-128	1	0	1	1	1	1	ISL1	ISL LIM homeobox 1
hsa-miR-128	1	0	1	1	1	1	CITED2	Cbp/p300-interacting transactivator, with Glu/Asp-rich carboxy-terminal domain, 2
hsa-miR-128	1	0	1	1	1	1	LEP	leptin
hsa-miR-128	1	0	1	1	1	1	PELI3	pellino E3 ubiquitin protein ligase family member 3
hsa-miR-128	1	0	1	1	0	0	WNK1	WNK lysine deficient protein kinase 1
hsa-miR-128	1	0	1	1	1	1	ATP5G3	ATP synthase, H+ transporting, mitochondrial Fo complex, subunit C3 (subunit 9)
hsa-miR-128	1	0	1	1	1	1	GPD2	glycerol-3-phosphate dehydrogenase 2 (mitochondrial)
hsa-miR-128	1	0	1	1	1	1	FUBP3	far upstream element (FUSE) binding protein 3
hsa-miR-128	1	0	1	1	1	1	LIFR	leukemia inhibitory factor receptor alpha
hsa-miR-128	1	0	1	1	1	1	SEMA6A	sema domain, transmembrane domain (TM), and cytoplasmic domain, (semaphorin) 6A
hsa-miR-128	1	0	1	0	1	1	DCAF17	DDB1 and CUL4 associated factor 17
hsa-miR-128	1	0	1	0	1	1	TUB	tubby homolog (mouse)
hsa-miR-128	1	0	1	1	1	1	E2F7	E2F transcription factor 7
hsa-miR-128	1	0	1	1	1	1	GREM1	gremlin 1
hsa-miR-128	1	0	1	1	1	1	TAF4	TAF4 RNA polymerase II, TATA box binding protein (TBP)-associated factor, 135kDa
hsa-miR-128	1	0	1	1	1	1	SGMS1	sphingomyelin synthase 1
hsa-miR-128	1	0	1	0	1	1	ZCCHC24	zinc finger, CCHC domain containing 24
hsa-miR-128	1	0	1	1	1	1	FOXP4	forkhead box P4
hsa-miR-128	1	0	1	1	1	1	FAM222B	family with sequence similarity 222, member B
hsa-miR-128	1	0	1	1	1	1	MED13	mediator complex subunit 13
hsa-miR-128	1	0	1	0	1	1	CCDC88A	coiled-coil domain containing 88A
hsa-miR-128	1	0	1	0	1	1	SS18L1	synovial sarcoma translocation gene on chromosome 18-like 1
hsa-miR-128	1	0	1	0	1	1	MAP2K7	mitogen-activated protein kinase kinase 7
hsa-miR-128	1	0	1	1	1	1	SNAP25	synaptosomal-associated protein, 25kDa
hsa-miR-128	1	0	1	1	1	1	STK39	serine threonine kinase 39
hsa-miR-128	1	0	1	1	1	1	NRBF2	nuclear receptor binding factor 2
hsa-miR-128	1	0	1	0	1	1	ARHGEF37	Rho guanine nucleotide exchange factor (GEF) 37
hsa-miR-128	1	0	1	1	1	1	STIM2	stromal interaction molecule 2
hsa-miR-128	1	0	1	1	1	1	ATP9A	ATPase, class II, type 9A
hsa-miR-128	1	0	1	0	1	1	WIPF2	WAS/WASL interacting protein family, member 2
hsa-miR-128	1	0	1	1	1	1	ERG	v-ets erythroblastosis virus E26 oncogene homolog (avian)
hsa-miR-128	1	0	1	1	1	1	AFAP1	actin filament associated protein 1
hsa-miR-128	1	0	1	0	1	1	KIAA0232	KIAA0232
hsa-miR-128	1	0	0	1	1	1	MIER2	mesoderm induction early response 1, family member 2
hsa-miR-128	1	0	1	1	1	1	JHDM1D	jumonji C domain containing histone demethylase 1 homolog D (S. cerevisiae)
hsa-miR-128	1	0	1	1	1	1	STAC	SH3 and cysteine rich domain
hsa-miR-128	1	0	1	1	0	0	STX1A	syntaxin 1A (brain)
hsa-miR-128	1	0	1	1	0	0	KIAA1109	KIAA1109
hsa-miR-128	1	0	1	1	1	1	UBE2E2	ubiquitin-conjugating enzyme E2E 2
hsa-miR-128	1	0	1	1	1	1	TAOK1	TAO kinase 1
hsa-miR-128	1	0	1	1	1	1	FBXO21	F-box protein 21
hsa-miR-128	1	0	1	0	1	1	NUS1	nuclear undecaprenyl pyrophosphate synthase 1 homolog (S. cerevisiae)
hsa-miR-128	1	0	1	0	1	1	CCDC6	coiled-coil domain containing 6
hsa-miR-128	1	0	1	0	1	1	KIAA1737	KIAA1737
hsa-miR-128	1	0	1	1	1	1	CDH5	cadherin 5, type 2 (vascular endothelium)
hsa-miR-128	1	0	1	0	1	1	GNA13	guanine nucleotide binding protein (G protein), alpha 13
hsa-miR-128	1	0	1	1	1	1	SFXN2	sideroflexin 2
hsa-miR-128	1	0	1	0	1	1	SMAD2	SMAD family member 2
hsa-miR-128	1	0	1	0	1	1	APOLD1	apolipoprotein L domain containing 1
hsa-miR-128	1	0	1	0	1	1	SH3BGRL2	SH3 domain binding glutamic acid-rich protein like 2
hsa-miR-128	1	0	1	0	1	1	GDF6	growth differentiation factor 6
hsa-miR-128	1	0	1	0	1	1	PRKY	protein kinase, Y-linked, pseudogene
hsa-miR-128	1	0	0	1	0	0	POM121C	POM121 transmembrane nucleoporin C
hsa-miR-128	1	0	1	0	1	1	PGM2L1	phosphoglucomutase 2-like 1
hsa-miR-128	1	0	1	1	1	1	CPEB3	cytoplasmic polyadenylation element binding protein 3
hsa-miR-128	1	0	1	1	1	1	ITSN2	intersectin 2
hsa-miR-128	1	0	1	0	1	1	MDGA1	MAM domain containing glycosylphosphatidylinositol anchor 1
hsa-miR-128	1	0	1	1	1	1	FADS1	fatty acid desaturase 1
hsa-miR-128	1	0	1	1	1	1	APLNR	apelin receptor
hsa-miR-128	1	0	1	1	1	1	NOTCH2NL	notch 2 N-terminal like
hsa-miR-128	1	0	1	0	0	0	IGLON5	IgLON family member 5
hsa-miR-128	1	0	1	1	1	1	NEUROD6	neuronal differentiation 6
hsa-miR-128	1	0	1	0	1	1	PDK1	pyruvate dehydrogenase kinase, isozyme 1
hsa-miR-128	1	0	1	1	1	1	ARF3	ADP-ribosylation factor 3
hsa-miR-128	1	0	1	1	1	1	FOXN3	forkhead box N3
hsa-miR-128	1	0	1	0	0	0	ZBTB34	zinc finger and BTB domain containing 34
hsa-miR-128	1	0	1	1	1	1	SAMD12	sterile alpha motif domain containing 12
hsa-miR-128	1	0	1	1	1	1	TMBIM6	transmembrane BAX inhibitor motif containing 6
hsa-miR-128	1	0	1	1	1	1	LARP4	La ribonucleoprotein domain family, member 4
hsa-miR-128	1	0	1	0	1	1	MGAT4B	mannosyl (alpha-1,3-)-glycoprotein beta-1,4-N-acetylglucosaminyltransferase, isozyme B
hsa-miR-128	1	0	1	1	1	1	LPPR1	lipid phosphate phosphatase-related protein type 1
hsa-miR-128	1	0	1	1	1	1	LASP1	LIM and SH3 protein 1
hsa-miR-128	1	0	1	1	1	1	GCC2	GRIP and coiled-coil domain containing 2
hsa-miR-128	1	0	1	1	1	1	ZFP36L1	zinc finger protein 36, C3H type-like 1
hsa-miR-128	1	0	0	1	0	0	STAB2	stabilin 2
hsa-miR-128	1	0	1	0	1	1	AGFG1	ArfGAP with FG repeats 1
hsa-miR-128	1	0	1	1	0	0	BCL3	B-cell CLL/lymphoma 3
hsa-miR-128	1	0	1	1	1	1	PLXND1	plexin D1
hsa-miR-128	1	0	1	0	1	1	ARID2	AT rich interactive domain 2 (ARID, RFX-like)
hsa-miR-128	1	0	1	1	1	1	NCOA1	nuclear receptor coactivator 1
hsa-miR-128	1	0	1	1	0	0	YPEL3	yippee-like 3 (Drosophila)
hsa-miR-128	1	0	1	1	1	1	SRP72	signal recognition particle 72kDa
hsa-miR-128	1	0	1	1	1	1	ARHGAP19	Rho GTPase activating protein 19
hsa-miR-128	1	0	0	1	1	1	CLPP	ClpP caseinolytic peptidase, ATP-dependent, proteolytic subunit homolog (E. coli)
hsa-miR-128	1	0	1	0	1	1	STK40	serine/threonine kinase 40
hsa-miR-128	1	0	1	1	1	1	FAM222A	family with sequence similarity 222, member A
hsa-miR-128	1	0	1	1	0	0	PDE3A	phosphodiesterase 3A, cGMP-inhibited
hsa-miR-128	1	0	1	0	1	1	SPOPL	speckle-type POZ protein-like
hsa-miR-128	1	0	1	1	1	1	SOWAHA	sosondowah ankyrin repeat domain family member A
hsa-miR-128	1	0	1	0	1	1	SETD7	SET domain containing (lysine methyltransferase) 7
hsa-miR-128	1	0	1	1	1	1	NGFR	nerve growth factor receptor
hsa-miR-128	1	0	1	1	1	1	PLAGL2	pleiomorphic adenoma gene-like 2
hsa-miR-128	1	0	1	1	1	1	ALDH4A1	aldehyde dehydrogenase 4 family, member A1
hsa-miR-128	1	0	1	1	1	1	RYBP	RING1 and YY1 binding protein
hsa-miR-128	1	0	1	1	1	1	DVL2	dishevelled, dsh homolog 2 (Drosophila)
hsa-miR-128	1	0	1	1	1	1	KCNAB1	potassium voltage-gated channel, shaker-related subfamily, beta member 1
hsa-miR-128	1	0	1	0	1	1	HMGB3	high mobility group box 3
hsa-miR-128	1	0	1	1	0	0	NEURL4	neuralized homolog 4 (Drosophila)
hsa-miR-128	1	0	1	0	0	0	DRP2	dystrophin related protein 2
hsa-miR-128	1	0	1	1	1	1	MCF2L	MCF.2 cell line derived transforming sequence-like
hsa-miR-128	1	0	1	1	1	1	NPEPPS	aminopeptidase puromycin sensitive
hsa-miR-128	1	0	1	0	1	1	SLC5A3	solute carrier family 5 (sodium/myo-inositol cotransporter), member 3
hsa-miR-128	1	0	1	1	1	1	UBR1	ubiquitin protein ligase E3 component n-recognin 1
hsa-miR-128	1	0	1	1	1	1	FNDC4	fibronectin type III domain containing 4
hsa-miR-128	1	0	1	0	1	1	USP46	ubiquitin specific peptidase 46
hsa-miR-128	1	0	1	1	1	1	TRAPPC8	trafficking protein particle complex 8
hsa-miR-128	1	0	1	1	1	1	MN1	meningioma (disrupted in balanced translocation) 1
hsa-miR-128	1	0	1	1	1	1	NEK6	NIMA (never in mitosis gene a)-related kinase 6
hsa-miR-128	1	0	1	1	1	1	NDST1	N-deacetylase/N-sulfotransferase (heparan glucosaminyl) 1
hsa-miR-128	1	0	1	0	1	1	VANGL2	vang-like 2 (van gogh, Drosophila)
hsa-miR-128	1	0	1	0	1	1	MPPED2	metallophosphoesterase domain containing 2
hsa-miR-128	1	0	1	0	1	1	FAXC	failed axon connections homolog (Drosophila)
hsa-miR-128	1	0	1	1	1	1	SIPA1L3	signal-induced proliferation-associated 1 like 3
hsa-miR-128	1	0	1	1	1	1	PITHD1	PITH (C-terminal proteasome-interacting domain of thioredoxin-like) domain containing 1
hsa-miR-128	1	0	1	1	0	0	GXYLT1	glucoside xylosyltransferase 1
hsa-miR-128	1	0	0	1	1	1	LANCL3	LanC lantibiotic synthetase component C-like 3 (bacterial)
hsa-miR-128	1	0	1	1	1	1	MFHAS1	malignant fibrous histiocytoma amplified sequence 1
hsa-miR-128	1	0	1	1	1	1	ERP44	endoplasmic reticulum protein 44
hsa-miR-128	1	0	1	1	1	1	NAV2	neuron navigator 2
hsa-miR-128	1	0	1	1	1	1	NKTR	natural killer-tumor recognition sequence
hsa-miR-128	1	0	1	1	1	1	ELMO1	engulfment and cell motility 1
hsa-miR-128	1	0	1	1	1	1	KIAA1199	KIAA1199
hsa-miR-128	1	0	1	1	1	1	HYOU1	hypoxia up-regulated 1
hsa-miR-128	1	0	1	1	1	1	POM121	POM121 transmembrane nucleoporin
hsa-miR-128	1	0	1	0	1	1	PDS5B	PDS5, regulator of cohesion maintenance, homolog B (S. cerevisiae)
hsa-miR-128	1	0	0	1	0	0	ZNF385C	zinc finger protein 385C
hsa-miR-128	1	0	1	1	1	1	TLK2	tousled-like kinase 2
hsa-miR-128	1	0	1	1	1	1	C8orf4	chromosome 8 open reading frame 4
hsa-miR-128	1	0	1	1	1	1	GNG12	guanine nucleotide binding protein (G protein), gamma 12
hsa-miR-128	1	0	1	1	1	1	RELN	reelin
hsa-miR-128	1	0	1	1	1	1	WSB1	WD repeat and SOCS box containing 1
hsa-miR-128	1	0	1	1	0	0	GRIA1	glutamate receptor, ionotropic, AMPA 1
hsa-miR-128	1	0	1	1	0	0	PRPF19	PRP19/PSO4 pre-mRNA processing factor 19 homolog (S. cerevisiae)
hsa-miR-128	1	0	1	1	0	0	MEPCE	methylphosphate capping enzyme
hsa-miR-128	1	0	1	1	1	1	RPGRIP1L	RPGRIP1-like
hsa-miR-128	1	0	1	1	1	1	CCNK	cyclin K
hsa-miR-128	1	0	1	1	1	1	KIAA2018	KIAA2018
hsa-miR-128	1	0	1	1	1	1	NOL4	nucleolar protein 4
hsa-miR-128	1	0	1	1	1	1	GRIA3	glutamate receptor, ionotropic, AMPA 3
hsa-miR-128	1	0	1	1	0	0	RPN1	ribophorin I
hsa-miR-128	1	0	1	1	1	1	GFPT2	glutamine-fructose-6-phosphate transaminase 2
hsa-miR-128	1	0	1	1	1	1	PTPN9	protein tyrosine phosphatase, non-receptor type 9
hsa-miR-128	1	0	1	1	0	0	KIAA1045	KIAA1045
hsa-miR-128	1	0	1	0	1	1	PAPPA	pregnancy-associated plasma protein A, pappalysin 1
hsa-miR-128	1	0	1	1	1	1	CTDSPL	CTD (carboxy-terminal domain, RNA polymerase II, polypeptide A) small phosphatase-like
hsa-miR-128	1	0	0	1	1	1	KLHDC8A	kelch domain containing 8A
hsa-miR-128	1	0	1	1	1	1	OTX2	orthodenticle homeobox 2
hsa-miR-128	1	0	1	1	1	1	FBLN2	fibulin 2
hsa-miR-128	1	0	1	0	1	1	MAP4K5	mitogen-activated protein kinase kinase kinase kinase 5
hsa-miR-128	1	0	1	1	1	1	ELFN2	extracellular leucine-rich repeat and fibronectin type III domain containing 2
hsa-miR-128	1	0	1	1	1	1	CBFA2T3	core-binding factor, runt domain, alpha subunit 2; translocated to, 3
hsa-miR-128	1	0	1	1	1	1	PDHX	pyruvate dehydrogenase complex, component X
hsa-miR-128	1	0	1	1	1	1	BEND3	BEN domain containing 3
hsa-miR-128	1	0	1	0	1	1	SLC6A6	solute carrier family 6 (neurotransmitter transporter, taurine), member 6
hsa-miR-128	1	0	1	1	1	1	NCOA5	nuclear receptor coactivator 5
hsa-miR-128	1	0	1	1	1	1	EIF5	eukaryotic translation initiation factor 5
hsa-miR-128	1	0	1	1	1	1	WDR7	WD repeat domain 7
hsa-miR-128	1	0	1	1	1	1	MAPKAPK3	mitogen-activated protein kinase-activated protein kinase 3
hsa-miR-128	1	0	1	1	1	1	SEC22A	SEC22 vesicle trafficking protein homolog A (S. cerevisiae)
hsa-miR-128	1	0	0	1	0	0	LMX1B	LIM homeobox transcription factor 1, beta
hsa-miR-128	1	0	1	0	1	1	PPARA	peroxisome proliferator-activated receptor alpha
hsa-miR-128	1	0	1	0	1	1	PAPD7	PAP associated domain containing 7
hsa-miR-128	1	0	1	1	1	1	CLCN6	chloride channel, voltage-sensitive 6
hsa-miR-128	1	0	1	1	1	1	PDE3B	phosphodiesterase 3B, cGMP-inhibited
hsa-miR-128	1	0	1	1	1	1	ENDOU	endonuclease, polyU-specific
hsa-miR-128	1	0	1	1	1	1	PANK1	pantothenate kinase 1
hsa-miR-128	1	0	1	1	1	1	NFIB	nuclear factor I/B
hsa-miR-128	1	0	1	0	1	1	DCBLD2	discoidin, CUB and LCCL domain containing 2
hsa-miR-128	1	0	1	0	1	1	MED14	mediator complex subunit 14
hsa-miR-128	1	0	1	1	0	0	GRIN2D	glutamate receptor, ionotropic, N-methyl D-aspartate 2D
hsa-miR-128	1	0	1	1	1	1	SPTBN1	spectrin, beta, non-erythrocytic 1
hsa-miR-128	1	0	1	1	1	1	IGF1	insulin-like growth factor 1 (somatomedin C)
hsa-miR-128	1	0	1	0	1	1	CPEB4	cytoplasmic polyadenylation element binding protein 4
hsa-miR-128	1	0	1	1	1	1	NRP2	neuropilin 2
hsa-miR-128	1	0	1	1	1	1	FRMD4A	FERM domain containing 4A
hsa-miR-128	1	0	1	1	1	1	BLOC1S5	biogenesis of lysosomal organelles complex-1, subunit 5, muted
hsa-miR-128	1	0	1	1	1	1	TSTD2	thiosulfate sulfurtransferase (rhodanese)-like domain containing 2
hsa-miR-128	1	0	1	0	0	0	PPME1	protein phosphatase methylesterase 1
hsa-miR-128	1	0	1	1	1	1	SLC35F3	solute carrier family 35, member F3
hsa-miR-128	1	0	1	1	0	0	BCORL1	BCL6 corepressor-like 1
hsa-miR-128	1	0	1	1	0	0	WNT3A	wingless-type MMTV integration site family, member 3A
hsa-miR-128	1	0	1	1	1	1	XPR1	xenotropic and polytropic retrovirus receptor 1
hsa-miR-128	1	0	1	1	1	1	ADAMTS5	ADAM metallopeptidase with thrombospondin type 1 motif, 5
hsa-miR-128	1	0	1	1	1	1	PALM2	paralemmin 2
hsa-miR-128	1	0	1	1	1	1	H3F3B	H3 histone, family 3B (H3.3B)
hsa-miR-128	1	0	1	1	1	1	SOX7	SRY (sex determining region Y)-box 7
hsa-miR-128	1	0	1	0	1	1	NRIP2	nuclear receptor interacting protein 2
hsa-miR-128	1	0	1	1	1	1	PHB	prohibitin
hsa-miR-128	1	0	1	0	1	1	TAPT1	transmembrane anterior posterior transformation 1
hsa-miR-128	1	0	1	1	0	0	TMSB10	thymosin beta 10
hsa-miR-128	1	0	1	1	1	1	POGZ	pogo transposable element with ZNF domain
hsa-miR-128	1	0	1	1	0	0	CSRP2	cysteine and glycine-rich protein 2
hsa-miR-128	1	0	1	1	0	0	PHGDH	phosphoglycerate dehydrogenase
hsa-miR-128	1	0	1	1	1	1	KCNA1	potassium voltage-gated channel, shaker-related subfamily, member 1 (episodic ataxia with myokymia)
hsa-miR-128	1	0	1	1	1	1	NABP1	nucleic acid binding protein 1
hsa-miR-128	1	0	0	0	0	0	AXIN1	axin 1
hsa-miR-128	1	0	1	1	1	1	TBP	TATA box binding protein
hsa-miR-128	1	0	1	1	1	1	TMEM9B	TMEM9 domain family, member B
hsa-miR-128	1	0	0	1	1	1	ADCY7	adenylate cyclase 7
hsa-miR-128	1	0	1	1	1	1	SLC7A11	solute carrier family 7 (anionic amino acid transporter light chain, xc- system), member 11
hsa-miR-128	1	0	1	1	1	1	MAN2A1	mannosidase, alpha, class 2A, member 1
hsa-miR-128	1	0	1	0	1	1	DIRAS1	DIRAS family, GTP-binding RAS-like 1
hsa-miR-128	1	0	1	1	1	1	GIGYF2	GRB10 interacting GYF protein 2
hsa-miR-128	1	0	1	1	1	1	CA12	carbonic anhydrase XII
hsa-miR-128	1	0	1	1	1	1	PGAP1	post-GPI attachment to proteins 1
hsa-miR-128	1	0	1	1	0	0	SHF	Src homology 2 domain containing F
hsa-miR-128	1	0	1	1	1	1	FGD6	FYVE, RhoGEF and PH domain containing 6
hsa-miR-128	1	0	1	1	1	1	PPP1CC	protein phosphatase 1, catalytic subunit, gamma isozyme
hsa-miR-128	1	0	1	1	1	1	GCC1	GRIP and coiled-coil domain containing 1
hsa-miR-128	1	0	1	1	1	1	TMEM132E	transmembrane protein 132E
hsa-miR-128	1	0	1	1	1	1	ABCB9	ATP-binding cassette, sub-family B (MDR/TAP), member 9
hsa-miR-128	1	0	1	0	1	1	YES1	v-yes-1 Yamaguchi sarcoma viral oncogene homolog 1
hsa-miR-128	1	0	1	1	1	1	PRKD1	protein kinase D1
hsa-miR-128	1	0	1	1	1	1	AFF4	AF4/FMR2 family, member 4
hsa-miR-128	1	0	1	1	1	1	INSM1	insulinoma-associated 1
hsa-miR-128	1	0	1	1	1	1	RET	ret proto-oncogene
hsa-miR-128	1	0	1	1	1	1	MYT1	myelin transcription factor 1
hsa-miR-128	1	0	1	0	1	1	KSR2	kinase suppressor of ras 2
hsa-miR-128	1	0	1	1	1	1	MESDC1	mesoderm development candidate 1
hsa-miR-128	1	0	1	1	1	1	MYH10	myosin, heavy chain 10, non-muscle
hsa-miR-128	1	0	1	1	1	1	GOLM1	golgi membrane protein 1
hsa-miR-128	1	0	1	1	1	1	APAF1	apoptotic peptidase activating factor 1
hsa-miR-128	1	0	1	1	1	1	SLC10A7	solute carrier family 10 (sodium/bile acid cotransporter family), member 7
hsa-miR-128	1	0	1	1	1	1	SLC35F1	solute carrier family 35, member F1
hsa-miR-128	1	0	1	1	0	0	CCDC71	coiled-coil domain containing 71
hsa-miR-128	1	0	1	1	1	1	HNRNPF	heterogeneous nuclear ribonucleoprotein F
hsa-miR-128	1	0	0	1	1	1	CEP135	centrosomal protein 135kDa
hsa-miR-128	1	0	1	1	1	1	NPTXR	neuronal pentraxin receptor
hsa-miR-128	1	0	1	1	0	0	RUVBL2	RuvB-like 2 (E. coli)
hsa-miR-128	1	0	1	1	1	1	MGAT1	mannosyl (alpha-1,3-)-glycoprotein beta-1,2-N-acetylglucosaminyltransferase
hsa-miR-128	1	0	1	0	1	1	THAP2	THAP domain containing, apoptosis associated protein 2
hsa-miR-128	1	0	1	1	1	1	GATA2	GATA binding protein 2
hsa-miR-128	1	0	1	1	1	1	STK38L	serine/threonine kinase 38 like
hsa-miR-128	1	0	1	1	1	1	RAI14	retinoic acid induced 14
hsa-miR-128	1	0	1	0	1	1	ATP11B	ATPase, class VI, type 11B
hsa-miR-128	1	0	1	1	1	1	APBA2	amyloid beta (A4) precursor protein-binding, family A, member 2
hsa-miR-128	1	0	1	1	1	1	CNOT6	CCR4-NOT transcription complex, subunit 6
hsa-miR-128	1	0	1	1	1	1	CASC3	cancer susceptibility candidate 3
hsa-miR-128	1	0	1	1	1	1	MLLT10	myeloid/lymphoid or mixed-lineage leukemia (trithorax homolog, Drosophila); translocated to, 10
hsa-miR-128	1	0	1	1	1	1	NIPBL	Nipped-B homolog (Drosophila)
hsa-miR-128	1	0	1	0	1	1	GCNT2	glucosaminyl (N-acetyl) transferase 2, I-branching enzyme (I blood group)
hsa-miR-128	1	0	1	1	0	0	PPP4C	protein phosphatase 4, catalytic subunit
hsa-miR-128	1	0	1	1	0	0	PCNX	pecanex homolog (Drosophila)
hsa-miR-128	1	0	1	0	1	1	TET1	tet methylcytosine dioxygenase 1
hsa-miR-128	1	0	1	1	1	1	MEIS2	Meis homeobox 2
hsa-miR-128	1	0	1	1	1	1	HOXA13	homeobox A13
hsa-miR-128	1	0	1	0	1	1	TMEM167A	transmembrane protein 167A
hsa-miR-128	1	0	1	1	0	0	SNX18	sorting nexin 18
hsa-miR-128	1	0	1	1	0	0	RAB24	RAB24, member RAS oncogene family
hsa-miR-128	1	0	1	0	1	1	COL21A1	collagen, type XXI, alpha 1
hsa-miR-128	1	0	1	1	1	1	DKK2	dickkopf 2 homolog (Xenopus laevis)
hsa-miR-128	1	0	1	1	1	1	PHLPP2	PH domain and leucine rich repeat protein phosphatase 2
hsa-miR-128	1	0	1	1	1	1	SHANK3	SH3 and multiple ankyrin repeat domains 3
hsa-miR-128	0	1	1	1	1	1	SYCP1	synaptonemal complex protein 1
hsa-miR-128	1	0	1	1	1	1	PLAU	plasminogen activator, urokinase
hsa-miR-128	1	0	1	1	1	1	NUPL1	nucleoporin like 1
hsa-miR-128	1	0	1	1	1	1	PPIP5K2	diphosphoinositol pentakisphosphate kinase 2
hsa-miR-128	0	0	1	1	1	1	PREPL	prolyl endopeptidase-like
hsa-miR-128	0	0	1	1	0	0	PLCH2	phospholipase C, eta 2
hsa-miR-128	0	0	1	1	1	1	RABGAP1L	RAB GTPase activating protein 1-like
hsa-miR-128	1	0	1	0	1	1	CEP350	centrosomal protein 350kDa
hsa-miR-128	1	0	1	1	1	1	HIPK1	homeodomain interacting protein kinase 1
hsa-miR-128	1	0	1	1	1	1	TP63	tumor protein p63
hsa-miR-128	1	0	1	1	1	1	DNM3	dynamin 3
hsa-miR-128	1	0	1	1	0	0	STXBP5L	syntaxin binding protein 5-like
hsa-miR-128	1	0	1	1	1	1	NLGN1	neuroligin 1
hsa-miR-128	1	0	1	1	1	1	PHF8	PHD finger protein 8
hsa-miR-128	1	0	1	1	0	0	PPM1H	protein phosphatase, Mg2+/Mn2+ dependent, 1H
hsa-miR-128	1	0	1	1	0	0	KIAA1210	KIAA1210
hsa-miR-128	1	0	1	1	1	1	MKL2	MKL/myocardin-like 2
hsa-miR-128	0	0	1	0	0	0	MTA3	metastasis associated 1 family, member 3
hsa-miR-128	0	0	1	1	1	1	CA10	carbonic anhydrase X
hsa-miR-128	1	0	1	1	0	0	CARNS1	carnosine synthase 1
hsa-miR-128	0	0	1	0	1	1	MUC3B	mucin 3B, cell surface associated
hsa-miR-128	1	0	1	1	1	1	INADL	InaD-like (Drosophila)
hsa-miR-128	0	0	1	0	1	1	FBRSL1	fibrosin-like 1
hsa-miR-128	0	0	1	1	0	0	TMEM132A	transmembrane protein 132A
hsa-miR-128	1	0	1	1	0	0	NCKAP5L	NCK-associated protein 5-like
hsa-miR-128	1	0	1	0	1	1	IGDCC4	immunoglobulin superfamily, DCC subclass, member 4
hsa-miR-128	0	0	1	1	1	1	BHLHB9	basic helix-loop-helix domain containing, class B, 9
hsa-miR-128	1	0	1	1	1	1	DDHD1	DDHD domain containing 1
hsa-miR-128	0	0	1	1	1	1	AMBRA1	autophagy/beclin-1 regulator 1
hsa-miR-128	1	0	1	0	1	1	RIMS1	regulating synaptic membrane exocytosis 1
hsa-miR-128	1	0	1	1	1	1	IKZF4	IKAROS family zinc finger 4 (Eos)
hsa-miR-128	1	0	1	1	1	1	LZTS2	leucine zipper, putative tumor suppressor 2
hsa-miR-128	0	0	1	1	0	0	SLC22A10	solute carrier family 22, member 10
hsa-miR-128	1	0	1	0	0	0	FAT3	FAT tumor suppressor homolog 3 (Drosophila)
hsa-miR-128	0	0	1	1	1	1	DYNC2H1	dynein, cytoplasmic 2, heavy chain 1
hsa-miR-128	1	0	1	1	1	1	C11orf57	chromosome 11 open reading frame 57
hsa-miR-128	0	0	1	1	0	0	IL2RG	interleukin 2 receptor, gamma
hsa-miR-128	0	0	1	1	0	0	DDB2	damage-specific DNA binding protein 2, 48kDa
hsa-miR-128	1	0	1	1	1	1	PAN3	PAN3 poly(A) specific ribonuclease subunit homolog (S. cerevisiae)
hsa-miR-128	0	0	1	1	0	0	SSPO	SCO-spondin homolog (Bos taurus)
hsa-miR-128	1	0	1	1	1	1	KCNMA1	potassium large conductance calcium-activated channel, subfamily M, alpha member 1
hsa-miR-128	1	0	1	1	1	1	UBE3A	ubiquitin protein ligase E3A
hsa-miR-128	0	0	1	1	1	1	SYBU	syntabulin (syntaxin-interacting)
hsa-miR-128	0	0	1	1	1	1	GABBR1	gamma-aminobutyric acid (GABA) B receptor, 1
hsa-miR-128	1	0	1	1	1	1	LTBP1	latent transforming growth factor beta binding protein 1
hsa-miR-128	1	0	1	1	1	1	VLDLR	very low density lipoprotein receptor
hsa-miR-128	0	0	1	0	1	1	NPY1R	neuropeptide Y receptor Y1
hsa-miR-128	1	0	1	1	1	1	CTAGE5	CTAGE family, member 5
hsa-miR-128	0	0	1	1	0	0	BMP1	bone morphogenetic protein 1
hsa-miR-128	0	0	1	1	0	0	CFLAR	CASP8 and FADD-like apoptosis regulator
hsa-miR-128	0	0	1	1	1	1	HLA-DQA1	major histocompatibility complex, class II, DQ alpha 1
hsa-miR-128	0	0	1	1	0	0	MBD1	methyl-CpG binding domain protein 1
hsa-miR-128	0	0	1	0	0	0	MIAT	myocardial infarction associated transcript (non-protein coding)
hsa-miR-128	0	0	1	1	1	1	PON2	paraoxonase 2
hsa-miR-128	1	0	1	0	1	1	PDE4D	phosphodiesterase 4D, cAMP-specific
hsa-miR-128	1	0	1	1	1	1	CBFA2T2	core-binding factor, runt domain, alpha subunit 2; translocated to, 2
hsa-miR-128	0	0	1	1	1	1	SH3GL3	SH3-domain GRB2-like 3
hsa-miR-128	0	0	1	1	1	1	SLC11A2	solute carrier family 11 (proton-coupled divalent metal ion transporters), member 2
hsa-miR-128	0	0	1	1	1	1	CYP4F3	cytochrome P450, family 4, subfamily F, polypeptide 3
hsa-miR-128	1	0	1	1	1	1	SHOC2	soc-2 suppressor of clear homolog (C. elegans)
hsa-miR-128	1	0	1	1	1	1	MBNL2	muscleblind-like splicing regulator 2
hsa-miR-128	1	0	1	1	1	1	DMTF1	cyclin D binding myb-like transcription factor 1
hsa-miR-128	0	0	1	1	1	1	MINPP1	multiple inositol-polyphosphate phosphatase 1
hsa-miR-128	1	0	1	1	1	1	ZNF236	zinc finger protein 236
hsa-miR-128	1	0	1	1	1	1	VAPB	VAMP (vesicle-associated membrane protein)-associated protein B and C
hsa-miR-128	1	0	1	1	1	1	GLS	glutaminase
hsa-miR-128	0	0	1	1	1	1	MSTO1	misato homolog 1 (Drosophila)
hsa-miR-128	0	0	1	1	1	1	SMC2	structural maintenance of chromosomes 2
hsa-miR-128	1	0	1	1	1	1	LRRFIP1	leucine rich repeat (in FLII) interacting protein 1
hsa-miR-128	0	0	1	1	1	1	AIG1	androgen-induced 1
hsa-miR-128	1	0	1	1	1	1	USP15	ubiquitin specific peptidase 15
hsa-miR-128	1	0	1	1	1	1	ANKRD13A	ankyrin repeat domain 13A
hsa-miR-128	1	0	1	1	1	1	STXBP6	syntaxin binding protein 6 (amisyn)
hsa-miR-128	1	0	1	1	1	1	USP25	ubiquitin specific peptidase 25
hsa-miR-128	1	0	1	1	1	1	C16orf70	chromosome 16 open reading frame 70
hsa-miR-128	0	0	1	1	0	0	FXYD5	FXYD domain containing ion transport regulator 5
hsa-miR-128	1	0	1	1	1	1	SNPH	syntaphilin
hsa-miR-128	0	0	1	1	1	1	SPG21	spastic paraplegia 21 (autosomal recessive, Mast syndrome)
hsa-miR-128	0	0	1	1	0	0	HES6	hairy and enhancer of split 6 (Drosophila)
hsa-miR-128	1	0	1	1	1	1	SH3GLB1	SH3-domain GRB2-like endophilin B1
hsa-miR-128	0	0	1	1	1	1	GOLGA6A	golgin A6 family, member A
hsa-miR-128	0	0	1	1	1	1	CBWD5	COBW domain containing 5
hsa-miR-128	0	0	1	0	1	1	ERBB2IP	erbb2 interacting protein
hsa-miR-128	0	0	1	1	1	1	RASD2	RASD family, member 2
hsa-miR-128	1	0	1	1	1	1	TMUB2	transmembrane and ubiquitin-like domain containing 2
hsa-miR-128	1	0	1	1	1	1	SPTBN4	spectrin, beta, non-erythrocytic 4
hsa-miR-128	1	0	1	1	0	0	RAB34	RAB34, member RAS oncogene family
hsa-miR-128	1	0	1	1	1	1	CPEB1	cytoplasmic polyadenylation element binding protein 1
hsa-miR-128	0	0	1	1	0	0	SPNS1	spinster homolog 1 (Drosophila)
hsa-miR-128	0	0	1	0	1	1	MYO3B	myosin IIIB
hsa-miR-128	0	0	1	1	0	0	SNRPN	small nuclear ribonucleoprotein polypeptide N
hsa-miR-128	0	0	1	1	0	0	ELP2	elongator acetyltransferase complex subunit 2
hsa-miR-128	1	0	1	1	0	0	SAMD4A	sterile alpha motif domain containing 4A
hsa-miR-128	1	0	1	1	1	1	CACNB2	calcium channel, voltage-dependent, beta 2 subunit
hsa-miR-128	0	0	1	1	1	1	SAMD9L	sterile alpha motif domain containing 9-like
hsa-miR-128	0	0	1	1	1	1	TPO	thyroid peroxidase
hsa-miR-128	0	0	1	1	1	1	ZNF638	zinc finger protein 638
hsa-miR-128	1	0	1	1	1	1	AFF2	AF4/FMR2 family, member 2
hsa-miR-128	1	0	1	1	1	1	PLAGL1	pleiomorphic adenoma gene-like 1
hsa-miR-128	0	0	1	1	1	1	CLDND1	claudin domain containing 1
hsa-miR-128	0	0	1	1	1	1	RANBP17	RAN binding protein 17
hsa-miR-128	1	0	1	1	1	1	NRXN3	neurexin 3
hsa-miR-128	0	0	1	1	1	1	ZNF248	zinc finger protein 248
hsa-miR-128	1	0	1	1	1	1	ARL4C	ADP-ribosylation factor-like 4C
hsa-miR-128	0	0	1	1	1	1	TFEB	transcription factor EB
hsa-miR-128	0	0	1	0	0	0	TUG1	taurine upregulated 1 (non-protein coding)
hsa-miR-128	0	0	1	1	1	1	OLFM4	olfactomedin 4
hsa-miR-128	1	0	1	1	1	1	ARHGAP17	Rho GTPase activating protein 17
hsa-miR-128	0	0	1	1	1	1	STOX2	storkhead box 2
hsa-miR-128	1	0	1	1	1	1	EIF2C1	eukaryotic translation initiation factor 2C, 1
hsa-miR-128	1	0	1	1	0	0	SMUG1	single-strand-selective monofunctional uracil-DNA glycosylase 1
hsa-miR-128	0	0	1	1	1	1	MCOLN3	mucolipin 3
hsa-miR-128	1	0	1	1	1	1	KLHDC8B	kelch domain containing 8B
hsa-miR-128	0	0	1	1	0	0	TMC6	transmembrane channel-like 6
hsa-miR-128	1	0	1	1	1	1	C12orf23	chromosome 12 open reading frame 23
hsa-miR-128	0	0	1	0	0	0	LOC149134	uncharacterized LOC149134
hsa-miR-128	1	0	1	1	1	1	S100PBP	S100P binding protein
hsa-miR-128	0	0	1	1	1	1	ARMC5	armadillo repeat containing 5
hsa-miR-128	1	0	1	1	0	0	FASTK	Fas-activated serine/threonine kinase
hsa-miR-128	0	0	1	0	0	0	LOC399491	GPS, PLAT and transmembrane domain-containing protein
hsa-miR-128	1	0	1	1	0	0	CCDC136	coiled-coil domain containing 136
hsa-miR-128	0	0	1	0	0	0	LINC00475	long intergenic non-protein coding RNA 475
hsa-miR-128	0	0	1	0	1	1	FLJ14186	uncharacterized LOC401149
hsa-miR-128	0	0	1	1	1	1	METTL7A	methyltransferase like 7A
hsa-miR-128	0	0	1	0	0	0	IFFO2	intermediate filament family orphan 2
hsa-miR-128	0	0	1	1	0	0	SPON2	spondin 2, extracellular matrix protein
hsa-miR-128	0	0	1	1	1	1	GGNBP2	gametogenetin binding protein 2
hsa-miR-128	0	0	1	1	1	1	PPFIBP2	PTPRF interacting protein, binding protein 2 (liprin beta 2)
hsa-miR-128	1	0	1	1	1	1	DLC1	deleted in liver cancer 1
hsa-miR-128	0	0	1	1	0	0	MOGAT2	monoacylglycerol O-acyltransferase 2
hsa-miR-128	0	0	1	1	0	0	PIF1	PIF1 5'-to-3' DNA helicase homolog (S. cerevisiae)
hsa-miR-128	0	0	1	0	1	1	FLJ22763	uncharacterized LOC401081
hsa-miR-128	1	0	1	1	1	1	RNF185	ring finger protein 185
hsa-miR-128	0	0	1	0	0	0	LOC729852	uncharacterized LOC729852
hsa-miR-128	0	0	1	1	1	1	NETO2	neuropilin (NRP) and tolloid (TLL)-like 2
hsa-miR-128	1	0	1	1	1	1	FAM40A	family with sequence similarity 40, member A
hsa-miR-128	0	0	1	0	0	0	KIAA0664L3	KIAA0664-like 3
hsa-miR-128	0	0	1	1	0	0	HAGHL	hydroxyacylglutathione hydrolase-like
hsa-miR-128	0	0	1	1	0	0	FAM153B	family with sequence similarity 153, member B
hsa-miR-128	1	0	1	0	1	1	AP1G1	adaptor-related protein complex 1, gamma 1 subunit
hsa-miR-128	0	0	1	0	0	0	SNHG11	small nucleolar RNA host gene 11 (non-protein coding)
hsa-miR-128	0	0	1	0	0	0	FLJ31104	uncharacterized LOC441072
hsa-miR-128	1	0	1	1	1	1	DIXDC1	DIX domain containing 1
hsa-miR-128	0	0	1	1	0	0	DNAH9	dynein, axonemal, heavy chain 9
hsa-miR-128	1	0	1	1	1	1	ZNF664	zinc finger protein 664
hsa-miR-128	1	0	1	0	1	1	PTPRE	protein tyrosine phosphatase, receptor type, E
hsa-miR-128	0	0	1	1	0	0	BEAN1	brain expressed, associated with NEDD4, 1
hsa-miR-128	0	0	1	1	1	1	SEPT5	septin 5
hsa-miR-128	0	0	1	0	0	0	FLG-AS1	FLG antisense RNA 1
hsa-miR-128	0	0	1	1	0	0	DNAH3	dynein, axonemal, heavy chain 3
hsa-miR-128	1	0	1	1	1	1	SORBS2	sorbin and SH3 domain containing 2
hsa-miR-128	0	0	1	1	1	1	ZNF606	zinc finger protein 606
hsa-miR-128	0	0	1	1	1	1	GNB2	guanine nucleotide binding protein (G protein), beta polypeptide 2
hsa-miR-128	0	0	1	1	1	1	PTCD2	pentatricopeptide repeat domain 2
hsa-miR-128	0	0	1	0	0	0	LOC255187	hCG1980447
hsa-miR-128	1	0	1	0	1	1	RABGEF1	RAB guanine nucleotide exchange factor (GEF) 1
hsa-miR-128	0	0	1	0	1	1	AGBL1	ATP/GTP binding protein-like 1
hsa-miR-128	0	0	1	0	1	1	THAP6	THAP domain containing 6
hsa-miR-128	0	0	1	1	0	0	RELT	RELT tumor necrosis factor receptor
hsa-miR-128	0	0	1	1	1	1	VWA3B	von Willebrand factor A domain containing 3B
hsa-miR-128	0	0	1	0	0	0	ANTXRL	anthrax toxin receptor-like
hsa-miR-128	0	0	1	1	1	1	ELL3	elongation factor RNA polymerase II-like 3
hsa-miR-128	1	0	1	1	1	1	ANKRD49	ankyrin repeat domain 49
hsa-miR-128	1	0	1	1	1	1	IST1	increased sodium tolerance 1 homolog (yeast)
hsa-miR-128	1	0	1	1	1	1	C6orf89	chromosome 6 open reading frame 89
hsa-miR-128	0	0	1	1	0	0	PIGO	phosphatidylinositol glycan anchor biosynthesis, class O
hsa-miR-128	1	0	1	0	1	1	CLASP1	cytoplasmic linker associated protein 1
hsa-miR-128	0	0	1	1	1	1	ZFAND2B	zinc finger, AN1-type domain 2B
hsa-miR-128	0	0	1	1	1	1	GALNT6	UDP-N-acetyl-alpha-D-galactosamine:polypeptide N-acetylgalactosaminyltransferase 6 (GalNAc-T6)
hsa-miR-128	1	0	1	1	1	1	MYO1B	myosin IB
hsa-miR-128	0	0	1	0	1	1	CADM1	cell adhesion molecule 1
hsa-miR-128	0	0	1	0	0	0	LOC643837	uncharacterized LOC643837
hsa-miR-128	0	0	1	1	0	0	ACOT11	acyl-CoA thioesterase 11
hsa-miR-128	1	0	1	1	1	1	SYN2	synapsin II
hsa-miR-128	1	0	1	1	1	1	FBXW2	F-box and WD repeat domain containing 2
hsa-miR-128	0	0	1	1	1	1	CD34	CD34 molecule
hsa-miR-128	1	0	1	1	1	1	GNG2	guanine nucleotide binding protein (G protein), gamma 2
hsa-miR-128	0	0	1	0	0	0	LOC283887	uncharacterized LOC283887
hsa-miR-128	1	0	1	1	1	1	DZIP1	DAZ interacting protein 1
hsa-miR-128	1	0	1	1	1	1	LRRC57	leucine rich repeat containing 57
hsa-miR-128	1	0	1	0	1	1	GATAD2B	GATA zinc finger domain containing 2B
hsa-miR-128	0	0	1	1	0	0	CES4A	carboxylesterase 4A
hsa-miR-128	0	0	1	1	1	1	ATP6V1H	ATPase, H+ transporting, lysosomal 50/57kDa, V1 subunit H
hsa-miR-128	1	0	1	1	1	1	EPHB1	EPH receptor B1
hsa-miR-128	1	0	1	0	1	1	FAM129A	family with sequence similarity 129, member A
hsa-miR-128	1	0	1	0	1	1	STC2	stanniocalcin 2
hsa-miR-128	1	0	1	1	1	1	GAPVD1	GTPase activating protein and VPS9 domains 1
hsa-miR-128	0	0	1	1	0	0	RPN2	ribophorin II
hsa-miR-128	0	0	1	0	0	0	ZNF815P	zinc finger protein 815, pseudogene
hsa-miR-128	0	0	1	1	1	1	DNM1	dynamin 1
hsa-miR-128	1	0	1	0	1	1	KBTBD8	kelch repeat and BTB (POZ) domain containing 8
hsa-miR-128	0	0	1	1	1	1	ITGAD	integrin, alpha D
hsa-miR-128	0	0	1	0	0	0	LOC400680	uncharacterized LOC400680
hsa-miR-128	0	0	1	1	1	1	LRRC27	leucine rich repeat containing 27
hsa-miR-128	1	0	1	1	1	1	GOLGA8B	golgin A8 family, member B
hsa-miR-128	0	0	1	0	0	0	LOC284385	uncharacterized LOC284385
hsa-miR-128	0	0	1	1	0	0	PSAPL1	prosaposin-like 1 (gene/pseudogene)
hsa-miR-128	1	0	1	1	1	1	HOOK1	hook homolog 1 (Drosophila)
hsa-miR-128	1	0	1	1	1	1	PIGA	phosphatidylinositol glycan anchor biosynthesis, class A
hsa-miR-128	1	0	1	0	1	1	SQSTM1	sequestosome 1
hsa-miR-128	1	0	1	1	0	0	ENTPD1	ectonucleoside triphosphate diphosphohydrolase 1
hsa-miR-128	0	0	1	1	1	1	ANKZF1	ankyrin repeat and zinc finger domain containing 1
hsa-miR-128	1	0	1	1	1	1	THTPA	thiamine triphosphatase
hsa-miR-128	0	0	1	0	0	0	LOC338579	ankyrin repeat domain-containing protein 30B pseudogene
hsa-miR-128	0	0	1	1	0	0	KIAA0146	KIAA0146
hsa-miR-128	1	0	1	1	1	1	WEE1	WEE1 homolog (S. pombe)
hsa-miR-128	0	0	1	1	0	0	PRICKLE1	prickle homolog 1 (Drosophila)
hsa-miR-128	0	0	1	1	1	1	ZDHHC15	zinc finger, DHHC-type containing 15
hsa-miR-128	0	0	1	1	1	1	GGA1	golgi-associated, gamma adaptin ear containing, ARF binding protein 1
hsa-miR-128	0	0	1	1	0	0	PROKR1	prokineticin receptor 1
hsa-miR-128	0	0	1	1	0	0	YSK4	YSK4 Sps1/Ste20-related kinase homolog (S. cerevisiae)
hsa-miR-128	0	0	1	1	0	0	MX2	myxovirus (influenza virus) resistance 2 (mouse)
hsa-miR-128	0	0	1	1	0	0	MARS	methionyl-tRNA synthetase
hsa-miR-128	1	0	1	1	1	1	ZBTB4	zinc finger and BTB domain containing 4
hsa-miR-128	0	0	1	0	0	0	C1orf132	chromosome 1 open reading frame 132
hsa-miR-128	1	0	1	1	1	1	EGLN3	egl nine homolog 3 (C. elegans)
hsa-miR-128	0	0	1	1	1	1	EXD1	exonuclease 3'-5' domain containing 1
hsa-miR-128	0	0	1	1	0	0	CENPM	centromere protein M
hsa-miR-128	0	0	1	0	0	0	LOC650368	asparagine-linked glycosylation 1-like pseudogene
hsa-miR-128	1	0	1	1	1	1	EPAS1	endothelial PAS domain protein 1
hsa-miR-128	0	0	1	0	1	1	LOC389641	uncharacterized LOC389641
hsa-miR-128	0	0	1	1	0	0	C20orf27	chromosome 20 open reading frame 27
hsa-miR-128	0	0	1	1	0	0	NPIP	nuclear pore complex interacting protein
hsa-miR-128	1	0	1	1	1	1	FAM122B	family with sequence similarity 122B
hsa-miR-128	0	0	1	1	1	1	IDS	iduronate 2-sulfatase
hsa-miR-128	0	0	1	1	0	0	DOCK11	dedicator of cytokinesis 11
hsa-miR-128	0	0	1	0	0	0	FAM47E	family with sequence similarity 47, member E
hsa-miR-128	0	0	1	0	0	0	TMEM232	transmembrane protein 232
hsa-miR-128	0	0	1	1	0	0	CUL9	cullin 9
hsa-miR-128	1	0	1	0	0	0	ANKRD52	ankyrin repeat domain 52
hsa-miR-128	0	0	1	0	1	1	RASGRP3	RAS guanyl releasing protein 3 (calcium and DAG-regulated)
hsa-miR-128	1	0	1	0	1	1	HECTD1	HECT domain containing E3 ubiquitin protein ligase 1
hsa-miR-128	0	0	1	0	0	0	FAM95B1	family with sequence similarity 95, member B1
hsa-miR-128	1	0	1	1	1	1	TP53INP1	tumor protein p53 inducible nuclear protein 1
hsa-miR-128	1	0	1	1	0	0	PFKM	phosphofructokinase, muscle
hsa-miR-128	0	0	1	1	1	1	EPPIN	epididymal peptidase inhibitor
hsa-miR-128	1	0	1	1	0	0	ATXN7L3	ataxin 7-like 3
hsa-miR-128	0	0	1	0	0	0	FLJ44313	FLJ44313 protein
hsa-miR-128	1	0	1	0	1	1	CLEC16A	C-type lectin domain family 16, member A
hsa-miR-128	1	0	1	1	1	1	IBTK	inhibitor of Bruton agammaglobulinemia tyrosine kinase
hsa-miR-128	0	0	1	1	0	0	TMEM151B	transmembrane protein 151B
hsa-miR-128	0	0	1	0	0	0	RPL23AP53	ribosomal protein L23a pseudogene 53
hsa-miR-128	1	0	1	0	1	1	N4BP3	NEDD4 binding protein 3
hsa-miR-128	1	0	1	0	1	1	YAF2	YY1 associated factor 2
hsa-miR-128	0	0	1	0	0	0	LOC100128262	uncharacterized LOC100128262
hsa-miR-128	1	0	1	1	1	1	RALB	v-ral simian leukemia viral oncogene homolog B (ras related; GTP binding protein)
hsa-miR-128	0	0	1	1	0	0	NCF1	neutrophil cytosolic factor 1
hsa-miR-128	0	0	1	1	0	0	TMEM136	transmembrane protein 136
hsa-miR-128	1	0	1	1	1	1	SLC12A6	solute carrier family 12 (potassium/chloride transporters), member 6
hsa-miR-128	0	0	1	0	0	0	FAM205B	transmembrane protein C9orf144B pseudogene
hsa-miR-128	1	0	1	1	1	1	WDR37	WD repeat domain 37
hsa-miR-128	0	0	1	0	0	0	AFG3L1P	AFG3 ATPase family gene 3-like 1 (S. cerevisiae), pseudogene
hsa-miR-128	1	0	1	1	1	1	BCAT1	branched chain amino-acid transaminase 1, cytosolic
hsa-miR-128	0	0	1	0	0	0	IDO2	indoleamine 2,3-dioxygenase 2
hsa-miR-128	1	0	1	1	1	1	ADAMTSL1	ADAMTS-like 1
hsa-miR-128	1	0	1	0	1	1	CYB561D1	cytochrome b-561 domain containing 1
hsa-miR-128	0	0	1	1	0	0	HEATR8	HEAT repeat containing 8
hsa-miR-128	0	0	1	1	0	0	TMEM91	transmembrane protein 91
hsa-miR-128	0	0	1	1	1	1	TMEM202	transmembrane protein 202
hsa-miR-128	0	0	1	0	0	0	LOC390660	FLJ00317 protein
hsa-miR-128	0	0	1	0	1	1	GALNT13	UDP-N-acetyl-alpha-D-galactosamine:polypeptide N-acetylgalactosaminyltransferase 13 (GalNAc-T13)
hsa-miR-128	0	0	1	1	1	1	ZNF346	zinc finger protein 346
hsa-miR-128	1	0	1	0	1	1	ZNF607	zinc finger protein 607
hsa-miR-128	0	0	1	1	1	1	KAZALD1	Kazal-type serine peptidase inhibitor domain 1
hsa-miR-128	1	0	1	1	1	1	TAP2	transporter 2, ATP-binding cassette, sub-family B (MDR/TAP)
hsa-miR-128	0	0	1	1	1	1	AGPAT9	1-acylglycerol-3-phosphate O-acyltransferase 9
hsa-miR-128	1	0	1	1	1	1	CYYR1	cysteine/tyrosine-rich 1
hsa-miR-128	1	0	1	0	1	1	SEZ6	seizure related 6 homolog (mouse)
hsa-miR-128	1	0	1	1	1	1	APBB2	amyloid beta (A4) precursor protein-binding, family B, member 2
hsa-miR-128	0	0	1	1	1	1	PTPN20B	protein tyrosine phosphatase, non-receptor type 20B
hsa-miR-128	0	0	1	1	1	1	PTPN20A	protein tyrosine phosphatase, non-receptor type 20A
hsa-miR-128	1	0	1	1	1	1	NECAP1	NECAP endocytosis associated 1
hsa-miR-128	0	0	1	0	1	1	NEK1	NIMA (never in mitosis gene a)-related kinase 1
hsa-miR-128	0	0	1	1	0	0	NEK7	NIMA (never in mitosis gene a)-related kinase 7
hsa-miR-128	0	0	1	1	1	1	TFDP2	transcription factor Dp-2 (E2F dimerization partner 2)
hsa-miR-128	0	0	1	0	0	0	POM121L9P	POM121 transmembrane nucleoporin-like 9, pseudogene
hsa-miR-128	1	0	1	1	1	1	GNB5	guanine nucleotide binding protein (G protein), beta 5
hsa-miR-128	1	0	1	0	1	1	DCDC2	doublecortin domain containing 2
hsa-miR-128	1	0	1	1	1	1	ARPP21	cAMP-regulated phosphoprotein, 21kDa
hsa-miR-128	0	0	1	0	0	0	KIAA0913	KIAA0913
hsa-miR-128	1	0	1	1	1	1	GOLGA8A	golgin A8 family, member A
hsa-miR-128	0	0	1	1	0	0	DOPEY1	dopey family member 1
hsa-miR-128	1	0	1	1	1	1	CTTNBP2NL	CTTNBP2 N-terminal like
hsa-miR-128	1	0	1	0	1	1	FAM19A1	family with sequence similarity 19 (chemokine (C-C motif)-like), member A1
hsa-miR-128	1	0	1	1	1	1	SLC30A8	solute carrier family 30 (zinc transporter), member 8
hsa-miR-128	1	0	1	1	1	1	BCL2L13	BCL2-like 13 (apoptosis facilitator)
hsa-miR-128	0	0	1	1	1	1	BEND7	BEN domain containing 7
hsa-miR-128	0	0	1	1	1	1	EGFLAM	EGF-like, fibronectin type III and laminin G domains
hsa-miR-128	0	0	1	1	1	1	MYPN	myopalladin
hsa-miR-128	0	0	1	1	1	1	YAP1	Yes-associated protein 1
hsa-miR-128	1	0	1	1	1	1	SH3TC2	SH3 domain and tetratricopeptide repeats 2
hsa-miR-128	1	0	1	1	0	0	PTAR1	protein prenyltransferase alpha subunit repeat containing 1
hsa-miR-128	1	0	1	1	1	1	EZH1	enhancer of zeste homolog 1 (Drosophila)
hsa-miR-128	0	0	1	0	1	1	PLEKHM1P	pleckstrin homology domain containing, family M (with RUN domain) member 1 pseudogene
hsa-miR-128	0	0	1	1	1	1	NARG2	NMDA receptor regulated 2
hsa-miR-128	1	0	1	1	1	1	BPTF	bromodomain PHD finger transcription factor
hsa-miR-128	0	0	1	1	0	0	FCRL3	Fc receptor-like 3
hsa-miR-128	0	0	1	0	0	0	EPHA1-AS1	EPHA1 antisense RNA 1
hsa-miR-128	1	0	1	1	1	1	NRP1	neuropilin 1
hsa-miR-128	1	0	1	0	0	0	NPEPL1	aminopeptidase-like 1
hsa-miR-128	1	0	1	0	1	1	COX18	COX18 cytochrome c oxidase assembly homolog (S. cerevisiae)
hsa-miR-128	1	0	1	1	1	1	SET	SET nuclear oncogene
hsa-miR-128	0	0	1	0	1	1	PSG1	pregnancy specific beta-1-glycoprotein 1
hsa-miR-128	0	0	1	1	1	1	KLHL7	kelch-like 7 (Drosophila)
hsa-miR-128	0	0	1	1	1	1	CRB1	crumbs homolog 1 (Drosophila)
hsa-miR-128	1	0	1	1	1	1	PIH1D3	PIH1 domain containing 3
hsa-miR-128	1	0	1	1	1	1	BCL11A	B-cell CLL/lymphoma 11A (zinc finger protein)
hsa-miR-128	0	0	1	0	0	0	MUC19	mucin 19, oligomeric
hsa-miR-128	0	0	1	1	0	0	CCL4	chemokine (C-C motif) ligand 4
hsa-miR-128	0	0	1	0	0	0	MEG3	maternally expressed 3 (non-protein coding)
hsa-miR-128	0	0	1	1	1	1	CBWD1	COBW domain containing 1
hsa-miR-128	0	0	1	1	1	1	GPR114	G protein-coupled receptor 114
hsa-miR-128	0	0	1	1	1	1	VWA5A	von Willebrand factor A domain containing 5A
hsa-miR-128	1	0	1	0	1	1	ANKRD28	ankyrin repeat domain 28
hsa-miR-128	1	0	1	1	1	1	SP3	Sp3 transcription factor
hsa-miR-128	0	0	1	1	1	1	HMBOX1	homeobox containing 1
hsa-miR-128	1	0	1	0	1	1	LRAT	lecithin retinol acyltransferase (phosphatidylcholine--retinol O-acyltransferase)
hsa-miR-128	0	0	1	1	0	0	DHRS4	dehydrogenase/reductase (SDR family) member 4
hsa-miR-128	0	0	1	1	1	1	ANXA10	annexin A10
hsa-miR-128	0	0	1	1	1	1	RHD	Rh blood group, D antigen
hsa-miR-128	1	0	1	1	1	1	PFKFB4	6-phosphofructo-2-kinase/fructose-2,6-biphosphatase 4
hsa-miR-128	1	0	1	1	1	1	NTNG1	netrin G1
hsa-miR-128	0	0	1	0	1	1	KCNE1	potassium voltage-gated channel, Isk-related family, member 1
hsa-miR-128	0	0	1	0	0	0	PTPRVP	protein tyrosine phosphatase, receptor type, V, pseudogene
hsa-miR-128	0	0	1	0	0	0	MAST4	microtubule associated serine/threonine kinase family member 4
hsa-miR-128	1	0	1	1	0	0	TAF4B	TAF4b RNA polymerase II, TATA box binding protein (TBP)-associated factor, 105kDa
hsa-miR-128	1	0	1	1	0	0	PLXNB3	plexin B3
hsa-miR-128	1	0	1	0	1	1	FAM46A	family with sequence similarity 46, member A
hsa-miR-128	1	0	1	1	1	1	PDLIM3	PDZ and LIM domain 3
hsa-miR-128	0	0	1	1	1	1	RLIM	ring finger protein, LIM domain interacting
hsa-miR-128	0	0	1	1	1	1	WDR55	WD repeat domain 55
hsa-miR-128	1	0	1	0	1	1	DPYSL5	dihydropyrimidinase-like 5
hsa-miR-128	1	0	1	0	0	0	VGLL4	vestigial like 4 (Drosophila)
hsa-miR-128	1	0	1	1	1	1	RIMS3	regulating synaptic membrane exocytosis 3
hsa-miR-128	1	0	1	1	1	1	NONO	non-POU domain containing, octamer-binding
hsa-miR-128	1	0	1	1	1	1	TSEN34	tRNA splicing endonuclease 34 homolog (S. cerevisiae)
hsa-miR-128	1	0	1	1	1	1	KIAA1191	KIAA1191
hsa-miR-128	0	0	1	1	0	0	CBX5	chromobox homolog 5
hsa-miR-128	0	0	1	1	0	0	AGBL5	ATP/GTP binding protein-like 5
hsa-miR-128	0	0	1	1	0	0	EIF3B	eukaryotic translation initiation factor 3, subunit B
hsa-miR-128	1	0	1	1	1	1	ATP6AP2	ATPase, H+ transporting, lysosomal accessory protein 2
hsa-miR-128	0	0	1	1	0	0	FLAD1	FAD1 flavin adenine dinucleotide synthetase homolog (S. cerevisiae)
hsa-miR-128	0	0	1	1	1	1	GNL3L	guanine nucleotide binding protein-like 3 (nucleolar)-like
hsa-miR-128	0	0	1	1	1	1	HDHD2	haloacid dehalogenase-like hydrolase domain containing 2
hsa-miR-128	1	0	1	0	1	1	MTMR2	myotubularin related protein 2
hsa-miR-128	0	0	1	1	1	1	H2AFY	H2A histone family, member Y
hsa-miR-128	1	0	1	1	1	1	ETF1	eukaryotic translation termination factor 1
hsa-miR-128	0	0	1	1	1	1	EAF2	ELL associated factor 2
hsa-miR-128	0	0	1	1	1	1	PTK7	PTK7 protein tyrosine kinase 7
hsa-miR-128	0	0	1	0	0	0	MGC21881	uncharacterized locus MGC21881
hsa-miR-128	0	0	1	1	1	1	C8orf33	chromosome 8 open reading frame 33
hsa-miR-128	1	0	1	0	1	1	NR1D2	nuclear receptor subfamily 1, group D, member 2
hsa-miR-128	1	0	1	1	1	1	FAM176A	family with sequence similarity 176, member A
hsa-miR-128	1	0	1	1	1	1	NRF1	nuclear respiratory factor 1
hsa-miR-128	1	0	1	1	1	1	ELF4	E74-like factor 4 (ets domain transcription factor)
hsa-miR-128	0	0	1	1	0	0	C1orf51	chromosome 1 open reading frame 51
hsa-miR-128	0	0	1	1	1	1	CSDE1	cold shock domain containing E1, RNA-binding
hsa-miR-128	0	0	1	1	0	0	ZBTB32	zinc finger and BTB domain containing 32
hsa-miR-128	0	0	1	1	1	1	RDH11	retinol dehydrogenase 11 (all-trans/9-cis/11-cis)
hsa-miR-128	0	0	1	1	1	1	PRMT3	protein arginine methyltransferase 3
hsa-miR-128	0	0	1	0	1	1	ZNF718	zinc finger protein 718
hsa-miR-128	0	0	1	0	0	0	NBR2	neighbor of BRCA1 gene 2 (non-protein coding)
hsa-miR-128	1	0	1	1	1	1	C16orf45	chromosome 16 open reading frame 45
hsa-miR-128	1	0	1	1	1	1	ASPH	aspartate beta-hydroxylase
hsa-miR-128	0	0	1	1	1	1	CDS2	CDP-diacylglycerol synthase (phosphatidate cytidylyltransferase) 2
hsa-miR-128	0	0	1	1	1	1	HS1BP3	HCLS1 binding protein 3
hsa-miR-128	1	0	1	1	1	1	APPL2	adaptor protein, phosphotyrosine interaction, PH domain and leucine zipper containing 2
hsa-miR-128	0	0	1	1	0	0	SYT3	synaptotagmin III
hsa-miR-128	1	0	1	0	0	0	KCNU1	potassium channel, subfamily U, member 1
hsa-miR-128	1	0	1	0	1	1	SV2B	synaptic vesicle glycoprotein 2B
hsa-miR-128	1	0	1	1	1	1	TIAL1	TIA1 cytotoxic granule-associated RNA binding protein-like 1
hsa-miR-128	0	0	1	1	1	1	PIP5K1B	phosphatidylinositol-4-phosphate 5-kinase, type I, beta
hsa-miR-128	1	0	1	1	1	1	ADARB1	adenosine deaminase, RNA-specific, B1
hsa-miR-128	0	0	1	1	1	1	APLF	aprataxin and PNKP like factor
hsa-miR-128	0	0	1	1	0	0	KIAA1324	KIAA1324
hsa-miR-128	1	0	1	1	1	1	ZNF282	zinc finger protein 282
hsa-miR-128	0	0	1	1	1	1	C7orf53	chromosome 7 open reading frame 53
hsa-miR-128	1	0	1	1	1	1	TBC1D1	TBC1 (tre-2/USP6, BUB2, cdc16) domain family, member 1
hsa-miR-128	1	0	1	1	1	1	FGF1	fibroblast growth factor 1 (acidic)
hsa-miR-128	1	0	1	1	1	1	SORL1	sortilin-related receptor, L(DLR class) A repeats containing
hsa-miR-128	0	0	1	1	1	1	ZCCHC7	zinc finger, CCHC domain containing 7
hsa-miR-128	0	0	1	1	0	0	TNMD	tenomodulin
hsa-miR-128	1	0	1	1	1	1	RIC8B	resistance to inhibitors of cholinesterase 8 homolog B (C. elegans)
hsa-miR-128	0	0	1	1	1	1	HEXA	hexosaminidase A (alpha polypeptide)
hsa-miR-128	1	0	1	1	1	1	LPGAT1	lysophosphatidylglycerol acyltransferase 1
hsa-miR-128	0	0	1	0	0	0	FAM66C	family with sequence similarity 66, member C
hsa-miR-128	0	0	1	1	0	0	GGT1	gamma-glutamyltransferase 1
hsa-miR-128	0	0	1	0	1	1	KSR1	kinase suppressor of ras 1
hsa-miR-128	1	0	1	1	1	1	CTDSPL2	CTD (carboxy-terminal domain, RNA polymerase II, polypeptide A) small phosphatase like 2
hsa-miR-128	0	0	1	1	1	1	CBLN2	cerebellin 2 precursor
hsa-miR-128	0	0	1	0	0	0	LINC00642	long intergenic non-protein coding RNA 642
hsa-miR-128	1	0	1	1	1	1	SMG7	smg-7 homolog, nonsense mediated mRNA decay factor (C. elegans)
hsa-miR-128	1	0	1	1	1	1	SLC35G1	solute carrier family 35, member G1
hsa-miR-128	1	0	1	1	1	1	MACROD2	MACRO domain containing 2
hsa-miR-128	0	0	1	0	0	0	CYP4F35P	cytochrome P450, family 4, subfamily F, polypeptide 35, pseudogene
hsa-miR-128	1	0	1	1	1	1	SOX6	SRY (sex determining region Y)-box 6
hsa-miR-128	0	0	1	0	0	0	LOC221122	uncharacterized LOC221122
hsa-miR-128	1	0	1	1	1	1	BVES	blood vessel epicardial substance
hsa-miR-128	0	0	1	0	0	0	LOC339240	keratin 17 pseudogene
hsa-miR-128	0	0	1	0	1	1	FAM13B	family with sequence similarity 13, member B
hsa-miR-128	1	0	1	1	1	1	FAM123A	family with sequence similarity 123A
hsa-miR-128	1	0	1	1	1	1	CTIF	CBP80/20-dependent translation initiation factor
hsa-miR-128	0	0	1	0	0	0	LOC340094	uncharacterized LOC340094
hsa-miR-128	1	0	1	1	1	1	AGAP3	ArfGAP with GTPase domain, ankyrin repeat and PH domain 3
hsa-miR-128	0	0	1	0	0	0	FAM27E3	family with sequence similarity 27, member E3
hsa-miR-128	0	0	1	1	1	1	MST1	macrophage stimulating 1 (hepatocyte growth factor-like)
hsa-miR-128	1	0	1	0	1	1	PSD3	pleckstrin and Sec7 domain containing 3
hsa-miR-128	0	0	1	0	0	0	LOC286135	uncharacterized LOC286135
hsa-miR-128	1	0	1	1	0	0	SFXN5	sideroflexin 5
hsa-miR-128	1	0	1	1	1	1	HSDL2	hydroxysteroid dehydrogenase like 2
hsa-miR-128	1	0	1	0	1	1	KDM2A	lysine (K)-specific demethylase 2A
hsa-miR-128	0	0	1	1	1	1	ANKDD1A	ankyrin repeat and death domain containing 1A
hsa-miR-128	1	0	1	1	1	1	RTKN2	rhotekin 2
hsa-miR-128	1	0	1	1	1	1	PELI1	pellino E3 ubiquitin protein ligase 1
hsa-miR-128	0	0	1	1	0	0	ENTPD8	ectonucleoside triphosphate diphosphohydrolase 8
hsa-miR-128	0	0	1	1	0	0	NLRC5	NLR family, CARD domain containing 5
hsa-miR-128	1	0	1	1	1	1	FNDC3A	fibronectin type III domain containing 3A
hsa-miR-128	0	0	1	1	1	1	LINC00086	long intergenic non-protein coding RNA 86
hsa-miR-128	0	0	1	0	0	0	LINC00265	long intergenic non-protein coding RNA 265
hsa-miR-128	0	0	1	0	1	1	C17orf51	chromosome 17 open reading frame 51
hsa-miR-128	0	0	1	1	0	0	TINAG	tubulointerstitial nephritis antigen
hsa-miR-128	0	0	1	1	0	0	C20orf152	chromosome 20 open reading frame 152
hsa-miR-128	1	0	1	1	1	1	RECK	reversion-inducing-cysteine-rich protein with kazal motifs
hsa-miR-128	1	0	1	1	1	1	INPP5A	inositol polyphosphate-5-phosphatase, 40kDa
hsa-miR-128	0	0	1	1	0	0	LRRIQ3	leucine-rich repeats and IQ motif containing 3
hsa-miR-128	0	0	1	1	1	1	GPATCH2	G patch domain containing 2
hsa-miR-128	0	0	1	1	0	0	DHX30	DEAH (Asp-Glu-Ala-His) box polypeptide 30
hsa-miR-128	1	0	1	1	1	1	ANXA4	annexin A4
hsa-miR-128	1	0	1	0	0	0	PRRT4	proline-rich transmembrane protein 4
hsa-miR-128	0	0	1	1	1	1	STAG1	stromal antigen 1
hsa-miR-128	1	0	1	1	1	1	ASXL1	additional sex combs like 1 (Drosophila)
hsa-miR-128	1	0	1	1	1	1	ZNF449	zinc finger protein 449
hsa-miR-128	1	0	1	0	1	1	MAGIX	MAGI family member, X-linked
hsa-miR-128	0	0	1	1	0	0	KLK15	kallikrein-related peptidase 15
hsa-miR-128	1	0	1	0	1	1	TMEM194A	transmembrane protein 194A
hsa-miR-128	1	0	1	1	0	0	TNXB	tenascin XB
hsa-miR-128	0	0	1	1	0	0	TRIM41	tripartite motif containing 41
hsa-miR-128	0	0	1	0	0	0	LOC440416	uncharacterized LOC440416
hsa-miR-128	0	0	1	0	0	0	LINC00152	long intergenic non-protein coding RNA 152
hsa-miR-128	1	0	1	1	1	1	PRTG	protogenin
hsa-miR-128	1	0	1	1	1	1	OPCML	opioid binding protein/cell adhesion molecule-like
hsa-miR-128	1	0	1	1	1	1	WNT5A	wingless-type MMTV integration site family, member 5A
hsa-miR-128	0	0	1	0	0	0	AGAP9	ArfGAP with GTPase domain, ankyrin repeat and PH domain 9
hsa-miR-128	0	0	1	0	0	0	LOC642846	DEAD/H (Asp-Glu-Ala-Asp/His) box polypeptide 11-like
hsa-miR-128	0	0	1	0	0	0	LINC00537	long intergenic non-protein coding RNA 537
hsa-miR-128	0	0	1	0	0	0	TBC1D25	TBC1 domain family, member 25
hsa-miR-128	0	0	1	0	0	0	LOC554249	uncharacterized LOC554249
hsa-miR-128	0	0	1	0	1	1	LOC389043	uncharacterized LOC389043
hsa-miR-128	1	0	1	1	1	1	ST8SIA2	ST8 alpha-N-acetyl-neuraminide alpha-2,8-sialyltransferase 2
hsa-miR-128	0	0	1	0	0	0	FAM106A	family with sequence similarity 106, member A
hsa-miR-128	0	0	1	1	1	1	ZNF365	zinc finger protein 365
hsa-miR-128	1	0	1	0	1	1	MYBL1	v-myb myeloblastosis viral oncogene homolog (avian)-like 1
hsa-miR-128	0	0	1	1	0	0	TMC1	transmembrane channel-like 1
hsa-miR-128	0	0	1	1	1	1	TTLL9	tubulin tyrosine ligase-like family, member 9
hsa-miR-128	1	0	1	1	0	0	KIAA1644	KIAA1644
hsa-miR-128	0	0	1	1	1	1	CCDC126	coiled-coil domain containing 126
hsa-miR-128	1	0	1	1	1	1	KLHL17	kelch-like 17 (Drosophila)
hsa-miR-128	1	0	1	1	1	1	PNISR	PNN-interacting serine/arginine-rich protein
hsa-miR-128	1	0	1	0	1	1	BTBD3	BTB (POZ) domain containing 3
hsa-miR-128	1	0	1	0	1	1	KIF5C	kinesin family member 5C
hsa-miR-128	0	0	1	1	1	1	RASAL2	RAS protein activator like 2
hsa-miR-128	0	0	1	0	0	0	KIAA0284	KIAA0284
hsa-miR-128	0	0	1	1	0	0	C14orf178	chromosome 14 open reading frame 178
hsa-miR-128	0	0	1	0	0	0	EEF1DP3	eukaryotic translation elongation factor 1 delta pseudogene 3
hsa-miR-128	0	0	1	0	1	1	GOLGA8G	golgin A8 family, member G
hsa-miR-128	0	0	1	1	1	1	RNF14	ring finger protein 14
hsa-miR-128	0	0	1	0	1	1	C20orf202	chromosome 20 open reading frame 202
hsa-miR-128	0	0	1	1	0	0	EPGN	epithelial mitogen homolog (mouse)
hsa-miR-128	0	0	1	0	0	0	FAM225B	family with sequence similarity 225, member B (non-protein coding)
hsa-miR-128	0	0	1	0	1	1	PDLIM4	PDZ and LIM domain 4
hsa-miR-128	1	0	1	0	0	0	SDR39U1	short chain dehydrogenase/reductase family 39U, member 1
hsa-miR-128	0	0	1	1	1	1	IP6K2	inositol hexakisphosphate kinase 2
hsa-miR-128	0	0	1	0	1	1	GPX8	glutathione peroxidase 8 (putative)
hsa-miR-128	1	0	1	1	1	1	FZD6	frizzled family receptor 6
hsa-miR-128	1	0	1	0	1	1	CLASP2	cytoplasmic linker associated protein 2
hsa-miR-128	1	0	1	1	1	1	SPPL3	signal peptide peptidase like 3
hsa-miR-128	1	0	1	1	1	1	PRKRIR	protein-kinase, interferon-inducible double stranded RNA dependent inhibitor, repressor of (P58 repressor)
hsa-miR-128	1	0	1	1	1	1	RORB	RAR-related orphan receptor B
hsa-miR-128	1	0	1	1	1	1	MASP1	mannan-binding lectin serine peptidase 1 (C4/C2 activating component of Ra-reactive factor)
hsa-miR-128	0	0	1	1	1	1	IPCEF1	interaction protein for cytohesin exchange factors 1
hsa-miR-128	1	0	1	1	0	0	RBM27	RNA binding motif protein 27
hsa-miR-128	0	0	1	1	0	0	SNAPC2	small nuclear RNA activating complex, polypeptide 2, 45kDa
hsa-miR-128	0	0	1	1	1	1	MLIP	muscular LMNA-interacting protein
hsa-miR-128	0	0	1	1	1	1	PPP1R1C	protein phosphatase 1, regulatory (inhibitor) subunit 1C
hsa-miR-128	1	0	1	1	1	1	RREB1	ras responsive element binding protein 1
hsa-miR-128	1	0	1	1	1	1	GABPA	GA binding protein transcription factor, alpha subunit 60kDa
hsa-miR-128	0	0	1	1	0	0	LRR1	leucine rich repeat protein 1
hsa-miR-128	0	0	1	1	1	1	CCNT2	cyclin T2
hsa-miR-128	1	0	1	1	1	1	PHF21A	PHD finger protein 21A
hsa-miR-128	1	0	1	0	0	0	CTSB	cathepsin B
hsa-miR-128	1	0	1	1	1	1	NAV1	neuron navigator 1
hsa-miR-128	1	0	1	1	1	1	PTER	phosphotriesterase related
hsa-miR-128	1	0	1	1	1	1	TMEM135	transmembrane protein 135
hsa-miR-128	0	0	1	0	0	0	ZNRD1-AS1	ZNRD1 antisense RNA 1
hsa-miR-128	0	0	1	0	0	0	DKFZp686K1684	uncharacterized LOC440034
hsa-miR-128	0	0	1	1	1	1	PLA2G4C	phospholipase A2, group IVC (cytosolic, calcium-independent)
hsa-miR-128	0	0	1	1	1	1	POLR2H	polymerase (RNA) II (DNA directed) polypeptide H
hsa-miR-128	0	0	1	1	0	0	SREBF2	sterol regulatory element binding transcription factor 2
hsa-miR-128	0	0	1	1	0	0	SLC39A7	solute carrier family 39 (zinc transporter), member 7
hsa-miR-128	0	0	1	1	0	0	H2AFY2	H2A histone family, member Y2
hsa-miR-128	0	0	1	0	0	0	RPS16P10	ribosomal protein S16 pseudogene 10
hsa-miR-128	0	0	1	1	1	1	DGCR14	DiGeorge syndrome critical region gene 14
hsa-miR-128	0	0	1	1	0	0	RBM28	RNA binding motif protein 28
hsa-miR-128	0	0	1	1	0	0	EXOSC8	exosome component 8
hsa-miR-128	0	0	1	1	0	0	PSG8	pregnancy specific beta-1-glycoprotein 8
hsa-miR-128	1	0	1	1	1	1	NME4	NME/NM23 nucleoside diphosphate kinase 4
hsa-miR-128	1	0	1	1	1	1	DOLPP1	dolichyl pyrophosphate phosphatase 1
hsa-miR-128	1	0	1	1	1	1	SETD8	SET domain containing (lysine methyltransferase) 8
hsa-miR-128	0	0	1	1	1	1	HSPB8	heat shock 22kDa protein 8
hsa-miR-128	1	0	1	1	0	0	ELOVL1	ELOVL fatty acid elongase 1
hsa-miR-128	1	0	1	1	1	1	RASL12	RAS-like, family 12
hsa-miR-128	1	0	1	1	1	1	CHTF8	CTF8, chromosome transmission fidelity factor 8 homolog (S. cerevisiae)
hsa-miR-128	0	0	1	1	1	1	PROCR	protein C receptor, endothelial
hsa-miR-128	0	0	1	1	0	0	FAM195A	family with sequence similarity 195, member A
hsa-miR-128	1	0	1	1	1	1	PLEKHB2	pleckstrin homology domain containing, family B (evectins) member 2
hsa-miR-128	0	0	1	1	1	1	CCDC115	coiled-coil domain containing 115
hsa-miR-128	0	0	1	1	1	1	STON1	stonin 1
hsa-miR-128	1	0	1	1	1	1	PCTP	phosphatidylcholine transfer protein
hsa-miR-128	0	0	1	1	1	1	TRIM68	tripartite motif containing 68
hsa-miR-128	0	0	1	1	0	0	IFT46	intraflagellar transport 46 homolog (Chlamydomonas)
hsa-miR-128	0	0	1	1	1	1	PDLIM1	PDZ and LIM domain 1
hsa-miR-128	0	0	1	0	0	0	LOC677759	uncharacterized LOC677759
hsa-miR-128	0	0	1	1	0	0	PTGDS	prostaglandin D2 synthase 21kDa (brain)
hsa-miR-128	0	0	1	0	0	0	LOC645513	uncharacterized LOC645513
hsa-miR-128	0	0	1	0	0	0	ZNF720	zinc finger protein 720
hsa-miR-128	1	0	1	1	1	1	TAGLN2	transgelin 2
hsa-miR-128	0	0	1	1	0	0	XRCC6	X-ray repair complementing defective repair in Chinese hamster cells 6
hsa-miR-128	0	0	1	0	1	1	RPL10	ribosomal protein L10
hsa-miR-128	0	0	1	1	1	1	ACSF3	acyl-CoA synthetase family member 3
hsa-miR-128	1	0	1	1	1	1	ILK	integrin-linked kinase
hsa-miR-128	0	0	1	1	0	0	ACSS2	acyl-CoA synthetase short-chain family member 2
hsa-miR-128	1	0	1	0	1	1	CD47	CD47 molecule
hsa-miR-128	0	0	1	0	0	0	NUDT18	nudix (nucleoside diphosphate linked moiety X)-type motif 18
hsa-miR-128	0	0	1	0	0	0	CHEK2P2	checkpoint kinase 2 pseudogene 2
hsa-miR-128	0	0	1	0	0	0	LOC100132984	uncharacterized LOC100132984
hsa-miR-128	0	0	1	1	0	0	TTYH1	tweety homolog 1 (Drosophila)
hsa-miR-128	0	0	1	0	1	1	TSPAN7	tetraspanin 7
hsa-miR-128	0	0	1	1	1	1	FAM118B	family with sequence similarity 118, member B
hsa-miR-128	0	0	1	1	1	1	C10orf2	chromosome 10 open reading frame 2
hsa-miR-128	1	0	1	1	1	1	GABPB2	GA binding protein transcription factor, beta subunit 2
hsa-miR-128	1	0	1	0	1	1	NMT1	N-myristoyltransferase 1
hsa-miR-128	0	0	1	0	0	0	LOC731789	uncharacterized LOC731789
hsa-miR-128	0	0	1	0	0	0	LINC00661	long intergenic non-protein coding RNA 661
hsa-miR-128	1	0	1	1	1	1	ANKS6	ankyrin repeat and sterile alpha motif domain containing 6
hsa-miR-128	1	0	1	1	1	1	SNRK	SNF related kinase
hsa-miR-128	1	0	1	1	0	0	POMGNT1	protein O-linked mannose beta1,2-N-acetylglucosaminyltransferase
hsa-miR-128	0	0	1	1	0	0	TENC1	tensin like C1 domain containing phosphatase (tensin 2)
hsa-miR-128	0	0	1	1	1	1	TMEM41B	transmembrane protein 41B
hsa-miR-128	1	0	1	1	1	1	RSPO1	R-spondin 1
hsa-miR-128	0	0	1	1	0	0	SPATA20	spermatogenesis associated 20
hsa-miR-128	0	0	1	1	0	0	GPR111	G protein-coupled receptor 111
hsa-miR-128	0	0	1	1	0	0	FAM58A	family with sequence similarity 58, member A
hsa-miR-128	1	0	1	1	1	1	QKI	QKI, KH domain containing, RNA binding
hsa-miR-128	0	0	1	0	0	0	POM121L8P	POM121 transmembrane nucleoporin-like 8 pseudogene
hsa-miR-128	1	0	1	0	1	1	RBBP5	retinoblastoma binding protein 5
hsa-miR-128	0	0	1	0	0	0	GPR144	G protein-coupled receptor 144
hsa-miR-128	0	0	1	1	1	1	ADPRH	ADP-ribosylarginine hydrolase
hsa-miR-128	1	0	1	1	1	1	AFF1	AF4/FMR2 family, member 1
hsa-miR-128	0	0	1	1	0	0	GGT2	gamma-glutamyltransferase 2
hsa-miR-128	0	0	1	0	0	0	PVT1	Pvt1 oncogene (non-protein coding)
hsa-miR-128	0	0	1	1	1	1	ELF1	E74-like factor 1 (ets domain transcription factor)
hsa-miR-128	0	0	1	1	1	1	ATP7A	ATPase, Cu++ transporting, alpha polypeptide
hsa-miR-128	1	0	1	1	1	1	COL3A1	collagen, type III, alpha 1
hsa-miR-128	0	0	1	1	1	1	COL7A1	collagen, type VII, alpha 1
hsa-miR-128	1	0	1	1	1	1	DMD	dystrophin
hsa-miR-128	1	0	1	1	1	1	F13A1	coagulation factor XIII, A1 polypeptide
hsa-miR-128	0	0	1	0	1	1	MS4A2	membrane-spanning 4-domains, subfamily A, member 2
hsa-miR-128	1	0	1	0	1	1	GHR	growth hormone receptor
hsa-miR-128	1	0	1	1	1	1	GK	glycerol kinase
hsa-miR-128	1	0	1	0	1	1	ITGB3	integrin, beta 3 (platelet glycoprotein IIIa, antigen CD61)
hsa-miR-128	1	0	1	0	1	1	KIT	v-kit Hardy-Zuckerman 4 feline sarcoma viral oncogene homolog
hsa-miR-128	1	0	1	1	1	1	RB1	retinoblastoma 1
hsa-miR-128	0	0	1	1	1	1	SLC25A20	solute carrier family 25 (carnitine/acylcarnitine translocase), member 20
hsa-miR-128	1	0	1	0	1	1	COL5A2	collagen, type V, alpha 2
hsa-miR-128	1	0	1	0	1	1	CYBB	cytochrome b-245, beta polypeptide
hsa-miR-128	0	0	1	1	1	1	LTBP2	latent transforming growth factor beta binding protein 2
hsa-miR-128	0	0	1	1	1	1	FCGR1A	Fc fragment of IgG, high affinity Ia, receptor (CD64)
hsa-miR-128	1	0	1	1	1	1	CXCL12	chemokine (C-X-C motif) ligand 12
hsa-miR-128	1	0	1	0	1	1	ADRB1	adrenoceptor beta 1
hsa-miR-128	0	0	1	1	0	0	ALOX5	arachidonate 5-lipoxygenase
hsa-miR-128	1	0	1	1	1	1	GAD1	glutamate decarboxylase 1 (brain, 67kDa)
hsa-miR-128	0	0	1	1	1	1	GAD2	glutamate decarboxylase 2 (pancreatic islets and brain, 65kDa)
hsa-miR-128	1	0	1	1	1	1	GRM7	glutamate receptor, metabotropic 7
hsa-miR-128	1	0	1	1	1	1	HTR4	5-hydroxytryptamine (serotonin) receptor 4, G protein-coupled
hsa-miR-128	1	0	1	1	1	1	MME	membrane metallo-endopeptidase
hsa-miR-128	0	0	1	1	0	0	NPY	neuropeptide Y
hsa-miR-128	1	0	1	1	1	1	PTGER2	prostaglandin E receptor 2 (subtype EP2), 53kDa
hsa-miR-128	1	0	1	1	1	1	PTGFR	prostaglandin F receptor (FP)
hsa-miR-128	0	0	1	1	0	0	PTGIR	prostaglandin I2 (prostacyclin) receptor (IP)
hsa-miR-128	0	0	1	1	1	1	PTGS2	prostaglandin-endoperoxide synthase 2 (prostaglandin G/H synthase and cyclooxygenase)
hsa-miR-128	1	0	1	1	1	1	RARB	retinoic acid receptor, beta
hsa-miR-128	1	0	1	1	1	1	TPD52L3	tumor protein D52-like 3
hsa-miR-128	1	0	1	0	1	1	CLDN18	claudin 18
hsa-miR-128	1	0	1	1	1	1	LCLAT1	lysocardiolipin acyltransferase 1
hsa-miR-128	1	0	1	1	1	1	GATA3	GATA binding protein 3
hsa-miR-128	0	0	1	1	1	1	STAG3L1	stromal antigen 3-like 1
hsa-miR-128	1	0	1	1	1	1	BICD2	bicaudal D homolog 2 (Drosophila)
hsa-miR-128	0	0	1	1	1	1	TRIM6-TRIM34	TRIM6-TRIM34 readthrough
hsa-miR-128	0	0	1	1	1	1	TRIM34	tripartite motif containing 34
hsa-miR-128	0	0	1	1	0	0	MANBAL	mannosidase, beta A, lysosomal-like
hsa-miR-128	1	0	1	0	1	1	BMF	Bcl2 modifying factor
hsa-miR-128	1	0	1	1	0	0	NOMO3	NODAL modulator 3
hsa-miR-128	1	0	1	0	1	1	LIN28B	lin-28 homolog B (C. elegans)
hsa-miR-128	0	0	1	0	0	0	FLJ42842	uncharacterized FLJ42842
hsa-miR-128	1	0	1	0	1	1	LRRC55	leucine rich repeat containing 55
hsa-miR-128	1	0	1	1	0	0	RPS6KA1	ribosomal protein S6 kinase, 90kDa, polypeptide 1
hsa-miR-128	1	0	1	0	1	1	GOSR1	golgi SNAP receptor complex member 1
hsa-miR-128	1	0	1	1	1	1	SPOP	speckle-type POZ protein
hsa-miR-128	0	0	1	1	1	1	FAM154B	family with sequence similarity 154, member B
hsa-miR-128	1	0	1	1	1	1	RBM33	RNA binding motif protein 33
hsa-miR-128	0	0	1	1	1	1	MXI1	MAX interactor 1
hsa-miR-128	0	0	1	1	0	0	CCT3	chaperonin containing TCP1, subunit 3 (gamma)
hsa-miR-128	1	0	1	0	1	1	RCHY1	ring finger and CHY zinc finger domain containing 1, E3 ubiquitin protein ligase
hsa-miR-128	1	0	1	1	1	1	ZNF655	zinc finger protein 655
hsa-miR-128	1	0	1	1	1	1	ARHGAP28	Rho GTPase activating protein 28
hsa-miR-128	0	0	1	1	0	0	LELP1	late cornified envelope-like proline-rich 1
hsa-miR-128	0	0	1	1	1	1	C1QL3	complement component 1, q subcomponent-like 3
hsa-miR-128	0	0	1	0	1	1	GOLGA8E	golgin A8 family, member E
hsa-miR-128	0	0	1	0	0	0	FAM71F2	family with sequence similarity 71, member F2
hsa-miR-128	0	0	1	0	0	0	LOC400707	uncharacterized LOC400707
hsa-miR-128	1	0	1	1	1	1	NCDN	neurochondrin
hsa-miR-128	1	0	1	1	1	1	PHF6	PHD finger protein 6
hsa-miR-128	0	0	1	1	1	1	BTBD11	BTB (POZ) domain containing 11
hsa-miR-128	0	0	1	1	1	1	ACTBL2	actin, beta-like 2
hsa-miR-128	1	0	1	1	1	1	TPM1	tropomyosin 1 (alpha)
hsa-miR-128	1	0	1	0	1	1	TFEC	transcription factor EC
hsa-miR-128	1	0	1	1	1	1	SBK1	SH3-binding domain kinase 1
hsa-miR-128	1	0	1	1	1	1	CANX	calnexin
hsa-miR-128	0	0	1	1	1	1	CD276	CD276 molecule
hsa-miR-128	1	0	1	0	1	1	ADAR	adenosine deaminase, RNA-specific
hsa-miR-128	0	0	1	1	0	0	RPS24	ribosomal protein S24
hsa-miR-128	0	0	1	1	0	0	PCDP1	primary ciliary dyskinesia protein 1
hsa-miR-128	0	0	1	1	0	0	KLK3	kallikrein-related peptidase 3
hsa-miR-128	1	0	1	0	1	1	SAMD5	sterile alpha motif domain containing 5
hsa-miR-128	1	0	1	0	1	1	MSRB3	methionine sulfoxide reductase B3
hsa-miR-128	1	0	1	1	1	1	TFAP2A	transcription factor AP-2 alpha (activating enhancer binding protein 2 alpha)
hsa-miR-128	1	0	1	1	1	1	AMD1	adenosylmethionine decarboxylase 1
hsa-miR-128	0	0	1	0	0	0	FER1L6	fer-1-like 6 (C. elegans)
hsa-miR-128	1	0	1	1	1	1	DPP6	dipeptidyl-peptidase 6
hsa-miR-128	1	0	1	0	1	1	GK5	glycerol kinase 5 (putative)
hsa-miR-128	1	0	1	1	1	1	KREMEN1	kringle containing transmembrane protein 1
hsa-miR-128	0	0	1	1	1	1	MCHR2	melanin-concentrating hormone receptor 2
hsa-miR-128	1	0	1	1	1	1	PRKAG2	protein kinase, AMP-activated, gamma 2 non-catalytic subunit
hsa-miR-128	1	0	1	1	1	1	HEY1	hairy/enhancer-of-split related with YRPW motif 1
hsa-miR-128	0	0	1	1	0	0	FAM110A	family with sequence similarity 110, member A
hsa-miR-128	1	0	1	1	1	1	HMGCLL1	3-hydroxymethyl-3-methylglutaryl-CoA lyase-like 1
hsa-miR-128	1	0	1	1	1	1	ERBB4	v-erb-a erythroblastic leukemia viral oncogene homolog 4 (avian)
hsa-miR-128	1	0	1	0	1	1	TMEM237	transmembrane protein 237
hsa-miR-128	1	0	1	1	1	1	SLA	Src-like-adaptor
hsa-miR-128	0	0	1	1	1	1	RCC1	regulator of chromosome condensation 1
hsa-miR-128	1	0	1	1	1	1	HS6ST2	heparan sulfate 6-O-sulfotransferase 2
hsa-miR-128	1	0	1	1	1	1	SREK1	splicing regulatory glutamine/lysine-rich protein 1
hsa-miR-128	1	0	1	1	1	1	IRF2BP2	interferon regulatory factor 2 binding protein 2
hsa-miR-128	1	0	1	1	1	1	PRR3	proline rich 3
hsa-miR-128	0	0	1	0	1	1	WTH3DI	RAB6C-like
hsa-miR-128	0	0	1	1	0	0	FAM127A	family with sequence similarity 127, member A
hsa-miR-128	1	0	1	0	0	0	FAM127B	family with sequence similarity 127, member B
hsa-miR-128	1	0	1	0	1	1	FAM127C	family with sequence similarity 127, member C
hsa-miR-128	0	0	1	1	1	1	FKTN	fukutin
hsa-miR-128	0	0	1	1	1	1	DBI	diazepam binding inhibitor (GABA receptor modulator, acyl-CoA binding protein)
hsa-miR-128	0	0	1	0	1	1	EPHA6	EPH receptor A6
hsa-miR-128	0	0	1	1	0	0	NEURL3	neuralized homolog 3 (Drosophila) pseudogene
hsa-miR-128	1	0	1	1	1	1	REPS2	RALBP1 associated Eps domain containing 2
hsa-miR-128	0	0	1	1	0	0	ARG2	arginase, type II
hsa-miR-128	0	0	1	1	0	0	ATP6AP1	ATPase, H+ transporting, lysosomal accessory protein 1
hsa-miR-128	0	0	1	0	1	1	CASQ2	calsequestrin 2 (cardiac muscle)
hsa-miR-128	1	0	1	1	1	1	CDK9	cyclin-dependent kinase 9
hsa-miR-128	0	0	1	1	1	1	CHUK	conserved helix-loop-helix ubiquitous kinase
hsa-miR-128	0	0	1	1	1	1	CCR1	chemokine (C-C motif) receptor 1
hsa-miR-128	1	0	1	1	1	1	CREBL2	cAMP responsive element binding protein-like 2
hsa-miR-128	1	0	1	1	1	1	CTNND2	catenin (cadherin-associated protein), delta 2
hsa-miR-128	0	0	1	1	1	1	DAD1	defender against cell death 1
hsa-miR-128	0	0	1	1	1	1	DPYS	dihydropyrimidinase
hsa-miR-128	1	0	1	1	1	1	EN1	engrailed homeobox 1
hsa-miR-128	1	0	1	0	1	1	B4GALT1	UDP-Gal:betaGlcNAc beta 1,4- galactosyltransferase, polypeptide 1
hsa-miR-128	0	0	1	1	1	1	IL13RA1	interleukin 13 receptor, alpha 1
hsa-miR-128	1	0	1	1	1	1	AQP4	aquaporin 4
hsa-miR-128	1	0	1	1	1	1	BNC1	basonuclin 1
hsa-miR-128	0	0	1	1	1	1	BTN1A1	butyrophilin, subfamily 1, member A1
hsa-miR-128	1	0	1	1	1	1	CD69	CD69 molecule
hsa-miR-128	1	0	1	1	1	1	COL4A6	collagen, type IV, alpha 6
hsa-miR-128	0	0	1	1	1	1	COX7B	cytochrome c oxidase subunit VIIb
hsa-miR-128	0	0	1	1	1	1	DSG1	desmoglein 1
hsa-miR-128	1	0	1	1	1	1	ENPEP	glutamyl aminopeptidase (aminopeptidase A)
hsa-miR-128	1	0	1	1	1	1	EPB49	erythrocyte membrane protein band 4.9 (dematin)
hsa-miR-128	1	0	1	1	1	1	FGF7	fibroblast growth factor 7
hsa-miR-128	1	0	1	1	1	1	FGF9	fibroblast growth factor 9 (glia-activating factor)
hsa-miR-128	1	0	1	0	1	1	FUT4	fucosyltransferase 4 (alpha (1,3) fucosyltransferase, myeloid-specific)
hsa-miR-128	0	0	1	1	1	1	GYS1	glycogen synthase 1 (muscle)
hsa-miR-128	0	0	1	1	1	1	HLA-DOA	major histocompatibility complex, class II, DO alpha
hsa-miR-128	1	0	1	1	1	1	ITGA3	integrin, alpha 3 (antigen CD49C, alpha 3 subunit of VLA-3 receptor)
hsa-miR-128	1	0	1	1	1	1	ITGB8	integrin, beta 8
hsa-miR-128	0	0	1	1	0	0	ITPKA	inositol-trisphosphate 3-kinase A
hsa-miR-128	1	0	1	1	1	1	JAG2	jagged 2
hsa-miR-128	1	0	1	1	1	1	KCNJ10	potassium inwardly-rectifying channel, subfamily J, member 10
hsa-miR-128	1	0	1	1	1	1	KPNB1	karyopherin (importin) beta 1
hsa-miR-128	1	0	1	1	1	1	KPNA3	karyopherin alpha 3 (importin alpha 4)
hsa-miR-128	0	0	1	1	0	0	KRT4	keratin 4
hsa-miR-128	0	0	1	1	0	0	LGALS3	lectin, galactoside-binding, soluble, 3
hsa-miR-128	0	0	1	1	1	1	LUM	lumican
hsa-miR-128	1	0	1	0	1	1	MXD1	MAX dimerization protein 1
hsa-miR-128	0	0	1	0	1	1	MFNG	MFNG O-fucosylpeptide 3-beta-N-acetylglucosaminyltransferase
hsa-miR-128	1	0	1	1	1	1	NEUROD1	neuronal differentiation 1
hsa-miR-128	1	0	1	1	1	1	NPAT	nuclear protein, ataxia-telangiectasia locus
hsa-miR-128	0	0	1	0	1	1	OPHN1	oligophrenin 1
hsa-miR-128	1	0	1	1	1	1	PCDH8	protocadherin 8
hsa-miR-128	1	0	1	1	1	1	PPP2R1B	protein phosphatase 2, regulatory subunit A, beta
hsa-miR-128	1	0	1	0	1	1	PPP2R2A	protein phosphatase 2, regulatory subunit B, alpha
hsa-miR-128	0	0	1	1	1	1	HHEX	hematopoietically expressed homeobox
hsa-miR-128	1	0	1	1	1	1	PTPN4	protein tyrosine phosphatase, non-receptor type 4 (megakaryocyte)
hsa-miR-128	0	0	1	1	1	1	RARS	arginyl-tRNA synthetase
hsa-miR-128	0	0	1	1	1	1	RGS2	regulator of G-protein signaling 2, 24kDa
hsa-miR-128	1	0	1	1	1	1	ROBO2	roundabout, axon guidance receptor, homolog 2 (Drosophila)
hsa-miR-128	1	0	1	1	0	0	CCL3	chemokine (C-C motif) ligand 3
hsa-miR-128	0	0	1	1	1	1	SH3BGRL	SH3 domain binding glutamic acid-rich protein like
hsa-miR-128	1	0	1	0	1	1	ST6GAL1	ST6 beta-galactosamide alpha-2,6-sialyltranferase 1
hsa-miR-128	1	0	1	1	1	1	SLC7A1	solute carrier family 7 (cationic amino acid transporter, y+ system), member 1
hsa-miR-128	0	0	1	1	1	1	SP100	SP100 nuclear antigen
hsa-miR-128	1	0	1	1	1	1	SRPR	signal recognition particle receptor (docking protein)
hsa-miR-128	1	0	1	1	1	1	TEC	tec protein tyrosine kinase
hsa-miR-128	1	0	1	0	1	1	VCL	vinculin
hsa-miR-128	0	0	1	1	1	1	ZNF143	zinc finger protein 143
hsa-miR-128	0	0	1	1	1	1	STAM	signal transducing adaptor molecule (SH3 domain and ITAM motif) 1
hsa-miR-128	1	0	1	1	1	1	HMGA2	high mobility group AT-hook 2
hsa-miR-128	1	0	1	1	1	1	PIP4K2B	phosphatidylinositol-5-phosphate 4-kinase, type II, beta
hsa-miR-128	0	0	1	1	1	1	STX7	syntaxin 7
hsa-miR-128	0	0	1	1	1	1	CHST1	carbohydrate (keratan sulfate Gal-6) sulfotransferase 1
hsa-miR-128	0	0	1	1	1	1	TNFSF12	tumor necrosis factor (ligand) superfamily, member 12
hsa-miR-128	1	0	1	0	1	1	ST13	suppression of tumorigenicity 13 (colon carcinoma) (Hsp70 interacting protein)
hsa-miR-128	1	0	1	0	1	1	WASL	Wiskott-Aldrich syndrome-like
hsa-miR-128	1	0	1	1	1	1	BCL2L2	BCL2-like 2
hsa-miR-128	1	0	1	1	0	0	COX8A	cytochrome c oxidase subunit VIIIA (ubiquitous)
hsa-miR-128	1	0	1	0	1	1	E2F2	E2F transcription factor 2
hsa-miR-128	0	0	1	1	1	1	CDH1	cadherin 1, type 1, E-cadherin (epithelial)
hsa-miR-128	1	0	1	0	1	1	FGF5	fibroblast growth factor 5
hsa-miR-128	1	0	1	1	1	1	FOXD2	forkhead box D2
hsa-miR-128	0	0	1	1	0	0	GTF2A2	general transcription factor IIA, 2, 12kDa
hsa-miR-128	0	0	1	0	1	1	POU4F2	POU class 4 homeobox 2
hsa-miR-128	1	0	1	0	1	1	SCN2B	sodium channel, voltage-gated, type II, beta subunit
hsa-miR-128	0	0	1	0	0	0	XKRY	XK, Kell blood group complex subunit-related, Y-linked
hsa-miR-128	1	0	1	1	1	1	MTMR4	myotubularin related protein 4
hsa-miR-128	0	0	1	1	1	1	BUB3	budding uninhibited by benzimidazoles 3 homolog (yeast)
hsa-miR-128	1	0	1	1	1	1	LARGE	like-glycosyltransferase
hsa-miR-128	1	0	1	1	1	1	BZRAP1	benzodiazapine receptor (peripheral) associated protein 1
hsa-miR-128	0	0	1	1	1	1	TJP2	tight junction protein 2
hsa-miR-128	1	0	1	0	1	1	ROCK2	Rho-associated, coiled-coil containing protein kinase 2
hsa-miR-128	0	0	1	0	0	0	CDK5	cyclin-dependent kinase 5
hsa-miR-128	0	0	1	0	1	1	DSC2	desmocollin 2
hsa-miR-128	1	0	1	1	1	1	GABRE	gamma-aminobutyric acid (GABA) A receptor, epsilon
hsa-miR-128	0	0	1	1	0	0	ROR1	receptor tyrosine kinase-like orphan receptor 1
hsa-miR-128	1	0	1	0	1	1	SCD	stearoyl-CoA desaturase (delta-9-desaturase)
hsa-miR-128	1	0	1	1	1	1	ARID3A	AT rich interactive domain 3A (BRIGHT-like)
hsa-miR-128	1	0	1	1	1	1	HAS3	hyaluronan synthase 3
hsa-miR-128	0	0	1	1	1	1	NFIL3	nuclear factor, interleukin 3 regulated
hsa-miR-128	1	0	1	1	1	1	RND2	Rho family GTPase 2
hsa-miR-128	0	0	1	1	1	1	DNAJB6	DnaJ (Hsp40) homolog, subfamily B, member 6
hsa-miR-128	0	0	1	1	0	0	LMNB1	lamin B1
hsa-miR-128	1	0	1	1	1	1	NHLH2	nescient helix loop helix 2
hsa-miR-128	0	0	1	0	1	1	POU3F2	POU class 3 homeobox 2
hsa-miR-128	1	0	1	1	1	1	ST8SIA4	ST8 alpha-N-acetyl-neuraminide alpha-2,8-sialyltransferase 4
hsa-miR-128	1	0	1	1	1	1	SRRM1	serine/arginine repetitive matrix 1
hsa-miR-128	1	0	1	0	1	1	SPRY3	sprouty homolog 3 (Drosophila)
hsa-miR-128	0	0	1	1	1	1	DSCR4	Down syndrome critical region gene 4
hsa-miR-128	1	0	1	0	1	1	NAB1	NGFI-A binding protein 1 (EGR1 binding protein 1)
hsa-miR-128	0	0	1	1	0	0	PPYR1	pancreatic polypeptide receptor 1
hsa-miR-128	1	0	1	1	1	1	DYNC1LI2	dynein, cytoplasmic 1, light intermediate chain 2
hsa-miR-128	1	0	1	1	1	1	DNAJB1	DnaJ (Hsp40) homolog, subfamily B, member 1
hsa-miR-128	0	0	1	1	1	1	NKX3-1	NK3 homeobox 1
hsa-miR-128	0	0	1	1	1	1	RRAS	related RAS viral (r-ras) oncogene homolog
hsa-miR-128	1	0	1	1	1	1	SMC1A	structural maintenance of chromosomes 1A
hsa-miR-128	1	0	1	1	1	1	TUBGCP3	tubulin, gamma complex associated protein 3
hsa-miR-128	1	0	1	1	1	1	FBLN5	fibulin 5
hsa-miR-128	0	0	1	1	1	1	UBE2E3	ubiquitin-conjugating enzyme E2E 3
hsa-miR-128	0	0	1	1	0	0	IPO7	importin 7
hsa-miR-128	0	0	1	1	1	1	CLCA2	chloride channel accessory 2
hsa-miR-128	1	0	1	1	1	1	CTCF	CCCTC-binding factor (zinc finger protein)
hsa-miR-128	1	0	1	1	1	1	MAP3K2	mitogen-activated protein kinase kinase kinase 2
hsa-miR-128	1	0	1	1	1	1	SRSF10	serine/arginine-rich splicing factor 10
hsa-miR-128	0	0	1	1	1	1	PPP1R17	protein phosphatase 1, regulatory subunit 17
hsa-miR-128	0	0	1	1	1	1	SERINC3	serine incorporator 3
hsa-miR-128	1	0	1	1	1	1	RAB35	RAB35, member RAS oncogene family
hsa-miR-128	1	0	1	1	1	1	RIT1	Ras-like without CAAX 1
hsa-miR-128	1	0	1	0	1	1	SLC2A3	solute carrier family 2 (facilitated glucose transporter), member 3
hsa-miR-128	0	0	1	1	1	1	RTN4	reticulon 4
hsa-miR-128	1	0	1	1	1	1	ABHD2	abhydrolase domain containing 2
hsa-miR-128	0	0	1	1	1	1	DNAJB4	DnaJ (Hsp40) homolog, subfamily B, member 4
hsa-miR-128	1	0	1	1	1	1	SSR3	signal sequence receptor, gamma (translocon-associated protein gamma)
hsa-miR-128	0	0	1	1	1	1	WIF1	WNT inhibitory factor 1
hsa-miR-128	0	0	1	1	1	1	ABCB10	ATP-binding cassette, sub-family B (MDR/TAP), member 10
hsa-miR-128	0	0	1	1	1	1	EHF	ets homologous factor
hsa-miR-128	1	0	1	1	1	1	GCA	grancalcin, EF-hand calcium binding protein
hsa-miR-128	1	0	1	1	1	1	MGEA5	meningioma expressed antigen 5 (hyaluronidase)
hsa-miR-128	1	0	1	1	1	1	RHOQ	ras homolog family member Q
hsa-miR-128	1	0	1	0	1	1	ACAP2	ArfGAP with coiled-coil, ankyrin repeat and PH domains 2
hsa-miR-128	0	0	1	1	0	0	KIR2DS4	killer cell immunoglobulin-like receptor, two domains, short cytoplasmic tail, 4
hsa-miR-128	1	0	1	1	1	1	TSPAN12	tetraspanin 12
hsa-miR-128	1	0	1	1	1	1	TLL2	tolloid-like 2
hsa-miR-128	0	0	1	1	1	1	N6AMT1	N-6 adenine-specific DNA methyltransferase 1 (putative)
hsa-miR-128	0	0	1	1	1	1	TBK1	TANK-binding kinase 1
hsa-miR-128	1	0	1	1	1	1	PPARGC1A	peroxisome proliferator-activated receptor gamma, coactivator 1 alpha
hsa-miR-128	0	0	1	1	0	0	GMPPB	GDP-mannose pyrophosphorylase B
hsa-miR-128	1	0	1	1	1	1	LRP12	low density lipoprotein receptor-related protein 12
hsa-miR-128	0	0	1	0	1	1	EMR2	egf-like module containing, mucin-like, hormone receptor-like 2
hsa-miR-128	1	0	1	1	1	1	SOCS5	suppressor of cytokine signaling 5
hsa-miR-128	0	0	1	0	1	1	SCN8A	sodium channel, voltage gated, type VIII, alpha subunit
hsa-miR-128	1	0	1	1	1	1	VAMP1	vesicle-associated membrane protein 1 (synaptobrevin 1)
hsa-miR-128	0	0	1	1	0	0	NOMO1	NODAL modulator 1
hsa-miR-128	0	0	1	0	1	1	EID1	EP300 interacting inhibitor of differentiation 1
hsa-miR-128	0	0	1	1	1	1	TSPAN13	tetraspanin 13
hsa-miR-128	0	0	1	1	1	1	TMOD2	tropomodulin 2 (neuronal)
hsa-miR-128	0	0	1	1	0	0	PCNXL2	pecanex-like 2 (Drosophila)
hsa-miR-128	0	0	1	0	1	1	EPM2AIP1	EPM2A (laforin) interacting protein 1
hsa-miR-128	0	0	1	1	1	1	TOX4	TOX high mobility group box family member 4
hsa-miR-128	1	0	1	1	1	1	TBC1D4	TBC1 domain family, member 4
hsa-miR-128	1	0	1	0	1	1	PDAP1	PDGFA associated protein 1
hsa-miR-128	0	0	1	0	1	1	PPM1E	protein phosphatase, Mg2+/Mn2+ dependent, 1E
hsa-miR-128	1	0	1	0	1	1	ICK	intestinal cell (MAK-like) kinase
hsa-miR-128	1	0	1	1	1	1	RCOR1	REST corepressor 1
hsa-miR-128	1	0	1	1	1	1	PRRC2C	proline-rich coiled-coil 2C
hsa-miR-128	1	0	1	1	1	1	PLCB1	phospholipase C, beta 1 (phosphoinositide-specific)
hsa-miR-128	1	0	1	0	1	1	KHNYN	KH and NYN domain containing
hsa-miR-128	1	0	1	1	1	1	MED13L	mediator complex subunit 13-like
hsa-miR-128	0	0	1	1	1	1	ZNF10	zinc finger protein 10
hsa-miR-128	1	0	1	1	0	0	POLDIP2	polymerase (DNA-directed), delta interacting protein 2
hsa-miR-128	0	0	1	1	1	1	PCF11	PCF11, cleavage and polyadenylation factor subunit, homolog (S. cerevisiae)
hsa-miR-128	1	0	1	1	1	1	TXNDC12	thioredoxin domain containing 12 (endoplasmic reticulum)
hsa-miR-128	0	0	1	1	1	1	MRPS23	mitochondrial ribosomal protein S23
hsa-miR-128	0	0	1	1	1	1	MRPS33	mitochondrial ribosomal protein S33
hsa-miR-128	1	0	1	1	1	1	VGLL3	vestigial like 3 (Drosophila)
hsa-miR-128	1	0	1	0	1	1	HPCAL4	hippocalcin like 4
hsa-miR-128	1	0	1	1	0	0	CPA4	carboxypeptidase A4
hsa-miR-128	1	0	1	1	1	1	ARID4B	AT rich interactive domain 4B (RBP1-like)
hsa-miR-128	0	0	1	0	1	1	GPR83	G protein-coupled receptor 83
hsa-miR-128	1	0	1	0	1	1	SLC25A37	solute carrier family 25 (mitochondrial iron transporter), member 37
hsa-miR-128	1	0	1	0	1	1	KLHL3	kelch-like 3 (Drosophila)
hsa-miR-128	1	0	1	1	1	1	SIX4	SIX homeobox 4
hsa-miR-128	1	0	1	1	0	0	C17orf59	chromosome 17 open reading frame 59
hsa-miR-128	0	0	1	0	1	1	GIPC2	GIPC PDZ domain containing family, member 2
hsa-miR-128	1	0	1	0	1	1	FAM46C	family with sequence similarity 46, member C
hsa-miR-128	1	0	1	1	1	1	TBC1D8B	TBC1 domain family, member 8B (with GRAM domain)
hsa-miR-128	1	0	1	0	1	1	CMTM6	CKLF-like MARVEL transmembrane domain containing 6
hsa-miR-128	1	0	1	1	1	1	RNF125	ring finger protein 125, E3 ubiquitin protein ligase
hsa-miR-128	1	0	1	1	1	1	ZNHIT6	zinc finger, HIT-type containing 6
hsa-miR-128	1	0	1	1	1	1	IFT57	intraflagellar transport 57 homolog (Chlamydomonas)
hsa-miR-128	1	0	1	1	1	1	FAM178A	family with sequence similarity 178, member A
hsa-miR-128	0	0	1	1	0	0	SMG8	smg-8 homolog, nonsense mediated mRNA decay factor (C. elegans)
hsa-miR-128	1	0	1	1	1	1	RPRD1A	regulation of nuclear pre-mRNA domain containing 1A
hsa-miR-128	1	0	1	0	1	1	ARL8B	ADP-ribosylation factor-like 8B
hsa-miR-128	1	0	1	1	1	1	LRRC1	leucine rich repeat containing 1
hsa-miR-128	1	0	1	0	1	1	PARVA	parvin, alpha
hsa-miR-128	1	0	1	1	1	1	UBA6	ubiquitin-like modifier activating enzyme 6
hsa-miR-128	0	0	1	1	1	1	SLC47A1	solute carrier family 47, member 1
hsa-miR-128	1	0	1	1	1	1	TMEM143	transmembrane protein 143
hsa-miR-128	0	0	1	0	1	1	BLOC1S4	biogenesis of lysosomal organelles complex-1, subunit 4, cappuccino
hsa-miR-128	0	0	1	1	1	1	LAPTM4B	lysosomal protein transmembrane 4 beta
hsa-miR-128	0	0	1	1	1	1	SLC22A15	solute carrier family 22, member 15
hsa-miR-128	0	0	1	1	0	0	GABRQ	gamma-aminobutyric acid (GABA) A receptor, theta
hsa-miR-128	0	0	1	1	1	1	GOLGA6B	golgin A6 family, member B
hsa-miR-128	0	0	1	0	0	0	APOBR	apolipoprotein B receptor
hsa-miR-128	0	0	1	1	1	1	NPAP1	nuclear pore associated protein 1
hsa-miR-128	0	0	1	0	1	1	ARL15	ADP-ribosylation factor-like 15
hsa-miR-128	1	0	1	1	1	1	GTPBP2	GTP binding protein 2
hsa-miR-128	1	0	1	1	1	1	SEPT3	septin 3
hsa-miR-128	1	0	1	1	1	1	ERO1LB	ERO1-like beta (S. cerevisiae)
hsa-miR-128	1	0	1	1	1	1	CNNM4	cyclin M4
hsa-miR-128	1	0	1	1	1	1	PCDH9	protocadherin 9
hsa-miR-128	1	0	1	0	1	1	DCUN1D1	DCN1, defective in cullin neddylation 1, domain containing 1 (S. cerevisiae)
hsa-miR-128	1	0	1	1	1	1	GALNTL1	UDP-N-acetyl-alpha-D-galactosamine:polypeptide N-acetylgalactosaminyltransferase-like 1
hsa-miR-128	0	0	1	1	1	1	SHROOM4	shroom family member 4
hsa-miR-128	1	0	1	1	1	1	USP31	ubiquitin specific peptidase 31
hsa-miR-128	1	0	1	1	1	1	DLG3	discs, large homolog 3 (Drosophila)
hsa-miR-128	1	0	1	1	0	0	CASKIN2	CASK interacting protein 2
hsa-miR-128	1	0	1	0	1	1	SYT4	synaptotagmin IV
hsa-miR-128	1	0	1	1	1	1	ARHGAP21	Rho GTPase activating protein 21
hsa-miR-128	1	0	1	0	1	1	WDFY1	WD repeat and FYVE domain containing 1
hsa-miR-128	1	0	1	1	1	1	RANBP10	RAN binding protein 10
hsa-miR-128	0	0	1	1	1	1	PRX	periaxin
hsa-miR-128	0	0	1	1	0	0	CCL3L1	chemokine (C-C motif) ligand 3-like 1
hsa-miR-128	1	0	1	0	1	1	RAP2A	RAP2A, member of RAS oncogene family
hsa-miR-128	1	0	1	1	1	1	MTMR3	myotubularin related protein 3
hsa-miR-128	1	0	1	1	0	0	SLC5A6	solute carrier family 5 (sodium-dependent vitamin transporter), member 6
hsa-miR-128	1	0	1	1	1	1	CLDN1	claudin 1
hsa-miR-128	1	0	1	0	1	1	TP53INP2	tumor protein p53 inducible nuclear protein 2
hsa-miR-128	1	0	1	1	1	1	SNX6	sorting nexin 6
hsa-miR-128	0	0	1	1	1	1	CHST6	carbohydrate (N-acetylglucosamine 6-O) sulfotransferase 6
hsa-miR-128	1	0	1	1	1	1	SLC22A3	solute carrier family 22 (extraneuronal monoamine transporter), member 3
hsa-miR-128	1	0	1	1	1	1	FBXW4	F-box and WD repeat domain containing 4
hsa-miR-128	0	0	1	1	1	1	CHP2	calcineurin-like EF hand protein 2
hsa-miR-128	0	0	1	1	1	1	MS4A6A	membrane-spanning 4-domains, subfamily A, member 6A
hsa-miR-128	0	0	1	1	0	0	DPEP3	dipeptidase 3
hsa-miR-128	0	0	1	1	1	1	ICAM4	intercellular adhesion molecule 4 (Landsteiner-Wiener blood group)
hsa-miR-128	1	0	1	0	1	1	GREM2	gremlin 2
hsa-miR-128	0	0	1	1	1	1	SUSD1	sushi domain containing 1
hsa-miR-128	1	0	1	0	1	1	ELOVL4	ELOVL fatty acid elongase 4
hsa-miR-128	1	0	1	1	1	1	FBXL17	F-box and leucine-rich repeat protein 17
hsa-miR-128	1	0	1	1	1	1	RFX7	regulatory factor X, 7
hsa-miR-128	1	0	1	1	0	0	UBE2Z	ubiquitin-conjugating enzyme E2Z
hsa-miR-128	1	0	1	1	1	1	GRAMD3	GRAM domain containing 3
hsa-miR-128	0	0	1	1	0	0	MS4A5	membrane-spanning 4-domains, subfamily A, member 5
hsa-miR-128	0	0	1	1	1	1	RNF219	ring finger protein 219
hsa-miR-128	1	0	1	1	1	1	USB1	U6 snRNA biogenesis 1
hsa-miR-128	1	0	1	0	1	1	MOB3B	MOB kinase activator 3B
hsa-miR-128	1	0	1	1	1	1	CPED1	cadherin-like and PC-esterase domain containing 1
hsa-miR-128	1	0	1	0	1	1	SRCIN1	SRC kinase signaling inhibitor 1
hsa-miR-128	1	0	1	1	1	1	CYB5B	cytochrome b5 type B (outer mitochondrial membrane)
hsa-miR-128	0	0	1	1	1	1	FCRL2	Fc receptor-like 2
hsa-miR-128	1	0	1	1	0	0	PVRL4	poliovirus receptor-related 4
hsa-miR-128	1	0	1	1	1	1	SNX27	sorting nexin family member 27
hsa-miR-128	1	0	1	1	1	1	PPP1R14C	protein phosphatase 1, regulatory (inhibitor) subunit 14C
hsa-miR-128	1	0	1	1	1	1	TIGD6	tigger transposable element derived 6
hsa-miR-128	1	0	1	1	1	1	DNAL1	dynein, axonemal, light chain 1
hsa-miR-128	1	0	1	1	1	1	CDH20	cadherin 20, type 2
hsa-miR-128	1	0	1	1	1	1	TMEM133	transmembrane protein 133
hsa-miR-128	1	0	1	1	1	1	FBXO30	F-box protein 30
hsa-miR-128	0	0	1	1	0	0	ATRIP	ATR interacting protein
hsa-miR-128	0	0	1	1	1	1	RNASEH2C	ribonuclease H2, subunit C
hsa-miR-128	1	0	1	1	1	1	ARID5B	AT rich interactive domain 5B (MRF1-like)
hsa-miR-128	1	0	1	0	1	1	FAR1	fatty acyl CoA reductase 1
hsa-miR-128	1	0	1	1	0	0	TRAF7	TNF receptor-associated factor 7, E3 ubiquitin protein ligase
hsa-miR-128	0	0	1	0	1	1	DNAJC30	DnaJ (Hsp40) homolog, subfamily C, member 30
hsa-miR-128	0	0	1	1	0	0	CHCHD6	coiled-coil-helix-coiled-coil-helix domain containing 6
hsa-miR-128	1	0	1	1	1	1	DCTN5	dynactin 5 (p25)
hsa-miR-128	0	0	1	1	1	1	JAGN1	jagunal homolog 1 (Drosophila)
hsa-miR-128	1	0	1	1	1	1	USP38	ubiquitin specific peptidase 38
hsa-miR-128	0	0	1	1	0	0	ACCS	1-aminocyclopropane-1-carboxylate synthase homolog (Arabidopsis)(non-functional)
hsa-miR-128	1	0	1	1	1	1	RBBP6	retinoblastoma binding protein 6
hsa-miR-128	0	0	1	1	1	1	RPUSD4	RNA pseudouridylate synthase domain containing 4
hsa-miR-128	0	0	1	1	1	1	FBXL20	F-box and leucine-rich repeat protein 20
hsa-miR-128	0	0	1	1	1	1	SEC22C	SEC22 vesicle trafficking protein homolog C (S. cerevisiae)
hsa-miR-128	1	0	1	1	1	1	TRIM55	tripartite motif containing 55
hsa-miR-128	1	0	1	0	1	1	EAF1	ELL associated factor 1
hsa-miR-128	1	0	1	0	1	1	PURB	purine-rich element binding protein B
hsa-miR-128	1	0	1	1	0	0	FCHSD1	FCH and double SH3 domains 1
hsa-miR-128	1	0	1	1	1	1	EPT1	ethanolaminephosphotransferase 1 (CDP-ethanolamine-specific)
hsa-miR-128	1	0	1	1	1	1	TSPYL5	TSPY-like 5
hsa-miR-128	1	0	1	1	0	0	CCDC120	coiled-coil domain containing 120
hsa-miR-128	0	0	1	1	0	0	CARD9	caspase recruitment domain family, member 9
hsa-miR-128	1	0	1	1	1	1	RCSD1	RCSD domain containing 1
hsa-miR-128	1	0	1	1	1	1	XKR4	XK, Kell blood group complex subunit-related family, member 4
hsa-miR-128	1	0	1	1	1	1	GPRIN1	G protein regulated inducer of neurite outgrowth 1
hsa-miR-128	0	0	1	1	0	0	THEM4	thioesterase superfamily member 4
hsa-miR-128	0	0	1	1	0	0	KRT3	keratin 3
hsa-miR-128	0	0	1	1	1	1	SLC32A1	solute carrier family 32 (GABA vesicular transporter), member 1
hsa-miR-128	0	0	1	1	0	0	BPIFA2	BPI fold containing family A, member 2
hsa-miR-128	0	0	1	1	1	1	CBLN4	cerebellin 4 precursor
hsa-miR-128	1	0	1	1	1	1	GPR62	G protein-coupled receptor 62
hsa-miR-128	0	0	1	1	0	0	GGTLC1	gamma-glutamyltransferase light chain 1
hsa-miR-128	0	0	1	1	0	0	RXFP2	relaxin/insulin-like family peptide receptor 2
hsa-miR-128	1	0	1	1	1	1	BMPER	BMP binding endothelial regulator
hsa-miR-128	1	0	1	1	1	1	ADAMTS19	ADAM metallopeptidase with thrombospondin type 1 motif, 19
hsa-miR-128	1	0	1	1	0	0	PKDCC	protein kinase domain containing, cytoplasmic homolog (mouse)
hsa-miR-128	0	0	1	1	1	1	PPIL4	peptidylprolyl isomerase (cyclophilin)-like 4
hsa-miR-128	1	0	1	1	1	1	ATRN	attractin
hsa-miR-128	1	0	1	0	1	1	CNOT6L	CCR4-NOT transcription complex, subunit 6-like
hsa-miR-128	0	0	1	1	0	0	DHRS13	dehydrogenase/reductase (SDR family) member 13
hsa-miR-128	0	0	1	1	0	0	ANKRD35	ankyrin repeat domain 35
hsa-miR-128	0	0	1	1	1	1	SLFN5	schlafen family member 5
hsa-miR-128	1	0	1	0	1	1	CENPBD1	CENPB DNA-binding domains containing 1
hsa-miR-128	0	0	1	1	0	0	CISH	cytokine inducible SH2-containing protein
hsa-miR-128	1	0	1	1	1	1	MRPL30	mitochondrial ribosomal protein L30
hsa-miR-128	0	0	1	0	1	1	DDIT4L	DNA-damage-inducible transcript 4-like
hsa-miR-128	0	0	1	0	1	1	SPATA18	spermatogenesis associated 18
hsa-miR-128	1	0	1	1	1	1	UBTD2	ubiquitin domain containing 2
hsa-miR-128	0	0	1	1	1	1	ERP27	endoplasmic reticulum protein 27
hsa-miR-128	1	0	1	1	1	1	TBX15	T-box 15
hsa-miR-128	1	0	1	1	1	1	FGFBP3	fibroblast growth factor binding protein 3
hsa-miR-128	1	0	1	1	1	1	CEP128	centrosomal protein 128kDa
hsa-miR-128	0	0	1	1	1	1	DUSP18	dual specificity phosphatase 18
hsa-miR-128	0	0	1	1	1	1	METTL15	methyltransferase like 15
hsa-miR-128	1	0	1	1	1	1	ZCCHC5	zinc finger, CCHC domain containing 5
hsa-miR-128	1	0	1	1	1	1	BEND6	BEN domain containing 6
hsa-miR-128	0	0	1	1	1	1	LINC00518	long intergenic non-protein coding RNA 518
hsa-miR-128	1	0	1	1	1	1	HOXA9	homeobox A9
hsa-miR-128	1	0	1	1	1	1	WTAP	Wilms tumor 1 associated protein
hsa-miR-128	1	0	1	1	1	1	UHRF2	ubiquitin-like with PHD and ring finger domains 2, E3 ubiquitin protein ligase
hsa-miR-128	0	0	1	0	1	1	KBTBD6	kelch repeat and BTB (POZ) domain containing 6
hsa-miR-128	0	0	1	0	1	1	LIX1	Lix1 homolog (chicken)
hsa-miR-128	1	0	1	1	1	1	SYT14	synaptotagmin XIV
hsa-miR-128	0	0	1	1	1	1	SLC22A7	solute carrier family 22 (organic anion transporter), member 7
hsa-miR-128	1	0	1	0	1	1	ENPP6	ectonucleotide pyrophosphatase/phosphodiesterase 6
hsa-miR-128	1	0	1	1	0	0	TMEM86A	transmembrane protein 86A
hsa-miR-128	1	0	1	1	1	1	TMEM161B	transmembrane protein 161B
hsa-miR-128	1	0	1	1	1	1	HS6ST3	heparan sulfate 6-O-sulfotransferase 3
hsa-miR-128	1	0	1	1	1	1	LCORL	ligand dependent nuclear receptor corepressor-like
hsa-miR-128	0	0	1	0	1	1	CTAGE1	cutaneous T-cell lymphoma-associated antigen 1
hsa-miR-128	1	0	1	1	1	1	IL28RA	interleukin 28 receptor, alpha (interferon, lambda receptor)
hsa-miR-128	1	0	1	1	1	1	CCDC117	coiled-coil domain containing 117
hsa-miR-128	0	0	1	1	1	1	FNDC7	fibronectin type III domain containing 7
hsa-miR-128	1	0	1	0	1	1	C3orf58	chromosome 3 open reading frame 58
hsa-miR-128	0	0	1	1	0	0	NOMO2	NODAL modulator 2
hsa-miR-128	1	0	1	1	1	1	SLC9A9	solute carrier family 9, subfamily A (NHE9, cation proton antiporter 9), member 9
hsa-miR-128	0	0	1	1	1	1	FAM133A	family with sequence similarity 133, member A
hsa-miR-128	0	0	1	1	1	1	GIMAP8	GTPase, IMAP family member 8
hsa-miR-128	1	0	1	1	1	1	RAB3IP	RAB3A interacting protein (rabin3)
hsa-miR-128	0	0	1	1	1	1	C16orf54	chromosome 16 open reading frame 54
hsa-miR-128	1	0	1	1	1	1	LRRTM3	leucine rich repeat transmembrane neuronal 3
hsa-miR-128	1	0	1	1	1	1	PRIMA1	proline rich membrane anchor 1
hsa-miR-128	1	0	1	0	1	1	IQGAP3	IQ motif containing GTPase activating protein 3
hsa-miR-128	0	0	1	1	1	1	ZNF831	zinc finger protein 831
hsa-miR-128	0	0	1	1	1	1	SLC5A12	solute carrier family 5 (sodium/glucose cotransporter), member 12
hsa-miR-128	1	0	1	1	1	1	TMEM26	transmembrane protein 26
hsa-miR-128	0	0	1	1	1	1	STXBP4	syntaxin binding protein 4
hsa-miR-128	0	0	1	1	0	0	HM13	histocompatibility (minor) 13
hsa-miR-128	0	0	1	1	1	1	WFDC8	WAP four-disulfide core domain 8
hsa-miR-128	0	0	1	1	1	1	ZNF714	zinc finger protein 714
hsa-miR-128	0	0	1	1	1	1	THEM5	thioesterase superfamily member 5
hsa-miR-128	0	0	1	0	1	1	VSIG1	V-set and immunoglobulin domain containing 1
hsa-miR-128	1	0	1	1	1	1	SUMF1	sulfatase modifying factor 1
hsa-miR-128	0	0	1	1	1	1	FLT4	fms-related tyrosine kinase 4
hsa-miR-128	1	0	1	1	1	1	RALGAPA1	Ral GTPase activating protein, alpha subunit 1 (catalytic)
hsa-miR-128	1	0	1	1	1	1	ADAMTS6	ADAM metallopeptidase with thrombospondin type 1 motif, 6
hsa-miR-128	1	0	1	0	1	1	LHFPL3	lipoma HMGIC fusion partner-like 3
hsa-miR-128	0	0	1	0	1	1	WASH3P	WAS protein family homolog 3 pseudogene
hsa-miR-128	1	0	1	1	1	1	WARS2	tryptophanyl tRNA synthetase 2, mitochondrial
hsa-miR-128	1	0	1	1	0	0	KAZN	kazrin, periplakin interacting protein
hsa-miR-128	1	0	1	0	1	1	MBLAC2	metallo-beta-lactamase domain containing 2
hsa-miR-128	0	0	1	1	0	0	IQCF2	IQ motif containing F2
hsa-miR-128	0	0	1	1	1	1	EDN3	endothelin 3
hsa-miR-128	1	0	1	1	1	1	ATRNL1	attractin-like 1
hsa-miR-128	1	0	1	1	1	1	SKIDA1	SKI/DACH domain containing 1
hsa-miR-128	1	0	1	1	1	1	TNFAIP8L3	tumor necrosis factor, alpha-induced protein 8-like 3
hsa-miR-128	0	0	1	0	1	1	C1orf229	chromosome 1 open reading frame 229
hsa-miR-128	0	0	1	0	0	0	SNORD4A	small nucleolar RNA, C/D box 4A
hsa-miR-128	0	0	1	0	0	0	MIR155HG	MIR155 host gene (non-protein coding)
hsa-miR-128	0	0	1	0	0	0	TTTY1	testis-specific transcript, Y-linked 1 (non-protein coding)
hsa-miR-128	0	0	1	0	0	0	CYCSP52	cytochrome c, somatic pseudogene 52
hsa-miR-128	0	0	1	0	0	0	TPI1P2	triosephosphate isomerase 1 pseudogene 2
hsa-miR-128	0	0	1	0	0	0	RPL23AP32	ribosomal protein L23a pseudogene 32
hsa-miR-128	0	0	1	0	0	0	TOP1P1	topoisomerase (DNA) I pseudogene 1
hsa-miR-128	0	0	1	0	0	0	GABPAP	GA binding protein transcription factor, alpha subunit pseudogene
hsa-miR-128	0	0	1	0	0	0	AOC4	amine oxidase, copper containing 3 (vascular adhesion protein 1) pseudogene
hsa-miR-128	0	0	1	0	0	0	HTR7P1	5-hydroxytryptamine (serotonin) receptor 7 pseudogene 1
hsa-miR-128	0	0	1	0	0	0	TRIM78P	tripartite motif containing 78, pseudogene
hsa-miR-128	0	0	1	0	0	0	HOXA11-AS	HOXA11 antisense RNA
hsa-miR-128	0	0	1	0	0	0	DUSP5P	dual specificity phosphatase 5 pseudogene
hsa-miR-128	0	0	1	0	0	0	SNX29P2	sorting nexin 29 pseudogene 2
hsa-miR-128	0	0	1	0	0	0	TCAM1P	testicular cell adhesion molecule 1 homolog (mouse), pseudogene
hsa-miR-128	0	0	1	0	0	0	SNORA11	small nucleolar RNA, H/ACA box 11
hsa-miR-128	0	0	1	0	0	0	SNORA39	small nucleolar RNA, H/ACA box 39
hsa-miR-128	0	0	1	0	0	0	SCARNA17	small Cajal body-specific RNA 17
hsa-miR-128	0	0	1	0	0	0	SNORD62B	small nucleolar RNA, C/D box 62B
hsa-miR-128	0	0	1	0	0	0	TUBA4B	tubulin, alpha 4b (pseudogene)
hsa-miR-128	0	0	1	0	0	0	HSP90AB2P	heat shock protein 90kDa alpha (cytosolic), class B member 2, pseudogene
hsa-miR-128	0	0	1	0	0	0	SNORD116-17	small nucleolar RNA, C/D box 116-17
hsa-miR-128	0	0	1	0	0	0	SNORD116-28	small nucleolar RNA, C/D box 116-28
hsa-miR-128	0	0	1	0	0	0	MST1P9	macrophage stimulating 1 (hepatocyte growth factor-like) pseudogene 9
hsa-miR-128	1	0	1	1	1	1	ZNF238	zinc finger protein 238
hsa-miR-128	1	0	1	1	1	1	TRIO	trio Rho guanine nucleotide exchange factor
hsa-miR-128	1	0	1	1	1	1	HNRNPA1	heterogeneous nuclear ribonucleoprotein A1
hsa-miR-128	0	0	1	0	0	0	MUC5AC	mucin 5AC, oligomeric mucus/gel-forming
