# Supplementary material for: Profiling of Selected MicroRNAs in Proliferative Eutopic Endometrium of Women with Ovarian Endometriosis
Source: Biomed Res Int. 2015 Aug 20;2015:760698. doi: 10.1155/2015/760698 (PMC4558423; doi:10.1155/2015/760698)
Supplement: Supplementary file 1 — Table I: The names of miRNAs significantly differentially expressed between eutopic endometrium of patients with endometriosis vs eutopic endometrium of patients without endometriosis. Table II: The associations between miRNA and mRNA, which presents detailed results of the search of six major databases i.e targetscan, tarbase, miranda, mirbase, mirtarget2 and pictar. [file 760698.f1.zip › 760698.f1/Table II/hsa-miR-129-5p.tsv]

miR	targetscan	tarbase	miranda	mirbase	mirtarget2	pictar	GeneSymbol	GeneName
hsa-miR-129-5p	1	0	1	0	0	0	PRPF40A	PRP40 pre-mRNA processing factor 40 homolog A (S. cerevisiae)
hsa-miR-129-5p	1	0	1	0	1	1	CDK5R1	cyclin-dependent kinase 5, regulatory subunit 1 (p35)
hsa-miR-129-5p	1	0	1	1	1	1	FAM160B1	family with sequence similarity 160, member B1
hsa-miR-129-5p	1	0	1	1	1	1	LSM12	LSM12 homolog (S. cerevisiae)
hsa-miR-129-5p	1	0	1	0	1	1	WDFY3	WD repeat and FYVE domain containing 3
hsa-miR-129-5p	1	0	1	0	1	1	FAXC	failed axon connections homolog (Drosophila)
hsa-miR-129-5p	1	0	1	1	1	1	NRN1	neuritin 1
hsa-miR-129-5p	1	0	1	1	1	1	CAMTA1	calmodulin binding transcription activator 1
hsa-miR-129-5p	1	0	1	1	1	1	MED26	mediator complex subunit 26
hsa-miR-129-5p	1	0	0	1	0	0	BTBD9	BTB (POZ) domain containing 9
hsa-miR-129-5p	1	0	1	1	1	1	PLEKHH3	pleckstrin homology domain containing, family H (with MyTH4 domain) member 3
hsa-miR-129-5p	1	0	1	1	1	1	SBK1	SH3-binding domain kinase 1
hsa-miR-129-5p	1	0	1	1	1	1	USP15	ubiquitin specific peptidase 15
hsa-miR-129-5p	1	0	1	1	1	1	FAM135B	family with sequence similarity 135, member B
hsa-miR-129-5p	1	0	1	1	1	1	DAB2IP	DAB2 interacting protein
hsa-miR-129-5p	1	0	1	1	1	1	CAMK2N1	calcium/calmodulin-dependent protein kinase II inhibitor 1
hsa-miR-129-5p	1	0	1	0	1	1	GLYR1	glyoxylate reductase 1 homolog (Arabidopsis)
hsa-miR-129-5p	1	0	1	1	1	1	ATRN	attractin
hsa-miR-129-5p	1	0	1	1	1	1	OXR1	oxidation resistance 1
hsa-miR-129-5p	1	0	1	1	1	1	MTF1	metal-regulatory transcription factor 1
hsa-miR-129-5p	1	0	1	0	1	1	DOCK3	dedicator of cytokinesis 3
hsa-miR-129-5p	1	0	1	1	1	1	SCML4	sex comb on midleg-like 4 (Drosophila)
hsa-miR-129-5p	1	0	1	0	0	0	ZBTB34	zinc finger and BTB domain containing 34
hsa-miR-129-5p	1	0	1	0	1	1	SOX11	SRY (sex determining region Y)-box 11
hsa-miR-129-5p	1	0	1	1	1	1	HBS1L	HBS1-like (S. cerevisiae)
hsa-miR-129-5p	1	0	1	1	1	1	LRRC4C	leucine rich repeat containing 4C
hsa-miR-129-5p	1	0	1	1	1	1	PCDH17	protocadherin 17
hsa-miR-129-5p	1	0	1	1	1	1	MEIS1	Meis homeobox 1
hsa-miR-129-5p	1	0	1	1	1	1	FBXW7	F-box and WD repeat domain containing 7, E3 ubiquitin protein ligase
hsa-miR-129-5p	1	0	0	1	0	0	DMRTA2	DMRT-like family A2
hsa-miR-129-5p	1	0	1	1	1	1	WNT5A	wingless-type MMTV integration site family, member 5A
hsa-miR-129-5p	1	0	1	1	1	1	ZNF608	zinc finger protein 608
hsa-miR-129-5p	1	0	1	1	1	1	ZDHHC23	zinc finger, DHHC-type containing 23
hsa-miR-129-5p	1	0	1	0	1	1	ZFHX4	zinc finger homeobox 4
hsa-miR-129-5p	1	0	1	0	0	0	KIF26A	kinesin family member 26A
hsa-miR-129-5p	1	0	1	1	1	1	FMR1	fragile X mental retardation 1
hsa-miR-129-5p	1	0	1	0	1	1	TOX	thymocyte selection-associated high mobility group box
hsa-miR-129-5p	1	0	1	1	0	0	INO80D	INO80 complex subunit D
hsa-miR-129-5p	1	0	1	0	1	1	CCDC88A	coiled-coil domain containing 88A
hsa-miR-129-5p	1	0	1	0	1	1	LARP1	La ribonucleoprotein domain family, member 1
hsa-miR-129-5p	1	0	1	0	0	0	ODZ4	odz, odd Oz/ten-m homolog 4 (Drosophila)
hsa-miR-129-5p	1	0	1	1	1	1	NCOA1	nuclear receptor coactivator 1
hsa-miR-129-5p	1	0	1	0	1	1	OLA1	Obg-like ATPase 1
hsa-miR-129-5p	1	0	1	1	1	1	AMD1	adenosylmethionine decarboxylase 1
hsa-miR-129-5p	1	0	1	1	1	1	CBX4	chromobox homolog 4
hsa-miR-129-5p	1	0	1	1	1	1	NR4A2	nuclear receptor subfamily 4, group A, member 2
hsa-miR-129-5p	1	0	1	1	1	1	BACH2	BTB and CNC homology 1, basic leucine zipper transcription factor 2
hsa-miR-129-5p	1	0	1	0	1	1	ARL5A	ADP-ribosylation factor-like 5A
hsa-miR-129-5p	1	0	1	1	1	1	DUSP10	dual specificity phosphatase 10
hsa-miR-129-5p	1	0	1	0	1	1	PTP4A1	protein tyrosine phosphatase type IVA, member 1
hsa-miR-129-5p	1	0	1	1	1	1	JDP2	Jun dimerization protein 2
hsa-miR-129-5p	1	0	1	0	1	1	RHOBTB2	Rho-related BTB domain containing 2
hsa-miR-129-5p	1	0	1	1	1	1	UBE2R2	ubiquitin-conjugating enzyme E2R 2
hsa-miR-129-5p	1	0	1	1	1	1	FNIP1	folliculin interacting protein 1
hsa-miR-129-5p	1	0	1	1	1	1	TSHZ1	teashirt zinc finger homeobox 1
hsa-miR-129-5p	1	0	1	0	1	1	RYR2	ryanodine receptor 2 (cardiac)
hsa-miR-129-5p	1	0	1	1	1	1	ETS1	v-ets erythroblastosis virus E26 oncogene homolog 1 (avian)
hsa-miR-129-5p	1	0	0	1	1	1	RBMS1	RNA binding motif, single stranded interacting protein 1
hsa-miR-129-5p	1	0	1	0	1	1	CACNA1C	calcium channel, voltage-dependent, L type, alpha 1C subunit
hsa-miR-129-5p	1	0	1	1	1	1	DNAJC13	DnaJ (Hsp40) homolog, subfamily C, member 13
hsa-miR-129-5p	1	0	1	1	1	1	NRXN2	neurexin 2
hsa-miR-129-5p	1	0	1	1	1	1	ZNF704	zinc finger protein 704
hsa-miR-129-5p	1	0	1	0	1	1	KCMF1	potassium channel modulatory factor 1
hsa-miR-129-5p	1	0	1	0	1	1	CLLU1	chronic lymphocytic leukemia up-regulated 1
hsa-miR-129-5p	1	0	1	0	1	1	ACVR1C	activin A receptor, type IC
hsa-miR-129-5p	1	0	1	0	1	1	ETV1	ets variant 1
hsa-miR-129-5p	1	0	1	1	1	1	SLBP	stem-loop binding protein
hsa-miR-129-5p	1	0	1	0	1	1	CBX7	chromobox homolog 7
hsa-miR-129-5p	1	0	1	1	1	1	UBR1	ubiquitin protein ligase E3 component n-recognin 1
hsa-miR-129-5p	1	0	1	1	1	1	FNDC5	fibronectin type III domain containing 5
hsa-miR-129-5p	1	0	1	0	1	1	AMMECR1L	AMME chromosomal region gene 1-like
hsa-miR-129-5p	1	0	1	1	1	1	TRIM9	tripartite motif containing 9
hsa-miR-129-5p	1	0	1	1	1	1	MTCH2	mitochondrial carrier 2
hsa-miR-129-5p	1	0	1	1	1	1	HIC2	hypermethylated in cancer 2
hsa-miR-129-5p	1	0	1	1	1	1	CTDSPL2	CTD (carboxy-terminal domain, RNA polymerase II, polypeptide A) small phosphatase like 2
hsa-miR-129-5p	1	0	1	1	1	1	NEUROD2	neuronal differentiation 2
hsa-miR-129-5p	1	0	1	1	1	1	MAPK1	mitogen-activated protein kinase 1
hsa-miR-129-5p	1	0	1	1	1	1	MAFG	v-maf musculoaponeurotic fibrosarcoma oncogene homolog G (avian)
hsa-miR-129-5p	1	0	1	1	0	0	TOE1	target of EGR1, member 1 (nuclear)
hsa-miR-129-5p	1	0	1	1	1	1	FIGN	fidgetin
hsa-miR-129-5p	1	0	1	1	1	1	HOXC10	homeobox C10
hsa-miR-129-5p	1	0	1	1	1	1	FGFBP3	fibroblast growth factor binding protein 3
hsa-miR-129-5p	1	0	1	1	0	0	PLXNA4	plexin A4
hsa-miR-129-5p	1	0	1	0	1	1	RPS6KB1	ribosomal protein S6 kinase, 70kDa, polypeptide 1
hsa-miR-129-5p	1	0	1	1	1	1	CIB2	calcium and integrin binding family member 2
hsa-miR-129-5p	1	0	1	1	1	1	ZBTB5	zinc finger and BTB domain containing 5
hsa-miR-129-5p	1	0	1	1	1	1	USP47	ubiquitin specific peptidase 47
hsa-miR-129-5p	1	0	1	1	1	1	SSH2	slingshot homolog 2 (Drosophila)
hsa-miR-129-5p	1	0	1	1	1	1	HDAC2	histone deacetylase 2
hsa-miR-129-5p	1	0	1	1	1	1	ZNRF1	zinc and ring finger 1, E3 ubiquitin protein ligase
hsa-miR-129-5p	1	0	1	1	1	1	EBF1	early B-cell factor 1
hsa-miR-129-5p	1	0	1	1	1	1	NSFL1C	NSFL1 (p97) cofactor (p47)
hsa-miR-129-5p	1	0	1	1	1	1	MAP6	microtubule-associated protein 6
hsa-miR-129-5p	1	0	1	0	1	1	TMX3	thioredoxin-related transmembrane protein 3
hsa-miR-129-5p	1	0	1	1	1	1	KANK4	KN motif and ankyrin repeat domains 4
hsa-miR-129-5p	1	0	1	1	1	1	BNC2	basonuclin 2
hsa-miR-129-5p	1	0	1	1	1	1	VGLL3	vestigial like 3 (Drosophila)
hsa-miR-129-5p	1	0	1	1	1	1	TIPARP	TCDD-inducible poly(ADP-ribose) polymerase
hsa-miR-129-5p	1	0	1	1	1	1	ATP2B4	ATPase, Ca++ transporting, plasma membrane 4
hsa-miR-129-5p	1	0	1	1	1	1	CDH2	cadherin 2, type 1, N-cadherin (neuronal)
hsa-miR-129-5p	1	0	1	1	1	1	OVOL1	ovo-like 1(Drosophila)
hsa-miR-129-5p	1	0	1	1	1	1	GFRA2	GDNF family receptor alpha 2
hsa-miR-129-5p	1	0	1	0	1	1	CELF2	CUGBP, Elav-like family member 2
hsa-miR-129-5p	1	0	1	1	0	0	CACNB1	calcium channel, voltage-dependent, beta 1 subunit
hsa-miR-129-5p	1	0	1	1	1	1	RBMS3	RNA binding motif, single stranded interacting protein 3
hsa-miR-129-5p	1	0	1	0	1	1	CREBZF	CREB/ATF bZIP transcription factor
hsa-miR-129-5p	1	0	1	1	1	1	IGSF3	immunoglobulin superfamily, member 3
hsa-miR-129-5p	1	0	1	1	1	1	PHF21A	PHD finger protein 21A
hsa-miR-129-5p	1	0	0	1	1	1	ZFP36L2	zinc finger protein 36, C3H type-like 2
hsa-miR-129-5p	1	0	1	0	1	1	MAML3	mastermind-like 3 (Drosophila)
hsa-miR-129-5p	1	0	1	1	1	1	ZMAT2	zinc finger, matrin-type 2
hsa-miR-129-5p	1	0	1	1	0	0	ZMYM3	zinc finger, MYM-type 3
hsa-miR-129-5p	1	0	1	1	1	1	OPCML	opioid binding protein/cell adhesion molecule-like
hsa-miR-129-5p	1	0	1	1	1	1	E2F7	E2F transcription factor 7
hsa-miR-129-5p	1	0	1	0	1	1	KIAA0182	KIAA0182
hsa-miR-129-5p	1	0	1	1	1	1	ZNF706	zinc finger protein 706
hsa-miR-129-5p	1	0	1	0	1	1	OTUD7B	OTU domain containing 7B
hsa-miR-129-5p	1	0	1	0	0	0	CACNA1A	calcium channel, voltage-dependent, P/Q type, alpha 1A subunit
hsa-miR-129-5p	1	0	1	1	0	0	PTAR1	protein prenyltransferase alpha subunit repeat containing 1
hsa-miR-129-5p	1	0	1	1	1	1	CAMK4	calcium/calmodulin-dependent protein kinase IV
hsa-miR-129-5p	1	0	1	1	1	1	CACNA2D2	calcium channel, voltage-dependent, alpha 2/delta subunit 2
hsa-miR-129-5p	1	0	1	0	1	1	GHR	growth hormone receptor
hsa-miR-129-5p	1	0	1	1	1	1	C14orf28	chromosome 14 open reading frame 28
hsa-miR-129-5p	1	0	1	1	1	1	CSMD2	CUB and Sushi multiple domains 2
hsa-miR-129-5p	1	0	1	1	1	1	LMNA	lamin A/C
hsa-miR-129-5p	1	0	1	1	1	1	C2orf88	chromosome 2 open reading frame 88
hsa-miR-129-5p	1	0	1	1	1	1	EP300	E1A binding protein p300
hsa-miR-129-5p	1	0	1	1	1	1	DNAJC27	DnaJ (Hsp40) homolog, subfamily C, member 27
hsa-miR-129-5p	1	0	1	1	1	1	MGLL	monoglyceride lipase
hsa-miR-129-5p	1	0	1	1	1	1	RAB3IP	RAB3A interacting protein (rabin3)
hsa-miR-129-5p	1	0	1	1	1	1	SMARCC1	SWI/SNF related, matrix associated, actin dependent regulator of chromatin, subfamily c, member 1
hsa-miR-129-5p	1	0	1	1	1	1	MAPRE1	microtubule-associated protein, RP/EB family, member 1
hsa-miR-129-5p	1	0	1	1	1	1	GNAZ	guanine nucleotide binding protein (G protein), alpha z polypeptide
hsa-miR-129-5p	1	0	1	1	1	1	ISL1	ISL LIM homeobox 1
hsa-miR-129-5p	1	0	1	1	1	1	STAT5B	signal transducer and activator of transcription 5B
hsa-miR-129-5p	1	0	1	1	0	0	MEX3A	mex-3 homolog A (C. elegans)
hsa-miR-129-5p	1	0	1	0	1	1	NUDT10	nudix (nucleoside diphosphate linked moiety X)-type motif 10
hsa-miR-129-5p	1	0	1	0	1	1	TNRC6B	trinucleotide repeat containing 6B
hsa-miR-129-5p	1	0	1	1	1	1	CECR6	cat eye syndrome chromosome region, candidate 6
hsa-miR-129-5p	1	0	1	1	1	1	SUN2	Sad1 and UNC84 domain containing 2
hsa-miR-129-5p	1	0	1	0	1	1	MFAP3L	microfibrillar-associated protein 3-like
hsa-miR-129-5p	1	0	1	0	1	1	PMEPA1	prostate transmembrane protein, androgen induced 1
hsa-miR-129-5p	1	0	1	1	1	1	EPHA8	EPH receptor A8
hsa-miR-129-5p	1	0	1	1	1	1	EIF4G3	eukaryotic translation initiation factor 4 gamma, 3
hsa-miR-129-5p	1	0	1	1	1	1	CBX6	chromobox homolog 6
hsa-miR-129-5p	1	0	1	1	1	1	ZFP36L1	zinc finger protein 36, C3H type-like 1
hsa-miR-129-5p	1	0	1	0	1	1	PKNOX1	PBX/knotted 1 homeobox 1
hsa-miR-129-5p	1	0	1	1	1	1	KLHL32	kelch-like 32 (Drosophila)
hsa-miR-129-5p	1	0	1	1	1	1	UBA6	ubiquitin-like modifier activating enzyme 6
hsa-miR-129-5p	1	0	1	1	1	1	TMEM97	transmembrane protein 97
hsa-miR-129-5p	1	0	1	0	1	1	KIAA1024	KIAA1024
hsa-miR-129-5p	1	0	1	1	1	1	TERF2	telomeric repeat binding factor 2
hsa-miR-129-5p	1	0	1	1	1	1	CKAP4	cytoskeleton-associated protein 4
hsa-miR-129-5p	1	0	1	0	1	1	UNC13A	unc-13 homolog A (C. elegans)
hsa-miR-129-5p	1	0	1	1	1	1	SEMA6A	sema domain, transmembrane domain (TM), and cytoplasmic domain, (semaphorin) 6A
hsa-miR-129-5p	1	0	1	1	1	1	MLLT6	myeloid/lymphoid or mixed-lineage leukemia (trithorax homolog, Drosophila); translocated to, 6
hsa-miR-129-5p	1	0	1	1	1	1	TRIO	trio Rho guanine nucleotide exchange factor
hsa-miR-129-5p	1	0	1	1	1	1	CHRNA3	cholinergic receptor, nicotinic, alpha 3 (neuronal)
hsa-miR-129-5p	1	0	1	1	1	1	EPHB1	EPH receptor B1
hsa-miR-129-5p	1	0	1	0	1	1	JPH4	junctophilin 4
hsa-miR-129-5p	1	0	1	0	1	1	RNF165	ring finger protein 165
hsa-miR-129-5p	1	0	1	1	1	1	DNAJB5	DnaJ (Hsp40) homolog, subfamily B, member 5
hsa-miR-129-5p	1	0	1	1	1	1	ABHD2	abhydrolase domain containing 2
hsa-miR-129-5p	1	0	1	1	1	1	RPIA	ribose 5-phosphate isomerase A
hsa-miR-129-5p	1	0	1	1	1	1	KCNH8	potassium voltage-gated channel, subfamily H (eag-related), member 8
hsa-miR-129-5p	1	0	1	1	1	1	HNRNPA1	heterogeneous nuclear ribonucleoprotein A1
hsa-miR-129-5p	1	0	1	0	1	1	TET1	tet methylcytosine dioxygenase 1
hsa-miR-129-5p	1	0	1	1	1	1	XKR6	XK, Kell blood group complex subunit-related family, member 6
hsa-miR-129-5p	1	0	1	1	1	1	CALM1	calmodulin 1 (phosphorylase kinase, delta)
hsa-miR-129-5p	1	0	1	1	1	1	ZNF281	zinc finger protein 281
hsa-miR-129-5p	1	0	1	1	1	1	COL1A1	collagen, type I, alpha 1
hsa-miR-129-5p	1	0	1	1	1	1	GLIS3	GLIS family zinc finger 3
hsa-miR-129-5p	1	0	1	0	1	1	VPS36	vacuolar protein sorting 36 homolog (S. cerevisiae)
hsa-miR-129-5p	1	0	1	0	1	1	KDM2A	lysine (K)-specific demethylase 2A
hsa-miR-129-5p	1	0	1	1	1	1	PAX6	paired box 6
hsa-miR-129-5p	1	0	1	1	1	1	CTBP2	C-terminal binding protein 2
hsa-miR-129-5p	1	0	1	1	1	1	SGMS1	sphingomyelin synthase 1
hsa-miR-129-5p	1	0	1	0	1	1	ARNT	aryl hydrocarbon receptor nuclear translocator
hsa-miR-129-5p	1	0	1	1	0	0	RIMS2	regulating synaptic membrane exocytosis 2
hsa-miR-129-5p	1	0	1	1	1	1	HDGF	hepatoma-derived growth factor
hsa-miR-129-5p	1	0	1	1	1	1	ZBTB10	zinc finger and BTB domain containing 10
hsa-miR-129-5p	1	0	1	1	1	1	MED12L	mediator complex subunit 12-like
hsa-miR-129-5p	1	0	1	0	1	1	BCL11B	B-cell CLL/lymphoma 11B (zinc finger protein)
hsa-miR-129-5p	1	0	1	0	0	0	FAT3	FAT tumor suppressor homolog 3 (Drosophila)
hsa-miR-129-5p	1	0	1	0	1	1	ETV5	ets variant 5
hsa-miR-129-5p	1	0	1	1	1	1	VCP	valosin containing protein
hsa-miR-129-5p	1	0	1	1	1	1	CSTF2T	cleavage stimulation factor, 3' pre-RNA, subunit 2, 64kDa, tau variant
hsa-miR-129-5p	1	0	1	1	1	1	XPO7	exportin 7
hsa-miR-129-5p	1	0	1	1	1	1	APC	adenomatous polyposis coli
hsa-miR-129-5p	1	0	1	1	1	1	EIF2C3	eukaryotic translation initiation factor 2C, 3
hsa-miR-129-5p	1	0	1	0	1	1	NUFIP2	nuclear fragile X mental retardation protein interacting protein 2
hsa-miR-129-5p	1	0	1	1	1	1	TAOK3	TAO kinase 3
hsa-miR-129-5p	1	0	1	1	1	1	LPHN1	latrophilin 1
hsa-miR-129-5p	1	0	1	1	1	1	PBX3	pre-B-cell leukemia homeobox 3
hsa-miR-129-5p	1	0	1	1	1	1	FOXP4	forkhead box P4
hsa-miR-129-5p	1	0	1	1	1	1	CMIP	c-Maf inducing protein
hsa-miR-129-5p	1	0	1	1	1	1	KIAA2018	KIAA2018
hsa-miR-129-5p	1	0	1	1	0	0	CDH8	cadherin 8, type 2
hsa-miR-129-5p	1	0	1	1	1	1	HMGB1	high mobility group box 1
hsa-miR-129-5p	1	0	1	1	1	1	ARHGEF9	Cdc42 guanine nucleotide exchange factor (GEF) 9
hsa-miR-129-5p	1	0	1	0	1	1	STK40	serine/threonine kinase 40
hsa-miR-129-5p	1	0	1	1	1	1	ASH1L	ash1 (absent, small, or homeotic)-like (Drosophila)
hsa-miR-129-5p	1	0	1	1	1	1	SLC7A10	solute carrier family 7 (neutral amino acid transporter light chain, asc system), member 10
hsa-miR-129-5p	1	0	1	0	1	1	SLC25A25	solute carrier family 25 (mitochondrial carrier; phosphate carrier), member 25
hsa-miR-129-5p	1	0	1	1	1	1	UNK	unkempt homolog (Drosophila)
hsa-miR-129-5p	1	0	1	1	1	1	NIPBL	Nipped-B homolog (Drosophila)
hsa-miR-129-5p	1	0	1	1	1	1	CELF4	CUGBP, Elav-like family member 4
hsa-miR-129-5p	1	0	1	1	1	1	ZNF238	zinc finger protein 238
hsa-miR-129-5p	1	0	1	1	1	1	DLX2	distal-less homeobox 2
hsa-miR-129-5p	1	0	1	1	1	1	PDIK1L	PDLIM1 interacting kinase 1 like
hsa-miR-129-5p	1	0	0	1	1	1	PABPC1	poly(A) binding protein, cytoplasmic 1
hsa-miR-129-5p	1	0	1	1	1	1	DDX6	DEAD (Asp-Glu-Ala-Asp) box helicase 6
hsa-miR-129-5p	1	0	1	1	1	1	LDB3	LIM domain binding 3
hsa-miR-129-5p	1	0	1	0	1	1	AMOTL2	angiomotin like 2
hsa-miR-129-5p	1	0	0	1	1	1	IQCE	IQ motif containing E
hsa-miR-129-5p	1	0	1	0	0	0	TNPO1	transportin 1
hsa-miR-129-5p	1	0	1	1	1	1	SEC61A1	Sec61 alpha 1 subunit (S. cerevisiae)
hsa-miR-129-5p	1	0	1	1	1	1	PAK7	p21 protein (Cdc42/Rac)-activated kinase 7
hsa-miR-129-5p	1	0	1	0	1	1	CPM	carboxypeptidase M
hsa-miR-129-5p	1	0	1	1	1	1	MAN1A1	mannosidase, alpha, class 1A, member 1
hsa-miR-129-5p	1	0	1	1	1	1	NPEPPS	aminopeptidase puromycin sensitive
hsa-miR-129-5p	1	0	1	1	1	1	NR2C2	nuclear receptor subfamily 2, group C, member 2
hsa-miR-129-5p	1	0	1	1	1	1	MYT1L	myelin transcription factor 1-like
hsa-miR-129-5p	1	0	1	1	1	1	INTS6	integrator complex subunit 6
hsa-miR-129-5p	1	0	1	1	1	1	TOB2	transducer of ERBB2, 2
hsa-miR-129-5p	1	0	1	1	1	1	KLHL28	kelch-like 28 (Drosophila)
hsa-miR-129-5p	1	0	1	1	1	1	BPTF	bromodomain PHD finger transcription factor
hsa-miR-129-5p	1	0	1	1	1	1	ITSN1	intersectin 1 (SH3 domain protein)
hsa-miR-129-5p	1	0	1	0	1	1	ELAVL3	ELAV (embryonic lethal, abnormal vision, Drosophila)-like 3 (Hu antigen C)
hsa-miR-129-5p	1	0	1	1	1	1	PHF20	PHD finger protein 20
hsa-miR-129-5p	1	0	1	1	1	1	U2SURP	U2 snRNP-associated SURP domain containing
hsa-miR-129-5p	1	0	1	1	1	1	SYT7	synaptotagmin VII
hsa-miR-129-5p	1	0	1	1	1	1	NTM	neurotrimin
hsa-miR-129-5p	1	0	1	1	1	1	SLIT3	slit homolog 3 (Drosophila)
hsa-miR-129-5p	1	0	1	1	1	1	ZNF395	zinc finger protein 395
hsa-miR-129-5p	1	0	1	1	1	1	DLC1	deleted in liver cancer 1
hsa-miR-129-5p	1	0	1	0	1	1	PSD3	pleckstrin and Sec7 domain containing 3
hsa-miR-129-5p	1	0	1	1	1	1	ZNF385A	zinc finger protein 385A
hsa-miR-129-5p	1	0	1	0	1	1	LPHN3	latrophilin 3
hsa-miR-129-5p	1	0	1	0	1	1	RUNX1T1	runt-related transcription factor 1; translocated to, 1 (cyclin D-related)
hsa-miR-129-5p	1	0	1	1	1	1	DMD	dystrophin
hsa-miR-129-5p	1	0	1	1	1	1	SP8	Sp8 transcription factor
hsa-miR-129-5p	1	0	1	1	0	0	ZNF292	zinc finger protein 292
hsa-miR-129-5p	1	0	0	0	0	0	RBFOX3	RNA binding protein, fox-1 homolog (C. elegans) 3
hsa-miR-129-5p	1	0	1	1	1	1	AFF3	AF4/FMR2 family, member 3
hsa-miR-129-5p	1	0	1	1	1	1	CCDC43	coiled-coil domain containing 43
hsa-miR-129-5p	1	0	1	1	1	1	PTPN11	protein tyrosine phosphatase, non-receptor type 11
hsa-miR-129-5p	1	0	1	1	1	1	AMMECR1	Alport syndrome, mental retardation, midface hypoplasia and elliptocytosis chromosomal region gene 1
hsa-miR-129-5p	1	0	1	1	1	1	SNX27	sorting nexin family member 27
hsa-miR-129-5p	1	0	1	1	1	1	PTER	phosphotriesterase related
hsa-miR-129-5p	1	0	1	1	1	1	HNRNPA1L2	heterogeneous nuclear ribonucleoprotein A1-like 2
hsa-miR-129-5p	1	0	1	1	1	1	RERE	arginine-glutamic acid dipeptide (RE) repeats
hsa-miR-129-5p	1	0	0	1	0	0	RGS19	regulator of G-protein signaling 19
hsa-miR-129-5p	1	0	1	1	1	1	P4HA2	prolyl 4-hydroxylase, alpha polypeptide II
hsa-miR-129-5p	1	0	1	0	1	1	YWHAB	tyrosine 3-monooxygenase/tryptophan 5-monooxygenase activation protein, beta polypeptide
hsa-miR-129-5p	1	0	1	1	1	1	CTNNA2	catenin (cadherin-associated protein), alpha 2
hsa-miR-129-5p	1	0	1	1	1	1	DCX	doublecortin
hsa-miR-129-5p	1	0	0	1	0	0	ZNF516	zinc finger protein 516
hsa-miR-129-5p	1	0	1	0	1	1	EXOC5	exocyst complex component 5
hsa-miR-129-5p	1	0	1	0	1	1	DDX3X	DEAD (Asp-Glu-Ala-Asp) box polypeptide 3, X-linked
hsa-miR-129-5p	1	0	1	1	0	0	JPH3	junctophilin 3
hsa-miR-129-5p	1	0	1	0	1	1	KPNA6	karyopherin alpha 6 (importin alpha 7)
hsa-miR-129-5p	1	0	1	1	1	1	GPR135	G protein-coupled receptor 135
hsa-miR-129-5p	1	0	1	0	1	1	SOX4	SRY (sex determining region Y)-box 4
hsa-miR-129-5p	1	0	1	0	0	0	CSMD1	CUB and Sushi multiple domains 1
hsa-miR-129-5p	1	0	1	1	1	1	CDC42EP3	CDC42 effector protein (Rho GTPase binding) 3
hsa-miR-129-5p	1	0	1	0	1	1	ESRRG	estrogen-related receptor gamma
hsa-miR-129-5p	1	0	1	1	1	1	CDKN1C	cyclin-dependent kinase inhibitor 1C (p57, Kip2)
hsa-miR-129-5p	1	0	1	1	1	1	KDSR	3-ketodihydrosphingosine reductase
hsa-miR-129-5p	1	0	1	0	1	1	CHMP2B	charged multivesicular body protein 2B
hsa-miR-129-5p	1	0	1	1	0	0	PAX2	paired box 2
hsa-miR-129-5p	1	0	1	1	1	1	ESR1	estrogen receptor 1
hsa-miR-129-5p	1	0	1	0	1	1	TSPYL4	TSPY-like 4
hsa-miR-129-5p	1	0	0	1	0	0	PLEKHO1	pleckstrin homology domain containing, family O member 1
hsa-miR-129-5p	1	0	1	1	1	1	NR3C2	nuclear receptor subfamily 3, group C, member 2
hsa-miR-129-5p	1	0	1	1	1	1	PIEZO2	piezo-type mechanosensitive ion channel component 2
hsa-miR-129-5p	1	0	1	1	1	1	ZNF618	zinc finger protein 618
hsa-miR-129-5p	1	0	1	1	1	1	VANGL1	vang-like 1 (van gogh, Drosophila)
hsa-miR-129-5p	1	0	1	1	1	1	EI24	etoposide induced 2.4 mRNA
hsa-miR-129-5p	1	0	1	1	1	1	FOXN3	forkhead box N3
hsa-miR-129-5p	1	0	1	1	1	1	MTMR3	myotubularin related protein 3
hsa-miR-129-5p	1	0	1	1	1	1	TCF20	transcription factor 20 (AR1)
hsa-miR-129-5p	1	0	1	1	1	1	TCF4	transcription factor 4
hsa-miR-129-5p	1	0	1	1	1	1	GRM4	glutamate receptor, metabotropic 4
hsa-miR-129-5p	1	0	1	1	1	1	GLCCI1	glucocorticoid induced transcript 1
hsa-miR-129-5p	1	0	1	1	1	1	RUNX1	runt-related transcription factor 1
hsa-miR-129-5p	1	0	1	1	1	1	DLGAP2	discs, large (Drosophila) homolog-associated protein 2
hsa-miR-129-5p	1	0	1	1	1	1	ZFX	zinc finger protein, X-linked
hsa-miR-129-5p	1	0	1	1	1	1	CACNG2	calcium channel, voltage-dependent, gamma subunit 2
hsa-miR-129-5p	1	0	1	1	1	1	KAT6B	K(lysine) acetyltransferase 6B
hsa-miR-129-5p	1	0	1	0	1	1	HNRNPA3	heterogeneous nuclear ribonucleoprotein A3
hsa-miR-129-5p	1	0	1	1	1	1	TGIF2	TGFB-induced factor homeobox 2
hsa-miR-129-5p	1	0	1	1	1	1	RPGRIP1L	RPGRIP1-like
hsa-miR-129-5p	1	0	1	0	1	1	KLF13	Kruppel-like factor 13
hsa-miR-129-5p	1	0	1	1	1	1	SLC7A1	solute carrier family 7 (cationic amino acid transporter, y+ system), member 1
hsa-miR-129-5p	1	0	1	1	1	1	GALNT1	UDP-N-acetyl-alpha-D-galactosamine:polypeptide N-acetylgalactosaminyltransferase 1 (GalNAc-T1)
hsa-miR-129-5p	1	0	1	1	1	1	PHF21B	PHD finger protein 21B
hsa-miR-129-5p	1	0	1	0	1	1	FNDC3B	fibronectin type III domain containing 3B
hsa-miR-129-5p	1	0	1	0	0	0	BAHCC1	BAH domain and coiled-coil containing 1
hsa-miR-129-5p	1	0	1	1	1	1	CASZ1	castor zinc finger 1
hsa-miR-129-5p	1	0	1	1	1	1	MYRIP	myosin VIIA and Rab interacting protein
hsa-miR-129-5p	1	0	1	1	1	1	ACTN1	actinin, alpha 1
hsa-miR-129-5p	1	0	1	1	1	1	RCOR1	REST corepressor 1
hsa-miR-129-5p	1	0	1	1	0	0	INHBB	inhibin, beta B
hsa-miR-129-5p	1	0	1	1	1	1	PCYOX1	prenylcysteine oxidase 1
hsa-miR-129-5p	1	0	1	0	1	1	BMPR2	bone morphogenetic protein receptor, type II (serine/threonine kinase)
hsa-miR-129-5p	1	0	1	1	1	1	RBFOX2	RNA binding protein, fox-1 homolog (C. elegans) 2
hsa-miR-129-5p	1	0	1	1	1	1	PAPD5	PAP associated domain containing 5
hsa-miR-129-5p	1	0	1	1	1	1	ASB8	ankyrin repeat and SOCS box containing 8
hsa-miR-129-5p	1	0	1	1	1	1	CACNB4	calcium channel, voltage-dependent, beta 4 subunit
hsa-miR-129-5p	1	0	1	1	1	1	CLTC	clathrin, heavy chain (Hc)
hsa-miR-129-5p	1	0	1	1	1	1	IGF1	insulin-like growth factor 1 (somatomedin C)
hsa-miR-129-5p	1	0	1	1	1	1	BRWD1	bromodomain and WD repeat domain containing 1
hsa-miR-129-5p	1	0	1	1	1	1	RICTOR	RPTOR independent companion of MTOR, complex 2
hsa-miR-129-5p	1	0	1	1	1	1	GPRIN3	GPRIN family member 3
hsa-miR-129-5p	1	0	1	1	1	1	HARS	histidyl-tRNA synthetase
hsa-miR-129-5p	1	0	1	1	1	1	MECP2	methyl CpG binding protein 2 (Rett syndrome)
hsa-miR-129-5p	1	0	1	1	1	1	FAM63B	family with sequence similarity 63, member B
hsa-miR-129-5p	1	0	1	1	1	1	FRS2	fibroblast growth factor receptor substrate 2
hsa-miR-129-5p	1	0	1	0	1	1	TRPS1	trichorhinophalangeal syndrome I
hsa-miR-129-5p	1	0	1	0	1	1	CHD7	chromodomain helicase DNA binding protein 7
hsa-miR-129-5p	1	0	1	0	1	1	ETV6	ets variant 6
hsa-miR-129-5p	1	0	1	1	1	1	ZNF410	zinc finger protein 410
hsa-miR-129-5p	1	0	1	1	1	1	PELI2	pellino E3 ubiquitin protein ligase family member 2
hsa-miR-129-5p	1	0	1	1	1	1	GRIA4	glutamate receptor, ionotropic, AMPA 4
hsa-miR-129-5p	1	0	1	1	1	1	GABBR2	gamma-aminobutyric acid (GABA) B receptor, 2
hsa-miR-129-5p	1	0	1	1	1	1	INSIG2	insulin induced gene 2
hsa-miR-129-5p	1	0	1	1	0	0	OLIG2	oligodendrocyte lineage transcription factor 2
hsa-miR-129-5p	1	0	1	1	1	1	NFIB	nuclear factor I/B
hsa-miR-129-5p	1	0	1	1	1	1	HOXC13	homeobox C13
hsa-miR-129-5p	1	0	1	1	1	1	PLCG1	phospholipase C, gamma 1
hsa-miR-129-5p	1	0	1	1	1	1	GNA12	guanine nucleotide binding protein (G protein) alpha 12
hsa-miR-129-5p	1	0	1	0	1	1	MED14	mediator complex subunit 14
hsa-miR-129-5p	1	0	1	0	1	1	CACYBP	calcyclin binding protein
hsa-miR-129-5p	1	0	1	1	1	1	GLUL	glutamate-ammonia ligase
hsa-miR-129-5p	1	0	1	1	0	0	SMCHD1	structural maintenance of chromosomes flexible hinge domain containing 1
hsa-miR-129-5p	1	0	1	0	1	1	PITPNA	phosphatidylinositol transfer protein, alpha
hsa-miR-129-5p	1	0	1	1	1	1	HIPK1	homeodomain interacting protein kinase 1
hsa-miR-129-5p	1	0	1	0	1	1	NFIX	nuclear factor I/X (CCAAT-binding transcription factor)
hsa-miR-129-5p	1	0	1	1	1	1	GRHL3	grainyhead-like 3 (Drosophila)
hsa-miR-129-5p	1	0	1	1	1	1	CNBP	CCHC-type zinc finger, nucleic acid binding protein
hsa-miR-129-5p	1	0	1	1	1	1	BANP	BTG3 associated nuclear protein
hsa-miR-129-5p	1	0	1	1	1	1	ATP8B2	ATPase, aminophospholipid transporter, class I, type 8B, member 2
hsa-miR-129-5p	1	0	1	1	1	1	ZNF280C	zinc finger protein 280C
hsa-miR-129-5p	1	0	1	1	1	1	FAM155B	family with sequence similarity 155, member B
hsa-miR-129-5p	1	0	1	1	1	1	FAM210B	family with sequence similarity 210, member B
hsa-miR-129-5p	1	0	1	1	1	1	CXorf23	chromosome X open reading frame 23
hsa-miR-129-5p	1	0	1	0	1	1	UBASH3B	ubiquitin associated and SH3 domain containing B
hsa-miR-129-5p	1	0	1	1	1	1	ZFYVE16	zinc finger, FYVE domain containing 16
hsa-miR-129-5p	1	0	1	1	0	0	SRCAP	Snf2-related CREBBP activator protein
hsa-miR-129-5p	1	0	1	1	1	1	ABCC5	ATP-binding cassette, sub-family C (CFTR/MRP), member 5
hsa-miR-129-5p	1	0	1	0	1	1	PTPRT	protein tyrosine phosphatase, receptor type, T
hsa-miR-129-5p	1	0	1	0	1	1	KIAA0408	KIAA0408
hsa-miR-129-5p	0	0	1	1	1	1	PREPL	prolyl endopeptidase-like
hsa-miR-129-5p	1	0	1	1	1	1	AUTS2	autism susceptibility candidate 2
hsa-miR-129-5p	1	0	1	1	1	1	CDC42BPA	CDC42 binding protein kinase alpha (DMPK-like)
hsa-miR-129-5p	1	0	1	0	1	1	CEP350	centrosomal protein 350kDa
hsa-miR-129-5p	0	0	1	1	1	1	NEU3	sialidase 3 (membrane sialidase)
hsa-miR-129-5p	0	0	1	1	0	0	ZNF862	zinc finger protein 862
hsa-miR-129-5p	1	0	1	1	0	0	PCLO	piccolo (presynaptic cytomatrix protein)
hsa-miR-129-5p	1	0	1	1	1	1	GREB1	growth regulation by estrogen in breast cancer 1
hsa-miR-129-5p	0	0	1	1	1	1	CLEC4M	C-type lectin domain family 4, member M
hsa-miR-129-5p	0	0	1	1	0	0	ATP10B	ATPase, class V, type 10B
hsa-miR-129-5p	1	0	1	1	1	1	MATR3	matrin 3
hsa-miR-129-5p	1	0	1	0	1	1	RBM12	RNA binding motif protein 12
hsa-miR-129-5p	1	0	1	1	1	1	CAMKK2	calcium/calmodulin-dependent protein kinase kinase 2, beta
hsa-miR-129-5p	0	0	1	1	1	1	WDR47	WD repeat domain 47
hsa-miR-129-5p	1	0	1	1	1	1	CALCR	calcitonin receptor
hsa-miR-129-5p	1	0	1	1	1	1	UBE2K	ubiquitin-conjugating enzyme E2K
hsa-miR-129-5p	1	0	1	1	1	1	CPEB3	cytoplasmic polyadenylation element binding protein 3
hsa-miR-129-5p	0	0	1	1	1	1	TBC1D30	TBC1 domain family, member 30
hsa-miR-129-5p	1	0	1	1	1	1	CNOT1	CCR4-NOT transcription complex, subunit 1
hsa-miR-129-5p	1	0	1	1	0	0	FRMD4B	FERM domain containing 4B
hsa-miR-129-5p	1	0	1	1	1	1	PHF8	PHD finger protein 8
hsa-miR-129-5p	1	0	1	0	1	1	ODZ2	odz, odd Oz/ten-m homolog 2 (Drosophila)
hsa-miR-129-5p	1	0	1	1	1	1	SPIRE1	spire homolog 1 (Drosophila)
hsa-miR-129-5p	1	0	1	1	0	0	KIAA1210	KIAA1210
hsa-miR-129-5p	1	0	1	1	1	1	KIAA1217	KIAA1217
hsa-miR-129-5p	1	0	1	1	1	1	ATXN7L1	ataxin 7-like 1
hsa-miR-129-5p	1	0	1	1	0	0	ATAD2B	ATPase family, AAA domain containing 2B
hsa-miR-129-5p	1	0	1	1	1	1	ASAP1	ArfGAP with SH3 domain, ankyrin repeat and PH domain 1
hsa-miR-129-5p	0	0	1	1	1	1	FSTL5	follistatin-like 5
hsa-miR-129-5p	0	0	1	1	1	1	FILIP1	filamin A interacting protein 1
hsa-miR-129-5p	1	0	1	1	1	1	PCDH19	protocadherin 19
hsa-miR-129-5p	1	0	1	1	1	1	TAOK1	TAO kinase 1
hsa-miR-129-5p	1	0	1	1	1	1	UPF2	UPF2 regulator of nonsense transcripts homolog (yeast)
hsa-miR-129-5p	1	0	1	1	1	1	INADL	InaD-like (Drosophila)
hsa-miR-129-5p	1	0	1	1	0	0	KIAA1549	KIAA1549
hsa-miR-129-5p	1	0	1	1	1	1	PPP6R3	protein phosphatase 6, regulatory subunit 3
hsa-miR-129-5p	1	0	1	1	1	1	SNX3	sorting nexin 3
hsa-miR-129-5p	1	0	1	1	1	1	PTBP2	polypyrimidine tract binding protein 2
hsa-miR-129-5p	0	0	1	1	1	1	BHLHB9	basic helix-loop-helix domain containing, class B, 9
hsa-miR-129-5p	0	0	1	1	1	1	SLC11A2	solute carrier family 11 (proton-coupled divalent metal ion transporters), member 2
hsa-miR-129-5p	1	0	1	1	1	1	AFAP1L2	actin filament associated protein 1-like 2
hsa-miR-129-5p	1	0	1	1	1	1	MAT2B	methionine adenosyltransferase II, beta
hsa-miR-129-5p	1	0	1	1	1	1	POGZ	pogo transposable element with ZNF domain
hsa-miR-129-5p	1	0	1	1	1	1	SH3TC2	SH3 domain and tetratricopeptide repeats 2
hsa-miR-129-5p	1	0	1	0	1	1	RNF43	ring finger protein 43
hsa-miR-129-5p	0	0	1	1	1	1	NELL1	NEL-like 1 (chicken)
hsa-miR-129-5p	0	0	1	1	0	0	FAM208B	family with sequence similarity 208, member B
hsa-miR-129-5p	0	0	1	1	1	1	BCO2	beta-carotene oxygenase 2
hsa-miR-129-5p	1	0	1	1	1	1	TRPM3	transient receptor potential cation channel, subfamily M, member 3
hsa-miR-129-5p	1	0	1	0	1	1	LIN54	lin-54 homolog (C. elegans)
hsa-miR-129-5p	1	0	1	0	1	1	BEND4	BEN domain containing 4
hsa-miR-129-5p	1	0	1	0	1	1	NFE2L2	nuclear factor (erythroid-derived 2)-like 2
hsa-miR-129-5p	1	0	1	1	1	1	SEC14L1	SEC14-like 1 (S. cerevisiae)
hsa-miR-129-5p	0	0	1	1	1	1	CAST	calpastatin
hsa-miR-129-5p	1	0	1	1	1	1	KLHL5	kelch-like 5 (Drosophila)
hsa-miR-129-5p	1	0	1	1	1	1	VLDLR	very low density lipoprotein receptor
hsa-miR-129-5p	1	0	1	1	1	1	COL11A1	collagen, type XI, alpha 1
hsa-miR-129-5p	1	0	1	1	1	1	DAPK1	death-associated protein kinase 1
hsa-miR-129-5p	1	0	1	1	1	1	MEF2A	myocyte enhancer factor 2A
hsa-miR-129-5p	1	0	1	1	1	1	DTNA	dystrobrevin, alpha
hsa-miR-129-5p	1	0	1	1	0	0	TSPYL2	TSPY-like 2
hsa-miR-129-5p	1	0	1	1	1	1	PPFIA1	protein tyrosine phosphatase, receptor type, f polypeptide (PTPRF), interacting protein (liprin), alpha 1
hsa-miR-129-5p	1	0	1	0	1	1	CHL1	cell adhesion molecule with homology to L1CAM (close homolog of L1)
hsa-miR-129-5p	0	0	1	0	0	0	CACNA1B	calcium channel, voltage-dependent, N type, alpha 1B subunit
hsa-miR-129-5p	1	0	1	1	1	1	MYO5A	myosin VA (heavy chain 12, myoxin)
hsa-miR-129-5p	1	0	1	1	1	1	HNRNPK	heterogeneous nuclear ribonucleoprotein K
hsa-miR-129-5p	0	0	1	1	0	0	BMP1	bone morphogenetic protein 1
hsa-miR-129-5p	1	0	1	0	1	1	RPL28	ribosomal protein L28
hsa-miR-129-5p	0	0	1	1	1	1	HLA-DQA1	major histocompatibility complex, class II, DQ alpha 1
hsa-miR-129-5p	0	0	1	0	0	0	LOC348162	uncharacterized protein 348162
hsa-miR-129-5p	0	0	1	1	0	0	SLC22A8	solute carrier family 22 (organic anion transporter), member 8
hsa-miR-129-5p	1	0	1	1	1	1	GOLGA4	golgin A4
hsa-miR-129-5p	1	0	1	0	1	1	ADD3	adducin 3 (gamma)
hsa-miR-129-5p	1	0	1	1	0	0	KAT5	K(lysine) acetyltransferase 5
hsa-miR-129-5p	1	0	1	1	1	1	CRTAM	cytotoxic and regulatory T cell molecule
hsa-miR-129-5p	0	0	1	1	0	0	TRIM27	tripartite motif containing 27
hsa-miR-129-5p	0	0	1	1	1	1	PLD1	phospholipase D1, phosphatidylcholine-specific
hsa-miR-129-5p	1	0	1	1	1	1	PICALM	phosphatidylinositol binding clathrin assembly protein
hsa-miR-129-5p	1	0	1	1	1	1	SDHC	succinate dehydrogenase complex, subunit C, integral membrane protein, 15kDa
hsa-miR-129-5p	1	0	1	1	1	1	ADARB1	adenosine deaminase, RNA-specific, B1
hsa-miR-129-5p	1	0	1	1	1	1	STX16	syntaxin 16
hsa-miR-129-5p	1	0	1	1	1	1	SYNJ1	synaptojanin 1
hsa-miR-129-5p	1	0	1	0	1	1	MLL2	myeloid/lymphoid or mixed-lineage leukemia 2
hsa-miR-129-5p	1	0	1	0	1	1	PDE4D	phosphodiesterase 4D, cAMP-specific
hsa-miR-129-5p	1	0	1	1	1	1	CBFA2T2	core-binding factor, runt domain, alpha subunit 2; translocated to, 2
hsa-miR-129-5p	1	0	1	0	0	0	MAP3K1	mitogen-activated protein kinase kinase kinase 1, E3 ubiquitin protein ligase
hsa-miR-129-5p	0	0	1	1	1	1	UBE4B	ubiquitination factor E4B
hsa-miR-129-5p	0	0	1	1	1	1	SLC16A7	solute carrier family 16, member 7 (monocarboxylic acid transporter 2)
hsa-miR-129-5p	0	0	1	1	1	1	KHDRBS3	KH domain containing, RNA binding, signal transduction associated 3
hsa-miR-129-5p	1	0	1	1	0	0	SH2D2A	SH2 domain containing 2A
hsa-miR-129-5p	0	0	1	1	1	1	CYP4F3	cytochrome P450, family 4, subfamily F, polypeptide 3
hsa-miR-129-5p	1	0	1	1	1	1	SHOC2	soc-2 suppressor of clear homolog (C. elegans)
hsa-miR-129-5p	1	0	1	1	1	1	MBNL2	muscleblind-like splicing regulator 2
hsa-miR-129-5p	1	0	1	1	1	1	CTNND1	catenin (cadherin-associated protein), delta 1
hsa-miR-129-5p	1	0	1	1	1	1	NUDT4	nudix (nucleoside diphosphate linked moiety X)-type motif 4
hsa-miR-129-5p	0	0	1	1	1	1	SC5DL	sterol-C5-desaturase (ERG3 delta-5-desaturase homolog, S. cerevisiae)-like
hsa-miR-129-5p	1	0	1	1	0	0	SLC44A2	solute carrier family 44, member 2
hsa-miR-129-5p	1	0	1	1	1	1	PDE4A	phosphodiesterase 4A, cAMP-specific
hsa-miR-129-5p	1	0	1	1	1	1	TP63	tumor protein p63
hsa-miR-129-5p	0	0	1	1	1	1	LYPLA1	lysophospholipase I
hsa-miR-129-5p	0	0	1	1	1	1	PCBP4	poly(rC) binding protein 4
hsa-miR-129-5p	0	0	1	1	1	1	FHL1	four and a half LIM domains 1
hsa-miR-129-5p	1	0	1	0	1	1	CD164	CD164 molecule, sialomucin
hsa-miR-129-5p	0	0	1	1	1	1	SMC2	structural maintenance of chromosomes 2
hsa-miR-129-5p	0	0	1	1	1	1	TIAM2	T-cell lymphoma invasion and metastasis 2
hsa-miR-129-5p	1	0	1	0	1	1	FAM19A5	family with sequence similarity 19 (chemokine (C-C motif)-like), member A5
hsa-miR-129-5p	1	0	1	1	1	1	HNRNPH3	heterogeneous nuclear ribonucleoprotein H3 (2H9)
hsa-miR-129-5p	1	0	1	1	1	1	CAB39	calcium binding protein 39
hsa-miR-129-5p	0	0	1	0	1	1	CLEC5A	C-type lectin domain family 5, member A
hsa-miR-129-5p	0	0	1	1	1	1	FAM114A2	family with sequence similarity 114, member A2
hsa-miR-129-5p	1	0	1	1	1	1	C16orf70	chromosome 16 open reading frame 70
hsa-miR-129-5p	0	0	1	0	0	0	ARL17A	ADP-ribosylation factor-like 17A
hsa-miR-129-5p	1	0	1	1	1	1	KCNMB2	potassium large conductance calcium-activated channel, subfamily M, beta member 2
hsa-miR-129-5p	1	0	1	1	1	1	NXT2	nuclear transport factor 2-like export factor 2
hsa-miR-129-5p	1	0	1	1	0	0	TDRKH	tudor and KH domain containing
hsa-miR-129-5p	0	0	1	0	0	0	TIGD7	tigger transposable element derived 7
hsa-miR-129-5p	0	0	1	0	1	1	PRDM6	PR domain containing 6
hsa-miR-129-5p	0	0	1	1	1	1	ASUN	asunder, spermatogenesis regulator homolog (Drosphila)
hsa-miR-129-5p	0	0	1	0	1	1	ERBB2IP	erbb2 interacting protein
hsa-miR-129-5p	1	0	1	1	1	1	PCDH11Y	protocadherin 11 Y-linked
hsa-miR-129-5p	0	0	1	1	1	1	CYP3A43	cytochrome P450, family 3, subfamily A, polypeptide 43
hsa-miR-129-5p	0	0	1	0	0	0	AFG3L1P	AFG3 ATPase family gene 3-like 1 (S. cerevisiae), pseudogene
hsa-miR-129-5p	0	0	1	1	1	1	RERG	RAS-like, estrogen-regulated, growth inhibitor
hsa-miR-129-5p	1	0	1	1	1	1	CALU	calumenin
hsa-miR-129-5p	0	0	1	1	1	1	MS4A4A	membrane-spanning 4-domains, subfamily A, member 4A
hsa-miR-129-5p	1	0	1	0	1	1	WIPF2	WAS/WASL interacting protein family, member 2
hsa-miR-129-5p	1	0	1	1	1	1	NTRK2	neurotrophic tyrosine kinase, receptor, type 2
hsa-miR-129-5p	0	0	1	1	0	0	CNKSR2	connector enhancer of kinase suppressor of Ras 2
hsa-miR-129-5p	0	0	1	1	1	1	PTMA	prothymosin, alpha
hsa-miR-129-5p	1	0	1	0	1	1	PPP1R12A	protein phosphatase 1, regulatory subunit 12A
hsa-miR-129-5p	0	0	1	1	1	1	CSPG5	chondroitin sulfate proteoglycan 5 (neuroglycan C)
hsa-miR-129-5p	1	0	1	1	1	1	F3	coagulation factor III (thromboplastin, tissue factor)
hsa-miR-129-5p	0	0	1	1	0	0	HOPX	HOP homeobox
hsa-miR-129-5p	0	0	1	1	1	1	AMPH	amphiphysin
hsa-miR-129-5p	0	0	1	1	1	1	TTLL11	tubulin tyrosine ligase-like family, member 11
hsa-miR-129-5p	0	0	1	1	1	1	BMP2K	BMP2 inducible kinase
hsa-miR-129-5p	0	0	1	1	1	1	ZNF638	zinc finger protein 638
hsa-miR-129-5p	1	0	1	0	1	1	IL1RAP	interleukin 1 receptor accessory protein
hsa-miR-129-5p	1	0	1	1	1	1	AFF2	AF4/FMR2 family, member 2
hsa-miR-129-5p	0	0	1	1	1	1	GNAS	GNAS complex locus
hsa-miR-129-5p	0	0	1	1	1	1	TCFL5	transcription factor-like 5 (basic helix-loop-helix)
hsa-miR-129-5p	1	0	1	1	1	1	ILF3	interleukin enhancer binding factor 3, 90kDa
hsa-miR-129-5p	0	0	1	1	1	1	CD1E	CD1e molecule
hsa-miR-129-5p	0	0	1	1	0	0	MCOLN1	mucolipin 1
hsa-miR-129-5p	1	0	1	1	1	1	PALM2	paralemmin 2
hsa-miR-129-5p	1	0	1	1	1	1	NRXN3	neurexin 3
hsa-miR-129-5p	0	0	1	0	1	1	SRPK1	SRSF protein kinase 1
hsa-miR-129-5p	1	0	1	1	1	1	EMID2	EMI domain containing 2
hsa-miR-129-5p	0	0	1	1	1	1	CCNB3	cyclin B3
hsa-miR-129-5p	0	0	1	1	1	1	TRDN	triadin
hsa-miR-129-5p	0	0	1	0	1	1	MUC15	mucin 15, cell surface associated
hsa-miR-129-5p	1	0	1	1	1	1	SYNM	synemin, intermediate filament protein
hsa-miR-129-5p	0	0	1	0	0	0	COL28A1	collagen, type XXVIII, alpha 1
hsa-miR-129-5p	1	0	1	1	1	1	SIK2	salt-inducible kinase 2
hsa-miR-129-5p	0	0	1	0	0	0	TUG1	taurine upregulated 1 (non-protein coding)
hsa-miR-129-5p	1	0	1	1	1	1	MEIS2	Meis homeobox 2
hsa-miR-129-5p	1	0	1	1	1	1	RIC8B	resistance to inhibitors of cholinesterase 8 homolog B (C. elegans)
hsa-miR-129-5p	1	0	1	1	1	1	CADM3	cell adhesion molecule 3
hsa-miR-129-5p	0	0	1	1	1	1	VPS52	vacuolar protein sorting 52 homolog (S. cerevisiae)
hsa-miR-129-5p	1	0	1	1	1	1	MBD5	methyl-CpG binding domain protein 5
hsa-miR-129-5p	0	0	1	1	1	1	STAU2	staufen, RNA binding protein, homolog 2 (Drosophila)
hsa-miR-129-5p	0	0	1	1	0	0	UBR4	ubiquitin protein ligase E3 component n-recognin 4
hsa-miR-129-5p	1	0	1	1	0	0	UQCC	ubiquinol-cytochrome c reductase complex chaperone
hsa-miR-129-5p	1	0	1	1	1	1	SLCO5A1	solute carrier organic anion transporter family, member 5A1
hsa-miR-129-5p	1	0	1	0	0	0	ZNRF3	zinc and ring finger 3
hsa-miR-129-5p	1	0	1	1	1	1	YME1L1	YME1-like 1 (S. cerevisiae)
hsa-miR-129-5p	0	0	1	0	0	0	LOC399491	GPS, PLAT and transmembrane domain-containing protein
hsa-miR-129-5p	0	0	1	1	1	1	CXorf57	chromosome X open reading frame 57
hsa-miR-129-5p	0	0	1	1	1	1	METTL7A	methyltransferase like 7A
hsa-miR-129-5p	0	0	1	0	0	0	IFFO2	intermediate filament family orphan 2
hsa-miR-129-5p	1	0	1	0	1	1	ATP2B1	ATPase, Ca++ transporting, plasma membrane 1
hsa-miR-129-5p	1	0	1	1	1	1	ABHD3	abhydrolase domain containing 3
hsa-miR-129-5p	0	0	1	1	0	0	MPRIP	myosin phosphatase Rho interacting protein
hsa-miR-129-5p	1	0	1	1	1	1	YPEL5	yippee-like 5 (Drosophila)
hsa-miR-129-5p	1	0	1	1	1	1	NAA30	N(alpha)-acetyltransferase 30, NatC catalytic subunit
hsa-miR-129-5p	0	0	1	0	1	1	FLJ23152	uncharacterized LOC401236
hsa-miR-129-5p	0	0	1	1	1	1	CCDC33	coiled-coil domain containing 33
hsa-miR-129-5p	0	0	1	1	1	1	GTF2H1	general transcription factor IIH, polypeptide 1, 62kDa
hsa-miR-129-5p	0	0	1	1	1	1	PLEKHS1	pleckstrin homology domain containing, family S member 1
hsa-miR-129-5p	0	0	1	1	1	1	DUSP14	dual specificity phosphatase 14
hsa-miR-129-5p	1	0	1	1	1	1	FOXP1	forkhead box P1
hsa-miR-129-5p	1	0	1	1	1	1	FAM40A	family with sequence similarity 40, member A
hsa-miR-129-5p	0	0	1	1	1	1	DTL	denticleless E3 ubiquitin protein ligase homolog (Drosophila)
hsa-miR-129-5p	1	0	1	1	1	1	TMEM2	transmembrane protein 2
hsa-miR-129-5p	1	0	1	1	1	1	SLAIN1	SLAIN motif family, member 1
hsa-miR-129-5p	0	0	1	0	0	0	LOC254559	uncharacterized LOC254559
hsa-miR-129-5p	0	0	1	1	1	1	C8orf46	chromosome 8 open reading frame 46
hsa-miR-129-5p	0	0	1	0	0	0	CHST9-AS1	CHST9 antisense RNA 1
hsa-miR-129-5p	0	0	1	1	1	1	TOX2	TOX high mobility group box family member 2
hsa-miR-129-5p	0	0	1	0	0	0	NYAP2	neuronal tyrosine-phosphorylated phosphoinositide-3-kinase adaptor 2
hsa-miR-129-5p	0	0	1	1	1	1	ANKRD36B	ankyrin repeat domain 36B
hsa-miR-129-5p	0	0	1	1	0	0	BEAN1	brain expressed, associated with NEDD4, 1
hsa-miR-129-5p	1	0	1	0	1	1	FSTL4	follistatin-like 4
hsa-miR-129-5p	1	0	1	1	1	1	AGPAT1	1-acylglycerol-3-phosphate O-acyltransferase 1 (lysophosphatidic acid acyltransferase, alpha)
hsa-miR-129-5p	1	0	1	1	1	1	CLCN5	chloride channel, voltage-sensitive 5
hsa-miR-129-5p	0	0	1	0	1	1	ZNF498	zinc finger protein 498
hsa-miR-129-5p	0	0	1	1	0	0	RELT	RELT tumor necrosis factor receptor
hsa-miR-129-5p	0	0	1	1	0	0	LOXHD1	lipoxygenase homology domains 1
hsa-miR-129-5p	0	0	1	1	1	1	VWA3B	von Willebrand factor A domain containing 3B
hsa-miR-129-5p	1	0	1	1	0	0	ZBTB37	zinc finger and BTB domain containing 37
hsa-miR-129-5p	0	0	1	1	1	1	TAF8	TAF8 RNA polymerase II, TATA box binding protein (TBP)-associated factor, 43kDa
hsa-miR-129-5p	0	0	1	1	0	0	NXF2	nuclear RNA export factor 2
hsa-miR-129-5p	0	0	1	1	1	1	MS4A14	membrane-spanning 4-domains, subfamily A, member 14
hsa-miR-129-5p	1	0	1	0	1	1	PLEKHA1	pleckstrin homology domain containing, family A (phosphoinositide binding specific) member 1
hsa-miR-129-5p	1	0	1	1	1	1	ANKRD49	ankyrin repeat domain 49
hsa-miR-129-5p	1	0	1	1	1	1	ANKRD29	ankyrin repeat domain 29
hsa-miR-129-5p	0	0	1	0	0	0	LINC00637	long intergenic non-protein coding RNA 637
hsa-miR-129-5p	0	0	1	1	1	1	ZBTB26	zinc finger and BTB domain containing 26
hsa-miR-129-5p	0	0	1	0	1	1	CCDC68	coiled-coil domain containing 68
hsa-miR-129-5p	1	0	1	1	1	1	PEAR1	platelet endothelial aggregation receptor 1
hsa-miR-129-5p	0	0	1	0	1	1	CDHR3	cadherin-related family member 3
hsa-miR-129-5p	1	0	1	1	1	1	SIRT1	sirtuin 1
hsa-miR-129-5p	1	0	1	1	1	1	TLK1	tousled-like kinase 1
hsa-miR-129-5p	0	0	1	0	0	0	LOC643837	uncharacterized LOC643837
hsa-miR-129-5p	1	0	1	1	1	1	EGR2	early growth response 2
hsa-miR-129-5p	1	0	1	1	1	1	FRY	furry homolog (Drosophila)
hsa-miR-129-5p	0	0	1	0	1	1	TBX5-AS1	TBX5 antisense RNA 1
hsa-miR-129-5p	0	0	1	0	0	0	LOC440910	uncharacterized LOC440910
hsa-miR-129-5p	0	0	1	1	1	1	GPATCH1	G patch domain containing 1
hsa-miR-129-5p	1	0	1	1	1	1	FBXW2	F-box and WD repeat domain containing 2
hsa-miR-129-5p	1	0	1	1	1	1	LUC7L2	LUC7-like 2 (S. cerevisiae)
hsa-miR-129-5p	0	0	1	1	1	1	NRCAM	neuronal cell adhesion molecule
hsa-miR-129-5p	0	0	1	1	1	1	MARC1	mitochondrial amidoxime reducing component 1
hsa-miR-129-5p	0	0	1	0	0	0	CXXC1P1	CXXC finger protein 1 pseudogene 1
hsa-miR-129-5p	1	0	1	1	1	1	SSH3	slingshot homolog 3 (Drosophila)
hsa-miR-129-5p	0	0	1	1	0	0	WBP1	WW domain binding protein 1
hsa-miR-129-5p	0	0	1	1	1	1	SPOCK1	sparc/osteonectin, cwcv and kazal-like domains proteoglycan (testican) 1
hsa-miR-129-5p	0	0	1	0	0	0	PART1	prostate androgen-regulated transcript 1 (non-protein coding)
hsa-miR-129-5p	1	0	1	1	1	1	SLC7A8	solute carrier family 7 (amino acid transporter light chain, L system), member 8
hsa-miR-129-5p	1	0	1	1	1	1	SNAP25	synaptosomal-associated protein, 25kDa
hsa-miR-129-5p	1	0	1	1	1	1	SYT1	synaptotagmin I
hsa-miR-129-5p	1	0	1	1	1	1	SIAH1	siah E3 ubiquitin protein ligase 1
hsa-miR-129-5p	1	0	1	0	1	1	ARL6IP6	ADP-ribosylation-like factor 6 interacting protein 6
hsa-miR-129-5p	0	0	1	1	1	1	RBM25	RNA binding motif protein 25
hsa-miR-129-5p	1	0	1	0	1	1	NCOA7	nuclear receptor coactivator 7
hsa-miR-129-5p	0	0	1	1	1	1	METTL13	methyltransferase like 13
hsa-miR-129-5p	0	0	1	1	1	1	TMEM170A	transmembrane protein 170A
hsa-miR-129-5p	1	0	1	1	1	1	GCLC	glutamate-cysteine ligase, catalytic subunit
hsa-miR-129-5p	0	0	1	0	0	0	FLJ37798	uncharacterized LOC401264
hsa-miR-129-5p	0	0	1	1	1	1	MOBP	myelin-associated oligodendrocyte basic protein
hsa-miR-129-5p	1	0	1	1	1	1	ANKRD46	ankyrin repeat domain 46
hsa-miR-129-5p	0	0	1	1	0	0	ZNF185	zinc finger protein 185 (LIM domain)
hsa-miR-129-5p	1	0	1	0	1	1	UVRAG	UV radiation resistance associated gene
hsa-miR-129-5p	0	0	1	0	0	0	LOC730101	uncharacterized LOC730101
hsa-miR-129-5p	1	0	1	1	1	1	CNEP1R1	CTD nuclear envelope phosphatase 1 regulatory subunit 1
hsa-miR-129-5p	0	0	1	1	1	1	SIRPB2	signal-regulatory protein beta 2
hsa-miR-129-5p	1	0	1	1	1	1	SPATS2	spermatogenesis associated, serine-rich 2
hsa-miR-129-5p	1	0	1	1	1	1	ZC3H11A	zinc finger CCCH-type containing 11A
hsa-miR-129-5p	1	0	1	0	1	1	STC2	stanniocalcin 2
hsa-miR-129-5p	0	0	1	1	1	1	FBLN1	fibulin 1
hsa-miR-129-5p	0	0	1	0	0	0	LOC100133029	sirtuin 5 pseudogene
hsa-miR-129-5p	1	0	1	1	1	1	GAPVD1	GTPase activating protein and VPS9 domains 1
hsa-miR-129-5p	0	0	1	0	0	0	C1orf204	chromosome 1 open reading frame 204
hsa-miR-129-5p	0	0	1	1	1	1	ZNF667	zinc finger protein 667
hsa-miR-129-5p	1	0	1	1	1	1	SLC30A6	solute carrier family 30 (zinc transporter), member 6
hsa-miR-129-5p	1	0	1	1	1	1	SNRNP70	small nuclear ribonucleoprotein 70kDa (U1)
hsa-miR-129-5p	1	0	1	1	1	1	CCDC141	coiled-coil domain containing 141
hsa-miR-129-5p	1	0	1	1	1	1	STIM2	stromal interaction molecule 2
hsa-miR-129-5p	1	0	1	1	1	1	CAPN2	calpain 2, (m/II) large subunit
hsa-miR-129-5p	1	0	1	1	1	1	TMEM185A	transmembrane protein 185A
hsa-miR-129-5p	1	0	1	0	1	1	AGFG1	ArfGAP with FG repeats 1
hsa-miR-129-5p	0	0	1	1	1	1	CBWD5	COBW domain containing 5
hsa-miR-129-5p	0	0	1	1	0	0	C10orf68	chromosome 10 open reading frame 68
hsa-miR-129-5p	0	0	1	0	0	0	LOC284385	uncharacterized LOC284385
hsa-miR-129-5p	0	0	1	1	0	0	PSAPL1	prosaposin-like 1 (gene/pseudogene)
hsa-miR-129-5p	1	0	1	1	1	1	HOOK1	hook homolog 1 (Drosophila)
hsa-miR-129-5p	1	0	1	1	1	1	GATM	glycine amidinotransferase (L-arginine:glycine amidinotransferase)
hsa-miR-129-5p	1	0	1	1	1	1	ZCCHC2	zinc finger, CCHC domain containing 2
hsa-miR-129-5p	0	0	1	1	0	0	ZNF283	zinc finger protein 283
hsa-miR-129-5p	0	0	1	1	0	0	FBXO16	F-box protein 16
hsa-miR-129-5p	0	0	1	1	1	1	VIPAS39	VPS33B interacting protein, apical-basolateral polarity regulator, spe-39 homolog
hsa-miR-129-5p	0	0	1	0	0	0	LOC338579	ankyrin repeat domain-containing protein 30B pseudogene
hsa-miR-129-5p	1	0	1	0	1	1	UNC5D	unc-5 homolog D (C. elegans)
hsa-miR-129-5p	0	0	1	1	1	1	RNF217	ring finger protein 217
hsa-miR-129-5p	0	0	1	1	0	0	KIAA0146	KIAA0146
hsa-miR-129-5p	1	0	1	1	1	1	SIK3	SIK family kinase 3
hsa-miR-129-5p	0	0	1	1	1	1	NFKB1	nuclear factor of kappa light polypeptide gene enhancer in B-cells 1
hsa-miR-129-5p	0	0	1	1	0	0	MARCH10	membrane-associated ring finger (C3HC4) 10, E3 ubiquitin protein ligase
hsa-miR-129-5p	0	0	1	1	0	0	MARS	methionyl-tRNA synthetase
hsa-miR-129-5p	1	0	1	1	1	1	ZNF25	zinc finger protein 25
hsa-miR-129-5p	1	0	1	1	1	1	ZBTB4	zinc finger and BTB domain containing 4
hsa-miR-129-5p	0	0	1	1	1	1	ARHGEF26	Rho guanine nucleotide exchange factor (GEF) 26
hsa-miR-129-5p	1	0	1	1	1	1	CBLB	Cbl proto-oncogene, E3 ubiquitin protein ligase B
hsa-miR-129-5p	0	0	1	0	0	0	C1orf132	chromosome 1 open reading frame 132
hsa-miR-129-5p	1	0	1	1	1	1	PLEKHH1	pleckstrin homology domain containing, family H (with MyTH4 domain) member 1
hsa-miR-129-5p	1	0	1	0	1	1	KCNK2	potassium channel, subfamily K, member 2
hsa-miR-129-5p	0	0	1	0	0	0	SATB2-AS1	SATB2 antisense RNA 1
hsa-miR-129-5p	0	0	1	0	0	0	LOC650368	asparagine-linked glycosylation 1-like pseudogene
hsa-miR-129-5p	1	0	1	1	1	1	IPPK	inositol 1,3,4,5,6-pentakisphosphate 2-kinase
hsa-miR-129-5p	0	0	1	0	0	0	LOC285043	uncharacterized LOC285043
hsa-miR-129-5p	1	0	1	1	1	1	ESYT2	extended synaptotagmin-like protein 2
hsa-miR-129-5p	0	0	1	1	1	1	CNPY3	canopy 3 homolog (zebrafish)
hsa-miR-129-5p	1	0	1	1	0	0	KCNC1	potassium voltage-gated channel, Shaw-related subfamily, member 1
hsa-miR-129-5p	0	0	1	1	0	0	NMI	N-myc (and STAT) interactor
hsa-miR-129-5p	1	0	1	1	0	0	BCORL1	BCL6 corepressor-like 1
hsa-miR-129-5p	1	0	1	1	1	1	SEPHS1	selenophosphate synthetase 1
hsa-miR-129-5p	1	0	1	1	1	1	ATXN7	ataxin 7
hsa-miR-129-5p	1	0	1	1	0	0	GXYLT1	glucoside xylosyltransferase 1
hsa-miR-129-5p	0	0	1	0	1	1	PRELID2	PRELI domain containing 2
hsa-miR-129-5p	1	0	1	0	0	0	ANKRD52	ankyrin repeat domain 52
hsa-miR-129-5p	0	0	1	0	0	0	LOC613266	uncharacterized LOC613266
hsa-miR-129-5p	1	0	1	1	1	1	KPNA1	karyopherin alpha 1 (importin alpha 5)
hsa-miR-129-5p	0	0	1	0	0	0	FAM95B1	family with sequence similarity 95, member B1
hsa-miR-129-5p	1	0	1	1	0	0	UBN2	ubinuclein 2
hsa-miR-129-5p	1	0	1	1	1	1	DCTN4	dynactin 4 (p62)
hsa-miR-129-5p	0	0	1	1	1	1	EPPIN	epididymal peptidase inhibitor
hsa-miR-129-5p	0	0	1	1	0	0	FSIP2	fibrous sheath interacting protein 2
hsa-miR-129-5p	1	0	1	1	1	1	CPNE2	copine II
hsa-miR-129-5p	1	0	1	1	1	1	IL16	interleukin 16
hsa-miR-129-5p	1	0	1	1	1	1	PIK3R1	phosphoinositide-3-kinase, regulatory subunit 1 (alpha)
hsa-miR-129-5p	1	0	1	0	1	1	ANO6	anoctamin 6
hsa-miR-129-5p	0	0	1	0	1	1	LOC388942	uncharacterized LOC388942
hsa-miR-129-5p	1	0	1	1	1	1	SACM1L	SAC1 suppressor of actin mutations 1-like (yeast)
hsa-miR-129-5p	1	0	1	1	1	1	LRIG1	leucine-rich repeats and immunoglobulin-like domains 1
hsa-miR-129-5p	1	0	1	1	1	1	PHTF1	putative homeodomain transcription factor 1
hsa-miR-129-5p	1	0	1	1	1	1	DLG2	discs, large homolog 2 (Drosophila)
hsa-miR-129-5p	0	0	1	1	0	0	NPIP	nuclear pore complex interacting protein
hsa-miR-129-5p	0	0	1	0	0	0	HNRNPKP3	heterogeneous nuclear ribonucleoprotein K pseudogene 3
hsa-miR-129-5p	1	0	1	1	1	1	EIF4E3	eukaryotic translation initiation factor 4E family member 3
hsa-miR-129-5p	0	0	1	0	0	0	RPL23AP53	ribosomal protein L23a pseudogene 53
hsa-miR-129-5p	1	0	1	1	1	1	PHF17	PHD finger protein 17
hsa-miR-129-5p	0	0	1	0	0	0	ERVFRD-2	endogenous retrovirus group FRD, member 2
hsa-miR-129-5p	1	0	1	0	1	1	CAPRIN1	cell cycle associated protein 1
hsa-miR-129-5p	0	0	1	1	1	1	MCU	mitochondrial calcium uniporter
hsa-miR-129-5p	0	0	1	1	0	0	LOC100128682	uncharacterized LOC100128682
hsa-miR-129-5p	0	0	1	0	0	0	FAM205B	transmembrane protein C9orf144B pseudogene
hsa-miR-129-5p	0	0	1	0	0	0	EP400NL	EP400 N-terminal like
hsa-miR-129-5p	1	0	1	1	1	1	KCTD12	potassium channel tetramerisation domain containing 12
hsa-miR-129-5p	1	0	1	1	1	1	DSE	dermatan sulfate epimerase
hsa-miR-129-5p	1	0	1	1	1	1	ADAMTS19	ADAM metallopeptidase with thrombospondin type 1 motif, 19
hsa-miR-129-5p	1	0	1	0	1	1	CYB561D1	cytochrome b-561 domain containing 1
hsa-miR-129-5p	0	0	1	1	1	1	G3BP1	GTPase activating protein (SH3 domain) binding protein 1
hsa-miR-129-5p	1	0	1	1	1	1	ARHGAP24	Rho GTPase activating protein 24
hsa-miR-129-5p	0	0	1	0	0	0	LOC494141	mitochondrial carrier triple repeat 1 pseudogene
hsa-miR-129-5p	1	0	1	1	0	0	FOXP2	forkhead box P2
hsa-miR-129-5p	0	0	1	1	0	0	DNASE1L3	deoxyribonuclease I-like 3
hsa-miR-129-5p	1	0	1	0	1	1	STK3	serine/threonine kinase 3
hsa-miR-129-5p	0	0	1	1	0	0	SLCO6A1	solute carrier organic anion transporter family, member 6A1
hsa-miR-129-5p	1	0	1	1	1	1	RABGAP1	RAB GTPase activating protein 1
hsa-miR-129-5p	0	0	1	1	0	0	ZNF730	zinc finger protein 730
hsa-miR-129-5p	0	0	1	1	1	1	PHF12	PHD finger protein 12
hsa-miR-129-5p	0	0	1	1	1	1	CRISP3	cysteine-rich secretory protein 3
hsa-miR-129-5p	1	0	1	1	1	1	B3GALNT1	beta-1,3-N-acetylgalactosaminyltransferase 1 (globoside blood group)
hsa-miR-129-5p	1	0	1	1	1	1	CYYR1	cysteine/tyrosine-rich 1
hsa-miR-129-5p	1	0	1	1	0	0	ATP13A3	ATPase type 13A3
hsa-miR-129-5p	1	0	1	1	1	1	TBC1D15	TBC1 domain family, member 15
hsa-miR-129-5p	1	0	1	1	1	1	CAMK2G	calcium/calmodulin-dependent protein kinase II gamma
hsa-miR-129-5p	0	0	1	1	0	0	PCSK5	proprotein convertase subtilisin/kexin type 5
hsa-miR-129-5p	1	0	1	1	1	1	EDN1	endothelin 1
hsa-miR-129-5p	1	0	1	1	1	1	RIF1	RAP1 interacting factor homolog (yeast)
hsa-miR-129-5p	0	0	1	1	0	0	PLK1S1	polo-like kinase 1 substrate 1
hsa-miR-129-5p	0	0	1	0	0	0	POM121L9P	POM121 transmembrane nucleoporin-like 9, pseudogene
hsa-miR-129-5p	1	0	1	1	1	1	ARF6	ADP-ribosylation factor 6
hsa-miR-129-5p	0	0	1	1	0	0	MSH5	mutS homolog 5 (E. coli)
hsa-miR-129-5p	0	0	1	1	0	0	SAPCD1	suppressor APC domain containing 1
hsa-miR-129-5p	1	0	1	0	1	1	DCDC2	doublecortin domain containing 2
hsa-miR-129-5p	1	0	1	1	1	1	SMAP2	small ArfGAP2
hsa-miR-129-5p	0	0	1	1	1	1	MYO9A	myosin IXA
hsa-miR-129-5p	1	0	1	0	1	1	CEP170	centrosomal protein 170kDa
hsa-miR-129-5p	0	0	1	1	1	1	ING3	inhibitor of growth family, member 3
hsa-miR-129-5p	1	0	1	0	1	1	FAM19A1	family with sequence similarity 19 (chemokine (C-C motif)-like), member A1
hsa-miR-129-5p	0	0	1	1	1	1	COBL	cordon-bleu homolog (mouse)
hsa-miR-129-5p	1	0	1	1	1	1	DENND1B	DENN/MADD domain containing 1B
hsa-miR-129-5p	1	0	1	1	1	1	MIER1	mesoderm induction early response 1 homolog (Xenopus laevis)
hsa-miR-129-5p	0	0	1	1	1	1	BEND7	BEN domain containing 7
hsa-miR-129-5p	1	0	1	1	1	1	MLL3	myeloid/lymphoid or mixed-lineage leukemia 3
hsa-miR-129-5p	1	0	1	1	1	1	KANK1	KN motif and ankyrin repeat domains 1
hsa-miR-129-5p	1	0	1	0	1	1	STYX	serine/threonine/tyrosine interacting protein
hsa-miR-129-5p	0	0	1	1	1	1	YAP1	Yes-associated protein 1
hsa-miR-129-5p	0	0	1	1	1	1	U2AF1	U2 small nuclear RNA auxiliary factor 1
hsa-miR-129-5p	1	0	1	1	1	1	TMEM182	transmembrane protein 182
hsa-miR-129-5p	0	0	1	1	1	1	RANBP17	RAN binding protein 17
hsa-miR-129-5p	0	0	1	1	0	0	TMEM44	transmembrane protein 44
hsa-miR-129-5p	0	0	1	1	1	1	INPP5B	inositol polyphosphate-5-phosphatase, 75kDa
hsa-miR-129-5p	0	0	1	1	1	1	CCDC132	coiled-coil domain containing 132
hsa-miR-129-5p	0	0	1	1	1	1	CCDC66	coiled-coil domain containing 66
hsa-miR-129-5p	0	0	1	0	0	0	LOC286135	uncharacterized LOC286135
hsa-miR-129-5p	1	0	1	0	1	1	CLINT1	clathrin interactor 1
hsa-miR-129-5p	0	0	1	0	0	0	EPHA1-AS1	EPHA1 antisense RNA 1
hsa-miR-129-5p	1	0	1	1	1	1	MARCH7	membrane-associated ring finger (C3HC4) 7, E3 ubiquitin protein ligase
hsa-miR-129-5p	1	0	1	1	1	1	IL17RD	interleukin 17 receptor D
hsa-miR-129-5p	1	0	1	0	0	0	XPNPEP3	X-prolyl aminopeptidase (aminopeptidase P) 3, putative
hsa-miR-129-5p	1	0	1	0	1	1	NR3C1	nuclear receptor subfamily 3, group C, member 1 (glucocorticoid receptor)
hsa-miR-129-5p	1	0	1	1	0	0	LRRC58	leucine rich repeat containing 58
hsa-miR-129-5p	1	0	1	1	1	1	PPP3CA	protein phosphatase 3, catalytic subunit, alpha isozyme
hsa-miR-129-5p	1	0	1	1	1	1	RNF38	ring finger protein 38
hsa-miR-129-5p	1	0	1	1	1	1	IKZF2	IKAROS family zinc finger 2 (Helios)
hsa-miR-129-5p	0	0	1	1	1	1	KLHL7	kelch-like 7 (Drosophila)
hsa-miR-129-5p	1	0	1	1	1	1	SORCS1	sortilin-related VPS10 domain containing receptor 1
hsa-miR-129-5p	1	0	1	1	1	1	ANGPT1	angiopoietin 1
hsa-miR-129-5p	0	0	1	0	1	1	UNC5B	unc-5 homolog B (C. elegans)
hsa-miR-129-5p	1	0	1	1	1	1	BCL11A	B-cell CLL/lymphoma 11A (zinc finger protein)
hsa-miR-129-5p	0	0	1	1	1	1	PINX1	PIN2/TERF1 interacting, telomerase inhibitor 1
hsa-miR-129-5p	0	0	1	1	1	1	IYD	iodotyrosine deiodinase
hsa-miR-129-5p	1	0	1	1	1	1	PBRM1	polybromo 1
hsa-miR-129-5p	1	0	1	1	1	1	RAI14	retinoic acid induced 14
hsa-miR-129-5p	1	0	1	1	1	1	TAB3	TGF-beta activated kinase 1/MAP3K7 binding protein 3
hsa-miR-129-5p	0	0	1	0	1	1	ANKS1B	ankyrin repeat and sterile alpha motif domain containing 1B
hsa-miR-129-5p	0	0	1	1	1	1	LINGO2	leucine rich repeat and Ig domain containing 2
hsa-miR-129-5p	0	0	1	1	1	1	LHFPL1	lipoma HMGIC fusion partner-like 1
hsa-miR-129-5p	0	0	1	1	1	1	ITGA10	integrin, alpha 10
hsa-miR-129-5p	0	0	1	0	1	1	FAM198B	family with sequence similarity 198, member B
hsa-miR-129-5p	0	0	1	1	0	0	PDZD11	PDZ domain containing 11
hsa-miR-129-5p	0	0	1	1	1	1	TNFRSF19	tumor necrosis factor receptor superfamily, member 19
hsa-miR-129-5p	1	0	1	1	1	1	FGD4	FYVE, RhoGEF and PH domain containing 4
hsa-miR-129-5p	1	0	1	1	1	1	ECT2	epithelial cell transforming sequence 2 oncogene
hsa-miR-129-5p	1	0	1	1	1	1	SP3	Sp3 transcription factor
hsa-miR-129-5p	0	0	1	1	1	1	TIMM50	translocase of inner mitochondrial membrane 50 homolog (S. cerevisiae)
hsa-miR-129-5p	1	0	1	0	1	1	CHRM2	cholinergic receptor, muscarinic 2
hsa-miR-129-5p	0	0	1	0	0	0	NPIPL3	nuclear pore complex interacting protein-like 3
hsa-miR-129-5p	0	0	1	1	1	1	TERF1	telomeric repeat binding factor (NIMA-interacting) 1
hsa-miR-129-5p	0	0	1	1	1	1	KANK2	KN motif and ankyrin repeat domains 2
hsa-miR-129-5p	1	0	1	1	1	1	PLCH1	phospholipase C, eta 1
hsa-miR-129-5p	1	0	1	1	1	1	QKI	QKI, KH domain containing, RNA binding
hsa-miR-129-5p	1	0	1	1	1	1	MYB	v-myb myeloblastosis viral oncogene homolog (avian)
hsa-miR-129-5p	1	0	1	1	1	1	AMOT	angiomotin
hsa-miR-129-5p	0	0	1	1	1	1	CDH6	cadherin 6, type 2, K-cadherin (fetal kidney)
hsa-miR-129-5p	0	0	1	0	1	1	MIS12	MIS12, MIND kinetochore complex component, homolog (S. pombe)
hsa-miR-129-5p	1	0	1	1	1	1	NOL4	nucleolar protein 4
hsa-miR-129-5p	0	0	1	1	1	1	SLC6A2	solute carrier family 6 (neurotransmitter transporter, noradrenalin), member 2
hsa-miR-129-5p	0	0	1	1	1	1	FAM115A	family with sequence similarity 115, member A
hsa-miR-129-5p	1	0	1	0	1	1	FAM46A	family with sequence similarity 46, member A
hsa-miR-129-5p	1	0	1	1	1	1	ARHGAP17	Rho GTPase activating protein 17
hsa-miR-129-5p	1	0	1	1	1	1	RIMS3	regulating synaptic membrane exocytosis 3
hsa-miR-129-5p	1	0	1	1	0	0	DHDDS	dehydrodolichyl diphosphate synthase
hsa-miR-129-5p	1	0	1	0	1	1	CGGBP1	CGG triplet repeat binding protein 1
hsa-miR-129-5p	0	0	1	1	1	1	CENPK	centromere protein K
hsa-miR-129-5p	1	0	1	1	1	1	SEC23B	Sec23 homolog B (S. cerevisiae)
hsa-miR-129-5p	1	0	1	1	1	1	POU2F2	POU class 2 homeobox 2
hsa-miR-129-5p	1	0	1	0	1	1	C15orf41	chromosome 15 open reading frame 41
hsa-miR-129-5p	1	0	1	1	1	1	COL2A1	collagen, type II, alpha 1
hsa-miR-129-5p	0	0	1	1	0	0	RBM14	RNA binding motif protein 14
hsa-miR-129-5p	0	0	1	0	0	0	ATXN7L3B	ataxin 7-like 3B
hsa-miR-129-5p	1	0	1	1	1	1	AGK	acylglycerol kinase
hsa-miR-129-5p	0	0	1	0	0	0	HIST1H2BN	histone cluster 1, H2bn
hsa-miR-129-5p	0	0	1	1	1	1	WSCD1	WSC domain containing 1
hsa-miR-129-5p	1	0	1	1	1	1	USB1	U6 snRNA biogenesis 1
hsa-miR-129-5p	0	0	1	1	0	0	SETMAR	SET domain and mariner transposase fusion gene
hsa-miR-129-5p	0	0	1	0	1	1	GDE1	glycerophosphodiester phosphodiesterase 1
hsa-miR-129-5p	0	0	1	1	1	1	NUP98	nucleoporin 98kDa
hsa-miR-129-5p	1	0	1	1	1	1	SNCA	synuclein, alpha (non A4 component of amyloid precursor)
hsa-miR-129-5p	1	0	1	1	1	1	ETF1	eukaryotic translation termination factor 1
hsa-miR-129-5p	0	0	1	1	0	0	MCCC2	methylcrotonoyl-CoA carboxylase 2 (beta)
hsa-miR-129-5p	1	0	1	1	1	1	PAPOLA	poly(A) polymerase alpha
hsa-miR-129-5p	0	0	1	1	0	0	BEST1	bestrophin 1
hsa-miR-129-5p	0	0	1	0	0	0	KLHL15	kelch-like 15 (Drosophila)
hsa-miR-129-5p	1	0	1	1	1	1	RIMKLB	ribosomal modification protein rimK-like family member B
hsa-miR-129-5p	1	0	1	0	1	1	NR1D2	nuclear receptor subfamily 1, group D, member 2
hsa-miR-129-5p	0	0	1	1	1	1	CMAS	cytidine monophosphate N-acetylneuraminic acid synthetase
hsa-miR-129-5p	0	0	1	0	0	0	LOC441528	uncharacterized LOC441528
hsa-miR-129-5p	0	0	1	1	0	0	ZNF584	zinc finger protein 584
hsa-miR-129-5p	0	0	1	0	0	0	LOC100144602	uncharacterized LOC100144602
hsa-miR-129-5p	0	0	1	1	1	1	RDH11	retinol dehydrogenase 11 (all-trans/9-cis/11-cis)
hsa-miR-129-5p	0	0	1	0	1	1	LOC646736	uncharacterized LOC646736
hsa-miR-129-5p	1	0	1	1	1	1	WWC2	WW and C2 domain containing 2
hsa-miR-129-5p	1	0	1	1	1	1	HMGA2	high mobility group AT-hook 2
hsa-miR-129-5p	0	0	1	0	0	0	WDFY3-AS2	WDFY3 antisense RNA 2
hsa-miR-129-5p	1	0	1	1	1	1	ZMAT4	zinc finger, matrin-type 4
hsa-miR-129-5p	0	0	1	0	1	1	CD99P1	CD99 molecule pseudogene 1
hsa-miR-129-5p	0	0	1	1	1	1	NELL2	NEL-like 2 (chicken)
hsa-miR-129-5p	1	0	1	0	1	1	ARHGAP26	Rho GTPase activating protein 26
hsa-miR-129-5p	0	0	1	1	0	0	CA5BP1	carbonic anhydrase VB pseudogene 1
hsa-miR-129-5p	1	0	1	1	1	1	BEND6	BEN domain containing 6
hsa-miR-129-5p	0	0	1	1	1	1	SPAG16	sperm associated antigen 16
hsa-miR-129-5p	0	0	1	1	1	1	TRIM4	tripartite motif containing 4
hsa-miR-129-5p	1	0	1	1	1	1	CNTN4	contactin 4
hsa-miR-129-5p	0	0	1	0	0	0	ZBED3-AS1	ZBED3 antisense RNA 1
hsa-miR-129-5p	0	0	1	1	1	1	MAP2	microtubule-associated protein 2
hsa-miR-129-5p	0	0	1	0	1	1	PAPOLG	poly(A) polymerase gamma
hsa-miR-129-5p	0	0	1	0	1	1	KIAA0895	KIAA0895
hsa-miR-129-5p	1	0	1	1	1	1	HTR2C	5-hydroxytryptamine (serotonin) receptor 2C, G protein-coupled
hsa-miR-129-5p	1	0	1	0	0	0	KCNU1	potassium channel, subfamily U, member 1
hsa-miR-129-5p	0	0	1	1	1	1	SEMA3D	sema domain, immunoglobulin domain (Ig), short basic domain, secreted, (semaphorin) 3D
hsa-miR-129-5p	1	0	1	1	1	1	MRO	maestro
hsa-miR-129-5p	1	0	1	1	1	1	TIAL1	TIA1 cytotoxic granule-associated RNA binding protein-like 1
hsa-miR-129-5p	0	0	1	1	1	1	DNAJA3	DnaJ (Hsp40) homolog, subfamily A, member 3
hsa-miR-129-5p	1	0	1	1	1	1	ELAVL2	ELAV (embryonic lethal, abnormal vision, Drosophila)-like 2 (Hu antigen B)
hsa-miR-129-5p	1	0	1	1	1	1	GABRA1	gamma-aminobutyric acid (GABA) A receptor, alpha 1
hsa-miR-129-5p	1	0	1	1	1	1	ZNF518A	zinc finger protein 518A
hsa-miR-129-5p	0	0	1	1	1	1	AADAT	aminoadipate aminotransferase
hsa-miR-129-5p	1	0	1	1	1	1	MUM1L1	melanoma associated antigen (mutated) 1-like 1
hsa-miR-129-5p	0	0	1	0	1	1	FLJ25328	uncharacterized LOC148231
hsa-miR-129-5p	1	0	1	1	1	1	PITPNB	phosphatidylinositol transfer protein, beta
hsa-miR-129-5p	0	0	1	1	0	0	POLI	polymerase (DNA directed) iota
hsa-miR-129-5p	1	0	1	1	1	1	FGF1	fibroblast growth factor 1 (acidic)
hsa-miR-129-5p	1	0	1	1	1	1	RAB5B	RAB5B, member RAS oncogene family
hsa-miR-129-5p	0	0	1	0	0	0	FAM86JP	family with sequence similarity 86, member A pseudogene
hsa-miR-129-5p	0	0	1	0	1	1	TTC23L	tetratricopeptide repeat domain 23-like
hsa-miR-129-5p	1	0	1	1	1	1	MAK	male germ cell-associated kinase
hsa-miR-129-5p	0	0	1	1	0	0	TNMD	tenomodulin
hsa-miR-129-5p	0	0	1	1	1	1	HRASLS5	HRAS-like suppressor family, member 5
hsa-miR-129-5p	0	0	1	1	1	1	ZNF337	zinc finger protein 337
hsa-miR-129-5p	0	0	1	1	1	1	NUB1	negative regulator of ubiquitin-like proteins 1
hsa-miR-129-5p	0	0	1	0	0	0	FAM66C	family with sequence similarity 66, member C
hsa-miR-129-5p	0	0	1	1	1	1	EDA2R	ectodysplasin A2 receptor
hsa-miR-129-5p	1	0	1	1	1	1	NKAIN2	Na+/K+ transporting ATPase interacting 2
hsa-miR-129-5p	0	0	1	1	1	1	APBB1IP	amyloid beta (A4) precursor protein-binding, family B, member 1 interacting protein
hsa-miR-129-5p	0	0	1	1	1	1	POLM	polymerase (DNA directed), mu
hsa-miR-129-5p	0	0	1	0	0	0	FLJ10661	family with sequence similarity 86, member A pseudogene
hsa-miR-129-5p	0	0	1	0	0	0	LOC339862	uncharacterized LOC339862
hsa-miR-129-5p	0	0	1	0	0	0	FAM201A	family with sequence similarity 201, member A
hsa-miR-129-5p	1	0	1	1	1	1	SLC38A9	solute carrier family 38, member 9
hsa-miR-129-5p	1	0	1	1	0	0	RASGEF1B	RasGEF domain family, member 1B
hsa-miR-129-5p	1	0	1	1	0	0	TMEM131	transmembrane protein 131
hsa-miR-129-5p	1	0	1	0	1	1	CPEB4	cytoplasmic polyadenylation element binding protein 4
hsa-miR-129-5p	0	0	1	0	0	0	CYP4F35P	cytochrome P450, family 4, subfamily F, polypeptide 35, pseudogene
hsa-miR-129-5p	1	0	1	0	1	1	YAF2	YY1 associated factor 2
hsa-miR-129-5p	1	0	1	1	1	1	SOX6	SRY (sex determining region Y)-box 6
hsa-miR-129-5p	1	0	1	1	1	1	WSCD2	WSC domain containing 2
hsa-miR-129-5p	0	0	1	1	0	0	HSPA14	heat shock 70kDa protein 14
hsa-miR-129-5p	0	0	1	0	0	0	LOC100134868	uncharacterized LOC100134868
hsa-miR-129-5p	0	0	1	0	0	0	USP32P1	ubiquitin specific peptidase 32 pseudogene 1
hsa-miR-129-5p	0	0	1	1	1	1	FAM21C	family with sequence similarity 21, member C
hsa-miR-129-5p	0	0	1	1	1	1	FBXL4	F-box and leucine-rich repeat protein 4
hsa-miR-129-5p	1	0	1	1	1	1	PDPK1	3-phosphoinositide dependent protein kinase-1
hsa-miR-129-5p	1	0	1	0	1	1	PCSK2	proprotein convertase subtilisin/kexin type 2
hsa-miR-129-5p	0	0	1	0	1	1	TSLP	thymic stromal lymphopoietin
hsa-miR-129-5p	0	0	1	0	0	0	LOC339240	keratin 17 pseudogene
hsa-miR-129-5p	0	0	1	1	0	0	SLC13A4	solute carrier family 13 (sodium/sulfate symporters), member 4
hsa-miR-129-5p	0	0	1	1	1	1	PCMTD2	protein-L-isoaspartate (D-aspartate) O-methyltransferase domain containing 2
hsa-miR-129-5p	1	0	1	0	1	1	KIAA0430	KIAA0430
hsa-miR-129-5p	0	0	1	0	1	1	FAM13B	family with sequence similarity 13, member B
hsa-miR-129-5p	1	0	1	1	1	1	FAM123A	family with sequence similarity 123A
hsa-miR-129-5p	1	0	1	0	1	1	HSPA12A	heat shock 70kDa protein 12A
hsa-miR-129-5p	0	0	1	1	0	0	NT5DC4	5'-nucleotidase domain containing 4
hsa-miR-129-5p	1	0	1	1	1	1	ROCK1	Rho-associated, coiled-coil containing protein kinase 1
hsa-miR-129-5p	0	0	1	1	0	0	TEX13A	testis expressed 13A
hsa-miR-129-5p	1	0	1	1	1	1	FKBP5	FK506 binding protein 5
hsa-miR-129-5p	0	0	1	1	1	1	SH3GL3	SH3-domain GRB2-like 3
hsa-miR-129-5p	1	0	1	0	1	1	USP6NL	USP6 N-terminal like
hsa-miR-129-5p	1	0	1	1	1	1	MAMDC2	MAM domain containing 2
hsa-miR-129-5p	1	0	1	1	1	1	SUPT7L	suppressor of Ty 7 (S. cerevisiae)-like
hsa-miR-129-5p	0	0	1	1	1	1	KCNG1	potassium voltage-gated channel, subfamily G, member 1
hsa-miR-129-5p	1	0	1	1	1	1	RMND5A	required for meiotic nuclear division 5 homolog A (S. cerevisiae)
hsa-miR-129-5p	0	0	1	1	0	0	FKBP11	FK506 binding protein 11, 19 kDa
hsa-miR-129-5p	0	0	1	1	1	1	ZNF589	zinc finger protein 589
hsa-miR-129-5p	1	0	1	1	1	1	CLVS1	clavesin 1
hsa-miR-129-5p	1	0	1	1	1	1	PELI1	pellino E3 ubiquitin protein ligase 1
hsa-miR-129-5p	1	0	1	0	1	1	RNF182	ring finger protein 182
hsa-miR-129-5p	0	0	1	1	0	0	NSUN5P2	NOP2/Sun domain family, member 5 pseudogene 2
hsa-miR-129-5p	1	0	1	1	1	1	FNDC3A	fibronectin type III domain containing 3A
hsa-miR-129-5p	1	0	1	1	1	1	GATA2	GATA binding protein 2
hsa-miR-129-5p	0	0	1	1	1	1	LINC00086	long intergenic non-protein coding RNA 86
hsa-miR-129-5p	0	0	1	1	0	0	AGAP8	ArfGAP with GTPase domain, ankyrin repeat and PH domain 8
hsa-miR-129-5p	1	0	1	1	1	1	ZFP91	zinc finger protein 91 homolog (mouse)
hsa-miR-129-5p	1	0	1	1	1	1	SCUBE3	signal peptide, CUB domain, EGF-like 3
hsa-miR-129-5p	1	0	1	0	1	1	C14orf43	chromosome 14 open reading frame 43
hsa-miR-129-5p	0	0	1	1	1	1	APOBEC3B	apolipoprotein B mRNA editing enzyme, catalytic polypeptide-like 3B
hsa-miR-129-5p	0	0	1	1	0	0	TINAG	tubulointerstitial nephritis antigen
hsa-miR-129-5p	1	0	1	1	1	1	ATP8B4	ATPase, class I, type 8B, member 4
hsa-miR-129-5p	0	0	1	1	1	1	ZNF365	zinc finger protein 365
hsa-miR-129-5p	0	0	1	1	0	0	GMFG	glia maturation factor, gamma
hsa-miR-129-5p	1	0	1	1	1	1	INPP5A	inositol polyphosphate-5-phosphatase, 40kDa
hsa-miR-129-5p	1	0	1	1	1	1	PTCHD1	patched domain containing 1
hsa-miR-129-5p	0	0	1	1	0	0	AGAP4	ArfGAP with GTPase domain, ankyrin repeat and PH domain 4
hsa-miR-129-5p	0	0	1	0	0	0	CCDC150	coiled-coil domain containing 150
hsa-miR-129-5p	0	0	1	0	0	0	LOC550643	uncharacterized LOC550643
hsa-miR-129-5p	0	0	1	1	1	1	GPATCH2	G patch domain containing 2
hsa-miR-129-5p	0	0	1	1	1	1	ANKRD44	ankyrin repeat domain 44
hsa-miR-129-5p	1	0	1	1	1	1	MGAT5B	mannosyl (alpha-1,6-)-glycoprotein beta-1,6-N-acetyl-glucosaminyltransferase, isozyme B
hsa-miR-129-5p	0	0	1	1	1	1	GORAB	golgin, RAB6-interacting
hsa-miR-129-5p	0	0	1	1	0	0	PLB1	phospholipase B1
hsa-miR-129-5p	1	0	1	1	1	1	STXBP5	syntaxin binding protein 5 (tomosyn)
hsa-miR-129-5p	1	0	1	1	1	1	PDCD6IP	programmed cell death 6 interacting protein
hsa-miR-129-5p	1	0	1	1	1	1	SLC26A7	solute carrier family 26, member 7
hsa-miR-129-5p	0	0	1	0	0	0	FLJ12334	uncharacterized LOC400946
hsa-miR-129-5p	0	0	1	1	1	1	TTLL9	tubulin tyrosine ligase-like family, member 9
hsa-miR-129-5p	1	0	1	0	1	1	TGFBR1	transforming growth factor, beta receptor 1
hsa-miR-129-5p	0	0	1	1	0	0	UGT8	UDP glycosyltransferase 8
hsa-miR-129-5p	0	0	1	0	0	0	AGAP9	ArfGAP with GTPase domain, ankyrin repeat and PH domain 9
hsa-miR-129-5p	0	0	1	0	0	0	LINC00537	long intergenic non-protein coding RNA 537
hsa-miR-129-5p	0	0	1	1	0	0	ZNF703	zinc finger protein 703
hsa-miR-129-5p	0	0	1	1	1	1	PARPBP	PARP1 binding protein
hsa-miR-129-5p	0	0	1	1	1	1	C10orf118	chromosome 10 open reading frame 118
hsa-miR-129-5p	1	0	1	0	1	1	MYBL1	v-myb myeloblastosis viral oncogene homolog (avian)-like 1
hsa-miR-129-5p	0	0	1	1	0	0	TMC1	transmembrane channel-like 1
hsa-miR-129-5p	0	0	1	0	0	0	LSAMP-AS3	LSAMP antisense RNA 3
hsa-miR-129-5p	1	0	1	1	1	1	GABRB2	gamma-aminobutyric acid (GABA) A receptor, beta 2
hsa-miR-129-5p	0	0	1	0	0	0	HIST2H2BA	histone cluster 2, H2ba (pseudogene)
hsa-miR-129-5p	1	0	1	1	1	1	PNISR	PNN-interacting serine/arginine-rich protein
hsa-miR-129-5p	1	0	1	0	1	1	DNAJC6	DnaJ (Hsp40) homolog, subfamily C, member 6
hsa-miR-129-5p	1	0	1	1	1	1	SP4	Sp4 transcription factor
hsa-miR-129-5p	1	0	1	0	1	1	BTBD3	BTB (POZ) domain containing 3
hsa-miR-129-5p	1	0	1	1	1	1	LARP1B	La ribonucleoprotein domain family, member 1B
hsa-miR-129-5p	0	0	1	1	0	0	KCNAB2	potassium voltage-gated channel, shaker-related subfamily, beta member 2
hsa-miR-129-5p	0	0	1	0	0	0	FAM86C2P	family with sequence similarity 86, member A pseudogene
hsa-miR-129-5p	1	0	1	1	1	1	TET2	tet methylcytosine dioxygenase 2
hsa-miR-129-5p	0	0	1	0	0	0	INTS4L1	integrator complex subunit 4-like 1
hsa-miR-129-5p	0	0	1	1	1	1	LOC100499484-C9ORF174	LOC100499484-C9orf174 readthrough
hsa-miR-129-5p	1	0	1	1	1	1	TMEM132B	transmembrane protein 132B
hsa-miR-129-5p	1	0	1	1	1	1	SLMAP	sarcolemma associated protein
hsa-miR-129-5p	0	0	1	1	1	1	KDM2B	lysine (K)-specific demethylase 2B
hsa-miR-129-5p	1	0	1	1	1	1	TNS1	tensin 1
hsa-miR-129-5p	1	0	1	0	1	1	PRDM10	PR domain containing 10
hsa-miR-129-5p	0	0	1	1	0	0	RGSL1	regulator of G-protein signaling like 1
hsa-miR-129-5p	1	0	1	0	1	1	CAMSAP2	calmodulin regulated spectrin-associated protein family, member 2
hsa-miR-129-5p	1	0	1	1	1	1	ANK2	ankyrin 2, neuronal
hsa-miR-129-5p	1	0	1	1	1	1	MEGF11	multiple EGF-like-domains 11
hsa-miR-129-5p	1	0	1	1	1	1	ZEB2	zinc finger E-box binding homeobox 2
hsa-miR-129-5p	0	0	1	0	0	0	FAM225B	family with sequence similarity 225, member B (non-protein coding)
hsa-miR-129-5p	0	0	1	1	0	0	AGAP6	ArfGAP with GTPase domain, ankyrin repeat and PH domain 6
hsa-miR-129-5p	0	0	1	0	0	0	LILRP2	leukocyte immunoglobulin-like receptor pseudogene 2
hsa-miR-129-5p	0	0	1	0	0	0	FLJ38723	uncharacterized FLJ38723
hsa-miR-129-5p	1	0	1	1	1	1	PTPRZ1	protein tyrosine phosphatase, receptor-type, Z polypeptide 1
hsa-miR-129-5p	0	0	1	1	1	1	FAM153C	family with sequence similarity 153, member C, pseudogene
hsa-miR-129-5p	0	0	1	1	0	0	EFCAB11	EF-hand calcium binding domain 11
hsa-miR-129-5p	0	0	1	1	1	1	CNIH	cornichon homolog (Drosophila)
hsa-miR-129-5p	1	0	1	1	1	1	GOLGA5	golgin A5
hsa-miR-129-5p	0	0	1	0	0	0	LINC00643	long intergenic non-protein coding RNA 643
hsa-miR-129-5p	0	0	1	1	1	1	NCBP2	nuclear cap binding protein subunit 2, 20kDa
hsa-miR-129-5p	0	0	1	1	1	1	RAD17	RAD17 homolog (S. pombe)
hsa-miR-129-5p	1	0	1	0	1	1	HMGB3	high mobility group box 3
hsa-miR-129-5p	0	0	1	1	1	1	IP6K2	inositol hexakisphosphate kinase 2
hsa-miR-129-5p	1	0	1	1	1	1	RBL2	retinoblastoma-like 2 (p130)
hsa-miR-129-5p	1	0	1	1	1	1	HECTD2	HECT domain containing E3 ubiquitin protein ligase 2
hsa-miR-129-5p	0	0	1	0	1	1	GPX8	glutathione peroxidase 8 (putative)
hsa-miR-129-5p	1	0	1	0	1	1	MTX3	metaxin 3
hsa-miR-129-5p	0	0	1	1	1	1	PDZRN4	PDZ domain containing ring finger 4
hsa-miR-129-5p	1	0	1	1	1	1	MLLT10	myeloid/lymphoid or mixed-lineage leukemia (trithorax homolog, Drosophila); translocated to, 10
hsa-miR-129-5p	1	0	1	1	1	1	C7orf31	chromosome 7 open reading frame 31
hsa-miR-129-5p	0	0	1	1	0	0	CDK5RAP2	CDK5 regulatory subunit associated protein 2
hsa-miR-129-5p	0	0	1	1	1	1	PSMA2	proteasome (prosome, macropain) subunit, alpha type, 2
hsa-miR-129-5p	1	0	1	1	1	1	SMAD4	SMAD family member 4
hsa-miR-129-5p	1	0	1	1	1	1	MYCBP2	MYC binding protein 2, E3 ubiquitin protein ligase
hsa-miR-129-5p	0	0	1	1	1	1	IPCEF1	interaction protein for cytohesin exchange factors 1
hsa-miR-129-5p	0	0	1	1	1	1	PRR14L	proline rich 14-like
hsa-miR-129-5p	0	0	1	1	1	1	CC2D2A	coiled-coil and C2 domain containing 2A
hsa-miR-129-5p	1	0	1	1	1	1	CGN	cingulin
hsa-miR-129-5p	0	0	1	1	1	1	MLIP	muscular LMNA-interacting protein
hsa-miR-129-5p	0	0	1	0	0	0	LINC00240	long intergenic non-protein coding RNA 240
hsa-miR-129-5p	1	0	1	1	1	1	VPS26A	vacuolar protein sorting 26 homolog A (S. pombe)
hsa-miR-129-5p	1	0	1	1	1	1	GTDC1	glycosyltransferase-like domain containing 1
hsa-miR-129-5p	0	0	1	1	1	1	ARMCX3	armadillo repeat containing, X-linked 3
hsa-miR-129-5p	0	0	1	1	1	1	DUSP19	dual specificity phosphatase 19
hsa-miR-129-5p	0	0	1	0	1	1	MYO3B	myosin IIIB
hsa-miR-129-5p	1	0	1	1	1	1	CASP7	caspase 7, apoptosis-related cysteine peptidase
hsa-miR-129-5p	0	0	1	1	0	0	LRR1	leucine rich repeat protein 1
hsa-miR-129-5p	1	0	1	1	1	1	DDAH1	dimethylarginine dimethylaminohydrolase 1
hsa-miR-129-5p	0	0	1	1	1	1	TMEM201	transmembrane protein 201
hsa-miR-129-5p	1	0	1	0	1	1	IGF2BP3	insulin-like growth factor 2 mRNA binding protein 3
hsa-miR-129-5p	0	0	1	0	0	0	TMEM232	transmembrane protein 232
hsa-miR-129-5p	1	0	1	1	1	1	PGAP1	post-GPI attachment to proteins 1
hsa-miR-129-5p	0	0	1	1	1	1	THSD4	thrombospondin, type I, domain containing 4
hsa-miR-129-5p	0	0	1	1	1	1	IFRD1	interferon-related developmental regulator 1
hsa-miR-129-5p	1	0	1	1	1	1	EOGT	EGF domain-specific O-linked N-acetylglucosamine (GlcNAc) transferase
hsa-miR-129-5p	1	0	1	0	1	1	TBL1XR1	transducin (beta)-like 1 X-linked receptor 1
hsa-miR-129-5p	1	0	1	0	1	1	C1orf21	chromosome 1 open reading frame 21
hsa-miR-129-5p	1	0	1	1	1	1	SGK3	serum/glucocorticoid regulated kinase family, member 3
hsa-miR-129-5p	0	0	1	1	1	1	USP54	ubiquitin specific peptidase 54
hsa-miR-129-5p	0	0	1	1	1	1	IPO11	importin 11
hsa-miR-129-5p	1	0	1	1	1	1	SIN3A	SIN3 transcription regulator homolog A (yeast)
hsa-miR-129-5p	0	0	1	0	1	1	GINS3	GINS complex subunit 3 (Psf3 homolog)
hsa-miR-129-5p	0	0	1	0	1	1	CD59	CD59 molecule, complement regulatory protein
hsa-miR-129-5p	0	0	1	1	0	0	RPS24	ribosomal protein S24
hsa-miR-129-5p	0	0	1	1	1	1	POLR2H	polymerase (RNA) II (DNA directed) polypeptide H
hsa-miR-129-5p	1	0	1	0	1	1	RNF144A	ring finger protein 144A
hsa-miR-129-5p	0	0	1	0	0	0	LOC401127	WD repeat domain 5 pseudogene
hsa-miR-129-5p	0	0	1	1	0	0	H2AFY2	H2A histone family, member Y2
hsa-miR-129-5p	0	0	1	0	0	0	RPS16P10	ribosomal protein S16 pseudogene 10
hsa-miR-129-5p	1	0	1	1	1	1	TARBP2	TAR (HIV-1) RNA binding protein 2
hsa-miR-129-5p	0	0	1	0	0	0	LOC400768	uncharacterized LOC400768
hsa-miR-129-5p	0	0	1	1	0	0	TMEM62	transmembrane protein 62
hsa-miR-129-5p	0	0	1	1	1	1	MFAP4	microfibrillar-associated protein 4
hsa-miR-129-5p	0	0	1	1	0	0	PPOX	protoporphyrinogen oxidase
hsa-miR-129-5p	1	0	1	1	1	1	C8orf58	chromosome 8 open reading frame 58
hsa-miR-129-5p	1	0	1	1	1	1	PTN	pleiotrophin
hsa-miR-129-5p	0	0	1	1	1	1	C1orf85	chromosome 1 open reading frame 85
hsa-miR-129-5p	1	0	1	1	1	1	RAP1A	RAP1A, member of RAS oncogene family
hsa-miR-129-5p	0	0	1	1	0	0	RPL11	ribosomal protein L11
hsa-miR-129-5p	0	0	1	1	1	1	ATP5F1	ATP synthase, H+ transporting, mitochondrial Fo complex, subunit B1
hsa-miR-129-5p	1	0	1	0	1	1	BNIP3L	BCL2/adenovirus E1B 19kDa interacting protein 3-like
hsa-miR-129-5p	0	0	1	0	0	0	MYCT1	myc target 1
hsa-miR-129-5p	0	0	1	0	0	0	SBDSP1	Shwachman-Bodian-Diamond syndrome pseudogene 1
hsa-miR-129-5p	0	0	1	1	1	1	XRCC4	X-ray repair complementing defective repair in Chinese hamster cells 4
hsa-miR-129-5p	1	0	1	1	1	1	STARD3NL	STARD3 N-terminal like
hsa-miR-129-5p	0	0	1	1	1	1	MRPS36	mitochondrial ribosomal protein S36
hsa-miR-129-5p	1	0	1	1	1	1	CDK7	cyclin-dependent kinase 7
hsa-miR-129-5p	1	0	1	1	1	1	RALB	v-ral simian leukemia viral oncogene homolog B (ras related; GTP binding protein)
hsa-miR-129-5p	0	0	1	1	1	1	CD1B	CD1b molecule
hsa-miR-129-5p	0	0	1	0	0	0	TRIQK	triple QxxK/R motif containing
hsa-miR-129-5p	0	0	1	1	0	0	RAD54B	RAD54 homolog B (S. cerevisiae)
hsa-miR-129-5p	1	0	1	1	1	1	FBXO9	F-box protein 9
hsa-miR-129-5p	1	0	1	1	1	1	TRA2B	transformer 2 beta homolog (Drosophila)
hsa-miR-129-5p	0	0	1	1	1	1	DCTD	dCMP deaminase
hsa-miR-129-5p	0	0	1	1	1	1	KCTD1	potassium channel tetramerisation domain containing 1
hsa-miR-129-5p	0	0	1	1	1	1	STON1	stonin 1
hsa-miR-129-5p	0	0	1	1	1	1	CCT5	chaperonin containing TCP1, subunit 5 (epsilon)
hsa-miR-129-5p	1	0	1	0	1	1	KIAA0494	KIAA0494
hsa-miR-129-5p	0	0	1	1	1	1	STXBP3	syntaxin binding protein 3
hsa-miR-129-5p	1	0	1	1	1	1	TMEM245	transmembrane protein 245
hsa-miR-129-5p	1	0	1	1	1	1	CRMP1	collapsin response mediator protein 1
hsa-miR-129-5p	1	0	1	1	1	1	TMEM66	transmembrane protein 66
hsa-miR-129-5p	0	0	1	1	1	1	BMPR1A	bone morphogenetic protein receptor, type IA
hsa-miR-129-5p	1	0	1	1	1	1	PEX2	peroxisomal biogenesis factor 2
hsa-miR-129-5p	1	0	1	1	1	1	BTBD10	BTB (POZ) domain containing 10
hsa-miR-129-5p	0	0	1	1	1	1	SERP2	stress-associated endoplasmic reticulum protein family member 2
hsa-miR-129-5p	0	0	1	0	0	0	ZNF720	zinc finger protein 720
hsa-miR-129-5p	1	0	1	1	1	1	ARNTL	aryl hydrocarbon receptor nuclear translocator-like
hsa-miR-129-5p	0	0	1	1	0	0	C11orf48	chromosome 11 open reading frame 48
hsa-miR-129-5p	0	0	1	1	1	1	WIBG	within bgcn homolog (Drosophila)
hsa-miR-129-5p	0	0	1	1	0	0	DDB2	damage-specific DNA binding protein 2, 48kDa
hsa-miR-129-5p	1	0	1	1	1	1	ANAPC16	anaphase promoting complex subunit 16
hsa-miR-129-5p	0	0	1	1	0	0	WFDC1	WAP four-disulfide core domain 1
hsa-miR-129-5p	1	0	1	1	1	1	PFN2	profilin 2
hsa-miR-129-5p	1	0	1	1	1	1	F11R	F11 receptor
hsa-miR-129-5p	0	0	1	1	1	1	ZNF333	zinc finger protein 333
hsa-miR-129-5p	0	0	1	1	0	0	OXA1L	oxidase (cytochrome c) assembly 1-like
hsa-miR-129-5p	1	0	1	0	1	1	GIT2	G protein-coupled receptor kinase interacting ArfGAP 2
hsa-miR-129-5p	1	0	1	1	1	1	RALY	RNA binding protein, autoantigenic (hnRNP-associated with lethal yellow homolog (mouse))
hsa-miR-129-5p	1	0	1	1	1	1	LYRM1	LYR motif containing 1
hsa-miR-129-5p	1	0	1	1	0	0	STAG3L4	stromal antigen 3-like 4
hsa-miR-129-5p	0	0	1	1	1	1	WDR78	WD repeat domain 78
hsa-miR-129-5p	1	0	1	1	1	1	RBPJ	recombination signal binding protein for immunoglobulin kappa J region
hsa-miR-129-5p	0	0	1	1	1	1	UBE2A	ubiquitin-conjugating enzyme E2A
hsa-miR-129-5p	1	0	1	0	1	1	CD47	CD47 molecule
hsa-miR-129-5p	1	0	1	1	1	1	PHF20L1	PHD finger protein 20-like 1
hsa-miR-129-5p	1	0	1	1	1	1	MYT1	myelin transcription factor 1
hsa-miR-129-5p	0	0	1	1	1	1	NUDT21	nudix (nucleoside diphosphate linked moiety X)-type motif 21
hsa-miR-129-5p	1	0	1	1	1	1	CALR	calreticulin
hsa-miR-129-5p	0	0	1	1	1	1	SLC2A8	solute carrier family 2 (facilitated glucose transporter), member 8
hsa-miR-129-5p	0	0	1	1	1	1	C10orf2	chromosome 10 open reading frame 2
hsa-miR-129-5p	0	0	1	1	1	1	C9orf3	chromosome 9 open reading frame 3
hsa-miR-129-5p	0	0	1	0	0	0	LOC731789	uncharacterized LOC731789
hsa-miR-129-5p	0	0	1	1	1	1	CCP110	centriolar coiled coil protein 110kDa
hsa-miR-129-5p	0	0	1	1	1	1	BDP1	B double prime 1, subunit of RNA polymerase III transcription initiation factor IIIB
hsa-miR-129-5p	0	0	1	1	1	1	ATG5	autophagy related 5
hsa-miR-129-5p	1	0	1	0	1	1	OSBPL8	oxysterol binding protein-like 8
hsa-miR-129-5p	0	0	1	0	1	1	HDAC9	histone deacetylase 9
hsa-miR-129-5p	1	0	1	0	1	1	CNTNAP2	contactin associated protein-like 2
hsa-miR-129-5p	0	0	1	1	1	1	ENKUR	enkurin, TRPC channel interacting protein
hsa-miR-129-5p	0	0	1	0	0	0	ZNFX1-AS1	ZNFX1 antisense RNA 1
hsa-miR-129-5p	0	0	1	1	1	1	MSS51	MSS51 mitochondrial translational activator homolog (S. cerevisiae)
hsa-miR-129-5p	1	0	1	1	1	1	ZFHX3	zinc finger homeobox 3
hsa-miR-129-5p	0	0	1	1	0	0	GOLGB1	golgin B1
hsa-miR-129-5p	0	0	1	1	1	1	SLC39A14	solute carrier family 39 (zinc transporter), member 14
hsa-miR-129-5p	1	0	1	1	1	1	METAP1	methionyl aminopeptidase 1
hsa-miR-129-5p	1	0	1	0	1	1	EFR3A	EFR3 homolog A (S. cerevisiae)
hsa-miR-129-5p	0	0	1	1	1	1	PARP14	poly (ADP-ribose) polymerase family, member 14
hsa-miR-129-5p	1	0	1	1	1	1	RSPO1	R-spondin 1
hsa-miR-129-5p	1	0	1	1	0	0	DPY19L1	dpy-19-like 1 (C. elegans)
hsa-miR-129-5p	0	0	1	1	1	1	P2RX7	purinergic receptor P2X, ligand-gated ion channel, 7
hsa-miR-129-5p	0	0	1	1	1	1	MARVELD2	MARVEL domain containing 2
hsa-miR-129-5p	0	0	1	1	1	1	ESR2	estrogen receptor 2 (ER beta)
hsa-miR-129-5p	0	0	1	0	0	0	POM121L8P	POM121 transmembrane nucleoporin-like 8 pseudogene
hsa-miR-129-5p	1	0	1	0	1	1	DCBLD2	discoidin, CUB and LCCL domain containing 2
hsa-miR-129-5p	0	0	1	1	0	0	SLCO3A1	solute carrier organic anion transporter family, member 3A1
hsa-miR-129-5p	1	0	1	1	1	1	SLC4A8	solute carrier family 4, sodium bicarbonate cotransporter, member 8
hsa-miR-129-5p	0	0	1	0	0	0	C1orf81	chromosome 1 open reading frame 81
hsa-miR-129-5p	1	0	1	0	1	1	KCNB1	potassium voltage-gated channel, Shab-related subfamily, member 1
hsa-miR-129-5p	0	0	1	1	1	1	AKAP17A	A kinase (PRKA) anchor protein 17A
hsa-miR-129-5p	1	0	1	1	1	1	MLL	myeloid/lymphoid or mixed-lineage leukemia (trithorax homolog, Drosophila)
hsa-miR-129-5p	0	0	1	1	1	1	ADPRH	ADP-ribosylarginine hydrolase
hsa-miR-129-5p	1	0	1	1	1	1	AFF1	AF4/FMR2 family, member 1
hsa-miR-129-5p	1	0	1	0	1	1	STAT3	signal transducer and activator of transcription 3 (acute-phase response factor)
hsa-miR-129-5p	0	0	1	1	1	1	PLCB4	phospholipase C, beta 4
hsa-miR-129-5p	1	0	1	1	1	1	GRM1	glutamate receptor, metabotropic 1
hsa-miR-129-5p	1	0	1	0	1	1	YES1	v-yes-1 Yamaguchi sarcoma viral oncogene homolog 1
hsa-miR-129-5p	0	0	1	1	1	1	ELF1	E74-like factor 1 (ets domain transcription factor)
hsa-miR-129-5p	0	0	1	1	1	1	AGA	aspartylglucosaminidase
hsa-miR-129-5p	1	0	1	0	1	1	ALAD	aminolevulinate dehydratase
hsa-miR-129-5p	0	0	1	1	1	1	BCHE	butyrylcholinesterase
hsa-miR-129-5p	1	0	1	1	1	1	COL4A4	collagen, type IV, alpha 4
hsa-miR-129-5p	1	0	1	1	1	1	COL5A1	collagen, type V, alpha 1
hsa-miR-129-5p	1	0	1	0	1	1	SLC26A2	solute carrier family 26 (sulfate transporter), member 2
hsa-miR-129-5p	1	0	1	1	1	1	F13A1	coagulation factor XIII, A1 polypeptide
hsa-miR-129-5p	0	0	1	1	1	1	F5	coagulation factor V (proaccelerin, labile factor)
hsa-miR-129-5p	1	0	1	1	1	1	GK	glycerol kinase
hsa-miR-129-5p	1	0	1	1	1	1	JAG1	jagged 1
hsa-miR-129-5p	1	0	1	1	1	1	KCNA1	potassium voltage-gated channel, shaker-related subfamily, member 1 (episodic ataxia with myokymia)
hsa-miR-129-5p	1	0	1	0	1	1	SGCB	sarcoglycan, beta (43kDa dystrophin-associated glycoprotein)
hsa-miR-129-5p	0	0	1	1	1	1	NDP	Norrie disease (pseudoglioma)
hsa-miR-129-5p	1	0	1	1	1	1	NF1	neurofibromin 1
hsa-miR-129-5p	1	0	1	1	1	1	OCRL	oculocerebrorenal syndrome of Lowe
hsa-miR-129-5p	1	0	1	1	1	1	PMP22	peripheral myelin protein 22
hsa-miR-129-5p	1	0	1	1	1	1	RB1	retinoblastoma 1
hsa-miR-129-5p	1	0	1	1	1	1	TIMP3	TIMP metallopeptidase inhibitor 3
hsa-miR-129-5p	1	0	1	1	1	1	APP	amyloid beta (A4) precursor protein
hsa-miR-129-5p	0	0	1	1	1	1	FCGR1A	Fc fragment of IgG, high affinity Ia, receptor (CD64)
hsa-miR-129-5p	0	0	1	1	0	0	IL3	interleukin 3 (colony-stimulating factor, multiple)
hsa-miR-129-5p	0	0	1	1	1	1	LTA	lymphotoxin alpha (TNF superfamily, member 1)
hsa-miR-129-5p	1	0	1	1	1	1	CD44	CD44 molecule (Indian blood group)
hsa-miR-129-5p	1	0	1	0	1	1	ADRA2B	adrenoceptor alpha 2B
hsa-miR-129-5p	0	0	1	0	0	0	GABRA3	gamma-aminobutyric acid (GABA) A receptor, alpha 3
hsa-miR-129-5p	1	0	1	1	1	1	GRM8	glutamate receptor, metabotropic 8
hsa-miR-129-5p	1	0	1	1	1	1	MME	membrane metallo-endopeptidase
hsa-miR-129-5p	0	0	1	1	1	1	NPY2R	neuropeptide Y receptor Y2
hsa-miR-129-5p	0	0	1	1	1	1	PON3	paraoxonase 3
hsa-miR-129-5p	1	0	1	1	1	1	PTGDR	prostaglandin D2 receptor (DP)
hsa-miR-129-5p	0	0	1	1	0	0	PTGIR	prostaglandin I2 (prostacyclin) receptor (IP)
hsa-miR-129-5p	0	0	1	0	1	1	PTGIS	prostaglandin I2 (prostacyclin) synthase
hsa-miR-129-5p	0	0	1	0	0	0	RPL30	ribosomal protein L30
hsa-miR-129-5p	1	0	1	0	1	1	SMAD5	SMAD family member 5
hsa-miR-129-5p	1	0	1	0	1	1	SPOPL	speckle-type POZ protein-like
hsa-miR-129-5p	1	0	1	1	1	1	LCLAT1	lysocardiolipin acyltransferase 1
hsa-miR-129-5p	1	0	1	1	0	0	EXOSC3	exosome component 3
hsa-miR-129-5p	1	0	1	1	1	1	KCTD11	potassium channel tetramerisation domain containing 11
hsa-miR-129-5p	1	0	1	1	1	1	LEPR	leptin receptor
hsa-miR-129-5p	1	0	1	1	1	1	HMGXB4	HMG box domain containing 4
hsa-miR-129-5p	0	0	1	1	1	1	SMAD1	SMAD family member 1
hsa-miR-129-5p	1	0	1	1	1	1	KLHL31	kelch-like 31 (Drosophila)
hsa-miR-129-5p	0	0	1	1	1	1	ZCCHC16	zinc finger, CCHC domain containing 16
hsa-miR-129-5p	0	0	1	1	1	1	CLEC2D	C-type lectin domain family 2, member D
hsa-miR-129-5p	1	0	1	1	1	1	NCK2	NCK adaptor protein 2
hsa-miR-129-5p	1	0	1	0	1	1	PKP2	plakophilin 2
hsa-miR-129-5p	1	0	1	1	1	1	EBF3	early B-cell factor 3
hsa-miR-129-5p	1	0	1	1	1	1	PLCXD3	phosphatidylinositol-specific phospholipase C, X domain containing 3
hsa-miR-129-5p	0	0	1	1	1	1	SUMO1	SMT3 suppressor of mif two 3 homolog 1 (S. cerevisiae)
hsa-miR-129-5p	1	0	1	1	1	1	ADAM9	ADAM metallopeptidase domain 9
hsa-miR-129-5p	1	0	1	1	1	1	TCEAL1	transcription elongation factor A (SII)-like 1
hsa-miR-129-5p	0	0	1	1	0	0	SPIN2B	spindlin family, member 2B
hsa-miR-129-5p	0	0	1	1	1	1	IGIP	IgA-inducing protein homolog (Bos taurus)
hsa-miR-129-5p	1	0	1	1	1	1	SPOP	speckle-type POZ protein
hsa-miR-129-5p	0	0	1	1	1	1	UACA	uveal autoantigen with coiled-coil domains and ankyrin repeats
hsa-miR-129-5p	1	0	1	1	1	1	BCAP29	B-cell receptor-associated protein 29
hsa-miR-129-5p	0	0	1	1	0	0	SLC41A3	solute carrier family 41, member 3
hsa-miR-129-5p	0	0	1	1	1	1	MXRA7	matrix-remodelling associated 7
hsa-miR-129-5p	1	0	1	0	1	1	KIAA2022	KIAA2022
hsa-miR-129-5p	0	0	1	1	1	1	MXI1	MAX interactor 1
hsa-miR-129-5p	1	0	1	1	1	1	NUPL1	nucleoporin like 1
hsa-miR-129-5p	0	0	1	1	1	1	GCSAM	germinal center-associated, signaling and motility
hsa-miR-129-5p	0	0	1	1	0	0	CDKL4	cyclin-dependent kinase-like 4
hsa-miR-129-5p	0	0	1	1	1	1	HRNR	hornerin
hsa-miR-129-5p	1	0	1	0	1	1	ERMN	ermin, ERM-like protein
hsa-miR-129-5p	1	0	1	1	1	1	ARHGAP28	Rho GTPase activating protein 28
hsa-miR-129-5p	0	0	1	1	1	1	SPIN3	spindlin family, member 3
hsa-miR-129-5p	1	0	1	1	1	1	ATP11C	ATPase, class VI, type 11C
hsa-miR-129-5p	1	0	1	0	1	1	CREB5	cAMP responsive element binding protein 5
hsa-miR-129-5p	0	0	1	0	1	1	ARGFX	arginine-fifty homeobox
hsa-miR-129-5p	0	0	1	1	0	0	LINC00207	long intergenic non-protein coding RNA 207
hsa-miR-129-5p	0	0	1	1	1	1	CCNC	cyclin C
hsa-miR-129-5p	0	0	1	1	0	0	EPGN	epithelial mitogen homolog (mouse)
hsa-miR-129-5p	0	0	1	0	0	0	LOC400707	uncharacterized LOC400707
hsa-miR-129-5p	1	0	1	1	1	1	RUNX2	runt-related transcription factor 2
hsa-miR-129-5p	0	0	1	1	0	0	SPRR2B	small proline-rich protein 2B
hsa-miR-129-5p	0	0	1	1	0	0	DAPL1	death associated protein-like 1
hsa-miR-129-5p	0	0	1	1	1	1	POLR2M	polymerase (RNA) II (DNA directed) polypeptide M
hsa-miR-129-5p	1	0	1	1	1	1	SH3KBP1	SH3-domain kinase binding protein 1
hsa-miR-129-5p	1	0	1	0	1	1	FBXO48	F-box protein 48
hsa-miR-129-5p	1	0	1	0	1	1	BCL7A	B-cell CLL/lymphoma 7A
hsa-miR-129-5p	1	0	1	1	1	1	ARPP21	cAMP-regulated phosphoprotein, 21kDa
hsa-miR-129-5p	0	0	1	1	0	0	CES1	carboxylesterase 1
hsa-miR-129-5p	1	0	1	1	1	1	KCTD21	potassium channel tetramerisation domain containing 21
hsa-miR-129-5p	0	0	1	0	1	1	C6orf120	chromosome 6 open reading frame 120
hsa-miR-129-5p	0	0	1	1	1	1	RPS29	ribosomal protein S29
hsa-miR-129-5p	1	0	1	0	1	1	SAMD5	sterile alpha motif domain containing 5
hsa-miR-129-5p	1	0	1	0	1	1	MSRB3	methionine sulfoxide reductase B3
hsa-miR-129-5p	0	0	1	1	1	1	C12orf40	chromosome 12 open reading frame 40
hsa-miR-129-5p	0	0	1	1	1	1	LYPD5	LY6/PLAUR domain containing 5
hsa-miR-129-5p	1	0	1	1	1	1	MAF	v-maf musculoaponeurotic fibrosarcoma oncogene homolog (avian)
hsa-miR-129-5p	1	0	1	1	1	1	CSNK1G3	casein kinase 1, gamma 3
hsa-miR-129-5p	1	0	1	1	1	1	GALNTL6	UDP-N-acetyl-alpha-D-galactosamine:polypeptide N-acetylgalactosaminyltransferase-like 6
hsa-miR-129-5p	0	0	1	1	1	1	C18orf62	chromosome 18 open reading frame 62
hsa-miR-129-5p	1	0	1	0	1	1	SCML1	sex comb on midleg-like 1 (Drosophila)
hsa-miR-129-5p	1	0	1	1	1	1	DLX1	distal-less homeobox 1
hsa-miR-129-5p	0	0	1	1	1	1	ATAD3C	ATPase family, AAA domain containing 3C
hsa-miR-129-5p	0	0	1	0	0	0	RUSC1-AS1	RUSC1 antisense RNA 1
hsa-miR-129-5p	1	0	1	0	1	1	GK5	glycerol kinase 5 (putative)
hsa-miR-129-5p	1	0	1	0	1	1	USP9X	ubiquitin specific peptidase 9, X-linked
hsa-miR-129-5p	1	0	1	1	1	1	C3orf65	chromosome 3 open reading frame 65
hsa-miR-129-5p	0	0	1	0	0	0	C19orf55	chromosome 19 open reading frame 55
hsa-miR-129-5p	1	0	1	1	1	1	SPTSSB	serine palmitoyltransferase, small subunit B
hsa-miR-129-5p	0	0	1	1	1	1	MLH3	mutL homolog 3 (E. coli)
hsa-miR-129-5p	0	0	1	1	1	1	SPOCK3	sparc/osteonectin, cwcv and kazal-like domains proteoglycan (testican) 3
hsa-miR-129-5p	1	0	1	1	1	1	ZBTB8A	zinc finger and BTB domain containing 8A
hsa-miR-129-5p	0	0	1	0	1	1	STEAP2	STEAP family member 2, metalloreductase
hsa-miR-129-5p	0	0	1	1	0	0	DEFB107B	defensin, beta 107B
hsa-miR-129-5p	1	0	1	1	1	1	ZC2HC1C	zinc finger, C2HC-type containing 1C
hsa-miR-129-5p	1	0	1	1	1	1	CEP85L	centrosomal protein 85kDa-like
hsa-miR-129-5p	1	0	1	1	1	1	GLRA3	glycine receptor, alpha 3
hsa-miR-129-5p	1	0	1	1	1	1	ERBB4	v-erb-a erythroblastic leukemia viral oncogene homolog 4 (avian)
hsa-miR-129-5p	1	0	1	1	1	1	NET1	neuroepithelial cell transforming 1
hsa-miR-129-5p	0	0	1	1	1	1	SSTR2	somatostatin receptor 2
hsa-miR-129-5p	1	0	1	1	1	1	QSER1	glutamine and serine rich 1
hsa-miR-129-5p	1	0	1	1	1	1	METTL9	methyltransferase like 9
hsa-miR-129-5p	1	0	1	1	1	1	HS6ST2	heparan sulfate 6-O-sulfotransferase 2
hsa-miR-129-5p	0	0	1	0	1	1	WTH3DI	RAB6C-like
hsa-miR-129-5p	0	0	1	0	0	0	AGAP7	ArfGAP with GTPase domain, ankyrin repeat and PH domain 7
hsa-miR-129-5p	1	0	1	1	1	1	TMTC4	transmembrane and tetratricopeptide repeat containing 4
hsa-miR-129-5p	1	0	1	1	1	1	VAV3	vav 3 guanine nucleotide exchange factor
hsa-miR-129-5p	1	0	1	1	1	1	DMP1	dentin matrix acidic phosphoprotein 1
hsa-miR-129-5p	1	0	1	1	1	1	FAM155A	family with sequence similarity 155, member A
hsa-miR-129-5p	1	0	1	1	1	1	BEND3	BEN domain containing 3
hsa-miR-129-5p	1	0	1	1	1	1	BICC1	bicaudal C homolog 1 (Drosophila)
hsa-miR-129-5p	1	0	1	1	1	1	REPS2	RALBP1 associated Eps domain containing 2
hsa-miR-129-5p	0	0	1	1	0	0	PRKDC	protein kinase, DNA-activated, catalytic polypeptide
hsa-miR-129-5p	0	0	1	1	1	1	ACPP	acid phosphatase, prostate
hsa-miR-129-5p	0	0	1	1	0	0	NUDT2	nudix (nucleoside diphosphate linked moiety X)-type motif 2
hsa-miR-129-5p	1	0	1	0	1	1	XIAP	X-linked inhibitor of apoptosis
hsa-miR-129-5p	1	0	1	1	1	1	PRDM1	PR domain containing 1, with ZNF domain
hsa-miR-129-5p	1	0	1	1	1	1	CAMK2D	calcium/calmodulin-dependent protein kinase II delta
hsa-miR-129-5p	0	0	1	1	1	1	TNFSF8	tumor necrosis factor (ligand) superfamily, member 8
hsa-miR-129-5p	1	0	1	0	1	1	CDK6	cyclin-dependent kinase 6
hsa-miR-129-5p	1	0	1	1	1	1	CHD1	chromodomain helicase DNA binding protein 1
hsa-miR-129-5p	0	0	1	1	1	1	DKC1	dyskeratosis congenita 1, dyskerin
hsa-miR-129-5p	0	0	1	1	1	1	DSCAM	Down syndrome cell adhesion molecule
hsa-miR-129-5p	1	0	1	1	1	1	CELSR3	cadherin, EGF LAG seven-pass G-type receptor 3 (flamingo homolog, Drosophila)
hsa-miR-129-5p	1	0	1	1	1	1	EIF1AX	eukaryotic translation initiation factor 1A, X-linked
hsa-miR-129-5p	1	0	1	1	1	1	ELAVL1	ELAV (embryonic lethal, abnormal vision, Drosophila)-like 1 (Hu antigen R)
hsa-miR-129-5p	0	0	1	0	1	1	EMP1	epithelial membrane protein 1
hsa-miR-129-5p	1	0	1	1	0	0	EMP2	epithelial membrane protein 2
hsa-miR-129-5p	1	0	1	0	1	1	B4GALT1	UDP-Gal:betaGlcNAc beta 1,4- galactosyltransferase, polypeptide 1
hsa-miR-129-5p	0	0	1	1	1	1	IL13RA1	interleukin 13 receptor, alpha 1
hsa-miR-129-5p	0	0	1	1	0	0	ACRV1	acrosomal vesicle protein 1
hsa-miR-129-5p	1	0	1	1	1	1	ADD2	adducin 2 (beta)
hsa-miR-129-5p	1	0	1	1	1	1	AK2	adenylate kinase 2
hsa-miR-129-5p	1	0	1	1	1	1	AQP4	aquaporin 4
hsa-miR-129-5p	0	0	1	0	1	1	AREG	amphiregulin
hsa-miR-129-5p	1	0	1	1	1	1	BAAT	bile acid CoA: amino acid N-acyltransferase (glycine N-choloyltransferase)
hsa-miR-129-5p	1	0	1	1	1	1	BCL6	B-cell CLL/lymphoma 6
hsa-miR-129-5p	1	0	1	0	1	1	CCND2	cyclin D2
hsa-miR-129-5p	1	0	1	1	1	1	CDC25A	cell division cycle 25 homolog A (S. pombe)
hsa-miR-129-5p	0	0	1	1	0	0	CEACAM3	carcinoembryonic antigen-related cell adhesion molecule 3
hsa-miR-129-5p	1	0	1	1	1	1	CLCN3	chloride channel, voltage-sensitive 3
hsa-miR-129-5p	1	0	1	0	1	1	COL19A1	collagen, type XIX, alpha 1
hsa-miR-129-5p	0	0	1	1	0	0	CPA3	carboxypeptidase A3 (mast cell)
hsa-miR-129-5p	1	0	1	1	1	1	MASP1	mannan-binding lectin serine peptidase 1 (C4/C2 activating component of Ra-reactive factor)
hsa-miR-129-5p	0	0	1	1	1	1	CTSE	cathepsin E
hsa-miR-129-5p	1	0	1	1	1	1	DSC3	desmocollin 3
hsa-miR-129-5p	1	0	1	1	1	1	E2F3	E2F transcription factor 3
hsa-miR-129-5p	0	0	1	0	1	1	FGF2	fibroblast growth factor 2 (basic)
hsa-miR-129-5p	1	0	1	0	1	1	FUT4	fucosyltransferase 4 (alpha (1,3) fucosyltransferase, myeloid-specific)
hsa-miR-129-5p	0	0	1	1	0	0	GLP1R	glucagon-like peptide 1 receptor
hsa-miR-129-5p	0	0	1	0	1	1	GYPA	glycophorin A (MNS blood group)
hsa-miR-129-5p	0	0	1	0	0	0	HLA-DRB1	major histocompatibility complex, class II, DR beta 1
hsa-miR-129-5p	1	0	1	1	1	1	TNC	tenascin C
hsa-miR-129-5p	0	0	1	1	1	1	IL12B	interleukin 12B (natural killer cell stimulatory factor 2, cytotoxic lymphocyte maturation factor 2, p40)
hsa-miR-129-5p	1	0	1	1	1	1	ITGA5	integrin, alpha 5 (fibronectin receptor, alpha polypeptide)
hsa-miR-129-5p	0	0	1	1	0	0	EIF6	eukaryotic translation initiation factor 6
hsa-miR-129-5p	1	0	1	1	1	1	KCNJ3	potassium inwardly-rectifying channel, subfamily J, member 3
hsa-miR-129-5p	1	0	1	1	1	1	KCNJ10	potassium inwardly-rectifying channel, subfamily J, member 10
hsa-miR-129-5p	0	0	1	1	1	1	KCNK1	potassium channel, subfamily K, member 1
hsa-miR-129-5p	1	0	1	1	1	1	LIFR	leukemia inhibitory factor receptor alpha
hsa-miR-129-5p	1	0	1	1	1	1	LRP6	low density lipoprotein receptor-related protein 6
hsa-miR-129-5p	1	0	1	1	1	1	MAP1A	microtubule-associated protein 1A
hsa-miR-129-5p	1	0	1	1	1	1	MATN2	matrilin 2
hsa-miR-129-5p	1	0	1	1	1	1	MSN	moesin
hsa-miR-129-5p	0	0	1	1	1	1	MSX2	msh homeobox 2
hsa-miR-129-5p	0	0	1	1	1	1	MTAP	methylthioadenosine phosphorylase
hsa-miR-129-5p	0	0	1	1	1	1	NOV	nephroblastoma overexpressed
hsa-miR-129-5p	1	0	1	1	1	1	NPAT	nuclear protein, ataxia-telangiectasia locus
hsa-miR-129-5p	1	0	1	1	1	1	NPTX1	neuronal pentraxin I
hsa-miR-129-5p	0	0	1	0	1	1	OPHN1	oligophrenin 1
hsa-miR-129-5p	1	0	1	0	1	1	PAK2	p21 protein (Cdc42/Rac)-activated kinase 2
hsa-miR-129-5p	1	0	1	1	1	1	PBX2	pre-B-cell leukemia homeobox 2
hsa-miR-129-5p	0	0	1	1	1	1	PF4V1	platelet factor 4 variant 1
hsa-miR-129-5p	1	0	1	0	1	1	POU3F1	POU class 3 homeobox 1
hsa-miR-129-5p	1	0	1	1	1	1	MAPK6	mitogen-activated protein kinase 6
hsa-miR-129-5p	1	0	1	1	1	1	PTPN4	protein tyrosine phosphatase, non-receptor type 4 (megakaryocyte)
hsa-miR-129-5p	0	0	1	1	1	1	PTPN12	protein tyrosine phosphatase, non-receptor type 12
hsa-miR-129-5p	1	0	1	1	1	1	PTX3	pentraxin 3, long
hsa-miR-129-5p	1	0	1	1	1	1	ARID4A	AT rich interactive domain 4A (RBP1-like)
hsa-miR-129-5p	0	0	1	1	0	0	RBP1	retinol binding protein 1, cellular
hsa-miR-129-5p	0	0	1	1	1	1	RGS2	regulator of G-protein signaling 2, 24kDa
hsa-miR-129-5p	1	0	1	1	1	1	CCL21	chemokine (C-C motif) ligand 21
hsa-miR-129-5p	0	0	1	0	1	1	CXCL5	chemokine (C-X-C motif) ligand 5
hsa-miR-129-5p	0	0	1	1	1	1	SDC2	syndecan 2
hsa-miR-129-5p	1	0	1	1	1	1	SKI	v-ski sarcoma viral oncogene homolog (avian)
hsa-miR-129-5p	1	0	1	1	1	1	SOX2	SRY (sex determining region Y)-box 2
hsa-miR-129-5p	0	0	1	1	1	1	SP100	SP100 nuclear antigen
hsa-miR-129-5p	1	0	1	0	1	1	STC1	stanniocalcin 1
hsa-miR-129-5p	0	0	1	1	1	1	SULT2A1	sulfotransferase family, cytosolic, 2A, dehydroepiandrosterone (DHEA)-preferring, member 1
hsa-miR-129-5p	1	0	1	0	1	1	TAL1	T-cell acute lymphocytic leukemia 1
hsa-miR-129-5p	1	0	1	0	1	1	SEC62	SEC62 homolog (S. cerevisiae)
hsa-miR-129-5p	1	0	1	0	1	1	TSPYL1	TSPY-like 1
hsa-miR-129-5p	0	0	1	1	1	1	TTK	TTK protein kinase
hsa-miR-129-5p	0	0	1	1	1	1	UBE2V2	ubiquitin-conjugating enzyme E2 variant 2
hsa-miR-129-5p	1	0	1	1	1	1	YWHAH	tyrosine 3-monooxygenase/tryptophan 5-monooxygenase activation protein, eta polypeptide
hsa-miR-129-5p	0	0	1	0	1	1	ZFY	zinc finger protein, Y-linked
hsa-miR-129-5p	0	0	1	1	1	1	STAM	signal transducing adaptor molecule (SH3 domain and ITAM motif) 1
hsa-miR-129-5p	1	0	1	1	1	1	ADAM12	ADAM metallopeptidase domain 12
hsa-miR-129-5p	1	0	1	1	1	1	CUL5	cullin 5
hsa-miR-129-5p	0	0	1	1	0	0	HIST1H4D	histone cluster 1, H4d
hsa-miR-129-5p	1	0	1	1	1	1	SUPT3H	suppressor of Ty 3 homolog (S. cerevisiae)
hsa-miR-129-5p	1	0	1	1	1	1	BARX2	BARX homeobox 2
hsa-miR-129-5p	0	0	1	1	1	1	AP3B1	adaptor-related protein complex 3, beta 1 subunit
hsa-miR-129-5p	0	0	1	1	1	1	BLZF1	basic leucine zipper nuclear factor 1
hsa-miR-129-5p	0	0	1	1	1	1	KMO	kynurenine 3-monooxygenase (kynurenine 3-hydroxylase)
hsa-miR-129-5p	1	0	1	1	1	1	TNFSF11	tumor necrosis factor (ligand) superfamily, member 11
hsa-miR-129-5p	1	0	1	1	1	1	SRSF9	serine/arginine-rich splicing factor 9
hsa-miR-129-5p	1	0	1	1	1	1	SNAP23	synaptosomal-associated protein, 23kDa
hsa-miR-129-5p	0	0	1	1	0	0	DLK1	delta-like 1 homolog (Drosophila)
hsa-miR-129-5p	1	0	1	0	1	1	SGPL1	sphingosine-1-phosphate lyase 1
hsa-miR-129-5p	0	0	1	1	1	1	PRPF4B	PRP4 pre-mRNA processing factor 4 homolog B (yeast)
hsa-miR-129-5p	1	0	1	1	1	1	MAP7	microtubule-associated protein 7
hsa-miR-129-5p	0	0	1	1	1	1	CDKN1B	cyclin-dependent kinase inhibitor 1B (p27, Kip1)
hsa-miR-129-5p	0	0	1	1	1	1	TIMM8A	translocase of inner mitochondrial membrane 8 homolog A (yeast)
hsa-miR-129-5p	1	0	1	1	1	1	EFNB2	ephrin-B2
hsa-miR-129-5p	1	0	1	1	1	1	EYA4	eyes absent homolog 4 (Drosophila)
hsa-miR-129-5p	1	0	1	1	1	1	FGF12	fibroblast growth factor 12
hsa-miR-129-5p	1	0	1	1	1	1	PPP2CB	protein phosphatase 2, catalytic subunit, beta isozyme
hsa-miR-129-5p	1	0	1	0	1	1	SLC1A2	solute carrier family 1 (glial high affinity glutamate transporter), member 2
hsa-miR-129-5p	1	0	1	1	1	1	SEMA3F	sema domain, immunoglobulin domain (Ig), short basic domain, secreted, (semaphorin) 3F
hsa-miR-129-5p	1	0	1	1	1	1	SOCS6	suppressor of cytokine signaling 6
hsa-miR-129-5p	0	0	1	1	1	1	LY86	lymphocyte antigen 86
hsa-miR-129-5p	0	0	1	1	1	1	HOMER1	homer homolog 1 (Drosophila)
hsa-miR-129-5p	1	0	1	1	1	1	GDA	guanine deaminase
hsa-miR-129-5p	0	0	1	1	0	0	BAD	BCL2-associated agonist of cell death
hsa-miR-129-5p	1	0	1	1	1	1	EGR3	early growth response 3
hsa-miR-129-5p	1	0	1	0	1	1	ACSL4	acyl-CoA synthetase long-chain family member 4
hsa-miR-129-5p	1	0	1	0	1	1	FGF5	fibroblast growth factor 5
hsa-miR-129-5p	0	0	1	0	1	1	FOXE1	forkhead box E1 (thyroid transcription factor 2)
hsa-miR-129-5p	0	0	1	1	0	0	GTF2A2	general transcription factor IIA, 2, 12kDa
hsa-miR-129-5p	1	0	1	0	1	1	SCN2B	sodium channel, voltage-gated, type II, beta subunit
hsa-miR-129-5p	0	0	1	1	1	1	PNPLA4	patatin-like phospholipase domain containing 4
hsa-miR-129-5p	0	0	1	0	1	1	BPY2	basic charge, Y-linked, 2
hsa-miR-129-5p	1	0	1	1	1	1	MTMR4	myotubularin related protein 4
hsa-miR-129-5p	0	0	1	0	1	1	CXorf1	chromosome X open reading frame 1
hsa-miR-129-5p	1	0	1	1	1	1	MAP3K13	mitogen-activated protein kinase kinase kinase 13
hsa-miR-129-5p	1	0	1	1	1	1	B4GALT6	UDP-Gal:betaGlcNAc beta 1,4- galactosyltransferase, polypeptide 6
hsa-miR-129-5p	0	0	1	1	1	1	LHX2	LIM homeobox 2
hsa-miR-129-5p	0	0	1	0	1	1	ADIPOQ	adiponectin, C1Q and collagen domain containing
hsa-miR-129-5p	1	0	1	1	1	1	KIF3B	kinesin family member 3B
hsa-miR-129-5p	1	0	1	0	1	1	CDYL	chromodomain protein, Y-like
hsa-miR-129-5p	1	0	1	0	1	1	ROCK2	Rho-associated, coiled-coil containing protein kinase 2
hsa-miR-129-5p	1	0	1	1	1	1	VPS4B	vacuolar protein sorting 4 homolog B (S. cerevisiae)
hsa-miR-129-5p	0	0	1	1	1	1	NRG2	neuregulin 2
hsa-miR-129-5p	1	0	1	1	1	1	CXCL14	chemokine (C-X-C motif) ligand 14
hsa-miR-129-5p	0	0	1	1	1	1	DSC1	desmocollin 1
hsa-miR-129-5p	0	0	1	0	1	1	DSC2	desmocollin 2
hsa-miR-129-5p	1	0	1	0	1	1	SEL1L	sel-1 suppressor of lin-12-like (C. elegans)
hsa-miR-129-5p	0	0	1	1	1	1	SIM1	single-minded homolog 1 (Drosophila)
hsa-miR-129-5p	1	0	1	1	1	1	TLE1	transducin-like enhancer of split 1 (E(sp1) homolog, Drosophila)
hsa-miR-129-5p	1	0	1	0	1	1	NUP153	nucleoporin 153kDa
hsa-miR-129-5p	0	0	1	1	1	1	CLEC2B	C-type lectin domain family 2, member B
hsa-miR-129-5p	1	0	1	1	1	1	BMI1	BMI1 polycomb ring finger oncogene
hsa-miR-129-5p	1	0	1	1	1	1	CBL	Cbl proto-oncogene, E3 ubiquitin protein ligase
hsa-miR-129-5p	1	0	1	1	1	1	GAS2	growth arrest-specific 2
hsa-miR-129-5p	0	0	1	1	1	1	MSTN	myostatin
hsa-miR-129-5p	1	0	1	1	1	1	GPR3	G protein-coupled receptor 3
hsa-miR-129-5p	0	0	1	1	1	1	GPR22	G protein-coupled receptor 22
hsa-miR-129-5p	0	0	1	1	1	1	GRPR	gastrin-releasing peptide receptor
hsa-miR-129-5p	1	0	1	1	1	1	NEFM	neurofilament, medium polypeptide
hsa-miR-129-5p	1	0	1	1	1	1	PDCL	phosducin-like
hsa-miR-129-5p	1	0	1	1	1	1	PHF2	PHD finger protein 2
hsa-miR-129-5p	1	0	1	1	0	0	SALL2	sal-like 2 (Drosophila)
hsa-miR-129-5p	1	0	1	0	1	1	CCDC6	coiled-coil domain containing 6
hsa-miR-129-5p	0	0	1	1	1	1	CER1	cerberus 1, cysteine knot superfamily, homolog (Xenopus laevis)
hsa-miR-129-5p	0	0	1	1	1	1	ZRANB2	zinc finger, RAN-binding domain containing 2
hsa-miR-129-5p	1	0	1	1	1	1	HCN4	hyperpolarization activated cyclic nucleotide-gated potassium channel 4
hsa-miR-129-5p	1	0	1	1	1	1	PIGK	phosphatidylinositol glycan anchor biosynthesis, class K
hsa-miR-129-5p	1	0	1	1	1	1	GTF2E1	general transcription factor IIE, polypeptide 1, alpha 56kDa
hsa-miR-129-5p	0	0	1	0	1	1	POU3F2	POU class 3 homeobox 2
hsa-miR-129-5p	0	0	1	1	1	1	SOX3	SRY (sex determining region Y)-box 3
hsa-miR-129-5p	0	0	1	1	0	0	NR2F1	nuclear receptor subfamily 2, group F, member 1
hsa-miR-129-5p	1	0	1	1	1	1	ST8SIA4	ST8 alpha-N-acetyl-neuraminide alpha-2,8-sialyltransferase 4
hsa-miR-129-5p	0	0	1	1	0	0	SNURF	SNRPN upstream reading frame
hsa-miR-129-5p	1	0	1	1	1	1	ARPC5	actin related protein 2/3 complex, subunit 5, 16kDa
hsa-miR-129-5p	1	0	1	1	1	1	SRRM1	serine/arginine repetitive matrix 1
hsa-miR-129-5p	0	0	1	1	1	1	ZMPSTE24	zinc metallopeptidase STE24 homolog (S. cerevisiae)
hsa-miR-129-5p	1	0	1	1	1	1	EFS	embryonal Fyn-associated substrate
hsa-miR-129-5p	0	0	1	1	1	1	CD5L	CD5 molecule-like
hsa-miR-129-5p	1	0	1	1	1	1	MMP16	matrix metallopeptidase 16 (membrane-inserted)
hsa-miR-129-5p	0	0	1	1	1	1	S100A2	S100 calcium binding protein A2
hsa-miR-129-5p	1	0	1	1	1	1	HS3ST4	heparan sulfate (glucosamine) 3-O-sulfotransferase 4
hsa-miR-129-5p	0	0	1	1	1	1	LANCL1	LanC lantibiotic synthetase component C-like 1 (bacterial)
hsa-miR-129-5p	1	0	1	1	1	1	SEMA3A	sema domain, immunoglobulin domain (Ig), short basic domain, secreted, (semaphorin) 3A
hsa-miR-129-5p	1	0	1	1	1	1	SPON1	spondin 1, extracellular matrix protein
hsa-miR-129-5p	1	0	1	1	1	1	NEFL	neurofilament, light polypeptide
hsa-miR-129-5p	0	0	1	1	1	1	NKX3-1	NK3 homeobox 1
hsa-miR-129-5p	1	0	1	1	1	1	PRKAA1	protein kinase, AMP-activated, alpha 1 catalytic subunit
hsa-miR-129-5p	1	0	1	1	1	1	PKN2	protein kinase N2
hsa-miR-129-5p	0	0	1	0	0	0	PTPN13	protein tyrosine phosphatase, non-receptor type 13 (APO-1/CD95 (Fas)-associated phosphatase)
hsa-miR-129-5p	1	0	1	1	1	1	RAD21	RAD21 homolog (S. pombe)
hsa-miR-129-5p	1	0	1	1	1	1	SMC1A	structural maintenance of chromosomes 1A
hsa-miR-129-5p	1	0	1	1	1	1	ZER1	zer-1 homolog (C. elegans)
hsa-miR-129-5p	1	0	1	1	1	1	SEC23A	Sec23 homolog A (S. cerevisiae)
hsa-miR-129-5p	1	0	1	1	1	1	VAT1	vesicle amine transport protein 1 homolog (T. californica)
hsa-miR-129-5p	1	0	1	0	1	1	APPBP2	amyloid beta precursor protein (cytoplasmic tail) binding protein 2
hsa-miR-129-5p	1	0	1	1	1	1	NEBL	nebulette
hsa-miR-129-5p	1	0	1	1	1	1	ANP32B	acidic (leucine-rich) nuclear phosphoprotein 32 family, member B
hsa-miR-129-5p	0	0	1	1	1	1	CXCL13	chemokine (C-X-C motif) ligand 13
hsa-miR-129-5p	1	0	1	1	1	1	PAIP1	poly(A) binding protein interacting protein 1
hsa-miR-129-5p	1	0	1	1	1	1	HEXIM1	hexamethylene bis-acetamide inducible 1
hsa-miR-129-5p	0	0	1	0	1	1	SLC16A2	solute carrier family 16, member 2 (thyroid hormone transporter)
hsa-miR-129-5p	1	0	1	1	1	1	DYNLT3	dynein, light chain, Tctex-type 3
hsa-miR-129-5p	1	0	1	0	1	1	IGF2BP1	insulin-like growth factor 2 mRNA binding protein 1
hsa-miR-129-5p	1	0	1	1	1	1	RRAGA	Ras-related GTP binding A
hsa-miR-129-5p	1	0	1	1	1	1	RBBP9	retinoblastoma binding protein 9
hsa-miR-129-5p	1	0	1	1	1	1	MAP3K2	mitogen-activated protein kinase kinase kinase 2
hsa-miR-129-5p	0	0	1	1	1	1	SMR3B	submaxillary gland androgen regulated protein 3B
hsa-miR-129-5p	1	0	1	1	1	1	MAN1A2	mannosidase, alpha, class 1A, member 2
hsa-miR-129-5p	0	0	1	0	1	1	SUB1	SUB1 homolog (S. cerevisiae)
hsa-miR-129-5p	1	0	1	1	1	1	ZBTB33	zinc finger and BTB domain containing 33
hsa-miR-129-5p	1	0	1	1	1	1	CBX1	chromobox homolog 1
hsa-miR-129-5p	1	0	1	1	1	1	RAB35	RAB35, member RAS oncogene family
hsa-miR-129-5p	1	0	1	1	1	1	B3GNT1	UDP-GlcNAc:betaGal beta-1,3-N-acetylglucosaminyltransferase 1
hsa-miR-129-5p	0	0	1	1	1	1	CEACAM7	carcinoembryonic antigen-related cell adhesion molecule 7
hsa-miR-129-5p	1	0	1	1	1	1	SKP1	S-phase kinase-associated protein 1
hsa-miR-129-5p	1	0	1	1	1	1	SRP72	signal recognition particle 72kDa
hsa-miR-129-5p	1	0	1	1	1	1	HSPA13	heat shock protein 70kDa family, member 13
hsa-miR-129-5p	0	0	1	1	1	1	ZNF80	zinc finger protein 80
hsa-miR-129-5p	1	0	1	1	1	1	VEZF1	vascular endothelial zinc finger 1
hsa-miR-129-5p	0	0	1	0	1	1	ZNF208	zinc finger protein 208
hsa-miR-129-5p	0	0	1	0	0	0	ZXDA	zinc finger, X-linked, duplicated A
hsa-miR-129-5p	0	0	1	0	1	1	ZXDB	zinc finger, X-linked, duplicated B
hsa-miR-129-5p	1	0	1	0	1	1	PRSS23	protease, serine, 23
hsa-miR-129-5p	0	0	1	1	1	1	WIF1	WNT inhibitory factor 1
hsa-miR-129-5p	1	0	1	1	1	1	CA5B	carbonic anhydrase VB, mitochondrial
hsa-miR-129-5p	1	0	1	0	1	1	CHP1	calcineurin-like EF hand protein 1
hsa-miR-129-5p	1	0	1	1	1	1	KLF12	Kruppel-like factor 12
hsa-miR-129-5p	1	0	1	1	1	1	RNF13	ring finger protein 13
hsa-miR-129-5p	1	0	1	1	1	1	TARDBP	TAR DNA binding protein
hsa-miR-129-5p	0	0	1	1	1	1	MIP	major intrinsic protein of lens fiber
hsa-miR-129-5p	0	0	1	1	1	1	ATF5	activating transcription factor 5
hsa-miR-129-5p	1	0	1	1	1	1	ELL2	elongation factor, RNA polymerase II, 2
hsa-miR-129-5p	0	0	1	1	1	1	AK5	adenylate kinase 5
hsa-miR-129-5p	0	0	1	1	1	1	LMOD1	leiomodin 1 (smooth muscle)
hsa-miR-129-5p	0	0	1	1	1	1	EHF	ets homologous factor
hsa-miR-129-5p	1	0	1	1	1	1	FBXL2	F-box and leucine-rich repeat protein 2
hsa-miR-129-5p	1	0	1	1	1	1	DKK1	dickkopf 1 homolog (Xenopus laevis)
hsa-miR-129-5p	0	0	1	1	1	1	SEPHS2	selenophosphate synthetase 2
hsa-miR-129-5p	1	0	1	1	1	1	RHOQ	ras homolog family member Q
hsa-miR-129-5p	1	0	1	1	1	1	KCND2	potassium voltage-gated channel, Shal-related subfamily, member 2
hsa-miR-129-5p	1	0	1	0	1	1	G3BP2	GTPase activating protein (SH3 domain) binding protein 2
hsa-miR-129-5p	1	0	1	1	1	1	TLL2	tolloid-like 2
hsa-miR-129-5p	0	0	1	1	1	1	TCL6	T-cell leukemia/lymphoma 6 (non-protein coding)
hsa-miR-129-5p	0	0	1	1	1	1	CD24	CD24 molecule
hsa-miR-129-5p	1	0	1	0	1	1	FLRT2	fibronectin leucine rich transmembrane protein 2
hsa-miR-129-5p	0	0	1	1	1	1	N6AMT1	N-6 adenine-specific DNA methyltransferase 1 (putative)
hsa-miR-129-5p	0	0	1	1	1	1	C16orf80	chromosome 16 open reading frame 80
hsa-miR-129-5p	1	0	1	1	1	1	LRP12	low density lipoprotein receptor-related protein 12
hsa-miR-129-5p	1	0	1	0	1	1	OSTM1	osteopetrosis associated transmembrane protein 1
hsa-miR-129-5p	1	0	1	0	1	1	C16orf72	chromosome 16 open reading frame 72
hsa-miR-129-5p	0	0	1	1	1	1	CCDC113	coiled-coil domain containing 113
hsa-miR-129-5p	0	0	1	1	1	1	CD5	CD5 molecule
hsa-miR-129-5p	1	0	1	1	1	1	VAMP1	vesicle-associated membrane protein 1 (synaptobrevin 1)
hsa-miR-129-5p	0	0	1	0	1	1	ADAMTS3	ADAM metallopeptidase with thrombospondin type 1 motif, 3
hsa-miR-129-5p	0	0	1	1	1	1	OPN3	opsin 3
hsa-miR-129-5p	0	0	1	1	1	1	TSPAN13	tetraspanin 13
hsa-miR-129-5p	1	0	1	1	1	1	DKK2	dickkopf 2 homolog (Xenopus laevis)
hsa-miR-129-5p	1	0	1	1	1	1	SERP1	stress-associated endoplasmic reticulum protein 1
hsa-miR-129-5p	1	0	1	1	1	1	KLHL20	kelch-like 20 (Drosophila)
hsa-miR-129-5p	1	0	1	1	1	1	SLC40A1	solute carrier family 40 (iron-regulated transporter), member 1
hsa-miR-129-5p	1	0	1	1	1	1	FAF2	Fas associated factor family member 2
hsa-miR-129-5p	0	0	1	1	1	1	HOXC4	homeobox C4
hsa-miR-129-5p	1	0	1	1	1	1	RALGPS1	Ral GEF with PH domain and SH3 binding motif 1
hsa-miR-129-5p	0	0	1	1	1	1	PHF14	PHD finger protein 14
hsa-miR-129-5p	1	0	1	1	1	1	ULK2	unc-51-like kinase 2 (C. elegans)
hsa-miR-129-5p	0	0	1	1	1	1	FRMPD4	FERM and PDZ domain containing 4
hsa-miR-129-5p	0	0	1	1	1	1	TATDN2	TatD DNase domain containing 2
hsa-miR-129-5p	0	0	1	1	1	1	KIAA0141	KIAA0141
hsa-miR-129-5p	0	0	1	1	0	0	PCNXL2	pecanex-like 2 (Drosophila)
hsa-miR-129-5p	0	0	1	0	1	1	EPM2AIP1	EPM2A (laforin) interacting protein 1
hsa-miR-129-5p	1	0	1	1	1	1	LRIG2	leucine-rich repeats and immunoglobulin-like domains 2
hsa-miR-129-5p	1	0	1	1	1	1	FCHSD2	FCH and double SH3 domains 2
hsa-miR-129-5p	1	0	1	0	1	1	LPPR4	lipid phosphate phosphatase-related protein type 4
hsa-miR-129-5p	1	0	1	1	1	1	JOSD1	Josephin domain containing 1
hsa-miR-129-5p	0	0	1	0	1	1	PPM1E	protein phosphatase, Mg2+/Mn2+ dependent, 1E
hsa-miR-129-5p	1	0	1	1	1	1	SPAST	spastin
hsa-miR-129-5p	1	0	1	0	1	1	ZBTB1	zinc finger and BTB domain containing 1
hsa-miR-129-5p	1	0	1	1	1	1	RAB21	RAB21, member RAS oncogene family
hsa-miR-129-5p	1	0	1	1	1	1	FBXO21	F-box protein 21
hsa-miR-129-5p	1	0	1	0	1	1	NMNAT2	nicotinamide nucleotide adenylyltransferase 2
hsa-miR-129-5p	1	0	1	0	1	1	ERC1	ELKS/RAB6-interacting/CAST family member 1
hsa-miR-129-5p	1	0	1	1	1	1	SIPA1L3	signal-induced proliferation-associated 1 like 3
hsa-miR-129-5p	1	0	1	1	1	1	SMG1	smg-1 homolog, phosphatidylinositol 3-kinase-related kinase (C. elegans)
hsa-miR-129-5p	1	0	1	0	1	1	ZZEF1	zinc finger, ZZ-type with EF-hand domain 1
hsa-miR-129-5p	1	0	1	1	1	1	RTF1	Rtf1, Paf1/RNA polymerase II complex component, homolog (S. cerevisiae)
hsa-miR-129-5p	1	0	1	1	1	1	PLCB1	phospholipase C, beta 1 (phosphoinositide-specific)
hsa-miR-129-5p	1	0	1	1	1	1	MYO1D	myosin ID
hsa-miR-129-5p	1	0	1	1	1	1	PDS5A	PDS5, regulator of cohesion maintenance, homolog A (S. cerevisiae)
hsa-miR-129-5p	1	0	1	1	1	1	WDR7	WD repeat domain 7
hsa-miR-129-5p	1	0	1	1	1	1	PHF15	PHD finger protein 15
hsa-miR-129-5p	1	0	1	1	1	1	MED13L	mediator complex subunit 13-like
hsa-miR-129-5p	0	0	1	0	1	1	ZDHHC17	zinc finger, DHHC-type containing 17
hsa-miR-129-5p	0	0	1	1	1	1	LEPROTL1	leptin receptor overlapping transcript-like 1
hsa-miR-129-5p	1	0	1	1	1	1	MORC3	MORC family CW-type zinc finger 3
hsa-miR-129-5p	1	0	1	1	1	1	DSTYK	dual serine/threonine and tyrosine protein kinase
hsa-miR-129-5p	1	0	1	1	1	1	MOB4	MOB family member 4, phocein
hsa-miR-129-5p	1	0	1	1	1	1	CAMSAP1	calmodulin regulated spectrin-associated protein 1
hsa-miR-129-5p	1	0	1	0	1	1	GLCE	glucuronic acid epimerase
hsa-miR-129-5p	1	0	1	1	1	1	LTN1	listerin E3 ubiquitin protein ligase 1
hsa-miR-129-5p	0	0	1	1	1	1	TES	testis derived transcript (3 LIM domains)
hsa-miR-129-5p	0	0	1	1	1	1	BRPF3	bromodomain and PHD finger containing, 3
hsa-miR-129-5p	1	0	1	0	1	1	RRM2B	ribonucleotide reductase M2 B (TP53 inducible)
hsa-miR-129-5p	1	0	1	1	1	1	PLA2G3	phospholipase A2, group III
hsa-miR-129-5p	0	0	1	1	0	0	PLEKHA8P1	pleckstrin homology domain containing, family A member 8 pseudogene 1
hsa-miR-129-5p	0	0	1	0	1	1	OTUD6B	OTU domain containing 6B
hsa-miR-129-5p	0	0	1	1	1	1	ISOC1	isochorismatase domain containing 1
hsa-miR-129-5p	1	0	1	1	1	1	GOLT1B	golgi transport 1B
hsa-miR-129-5p	0	0	1	1	1	1	HDGFRP3	hepatoma-derived growth factor, related protein 3
hsa-miR-129-5p	1	0	1	1	1	1	NLK	nemo-like kinase
hsa-miR-129-5p	1	0	1	0	1	1	HPCAL4	hippocalcin like 4
hsa-miR-129-5p	1	0	1	1	1	1	RNF138	ring finger protein 138, E3 ubiquitin protein ligase
hsa-miR-129-5p	0	0	1	1	1	1	RSL24D1	ribosomal L24 domain containing 1
hsa-miR-129-5p	1	0	1	1	1	1	RAPGEFL1	Rap guanine nucleotide exchange factor (GEF)-like 1
hsa-miR-129-5p	1	0	1	1	1	1	TRIAP1	TP53 regulated inhibitor of apoptosis 1
hsa-miR-129-5p	0	0	1	0	1	1	GPR83	G protein-coupled receptor 83
hsa-miR-129-5p	1	0	1	1	1	1	SIX4	SIX homeobox 4
hsa-miR-129-5p	1	0	1	1	1	1	ARID1B	AT rich interactive domain 1B (SWI1-like)
hsa-miR-129-5p	0	0	1	1	1	1	NKRF	NFKB repressing factor
hsa-miR-129-5p	1	0	1	0	1	1	ZRANB1	zinc finger, RAN-binding domain containing 1
hsa-miR-129-5p	0	0	1	0	1	1	VEZT	vezatin, adherens junctions transmembrane protein
hsa-miR-129-5p	0	0	1	1	1	1	DYM	dymeclin
hsa-miR-129-5p	0	0	1	1	0	0	CNTLN	centlein, centrosomal protein
hsa-miR-129-5p	1	0	1	1	1	1	TBC1D8B	TBC1 domain family, member 8B (with GRAM domain)
hsa-miR-129-5p	1	0	1	1	1	1	ALKBH5	alkB, alkylation repair homolog 5 (E. coli)
hsa-miR-129-5p	0	0	1	1	1	1	NCAPG2	non-SMC condensin II complex, subunit G2
hsa-miR-129-5p	1	0	1	0	1	1	MARCH5	membrane-associated ring finger (C3HC4) 5
hsa-miR-129-5p	0	0	1	1	1	1	SOHLH2	spermatogenesis and oogenesis specific basic helix-loop-helix 2
hsa-miR-129-5p	1	0	1	1	1	1	RNF125	ring finger protein 125, E3 ubiquitin protein ligase
hsa-miR-129-5p	1	0	1	1	1	1	SLC48A1	solute carrier family 48 (heme transporter), member 1
hsa-miR-129-5p	1	0	1	1	1	1	C9orf40	chromosome 9 open reading frame 40
hsa-miR-129-5p	1	0	1	1	1	1	IFT57	intraflagellar transport 57 homolog (Chlamydomonas)
hsa-miR-129-5p	0	0	1	1	1	1	HEATR1	HEAT repeat containing 1
hsa-miR-129-5p	1	0	1	1	0	0	GSPT2	G1 to S phase transition 2
hsa-miR-129-5p	1	0	1	1	1	1	FAM178A	family with sequence similarity 178, member A
hsa-miR-129-5p	1	0	1	0	1	1	MSL2	male-specific lethal 2 homolog (Drosophila)
hsa-miR-129-5p	1	0	1	1	1	1	RPRD1A	regulation of nuclear pre-mRNA domain containing 1A
hsa-miR-129-5p	1	0	1	1	1	1	LRRC1	leucine rich repeat containing 1
hsa-miR-129-5p	1	0	1	1	1	1	RSBN1	round spermatid basic protein 1
hsa-miR-129-5p	0	0	1	1	1	1	STK32B	serine/threonine kinase 32B
hsa-miR-129-5p	0	0	1	1	1	1	ZC3H15	zinc finger CCCH-type containing 15
hsa-miR-129-5p	0	0	1	0	0	0	FAM45B	family with sequence similarity 45, member A pseudogene
hsa-miR-129-5p	1	0	1	0	1	1	LRP1B	low density lipoprotein receptor-related protein 1B
hsa-miR-129-5p	1	0	1	1	1	1	ETNK1	ethanolamine kinase 1
hsa-miR-129-5p	1	0	1	1	1	1	LANCL2	LanC lantibiotic synthetase component C-like 2 (bacterial)
hsa-miR-129-5p	1	0	1	1	1	1	CTTNBP2NL	CTTNBP2 N-terminal like
hsa-miR-129-5p	1	0	1	1	1	1	CDCA7L	cell division cycle associated 7-like
hsa-miR-129-5p	1	0	1	0	1	1	PCDHAC1	protocadherin alpha subfamily C, 1
hsa-miR-129-5p	1	0	1	0	1	1	PCDHAC2	protocadherin alpha subfamily C, 2
hsa-miR-129-5p	1	0	1	1	1	1	PCDHA1	protocadherin alpha 1
hsa-miR-129-5p	1	0	1	0	1	1	PCDHA10	protocadherin alpha 10
hsa-miR-129-5p	1	0	1	0	1	1	PCDHA11	protocadherin alpha 11
hsa-miR-129-5p	1	0	1	0	1	1	PCDHA12	protocadherin alpha 12
hsa-miR-129-5p	1	0	1	0	1	1	PCDHA13	protocadherin alpha 13
hsa-miR-129-5p	1	0	1	1	1	1	PCDHA2	protocadherin alpha 2
hsa-miR-129-5p	1	0	1	1	1	1	PCDHA3	protocadherin alpha 3
hsa-miR-129-5p	1	0	1	1	1	1	PCDHA4	protocadherin alpha 4
hsa-miR-129-5p	1	0	1	1	1	1	PCDHA5	protocadherin alpha 5
hsa-miR-129-5p	1	0	1	1	1	1	PCDHA6	protocadherin alpha 6
hsa-miR-129-5p	1	0	1	0	1	1	PCDHA7	protocadherin alpha 7
hsa-miR-129-5p	1	0	1	1	1	1	PCDHA8	protocadherin alpha 8
hsa-miR-129-5p	0	0	1	1	1	1	NPAP1	nuclear pore associated protein 1
hsa-miR-129-5p	0	0	1	1	0	0	MRPS21	mitochondrial ribosomal protein S21
hsa-miR-129-5p	1	0	1	0	1	1	FAM190B	family with sequence similarity 190, member B
hsa-miR-129-5p	0	0	1	1	0	0	SPIN2A	spindlin family, member 2A
hsa-miR-129-5p	1	0	1	0	1	1	CCDC93	coiled-coil domain containing 93
hsa-miR-129-5p	0	0	1	1	0	0	TOMM7	translocase of outer mitochondrial membrane 7 homolog (yeast)
hsa-miR-129-5p	0	0	1	0	1	1	ARL15	ADP-ribosylation factor-like 15
hsa-miR-129-5p	1	0	1	1	1	1	LRRC8A	leucine rich repeat containing 8 family, member A
hsa-miR-129-5p	1	0	1	1	0	0	KCNQ5	potassium voltage-gated channel, KQT-like subfamily, member 5
hsa-miR-129-5p	0	0	1	1	1	1	FMN2	formin 2
hsa-miR-129-5p	0	0	1	1	1	1	TMEM167B	transmembrane protein 167B
hsa-miR-129-5p	1	0	1	0	1	1	PAPOLB	poly(A) polymerase beta (testis specific)
hsa-miR-129-5p	0	0	1	1	1	1	ACN9	ACN9 homolog (S. cerevisiae)
hsa-miR-129-5p	0	0	1	1	1	1	MEPE	matrix extracellular phosphoglycoprotein
hsa-miR-129-5p	0	0	1	1	1	1	STOX2	storkhead box 2
hsa-miR-129-5p	0	0	1	1	1	1	ANKMY2	ankyrin repeat and MYND domain containing 2
hsa-miR-129-5p	1	0	1	0	1	1	SLC17A6	solute carrier family 17 (sodium-dependent inorganic phosphate cotransporter), member 6
hsa-miR-129-5p	1	0	1	0	1	1	CNNM1	cyclin M1
hsa-miR-129-5p	0	0	1	1	1	1	CYSLTR2	cysteinyl leukotriene receptor 2
hsa-miR-129-5p	0	0	1	1	1	1	PDSS2	prenyl (decaprenyl) diphosphate synthase, subunit 2
hsa-miR-129-5p	0	0	1	0	1	1	TWSG1	twisted gastrulation homolog 1 (Drosophila)
hsa-miR-129-5p	1	0	1	0	1	1	FAM40B	family with sequence similarity 40, member B
hsa-miR-129-5p	0	0	1	1	1	1	SHROOM4	shroom family member 4
hsa-miR-129-5p	1	0	1	1	1	1	RNF150	ring finger protein 150
hsa-miR-129-5p	1	0	1	1	1	1	DLG3	discs, large homolog 3 (Drosophila)
hsa-miR-129-5p	0	0	1	1	1	1	ARRDC3	arrestin domain containing 3
hsa-miR-129-5p	0	0	1	0	1	1	SYT13	synaptotagmin XIII
hsa-miR-129-5p	1	0	1	0	1	1	WDFY1	WD repeat and FYVE domain containing 1
hsa-miR-129-5p	1	0	1	1	1	1	HOMEZ	homeobox and leucine zipper encoding
hsa-miR-129-5p	1	0	1	1	1	1	RANBP10	RAN binding protein 10
hsa-miR-129-5p	1	0	1	0	1	1	RNF213	ring finger protein 213
hsa-miR-129-5p	1	0	1	1	1	1	ZFP14	zinc finger protein 14 homolog (mouse)
hsa-miR-129-5p	1	0	1	0	1	1	RAP2A	RAP2A, member of RAS oncogene family
hsa-miR-129-5p	0	0	1	1	1	1	RNASEL	ribonuclease L (2',5'-oligoisoadenylate synthetase-dependent)
hsa-miR-129-5p	1	0	1	1	1	1	RTN1	reticulon 1
hsa-miR-129-5p	0	0	1	0	1	1	MS4A7	membrane-spanning 4-domains, subfamily A, member 7
hsa-miR-129-5p	1	0	1	1	1	1	SLC5A7	solute carrier family 5 (choline transporter), member 7
hsa-miR-129-5p	1	0	1	0	1	1	GAN	gigaxonin
hsa-miR-129-5p	1	0	1	0	1	1	CSNK1G1	casein kinase 1, gamma 1
hsa-miR-129-5p	0	0	1	1	1	1	PERP	PERP, TP53 apoptosis effector
hsa-miR-129-5p	1	0	1	0	1	1	EDAR	ectodysplasin A receptor
hsa-miR-129-5p	1	0	1	0	1	1	GREM2	gremlin 2
hsa-miR-129-5p	1	0	1	1	1	1	NDRG3	NDRG family member 3
hsa-miR-129-5p	1	0	1	0	1	1	MRPS25	mitochondrial ribosomal protein S25
hsa-miR-129-5p	1	0	1	0	1	1	DNMT3A	DNA (cytosine-5-)-methyltransferase 3 alpha
hsa-miR-129-5p	1	0	1	1	1	1	S100PBP	S100P binding protein
hsa-miR-129-5p	0	0	1	1	1	1	CERK	ceramide kinase
hsa-miR-129-5p	1	0	1	1	1	1	DEPTOR	DEP domain containing MTOR-interacting protein
hsa-miR-129-5p	1	0	1	1	1	1	RFX7	regulatory factor X, 7
hsa-miR-129-5p	1	0	1	1	1	1	REEP1	receptor accessory protein 1
hsa-miR-129-5p	0	0	1	1	1	1	MARCKSL1	MARCKS-like 1
hsa-miR-129-5p	1	0	1	1	1	1	SOWAHC	sosondowah ankyrin repeat domain family member C
hsa-miR-129-5p	1	0	1	1	0	0	UBE2Z	ubiquitin-conjugating enzyme E2Z
hsa-miR-129-5p	1	0	1	1	1	1	GID4	GID complex subunit 4, VID24 homolog (S. cerevisiae)
hsa-miR-129-5p	1	0	1	1	1	1	EFHD2	EF-hand domain family, member D2
hsa-miR-129-5p	1	0	1	1	1	1	IRF2BPL	interferon regulatory factor 2 binding protein-like
hsa-miR-129-5p	0	0	1	1	0	0	EPS8L3	EPS8-like 3
hsa-miR-129-5p	1	0	1	1	1	1	RNF128	ring finger protein 128, E3 ubiquitin protein ligase
hsa-miR-129-5p	0	0	1	1	0	0	RNASEH2B	ribonuclease H2, subunit B
hsa-miR-129-5p	0	0	1	1	1	1	AKIRIN1	akirin 1
hsa-miR-129-5p	0	0	1	1	1	1	GALNT12	UDP-N-acetyl-alpha-D-galactosamine:polypeptide N-acetylgalactosaminyltransferase 12 (GalNAc-T12)
hsa-miR-129-5p	1	0	1	0	1	1	LIN28A	lin-28 homolog A (C. elegans)
hsa-miR-129-5p	1	0	1	1	1	1	TXNDC15	thioredoxin domain containing 15
hsa-miR-129-5p	1	0	1	1	1	1	IQCA1	IQ motif containing with AAA domain 1
hsa-miR-129-5p	0	0	1	1	1	1	GGNBP2	gametogenetin binding protein 2
hsa-miR-129-5p	1	0	1	1	1	1	POF1B	premature ovarian failure, 1B
hsa-miR-129-5p	1	0	1	0	1	1	VCPIP1	valosin containing protein (p97)/p47 complex interacting protein 1
hsa-miR-129-5p	0	0	1	1	1	1	CCDC170	coiled-coil domain containing 170
hsa-miR-129-5p	1	0	1	1	1	1	NAA50	N(alpha)-acetyltransferase 50, NatE catalytic subunit
hsa-miR-129-5p	1	0	1	1	1	1	CYB5B	cytochrome b5 type B (outer mitochondrial membrane)
hsa-miR-129-5p	1	0	1	1	1	1	JHDM1D	jumonji C domain containing histone demethylase 1 homolog D (S. cerevisiae)
hsa-miR-129-5p	1	0	1	0	1	1	SETD7	SET domain containing (lysine methyltransferase) 7
hsa-miR-129-5p	1	0	1	1	1	1	SYNC	syncoilin, intermediate filament protein
hsa-miR-129-5p	1	0	1	1	1	1	VMP1	vacuole membrane protein 1
hsa-miR-129-5p	1	0	1	1	1	1	C6orf62	chromosome 6 open reading frame 62
hsa-miR-129-5p	1	0	1	1	1	1	TEX14	testis expressed 14
hsa-miR-129-5p	1	0	1	1	1	1	SESN2	sestrin 2
hsa-miR-129-5p	1	0	1	1	1	1	CRISPLD1	cysteine-rich secretory protein LCCL domain containing 1
hsa-miR-129-5p	1	0	1	1	1	1	PCDHA9	protocadherin alpha 9
hsa-miR-129-5p	0	0	1	0	1	1	ENAM	enamelin
hsa-miR-129-5p	0	0	1	1	0	0	KRTAP17-1	keratin associated protein 17-1
hsa-miR-129-5p	1	0	1	0	1	1	SRSF8	serine/arginine-rich splicing factor 8
hsa-miR-129-5p	1	0	1	1	1	1	OTP	orthopedia homeobox
hsa-miR-129-5p	0	0	1	0	1	1	RAB6C	RAB6C, member RAS oncogene family
hsa-miR-129-5p	1	0	1	1	1	1	FBXO30	F-box protein 30
hsa-miR-129-5p	1	0	1	1	1	1	DSEL	dermatan sulfate epimerase-like
hsa-miR-129-5p	1	0	1	1	1	1	ARID5B	AT rich interactive domain 5B (MRF1-like)
hsa-miR-129-5p	1	0	1	1	1	1	LOXL4	lysyl oxidase-like 4
hsa-miR-129-5p	1	0	1	1	1	1	MEX3B	mex-3 homolog B (C. elegans)
hsa-miR-129-5p	1	0	1	1	1	1	BRMS1L	breast cancer metastasis-suppressor 1-like
hsa-miR-129-5p	1	0	1	1	1	1	HPS3	Hermansky-Pudlak syndrome 3
hsa-miR-129-5p	1	0	1	1	1	1	PCDH7	protocadherin 7
hsa-miR-129-5p	1	0	1	1	1	1	USP38	ubiquitin specific peptidase 38
hsa-miR-129-5p	0	0	1	1	1	1	SPPL2A	signal peptide peptidase like 2A
hsa-miR-129-5p	0	0	1	1	1	1	FAM136A	family with sequence similarity 136, member A
hsa-miR-129-5p	0	0	1	1	0	0	TNS4	tensin 4
hsa-miR-129-5p	1	0	1	1	1	1	POLR2C	polymerase (RNA) II (DNA directed) polypeptide C, 33kDa
hsa-miR-129-5p	0	0	1	1	0	0	MUC13	mucin 13, cell surface associated
hsa-miR-129-5p	0	0	1	1	1	1	SUCNR1	succinate receptor 1
hsa-miR-129-5p	1	0	1	1	1	1	TRIM55	tripartite motif containing 55
hsa-miR-129-5p	0	0	1	1	1	1	CABS1	calcium-binding protein, spermatid-specific 1
hsa-miR-129-5p	0	0	1	1	1	1	KRTAP3-3	keratin associated protein 3-3
hsa-miR-129-5p	1	0	1	1	1	1	C5orf30	chromosome 5 open reading frame 30
hsa-miR-129-5p	1	0	1	0	1	1	PURB	purine-rich element binding protein B
hsa-miR-129-5p	1	0	1	1	1	1	XRCC6BP1	XRCC6 binding protein 1
hsa-miR-129-5p	1	0	1	1	1	1	TP53INP1	tumor protein p53 inducible nuclear protein 1
hsa-miR-129-5p	1	0	1	1	1	1	ADRA1A	adrenoceptor alpha 1A
hsa-miR-129-5p	1	0	1	0	1	1	KRAS	v-Ki-ras2 Kirsten rat sarcoma viral oncogene homolog
hsa-miR-129-5p	0	0	1	1	1	1	CTTNBP2	cortactin binding protein 2
hsa-miR-129-5p	1	0	1	1	1	1	TPD52L3	tumor protein D52-like 3
hsa-miR-129-5p	0	0	1	1	0	0	INTS4	integrator complex subunit 4
hsa-miR-129-5p	1	0	1	1	1	1	MAL2	mal, T-cell differentiation protein 2 (gene/pseudogene)
hsa-miR-129-5p	0	0	1	1	1	1	CARD16	caspase recruitment domain family, member 16
hsa-miR-129-5p	1	0	1	1	1	1	XKR4	XK, Kell blood group complex subunit-related family, member 4
hsa-miR-129-5p	1	0	1	1	1	1	ELFN2	extracellular leucine-rich repeat and fibronectin type III domain containing 2
hsa-miR-129-5p	0	0	1	0	1	1	CLNK	cytokine-dependent hematopoietic cell linker
hsa-miR-129-5p	1	0	1	1	1	1	SRSF10	serine/arginine-rich splicing factor 10
hsa-miR-129-5p	1	0	1	1	1	1	NAA15	N(alpha)-acetyltransferase 15, NatA auxiliary subunit
hsa-miR-129-5p	0	0	1	1	1	1	CDKN2B	cyclin-dependent kinase inhibitor 2B (p15, inhibits CDK4)
hsa-miR-129-5p	0	0	1	1	1	1	C14orf126	chromosome 14 open reading frame 126
hsa-miR-129-5p	0	0	1	1	1	1	DTD1	D-tyrosyl-tRNA deacylase 1 homolog (S. cerevisiae)
hsa-miR-129-5p	0	0	1	1	1	1	PABPC5	poly(A) binding protein, cytoplasmic 5
hsa-miR-129-5p	1	0	1	0	1	1	SOCS4	suppressor of cytokine signaling 4
hsa-miR-129-5p	0	0	1	1	1	1	RAD51B	RAD51 homolog B (S. cerevisiae)
hsa-miR-129-5p	1	0	1	1	1	1	SPTSSA	serine palmitoyltransferase, small subunit A
hsa-miR-129-5p	1	0	1	0	1	1	NUS1	nuclear undecaprenyl pyrophosphate synthase 1 homolog (S. cerevisiae)
hsa-miR-129-5p	1	0	1	1	1	1	ICA1L	islet cell autoantigen 1,69kDa-like
hsa-miR-129-5p	1	0	1	1	1	1	PKHD1	polycystic kidney and hepatic disease 1 (autosomal recessive)
hsa-miR-129-5p	1	0	1	1	1	1	MSR1	macrophage scavenger receptor 1
hsa-miR-129-5p	1	0	1	0	1	1	FCHO2	FCH domain only 2
hsa-miR-129-5p	1	0	1	1	1	1	HLTF	helicase-like transcription factor
hsa-miR-129-5p	1	0	1	1	0	0	LIPH	lipase, member H
hsa-miR-129-5p	1	0	1	0	1	1	CNOT6L	CCR4-NOT transcription complex, subunit 6-like
hsa-miR-129-5p	0	0	1	1	1	1	SESN3	sestrin 3
hsa-miR-129-5p	0	0	1	1	0	0	LSM14B	LSM14B, SCD6 homolog B (S. cerevisiae)
hsa-miR-129-5p	0	0	1	1	0	0	EVI5L	ecotropic viral integration site 5-like
hsa-miR-129-5p	0	0	1	0	1	1	NUDCD2	NudC domain containing 2
hsa-miR-129-5p	0	0	1	1	1	1	APOBEC3F	apolipoprotein B mRNA editing enzyme, catalytic polypeptide-like 3F
hsa-miR-129-5p	1	0	1	1	1	1	MAP3K7	mitogen-activated protein kinase kinase kinase 7
hsa-miR-129-5p	1	0	1	1	1	1	LPIN1	lipin 1
hsa-miR-129-5p	0	0	1	0	1	1	CHKB	choline kinase beta
hsa-miR-129-5p	1	0	1	1	1	1	TPM3	tropomyosin 3
hsa-miR-129-5p	0	0	1	1	1	1	RMI2	RMI2, RecQ mediated genome instability 2, homolog (S. cerevisiae)
hsa-miR-129-5p	0	0	1	1	1	1	DEPDC4	DEP domain containing 4
hsa-miR-129-5p	0	0	1	1	0	0	TMCO5A	transmembrane and coiled-coil domains 5A
hsa-miR-129-5p	1	0	1	1	1	1	ZNF362	zinc finger protein 362
hsa-miR-129-5p	0	0	1	0	1	1	HORMAD2	HORMA domain containing 2
hsa-miR-129-5p	0	0	1	1	1	1	ENTHD1	ENTH domain containing 1
hsa-miR-129-5p	0	0	1	1	0	0	HSFY1	heat shock transcription factor, Y-linked 1
hsa-miR-129-5p	0	0	1	1	1	1	METTL15	methyltransferase like 15
hsa-miR-129-5p	1	0	1	1	1	1	WTAP	Wilms tumor 1 associated protein
hsa-miR-129-5p	0	0	1	0	1	1	KBTBD6	kelch repeat and BTB (POZ) domain containing 6
hsa-miR-129-5p	1	0	1	1	1	1	APCDD1	adenomatosis polyposis coli down-regulated 1
hsa-miR-129-5p	1	0	1	0	1	1	KDM1B	lysine (K)-specific demethylase 1B
hsa-miR-129-5p	0	0	1	1	1	1	FAM71C	family with sequence similarity 71, member C
hsa-miR-129-5p	1	0	1	1	1	1	LRIG3	leucine-rich repeats and immunoglobulin-like domains 3
hsa-miR-129-5p	0	0	1	0	1	1	VGLL2	vestigial like 2 (Drosophila)
hsa-miR-129-5p	0	0	1	1	1	1	REXO1L1	REX1, RNA exonuclease 1 homolog (S. cerevisiae)-like 1
hsa-miR-129-5p	0	0	1	1	1	1	KCNH5	potassium voltage-gated channel, subfamily H (eag-related), member 5
hsa-miR-129-5p	0	0	1	1	1	1	NFATC3	nuclear factor of activated T-cells, cytoplasmic, calcineurin-dependent 3
hsa-miR-129-5p	0	0	1	1	0	0	DEFB119	defensin, beta 119
hsa-miR-129-5p	0	0	1	1	0	0	C3orf24	chromosome 3 open reading frame 24
hsa-miR-129-5p	1	0	1	1	1	1	TTBK2	tau tubulin kinase 2
hsa-miR-129-5p	1	0	1	1	1	1	CCDC117	coiled-coil domain containing 117
hsa-miR-129-5p	1	0	1	0	1	1	GABRG1	gamma-aminobutyric acid (GABA) A receptor, gamma 1
hsa-miR-129-5p	1	0	1	1	1	1	IGSF22	immunoglobulin superfamily, member 22
hsa-miR-129-5p	1	0	1	1	1	1	DIP2B	DIP2 disco-interacting protein 2 homolog B (Drosophila)
hsa-miR-129-5p	0	0	1	0	1	1	NBPF15	neuroblastoma breakpoint family, member 15
hsa-miR-129-5p	1	0	1	1	1	1	SLC41A1	solute carrier family 41, member 1
hsa-miR-129-5p	1	0	1	0	1	1	TMEM167A	transmembrane protein 167A
hsa-miR-129-5p	0	0	1	1	1	1	FRMD3	FERM domain containing 3
hsa-miR-129-5p	0	0	1	1	0	0	C20orf79	chromosome 20 open reading frame 79
hsa-miR-129-5p	1	0	1	1	1	1	TMEM26	transmembrane protein 26
hsa-miR-129-5p	1	0	1	1	1	1	RNF180	ring finger protein 180
hsa-miR-129-5p	1	0	1	0	1	1	ZDHHC21	zinc finger, DHHC-type containing 21
hsa-miR-129-5p	1	0	1	1	1	1	LRRTM1	leucine rich repeat transmembrane neuronal 1
hsa-miR-129-5p	0	0	1	1	1	1	CMTM8	CKLF-like MARVEL transmembrane domain containing 8
hsa-miR-129-5p	0	0	1	0	1	1	KRT28	keratin 28
hsa-miR-129-5p	1	0	1	1	1	1	CREM	cAMP responsive element modulator
hsa-miR-129-5p	0	0	1	1	1	1	DNAJC24	DnaJ (Hsp40) homolog, subfamily C, member 24
hsa-miR-129-5p	1	0	1	1	1	1	DPY19L4	dpy-19-like 4 (C. elegans)
hsa-miR-129-5p	1	0	1	1	1	1	ZSCAN22	zinc finger and SCAN domain containing 22
hsa-miR-129-5p	1	0	1	1	1	1	GRM7	glutamate receptor, metabotropic 7
hsa-miR-129-5p	0	0	1	1	1	1	TMPRSS11B	transmembrane protease, serine 11B
hsa-miR-129-5p	1	0	1	1	1	1	DDX26B	DEAD/H (Asp-Glu-Ala-Asp/His) box polypeptide 26B
hsa-miR-129-5p	1	0	1	0	1	1	RNF144B	ring finger protein 144B
hsa-miR-129-5p	1	0	1	1	1	1	ZBTB41	zinc finger and BTB domain containing 41
hsa-miR-129-5p	0	0	1	1	1	1	UTS2D	urotensin 2 domain containing
hsa-miR-129-5p	1	0	1	1	1	1	KCTD4	potassium channel tetramerisation domain containing 4
hsa-miR-129-5p	1	0	1	1	1	1	RAB43	RAB43, member RAS oncogene family
hsa-miR-129-5p	1	0	1	0	1	1	FAM73A	family with sequence similarity 73, member A
hsa-miR-129-5p	1	0	1	1	1	1	PTGER3	prostaglandin E receptor 3 (subtype EP3)
hsa-miR-129-5p	0	0	1	1	1	1	COL25A1	collagen, type XXV, alpha 1
hsa-miR-129-5p	0	0	1	1	1	1	FAM120AOS	family with sequence similarity 120A opposite strand
hsa-miR-129-5p	1	0	1	0	1	1	DLEU7	deleted in lymphocytic leukemia, 7
hsa-miR-129-5p	1	0	1	1	1	1	NSUN4	NOP2/Sun domain family, member 4
hsa-miR-129-5p	0	0	1	0	1	1	WASH3P	WAS protein family homolog 3 pseudogene
hsa-miR-129-5p	0	0	1	1	1	1	ARHGAP27	Rho GTPase activating protein 27
hsa-miR-129-5p	1	0	1	1	1	1	THRA	thyroid hormone receptor, alpha
hsa-miR-129-5p	0	0	1	1	1	1	SFT2D2	SFT2 domain containing 2
hsa-miR-129-5p	0	0	1	1	1	1	ILDR2	immunoglobulin-like domain containing receptor 2
hsa-miR-129-5p	1	0	1	1	1	1	ADAMTS18	ADAM metallopeptidase with thrombospondin type 1 motif, 18
hsa-miR-129-5p	1	0	1	1	1	1	BLOC1S5	biogenesis of lysosomal organelles complex-1, subunit 5, muted
hsa-miR-129-5p	0	0	1	1	1	1	H2AFV	H2A histone family, member V
hsa-miR-129-5p	1	0	1	1	1	1	FBXO33	F-box protein 33
hsa-miR-129-5p	0	0	1	1	1	1	SERTM1	serine-rich and transmembrane domain containing 1
hsa-miR-129-5p	1	0	1	1	1	1	PPAPDC2	phosphatidic acid phosphatase type 2 domain containing 2
hsa-miR-129-5p	0	0	1	1	0	0	LST1	leukocyte specific transcript 1
hsa-miR-129-5p	0	0	1	1	1	1	SPINK6	serine peptidase inhibitor, Kazal type 6
hsa-miR-129-5p	1	0	1	1	1	1	MOG	myelin oligodendrocyte glycoprotein
hsa-miR-129-5p	0	0	1	0	1	1	NPSR1-AS1	NPSR1 antisense RNA 1
hsa-miR-129-5p	0	0	1	1	1	1	ZNF474	zinc finger protein 474
hsa-miR-129-5p	1	0	1	1	1	1	GADL1	glutamate decarboxylase-like 1
hsa-miR-129-5p	1	0	1	0	1	1	NCKAP5	NCK-associated protein 5
hsa-miR-129-5p	0	0	1	0	0	0	C16orf47	chromosome 16 open reading frame 47
hsa-miR-129-5p	0	0	1	0	1	1	C1orf229	chromosome 1 open reading frame 229
hsa-miR-129-5p	1	0	1	0	1	1	C17orf102	chromosome 17 open reading frame 102
hsa-miR-129-5p	1	0	1	1	1	1	C11orf87	chromosome 11 open reading frame 87
hsa-miR-129-5p	1	0	1	1	1	1	CAPN3	calpain 3, (p94)
hsa-miR-129-5p	0	0	1	1	1	1	PATE2	prostate and testis expressed 2
hsa-miR-129-5p	0	0	1	1	1	1	ADAMTSL5	ADAMTS-like 5
hsa-miR-129-5p	0	0	1	0	0	0	PPIAP29	peptidylprolyl isomerase A (cyclophilin A) pseudogene 29
hsa-miR-129-5p	0	0	1	0	0	0	PCDHB19P	protocadherin beta 19 pseudogene
hsa-miR-129-5p	0	0	1	0	0	0	TFAMP1	transcription factor A, mitochondrial pseudogene 1
hsa-miR-129-5p	0	0	1	0	0	0	TTTY2	testis-specific transcript, Y-linked 2 (non-protein coding)
hsa-miR-129-5p	0	0	1	0	0	0	VENTXP1	VENT homeobox pseudogene 1
hsa-miR-129-5p	0	0	1	0	0	0	FAM224B	family with sequence similarity 224, member B (non-protein coding)
hsa-miR-129-5p	0	0	1	0	0	0	SUMO1P3	SUMO1 pseudogene 3
hsa-miR-129-5p	0	0	1	0	0	0	NUDT4P1	nudix (nucleoside diphosphate linked moiety X)-type motif 4 pseudogene 1
hsa-miR-129-5p	0	0	1	0	0	0	DPRXP4	divergent-paired related homeobox pseudogene 4
hsa-miR-129-5p	0	0	1	0	0	0	MSX2P1	msh homeobox 2 pseudogene 1
hsa-miR-129-5p	0	0	1	0	0	0	SNORA4	small nucleolar RNA, H/ACA box 4
hsa-miR-129-5p	0	0	1	0	0	0	ATXN8OS	ATXN8 opposite strand (non-protein coding)
hsa-miR-129-5p	0	0	1	0	0	0	TOP1P1	topoisomerase (DNA) I pseudogene 1
hsa-miR-129-5p	0	0	1	0	0	0	SNORD57	small nucleolar RNA, C/D box 57
hsa-miR-129-5p	0	0	1	0	0	0	PCGEM1	prostate-specific transcript 1 (non-protein coding)
hsa-miR-129-5p	0	0	1	0	0	0	SEPHS1P1	selenophosphate synthetase 1 pseudogene 1
hsa-miR-129-5p	0	0	1	0	0	0	PER4	period homolog 3 (Drosophila) pseudogene
hsa-miR-129-5p	0	0	1	0	0	0	MALAT1	metastasis associated lung adenocarcinoma transcript 1 (non-protein coding)
hsa-miR-129-5p	0	0	1	0	0	0	RNASEH2CP1	ribonuclease H2, subunit C pseudogene 1
hsa-miR-129-5p	0	0	1	0	0	0	SNX29P2	sorting nexin 29 pseudogene 2
hsa-miR-129-5p	0	0	1	0	0	0	LOC285359	phosducin-like 3 pseudogene
hsa-miR-129-5p	0	0	1	0	0	0	HNRNPA1P16	heterogeneous nuclear ribonucleoprotein A1 pseudogene 16
hsa-miR-129-5p	0	0	1	0	0	0	HNRNPA1P10	heterogeneous nuclear ribonucleoprotein A1 pseudogene 10
hsa-miR-129-5p	0	0	1	0	0	0	SNORA40	small nucleolar RNA, H/ACA box 40
hsa-miR-129-5p	0	0	1	0	0	0	SCARNA1	small Cajal body-specific RNA 1
hsa-miR-129-5p	0	0	1	0	0	0	GBP1P1	guanylate binding protein 1, interferon-inducible pseudogene 1
hsa-miR-129-5p	0	0	1	1	0	0	BICD1	bicaudal D homolog 1 (Drosophila)
hsa-miR-129-5p	0	0	1	1	1	1	HPGD	hydroxyprostaglandin dehydrogenase 15-(NAD)
hsa-miR-129-5p	0	0	1	1	0	0	RHBDD2	rhomboid domain containing 2
hsa-miR-129-5p	0	0	0	1	1	1	MS4A12	membrane-spanning 4-domains, subfamily A, member 12
hsa-miR-129-5p	0	0	0	1	1	1	KRT20	keratin 20
hsa-miR-129-5p	0	0	0	1	1	1	RDH8	retinol dehydrogenase 8 (all-trans)
hsa-miR-129-5p	0	0	0	1	1	1	C4orf6	chromosome 4 open reading frame 6
hsa-miR-129-5p	1	0	1	1	1	1	TFAP2C	transcription factor AP-2 gamma (activating enhancer binding protein 2 gamma)
hsa-miR-129-5p	0	0	1	1	0	0	UQCRC1	ubiquinol-cytochrome c reductase core protein I
hsa-miR-129-5p	0	0	0	1	0	0	GMIP	GEM interacting protein
hsa-miR-129-5p	0	0	1	1	1	1	GNPTG	N-acetylglucosamine-1-phosphate transferase, gamma subunit
hsa-miR-129-5p	0	0	0	1	0	0	CEBPE	CCAAT/enhancer binding protein (C/EBP), epsilon
hsa-miR-129-5p	0	0	0	1	1	1	COMT	catechol-O-methyltransferase
hsa-miR-129-5p	0	0	0	1	0	0	CATSPERG	catsper channel auxiliary subunit gamma
hsa-miR-129-5p	0	0	1	1	0	0	CRYBB3	crystallin, beta B3
hsa-miR-129-5p	0	0	0	1	1	1	ADSL	adenylosuccinate lyase
hsa-miR-129-5p	0	0	1	1	0	0	HDAC10	histone deacetylase 10
hsa-miR-129-5p	1	0	0	1	1	1	NID2	nidogen 2 (osteonidogen)
hsa-miR-129-5p	0	0	0	1	1	1	SLC10A1	solute carrier family 10 (sodium/bile acid cotransporter family), member 1
hsa-miR-129-5p	0	0	1	1	1	1	PCK2	phosphoenolpyruvate carboxykinase 2 (mitochondrial)
hsa-miR-129-5p	0	0	1	1	1	1	PNN	pinin, desmosome associated protein
hsa-miR-129-5p	0	0	1	1	1	1	PABPC1L	poly(A) binding protein, cytoplasmic 1-like
hsa-miR-129-5p	1	0	1	1	1	1	PGRMC1	progesterone receptor membrane component 1
hsa-miR-129-5p	0	0	1	1	0	0	GPR50	G protein-coupled receptor 50
hsa-miR-129-5p	0	0	1	1	0	0	CTSH	cathepsin H
hsa-miR-129-5p	0	0	1	1	1	1	RHOV	ras homolog family member V
hsa-miR-129-5p	1	0	1	1	1	1	BRF2	BRF2, subunit of RNA polymerase III transcription initiation factor, BRF1-like
hsa-miR-129-5p	0	0	0	1	1	1	POP4	processing of precursor 4, ribonuclease P/MRP subunit (S. cerevisiae)
hsa-miR-129-5p	0	0	0	1	0	0	FKBP8	FK506 binding protein 8, 38kDa
hsa-miR-129-5p	0	0	1	1	1	1	HOXA2	homeobox A2
hsa-miR-129-5p	0	0	0	1	0	0	MYL10	myosin, light chain 10, regulatory
hsa-miR-129-5p	0	0	0	1	0	0	ZNF688	zinc finger protein 688
hsa-miR-129-5p	0	0	0	1	1	1	ZNF785	zinc finger protein 785
hsa-miR-129-5p	1	0	1	1	1	1	VIM	vimentin
hsa-miR-129-5p	1	0	0	1	1	1	WNT3	wingless-type MMTV integration site family, member 3
hsa-miR-129-5p	0	0	1	1	0	0	PIGL	phosphatidylinositol glycan anchor biosynthesis, class L
hsa-miR-129-5p	0	0	0	1	0	0	NUP88	nucleoporin 88kDa
hsa-miR-129-5p	0	0	1	1	1	1	KRT32	keratin 32
hsa-miR-129-5p	0	0	1	1	1	1	CCDC86	coiled-coil domain containing 86
hsa-miR-129-5p	0	0	0	1	0	0	GPRC5D	G protein-coupled receptor, family C, group 5, member D
hsa-miR-129-5p	0	0	0	1	0	0	UNC93A	unc-93 homolog A (C. elegans)
hsa-miR-129-5p	0	0	0	1	0	0	PRPH2	peripherin 2 (retinal degeneration, slow)
hsa-miR-129-5p	0	0	1	1	0	0	TTC1	tetratricopeptide repeat domain 1
hsa-miR-129-5p	0	0	0	1	0	0	CYB561D2	cytochrome b-561 domain containing 2
hsa-miR-129-5p	0	0	1	1	1	1	RARRES1	retinoic acid receptor responder (tazarotene induced) 1
hsa-miR-129-5p	0	0	0	1	0	0	MTERFD3	MTERF domain containing 3
hsa-miR-129-5p	0	0	1	1	0	0	PPP3CC	protein phosphatase 3, catalytic subunit, gamma isozyme
hsa-miR-129-5p	0	0	1	1	0	0	FAAH	fatty acid amide hydrolase
hsa-miR-129-5p	0	0	1	1	1	1	AP5S1	adaptor-related protein complex 5, sigma 1 subunit
hsa-miR-129-5p	1	0	1	1	1	1	MAX	MYC associated factor X
hsa-miR-129-5p	1	0	1	1	1	1	NECAB3	N-terminal EF-hand calcium binding protein 3
hsa-miR-129-5p	0	0	0	1	1	1	PCID2	PCI domain containing 2
hsa-miR-129-5p	0	0	1	1	0	0	IFI35	interferon-induced protein 35
hsa-miR-129-5p	0	0	0	1	0	0	PLA2G2C	phospholipase A2, group IIC
hsa-miR-129-5p	0	0	0	1	0	0	NCF4	neutrophil cytosolic factor 4, 40kDa
hsa-miR-129-5p	0	0	0	1	0	0	GSTT1	glutathione S-transferase theta 1
hsa-miR-129-5p	0	0	0	1	0	0	C22orf23	chromosome 22 open reading frame 23
hsa-miR-129-5p	0	0	1	1	1	1	LRRC17	leucine rich repeat containing 17
hsa-miR-129-5p	0	0	0	1	1	1	GDF2	growth differentiation factor 2
hsa-miR-129-5p	0	0	1	1	0	0	KLK12	kallikrein-related peptidase 12
hsa-miR-129-5p	0	0	1	1	0	0	ALOX12	arachidonate 12-lipoxygenase
hsa-miR-129-5p	0	0	0	1	0	0	NARFL	nuclear prelamin A recognition factor-like
hsa-miR-129-5p	0	0	0	1	0	0	NSUN5	NOP2/Sun domain family, member 5
hsa-miR-129-5p	0	0	1	1	1	1	NDUFA10	NADH dehydrogenase (ubiquinone) 1 alpha subcomplex, 10, 42kDa
hsa-miR-129-5p	0	0	1	1	0	0	MRPL4	mitochondrial ribosomal protein L4
hsa-miR-129-5p	1	0	1	1	1	1	SLC35D2	solute carrier family 35, member D2
hsa-miR-129-5p	1	0	1	1	1	1	NDFIP1	Nedd4 family interacting protein 1
hsa-miR-129-5p	0	0	0	1	0	0	RHBG	Rh family, B glycoprotein (gene/pseudogene)
hsa-miR-129-5p	0	0	1	1	0	0	HSD17B4	hydroxysteroid (17-beta) dehydrogenase 4
hsa-miR-129-5p	0	0	1	1	0	0	SPOCD1	SPOC domain containing 1
hsa-miR-129-5p	0	0	1	1	1	1	GIF	gastric intrinsic factor (vitamin B synthesis)
hsa-miR-129-5p	0	0	1	1	1	1	HRK	harakiri, BCL2 interacting protein (contains only BH3 domain)
hsa-miR-129-5p	1	0	1	1	0	0	AUP1	ancient ubiquitous protein 1
hsa-miR-129-5p	0	0	0	1	0	0	CAMK2B	calcium/calmodulin-dependent protein kinase II beta
hsa-miR-129-5p	1	0	1	1	0	0	HS6ST1	heparan sulfate 6-O-sulfotransferase 1
hsa-miR-129-5p	1	0	1	1	0	0	STX17	syntaxin 17
hsa-miR-129-5p	0	0	1	1	1	1	CCDC90B	coiled-coil domain containing 90B
hsa-miR-129-5p	1	0	1	1	1	1	CCBL2	cysteine conjugate-beta lyase 2
hsa-miR-129-5p	0	0	0	1	0	0	WDR12	WD repeat domain 12
hsa-miR-129-5p	0	0	0	1	1	1	JKAMP	JNK1/MAPK8-associated membrane protein
hsa-miR-129-5p	0	0	1	1	1	1	ZNF397	zinc finger protein 397
hsa-miR-129-5p	0	0	0	1	1	1	PPP2R3C	protein phosphatase 2, regulatory subunit B'', gamma
hsa-miR-129-5p	0	0	0	1	1	1	SERPINA10	serpin peptidase inhibitor, clade A (alpha-1 antiproteinase, antitrypsin), member 10
hsa-miR-129-5p	0	0	1	1	0	0	KCNH2	potassium voltage-gated channel, subfamily H (eag-related), member 2
hsa-miR-129-5p	1	0	0	1	0	0	ISM1	isthmin 1 homolog (zebrafish)
hsa-miR-129-5p	0	0	1	1	0	0	ZBTB32	zinc finger and BTB domain containing 32
hsa-miR-129-5p	1	0	1	1	1	1	CDH20	cadherin 20, type 2
hsa-miR-129-5p	0	0	1	1	0	0	CSF2RB	colony stimulating factor 2 receptor, beta, low-affinity (granulocyte-macrophage)
hsa-miR-129-5p	0	0	0	1	1	1	BPI	bactericidal/permeability-increasing protein
hsa-miR-129-5p	1	0	1	1	1	1	TBC1D9	TBC1 domain family, member 9 (with GRAM domain)
hsa-miR-129-5p	0	0	1	1	1	1	ITGAE	integrin, alpha E (antigen CD103, human mucosal lymphocyte antigen 1; alpha polypeptide)
hsa-miR-129-5p	1	0	0	1	1	1	DDX25	DEAD (Asp-Glu-Ala-Asp) box helicase 25
hsa-miR-129-5p	0	0	1	1	0	0	ACCS	1-aminocyclopropane-1-carboxylate synthase homolog (Arabidopsis)(non-functional)
hsa-miR-129-5p	0	0	1	1	1	1	LNX1	ligand of numb-protein X 1, E3 ubiquitin protein ligase
hsa-miR-129-5p	0	0	1	1	1	1	PKP1	plakophilin 1 (ectodermal dysplasia/skin fragility syndrome)
hsa-miR-129-5p	0	0	0	1	1	1	LCT	lactase
hsa-miR-129-5p	1	0	1	1	0	0	BMPR1B	bone morphogenetic protein receptor, type IB
hsa-miR-129-5p	1	0	1	1	1	1	AHRR	aryl-hydrocarbon receptor repressor
hsa-miR-129-5p	1	0	1	1	1	1	PDCD6	programmed cell death 6
hsa-miR-129-5p	0	0	1	1	1	1	DNAJB11	DnaJ (Hsp40) homolog, subfamily B, member 11
hsa-miR-129-5p	1	0	1	1	1	1	ANK1	ankyrin 1, erythrocytic
hsa-miR-129-5p	0	0	1	1	1	1	HYAL1	hyaluronoglucosaminidase 1
hsa-miR-129-5p	1	0	1	1	0	0	KIAA1644	KIAA1644
hsa-miR-129-5p	0	0	1	1	1	1	METTL21C	methyltransferase like 21C
hsa-miR-129-5p	0	0	1	1	0	0	ADAM21	ADAM metallopeptidase domain 21
hsa-miR-129-5p	0	0	1	1	1	1	SLC27A2	solute carrier family 27 (fatty acid transporter), member 2
hsa-miR-129-5p	0	0	1	1	1	1	WDR61	WD repeat domain 61
hsa-miR-129-5p	0	0	0	1	0	0	RHCG	Rh family, C glycoprotein
hsa-miR-129-5p	0	0	1	1	0	0	UQCRC2	ubiquinol-cytochrome c reductase core protein II
hsa-miR-129-5p	0	0	1	1	0	0	DHX38	DEAH (Asp-Glu-Ala-His) box polypeptide 38
hsa-miR-129-5p	0	0	0	1	1	1	ERBB2	v-erb-b2 erythroblastic leukemia viral oncogene homolog 2, neuro/glioblastoma derived oncogene homolog (avian)
hsa-miR-129-5p	0	0	1	1	1	1	CREG1	cellular repressor of E1A-stimulated genes 1
hsa-miR-129-5p	0	0	1	1	0	0	SNRPG	small nuclear ribonucleoprotein polypeptide G
hsa-miR-129-5p	1	0	1	1	1	1	GABRA6	gamma-aminobutyric acid (GABA) A receptor, alpha 6
hsa-miR-129-5p	0	0	1	1	0	0	CLVS2	clavesin 2
hsa-miR-129-5p	0	0	0	1	1	1	EPHA1	EPH receptor A1
hsa-miR-129-5p	1	0	1	1	1	1	FADS1	fatty acid desaturase 1
hsa-miR-129-5p	0	0	1	1	0	0	FADS3	fatty acid desaturase 3
hsa-miR-129-5p	0	0	1	1	1	1	TAGLN	transgelin
hsa-miR-129-5p	1	0	1	1	1	1	VEGFC	vascular endothelial growth factor C
hsa-miR-129-5p	0	0	1	1	0	0	PIH1D2	PIH1 domain containing 2
hsa-miR-129-5p	0	0	0	1	1	1	ZNF773	zinc finger protein 773
hsa-miR-129-5p	0	0	1	1	0	0	NUBP1	nucleotide binding protein 1
hsa-miR-129-5p	0	0	0	1	0	0	GYPB	glycophorin B (MNS blood group)
hsa-miR-129-5p	0	0	1	1	1	1	PANX3	pannexin 3
hsa-miR-129-5p	0	0	1	1	1	1	PPP1R3A	protein phosphatase 1, regulatory subunit 3A
hsa-miR-129-5p	0	0	1	1	1	1	SAMSN1	SAM domain, SH3 domain and nuclear localization signals 1
hsa-miR-129-5p	0	0	1	1	0	0	OTOA	otoancorin
hsa-miR-129-5p	0	0	0	1	1	1	ALS2CR12	amyotrophic lateral sclerosis 2 (juvenile) chromosome region, candidate 12
hsa-miR-129-5p	0	0	0	1	0	0	FAM161B	family with sequence similarity 161, member B
hsa-miR-129-5p	0	0	0	1	1	1	ZNF19	zinc finger protein 19
hsa-miR-129-5p	0	0	1	1	1	1	RHBDL2	rhomboid, veinlet-like 2 (Drosophila)
hsa-miR-129-5p	0	0	1	1	1	1	C2orf62	chromosome 2 open reading frame 62
hsa-miR-129-5p	0	0	0	1	0	0	TMEM141	transmembrane protein 141
hsa-miR-129-5p	0	0	0	1	0	0	KIAA1984	KIAA1984
hsa-miR-129-5p	0	0	0	1	0	0	OGFR	opioid growth factor receptor
hsa-miR-129-5p	0	0	1	1	0	0	TNFRSF13C	tumor necrosis factor receptor superfamily, member 13C
hsa-miR-129-5p	0	0	0	1	0	0	PWP2	PWP2 periodic tryptophan protein homolog (yeast)
hsa-miR-129-5p	0	0	0	1	0	0	MYL3	myosin, light chain 3, alkali; ventricular, skeletal, slow
hsa-miR-129-5p	0	0	1	1	1	1	FCRL2	Fc receptor-like 2
hsa-miR-129-5p	0	0	0	1	0	0	PPP1R16A	protein phosphatase 1, regulatory subunit 16A
hsa-miR-129-5p	1	0	0	1	1	1	KRT72	keratin 72
hsa-miR-129-5p	0	0	1	1	1	1	UBXN1	UBX domain protein 1
hsa-miR-129-5p	1	0	1	1	1	1	DOCK7	dedicator of cytokinesis 7
hsa-miR-129-5p	1	0	1	1	1	1	FUBP1	far upstream element (FUSE) binding protein 1
hsa-miR-129-5p	0	0	1	1	1	1	OLFML2B	olfactomedin-like 2B
hsa-miR-129-5p	0	0	0	1	1	1	STPG2	sperm-tail PG-rich repeat containing 2
hsa-miR-129-5p	0	0	1	1	0	0	DCST2	DC-STAMP domain containing 2
hsa-miR-129-5p	0	0	0	1	0	0	CCKAR	cholecystokinin A receptor
hsa-miR-129-5p	0	0	0	1	0	0	RNPEP	arginyl aminopeptidase (aminopeptidase B)
hsa-miR-129-5p	1	0	1	1	0	0	CRELD1	cysteine-rich with EGF-like domains 1
hsa-miR-129-5p	0	0	1	1	0	0	PPBP	pro-platelet basic protein (chemokine (C-X-C motif) ligand 7)
hsa-miR-129-5p	0	0	0	1	0	0	TCF23	transcription factor 23
hsa-miR-129-5p	0	0	0	1	0	0	UCN	urocortin
hsa-miR-129-5p	1	0	1	1	0	0	RPN1	ribophorin I
hsa-miR-129-5p	0	0	1	1	0	0	CCDC36	coiled-coil domain containing 36
hsa-miR-129-5p	0	0	1	1	1	1	SUN3	Sad1 and UNC84 domain containing 3
hsa-miR-129-5p	0	0	1	1	1	1	HEATR2	HEAT repeat containing 2
hsa-miR-129-5p	0	0	1	1	1	1	CPA6	carboxypeptidase A6
hsa-miR-129-5p	0	0	1	1	1	1	KIF27	kinesin family member 27
hsa-miR-129-5p	0	0	1	1	1	1	COL14A1	collagen, type XIV, alpha 1
hsa-miR-129-5p	0	0	1	1	1	1	MSMB	microseminoprotein, beta-
hsa-miR-129-5p	0	0	0	1	0	0	SNAPC4	small nuclear RNA activating complex, polypeptide 4, 190kDa
hsa-miR-129-5p	0	0	0	1	0	0	SPATA19	spermatogenesis associated 19
hsa-miR-129-5p	0	0	1	1	1	1	HEATR3	HEAT repeat containing 3
hsa-miR-129-5p	0	0	0	1	0	0	TBATA	thymus, brain and testes associated
[truncated: 734 more rows]
