# Supplementary material for: Profiling of Selected MicroRNAs in Proliferative Eutopic Endometrium of Women with Ovarian Endometriosis
Source: Biomed Res Int. 2015 Aug 20;2015:760698. doi: 10.1155/2015/760698 (PMC4558423; doi:10.1155/2015/760698)
Supplement: Supplementary file 1 — Table I: The names of miRNAs significantly differentially expressed between eutopic endometrium of patients with endometriosis vs eutopic endometrium of patients without endometriosis. Table II: The associations between miRNA and mRNA, which presents detailed results of the search of six major databases i.e targetscan, tarbase, miranda, mirbase, mirtarget2 and pictar. [file 760698.f1.zip › 760698.f1/Table II/hsa-miR-133a.tsv]

miR	targetscan	tarbase	miranda	mirbase	mirtarget2	pictar	GeneSymbol	GeneName
hsa-miR-133a	1	0	1	1	1	1	SGCD	sarcoglycan, delta (35kDa dystrophin-associated glycoprotein)
hsa-miR-133a	1	0	1	1	1	1	AP2M1	adaptor-related protein complex 2, mu 1 subunit
hsa-miR-133a	1	0	1	1	0	0	TET3	tet methylcytosine dioxygenase 3
hsa-miR-133a	1	0	1	1	1	1	EPHB4	EPH receptor B4
hsa-miR-133a	1	0	1	1	1	1	SLC27A4	solute carrier family 27 (fatty acid transporter), member 4
hsa-miR-133a	1	0	1	1	1	1	BAZ2A	bromodomain adjacent to zinc finger domain, 2A
hsa-miR-133a	1	0	1	1	1	1	PAN3	PAN3 poly(A) specific ribonuclease subunit homolog (S. cerevisiae)
hsa-miR-133a	1	0	1	1	1	1	TIMM17A	translocase of inner mitochondrial membrane 17 homolog A (yeast)
hsa-miR-133a	1	0	1	1	1	1	FAM43B	family with sequence similarity 43, member B
hsa-miR-133a	1	0	1	1	1	1	C2orf69	chromosome 2 open reading frame 69
hsa-miR-133a	1	0	1	1	1	1	ARHGDIA	Rho GDP dissociation inhibitor (GDI) alpha
hsa-miR-133a	1	0	1	1	1	1	CLTA	clathrin, light chain A
hsa-miR-133a	1	0	1	0	0	0	RAVER1	ribonucleoprotein, PTB-binding 1
hsa-miR-133a	1	0	1	0	0	0	PITPNM2	phosphatidylinositol transfer protein, membrane-associated 2
hsa-miR-133a	1	0	1	1	1	1	TEAD1	TEA domain family member 1 (SV40 transcriptional enhancer factor)
hsa-miR-133a	1	0	1	1	1	1	ZHX3	zinc fingers and homeoboxes 3
hsa-miR-133a	1	0	1	1	1	1	MAN1A2	mannosidase, alpha, class 1A, member 2
hsa-miR-133a	1	0	1	1	1	1	ADPRHL2	ADP-ribosylhydrolase like 2
hsa-miR-133a	1	0	1	1	1	1	APPL2	adaptor protein, phosphotyrosine interaction, PH domain and leucine zipper containing 2
hsa-miR-133a	1	0	1	1	1	1	SIRT1	sirtuin 1
hsa-miR-133a	1	0	1	1	1	1	SNX1	sorting nexin 1
hsa-miR-133a	1	0	1	1	1	1	PRDM16	PR domain containing 16
hsa-miR-133a	1	0	1	1	1	1	ZNF280C	zinc finger protein 280C
hsa-miR-133a	1	0	1	1	1	1	HOXD1	homeobox D1
hsa-miR-133a	1	0	1	1	1	1	ANK2	ankyrin 2, neuronal
hsa-miR-133a	1	0	0	1	1	1	ELF3	E74-like factor 3 (ets domain transcription factor, epithelial-specific )
hsa-miR-133a	1	0	1	1	1	1	FOXN3	forkhead box N3
hsa-miR-133a	1	0	1	0	1	1	TNFRSF10B	tumor necrosis factor receptor superfamily, member 10b
hsa-miR-133a	1	0	1	1	1	1	DUSP5	dual specificity phosphatase 5
hsa-miR-133a	1	0	1	1	1	1	RAB5C	RAB5C, member RAS oncogene family
hsa-miR-133a	1	0	1	1	1	1	DSTYK	dual serine/threonine and tyrosine protein kinase
hsa-miR-133a	1	0	0	1	0	0	C1QL1	complement component 1, q subcomponent-like 1
hsa-miR-133a	1	0	1	1	0	0	RAB34	RAB34, member RAS oncogene family
hsa-miR-133a	1	0	1	1	1	1	AQP1	aquaporin 1 (Colton blood group)
hsa-miR-133a	1	0	1	1	1	1	SGTB	small glutamine-rich tetratricopeptide repeat (TPR)-containing, beta
hsa-miR-133a	1	0	1	1	1	1	ADCYAP1	adenylate cyclase activating polypeptide 1 (pituitary)
hsa-miR-133a	1	0	1	1	1	1	SIX5	SIX homeobox 5
hsa-miR-133a	1	0	1	1	0	0	MRC2	mannose receptor, C type 2
hsa-miR-133a	1	0	1	1	1	1	TPM4	tropomyosin 4
hsa-miR-133a	1	0	1	1	1	1	CCBL2	cysteine conjugate-beta lyase 2
hsa-miR-133a	1	0	1	1	1	1	SYAP1	synapse associated protein 1
hsa-miR-133a	1	0	1	1	1	1	DOLPP1	dolichyl pyrophosphate phosphatase 1
hsa-miR-133a	1	0	0	0	0	0	TMEM170B	transmembrane protein 170B
hsa-miR-133a	1	0	1	0	1	1	DDX3X	DEAD (Asp-Glu-Ala-Asp) box polypeptide 3, X-linked
hsa-miR-133a	1	0	1	1	1	1	NEBL	nebulette
hsa-miR-133a	1	0	1	1	1	1	BSDC1	BSD domain containing 1
hsa-miR-133a	1	0	1	1	1	1	PAPD5	PAP associated domain containing 5
hsa-miR-133a	1	0	1	1	1	1	SH3PXD2B	SH3 and PX domains 2B
hsa-miR-133a	1	0	1	0	1	1	ZNF740	zinc finger protein 740
hsa-miR-133a	1	0	1	1	1	1	ZHX1	zinc fingers and homeoboxes 1
hsa-miR-133a	1	0	0	0	0	0	AAK1	AP2 associated kinase 1
hsa-miR-133a	1	0	1	1	1	1	SLC50A1	solute carrier family 50 (sugar transporter), member 1
hsa-miR-133a	1	0	1	0	1	1	CDK5R1	cyclin-dependent kinase 5, regulatory subunit 1 (p35)
hsa-miR-133a	1	0	1	1	0	0	PPP2R5D	protein phosphatase 2, regulatory subunit B', delta
hsa-miR-133a	1	0	1	0	1	1	SLC7A2	solute carrier family 7 (cationic amino acid transporter, y+ system), member 2
hsa-miR-133a	1	0	1	0	1	1	KCTD20	potassium channel tetramerisation domain containing 20
hsa-miR-133a	1	0	1	1	1	1	ASH1L	ash1 (absent, small, or homeotic)-like (Drosophila)
hsa-miR-133a	1	0	1	1	1	1	NLE1	notchless homolog 1 (Drosophila)
hsa-miR-133a	1	0	1	1	1	1	C11orf58	chromosome 11 open reading frame 58
hsa-miR-133a	1	0	1	1	1	1	CMPK1	cytidine monophosphate (UMP-CMP) kinase 1, cytosolic
hsa-miR-133a	1	0	1	1	1	1	NIPA1	non imprinted in Prader-Willi/Angelman syndrome 1
hsa-miR-133a	1	0	1	1	1	1	C20orf20	chromosome 20 open reading frame 20
hsa-miR-133a	1	0	1	1	1	1	ESYT2	extended synaptotagmin-like protein 2
hsa-miR-133a	1	0	1	1	1	1	RALGAPB	Ral GTPase activating protein, beta subunit (non-catalytic)
hsa-miR-133a	1	0	1	1	1	1	RICTOR	RPTOR independent companion of MTOR, complex 2
hsa-miR-133a	1	0	1	1	1	1	AK2	adenylate kinase 2
hsa-miR-133a	1	0	1	1	1	1	EPS15	epidermal growth factor receptor pathway substrate 15
hsa-miR-133a	1	0	1	1	1	1	FBXL2	F-box and leucine-rich repeat protein 2
hsa-miR-133a	1	0	1	1	1	1	GPM6A	glycoprotein M6A
hsa-miR-133a	1	0	1	1	1	1	EPHA7	EPH receptor A7
hsa-miR-133a	1	0	1	1	1	1	GLRA2	glycine receptor, alpha 2
hsa-miR-133a	1	0	0	1	1	1	ZNF354A	zinc finger protein 354A
hsa-miR-133a	1	0	1	1	1	1	PTBP1	polypyrimidine tract binding protein 1
hsa-miR-133a	1	0	1	0	1	1	TGFBR1	transforming growth factor, beta receptor 1
hsa-miR-133a	1	0	1	1	1	1	LAMB3	laminin, beta 3
hsa-miR-133a	1	0	1	1	1	1	GCLC	glutamate-cysteine ligase, catalytic subunit
hsa-miR-133a	1	0	1	0	1	1	CERS2	ceramide synthase 2
hsa-miR-133a	1	0	1	1	1	1	TMEM220	transmembrane protein 220
hsa-miR-133a	1	0	1	1	1	1	SLC4A8	solute carrier family 4, sodium bicarbonate cotransporter, member 8
hsa-miR-133a	1	0	1	0	1	1	TNRC6B	trinucleotide repeat containing 6B
hsa-miR-133a	1	0	1	0	1	1	SLC6A1	solute carrier family 6 (neurotransmitter transporter, GABA), member 1
hsa-miR-133a	1	0	1	1	1	1	METTL21B	methyltransferase like 21B
hsa-miR-133a	1	0	1	1	1	1	SLC39A1	solute carrier family 39 (zinc transporter), member 1
hsa-miR-133a	1	0	1	1	1	1	FBN1	fibrillin 1
hsa-miR-133a	1	0	1	1	1	1	BCL2L2	BCL2-like 2
hsa-miR-133a	1	0	1	1	1	1	KIF21A	kinesin family member 21A
hsa-miR-133a	1	0	1	0	1	1	MTX3	metaxin 3
hsa-miR-133a	1	0	1	1	1	1	CLCN6	chloride channel, voltage-sensitive 6
hsa-miR-133a	1	0	1	1	1	1	THRAP3	thyroid hormone receptor associated protein 3
hsa-miR-133a	1	0	1	0	1	1	ENC1	ectodermal-neural cortex 1 (with BTB-like domain)
hsa-miR-133a	1	0	1	1	0	0	WNT4	wingless-type MMTV integration site family, member 4
hsa-miR-133a	1	0	0	1	1	1	ACAT2	acetyl-CoA acetyltransferase 2
hsa-miR-133a	1	0	1	1	1	1	ADCY6	adenylate cyclase 6
hsa-miR-133a	1	0	1	1	0	0	KIAA1549	KIAA1549
hsa-miR-133a	1	0	1	1	0	0	PROSAPIP1	ProSAPiP1 protein
hsa-miR-133a	1	0	1	1	1	1	MAFG	v-maf musculoaponeurotic fibrosarcoma oncogene homolog G (avian)
hsa-miR-133a	1	0	1	0	1	1	SPRY4	sprouty homolog 4 (Drosophila)
hsa-miR-133a	1	0	1	1	1	1	TMEM200B	transmembrane protein 200B
hsa-miR-133a	1	0	1	1	1	1	LRRC7	leucine rich repeat containing 7
hsa-miR-133a	1	0	1	1	1	1	ZNF395	zinc finger protein 395
hsa-miR-133a	1	0	1	1	1	1	PPP6R3	protein phosphatase 6, regulatory subunit 3
hsa-miR-133a	1	0	1	0	1	1	KIAA1147	KIAA1147
hsa-miR-133a	1	0	1	1	1	1	CASC3	cancer susceptibility candidate 3
hsa-miR-133a	1	0	1	1	1	1	FGF1	fibroblast growth factor 1 (acidic)
hsa-miR-133a	1	0	1	1	1	1	B3GALNT1	beta-1,3-N-acetylgalactosaminyltransferase 1 (globoside blood group)
hsa-miR-133a	1	0	1	1	0	0	ATOX1	ATX1 antioxidant protein 1 homolog (yeast)
hsa-miR-133a	1	0	1	1	1	1	IGF1R	insulin-like growth factor 1 receptor
hsa-miR-133a	1	0	1	1	1	1	PTPRD	protein tyrosine phosphatase, receptor type, D
hsa-miR-133a	1	0	1	1	1	1	TFAP2D	transcription factor AP-2 delta (activating enhancer binding protein 2 delta)
hsa-miR-133a	1	0	1	1	1	1	FOXG1	forkhead box G1
hsa-miR-133a	1	0	1	1	1	1	SYT1	synaptotagmin I
hsa-miR-133a	1	0	1	0	1	1	FAM46A	family with sequence similarity 46, member A
hsa-miR-133a	1	0	1	1	1	1	TBPL1	TBP-like 1
hsa-miR-133a	1	0	1	1	1	1	CTGF	connective tissue growth factor
hsa-miR-133a	1	0	1	1	1	1	FTL	ferritin, light polypeptide
hsa-miR-133a	1	0	1	1	1	1	MYO9B	myosin IXB
hsa-miR-133a	1	0	1	1	1	1	MECOM	MDS1 and EVI1 complex locus
hsa-miR-133a	1	0	1	1	1	1	RCE1	RCE1 homolog, prenyl protein protease (S. cerevisiae)
hsa-miR-133a	1	0	1	1	1	1	ZIC3	Zic family member 3
hsa-miR-133a	1	0	1	1	1	1	PTPRZ1	protein tyrosine phosphatase, receptor-type, Z polypeptide 1
hsa-miR-133a	1	0	1	1	1	1	ABCG4	ATP-binding cassette, sub-family G (WHITE), member 4
hsa-miR-133a	1	0	1	1	1	1	RCL1	RNA terminal phosphate cyclase-like 1
hsa-miR-133a	1	0	1	1	1	1	MTMR4	myotubularin related protein 4
hsa-miR-133a	1	0	1	1	1	1	CUX2	cut-like homeobox 2
hsa-miR-133a	1	0	1	1	1	1	ADAMTS19	ADAM metallopeptidase with thrombospondin type 1 motif, 19
hsa-miR-133a	1	0	1	1	1	1	QKI	QKI, KH domain containing, RNA binding
hsa-miR-133a	1	0	1	1	1	1	PTPRO	protein tyrosine phosphatase, receptor type, O
hsa-miR-133a	1	0	1	1	1	1	FARP1	FERM, RhoGEF (ARHGEF) and pleckstrin domain protein 1 (chondrocyte-derived)
hsa-miR-133a	1	0	1	1	1	1	ARL3	ADP-ribosylation factor-like 3
hsa-miR-133a	1	0	1	1	1	1	SORBS3	sorbin and SH3 domain containing 3
hsa-miR-133a	1	0	1	1	1	1	FAM13A	family with sequence similarity 13, member A
hsa-miR-133a	1	0	1	0	1	1	KIF3C	kinesin family member 3C
hsa-miR-133a	1	0	1	1	1	1	ARHGAP12	Rho GTPase activating protein 12
hsa-miR-133a	1	0	1	1	1	1	STARD13	StAR-related lipid transfer (START) domain containing 13
hsa-miR-133a	1	0	1	1	1	1	CTBP2	C-terminal binding protein 2
hsa-miR-133a	1	0	1	0	1	1	SYT2	synaptotagmin II
hsa-miR-133a	1	0	1	1	1	1	MSN	moesin
hsa-miR-133a	1	0	1	1	1	1	TUBB1	tubulin, beta 1 class VI
hsa-miR-133a	1	0	1	0	1	1	ALDH5A1	aldehyde dehydrogenase 5 family, member A1
hsa-miR-133a	1	0	1	1	1	1	HIC2	hypermethylated in cancer 2
hsa-miR-133a	1	0	1	1	1	1	ZNF362	zinc finger protein 362
hsa-miR-133a	1	0	1	0	1	1	KIAA0232	KIAA0232
hsa-miR-133a	1	0	1	1	1	1	UNK	unkempt homolog (Drosophila)
hsa-miR-133a	1	0	1	1	1	1	CDCA8	cell division cycle associated 8
hsa-miR-133a	1	0	0	0	1	1	SPRN	shadow of prion protein homolog (zebrafish)
hsa-miR-133a	1	0	1	1	1	1	GABBR2	gamma-aminobutyric acid (GABA) B receptor, 2
hsa-miR-133a	1	0	1	1	1	1	FAF2	Fas associated factor family member 2
hsa-miR-133a	1	0	1	0	1	1	CD47	CD47 molecule
hsa-miR-133a	1	0	1	1	1	1	ACTR1A	ARP1 actin-related protein 1 homolog A, centractin alpha (yeast)
hsa-miR-133a	1	0	1	0	1	1	ATG14	autophagy related 14
hsa-miR-133a	1	0	1	1	1	1	RB1CC1	RB1-inducible coiled-coil 1
hsa-miR-133a	1	0	1	0	1	1	RBM23	RNA binding motif protein 23
hsa-miR-133a	1	0	1	1	0	0	DLGAP3	discs, large (Drosophila) homolog-associated protein 3
hsa-miR-133a	1	0	1	1	0	0	FBXL19	F-box and leucine-rich repeat protein 19
hsa-miR-133a	1	0	1	1	1	1	GAS2	growth arrest-specific 2
hsa-miR-133a	1	0	1	1	1	1	PIP4K2B	phosphatidylinositol-5-phosphate 4-kinase, type II, beta
hsa-miR-133a	1	0	1	1	1	1	SYT9	synaptotagmin IX
hsa-miR-133a	1	0	1	1	1	1	GID8	GID complex subunit 8 homolog (S. cerevisiae)
hsa-miR-133a	1	0	1	1	1	1	SGPP1	sphingosine-1-phosphate phosphatase 1
hsa-miR-133a	1	0	1	0	1	1	GCH1	GTP cyclohydrolase 1
hsa-miR-133a	1	0	1	1	1	1	BCL11A	B-cell CLL/lymphoma 11A (zinc finger protein)
hsa-miR-133a	1	0	1	0	1	1	WASF2	WAS protein family, member 2
hsa-miR-133a	1	0	1	0	1	1	NUP153	nucleoporin 153kDa
hsa-miR-133a	1	0	1	0	1	1	LARP1	La ribonucleoprotein domain family, member 1
hsa-miR-133a	1	0	1	1	1	1	PDE8B	phosphodiesterase 8B
hsa-miR-133a	1	0	1	1	1	1	BICC1	bicaudal C homolog 1 (Drosophila)
hsa-miR-133a	1	0	1	1	1	1	PRRT2	proline-rich transmembrane protein 2
hsa-miR-133a	1	0	1	1	1	1	FGFR1	fibroblast growth factor receptor 1
hsa-miR-133a	1	0	1	1	1	1	AP1AR	adaptor-related protein complex 1 associated regulatory protein
hsa-miR-133a	1	0	1	1	1	1	NUP160	nucleoporin 160kDa
hsa-miR-133a	1	0	1	0	1	1	SLC6A6	solute carrier family 6 (neurotransmitter transporter, taurine), member 6
hsa-miR-133a	1	0	1	1	1	1	ZBTB4	zinc finger and BTB domain containing 4
hsa-miR-133a	1	0	1	1	1	1	SYNPO2L	synaptopodin 2-like
hsa-miR-133a	1	0	1	0	1	1	SGSM1	small G protein signaling modulator 1
hsa-miR-133a	1	0	0	0	0	0	ABCC1	ATP-binding cassette, sub-family C (CFTR/MRP), member 1
hsa-miR-133a	1	0	1	1	0	0	GDI1	GDP dissociation inhibitor 1
hsa-miR-133a	1	0	1	0	1	1	TTPAL	tocopherol (alpha) transfer protein-like
hsa-miR-133a	1	0	1	1	1	1	PRKAB1	protein kinase, AMP-activated, beta 1 non-catalytic subunit
hsa-miR-133a	1	0	1	0	1	1	TXLNA	taxilin alpha
hsa-miR-133a	1	0	0	1	1	1	PWWP2B	PWWP domain containing 2B
hsa-miR-133a	1	0	1	1	1	1	SOBP	sine oculis binding protein homolog (Drosophila)
hsa-miR-133a	1	0	1	1	0	0	LDLRAP1	low density lipoprotein receptor adaptor protein 1
hsa-miR-133a	1	0	1	1	1	1	GRM5	glutamate receptor, metabotropic 5
hsa-miR-133a	1	0	1	1	1	1	CRTAM	cytotoxic and regulatory T cell molecule
hsa-miR-133a	1	0	1	1	1	1	DIAPH2	diaphanous homolog 2 (Drosophila)
hsa-miR-133a	1	0	1	1	1	1	UNKL	unkempt homolog (Drosophila)-like
hsa-miR-133a	1	0	1	1	1	1	ARPC5	actin related protein 2/3 complex, subunit 5, 16kDa
hsa-miR-133a	1	0	1	1	1	1	FOXL2	forkhead box L2
hsa-miR-133a	1	0	1	1	1	1	ENPEP	glutamyl aminopeptidase (aminopeptidase A)
hsa-miR-133a	1	0	1	1	1	1	CRK	v-crk sarcoma virus CT10 oncogene homolog (avian)
hsa-miR-133a	1	0	1	1	1	1	SPTY2D1	SPT2, Suppressor of Ty, domain containing 1 (S. cerevisiae)
hsa-miR-133a	1	0	1	1	1	1	ATRX	alpha thalassemia/mental retardation syndrome X-linked
hsa-miR-133a	1	0	1	1	1	1	HOXA9	homeobox A9
hsa-miR-133a	1	0	1	1	1	1	ASB1	ankyrin repeat and SOCS box containing 1
hsa-miR-133a	1	0	1	1	1	1	JHDM1D	jumonji C domain containing histone demethylase 1 homolog D (S. cerevisiae)
hsa-miR-133a	1	0	1	1	1	1	MEIS1	Meis homeobox 1
hsa-miR-133a	1	0	1	1	1	1	EXD2	exonuclease 3'-5' domain containing 2
hsa-miR-133a	1	0	1	1	1	1	FBXW11	F-box and WD repeat domain containing 11
hsa-miR-133a	1	0	1	1	1	1	GDI2	GDP dissociation inhibitor 2
hsa-miR-133a	1	0	1	1	1	1	KCNJ12	potassium inwardly-rectifying channel, subfamily J, member 12
hsa-miR-133a	1	0	1	1	1	1	ZNF131	zinc finger protein 131
hsa-miR-133a	1	0	1	1	1	1	SOLH	small optic lobes homolog (Drosophila)
hsa-miR-133a	1	0	1	1	1	1	RBPJ	recombination signal binding protein for immunoglobulin kappa J region
hsa-miR-133a	1	0	1	1	1	1	PPFIA3	protein tyrosine phosphatase, receptor type, f polypeptide (PTPRF), interacting protein (liprin), alpha 3
hsa-miR-133a	1	0	1	1	1	1	FAM160B1	family with sequence similarity 160, member B1
hsa-miR-133a	1	0	1	1	0	0	C16orf5	chromosome 16 open reading frame 5
hsa-miR-133a	1	0	1	0	1	1	RIMS1	regulating synaptic membrane exocytosis 1
hsa-miR-133a	1	0	1	1	1	1	C5orf25	chromosome 5 open reading frame 25
hsa-miR-133a	1	0	1	0	1	1	TMEM123	transmembrane protein 123
hsa-miR-133a	1	0	1	1	1	1	PPP2R5E	protein phosphatase 2, regulatory subunit B', epsilon isoform
hsa-miR-133a	1	0	1	1	1	1	RARB	retinoic acid receptor, beta
hsa-miR-133a	1	0	1	1	1	1	LARP6	La ribonucleoprotein domain family, member 6
hsa-miR-133a	1	0	1	0	0	0	ZNRF3	zinc and ring finger 3
hsa-miR-133a	1	0	1	1	1	1	ZBTB38	zinc finger and BTB domain containing 38
hsa-miR-133a	1	0	1	1	1	1	NDRG1	N-myc downstream regulated 1
hsa-miR-133a	1	0	1	1	1	1	MEIS2	Meis homeobox 2
hsa-miR-133a	1	0	1	1	1	1	FOXQ1	forkhead box Q1
hsa-miR-133a	1	0	1	1	1	1	RBMX	RNA binding motif protein, X-linked
hsa-miR-133a	1	0	1	1	0	0	VKORC1	vitamin K epoxide reductase complex, subunit 1
hsa-miR-133a	1	0	1	1	1	1	EEF1A1	eukaryotic translation elongation factor 1 alpha 1
hsa-miR-133a	1	0	1	0	1	1	NMT1	N-myristoyltransferase 1
hsa-miR-133a	1	0	0	0	1	1	GZF1	GDNF-inducible zinc finger protein 1
hsa-miR-133a	1	0	1	1	1	1	LANCL2	LanC lantibiotic synthetase component C-like 2 (bacterial)
hsa-miR-133a	1	0	1	1	1	1	PRRX1	paired related homeobox 1
hsa-miR-133a	1	0	0	1	0	0	AGRP	agouti related protein homolog (mouse)
hsa-miR-133a	1	0	1	1	1	1	INSR	insulin receptor
hsa-miR-133a	1	0	1	1	1	1	LETMD1	LETM1 domain containing 1
hsa-miR-133a	1	0	1	1	1	1	XYLT1	xylosyltransferase I
hsa-miR-133a	1	0	0	1	1	1	MMP15	matrix metallopeptidase 15 (membrane-inserted)
hsa-miR-133a	1	0	1	1	1	1	SNRK	SNF related kinase
hsa-miR-133a	1	0	1	1	1	1	ABCA2	ATP-binding cassette, sub-family A (ABC1), member 2
hsa-miR-133a	1	0	1	1	1	1	BCL2L1	BCL2-like 1
hsa-miR-133a	1	0	1	1	1	1	EYA4	eyes absent homolog 4 (Drosophila)
hsa-miR-133a	1	0	1	0	1	1	JAZF1	JAZF zinc finger 1
hsa-miR-133a	1	0	1	1	1	1	COL1A1	collagen, type I, alpha 1
hsa-miR-133a	1	0	1	0	1	1	PKNOX1	PBX/knotted 1 homeobox 1
hsa-miR-133a	1	0	1	1	1	1	PPP2R4	protein phosphatase 2A activator, regulatory subunit 4
hsa-miR-133a	1	0	1	1	1	1	VAT1	vesicle amine transport protein 1 homolog (T. californica)
hsa-miR-133a	1	0	1	1	1	1	RFFL	ring finger and FYVE-like domain containing E3 ubiquitin protein ligase
hsa-miR-133a	1	0	1	1	1	1	PTBP3	polypyrimidine tract binding protein 3
hsa-miR-133a	1	0	0	1	1	1	ZNF710	zinc finger protein 710
hsa-miR-133a	1	0	1	1	1	1	TMEM110	transmembrane protein 110
hsa-miR-133a	1	0	1	1	1	1	FOXP4	forkhead box P4
hsa-miR-133a	1	0	1	1	1	1	LTBP1	latent transforming growth factor beta binding protein 1
hsa-miR-133a	1	0	1	1	0	0	MMP14	matrix metallopeptidase 14 (membrane-inserted)
hsa-miR-133a	1	0	1	1	1	1	CSNK1G3	casein kinase 1, gamma 3
hsa-miR-133a	1	0	1	0	1	1	MCL1	myeloid cell leukemia sequence 1 (BCL2-related)
hsa-miR-133a	1	0	1	1	1	1	SMARCD1	SWI/SNF related, matrix associated, actin dependent regulator of chromatin, subfamily d, member 1
hsa-miR-133a	1	0	1	1	0	0	UBE2Z	ubiquitin-conjugating enzyme E2Z
hsa-miR-133a	1	0	1	1	1	1	IQGAP2	IQ motif containing GTPase activating protein 2
hsa-miR-133a	1	0	1	1	1	1	LASP1	LIM and SH3 protein 1
hsa-miR-133a	1	0	1	1	1	1	UBA2	ubiquitin-like modifier activating enzyme 2
hsa-miR-133a	1	0	1	1	1	1	AGK	acylglycerol kinase
hsa-miR-133a	1	0	1	1	1	1	GLS	glutaminase
hsa-miR-133a	1	0	1	0	1	1	KPNA6	karyopherin alpha 6 (importin alpha 7)
hsa-miR-133a	1	0	1	0	1	1	UNC13A	unc-13 homolog A (C. elegans)
hsa-miR-133a	1	0	1	1	1	1	ZBTB7B	zinc finger and BTB domain containing 7B
hsa-miR-133a	1	0	1	1	1	1	SEC61B	Sec61 beta subunit
hsa-miR-133a	1	0	1	1	1	1	PPP2CB	protein phosphatase 2, catalytic subunit, beta isozyme
hsa-miR-133a	1	0	1	1	1	1	EPB41	erythrocyte membrane protein band 4.1 (elliptocytosis 1, RH-linked)
hsa-miR-133a	1	0	1	1	1	1	RRP15	ribosomal RNA processing 15 homolog (S. cerevisiae)
hsa-miR-133a	1	0	1	1	1	1	AFAP1	actin filament associated protein 1
hsa-miR-133a	1	0	1	1	0	0	ESYT1	extended synaptotagmin-like protein 1
hsa-miR-133a	1	0	1	1	1	1	CSRNP1	cysteine-serine-rich nuclear protein 1
hsa-miR-133a	1	0	1	0	1	1	BTBD3	BTB (POZ) domain containing 3
hsa-miR-133a	1	0	1	1	1	1	CELF6	CUGBP, Elav-like family member 6
hsa-miR-133a	1	0	1	1	1	1	ELF2	E74-like factor 2 (ets domain transcription factor)
hsa-miR-133a	1	0	0	1	0	0	THNSL1	threonine synthase-like 1 (S. cerevisiae)
hsa-miR-133a	1	0	1	1	1	1	IDH1	isocitrate dehydrogenase 1 (NADP+), soluble
hsa-miR-133a	1	0	1	1	1	1	SVOP	SV2 related protein homolog (rat)
hsa-miR-133a	1	0	1	0	0	0	ANKRD52	ankyrin repeat domain 52
hsa-miR-133a	1	0	1	1	1	1	SACM1L	SAC1 suppressor of actin mutations 1-like (yeast)
hsa-miR-133a	1	0	1	1	1	1	PTPRK	protein tyrosine phosphatase, receptor type, K
hsa-miR-133a	1	0	1	0	1	1	LIN7C	lin-7 homolog C (C. elegans)
hsa-miR-133a	1	0	1	1	1	1	RAB30	RAB30, member RAS oncogene family
hsa-miR-133a	1	0	1	1	1	1	TXNDC5	thioredoxin domain containing 5 (endoplasmic reticulum)
hsa-miR-133a	1	0	1	1	1	1	TGOLN2	trans-golgi network protein 2
hsa-miR-133a	1	0	1	1	1	1	MECP2	methyl CpG binding protein 2 (Rett syndrome)
hsa-miR-133a	1	0	1	1	1	1	C11orf9	chromosome 11 open reading frame 9
hsa-miR-133a	1	0	1	1	1	1	POU4F1	POU class 4 homeobox 1
hsa-miR-133a	1	0	1	0	1	1	SPOPL	speckle-type POZ protein-like
hsa-miR-133a	1	0	1	1	0	0	EIF4A1	eukaryotic translation initiation factor 4A1
hsa-miR-133a	1	0	0	1	0	0	LHX5	LIM homeobox 5
hsa-miR-133a	1	0	1	1	1	1	SLC25A36	solute carrier family 25 (pyrimidine nucleotide carrier ), member 36
hsa-miR-133a	1	0	0	0	1	1	MLXIP	MLX interacting protein
hsa-miR-133a	1	0	1	0	1	1	TTYH3	tweety homolog 3 (Drosophila)
hsa-miR-133a	1	0	1	1	1	1	CAP1	CAP, adenylate cyclase-associated protein 1 (yeast)
hsa-miR-133a	1	0	1	0	1	1	MAML3	mastermind-like 3 (Drosophila)
hsa-miR-133a	1	0	1	1	1	1	SGK1	serum/glucocorticoid regulated kinase 1
hsa-miR-133a	1	0	1	1	1	1	ZC3H14	zinc finger CCCH-type containing 14
hsa-miR-133a	1	0	1	0	1	1	CREB5	cAMP responsive element binding protein 5
hsa-miR-133a	1	0	1	1	0	0	JUP	junction plakoglobin
hsa-miR-133a	1	0	1	1	1	1	LZTS2	leucine zipper, putative tumor suppressor 2
hsa-miR-133a	1	0	1	0	1	1	MAP3K3	mitogen-activated protein kinase kinase kinase 3
hsa-miR-133a	1	0	1	1	1	1	ZNF217	zinc finger protein 217
hsa-miR-133a	1	0	1	0	1	1	ICK	intestinal cell (MAK-like) kinase
hsa-miR-133a	1	0	1	1	1	1	FOXC1	forkhead box C1
hsa-miR-133a	1	0	1	1	1	1	MED12L	mediator complex subunit 12-like
hsa-miR-133a	1	0	1	1	1	1	ANKRD46	ankyrin repeat domain 46
hsa-miR-133a	1	0	1	1	1	1	SV2A	synaptic vesicle glycoprotein 2A
hsa-miR-133a	1	0	1	1	1	1	NCAM2	neural cell adhesion molecule 2
hsa-miR-133a	1	0	1	0	1	1	FAM73A	family with sequence similarity 73, member A
hsa-miR-133a	1	0	1	0	1	1	DCP1A	DCP1 decapping enzyme homolog A (S. cerevisiae)
hsa-miR-133a	1	0	1	1	1	1	ARHGAP24	Rho GTPase activating protein 24
hsa-miR-133a	1	0	1	1	1	1	PDIK1L	PDLIM1 interacting kinase 1 like
hsa-miR-133a	1	0	1	1	1	1	CALM1	calmodulin 1 (phosphorylase kinase, delta)
hsa-miR-133a	1	0	1	1	0	0	SNX30	sorting nexin family member 30
hsa-miR-133a	1	0	1	0	1	1	SP1	Sp1 transcription factor
hsa-miR-133a	1	0	1	0	1	1	ANKRD28	ankyrin repeat domain 28
hsa-miR-133a	1	0	1	1	0	0	EFNA4	ephrin-A4
hsa-miR-133a	1	0	1	1	1	1	PFN2	profilin 2
hsa-miR-133a	1	0	1	0	1	1	FAM19A5	family with sequence similarity 19 (chemokine (C-C motif)-like), member A5
hsa-miR-133a	1	0	1	1	0	0	UBXN7	UBX domain protein 7
hsa-miR-133a	1	0	1	0	1	1	WIPF2	WAS/WASL interacting protein family, member 2
hsa-miR-133a	1	0	1	0	1	1	MAML1	mastermind-like 1 (Drosophila)
hsa-miR-133a	1	0	1	1	1	1	ZNF385A	zinc finger protein 385A
hsa-miR-133a	1	0	1	1	1	1	NKX2-2	NK2 homeobox 2
hsa-miR-133a	1	0	1	1	0	0	ARHGAP39	Rho GTPase activating protein 39
hsa-miR-133a	1	0	1	1	1	1	LHFP	lipoma HMGIC fusion partner
hsa-miR-133a	1	0	1	1	1	1	SPTBN1	spectrin, beta, non-erythrocytic 1
hsa-miR-133a	1	0	1	1	1	1	KCNA1	potassium voltage-gated channel, shaker-related subfamily, member 1 (episodic ataxia with myokymia)
hsa-miR-133a	1	0	1	0	1	1	TRHDE	thyrotropin-releasing hormone degrading enzyme
hsa-miR-133a	1	0	1	1	0	0	FSCN1	fascin homolog 1, actin-bundling protein (Strongylocentrotus purpuratus)
hsa-miR-133a	1	0	1	1	1	1	KIAA1429	KIAA1429
hsa-miR-133a	1	0	1	1	0	0	GXYLT1	glucoside xylosyltransferase 1
hsa-miR-133a	1	0	1	1	1	1	PPP1R9B	protein phosphatase 1, regulatory subunit 9B
hsa-miR-133a	1	0	1	1	1	1	PFAS	phosphoribosylformylglycinamidine synthase
hsa-miR-133a	1	0	1	1	1	1	CORO1C	coronin, actin binding protein, 1C
hsa-miR-133a	1	0	1	1	1	1	VPS54	vacuolar protein sorting 54 homolog (S. cerevisiae)
hsa-miR-133a	1	0	1	1	1	1	FURIN	furin (paired basic amino acid cleaving enzyme)
hsa-miR-133a	1	0	1	1	1	1	ELAVL1	ELAV (embryonic lethal, abnormal vision, Drosophila)-like 1 (Hu antigen R)
hsa-miR-133a	1	0	1	1	1	1	ATP6AP2	ATPase, H+ transporting, lysosomal accessory protein 2
hsa-miR-133a	1	0	1	0	1	1	IRF2	interferon regulatory factor 2
hsa-miR-133a	1	0	1	1	1	1	LOXL4	lysyl oxidase-like 4
hsa-miR-133a	1	0	1	0	1	1	DCUN1D4	DCN1, defective in cullin neddylation 1, domain containing 4 (S. cerevisiae)
hsa-miR-133a	1	0	1	1	1	1	PRDM1	PR domain containing 1, with ZNF domain
hsa-miR-133a	1	0	1	1	1	1	IFIT2	interferon-induced protein with tetratricopeptide repeats 2
hsa-miR-133a	1	0	1	0	1	1	NFAT5	nuclear factor of activated T-cells 5, tonicity-responsive
hsa-miR-133a	1	0	1	1	1	1	CKAP4	cytoskeleton-associated protein 4
hsa-miR-133a	1	0	1	1	0	0	BRD4	bromodomain containing 4
hsa-miR-133a	1	0	1	1	1	1	HLTF	helicase-like transcription factor
hsa-miR-133a	1	0	1	0	1	1	CSNK1G1	casein kinase 1, gamma 1
hsa-miR-133a	1	0	1	1	1	1	AIF1L	allograft inflammatory factor 1-like
hsa-miR-133a	1	0	0	1	1	1	CAPN5	calpain 5
hsa-miR-133a	1	0	1	1	1	1	GRM7	glutamate receptor, metabotropic 7
hsa-miR-133a	1	0	1	1	1	1	ANKRD12	ankyrin repeat domain 12
hsa-miR-133a	1	0	1	1	0	0	RBMXL2	RNA binding motif protein, X-linked-like 2
hsa-miR-133a	1	0	1	0	1	1	TM9SF3	transmembrane 9 superfamily member 3
hsa-miR-133a	1	0	1	0	1	1	LIN28B	lin-28 homolog B (C. elegans)
hsa-miR-133a	1	0	1	1	1	1	SLC8A2	solute carrier family 8 (sodium/calcium exchanger), member 2
hsa-miR-133a	1	0	1	1	1	1	ZNF436	zinc finger protein 436
hsa-miR-133a	1	0	1	1	1	1	CACUL1	CDK2-associated, cullin domain 1
hsa-miR-133a	1	0	1	1	1	1	PTH1R	parathyroid hormone 1 receptor
hsa-miR-133a	1	0	1	1	1	1	AFTPH	aftiphilin
hsa-miR-133a	1	0	1	1	1	1	TAGLN2	transgelin 2
hsa-miR-133a	1	0	1	0	1	1	CHP1	calcineurin-like EF hand protein 1
hsa-miR-133a	1	0	1	1	1	1	HLF	hepatic leukemia factor
hsa-miR-133a	1	0	1	1	0	0	PCLO	piccolo (presynaptic cytomatrix protein)
hsa-miR-133a	1	0	0	1	1	1	DBNL	drebrin-like
hsa-miR-133a	1	0	1	1	1	1	CCDC117	coiled-coil domain containing 117
hsa-miR-133a	1	0	1	1	1	1	CELF4	CUGBP, Elav-like family member 4
hsa-miR-133a	1	0	1	1	1	1	EYA1	eyes absent homolog 1 (Drosophila)
hsa-miR-133a	1	0	1	1	0	0	HAUS2	HAUS augmin-like complex, subunit 2
hsa-miR-133a	1	0	1	1	1	1	CHD2	chromodomain helicase DNA binding protein 2
hsa-miR-133a	1	0	1	0	1	1	PURB	purine-rich element binding protein B
hsa-miR-133a	1	0	1	1	1	1	CYLD	cylindromatosis (turban tumor syndrome)
hsa-miR-133a	1	0	0	1	0	0	CNN2	calponin 2
hsa-miR-133a	1	0	1	1	1	1	HS2ST1	heparan sulfate 2-O-sulfotransferase 1
hsa-miR-133a	1	0	1	1	0	0	PPP2R2D	protein phosphatase 2, regulatory subunit B, delta
hsa-miR-133a	1	0	0	1	1	1	PARD6G	par-6 partitioning defective 6 homolog gamma (C. elegans)
hsa-miR-133a	1	0	0	1	0	0	SF3B4	splicing factor 3b, subunit 4, 49kDa
hsa-miR-133a	1	0	1	1	1	1	PPP2CA	protein phosphatase 2, catalytic subunit, alpha isozyme
hsa-miR-133a	1	0	1	0	1	1	YES1	v-yes-1 Yamaguchi sarcoma viral oncogene homolog 1
hsa-miR-133a	1	0	1	1	1	1	TRAM2	translocation associated membrane protein 2
hsa-miR-133a	1	0	1	1	1	1	VAPB	VAMP (vesicle-associated membrane protein)-associated protein B and C
hsa-miR-133a	1	0	1	1	1	1	PFKFB3	6-phosphofructo-2-kinase/fructose-2,6-biphosphatase 3
hsa-miR-133a	1	0	1	1	1	1	SLC41A1	solute carrier family 41, member 1
hsa-miR-133a	1	0	1	1	1	1	SFXN2	sideroflexin 2
hsa-miR-133a	1	0	1	0	1	1	RTN4RL1	reticulon 4 receptor-like 1
hsa-miR-133a	1	0	1	1	1	1	ID4	inhibitor of DNA binding 4, dominant negative helix-loop-helix protein
hsa-miR-133a	1	0	1	1	1	1	FOXP1	forkhead box P1
hsa-miR-133a	1	0	1	1	1	1	ZNF664	zinc finger protein 664
hsa-miR-133a	1	0	1	1	1	1	C4orf34	chromosome 4 open reading frame 34
hsa-miR-133a	1	0	1	1	0	0	PEAK1	NKF3 kinase family member
hsa-miR-133a	1	0	1	0	1	1	KLHL9	kelch-like 9 (Drosophila)
hsa-miR-133a	1	0	1	1	1	1	MAEA	macrophage erythroblast attacher
hsa-miR-133a	1	0	1	1	0	0	STX5	syntaxin 5
hsa-miR-133a	1	0	1	1	0	0	NCKAP5L	NCK-associated protein 5-like
hsa-miR-133a	1	0	1	0	1	1	KLHDC5	kelch domain containing 5
hsa-miR-133a	1	0	0	1	0	0	PIK3C2A	phosphatidylinositol-4-phosphate 3-kinase, catalytic subunit type 2 alpha
hsa-miR-133a	1	0	1	1	1	1	LPGAT1	lysophosphatidylglycerol acyltransferase 1
hsa-miR-133a	1	0	1	1	1	1	PHTF2	putative homeodomain transcription factor 2
hsa-miR-133a	1	0	1	1	1	1	SCOC	short coiled-coil protein
hsa-miR-133a	1	0	1	0	1	1	TBL1X	transducin (beta)-like 1X-linked
hsa-miR-133a	1	0	1	1	1	1	PGAP1	post-GPI attachment to proteins 1
hsa-miR-133a	1	0	1	1	1	1	MLLT3	myeloid/lymphoid or mixed-lineage leukemia (trithorax homolog, Drosophila); translocated to, 3
hsa-miR-133a	1	0	1	1	1	1	NAGS	N-acetylglutamate synthase
hsa-miR-133a	1	0	0	1	1	1	XXYLT1	xyloside xylosyltransferase 1
hsa-miR-133a	1	0	0	1	1	1	EGFR	epidermal growth factor receptor
hsa-miR-133a	1	0	1	1	1	1	MYH9	myosin, heavy chain 9, non-muscle
hsa-miR-133a	1	0	1	1	0	0	SLC25A39	solute carrier family 25, member 39
hsa-miR-133a	1	0	1	1	0	0	COL5A3	collagen, type V, alpha 3
hsa-miR-133a	1	0	1	1	1	1	SLC7A8	solute carrier family 7 (amino acid transporter light chain, L system), member 8
hsa-miR-133a	1	0	1	1	1	1	DNAJB1	DnaJ (Hsp40) homolog, subfamily B, member 1
hsa-miR-133a	1	0	1	1	0	0	C20orf194	chromosome 20 open reading frame 194
hsa-miR-133a	1	0	1	0	1	1	UBFD1	ubiquitin family domain containing 1
hsa-miR-133a	1	0	1	1	1	1	HIVEP2	human immunodeficiency virus type I enhancer binding protein 2
hsa-miR-133a	1	0	1	1	1	1	NAA40	N(alpha)-acetyltransferase 40, NatD catalytic subunit, homolog (S. cerevisiae)
hsa-miR-133a	1	0	1	0	1	1	CMTM6	CKLF-like MARVEL transmembrane domain containing 6
hsa-miR-133a	1	0	1	1	1	1	CNOT1	CCR4-NOT transcription complex, subunit 1
hsa-miR-133a	1	0	1	1	1	1	LRRFIP1	leucine rich repeat (in FLII) interacting protein 1
hsa-miR-133a	1	0	1	1	1	1	FAM199X	family with sequence similarity 199, X-linked
hsa-miR-133a	1	0	1	1	1	1	SHISA5	shisa homolog 5 (Xenopus laevis)
hsa-miR-133a	1	0	1	0	1	1	KIAA0430	KIAA0430
hsa-miR-133a	1	0	0	1	1	1	DCLRE1A	DNA cross-link repair 1A
hsa-miR-133a	1	0	1	0	1	1	FAM46C	family with sequence similarity 46, member C
hsa-miR-133a	1	0	1	0	1	1	SRGAP3	SLIT-ROBO Rho GTPase activating protein 3
hsa-miR-133a	1	0	1	1	1	1	RAP2C	RAP2C, member of RAS oncogene family
hsa-miR-133a	1	0	1	1	1	1	NFIB	nuclear factor I/B
hsa-miR-133a	1	0	1	0	1	1	TMEM167A	transmembrane protein 167A
hsa-miR-133a	1	0	1	1	1	1	SLMO2	slowmo homolog 2 (Drosophila)
hsa-miR-133a	1	0	1	1	1	1	CDK13	cyclin-dependent kinase 13
hsa-miR-133a	1	0	1	1	1	1	LRRC2	leucine rich repeat containing 2
hsa-miR-133a	1	0	1	1	1	1	FAM117B	family with sequence similarity 117, member B
hsa-miR-133a	1	0	1	1	1	1	ADAMTS5	ADAM metallopeptidase with thrombospondin type 1 motif, 5
hsa-miR-133a	1	0	1	1	1	1	ZBTB10	zinc finger and BTB domain containing 10
hsa-miR-133a	1	0	1	0	1	1	SCN2B	sodium channel, voltage-gated, type II, beta subunit
hsa-miR-133a	1	0	1	1	0	0	SFXN5	sideroflexin 5
hsa-miR-133a	1	0	1	0	1	1	KIAA1024	KIAA1024
hsa-miR-133a	1	0	1	1	1	1	XIRP1	xin actin-binding repeat containing 1
hsa-miR-133a	1	0	1	1	1	1	PML	promyelocytic leukemia
hsa-miR-133a	1	0	1	0	1	1	PSD3	pleckstrin and Sec7 domain containing 3
hsa-miR-133a	1	0	1	1	0	0	KIAA1045	KIAA1045
hsa-miR-133a	1	0	1	1	1	1	PTBP2	polypyrimidine tract binding protein 2
hsa-miR-133a	1	0	1	1	1	1	PIKFYVE	phosphoinositide kinase, FYVE finger containing
hsa-miR-133a	1	0	1	0	1	1	VAMP3	vesicle-associated membrane protein 3 (cellubrevin)
hsa-miR-133a	1	0	1	1	1	1	TULP4	tubby like protein 4
hsa-miR-133a	1	0	1	1	1	1	ZC3H11A	zinc finger CCCH-type containing 11A
hsa-miR-133a	1	0	1	1	1	1	XPO4	exportin 4
hsa-miR-133a	1	0	1	1	1	1	RAPH1	Ras association (RalGDS/AF-6) and pleckstrin homology domains 1
hsa-miR-133a	1	0	1	1	1	1	ARFIP2	ADP-ribosylation factor interacting protein 2
hsa-miR-133a	1	0	1	1	1	1	GABPB2	GA binding protein transcription factor, beta subunit 2
hsa-miR-133a	1	0	1	1	1	1	XPO1	exportin 1 (CRM1 homolog, yeast)
hsa-miR-133a	1	0	1	1	1	1	ZC3H7A	zinc finger CCCH-type containing 7A
hsa-miR-133a	1	0	1	0	1	1	EDEM1	ER degradation enhancer, mannosidase alpha-like 1
hsa-miR-133a	1	0	1	0	1	1	UBE2Q1	ubiquitin-conjugating enzyme E2Q family member 1
hsa-miR-133a	1	0	1	1	1	1	GABARAPL1	GABA(A) receptor-associated protein like 1
hsa-miR-133a	1	0	1	1	1	1	CNNM4	cyclin M4
hsa-miR-133a	1	0	1	0	1	1	NUS1	nuclear undecaprenyl pyrophosphate synthase 1 homolog (S. cerevisiae)
hsa-miR-133a	1	0	1	1	1	1	ELMO1	engulfment and cell motility 1
hsa-miR-133a	1	0	1	1	1	1	FBN2	fibrillin 2
hsa-miR-133a	1	0	1	1	1	1	USP6	ubiquitin specific peptidase 6 (Tre-2 oncogene)
hsa-miR-133a	1	0	1	1	1	1	PEX5L	peroxisomal biogenesis factor 5-like
hsa-miR-133a	1	0	1	1	1	1	EIF2C1	eukaryotic translation initiation factor 2C, 1
hsa-miR-133a	1	0	1	1	1	1	CNNM2	cyclin M2
hsa-miR-133a	1	0	1	1	1	1	FOXK2	forkhead box K2
hsa-miR-133a	1	0	1	1	1	1	ARPP21	cAMP-regulated phosphoprotein, 21kDa
hsa-miR-133a	1	0	1	1	1	1	E2F7	E2F transcription factor 7
hsa-miR-133a	1	0	1	0	1	1	SPTLC2	serine palmitoyltransferase, long chain base subunit 2
hsa-miR-133a	1	0	1	1	1	1	MLL3	myeloid/lymphoid or mixed-lineage leukemia 3
hsa-miR-133a	1	0	1	1	0	0	ITPRIPL2	inositol 1,4,5-trisphosphate receptor interacting protein-like 2
hsa-miR-133a	1	0	1	1	0	0	ABL2	v-abl Abelson murine leukemia viral oncogene homolog 2
hsa-miR-133a	1	0	1	1	1	1	DYNC1LI2	dynein, cytoplasmic 1, light intermediate chain 2
hsa-miR-133a	1	0	1	1	1	1	PITPNB	phosphatidylinositol transfer protein, beta
hsa-miR-133a	1	0	1	1	0	0	PPM1H	protein phosphatase, Mg2+/Mn2+ dependent, 1H
hsa-miR-133a	1	0	1	1	1	1	KCTD15	potassium channel tetramerisation domain containing 15
hsa-miR-133a	1	0	1	1	1	1	SGMS2	sphingomyelin synthase 2
hsa-miR-133a	1	0	1	1	1	1	TMEM128	transmembrane protein 128
hsa-miR-133a	1	0	1	1	1	1	STXBP6	syntaxin binding protein 6 (amisyn)
hsa-miR-133a	1	0	1	1	1	1	SPTSSA	serine palmitoyltransferase, small subunit A
hsa-miR-133a	1	0	1	0	1	1	CNP	2',3'-cyclic nucleotide 3' phosphodiesterase
hsa-miR-133a	1	0	0	1	0	0	SMPD4	sphingomyelin phosphodiesterase 4, neutral membrane (neutral sphingomyelinase-3)
hsa-miR-133a	1	0	1	1	1	1	TRIM55	tripartite motif containing 55
hsa-miR-133a	1	0	1	1	1	1	GNB4	guanine nucleotide binding protein (G protein), beta polypeptide 4
hsa-miR-133a	1	0	1	1	1	1	ARSJ	arylsulfatase family, member J
hsa-miR-133a	1	0	1	1	1	1	BHLHE41	basic helix-loop-helix family, member e41
hsa-miR-133a	1	0	1	1	1	1	KIAA1522	KIAA1522
hsa-miR-133a	1	0	1	1	0	0	DOT1L	DOT1-like, histone H3 methyltransferase (S. cerevisiae)
hsa-miR-133a	1	0	1	1	0	0	BCORL1	BCL6 corepressor-like 1
hsa-miR-133a	1	0	0	0	1	1	STOM	stomatin
hsa-miR-133a	1	0	1	0	1	1	SOX4	SRY (sex determining region Y)-box 4
hsa-miR-133a	1	0	1	1	1	1	TFE3	transcription factor binding to IGHM enhancer 3
hsa-miR-133a	1	0	1	1	1	1	GALNTL1	UDP-N-acetyl-alpha-D-galactosamine:polypeptide N-acetylgalactosaminyltransferase-like 1
hsa-miR-133a	1	0	1	1	1	1	ATP7B	ATPase, Cu++ transporting, beta polypeptide
hsa-miR-133a	1	0	1	1	1	1	SUPT16H	suppressor of Ty 16 homolog (S. cerevisiae)
hsa-miR-133a	1	0	1	0	1	1	YPEL2	yippee-like 2 (Drosophila)
hsa-miR-133a	1	0	1	1	1	1	MKL2	MKL/myocardin-like 2
hsa-miR-133a	1	0	1	1	0	0	SNX15	sorting nexin 15
hsa-miR-133a	1	0	1	1	1	1	SLC30A7	solute carrier family 30 (zinc transporter), member 7
hsa-miR-133a	1	0	1	1	1	1	TRIM56	tripartite motif containing 56
hsa-miR-133a	1	0	1	0	1	1	VAMP2	vesicle-associated membrane protein 2 (synaptobrevin 2)
hsa-miR-133a	1	0	1	1	1	1	CECR6	cat eye syndrome chromosome region, candidate 6
hsa-miR-133a	1	0	1	1	1	1	NIPA2	non imprinted in Prader-Willi/Angelman syndrome 2
hsa-miR-133a	1	0	1	0	1	1	PTPRT	protein tyrosine phosphatase, receptor type, T
hsa-miR-133a	1	0	1	0	1	1	KLHDC10	kelch domain containing 10
hsa-miR-133a	1	0	1	1	1	1	SP3	Sp3 transcription factor
hsa-miR-133a	1	0	1	1	1	1	PREX1	phosphatidylinositol-3,4,5-trisphosphate-dependent Rac exchange factor 1
hsa-miR-133a	1	0	1	0	1	1	CPNE3	copine III
hsa-miR-133a	1	0	0	1	1	1	FAM57A	family with sequence similarity 57, member A
hsa-miR-133a	1	0	1	0	1	1	USP32	ubiquitin specific peptidase 32
hsa-miR-133a	1	0	1	1	1	1	NRIP3	nuclear receptor interacting protein 3
hsa-miR-133a	1	0	1	1	1	1	PLXNA2	plexin A2
hsa-miR-133a	0	1	1	1	0	0	PKM	pyruvate kinase, muscle
hsa-miR-133a	1	0	1	1	1	1	PLAU	plasminogen activator, urokinase
hsa-miR-133a	1	0	1	1	0	0	SRCAP	Snf2-related CREBBP activator protein
hsa-miR-133a	0	0	1	1	0	0	PLXNB1	plexin B1
hsa-miR-133a	1	0	1	1	1	1	ATMIN	ATM interactor
hsa-miR-133a	0	0	1	1	0	0	ATP10B	ATPase, class V, type 10B
hsa-miR-133a	1	0	1	1	1	1	UBE2K	ubiquitin-conjugating enzyme E2K
hsa-miR-133a	1	0	1	1	1	1	PLCL2	phospholipase C-like 2
hsa-miR-133a	1	0	1	1	1	1	DKK2	dickkopf 2 homolog (Xenopus laevis)
hsa-miR-133a	1	0	1	0	0	0	ODZ4	odz, odd Oz/ten-m homolog 4 (Drosophila)
hsa-miR-133a	1	0	1	1	1	1	FAM214B	family with sequence similarity 214, member B
hsa-miR-133a	0	0	1	0	0	0	LOC440792	proline dehydrogenase (oxidase) 1 pseudogene
hsa-miR-133a	1	0	1	0	1	1	JPH4	junctophilin 4
hsa-miR-133a	1	0	1	1	1	1	MAT2B	methionine adenosyltransferase II, beta
hsa-miR-133a	1	0	1	0	0	0	FAT3	FAT tumor suppressor homolog 3 (Drosophila)
hsa-miR-133a	0	0	1	1	0	0	DDB2	damage-specific DNA binding protein 2, 48kDa
hsa-miR-133a	1	0	1	1	1	1	KCNMA1	potassium large conductance calcium-activated channel, subfamily M, alpha member 1
hsa-miR-133a	1	0	1	1	1	1	FAT2	FAT tumor suppressor homolog 2 (Drosophila)
hsa-miR-133a	1	1	1	1	1	1	BACE1	beta-site APP-cleaving enzyme 1
hsa-miR-133a	0	0	1	1	1	1	DOCK8	dedicator of cytokinesis 8
hsa-miR-133a	1	0	1	1	1	1	ADARB1	adenosine deaminase, RNA-specific, B1
hsa-miR-133a	1	0	1	1	1	1	RPS6KA3	ribosomal protein S6 kinase, 90kDa, polypeptide 3
hsa-miR-133a	0	0	1	1	1	1	DDX39B	DEAD (Asp-Glu-Ala-Asp) box polypeptide 39B
hsa-miR-133a	1	0	1	1	0	0	TNK2	tyrosine kinase, non-receptor, 2
hsa-miR-133a	1	0	1	1	1	1	EPHA5	EPH receptor A5
hsa-miR-133a	0	0	1	1	1	1	PPP1R12C	protein phosphatase 1, regulatory subunit 12C
hsa-miR-133a	1	0	1	1	1	1	GULP1	GULP, engulfment adaptor PTB domain containing 1
hsa-miR-133a	0	0	1	1	1	1	SGSH	N-sulfoglucosamine sulfohydrolase
hsa-miR-133a	1	0	1	0	1	1	CAV1	caveolin 1, caveolae protein, 22kDa
hsa-miR-133a	1	0	1	1	1	1	SDHC	succinate dehydrogenase complex, subunit C, integral membrane protein, 15kDa
hsa-miR-133a	1	0	1	1	1	1	YME1L1	YME1-like 1 (S. cerevisiae)
hsa-miR-133a	0	0	1	1	1	1	SESN1	sestrin 1
hsa-miR-133a	0	0	1	1	1	1	CD84	CD84 molecule
hsa-miR-133a	1	0	1	1	1	1	AKAP9	A kinase (PRKA) anchor protein (yotiao) 9
hsa-miR-133a	0	0	1	1	0	0	ADAMTS7	ADAM metallopeptidase with thrombospondin type 1 motif, 7
hsa-miR-133a	0	0	1	1	0	0	NCOA6	nuclear receptor coactivator 6
hsa-miR-133a	1	0	1	1	1	1	KCNMB2	potassium large conductance calcium-activated channel, subfamily M, beta member 2
hsa-miR-133a	0	0	1	1	0	0	SHANK1	SH3 and multiple ankyrin repeat domains 1
hsa-miR-133a	1	0	1	1	0	0	TDRKH	tudor and KH domain containing
hsa-miR-133a	0	0	1	1	1	1	CELF1	CUGBP, Elav-like family member 1
hsa-miR-133a	0	0	1	1	1	1	LRTOMT	leucine rich transmembrane and 0-methyltransferase domain containing
hsa-miR-133a	0	0	1	1	1	1	RERG	RAS-like, estrogen-regulated, growth inhibitor
hsa-miR-133a	0	0	1	1	0	0	TRO	trophinin
hsa-miR-133a	0	0	1	0	0	0	NBPF10	neuroblastoma breakpoint family, member 10
hsa-miR-133a	0	0	1	0	0	0	CLRN1-AS1	CLRN1 antisense RNA 1
hsa-miR-133a	1	0	1	1	1	1	NTRK2	neurotrophic tyrosine kinase, receptor, type 2
hsa-miR-133a	1	0	1	1	1	1	ST3GAL3	ST3 beta-galactoside alpha-2,3-sialyltransferase 3
hsa-miR-133a	1	0	1	1	1	1	STX16	syntaxin 16
hsa-miR-133a	1	0	1	1	0	0	SEPT8	septin 8
hsa-miR-133a	1	0	1	1	1	1	AFF2	AF4/FMR2 family, member 2
hsa-miR-133a	1	0	1	0	1	1	CACNA1C	calcium channel, voltage-dependent, L type, alpha 1C subunit
hsa-miR-133a	0	0	1	1	1	1	MTHFR	methylenetetrahydrofolate reductase (NAD(P)H)
hsa-miR-133a	0	0	1	1	1	1	DMRTC1	DMRT-like family C1
hsa-miR-133a	0	0	1	1	0	0	DMRTC1B	DMRT-like family C1B
hsa-miR-133a	0	0	1	0	0	0	CD177	CD177 molecule
hsa-miR-133a	0	0	1	0	1	1	SRPK1	SRSF protein kinase 1
hsa-miR-133a	1	0	1	1	1	1	EMID2	EMI domain containing 2
hsa-miR-133a	1	0	1	1	1	1	NFYA	nuclear transcription factor Y, alpha
hsa-miR-133a	1	0	1	1	1	1	NRXN3	neurexin 3
hsa-miR-133a	0	0	1	1	1	1	TAF1	TAF1 RNA polymerase II, TATA box binding protein (TBP)-associated factor, 250kDa
hsa-miR-133a	1	0	1	1	1	1	ARL4C	ADP-ribosylation factor-like 4C
hsa-miR-133a	0	0	1	0	0	0	LINC00271	long intergenic non-protein coding RNA 271
hsa-miR-133a	0	0	1	1	0	0	NHLRC2	NHL repeat containing 2
hsa-miR-133a	0	0	1	1	0	0	ASAP3	ArfGAP with SH3 domain, ankyrin repeat and PH domain 3
hsa-miR-133a	0	0	1	1	1	1	PARP16	poly (ADP-ribose) polymerase family, member 16
hsa-miR-133a	0	0	1	1	1	1	PARPBP	PARP1 binding protein
hsa-miR-133a	0	0	1	1	1	1	OLFM4	olfactomedin 4
hsa-miR-133a	0	0	1	1	0	0	AP4B1	adaptor-related protein complex 4, beta 1 subunit
hsa-miR-133a	1	0	1	1	1	1	ARHGAP17	Rho GTPase activating protein 17
hsa-miR-133a	1	0	1	1	1	1	ARMC8	armadillo repeat containing 8
hsa-miR-133a	1	0	1	1	1	1	KLHDC8B	kelch domain containing 8B
hsa-miR-133a	0	0	1	1	0	0	C17orf53	chromosome 17 open reading frame 53
hsa-miR-133a	0	0	1	0	0	0	C17orf72	chromosome 17 open reading frame 72
hsa-miR-133a	0	0	1	1	1	1	AMACR	alpha-methylacyl-CoA racemase
hsa-miR-133a	0	0	1	1	1	1	ARMC5	armadillo repeat containing 5
hsa-miR-133a	0	0	1	0	0	0	TDRD12	tudor domain containing 12
hsa-miR-133a	1	0	1	1	1	1	MACF1	microtubule-actin crosslinking factor 1
hsa-miR-133a	1	0	1	0	1	1	C14orf101	chromosome 14 open reading frame 101
hsa-miR-133a	0	0	1	0	0	0	LOC286059	tumor necrosis factor receptor superfamily, member 10d, decoy with truncated death domain pseudogene
hsa-miR-133a	0	0	1	1	1	1	METTL7A	methyltransferase like 7A
hsa-miR-133a	0	0	1	1	1	1	SIGLEC1	sialic acid binding Ig-like lectin 1, sialoadhesin
hsa-miR-133a	1	0	1	1	1	1	ZMIZ1	zinc finger, MIZ-type containing 1
hsa-miR-133a	0	0	1	1	0	0	SPON2	spondin 2, extracellular matrix protein
hsa-miR-133a	1	0	1	1	1	1	PHACTR4	phosphatase and actin regulator 4
hsa-miR-133a	1	0	1	0	1	1	MYO5B	myosin VB
hsa-miR-133a	1	0	1	1	0	0	GPI	glucose-6-phosphate isomerase
hsa-miR-133a	1	0	1	1	1	1	ARFGEF1	ADP-ribosylation factor guanine nucleotide-exchange factor 1 (brefeldin A-inhibited)
hsa-miR-133a	1	0	1	0	1	1	ZCCHC3	zinc finger, CCHC domain containing 3
hsa-miR-133a	0	0	1	0	1	1	HEMK1	HemK methyltransferase family member 1
hsa-miR-133a	0	0	1	1	1	1	HSPBAP1	HSPB (heat shock 27kDa) associated protein 1
hsa-miR-133a	0	0	1	1	1	1	ZBBX	zinc finger, B-box domain containing
hsa-miR-133a	0	0	1	0	0	0	LOC254559	uncharacterized LOC254559
hsa-miR-133a	0	0	1	1	1	1	C8orf46	chromosome 8 open reading frame 46
hsa-miR-133a	0	0	1	1	0	0	ABHD16A	abhydrolase domain containing 16A
hsa-miR-133a	0	0	1	1	1	1	CCND3	cyclin D3
hsa-miR-133a	0	0	1	1	1	1	SLCO1B3	solute carrier organic anion transporter family, member 1B3
hsa-miR-133a	0	0	1	0	0	0	BTBD19	BTB (POZ) domain containing 19
hsa-miR-133a	0	0	1	1	1	1	PDE1C	phosphodiesterase 1C, calmodulin-dependent 70kDa
hsa-miR-133a	0	0	1	0	0	0	JPX	JPX transcript, XIST activator (non-protein coding)
hsa-miR-133a	1	0	1	1	1	1	ZIC4	Zic family member 4
hsa-miR-133a	1	0	1	1	1	1	CLCN5	chloride channel, voltage-sensitive 5
hsa-miR-133a	0	0	1	0	0	0	LOC255187	hCG1980447
hsa-miR-133a	0	0	1	1	0	0	BTN2A3P	butyrophilin, subfamily 2, member A3, pseudogene
hsa-miR-133a	0	0	1	1	0	0	HECTD3	HECT domain containing E3 ubiquitin protein ligase 3
hsa-miR-133a	1	0	1	0	1	1	PCGF3	polycomb group ring finger 3
hsa-miR-133a	1	0	1	1	1	1	MGAT1	mannosyl (alpha-1,3-)-glycoprotein beta-1,2-N-acetylglucosaminyltransferase
hsa-miR-133a	0	0	1	1	1	1	VWA3B	von Willebrand factor A domain containing 3B
hsa-miR-133a	1	0	1	1	1	1	MAP3K11	mitogen-activated protein kinase kinase kinase 11
hsa-miR-133a	1	0	1	0	1	1	NCAM1	neural cell adhesion molecule 1
hsa-miR-133a	1	0	1	1	0	0	GBA2	glucosidase, beta (bile acid) 2
hsa-miR-133a	1	0	1	1	1	1	ANKRD29	ankyrin repeat domain 29
hsa-miR-133a	0	0	1	1	0	0	CD37	CD37 molecule
hsa-miR-133a	0	0	1	1	0	0	PIGO	phosphatidylinositol glycan anchor biosynthesis, class O
hsa-miR-133a	1	0	1	1	1	1	STXBP5	syntaxin binding protein 5 (tomosyn)
hsa-miR-133a	0	0	1	0	0	0	LOC643837	uncharacterized LOC643837
hsa-miR-133a	0	0	1	1	0	0	MSANTD3	Myb/SANT-like DNA-binding domain containing 3
hsa-miR-133a	1	0	1	1	1	1	GNG2	guanine nucleotide binding protein (G protein), gamma 2
hsa-miR-133a	1	0	1	1	1	1	GPD2	glycerol-3-phosphate dehydrogenase 2 (mitochondrial)
hsa-miR-133a	1	0	1	0	0	0	SH3RF3	SH3 domain containing ring finger 3
hsa-miR-133a	0	0	1	1	1	1	SLC16A1	solute carrier family 16, member 1 (monocarboxylic acid transporter 1)
hsa-miR-133a	1	0	1	1	1	1	DEM1	defects in morphology 1 homolog (S. cerevisiae)
hsa-miR-133a	0	0	1	0	0	0	PART1	prostate androgen-regulated transcript 1 (non-protein coding)
hsa-miR-133a	1	0	1	1	1	1	EPHB1	EPH receptor B1
hsa-miR-133a	0	0	1	1	1	1	AQP3	aquaporin 3 (Gill blood group)
hsa-miR-133a	1	0	1	0	1	1	STC2	stanniocalcin 2
hsa-miR-133a	1	0	1	1	1	1	CLSTN2	calsyntenin 2
hsa-miR-133a	0	0	1	1	1	1	PPP1R27	protein phosphatase 1, regulatory subunit 27
hsa-miR-133a	0	0	1	1	1	1	ITGAD	integrin, alpha D
hsa-miR-133a	0	0	1	0	0	0	LINC00293	long intergenic non-protein coding RNA 293
hsa-miR-133a	0	0	1	1	0	0	AHCY	adenosylhomocysteinase
hsa-miR-133a	0	0	1	0	0	0	LOC284385	uncharacterized LOC284385
hsa-miR-133a	0	0	1	1	0	0	KLHDC3	kelch domain containing 3
hsa-miR-133a	0	0	1	1	0	0	DCBLD1	discoidin, CUB and LCCL domain containing 1
hsa-miR-133a	1	0	1	1	1	1	SLC39A13	solute carrier family 39 (zinc transporter), member 13
hsa-miR-133a	0	0	1	0	1	1	MYLK4	myosin light chain kinase family, member 4
hsa-miR-133a	0	0	1	1	1	1	GGA1	golgi-associated, gamma adaptin ear containing, ARF binding protein 1
hsa-miR-133a	0	0	1	1	0	0	MARS	methionyl-tRNA synthetase
hsa-miR-133a	0	0	1	1	0	0	WDR81	WD repeat domain 81
hsa-miR-133a	0	0	1	1	1	1	FRMD5	FERM domain containing 5
hsa-miR-133a	0	0	1	1	1	1	RGS3	regulator of G-protein signaling 3
hsa-miR-133a	0	0	1	1	1	1	C2orf91	chromosome 2 open reading frame 91
hsa-miR-133a	1	0	1	1	1	1	METAP2	methionyl aminopeptidase 2
hsa-miR-133a	1	0	1	1	0	0	DYDC1	DPY30 domain containing 1
hsa-miR-133a	1	0	1	1	1	1	CSRNP3	cysteine-serine-rich nuclear protein 3
hsa-miR-133a	1	0	1	1	1	1	DLG2	discs, large homolog 2 (Drosophila)
hsa-miR-133a	1	0	1	1	1	1	MFSD6	major facilitator superfamily domain containing 6
hsa-miR-133a	0	0	1	1	1	1	DOCK9	dedicator of cytokinesis 9
hsa-miR-133a	1	0	1	0	1	1	N4BP3	NEDD4 binding protein 3
hsa-miR-133a	0	0	1	1	1	1	SLC35F2	solute carrier family 35, member F2
hsa-miR-133a	0	0	1	0	0	0	FAM205B	transmembrane protein C9orf144B pseudogene
hsa-miR-133a	0	0	1	1	1	1	ZNF662	zinc finger protein 662
hsa-miR-133a	0	0	1	1	0	0	IQCF2	IQ motif containing F2
hsa-miR-133a	0	0	1	0	0	0	FLJ26245	uncharacterized LOC400533
hsa-miR-133a	1	0	1	1	1	1	CD200	CD200 molecule
hsa-miR-133a	0	0	1	1	1	1	MRPL49	mitochondrial ribosomal protein L49
hsa-miR-133a	1	0	1	0	1	1	GPC6	glypican 6
hsa-miR-133a	0	0	1	0	1	1	KIF1A	kinesin family member 1A
hsa-miR-133a	0	0	1	0	0	0	FAM27A	family with sequence similarity 27, member A
hsa-miR-133a	0	0	1	1	0	0	CYP4X1	cytochrome P450, family 4, subfamily X, polypeptide 1
hsa-miR-133a	1	0	1	0	1	1	STK3	serine/threonine kinase 3
hsa-miR-133a	1	0	1	1	1	1	RABGAP1	RAB GTPase activating protein 1
hsa-miR-133a	0	0	1	1	1	1	ZNF346	zinc finger protein 346
hsa-miR-133a	0	0	1	1	0	0	FIZ1	FLT3-interacting zinc finger 1
hsa-miR-133a	1	0	1	1	0	0	ATP13A3	ATPase type 13A3
hsa-miR-133a	1	0	1	1	1	1	AHCYL1	adenosylhomocysteinase-like 1
hsa-miR-133a	0	0	1	1	1	1	PTPN20B	protein tyrosine phosphatase, non-receptor type 20B
hsa-miR-133a	0	0	1	1	1	1	PTPN20A	protein tyrosine phosphatase, non-receptor type 20A
hsa-miR-133a	0	0	1	1	0	0	MSH5	mutS homolog 5 (E. coli)
hsa-miR-133a	0	0	1	1	0	0	SAPCD1	suppressor APC domain containing 1
hsa-miR-133a	1	0	1	1	1	1	SMAP2	small ArfGAP2
hsa-miR-133a	0	0	1	1	1	1	STAG3L1	stromal antigen 3-like 1
hsa-miR-133a	0	0	1	1	0	0	DNAI2	dynein, axonemal, intermediate chain 2
hsa-miR-133a	1	0	1	1	1	1	EZR	ezrin
hsa-miR-133a	1	0	1	1	1	1	CTTNBP2NL	CTTNBP2 N-terminal like
hsa-miR-133a	0	0	1	1	1	1	ARL13B	ADP-ribosylation factor-like 13B
hsa-miR-133a	1	0	1	1	1	1	YTHDF3	YTH domain family, member 3
hsa-miR-133a	1	0	1	0	0	0	SYNPO	synaptopodin
hsa-miR-133a	1	0	1	1	1	1	DENND1B	DENN/MADD domain containing 1B
hsa-miR-133a	0	0	1	1	0	0	KRBA1	KRAB-A domain containing 1
hsa-miR-133a	0	0	1	0	0	0	ZNF720	zinc finger protein 720
hsa-miR-133a	1	0	1	0	1	1	HNRNPA3	heterogeneous nuclear ribonucleoprotein A3
hsa-miR-133a	1	0	1	1	1	1	CEP164	centrosomal protein 164kDa
hsa-miR-133a	1	0	1	1	1	1	ZNF207	zinc finger protein 207
hsa-miR-133a	1	0	1	0	1	1	KIF21B	kinesin family member 21B
hsa-miR-133a	1	0	1	0	1	1	NR3C1	nuclear receptor subfamily 3, group C, member 1 (glucocorticoid receptor)
hsa-miR-133a	1	0	1	1	1	1	RNF38	ring finger protein 38
hsa-miR-133a	1	0	1	1	1	1	SULF1	sulfatase 1
hsa-miR-133a	0	0	1	1	0	0	CMTM1	CKLF-like MARVEL transmembrane domain containing 1
hsa-miR-133a	0	0	1	1	0	0	DNAH1	dynein, axonemal, heavy chain 1
hsa-miR-133a	0	0	1	1	1	1	PINX1	PIN2/TERF1 interacting, telomerase inhibitor 1
hsa-miR-133a	1	0	1	1	1	1	RAI14	retinoic acid induced 14
hsa-miR-133a	0	0	1	1	1	1	GON4L	gon-4-like (C. elegans)
hsa-miR-133a	0	0	1	1	1	1	NYAP1	neuronal tyrosine-phosphorylated phosphoinositide-3-kinase adaptor 1
hsa-miR-133a	0	0	1	1	1	1	RPTN	repetin
hsa-miR-133a	0	0	1	1	0	0	ESRRB	estrogen-related receptor beta
hsa-miR-133a	0	0	1	1	1	1	EHBP1	EH domain binding protein 1
hsa-miR-133a	0	0	1	1	1	1	NR1I3	nuclear receptor subfamily 1, group I, member 3
hsa-miR-133a	0	0	1	1	1	1	KANK2	KN motif and ankyrin repeat domains 2
hsa-miR-133a	1	0	1	1	1	1	NTNG1	netrin G1
hsa-miR-133a	0	0	1	1	0	0	NBPF8	neuroblastoma breakpoint family, member 8
hsa-miR-133a	0	0	1	0	0	0	KIAA0664L3	KIAA0664-like 3
hsa-miR-133a	0	0	1	1	1	1	SLC6A2	solute carrier family 6 (neurotransmitter transporter, noradrenalin), member 2
hsa-miR-133a	0	0	1	1	1	1	PAFAH1B2	platelet-activating factor acetylhydrolase 1b, catalytic subunit 2 (30kDa)
hsa-miR-133a	0	0	1	1	1	1	B4GALT2	UDP-Gal:betaGlcNAc beta 1,4- galactosyltransferase, polypeptide 2
hsa-miR-133a	1	0	1	1	0	0	STX1A	syntaxin 1A (brain)
hsa-miR-133a	1	0	1	0	0	0	VGLL4	vestigial like 4 (Drosophila)
hsa-miR-133a	0	0	1	1	0	0	HEXIM2	hexamethylene bis-acetamide inducible 2
hsa-miR-133a	1	0	1	1	0	0	DHDDS	dehydrodolichyl diphosphate synthase
hsa-miR-133a	1	0	1	0	0	0	TGFA	transforming growth factor, alpha
hsa-miR-133a	0	0	1	1	1	1	PDXK	pyridoxal (pyridoxine, vitamin B6) kinase
hsa-miR-133a	0	0	1	0	0	0	LINC00467	long intergenic non-protein coding RNA 467
hsa-miR-133a	1	0	1	1	0	0	MARCH9	membrane-associated ring finger (C3HC4) 9
hsa-miR-133a	0	0	1	1	0	0	ARHGAP8	Rho GTPase activating protein 8
hsa-miR-133a	0	0	1	1	1	1	HDHD2	haloacid dehalogenase-like hydrolase domain containing 2
hsa-miR-133a	1	0	1	1	1	1	DCAF8	DDB1 and CUL4 associated factor 8
hsa-miR-133a	0	0	1	1	1	1	KLHL29	kelch-like 29 (Drosophila)
hsa-miR-133a	0	0	1	1	1	1	KEAP1	kelch-like ECH-associated protein 1
hsa-miR-133a	1	0	1	1	1	1	ETF1	eukaryotic translation termination factor 1
hsa-miR-133a	0	0	1	0	1	1	ZNF37A	zinc finger protein 37A
hsa-miR-133a	0	0	1	1	0	0	ZBTB32	zinc finger and BTB domain containing 32
hsa-miR-133a	0	0	1	1	1	1	PTPN22	protein tyrosine phosphatase, non-receptor type 22 (lymphoid)
hsa-miR-133a	0	0	1	1	1	1	GLIPR2	GLI pathogenesis-related 2
hsa-miR-133a	1	0	1	1	1	1	ARHGEF9	Cdc42 guanine nucleotide exchange factor (GEF) 9
hsa-miR-133a	0	0	1	0	0	0	WDFY3-AS2	WDFY3 antisense RNA 2
hsa-miR-133a	0	0	1	1	1	1	HLA-G	major histocompatibility complex, class I, G
hsa-miR-133a	0	0	1	0	0	0	ENTPD5	ectonucleoside triphosphate diphosphohydrolase 5
hsa-miR-133a	1	0	1	1	1	1	TM9SF4	transmembrane 9 superfamily protein member 4
hsa-miR-133a	0	0	1	0	0	0	FAM92A1P2	family with sequence similarity 92, member A3
hsa-miR-133a	1	0	1	1	1	1	BEND6	BEN domain containing 6
hsa-miR-133a	0	0	1	1	0	0	GLS2	glutaminase 2 (liver, mitochondrial)
hsa-miR-133a	0	0	1	1	1	1	DSN1	DSN1, MIND kinetochore complex component, homolog (S. cerevisiae)
hsa-miR-133a	0	0	1	0	1	1	FHAD1	forkhead-associated (FHA) phosphopeptide binding domain 1
hsa-miR-133a	0	0	1	0	0	0	TRGV7	T cell receptor gamma variable 7 (pseudogene)
hsa-miR-133a	0	0	1	1	1	1	SELP	selectin P (granule membrane protein 140kDa, antigen CD62)
hsa-miR-133a	1	0	1	1	1	1	HTR2C	5-hydroxytryptamine (serotonin) receptor 2C, G protein-coupled
hsa-miR-133a	1	0	1	1	1	1	GIGYF2	GRB10 interacting GYF protein 2
hsa-miR-133a	1	0	1	0	1	1	SV2B	synaptic vesicle glycoprotein 2B
hsa-miR-133a	0	0	1	1	1	1	PIP5K1B	phosphatidylinositol-4-phosphate 5-kinase, type I, beta
hsa-miR-133a	0	0	1	1	0	0	AHSA2	AHA1, activator of heat shock 90kDa protein ATPase homolog 2 (yeast)
hsa-miR-133a	0	0	1	0	0	0	CFL1P1	cofilin 1 (non-muscle) pseudogene 1
hsa-miR-133a	0	0	1	0	1	1	PLEKHM1P	pleckstrin homology domain containing, family M (with RUN domain) member 1 pseudogene
hsa-miR-133a	1	0	1	1	1	1	CCNG2	cyclin G2
hsa-miR-133a	1	0	1	0	1	1	LYPD6	LY6/PLAUR domain containing 6
hsa-miR-133a	1	0	1	1	1	1	SORL1	sortilin-related receptor, L(DLR class) A repeats containing
hsa-miR-133a	1	0	1	0	1	1	KCTD2	potassium channel tetramerisation domain containing 2
hsa-miR-133a	1	0	1	1	1	1	FAM189B	family with sequence similarity 189, member B
hsa-miR-133a	1	0	1	1	1	1	RIC8B	resistance to inhibitors of cholinesterase 8 homolog B (C. elegans)
hsa-miR-133a	0	0	1	1	1	1	ZNF337	zinc finger protein 337
hsa-miR-133a	0	0	1	1	1	1	UBE3D	ubiquitin protein ligase E3D
hsa-miR-133a	1	0	1	1	0	0	RASGEF1B	RasGEF domain family, member 1B
hsa-miR-133a	1	0	1	1	1	1	DPP10	dipeptidyl-peptidase 10 (non-functional)
hsa-miR-133a	0	0	1	0	0	0	FLJ36000	uncharacterized FLJ36000
hsa-miR-133a	0	0	1	0	0	0	LOC339622	uncharacterized LOC339622
hsa-miR-133a	0	0	1	0	1	1	TSLP	thymic stromal lymphopoietin
hsa-miR-133a	1	0	1	0	1	1	HSPA12A	heat shock 70kDa protein 12A
hsa-miR-133a	0	0	1	0	0	0	LRRC37BP1	leucine rich repeat containing 37B pseudogene 1
hsa-miR-133a	1	0	1	1	1	1	FKBP5	FK506 binding protein 5
hsa-miR-133a	1	0	1	1	1	1	ARHGAP30	Rho GTPase activating protein 30
hsa-miR-133a	0	0	1	1	1	1	C14orf45	chromosome 14 open reading frame 45
hsa-miR-133a	0	0	1	0	0	0	LOC283914	uncharacterized LOC283914
hsa-miR-133a	1	0	1	1	1	1	SENP1	SUMO1/sentrin specific peptidase 1
hsa-miR-133a	1	0	1	1	1	1	WSB1	WD repeat and SOCS box containing 1
hsa-miR-133a	0	0	1	1	0	0	ENTPD8	ectonucleoside triphosphate diphosphohydrolase 8
hsa-miR-133a	1	0	1	1	1	1	FNDC3A	fibronectin type III domain containing 3A
hsa-miR-133a	1	0	1	1	1	1	SCUBE3	signal peptide, CUB domain, EGF-like 3
hsa-miR-133a	0	0	1	0	0	0	ADAM5	ADAM metallopeptidase domain 5, pseudogene
hsa-miR-133a	1	0	1	1	1	1	KLHL28	kelch-like 28 (Drosophila)
hsa-miR-133a	0	0	1	1	1	1	ZNF365	zinc finger protein 365
hsa-miR-133a	1	0	1	1	1	1	ZEB2	zinc finger E-box binding homeobox 2
hsa-miR-133a	1	0	1	1	1	1	ZSCAN29	zinc finger and SCAN domain containing 29
hsa-miR-133a	1	0	1	1	1	1	MTMR10	myotubularin related protein 10
hsa-miR-133a	0	0	1	0	0	0	SCAND2	SCAN domain containing 2 pseudogene
hsa-miR-133a	0	0	1	1	0	0	ADORA3	adenosine A3 receptor
hsa-miR-133a	1	0	1	1	1	1	GANAB	glucosidase, alpha; neutral AB
hsa-miR-133a	1	0	1	1	1	1	SOCS2	suppressor of cytokine signaling 2
hsa-miR-133a	1	0	1	1	1	1	LRRC32	leucine rich repeat containing 32
hsa-miR-133a	0	0	1	1	0	0	NDUFAF2	NADH dehydrogenase (ubiquinone) complex I, assembly factor 2
hsa-miR-133a	0	0	1	1	1	1	TNFSF12	tumor necrosis factor (ligand) superfamily, member 12
hsa-miR-133a	0	0	1	1	1	1	GNG10	guanine nucleotide binding protein (G protein), gamma 10
hsa-miR-133a	1	0	1	0	1	1	MEST	mesoderm specific transcript homolog (mouse)
hsa-miR-133a	0	0	1	1	1	1	C1orf141	chromosome 1 open reading frame 141
hsa-miR-133a	0	0	1	0	0	0	FRG1B	FSHD region gene 1 family, member B
hsa-miR-133a	0	0	1	1	1	1	SPRR2A	small proline-rich protein 2A
hsa-miR-133a	1	0	1	1	1	1	ST8SIA2	ST8 alpha-N-acetyl-neuraminide alpha-2,8-sialyltransferase 2
hsa-miR-133a	0	0	1	1	0	0	NUBP1	nucleotide binding protein 1
hsa-miR-133a	0	0	1	1	0	0	SEC14L3	SEC14-like 3 (S. cerevisiae)
hsa-miR-133a	1	0	1	1	1	1	KLHL17	kelch-like 17 (Drosophila)
hsa-miR-133a	1	0	1	1	1	1	LARP1B	La ribonucleoprotein domain family, member 1B
hsa-miR-133a	0	0	1	0	0	0	LRRC37A11P	leucine rich repeat containing 37, member A11, pseudogene
hsa-miR-133a	1	0	1	1	1	1	TMEM64	transmembrane protein 64
hsa-miR-133a	1	0	1	1	1	1	RFXANK	regulatory factor X-associated ankyrin-containing protein
hsa-miR-133a	0	0	1	1	0	0	RGS9	regulator of G-protein signaling 9
hsa-miR-133a	0	0	1	0	0	0	CCT6P1	chaperonin containing TCP1, subunit 6 (zeta) pseudogene 1
hsa-miR-133a	0	0	1	1	1	1	TPRN	taperin
hsa-miR-133a	0	0	1	1	0	0	HSF4	heat shock transcription factor 4
hsa-miR-133a	1	0	1	1	1	1	MTFR1	mitochondrial fission regulator 1
hsa-miR-133a	1	0	1	1	1	1	ETS1	v-ets erythroblastosis virus E26 oncogene homolog 1 (avian)
hsa-miR-133a	1	0	1	1	0	0	CCDC30	coiled-coil domain containing 30
hsa-miR-133a	0	0	1	1	1	1	THSD4	thrombospondin, type I, domain containing 4
hsa-miR-133a	0	0	1	1	1	1	COL6A3	collagen, type VI, alpha 3
hsa-miR-133a	1	0	1	1	1	1	NAV1	neuron navigator 1
hsa-miR-133a	0	0	1	1	1	1	RBM20	RNA binding motif protein 20
hsa-miR-133a	1	0	1	1	1	1	TMEM135	transmembrane protein 135
hsa-miR-133a	1	0	1	1	1	1	CALD1	caldesmon 1
hsa-miR-133a	0	0	1	1	1	1	SSFA2	sperm specific antigen 2
hsa-miR-133a	1	0	1	0	1	1	TBL1XR1	transducin (beta)-like 1 X-linked receptor 1
hsa-miR-133a	0	0	1	1	1	1	HPGD	hydroxyprostaglandin dehydrogenase 15-(NAD)
hsa-miR-133a	0	0	1	1	0	0	H2AFY2	H2A histone family, member Y2
hsa-miR-133a	0	0	1	1	0	0	CHCHD3	coiled-coil-helix-coiled-coil-helix domain containing 3
hsa-miR-133a	0	0	1	1	0	0	EMX1	empty spiracles homeobox 1
hsa-miR-133a	1	0	1	1	1	1	PCGF2	polycomb group ring finger 2
hsa-miR-133a	1	0	1	1	1	1	TARBP2	TAR (HIV-1) RNA binding protein 2
hsa-miR-133a	0	0	1	1	1	1	IER3	immediate early response 3
hsa-miR-133a	1	0	1	1	1	1	NME4	NME/NM23 nucleoside diphosphate kinase 4
hsa-miR-133a	1	1	1	1	0	0	EFNA3	ephrin-A3
hsa-miR-133a	0	0	1	1	0	0	CCNDBP1	cyclin D-type binding-protein 1
hsa-miR-133a	1	0	1	0	1	1	BNIP3L	BCL2/adenovirus E1B 19kDa interacting protein 3-like
hsa-miR-133a	1	0	1	1	0	0	ELOVL1	ELOVL fatty acid elongase 1
hsa-miR-133a	0	0	1	1	0	0	NGDN	neuroguidin, EIF4E binding protein
hsa-miR-133a	0	0	1	1	0	0	MYL6	myosin, light chain 6, alkali, smooth muscle and non-muscle
hsa-miR-133a	1	0	1	1	1	1	CHTF8	CTF8, chromosome transmission fidelity factor 8 homolog (S. cerevisiae)
hsa-miR-133a	0	0	1	1	1	1	PLAUR	plasminogen activator, urokinase receptor
hsa-miR-133a	0	0	1	0	0	0	TRIQK	triple QxxK/R motif containing
hsa-miR-133a	0	0	1	1	1	1	GGPS1	geranylgeranyl diphosphate synthase 1
hsa-miR-133a	0	0	1	1	1	1	ELP5	elongator acetyltransferase complex subunit 5
hsa-miR-133a	0	0	1	1	1	1	STON1	stonin 1
hsa-miR-133a	1	0	1	1	1	1	POU2F2	POU class 2 homeobox 2
hsa-miR-133a	0	0	1	0	0	0	LOC729678	uncharacterized LOC729678
hsa-miR-133a	0	0	1	1	0	0	STK19	serine/threonine kinase 19
hsa-miR-133a	0	0	1	0	0	0	LOC150568	uncharacterized LOC150568
hsa-miR-133a	0	0	1	1	0	0	PTGDS	prostaglandin D2 synthase 21kDa (brain)
hsa-miR-133a	0	0	1	1	0	0	CCDC22	coiled-coil domain containing 22
hsa-miR-133a	0	0	1	1	0	0	C1orf122	chromosome 1 open reading frame 122
hsa-miR-133a	1	0	1	1	1	1	ARNTL	aryl hydrocarbon receptor nuclear translocator-like
hsa-miR-133a	0	0	1	1	1	1	ODC1	ornithine decarboxylase 1
hsa-miR-133a	0	0	1	1	1	1	CD1C	CD1c molecule
hsa-miR-133a	1	0	1	1	1	1	PDCL	phosducin-like
hsa-miR-133a	0	0	1	1	0	0	FAM216A	family with sequence similarity 216, member A
hsa-miR-133a	0	0	1	1	0	0	TTYH1	tweety homolog 1 (Drosophila)
hsa-miR-133a	0	0	1	1	1	1	PCNP	PEST proteolytic signal containing nuclear protein
hsa-miR-133a	0	0	1	1	1	1	MRPL42	mitochondrial ribosomal protein L42
hsa-miR-133a	0	0	1	0	0	0	LINC00661	long intergenic non-protein coding RNA 661
hsa-miR-133a	1	0	1	1	1	1	KIAA2018	KIAA2018
hsa-miR-133a	1	0	1	1	1	1	SLC39A10	solute carrier family 39 (zinc transporter), member 10
hsa-miR-133a	1	0	1	1	1	1	ADD1	adducin 1 (alpha)
hsa-miR-133a	1	0	1	1	1	1	PHF21B	PHD finger protein 21B
hsa-miR-133a	1	0	1	1	1	1	MAN2A2	mannosidase, alpha, class 2A, member 2
hsa-miR-133a	1	0	1	1	1	1	RSPO1	R-spondin 1
hsa-miR-133a	1	0	1	1	1	1	ATP2B3	ATPase, Ca++ transporting, plasma membrane 3
hsa-miR-133a	0	0	1	0	0	0	LOC728377	Rho guanine nucleotide exchange factor (GEF) 5 pseudogene
hsa-miR-133a	0	0	1	1	0	0	SLCO3A1	solute carrier organic anion transporter family, member 3A1
hsa-miR-133a	0	0	1	1	1	1	ADPRH	ADP-ribosylarginine hydrolase
hsa-miR-133a	0	0	1	1	1	1	RFC1	replication factor C (activator 1) 1, 145kDa
hsa-miR-133a	0	0	1	0	0	0	CTSL1P2	cathepsin L1 pseudogene 2
hsa-miR-133a	0	0	1	0	0	0	CTSL1P8	cathepsin L1 pseudogene 8
hsa-miR-133a	0	0	1	1	0	0	CD40LG	CD40 ligand
hsa-miR-133a	0	0	1	1	0	0	EMD	emerin
hsa-miR-133a	1	0	1	0	1	1	GLI3	GLI family zinc finger 3
hsa-miR-133a	0	0	1	1	1	1	LPL	lipoprotein lipase
hsa-miR-133a	1	0	1	1	1	1	MET	met proto-oncogene (hepatocyte growth factor receptor)
hsa-miR-133a	1	0	1	1	1	1	OCRL	oculocerebrorenal syndrome of Lowe
hsa-miR-133a	1	0	1	1	1	1	MPZ	myelin protein zero
hsa-miR-133a	1	0	1	1	1	1	PLP1	proteolipid protein 1
hsa-miR-133a	1	0	1	1	1	1	CXCL12	chemokine (C-X-C motif) ligand 12
hsa-miR-133a	1	0	1	1	1	1	ADRA1A	adrenoceptor alpha 1A
hsa-miR-133a	1	0	1	0	1	1	ADRB1	adrenoceptor beta 1
hsa-miR-133a	0	0	1	1	1	1	ALDH1B1	aldehyde dehydrogenase 1 family, member B1
hsa-miR-133a	1	0	1	1	1	1	CSF1	colony stimulating factor 1 (macrophage)
hsa-miR-133a	1	0	1	0	0	0	CSF2	colony stimulating factor 2 (granulocyte-macrophage)
hsa-miR-133a	1	0	1	1	1	1	DIO2	deiodinase, iodothyronine, type II
hsa-miR-133a	1	0	1	1	1	1	GABRB3	gamma-aminobutyric acid (GABA) A receptor, beta 3
hsa-miR-133a	0	0	1	1	1	1	HTR1D	5-hydroxytryptamine (serotonin) receptor 1D, G protein-coupled
hsa-miR-133a	1	0	1	1	1	1	RORC	RAR-related orphan receptor C
hsa-miR-133a	1	0	1	1	1	1	MIR22HG	MIR22 host gene (non-protein coding)
hsa-miR-133a	0	0	1	0	0	0	KLK2	kallikrein-related peptidase 2
hsa-miR-133a	1	0	1	1	1	1	LEPR	leptin receptor
hsa-miR-133a	1	0	1	1	1	1	BICD2	bicaudal D homolog 2 (Drosophila)
hsa-miR-133a	0	0	1	1	1	1	DBX2	developing brain homeobox 2
hsa-miR-133a	0	0	1	0	1	1	FLJ16124	FLJ16124 protein
hsa-miR-133a	0	0	1	1	1	1	SUMO1	SMT3 suppressor of mif two 3 homolog 1 (S. cerevisiae)
hsa-miR-133a	1	0	1	0	1	1	IP6K1	inositol hexakisphosphate kinase 1
hsa-miR-133a	0	0	1	0	1	1	WDR35	WD repeat domain 35
hsa-miR-133a	0	0	1	1	1	1	TCEAL6	transcription elongation factor A (SII)-like 6
hsa-miR-133a	0	0	1	1	1	1	SCP2	sterol carrier protein 2
hsa-miR-133a	1	0	1	1	1	1	NTRK3	neurotrophic tyrosine kinase, receptor, type 3
hsa-miR-133a	0	0	1	1	1	1	MXI1	MAX interactor 1
hsa-miR-133a	0	0	1	1	0	0	TCOF1	Treacher Collins-Franceschetti syndrome 1
hsa-miR-133a	0	0	1	1	1	1	SPIN3	spindlin family, member 3
hsa-miR-133a	0	0	1	1	1	1	C9orf152	chromosome 9 open reading frame 152
hsa-miR-133a	0	0	1	1	1	1	CCNC	cyclin C
hsa-miR-133a	0	0	1	1	1	1	C1orf192	chromosome 1 open reading frame 192
hsa-miR-133a	0	0	1	1	1	1	POLR2M	polymerase (RNA) II (DNA directed) polypeptide M
hsa-miR-133a	1	0	1	1	1	1	SBK1	SH3-binding domain kinase 1
hsa-miR-133a	0	0	1	1	0	0	ARPC4	actin related protein 2/3 complex, subunit 4, 20kDa
hsa-miR-133a	1	0	1	0	1	1	CLLU1	chronic lymphocytic leukemia up-regulated 1
hsa-miR-133a	1	0	1	1	1	1	KCTD21	potassium channel tetramerisation domain containing 21
hsa-miR-133a	0	0	1	1	0	0	KLK3	kallikrein-related peptidase 3
hsa-miR-133a	1	0	1	0	1	1	CYB5RL	cytochrome b5 reductase-like
hsa-miR-133a	0	0	1	0	1	1	STXBP1	syntaxin binding protein 1
hsa-miR-133a	0	0	1	1	1	1	FAIM	Fas apoptotic inhibitory molecule
hsa-miR-133a	1	0	1	1	1	1	AMD1	adenosylmethionine decarboxylase 1
hsa-miR-133a	1	0	1	1	1	1	MYCL1	v-myc myelocytomatosis viral oncogene homolog 1, lung carcinoma derived (avian)
hsa-miR-133a	0	0	1	1	1	1	KCNIP1	Kv channel interacting protein 1
hsa-miR-133a	0	0	1	1	0	0	AGBL5	ATP/GTP binding protein-like 5
hsa-miR-133a	1	0	1	1	1	1	RUFY3	RUN and FYVE domain containing 3
hsa-miR-133a	0	0	1	1	1	1	EFEMP1	EGF containing fibulin-like extracellular matrix protein 1
hsa-miR-133a	0	0	1	1	0	0	ANGPTL4	angiopoietin-like 4
hsa-miR-133a	1	0	1	1	1	1	CBLN3	cerebellin 3 precursor
hsa-miR-133a	1	0	1	1	1	1	C3orf65	chromosome 3 open reading frame 65
hsa-miR-133a	0	0	1	0	1	1	SCN3B	sodium channel, voltage-gated, type III, beta subunit
hsa-miR-133a	1	0	1	1	1	1	HMGCLL1	3-hydroxymethyl-3-methylglutaryl-CoA lyase-like 1
hsa-miR-133a	1	0	1	1	1	1	CEP85L	centrosomal protein 85kDa-like
hsa-miR-133a	0	0	1	1	1	1	SMC2	structural maintenance of chromosomes 2
hsa-miR-133a	1	0	1	1	1	1	FRS2	fibroblast growth factor receptor substrate 2
hsa-miR-133a	1	0	1	1	1	1	KDM5A	lysine (K)-specific demethylase 5A
hsa-miR-133a	1	0	1	0	1	1	SLC12A2	solute carrier family 12 (sodium/potassium/chloride transporters), member 2
hsa-miR-133a	0	0	1	0	1	1	WTH3DI	RAB6C-like
hsa-miR-133a	1	0	1	1	1	1	SRSF1	serine/arginine-rich splicing factor 1
hsa-miR-133a	0	0	1	1	0	0	ARHGAP9	Rho GTPase activating protein 9
hsa-miR-133a	1	0	1	1	1	1	SHANK3	SH3 and multiple ankyrin repeat domains 3
hsa-miR-133a	1	0	1	1	1	1	DGKG	diacylglycerol kinase, gamma 90kDa
hsa-miR-133a	0	0	1	1	0	0	CSAG2	CSAG family, member 2
hsa-miR-133a	1	0	1	1	0	0	ASIC2	acid-sensing (proton-gated) ion channel 2
hsa-miR-133a	0	0	1	0	1	1	CAV2	caveolin 2
hsa-miR-133a	1	0	1	0	1	1	CPD	carboxypeptidase D
hsa-miR-133a	1	0	1	1	1	1	MAPK14	mitogen-activated protein kinase 14
hsa-miR-133a	1	0	1	1	1	1	DYRK1A	dual-specificity tyrosine-(Y)-phosphorylation regulated kinase 1A
hsa-miR-133a	1	0	1	0	1	1	EFNB3	ephrin-B3
hsa-miR-133a	0	0	1	1	0	0	GCKR	glucokinase (hexokinase 4) regulator
hsa-miR-133a	0	0	1	0	1	1	ACADSB	acyl-CoA dehydrogenase, short/branched chain
hsa-miR-133a	1	0	1	1	1	1	ADD2	adducin 2 (beta)
hsa-miR-133a	1	0	1	1	1	1	ARF3	ADP-ribosylation factor 3
hsa-miR-133a	0	0	1	1	0	0	CD33	CD33 molecule
hsa-miR-133a	1	0	1	1	1	1	CENPB	centromere protein B, 80kDa
hsa-miR-133a	0	0	1	1	1	1	CTH	cystathionase (cystathionine gamma-lyase)
hsa-miR-133a	1	0	1	1	1	1	E2F3	E2F transcription factor 3
hsa-miR-133a	0	0	1	1	1	1	FLI1	Friend leukemia virus integration 1
hsa-miR-133a	1	0	1	1	1	1	ITGA3	integrin, alpha 3 (antigen CD49C, alpha 3 subunit of VLA-3 receptor)
hsa-miR-133a	1	0	1	1	1	1	ITGB8	integrin, beta 8
hsa-miR-133a	1	0	1	1	1	1	KCNA6	potassium voltage-gated channel, shaker-related subfamily, member 6
hsa-miR-133a	0	0	1	1	0	0	MYOG	myogenin (myogenic factor 4)
hsa-miR-133a	1	0	1	1	1	1	NEUROD1	neuronal differentiation 1
hsa-miR-133a	1	0	1	1	1	1	NGFR	nerve growth factor receptor
hsa-miR-133a	1	0	1	1	1	1	NPTX1	neuronal pentraxin I
hsa-miR-133a	1	0	1	1	1	1	NPTX2	neuronal pentraxin II
hsa-miR-133a	1	0	1	1	1	1	PGAM1	phosphoglycerate mutase 1 (brain)
hsa-miR-133a	0	0	1	0	0	0	PSMB10	proteasome (prosome, macropain) subunit, beta type, 10
hsa-miR-133a	0	0	1	1	0	0	PTPRH	protein tyrosine phosphatase, receptor type, H
hsa-miR-133a	1	0	1	0	1	1	RAB6A	RAB6A, member RAS oncogene family
hsa-miR-133a	0	0	1	1	1	1	RFC3	replication factor C (activator 1) 3, 38kDa
hsa-miR-133a	1	0	1	1	1	1	ROBO2	roundabout, axon guidance receptor, homolog 2 (Drosophila)
hsa-miR-133a	1	0	1	0	1	1	CCL22	chemokine (C-C motif) ligand 22
hsa-miR-133a	1	0	1	1	1	1	SH3GL2	SH3-domain GRB2-like 2
hsa-miR-133a	0	0	1	1	1	1	SQLE	squalene epoxidase
hsa-miR-133a	1	0	1	0	1	1	STC1	stanniocalcin 1
hsa-miR-133a	1	0	1	1	1	1	TFAP2B	transcription factor AP-2 beta (activating enhancer binding protein 2 beta)
hsa-miR-133a	0	0	1	1	1	1	SCG2	secretogranin II
hsa-miR-133a	1	0	1	0	1	1	CNTNAP1	contactin associated protein 1
hsa-miR-133a	0	0	1	1	1	1	SLC25A12	solute carrier family 25 (aspartate/glutamate carrier), member 12
hsa-miR-133a	1	0	1	1	1	1	NR5A2	nuclear receptor subfamily 5, group A, member 2
hsa-miR-133a	0	0	1	1	1	1	PRPF4B	PRP4 pre-mRNA processing factor 4 homolog B (yeast)
hsa-miR-133a	1	0	1	0	1	1	SLC1A2	solute carrier family 1 (glial high affinity glutamate transporter), member 2
hsa-miR-133a	1	0	1	1	1	1	DUSP1	dual specificity phosphatase 1
hsa-miR-133a	0	0	1	1	1	1	TK2	thymidine kinase 2, mitochondrial
hsa-miR-133a	1	0	1	1	1	1	ZFYVE9	zinc finger, FYVE domain containing 9
hsa-miR-133a	0	0	1	1	0	0	AIM2	absent in melanoma 2
hsa-miR-133a	1	0	1	1	1	1	ONECUT2	one cut homeobox 2
hsa-miR-133a	1	0	1	1	1	1	FXR2	fragile X mental retardation, autosomal homolog 2
hsa-miR-133a	1	0	1	0	1	1	DOCK3	dedicator of cytokinesis 3
hsa-miR-133a	1	0	1	1	1	1	ATXN3	ataxin 3
hsa-miR-133a	0	0	1	1	1	1	PRCP	prolylcarboxypeptidase (angiotensinase C)
hsa-miR-133a	1	0	1	1	1	1	TLE1	transducin-like enhancer of split 1 (E(sp1) homolog, Drosophila)
hsa-miR-133a	0	0	1	1	1	1	XYLB	xylulokinase homolog (H. influenzae)
hsa-miR-133a	1	0	1	1	1	1	CBL	Cbl proto-oncogene, E3 ubiquitin protein ligase
hsa-miR-133a	1	0	1	1	1	1	DLX3	distal-less homeobox 3
hsa-miR-133a	1	0	1	1	1	1	ARID3A	AT rich interactive domain 3A (BRIGHT-like)
hsa-miR-133a	1	0	1	0	1	1	E2F1	E2F transcription factor 1
hsa-miR-133a	1	0	1	1	1	1	FOXL1	forkhead box L1
hsa-miR-133a	1	0	1	1	1	1	GEM	GTP binding protein overexpressed in skeletal muscle
hsa-miR-133a	1	0	1	1	0	0	NNAT	neuronatin
hsa-miR-133a	1	0	1	1	1	1	PIGK	phosphatidylinositol glycan anchor biosynthesis, class K
hsa-miR-133a	0	0	1	1	1	1	SLC35A2	solute carrier family 35 (UDP-galactose transporter), member A2
hsa-miR-133a	0	0	1	1	1	1	ZNF263	zinc finger protein 263
hsa-miR-133a	0	0	1	0	1	1	CD96	CD96 molecule
hsa-miR-133a	0	0	1	0	1	1	HCAR3	hydroxycarboxylic acid receptor 3
hsa-miR-133a	0	0	1	1	1	1	TRDN	triadin
hsa-miR-133a	1	0	1	1	1	1	DAGLA	diacylglycerol lipase, alpha
hsa-miR-133a	1	0	1	1	1	1	STK4	serine/threonine kinase 4
hsa-miR-133a	0	0	1	0	1	1	SLC16A2	solute carrier family 16, member 2 (thyroid hormone transporter)
hsa-miR-133a	1	0	1	1	1	1	MMP24	matrix metallopeptidase 24 (membrane-inserted)
hsa-miR-133a	1	0	1	1	0	0	PSKH1	protein serine kinase H1
hsa-miR-133a	1	0	1	1	1	1	SF3A3	splicing factor 3a, subunit 3, 60kDa
hsa-miR-133a	1	0	1	1	1	1	CD86	CD86 molecule
hsa-miR-133a	0	0	1	1	1	1	HOXD3	homeobox D3
hsa-miR-133a	1	0	1	1	1	1	ABCF2	ATP-binding cassette, sub-family F (GCN20), member 2
hsa-miR-133a	0	0	1	1	0	0	GABARAP	GABA(A) receptor-associated protein
hsa-miR-133a	1	0	1	1	1	1	ZNF236	zinc finger protein 236
hsa-miR-133a	0	0	1	0	1	1	AP4E1	adaptor-related protein complex 4, epsilon 1 subunit
hsa-miR-133a	0	0	1	1	1	1	KLRK1	killer cell lectin-like receptor subfamily K, member 1
hsa-miR-133a	0	0	1	1	1	1	SEPHS2	selenophosphate synthetase 2
hsa-miR-133a	1	0	1	1	1	1	KCND2	potassium voltage-gated channel, Shal-related subfamily, member 2
hsa-miR-133a	0	0	1	1	0	0	PFDN2	prefoldin subunit 2
hsa-miR-133a	1	0	1	1	1	1	TLL2	tolloid-like 2
hsa-miR-133a	1	0	1	0	1	1	RBM15B	RNA binding motif protein 15B
hsa-miR-133a	0	0	1	1	1	1	SERTAD1	SERTA domain containing 1
hsa-miR-133a	0	0	1	1	1	1	UBQLN1	ubiquilin 1
hsa-miR-133a	1	0	1	1	1	1	NRG1	neuregulin 1
hsa-miR-133a	1	0	1	1	1	1	SOCS5	suppressor of cytokine signaling 5
hsa-miR-133a	0	0	1	1	1	1	DAPK2	death-associated protein kinase 2
hsa-miR-133a	1	0	1	0	1	1	DIEXF	digestive organ expansion factor homolog (zebrafish)
hsa-miR-133a	0	0	1	1	1	1	EHD2	EH-domain containing 2
hsa-miR-133a	1	0	1	0	1	1	SH3PXD2A	SH3 and PX domains 2A
hsa-miR-133a	0	0	1	0	1	1	DHCR24	24-dehydrocholesterol reductase
hsa-miR-133a	1	0	1	1	1	1	MRPL19	mitochondrial ribosomal protein L19
hsa-miR-133a	0	0	1	1	0	0	PCNXL2	pecanex-like 2 (Drosophila)
hsa-miR-133a	1	0	1	0	1	1	GGA2	golgi-associated, gamma adaptin ear containing, ARF binding protein 2
hsa-miR-133a	1	0	1	1	1	1	ERP44	endoplasmic reticulum protein 44
hsa-miR-133a	1	0	1	1	1	1	HECW1	HECT, C2 and WW domain containing E3 ubiquitin protein ligase 1
hsa-miR-133a	1	0	1	1	1	1	RTF1	Rtf1, Paf1/RNA polymerase II complex component, homolog (S. cerevisiae)
hsa-miR-133a	1	0	1	0	1	1	KHNYN	KH and NYN domain containing
hsa-miR-133a	1	0	1	1	1	1	PHF19	PHD finger protein 19
hsa-miR-133a	1	0	1	1	1	1	FAM155B	family with sequence similarity 155, member B
hsa-miR-133a	1	0	1	1	1	1	ST8SIA3	ST8 alpha-N-acetyl-neuraminide alpha-2,8-sialyltransferase 3
hsa-miR-133a	1	0	1	1	0	0	YBX2	Y box binding protein 2
hsa-miR-133a	0	0	1	1	1	1	DYNC1LI1	dynein, cytoplasmic 1, light intermediate chain 1
hsa-miR-133a	0	0	1	0	1	1	IGF2-AS	IGF2 antisense RNA
hsa-miR-133a	1	0	1	0	1	1	RAB8B	RAB8B, member RAS oncogene family
hsa-miR-133a	1	0	1	1	1	1	RAB6B	RAB6B, member RAS oncogene family
hsa-miR-133a	0	0	1	1	1	1	OGG1	8-oxoguanine DNA glycosylase
hsa-miR-133a	1	0	1	0	1	1	KLHL3	kelch-like 3 (Drosophila)
hsa-miR-133a	0	0	1	0	1	1	TRIM44	tripartite motif containing 44
hsa-miR-133a	1	0	1	1	0	0	LAMTOR1	late endosomal/lysosomal adaptor, MAPK and MTOR activator 1
hsa-miR-133a	1	0	1	1	1	1	SAMD4B	sterile alpha motif domain containing 4B
hsa-miR-133a	1	0	1	1	1	1	RPRD1A	regulation of nuclear pre-mRNA domain containing 1A
hsa-miR-133a	0	0	1	0	1	1	TMEM57	transmembrane protein 57
hsa-miR-133a	1	0	1	1	1	1	ZNF654	zinc finger protein 654
hsa-miR-133a	1	0	1	1	1	1	PI4K2B	phosphatidylinositol 4-kinase type 2 beta
hsa-miR-133a	0	0	1	1	1	1	STYK1	serine/threonine/tyrosine kinase 1
hsa-miR-133a	0	0	1	1	1	1	NPAP1	nuclear pore associated protein 1
hsa-miR-133a	1	0	1	1	1	1	SASH3	SAM and SH3 domain containing 3
hsa-miR-133a	1	0	1	1	1	1	DLL4	delta-like 4 (Drosophila)
hsa-miR-133a	1	0	1	1	1	1	PLEKHA3	pleckstrin homology domain containing, family A (phosphoinositide binding specific) member 3
hsa-miR-133a	1	0	1	1	1	1	POLE4	polymerase (DNA-directed), epsilon 4, accessory subunit
hsa-miR-133a	1	0	1	1	1	1	C8orf4	chromosome 8 open reading frame 4
hsa-miR-133a	0	0	1	1	1	1	UBQLN4	ubiquilin 4
hsa-miR-133a	1	0	1	0	1	1	PAPOLB	poly(A) polymerase beta (testis specific)
hsa-miR-133a	1	0	1	0	1	1	OTUD7B	OTU domain containing 7B
hsa-miR-133a	1	0	1	0	1	1	MNT	MAX binding protein
hsa-miR-133a	1	0	1	1	1	1	C1orf63	chromosome 1 open reading frame 63
hsa-miR-133a	0	0	1	1	0	0	ENTPD7	ectonucleoside triphosphate diphosphohydrolase 7
hsa-miR-133a	1	0	1	1	1	1	PITHD1	PITH (C-terminal proteasome-interacting domain of thioredoxin-like) domain containing 1
hsa-miR-133a	0	0	1	1	0	0	GPR84	G protein-coupled receptor 84
hsa-miR-133a	1	0	1	1	0	0	JPH2	junctophilin 2
hsa-miR-133a	0	0	1	1	1	1	SHROOM4	shroom family member 4
hsa-miR-133a	1	0	1	1	1	1	USP31	ubiquitin specific peptidase 31
hsa-miR-133a	1	0	1	0	1	1	ALPK3	alpha-kinase 3
hsa-miR-133a	1	0	1	0	1	1	SYT4	synaptotagmin IV
hsa-miR-133a	1	0	1	1	1	1	HOMEZ	homeobox and leucine zipper encoding
hsa-miR-133a	1	0	1	1	1	1	RANBP10	RAN binding protein 10
hsa-miR-133a	0	0	1	1	1	1	VPS11	vacuolar protein sorting 11 homolog (S. cerevisiae)
hsa-miR-133a	0	0	1	1	1	1	ANKRD5	ankyrin repeat domain 5
hsa-miR-133a	1	0	1	1	1	1	GIGYF1	GRB10 interacting GYF protein 1
hsa-miR-133a	0	0	1	0	1	1	EBF2	early B-cell factor 2
hsa-miR-133a	0	0	1	1	0	0	PLA2G2F	phospholipase A2, group IIF
hsa-miR-133a	0	0	1	1	1	1	METTL4	methyltransferase like 4
hsa-miR-133a	1	0	1	0	1	1	BCL11B	B-cell CLL/lymphoma 11B (zinc finger protein)
hsa-miR-133a	1	0	1	1	1	1	SOWAHC	sosondowah ankyrin repeat domain family member C
hsa-miR-133a	0	0	1	1	1	1	C8orf33	chromosome 8 open reading frame 33
hsa-miR-133a	1	0	1	1	1	1	NKAIN1	Na+/K+ transporting ATPase interacting 1
hsa-miR-133a	1	0	1	1	1	1	GCC1	GRIP and coiled-coil domain containing 1
hsa-miR-133a	1	0	1	0	1	1	ZFHX4	zinc finger homeobox 4
hsa-miR-133a	1	0	1	0	1	1	MOB3B	MOB kinase activator 3B
hsa-miR-133a	1	0	1	1	1	1	SLC35F5	solute carrier family 35, member F5
hsa-miR-133a	1	0	1	1	1	1	CYB5B	cytochrome b5 type B (outer mitochondrial membrane)
hsa-miR-133a	0	0	1	1	1	1	MS4A8B	membrane-spanning 4-domains, subfamily A, member 8B
hsa-miR-133a	0	0	1	0	1	1	RAB6C	RAB6C, member RAS oncogene family
hsa-miR-133a	1	0	1	1	1	1	ZDHHC18	zinc finger, DHHC-type containing 18
hsa-miR-133a	0	0	1	0	1	1	LDOC1L	leucine zipper, down-regulated in cancer 1-like
hsa-miR-133a	1	0	1	0	1	1	PSD2	pleckstrin and Sec7 domain containing 2
hsa-miR-133a	0	0	1	1	0	0	GARNL3	GTPase activating Rap/RanGAP domain-like 3
hsa-miR-133a	1	0	1	1	1	1	CAMKK1	calcium/calmodulin-dependent protein kinase kinase 1, alpha
hsa-miR-133a	0	0	1	1	0	0	NICN1	nicolin 1
hsa-miR-133a	0	0	1	1	0	0	CHCHD6	coiled-coil-helix-coiled-coil-helix domain containing 6
hsa-miR-133a	0	0	1	1	1	1	C5orf4	chromosome 5 open reading frame 4
hsa-miR-133a	1	0	1	1	1	1	TTBK1	tau tubulin kinase 1
hsa-miR-133a	0	0	1	1	1	1	HAVCR2	hepatitis A virus cellular receptor 2
hsa-miR-133a	1	0	1	1	0	0	ORAI1	ORAI calcium release-activated calcium modulator 1
hsa-miR-133a	1	0	1	1	1	1	ARHGEF39	Rho guanine nucleotide exchange factor (GEF) 39
hsa-miR-133a	1	0	1	1	1	1	RAB2B	RAB2B, member RAS oncogene family
hsa-miR-133a	0	0	1	1	0	0	MUC13	mucin 13, cell surface associated
hsa-miR-133a	1	0	1	0	1	1	SCRT2	scratch homolog 2, zinc finger protein (Drosophila)
hsa-miR-133a	1	0	1	1	1	1	RASL10B	RAS-like, family 10, member B
hsa-miR-133a	0	0	1	1	0	0	KCNK7	potassium channel, subfamily K, member 7
hsa-miR-133a	1	0	1	1	1	1	LUZP1	leucine zipper protein 1
hsa-miR-133a	0	0	1	1	1	1	MED8	mediator complex subunit 8
hsa-miR-133a	0	0	1	1	0	0	SIGLEC11	sialic acid binding Ig-like lectin 11
hsa-miR-133a	1	0	1	1	1	1	SEPT4	septin 4
hsa-miR-133a	1	0	1	1	1	1	JDP2	Jun dimerization protein 2
hsa-miR-133a	0	0	1	1	1	1	RAD51B	RAD51 homolog B (S. cerevisiae)
hsa-miR-133a	0	0	1	1	0	0	C6orf25	chromosome 6 open reading frame 25
hsa-miR-133a	0	0	1	1	1	1	CASC4	cancer susceptibility candidate 4
hsa-miR-133a	0	0	1	1	0	0	KLK8	kallikrein-related peptidase 8
hsa-miR-133a	1	0	1	0	1	1	ZBTB47	zinc finger and BTB domain containing 47
hsa-miR-133a	1	0	1	1	1	1	SLC2A12	solute carrier family 2 (facilitated glucose transporter), member 12
hsa-miR-133a	0	0	1	1	0	0	WFDC5	WAP four-disulfide core domain 5
hsa-miR-133a	0	0	1	1	0	0	TCEB3C	transcription elongation factor B polypeptide 3C (elongin A3)
hsa-miR-133a	1	0	1	1	1	1	POGLUT1	protein O-glucosyltransferase 1
hsa-miR-133a	1	0	1	1	1	1	C1orf216	chromosome 1 open reading frame 216
hsa-miR-133a	1	0	1	1	1	1	FAM123B	family with sequence similarity 123B
hsa-miR-133a	0	0	1	1	1	1	SLC35G3	solute carrier family 35, member G3
hsa-miR-133a	0	0	1	0	1	1	HORMAD2	HORMA domain containing 2
hsa-miR-133a	1	0	1	0	1	1	MOSPD2	motile sperm domain containing 2
hsa-miR-133a	0	0	1	1	0	0	GPC2	glypican 2
hsa-miR-133a	1	0	1	1	0	0	TMEM86A	transmembrane protein 86A
hsa-miR-133a	1	0	1	1	1	1	HS6ST3	heparan sulfate 6-O-sulfotransferase 3
hsa-miR-133a	0	0	1	0	1	1	RTP1	receptor (chemosensory) transporter protein 1
hsa-miR-133a	1	0	1	1	1	1	PKHD1	polycystic kidney and hepatic disease 1 (autosomal recessive)
hsa-miR-133a	0	0	1	1	1	1	PAPLN	papilin, proteoglycan-like sulfated glycoprotein
hsa-miR-133a	0	0	1	1	1	1	MPV17L	MPV17 mitochondrial membrane protein-like
hsa-miR-133a	1	0	1	1	1	1	RABL3	RAB, member of RAS oncogene family-like 3
hsa-miR-133a	1	0	1	1	1	1	ZADH2	zinc binding alcohol dehydrogenase domain containing 2
hsa-miR-133a	0	0	1	1	1	1	STXBP4	syntaxin binding protein 4
hsa-miR-133a	0	0	1	1	0	0	C2orf53	chromosome 2 open reading frame 53
hsa-miR-133a	0	0	1	0	1	1	ZNF445	zinc finger protein 445
hsa-miR-133a	1	0	1	1	1	1	BCL9L	B-cell CLL/lymphoma 9-like
hsa-miR-133a	1	0	1	0	1	1	RIMS4	regulating synaptic membrane exocytosis 4
hsa-miR-133a	0	0	1	1	1	1	TMEM37	transmembrane protein 37
hsa-miR-133a	0	0	1	1	1	1	COL25A1	collagen, type XXV, alpha 1
hsa-miR-133a	0	0	1	0	1	1	SIAH3	siah E3 ubiquitin protein ligase family member 3
hsa-miR-133a	0	0	1	0	1	1	SOGA1	suppressor of glucose, autophagy associated 1
hsa-miR-133a	0	0	1	0	0	0	CSAG3	CSAG family, member 3
hsa-miR-133a	1	0	1	1	1	1	TNFAIP8L3	tumor necrosis factor, alpha-induced protein 8-like 3
hsa-miR-133a	1	0	1	1	0	0	CD164L2	CD164 sialomucin-like 2
hsa-miR-133a	0	0	1	0	1	1	C1orf229	chromosome 1 open reading frame 229
hsa-miR-133a	0	0	1	1	0	0	TMPRSS11F	transmembrane protease, serine 11F
hsa-miR-133a	0	0	1	1	1	1	C11orf88	chromosome 11 open reading frame 88
hsa-miR-133a	0	0	1	1	1	1	C15orf54	chromosome 15 open reading frame 54
hsa-miR-133a	1	0	1	1	1	1	TEX19	testis expressed 19
hsa-miR-133a	0	0	1	0	0	0	CELP	carboxyl ester lipase pseudogene
hsa-miR-133a	0	0	1	0	0	0	HLA-H	major histocompatibility complex, class I, H (pseudogene)
hsa-miR-133a	0	0	1	0	0	0	MIR155HG	MIR155 host gene (non-protein coding)
hsa-miR-133a	0	0	1	0	0	0	TTTY12	testis-specific transcript, Y-linked 12 (non-protein coding)
hsa-miR-133a	0	0	1	0	0	0	SUMO1P1	SUMO1 pseudogene 1
hsa-miR-133a	0	0	1	0	0	0	SUMO1P3	SUMO1 pseudogene 3
hsa-miR-133a	0	0	1	0	0	0	COX6B1P1	cytochrome c oxidase subunit VIb polypeptide 1 (ubiquitous) pseudogene 1
hsa-miR-133a	0	0	1	0	0	0	SCARNA9	small Cajal body-specific RNA 9
hsa-miR-133a	0	0	1	0	0	0	HNRNPA3P1	heterogeneous nuclear ribonucleoprotein A3 pseudogene 1
hsa-miR-133a	0	0	1	0	0	0	RNF126P1	ring finger protein 126 pseudogene 1
hsa-miR-133a	0	0	1	0	0	0	MALAT1	metastasis associated lung adenocarcinoma transcript 1 (non-protein coding)
hsa-miR-133a	0	0	1	0	0	0	SIGLEC16	sialic acid binding Ig-like lectin 16 (gene/pseudogene)
hsa-miR-133a	0	0	1	0	0	0	DUSP5P	dual specificity phosphatase 5 pseudogene
hsa-miR-133a	0	0	1	0	0	0	SNORD112	small nucleolar RNA, C/D box 112
hsa-miR-133a	0	0	1	0	0	0	GBP1P1	guanylate binding protein 1, interferon-inducible pseudogene 1
hsa-miR-133a	0	0	1	0	0	0	USP32P1	ubiquitin specific peptidase 32 pseudogene 1
hsa-miR-133a	0	0	1	0	0	0	SNORD114-3	small nucleolar RNA, C/D box 114-3
hsa-miR-133a	0	0	1	0	0	0	SNORD114-12	small nucleolar RNA, C/D box 114-12
hsa-miR-133a	0	0	1	0	0	0	SNORD114-14	small nucleolar RNA, C/D box 114-14
hsa-miR-133a	0	0	1	0	0	0	SNORD113-8	small nucleolar RNA, C/D box 113-8
hsa-miR-133a	0	0	1	1	0	0	SNRPN	small nuclear ribonucleoprotein polypeptide N
hsa-miR-133a	0	0	1	0	0	0	SNORD116-11	small nucleolar RNA, C/D box 116-11
hsa-miR-133a	0	0	1	0	0	0	SNORD116-28	small nucleolar RNA, C/D box 116-28
hsa-miR-133a	1	0	1	1	1	1	MLL	myeloid/lymphoid or mixed-lineage leukemia (trithorax homolog, Drosophila)
hsa-miR-133a	0	0	1	1	0	0	GLP1R	glucagon-like peptide 1 receptor
hsa-miR-133a	0	0	1	1	1	1	CAST	calpastatin
hsa-miR-133a	0	0	1	1	0	0	SHBG	sex hormone-binding globulin
hsa-miR-133a	0	0	1	1	0	0	TSR3	TSR3, 20S rRNA accumulation, homolog (S. cerevisiae)
hsa-miR-133a	1	0	1	1	0	0	PLEKHG6	pleckstrin homology domain containing, family G (with RhoGef domain) member 6
hsa-miR-133a	0	0	0	1	0	0	QPCTL	glutaminyl-peptide cyclotransferase-like
hsa-miR-133a	1	0	1	1	1	1	B4GALT7	xylosylprotein beta 1,4-galactosyltransferase, polypeptide 7
hsa-miR-133a	0	0	0	1	0	0	THAP3	THAP domain containing, apoptosis associated protein 3
hsa-miR-133a	0	0	1	1	0	0	FNDC8	fibronectin type III domain containing 8
hsa-miR-133a	1	0	1	1	1	1	PANX2	pannexin 2
hsa-miR-133a	0	0	0	1	0	0	RAPGEF3	Rap guanine nucleotide exchange factor (GEF) 3
hsa-miR-133a	0	0	0	1	1	1	RDH8	retinol dehydrogenase 8 (all-trans)
hsa-miR-133a	0	0	0	1	0	0	ASNS	asparagine synthetase (glutamine-hydrolyzing)
hsa-miR-133a	0	0	0	1	0	0	DRD4	dopamine receptor D4
hsa-miR-133a	0	0	0	1	0	0	GSTP1	glutathione S-transferase pi 1
hsa-miR-133a	0	0	1	1	1	1	CHRD	chordin
hsa-miR-133a	0	0	1	1	1	1	GNPTG	N-acetylglucosamine-1-phosphate transferase, gamma subunit
hsa-miR-133a	0	0	1	1	1	1	UNC13D	unc-13 homolog D (C. elegans)
hsa-miR-133a	0	0	1	1	0	0	PDXP	pyridoxal (pyridoxine, vitamin B6) phosphatase
hsa-miR-133a	0	0	1	1	0	0	SH3BP1	SH3-domain binding protein 1
hsa-miR-133a	0	0	1	1	1	1	C22orf28	chromosome 22 open reading frame 28
hsa-miR-133a	1	0	1	1	1	1	DNAL4	dynein, axonemal, light chain 4
hsa-miR-133a	1	0	0	1	1	1	NID2	nidogen 2 (osteonidogen)
hsa-miR-133a	0	0	1	1	0	0	PIGU	phosphatidylinositol glycan anchor biosynthesis, class U
hsa-miR-133a	0	0	1	1	1	1	DECR2	2,4-dienoyl CoA reductase 2, peroxisomal
hsa-miR-133a	0	0	0	1	0	0	FAM173A	family with sequence similarity 173, member A
hsa-miR-133a	0	0	1	1	1	1	CSK	c-src tyrosine kinase
hsa-miR-133a	1	0	1	1	1	1	NEFM	neurofilament, medium polypeptide
hsa-miR-133a	0	0	0	1	1	1	PEX11G	peroxisomal biogenesis factor 11 gamma
hsa-miR-133a	0	0	0	1	0	0	C19orf53	chromosome 19 open reading frame 53
hsa-miR-133a	0	0	0	1	1	1	POP4	processing of precursor 4, ribonuclease P/MRP subunit (S. cerevisiae)
hsa-miR-133a	0	0	0	1	1	1	TGFB1	transforming growth factor, beta 1
hsa-miR-133a	0	0	1	1	1	1	RAB3A	RAB3A, member RAS oncogene family
hsa-miR-133a	0	0	0	1	0	0	EVX1	even-skipped homeobox 1
hsa-miR-133a	0	0	1	1	1	1	HYAL4	hyaluronoglucosaminidase 4
hsa-miR-133a	0	0	0	1	0	0	OBFC1	oligonucleotide/oligosaccharide-binding fold containing 1
hsa-miR-133a	0	0	1	1	0	0	KRT37	keratin 37
hsa-miR-133a	1	0	1	1	1	1	GOSR2	golgi SNAP receptor complex member 2
hsa-miR-133a	0	0	0	1	1	1	KAT2A	K(lysine) acetyltransferase 2A
hsa-miR-133a	0	0	1	1	0	0	CACNG1	calcium channel, voltage-dependent, gamma subunit 1
hsa-miR-133a	0	0	1	1	1	1	MYH1	myosin, heavy chain 1, skeletal muscle, adult
hsa-miR-133a	0	0	1	1	1	1	C11orf63	chromosome 11 open reading frame 63
hsa-miR-133a	0	0	1	1	1	1	PUS3	pseudouridylate synthase 3
hsa-miR-133a	0	0	0	1	0	0	OGFOD2	2-oxoglutarate and iron-dependent oxygenase domain containing 2
hsa-miR-133a	0	0	1	1	0	0	COX7A2	cytochrome c oxidase subunit VIIa polypeptide 2 (liver)
hsa-miR-133a	0	0	1	1	0	0	SLC4A9	solute carrier family 4, sodium bicarbonate cotransporter, member 9
hsa-miR-133a	0	0	1	1	0	0	RBP1	retinol binding protein 1, cellular
hsa-miR-133a	0	0	1	1	0	0	APOB	apolipoprotein B (including Ag(x) antigen)
hsa-miR-133a	0	0	0	1	1	1	DOK1	docking protein 1, 62kDa (downstream of tyrosine kinase 1)
hsa-miR-133a	1	0	1	1	0	0	TNP1	transition protein 1 (during histone to protamine replacement)
hsa-miR-133a	0	0	1	1	0	0	GSC	goosecoid homeobox
hsa-miR-133a	1	0	0	1	0	0	TMEM180	transmembrane protein 180
hsa-miR-133a	0	0	1	1	1	1	HOXB5	homeobox B5
hsa-miR-133a	0	0	1	1	1	1	CCDC77	coiled-coil domain containing 77
hsa-miR-133a	0	0	1	1	0	0	MRPS2	mitochondrial ribosomal protein S2
hsa-miR-133a	0	0	1	1	0	0	WDR83	WD repeat domain 83
hsa-miR-133a	0	0	0	1	0	0	ZNF350	zinc finger protein 350
hsa-miR-133a	0	0	1	1	0	0	RRP36	ribosomal RNA processing 36 homolog (S. cerevisiae)
hsa-miR-133a	0	0	1	1	0	0	SLC17A1	solute carrier family 17 (sodium phosphate), member 1
hsa-miR-133a	0	0	0	1	1	1	AARS2	alanyl-tRNA synthetase 2, mitochondrial (putative)
hsa-miR-133a	0	0	1	1	0	0	TCP11	t-complex 11 homolog (mouse)
hsa-miR-133a	1	0	1	1	1	1	SPHK2	sphingosine kinase 2
hsa-miR-133a	0	0	0	1	0	0	GPR42	G protein-coupled receptor 42 (gene/pseudogene)
hsa-miR-133a	0	0	1	1	0	0	COX6B1	cytochrome c oxidase subunit VIb polypeptide 1 (ubiquitous)
hsa-miR-133a	1	0	1	1	1	1	CCR7	chemokine (C-C motif) receptor 7
hsa-miR-133a	0	0	1	1	0	0	FLRT1	fibronectin leucine rich transmembrane protein 1
hsa-miR-133a	0	0	0	1	0	0	COX7C	cytochrome c oxidase subunit VIIc
hsa-miR-133a	1	0	1	1	1	1	AAMP	angio-associated, migratory cell protein
hsa-miR-133a	0	0	1	1	0	0	STYXL1	serine/threonine/tyrosine interacting-like 1
hsa-miR-133a	0	0	0	1	0	0	NCF4	neutrophil cytosolic factor 4, 40kDa
hsa-miR-133a	0	0	1	1	1	1	NFATC4	nuclear factor of activated T-cells, cytoplasmic, calcineurin-dependent 4
hsa-miR-133a	0	0	1	1	0	0	TMCO6	transmembrane and coiled-coil domains 6
hsa-miR-133a	1	0	1	1	1	1	LDLR	low density lipoprotein receptor
hsa-miR-133a	0	0	0	1	1	1	BST2	bone marrow stromal cell antigen 2
hsa-miR-133a	0	0	0	1	0	0	PGLS	6-phosphogluconolactonase
hsa-miR-133a	0	0	0	1	0	0	RSPH3	radial spoke 3 homolog (Chlamydomonas)
hsa-miR-133a	1	0	1	1	0	0	TRPM4	transient receptor potential cation channel, subfamily M, member 4
hsa-miR-133a	1	0	0	1	1	1	YIPF2	Yip1 domain family, member 2
hsa-miR-133a	0	0	0	1	1	1	HIP1R	huntingtin interacting protein 1 related
hsa-miR-133a	0	0	1	1	0	0	BPIFA2	BPI fold containing family A, member 2
hsa-miR-133a	0	0	1	1	1	1	NR0B2	nuclear receptor subfamily 0, group B, member 2
hsa-miR-133a	0	0	0	1	0	0	FBXW9	F-box and WD repeat domain containing 9
hsa-miR-133a	0	0	1	1	1	1	SERINC3	serine incorporator 3
hsa-miR-133a	0	0	0	1	1	1	PRAM1	PML-RARA regulated adaptor molecule 1
hsa-miR-133a	0	0	1	1	1	1	MED10	mediator complex subunit 10
hsa-miR-133a	0	0	1	1	1	1	DSG3	desmoglein 3
hsa-miR-133a	0	0	1	1	1	1	AKIRIN2	akirin 2
hsa-miR-133a	0	0	1	1	1	1	ARHGEF25	Rho guanine nucleotide exchange factor (GEF) 25
hsa-miR-133a	0	0	1	1	0	0	SLC26A10	solute carrier family 26, member 10
hsa-miR-133a	0	0	0	1	1	1	BCMO1	beta-carotene 15,15'-monooxygenase 1
hsa-miR-133a	0	0	0	1	1	1	MFSD9	major facilitator superfamily domain containing 9
hsa-miR-133a	0	0	1	1	0	0	KIF13A	kinesin family member 13A
hsa-miR-133a	0	0	1	1	1	1	SQRDL	sulfide quinone reductase-like (yeast)
hsa-miR-133a	0	0	1	1	1	1	LRRC49	leucine rich repeat containing 49
hsa-miR-133a	0	0	1	1	0	0	ITPKA	inositol-trisphosphate 3-kinase A
hsa-miR-133a	0	0	1	1	0	0	PLCE1	phospholipase C, epsilon 1
hsa-miR-133a	0	0	1	1	0	0	TSPAN11	tetraspanin 11
hsa-miR-133a	0	0	1	1	1	1	SPECC1	sperm antigen with calponin homology and coiled-coil domains 1
hsa-miR-133a	0	0	0	1	0	0	AP3B2	adaptor-related protein complex 3, beta 2 subunit
hsa-miR-133a	0	0	0	1	0	0	RBFA	ribosome binding factor A (putative)
hsa-miR-133a	0	0	0	1	0	0	POLD1	polymerase (DNA directed), delta 1, catalytic subunit
hsa-miR-133a	0	0	0	1	1	1	SLC4A1	solute carrier family 4, anion exchanger, member 1 (erythrocyte membrane protein band 3, Diego blood group)
hsa-miR-133a	0	0	0	1	0	0	RPL8	ribosomal protein L8
hsa-miR-133a	0	0	0	1	0	0	CHST8	carbohydrate (N-acetylgalactosamine 4-0) sulfotransferase 8
hsa-miR-133a	0	0	0	1	0	0	HCK	hemopoietic cell kinase
hsa-miR-133a	0	0	0	1	0	0	CCDC124	coiled-coil domain containing 124
hsa-miR-133a	0	0	1	1	0	0	KCNN4	potassium intermediate/small conductance calcium-activated channel, subfamily N, member 4
hsa-miR-133a	0	0	0	1	0	0	SLC27A5	solute carrier family 27 (fatty acid transporter), member 5
hsa-miR-133a	0	0	0	1	1	1	CABIN1	calcineurin binding protein 1
hsa-miR-133a	0	0	0	1	1	1	TYR	tyrosinase (oculocutaneous albinism IA)
hsa-miR-133a	0	0	0	1	0	0	ILVBL	ilvB (bacterial acetolactate synthase)-like
hsa-miR-133a	0	0	1	1	1	1	BARHL1	BarH-like homeobox 1
hsa-miR-133a	0	0	1	1	0	0	ASB3	ankyrin repeat and SOCS box containing 3
hsa-miR-133a	0	0	1	1	1	1	MECR	mitochondrial trans-2-enoyl-CoA reductase
hsa-miR-133a	0	0	0	1	1	1	SGOL1	shugoshin-like 1 (S. pombe)
hsa-miR-133a	0	0	1	1	1	1	POLR1A	polymerase (RNA) I polypeptide A, 194kDa
hsa-miR-133a	0	0	0	1	1	1	GTF3C3	general transcription factor IIIC, polypeptide 3, 102kDa
hsa-miR-133a	0	0	0	1	1	1	FARP2	FERM, RhoGEF and pleckstrin domain protein 2
hsa-miR-133a	0	0	0	1	0	0	GPR108	G protein-coupled receptor 108
hsa-miR-133a	0	0	0	1	0	0	GZMM	granzyme M (lymphocyte met-ase 1)
hsa-miR-133a	0	0	0	1	0	0	TYK2	tyrosine kinase 2
hsa-miR-133a	0	0	0	1	0	0	LYL1	lymphoblastic leukemia derived sequence 1
hsa-miR-133a	0	0	1	1	1	1	ICAM1	intercellular adhesion molecule 1
hsa-miR-133a	0	0	0	1	0	0	INTS12	integrator complex subunit 12
hsa-miR-133a	1	0	1	1	1	1	BTN2A1	butyrophilin, subfamily 2, member A1
hsa-miR-133a	0	0	0	1	0	0	SCAP	SREBF chaperone
hsa-miR-133a	1	0	1	1	1	1	CPSF6	cleavage and polyadenylation specific factor 6, 68kDa
hsa-miR-133a	0	0	0	1	0	0	ITGB7	integrin, beta 7
hsa-miR-133a	0	0	0	1	0	0	KRT71	keratin 71
hsa-miR-133a	0	0	1	1	1	1	RDH12	retinol dehydrogenase 12 (all-trans/9-cis/11-cis)
hsa-miR-133a	0	0	1	1	0	0	GPR65	G protein-coupled receptor 65
hsa-miR-133a	0	0	0	1	1	1	MARVELD3	MARVEL domain containing 3
hsa-miR-133a	0	0	0	1	0	0	ADAD2	adenosine deaminase domain containing 2
hsa-miR-133a	0	0	0	1	0	0	CDRT15	CMT1A duplicated region transcript 15
hsa-miR-133a	0	0	1	1	0	0	COPS3	COP9 constitutive photomorphogenic homolog subunit 3 (Arabidopsis)
hsa-miR-133a	0	0	1	1	1	1	CYP4F22	cytochrome P450, family 4, subfamily F, polypeptide 22
hsa-miR-133a	0	0	0	1	0	0	SLC39A3	solute carrier family 39 (zinc transporter), member 3
hsa-miR-133a	0	0	0	1	0	0	PPAP2C	phosphatidic acid phosphatase type 2C
hsa-miR-133a	0	0	0	1	0	0	LRRC56	leucine rich repeat containing 56
hsa-miR-133a	0	0	0	1	0	0	SLC2A7	solute carrier family 2 (facilitated glucose transporter), member 7
hsa-miR-133a	1	0	1	1	0	0	ADAM15	ADAM metallopeptidase domain 15
hsa-miR-133a	0	0	1	1	1	1	DQX1	DEAQ box RNA-dependent ATPase 1
hsa-miR-133a	0	0	0	1	0	0	RQCD1	RCD1 required for cell differentiation1 homolog (S. pombe)
hsa-miR-133a	0	0	0	1	0	0	PLA2G7	phospholipase A2, group VII (platelet-activating factor acetylhydrolase, plasma)
hsa-miR-133a	1	0	1	1	1	1	GPR6	G protein-coupled receptor 6
hsa-miR-133a	0	0	1	1	0	0	SRCRB4D	scavenger receptor cysteine rich domain containing, group B (4 domains)
hsa-miR-133a	0	0	0	1	1	1	EPHA1	EPH receptor A1
hsa-miR-133a	1	0	1	1	1	1	NACC2	NACC family member 2, BEN and BTB (POZ) domain containing
hsa-miR-133a	0	0	1	1	0	0	CARS	cysteinyl-tRNA synthetase
hsa-miR-133a	0	0	0	1	0	0	ROM1	retinal outer segment membrane protein 1
hsa-miR-133a	0	0	0	1	0	0	DUSP15	dual specificity phosphatase 15
hsa-miR-133a	0	0	1	1	0	0	TBX6	T-box 6
hsa-miR-133a	0	0	0	1	1	1	C11orf53	chromosome 11 open reading frame 53
hsa-miR-133a	0	0	0	1	0	0	MSGN1	mesogenin 1
hsa-miR-133a	0	0	1	1	1	1	UNC80	unc-80 homolog (C. elegans)
hsa-miR-133a	0	0	1	1	1	1	ANKRD44	ankyrin repeat domain 44
hsa-miR-133a	0	0	0	1	1	1	CAPSL	calcyphosine-like
hsa-miR-133a	0	0	1	1	1	1	CETN3	centrin, EF-hand protein, 3
hsa-miR-133a	1	0	1	1	1	1	CMIP	c-Maf inducing protein
hsa-miR-133a	0	0	1	1	1	1	TTLL5	tubulin tyrosine ligase-like family, member 5
hsa-miR-133a	0	0	1	1	1	1	PDE6D	phosphodiesterase 6D, cGMP-specific, rod, delta
hsa-miR-133a	1	0	1	1	1	1	ABHD3	abhydrolase domain containing 3
hsa-miR-133a	0	0	1	1	0	0	SLC45A1	solute carrier family 45, member 1
hsa-miR-133a	0	0	1	1	1	1	IRX6	iroquois homeobox 6
hsa-miR-133a	0	0	1	1	0	0	TNFRSF13C	tumor necrosis factor receptor superfamily, member 13C
hsa-miR-133a	0	0	1	1	0	0	CPAMD8	C3 and PZP-like, alpha-2-macroglobulin domain containing 8
hsa-miR-133a	0	0	0	1	0	0	AIRE	autoimmune regulator
hsa-miR-133a	0	0	1	1	0	0	NLRX1	NLR family member X1
hsa-miR-133a	0	0	0	1	0	0	LRWD1	leucine-rich repeats and WD repeat domain containing 1
hsa-miR-133a	0	0	1	1	0	0	SSRP1	structure specific recognition protein 1
hsa-miR-133a	0	0	0	1	0	0	FLYWCH2	FLYWCH family member 2
hsa-miR-133a	0	0	1	1	0	0	CLPB	ClpB caseinolytic peptidase B homolog (E. coli)
hsa-miR-133a	0	0	1	1	0	0	FAM151A	family with sequence similarity 151, member A
hsa-miR-133a	0	0	0	1	0	0	TRIM17	tripartite motif containing 17
hsa-miR-133a	0	0	0	1	0	0	KCNF1	potassium voltage-gated channel, subfamily F, member 1
hsa-miR-133a	0	0	0	1	1	1	ALPI	alkaline phosphatase, intestinal
hsa-miR-133a	0	0	0	1	0	0	FEV	FEV (ETS oncogene family)
hsa-miR-133a	0	0	1	1	0	0	CLDN19	claudin 19
hsa-miR-133a	0	0	1	1	1	1	SAP30L	SAP30-like
hsa-miR-133a	0	0	1	1	1	1	BRI3	brain protein I3
hsa-miR-133a	0	0	0	1	1	1	FOLR2	folate receptor 2 (fetal)
hsa-miR-133a	0	0	0	1	0	0	OR4K2	olfactory receptor, family 4, subfamily K, member 2
hsa-miR-133a	0	0	1	1	0	0	CYB5A	cytochrome b5 type A (microsomal)
hsa-miR-133a	0	0	1	1	1	1	SEC11C	SEC11 homolog C (S. cerevisiae)
hsa-miR-133a	0	0	1	1	1	1	GALR1	galanin receptor 1
hsa-miR-133a	1	0	1	1	0	0	PPIB	peptidylprolyl isomerase B (cyclophilin B)
hsa-miR-133a	0	0	0	1	0	0	GPR182	G protein-coupled receptor 182
hsa-miR-133a	0	0	1	1	1	1	PDIA3	protein disulfide isomerase family A, member 3
hsa-miR-133a	0	0	1	1	0	0	GNGT2	guanine nucleotide binding protein (G protein), gamma transducing activity polypeptide 2
hsa-miR-133a	0	0	0	1	0	0	COQ4	coenzyme Q4 homolog (S. cerevisiae)
hsa-miR-133a	0	0	0	1	0	0	MMP26	matrix metallopeptidase 26
hsa-miR-133a	0	0	1	1	1	1	UNC119	unc-119 homolog (C. elegans)
hsa-miR-133a	0	0	0	1	0	0	CYP2A6	cytochrome P450, family 2, subfamily A, polypeptide 6
hsa-miR-133a	0	0	0	1	0	0	CYP2A7	cytochrome P450, family 2, subfamily A, polypeptide 7
hsa-miR-133a	0	0	0	1	0	0	PSCA	prostate stem cell antigen
hsa-miR-133a	0	0	0	1	0	0	LY6D	lymphocyte antigen 6 complex, locus D
hsa-miR-133a	0	0	0	1	0	0	C20orf201	chromosome 20 open reading frame 201
hsa-miR-133a	1	0	1	1	1	1	WDR48	WD repeat domain 48
hsa-miR-133a	0	0	0	1	1	1	PYDC1	PYD (pyrin domain) containing 1
hsa-miR-133a	0	0	1	1	1	1	MXD3	MAX dimerization protein 3
hsa-miR-133a	0	0	1	1	0	0	C2orf27B	chromosome 2 open reading frame 27B
hsa-miR-133a	1	0	1	1	0	0	EGLN2	egl nine homolog 2 (C. elegans)
hsa-miR-133a	0	0	0	1	0	0	RPAP1	RNA polymerase II associated protein 1
hsa-miR-133a	0	0	0	1	1	1	C8orf74	chromosome 8 open reading frame 74
hsa-miR-133a	0	0	0	1	0	0	NFRKB	nuclear factor related to kappaB binding protein
hsa-miR-133a	0	0	0	1	0	0	ECEL1	endothelin converting enzyme-like 1
hsa-miR-133a	0	0	1	1	1	1	TPD52L1	tumor protein D52-like 1
hsa-miR-133a	0	0	0	1	0	0	IL17D	interleukin 17D
hsa-miR-133a	0	0	1	1	0	0	ZNHIT1	zinc finger, HIT-type containing 1
hsa-miR-133a	0	0	1	1	0	0	TWF2	twinfilin, actin-binding protein, homolog 2 (Drosophila)
hsa-miR-133a	0	0	0	1	0	0	TLR9	toll-like receptor 9
hsa-miR-133a	0	0	1	1	0	0	CD2BP2	CD2 (cytoplasmic tail) binding protein 2
hsa-miR-133a	1	0	1	1	0	0	MYO1F	myosin IF
hsa-miR-133a	0	0	1	1	0	0	USP19	ubiquitin specific peptidase 19
hsa-miR-133a	1	0	1	1	1	1	BAALC	brain and acute leukemia, cytoplasmic
hsa-miR-133a	0	0	1	1	1	1	CXCL11	chemokine (C-X-C motif) ligand 11
hsa-miR-133a	0	0	0	1	0	0	RPL36P8	ribosomal protein L36 pseudogene 8
hsa-miR-133a	0	0	0	1	1	1	LRRC45	leucine rich repeat containing 45
hsa-miR-133a	0	0	1	1	0	0	SPRR1A	small proline-rich protein 1A
hsa-miR-133a	1	0	1	1	1	1	DDIT4	DNA-damage-inducible transcript 4
hsa-miR-133a	0	0	1	1	0	0	GOLT1A	golgi transport 1A
hsa-miR-133a	0	0	1	1	0	0	RELA	v-rel reticuloendotheliosis viral oncogene homolog A (avian)
hsa-miR-133a	0	0	1	1	1	1	BTK	Bruton agammaglobulinemia tyrosine kinase
hsa-miR-133a	0	0	0	1	0	0	XCR1	chemokine (C motif) receptor 1
hsa-miR-133a	0	0	1	1	0	0	FKBP2	FK506 binding protein 2, 13kDa
hsa-miR-133a	1	0	1	1	0	0	ATG4D	autophagy related 4D, cysteine peptidase
hsa-miR-133a	1	0	0	1	1	1	TMEM234	transmembrane protein 234
hsa-miR-133a	0	0	1	1	0	0	DAPL1	death associated protein-like 1
hsa-miR-133a	0	0	0	1	0	0	MAL	mal, T-cell differentiation protein
hsa-miR-133a	0	0	0	1	0	0	ATP8B3	ATPase, aminophospholipid transporter, class I, type 8B, member 3
hsa-miR-133a	0	0	1	1	1	1	CCS	copper chaperone for superoxide dismutase
hsa-miR-133a	1	0	1	1	0	0	LRCH4	leucine-rich repeats and calponin homology (CH) domain containing 4
hsa-miR-133a	0	0	1	1	0	0	SLC4A2	solute carrier family 4, anion exchanger, member 2 (erythrocyte membrane protein band 3-like 1)
hsa-miR-133a	1	0	1	1	0	0	MEPCE	methylphosphate capping enzyme
hsa-miR-133a	0	0	1	1	1	1	REP15	RAB15 effector protein
hsa-miR-133a	0	0	0	1	1	1	TMEM52	transmembrane protein 52
hsa-miR-133a	0	0	1	1	1	1	GNPDA1	glucosamine-6-phosphate deaminase 1
hsa-miR-133a	0	0	1	1	1	1	TNK1	tyrosine kinase, non-receptor, 1
hsa-miR-133a	0	0	1	1	0	0	CCL19	chemokine (C-C motif) ligand 19
hsa-miR-133a	0	0	1	1	1	1	TMEM70	transmembrane protein 70
hsa-miR-133a	0	0	0	1	0	0	NAGPA	N-acetylglucosamine-1-phosphodiester alpha-N-acetylglucosaminidase
hsa-miR-133a	1	0	1	1	0	0	TBC1D10C	TBC1 domain family, member 10C
hsa-miR-133a	1	0	1	1	0	0	CCDC85B	coiled-coil domain containing 85B
hsa-miR-133a	0	0	1	1	1	1	JAM2	junctional adhesion molecule 2
hsa-miR-133a	0	0	0	1	0	0	PARP10	poly (ADP-ribose) polymerase family, member 10
hsa-miR-133a	1	0	1	1	1	1	GALE	UDP-galactose-4-epimerase
hsa-miR-133a	0	0	0	1	0	0	BHLHA15	basic helix-loop-helix family, member a15
hsa-miR-133a	0	0	0	1	0	0	FUT7	fucosyltransferase 7 (alpha (1,3) fucosyltransferase)
hsa-miR-133a	0	0	1	1	0	0	KCNH6	potassium voltage-gated channel, subfamily H (eag-related), member 6
hsa-miR-133a	1	0	1	1	1	1	RHOT2	ras homolog family member T2
hsa-miR-133a	0	0	0	1	0	0	MATK	megakaryocyte-associated tyrosine kinase
hsa-miR-133a	0	0	0	1	1	1	ITGA11	integrin, alpha 11
hsa-miR-133a	0	0	1	1	0	0	SLC41A3	solute carrier family 41, member 3
hsa-miR-133a	0	0	1	1	1	1	KCND3	potassium voltage-gated channel, Shal-related subfamily, member 3
hsa-miR-133a	0	0	1	1	0	0	TTC9C	tetratricopeptide repeat domain 9C
hsa-miR-133a	0	0	1	1	0	0	DNAJC7	DnaJ (Hsp40) homolog, subfamily C, member 7
hsa-miR-133a	1	0	0	1	0	0	APBA3	amyloid beta (A4) precursor protein-binding, family A, member 3
hsa-miR-133a	0	0	1	1	1	1	VRK3	vaccinia related kinase 3
hsa-miR-133a	1	0	1	1	1	1	CABP1	calcium binding protein 1
hsa-miR-133a	0	0	1	1	0	0	STOML1	stomatin (EPB72)-like 1
hsa-miR-133a	1	0	1	1	1	1	HOXA3	homeobox A3
hsa-miR-133a	0	0	0	1	0	0	OR52N4	olfactory receptor, family 52, subfamily N, member 4
hsa-miR-133a	0	0	0	1	0	0	PXMP2	peroxisomal membrane protein 2, 22kDa
hsa-miR-133a	0	0	1	1	1	1	FRMD8	FERM domain containing 8
hsa-miR-133a	0	0	0	1	0	0	S1PR2	sphingosine-1-phosphate receptor 2
hsa-miR-133a	1	0	1	1	1	1	CC2D1A	coiled-coil and C2 domain containing 1A
hsa-miR-133a	1	0	1	1	1	1	SLBP	stem-loop binding protein
hsa-miR-133a	0	0	1	1	0	0	FAM195A	family with sequence similarity 195, member A
hsa-miR-133a	0	0	1	1	0	0	AVL9	AVL9 homolog (S. cerevisiase)
hsa-miR-133a	0	0	1	1	1	1	PRF1	perforin 1 (pore forming protein)
hsa-miR-133a	0	0	0	1	0	0	GEMIN4	gem (nuclear organelle) associated protein 4
hsa-miR-133a	0	0	1	1	1	1	C14orf119	chromosome 14 open reading frame 119
hsa-miR-133a	0	0	0	1	0	0	DOCK6	dedicator of cytokinesis 6
hsa-miR-133a	0	0	1	1	1	1	RASGRP2	RAS guanyl releasing protein 2 (calcium and DAG-regulated)
hsa-miR-133a	0	0	1	1	1	1	C1orf172	chromosome 1 open reading frame 172
hsa-miR-133a	0	0	1	1	1	1	ARL14	ADP-ribosylation factor-like 14
hsa-miR-133a	0	0	0	1	1	1	SPTBN5	spectrin, beta, non-erythrocytic 5
hsa-miR-133a	0	0	1	1	0	0	D2HGDH	D-2-hydroxyglutarate dehydrogenase
hsa-miR-133a	0	0	0	1	0	0	GJD4	gap junction protein, delta 4, 40.1kDa
hsa-miR-133a	0	0	0	1	0	0	P2RY11	purinergic receptor P2Y, G-protein coupled, 11
hsa-miR-133a	0	0	0	1	0	0	PPAN	peter pan homolog (Drosophila)
hsa-miR-133a	0	0	0	1	0	0	PPAN-P2RY11	PPAN-P2RY11 readthrough
hsa-miR-133a	0	0	0	1	0	0	ROGDI	rogdi homolog (Drosophila)
hsa-miR-133a	0	0	1	1	1	1	PDZD3	PDZ domain containing 3
hsa-miR-133a	0	0	1	1	0	0	ZNF335	zinc finger protein 335
hsa-miR-133a	0	0	1	1	0	0	DYRK1B	dual-specificity tyrosine-(Y)-phosphorylation regulated kinase 1B
hsa-miR-133a	0	0	1	1	0	0	GCAT	glycine C-acetyltransferase
hsa-miR-133a	0	0	1	1	1	1	ANKZF1	ankyrin repeat and zinc finger domain containing 1
hsa-miR-133a	0	0	1	1	1	1	SNRNP200	small nuclear ribonucleoprotein 200kDa (U5)
hsa-miR-133a	0	0	1	1	0	0	AQP10	aquaporin 10
hsa-miR-133a	1	0	0	1	1	1	ANGPT2	angiopoietin 2
hsa-miR-133a	1	0	1	1	1	1	ZNF580	zinc finger protein 580
hsa-miR-133a	0	0	1	1	1	1	KLHDC7A	kelch domain containing 7A
hsa-miR-133a	1	0	1	1	0	0	UBC	ubiquitin C
hsa-miR-133a	0	0	1	1	0	0	HEATR7A	HEAT repeat containing 7A
hsa-miR-133a	0	0	0	1	0	0	GDNF	glial cell derived neurotrophic factor
hsa-miR-133a	0	0	1	1	0	0	TMEM150B	transmembrane protein 150B
hsa-miR-133a	0	0	0	1	0	0	IMPDH2	IMP (inosine 5'-monophosphate) dehydrogenase 2
hsa-miR-133a	1	0	1	1	1	1	BRSK1	BR serine/threonine kinase 1
hsa-miR-133a	0	0	1	1	0	0	MARCO	macrophage receptor with collagenous structure
hsa-miR-133a	0	0	1	1	0	0	NR2F1	nuclear receptor subfamily 2, group F, member 1
hsa-miR-133a	0	0	0	1	1	1	BRF1	BRF1 homolog, subunit of RNA polymerase III transcription initiation factor IIIB (S. cerevisiae)
hsa-miR-133a	1	0	0	1	0	0	GGT5	gamma-glutamyltransferase 5
hsa-miR-133a	0	0	0	1	0	0	OR8B8	olfactory receptor, family 8, subfamily B, member 8
hsa-miR-133a	0	0	0	1	0	0	COA3	cytochrome C oxidase assembly factor 3
hsa-miR-133a	0	0	0	1	1	1	C16orf79	chromosome 16 open reading frame 79
hsa-miR-133a	0	0	1	1	0	0	TRMT12	tRNA methyltransferase 12 homolog (S. cerevisiae)
hsa-miR-133a	0	0	1	1	0	0	NXPH3	neurexophilin 3
hsa-miR-133a	0	0	0	1	0	0	HCAR2	hydroxycarboxylic acid receptor 2
hsa-miR-133a	0	0	1	1	0	0	RPL35A	ribosomal protein L35a
hsa-miR-133a	0	0	0	1	0	0	C19orf71	chromosome 19 open reading frame 71
hsa-miR-133a	1	0	0	1	0	0	FAM193B	family with sequence similarity 193, member B
hsa-miR-133a	1	0	1	1	1	1	TMCC2	transmembrane and coiled-coil domain family 2
hsa-miR-133a	0	0	0	1	1	1	SLC52A2	solute carrier family 52, riboflavin transporter, member 2
hsa-miR-133a	0	0	1	1	0	0	FAM156A	family with sequence similarity 156, member A
hsa-miR-133a	0	0	1	1	0	0	IDH2	isocitrate dehydrogenase 2 (NADP+), mitochondrial
hsa-miR-133a	0	0	0	1	0	0	MRPL54	mitochondrial ribosomal protein L54
hsa-miR-133a	0	0	1	1	1	1	MINA	MYC induced nuclear antigen
hsa-miR-133a	0	0	0	1	0	0	DDX41	DEAD (Asp-Glu-Ala-Asp) box polypeptide 41
hsa-miR-133a	0	0	1	1	0	0	INTS5	integrator complex subunit 5
hsa-miR-133a	0	0	0	1	0	0	KANK3	KN motif and ankyrin repeat domains 3
hsa-miR-133a	0	0	0	1	0	0	NPBWR1	neuropeptides B/W receptor 1
hsa-miR-133a	0	0	1	1	1	1	P4HA3	prolyl 4-hydroxylase, alpha polypeptide III
hsa-miR-133a	0	0	0	1	1	1	C14orf180	chromosome 14 open reading frame 180
hsa-miR-133a	0	0	1	1	1	1	LRRC16A	leucine rich repeat containing 16A
hsa-miR-133a	0	0	0	1	0	0	ALG12	asparagine-linked glycosylation 12, alpha-1,6-mannosyltransferase homolog (S. cerevisiae)
hsa-miR-133a	0	0	1	1	0	0	STAC3	SH3 and cysteine rich domain 3
hsa-miR-133a	0	0	0	1	0	0	IZUMO1	izumo sperm-egg fusion 1
hsa-miR-133a	0	0	1	1	0	0	CKLF	chemokine-like factor
hsa-miR-133a	1	0	1	1	0	0	TSEN54	tRNA splicing endonuclease 54 homolog (S. cerevisiae)
hsa-miR-133a	0	0	1	1	1	1	ING1	inhibitor of growth family, member 1
hsa-miR-133a	0	0	1	1	1	1	C18orf21	chromosome 18 open reading frame 21
hsa-miR-133a	0	0	1	1	1	1	WBSCR17	Williams-Beuren syndrome chromosome region 17
hsa-miR-133a	0	0	0	1	1	1	TOM1L2	target of myb1-like 2 (chicken)
hsa-miR-133a	0	0	1	1	1	1	PGAM4	phosphoglycerate mutase family member 4
hsa-miR-133a	0	0	1	1	1	1	PLCD1	phospholipase C, delta 1
hsa-miR-133a	0	0	1	1	0	0	RPS19BP1	ribosomal protein S19 binding protein 1
hsa-miR-133a	0	0	0	1	0	0	SERPINA11	serpin peptidase inhibitor, clade A (alpha-1 antiproteinase, antitrypsin), member 11
hsa-miR-133a	0	0	1	1	1	1	NEXN	nexilin (F actin binding protein)
hsa-miR-133a	0	0	1	1	0	0	STARD10	StAR-related lipid transfer (START) domain containing 10
hsa-miR-133a	0	0	0	1	1	1	H1FNT	H1 histone family, member N, testis-specific
hsa-miR-133a	1	0	1	1	1	1	GRIA3	glutamate receptor, ionotropic, AMPA 3
hsa-miR-133a	0	0	0	1	0	0	PES1	pescadillo ribosomal biogenesis factor 1
hsa-miR-133a	0	0	0	1	0	0	OR4C12	olfactory receptor, family 4, subfamily C, member 12
hsa-miR-133a	0	0	0	1	1	1	INTU	inturned planar cell polarity effector homolog (Drosophila)
hsa-miR-133a	0	0	1	1	0	0	FAM170A	family with sequence similarity 170, member A
hsa-miR-133a	0	0	0	1	1	1	ZDHHC4	zinc finger, DHHC-type containing 4
hsa-miR-133a	0	0	1	1	0	0	NME1	NME/NM23 nucleoside diphosphate kinase 1
hsa-miR-133a	0	0	0	1	0	0	NME1-NME2	NME1-NME2 readthrough
hsa-miR-133a	0	0	0	1	0	0	NME2	NME/NM23 nucleoside diphosphate kinase 2
hsa-miR-133a	0	0	1	1	0	0	MRPL37	mitochondrial ribosomal protein L37
hsa-miR-133a	0	0	0	1	0	0	TMEM39B	transmembrane protein 39B
hsa-miR-133a	0	0	0	1	0	0	STARD3	StAR-related lipid transfer (START) domain containing 3
hsa-miR-133a	0	0	0	1	1	1	NEIL1	nei endonuclease VIII-like 1 (E. coli)
hsa-miR-133a	0	0	1	1	0	0	PLSCR2	phospholipid scramblase 2
hsa-miR-133a	1	0	1	1	0	0	SMUG1	single-strand-selective monofunctional uracil-DNA glycosylase 1
hsa-miR-133a	0	0	1	1	1	1	MS4A4A	membrane-spanning 4-domains, subfamily A, member 4A
hsa-miR-133a	0	0	0	1	1	1	NR1I2	nuclear receptor subfamily 1, group I, member 2
hsa-miR-133a	0	0	1	1	1	1	MAFF	v-maf musculoaponeurotic fibrosarcoma oncogene homolog F (avian)
hsa-miR-133a	1	0	1	1	1	1	MTSS1L	metastasis suppressor 1-like
hsa-miR-133a	0	0	1	1	1	1	MMP28	matrix metallopeptidase 28
hsa-miR-133a	0	0	0	1	0	0	TPSAB1	tryptase alpha/beta 1
hsa-miR-133a	0	0	0	1	0	0	PTGES2	prostaglandin E synthase 2
hsa-miR-133a	1	0	1	1	0	0	CLYBL	citrate lyase beta like
hsa-miR-133a	1	0	1	1	1	1	NLGN4Y	neuroligin 4, Y-linked
hsa-miR-133a	0	0	1	1	1	1	WNT7B	wingless-type MMTV integration site family, member 7B
hsa-miR-133a	0	0	1	1	0	0	TSSK4	testis-specific serine kinase 4
hsa-miR-133a	0	0	1	1	1	1	ETV7	ets variant 7
hsa-miR-133a	0	0	1	1	1	1	STAG3L3	stromal antigen 3-like 3
hsa-miR-133a	0	0	0	1	0	0	ZSCAN16	zinc finger and SCAN domain containing 16
hsa-miR-133a	0	0	1	1	1	1	BRAT1	BRCA1-associated ATM activator 1
hsa-miR-133a	0	0	0	1	0	0	SAMD11	sterile alpha motif domain containing 11
hsa-miR-133a	0	0	1	1	1	1	UPP1	uridine phosphorylase 1
hsa-miR-133a	1	0	1	1	0	0	KAT5	K(lysine) acetyltransferase 5
hsa-miR-133a	0	0	1	1	1	1	BID	BH3 interacting domain death agonist
hsa-miR-133a	0	0	0	1	1	1	SUMF2	sulfatase modifying factor 2
hsa-miR-133a	0	0	0	1	0	0	PODXL2	podocalyxin-like 2
hsa-miR-133a	0	0	0	1	0	0	FAM22B	family with sequence similarity 22, member B
hsa-miR-133a	0	0	1	1	0	0	RGL3	ral guanine nucleotide dissociation stimulator-like 3
hsa-miR-133a	1	0	1	1	0	0	LRRC16B	leucine rich repeat containing 16B
hsa-miR-133a	0	0	0	1	0	0	BSX	brain-specific homeobox
hsa-miR-133a	1	0	1	1	1	1	CASKIN1	CASK interacting protein 1
hsa-miR-133a	0	0	0	1	1	1	DMBT1	deleted in malignant brain tumors 1
hsa-miR-133a	0	0	1	1	0	0	FZD9	frizzled family receptor 9
hsa-miR-133a	0	0	0	1	0	0	HSFY2	heat shock transcription factor, Y linked 2
hsa-miR-133a	0	0	0	1	0	0	TNNI3	troponin I type 3 (cardiac)
hsa-miR-133a	0	0	0	1	0	0	IZUMO4	IZUMO family member 4
hsa-miR-133a	1	0	1	1	1	1	TRIM3	tripartite motif containing 3
hsa-miR-133a	0	0	1	1	1	1	SYNRG	synergin, gamma
hsa-miR-133a	1	0	1	1	0	0	ZDHHC1	zinc finger, DHHC-type containing 1
hsa-miR-133a	0	0	1	1	1	1	C16orf89	chromosome 16 open reading frame 89
hsa-miR-133a	0	0	0	1	0	0	CHIA	chitinase, acidic
hsa-miR-133a	0	0	0	1	1	1	SLC23A1	solute carrier family 23 (nucleobase transporters), member 1
hsa-miR-133a	1	0	1	1	1	1	FAM168B	family with sequence similarity 168, member B
hsa-miR-133a	0	0	1	1	1	1	NUP214	nucleoporin 214kDa
hsa-miR-133a	0	0	0	1	0	0	NOXO1	NADPH oxidase organizer 1
hsa-miR-133a	1	0	1	1	1	1	DENND5B	DENN/MADD domain containing 5B
hsa-miR-133a	1	0	0	1	1	1	SYT5	synaptotagmin V
hsa-miR-133a	1	0	1	1	1	1	PTGER3	prostaglandin E receptor 3 (subtype EP3)
hsa-miR-133a	0	0	1	1	1	1	MOBP	myelin-associated oligodendrocyte basic protein
hsa-miR-133a	1	0	0	1	0	0	CARD11	caspase recruitment domain family, member 11
hsa-miR-133a	0	0	1	1	1	1	TPRA1	transmembrane protein, adipocyte asscociated 1
hsa-miR-133a	0	0	1	1	0	0	CLK2	CDC-like kinase 2
hsa-miR-133a	1	0	1	1	0	0	DNM2	dynamin 2
hsa-miR-133a	1	0	1	1	1	1	SH3BP2	SH3-domain binding protein 2
hsa-miR-133a	1	0	1	1	0	0	PLD3	phospholipase D family, member 3
hsa-miR-133a	0	0	1	1	0	0	TSGA13	testis specific, 13
hsa-miR-133a	1	0	1	1	0	0	TNPO2	transportin 2
hsa-miR-133a	0	0	0	1	0	0	ZNF628	zinc finger protein 628
hsa-miR-133a	1	0	0	1	1	1	SDCCAG3	serologically defined colon cancer antigen 3
hsa-miR-133a	0	0	1	1	1	1	CCR3	chemokine (C-C motif) receptor 3
hsa-miR-133a	0	0	1	1	0	0	MAP3K6	mitogen-activated protein kinase kinase kinase 6
hsa-miR-133a	0	0	1	1	1	1	AP1B1	adaptor-related protein complex 1, beta 1 subunit
hsa-miR-133a	0	0	1	1	1	1	SEMA5B	sema domain, seven thrombospondin repeats (type 1 and type 1-like), transmembrane domain (TM) and short cytoplasmic domain, (semaphorin) 5B
hsa-miR-133a	0	0	1	1	0	0	HYAL2	hyaluronoglucosaminidase 2
hsa-miR-133a	1	0	1	1	1	1	EHMT1	euchromatic histone-lysine N-methyltransferase 1
hsa-miR-133a	1	0	0	1	0	0	RABEP2	rabaptin, RAB GTPase binding effector protein 2
hsa-miR-133a	1	0	1	1	1	1	MYO5A	myosin VA (heavy chain 12, myoxin)
hsa-miR-133a	1	0	1	1	1	1	POM121	POM121 transmembrane nucleoporin
hsa-miR-133a	1	0	1	1	1	1	CTNND1	catenin (cadherin-associated protein), delta 1
hsa-miR-133a	0	0	1	1	0	0	FAM3D	family with sequence similarity 3, member D
hsa-miR-133a	1	0	1	1	1	1	TRPM6	transient receptor potential cation channel, subfamily M, member 6
hsa-miR-133a	1	0	1	1	0	0	HAND2	heart and neural crest derivatives expressed 2
hsa-miR-133a	0	0	0	1	0	0	CFH	complement factor H
hsa-miR-133a	0	0	0	1	0	0	CLN3	ceroid-lipofuscinosis, neuronal 3
hsa-miR-133a	0	0	0	1	0	0	ZMYND10	zinc finger, MYND-type containing 10
hsa-miR-133a	0	0	0	1	0	0	PLEKHG4	pleckstrin homology domain containing, family G (with RhoGef domain) member 4
hsa-miR-133a	0	0	1	1	1	1	CDH4	cadherin 4, type 1, R-cadherin (retinal)
hsa-miR-133a	1	0	1	1	1	1	PIK3CD	phosphatidylinositol-4,5-bisphosphate 3-kinase, catalytic subunit delta
hsa-miR-133a	0	0	0	1	1	1	RDH16	retinol dehydrogenase 16 (all-trans)
hsa-miR-133a	1	0	1	1	0	0	ZNF219	zinc finger protein 219
hsa-miR-133a	0	0	1	1	1	1	FAM107A	family with sequence similarity 107, member A
hsa-miR-133a	1	0	1	1	1	1	PPP1R14C	protein phosphatase 1, regulatory (inhibitor) subunit 14C
hsa-miR-133a	0	0	1	1	0	0	SREBF2	sterol regulatory element binding transcription factor 2
hsa-miR-133a	1	0	1	1	1	1	GPX7	glutathione peroxidase 7
hsa-miR-133a	0	0	1	1	1	1	VWA5A	von Willebrand factor A domain containing 5A
hsa-miR-133a	0	0	0	1	0	0	POU3F3	POU class 3 homeobox 3
hsa-miR-133a	0	0	1	1	1	1	PHLDB1	pleckstrin homology-like domain, family B, member 1
hsa-miR-133a	0	0	1	1	0	0	LSM14B	LSM14B, SCD6 homolog B (S. cerevisiae)
hsa-miR-133a	0	0	0	1	0	0	DMAP1	DNA methyltransferase 1 associated protein 1
hsa-miR-133a	1	0	0	1	1	1	SBNO2	strawberry notch homolog 2 (Drosophila)
hsa-miR-133a	0	0	0	1	1	1	C16orf59	chromosome 16 open reading frame 59
hsa-miR-133a	0	0	1	1	0	0	CSAG1	chondrosarcoma associated gene 1
hsa-miR-133a	1	0	1	1	0	0	DCTN1	dynactin 1
hsa-miR-133a	1	0	0	1	1	1	TRIM67	tripartite motif containing 67
hsa-miR-133a	0	0	1	1	1	1	PARP1	poly (ADP-ribose) polymerase 1
hsa-miR-133a	0	0	1	1	1	1	FCAMR	Fc receptor, IgA, IgM, high affinity
hsa-miR-133a	0	0	0	1	0	0	TMEM81	transmembrane protein 81
hsa-miR-133a	0	0	1	1	1	1	CYB5R1	cytochrome b5 reductase 1
hsa-miR-133a	0	0	1	1	1	1	MTHFD1L	methylenetetrahydrofolate dehydrogenase (NADP+ dependent) 1-like
hsa-miR-133a	0	0	1	1	0	0	TMEM9	transmembrane protein 9
hsa-miR-133a	1	0	0	1	1	1	SWT1	SWT1 RNA endoribonuclease homolog (S. cerevisiae)
hsa-miR-133a	1	0	1	1	1	1	OLIG3	oligodendrocyte transcription factor 3
hsa-miR-133a	1	0	1	1	1	1	PRRC2C	proline-rich coiled-coil 2C
hsa-miR-133a	0	0	0	1	1	1	GPR161	G protein-coupled receptor 161
hsa-miR-133a	0	0	1	1	1	1	ATP1A4	ATPase, Na+/K+ transporting, alpha 4 polypeptide
hsa-miR-133a	0	0	1	1	0	0	DUSP23	dual specificity phosphatase 23
hsa-miR-133a	0	0	1	1	1	1	CRP	C-reactive protein, pentraxin-related
hsa-miR-133a	0	0	0	1	0	0	TTC24	tetratricopeptide repeat domain 24
hsa-miR-133a	0	0	1	1	0	0	CCT3	chaperonin containing TCP1, subunit 3 (gamma)
hsa-miR-133a	0	0	1	1	0	0	DCST1	DC-STAMP domain containing 1
hsa-miR-133a	0	0	1	1	0	0	FLAD1	FAD1 flavin adenine dinucleotide synthetase homolog (S. cerevisiae)
hsa-miR-133a	0	0	1	1	1	1	GLRX3	glutaredoxin 3
hsa-miR-133a	0	0	1	1	1	1	S100A14	S100 calcium binding protein A14
hsa-miR-133a	0	0	0	1	0	0	S100A9	S100 calcium binding protein A9
hsa-miR-133a	0	0	0	1	0	0	LCE1C	late cornified envelope 1C
hsa-miR-133a	0	0	0	1	1	1	LCE2D	late cornified envelope 2D
hsa-miR-133a	0	0	0	1	0	0	BOLA1	bolA homolog 1 (E. coli)
hsa-miR-133a	0	0	0	1	1	1	CD2	CD2 molecule
hsa-miR-133a	1	0	1	1	1	1	FAM40A	family with sequence similarity 40, member A
hsa-miR-133a	0	0	0	1	0	0	HTR1B	5-hydroxytryptamine (serotonin) receptor 1B, G protein-coupled
hsa-miR-133a	0	0	1	1	0	0	PITX3	paired-like homeodomain 3
hsa-miR-133a	0	0	0	1	0	0	TNFRSF6B	tumor necrosis factor receptor superfamily, member 6b, decoy
hsa-miR-133a	0	0	1	1	0	0	RTEL1	regulator of telomere elongation helicase 1
hsa-miR-133a	1	0	1	1	0	0	POLL	polymerase (DNA directed), lambda
hsa-miR-133a	0	0	0	1	0	0	LOC100130152	uncharacterized LOC100130152
hsa-miR-133a	1	0	1	1	1	1	VMA21	VMA21 vacuolar H+-ATPase homolog (S. cerevisiae)
hsa-miR-133a	1	0	1	1	1	1	HS6ST2	heparan sulfate 6-O-sulfotransferase 2
hsa-miR-133a	0	0	1	1	0	0	L1TD1	LINE-1 type transposase domain containing 1
hsa-miR-133a	0	0	1	1	0	0	BCAS4	breast carcinoma amplified sequence 4
hsa-miR-133a	1	0	1	1	1	1	NCOA3	nuclear receptor coactivator 3
hsa-miR-133a	1	0	1	1	1	1	GHITM	growth hormone inducible transmembrane protein
hsa-miR-133a	0	0	0	1	1	1	DDX31	DEAD (Asp-Glu-Ala-Asp) box polypeptide 31
hsa-miR-133a	1	0	1	1	1	1	MED27	mediator complex subunit 27
hsa-miR-133a	0	0	1	1	1	1	KIF2C	kinesin family member 2C
hsa-miR-133a	0	0	1	1	0	0	MMP9	matrix metallopeptidase 9 (gelatinase B, 92kDa gelatinase, 92kDa type IV collagenase)
hsa-miR-133a	0	0	1	1	1	1	EPPIN	epididymal peptidase inhibitor
hsa-miR-133a	0	0	1	1	0	0	WFDC6	WAP four-disulfide core domain 6
hsa-miR-133a	0	0	0	1	0	0	SEMG2	semenogelin II
hsa-miR-133a	0	0	1	1	1	1	SEMG1	semenogelin I
hsa-miR-133a	0	0	1	1	0	0	GNMT	glycine N-methyltransferase
hsa-miR-133a	0	0	1	1	1	1	SRPX2	sushi-repeat containing protein, X-linked 2
hsa-miR-133a	1	0	1	1	0	0	FRS3	fibroblast growth factor receptor substrate 3
hsa-miR-133a	0	0	1	1	0	0	CSF3R	colony stimulating factor 3 receptor (granulocyte)
hsa-miR-133a	1	0	1	1	0	0	CCDC167	coiled-coil domain containing 167
hsa-miR-133a	0	0	0	1	1	1	LHFPL5	lipoma HMGIC fusion partner-like 5
hsa-miR-133a	0	0	0	1	1	1	NFS1	NFS1 nitrogen fixation 1 homolog (S. cerevisiae)
hsa-miR-133a	0	0	1	1	0	0	OGDHL	oxoglutarate dehydrogenase-like
hsa-miR-133a	0	0	1	1	0	0	ZNF593	zinc finger protein 593
hsa-miR-133a	0	0	1	1	0	0	STPG1	sperm-tail PG-rich repeat containing 1
hsa-miR-133a	1	0	1	1	1	1	FUCA1	fucosidase, alpha-L- 1, tissue
hsa-miR-133a	0	0	0	1	0	0	DAXX	death-domain associated protein
hsa-miR-133a	0	0	1	1	1	1	C1orf213	chromosome 1 open reading frame 213
hsa-miR-133a	0	0	1	1	1	1	RING1	ring finger protein 1
hsa-miR-133a	0	0	1	1	0	0	AOX1	aldehyde oxidase 1
hsa-miR-133a	0	0	0	1	1	1	PSMB9	proteasome (prosome, macropain) subunit, beta type, 9 (large multifunctional peptidase 2)
hsa-miR-133a	0	0	0	1	0	0	OR10G8	olfactory receptor, family 10, subfamily G, member 8
hsa-miR-133a	0	0	1	1	0	0	CCDC7	coiled-coil domain containing 7
hsa-miR-133a	0	0	1	1	0	0	C10orf68	chromosome 10 open reading frame 68
hsa-miR-133a	0	0	0	1	0	0	HSD17B3	hydroxysteroid (17-beta) dehydrogenase 3
hsa-miR-133a	0	0	1	1	1	1	TAGLN	transgelin
hsa-miR-133a	0	0	1	1	0	0	HSD17B10	hydroxysteroid (17-beta) dehydrogenase 10
hsa-miR-133a	1	0	1	1	1	1	SMC1A	structural maintenance of chromosomes 1A
hsa-miR-133a	0	0	0	1	0	0	GRTP1	growth hormone regulated TBC protein 1
hsa-miR-133a	1	0	1	1	1	1	FGD3	FYVE, RhoGEF and PH domain containing 3
hsa-miR-133a	0	0	0	1	0	0	FAM156B	family with sequence similarity 156, member B
hsa-miR-133a	0	0	1	1	0	0	CROCC	ciliary rootlet coiled-coil, rootletin
hsa-miR-133a	0	0	0	1	0	0	RSG1	REM2 and RAB-like small GTPase 1
hsa-miR-133a	1	0	1	1	1	1	C20orf112	chromosome 20 open reading frame 112
hsa-miR-133a	1	0	1	1	1	1	AXIN2	axin 2
hsa-miR-133a	0	0	1	1	0	0	DDAH2	dimethylarginine dimethylaminohydrolase 2
hsa-miR-133a	0	0	0	1	0	0	LY6G6D	lymphocyte antigen 6 complex, locus G6D
hsa-miR-133a	0	0	0	1	0	0	LY6G6F	lymphocyte antigen 6 complex, locus G6F
hsa-miR-133a	0	0	1	1	1	1	SHC3	SHC (Src homology 2 domain containing) transforming protein 3
hsa-miR-133a	0	0	0	1	0	0	GPANK1	G patch domain and ankyrin repeats 1
hsa-miR-133a	1	0	1	1	1	1	GOLM1	golgi membrane protein 1
hsa-miR-133a	0	0	0	1	1	1	FOXP3	forkhead box P3
hsa-miR-133a	0	0	1	1	0	0	HLA-C	major histocompatibility complex, class I, C
hsa-miR-133a	0	0	0	1	0	0	CACNA1F	calcium channel, voltage-dependent, L type, alpha 1F subunit
hsa-miR-133a	1	0	0	1	1	1	PRAF2	PRA1 domain family, member 2
hsa-miR-133a	0	0	0	1	1	1	MDC1	mediator of DNA-damage checkpoint 1
hsa-miR-133a	1	0	0	1	0	0	NRM	nurim (nuclear envelope membrane protein)
hsa-miR-133a	0	0	1	1	1	1	HLA-A	major histocompatibility complex, class I, A
hsa-miR-133a	0	0	0	1	0	0	HLA-F	major histocompatibility complex, class I, F
hsa-miR-133a	0	0	1	1	0	0	UBD	ubiquitin D
hsa-miR-133a	0	0	1	1	1	1	CD300LG	CD300 molecule-like family member g
hsa-miR-133a	0	0	1	1	1	1	TJP2	tight junction protein 2
hsa-miR-133a	0	0	1	1	1	1	PLXDC2	plexin domain containing 2
hsa-miR-133a	0	0	0	1	0	0	ASB10	ankyrin repeat and SOCS box containing 10
hsa-miR-133a	0	0	0	1	0	0	ACTRT2	actin-related protein T2
hsa-miR-133a	1	0	1	1	1	1	NRSN1	neurensin 1
hsa-miR-133a	0	0	1	1	0	0	ISG20	interferon stimulated exonuclease gene 20kDa
hsa-miR-133a	0	0	1	1	0	0	UBAP2	ubiquitin associated protein 2
hsa-miR-133a	0	0	0	1	0	0	TNFRSF4	tumor necrosis factor receptor superfamily, member 4
hsa-miR-133a	0	0	0	1	0	0	ADRA1D	adrenoceptor alpha 1D
hsa-miR-133a	0	0	1	1	0	0	SLC4A11	solute carrier family 4, sodium borate transporter, member 11
hsa-miR-133a	0	0	0	1	0	0	KRTAP12-3	keratin associated protein 12-3
hsa-miR-133a	0	0	0	1	1	1	KRTAP10-10	keratin associated protein 10-10
hsa-miR-133a	0	0	0	1	0	0	KRTAP10-11	keratin associated protein 10-11
hsa-miR-133a	0	0	1	1	1	1	TRIM34	tripartite motif containing 34
hsa-miR-133a	0	0	1	1	1	1	TRIM6	tripartite motif containing 6
hsa-miR-133a	0	0	1	1	1	1	TRIM6-TRIM34	TRIM6-TRIM34 readthrough
hsa-miR-133a	0	0	1	1	0	0	ALOXE3	arachidonate lipoxygenase 3
hsa-miR-133a	1	0	1	1	1	1	FRY	furry homolog (Drosophila)
hsa-miR-133a	0	0	1	1	1	1	FUS	fused in sarcoma
hsa-miR-133a	0	0	1	1	0	0	FAM57B	family with sequence similarity 57, member B
hsa-miR-133a	1	0	1	1	1	1	ADAMTSL1	ADAMTS-like 1
hsa-miR-133a	1	0	1	1	1	1	WRNIP1	Werner helicase interacting protein 1
hsa-miR-133a	0	0	0	1	0	0	FAM116B	family with sequence similarity 116, member B
hsa-miR-133a	0	0	1	1	1	1	A4GALT	alpha 1,4-galactosyltransferase
hsa-miR-133a	0	0	0	1	1	1	ADARB2	adenosine deaminase, RNA-specific, B2
hsa-miR-133a	0	0	1	1	1	1	CSF2RA	colony stimulating factor 2 receptor, alpha, low-affinity (granulocyte-macrophage)
hsa-miR-133a	0	0	0	1	0	0	LOC100131094	uncharacterized LOC100131094
hsa-miR-133a	0	0	1	1	0	0	FAM110A	family with sequence similarity 110, member A
hsa-miR-133a	0	0	0	1	0	0	DNASE1L2	deoxyribonuclease I-like 2
hsa-miR-133a	0	0	1	1	1	1	SH3TC1	SH3 domain and tetratricopeptide repeats 1
hsa-miR-133a	0	0	1	1	1	1	WHSC2	Wolf-Hirschhorn syndrome candidate 2
hsa-miR-133a	0	0	1	1	1	1	MST1	macrophage stimulating 1 (hepatocyte growth factor-like)
hsa-miR-133a	0	0	0	1	0	0	TMEM42	transmembrane protein 42
hsa-miR-133a	0	0	0	1	0	0	CCDC57	coiled-coil domain containing 57
hsa-miR-133a	0	0	1	1	0	0	DNAH17	dynein, axonemal, heavy chain 17
hsa-miR-133a	0	0	0	1	0	0	NKX1-1	NK1 homeobox 1
hsa-miR-133a	0	0	1	1	1	1	GALK2	galactokinase 2
hsa-miR-133a	1	0	1	1	1	1	ENAH	enabled homolog (Drosophila)
hsa-miR-133a	1	0	0	1	1	1	ZNF260	zinc finger protein 260
hsa-miR-133a	1	0	1	1	1	1	SERBP1	SERPINE1 mRNA binding protein 1
hsa-miR-133a	1	0	1	0	1	1	SAMD5	sterile alpha motif domain containing 5
hsa-miR-133a	1	0	1	1	1	1	WIPI2	WD repeat domain, phosphoinositide interacting 2
hsa-miR-133a	0	0	1	1	1	1	PRPS2	phosphoribosyl pyrophosphate synthetase 2
hsa-miR-133a	0	0	1	0	1	1	RGS21	regulator of G-protein signaling 21
hsa-miR-133a	0	0	0	1	1	1	CXCR3	chemokine (C-X-C motif) receptor 3
hsa-miR-133a	1	0	1	0	1	1	PCDHGC3	protocadherin gamma subfamily C, 3
hsa-miR-133a	1	0	1	0	1	1	PCDHGA12	protocadherin gamma subfamily A, 12
hsa-miR-133a	0	0	1	1	1	1	TRDMT1	tRNA aspartic acid methyltransferase 1
hsa-miR-133a	0	0	1	1	1	1	CAP2	CAP, adenylate cyclase-associated protein, 2 (yeast)
hsa-miR-133a	0	0	0	1	1	1	POLH	polymerase (DNA directed), eta
hsa-miR-133a	0	0	1	1	1	1	TMOD3	tropomodulin 3 (ubiquitous)
hsa-miR-133a	0	0	1	0	1	1	LPIN2	lipin 2
hsa-miR-133a	0	0	0	1	1	1	GLOD4	glyoxalase domain containing 4
hsa-miR-133a	0	0	0	0	1	1	COQ7	coenzyme Q7 homolog, ubiquinone (yeast)
hsa-miR-133a	0	0	1	0	1	1	GPR83	G protein-coupled receptor 83
hsa-miR-133a	0	0	1	0	1	1	PAX5	paired box 5
hsa-miR-133a	0	0	0	1	1	1	SAMD9	sterile alpha motif domain containing 9
hsa-miR-133a	0	0	1	1	1	1	WDR33	WD repeat domain 33
hsa-miR-133a	1	0	1	1	1	1	PCDHGA1	protocadherin gamma subfamily A, 1
hsa-miR-133a	1	0	1	0	1	1	PCDHGA10	protocadherin gamma subfamily A, 10
hsa-miR-133a	1	0	1	0	1	1	PCDHGA11	protocadherin gamma subfamily A, 11
hsa-miR-133a	1	0	1	1	1	1	PCDHGA2	protocadherin gamma subfamily A, 2
hsa-miR-133a	1	0	1	0	1	1	PCDHGA3	protocadherin gamma subfamily A, 3
hsa-miR-133a	1	0	1	0	1	1	PCDHGA5	protocadherin gamma subfamily A, 5
hsa-miR-133a	1	0	1	0	1	1	PCDHGA7	protocadherin gamma subfamily A, 7
hsa-miR-133a	1	0	1	0	1	1	PCDHGA9	protocadherin gamma subfamily A, 9
hsa-miR-133a	1	0	1	0	1	1	PCDHGB3	protocadherin gamma subfamily B, 3
hsa-miR-133a	1	0	1	0	1	1	PCDHGB7	protocadherin gamma subfamily B, 7
hsa-miR-133a	0	0	1	0	1	1	SLC6A20	solute carrier family 6 (proline IMINO transporter), member 20
hsa-miR-133a	1	0	1	1	1	1	C12orf4	chromosome 12 open reading frame 4
hsa-miR-133a	1	0	1	1	1	1	SH3TC2	SH3 domain and tetratricopeptide repeats 2
hsa-miR-133a	1	0	1	0	1	1	PCDHGA8	protocadherin gamma subfamily A, 8
hsa-miR-133a	0	0	0	1	1	1	ZNF670	zinc finger protein 670
hsa-miR-133a	0	0	1	1	1	1	OSCAR	osteoclast associated, immunoglobulin-like receptor
hsa-miR-133a	0	0	0	0	1	1	TSPAN18	tetraspanin 18
hsa-miR-133a	0	0	0	0	1	1	TOR1AIP2	torsin A interacting protein 2
hsa-miR-133a	0	0	0	1	1	1	C20orf166-AS1	C20orf166 antisense RNA 1
hsa-miR-133a	0	0	1	0	1	1	C9orf91	chromosome 9 open reading frame 91
hsa-miR-133a	1	0	1	1	1	1	SLC24A4	solute carrier family 24 (sodium/potassium/calcium exchanger), member 4
hsa-miR-133a	1	0	0	1	1	1	ZFP1	zinc finger protein 1 homolog (mouse)
hsa-miR-133a	0	0	1	1	1	1	AQPEP	laeverin
hsa-miR-133a	0	0	1	1	1	1	LHFPL4	lipoma HMGIC fusion partner-like 4
hsa-miR-133a	0	0	0	0	1	1	LOC340113	uncharacterized LOC340113
hsa-miR-133a	0	0	0	0	1	1	LOC645086	chromosome 11 open reading frame 58 pseudogene
hsa-miR-133a	0	0	1	1	0	0	KCNH2	potassium voltage-gated channel, subfamily H (eag-related), member 2
hsa-miR-133a	0	0	0	1	0	0	TPI1	triosephosphate isomerase 1
hsa-miR-133a	1	0	1	0	1	1	RAG1	recombination activating gene 1
hsa-miR-133a	1	0	1	0	1	1	RAB11FIP1	RAB11 family interacting protein 1 (class I)
hsa-miR-133a	1	0	1	0	1	1	OSBPL8	oxysterol binding protein-like 8
hsa-miR-133a	1	0	1	1	1	1	CACNA2D2	calcium channel, voltage-dependent, alpha 2/delta subunit 2
hsa-miR-133a	0	0	0	1	1	1	ABCA3	ATP-binding cassette, sub-family A (ABC1), member 3
hsa-miR-133a	0	0	1	1	1	1	ARHGAP6	Rho GTPase activating protein 6
hsa-miR-133a	1	0	1	0	1	1	BACH1	BTB and CNC homology 1, basic leucine zipper transcription factor 1
hsa-miR-133a	1	0	1	1	1	1	DUSP9	dual specificity phosphatase 9
hsa-miR-133a	0	0	1	0	0	0	BAI1	brain-specific angiogenesis inhibitor 1
hsa-miR-133a	1	0	1	1	1	1	CDC42	cell division cycle 42 (GTP binding protein, 25kDa)
hsa-miR-133a	1	0	1	1	1	1	DLST	dihydrolipoamide S-succinyltransferase (E2 component of 2-oxo-glutarate complex)
hsa-miR-133a	0	0	1	1	0	0	EIF5A	eukaryotic translation initiation factor 5A
hsa-miR-133a	1	0	0	1	1	1	PABPC1	poly(A) binding protein, cytoplasmic 1
hsa-miR-133a	1	0	1	0	1	1	PAPPA	pregnancy-associated plasma protein A, pappalysin 1
hsa-miR-133a	0	0	1	1	1	1	PTPN12	protein tyrosine phosphatase, non-receptor type 12
hsa-miR-133a	1	0	1	1	1	1	SRSF2	serine/arginine-rich splicing factor 2
hsa-miR-133a	1	0	1	1	0	0	TCF7	transcription factor 7 (T-cell specific, HMG-box)
hsa-miR-133a	1	0	1	0	1	1	PCDHGB4	protocadherin gamma subfamily B, 4
hsa-miR-133a	0	0	1	1	0	0	CDK5R2	cyclin-dependent kinase 5, regulatory subunit 2 (p39)
hsa-miR-133a	1	0	1	0	1	1	PLK3	polo-like kinase 3
hsa-miR-133a	0	0	1	1	1	1	TIMM8A	translocase of inner mitochondrial membrane 8 homolog A (yeast)
hsa-miR-133a	1	0	1	0	1	1	ACVR1B	activin A receptor, type IB
hsa-miR-133a	0	0	1	1	0	0	COX6A1	cytochrome c oxidase subunit VIa polypeptide 1
hsa-miR-133a	1	0	1	0	1	1	ACSL4	acyl-CoA synthetase long-chain family member 4
hsa-miR-133a	1	0	1	1	1	1	FLOT2	flotillin 2
hsa-miR-133a	0	0	1	1	0	0	ARHGEF2	Rho/Rac guanine nucleotide exchange factor (GEF) 2
hsa-miR-133a	1	0	1	1	1	1	DLG5	discs, large homolog 5 (Drosophila)
hsa-miR-133a	1	0	1	1	1	1	CLTC	clathrin, heavy chain (Hc)
hsa-miR-133a	1	0	1	1	0	0	ZMYM3	zinc finger, MYM-type 3
hsa-miR-133a	1	0	1	1	1	1	GPR3	G protein-coupled receptor 3
hsa-miR-133a	0	0	1	1	1	1	PAPSS1	3'-phosphoadenosine 5'-phosphosulfate synthase 1
hsa-miR-133a	0	0	1	1	1	1	DNAJB6	DnaJ (Hsp40) homolog, subfamily B, member 6
hsa-miR-133a	1	0	1	1	1	1	LHFPL2	lipoma HMGIC fusion partner-like 2
hsa-miR-133a	1	0	1	0	1	1	NAB1	NGFI-A binding protein 1 (EGR1 binding protein 1)
hsa-miR-133a	1	0	1	1	1	1	NUMA1	nuclear mitotic apparatus protein 1
hsa-miR-133a	1	0	1	1	1	1	RANBP2	RAN binding protein 2
hsa-miR-133a	1	0	1	1	0	0	GAS2L1	growth arrest-specific 2 like 1
hsa-miR-133a	1	0	1	0	1	1	GNAI3	guanine nucleotide binding protein (G protein), alpha inhibiting activity polypeptide 3
hsa-miR-133a	1	0	1	0	1	1	SLC19A2	solute carrier family 19 (thiamine transporter), member 2
hsa-miR-133a	0	0	1	1	1	1	AKAP10	A kinase (PRKA) anchor protein 10
hsa-miR-133a	1	0	1	1	1	1	LYPLA2	lysophospholipase II
hsa-miR-133a	0	0	1	1	1	1	DLEC1	deleted in lung and esophageal cancer 1
hsa-miR-133a	0	0	1	1	1	1	FBXO24	F-box protein 24
hsa-miR-133a	0	0	1	1	0	0	ZDHHC8	zinc finger, DHHC-type containing 8
hsa-miR-133a	1	0	1	1	1	1	NPTXR	neuronal pentraxin receptor
hsa-miR-133a	0	0	1	1	1	1	TRAM1	translocation associated membrane protein 1
hsa-miR-133a	1	0	1	1	1	1	PALD1	phosphatase domain containing, paladin 1
hsa-miR-133a	1	0	1	1	1	1	CDR2L	cerebellar degeneration-related protein 2-like
hsa-miR-133a	1	0	1	1	1	1	SECISBP2L	SECIS binding protein 2-like
hsa-miR-133a	1	0	1	1	1	1	BAHD1	bromo adjacent homology domain containing 1
hsa-miR-133a	1	0	1	1	1	1	MYCBP2	MYC binding protein 2, E3 ubiquitin protein ligase
hsa-miR-133a	1	0	1	1	1	1	TRIM2	tripartite motif containing 2
hsa-miR-133a	1	0	1	1	1	1	SASH1	SAM and SH3 domain containing 1
hsa-miR-133a	1	0	1	1	1	1	GAPVD1	GTPase activating protein and VPS9 domains 1
hsa-miR-133a	1	0	1	1	1	1	MINK1	misshapen-like kinase 1
hsa-miR-133a	1	0	1	1	1	1	AZIN1	antizyme inhibitor 1
hsa-miR-133a	1	0	1	1	1	1	RAB14	RAB14, member RAS oncogene family
hsa-miR-133a	0	0	1	1	1	1	RAPGEF6	Rap guanine nucleotide exchange factor (GEF) 6
hsa-miR-133a	0	0	1	1	0	0	NCKIPSD	NCK interacting protein with SH3 domain
hsa-miR-133a	0	0	1	1	0	0	CRYGS	crystallin, gamma S
hsa-miR-133a	1	0	1	1	1	1	ZC3H7B	zinc finger CCCH-type containing 7B
hsa-miR-133a	0	0	1	1	1	1	CDKN2AIP	CDKN2A interacting protein
hsa-miR-133a	1	0	1	1	1	1	FAM118A	family with sequence similarity 118, member A
hsa-miR-133a	1	0	1	0	1	1	PCDHGA4	protocadherin gamma subfamily A, 4
hsa-miR-133a	1	0	1	0	1	1	PCDHGA6	protocadherin gamma subfamily A, 6
hsa-miR-133a	1	0	1	0	1	1	PCDHGB1	protocadherin gamma subfamily B, 1
hsa-miR-133a	1	0	1	0	1	1	PCDHGB2	protocadherin gamma subfamily B, 2
hsa-miR-133a	1	0	1	0	1	1	PCDHGB5	protocadherin gamma subfamily B, 5
hsa-miR-133a	1	0	1	0	1	1	PCDHGB6	protocadherin gamma subfamily B, 6
hsa-miR-133a	1	0	1	0	1	1	PCDHGC4	protocadherin gamma subfamily C, 4
hsa-miR-133a	1	0	1	0	1	1	PCDHGC5	protocadherin gamma subfamily C, 5
hsa-miR-133a	0	0	1	1	1	1	FAM134B	family with sequence similarity 134, member B
hsa-miR-133a	0	0	1	1	1	1	MIOS	missing oocyte, meiosis regulator, homolog (Drosophila)
hsa-miR-133a	1	0	1	1	1	1	SETD8	SET domain containing (lysine methyltransferase) 8
hsa-miR-133a	0	0	1	1	0	0	CORO1B	coronin, actin binding protein, 1B
hsa-miR-133a	1	0	1	1	1	1	SMEK2	SMEK homolog 2, suppressor of mek1 (Dictyostelium)
hsa-miR-133a	1	0	1	1	1	1	NLGN2	neuroligin 2
hsa-miR-133a	1	0	1	0	1	1	PACSIN1	protein kinase C and casein kinase substrate in neurons 1
hsa-miR-133a	1	0	1	0	1	1	CRAMP1L	Crm, cramped-like (Drosophila)
hsa-miR-133a	1	0	1	0	1	1	GRAMD1A	GRAM domain containing 1A
hsa-miR-133a	1	0	1	1	1	1	TGIF2	TGFB-induced factor homeobox 2
hsa-miR-133a	1	0	1	0	1	1	OTUB2	OTU domain, ubiquitin aldehyde binding 2
hsa-miR-133a	0	0	0	1	0	0	HOXA6	homeobox A6
hsa-miR-133a	0	0	1	1	1	1	HMBOX1	homeobox containing 1
hsa-miR-133a	1	0	1	1	1	1	SMEK1	SMEK homolog 1, suppressor of mek1 (Dictyostelium)
hsa-miR-133a	1	0	1	1	0	0	ZC3H10	zinc finger CCCH-type containing 10
hsa-miR-133a	1	0	1	1	0	0	ATOH8	atonal homolog 8 (Drosophila)
hsa-miR-133a	0	0	1	1	1	1	FBXL20	F-box and leucine-rich repeat protein 20
hsa-miR-133a	0	0	1	1	1	1	CALML4	calmodulin-like 4
hsa-miR-133a	1	0	1	0	1	1	SLC25A25	solute carrier family 25 (mitochondrial carrier; phosphate carrier), member 25
hsa-miR-133a	1	0	1	1	1	1	ZFP91	zinc finger protein 91 homolog (mouse)
hsa-miR-133a	1	0	1	1	1	1	SREK1	splicing regulatory glutamine/lysine-rich protein 1
hsa-miR-133a	1	0	1	1	1	1	NCOA1	nuclear receptor coactivator 1
hsa-miR-133a	0	0	1	0	1	1	CHKB	choline kinase beta
hsa-miR-133a	1	0	1	1	0	0	C15orf27	chromosome 15 open reading frame 27
hsa-miR-133a	0	0	0	1	1	1	SNX33	sorting nexin 33
hsa-miR-133a	0	0	1	1	0	0	GPR97	G protein-coupled receptor 97
hsa-miR-133a	0	0	1	1	1	1	IL6ST	interleukin 6 signal transducer (gp130, oncostatin M receptor)
hsa-miR-133a	1	0	1	0	1	1	C14orf43	chromosome 14 open reading frame 43
hsa-miR-133a	1	0	1	1	1	1	CAPN3	calpain 3, (p94)
hsa-miR-133a	1	0	1	1	1	1	METTL10	methyltransferase like 10
