# Supplementary material for: Profiling of Selected MicroRNAs in Proliferative Eutopic Endometrium of Women with Ovarian Endometriosis
Source: Biomed Res Int. 2015 Aug 20;2015:760698. doi: 10.1155/2015/760698 (PMC4558423; doi:10.1155/2015/760698)
Supplement: Supplementary file 1 — Table I: The names of miRNAs significantly differentially expressed between eutopic endometrium of patients with endometriosis vs eutopic endometrium of patients without endometriosis. Table II: The associations between miRNA and mRNA, which presents detailed results of the search of six major databases i.e targetscan, tarbase, miranda, mirbase, mirtarget2 and pictar. [file 760698.f1.zip › 760698.f1/Table II/hsa-miR-137.tsv]

miR	targetscan	tarbase	miranda	mirbase	mirtarget2	pictar	GeneSymbol	GeneName
hsa-miR-137	1	0	1	0	1	1	RYR3	ryanodine receptor 3
hsa-miR-137	1	0	1	1	1	1	C21orf91	chromosome 21 open reading frame 91
hsa-miR-137	1	0	1	1	1	1	CHGA	chromogranin A (parathyroid secretory protein 1)
hsa-miR-137	1	0	1	1	1	1	NCOA3	nuclear receptor coactivator 3
hsa-miR-137	1	0	1	1	1	1	BCL2L11	BCL2-like 11 (apoptosis facilitator)
hsa-miR-137	1	0	1	1	1	1	KANK4	KN motif and ankyrin repeat domains 4
hsa-miR-137	1	0	0	1	0	0	TMEM184A	transmembrane protein 184A
hsa-miR-137	1	0	1	1	1	1	LIMCH1	LIM and calponin homology domains 1
hsa-miR-137	1	0	1	1	1	1	C18orf1	chromosome 18 open reading frame 1
hsa-miR-137	1	0	1	1	1	1	CRKL	v-crk sarcoma virus CT10 oncogene homolog (avian)-like
hsa-miR-137	1	0	1	1	1	1	TCF4	transcription factor 4
hsa-miR-137	1	0	1	1	1	1	HOXD10	homeobox D10
hsa-miR-137	1	0	1	1	1	1	BNIP2	BCL2/adenovirus E1B 19kDa interacting protein 2
hsa-miR-137	1	0	1	1	1	1	SMC1A	structural maintenance of chromosomes 1A
hsa-miR-137	1	0	1	0	1	1	KIAA1024	KIAA1024
hsa-miR-137	1	0	1	1	1	1	RCAN2	regulator of calcineurin 2
hsa-miR-137	1	0	1	1	1	1	GCFC1	GC-rich sequence DNA-binding factor 1
hsa-miR-137	1	0	1	1	1	1	RIMKLB	ribosomal modification protein rimK-like family member B
hsa-miR-137	1	0	1	0	1	1	MSRB3	methionine sulfoxide reductase B3
hsa-miR-137	1	0	1	1	1	1	ZNF449	zinc finger protein 449
hsa-miR-137	1	0	1	1	1	1	PDE4A	phosphodiesterase 4A, cAMP-specific
hsa-miR-137	1	0	1	1	1	1	PLCB1	phospholipase C, beta 1 (phosphoinositide-specific)
hsa-miR-137	1	0	1	1	1	1	CYB5R4	cytochrome b5 reductase 4
hsa-miR-137	1	0	1	1	1	1	MYO1D	myosin ID
hsa-miR-137	1	0	1	0	1	1	ESRRG	estrogen-related receptor gamma
hsa-miR-137	1	1	1	1	0	0	EFNA3	ephrin-A3
hsa-miR-137	1	0	1	1	1	1	RSBN1	round spermatid basic protein 1
hsa-miR-137	1	0	1	1	1	1	ZNF280C	zinc finger protein 280C
hsa-miR-137	1	0	1	1	1	1	TCF12	transcription factor 12
hsa-miR-137	1	0	1	1	0	0	RASIP1	Ras interacting protein 1
hsa-miR-137	1	0	1	1	1	1	HNRPDL	heterogeneous nuclear ribonucleoprotein D-like
hsa-miR-137	1	0	0	1	1	1	CCT6A	chaperonin containing TCP1, subunit 6A (zeta 1)
hsa-miR-137	1	0	1	0	1	1	OSBPL8	oxysterol binding protein-like 8
hsa-miR-137	1	0	1	1	1	1	UGP2	UDP-glucose pyrophosphorylase 2
hsa-miR-137	1	0	1	1	1	1	ZDHHC3	zinc finger, DHHC-type containing 3
hsa-miR-137	1	0	1	0	0	0	FAT3	FAT tumor suppressor homolog 3 (Drosophila)
hsa-miR-137	1	0	1	1	1	1	CPSF6	cleavage and polyadenylation specific factor 6, 68kDa
hsa-miR-137	1	0	1	1	0	0	TRPC3	transient receptor potential cation channel, subfamily C, member 3
hsa-miR-137	1	0	1	1	0	0	TTC9	tetratricopeptide repeat domain 9
hsa-miR-137	1	0	1	1	1	1	CADPS	Ca++-dependent secretion activator
hsa-miR-137	1	0	1	1	1	1	PRKAR2B	protein kinase, cAMP-dependent, regulatory, type II, beta
hsa-miR-137	1	0	1	1	1	1	FNIP1	folliculin interacting protein 1
hsa-miR-137	1	0	1	1	1	1	FNDC5	fibronectin type III domain containing 5
hsa-miR-137	1	0	1	1	1	1	DR1	down-regulator of transcription 1, TBP-binding (negative cofactor 2)
hsa-miR-137	1	0	0	1	0	0	CDC42EP2	CDC42 effector protein (Rho GTPase binding) 2
hsa-miR-137	1	0	1	1	0	0	RNF39	ring finger protein 39
hsa-miR-137	1	0	1	1	1	1	FAM81A	family with sequence similarity 81, member A
hsa-miR-137	1	0	1	1	1	1	DHX40	DEAH (Asp-Glu-Ala-His) box polypeptide 40
hsa-miR-137	1	0	1	1	1	1	KCNA2	potassium voltage-gated channel, shaker-related subfamily, member 2
hsa-miR-137	1	0	1	0	1	1	OSTM1	osteopetrosis associated transmembrane protein 1
hsa-miR-137	1	0	1	1	1	1	PALM2-AKAP2	PALM2-AKAP2 readthrough
hsa-miR-137	1	0	1	1	1	1	KCNJ3	potassium inwardly-rectifying channel, subfamily J, member 3
hsa-miR-137	1	0	1	0	1	1	ZC3H6	zinc finger CCCH-type containing 6
hsa-miR-137	1	0	1	1	1	1	MITF	microphthalmia-associated transcription factor
hsa-miR-137	1	0	1	1	0	0	KDM1A	lysine (K)-specific demethylase 1A
hsa-miR-137	1	0	1	0	1	1	TRPS1	trichorhinophalangeal syndrome I
hsa-miR-137	1	0	1	0	1	1	SLC6A6	solute carrier family 6 (neurotransmitter transporter, taurine), member 6
hsa-miR-137	1	0	1	1	1	1	QKI	QKI, KH domain containing, RNA binding
hsa-miR-137	1	0	1	0	1	1	ZZEF1	zinc finger, ZZ-type with EF-hand domain 1
hsa-miR-137	1	0	1	1	1	1	TMED5	transmembrane emp24 protein transport domain containing 5
hsa-miR-137	1	0	1	1	1	1	MAX	MYC associated factor X
hsa-miR-137	1	0	1	0	1	1	SLC19A2	solute carrier family 19 (thiamine transporter), member 2
hsa-miR-137	1	0	1	1	1	1	CHM	choroideremia (Rab escort protein 1)
hsa-miR-137	1	0	1	1	1	1	ZNF770	zinc finger protein 770
hsa-miR-137	1	0	1	1	1	1	L3MBTL4	l(3)mbt-like 4 (Drosophila)
hsa-miR-137	1	0	1	0	1	1	ACVR1C	activin A receptor, type IC
hsa-miR-137	1	0	1	1	1	1	SPTY2D1	SPT2, Suppressor of Ty, domain containing 1 (S. cerevisiae)
hsa-miR-137	1	0	1	0	1	1	CPD	carboxypeptidase D
hsa-miR-137	1	0	1	0	0	0	PITPNM2	phosphatidylinositol transfer protein, membrane-associated 2
hsa-miR-137	1	0	0	1	1	1	CACFD1	calcium channel flower domain containing 1
hsa-miR-137	1	0	1	1	1	1	ESRRA	estrogen-related receptor alpha
hsa-miR-137	1	0	1	0	1	1	HNRNPA3	heterogeneous nuclear ribonucleoprotein A3
hsa-miR-137	1	0	1	1	0	0	ZC3H3	zinc finger CCCH-type containing 3
hsa-miR-137	1	0	1	1	1	1	MTMR4	myotubularin related protein 4
hsa-miR-137	1	0	1	1	0	0	PROSAPIP1	ProSAPiP1 protein
hsa-miR-137	1	0	1	1	1	1	CDH12	cadherin 12, type 2 (N-cadherin 2)
hsa-miR-137	1	0	1	0	1	1	SLC12A2	solute carrier family 12 (sodium/potassium/chloride transporters), member 2
hsa-miR-137	1	0	1	1	1	1	ZBTB7A	zinc finger and BTB domain containing 7A
hsa-miR-137	1	0	1	1	1	1	RPS6KA3	ribosomal protein S6 kinase, 90kDa, polypeptide 3
hsa-miR-137	1	0	1	1	1	1	PTBP1	polypyrimidine tract binding protein 1
hsa-miR-137	1	0	1	0	1	1	GIT2	G protein-coupled receptor kinase interacting ArfGAP 2
hsa-miR-137	1	0	1	1	1	1	KLF4	Kruppel-like factor 4 (gut)
hsa-miR-137	1	0	1	0	1	1	RPL28	ribosomal protein L28
hsa-miR-137	1	0	1	1	1	1	METTL9	methyltransferase like 9
hsa-miR-137	1	0	1	1	1	1	AP1S3	adaptor-related protein complex 1, sigma 3 subunit
hsa-miR-137	1	0	1	1	1	1	USF2	upstream transcription factor 2, c-fos interacting
hsa-miR-137	1	0	1	1	1	1	PRKD3	protein kinase D3
hsa-miR-137	1	0	1	1	1	1	ATPAF1	ATP synthase mitochondrial F1 complex assembly factor 1
hsa-miR-137	1	0	1	1	1	1	CHORDC1	cysteine and histidine-rich domain (CHORD) containing 1
hsa-miR-137	1	0	0	1	0	0	HIC1	hypermethylated in cancer 1
hsa-miR-137	1	0	0	1	0	0	NT5DC2	5'-nucleotidase domain containing 2
hsa-miR-137	1	0	1	1	1	1	ZNF512	zinc finger protein 512
hsa-miR-137	1	0	1	1	1	1	RAB35	RAB35, member RAS oncogene family
hsa-miR-137	1	0	1	1	0	0	SCRT1	scratch homolog 1, zinc finger protein (Drosophila)
hsa-miR-137	1	0	1	1	1	1	ST3GAL3	ST3 beta-galactoside alpha-2,3-sialyltransferase 3
hsa-miR-137	1	0	0	1	1	1	MSI1	musashi homolog 1 (Drosophila)
hsa-miR-137	1	0	1	1	1	1	CAPN2	calpain 2, (m/II) large subunit
hsa-miR-137	1	0	1	1	1	1	AGPAT3	1-acylglycerol-3-phosphate O-acyltransferase 3
hsa-miR-137	1	0	0	0	0	0	PABPC4L	poly(A) binding protein, cytoplasmic 4-like
hsa-miR-137	1	0	1	0	1	1	EIF2S3	eukaryotic translation initiation factor 2, subunit 3 gamma, 52kDa
hsa-miR-137	1	0	1	1	1	1	STK38	serine/threonine kinase 38
hsa-miR-137	1	0	1	0	1	1	IRS2	insulin receptor substrate 2
hsa-miR-137	1	0	1	0	1	1	CUL3	cullin 3
hsa-miR-137	1	0	1	1	1	1	EPHB3	EPH receptor B3
hsa-miR-137	1	0	1	0	1	1	FAM19A5	family with sequence similarity 19 (chemokine (C-C motif)-like), member A5
hsa-miR-137	1	0	1	1	1	1	PDLIM3	PDZ and LIM domain 3
hsa-miR-137	1	0	1	1	0	0	NAB2	NGFI-A binding protein 2 (EGR1 binding protein 2)
hsa-miR-137	1	0	1	1	1	1	AP3S1	adaptor-related protein complex 3, sigma 1 subunit
hsa-miR-137	1	0	1	1	1	1	SERP1	stress-associated endoplasmic reticulum protein 1
hsa-miR-137	1	0	1	0	1	1	STK40	serine/threonine kinase 40
hsa-miR-137	1	0	1	0	1	1	NAA25	N(alpha)-acetyltransferase 25, NatB auxiliary subunit
hsa-miR-137	1	0	0	1	1	1	TSPAN33	tetraspanin 33
hsa-miR-137	1	0	1	0	1	1	TBL1XR1	transducin (beta)-like 1 X-linked receptor 1
hsa-miR-137	1	0	1	1	1	1	SLC35A1	solute carrier family 35 (CMP-sialic acid transporter), member A1
hsa-miR-137	1	0	1	1	0	0	STX17	syntaxin 17
hsa-miR-137	1	0	1	0	1	1	ATG14	autophagy related 14
hsa-miR-137	1	0	1	1	1	1	ERBB4	v-erb-a erythroblastic leukemia viral oncogene homolog 4 (avian)
hsa-miR-137	1	0	1	1	1	1	NCOA1	nuclear receptor coactivator 1
hsa-miR-137	1	0	1	1	1	1	MEGF11	multiple EGF-like-domains 11
hsa-miR-137	1	0	1	0	1	1	PPP1R16B	protein phosphatase 1, regulatory subunit 16B
hsa-miR-137	1	0	1	1	1	1	PHF15	PHD finger protein 15
hsa-miR-137	1	0	0	1	0	0	SERPINA3	serpin peptidase inhibitor, clade A (alpha-1 antiproteinase, antitrypsin), member 3
hsa-miR-137	1	0	0	1	1	1	KRT72	keratin 72
hsa-miR-137	1	0	1	1	1	1	KCNMB2	potassium large conductance calcium-activated channel, subfamily M, beta member 2
hsa-miR-137	1	0	1	1	1	1	SLC39A13	solute carrier family 39 (zinc transporter), member 13
hsa-miR-137	1	0	1	1	1	1	C20orf26	chromosome 20 open reading frame 26
hsa-miR-137	1	0	1	1	1	1	NREP	neuronal regeneration related protein homolog (rat)
hsa-miR-137	1	0	1	1	1	1	BAZ2A	bromodomain adjacent to zinc finger domain, 2A
hsa-miR-137	1	0	1	1	1	1	NCK1	NCK adaptor protein 1
hsa-miR-137	1	0	1	1	1	1	PVRL1	poliovirus receptor-related 1 (herpesvirus entry mediator C)
hsa-miR-137	1	0	1	1	1	1	DSCAML1	Down syndrome cell adhesion molecule like 1
hsa-miR-137	1	0	1	0	1	1	CELF2	CUGBP, Elav-like family member 2
hsa-miR-137	1	0	0	1	0	0	EML3	echinoderm microtubule associated protein like 3
hsa-miR-137	1	0	1	1	1	1	DENND1B	DENN/MADD domain containing 1B
hsa-miR-137	1	0	0	1	0	0	NEUROD4	neuronal differentiation 4
hsa-miR-137	1	0	1	1	0	0	CCDC167	coiled-coil domain containing 167
hsa-miR-137	1	0	1	0	1	1	SP1	Sp1 transcription factor
hsa-miR-137	1	0	1	1	1	1	ZBTB4	zinc finger and BTB domain containing 4
hsa-miR-137	1	0	1	0	0	0	DTX2	deltex homolog 2 (Drosophila)
hsa-miR-137	1	0	1	1	0	0	SYNDIG1	synapse differentiation inducing 1
hsa-miR-137	1	0	1	0	1	1	BSN	bassoon (presynaptic cytomatrix protein)
hsa-miR-137	1	0	1	1	1	1	TWIST1	twist homolog 1 (Drosophila)
hsa-miR-137	1	0	1	1	1	1	MARCH7	membrane-associated ring finger (C3HC4) 7, E3 ubiquitin protein ligase
hsa-miR-137	1	0	1	0	0	0	CSMD1	CUB and Sushi multiple domains 1
hsa-miR-137	1	0	1	1	1	1	NF1	neurofibromin 1
hsa-miR-137	1	0	1	1	0	0	NCLN	nicalin
hsa-miR-137	1	0	1	1	1	1	NEFL	neurofilament, light polypeptide
hsa-miR-137	1	0	1	1	1	1	PRDM16	PR domain containing 16
hsa-miR-137	1	0	1	0	1	1	DIRAS1	DIRAS family, GTP-binding RAS-like 1
hsa-miR-137	1	0	1	1	1	1	SLC12A6	solute carrier family 12 (potassium/chloride transporters), member 6
hsa-miR-137	1	0	1	0	1	1	GREM2	gremlin 2
hsa-miR-137	1	0	1	1	1	1	PLK2	polo-like kinase 2
hsa-miR-137	1	0	1	1	1	1	ABHD2	abhydrolase domain containing 2
hsa-miR-137	1	0	1	0	1	1	RNF4	ring finger protein 4
hsa-miR-137	1	0	1	0	1	1	DCP1A	DCP1 decapping enzyme homolog A (S. cerevisiae)
hsa-miR-137	1	0	1	1	1	1	SLC6A8	solute carrier family 6 (neurotransmitter transporter, creatine), member 8
hsa-miR-137	1	0	1	1	1	1	NIPBL	Nipped-B homolog (Drosophila)
hsa-miR-137	1	0	1	1	1	1	ADPRHL2	ADP-ribosylhydrolase like 2
hsa-miR-137	1	0	0	1	1	1	PLEKHA5	pleckstrin homology domain containing, family A member 5
hsa-miR-137	1	0	1	0	1	1	CLASP2	cytoplasmic linker associated protein 2
hsa-miR-137	1	0	1	0	1	1	GPR158	G protein-coupled receptor 158
hsa-miR-137	1	0	1	1	1	1	WSB1	WD repeat and SOCS box containing 1
hsa-miR-137	1	0	1	1	1	1	RNASE6	ribonuclease, RNase A family, k6
hsa-miR-137	1	0	1	1	1	1	ZNF148	zinc finger protein 148
hsa-miR-137	1	0	1	1	0	0	UBN2	ubinuclein 2
hsa-miR-137	1	0	1	1	1	1	SPOCK2	sparc/osteonectin, cwcv and kazal-like domains proteoglycan (testican) 2
hsa-miR-137	1	0	0	1	1	1	USP30	ubiquitin specific peptidase 30
hsa-miR-137	1	0	1	1	1	1	DUSP5	dual specificity phosphatase 5
hsa-miR-137	1	0	1	0	1	1	PMEPA1	prostate transmembrane protein, androgen induced 1
hsa-miR-137	1	0	1	1	1	1	DIRAS2	DIRAS family, GTP-binding RAS-like 2
hsa-miR-137	1	0	1	1	1	1	GRIA4	glutamate receptor, ionotropic, AMPA 4
hsa-miR-137	1	0	1	1	1	1	GJC1	gap junction protein, gamma 1, 45kDa
hsa-miR-137	1	0	1	1	1	1	KIAA0907	KIAA0907
hsa-miR-137	1	0	1	1	1	1	SNX27	sorting nexin family member 27
hsa-miR-137	1	0	1	1	1	1	MARK1	MAP/microtubule affinity-regulating kinase 1
hsa-miR-137	1	0	1	1	1	1	BEND3	BEN domain containing 3
hsa-miR-137	1	0	1	1	1	1	CHD9	chromodomain helicase DNA binding protein 9
hsa-miR-137	1	0	1	1	1	1	DMXL1	Dmx-like 1
hsa-miR-137	1	0	1	1	1	1	NFYC	nuclear transcription factor Y, gamma
hsa-miR-137	1	0	1	1	1	1	GULP1	GULP, engulfment adaptor PTB domain containing 1
hsa-miR-137	1	0	1	0	1	1	SPRY3	sprouty homolog 3 (Drosophila)
hsa-miR-137	1	0	1	0	1	1	SNN	stannin
hsa-miR-137	1	0	1	0	1	1	PAPD7	PAP associated domain containing 7
hsa-miR-137	1	0	1	1	1	1	C6orf47	chromosome 6 open reading frame 47
hsa-miR-137	1	0	1	1	1	1	CALCOCO1	calcium binding and coiled-coil domain 1
hsa-miR-137	1	0	0	1	0	0	KISS1	KiSS-1 metastasis-suppressor
hsa-miR-137	1	0	1	0	1	1	GAN	gigaxonin
hsa-miR-137	1	0	1	1	1	1	PHLPP2	PH domain and leucine rich repeat protein phosphatase 2
hsa-miR-137	1	0	1	1	1	1	BLOC1S5	biogenesis of lysosomal organelles complex-1, subunit 5, muted
hsa-miR-137	1	0	1	0	1	1	MTSS1	metastasis suppressor 1
hsa-miR-137	1	0	1	1	0	0	KCNC1	potassium voltage-gated channel, Shaw-related subfamily, member 1
hsa-miR-137	1	0	1	1	1	1	C20orf20	chromosome 20 open reading frame 20
hsa-miR-137	1	0	1	1	0	0	PLEKHG3	pleckstrin homology domain containing, family G (with RhoGef domain) member 3
hsa-miR-137	1	0	1	1	1	1	EIF2C1	eukaryotic translation initiation factor 2C, 1
hsa-miR-137	1	0	1	1	1	1	ITGA9	integrin, alpha 9
hsa-miR-137	1	0	1	0	1	1	ATP11A	ATPase, class VI, type 11A
hsa-miR-137	1	0	1	1	1	1	ZMAT4	zinc finger, matrin-type 4
hsa-miR-137	1	0	1	1	1	1	DUSP4	dual specificity phosphatase 4
hsa-miR-137	1	0	1	1	1	1	PDZD2	PDZ domain containing 2
hsa-miR-137	1	0	1	1	1	1	NXT2	nuclear transport factor 2-like export factor 2
hsa-miR-137	1	0	1	1	1	1	HMGN3	high mobility group nucleosomal binding domain 3
hsa-miR-137	1	0	1	1	1	1	C20orf111	chromosome 20 open reading frame 111
hsa-miR-137	1	0	1	1	1	1	GABRA1	gamma-aminobutyric acid (GABA) A receptor, alpha 1
hsa-miR-137	1	0	1	0	1	1	C18orf25	chromosome 18 open reading frame 25
hsa-miR-137	1	0	1	1	1	1	TMF1	TATA element modulatory factor 1
hsa-miR-137	1	0	1	0	1	1	PITPNA	phosphatidylinositol transfer protein, alpha
hsa-miR-137	1	0	1	1	1	1	DNAJB12	DnaJ (Hsp40) homolog, subfamily B, member 12
hsa-miR-137	1	0	1	1	1	1	PDCD6IP	programmed cell death 6 interacting protein
hsa-miR-137	1	0	1	1	1	1	SH3BP5	SH3-domain binding protein 5 (BTK-associated)
hsa-miR-137	1	0	1	1	1	1	SGTB	small glutamine-rich tetratricopeptide repeat (TPR)-containing, beta
hsa-miR-137	1	0	1	1	1	1	TOR1B	torsin family 1, member B (torsin B)
hsa-miR-137	1	0	1	1	1	1	SLC12A5	solute carrier family 12 (potassium/chloride transporter), member 5
hsa-miR-137	1	0	1	1	1	1	AKAP2	A kinase (PRKA) anchor protein 2
hsa-miR-137	1	0	1	1	1	1	SSX2IP	synovial sarcoma, X breakpoint 2 interacting protein
hsa-miR-137	1	0	1	1	0	0	GPRC5A	G protein-coupled receptor, family C, group 5, member A
hsa-miR-137	1	0	1	1	1	1	RIC8B	resistance to inhibitors of cholinesterase 8 homolog B (C. elegans)
hsa-miR-137	1	0	1	1	1	1	GORASP2	golgi reassembly stacking protein 2, 55kDa
hsa-miR-137	1	0	1	1	1	1	SNRK	SNF related kinase
hsa-miR-137	1	0	1	1	0	0	ANGPTL2	angiopoietin-like 2
hsa-miR-137	1	0	1	0	0	0	HEG1	HEG homolog 1 (zebrafish)
hsa-miR-137	1	0	1	1	1	1	NECAP1	NECAP endocytosis associated 1
hsa-miR-137	1	0	1	0	1	1	GPR180	G protein-coupled receptor 180
hsa-miR-137	1	0	1	1	1	1	NUBPL	nucleotide binding protein-like
hsa-miR-137	1	0	1	1	1	1	AKT2	v-akt murine thymoma viral oncogene homolog 2
hsa-miR-137	1	0	1	0	1	1	COL19A1	collagen, type XIX, alpha 1
hsa-miR-137	1	0	1	1	1	1	RANBP2	RAN binding protein 2
hsa-miR-137	1	0	0	1	0	0	ZNF385D	zinc finger protein 385D
hsa-miR-137	1	0	1	1	1	1	DESI2	desumoylating isopeptidase 2
hsa-miR-137	1	0	1	1	1	1	PPP1CB	protein phosphatase 1, catalytic subunit, beta isozyme
hsa-miR-137	1	0	1	1	1	1	BACH2	BTB and CNC homology 1, basic leucine zipper transcription factor 2
hsa-miR-137	1	0	1	1	0	0	RELL1	RELT-like 1
hsa-miR-137	1	0	1	1	1	1	ANKRD12	ankyrin repeat domain 12
hsa-miR-137	1	0	1	1	1	1	MLL	myeloid/lymphoid or mixed-lineage leukemia (trithorax homolog, Drosophila)
hsa-miR-137	1	0	1	1	1	1	EFNB2	ephrin-B2
hsa-miR-137	1	0	1	1	1	1	PRR16	proline rich 16
hsa-miR-137	1	0	1	1	1	1	RICTOR	RPTOR independent companion of MTOR, complex 2
hsa-miR-137	1	0	1	1	1	1	UBE3C	ubiquitin protein ligase E3C
hsa-miR-137	1	0	1	1	1	1	TRIM23	tripartite motif containing 23
hsa-miR-137	1	0	1	1	1	1	WBP1L	WW domain binding protein 1-like
hsa-miR-137	1	0	1	1	1	1	USP28	ubiquitin specific peptidase 28
hsa-miR-137	1	0	1	1	1	1	TMEM50B	transmembrane protein 50B
hsa-miR-137	1	0	1	1	1	1	DSTYK	dual serine/threonine and tyrosine protein kinase
hsa-miR-137	1	0	1	1	1	1	BRD1	bromodomain containing 1
hsa-miR-137	1	0	1	1	1	1	ZNF76	zinc finger protein 76
hsa-miR-137	1	0	1	1	1	1	MED27	mediator complex subunit 27
hsa-miR-137	1	0	0	1	0	0	ZNF516	zinc finger protein 516
hsa-miR-137	1	0	1	0	1	1	KIAA0240	KIAA0240
hsa-miR-137	1	0	1	1	1	1	PXN	paxillin
hsa-miR-137	1	0	1	1	1	1	RAVER2	ribonucleoprotein, PTB-binding 2
hsa-miR-137	1	0	1	1	1	1	NRP1	neuropilin 1
hsa-miR-137	1	0	1	1	1	1	MSANTD2	Myb/SANT-like DNA-binding domain containing 2
hsa-miR-137	1	0	1	0	1	1	SS18	synovial sarcoma translocation, chromosome 18
hsa-miR-137	1	0	1	0	1	1	KIAA1147	KIAA1147
hsa-miR-137	1	0	1	0	1	1	SLC17A6	solute carrier family 17 (sodium-dependent inorganic phosphate cotransporter), member 6
hsa-miR-137	1	0	1	1	1	1	ABHD13	abhydrolase domain containing 13
hsa-miR-137	1	0	1	0	1	1	ZNF295	zinc finger protein 295
hsa-miR-137	1	0	1	0	0	0	TGFA	transforming growth factor, alpha
hsa-miR-137	1	0	1	1	1	1	RGS7BP	regulator of G-protein signaling 7 binding protein
hsa-miR-137	1	0	1	1	1	1	KCNB2	potassium voltage-gated channel, Shab-related subfamily, member 2
hsa-miR-137	1	0	1	1	0	0	VKORC1	vitamin K epoxide reductase complex, subunit 1
hsa-miR-137	1	0	1	1	1	1	SLC4A7	solute carrier family 4, sodium bicarbonate cotransporter, member 7
hsa-miR-137	1	0	1	1	1	1	SLC30A4	solute carrier family 30 (zinc transporter), member 4
hsa-miR-137	1	0	1	1	0	0	RBM27	RNA binding motif protein 27
hsa-miR-137	1	0	0	1	1	1	RPL15	ribosomal protein L15
hsa-miR-137	1	0	1	0	1	1	ADRB1	adrenoceptor beta 1
hsa-miR-137	1	0	1	1	1	1	DCAF8	DDB1 and CUL4 associated factor 8
hsa-miR-137	1	0	1	1	1	1	DMRT3	doublesex and mab-3 related transcription factor 3
hsa-miR-137	1	0	1	1	1	1	SLC35A4	solute carrier family 35, member A4
hsa-miR-137	1	0	1	1	1	1	SIK1	salt-inducible kinase 1
hsa-miR-137	1	0	1	1	1	1	CTBP1	C-terminal binding protein 1
hsa-miR-137	1	0	1	0	1	1	ANKRD28	ankyrin repeat domain 28
hsa-miR-137	1	0	1	1	1	1	OSBP2	oxysterol binding protein 2
hsa-miR-137	1	0	1	1	1	1	RALBP1	ralA binding protein 1
hsa-miR-137	1	0	1	1	1	1	PIP5KL1	phosphatidylinositol-4-phosphate 5-kinase-like 1
hsa-miR-137	1	0	1	1	1	1	ZBTB7B	zinc finger and BTB domain containing 7B
hsa-miR-137	1	0	0	1	1	1	LEMD2	LEM domain containing 2
hsa-miR-137	1	0	1	1	1	1	ABCG4	ATP-binding cassette, sub-family G (WHITE), member 4
hsa-miR-137	1	0	1	1	1	1	MAF	v-maf musculoaponeurotic fibrosarcoma oncogene homolog (avian)
hsa-miR-137	1	0	1	1	1	1	SPTLC1	serine palmitoyltransferase, long chain base subunit 1
hsa-miR-137	1	0	1	1	1	1	DUSP10	dual specificity phosphatase 10
hsa-miR-137	1	0	1	0	1	1	MXD1	MAX dimerization protein 1
hsa-miR-137	1	0	1	1	1	1	FAM117B	family with sequence similarity 117, member B
hsa-miR-137	1	0	1	1	1	1	FAM160B2	family with sequence similarity 160, member B2
hsa-miR-137	1	0	1	1	0	0	ELOVL1	ELOVL fatty acid elongase 1
hsa-miR-137	1	0	1	1	1	1	NFIB	nuclear factor I/B
hsa-miR-137	1	0	1	1	1	1	BEND6	BEN domain containing 6
hsa-miR-137	1	0	1	1	1	1	PHC3	polyhomeotic homolog 3 (Drosophila)
hsa-miR-137	1	0	1	1	1	1	RANBP9	RAN binding protein 9
hsa-miR-137	1	0	1	1	1	1	MED1	mediator complex subunit 1
hsa-miR-137	1	0	1	1	1	1	TEAD1	TEA domain family member 1 (SV40 transcriptional enhancer factor)
hsa-miR-137	1	0	1	1	1	1	AHCYL1	adenosylhomocysteinase-like 1
hsa-miR-137	1	0	1	1	1	1	SIPA1L3	signal-induced proliferation-associated 1 like 3
hsa-miR-137	1	0	1	1	1	1	LRP6	low density lipoprotein receptor-related protein 6
hsa-miR-137	1	0	1	0	1	1	CACNA1I	calcium channel, voltage-dependent, T type, alpha 1I subunit
hsa-miR-137	1	0	1	1	1	1	PHF3	PHD finger protein 3
hsa-miR-137	1	0	1	1	1	1	COCH	coagulation factor C homolog, cochlin (Limulus polyphemus)
hsa-miR-137	1	0	1	1	1	1	ISM2	isthmin 2 homolog (zebrafish)
hsa-miR-137	1	0	1	1	1	1	RNF138	ring finger protein 138, E3 ubiquitin protein ligase
hsa-miR-137	1	0	1	0	1	1	LRRTM4	leucine rich repeat transmembrane neuronal 4
hsa-miR-137	1	0	1	1	1	1	MTF1	metal-regulatory transcription factor 1
hsa-miR-137	1	0	1	1	1	1	SEC23A	Sec23 homolog A (S. cerevisiae)
hsa-miR-137	1	0	1	1	1	1	STAC	SH3 and cysteine rich domain
hsa-miR-137	1	0	1	1	1	1	FOXN3	forkhead box N3
hsa-miR-137	1	0	1	1	0	0	DUS2L	dihydrouridine synthase 2-like, SMM1 homolog (S. cerevisiae)
hsa-miR-137	1	0	1	0	1	1	NFIX	nuclear factor I/X (CCAAT-binding transcription factor)
hsa-miR-137	1	0	1	1	1	1	ZNHIT6	zinc finger, HIT-type containing 6
hsa-miR-137	1	0	1	1	1	1	FAM76B	family with sequence similarity 76, member B
hsa-miR-137	1	0	1	1	1	1	C2CD2	C2 calcium-dependent domain containing 2
hsa-miR-137	1	0	1	1	1	1	KLF15	Kruppel-like factor 15
hsa-miR-137	1	0	1	1	1	1	CUL4A	cullin 4A
hsa-miR-137	1	0	1	1	1	1	HAS3	hyaluronan synthase 3
hsa-miR-137	1	0	1	1	1	1	TBC1D1	TBC1 (tre-2/USP6, BUB2, cdc16) domain family, member 1
hsa-miR-137	1	0	1	0	1	1	KIT	v-kit Hardy-Zuckerman 4 feline sarcoma viral oncogene homolog
hsa-miR-137	1	0	1	0	1	1	RYR2	ryanodine receptor 2 (cardiac)
hsa-miR-137	1	0	1	1	0	0	ADAM15	ADAM metallopeptidase domain 15
hsa-miR-137	1	0	1	1	1	1	EPHA7	EPH receptor A7
hsa-miR-137	1	0	1	1	1	1	YBX1	Y box binding protein 1
hsa-miR-137	1	0	1	1	1	1	MAPK1IP1L	mitogen-activated protein kinase 1 interacting protein 1-like
hsa-miR-137	1	0	1	1	1	1	C17orf103	chromosome 17 open reading frame 103
hsa-miR-137	1	0	1	1	1	1	SBK1	SH3-binding domain kinase 1
hsa-miR-137	1	0	1	1	1	1	MIER3	mesoderm induction early response 1, family member 3
hsa-miR-137	1	0	1	1	0	0	FAM108A1	family with sequence similarity 108, member A1
hsa-miR-137	1	0	1	1	1	1	JDP2	Jun dimerization protein 2
hsa-miR-137	1	0	1	1	0	0	RGS6	regulator of G-protein signaling 6
hsa-miR-137	1	0	1	1	1	1	RELL2	RELT-like 2
hsa-miR-137	1	0	1	1	1	1	RBM24	RNA binding motif protein 24
hsa-miR-137	1	0	1	0	1	1	IGFBP5	insulin-like growth factor binding protein 5
hsa-miR-137	1	0	1	1	1	1	PFKFB4	6-phosphofructo-2-kinase/fructose-2,6-biphosphatase 4
hsa-miR-137	1	0	1	1	1	1	IKZF4	IKAROS family zinc finger 4 (Eos)
hsa-miR-137	1	0	1	0	0	0	IGLON5	IgLON family member 5
hsa-miR-137	1	0	1	1	1	1	TBX3	T-box 3
hsa-miR-137	1	0	1	1	1	1	PLXNA3	plexin A3
hsa-miR-137	1	0	1	1	1	1	GABBR2	gamma-aminobutyric acid (GABA) B receptor, 2
hsa-miR-137	1	0	1	1	0	0	FAM167A	family with sequence similarity 167, member A
hsa-miR-137	1	0	1	1	1	1	FGF11	fibroblast growth factor 11
hsa-miR-137	1	0	1	1	1	1	PCGF5	polycomb group ring finger 5
hsa-miR-137	1	0	1	1	1	1	MEF2A	myocyte enhancer factor 2A
hsa-miR-137	1	0	1	1	1	1	DSP	desmoplakin
hsa-miR-137	1	0	1	0	1	1	SELT	selenoprotein T
hsa-miR-137	1	0	1	1	1	1	IMPACT	Impact homolog (mouse)
hsa-miR-137	1	0	1	1	1	1	ANKRD13A	ankyrin repeat domain 13A
hsa-miR-137	1	0	1	1	1	1	MBD6	methyl-CpG binding domain protein 6
hsa-miR-137	1	0	1	1	1	1	CHST9	carbohydrate (N-acetylgalactosamine 4-0) sulfotransferase 9
hsa-miR-137	1	0	1	1	1	1	ADCY9	adenylate cyclase 9
hsa-miR-137	1	0	1	1	1	1	MAP3K13	mitogen-activated protein kinase kinase kinase 13
hsa-miR-137	1	0	1	1	1	1	BAI3	brain-specific angiogenesis inhibitor 3
hsa-miR-137	1	0	1	1	1	1	SNX25	sorting nexin 25
hsa-miR-137	1	0	1	1	1	1	FKBP4	FK506 binding protein 4, 59kDa
hsa-miR-137	1	0	1	1	0	0	DYDC1	DPY30 domain containing 1
hsa-miR-137	1	0	1	1	1	1	SCN2A	sodium channel, voltage-gated, type II, alpha subunit
hsa-miR-137	1	0	1	1	1	1	SLC6A9	solute carrier family 6 (neurotransmitter transporter, glycine), member 9
hsa-miR-137	1	0	1	0	1	1	INTS2	integrator complex subunit 2
hsa-miR-137	1	0	1	1	1	1	DAG1	dystroglycan 1 (dystrophin-associated glycoprotein 1)
hsa-miR-137	1	0	1	1	1	1	KLHL28	kelch-like 28 (Drosophila)
hsa-miR-137	1	0	1	0	1	1	GPCPD1	glycerophosphocholine phosphodiesterase GDE1 homolog (S. cerevisiae)
hsa-miR-137	1	0	1	1	1	1	CAMK2A	calcium/calmodulin-dependent protein kinase II alpha
hsa-miR-137	1	0	1	1	1	1	TMX1	thioredoxin-related transmembrane protein 1
hsa-miR-137	1	0	1	1	1	1	NBEA	neurobeachin
hsa-miR-137	1	0	1	1	1	1	NRXN3	neurexin 3
hsa-miR-137	1	0	1	1	1	1	RNF180	ring finger protein 180
hsa-miR-137	1	0	1	1	1	1	ACVR1	activin A receptor, type I
hsa-miR-137	1	0	1	1	0	0	SLX4	SLX4 structure-specific endonuclease subunit homolog (S. cerevisiae)
hsa-miR-137	1	0	1	1	0	0	FXYD6	FXYD domain containing ion transport regulator 6
hsa-miR-137	1	0	1	1	1	1	PHTF2	putative homeodomain transcription factor 2
hsa-miR-137	1	0	1	1	0	0	XRRA1	X-ray radiation resistance associated 1
hsa-miR-137	1	0	1	1	0	0	GXYLT1	glucoside xylosyltransferase 1
hsa-miR-137	1	0	1	1	0	0	CCDC153	coiled-coil domain containing 153
hsa-miR-137	1	0	1	1	1	1	EN2	engrailed homeobox 2
hsa-miR-137	1	0	1	1	1	1	MGAT5B	mannosyl (alpha-1,6-)-glycoprotein beta-1,6-N-acetyl-glucosaminyltransferase, isozyme B
hsa-miR-137	1	0	1	1	0	0	MARCH9	membrane-associated ring finger (C3HC4) 9
hsa-miR-137	1	0	1	0	1	1	REPIN1	replication initiator 1
hsa-miR-137	1	0	1	1	1	1	CSDA	cold shock domain protein A
hsa-miR-137	1	0	1	1	1	1	KCND2	potassium voltage-gated channel, Shal-related subfamily, member 2
hsa-miR-137	1	0	1	0	1	1	DDX3X	DEAD (Asp-Glu-Ala-Asp) box polypeptide 3, X-linked
hsa-miR-137	1	0	1	0	1	1	NCOA2	nuclear receptor coactivator 2
hsa-miR-137	1	0	1	0	1	1	ZBTB47	zinc finger and BTB domain containing 47
hsa-miR-137	1	0	1	1	1	1	DVL2	dishevelled, dsh homolog 2 (Drosophila)
hsa-miR-137	1	0	1	0	1	1	XRN1	5'-3' exoribonuclease 1
hsa-miR-137	1	0	1	1	1	1	TCF3	transcription factor 3 (E2A immunoglobulin enhancer binding factors E12/E47)
hsa-miR-137	1	0	1	1	1	1	KLF11	Kruppel-like factor 11
hsa-miR-137	1	0	1	1	1	1	SLC43A2	solute carrier family 43, member 2
hsa-miR-137	1	0	1	1	1	1	ARID4B	AT rich interactive domain 4B (RBP1-like)
hsa-miR-137	1	0	1	1	1	1	FURIN	furin (paired basic amino acid cleaving enzyme)
hsa-miR-137	1	0	1	1	1	1	LMBR1L	limb region 1 homolog (mouse)-like
hsa-miR-137	1	0	0	1	1	1	AURKA	aurora kinase A
hsa-miR-137	1	0	1	1	1	1	PHF17	PHD finger protein 17
hsa-miR-137	1	0	1	1	1	1	MARK3	MAP/microtubule affinity-regulating kinase 3
hsa-miR-137	1	0	1	1	1	1	AHR	aryl hydrocarbon receptor
hsa-miR-137	1	0	1	1	1	1	ASPH	aspartate beta-hydroxylase
hsa-miR-137	1	0	1	1	1	1	SLC5A7	solute carrier family 5 (choline transporter), member 7
hsa-miR-137	1	0	1	1	1	1	E2F7	E2F transcription factor 7
hsa-miR-137	1	0	1	1	1	1	LRP12	low density lipoprotein receptor-related protein 12
hsa-miR-137	1	0	1	1	1	1	KCTD12	potassium channel tetramerisation domain containing 12
hsa-miR-137	1	0	1	1	0	0	PTPN5	protein tyrosine phosphatase, non-receptor type 5 (striatum-enriched)
hsa-miR-137	1	0	1	1	0	0	CHST10	carbohydrate sulfotransferase 10
hsa-miR-137	1	0	1	1	1	1	KDM4A	lysine (K)-specific demethylase 4A
hsa-miR-137	1	0	1	0	1	1	UBE2G1	ubiquitin-conjugating enzyme E2G 1
hsa-miR-137	1	0	1	1	1	1	PPARGC1A	peroxisome proliferator-activated receptor gamma, coactivator 1 alpha
hsa-miR-137	1	0	1	1	1	1	TTC26	tetratricopeptide repeat domain 26
hsa-miR-137	1	0	1	1	1	1	CDH20	cadherin 20, type 2
hsa-miR-137	1	0	1	1	1	1	CABLES2	Cdk5 and Abl enzyme substrate 2
hsa-miR-137	1	0	1	1	1	1	TJP1	tight junction protein 1
hsa-miR-137	1	0	1	1	1	1	ZNF385A	zinc finger protein 385A
hsa-miR-137	1	0	1	1	1	1	PRADC1	protease-associated domain containing 1
hsa-miR-137	1	0	1	1	1	1	NPC1	Niemann-Pick disease, type C1
hsa-miR-137	1	0	1	1	1	1	ELFN2	extracellular leucine-rich repeat and fibronectin type III domain containing 2
hsa-miR-137	1	0	1	1	1	1	FBN2	fibrillin 2
hsa-miR-137	1	0	0	1	1	1	SLC1A5	solute carrier family 1 (neutral amino acid transporter), member 5
hsa-miR-137	1	0	0	1	0	0	HAPLN2	hyaluronan and proteoglycan link protein 2
hsa-miR-137	1	0	0	0	1	1	SHROOM2	shroom family member 2
hsa-miR-137	1	0	1	0	1	1	PIK3R3	phosphoinositide-3-kinase, regulatory subunit 3 (gamma)
hsa-miR-137	1	0	1	0	1	1	MED14	mediator complex subunit 14
hsa-miR-137	1	0	1	0	0	0	VARS	valyl-tRNA synthetase
hsa-miR-137	1	0	1	1	1	1	NDST1	N-deacetylase/N-sulfotransferase (heparan glucosaminyl) 1
hsa-miR-137	1	0	1	1	1	1	PTPN2	protein tyrosine phosphatase, non-receptor type 2
hsa-miR-137	1	0	1	1	1	1	CPEB3	cytoplasmic polyadenylation element binding protein 3
hsa-miR-137	1	0	1	1	0	0	TUT1	terminal uridylyl transferase 1, U6 snRNA-specific
hsa-miR-137	1	0	1	0	1	1	SRGAP3	SLIT-ROBO Rho GTPase activating protein 3
hsa-miR-137	1	0	1	1	1	1	TSNAX	translin-associated factor X
hsa-miR-137	1	0	1	1	1	1	KLHL17	kelch-like 17 (Drosophila)
hsa-miR-137	1	0	1	1	1	1	MTFR1	mitochondrial fission regulator 1
hsa-miR-137	1	0	1	0	1	1	SMURF1	SMAD specific E3 ubiquitin protein ligase 1
hsa-miR-137	1	0	1	0	1	1	UBE2G2	ubiquitin-conjugating enzyme E2G 2
hsa-miR-137	1	0	1	1	1	1	NEUROD1	neuronal differentiation 1
hsa-miR-137	1	0	1	1	1	1	RIMS3	regulating synaptic membrane exocytosis 3
hsa-miR-137	1	0	1	1	1	1	CDC42BPA	CDC42 binding protein kinase alpha (DMPK-like)
hsa-miR-137	1	0	1	1	1	1	BCL11A	B-cell CLL/lymphoma 11A (zinc finger protein)
hsa-miR-137	1	0	1	1	1	1	PPP2R5C	protein phosphatase 2, regulatory subunit B', gamma
hsa-miR-137	1	0	1	1	1	1	GIGYF1	GRB10 interacting GYF protein 1
hsa-miR-137	1	0	1	1	1	1	FAM135B	family with sequence similarity 135, member B
hsa-miR-137	1	0	1	1	1	1	VMA21	VMA21 vacuolar H+-ATPase homolog (S. cerevisiae)
hsa-miR-137	1	0	0	1	1	1	TECPR2	tectonin beta-propeller repeat containing 2
hsa-miR-137	1	0	1	1	1	1	PHLDB2	pleckstrin homology-like domain, family B, member 2
hsa-miR-137	1	0	1	1	1	1	PRKAA1	protein kinase, AMP-activated, alpha 1 catalytic subunit
hsa-miR-137	1	0	1	1	1	1	APPL2	adaptor protein, phosphotyrosine interaction, PH domain and leucine zipper containing 2
hsa-miR-137	1	0	1	1	1	1	HTR2C	5-hydroxytryptamine (serotonin) receptor 2C, G protein-coupled
hsa-miR-137	1	0	1	1	1	1	SLC24A3	solute carrier family 24 (sodium/potassium/calcium exchanger), member 3
hsa-miR-137	1	0	1	1	1	1	MKRN2	makorin ring finger protein 2
hsa-miR-137	1	0	1	1	1	1	LGI3	leucine-rich repeat LGI family, member 3
hsa-miR-137	1	0	1	1	0	0	TBC1D12	TBC1 domain family, member 12
hsa-miR-137	1	0	1	1	1	1	EPHA8	EPH receptor A8
hsa-miR-137	1	0	1	1	1	1	SCN1A	sodium channel, voltage-gated, type I, alpha subunit
hsa-miR-137	1	0	1	0	1	1	KLHL3	kelch-like 3 (Drosophila)
hsa-miR-137	1	0	1	1	0	0	SYN3	synapsin III
hsa-miR-137	1	0	1	1	1	1	SUZ12	suppressor of zeste 12 homolog (Drosophila)
hsa-miR-137	1	0	0	1	1	1	PGP	phosphoglycolate phosphatase
hsa-miR-137	1	0	1	1	1	1	ABHD6	abhydrolase domain containing 6
hsa-miR-137	1	0	1	0	0	0	PWWP2A	PWWP domain containing 2A
hsa-miR-137	1	0	1	1	1	1	SULF1	sulfatase 1
hsa-miR-137	1	0	1	1	1	1	FSTL1	follistatin-like 1
hsa-miR-137	1	0	1	1	1	1	LHFPL2	lipoma HMGIC fusion partner-like 2
hsa-miR-137	1	0	1	1	1	1	IMPA2	inositol(myo)-1(or 4)-monophosphatase 2
hsa-miR-137	1	0	1	1	1	1	STX1B	syntaxin 1B
hsa-miR-137	1	0	1	1	1	1	DGKG	diacylglycerol kinase, gamma 90kDa
hsa-miR-137	1	0	1	1	1	1	WWP2	WW domain containing E3 ubiquitin protein ligase 2
hsa-miR-137	1	0	1	1	1	1	CNEP1R1	CTD nuclear envelope phosphatase 1 regulatory subunit 1
hsa-miR-137	1	0	1	1	1	1	NKAIN1	Na+/K+ transporting ATPase interacting 1
hsa-miR-137	1	0	1	1	1	1	NUDCD3	NudC domain containing 3
hsa-miR-137	1	0	1	1	1	1	JHDM1D	jumonji C domain containing histone demethylase 1 homolog D (S. cerevisiae)
hsa-miR-137	1	0	0	0	1	1	STK11	serine/threonine kinase 11
hsa-miR-137	1	0	0	1	1	1	RCOR2	REST corepressor 2
hsa-miR-137	1	0	1	1	1	1	PRKAB1	protein kinase, AMP-activated, beta 1 non-catalytic subunit
hsa-miR-137	1	0	1	1	1	1	PPP1R9A	protein phosphatase 1, regulatory subunit 9A
hsa-miR-137	1	0	1	1	1	1	NLGN4X	neuroligin 4, X-linked
hsa-miR-137	1	0	1	1	1	1	PIP4K2C	phosphatidylinositol-5-phosphate 4-kinase, type II, gamma
hsa-miR-137	1	0	1	0	1	1	GPAM	glycerol-3-phosphate acyltransferase, mitochondrial
hsa-miR-137	1	0	1	0	1	1	CACNA1G	calcium channel, voltage-dependent, T type, alpha 1G subunit
hsa-miR-137	1	0	1	1	1	1	NLGN4Y	neuroligin 4, Y-linked
hsa-miR-137	1	0	1	1	1	1	GPR88	G protein-coupled receptor 88
hsa-miR-137	1	0	1	1	1	1	GPR137B	G protein-coupled receptor 137B
hsa-miR-137	1	0	1	1	0	0	KIAA1644	KIAA1644
hsa-miR-137	1	0	0	1	1	1	ABCC9	ATP-binding cassette, sub-family C (CFTR/MRP), member 9
hsa-miR-137	1	0	1	1	1	1	FRMD6	FERM domain containing 6
hsa-miR-137	1	0	1	1	1	1	NSF	N-ethylmaleimide-sensitive factor
hsa-miR-137	1	0	0	0	0	0	CACNA1H	calcium channel, voltage-dependent, T type, alpha 1H subunit
hsa-miR-137	1	0	1	1	0	0	RPS13	ribosomal protein S13
hsa-miR-137	1	0	1	0	1	1	MAPKAPK2	mitogen-activated protein kinase-activated protein kinase 2
hsa-miR-137	1	0	1	1	1	1	MAFK	v-maf musculoaponeurotic fibrosarcoma oncogene homolog K (avian)
hsa-miR-137	1	0	1	1	1	1	SCN1B	sodium channel, voltage-gated, type I, beta subunit
hsa-miR-137	1	0	1	1	1	1	UBE2K	ubiquitin-conjugating enzyme E2K
hsa-miR-137	1	0	1	0	1	1	SETD7	SET domain containing (lysine methyltransferase) 7
hsa-miR-137	1	0	1	1	1	1	PCMTD1	protein-L-isoaspartate (D-aspartate) O-methyltransferase domain containing 1
hsa-miR-137	1	0	1	0	1	1	SRSF6	serine/arginine-rich splicing factor 6
hsa-miR-137	1	0	1	0	1	1	PURB	purine-rich element binding protein B
hsa-miR-137	1	0	1	1	1	1	ZNF654	zinc finger protein 654
hsa-miR-137	1	0	1	1	1	1	ARHGAP31	Rho GTPase activating protein 31
hsa-miR-137	1	0	1	1	1	1	IBTK	inhibitor of Bruton agammaglobulinemia tyrosine kinase
hsa-miR-137	1	0	1	1	1	1	KIF3B	kinesin family member 3B
hsa-miR-137	1	0	1	0	1	1	RAPGEF5	Rap guanine nucleotide exchange factor (GEF) 5
hsa-miR-137	1	0	1	1	0	0	DENND4B	DENN/MADD domain containing 4B
hsa-miR-137	1	0	1	1	1	1	SV2A	synaptic vesicle glycoprotein 2A
hsa-miR-137	1	0	1	1	0	0	SFXN5	sideroflexin 5
hsa-miR-137	1	0	1	1	1	1	FRY	furry homolog (Drosophila)
hsa-miR-137	1	0	1	1	1	1	KLF12	Kruppel-like factor 12
hsa-miR-137	1	0	1	1	0	0	GRK6	G protein-coupled receptor kinase 6
hsa-miR-137	1	0	1	1	1	1	SLC6A17	solute carrier family 6, member 17
hsa-miR-137	1	0	1	1	1	1	CSDC2	cold shock domain containing C2, RNA binding
hsa-miR-137	1	0	1	0	1	1	ZFPM2	zinc finger protein, multitype 2
hsa-miR-137	1	0	1	1	1	1	CA7	carbonic anhydrase VII
hsa-miR-137	1	0	1	1	0	0	STXBP5L	syntaxin binding protein 5-like
hsa-miR-137	1	0	1	1	1	1	LUZP1	leucine zipper protein 1
hsa-miR-137	1	0	1	1	0	0	RFTN1	raftlin, lipid raft linker 1
hsa-miR-137	1	0	1	1	0	0	DEXI	Dexi homolog (mouse)
hsa-miR-137	1	0	1	1	1	1	LRRN3	leucine rich repeat neuronal 3
hsa-miR-137	1	0	1	1	1	1	SSBP3	single stranded DNA binding protein 3
hsa-miR-137	1	0	1	0	1	1	KIAA1456	KIAA1456
hsa-miR-137	1	0	1	0	1	1	LBH	limb bud and heart development homolog (mouse)
hsa-miR-137	1	0	1	0	1	1	SLC6A1	solute carrier family 6 (neurotransmitter transporter, GABA), member 1
hsa-miR-137	1	0	1	1	1	1	TULP4	tubby like protein 4
hsa-miR-137	1	0	1	0	1	1	CLEC16A	C-type lectin domain family 16, member A
hsa-miR-137	1	0	1	0	0	0	ANKRD52	ankyrin repeat domain 52
hsa-miR-137	1	0	1	1	1	1	C11orf30	chromosome 11 open reading frame 30
hsa-miR-137	1	0	1	1	1	1	LIFR	leukemia inhibitory factor receptor alpha
hsa-miR-137	1	0	1	0	1	1	CD2AP	CD2-associated protein
hsa-miR-137	1	0	1	0	1	1	HOXC8	homeobox C8
hsa-miR-137	1	0	1	1	1	1	LRRC20	leucine rich repeat containing 20
hsa-miR-137	1	0	1	0	1	1	PDE4D	phosphodiesterase 4D, cAMP-specific
hsa-miR-137	1	0	1	1	1	1	SLMAP	sarcolemma associated protein
hsa-miR-137	1	0	1	1	0	0	KLHL10	kelch-like 10 (Drosophila)
hsa-miR-137	1	0	1	1	1	1	ZNF238	zinc finger protein 238
hsa-miR-137	1	0	1	1	1	1	TSN	translin
hsa-miR-137	1	0	1	0	1	1	ARHGAP5	Rho GTPase activating protein 5
hsa-miR-137	1	0	1	1	1	1	ACSL6	acyl-CoA synthetase long-chain family member 6
hsa-miR-137	1	0	1	1	1	1	PANX2	pannexin 2
hsa-miR-137	1	0	1	1	1	1	SRPR	signal recognition particle receptor (docking protein)
hsa-miR-137	1	0	1	1	1	1	ARF6	ADP-ribosylation factor 6
hsa-miR-137	1	0	1	1	1	1	SZRD1	SUZ RNA binding domain containing 1
hsa-miR-137	1	0	1	1	1	1	FBXO33	F-box protein 33
hsa-miR-137	1	0	1	1	1	1	HMGCLL1	3-hydroxymethyl-3-methylglutaryl-CoA lyase-like 1
hsa-miR-137	1	0	1	1	1	1	GPX7	glutathione peroxidase 7
hsa-miR-137	1	0	1	1	1	1	FNBP1L	formin binding protein 1-like
hsa-miR-137	1	0	1	1	0	0	SEMA3B	sema domain, immunoglobulin domain (Ig), short basic domain, secreted, (semaphorin) 3B
hsa-miR-137	1	0	0	1	1	1	SWT1	SWT1 RNA endoribonuclease homolog (S. cerevisiae)
hsa-miR-137	1	0	1	1	1	1	RIMKLA	ribosomal modification protein rimK-like family member A
hsa-miR-137	1	0	0	0	0	0	TMEM170B	transmembrane protein 170B
hsa-miR-137	1	0	1	1	1	1	FAM126B	family with sequence similarity 126, member B
hsa-miR-137	1	0	1	1	1	1	NIPA1	non imprinted in Prader-Willi/Angelman syndrome 1
hsa-miR-137	1	0	1	1	1	1	DFFB	DNA fragmentation factor, 40kDa, beta polypeptide (caspase-activated DNase)
hsa-miR-137	1	0	1	1	1	1	SAMD8	sterile alpha motif domain containing 8
hsa-miR-137	1	0	1	1	1	1	CNTN3	contactin 3 (plasmacytoma associated)
hsa-miR-137	1	0	1	1	1	1	DNAJB5	DnaJ (Hsp40) homolog, subfamily B, member 5
hsa-miR-137	1	0	1	1	1	1	C11orf57	chromosome 11 open reading frame 57
hsa-miR-137	1	0	1	1	1	1	SIPA1L2	signal-induced proliferation-associated 1 like 2
hsa-miR-137	1	0	1	1	0	0	SEZ6L2	seizure related 6 homolog (mouse)-like 2
hsa-miR-137	1	0	1	1	1	1	SASH3	SAM and SH3 domain containing 3
hsa-miR-137	1	0	1	1	1	1	GREB1	growth regulation by estrogen in breast cancer 1
hsa-miR-137	1	0	1	0	1	1	OTUD7B	OTU domain containing 7B
hsa-miR-137	1	0	1	1	1	1	ZBTB38	zinc finger and BTB domain containing 38
hsa-miR-137	1	0	1	1	0	0	PTP4A3	protein tyrosine phosphatase type IVA, member 3
hsa-miR-137	1	0	1	1	1	1	DNAJB1	DnaJ (Hsp40) homolog, subfamily B, member 1
hsa-miR-137	1	0	1	1	1	1	COL24A1	collagen, type XXIV, alpha 1
hsa-miR-137	1	0	1	1	1	1	MAN2A1	mannosidase, alpha, class 2A, member 1
hsa-miR-137	1	0	1	1	1	1	B3GALT2	UDP-Gal:betaGlcNAc beta 1,3-galactosyltransferase, polypeptide 2
hsa-miR-137	1	0	1	1	1	1	CTTNBP2NL	CTTNBP2 N-terminal like
hsa-miR-137	1	0	1	1	1	1	RNF38	ring finger protein 38
hsa-miR-137	1	0	1	1	1	1	COPS2	COP9 constitutive photomorphogenic homolog subunit 2 (Arabidopsis)
hsa-miR-137	1	0	1	1	1	1	PCDH9	protocadherin 9
hsa-miR-137	1	0	1	1	1	1	MPC1	mitochondrial pyruvate carrier 1
hsa-miR-137	1	0	1	1	1	1	CTDSPL	CTD (carboxy-terminal domain, RNA polymerase II, polypeptide A) small phosphatase-like
hsa-miR-137	1	0	1	0	1	1	FBXL7	F-box and leucine-rich repeat protein 7
hsa-miR-137	1	0	1	1	1	1	TDRD7	tudor domain containing 7
hsa-miR-137	1	0	1	1	1	1	TRAM2	translocation associated membrane protein 2
hsa-miR-137	1	0	1	1	1	1	CALN1	calneuron 1
hsa-miR-137	1	0	1	1	1	1	OTUD4	OTU domain containing 4
hsa-miR-137	1	0	1	1	1	1	PNKD	paroxysmal nonkinesigenic dyskinesia
hsa-miR-137	1	0	1	0	1	1	ICK	intestinal cell (MAK-like) kinase
hsa-miR-137	1	0	1	1	1	1	ZNF217	zinc finger protein 217
hsa-miR-137	1	0	1	1	1	1	AJUBA	ajuba LIM protein
hsa-miR-137	1	0	1	1	1	1	CSE1L	CSE1 chromosome segregation 1-like (yeast)
hsa-miR-137	1	0	1	1	1	1	SNAP91	synaptosomal-associated protein, 91kDa homolog (mouse)
hsa-miR-137	1	0	1	0	1	1	OSBPL3	oxysterol binding protein-like 3
hsa-miR-137	1	0	1	1	1	1	TNFAIP1	tumor necrosis factor, alpha-induced protein 1 (endothelial)
hsa-miR-137	1	0	1	0	1	1	ICMT	isoprenylcysteine carboxyl methyltransferase
hsa-miR-137	1	0	1	1	0	0	GRIN2A	glutamate receptor, ionotropic, N-methyl D-aspartate 2A
hsa-miR-137	1	0	1	1	1	1	TRMT6	tRNA methyltransferase 6 homolog (S. cerevisiae)
hsa-miR-137	1	0	1	0	1	1	KIAA0494	KIAA0494
hsa-miR-137	1	0	1	1	1	1	PHACTR4	phosphatase and actin regulator 4
hsa-miR-137	1	0	1	1	1	1	PDGFRA	platelet-derived growth factor receptor, alpha polypeptide
hsa-miR-137	1	0	1	1	1	1	PDCD6	programmed cell death 6
hsa-miR-137	1	0	0	1	1	1	IKZF1	IKAROS family zinc finger 1 (Ikaros)
hsa-miR-137	1	0	1	1	1	1	KAT2B	K(lysine) acetyltransferase 2B
hsa-miR-137	1	0	1	1	1	1	H3F3B	H3 histone, family 3B (H3.3B)
hsa-miR-137	1	0	1	1	1	1	SYNJ1	synaptojanin 1
hsa-miR-137	1	0	1	1	1	1	KDELR3	KDEL (Lys-Asp-Glu-Leu) endoplasmic reticulum protein retention receptor 3
hsa-miR-137	1	0	1	0	1	1	TRIM33	tripartite motif containing 33
hsa-miR-137	1	0	1	1	1	1	DCLK1	doublecortin-like kinase 1
hsa-miR-137	1	0	1	1	1	1	TAF15	TAF15 RNA polymerase II, TATA box binding protein (TBP)-associated factor, 68kDa
hsa-miR-137	1	0	1	1	0	0	MTUS2	microtubule associated tumor suppressor candidate 2
hsa-miR-137	1	0	1	0	1	1	CNOT6L	CCR4-NOT transcription complex, subunit 6-like
hsa-miR-137	1	0	1	0	1	1	TMEM55A	transmembrane protein 55A
hsa-miR-137	1	0	1	0	1	1	THRB	thyroid hormone receptor, beta
hsa-miR-137	1	0	1	1	1	1	MYO1C	myosin IC
hsa-miR-137	1	0	1	1	1	1	AHCYL2	adenosylhomocysteinase-like 2
hsa-miR-137	1	0	1	1	1	1	MPP1	membrane protein, palmitoylated 1, 55kDa
hsa-miR-137	1	0	1	1	1	1	PAIP1	poly(A) binding protein interacting protein 1
hsa-miR-137	1	0	1	1	1	1	CEP128	centrosomal protein 128kDa
hsa-miR-137	1	0	1	0	1	1	UBXN4	UBX domain protein 4
hsa-miR-137	1	0	1	1	1	1	FAM98A	family with sequence similarity 98, member A
hsa-miR-137	1	0	1	0	1	1	GPR26	G protein-coupled receptor 26
hsa-miR-137	1	0	1	1	0	0	HIPK2	homeodomain interacting protein kinase 2
hsa-miR-137	1	0	1	1	0	0	GNAT1	guanine nucleotide binding protein (G protein), alpha transducing activity polypeptide 1
hsa-miR-137	1	0	1	0	1	1	UBE2W	ubiquitin-conjugating enzyme E2W (putative)
hsa-miR-137	1	0	1	1	1	1	IFT20	intraflagellar transport 20 homolog (Chlamydomonas)
hsa-miR-137	1	0	1	1	1	1	CDC42	cell division cycle 42 (GTP binding protein, 25kDa)
hsa-miR-137	1	0	1	1	1	1	STAC2	SH3 and cysteine rich domain 2
hsa-miR-137	1	0	1	1	1	1	SH3PXD2B	SH3 and PX domains 2B
hsa-miR-137	1	0	1	1	1	1	PPP5C	protein phosphatase 5, catalytic subunit
hsa-miR-137	1	0	1	1	1	1	CEACAM19	carcinoembryonic antigen-related cell adhesion molecule 19
hsa-miR-137	1	0	1	0	1	1	DCDC2	doublecortin domain containing 2
hsa-miR-137	1	0	1	1	1	1	MECP2	methyl CpG binding protein 2 (Rett syndrome)
hsa-miR-137	1	0	1	1	1	1	SGK1	serum/glucocorticoid regulated kinase 1
hsa-miR-137	1	0	1	0	1	1	CREB5	cAMP responsive element binding protein 5
hsa-miR-137	1	0	1	1	1	1	ELOVL2	ELOVL fatty acid elongase 2
hsa-miR-137	1	0	1	1	0	0	FHL3	four and a half LIM domains 3
hsa-miR-137	1	0	1	0	0	0	SDR39U1	short chain dehydrogenase/reductase family 39U, member 1
hsa-miR-137	1	0	1	1	1	1	MAP2K4	mitogen-activated protein kinase kinase 4
hsa-miR-137	1	0	1	1	1	1	PTN	pleiotrophin
hsa-miR-137	1	0	1	1	1	1	SHANK2	SH3 and multiple ankyrin repeat domains 2
hsa-miR-137	1	0	0	1	1	1	SLC46A3	solute carrier family 46, member 3
hsa-miR-137	1	0	1	1	0	0	PIAS2	protein inhibitor of activated STAT, 2
hsa-miR-137	1	0	1	1	1	1	PLA2G15	phospholipase A2, group XV
hsa-miR-137	1	0	0	0	1	1	ARHGEF18	Rho/Rac guanine nucleotide exchange factor (GEF) 18
hsa-miR-137	1	0	0	1	1	1	TRIM67	tripartite motif containing 67
hsa-miR-137	1	0	1	1	1	1	XPO4	exportin 4
hsa-miR-137	1	0	1	0	1	1	CD83	CD83 molecule
hsa-miR-137	1	0	1	1	1	1	PHF20	PHD finger protein 20
hsa-miR-137	1	0	1	0	1	1	ADO	2-aminoethanethiol (cysteamine) dioxygenase
hsa-miR-137	1	0	1	1	1	1	ZFYVE16	zinc finger, FYVE domain containing 16
hsa-miR-137	1	0	1	1	0	0	TNXB	tenascin XB
hsa-miR-137	1	0	1	1	1	1	SPHK2	sphingosine kinase 2
hsa-miR-137	1	0	1	0	1	1	ZDHHC21	zinc finger, DHHC-type containing 21
hsa-miR-137	1	0	1	1	1	1	FAM222B	family with sequence similarity 222, member B
hsa-miR-137	1	0	1	1	1	1	FBXW7	F-box and WD repeat domain containing 7, E3 ubiquitin protein ligase
hsa-miR-137	1	0	1	1	0	0	ZDHHC1	zinc finger, DHHC-type containing 1
hsa-miR-137	1	0	1	1	1	1	KCNA1	potassium voltage-gated channel, shaker-related subfamily, member 1 (episodic ataxia with myokymia)
hsa-miR-137	1	0	1	0	0	0	ZBTB34	zinc finger and BTB domain containing 34
hsa-miR-137	1	0	1	1	1	1	TMEM132B	transmembrane protein 132B
hsa-miR-137	1	0	1	1	1	1	LUZP2	leucine zipper protein 2
hsa-miR-137	1	0	1	1	1	1	ZDHHC5	zinc finger, DHHC-type containing 5
hsa-miR-137	1	0	1	0	1	1	RBM12	RNA binding motif protein 12
hsa-miR-137	1	0	1	1	1	1	AZIN1	antizyme inhibitor 1
hsa-miR-137	1	0	1	0	1	1	HTT	huntingtin
hsa-miR-137	1	0	1	1	1	1	TFAP2C	transcription factor AP-2 gamma (activating enhancer binding protein 2 gamma)
hsa-miR-137	1	0	1	0	1	1	FCHO2	FCH domain only 2
hsa-miR-137	1	0	1	0	1	1	SOX11	SRY (sex determining region Y)-box 11
hsa-miR-137	1	0	1	0	0	0	PRRT4	proline-rich transmembrane protein 4
hsa-miR-137	1	0	0	1	1	1	CTSF	cathepsin F
hsa-miR-137	1	0	1	1	1	1	RBMS3	RNA binding motif, single stranded interacting protein 3
hsa-miR-137	1	0	1	1	1	1	GABRA6	gamma-aminobutyric acid (GABA) A receptor, alpha 6
hsa-miR-137	1	0	1	0	1	1	CDK6	cyclin-dependent kinase 6
hsa-miR-137	1	0	1	1	1	1	SEPT3	septin 3
hsa-miR-137	1	0	1	1	1	1	ZAK	sterile alpha motif and leucine zipper containing kinase AZK
hsa-miR-137	1	0	1	1	1	1	CCNG2	cyclin G2
hsa-miR-137	1	0	1	0	1	1	GLCE	glucuronic acid epimerase
hsa-miR-137	1	0	1	0	1	1	DNMT3A	DNA (cytosine-5-)-methyltransferase 3 alpha
hsa-miR-137	1	0	1	1	1	1	SOX6	SRY (sex determining region Y)-box 6
hsa-miR-137	1	0	1	1	1	1	PLEKHO2	pleckstrin homology domain containing, family O member 2
hsa-miR-137	1	0	1	1	1	1	NABP1	nucleic acid binding protein 1
hsa-miR-137	1	0	1	1	0	0	OSGEP	O-sialoglycoprotein endopeptidase
hsa-miR-137	1	0	1	1	1	1	ITGA5	integrin, alpha 5 (fibronectin receptor, alpha polypeptide)
hsa-miR-137	1	0	1	1	1	1	PLEKHB2	pleckstrin homology domain containing, family B (evectins) member 2
hsa-miR-137	1	0	1	1	1	1	GOLGA3	golgin A3
hsa-miR-137	1	0	1	1	1	1	TRIM3	tripartite motif containing 3
hsa-miR-137	1	0	1	1	1	1	HERPUD2	HERPUD family member 2
hsa-miR-137	1	0	1	1	1	1	MAP3K14	mitogen-activated protein kinase kinase kinase 14
hsa-miR-137	1	0	1	1	0	0	KAT5	K(lysine) acetyltransferase 5
hsa-miR-137	1	0	1	1	1	1	PRDM1	PR domain containing 1, with ZNF domain
hsa-miR-137	1	0	1	1	1	1	ZCCHC2	zinc finger, CCHC domain containing 2
hsa-miR-137	1	0	1	1	1	1	UBE2H	ubiquitin-conjugating enzyme E2H
hsa-miR-137	1	0	1	1	1	1	KDM5B	lysine (K)-specific demethylase 5B
hsa-miR-137	1	0	1	1	1	1	PTGFRN	prostaglandin F2 receptor negative regulator
hsa-miR-137	1	0	1	1	1	1	WDYHV1	WDYHV motif containing 1
hsa-miR-137	1	0	1	1	1	1	OPCML	opioid binding protein/cell adhesion molecule-like
hsa-miR-137	1	0	1	0	1	1	ALPK3	alpha-kinase 3
hsa-miR-137	1	0	1	0	1	1	RWDD4	RWD domain containing 4
hsa-miR-137	1	0	1	1	1	1	E2F6	E2F transcription factor 6
hsa-miR-137	1	0	1	1	1	1	ZMYND11	zinc finger, MYND-type containing 11
hsa-miR-137	1	0	1	0	1	1	ELAVL3	ELAV (embryonic lethal, abnormal vision, Drosophila)-like 3 (Hu antigen C)
hsa-miR-137	1	0	1	1	1	1	ST18	suppression of tumorigenicity 18 (breast carcinoma) (zinc finger protein)
hsa-miR-137	1	0	1	1	0	0	SPATA16	spermatogenesis associated 16
hsa-miR-137	1	0	1	1	1	1	SYN2	synapsin II
hsa-miR-137	1	0	1	1	1	1	TBX15	T-box 15
hsa-miR-137	1	0	1	1	1	1	VASH2	vasohibin 2
hsa-miR-137	1	0	1	1	0	0	GRIA1	glutamate receptor, ionotropic, AMPA 1
hsa-miR-137	1	0	1	1	1	1	FAM134C	family with sequence similarity 134, member C
hsa-miR-137	1	0	1	1	1	1	HLF	hepatic leukemia factor
hsa-miR-137	1	0	1	0	1	1	STYX	serine/threonine/tyrosine interacting protein
hsa-miR-137	1	0	1	1	1	1	IDH1	isocitrate dehydrogenase 1 (NADP+), soluble
hsa-miR-137	1	0	1	0	1	1	CDK19	cyclin-dependent kinase 19
hsa-miR-137	1	0	1	1	1	1	FOXP4	forkhead box P4
hsa-miR-137	1	0	1	0	1	1	WNT7A	wingless-type MMTV integration site family, member 7A
hsa-miR-137	1	0	1	0	1	1	C3orf58	chromosome 3 open reading frame 58
hsa-miR-137	1	0	1	1	1	1	LONRF3	LON peptidase N-terminal domain and ring finger 3
hsa-miR-137	1	0	1	1	1	1	HNRNPU	heterogeneous nuclear ribonucleoprotein U (scaffold attachment factor A)
hsa-miR-137	1	0	1	1	1	1	MBOAT2	membrane bound O-acyltransferase domain containing 2
hsa-miR-137	1	0	1	1	1	1	RNF150	ring finger protein 150
hsa-miR-137	1	0	1	1	1	1	COL5A1	collagen, type V, alpha 1
hsa-miR-137	1	0	1	1	1	1	HEY2	hairy/enhancer-of-split related with YRPW motif 2
hsa-miR-137	1	0	1	1	1	1	DUSP8	dual specificity phosphatase 8
hsa-miR-137	1	0	1	1	1	1	MGLL	monoglyceride lipase
hsa-miR-137	1	0	1	1	1	1	TARDBP	TAR DNA binding protein
hsa-miR-137	1	0	1	1	1	1	AIFM2	apoptosis-inducing factor, mitochondrion-associated, 2
hsa-miR-137	1	0	1	1	1	1	RHOBTB1	Rho-related BTB domain containing 1
hsa-miR-137	1	0	1	1	1	1	NSUN4	NOP2/Sun domain family, member 4
hsa-miR-137	1	0	1	1	1	1	PGM2	phosphoglucomutase 2
hsa-miR-137	1	0	1	1	1	1	NOVA1	neuro-oncological ventral antigen 1
hsa-miR-137	1	0	1	0	1	1	RIMS4	regulating synaptic membrane exocytosis 4
hsa-miR-137	1	0	1	1	1	1	B4GALT5	UDP-Gal:betaGlcNAc beta 1,4- galactosyltransferase, polypeptide 5
hsa-miR-137	1	0	1	1	0	0	BCORL1	BCL6 corepressor-like 1
hsa-miR-137	1	0	1	1	0	0	LBX1	ladybird homeobox 1
hsa-miR-137	1	0	1	1	1	1	OXR1	oxidation resistance 1
hsa-miR-137	1	0	1	0	1	1	STK35	serine/threonine kinase 35
hsa-miR-137	1	0	1	1	1	1	DENND1A	DENN/MADD domain containing 1A
hsa-miR-137	1	0	1	1	1	1	NFASC	neurofascin
hsa-miR-137	1	0	1	1	1	1	RAPH1	Ras association (RalGDS/AF-6) and pleckstrin homology domains 1
hsa-miR-137	1	0	1	1	1	1	MBNL2	muscleblind-like splicing regulator 2
hsa-miR-137	1	0	1	1	1	1	CCZ1B	CCZ1 vacuolar protein trafficking and biogenesis associated homolog B (S. cerevisiae)
hsa-miR-137	1	0	1	1	1	1	SOCS6	suppressor of cytokine signaling 6
hsa-miR-137	1	0	1	1	1	1	MLC1	megalencephalic leukoencephalopathy with subcortical cysts 1
hsa-miR-137	1	0	1	1	1	1	CSMD3	CUB and Sushi multiple domains 3
hsa-miR-137	1	0	1	1	1	1	NFATC1	nuclear factor of activated T-cells, cytoplasmic, calcineurin-dependent 1
hsa-miR-137	1	0	1	1	1	1	SCAF11	SR-related CTD-associated factor 11
hsa-miR-137	1	0	1	1	1	1	MIA3	melanoma inhibitory activity family, member 3
hsa-miR-137	1	0	1	0	1	1	FAM78A	family with sequence similarity 78, member A
hsa-miR-137	1	0	1	1	1	1	RNF10	ring finger protein 10
hsa-miR-137	1	0	1	1	1	1	GLS	glutaminase
hsa-miR-137	1	0	1	1	1	1	EPB41	erythrocyte membrane protein band 4.1 (elliptocytosis 1, RH-linked)
hsa-miR-137	1	0	1	0	1	1	MAML1	mastermind-like 1 (Drosophila)
hsa-miR-137	1	0	1	1	1	1	CCDC47	coiled-coil domain containing 47
hsa-miR-137	1	0	1	1	1	1	ARHGAP44	Rho GTPase activating protein 44
hsa-miR-137	1	0	1	1	1	1	POLR2C	polymerase (RNA) II (DNA directed) polypeptide C, 33kDa
hsa-miR-137	1	0	1	1	1	1	FRS2	fibroblast growth factor receptor substrate 2
hsa-miR-137	1	0	1	1	1	1	SPATS2	spermatogenesis associated, serine-rich 2
hsa-miR-137	1	0	1	1	1	1	SEMA4D	sema domain, immunoglobulin domain (Ig), transmembrane domain (TM) and short cytoplasmic domain, (semaphorin) 4D
hsa-miR-137	1	0	1	1	1	1	SLC8A1	solute carrier family 8 (sodium/calcium exchanger), member 1
hsa-miR-137	1	0	1	1	1	1	C15orf63	chromosome 15 open reading frame 63
hsa-miR-137	1	0	1	0	1	1	API5	apoptosis inhibitor 5
hsa-miR-137	1	0	1	1	1	1	NEUROD2	neuronal differentiation 2
hsa-miR-137	1	0	1	1	1	1	GUCY1A2	guanylate cyclase 1, soluble, alpha 2
hsa-miR-137	1	0	1	0	1	1	ATP11B	ATPase, class VI, type 11B
hsa-miR-137	1	0	1	1	1	1	EDIL3	EGF-like repeats and discoidin I-like domains 3
hsa-miR-137	1	0	1	1	1	1	PDCL	phosducin-like
hsa-miR-137	1	0	1	1	1	1	MYO1B	myosin IB
hsa-miR-137	1	0	1	1	1	1	YTHDC1	YTH domain containing 1
hsa-miR-137	1	0	1	1	1	1	UNC79	unc-79 homolog (C. elegans)
hsa-miR-137	1	0	1	1	1	1	CLGN	calmegin
hsa-miR-137	1	0	1	0	1	1	FMNL2	formin-like 2
hsa-miR-137	1	0	1	1	1	1	UBTD2	ubiquitin domain containing 2
hsa-miR-137	1	0	1	1	1	1	LRRC4	leucine rich repeat containing 4
hsa-miR-137	1	0	1	1	1	1	PPP6R2	protein phosphatase 6, regulatory subunit 2
hsa-miR-137	1	0	1	0	1	1	SRC	v-src sarcoma (Schmidt-Ruppin A-2) viral oncogene homolog (avian)
hsa-miR-137	1	0	1	1	1	1	SYT1	synaptotagmin I
hsa-miR-137	1	0	1	0	1	1	ARMC1	armadillo repeat containing 1
hsa-miR-137	1	0	1	1	1	1	EPS8	epidermal growth factor receptor pathway substrate 8
hsa-miR-137	1	0	1	1	1	1	EFHC2	EF-hand domain (C-terminal) containing 2
hsa-miR-137	1	0	1	1	1	1	TFAP2A	transcription factor AP-2 alpha (activating enhancer binding protein 2 alpha)
hsa-miR-137	1	0	1	0	1	1	ADCY2	adenylate cyclase 2 (brain)
hsa-miR-137	1	0	1	0	1	1	CHD7	chromodomain helicase DNA binding protein 7
hsa-miR-137	1	0	1	1	1	1	SLC25A5	solute carrier family 25 (mitochondrial carrier; adenine nucleotide translocator), member 5
hsa-miR-137	1	0	1	0	1	1	CACNA1C	calcium channel, voltage-dependent, L type, alpha 1C subunit
hsa-miR-137	1	0	1	1	1	1	CSNK1G3	casein kinase 1, gamma 3
hsa-miR-137	1	0	1	0	1	1	RNF141	ring finger protein 141
hsa-miR-137	1	0	1	1	1	1	RPGRIP1L	RPGRIP1-like
hsa-miR-137	1	0	1	1	1	1	TMEM218	transmembrane protein 218
hsa-miR-137	1	0	1	1	1	1	AQP2	aquaporin 2 (collecting duct)
hsa-miR-137	1	0	1	0	1	1	CADPS2	Ca++-dependent secretion activator 2
hsa-miR-137	1	0	1	0	1	1	ST13	suppression of tumorigenicity 13 (colon carcinoma) (Hsp70 interacting protein)
hsa-miR-137	1	0	1	1	1	1	PDE1B	phosphodiesterase 1B, calmodulin-dependent
hsa-miR-137	1	0	1	1	1	1	PLXNA2	plexin A2
hsa-miR-137	1	0	1	1	1	1	NEFH	neurofilament, heavy polypeptide
hsa-miR-137	1	0	1	1	1	1	NFYB	nuclear transcription factor Y, beta
hsa-miR-137	1	0	1	1	1	1	BCL2L13	BCL2-like 13 (apoptosis facilitator)
hsa-miR-137	1	0	0	1	0	0	THNSL1	threonine synthase-like 1 (S. cerevisiae)
hsa-miR-137	1	0	1	1	1	1	HERC3	HECT and RLD domain containing E3 ubiquitin protein ligase 3
hsa-miR-137	1	0	1	1	1	1	PAQR3	progestin and adipoQ receptor family member III
hsa-miR-137	1	0	1	1	1	1	PKN2	protein kinase N2
hsa-miR-137	1	0	1	1	1	1	OXSR1	oxidative-stress responsive 1
hsa-miR-137	1	0	1	1	1	1	QSER1	glutamine and serine rich 1
hsa-miR-137	1	0	1	1	1	1	KCND1	potassium voltage-gated channel, Shal-related subfamily, member 1
hsa-miR-137	1	0	1	1	1	1	DCLK2	doublecortin-like kinase 2
hsa-miR-137	1	0	1	0	1	1	SCRT2	scratch homolog 2, zinc finger protein (Drosophila)
hsa-miR-137	1	0	1	1	1	1	INPP5A	inositol polyphosphate-5-phosphatase, 40kDa
hsa-miR-137	1	0	1	0	1	1	CCNY	cyclin Y
hsa-miR-137	1	0	1	1	1	1	ALDH1A2	aldehyde dehydrogenase 1 family, member A2
hsa-miR-137	1	0	1	1	1	1	NOTCH1	notch 1
hsa-miR-137	1	0	1	1	1	1	GRAMD4	GRAM domain containing 4
hsa-miR-137	1	0	1	1	1	1	FAM210B	family with sequence similarity 210, member B
hsa-miR-137	1	0	1	1	1	1	TMEM33	transmembrane protein 33
hsa-miR-137	1	0	1	0	1	1	RNF152	ring finger protein 152
hsa-miR-137	1	0	1	1	0	0	ENHO	energy homeostasis associated
hsa-miR-137	1	0	1	1	0	0	REXO1	REX1, RNA exonuclease 1 homolog (S. cerevisiae)
hsa-miR-137	1	0	1	0	1	1	EIF2C4	eukaryotic translation initiation factor 2C, 4
hsa-miR-137	1	0	0	1	0	0	EHBP1L1	EH domain binding protein 1-like 1
hsa-miR-137	1	0	1	1	1	1	GRAMD3	GRAM domain containing 3
hsa-miR-137	1	0	1	1	1	1	ATP10A	ATPase, class V, type 10A
hsa-miR-137	1	0	1	1	1	1	CLDN11	claudin 11
hsa-miR-137	1	0	0	1	1	1	SGCG	sarcoglycan, gamma (35kDa dystrophin-associated glycoprotein)
hsa-miR-137	1	0	0	0	0	0	SLC35E2B	solute carrier family 35, member E2B
hsa-miR-137	1	0	0	1	1	1	MAP4K2	mitogen-activated protein kinase kinase kinase kinase 2
hsa-miR-137	1	0	1	1	1	1	NAA15	N(alpha)-acetyltransferase 15, NatA auxiliary subunit
hsa-miR-137	1	0	1	1	1	1	SERBP1	SERPINE1 mRNA binding protein 1
hsa-miR-137	1	0	1	1	0	0	ANO8	anoctamin 8
hsa-miR-137	1	0	1	1	1	1	NECAB3	N-terminal EF-hand calcium binding protein 3
hsa-miR-137	1	0	1	1	1	1	GLIS2	GLIS family zinc finger 2
hsa-miR-137	1	0	1	1	1	1	DBN1	drebrin 1
hsa-miR-137	1	0	1	1	1	1	TMPO	thymopoietin
hsa-miR-137	1	0	1	1	1	1	AIDA	axin interactor, dorsalization associated
hsa-miR-137	1	0	1	0	1	1	NCKAP5	NCK-associated protein 5
hsa-miR-137	1	0	1	1	1	1	LEMD3	LEM domain containing 3
hsa-miR-137	1	0	1	1	1	1	GALNT1	UDP-N-acetyl-alpha-D-galactosamine:polypeptide N-acetylgalactosaminyltransferase 1 (GalNAc-T1)
hsa-miR-137	1	0	1	1	1	1	ASH1L	ash1 (absent, small, or homeotic)-like (Drosophila)
hsa-miR-137	1	0	1	1	1	1	HLTF	helicase-like transcription factor
hsa-miR-137	1	0	1	1	1	1	TAB3	TGF-beta activated kinase 1/MAP3K7 binding protein 3
hsa-miR-137	1	0	1	0	1	1	MEGF9	multiple EGF-like-domains 9
hsa-miR-137	1	0	1	0	1	1	LURAP1L	leucine rich adaptor protein 1-like
hsa-miR-137	1	0	1	1	1	1	BAZ1A	bromodomain adjacent to zinc finger domain, 1A
hsa-miR-137	1	0	1	0	1	1	RRM2B	ribonucleotide reductase M2 B (TP53 inducible)
hsa-miR-137	1	0	1	1	1	1	CTDSP2	CTD (carboxy-terminal domain, RNA polymerase II, polypeptide A) small phosphatase 2
hsa-miR-137	1	0	1	1	1	1	GPD2	glycerol-3-phosphate dehydrogenase 2 (mitochondrial)
hsa-miR-137	1	0	0	0	0	0	AXIN1	axin 1
hsa-miR-137	1	0	1	1	1	1	GPATCH8	G patch domain containing 8
hsa-miR-137	1	0	0	0	1	1	MLXIP	MLX interacting protein
hsa-miR-137	1	0	1	0	1	1	STK3	serine/threonine kinase 3
hsa-miR-137	1	0	1	1	1	1	TP63	tumor protein p63
hsa-miR-137	1	0	1	1	1	1	CPNE8	copine VIII
hsa-miR-137	1	0	1	1	1	1	ADCY1	adenylate cyclase 1 (brain)
hsa-miR-137	1	0	1	1	1	1	RAC1	ras-related C3 botulinum toxin substrate 1 (rho family, small GTP binding protein Rac1)
hsa-miR-137	1	0	1	1	1	1	GBP1	guanylate binding protein 1, interferon-inducible
hsa-miR-137	1	0	1	1	1	1	CAMKK2	calcium/calmodulin-dependent protein kinase kinase 2, beta
hsa-miR-137	1	0	1	0	1	1	TEF	thyrotrophic embryonic factor
hsa-miR-137	1	0	1	0	1	1	FAM172A	family with sequence similarity 172, member A
hsa-miR-137	1	0	1	1	1	1	SLC45A3	solute carrier family 45, member 3
hsa-miR-137	1	0	1	1	1	1	SMEK1	SMEK homolog 1, suppressor of mek1 (Dictyostelium)
hsa-miR-137	1	0	1	1	0	0	UBE2Z	ubiquitin-conjugating enzyme E2Z
hsa-miR-137	1	0	1	0	1	1	TNRC6B	trinucleotide repeat containing 6B
hsa-miR-137	1	0	1	0	1	1	SGPL1	sphingosine-1-phosphate lyase 1
hsa-miR-137	1	0	1	1	1	1	PTPRD	protein tyrosine phosphatase, receptor type, D
hsa-miR-137	1	0	1	1	1	1	DAB2IP	DAB2 interacting protein
hsa-miR-137	1	0	1	1	1	1	SMC6	structural maintenance of chromosomes 6
hsa-miR-137	1	0	1	1	0	0	JPH2	junctophilin 2
hsa-miR-137	1	0	1	1	0	0	HK3	hexokinase 3 (white cell)
hsa-miR-137	1	0	1	1	1	1	CYYR1	cysteine/tyrosine-rich 1
hsa-miR-137	1	0	1	0	1	1	CALM3	calmodulin 3 (phosphorylase kinase, delta)
hsa-miR-137	1	0	1	1	1	1	NSG1	neuron specific gene family member 1
hsa-miR-137	1	0	1	1	1	1	AMMECR1	Alport syndrome, mental retardation, midface hypoplasia and elliptocytosis chromosomal region gene 1
hsa-miR-137	1	0	1	0	1	1	BCL11B	B-cell CLL/lymphoma 11B (zinc finger protein)
hsa-miR-137	1	0	1	1	1	1	CNST	consortin, connexin sorting protein
hsa-miR-137	1	0	1	1	1	1	CHD1	chromodomain helicase DNA binding protein 1
hsa-miR-137	1	0	1	1	1	1	SSR1	signal sequence receptor, alpha
hsa-miR-137	1	0	1	1	1	1	GCA	grancalcin, EF-hand calcium binding protein
hsa-miR-137	1	0	1	1	1	1	TMEM229B	transmembrane protein 229B
hsa-miR-137	1	0	1	0	0	0	TADA2B	transcriptional adaptor 2B
hsa-miR-137	1	0	1	1	1	1	TAF7L	TAF7-like RNA polymerase II, TATA box binding protein (TBP)-associated factor, 50kDa
hsa-miR-137	1	0	1	1	1	1	SIK2	salt-inducible kinase 2
hsa-miR-137	1	0	1	1	1	1	AFM	afamin
hsa-miR-137	1	0	1	1	1	1	CDC37L1	cell division cycle 37 homolog (S. cerevisiae)-like 1
hsa-miR-137	1	0	1	1	1	1	CEP63	centrosomal protein 63kDa
hsa-miR-137	0	0	1	1	1	1	PPIP5K1	diphosphoinositol pentakisphosphate kinase 1
hsa-miR-137	1	0	1	1	1	1	NUPL1	nucleoporin like 1
hsa-miR-137	1	0	1	1	1	1	HIPK1	homeodomain interacting protein kinase 1
hsa-miR-137	1	0	1	0	1	1	SNX13	sorting nexin 13
hsa-miR-137	0	0	1	1	0	0	ATP10B	ATPase, class V, type 10B
hsa-miR-137	1	0	1	1	1	1	ARHGEF15	Rho guanine nucleotide exchange factor (GEF) 15
hsa-miR-137	0	0	1	1	0	0	FAM149B1	family with sequence similarity 149, member B1
hsa-miR-137	1	0	1	0	1	1	ZNF507	zinc finger protein 507
hsa-miR-137	1	0	1	1	1	1	ATXN7L1	ataxin 7-like 1
hsa-miR-137	1	0	1	1	0	0	ATAD2B	ATPase family, AAA domain containing 2B
hsa-miR-137	1	0	1	1	1	1	ASAP1	ArfGAP with SH3 domain, ankyrin repeat and PH domain 1
hsa-miR-137	0	0	1	1	1	1	FSTL5	follistatin-like 5
hsa-miR-137	0	0	1	1	1	1	SLC7A9	solute carrier family 7 (glycoprotein-associated amino acid transporter light chain, bo,+ system), member 9
hsa-miR-137	1	0	1	1	0	0	KIAA1109	KIAA1109
hsa-miR-137	0	0	1	0	0	0	KIAA1383	KIAA1383
hsa-miR-137	1	0	1	1	1	1	SLC2A4RG	SLC2A4 regulator
hsa-miR-137	1	0	1	1	1	1	PPP6R3	protein phosphatase 6, regulatory subunit 3
hsa-miR-137	0	0	1	0	1	1	ZSWIM6	zinc finger, SWIM-type containing 6
hsa-miR-137	1	0	1	0	1	1	IGDCC4	immunoglobulin superfamily, DCC subclass, member 4
hsa-miR-137	0	0	1	1	1	1	PBLD	phenazine biosynthesis-like protein domain containing
hsa-miR-137	1	0	1	1	1	1	PHF21A	PHD finger protein 21A
hsa-miR-137	1	0	1	1	1	1	ABI3BP	ABI family, member 3 (NESH) binding protein
hsa-miR-137	1	0	1	1	1	1	AHCTF1	AT hook containing transcription factor 1
hsa-miR-137	1	0	1	1	1	1	LSM14A	LSM14A, SCD6 homolog A (S. cerevisiae)
hsa-miR-137	1	0	1	1	1	1	SSH3	slingshot homolog 3 (Drosophila)
hsa-miR-137	1	0	1	1	1	1	SH3TC2	SH3 domain and tetratricopeptide repeats 2
hsa-miR-137	0	0	1	1	0	0	SLC22A10	solute carrier family 22, member 10
hsa-miR-137	1	0	1	0	0	0	ZC3H12C	zinc finger CCCH-type containing 12C
hsa-miR-137	1	0	1	1	1	1	PAN3	PAN3 poly(A) specific ribonuclease subunit homolog (S. cerevisiae)
hsa-miR-137	0	0	1	1	1	1	DOCK8	dedicator of cytokinesis 8
hsa-miR-137	1	0	1	1	1	1	TRIM36	tripartite motif containing 36
hsa-miR-137	1	0	1	1	1	1	COL11A1	collagen, type XI, alpha 1
hsa-miR-137	0	0	1	1	0	0	KCNC3	potassium voltage-gated channel, Shaw-related subfamily, member 3
hsa-miR-137	0	0	1	1	1	1	PTK2	PTK2 protein tyrosine kinase 2
hsa-miR-137	1	0	1	0	1	1	PLAG1	pleiomorphic adenoma gene 1
hsa-miR-137	1	0	1	0	1	1	MPPED2	metallophosphoesterase domain containing 2
hsa-miR-137	1	0	1	1	1	1	FMR1	fragile X mental retardation 1
hsa-miR-137	1	0	1	0	1	1	DPYSL2	dihydropyrimidinase-like 2
hsa-miR-137	1	0	1	1	1	1	EPHA5	EPH receptor A5
hsa-miR-137	1	0	1	1	1	1	SATB2	SATB homeobox 2
hsa-miR-137	0	0	1	0	1	1	ACTN2	actinin, alpha 2
hsa-miR-137	0	0	1	1	1	1	GPM6B	glycoprotein M6B
hsa-miR-137	1	0	1	1	1	1	HNRNPK	heterogeneous nuclear ribonucleoprotein K
hsa-miR-137	0	0	1	0	0	0	LOC348162	uncharacterized protein 348162
hsa-miR-137	1	0	1	0	1	1	ADD3	adducin 3 (gamma)
hsa-miR-137	0	0	1	1	1	1	CENPE	centromere protein E, 312kDa
hsa-miR-137	1	0	1	1	1	1	SLC4A4	solute carrier family 4, sodium bicarbonate cotransporter, member 4
hsa-miR-137	1	0	1	1	1	1	CBFA2T2	core-binding factor, runt domain, alpha subunit 2; translocated to, 2
hsa-miR-137	1	0	1	1	1	1	PCDH17	protocadherin 17
hsa-miR-137	1	0	1	0	0	0	MAP3K1	mitogen-activated protein kinase kinase kinase 1, E3 ubiquitin protein ligase
hsa-miR-137	0	0	1	1	1	1	CYP4F3	cytochrome P450, family 4, subfamily F, polypeptide 3
hsa-miR-137	0	0	1	0	1	1	GPR98	G protein-coupled receptor 98
hsa-miR-137	0	0	1	0	0	0	ZNF880	zinc finger protein 880
hsa-miR-137	0	0	1	1	1	1	FHL1	four and a half LIM domains 1
hsa-miR-137	0	0	1	1	1	1	IL18BP	interleukin 18 binding protein
hsa-miR-137	1	0	1	1	1	1	EDNRB	endothelin receptor type B
hsa-miR-137	1	0	1	1	1	1	LRRFIP1	leucine rich repeat (in FLII) interacting protein 1
hsa-miR-137	0	0	1	1	1	1	DMRT2	doublesex and mab-3 related transcription factor 2
hsa-miR-137	1	0	1	1	1	1	CAB39	calcium binding protein 39
hsa-miR-137	1	0	1	1	1	1	TAOK3	TAO kinase 3
hsa-miR-137	0	0	1	1	0	0	DTWD1	DTW domain containing 1
hsa-miR-137	1	0	1	1	1	1	TSC22D2	TSC22 domain family, member 2
hsa-miR-137	0	0	1	1	1	1	CD28	CD28 molecule
hsa-miR-137	0	0	1	1	1	1	DOCK10	dedicator of cytokinesis 10
hsa-miR-137	1	0	1	1	0	0	LMO2	LIM domain only 2 (rhombotin-like 1)
hsa-miR-137	1	0	1	1	1	1	RBM47	RNA binding motif protein 47
hsa-miR-137	1	0	1	1	1	1	SH3GLB1	SH3-domain GRB2-like endophilin B1
hsa-miR-137	0	0	1	1	1	1	CKS1B	CDC28 protein kinase regulatory subunit 1B
hsa-miR-137	0	0	1	0	1	1	ERBB2IP	erbb2 interacting protein
hsa-miR-137	1	0	1	1	1	1	VPS39	vacuolar protein sorting 39 homolog (S. cerevisiae)
hsa-miR-137	1	0	1	1	1	1	SPTBN4	spectrin, beta, non-erythrocytic 4
hsa-miR-137	0	0	1	1	1	1	SLC6A15	solute carrier family 6 (neutral amino acid transporter), member 15
hsa-miR-137	0	0	1	1	1	1	MS4A4A	membrane-spanning 4-domains, subfamily A, member 4A
hsa-miR-137	1	0	1	1	1	1	PBX3	pre-B-cell leukemia homeobox 3
hsa-miR-137	0	0	1	1	1	1	RAPGEF6	Rap guanine nucleotide exchange factor (GEF) 6
hsa-miR-137	0	0	1	1	1	1	PSEN1	presenilin 1
hsa-miR-137	1	0	1	1	1	1	AKIP1	A kinase (PRKA) interacting protein 1
hsa-miR-137	0	0	1	1	1	1	CHODL	chondrolectin
hsa-miR-137	1	0	1	0	1	1	IL1RAP	interleukin 1 receptor accessory protein
hsa-miR-137	1	0	1	1	1	1	PLAGL1	pleiomorphic adenoma gene-like 1
hsa-miR-137	0	0	1	1	0	0	CLDN7	claudin 7
hsa-miR-137	0	0	1	1	1	1	TCFL5	transcription factor-like 5 (basic helix-loop-helix)
hsa-miR-137	1	0	1	1	1	1	PALM2	paralemmin 2
hsa-miR-137	0	0	1	0	1	1	SRPK1	SRSF protein kinase 1
hsa-miR-137	1	0	1	1	1	1	PPP3CB	protein phosphatase 3, catalytic subunit, beta isozyme
hsa-miR-137	0	0	1	1	0	0	NHLRC2	NHL repeat containing 2
hsa-miR-137	0	0	1	0	0	0	TUG1	taurine upregulated 1 (non-protein coding)
hsa-miR-137	1	0	1	0	1	1	CLIC4	chloride intracellular channel 4
hsa-miR-137	1	0	1	1	1	1	PTBP3	polypyrimidine tract binding protein 3
hsa-miR-137	1	0	1	1	1	1	SLC38A2	solute carrier family 38, member 2
hsa-miR-137	1	0	1	1	1	1	ARMC8	armadillo repeat containing 8
hsa-miR-137	0	0	1	1	1	1	GBP3	guanylate binding protein 3
hsa-miR-137	0	0	1	1	1	1	PRPF39	PRP39 pre-mRNA processing factor 39 homolog (S. cerevisiae)
hsa-miR-137	1	0	1	1	1	1	MYEF2	myelin expression factor 2
hsa-miR-137	1	0	1	1	1	1	INSIG2	insulin induced gene 2
hsa-miR-137	0	0	1	1	0	0	TTC21A	tetratricopeptide repeat domain 21A
hsa-miR-137	1	0	1	1	1	1	SLCO5A1	solute carrier organic anion transporter family, member 5A1
hsa-miR-137	0	0	1	0	0	0	SOX2-OT	SOX2 overlapping transcript (non-protein coding)
hsa-miR-137	0	0	1	0	1	1	GVINP1	GTPase, very large interferon inducible pseudogene 1
hsa-miR-137	0	0	1	0	1	1	ARHGAP42	Rho GTPase activating protein 42
hsa-miR-137	1	0	1	1	1	1	PHF20L1	PHD finger protein 20-like 1
hsa-miR-137	0	0	1	0	1	1	ZNF766	zinc finger protein 766
hsa-miR-137	1	0	1	1	1	1	ZMIZ1	zinc finger, MIZ-type containing 1
hsa-miR-137	0	0	1	0	0	0	FLJ21408	uncharacterized LOC400512
hsa-miR-137	1	0	1	1	1	1	YPEL5	yippee-like 5 (Drosophila)
hsa-miR-137	0	0	1	1	1	1	HSPBAP1	HSPB (heat shock 27kDa) associated protein 1
hsa-miR-137	0	0	1	1	1	1	PION	pigeon homolog (Drosophila)
hsa-miR-137	0	0	1	0	1	1	ZCCHC8	zinc finger, CCHC domain containing 8
hsa-miR-137	1	0	1	0	1	1	TOX3	TOX high mobility group box family member 3
hsa-miR-137	1	0	1	1	1	1	RNF185	ring finger protein 185
hsa-miR-137	0	0	1	0	0	0	LOC729852	uncharacterized LOC729852
hsa-miR-137	0	0	1	1	1	1	PLEKHS1	pleckstrin homology domain containing, family S member 1
hsa-miR-137	0	0	1	1	1	1	GPBP1L1	GC-rich promoter binding protein 1-like 1
hsa-miR-137	0	0	1	1	1	1	DTL	denticleless E3 ubiquitin protein ligase homolog (Drosophila)
hsa-miR-137	1	0	1	1	1	1	SLAIN1	SLAIN motif family, member 1
hsa-miR-137	1	0	1	0	1	1	AP1G1	adaptor-related protein complex 1, gamma 1 subunit
hsa-miR-137	0	0	1	0	0	0	CASC2	cancer susceptibility candidate 2 (non-protein coding)
hsa-miR-137	1	0	1	0	1	1	RAB1A	RAB1A, member RAS oncogene family
hsa-miR-137	1	0	1	0	1	1	RNF165	ring finger protein 165
hsa-miR-137	0	0	1	1	1	1	ANKRD36B	ankyrin repeat domain 36B
hsa-miR-137	0	0	1	0	0	0	LOC654433	uncharacterized LOC654433
hsa-miR-137	0	0	1	0	0	0	FLG-AS1	FLG antisense RNA 1
hsa-miR-137	1	0	1	1	1	1	SCAMP5	secretory carrier membrane protein 5
hsa-miR-137	1	0	1	1	1	1	CLCN5	chloride channel, voltage-sensitive 5
hsa-miR-137	1	0	1	1	1	1	SORBS2	sorbin and SH3 domain containing 2
hsa-miR-137	0	0	1	1	0	0	ZP3	zona pellucida glycoprotein 3 (sperm receptor)
hsa-miR-137	0	0	1	1	1	1	DST	dystonin
hsa-miR-137	1	0	1	0	1	1	RABGEF1	RAB guanine nucleotide exchange factor (GEF) 1
hsa-miR-137	0	0	1	1	0	0	LOXHD1	lipoxygenase homology domains 1
hsa-miR-137	1	0	1	1	1	1	TLE4	transducin-like enhancer of split 4 (E(sp1) homolog, Drosophila)
hsa-miR-137	0	0	1	0	0	0	FLJ32742	uncharacterized locus FLJ32742
hsa-miR-137	0	0	1	1	1	1	SPICE1	spindle and centriole associated protein 1
hsa-miR-137	0	0	1	1	0	0	ANKAR	ankyrin and armadillo repeat containing
hsa-miR-137	0	0	1	0	1	1	UHMK1	U2AF homology motif (UHM) kinase 1
hsa-miR-137	1	0	1	1	1	1	BLCAP	bladder cancer associated protein
hsa-miR-137	1	0	1	1	1	1	TLK1	tousled-like kinase 1
hsa-miR-137	0	0	1	1	1	1	STBD1	starch binding domain 1
hsa-miR-137	0	0	1	0	1	1	TMSB15B	thymosin beta 15B
hsa-miR-137	1	0	1	1	1	1	EGR2	early growth response 2
hsa-miR-137	0	0	1	0	0	0	FLJ34208	uncharacterized LOC401106
hsa-miR-137	0	0	1	1	0	0	CDK15	cyclin-dependent kinase 15
hsa-miR-137	0	0	1	0	1	1	TBX5-AS1	TBX5 antisense RNA 1
hsa-miR-137	1	0	1	1	1	1	FBXW2	F-box and WD repeat domain containing 2
hsa-miR-137	0	0	1	0	0	0	KIAA1430	KIAA1430
hsa-miR-137	1	0	1	1	1	1	LUC7L2	LUC7-like 2 (S. cerevisiae)
hsa-miR-137	0	0	1	1	1	1	HNRNPH1	heterogeneous nuclear ribonucleoprotein H1 (H)
hsa-miR-137	0	0	1	1	1	1	NRCAM	neuronal cell adhesion molecule
hsa-miR-137	1	0	1	1	1	1	GNG2	guanine nucleotide binding protein (G protein), gamma 2
hsa-miR-137	0	0	1	0	1	1	SSPN	sarcospan
hsa-miR-137	0	0	1	1	0	0	GPX5	glutathione peroxidase 5 (epididymal androgen-related protein)
hsa-miR-137	0	0	1	1	1	1	RBM25	RNA binding motif protein 25
hsa-miR-137	0	0	1	0	0	0	LINC00340	long intergenic non-protein coding RNA 340
hsa-miR-137	0	0	1	1	0	0	C9orf24	chromosome 9 open reading frame 24
hsa-miR-137	1	0	1	1	1	1	NMT2	N-myristoyltransferase 2
hsa-miR-137	0	0	1	1	1	1	TMEM170A	transmembrane protein 170A
hsa-miR-137	0	0	1	1	1	1	MOBP	myelin-associated oligodendrocyte basic protein
hsa-miR-137	0	0	1	1	1	1	SIRPB2	signal-regulatory protein beta 2
hsa-miR-137	1	0	1	1	1	1	ZC3H11A	zinc finger CCCH-type containing 11A
hsa-miR-137	1	0	1	0	1	1	STC2	stanniocalcin 2
hsa-miR-137	0	0	1	0	1	1	C1orf198	chromosome 1 open reading frame 198
hsa-miR-137	1	0	1	0	1	1	KBTBD8	kelch repeat and BTB (POZ) domain containing 8
hsa-miR-137	0	0	1	1	1	1	EXTL2	exostoses (multiple)-like 2
hsa-miR-137	0	0	1	1	1	1	PPFIBP2	PTPRF interacting protein, binding protein 2 (liprin beta 2)
hsa-miR-137	1	0	1	1	1	1	GOLGA8B	golgin A8 family, member B
hsa-miR-137	0	0	1	0	0	0	LOC284385	uncharacterized LOC284385
hsa-miR-137	0	0	1	1	1	1	ATP9B	ATPase, class II, type 9B
hsa-miR-137	0	0	1	1	1	1	HCCS	holocytochrome c synthase
hsa-miR-137	0	0	1	1	1	1	POLR1D	polymerase (RNA) I polypeptide D, 16kDa
hsa-miR-137	1	0	1	1	0	0	FBXL19	F-box and leucine-rich repeat protein 19
hsa-miR-137	0	0	1	0	0	0	GTF2IP1	general transcription factor IIi, pseudogene 1
hsa-miR-137	0	0	1	1	1	1	ARHGEF26	Rho guanine nucleotide exchange factor (GEF) 26
hsa-miR-137	0	0	1	0	1	1	PATE4	prostate and testis expressed 4
hsa-miR-137	0	0	1	1	1	1	DNAJC24	DnaJ (Hsp40) homolog, subfamily C, member 24
hsa-miR-137	0	0	1	0	1	1	FLJ41200	uncharacterized LOC401492
hsa-miR-137	1	0	1	1	1	1	PLEKHH1	pleckstrin homology domain containing, family H (with MyTH4 domain) member 1
hsa-miR-137	0	0	1	0	0	0	TMPRSS11BNL	TMPRSS11B N terminal-like
hsa-miR-137	1	0	1	0	0	0	GPR137C	G protein-coupled receptor 137C
hsa-miR-137	1	0	1	1	1	1	VPS54	vacuolar protein sorting 54 homolog (S. cerevisiae)
hsa-miR-137	0	0	1	1	1	1	C2orf91	chromosome 2 open reading frame 91
hsa-miR-137	0	0	1	1	1	1	ATPBD4	ATP binding domain 4
hsa-miR-137	1	0	1	1	1	1	SGIP1	SH3-domain GRB2-like (endophilin) interacting protein 1
hsa-miR-137	1	0	1	1	1	1	KPNA1	karyopherin alpha 1 (importin alpha 5)
hsa-miR-137	0	0	1	1	1	1	RBM46	RNA binding motif protein 46
hsa-miR-137	0	0	1	0	0	0	FER1L5	fer-1-like 5 (C. elegans)
hsa-miR-137	0	0	1	0	0	0	FLJ44313	FLJ44313 protein
hsa-miR-137	1	0	1	1	1	1	DLG2	discs, large homolog 2 (Drosophila)
hsa-miR-137	1	0	1	1	1	1	TSHZ1	teashirt zinc finger homeobox 1
hsa-miR-137	1	0	1	1	0	0	PEAK1	NKF3 kinase family member
hsa-miR-137	1	0	1	0	1	1	SP6	Sp6 transcription factor
hsa-miR-137	1	0	1	1	1	1	CXorf23	chromosome X open reading frame 23
hsa-miR-137	1	0	1	0	1	1	FNDC3B	fibronectin type III domain containing 3B
hsa-miR-137	0	0	1	1	0	0	C1orf86	chromosome 1 open reading frame 86
hsa-miR-137	1	0	1	0	1	1	YOD1	YOD1 OTU deubiquinating enzyme 1 homolog (S. cerevisiae)
hsa-miR-137	0	0	1	0	0	0	FAM205B	transmembrane protein C9orf144B pseudogene
hsa-miR-137	1	0	1	0	1	1	KDM2A	lysine (K)-specific demethylase 2A
hsa-miR-137	1	0	1	1	1	1	BCAT1	branched chain amino-acid transaminase 1, cytosolic
hsa-miR-137	0	0	1	1	1	1	ATXN2	ataxin 2
hsa-miR-137	0	0	1	0	0	0	EMBP1	embigin pseudogene 1
hsa-miR-137	1	0	1	1	1	1	CD200	CD200 molecule
hsa-miR-137	1	0	1	1	0	0	FOXP2	forkhead box P2
hsa-miR-137	0	0	1	1	1	1	AKTIP	AKT interacting protein
hsa-miR-137	1	0	1	1	1	1	TAP2	transporter 2, ATP-binding cassette, sub-family B (MDR/TAP)
hsa-miR-137	0	0	1	1	0	0	VIL1	villin 1
hsa-miR-137	0	0	1	1	1	1	AGPAT9	1-acylglycerol-3-phosphate O-acyltransferase 9
hsa-miR-137	0	0	1	1	1	1	C5orf28	chromosome 5 open reading frame 28
hsa-miR-137	1	0	1	1	1	1	COBLL1	COBL-like 1
hsa-miR-137	0	0	1	1	1	1	BCL2A1	BCL2-related protein A1
hsa-miR-137	1	0	1	1	1	1	TAB2	TGF-beta activated kinase 1/MAP3K7 binding protein 2
hsa-miR-137	0	0	1	0	0	0	POM121L8P	POM121 transmembrane nucleoporin-like 8 pseudogene
hsa-miR-137	0	0	1	1	0	0	H2AFJ	H2A histone family, member J
hsa-miR-137	0	0	1	1	1	1	ZNF280D	zinc finger protein 280D
hsa-miR-137	0	0	1	0	0	0	TPTE2P6	transmembrane phosphoinositide 3-phosphatase and tensin homolog 2 pseudogene 6
hsa-miR-137	1	0	1	1	1	1	GOLGA8A	golgin A8 family, member A
hsa-miR-137	1	0	1	0	1	1	GPR85	G protein-coupled receptor 85
hsa-miR-137	0	0	1	0	0	0	RPL23AP82	ribosomal protein L23a pseudogene 82
hsa-miR-137	1	0	1	1	1	1	USP45	ubiquitin specific peptidase 45
hsa-miR-137	1	0	1	1	1	1	YTHDF3	YTH domain family, member 3
hsa-miR-137	1	0	1	1	1	1	MIER1	mesoderm induction early response 1 homolog (Xenopus laevis)
hsa-miR-137	1	0	1	1	1	1	KDM6A	lysine (K)-specific demethylase 6A
hsa-miR-137	0	0	1	0	0	0	ZNF720	zinc finger protein 720
hsa-miR-137	0	0	1	1	1	1	SRSF11	serine/arginine-rich splicing factor 11
hsa-miR-137	0	0	1	1	1	1	YAP1	Yes-associated protein 1
hsa-miR-137	0	0	1	1	1	1	CCDC125	coiled-coil domain containing 125
hsa-miR-137	1	0	1	1	0	0	PTAR1	protein prenyltransferase alpha subunit repeat containing 1
hsa-miR-137	0	0	1	0	1	1	PAPD4	PAP associated domain containing 4
hsa-miR-137	1	0	1	0	1	1	MEF2C	myocyte enhancer factor 2C
hsa-miR-137	0	0	1	1	1	1	NARG2	NMDA receptor regulated 2
hsa-miR-137	1	0	1	0	1	1	CLINT1	clathrin interactor 1
hsa-miR-137	0	0	1	1	0	0	LRRN2	leucine rich repeat neuronal 2
hsa-miR-137	0	0	1	0	0	0	EPHA1-AS1	EPHA1 antisense RNA 1
hsa-miR-137	1	0	1	1	1	1	IL17RD	interleukin 17 receptor D
hsa-miR-137	1	0	1	1	1	1	CADM2	cell adhesion molecule 2
hsa-miR-137	1	0	1	0	1	1	NR3C1	nuclear receptor subfamily 3, group C, member 1 (glucocorticoid receptor)
hsa-miR-137	1	0	1	1	1	1	AP1AR	adaptor-related protein complex 1 associated regulatory protein
hsa-miR-137	1	0	1	0	1	1	PHYHIPL	phytanoyl-CoA 2-hydroxylase interacting protein-like
hsa-miR-137	1	0	1	1	1	1	IKZF2	IKAROS family zinc finger 2 (Helios)
hsa-miR-137	0	0	1	1	1	1	ALS2CR8	amyotrophic lateral sclerosis 2 (juvenile) chromosome region, candidate 8
hsa-miR-137	1	0	1	1	1	1	TACC1	transforming, acidic coiled-coil containing protein 1
hsa-miR-137	1	0	1	1	1	1	ANGPT1	angiopoietin 1
hsa-miR-137	0	0	1	1	1	1	SHPRH	SNF2 histone linker PHD RING helicase, E3 ubiquitin protein ligase
hsa-miR-137	1	0	1	1	1	1	OPRM1	opioid receptor, mu 1
hsa-miR-137	1	0	1	1	1	1	RAI14	retinoic acid induced 14
hsa-miR-137	0	0	1	1	1	1	GCOM1	GRINL1A complex locus 1
hsa-miR-137	0	0	1	1	1	1	MFAP5	microfibrillar associated protein 5
hsa-miR-137	0	0	1	0	1	1	ANKS1B	ankyrin repeat and sterile alpha motif domain containing 1B
hsa-miR-137	1	0	1	0	1	1	DLEU7	deleted in lymphocytic leukemia, 7
hsa-miR-137	0	0	1	1	0	0	PDZD11	PDZ domain containing 11
hsa-miR-137	0	0	1	1	1	1	RPTN	repetin
hsa-miR-137	1	0	1	0	1	1	NHS	Nance-Horan syndrome (congenital cataracts and dental anomalies)
hsa-miR-137	0	0	1	0	0	0	NPIPL3	nuclear pore complex interacting protein-like 3
hsa-miR-137	1	0	1	0	1	1	LRAT	lecithin retinol acyltransferase (phosphatidylcholine--retinol O-acyltransferase)
hsa-miR-137	0	0	1	1	1	1	NR1I3	nuclear receptor subfamily 1, group I, member 3
hsa-miR-137	0	0	1	0	1	1	RASSF8	Ras association (RalGDS/AF-6) domain family (N-terminal) member 8
hsa-miR-137	0	0	1	1	1	1	KCNJ13	potassium inwardly-rectifying channel, subfamily J, member 13
hsa-miR-137	0	0	1	1	0	0	NBPF8	neuroblastoma breakpoint family, member 8
hsa-miR-137	1	0	1	1	1	1	PRKACB	protein kinase, cAMP-dependent, catalytic, beta
hsa-miR-137	0	0	1	1	1	1	IL23R	interleukin 23 receptor
hsa-miR-137	1	0	1	1	1	1	AMOT	angiomotin
hsa-miR-137	1	0	1	1	1	1	RPRD1A	regulation of nuclear pre-mRNA domain containing 1A
hsa-miR-137	0	0	1	0	1	1	MIS12	MIS12, MIND kinetochore complex component, homolog (S. pombe)
hsa-miR-137	1	0	1	0	1	1	BAG4	BCL2-associated athanogene 4
hsa-miR-137	0	0	1	1	1	1	PAFAH1B2	platelet-activating factor acetylhydrolase 1b, catalytic subunit 2 (30kDa)
hsa-miR-137	0	0	1	1	1	1	GGCT	gamma-glutamylcyclotransferase
hsa-miR-137	1	0	1	1	1	1	U2SURP	U2 snRNP-associated SURP domain containing
hsa-miR-137	0	0	1	1	1	1	TMEM30A	transmembrane protein 30A
hsa-miR-137	0	0	1	1	0	0	TCN2	transcobalamin II
hsa-miR-137	0	0	1	1	1	1	TAF12	TAF12 RNA polymerase II, TATA box binding protein (TBP)-associated factor, 20kDa
hsa-miR-137	0	0	1	1	0	0	WISP3	WNT1 inducible signaling pathway protein 3
hsa-miR-137	0	0	1	1	1	1	NUP98	nucleoporin 98kDa
hsa-miR-137	0	0	1	1	0	0	KLHDC3	kelch domain containing 3
hsa-miR-137	1	0	1	1	1	1	YY1	YY1 transcription factor
hsa-miR-137	0	0	1	0	0	0	LOC729013	uncharacterized LOC729013
hsa-miR-137	0	0	1	1	1	1	EAF2	ELL associated factor 2
hsa-miR-137	1	0	1	1	1	1	SOX5	SRY (sex determining region Y)-box 5
hsa-miR-137	0	0	1	1	1	1	FAM122C	family with sequence similarity 122C
hsa-miR-137	0	0	1	1	1	1	PARP9	poly (ADP-ribose) polymerase family, member 9
hsa-miR-137	1	0	1	1	0	0	ATP6V0A1	ATPase, H+ transporting, lysosomal V0 subunit a1
hsa-miR-137	1	0	1	1	1	1	WWC2	WW and C2 domain containing 2
hsa-miR-137	0	0	1	0	0	0	FAM200B	family with sequence similarity 200, member B
hsa-miR-137	1	0	1	1	1	1	HMGA2	high mobility group AT-hook 2
hsa-miR-137	0	0	1	1	0	0	RPL11	ribosomal protein L11
hsa-miR-137	0	0	1	1	1	1	SLFN5	schlafen family member 5
hsa-miR-137	0	0	1	1	1	1	SETD6	SET domain containing 6
hsa-miR-137	1	0	1	1	1	1	CNTN4	contactin 4
hsa-miR-137	0	0	1	1	1	1	WDR67	WD repeat domain 67
hsa-miR-137	0	0	1	0	0	0	TRGV7	T cell receptor gamma variable 7 (pseudogene)
hsa-miR-137	1	0	1	0	1	1	NCAM1	neural cell adhesion molecule 1
hsa-miR-137	1	0	1	1	1	1	TIAL1	TIA1 cytotoxic granule-associated RNA binding protein-like 1
hsa-miR-137	1	0	1	1	1	1	PLS1	plastin 1
hsa-miR-137	1	0	1	1	1	1	ZPLD1	zona pellucida-like domain containing 1
hsa-miR-137	1	0	1	1	1	1	RCOR3	REST corepressor 3
hsa-miR-137	0	0	1	0	0	0	LOC643648	uncharacterized LOC643648
hsa-miR-137	1	0	1	1	1	1	PMAIP1	phorbol-12-myristate-13-acetate-induced protein 1
hsa-miR-137	0	0	1	0	0	0	WDFY3-AS2	WDFY3 antisense RNA 2
hsa-miR-137	0	0	1	1	1	1	KIF16B	kinesin family member 16B
hsa-miR-137	1	0	1	1	1	1	NKAIN2	Na+/K+ transporting ATPase interacting 2
hsa-miR-137	0	0	1	0	0	0	TMPRSS12	transmembrane (C-terminal) protease, serine 12
hsa-miR-137	1	0	1	1	1	1	RAP2C	RAP2C, member of RAS oncogene family
hsa-miR-137	0	0	1	1	1	1	NR1H4	nuclear receptor subfamily 1, group H, member 4
hsa-miR-137	0	0	1	1	1	1	ARHGAP6	Rho GTPase activating protein 6
hsa-miR-137	0	0	1	1	1	1	CLEC12B	C-type lectin domain family 12, member B
hsa-miR-137	1	0	1	1	1	1	ZNF618	zinc finger protein 618
hsa-miR-137	0	0	1	1	1	1	UBE3D	ubiquitin protein ligase E3D
hsa-miR-137	1	0	1	1	1	1	MEIS1	Meis homeobox 1
hsa-miR-137	1	0	1	1	1	1	BNC2	basonuclin 2
hsa-miR-137	0	0	1	0	0	0	LOC286184	uncharacterized LOC286184
hsa-miR-137	1	0	1	1	1	1	PLS3	plastin 3
hsa-miR-137	0	0	1	1	0	0	CCDC152	coiled-coil domain containing 152
hsa-miR-137	0	0	1	1	1	1	CACHD1	cache domain containing 1
hsa-miR-137	0	0	1	0	0	0	LINC00620	long intergenic non-protein coding RNA 620
hsa-miR-137	0	0	1	0	0	0	SNHG8	small nucleolar RNA host gene 8 (non-protein coding)
hsa-miR-137	1	0	1	1	1	1	TIMP2	TIMP metallopeptidase inhibitor 2
hsa-miR-137	0	0	1	1	1	1	FBXL4	F-box and leucine-rich repeat protein 4
hsa-miR-137	1	0	1	1	1	1	CHD6	chromodomain helicase DNA binding protein 6
hsa-miR-137	1	0	1	0	1	1	G2E3	G2/M-phase specific E3 ubiquitin protein ligase
hsa-miR-137	1	0	1	1	1	1	DPP8	dipeptidyl-peptidase 8
hsa-miR-137	1	0	1	1	1	1	DACH2	dachshund homolog 2 (Drosophila)
hsa-miR-137	0	0	1	0	0	0	LOC339622	uncharacterized LOC339622
hsa-miR-137	1	0	1	1	1	1	BVES	blood vessel epicardial substance
hsa-miR-137	0	0	1	1	0	0	KIAA1432	KIAA1432
hsa-miR-137	1	0	1	1	1	1	SEL1L3	sel-1 suppressor of lin-12-like 3 (C. elegans)
hsa-miR-137	0	0	1	0	1	1	FAM13B	family with sequence similarity 13, member B
hsa-miR-137	1	0	1	1	1	1	FAM123A	family with sequence similarity 123A
hsa-miR-137	1	0	1	0	1	1	HSPA12A	heat shock 70kDa protein 12A
hsa-miR-137	1	0	1	0	1	1	DCUN1D4	DCN1, defective in cullin neddylation 1, domain containing 4 (S. cerevisiae)
hsa-miR-137	1	0	1	1	1	1	CLOCK	clock homolog (mouse)
hsa-miR-137	0	0	1	1	1	1	C4orf32	chromosome 4 open reading frame 32
hsa-miR-137	1	0	1	1	1	1	TXNRD1	thioredoxin reductase 1
hsa-miR-137	0	0	1	0	0	0	LOC339260	uncharacterized LOC339260
hsa-miR-137	0	0	1	0	0	0	DKFZp686O1327	uncharacterized LOC401014
hsa-miR-137	1	0	1	1	1	1	PSIP1	PC4 and SFRS1 interacting protein 1
hsa-miR-137	0	0	1	0	0	0	LOC283914	uncharacterized LOC283914
hsa-miR-137	1	0	1	1	1	1	SON	SON DNA binding protein
hsa-miR-137	1	0	1	1	1	1	SF3B1	splicing factor 3b, subunit 1, 155kDa
hsa-miR-137	1	0	1	0	1	1	LYPD6	LY6/PLAUR domain containing 6
hsa-miR-137	0	0	1	0	0	0	LOC348120	uncharacterized LOC348120
hsa-miR-137	0	0	1	0	0	0	DPY19L2P4	dpy-19-like 2 pseudogene 4 (C. elegans)
hsa-miR-137	0	0	1	0	1	1	LOC338758	uncharacterized LOC338758
hsa-miR-137	1	0	1	1	1	1	CLVS1	clavesin 1
hsa-miR-137	0	0	1	1	1	1	HLA-DQA1	major histocompatibility complex, class II, DQ alpha 1
hsa-miR-137	1	0	1	1	1	1	PPP2R5E	protein phosphatase 2, regulatory subunit B', epsilon isoform
hsa-miR-137	0	0	1	0	0	0	RPSAP52	ribosomal protein SA pseudogene 52
hsa-miR-137	0	0	1	1	1	1	ZNF365	zinc finger protein 365
hsa-miR-137	1	0	1	1	1	1	PRRG1	proline rich Gla (G-carboxyglutamic acid) 1
hsa-miR-137	1	0	1	1	1	1	GTDC1	glycosyltransferase-like domain containing 1
hsa-miR-137	0	0	1	1	1	1	MTRR	5-methyltetrahydrofolate-homocysteine methyltransferase reductase
hsa-miR-137	0	0	1	1	0	0	PDSS1	prenyl (decaprenyl) diphosphate synthase, subunit 1
hsa-miR-137	1	0	1	1	1	1	UEVLD	UEV and lactate/malate dehyrogenase domains
hsa-miR-137	1	0	1	1	0	0	ASRGL1	asparaginase like 1
hsa-miR-137	0	0	1	1	1	1	ATP2A2	ATPase, Ca++ transporting, cardiac muscle, slow twitch 2
hsa-miR-137	0	0	1	1	1	1	SLAMF1	signaling lymphocytic activation molecule family member 1
hsa-miR-137	0	0	1	0	0	0	SLC6A10P	solute carrier family 6 (neurotransmitter transporter, creatine), member 10, pseudogene
hsa-miR-137	0	0	1	1	0	0	CSF2RB	colony stimulating factor 2 receptor, beta, low-affinity (granulocyte-macrophage)
hsa-miR-137	0	0	1	1	0	0	CRYGS	crystallin, gamma S
hsa-miR-137	1	0	1	0	1	1	TGFBR1	transforming growth factor, beta receptor 1
hsa-miR-137	1	0	1	1	1	1	FARP1	FERM, RhoGEF (ARHGEF) and pleckstrin domain protein 1 (chondrocyte-derived)
hsa-miR-137	1	0	1	1	1	1	WNT5A	wingless-type MMTV integration site family, member 5A
hsa-miR-137	0	0	1	1	1	1	C3orf67	chromosome 3 open reading frame 67
hsa-miR-137	0	0	1	1	0	0	TMEM222	transmembrane protein 222
hsa-miR-137	0	0	1	1	1	1	C1orf141	chromosome 1 open reading frame 141
hsa-miR-137	0	0	1	1	1	1	COBL	cordon-bleu homolog (mouse)
hsa-miR-137	1	0	1	1	1	1	ELOVL7	ELOVL fatty acid elongase 7
hsa-miR-137	1	0	1	1	1	1	ST8SIA2	ST8 alpha-N-acetyl-neuraminide alpha-2,8-sialyltransferase 2
hsa-miR-137	1	0	1	1	1	1	GTF2I	general transcription factor IIi
hsa-miR-137	1	0	1	0	1	1	ARPP19	cAMP-regulated phosphoprotein, 19kDa
hsa-miR-137	1	0	1	0	1	1	MYBL1	v-myb myeloblastosis viral oncogene homolog (avian)-like 1
hsa-miR-137	0	0	1	0	0	0	LOC441493	uncharacterized LOC441493
hsa-miR-137	0	0	1	1	0	0	C10orf128	chromosome 10 open reading frame 128
hsa-miR-137	0	0	1	1	1	1	CCDC126	coiled-coil domain containing 126
hsa-miR-137	0	0	1	1	1	1	PAX4	paired box 4
hsa-miR-137	0	0	1	1	1	1	TBRG1	transforming growth factor beta regulator 1
hsa-miR-137	0	0	1	1	0	0	KCNAB2	potassium voltage-gated channel, shaker-related subfamily, beta member 2
hsa-miR-137	1	0	1	1	1	1	TET2	tet methylcytosine dioxygenase 2
hsa-miR-137	1	0	1	1	1	1	SLK	STE20-like kinase
hsa-miR-137	1	0	1	1	1	1	PAX3	paired box 3
hsa-miR-137	0	0	1	1	1	1	C14orf105	chromosome 14 open reading frame 105
hsa-miR-137	1	0	1	0	1	1	PRDM10	PR domain containing 10
hsa-miR-137	0	0	1	1	0	0	RGSL1	regulator of G-protein signaling like 1
hsa-miR-137	1	0	1	0	1	1	CAMSAP2	calmodulin regulated spectrin-associated protein family, member 2
hsa-miR-137	1	0	1	1	1	1	PTPRZ1	protein tyrosine phosphatase, receptor-type, Z polypeptide 1
hsa-miR-137	1	0	1	1	1	1	JPH1	junctophilin 1
hsa-miR-137	1	0	1	1	1	1	SGCD	sarcoglycan, delta (35kDa dystrophin-associated glycoprotein)
hsa-miR-137	0	0	1	1	1	1	DSG3	desmoglein 3
hsa-miR-137	0	0	1	1	0	0	TTC5	tetratricopeptide repeat domain 5
hsa-miR-137	0	0	1	1	1	1	SLC26A3	solute carrier family 26, member 3
hsa-miR-137	0	0	1	1	1	1	PSMA2	proteasome (prosome, macropain) subunit, alpha type, 2
hsa-miR-137	0	0	1	0	1	1	PRH2	proline-rich protein HaeIII subfamily 2
hsa-miR-137	1	0	1	1	1	1	PRDM2	PR domain containing 2, with ZNF domain
hsa-miR-137	1	0	1	1	1	1	FOXP1	forkhead box P1
hsa-miR-137	0	0	1	1	1	1	HTR2A	5-hydroxytryptamine (serotonin) receptor 2A, G protein-coupled
hsa-miR-137	0	0	1	1	1	1	DUSP19	dual specificity phosphatase 19
hsa-miR-137	1	0	1	1	1	1	TC2N	tandem C2 domains, nuclear
hsa-miR-137	1	0	1	1	1	1	RDX	radixin
hsa-miR-137	1	0	1	1	1	1	RECK	reversion-inducing-cysteine-rich protein with kazal motifs
hsa-miR-137	1	0	1	1	1	1	TMEM135	transmembrane protein 135
hsa-miR-137	0	0	1	1	1	1	USP54	ubiquitin specific peptidase 54
hsa-miR-137	1	0	1	0	1	1	TTL	tubulin tyrosine ligase
hsa-miR-137	0	0	1	1	1	1	HPGD	hydroxyprostaglandin dehydrogenase 15-(NAD)
hsa-miR-137	0	0	1	1	1	1	SNRNP27	small nuclear ribonucleoprotein 27kDa (U4/U6.U5)
hsa-miR-137	1	0	1	1	1	1	FUT9	fucosyltransferase 9 (alpha (1,3) fucosyltransferase)
hsa-miR-137	0	0	1	0	0	0	LOC400768	uncharacterized LOC400768
hsa-miR-137	1	0	1	1	1	1	LETMD1	LETM1 domain containing 1
hsa-miR-137	0	0	1	1	0	0	ITGB3BP	integrin beta 3 binding protein (beta3-endonexin)
hsa-miR-137	0	0	1	0	0	0	ARRDC1	arrestin domain containing 1
hsa-miR-137	0	0	1	1	0	0	NGDN	neuroguidin, EIF4E binding protein
hsa-miR-137	1	0	1	1	1	1	ADM	adrenomedullin
hsa-miR-137	0	0	1	1	1	1	BLZF1	basic leucine zipper nuclear factor 1
hsa-miR-137	1	0	1	1	1	1	EI24	etoposide induced 2.4 mRNA
hsa-miR-137	1	0	1	1	1	1	HMGN1	high mobility group nucleosome binding domain 1
hsa-miR-137	1	0	1	1	1	1	TRA2B	transformer 2 beta homolog (Drosophila)
hsa-miR-137	0	0	1	0	0	0	HMGN1P37	high mobility group nucleosome binding domain 1 pseudogene 37
hsa-miR-137	1	0	1	0	1	1	RPS6KB1	ribosomal protein S6 kinase, 70kDa, polypeptide 1
hsa-miR-137	0	0	1	1	1	1	PECR	peroxisomal trans-2-enoyl-CoA reductase
hsa-miR-137	1	0	1	0	1	1	MGRN1	mahogunin ring finger 1, E3 ubiquitin protein ligase
hsa-miR-137	1	0	1	1	1	1	STK38L	serine/threonine kinase 38 like
hsa-miR-137	0	0	1	1	1	1	EIF3J	eukaryotic translation initiation factor 3, subunit J
hsa-miR-137	1	0	1	1	1	1	TMEM245	transmembrane protein 245
hsa-miR-137	0	0	1	1	1	1	ATG4A	autophagy related 4A, cysteine peptidase
hsa-miR-137	1	0	1	1	1	1	DKK3	dickkopf 3 homolog (Xenopus laevis)
hsa-miR-137	0	0	1	0	0	0	MEG3	maternally expressed 3 (non-protein coding)
hsa-miR-137	0	0	1	1	0	0	FGB	fibrinogen beta chain
hsa-miR-137	0	0	1	1	1	1	C1orf88	chromosome 1 open reading frame 88
hsa-miR-137	1	0	1	1	1	1	KCNIP4	Kv channel interacting protein 4
hsa-miR-137	1	0	1	0	1	1	C15orf41	chromosome 15 open reading frame 41
hsa-miR-137	1	0	1	1	1	1	FOS	FBJ murine osteosarcoma viral oncogene homolog
hsa-miR-137	1	0	1	1	1	1	FUBP3	far upstream element (FUSE) binding protein 3
hsa-miR-137	1	0	1	1	1	1	EIF1	eukaryotic translation initiation factor 1
hsa-miR-137	0	0	1	1	1	1	FAM18B1	family with sequence similarity 18, member B1
hsa-miR-137	0	0	1	1	1	1	PLAC8	placenta-specific 8
hsa-miR-137	0	0	1	1	0	0	CTSW	cathepsin W
hsa-miR-137	1	0	1	1	1	1	RUNX1	runt-related transcription factor 1
hsa-miR-137	0	0	1	1	0	0	C6orf203	chromosome 6 open reading frame 203
hsa-miR-137	0	0	1	1	1	1	ANXA7	annexin A7
hsa-miR-137	0	0	1	1	1	1	LIMK2	LIM domain kinase 2
hsa-miR-137	1	0	1	1	1	1	TFPI	tissue factor pathway inhibitor (lipoprotein-associated coagulation inhibitor)
hsa-miR-137	1	0	1	1	1	1	KIAA1551	KIAA1551
hsa-miR-137	0	0	1	1	1	1	BDP1	B double prime 1, subunit of RNA polymerase III transcription initiation factor IIIB
hsa-miR-137	1	0	1	1	1	1	HECW2	HECT, C2 and WW domain containing E3 ubiquitin protein ligase 2
hsa-miR-137	0	0	1	0	0	0	MUC19	mucin 19, oligomeric
hsa-miR-137	1	0	1	0	1	1	MCFD2	multiple coagulation factor deficiency 2
hsa-miR-137	1	0	1	1	1	1	TIPARP	TCDD-inducible poly(ADP-ribose) polymerase
hsa-miR-137	1	0	1	1	1	1	SLC39A10	solute carrier family 39 (zinc transporter), member 10
hsa-miR-137	1	0	1	0	1	1	CNTNAP2	contactin associated protein-like 2
hsa-miR-137	1	0	1	1	1	1	RBPJ	recombination signal binding protein for immunoglobulin kappa J region
hsa-miR-137	1	0	1	1	1	1	METAP1	methionyl aminopeptidase 1
hsa-miR-137	1	0	1	1	1	1	PI15	peptidase inhibitor 15
hsa-miR-137	1	0	1	1	1	1	MOSPD1	motile sperm domain containing 1
hsa-miR-137	0	0	1	1	1	1	TNFSF10	tumor necrosis factor (ligand) superfamily, member 10
hsa-miR-137	0	0	1	1	1	1	DHX36	DEAH (Asp-Glu-Ala-His) box polypeptide 36
hsa-miR-137	1	0	1	0	1	1	DCBLD2	discoidin, CUB and LCCL domain containing 2
hsa-miR-137	1	0	1	1	1	1	LGR4	leucine-rich repeat containing G protein-coupled receptor 4
hsa-miR-137	0	0	1	1	1	1	MORC4	MORC family CW-type zinc finger 4
hsa-miR-137	1	0	1	1	1	1	AFF1	AF4/FMR2 family, member 1
hsa-miR-137	1	0	1	0	1	1	STAT3	signal transducer and activator of transcription 3 (acute-phase response factor)
hsa-miR-137	1	0	1	0	1	1	BCL2	B-cell CLL/lymphoma 2
hsa-miR-137	1	0	1	0	1	1	YES1	v-yes-1 Yamaguchi sarcoma viral oncogene homolog 1
hsa-miR-137	1	0	1	1	1	1	IGF1	insulin-like growth factor 1 (somatomedin C)
hsa-miR-137	1	0	1	0	1	1	ACVR2A	activin A receptor, type IIA
hsa-miR-137	1	0	1	1	1	1	FAS	Fas (TNF receptor superfamily, member 6)
hsa-miR-137	1	0	1	1	1	1	ARSB	arylsulfatase B
hsa-miR-137	1	0	1	1	1	1	GALC	galactosylceramidase
hsa-miR-137	1	0	1	1	1	1	GK	glycerol kinase
hsa-miR-137	1	0	1	0	1	1	GLI3	GLI family zinc finger 3
hsa-miR-137	1	0	1	1	1	1	TBX5	T-box 5
hsa-miR-137	1	0	1	1	1	1	JAG1	jagged 1
hsa-miR-137	0	0	1	1	1	1	LPL	lipoprotein lipase
hsa-miR-137	1	0	1	1	1	1	MET	met proto-oncogene (hepatocyte growth factor receptor)
hsa-miR-137	0	0	1	1	1	1	NDP	Norrie disease (pseudoglioma)
hsa-miR-137	1	0	1	1	1	1	OCRL	oculocerebrorenal syndrome of Lowe
hsa-miR-137	0	0	1	1	1	1	PAH	phenylalanine hydroxylase
hsa-miR-137	0	0	1	1	1	1	RPGR	retinitis pigmentosa GTPase regulator
hsa-miR-137	1	0	1	1	1	1	ATXN1	ataxin 1
hsa-miR-137	1	0	1	1	1	1	SOX9	SRY (sex determining region Y)-box 9
hsa-miR-137	1	0	1	0	1	1	RAG1	recombination activating gene 1
hsa-miR-137	1	0	1	1	1	1	PLP1	proteolipid protein 1
hsa-miR-137	0	0	1	1	1	1	RFXAP	regulatory factor X-associated protein
hsa-miR-137	0	0	1	1	1	1	WRN	Werner syndrome, RecQ helicase-like
hsa-miR-137	1	0	1	1	1	1	CR1	complement component (3b/4b) receptor 1 (Knops blood group)
hsa-miR-137	0	0	1	1	1	1	IL15	interleukin 15
hsa-miR-137	0	0	1	1	1	1	IL6	interleukin 6 (interferon, beta 2)
hsa-miR-137	0	0	1	1	1	1	IL11	interleukin 11
hsa-miR-137	0	0	1	1	1	1	AGTR1	angiotensin II receptor, type 1
hsa-miR-137	1	0	1	1	1	1	DIO2	deiodinase, iodothyronine, type II
hsa-miR-137	1	0	1	1	1	1	GABRG2	gamma-aminobutyric acid (GABA) A receptor, gamma 2
hsa-miR-137	1	0	1	1	1	1	GRM7	glutamate receptor, metabotropic 7
hsa-miR-137	1	0	1	1	1	1	GRM8	glutamate receptor, metabotropic 8
hsa-miR-137	0	0	1	1	1	1	HTR7	5-hydroxytryptamine (serotonin) receptor 7, adenylate cyclase-coupled
hsa-miR-137	1	0	1	1	1	1	MME	membrane metallo-endopeptidase
hsa-miR-137	1	0	1	1	1	1	PTGDR	prostaglandin D2 receptor (DP)
hsa-miR-137	0	0	1	1	1	1	PTGS2	prostaglandin-endoperoxide synthase 2 (prostaglandin G/H synthase and cyclooxygenase)
hsa-miR-137	0	0	1	0	0	0	RPL34	ribosomal protein L34
hsa-miR-137	0	0	1	1	1	1	C16orf87	chromosome 16 open reading frame 87
hsa-miR-137	1	0	1	0	1	1	GDF6	growth differentiation factor 6
hsa-miR-137	1	0	1	1	1	1	ATP1B1	ATPase, Na+/K+ transporting, beta 1 polypeptide
hsa-miR-137	1	0	1	0	1	1	CLDN18	claudin 18
hsa-miR-137	1	0	1	1	1	1	ABLIM1	actin binding LIM protein 1
hsa-miR-137	1	0	1	1	1	1	LEPR	leptin receptor
hsa-miR-137	0	0	1	1	1	1	TRIM6-TRIM34	TRIM6-TRIM34 readthrough
hsa-miR-137	0	0	1	1	1	1	TRIM34	tripartite motif containing 34
hsa-miR-137	1	0	1	0	1	1	LIN28B	lin-28 homolog B (C. elegans)
hsa-miR-137	1	0	1	0	1	1	YPEL2	yippee-like 2 (Drosophila)
hsa-miR-137	1	0	1	1	1	1	PLCXD3	phosphatidylinositol-specific phospholipase C, X domain containing 3
hsa-miR-137	1	0	1	0	1	1	CPM	carboxypeptidase M
hsa-miR-137	0	0	1	1	1	1	MAPKAP1	mitogen-activated protein kinase associated protein 1
hsa-miR-137	0	0	1	0	1	1	WDR35	WD repeat domain 35
hsa-miR-137	0	0	1	1	1	1	TCEAL6	transcription elongation factor A (SII)-like 6
hsa-miR-137	0	0	1	0	1	1	C8orf22	chromosome 8 open reading frame 22
hsa-miR-137	0	0	1	1	1	1	UACA	uveal autoantigen with coiled-coil domains and ankyrin repeats
hsa-miR-137	0	0	1	1	0	0	AKAP14	A kinase (PRKA) anchor protein 14
hsa-miR-137	1	0	1	0	1	1	KIAA2022	KIAA2022
hsa-miR-137	0	0	1	1	1	1	HRNR	hornerin
hsa-miR-137	1	0	1	0	1	1	ZC3H12B	zinc finger CCCH-type containing 12B
hsa-miR-137	1	0	1	1	1	1	PDLIM5	PDZ and LIM domain 5
hsa-miR-137	0	0	1	1	0	0	PNLIPRP3	pancreatic lipase-related protein 3
hsa-miR-137	1	0	1	1	1	1	SLC25A53	solute carrier family 25, member 53
hsa-miR-137	0	0	1	1	1	1	C2orf68	chromosome 2 open reading frame 68
hsa-miR-137	0	0	1	0	1	1	LINC00268	long intergenic non-protein coding RNA 268
hsa-miR-137	1	0	1	1	1	1	RUNX2	runt-related transcription factor 2
hsa-miR-137	1	0	1	1	1	1	TMCC1	transmembrane and coiled-coil domain family 1
hsa-miR-137	0	0	1	1	1	1	ACTBL2	actin, beta-like 2
hsa-miR-137	1	0	1	0	1	1	BRCC3	BRCA1/BRCA2-containing complex, subunit 3
hsa-miR-137	0	0	1	1	1	1	POLR2M	polymerase (RNA) II (DNA directed) polypeptide M
hsa-miR-137	0	0	1	1	1	1	ZNF187	zinc finger protein 187
hsa-miR-137	1	0	1	1	1	1	GPHN	gephyrin
hsa-miR-137	1	0	1	0	1	1	RGAG4	retrotransposon gag domain containing 4
hsa-miR-137	1	0	1	0	1	1	BCL7A	B-cell CLL/lymphoma 7A
hsa-miR-137	1	0	1	0	1	1	CLLU1	chronic lymphocytic leukemia up-regulated 1
hsa-miR-137	1	0	1	1	1	1	FAM108B1	family with sequence similarity 108, member B1
hsa-miR-137	0	0	1	1	1	1	FAM24A	family with sequence similarity 24, member A
hsa-miR-137	1	0	1	1	1	1	SLC10A7	solute carrier family 10 (sodium/bile acid cotransporter family), member 7
hsa-miR-137	1	0	1	0	1	1	MINOS1	mitochondrial inner membrane organizing system 1
hsa-miR-137	0	0	1	1	1	1	HNRNPH2	heterogeneous nuclear ribonucleoprotein H2 (H')
hsa-miR-137	1	0	1	0	1	1	GPR126	G protein-coupled receptor 126
hsa-miR-137	1	0	1	1	1	1	ZNF704	zinc finger protein 704
hsa-miR-137	0	0	1	1	1	1	ERP29	endoplasmic reticulum protein 29
hsa-miR-137	1	0	1	1	1	1	GALNTL6	UDP-N-acetyl-alpha-D-galactosamine:polypeptide N-acetylgalactosaminyltransferase-like 6
hsa-miR-137	1	0	1	1	1	1	ACPL2	acid phosphatase-like 2
hsa-miR-137	1	0	1	1	1	1	PDE4B	phosphodiesterase 4B, cAMP-specific
hsa-miR-137	0	0	1	1	1	1	ATAD3C	ATPase family, AAA domain containing 3C
hsa-miR-137	0	0	1	1	1	1	EFEMP1	EGF containing fibulin-like extracellular matrix protein 1
hsa-miR-137	1	0	1	0	1	1	USP9X	ubiquitin specific peptidase 9, X-linked
hsa-miR-137	0	0	1	1	1	1	MTL5	metallothionein-like 5, testis-specific (tesmin)
hsa-miR-137	1	0	1	1	0	0	ANKRD34A	ankyrin repeat domain 34A
hsa-miR-137	1	0	1	1	1	1	CHN2	chimerin (chimaerin) 2
hsa-miR-137	1	0	1	0	1	1	FAM133B	family with sequence similarity 133, member B
hsa-miR-137	1	0	1	0	1	1	CEP44	centrosomal protein 44kDa
hsa-miR-137	1	0	1	1	1	1	MTMR12	myotubularin related protein 12
hsa-miR-137	1	0	1	1	1	1	PRKAG2	protein kinase, AMP-activated, gamma 2 non-catalytic subunit
hsa-miR-137	1	0	1	1	1	1	GLIS3	GLIS family zinc finger 3
hsa-miR-137	1	0	1	1	1	1	CEP85L	centrosomal protein 85kDa-like
hsa-miR-137	0	0	1	1	1	1	NUPR1	nuclear protein, transcriptional regulator, 1
hsa-miR-137	1	0	1	1	1	1	SLC9A6	solute carrier family 9, subfamily A (NHE6, cation proton antiporter 6), member 6
hsa-miR-137	0	0	1	1	1	1	SMC2	structural maintenance of chromosomes 2
hsa-miR-137	0	0	1	1	1	1	TRAK1	trafficking protein, kinesin binding 1
hsa-miR-137	1	0	1	1	1	1	MZT1	mitotic spindle organizing protein 1
hsa-miR-137	1	0	1	1	1	1	HS6ST2	heparan sulfate 6-O-sulfotransferase 2
hsa-miR-137	1	0	1	1	1	1	PDE11A	phosphodiesterase 11A
hsa-miR-137	1	0	1	0	1	1	FAM127C	family with sequence similarity 127, member C
hsa-miR-137	1	0	1	1	1	1	TMTC4	transmembrane and tetratricopeptide repeat containing 4
hsa-miR-137	0	0	1	1	1	1	CAB39L	calcium binding protein 39-like
hsa-miR-137	1	0	1	1	1	1	CUL4B	cullin 4B
hsa-miR-137	1	0	1	1	1	1	FAM155A	family with sequence similarity 155, member A
hsa-miR-137	1	0	1	0	1	1	THSD7B	thrombospondin, type I, domain containing 7B
hsa-miR-137	1	0	1	0	1	1	CCDC85A	coiled-coil domain containing 85A
hsa-miR-137	0	0	1	1	1	1	TBX18	T-box 18
hsa-miR-137	0	0	1	0	0	0	C16orf90	chromosome 16 open reading frame 90
hsa-miR-137	0	0	1	0	1	1	ISCA1P1	iron-sulfur cluster assembly 1 homolog (S. cerevisiae) pseudogene 1
hsa-miR-137	1	0	1	1	1	1	REPS2	RALBP1 associated Eps domain containing 2
hsa-miR-137	1	0	1	0	1	1	PDE5A	phosphodiesterase 5A, cGMP-specific
hsa-miR-137	0	0	1	1	0	0	AOX1	aldehyde oxidase 1
hsa-miR-137	1	0	1	0	1	1	XIAP	X-linked inhibitor of apoptosis
hsa-miR-137	1	0	1	0	1	1	BACH1	BTB and CNC homology 1, basic leucine zipper transcription factor 1
hsa-miR-137	1	0	1	0	1	1	BMPR2	bone morphogenetic protein receptor, type II (serine/threonine kinase)
hsa-miR-137	0	0	1	0	1	1	CASQ2	calsequestrin 2 (cardiac muscle)
hsa-miR-137	0	0	1	1	0	0	CDC6	cell division cycle 6 homolog (S. cerevisiae)
hsa-miR-137	0	0	1	1	1	1	CDKN2C	cyclin-dependent kinase inhibitor 2C (p18, inhibits CDK4)
hsa-miR-137	1	0	1	1	1	1	DYRK1A	dual-specificity tyrosine-(Y)-phosphorylation regulated kinase 1A
hsa-miR-137	1	0	1	1	1	1	EIF1AX	eukaryotic translation initiation factor 1A, X-linked
hsa-miR-137	1	0	1	1	1	1	ELAVL1	ELAV (embryonic lethal, abnormal vision, Drosophila)-like 1 (Hu antigen R)
hsa-miR-137	1	0	1	1	1	1	EXTL3	exostoses (multiple)-like 3
hsa-miR-137	1	0	1	1	1	1	FOXF1	forkhead box F1
hsa-miR-137	1	0	1	1	1	1	FOXC1	forkhead box C1
hsa-miR-137	0	0	1	1	1	1	ARF5	ADP-ribosylation factor 5
hsa-miR-137	1	0	1	1	1	1	ATP6V1A	ATPase, H+ transporting, lysosomal 70kDa, V1 subunit A
hsa-miR-137	1	0	1	1	1	1	BAAT	bile acid CoA: amino acid N-acyltransferase (glycine N-choloyltransferase)
hsa-miR-137	1	0	1	0	1	1	CCND2	cyclin D2
hsa-miR-137	0	0	1	1	0	0	CD19	CD19 molecule
hsa-miR-137	1	0	1	1	1	1	CDH5	cadherin 5, type 2 (vascular endothelium)
hsa-miR-137	0	0	1	1	1	1	CDO1	cysteine dioxygenase, type I
hsa-miR-137	0	0	1	1	1	1	CDR2	cerebellar degeneration-related protein 2, 62kDa
hsa-miR-137	0	0	1	0	0	0	CPE	carboxypeptidase E
hsa-miR-137	1	0	1	1	1	1	DSC3	desmocollin 3
hsa-miR-137	1	0	1	0	1	1	FOXO1	forkhead box O1
hsa-miR-137	0	0	1	0	1	1	GCG	glucagon
hsa-miR-137	1	0	1	1	1	1	TNC	tenascin C
hsa-miR-137	0	0	1	1	1	1	IL12B	interleukin 12B (natural killer cell stimulatory factor 2, cytotoxic lymphocyte maturation factor 2, p40)
hsa-miR-137	1	0	1	1	1	1	ITGB8	integrin, beta 8
hsa-miR-137	1	0	1	1	1	1	KCNA3	potassium voltage-gated channel, shaker-related subfamily, member 3
hsa-miR-137	1	0	1	1	1	1	KCNJ10	potassium inwardly-rectifying channel, subfamily J, member 10
hsa-miR-137	0	0	1	1	1	1	KCNK1	potassium channel, subfamily K, member 1
hsa-miR-137	1	0	1	1	1	1	LY75	lymphocyte antigen 75
hsa-miR-137	0	0	1	0	1	1	CXCL9	chemokine (C-X-C motif) ligand 9
hsa-miR-137	1	0	1	1	1	1	MYH9	myosin, heavy chain 9, non-muscle
hsa-miR-137	0	0	1	1	1	1	NID1	nidogen 1
hsa-miR-137	0	0	1	1	1	1	PDE7A	phosphodiesterase 7A
hsa-miR-137	1	0	1	0	1	1	PDK1	pyruvate dehydrogenase kinase, isozyme 1
hsa-miR-137	0	0	1	1	1	1	PPP1R3A	protein phosphatase 1, regulatory subunit 3A
hsa-miR-137	1	0	1	1	1	1	PPP2R3A	protein phosphatase 2, regulatory subunit B'', alpha
hsa-miR-137	0	0	1	1	1	1	MAP2K6	mitogen-activated protein kinase kinase 6
hsa-miR-137	0	0	1	1	1	1	PTPRR	protein tyrosine phosphatase, receptor type, R
hsa-miR-137	1	0	1	1	1	1	PVALB	parvalbumin
hsa-miR-137	1	0	1	0	1	1	RAB6A	RAB6A, member RAS oncogene family
hsa-miR-137	1	0	1	1	1	1	RABIF	RAB interacting factor
hsa-miR-137	1	0	1	0	1	1	SORT1	sortilin 1
hsa-miR-137	1	0	1	1	1	1	SALL1	sal-like 1 (Drosophila)
hsa-miR-137	1	0	1	1	1	1	ST8SIA1	ST8 alpha-N-acetyl-neuraminide alpha-2,8-sialyltransferase 1
hsa-miR-137	1	0	1	1	1	1	SSR2	signal sequence receptor, beta (translocon-associated protein beta)
hsa-miR-137	1	0	1	0	1	1	STC1	stanniocalcin 1
hsa-miR-137	1	0	1	1	1	1	SVIL	supervillin
hsa-miR-137	0	0	1	0	1	1	TCEA3	transcription elongation factor A (SII), 3
hsa-miR-137	0	0	1	1	1	1	UBE2D1	ubiquitin-conjugating enzyme E2D 1
hsa-miR-137	0	0	1	1	1	1	UBE2V2	ubiquitin-conjugating enzyme E2 variant 2
hsa-miR-137	1	0	1	0	1	1	YWHAB	tyrosine 3-monooxygenase/tryptophan 5-monooxygenase activation protein, beta polypeptide
hsa-miR-137	1	0	1	1	1	1	YWHAH	tyrosine 3-monooxygenase/tryptophan 5-monooxygenase activation protein, eta polypeptide
hsa-miR-137	0	0	1	1	1	1	ZNF143	zinc finger protein 143
hsa-miR-137	1	0	1	1	1	1	PAX8	paired box 8
hsa-miR-137	1	0	1	1	1	1	KCNAB1	potassium voltage-gated channel, shaker-related subfamily, beta member 1
hsa-miR-137	1	0	1	1	1	1	CUL5	cullin 5
hsa-miR-137	1	0	1	1	1	1	NRIP1	nuclear receptor interacting protein 1
hsa-miR-137	1	0	1	1	1	1	ULK1	unc-51-like kinase 1 (C. elegans)
hsa-miR-137	0	0	1	1	1	1	BFSP2	beaded filament structural protein 2, phakinin
hsa-miR-137	0	0	1	1	1	1	SOAT2	sterol O-acyltransferase 2
hsa-miR-137	1	0	1	1	1	1	EXO1	exonuclease 1
hsa-miR-137	0	0	1	1	1	1	FAM193A	family with sequence similarity 193, member A
hsa-miR-137	1	0	1	0	1	1	TNKS	tankyrase, TRF1-interacting ankyrin-related ADP-ribose polymerase
hsa-miR-137	0	0	1	1	1	1	ADAM20	ADAM metallopeptidase domain 20
hsa-miR-137	0	0	1	1	1	1	SCEL	sciellin
hsa-miR-137	1	0	1	1	1	1	IQGAP1	IQ motif containing GTPase activating protein 1
hsa-miR-137	1	0	1	1	1	1	FUBP1	far upstream element (FUSE) binding protein 1
hsa-miR-137	0	0	1	0	1	1	AP1S2	adaptor-related protein complex 1, sigma 2 subunit
hsa-miR-137	1	0	1	0	1	1	WASL	Wiskott-Aldrich syndrome-like
hsa-miR-137	0	0	1	1	1	1	UBA3	ubiquitin-like modifier activating enzyme 3
hsa-miR-137	1	0	1	1	1	1	BTAF1	BTAF1 RNA polymerase II, B-TFIID transcription factor-associated, 170kDa (Mot1 homolog, S. cerevisiae)
hsa-miR-137	1	0	1	0	1	1	SLC1A2	solute carrier family 1 (glial high affinity glutamate transporter), member 2
hsa-miR-137	1	0	1	1	1	1	GDA	guanine deaminase
hsa-miR-137	1	0	1	1	1	1	EPHB2	EPH receptor B2
hsa-miR-137	1	0	1	0	1	1	ETV5	ets variant 5
hsa-miR-137	1	0	1	0	1	1	SCN2B	sodium channel, voltage-gated, type II, beta subunit
hsa-miR-137	1	0	1	0	1	1	USP9Y	ubiquitin specific peptidase 9, Y-linked
hsa-miR-137	1	0	1	1	1	1	RAB11A	RAB11A, member RAS oncogene family
hsa-miR-137	0	0	1	0	1	1	BPY2	basic charge, Y-linked, 2
hsa-miR-137	0	0	1	0	1	1	CXorf1	chromosome X open reading frame 1
hsa-miR-137	1	0	1	1	1	1	XPR1	xenotropic and polytropic retrovirus receptor 1
hsa-miR-137	1	0	1	1	1	1	RPS6KA5	ribosomal protein S6 kinase, 90kDa, polypeptide 5
hsa-miR-137	0	0	1	1	1	1	MMP20	matrix metallopeptidase 20
hsa-miR-137	0	0	1	1	1	1	TJP2	tight junction protein 2
hsa-miR-137	0	0	1	1	0	0	GSTO1	glutathione S-transferase omega 1
hsa-miR-137	1	0	1	1	1	1	CXCL14	chemokine (C-X-C motif) ligand 14
hsa-miR-137	1	0	1	0	1	1	KIF5A	kinesin family member 5A
hsa-miR-137	0	0	1	1	1	1	XYLB	xylulokinase homolog (H. influenzae)
hsa-miR-137	0	0	1	1	1	1	FGFBP1	fibroblast growth factor binding protein 1
hsa-miR-137	0	0	1	1	1	1	ABCD2	ATP-binding cassette, sub-family D (ALD), member 2
hsa-miR-137	1	0	1	1	1	1	BMI1	BMI1 polycomb ring finger oncogene
hsa-miR-137	1	1	1	1	1	1	MAP3K8	mitogen-activated protein kinase kinase kinase 8
hsa-miR-137	0	0	1	0	1	1	EPHA3	EPH receptor A3
hsa-miR-137	1	0	1	1	1	1	GAS2	growth arrest-specific 2
hsa-miR-137	0	0	1	1	1	1	ITGAD	integrin, alpha D
hsa-miR-137	1	0	1	1	1	1	RAB8A	RAB8A, member RAS oncogene family
hsa-miR-137	1	0	1	1	0	0	NNAT	neuronatin
hsa-miR-137	1	0	1	0	1	1	PRKAB2	protein kinase, AMP-activated, beta 2 non-catalytic subunit
hsa-miR-137	0	0	1	1	1	1	CXCL11	chemokine (C-X-C motif) ligand 11
hsa-miR-137	1	0	1	1	1	1	RND2	Rho family GTPase 2
hsa-miR-137	1	0	1	1	1	1	HCN4	hyperpolarization activated cyclic nucleotide-gated potassium channel 4
hsa-miR-137	0	0	1	0	1	1	LCP2	lymphocyte cytosolic protein 2 (SH2 domain containing leukocyte protein of 76kDa)
hsa-miR-137	0	0	1	0	1	1	POU3F2	POU class 3 homeobox 2
hsa-miR-137	1	0	1	1	1	1	RHEB	Ras homolog enriched in brain
hsa-miR-137	0	0	1	1	1	1	CCL8	chemokine (C-C motif) ligand 8
hsa-miR-137	1	0	1	1	1	1	EVI5	ecotropic viral integration site 5
hsa-miR-137	1	0	1	1	1	1	NAMPT	nicotinamide phosphoribosyltransferase
hsa-miR-137	0	0	1	0	1	1	CD96	CD96 molecule
hsa-miR-137	0	0	1	1	1	1	EIF1B	eukaryotic translation initiation factor 1B
hsa-miR-137	1	0	1	0	1	1	MAP1B	microtubule-associated protein 1B
hsa-miR-137	1	0	1	1	1	1	MAP3K5	mitogen-activated protein kinase kinase kinase 5
hsa-miR-137	1	0	1	1	1	1	MMP16	matrix metallopeptidase 16 (membrane-inserted)
hsa-miR-137	1	0	1	1	1	1	RNF6	ring finger protein (C3H2C3 type) 6
hsa-miR-137	1	0	1	0	1	1	HS3ST3B1	heparan sulfate (glucosamine) 3-O-sulfotransferase 3B1
hsa-miR-137	0	0	1	1	1	1	TRDN	triadin
hsa-miR-137	0	0	1	1	0	0	PAX1	paired box 1
hsa-miR-137	1	0	1	1	1	1	POU4F1	POU class 4 homeobox 1
hsa-miR-137	0	0	1	1	1	1	PRKG2	protein kinase, cGMP-dependent, type II
hsa-miR-137	1	0	1	1	1	1	STK4	serine/threonine kinase 4
hsa-miR-137	1	0	1	1	1	1	NEBL	nebulette
hsa-miR-137	1	0	1	1	1	1	CDC42EP3	CDC42 effector protein (Rho GTPase binding) 3
hsa-miR-137	0	0	1	1	0	0	STAMBP	STAM binding protein
hsa-miR-137	1	0	1	1	1	1	DYNLT3	dynein, light chain, Tctex-type 3
hsa-miR-137	0	0	1	1	0	0	YEATS4	YEATS domain containing 4
hsa-miR-137	1	0	1	0	1	1	IGF2BP1	insulin-like growth factor 2 mRNA binding protein 1
hsa-miR-137	1	0	1	0	1	1	MAP4K5	mitogen-activated protein kinase kinase kinase kinase 5
hsa-miR-137	0	0	1	1	1	1	CLPX	ClpX caseinolytic peptidase X homolog (E. coli)
hsa-miR-137	0	0	1	1	1	1	CD300C	CD300c molecule
hsa-miR-137	0	0	1	1	1	1	FGL2	fibrinogen-like 2
hsa-miR-137	0	0	1	1	1	1	GLO1	glyoxalase I
hsa-miR-137	1	0	1	1	1	1	HIVEP2	human immunodeficiency virus type I enhancer binding protein 2
hsa-miR-137	0	0	1	1	1	1	HOXA2	homeobox A2
hsa-miR-137	1	0	1	1	1	1	BTG2	BTG family, member 2
hsa-miR-137	1	0	1	0	1	1	SYNGAP1	synaptic Ras GTPase activating protein 1
hsa-miR-137	0	0	1	1	0	0	HNRNPA0	heterogeneous nuclear ribonucleoprotein A0
hsa-miR-137	1	0	1	1	1	1	RBPMS	RNA binding protein with multiple splicing
hsa-miR-137	1	0	1	1	1	1	RIT1	Ras-like without CAAX 1
hsa-miR-137	1	0	1	1	1	1	SKP1	S-phase kinase-associated protein 1
hsa-miR-137	1	0	1	1	1	1	NR4A3	nuclear receptor subfamily 4, group A, member 3
hsa-miR-137	1	0	1	1	1	1	ADAMTS5	ADAM metallopeptidase with thrombospondin type 1 motif, 5
hsa-miR-137	1	0	1	1	1	1	UTRN	utrophin
hsa-miR-137	1	0	1	1	1	1	ERLIN2	ER lipid raft associated 2
hsa-miR-137	0	0	1	1	1	1	WIF1	WNT inhibitory factor 1
hsa-miR-137	1	0	1	1	0	0	GRIN1	glutamate receptor, ionotropic, N-methyl D-aspartate 1
hsa-miR-137	1	0	1	1	1	1	ZNF236	zinc finger protein 236
hsa-miR-137	0	0	1	0	1	1	AP4E1	adaptor-related protein complex 4, epsilon 1 subunit
hsa-miR-137	1	0	1	1	1	1	RYBP	RING1 and YY1 binding protein
hsa-miR-137	1	0	1	1	1	1	LAMP5	lysosomal-associated membrane protein family, member 5
hsa-miR-137	1	0	1	1	1	1	HS2ST1	heparan sulfate 2-O-sulfotransferase 1
hsa-miR-137	0	0	1	1	1	1	IL36RN	interleukin 36 receptor antagonist
hsa-miR-137	1	0	1	0	1	1	ACAP2	ArfGAP with coiled-coil, ankyrin repeat and PH domains 2
hsa-miR-137	1	0	1	1	1	1	RANBP6	RAN binding protein 6
hsa-miR-137	1	0	1	0	1	1	FLRT2	fibronectin leucine rich transmembrane protein 2
hsa-miR-137	1	0	1	1	1	1	STK39	serine threonine kinase 39
hsa-miR-137	0	0	1	1	1	1	CTNNA3	catenin (cadherin-associated protein), alpha 3
hsa-miR-137	1	0	1	1	1	1	FLRT3	fibronectin leucine rich transmembrane protein 3
hsa-miR-137	0	0	1	0	1	1	LINC00312	long intergenic non-protein coding RNA 312
hsa-miR-137	0	0	1	1	1	1	PURG	purine-rich element binding protein G
hsa-miR-137	1	0	1	1	1	1	SLC25A24	solute carrier family 25 (mitochondrial carrier; phosphate carrier), member 24
hsa-miR-137	0	0	1	0	1	1	EMR2	egf-like module containing, mucin-like, hormone receptor-like 2
hsa-miR-137	1	0	1	1	1	1	LAMP2	lysosomal-associated membrane protein 2
hsa-miR-137	1	0	1	1	1	1	ASF1A	ASF1 anti-silencing function 1 homolog A (S. cerevisiae)
hsa-miR-137	0	0	1	1	1	1	MRPL42	mitochondrial ribosomal protein L42
hsa-miR-137	1	0	1	0	1	1	ODZ1	odz, odd Oz/ten-m homolog 1 (Drosophila)
hsa-miR-137	1	0	1	1	1	1	C11orf58	chromosome 11 open reading frame 58
hsa-miR-137	0	0	1	1	0	0	NGFRAP1	nerve growth factor receptor (TNFRSF16) associated protein 1
hsa-miR-137	0	0	1	1	1	1	TAF5L	TAF5-like RNA polymerase II, p300/CBP-associated factor (PCAF)-associated factor, 65kDa
hsa-miR-137	1	0	1	1	1	1	ZBTB11	zinc finger and BTB domain containing 11
hsa-miR-137	1	0	1	1	1	1	AFF4	AF4/FMR2 family, member 4
hsa-miR-137	0	0	1	1	0	0	GPR162	G protein-coupled receptor 162
hsa-miR-137	0	0	1	1	0	0	TINAG	tubulointerstitial nephritis antigen
hsa-miR-137	0	0	1	1	1	1	ZNF330	zinc finger protein 330
hsa-miR-137	0	0	1	1	1	1	RPS6KA6	ribosomal protein S6 kinase, 90kDa, polypeptide 6
hsa-miR-137	0	0	1	1	1	1	TMOD2	tropomodulin 2 (neuronal)
hsa-miR-137	1	0	1	1	1	1	ZNF592	zinc finger protein 592
hsa-miR-137	1	0	1	1	1	1	ULK2	unc-51-like kinase 2 (C. elegans)
hsa-miR-137	1	0	1	1	1	1	ARHGAP32	Rho GTPase activating protein 32
hsa-miR-137	1	0	1	1	1	1	ZBTB5	zinc finger and BTB domain containing 5
hsa-miR-137	0	0	1	0	1	1	PPM1E	protein phosphatase, Mg2+/Mn2+ dependent, 1E
hsa-miR-137	1	0	1	1	1	1	SPAST	spastin
hsa-miR-137	1	0	1	0	1	1	PDS5B	PDS5, regulator of cohesion maintenance, homolog B (S. cerevisiae)
hsa-miR-137	1	0	1	0	1	1	PEG10	paternally expressed 10
hsa-miR-137	1	0	1	1	1	1	SMG1	smg-1 homolog, phosphatidylinositol 3-kinase-related kinase (C. elegans)
hsa-miR-137	1	0	1	1	1	1	RCOR1	REST corepressor 1
hsa-miR-137	1	0	1	1	1	1	CSTF2T	cleavage stimulation factor, 3' pre-RNA, subunit 2, 64kDa, tau variant
hsa-miR-137	1	0	1	1	1	1	ASXL1	additional sex combs like 1 (Drosophila)
hsa-miR-137	1	0	1	0	1	1	ERC2	ELKS/RAB6-interacting/CAST family member 2
hsa-miR-137	1	0	1	1	1	1	TOR1AIP1	torsin A interacting protein 1
hsa-miR-137	0	0	1	1	0	0	CCZ1	CCZ1 vacuolar protein trafficking and biogenesis associated homolog (S. cerevisiae)
hsa-miR-137	1	0	1	1	1	1	CDC40	cell division cycle 40 homolog (S. cerevisiae)
hsa-miR-137	1	0	1	0	1	1	WNT16	wingless-type MMTV integration site family, member 16
hsa-miR-137	0	0	1	1	0	0	RPL26L1	ribosomal protein L26-like 1
hsa-miR-137	0	0	1	1	0	0	SCFD1	sec1 family domain containing 1
hsa-miR-137	0	0	1	1	1	1	ZFR	zinc finger RNA binding protein
hsa-miR-137	1	0	1	1	1	1	VGLL3	vestigial like 3 (Drosophila)
hsa-miR-137	1	0	1	0	1	1	HECA	headcase homolog (Drosophila)
hsa-miR-137	0	0	1	1	1	1	ACSL5	acyl-CoA synthetase long-chain family member 5
hsa-miR-137	0	0	1	1	1	1	HSD17B11	hydroxysteroid (17-beta) dehydrogenase 11
hsa-miR-137	0	0	1	1	1	1	SS18L2	synovial sarcoma translocation gene on chromosome 18-like 2
hsa-miR-137	1	0	1	0	1	1	RAB8B	RAB8B, member RAS oncogene family
hsa-miR-137	0	0	1	0	1	1	APLN	apelin
hsa-miR-137	0	0	1	1	1	1	BHMT2	betaine--homocysteine S-methyltransferase 2
hsa-miR-137	1	0	1	1	1	1	MBTD1	mbt domain containing 1
hsa-miR-137	0	0	1	1	1	1	MTMR8	myotubularin related protein 8
hsa-miR-137	0	0	1	1	1	1	COMMD8	COMM domain containing 8
hsa-miR-137	1	0	1	0	1	1	CCDC88A	coiled-coil domain containing 88A
hsa-miR-137	0	0	1	1	1	1	THAP1	THAP domain containing, apoptosis associated protein 1
hsa-miR-137	1	0	1	1	1	1	RFWD3	ring finger and WD repeat domain 3
hsa-miR-137	0	0	1	1	1	1	NUDT11	nudix (nucleoside diphosphate linked moiety X)-type motif 11
hsa-miR-137	1	0	1	0	1	1	PARVA	parvin, alpha
hsa-miR-137	1	0	1	1	1	1	UBA6	ubiquitin-like modifier activating enzyme 6
hsa-miR-137	1	0	1	1	1	1	TMEM143	transmembrane protein 143
hsa-miR-137	1	0	1	1	1	1	TBC1D19	TBC1 domain family, member 19
hsa-miR-137	1	0	1	1	1	1	C9orf72	chromosome 9 open reading frame 72
hsa-miR-137	1	0	1	1	1	1	SPTLC3	serine palmitoyltransferase, long chain base subunit 3
hsa-miR-137	0	0	1	1	1	1	SYNJ2BP	synaptojanin 2 binding protein
hsa-miR-137	1	0	1	0	1	1	TMEM106B	transmembrane protein 106B
hsa-miR-137	0	0	1	1	1	1	LAPTM4B	lysosomal protein transmembrane 4 beta
hsa-miR-137	1	0	1	1	1	1	RRN3	RRN3 RNA polymerase I transcription factor homolog (S. cerevisiae)
hsa-miR-137	1	0	1	0	1	1	LRP1B	low density lipoprotein receptor-related protein 1B
hsa-miR-137	1	0	1	0	1	1	KLHL9	kelch-like 9 (Drosophila)
hsa-miR-137	1	0	1	1	1	1	C8orf4	chromosome 8 open reading frame 4
hsa-miR-137	1	0	1	1	1	1	C1GALT1	core 1 synthase, glycoprotein-N-acetylgalactosamine 3-beta-galactosyltransferase, 1
hsa-miR-137	1	0	1	1	1	1	C5orf15	chromosome 5 open reading frame 15
hsa-miR-137	0	0	1	1	1	1	MEPE	matrix extracellular phosphoglycoprotein
hsa-miR-137	1	0	1	1	1	1	KIAA1244	KIAA1244
hsa-miR-137	1	0	1	0	1	1	EIF5A2	eukaryotic translation initiation factor 5A2
hsa-miR-137	0	0	1	0	1	1	ZNF490	zinc finger protein 490
hsa-miR-137	0	0	1	1	1	1	SHROOM4	shroom family member 4
hsa-miR-137	1	0	1	1	1	1	MIB1	mindbomb E3 ubiquitin protein ligase 1
hsa-miR-137	1	0	1	1	1	1	SEMA6A	sema domain, transmembrane domain (TM), and cytoplasmic domain, (semaphorin) 6A
hsa-miR-137	1	0	1	0	1	1	WDFY1	WD repeat and FYVE domain containing 1
hsa-miR-137	0	0	1	1	1	1	KLHL1	kelch-like 1 (Drosophila)
hsa-miR-137	1	0	1	1	1	1	SNTB1	syntrophin, beta 1 (dystrophin-associated protein A1, 59kDa, basic component 1)
hsa-miR-137	0	0	1	1	1	1	SLC15A2	solute carrier family 15 (H+/peptide transporter), member 2
hsa-miR-137	1	0	1	1	1	1	RTN1	reticulon 1
hsa-miR-137	1	0	1	0	1	1	TMX4	thioredoxin-related transmembrane protein 4
hsa-miR-137	1	0	1	1	1	1	GRHL3	grainyhead-like 3 (Drosophila)
hsa-miR-137	0	0	1	0	1	1	MS4A7	membrane-spanning 4-domains, subfamily A, member 7
hsa-miR-137	0	0	1	0	1	1	PROL1	proline rich, lacrimal 1
hsa-miR-137	1	0	1	1	1	1	NTN4	netrin 4
hsa-miR-137	0	0	1	1	1	1	MS4A1	membrane-spanning 4-domains, subfamily A, member 1
hsa-miR-137	1	0	1	0	1	1	MCL1	myeloid cell leukemia sequence 1 (BCL2-related)
hsa-miR-137	0	0	1	1	1	1	PGM5	phosphoglucomutase 5
hsa-miR-137	1	0	1	0	1	1	CSNK1G1	casein kinase 1, gamma 1
hsa-miR-137	1	0	1	1	1	1	EGLN1	egl nine homolog 1 (C. elegans)
hsa-miR-137	0	0	1	1	1	1	CHP2	calcineurin-like EF hand protein 2
hsa-miR-137	1	0	1	1	1	1	GOLPH3	golgi phosphoprotein 3 (coat-protein)
hsa-miR-137	1	0	1	1	1	1	TMEM168	transmembrane protein 168
hsa-miR-137	1	0	1	1	1	1	MESDC1	mesoderm development candidate 1
hsa-miR-137	1	0	1	1	1	1	ALDH8A1	aldehyde dehydrogenase 8 family, member A1
hsa-miR-137	0	0	1	1	1	1	ACBD3	acyl-CoA binding domain containing 3
hsa-miR-137	0	0	1	1	1	1	OSBPL11	oxysterol binding protein-like 11
hsa-miR-137	1	0	1	1	1	1	YTHDC2	YTH domain containing 2
hsa-miR-137	1	0	1	0	1	1	OTUB2	OTU domain, ubiquitin aldehyde binding 2
hsa-miR-137	0	0	1	1	1	1	HTR5A	5-hydroxytryptamine (serotonin) receptor 5A, G protein-coupled
hsa-miR-137	0	0	1	1	1	1	CEP70	centrosomal protein 70kDa
hsa-miR-137	1	0	1	1	1	1	IRF2BPL	interferon regulatory factor 2 binding protein-like
hsa-miR-137	1	0	1	0	1	1	PLEKHF2	pleckstrin homology domain containing, family F (with FYVE domain) member 2
hsa-miR-137	1	0	1	0	1	1	MOB3B	MOB kinase activator 3B
hsa-miR-137	1	0	1	1	1	1	CPED1	cadherin-like and PC-esterase domain containing 1
hsa-miR-137	1	0	1	0	1	1	VCPIP1	valosin containing protein (p97)/p47 complex interacting protein 1
hsa-miR-137	1	0	1	1	1	1	FBXO11	F-box protein 11
hsa-miR-137	1	0	1	1	1	1	PROSER1	proline and serine rich 1
hsa-miR-137	1	0	1	1	1	1	NAA50	N(alpha)-acetyltransferase 50, NatE catalytic subunit
hsa-miR-137	1	0	1	1	1	1	TRIB1	tribbles homolog 1 (Drosophila)
hsa-miR-137	1	0	1	1	1	1	CYB5B	cytochrome b5 type B (outer mitochondrial membrane)
hsa-miR-137	0	0	1	1	1	1	SMCP	sperm mitochondria-associated cysteine-rich protein
hsa-miR-137	0	0	1	1	1	1	FCRL2	Fc receptor-like 2
hsa-miR-137	1	0	1	0	1	1	THAP2	THAP domain containing, apoptosis associated protein 2
hsa-miR-137	1	0	1	0	1	1	TMEM47	transmembrane protein 47
hsa-miR-137	1	0	1	0	1	1	SH3BGRL2	SH3 domain binding glutamic acid-rich protein like 2
hsa-miR-137	0	0	1	0	1	1	ENAM	enamelin
hsa-miR-137	0	0	1	1	1	1	ANKRD27	ankyrin repeat domain 27 (VPS9 domain)
hsa-miR-137	1	0	1	1	1	1	FBXO30	F-box protein 30
hsa-miR-137	0	0	1	1	1	1	RNASEH2C	ribonuclease H2, subunit C
hsa-miR-137	1	0	1	0	1	1	FAR1	fatty acyl CoA reductase 1
hsa-miR-137	0	0	1	1	1	1	ZMYND12	zinc finger, MYND-type containing 12
hsa-miR-137	0	0	1	1	1	1	YIPF4	Yip1 domain family, member 4
hsa-miR-137	0	0	1	1	0	0	NICN1	nicolin 1
hsa-miR-137	1	0	1	1	1	1	JAM3	junctional adhesion molecule 3
hsa-miR-137	0	0	1	1	1	1	MICALCL	MICAL C-terminal like
hsa-miR-137	1	0	1	0	1	1	FGF5	fibroblast growth factor 5
hsa-miR-137	1	0	1	1	1	1	C5orf30	chromosome 5 open reading frame 30
hsa-miR-137	1	0	1	1	1	1	COL4A5	collagen, type IV, alpha 5
hsa-miR-137	1	0	1	1	0	0	FCHSD1	FCH and double SH3 domains 1
hsa-miR-137	1	0	1	1	1	1	EPT1	ethanolaminephosphotransferase 1 (CDP-ethanolamine-specific)
hsa-miR-137	1	0	1	1	0	0	DISP2	dispatched homolog 2 (Drosophila)
hsa-miR-137	0	0	1	1	0	0	SIGLEC11	sialic acid binding Ig-like lectin 11
hsa-miR-137	0	0	1	1	1	1	IL22RA2	interleukin 22 receptor, alpha 2
hsa-miR-137	0	0	1	1	1	1	RAD51B	RAD51 homolog B (S. cerevisiae)
hsa-miR-137	1	0	1	1	1	1	SPTSSA	serine palmitoyltransferase, small subunit A
hsa-miR-137	0	0	1	1	1	1	CASC4	cancer susceptibility candidate 4
hsa-miR-137	1	0	1	0	1	1	NUS1	nuclear undecaprenyl pyrophosphate synthase 1 homolog (S. cerevisiae)
hsa-miR-137	0	0	1	1	1	1	TM4SF19	transmembrane 4 L six family member 19
hsa-miR-137	1	0	1	1	1	1	ICA1L	islet cell autoantigen 1,69kDa-like
hsa-miR-137	0	0	1	0	1	1	PRELID2	PRELI domain containing 2
hsa-miR-137	0	0	1	1	0	0	PPP1R14B	protein phosphatase 1, regulatory (inhibitor) subunit 14B
hsa-miR-137	0	0	1	0	0	0	TM4SF18	transmembrane 4 L six family member 18
hsa-miR-137	1	0	1	1	1	1	CD200R1	CD200 receptor 1
hsa-miR-137	0	0	1	1	1	1	C10orf82	chromosome 10 open reading frame 82
hsa-miR-137	0	0	1	1	0	0	CMTM2	CKLF-like MARVEL transmembrane domain containing 2
hsa-miR-137	1	0	1	1	1	1	FAM91A1	family with sequence similarity 91, member A1
hsa-miR-137	0	0	1	0	1	1	UBLCP1	ubiquitin-like domain containing CTD phosphatase 1
hsa-miR-137	1	0	1	1	1	1	UBQLNL	ubiquilin-like
hsa-miR-137	0	0	1	1	0	0	SENP8	SUMO/sentrin specific peptidase family member 8
hsa-miR-137	1	0	1	0	1	1	MTPN	myotrophin
hsa-miR-137	1	0	1	1	1	1	SGMS1	sphingomyelin synthase 1
hsa-miR-137	1	0	1	0	1	1	SYT11	synaptotagmin XI
hsa-miR-137	1	0	1	1	1	1	POGLUT1	protein O-glucosyltransferase 1
hsa-miR-137	1	0	1	1	1	1	BHLHE22	basic helix-loop-helix family, member e22
hsa-miR-137	1	0	1	1	1	1	FAM123B	family with sequence similarity 123B
hsa-miR-137	0	0	1	1	0	0	TMCO5A	transmembrane and coiled-coil domains 5A
hsa-miR-137	1	0	1	1	1	1	SPRED1	sprouty-related, EVH1 domain containing 1
hsa-miR-137	0	0	1	1	1	1	SNX31	sorting nexin 31
hsa-miR-137	0	0	1	1	0	0	FAM24B	family with sequence similarity 24, member B
hsa-miR-137	0	0	1	1	1	1	DNAJC18	DnaJ (Hsp40) homolog, subfamily C, member 18
hsa-miR-137	1	0	1	1	1	1	PDIK1L	PDLIM1 interacting kinase 1 like
hsa-miR-137	0	0	1	1	0	0	POMZP3	POM121 and ZP3 fusion
hsa-miR-137	1	0	1	1	1	1	TCEANC2	transcription elongation factor A (SII) N-terminal and central domain containing 2
hsa-miR-137	0	0	1	1	0	0	APCDD1L	adenomatosis polyposis coli down-regulated 1-like
hsa-miR-137	1	0	1	1	1	1	HS6ST3	heparan sulfate 6-O-sulfotransferase 3
hsa-miR-137	1	0	1	1	1	1	CREBRF	CREB3 regulatory factor
hsa-miR-137	1	0	1	0	1	1	PLEKHH2	pleckstrin homology domain containing, family H (with MyTH4 domain) member 2
hsa-miR-137	0	0	1	1	1	1	CD8B	CD8b molecule
hsa-miR-137	0	0	1	1	0	0	KCNE2	potassium voltage-gated channel, Isk-related family, member 2
hsa-miR-137	0	0	1	1	1	1	REXO1L1	REX1, RNA exonuclease 1 homolog (S. cerevisiae)-like 1
hsa-miR-137	1	0	1	1	1	1	NR4A2	nuclear receptor subfamily 4, group A, member 2
hsa-miR-137	1	0	1	1	1	1	LSM11	LSM11, U7 small nuclear RNA associated
hsa-miR-137	0	0	1	0	0	0	SLC39A5	solute carrier family 39 (metal ion transporter), member 5
hsa-miR-137	1	0	1	0	1	1	KSR2	kinase suppressor of ras 2
hsa-miR-137	1	0	1	1	1	1	DIP2B	DIP2 disco-interacting protein 2 homolog B (Drosophila)
hsa-miR-137	0	0	1	1	1	1	MAGEB18	melanoma antigen family B, 18
hsa-miR-137	0	0	1	1	1	1	FUNDC1	FUN14 domain containing 1
hsa-miR-137	1	0	1	1	1	1	RABL3	RAB, member of RAS oncogene family-like 3
hsa-miR-137	1	0	1	0	1	1	SREK1IP1	SREK1-interacting protein 1
hsa-miR-137	1	0	1	1	1	1	SLC41A1	solute carrier family 41, member 1
hsa-miR-137	1	0	1	1	1	1	ZADH2	zinc binding alcohol dehydrogenase domain containing 2
hsa-miR-137	0	0	1	1	0	0	CHMP4B	charged multivesicular body protein 4B
hsa-miR-137	0	0	1	1	1	1	NLRP9	NLR family, pyrin domain containing 9
hsa-miR-137	1	0	1	1	1	1	PKHD1L1	polycystic kidney and hepatic disease 1 (autosomal recessive)-like 1
hsa-miR-137	1	0	1	1	1	1	DCAF12L1	DDB1 and CUL4 associated factor 12-like 1
hsa-miR-137	0	0	1	1	1	1	STXBP4	syntaxin binding protein 4
hsa-miR-137	0	0	1	1	1	1	SLC9C2	solute carrier family 9, member C2 (putative)
hsa-miR-137	1	0	1	0	1	1	IL6R	interleukin 6 receptor
hsa-miR-137	1	0	1	1	1	1	CREM	cAMP responsive element modulator
hsa-miR-137	0	0	1	1	1	1	C17orf58	chromosome 17 open reading frame 58
hsa-miR-137	0	0	1	1	1	1	ZNF326	zinc finger protein 326
hsa-miR-137	1	0	1	1	1	1	RBPMS2	RNA binding protein with multiple splicing 2
hsa-miR-137	1	0	1	0	1	1	SRRM4	serine/arginine repetitive matrix 4
hsa-miR-137	1	0	1	1	1	1	RALGAPA1	Ral GTPase activating protein, alpha subunit 1 (catalytic)
hsa-miR-137	1	0	1	1	1	1	ZBTB41	zinc finger and BTB domain containing 41
hsa-miR-137	0	0	1	0	1	1	TCF21	transcription factor 21
hsa-miR-137	1	0	1	0	1	1	NRK	Nik related kinase
hsa-miR-137	1	0	1	1	1	1	PTGER3	prostaglandin E receptor 3 (subtype EP3)
hsa-miR-137	1	0	1	1	1	1	CXCL12	chemokine (C-X-C motif) ligand 12
hsa-miR-137	0	0	1	1	1	1	IKBIP	IKBKB interacting protein
hsa-miR-137	0	0	1	1	1	1	SERTM1	serine-rich and transmembrane domain containing 1
hsa-miR-137	1	0	1	1	1	1	PPAPDC2	phosphatidic acid phosphatase type 2 domain containing 2
hsa-miR-137	0	0	1	1	1	1	APOBEC4	apolipoprotein B mRNA editing enzyme, catalytic polypeptide-like 4 (putative)
hsa-miR-137	0	0	1	1	1	1	SEPT14	septin 14
hsa-miR-137	0	0	1	1	1	1	FAM177B	family with sequence similarity 177, member B
hsa-miR-137	0	0	1	0	0	0	ESRRAP2	estrogen-related receptor alpha pseudogene 2
hsa-miR-137	0	0	1	0	0	0	MIR155HG	MIR155 host gene (non-protein coding)
hsa-miR-137	0	0	1	1	0	0	TTTY8	testis-specific transcript, Y-linked 8 (non-protein coding)
hsa-miR-137	0	0	1	0	0	0	TTTY21	testis-specific transcript, Y-linked 21 (non-protein coding)
hsa-miR-137	0	0	1	0	0	0	TTTY2	testis-specific transcript, Y-linked 2 (non-protein coding)
hsa-miR-137	0	0	1	0	0	0	TTTY22	testis-specific transcript, Y-linked 22 (non-protein coding)
hsa-miR-137	0	0	1	0	0	0	TTTY12	testis-specific transcript, Y-linked 12 (non-protein coding)
hsa-miR-137	0	0	1	0	0	0	PPP1R2P3	protein phosphatase 1, regulatory (inhibitor) subunit 2 pseudogene 3
hsa-miR-137	0	0	1	0	0	0	PDIA3P	protein disulfide isomerase family A, member 3 pseudogene
hsa-miR-137	0	0	1	0	0	0	SLC7A5P2	solute carrier family 7 (amino acid transporter light chain, L system), member 5 pseudogene 2
hsa-miR-137	0	0	1	0	0	0	HNRNPA3P1	heterogeneous nuclear ribonucleoprotein A3 pseudogene 1
hsa-miR-137	0	0	1	0	0	0	PCGEM1	prostate-specific transcript 1 (non-protein coding)
hsa-miR-137	0	0	1	0	0	0	TRIM78P	tripartite motif containing 78, pseudogene
hsa-miR-137	0	0	1	0	0	0	SEPHS1P1	selenophosphate synthetase 1 pseudogene 1
hsa-miR-137	0	0	1	0	0	0	HCG26	HLA complex group 26 (non-protein coding)
hsa-miR-137	0	0	1	0	0	0	AQP7P1	aquaporin 7 pseudogene 1
hsa-miR-137	0	0	1	0	0	0	RNASEH2CP1	ribonuclease H2, subunit C pseudogene 1
hsa-miR-137	0	0	1	0	0	0	DUSP5P	dual specificity phosphatase 5 pseudogene
hsa-miR-137	0	0	1	0	0	0	HAS2-AS1	HAS2 antisense RNA 1
hsa-miR-137	0	0	1	0	0	0	PTPRVP	protein tyrosine phosphatase, receptor type, V, pseudogene
hsa-miR-137	0	0	1	0	0	0	HSP90AB2P	heat shock protein 90kDa alpha (cytosolic), class B member 2, pseudogene
hsa-miR-137	0	0	1	1	0	0	TCP10	t-complex 10 homolog (mouse)
hsa-miR-137	0	0	1	0	1	1	SRSF5	serine/arginine-rich splicing factor 5
hsa-miR-137	1	0	1	1	1	1	KLF6	Kruppel-like factor 6
hsa-miR-137	1	0	1	1	1	1	HNRNPA1	heterogeneous nuclear ribonucleoprotein A1
hsa-miR-137	0	0	1	1	1	1	CD46	CD46 molecule, complement regulatory protein
hsa-miR-137	0	0	1	1	0	0	BAIAP2L1	BAI1-associated protein 2-like 1
hsa-miR-137	1	0	0	1	0	0	PRSS21	protease, serine, 21 (testisin)
hsa-miR-137	0	0	0	1	1	1	ABHD5	abhydrolase domain containing 5
hsa-miR-137	0	0	0	1	1	1	FTSJ1	FtsJ RNA methyltransferase homolog 1 (E. coli)
hsa-miR-137	0	0	1	1	0	0	C20orf43	chromosome 20 open reading frame 43
hsa-miR-137	1	0	1	1	1	1	B4GALT7	xylosylprotein beta 1,4-galactosyltransferase, polypeptide 7
hsa-miR-137	0	0	0	1	0	0	TARBP1	TAR (HIV-1) RNA binding protein 1
hsa-miR-137	0	0	0	1	1	1	PSG6	pregnancy specific beta-1-glycoprotein 6
hsa-miR-137	0	0	1	1	0	0	PPP1R15A	protein phosphatase 1, regulatory subunit 15A
hsa-miR-137	0	0	1	1	0	0	TGM1	transglutaminase 1 (K polypeptide epidermal type I, protein-glutamine-gamma-glutamyltransferase)
hsa-miR-137	0	0	0	1	1	1	ADH7	alcohol dehydrogenase 7 (class IV), mu or sigma polypeptide
hsa-miR-137	0	0	1	1	0	0	PDXP	pyridoxal (pyridoxine, vitamin B6) phosphatase
hsa-miR-137	0	0	1	1	0	0	SH3BP1	SH3-domain binding protein 1
hsa-miR-137	0	0	1	1	1	1	F9	coagulation factor IX
hsa-miR-137	0	0	1	1	0	0	USP11	ubiquitin specific peptidase 11
hsa-miR-137	1	0	1	1	1	1	BRF2	BRF2, subunit of RNA polymerase III transcription initiation factor, BRF1-like
hsa-miR-137	1	0	1	1	1	1	GDAP1	ganglioside induced differentiation associated protein 1
hsa-miR-137	0	0	1	1	0	0	EMC2	ER membrane protein complex subunit 2
hsa-miR-137	0	0	1	1	0	0	CKM	creatine kinase, muscle
hsa-miR-137	1	0	1	1	1	1	VIM	vimentin
hsa-miR-137	0	0	1	1	0	0	BLNK	B-cell linker
hsa-miR-137	1	0	1	1	1	1	DDX5	DEAD (Asp-Glu-Ala-Asp) box helicase 5
hsa-miR-137	0	0	1	1	1	1	CCL13	chemokine (C-C motif) ligand 13
hsa-miR-137	0	0	0	1	1	1	UNC93B1	unc-93 homolog B1 (C. elegans)
hsa-miR-137	1	0	1	1	0	0	PRPF19	PRP19/PSO4 pre-mRNA processing factor 19 homolog (S. cerevisiae)
hsa-miR-137	0	0	1	1	1	1	ARPC3	actin related protein 2/3 complex, subunit 3, 21kDa
hsa-miR-137	0	0	1	1	1	1	GPR63	G protein-coupled receptor 63
hsa-miR-137	0	0	0	1	1	1	PCDHB7	protocadherin beta 7
hsa-miR-137	0	0	0	1	1	1	PCDHB15	protocadherin beta 15
hsa-miR-137	1	0	0	1	0	0	ABTB1	ankyrin repeat and BTB (POZ) domain containing 1
hsa-miR-137	0	0	1	1	1	1	MSH2	mutS homolog 2, colon cancer, nonpolyposis type 1 (E. coli)
hsa-miR-137	1	0	1	1	1	1	NCK2	NCK adaptor protein 2
hsa-miR-137	0	0	1	1	1	1	ACADL	acyl-CoA dehydrogenase, long chain
hsa-miR-137	0	0	1	1	0	0	KIAA1324	KIAA1324
hsa-miR-137	0	0	1	1	1	1	TTR	transthyretin
hsa-miR-137	0	0	0	1	1	1	PCDHB10	protocadherin beta 10
hsa-miR-137	0	0	0	1	1	1	TTLL2	tubulin tyrosine ligase-like family, member 2
hsa-miR-137	0	0	0	1	1	1	RAB9A	RAB9A, member RAS oncogene family
hsa-miR-137	0	0	0	1	1	1	TNFAIP6	tumor necrosis factor, alpha-induced protein 6
hsa-miR-137	0	0	0	1	1	1	TBCC	tubulin folding cofactor C
hsa-miR-137	0	0	1	1	1	1	SH3TC1	SH3 domain and tetratricopeptide repeats 1
hsa-miR-137	0	0	0	1	1	1	STATH	statherin
hsa-miR-137	0	0	0	1	1	1	HTN1	histatin 1
hsa-miR-137	0	0	1	1	0	0	WDR24	WD repeat domain 24
hsa-miR-137	0	0	0	1	1	1	CCRL1	chemokine (C-C motif) receptor-like 1
hsa-miR-137	0	0	0	1	1	1	EAPP	E2F-associated phosphoprotein
hsa-miR-137	0	0	0	1	0	0	CFHR4	complement factor H-related 4
hsa-miR-137	0	0	1	1	1	1	TRNT1	tRNA nucleotidyl transferase, CCA-adding, 1
hsa-miR-137	1	0	1	1	1	1	TSG101	tumor susceptibility gene 101
hsa-miR-137	0	0	0	1	1	1	EFCAB4B	EF-hand calcium binding domain 4B
hsa-miR-137	0	0	0	1	1	1	ACSBG2	acyl-CoA synthetase bubblegum family member 2
hsa-miR-137	0	0	0	1	0	0	EIF3G	eukaryotic translation initiation factor 3, subunit G
hsa-miR-137	0	0	0	1	1	1	ZNF233	zinc finger protein 233
hsa-miR-137	0	0	1	1	0	0	FAM153B	family with sequence similarity 153, member B
hsa-miR-137	0	0	0	1	1	1	ZCCHC9	zinc finger, CCHC domain containing 9
hsa-miR-137	0	0	0	1	0	0	FTH1P19	ferritin, heavy polypeptide 1 pseudogene 19
hsa-miR-137	0	0	0	1	1	1	UTP3	UTP3, small subunit (SSU) processome component, homolog (S. cerevisiae)
hsa-miR-137	1	0	1	1	0	0	ATP13A3	ATPase type 13A3
hsa-miR-137	0	0	1	1	1	1	TEX15	testis expressed 15
hsa-miR-137	0	0	1	1	1	1	IL5RA	interleukin 5 receptor, alpha
hsa-miR-137	0	0	1	1	0	0	FHOD1	formin homology 2 domain containing 1
hsa-miR-137	0	0	1	1	1	1	URB2	URB2 ribosome biogenesis 2 homolog (S. cerevisiae)
hsa-miR-137	0	0	1	1	0	0	WNT10A	wingless-type MMTV integration site family, member 10A
hsa-miR-137	0	0	1	1	1	1	PWP1	PWP1 homolog (S. cerevisiae)
hsa-miR-137	0	0	1	1	1	1	NUPL2	nucleoporin like 2
hsa-miR-137	0	0	0	1	1	1	BRIP1	BRCA1 interacting protein C-terminal helicase 1
hsa-miR-137	0	0	1	1	1	1	RTP4	receptor (chemosensory) transporter protein 4
hsa-miR-137	0	0	1	1	0	0	CFC1	cripto, FRL-1, cryptic family 1
hsa-miR-137	0	0	0	1	1	1	FGFBP2	fibroblast growth factor binding protein 2
hsa-miR-137	0	0	0	1	0	0	HTR3B	5-hydroxytryptamine (serotonin) receptor 3B, ionotropic
hsa-miR-137	0	0	1	1	0	0	DCUN1D5	DCN1, defective in cullin neddylation 1, domain containing 5 (S. cerevisiae)
hsa-miR-137	0	0	1	1	1	1	ASUN	asunder, spermatogenesis regulator homolog (Drosphila)
hsa-miR-137	0	0	1	1	0	0	MNAT1	menage a trois homolog 1, cyclin H assembly factor (Xenopus laevis)
hsa-miR-137	1	0	1	1	1	1	TGDS	TDP-glucose 4,6-dehydratase
hsa-miR-137	0	0	0	1	1	1	C4orf27	chromosome 4 open reading frame 27
hsa-miR-137	0	0	1	1	0	0	EIF4EBP3	eukaryotic translation initiation factor 4E binding protein 3
hsa-miR-137	0	0	1	1	0	0	ANKHD1-EIF4EBP3	ANKHD1-EIF4EBP3 readthrough
hsa-miR-137	0	0	1	1	1	1	ANKHD1	ankyrin repeat and KH domain containing 1
hsa-miR-137	0	0	0	1	0	0	LMF1	lipase maturation factor 1
hsa-miR-137	0	0	1	1	1	1	DHX8	DEAH (Asp-Glu-Ala-His) box polypeptide 8
hsa-miR-137	1	0	1	1	0	0	EPC1	enhancer of polycomb homolog 1 (Drosophila)
hsa-miR-137	0	0	0	1	1	1	TYR	tyrosinase (oculocutaneous albinism IA)
hsa-miR-137	0	0	0	1	0	0	BLVRB	biliverdin reductase B (flavin reductase (NADPH))
hsa-miR-137	0	0	1	1	1	1	TIMMDC1	translocase of inner mitochondrial membrane domain containing 1
hsa-miR-137	0	0	1	1	1	1	MFSD1	major facilitator superfamily domain containing 1
hsa-miR-137	1	0	1	1	1	1	ARHGAP24	Rho GTPase activating protein 24
hsa-miR-137	0	0	0	1	1	1	C2orf83	chromosome 2 open reading frame 83
hsa-miR-137	0	0	1	1	0	0	ALMS1	Alstrom syndrome 1
hsa-miR-137	0	0	1	1	0	0	NUCKS1	nuclear casein kinase and cyclin-dependent kinase substrate 1
hsa-miR-137	0	0	1	1	0	0	SERPINI2	serpin peptidase inhibitor, clade I (pancpin), member 2
hsa-miR-137	0	0	1	1	1	1	HOOK2	hook homolog 2 (Drosophila)
hsa-miR-137	1	0	1	1	1	1	AHRR	aryl-hydrocarbon receptor repressor
hsa-miR-137	0	0	1	1	1	1	DNAJB11	DnaJ (Hsp40) homolog, subfamily B, member 11
hsa-miR-137	0	0	1	1	0	0	FETUB	fetuin B
hsa-miR-137	0	0	1	1	1	1	TCTN3	tectonic family member 3
hsa-miR-137	1	0	1	1	1	1	GLIPR1	GLI pathogenesis-related 1
hsa-miR-137	0	0	1	1	0	0	SYCP3	synaptonemal complex protein 3
hsa-miR-137	0	0	1	1	1	1	METTL21C	methyltransferase like 21C
hsa-miR-137	0	0	1	1	0	0	STON2	stonin 2
hsa-miR-137	0	0	1	1	1	1	WDR61	WD repeat domain 61
hsa-miR-137	0	0	1	1	1	1	DYM	dymeclin
hsa-miR-137	0	0	0	1	1	1	PSG9	pregnancy specific beta-1-glycoprotein 9
hsa-miR-137	0	0	0	1	0	0	ECSIT	ECSIT homolog (Drosophila)
hsa-miR-137	0	0	0	1	0	0	RCN3	reticulocalbin 3, EF-hand calcium binding domain
hsa-miR-137	0	0	0	1	0	0	ZNF432	zinc finger protein 432
hsa-miR-137	1	0	0	1	1	1	ZNF614	zinc finger protein 614
hsa-miR-137	0	0	1	1	1	1	SULT1C4	sulfotransferase family, cytosolic, 1C, member 4
hsa-miR-137	0	0	1	1	1	1	LARS	leucyl-tRNA synthetase
hsa-miR-137	0	0	1	1	1	1	UIMC1	ubiquitin interaction motif containing 1
hsa-miR-137	1	0	1	1	0	0	PHIP	pleckstrin homology domain interacting protein
hsa-miR-137	0	0	1	1	1	1	NCAPG2	non-SMC condensin II complex, subunit G2
hsa-miR-137	0	0	0	1	1	1	STAR	steroidogenic acute regulatory protein
hsa-miR-137	0	0	1	1	1	1	CRH	corticotropin releasing hormone
hsa-miR-137	0	0	1	1	0	0	WDR96	WD repeat domain 96
hsa-miR-137	0	0	1	1	0	0	IMMP1L	IMP1 inner mitochondrial membrane peptidase-like (S. cerevisiae)
hsa-miR-137	0	0	0	1	1	1	ZNF343	zinc finger protein 343
hsa-miR-137	1	0	1	1	1	1	TMPRSS13	transmembrane protease, serine 13
hsa-miR-137	0	0	1	1	0	0	CWC15	CWC15 spliceosome-associated protein homolog (S. cerevisiae)
hsa-miR-137	1	0	1	1	1	1	VEGFC	vascular endothelial growth factor C
hsa-miR-137	0	0	1	1	1	1	TKTL2	transketolase-like 2
hsa-miR-137	0	0	0	1	0	0	DCP1B	DCP1 decapping enzyme homolog B (S. cerevisiae)
hsa-miR-137	0	0	1	1	0	0	CFC1B	cripto, FRL-1, cryptic family 1B
hsa-miR-137	1	0	0	1	0	0	POC5	POC5 centriolar protein homolog (Chlamydomonas)
hsa-miR-137	0	0	1	1	0	0	FAM21A	family with sequence similarity 21, member A
hsa-miR-137	0	0	1	1	0	0	SMARCA5	SWI/SNF related, matrix associated, actin dependent regulator of chromatin, subfamily a, member 5
hsa-miR-137	1	0	1	1	1	1	TRAPPC8	trafficking protein particle complex 8
hsa-miR-137	0	0	0	1	0	0	RBM45	RNA binding motif protein 45
hsa-miR-137	0	0	0	1	0	0	MED7	mediator complex subunit 7
hsa-miR-137	0	0	1	1	1	1	TMBIM4	transmembrane BAX inhibitor motif containing 4
hsa-miR-137	0	0	0	1	1	1	NDUFAF6	NADH dehydrogenase (ubiquinone) complex I, assembly factor 6
hsa-miR-137	0	0	1	1	0	0	CCT8	chaperonin containing TCP1, subunit 8 (theta)
hsa-miR-137	0	0	1	1	1	1	UQCRB	ubiquinol-cytochrome c reductase binding protein
hsa-miR-137	0	0	1	1	0	0	LCA5L	Leber congenital amaurosis 5-like
hsa-miR-137	0	0	0	1	0	0	PRKD2	protein kinase D2
hsa-miR-137	0	0	1	1	0	0	FLAD1	FAD1 flavin adenine dinucleotide synthetase homolog (S. cerevisiae)
hsa-miR-137	0	0	0	1	0	0	HCRT	hypocretin (orexin) neuropeptide precursor
hsa-miR-137	0	0	1	1	1	1	MED11	mediator complex subunit 11
hsa-miR-137	0	0	0	1	1	1	GBP7	guanylate binding protein 7
hsa-miR-137	0	0	1	1	0	0	PCDP1	primary ciliary dyskinesia protein 1
hsa-miR-137	0	0	0	1	1	1	STPG2	sperm-tail PG-rich repeat containing 2
hsa-miR-137	0	0	0	1	0	0	BMP10	bone morphogenetic protein 10
hsa-miR-137	0	0	1	1	0	0	RNF25	ring finger protein 25
hsa-miR-137	0	0	1	1	1	1	RETNLB	resistin like beta
hsa-miR-137	0	0	1	1	1	1	SGOL2	shugoshin-like 2 (S. pombe)
hsa-miR-137	0	0	1	1	1	1	THOC7	THO complex 7 homolog (Drosophila)
hsa-miR-137	0	0	1	1	1	1	KIAA1143	KIAA1143
hsa-miR-137	0	0	1	1	1	1	NMNAT3	nicotinamide nucleotide adenylyltransferase 3
hsa-miR-137	0	0	1	1	0	0	RPL39L	ribosomal protein L39-like
hsa-miR-137	0	0	1	1	1	1	EMCN	endomucin
hsa-miR-137	0	0	1	1	0	0	CCDC51	coiled-coil domain containing 51
hsa-miR-137	0	0	0	1	0	0	MST1R	macrophage stimulating 1 receptor (c-met-related tyrosine kinase)
hsa-miR-137	0	0	1	1	1	1	HMGB2	high mobility group box 2
hsa-miR-137	0	0	1	1	0	0	SCRG1	stimulator of chondrogenesis 1
hsa-miR-137	0	0	0	1	0	0	ANKRD33B	ankyrin repeat domain 33B
hsa-miR-137	0	0	1	1	0	0	SCGB3A2	secretoglobin, family 3A, member 2
hsa-miR-137	0	0	1	1	1	1	MED30	mediator complex subunit 30
hsa-miR-137	0	0	1	1	0	0	KIAA0146	KIAA0146
hsa-miR-137	0	0	1	1	0	0	TMC1	transmembrane channel-like 1
hsa-miR-137	0	0	1	1	1	1	TRMT10B	tRNA methyltransferase 10 homolog B (S. cerevisiae)
hsa-miR-137	0	0	0	1	0	0	ADAMTS15	ADAM metallopeptidase with thrombospondin type 1 motif, 15
hsa-miR-137	0	0	0	1	0	0	TRMT61A	tRNA methyltransferase 61 homolog A (S. cerevisiae)
hsa-miR-137	0	0	1	1	0	0	CHRNA5	cholinergic receptor, nicotinic, alpha 5 (neuronal)
hsa-miR-137	0	0	0	1	0	0	GPR182	G protein-coupled receptor 182
hsa-miR-137	1	0	1	1	1	1	TAC3	tachykinin 3
hsa-miR-137	0	0	1	1	1	1	MRPL16	mitochondrial ribosomal protein L16
hsa-miR-137	0	0	1	1	1	1	ATP5L	ATP synthase, H+ transporting, mitochondrial Fo complex, subunit G
hsa-miR-137	0	0	0	1	1	1	LAIR2	leukocyte-associated immunoglobulin-like receptor 2
hsa-miR-137	0	0	0	1	0	0	OR5I1	olfactory receptor, family 5, subfamily I, member 1
hsa-miR-137	1	0	0	1	1	1	RNF157	ring finger protein 157
hsa-miR-137	1	0	0	1	0	0	ZNF597	zinc finger protein 597
hsa-miR-137	1	0	1	1	1	1	WDR48	WD repeat domain 48
hsa-miR-137	1	0	1	1	1	1	ING2	inhibitor of growth family, member 2
hsa-miR-137	0	0	1	1	1	1	MCOLN3	mucolipin 3
hsa-miR-137	0	0	0	1	1	1	GPR37	G protein-coupled receptor 37 (endothelin receptor type B-like)
hsa-miR-137	0	0	0	1	0	0	RPAP1	RNA polymerase II associated protein 1
hsa-miR-137	0	0	1	1	1	1	PPP4R4	protein phosphatase 4, regulatory subunit 4
hsa-miR-137	0	0	1	1	1	1	GPR22	G protein-coupled receptor 22
hsa-miR-137	1	0	1	1	1	1	TTC39C	tetratricopeptide repeat domain 39C
hsa-miR-137	0	0	0	1	0	0	TIGD1	tigger transposable element derived 1
hsa-miR-137	0	0	1	1	1	1	TPD52L1	tumor protein D52-like 1
hsa-miR-137	0	0	1	1	0	0	REG3A	regenerating islet-derived 3 alpha
hsa-miR-137	0	0	1	1	1	1	TMPRSS11E	transmembrane protease, serine 11E
[truncated: 391 more rows]
