# Supplementary material for: Profiling of Selected MicroRNAs in Proliferative Eutopic Endometrium of Women with Ovarian Endometriosis
Source: Biomed Res Int. 2015 Aug 20;2015:760698. doi: 10.1155/2015/760698 (PMC4558423; doi:10.1155/2015/760698)
Supplement: Supplementary file 1 — Table I: The names of miRNAs significantly differentially expressed between eutopic endometrium of patients with endometriosis vs eutopic endometrium of patients without endometriosis. Table II: The associations between miRNA and mRNA, which presents detailed results of the search of six major databases i.e targetscan, tarbase, miranda, mirbase, mirtarget2 and pictar. [file 760698.f1.zip › 760698.f1/Table II/hsa-miR-146b-3p.tsv]

miR	targetscan	tarbase	miranda	mirbase	mirtarget2	pictar	GeneSymbol	GeneName
hsa-miR-146b-3p	1	0	1	1	1	1	PRUNE2	prune homolog 2 (Drosophila)
hsa-miR-146b-3p	1	0	1	0	1	1	PTPRT	protein tyrosine phosphatase, receptor type, T
hsa-miR-146b-3p	0	0	1	1	0	0	PLXNB1	plexin B1
hsa-miR-146b-3p	0	0	1	1	0	0	PLCH2	phospholipase C, eta 2
hsa-miR-146b-3p	0	0	1	1	1	1	PDE4DIP	phosphodiesterase 4D interacting protein
hsa-miR-146b-3p	1	0	1	1	0	0	SUSD5	sushi domain containing 5
hsa-miR-146b-3p	1	0	1	1	0	0	ESYT1	extended synaptotagmin-like protein 1
hsa-miR-146b-3p	1	0	1	0	1	1	LPHN3	latrophilin 3
hsa-miR-146b-3p	0	0	1	1	1	1	MAN2B2	mannosidase, alpha, class 2B, member 2
hsa-miR-146b-3p	1	0	1	0	0	0	DTX4	deltex homolog 4 (Drosophila)
hsa-miR-146b-3p	0	0	1	1	1	1	TBC1D30	TBC1 domain family, member 30
hsa-miR-146b-3p	1	0	1	1	0	0	KIAA1045	KIAA1045
hsa-miR-146b-3p	0	0	1	1	0	0	RTEL1	regulator of telomere elongation helicase 1
hsa-miR-146b-3p	1	0	1	1	1	1	ZMIZ1	zinc finger, MIZ-type containing 1
hsa-miR-146b-3p	1	0	1	1	1	1	MKL2	MKL/myocardin-like 2
hsa-miR-146b-3p	0	0	1	1	1	1	COPS7A	COP9 constitutive photomorphogenic homolog subunit 7A (Arabidopsis)
hsa-miR-146b-3p	1	0	1	1	1	1	PCDH19	protocadherin 19
hsa-miR-146b-3p	1	0	1	0	1	1	KCTD16	potassium channel tetramerisation domain containing 16
hsa-miR-146b-3p	1	0	1	0	0	0	PITPNM2	phosphatidylinositol transfer protein, membrane-associated 2
hsa-miR-146b-3p	1	0	1	0	1	1	SEMA6D	sema domain, transmembrane domain (TM), and cytoplasmic domain, (semaphorin) 6D
hsa-miR-146b-3p	0	0	1	1	0	0	URGCP	upregulator of cell proliferation
hsa-miR-146b-3p	1	0	1	1	0	0	ZSWIM5	zinc finger, SWIM-type containing 5
hsa-miR-146b-3p	1	0	1	1	1	1	USP28	ubiquitin specific peptidase 28
hsa-miR-146b-3p	1	0	1	1	0	0	SEMA4C	sema domain, immunoglobulin domain (Ig), transmembrane domain (TM) and short cytoplasmic domain, (semaphorin) 4C
hsa-miR-146b-3p	1	0	1	0	1	1	RIMS1	regulating synaptic membrane exocytosis 1
hsa-miR-146b-3p	1	0	1	1	1	1	LZTS2	leucine zipper, putative tumor suppressor 2
hsa-miR-146b-3p	1	0	1	1	1	1	NAV2	neuron navigator 2
hsa-miR-146b-3p	0	0	1	1	0	0	SEC16B	SEC16 homolog B (S. cerevisiae)
hsa-miR-146b-3p	1	0	1	0	0	0	SMYD4	SET and MYND domain containing 4
hsa-miR-146b-3p	1	0	1	1	1	1	SSH3	slingshot homolog 3 (Drosophila)
hsa-miR-146b-3p	1	0	1	1	1	1	ANKRD12	ankyrin repeat domain 12
hsa-miR-146b-3p	1	0	1	1	1	1	OXR1	oxidation resistance 1
hsa-miR-146b-3p	1	0	1	1	1	1	SH3TC2	SH3 domain and tetratricopeptide repeats 2
hsa-miR-146b-3p	1	0	1	0	0	0	ZBTB34	zinc finger and BTB domain containing 34
hsa-miR-146b-3p	1	0	1	1	1	1	SMEK1	SMEK homolog 1, suppressor of mek1 (Dictyostelium)
hsa-miR-146b-3p	1	0	1	1	1	1	TRPM3	transient receptor potential cation channel, subfamily M, member 3
hsa-miR-146b-3p	0	0	1	1	1	1	PAK3	p21 protein (Cdc42/Rac)-activated kinase 3
hsa-miR-146b-3p	0	0	1	1	0	0	SSPO	SCO-spondin homolog (Bos taurus)
hsa-miR-146b-3p	1	0	1	1	1	1	HIF3A	hypoxia inducible factor 3, alpha subunit
hsa-miR-146b-3p	1	0	1	0	1	1	BEND4	BEN domain containing 4
hsa-miR-146b-3p	1	0	1	1	1	1	FAT2	FAT tumor suppressor homolog 2 (Drosophila)
hsa-miR-146b-3p	1	0	1	1	1	1	LTBP1	latent transforming growth factor beta binding protein 1
hsa-miR-146b-3p	1	0	1	1	1	1	COL11A1	collagen, type XI, alpha 1
hsa-miR-146b-3p	1	0	1	1	1	1	RPS6KA3	ribosomal protein S6 kinase, 90kDa, polypeptide 3
hsa-miR-146b-3p	1	0	1	1	1	1	PLEKHH3	pleckstrin homology domain containing, family H (with MyTH4 domain) member 3
hsa-miR-146b-3p	1	0	1	1	0	0	ELN	elastin
hsa-miR-146b-3p	1	0	1	1	1	1	PML	promyelocytic leukemia
hsa-miR-146b-3p	1	0	1	1	1	1	PCCB	propionyl CoA carboxylase, beta polypeptide
hsa-miR-146b-3p	1	0	1	0	1	1	MAML1	mastermind-like 1 (Drosophila)
hsa-miR-146b-3p	0	0	1	1	0	0	CASP9	caspase 9, apoptosis-related cysteine peptidase
hsa-miR-146b-3p	1	0	1	0	1	1	MPPED2	metallophosphoesterase domain containing 2
hsa-miR-146b-3p	1	0	1	0	1	1	SLC6A6	solute carrier family 6 (neurotransmitter transporter, taurine), member 6
hsa-miR-146b-3p	1	0	1	1	1	1	FMR1	fragile X mental retardation 1
hsa-miR-146b-3p	0	0	1	1	1	1	TFRC	transferrin receptor (p90, CD71)
hsa-miR-146b-3p	0	0	1	1	1	1	RYR1	ryanodine receptor 1 (skeletal)
hsa-miR-146b-3p	1	0	1	1	1	1	MINK1	misshapen-like kinase 1
hsa-miR-146b-3p	0	0	1	1	1	1	PPP1R12C	protein phosphatase 1, regulatory subunit 12C
hsa-miR-146b-3p	1	0	1	1	0	0	RGS6	regulator of G-protein signaling 6
hsa-miR-146b-3p	0	0	1	1	0	0	PSMB2	proteasome (prosome, macropain) subunit, beta type, 2
hsa-miR-146b-3p	0	0	1	1	0	0	EIF4E2	eukaryotic translation initiation factor 4E family member 2
hsa-miR-146b-3p	0	0	1	1	0	0	CFLAR	CASP8 and FADD-like apoptosis regulator
hsa-miR-146b-3p	1	0	1	1	1	1	ARHGEF3	Rho guanine nucleotide exchange factor (GEF) 3
hsa-miR-146b-3p	0	0	1	1	1	1	KIF3A	kinesin family member 3A
hsa-miR-146b-3p	0	0	1	1	0	0	CDK10	cyclin-dependent kinase 10
hsa-miR-146b-3p	1	0	1	1	0	0	PPP2R5D	protein phosphatase 2, regulatory subunit B', delta
hsa-miR-146b-3p	1	0	1	1	1	1	ANPEP	alanyl (membrane) aminopeptidase
hsa-miR-146b-3p	1	0	1	0	1	1	MLL2	myeloid/lymphoid or mixed-lineage leukemia 2
hsa-miR-146b-3p	0	0	1	1	0	0	SPTBN2	spectrin, beta, non-erythrocytic 2
hsa-miR-146b-3p	1	0	1	1	1	1	PCDH17	protocadherin 17
hsa-miR-146b-3p	0	0	1	1	0	0	ITGA7	integrin, alpha 7
hsa-miR-146b-3p	1	0	1	1	1	1	MYT1L	myelin transcription factor 1-like
hsa-miR-146b-3p	1	0	1	0	0	0	MAP3K1	mitogen-activated protein kinase kinase kinase 1, E3 ubiquitin protein ligase
hsa-miR-146b-3p	1	0	1	1	1	1	ZFAND6	zinc finger, AN1-type domain 6
hsa-miR-146b-3p	1	0	1	1	1	1	CTNND1	catenin (cadherin-associated protein), delta 1
hsa-miR-146b-3p	1	0	1	1	1	1	CBFA2T2	core-binding factor, runt domain, alpha subunit 2; translocated to, 2
hsa-miR-146b-3p	1	0	1	1	0	0	ASPHD1	aspartate beta-hydroxylase domain containing 1
hsa-miR-146b-3p	1	0	1	1	1	1	WHSC1	Wolf-Hirschhorn syndrome candidate 1
hsa-miR-146b-3p	0	0	1	1	0	0	CARD10	caspase recruitment domain family, member 10
hsa-miR-146b-3p	0	0	1	1	1	1	PLEKHB1	pleckstrin homology domain containing, family B (evectins) member 1
hsa-miR-146b-3p	0	0	1	1	1	1	SH2D1A	SH2 domain containing 1A
hsa-miR-146b-3p	1	0	1	1	0	0	RASSF1	Ras association (RalGDS/AF-6) domain family member 1
hsa-miR-146b-3p	0	0	1	1	1	1	IL18BP	interleukin 18 binding protein
hsa-miR-146b-3p	0	0	1	1	1	1	FAM35A	family with sequence similarity 35, member A
hsa-miR-146b-3p	1	0	1	1	1	1	SORBS1	sorbin and SH3 domain containing 1
hsa-miR-146b-3p	1	0	1	1	1	1	AASDHPPT	aminoadipate-semialdehyde dehydrogenase-phosphopantetheinyl transferase
hsa-miR-146b-3p	0	0	1	1	0	0	ADAMTS7	ADAM metallopeptidase with thrombospondin type 1 motif, 7
hsa-miR-146b-3p	1	0	1	1	1	1	C14orf129	chromosome 14 open reading frame 129
hsa-miR-146b-3p	1	0	1	0	0	0	PRPF40A	PRP40 pre-mRNA processing factor 40 homolog A (S. cerevisiae)
hsa-miR-146b-3p	0	0	1	0	1	1	CLDN2	claudin 2
hsa-miR-146b-3p	1	0	1	1	1	1	SNPH	syntaphilin
hsa-miR-146b-3p	1	0	1	1	1	1	TSC22D2	TSC22 domain family, member 2
hsa-miR-146b-3p	1	0	1	1	1	1	KCNMB2	potassium large conductance calcium-activated channel, subfamily M, beta member 2
hsa-miR-146b-3p	0	0	1	0	0	0	TIGD7	tigger transposable element derived 7
hsa-miR-146b-3p	0	0	1	1	0	0	ELMOD3	ELMO/CED-12 domain containing 3
hsa-miR-146b-3p	0	0	1	1	0	0	TTTY7	testis-specific transcript, Y-linked 7 (non-protein coding)
hsa-miR-146b-3p	1	0	1	1	1	1	CALU	calumenin
hsa-miR-146b-3p	1	0	1	1	1	1	BBC3	BCL2 binding component 3
hsa-miR-146b-3p	1	0	1	1	1	1	SON	SON DNA binding protein
hsa-miR-146b-3p	0	0	1	1	0	0	SNRPN	small nuclear ribonucleoprotein polypeptide N
hsa-miR-146b-3p	1	0	1	1	1	1	MAGI1	membrane associated guanylate kinase, WW and PDZ domain containing 1
hsa-miR-146b-3p	0	0	1	0	0	0	MYO15B	myosin XVB pseudogene
hsa-miR-146b-3p	0	0	1	1	1	1	PPP1R1B	protein phosphatase 1, regulatory (inhibitor) subunit 1B
hsa-miR-146b-3p	1	0	1	1	0	0	XRRA1	X-ray radiation resistance associated 1
hsa-miR-146b-3p	1	0	1	1	0	0	FOXP2	forkhead box P2
hsa-miR-146b-3p	1	0	1	1	1	1	BRSK1	BR serine/threonine kinase 1
hsa-miR-146b-3p	0	0	1	1	1	1	R3HCC1L	R3H domain and coiled-coil containing 1-like
hsa-miR-146b-3p	0	0	1	1	1	1	PTK7	PTK7 protein tyrosine kinase 7
hsa-miR-146b-3p	1	0	1	0	1	1	IL1RAP	interleukin 1 receptor accessory protein
hsa-miR-146b-3p	0	0	1	1	1	1	ANKRD36B	ankyrin repeat domain 36B
hsa-miR-146b-3p	0	0	1	1	1	1	GPR56	G protein-coupled receptor 56
hsa-miR-146b-3p	0	0	1	1	1	1	DMRTC1	DMRT-like family C1
hsa-miR-146b-3p	0	0	1	1	0	0	DMRTC1B	DMRT-like family C1B
hsa-miR-146b-3p	1	0	1	1	1	1	PALM2	paralemmin 2
hsa-miR-146b-3p	1	0	1	1	1	1	NRXN3	neurexin 3
hsa-miR-146b-3p	1	0	1	1	1	1	EMID2	EMI domain containing 2
hsa-miR-146b-3p	1	0	1	1	1	1	NAV3	neuron navigator 3
hsa-miR-146b-3p	0	0	1	1	0	0	MBD1	methyl-CpG binding domain protein 1
hsa-miR-146b-3p	1	0	1	1	1	1	ARL4C	ADP-ribosylation factor-like 4C
hsa-miR-146b-3p	0	0	1	1	0	0	ACSS2	acyl-CoA synthetase short-chain family member 2
hsa-miR-146b-3p	1	0	1	0	1	1	NFAT5	nuclear factor of activated T-cells 5, tonicity-responsive
hsa-miR-146b-3p	1	0	1	1	0	0	DUS2L	dihydrouridine synthase 2-like, SMM1 homolog (S. cerevisiae)
hsa-miR-146b-3p	0	0	1	1	0	0	SLC6A19	solute carrier family 6 (neutral amino acid transporter), member 19
hsa-miR-146b-3p	1	0	1	1	1	1	EIF2C1	eukaryotic translation initiation factor 2C, 1
hsa-miR-146b-3p	1	0	1	1	1	1	SLC38A2	solute carrier family 38, member 2
hsa-miR-146b-3p	1	0	1	1	1	1	KLHDC8B	kelch domain containing 8B
hsa-miR-146b-3p	1	0	1	1	1	1	MYO9B	myosin IXB
hsa-miR-146b-3p	0	0	1	1	0	0	TMC6	transmembrane channel-like 6
hsa-miR-146b-3p	1	0	1	0	1	1	LIN28A	lin-28 homolog A (C. elegans)
hsa-miR-146b-3p	1	0	1	1	0	0	UQCC	ubiquinol-cytochrome c reductase complex chaperone
hsa-miR-146b-3p	0	0	1	1	0	0	TRMT2B	tRNA methyltransferase 2 homolog B (S. cerevisiae)
hsa-miR-146b-3p	0	0	1	0	0	0	LOC149134	uncharacterized LOC149134
hsa-miR-146b-3p	0	0	1	1	0	0	JMJD4	jumonji domain containing 4
hsa-miR-146b-3p	0	0	1	0	0	0	LINC00475	long intergenic non-protein coding RNA 475
hsa-miR-146b-3p	1	0	1	1	1	1	PPFIA3	protein tyrosine phosphatase, receptor type, f polypeptide (PTPRF), interacting protein (liprin), alpha 3
hsa-miR-146b-3p	1	0	1	0	1	1	C14orf101	chromosome 14 open reading frame 101
hsa-miR-146b-3p	0	0	1	1	1	1	HDAC7	histone deacetylase 7
hsa-miR-146b-3p	0	0	1	1	1	1	PPFIBP2	PTPRF interacting protein, binding protein 2 (liprin beta 2)
hsa-miR-146b-3p	1	0	1	1	1	1	NAA30	N(alpha)-acetyltransferase 30, NatC catalytic subunit
hsa-miR-146b-3p	1	0	1	0	1	1	ZCCHC3	zinc finger, CCHC domain containing 3
hsa-miR-146b-3p	0	0	1	0	1	1	HEMK1	HemK methyltransferase family member 1
hsa-miR-146b-3p	1	0	1	0	0	0	DTX2	deltex homolog 2 (Drosophila)
hsa-miR-146b-3p	0	0	1	1	1	1	HDC	histidine decarboxylase
hsa-miR-146b-3p	1	0	1	0	1	1	CCNL2	cyclin L2
hsa-miR-146b-3p	0	0	1	0	0	0	KIAA0664L3	KIAA0664-like 3
hsa-miR-146b-3p	1	0	1	0	1	1	ELMOD1	ELMO/CED-12 domain containing 1
hsa-miR-146b-3p	0	0	1	1	0	0	FGGY	FGGY carbohydrate kinase domain containing
hsa-miR-146b-3p	1	0	1	1	1	1	C7orf43	chromosome 7 open reading frame 43
hsa-miR-146b-3p	0	0	1	0	0	0	FLJ31104	uncharacterized LOC441072
hsa-miR-146b-3p	0	0	1	1	0	0	ANXA11	annexin A11
hsa-miR-146b-3p	0	0	1	1	1	1	MSTO1	misato homolog 1 (Drosophila)
hsa-miR-146b-3p	0	0	1	0	0	0	SEC14L2	SEC14-like 2 (S. cerevisiae)
hsa-miR-146b-3p	1	0	1	1	0	0	SLC26A6	solute carrier family 26, member 6
hsa-miR-146b-3p	1	0	1	1	1	1	PPP1R3F	protein phosphatase 1, regulatory subunit 3F
hsa-miR-146b-3p	0	0	1	0	0	0	FLG-AS1	FLG antisense RNA 1
hsa-miR-146b-3p	1	0	1	1	1	1	SCAMP5	secretory carrier membrane protein 5
hsa-miR-146b-3p	1	0	1	1	1	1	CLCN5	chloride channel, voltage-sensitive 5
hsa-miR-146b-3p	1	0	1	1	1	1	SORBS2	sorbin and SH3 domain containing 2
hsa-miR-146b-3p	0	0	1	1	1	1	IPO4	importin 4
hsa-miR-146b-3p	0	0	1	0	0	0	LOC255187	hCG1980447
hsa-miR-146b-3p	0	0	1	0	0	0	LOC157381	uncharacterized LOC157381
hsa-miR-146b-3p	1	0	1	0	1	1	NCAM1	neural cell adhesion molecule 1
hsa-miR-146b-3p	1	0	1	1	0	0	GBA2	glucosidase, beta (bile acid) 2
hsa-miR-146b-3p	0	0	1	0	0	0	TUG1	taurine upregulated 1 (non-protein coding)
hsa-miR-146b-3p	1	0	1	1	1	1	ANKRD49	ankyrin repeat domain 49
hsa-miR-146b-3p	0	0	1	0	0	0	LOC284014	uncharacterized LOC284014
hsa-miR-146b-3p	0	0	1	0	0	0	LINC00637	long intergenic non-protein coding RNA 637
hsa-miR-146b-3p	0	0	1	1	1	1	FXC1	fracture callus 1 homolog (rat)
hsa-miR-146b-3p	0	0	1	1	1	1	ZBTB26	zinc finger and BTB domain containing 26
hsa-miR-146b-3p	1	0	1	1	1	1	C6orf89	chromosome 6 open reading frame 89
hsa-miR-146b-3p	0	0	1	1	0	0	CD37	CD37 molecule
hsa-miR-146b-3p	0	0	1	0	0	0	C10orf105	chromosome 10 open reading frame 105
hsa-miR-146b-3p	0	0	1	0	1	1	CDHR3	cadherin-related family member 3
hsa-miR-146b-3p	1	0	1	1	1	1	BLCAP	bladder cancer associated protein
hsa-miR-146b-3p	1	0	1	0	1	1	RNF165	ring finger protein 165
hsa-miR-146b-3p	1	0	1	1	1	1	CNOT4	CCR4-NOT transcription complex, subunit 4
hsa-miR-146b-3p	1	0	1	1	0	0	B3GAT3	beta-1,3-glucuronyltransferase 3 (glucuronosyltransferase I)
hsa-miR-146b-3p	0	0	1	1	1	1	CAMKV	CaM kinase-like vesicle-associated
hsa-miR-146b-3p	1	0	1	1	1	1	ARIH2	ariadne homolog 2 (Drosophila)
hsa-miR-146b-3p	0	0	1	1	1	1	DYNC1I1	dynein, cytoplasmic 1, intermediate chain 1
hsa-miR-146b-3p	0	0	1	0	0	0	FLJ34208	uncharacterized LOC401106
hsa-miR-146b-3p	0	0	1	0	1	1	PIANP	PILR alpha associated neural protein
hsa-miR-146b-3p	0	0	1	1	1	1	USP8	ubiquitin specific peptidase 8
hsa-miR-146b-3p	1	0	1	1	1	1	FBXW2	F-box and WD repeat domain containing 2
hsa-miR-146b-3p	1	0	1	0	1	1	TEF	thyrotrophic embryonic factor
hsa-miR-146b-3p	0	0	1	1	1	1	NRCAM	neuronal cell adhesion molecule
hsa-miR-146b-3p	1	0	1	1	1	1	GPD2	glycerol-3-phosphate dehydrogenase 2 (mitochondrial)
hsa-miR-146b-3p	0	0	1	0	0	0	LOC283887	uncharacterized LOC283887
hsa-miR-146b-3p	1	0	1	1	1	1	SPTBN1	spectrin, beta, non-erythrocytic 1
hsa-miR-146b-3p	0	0	1	1	1	1	CYP11B1	cytochrome P450, family 11, subfamily B, polypeptide 1
hsa-miR-146b-3p	1	0	1	1	1	1	KCND1	potassium voltage-gated channel, Shal-related subfamily, member 1
hsa-miR-146b-3p	0	0	1	1	0	0	CYHR1	cysteine/histidine-rich 1
hsa-miR-146b-3p	1	0	1	0	1	1	GATAD2B	GATA zinc finger domain containing 2B
hsa-miR-146b-3p	0	0	1	0	0	0	LINC00340	long intergenic non-protein coding RNA 340
hsa-miR-146b-3p	0	0	1	1	1	1	HOGA1	4-hydroxy-2-oxoglutarate aldolase 1
hsa-miR-146b-3p	0	0	1	0	1	1	AGBL4	ATP/GTP binding protein-like 4
hsa-miR-146b-3p	0	0	1	0	0	0	LOC285500	uncharacterized LOC285500
hsa-miR-146b-3p	1	0	1	1	1	1	RASGEF1A	RasGEF domain family, member 1A
hsa-miR-146b-3p	1	0	1	1	1	1	NDEL1	nudE nuclear distribution E homolog (A. nidulans)-like 1
hsa-miR-146b-3p	0	0	1	1	1	1	AQP3	aquaporin 3 (Gill blood group)
hsa-miR-146b-3p	0	0	1	1	1	1	LTBR	lymphotoxin beta receptor (TNFR superfamily, member 3)
hsa-miR-146b-3p	0	0	1	0	0	0	LOC284577	uncharacterized LOC284577
hsa-miR-146b-3p	0	0	1	0	0	0	LOC730101	uncharacterized LOC730101
hsa-miR-146b-3p	1	0	1	1	1	1	ACSL1	acyl-CoA synthetase long-chain family member 1
hsa-miR-146b-3p	0	0	1	0	1	1	C19orf66	chromosome 19 open reading frame 66
hsa-miR-146b-3p	0	0	1	1	1	1	ZNF673	zinc finger family member 673
hsa-miR-146b-3p	1	0	1	0	1	1	THRB	thyroid hormone receptor, beta
hsa-miR-146b-3p	0	0	1	0	0	0	FLJ39534	uncharacterized FLJ39534
hsa-miR-146b-3p	0	0	1	0	0	0	CCDC150	coiled-coil domain containing 150
hsa-miR-146b-3p	0	0	1	0	0	0	LOC400680	uncharacterized LOC400680
hsa-miR-146b-3p	0	0	1	0	0	0	LINC00293	long intergenic non-protein coding RNA 293
hsa-miR-146b-3p	0	0	1	1	0	0	CORO1A	coronin, actin binding protein, 1A
hsa-miR-146b-3p	1	0	1	1	0	0	DNM2	dynamin 2
hsa-miR-146b-3p	0	0	1	0	0	0	LOC100130954	uncharacterized LOC100130954
hsa-miR-146b-3p	0	0	1	0	0	0	ZBTB20-AS1	ZBTB20 antisense RNA 1
hsa-miR-146b-3p	0	0	1	1	0	0	GDPD5	glycerophosphodiester phosphodiesterase domain containing 5
hsa-miR-146b-3p	0	0	1	1	1	1	ABCC12	ATP-binding cassette, sub-family C (CFTR/MRP), member 12
hsa-miR-146b-3p	1	0	1	1	1	1	LMX1A	LIM homeobox transcription factor 1, alpha
hsa-miR-146b-3p	0	0	1	1	0	0	KIAA0146	KIAA0146
hsa-miR-146b-3p	1	0	1	1	0	0	WIZ	widely interspaced zinc finger motifs
hsa-miR-146b-3p	1	0	1	1	0	0	CACNB3	calcium channel, voltage-dependent, beta 3 subunit
hsa-miR-146b-3p	1	0	1	1	1	1	HNRNPA1L2	heterogeneous nuclear ribonucleoprotein A1-like 2
hsa-miR-146b-3p	0	0	1	0	0	0	C1orf132	chromosome 1 open reading frame 132
hsa-miR-146b-3p	1	0	1	1	1	1	PLEKHH1	pleckstrin homology domain containing, family H (with MyTH4 domain) member 1
hsa-miR-146b-3p	0	0	1	1	1	1	FAM5B	family with sequence similarity 5, member B
hsa-miR-146b-3p	1	0	1	0	1	1	KCNK2	potassium channel, subfamily K, member 2
hsa-miR-146b-3p	0	0	1	1	1	1	PCBP2	poly(rC) binding protein 2
hsa-miR-146b-3p	0	0	1	1	0	0	TTLL12	tubulin tyrosine ligase-like family, member 12
hsa-miR-146b-3p	0	0	1	0	0	0	MYL5	myosin, light chain 5, regulatory
hsa-miR-146b-3p	0	0	1	0	0	0	DKFZP434H168	uncharacterized LOC26077
hsa-miR-146b-3p	1	0	1	1	1	1	SGIP1	SH3-domain GRB2-like (endophilin) interacting protein 1
hsa-miR-146b-3p	0	0	1	0	0	0	FAM95B1	family with sequence similarity 95, member B1
hsa-miR-146b-3p	1	0	1	1	0	0	UBN2	ubinuclein 2
hsa-miR-146b-3p	1	0	1	1	0	0	KIAA1211	KIAA1211
hsa-miR-146b-3p	0	0	1	1	1	1	MORF4L2	mortality factor 4 like 2
hsa-miR-146b-3p	1	0	1	1	1	1	PLEKHB2	pleckstrin homology domain containing, family B (evectins) member 2
hsa-miR-146b-3p	1	0	1	1	0	0	SMCHD1	structural maintenance of chromosomes flexible hinge domain containing 1
hsa-miR-146b-3p	0	0	1	1	0	0	CLDN4	claudin 4
hsa-miR-146b-3p	1	0	1	1	1	1	C15orf52	chromosome 15 open reading frame 52
hsa-miR-146b-3p	1	0	1	1	1	1	KLC2	kinesin light chain 2
hsa-miR-146b-3p	0	0	1	1	1	1	BDH1	3-hydroxybutyrate dehydrogenase, type 1
hsa-miR-146b-3p	0	0	1	1	1	1	SZT2	seizure threshold 2 homolog (mouse)
hsa-miR-146b-3p	1	0	1	1	0	0	MAN1B1	mannosidase, alpha, class 1B, member 1
hsa-miR-146b-3p	1	0	1	1	0	0	SNX30	sorting nexin family member 30
hsa-miR-146b-3p	0	0	1	1	1	1	KLC4	kinesin light chain 4
hsa-miR-146b-3p	0	0	1	1	0	0	FAM54B	family with sequence similarity 54, member B
hsa-miR-146b-3p	0	0	1	0	0	0	LOC619207	scavenger receptor protein family member
hsa-miR-146b-3p	1	0	1	1	1	1	PHF17	PHD finger protein 17
hsa-miR-146b-3p	0	0	1	1	1	1	ERI2	ERI1 exoribonuclease family member 2
hsa-miR-146b-3p	1	0	1	1	1	1	KANK4	KN motif and ankyrin repeat domains 4
hsa-miR-146b-3p	1	0	1	0	1	1	YAF2	YY1 associated factor 2
hsa-miR-146b-3p	1	0	1	0	1	1	FNDC3B	fibronectin type III domain containing 3B
hsa-miR-146b-3p	1	0	1	1	1	1	PLA2G15	phospholipase A2, group XV
hsa-miR-146b-3p	1	0	1	0	1	1	CAPRIN1	cell cycle associated protein 1
hsa-miR-146b-3p	0	0	1	0	0	0	FAM71E2	family with sequence similarity 71, member E2
hsa-miR-146b-3p	0	0	1	1	0	0	TRIM46	tripartite motif containing 46
hsa-miR-146b-3p	0	0	1	1	0	0	FAM159A	family with sequence similarity 159, member A
hsa-miR-146b-3p	0	0	1	1	0	0	C17orf107	chromosome 17 open reading frame 107
hsa-miR-146b-3p	0	0	1	1	1	1	ATXN2	ataxin 2
hsa-miR-146b-3p	0	0	1	1	1	1	TBX19	T-box 19
hsa-miR-146b-3p	0	0	1	1	0	0	HEATR8	HEAT repeat containing 8
hsa-miR-146b-3p	0	0	1	0	0	0	LOC390660	FLJ00317 protein
hsa-miR-146b-3p	0	0	1	0	1	1	GALNT13	UDP-N-acetyl-alpha-D-galactosamine:polypeptide N-acetylgalactosaminyltransferase 13 (GalNAc-T13)
hsa-miR-146b-3p	0	0	1	1	1	1	SYPL2	synaptophysin-like 2
hsa-miR-146b-3p	0	0	1	1	0	0	ZNF730	zinc finger protein 730
hsa-miR-146b-3p	0	0	1	1	1	1	PDE2A	phosphodiesterase 2A, cGMP-stimulated
hsa-miR-146b-3p	0	0	1	0	0	0	AGAP9	ArfGAP with GTPase domain, ankyrin repeat and PH domain 9
hsa-miR-146b-3p	0	0	1	1	1	1	KAZALD1	Kazal-type serine peptidase inhibitor domain 1
hsa-miR-146b-3p	0	0	1	1	1	1	NECAP2	NECAP endocytosis associated 2
hsa-miR-146b-3p	0	0	1	1	1	1	DHRS3	dehydrogenase/reductase (SDR family) member 3
hsa-miR-146b-3p	1	0	1	1	1	1	AHCYL1	adenosylhomocysteinase-like 1
hsa-miR-146b-3p	1	0	1	1	1	1	NECAP1	NECAP endocytosis associated 1
hsa-miR-146b-3p	0	0	1	0	0	0	POM121L9P	POM121 transmembrane nucleoporin-like 9, pseudogene
hsa-miR-146b-3p	1	0	1	1	1	1	TAB2	TGF-beta activated kinase 1/MAP3K7 binding protein 2
hsa-miR-146b-3p	0	0	1	1	0	0	ODF3	outer dense fiber of sperm tails 3
hsa-miR-146b-3p	1	0	1	1	1	1	MLLT6	myeloid/lymphoid or mixed-lineage leukemia (trithorax homolog, Drosophila); translocated to, 6
hsa-miR-146b-3p	0	0	1	0	0	0	KIAA0913	KIAA0913
hsa-miR-146b-3p	0	0	1	1	1	1	CD276	CD276 molecule
hsa-miR-146b-3p	1	0	1	1	1	1	SLC30A8	solute carrier family 30 (zinc transporter), member 8
hsa-miR-146b-3p	1	0	1	1	1	1	MAP4	microtubule-associated protein 4
hsa-miR-146b-3p	0	0	1	0	1	1	GAB3	GRB2-associated binding protein 3
hsa-miR-146b-3p	0	0	1	1	1	1	BEND7	BEN domain containing 7
hsa-miR-146b-3p	0	0	1	1	1	1	EGFLAM	EGF-like, fibronectin type III and laminin G domains
hsa-miR-146b-3p	1	0	1	1	0	0	PTAR1	protein prenyltransferase alpha subunit repeat containing 1
hsa-miR-146b-3p	0	0	1	0	1	1	PLEKHM1P	pleckstrin homology domain containing, family M (with RUN domain) member 1 pseudogene
hsa-miR-146b-3p	1	0	1	1	1	1	IL17RD	interleukin 17 receptor D
hsa-miR-146b-3p	1	0	1	1	1	1	CADM2	cell adhesion molecule 2
hsa-miR-146b-3p	0	0	1	0	1	1	PSG1	pregnancy specific beta-1-glycoprotein 1
hsa-miR-146b-3p	0	0	1	1	0	0	TMEM134	transmembrane protein 134
hsa-miR-146b-3p	0	0	1	1	1	1	CRB1	crumbs homolog 1 (Drosophila)
hsa-miR-146b-3p	1	0	1	1	1	1	KIAA0907	KIAA0907
hsa-miR-146b-3p	0	0	1	1	1	1	NFXL1	nuclear transcription factor, X-box binding-like 1
hsa-miR-146b-3p	1	0	1	1	1	1	USF2	upstream transcription factor 2, c-fos interacting
hsa-miR-146b-3p	0	0	1	1	0	0	DNAH1	dynein, axonemal, heavy chain 1
hsa-miR-146b-3p	0	0	1	0	0	0	MEG3	maternally expressed 3 (non-protein coding)
hsa-miR-146b-3p	1	0	1	1	1	1	RAI14	retinoic acid induced 14
hsa-miR-146b-3p	1	0	1	1	1	1	TAB3	TGF-beta activated kinase 1/MAP3K7 binding protein 3
hsa-miR-146b-3p	0	0	1	1	0	0	PIGU	phosphatidylinositol glycan anchor biosynthesis, class U
hsa-miR-146b-3p	0	0	1	1	0	0	VSIG4	V-set and immunoglobulin domain containing 4
hsa-miR-146b-3p	0	0	1	1	1	1	TNFSF15	tumor necrosis factor (ligand) superfamily, member 15
hsa-miR-146b-3p	1	0	1	1	1	1	FAM120A	family with sequence similarity 120A
hsa-miR-146b-3p	1	0	1	1	1	1	MYNN	myoneurin
hsa-miR-146b-3p	0	0	1	1	0	0	SH2D6	SH2 domain containing 6
hsa-miR-146b-3p	0	0	1	0	1	1	XKR5	XK, Kell blood group complex subunit-related family, member 5
hsa-miR-146b-3p	1	0	1	1	1	1	MECP2	methyl CpG binding protein 2 (Rett syndrome)
hsa-miR-146b-3p	1	0	1	0	1	1	LRAT	lecithin retinol acyltransferase (phosphatidylcholine--retinol O-acyltransferase)
hsa-miR-146b-3p	1	0	1	1	0	0	ADAM15	ADAM metallopeptidase domain 15
hsa-miR-146b-3p	0	0	1	1	0	0	DHRS4	dehydrogenase/reductase (SDR family) member 4
hsa-miR-146b-3p	0	0	1	1	1	1	KANK2	KN motif and ankyrin repeat domains 2
hsa-miR-146b-3p	0	0	1	1	1	1	SMPD1	sphingomyelin phosphodiesterase 1, acid lysosomal
hsa-miR-146b-3p	1	0	1	1	1	1	MCHR1	melanin-concentrating hormone receptor 1
hsa-miR-146b-3p	1	0	1	1	1	1	PFKFB4	6-phosphofructo-2-kinase/fructose-2,6-biphosphatase 4
hsa-miR-146b-3p	1	0	1	1	1	1	NTNG1	netrin G1
hsa-miR-146b-3p	0	0	1	1	1	1	IL23R	interleukin 23 receptor
hsa-miR-146b-3p	0	0	1	0	0	0	GBAP1	glucosidase, beta, acid pseudogene 1
hsa-miR-146b-3p	0	0	1	1	0	0	GFOD2	glucose-fructose oxidoreductase domain containing 2
hsa-miR-146b-3p	0	0	1	1	1	1	SNX11	sorting nexin 11
hsa-miR-146b-3p	1	0	1	1	1	1	ELOVL6	ELOVL fatty acid elongase 6
hsa-miR-146b-3p	0	0	1	1	1	1	PTDSS1	phosphatidylserine synthase 1
hsa-miR-146b-3p	1	0	1	0	1	1	DPYSL5	dihydropyrimidinase-like 5
hsa-miR-146b-3p	1	0	1	1	1	1	RIMS3	regulating synaptic membrane exocytosis 3
hsa-miR-146b-3p	0	0	1	1	0	0	SNRPB	small nuclear ribonucleoprotein polypeptides B and B1
hsa-miR-146b-3p	1	0	1	1	1	1	CELF4	CUGBP, Elav-like family member 4
hsa-miR-146b-3p	1	0	1	1	1	1	SMO	smoothened, frizzled family receptor
hsa-miR-146b-3p	0	0	1	1	1	1	C20orf24	chromosome 20 open reading frame 24
hsa-miR-146b-3p	0	0	1	1	1	1	RABL5	RAB, member RAS oncogene family-like 5
hsa-miR-146b-3p	1	0	1	1	1	1	POU2F2	POU class 2 homeobox 2
hsa-miR-146b-3p	0	0	1	1	1	1	KIRREL2	kin of IRRE like 2 (Drosophila)
hsa-miR-146b-3p	1	0	1	1	0	0	SAP30BP	SAP30 binding protein
hsa-miR-146b-3p	0	0	1	1	0	0	MYLK2	myosin light chain kinase 2
hsa-miR-146b-3p	0	0	1	0	0	0	ATXN7L3B	ataxin 7-like 3B
hsa-miR-146b-3p	1	0	1	1	0	0	MARCH9	membrane-associated ring finger (C3HC4) 9
hsa-miR-146b-3p	0	0	1	0	0	0	LOC154761	family with sequence similarity 115, member C pseudogene
hsa-miR-146b-3p	0	0	1	1	1	1	ATXN2L	ataxin 2-like
hsa-miR-146b-3p	1	0	1	1	0	0	FA2H	fatty acid 2-hydroxylase
hsa-miR-146b-3p	1	0	1	0	1	1	CNP	2',3'-cyclic nucleotide 3' phosphodiesterase
hsa-miR-146b-3p	1	0	1	1	1	1	TRIM2	tripartite motif containing 2
hsa-miR-146b-3p	0	0	1	0	0	0	LRRC14	leucine rich repeat containing 14
hsa-miR-146b-3p	0	0	1	1	1	1	GNL3L	guanine nucleotide binding protein-like 3 (nucleolar)-like
hsa-miR-146b-3p	0	0	1	1	1	1	HDHD2	haloacid dehalogenase-like hydrolase domain containing 2
hsa-miR-146b-3p	1	0	1	1	1	1	DNAJB5	DnaJ (Hsp40) homolog, subfamily B, member 5
hsa-miR-146b-3p	0	0	1	0	1	1	GDE1	glycerophosphodiester phosphodiesterase 1
hsa-miR-146b-3p	1	0	1	1	1	1	TMEM185A	transmembrane protein 185A
hsa-miR-146b-3p	0	0	1	1	1	1	KLHL29	kelch-like 29 (Drosophila)
hsa-miR-146b-3p	0	0	1	1	1	1	TOMM40L	translocase of outer mitochondrial membrane 40 homolog (yeast)-like
hsa-miR-146b-3p	0	0	1	0	0	0	MGC21881	uncharacterized locus MGC21881
hsa-miR-146b-3p	0	0	1	1	1	1	C8orf33	chromosome 8 open reading frame 33
hsa-miR-146b-3p	0	0	1	1	1	1	C1QTNF3	C1q and tumor necrosis factor related protein 3
hsa-miR-146b-3p	1	0	1	1	1	1	ELF4	E74-like factor 4 (ets domain transcription factor)
hsa-miR-146b-3p	0	0	1	0	0	0	LOC441528	uncharacterized LOC441528
hsa-miR-146b-3p	0	0	1	1	0	0	ZBTB32	zinc finger and BTB domain containing 32
hsa-miR-146b-3p	0	0	1	1	1	1	GLIPR2	GLI pathogenesis-related 2
hsa-miR-146b-3p	1	0	1	1	1	1	WWC2	WW and C2 domain containing 2
hsa-miR-146b-3p	1	0	1	1	1	1	ADPGK	ADP-dependent glucokinase
hsa-miR-146b-3p	0	0	1	0	1	1	TMSB15B	thymosin beta 15B
hsa-miR-146b-3p	1	0	1	1	1	1	CNEP1R1	CTD nuclear envelope phosphatase 1 regulatory subunit 1
hsa-miR-146b-3p	1	0	1	0	1	1	CDK19	cyclin-dependent kinase 19
hsa-miR-146b-3p	0	0	1	0	0	0	SNX29P2	sorting nexin 29 pseudogene 2
hsa-miR-146b-3p	0	0	1	0	0	0	FLJ35390	uncharacterized LOC255031
hsa-miR-146b-3p	0	0	1	1	0	0	PRRG2	proline rich Gla (G-carboxyglutamic acid) 2
hsa-miR-146b-3p	1	0	1	1	1	1	FAM131A	family with sequence similarity 131, member A
hsa-miR-146b-3p	0	0	1	1	1	1	ANKZF1	ankyrin repeat and zinc finger domain containing 1
hsa-miR-146b-3p	1	0	1	1	1	1	TMEM127	transmembrane protein 127
hsa-miR-146b-3p	0	0	1	0	0	0	ANKRD19P	ankyrin repeat domain 19, pseudogene
hsa-miR-146b-3p	0	0	1	1	1	1	SEMA3D	sema domain, immunoglobulin domain (Ig), short basic domain, secreted, (semaphorin) 3D
hsa-miR-146b-3p	0	0	1	1	1	1	CD48	CD48 molecule
hsa-miR-146b-3p	0	0	1	1	1	1	SH3TC1	SH3 domain and tetratricopeptide repeats 1
hsa-miR-146b-3p	1	0	1	1	1	1	ADARB1	adenosine deaminase, RNA-specific, B1
hsa-miR-146b-3p	0	0	1	1	0	0	FREM1	FRAS1 related extracellular matrix 1
hsa-miR-146b-3p	1	0	1	0	1	1	RNF4	ring finger protein 4
hsa-miR-146b-3p	1	0	1	1	1	1	GLUL	glutamate-ammonia ligase
hsa-miR-146b-3p	0	0	1	1	1	1	C7orf53	chromosome 7 open reading frame 53
hsa-miR-146b-3p	0	0	1	0	0	0	FAM86JP	family with sequence similarity 86, member A pseudogene
hsa-miR-146b-3p	1	0	1	1	1	1	HMGCR	3-hydroxy-3-methylglutaryl-CoA reductase
hsa-miR-146b-3p	1	0	1	1	1	1	RNF207	ring finger protein 207
hsa-miR-146b-3p	0	0	1	0	0	0	TMPRSS12	transmembrane (C-terminal) protease, serine 12
hsa-miR-146b-3p	1	0	1	1	1	1	THRA	thyroid hormone receptor, alpha
hsa-miR-146b-3p	1	0	1	1	0	0	CHST4	carbohydrate (N-acetylglucosamine 6-O) sulfotransferase 4
hsa-miR-146b-3p	0	0	1	1	1	1	DUSP28	dual specificity phosphatase 28
hsa-miR-146b-3p	0	0	1	0	0	0	FAM201A	family with sequence similarity 201, member A
hsa-miR-146b-3p	1	0	1	1	1	1	HECTD2	HECT domain containing E3 ubiquitin protein ligase 2
hsa-miR-146b-3p	1	0	1	1	1	1	MEIS1	Meis homeobox 1
hsa-miR-146b-3p	0	0	1	1	1	1	SNX22	sorting nexin 22
hsa-miR-146b-3p	0	0	1	0	0	0	TMEM235	transmembrane protein 235
hsa-miR-146b-3p	1	0	1	0	1	1	CPEB4	cytoplasmic polyadenylation element binding protein 4
hsa-miR-146b-3p	0	0	1	0	0	0	PATL2	protein associated with topoisomerase II homolog 2 (yeast)
hsa-miR-146b-3p	0	0	1	0	0	0	CYP4F35P	cytochrome P450, family 4, subfamily F, polypeptide 35, pseudogene
hsa-miR-146b-3p	1	0	1	1	1	1	CTBP2	C-terminal binding protein 2
hsa-miR-146b-3p	0	0	1	0	0	0	LINC00264	long intergenic non-protein coding RNA 264
hsa-miR-146b-3p	0	0	1	1	0	0	BLK	B lymphoid tyrosine kinase
hsa-miR-146b-3p	0	0	1	1	1	1	C14orf118	chromosome 14 open reading frame 118
hsa-miR-146b-3p	0	0	1	1	1	1	NAALAD2	N-acetylated alpha-linked acidic dipeptidase 2
hsa-miR-146b-3p	1	0	1	1	0	0	PROSAPIP1	ProSAPiP1 protein
hsa-miR-146b-3p	0	0	1	0	0	0	LOC401074	uncharacterized LOC401074
hsa-miR-146b-3p	0	0	1	0	0	0	LOC388906	opioid growth factor receptor pseudogene
hsa-miR-146b-3p	0	0	1	0	0	0	TOB1-AS1	TOB1 antisense RNA 1
hsa-miR-146b-3p	0	0	1	0	1	1	LINC00634	long intergenic non-protein coding RNA 634
hsa-miR-146b-3p	1	0	1	0	1	1	PACSIN1	protein kinase C and casein kinase substrate in neurons 1
hsa-miR-146b-3p	0	0	1	1	0	0	CNGA4	cyclic nucleotide gated channel alpha 4
hsa-miR-146b-3p	1	0	1	1	1	1	TNFSF4	tumor necrosis factor (ligand) superfamily, member 4
hsa-miR-146b-3p	1	0	1	1	1	1	ARID3B	AT rich interactive domain 3B (BRIGHT-like)
hsa-miR-146b-3p	0	0	1	0	0	0	ALOX12P2	arachidonate 12-lipoxygenase pseudogene 2
hsa-miR-146b-3p	1	0	1	1	1	1	CTIF	CBP80/20-dependent translation initiation factor
hsa-miR-146b-3p	1	0	1	1	1	1	TNFRSF1B	tumor necrosis factor receptor superfamily, member 1B
hsa-miR-146b-3p	1	0	1	1	1	1	ARHGAP30	Rho GTPase activating protein 30
hsa-miR-146b-3p	0	0	1	0	0	0	LOC339260	uncharacterized LOC339260
hsa-miR-146b-3p	1	0	1	0	1	1	PSD3	pleckstrin and Sec7 domain containing 3
hsa-miR-146b-3p	1	0	1	1	0	0	SFXN5	sideroflexin 5
hsa-miR-146b-3p	1	0	1	0	1	1	KDM2A	lysine (K)-specific demethylase 2A
hsa-miR-146b-3p	1	0	1	1	1	1	RTKN2	rhotekin 2
hsa-miR-146b-3p	0	0	1	1	1	1	FBXO38	F-box protein 38
hsa-miR-146b-3p	0	0	1	1	0	0	NLRC5	NLR family, CARD domain containing 5
hsa-miR-146b-3p	1	0	1	0	1	1	FAM131B	family with sequence similarity 131, member B
hsa-miR-146b-3p	1	0	1	0	1	1	SEMA4G	sema domain, immunoglobulin domain (Ig), transmembrane domain (TM) and short cytoplasmic domain, (semaphorin) 4G
hsa-miR-146b-3p	1	0	1	1	1	1	ZFP91	zinc finger protein 91 homolog (mouse)
hsa-miR-146b-3p	1	0	1	1	1	1	LIMD2	LIM domain containing 2
hsa-miR-146b-3p	0	0	1	0	0	0	AQP7P1	aquaporin 7 pseudogene 1
hsa-miR-146b-3p	0	0	1	0	0	0	LINC00265	long intergenic non-protein coding RNA 265
hsa-miR-146b-3p	0	0	1	0	1	1	C16orf52	chromosome 16 open reading frame 52
hsa-miR-146b-3p	0	0	1	0	1	1	C17orf51	chromosome 17 open reading frame 51
hsa-miR-146b-3p	1	0	1	1	1	1	KDM5C	lysine (K)-specific demethylase 5C
hsa-miR-146b-3p	1	0	1	1	1	1	ZEB2	zinc finger E-box binding homeobox 2
hsa-miR-146b-3p	0	0	1	1	1	1	ELL3	elongation factor RNA polymerase II-like 3
hsa-miR-146b-3p	1	0	1	1	1	1	PDGFRA	platelet-derived growth factor receptor, alpha polypeptide
hsa-miR-146b-3p	0	0	1	1	0	0	C8orf31	chromosome 8 open reading frame 31
hsa-miR-146b-3p	0	0	1	0	0	0	SCAND2	SCAN domain containing 2 pseudogene
hsa-miR-146b-3p	0	0	1	0	0	0	GNN	Grp94 neighboring nucleotidase pseudogene
hsa-miR-146b-3p	1	0	1	1	1	1	VTCN1	V-set domain containing T cell activation inhibitor 1
hsa-miR-146b-3p	1	0	1	1	1	1	CUX1	cut-like homeobox 1
hsa-miR-146b-3p	1	0	1	1	1	1	AP3M1	adaptor-related protein complex 3, mu 1 subunit
hsa-miR-146b-3p	1	0	1	1	1	1	NRSN1	neurensin 1
hsa-miR-146b-3p	1	0	1	1	1	1	CCDC149	coiled-coil domain containing 149
hsa-miR-146b-3p	0	0	1	1	0	0	TMEM183A	transmembrane protein 183A
hsa-miR-146b-3p	0	0	1	0	0	0	LINC00442	long intergenic non-protein coding RNA 442
hsa-miR-146b-3p	0	0	1	0	0	0	LEF1-AS1	LEF1 antisense RNA 1
hsa-miR-146b-3p	0	0	1	1	1	1	PABPC1L	poly(A) binding protein, cytoplasmic 1-like
hsa-miR-146b-3p	1	0	1	1	1	1	LINGO1	leucine rich repeat and Ig domain containing 1
hsa-miR-146b-3p	0	0	1	0	0	0	C17orf69	chromosome 17 open reading frame 69
hsa-miR-146b-3p	0	0	1	1	0	0	CYP4F30P	cytochrome P450, family 4, subfamily F, polypeptide 30, pseudogene
hsa-miR-146b-3p	1	0	1	1	0	0	CHTOP	chromatin target of PRMT1
hsa-miR-146b-3p	1	0	1	1	1	1	TBX2	T-box 2
hsa-miR-146b-3p	1	0	1	1	1	1	LRRC32	leucine rich repeat containing 32
hsa-miR-146b-3p	0	0	1	0	0	0	ULK4P1	unc-51-like kinase 4 (C. elegans) pseudogene 1
hsa-miR-146b-3p	1	0	1	1	0	0	TNXB	tenascin XB
hsa-miR-146b-3p	0	0	1	1	0	0	TRIM41	tripartite motif containing 41
hsa-miR-146b-3p	0	0	1	0	0	0	LOC440416	uncharacterized LOC440416
hsa-miR-146b-3p	1	0	1	0	1	1	AMMECR1L	AMME chromosomal region gene 1-like
hsa-miR-146b-3p	0	0	1	0	0	0	LINC00537	long intergenic non-protein coding RNA 537
hsa-miR-146b-3p	0	0	1	0	0	0	LOC554249	uncharacterized LOC554249
hsa-miR-146b-3p	1	0	1	1	1	1	FMNL3	formin-like 3
hsa-miR-146b-3p	1	0	1	1	1	1	ZMYND11	zinc finger, MYND-type containing 11
hsa-miR-146b-3p	0	0	1	0	0	0	FRG1B	FSHD region gene 1 family, member B
hsa-miR-146b-3p	1	0	1	1	1	1	OTUD5	OTU domain containing 5
hsa-miR-146b-3p	0	0	1	1	0	0	PNMA5	paraneoplastic Ma antigen family member 5
hsa-miR-146b-3p	1	0	1	1	1	1	IL28RA	interleukin 28 receptor, alpha (interferon, lambda receptor)
hsa-miR-146b-3p	1	0	1	1	0	0	HAND2	heart and neural crest derivatives expressed 2
hsa-miR-146b-3p	1	0	1	1	1	1	HNRNPA1	heterogeneous nuclear ribonucleoprotein A1
hsa-miR-146b-3p	1	0	1	0	1	1	VANGL2	vang-like 2 (van gogh, Drosophila)
hsa-miR-146b-3p	0	0	1	0	0	0	LSAMP-AS3	LSAMP antisense RNA 3
hsa-miR-146b-3p	0	0	1	0	0	0	C5orf49	chromosome 5 open reading frame 49
hsa-miR-146b-3p	0	0	1	1	0	0	TRPV3	transient receptor potential cation channel, subfamily V, member 3
hsa-miR-146b-3p	0	0	1	1	1	1	PNMA3	paraneoplastic Ma antigen 3
hsa-miR-146b-3p	1	0	1	1	1	1	GABRB2	gamma-aminobutyric acid (GABA) A receptor, beta 2
hsa-miR-146b-3p	0	0	1	0	0	0	FBXL19-AS1	FBXL19 antisense RNA 1 (head to head)
hsa-miR-146b-3p	1	0	1	1	1	1	PTPRD	protein tyrosine phosphatase, receptor type, D
hsa-miR-146b-3p	1	0	1	1	1	1	LARP1B	La ribonucleoprotein domain family, member 1B
hsa-miR-146b-3p	0	0	1	1	0	0	C1QTNF9B	C1q and tumor necrosis factor related protein 9B
hsa-miR-146b-3p	1	0	1	0	1	1	MAP3K9	mitogen-activated protein kinase kinase kinase 9
hsa-miR-146b-3p	1	0	1	1	1	1	TMEM64	transmembrane protein 64
hsa-miR-146b-3p	1	0	1	1	1	1	ITSN1	intersectin 1 (SH3 domain protein)
hsa-miR-146b-3p	0	0	1	0	0	0	FAM27E3	family with sequence similarity 27, member E3
hsa-miR-146b-3p	0	0	1	1	0	0	C10orf68	chromosome 10 open reading frame 68
hsa-miR-146b-3p	0	0	1	1	0	0	HSF4	heat shock transcription factor 4
hsa-miR-146b-3p	0	0	1	0	0	0	FAM225B	family with sequence similarity 225, member B (non-protein coding)
hsa-miR-146b-3p	1	0	1	0	1	1	FAM196A	family with sequence similarity 196, member A
hsa-miR-146b-3p	0	0	1	1	1	1	PBX1	pre-B-cell leukemia homeobox 1
hsa-miR-146b-3p	0	0	1	1	1	1	PRKAR2A	protein kinase, cAMP-dependent, regulatory, type II, alpha
hsa-miR-146b-3p	1	0	1	1	1	1	CHGA	chromogranin A (parathyroid secretory protein 1)
hsa-miR-146b-3p	0	0	1	1	1	1	IP6K2	inositol hexakisphosphate kinase 2
hsa-miR-146b-3p	1	0	1	1	1	1	SLC35F1	solute carrier family 35, member F1
hsa-miR-146b-3p	1	0	1	1	1	1	MASP1	mannan-binding lectin serine peptidase 1 (C4/C2 activating component of Ra-reactive factor)
hsa-miR-146b-3p	0	0	1	1	0	0	CIRH1A	cirrhosis, autosomal recessive 1A (cirhin)
hsa-miR-146b-3p	0	0	1	1	0	0	SNAPC2	small nuclear RNA activating complex, polypeptide 2, 45kDa
hsa-miR-146b-3p	0	0	1	1	1	1	ZNF365	zinc finger protein 365
hsa-miR-146b-3p	0	0	1	0	0	0	OVOS	ovostatin
hsa-miR-146b-3p	1	0	1	1	1	1	ATP6V1C1	ATPase, H+ transporting, lysosomal 42kDa, V1 subunit C1
hsa-miR-146b-3p	1	0	1	1	1	1	ZNF711	zinc finger protein 711
hsa-miR-146b-3p	1	0	1	1	1	1	NFIB	nuclear factor I/B
hsa-miR-146b-3p	0	0	1	1	1	1	PLA2G4C	phospholipase A2, group IVC (cytosolic, calcium-independent)
hsa-miR-146b-3p	1	0	1	1	1	1	ARHGDIA	Rho GDP dissociation inhibitor (GDI) alpha
hsa-miR-146b-3p	0	0	1	1	1	1	POLR2H	polymerase (RNA) II (DNA directed) polypeptide H
hsa-miR-146b-3p	0	0	1	1	1	1	SLC25A11	solute carrier family 25 (mitochondrial carrier; oxoglutarate carrier), member 11
hsa-miR-146b-3p	0	0	1	1	0	0	AP4S1	adaptor-related protein complex 4, sigma 1 subunit
hsa-miR-146b-3p	0	0	1	1	1	1	CCS	copper chaperone for superoxide dismutase
hsa-miR-146b-3p	0	0	1	1	0	0	EMX1	empty spiracles homeobox 1
hsa-miR-146b-3p	0	0	1	0	0	0	FLJ30838	uncharacterized LOC400955
hsa-miR-146b-3p	0	0	1	1	1	1	DGCR14	DiGeorge syndrome critical region gene 14
hsa-miR-146b-3p	1	0	1	1	1	1	TARBP2	TAR (HIV-1) RNA binding protein 2
hsa-miR-146b-3p	0	0	1	1	0	0	TMEM62	transmembrane protein 62
hsa-miR-146b-3p	0	0	1	1	0	0	RAD54L	RAD54-like (S. cerevisiae)
hsa-miR-146b-3p	0	0	1	1	1	1	DMWD	dystrophia myotonica, WD repeat containing
hsa-miR-146b-3p	0	0	1	1	1	1	PISD	phosphatidylserine decarboxylase
hsa-miR-146b-3p	0	0	1	1	0	0	CD81	CD81 molecule
hsa-miR-146b-3p	0	0	1	0	0	0	ZBED3-AS1	ZBED3 antisense RNA 1
hsa-miR-146b-3p	1	0	1	0	1	1	BNIP3L	BCL2/adenovirus E1B 19kDa interacting protein 3-like
hsa-miR-146b-3p	1	0	1	1	0	0	ELOVL1	ELOVL fatty acid elongase 1
hsa-miR-146b-3p	0	0	1	1	1	1	TUBA1A	tubulin, alpha 1a
hsa-miR-146b-3p	0	0	1	1	1	1	MRPS36	mitochondrial ribosomal protein S36
hsa-miR-146b-3p	1	0	1	1	0	0	CCM2	cerebral cavernous malformation 2
hsa-miR-146b-3p	1	0	1	1	1	1	CCNE1	cyclin E1
hsa-miR-146b-3p	0	0	1	0	1	1	EMX2	empty spiracles homeobox 2
hsa-miR-146b-3p	1	0	1	1	1	1	COPZ1	coatomer protein complex, subunit zeta 1
hsa-miR-146b-3p	0	0	1	1	0	0	TCP1	t-complex 1
hsa-miR-146b-3p	0	0	1	1	1	1	DCTD	dCMP deaminase
hsa-miR-146b-3p	0	0	1	1	0	0	IKBKG	inhibitor of kappa light polypeptide gene enhancer in B-cells, kinase gamma
hsa-miR-146b-3p	0	0	1	0	0	0	LOC729678	uncharacterized LOC729678
hsa-miR-146b-3p	1	0	1	1	0	0	MAP3K10	mitogen-activated protein kinase kinase kinase 10
hsa-miR-146b-3p	0	0	1	1	0	0	B9D1	B9 protein domain 1
hsa-miR-146b-3p	1	0	1	1	1	1	ARFIP2	ADP-ribosylation factor interacting protein 2
hsa-miR-146b-3p	0	0	1	1	1	1	TOX4	TOX high mobility group box family member 4
hsa-miR-146b-3p	0	0	1	0	0	0	FLJ45248	FLJ45248 protein
hsa-miR-146b-3p	0	0	1	0	1	1	TMEM155	transmembrane protein 155
hsa-miR-146b-3p	0	0	1	1	1	1	MPDU1	mannose-P-dolichol utilization defect 1
hsa-miR-146b-3p	1	0	1	1	1	1	MMP2	matrix metallopeptidase 2 (gelatinase A, 72kDa gelatinase, 72kDa type IV collagenase)
hsa-miR-146b-3p	0	0	1	1	1	1	TMEM109	transmembrane protein 109
hsa-miR-146b-3p	0	0	1	1	1	1	ZDHHC16	zinc finger, DHHC-type containing 16
hsa-miR-146b-3p	0	0	1	1	0	0	PTGDS	prostaglandin D2 synthase 21kDa (brain)
hsa-miR-146b-3p	0	0	1	0	0	0	LOC100130353	hippocampus abundant transcript-like 1 pseudogene
hsa-miR-146b-3p	0	0	1	1	1	1	SERP2	stress-associated endoplasmic reticulum protein family member 2
hsa-miR-146b-3p	0	0	1	1	1	1	BTF3	basic transcription factor 3
hsa-miR-146b-3p	0	0	1	1	1	1	SLC9A3R1	solute carrier family 9, subfamily A (NHE3, cation proton antiporter 3), member 3 regulator 1
hsa-miR-146b-3p	0	0	1	1	1	1	LYSMD4	LysM, putative peptidoglycan-binding, domain containing 4
hsa-miR-146b-3p	0	0	1	1	1	1	ACSF3	acyl-CoA synthetase family member 3
hsa-miR-146b-3p	1	0	1	1	1	1	F11R	F11 receptor
hsa-miR-146b-3p	0	0	1	1	0	0	PARD6A	par-6 partitioning defective 6 homolog alpha (C. elegans)
hsa-miR-146b-3p	0	0	1	1	0	0	CD79B	CD79b molecule, immunoglobulin-associated beta
hsa-miR-146b-3p	1	0	1	1	0	0	INO80E	INO80 complex subunit E
hsa-miR-146b-3p	1	0	1	1	1	1	RNF2	ring finger protein 2
hsa-miR-146b-3p	0	0	1	1	0	0	BCKDK	branched chain ketoacid dehydrogenase kinase
hsa-miR-146b-3p	1	0	1	1	1	1	GDA	guanine deaminase
hsa-miR-146b-3p	1	0	1	0	1	1	CD47	CD47 molecule
hsa-miR-146b-3p	0	0	1	1	1	1	TRNT1	tRNA nucleotidyl transferase, CCA-adding, 1
hsa-miR-146b-3p	1	0	1	1	1	1	ATPAF1	ATP synthase mitochondrial F1 complex assembly factor 1
hsa-miR-146b-3p	1	0	1	1	1	1	MED1	mediator complex subunit 1
hsa-miR-146b-3p	0	0	1	1	1	1	TOP3B	topoisomerase (DNA) III beta
hsa-miR-146b-3p	1	0	1	0	1	1	DNMT3A	DNA (cytosine-5-)-methyltransferase 3 alpha
hsa-miR-146b-3p	0	0	1	0	0	0	LOC731789	uncharacterized LOC731789
hsa-miR-146b-3p	0	0	1	1	1	1	BDP1	B double prime 1, subunit of RNA polymerase III transcription initiation factor IIIB
hsa-miR-146b-3p	0	0	1	0	0	0	MIR143HG	MIR143 host gene (non-protein coding)
hsa-miR-146b-3p	1	0	1	0	1	1	CNTNAP2	contactin associated protein-like 2
hsa-miR-146b-3p	1	0	1	1	1	1	ZFHX3	zinc finger homeobox 3
hsa-miR-146b-3p	1	0	1	1	1	1	BTLA	B and T lymphocyte associated
hsa-miR-146b-3p	0	0	1	1	0	0	SPATA20	spermatogenesis associated 20
hsa-miR-146b-3p	1	0	1	1	1	1	CADM3	cell adhesion molecule 3
hsa-miR-146b-3p	1	0	1	1	1	1	LGR4	leucine-rich repeat containing G protein-coupled receptor 4
hsa-miR-146b-3p	1	0	1	1	1	1	GRM1	glutamate receptor, metabotropic 1
hsa-miR-146b-3p	1	0	1	0	1	1	BCL2	B-cell CLL/lymphoma 2
hsa-miR-146b-3p	1	0	1	1	1	1	COL4A4	collagen, type IV, alpha 4
hsa-miR-146b-3p	1	0	1	1	1	1	GALC	galactosylceramidase
hsa-miR-146b-3p	1	0	1	1	1	1	GK	glycerol kinase
hsa-miR-146b-3p	1	0	1	0	1	1	ITGB3	integrin, beta 3 (platelet glycoprotein IIIa, antigen CD61)
hsa-miR-146b-3p	1	0	1	1	1	1	KCNA1	potassium voltage-gated channel, shaker-related subfamily, member 1 (episodic ataxia with myokymia)
hsa-miR-146b-3p	1	0	1	0	1	1	SGCB	sarcoglycan, beta (43kDa dystrophin-associated glycoprotein)
hsa-miR-146b-3p	0	0	1	1	1	1	MTM1	myotubularin 1
hsa-miR-146b-3p	0	0	1	0	0	0	MYBPC3	myosin binding protein C, cardiac
hsa-miR-146b-3p	0	0	1	1	1	1	PKP1	plakophilin 1 (ectodermal dysplasia/skin fragility syndrome)
hsa-miR-146b-3p	1	0	1	1	1	1	ATXN1	ataxin 1
hsa-miR-146b-3p	0	0	1	1	1	1	GM2A	GM2 ganglioside activator
hsa-miR-146b-3p	0	0	1	1	1	1	PLEC	plectin
hsa-miR-146b-3p	1	0	1	1	1	1	MPZ	myelin protein zero
hsa-miR-146b-3p	1	0	1	1	1	1	DCX	doublecortin
hsa-miR-146b-3p	0	0	1	1	1	1	CRP	C-reactive protein, pentraxin-related
hsa-miR-146b-3p	1	0	1	1	1	1	IL1A	interleukin 1, alpha
hsa-miR-146b-3p	0	0	1	1	1	1	C7	complement component 7
hsa-miR-146b-3p	1	0	1	1	1	1	CD44	CD44 molecule (Indian blood group)
hsa-miR-146b-3p	0	0	1	1	1	1	IGF2	insulin-like growth factor 2 (somatomedin A)
hsa-miR-146b-3p	1	0	1	1	1	1	FASLG	Fas ligand (TNF superfamily, member 6)
hsa-miR-146b-3p	0	0	1	1	1	1	EPO	erythropoietin
hsa-miR-146b-3p	1	0	1	1	1	1	GABRB3	gamma-aminobutyric acid (GABA) A receptor, beta 3
hsa-miR-146b-3p	1	0	1	1	1	1	PPP3R1	protein phosphatase 3, regulatory subunit B, alpha
hsa-miR-146b-3p	1	0	1	1	1	1	PTGDR	prostaglandin D2 receptor (DP)
hsa-miR-146b-3p	0	0	1	1	0	0	SNCB	synuclein, beta
hsa-miR-146b-3p	1	0	1	0	1	1	ARHGEF37	Rho guanine nucleotide exchange factor (GEF) 37
hsa-miR-146b-3p	0	0	1	0	1	1	C9orf170	chromosome 9 open reading frame 170
hsa-miR-146b-3p	1	0	1	1	1	1	ATP1B1	ATPase, Na+/K+ transporting, beta 1 polypeptide
hsa-miR-146b-3p	1	0	1	1	1	1	C14orf37	chromosome 14 open reading frame 37
hsa-miR-146b-3p	1	0	1	1	1	1	GATA3	GATA binding protein 3
hsa-miR-146b-3p	1	0	1	1	1	1	WNK3	WNK lysine deficient protein kinase 3
hsa-miR-146b-3p	0	0	1	1	1	1	C11orf49	chromosome 11 open reading frame 49
hsa-miR-146b-3p	1	0	1	1	1	1	HMGXB4	HMG box domain containing 4
hsa-miR-146b-3p	1	0	1	1	1	1	KLHL31	kelch-like 31 (Drosophila)
hsa-miR-146b-3p	1	0	1	0	1	1	LRRC55	leucine rich repeat containing 55
hsa-miR-146b-3p	1	0	1	0	1	1	IP6K1	inositol hexakisphosphate kinase 1
hsa-miR-146b-3p	1	0	1	1	0	0	RPS6KA1	ribosomal protein S6 kinase, 90kDa, polypeptide 1
hsa-miR-146b-3p	0	0	1	1	1	1	APOBEC3F	apolipoprotein B mRNA editing enzyme, catalytic polypeptide-like 3F
hsa-miR-146b-3p	0	0	1	1	1	1	SCP2	sterol carrier protein 2
hsa-miR-146b-3p	0	0	1	0	1	1	C8orf22	chromosome 8 open reading frame 22
hsa-miR-146b-3p	1	0	1	1	1	1	IGF2BP2	insulin-like growth factor 2 mRNA binding protein 2
hsa-miR-146b-3p	1	0	1	1	1	1	IGSF3	immunoglobulin superfamily, member 3
hsa-miR-146b-3p	1	0	1	1	1	1	ZDHHC9	zinc finger, DHHC-type containing 9
hsa-miR-146b-3p	1	0	1	1	1	1	CTDSPL	CTD (carboxy-terminal domain, RNA polymerase II, polypeptide A) small phosphatase-like
hsa-miR-146b-3p	1	0	1	1	1	1	NUPL1	nucleoporin like 1
hsa-miR-146b-3p	0	0	1	1	1	1	C12orf29	chromosome 12 open reading frame 29
hsa-miR-146b-3p	1	0	1	0	1	1	ZC3H12B	zinc finger CCCH-type containing 12B
hsa-miR-146b-3p	1	0	1	1	1	1	BCL2L15	BCL2-like 15
hsa-miR-146b-3p	1	0	1	1	1	1	FOXP4	forkhead box P4
hsa-miR-146b-3p	1	0	1	1	1	1	SORCS1	sortilin-related VPS10 domain containing receptor 1
hsa-miR-146b-3p	0	0	1	1	1	1	C1orf192	chromosome 1 open reading frame 192
hsa-miR-146b-3p	1	0	1	1	1	1	H3F3C	H3 histone, family 3C
hsa-miR-146b-3p	0	0	1	0	0	0	LOC441956	uncharacterized LOC441956
hsa-miR-146b-3p	1	0	1	0	1	1	SYT14L	synaptotagmin XIV-like
hsa-miR-146b-3p	1	0	1	1	1	1	NCDN	neurochondrin
hsa-miR-146b-3p	0	0	1	1	1	1	BTBD11	BTB (POZ) domain containing 11
hsa-miR-146b-3p	0	0	1	1	0	0	CCDC58	coiled-coil domain containing 58
hsa-miR-146b-3p	0	0	1	1	0	0	POLR3H	polymerase (RNA) III (DNA directed) polypeptide H (22.9kD)
hsa-miR-146b-3p	0	0	1	1	1	1	NPIPL1	nuclear pore complex interacting protein-like 1
hsa-miR-146b-3p	1	0	1	1	1	1	VEGFA	vascular endothelial growth factor A
hsa-miR-146b-3p	1	0	1	1	1	1	KCTD21	potassium channel tetramerisation domain containing 21
hsa-miR-146b-3p	1	0	1	0	1	1	MSRB3	methionine sulfoxide reductase B3
hsa-miR-146b-3p	0	0	1	1	1	1	LYPD5	LY6/PLAUR domain containing 5
hsa-miR-146b-3p	1	0	1	1	1	1	UBE2V1	ubiquitin-conjugating enzyme E2 variant 1
hsa-miR-146b-3p	1	0	1	1	1	1	ZNF704	zinc finger protein 704
hsa-miR-146b-3p	0	0	1	1	1	1	DYNLL1	dynein, light chain, LC8-type 1
hsa-miR-146b-3p	0	0	1	0	0	0	CEACAM16	carcinoembryonic antigen-related cell adhesion molecule 16
hsa-miR-146b-3p	1	0	1	1	1	1	KREMEN1	kringle containing transmembrane protein 1
hsa-miR-146b-3p	1	0	1	1	1	1	CHTF8	CTF8, chromosome transmission fidelity factor 8 homolog (S. cerevisiae)
hsa-miR-146b-3p	1	0	1	1	0	0	ANKRD34A	ankyrin repeat domain 34A
hsa-miR-146b-3p	0	0	1	1	1	1	C10orf53	chromosome 10 open reading frame 53
hsa-miR-146b-3p	0	0	1	1	1	1	GEMIN8	gem (nuclear organelle) associated protein 8
hsa-miR-146b-3p	1	0	1	1	1	1	KDM5A	lysine (K)-specific demethylase 5A
hsa-miR-146b-3p	0	0	1	1	1	1	CLCNKA	chloride channel, voltage-sensitive Ka
hsa-miR-146b-3p	0	0	1	1	1	1	SLC6A4	solute carrier family 6 (neurotransmitter transporter, serotonin), member 4
hsa-miR-146b-3p	1	0	1	0	1	1	SLC7A6	solute carrier family 7 (amino acid transporter light chain, y+L system), member 6
hsa-miR-146b-3p	1	0	1	1	1	1	PDE11A	phosphodiesterase 11A
hsa-miR-146b-3p	1	0	1	1	1	1	NCOR2	nuclear receptor corepressor 2
hsa-miR-146b-3p	0	0	1	1	0	0	VPS37D	vacuolar protein sorting 37 homolog D (S. cerevisiae)
hsa-miR-146b-3p	1	0	1	1	1	1	DACT1	dapper, antagonist of beta-catenin, homolog 1 (Xenopus laevis)
hsa-miR-146b-3p	1	0	1	1	1	1	HAP1	huntingtin-associated protein 1
hsa-miR-146b-3p	1	0	1	1	1	1	LDB3	LIM domain binding 3
hsa-miR-146b-3p	1	0	1	1	1	1	ZNF697	zinc finger protein 697
hsa-miR-146b-3p	1	0	1	1	1	1	MYO1C	myosin IC
hsa-miR-146b-3p	1	0	1	1	1	1	REPS2	RALBP1 associated Eps domain containing 2
hsa-miR-146b-3p	0	0	1	1	0	0	PLOD3	procollagen-lysine, 2-oxoglutarate 5-dioxygenase 3
hsa-miR-146b-3p	1	0	1	0	1	1	XIAP	X-linked inhibitor of apoptosis
hsa-miR-146b-3p	1	0	1	0	1	1	BMPR2	bone morphogenetic protein receptor, type II (serine/threonine kinase)
hsa-miR-146b-3p	0	0	1	1	1	1	TNFSF8	tumor necrosis factor (ligand) superfamily, member 8
hsa-miR-146b-3p	0	0	1	1	1	1	ENTPD3	ectonucleoside triphosphate diphosphohydrolase 3
hsa-miR-146b-3p	1	0	1	1	1	1	CDK9	cyclin-dependent kinase 9
hsa-miR-146b-3p	1	0	1	1	1	1	CNN1	calponin 1, basic, smooth muscle
hsa-miR-146b-3p	1	0	1	1	1	1	CELSR3	cadherin, EGF LAG seven-pass G-type receptor 3 (flamingo homolog, Drosophila)
hsa-miR-146b-3p	1	0	1	1	1	1	EXTL3	exostoses (multiple)-like 3
hsa-miR-146b-3p	1	0	1	1	1	1	GCNT1	glucosaminyl (N-acetyl) transferase 1, core 2
hsa-miR-146b-3p	1	0	1	0	1	1	GCNT2	glucosaminyl (N-acetyl) transferase 2, I-branching enzyme (I blood group)
hsa-miR-146b-3p	0	0	1	1	0	0	GSTZ1	glutathione S-transferase zeta 1
hsa-miR-146b-3p	1	0	1	1	1	1	NDST1	N-deacetylase/N-sulfotransferase (heparan glucosaminyl) 1
hsa-miR-146b-3p	0	0	1	1	1	1	TNFRSF9	tumor necrosis factor receptor superfamily, member 9
hsa-miR-146b-3p	1	0	1	1	1	1	ADD2	adducin 2 (beta)
hsa-miR-146b-3p	0	0	1	0	0	0	BAI1	brain-specific angiogenesis inhibitor 1
hsa-miR-146b-3p	1	0	1	0	1	1	CCND2	cyclin D2
hsa-miR-146b-3p	1	0	1	1	1	1	CDH5	cadherin 5, type 2 (vascular endothelium)
hsa-miR-146b-3p	0	0	1	1	1	1	SLC31A2	solute carrier family 31 (copper transporters), member 2
hsa-miR-146b-3p	1	0	1	1	1	1	CSNK1D	casein kinase 1, delta
hsa-miR-146b-3p	0	0	1	1	1	1	DPT	dermatopontin
hsa-miR-146b-3p	0	0	1	1	0	0	EFNA5	ephrin-A5
hsa-miR-146b-3p	0	0	1	1	1	1	FLI1	Friend leukemia virus integration 1
hsa-miR-146b-3p	1	0	1	1	1	1	GOT2	glutamic-oxaloacetic transaminase 2, mitochondrial (aspartate aminotransferase 2)
hsa-miR-146b-3p	1	0	1	1	0	0	GRK6	G protein-coupled receptor kinase 6
hsa-miR-146b-3p	0	0	1	1	1	1	GYS1	glycogen synthase 1 (muscle)
hsa-miR-146b-3p	1	0	1	1	0	0	IHH	Indian hedgehog
hsa-miR-146b-3p	1	0	1	1	1	1	ITPR2	inositol 1,4,5-trisphosphate receptor, type 2
hsa-miR-146b-3p	0	0	1	1	1	1	KCNJ6	potassium inwardly-rectifying channel, subfamily J, member 6
hsa-miR-146b-3p	1	0	1	0	1	1	KIF3C	kinesin family member 3C
hsa-miR-146b-3p	1	0	1	1	1	1	LIMK1	LIM domain kinase 1
hsa-miR-146b-3p	0	0	1	1	1	1	MSMB	microseminoprotein, beta-
hsa-miR-146b-3p	0	0	1	1	0	0	MYBL2	v-myb myeloblastosis viral oncogene homolog (avian)-like 2
hsa-miR-146b-3p	1	0	1	1	1	1	MYH9	myosin, heavy chain 9, non-muscle
hsa-miR-146b-3p	0	0	1	0	1	1	OAZ2	ornithine decarboxylase antizyme 2
hsa-miR-146b-3p	1	0	1	1	1	1	TNFRSF11B	tumor necrosis factor receptor superfamily, member 11b
hsa-miR-146b-3p	1	0	1	1	1	1	OSBP	oxysterol binding protein
hsa-miR-146b-3p	1	0	1	1	1	1	PBX2	pre-B-cell leukemia homeobox 2
hsa-miR-146b-3p	1	0	1	0	1	1	PCDHGC3	protocadherin gamma subfamily C, 3
hsa-miR-146b-3p	0	0	1	1	0	0	SERPINF1	serpin peptidase inhibitor, clade F (alpha-2 antiplasmin, pigment epithelium derived factor), member 1
hsa-miR-146b-3p	0	0	1	1	1	1	PIM1	pim-1 oncogene
hsa-miR-146b-3p	1	0	1	1	1	1	PLAGL2	pleiomorphic adenoma gene-like 2
hsa-miR-146b-3p	0	0	1	0	1	1	PRSS8	protease, serine, 8
hsa-miR-146b-3p	0	0	1	0	0	0	PSMB10	proteasome (prosome, macropain) subunit, beta type, 10
hsa-miR-146b-3p	0	0	1	1	0	0	PSMD8	proteasome (prosome, macropain) 26S subunit, non-ATPase, 8
hsa-miR-146b-3p	1	0	1	1	1	1	PTPN9	protein tyrosine phosphatase, non-receptor type 9
hsa-miR-146b-3p	0	0	1	1	1	1	PTPN12	protein tyrosine phosphatase, non-receptor type 12
hsa-miR-146b-3p	1	0	1	1	1	1	PVRL1	poliovirus receptor-related 1 (herpesvirus entry mediator C)
hsa-miR-146b-3p	0	0	1	0	1	1	RAB3B	RAB3B, member RAS oncogene family
hsa-miR-146b-3p	1	0	1	1	1	1	RAD23B	RAD23 homolog B (S. cerevisiae)
hsa-miR-146b-3p	0	0	1	1	1	1	RAF1	v-raf-1 murine leukemia viral oncogene homolog 1
hsa-miR-146b-3p	1	0	1	0	1	1	RAP2B	RAP2B, member of RAS oncogene family
hsa-miR-146b-3p	1	0	1	1	0	0	RFX1	regulatory factor X, 1 (influences HLA class II expression)
hsa-miR-146b-3p	1	0	1	0	1	1	SORT1	sortilin 1
hsa-miR-146b-3p	0	0	1	1	0	0	SNRPG	small nuclear ribonucleoprotein polypeptide G
hsa-miR-146b-3p	1	0	1	0	1	1	SOX4	SRY (sex determining region Y)-box 4
hsa-miR-146b-3p	1	0	1	1	1	1	SRF	serum response factor (c-fos serum response element-binding transcription factor)
hsa-miR-146b-3p	0	0	1	1	1	1	STIM1	stromal interaction molecule 1
hsa-miR-146b-3p	0	0	1	1	1	1	STRN	striatin, calmodulin binding protein
hsa-miR-146b-3p	1	0	1	1	1	1	SYN2	synapsin II
hsa-miR-146b-3p	1	0	1	0	1	1	BSN	bassoon (presynaptic cytomatrix protein)
hsa-miR-146b-3p	1	0	1	1	1	1	PAX8	paired box 8
hsa-miR-146b-3p	1	0	1	1	1	1	NRIP1	nuclear receptor interacting protein 1
hsa-miR-146b-3p	1	0	1	1	1	1	PPM1D	protein phosphatase, Mg2+/Mn2+ dependent, 1D
hsa-miR-146b-3p	1	0	1	1	1	1	CBX4	chromobox homolog 4
hsa-miR-146b-3p	1	0	1	0	1	1	PCDHGA12	protocadherin gamma subfamily A, 12
hsa-miR-146b-3p	1	0	1	0	1	1	PCDHGB4	protocadherin gamma subfamily B, 4
hsa-miR-146b-3p	1	0	1	1	1	1	NRP2	neuropilin 2
hsa-miR-146b-3p	1	0	1	0	1	1	SLC1A2	solute carrier family 1 (glial high affinity glutamate transporter), member 2
hsa-miR-146b-3p	1	0	1	1	1	1	CREB1	cAMP responsive element binding protein 1
hsa-miR-146b-3p	1	0	1	1	1	1	DAG1	dystroglycan 1 (dystrophin-associated glycoprotein 1)
hsa-miR-146b-3p	1	0	1	1	1	1	DBN1	drebrin 1
hsa-miR-146b-3p	1	0	1	1	1	1	EPHB2	EPH receptor B2
hsa-miR-146b-3p	1	0	1	1	1	1	EPHB3	EPH receptor B3
hsa-miR-146b-3p	1	0	1	0	1	1	FGF5	fibroblast growth factor 5
hsa-miR-146b-3p	1	0	1	1	1	1	FOXK2	forkhead box K2
hsa-miR-146b-3p	0	0	1	1	1	1	PIGH	phosphatidylinositol glycan anchor biosynthesis, class H
hsa-miR-146b-3p	1	0	1	1	1	1	MTMR6	myotubularin related protein 6
hsa-miR-146b-3p	1	0	1	1	1	1	RABEP1	rabaptin, RAB GTPase binding effector protein 1
hsa-miR-146b-3p	1	0	1	1	1	1	STK17A	serine/threonine kinase 17a
hsa-miR-146b-3p	0	0	1	1	1	1	TAOK2	TAO kinase 2
hsa-miR-146b-3p	0	0	1	0	1	1	ADIPOQ	adiponectin, C1Q and collagen domain containing
hsa-miR-146b-3p	1	0	1	1	1	1	ONECUT2	one cut homeobox 2
hsa-miR-146b-3p	1	0	1	0	1	1	PRKX	protein kinase, X-linked
hsa-miR-146b-3p	1	0	1	1	1	1	SIAH2	siah E3 ubiquitin protein ligase 2
hsa-miR-146b-3p	1	0	1	1	0	0	ZMYM3	zinc finger, MYM-type 3
hsa-miR-146b-3p	1	0	1	1	1	1	APLNR	apelin receptor
hsa-miR-146b-3p	0	0	1	0	1	1	CD80	CD80 molecule
hsa-miR-146b-3p	1	0	1	1	1	1	CRK	v-crk sarcoma virus CT10 oncogene homolog (avian)
hsa-miR-146b-3p	0	0	1	0	1	1	FOSL2	FOS-like antigen 2
hsa-miR-146b-3p	1	0	1	1	1	1	GAS2	growth arrest-specific 2
hsa-miR-146b-3p	1	0	1	1	1	1	HIP1	huntingtin interacting protein 1
hsa-miR-146b-3p	1	0	1	0	1	1	PRKAB2	protein kinase, AMP-activated, beta 2 non-catalytic subunit
hsa-miR-146b-3p	0	0	1	1	1	1	ST5	suppression of tumorigenicity 5
hsa-miR-146b-3p	1	0	1	1	1	1	RND2	Rho family GTPase 2
hsa-miR-146b-3p	0	0	1	1	1	1	FAIM3	Fas apoptotic inhibitory molecule 3
hsa-miR-146b-3p	1	0	1	1	0	0	ZBTB22	zinc finger and BTB domain containing 22
hsa-miR-146b-3p	1	0	1	1	1	1	ITGA3	integrin, alpha 3 (antigen CD49C, alpha 3 subunit of VLA-3 receptor)
hsa-miR-146b-3p	1	0	1	1	1	1	RGS4	regulator of G-protein signaling 4
hsa-miR-146b-3p	0	0	1	1	0	0	RTN2	reticulon 2
hsa-miR-146b-3p	0	0	1	1	0	0	SNURF	SNRPN upstream reading frame
hsa-miR-146b-3p	1	0	1	1	0	0	DPP3	dipeptidyl-peptidase 3
hsa-miR-146b-3p	1	0	1	1	1	1	UST	uronyl-2-sulfotransferase
hsa-miR-146b-3p	1	0	1	1	1	1	GIPC1	GIPC PDZ domain containing family, member 1
hsa-miR-146b-3p	1	0	1	1	1	1	ACTR1A	ARP1 actin-related protein 1 homolog A, centractin alpha (yeast)
hsa-miR-146b-3p	0	0	1	1	1	1	MPHOSPH6	M-phase phosphoprotein 6
hsa-miR-146b-3p	1	0	1	0	1	1	DCAF7	DDB1 and CUL4 associated factor 7
hsa-miR-146b-3p	1	0	1	0	1	1	SPRY3	sprouty homolog 3 (Drosophila)
hsa-miR-146b-3p	1	0	1	1	1	1	MAT2A	methionine adenosyltransferase II, alpha
hsa-miR-146b-3p	0	0	1	1	0	0	PPYR1	pancreatic polypeptide receptor 1
hsa-miR-146b-3p	1	0	1	1	1	1	HS3ST4	heparan sulfate (glucosamine) 3-O-sulfotransferase 4
hsa-miR-146b-3p	0	0	1	1	0	0	BMP1	bone morphogenetic protein 1
hsa-miR-146b-3p	1	0	1	1	1	1	DAGLA	diacylglycerol lipase, alpha
hsa-miR-146b-3p	1	0	1	1	1	1	NEUROG1	neurogenin 1
hsa-miR-146b-3p	1	0	1	1	1	1	ORC2	origin recognition complex, subunit 2
hsa-miR-146b-3p	0	0	1	1	1	1	PA2G4	proliferation-associated 2G4, 38kDa
hsa-miR-146b-3p	1	0	1	1	1	1	CDK16	cyclin-dependent kinase 16
hsa-miR-146b-3p	1	0	1	1	1	1	PRKAA1	protein kinase, AMP-activated, alpha 1 catalytic subunit
hsa-miR-146b-3p	0	0	1	1	1	1	PRKCH	protein kinase C, eta
hsa-miR-146b-3p	0	0	1	1	1	1	PROP1	PROP paired-like homeobox 1
hsa-miR-146b-3p	0	0	1	1	0	0	CCL19	chemokine (C-C motif) ligand 19
hsa-miR-146b-3p	1	0	1	1	1	1	SMC1A	structural maintenance of chromosomes 1A
hsa-miR-146b-3p	1	0	1	1	1	1	BASP1	brain abundant, membrane attached signal protein 1
hsa-miR-146b-3p	1	0	1	1	1	1	VAT1	vesicle amine transport protein 1 homolog (T. californica)
hsa-miR-146b-3p	1	0	1	0	1	1	APPBP2	amyloid beta precursor protein (cytoplasmic tail) binding protein 2
hsa-miR-146b-3p	1	0	1	0	1	1	IGF2BP1	insulin-like growth factor 2 mRNA binding protein 1
hsa-miR-146b-3p	1	0	1	1	1	1	PLK2	polo-like kinase 2
hsa-miR-146b-3p	1	0	1	1	1	1	MMP24	matrix metallopeptidase 24 (membrane-inserted)
hsa-miR-146b-3p	1	0	1	1	1	1	DIAPH2	diaphanous homolog 2 (Drosophila)
hsa-miR-146b-3p	1	0	1	1	1	1	BTG2	BTG family, member 2
hsa-miR-146b-3p	1	0	1	0	1	1	SYNGAP1	synaptic Ras GTPase activating protein 1
hsa-miR-146b-3p	1	0	1	1	1	1	TOMM34	translocase of outer mitochondrial membrane 34
hsa-miR-146b-3p	1	0	1	1	1	1	CKAP4	cytoskeleton-associated protein 4
hsa-miR-146b-3p	0	0	1	1	1	1	TMED10	transmembrane emp24-like trafficking protein 10 (yeast)
hsa-miR-146b-3p	1	0	1	1	1	1	PRRX1	paired related homeobox 1
hsa-miR-146b-3p	1	0	1	0	1	1	SOX12	SRY (sex determining region Y)-box 12
hsa-miR-146b-3p	1	0	1	1	1	1	NR4A3	nuclear receptor subfamily 4, group A, member 3
hsa-miR-146b-3p	1	0	1	1	1	1	FSTL1	follistatin-like 1
hsa-miR-146b-3p	0	0	1	1	1	1	WBP4	WW domain binding protein 4 (formin binding protein 21)
hsa-miR-146b-3p	0	0	1	1	1	1	SLC6A14	solute carrier family 6 (amino acid transporter), member 14
hsa-miR-146b-3p	1	0	1	0	1	1	CHP1	calcineurin-like EF hand protein 1
hsa-miR-146b-3p	0	0	1	1	1	1	ATF5	activating transcription factor 5
hsa-miR-146b-3p	0	0	1	1	1	1	LMOD1	leiomodin 1 (smooth muscle)
hsa-miR-146b-3p	1	0	1	1	1	1	RYBP	RING1 and YY1 binding protein
hsa-miR-146b-3p	1	0	1	1	1	1	HS2ST1	heparan sulfate 2-O-sulfotransferase 1
hsa-miR-146b-3p	1	0	1	1	1	1	MAPRE1	microtubule-associated protein, RP/EB family, member 1
hsa-miR-146b-3p	0	0	1	1	1	1	N6AMT1	N-6 adenine-specific DNA methyltransferase 1 (putative)
hsa-miR-146b-3p	1	0	1	0	1	1	VPS4A	vacuolar protein sorting 4 homolog A (S. cerevisiae)
hsa-miR-146b-3p	1	0	1	1	1	1	CLCF1	cardiotrophin-like cytokine factor 1
hsa-miR-146b-3p	0	0	1	1	0	0	KCNJ14	potassium inwardly-rectifying channel, subfamily J, member 14
hsa-miR-146b-3p	0	0	1	1	1	1	SERTAD1	SERTA domain containing 1
hsa-miR-146b-3p	0	0	1	1	1	1	LRP10	low density lipoprotein receptor-related protein 10
hsa-miR-146b-3p	0	0	1	1	1	1	CCDC113	coiled-coil domain containing 113
hsa-miR-146b-3p	0	0	1	0	1	1	ADAMTS3	ADAM metallopeptidase with thrombospondin type 1 motif, 3
hsa-miR-146b-3p	1	0	1	1	1	1	SERP1	stress-associated endoplasmic reticulum protein 1
hsa-miR-146b-3p	0	0	1	1	1	1	KCNMB4	potassium large conductance calcium-activated channel, subfamily M, beta member 4
hsa-miR-146b-3p	1	0	1	0	1	1	ATP11B	ATPase, class VI, type 11B
hsa-miR-146b-3p	1	0	1	1	1	1	RALGPS1	Ral GEF with PH domain and SH3 binding motif 1
hsa-miR-146b-3p	1	0	1	0	1	1	EDEM1	ER degradation enhancer, mannosidase alpha-like 1
hsa-miR-146b-3p	0	0	1	1	1	1	VPRBP	Vpr (HIV-1) binding protein
hsa-miR-146b-3p	1	0	1	1	1	1	RASSF2	Ras association (RalGDS/AF-6) domain family member 2
hsa-miR-146b-3p	1	0	1	0	1	1	SERTAD2	SERTA domain containing 2
hsa-miR-146b-3p	1	0	1	1	1	1	ARHGEF11	Rho guanine nucleotide exchange factor (GEF) 11
hsa-miR-146b-3p	1	0	1	1	1	1	RUSC2	RUN and SH3 domain containing 2
hsa-miR-146b-3p	1	0	1	1	1	1	ZBTB39	zinc finger and BTB domain containing 39
hsa-miR-146b-3p	1	0	1	1	1	1	NUAK1	NUAK family, SNF1-like kinase, 1
hsa-miR-146b-3p	1	0	1	1	1	1	SV2A	synaptic vesicle glycoprotein 2A
hsa-miR-146b-3p	1	0	1	0	1	1	WDFY3	WD repeat and FYVE domain containing 3
hsa-miR-146b-3p	1	0	1	1	1	1	SPEN	spen homolog, transcriptional regulator (Drosophila)
hsa-miR-146b-3p	1	0	1	1	1	1	PHLPP2	PH domain and leucine rich repeat protein phosphatase 2
hsa-miR-146b-3p	1	0	1	0	1	1	ZNF609	zinc finger protein 609
hsa-miR-146b-3p	1	0	1	1	0	0	CIC	capicua homolog (Drosophila)
hsa-miR-146b-3p	1	0	1	1	1	1	MYO1D	myosin ID
hsa-miR-146b-3p	0	0	1	1	1	1	ICOSLG	inducible T-cell co-stimulator ligand
hsa-miR-146b-3p	1	0	1	0	1	1	KHNYN	KH and NYN domain containing
hsa-miR-146b-3p	1	0	1	1	1	1	CCDC28A	coiled-coil domain containing 28A
hsa-miR-146b-3p	1	0	1	1	1	1	MYRIP	myosin VIIA and Rab interacting protein
hsa-miR-146b-3p	0	0	1	1	0	0	TSKU	tsukushi small leucine rich proteoglycan homolog (Xenopus laevis)
hsa-miR-146b-3p	1	0	1	1	0	0	POLDIP2	polymerase (DNA-directed), delta interacting protein 2
hsa-miR-146b-3p	1	0	1	1	1	1	PHF19	PHD finger protein 19
hsa-miR-146b-3p	1	0	1	0	1	1	WWC3	WWC family member 3
hsa-miR-146b-3p	0	0	1	1	1	1	BRPF3	bromodomain and PHD finger containing, 3
hsa-miR-146b-3p	1	0	1	1	1	1	PLA2G3	phospholipase A2, group III
hsa-miR-146b-3p	1	0	1	1	0	0	COL5A3	collagen, type V, alpha 3
hsa-miR-146b-3p	1	0	1	1	1	1	TAF9B	TAF9B RNA polymerase II, TATA box binding protein (TBP)-associated factor, 31kDa
hsa-miR-146b-3p	0	0	1	1	1	1	HMP19	HMP19 protein
hsa-miR-146b-3p	0	0	1	1	1	1	MRPS16	mitochondrial ribosomal protein S16
hsa-miR-146b-3p	1	0	1	0	1	1	WNT16	wingless-type MMTV integration site family, member 16
hsa-miR-146b-3p	1	0	1	0	1	1	HPCAL4	hippocalcin like 4
hsa-miR-146b-3p	1	0	1	1	1	1	CMPK1	cytidine monophosphate (UMP-CMP) kinase 1, cytosolic
hsa-miR-146b-3p	0	0	1	1	1	1	ADAM22	ADAM metallopeptidase domain 22
hsa-miR-146b-3p	1	0	1	0	1	1	RNF141	ring finger protein 141
hsa-miR-146b-3p	1	0	1	1	1	1	VTA1	Vps20-associated 1 homolog (S. cerevisiae)
hsa-miR-146b-3p	0	0	1	1	0	0	ATP8A2	ATPase, aminophospholipid transporter, class I, type 8A, member 2
hsa-miR-146b-3p	0	0	1	1	1	1	OGG1	8-oxoguanine DNA glycosylase
hsa-miR-146b-3p	1	0	1	1	1	1	SIX2	SIX homeobox 2
hsa-miR-146b-3p	1	0	1	1	1	1	PLXNA3	plexin A3
hsa-miR-146b-3p	1	0	1	1	1	1	INO80	INO80 homolog (S. cerevisiae)
hsa-miR-146b-3p	1	0	1	1	0	0	C17orf59	chromosome 17 open reading frame 59
hsa-miR-146b-3p	1	0	1	1	1	1	TET2	tet methylcytosine dioxygenase 2
hsa-miR-146b-3p	0	0	1	0	1	1	OTUB1	OTU domain, ubiquitin aldehyde binding 1
hsa-miR-146b-3p	0	0	1	1	0	0	CNTLN	centlein, centrosomal protein
hsa-miR-146b-3p	1	0	1	1	1	1	LPPR1	lipid phosphate phosphatase-related protein type 1
hsa-miR-146b-3p	1	0	1	1	1	1	ELOVL2	ELOVL fatty acid elongase 2
hsa-miR-146b-3p	1	0	1	1	1	1	IMPAD1	inositol monophosphatase domain containing 1
hsa-miR-146b-3p	1	0	1	0	1	1	MARCH5	membrane-associated ring finger (C3HC4) 5
hsa-miR-146b-3p	1	0	1	1	1	1	RNF125	ring finger protein 125, E3 ubiquitin protein ligase
hsa-miR-146b-3p	1	0	1	1	1	1	HIF1AN	hypoxia inducible factor 1, alpha subunit inhibitor
hsa-miR-146b-3p	0	0	1	1	1	1	AIM1L	absent in melanoma 1-like
hsa-miR-146b-3p	1	0	1	0	1	1	CCDC88A	coiled-coil domain containing 88A
hsa-miR-146b-3p	1	0	1	1	1	1	FIGN	fidgetin
hsa-miR-146b-3p	0	0	1	1	1	1	TMLHE	trimethyllysine hydroxylase, epsilon
hsa-miR-146b-3p	1	0	1	1	1	1	LRRC20	leucine rich repeat containing 20
hsa-miR-146b-3p	1	0	1	0	1	1	FOXJ2	forkhead box J2
hsa-miR-146b-3p	1	0	1	1	1	1	PAG1	phosphoprotein associated with glycosphingolipid microdomains 1
hsa-miR-146b-3p	1	0	1	0	1	1	BRK1	BRICK1, SCAR/WAVE actin-nucleating complex subunit
hsa-miR-146b-3p	1	0	1	0	1	1	LRP1B	low density lipoprotein receptor-related protein 1B
hsa-miR-146b-3p	1	0	1	1	1	1	CAMK2N1	calcium/calmodulin-dependent protein kinase II inhibitor 1
hsa-miR-146b-3p	1	0	1	1	1	1	SVOP	SV2 related protein homolog (rat)
hsa-miR-146b-3p	1	0	1	1	1	1	CDCA7L	cell division cycle associated 7-like
hsa-miR-146b-3p	1	0	1	1	1	1	PCDHGA1	protocadherin gamma subfamily A, 1
hsa-miR-146b-3p	1	0	1	0	1	1	PCDHGA10	protocadherin gamma subfamily A, 10
hsa-miR-146b-3p	1	0	1	0	1	1	PCDHGA11	protocadherin gamma subfamily A, 11
hsa-miR-146b-3p	1	0	1	1	1	1	PCDHGA2	protocadherin gamma subfamily A, 2
hsa-miR-146b-3p	1	0	1	0	1	1	PCDHGA3	protocadherin gamma subfamily A, 3
hsa-miR-146b-3p	1	0	1	0	1	1	PCDHGA4	protocadherin gamma subfamily A, 4
hsa-miR-146b-3p	1	0	1	0	1	1	PCDHGA5	protocadherin gamma subfamily A, 5
hsa-miR-146b-3p	1	0	1	0	1	1	PCDHGA6	protocadherin gamma subfamily A, 6
hsa-miR-146b-3p	1	0	1	0	1	1	PCDHGA7	protocadherin gamma subfamily A, 7
hsa-miR-146b-3p	1	0	1	0	1	1	PCDHGA9	protocadherin gamma subfamily A, 9
hsa-miR-146b-3p	1	0	1	0	1	1	PCDHGB1	protocadherin gamma subfamily B, 1
hsa-miR-146b-3p	1	0	1	0	1	1	PCDHGB2	protocadherin gamma subfamily B, 2
hsa-miR-146b-3p	1	0	1	0	1	1	PCDHGB3	protocadherin gamma subfamily B, 3
hsa-miR-146b-3p	1	0	1	0	1	1	PCDHGB5	protocadherin gamma subfamily B, 5
hsa-miR-146b-3p	1	0	1	0	1	1	PCDHGB6	protocadherin gamma subfamily B, 6
hsa-miR-146b-3p	1	0	1	0	1	1	PCDHGB7	protocadherin gamma subfamily B, 7
hsa-miR-146b-3p	1	0	1	0	1	1	PCDHGC4	protocadherin gamma subfamily C, 4
hsa-miR-146b-3p	1	0	1	0	1	1	PCDHGC5	protocadherin gamma subfamily C, 5
hsa-miR-146b-3p	1	0	1	1	1	1	KCTD5	potassium channel tetramerisation domain containing 5
hsa-miR-146b-3p	1	0	1	0	1	1	CCNJ	cyclin J
hsa-miR-146b-3p	0	0	1	1	1	1	CRLS1	cardiolipin synthase 1
hsa-miR-146b-3p	1	0	1	1	1	1	SERTAD4	SERTA domain containing 4
hsa-miR-146b-3p	0	0	1	1	1	1	TMEM167B	transmembrane protein 167B
hsa-miR-146b-3p	1	0	1	1	1	1	PAK7	p21 protein (Cdc42/Rac)-activated kinase 7
hsa-miR-146b-3p	0	0	1	1	0	0	CHRNA10	cholinergic receptor, nicotinic, alpha 10 (neuronal)
hsa-miR-146b-3p	1	0	1	1	1	1	RAB22A	RAB22A, member RAS oncogene family
hsa-miR-146b-3p	0	0	1	1	1	1	KIAA1161	KIAA1161
hsa-miR-146b-3p	0	0	1	1	0	0	AMIGO1	adhesion molecule with Ig-like domain 1
hsa-miR-146b-3p	1	0	1	1	1	1	NLGN2	neuroligin 2
hsa-miR-146b-3p	1	0	1	1	1	1	HOMEZ	homeobox and leucine zipper encoding
hsa-miR-146b-3p	1	0	1	1	1	1	RANBP10	RAN binding protein 10
hsa-miR-146b-3p	1	0	1	1	1	1	FAM160B1	family with sequence similarity 160, member B1
hsa-miR-146b-3p	0	0	1	1	1	1	PRX	periaxin
hsa-miR-146b-3p	1	0	1	1	1	1	HCN1	hyperpolarization activated cyclic nucleotide-gated potassium channel 1
hsa-miR-146b-3p	0	0	1	1	1	1	MRPS12	mitochondrial ribosomal protein S12
hsa-miR-146b-3p	1	0	1	1	1	1	C6orf47	chromosome 6 open reading frame 47
hsa-miR-146b-3p	1	0	1	0	1	1	TP53INP2	tumor protein p53 inducible nuclear protein 2
hsa-miR-146b-3p	1	0	1	1	1	1	TRIB2	tribbles homolog 2 (Drosophila)
hsa-miR-146b-3p	1	0	1	1	1	1	GRIK2	glutamate receptor, ionotropic, kainate 2
hsa-miR-146b-3p	0	0	1	1	1	1	ITM2B	integral membrane protein 2B
hsa-miR-146b-3p	1	0	1	1	1	1	TIA1	TIA1 cytotoxic granule-associated RNA binding protein
hsa-miR-146b-3p	1	0	1	1	0	0	SDF2L1	stromal cell-derived factor 2-like 1
hsa-miR-146b-3p	1	0	1	0	1	1	CSNK1G1	casein kinase 1, gamma 1
hsa-miR-146b-3p	0	0	1	1	1	1	NXF3	nuclear RNA export factor 3
hsa-miR-146b-3p	1	0	1	0	1	1	SLC4A10	solute carrier family 4, sodium bicarbonate transporter, member 10
hsa-miR-146b-3p	1	0	1	1	1	1	XYLT2	xylosyltransferase II
hsa-miR-146b-3p	1	0	1	1	1	1	ABCG4	ATP-binding cassette, sub-family G (WHITE), member 4
hsa-miR-146b-3p	0	0	1	1	1	1	TCTA	T-cell leukemia translocation altered
hsa-miR-146b-3p	0	0	1	1	0	0	POLR1E	polymerase (RNA) I polypeptide E, 53kDa
hsa-miR-146b-3p	1	0	1	0	1	1	MRPS25	mitochondrial ribosomal protein S25
hsa-miR-146b-3p	1	0	1	1	0	0	UBE2Z	ubiquitin-conjugating enzyme E2Z
hsa-miR-146b-3p	0	0	1	1	0	0	C7orf25	chromosome 7 open reading frame 25
hsa-miR-146b-3p	1	0	1	1	1	1	FAM134A	family with sequence similarity 134, member A
hsa-miR-146b-3p	1	0	1	1	1	1	CCNJL	cyclin J-like
hsa-miR-146b-3p	1	0	1	1	1	1	PPP1R3B	protein phosphatase 1, regulatory subunit 3B
hsa-miR-146b-3p	0	0	1	1	1	1	LRRK1	leucine-rich repeat kinase 1
hsa-miR-146b-3p	0	0	1	1	1	1	GLT25D1	glycosyltransferase 25 domain containing 1
hsa-miR-146b-3p	0	0	1	1	1	1	WDR78	WD repeat domain 78
hsa-miR-146b-3p	0	0	1	1	1	1	MAP6D1	MAP6 domain containing 1
hsa-miR-146b-3p	0	0	1	1	1	1	TNIP3	TNFAIP3 interacting protein 3
hsa-miR-146b-3p	0	0	1	1	1	1	ZNF767	zinc finger family member 767
hsa-miR-146b-3p	1	0	1	1	0	0	UBTD1	ubiquitin domain containing 1
hsa-miR-146b-3p	1	0	1	1	1	1	NAA50	N(alpha)-acetyltransferase 50, NatE catalytic subunit
hsa-miR-146b-3p	0	0	1	1	1	1	COQ10B	coenzyme Q10 homolog B (S. cerevisiae)
hsa-miR-146b-3p	1	0	1	1	1	1	TRIB1	tribbles homolog 1 (Drosophila)
hsa-miR-146b-3p	0	0	1	1	1	1	ITIH5	inter-alpha-trypsin inhibitor heavy chain family, member 5
hsa-miR-146b-3p	1	0	1	1	1	1	CYB5B	cytochrome b5 type B (outer mitochondrial membrane)
hsa-miR-146b-3p	1	0	1	0	1	1	SETD7	SET domain containing (lysine methyltransferase) 7
hsa-miR-146b-3p	1	0	1	0	1	1	C1orf21	chromosome 1 open reading frame 21
hsa-miR-146b-3p	1	0	1	1	1	1	RAB1B	RAB1B, member RAS oncogene family
hsa-miR-146b-3p	0	0	1	1	1	1	FAHD1	fumarylacetoacetate hydrolase domain containing 1
hsa-miR-146b-3p	0	0	1	1	1	1	FCRL5	Fc receptor-like 5
hsa-miR-146b-3p	1	0	1	1	1	1	ANO3	anoctamin 3
hsa-miR-146b-3p	0	0	1	1	1	1	INHBE	inhibin, beta E
hsa-miR-146b-3p	1	0	1	0	1	1	ITCH	itchy E3 ubiquitin protein ligase
hsa-miR-146b-3p	1	0	1	0	1	1	PCDHGA8	protocadherin gamma subfamily A, 8
hsa-miR-146b-3p	1	0	1	1	1	1	FBXO30	F-box protein 30
hsa-miR-146b-3p	1	0	1	1	1	1	LOXL4	lysyl oxidase-like 4
hsa-miR-146b-3p	1	0	1	1	1	1	CAMKK1	calcium/calmodulin-dependent protein kinase kinase 1, alpha
hsa-miR-146b-3p	0	0	1	1	0	0	NICN1	nicolin 1
hsa-miR-146b-3p	1	0	1	1	1	1	BRMS1L	breast cancer metastasis-suppressor 1-like
hsa-miR-146b-3p	1	0	1	1	0	0	ZC3H10	zinc finger CCCH-type containing 10
hsa-miR-146b-3p	0	0	1	1	1	1	RPUSD4	RNA pseudouridylate synthase domain containing 4
hsa-miR-146b-3p	0	0	1	0	1	1	PIGY	phosphatidylinositol glycan anchor biosynthesis, class Y
hsa-miR-146b-3p	0	0	1	1	1	1	TRIM4	tripartite motif containing 4
hsa-miR-146b-3p	1	0	1	0	1	1	PURB	purine-rich element binding protein B
hsa-miR-146b-3p	1	0	1	1	1	1	RASL10B	RAS-like, family 10, member B
hsa-miR-146b-3p	0	0	1	1	1	1	LHX4	LIM homeobox 4
hsa-miR-146b-3p	1	0	1	1	0	0	DISP2	dispatched homolog 2 (Drosophila)
hsa-miR-146b-3p	1	0	1	1	1	1	BRWD1	bromodomain and WD repeat domain containing 1
hsa-miR-146b-3p	0	0	1	0	1	1	CCDC97	coiled-coil domain containing 97
hsa-miR-146b-3p	1	0	1	1	1	1	RCSD1	RCSD domain containing 1
hsa-miR-146b-3p	0	0	1	1	0	0	FAM46B	family with sequence similarity 46, member B
hsa-miR-146b-3p	0	0	1	1	0	0	BSND	Bartter syndrome, infantile, with sensorineural deafness (Barttin)
hsa-miR-146b-3p	0	0	1	1	0	0	COL6A2	collagen, type VI, alpha 2
hsa-miR-146b-3p	0	0	1	1	1	1	CDKN2B	cyclin-dependent kinase inhibitor 2B (p15, inhibits CDK4)
hsa-miR-146b-3p	1	0	1	1	1	1	C20orf112	chromosome 20 open reading frame 112
hsa-miR-146b-3p	0	0	1	1	1	1	CHST14	carbohydrate (N-acetylgalactosamine 4-0) sulfotransferase 14
hsa-miR-146b-3p	1	0	1	1	1	1	JDP2	Jun dimerization protein 2
hsa-miR-146b-3p	0	0	1	1	0	0	CITED4	Cbp/p300-interacting transactivator, with Glu/Asp-rich carboxy-terminal domain, 4
hsa-miR-146b-3p	0	0	1	1	0	0	SPACA4	sperm acrosome associated 4
hsa-miR-146b-3p	1	0	1	1	0	0	DCAF15	DDB1 and CUL4 associated factor 15
hsa-miR-146b-3p	0	0	1	0	0	0	AP5B1	adaptor-related protein complex 5, beta 1 subunit
hsa-miR-146b-3p	1	0	1	1	1	1	ICA1L	islet cell autoantigen 1,69kDa-like
hsa-miR-146b-3p	1	0	1	0	1	1	SP1	Sp1 transcription factor
hsa-miR-146b-3p	1	0	1	1	1	1	KCNH8	potassium voltage-gated channel, subfamily H (eag-related), member 8
hsa-miR-146b-3p	1	0	1	1	1	1	FAM91A1	family with sequence similarity 91, member A1
hsa-miR-146b-3p	1	0	1	1	1	1	YPEL4	yippee-like 4 (Drosophila)
hsa-miR-146b-3p	1	0	1	1	1	1	FAM84A	family with sequence similarity 84, member A
hsa-miR-146b-3p	0	0	1	1	0	0	TMEM217	transmembrane protein 217
hsa-miR-146b-3p	0	0	1	1	1	1	SCARF1	scavenger receptor class F, member 1
hsa-miR-146b-3p	1	0	1	0	1	1	MTPN	myotrophin
hsa-miR-146b-3p	0	0	1	1	0	0	RPUSD2	RNA pseudouridylate synthase domain containing 2
hsa-miR-146b-3p	1	0	1	0	1	1	SYT11	synaptotagmin XI
hsa-miR-146b-3p	1	0	1	1	1	1	LSM12	LSM12 homolog (S. cerevisiae)
hsa-miR-146b-3p	1	0	1	1	1	1	FAM123B	family with sequence similarity 123B
hsa-miR-146b-3p	0	0	1	0	1	1	HORMAD2	HORMA domain containing 2
hsa-miR-146b-3p	1	0	1	1	1	1	TCTEX1D1	Tctex1 domain containing 1
hsa-miR-146b-3p	0	0	1	1	0	0	DOK6	docking protein 6
hsa-miR-146b-3p	1	0	1	1	1	1	NXPH1	neurexophilin 1
hsa-miR-146b-3p	0	0	1	1	0	0	CATSPERD	catsper channel auxiliary subunit delta
hsa-miR-146b-3p	1	0	1	0	1	1	MDGA1	MAM domain containing glycosylphosphatidylinositol anchor 1
hsa-miR-146b-3p	1	0	1	1	1	1	DAZAP1	DAZ associated protein 1
hsa-miR-146b-3p	0	0	1	1	1	1	IL29	interleukin 29 (interferon, lambda 1)
hsa-miR-146b-3p	0	0	1	1	1	1	REXO1L1	REX1, RNA exonuclease 1 homolog (S. cerevisiae)-like 1
hsa-miR-146b-3p	0	0	1	1	1	1	KCNH5	potassium voltage-gated channel, subfamily H (eag-related), member 5
hsa-miR-146b-3p	1	0	1	1	1	1	MOB1B	MOB kinase activator 1B
hsa-miR-146b-3p	1	0	1	0	1	1	RNF152	ring finger protein 152
hsa-miR-146b-3p	0	0	1	1	1	1	UNC5CL	unc-5 homolog C (C. elegans)-like
hsa-miR-146b-3p	1	0	1	0	1	1	PGM2L1	phosphoglucomutase 2-like 1
hsa-miR-146b-3p	0	0	1	0	0	0	SLC39A5	solute carrier family 39 (metal ion transporter), member 5
hsa-miR-146b-3p	1	0	1	1	1	1	SLC9A9	solute carrier family 9, subfamily A (NHE9, cation proton antiporter 9), member 9
hsa-miR-146b-3p	1	0	1	0	1	1	FAM84B	family with sequence similarity 84, member B
hsa-miR-146b-3p	1	0	1	1	1	1	LRRTM3	leucine rich repeat transmembrane neuronal 3
hsa-miR-146b-3p	1	0	1	1	1	1	DCAF12L1	DDB1 and CUL4 associated factor 12-like 1
hsa-miR-146b-3p	0	0	1	1	0	0	APOBEC3H	apolipoprotein B mRNA editing enzyme, catalytic polypeptide-like 3H
hsa-miR-146b-3p	1	0	1	1	1	1	ZSCAN2	zinc finger and SCAN domain containing 2
hsa-miR-146b-3p	1	0	1	1	1	1	BCL9L	B-cell CLL/lymphoma 9-like
hsa-miR-146b-3p	1	0	1	1	1	1	ZBTB41	zinc finger and BTB domain containing 41
hsa-miR-146b-3p	1	0	1	1	1	1	GPRIN3	GPRIN family member 3
hsa-miR-146b-3p	0	0	1	1	1	1	FOXR2	forkhead box R2
hsa-miR-146b-3p	0	0	1	1	1	1	LHFPL4	lipoma HMGIC fusion partner-like 4
hsa-miR-146b-3p	0	0	1	1	1	1	COL25A1	collagen, type XXV, alpha 1
hsa-miR-146b-3p	0	0	1	0	1	1	SIAH3	siah E3 ubiquitin protein ligase family member 3
hsa-miR-146b-3p	1	0	1	1	1	1	TMEM189-UBE2V1	TMEM189-UBE2V1 readthrough
hsa-miR-146b-3p	0	0	1	1	1	1	ARHGAP27	Rho GTPase activating protein 27
hsa-miR-146b-3p	1	0	1	1	0	0	KAZN	kazrin, periplakin interacting protein
hsa-miR-146b-3p	1	0	1	1	1	1	SYT6	synaptotagmin VI
hsa-miR-146b-3p	1	0	1	0	1	1	NCKAP5	NCK-associated protein 5
hsa-miR-146b-3p	1	0	1	1	1	1	TNFAIP8L3	tumor necrosis factor, alpha-induced protein 8-like 3
hsa-miR-146b-3p	1	0	1	1	1	1	TEX19	testis expressed 19
hsa-miR-146b-3p	0	0	1	1	1	1	DEFB132	defensin, beta 132
hsa-miR-146b-3p	0	0	1	0	1	1	TMEM215	transmembrane protein 215
hsa-miR-146b-3p	1	0	1	0	1	1	STAT3	signal transducer and activator of transcription 3 (acute-phase response factor)
hsa-miR-146b-3p	0	0	1	0	0	0	CELP	carboxyl ester lipase pseudogene
hsa-miR-146b-3p	0	0	1	0	0	0	LOC606724	coronin, actin binding protein, 1A pseudogene
hsa-miR-146b-3p	0	0	1	0	0	0	MBL1P	mannose-binding lectin (protein A) 1, pseudogene
hsa-miR-146b-3p	0	0	1	0	0	0	HOXA11-AS	HOXA11 antisense RNA
hsa-miR-146b-3p	0	0	1	0	0	0	RNASEH2CP1	ribonuclease H2, subunit C pseudogene 1
hsa-miR-146b-3p	0	0	1	0	0	0	HNRNPA1P16	heterogeneous nuclear ribonucleoprotein A1 pseudogene 16
hsa-miR-146b-3p	0	0	1	0	0	0	HNRNPA1P10	heterogeneous nuclear ribonucleoprotein A1 pseudogene 10
hsa-miR-146b-3p	0	0	1	0	0	0	LILRP2	leukocyte immunoglobulin-like receptor pseudogene 2
hsa-miR-146b-3p	0	0	1	0	0	0	PYY2	peptide YY, 2 (pseudogene)
hsa-miR-146b-3p	0	0	1	0	0	0	LOC729603	calcium binding protein P22 pseudogene
hsa-miR-146b-3p	0	0	1	0	0	0	SNORD115-26	small nucleolar RNA, C/D box 115-26
hsa-miR-146b-3p	0	0	1	0	0	0	SNORD116-28	small nucleolar RNA, C/D box 116-28
hsa-miR-146b-3p	1	0	1	0	1	1	NFIX	nuclear factor I/X (CCAAT-binding transcription factor)
hsa-miR-146b-3p	0	0	1	0	0	0	PLGLA	plasminogen-like A
hsa-miR-146b-3p	1	0	1	1	1	1	ESR1	estrogen receptor 1
hsa-miR-146b-3p	0	0	1	1	1	1	CD99	CD99 molecule
hsa-miR-146b-3p	0	0	1	1	0	0	KIR2DL4	killer cell immunoglobulin-like receptor, two domains, long cytoplasmic tail, 4
hsa-miR-146b-3p	1	0	0	1	0	0	PRSS21	protease, serine, 21 (testisin)
hsa-miR-146b-3p	0	0	0	1	0	0	IL32	interleukin 32
hsa-miR-146b-3p	1	0	1	1	1	1	PSD	pleckstrin and Sec7 domain containing
hsa-miR-146b-3p	0	0	0	1	1	1	MRI1	methylthioribose-1-phosphate isomerase homolog (S. cerevisiae)
hsa-miR-146b-3p	0	0	0	1	0	0	FAM65C	family with sequence similarity 65, member C
hsa-miR-146b-3p	0	0	1	1	0	0	GNA11	guanine nucleotide binding protein (G protein), alpha 11 (Gq class)
hsa-miR-146b-3p	0	0	1	1	0	0	ISOC2	isochorismatase domain containing 2
hsa-miR-146b-3p	1	0	1	1	1	1	KDM4B	lysine (K)-specific demethylase 4B
hsa-miR-146b-3p	0	0	1	1	1	1	BCAR1	breast cancer anti-estrogen resistance 1
hsa-miR-146b-3p	0	0	1	1	0	0	LLGL2	lethal giant larvae homolog 2 (Drosophila)
hsa-miR-146b-3p	0	0	0	1	0	0	GAL3ST2	galactose-3-O-sulfotransferase 2
hsa-miR-146b-3p	0	0	0	1	0	0	ZNF8	zinc finger protein 8
hsa-miR-146b-3p	0	0	0	1	0	0	NAT14	N-acetyltransferase 14 (GCN5-related, putative)
hsa-miR-146b-3p	0	0	1	1	1	1	UNC13D	unc-13 homolog D (C. elegans)
hsa-miR-146b-3p	0	0	1	1	0	0	OCEL1	occludin/ELL domain containing 1
hsa-miR-146b-3p	0	0	1	1	1	1	C22orf28	chromosome 22 open reading frame 28
hsa-miR-146b-3p	0	0	0	1	0	0	LMF2	lipase maturation factor 2
hsa-miR-146b-3p	1	0	1	1	1	1	SYNGR1	synaptogyrin 1
hsa-miR-146b-3p	0	0	1	1	0	0	UPK3A	uroplakin 3A
hsa-miR-146b-3p	0	0	1	1	1	1	AHSA1	AHA1, activator of heat shock 90kDa protein ATPase homolog 1 (yeast)
hsa-miR-146b-3p	0	0	0	1	0	0	WDR13	WD repeat domain 13
hsa-miR-146b-3p	0	0	1	1	1	1	F9	coagulation factor IX
hsa-miR-146b-3p	0	0	1	1	1	1	CMC2	COX assembly mitochondrial protein 2 homolog (S. cerevisiae)
hsa-miR-146b-3p	0	0	0	1	0	0	TGM5	transglutaminase 5
hsa-miR-146b-3p	0	0	1	1	0	0	CNOT3	CCR4-NOT transcription complex, subunit 3
hsa-miR-146b-3p	0	0	0	1	0	0	EXOSC5	exosome component 5
hsa-miR-146b-3p	0	0	1	1	0	0	PPP1R37	protein phosphatase 1, regulatory subunit 37
hsa-miR-146b-3p	1	0	1	1	0	0	DOT1L	DOT1-like, histone H3 methyltransferase (S. cerevisiae)
hsa-miR-146b-3p	0	0	0	1	0	0	CACTIN	cactin, spliceosome C complex subunit
hsa-miR-146b-3p	0	0	1	1	1	1	GCDH	glutaryl-CoA dehydrogenase
hsa-miR-146b-3p	0	0	0	1	0	0	AIMP2	aminoacyl tRNA synthetase complex-interacting multifunctional protein 2
hsa-miR-146b-3p	0	0	1	1	0	0	AATF	apoptosis antagonizing transcription factor
hsa-miR-146b-3p	0	0	0	1	0	0	DDX11	DEAD/H (Asp-Glu-Ala-Asp/His) box helicase 11
hsa-miR-146b-3p	0	0	0	1	1	1	GNB3	guanine nucleotide binding protein (G protein), beta polypeptide 3
hsa-miR-146b-3p	0	0	0	1	1	1	CDCA3	cell division cycle associated 3
hsa-miR-146b-3p	0	0	1	1	0	0	SLC4A9	solute carrier family 4, sodium bicarbonate cotransporter, member 9
hsa-miR-146b-3p	0	0	1	1	1	1	UMPS	uridine monophosphate synthetase
hsa-miR-146b-3p	0	0	1	1	1	1	EIF2AK2	eukaryotic translation initiation factor 2-alpha kinase 2
hsa-miR-146b-3p	0	0	0	1	0	0	REEP6	receptor accessory protein 6
hsa-miR-146b-3p	0	0	0	1	1	1	WNT6	wingless-type MMTV integration site family, member 6
hsa-miR-146b-3p	0	0	0	1	0	0	PRTN3	proteinase 3
hsa-miR-146b-3p	1	0	1	1	1	1	ANGPTL1	angiopoietin-like 1
hsa-miR-146b-3p	0	0	0	1	1	1	OPRD1	opioid receptor, delta 1
hsa-miR-146b-3p	0	0	1	1	1	1	CD160	CD160 molecule
hsa-miR-146b-3p	0	0	1	1	1	1	ATP6V0B	ATPase, H+ transporting, lysosomal 21kDa, V0 subunit b
hsa-miR-146b-3p	0	0	1	1	1	1	NEK9	NIMA (never in mitosis gene a)- related kinase 9
hsa-miR-146b-3p	0	0	1	1	1	1	MLH3	mutL homolog 3 (E. coli)
hsa-miR-146b-3p	0	0	1	1	0	0	ARMC4	armadillo repeat containing 4
hsa-miR-146b-3p	0	0	1	1	0	0	CHRNA2	cholinergic receptor, nicotinic, alpha 2 (neuronal)
hsa-miR-146b-3p	0	0	0	1	0	0	PEX16	peroxisomal biogenesis factor 16
hsa-miR-146b-3p	0	0	1	1	1	1	CCDC70	coiled-coil domain containing 70
hsa-miR-146b-3p	0	0	0	1	0	0	B9D2	B9 protein domain 2
hsa-miR-146b-3p	1	0	1	1	1	1	SPHK2	sphingosine kinase 2
hsa-miR-146b-3p	1	0	1	1	1	1	RALY	RNA binding protein, autoantigenic (hnRNP-associated with lethal yellow homolog (mouse))
hsa-miR-146b-3p	0	0	0	1	0	0	SLURP1	secreted LY6/PLAUR domain containing 1
hsa-miR-146b-3p	0	0	1	1	0	0	DDX49	DEAD (Asp-Glu-Ala-Asp) box polypeptide 49
hsa-miR-146b-3p	0	0	1	1	0	0	PHPT1	phosphohistidine phosphatase 1
hsa-miR-146b-3p	0	0	0	1	1	1	CYP4F11	cytochrome P450, family 4, subfamily F, polypeptide 11
hsa-miR-146b-3p	1	0	1	1	1	1	AAMP	angio-associated, migratory cell protein
hsa-miR-146b-3p	0	0	0	1	0	0	GNGT1	guanine nucleotide binding protein (G protein), gamma transducing activity polypeptide 1
hsa-miR-146b-3p	0	0	1	1	0	0	TUBGCP6	tubulin, gamma complex associated protein 6
hsa-miR-146b-3p	0	0	1	1	0	0	CDC42EP1	CDC42 effector protein (Rho GTPase binding) 1
hsa-miR-146b-3p	0	0	1	1	0	0	SIRT2	sirtuin 2
hsa-miR-146b-3p	0	0	1	1	1	1	HOXD3	homeobox D3
hsa-miR-146b-3p	0	0	1	1	1	1	MYOD1	myogenic differentiation 1
hsa-miR-146b-3p	0	0	0	1	0	0	AANAT	aralkylamine N-acetyltransferase
hsa-miR-146b-3p	0	0	0	1	1	1	DOHH	deoxyhypusine hydroxylase/monooxygenase
hsa-miR-146b-3p	1	0	1	1	0	0	HCN2	hyperpolarization activated cyclic nucleotide-gated potassium channel 2
hsa-miR-146b-3p	1	0	1	1	1	1	DHX35	DEAH (Asp-Glu-Ala-His) box polypeptide 35
hsa-miR-146b-3p	0	0	0	1	1	1	TRMT2A	tRNA methyltransferase 2 homolog A (S. cerevisiae)
hsa-miR-146b-3p	1	0	0	1	1	1	ELOF1	elongation factor 1 homolog (S. cerevisiae)
hsa-miR-146b-3p	0	0	0	1	1	1	BST2	bone marrow stromal cell antigen 2
hsa-miR-146b-3p	0	0	0	1	0	0	PGLS	6-phosphogluconolactonase
hsa-miR-146b-3p	0	0	0	1	1	1	LSM4	LSM4 homolog, U6 small nuclear RNA associated (S. cerevisiae)
hsa-miR-146b-3p	1	0	0	1	1	1	YIPF2	Yip1 domain family, member 2
hsa-miR-146b-3p	0	0	1	1	1	1	LRRC41	leucine rich repeat containing 41
hsa-miR-146b-3p	0	0	1	1	1	1	SCLY	selenocysteine lyase
hsa-miR-146b-3p	0	0	1	1	1	1	MTL5	metallothionein-like 5, testis-specific (tesmin)
hsa-miR-146b-3p	0	0	0	1	0	0	PEMT	phosphatidylethanolamine N-methyltransferase
hsa-miR-146b-3p	0	0	1	1	0	0	HSPBP1	HSPA (heat shock 70kDa) binding protein, cytoplasmic cochaperone 1
hsa-miR-146b-3p	1	0	1	1	0	0	CSNK1G2	casein kinase 1, gamma 2
hsa-miR-146b-3p	0	0	1	1	0	0	LGALS12	lectin, galactoside-binding, soluble, 12
hsa-miR-146b-3p	0	0	0	1	0	0	A2LD1	AIG2-like domain 1
hsa-miR-146b-3p	0	0	0	1	1	1	SDS	serine dehydratase
hsa-miR-146b-3p	0	0	1	1	1	1	OASL	2'-5'-oligoadenylate synthetase-like
hsa-miR-146b-3p	0	0	0	1	1	1	SP110	SP110 nuclear body protein
hsa-miR-146b-3p	0	0	1	1	1	1	IL6	interleukin 6 (interferon, beta 2)
hsa-miR-146b-3p	0	0	1	1	0	0	TTC5	tetratricopeptide repeat domain 5
hsa-miR-146b-3p	0	0	1	1	0	0	POU5F1	POU class 5 homeobox 1
hsa-miR-146b-3p	0	0	1	1	1	1	ALDH2	aldehyde dehydrogenase 2 family (mitochondrial)
hsa-miR-146b-3p	1	0	1	1	0	0	LOXL1	lysyl oxidase-like 1
hsa-miR-146b-3p	0	0	1	1	1	1	ANXA13	annexin A13
hsa-miR-146b-3p	0	0	0	1	0	0	LPO	lactoperoxidase
hsa-miR-146b-3p	0	0	0	1	0	0	TELO2	TEL2, telomere maintenance 2, homolog (S. cerevisiae)
hsa-miR-146b-3p	1	0	1	1	0	0	ZC3H3	zinc finger CCCH-type containing 3
hsa-miR-146b-3p	1	0	1	1	1	1	GDAP1L1	ganglioside induced differentiation associated protein 1-like 1
hsa-miR-146b-3p	0	0	0	1	0	0	CHST8	carbohydrate (N-acetylgalactosamine 4-0) sulfotransferase 8
hsa-miR-146b-3p	0	0	1	1	0	0	EFCAB6	EF-hand calcium binding domain 6
hsa-miR-146b-3p	0	0	0	1	0	0	MOV10L1	Mov10l1, Moloney leukemia virus 10-like 1, homolog (mouse)
hsa-miR-146b-3p	1	0	1	1	1	1	MARK4	MAP/microtubule affinity-regulating kinase 4
hsa-miR-146b-3p	0	0	0	1	0	0	PLEKHA4	pleckstrin homology domain containing, family A (phosphoinositide binding specific) member 4
hsa-miR-146b-3p	0	0	0	1	0	0	LIG1	ligase I, DNA, ATP-dependent
hsa-miR-146b-3p	1	0	0	1	1	1	GPC1	glypican 1
hsa-miR-146b-3p	0	0	0	1	1	1	LCT	lactase
hsa-miR-146b-3p	1	0	1	1	1	1	WDR1	WD repeat domain 1
hsa-miR-146b-3p	0	0	1	1	0	0	RPL24	ribosomal protein L24
hsa-miR-146b-3p	0	0	1	1	1	1	NBN	nibrin
hsa-miR-146b-3p	0	0	1	1	1	1	CPT1A	carnitine palmitoyltransferase 1A (liver)
hsa-miR-146b-3p	0	0	1	1	0	0	STMN4	stathmin-like 4
hsa-miR-146b-3p	0	0	1	1	0	0	ITIH4	inter-alpha-trypsin inhibitor heavy chain family, member 4
hsa-miR-146b-3p	0	0	1	1	0	0	EIF2B2	eukaryotic translation initiation factor 2B, subunit 2 beta, 39kDa
hsa-miR-146b-3p	0	0	1	1	0	0	B4GALNT3	beta-1,4-N-acetyl-galactosaminyl transferase 3
hsa-miR-146b-3p	0	0	0	1	0	0	CYP11A1	cytochrome P450, family 11, subfamily A, polypeptide 1
hsa-miR-146b-3p	1	0	1	1	0	0	SCAMP2	secretory carrier membrane protein 2
hsa-miR-146b-3p	0	0	0	1	1	1	CPNE7	copine VII
hsa-miR-146b-3p	1	0	1	1	1	1	TTYH2	tweety homolog 2 (Drosophila)
hsa-miR-146b-3p	0	0	0	1	0	0	LOC113230	uncharacterized LOC113230
hsa-miR-146b-3p	0	0	1	1	1	1	FBN3	fibrillin 3
hsa-miR-146b-3p	0	0	0	1	0	0	CTU1	cytosolic thiouridylase subunit 1 homolog (S. pombe)
hsa-miR-146b-3p	0	0	1	1	0	0	WRAP73	WD repeat containing, antisense to TP73
hsa-miR-146b-3p	0	0	0	1	0	0	KIAA1751	KIAA1751
hsa-miR-146b-3p	0	0	1	1	0	0	ZNF593	zinc finger protein 593
hsa-miR-146b-3p	0	0	0	1	0	0	ANKMY1	ankyrin repeat and MYND domain containing 1
hsa-miR-146b-3p	0	0	0	1	1	1	TMEM140	transmembrane protein 140
hsa-miR-146b-3p	0	0	0	1	0	0	GPR174	G protein-coupled receptor 174
hsa-miR-146b-3p	0	0	1	1	1	1	FBXO25	F-box protein 25
hsa-miR-146b-3p	0	0	0	1	0	0	PNPLA7	patatin-like phospholipase domain containing 7
hsa-miR-146b-3p	0	0	1	1	0	0	SAA4	serum amyloid A4, constitutive
hsa-miR-146b-3p	0	0	0	1	1	1	CSRP2BP	CSRP2 binding protein
hsa-miR-146b-3p	0	0	0	1	0	0	GPHA2	glycoprotein hormone alpha 2
hsa-miR-146b-3p	0	0	0	1	0	0	PLCB3	phospholipase C, beta 3 (phosphatidylinositol-specific)
hsa-miR-146b-3p	1	0	0	1	0	0	CDC42EP2	CDC42 effector protein (Rho GTPase binding) 2
hsa-miR-146b-3p	0	0	0	1	1	1	GLT1D1	glycosyltransferase 1 domain containing 1
hsa-miR-146b-3p	0	0	0	1	0	0	SPACA7	sperm acrosome associated 7
hsa-miR-146b-3p	0	0	1	1	0	0	TBCEL	tubulin folding cofactor E-like
hsa-miR-146b-3p	0	0	0	1	1	1	HHIPL2	HHIP-like 2
hsa-miR-146b-3p	0	0	1	1	1	1	CCDC146	coiled-coil domain containing 146
hsa-miR-146b-3p	0	0	0	1	0	0	KIF6	kinesin family member 6
hsa-miR-146b-3p	0	0	1	1	1	1	KBTBD5	kelch repeat and BTB (POZ) domain containing 5
hsa-miR-146b-3p	0	0	1	1	0	0	CLEC18A	C-type lectin domain family 18, member A
hsa-miR-146b-3p	0	0	0	1	0	0	IL34	interleukin 34
hsa-miR-146b-3p	0	0	0	1	0	0	SLC38A10	solute carrier family 38, member 10
hsa-miR-146b-3p	0	0	1	1	0	0	GPR153	G protein-coupled receptor 153
hsa-miR-146b-3p	0	0	1	1	1	1	C2orf62	chromosome 2 open reading frame 62
hsa-miR-146b-3p	0	0	1	1	0	0	OBSL1	obscurin-like 1
hsa-miR-146b-3p	0	0	0	1	0	0	CBR1	carbonyl reductase 1
hsa-miR-146b-3p	0	0	1	1	0	0	GPR162	G protein-coupled receptor 162
hsa-miR-146b-3p	0	0	0	1	0	0	LEPREL2	leprecan-like 2
hsa-miR-146b-3p	0	0	1	1	1	1	IRX6	iroquois homeobox 6
hsa-miR-146b-3p	0	0	1	1	1	1	TPPP3	tubulin polymerization-promoting protein family member 3
hsa-miR-146b-3p	0	0	1	1	0	0	ATP13A1	ATPase type 13A1
hsa-miR-146b-3p	0	0	0	1	1	1	CYP3A7	cytochrome P450, family 3, subfamily A, polypeptide 7
hsa-miR-146b-3p	0	0	1	1	1	1	IKZF3	IKAROS family zinc finger 3 (Aiolos)
hsa-miR-146b-3p	0	0	0	1	0	0	SSTR5	somatostatin receptor 5
hsa-miR-146b-3p	0	0	0	1	0	0	NTN3	netrin 3
hsa-miR-146b-3p	0	0	0	1	0	0	FLYWCH2	FLYWCH family member 2
hsa-miR-146b-3p	0	0	0	1	0	0	KCNF1	potassium voltage-gated channel, subfamily F, member 1
hsa-miR-146b-3p	1	0	1	1	1	1	WDR92	WD repeat domain 92
hsa-miR-146b-3p	0	0	0	1	1	1	FAM228A	family with sequence similarity 228, member A
hsa-miR-146b-3p	0	0	0	1	1	1	ALPI	alkaline phosphatase, intestinal
hsa-miR-146b-3p	0	0	0	1	0	0	RNPEP	arginyl aminopeptidase (aminopeptidase B)
hsa-miR-146b-3p	0	0	0	1	0	0	UCN	urocortin
hsa-miR-146b-3p	1	0	1	1	0	0	CAMK2N2	calcium/calmodulin-dependent protein kinase II inhibitor 2
hsa-miR-146b-3p	0	0	0	1	0	0	SLC9B1	solute carrier family 9, subfamily B (NHA1, cation proton antiporter 1), member 1
hsa-miR-146b-3p	0	0	1	1	0	0	APEH	N-acylaminoacyl-peptide hydrolase
hsa-miR-146b-3p	0	0	0	1	0	0	DUSP7	dual specificity phosphatase 7
hsa-miR-146b-3p	1	0	1	1	1	1	GALNT10	UDP-N-acetyl-alpha-D-galactosamine:polypeptide N-acetylgalactosaminyltransferase 10 (GalNAc-T10)
hsa-miR-146b-3p	0	0	0	1	1	1	RP9	retinitis pigmentosa 9 (autosomal dominant)
hsa-miR-146b-3p	1	0	1	1	0	0	FASTK	Fas-activated serine/threonine kinase
hsa-miR-146b-3p	0	0	1	1	1	1	CPA6	carboxypeptidase A6
hsa-miR-146b-3p	0	0	0	1	1	1	ZNF488	zinc finger protein 488
hsa-miR-146b-3p	0	0	0	1	0	0	VWA2	von Willebrand factor A domain containing 2
hsa-miR-146b-3p	0	0	0	1	0	0	SERPINA4	serpin peptidase inhibitor, clade A (alpha-1 antiproteinase, antitrypsin), member 4
hsa-miR-146b-3p	0	0	0	1	0	0	SPATA19	spermatogenesis associated 19
hsa-miR-146b-3p	0	0	1	1	1	1	MMP3	matrix metallopeptidase 3 (stromelysin 1, progelatinase)
hsa-miR-146b-3p	1	0	1	1	0	0	PPIB	peptidylprolyl isomerase B (cyclophilin B)
hsa-miR-146b-3p	0	0	1	1	0	0	MESP1	mesoderm posterior 1 homolog (mouse)
hsa-miR-146b-3p	0	0	0	1	0	0	RECQL4	RecQ protein-like 4
hsa-miR-146b-3p	0	0	0	1	0	0	RILP	Rab interacting lysosomal protein
hsa-miR-146b-3p	0	0	1	1	0	0	IGFBP6	insulin-like growth factor binding protein 6
hsa-miR-146b-3p	0	0	0	1	0	0	SPSB3	splA/ryanodine receptor domain and SOCS box containing 3
hsa-miR-146b-3p	0	0	0	1	0	0	E4F1	E4F transcription factor 1
hsa-miR-146b-3p	0	0	0	1	0	0	OR5A2	olfactory receptor, family 5, subfamily A, member 2
hsa-miR-146b-3p	0	0	1	1	0	0	HMCN2	hemicentin 2
hsa-miR-146b-3p	0	0	1	1	0	0	KCNK3	potassium channel, subfamily K, member 3
hsa-miR-146b-3p	1	0	1	1	1	1	TSEN34	tRNA splicing endonuclease 34 homolog (S. cerevisiae)
hsa-miR-146b-3p	0	0	1	1	1	1	MXD3	MAX dimerization protein 3
hsa-miR-146b-3p	0	0	1	1	1	1	GNB2	guanine nucleotide binding protein (G protein), beta polypeptide 2
hsa-miR-146b-3p	0	0	0	1	0	0	PRY2	PTPN13-like, Y-linked 2
hsa-miR-146b-3p	0	0	0	1	0	0	RPAP1	RNA polymerase II associated protein 1
hsa-miR-146b-3p	0	0	0	1	0	0	TMEM126A	transmembrane protein 126A
hsa-miR-146b-3p	0	0	1	1	0	0	GSG1L	GSG1-like
hsa-miR-146b-3p	0	0	0	1	1	1	VASN	vasorin
hsa-miR-146b-3p	0	0	0	1	0	0	ASL	argininosuccinate lyase
hsa-miR-146b-3p	0	0	0	1	0	0	TUBB3	tubulin, beta 3 class III
hsa-miR-146b-3p	1	0	0	1	1	1	TACR1	tachykinin receptor 1
hsa-miR-146b-3p	0	0	0	1	0	0	DEGS2	delta(4)-desaturase, sphingolipid 2
hsa-miR-146b-3p	0	0	0	1	0	0	CEP89	centrosomal protein 89kDa
hsa-miR-146b-3p	0	0	1	1	1	1	GNAS	GNAS complex locus
hsa-miR-146b-3p	0	0	1	1	0	0	VAMP5	vesicle-associated membrane protein 5 (myobrevin)
hsa-miR-146b-3p	0	0	0	1	1	1	FOXD4L1	forkhead box D4-like 1
hsa-miR-146b-3p	0	0	1	1	1	1	RPTOR	regulatory associated protein of MTOR, complex 1
hsa-miR-146b-3p	0	0	1	1	0	0	AVPI1	arginine vasopressin-induced 1
hsa-miR-146b-3p	0	0	0	1	0	0	SNX32	sorting nexin 32
hsa-miR-146b-3p	0	0	1	1	0	0	GMPPB	GDP-mannose pyrophosphorylase B
hsa-miR-146b-3p	0	0	0	1	0	0	ANKRD13D	ankyrin repeat domain 13 family, member D
hsa-miR-146b-3p	0	0	1	1	0	0	DHX37	DEAH (Asp-Glu-Ala-His) box polypeptide 37
hsa-miR-146b-3p	0	0	1	1	0	0	CYP2W1	cytochrome P450, family 2, subfamily W, polypeptide 1
hsa-miR-146b-3p	0	0	1	1	0	0	GRB7	growth factor receptor-bound protein 7
hsa-miR-146b-3p	0	0	1	1	0	0	WDR81	WD repeat domain 81
hsa-miR-146b-3p	1	0	0	1	0	0	EHBP1L1	EH domain binding protein 1-like 1
hsa-miR-146b-3p	0	0	1	1	0	0	PPP1R14B	protein phosphatase 1, regulatory (inhibitor) subunit 14B
hsa-miR-146b-3p	1	0	1	1	0	0	ATG4D	autophagy related 4D, cysteine peptidase
hsa-miR-146b-3p	0	0	1	1	0	0	CARD14	caspase recruitment domain family, member 14
hsa-miR-146b-3p	0	0	0	1	0	0	TUBB8	tubulin, beta 8 class VIII
hsa-miR-146b-3p	1	0	1	1	0	0	KY	kyphoscoliosis peptidase
hsa-miR-146b-3p	0	0	0	1	0	0	METTL18	methyltransferase like 18
hsa-miR-146b-3p	0	0	1	1	1	1	PAAF1	proteasomal ATPase-associated factor 1
hsa-miR-146b-3p	0	0	1	1	1	1	LSM1	LSM1 homolog, U6 small nuclear RNA associated (S. cerevisiae)
hsa-miR-146b-3p	0	0	1	1	1	1	TNK1	tyrosine kinase, non-receptor, 1
hsa-miR-146b-3p	0	0	0	1	1	1	SLC22A13	solute carrier family 22 (organic anion transporter), member 13
hsa-miR-146b-3p	0	0	1	1	1	1	MRPL52	mitochondrial ribosomal protein L52
hsa-miR-146b-3p	0	0	1	1	0	0	POLD4	polymerase (DNA-directed), delta 4, accessory subunit
hsa-miR-146b-3p	0	0	0	1	1	1	MRPL45	mitochondrial ribosomal protein L45
hsa-miR-146b-3p	1	0	0	1	1	1	TCHP	trichoplein, keratin filament binding
hsa-miR-146b-3p	0	0	1	1	1	1	CCDC147	coiled-coil domain containing 147
hsa-miR-146b-3p	1	0	1	1	1	1	AGGF1	angiogenic factor with G patch and FHA domains 1
hsa-miR-146b-3p	0	0	0	1	1	1	HMHA1	histocompatibility (minor) HA-1
hsa-miR-146b-3p	1	0	1	1	1	1	GALE	UDP-galactose-4-epimerase
hsa-miR-146b-3p	1	0	1	1	1	1	NEUROG2	neurogenin 2
hsa-miR-146b-3p	0	0	0	1	1	1	NOS2	nitric oxide synthase 2, inducible
hsa-miR-146b-3p	0	0	1	1	0	0	STX4	syntaxin 4
hsa-miR-146b-3p	0	0	0	1	0	0	RPL27A	ribosomal protein L27a
hsa-miR-146b-3p	0	0	1	1	0	0	CLEC18C	C-type lectin domain family 18, member C
hsa-miR-146b-3p	0	0	1	1	1	1	CD300LB	CD300 molecule-like family member b
hsa-miR-146b-3p	0	0	0	1	0	0	EXOC3	exocyst complex component 3
hsa-miR-146b-3p	0	0	0	1	0	0	STX19	syntaxin 19
hsa-miR-146b-3p	0	0	1	1	0	0	CALML3	calmodulin-like 3
hsa-miR-146b-3p	0	0	1	1	0	0	LSM10	LSM10, U7 small nuclear RNA associated
hsa-miR-146b-3p	1	0	1	1	1	1	C3orf45	chromosome 3 open reading frame 45
hsa-miR-146b-3p	1	0	1	1	1	1	CALR	calreticulin
hsa-miR-146b-3p	0	0	1	1	0	0	STK25	serine/threonine kinase 25
hsa-miR-146b-3p	1	0	0	1	0	0	APBA3	amyloid beta (A4) precursor protein-binding, family A, member 3
hsa-miR-146b-3p	0	0	0	1	0	0	SERPINB6	serpin peptidase inhibitor, clade B (ovalbumin), member 6
hsa-miR-146b-3p	0	0	1	1	0	0	CCDC101	coiled-coil domain containing 101
hsa-miR-146b-3p	0	0	0	1	0	0	NKPD1	NTPase, KAP family P-loop domain containing 1
hsa-miR-146b-3p	0	0	1	1	0	0	RAP1GAP	RAP1 GTPase activating protein
hsa-miR-146b-3p	1	0	1	1	1	1	CC2D1A	coiled-coil and C2 domain containing 1A
hsa-miR-146b-3p	0	0	1	1	1	1	ZFAT	zinc finger and AT hook domain containing
hsa-miR-146b-3p	0	0	1	1	1	1	SAMD9L	sterile alpha motif domain containing 9-like
hsa-miR-146b-3p	0	0	0	1	0	0	TSTD1	thiosulfate sulfurtransferase (rhodanese)-like domain containing 1
hsa-miR-146b-3p	0	0	1	1	1	1	MRPL43	mitochondrial ribosomal protein L43
hsa-miR-146b-3p	1	0	1	1	1	1	MET	met proto-oncogene (hepatocyte growth factor receptor)
hsa-miR-146b-3p	0	0	0	1	0	0	CTXN1	cortexin 1
hsa-miR-146b-3p	1	0	1	1	0	0	UBASH3A	ubiquitin associated and SH3 domain containing A
hsa-miR-146b-3p	0	0	1	1	1	1	ZNF771	zinc finger protein 771
hsa-miR-146b-3p	0	0	0	1	0	0	LRRC37A3	leucine rich repeat containing 37, member A3
hsa-miR-146b-3p	0	0	1	1	0	0	CTRL	chymotrypsin-like
hsa-miR-146b-3p	0	0	0	1	0	0	FGF8	fibroblast growth factor 8 (androgen-induced)
hsa-miR-146b-3p	0	0	1	1	1	1	RASGRP2	RAS guanyl releasing protein 2 (calcium and DAG-regulated)
hsa-miR-146b-3p	1	0	1	1	1	1	PACS1	phosphofurin acidic cluster sorting protein 1
hsa-miR-146b-3p	1	0	1	1	1	1	DAB2	disabled homolog 2, mitogen-responsive phosphoprotein (Drosophila)
hsa-miR-146b-3p	0	0	1	1	0	0	VWF	von Willebrand factor
hsa-miR-146b-3p	0	0	1	1	0	0	RPLP2	ribosomal protein, large, P2
hsa-miR-146b-3p	0	0	0	1	0	0	STAB1	stabilin 1
hsa-miR-146b-3p	0	0	0	1	0	0	P2RY11	purinergic receptor P2Y, G-protein coupled, 11
hsa-miR-146b-3p	0	0	0	1	0	0	PPAN	peter pan homolog (Drosophila)
hsa-miR-146b-3p	0	0	0	1	0	0	PPAN-P2RY11	PPAN-P2RY11 readthrough
hsa-miR-146b-3p	0	0	0	1	0	0	ROGDI	rogdi homolog (Drosophila)
hsa-miR-146b-3p	0	0	0	1	0	0	OR51S1	olfactory receptor, family 51, subfamily S, member 1
hsa-miR-146b-3p	0	0	0	1	0	0	TRIM75	tripartite motif containing 75
hsa-miR-146b-3p	0	0	0	1	0	0	UFSP1	UFM1-specific peptidase 1 (non-functional)
hsa-miR-146b-3p	1	0	0	1	1	1	GPR4	G protein-coupled receptor 4
hsa-miR-146b-3p	1	0	1	1	1	1	PRR7	proline rich 7 (synaptic)
hsa-miR-146b-3p	0	0	0	1	0	0	SPHK1	sphingosine kinase 1
hsa-miR-146b-3p	0	0	1	1	1	1	BRD9	bromodomain containing 9
hsa-miR-146b-3p	0	0	1	1	1	1	CNTNAP3	contactin associated protein-like 3
hsa-miR-146b-3p	0	0	0	1	0	0	SLC6A18	solute carrier family 6, member 18
hsa-miR-146b-3p	0	0	0	1	1	1	LIMS2	LIM and senescent cell antigen-like domains 2
hsa-miR-146b-3p	0	0	0	1	1	1	SIRT3	sirtuin 3
hsa-miR-146b-3p	0	0	0	1	1	1	C9orf156	chromosome 9 open reading frame 156
hsa-miR-146b-3p	0	0	1	1	0	0	GLTSCR2	glioma tumor suppressor candidate region gene 2
hsa-miR-146b-3p	0	0	0	1	0	0	NEU4	sialidase 4
hsa-miR-146b-3p	0	0	0	1	0	0	TMIE	transmembrane inner ear
hsa-miR-146b-3p	0	0	0	1	0	0	SPAG11A	sperm associated antigen 11A
hsa-miR-146b-3p	0	0	1	1	0	0	PTPMT1	protein tyrosine phosphatase, mitochondrial 1
hsa-miR-146b-3p	0	0	0	1	0	0	IMPDH2	IMP (inosine 5'-monophosphate) dehydrogenase 2
hsa-miR-146b-3p	1	0	1	1	0	0	FAM100B	family with sequence similarity 100, member B
hsa-miR-146b-3p	0	0	1	1	1	1	FFAR3	free fatty acid receptor 3
hsa-miR-146b-3p	0	0	0	1	0	0	HSF1	heat shock transcription factor 1
hsa-miR-146b-3p	0	0	0	1	0	0	SPATA8	spermatogenesis associated 8
hsa-miR-146b-3p	0	0	0	1	0	0	KLHL22	kelch-like 22 (Drosophila)
hsa-miR-146b-3p	0	0	0	1	1	1	C1S	complement component 1, s subcomponent
hsa-miR-146b-3p	0	0	0	1	0	0	DDX51	DEAD (Asp-Glu-Ala-Asp) box polypeptide 51
hsa-miR-146b-3p	0	0	0	1	0	0	NKX2-5	NK2 homeobox 5
hsa-miR-146b-3p	0	0	1	1	0	0	C10orf120	chromosome 10 open reading frame 120
hsa-miR-146b-3p	0	0	0	1	0	0	C19orf71	chromosome 19 open reading frame 71
hsa-miR-146b-3p	1	0	1	1	1	1	CSF1	colony stimulating factor 1 (macrophage)
hsa-miR-146b-3p	1	0	1	1	1	1	SHMT1	serine hydroxymethyltransferase 1 (soluble)
hsa-miR-146b-3p	0	0	0	1	0	0	ACTL10	actin-like 10
hsa-miR-146b-3p	0	0	0	1	0	0	CYP2A13	cytochrome P450, family 2, subfamily A, polypeptide 13
hsa-miR-146b-3p	0	0	1	1	1	1	TBX18	T-box 18
hsa-miR-146b-3p	0	0	0	1	0	0	CYP2F1	cytochrome P450, family 2, subfamily F, polypeptide 1
hsa-miR-146b-3p	0	0	1	1	0	0	PKP3	plakophilin 3
hsa-miR-146b-3p	1	0	1	1	1	1	CLSTN2	calsyntenin 2
hsa-miR-146b-3p	0	0	1	1	0	0	STAC3	SH3 and cysteine rich domain 3
hsa-miR-146b-3p	1	0	1	1	0	0	GAS2L1	growth arrest-specific 2 like 1
hsa-miR-146b-3p	1	0	0	1	0	0	EMID1	EMI domain containing 1
hsa-miR-146b-3p	0	0	1	1	0	0	ARAP1	ArfGAP with RhoGAP domain, ankyrin repeat and PH domain 1
hsa-miR-146b-3p	0	0	1	1	0	0	NUDT17	nudix (nucleoside diphosphate linked moiety X)-type motif 17
hsa-miR-146b-3p	0	0	1	1	0	0	ZACN	zinc activated ligand-gated ion channel
hsa-miR-146b-3p	0	0	0	1	1	1	TBCD	tubulin folding cofactor D
hsa-miR-146b-3p	0	0	1	1	1	1	PLCD1	phospholipase C, delta 1
hsa-miR-146b-3p	0	0	0	1	1	1	HSP90AA1	heat shock protein 90kDa alpha (cytosolic), class A member 1
hsa-miR-146b-3p	0	0	0	1	0	0	PES1	pescadillo ribosomal biogenesis factor 1
hsa-miR-146b-3p	0	0	0	1	0	0	VWCE	von Willebrand factor C and EGF domains
hsa-miR-146b-3p	0	0	1	1	0	0	CHID1	chitinase domain containing 1
hsa-miR-146b-3p	0	0	0	1	0	0	HEXDC	hexosaminidase (glycosyl hydrolase family 20, catalytic domain) containing
hsa-miR-146b-3p	0	0	1	1	1	1	SLC28A1	solute carrier family 28 (sodium-coupled nucleoside transporter), member 1
hsa-miR-146b-3p	0	0	1	1	1	1	PARK7	parkinson protein 7
hsa-miR-146b-3p	1	0	1	1	1	1	PHF8	PHD finger protein 8
hsa-miR-146b-3p	0	0	0	1	0	0	PTGES2	prostaglandin E synthase 2
hsa-miR-146b-3p	0	0	0	1	0	0	INF2	inverted formin, FH2 and WH2 domain containing
hsa-miR-146b-3p	0	0	0	1	0	0	SLC26A5	solute carrier family 26, member 5 (prestin)
hsa-miR-146b-3p	0	0	1	1	0	0	S100A13	S100 calcium binding protein A13
hsa-miR-146b-3p	1	0	1	1	1	1	KCNJ11	potassium inwardly-rectifying channel, subfamily J, member 11
hsa-miR-146b-3p	0	0	1	1	1	1	CCDC78	coiled-coil domain containing 78
hsa-miR-146b-3p	0	0	1	1	1	1	LIMK2	LIM domain kinase 2
hsa-miR-146b-3p	0	0	0	1	0	0	OBP2A	odorant binding protein 2A
hsa-miR-146b-3p	0	0	0	1	0	0	LCN6	lipocalin 6
hsa-miR-146b-3p	0	0	1	1	0	0	CORO1B	coronin, actin binding protein, 1B
hsa-miR-146b-3p	1	0	1	1	1	1	PCDH11Y	protocadherin 11 Y-linked
hsa-miR-146b-3p	0	0	1	1	0	0	TAF1C	TATA box binding protein (TBP)-associated factor, RNA polymerase I, C, 110kDa
hsa-miR-146b-3p	0	0	1	1	1	1	ABLIM2	actin binding LIM protein family, member 2
hsa-miR-146b-3p	1	0	0	1	0	0	MAP2K3	mitogen-activated protein kinase kinase 3
hsa-miR-146b-3p	1	0	1	1	1	1	BCAT1	branched chain amino-acid transaminase 1, cytosolic
hsa-miR-146b-3p	0	0	0	1	0	0	COBRA1	cofactor of BRCA1
hsa-miR-146b-3p	1	0	1	1	1	1	TTC26	tetratricopeptide repeat domain 26
hsa-miR-146b-3p	0	0	0	1	0	0	CDHR4	cadherin-related family member 4
hsa-miR-146b-3p	1	0	1	1	1	1	CASZ1	castor zinc finger 1
hsa-miR-146b-3p	0	0	1	1	1	1	LRRC27	leucine rich repeat containing 27
hsa-miR-146b-3p	1	0	1	1	1	1	PDGFA	platelet-derived growth factor alpha polypeptide
hsa-miR-146b-3p	0	0	1	1	0	0	FZD9	frizzled family receptor 9
hsa-miR-146b-3p	1	0	1	1	1	1	ZDHHC7	zinc finger, DHHC-type containing 7
hsa-miR-146b-3p	1	0	1	1	1	1	AP3D1	adaptor-related protein complex 3, delta 1 subunit
hsa-miR-146b-3p	0	0	0	1	0	0	C19orf48	chromosome 19 open reading frame 48
hsa-miR-146b-3p	0	0	1	1	1	1	CCNB3	cyclin B3
hsa-miR-146b-3p	0	0	0	1	1	1	POP1	processing of precursor 1, ribonuclease P/MRP subunit (S. cerevisiae)
hsa-miR-146b-3p	0	0	1	1	0	0	MARK2	MAP/microtubule affinity-regulating kinase 2
hsa-miR-146b-3p	1	0	1	1	1	1	MLLT4	myeloid/lymphoid or mixed-lineage leukemia (trithorax homolog, Drosophila); translocated to, 4
hsa-miR-146b-3p	0	0	1	1	1	1	ACPP	acid phosphatase, prostate
hsa-miR-146b-3p	0	0	0	1	0	0	P2RX2	purinergic receptor P2X, ligand-gated ion channel, 2
hsa-miR-146b-3p	1	0	1	1	1	1	ANKS6	ankyrin repeat and sterile alpha motif domain containing 6
hsa-miR-146b-3p	1	0	1	1	1	1	RAI1	retinoic acid induced 1
hsa-miR-146b-3p	1	0	1	1	1	1	DENND5B	DENN/MADD domain containing 5B
hsa-miR-146b-3p	0	0	1	1	1	1	CD209	CD209 molecule
hsa-miR-146b-3p	0	0	1	1	0	0	CUL9	cullin 9
hsa-miR-146b-3p	0	0	0	1	0	0	ZBTB45	zinc finger and BTB domain containing 45
hsa-miR-146b-3p	0	0	0	1	0	0	GPSM1	G-protein signaling modulator 1
hsa-miR-146b-3p	0	0	1	1	0	0	CCDC81	coiled-coil domain containing 81
hsa-miR-146b-3p	0	0	1	1	1	1	SLC22A17	solute carrier family 22, member 17
hsa-miR-146b-3p	0	0	1	1	0	0	PRMT2	protein arginine methyltransferase 2
hsa-miR-146b-3p	0	0	0	1	1	1	RPL23A	ribosomal protein L23a
hsa-miR-146b-3p	0	0	0	1	0	0	MMP23B	matrix metallopeptidase 23B
hsa-miR-146b-3p	0	0	1	1	1	1	CDAN1	codanin 1
hsa-miR-146b-3p	0	0	1	1	0	0	PARVG	parvin, gamma
hsa-miR-146b-3p	0	0	1	1	0	0	CSAG2	CSAG family, member 2
hsa-miR-146b-3p	0	0	1	1	0	0	FAM115C	family with sequence similarity 115, member C
hsa-miR-146b-3p	0	0	0	1	0	0	ARID5A	AT rich interactive domain 5A (MRF1-like)
hsa-miR-146b-3p	0	0	0	1	1	1	TMEM79	transmembrane protein 79
hsa-miR-146b-3p	1	0	1	1	1	1	SLC30A7	solute carrier family 30 (zinc transporter), member 7
hsa-miR-146b-3p	1	0	0	1	1	1	PTRF	polymerase I and transcript release factor
hsa-miR-146b-3p	0	0	1	1	0	0	RAD51D	RAD51 homolog D (S. cerevisiae)
hsa-miR-146b-3p	1	0	1	1	1	1	TMUB2	transmembrane and ubiquitin-like domain containing 2
hsa-miR-146b-3p	0	0	1	1	0	0	BCAS4	breast carcinoma amplified sequence 4
hsa-miR-146b-3p	1	0	1	1	1	1	ANK1	ankyrin 1, erythrocytic
hsa-miR-146b-3p	0	0	1	1	1	1	TFEB	transcription factor EB
hsa-miR-146b-3p	1	0	1	1	1	1	TNPO3	transportin 3
hsa-miR-146b-3p	0	0	0	1	0	0	SLFNL1	schlafen-like 1
hsa-miR-146b-3p	1	0	1	1	1	1	FGFR2	fibroblast growth factor receptor 2
hsa-miR-146b-3p	1	0	0	1	0	0	TRPV6	transient receptor potential cation channel, subfamily V, member 6
hsa-miR-146b-3p	1	0	1	1	1	1	AGAP3	ArfGAP with GTPase domain, ankyrin repeat and PH domain 3
hsa-miR-146b-3p	0	0	1	1	0	0	KIAA1211L	KIAA1211-like
hsa-miR-146b-3p	1	0	1	1	1	1	TRRAP	transformation/transcription domain-associated protein
hsa-miR-146b-3p	0	0	1	1	0	0	ART5	ADP-ribosyltransferase 5
hsa-miR-146b-3p	0	0	1	1	1	1	DMBX1	diencephalon/mesencephalon homeobox 1
hsa-miR-146b-3p	1	0	1	1	1	1	MAN2A2	mannosidase, alpha, class 2A, member 2
hsa-miR-146b-3p	1	0	1	1	1	1	SNTB2	syntrophin, beta 2 (dystrophin-associated protein A1, 59kDa, basic component 2)
hsa-miR-146b-3p	0	0	0	1	0	0	MMP17	matrix metallopeptidase 17 (membrane-inserted)
hsa-miR-146b-3p	0	0	0	1	0	0	OR10S1	olfactory receptor, family 10, subfamily S, member 1
hsa-miR-146b-3p	0	0	0	1	1	1	CDKN2A	cyclin-dependent kinase inhibitor 2A
hsa-miR-146b-3p	0	0	0	1	0	0	SLC25A47	solute carrier family 25, member 47
hsa-miR-146b-3p	0	0	1	1	0	0	FAM19A3	family with sequence similarity 19 (chemokine (C-C motif)-like), member A3
hsa-miR-146b-3p	1	0	1	1	0	0	PLXNB3	plexin B3
hsa-miR-146b-3p	0	0	1	1	0	0	CSAG1	chondrosarcoma associated gene 1
hsa-miR-146b-3p	1	0	0	1	1	1	TRIM67	tripartite motif containing 67
hsa-miR-146b-3p	0	0	0	1	1	1	OBSCN	obscurin, cytoskeletal calmodulin and titin-interacting RhoGEF
hsa-miR-146b-3p	0	0	0	1	1	1	LGR6	leucine-rich repeat containing G protein-coupled receptor 6
hsa-miR-146b-3p	0	0	0	1	0	0	PHLDA3	pleckstrin homology-like domain, family A, member 3
hsa-miR-146b-3p	0	0	1	1	1	1	SHPRH	SNF2 histone linker PHD RING helicase, E3 ubiquitin protein ligase
hsa-miR-146b-3p	0	0	0	1	1	1	LTV1	LTV1 homolog (S. cerevisiae)
hsa-miR-146b-3p	0	0	1	1	0	0	ABRACL	ABRA C-terminal like
hsa-miR-146b-3p	1	0	1	1	1	1	EYA4	eyes absent homolog 4 (Drosophila)
hsa-miR-146b-3p	0	0	1	1	1	1	HSD17B7	hydroxysteroid (17-beta) dehydrogenase 7
hsa-miR-146b-3p	0	0	1	1	1	1	UFC1	ubiquitin-fold modifier conjugating enzyme 1
hsa-miR-146b-3p	0	0	0	1	0	0	RHBG	Rh family, B glycoprotein (gene/pseudogene)
hsa-miR-146b-3p	0	0	1	1	1	1	C1orf43	chromosome 1 open reading frame 43
hsa-miR-146b-3p	0	0	1	1	0	0	PAOX	polyamine oxidase (exo-N4-amino)
hsa-miR-146b-3p	0	0	0	1	0	0	ADAM8	ADAM metallopeptidase domain 8
hsa-miR-146b-3p	0	0	1	1	1	1	RAB13	RAB13, member RAS oncogene family
hsa-miR-146b-3p	0	0	0	1	0	0	BET3L	BET3 like (S. cerevisiae)
hsa-miR-146b-3p	0	0	1	1	1	1	THEM5	thioesterase superfamily member 5
hsa-miR-146b-3p	1	0	1	1	1	1	ENSA	endosulfine alpha
hsa-miR-146b-3p	0	0	0	1	0	0	ADAMTSL4	ADAMTS-like 4
hsa-miR-146b-3p	0	0	1	1	1	1	GRK5	G protein-coupled receptor kinase 5
hsa-miR-146b-3p	1	0	1	1	1	1	VAX1	ventral anterior homeobox 1
hsa-miR-146b-3p	0	0	1	1	1	1	SMNDC1	survival motor neuron domain containing 1
hsa-miR-146b-3p	0	0	1	1	0	0	WNT2B	wingless-type MMTV integration site family, member 2B
hsa-miR-146b-3p	0	0	1	1	1	1	C1orf162	chromosome 1 open reading frame 162
hsa-miR-146b-3p	1	0	1	1	1	1	SFXN2	sideroflexin 2
hsa-miR-146b-3p	0	0	0	1	0	0	TNFRSF6B	tumor necrosis factor receptor superfamily, member 6b, decoy
hsa-miR-146b-3p	0	0	0	1	0	0	SRPK3	SRSF protein kinase 3
hsa-miR-146b-3p	0	0	1	1	0	0	DPCD	deleted in primary ciliary dyskinesia homolog (mouse)
hsa-miR-146b-3p	0	0	0	1	0	0	HAUS7	HAUS augmin-like complex, subunit 7
hsa-miR-146b-3p	0	0	0	1	1	1	KCNQ2	potassium voltage-gated channel, KQT-like subfamily, member 2
hsa-miR-146b-3p	0	0	0	1	1	1	CHRNA4	cholinergic receptor, nicotinic, alpha 4 (neuronal)
hsa-miR-146b-3p	0	0	0	1	0	0	PNMA6B	paraneoplastic Ma antigen family member 6B
hsa-miR-146b-3p	1	0	0	1	1	1	NKAIN4	Na+/K+ transporting ATPase interacting 4
hsa-miR-146b-3p	0	0	1	1	1	1	SLCO4A1	solute carrier organic anion transporter family, member 4A1
hsa-miR-146b-3p	1	0	1	1	1	1	FUBP1	far upstream element (FUSE) binding protein 1
hsa-miR-146b-3p	0	0	1	1	0	0	LSM14B	LSM14B, SCD6 homolog B (S. cerevisiae)
hsa-miR-146b-3p	1	0	1	1	0	0	EFHC1	EF-hand domain (C-terminal) containing 1
hsa-miR-146b-3p	0	0	0	1	1	1	C20orf85	chromosome 20 open reading frame 85
hsa-miR-146b-3p	0	0	1	1	0	0	PLCE1	phospholipase C, epsilon 1
hsa-miR-146b-3p	0	0	1	1	1	1	PFDN4	prefoldin subunit 4
hsa-miR-146b-3p	0	0	1	1	0	0	ENTPD8	ectonucleoside triphosphate diphosphohydrolase 8
hsa-miR-146b-3p	0	0	1	1	0	0	NDOR1	NADPH dependent diflavin oxidoreductase 1
hsa-miR-146b-3p	0	0	1	1	0	0	ORC1	origin recognition complex, subunit 1
hsa-miR-146b-3p	0	0	1	1	1	1	TMEM189	transmembrane protein 189
hsa-miR-146b-3p	0	0	1	1	0	0	PDZK1IP1	PDZK1 interacting protein 1
hsa-miR-146b-3p	0	0	1	1	0	0	MAST2	microtubule associated serine/threonine kinase 2
hsa-miR-146b-3p	0	0	1	1	1	1	MRPL14	mitochondrial ribosomal protein L14
hsa-miR-146b-3p	0	0	0	1	0	0	LRIT2	leucine-rich repeat, immunoglobulin-like and transmembrane domains 2
hsa-miR-146b-3p	0	0	0	1	0	0	C10orf99	chromosome 10 open reading frame 99
hsa-miR-146b-3p	1	0	1	1	1	1	TSPAN14	tetraspanin 14
hsa-miR-146b-3p	1	0	1	1	1	1	ERI3	ERI1 exoribonuclease family member 3
hsa-miR-146b-3p	1	0	1	1	1	1	CTSA	cathepsin A
hsa-miR-146b-3p	1	0	1	1	1	1	SLC2A1	solute carrier family 2 (facilitated glucose transporter), member 1
hsa-miR-146b-3p	0	0	1	1	0	0	ABCC10	ATP-binding cassette, sub-family C (CFTR/MRP), member 10
hsa-miR-146b-3p	0	0	0	1	1	1	ZDHHC12	zinc finger, DHHC-type containing 12
hsa-miR-146b-3p	0	0	1	1	0	0	COL9A2	collagen, type IX, alpha 2
hsa-miR-146b-3p	0	0	1	1	0	0	PPIE	peptidylprolyl isomerase E (cyclophilin E)
hsa-miR-146b-3p	0	0	1	1	1	1	SLC2A8	solute carrier family 2 (facilitated glucose transporter), member 8
hsa-miR-146b-3p	0	0	1	1	0	0	TMEM54	transmembrane protein 54
hsa-miR-146b-3p	0	0	0	1	0	0	PSMB7	proteasome (prosome, macropain) subunit, beta type, 7
hsa-miR-146b-3p	0	0	1	1	0	0	PI16	peptidase inhibitor 16
hsa-miR-146b-3p	0	0	1	1	1	1	ZWINT	ZW10 interactor
hsa-miR-146b-3p	1	0	1	1	0	0	DES	desmin
hsa-miR-146b-3p	1	0	1	1	0	0	CD164L2	CD164 sialomucin-like 2
hsa-miR-146b-3p	0	0	1	1	0	0	SPDEF	SAM pointed domain containing ets transcription factor
hsa-miR-146b-3p	0	0	0	1	1	1	ARHGAP22	Rho GTPase activating protein 22
hsa-miR-146b-3p	0	0	1	1	1	1	WDR31	WD repeat domain 31
hsa-miR-146b-3p	0	0	1	1	0	0	GPRIN2	G protein regulated inducer of neurite outgrowth 2
hsa-miR-146b-3p	0	0	1	1	1	1	SYT15	synaptotagmin XV
hsa-miR-146b-3p	1	0	1	1	1	1	LYPLA2	lysophospholipase II
hsa-miR-146b-3p	0	0	1	1	0	0	P2RY4	pyrimidinergic receptor P2Y, G-protein coupled, 4
hsa-miR-146b-3p	0	0	1	1	1	1	RING1	ring finger protein 1
hsa-miR-146b-3p	0	0	0	1	0	0	ACTL7B	actin-like 7B
hsa-miR-146b-3p	0	0	1	1	1	1	RXRB	retinoid X receptor, beta
hsa-miR-146b-3p	0	0	0	1	0	0	ASIP	agouti signaling protein
hsa-miR-146b-3p	0	0	1	1	0	0	CCDC7	coiled-coil domain containing 7
hsa-miR-146b-3p	0	0	1	1	1	1	TBC1D2	TBC1 domain family, member 2
hsa-miR-146b-3p	0	0	0	1	0	0	CLCNKB	chloride channel, voltage-sensitive Kb
hsa-miR-146b-3p	0	0	0	1	0	0	VWA7	von Willebrand factor A domain containing 7
hsa-miR-146b-3p	0	0	1	1	0	0	MSH5	mutS homolog 5 (E. coli)
hsa-miR-146b-3p	1	0	1	1	1	1	DNAJC16	DnaJ (Hsp40) homolog, subfamily C, member 16
hsa-miR-146b-3p	0	0	1	1	0	0	TMEM51	transmembrane protein 51
hsa-miR-146b-3p	0	0	1	1	1	1	LTA	lymphotoxin alpha (TNF superfamily, member 1)
hsa-miR-146b-3p	0	0	0	1	0	0	PRICKLE3	prickle homolog 3 (Drosophila)
hsa-miR-146b-3p	0	0	0	1	0	0	CST7	cystatin F (leukocystatin)
hsa-miR-146b-3p	0	0	1	1	0	0	UXT	ubiquitously-expressed, prefoldin-like chaperone
hsa-miR-146b-3p	0	0	1	1	1	1	CNTNAP3B	contactin associated protein-like 3B
hsa-miR-146b-3p	0	0	1	1	0	0	TCTN1	tectonic family member 1
hsa-miR-146b-3p	0	0	0	1	0	0	IGFBPL1	insulin-like growth factor binding protein-like 1
hsa-miR-146b-3p	0	0	0	1	1	1	GRHPR	glyoxylate reductase/hydroxypyruvate reductase
hsa-miR-146b-3p	0	0	1	1	1	1	SCGN	secretagogin, EF-hand calcium binding protein
hsa-miR-146b-3p	0	0	0	1	0	0	OR13J1	olfactory receptor, family 13, subfamily J, member 1
hsa-miR-146b-3p	0	0	1	1	0	0	TP73	tumor protein p73
hsa-miR-146b-3p	0	0	0	1	0	0	LOC400558	uncharacterized LOC400558
hsa-miR-146b-3p	0	0	0	1	0	0	APRT	adenine phosphoribosyltransferase
hsa-miR-146b-3p	0	0	0	1	0	0	UCMA	upper zone of growth plate and cartilage matrix associated
hsa-miR-146b-3p	0	0	1	1	0	0	KIAA0226L	KIAA0226-like
hsa-miR-146b-3p	0	0	1	1	0	0	DHRS13	dehydrogenase/reductase (SDR family) member 13
hsa-miR-146b-3p	0	0	0	1	1	1	C5orf56	chromosome 5 open reading frame 56
hsa-miR-146b-3p	0	0	0	1	0	0	TNFRSF4	tumor necrosis factor receptor superfamily, member 4
hsa-miR-146b-3p	1	0	1	1	0	0	AGRN	agrin
hsa-miR-146b-3p	0	0	0	1	0	0	PLEKHN1	pleckstrin homology domain containing, family N member 1
hsa-miR-146b-3p	0	0	1	1	0	0	KATNB1	katanin p80 (WD repeat containing) subunit B 1
hsa-miR-146b-3p	0	0	1	1	1	1	PXDC1	PX domain containing 1
hsa-miR-146b-3p	0	0	0	1	0	0	CALML5	calmodulin-like 5
hsa-miR-146b-3p	1	0	1	1	1	1	WNT1	wingless-type MMTV integration site family, member 1
hsa-miR-146b-3p	0	0	0	1	0	0	AKR1C3	aldo-keto reductase family 1, member C3 (3-alpha hydroxysteroid dehydrogenase, type II)
hsa-miR-146b-3p	0	0	0	1	0	0	HUS1B	HUS1 checkpoint homolog b (S. pombe)
hsa-miR-146b-3p	0	0	1	1	0	0	PITRM1	pitrilysin metallopeptidase 1
hsa-miR-146b-3p	1	0	1	1	0	0	KIAA1644	KIAA1644
hsa-miR-146b-3p	0	0	1	1	0	0	APOBEC3C	apolipoprotein B mRNA editing enzyme, catalytic polypeptide-like 3C
hsa-miR-146b-3p	0	0	1	1	0	0	FAM188B	family with sequence similarity 188, member B
hsa-miR-146b-3p	0	0	1	1	0	0	TMEM74B	transmembrane protein 74B
hsa-miR-146b-3p	0	0	1	1	1	1	SLC45A2	solute carrier family 45, member 2
hsa-miR-146b-3p	0	0	1	1	1	1	TSSC1	tumor suppressing subtransferable candidate 1
hsa-miR-146b-3p	0	0	0	1	0	0	ZNF205	zinc finger protein 205
hsa-miR-146b-3p	0	0	0	1	0	0	MUC6	mucin 6, oligomeric mucus/gel-forming
hsa-miR-146b-3p	0	0	0	1	0	0	PSMD13	proteasome (prosome, macropain) 26S subunit, non-ATPase, 13
hsa-miR-146b-3p	0	0	0	1	0	0	NKD2	naked cuticle homolog 2 (Drosophila)
hsa-miR-146b-3p	0	0	1	1	0	0	DHRS4L2	dehydrogenase/reductase (SDR family) member 4 like 2
hsa-miR-146b-3p	0	0	1	1	0	0	SNRNP25	small nuclear ribonucleoprotein 25kDa (U11/U12)
hsa-miR-146b-3p	0	0	0	1	0	0	PTCHD2	patched domain containing 2
hsa-miR-146b-3p	1	0	1	1	1	1	GRHL1	grainyhead-like 1 (Drosophila)
hsa-miR-146b-3p	0	0	0	1	0	0	ZC3H12D	zinc finger CCCH-type containing 12D
hsa-miR-146b-3p	1	0	1	1	1	1	CYFIP2	cytoplasmic FMR1 interacting protein 2
hsa-miR-146b-3p	0	0	0	0	1	1	ZSWIM7	zinc finger, SWIM-type containing 7
hsa-miR-146b-3p	0	0	1	1	1	1	CPS1	carbamoyl-phosphate synthase 1, mitochondrial
hsa-miR-146b-3p	1	0	1	1	1	1	RFX4	regulatory factor X, 4 (influences HLA class II expression)
hsa-miR-146b-3p	1	0	1	1	1	1	SHB	Src homology 2 domain containing adaptor protein B
hsa-miR-146b-3p	0	0	1	1	1	1	TNNI1	troponin I type 1 (skeletal, slow)
hsa-miR-146b-3p	1	0	1	1	1	1	ASTN1	astrotactin 1
hsa-miR-146b-3p	1	0	1	0	1	1	GALNT2	UDP-N-acetyl-alpha-D-galactosamine:polypeptide N-acetylgalactosaminyltransferase 2 (GalNAc-T2)
hsa-miR-146b-3p	1	0	0	1	1	1	SLU7	SLU7 splicing factor homolog (S. cerevisiae)
hsa-miR-146b-3p	1	0	0	1	1	1	ZFP36L2	zinc finger protein 36, C3H type-like 2
hsa-miR-146b-3p	1	0	1	1	1	1	ADAMTS5	ADAM metallopeptidase with thrombospondin type 1 motif, 5
hsa-miR-146b-3p	0	0	0	1	1	1	SPAG6	sperm associated antigen 6
hsa-miR-146b-3p	1	0	1	0	1	1	HUNK	hormonally up-regulated Neu-associated kinase
hsa-miR-146b-3p	1	0	1	1	1	1	ZC3H7B	zinc finger CCCH-type containing 7B
hsa-miR-146b-3p	1	0	1	1	1	1	ASB6	ankyrin repeat and SOCS box containing 6
hsa-miR-146b-3p	0	0	0	1	1	1	TTC38	tetratricopeptide repeat domain 38
hsa-miR-146b-3p	1	0	1	1	1	1	SLC7A10	solute carrier family 7 (neutral amino acid transporter light chain, asc system), member 10
hsa-miR-146b-3p	1	0	1	1	1	1	SMARCAD1	SWI/SNF-related, matrix-associated actin-dependent regulator of chromatin, subfamily a, containing DEAD/H box 1
hsa-miR-146b-3p	1	0	1	1	1	1	EPB41L4A	erythrocyte membrane protein band 4.1 like 4A
hsa-miR-146b-3p	0	0	1	1	1	1	ESRP2	epithelial splicing regulatory protein 2
hsa-miR-146b-3p	0	0	0	1	1	1	COL18A1	collagen, type XVIII, alpha 1
hsa-miR-146b-3p	1	0	1	0	1	1	THAP2	THAP domain containing, apoptosis associated protein 2
hsa-miR-146b-3p	1	0	1	1	1	1	C22orf13	chromosome 22 open reading frame 13
hsa-miR-146b-3p	0	0	0	1	1	1	IDI2	isopentenyl-diphosphate delta isomerase 2
hsa-miR-146b-3p	0	0	1	1	1	1	FBXO4	F-box protein 4
hsa-miR-146b-3p	1	0	1	0	1	1	FAM129A	family with sequence similarity 129, member A
hsa-miR-146b-3p	1	0	1	1	1	1	SLC46A1	solute carrier family 46 (folate transporter), member 1
hsa-miR-146b-3p	0	0	1	1	1	1	DIDO1	death inducer-obliterator 1
hsa-miR-146b-3p	0	0	1	0	1	1	AMZ1	archaelysin family metallopeptidase 1
hsa-miR-146b-3p	0	0	0	1	1	1	TRIM35	tripartite motif containing 35
hsa-miR-146b-3p	0	0	1	0	1	1	VSIG1	V-set and immunoglobulin domain containing 1
hsa-miR-146b-3p	1	0	1	1	1	1	RAB43	RAB43, member RAS oncogene family
hsa-miR-146b-3p	0	0	1	1	1	1	MXRA7	matrix-remodelling associated 7
hsa-miR-146b-3p	0	0	0	0	1	1	RPS16P5	ribosomal protein S16 pseudogene 5
