# Supplementary material for: Profiling of Selected MicroRNAs in Proliferative Eutopic Endometrium of Women with Ovarian Endometriosis
Source: Biomed Res Int. 2015 Aug 20;2015:760698. doi: 10.1155/2015/760698 (PMC4558423; doi:10.1155/2015/760698)
Supplement: Supplementary file 1 — Table I: The names of miRNAs significantly differentially expressed between eutopic endometrium of patients with endometriosis vs eutopic endometrium of patients without endometriosis. Table II: The associations between miRNA and mRNA, which presents detailed results of the search of six major databases i.e targetscan, tarbase, miranda, mirbase, mirtarget2 and pictar. [file 760698.f1.zip › 760698.f1/Table II/hsa-miR-153.tsv]

miR	targetscan	tarbase	miranda	mirbase	mirtarget2	pictar	GeneSymbol	GeneName
hsa-miR-153	1	0	0	1	0	0	RNF26	ring finger protein 26
hsa-miR-153	1	0	1	1	1	1	JAG1	jagged 1
hsa-miR-153	1	0	1	1	1	1	CROT	carnitine O-octanoyltransferase
hsa-miR-153	1	0	1	1	1	1	ERO1LB	ERO1-like beta (S. cerevisiae)
hsa-miR-153	1	0	1	1	1	1	DMD	dystrophin
hsa-miR-153	1	0	1	1	1	1	PTPRD	protein tyrosine phosphatase, receptor type, D
hsa-miR-153	1	0	1	1	1	1	NAV2	neuron navigator 2
hsa-miR-153	1	0	1	1	0	0	PLXNA4	plexin A4
hsa-miR-153	1	0	1	1	1	1	PIGA	phosphatidylinositol glycan anchor biosynthesis, class A
hsa-miR-153	1	0	1	1	1	1	GCFC1	GC-rich sequence DNA-binding factor 1
hsa-miR-153	1	0	1	1	1	1	ELL2	elongation factor, RNA polymerase II, 2
hsa-miR-153	1	0	1	1	1	1	RSBN1	round spermatid basic protein 1
hsa-miR-153	1	0	1	1	1	1	IMPAD1	inositol monophosphatase domain containing 1
hsa-miR-153	1	0	1	1	1	1	CDH13	cadherin 13, H-cadherin (heart)
hsa-miR-153	1	0	1	1	1	1	PCDH7	protocadherin 7
hsa-miR-153	1	0	1	0	1	1	PCDHGB5	protocadherin gamma subfamily B, 5
hsa-miR-153	1	0	1	1	1	1	DSE	dermatan sulfate epimerase
hsa-miR-153	1	0	1	1	1	1	PALLD	palladin, cytoskeletal associated protein
hsa-miR-153	1	0	1	1	1	1	SP8	Sp8 transcription factor
hsa-miR-153	1	0	1	1	1	1	EIF2C3	eukaryotic translation initiation factor 2C, 3
hsa-miR-153	1	0	1	1	1	1	JOSD1	Josephin domain containing 1
hsa-miR-153	1	0	1	0	1	1	MEF2C	myocyte enhancer factor 2C
hsa-miR-153	1	0	1	1	1	1	SGK3	serum/glucocorticoid regulated kinase family, member 3
hsa-miR-153	1	0	1	1	1	1	FEM1C	fem-1 homolog c (C. elegans)
hsa-miR-153	1	0	1	1	1	1	ASB7	ankyrin repeat and SOCS box containing 7
hsa-miR-153	1	0	1	0	1	1	SLC1A2	solute carrier family 1 (glial high affinity glutamate transporter), member 2
hsa-miR-153	1	0	1	1	1	1	OSBPL6	oxysterol binding protein-like 6
hsa-miR-153	1	0	1	1	1	1	FAM102A	family with sequence similarity 102, member A
hsa-miR-153	1	0	1	1	1	1	CLCN5	chloride channel, voltage-sensitive 5
hsa-miR-153	1	0	1	0	1	1	CCNJ	cyclin J
hsa-miR-153	1	0	1	1	1	1	CAP1	CAP, adenylate cyclase-associated protein 1 (yeast)
hsa-miR-153	1	0	1	1	1	1	PCDHA6	protocadherin alpha 6
hsa-miR-153	1	0	1	1	1	1	GRIK2	glutamate receptor, ionotropic, kainate 2
hsa-miR-153	1	0	1	1	1	1	ZNF704	zinc finger protein 704
hsa-miR-153	1	0	1	1	1	1	LIMS1	LIM and senescent cell antigen-like domains 1
hsa-miR-153	1	0	1	1	0	0	PTAR1	protein prenyltransferase alpha subunit repeat containing 1
hsa-miR-153	1	0	1	1	1	1	ATP2C1	ATPase, Ca++ transporting, type 2C, member 1
hsa-miR-153	1	0	1	1	1	1	TLK1	tousled-like kinase 1
hsa-miR-153	1	0	1	0	1	1	KLF3	Kruppel-like factor 3 (basic)
hsa-miR-153	1	0	1	1	1	1	IPO5	importin 5
hsa-miR-153	1	0	1	0	1	1	PCDHGB2	protocadherin gamma subfamily B, 2
hsa-miR-153	1	0	1	0	1	1	PCDHGB6	protocadherin gamma subfamily B, 6
hsa-miR-153	1	0	1	1	1	1	APLP2	amyloid beta (A4) precursor-like protein 2
hsa-miR-153	1	0	1	0	1	1	PCDHGB1	protocadherin gamma subfamily B, 1
hsa-miR-153	1	0	1	1	0	0	KCNH7	potassium voltage-gated channel, subfamily H (eag-related), member 7
hsa-miR-153	1	0	1	1	1	1	GRB2	growth factor receptor-bound protein 2
hsa-miR-153	1	0	1	1	1	1	SNAI1	snail homolog 1 (Drosophila)
hsa-miR-153	1	0	1	1	0	0	ADC	arginine decarboxylase
hsa-miR-153	1	0	1	1	1	1	SPTSSB	serine palmitoyltransferase, small subunit B
hsa-miR-153	1	0	1	1	1	1	PDE3B	phosphodiesterase 3B, cGMP-inhibited
hsa-miR-153	1	0	1	0	1	1	TNRC6B	trinucleotide repeat containing 6B
hsa-miR-153	1	0	1	1	0	0	TCERG1L	transcription elongation regulator 1-like
hsa-miR-153	1	0	1	1	1	1	ANKRD10	ankyrin repeat domain 10
hsa-miR-153	1	0	1	0	1	1	ZZEF1	zinc finger, ZZ-type with EF-hand domain 1
hsa-miR-153	1	0	0	1	1	1	GPR4	G protein-coupled receptor 4
hsa-miR-153	1	0	1	1	1	1	SH2B3	SH2B adaptor protein 3
hsa-miR-153	1	0	1	1	1	1	KIAA0247	KIAA0247
hsa-miR-153	1	0	1	1	1	1	CANX	calnexin
hsa-miR-153	1	0	1	1	1	1	MYCL1	v-myc myelocytomatosis viral oncogene homolog 1, lung carcinoma derived (avian)
hsa-miR-153	1	0	1	1	1	1	HEY2	hairy/enhancer-of-split related with YRPW motif 2
hsa-miR-153	1	0	1	1	1	1	GATM	glycine amidinotransferase (L-arginine:glycine amidinotransferase)
hsa-miR-153	1	0	1	1	1	1	UBE2K	ubiquitin-conjugating enzyme E2K
hsa-miR-153	1	0	1	1	1	1	PCDHA5	protocadherin alpha 5
hsa-miR-153	1	0	1	1	1	1	ADAMTS8	ADAM metallopeptidase with thrombospondin type 1 motif, 8
hsa-miR-153	1	0	0	1	1	1	KIF20A	kinesin family member 20A
hsa-miR-153	1	0	1	0	1	1	EPDR1	ependymin related protein 1 (zebrafish)
hsa-miR-153	1	0	1	0	1	1	PTPRE	protein tyrosine phosphatase, receptor type, E
hsa-miR-153	1	0	1	1	1	1	DLGAP2	discs, large (Drosophila) homolog-associated protein 2
hsa-miR-153	1	0	1	1	0	0	INO80D	INO80 complex subunit D
hsa-miR-153	1	0	1	1	1	1	UNKL	unkempt homolog (Drosophila)-like
hsa-miR-153	1	0	1	1	1	1	SATB1	SATB homeobox 1
hsa-miR-153	1	0	1	1	1	1	DYRK1A	dual-specificity tyrosine-(Y)-phosphorylation regulated kinase 1A
hsa-miR-153	1	0	0	1	1	1	SYT10	synaptotagmin X
hsa-miR-153	1	0	1	1	1	1	NEUROD2	neuronal differentiation 2
hsa-miR-153	1	0	1	1	1	1	ROCK1	Rho-associated, coiled-coil containing protein kinase 1
hsa-miR-153	1	0	1	1	1	1	FAM168B	family with sequence similarity 168, member B
hsa-miR-153	1	0	1	1	1	1	CALN1	calneuron 1
hsa-miR-153	1	0	1	0	1	1	CELF2	CUGBP, Elav-like family member 2
hsa-miR-153	1	0	1	1	1	1	SEMA4F	sema domain, immunoglobulin domain (Ig), transmembrane domain (TM) and short cytoplasmic domain, (semaphorin) 4F
hsa-miR-153	1	0	1	0	1	1	PCDHAC2	protocadherin alpha subfamily C, 2
hsa-miR-153	1	0	1	1	1	1	USP28	ubiquitin specific peptidase 28
hsa-miR-153	1	0	1	0	1	1	GPR158	G protein-coupled receptor 158
hsa-miR-153	1	0	1	1	1	1	CADM2	cell adhesion molecule 2
hsa-miR-153	1	0	1	0	1	1	EXT1	exostosin 1
hsa-miR-153	1	0	1	1	1	1	NUPL1	nucleoporin like 1
hsa-miR-153	1	0	1	1	1	1	DLG2	discs, large homolog 2 (Drosophila)
hsa-miR-153	1	0	1	1	1	1	RCOR1	REST corepressor 1
hsa-miR-153	1	0	1	1	0	0	PCLO	piccolo (presynaptic cytomatrix protein)
hsa-miR-153	1	0	1	1	1	1	PRDM16	PR domain containing 16
hsa-miR-153	1	0	1	1	1	1	RICTOR	RPTOR independent companion of MTOR, complex 2
hsa-miR-153	1	0	1	0	1	1	FAM190B	family with sequence similarity 190, member B
hsa-miR-153	1	0	1	1	1	1	WDR26	WD repeat domain 26
hsa-miR-153	1	0	1	0	1	1	CCND2	cyclin D2
hsa-miR-153	1	0	1	1	1	1	UBR1	ubiquitin protein ligase E3 component n-recognin 1
hsa-miR-153	1	0	1	1	1	1	SOLH	small optic lobes homolog (Drosophila)
hsa-miR-153	1	0	1	1	0	0	ATP13A3	ATPase type 13A3
hsa-miR-153	1	0	1	0	1	1	ABAT	4-aminobutyrate aminotransferase
hsa-miR-153	1	0	1	1	1	1	BTBD7	BTB (POZ) domain containing 7
hsa-miR-153	1	0	1	1	1	1	MIER3	mesoderm induction early response 1, family member 3
hsa-miR-153	1	0	1	0	1	1	PAPD7	PAP associated domain containing 7
hsa-miR-153	1	0	1	1	1	1	TSHZ1	teashirt zinc finger homeobox 1
hsa-miR-153	1	0	1	1	1	1	DDIT4	DNA-damage-inducible transcript 4
hsa-miR-153	1	0	1	1	1	1	GALNT7	UDP-N-acetyl-alpha-D-galactosamine:polypeptide N-acetylgalactosaminyltransferase 7 (GalNAc-T7)
hsa-miR-153	1	0	1	1	1	1	KCTD5	potassium channel tetramerisation domain containing 5
hsa-miR-153	1	0	1	0	1	1	KCTD9	potassium channel tetramerisation domain containing 9
hsa-miR-153	1	0	1	1	0	0	SIGMAR1	sigma non-opioid intracellular receptor 1
hsa-miR-153	1	0	1	0	1	1	TP53INP2	tumor protein p53 inducible nuclear protein 2
hsa-miR-153	1	0	1	1	1	1	ATP2B4	ATPase, Ca++ transporting, plasma membrane 4
hsa-miR-153	1	0	1	1	1	1	AZIN1	antizyme inhibitor 1
hsa-miR-153	1	0	1	1	1	1	C9orf40	chromosome 9 open reading frame 40
hsa-miR-153	1	0	1	1	0	0	EPC1	enhancer of polycomb homolog 1 (Drosophila)
hsa-miR-153	1	0	1	1	1	1	PLEKHM1	pleckstrin homology domain containing, family M (with RUN domain) member 1
hsa-miR-153	1	0	1	1	1	1	SUN2	Sad1 and UNC84 domain containing 2
hsa-miR-153	1	0	1	1	1	1	LRRC57	leucine rich repeat containing 57
hsa-miR-153	1	0	1	0	1	1	DCP2	DCP2 decapping enzyme homolog (S. cerevisiae)
hsa-miR-153	1	0	1	1	1	1	PKN2	protein kinase N2
hsa-miR-153	1	0	1	0	1	1	PCDHA13	protocadherin alpha 13
hsa-miR-153	1	0	1	0	1	1	PCDHGA9	protocadherin gamma subfamily A, 9
hsa-miR-153	1	0	1	1	1	1	ARID4A	AT rich interactive domain 4A (RBP1-like)
hsa-miR-153	1	0	1	0	1	1	RPS6KB1	ribosomal protein S6 kinase, 70kDa, polypeptide 1
hsa-miR-153	1	0	1	0	1	1	RAP2B	RAP2B, member of RAS oncogene family
hsa-miR-153	1	0	1	1	1	1	NOVA1	neuro-oncological ventral antigen 1
hsa-miR-153	1	0	1	0	1	1	MFAP3L	microfibrillar-associated protein 3-like
hsa-miR-153	1	0	1	1	0	0	TSPYL2	TSPY-like 2
hsa-miR-153	1	0	1	1	1	1	TNRC6A	trinucleotide repeat containing 6A
hsa-miR-153	1	0	1	1	1	1	RNGTT	RNA guanylyltransferase and 5'-phosphatase
hsa-miR-153	1	0	1	1	1	1	VASH2	vasohibin 2
hsa-miR-153	1	0	1	0	1	1	SMURF1	SMAD specific E3 ubiquitin protein ligase 1
hsa-miR-153	1	0	1	0	1	1	KLF13	Kruppel-like factor 13
hsa-miR-153	1	0	1	1	1	1	SNTB2	syntrophin, beta 2 (dystrophin-associated protein A1, 59kDa, basic component 2)
hsa-miR-153	1	0	1	1	1	1	ADAM19	ADAM metallopeptidase domain 19
hsa-miR-153	1	0	1	1	1	1	FBXL3	F-box and leucine-rich repeat protein 3
hsa-miR-153	1	0	1	1	1	1	USP31	ubiquitin specific peptidase 31
hsa-miR-153	1	0	1	1	1	1	ENAH	enabled homolog (Drosophila)
hsa-miR-153	1	0	1	1	1	1	CIB2	calcium and integrin binding family member 2
hsa-miR-153	1	0	1	1	1	1	TESK2	testis-specific kinase 2
hsa-miR-153	1	0	1	1	1	1	NFIB	nuclear factor I/B
hsa-miR-153	1	0	1	1	1	1	CITED2	Cbp/p300-interacting transactivator, with Glu/Asp-rich carboxy-terminal domain, 2
hsa-miR-153	1	0	1	0	1	1	KLHL3	kelch-like 3 (Drosophila)
hsa-miR-153	1	0	1	1	1	1	FXR1	fragile X mental retardation, autosomal homolog 1
hsa-miR-153	1	0	1	0	1	1	FAM214A	family with sequence similarity 214, member A
hsa-miR-153	1	0	0	0	0	0	TMEM170B	transmembrane protein 170B
hsa-miR-153	1	0	1	1	1	1	ACTN4	actinin, alpha 4
hsa-miR-153	1	0	1	0	1	1	RAB11FIP2	RAB11 family interacting protein 2 (class I)
hsa-miR-153	1	0	1	1	1	1	WIPF1	WAS/WASL interacting protein family, member 1
hsa-miR-153	1	0	1	1	1	1	C6orf106	chromosome 6 open reading frame 106
hsa-miR-153	1	0	1	1	1	1	RCAN2	regulator of calcineurin 2
hsa-miR-153	1	0	1	1	1	1	PTGFRN	prostaglandin F2 receptor negative regulator
hsa-miR-153	1	0	1	1	1	1	JARID2	jumonji, AT rich interactive domain 2
hsa-miR-153	1	0	1	1	1	1	UBE3B	ubiquitin protein ligase E3B
hsa-miR-153	1	0	1	1	1	1	MAGI1	membrane associated guanylate kinase, WW and PDZ domain containing 1
hsa-miR-153	1	0	1	0	1	1	UBFD1	ubiquitin family domain containing 1
hsa-miR-153	1	0	1	0	1	1	ROCK2	Rho-associated, coiled-coil containing protein kinase 2
hsa-miR-153	1	0	1	1	1	1	PCDHA1	protocadherin alpha 1
hsa-miR-153	1	0	1	1	1	1	GPHN	gephyrin
hsa-miR-153	1	0	1	1	1	1	WWC2	WW and C2 domain containing 2
hsa-miR-153	1	0	1	1	1	1	HTR1F	5-hydroxytryptamine (serotonin) receptor 1F, G protein-coupled
hsa-miR-153	1	0	1	0	1	1	TMSB4XP8	thymosin beta 4, X-linked pseudogene 8
hsa-miR-153	1	0	1	1	1	1	RASA1	RAS p21 protein activator (GTPase activating protein) 1
hsa-miR-153	1	0	1	1	1	1	TOR1AIP1	torsin A interacting protein 1
hsa-miR-153	1	0	1	1	1	1	C2CD2	C2 calcium-dependent domain containing 2
hsa-miR-153	1	0	1	1	1	1	AUTS2	autism susceptibility candidate 2
hsa-miR-153	1	0	1	1	1	1	APC	adenomatous polyposis coli
hsa-miR-153	1	0	1	0	1	1	FZD3	frizzled family receptor 3
hsa-miR-153	1	0	1	1	1	1	PCDHA4	protocadherin alpha 4
hsa-miR-153	1	0	1	1	1	1	DOC2A	double C2-like domains, alpha
hsa-miR-153	1	0	1	0	1	1	PCDHGA8	protocadherin gamma subfamily A, 8
hsa-miR-153	1	0	0	1	1	1	IKZF1	IKAROS family zinc finger 1 (Ikaros)
hsa-miR-153	1	0	1	1	1	1	ARF1	ADP-ribosylation factor 1
hsa-miR-153	1	0	1	1	1	1	C5orf24	chromosome 5 open reading frame 24
hsa-miR-153	1	0	1	1	1	1	DESI2	desumoylating isopeptidase 2
hsa-miR-153	1	0	1	1	1	1	IGF1R	insulin-like growth factor 1 receptor
hsa-miR-153	1	0	1	1	1	1	GLCCI1	glucocorticoid induced transcript 1
hsa-miR-153	1	0	1	0	1	1	ATP8A1	ATPase, aminophospholipid transporter (APLT), class I, type 8A, member 1
hsa-miR-153	1	0	1	0	1	1	GIT2	G protein-coupled receptor kinase interacting ArfGAP 2
hsa-miR-153	1	0	1	1	1	1	RGS7BP	regulator of G-protein signaling 7 binding protein
hsa-miR-153	1	0	1	0	1	1	RCHY1	ring finger and CHY zinc finger domain containing 1, E3 ubiquitin protein ligase
hsa-miR-153	1	0	1	0	1	1	UBE2G1	ubiquitin-conjugating enzyme E2G 1
hsa-miR-153	1	0	1	1	1	1	UTRN	utrophin
hsa-miR-153	1	0	1	1	1	1	BPTF	bromodomain PHD finger transcription factor
hsa-miR-153	1	0	1	1	1	1	NAV1	neuron navigator 1
hsa-miR-153	1	0	0	1	1	1	YIPF2	Yip1 domain family, member 2
hsa-miR-153	1	0	1	1	1	1	CYFIP2	cytoplasmic FMR1 interacting protein 2
hsa-miR-153	1	0	1	1	1	1	ANK1	ankyrin 1, erythrocytic
hsa-miR-153	1	0	1	1	1	1	BCL11A	B-cell CLL/lymphoma 11A (zinc finger protein)
hsa-miR-153	1	0	1	0	1	1	RYR2	ryanodine receptor 2 (cardiac)
hsa-miR-153	1	0	1	1	1	1	ZMIZ1	zinc finger, MIZ-type containing 1
hsa-miR-153	1	0	1	1	1	1	ELAVL2	ELAV (embryonic lethal, abnormal vision, Drosophila)-like 2 (Hu antigen B)
hsa-miR-153	1	0	1	1	1	1	DCC	deleted in colorectal carcinoma
hsa-miR-153	1	0	1	1	1	1	KCNA6	potassium voltage-gated channel, shaker-related subfamily, member 6
hsa-miR-153	1	0	1	1	1	1	TMEM110	transmembrane protein 110
hsa-miR-153	1	0	1	1	1	1	MAPK1IP1L	mitogen-activated protein kinase 1 interacting protein 1-like
hsa-miR-153	1	0	1	1	1	1	KDM6A	lysine (K)-specific demethylase 6A
hsa-miR-153	1	0	1	1	1	1	ANO3	anoctamin 3
hsa-miR-153	1	0	1	1	1	1	SOCS2	suppressor of cytokine signaling 2
hsa-miR-153	1	0	1	1	1	1	CUX2	cut-like homeobox 2
hsa-miR-153	1	0	1	1	1	1	FAM135B	family with sequence similarity 135, member B
hsa-miR-153	1	0	1	1	1	1	SNAP25	synaptosomal-associated protein, 25kDa
hsa-miR-153	1	0	1	1	1	1	FBXO33	F-box protein 33
hsa-miR-153	1	0	1	0	1	1	UBE2W	ubiquitin-conjugating enzyme E2W (putative)
hsa-miR-153	1	0	1	1	1	1	RPL22	ribosomal protein L22
hsa-miR-153	1	0	1	0	1	1	FOXO1	forkhead box O1
hsa-miR-153	1	0	1	0	1	1	ARPP19	cAMP-regulated phosphoprotein, 19kDa
hsa-miR-153	1	0	1	1	1	1	PKHD1	polycystic kidney and hepatic disease 1 (autosomal recessive)
hsa-miR-153	1	0	1	1	1	1	PLEKHA3	pleckstrin homology domain containing, family A (phosphoinositide binding specific) member 3
hsa-miR-153	1	0	1	1	0	0	KIAA0556	KIAA0556
hsa-miR-153	1	0	0	0	1	1	MRE11A	MRE11 meiotic recombination 11 homolog A (S. cerevisiae)
hsa-miR-153	1	0	1	1	1	1	YTHDC1	YTH domain containing 1
hsa-miR-153	1	0	1	1	1	1	SLC4A4	solute carrier family 4, sodium bicarbonate cotransporter, member 4
hsa-miR-153	1	0	1	1	1	1	SPTY2D1	SPT2, Suppressor of Ty, domain containing 1 (S. cerevisiae)
hsa-miR-153	1	0	1	1	1	1	IKZF2	IKAROS family zinc finger 2 (Helios)
hsa-miR-153	1	0	1	1	1	1	CLMP	CXADR-like membrane protein
hsa-miR-153	1	0	1	0	1	1	PCDHGB4	protocadherin gamma subfamily B, 4
hsa-miR-153	1	0	1	0	1	1	ZNF295	zinc finger protein 295
hsa-miR-153	1	0	1	1	1	1	AKAP7	A kinase (PRKA) anchor protein 7
hsa-miR-153	1	0	1	1	1	1	GATAD2A	GATA zinc finger domain containing 2A
hsa-miR-153	1	0	1	1	1	1	ZNF654	zinc finger protein 654
hsa-miR-153	1	0	1	1	1	1	PPP3CA	protein phosphatase 3, catalytic subunit, alpha isozyme
hsa-miR-153	1	0	1	1	1	1	SENP7	SUMO1/sentrin specific peptidase 7
hsa-miR-153	1	0	1	0	1	1	PXDN	peroxidasin homolog (Drosophila)
hsa-miR-153	1	0	1	1	1	1	ZNF592	zinc finger protein 592
hsa-miR-153	1	0	1	1	1	1	POU4F1	POU class 4 homeobox 1
hsa-miR-153	1	0	1	1	1	1	CBFB	core-binding factor, beta subunit
hsa-miR-153	1	0	1	1	1	1	TBC1D19	TBC1 domain family, member 19
hsa-miR-153	1	0	1	0	1	1	BEND4	BEN domain containing 4
hsa-miR-153	1	0	1	0	0	0	RNF169	ring finger protein 169
hsa-miR-153	1	0	1	1	1	1	PPARGC1A	peroxisome proliferator-activated receptor gamma, coactivator 1 alpha
hsa-miR-153	1	0	1	1	1	1	CLCN4	chloride channel, voltage-sensitive 4
hsa-miR-153	1	0	0	1	1	1	PPRC1	peroxisome proliferator-activated receptor gamma, coactivator-related 1
hsa-miR-153	1	0	1	1	1	1	SH3BP4	SH3-domain binding protein 4
hsa-miR-153	1	0	1	0	1	1	DPYSL5	dihydropyrimidinase-like 5
hsa-miR-153	1	0	1	1	1	1	PTCH1	patched 1
hsa-miR-153	1	0	1	1	1	1	PIK3R1	phosphoinositide-3-kinase, regulatory subunit 1 (alpha)
hsa-miR-153	1	0	1	1	0	0	ASIC2	acid-sensing (proton-gated) ion channel 2
hsa-miR-153	1	0	1	0	1	1	PCDHAC1	protocadherin alpha subfamily C, 1
hsa-miR-153	1	0	1	0	1	1	NUFIP2	nuclear fragile X mental retardation protein interacting protein 2
hsa-miR-153	1	0	1	0	1	1	RYR3	ryanodine receptor 3
hsa-miR-153	1	0	1	1	0	0	TMEM181	transmembrane protein 181
hsa-miR-153	1	0	0	0	0	0	FAM160A1	family with sequence similarity 160, member A1
hsa-miR-153	1	1	1	1	0	0	EFNA3	ephrin-A3
hsa-miR-153	1	0	1	1	0	0	HOXC11	homeobox C11
hsa-miR-153	1	0	1	0	1	1	PCDHGB3	protocadherin gamma subfamily B, 3
hsa-miR-153	1	0	1	1	1	1	SLC36A2	solute carrier family 36 (proton/amino acid symporter), member 2
hsa-miR-153	1	0	1	1	1	1	SYN2	synapsin II
hsa-miR-153	1	0	1	1	1	1	TJP1	tight junction protein 1
hsa-miR-153	1	0	1	1	1	1	ADD1	adducin 1 (alpha)
hsa-miR-153	1	0	1	1	1	1	PALM2	paralemmin 2
hsa-miR-153	1	0	1	1	1	1	SNPH	syntaphilin
hsa-miR-153	1	0	1	1	1	1	CREM	cAMP responsive element modulator
hsa-miR-153	1	0	1	1	1	1	RBM26	RNA binding motif protein 26
hsa-miR-153	1	0	1	1	0	0	PBXIP1	pre-B-cell leukemia homeobox interacting protein 1
hsa-miR-153	1	0	1	1	1	1	PLCB1	phospholipase C, beta 1 (phosphoinositide-specific)
hsa-miR-153	1	0	1	1	0	0	KIAA1549	KIAA1549
hsa-miR-153	1	0	1	0	1	1	ZFPM2	zinc finger protein, multitype 2
hsa-miR-153	1	0	1	1	1	1	SMARCD2	SWI/SNF related, matrix associated, actin dependent regulator of chromatin, subfamily d, member 2
hsa-miR-153	1	0	1	0	1	1	SCN3A	sodium channel, voltage-gated, type III, alpha subunit
hsa-miR-153	1	0	1	1	1	1	OTUD4	OTU domain containing 4
hsa-miR-153	1	0	1	0	1	1	SCML2	sex comb on midleg-like 2 (Drosophila)
hsa-miR-153	1	0	0	1	0	0	CRTC1	CREB regulated transcription coactivator 1
hsa-miR-153	1	0	1	1	1	1	HELZ	helicase with zinc finger
hsa-miR-153	1	0	1	1	0	0	PHOSPHO1	phosphatase, orphan 1
hsa-miR-153	1	0	1	1	1	1	MBTD1	mbt domain containing 1
hsa-miR-153	1	0	1	1	1	1	MYB	v-myb myeloblastosis viral oncogene homolog (avian)
hsa-miR-153	1	0	1	1	1	1	TMEM178A	transmembrane protein 178A
hsa-miR-153	1	0	1	0	1	1	PDE4D	phosphodiesterase 4D, cAMP-specific
hsa-miR-153	1	0	1	1	1	1	GPR124	G protein-coupled receptor 124
hsa-miR-153	1	0	1	1	1	1	GMCL1	germ cell-less, spermatogenesis associated 1
hsa-miR-153	1	0	1	1	1	1	AFF1	AF4/FMR2 family, member 1
hsa-miR-153	1	0	1	0	1	1	SEMA4G	sema domain, immunoglobulin domain (Ig), transmembrane domain (TM) and short cytoplasmic domain, (semaphorin) 4G
hsa-miR-153	1	0	1	0	1	1	ADO	2-aminoethanethiol (cysteamine) dioxygenase
hsa-miR-153	1	0	1	1	1	1	MKNK2	MAP kinase interacting serine/threonine kinase 2
hsa-miR-153	1	0	1	1	1	1	FURIN	furin (paired basic amino acid cleaving enzyme)
hsa-miR-153	1	0	1	1	1	1	EIF2C1	eukaryotic translation initiation factor 2C, 1
hsa-miR-153	1	0	1	1	1	1	RIC8B	resistance to inhibitors of cholinesterase 8 homolog B (C. elegans)
hsa-miR-153	1	0	1	1	1	1	KANSL1	KAT8 regulatory NSL complex subunit 1
hsa-miR-153	1	0	1	1	1	1	CAMKK2	calcium/calmodulin-dependent protein kinase kinase 2, beta
hsa-miR-153	1	0	1	1	1	1	RFFL	ring finger and FYVE-like domain containing E3 ubiquitin protein ligase
hsa-miR-153	1	0	1	1	1	1	MTMR12	myotubularin related protein 12
hsa-miR-153	1	0	1	1	1	1	APP	amyloid beta (A4) precursor protein
hsa-miR-153	1	0	1	0	1	1	VAMP2	vesicle-associated membrane protein 2 (synaptobrevin 2)
hsa-miR-153	1	0	1	0	1	1	RBBP5	retinoblastoma binding protein 5
hsa-miR-153	1	0	1	0	1	1	PTEN	phosphatase and tensin homolog
hsa-miR-153	1	0	1	0	1	1	ZCCHC24	zinc finger, CCHC domain containing 24
hsa-miR-153	1	0	1	1	1	1	KREMEN1	kringle containing transmembrane protein 1
hsa-miR-153	1	0	0	1	1	1	RBAK	RB-associated KRAB zinc finger
hsa-miR-153	1	0	1	0	1	1	GPCPD1	glycerophosphocholine phosphodiesterase GDE1 homolog (S. cerevisiae)
hsa-miR-153	1	0	1	1	1	1	ZFAND3	zinc finger, AN1-type domain 3
hsa-miR-153	1	0	1	1	1	1	C18orf1	chromosome 18 open reading frame 1
hsa-miR-153	1	0	1	1	1	1	NPTN	neuroplastin
hsa-miR-153	1	0	1	1	1	1	CREBBP	CREB binding protein
hsa-miR-153	1	0	1	1	1	1	ING2	inhibitor of growth family, member 2
hsa-miR-153	1	0	1	1	1	1	RANBP2	RAN binding protein 2
hsa-miR-153	1	0	1	0	1	1	CACNA1C	calcium channel, voltage-dependent, L type, alpha 1C subunit
hsa-miR-153	1	0	1	0	1	1	SRC	v-src sarcoma (Schmidt-Ruppin A-2) viral oncogene homolog (avian)
hsa-miR-153	1	0	1	1	1	1	TMEM168	transmembrane protein 168
hsa-miR-153	1	0	1	1	1	1	GLRA3	glycine receptor, alpha 3
hsa-miR-153	1	0	1	1	1	1	KCTD6	potassium channel tetramerisation domain containing 6
hsa-miR-153	1	0	1	1	1	1	NEUROD6	neuronal differentiation 6
hsa-miR-153	1	0	1	1	1	1	PHF13	PHD finger protein 13
hsa-miR-153	1	0	1	0	1	1	STYX	serine/threonine/tyrosine interacting protein
hsa-miR-153	1	0	1	1	1	1	CMIP	c-Maf inducing protein
hsa-miR-153	1	0	1	1	1	1	ZBTB7B	zinc finger and BTB domain containing 7B
hsa-miR-153	1	0	1	1	1	1	KDSR	3-ketodihydrosphingosine reductase
hsa-miR-153	1	0	1	1	1	1	PDGFA	platelet-derived growth factor alpha polypeptide
hsa-miR-153	1	0	1	0	1	1	DCP1A	DCP1 decapping enzyme homolog A (S. cerevisiae)
hsa-miR-153	1	0	1	1	1	1	E2F3	E2F transcription factor 3
hsa-miR-153	1	0	1	0	1	1	SOX11	SRY (sex determining region Y)-box 11
hsa-miR-153	1	0	1	1	1	1	DUSP3	dual specificity phosphatase 3
hsa-miR-153	1	0	1	1	1	1	SLC26A7	solute carrier family 26, member 7
hsa-miR-153	1	0	1	1	1	1	GLS	glutaminase
hsa-miR-153	1	0	1	1	1	1	SMYD2	SET and MYND domain containing 2
hsa-miR-153	1	0	1	0	0	0	ZC3H12C	zinc finger CCCH-type containing 12C
hsa-miR-153	1	0	1	0	1	1	SPOPL	speckle-type POZ protein-like
hsa-miR-153	1	0	1	1	1	1	MORC3	MORC family CW-type zinc finger 3
hsa-miR-153	1	0	1	1	0	0	UBN2	ubinuclein 2
hsa-miR-153	1	0	1	1	1	1	ATP6V1C1	ATPase, H+ transporting, lysosomal 42kDa, V1 subunit C1
hsa-miR-153	1	0	1	0	1	1	MCL1	myeloid cell leukemia sequence 1 (BCL2-related)
hsa-miR-153	1	0	1	1	0	0	FOXO3	forkhead box O3
hsa-miR-153	1	0	1	0	1	1	CPEB2	cytoplasmic polyadenylation element binding protein 2
hsa-miR-153	1	0	1	1	1	1	PCDHA8	protocadherin alpha 8
hsa-miR-153	1	0	1	1	0	0	DPY19L1	dpy-19-like 1 (C. elegans)
hsa-miR-153	1	0	0	1	1	1	PDP2	pyruvate dehyrogenase phosphatase catalytic subunit 2
hsa-miR-153	1	0	1	1	1	1	IQCK	IQ motif containing K
hsa-miR-153	1	0	1	0	1	1	NCAM1	neural cell adhesion molecule 1
hsa-miR-153	1	0	0	0	0	0	AAK1	AP2 associated kinase 1
hsa-miR-153	1	0	1	1	1	1	SPHK2	sphingosine kinase 2
hsa-miR-153	1	0	1	1	1	1	PEA15	phosphoprotein enriched in astrocytes 15
hsa-miR-153	1	0	1	0	1	1	SERTAD2	SERTA domain containing 2
hsa-miR-153	1	0	0	1	0	0	ZNF385C	zinc finger protein 385C
hsa-miR-153	1	0	1	1	1	1	ZMYND11	zinc finger, MYND-type containing 11
hsa-miR-153	1	0	1	1	1	1	WWP1	WW domain containing E3 ubiquitin protein ligase 1
hsa-miR-153	1	0	1	1	1	1	FRS2	fibroblast growth factor receptor substrate 2
hsa-miR-153	1	0	1	0	1	1	GNAI3	guanine nucleotide binding protein (G protein), alpha inhibiting activity polypeptide 3
hsa-miR-153	1	0	1	1	1	1	FOXN3	forkhead box N3
hsa-miR-153	1	0	1	1	1	1	MLL4	myeloid/lymphoid or mixed-lineage leukemia 4
hsa-miR-153	1	0	1	1	1	1	ABHD13	abhydrolase domain containing 13
hsa-miR-153	1	0	1	1	1	1	ZCCHC2	zinc finger, CCHC domain containing 2
hsa-miR-153	1	0	1	1	0	0	HDLBP	high density lipoprotein binding protein
hsa-miR-153	1	0	1	1	1	1	SIX4	SIX homeobox 4
hsa-miR-153	1	0	1	0	1	1	PCDHGC3	protocadherin gamma subfamily C, 3
hsa-miR-153	1	0	1	1	1	1	ZNF518A	zinc finger protein 518A
hsa-miR-153	1	0	1	1	1	1	ZNFX1	zinc finger, NFX1-type containing 1
hsa-miR-153	1	0	1	1	1	1	ZEB2	zinc finger E-box binding homeobox 2
hsa-miR-153	1	0	1	1	0	0	PAX2	paired box 2
hsa-miR-153	1	0	1	0	1	1	MYCBP	c-myc binding protein
hsa-miR-153	1	0	1	1	1	1	OTX2	orthodenticle homeobox 2
hsa-miR-153	1	0	0	1	0	0	NEUROD4	neuronal differentiation 4
hsa-miR-153	1	0	1	0	1	1	ACVR2A	activin A receptor, type IIA
hsa-miR-153	1	0	1	1	1	1	RASSF4	Ras association (RalGDS/AF-6) domain family member 4
hsa-miR-153	1	0	1	1	1	1	PHF17	PHD finger protein 17
hsa-miR-153	1	0	1	1	1	1	SOST	sclerostin
hsa-miR-153	1	0	1	1	1	1	UXS1	UDP-glucuronate decarboxylase 1
hsa-miR-153	1	0	1	0	1	1	MPPED2	metallophosphoesterase domain containing 2
hsa-miR-153	1	0	1	0	1	1	PCDHA11	protocadherin alpha 11
hsa-miR-153	1	0	1	0	1	1	WIPF2	WAS/WASL interacting protein family, member 2
hsa-miR-153	1	0	1	0	1	1	PCDHGC5	protocadherin gamma subfamily C, 5
hsa-miR-153	1	0	1	1	1	1	NEUROD1	neuronal differentiation 1
hsa-miR-153	1	0	1	0	1	1	CREB5	cAMP responsive element binding protein 5
hsa-miR-153	1	0	1	1	1	1	SLC35A3	solute carrier family 35 (UDP-N-acetylglucosamine (UDP-GlcNAc) transporter), member A3
hsa-miR-153	1	0	1	0	1	1	IRS2	insulin receptor substrate 2
hsa-miR-153	1	0	1	1	1	1	MAT2A	methionine adenosyltransferase II, alpha
hsa-miR-153	1	0	1	1	1	1	ONECUT2	one cut homeobox 2
hsa-miR-153	1	0	1	1	1	1	DMXL2	Dmx-like 2
hsa-miR-153	1	0	1	0	1	1	CDON	Cdon homolog (mouse)
hsa-miR-153	1	0	1	1	1	1	HECW1	HECT, C2 and WW domain containing E3 ubiquitin protein ligase 1
hsa-miR-153	1	0	1	1	1	1	MYO5A	myosin VA (heavy chain 12, myoxin)
hsa-miR-153	1	0	1	1	1	1	LMX1A	LIM homeobox transcription factor 1, alpha
hsa-miR-153	1	0	1	0	1	1	BMPR2	bone morphogenetic protein receptor, type II (serine/threonine kinase)
hsa-miR-153	1	0	1	1	0	0	ZDHHC1	zinc finger, DHHC-type containing 1
hsa-miR-153	1	0	1	1	1	1	LAMP1	lysosomal-associated membrane protein 1
hsa-miR-153	1	0	1	1	1	1	MITF	microphthalmia-associated transcription factor
hsa-miR-153	1	0	1	1	0	0	SLC10A3	solute carrier family 10 (sodium/bile acid cotransporter family), member 3
hsa-miR-153	1	0	1	0	1	1	SETD7	SET domain containing (lysine methyltransferase) 7
hsa-miR-153	1	0	1	1	1	1	BACH2	BTB and CNC homology 1, basic leucine zipper transcription factor 2
hsa-miR-153	1	0	1	0	1	1	TFEC	transcription factor EC
hsa-miR-153	1	0	1	0	1	1	BSN	bassoon (presynaptic cytomatrix protein)
hsa-miR-153	1	0	1	0	0	0	ANKRD52	ankyrin repeat domain 52
hsa-miR-153	1	0	1	1	1	1	APBB2	amyloid beta (A4) precursor protein-binding, family B, member 2
hsa-miR-153	1	0	1	1	1	1	JHDM1D	jumonji C domain containing histone demethylase 1 homolog D (S. cerevisiae)
hsa-miR-153	1	0	1	1	1	1	RABL3	RAB, member of RAS oncogene family-like 3
hsa-miR-153	1	0	1	0	1	1	THAP2	THAP domain containing, apoptosis associated protein 2
hsa-miR-153	1	0	1	1	1	1	PCDHA3	protocadherin alpha 3
hsa-miR-153	1	0	1	1	1	1	DNM3	dynamin 3
hsa-miR-153	1	0	1	0	1	1	PCDHGA6	protocadherin gamma subfamily A, 6
hsa-miR-153	1	0	1	1	1	1	PITPNB	phosphatidylinositol transfer protein, beta
hsa-miR-153	1	0	1	1	1	1	TGFBR2	transforming growth factor, beta receptor II (70/80kDa)
hsa-miR-153	1	0	1	1	1	1	TAGLN3	transgelin 3
hsa-miR-153	1	0	1	1	1	1	ARL4A	ADP-ribosylation factor-like 4A
hsa-miR-153	1	0	1	1	1	1	PTF1A	pancreas specific transcription factor, 1a
hsa-miR-153	1	0	1	0	1	1	PCDHGA7	protocadherin gamma subfamily A, 7
hsa-miR-153	1	0	1	1	1	1	SRSF10	serine/arginine-rich splicing factor 10
hsa-miR-153	1	0	1	0	1	1	MAPK4	mitogen-activated protein kinase 4
hsa-miR-153	1	0	1	0	1	1	NFE2L2	nuclear factor (erythroid-derived 2)-like 2
hsa-miR-153	1	0	1	1	1	1	METAP1	methionyl aminopeptidase 1
hsa-miR-153	1	0	1	0	1	1	RNF165	ring finger protein 165
hsa-miR-153	1	0	1	1	1	1	FAM171A1	family with sequence similarity 171, member A1
hsa-miR-153	1	0	1	1	1	1	CDK13	cyclin-dependent kinase 13
hsa-miR-153	1	0	1	1	1	1	MTF1	metal-regulatory transcription factor 1
hsa-miR-153	1	0	1	1	1	1	TMEM25	transmembrane protein 25
hsa-miR-153	1	0	1	0	1	1	ACVR1B	activin A receptor, type IB
hsa-miR-153	1	0	1	1	1	1	SLC9A6	solute carrier family 9, subfamily A (NHE6, cation proton antiporter 6), member 6
hsa-miR-153	1	0	1	1	1	1	SNCA	synuclein, alpha (non A4 component of amyloid precursor)
hsa-miR-153	1	0	1	1	1	1	HERC3	HECT and RLD domain containing E3 ubiquitin protein ligase 3
hsa-miR-153	1	0	1	1	1	1	CELF6	CUGBP, Elav-like family member 6
hsa-miR-153	1	0	1	1	1	1	PXMP4	peroxisomal membrane protein 4, 24kDa
hsa-miR-153	1	0	1	1	1	1	GNPDA2	glucosamine-6-phosphate deaminase 2
hsa-miR-153	1	0	1	1	1	1	MATN2	matrilin 2
hsa-miR-153	1	0	1	1	1	1	FAM168A	family with sequence similarity 168, member A
hsa-miR-153	1	0	1	0	1	1	KCNB1	potassium voltage-gated channel, Shab-related subfamily, member 1
hsa-miR-153	1	0	1	1	1	1	MTF2	metal response element binding transcription factor 2
hsa-miR-153	1	0	1	1	1	1	ARHGEF40	Rho guanine nucleotide exchange factor (GEF) 40
hsa-miR-153	1	0	1	1	1	1	GRHL3	grainyhead-like 3 (Drosophila)
hsa-miR-153	1	0	1	1	1	1	SPTBN1	spectrin, beta, non-erythrocytic 1
hsa-miR-153	1	0	1	1	1	1	CKAP4	cytoskeleton-associated protein 4
hsa-miR-153	1	0	1	1	1	1	ITSN2	intersectin 2
hsa-miR-153	1	0	1	1	1	1	KCNMB2	potassium large conductance calcium-activated channel, subfamily M, beta member 2
hsa-miR-153	1	0	1	0	1	1	TRHDE	thyrotropin-releasing hormone degrading enzyme
hsa-miR-153	1	0	1	0	1	1	TRPS1	trichorhinophalangeal syndrome I
hsa-miR-153	1	0	1	0	1	1	RTN4RL1	reticulon 4 receptor-like 1
hsa-miR-153	1	0	1	1	1	1	PTBP1	polypyrimidine tract binding protein 1
hsa-miR-153	1	0	1	0	1	1	KBTBD8	kelch repeat and BTB (POZ) domain containing 8
hsa-miR-153	1	0	1	1	1	1	RAI14	retinoic acid induced 14
hsa-miR-153	1	0	1	1	0	0	SLC30A3	solute carrier family 30 (zinc transporter), member 3
hsa-miR-153	1	0	1	1	1	1	TP53INP1	tumor protein p53 inducible nuclear protein 1
hsa-miR-153	1	0	1	1	1	1	ROBO2	roundabout, axon guidance receptor, homolog 2 (Drosophila)
hsa-miR-153	1	0	1	1	1	1	GFPT2	glutamine-fructose-6-phosphate transaminase 2
hsa-miR-153	1	0	1	1	0	0	GRIK3	glutamate receptor, ionotropic, kainate 3
hsa-miR-153	1	0	1	1	1	1	RAB7A	RAB7A, member RAS oncogene family
hsa-miR-153	1	0	1	1	1	1	GOLGA8B	golgin A8 family, member B
hsa-miR-153	1	0	1	0	1	1	PRKAB2	protein kinase, AMP-activated, beta 2 non-catalytic subunit
hsa-miR-153	1	0	1	1	1	1	SCAMP5	secretory carrier membrane protein 5
hsa-miR-153	1	0	1	1	1	1	PROSC	proline synthetase co-transcribed homolog (bacterial)
hsa-miR-153	1	0	1	0	1	1	YOD1	YOD1 OTU deubiquinating enzyme 1 homolog (S. cerevisiae)
hsa-miR-153	1	0	1	0	1	1	SCML1	sex comb on midleg-like 1 (Drosophila)
hsa-miR-153	1	0	1	1	0	0	UNC5A	unc-5 homolog A (C. elegans)
hsa-miR-153	1	0	1	1	1	1	PRDM2	PR domain containing 2, with ZNF domain
hsa-miR-153	1	0	1	1	1	1	SSBP3	single stranded DNA binding protein 3
hsa-miR-153	1	0	1	0	1	1	B4GALT1	UDP-Gal:betaGlcNAc beta 1,4- galactosyltransferase, polypeptide 1
hsa-miR-153	1	0	1	1	1	1	PHF21A	PHD finger protein 21A
hsa-miR-153	1	0	1	1	1	1	NBEA	neurobeachin
hsa-miR-153	1	0	1	1	1	1	MON2	MON2 homolog (S. cerevisiae)
hsa-miR-153	1	0	1	1	1	1	HLCS	holocarboxylase synthetase (biotin-(proprionyl-CoA-carboxylase (ATP-hydrolysing)) ligase)
hsa-miR-153	1	0	1	1	0	0	SLAIN2	SLAIN motif family, member 2
hsa-miR-153	1	0	1	1	1	1	PIP5K1C	phosphatidylinositol-4-phosphate 5-kinase, type I, gamma
hsa-miR-153	1	0	1	0	1	1	LAMC1	laminin, gamma 1 (formerly LAMB2)
hsa-miR-153	1	0	1	1	1	1	ZBTB2	zinc finger and BTB domain containing 2
hsa-miR-153	1	0	1	1	1	1	ANKRD50	ankyrin repeat domain 50
hsa-miR-153	1	0	1	1	1	1	FGFR2	fibroblast growth factor receptor 2
hsa-miR-153	1	0	1	1	1	1	EFNB2	ephrin-B2
hsa-miR-153	1	0	1	1	1	1	PCDHA2	protocadherin alpha 2
hsa-miR-153	1	0	1	1	1	1	ZSCAN2	zinc finger and SCAN domain containing 2
hsa-miR-153	1	0	1	0	1	1	PCDHGA5	protocadherin gamma subfamily A, 5
hsa-miR-153	1	0	1	1	1	1	XYLT1	xylosyltransferase I
hsa-miR-153	1	0	1	1	1	1	KIAA1522	KIAA1522
hsa-miR-153	1	0	1	1	1	1	XYLT2	xylosyltransferase II
hsa-miR-153	1	0	1	0	1	1	PCDHGB7	protocadherin gamma subfamily B, 7
hsa-miR-153	1	0	1	1	1	1	EFHD2	EF-hand domain family, member D2
hsa-miR-153	1	0	1	1	1	1	CLTC	clathrin, heavy chain (Hc)
hsa-miR-153	1	0	1	1	1	1	ZNF148	zinc finger protein 148
hsa-miR-153	1	0	1	1	1	1	IARS	isoleucyl-tRNA synthetase
hsa-miR-153	1	0	1	1	1	1	DACH1	dachshund homolog 1 (Drosophila)
hsa-miR-153	1	0	1	1	1	1	KCNIP4	Kv channel interacting protein 4
hsa-miR-153	1	0	1	1	1	1	ZNF217	zinc finger protein 217
hsa-miR-153	1	0	1	1	1	1	TBX3	T-box 3
hsa-miR-153	1	0	1	1	1	1	SLC38A1	solute carrier family 38, member 1
hsa-miR-153	1	0	1	1	1	1	DVL3	dishevelled, dsh homolog 3 (Drosophila)
hsa-miR-153	1	0	1	0	1	1	TMEM55A	transmembrane protein 55A
hsa-miR-153	1	0	1	1	1	1	NAV3	neuron navigator 3
hsa-miR-153	1	0	1	0	1	1	CHST15	carbohydrate (N-acetylgalactosamine 4-sulfate 6-O) sulfotransferase 15
hsa-miR-153	1	0	1	0	1	1	PCDHGA3	protocadherin gamma subfamily A, 3
hsa-miR-153	1	0	1	1	0	0	DOT1L	DOT1-like, histone H3 methyltransferase (S. cerevisiae)
hsa-miR-153	1	0	1	0	1	1	OTUD7B	OTU domain containing 7B
hsa-miR-153	1	0	1	1	1	1	TMSB4X	thymosin beta 4, X-linked
hsa-miR-153	1	0	1	0	1	1	CPEB4	cytoplasmic polyadenylation element binding protein 4
hsa-miR-153	1	0	1	0	1	1	PCDHGA12	protocadherin gamma subfamily A, 12
hsa-miR-153	1	0	1	1	1	1	XKR4	XK, Kell blood group complex subunit-related family, member 4
hsa-miR-153	1	0	1	1	1	1	SMARCC1	SWI/SNF related, matrix associated, actin dependent regulator of chromatin, subfamily c, member 1
hsa-miR-153	1	0	1	1	1	1	ZFYVE9	zinc finger, FYVE domain containing 9
hsa-miR-153	1	0	1	1	0	0	INHBB	inhibin, beta B
hsa-miR-153	1	0	1	1	1	1	KCND1	potassium voltage-gated channel, Shal-related subfamily, member 1
hsa-miR-153	1	0	1	1	1	1	KCNA4	potassium voltage-gated channel, shaker-related subfamily, member 4
hsa-miR-153	1	0	1	1	1	1	MOV10	Mov10, Moloney leukemia virus 10, homolog (mouse)
hsa-miR-153	1	0	1	0	1	1	PCDHGA4	protocadherin gamma subfamily A, 4
hsa-miR-153	1	0	1	1	1	1	DAGLA	diacylglycerol lipase, alpha
hsa-miR-153	1	0	1	0	1	1	AKAP6	A kinase (PRKA) anchor protein 6
hsa-miR-153	1	0	1	1	1	1	CNN3	calponin 3, acidic
hsa-miR-153	1	0	1	1	1	1	RHOU	ras homolog family member U
hsa-miR-153	1	0	1	1	1	1	FAM59A	family with sequence similarity 59, member A
hsa-miR-153	1	0	1	1	1	1	KLF5	Kruppel-like factor 5 (intestinal)
hsa-miR-153	1	0	1	0	1	1	ZNF609	zinc finger protein 609
hsa-miR-153	1	0	1	0	1	1	SCRT2	scratch homolog 2, zinc finger protein (Drosophila)
hsa-miR-153	1	0	1	0	0	0	ZBTB34	zinc finger and BTB domain containing 34
hsa-miR-153	1	0	1	1	1	1	KCNA1	potassium voltage-gated channel, shaker-related subfamily, member 1 (episodic ataxia with myokymia)
hsa-miR-153	1	0	1	1	1	1	NUFIP1	nuclear fragile X mental retardation protein interacting protein 1
hsa-miR-153	1	0	1	1	1	1	SLCO5A1	solute carrier organic anion transporter family, member 5A1
hsa-miR-153	1	0	1	1	1	1	DLL4	delta-like 4 (Drosophila)
hsa-miR-153	1	0	1	0	0	0	TPCN1	two pore segment channel 1
hsa-miR-153	1	0	1	1	1	1	NUDT4	nudix (nucleoside diphosphate linked moiety X)-type motif 4
hsa-miR-153	1	0	1	1	1	1	ASB8	ankyrin repeat and SOCS box containing 8
hsa-miR-153	1	0	0	1	1	1	ZNRF2	zinc and ring finger 2
hsa-miR-153	1	0	1	1	1	1	KDM5A	lysine (K)-specific demethylase 5A
hsa-miR-153	1	0	1	0	1	1	FLRT2	fibronectin leucine rich transmembrane protein 2
hsa-miR-153	1	0	1	0	1	1	GLCE	glucuronic acid epimerase
hsa-miR-153	1	0	1	1	1	1	HNRNPA1	heterogeneous nuclear ribonucleoprotein A1
hsa-miR-153	1	0	1	1	1	1	MDGA2	MAM domain containing glycosylphosphatidylinositol anchor 2
hsa-miR-153	1	0	1	1	1	1	MFHAS1	malignant fibrous histiocytoma amplified sequence 1
hsa-miR-153	1	0	1	1	1	1	RABGAP1	RAB GTPase activating protein 1
hsa-miR-153	1	0	1	1	1	1	ASXL1	additional sex combs like 1 (Drosophila)
hsa-miR-153	1	0	1	0	1	1	SEPT11	septin 11
hsa-miR-153	1	0	1	0	0	0	BAHCC1	BAH domain and coiled-coil containing 1
hsa-miR-153	1	0	1	0	1	1	PCDHGA11	protocadherin gamma subfamily A, 11
hsa-miR-153	1	0	1	1	1	1	PPM1D	protein phosphatase, Mg2+/Mn2+ dependent, 1D
hsa-miR-153	1	0	1	0	1	1	SS18	synovial sarcoma translocation, chromosome 18
hsa-miR-153	1	0	1	1	1	1	TBX2	T-box 2
hsa-miR-153	1	0	1	1	1	1	ANGPT1	angiopoietin 1
hsa-miR-153	1	0	0	1	0	0	TMEM192	transmembrane protein 192
hsa-miR-153	1	0	1	1	1	1	PCDHGA2	protocadherin gamma subfamily A, 2
hsa-miR-153	1	0	1	0	1	1	PCDHGA10	protocadherin gamma subfamily A, 10
hsa-miR-153	1	0	1	0	1	1	TTYH3	tweety homolog 3 (Drosophila)
hsa-miR-153	1	0	1	1	1	1	UTY	ubiquitously transcribed tetratricopeptide repeat gene, Y-linked
hsa-miR-153	1	0	1	1	1	1	PPP1R12B	protein phosphatase 1, regulatory subunit 12B
hsa-miR-153	1	0	1	1	1	1	NF1	neurofibromin 1
hsa-miR-153	1	0	1	1	1	1	PCDHGA1	protocadherin gamma subfamily A, 1
hsa-miR-153	1	0	1	0	0	0	FAT3	FAT tumor suppressor homolog 3 (Drosophila)
hsa-miR-153	1	0	1	1	1	1	TRAK2	trafficking protein, kinesin binding 2
hsa-miR-153	1	0	1	1	0	0	TET3	tet methylcytosine dioxygenase 3
hsa-miR-153	1	0	1	0	1	1	PCDHA10	protocadherin alpha 10
hsa-miR-153	1	0	1	1	1	1	NFASC	neurofascin
hsa-miR-153	1	0	1	1	1	1	ZCCHC14	zinc finger, CCHC domain containing 14
hsa-miR-153	1	0	1	1	1	1	IFNAR2	interferon (alpha, beta and omega) receptor 2
hsa-miR-153	1	0	0	1	1	1	FAM177A1	family with sequence similarity 177, member A1
hsa-miR-153	1	0	1	1	1	1	ME1	malic enzyme 1, NADP(+)-dependent, cytosolic
hsa-miR-153	1	0	1	1	1	1	PHKB	phosphorylase kinase, beta
hsa-miR-153	1	0	1	1	1	1	LAMP5	lysosomal-associated membrane protein family, member 5
hsa-miR-153	1	0	1	1	1	1	PKNOX2	PBX/knotted 1 homeobox 2
hsa-miR-153	1	0	1	1	1	1	NEBL	nebulette
hsa-miR-153	1	0	1	1	1	1	NAA50	N(alpha)-acetyltransferase 50, NatE catalytic subunit
hsa-miR-153	1	0	1	1	1	1	FMR1	fragile X mental retardation 1
hsa-miR-153	1	0	1	0	1	1	PCDHA12	protocadherin alpha 12
hsa-miR-153	1	0	1	0	1	1	PCDHA7	protocadherin alpha 7
hsa-miR-153	1	0	1	1	1	1	LPGAT1	lysophosphatidylglycerol acyltransferase 1
hsa-miR-153	1	0	1	1	1	1	CHD1	chromodomain helicase DNA binding protein 1
hsa-miR-153	1	0	1	0	1	1	PCDHGC4	protocadherin gamma subfamily C, 4
hsa-miR-153	1	0	1	0	1	1	SYT4	synaptotagmin IV
hsa-miR-153	1	0	1	0	1	1	LARP1	La ribonucleoprotein domain family, member 1
hsa-miR-153	1	0	1	1	1	1	ZDHHC2	zinc finger, DHHC-type containing 2
hsa-miR-153	1	0	1	1	1	1	SRSF1	serine/arginine-rich splicing factor 1
hsa-miR-153	1	0	1	1	0	0	PCNX	pecanex homolog (Drosophila)
hsa-miR-153	1	0	1	1	1	1	FAM210B	family with sequence similarity 210, member B
hsa-miR-153	1	0	1	1	0	0	RAPGEF2	Rap guanine nucleotide exchange factor (GEF) 2
hsa-miR-153	1	0	1	0	1	1	CEP350	centrosomal protein 350kDa
hsa-miR-153	1	0	1	1	0	0	TBC1D12	TBC1 domain family, member 12
hsa-miR-153	0	0	1	1	1	1	DZIP3	DAZ interacting protein 3, zinc finger
hsa-miR-153	1	0	1	1	1	1	TP63	tumor protein p63
hsa-miR-153	1	0	1	0	1	1	SNX13	sorting nexin 13
hsa-miR-153	1	0	1	0	1	1	DOCK4	dedicator of cytokinesis 4
hsa-miR-153	1	0	1	0	1	1	LPHN3	latrophilin 3
hsa-miR-153	0	0	1	1	0	0	FAM169A	family with sequence similarity 169, member A
hsa-miR-153	0	0	1	1	1	1	WDR47	WD repeat domain 47
hsa-miR-153	1	0	1	0	0	0	DTX4	deltex homolog 4 (Drosophila)
hsa-miR-153	1	0	1	1	1	1	NLGN4Y	neuroligin 4, Y-linked
hsa-miR-153	0	0	1	1	1	1	TBC1D30	TBC1 domain family, member 30
hsa-miR-153	0	0	1	1	1	1	TTC28	tetratricopeptide repeat domain 28
hsa-miR-153	1	0	1	1	1	1	RIMKLB	ribosomal modification protein rimK-like family member B
hsa-miR-153	1	0	1	1	1	1	MKL2	MKL/myocardin-like 2
hsa-miR-153	0	0	1	1	1	1	GKAP1	G kinase anchoring protein 1
hsa-miR-153	1	0	1	1	1	1	PCDH19	protocadherin 19
hsa-miR-153	1	0	1	1	1	1	FAM135A	family with sequence similarity 135, member A
hsa-miR-153	0	0	1	0	0	0	COL20A1	collagen, type XX, alpha 1
hsa-miR-153	1	0	1	1	0	0	ZSWIM5	zinc finger, SWIM-type containing 5
hsa-miR-153	1	0	1	1	1	1	TOPORS	topoisomerase I binding, arginine/serine-rich, E3 ubiquitin protein ligase
hsa-miR-153	0	0	1	0	1	1	FBRSL1	fibrosin-like 1
hsa-miR-153	0	0	1	0	1	1	ZSWIM6	zinc finger, SWIM-type containing 6
hsa-miR-153	1	0	1	1	1	1	ZNF532	zinc finger protein 532
hsa-miR-153	0	0	1	0	0	0	LOC440792	proline dehydrogenase (oxidase) 1 pseudogene
hsa-miR-153	1	0	1	1	1	1	ABI3BP	ABI family, member 3 (NESH) binding protein
hsa-miR-153	1	0	1	1	1	1	AHCTF1	AT hook containing transcription factor 1
hsa-miR-153	1	0	1	1	1	1	BCL2L11	BCL2-like 11 (apoptosis facilitator)
hsa-miR-153	1	0	1	1	1	1	SH3TC2	SH3 domain and tetratricopeptide repeats 2
hsa-miR-153	0	0	1	1	0	0	SSPO	SCO-spondin homolog (Bos taurus)
hsa-miR-153	1	0	1	1	1	1	FAT2	FAT tumor suppressor homolog 2 (Drosophila)
hsa-miR-153	0	0	1	1	0	0	APH1B	anterior pharynx defective 1 homolog B (C. elegans)
hsa-miR-153	0	0	1	1	1	1	SYBU	syntabulin (syntaxin-interacting)
hsa-miR-153	1	0	1	1	1	1	LTBP1	latent transforming growth factor beta binding protein 1
hsa-miR-153	0	0	1	0	1	1	ITPR1	inositol 1,4,5-trisphosphate receptor, type 1
hsa-miR-153	0	0	1	1	0	0	KCNC3	potassium voltage-gated channel, Shaw-related subfamily, member 3
hsa-miR-153	0	0	1	1	0	0	STON2	stonin 2
hsa-miR-153	1	0	1	1	1	1	MEF2A	myocyte enhancer factor 2A
hsa-miR-153	1	0	1	1	1	1	PCCB	propionyl CoA carboxylase, beta polypeptide
hsa-miR-153	1	0	1	1	1	1	SLC8A1	solute carrier family 8 (sodium/calcium exchanger), member 1
hsa-miR-153	1	0	1	0	1	1	PLAG1	pleiomorphic adenoma gene 1
hsa-miR-153	0	0	1	1	1	1	DGKI	diacylglycerol kinase, iota
hsa-miR-153	1	0	1	0	1	1	SLC6A6	solute carrier family 6 (neurotransmitter transporter, taurine), member 6
hsa-miR-153	1	0	1	1	1	1	PRKACB	protein kinase, cAMP-dependent, catalytic, beta
hsa-miR-153	1	0	1	0	1	1	ETV1	ets variant 1
hsa-miR-153	0	0	1	0	1	1	NPY1R	neuropeptide Y receptor Y1
hsa-miR-153	1	0	1	0	1	1	CHL1	cell adhesion molecule with homology to L1CAM (close homolog of L1)
hsa-miR-153	1	0	1	1	1	1	AEBP2	AE binding protein 2
hsa-miR-153	0	0	1	1	0	0	DNMT1	DNA (cytosine-5-)-methyltransferase 1
hsa-miR-153	0	0	1	1	0	0	IFT27	intraflagellar transport 27 homolog (Chlamydomonas)
hsa-miR-153	0	0	1	1	0	0	HLA-DMB	major histocompatibility complex, class II, DM beta
hsa-miR-153	1	0	1	1	1	1	IPO8	importin 8
hsa-miR-153	1	0	1	1	1	1	HMGA2	high mobility group AT-hook 2
hsa-miR-153	1	0	1	1	0	0	PPP2R5D	protein phosphatase 2, regulatory subunit B', delta
hsa-miR-153	1	0	1	0	1	1	PDE7B	phosphodiesterase 7B
hsa-miR-153	0	0	1	0	0	0	MIAT	myocardial infarction associated transcript (non-protein coding)
hsa-miR-153	0	0	1	1	1	1	BRCA1	breast cancer 1, early onset
hsa-miR-153	0	0	1	1	1	1	SESN1	sestrin 1
hsa-miR-153	1	0	1	1	1	1	MYT1L	myelin transcription factor 1-like
hsa-miR-153	1	0	1	1	1	1	RUNX2	runt-related transcription factor 2
hsa-miR-153	1	0	1	1	1	1	VAPB	VAMP (vesicle-associated membrane protein)-associated protein B and C
hsa-miR-153	0	0	1	1	0	0	AVPR2	arginine vasopressin receptor 2
hsa-miR-153	1	0	1	1	1	1	SORBS1	sorbin and SH3 domain containing 1
hsa-miR-153	1	0	1	1	1	1	MYNN	myoneurin
hsa-miR-153	0	0	1	0	1	1	PDP1	pyruvate dehyrogenase phosphatase catalytic subunit 1
hsa-miR-153	1	0	1	1	1	1	BCL2L13	BCL2-like 13 (apoptosis facilitator)
hsa-miR-153	0	0	1	0	0	0	BPESC1	blepharophimosis, epicanthus inversus and ptosis, candidate 1 (non-protein coding)
hsa-miR-153	1	0	1	1	1	1	TSC22D2	TSC22 domain family, member 2
hsa-miR-153	1	0	1	1	1	1	MYLIP	myosin regulatory light chain interacting protein
hsa-miR-153	1	0	1	1	1	1	ABI2	abl-interactor 2
hsa-miR-153	1	0	1	1	1	1	RBM47	RNA binding motif protein 47
hsa-miR-153	0	0	1	0	1	1	ERBB2IP	erbb2 interacting protein
hsa-miR-153	0	0	1	0	1	1	KANSL3	KAT8 regulatory NSL complex subunit 3
hsa-miR-153	0	0	1	1	0	0	STX4	syntaxin 4
hsa-miR-153	1	0	1	1	0	0	CANT1	calcium activated nucleotidase 1
hsa-miR-153	0	0	1	1	1	1	SLC6A15	solute carrier family 6 (neutral amino acid transporter), member 15
hsa-miR-153	1	0	1	1	1	1	KCNIP2	Kv channel interacting protein 2
hsa-miR-153	0	0	1	1	0	0	SNRPN	small nuclear ribonucleoprotein polypeptide N
hsa-miR-153	0	0	1	0	0	0	MIR155HG	MIR155 host gene (non-protein coding)
hsa-miR-153	0	0	1	1	0	0	CNKSR2	connector enhancer of kinase suppressor of Ras 2
hsa-miR-153	1	0	1	1	0	0	SEPT8	septin 8
hsa-miR-153	1	0	1	0	1	1	PPP1R12A	protein phosphatase 1, regulatory subunit 12A
hsa-miR-153	1	0	1	1	1	1	HNRNPU	heterogeneous nuclear ribonucleoprotein U (scaffold attachment factor A)
hsa-miR-153	0	0	1	1	1	1	AMPH	amphiphysin
hsa-miR-153	1	0	1	1	1	1	TRIP10	thyroid hormone receptor interactor 10
hsa-miR-153	1	0	1	0	1	1	IL1RAP	interleukin 1 receptor accessory protein
hsa-miR-153	1	0	1	1	1	1	VPS37A	vacuolar protein sorting 37 homolog A (S. cerevisiae)
hsa-miR-153	0	0	1	0	0	0	ADAM5	ADAM metallopeptidase domain 5, pseudogene
hsa-miR-153	0	0	1	1	1	1	TCFL5	transcription factor-like 5 (basic helix-loop-helix)
hsa-miR-153	1	0	1	1	1	1	RAB3IP	RAB3A interacting protein (rabin3)
hsa-miR-153	0	0	1	0	1	1	SRPK1	SRSF protein kinase 1
hsa-miR-153	0	0	1	1	1	1	ZNF248	zinc finger protein 248
hsa-miR-153	1	0	1	0	1	1	NFAT5	nuclear factor of activated T-cells 5, tonicity-responsive
hsa-miR-153	0	0	1	0	1	1	TRMT10A	tRNA methyltransferase 10 homolog A (S. cerevisiae)
hsa-miR-153	1	0	1	1	0	0	DUS2L	dihydrouridine synthase 2-like, SMM1 homolog (S. cerevisiae)
hsa-miR-153	0	0	1	0	0	0	FLJ20518	FSHD region gene 2 family, member C pseudogene
hsa-miR-153	0	0	1	0	0	0	TUG1	taurine upregulated 1 (non-protein coding)
hsa-miR-153	1	0	1	1	1	1	CADM3	cell adhesion molecule 3
hsa-miR-153	1	0	1	1	1	1	PTBP3	polypyrimidine tract binding protein 3
hsa-miR-153	1	0	1	1	1	1	ARMC8	armadillo repeat containing 8
hsa-miR-153	0	0	1	1	1	1	CXXC5	CXXC finger protein 5
hsa-miR-153	1	0	1	1	1	1	ACER3	alkaline ceramidase 3
hsa-miR-153	0	0	1	1	0	0	UGGT2	UDP-glucose glycoprotein glucosyltransferase 2
hsa-miR-153	1	0	1	1	1	1	C12orf23	chromosome 12 open reading frame 23
hsa-miR-153	0	0	1	0	0	0	DUXAP10	double homeobox A pseudogene 10
hsa-miR-153	1	0	1	1	1	1	S100PBP	S100P binding protein
hsa-miR-153	0	0	1	1	0	0	JMJD4	jumonji domain containing 4
hsa-miR-153	1	0	1	1	1	1	PHF20L1	PHD finger protein 20-like 1
hsa-miR-153	1	0	1	1	1	1	BAZ2A	bromodomain adjacent to zinc finger domain, 2A
hsa-miR-153	1	0	1	1	1	1	DERL1	derlin 1
hsa-miR-153	1	0	1	1	1	1	PAX8	paired box 8
hsa-miR-153	1	0	1	1	1	1	MAPK8IP3	mitogen-activated protein kinase 8 interacting protein 3
hsa-miR-153	0	0	1	0	0	0	IFFO2	intermediate filament family orphan 2
hsa-miR-153	1	0	1	1	1	1	ABHD3	abhydrolase domain containing 3
hsa-miR-153	0	0	1	0	1	1	ATXN1L	ataxin 1-like
hsa-miR-153	1	0	1	1	1	1	KANK1	KN motif and ankyrin repeat domains 1
hsa-miR-153	0	0	1	0	1	1	FLJ22447	uncharacterized LOC400221
hsa-miR-153	0	0	1	1	1	1	SH3YL1	SH3 domain containing, Ysc84-like 1 (S. cerevisiae)
hsa-miR-153	0	0	1	0	0	0	NEURL1B	neuralized homolog 1B (Drosophila)
hsa-miR-153	0	0	1	1	1	1	TGIF1	TGFB-induced factor homeobox 1
hsa-miR-153	0	0	1	0	0	0	LOC729852	uncharacterized LOC729852
hsa-miR-153	0	0	1	1	1	1	KDM2B	lysine (K)-specific demethylase 2B
hsa-miR-153	1	0	1	0	1	1	LOC90462	zinc finger protein 605-like
hsa-miR-153	1	0	1	1	1	1	SLAIN1	SLAIN motif family, member 1
hsa-miR-153	1	0	1	0	1	1	ELMOD1	ELMO/CED-12 domain containing 1
hsa-miR-153	0	0	1	1	1	1	C8orf46	chromosome 8 open reading frame 46
hsa-miR-153	1	0	1	0	1	1	AP1G1	adaptor-related protein complex 1, gamma 1 subunit
hsa-miR-153	0	0	1	1	1	1	OPTN	optineurin
hsa-miR-153	0	0	1	1	1	1	SLCO1B3	solute carrier organic anion transporter family, member 1B3
hsa-miR-153	0	0	1	1	0	0	HECTD3	HECT domain containing E3 ubiquitin protein ligase 3
hsa-miR-153	0	0	1	1	0	0	AARSD1	alanyl-tRNA synthetase domain containing 1
hsa-miR-153	0	0	1	1	0	0	DMRTC2	DMRT-like family C2
hsa-miR-153	1	0	1	1	1	1	ANKRD29	ankyrin repeat domain 29
hsa-miR-153	0	0	1	1	0	0	PRSS54	protease, serine, 54
hsa-miR-153	0	0	1	1	1	1	ZBTB26	zinc finger and BTB domain containing 26
hsa-miR-153	0	0	1	1	0	0	PIGO	phosphatidylinositol glycan anchor biosynthesis, class O
hsa-miR-153	0	0	1	1	1	1	TRPC4AP	transient receptor potential cation channel, subfamily C, member 4 associated protein
hsa-miR-153	1	0	1	1	1	1	ZNF449	zinc finger protein 449
hsa-miR-153	1	0	1	0	1	1	SLC25A37	solute carrier family 25 (mitochondrial iron transporter), member 37
hsa-miR-153	1	0	1	1	1	1	STXBP5	syntaxin binding protein 5 (tomosyn)
hsa-miR-153	0	0	1	0	1	1	TMSB15B	thymosin beta 15B
hsa-miR-153	0	0	1	1	1	1	CCDC102B	coiled-coil domain containing 102B
hsa-miR-153	0	0	1	1	1	1	SP100	SP100 nuclear antigen
hsa-miR-153	1	0	1	1	1	1	TSN	translin
hsa-miR-153	0	0	1	1	1	1	NRCAM	neuronal cell adhesion molecule
hsa-miR-153	1	0	1	1	1	1	GNG2	guanine nucleotide binding protein (G protein), gamma 2
hsa-miR-153	1	0	1	1	0	0	TOE1	target of EGR1, member 1 (nuclear)
hsa-miR-153	0	0	1	1	1	1	LZTFL1	leucine zipper transcription factor-like 1
hsa-miR-153	0	0	1	1	1	1	TMPRSS11D	transmembrane protease, serine 11D
hsa-miR-153	1	0	1	1	1	1	BANP	BTG3 associated nuclear protein
hsa-miR-153	0	0	1	1	0	0	CES4A	carboxylesterase 4A
hsa-miR-153	0	0	1	1	1	1	SDHA	succinate dehydrogenase complex, subunit A, flavoprotein (Fp)
hsa-miR-153	1	0	1	1	1	1	NMT2	N-myristoyltransferase 2
hsa-miR-153	1	0	1	1	1	1	GCLC	glutamate-cysteine ligase, catalytic subunit
hsa-miR-153	1	0	1	1	1	1	CPNE8	copine VIII
hsa-miR-153	0	0	1	1	1	1	MOBP	myelin-associated oligodendrocyte basic protein
hsa-miR-153	0	0	1	0	0	0	LINC00486	long intergenic non-protein coding RNA 486
hsa-miR-153	0	0	1	1	1	1	CHRM5	cholinergic receptor, muscarinic 5
hsa-miR-153	1	0	1	1	1	1	ANKRD46	ankyrin repeat domain 46
hsa-miR-153	0	0	1	1	0	0	ZNF185	zinc finger protein 185 (LIM domain)
hsa-miR-153	0	0	1	0	0	0	LOC100129858	uncharacterized LOC100129858
hsa-miR-153	1	0	1	1	1	1	SPATS2	spermatogenesis associated, serine-rich 2
hsa-miR-153	0	0	1	0	0	0	FAM66C	family with sequence similarity 66, member C
hsa-miR-153	0	0	1	0	0	0	C1orf204	chromosome 1 open reading frame 204
hsa-miR-153	0	0	1	1	1	1	MPHOSPH9	M-phase phosphoprotein 9
hsa-miR-153	1	0	1	0	1	1	THRB	thyroid hormone receptor, beta
hsa-miR-153	1	0	1	1	1	1	ETS2	v-ets erythroblastosis virus E26 oncogene homolog 2 (avian)
hsa-miR-153	1	0	1	1	1	1	CDV3	CDV3 homolog (mouse)
hsa-miR-153	1	0	1	0	1	1	YPEL2	yippee-like 2 (Drosophila)
hsa-miR-153	0	0	1	0	1	1	TNFAIP8	tumor necrosis factor, alpha-induced protein 8
hsa-miR-153	1	0	1	0	1	1	AGFG1	ArfGAP with FG repeats 1
hsa-miR-153	0	0	1	1	0	0	PLCZ1	phospholipase C, zeta 1
hsa-miR-153	1	0	1	1	1	1	IL20RA	interleukin 20 receptor, alpha
hsa-miR-153	0	0	1	1	1	1	FAM76A	family with sequence similarity 76, member A
hsa-miR-153	0	0	1	1	1	1	CHCHD1	coiled-coil-helix-coiled-coil-helix domain containing 1
hsa-miR-153	1	0	1	1	1	1	AGAP2	ArfGAP with GTPase domain, ankyrin repeat and PH domain 2
hsa-miR-153	1	0	1	1	0	0	WIZ	widely interspaced zinc finger motifs
hsa-miR-153	1	0	1	1	1	1	PPP1R21	protein phosphatase 1, regulatory subunit 21
hsa-miR-153	0	0	1	1	1	1	FAM19A2	family with sequence similarity 19 (chemokine (C-C motif)-like), member A2
hsa-miR-153	1	0	1	1	1	1	SBF2	SET binding factor 2
hsa-miR-153	1	0	1	1	1	1	EPAS1	endothelial PAS domain protein 1
hsa-miR-153	1	0	1	1	1	1	SH2D4B	SH2 domain containing 4B
hsa-miR-153	0	0	1	0	0	0	DKFZP434H168	uncharacterized LOC26077
hsa-miR-153	1	0	1	1	1	1	ABR	active BCR-related
hsa-miR-153	1	0	1	1	1	1	DAB2IP	DAB2 interacting protein
hsa-miR-153	1	0	1	1	1	1	UBA2	ubiquitin-like modifier activating enzyme 2
hsa-miR-153	0	0	1	1	0	0	DOCK11	dedicator of cytokinesis 11
hsa-miR-153	1	0	1	1	1	1	FAM118A	family with sequence similarity 118, member A
hsa-miR-153	1	0	1	1	0	0	GXYLT1	glucoside xylosyltransferase 1
hsa-miR-153	0	0	1	1	0	0	GABRA2	gamma-aminobutyric acid (GABA) A receptor, alpha 2
hsa-miR-153	0	0	1	1	1	1	MKX	mohawk homeobox
hsa-miR-153	0	0	1	1	0	0	CLDN4	claudin 4
hsa-miR-153	0	0	1	0	0	0	HNRNPKP3	heterogeneous nuclear ribonucleoprotein K pseudogene 3
hsa-miR-153	0	0	1	0	1	1	NPHP4	nephronophthisis 4
hsa-miR-153	1	0	1	1	1	1	BCAT1	branched chain amino-acid transaminase 1, cytosolic
hsa-miR-153	1	0	1	1	1	1	SDCBP	syndecan binding protein (syntenin)
hsa-miR-153	0	0	1	0	0	0	LOC100129940	uncharacterized LOC100129940
hsa-miR-153	0	0	1	0	0	0	EMBP1	embigin pseudogene 1
hsa-miR-153	1	0	1	1	1	1	RBM24	RNA binding motif protein 24
hsa-miR-153	1	0	1	0	1	1	ESRRG	estrogen-related receptor gamma
hsa-miR-153	0	0	1	1	1	1	ZNF680	zinc finger protein 680
hsa-miR-153	0	0	1	0	0	0	LOC100124692	maltase-glucoamylase (alpha-glucosidase) pseudogene
hsa-miR-153	0	0	1	1	0	0	CYP4X1	cytochrome P450, family 4, subfamily X, polypeptide 1
hsa-miR-153	1	0	1	0	0	0	ASXL3	additional sex combs like 3 (Drosophila)
hsa-miR-153	0	0	1	1	0	0	ZNF730	zinc finger protein 730
hsa-miR-153	1	0	1	1	1	1	MAP2K4	mitogen-activated protein kinase kinase 4
hsa-miR-153	1	0	1	1	1	1	RPS6KA4	ribosomal protein S6 kinase, 90kDa, polypeptide 4
hsa-miR-153	1	0	1	1	1	1	KIAA0907	KIAA0907
hsa-miR-153	1	0	1	1	1	1	CAMK2G	calcium/calmodulin-dependent protein kinase II gamma
hsa-miR-153	0	0	1	1	0	0	HSPB11	heat shock protein family B (small), member 11
hsa-miR-153	1	0	1	1	1	1	ZNF655	zinc finger protein 655
hsa-miR-153	0	0	1	1	1	1	CCKBR	cholecystokinin B receptor
hsa-miR-153	0	0	1	1	1	1	RABGAP1L	RAB GTPase activating protein 1-like
hsa-miR-153	0	0	1	1	1	1	PTPN20B	protein tyrosine phosphatase, non-receptor type 20B
hsa-miR-153	0	0	1	1	1	1	PTPN20A	protein tyrosine phosphatase, non-receptor type 20A
hsa-miR-153	1	0	1	1	1	1	MARCH7	membrane-associated ring finger (C3HC4) 7, E3 ubiquitin protein ligase
hsa-miR-153	1	0	1	1	1	1	NECAP1	NECAP endocytosis associated 1
hsa-miR-153	0	0	1	0	1	1	NEK1	NIMA (never in mitosis gene a)-related kinase 1
hsa-miR-153	0	0	1	1	1	1	TFDP2	transcription factor Dp-2 (E2F dimerization partner 2)
hsa-miR-153	0	0	1	0	0	0	ANKRD34C	ankyrin repeat domain 34C
hsa-miR-153	1	0	1	1	1	1	FBXL17	F-box and leucine-rich repeat protein 17
hsa-miR-153	0	0	1	1	0	0	H2AFJ	H2A histone family, member J
hsa-miR-153	0	0	1	1	0	0	ODF3	outer dense fiber of sperm tails 3
hsa-miR-153	0	0	1	1	1	1	PPA2	pyrophosphatase (inorganic) 2
hsa-miR-153	0	0	1	1	1	1	DDX60	DEAD (Asp-Glu-Ala-Asp) box polypeptide 60
hsa-miR-153	1	0	1	1	1	1	GOLGA8A	golgin A8 family, member A
hsa-miR-153	1	0	1	0	1	1	GPR85	G protein-coupled receptor 85
hsa-miR-153	0	0	1	1	1	1	SLC30A10	solute carrier family 30, member 10
hsa-miR-153	1	0	1	1	1	1	SLC30A8	solute carrier family 30 (zinc transporter), member 8
hsa-miR-153	1	0	1	1	1	1	YTHDF3	YTH domain family, member 3
hsa-miR-153	0	0	1	0	1	1	GAB3	GRB2-associated binding protein 3
hsa-miR-153	1	0	1	1	1	1	FAM126B	family with sequence similarity 126, member B
hsa-miR-153	0	0	1	1	1	1	CENPW	centromere protein W
hsa-miR-153	0	0	1	1	1	1	EGFLAM	EGF-like, fibronectin type III and laminin G domains
hsa-miR-153	1	0	1	1	0	0	USP24	ubiquitin specific peptidase 24
hsa-miR-153	1	0	1	1	1	1	TMEM68	transmembrane protein 68
hsa-miR-153	1	0	1	1	1	1	FAM126A	family with sequence similarity 126, member A
hsa-miR-153	1	0	1	0	1	1	CLINT1	clathrin interactor 1
hsa-miR-153	0	0	1	0	0	0	EPHA1-AS1	EPHA1 antisense RNA 1
hsa-miR-153	1	0	1	1	1	1	ANP32E	acidic (leucine-rich) nuclear phosphoprotein 32 family, member E
hsa-miR-153	1	0	1	0	1	1	EXOC5	exocyst complex component 5
hsa-miR-153	1	0	1	0	0	0	XPNPEP3	X-prolyl aminopeptidase (aminopeptidase P) 3, putative
hsa-miR-153	0	0	1	1	1	1	KLHL29	kelch-like 29 (Drosophila)
hsa-miR-153	1	0	1	0	1	1	NR3C1	nuclear receptor subfamily 3, group C, member 1 (glucocorticoid receptor)
hsa-miR-153	0	0	1	1	1	1	KLHL7	kelch-like 7 (Drosophila)
hsa-miR-153	1	0	1	1	1	1	DUSP16	dual specificity phosphatase 16
hsa-miR-153	0	0	1	0	0	0	BDNF-AS	BDNF antisense RNA
hsa-miR-153	0	0	1	0	0	0	KGFLP1	fibroblast growth factor 7 pseudogene
hsa-miR-153	0	0	1	1	1	1	NFXL1	nuclear transcription factor, X-box binding-like 1
hsa-miR-153	1	0	1	1	1	1	USF2	upstream transcription factor 2, c-fos interacting
hsa-miR-153	1	0	1	1	1	1	TAB3	TGF-beta activated kinase 1/MAP3K7 binding protein 3
hsa-miR-153	0	0	1	1	1	1	GCOM1	GRINL1A complex locus 1
hsa-miR-153	1	0	1	1	1	1	CAMTA1	calmodulin binding transcription activator 1
hsa-miR-153	0	0	1	1	1	1	IL20	interleukin 20
hsa-miR-153	0	0	1	1	1	1	GPR114	G protein-coupled receptor 114
hsa-miR-153	1	0	1	0	1	1	ANKRD28	ankyrin repeat domain 28
hsa-miR-153	1	0	1	0	1	1	NHS	Nance-Horan syndrome (congenital cataracts and dental anomalies)
hsa-miR-153	0	0	1	1	1	1	DIO1	deiodinase, iodothyronine, type I
hsa-miR-153	0	0	1	0	1	1	RAB18	RAB18, member RAS oncogene family
hsa-miR-153	1	0	1	1	1	1	ALCAM	activated leukocyte cell adhesion molecule
hsa-miR-153	0	0	1	1	1	1	RHD	Rh blood group, D antigen
hsa-miR-153	1	0	1	1	1	1	NTNG1	netrin G1
hsa-miR-153	0	0	1	0	0	0	PTPRVP	protein tyrosine phosphatase, receptor type, V, pseudogene
hsa-miR-153	0	0	1	1	0	0	TMEM116	transmembrane protein 116
hsa-miR-153	0	0	1	0	0	0	VWA5B2	von Willebrand factor A domain containing 5B2
hsa-miR-153	0	0	1	1	1	1	ATG3	autophagy related 3
hsa-miR-153	1	0	1	1	1	1	NRGN	neurogranin (protein kinase C substrate, RC3)
hsa-miR-153	1	0	1	0	1	1	DCAF10	DDB1 and CUL4 associated factor 10
hsa-miR-153	0	0	1	0	1	1	HAUS3	HAUS augmin-like complex, subunit 3
hsa-miR-153	0	0	1	1	0	0	SCG5	secretogranin V (7B2 protein)
hsa-miR-153	0	0	1	0	0	0	DNM1P33	DNM1 pseudogene 33
hsa-miR-153	1	0	1	0	1	1	DDX3X	DEAD (Asp-Glu-Ala-Asp) box polypeptide 3, X-linked
hsa-miR-153	0	0	1	1	1	1	ZNF85	zinc finger protein 85
hsa-miR-153	0	0	1	0	0	0	ATXN7L3B	ataxin 7-like 3B
hsa-miR-153	1	0	1	1	1	1	B4GALT3	UDP-Gal:betaGlcNAc beta 1,4- galactosyltransferase, polypeptide 3
hsa-miR-153	1	0	1	1	1	1	TRIM2	tripartite motif containing 2
hsa-miR-153	0	0	1	1	0	0	CCDC36	coiled-coil domain containing 36
hsa-miR-153	1	0	1	1	1	1	PAPOLA	poly(A) polymerase alpha
hsa-miR-153	0	0	1	1	1	1	CCDC148	coiled-coil domain containing 148
hsa-miR-153	1	0	1	1	1	1	ZBTB38	zinc finger and BTB domain containing 38
hsa-miR-153	1	0	1	0	1	1	NR1D2	nuclear receptor subfamily 1, group D, member 2
hsa-miR-153	1	0	1	0	1	1	NECAB1	N-terminal EF-hand calcium binding protein 1
hsa-miR-153	0	0	1	1	1	1	FAM122C	family with sequence similarity 122C
hsa-miR-153	0	0	1	1	1	1	RDH11	retinol dehydrogenase 11 (all-trans/9-cis/11-cis)
hsa-miR-153	1	0	1	1	1	1	ZNF131	zinc finger protein 131
hsa-miR-153	1	0	1	1	1	1	ARHGEF9	Cdc42 guanine nucleotide exchange factor (GEF) 9
hsa-miR-153	0	0	1	1	1	1	EXOC7	exocyst complex component 7
hsa-miR-153	0	0	1	1	1	1	TRAPPC11	trafficking protein particle complex 11
hsa-miR-153	1	0	1	1	1	1	SPRYD7	SPRY domain containing 7
hsa-miR-153	1	0	1	1	1	1	SPOCK2	sparc/osteonectin, cwcv and kazal-like domains proteoglycan (testican) 2
hsa-miR-153	0	0	1	1	1	1	SEC61A2	Sec61 alpha 2 subunit (S. cerevisiae)
hsa-miR-153	0	0	1	1	1	1	RHBDD1	rhomboid domain containing 1
hsa-miR-153	0	0	1	1	0	0	TMEM251	transmembrane protein 251
hsa-miR-153	1	0	1	1	1	1	MUM1L1	melanoma associated antigen (mutated) 1-like 1
hsa-miR-153	1	0	1	1	1	1	ZPLD1	zona pellucida-like domain containing 1
hsa-miR-153	0	0	1	0	0	0	ATP8B5P	ATPase, class I, type 8B, member 5, pseudogene
hsa-miR-153	1	0	1	1	1	1	SORL1	sortilin-related receptor, L(DLR class) A repeats containing
hsa-miR-153	1	0	1	1	1	1	QTRTD1	queuine tRNA-ribosyltransferase domain containing 1
hsa-miR-153	0	0	1	1	1	1	SLC39A12	solute carrier family 39 (zinc transporter), member 12
hsa-miR-153	1	0	1	1	1	1	CTDSPL2	CTD (carboxy-terminal domain, RNA polymerase II, polypeptide A) small phosphatase like 2
hsa-miR-153	0	0	1	1	1	1	CLEC12B	C-type lectin domain family 12, member B
hsa-miR-153	1	0	1	1	1	1	IMPACT	Impact homolog (mouse)
hsa-miR-153	0	0	1	0	0	0	LINC00642	long intergenic non-protein coding RNA 642
hsa-miR-153	1	0	1	1	1	1	SMG7	smg-7 homolog, nonsense mediated mRNA decay factor (C. elegans)
hsa-miR-153	0	0	1	1	1	1	FAM171B	family with sequence similarity 171, member B
hsa-miR-153	1	0	1	1	1	1	HECTD2	HECT domain containing E3 ubiquitin protein ligase 2
hsa-miR-153	1	0	1	1	1	1	BNC2	basonuclin 2
hsa-miR-153	0	0	1	0	0	0	CYP4F35P	cytochrome P450, family 4, subfamily F, polypeptide 35, pseudogene
hsa-miR-153	0	0	1	1	1	1	FAM71F1	family with sequence similarity 71, member F1
hsa-miR-153	0	0	1	0	0	0	LOC286184	uncharacterized LOC286184
hsa-miR-153	0	0	1	1	1	1	ZNF138	zinc finger protein 138
hsa-miR-153	1	0	1	1	1	1	GALNT1	UDP-N-acetyl-alpha-D-galactosamine:polypeptide N-acetylgalactosaminyltransferase 1 (GalNAc-T1)
hsa-miR-153	1	0	1	0	1	1	ARID2	AT rich interactive domain 2 (ARID, RFX-like)
hsa-miR-153	1	0	1	1	1	1	PRR16	proline rich 16
hsa-miR-153	1	0	1	1	0	0	PROSAPIP1	ProSAPiP1 protein
hsa-miR-153	1	0	1	1	1	1	TIMP2	TIMP metallopeptidase inhibitor 2
hsa-miR-153	1	0	1	1	1	1	BVES	blood vessel epicardial substance
hsa-miR-153	1	0	1	1	1	1	INTS6	integrator complex subunit 6
hsa-miR-153	1	0	1	1	1	1	KCNJ11	potassium inwardly-rectifying channel, subfamily J, member 11
hsa-miR-153	1	0	1	1	1	1	UNC13C	unc-13 homolog C (C. elegans)
hsa-miR-153	0	0	1	0	1	1	METTL12	methyltransferase like 12
hsa-miR-153	1	0	1	1	1	1	TNFSF4	tumor necrosis factor (ligand) superfamily, member 4
hsa-miR-153	0	0	1	1	1	1	ZNF568	zinc finger protein 568
hsa-miR-153	0	0	1	1	1	1	C8orf34	chromosome 8 open reading frame 34
hsa-miR-153	0	0	1	0	0	0	LOC338579	ankyrin repeat domain-containing protein 30B pseudogene
hsa-miR-153	1	0	1	1	1	1	MAMDC2	MAM domain containing 2
hsa-miR-153	0	0	1	0	0	0	LOC283914	uncharacterized LOC283914
hsa-miR-153	0	0	1	0	1	1	IL33	interleukin 33
hsa-miR-153	0	0	1	0	0	0	LOC348120	uncharacterized LOC348120
hsa-miR-153	1	0	1	0	1	1	KDM2A	lysine (K)-specific demethylase 2A
hsa-miR-153	1	0	1	1	1	1	PELI1	pellino E3 ubiquitin protein ligase 1
hsa-miR-153	1	0	1	0	1	1	ARHGAP5	Rho GTPase activating protein 5
hsa-miR-153	0	0	1	0	1	1	ITGA1	integrin, alpha 1
hsa-miR-153	1	0	1	1	1	1	RECK	reversion-inducing-cysteine-rich protein with kazal motifs
hsa-miR-153	0	0	1	1	1	1	KDELC1	KDEL (Lys-Asp-Glu-Leu) containing 1
hsa-miR-153	1	0	1	0	1	1	C14orf43	chromosome 14 open reading frame 43
hsa-miR-153	1	0	1	1	1	1	HP1BP3	heterochromatin protein 1, binding protein 3
hsa-miR-153	0	0	1	1	0	0	TINAG	tubulointerstitial nephritis antigen
hsa-miR-153	0	0	1	1	1	1	ZNF365	zinc finger protein 365
hsa-miR-153	0	0	1	0	0	0	LOC387647	patched domain containing 3 pseudogene
hsa-miR-153	1	0	1	1	1	1	RANBP9	RAN binding protein 9
hsa-miR-153	0	0	1	1	1	1	ZNF333	zinc finger protein 333
hsa-miR-153	1	0	1	1	1	1	ADCY6	adenylate cyclase 6
hsa-miR-153	0	0	1	1	1	1	RWDD3	RWD domain containing 3
hsa-miR-153	0	0	1	0	0	0	WHAMMP2	WAS protein homolog associated with actin, golgi membranes and microtubules pseudogene 2
hsa-miR-153	1	0	1	1	1	1	CDKN1C	cyclin-dependent kinase inhibitor 1C (p57, Kip2)
hsa-miR-153	0	0	1	0	0	0	ZNF66P	zinc finger protein 66, pseudogene
hsa-miR-153	1	0	1	1	1	1	SRPK2	SRSF protein kinase 2
hsa-miR-153	0	0	1	1	1	1	TTLL9	tubulin tyrosine ligase-like family, member 9
hsa-miR-153	0	0	1	0	0	0	PTGER4P2	prostaglandin E receptor 4 (subtype EP4) pseudogene 2
hsa-miR-153	0	0	1	0	0	0	SPDYE8P	speedy homolog E8 (Xenopus laevis), pseudogene
hsa-miR-153	0	0	1	0	0	0	FOXN3-AS2	FOXN3 antisense RNA 2
hsa-miR-153	1	0	1	1	1	1	ANLN	anillin, actin binding protein
hsa-miR-153	0	0	1	0	0	0	LOC283070	uncharacterized LOC283070
hsa-miR-153	1	0	1	1	1	1	OPCML	opioid binding protein/cell adhesion molecule-like
hsa-miR-153	1	0	1	1	1	1	WNT5A	wingless-type MMTV integration site family, member 5A
hsa-miR-153	1	0	1	0	1	1	DPYSL3	dihydropyrimidinase-like 3
hsa-miR-153	0	0	1	1	0	0	PDLIM7	PDZ and LIM domain 7 (enigma)
hsa-miR-153	0	0	1	1	1	1	COBL	cordon-bleu homolog (mouse)
hsa-miR-153	1	0	1	1	1	1	ELOVL7	ELOVL fatty acid elongase 7
hsa-miR-153	0	0	1	1	0	0	EDDM3A	epididymal protein 3A
hsa-miR-153	0	0	1	1	1	1	CCDC126	coiled-coil domain containing 126
hsa-miR-153	1	0	1	1	1	1	NR2F2	nuclear receptor subfamily 2, group F, member 2
hsa-miR-153	0	0	1	1	1	1	PAX4	paired box 4
hsa-miR-153	1	0	1	1	1	1	SP4	Sp4 transcription factor
hsa-miR-153	1	0	1	1	1	1	TET2	tet methylcytosine dioxygenase 2
hsa-miR-153	0	0	1	1	1	1	FSHB	follicle stimulating hormone, beta polypeptide
hsa-miR-153	1	0	1	1	1	1	TRIP12	thyroid hormone receptor interactor 12
hsa-miR-153	1	0	1	1	1	1	SLMAP	sarcolemma associated protein
hsa-miR-153	1	0	1	1	1	1	ST18	suppression of tumorigenicity 18 (breast carcinoma) (zinc finger protein)
hsa-miR-153	1	0	1	0	1	1	PRDM10	PR domain containing 10
hsa-miR-153	0	0	1	0	0	0	KRT8P12	keratin 8 pseudogene 12
hsa-miR-153	0	0	1	0	1	1	GOLGA8G	golgin A8 family, member G
hsa-miR-153	0	0	1	1	1	1	KANSL1L	KAT8 regulatory NSL complex subunit 1-like
hsa-miR-153	1	0	1	1	1	1	MEGF11	multiple EGF-like-domains 11
hsa-miR-153	1	0	1	1	1	1	CADPS	Ca++-dependent secretion activator
hsa-miR-153	1	0	1	1	1	1	NUMB	numb homolog (Drosophila)
hsa-miR-153	1	0	1	1	1	1	SASH1	SAM and SH3 domain containing 1
hsa-miR-153	0	0	1	1	1	1	FUCA2	fucosidase, alpha-L- 2, plasma
hsa-miR-153	1	0	1	1	1	1	FZD6	frizzled family receptor 6
hsa-miR-153	0	0	1	0	1	1	ZNF498	zinc finger protein 498
hsa-miR-153	0	0	1	1	1	1	GTF3C2	general transcription factor IIIC, polypeptide 2, beta 110kDa
hsa-miR-153	0	0	1	1	1	1	IPCEF1	interaction protein for cytohesin exchange factors 1
hsa-miR-153	0	0	1	0	0	0	LINC00240	long intergenic non-protein coding RNA 240
hsa-miR-153	1	0	1	1	1	1	FOXP1	forkhead box P1
hsa-miR-153	1	0	1	1	1	1	STARD13	StAR-related lipid transfer (START) domain containing 13
hsa-miR-153	1	0	1	1	1	1	DCAF5	DDB1 and CUL4 associated factor 5
hsa-miR-153	1	0	1	1	1	1	PPFIA1	protein tyrosine phosphatase, receptor type, f polypeptide (PTPRF), interacting protein (liprin), alpha 1
hsa-miR-153	0	0	1	1	1	1	CCNT2	cyclin T2
hsa-miR-153	1	0	1	1	1	1	PTPRB	protein tyrosine phosphatase, receptor type, B
hsa-miR-153	1	0	1	1	1	1	PTER	phosphotriesterase related
hsa-miR-153	1	0	1	1	1	1	CREB3L2	cAMP responsive element binding protein 3-like 2
hsa-miR-153	1	0	1	0	1	1	TTL	tubulin tyrosine ligase
hsa-miR-153	0	0	1	0	0	0	AKR1A1	aldo-keto reductase family 1, member A1 (aldehyde reductase)
hsa-miR-153	1	0	1	1	0	0	TSC22D4	TSC22 domain family, member 4
hsa-miR-153	0	0	1	1	0	0	PPOX	protoporphyrinogen oxidase
hsa-miR-153	0	0	1	1	1	1	ATP1B3	ATPase, Na+/K+ transporting, beta 3 polypeptide
hsa-miR-153	1	0	1	1	1	1	PTN	pleiotrophin
hsa-miR-153	0	0	1	1	0	0	TBCB	tubulin folding cofactor B
hsa-miR-153	1	0	1	0	1	1	BNIP3L	BCL2/adenovirus E1B 19kDa interacting protein 3-like
hsa-miR-153	0	0	1	1	1	1	FUS	fused in sarcoma
hsa-miR-153	1	0	1	1	1	1	RASL12	RAS-like, family 12
hsa-miR-153	1	0	1	1	1	1	HMGN3	high mobility group nucleosomal binding domain 3
hsa-miR-153	1	0	1	1	1	1	NTM	neurotrimin
hsa-miR-153	0	0	1	1	1	1	STON1	stonin 1
hsa-miR-153	0	0	1	0	0	0	LOC643072	uncharacterized LOC643072
hsa-miR-153	1	0	1	1	1	1	PCTP	phosphatidylcholine transfer protein
hsa-miR-153	1	0	1	1	1	1	STK38L	serine/threonine kinase 38 like
hsa-miR-153	0	0	1	1	1	1	ATG4A	autophagy related 4A, cysteine peptidase
hsa-miR-153	1	0	1	1	0	0	THY1	Thy-1 cell surface antigen
hsa-miR-153	0	0	1	1	1	1	UIMC1	ubiquitin interaction motif containing 1
hsa-miR-153	0	0	1	1	1	1	PEX19	peroxisomal biogenesis factor 19
hsa-miR-153	1	0	1	1	1	1	PPP3CB	protein phosphatase 3, catalytic subunit, beta isozyme
hsa-miR-153	0	0	1	1	1	1	UBE2A	ubiquitin-conjugating enzyme E2A
hsa-miR-153	1	0	1	1	1	1	BAALC	brain and acute leukemia, cytoplasmic
hsa-miR-153	1	0	1	1	1	1	GOLGA7	golgin A7
hsa-miR-153	1	0	1	1	0	0	ATP6V1B2	ATPase, H+ transporting, lysosomal 56/58kDa, V1 subunit B2
hsa-miR-153	0	0	1	1	1	1	IL15	interleukin 15
hsa-miR-153	0	0	1	1	1	1	DNAJC25	DnaJ (Hsp40) homolog, subfamily C , member 25
hsa-miR-153	1	0	1	1	1	1	PDCL	phosducin-like
hsa-miR-153	1	0	1	1	1	1	DNAJA2	DnaJ (Hsp40) homolog, subfamily A, member 2
hsa-miR-153	1	0	1	1	1	1	ATPAF1	ATP synthase mitochondrial F1 complex assembly factor 1
hsa-miR-153	0	0	1	1	1	1	PTMA	prothymosin, alpha
hsa-miR-153	0	0	1	1	1	1	ARHGEF25	Rho guanine nucleotide exchange factor (GEF) 25
hsa-miR-153	1	0	1	1	1	1	SLC37A3	solute carrier family 37 (glycerol-3-phosphate transporter), member 3
hsa-miR-153	1	0	1	1	1	1	SERF2	small EDRK-rich factor 2
hsa-miR-153	1	0	1	1	1	1	PHACTR2	phosphatase and actin regulator 2
hsa-miR-153	1	0	1	0	1	1	MEGF10	multiple EGF-like-domains 10
hsa-miR-153	1	0	1	1	1	1	SLC39A10	solute carrier family 39 (zinc transporter), member 10
hsa-miR-153	1	0	1	1	1	1	ATP2B3	ATPase, Ca++ transporting, plasma membrane 3
hsa-miR-153	1	0	1	1	1	1	QKI	QKI, KH domain containing, RNA binding
hsa-miR-153	1	0	1	1	1	1	ITSN1	intersectin 1 (SH3 domain protein)
hsa-miR-153	0	0	1	1	1	1	VDAC2	voltage-dependent anion channel 2
hsa-miR-153	1	0	1	1	1	1	DBT	dihydrolipoamide branched chain transacylase E2
hsa-miR-153	0	0	1	1	1	1	F8	coagulation factor VIII, procoagulant component
hsa-miR-153	1	0	1	0	1	1	G6PC	glucose-6-phosphatase, catalytic subunit
hsa-miR-153	0	0	1	0	1	1	GBE1	glucan (1,4-alpha-), branching enzyme 1
hsa-miR-153	1	0	1	0	1	1	GHR	growth hormone receptor
hsa-miR-153	0	0	1	1	0	0	GP1BA	glycoprotein Ib (platelet), alpha polypeptide
hsa-miR-153	0	0	1	1	1	1	MTM1	myotubularin 1
hsa-miR-153	0	0	1	0	1	1	PGK1	phosphoglycerate kinase 1
hsa-miR-153	0	0	1	1	1	1	SLC25A20	solute carrier family 25 (carnitine/acylcarnitine translocase), member 20
hsa-miR-153	1	0	1	1	1	1	CHM	choroideremia (Rab escort protein 1)
hsa-miR-153	0	0	1	0	1	1	GNRHR	gonadotropin-releasing hormone receptor
hsa-miR-153	1	0	1	0	1	1	PAFAH1B1	platelet-activating factor acetylhydrolase 1b, regulatory subunit 1 (45kDa)
hsa-miR-153	1	0	1	1	1	1	HNF1B	HNF1 homeobox B
hsa-miR-153	0	0	1	1	1	1	C7	complement component 7
hsa-miR-153	0	0	1	1	1	1	IL6	interleukin 6 (interferon, beta 2)
hsa-miR-153	1	0	1	1	1	1	CXCL12	chemokine (C-X-C motif) ligand 12
hsa-miR-153	1	0	1	1	1	1	DIO2	deiodinase, iodothyronine, type II
hsa-miR-153	1	0	1	0	1	1	GABRA4	gamma-aminobutyric acid (GABA) A receptor, alpha 4
hsa-miR-153	0	0	1	1	1	1	HTR7	5-hydroxytryptamine (serotonin) receptor 7, adenylate cyclase-coupled
hsa-miR-153	0	0	1	1	1	1	SLC2A9	solute carrier family 2 (facilitated glucose transporter), member 9
hsa-miR-153	0	0	1	1	1	1	BLOC1S2	biogenesis of lysosomal organelles complex-1, subunit 2
hsa-miR-153	1	0	1	0	1	1	SMAD5	SMAD family member 5
hsa-miR-153	1	0	1	1	1	1	ATP1B1	ATPase, Na+/K+ transporting, beta 1 polypeptide
hsa-miR-153	1	0	1	1	1	1	LCLAT1	lysocardiolipin acyltransferase 1
hsa-miR-153	1	0	1	0	1	1	CACNA1I	calcium channel, voltage-dependent, T type, alpha 1I subunit
hsa-miR-153	1	0	1	1	1	1	ABLIM1	actin binding LIM protein 1
hsa-miR-153	1	0	1	1	1	1	RBMS3	RNA binding motif, single stranded interacting protein 3
hsa-miR-153	0	0	1	1	1	1	ANXA13	annexin A13
hsa-miR-153	0	0	1	1	1	1	ALG11	asparagine-linked glycosylation 11, alpha-1,2-mannosyltransferase homolog (yeast)
hsa-miR-153	0	0	1	1	1	1	CCDC144NL	coiled-coil domain containing 144 family, N-terminal like
hsa-miR-153	0	0	1	1	1	1	OR9Q1	olfactory receptor, family 9, subfamily Q, member 1
hsa-miR-153	0	0	1	1	1	1	FRG2	FSHD region gene 2
hsa-miR-153	0	0	1	1	1	1	RYK	receptor-like tyrosine kinase
hsa-miR-153	1	0	1	0	1	1	IP6K1	inositol hexakisphosphate kinase 1
hsa-miR-153	0	0	1	0	0	0	RWDD1	RWD domain containing 1
hsa-miR-153	1	0	1	1	1	1	CTDSPL	CTD (carboxy-terminal domain, RNA polymerase II, polypeptide A) small phosphatase-like
hsa-miR-153	1	0	1	1	1	1	BCAP29	B-cell receptor-associated protein 29
hsa-miR-153	0	0	1	1	1	1	MXRA7	matrix-remodelling associated 7
hsa-miR-153	1	0	1	0	1	1	KIAA2022	KIAA2022
hsa-miR-153	1	0	1	1	1	1	FNIP1	folliculin interacting protein 1
hsa-miR-153	0	0	1	1	1	1	GCSAM	germinal center-associated, signaling and motility
hsa-miR-153	1	0	1	1	1	1	DSP	desmoplakin
hsa-miR-153	0	0	1	1	0	0	C10orf62	chromosome 10 open reading frame 62
hsa-miR-153	1	0	1	0	1	1	FAM102B	family with sequence similarity 102, member B
hsa-miR-153	1	0	1	0	1	1	MTX3	metaxin 3
hsa-miR-153	1	0	1	1	1	1	BCL2L15	BCL2-like 15
hsa-miR-153	0	0	1	0	1	1	THEMIS	thymocyte selection associated
hsa-miR-153	1	0	1	1	1	1	CENPP	centromere protein P
hsa-miR-153	0	0	1	1	0	0	SOHLH1	spermatogenesis and oogenesis specific basic helix-loop-helix 1
hsa-miR-153	0	0	1	0	1	1	GOLGA8E	golgin A8 family, member E
hsa-miR-153	1	0	1	1	1	1	SLC25A53	solute carrier family 25, member 53
hsa-miR-153	1	0	1	0	1	1	ZKSCAN2	zinc finger with KRAB and SCAN domains 2
hsa-miR-153	1	0	1	1	1	1	SORCS1	sortilin-related VPS10 domain containing receptor 1
hsa-miR-153	1	0	1	0	1	1	SYT14L	synaptotagmin XIV-like
hsa-miR-153	0	0	1	1	1	1	DCAF8L1	DDB1 and CUL4 associated factor 8-like 1
hsa-miR-153	0	0	1	1	1	1	ACTBL2	actin, beta-like 2
hsa-miR-153	0	0	1	1	1	1	MTCP1	mature T-cell proliferation 1
hsa-miR-153	1	0	1	1	1	1	SERBP1	SERPINE1 mRNA binding protein 1
hsa-miR-153	1	0	1	0	1	1	RGAG4	retrotransposon gag domain containing 4
hsa-miR-153	1	0	1	1	1	1	KALRN	kalirin, RhoGEF kinase
hsa-miR-153	1	0	1	0	1	1	ADAR	adenosine deaminase, RNA-specific
hsa-miR-153	1	0	1	1	1	1	AFF3	AF4/FMR2 family, member 3
hsa-miR-153	1	0	1	0	1	1	MSRB3	methionine sulfoxide reductase B3
hsa-miR-153	0	0	1	1	1	1	VSTM4	V-set and transmembrane domain containing 4
hsa-miR-153	1	0	1	1	1	1	MAF	v-maf musculoaponeurotic fibrosarcoma oncogene homolog (avian)
hsa-miR-153	1	0	1	1	1	1	AMD1	adenosylmethionine decarboxylase 1
hsa-miR-153	1	0	1	0	1	1	SRGAP3	SLIT-ROBO Rho GTPase activating protein 3
hsa-miR-153	1	0	1	1	1	1	SAR1B	SAR1 homolog B (S. cerevisiae)
hsa-miR-153	1	0	1	1	1	1	PPM1B	protein phosphatase, Mg2+/Mn2+ dependent, 1B
hsa-miR-153	0	0	1	1	1	1	TRAF5	TNF receptor-associated factor 5
hsa-miR-153	1	0	1	1	1	1	RRM2	ribonucleotide reductase M2
hsa-miR-153	1	0	1	1	1	1	DLX1	distal-less homeobox 1
hsa-miR-153	1	0	1	1	1	1	CHN2	chimerin (chimaerin) 2
hsa-miR-153	1	0	1	0	1	1	CEP44	centrosomal protein 44kDa
hsa-miR-153	1	0	1	1	1	1	PAPD5	PAP associated domain containing 5
hsa-miR-153	0	0	1	0	1	1	STEAP2	STEAP family member 2, metalloreductase
hsa-miR-153	1	0	1	1	1	1	TROVE2	TROVE domain family, member 2
hsa-miR-153	1	0	1	1	1	1	HMGCLL1	3-hydroxymethyl-3-methylglutaryl-CoA lyase-like 1
hsa-miR-153	1	0	1	1	1	1	MZT1	mitotic spindle organizing protein 1
hsa-miR-153	1	0	1	1	1	1	METTL9	methyltransferase like 9
hsa-miR-153	1	0	1	1	1	1	HS6ST2	heparan sulfate 6-O-sulfotransferase 2
hsa-miR-153	1	0	1	1	1	1	SREK1	splicing regulatory glutamine/lysine-rich protein 1
hsa-miR-153	1	0	1	1	1	1	PRR3	proline rich 3
hsa-miR-153	1	0	1	0	1	1	UBXN2B	UBX domain protein 2B
hsa-miR-153	0	0	1	0	1	1	WTH3DI	RAB6C-like
hsa-miR-153	0	0	1	1	1	1	VCAM1	vascular cell adhesion molecule 1
hsa-miR-153	1	0	1	1	1	1	CASZ1	castor zinc finger 1
hsa-miR-153	0	0	1	1	1	1	PPP1R1C	protein phosphatase 1, regulatory (inhibitor) subunit 1C
hsa-miR-153	1	0	1	1	1	1	ADCYAP1	adenylate cyclase activating polypeptide 1 (pituitary)
hsa-miR-153	0	0	1	1	1	1	ARHGAP6	Rho GTPase activating protein 6
hsa-miR-153	0	0	1	1	1	1	CASQ1	calsequestrin 1 (fast-twitch, skeletal muscle)
hsa-miR-153	1	0	1	0	1	1	CPD	carboxypeptidase D
hsa-miR-153	1	0	1	1	1	1	CELSR3	cadherin, EGF LAG seven-pass G-type receptor 3 (flamingo homolog, Drosophila)
hsa-miR-153	1	0	1	1	1	1	EIF1AX	eukaryotic translation initiation factor 1A, X-linked
hsa-miR-153	1	0	1	1	1	1	ELAVL1	ELAV (embryonic lethal, abnormal vision, Drosophila)-like 1 (Hu antigen R)
hsa-miR-153	1	0	1	1	1	1	EREG	epiregulin
hsa-miR-153	0	0	1	0	1	1	FMO2	flavin containing monooxygenase 2 (non-functional)
hsa-miR-153	1	0	1	1	1	1	ADRBK1	adrenergic, beta, receptor kinase 1
hsa-miR-153	1	0	1	1	1	1	AHR	aryl hydrocarbon receptor
hsa-miR-153	1	0	1	1	1	1	AQP4	aquaporin 4
hsa-miR-153	1	0	1	0	1	1	ARNT	aryl hydrocarbon receptor nuclear translocator
hsa-miR-153	1	0	1	1	1	1	ATP6V1A	ATPase, H+ transporting, lysosomal 70kDa, V1 subunit A
hsa-miR-153	1	0	1	1	1	1	CD69	CD69 molecule
hsa-miR-153	1	0	1	1	1	1	COL4A6	collagen, type IV, alpha 6
hsa-miR-153	1	0	1	0	1	1	COL19A1	collagen, type XIX, alpha 1
hsa-miR-153	0	0	1	1	1	1	SLC31A2	solute carrier family 31 (copper transporters), member 2
hsa-miR-153	1	0	1	1	1	1	MASP1	mannan-binding lectin serine peptidase 1 (C4/C2 activating component of Ra-reactive factor)
hsa-miR-153	0	0	1	1	1	1	DSG1	desmoglein 1
hsa-miR-153	0	0	1	1	1	1	FLI1	Friend leukemia virus integration 1
hsa-miR-153	1	0	1	1	1	1	FRK	fyn-related kinase
hsa-miR-153	1	0	1	1	1	1	ITGA5	integrin, alpha 5 (fibronectin receptor, alpha polypeptide)
hsa-miR-153	1	0	1	1	1	1	ITGB8	integrin, beta 8
hsa-miR-153	1	0	1	1	1	1	KCNJ10	potassium inwardly-rectifying channel, subfamily J, member 10
hsa-miR-153	1	0	1	1	1	1	KPNA4	karyopherin alpha 4 (importin alpha 3)
hsa-miR-153	1	0	1	1	1	1	LBR	lamin B receptor
hsa-miR-153	0	0	1	1	1	1	MMP13	matrix metallopeptidase 13 (collagenase 3)
hsa-miR-153	0	0	1	1	1	1	MSX1	msh homeobox 1
hsa-miR-153	0	0	1	1	1	1	OAS2	2'-5'-oligoadenylate synthetase 2, 69/71kDa
hsa-miR-153	0	0	1	0	1	1	OPHN1	oligophrenin 1
hsa-miR-153	1	0	1	0	1	1	CDK17	cyclin-dependent kinase 17
hsa-miR-153	0	0	1	0	1	1	PMP2	peripheral myelin protein 2
hsa-miR-153	0	0	1	1	1	1	PRKCB	protein kinase C, beta
hsa-miR-153	1	0	1	1	1	1	PRPS1	phosphoribosyl pyrophosphate synthetase 1
hsa-miR-153	0	0	1	0	1	1	CXCL5	chemokine (C-X-C motif) ligand 5
hsa-miR-153	1	0	1	1	1	1	SFRP4	secreted frizzled-related protein 4
hsa-miR-153	1	0	1	1	1	1	SRSF3	serine/arginine-rich splicing factor 3
hsa-miR-153	1	0	1	1	1	1	STAC	SH3 and cysteine rich domain
hsa-miR-153	1	0	1	1	1	1	SUV39H1	suppressor of variegation 3-9 homolog 1 (Drosophila)
hsa-miR-153	1	0	1	0	1	1	SEC62	SEC62 homolog (S. cerevisiae)
hsa-miR-153	1	0	1	1	1	1	TRAPPC10	trafficking protein particle complex 10
hsa-miR-153	1	0	1	1	1	1	TRPC1	transient receptor potential cation channel, subfamily C, member 1
hsa-miR-153	0	0	1	1	0	0	TTC1	tetratricopeptide repeat domain 1
hsa-miR-153	0	0	1	1	1	1	ZNF137P	zinc finger protein 137, pseudogene
hsa-miR-153	1	0	1	1	1	1	NRIP1	nuclear receptor interacting protein 1
hsa-miR-153	0	0	1	1	0	0	SOCS1	suppressor of cytokine signaling 1
hsa-miR-153	1	0	1	0	1	1	TNKS	tankyrase, TRF1-interacting ankyrin-related ADP-ribose polymerase
hsa-miR-153	1	0	1	1	1	1	KAT2B	K(lysine) acetyltransferase 2B
hsa-miR-153	1	0	1	0	1	1	CDK5R1	cyclin-dependent kinase 5, regulatory subunit 1 (p35)
hsa-miR-153	0	0	1	0	1	1	AP1S2	adaptor-related protein complex 1, sigma 2 subunit
hsa-miR-153	1	0	1	0	1	1	WASL	Wiskott-Aldrich syndrome-like
hsa-miR-153	1	0	1	1	1	1	BTAF1	BTAF1 RNA polymerase II, B-TFIID transcription factor-associated, 170kDa (Mot1 homolog, S. cerevisiae)
hsa-miR-153	1	0	1	1	1	1	BCL2L2	BCL2-like 2
hsa-miR-153	0	0	1	1	1	1	TIMM8A	translocase of inner mitochondrial membrane 8 homolog A (yeast)
hsa-miR-153	1	0	1	1	1	1	FGF13	fibroblast growth factor 13
hsa-miR-153	1	0	1	1	1	1	HNF4G	hepatocyte nuclear factor 4, gamma
hsa-miR-153	0	0	1	1	1	1	LBP	lipopolysaccharide binding protein
hsa-miR-153	0	0	1	1	0	0	BAD	BCL2-associated agonist of cell death
hsa-miR-153	1	0	1	1	1	1	CREB1	cAMP responsive element binding protein 1
hsa-miR-153	0	0	1	0	1	1	GALNT3	UDP-N-acetyl-alpha-D-galactosamine:polypeptide N-acetylgalactosaminyltransferase 3 (GalNAc-T3)
hsa-miR-153	0	0	1	1	1	1	PNPLA4	patatin-like phospholipase domain containing 4
hsa-miR-153	1	0	1	0	1	1	USP9Y	ubiquitin specific peptidase 9, Y-linked
hsa-miR-153	1	0	1	1	1	1	SPARCL1	SPARC-like 1 (hevin)
hsa-miR-153	1	0	1	1	1	1	MTMR4	myotubularin related protein 4
hsa-miR-153	1	0	1	1	1	1	DCLK1	doublecortin-like kinase 1
hsa-miR-153	1	0	1	1	1	1	LARGE	like-glycosyltransferase
hsa-miR-153	1	0	1	1	1	1	RPS6KA5	ribosomal protein S6 kinase, 90kDa, polypeptide 5
hsa-miR-153	1	0	1	0	1	1	VAMP3	vesicle-associated membrane protein 3 (cellubrevin)
hsa-miR-153	0	0	1	1	1	1	CALB1	calbindin 1, 28kDa
hsa-miR-153	0	0	1	1	1	1	CDH6	cadherin 6, type 2, K-cadherin (fetal kidney)
hsa-miR-153	0	0	1	0	1	1	DSC2	desmocollin 2
hsa-miR-153	0	0	1	1	1	1	PTH2R	parathyroid hormone 2 receptor
hsa-miR-153	1	0	1	1	1	1	SFPQ	splicing factor proline/glutamine-rich
hsa-miR-153	1	0	1	1	1	1	MED13	mediator complex subunit 13
hsa-miR-153	0	0	1	1	1	1	GIF	gastric intrinsic factor (vitamin B synthesis)
hsa-miR-153	0	0	1	1	0	0	ALDOC	aldolase C, fructose-bisphosphate
hsa-miR-153	1	1	1	1	1	1	MAP3K8	mitogen-activated protein kinase kinase kinase 8
hsa-miR-153	1	0	1	1	1	1	GPM6A	glycoprotein M6A
hsa-miR-153	1	0	1	1	1	1	HAS2	hyaluronan synthase 2
hsa-miR-153	1	0	1	0	1	1	CCDC6	coiled-coil domain containing 6
hsa-miR-153	1	0	1	1	1	1	AKT3	v-akt murine thymoma viral oncogene homolog 3 (protein kinase B, gamma)
hsa-miR-153	1	0	1	1	1	1	HMGN2	high mobility group nucleosomal binding domain 2
hsa-miR-153	1	0	1	1	1	1	LPP	LIM domain containing preferred translocation partner in lipoma
hsa-miR-153	0	0	1	1	1	1	ALDH6A1	aldehyde dehydrogenase 6 family, member A1
hsa-miR-153	1	0	1	1	1	1	SYT1	synaptotagmin I
hsa-miR-153	1	0	1	1	1	1	NAMPT	nicotinamide phosphoribosyltransferase
hsa-miR-153	1	0	1	1	1	1	LHFP	lipoma HMGIC fusion partner
hsa-miR-153	1	0	1	1	1	1	FOXO4	forkhead box O4
hsa-miR-153	0	0	1	1	1	1	LANCL1	LanC lantibiotic synthetase component C-like 1 (bacterial)
hsa-miR-153	1	0	1	1	1	1	SEMA3A	sema domain, immunoglobulin domain (Ig), short basic domain, secreted, (semaphorin) 3A
hsa-miR-153	1	0	1	1	1	1	CAPZA2	capping protein (actin filament) muscle Z-line, alpha 2
hsa-miR-153	1	0	1	1	1	1	DYNC1LI2	dynein, cytoplasmic 1, light intermediate chain 2
hsa-miR-153	1	0	1	1	1	1	NEFL	neurofilament, light polypeptide
hsa-miR-153	1	0	1	1	1	1	ORC2	origin recognition complex, subunit 2
hsa-miR-153	1	0	1	1	1	1	PRKAA1	protein kinase, AMP-activated, alpha 1 catalytic subunit
hsa-miR-153	1	0	1	1	1	1	STK4	serine/threonine kinase 4
hsa-miR-153	1	0	1	1	1	1	SMC1A	structural maintenance of chromosomes 1A
hsa-miR-153	1	0	1	1	1	1	TIMM17A	translocase of inner mitochondrial membrane 17 homolog A (yeast)
hsa-miR-153	0	0	1	1	1	1	CXCL13	chemokine (C-X-C motif) ligand 13
hsa-miR-153	0	0	1	1	0	0	CCT2	chaperonin containing TCP1, subunit 2 (beta)
hsa-miR-153	1	0	1	0	1	1	MAP4K5	mitogen-activated protein kinase kinase kinase kinase 5
hsa-miR-153	1	0	1	1	1	1	DIAPH2	diaphanous homolog 2 (Drosophila)
hsa-miR-153	0	0	1	1	1	1	MSL3	male-specific lethal 3 homolog (Drosophila)
hsa-miR-153	0	0	1	1	0	0	HNRNPA0	heterogeneous nuclear ribonucleoprotein A0
hsa-miR-153	0	0	1	1	1	1	PKIA	protein kinase (cAMP-dependent, catalytic) inhibitor alpha
hsa-miR-153	0	0	1	1	0	0	IDH3B	isocitrate dehydrogenase 3 (NAD+) beta
hsa-miR-153	1	0	1	0	1	1	SLC2A3	solute carrier family 2 (facilitated glucose transporter), member 3
hsa-miR-153	1	0	1	0	1	1	SLC5A3	solute carrier family 5 (sodium/myo-inositol cotransporter), member 3
hsa-miR-153	0	0	1	1	1	1	TAF5	TAF5 RNA polymerase II, TATA box binding protein (TBP)-associated factor, 100kDa
hsa-miR-153	1	0	1	0	1	1	WASF2	WAS protein family, member 2
hsa-miR-153	0	0	1	1	0	0	USF1	upstream transcription factor 1
hsa-miR-153	0	0	1	0	1	1	ZNF208	zinc finger protein 208
hsa-miR-153	1	0	1	0	1	1	PRSS23	protease, serine, 23
hsa-miR-153	1	0	1	1	1	1	TUSC2	tumor suppressor candidate 2
hsa-miR-153	1	0	1	1	1	1	RNF13	ring finger protein 13
hsa-miR-153	0	0	1	1	1	1	MIP	major intrinsic protein of lens fiber
hsa-miR-153	0	0	1	1	1	1	ATF5	activating transcription factor 5
hsa-miR-153	1	0	1	1	1	1	ICOS	inducible T-cell co-stimulator
hsa-miR-153	0	0	1	1	1	1	AK5	adenylate kinase 5
hsa-miR-153	1	0	1	0	1	1	FZD4	frizzled family receptor 4
hsa-miR-153	0	0	1	1	1	1	RAB3GAP1	RAB3 GTPase activating protein subunit 1 (catalytic)
hsa-miR-153	1	0	1	1	1	1	RHOQ	ras homolog family member Q
hsa-miR-153	1	0	1	1	1	1	KCND2	potassium voltage-gated channel, Shal-related subfamily, member 2
hsa-miR-153	1	0	1	1	1	1	KCNE1L	KCNE1-like
hsa-miR-153	1	0	1	1	1	1	LDOC1	leucine zipper, down-regulated in cancer 1
hsa-miR-153	1	0	1	1	1	1	MMD	monocyte to macrophage differentiation-associated
hsa-miR-153	0	0	1	0	1	1	PLA2G2D	phospholipase A2, group IID
hsa-miR-153	1	0	1	1	1	1	RGS17	regulator of G-protein signaling 17
hsa-miR-153	1	0	1	1	1	1	YWHAG	tyrosine 3-monooxygenase/tryptophan 5-monooxygenase activation protein, gamma polypeptide
hsa-miR-153	0	0	1	0	1	1	LINC00312	long intergenic non-protein coding RNA 312
hsa-miR-153	1	0	1	1	1	1	LRP12	low density lipoprotein receptor-related protein 12
hsa-miR-153	0	0	1	1	1	1	UBQLN2	ubiquilin 2
hsa-miR-153	0	0	1	1	1	1	CCDC113	coiled-coil domain containing 113
hsa-miR-153	1	0	1	0	1	1	ODZ1	odz, odd Oz/ten-m homolog 1 (Drosophila)
hsa-miR-153	1	0	1	1	1	1	SLC7A11	solute carrier family 7 (anionic amino acid transporter light chain, xc- system), member 11
hsa-miR-153	0	0	1	0	0	0	SND1-IT1	SND1 intronic transcript 1 (non-protein coding)
hsa-miR-153	1	0	1	1	1	1	SERP1	stress-associated endoplasmic reticulum protein 1
hsa-miR-153	1	0	1	1	1	1	TNFRSF21	tumor necrosis factor receptor superfamily, member 21
hsa-miR-153	0	0	1	1	1	1	TMOD2	tropomodulin 2 (neuronal)
hsa-miR-153	1	0	1	1	1	1	EHD3	EH-domain containing 3
hsa-miR-153	0	0	1	1	1	1	PSME4	proteasome (prosome, macropain) activator subunit 4
hsa-miR-153	1	0	1	1	1	1	KDM4A	lysine (K)-specific demethylase 4A
hsa-miR-153	0	0	1	1	1	1	KIAA0141	KIAA0141
hsa-miR-153	1	0	1	1	1	1	TBC1D4	TBC1 domain family, member 4
hsa-miR-153	1	0	1	1	1	1	SPAST	spastin
hsa-miR-153	0	0	1	1	1	1	FTSJD2	FtsJ methyltransferase domain containing 2
hsa-miR-153	1	0	1	1	1	1	SMG1	smg-1 homolog, phosphatidylinositol 3-kinase-related kinase (C. elegans)
hsa-miR-153	0	0	1	1	1	1	FBXO28	F-box protein 28
hsa-miR-153	1	0	1	1	1	1	AHCYL2	adenosylhomocysteinase-like 2
hsa-miR-153	1	0	1	1	1	1	NUDCD3	NudC domain containing 3
hsa-miR-153	0	0	1	0	1	1	ZDHHC17	zinc finger, DHHC-type containing 17
hsa-miR-153	0	0	1	1	1	1	NUP188	nucleoporin 188kDa
hsa-miR-153	1	0	1	1	1	1	EPC2	enhancer of polycomb homolog 2 (Drosophila)
hsa-miR-153	0	0	1	1	1	1	TES	testis derived transcript (3 LIM domains)
hsa-miR-153	1	0	1	1	1	1	ST8SIA3	ST8 alpha-N-acetyl-neuraminide alpha-2,8-sialyltransferase 3
hsa-miR-153	0	0	1	1	1	1	PCF11	PCF11, cleavage and polyadenylation factor subunit, homolog (S. cerevisiae)
hsa-miR-153	1	0	1	1	1	1	EIF5B	eukaryotic translation initiation factor 5B
hsa-miR-153	0	0	1	1	1	1	LAP3	leucine aminopeptidase 3
hsa-miR-153	1	0	1	1	1	1	TAF9B	TAF9B RNA polymerase II, TATA box binding protein (TBP)-associated factor, 31kDa
hsa-miR-153	0	0	1	1	1	1	LACTB2	lactamase, beta 2
hsa-miR-153	0	0	1	1	1	1	MRPS33	mitochondrial ribosomal protein S33
hsa-miR-153	0	0	1	1	1	1	EMCN	endomucin
hsa-miR-153	0	0	1	1	0	0	PHF7	PHD finger protein 7
hsa-miR-153	1	0	1	1	1	1	DNAJC27	DnaJ (Hsp40) homolog, subfamily C, member 27
hsa-miR-153	0	0	1	1	0	0	NME8	NME/NM23 family member 8
hsa-miR-153	1	0	1	1	1	1	MAGOHB	mago-nashi homolog B (Drosophila)
hsa-miR-153	0	0	1	0	1	1	WDR60	WD repeat domain 60
hsa-miR-153	1	0	1	1	1	1	TMEM33	transmembrane protein 33
hsa-miR-153	1	0	1	0	1	1	MSL2	male-specific lethal 2 homolog (Drosophila)
hsa-miR-153	1	0	1	1	1	1	RPRD1A	regulation of nuclear pre-mRNA domain containing 1A
hsa-miR-153	0	0	1	1	1	1	TMLHE	trimethyllysine hydroxylase, epsilon
hsa-miR-153	1	0	1	0	1	1	PARVA	parvin, alpha
hsa-miR-153	1	0	1	1	1	1	UBA6	ubiquitin-like modifier activating enzyme 6
hsa-miR-153	1	0	1	1	1	1	SPTLC3	serine palmitoyltransferase, long chain base subunit 3
hsa-miR-153	1	0	1	1	1	1	EPB41L4B	erythrocyte membrane protein band 4.1 like 4B
hsa-miR-153	1	0	1	0	1	1	BRK1	BRICK1, SCAR/WAVE actin-nucleating complex subunit
hsa-miR-153	1	0	1	1	1	1	ETNK1	ethanolamine kinase 1
hsa-miR-153	1	0	1	1	1	1	CTTNBP2NL	CTTNBP2 N-terminal like
hsa-miR-153	1	0	1	1	1	1	HOXA10	homeobox A10
hsa-miR-153	0	0	1	1	1	1	RIN2	Ras and Rab interactor 2
hsa-miR-153	0	0	1	1	1	1	DHX29	DEAH (Asp-Glu-Ala-His) box polypeptide 29
hsa-miR-153	0	0	1	1	1	1	GNL3L	guanine nucleotide binding protein-like 3 (nucleolar)-like
hsa-miR-153	0	0	1	0	1	1	ARL15	ADP-ribosylation factor-like 15
hsa-miR-153	1	0	1	1	1	1	HOXA5	homeobox A5
hsa-miR-153	1	0	1	1	1	1	CCBL2	cysteine conjugate-beta lyase 2
hsa-miR-153	0	0	1	0	1	1	ZC3HAV1	zinc finger CCCH-type, antiviral 1
hsa-miR-153	1	0	1	0	1	1	SLAMF8	SLAM family member 8
hsa-miR-153	1	0	1	1	1	1	RAB22A	RAB22A, member RAS oncogene family
hsa-miR-153	0	0	1	1	1	1	KIAA1161	KIAA1161
hsa-miR-153	1	0	1	1	1	1	MIB1	mindbomb E3 ubiquitin protein ligase 1
hsa-miR-153	0	0	1	1	1	1	TXNDC16	thioredoxin domain containing 16
hsa-miR-153	0	0	1	1	1	1	ARRDC3	arrestin domain containing 3
hsa-miR-153	1	0	1	1	1	1	ARHGAP21	Rho GTPase activating protein 21
hsa-miR-153	1	0	1	0	1	1	KIAA1456	KIAA1456
hsa-miR-153	1	0	1	1	1	1	TSHZ3	teashirt zinc finger homeobox 3
hsa-miR-153	1	0	1	1	1	1	CNTN3	contactin 3 (plasmacytoma associated)
hsa-miR-153	1	0	1	0	1	1	USP37	ubiquitin specific peptidase 37
hsa-miR-153	1	0	1	1	1	1	FAM160B1	family with sequence similarity 160, member B1
hsa-miR-153	1	0	1	0	1	1	RAP2A	RAP2A, member of RAS oncogene family
hsa-miR-153	1	0	1	1	1	1	HCN1	hyperpolarization activated cyclic nucleotide-gated potassium channel 1
hsa-miR-153	0	0	1	1	1	1	SLC15A2	solute carrier family 15 (H+/peptide transporter), member 2
hsa-miR-153	1	0	1	0	1	1	XK	X-linked Kx blood group (McLeod syndrome)
hsa-miR-153	0	0	1	0	1	1	MS4A7	membrane-spanning 4-domains, subfamily A, member 7
hsa-miR-153	1	0	1	1	1	1	SLC5A7	solute carrier family 5 (choline transporter), member 7
hsa-miR-153	0	0	1	0	1	1	CFL2	cofilin 2 (muscle)
hsa-miR-153	0	0	1	1	1	1	MS4A1	membrane-spanning 4-domains, subfamily A, member 1
hsa-miR-153	1	0	1	1	1	1	SEC24A	SEC24 family, member A (S. cerevisiae)
hsa-miR-153	1	0	1	0	1	1	CSNK1G1	casein kinase 1, gamma 1
hsa-miR-153	1	0	1	1	1	1	GOLPH3	golgi phosphoprotein 3 (coat-protein)
hsa-miR-153	0	0	1	1	1	1	ICAM4	intercellular adhesion molecule 4 (Landsteiner-Wiener blood group)
hsa-miR-153	1	0	1	1	1	1	XPO4	exportin 4
hsa-miR-153	1	0	1	0	1	1	HOXC8	homeobox C8
hsa-miR-153	0	0	1	0	1	1	EBF2	early B-cell factor 2
hsa-miR-153	1	0	1	1	1	1	PRRX1	paired related homeobox 1
hsa-miR-153	1	0	1	0	1	1	BCL11B	B-cell CLL/lymphoma 11B (zinc finger protein)
hsa-miR-153	1	0	1	1	1	1	REEP1	receptor accessory protein 1
hsa-miR-153	1	0	1	1	1	1	IRF2BPL	interferon regulatory factor 2 binding protein-like
hsa-miR-153	1	0	1	1	1	1	GCC1	GRIP and coiled-coil domain containing 1
hsa-miR-153	1	0	1	1	1	1	C10orf76	chromosome 10 open reading frame 76
hsa-miR-153	0	0	1	1	1	1	RNF219	ring finger protein 219
hsa-miR-153	0	0	1	1	1	1	LRRK1	leucine-rich repeat kinase 1
hsa-miR-153	0	0	1	1	1	1	E2F8	E2F transcription factor 8
hsa-miR-153	1	0	1	0	1	1	ZFHX4	zinc finger homeobox 4
hsa-miR-153	0	0	1	1	1	1	SHCBP1	SHC SH2-domain binding protein 1
hsa-miR-153	1	0	1	0	1	1	MOB3B	MOB kinase activator 3B
hsa-miR-153	0	0	1	1	0	0	TMEM156	transmembrane protein 156
hsa-miR-153	0	0	1	1	1	1	CWH43	cell wall biogenesis 43 C-terminal homolog (S. cerevisiae)
hsa-miR-153	1	0	1	1	1	1	PROSER1	proline and serine rich 1
hsa-miR-153	0	0	1	1	1	1	COQ10B	coenzyme Q10 homolog B (S. cerevisiae)
hsa-miR-153	1	0	1	1	1	1	TRIB1	tribbles homolog 1 (Drosophila)
hsa-miR-153	0	0	1	0	1	1	PDGFD	platelet derived growth factor D
hsa-miR-153	1	0	1	1	1	1	TNKS2	tankyrase, TRF1-interacting ankyrin-related ADP-ribose polymerase 2
hsa-miR-153	0	0	1	1	0	0	C6orf25	chromosome 6 open reading frame 25
hsa-miR-153	1	0	1	1	1	1	TMX1	thioredoxin-related transmembrane protein 1
hsa-miR-153	1	0	1	0	1	1	C1orf21	chromosome 1 open reading frame 21
hsa-miR-153	1	0	1	1	1	1	C6orf62	chromosome 6 open reading frame 62
hsa-miR-153	0	0	1	1	1	1	TEX15	testis expressed 15
hsa-miR-153	0	0	1	1	1	1	FCRL5	Fc receptor-like 5
hsa-miR-153	0	0	1	0	1	1	RAB6C	RAB6C, member RAS oncogene family
hsa-miR-153	1	0	1	0	1	1	FAR1	fatty acyl CoA reductase 1
hsa-miR-153	1	0	1	1	1	1	PARD6B	par-6 partitioning defective 6 homolog beta (C. elegans)
hsa-miR-153	0	0	1	1	1	1	MGARP	mitochondria-localized glutamic acid-rich protein
hsa-miR-153	1	0	1	0	1	1	INA	internexin neuronal intermediate filament protein, alpha
hsa-miR-153	0	0	1	1	1	1	FAM136A	family with sequence similarity 136, member A
hsa-miR-153	0	0	1	1	1	1	C13orf33	chromosome 13 open reading frame 33
hsa-miR-153	1	0	1	1	1	1	ARHGAP19	Rho GTPase activating protein 19
hsa-miR-153	1	0	1	1	1	1	TMEM60	transmembrane protein 60
hsa-miR-153	1	0	1	0	1	1	PURB	purine-rich element binding protein B
hsa-miR-153	1	0	1	1	1	1	CDC14A	CDC14 cell division cycle 14 homolog A (S. cerevisiae)
hsa-miR-153	1	0	1	0	1	1	FHDC1	FH2 domain containing 1
hsa-miR-153	1	0	1	1	0	0	FCHSD1	FCH and double SH3 domains 1
hsa-miR-153	0	0	1	1	1	1	FBXO4	F-box protein 4
hsa-miR-153	1	0	1	1	1	1	EPT1	ethanolaminephosphotransferase 1 (CDP-ethanolamine-specific)
hsa-miR-153	1	0	1	1	1	1	TSPYL5	TSPY-like 5
hsa-miR-153	1	0	1	1	1	1	MAL2	mal, T-cell differentiation protein 2 (gene/pseudogene)
hsa-miR-153	1	0	1	0	1	1	TMEM123	transmembrane protein 123
hsa-miR-153	1	0	1	0	1	1	ANTXR2	anthrax toxin receptor 2
hsa-miR-153	0	0	1	1	1	1	PABPC5	poly(A) binding protein, cytoplasmic 5
hsa-miR-153	0	0	1	0	1	1	SYNPO2	synaptopodin 2
hsa-miR-153	1	0	1	1	1	1	FAM122A	family with sequence similarity 122A
hsa-miR-153	0	0	1	1	1	1	NAF1	nuclear assembly factor 1 homolog (S. cerevisiae)
hsa-miR-153	0	0	1	1	1	1	CASC4	cancer susceptibility candidate 4
hsa-miR-153	1	0	1	1	1	1	PPTC7	PTC7 protein phosphatase homolog (S. cerevisiae)
hsa-miR-153	0	0	1	1	1	1	KCNH5	potassium voltage-gated channel, subfamily H (eag-related), member 5
hsa-miR-153	0	0	1	1	0	0	RNASE11	ribonuclease, RNase A family, 11 (non-active)
hsa-miR-153	0	0	1	1	1	1	APOBEC3F	apolipoprotein B mRNA editing enzyme, catalytic polypeptide-like 3F
hsa-miR-153	1	0	1	1	1	1	SEPT6	septin 6
hsa-miR-153	1	0	1	1	1	1	FAM110B	family with sequence similarity 110, member B
hsa-miR-153	1	0	1	1	1	1	BOD1L1	biorientation of chromosomes in cell division 1-like 1
hsa-miR-153	0	0	1	1	1	1	IPMK	inositol polyphosphate multikinase
hsa-miR-153	1	0	1	1	1	1	GRPEL2	GrpE-like 2, mitochondrial (E. coli)
hsa-miR-153	1	0	1	1	1	1	FAM81A	family with sequence similarity 81, member A
hsa-miR-153	1	0	1	1	1	1	ZSCAN29	zinc finger and SCAN domain containing 29
hsa-miR-153	1	0	1	0	1	1	MOSPD2	motile sperm domain containing 2
hsa-miR-153	1	0	1	1	1	1	SPRED1	sprouty-related, EVH1 domain containing 1
hsa-miR-153	1	0	1	0	1	1	FAM116A	family with sequence similarity 116, member A
hsa-miR-153	0	0	1	1	1	1	C6orf170	chromosome 6 open reading frame 170
hsa-miR-153	1	0	1	1	1	1	BEND6	BEN domain containing 6
hsa-miR-153	0	0	1	0	1	1	KCTD7	potassium channel tetramerisation domain containing 7
hsa-miR-153	1	0	1	0	1	1	TAPT1	transmembrane anterior posterior transformation 1
hsa-miR-153	1	0	1	1	1	1	LRIG3	leucine-rich repeats and immunoglobulin-like domains 3
hsa-miR-153	1	0	1	1	1	1	LCORL	ligand dependent nuclear receptor corepressor-like
hsa-miR-153	1	0	1	1	0	0	FAM43A	family with sequence similarity 43, member A
hsa-miR-153	1	0	1	1	1	1	NAP1L5	nucleosome assembly protein 1-like 5
hsa-miR-153	1	0	1	1	1	1	CACUL1	CDK2-associated, cullin domain 1
hsa-miR-153	0	0	1	1	1	1	IL29	interleukin 29 (interferon, lambda 1)
hsa-miR-153	0	0	1	0	1	1	CTAGE1	cutaneous T-cell lymphoma-associated antigen 1
hsa-miR-153	0	0	1	1	1	1	TPH2	tryptophan hydroxylase 2
hsa-miR-153	1	0	1	1	1	1	MMGT1	membrane magnesium transporter 1
hsa-miR-153	1	0	1	1	1	1	FAM117B	family with sequence similarity 117, member B
hsa-miR-153	1	0	1	1	1	1	DIP2B	DIP2 disco-interacting protein 2 homolog B (Drosophila)
hsa-miR-153	1	0	1	1	1	1	LDLRAD3	low density lipoprotein receptor class A domain containing 3
hsa-miR-153	1	0	1	1	1	1	ZADH2	zinc binding alcohol dehydrogenase domain containing 2
hsa-miR-153	0	0	1	1	0	0	KRT26	keratin 26
hsa-miR-153	0	0	1	0	1	1	HCG27	HLA complex group 27 (non-protein coding)
hsa-miR-153	1	0	1	1	1	1	TMED7	transmembrane emp24 protein transport domain containing 7
hsa-miR-153	0	0	1	1	1	1	COX8C	cytochrome c oxidase subunit VIIIC
hsa-miR-153	1	0	1	1	1	1	TMEM65	transmembrane protein 65
hsa-miR-153	1	0	1	0	1	1	SLC16A9	solute carrier family 16, member 9 (monocarboxylic acid transporter 9)
hsa-miR-153	1	0	1	1	1	1	RALGAPA1	Ral GTPase activating protein, alpha subunit 1 (catalytic)
hsa-miR-153	1	0	1	0	1	1	PTPLB	protein tyrosine phosphatase-like (proline instead of catalytic arginine), member b
hsa-miR-153	1	0	1	1	1	1	PTGER3	prostaglandin E receptor 3 (subtype EP3)
hsa-miR-153	0	0	1	1	0	0	PYHIN1	pyrin and HIN domain family, member 1
hsa-miR-153	0	0	1	1	1	1	SHC4	SHC (Src homology 2 domain containing) family, member 4
hsa-miR-153	1	0	1	1	1	1	RAPH1	Ras association (RalGDS/AF-6) and pleckstrin homology domains 1
hsa-miR-153	0	0	1	0	1	1	NPSR1-AS1	NPSR1 antisense RNA 1
hsa-miR-153	1	0	1	1	1	1	GADL1	glutamate decarboxylase-like 1
hsa-miR-153	0	0	1	1	1	1	SEPT14	septin 14
hsa-miR-153	0	0	1	1	1	1	PATE2	prostate and testis expressed 2
hsa-miR-153	0	0	1	0	0	0	SNORD15B	small nucleolar RNA, C/D box 15B
hsa-miR-153	0	0	1	0	0	0	TFAMP1	transcription factor A, mitochondrial pseudogene 1
hsa-miR-153	0	0	1	0	0	0	TTTY15	testis-specific transcript, Y-linked 15 (non-protein coding)
hsa-miR-153	0	0	1	0	0	0	VENTXP1	VENT homeobox pseudogene 1
hsa-miR-153	0	0	1	0	0	0	NUDT4P1	nudix (nucleoside diphosphate linked moiety X)-type motif 4 pseudogene 1
hsa-miR-153	0	0	1	0	0	0	NPY6R	neuropeptide Y receptor Y6 (pseudogene)
hsa-miR-153	0	0	1	0	0	0	TDGF1P3	teratocarcinoma-derived growth factor 1 pseudogene 3
hsa-miR-153	0	0	1	0	0	0	DGCR5	DiGeorge syndrome critical region gene 5 (non-protein coding)
hsa-miR-153	0	0	1	0	0	0	HTR7P1	5-hydroxytryptamine (serotonin) receptor 7 pseudogene 1
hsa-miR-153	0	0	1	0	0	0	HNRNPA1P10	heterogeneous nuclear ribonucleoprotein A1 pseudogene 10
hsa-miR-153	0	0	1	0	0	0	SNORA77	small nucleolar RNA, H/ACA box 77
hsa-miR-153	0	0	1	0	0	0	HSP90B3P	heat shock protein 90kDa beta (Grp94), member 3, pseudogene
hsa-miR-153	0	0	1	0	0	0	GMCL1P1	germ cell-less, spermatogenesis associated 1 pseudogene 1
hsa-miR-153	0	0	1	1	1	1	PEG3	paternally expressed 3
hsa-miR-153	0	0	0	1	0	0	ZNF195	zinc finger protein 195
hsa-miR-153	0	0	1	1	1	1	GRIPAP1	GRIP1 associated protein 1
hsa-miR-153	1	0	1	1	1	1	GABRA1	gamma-aminobutyric acid (GABA) A receptor, alpha 1
hsa-miR-153	1	0	1	1	1	1	LRRC7	leucine rich repeat containing 7
hsa-miR-153	0	0	0	1	0	0	CECR5	cat eye syndrome chromosome region, candidate 5
hsa-miR-153	0	0	1	1	0	0	FAR2	fatty acyl CoA reductase 2
hsa-miR-153	0	0	0	1	0	0	PCDHB2	protocadherin beta 2
hsa-miR-153	1	0	1	1	1	1	TRMT6	tRNA methyltransferase 6 homolog (S. cerevisiae)
hsa-miR-153	0	0	1	1	0	0	UQCRC1	ubiquinol-cytochrome c reductase core protein I
hsa-miR-153	1	0	1	1	1	1	MLF2	myeloid leukemia factor 2
hsa-miR-153	0	0	1	1	0	0	GSTZ1	glutathione S-transferase zeta 1
hsa-miR-153	1	0	0	1	1	1	SALL4	sal-like 4 (Drosophila)
hsa-miR-153	0	0	1	1	0	0	PIGU	phosphatidylinositol glycan anchor biosynthesis, class U
hsa-miR-153	1	0	1	1	1	1	PHF16	PHD finger protein 16
hsa-miR-153	1	0	0	1	1	1	SGCG	sarcoglycan, gamma (35kDa dystrophin-associated glycoprotein)
hsa-miR-153	1	0	1	1	1	1	NEFM	neurofilament, medium polypeptide
hsa-miR-153	0	0	1	1	0	0	ECH1	enoyl CoA hydratase 1, peroxisomal
hsa-miR-153	0	0	0	1	0	0	RSPH6A	radial spoke head 6 homolog A (Chlamydomonas)
hsa-miR-153	0	0	0	1	1	1	MRPL32	mitochondrial ribosomal protein L32
hsa-miR-153	0	0	1	1	1	1	GDF10	growth differentiation factor 10
hsa-miR-153	1	0	1	1	1	1	TMEM97	transmembrane protein 97
hsa-miR-153	0	0	1	1	1	1	IL2	interleukin 2
hsa-miR-153	0	0	1	1	0	0	GALNTL4	UDP-N-acetyl-alpha-D-galactosamine:polypeptide N-acetylgalactosaminyltransferase-like 4
hsa-miR-153	0	0	1	1	0	0	GLI1	GLI family zinc finger 1
hsa-miR-153	0	0	1	1	1	1	ITK	IL2-inducible T-cell kinase
hsa-miR-153	0	0	1	1	0	0	RBP2	retinol binding protein 2, cellular
hsa-miR-153	0	0	1	1	0	0	LEPRE1	leucine proline-enriched proteoglycan (leprecan) 1
hsa-miR-153	0	0	1	1	1	1	ATP6V0B	ATPase, H+ transporting, lysosomal 21kDa, V0 subunit b
hsa-miR-153	0	0	1	1	1	1	ARMC2	armadillo repeat containing 2
hsa-miR-153	0	0	1	1	0	0	ADH6	alcohol dehydrogenase 6 (class V)
hsa-miR-153	1	0	0	1	1	1	PIGZ	phosphatidylinositol glycan anchor biosynthesis, class Z
hsa-miR-153	0	0	0	1	1	1	PCDHB10	protocadherin beta 10
hsa-miR-153	0	0	0	1	0	0	ALG5	asparagine-linked glycosylation 5, dolichyl-phosphate beta-glucosyltransferase homolog (S. cerevisiae)
hsa-miR-153	0	0	1	1	0	0	EXOSC8	exosome component 8
hsa-miR-153	0	0	1	1	1	1	PLBD1	phospholipase B domain containing 1
hsa-miR-153	1	0	1	1	1	1	CLTA	clathrin, light chain A
hsa-miR-153	1	0	1	1	1	1	C1orf63	chromosome 1 open reading frame 63
hsa-miR-153	0	0	0	1	1	1	MCM9	minichromosome maintenance complex component 9
hsa-miR-153	0	0	0	1	1	1	RAB9A	RAB9A, member RAS oncogene family
hsa-miR-153	0	0	0	1	0	0	BATF3	basic leucine zipper transcription factor, ATF-like 3
hsa-miR-153	0	0	0	1	0	0	ZNF350	zinc finger protein 350
hsa-miR-153	0	0	1	1	0	0	HIST1H3B	histone cluster 1, H3b
hsa-miR-153	1	0	1	1	1	1	C20orf26	chromosome 20 open reading frame 26
hsa-miR-153	1	0	1	1	1	1	FBXL12	F-box and leucine-rich repeat protein 12
hsa-miR-153	0	0	1	1	1	1	GNG11	guanine nucleotide binding protein (G protein), gamma 11
hsa-miR-153	1	0	0	1	1	1	TST	thiosulfate sulfurtransferase (rhodanese)
hsa-miR-153	0	0	1	1	1	1	EMC4	ER membrane protein complex subunit 4
hsa-miR-153	0	0	1	1	0	0	PARP2	poly (ADP-ribose) polymerase 2
hsa-miR-153	0	0	1	1	1	1	DAD1	defender against cell death 1
hsa-miR-153	0	0	0	1	0	0	LILRA2	leukocyte immunoglobulin-like receptor, subfamily A (with TM domain), member 2
hsa-miR-153	0	0	1	1	0	0	ALOX12	arachidonate 12-lipoxygenase
hsa-miR-153	0	0	1	1	0	0	NXPE1	neurexophilin and PC-esterase domain family, member 1
hsa-miR-153	0	0	1	1	0	0	NDUFA2	NADH dehydrogenase (ubiquinone) 1 alpha subcomplex, 2, 8kDa
hsa-miR-153	1	0	1	1	1	1	ARPC1B	actin related protein 2/3 complex, subunit 1B, 41kDa
hsa-miR-153	0	0	0	1	0	0	GDF15	growth differentiation factor 15
hsa-miR-153	0	0	1	1	1	1	DEFB118	defensin, beta 118
hsa-miR-153	0	0	1	1	1	1	CHI3L1	chitinase 3-like 1 (cartilage glycoprotein-39)
hsa-miR-153	1	0	0	1	0	0	PI4KA	phosphatidylinositol 4-kinase, catalytic, alpha
hsa-miR-153	0	0	0	1	0	0	ANXA1	annexin A1
hsa-miR-153	0	0	0	1	1	1	SDS	serine dehydratase
hsa-miR-153	1	0	1	1	1	1	C7orf23	chromosome 7 open reading frame 23
hsa-miR-153	0	0	1	1	1	1	SPDYE1	speedy homolog E1 (Xenopus laevis)
hsa-miR-153	0	0	1	1	1	1	AOAH	acyloxyacyl hydrolase (neutrophil)
hsa-miR-153	1	0	1	1	1	1	BZW2	basic leucine zipper and W2 domains 2
hsa-miR-153	0	0	1	1	1	1	IFNA14	interferon, alpha 14
hsa-miR-153	0	0	0	1	0	0	PSORS1C1	psoriasis susceptibility 1 candidate 1
hsa-miR-153	0	0	0	1	1	1	MRPL15	mitochondrial ribosomal protein L15
hsa-miR-153	0	0	0	1	1	1	CYP2C9	cytochrome P450, family 2, subfamily C, polypeptide 9
hsa-miR-153	0	0	1	1	0	0	CALHM2	calcium homeostasis modulator 2
hsa-miR-153	0	0	1	1	1	1	SSB	Sjogren syndrome antigen B (autoantigen La)
hsa-miR-153	0	0	1	1	1	1	SLC16A7	solute carrier family 16, member 7 (monocarboxylic acid transporter 2)
hsa-miR-153	0	0	0	1	1	1	LYZ	lysozyme
hsa-miR-153	0	0	0	1	1	1	PSMC1	proteasome (prosome, macropain) 26S subunit, ATPase, 1
hsa-miR-153	0	0	0	1	1	1	TMEM206	transmembrane protein 206
hsa-miR-153	0	0	0	1	0	0	AP3B2	adaptor-related protein complex 3, beta 2 subunit
hsa-miR-153	0	0	1	1	0	0	ANAPC5	anaphase promoting complex subunit 5
hsa-miR-153	0	0	0	1	0	0	TIPIN	TIMELESS interacting protein
hsa-miR-153	0	0	1	1	1	1	INVS	inversin
hsa-miR-153	0	0	1	1	1	1	ITGAE	integrin, alpha E (antigen CD103, human mucosal lymphocyte antigen 1; alpha polypeptide)
hsa-miR-153	0	0	0	1	1	1	CDC45	cell division cycle 45 homolog (S. cerevisiae)
hsa-miR-153	1	0	1	1	1	1	EP300	E1A binding protein p300
hsa-miR-153	0	0	1	1	0	0	ZNF541	zinc finger protein 541
hsa-miR-153	0	0	1	1	0	0	MIA	melanoma inhibitory activity
hsa-miR-153	0	0	1	1	0	0	ALG6	asparagine-linked glycosylation 6, alpha-1,3-glucosyltransferase homolog (S. cerevisiae)
hsa-miR-153	1	0	0	1	1	1	DDX25	DEAD (Asp-Glu-Ala-Asp) box helicase 25
hsa-miR-153	0	0	1	1	0	0	IFIH1	interferon induced with helicase C domain 1
hsa-miR-153	1	0	1	1	1	1	TTBK2	tau tubulin kinase 2
hsa-miR-153	0	0	1	1	1	1	CHIC2	cysteine-rich hydrophobic domain 2
hsa-miR-153	0	0	1	1	1	1	SC5DL	sterol-C5-desaturase (ERG3 delta-5-desaturase homolog, S. cerevisiae)-like
hsa-miR-153	1	0	1	1	0	0	KIAA1211	KIAA1211
hsa-miR-153	0	0	1	1	1	1	COPS4	COP9 constitutive photomorphogenic homolog subunit 4 (Arabidopsis)
hsa-miR-153	0	0	0	1	0	0	PPAP2A	phosphatidic acid phosphatase type 2A
hsa-miR-153	0	0	0	1	1	1	OLFM2	olfactomedin 2
hsa-miR-153	0	0	1	1	1	1	RIOK1	RIO kinase 1 (yeast)
hsa-miR-153	0	0	1	1	0	0	ZAP70	zeta-chain (TCR) associated protein kinase 70kDa
hsa-miR-153	0	0	1	1	1	1	CEP70	centrosomal protein 70kDa
hsa-miR-153	0	0	1	1	1	1	PAPSS1	3'-phosphoadenosine 5'-phosphosulfate synthase 1
hsa-miR-153	0	0	0	1	0	0	SIL1	SIL1 homolog, endoplasmic reticulum chaperone (S. cerevisiae)
hsa-miR-153	0	0	0	1	0	0	TRPV5	transient receptor potential cation channel, subfamily V, member 5
hsa-miR-153	0	0	1	1	0	0	POLB	polymerase (DNA directed), beta
hsa-miR-153	1	0	1	1	1	1	NPTX2	neuronal pentraxin II
hsa-miR-153	0	0	1	1	0	0	IDE	insulin-degrading enzyme
hsa-miR-153	0	0	1	1	1	1	SLC5A1	solute carrier family 5 (sodium/glucose cotransporter), member 1
hsa-miR-153	1	0	1	1	1	1	FGD4	FYVE, RhoGEF and PH domain containing 4
hsa-miR-153	0	0	1	1	0	0	TAPBPL	TAP binding protein-like
hsa-miR-153	0	0	1	1	1	1	AK7	adenylate kinase 7
hsa-miR-153	0	0	1	1	0	0	LYSMD2	LysM, putative peptidoglycan-binding, domain containing 2
hsa-miR-153	0	0	1	1	1	1	SLC27A2	solute carrier family 27 (fatty acid transporter), member 2
hsa-miR-153	0	0	1	1	1	1	HDC	histidine decarboxylase
hsa-miR-153	0	0	1	1	0	0	DHX38	DEAH (Asp-Glu-Ala-His) box polypeptide 38
hsa-miR-153	0	0	0	1	0	0	ZNF287	zinc finger protein 287
hsa-miR-153	0	0	1	1	1	1	SLC39A6	solute carrier family 39 (zinc transporter), member 6
hsa-miR-153	0	0	1	1	0	0	WRAP73	WD repeat containing, antisense to TP73
hsa-miR-153	0	0	1	1	0	0	CRNN	cornulin
hsa-miR-153	0	0	0	1	0	0	CPO	carboxypeptidase O
hsa-miR-153	1	0	1	1	1	1	BOC	Boc homolog (mouse)
hsa-miR-153	0	0	1	1	1	1	FAM54A	family with sequence similarity 54, member A
hsa-miR-153	0	0	1	1	0	0	DOK2	docking protein 2, 56kDa
hsa-miR-153	0	0	0	1	0	0	WDR85	WD repeat domain 85
hsa-miR-153	0	0	1	1	1	1	TMEM138	transmembrane protein 138
hsa-miR-153	1	0	1	1	1	1	USP15	ubiquitin specific peptidase 15
hsa-miR-153	0	0	1	1	1	1	NGLY1	N-glycanase 1
hsa-miR-153	0	0	1	1	1	1	QDPR	quinoid dihydropteridine reductase
hsa-miR-153	1	0	1	1	1	1	ANO4	anoctamin 4
hsa-miR-153	0	0	1	1	1	1	PIGF	phosphatidylinositol glycan anchor biosynthesis, class F
hsa-miR-153	0	0	1	1	1	1	VWA8	von Willebrand factor A domain containing 8
hsa-miR-153	0	0	1	1	1	1	UNC80	unc-80 homolog (C. elegans)
hsa-miR-153	0	0	1	1	1	1	PLOD2	procollagen-lysine, 2-oxoglutarate 5-dioxygenase 2
hsa-miR-153	0	0	1	1	0	0	CFDP1	craniofacial development protein 1
hsa-miR-153	1	0	1	1	1	1	TOMM70A	translocase of outer mitochondrial membrane 70 homolog A (S. cerevisiae)
hsa-miR-153	1	0	1	1	1	1	DKK2	dickkopf 2 homolog (Xenopus laevis)
hsa-miR-153	0	0	1	1	0	0	SLC26A10	solute carrier family 26, member 10
hsa-miR-153	0	0	1	1	1	1	C15orf26	chromosome 15 open reading frame 26
hsa-miR-153	0	0	1	1	0	0	AIFM1	apoptosis-inducing factor, mitochondrion-associated, 1
hsa-miR-153	0	0	0	1	0	0	PWP2	PWP2 periodic tryptophan protein homolog (yeast)
hsa-miR-153	0	0	1	1	0	0	ABCF3	ATP-binding cassette, sub-family F (GCN20), member 3
hsa-miR-153	0	0	1	1	1	1	KRT8	keratin 8
hsa-miR-153	0	0	1	1	1	1	RBM15	RNA binding motif protein 15
hsa-miR-153	0	0	0	1	1	1	PQLC3	PQ loop repeat containing 3
hsa-miR-153	0	0	0	1	0	0	RNPEP	arginyl aminopeptidase (aminopeptidase B)
hsa-miR-153	0	0	1	1	1	1	PTPRN	protein tyrosine phosphatase, receptor type, N
hsa-miR-153	0	0	1	1	1	1	RSRC1	arginine/serine-rich coiled-coil 1
hsa-miR-153	0	0	1	1	0	0	APEH	N-acylaminoacyl-peptide hydrolase
hsa-miR-153	1	0	1	1	1	1	FBXO8	F-box protein 8
hsa-miR-153	0	0	1	1	1	1	RANBP3L	RAN binding protein 3-like
hsa-miR-153	1	0	0	1	1	1	CTHRC1	collagen triple helix repeat containing 1
hsa-miR-153	0	0	1	1	0	0	WNK2	WNK lysine deficient protein kinase 2
hsa-miR-153	0	0	1	1	1	1	TRIM13	tripartite motif containing 13
hsa-miR-153	0	0	1	1	1	1	ISCA2	iron-sulfur cluster assembly 2 homolog (S. cerevisiae)
hsa-miR-153	0	0	0	1	0	0	SERPINA4	serpin peptidase inhibitor, clade A (alpha-1 antiproteinase, antitrypsin), member 4
hsa-miR-153	0	0	0	1	0	0	ADAMTS15	ADAM metallopeptidase with thrombospondin type 1 motif, 15
hsa-miR-153	0	0	0	1	1	1	PCBD1	pterin-4 alpha-carbinolamine dehydratase/dimerization cofactor of hepatocyte nuclear factor 1 alpha
hsa-miR-153	0	0	1	1	1	1	NETO1	neuropilin (NRP) and tolloid (TLL)-like 1
hsa-miR-153	0	0	0	1	0	0	CENPN	centromere protein N
hsa-miR-153	1	0	1	1	0	0	PPIB	peptidylprolyl isomerase B (cyclophilin B)
hsa-miR-153	0	0	1	1	0	0	PLK1	polo-like kinase 1
hsa-miR-153	0	0	1	1	1	1	STAT6	signal transducer and activator of transcription 6, interleukin-4 induced
hsa-miR-153	0	0	1	1	1	1	MS4A8B	membrane-spanning 4-domains, subfamily A, member 8B
hsa-miR-153	1	0	1	1	1	1	PHB	prohibitin
hsa-miR-153	1	0	1	1	1	1	RNF214	ring finger protein 214
hsa-miR-153	1	0	1	1	0	0	JPH3	junctophilin 3
hsa-miR-153	0	0	0	1	1	1	ZNF443	zinc finger protein 443
hsa-miR-153	0	0	1	1	1	1	ITGB1	integrin, beta 1 (fibronectin receptor, beta polypeptide, antigen CD29 includes MDF2, MSK12)
hsa-miR-153	0	0	1	1	0	0	BUB1	budding uninhibited by benzimidazoles 1 homolog (yeast)
hsa-miR-153	0	0	1	1	1	1	HYDIN	HYDIN, axonemal central pair apparatus protein
hsa-miR-153	0	0	0	1	0	0	OR5AR1	olfactory receptor, family 5, subfamily AR, member 1
hsa-miR-153	0	0	0	1	1	1	ACYP2	acylphosphatase 2, muscle type
hsa-miR-153	0	0	0	1	1	1	HINT1	histidine triad nucleotide binding protein 1
hsa-miR-153	0	0	0	1	1	1	CXCR6	chemokine (C-X-C motif) receptor 6
hsa-miR-153	0	0	1	1	0	0	LAMB2	laminin, beta 2 (laminin S)
hsa-miR-153	0	0	0	1	1	1	SLC9C1	solute carrier family 9, subfamily C (Na+-transporting carboxylic acid decarboxylase), member 1
hsa-miR-153	0	0	1	1	1	1	CDY1	chromodomain protein, Y-linked, 1
hsa-miR-153	1	0	1	1	1	1	RBM33	RNA binding motif protein 33
hsa-miR-153	0	0	0	1	1	1	CCDC110	coiled-coil domain containing 110
hsa-miR-153	0	0	1	1	1	1	GEMIN2	gem (nuclear organelle) associated protein 2
hsa-miR-153	0	0	0	1	0	0	CLDN15	claudin 15
hsa-miR-153	1	0	1	1	1	1	PDLIM2	PDZ and LIM domain 2 (mystique)
hsa-miR-153	0	0	0	1	1	1	NPFFR2	neuropeptide FF receptor 2
hsa-miR-153	0	0	1	1	0	0	TRMT112	tRNA methyltransferase 11-2 homolog (S. cerevisiae)
hsa-miR-153	0	0	1	1	1	1	KLRC4	killer cell lectin-like receptor subfamily C, member 4
hsa-miR-153	0	0	0	1	0	0	HSPA6	heat shock 70kDa protein 6 (HSP70B')
hsa-miR-153	1	0	1	1	0	0	KY	kyphoscoliosis peptidase
hsa-miR-153	0	0	0	1	1	1	DDX31	DEAD (Asp-Glu-Ala-Asp) box polypeptide 31
hsa-miR-153	1	0	1	1	1	1	NEFH	neurofilament, heavy polypeptide
hsa-miR-153	0	0	1	1	1	1	RFESD	Rieske (Fe-S) domain containing
hsa-miR-153	0	0	1	1	0	0	UQCRH	ubiquinol-cytochrome c reductase hinge protein
hsa-miR-153	0	0	1	1	1	1	ZNF323	zinc finger protein 323
hsa-miR-153	0	0	0	1	1	1	TLR8	toll-like receptor 8
hsa-miR-153	0	0	1	1	1	1	TMEM70	transmembrane protein 70
hsa-miR-153	1	0	0	1	1	1	AURKA	aurora kinase A
hsa-miR-153	0	0	1	1	1	1	KCNRG	potassium channel regulator
hsa-miR-153	0	0	0	1	1	1	DSCC1	defective in sister chromatid cohesion 1 homolog (S. cerevisiae)
hsa-miR-153	1	0	1	1	0	0	RELL1	RELT-like 1
hsa-miR-153	0	0	0	1	0	0	NOP14	NOP14 nucleolar protein homolog (yeast)
hsa-miR-153	0	0	1	1	0	0	HIST1H2BC	histone cluster 1, H2bc
hsa-miR-153	0	0	1	1	1	1	NSUN3	NOP2/Sun domain family, member 3
hsa-miR-153	0	0	0	1	1	1	WSB2	WD repeat and SOCS box containing 2
hsa-miR-153	0	0	0	1	0	0	NCAPD2	non-SMC condensin I complex, subunit D2
hsa-miR-153	0	0	0	1	0	0	WRAP53	WD repeat containing, antisense to TP53
hsa-miR-153	0	0	0	1	0	0	MAP7D3	MAP7 domain containing 3
hsa-miR-153	1	0	1	1	1	1	PDCD6	programmed cell death 6
hsa-miR-153	1	0	1	1	1	1	AHRR	aryl-hydrocarbon receptor repressor
hsa-miR-153	0	0	1	1	0	0	TTC9C	tetratricopeptide repeat domain 9C
hsa-miR-153	0	0	0	1	1	1	ZNF552	zinc finger protein 552
hsa-miR-153	1	0	1	1	1	1	SLC9A9	solute carrier family 9, subfamily A (NHE9, cation proton antiporter 9), member 9
hsa-miR-153	1	0	1	1	1	1	AP3S1	adaptor-related protein complex 3, sigma 1 subunit
hsa-miR-153	0	0	0	1	1	1	ZNF559	zinc finger protein 559
hsa-miR-153	1	0	0	1	1	1	TUBB6	tubulin, beta 6 class V
hsa-miR-153	0	0	1	1	1	1	C8orf47	chromosome 8 open reading frame 47
hsa-miR-153	0	0	1	1	1	1	FKRP	fukutin related protein
hsa-miR-153	1	0	1	1	1	1	FIBIN	fin bud initiation factor homolog (zebrafish)
hsa-miR-153	0	0	1	1	1	1	ZFP3	zinc finger protein 3 homolog (mouse)
hsa-miR-153	0	0	1	1	0	0	TALDO1	transaldolase 1
hsa-miR-153	0	0	1	1	1	1	TAC1	tachykinin, precursor 1
hsa-miR-153	0	0	1	1	1	1	ZNF611	zinc finger protein 611
hsa-miR-153	1	0	1	1	1	1	ARL4D	ADP-ribosylation factor-like 4D
hsa-miR-153	0	0	1	1	1	1	TGIF2LY	TGFB-induced factor homeobox 2-like, Y-linked
hsa-miR-153	0	0	1	1	1	1	C14orf39	chromosome 14 open reading frame 39
hsa-miR-153	0	0	0	1	0	0	OR51S1	olfactory receptor, family 51, subfamily S, member 1
hsa-miR-153	0	0	0	1	1	1	TPRX1	tetra-peptide repeat homeobox 1
hsa-miR-153	1	0	1	1	1	1	EEA1	early endosome antigen 1
hsa-miR-153	0	0	0	1	0	0	INPP1	inositol polyphosphate-1-phosphatase
hsa-miR-153	1	0	1	1	1	1	FAM189B	family with sequence similarity 189, member B
hsa-miR-153	0	0	0	1	0	0	SPHK1	sphingosine kinase 1
hsa-miR-153	0	0	0	1	0	0	PLEKHM3	pleckstrin homology domain containing, family M, member 3
hsa-miR-153	0	0	1	1	0	0	HKR1	HKR1, GLI-Kruppel zinc finger family member
hsa-miR-153	0	0	1	1	1	1	SLC34A1	solute carrier family 34 (sodium phosphate), member 1
hsa-miR-153	0	0	1	1	0	0	ADCK4	aarF domain containing kinase 4
hsa-miR-153	0	0	1	1	1	1	ASCC3	activating signal cointegrator 1 complex subunit 3
hsa-miR-153	0	0	1	1	1	1	SCAPER	S-phase cyclin A-associated protein in the ER
hsa-miR-153	0	0	1	1	1	1	YARS2	tyrosyl-tRNA synthetase 2, mitochondrial
hsa-miR-153	1	0	0	1	1	1	ANGPT2	angiopoietin 2
hsa-miR-153	1	0	1	1	1	1	ZNF580	zinc finger protein 580
hsa-miR-153	0	0	1	1	1	1	CCDC66	coiled-coil domain containing 66
hsa-miR-153	0	0	1	1	1	1	HARBI1	harbinger transposase derived 1
hsa-miR-153	0	0	1	1	0	0	EDDM3B	epididymal protein 3B
hsa-miR-153	0	0	0	1	0	0	ZAR1	zygote arrest 1
hsa-miR-153	0	0	1	1	0	0	CIB1	calcium and integrin binding 1 (calmyrin)
hsa-miR-153	1	0	1	1	1	1	PTPN21	protein tyrosine phosphatase, non-receptor type 21
hsa-miR-153	0	0	0	1	0	0	DHX34	DEAH (Asp-Glu-Ala-His) box polypeptide 34
hsa-miR-153	0	0	0	1	1	1	CNOT10	CCR4-NOT transcription complex, subunit 10
hsa-miR-153	0	0	0	1	0	0	OR4F6	olfactory receptor, family 4, subfamily F, member 6
hsa-miR-153	1	0	0	1	0	0	FAM193B	family with sequence similarity 193, member B
hsa-miR-153	0	0	1	1	0	0	MFSD10	major facilitator superfamily domain containing 10
hsa-miR-153	0	0	1	1	0	0	EIF4ENIF1	eukaryotic translation initiation factor 4E nuclear import factor 1
hsa-miR-153	1	0	1	1	0	0	FAT4	FAT tumor suppressor homolog 4 (Drosophila)
hsa-miR-153	0	0	0	1	0	0	AMY1B	amylase, alpha 1B (salivary)
hsa-miR-153	0	0	1	1	1	1	TBX18	T-box 18
hsa-miR-153	0	0	1	1	1	1	SLC25A21	solute carrier family 25 (mitochondrial oxoadipate carrier), member 21
hsa-miR-153	0	0	0	1	1	1	SGK196	protein kinase-like protein SgK196
hsa-miR-153	0	0	0	1	0	0	MCTP2	multiple C2 domains, transmembrane 2
hsa-miR-153	0	0	1	1	0	0	ACTB	actin, beta
hsa-miR-153	0	0	1	1	0	0	EPGN	epithelial mitogen homolog (mouse)
hsa-miR-153	0	0	1	1	0	0	GPR19	G protein-coupled receptor 19
hsa-miR-153	0	0	0	1	0	0	OR6A2	olfactory receptor, family 6, subfamily A, member 2
hsa-miR-153	0	0	1	1	0	0	WDR53	WD repeat domain 53
hsa-miR-153	1	0	1	1	0	0	NOG	noggin
hsa-miR-153	0	0	0	1	0	0	LCK	lymphocyte-specific protein tyrosine kinase
hsa-miR-153	0	0	1	1	0	0	C3orf26	chromosome 3 open reading frame 26
hsa-miR-153	0	0	0	1	0	0	ACAA1	acetyl-CoA acyltransferase 1
hsa-miR-153	0	0	1	1	0	0	DMRTC1B	DMRT-like family C1B
hsa-miR-153	0	0	0	1	0	0	QRFPR	pyroglutamylated RFamide peptide receptor
hsa-miR-153	0	0	1	1	1	1	CCDC18	coiled-coil domain containing 18
hsa-miR-153	0	0	1	1	1	1	NEXN	nexilin (F actin binding protein)
hsa-miR-153	1	0	1	1	1	1	CTBP2	C-terminal binding protein 2
hsa-miR-153	0	0	1	1	0	0	ARL6	ADP-ribosylation factor-like 6
hsa-miR-153	0	0	1	1	0	0	PLSCR2	phospholipid scramblase 2
hsa-miR-153	0	0	1	1	1	1	ZNF385B	zinc finger protein 385B
hsa-miR-153	0	0	0	1	0	0	ZNF224	zinc finger protein 224
hsa-miR-153	0	0	1	1	0	0	ARHGAP8	Rho GTPase activating protein 8
hsa-miR-153	0	0	0	1	0	0	PRR5-ARHGAP8	PRR5-ARHGAP8 readthrough
hsa-miR-153	0	0	1	1	0	0	PRR5	proline rich 5 (renal)
hsa-miR-153	0	0	0	1	1	1	IL21R	interleukin 21 receptor
hsa-miR-153	1	0	1	1	1	1	EME1	essential meiotic endonuclease 1 homolog 1 (S. pombe)
hsa-miR-153	0	0	1	1	1	1	CLUL1	clusterin-like 1 (retinal)
hsa-miR-153	0	0	1	1	1	1	STAG3L1	stromal antigen 3-like 1
hsa-miR-153	0	0	0	1	1	1	NPY5R	neuropeptide Y receptor Y5
hsa-miR-153	0	0	1	1	0	0	RPN2	ribophorin II
hsa-miR-153	1	0	1	1	1	1	ATP9A	ATPase, class II, type 9A
hsa-miR-153	0	0	0	1	0	0	CATSPER4	cation channel, sperm associated 4
hsa-miR-153	1	0	1	1	1	1	SCAMP1	secretory carrier membrane protein 1
hsa-miR-153	0	0	0	1	0	0	GJB4	gap junction protein, beta 4, 30.3kDa
hsa-miR-153	1	0	1	1	1	1	BTG3	BTG family, member 3
hsa-miR-153	0	0	1	1	1	1	STAG3L3	stromal antigen 3-like 3
hsa-miR-153	0	0	1	1	1	1	DOCK9	dedicator of cytokinesis 9
hsa-miR-153	1	0	1	1	1	1	CPED1	cadherin-like and PC-esterase domain containing 1
hsa-miR-153	0	0	1	1	0	0	MCCC2	methylcrotonoyl-CoA carboxylase 2 (beta)
hsa-miR-153	0	0	0	1	1	1	ZNF823	zinc finger protein 823
hsa-miR-153	0	0	1	1	0	0	METTL23	methyltransferase like 23
hsa-miR-153	0	0	1	1	0	0	SPRR2B	small proline-rich protein 2B
hsa-miR-153	0	0	1	1	1	1	CLUAP1	clusterin associated protein 1
hsa-miR-153	0	0	1	1	1	1	MSANTD1	Myb/SANT-like DNA-binding domain containing 1
hsa-miR-153	1	0	1	1	1	1	TMEM220	transmembrane protein 220
hsa-miR-153	0	0	1	1	1	1	CNTNAP3B	contactin associated protein-like 3B
hsa-miR-153	0	0	1	1	1	1	PMS1	PMS1 postmeiotic segregation increased 1 (S. cerevisiae)
hsa-miR-153	0	0	1	1	0	0	DPY30	dpy-30 homolog (C. elegans)
hsa-miR-153	1	0	1	1	1	1	FOXM1	forkhead box M1
hsa-miR-153	1	0	1	1	1	1	FUT8	fucosyltransferase 8 (alpha (1,6) fucosyltransferase)
hsa-miR-153	0	0	0	1	1	1	PSG4	pregnancy specific beta-1-glycoprotein 4
hsa-miR-153	0	0	1	1	1	1	PSG5	pregnancy specific beta-1-glycoprotein 5
hsa-miR-153	0	0	1	1	1	1	C1orf168	chromosome 1 open reading frame 168
hsa-miR-153	0	0	1	1	1	1	GBP5	guanylate binding protein 5
hsa-miR-153	0	0	0	1	1	1	FAM111B	family with sequence similarity 111, member B
hsa-miR-153	0	0	1	1	0	0	PPM1G	protein phosphatase, Mg2+/Mn2+ dependent, 1G
hsa-miR-153	0	0	1	1	1	1	ICOSLG	inducible T-cell co-stimulator ligand
hsa-miR-153	1	0	1	1	1	1	DROSHA	drosha, ribonuclease type III
hsa-miR-153	0	0	0	1	1	1	SERPINB13	serpin peptidase inhibitor, clade B (ovalbumin), member 13
hsa-miR-153	0	0	1	1	1	1	LYPD1	LY6/PLAUR domain containing 1
hsa-miR-153	0	0	0	1	0	0	SDSL	serine dehydratase-like
hsa-miR-153	0	0	1	1	1	1	DLEC1	deleted in lung and esophageal cancer 1
hsa-miR-153	0	0	0	1	1	1	ZNF334	zinc finger protein 334
hsa-miR-153	0	0	1	1	1	1	HAUS4	HAUS augmin-like complex, subunit 4
hsa-miR-153	0	0	1	1	0	0	DHX30	DEAH (Asp-Glu-Ala-His) box polypeptide 30
hsa-miR-153	1	0	1	1	1	1	AKT1	v-akt murine thymoma viral oncogene homolog 1
hsa-miR-153	1	0	1	1	1	1	SPTBN4	spectrin, beta, non-erythrocytic 4
hsa-miR-153	0	0	0	1	1	1	TAF1A	TATA box binding protein (TBP)-associated factor, RNA polymerase I, A, 48kDa
hsa-miR-153	0	0	0	1	1	1	UCKL1	uridine-cytidine kinase 1-like 1
hsa-miR-153	0	0	1	1	1	1	C11orf54	chromosome 11 open reading frame 54
hsa-miR-153	0	0	0	1	1	1	GNL3	guanine nucleotide binding protein-like 3 (nucleolar)
hsa-miR-153	1	0	1	1	1	1	ADRA1A	adrenoceptor alpha 1A
hsa-miR-153	0	0	1	1	0	0	STK31	serine/threonine kinase 31
hsa-miR-153	0	0	0	1	0	0	ACAP3	ArfGAP with coiled-coil, ankyrin repeat and PH domains 3
hsa-miR-153	0	0	0	1	0	0	PCDHB11	protocadherin beta 11
hsa-miR-153	0	0	0	1	0	0	OR5K4	olfactory receptor, family 5, subfamily K, member 4
hsa-miR-153	1	0	1	1	1	1	TXNRD1	thioredoxin reductase 1
hsa-miR-153	1	0	1	1	1	1	IL16	interleukin 16
hsa-miR-153	0	0	1	1	0	0	ADORA3	adenosine A3 receptor
hsa-miR-153	1	0	1	1	1	1	MBD6	methyl-CpG binding domain protein 6
hsa-miR-153	1	0	1	1	1	1	TMF1	TATA element modulatory factor 1
hsa-miR-153	0	0	1	1	0	0	GMNN	geminin, DNA replication inhibitor
hsa-miR-153	0	0	0	1	1	1	PIK3R4	phosphoinositide-3-kinase, regulatory subunit 4
hsa-miR-153	0	0	1	1	0	0	TXNDC11	thioredoxin domain containing 11
hsa-miR-153	1	0	0	1	1	1	PTRF	polymerase I and transcript release factor
hsa-miR-153	0	0	0	1	0	0	TTC30B	tetratricopeptide repeat domain 30B
hsa-miR-153	1	0	1	1	0	0	ATP2A1	ATPase, Ca++ transporting, cardiac muscle, fast twitch 1
hsa-miR-153	1	0	0	1	1	1	SDCCAG3	serologically defined colon cancer antigen 3
hsa-miR-153	0	0	0	1	0	0	IFNA10	interferon, alpha 10
hsa-miR-153	1	0	1	1	1	1	BET1	blocked early in transport 1 homolog (S. cerevisiae)
hsa-miR-153	0	0	0	1	0	0	ZNF799	zinc finger protein 799
hsa-miR-153	0	0	0	1	1	1	SUSD2	sushi domain containing 2
hsa-miR-153	1	0	1	1	1	1	DNA2	DNA replication helicase 2 homolog (yeast)
hsa-miR-153	0	0	1	1	1	1	ESR2	estrogen receptor 2 (ER beta)
hsa-miR-153	1	0	1	1	0	0	PDE3A	phosphodiesterase 3A, cGMP-inhibited
hsa-miR-153	0	0	1	1	1	1	SPRR2A	small proline-rich protein 2A
hsa-miR-153	0	0	1	1	1	1	ANXA10	annexin A10
hsa-miR-153	0	0	1	1	0	0	RGR	retinal G protein coupled receptor
hsa-miR-153	0	0	0	1	0	0	OR6K2	olfactory receptor, family 6, subfamily K, member 2
hsa-miR-153	0	0	0	1	1	1	CELA2A	chymotrypsin-like elastase family, member 2A
hsa-miR-153	0	0	0	1	1	1	SPN	sialophorin
hsa-miR-153	0	0	0	1	1	1	ZNF681	zinc finger protein 681
hsa-miR-153	0	0	0	1	0	0	DISP1	dispatched homolog 1 (Drosophila)
hsa-miR-153	0	0	0	1	1	1	SPRR2D	small proline-rich protein 2D
hsa-miR-153	0	0	1	1	0	0	CCDC144A	coiled-coil domain containing 144A
hsa-miR-153	0	0	0	1	0	0	OR10A3	olfactory receptor, family 10, subfamily A, member 3
hsa-miR-153	1	0	1	1	1	1	CD300LF	CD300 molecule-like family member f
hsa-miR-153	0	0	1	1	1	1	PTPLA	protein tyrosine phosphatase-like (proline instead of catalytic arginine), member A
hsa-miR-153	0	0	0	1	1	1	GPR161	G protein-coupled receptor 161
hsa-miR-153	1	0	1	1	1	1	ILF2	interleukin enhancer binding factor 2, 45kDa
hsa-miR-153	1	0	1	1	1	1	ENSA	endosulfine alpha
hsa-miR-153	0	0	0	1	0	0	G0S2	G0/G1switch 2
hsa-miR-153	0	0	1	1	1	1	SOD2	superoxide dismutase 2, mitochondrial
hsa-miR-153	1	0	1	1	1	1	SYNE1	spectrin repeat containing, nuclear envelope 1
hsa-miR-153	0	0	1	1	1	1	TNNI1	troponin I type 1 (skeletal, slow)
hsa-miR-153	0	0	0	1	0	0	ASPM	asp (abnormal spindle) homolog, microcephaly associated (Drosophila)
hsa-miR-153	0	0	1	1	1	1	PLA2G4A	phospholipase A2, group IVA (cytosolic, calcium-dependent)
hsa-miR-153	0	0	1	1	0	0	DHX9	DEAH (Asp-Glu-Ala-His) box polypeptide 9
hsa-miR-153	0	0	1	1	0	0	AXDND1	axonemal dynein light chain domain containing 1
hsa-miR-153	0	0	1	1	0	0	IFNGR1	interferon gamma receptor 1
hsa-miR-153	1	0	1	1	1	1	MGST3	microsomal glutathione S-transferase 3
hsa-miR-153	0	0	1	1	0	0	NUF2	NUF2, NDC80 kinetochore complex component, homolog (S. cerevisiae)
hsa-miR-153	0	0	1	1	1	1	HSD17B7	hydroxysteroid (17-beta) dehydrogenase 7
hsa-miR-153	1	0	1	1	0	0	ADAMTS4	ADAM metallopeptidase with thrombospondin type 1 motif, 4
hsa-miR-153	0	0	1	1	1	1	UFC1	ubiquitin-fold modifier conjugating enzyme 1
hsa-miR-153	1	0	1	1	1	1	ATP1A2	ATPase, Na+/K+ transporting, alpha 2 polypeptide
hsa-miR-153	0	0	1	1	1	1	FCRL2	Fc receptor-like 2
hsa-miR-153	0	0	1	1	1	1	TPD52L1	tumor protein D52-like 1
hsa-miR-153	1	0	1	1	1	1	ATP8B2	ATPase, aminophospholipid transporter, class I, type 8B, member 2
hsa-miR-153	0	0	1	1	0	0	LELP1	late cornified envelope-like proline-rich 1
hsa-miR-153	1	0	1	1	0	0	TDRKH	tudor and KH domain containing
hsa-miR-153	0	0	0	1	1	1	FIG4	FIG4 homolog, SAC1 lipid phosphatase domain containing (S. cerevisiae)
hsa-miR-153	1	0	1	1	1	1	PEX11B	peroxisomal biogenesis factor 11 beta
hsa-miR-153	0	0	0	1	0	0	MDN1	MDN1, midasin homolog (yeast)
hsa-miR-153	0	0	1	1	0	0	ZDHHC6	zinc finger, DHHC-type containing 6
hsa-miR-153	0	0	1	1	0	0	RWDD2A	RWD domain containing 2A
hsa-miR-153	0	0	0	1	0	0	PPDPF	pancreatic progenitor cell differentiation and proliferation factor homolog (zebrafish)
hsa-miR-153	0	0	0	1	1	1	KCNQ2	potassium voltage-gated channel, KQT-like subfamily, member 2
hsa-miR-153	0	0	1	1	1	1	MRPL43	mitochondrial ribosomal protein L43
hsa-miR-153	0	0	1	1	1	1	MAGEA4	melanoma antigen family A, 4
hsa-miR-153	0	0	0	1	1	1	ABCC2	ATP-binding cassette, sub-family C (CFTR/MRP), member 2
hsa-miR-153	1	0	1	1	1	1	GTF2B	general transcription factor IIB
hsa-miR-153	0	0	1	1	1	1	LMBRD1	LMBR1 domain containing 1
hsa-miR-153	0	0	1	1	1	1	MCOLN3	mucolipin 3
hsa-miR-153	0	0	0	1	0	0	RPF1	ribosome production factor 1 homolog (S. cerevisiae)
hsa-miR-153	0	0	1	1	1	1	EXOSC1	exosome component 1
hsa-miR-153	0	0	1	1	1	1	GSTA4	glutathione S-transferase alpha 4
hsa-miR-153	0	0	1	1	1	1	WDR78	WD repeat domain 78
hsa-miR-153	1	0	1	1	0	0	EFHC1	EF-hand domain (C-terminal) containing 1
hsa-miR-153	0	0	1	1	0	0	ROR1	receptor tyrosine kinase-like orphan receptor 1
hsa-miR-153	0	0	0	1	1	1	C20orf85	chromosome 20 open reading frame 85
hsa-miR-153	0	0	1	1	0	0	MCTS1	malignant T cell amplified sequence 1
hsa-miR-153	0	0	0	1	0	0	CYP2C19	cytochrome P450, family 2, subfamily C, polypeptide 19
hsa-miR-153	0	0	0	1	1	1	PDE6C	phosphodiesterase 6C, cGMP-specific, cone, alpha prime
hsa-miR-153	0	0	1	1	1	1	KCNG1	potassium voltage-gated channel, subfamily G, member 1
hsa-miR-153	0	0	0	1	1	1	GLT6D1	glycosyltransferase 6 domain containing 1
hsa-miR-153	0	0	0	1	1	1	IFIT1	interferon-induced protein with tetratricopeptide repeats 1
hsa-miR-153	0	0	0	1	1	1	IFIT1B	interferon-induced protein with tetratricopeptide repeats 1B
hsa-miR-153	1	0	1	1	1	1	FAS	Fas (TNF receptor superfamily, member 6)
hsa-miR-153	1	0	1	1	0	0	DYDC1	DPY30 domain containing 1
hsa-miR-153	0	0	1	1	1	1	PPCS	phosphopantothenoylcysteine synthetase
hsa-miR-153	0	0	1	1	0	0	DUSP13	dual specificity phosphatase 13
hsa-miR-153	0	0	1	1	1	1	NXF3	nuclear RNA export factor 3
hsa-miR-153	0	0	0	1	0	0	RPL36A	ribosomal protein L36a
hsa-miR-153	0	0	0	1	1	1	ADA	adenosine deaminase
hsa-miR-153	0	0	1	1	0	0	CIZ1	CDKN1A interacting zinc finger protein 1
hsa-miR-153	0	0	1	1	1	1	SRPX2	sushi-repeat containing protein, X-linked 2
hsa-miR-153	1	0	1	1	1	1	PCDH11X	protocadherin 11 X-linked
hsa-miR-153	1	0	1	1	1	1	CSMD2	CUB and Sushi multiple domains 2
hsa-miR-153	1	0	1	1	1	1	TBC1D22B	TBC1 domain family, member 22B
hsa-miR-153	0	0	1	1	1	1	DMRTC1	DMRT-like family C1
hsa-miR-153	0	0	1	1	1	1	HDAC8	histone deacetylase 8
hsa-miR-153	1	0	0	1	1	1	CNTRL	centriolin
hsa-miR-153	1	0	1	1	0	0	DHDDS	dehydrodolichyl diphosphate synthase
hsa-miR-153	0	0	1	1	0	0	GPRIN2	G protein regulated inducer of neurite outgrowth 2
hsa-miR-153	1	0	1	1	0	0	SVEP1	sushi, von Willebrand factor type A, EGF and pentraxin domain containing 1
hsa-miR-153	0	0	0	1	0	0	KIFC1	kinesin family member C1
hsa-miR-153	1	0	1	1	1	1	CASP10	caspase 10, apoptosis-related cysteine peptidase
hsa-miR-153	0	0	1	1	1	1	SMC2	structural maintenance of chromosomes 2
hsa-miR-153	0	0	0	1	0	0	OR10G8	olfactory receptor, family 10, subfamily G, member 8
hsa-miR-153	1	0	1	1	0	0	ROR2	receptor tyrosine kinase-like orphan receptor 2
hsa-miR-153	0	0	1	1	1	1	NFIL3	nuclear factor, interleukin 3 regulated
hsa-miR-153	0	0	0	1	0	0	CELA2B	chymotrypsin-like elastase family, member 2B
hsa-miR-153	0	0	0	1	0	0	DAOA	D-amino acid oxidase activator
hsa-miR-153	0	0	1	1	1	1	IER3	immediate early response 3
hsa-miR-153	0	0	1	1	1	1	IDNK	idnK, gluconokinase homolog (E. coli)
hsa-miR-153	0	0	1	1	0	0	NPPB	natriuretic peptide B
hsa-miR-153	0	0	1	1	1	1	CPT1A	carnitine palmitoyltransferase 1A (liver)
hsa-miR-153	0	0	0	1	0	0	SULT1C3	sulfotransferase family, cytosolic, 1C, member 3
hsa-miR-153	1	0	1	1	1	1	VSX1	visual system homeobox 1
hsa-miR-153	1	0	1	1	1	1	TRPM6	transient receptor potential cation channel, subfamily M, member 6
hsa-miR-153	0	0	0	1	0	0	NMS	neuromedin S
hsa-miR-153	1	0	1	1	1	1	RILPL1	Rab interacting lysosomal protein-like 1
hsa-miR-153	1	0	0	1	1	1	ABCC4	ATP-binding cassette, sub-family C (CFTR/MRP), member 4
hsa-miR-153	1	0	1	1	1	1	FAM108B1	family with sequence similarity 108, member B1
hsa-miR-153	0	0	0	1	1	1	TMEM252	transmembrane protein 252
hsa-miR-153	0	0	1	1	1	1	CNTNAP3	contactin associated protein-like 3
hsa-miR-153	0	0	0	1	0	0	ASB10	ankyrin repeat and SOCS box containing 10
hsa-miR-153	0	0	1	1	1	1	SCGN	secretagogin, EF-hand calcium binding protein
hsa-miR-153	0	0	0	1	0	0	C4orf47	chromosome 4 open reading frame 47
hsa-miR-153	0	0	1	1	1	1	ADAMTS17	ADAM metallopeptidase with thrombospondin type 1 motif, 17
hsa-miR-153	0	0	1	1	1	1	MAGEB2	melanoma antigen family B, 2
hsa-miR-153	0	0	1	1	1	1	DGKH	diacylglycerol kinase, eta
hsa-miR-153	1	0	1	1	1	1	INSC	inscuteable homolog (Drosophila)
hsa-miR-153	0	0	0	1	1	1	PAK1IP1	PAK1 interacting protein 1
hsa-miR-153	0	0	0	1	1	1	CCDC169	coiled-coil domain containing 169
hsa-miR-153	0	0	0	1	0	0	OR7C2	olfactory receptor, family 7, subfamily C, member 2
hsa-miR-153	0	0	1	1	0	0	SLC4A11	solute carrier family 4, sodium borate transporter, member 11
hsa-miR-153	0	0	0	1	0	0	ATP6AP1L	ATPase, H+ transporting, lysosomal accessory protein 1-like
hsa-miR-153	0	0	1	1	1	1	IFNA21	interferon, alpha 21
hsa-miR-153	0	0	1	1	0	0	GTF2H2C	general transcription factor IIH, polypeptide 2C
hsa-miR-153	1	0	1	1	1	1	HMGN1	high mobility group nucleosome binding domain 1
hsa-miR-153	1	0	0	1	1	1	SLC46A3	solute carrier family 46, member 3
hsa-miR-153	0	0	0	1	0	0	HUS1B	HUS1 checkpoint homolog b (S. pombe)
hsa-miR-153	0	0	1	1	1	1	SIRPB2	signal-regulatory protein beta 2
hsa-miR-153	1	0	1	1	1	1	FKBP1A	FK506 binding protein 1A, 12kDa
hsa-miR-153	0	0	0	1	0	0	ZNF555	zinc finger protein 555
hsa-miR-153	0	0	1	1	1	1	DAZ2	deleted in azoospermia 2
hsa-miR-153	0	0	0	1	1	1	RIPK3	receptor-interacting serine-threonine kinase 3
hsa-miR-153	0	0	1	1	1	1	RBMY1B	RNA binding motif protein, Y-linked, family 1, member B
hsa-miR-153	0	0	1	1	1	1	RBMY1A1	RNA binding motif protein, Y-linked, family 1, member A1
hsa-miR-153	0	0	1	1	1	1	FBXO25	F-box protein 25
hsa-miR-153	1	0	1	1	1	1	WHSC1	Wolf-Hirschhorn syndrome candidate 1
hsa-miR-153	0	0	1	1	0	0	TBL1Y	transducin (beta)-like 1, Y-linked
hsa-miR-153	1	0	0	1	0	0	UROC1	urocanate hydratase 1
hsa-miR-153	0	0	1	1	1	1	GTPBP8	GTP-binding protein 8 (putative)
hsa-miR-153	1	0	1	1	1	1	SLC4A7	solute carrier family 4, sodium bicarbonate cotransporter, member 7
hsa-miR-153	1	0	1	1	1	1	SPTB	spectrin, beta, erythrocytic
hsa-miR-153	0	0	1	0	1	1	MS4A2	membrane-spanning 4-domains, subfamily A, member 2
hsa-miR-153	1	0	1	1	1	1	LDLR	low density lipoprotein receptor
hsa-miR-153	0	0	0	1	1	1	GGCX	gamma-glutamyl carboxylase
hsa-miR-153	1	0	1	1	1	1	REEP3	receptor accessory protein 3
hsa-miR-153	1	0	1	1	1	1	ARHGAP24	Rho GTPase activating protein 24
hsa-miR-153	1	0	1	0	1	1	CHML	choroideremia-like (Rab escort protein 2)
hsa-miR-153	1	0	1	1	1	1	GABPA	GA binding protein transcription factor, alpha subunit 60kDa
hsa-miR-153	0	0	1	0	1	1	IDO1	indoleamine 2,3-dioxygenase 1
hsa-miR-153	0	0	1	0	1	1	ASAP2	ArfGAP with SH3 domain, ankyrin repeat and PH domain 2
hsa-miR-153	1	0	1	0	1	1	CPNE3	copine III
hsa-miR-153	0	0	1	1	1	1	MGAM	maltase-glucoamylase (alpha-glucosidase)
hsa-miR-153	0	0	1	1	1	1	NDUFS1	NADH dehydrogenase (ubiquinone) Fe-S protein 1, 75kDa (NADH-coenzyme Q reductase)
hsa-miR-153	0	0	0	0	1	1	S1PR3	sphingosine-1-phosphate receptor 3
hsa-miR-153	1	0	1	1	1	1	RP2	retinitis pigmentosa 2 (X-linked recessive)
hsa-miR-153	0	0	1	1	1	1	ZNF146	zinc finger protein 146
hsa-miR-153	0	0	1	1	1	1	CCT5	chaperonin containing TCP1, subunit 5 (epsilon)
hsa-miR-153	0	0	0	1	1	1	TRIM58	tripartite motif containing 58
hsa-miR-153	0	0	0	1	1	1	WWOX	WW domain containing oxidoreductase
hsa-miR-153	0	0	1	0	1	1	ERAP1	endoplasmic reticulum aminopeptidase 1
hsa-miR-153	1	0	1	1	1	1	UFM1	ubiquitin-fold modifier 1
hsa-miR-153	1	0	1	1	1	1	FTSJD1	FtsJ methyltransferase domain containing 1
hsa-miR-153	0	0	1	0	1	1	IL17RB	interleukin 17 receptor B
hsa-miR-153	1	0	1	1	1	1	CEACAM19	carcinoembryonic antigen-related cell adhesion molecule 19
hsa-miR-153	1	0	1	0	1	1	EIF5A2	eukaryotic translation initiation factor 5A2
hsa-miR-153	1	0	1	1	1	1	ERGIC1	endoplasmic reticulum-golgi intermediate compartment (ERGIC) 1
hsa-miR-153	1	0	0	1	1	1	PARD6G	par-6 partitioning defective 6 homolog gamma (C. elegans)
hsa-miR-153	1	0	0	0	1	1	NFATC2IP	nuclear factor of activated T-cells, cytoplasmic, calcineurin-dependent 2 interacting protein
hsa-miR-153	1	0	1	1	1	1	SLC35B4	solute carrier family 35, member B4
hsa-miR-153	0	0	1	1	1	1	SERAC1	serine active site containing 1
hsa-miR-153	0	0	1	1	1	1	SCIN	scinderin
hsa-miR-153	1	0	1	1	1	1	PCMTD1	protein-L-isoaspartate (D-aspartate) O-methyltransferase domain containing 1
hsa-miR-153	0	0	1	1	1	1	ZNF431	zinc finger protein 431
hsa-miR-153	1	0	1	1	1	1	CD109	CD109 molecule
hsa-miR-153	0	0	1	1	1	1	ENKUR	enkurin, TRPC channel interacting protein
hsa-miR-153	0	0	1	0	1	1	SPATA18	spermatogenesis associated 18
hsa-miR-153	1	0	1	1	1	1	SLC24A4	solute carrier family 24 (sodium/potassium/calcium exchanger), member 4
hsa-miR-153	0	0	1	1	1	1	DTWD2	DTW domain containing 2
hsa-miR-153	0	0	0	0	1	1	LOC284801	uncharacterized LOC284801
hsa-miR-153	1	0	1	0	1	1	BCL2	B-cell CLL/lymphoma 2
hsa-miR-153	1	0	1	1	1	1	NR3C2	nuclear receptor subfamily 3, group C, member 2
hsa-miR-153	1	0	1	1	1	1	ARNTL	aryl hydrocarbon receptor nuclear translocator-like
hsa-miR-153	1	0	1	1	1	1	CLCN3	chloride channel, voltage-sensitive 3
hsa-miR-153	1	0	1	1	1	1	DPP4	dipeptidyl-peptidase 4
hsa-miR-153	1	0	1	1	1	1	GAP43	growth associated protein 43
hsa-miR-153	0	0	1	1	1	1	IL12B	interleukin 12B (natural killer cell stimulatory factor 2, cytotoxic lymphocyte maturation factor 2, p40)
hsa-miR-153	1	0	1	0	1	1	IRF2	interferon regulatory factor 2
hsa-miR-153	1	0	1	1	1	1	PCDH8	protocadherin 8
hsa-miR-153	1	0	1	1	1	1	SP3	Sp3 transcription factor
hsa-miR-153	1	0	1	1	1	1	SYNJ1	synaptojanin 1
hsa-miR-153	1	0	1	0	1	1	CYTH3	cytohesin 3
hsa-miR-153	1	0	1	1	1	1	EPHA4	EPH receptor A4
hsa-miR-153	1	0	1	0	1	1	FOXD1	forkhead box D1
hsa-miR-153	1	0	1	1	1	1	USP6	ubiquitin specific peptidase 6 (Tre-2 oncogene)
hsa-miR-153	1	0	1	1	1	1	MLLT3	myeloid/lymphoid or mixed-lineage leukemia (trithorax homolog, Drosophila); translocated to, 3
hsa-miR-153	1	0	1	1	1	1	YBX1	Y box binding protein 1
hsa-miR-153	0	0	1	1	1	1	LATS1	LATS, large tumor suppressor, homolog 1 (Drosophila)
hsa-miR-153	1	0	1	1	1	1	TCEAL1	transcription elongation factor A (SII)-like 1
hsa-miR-153	0	0	1	1	1	1	ATG5	autophagy related 5
hsa-miR-153	1	0	1	1	1	1	RALA	v-ral simian leukemia viral oncogene homolog A (ras related)
hsa-miR-153	1	0	1	1	1	1	BPNT1	3'(2'), 5'-bisphosphate nucleotidase 1
hsa-miR-153	1	0	1	1	1	1	PAIP1	poly(A) binding protein interacting protein 1
hsa-miR-153	0	0	1	1	1	1	RTN4	reticulon 4
hsa-miR-153	1	0	1	1	1	1	VEZF1	vascular endothelial zinc finger 1
hsa-miR-153	1	0	1	1	1	1	SIRT1	sirtuin 1
hsa-miR-153	1	0	1	1	1	1	STAT5B	signal transducer and activator of transcription 5B
hsa-miR-153	0	0	1	1	1	1	UBQLN1	ubiquilin 1
hsa-miR-153	1	0	1	1	1	1	SOCS5	suppressor of cytokine signaling 5
hsa-miR-153	1	0	1	1	1	1	PATZ1	POZ (BTB) and AT hook containing zinc finger 1
hsa-miR-153	1	0	1	1	1	1	DBC1	deleted in bladder cancer 1
hsa-miR-153	1	0	1	0	1	1	LPPR4	lipid phosphate phosphatase-related protein type 4
hsa-miR-153	1	0	1	1	1	1	SCAF8	SR-related CTD-associated factor 8
hsa-miR-153	1	0	1	1	1	1	PLEKHA6	pleckstrin homology domain containing, family A member 6
hsa-miR-153	1	0	1	0	1	1	CDK19	cyclin-dependent kinase 19
hsa-miR-153	1	0	1	1	1	1	PHF3	PHD finger protein 3
hsa-miR-153	1	0	1	1	1	1	PDS5A	PDS5, regulator of cohesion maintenance, homolog A (S. cerevisiae)
hsa-miR-153	0	0	1	1	1	1	LEPROTL1	leptin receptor overlapping transcript-like 1
hsa-miR-153	1	0	1	1	1	1	ZNF521	zinc finger protein 521
hsa-miR-153	0	0	1	1	1	1	DNAJB11	DnaJ (Hsp40) homolog, subfamily B, member 11
hsa-miR-153	1	0	1	1	0	0	LGSN	lengsin, lens protein with glutamine synthetase domain
hsa-miR-153	0	0	1	1	1	1	LRRC16A	leucine rich repeat containing 16A
hsa-miR-153	1	0	1	0	1	1	C14orf101	chromosome 14 open reading frame 101
hsa-miR-153	1	0	1	1	1	1	ARHGAP17	Rho GTPase activating protein 17
hsa-miR-153	1	0	1	1	1	1	MARK1	MAP/microtubule affinity-regulating kinase 1
hsa-miR-153	1	0	1	1	1	1	WRNIP1	Werner helicase interacting protein 1
hsa-miR-153	1	0	1	0	1	1	GAN	gigaxonin
hsa-miR-153	1	0	1	1	1	1	PCDHA9	protocadherin alpha 9
hsa-miR-153	1	0	1	1	1	1	SH3KBP1	SH3-domain kinase binding protein 1
hsa-miR-153	1	0	1	1	1	1	NAA15	N(alpha)-acetyltransferase 15, NatA auxiliary subunit
hsa-miR-153	1	0	1	1	1	1	SLC44A1	solute carrier family 44, member 1
hsa-miR-153	1	0	1	1	1	1	SON	SON DNA binding protein
hsa-miR-153	1	0	1	1	1	1	FAM123A	family with sequence similarity 123A
hsa-miR-153	1	0	1	1	1	1	UHRF2	ubiquitin-like with PHD and ring finger domains 2, E3 ubiquitin protein ligase
hsa-miR-153	1	0	1	1	1	1	MTDH	metadherin
hsa-miR-153	0	0	1	1	1	1	KCTD1	potassium channel tetramerisation domain containing 1
hsa-miR-153	1	0	1	1	1	1	KLHL5	kelch-like 5 (Drosophila)
