# Supplementary material for: Profiling of Selected MicroRNAs in Proliferative Eutopic Endometrium of Women with Ovarian Endometriosis
Source: Biomed Res Int. 2015 Aug 20;2015:760698. doi: 10.1155/2015/760698 (PMC4558423; doi:10.1155/2015/760698)
Supplement: Supplementary file 1 — Table I: The names of miRNAs significantly differentially expressed between eutopic endometrium of patients with endometriosis vs eutopic endometrium of patients without endometriosis. Table II: The associations between miRNA and mRNA, which presents detailed results of the search of six major databases i.e targetscan, tarbase, miranda, mirbase, mirtarget2 and pictar. [file 760698.f1.zip › 760698.f1/Table II/hsa-miR-181d.tsv]

miR	targetscan	tarbase	miranda	mirbase	mirtarget2	pictar	GeneSymbol	GeneName
hsa-miR-181d	1	0	1	1	1	1	GPD1L	glycerol-3-phosphate dehydrogenase 1-like
hsa-miR-181d	1	0	1	1	1	1	RP2	retinitis pigmentosa 2 (X-linked recessive)
hsa-miR-181d	1	0	1	1	1	1	CNOT2	CCR4-NOT transcription complex, subunit 2
hsa-miR-181d	1	0	1	1	1	1	KLHL5	kelch-like 5 (Drosophila)
hsa-miR-181d	1	0	1	1	0	0	KIAA0226	KIAA0226
hsa-miR-181d	1	0	1	1	1	1	GABRA1	gamma-aminobutyric acid (GABA) A receptor, alpha 1
hsa-miR-181d	1	0	1	1	0	0	INO80D	INO80 complex subunit D
hsa-miR-181d	1	0	1	1	1	1	ACVR2B	activin A receptor, type IIB
hsa-miR-181d	1	0	1	1	1	1	MECP2	methyl CpG binding protein 2 (Rett syndrome)
hsa-miR-181d	1	0	1	1	1	1	ZBTB41	zinc finger and BTB domain containing 41
hsa-miR-181d	1	0	1	1	1	1	BAZ2A	bromodomain adjacent to zinc finger domain, 2A
hsa-miR-181d	1	0	1	1	1	1	EPS15	epidermal growth factor receptor pathway substrate 15
hsa-miR-181d	1	0	1	0	1	1	RABGEF1	RAB guanine nucleotide exchange factor (GEF) 1
hsa-miR-181d	1	0	1	1	1	1	VANGL1	vang-like 1 (van gogh, Drosophila)
hsa-miR-181d	1	0	1	0	1	1	SRGAP2	SLIT-ROBO Rho GTPase activating protein 2
hsa-miR-181d	1	0	1	1	1	1	HOXA11	homeobox A11
hsa-miR-181d	1	0	1	0	1	1	PDE5A	phosphodiesterase 5A, cGMP-specific
hsa-miR-181d	1	0	1	1	1	1	PROSER1	proline and serine rich 1
hsa-miR-181d	1	0	1	1	1	1	CPSF6	cleavage and polyadenylation specific factor 6, 68kDa
hsa-miR-181d	1	0	1	1	1	1	SLC25A53	solute carrier family 25, member 53
hsa-miR-181d	1	0	1	0	1	1	KRAS	v-Ki-ras2 Kirsten rat sarcoma viral oncogene homolog
hsa-miR-181d	1	0	1	0	1	1	MYBL1	v-myb myeloblastosis viral oncogene homolog (avian)-like 1
hsa-miR-181d	1	0	1	1	1	1	WDR37	WD repeat domain 37
hsa-miR-181d	1	0	1	1	1	1	RNF125	ring finger protein 125, E3 ubiquitin protein ligase
hsa-miR-181d	1	0	1	0	1	1	PPP1R2	protein phosphatase 1, regulatory (inhibitor) subunit 2
hsa-miR-181d	1	0	1	1	1	1	PALM2	paralemmin 2
hsa-miR-181d	1	0	1	1	1	1	LIMCH1	LIM and calponin homology domains 1
hsa-miR-181d	1	0	1	1	1	1	LPP	LIM domain containing preferred translocation partner in lipoma
hsa-miR-181d	1	0	0	1	1	1	ZFP30	zinc finger protein 30 homolog (mouse)
hsa-miR-181d	1	0	1	1	1	1	FAM216B	family with sequence similarity 216, member B
hsa-miR-181d	1	0	1	1	1	1	ZNF329	zinc finger protein 329
hsa-miR-181d	1	0	0	0	0	0	AAK1	AP2 associated kinase 1
hsa-miR-181d	1	0	1	1	1	1	CUL5	cullin 5
hsa-miR-181d	1	0	1	1	1	1	KIAA0528	KIAA0528
hsa-miR-181d	1	0	1	0	1	1	LIN28B	lin-28 homolog B (C. elegans)
hsa-miR-181d	1	0	1	1	1	1	MED26	mediator complex subunit 26
hsa-miR-181d	1	0	1	1	1	1	AP1AR	adaptor-related protein complex 1 associated regulatory protein
hsa-miR-181d	1	0	1	1	1	1	GMFB	glia maturation factor, beta
hsa-miR-181d	1	0	1	1	1	1	JARID2	jumonji, AT rich interactive domain 2
hsa-miR-181d	1	0	1	1	1	1	PRKAG2	protein kinase, AMP-activated, gamma 2 non-catalytic subunit
hsa-miR-181d	1	0	1	1	1	1	IPO5	importin 5
hsa-miR-181d	1	0	1	0	1	1	PDAP1	PDGFA associated protein 1
hsa-miR-181d	1	0	1	1	1	1	ZADH2	zinc binding alcohol dehydrogenase domain containing 2
hsa-miR-181d	1	0	1	0	1	1	ATM	ataxia telangiectasia mutated
hsa-miR-181d	1	0	1	1	1	1	METAP1	methionyl aminopeptidase 1
hsa-miR-181d	1	0	1	1	1	1	ADM	adrenomedullin
hsa-miR-181d	1	0	1	1	1	1	HSPA5	heat shock 70kDa protein 5 (glucose-regulated protein, 78kDa)
hsa-miR-181d	1	0	1	1	1	1	RAN	RAN, member RAS oncogene family
hsa-miR-181d	1	0	1	1	1	1	TMEM165	transmembrane protein 165
hsa-miR-181d	1	0	1	1	1	1	NR4A3	nuclear receptor subfamily 4, group A, member 3
hsa-miR-181d	1	0	1	0	1	1	ATP2B1	ATPase, Ca++ transporting, plasma membrane 1
hsa-miR-181d	1	0	1	1	1	1	PRKG1	protein kinase, cGMP-dependent, type I
hsa-miR-181d	1	0	1	1	1	1	ZNF280B	zinc finger protein 280B
hsa-miR-181d	1	0	1	1	1	1	PDIK1L	PDLIM1 interacting kinase 1 like
hsa-miR-181d	1	0	1	0	1	1	NUDT12	nudix (nucleoside diphosphate linked moiety X)-type motif 12
hsa-miR-181d	1	0	1	1	1	1	MGA	MAX gene associated
hsa-miR-181d	1	0	1	1	1	1	PODXL	podocalyxin-like
hsa-miR-181d	1	0	1	1	1	1	CRYBG3	beta-gamma crystallin domain containing 3
hsa-miR-181d	1	0	1	1	1	1	PGR	progesterone receptor
hsa-miR-181d	1	0	1	1	1	1	MAPK1IP1L	mitogen-activated protein kinase 1 interacting protein 1-like
hsa-miR-181d	1	0	1	1	1	1	COQ2	coenzyme Q2 homolog, prenyltransferase (yeast)
hsa-miR-181d	1	0	1	1	1	1	KIAA0195	KIAA0195
hsa-miR-181d	1	0	0	1	1	1	MSI1	musashi homolog 1 (Drosophila)
hsa-miR-181d	1	0	1	0	1	1	ZFHX4	zinc finger homeobox 4
hsa-miR-181d	1	0	1	0	1	1	DCBLD2	discoidin, CUB and LCCL domain containing 2
hsa-miR-181d	1	0	1	0	1	1	NMNAT2	nicotinamide nucleotide adenylyltransferase 2
hsa-miR-181d	1	0	1	1	1	1	POU2F2	POU class 2 homeobox 2
hsa-miR-181d	1	0	1	0	1	1	CCDC6	coiled-coil domain containing 6
hsa-miR-181d	1	0	0	1	1	1	WHAMM	WAS protein homolog associated with actin, golgi membranes and microtubules
hsa-miR-181d	1	0	1	1	1	1	RAB3IP	RAB3A interacting protein (rabin3)
hsa-miR-181d	1	0	1	1	0	0	IGDCC3	immunoglobulin superfamily, DCC subclass, member 3
hsa-miR-181d	1	0	1	1	1	1	TLK2	tousled-like kinase 2
hsa-miR-181d	1	0	1	1	1	1	ADAMTS6	ADAM metallopeptidase with thrombospondin type 1 motif, 6
hsa-miR-181d	1	0	1	0	1	1	UBE2W	ubiquitin-conjugating enzyme E2W (putative)
hsa-miR-181d	1	0	1	1	1	1	GATA6	GATA binding protein 6
hsa-miR-181d	1	0	1	1	1	1	C12orf68	chromosome 12 open reading frame 68
hsa-miR-181d	1	0	1	1	1	1	CCNG1	cyclin G1
hsa-miR-181d	1	0	1	0	1	1	SS18L1	synovial sarcoma translocation gene on chromosome 18-like 1
hsa-miR-181d	1	0	1	1	1	1	DUSP10	dual specificity phosphatase 10
hsa-miR-181d	1	0	1	1	0	0	PACS2	phosphofurin acidic cluster sorting protein 2
hsa-miR-181d	1	0	1	0	1	1	PCDHA11	protocadherin alpha 11
hsa-miR-181d	1	0	1	1	1	1	KLHL2	kelch-like 2, Mayven (Drosophila)
hsa-miR-181d	1	0	1	1	1	1	USP33	ubiquitin specific peptidase 33
hsa-miR-181d	1	0	1	0	1	1	IRS2	insulin receptor substrate 2
hsa-miR-181d	1	0	1	1	1	1	APLP2	amyloid beta (A4) precursor-like protein 2
hsa-miR-181d	1	0	0	1	1	1	FLT1	fms-related tyrosine kinase 1 (vascular endothelial growth factor/vascular permeability factor receptor)
hsa-miR-181d	1	0	1	1	1	1	XYLT1	xylosyltransferase I
hsa-miR-181d	1	0	1	0	1	1	SMAD2	SMAD family member 2
hsa-miR-181d	1	0	1	1	1	1	ENAH	enabled homolog (Drosophila)
hsa-miR-181d	1	0	1	1	1	1	HCN1	hyperpolarization activated cyclic nucleotide-gated potassium channel 1
hsa-miR-181d	1	0	1	1	1	1	PCDHA8	protocadherin alpha 8
hsa-miR-181d	1	0	1	1	1	1	CNKSR3	CNKSR family member 3
hsa-miR-181d	1	0	1	0	1	1	MEGF9	multiple EGF-like-domains 9
hsa-miR-181d	1	0	1	1	1	1	C7orf60	chromosome 7 open reading frame 60
hsa-miR-181d	1	0	1	0	1	1	DDX3Y	DEAD (Asp-Glu-Ala-Asp) box polypeptide 3, Y-linked
hsa-miR-181d	1	0	1	1	1	1	CDC42BPA	CDC42 binding protein kinase alpha (DMPK-like)
hsa-miR-181d	1	0	1	0	1	1	HECA	headcase homolog (Drosophila)
hsa-miR-181d	1	0	0	1	1	1	SPECC1L	sperm antigen with calponin homology and coiled-coil domains 1-like
hsa-miR-181d	1	0	1	0	0	0	ZBTB34	zinc finger and BTB domain containing 34
hsa-miR-181d	1	0	1	0	1	1	TOX	thymocyte selection-associated high mobility group box
hsa-miR-181d	1	0	0	1	1	1	TGFBRAP1	transforming growth factor, beta receptor associated protein 1
hsa-miR-181d	1	0	1	1	1	1	GAPVD1	GTPase activating protein and VPS9 domains 1
hsa-miR-181d	1	0	1	1	1	1	RNMT	RNA (guanine-7-) methyltransferase
hsa-miR-181d	1	0	1	1	1	1	CLIP1	CAP-GLY domain containing linker protein 1
hsa-miR-181d	1	0	1	1	1	1	CREBRF	CREB3 regulatory factor
hsa-miR-181d	1	0	1	0	1	1	JAZF1	JAZF zinc finger 1
hsa-miR-181d	1	0	1	1	1	1	NOVA1	neuro-oncological ventral antigen 1
hsa-miR-181d	1	0	1	1	1	1	POLA1	polymerase (DNA directed), alpha 1, catalytic subunit
hsa-miR-181d	1	0	1	0	1	1	ATP11A	ATPase, class VI, type 11A
hsa-miR-181d	1	0	1	1	1	1	AFF1	AF4/FMR2 family, member 1
hsa-miR-181d	1	0	1	1	1	1	GNG2	guanine nucleotide binding protein (G protein), gamma 2
hsa-miR-181d	1	0	1	1	1	1	ZNF562	zinc finger protein 562
hsa-miR-181d	1	0	1	1	1	1	ATP8B1	ATPase, aminophospholipid transporter, class I, type 8B, member 1
hsa-miR-181d	1	0	1	1	0	0	HAND2	heart and neural crest derivatives expressed 2
hsa-miR-181d	1	0	1	1	1	1	SLC24A3	solute carrier family 24 (sodium/potassium/calcium exchanger), member 3
hsa-miR-181d	1	0	1	0	0	0	TADA2B	transcriptional adaptor 2B
hsa-miR-181d	1	0	1	1	1	1	MOSPD1	motile sperm domain containing 1
hsa-miR-181d	1	0	1	0	1	1	LMO3	LIM domain only 3 (rhombotin-like 2)
hsa-miR-181d	1	0	1	0	1	1	ATP8A1	ATPase, aminophospholipid transporter (APLT), class I, type 8A, member 1
hsa-miR-181d	1	0	1	1	1	1	GPD2	glycerol-3-phosphate dehydrogenase 2 (mitochondrial)
hsa-miR-181d	1	0	1	1	1	1	WHSC1	Wolf-Hirschhorn syndrome candidate 1
hsa-miR-181d	1	0	1	1	1	1	DNAJA4	DnaJ (Hsp40) homolog, subfamily A, member 4
hsa-miR-181d	1	0	1	1	1	1	ATP2B3	ATPase, Ca++ transporting, plasma membrane 3
hsa-miR-181d	1	0	1	0	0	0	TNPO1	transportin 1
hsa-miR-181d	1	0	1	1	1	1	SASH1	SAM and SH3 domain containing 1
hsa-miR-181d	1	0	1	0	1	1	ARID2	AT rich interactive domain 2 (ARID, RFX-like)
hsa-miR-181d	1	0	1	1	1	1	MAPK1	mitogen-activated protein kinase 1
hsa-miR-181d	1	0	1	1	1	1	FBXO34	F-box protein 34
hsa-miR-181d	1	0	1	1	1	1	CD163	CD163 molecule
hsa-miR-181d	1	0	1	1	1	1	BAIAP2	BAI1-associated protein 2
hsa-miR-181d	1	0	1	1	1	1	RUNX1	runt-related transcription factor 1
hsa-miR-181d	1	0	1	1	1	1	MTF2	metal response element binding transcription factor 2
hsa-miR-181d	1	0	1	1	0	0	SEPT8	septin 8
hsa-miR-181d	1	0	1	1	1	1	PHACTR4	phosphatase and actin regulator 4
hsa-miR-181d	1	0	1	1	1	1	SSX2IP	synovial sarcoma, X breakpoint 2 interacting protein
hsa-miR-181d	1	0	1	1	1	1	PCDHA4	protocadherin alpha 4
hsa-miR-181d	1	0	1	1	1	1	ADAMTSL1	ADAMTS-like 1
hsa-miR-181d	1	0	1	1	1	1	MINK1	misshapen-like kinase 1
hsa-miR-181d	1	0	1	1	1	1	LIF	leukemia inhibitory factor
hsa-miR-181d	1	0	1	1	1	1	PI4K2B	phosphatidylinositol 4-kinase type 2 beta
hsa-miR-181d	1	0	1	1	1	1	MAMDC2	MAM domain containing 2
hsa-miR-181d	1	0	0	1	0	0	CARD11	caspase recruitment domain family, member 11
hsa-miR-181d	1	0	1	0	1	1	AGFG1	ArfGAP with FG repeats 1
hsa-miR-181d	1	0	1	0	0	0	RNF169	ring finger protein 169
hsa-miR-181d	1	0	1	1	0	0	TMEM131	transmembrane protein 131
hsa-miR-181d	1	0	1	0	1	1	TMEM47	transmembrane protein 47
hsa-miR-181d	1	0	1	1	0	0	ZNF594	zinc finger protein 594
hsa-miR-181d	1	0	1	0	1	1	XIAP	X-linked inhibitor of apoptosis
hsa-miR-181d	1	0	1	1	1	1	BNC2	basonuclin 2
hsa-miR-181d	1	0	1	0	0	0	NKX3-2	NK3 homeobox 2
hsa-miR-181d	1	0	1	1	1	1	ACER3	alkaline ceramidase 3
hsa-miR-181d	1	0	1	1	1	1	FOXP1	forkhead box P1
hsa-miR-181d	1	0	1	1	1	1	BRD1	bromodomain containing 1
hsa-miR-181d	1	0	1	1	1	1	UNKL	unkempt homolog (Drosophila)-like
hsa-miR-181d	1	0	1	1	0	0	RANBP3	RAN binding protein 3
hsa-miR-181d	1	0	1	1	1	1	ACSL1	acyl-CoA synthetase long-chain family member 1
hsa-miR-181d	1	0	1	0	1	1	FHDC1	FH2 domain containing 1
hsa-miR-181d	1	0	1	1	1	1	PCDHA2	protocadherin alpha 2
hsa-miR-181d	1	0	1	0	1	1	PKNOX1	PBX/knotted 1 homeobox 1
hsa-miR-181d	1	0	1	1	1	1	HEY2	hairy/enhancer-of-split related with YRPW motif 2
hsa-miR-181d	1	0	1	0	1	1	MFAP3L	microfibrillar-associated protein 3-like
hsa-miR-181d	1	0	1	0	1	1	SLC2A3	solute carrier family 2 (facilitated glucose transporter), member 3
hsa-miR-181d	1	0	1	0	1	1	RAB8B	RAB8B, member RAS oncogene family
hsa-miR-181d	1	0	1	0	1	1	ARL5A	ADP-ribosylation factor-like 5A
hsa-miR-181d	1	0	1	0	1	1	CNOT6L	CCR4-NOT transcription complex, subunit 6-like
hsa-miR-181d	1	0	1	1	1	1	PPP1R3B	protein phosphatase 1, regulatory subunit 3B
hsa-miR-181d	1	0	1	1	1	1	ZNF200	zinc finger protein 200
hsa-miR-181d	1	0	1	0	1	1	KIAA1715	KIAA1715
hsa-miR-181d	1	0	1	0	1	1	PCDHA12	protocadherin alpha 12
hsa-miR-181d	1	0	1	0	1	1	TM9SF3	transmembrane 9 superfamily member 3
hsa-miR-181d	1	0	1	1	1	1	SCHIP1	schwannomin interacting protein 1
hsa-miR-181d	1	0	1	1	1	1	ARSJ	arylsulfatase family, member J
hsa-miR-181d	1	0	1	1	1	1	TMEM71	transmembrane protein 71
hsa-miR-181d	1	0	1	1	1	1	CPNE2	copine II
hsa-miR-181d	1	0	1	0	1	1	TNRC6B	trinucleotide repeat containing 6B
hsa-miR-181d	1	0	1	1	1	1	TTBK1	tau tubulin kinase 1
hsa-miR-181d	1	0	1	1	1	1	PPFIA1	protein tyrosine phosphatase, receptor type, f polypeptide (PTPRF), interacting protein (liprin), alpha 1
hsa-miR-181d	1	0	1	1	1	1	PITPNB	phosphatidylinositol transfer protein, beta
hsa-miR-181d	1	0	1	1	1	1	HIC2	hypermethylated in cancer 2
hsa-miR-181d	1	0	1	1	1	1	EPB41	erythrocyte membrane protein band 4.1 (elliptocytosis 1, RH-linked)
hsa-miR-181d	1	0	1	1	1	1	SIX4	SIX homeobox 4
hsa-miR-181d	1	0	1	1	1	1	RCOR1	REST corepressor 1
hsa-miR-181d	1	0	1	1	1	1	BCLAF1	BCL2-associated transcription factor 1
hsa-miR-181d	1	0	1	1	1	1	SEC24C	SEC24 family, member C (S. cerevisiae)
hsa-miR-181d	1	0	1	1	1	1	PRIMA1	proline rich membrane anchor 1
hsa-miR-181d	1	0	1	1	1	1	FMR1	fragile X mental retardation 1
hsa-miR-181d	1	0	1	1	1	1	CHIC1	cysteine-rich hydrophobic domain 1
hsa-miR-181d	1	0	1	0	1	1	BTBD3	BTB (POZ) domain containing 3
hsa-miR-181d	1	0	1	0	1	1	SERTAD2	SERTA domain containing 2
hsa-miR-181d	1	0	1	0	1	1	KLHDC5	kelch domain containing 5
hsa-miR-181d	1	0	1	1	1	1	SIRT1	sirtuin 1
hsa-miR-181d	1	0	1	0	1	1	MAP4K4	mitogen-activated protein kinase kinase kinase kinase 4
hsa-miR-181d	1	0	1	1	1	1	EVI2A	ecotropic viral integration site 2A
hsa-miR-181d	1	0	1	1	1	1	ZDHHC3	zinc finger, DHHC-type containing 3
hsa-miR-181d	1	0	1	1	1	1	KCNA1	potassium voltage-gated channel, shaker-related subfamily, member 1 (episodic ataxia with myokymia)
hsa-miR-181d	1	0	1	0	1	1	PSMF1	proteasome (prosome, macropain) inhibitor subunit 1 (PI31)
hsa-miR-181d	1	0	1	1	1	1	TRRAP	transformation/transcription domain-associated protein
hsa-miR-181d	1	0	1	0	1	1	MTPN	myotrophin
hsa-miR-181d	1	0	0	1	1	1	PLEKHJ1	pleckstrin homology domain containing, family J member 1
hsa-miR-181d	1	0	1	1	0	0	MEX3A	mex-3 homolog A (C. elegans)
hsa-miR-181d	1	0	1	1	1	1	NRP1	neuropilin 1
hsa-miR-181d	1	0	1	1	1	1	ITSN1	intersectin 1 (SH3 domain protein)
hsa-miR-181d	1	0	1	0	1	1	CPEB4	cytoplasmic polyadenylation element binding protein 4
hsa-miR-181d	1	0	0	1	1	1	AK3	adenylate kinase 3
hsa-miR-181d	1	0	1	1	1	1	OGT	O-linked N-acetylglucosamine (GlcNAc) transferase
hsa-miR-181d	1	0	1	1	1	1	MBOAT2	membrane bound O-acyltransferase domain containing 2
hsa-miR-181d	1	0	1	1	1	1	AFAP1	actin filament associated protein 1
hsa-miR-181d	1	0	1	0	1	1	EIF2C4	eukaryotic translation initiation factor 2C, 4
hsa-miR-181d	1	0	1	1	1	1	METAP2	methionyl aminopeptidase 2
hsa-miR-181d	1	0	1	1	1	1	BPTF	bromodomain PHD finger transcription factor
hsa-miR-181d	1	0	1	1	1	1	RIMKLB	ribosomal modification protein rimK-like family member B
hsa-miR-181d	1	0	1	1	1	1	EML1	echinoderm microtubule associated protein like 1
hsa-miR-181d	1	0	1	1	1	1	PUM1	pumilio homolog 1 (Drosophila)
hsa-miR-181d	1	0	1	1	1	1	RFTN2	raftlin family member 2
hsa-miR-181d	1	0	1	1	1	1	HOXD1	homeobox D1
hsa-miR-181d	1	0	1	1	1	1	TARDBP	TAR DNA binding protein
hsa-miR-181d	1	0	1	1	1	1	TNS1	tensin 1
hsa-miR-181d	1	0	1	1	1	1	HOXA1	homeobox A1
hsa-miR-181d	1	0	1	1	1	1	LRP4	low density lipoprotein receptor-related protein 4
hsa-miR-181d	1	0	1	0	1	1	RAB11FIP2	RAB11 family interacting protein 2 (class I)
hsa-miR-181d	1	0	1	1	1	1	RSPO2	R-spondin 2
hsa-miR-181d	1	0	1	1	1	1	NR2C2	nuclear receptor subfamily 2, group C, member 2
hsa-miR-181d	1	0	1	0	1	1	SNN	stannin
hsa-miR-181d	1	0	1	0	1	1	LIN7C	lin-7 homolog C (C. elegans)
hsa-miR-181d	1	0	1	1	1	1	GIGYF1	GRB10 interacting GYF protein 1
hsa-miR-181d	1	0	1	1	1	1	TNFRSF11B	tumor necrosis factor receptor superfamily, member 11b
hsa-miR-181d	1	0	1	1	1	1	TMF1	TATA element modulatory factor 1
hsa-miR-181d	1	0	1	1	1	1	TMCC1	transmembrane and coiled-coil domain family 1
hsa-miR-181d	1	0	1	1	1	1	RAI1	retinoic acid induced 1
hsa-miR-181d	1	0	1	0	1	1	PCDHAC2	protocadherin alpha subfamily C, 2
hsa-miR-181d	1	0	1	1	1	1	GID4	GID complex subunit 4, VID24 homolog (S. cerevisiae)
hsa-miR-181d	1	0	1	1	1	1	SIPA1L2	signal-induced proliferation-associated 1 like 2
hsa-miR-181d	1	0	1	0	1	1	CD2AP	CD2-associated protein
hsa-miR-181d	1	0	1	1	1	1	PIP4K2B	phosphatidylinositol-5-phosphate 4-kinase, type II, beta
hsa-miR-181d	1	0	1	1	1	1	FAM126B	family with sequence similarity 126, member B
hsa-miR-181d	1	0	1	1	1	1	MARCKS	myristoylated alanine-rich protein kinase C substrate
hsa-miR-181d	1	0	1	1	1	1	PCDHA3	protocadherin alpha 3
hsa-miR-181d	1	0	1	1	1	1	KIAA2018	KIAA2018
hsa-miR-181d	1	0	1	0	1	1	ADO	2-aminoethanethiol (cysteamine) dioxygenase
hsa-miR-181d	1	0	1	1	1	1	BRWD1	bromodomain and WD repeat domain containing 1
hsa-miR-181d	1	0	1	1	1	1	ADAM11	ADAM metallopeptidase domain 11
hsa-miR-181d	1	0	1	1	1	1	TBC1D14	TBC1 domain family, member 14
hsa-miR-181d	1	0	1	1	1	1	BACH2	BTB and CNC homology 1, basic leucine zipper transcription factor 2
hsa-miR-181d	1	0	1	1	1	1	FAM120C	family with sequence similarity 120C
hsa-miR-181d	1	0	1	1	1	1	LGALSL	lectin, galactoside-binding-like
hsa-miR-181d	1	0	1	1	1	1	EPB49	erythrocyte membrane protein band 4.9 (dematin)
hsa-miR-181d	1	0	1	1	1	1	SRF	serum response factor (c-fos serum response element-binding transcription factor)
hsa-miR-181d	1	0	1	0	1	1	SEL1L	sel-1 suppressor of lin-12-like (C. elegans)
hsa-miR-181d	1	0	1	0	1	1	G3BP2	GTPase activating protein (SH3 domain) binding protein 2
hsa-miR-181d	1	0	1	0	1	1	DCAF16	DDB1 and CUL4 associated factor 16
hsa-miR-181d	1	0	1	1	0	0	YTHDF2	YTH domain family, member 2
hsa-miR-181d	1	0	1	1	1	1	ITGB8	integrin, beta 8
hsa-miR-181d	1	0	1	0	1	1	XRN1	5'-3' exoribonuclease 1
hsa-miR-181d	1	0	1	1	1	1	S1PR1	sphingosine-1-phosphate receptor 1
hsa-miR-181d	1	0	1	1	1	1	ZIC3	Zic family member 3
hsa-miR-181d	1	0	1	1	1	1	YWHAG	tyrosine 3-monooxygenase/tryptophan 5-monooxygenase activation protein, gamma polypeptide
hsa-miR-181d	1	0	1	1	0	0	CCDC64	coiled-coil domain containing 64
hsa-miR-181d	1	0	1	1	1	1	BAI3	brain-specific angiogenesis inhibitor 3
hsa-miR-181d	1	0	1	1	1	1	ZIC2	Zic family member 2
hsa-miR-181d	1	0	1	1	1	1	ITGA3	integrin, alpha 3 (antigen CD49C, alpha 3 subunit of VLA-3 receptor)
hsa-miR-181d	1	0	1	1	1	1	PHOX2B	paired-like homeobox 2b
hsa-miR-181d	1	0	1	1	1	1	CBFA2T3	core-binding factor, runt domain, alpha subunit 2; translocated to, 3
hsa-miR-181d	1	0	1	1	1	1	CREB1	cAMP responsive element binding protein 1
hsa-miR-181d	1	0	1	1	1	1	RABGAP1	RAB GTPase activating protein 1
hsa-miR-181d	1	0	1	1	1	1	RECK	reversion-inducing-cysteine-rich protein with kazal motifs
hsa-miR-181d	1	0	1	1	0	0	ELN	elastin
hsa-miR-181d	1	0	1	1	1	1	SHOC2	soc-2 suppressor of clear homolog (C. elegans)
hsa-miR-181d	1	0	1	1	1	1	MPP7	membrane protein, palmitoylated 7 (MAGUK p55 subfamily member 7)
hsa-miR-181d	1	0	1	1	1	1	TMEM64	transmembrane protein 64
hsa-miR-181d	1	0	1	1	1	1	SRSF7	serine/arginine-rich splicing factor 7
hsa-miR-181d	1	0	1	0	0	0	TRANK1	tetratricopeptide repeat and ankyrin repeat containing 1
hsa-miR-181d	1	0	1	1	1	1	ZNF655	zinc finger protein 655
hsa-miR-181d	1	0	1	0	1	1	ZC3H6	zinc finger CCCH-type containing 6
hsa-miR-181d	1	0	1	1	1	1	ZFAND5	zinc finger, AN1-type domain 5
hsa-miR-181d	1	0	1	1	1	1	NIPBL	Nipped-B homolog (Drosophila)
hsa-miR-181d	1	0	1	0	1	1	PCDHA7	protocadherin alpha 7
hsa-miR-181d	1	0	1	1	1	1	EPN2	epsin 2
hsa-miR-181d	1	0	1	1	1	1	ZBTB4	zinc finger and BTB domain containing 4
hsa-miR-181d	1	0	1	1	1	1	ECT2L	epithelial cell transforming sequence 2 oncogene-like
hsa-miR-181d	1	0	1	0	1	1	NMT1	N-myristoyltransferase 1
hsa-miR-181d	1	0	1	1	1	1	ASTN1	astrotactin 1
hsa-miR-181d	1	0	1	1	1	1	HECW2	HECT, C2 and WW domain containing E3 ubiquitin protein ligase 2
hsa-miR-181d	1	0	1	1	1	1	ZNF236	zinc finger protein 236
hsa-miR-181d	1	0	1	1	1	1	COL16A1	collagen, type XVI, alpha 1
hsa-miR-181d	1	0	1	0	1	1	MAP1B	microtubule-associated protein 1B
hsa-miR-181d	1	0	1	1	1	1	CACNA2D2	calcium channel, voltage-dependent, alpha 2/delta subunit 2
hsa-miR-181d	1	0	1	1	0	0	GDI1	GDP dissociation inhibitor 1
hsa-miR-181d	1	0	1	1	1	1	ADAMTS18	ADAM metallopeptidase with thrombospondin type 1 motif, 18
hsa-miR-181d	1	0	1	1	1	1	AGPAT1	1-acylglycerol-3-phosphate O-acyltransferase 1 (lysophosphatidic acid acyltransferase, alpha)
hsa-miR-181d	1	0	1	1	0	0	ZSWIM1	zinc finger, SWIM-type containing 1
hsa-miR-181d	1	0	1	0	1	1	KIAA1024	KIAA1024
hsa-miR-181d	1	0	1	0	1	1	CUL3	cullin 3
hsa-miR-181d	1	0	1	1	1	1	SUDS3	suppressor of defective silencing 3 homolog (S. cerevisiae)
hsa-miR-181d	1	0	1	1	0	0	UBN2	ubinuclein 2
hsa-miR-181d	1	0	1	0	1	1	USP9X	ubiquitin specific peptidase 9, X-linked
hsa-miR-181d	1	0	1	0	1	1	PCDHA13	protocadherin alpha 13
hsa-miR-181d	1	0	1	0	1	1	PTPRE	protein tyrosine phosphatase, receptor type, E
hsa-miR-181d	1	0	1	0	1	1	PLAG1	pleiomorphic adenoma gene 1
hsa-miR-181d	1	0	1	1	1	1	PAK7	p21 protein (Cdc42/Rac)-activated kinase 7
hsa-miR-181d	1	0	1	1	0	0	ZNF440	zinc finger protein 440
hsa-miR-181d	1	0	1	1	1	1	CBX4	chromobox homolog 4
hsa-miR-181d	1	0	1	0	1	1	ACVR2A	activin A receptor, type IIA
hsa-miR-181d	1	0	1	1	1	1	SLC26A9	solute carrier family 26, member 9
hsa-miR-181d	1	0	1	0	1	1	KITLG	KIT ligand
hsa-miR-181d	1	0	1	1	1	1	PHF20L1	PHD finger protein 20-like 1
hsa-miR-181d	1	0	1	0	1	1	FIGNL2	fidgetin-like 2
hsa-miR-181d	1	0	1	0	1	1	GAS7	growth arrest-specific 7
hsa-miR-181d	1	0	1	1	1	1	DYRK2	dual-specificity tyrosine-(Y)-phosphorylation regulated kinase 2
hsa-miR-181d	1	0	1	1	1	1	OTUD4	OTU domain containing 4
hsa-miR-181d	1	0	1	0	0	0	ACAN	aggrecan
hsa-miR-181d	1	0	1	0	1	1	OSBPL8	oxysterol binding protein-like 8
hsa-miR-181d	1	0	1	1	1	1	TXNDC15	thioredoxin domain containing 15
hsa-miR-181d	1	0	1	1	1	1	VAX1	ventral anterior homeobox 1
hsa-miR-181d	1	0	1	1	1	1	RASSF2	Ras association (RalGDS/AF-6) domain family member 2
hsa-miR-181d	1	0	1	1	1	1	ATXN1	ataxin 1
hsa-miR-181d	1	0	1	1	1	1	EIF4A2	eukaryotic translation initiation factor 4A2
hsa-miR-181d	1	0	1	1	1	1	SOGA2	SOGA family member 2
hsa-miR-181d	1	0	1	1	1	1	BIRC6	baculoviral IAP repeat containing 6
hsa-miR-181d	1	0	1	1	1	1	PLCXD3	phosphatidylinositol-specific phospholipase C, X domain containing 3
hsa-miR-181d	1	0	1	1	1	1	SHE	Src homology 2 domain containing E
hsa-miR-181d	1	0	1	1	1	1	PAPD5	PAP associated domain containing 5
hsa-miR-181d	1	0	1	0	1	1	PLEK	pleckstrin
hsa-miR-181d	1	0	1	1	1	1	TRIM2	tripartite motif containing 2
hsa-miR-181d	1	0	1	1	1	1	ZDHHC7	zinc finger, DHHC-type containing 7
hsa-miR-181d	1	0	1	1	1	1	ABI1	abl-interactor 1
hsa-miR-181d	1	0	1	0	1	1	KIAA0182	KIAA0182
hsa-miR-181d	1	0	1	1	1	1	UBE2B	ubiquitin-conjugating enzyme E2B
hsa-miR-181d	1	0	1	0	1	1	LAMC1	laminin, gamma 1 (formerly LAMB2)
hsa-miR-181d	1	0	1	0	1	1	NOL8	nucleolar protein 8
hsa-miR-181d	1	0	1	0	1	1	CDYL	chromodomain protein, Y-like
hsa-miR-181d	1	0	0	0	1	1	SLC9A8	solute carrier family 9, subfamily A (NHE8, cation proton antiporter 8), member 8
hsa-miR-181d	1	0	1	1	1	1	PCDHA1	protocadherin alpha 1
hsa-miR-181d	1	0	1	1	1	1	PNISR	PNN-interacting serine/arginine-rich protein
hsa-miR-181d	1	0	0	1	1	1	ZFP82	zinc finger protein 82 homolog (mouse)
hsa-miR-181d	1	0	1	1	1	1	ST8SIA4	ST8 alpha-N-acetyl-neuraminide alpha-2,8-sialyltransferase 4
hsa-miR-181d	1	0	1	1	1	1	PPAP2B	phosphatidic acid phosphatase type 2B
hsa-miR-181d	1	0	1	0	1	1	LRBA	LPS-responsive vesicle trafficking, beach and anchor containing
hsa-miR-181d	1	0	1	0	1	1	PAFAH1B1	platelet-activating factor acetylhydrolase 1b, regulatory subunit 1 (45kDa)
hsa-miR-181d	1	0	1	0	1	1	FAM46C	family with sequence similarity 46, member C
hsa-miR-181d	1	0	1	1	1	1	USP47	ubiquitin specific peptidase 47
hsa-miR-181d	1	0	1	0	1	1	PCDHA10	protocadherin alpha 10
hsa-miR-181d	1	0	1	0	1	1	NEGR1	neuronal growth regulator 1
hsa-miR-181d	1	0	1	1	1	1	SECISBP2	SECIS binding protein 2
hsa-miR-181d	1	0	1	0	1	1	MBLAC2	metallo-beta-lactamase domain containing 2
hsa-miR-181d	1	0	1	0	1	1	CEBPA	CCAAT/enhancer binding protein (C/EBP), alpha
hsa-miR-181d	1	0	1	1	0	0	RAPGEF2	Rap guanine nucleotide exchange factor (GEF) 2
hsa-miR-181d	1	0	1	1	1	1	RPS6KA3	ribosomal protein S6 kinase, 90kDa, polypeptide 3
hsa-miR-181d	1	0	1	0	1	1	TMEM196	transmembrane protein 196
hsa-miR-181d	1	0	1	0	1	1	FBXO41	F-box protein 41
hsa-miR-181d	1	0	1	1	1	1	CNTN4	contactin 4
hsa-miR-181d	1	0	1	1	0	0	SEMA4C	sema domain, immunoglobulin domain (Ig), transmembrane domain (TM) and short cytoplasmic domain, (semaphorin) 4C
hsa-miR-181d	1	0	1	1	1	1	NBEA	neurobeachin
hsa-miR-181d	1	0	1	1	1	1	RLF	rearranged L-myc fusion
hsa-miR-181d	1	0	1	1	1	1	SLC35F1	solute carrier family 35, member F1
hsa-miR-181d	1	0	1	1	1	1	ARF3	ADP-ribosylation factor 3
hsa-miR-181d	1	0	1	1	1	1	C14orf28	chromosome 14 open reading frame 28
hsa-miR-181d	1	0	1	1	1	1	ERLIN2	ER lipid raft associated 2
hsa-miR-181d	1	0	1	1	1	1	SOX5	SRY (sex determining region Y)-box 5
hsa-miR-181d	1	0	1	1	1	1	ADAMTS19	ADAM metallopeptidase with thrombospondin type 1 motif, 19
hsa-miR-181d	1	0	1	1	1	1	PKN2	protein kinase N2
hsa-miR-181d	1	0	1	1	1	1	BEND3	BEN domain containing 3
hsa-miR-181d	1	0	1	1	1	1	GRIA2	glutamate receptor, ionotropic, AMPA 2
hsa-miR-181d	1	0	1	1	1	1	COL5A1	collagen, type V, alpha 1
hsa-miR-181d	1	0	1	0	1	1	MPP5	membrane protein, palmitoylated 5 (MAGUK p55 subfamily member 5)
hsa-miR-181d	1	0	1	1	1	1	INO80	INO80 homolog (S. cerevisiae)
hsa-miR-181d	1	0	1	1	1	1	GLI2	GLI family zinc finger 2
hsa-miR-181d	1	0	1	1	1	1	HEXIM1	hexamethylene bis-acetamide inducible 1
hsa-miR-181d	1	0	1	1	1	1	EPC2	enhancer of polycomb homolog 2 (Drosophila)
hsa-miR-181d	1	0	1	1	1	1	MTF1	metal-regulatory transcription factor 1
hsa-miR-181d	1	0	1	1	1	1	NCALD	neurocalcin delta
hsa-miR-181d	1	0	1	1	1	1	WSCD2	WSC domain containing 2
hsa-miR-181d	1	0	1	1	0	0	NIPAL4	NIPA-like domain containing 4
hsa-miR-181d	1	0	1	1	1	1	RASL10B	RAS-like, family 10, member B
hsa-miR-181d	1	0	1	1	1	1	TOM1L1	target of myb1 (chicken)-like 1
hsa-miR-181d	1	0	1	1	1	1	NAA50	N(alpha)-acetyltransferase 50, NatE catalytic subunit
hsa-miR-181d	1	0	1	1	1	1	RBM47	RNA binding motif protein 47
hsa-miR-181d	1	0	1	1	1	1	PHKA1	phosphorylase kinase, alpha 1 (muscle)
hsa-miR-181d	1	0	1	1	1	1	ZNF449	zinc finger protein 449
hsa-miR-181d	1	0	1	1	1	1	PROX1	prospero homeobox 1
hsa-miR-181d	1	0	1	1	1	1	PHF15	PHD finger protein 15
hsa-miR-181d	1	0	1	0	1	1	CPD	carboxypeptidase D
hsa-miR-181d	1	0	1	1	0	0	MADD	MAP-kinase activating death domain
hsa-miR-181d	1	0	1	1	1	1	PPIP5K2	diphosphoinositol pentakisphosphate kinase 2
hsa-miR-181d	1	0	1	0	1	1	MAP3K3	mitogen-activated protein kinase kinase kinase 3
hsa-miR-181d	1	0	1	1	1	1	NPTN	neuroplastin
hsa-miR-181d	1	0	1	1	1	1	PCDHA6	protocadherin alpha 6
hsa-miR-181d	1	0	1	1	1	1	PAK4	p21 protein (Cdc42/Rac)-activated kinase 4
hsa-miR-181d	1	0	1	1	1	1	GNB4	guanine nucleotide binding protein (G protein), beta polypeptide 4
hsa-miR-181d	1	0	1	1	1	1	TBPL1	TBP-like 1
hsa-miR-181d	1	0	1	0	1	1	BLOC1S6	biogenesis of lysosomal organelles complex-1, subunit 6, pallidin
hsa-miR-181d	1	0	1	1	1	1	PDXDC1	pyridoxal-dependent decarboxylase domain containing 1
hsa-miR-181d	1	0	1	0	1	1	UHRF1BP1	UHRF1 binding protein 1
hsa-miR-181d	1	0	1	1	1	1	FKBP1A	FK506 binding protein 1A, 12kDa
hsa-miR-181d	1	0	1	1	1	1	SIK3	SIK family kinase 3
hsa-miR-181d	1	0	1	0	1	1	UBP1	upstream binding protein 1 (LBP-1a)
hsa-miR-181d	1	0	1	1	1	1	PARM1	prostate androgen-regulated mucin-like protein 1
hsa-miR-181d	1	0	1	0	1	1	CEP350	centrosomal protein 350kDa
hsa-miR-181d	1	0	1	1	1	1	PLCL2	phospholipase C-like 2
hsa-miR-181d	1	0	1	0	1	1	C7orf41	chromosome 7 open reading frame 41
hsa-miR-181d	1	0	1	1	1	1	TPD52L3	tumor protein D52-like 3
hsa-miR-181d	1	0	1	1	0	0	PKDCC	protein kinase domain containing, cytoplasmic homolog (mouse)
hsa-miR-181d	1	0	1	0	1	1	PIK3R3	phosphoinositide-3-kinase, regulatory subunit 3 (gamma)
hsa-miR-181d	1	0	1	1	1	1	LRP12	low density lipoprotein receptor-related protein 12
hsa-miR-181d	1	0	1	1	1	1	TBC1D1	TBC1 (tre-2/USP6, BUB2, cdc16) domain family, member 1
hsa-miR-181d	1	0	1	0	1	1	CREBZF	CREB/ATF bZIP transcription factor
hsa-miR-181d	1	0	1	1	1	1	MIER3	mesoderm induction early response 1, family member 3
hsa-miR-181d	1	0	1	1	1	1	RAD23B	RAD23 homolog B (S. cerevisiae)
hsa-miR-181d	1	0	1	1	1	1	XPO7	exportin 7
hsa-miR-181d	1	0	1	1	1	1	CBFA2T2	core-binding factor, runt domain, alpha subunit 2; translocated to, 2
hsa-miR-181d	1	0	1	1	1	1	SAMHD1	SAM domain and HD domain 1
hsa-miR-181d	1	0	1	0	1	1	NAB1	NGFI-A binding protein 1 (EGR1 binding protein 1)
hsa-miR-181d	1	0	1	1	1	1	TSC22D2	TSC22 domain family, member 2
hsa-miR-181d	1	0	0	1	1	1	SLC35E1	solute carrier family 35, member E1
hsa-miR-181d	1	0	0	1	0	0	PCDHB6	protocadherin beta 6
hsa-miR-181d	1	0	1	1	1	1	SPIRE1	spire homolog 1 (Drosophila)
hsa-miR-181d	1	0	1	1	1	1	RPS6KC1	ribosomal protein S6 kinase, 52kDa, polypeptide 1
hsa-miR-181d	1	0	1	1	0	0	PAX9	paired box 9
hsa-miR-181d	1	0	1	0	1	1	BMPR2	bone morphogenetic protein receptor, type II (serine/threonine kinase)
hsa-miR-181d	1	0	1	1	1	1	ST8SIA3	ST8 alpha-N-acetyl-neuraminide alpha-2,8-sialyltransferase 3
hsa-miR-181d	1	0	1	0	1	1	PCDHAC1	protocadherin alpha subfamily C, 1
hsa-miR-181d	1	0	1	0	1	1	CAMTA2	calmodulin binding transcription activator 2
hsa-miR-181d	1	0	1	1	1	1	PHLDA1	pleckstrin homology-like domain, family A, member 1
hsa-miR-181d	1	0	1	1	0	0	SRGAP1	SLIT-ROBO Rho GTPase activating protein 1
hsa-miR-181d	1	0	1	1	0	0	MMP14	matrix metallopeptidase 14 (membrane-inserted)
hsa-miR-181d	1	0	1	1	1	1	KPNA1	karyopherin alpha 1 (importin alpha 5)
hsa-miR-181d	1	0	1	1	1	1	SLC9A6	solute carrier family 9, subfamily A (NHE6, cation proton antiporter 6), member 6
hsa-miR-181d	1	0	1	0	1	1	RNF43	ring finger protein 43
hsa-miR-181d	1	0	1	0	1	1	MEST	mesoderm specific transcript homolog (mouse)
hsa-miR-181d	1	0	1	1	1	1	DDIT4	DNA-damage-inducible transcript 4
hsa-miR-181d	1	0	1	0	1	1	PJA2	praja ring finger 2, E3 ubiquitin protein ligase
hsa-miR-181d	1	0	1	1	1	1	NR6A1	nuclear receptor subfamily 6, group A, member 1
hsa-miR-181d	1	0	1	1	1	1	SLC12A5	solute carrier family 12 (potassium/chloride transporter), member 5
hsa-miR-181d	1	0	1	1	1	1	TIMP3	TIMP metallopeptidase inhibitor 3
hsa-miR-181d	1	0	1	1	1	1	CTDSPL	CTD (carboxy-terminal domain, RNA polymerase II, polypeptide A) small phosphatase-like
hsa-miR-181d	1	0	1	0	1	1	LPPR4	lipid phosphate phosphatase-related protein type 4
hsa-miR-181d	1	0	1	1	1	1	DNAJC13	DnaJ (Hsp40) homolog, subfamily C, member 13
hsa-miR-181d	1	0	1	1	1	1	ELAVL2	ELAV (embryonic lethal, abnormal vision, Drosophila)-like 2 (Hu antigen B)
hsa-miR-181d	1	0	0	1	1	1	CDX2	caudal type homeobox 2
hsa-miR-181d	1	0	1	0	1	1	AP1G1	adaptor-related protein complex 1, gamma 1 subunit
hsa-miR-181d	1	0	1	1	1	1	DLGAP2	discs, large (Drosophila) homolog-associated protein 2
hsa-miR-181d	1	0	1	1	1	1	DCLK1	doublecortin-like kinase 1
hsa-miR-181d	1	0	1	1	1	1	PPP3R1	protein phosphatase 3, regulatory subunit B, alpha
hsa-miR-181d	1	0	1	1	1	1	CYLD	cylindromatosis (turban tumor syndrome)
hsa-miR-181d	1	0	1	1	1	1	KCNH8	potassium voltage-gated channel, subfamily H (eag-related), member 8
hsa-miR-181d	1	0	1	0	0	0	HEPHL1	hephaestin-like 1
hsa-miR-181d	1	0	1	1	1	1	DAZAP2	DAZ associated protein 2
hsa-miR-181d	1	0	1	0	1	1	EDAR	ectodysplasin A receptor
hsa-miR-181d	1	0	1	0	1	1	SLC25A37	solute carrier family 25 (mitochondrial iron transporter), member 37
hsa-miR-181d	1	0	1	0	1	1	MCL1	myeloid cell leukemia sequence 1 (BCL2-related)
hsa-miR-181d	1	0	1	1	1	1	SOX6	SRY (sex determining region Y)-box 6
hsa-miR-181d	1	0	0	1	0	0	RAP1BL	RAP1B, member of RAS oncogene family pseudogene
hsa-miR-181d	1	0	1	1	1	1	IQGAP2	IQ motif containing GTPase activating protein 2
hsa-miR-181d	1	0	1	1	0	0	SLAIN2	SLAIN motif family, member 2
hsa-miR-181d	1	0	1	1	1	1	CLVS1	clavesin 1
hsa-miR-181d	1	0	1	1	1	1	DOCK7	dedicator of cytokinesis 7
hsa-miR-181d	1	0	1	1	1	1	PIAS3	protein inhibitor of activated STAT, 3
hsa-miR-181d	1	0	1	1	1	1	ATP2B2	ATPase, Ca++ transporting, plasma membrane 2
hsa-miR-181d	1	0	1	1	1	1	FAM222B	family with sequence similarity 222, member B
hsa-miR-181d	1	0	1	1	1	1	SLC7A11	solute carrier family 7 (anionic amino acid transporter light chain, xc- system), member 11
hsa-miR-181d	1	0	1	1	1	1	ATP11C	ATPase, class VI, type 11C
hsa-miR-181d	1	0	1	1	0	0	HIPK2	homeodomain interacting protein kinase 2
hsa-miR-181d	1	0	1	0	1	1	CCNL2	cyclin L2
hsa-miR-181d	1	0	1	1	0	0	FGFR3	fibroblast growth factor receptor 3
hsa-miR-181d	1	0	1	0	1	1	NCOA2	nuclear receptor coactivator 2
hsa-miR-181d	1	0	0	1	1	1	CEP135	centrosomal protein 135kDa
hsa-miR-181d	1	0	1	1	1	1	SEPT3	septin 3
hsa-miR-181d	1	0	1	1	1	1	TMEM132B	transmembrane protein 132B
hsa-miR-181d	1	0	1	0	1	1	MEGF10	multiple EGF-like-domains 10
hsa-miR-181d	1	0	1	1	1	1	CBLB	Cbl proto-oncogene, E3 ubiquitin protein ligase B
hsa-miR-181d	1	0	1	1	1	1	PDCD4	programmed cell death 4 (neoplastic transformation inhibitor)
hsa-miR-181d	1	0	1	1	1	1	PI4K2A	phosphatidylinositol 4-kinase type 2 alpha
hsa-miR-181d	1	0	0	1	0	0	SOS1	son of sevenless homolog 1 (Drosophila)
hsa-miR-181d	1	0	1	1	0	0	CECR2	cat eye syndrome chromosome region, candidate 2
hsa-miR-181d	1	0	1	1	1	1	C6orf62	chromosome 6 open reading frame 62
hsa-miR-181d	1	0	1	1	0	0	TNP1	transition protein 1 (during histone to protamine replacement)
hsa-miR-181d	1	0	1	1	1	1	CDH13	cadherin 13, H-cadherin (heart)
hsa-miR-181d	1	0	1	0	1	1	TGFBR1	transforming growth factor, beta receptor 1
hsa-miR-181d	1	0	1	1	1	1	HLF	hepatic leukemia factor
hsa-miR-181d	1	0	1	1	1	1	GLCCI1	glucocorticoid induced transcript 1
hsa-miR-181d	1	0	1	0	1	1	SLC25A25	solute carrier family 25 (mitochondrial carrier; phosphate carrier), member 25
hsa-miR-181d	1	0	1	1	1	1	SOCS3	suppressor of cytokine signaling 3
hsa-miR-181d	1	0	1	0	1	1	NUS1	nuclear undecaprenyl pyrophosphate synthase 1 homolog (S. cerevisiae)
hsa-miR-181d	1	0	1	1	0	0	PEAK1	NKF3 kinase family member
hsa-miR-181d	1	0	1	1	1	1	DPP6	dipeptidyl-peptidase 6
hsa-miR-181d	1	0	1	1	0	0	CDK8	cyclin-dependent kinase 8
hsa-miR-181d	1	0	1	1	1	1	BCL9	B-cell CLL/lymphoma 9
hsa-miR-181d	1	0	1	1	1	1	TTC39A	tetratricopeptide repeat domain 39A
hsa-miR-181d	1	0	0	1	0	0	CCDC17	coiled-coil domain containing 17
hsa-miR-181d	1	0	1	0	1	1	MOB3B	MOB kinase activator 3B
hsa-miR-181d	1	0	1	1	1	1	TBC1D4	TBC1 domain family, member 4
hsa-miR-181d	1	0	1	1	1	1	CAMK2G	calcium/calmodulin-dependent protein kinase II gamma
hsa-miR-181d	1	0	1	1	1	1	AP1S3	adaptor-related protein complex 1, sigma 3 subunit
hsa-miR-181d	1	0	1	1	1	1	TULP4	tubby like protein 4
hsa-miR-181d	1	0	1	1	1	1	BCL2L11	BCL2-like 11 (apoptosis facilitator)
hsa-miR-181d	1	0	1	1	1	1	RNF2	ring finger protein 2
hsa-miR-181d	1	0	1	1	1	1	GLIS3	GLIS family zinc finger 3
hsa-miR-181d	1	0	1	1	1	1	KLF15	Kruppel-like factor 15
hsa-miR-181d	1	0	1	0	1	1	ETV6	ets variant 6
hsa-miR-181d	1	0	1	0	1	1	C14orf43	chromosome 14 open reading frame 43
hsa-miR-181d	1	0	1	1	1	1	MFSD6	major facilitator superfamily domain containing 6
hsa-miR-181d	1	0	1	1	1	1	PRDM1	PR domain containing 1, with ZNF domain
hsa-miR-181d	1	0	1	1	1	1	ANKRD50	ankyrin repeat domain 50
hsa-miR-181d	1	0	1	1	1	1	SEMA3C	sema domain, immunoglobulin domain (Ig), short basic domain, secreted, (semaphorin) 3C
hsa-miR-181d	1	0	1	1	1	1	PPP1CB	protein phosphatase 1, catalytic subunit, beta isozyme
hsa-miR-181d	1	0	1	1	1	1	ZFP14	zinc finger protein 14 homolog (mouse)
hsa-miR-181d	1	0	1	0	1	1	OSBPL3	oxysterol binding protein-like 3
hsa-miR-181d	1	0	1	0	1	1	HOXC8	homeobox C8
hsa-miR-181d	1	0	1	1	1	1	FNBP4	formin binding protein 4
hsa-miR-181d	1	0	1	1	1	1	IPPK	inositol 1,3,4,5,6-pentakisphosphate 2-kinase
hsa-miR-181d	1	0	1	1	1	1	PDE11A	phosphodiesterase 11A
hsa-miR-181d	1	0	1	1	0	0	MAP3K10	mitogen-activated protein kinase kinase kinase 10
hsa-miR-181d	1	0	1	1	1	1	USP42	ubiquitin specific peptidase 42
hsa-miR-181d	1	0	1	0	0	0	YLPM1	YLP motif containing 1
hsa-miR-181d	1	0	1	0	1	1	YWHAB	tyrosine 3-monooxygenase/tryptophan 5-monooxygenase activation protein, beta polypeptide
hsa-miR-181d	1	0	1	1	1	1	ETNK1	ethanolamine kinase 1
hsa-miR-181d	1	0	1	1	1	1	RORB	RAR-related orphan receptor B
hsa-miR-181d	1	0	1	1	1	1	FBXO33	F-box protein 33
hsa-miR-181d	1	0	1	1	1	1	CDC27	cell division cycle 27 homolog (S. cerevisiae)
hsa-miR-181d	1	0	1	1	1	1	ZCCHC14	zinc finger, CCHC domain containing 14
hsa-miR-181d	1	0	1	1	1	1	CHD9	chromodomain helicase DNA binding protein 9
hsa-miR-181d	1	0	1	0	0	0	CDH23	cadherin-related 23
hsa-miR-181d	1	0	1	1	1	1	UBE2J1	ubiquitin-conjugating enzyme E2, J1
hsa-miR-181d	1	0	1	1	0	0	C11orf75	chromosome 11 open reading frame 75
hsa-miR-181d	1	0	1	1	1	1	PBX3	pre-B-cell leukemia homeobox 3
hsa-miR-181d	1	0	1	0	1	1	PRICKLE2	prickle homolog 2 (Drosophila)
hsa-miR-181d	1	0	1	1	0	0	UNC5A	unc-5 homolog A (C. elegans)
hsa-miR-181d	1	0	0	0	1	1	NFATC2IP	nuclear factor of activated T-cells, cytoplasmic, calcineurin-dependent 2 interacting protein
hsa-miR-181d	1	0	1	1	1	1	NOL4	nucleolar protein 4
hsa-miR-181d	1	0	1	1	1	1	SLC26A4	solute carrier family 26, member 4
hsa-miR-181d	1	0	1	1	1	1	EPB41L3	erythrocyte membrane protein band 4.1-like 3
hsa-miR-181d	1	0	0	1	1	1	HMBS	hydroxymethylbilane synthase
hsa-miR-181d	1	0	1	1	1	1	IQSEC2	IQ motif and Sec7 domain 2
hsa-miR-181d	1	0	1	0	1	1	CCNJ	cyclin J
hsa-miR-181d	1	0	0	0	0	0	FAM160A1	family with sequence similarity 160, member A1
hsa-miR-181d	1	0	1	1	0	0	EXOSC3	exosome component 3
hsa-miR-181d	1	0	1	1	1	1	ADCY9	adenylate cyclase 9
hsa-miR-181d	1	0	1	1	1	1	UBE3C	ubiquitin protein ligase E3C
hsa-miR-181d	1	0	0	1	1	1	RBAK	RB-associated KRAB zinc finger
hsa-miR-181d	1	0	1	1	1	1	TM9SF4	transmembrane 9 superfamily protein member 4
hsa-miR-181d	1	0	1	0	1	1	MYCBP	c-myc binding protein
hsa-miR-181d	1	0	1	1	1	1	GLS	glutaminase
hsa-miR-181d	1	0	1	1	1	1	ANO1	anoctamin 1, calcium activated chloride channel
hsa-miR-181d	1	0	1	1	0	0	GRIK3	glutamate receptor, ionotropic, kainate 3
hsa-miR-181d	1	0	1	1	1	1	BHLHE40	basic helix-loop-helix family, member e40
hsa-miR-181d	1	0	1	1	1	1	SETX	senataxin
hsa-miR-181d	1	0	1	1	1	1	MYCBP2	MYC binding protein 2, E3 ubiquitin protein ligase
hsa-miR-181d	1	0	1	0	1	1	ZNF800	zinc finger protein 800
hsa-miR-181d	1	0	1	0	1	1	USP9Y	ubiquitin specific peptidase 9, Y-linked
hsa-miR-181d	1	0	0	1	0	0	C1orf50	chromosome 1 open reading frame 50
hsa-miR-181d	1	0	1	1	1	1	C15orf29	chromosome 15 open reading frame 29
hsa-miR-181d	1	0	1	1	1	1	EPB41L4B	erythrocyte membrane protein band 4.1 like 4B
hsa-miR-181d	1	0	1	1	1	1	ZNF664	zinc finger protein 664
hsa-miR-181d	1	0	1	0	1	1	RNF182	ring finger protein 182
hsa-miR-181d	1	0	1	0	1	1	CBX7	chromobox homolog 7
hsa-miR-181d	1	0	1	1	1	1	KPNA4	karyopherin alpha 4 (importin alpha 3)
hsa-miR-181d	1	0	1	1	1	1	ZZZ3	zinc finger, ZZ-type containing 3
hsa-miR-181d	1	0	1	1	1	1	ATG2B	autophagy related 2B
hsa-miR-181d	1	0	1	0	1	1	THRB	thyroid hormone receptor, beta
hsa-miR-181d	1	0	1	1	1	1	TXNDC12	thioredoxin domain containing 12 (endoplasmic reticulum)
hsa-miR-181d	1	0	1	1	1	1	SF1	splicing factor 1
hsa-miR-181d	1	0	1	1	1	1	TGIF2	TGFB-induced factor homeobox 2
hsa-miR-181d	1	0	1	0	1	1	ZCCHC3	zinc finger, CCHC domain containing 3
hsa-miR-181d	1	0	1	1	1	1	PAM	peptidylglycine alpha-amidating monooxygenase
hsa-miR-181d	1	0	1	1	1	1	MTMR12	myotubularin related protein 12
hsa-miR-181d	1	0	1	1	1	1	KANK1	KN motif and ankyrin repeat domains 1
hsa-miR-181d	1	0	1	0	1	1	KLHL3	kelch-like 3 (Drosophila)
hsa-miR-181d	1	0	1	1	1	1	KCNMA1	potassium large conductance calcium-activated channel, subfamily M, alpha member 1
hsa-miR-181d	1	0	1	0	1	1	BCL2	B-cell CLL/lymphoma 2
hsa-miR-181d	1	0	1	1	1	1	TMEM242	transmembrane protein 242
hsa-miR-181d	1	0	1	1	1	1	RALBP1	ralA binding protein 1
hsa-miR-181d	1	0	1	1	1	1	ARF6	ADP-ribosylation factor 6
hsa-miR-181d	1	0	1	0	1	1	PCSK1	proprotein convertase subtilisin/kexin type 1
hsa-miR-181d	1	0	1	1	1	1	MKLN1	muskelin 1, intracellular mediator containing kelch motifs
hsa-miR-181d	1	0	1	1	1	1	ARHGEF3	Rho guanine nucleotide exchange factor (GEF) 3
hsa-miR-181d	1	0	1	1	1	1	PRDM4	PR domain containing 4
hsa-miR-181d	1	0	1	1	0	0	KHSRP	KH-type splicing regulatory protein
hsa-miR-181d	1	0	1	1	1	1	RGMA	RGM domain family, member A
hsa-miR-181d	1	0	1	1	1	1	WSB1	WD repeat and SOCS box containing 1
hsa-miR-181d	1	0	0	1	1	1	CD4	CD4 molecule
hsa-miR-181d	1	0	1	0	1	1	CAMSAP2	calmodulin regulated spectrin-associated protein family, member 2
hsa-miR-181d	1	0	1	1	1	1	AHNAK	AHNAK nucleoprotein
hsa-miR-181d	1	0	1	1	1	1	QKI	QKI, KH domain containing, RNA binding
hsa-miR-181d	1	0	1	1	1	1	FAM160A2	family with sequence similarity 160, member A2
hsa-miR-181d	1	0	1	0	1	1	BAG4	BCL2-associated athanogene 4
hsa-miR-181d	1	0	1	1	1	1	GDPD1	glycerophosphodiester phosphodiesterase domain containing 1
hsa-miR-181d	1	0	1	1	1	1	FIGN	fidgetin
hsa-miR-181d	1	0	1	1	1	1	ING5	inhibitor of growth family, member 5
hsa-miR-181d	1	0	1	1	1	1	CELSR3	cadherin, EGF LAG seven-pass G-type receptor 3 (flamingo homolog, Drosophila)
hsa-miR-181d	1	0	1	1	1	1	SACM1L	SAC1 suppressor of actin mutations 1-like (yeast)
hsa-miR-181d	1	0	1	1	1	1	FAM102A	family with sequence similarity 102, member A
hsa-miR-181d	1	0	1	0	1	1	KCMF1	potassium channel modulatory factor 1
hsa-miR-181d	1	0	1	1	1	1	ADRBK1	adrenergic, beta, receptor kinase 1
hsa-miR-181d	1	0	1	0	1	1	PKP2	plakophilin 2
hsa-miR-181d	1	0	1	1	1	1	ZNF83	zinc finger protein 83
hsa-miR-181d	1	0	1	1	0	0	ZNF527	zinc finger protein 527
hsa-miR-181d	1	0	1	1	1	1	GRM1	glutamate receptor, metabotropic 1
hsa-miR-181d	1	0	1	1	1	1	ARHGEF7	Rho guanine nucleotide exchange factor (GEF) 7
hsa-miR-181d	1	0	1	1	1	1	LBR	lamin B receptor
hsa-miR-181d	1	0	0	0	1	1	ZNF418	zinc finger protein 418
hsa-miR-181d	1	0	1	1	1	1	CHD1	chromodomain helicase DNA binding protein 1
hsa-miR-181d	1	0	1	1	1	1	MARK1	MAP/microtubule affinity-regulating kinase 1
hsa-miR-181d	1	0	1	1	1	1	MLL3	myeloid/lymphoid or mixed-lineage leukemia 3
hsa-miR-181d	1	0	1	1	0	0	LMO1	LIM domain only 1 (rhombotin 1)
hsa-miR-181d	1	0	1	1	1	1	ITGA6	integrin, alpha 6
hsa-miR-181d	1	0	1	1	1	1	DNAJB1	DnaJ (Hsp40) homolog, subfamily B, member 1
hsa-miR-181d	1	0	1	1	1	1	NMT2	N-myristoyltransferase 2
hsa-miR-181d	1	0	1	1	1	1	TCERG1	transcription elongation regulator 1
hsa-miR-181d	1	0	1	0	1	1	DNAJC21	DnaJ (Hsp40) homolog, subfamily C, member 21
hsa-miR-181d	1	0	1	0	1	1	GRB10	growth factor receptor-bound protein 10
hsa-miR-181d	1	0	1	1	1	1	TAB3	TGF-beta activated kinase 1/MAP3K7 binding protein 3
hsa-miR-181d	1	0	1	1	1	1	FAM122B	family with sequence similarity 122B
hsa-miR-181d	1	0	1	1	0	0	SEMA3B	sema domain, immunoglobulin domain (Ig), short basic domain, secreted, (semaphorin) 3B
hsa-miR-181d	1	0	1	1	1	1	RAD21	RAD21 homolog (S. pombe)
hsa-miR-181d	1	0	1	0	1	1	MSL2	male-specific lethal 2 homolog (Drosophila)
hsa-miR-181d	1	0	1	1	0	0	FBXO45	F-box protein 45
hsa-miR-181d	1	0	1	1	1	1	ABTB2	ankyrin repeat and BTB (POZ) domain containing 2
hsa-miR-181d	1	0	1	1	1	1	DUSP5	dual specificity phosphatase 5
hsa-miR-181d	1	0	1	1	0	0	KIAA1549	KIAA1549
hsa-miR-181d	1	0	1	1	1	1	CTIF	CBP80/20-dependent translation initiation factor
hsa-miR-181d	1	0	1	1	1	1	NAA15	N(alpha)-acetyltransferase 15, NatA auxiliary subunit
hsa-miR-181d	1	0	1	1	1	1	MAB21L2	mab-21-like 2 (C. elegans)
hsa-miR-181d	1	0	1	1	1	1	PHTF2	putative homeodomain transcription factor 2
hsa-miR-181d	1	0	1	1	1	1	ZFP36L1	zinc finger protein 36, C3H type-like 1
hsa-miR-181d	1	0	0	1	1	1	LPCAT1	lysophosphatidylcholine acyltransferase 1
hsa-miR-181d	1	0	1	1	1	1	LMBRD2	LMBR1 domain containing 2
hsa-miR-181d	1	0	1	1	1	1	TEAD1	TEA domain family member 1 (SV40 transcriptional enhancer factor)
hsa-miR-181d	1	0	1	1	1	1	ETS1	v-ets erythroblastosis virus E26 oncogene homolog 1 (avian)
hsa-miR-181d	1	0	1	1	1	1	ARNT2	aryl-hydrocarbon receptor nuclear translocator 2
hsa-miR-181d	1	0	1	1	1	1	YTHDC1	YTH domain containing 1
hsa-miR-181d	1	0	1	1	1	1	ZNF563	zinc finger protein 563
hsa-miR-181d	1	0	1	1	1	1	GRIK2	glutamate receptor, ionotropic, kainate 2
hsa-miR-181d	1	0	1	1	1	1	PSAP	prosaposin
hsa-miR-181d	1	0	1	1	1	1	NPTXR	neuronal pentraxin receptor
hsa-miR-181d	1	0	1	0	1	1	CDON	Cdon homolog (mouse)
hsa-miR-181d	1	0	1	1	1	1	SH2B3	SH2B adaptor protein 3
hsa-miR-181d	1	0	1	1	1	1	ROBO2	roundabout, axon guidance receptor, homolog 2 (Drosophila)
hsa-miR-181d	1	0	1	1	1	1	ENOX2	ecto-NOX disulfide-thiol exchanger 2
hsa-miR-181d	1	0	1	1	1	1	IGSF11	immunoglobulin superfamily, member 11
hsa-miR-181d	1	0	1	0	1	1	BMF	Bcl2 modifying factor
hsa-miR-181d	1	0	1	0	1	1	SCD	stearoyl-CoA desaturase (delta-9-desaturase)
hsa-miR-181d	1	0	1	1	1	1	CCNK	cyclin K
hsa-miR-181d	1	0	1	0	1	1	USP6NL	USP6 N-terminal like
hsa-miR-181d	1	0	1	1	1	1	SPTY2D1	SPT2, Suppressor of Ty, domain containing 1 (S. cerevisiae)
hsa-miR-181d	1	0	1	1	1	1	EN2	engrailed homeobox 2
hsa-miR-181d	1	0	1	0	1	1	DPY19L2	dpy-19-like 2 (C. elegans)
hsa-miR-181d	1	0	1	1	1	1	PDE10A	phosphodiesterase 10A
hsa-miR-181d	1	0	1	1	1	1	SIN3B	SIN3 transcription regulator homolog B (yeast)
hsa-miR-181d	1	0	1	1	1	1	FBXO11	F-box protein 11
hsa-miR-181d	1	0	1	0	1	1	NAALADL2	N-acetylated alpha-linked acidic dipeptidase-like 2
hsa-miR-181d	1	0	1	1	1	1	MYH10	myosin, heavy chain 10, non-muscle
hsa-miR-181d	1	0	1	1	1	1	LARP4	La ribonucleoprotein domain family, member 4
hsa-miR-181d	1	0	1	1	1	1	HYOU1	hypoxia up-regulated 1
hsa-miR-181d	1	0	1	1	1	1	LRP6	low density lipoprotein receptor-related protein 6
hsa-miR-181d	1	0	1	1	1	1	RALA	v-ral simian leukemia viral oncogene homolog A (ras related)
hsa-miR-181d	1	0	1	0	1	1	MOSPD2	motile sperm domain containing 2
hsa-miR-181d	1	0	1	1	0	0	ZNF292	zinc finger protein 292
hsa-miR-181d	1	0	1	1	1	1	ZNF618	zinc finger protein 618
hsa-miR-181d	1	0	1	1	1	1	DIP2B	DIP2 disco-interacting protein 2 homolog B (Drosophila)
hsa-miR-181d	1	0	1	0	1	1	ANKFY1	ankyrin repeat and FYVE domain containing 1
hsa-miR-181d	1	0	1	1	1	1	CASP10	caspase 10, apoptosis-related cysteine peptidase
hsa-miR-181d	1	0	1	1	1	1	KDM5A	lysine (K)-specific demethylase 5A
hsa-miR-181d	1	0	1	0	1	1	STC2	stanniocalcin 2
hsa-miR-181d	1	0	1	1	1	1	E2F7	E2F transcription factor 7
hsa-miR-181d	1	0	1	0	1	1	WDR82	WD repeat domain 82
hsa-miR-181d	1	0	1	1	1	1	NLK	nemo-like kinase
hsa-miR-181d	1	0	1	1	1	1	KIF3B	kinesin family member 3B
hsa-miR-181d	1	0	1	0	1	1	YOD1	YOD1 OTU deubiquinating enzyme 1 homolog (S. cerevisiae)
hsa-miR-181d	1	0	1	1	1	1	CCDC117	coiled-coil domain containing 117
hsa-miR-181d	1	0	1	1	1	1	MAEA	macrophage erythroblast attacher
hsa-miR-181d	1	0	1	0	1	1	PPARA	peroxisome proliferator-activated receptor alpha
hsa-miR-181d	1	0	1	1	1	1	PAWR	PRKC, apoptosis, WT1, regulator
hsa-miR-181d	1	0	1	1	1	1	PCDHA5	protocadherin alpha 5
hsa-miR-181d	1	0	1	1	1	1	LRRC32	leucine rich repeat containing 32
hsa-miR-181d	1	0	1	1	1	1	TNFAIP1	tumor necrosis factor, alpha-induced protein 1 (endothelial)
hsa-miR-181d	1	0	1	1	1	1	AFTPH	aftiphilin
hsa-miR-181d	1	0	1	0	1	1	IGF2BP3	insulin-like growth factor 2 mRNA binding protein 3
hsa-miR-181d	1	0	1	1	1	1	PLAU	plasminogen activator, urokinase
hsa-miR-181d	1	0	1	1	1	1	DLG2	discs, large homolog 2 (Drosophila)
hsa-miR-181d	1	0	1	1	1	1	ARL1	ADP-ribosylation factor-like 1
hsa-miR-181d	1	0	1	1	1	1	DEPTOR	DEP domain containing MTOR-interacting protein
hsa-miR-181d	1	0	1	0	1	1	B4GALT1	UDP-Gal:betaGlcNAc beta 1,4- galactosyltransferase, polypeptide 1
hsa-miR-181d	1	0	1	1	1	1	CA5B	carbonic anhydrase VB, mitochondrial
hsa-miR-181d	1	1	1	1	1	1	TRIM71	tripartite motif containing 71, E3 ubiquitin protein ligase
hsa-miR-181d	1	0	1	0	1	1	KIAA0664	KIAA0664
hsa-miR-181d	1	0	1	1	1	1	PKNOX2	PBX/knotted 1 homeobox 2
hsa-miR-181d	1	0	1	1	1	1	HS2ST1	heparan sulfate 2-O-sulfotransferase 1
hsa-miR-181d	1	0	1	1	1	1	DNAL1	dynein, axonemal, light chain 1
hsa-miR-181d	1	0	1	1	1	1	LUZP1	leucine zipper protein 1
hsa-miR-181d	1	0	1	1	1	1	CALCR	calcitonin receptor
hsa-miR-181d	1	0	1	1	1	1	ADAMTS5	ADAM metallopeptidase with thrombospondin type 1 motif, 5
hsa-miR-181d	1	0	1	1	1	1	PDCD6IP	programmed cell death 6 interacting protein
hsa-miR-181d	1	0	1	1	1	1	PRKCD	protein kinase C, delta
hsa-miR-181d	1	0	1	1	1	1	SENP1	SUMO1/sentrin specific peptidase 1
hsa-miR-181d	1	0	1	1	1	1	ADCY1	adenylate cyclase 1 (brain)
hsa-miR-181d	1	0	1	1	1	1	ANAPC16	anaphase promoting complex subunit 16
hsa-miR-181d	1	0	1	1	1	1	CYP26B1	cytochrome P450, family 26, subfamily B, polypeptide 1
hsa-miR-181d	1	0	1	1	1	1	KREMEN1	kringle containing transmembrane protein 1
hsa-miR-181d	1	0	1	1	1	1	GRID1	glutamate receptor, ionotropic, delta 1
hsa-miR-181d	1	0	1	0	1	1	DDX3X	DEAD (Asp-Glu-Ala-Asp) box polypeptide 3, X-linked
hsa-miR-181d	1	0	1	1	1	1	GCC2	GRIP and coiled-coil domain containing 2
hsa-miR-181d	1	0	1	1	1	1	SMAD7	SMAD family member 7
hsa-miR-181d	1	0	1	0	0	0	GPR137C	G protein-coupled receptor 137C
hsa-miR-181d	1	0	1	1	1	1	YY1	YY1 transcription factor
hsa-miR-181d	1	0	1	1	1	1	USP15	ubiquitin specific peptidase 15
hsa-miR-181d	1	0	1	1	1	1	NPEPPS	aminopeptidase puromycin sensitive
hsa-miR-181d	1	0	1	1	1	1	CAMSAP1	calmodulin regulated spectrin-associated protein 1
hsa-miR-181d	1	0	1	1	1	1	PGAP1	post-GPI attachment to proteins 1
hsa-miR-181d	1	0	1	0	1	1	SEMA4G	sema domain, immunoglobulin domain (Ig), transmembrane domain (TM) and short cytoplasmic domain, (semaphorin) 4G
hsa-miR-181d	1	0	1	1	1	1	FAM179B	family with sequence similarity 179, member B
hsa-miR-181d	1	0	1	1	1	1	PICALM	phosphatidylinositol binding clathrin assembly protein
hsa-miR-181d	1	0	1	0	1	1	CSNK1G1	casein kinase 1, gamma 1
hsa-miR-181d	1	0	1	0	1	1	CHD7	chromodomain helicase DNA binding protein 7
hsa-miR-181d	1	0	1	0	1	1	PRKCE	protein kinase C, epsilon
hsa-miR-181d	1	0	1	0	1	1	DOCK4	dedicator of cytokinesis 4
hsa-miR-181d	1	0	1	1	1	1	PTBP3	polypyrimidine tract binding protein 3
hsa-miR-181d	1	0	1	1	1	1	ZNF654	zinc finger protein 654
hsa-miR-181d	1	0	1	1	1	1	TRNP1	TMF1-regulated nuclear protein 1
hsa-miR-181d	1	0	1	1	1	1	ESR1	estrogen receptor 1
hsa-miR-181d	1	0	1	1	1	1	ZMYND11	zinc finger, MYND-type containing 11
hsa-miR-181d	1	0	1	1	1	1	ERI1	exoribonuclease 1
hsa-miR-181d	1	0	1	1	1	1	PPP2R5E	protein phosphatase 2, regulatory subunit B', epsilon isoform
hsa-miR-181d	1	0	1	1	1	1	PDGFRA	platelet-derived growth factor receptor, alpha polypeptide
hsa-miR-181d	1	0	1	1	0	0	KIAA1549L	KIAA1549-like
hsa-miR-181d	1	0	1	0	1	1	AKAP6	A kinase (PRKA) anchor protein 6
hsa-miR-181d	1	0	1	1	0	0	RASSF1	Ras association (RalGDS/AF-6) domain family member 1
hsa-miR-181d	1	0	1	1	1	1	BAZ2B	bromodomain adjacent to zinc finger domain, 2B
hsa-miR-181d	1	0	1	1	1	1	ZFAND6	zinc finger, AN1-type domain 6
hsa-miR-181d	1	0	1	1	1	1	RBM26	RNA binding motif protein 26
hsa-miR-181d	1	0	1	1	1	1	CTTNBP2NL	CTTNBP2 N-terminal like
hsa-miR-181d	1	0	1	1	1	1	GOT2	glutamic-oxaloacetic transaminase 2, mitochondrial (aspartate aminotransferase 2)
hsa-miR-181d	1	0	1	1	1	1	TRPM3	transient receptor potential cation channel, subfamily M, member 3
hsa-miR-181d	1	0	1	1	1	1	FAM3C	family with sequence similarity 3, member C
hsa-miR-181d	1	0	0	1	0	0	ZNF699	zinc finger protein 699
hsa-miR-181d	1	0	1	1	1	1	KPNB1	karyopherin (importin) beta 1
hsa-miR-181d	1	0	0	1	0	0	POM121C	POM121 transmembrane nucleoporin C
hsa-miR-181d	1	0	1	1	1	1	FAM178A	family with sequence similarity 178, member A
hsa-miR-181d	1	0	1	1	1	1	MNX1	motor neuron and pancreas homeobox 1
hsa-miR-181d	1	0	1	1	1	1	NKAIN2	Na+/K+ transporting ATPase interacting 2
hsa-miR-181d	1	0	1	1	1	1	DCN	decorin
hsa-miR-181d	1	0	1	1	1	1	ADARB1	adenosine deaminase, RNA-specific, B1
hsa-miR-181d	1	0	1	1	1	1	TNF	tumor necrosis factor
hsa-miR-181d	1	0	1	0	1	1	ACAP2	ArfGAP with coiled-coil, ankyrin repeat and PH domains 2
hsa-miR-181d	1	0	1	1	1	1	NRXN1	neurexin 1
hsa-miR-181d	1	0	1	1	1	1	ANK1	ankyrin 1, erythrocytic
hsa-miR-181d	1	0	1	0	1	1	LIN28A	lin-28 homolog A (C. elegans)
hsa-miR-181d	1	0	1	0	1	1	TMEM237	transmembrane protein 237
hsa-miR-181d	1	0	1	1	1	1	IPO8	importin 8
hsa-miR-181d	1	0	1	1	1	1	CALM1	calmodulin 1 (phosphorylase kinase, delta)
hsa-miR-181d	1	0	1	1	1	1	DEK	DEK oncogene
hsa-miR-181d	1	0	1	0	1	1	SP1	Sp1 transcription factor
hsa-miR-181d	1	0	1	1	1	1	EGR3	early growth response 3
hsa-miR-181d	1	0	1	1	1	1	ABI3BP	ABI family, member 3 (NESH) binding protein
hsa-miR-181d	1	0	1	1	1	1	TRIM3	tripartite motif containing 3
hsa-miR-181d	1	0	1	1	1	1	LMX1A	LIM homeobox transcription factor 1, alpha
hsa-miR-181d	1	0	1	0	1	1	CNTNAP2	contactin associated protein-like 2
hsa-miR-181d	1	0	1	1	1	1	LMTK2	lemur tyrosine kinase 2
hsa-miR-181d	1	0	1	1	1	1	KCNJ10	potassium inwardly-rectifying channel, subfamily J, member 10
hsa-miR-181d	1	0	1	0	1	1	MTMR9	myotubularin related protein 9
hsa-miR-181d	1	0	1	1	1	1	CHMP3	charged multivesicular body protein 3
hsa-miR-181d	1	0	1	1	1	1	KLF6	Kruppel-like factor 6
hsa-miR-181d	1	0	1	1	1	1	PDPK1	3-phosphoinositide dependent protein kinase-1
hsa-miR-181d	1	0	1	1	1	1	EPT1	ethanolaminephosphotransferase 1 (CDP-ethanolamine-specific)
hsa-miR-181d	1	0	1	1	1	1	PPM1B	protein phosphatase, Mg2+/Mn2+ dependent, 1B
hsa-miR-181d	1	0	1	1	1	1	SAMD12	sterile alpha motif domain containing 12
hsa-miR-181d	1	0	1	1	1	1	TBC1D9	TBC1 domain family, member 9 (with GRAM domain)
hsa-miR-181d	1	0	1	0	1	1	SLC19A2	solute carrier family 19 (thiamine transporter), member 2
hsa-miR-181d	1	0	1	1	1	1	PPP1R12B	protein phosphatase 1, regulatory subunit 12B
hsa-miR-181d	1	0	1	1	0	0	HCN2	hyperpolarization activated cyclic nucleotide-gated potassium channel 2
hsa-miR-181d	1	0	1	1	1	1	EGR1	early growth response 1
hsa-miR-181d	1	0	1	0	1	1	NLN	neurolysin (metallopeptidase M3 family)
hsa-miR-181d	1	0	1	1	1	1	ERF	Ets2 repressor factor
hsa-miR-181d	1	0	1	1	1	1	HOXB8	homeobox B8
hsa-miR-181d	1	0	1	0	0	0	ANKRD52	ankyrin repeat domain 52
hsa-miR-181d	1	0	1	1	1	1	ENTPD6	ectonucleoside triphosphate diphosphohydrolase 6 (putative)
hsa-miR-181d	1	0	1	0	1	1	NFAT5	nuclear factor of activated T-cells 5, tonicity-responsive
hsa-miR-181d	1	0	1	0	1	1	TBC1D2B	TBC1 domain family, member 2B
hsa-miR-181d	1	0	1	1	1	1	FNDC3A	fibronectin type III domain containing 3A
hsa-miR-181d	1	0	1	1	1	1	SIX2	SIX homeobox 2
hsa-miR-181d	1	0	1	1	1	1	ILF3	interleukin enhancer binding factor 3, 90kDa
hsa-miR-181d	1	0	1	1	1	1	CD69	CD69 molecule
hsa-miR-181d	1	0	1	1	1	1	PRRC2C	proline-rich coiled-coil 2C
hsa-miR-181d	1	0	1	1	1	1	PHACTR2	phosphatase and actin regulator 2
hsa-miR-181d	1	0	1	1	1	1	CAMKK1	calcium/calmodulin-dependent protein kinase kinase 1, alpha
hsa-miR-181d	1	0	1	1	1	1	PHF2	PHD finger protein 2
hsa-miR-181d	1	0	1	1	1	1	RNF34	ring finger protein 34, E3 ubiquitin protein ligase
hsa-miR-181d	1	0	1	1	1	1	SLITRK1	SLIT and NTRK-like family, member 1
hsa-miR-181d	1	0	1	1	1	1	BMP3	bone morphogenetic protein 3
hsa-miR-181d	1	0	1	0	1	1	TBL1X	transducin (beta)-like 1X-linked
hsa-miR-181d	1	0	1	1	1	1	MB21D2	Mab-21 domain containing 2
hsa-miR-181d	1	0	1	1	1	1	ZNF286A	zinc finger protein 286A
hsa-miR-181d	1	0	1	1	1	1	RALGAPB	Ral GTPase activating protein, beta subunit (non-catalytic)
hsa-miR-181d	1	0	1	1	1	1	INPP5A	inositol polyphosphate-5-phosphatase, 40kDa
hsa-miR-181d	1	0	1	1	1	1	MTMR10	myotubularin related protein 10
hsa-miR-181d	1	0	1	1	0	0	APOO	apolipoprotein O
hsa-miR-181d	1	0	1	0	1	1	SPRY4	sprouty homolog 4 (Drosophila)
hsa-miR-181d	1	0	1	1	1	1	PTBP2	polypyrimidine tract binding protein 2
hsa-miR-181d	1	0	1	1	1	1	SLC10A7	solute carrier family 10 (sodium/bile acid cotransporter family), member 7
hsa-miR-181d	1	0	1	0	1	1	CLASP1	cytoplasmic linker associated protein 1
hsa-miR-181d	1	0	1	0	1	1	TMX3	thioredoxin-related transmembrane protein 3
hsa-miR-181d	1	0	1	1	1	1	MBNL1	muscleblind-like splicing regulator 1
hsa-miR-181d	1	0	1	1	1	1	NSG1	neuron specific gene family member 1
hsa-miR-181d	1	0	1	1	1	1	CARM1	coactivator-associated arginine methyltransferase 1
hsa-miR-181d	1	0	1	1	1	1	ANKRD13C	ankyrin repeat domain 13C
hsa-miR-181d	1	0	1	1	1	1	RTKN2	rhotekin 2
hsa-miR-181d	1	0	1	1	1	1	MAP1A	microtubule-associated protein 1A
hsa-miR-181d	1	0	1	1	1	1	CALR	calreticulin
hsa-miR-181d	1	0	1	0	1	1	MTX3	metaxin 3
hsa-miR-181d	1	0	1	0	1	1	SEPT11	septin 11
hsa-miR-181d	1	0	1	1	1	1	PNRC2	proline-rich nuclear receptor coactivator 2
hsa-miR-181d	1	0	1	1	1	1	PTPN9	protein tyrosine phosphatase, non-receptor type 9
hsa-miR-181d	1	0	1	1	1	1	FRS2	fibroblast growth factor receptor substrate 2
hsa-miR-181d	1	0	1	1	1	1	DMXL2	Dmx-like 2
hsa-miR-181d	1	0	1	1	1	1	DERL1	derlin 1
hsa-miR-181d	1	0	1	0	0	0	TANC2	tetratricopeptide repeat, ankyrin repeat and coiled-coil containing 2
hsa-miR-181d	1	0	1	1	1	1	SRPK2	SRSF protein kinase 2
hsa-miR-181d	1	0	1	1	1	1	GALNTL1	UDP-N-acetyl-alpha-D-galactosamine:polypeptide N-acetylgalactosaminyltransferase-like 1
hsa-miR-181d	1	0	1	0	1	1	GABRA4	gamma-aminobutyric acid (GABA) A receptor, alpha 4
hsa-miR-181d	1	0	1	1	1	1	ATXN3	ataxin 3
hsa-miR-181d	1	0	1	0	1	1	GCNT2	glucosaminyl (N-acetyl) transferase 2, I-branching enzyme (I blood group)
hsa-miR-181d	1	0	1	1	1	1	PHC3	polyhomeotic homolog 3 (Drosophila)
hsa-miR-181d	1	0	1	1	1	1	PPP2R3A	protein phosphatase 2, regulatory subunit B'', alpha
hsa-miR-181d	1	0	1	0	1	1	NOTCH2	notch 2
hsa-miR-181d	1	0	1	1	1	1	ONECUT2	one cut homeobox 2
hsa-miR-181d	1	0	1	1	1	1	RBBP7	retinoblastoma binding protein 7
hsa-miR-181d	1	0	1	1	1	1	CSNK1G3	casein kinase 1, gamma 3
hsa-miR-181d	1	0	1	1	1	1	SLC18B1	solute carrier family 18, subfamily B, member 1
hsa-miR-181d	1	0	1	1	0	0	ABL2	v-abl Abelson murine leukemia viral oncogene homolog 2
hsa-miR-181d	1	0	1	1	1	1	MBOAT1	membrane bound O-acyltransferase domain containing 1
hsa-miR-181d	1	0	1	1	1	1	LPGAT1	lysophosphatidylglycerol acyltransferase 1
hsa-miR-181d	1	0	1	1	1	1	ATRNL1	attractin-like 1
hsa-miR-181d	1	0	1	0	1	1	TNS3	tensin 3
hsa-miR-181d	1	0	1	1	1	1	LRRC8D	leucine rich repeat containing 8 family, member D
hsa-miR-181d	1	0	1	1	1	1	YTHDC2	YTH domain containing 2
hsa-miR-181d	1	0	1	1	1	1	FAM73B	family with sequence similarity 73, member B
hsa-miR-181d	1	0	1	1	1	1	GRM7	glutamate receptor, metabotropic 7
hsa-miR-181d	1	0	1	1	1	1	CAPRIN2	caprin family member 2
hsa-miR-181d	1	0	1	1	1	1	CNOT1	CCR4-NOT transcription complex, subunit 1
hsa-miR-181d	1	0	1	1	1	1	EED	embryonic ectoderm development
hsa-miR-181d	1	0	1	1	1	1	C14orf129	chromosome 14 open reading frame 129
hsa-miR-181d	1	0	1	1	1	1	E2F5	E2F transcription factor 5, p130-binding
hsa-miR-181d	1	0	1	1	1	1	NEO1	neogenin 1
hsa-miR-181d	1	0	1	1	1	1	SGTB	small glutamine-rich tetratricopeptide repeat (TPR)-containing, beta
hsa-miR-181d	1	0	1	1	1	1	IL1A	interleukin 1, alpha
hsa-miR-181d	1	0	1	1	1	1	LEMD3	LEM domain containing 3
hsa-miR-181d	1	0	1	0	1	1	PURB	purine-rich element binding protein B
hsa-miR-181d	1	0	1	1	1	1	POM121	POM121 transmembrane nucleoporin
hsa-miR-181d	1	0	1	1	1	1	C2orf69	chromosome 2 open reading frame 69
hsa-miR-181d	1	0	0	1	1	1	MCC	mutated in colorectal cancers
hsa-miR-181d	1	0	1	1	1	1	RNF145	ring finger protein 145
hsa-miR-181d	1	0	1	1	1	1	QSER1	glutamine and serine rich 1
hsa-miR-181d	1	0	1	0	1	1	KIAA2022	KIAA2022
hsa-miR-181d	1	0	1	1	1	1	ATP8B2	ATPase, aminophospholipid transporter, class I, type 8B, member 2
hsa-miR-181d	1	0	1	1	1	1	PCGF2	polycomb group ring finger 2
hsa-miR-181d	1	0	1	1	1	1	LCLAT1	lysocardiolipin acyltransferase 1
hsa-miR-181d	1	0	1	1	1	1	LYRM1	LYR motif containing 1
hsa-miR-181d	1	0	1	1	1	1	ATP1B1	ATPase, Na+/K+ transporting, beta 1 polypeptide
hsa-miR-181d	1	0	1	1	1	1	MAPT	microtubule-associated protein tau
hsa-miR-181d	1	0	1	1	1	1	MTMR7	myotubularin related protein 7
hsa-miR-181d	1	0	1	1	1	1	SLC38A2	solute carrier family 38, member 2
hsa-miR-181d	1	0	1	1	1	1	FOXK1	forkhead box K1
hsa-miR-181d	1	0	1	0	1	1	TBL1XR1	transducin (beta)-like 1 X-linked receptor 1
hsa-miR-181d	1	0	1	1	1	1	TMEM9B	TMEM9 domain family, member B
hsa-miR-181d	1	0	1	1	0	0	SERPINE1	serpin peptidase inhibitor, clade E (nexin, plasminogen activator inhibitor type 1), member 1
hsa-miR-181d	1	0	1	1	1	1	ARL3	ADP-ribosylation factor-like 3
hsa-miR-181d	1	0	1	1	1	1	STIM2	stromal interaction molecule 2
hsa-miR-181d	1	0	1	1	1	1	RAP1B	RAP1B, member of RAS oncogene family
hsa-miR-181d	1	0	1	1	1	1	C11orf30	chromosome 11 open reading frame 30
hsa-miR-181d	1	0	1	0	1	1	CNR1	cannabinoid receptor 1 (brain)
hsa-miR-181d	1	0	1	1	1	1	CDKL2	cyclin-dependent kinase-like 2 (CDC2-related kinase)
hsa-miR-181d	1	0	1	1	1	1	MAGOHB	mago-nashi homolog B (Drosophila)
hsa-miR-181d	1	0	1	1	0	0	WNK1	WNK lysine deficient protein kinase 1
hsa-miR-181d	1	0	1	1	1	1	UBL3	ubiquitin-like 3
hsa-miR-181d	1	0	1	1	1	1	TMEM127	transmembrane protein 127
hsa-miR-181d	1	0	1	0	1	1	CRIM1	cysteine rich transmembrane BMP regulator 1 (chordin-like)
hsa-miR-181d	1	0	1	1	1	1	GRM5	glutamate receptor, metabotropic 5
hsa-miR-181d	1	0	1	0	1	1	TMEM132D	transmembrane protein 132D
hsa-miR-181d	1	0	1	1	1	1	GOLGA1	golgin A1
hsa-miR-181d	1	0	1	1	1	1	MBNL2	muscleblind-like splicing regulator 2
hsa-miR-181d	1	0	1	0	1	1	KLF3	Kruppel-like factor 3 (basic)
hsa-miR-181d	1	0	1	1	1	1	ATMIN	ATM interactor
hsa-miR-181d	1	0	1	1	1	1	FOS	FBJ murine osteosarcoma viral oncogene homolog
hsa-miR-181d	1	0	1	1	1	1	KIAA0247	KIAA0247
hsa-miR-181d	1	0	1	1	0	0	HS6ST1	heparan sulfate 6-O-sulfotransferase 1
hsa-miR-181d	1	0	1	0	1	1	DPYSL2	dihydropyrimidinase-like 2
hsa-miR-181d	1	0	1	0	1	1	NUFIP2	nuclear fragile X mental retardation protein interacting protein 2
hsa-miR-181d	1	0	1	1	1	1	MYO1E	myosin IE
hsa-miR-181d	1	0	1	1	1	1	SOWAHA	sosondowah ankyrin repeat domain family member A
hsa-miR-181d	1	0	1	1	1	1	TAF9B	TAF9B RNA polymerase II, TATA box binding protein (TBP)-associated factor, 31kDa
hsa-miR-181d	1	0	1	1	1	1	IGF2BP2	insulin-like growth factor 2 mRNA binding protein 2
hsa-miR-181d	1	0	1	1	1	1	LYPLA2	lysophospholipase II
hsa-miR-181d	1	0	1	1	1	1	ZIC4	Zic family member 4
hsa-miR-181d	1	0	1	1	1	1	HSP90B1	heat shock protein 90kDa beta (Grp94), member 1
hsa-miR-181d	1	0	1	0	1	1	ARHGEF37	Rho guanine nucleotide exchange factor (GEF) 37
hsa-miR-181d	1	0	1	1	1	1	ZFYVE16	zinc finger, FYVE domain containing 16
hsa-miR-181d	1	0	1	1	1	1	ABCC5	ATP-binding cassette, sub-family C (CFTR/MRP), member 5
hsa-miR-181d	1	0	1	0	1	1	PTPRT	protein tyrosine phosphatase, receptor type, T
hsa-miR-181d	1	0	1	0	1	1	KIAA0408	KIAA0408
hsa-miR-181d	1	0	1	1	1	1	NUPL1	nucleoporin like 1
hsa-miR-181d	1	0	1	0	1	1	MTSS1	metastasis suppressor 1
hsa-miR-181d	1	0	1	0	1	1	NEDD4L	neural precursor cell expressed, developmentally down-regulated 4-like, E3 ubiquitin protein ligase
hsa-miR-181d	1	0	1	1	1	1	AUTS2	autism susceptibility candidate 2
hsa-miR-181d	0	0	1	1	1	1	PDE4DIP	phosphodiesterase 4D interacting protein
hsa-miR-181d	0	0	1	0	0	0	FAM91A2	family with sequence similarity 91, member A2
hsa-miR-181d	1	0	1	1	0	0	SUSD5	sushi domain containing 5
hsa-miR-181d	0	0	1	1	0	0	ZNF862	zinc finger protein 862
hsa-miR-181d	1	0	1	1	1	1	HIPK1	homeodomain interacting protein kinase 1
hsa-miR-181d	0	0	1	1	1	1	CLUAP1	clusterin associated protein 1
hsa-miR-181d	1	0	1	1	1	1	DNM3	dynamin 3
hsa-miR-181d	1	0	1	1	1	1	ARHGEF15	Rho guanine nucleotide exchange factor (GEF) 15
hsa-miR-181d	1	0	1	1	1	1	SEMA4F	sema domain, immunoglobulin domain (Ig), transmembrane domain (TM) and short cytoplasmic domain, (semaphorin) 4F
hsa-miR-181d	1	0	1	0	0	0	DTX4	deltex homolog 4 (Drosophila)
hsa-miR-181d	1	0	1	1	1	1	CIT	citron (rho-interacting, serine/threonine kinase 21)
hsa-miR-181d	1	0	1	1	1	1	C11orf9	chromosome 11 open reading frame 9
hsa-miR-181d	0	0	1	1	0	0	FAM149B1	family with sequence similarity 149, member B1
hsa-miR-181d	1	0	1	1	1	1	PALLD	palladin, cytoskeletal associated protein
hsa-miR-181d	1	0	1	1	1	1	FOXJ3	forkhead box J3
hsa-miR-181d	1	0	1	1	0	0	KIAA1045	KIAA1045
hsa-miR-181d	0	0	1	0	0	0	ELTD1	EGF, latrophilin and seven transmembrane domain containing 1
hsa-miR-181d	1	0	1	1	1	1	SMARCAD1	SWI/SNF-related, matrix-associated actin-dependent regulator of chromatin, subfamily a, containing DEAD/H box 1
hsa-miR-181d	1	0	1	1	0	0	PPM1H	protein phosphatase, Mg2+/Mn2+ dependent, 1H
hsa-miR-181d	1	0	1	1	1	1	NDRG4	NDRG family member 4
hsa-miR-181d	1	0	1	1	1	1	ATXN7L1	ataxin 7-like 1
hsa-miR-181d	1	0	1	0	1	1	PPFIBP1	PTPRF interacting protein, binding protein 1 (liprin beta 1)
hsa-miR-181d	1	0	1	0	0	0	HEG1	HEG homolog 1 (zebrafish)
hsa-miR-181d	1	0	1	0	0	0	ODZ4	odz, odd Oz/ten-m homolog 4 (Drosophila)
hsa-miR-181d	1	0	1	1	1	1	PCDH19	protocadherin 19
hsa-miR-181d	1	0	1	1	1	1	LRRC7	leucine rich repeat containing 7
hsa-miR-181d	1	0	1	1	1	1	UPF2	UPF2 regulator of nonsense transcripts homolog (yeast)
hsa-miR-181d	1	0	1	1	1	1	FAM135A	family with sequence similarity 135, member A
hsa-miR-181d	1	0	1	1	1	1	INADL	InaD-like (Drosophila)
hsa-miR-181d	0	0	1	1	1	1	ANKRD36B	ankyrin repeat domain 36B
hsa-miR-181d	1	0	1	1	1	1	PER3	period homolog 3 (Drosophila)
hsa-miR-181d	0	0	1	0	0	0	LOC440792	proline dehydrogenase (oxidase) 1 pseudogene
hsa-miR-181d	0	0	1	0	1	1	SETD5	SET domain containing 5
hsa-miR-181d	1	0	1	1	1	1	LCOR	ligand dependent nuclear receptor corepressor
hsa-miR-181d	1	0	1	0	1	1	JPH4	junctophilin 4
hsa-miR-181d	1	0	1	1	1	1	AHCTF1	AT hook containing transcription factor 1
hsa-miR-181d	0	0	1	1	1	1	SLC11A2	solute carrier family 11 (proton-coupled divalent metal ion transporters), member 2
hsa-miR-181d	0	0	1	1	0	0	SEC16B	SEC16 homolog B (S. cerevisiae)
hsa-miR-181d	1	0	1	1	1	1	SH3TC2	SH3 domain and tetratricopeptide repeats 2
hsa-miR-181d	0	0	1	0	1	1	RASSF8	Ras association (RalGDS/AF-6) domain family (N-terminal) member 8
hsa-miR-181d	0	0	1	1	1	1	IL7	interleukin 7
hsa-miR-181d	1	0	1	1	1	1	PAN3	PAN3 poly(A) specific ribonuclease subunit homolog (S. cerevisiae)
hsa-miR-181d	0	0	1	1	0	0	SSPO	SCO-spondin homolog (Bos taurus)
hsa-miR-181d	1	0	1	0	1	1	BEND4	BEN domain containing 4
hsa-miR-181d	1	0	1	1	1	1	VLDLR	very low density lipoprotein receptor
hsa-miR-181d	0	0	1	0	1	1	ATR	ataxia telangiectasia and Rad3 related
hsa-miR-181d	1	0	1	1	1	1	PLEKHH3	pleckstrin homology domain containing, family H (with MyTH4 domain) member 3
hsa-miR-181d	0	0	1	1	1	1	NME7	NME/NM23 family member 7
hsa-miR-181d	0	0	1	1	1	1	DNM1L	dynamin 1-like
hsa-miR-181d	0	0	1	0	1	1	DCAF11	DDB1 and CUL4 associated factor 11
hsa-miR-181d	1	0	1	1	1	1	SYNCRIP	synaptotagmin binding, cytoplasmic RNA interacting protein
hsa-miR-181d	1	0	1	1	1	1	DTNA	dystrobrevin, alpha
hsa-miR-181d	0	0	1	1	1	1	DGKI	diacylglycerol kinase, iota
hsa-miR-181d	1	0	1	0	1	1	SLC6A6	solute carrier family 6 (neurotransmitter transporter, taurine), member 6
hsa-miR-181d	1	0	1	1	0	0	TSPYL2	TSPY-like 2
hsa-miR-181d	1	0	1	1	1	1	TWF1	twinfilin, actin-binding protein, homolog 1 (Drosophila)
hsa-miR-181d	1	0	1	0	1	1	CHL1	cell adhesion molecule with homology to L1CAM (close homolog of L1)
hsa-miR-181d	1	0	1	1	1	1	EPHA5	EPH receptor A5
hsa-miR-181d	1	0	1	1	1	1	AEBP2	AE binding protein 2
hsa-miR-181d	0	0	1	1	0	0	EIF4E2	eukaryotic translation initiation factor 4E family member 2
hsa-miR-181d	1	0	1	1	0	0	ARRB2	arrestin, beta 2
hsa-miR-181d	1	0	1	1	1	1	NCOA3	nuclear receptor coactivator 3
hsa-miR-181d	1	0	1	1	1	1	ZFX	zinc finger protein, X-linked
hsa-miR-181d	1	0	1	1	1	1	PHLDB2	pleckstrin homology-like domain, family B, member 2
hsa-miR-181d	0	0	1	1	1	1	PLD1	phospholipase D1, phosphatidylcholine-specific
hsa-miR-181d	0	0	1	1	1	1	SPP1	secreted phosphoprotein 1
hsa-miR-181d	1	0	1	1	1	1	APC	adenomatous polyposis coli
hsa-miR-181d	0	0	1	1	1	1	CD55	CD55 molecule, decay accelerating factor for complement (Cromer blood group)
hsa-miR-181d	1	0	1	1	1	1	MYT1L	myelin transcription factor 1-like
hsa-miR-181d	0	0	1	1	0	0	BMX	BMX non-receptor tyrosine kinase
hsa-miR-181d	0	0	1	1	1	1	CYP4F3	cytochrome P450, family 4, subfamily F, polypeptide 3
hsa-miR-181d	0	0	1	1	1	1	SLIT2	slit homolog 2 (Drosophila)
hsa-miR-181d	1	0	1	1	1	1	CTNND1	catenin (cadherin-associated protein), delta 1
hsa-miR-181d	1	0	1	1	1	1	RBBP6	retinoblastoma binding protein 6
hsa-miR-181d	1	0	1	1	1	1	TMEM159	transmembrane protein 159
hsa-miR-181d	1	0	1	1	1	1	TP63	tumor protein p63
hsa-miR-181d	1	0	1	1	1	1	AKAP9	A kinase (PRKA) anchor protein (yotiao) 9
hsa-miR-181d	0	0	1	0	0	0	ZNF880	zinc finger protein 880
hsa-miR-181d	1	0	1	1	1	1	SLMAP	sarcolemma associated protein
hsa-miR-181d	0	0	1	1	1	1	THOC7	THO complex 7 homolog (Drosophila)
hsa-miR-181d	0	0	1	1	0	0	RBM5	RNA binding motif protein 5
hsa-miR-181d	1	0	1	1	1	1	EDNRB	endothelin receptor type B
hsa-miR-181d	0	0	1	1	1	1	FAM35A	family with sequence similarity 35, member A
hsa-miR-181d	1	0	1	1	1	1	CAB39	calcium binding protein 39
hsa-miR-181d	1	0	1	1	1	1	TAOK3	TAO kinase 3
hsa-miR-181d	1	0	1	1	1	1	AASDHPPT	aminoadipate-semialdehyde dehydrogenase-phosphopantetheinyl transferase
hsa-miR-181d	0	0	1	1	0	0	ALOX12	arachidonate 12-lipoxygenase
hsa-miR-181d	0	0	1	1	0	0	ANGPTL4	angiopoietin-like 4
hsa-miR-181d	1	0	1	1	1	1	ANKRD13A	ankyrin repeat domain 13A
hsa-miR-181d	1	0	1	1	1	1	MARK3	MAP/microtubule affinity-regulating kinase 3
hsa-miR-181d	1	0	1	1	1	1	C16orf70	chromosome 16 open reading frame 70
hsa-miR-181d	0	0	1	1	0	0	SLC24A2	solute carrier family 24 (sodium/potassium/calcium exchanger), member 2
hsa-miR-181d	1	0	1	1	1	1	EDC3	enhancer of mRNA decapping 3 homolog (S. cerevisiae)
hsa-miR-181d	1	0	1	1	1	1	KCNMB2	potassium large conductance calcium-activated channel, subfamily M, beta member 2
hsa-miR-181d	1	0	1	1	1	1	NXT2	nuclear transport factor 2-like export factor 2
hsa-miR-181d	0	0	1	1	1	1	SPG21	spastic paraplegia 21 (autosomal recessive, Mast syndrome)
hsa-miR-181d	1	0	1	1	1	1	DESI2	desumoylating isopeptidase 2
hsa-miR-181d	1	0	1	1	1	1	C21orf91	chromosome 21 open reading frame 91
hsa-miR-181d	1	0	1	1	1	1	CALD1	caldesmon 1
hsa-miR-181d	0	0	1	1	1	1	DOCK10	dedicator of cytokinesis 10
hsa-miR-181d	0	0	1	1	0	0	ELMOD3	ELMO/CED-12 domain containing 3
hsa-miR-181d	1	0	1	1	1	1	ABI2	abl-interactor 2
hsa-miR-181d	0	0	1	1	1	1	CCR3	chemokine (C-C motif) receptor 3
hsa-miR-181d	1	0	1	0	1	1	PARP11	poly (ADP-ribose) polymerase family, member 11
hsa-miR-181d	0	0	1	0	1	1	ERBB2IP	erbb2 interacting protein
hsa-miR-181d	1	0	1	1	1	1	KLHL12	kelch-like 12 (Drosophila)
hsa-miR-181d	1	0	1	1	1	1	VEGFA	vascular endothelial growth factor A
hsa-miR-181d	0	0	1	0	1	1	ZNF302	zinc finger protein 302
hsa-miR-181d	1	0	1	1	1	1	CPEB1	cytoplasmic polyadenylation element binding protein 1
hsa-miR-181d	1	0	1	1	1	1	BIVM	basic, immunoglobulin-like variable motif containing
hsa-miR-181d	1	0	1	1	1	1	CALU	calumenin
hsa-miR-181d	0	0	1	1	1	1	MFSD1	major facilitator superfamily domain containing 1
hsa-miR-181d	1	0	1	1	1	1	ATAD1	ATPase family, AAA domain containing 1
hsa-miR-181d	1	0	1	0	1	1	WIPF2	WAS/WASL interacting protein family, member 2
hsa-miR-181d	0	0	1	1	1	1	PARK2	parkinson protein 2, E3 ubiquitin protein ligase (parkin)
hsa-miR-181d	0	0	1	0	1	1	ZNF268	zinc finger protein 268
hsa-miR-181d	0	0	1	1	0	0	SNRPN	small nuclear ribonucleoprotein polypeptide N
hsa-miR-181d	0	0	1	1	1	1	SPSB1	splA/ryanodine receptor domain and SOCS box containing 1
hsa-miR-181d	0	0	1	1	1	1	PSRC1	proline/serine-rich coiled-coil 1
hsa-miR-181d	1	0	1	1	1	1	ASB8	ankyrin repeat and SOCS box containing 8
hsa-miR-181d	1	0	1	1	1	1	CACNB2	calcium channel, voltage-dependent, beta 2 subunit
hsa-miR-181d	1	0	1	1	1	1	CPNE4	copine IV
hsa-miR-181d	1	0	1	1	0	0	FOXP2	forkhead box P2
hsa-miR-181d	0	0	1	1	1	1	LGI1	leucine-rich, glioma inactivated 1
hsa-miR-181d	0	0	1	1	1	1	SAMD9L	sterile alpha motif domain containing 9-like
hsa-miR-181d	0	0	1	1	1	1	SLC2A14	solute carrier family 2 (facilitated glucose transporter), member 14
hsa-miR-181d	0	0	1	1	1	1	CARD8	caspase recruitment domain family, member 8
hsa-miR-181d	1	0	1	0	1	1	ACVR1C	activin A receptor, type IC
hsa-miR-181d	0	0	1	1	1	1	BMP2K	BMP2 inducible kinase
hsa-miR-181d	0	0	1	1	0	0	SVIP	small VCP/p97-interacting protein
hsa-miR-181d	1	0	1	0	1	1	IL1RAP	interleukin 1 receptor accessory protein
hsa-miR-181d	1	0	1	1	1	1	GPR64	G protein-coupled receptor 64
hsa-miR-181d	1	0	1	1	1	1	AFF2	AF4/FMR2 family, member 2
hsa-miR-181d	1	0	1	1	1	1	PLAGL1	pleiomorphic adenoma gene-like 1
hsa-miR-181d	0	0	1	1	0	0	SERGEF	secretion regulating guanine nucleotide exchange factor
hsa-miR-181d	1	0	1	1	1	1	SUCO	SUN domain containing ossification factor
hsa-miR-181d	0	0	1	1	1	1	TCFL5	transcription factor-like 5 (basic helix-loop-helix)
hsa-miR-181d	0	0	1	1	1	1	CD1E	CD1e molecule
hsa-miR-181d	0	0	1	1	1	1	WWTR1	WW domain containing transcription regulator 1
hsa-miR-181d	1	0	1	1	1	1	NRXN3	neurexin 3
hsa-miR-181d	0	0	1	1	1	1	TRDN	triadin
hsa-miR-181d	0	0	1	1	1	1	DEPDC5	DEP domain containing 5
hsa-miR-181d	1	0	1	1	1	1	PPP1R9A	protein phosphatase 1, regulatory subunit 9A
hsa-miR-181d	0	0	1	1	1	1	ESRP1	epithelial splicing regulatory protein 1
hsa-miR-181d	0	0	1	1	0	0	ASAP3	ArfGAP with SH3 domain, ankyrin repeat and PH domain 3
hsa-miR-181d	0	0	1	1	0	0	GPRC5C	G protein-coupled receptor, family C, group 5, member C
hsa-miR-181d	1	0	1	1	1	1	AKAP2	A kinase (PRKA) anchor protein 2
hsa-miR-181d	0	0	1	0	0	0	TUG1	taurine upregulated 1 (non-protein coding)
hsa-miR-181d	0	0	1	1	1	1	BANK1	B-cell scaffold protein with ankyrin repeats 1
hsa-miR-181d	1	0	1	1	1	1	ARHGAP12	Rho GTPase activating protein 12
hsa-miR-181d	1	0	1	1	1	1	ARHGAP17	Rho GTPase activating protein 17
hsa-miR-181d	0	0	1	1	0	0	FAM64A	family with sequence similarity 64, member A
hsa-miR-181d	0	0	1	0	0	0	MCM3AP-AS1	MCM3AP antisense RNA 1
hsa-miR-181d	0	0	1	1	1	1	STOX2	storkhead box 2
hsa-miR-181d	0	0	1	1	1	1	ARAP3	ArfGAP with RhoGAP domain, ankyrin repeat and PH domain 3
hsa-miR-181d	1	0	1	1	1	1	EIF2C1	eukaryotic translation initiation factor 2C, 1
hsa-miR-181d	1	0	1	0	1	1	CLIC4	chloride intracellular channel 4
hsa-miR-181d	1	0	1	1	1	1	ARMC8	armadillo repeat containing 8
hsa-miR-181d	0	0	1	1	0	0	PARP2	poly (ADP-ribose) polymerase 2
hsa-miR-181d	0	0	1	0	0	0	C17orf72	chromosome 17 open reading frame 72
hsa-miR-181d	0	0	1	1	1	1	CCPG1	cell cycle progression 1
hsa-miR-181d	0	0	1	0	0	0	SOX2-OT	SOX2 overlapping transcript (non-protein coding)
hsa-miR-181d	1	0	1	1	1	1	S100PBP	S100P binding protein
hsa-miR-181d	0	0	1	1	1	1	LRRN1	leucine rich repeat neuronal 1
hsa-miR-181d	0	0	1	0	0	0	LOC284561	uncharacterized LOC284561
hsa-miR-181d	0	0	1	0	0	0	LOC286059	tumor necrosis factor receptor superfamily, member 10d, decoy with truncated death domain pseudogene
hsa-miR-181d	1	0	1	1	1	1	FAM131A	family with sequence similarity 131, member A
hsa-miR-181d	0	0	1	1	1	1	GGNBP2	gametogenetin binding protein 2
hsa-miR-181d	0	0	1	0	0	0	FLJ21408	uncharacterized LOC400512
hsa-miR-181d	0	0	1	1	1	1	CNOT8	CCR4-NOT transcription complex, subunit 8
hsa-miR-181d	1	0	1	1	1	1	DLC1	deleted in liver cancer 1
hsa-miR-181d	1	0	1	1	1	1	ARFGEF1	ADP-ribosylation factor guanine nucleotide-exchange factor 1 (brefeldin A-inhibited)
hsa-miR-181d	1	0	1	1	1	1	NAA30	N(alpha)-acetyltransferase 30, NatC catalytic subunit
hsa-miR-181d	0	0	1	0	1	1	HEMK1	HemK methyltransferase family member 1
hsa-miR-181d	0	0	1	0	1	1	FLJ22763	uncharacterized LOC401081
hsa-miR-181d	1	0	1	1	0	0	MAGI3	membrane associated guanylate kinase, WW and PDZ domain containing 3
hsa-miR-181d	1	0	1	1	0	0	UBXN7	UBX domain protein 7
hsa-miR-181d	0	0	1	1	1	1	GTF2H1	general transcription factor IIH, polypeptide 1, 62kDa
hsa-miR-181d	0	0	1	1	1	1	MINA	MYC induced nuclear antigen
hsa-miR-181d	1	0	1	1	1	1	FAM53C	family with sequence similarity 53, member C
hsa-miR-181d	0	0	1	1	0	0	FAM48A	family with sequence similarity 48, member A
hsa-miR-181d	0	0	1	1	1	1	UNC80	unc-80 homolog (C. elegans)
hsa-miR-181d	0	0	1	1	0	0	ZNF252P	zinc finger protein 252, pseudogene
hsa-miR-181d	0	0	1	0	0	0	NBLA00301	Nbla00301
hsa-miR-181d	1	0	1	1	1	1	SLAIN1	SLAIN motif family, member 1
hsa-miR-181d	1	0	1	0	1	1	ZKSCAN1	zinc finger with KRAB and SCAN domains 1
hsa-miR-181d	0	0	1	1	1	1	RAB37	RAB37, member RAS oncogene family
hsa-miR-181d	0	0	1	0	0	0	LOC254559	uncharacterized LOC254559
hsa-miR-181d	1	0	1	1	1	1	MBD5	methyl-CpG binding domain protein 5
hsa-miR-181d	0	0	1	1	1	1	FBXO5	F-box protein 5
hsa-miR-181d	1	0	1	1	1	1	PDLIM2	PDZ and LIM domain 2 (mystique)
hsa-miR-181d	0	0	1	1	1	1	GLYATL1	glycine-N-acyltransferase-like 1
hsa-miR-181d	1	0	1	1	1	1	DIXDC1	DIX domain containing 1
hsa-miR-181d	1	0	1	1	1	1	MAP3K7	mitogen-activated protein kinase kinase kinase 7
hsa-miR-181d	1	0	1	0	1	1	RAB1A	RAB1A, member RAS oncogene family
hsa-miR-181d	0	0	1	1	0	0	ANXA11	annexin A11
hsa-miR-181d	0	0	1	0	0	0	RMST	rhabdomyosarcoma 2 associated transcript (non-protein coding)
hsa-miR-181d	0	0	1	0	1	1	FAM70A	family with sequence similarity 70, member A
hsa-miR-181d	1	0	1	1	1	1	CLCN5	chloride channel, voltage-sensitive 5
hsa-miR-181d	1	0	1	1	1	1	SORBS2	sorbin and SH3 domain containing 2
hsa-miR-181d	0	0	1	0	0	0	LOC255187	hCG1980447
hsa-miR-181d	0	0	1	0	0	0	MAGI1-IT1	MAGI1 intronic transcript 1 (non-protein coding)
hsa-miR-181d	0	0	1	0	0	0	PLCD4	phospholipase C, delta 4
hsa-miR-181d	0	0	1	0	0	0	TUBA3FP	tubulin, alpha 3f, pseudogene
hsa-miR-181d	0	0	1	0	0	0	LOC147004	uncharacterized LOC147004
hsa-miR-181d	1	0	1	0	1	1	PLEKHA1	pleckstrin homology domain containing, family A (phosphoinositide binding specific) member 1
hsa-miR-181d	1	0	1	1	1	1	SEC22A	SEC22 vesicle trafficking protein homolog A (S. cerevisiae)
hsa-miR-181d	0	0	1	0	1	1	CHURC1	churchill domain containing 1
hsa-miR-181d	0	0	1	0	0	0	LOC285074	anaphase promoting complex subunit 1 pseudogene
hsa-miR-181d	0	0	1	0	0	0	UBE2QL1	ubiquitin-conjugating enzyme E2Q family-like 1
hsa-miR-181d	0	0	1	1	1	1	ZBTB26	zinc finger and BTB domain containing 26
hsa-miR-181d	1	0	1	1	1	1	C6orf89	chromosome 6 open reading frame 89
hsa-miR-181d	0	0	1	0	1	1	UHMK1	U2AF homology motif (UHM) kinase 1
hsa-miR-181d	1	0	1	1	1	1	TBCK	TBC1 domain containing kinase
hsa-miR-181d	0	0	1	1	1	1	HDAC8	histone deacetylase 8
hsa-miR-181d	0	0	1	1	1	1	PDZRN3	PDZ domain containing ring finger 3
hsa-miR-181d	1	0	1	1	1	1	CNOT4	CCR4-NOT transcription complex, subunit 4
hsa-miR-181d	0	0	1	0	0	0	VPS33B	vacuolar protein sorting 33 homolog B (yeast)
hsa-miR-181d	1	0	1	1	1	1	UBAP1	ubiquitin associated protein 1
hsa-miR-181d	0	0	1	1	1	1	ITGBL1	integrin, beta-like 1 (with EGF-like repeat domains)
hsa-miR-181d	1	0	1	1	1	1	PIP4K2C	phosphatidylinositol-5-phosphate 4-kinase, type II, gamma
hsa-miR-181d	1	0	1	1	1	1	WDR20	WD repeat domain 20
hsa-miR-181d	0	0	1	0	0	0	LOC152225	uncharacterized LOC152225
hsa-miR-181d	0	0	1	1	1	1	STBD1	starch binding domain 1
hsa-miR-181d	0	0	1	1	1	1	BBS9	Bardet-Biedl syndrome 9
hsa-miR-181d	1	0	1	1	1	1	FRY	furry homolog (Drosophila)
hsa-miR-181d	1	0	1	1	1	1	AMMECR1	Alport syndrome, mental retardation, midface hypoplasia and elliptocytosis chromosomal region gene 1
hsa-miR-181d	0	0	1	0	0	0	LOC440910	uncharacterized LOC440910
hsa-miR-181d	1	0	1	1	1	1	FBXW2	F-box and WD repeat domain containing 2
hsa-miR-181d	0	0	1	1	1	1	SP100	SP100 nuclear antigen
hsa-miR-181d	1	0	1	0	1	1	RNF114	ring finger protein 114
hsa-miR-181d	0	0	1	1	1	1	NRCAM	neuronal cell adhesion molecule
hsa-miR-181d	0	0	1	0	0	0	IDO2	indoleamine 2,3-dioxygenase 2
hsa-miR-181d	0	0	1	1	1	1	STAMBPL1	STAM binding protein-like 1
hsa-miR-181d	1	0	1	1	1	1	GCFC1	GC-rich sequence DNA-binding factor 1
hsa-miR-181d	0	0	1	1	1	1	AP5S1	adaptor-related protein complex 5, sigma 1 subunit
hsa-miR-181d	0	0	1	0	0	0	LOC283887	uncharacterized LOC283887
hsa-miR-181d	1	0	1	1	0	0	PRMT8	protein arginine methyltransferase 8
hsa-miR-181d	0	0	1	1	1	1	TGFBI	transforming growth factor, beta-induced, 68kDa
hsa-miR-181d	0	0	1	1	1	1	CYP11B1	cytochrome P450, family 11, subfamily B, polypeptide 1
hsa-miR-181d	0	0	1	0	0	0	CXXC1P1	CXXC finger protein 1 pseudogene 1
hsa-miR-181d	0	0	1	1	0	0	ORC3	origin recognition complex, subunit 3
hsa-miR-181d	1	0	1	1	1	1	CTNNA1	catenin (cadherin-associated protein), alpha 1, 102kDa
hsa-miR-181d	1	0	1	1	1	1	MAP3K12	mitogen-activated protein kinase kinase kinase 12
hsa-miR-181d	1	0	1	1	1	1	RCN1	reticulocalbin 1, EF-hand calcium binding domain
hsa-miR-181d	0	0	1	1	1	1	SPOCK1	sparc/osteonectin, cwcv and kazal-like domains proteoglycan (testican) 1
hsa-miR-181d	0	0	1	1	1	1	ACTR8	ARP8 actin-related protein 8 homolog (yeast)
hsa-miR-181d	1	0	1	1	1	1	SNAP25	synaptosomal-associated protein, 25kDa
hsa-miR-181d	0	0	1	0	0	0	ZNF806	zinc finger protein 806
hsa-miR-181d	0	0	1	1	1	1	RBM25	RNA binding motif protein 25
hsa-miR-181d	0	0	1	0	0	0	LOC285500	uncharacterized LOC285500
hsa-miR-181d	0	0	1	1	0	0	DPAGT1	dolichyl-phosphate (UDP-N-acetylglucosamine) N-acetylglucosaminephosphotransferase 1 (GlcNAc-1-P transferase)
hsa-miR-181d	0	0	1	1	0	0	ZNF185	zinc finger protein 185 (LIM domain)
hsa-miR-181d	1	0	1	1	1	1	ATXN10	ataxin 10
hsa-miR-181d	1	0	1	1	1	1	SPATS2	spermatogenesis associated, serine-rich 2
hsa-miR-181d	1	0	1	1	1	1	ZC3H11A	zinc finger CCCH-type containing 11A
hsa-miR-181d	0	0	1	1	0	0	MAP7D1	MAP7 domain containing 1
hsa-miR-181d	0	0	1	1	0	0	C11orf74	chromosome 11 open reading frame 74
hsa-miR-181d	0	0	1	1	1	1	CDKN2AIP	CDKN2A interacting protein
hsa-miR-181d	0	0	1	1	0	0	RPN2	ribophorin II
hsa-miR-181d	0	0	1	0	0	0	ZNF815P	zinc finger protein 815, pseudogene
hsa-miR-181d	0	0	1	0	0	0	FAM66C	family with sequence similarity 66, member C
hsa-miR-181d	0	0	1	0	0	0	OTUD1	OTU domain containing 1
hsa-miR-181d	0	0	1	0	1	1	FLJ39080	uncharacterized LOC441355
hsa-miR-181d	0	0	1	1	1	1	ZNF673	zinc finger family member 673
hsa-miR-181d	1	0	1	1	1	1	LRP8	low density lipoprotein receptor-related protein 8, apolipoprotein e receptor
hsa-miR-181d	0	0	1	0	0	0	ZNF300P1	zinc finger protein 300 pseudogene 1
hsa-miR-181d	1	0	1	0	1	1	KBTBD8	kelch repeat and BTB (POZ) domain containing 8
hsa-miR-181d	1	0	1	1	1	1	CCDC141	coiled-coil domain containing 141
hsa-miR-181d	0	0	1	1	1	1	GBAS	glioblastoma amplified sequence
hsa-miR-181d	0	0	1	1	0	0	NMRK1	nicotinamide riboside kinase 1
hsa-miR-181d	0	0	1	1	0	0	PRKRIP1	PRKR interacting protein 1 (IL11 inducible)
hsa-miR-181d	1	0	1	1	1	1	KL	klotho
hsa-miR-181d	0	0	1	1	0	0	LAS1L	LAS1-like (S. cerevisiae)
hsa-miR-181d	0	0	1	1	1	1	NEIL2	nei endonuclease VIII-like 2 (E. coli)
hsa-miR-181d	1	0	1	1	1	1	GOLGA8B	golgin A8 family, member B
hsa-miR-181d	0	0	1	1	1	1	CBWD5	COBW domain containing 5
hsa-miR-181d	0	0	1	1	1	1	PRSS16	protease, serine, 16 (thymus)
hsa-miR-181d	1	0	1	1	1	1	GATM	glycine amidinotransferase (L-arginine:glycine amidinotransferase)
hsa-miR-181d	0	0	1	1	0	0	ZNF283	zinc finger protein 283
hsa-miR-181d	0	0	1	1	1	1	RP1	retinitis pigmentosa 1 (autosomal dominant)
hsa-miR-181d	0	0	1	0	0	0	LOC100130954	uncharacterized LOC100130954
hsa-miR-181d	0	0	1	0	0	0	LOC338579	ankyrin repeat domain-containing protein 30B pseudogene
hsa-miR-181d	0	0	1	0	1	1	MYLK4	myosin light chain kinase family, member 4
hsa-miR-181d	1	0	1	0	1	1	UNC5D	unc-5 homolog D (C. elegans)
hsa-miR-181d	1	0	1	1	1	1	NAP1L1	nucleosome assembly protein 1-like 1
hsa-miR-181d	1	0	1	1	1	1	GLUD1	glutamate dehydrogenase 1
hsa-miR-181d	0	0	1	1	1	1	HMGCL	3-hydroxymethyl-3-methylglutaryl-CoA lyase
hsa-miR-181d	0	0	1	1	1	1	WDR64	WD repeat domain 64
hsa-miR-181d	0	0	1	1	0	0	CFP	complement factor properdin
hsa-miR-181d	1	0	1	1	1	1	ABHD6	abhydrolase domain containing 6
hsa-miR-181d	0	0	1	0	1	1	PATE4	prostate and testis expressed 4
hsa-miR-181d	0	0	1	0	0	0	MORN2	MORN repeat containing 2
hsa-miR-181d	0	0	1	0	0	0	LGALS17A	Charcot-Leyden crystal protein pseudogene
hsa-miR-181d	0	0	1	0	0	0	TMPRSS11BNL	TMPRSS11B N terminal-like
hsa-miR-181d	1	0	1	1	1	1	ADAMTS8	ADAM metallopeptidase with thrombospondin type 1 motif, 8
hsa-miR-181d	0	0	1	1	0	0	C16orf86	chromosome 16 open reading frame 86
hsa-miR-181d	1	0	1	1	1	1	SFR1	SWI5-dependent recombination repair 1
hsa-miR-181d	1	0	1	1	1	1	SH2D4B	SH2 domain containing 4B
hsa-miR-181d	0	0	1	0	0	0	LOC100133029	sirtuin 5 pseudogene
hsa-miR-181d	1	0	1	1	1	1	SMAP1	small ArfGAP 1
hsa-miR-181d	1	0	1	1	1	1	NECAB3	N-terminal EF-hand calcium binding protein 3
hsa-miR-181d	0	0	1	0	0	0	FAM47E	family with sequence similarity 47, member E
hsa-miR-181d	1	0	1	1	1	1	SGIP1	SH3-domain GRB2-like (endophilin) interacting protein 1
hsa-miR-181d	1	0	1	1	0	0	GXYLT1	glucoside xylosyltransferase 1
hsa-miR-181d	0	0	1	1	1	1	MKX	mohawk homeobox
hsa-miR-181d	1	0	1	1	1	1	SACS	spastic ataxia of Charlevoix-Saguenay (sacsin)
hsa-miR-181d	0	0	1	0	0	0	FAM95B1	family with sequence similarity 95, member B1
hsa-miR-181d	1	0	1	1	0	0	CCDC92	coiled-coil domain containing 92
hsa-miR-181d	0	0	1	1	1	1	RBM46	RNA binding motif protein 46
hsa-miR-181d	1	0	1	1	1	1	TP53INP1	tumor protein p53 inducible nuclear protein 1
hsa-miR-181d	0	0	1	1	0	0	C20orf141	chromosome 20 open reading frame 141
hsa-miR-181d	1	0	1	1	0	0	ATXN7L3	ataxin 7-like 3
hsa-miR-181d	0	0	1	0	1	1	LOC388942	uncharacterized LOC388942
hsa-miR-181d	0	0	1	1	1	1	RHPN2	rhophilin, Rho GTPase binding protein 2
hsa-miR-181d	0	0	1	1	0	0	TMEM151B	transmembrane protein 151B
hsa-miR-181d	0	0	1	1	1	1	SPICE1	spindle and centriole associated protein 1
hsa-miR-181d	0	0	1	1	1	1	SZT2	seizure threshold 2 homolog (mouse)
hsa-miR-181d	1	0	1	1	0	0	SNX30	sorting nexin family member 30
hsa-miR-181d	1	0	1	1	1	1	MKRN1	makorin ring finger protein 1
hsa-miR-181d	0	0	1	1	0	0	FAM54B	family with sequence similarity 54, member B
hsa-miR-181d	1	0	1	1	1	1	CTNNA2	catenin (cadherin-associated protein), alpha 2
hsa-miR-181d	0	0	1	0	1	1	NPHP4	nephronophthisis 4
hsa-miR-181d	0	0	1	1	1	1	PDIA6	protein disulfide isomerase family A, member 6
hsa-miR-181d	0	0	1	0	0	0	LOC285812	uncharacterized LOC285812
hsa-miR-181d	0	0	1	0	0	0	LOC100128262	uncharacterized LOC100128262
hsa-miR-181d	1	0	1	1	1	1	EYA1	eyes absent homolog 1 (Drosophila)
hsa-miR-181d	1	0	1	0	1	1	FNDC3B	fibronectin type III domain containing 3B
hsa-miR-181d	0	0	1	1	0	0	AADACL3	arylacetamide deacetylase-like 3
hsa-miR-181d	0	0	1	0	0	0	ERVFRD-2	endogenous retrovirus group FRD, member 2
hsa-miR-181d	0	0	1	0	0	0	LRRC9	leucine rich repeat containing 9
hsa-miR-181d	0	0	1	1	0	0	TRIM46	tripartite motif containing 46
hsa-miR-181d	0	0	1	0	0	0	EP400NL	EP400 N-terminal like
hsa-miR-181d	1	0	1	0	1	1	ZZEF1	zinc finger, ZZ-type with EF-hand domain 1
hsa-miR-181d	0	0	1	1	1	1	MON1B	MON1 homolog B (yeast)
hsa-miR-181d	1	0	1	1	1	1	BCR	breakpoint cluster region
hsa-miR-181d	1	0	1	1	1	1	DSE	dermatan sulfate epimerase
hsa-miR-181d	0	0	1	1	1	1	RAB13	RAB13, member RAS oncogene family
hsa-miR-181d	0	0	1	1	1	1	SHROOM3	shroom family member 3
hsa-miR-181d	0	0	1	0	0	0	LOC100129940	uncharacterized LOC100129940
hsa-miR-181d	1	0	1	0	1	1	CYB561D1	cytochrome b-561 domain containing 1
hsa-miR-181d	0	0	1	1	1	1	ADAM32	ADAM metallopeptidase domain 32
hsa-miR-181d	0	0	1	1	0	0	ACSM2B	acyl-CoA synthetase medium-chain family member 2B
hsa-miR-181d	1	0	1	1	1	1	CEP97	centrosomal protein 97kDa
hsa-miR-181d	0	0	1	1	0	0	HEATR8	HEAT repeat containing 8
hsa-miR-181d	1	0	1	0	1	1	ESRRG	estrogen-related receptor gamma
hsa-miR-181d	1	0	1	0	1	1	FMNL2	formin-like 2
hsa-miR-181d	1	0	1	1	1	1	WTAP	Wilms tumor 1 associated protein
hsa-miR-181d	0	0	1	1	1	1	RNF19B	ring finger protein 19B
hsa-miR-181d	0	0	1	1	0	0	ZNF730	zinc finger protein 730
hsa-miR-181d	1	0	1	1	1	1	MAP2K4	mitogen-activated protein kinase kinase 4
hsa-miR-181d	1	0	1	0	1	1	ZNF607	zinc finger protein 607
hsa-miR-181d	0	0	1	1	1	1	PHF12	PHD finger protein 12
hsa-miR-181d	0	0	1	0	0	0	AGAP9	ArfGAP with GTPase domain, ankyrin repeat and PH domain 9
hsa-miR-181d	1	0	1	1	1	1	TAP2	transporter 2, ATP-binding cassette, sub-family B (MDR/TAP)
hsa-miR-181d	1	0	1	0	1	1	TMEM106B	transmembrane protein 106B
hsa-miR-181d	0	0	1	1	1	1	ARID1A	AT rich interactive domain 1A (SWI-like)
hsa-miR-181d	0	0	1	1	1	1	CASP1	caspase 1, apoptosis-related cysteine peptidase
hsa-miR-181d	1	0	1	1	0	0	ATP13A3	ATPase type 13A3
hsa-miR-181d	0	0	1	1	0	0	FERMT1	fermitin family member 1
hsa-miR-181d	1	0	1	1	1	1	MEAF6	MYST/Esa1-associated factor 6
hsa-miR-181d	0	0	1	1	0	0	HSPB11	heat shock protein family B (small), member 11
hsa-miR-181d	0	0	1	1	0	0	NEK7	NIMA (never in mitosis gene a)-related kinase 7
hsa-miR-181d	1	0	1	1	1	1	RIF1	RAP1 interacting factor homolog (yeast)
hsa-miR-181d	0	0	1	0	0	0	ANKRD34C	ankyrin repeat domain 34C
hsa-miR-181d	0	0	1	0	0	0	POM121L9P	POM121 transmembrane nucleoporin-like 9, pseudogene
hsa-miR-181d	1	0	1	1	1	1	TAB2	TGF-beta activated kinase 1/MAP3K7 binding protein 2
hsa-miR-181d	0	0	1	1	1	1	ARIH1	ariadne homolog, ubiquitin-conjugating enzyme E2 binding protein, 1 (Drosophila)
hsa-miR-181d	0	0	1	1	1	1	ZNF280D	zinc finger protein 280D
hsa-miR-181d	1	0	1	0	1	1	DNAJC5	DnaJ (Hsp40) homolog, subfamily C, member 5
hsa-miR-181d	1	0	1	1	1	1	GOLGA8A	golgin A8 family, member A
hsa-miR-181d	1	0	1	0	1	1	GPR85	G protein-coupled receptor 85
hsa-miR-181d	1	0	1	1	1	1	GPBP1	GC-rich promoter binding protein 1
hsa-miR-181d	0	0	1	1	0	0	DOPEY1	dopey family member 1
hsa-miR-181d	0	0	1	1	1	1	SLC30A10	solute carrier family 30, member 10
hsa-miR-181d	0	0	1	1	1	1	IDH3A	isocitrate dehydrogenase 3 (NAD+) alpha
hsa-miR-181d	0	0	1	1	1	1	HNRNPM	heterogeneous nuclear ribonucleoprotein M
hsa-miR-181d	0	0	1	1	1	1	COBL	cordon-bleu homolog (mouse)
hsa-miR-181d	1	0	1	1	1	1	YTHDF3	YTH domain family, member 3
hsa-miR-181d	0	0	1	0	1	1	GAB3	GRB2-associated binding protein 3
hsa-miR-181d	0	0	1	1	1	1	CENPW	centromere protein W
hsa-miR-181d	1	0	1	1	1	1	NFX1	nuclear transcription factor, X-box binding 1
hsa-miR-181d	1	0	1	1	1	1	RNF180	ring finger protein 180
hsa-miR-181d	1	0	1	1	1	1	PRRC1	proline-rich coiled-coil 1
hsa-miR-181d	1	0	1	1	1	1	DNAJC10	DnaJ (Hsp40) homolog, subfamily C, member 10
hsa-miR-181d	0	0	1	1	1	1	CYR61	cysteine-rich, angiogenic inducer, 61
hsa-miR-181d	0	0	1	1	1	1	RANBP17	RAN binding protein 17
hsa-miR-181d	0	0	1	1	1	1	NARG2	NMDA receptor regulated 2
hsa-miR-181d	0	0	1	0	1	1	C3orf43	chromosome 3 open reading frame 43
hsa-miR-181d	0	0	1	1	1	1	CEP192	centrosomal protein 192kDa
hsa-miR-181d	1	0	1	0	1	1	EXOC5	exocyst complex component 5
hsa-miR-181d	0	0	1	1	1	1	DDX55	DEAD (Asp-Glu-Ala-Asp) box polypeptide 55
hsa-miR-181d	1	0	1	1	1	1	PRPF38B	PRP38 pre-mRNA processing factor 38 (yeast) domain containing B
hsa-miR-181d	1	0	1	0	0	0	NPEPL1	aminopeptidase-like 1
hsa-miR-181d	1	0	1	1	1	1	ANKRD12	ankyrin repeat domain 12
hsa-miR-181d	1	0	1	1	1	1	SLC24A4	solute carrier family 24 (sodium/potassium/calcium exchanger), member 4
hsa-miR-181d	1	0	1	1	1	1	C1orf131	chromosome 1 open reading frame 131
hsa-miR-181d	1	0	1	0	0	0	XPNPEP3	X-prolyl aminopeptidase (aminopeptidase P) 3, putative
hsa-miR-181d	1	0	1	0	1	1	NR3C1	nuclear receptor subfamily 3, group C, member 1 (glucocorticoid receptor)
hsa-miR-181d	1	0	1	1	1	1	BOLL	bol, boule-like (Drosophila)
hsa-miR-181d	0	0	1	0	1	1	USO1	USO1 vesicle docking protein homolog (yeast)
hsa-miR-181d	1	0	1	1	1	1	RNF38	ring finger protein 38
hsa-miR-181d	0	0	1	1	0	0	LYG2	lysozyme G-like 2
hsa-miR-181d	1	0	1	1	1	1	TACC1	transforming, acidic coiled-coil containing protein 1
hsa-miR-181d	0	0	1	1	1	1	CRB1	crumbs homolog 1 (Drosophila)
hsa-miR-181d	0	0	1	0	0	0	LINC00308	long intergenic non-protein coding RNA 308
hsa-miR-181d	0	0	1	1	1	1	CEP41	centrosomal protein 41kDa
hsa-miR-181d	1	0	1	1	1	1	BCL11A	B-cell CLL/lymphoma 11A (zinc finger protein)
hsa-miR-181d	1	0	1	1	1	1	PBRM1	polybromo 1
hsa-miR-181d	0	0	1	1	0	0	GLYCTK	glycerate kinase
hsa-miR-181d	1	0	1	1	1	1	PNRC1	proline-rich nuclear receptor coactivator 1
hsa-miR-181d	1	0	1	1	1	1	RAI14	retinoic acid induced 14
hsa-miR-181d	0	0	1	1	1	1	GCOM1	GRINL1A complex locus 1
hsa-miR-181d	0	0	1	1	1	1	BRDT	bromodomain, testis-specific
hsa-miR-181d	1	0	1	1	1	1	CAMTA1	calmodulin binding transcription activator 1
hsa-miR-181d	0	0	1	1	0	0	PDZD11	PDZ domain containing 11
hsa-miR-181d	0	0	1	1	1	1	TNFRSF19	tumor necrosis factor receptor superfamily, member 19
hsa-miR-181d	0	0	1	1	0	0	RAET1E	retinoic acid early transcript 1E
hsa-miR-181d	0	0	1	1	1	1	PTGR2	prostaglandin reductase 2
hsa-miR-181d	0	0	1	1	1	1	TNFSF15	tumor necrosis factor (ligand) superfamily, member 15
hsa-miR-181d	0	0	1	1	1	1	AICDA	activation-induced cytidine deaminase
hsa-miR-181d	1	0	1	1	1	1	LAMP2	lysosomal-associated membrane protein 2
hsa-miR-181d	0	0	1	1	0	0	DHRS4	dehydrogenase/reductase (SDR family) member 4
hsa-miR-181d	0	0	1	1	1	1	ANXA10	annexin A10
hsa-miR-181d	0	0	1	1	1	1	KLK7	kallikrein-related peptidase 7
hsa-miR-181d	1	0	1	1	1	1	PCDH11X	protocadherin 11 X-linked
hsa-miR-181d	1	0	1	1	1	1	TBC1D22B	TBC1 domain family, member 22B
hsa-miR-181d	0	0	1	1	1	1	IL23R	interleukin 23 receptor
hsa-miR-181d	1	0	1	0	1	1	FAM46A	family with sequence similarity 46, member A
hsa-miR-181d	0	0	1	1	1	1	SNX11	sorting nexin 11
hsa-miR-181d	0	0	1	1	0	0	DGUOK	deoxyguanosine kinase
hsa-miR-181d	0	0	1	1	1	1	TFG	TRK-fused gene
hsa-miR-181d	0	0	1	1	1	1	PAFAH1B2	platelet-activating factor acetylhydrolase 1b, catalytic subunit 2 (30kDa)
hsa-miR-181d	1	0	1	1	1	1	PPP5C	protein phosphatase 5, catalytic subunit
hsa-miR-181d	1	0	1	1	1	1	RIMS3	regulating synaptic membrane exocytosis 3
hsa-miR-181d	0	0	1	1	0	0	DNAJC7	DnaJ (Hsp40) homolog, subfamily C, member 7
hsa-miR-181d	0	0	1	0	1	1	HAUS3	HAUS augmin-like complex, subunit 3
hsa-miR-181d	0	0	1	1	0	0	RUSC1	RUN and SH3 domain containing 1
hsa-miR-181d	1	0	1	1	1	1	SMO	smoothened, frizzled family receptor
hsa-miR-181d	1	0	1	1	0	0	POLR3D	polymerase (RNA) III (DNA directed) polypeptide D, 44kDa
hsa-miR-181d	0	0	1	1	1	1	RABL5	RAB, member RAS oncogene family-like 5
hsa-miR-181d	0	0	1	1	1	1	ZNF146	zinc finger protein 146
hsa-miR-181d	1	0	1	0	1	1	CGGBP1	CGG triplet repeat binding protein 1
hsa-miR-181d	0	0	1	1	0	0	SCG5	secretogranin V (7B2 protein)
hsa-miR-181d	0	0	1	1	0	0	NFKBID	nuclear factor of kappa light polypeptide gene enhancer in B-cells inhibitor, delta
hsa-miR-181d	0	0	1	1	1	1	ARPC1A	actin related protein 2/3 complex, subunit 1A, 41kDa
hsa-miR-181d	0	0	1	1	0	0	RBM14	RNA binding motif protein 14
hsa-miR-181d	0	0	1	1	0	0	SPAG7	sperm associated antigen 7
hsa-miR-181d	0	0	1	1	1	1	ZNF85	zinc finger protein 85
hsa-miR-181d	0	0	1	1	1	1	TMEM30A	transmembrane protein 30A
hsa-miR-181d	0	0	1	0	0	0	ATXN7L3B	ataxin 7-like 3B
hsa-miR-181d	1	0	1	0	1	1	TMEM39A	transmembrane protein 39A
hsa-miR-181d	1	0	1	1	1	1	ATP6AP2	ATPase, H+ transporting, lysosomal accessory protein 2
hsa-miR-181d	0	0	1	1	1	1	KLF7	Kruppel-like factor 7 (ubiquitous)
hsa-miR-181d	0	0	1	1	1	1	PCNP	PEST proteolytic signal containing nuclear protein
hsa-miR-181d	0	0	1	0	0	0	MGC20647	uncharacterized protein MGC20647
hsa-miR-181d	1	0	1	1	1	1	ETF1	eukaryotic translation termination factor 1
hsa-miR-181d	0	0	1	1	0	0	C9orf11	chromosome 9 open reading frame 11
hsa-miR-181d	0	0	1	1	1	1	EAF2	ELL associated factor 2
hsa-miR-181d	0	0	1	1	1	1	TOMM40L	translocase of outer mitochondrial membrane 40 homolog (yeast)-like
hsa-miR-181d	0	0	1	0	0	0	MGC21881	uncharacterized locus MGC21881
hsa-miR-181d	0	0	1	0	0	0	KLHL15	kelch-like 15 (Drosophila)
hsa-miR-181d	1	0	1	1	1	1	ZBTB38	zinc finger and BTB domain containing 38
hsa-miR-181d	1	0	1	0	1	1	NR1D2	nuclear receptor subfamily 1, group D, member 2
hsa-miR-181d	0	0	1	1	0	0	DPY30	dpy-30 homolog (C. elegans)
hsa-miR-181d	0	0	1	1	1	1	MBIP	MAP3K12 binding inhibitory protein 1
hsa-miR-181d	0	0	1	1	0	0	PREB	prolactin regulatory element binding
hsa-miR-181d	1	0	1	1	1	1	NRF1	nuclear respiratory factor 1
hsa-miR-181d	0	0	1	1	0	0	ZDHHC6	zinc finger, DHHC-type containing 6
hsa-miR-181d	0	0	1	1	1	1	CSDE1	cold shock domain containing E1, RNA-binding
hsa-miR-181d	0	0	1	1	0	0	HIST2H4A	histone cluster 2, H4a
hsa-miR-181d	0	0	1	1	0	0	HIST2H4B	histone cluster 2, H4b
hsa-miR-181d	0	0	1	0	1	1	TMSB15B	thymosin beta 15B
hsa-miR-181d	0	0	1	1	1	1	TMEM40	transmembrane protein 40
hsa-miR-181d	0	0	1	1	0	0	PLRG1	pleiotropic regulator 1
hsa-miR-181d	0	0	1	0	1	1	ZNF718	zinc finger protein 718
hsa-miR-181d	0	0	1	1	1	1	HLA-G	major histocompatibility complex, class I, G
hsa-miR-181d	1	0	1	0	1	1	ARHGAP26	Rho GTPase activating protein 26
hsa-miR-181d	0	0	1	1	0	0	C6orf130	chromosome 6 open reading frame 130
hsa-miR-181d	0	0	1	1	1	1	CDC42SE2	CDC42 small effector 2
hsa-miR-181d	0	0	1	1	1	1	TLR4	toll-like receptor 4
hsa-miR-181d	1	0	1	1	1	1	NIPA1	non imprinted in Prader-Willi/Angelman syndrome 1
hsa-miR-181d	0	0	1	1	1	1	MAP2	microtubule-associated protein 2
hsa-miR-181d	1	0	1	1	1	1	APPL2	adaptor protein, phosphotyrosine interaction, PH domain and leucine zipper containing 2
hsa-miR-181d	1	0	1	1	1	1	B3GNT5	UDP-GlcNAc:betaGal beta-1,3-N-acetylglucosaminyltransferase 5
hsa-miR-181d	0	0	1	1	1	1	RNF32	ring finger protein 32
hsa-miR-181d	0	0	1	1	0	0	SYT3	synaptotagmin III
hsa-miR-181d	1	0	1	1	1	1	ACACB	acetyl-CoA carboxylase beta
hsa-miR-181d	0	0	1	1	1	1	ZNF611	zinc finger protein 611
hsa-miR-181d	0	0	1	0	1	1	PAPOLG	poly(A) polymerase gamma
hsa-miR-181d	1	0	1	1	1	1	HTR2C	5-hydroxytryptamine (serotonin) receptor 2C, G protein-coupled
hsa-miR-181d	0	0	1	1	1	1	SEMA3D	sema domain, immunoglobulin domain (Ig), short basic domain, secreted, (semaphorin) 3D
hsa-miR-181d	1	0	1	1	1	1	PPARGC1A	peroxisome proliferator-activated receptor gamma, coactivator 1 alpha
hsa-miR-181d	1	0	1	0	1	1	TFEC	transcription factor EC
hsa-miR-181d	1	0	1	0	1	1	SV2B	synaptic vesicle glycoprotein 2B
hsa-miR-181d	0	0	1	0	0	0	C20orf62	chromosome 20 open reading frame 62
hsa-miR-181d	0	0	1	0	0	0	ATP8B5P	ATPase, class I, type 8B, member 5, pseudogene
hsa-miR-181d	1	0	1	1	1	1	BZRAP1	benzodiazapine receptor (peripheral) associated protein 1
hsa-miR-181d	1	0	1	1	1	1	RCOR3	REST corepressor 3
hsa-miR-181d	0	0	1	0	1	1	PLEKHM1P	pleckstrin homology domain containing, family M (with RUN domain) member 1 pseudogene
hsa-miR-181d	1	0	1	1	1	1	C5orf25	chromosome 5 open reading frame 25
hsa-miR-181d	0	0	1	1	1	1	C5orf22	chromosome 5 open reading frame 22
hsa-miR-181d	1	0	1	1	1	1	RHOBTB1	Rho-related BTB domain containing 1
hsa-miR-181d	1	0	1	1	1	1	ZNF439	zinc finger protein 439
hsa-miR-181d	0	0	1	1	1	1	CDADC1	cytidine and dCMP deaminase domain containing 1
hsa-miR-181d	1	0	1	1	0	0	TMEM181	transmembrane protein 181
hsa-miR-181d	0	0	1	0	0	0	LINC00238	long intergenic non-protein coding RNA 238
hsa-miR-181d	0	0	1	1	0	0	ADAP2	ArfGAP with dual PH domains 2
hsa-miR-181d	1	0	1	0	1	1	RHOBTB2	Rho-related BTB domain containing 2
hsa-miR-181d	0	0	1	1	1	1	EDA2R	ectodysplasin A2 receptor
hsa-miR-181d	0	0	1	1	1	1	KIF16B	kinesin family member 16B
hsa-miR-181d	0	0	1	1	1	1	ZNF781	zinc finger protein 781
hsa-miR-181d	0	0	1	1	1	1	SEC24D	SEC24 family, member D (S. cerevisiae)
hsa-miR-181d	0	0	1	0	0	0	LINC00642	long intergenic non-protein coding RNA 642
hsa-miR-181d	1	0	1	1	1	1	MACROD2	MACRO domain containing 2
hsa-miR-181d	1	0	1	1	1	1	LMO7	LIM domain 7
hsa-miR-181d	0	0	1	1	1	1	TADA1	transcriptional adaptor 1
hsa-miR-181d	1	0	1	1	1	1	CEP128	centrosomal protein 128kDa
hsa-miR-181d	0	0	1	0	0	0	CYP4F35P	cytochrome P450, family 4, subfamily F, polypeptide 35, pseudogene
hsa-miR-181d	1	0	1	0	1	1	RAG1	recombination activating gene 1
hsa-miR-181d	0	0	1	1	1	1	EFCAB13	EF-hand calcium binding domain 13
hsa-miR-181d	0	0	1	0	0	0	MGC42157	uncharacterized locus MGC42157
hsa-miR-181d	0	0	1	0	0	0	INHBA-AS1	INHBA antisense RNA 1
hsa-miR-181d	1	0	1	1	1	1	DAAM1	dishevelled associated activator of morphogenesis 1
hsa-miR-181d	1	0	1	1	1	1	GALNT1	UDP-N-acetyl-alpha-D-galactosamine:polypeptide N-acetylgalactosaminyltransferase 1 (GalNAc-T1)
hsa-miR-181d	1	0	1	1	1	1	DPP10	dipeptidyl-peptidase 10 (non-functional)
hsa-miR-181d	0	0	1	0	0	0	FLJ36000	uncharacterized FLJ36000
hsa-miR-181d	1	0	1	1	1	1	FGFR2	fibroblast growth factor receptor 2
hsa-miR-181d	1	0	1	1	1	1	NFYA	nuclear transcription factor Y, alpha
hsa-miR-181d	0	0	1	0	0	0	USP32P1	ubiquitin specific peptidase 32 pseudogene 1
hsa-miR-181d	0	0	1	0	0	0	LINC00326	long intergenic non-protein coding RNA 326
hsa-miR-181d	0	0	1	0	0	0	TOB1-AS1	TOB1 antisense RNA 1
hsa-miR-181d	0	0	1	1	1	1	VBP1	von Hippel-Lindau binding protein 1
hsa-miR-181d	0	0	1	0	1	1	SRSF5	serine/arginine-rich splicing factor 5
hsa-miR-181d	0	0	1	1	1	1	TMEM45A	transmembrane protein 45A
hsa-miR-181d	0	0	1	1	1	1	ZFP90	zinc finger protein 90 homolog (mouse)
hsa-miR-181d	1	0	1	1	1	1	INTS6	integrator complex subunit 6
hsa-miR-181d	1	0	1	1	1	1	UNC13C	unc-13 homolog C (C. elegans)
hsa-miR-181d	0	0	1	0	1	1	FAM13B	family with sequence similarity 13, member B
hsa-miR-181d	1	0	1	1	1	1	FAM123A	family with sequence similarity 123A
hsa-miR-181d	1	0	1	1	1	1	TNFSF4	tumor necrosis factor (ligand) superfamily, member 4
hsa-miR-181d	0	0	1	1	1	1	GOLGA6L9	golgin A6 family-like 9
hsa-miR-181d	0	0	1	1	1	1	C8orf34	chromosome 8 open reading frame 34
hsa-miR-181d	0	0	1	1	1	1	NSUN7	NOP2/Sun domain family, member 7
hsa-miR-181d	0	0	1	0	0	0	LRRC37BP1	leucine rich repeat containing 37B pseudogene 1
hsa-miR-181d	1	0	1	1	1	1	ADD1	adducin 1 (alpha)
hsa-miR-181d	0	0	1	0	0	0	LINC00347	long intergenic non-protein coding RNA 347
hsa-miR-181d	0	0	1	1	1	1	DGKH	diacylglycerol kinase, eta
hsa-miR-181d	0	0	1	1	1	1	C14orf45	chromosome 14 open reading frame 45
hsa-miR-181d	1	0	1	0	1	1	PSD3	pleckstrin and Sec7 domain containing 3
hsa-miR-181d	0	0	1	1	1	1	MGC57346	uncharacterized LOC401884
hsa-miR-181d	0	0	1	0	0	0	LOC283914	uncharacterized LOC283914
hsa-miR-181d	1	0	1	1	1	1	ZFAND4	zinc finger, AN1-type domain 4
hsa-miR-181d	0	0	1	1	1	1	DOCK8	dedicator of cytokinesis 8
hsa-miR-181d	1	0	1	0	1	1	LYPD6	LY6/PLAUR domain containing 6
hsa-miR-181d	1	0	1	0	1	1	KDM2A	lysine (K)-specific demethylase 2A
hsa-miR-181d	1	0	1	1	1	1	SMARCE1	SWI/SNF related, matrix associated, actin dependent regulator of chromatin, subfamily e, member 1
hsa-miR-181d	0	0	1	1	1	1	ZNF589	zinc finger protein 589
hsa-miR-181d	1	0	1	0	1	1	ARHGAP5	Rho GTPase activating protein 5
hsa-miR-181d	0	0	1	1	0	0	NISCH	nischarin
hsa-miR-181d	0	0	1	0	0	0	BMS1P6	BMS1 pseudogene 6
hsa-miR-181d	1	0	1	1	1	1	ZFP91	zinc finger protein 91 homolog (mouse)
hsa-miR-181d	1	0	1	1	1	1	PCGF5	polycomb group ring finger 5
hsa-miR-181d	0	0	1	0	0	0	LINC00265	long intergenic non-protein coding RNA 265
hsa-miR-181d	0	0	1	1	0	0	ADAM7	ADAM metallopeptidase domain 7
hsa-miR-181d	0	0	1	1	0	0	GRIN2C	glutamate receptor, ionotropic, N-methyl D-aspartate 2C
hsa-miR-181d	1	0	1	1	1	1	ZEB2	zinc finger E-box binding homeobox 2
hsa-miR-181d	1	0	1	1	1	1	PRRG1	proline rich Gla (G-carboxyglutamic acid) 1
hsa-miR-181d	0	0	1	1	1	1	B4GALT4	UDP-Gal:betaGlcNAc beta 1,4- galactosyltransferase, polypeptide 4
hsa-miR-181d	0	0	1	1	1	1	SNX5	sorting nexin 5
hsa-miR-181d	1	0	1	1	1	1	SCOC	short coiled-coil protein
hsa-miR-181d	0	0	1	1	0	0	AGAP11	ankyrin repeat and GTPase domain Arf GTPase activating protein 11
hsa-miR-181d	0	0	1	1	1	1	GSTA4	glutathione S-transferase alpha 4
hsa-miR-181d	0	0	1	1	1	1	C1orf109	chromosome 1 open reading frame 109
hsa-miR-181d	0	0	1	1	1	1	SCLT1	sodium channel and clathrin linker 1
hsa-miR-181d	0	0	1	1	1	1	VNN2	vanin 2
hsa-miR-181d	0	0	1	1	1	1	STAG1	stromal antigen 1
hsa-miR-181d	1	0	1	1	0	0	ASRGL1	asparaginase like 1
hsa-miR-181d	1	0	1	1	1	1	GANAB	glucosidase, alpha; neutral AB
hsa-miR-181d	0	0	1	1	0	0	ZNF253	zinc finger protein 253
hsa-miR-181d	0	0	1	1	1	1	ZNF189	zinc finger protein 189
hsa-miR-181d	1	0	1	1	1	1	CKAP2	cytoskeleton associated protein 2
hsa-miR-181d	0	0	1	0	0	0	DPY19L2P1	dpy-19-like 2 pseudogene 1 (C. elegans)
hsa-miR-181d	0	0	1	0	0	0	ADAM5	ADAM metallopeptidase domain 5, pseudogene
hsa-miR-181d	0	0	1	0	0	0	LEF1-AS1	LEF1 antisense RNA 1
hsa-miR-181d	1	0	1	1	1	1	SLC26A7	solute carrier family 26, member 7
hsa-miR-181d	0	0	1	0	0	0	PTGER4P2	prostaglandin E receptor 4 (subtype EP4) pseudogene 2
hsa-miR-181d	0	0	1	0	0	0	C17orf69	chromosome 17 open reading frame 69
hsa-miR-181d	0	0	1	1	0	0	RELA	v-rel reticuloendotheliosis viral oncogene homolog A (avian)
hsa-miR-181d	0	0	1	1	0	0	GP6	glycoprotein VI (platelet)
hsa-miR-181d	0	0	1	0	0	0	FOXN3-AS2	FOXN3 antisense RNA 2
hsa-miR-181d	0	0	1	1	0	0	CYP4F30P	cytochrome P450, family 4, subfamily F, polypeptide 30, pseudogene
hsa-miR-181d	0	0	1	1	0	0	CSF2RB	colony stimulating factor 2 receptor, beta, low-affinity (granulocyte-macrophage)
hsa-miR-181d	0	0	1	1	1	1	TSPAN8	tetraspanin 8
hsa-miR-181d	1	0	1	0	1	1	HMGB3	high mobility group box 3
hsa-miR-181d	1	0	1	0	1	1	MAP4K3	mitogen-activated protein kinase kinase kinase kinase 3
hsa-miR-181d	1	0	1	0	1	1	TMEM194A	transmembrane protein 194A
hsa-miR-181d	1	0	1	1	1	1	LOXL3	lysyl oxidase-like 3
hsa-miR-181d	1	0	1	1	1	1	OPCML	opioid binding protein/cell adhesion molecule-like
hsa-miR-181d	1	0	1	1	1	1	WNT5A	wingless-type MMTV integration site family, member 5A
hsa-miR-181d	1	0	1	1	1	1	NTRK2	neurotrophic tyrosine kinase, receptor, type 2
hsa-miR-181d	0	0	1	1	0	0	TMEM222	transmembrane protein 222
hsa-miR-181d	1	0	1	1	1	1	SYNE1	spectrin repeat containing, nuclear envelope 1
hsa-miR-181d	1	0	1	1	1	1	C18orf34	chromosome 18 open reading frame 34
hsa-miR-181d	0	0	1	1	0	0	APOBEC1	apolipoprotein B mRNA editing enzyme, catalytic polypeptide 1
hsa-miR-181d	1	0	1	1	1	1	WNT10B	wingless-type MMTV integration site family, member 10B
hsa-miR-181d	0	0	1	1	1	1	KLRF1	killer cell lectin-like receptor subfamily F, member 1
hsa-miR-181d	0	0	1	1	1	1	TMEM52B	transmembrane protein 52B
hsa-miR-181d	0	0	1	1	1	1	HMGB2	high mobility group box 2
hsa-miR-181d	0	0	1	1	1	1	XG	Xg blood group
hsa-miR-181d	1	0	1	1	1	1	ARFIP1	ADP-ribosylation factor interacting protein 1
hsa-miR-181d	1	0	1	1	0	0	KIAA1644	KIAA1644
hsa-miR-181d	0	0	1	0	0	0	C5orf49	chromosome 5 open reading frame 49
hsa-miR-181d	0	0	1	1	1	1	CCDC126	coiled-coil domain containing 126
hsa-miR-181d	0	0	1	0	0	0	LOC283174	uncharacterized LOC283174
hsa-miR-181d	0	0	1	0	0	0	FBXL19-AS1	FBXL19 antisense RNA 1 (head to head)
hsa-miR-181d	1	0	1	1	1	1	NR2F2	nuclear receptor subfamily 2, group F, member 2
hsa-miR-181d	1	0	1	1	1	1	PTPRD	protein tyrosine phosphatase, receptor type, D
hsa-miR-181d	0	0	1	1	0	0	FMN1	formin 1
hsa-miR-181d	0	0	1	1	0	0	TMEM126B	transmembrane protein 126B
hsa-miR-181d	1	0	1	1	1	1	TBP	TATA box binding protein
hsa-miR-181d	1	0	1	0	1	1	DNAJC6	DnaJ (Hsp40) homolog, subfamily C, member 6
hsa-miR-181d	1	0	1	1	1	1	ANO4	anoctamin 4
hsa-miR-181d	0	0	1	1	1	1	ZNF514	zinc finger protein 514
hsa-miR-181d	1	0	1	1	1	1	SLK	STE20-like kinase
hsa-miR-181d	1	0	1	0	1	1	ROBO1	roundabout, axon guidance receptor, homolog 1 (Drosophila)
hsa-miR-181d	0	0	1	1	0	0	RNF123	ring finger protein 123
hsa-miR-181d	1	0	1	1	1	1	GRIA3	glutamate receptor, ionotropic, AMPA 3
hsa-miR-181d	0	0	1	1	0	0	ANKLE1	ankyrin repeat and LEM domain containing 1
hsa-miR-181d	0	0	1	1	0	0	RGSL1	regulator of G-protein signaling like 1
hsa-miR-181d	0	0	1	0	0	0	LINC00486	long intergenic non-protein coding RNA 486
hsa-miR-181d	1	0	1	1	1	1	PIKFYVE	phosphoinositide kinase, FYVE finger containing
hsa-miR-181d	0	0	1	0	0	0	EEF1DP3	eukaryotic translation elongation factor 1 delta pseudogene 3
hsa-miR-181d	0	0	1	1	1	1	SLC7A13	solute carrier family 7 (anionic amino acid transporter), member 13
hsa-miR-181d	0	0	1	0	1	1	GOLGA8G	golgin A8 family, member G
hsa-miR-181d	1	0	1	1	1	1	MEGF11	multiple EGF-like-domains 11
hsa-miR-181d	1	0	1	1	1	1	ZMYM4	zinc finger, MYM-type 4
hsa-miR-181d	0	0	1	0	1	1	C20orf202	chromosome 20 open reading frame 202
hsa-miR-181d	0	0	1	1	1	1	HSF2	heat shock transcription factor 2
hsa-miR-181d	1	0	1	1	1	1	MLLT10	myeloid/lymphoid or mixed-lineage leukemia (trithorax homolog, Drosophila); translocated to, 10
hsa-miR-181d	1	0	1	1	1	1	CADPS	Ca++-dependent secretion activator
hsa-miR-181d	0	0	1	1	0	0	CCDC144A	coiled-coil domain containing 144A
hsa-miR-181d	0	0	1	1	0	0	EFCAB11	EF-hand calcium binding domain 11
hsa-miR-181d	0	0	1	1	0	0	NDRG2	NDRG family member 2
hsa-miR-181d	0	0	1	0	0	0	LINC00643	long intergenic non-protein coding RNA 643
hsa-miR-181d	0	0	1	0	0	0	ADCY10P1	adenylate cyclase 10 (soluble) pseudogene 1
hsa-miR-181d	0	0	1	0	1	1	GPX8	glutathione peroxidase 8 (putative)
hsa-miR-181d	1	0	1	0	1	1	CCDC88A	coiled-coil domain containing 88A
hsa-miR-181d	0	0	1	1	1	1	STAT2	signal transducer and activator of transcription 2, 113kDa
hsa-miR-181d	0	0	1	0	0	0	ZNF542	zinc finger protein 542
hsa-miR-181d	1	0	1	1	1	1	C7orf31	chromosome 7 open reading frame 31
hsa-miR-181d	0	0	1	1	1	1	COL6A3	collagen, type VI, alpha 3
hsa-miR-181d	1	0	1	0	1	1	FAM73A	family with sequence similarity 73, member A
hsa-miR-181d	0	0	1	0	0	0	TRAF3IP2-AS1	TRAF3IP2 antisense RNA 1
hsa-miR-181d	0	0	1	1	1	1	TSGA10	testis specific, 10
hsa-miR-181d	1	0	1	0	1	1	GALNT4	UDP-N-acetyl-alpha-D-galactosamine:polypeptide N-acetylgalactosaminyltransferase 4 (GalNAc-T4)
hsa-miR-181d	0	0	1	1	1	1	PRR14L	proline rich 14-like
hsa-miR-181d	0	0	1	1	1	1	SCAPER	S-phase cyclin A-associated protein in the ER
hsa-miR-181d	1	0	1	1	0	0	RBM27	RNA binding motif protein 27
hsa-miR-181d	1	0	1	1	1	1	SLC39A13	solute carrier family 39 (zinc transporter), member 13
hsa-miR-181d	1	0	1	1	1	1	ABCA13	ATP-binding cassette, sub-family A (ABC1), member 13
hsa-miR-181d	0	0	1	1	0	0	PRKCQ	protein kinase C, theta
hsa-miR-181d	1	0	1	1	1	1	DROSHA	drosha, ribonuclease type III
hsa-miR-181d	1	0	1	1	1	1	DCAF5	DDB1 and CUL4 associated factor 5
hsa-miR-181d	0	0	1	1	1	1	EXT2	exostosin 2
hsa-miR-181d	0	0	1	0	1	1	TYW5	tRNA-yW synthesizing protein 5
hsa-miR-181d	1	0	1	1	1	1	PHF3	PHD finger protein 3
hsa-miR-181d	0	0	1	1	1	1	ATP2A2	ATPase, Ca++ transporting, cardiac muscle, slow twitch 2
hsa-miR-181d	0	0	1	0	0	0	LINC00338	long intergenic non-protein coding RNA 338
hsa-miR-181d	1	0	1	1	1	1	NFIB	nuclear factor I/B
hsa-miR-181d	1	0	1	1	1	1	NAV1	neuron navigator 1
hsa-miR-181d	1	0	1	1	1	1	C5orf24	chromosome 5 open reading frame 24
hsa-miR-181d	1	0	1	1	1	1	TMEM135	transmembrane protein 135
hsa-miR-181d	0	0	1	1	1	1	SSFA2	sperm specific antigen 2
hsa-miR-181d	1	0	1	1	1	1	SGK3	serum/glucocorticoid regulated kinase family, member 3
hsa-miR-181d	1	0	1	1	0	0	GSK3B	glycogen synthase kinase 3 beta
hsa-miR-181d	0	0	1	0	1	1	CD59	CD59 molecule, complement regulatory protein
hsa-miR-181d	1	0	1	0	0	0	PLSCR5	phospholipid scramblase family, member 5
hsa-miR-181d	0	0	1	1	0	0	SGCE	sarcoglycan, epsilon
hsa-miR-181d	1	0	1	1	1	1	RNF10	ring finger protein 10
hsa-miR-181d	0	0	1	1	1	1	DUSP26	dual specificity phosphatase 26 (putative)
hsa-miR-181d	0	0	1	1	0	0	GPX3	glutathione peroxidase 3 (plasma)
hsa-miR-181d	0	0	1	1	0	0	HSD3B1	hydroxy-delta-5-steroid dehydrogenase, 3 beta- and steroid delta-isomerase 1
hsa-miR-181d	1	0	1	1	1	1	FUT9	fucosyltransferase 9 (alpha (1,3) fucosyltransferase)
hsa-miR-181d	1	0	1	1	1	1	FAM192A	family with sequence similarity 192, member A
hsa-miR-181d	1	0	1	1	0	0	CGREF1	cell growth regulator with EF-hand domain 1
hsa-miR-181d	0	0	1	1	1	1	CETN2	centrin, EF-hand protein, 2
hsa-miR-181d	1	0	1	1	1	1	TARBP2	TAR (HIV-1) RNA binding protein 2
hsa-miR-181d	0	0	1	1	1	1	RABGGTB	Rab geranylgeranyltransferase, beta subunit
hsa-miR-181d	0	0	1	1	0	0	HLA-C	major histocompatibility complex, class I, C
hsa-miR-181d	0	0	1	1	1	1	SRP9	signal recognition particle 9kDa
hsa-miR-181d	1	0	1	0	1	1	SLCO2A1	solute carrier organic anion transporter family, member 2A1
hsa-miR-181d	0	0	1	1	1	1	CYTH2	cytohesin 2
hsa-miR-181d	1	0	1	1	1	1	SLC35D2	solute carrier family 35, member D2
hsa-miR-181d	0	0	1	1	1	1	SLC25A4	solute carrier family 25 (mitochondrial carrier; adenine nucleotide translocator), member 4
hsa-miR-181d	1	0	1	1	1	1	RASL12	RAS-like, family 12
hsa-miR-181d	0	0	1	1	1	1	INCENP	inner centromere protein antigens 135/155kDa
hsa-miR-181d	1	0	1	1	1	1	CLTA	clathrin, light chain A
hsa-miR-181d	1	0	1	0	1	1	EIF4H	eukaryotic translation initiation factor 4H
hsa-miR-181d	0	0	1	1	1	1	PROCR	protein C receptor, endothelial
hsa-miR-181d	0	0	1	1	1	1	SORD	sorbitol dehydrogenase
hsa-miR-181d	1	0	1	1	1	1	ADAM9	ADAM metallopeptidase domain 9
hsa-miR-181d	1	0	1	1	1	1	DRAM2	DNA-damage regulated autophagy modulator 2
hsa-miR-181d	0	0	1	1	1	1	GGPS1	geranylgeranyl diphosphate synthase 1
hsa-miR-181d	0	0	1	0	1	1	PDCD5	programmed cell death 5
hsa-miR-181d	0	0	1	1	0	0	TUSC3	tumor suppressor candidate 3
hsa-miR-181d	0	0	1	0	0	0	LOC654433	uncharacterized LOC654433
hsa-miR-181d	1	0	1	1	1	1	DPP9	dipeptidyl-peptidase 9
hsa-miR-181d	0	0	1	1	1	1	GRAP2	GRB2-related adaptor protein 2
hsa-miR-181d	1	0	1	0	1	1	RPS6KB1	ribosomal protein S6 kinase, 70kDa, polypeptide 1
hsa-miR-181d	0	0	1	1	1	1	C19orf12	chromosome 19 open reading frame 12
hsa-miR-181d	0	0	1	1	1	1	STON1	stonin 1
hsa-miR-181d	0	0	1	0	0	0	LOC729678	uncharacterized LOC729678
hsa-miR-181d	0	0	1	1	0	0	HCRTR1	hypocretin (orexin) receptor 1
hsa-miR-181d	0	0	1	1	0	0	CXorf40A	chromosome X open reading frame 40A
hsa-miR-181d	1	0	1	1	1	1	CCDC25	coiled-coil domain containing 25
hsa-miR-181d	0	0	1	0	0	0	TMEM208	transmembrane protein 208
hsa-miR-181d	1	0	1	1	1	1	PHTF1	putative homeodomain transcription factor 1
hsa-miR-181d	0	0	1	1	1	1	BEX2	brain expressed X-linked 2
hsa-miR-181d	1	0	1	1	1	1	DKK3	dickkopf 3 homolog (Xenopus laevis)
hsa-miR-181d	0	0	1	1	1	1	PDLIM1	PDZ and LIM domain 1
hsa-miR-181d	1	0	1	1	1	1	BTBD10	BTB (POZ) domain containing 10
hsa-miR-181d	0	0	1	0	0	0	LOC677759	uncharacterized LOC677759
hsa-miR-181d	0	0	1	1	1	1	PEX19	peroxisomal biogenesis factor 19
hsa-miR-181d	1	0	1	1	1	1	TLE1	transducin-like enhancer of split 1 (E(sp1) homolog, Drosophila)
hsa-miR-181d	0	0	1	1	1	1	DEDD	death effector domain containing
hsa-miR-181d	1	0	1	1	1	1	PPP3CB	protein phosphatase 3, catalytic subunit, beta isozyme
hsa-miR-181d	0	0	1	0	1	1	VSTM2A	V-set and transmembrane domain containing 2A
hsa-miR-181d	0	0	1	1	1	1	JMJD8	jumonji domain containing 8
hsa-miR-181d	1	0	1	1	1	1	ARL4A	ADP-ribosylation factor-like 4A
hsa-miR-181d	0	0	1	1	1	1	TCTN3	tectonic family member 3
hsa-miR-181d	0	0	1	1	1	1	ACSF3	acyl-CoA synthetase family member 3
hsa-miR-181d	1	0	1	1	1	1	ZNF207	zinc finger protein 207
hsa-miR-181d	0	0	1	1	1	1	SLCO4A1	solute carrier organic anion transporter family, member 4A1
hsa-miR-181d	0	0	1	1	0	0	AATF	apoptosis antagonizing transcription factor
hsa-miR-181d	1	0	1	1	1	1	F11R	F11 receptor
hsa-miR-181d	0	0	1	1	1	1	IL15	interleukin 15
hsa-miR-181d	1	0	1	1	1	1	PDCL	phosducin-like
hsa-miR-181d	0	0	1	0	0	0	RNF115	ring finger protein 115
hsa-miR-181d	0	0	1	1	0	0	PCCA	propionyl CoA carboxylase, alpha polypeptide
hsa-miR-181d	0	0	1	1	0	0	HEBP1	heme binding protein 1
hsa-miR-181d	1	0	1	1	1	1	UBE2K	ubiquitin-conjugating enzyme E2K
hsa-miR-181d	0	0	1	0	0	0	NUDT18	nudix (nucleoside diphosphate linked moiety X)-type motif 18
hsa-miR-181d	0	0	1	1	0	0	HP	haptoglobin
hsa-miR-181d	0	0	1	0	1	1	DENR	density-regulated protein
hsa-miR-181d	1	0	1	1	1	1	ATPAF1	ATP synthase mitochondrial F1 complex assembly factor 1
hsa-miR-181d	0	0	1	1	1	1	MBNL3	muscleblind-like splicing regulator 3
hsa-miR-181d	0	0	1	1	1	1	ZNF75D	zinc finger protein 75D
hsa-miR-181d	0	0	1	0	1	1	TSPAN7	tetraspanin 7
hsa-miR-181d	0	0	1	1	1	1	CIRBP	cold inducible RNA binding protein
hsa-miR-181d	0	0	1	1	1	1	COMMD3	COMM domain containing 3
hsa-miR-181d	1	0	1	1	1	1	LHX9	LIM homeobox 9
hsa-miR-181d	1	0	1	1	1	1	SLC37A3	solute carrier family 37 (glycerol-3-phosphate transporter), member 3
hsa-miR-181d	1	0	1	1	1	1	STAG2	stromal antigen 2
hsa-miR-181d	0	0	1	1	1	1	BDP1	B double prime 1, subunit of RNA polymerase III transcription initiation factor IIIB
hsa-miR-181d	0	0	1	0	0	0	LOC731789	uncharacterized LOC731789
hsa-miR-181d	0	0	1	1	1	1	CCP110	centriolar coiled coil protein 110kDa
hsa-miR-181d	1	0	1	1	1	1	FBXW7	F-box and WD repeat domain containing 7, E3 ubiquitin protein ligase
hsa-miR-181d	0	0	1	1	1	1	ATG5	autophagy related 5
hsa-miR-181d	1	0	1	1	1	1	SLC39A10	solute carrier family 39 (zinc transporter), member 10
hsa-miR-181d	0	0	1	0	1	1	ZNF28	zinc finger protein 28
hsa-miR-181d	0	0	1	0	1	1	SYNPR	synaptoporin
hsa-miR-181d	0	0	1	0	1	1	DNAH14	dynein, axonemal, heavy chain 14
hsa-miR-181d	0	0	1	1	1	1	MSS51	MSS51 mitochondrial translational activator homolog (S. cerevisiae)
hsa-miR-181d	1	0	1	1	1	1	ZFHX3	zinc finger homeobox 3
hsa-miR-181d	0	0	1	1	1	1	SLC39A14	solute carrier family 39 (zinc transporter), member 14
hsa-miR-181d	1	0	1	1	1	1	RBPMS	RNA binding protein with multiple splicing
hsa-miR-181d	0	0	1	1	1	1	PARP14	poly (ADP-ribose) polymerase family, member 14
hsa-miR-181d	1	0	1	1	1	1	BTLA	B and T lymphocyte associated
hsa-miR-181d	0	0	1	1	0	0	SPATA20	spermatogenesis associated 20
hsa-miR-181d	1	0	1	1	0	0	DPY19L1	dpy-19-like 1 (C. elegans)
hsa-miR-181d	0	0	1	1	0	0	FAM58A	family with sequence similarity 58, member A
hsa-miR-181d	0	0	1	1	1	1	MARVELD2	MARVEL domain containing 2
hsa-miR-181d	0	0	1	1	1	1	ESR2	estrogen receptor 2 (ER beta)
hsa-miR-181d	1	0	1	0	1	1	EPDR1	ependymin related protein 1 (zebrafish)
hsa-miR-181d	1	0	1	1	1	1	SLC4A8	solute carrier family 4, sodium bicarbonate cotransporter, member 8
hsa-miR-181d	0	0	1	1	1	1	MORC4	MORC family CW-type zinc finger 4
hsa-miR-181d	1	0	1	1	1	1	MLL	myeloid/lymphoid or mixed-lineage leukemia (trithorax homolog, Drosophila)
hsa-miR-181d	0	0	1	1	1	1	VDAC2	voltage-dependent anion channel 2
hsa-miR-181d	1	0	1	0	1	1	STAT3	signal transducer and activator of transcription 3 (acute-phase response factor)
hsa-miR-181d	0	0	1	1	1	1	GAD2	glutamate decarboxylase 2 (pancreatic islets and brain, 65kDa)
hsa-miR-181d	1	0	1	1	1	1	FAS	Fas (TNF receptor superfamily, member 6)
hsa-miR-181d	0	0	1	1	1	1	BCHE	butyrylcholinesterase
hsa-miR-181d	1	0	1	1	1	1	COL3A1	collagen, type III, alpha 1
hsa-miR-181d	1	0	1	1	1	1	CPOX	coproporphyrinogen oxidase
hsa-miR-181d	1	0	1	1	1	1	CYP19A1	cytochrome P450, family 19, subfamily A, polypeptide 1
hsa-miR-181d	1	0	1	0	1	1	SLC26A2	solute carrier family 26 (sulfate transporter), member 2
hsa-miR-181d	0	0	1	0	1	1	MS4A2	membrane-spanning 4-domains, subfamily A, member 2
hsa-miR-181d	1	0	1	1	1	1	FUCA1	fucosidase, alpha-L- 1, tissue
hsa-miR-181d	1	0	1	1	1	1	GK	glycerol kinase
hsa-miR-181d	1	0	1	1	1	1	HK2	hexokinase 2
hsa-miR-181d	1	0	1	0	1	1	KIT	v-kit Hardy-Zuckerman 4 feline sarcoma viral oncogene homolog
hsa-miR-181d	1	0	1	0	1	1	SGCB	sarcoglycan, beta (43kDa dystrophin-associated glycoprotein)
hsa-miR-181d	0	0	1	1	1	1	LPL	lipoprotein lipase
hsa-miR-181d	1	0	1	1	1	1	MET	met proto-oncogene (hepatocyte growth factor receptor)
hsa-miR-181d	1	0	1	1	1	1	MITF	microphthalmia-associated transcription factor
hsa-miR-181d	1	0	1	1	1	1	PTCH1	patched 1
hsa-miR-181d	1	0	1	1	1	1	NF1	neurofibromin 1
hsa-miR-181d	1	0	1	0	1	1	PKD2	polycystic kidney disease 2 (autosomal dominant)
hsa-miR-181d	1	0	1	0	1	1	PTEN	phosphatase and tensin homolog
hsa-miR-181d	0	0	1	1	1	1	STS	steroid sulfatase (microsomal), isozyme S
hsa-miR-181d	1	1	1	1	1	1	CDKN1A	cyclin-dependent kinase inhibitor 1A (p21, Cip1)
hsa-miR-181d	1	0	1	0	1	1	CYBB	cytochrome b-245, beta polypeptide
hsa-miR-181d	0	0	1	1	1	1	LTBP2	latent transforming growth factor beta binding protein 2
hsa-miR-181d	1	0	1	1	1	1	LDLR	low density lipoprotein receptor
hsa-miR-181d	0	0	1	1	0	0	REN	renin
hsa-miR-181d	0	0	1	1	1	1	FCGR1A	Fc fragment of IgG, high affinity Ia, receptor (CD64)
hsa-miR-181d	0	0	1	1	1	1	IL2	interleukin 2
hsa-miR-181d	0	0	1	1	0	0	CD14	CD14 molecule
hsa-miR-181d	0	0	1	1	1	1	IGF2	insulin-like growth factor 2 (somatomedin A)
hsa-miR-181d	0	0	1	1	1	1	IFNG	interferon, gamma
hsa-miR-181d	0	0	1	1	1	1	ADH4	alcohol dehydrogenase 4 (class II), pi polypeptide
hsa-miR-181d	0	0	1	1	0	0	ADORA3	adenosine A3 receptor
hsa-miR-181d	0	0	1	0	1	1	ADRA2A	adrenoceptor alpha 2A
hsa-miR-181d	1	0	1	1	1	1	CACNB4	calcium channel, voltage-dependent, beta 4 subunit
hsa-miR-181d	1	0	1	1	1	1	DIO2	deiodinase, iodothyronine, type II
hsa-miR-181d	1	0	1	1	1	1	GABRB3	gamma-aminobutyric acid (GABA) A receptor, beta 3
hsa-miR-181d	1	0	1	1	1	1	GABRG2	gamma-aminobutyric acid (GABA) A receptor, gamma 2
hsa-miR-181d	1	0	1	1	1	1	GRM8	glutamate receptor, metabotropic 8
hsa-miR-181d	0	0	1	1	1	1	HTR7	5-hydroxytryptamine (serotonin) receptor 7, adenylate cyclase-coupled
hsa-miR-181d	1	0	1	1	1	1	IGF2R	insulin-like growth factor 2 receptor
hsa-miR-181d	1	0	1	0	1	1	KCNJ2	potassium inwardly-rectifying channel, subfamily J, member 2
hsa-miR-181d	1	0	1	1	1	1	MME	membrane metallo-endopeptidase
hsa-miR-181d	1	0	1	1	1	1	PDE3B	phosphodiesterase 3B, cGMP-inhibited
hsa-miR-181d	0	0	1	1	1	1	PTGS2	prostaglandin-endoperoxide synthase 2 (prostaglandin G/H synthase and cyclooxygenase)
hsa-miR-181d	0	0	1	1	1	1	BLOC1S2	biogenesis of lysosomal organelles complex-1, subunit 2
hsa-miR-181d	0	0	1	1	1	1	C16orf87	chromosome 16 open reading frame 87
hsa-miR-181d	0	0	1	1	0	0	RNASE9	ribonuclease, RNase A family, 9 (non-active)
hsa-miR-181d	1	0	1	1	1	1	C14orf37	chromosome 14 open reading frame 37
hsa-miR-181d	0	0	1	1	1	1	POTEA	POTE ankyrin domain family, member A
hsa-miR-181d	1	0	1	1	1	1	HMGXB4	HMG box domain containing 4
hsa-miR-181d	1	0	1	1	1	1	BICD2	bicaudal D homolog 2 (Drosophila)
hsa-miR-181d	1	0	1	1	0	0	NOMO3	NODAL modulator 3
hsa-miR-181d	0	0	1	1	1	1	ALG11	asparagine-linked glycosylation 11, alpha-1,2-mannosyltransferase homolog (yeast)
hsa-miR-181d	0	0	1	1	1	1	CCDC144NL	coiled-coil domain containing 144 family, N-terminal like
hsa-miR-181d	0	0	1	1	1	1	ZCCHC16	zinc finger, CCHC domain containing 16
hsa-miR-181d	0	0	1	1	1	1	MTHFD2L	methylenetetrahydrofolate dehydrogenase (NADP+ dependent) 2-like
hsa-miR-181d	1	0	1	0	1	1	LRRC55	leucine rich repeat containing 55
hsa-miR-181d	1	0	1	1	1	1	ACTR2	ARP2 actin-related protein 2 homolog (yeast)
hsa-miR-181d	0	0	1	0	1	1	WDR35	WD repeat domain 35
hsa-miR-181d	1	0	1	0	1	1	GOSR1	golgi SNAP receptor complex member 1
hsa-miR-181d	1	0	1	1	1	1	NTRK3	neurotrophic tyrosine kinase, receptor, type 3
hsa-miR-181d	0	0	1	1	1	1	TRIM13	tripartite motif containing 13
hsa-miR-181d	1	0	1	0	1	1	C18orf25	chromosome 18 open reading frame 25
hsa-miR-181d	0	0	1	1	1	1	MXI1	MAX interactor 1
hsa-miR-181d	1	0	1	1	1	1	FNIP1	folliculin interacting protein 1
hsa-miR-181d	1	0	1	1	1	1	ZNF468	zinc finger protein 468
hsa-miR-181d	0	0	1	1	1	1	HRNR	hornerin
hsa-miR-181d	1	0	1	0	1	1	ERMN	ermin, ERM-like protein
hsa-miR-181d	1	0	1	0	1	1	ZC3H12B	zinc finger CCCH-type containing 12B
hsa-miR-181d	1	0	1	0	1	1	C6orf222	chromosome 6 open reading frame 222
hsa-miR-181d	0	0	1	0	1	1	THEMIS	thymocyte selection associated
hsa-miR-181d	1	0	1	1	1	1	FAM171A1	family with sequence similarity 171, member A1
hsa-miR-181d	0	0	1	1	0	0	C9orf135	chromosome 9 open reading frame 135
hsa-miR-181d	1	0	1	1	1	1	PCGF6	polycomb group ring finger 6
hsa-miR-181d	1	0	1	0	1	1	CREB5	cAMP responsive element binding protein 5
hsa-miR-181d	1	0	1	0	1	1	FAM125B	family with sequence similarity 125, member B
hsa-miR-181d	0	0	1	0	1	1	GOLGA8E	golgin A8 family, member E
hsa-miR-181d	1	0	1	0	1	1	RGMB	RGM domain family, member B
hsa-miR-181d	1	0	1	0	1	1	ZKSCAN2	zinc finger with KRAB and SCAN domains 2
hsa-miR-181d	1	0	1	1	1	1	SORCS1	sortilin-related VPS10 domain containing receptor 1
hsa-miR-181d	0	0	1	1	1	1	ZNF833P	zinc finger protein 833, pseudogene
hsa-miR-181d	0	0	1	1	1	1	PURG	purine-rich element binding protein G
hsa-miR-181d	0	0	1	1	1	1	BTBD11	BTB (POZ) domain containing 11
hsa-miR-181d	1	0	1	1	1	1	VMA21	VMA21 vacuolar H+-ATPase homolog (S. cerevisiae)
hsa-miR-181d	0	0	1	1	1	1	POLR2M	polymerase (RNA) II (DNA directed) polypeptide M
hsa-miR-181d	0	0	1	1	1	1	NPIPL1	nuclear pore complex interacting protein-like 1
hsa-miR-181d	0	0	1	1	0	0	FNTA	farnesyltransferase, CAAX box, alpha
hsa-miR-181d	1	0	1	1	1	1	KALRN	kalirin, RhoGEF kinase
hsa-miR-181d	0	0	1	1	1	1	WASF1	WAS protein family, member 1
hsa-miR-181d	1	0	1	0	1	1	CELF2	CUGBP, Elav-like family member 2
hsa-miR-181d	0	0	1	1	0	0	CCT8L1P	chaperonin containing TCP1, subunit 8 (theta)-like 1, pseudogene
hsa-miR-181d	0	0	1	1	1	1	RPS29	ribosomal protein S29
hsa-miR-181d	1	0	1	1	1	1	OPN5	opsin 5
hsa-miR-181d	1	0	1	0	1	1	MSRB3	methionine sulfoxide reductase B3
hsa-miR-181d	0	0	1	1	1	1	MMP28	matrix metallopeptidase 28
hsa-miR-181d	0	0	1	1	1	1	PLGLB1	plasminogen-like B1
hsa-miR-181d	1	0	1	0	1	1	SRGAP3	SLIT-ROBO Rho GTPase activating protein 3
hsa-miR-181d	1	0	1	0	1	1	RYR3	ryanodine receptor 3
hsa-miR-181d	1	0	1	1	1	1	NPM1	nucleophosmin (nucleolar phosphoprotein B23, numatrin)
hsa-miR-181d	1	0	1	0	1	1	GK5	glycerol kinase 5 (putative)
hsa-miR-181d	1	0	1	1	1	1	CBLN3	cerebellin 3 precursor
hsa-miR-181d	1	0	1	1	1	1	C3orf65	chromosome 3 open reading frame 65
hsa-miR-181d	0	0	1	1	1	1	MDH1B	malate dehydrogenase 1B, NAD (soluble)
hsa-miR-181d	0	0	1	0	1	1	C15orf56	chromosome 15 open reading frame 56
hsa-miR-181d	1	0	1	1	1	1	CHN2	chimerin (chimaerin) 2
hsa-miR-181d	1	0	1	1	1	1	SPTSSB	serine palmitoyltransferase, small subunit B
hsa-miR-181d	1	0	1	1	1	1	SCN2A	sodium channel, voltage-gated, type II, alpha subunit
hsa-miR-181d	0	0	1	0	1	1	SCN3B	sodium channel, voltage-gated, type III, beta subunit
hsa-miR-181d	0	0	1	1	1	1	SPOCK3	sparc/osteonectin, cwcv and kazal-like domains proteoglycan (testican) 3
hsa-miR-181d	0	0	1	0	1	1	ZNF765	zinc finger protein 765
hsa-miR-181d	1	0	1	0	1	1	DCUN1D4	DCN1, defective in cullin neddylation 1, domain containing 4 (S. cerevisiae)
hsa-miR-181d	1	0	1	1	1	1	FAM63B	family with sequence similarity 63, member B
hsa-miR-181d	1	0	1	1	1	1	CRCP	CGRP receptor component
hsa-miR-181d	0	0	1	1	1	1	CCDC41	coiled-coil domain containing 41
hsa-miR-181d	0	0	1	1	1	1	PSPC1	paraspeckle component 1
hsa-miR-181d	0	0	1	1	1	1	C6orf162	chromosome 6 open reading frame 162
hsa-miR-181d	1	0	1	1	1	1	DIAPH3	diaphanous homolog 3 (Drosophila)
hsa-miR-181d	1	0	1	1	1	1	C2orf88	chromosome 2 open reading frame 88
hsa-miR-181d	0	0	1	1	1	1	TRAK1	trafficking protein, kinesin binding 1
hsa-miR-181d	1	0	1	1	1	1	SLA	Src-like-adaptor
hsa-miR-181d	0	0	1	1	0	0	REC8	REC8 homolog (yeast)
hsa-miR-181d	1	0	1	1	1	1	METTL9	methyltransferase like 9
hsa-miR-181d	1	0	1	1	1	1	CDC14B	CDC14 cell division cycle 14 homolog B (S. cerevisiae)
hsa-miR-181d	1	0	1	1	1	1	IRF2BP2	interferon regulatory factor 2 binding protein 2
hsa-miR-181d	0	0	1	1	1	1	ZNF586	zinc finger protein 586
hsa-miR-181d	0	0	1	1	1	1	PPCS	phosphopantothenoylcysteine synthetase
hsa-miR-181d	1	0	1	0	1	1	UBXN2B	UBX domain protein 2B
hsa-miR-181d	0	0	1	1	1	1	VCAM1	vascular cell adhesion molecule 1
hsa-miR-181d	1	0	1	1	1	1	VAV3	vav 3 guanine nucleotide exchange factor
hsa-miR-181d	1	0	1	0	1	1	THSD7B	thrombospondin, type I, domain containing 7B
hsa-miR-181d	1	0	1	0	1	1	CCDC85A	coiled-coil domain containing 85A
hsa-miR-181d	0	0	1	1	1	1	HSF5	heat shock transcription factor family member 5
hsa-miR-181d	1	0	1	1	1	1	ZNF697	zinc finger protein 697
hsa-miR-181d	1	0	1	1	1	1	MYO1C	myosin IC
hsa-miR-181d	1	0	1	1	1	1	REPS2	RALBP1 associated Eps domain containing 2
hsa-miR-181d	0	0	1	1	1	1	ACYP1	acylphosphatase 1, erythrocyte (common) type
hsa-miR-181d	1	0	1	0	1	1	KLF9	Kruppel-like factor 9
hsa-miR-181d	1	0	1	1	1	1	CAMK2D	calcium/calmodulin-dependent protein kinase II delta
hsa-miR-181d	1	0	1	0	1	1	CDK6	cyclin-dependent kinase 6
hsa-miR-181d	0	0	1	1	1	1	CLIC2	chloride intracellular channel 2
hsa-miR-181d	1	0	1	1	1	1	CNN1	calponin 1, basic, smooth muscle
hsa-miR-181d	1	0	1	1	1	1	CREBL2	cAMP responsive element binding protein-like 2
hsa-miR-181d	1	0	1	1	1	1	MAPK14	mitogen-activated protein kinase 14
hsa-miR-181d	1	0	1	1	1	1	CTNND2	catenin (cadherin-associated protein), delta 2
hsa-miR-181d	0	0	1	1	1	1	DARS	aspartyl-tRNA synthetase
hsa-miR-181d	1	0	1	1	1	1	EN1	engrailed homeobox 1
hsa-miR-181d	1	0	1	1	1	1	EREG	epiregulin
hsa-miR-181d	0	0	1	0	1	1	CXCL1	chemokine (C-X-C motif) ligand 1 (melanoma growth stimulating activity, alpha)
hsa-miR-181d	0	0	1	1	0	0	PRMT2	protein arginine methyltransferase 2
hsa-miR-181d	0	0	1	1	0	0	DNAJA1	DnaJ (Hsp40) homolog, subfamily A, member 1
hsa-miR-181d	1	0	1	1	1	1	AHR	aryl hydrocarbon receptor
hsa-miR-181d	0	0	1	1	0	0	RHOG	ras homolog family member G
hsa-miR-181d	1	0	1	0	1	1	ATP1B2	ATPase, Na+/K+ transporting, beta 2 polypeptide
hsa-miR-181d	1	0	1	1	1	1	ATP6V1A	ATPase, H+ transporting, lysosomal 70kDa, V1 subunit A
hsa-miR-181d	1	0	1	1	1	1	BAAT	bile acid CoA: amino acid N-acyltransferase (glycine N-choloyltransferase)
hsa-miR-181d	1	0	1	1	1	1	BNC1	basonuclin 1
hsa-miR-181d	1	0	1	0	1	1	CEBPG	CCAAT/enhancer binding protein (C/EBP), gamma
hsa-miR-181d	0	0	1	1	1	1	CHGB	chromogranin B (secretogranin 1)
hsa-miR-181d	0	0	1	1	1	1	CKS1B	CDC28 protein kinase regulatory subunit 1B
hsa-miR-181d	1	0	1	1	1	1	CLCN4	chloride channel, voltage-sensitive 4
hsa-miR-181d	1	0	1	1	1	1	COL4A1	collagen, type IV, alpha 1
hsa-miR-181d	1	0	1	1	1	1	COL4A6	collagen, type IV, alpha 6
hsa-miR-181d	1	0	1	0	1	1	COL19A1	collagen, type XIX, alpha 1
hsa-miR-181d	0	0	1	0	0	0	CPE	carboxypeptidase E
hsa-miR-181d	1	0	1	1	1	1	DR1	down-regulator of transcription 1, TBP-binding (negative cofactor 2)
hsa-miR-181d	0	0	1	1	1	1	EGR4	early growth response 4
hsa-miR-181d	1	0	1	1	1	1	FBN2	fibrillin 2
hsa-miR-181d	0	0	1	1	1	1	FLI1	Friend leukemia virus integration 1
hsa-miR-181d	0	0	1	1	1	1	FPR3	formyl peptide receptor 3
hsa-miR-181d	1	0	1	0	1	1	FUT4	fucosyltransferase 4 (alpha (1,3) fucosyltransferase, myeloid-specific)
hsa-miR-181d	1	0	1	1	1	1	GAB1	GRB2-associated binding protein 1
hsa-miR-181d	0	0	1	0	1	1	GCLM	glutamate-cysteine ligase, modifier subunit
hsa-miR-181d	1	0	1	1	1	1	CXCL2	chemokine (C-X-C motif) ligand 2
hsa-miR-181d	0	0	1	0	1	1	GYPA	glycophorin A (MNS blood group)
hsa-miR-181d	0	0	1	1	1	1	HOXB5	homeobox B5
hsa-miR-181d	1	0	1	1	1	1	ISL1	ISL LIM homeobox 1
hsa-miR-181d	1	0	1	1	1	1	ITGA2	integrin, alpha 2 (CD49B, alpha 2 subunit of VLA-2 receptor)
hsa-miR-181d	1	0	1	1	1	1	ITPR2	inositol 1,4,5-trisphosphate receptor, type 2
hsa-miR-181d	1	0	1	1	1	1	LIFR	leukemia inhibitory factor receptor alpha
hsa-miR-181d	1	0	1	1	1	1	LY75	lymphocyte antigen 75
hsa-miR-181d	1	0	1	1	1	1	MAFG	v-maf musculoaponeurotic fibrosarcoma oncogene homolog G (avian)
hsa-miR-181d	1	0	1	1	1	1	MN1	meningioma (disrupted in balanced translocation) 1
hsa-miR-181d	0	0	1	1	1	1	MTAP	methylthioadenosine phosphorylase
hsa-miR-181d	0	0	1	1	1	1	CEACAM6	carcinoembryonic antigen-related cell adhesion molecule 6 (non-specific cross reacting antigen)
hsa-miR-181d	1	0	1	1	1	1	NCBP1	nuclear cap binding protein subunit 1, 80kDa
hsa-miR-181d	0	0	1	1	1	1	NOV	nephroblastoma overexpressed
hsa-miR-181d	1	0	1	1	1	1	NPAT	nuclear protein, ataxia-telangiectasia locus
hsa-miR-181d	1	0	1	0	1	1	NRAS	neuroblastoma RAS viral (v-ras) oncogene homolog
hsa-miR-181d	1	0	1	1	1	1	PCDH7	protocadherin 7
hsa-miR-181d	1	0	1	0	1	1	CDK17	cyclin-dependent kinase 17
hsa-miR-181d	1	0	1	0	1	1	PDK1	pyruvate dehydrogenase kinase, isozyme 1
hsa-miR-181d	0	0	1	1	1	1	PEX13	peroxisomal biogenesis factor 13
hsa-miR-181d	0	0	1	1	1	1	PLGLB2	plasminogen-like B2
hsa-miR-181d	0	0	1	1	1	1	PPP1R3A	protein phosphatase 1, regulatory subunit 3A
hsa-miR-181d	0	0	1	1	1	1	PREP	prolyl endopeptidase
hsa-miR-181d	1	0	1	0	1	1	PRKCA	protein kinase C, alpha
hsa-miR-181d	1	0	1	1	1	1	PRKD1	protein kinase D1
hsa-miR-181d	1	0	1	1	1	1	MAPK6	mitogen-activated protein kinase 6
hsa-miR-181d	0	0	1	1	1	1	MAP2K1	mitogen-activated protein kinase kinase 1
hsa-miR-181d	0	0	1	1	1	1	MAP2K6	mitogen-activated protein kinase kinase 6
hsa-miR-181d	0	0	1	1	1	1	PTPRR	protein tyrosine phosphatase, receptor type, R
hsa-miR-181d	0	0	1	1	1	1	RFC3	replication factor C (activator 1) 3, 38kDa
hsa-miR-181d	1	0	1	1	1	1	RGS16	regulator of G-protein signaling 16
hsa-miR-181d	1	0	1	0	1	1	SORT1	sortilin 1
hsa-miR-181d	1	0	1	0	1	1	CCL22	chemokine (C-C motif) ligand 22
hsa-miR-181d	0	0	1	0	1	1	CXCL5	chemokine (C-X-C motif) ligand 5
hsa-miR-181d	0	0	1	1	1	1	SDC2	syndecan 2
hsa-miR-181d	1	0	1	1	1	1	SHB	Src homology 2 domain containing adaptor protein B
hsa-miR-181d	1	0	1	0	1	1	ST6GAL1	ST6 beta-galactosamide alpha-2,6-sialyltranferase 1
hsa-miR-181d	1	0	1	1	1	1	SLC9A2	solute carrier family 9, subfamily A (NHE2, cation proton antiporter 2), member 2
hsa-miR-181d	1	0	1	1	1	1	SMARCC1	SWI/SNF related, matrix associated, actin dependent regulator of chromatin, subfamily c, member 1
hsa-miR-181d	1	0	1	1	1	1	SRI	sorcin
hsa-miR-181d	0	0	1	1	0	0	SSX2	synovial sarcoma, X breakpoint 2
hsa-miR-181d	1	0	1	0	1	1	STC1	stanniocalcin 1
hsa-miR-181d	1	0	1	1	1	1	SYN2	synapsin II
hsa-miR-181d	1	0	1	1	1	1	TAF4	TAF4 RNA polymerase II, TATA box binding protein (TBP)-associated factor, 135kDa
hsa-miR-181d	1	0	1	1	1	1	TFAP2B	transcription factor AP-2 beta (activating enhancer binding protein 2 beta)
hsa-miR-181d	1	0	1	1	1	1	NR2E1	nuclear receptor subfamily 2, group E, member 1
hsa-miR-181d	0	0	1	1	1	1	TNNI1	troponin I type 1 (skeletal, slow)
hsa-miR-181d	1	0	1	0	1	1	TSPYL1	TSPY-like 1
hsa-miR-181d	0	0	1	1	1	1	UBE2D1	ubiquitin-conjugating enzyme E2D 1
hsa-miR-181d	1	0	1	1	1	1	UBE2N	ubiquitin-conjugating enzyme E2N
hsa-miR-181d	0	0	1	0	1	1	ZFY	zinc finger protein, Y-linked
hsa-miR-181d	0	0	1	1	1	1	ZNF124	zinc finger protein 124
hsa-miR-181d	1	0	1	1	1	1	HMGA2	high mobility group AT-hook 2
hsa-miR-181d	1	0	1	1	1	1	TAF15	TAF15 RNA polymerase II, TATA box binding protein (TBP)-associated factor, 68kDa
hsa-miR-181d	0	0	1	1	0	0	HIST1H3D	histone cluster 1, H3d
hsa-miR-181d	1	0	1	0	1	1	VAPA	VAMP (vesicle-associated membrane protein)-associated protein A, 33kDa
hsa-miR-181d	0	0	1	1	1	1	SOAT2	sterol O-acyltransferase 2
hsa-miR-181d	0	0	1	1	1	1	NSMAF	neutral sphingomyelinase (N-SMase) activation associated factor
hsa-miR-181d	0	0	1	1	1	1	DDO	D-aspartate oxidase
hsa-miR-181d	0	0	1	1	1	1	CHST1	carbohydrate (keratan sulfate Gal-6) sulfotransferase 1
hsa-miR-181d	0	0	1	1	1	1	AGPS	alkylglycerone phosphate synthase
hsa-miR-181d	0	0	1	1	1	1	AP3B1	adaptor-related protein complex 3, beta 1 subunit
hsa-miR-181d	1	0	1	1	1	1	CDC14A	CDC14 cell division cycle 14 homolog A (S. cerevisiae)
hsa-miR-181d	0	0	1	1	1	1	PRPF18	PRP18 pre-mRNA processing factor 18 homolog (S. cerevisiae)
hsa-miR-181d	0	0	1	1	1	1	KMO	kynurenine 3-monooxygenase (kynurenine 3-hydroxylase)
hsa-miR-181d	1	0	1	1	1	1	EXO1	exonuclease 1
hsa-miR-181d	1	0	1	1	1	1	TNFSF11	tumor necrosis factor (ligand) superfamily, member 11
hsa-miR-181d	0	0	1	1	1	1	SLC25A12	solute carrier family 25 (aspartate/glutamate carrier), member 12
hsa-miR-181d	1	0	1	0	1	1	TNKS	tankyrase, TRF1-interacting ankyrin-related ADP-ribose polymerase
hsa-miR-181d	0	0	1	1	1	1	SNX4	sorting nexin 4
hsa-miR-181d	1	0	1	1	1	1	URI1	URI1, prefoldin-like chaperone
hsa-miR-181d	0	0	1	1	1	1	CRADD	CASP2 and RIPK1 domain containing adaptor with death domain
hsa-miR-181d	1	0	1	1	1	1	SUCLG2	succinate-CoA ligase, GDP-forming, beta subunit
hsa-miR-181d	0	0	1	1	0	0	SAP30	Sin3A-associated protein, 30kDa
hsa-miR-181d	1	0	1	1	1	1	NRP2	neuropilin 2
hsa-miR-181d	1	0	1	1	1	1	KAT2B	K(lysine) acetyltransferase 2B
hsa-miR-181d	1	0	1	1	1	1	ALDH1A2	aldehyde dehydrogenase 1 family, member A2
hsa-miR-181d	0	0	1	1	1	1	TIMELESS	timeless homolog (Drosophila)
hsa-miR-181d	1	0	1	0	1	1	WASL	Wiskott-Aldrich syndrome-like
hsa-miR-181d	0	0	1	1	1	1	RNF8	ring finger protein 8, E3 ubiquitin protein ligase
hsa-miR-181d	0	0	1	1	1	1	CA8	carbonic anhydrase VIII
hsa-miR-181d	0	0	1	1	1	1	CDKN1B	cyclin-dependent kinase inhibitor 1B (p27, Kip1)
hsa-miR-181d	1	0	1	0	1	1	IREB2	iron-responsive element binding protein 2
hsa-miR-181d	1	0	1	0	1	1	SLC1A2	solute carrier family 1 (glial high affinity glutamate transporter), member 2
hsa-miR-181d	0	0	1	1	0	0	WNT2B	wingless-type MMTV integration site family, member 2B
hsa-miR-181d	0	0	1	0	1	1	TMSB4Y	thymosin beta 4, Y-linked
hsa-miR-181d	0	0	1	1	1	1	SEP15	15 kDa selenoprotein
hsa-miR-181d	1	0	1	1	1	1	SLC25A27	solute carrier family 25, member 27
hsa-miR-181d	1	0	1	1	1	1	GDA	guanine deaminase
hsa-miR-181d	1	0	1	1	1	1	COX11	COX11 cytochrome c oxidase assembly homolog (yeast)
hsa-miR-181d	1	0	1	1	1	1	DACH1	dachshund homolog 1 (Drosophila)
hsa-miR-181d	1	0	1	1	1	1	DAG1	dystroglycan 1 (dystrophin-associated glycoprotein 1)
hsa-miR-181d	1	0	1	1	1	1	EPS8	epidermal growth factor receptor pathway substrate 8
hsa-miR-181d	1	0	1	0	1	1	ACSL4	acyl-CoA synthetase long-chain family member 4
hsa-miR-181d	0	0	1	1	1	1	GPC5	glypican 5
hsa-miR-181d	1	0	1	1	1	1	FLOT2	flotillin 2
hsa-miR-181d	0	0	1	1	1	1	GP5	glycoprotein V (platelet)
hsa-miR-181d	1	0	1	1	1	1	LRP2	low density lipoprotein receptor-related protein 2
hsa-miR-181d	0	0	1	1	1	1	PIGH	phosphatidylinositol glycan anchor biosynthesis, class H
hsa-miR-181d	0	0	1	0	1	1	POU4F2	POU class 4 homeobox 2
hsa-miR-181d	1	0	1	1	1	1	COIL	coilin
hsa-miR-181d	1	0	1	1	1	1	RAB11A	RAB11A, member RAS oncogene family
hsa-miR-181d	0	0	1	1	1	1	MGAM	maltase-glucoamylase (alpha-glucosidase)
hsa-miR-181d	0	0	1	0	1	1	BPY2	basic charge, Y-linked, 2
hsa-miR-181d	1	0	1	1	1	1	MTMR6	myotubularin related protein 6
hsa-miR-181d	0	0	1	1	0	0	NMI	N-myc (and STAT) interactor
hsa-miR-181d	0	0	1	1	1	1	LATS1	LATS, large tumor suppressor, homolog 1 (Drosophila)
hsa-miR-181d	0	0	1	1	1	1	MTA2	metastasis associated 1 family, member 2
hsa-miR-181d	1	0	1	1	1	1	NREP	neuronal regeneration related protein homolog (rat)
hsa-miR-181d	1	0	1	1	1	1	B4GALT6	UDP-Gal:betaGlcNAc beta 1,4- galactosyltransferase, polypeptide 6
hsa-miR-181d	0	0	1	0	1	1	ADIPOQ	adiponectin, C1Q and collagen domain containing
hsa-miR-181d	1	0	1	1	1	1	HOMER2	homer homolog 2 (Drosophila)
hsa-miR-181d	1	0	1	1	1	1	AKAP7	A kinase (PRKA) anchor protein 7
hsa-miR-181d	0	0	1	1	0	0	PDIA4	protein disulfide isomerase family A, member 4
hsa-miR-181d	0	0	1	1	1	1	CALB1	calbindin 1, 28kDa
hsa-miR-181d	0	0	1	1	1	1	JAK2	Janus kinase 2
hsa-miR-181d	1	0	1	0	1	1	KIF5A	kinesin family member 5A
hsa-miR-181d	0	0	1	1	1	1	PRCP	prolylcarboxypeptidase (angiotensinase C)
hsa-miR-181d	1	0	1	1	1	1	MED13	mediator complex subunit 13
hsa-miR-181d	1	0	1	1	1	1	APLNR	apelin receptor
hsa-miR-181d	0	0	1	1	1	1	CA3	carbonic anhydrase III, muscle specific
hsa-miR-181d	1	0	1	0	1	1	CALM3	calmodulin 3 (phosphorylase kinase, delta)
hsa-miR-181d	1	1	1	1	1	1	MAP3K8	mitogen-activated protein kinase kinase kinase 8
hsa-miR-181d	1	0	1	1	1	1	DCC	deleted in colorectal carcinoma
hsa-miR-181d	1	0	1	0	1	1	E2F1	E2F transcription factor 1
hsa-miR-181d	1	0	1	1	1	1	GABPB1	GA binding protein transcription factor, beta subunit 1
hsa-miR-181d	0	0	1	1	1	1	MSTN	myostatin
hsa-miR-181d	0	0	1	1	1	1	GPR22	G protein-coupled receptor 22
hsa-miR-181d	1	0	1	1	1	1	H3F3B	H3 histone, family 3B (H3.3B)
hsa-miR-181d	0	0	1	1	1	1	PPP1R3C	protein phosphatase 1, regulatory subunit 3C
hsa-miR-181d	1	0	1	1	1	1	AKT3	v-akt murine thymoma viral oncogene homolog 3 (protein kinase B, gamma)
hsa-miR-181d	1	0	1	1	1	1	GTF2E1	general transcription factor IIE, polypeptide 1, alpha 56kDa
hsa-miR-181d	0	0	1	1	1	1	HSD11B1	hydroxysteroid (11-beta) dehydrogenase 1
hsa-miR-181d	0	0	1	1	0	0	IVL	involucrin
hsa-miR-181d	0	0	1	0	1	1	POU3F2	POU class 3 homeobox 2
hsa-miR-181d	1	0	1	1	1	1	RGS4	regulator of G-protein signaling 4
hsa-miR-181d	0	0	1	1	1	1	SSX1	synovial sarcoma, X breakpoint 1
hsa-miR-181d	0	0	1	1	1	1	PDCD7	programmed cell death 7
hsa-miR-181d	1	0	1	0	1	1	TSPAN2	tetraspanin 2
hsa-miR-181d	1	0	1	0	1	1	CLEC3A	C-type lectin domain family 3, member A
hsa-miR-181d	0	0	1	1	1	1	MPHOSPH6	M-phase phosphoprotein 6
hsa-miR-181d	1	0	1	0	1	1	CALCRL	calcitonin receptor-like
hsa-miR-181d	1	0	1	1	1	1	GLYAT	glycine-N-acyltransferase
hsa-miR-181d	0	0	1	1	1	1	ZMPSTE24	zinc metallopeptidase STE24 homolog (S. cerevisiae)
hsa-miR-181d	1	0	1	1	1	1	PURA	purine-rich element binding protein A
[truncated: 1,082 more rows]
