# Supplementary material for: Profiling of Selected MicroRNAs in Proliferative Eutopic Endometrium of Women with Ovarian Endometriosis
Source: Biomed Res Int. 2015 Aug 20;2015:760698. doi: 10.1155/2015/760698 (PMC4558423; doi:10.1155/2015/760698)
Supplement: Supplementary file 1 — Table I: The names of miRNAs significantly differentially expressed between eutopic endometrium of patients with endometriosis vs eutopic endometrium of patients without endometriosis. Table II: The associations between miRNA and mRNA, which presents detailed results of the search of six major databases i.e targetscan, tarbase, miranda, mirbase, mirtarget2 and pictar. [file 760698.f1.zip › 760698.f1/Table II/hsa-miR-188-3p.tsv]

miR	targetscan	tarbase	miranda	mirbase	mirtarget2	pictar	GeneSymbol	GeneName
hsa-miR-188-3p	1	0	1	1	0	0	SRCAP	Snf2-related CREBBP activator protein
hsa-miR-188-3p	1	0	1	1	1	1	ABCC5	ATP-binding cassette, sub-family C (CFTR/MRP), member 5
hsa-miR-188-3p	1	0	1	0	1	1	PTPRT	protein tyrosine phosphatase, receptor type, T
hsa-miR-188-3p	0	0	1	1	1	1	C2CD2L	C2CD2-like
hsa-miR-188-3p	1	0	1	1	1	1	LPHN2	latrophilin 2
hsa-miR-188-3p	1	0	1	1	1	1	BAHD1	bromo adjacent homology domain containing 1
hsa-miR-188-3p	1	0	1	1	1	1	CIT	citron (rho-interacting, serine/threonine kinase 21)
hsa-miR-188-3p	1	0	1	1	1	1	NLGN4Y	neuroligin 4, Y-linked
hsa-miR-188-3p	1	0	1	1	1	1	RGL1	ral guanine nucleotide dissociation stimulator-like 1
hsa-miR-188-3p	0	0	1	0	0	0	THSD7A	thrombospondin, type I, domain containing 7A
hsa-miR-188-3p	1	0	1	1	1	1	RPGRIP1L	RPGRIP1-like
hsa-miR-188-3p	1	0	1	1	1	1	FOXJ3	forkhead box J3
hsa-miR-188-3p	1	0	1	1	0	0	ATAD2B	ATPase family, AAA domain containing 2B
hsa-miR-188-3p	1	0	1	1	1	1	ASAP1	ArfGAP with SH3 domain, ankyrin repeat and PH domain 1
hsa-miR-188-3p	0	0	1	0	0	0	MTA3	metastasis associated 1 family, member 3
hsa-miR-188-3p	1	0	1	0	0	0	ODZ4	odz, odd Oz/ten-m homolog 4 (Drosophila)
hsa-miR-188-3p	1	0	1	0	0	0	NYNRIN	NYN domain and retroviral integrase containing
hsa-miR-188-3p	1	0	1	1	1	1	BAZ2B	bromodomain adjacent to zinc finger domain, 2B
hsa-miR-188-3p	1	0	1	1	0	0	ZSWIM5	zinc finger, SWIM-type containing 5
hsa-miR-188-3p	1	0	1	1	0	0	NCKAP5L	NCK-associated protein 5-like
hsa-miR-188-3p	1	0	1	1	1	1	IKZF4	IKAROS family zinc finger 4 (Eos)
hsa-miR-188-3p	1	0	1	1	1	1	LCOR	ligand dependent nuclear receptor corepressor
hsa-miR-188-3p	1	0	1	1	1	1	KIAA1804	mixed lineage kinase 4
hsa-miR-188-3p	0	0	1	1	0	0	COL27A1	collagen, type XXVII, alpha 1
hsa-miR-188-3p	1	0	1	1	1	1	CSRNP1	cysteine-serine-rich nuclear protein 1
hsa-miR-188-3p	0	0	1	1	1	1	KIAA1967	KIAA1967
hsa-miR-188-3p	1	0	1	1	1	1	SH3TC2	SH3 domain and tetratricopeptide repeats 2
hsa-miR-188-3p	0	0	1	1	0	0	CIRH1A	cirrhosis, autosomal recessive 1A (cirhin)
hsa-miR-188-3p	1	0	1	1	1	1	PRDM16	PR domain containing 16
hsa-miR-188-3p	1	0	1	1	1	1	PAM	peptidylglycine alpha-amidating monooxygenase
hsa-miR-188-3p	1	0	1	1	1	1	RFX4	regulatory factor X, 4 (influences HLA class II expression)
hsa-miR-188-3p	1	0	1	0	0	0	ZC3H12C	zinc finger CCCH-type containing 12C
hsa-miR-188-3p	1	0	1	1	1	1	C11orf57	chromosome 11 open reading frame 57
hsa-miR-188-3p	0	0	1	1	0	0	DDB2	damage-specific DNA binding protein 2, 48kDa
hsa-miR-188-3p	1	1	1	1	1	1	BACE1	beta-site APP-cleaving enzyme 1
hsa-miR-188-3p	1	0	1	1	1	1	NRXN2	neurexin 2
hsa-miR-188-3p	0	0	1	1	0	0	DBP	D site of albumin promoter (albumin D-box) binding protein
hsa-miR-188-3p	1	0	1	1	0	0	NDST2	N-deacetylase/N-sulfotransferase (heparan glucosaminyl) 2
hsa-miR-188-3p	0	0	1	1	0	0	KCNC3	potassium voltage-gated channel, Shaw-related subfamily, member 3
hsa-miR-188-3p	1	0	1	1	1	1	PLEKHH3	pleckstrin homology domain containing, family H (with MyTH4 domain) member 3
hsa-miR-188-3p	1	0	1	1	1	1	PML	promyelocytic leukemia
hsa-miR-188-3p	1	0	1	1	1	1	PHC1	polyhomeotic homolog 1 (Drosophila)
hsa-miR-188-3p	0	0	1	0	1	1	DCAF11	DDB1 and CUL4 associated factor 11
hsa-miR-188-3p	1	0	1	1	1	1	SLC8A1	solute carrier family 8 (sodium/calcium exchanger), member 1
hsa-miR-188-3p	1	0	1	1	1	1	SYNCRIP	synaptotagmin binding, cytoplasmic RNA interacting protein
hsa-miR-188-3p	1	0	1	0	1	1	MPPED2	metallophosphoesterase domain containing 2
hsa-miR-188-3p	0	0	1	1	1	1	DGKI	diacylglycerol kinase, iota
hsa-miR-188-3p	1	0	1	1	1	1	DMTF1	cyclin D binding myb-like transcription factor 1
hsa-miR-188-3p	1	0	1	1	1	1	ABI1	abl-interactor 1
hsa-miR-188-3p	0	0	1	1	0	0	IFT27	intraflagellar transport 27 homolog (Chlamydomonas)
hsa-miR-188-3p	1	0	1	1	1	1	MYO5A	myosin VA (heavy chain 12, myoxin)
hsa-miR-188-3p	0	0	1	1	0	0	EIF4E2	eukaryotic translation initiation factor 4E family member 2
hsa-miR-188-3p	0	0	1	1	1	1	ZNF747	zinc finger protein 747
hsa-miR-188-3p	0	0	1	1	0	0	ITGA2B	integrin, alpha 2b (platelet glycoprotein IIb of IIb/IIIa complex, antigen CD41)
hsa-miR-188-3p	0	0	1	1	0	0	HLA-DMB	major histocompatibility complex, class II, DM beta
hsa-miR-188-3p	0	0	1	1	0	0	BMP1	bone morphogenetic protein 1
hsa-miR-188-3p	1	0	1	1	1	1	NCOA3	nuclear receptor coactivator 3
hsa-miR-188-3p	1	0	1	1	1	1	ZFX	zinc finger protein, X-linked
hsa-miR-188-3p	0	0	1	1	1	1	SGSH	N-sulfoglucosamine sulfohydrolase
hsa-miR-188-3p	1	0	1	1	1	1	MEF2D	myocyte enhancer factor 2D
hsa-miR-188-3p	1	0	1	1	1	1	PICALM	phosphatidylinositol binding clathrin assembly protein
hsa-miR-188-3p	1	0	1	1	1	1	PCDH17	protocadherin 17
hsa-miR-188-3p	0	0	1	1	1	1	SESN1	sestrin 1
hsa-miR-188-3p	0	0	1	1	0	0	PLA1A	phospholipase A1 member A
hsa-miR-188-3p	0	0	1	1	1	1	SLC16A7	solute carrier family 16, member 7 (monocarboxylic acid transporter 2)
hsa-miR-188-3p	0	0	1	0	0	0	FP588	uncharacterized LOC92973
hsa-miR-188-3p	0	0	1	1	1	1	MICAL2	microtubule associated monoxygenase, calponin and LIM domain containing 2
hsa-miR-188-3p	0	0	1	1	1	1	CD84	CD84 molecule
hsa-miR-188-3p	0	0	1	1	1	1	SLIT2	slit homolog 2 (Drosophila)
hsa-miR-188-3p	1	0	1	1	1	1	MBNL2	muscleblind-like splicing regulator 2
hsa-miR-188-3p	1	0	1	1	1	1	CTNND1	catenin (cadherin-associated protein), delta 1
hsa-miR-188-3p	1	0	1	1	1	1	ERLIN1	ER lipid raft associated 1
hsa-miR-188-3p	0	0	1	1	1	1	SC5DL	sterol-C5-desaturase (ERG3 delta-5-desaturase homolog, S. cerevisiae)-like
hsa-miR-188-3p	1	0	1	1	1	1	TP63	tumor protein p63
hsa-miR-188-3p	0	0	1	1	1	1	SSBP2	single-stranded DNA binding protein 2
hsa-miR-188-3p	0	0	1	1	0	0	CARD10	caspase recruitment domain family, member 10
hsa-miR-188-3p	0	0	1	1	1	1	PCBP4	poly(rC) binding protein 4
hsa-miR-188-3p	1	0	1	0	1	1	CD164	CD164 molecule, sialomucin
hsa-miR-188-3p	0	0	1	1	1	1	MSTO1	misato homolog 1 (Drosophila)
hsa-miR-188-3p	0	0	1	1	1	1	DCAF6	DDB1 and CUL4 associated factor 6
hsa-miR-188-3p	0	0	1	1	1	1	DHX16	DEAH (Asp-Glu-Ala-His) box polypeptide 16
hsa-miR-188-3p	1	0	1	1	1	1	HNRNPH3	heterogeneous nuclear ribonucleoprotein H3 (2H9)
hsa-miR-188-3p	1	0	1	1	1	1	CAB39	calcium binding protein 39
hsa-miR-188-3p	1	0	1	0	1	1	BECN1	beclin 1, autophagy related
hsa-miR-188-3p	0	0	1	0	1	1	CLEC5A	C-type lectin domain family 5, member A
hsa-miR-188-3p	1	0	1	1	1	1	ZNF202	zinc finger protein 202
hsa-miR-188-3p	1	0	1	1	1	1	SNPH	syntaphilin
hsa-miR-188-3p	0	0	1	1	1	1	CHRD	chordin
hsa-miR-188-3p	1	0	1	1	1	1	SYDE1	synapse defective 1, Rho GTPase, homolog 1 (C. elegans)
hsa-miR-188-3p	1	0	1	1	1	1	DESI2	desumoylating isopeptidase 2
hsa-miR-188-3p	1	0	1	1	1	1	STRN3	striatin, calmodulin binding protein 3
hsa-miR-188-3p	0	0	1	1	1	1	CELF1	CUGBP, Elav-like family member 1
hsa-miR-188-3p	1	0	1	1	1	1	RBM47	RNA binding motif protein 47
hsa-miR-188-3p	1	0	1	1	1	1	ERGIC1	endoplasmic reticulum-golgi intermediate compartment (ERGIC) 1
hsa-miR-188-3p	1	0	1	1	1	1	CALN1	calneuron 1
hsa-miR-188-3p	0	0	1	0	0	0	LOC645355	uncharacterized LOC645355
hsa-miR-188-3p	1	0	1	1	1	1	KLHL12	kelch-like 12 (Drosophila)
hsa-miR-188-3p	0	0	1	0	1	1	ZNF302	zinc finger protein 302
hsa-miR-188-3p	1	0	1	0	1	1	GLYR1	glyoxylate reductase 1 homolog (Arabidopsis)
hsa-miR-188-3p	1	0	1	1	1	1	LETMD1	LETM1 domain containing 1
hsa-miR-188-3p	0	0	1	1	0	0	ZAN	zonadhesin
hsa-miR-188-3p	1	0	1	0	1	1	USP32	ubiquitin specific peptidase 32
hsa-miR-188-3p	1	0	1	1	1	1	KCNIP2	Kv channel interacting protein 2
hsa-miR-188-3p	1	0	1	1	1	1	NF2	neurofibromin 2 (merlin)
hsa-miR-188-3p	1	0	1	0	1	1	WIPF2	WAS/WASL interacting protein family, member 2
hsa-miR-188-3p	1	0	1	1	1	1	CALCOCO1	calcium binding and coiled-coil domain 1
hsa-miR-188-3p	0	0	1	0	1	1	ZNF268	zinc finger protein 268
hsa-miR-188-3p	0	0	1	1	1	1	WBP2NL	WBP2 N-terminal like
hsa-miR-188-3p	0	0	1	1	0	0	CNKSR2	connector enhancer of kinase suppressor of Ras 2
hsa-miR-188-3p	0	0	1	0	0	0	MYO15B	myosin XVB pseudogene
hsa-miR-188-3p	1	0	1	1	1	1	ST3GAL3	ST3 beta-galactoside alpha-2,3-sialyltransferase 3
hsa-miR-188-3p	1	0	1	1	0	0	SAMD4A	sterile alpha motif domain containing 4A
hsa-miR-188-3p	1	0	1	1	1	1	PSIP1	PC4 and SFRS1 interacting protein 1
hsa-miR-188-3p	0	0	1	1	1	1	C10orf90	chromosome 10 open reading frame 90
hsa-miR-188-3p	1	0	1	1	1	1	RBFOX1	RNA binding protein, fox-1 homolog (C. elegans) 1
hsa-miR-188-3p	1	0	1	1	0	0	POLR2J3	polymerase (RNA) II (DNA directed) polypeptide J3
hsa-miR-188-3p	0	0	1	1	1	1	LGI1	leucine-rich, glioma inactivated 1
hsa-miR-188-3p	0	0	1	1	0	0	MT1E	metallothionein 1E
hsa-miR-188-3p	1	0	1	1	0	0	ST3GAL4	ST3 beta-galactoside alpha-2,3-sialyltransferase 4
hsa-miR-188-3p	1	0	1	1	1	1	PTBP2	polypyrimidine tract binding protein 2
hsa-miR-188-3p	1	0	1	1	1	1	INADL	InaD-like (Drosophila)
hsa-miR-188-3p	1	0	1	1	1	1	AFF2	AF4/FMR2 family, member 2
hsa-miR-188-3p	1	0	1	1	0	0	PI4KB	phosphatidylinositol 4-kinase, catalytic, beta
hsa-miR-188-3p	1	0	1	1	1	1	SUCO	SUN domain containing ossification factor
hsa-miR-188-3p	1	0	1	1	1	1	ILF3	interleukin enhancer binding factor 3, 90kDa
hsa-miR-188-3p	0	0	1	1	1	1	CD1E	CD1e molecule
hsa-miR-188-3p	1	0	1	1	1	1	VAMP7	vesicle-associated membrane protein 7
hsa-miR-188-3p	1	0	1	1	1	1	PDE1B	phosphodiesterase 1B, calmodulin-dependent
hsa-miR-188-3p	0	0	1	1	0	0	ADAMTS13	ADAM metallopeptidase with thrombospondin type 1 motif, 13
hsa-miR-188-3p	0	0	1	1	1	1	TAF1	TAF1 RNA polymerase II, TATA box binding protein (TBP)-associated factor, 250kDa
hsa-miR-188-3p	0	0	1	1	0	0	MBD1	methyl-CpG binding domain protein 1
hsa-miR-188-3p	0	0	1	1	1	1	SLC8A3	solute carrier family 8 (sodium/calcium exchanger), member 3
hsa-miR-188-3p	0	0	1	1	0	0	GPRC5C	G protein-coupled receptor, family C, group 5, member C
hsa-miR-188-3p	0	0	1	1	1	1	PARP16	poly (ADP-ribose) polymerase family, member 16
hsa-miR-188-3p	0	0	1	0	0	0	TUG1	taurine upregulated 1 (non-protein coding)
hsa-miR-188-3p	1	0	1	1	1	1	PTBP3	polypyrimidine tract binding protein 3
hsa-miR-188-3p	1	0	1	1	1	1	SLC38A2	solute carrier family 38, member 2
hsa-miR-188-3p	1	0	1	1	1	1	ACER3	alkaline ceramidase 3
hsa-miR-188-3p	0	0	1	1	1	1	STAU2	staufen, RNA binding protein, homolog 2 (Drosophila)
hsa-miR-188-3p	1	0	1	1	1	1	KLHDC8B	kelch domain containing 8B
hsa-miR-188-3p	0	0	1	1	0	0	MLST8	MTOR associated protein, LST8 homolog (S. cerevisiae)
hsa-miR-188-3p	1	0	1	1	1	1	PGAP1	post-GPI attachment to proteins 1
hsa-miR-188-3p	1	0	1	1	1	1	S100PBP	S100P binding protein
hsa-miR-188-3p	0	0	1	1	0	0	CLPB	ClpB caseinolytic peptidase B homolog (E. coli)
hsa-miR-188-3p	0	0	1	1	1	1	SPATA5L1	spermatogenesis associated 5-like 1
hsa-miR-188-3p	1	0	1	1	1	1	STARD7	StAR-related lipid transfer (START) domain containing 7
hsa-miR-188-3p	1	0	1	1	1	1	MARCH8	membrane-associated ring finger (C3HC4) 8, E3 ubiquitin protein ligase
hsa-miR-188-3p	0	0	1	0	0	0	LOC284561	uncharacterized LOC284561
hsa-miR-188-3p	1	0	1	1	0	0	ST6GALNAC6	ST6 (alpha-N-acetyl-neuraminyl-2,3-beta-galactosyl-1,3)-N-acetylgalactosaminide alpha-2,6-sialyltransferase 6
hsa-miR-188-3p	0	0	1	1	1	1	CXorf57	chromosome X open reading frame 57
hsa-miR-188-3p	0	0	1	0	0	0	LOC286059	tumor necrosis factor receptor superfamily, member 10d, decoy with truncated death domain pseudogene
hsa-miR-188-3p	0	0	1	1	1	1	SIGLEC1	sialic acid binding Ig-like lectin 1, sialoadhesin
hsa-miR-188-3p	0	0	1	1	0	0	SPON2	spondin 2, extracellular matrix protein
hsa-miR-188-3p	1	0	1	0	1	1	STK40	serine/threonine kinase 40
hsa-miR-188-3p	1	0	1	1	1	1	GBF1	golgi brefeldin A resistant guanine nucleotide exchange factor 1
hsa-miR-188-3p	1	0	1	1	1	1	TNRC6A	trinucleotide repeat containing 6A
hsa-miR-188-3p	1	0	1	1	1	1	DENND4C	DENN/MADD domain containing 4C
hsa-miR-188-3p	1	0	1	0	0	0	DTX2	deltex homolog 2 (Drosophila)
hsa-miR-188-3p	1	0	1	1	1	1	LRP4	low density lipoprotein receptor-related protein 4
hsa-miR-188-3p	1	0	1	1	1	1	FAM40A	family with sequence similarity 40, member A
hsa-miR-188-3p	0	0	1	1	0	0	ZNF252P	zinc finger protein 252, pseudogene
hsa-miR-188-3p	1	0	1	1	1	1	EIF2C3	eukaryotic translation initiation factor 2C, 3
hsa-miR-188-3p	1	0	1	1	1	1	ARHGAP36	Rho GTPase activating protein 36
hsa-miR-188-3p	1	0	1	0	1	1	ZKSCAN1	zinc finger with KRAB and SCAN domains 1
hsa-miR-188-3p	0	0	1	1	1	1	RAB37	RAB37, member RAS oncogene family
hsa-miR-188-3p	0	0	1	0	0	0	LOC283508	uncharacterized LOC283508
hsa-miR-188-3p	1	0	1	1	1	1	PPM1L	protein phosphatase, Mg2+/Mn2+ dependent, 1L
hsa-miR-188-3p	0	0	1	0	1	1	HDX	highly divergent homeobox
hsa-miR-188-3p	0	0	1	1	1	1	ZNF213	zinc finger protein 213
hsa-miR-188-3p	0	0	1	0	0	0	SNHG11	small nucleolar RNA host gene 11 (non-protein coding)
hsa-miR-188-3p	0	0	1	0	0	0	LOC157273	uncharacterized LOC157273
hsa-miR-188-3p	0	0	1	1	1	1	PDE1C	phosphodiesterase 1C, calmodulin-dependent 70kDa
hsa-miR-188-3p	1	0	1	1	1	1	PPP1R3F	protein phosphatase 1, regulatory subunit 3F
hsa-miR-188-3p	1	0	1	1	1	1	AGPAT1	1-acylglycerol-3-phosphate O-acyltransferase 1 (lysophosphatidic acid acyltransferase, alpha)
hsa-miR-188-3p	1	0	1	1	1	1	ZIC4	Zic family member 4
hsa-miR-188-3p	1	0	1	1	1	1	CLCN5	chloride channel, voltage-sensitive 5
hsa-miR-188-3p	1	0	1	1	1	1	SORBS2	sorbin and SH3 domain containing 2
hsa-miR-188-3p	0	0	1	1	0	0	NUP93	nucleoporin 93kDa
hsa-miR-188-3p	0	0	1	1	0	0	ACOT8	acyl-CoA thioesterase 8
hsa-miR-188-3p	0	0	1	1	1	1	ZNF606	zinc finger protein 606
hsa-miR-188-3p	1	0	1	1	1	1	TPM3	tropomyosin 3
hsa-miR-188-3p	0	0	1	1	0	0	RELT	RELT tumor necrosis factor receptor
hsa-miR-188-3p	0	0	1	1	1	1	C14orf79	chromosome 14 open reading frame 79
hsa-miR-188-3p	0	0	1	0	0	0	FLJ32742	uncharacterized locus FLJ32742
hsa-miR-188-3p	0	0	1	1	0	0	NXF2	nuclear RNA export factor 2
hsa-miR-188-3p	1	0	1	1	0	0	GBA2	glucosidase, beta (bile acid) 2
hsa-miR-188-3p	0	0	1	1	0	0	FAM156A	family with sequence similarity 156, member A
hsa-miR-188-3p	1	0	1	1	1	1	IST1	increased sodium tolerance 1 homolog (yeast)
hsa-miR-188-3p	0	0	1	1	0	0	KRT86	keratin 86
hsa-miR-188-3p	0	0	1	1	1	1	A2ML1	alpha-2-macroglobulin-like 1
hsa-miR-188-3p	0	0	1	1	0	0	PRSS54	protease, serine, 54
hsa-miR-188-3p	0	0	1	0	1	1	CCDC68	coiled-coil domain containing 68
hsa-miR-188-3p	0	0	1	0	1	1	UHMK1	U2AF homology motif (UHM) kinase 1
hsa-miR-188-3p	1	0	1	1	1	1	FAM102A	family with sequence similarity 102, member A
hsa-miR-188-3p	0	0	1	0	0	0	C10orf105	chromosome 10 open reading frame 105
hsa-miR-188-3p	1	0	1	1	1	1	TBCK	TBC1 domain containing kinase
hsa-miR-188-3p	0	0	1	1	0	0	WDR83	WD repeat domain 83
hsa-miR-188-3p	0	0	1	0	0	0	SDHAP2	succinate dehydrogenase complex, subunit A, flavoprotein pseudogene 2
hsa-miR-188-3p	1	0	1	1	1	1	UBAP1	ubiquitin associated protein 1
hsa-miR-188-3p	0	0	1	1	0	0	SHKBP1	SH3KBP1 binding protein 1
hsa-miR-188-3p	1	0	1	1	1	1	CLIC5	chloride intracellular channel 5
hsa-miR-188-3p	1	0	1	1	0	0	B3GAT3	beta-1,3-glucuronyltransferase 3 (glucuronosyltransferase I)
hsa-miR-188-3p	0	0	1	1	1	1	CAMKV	CaM kinase-like vesicle-associated
hsa-miR-188-3p	0	0	1	1	1	1	TOR2A	torsin family 2, member A
hsa-miR-188-3p	1	0	1	1	1	1	PIP4K2C	phosphatidylinositol-5-phosphate 4-kinase, type II, gamma
hsa-miR-188-3p	1	0	1	1	1	1	WDR20	WD repeat domain 20
hsa-miR-188-3p	0	0	1	1	1	1	KIAA0319L	KIAA0319-like
hsa-miR-188-3p	0	0	1	0	1	1	TMSB15B	thymosin beta 15B
hsa-miR-188-3p	0	0	1	0	1	1	PIANP	PILR alpha associated neural protein
hsa-miR-188-3p	1	0	1	1	1	1	FBXW2	F-box and WD repeat domain containing 2
hsa-miR-188-3p	1	0	1	0	1	1	RNF114	ring finger protein 114
hsa-miR-188-3p	1	0	1	1	1	1	LUC7L2	LUC7-like 2 (S. cerevisiae)
hsa-miR-188-3p	1	0	1	1	1	1	MAFK	v-maf musculoaponeurotic fibrosarcoma oncogene homolog K (avian)
hsa-miR-188-3p	1	0	1	0	1	1	CRTAP	cartilage associated protein
hsa-miR-188-3p	0	0	1	0	0	0	LOC283887	uncharacterized LOC283887
hsa-miR-188-3p	1	0	1	1	1	1	RRBP1	ribosome binding protein 1 homolog 180kDa (dog)
hsa-miR-188-3p	0	0	1	1	1	1	TGFBI	transforming growth factor, beta-induced, 68kDa
hsa-miR-188-3p	0	0	1	1	1	1	SPOCK1	sparc/osteonectin, cwcv and kazal-like domains proteoglycan (testican) 1
hsa-miR-188-3p	0	0	1	0	0	0	ZNF806	zinc finger protein 806
hsa-miR-188-3p	1	0	1	0	1	1	GATAD2B	GATA zinc finger domain containing 2B
hsa-miR-188-3p	0	0	1	0	0	0	LINC00340	long intergenic non-protein coding RNA 340
hsa-miR-188-3p	0	0	1	1	0	0	CES4A	carboxylesterase 4A
hsa-miR-188-3p	1	0	1	1	1	1	LPPR2	lipid phosphate phosphatase-related protein type 2
hsa-miR-188-3p	1	0	1	1	1	1	ARHGEF7	Rho guanine nucleotide exchange factor (GEF) 7
hsa-miR-188-3p	1	0	1	0	1	1	IL1RAP	interleukin 1 receptor accessory protein
hsa-miR-188-3p	0	0	1	1	0	0	DPAGT1	dolichyl-phosphate (UDP-N-acetylglucosamine) N-acetylglucosaminephosphotransferase 1 (GlcNAc-1-P transferase)
hsa-miR-188-3p	1	0	1	1	1	1	CUL2	cullin 2
hsa-miR-188-3p	1	0	1	0	1	1	UVRAG	UV radiation resistance associated gene
hsa-miR-188-3p	0	0	1	1	1	1	SIRPB2	signal-regulatory protein beta 2
hsa-miR-188-3p	1	0	1	0	1	1	FAM129A	family with sequence similarity 129, member A
hsa-miR-188-3p	1	0	1	1	1	1	ZC3H11A	zinc finger CCCH-type containing 11A
hsa-miR-188-3p	1	0	1	1	1	1	PEA15	phosphoprotein enriched in astrocytes 15
hsa-miR-188-3p	1	0	1	1	1	1	FADS1	fatty acid desaturase 1
hsa-miR-188-3p	1	0	1	1	1	1	SLITRK2	SLIT and NTRK-like family, member 2
hsa-miR-188-3p	0	0	1	0	0	0	ZNF815P	zinc finger protein 815, pseudogene
hsa-miR-188-3p	0	0	1	0	0	0	OTUD1	OTU domain containing 1
hsa-miR-188-3p	0	0	1	1	1	1	ZNF673	zinc finger family member 673
hsa-miR-188-3p	1	0	1	1	1	1	LRP8	low density lipoprotein receptor-related protein 8, apolipoprotein e receptor
hsa-miR-188-3p	0	0	1	0	0	0	ZNF300P1	zinc finger protein 300 pseudogene 1
hsa-miR-188-3p	1	0	1	0	0	0	PID1	phosphotyrosine interaction domain containing 1
hsa-miR-188-3p	1	0	1	1	1	1	SNRNP70	small nuclear ribonucleoprotein 70kDa (U1)
hsa-miR-188-3p	1	0	1	1	1	1	STIM2	stromal interaction molecule 2
hsa-miR-188-3p	1	0	1	1	1	1	EPB41L1	erythrocyte membrane protein band 4.1-like 1
hsa-miR-188-3p	1	0	1	0	1	1	YPEL2	yippee-like 2 (Drosophila)
hsa-miR-188-3p	0	0	1	1	0	0	VPS37C	vacuolar protein sorting 37 homolog C (S. cerevisiae)
hsa-miR-188-3p	1	0	1	1	1	1	KL	klotho
hsa-miR-188-3p	0	0	1	1	1	1	PPFIBP2	PTPRF interacting protein, binding protein 2 (liprin beta 2)
hsa-miR-188-3p	0	0	1	1	1	1	TEX35	testis expressed 35
hsa-miR-188-3p	0	0	1	0	0	0	LOC285626	uncharacterized LOC285626
hsa-miR-188-3p	0	0	1	1	1	1	CBWD5	COBW domain containing 5
hsa-miR-188-3p	0	0	1	1	0	0	ZNF283	zinc finger protein 283
hsa-miR-188-3p	0	0	1	0	0	0	LOC100130954	uncharacterized LOC100130954
hsa-miR-188-3p	0	0	1	1	1	1	FAM76A	family with sequence similarity 76, member A
hsa-miR-188-3p	1	0	1	1	1	1	THTPA	thiamine triphosphatase
hsa-miR-188-3p	1	0	1	1	1	1	NDFIP2	Nedd4 family interacting protein 2
hsa-miR-188-3p	1	0	1	0	1	1	UNC5D	unc-5 homolog D (C. elegans)
hsa-miR-188-3p	1	0	1	1	0	0	SLX4	SLX4 structure-specific endonuclease subunit homolog (S. cerevisiae)
hsa-miR-188-3p	0	0	1	1	1	1	GFI1	growth factor independent 1 transcription repressor
hsa-miR-188-3p	0	0	1	0	0	0	C1orf132	chromosome 1 open reading frame 132
hsa-miR-188-3p	0	0	1	0	0	0	LGALS17A	Charcot-Leyden crystal protein pseudogene
hsa-miR-188-3p	0	0	1	1	0	0	LIX1L	Lix1 homolog (mouse)-like
hsa-miR-188-3p	1	0	1	1	1	1	IPPK	inositol 1,3,4,5,6-pentakisphosphate 2-kinase
hsa-miR-188-3p	0	0	1	1	0	0	KRT37	keratin 37
hsa-miR-188-3p	0	0	1	0	0	0	DKFZP434H168	uncharacterized LOC26077
hsa-miR-188-3p	1	0	1	0	1	1	TTYH3	tweety homolog 3 (Drosophila)
hsa-miR-188-3p	0	0	1	1	1	1	IDS	iduronate 2-sulfatase
hsa-miR-188-3p	0	0	1	0	0	0	LINC00282	long intergenic non-protein coding RNA 282
hsa-miR-188-3p	1	0	1	1	1	1	XPO1	exportin 1 (CRM1 homolog, yeast)
hsa-miR-188-3p	0	0	1	1	0	0	PPP1R18	protein phosphatase 1, regulatory subunit 18
hsa-miR-188-3p	1	0	1	1	1	1	C17orf85	chromosome 17 open reading frame 85
hsa-miR-188-3p	1	0	1	0	1	1	CHRM2	cholinergic receptor, muscarinic 2
hsa-miR-188-3p	1	0	1	1	1	1	DENND5B	DENN/MADD domain containing 5B
hsa-miR-188-3p	1	0	1	0	1	1	KIAA1456	KIAA1456
hsa-miR-188-3p	1	0	1	0	0	0	MSL1	male-specific lethal 1 homolog (Drosophila)
hsa-miR-188-3p	1	0	1	1	1	1	MACROD2	MACRO domain containing 2
hsa-miR-188-3p	1	0	1	1	0	0	ATXN7L3	ataxin 7-like 3
hsa-miR-188-3p	1	0	1	1	1	1	CLIP1	CAP-GLY domain containing linker protein 1
hsa-miR-188-3p	0	0	1	0	0	0	RPL23AP53	ribosomal protein L23a pseudogene 53
hsa-miR-188-3p	0	0	1	1	1	1	MOBP	myelin-associated oligodendrocyte basic protein
hsa-miR-188-3p	1	0	1	1	1	1	TSHZ1	teashirt zinc finger homeobox 1
hsa-miR-188-3p	1	0	1	1	1	1	CLTC	clathrin, heavy chain (Hc)
hsa-miR-188-3p	1	0	1	1	1	1	MFSD6	major facilitator superfamily domain containing 6
hsa-miR-188-3p	1	0	1	0	1	1	ADIPOR2	adiponectin receptor 2
hsa-miR-188-3p	1	0	1	1	0	0	MRVI1	murine retrovirus integration site 1 homolog
hsa-miR-188-3p	0	0	1	0	0	0	LOC619207	scavenger receptor protein family member
hsa-miR-188-3p	1	0	1	1	1	1	UBE3C	ubiquitin protein ligase E3C
hsa-miR-188-3p	1	0	1	1	0	0	PTPN5	protein tyrosine phosphatase, non-receptor type 5 (striatum-enriched)
hsa-miR-188-3p	1	0	1	1	1	1	HYOU1	hypoxia up-regulated 1
hsa-miR-188-3p	1	0	1	1	1	1	PHF17	PHD finger protein 17
hsa-miR-188-3p	1	0	1	1	1	1	ENAH	enabled homolog (Drosophila)
hsa-miR-188-3p	1	0	1	1	1	1	RALB	v-ral simian leukemia viral oncogene homolog B (ras related; GTP binding protein)
hsa-miR-188-3p	0	0	1	1	1	1	MCU	mitochondrial calcium uniporter
hsa-miR-188-3p	0	0	1	0	0	0	LRRC9	leucine rich repeat containing 9
hsa-miR-188-3p	0	0	1	1	0	0	TRIM46	tripartite motif containing 46
hsa-miR-188-3p	1	0	1	1	1	1	KALRN	kalirin, RhoGEF kinase
hsa-miR-188-3p	0	0	1	1	1	1	CD160	CD160 molecule
hsa-miR-188-3p	1	0	1	0	1	1	ZZEF1	zinc finger, ZZ-type with EF-hand domain 1
hsa-miR-188-3p	1	0	1	1	1	1	FRYL	FRY-like
hsa-miR-188-3p	0	0	1	1	1	1	ATXN2	ataxin 2
hsa-miR-188-3p	1	0	1	0	1	1	CYB561D1	cytochrome b-561 domain containing 1
hsa-miR-188-3p	1	0	1	1	1	1	PHC2	polyhomeotic homolog 2 (Drosophila)
hsa-miR-188-3p	0	0	1	1	1	1	BRAT1	BRCA1-associated ATM activator 1
hsa-miR-188-3p	0	0	1	0	0	0	LOC390660	FLJ00317 protein
hsa-miR-188-3p	0	0	1	0	1	1	RUFY4	RUN and FYVE domain containing 4
hsa-miR-188-3p	0	0	1	1	0	0	ISOC2	isochorismatase domain containing 2
hsa-miR-188-3p	0	0	1	1	0	0	MAMSTR	MEF2 activating motif and SAP domain containing transcriptional regulator
hsa-miR-188-3p	0	0	1	1	1	1	SYPL2	synaptophysin-like 2
hsa-miR-188-3p	1	0	1	1	1	1	CYFIP2	cytoplasmic FMR1 interacting protein 2
hsa-miR-188-3p	1	0	1	0	1	1	SEZ6	seizure related 6 homolog (mouse)
hsa-miR-188-3p	1	0	1	1	0	0	ABLIM3	actin binding LIM protein family, member 3
hsa-miR-188-3p	1	0	1	1	1	1	CAMK2G	calcium/calmodulin-dependent protein kinase II gamma
hsa-miR-188-3p	1	0	1	1	1	1	ACTN1	actinin, alpha 1
hsa-miR-188-3p	1	0	1	0	1	1	MAP3K3	mitogen-activated protein kinase kinase kinase 3
hsa-miR-188-3p	1	0	1	1	1	1	LUC7L3	LUC7-like 3 (S. cerevisiae)
hsa-miR-188-3p	1	0	1	0	1	1	TEAD3	TEA domain family member 3
hsa-miR-188-3p	1	0	1	1	1	1	APBB2	amyloid beta (A4) precursor protein-binding, family B, member 2
hsa-miR-188-3p	0	0	1	0	0	0	POM121L9P	POM121 transmembrane nucleoporin-like 9, pseudogene
hsa-miR-188-3p	0	0	1	0	0	0	POM121L8P	POM121 transmembrane nucleoporin-like 8 pseudogene
hsa-miR-188-3p	0	0	1	1	1	1	ARIH1	ariadne homolog, ubiquitin-conjugating enzyme E2 binding protein, 1 (Drosophila)
hsa-miR-188-3p	1	0	1	1	1	1	SMAP2	small ArfGAP2
hsa-miR-188-3p	0	0	1	0	0	0	DNAJC5B	DnaJ (Hsp40) homolog, subfamily C, member 5 beta
hsa-miR-188-3p	0	0	1	1	1	1	RHOT1	ras homolog family member T1
hsa-miR-188-3p	1	0	1	0	1	1	CEP170	centrosomal protein 170kDa
hsa-miR-188-3p	1	0	1	1	1	1	NEO1	neogenin 1
hsa-miR-188-3p	1	0	1	0	1	1	GRIN3A	glutamate receptor, ionotropic, N-methyl-D-aspartate 3A
hsa-miR-188-3p	0	0	1	0	0	0	FAM66D	family with sequence similarity 66, member D
hsa-miR-188-3p	1	0	1	1	1	1	PKNOX2	PBX/knotted 1 homeobox 2
hsa-miR-188-3p	1	0	1	1	1	1	LIMCH1	LIM and calponin homology domains 1
hsa-miR-188-3p	0	0	1	0	1	1	GAB3	GRB2-associated binding protein 3
hsa-miR-188-3p	1	0	1	1	0	0	USP24	ubiquitin specific peptidase 24
hsa-miR-188-3p	1	0	1	0	1	1	STYX	serine/threonine/tyrosine interacting protein
hsa-miR-188-3p	0	0	1	0	1	1	FBXO42	F-box protein 42
hsa-miR-188-3p	1	0	1	0	1	1	CLINT1	clathrin interactor 1
hsa-miR-188-3p	0	0	1	1	0	0	LRRN2	leucine rich repeat neuronal 2
hsa-miR-188-3p	0	0	1	0	0	0	EPHA1-AS1	EPHA1 antisense RNA 1
hsa-miR-188-3p	0	0	1	1	1	1	SOAT1	sterol O-acyltransferase 1
hsa-miR-188-3p	1	0	1	1	1	1	IL17RD	interleukin 17 receptor D
hsa-miR-188-3p	1	0	1	1	1	1	PRPF38B	PRP38 pre-mRNA processing factor 38 (yeast) domain containing B
hsa-miR-188-3p	1	0	1	1	1	1	ANKRD12	ankyrin repeat domain 12
hsa-miR-188-3p	0	0	1	1	1	1	TEX2	testis expressed 2
hsa-miR-188-3p	0	0	1	1	1	1	STS	steroid sulfatase (microsomal), isozyme S
hsa-miR-188-3p	0	0	1	1	1	1	LMAN2L	lectin, mannose-binding 2-like
hsa-miR-188-3p	1	0	1	0	1	1	PATL1	protein associated with topoisomerase II homolog 1 (yeast)
hsa-miR-188-3p	1	0	1	1	1	1	SET	SET nuclear oncogene
hsa-miR-188-3p	1	0	1	1	1	1	IKZF2	IKAROS family zinc finger 2 (Helios)
hsa-miR-188-3p	0	0	1	1	1	1	CRB1	crumbs homolog 1 (Drosophila)
hsa-miR-188-3p	1	0	1	1	1	1	WDR26	WD repeat domain 26
hsa-miR-188-3p	0	0	1	1	0	0	GLYCTK	glycerate kinase
hsa-miR-188-3p	0	0	1	0	0	0	MEG3	maternally expressed 3 (non-protein coding)
hsa-miR-188-3p	1	0	1	1	1	1	GFRA2	GDNF family receptor alpha 2
hsa-miR-188-3p	0	0	1	1	1	1	GCOM1	GRINL1A complex locus 1
hsa-miR-188-3p	0	0	1	1	0	0	EGFL8	EGF-like-domain, multiple 8
hsa-miR-188-3p	1	0	1	1	1	1	ARHGAP20	Rho GTPase activating protein 20
hsa-miR-188-3p	1	0	1	1	0	0	ZNF594	zinc finger protein 594
hsa-miR-188-3p	1	0	1	1	1	1	MYNN	myoneurin
hsa-miR-188-3p	1	0	1	1	1	1	MECP2	methyl CpG binding protein 2 (Rett syndrome)
hsa-miR-188-3p	1	0	1	1	1	1	CHRDL1	chordin-like 1
hsa-miR-188-3p	0	0	1	1	0	0	DHRS4	dehydrogenase/reductase (SDR family) member 4
hsa-miR-188-3p	0	0	1	1	1	1	IL24	interleukin 24
hsa-miR-188-3p	1	0	1	1	1	1	ALCAM	activated leukocyte cell adhesion molecule
hsa-miR-188-3p	1	0	1	1	1	1	RTN3	reticulon 3
hsa-miR-188-3p	1	0	1	1	1	1	NTNG1	netrin G1
hsa-miR-188-3p	0	0	1	0	0	0	PTPRVP	protein tyrosine phosphatase, receptor type, V, pseudogene
hsa-miR-188-3p	0	0	1	0	0	0	MAST4	microtubule associated serine/threonine kinase family member 4
hsa-miR-188-3p	1	0	1	1	1	1	PCDH11X	protocadherin 11 X-linked
hsa-miR-188-3p	0	0	1	1	0	0	NBPF8	neuroblastoma breakpoint family, member 8
hsa-miR-188-3p	0	0	1	1	1	1	IYD	iodotyrosine deiodinase
hsa-miR-188-3p	1	0	1	1	1	1	AMOT	angiomotin
hsa-miR-188-3p	0	0	1	1	0	0	C17orf53	chromosome 17 open reading frame 53
hsa-miR-188-3p	0	0	1	1	1	1	SLC6A2	solute carrier family 6 (neurotransmitter transporter, noradrenalin), member 2
hsa-miR-188-3p	0	0	1	1	1	1	SNX11	sorting nexin 11
hsa-miR-188-3p	1	0	1	1	1	1	ANKRD10	ankyrin repeat domain 10
hsa-miR-188-3p	0	0	1	1	1	1	PAFAH1B2	platelet-activating factor acetylhydrolase 1b, catalytic subunit 2 (30kDa)
hsa-miR-188-3p	0	0	1	1	1	1	BOD1	biorientation of chromosomes in cell division 1
hsa-miR-188-3p	0	0	1	1	0	0	RUSC1	RUN and SH3 domain containing 1
hsa-miR-188-3p	1	0	1	1	1	1	SMO	smoothened, frizzled family receptor
hsa-miR-188-3p	0	0	1	0	0	0	LOC254896	uncharacterized LOC254896
hsa-miR-188-3p	1	0	1	0	1	1	CGGBP1	CGG triplet repeat binding protein 1
hsa-miR-188-3p	0	0	1	1	1	1	ZNF589	zinc finger protein 589
hsa-miR-188-3p	1	0	1	1	1	1	U2SURP	U2 snRNP-associated SURP domain containing
hsa-miR-188-3p	0	0	1	1	1	1	ACPP	acid phosphatase, prostate
hsa-miR-188-3p	1	0	1	1	0	0	SAP30BP	SAP30 binding protein
hsa-miR-188-3p	1	0	1	1	1	1	TRIM39	tripartite motif containing 39
hsa-miR-188-3p	0	0	1	1	0	0	CCDC114	coiled-coil domain containing 114
hsa-miR-188-3p	1	0	1	1	1	1	SHOX2	short stature homeobox 2
hsa-miR-188-3p	1	0	1	1	1	1	SLC50A1	solute carrier family 50 (sugar transporter), member 1
hsa-miR-188-3p	1	0	1	0	1	1	TMEM39A	transmembrane protein 39A
hsa-miR-188-3p	1	0	1	1	1	1	USB1	U6 snRNA biogenesis 1
hsa-miR-188-3p	0	0	1	0	0	0	LRRC14	leucine rich repeat containing 14
hsa-miR-188-3p	1	0	1	1	1	1	OTUD5	OTU domain containing 5
hsa-miR-188-3p	0	0	1	1	0	0	WISP3	WNT1 inducible signaling pathway protein 3
hsa-miR-188-3p	1	0	1	1	1	1	SUPT16H	suppressor of Ty 16 homolog (S. cerevisiae)
hsa-miR-188-3p	0	0	1	1	1	1	PCNP	PEST proteolytic signal containing nuclear protein
hsa-miR-188-3p	0	0	1	1	1	1	KLHL29	kelch-like 29 (Drosophila)
hsa-miR-188-3p	1	0	1	1	1	1	ETF1	eukaryotic translation termination factor 1
hsa-miR-188-3p	0	0	1	0	0	0	KLHL15	kelch-like 15 (Drosophila)
hsa-miR-188-3p	1	0	1	1	1	1	ZBTB38	zinc finger and BTB domain containing 38
hsa-miR-188-3p	1	0	1	0	1	1	NR1D2	nuclear receptor subfamily 1, group D, member 2
hsa-miR-188-3p	1	0	1	1	0	0	AKT1S1	AKT1 substrate 1 (proline-rich)
hsa-miR-188-3p	1	0	1	1	1	1	RAN	RAN, member RAS oncogene family
hsa-miR-188-3p	1	0	1	0	1	1	CYBRD1	cytochrome b reductase 1
hsa-miR-188-3p	1	0	1	1	1	1	VTI1A	vesicle transport through interaction with t-SNAREs homolog 1A (yeast)
hsa-miR-188-3p	0	0	1	1	1	1	GLIPR2	GLI pathogenesis-related 2
hsa-miR-188-3p	1	0	1	1	1	1	ARHGEF9	Cdc42 guanine nucleotide exchange factor (GEF) 9
hsa-miR-188-3p	0	0	1	1	1	1	PRMT3	protein arginine methyltransferase 3
hsa-miR-188-3p	1	0	1	1	1	1	WHSC1	Wolf-Hirschhorn syndrome candidate 1
hsa-miR-188-3p	0	0	1	1	1	1	HLA-G	major histocompatibility complex, class I, G
hsa-miR-188-3p	1	0	1	1	1	1	TM9SF4	transmembrane 9 superfamily protein member 4
hsa-miR-188-3p	1	0	1	1	1	1	PELI3	pellino E3 ubiquitin protein ligase family member 3
hsa-miR-188-3p	1	0	1	1	1	1	VASP	vasodilator-stimulated phosphoprotein
hsa-miR-188-3p	1	0	1	1	1	1	FAM131A	family with sequence similarity 131, member A
hsa-miR-188-3p	1	0	1	1	1	1	UHRF2	ubiquitin-like with PHD and ring finger domains 2, E3 ubiquitin protein ligase
hsa-miR-188-3p	0	0	1	0	0	0	LOC145837	uncharacterized LOC145837
hsa-miR-188-3p	1	0	1	0	1	1	SV2B	synaptic vesicle glycoprotein 2B
hsa-miR-188-3p	0	0	1	1	1	1	SH3TC1	SH3 domain and tetratricopeptide repeats 1
hsa-miR-188-3p	0	0	1	1	0	0	AGBL3	ATP/GTP binding protein-like 3
hsa-miR-188-3p	1	0	1	1	1	1	ADARB1	adenosine deaminase, RNA-specific, B1
hsa-miR-188-3p	0	0	1	1	1	1	IQCH	IQ motif containing H
hsa-miR-188-3p	1	0	1	1	1	1	RCOR3	REST corepressor 3
hsa-miR-188-3p	1	0	1	1	1	1	SPATS2	spermatogenesis associated, serine-rich 2
hsa-miR-188-3p	0	0	1	1	1	1	FBXO24	F-box protein 24
hsa-miR-188-3p	1	0	1	1	1	1	ZNF439	zinc finger protein 439
hsa-miR-188-3p	0	0	1	1	0	0	LINC00176	long intergenic non-protein coding RNA 176
hsa-miR-188-3p	0	0	1	1	0	0	ADAP2	ArfGAP with dual PH domains 2
hsa-miR-188-3p	1	0	1	1	1	1	LPGAT1	lysophosphatidylglycerol acyltransferase 1
hsa-miR-188-3p	0	0	1	0	0	0	FAM66C	family with sequence similarity 66, member C
hsa-miR-188-3p	0	0	1	0	1	1	DKFZP434I0714	uncharacterized protein DKFZP434I0714
hsa-miR-188-3p	0	0	1	1	0	0	TSNAXIP1	translin-associated factor X interacting protein 1
hsa-miR-188-3p	0	0	1	1	1	1	ZNF781	zinc finger protein 781
hsa-miR-188-3p	1	0	1	1	1	1	ZEB2	zinc finger E-box binding homeobox 2
hsa-miR-188-3p	1	0	1	1	0	0	ZNF440	zinc finger protein 440
hsa-miR-188-3p	0	0	1	1	1	1	SNAPC3	small nuclear RNA activating complex, polypeptide 3, 50kDa
hsa-miR-188-3p	0	0	1	1	1	1	TADA1	transcriptional adaptor 1
hsa-miR-188-3p	1	0	1	0	1	1	NEGR1	neuronal growth regulator 1
hsa-miR-188-3p	0	0	1	0	0	0	PATL2	protein associated with topoisomerase II homolog 2 (yeast)
hsa-miR-188-3p	0	0	1	0	0	0	CYP4F35P	cytochrome P450, family 4, subfamily F, polypeptide 35, pseudogene
hsa-miR-188-3p	1	0	1	0	0	0	RAVER1	ribonucleoprotein, PTB-binding 1
hsa-miR-188-3p	0	0	1	0	0	0	LOC284263	uncharacterized LOC284263
hsa-miR-188-3p	0	0	1	1	1	1	C14orf118	chromosome 14 open reading frame 118
hsa-miR-188-3p	0	0	1	1	0	0	CCDC152	coiled-coil domain containing 152
hsa-miR-188-3p	1	0	1	1	1	1	PSD	pleckstrin and Sec7 domain containing
hsa-miR-188-3p	1	0	1	1	1	1	UNK	unkempt homolog (Drosophila)
hsa-miR-188-3p	1	0	1	0	1	1	GPR107	G protein-coupled receptor 107
hsa-miR-188-3p	0	0	1	1	1	1	SLTM	SAFB-like, transcription modulator
hsa-miR-188-3p	1	0	1	1	0	0	KDM1A	lysine (K)-specific demethylase 1A
hsa-miR-188-3p	0	0	1	1	1	1	ZFP90	zinc finger protein 90 homolog (mouse)
hsa-miR-188-3p	1	0	1	1	1	1	KCNJ11	potassium inwardly-rectifying channel, subfamily J, member 11
hsa-miR-188-3p	1	0	1	1	0	0	RGL2	ral guanine nucleotide dissociation stimulator-like 2
hsa-miR-188-3p	1	0	1	1	1	1	ARPP21	cAMP-regulated phosphoprotein, 21kDa
hsa-miR-188-3p	1	0	1	1	1	1	FAM123A	family with sequence similarity 123A
hsa-miR-188-3p	1	0	1	1	1	1	GNG2	guanine nucleotide binding protein (G protein), gamma 2
hsa-miR-188-3p	1	0	1	1	1	1	TNFSF4	tumor necrosis factor (ligand) superfamily, member 4
hsa-miR-188-3p	1	0	1	1	1	1	ROCK1	Rho-associated, coiled-coil containing protein kinase 1
hsa-miR-188-3p	0	0	1	1	0	0	TEX13A	testis expressed 13A
hsa-miR-188-3p	0	0	1	1	1	1	FAM90A1	family with sequence similarity 90, member A1
hsa-miR-188-3p	0	0	1	1	0	0	PLB1	phospholipase B1
hsa-miR-188-3p	0	0	1	0	0	0	LOC338579	ankyrin repeat domain-containing protein 30B pseudogene
hsa-miR-188-3p	0	0	1	0	0	0	LINC00347	long intergenic non-protein coding RNA 347
hsa-miR-188-3p	0	0	1	0	1	1	C12orf74	chromosome 12 open reading frame 74
hsa-miR-188-3p	1	0	1	1	1	1	ARHGAP30	Rho GTPase activating protein 30
hsa-miR-188-3p	0	0	1	0	0	0	LOC339166	uncharacterized LOC339166
hsa-miR-188-3p	1	0	1	1	1	1	HLTF	helicase-like transcription factor
hsa-miR-188-3p	0	0	1	0	0	0	FAM27E3	family with sequence similarity 27, member E3
hsa-miR-188-3p	1	0	1	1	1	1	RNF145	ring finger protein 145
hsa-miR-188-3p	0	0	1	1	1	1	NADKD1	NAD kinase domain containing 1
hsa-miR-188-3p	0	0	1	0	0	0	LOC283914	uncharacterized LOC283914
hsa-miR-188-3p	1	0	1	1	1	1	SENP1	SUMO1/sentrin specific peptidase 1
hsa-miR-188-3p	1	0	1	1	1	1	CARM1	coactivator-associated arginine methyltransferase 1
hsa-miR-188-3p	1	0	1	0	1	1	LYPD6	LY6/PLAUR domain containing 6
hsa-miR-188-3p	1	0	1	0	1	1	KDM2A	lysine (K)-specific demethylase 2A
hsa-miR-188-3p	1	0	1	1	0	0	TTC9	tetratricopeptide repeat domain 9
hsa-miR-188-3p	0	0	1	1	0	0	OXLD1	oxidoreductase-like domain containing 1
hsa-miR-188-3p	1	0	1	1	1	1	CLVS1	clavesin 1
hsa-miR-188-3p	0	0	1	1	0	0	NISCH	nischarin
hsa-miR-188-3p	1	0	1	0	1	1	SEMA4G	sema domain, immunoglobulin domain (Ig), transmembrane domain (TM) and short cytoplasmic domain, (semaphorin) 4G
hsa-miR-188-3p	0	0	1	1	1	1	HLA-DQA1	major histocompatibility complex, class II, DQ alpha 1
hsa-miR-188-3p	1	0	1	1	1	1	SCUBE3	signal peptide, CUB domain, EGF-like 3
hsa-miR-188-3p	1	0	1	1	1	1	OLFML2A	olfactomedin-like 2A
hsa-miR-188-3p	0	0	1	1	0	0	PLSCR2	phospholipid scramblase 2
hsa-miR-188-3p	0	0	1	1	1	1	MPP3	membrane protein, palmitoylated 3 (MAGUK p55 subfamily member 3)
hsa-miR-188-3p	0	0	1	1	0	0	RPS9	ribosomal protein S9
hsa-miR-188-3p	1	0	1	1	1	1	PDGFRA	platelet-derived growth factor receptor, alpha polypeptide
hsa-miR-188-3p	0	0	1	1	1	1	C10orf129	chromosome 10 open reading frame 129
hsa-miR-188-3p	0	0	1	1	1	1	C1orf109	chromosome 1 open reading frame 109
hsa-miR-188-3p	1	0	1	1	1	1	NIPBL	Nipped-B homolog (Drosophila)
hsa-miR-188-3p	0	0	1	1	1	1	PIM3	pim-3 oncogene
hsa-miR-188-3p	1	0	1	1	1	1	ADCY6	adenylate cyclase 6
hsa-miR-188-3p	0	0	1	1	0	0	ZNF253	zinc finger protein 253
hsa-miR-188-3p	0	0	1	1	1	1	METTL15	methyltransferase like 15
hsa-miR-188-3p	0	0	1	0	0	0	LINC00442	long intergenic non-protein coding RNA 442
hsa-miR-188-3p	1	0	1	0	0	0	TNRC18	trinucleotide repeat containing 18
hsa-miR-188-3p	1	0	1	1	1	1	SLC26A7	solute carrier family 26, member 7
hsa-miR-188-3p	1	0	1	1	1	1	MAPKAPK3	mitogen-activated protein kinase-activated protein kinase 3
hsa-miR-188-3p	1	0	1	1	1	1	LRRC32	leucine rich repeat containing 32
hsa-miR-188-3p	1	0	1	0	1	1	TGFBR1	transforming growth factor, beta receptor 1
hsa-miR-188-3p	1	0	1	0	1	1	TMEM194A	transmembrane protein 194A
hsa-miR-188-3p	0	0	1	0	0	0	LOC100147773	uncharacterized LOC100147773
hsa-miR-188-3p	0	0	1	0	0	0	JPX	JPX transcript, XIST activator (non-protein coding)
hsa-miR-188-3p	0	0	1	1	1	1	CTXN3	cortexin 3
hsa-miR-188-3p	0	0	1	1	0	0	TRIM41	tripartite motif containing 41
hsa-miR-188-3p	1	0	1	1	1	1	WBP1L	WW domain binding protein 1-like
hsa-miR-188-3p	0	0	1	0	0	0	LINC00537	long intergenic non-protein coding RNA 537
hsa-miR-188-3p	0	0	1	0	0	0	LINC00626	long intergenic non-protein coding RNA 626
hsa-miR-188-3p	0	0	1	1	0	0	PDLIM7	PDZ and LIM domain 7 (enigma)
hsa-miR-188-3p	1	0	1	1	1	1	STK38	serine/threonine kinase 38
hsa-miR-188-3p	1	0	1	1	1	1	ST8SIA2	ST8 alpha-N-acetyl-neuraminide alpha-2,8-sialyltransferase 2
hsa-miR-188-3p	1	0	1	1	1	1	ACVR2B	activin A receptor, type IIB
hsa-miR-188-3p	1	0	1	1	1	1	WNT10B	wingless-type MMTV integration site family, member 10B
hsa-miR-188-3p	1	0	1	0	1	1	VANGL2	vang-like 2 (van gogh, Drosophila)
hsa-miR-188-3p	1	0	1	1	1	1	ZNF763	zinc finger protein 763
hsa-miR-188-3p	0	0	1	1	1	1	MUC21	mucin 21, cell surface associated
hsa-miR-188-3p	1	0	1	1	1	1	PTPRD	protein tyrosine phosphatase, receptor type, D
hsa-miR-188-3p	1	0	1	1	1	1	SUV420H1	suppressor of variegation 4-20 homolog 1 (Drosophila)
hsa-miR-188-3p	0	0	1	1	1	1	ZNF514	zinc finger protein 514
hsa-miR-188-3p	1	0	1	1	1	1	SLK	STE20-like kinase
hsa-miR-188-3p	0	0	1	1	0	0	ZNF630	zinc finger protein 630
hsa-miR-188-3p	0	0	1	1	0	0	RNF123	ring finger protein 123
hsa-miR-188-3p	1	0	1	1	1	1	TMEM132B	transmembrane protein 132B
hsa-miR-188-3p	1	0	1	1	1	1	TMEM64	transmembrane protein 64
hsa-miR-188-3p	1	0	1	1	0	0	MAPKBP1	mitogen-activated protein kinase binding protein 1
hsa-miR-188-3p	0	0	1	1	1	1	ATP1B4	ATPase, Na+/K+ transporting, beta 4 polypeptide
hsa-miR-188-3p	0	0	1	0	0	0	LINC00486	long intergenic non-protein coding RNA 486
hsa-miR-188-3p	1	0	1	1	1	1	ZMYM4	zinc finger, MYM-type 4
hsa-miR-188-3p	0	0	1	1	1	1	TPRN	taperin
hsa-miR-188-3p	0	0	1	0	0	0	FAM225B	family with sequence similarity 225, member B (non-protein coding)
hsa-miR-188-3p	1	0	1	0	1	1	FAM196A	family with sequence similarity 196, member A
hsa-miR-188-3p	0	0	1	1	0	0	TCHH	trichohyalin
hsa-miR-188-3p	1	0	1	1	1	1	TMEM218	transmembrane protein 218
hsa-miR-188-3p	0	0	1	1	0	0	CCDC144A	coiled-coil domain containing 144A
hsa-miR-188-3p	0	0	1	1	1	1	PRKAR2A	protein kinase, cAMP-dependent, regulatory, type II, alpha
hsa-miR-188-3p	0	0	1	1	1	1	IP6K2	inositol hexakisphosphate kinase 2
hsa-miR-188-3p	0	0	1	0	0	0	DKFZp686D0853	uncharacterized LOC401613
hsa-miR-188-3p	0	0	1	1	0	0	CCDC171	coiled-coil domain containing 171
hsa-miR-188-3p	1	0	1	1	1	1	SGCD	sarcoglycan, delta (35kDa dystrophin-associated glycoprotein)
hsa-miR-188-3p	0	0	1	1	1	1	NUP54	nucleoporin 54kDa
hsa-miR-188-3p	0	0	1	0	0	0	ZNF542	zinc finger protein 542
hsa-miR-188-3p	0	0	1	1	1	1	DEPDC5	DEP domain containing 5
hsa-miR-188-3p	1	0	1	1	1	1	RAB30	RAB30, member RAS oncogene family
hsa-miR-188-3p	0	0	1	1	1	1	IPCEF1	interaction protein for cytohesin exchange factors 1
hsa-miR-188-3p	0	0	1	0	1	1	ANKRD36	ankyrin repeat domain 36
hsa-miR-188-3p	0	0	1	1	1	1	ARMCX3	armadillo repeat containing, X-linked 3
hsa-miR-188-3p	1	0	1	1	1	1	TSC22D3	TSC22 domain family, member 3
hsa-miR-188-3p	0	0	1	1	1	1	ZNF365	zinc finger protein 365
hsa-miR-188-3p	0	0	1	1	0	0	LRR1	leucine rich repeat protein 1
hsa-miR-188-3p	1	0	1	1	1	1	NEDD9	neural precursor cell expressed, developmentally down-regulated 9
hsa-miR-188-3p	1	0	1	1	1	1	ZNF711	zinc finger protein 711
hsa-miR-188-3p	1	0	1	1	1	1	PLEKHH1	pleckstrin homology domain containing, family H (with MyTH4 domain) member 1
hsa-miR-188-3p	0	0	1	1	1	1	EXT2	exostosin 2
hsa-miR-188-3p	1	0	1	1	1	1	DDAH1	dimethylarginine dimethylaminohydrolase 1
hsa-miR-188-3p	1	0	1	1	1	1	PTPN3	protein tyrosine phosphatase, non-receptor type 3
hsa-miR-188-3p	1	0	1	1	1	1	GAP43	growth associated protein 43
hsa-miR-188-3p	1	0	1	1	1	1	NAV1	neuron navigator 1
hsa-miR-188-3p	1	0	1	1	1	1	C5orf24	chromosome 5 open reading frame 24
hsa-miR-188-3p	1	0	1	1	1	1	RDX	radixin
hsa-miR-188-3p	1	0	1	1	1	1	RECK	reversion-inducing-cysteine-rich protein with kazal motifs
hsa-miR-188-3p	1	0	1	1	1	1	WLS	wntless homolog (Drosophila)
hsa-miR-188-3p	1	0	1	1	1	1	EOGT	EGF domain-specific O-linked N-acetylglucosamine (GlcNAc) transferase
hsa-miR-188-3p	1	0	1	0	1	1	TBL1XR1	transducin (beta)-like 1 X-linked receptor 1
hsa-miR-188-3p	1	0	1	0	1	1	TTL	tubulin tyrosine ligase
hsa-miR-188-3p	0	0	1	1	1	1	LRRC42	leucine rich repeat containing 42
hsa-miR-188-3p	0	0	1	1	0	0	HNRNPAB	heterogeneous nuclear ribonucleoprotein A/B
hsa-miR-188-3p	0	0	1	0	0	0	DCTN2	dynactin 2 (p50)
hsa-miR-188-3p	0	0	1	1	0	0	SREBF2	sterol regulatory element binding transcription factor 2
hsa-miR-188-3p	1	0	1	0	1	1	RNF144A	ring finger protein 144A
hsa-miR-188-3p	1	0	1	1	0	0	INO80E	INO80 complex subunit E
hsa-miR-188-3p	0	0	1	1	1	1	CCS	copper chaperone for superoxide dismutase
hsa-miR-188-3p	0	0	1	1	1	1	TTC27	tetratricopeptide repeat domain 27
hsa-miR-188-3p	0	0	1	0	0	0	FLJ30838	uncharacterized LOC400955
hsa-miR-188-3p	0	0	1	0	0	0	LOC400768	uncharacterized LOC400768
hsa-miR-188-3p	0	0	1	1	1	1	FBXO36	F-box protein 36
hsa-miR-188-3p	0	0	1	1	1	1	FANCL	Fanconi anemia, complementation group L
hsa-miR-188-3p	0	0	1	1	1	1	APH1A	anterior pharynx defective 1 homolog A (C. elegans)
hsa-miR-188-3p	0	0	1	1	1	1	IER3	immediate early response 3
hsa-miR-188-3p	1	0	1	1	1	1	DOLPP1	dolichyl pyrophosphate phosphatase 1
hsa-miR-188-3p	0	0	1	1	1	1	CIRBP	cold inducible RNA binding protein
hsa-miR-188-3p	1	0	1	0	1	1	BNIP3L	BCL2/adenovirus E1B 19kDa interacting protein 3-like
hsa-miR-188-3p	0	0	1	1	0	0	WDR18	WD repeat domain 18
hsa-miR-188-3p	0	0	1	1	1	1	INCENP	inner centromere protein antigens 135/155kDa
hsa-miR-188-3p	0	0	1	0	0	0	SBDSP1	Shwachman-Bodian-Diamond syndrome pseudogene 1
hsa-miR-188-3p	0	0	1	1	1	1	HPGD	hydroxyprostaglandin dehydrogenase 15-(NAD)
hsa-miR-188-3p	0	0	1	1	0	0	HAS1	hyaluronan synthase 1
hsa-miR-188-3p	0	0	1	1	0	0	TRAF3IP3	TRAF3 interacting protein 3
hsa-miR-188-3p	1	0	1	1	1	1	COPZ1	coatomer protein complex, subunit zeta 1
hsa-miR-188-3p	0	0	1	0	0	0	HMGN1P37	high mobility group nucleosome binding domain 1 pseudogene 37
hsa-miR-188-3p	0	0	1	1	1	1	GRAP2	GRB2-related adaptor protein 2
hsa-miR-188-3p	1	0	1	1	1	1	POU2F2	POU class 2 homeobox 2
hsa-miR-188-3p	1	0	1	1	1	1	PCTP	phosphatidylcholine transfer protein
hsa-miR-188-3p	1	0	1	1	1	1	ARFIP2	ADP-ribosylation factor interacting protein 2
hsa-miR-188-3p	1	0	1	1	1	1	DOK4	docking protein 4
hsa-miR-188-3p	1	0	1	1	1	1	NRN1	neuritin 1
hsa-miR-188-3p	0	0	1	1	0	0	NUP205	nucleoporin 205kDa
hsa-miR-188-3p	0	0	1	0	0	0	ZNF720	zinc finger protein 720
hsa-miR-188-3p	1	0	1	1	1	1	CTDSPL	CTD (carboxy-terminal domain, RNA polymerase II, polypeptide A) small phosphatase-like
hsa-miR-188-3p	1	0	1	1	1	1	NT5DC1	5'-nucleotidase domain containing 1
hsa-miR-188-3p	0	0	1	1	1	1	RHEBL1	Ras homolog enriched in brain like 1
hsa-miR-188-3p	0	0	1	1	1	1	ATP1A1	ATPase, Na+/K+ transporting, alpha 1 polypeptide
hsa-miR-188-3p	0	0	1	1	0	0	TMEM120A	transmembrane protein 120A
hsa-miR-188-3p	1	0	1	1	1	1	ARL4A	ADP-ribosylation factor-like 4A
hsa-miR-188-3p	1	0	1	1	1	1	NFYB	nuclear transcription factor Y, beta
hsa-miR-188-3p	0	0	1	1	0	0	C9orf114	chromosome 9 open reading frame 114
hsa-miR-188-3p	1	0	1	1	1	1	F11R	F11 receptor
hsa-miR-188-3p	1	0	1	0	1	1	RUNX1T1	runt-related transcription factor 1; translocated to, 1 (cyclin D-related)
hsa-miR-188-3p	1	0	1	1	1	1	TMEM55B	transmembrane protein 55B
hsa-miR-188-3p	0	0	1	1	1	1	HS3ST2	heparan sulfate (glucosamine) 3-O-sulfotransferase 2
hsa-miR-188-3p	0	0	1	1	0	0	HEBP1	heme binding protein 1
hsa-miR-188-3p	1	0	1	1	1	1	MFSD2A	major facilitator superfamily domain containing 2A
hsa-miR-188-3p	1	0	1	1	0	0	CCM2	cerebral cavernous malformation 2
hsa-miR-188-3p	0	0	1	0	0	0	EEF1G	eukaryotic translation elongation factor 1 gamma
hsa-miR-188-3p	1	0	1	1	1	1	ATPAF1	ATP synthase mitochondrial F1 complex assembly factor 1
hsa-miR-188-3p	1	0	1	1	1	1	MED1	mediator complex subunit 1
hsa-miR-188-3p	0	0	1	1	0	0	ISG20	interferon stimulated exonuclease gene 20kDa
hsa-miR-188-3p	1	0	1	0	1	1	KIAA0240	KIAA0240
hsa-miR-188-3p	1	0	1	1	1	1	STAG2	stromal antigen 2
hsa-miR-188-3p	1	0	1	0	1	1	PTP4A1	protein tyrosine phosphatase type IVA, member 1
hsa-miR-188-3p	1	0	1	1	1	1	ANKS6	ankyrin repeat and sterile alpha motif domain containing 6
hsa-miR-188-3p	0	0	1	1	0	0	TENC1	tensin like C1 domain containing phosphatase (tensin 2)
hsa-miR-188-3p	1	0	1	1	1	1	RBPJ	recombination signal binding protein for immunoglobulin kappa J region
hsa-miR-188-3p	1	0	1	1	1	1	PRKG1	protein kinase, cGMP-dependent, type I
hsa-miR-188-3p	0	0	1	1	1	1	CD274	CD274 molecule
hsa-miR-188-3p	0	0	1	0	0	0	PILRB	paired immunoglobin-like type 2 receptor beta
hsa-miR-188-3p	1	0	1	1	1	1	BNC2	basonuclin 2
hsa-miR-188-3p	0	0	1	1	1	1	PROS1	protein S (alpha)
hsa-miR-188-3p	1	0	1	1	1	1	LGR4	leucine-rich repeat containing G protein-coupled receptor 4
hsa-miR-188-3p	1	0	1	1	1	1	TNFAIP1	tumor necrosis factor, alpha-induced protein 1 (endothelial)
hsa-miR-188-3p	1	0	1	1	1	1	PLAU	plasminogen activator, urokinase
hsa-miR-188-3p	0	0	1	1	1	1	PRKACA	protein kinase, cAMP-dependent, catalytic, alpha
hsa-miR-188-3p	1	0	1	0	1	1	ACVR2A	activin A receptor, type IIA
hsa-miR-188-3p	0	0	1	1	1	1	ATP7A	ATPase, Cu++ transporting, alpha polypeptide
hsa-miR-188-3p	0	0	1	1	1	1	ERCC8	excision repair cross-complementing rodent repair deficiency, complementation group 8
hsa-miR-188-3p	1	0	1	1	1	1	F13A1	coagulation factor XIII, A1 polypeptide
hsa-miR-188-3p	0	0	1	1	1	1	GLDC	glycine dehydrogenase (decarboxylating)
hsa-miR-188-3p	0	0	1	1	1	1	GSS	glutathione synthetase
hsa-miR-188-3p	1	0	1	1	1	1	HK2	hexokinase 2
hsa-miR-188-3p	1	0	1	0	1	1	ITGB3	integrin, beta 3 (platelet glycoprotein IIIa, antigen CD61)
hsa-miR-188-3p	1	0	1	1	1	1	KCNA1	potassium voltage-gated channel, shaker-related subfamily, member 1 (episodic ataxia with myokymia)
hsa-miR-188-3p	0	0	1	1	1	1	LPL	lipoprotein lipase
hsa-miR-188-3p	0	0	1	1	1	1	MAOA	monoamine oxidase A
hsa-miR-188-3p	1	0	1	1	1	1	MET	met proto-oncogene (hepatocyte growth factor receptor)
hsa-miR-188-3p	0	0	1	1	1	1	PRNP	prion protein
hsa-miR-188-3p	0	0	1	1	1	1	PTS	6-pyruvoyltetrahydropterin synthase
hsa-miR-188-3p	1	0	1	1	1	1	ATXN1	ataxin 1
hsa-miR-188-3p	0	0	1	1	1	1	LTBP2	latent transforming growth factor beta binding protein 2
hsa-miR-188-3p	1	0	1	1	0	0	NOTCH3	notch 3
hsa-miR-188-3p	0	0	1	1	0	0	PHEX	phosphate regulating endopeptidase homolog, X-linked
hsa-miR-188-3p	1	0	1	1	1	1	RFX5	regulatory factor X, 5 (influences HLA class II expression)
hsa-miR-188-3p	1	0	1	1	1	1	APP	amyloid beta (A4) precursor protein
hsa-miR-188-3p	0	0	1	1	1	1	C7	complement component 7
hsa-miR-188-3p	0	0	1	1	1	1	IGF2	insulin-like growth factor 2 (somatomedin A)
hsa-miR-188-3p	0	0	1	1	1	1	ALDH1B1	aldehyde dehydrogenase 1 family, member B1
hsa-miR-188-3p	0	0	1	1	0	0	ALOX5	arachidonate 5-lipoxygenase
hsa-miR-188-3p	1	0	1	0	1	1	CACNA1E	calcium channel, voltage-dependent, R type, alpha 1E subunit
hsa-miR-188-3p	1	0	1	1	1	1	CSF1	colony stimulating factor 1 (macrophage)
hsa-miR-188-3p	1	0	1	0	1	1	GABRA4	gamma-aminobutyric acid (GABA) A receptor, alpha 4
hsa-miR-188-3p	1	0	1	1	1	1	GRIA4	glutamate receptor, ionotropic, AMPA 4
hsa-miR-188-3p	0	0	1	1	1	1	HTR7	5-hydroxytryptamine (serotonin) receptor 7, adenylate cyclase-coupled
hsa-miR-188-3p	1	0	1	1	1	1	PPP3R1	protein phosphatase 3, regulatory subunit B, alpha
hsa-miR-188-3p	1	0	1	1	1	1	PTGER2	prostaglandin E receptor 2 (subtype EP2), 53kDa
hsa-miR-188-3p	0	0	1	1	0	0	PTGIR	prostaglandin I2 (prostacyclin) receptor (IP)
hsa-miR-188-3p	1	0	1	1	1	1	RORC	RAR-related orphan receptor C
hsa-miR-188-3p	0	0	1	0	0	0	C10orf55	chromosome 10 open reading frame 55
hsa-miR-188-3p	1	0	1	1	1	1	MIR22HG	MIR22 host gene (non-protein coding)
hsa-miR-188-3p	0	0	1	1	0	0	PAMR1	peptidase domain containing associated with muscle regeneration 1
hsa-miR-188-3p	0	0	1	0	0	0	KLK2	kallikrein-related peptidase 2
hsa-miR-188-3p	1	0	1	1	1	1	LCLAT1	lysocardiolipin acyltransferase 1
hsa-miR-188-3p	1	0	1	1	1	1	TMEM200B	transmembrane protein 200B
hsa-miR-188-3p	1	0	1	0	1	1	BMF	Bcl2 modifying factor
hsa-miR-188-3p	0	0	1	0	1	1	ZNF705A	zinc finger protein 705A
hsa-miR-188-3p	0	0	1	1	1	1	MAP1LC3C	microtubule-associated protein 1 light chain 3 gamma
hsa-miR-188-3p	0	0	1	0	1	1	FLJ16124	FLJ16124 protein
hsa-miR-188-3p	1	0	1	1	1	1	PLCXD3	phosphatidylinositol-specific phospholipase C, X domain containing 3
hsa-miR-188-3p	0	0	1	0	1	1	GIMAP6	GTPase, IMAP family member 6
hsa-miR-188-3p	0	0	1	1	1	1	TRIM13	tripartite motif containing 13
hsa-miR-188-3p	1	0	1	1	1	1	LMBRD2	LMBR1 domain containing 2
hsa-miR-188-3p	0	0	1	1	0	0	NTRK1	neurotrophic tyrosine kinase, receptor, type 1
hsa-miR-188-3p	1	0	1	0	1	1	C18orf25	chromosome 18 open reading frame 25
hsa-miR-188-3p	1	0	1	0	1	1	KIAA2022	KIAA2022
hsa-miR-188-3p	0	0	1	1	0	0	CDKL4	cyclin-dependent kinase-like 4
hsa-miR-188-3p	0	0	1	1	1	1	SPIN3	spindlin family, member 3
hsa-miR-188-3p	1	0	1	0	1	1	ZC3H12B	zinc finger CCCH-type containing 12B
hsa-miR-188-3p	1	0	1	0	1	1	MTX3	metaxin 3
hsa-miR-188-3p	1	0	1	1	1	1	SLC6A17	solute carrier family 6, member 17
hsa-miR-188-3p	1	0	1	1	1	1	FAM171A1	family with sequence similarity 171, member A1
hsa-miR-188-3p	1	0	1	0	1	1	CREB5	cAMP responsive element binding protein 5
hsa-miR-188-3p	0	0	1	1	1	1	LDLRAD2	low density lipoprotein receptor class A domain containing 2
hsa-miR-188-3p	1	0	1	1	1	1	KCNMA1	potassium large conductance calcium-activated channel, subfamily M, alpha member 1
hsa-miR-188-3p	0	0	1	1	1	1	ACTBL2	actin, beta-like 2
hsa-miR-188-3p	1	0	1	1	1	1	NTRK2	neurotrophic tyrosine kinase, receptor, type 2
hsa-miR-188-3p	0	0	1	1	1	1	NARG2	NMDA receptor regulated 2
hsa-miR-188-3p	1	0	1	1	1	1	CANX	calnexin
hsa-miR-188-3p	1	0	1	0	1	1	TNRC6B	trinucleotide repeat containing 6B
hsa-miR-188-3p	1	0	1	1	1	1	YIPF5	Yip1 domain family, member 5
hsa-miR-188-3p	1	0	1	1	1	1	RGS7BP	regulator of G-protein signaling 7 binding protein
hsa-miR-188-3p	1	0	1	0	1	1	MSRB3	methionine sulfoxide reductase B3
hsa-miR-188-3p	0	0	1	1	1	1	SLC35A2	solute carrier family 35 (UDP-galactose transporter), member A2
hsa-miR-188-3p	0	0	1	1	1	1	HNRNPH2	heterogeneous nuclear ribonucleoprotein H2 (H')
hsa-miR-188-3p	1	0	1	1	1	1	MAGI1	membrane associated guanylate kinase, WW and PDZ domain containing 1
hsa-miR-188-3p	0	0	1	1	0	0	NGRN	neugrin, neurite outgrowth associated
hsa-miR-188-3p	1	0	1	0	1	1	SRGAP3	SLIT-ROBO Rho GTPase activating protein 3
hsa-miR-188-3p	0	0	1	1	1	1	KCNIP1	Kv channel interacting protein 1
hsa-miR-188-3p	1	0	1	1	1	1	DLX1	distal-less homeobox 1
hsa-miR-188-3p	1	0	1	0	1	1	GK5	glycerol kinase 5 (putative)
hsa-miR-188-3p	1	0	1	1	1	1	KCNC4	potassium voltage-gated channel, Shaw-related subfamily, member 4
hsa-miR-188-3p	0	0	1	0	1	1	ZNF705D	zinc finger protein 705D
hsa-miR-188-3p	1	0	1	1	1	1	ZNF384	zinc finger protein 384
hsa-miR-188-3p	0	0	1	1	0	0	FAM83G	family with sequence similarity 83, member G
hsa-miR-188-3p	0	0	1	0	1	1	SCN3B	sodium channel, voltage-gated, type III, beta subunit
hsa-miR-188-3p	1	0	1	1	1	1	PAPD5	PAP associated domain containing 5
hsa-miR-188-3p	1	0	1	1	1	1	NSL1	NSL1, MIND kinetochore complex component, homolog (S. cerevisiae)
hsa-miR-188-3p	1	0	1	1	1	1	KDM5A	lysine (K)-specific demethylase 5A
hsa-miR-188-3p	1	0	1	0	1	1	TMEM237	transmembrane protein 237
hsa-miR-188-3p	0	0	1	1	1	1	FAM22G	family with sequence similarity 22, member G
hsa-miR-188-3p	1	0	1	1	1	1	IRF2BP2	interferon regulatory factor 2 binding protein 2
hsa-miR-188-3p	0	0	1	1	1	1	ZNF586	zinc finger protein 586
hsa-miR-188-3p	1	0	1	0	1	1	UBXN2B	UBX domain protein 2B
hsa-miR-188-3p	0	0	1	1	0	0	VPS37D	vacuolar protein sorting 37 homolog D (S. cerevisiae)
hsa-miR-188-3p	1	0	1	1	1	1	SRSF1	serine/arginine-rich splicing factor 1
hsa-miR-188-3p	0	0	1	1	1	1	FKTN	fukutin
hsa-miR-188-3p	0	0	1	1	0	0	CT47A1	cancer/testis antigen family 47, member A1
hsa-miR-188-3p	1	0	1	1	1	1	FAM155A	family with sequence similarity 155, member A
hsa-miR-188-3p	0	0	1	1	1	1	HSF5	heat shock transcription factor family member 5
hsa-miR-188-3p	0	0	1	0	0	0	CCDC150	coiled-coil domain containing 150
hsa-miR-188-3p	1	0	1	1	1	1	REPS2	RALBP1 associated Eps domain containing 2
hsa-miR-188-3p	0	0	1	1	1	1	PLIN2	perilipin 2
hsa-miR-188-3p	0	0	1	1	0	0	AZGP1	alpha-2-glycoprotein 1, zinc-binding
hsa-miR-188-3p	1	0	1	1	1	1	CDH13	cadherin 13, H-cadherin (heart)
hsa-miR-188-3p	1	0	1	0	1	1	CPD	carboxypeptidase D
hsa-miR-188-3p	1	0	1	1	1	1	CREBL2	cAMP responsive element binding protein-like 2
hsa-miR-188-3p	0	0	1	0	1	1	EMP1	epithelial membrane protein 1
hsa-miR-188-3p	0	0	1	1	1	1	FABP4	fatty acid binding protein 4, adipocyte
hsa-miR-188-3p	1	0	1	0	1	1	B4GALT1	UDP-Gal:betaGlcNAc beta 1,4- galactosyltransferase, polypeptide 1
hsa-miR-188-3p	0	0	1	1	1	1	IL13RA1	interleukin 13 receptor, alpha 1
hsa-miR-188-3p	1	0	1	1	1	1	ARF3	ADP-ribosylation factor 3
hsa-miR-188-3p	1	0	1	1	1	1	BCL6	B-cell CLL/lymphoma 6
hsa-miR-188-3p	1	0	1	0	1	1	CCND2	cyclin D2
hsa-miR-188-3p	1	0	1	1	1	1	CD69	CD69 molecule
hsa-miR-188-3p	1	0	1	1	1	1	CDC25A	cell division cycle 25 homolog A (S. pombe)
hsa-miR-188-3p	1	0	1	0	1	1	CEBPG	CCAAT/enhancer binding protein (C/EBP), gamma
hsa-miR-188-3p	1	0	1	0	1	1	COL19A1	collagen, type XIX, alpha 1
hsa-miR-188-3p	1	0	1	1	1	1	MASP1	mannan-binding lectin serine peptidase 1 (C4/C2 activating component of Ra-reactive factor)
hsa-miR-188-3p	1	0	1	1	1	1	CSNK2A1	casein kinase 2, alpha 1 polypeptide
hsa-miR-188-3p	0	0	1	1	1	1	DSG1	desmoglein 1
hsa-miR-188-3p	1	0	1	1	1	1	E2F3	E2F transcription factor 3
hsa-miR-188-3p	1	0	1	1	1	1	FKBP4	FK506 binding protein 4, 59kDa
hsa-miR-188-3p	1	0	1	1	1	1	GAB1	GRB2-associated binding protein 1
hsa-miR-188-3p	0	0	1	1	1	1	GFAP	glial fibrillary acidic protein
hsa-miR-188-3p	0	0	1	0	0	0	ITIH3	inter-alpha-trypsin inhibitor heavy chain 3
hsa-miR-188-3p	1	0	1	1	1	1	MAN2A1	mannosidase, alpha, class 2A, member 1
hsa-miR-188-3p	1	0	1	1	1	1	MSN	moesin
hsa-miR-188-3p	0	0	1	1	0	0	MYBL2	v-myb myeloblastosis viral oncogene homolog (avian)-like 2
hsa-miR-188-3p	1	0	1	1	1	1	NGFR	nerve growth factor receptor
hsa-miR-188-3p	1	0	1	1	1	1	OSBP	oxysterol binding protein
hsa-miR-188-3p	1	0	1	1	1	1	PBX2	pre-B-cell leukemia homeobox 2
hsa-miR-188-3p	1	0	1	1	0	0	PDGFB	platelet-derived growth factor beta polypeptide
hsa-miR-188-3p	0	0	1	1	1	1	PIM1	pim-1 oncogene
hsa-miR-188-3p	1	0	1	1	1	1	PLAGL2	pleiomorphic adenoma gene-like 2
hsa-miR-188-3p	1	0	1	1	1	1	PPP1CC	protein phosphatase 1, catalytic subunit, gamma isozyme
hsa-miR-188-3p	0	0	1	1	1	1	PRKCB	protein kinase C, beta
hsa-miR-188-3p	1	0	1	1	1	1	PRKD1	protein kinase D1
hsa-miR-188-3p	1	0	1	0	1	1	MAPK4	mitogen-activated protein kinase 4
hsa-miR-188-3p	0	0	1	1	1	1	MAP2K1	mitogen-activated protein kinase kinase 1
hsa-miR-188-3p	0	0	1	0	1	1	PSMD3	proteasome (prosome, macropain) 26S subunit, non-ATPase, 3
hsa-miR-188-3p	0	0	1	1	1	1	PTPN12	protein tyrosine phosphatase, non-receptor type 12
hsa-miR-188-3p	1	0	1	1	1	1	RAD23B	RAD23 homolog B (S. cerevisiae)
hsa-miR-188-3p	1	0	1	0	1	1	SORT1	sortilin 1
hsa-miR-188-3p	1	0	1	1	0	0	CCL3	chemokine (C-C motif) ligand 3
hsa-miR-188-3p	0	0	1	0	1	1	CXCL5	chemokine (C-X-C motif) ligand 5
hsa-miR-188-3p	0	0	1	1	1	1	SDC4	syndecan 4
hsa-miR-188-3p	1	0	1	0	1	1	SLC6A1	solute carrier family 6 (neurotransmitter transporter, GABA), member 1
hsa-miR-188-3p	1	0	1	1	1	1	SMARCC1	SWI/SNF related, matrix associated, actin dependent regulator of chromatin, subfamily c, member 1
hsa-miR-188-3p	1	0	1	1	1	1	SMARCD2	SWI/SNF related, matrix associated, actin dependent regulator of chromatin, subfamily d, member 2
hsa-miR-188-3p	1	0	1	1	1	1	NR2C2	nuclear receptor subfamily 2, group C, member 2
hsa-miR-188-3p	1	0	1	1	1	1	HSP90B1	heat shock protein 90kDa beta (Grp94), member 1
hsa-miR-188-3p	1	0	1	1	1	1	UBE2D3	ubiquitin-conjugating enzyme E2D 3
hsa-miR-188-3p	1	0	1	1	1	1	UBE2H	ubiquitin-conjugating enzyme E2H
hsa-miR-188-3p	1	0	1	1	1	1	UBE2N	ubiquitin-conjugating enzyme E2N
hsa-miR-188-3p	1	0	1	1	1	1	FZD5	frizzled family receptor 5
hsa-miR-188-3p	0	0	1	1	1	1	STAM	signal transducing adaptor molecule (SH3 domain and ITAM motif) 1
hsa-miR-188-3p	1	0	1	1	1	1	HMGA2	high mobility group AT-hook 2
hsa-miR-188-3p	1	0	1	1	1	1	DYRK2	dual-specificity tyrosine-(Y)-phosphorylation regulated kinase 2
hsa-miR-188-3p	1	0	1	1	1	1	SUPT3H	suppressor of Ty 3 homolog (S. cerevisiae)
hsa-miR-188-3p	1	0	1	0	1	1	CNTNAP1	contactin associated protein 1
hsa-miR-188-3p	1	0	1	1	1	1	TNFSF11	tumor necrosis factor (ligand) superfamily, member 11
hsa-miR-188-3p	1	0	1	0	1	1	TNKS	tankyrase, TRF1-interacting ankyrin-related ADP-ribose polymerase
hsa-miR-188-3p	1	0	1	0	1	1	IRS2	insulin receptor substrate 2
hsa-miR-188-3p	0	0	1	1	0	0	PEX11A	peroxisomal biogenesis factor 11 alpha
hsa-miR-188-3p	1	0	1	1	1	1	SUCLG2	succinate-CoA ligase, GDP-forming, beta subunit
hsa-miR-188-3p	1	0	1	1	1	1	NRP2	neuropilin 2
hsa-miR-188-3p	1	0	1	1	1	1	KAT2B	K(lysine) acetyltransferase 2B
hsa-miR-188-3p	0	0	1	1	1	1	PRPF4B	PRP4 pre-mRNA processing factor 4 homolog B (yeast)
hsa-miR-188-3p	0	0	1	1	1	1	RNF8	ring finger protein 8, E3 ubiquitin protein ligase
hsa-miR-188-3p	0	0	1	1	0	0	AP2S1	adaptor-related protein complex 2, sigma 1 subunit
hsa-miR-188-3p	1	0	1	1	1	1	CTSS	cathepsin S
hsa-miR-188-3p	1	0	1	0	1	1	EIF2S1	eukaryotic translation initiation factor 2, subunit 1 alpha, 35kDa
hsa-miR-188-3p	1	0	1	1	1	1	EYA4	eyes absent homolog 4 (Drosophila)
hsa-miR-188-3p	1	0	1	1	1	1	SYT7	synaptotagmin VII
hsa-miR-188-3p	0	0	1	0	1	1	TMSB4Y	thymosin beta 4, Y-linked
hsa-miR-188-3p	0	0	1	1	0	0	SLC6A5	solute carrier family 6 (neurotransmitter transporter, glycine), member 5
hsa-miR-188-3p	1	0	1	0	1	1	MED14	mediator complex subunit 14
hsa-miR-188-3p	0	0	1	1	1	1	CHST2	carbohydrate (N-acetylglucosamine-6-O) sulfotransferase 2
hsa-miR-188-3p	0	0	1	1	1	1	LY86	lymphocyte antigen 86
hsa-miR-188-3p	1	0	1	0	1	1	CHST3	carbohydrate (chondroitin 6) sulfotransferase 3
hsa-miR-188-3p	1	0	1	1	1	1	TRAF4	TNF receptor-associated factor 4
hsa-miR-188-3p	1	0	1	1	1	1	ARL3	ADP-ribosylation factor-like 3
hsa-miR-188-3p	1	0	1	1	1	1	BCL9	B-cell CLL/lymphoma 9
hsa-miR-188-3p	1	0	1	0	1	1	CEBPA	CCAAT/enhancer binding protein (C/EBP), alpha
hsa-miR-188-3p	1	0	1	1	1	1	DACH1	dachshund homolog 1 (Drosophila)
hsa-miR-188-3p	1	0	1	1	1	1	DAG1	dystroglycan 1 (dystrophin-associated glycoprotein 1)
hsa-miR-188-3p	1	0	1	1	1	1	EFNB1	ephrin-B1
hsa-miR-188-3p	1	0	1	1	1	1	ENSA	endosulfine alpha
hsa-miR-188-3p	1	0	1	0	1	1	ETV5	ets variant 5
hsa-miR-188-3p	1	0	1	0	1	1	FGF5	fibroblast growth factor 5
hsa-miR-188-3p	1	0	1	1	1	1	FOXD2	forkhead box D2
hsa-miR-188-3p	1	0	1	1	1	1	FLOT2	flotillin 2
hsa-miR-188-3p	0	0	1	1	1	1	TK2	thymidine kinase 2, mitochondrial
hsa-miR-188-3p	0	0	1	1	1	1	DIRAS3	DIRAS family, GTP-binding RAS-like 3
hsa-miR-188-3p	1	0	1	1	1	1	MTMR4	myotubularin related protein 4
hsa-miR-188-3p	0	0	1	1	1	1	MTA2	metastasis associated 1 family, member 2
hsa-miR-188-3p	1	0	1	1	1	1	B4GALT5	UDP-Gal:betaGlcNAc beta 1,4- galactosyltransferase, polypeptide 5
hsa-miR-188-3p	1	0	1	1	1	1	NRXN1	neurexin 1
hsa-miR-188-3p	1	0	1	0	1	1	CDYL	chromodomain protein, Y-like
hsa-miR-188-3p	1	0	1	1	1	1	GABRE	gamma-aminobutyric acid (GABA) A receptor, epsilon
hsa-miR-188-3p	1	0	1	0	1	1	KRAS	v-Ki-ras2 Kirsten rat sarcoma viral oncogene homolog
hsa-miR-188-3p	0	0	1	1	1	1	PTH2R	parathyroid hormone 2 receptor
hsa-miR-188-3p	1	0	1	0	1	1	SCD	stearoyl-CoA desaturase (delta-9-desaturase)
hsa-miR-188-3p	1	0	1	1	1	1	SIAH2	siah E3 ubiquitin protein ligase 2
hsa-miR-188-3p	1	0	1	1	0	0	BCL3	B-cell CLL/lymphoma 3
hsa-miR-188-3p	1	0	1	1	1	1	CBL	Cbl proto-oncogene, E3 ubiquitin protein ligase
hsa-miR-188-3p	1	0	1	1	1	1	DLX3	distal-less homeobox 3
hsa-miR-188-3p	1	0	1	1	1	1	GJA5	gap junction protein, alpha 5, 40kDa
hsa-miR-188-3p	1	0	1	1	0	0	HCFC1	host cell factor C1 (VP16-accessory protein)
hsa-miR-188-3p	1	0	1	0	1	1	PRKAB2	protein kinase, AMP-activated, beta 2 non-catalytic subunit
hsa-miR-188-3p	0	0	1	1	1	1	SLC20A1	solute carrier family 20 (phosphate transporter), member 1
hsa-miR-188-3p	0	0	1	1	1	1	FAIM3	Fas apoptotic inhibitory molecule 3
hsa-miR-188-3p	1	0	1	1	1	1	PIGK	phosphatidylinositol glycan anchor biosynthesis, class K
hsa-miR-188-3p	1	0	1	1	1	1	ABCA1	ATP-binding cassette, sub-family A (ABC1), member 1
hsa-miR-188-3p	1	0	1	1	1	1	IRS1	insulin receptor substrate 1
hsa-miR-188-3p	1	0	1	1	1	1	LPP	LIM domain containing preferred translocation partner in lipoma
hsa-miR-188-3p	1	0	1	1	1	1	NHLH2	nescient helix loop helix 2
hsa-miR-188-3p	1	0	1	1	1	1	ATP8B1	ATPase, aminophospholipid transporter, class I, type 8B, member 1
hsa-miR-188-3p	1	0	1	1	1	1	EVI5	ecotropic viral integration site 5
hsa-miR-188-3p	1	0	1	0	1	1	TSPAN2	tetraspanin 2
hsa-miR-188-3p	1	0	1	1	1	1	DNAL4	dynein, axonemal, light chain 4
hsa-miR-188-3p	0	0	1	1	0	0	BCKDK	branched chain ketoacid dehydrogenase kinase
hsa-miR-188-3p	1	0	1	1	1	1	FOXO4	forkhead box O4
hsa-miR-188-3p	1	0	1	1	1	1	MMP16	matrix metallopeptidase 16 (membrane-inserted)
hsa-miR-188-3p	1	0	1	1	0	0	NAB2	NGFI-A binding protein 2 (EGR1 binding protein 2)
hsa-miR-188-3p	1	0	1	1	1	1	ENDOU	endonuclease, polyU-specific
hsa-miR-188-3p	0	0	1	1	1	1	TRDN	triadin
hsa-miR-188-3p	1	0	1	1	1	1	CACNG2	calcium channel, voltage-dependent, gamma subunit 2
hsa-miR-188-3p	1	0	1	1	1	1	DYNC1LI2	dynein, cytoplasmic 1, light intermediate chain 2
hsa-miR-188-3p	1	0	1	1	1	1	RAD21	RAD21 homolog (S. pombe)
hsa-miR-188-3p	1	0	1	1	1	1	CCL7	chemokine (C-C motif) ligand 7
hsa-miR-188-3p	0	0	1	1	1	1	TNFAIP2	tumor necrosis factor, alpha-induced protein 2
hsa-miR-188-3p	0	0	1	1	0	0	ANP32A	acidic (leucine-rich) nuclear phosphoprotein 32 family, member A
hsa-miR-188-3p	1	0	1	1	1	1	SMC1A	structural maintenance of chromosomes 1A
hsa-miR-188-3p	1	0	1	1	1	1	TUBGCP3	tubulin, gamma complex associated protein 3
hsa-miR-188-3p	0	0	1	1	1	1	SLC30A9	solute carrier family 30 (zinc transporter), member 9
hsa-miR-188-3p	0	0	1	1	1	1	TM9SF1	transmembrane 9 superfamily member 1
hsa-miR-188-3p	1	0	1	1	1	1	TRIM3	tripartite motif containing 3
hsa-miR-188-3p	1	0	1	1	1	1	HEXIM1	hexamethylene bis-acetamide inducible 1
hsa-miR-188-3p	0	0	1	0	0	0	RELB	v-rel reticuloendotheliosis viral oncogene homolog B
hsa-miR-188-3p	1	0	1	1	1	1	SLC2A1	solute carrier family 2 (facilitated glucose transporter), member 1
hsa-miR-188-3p	1	0	1	1	1	1	DYNLT3	dynein, light chain, Tctex-type 3
hsa-miR-188-3p	1	0	1	0	1	1	NCOA2	nuclear receptor coactivator 2
hsa-miR-188-3p	1	0	1	0	1	1	IGF2BP1	insulin-like growth factor 2 mRNA binding protein 1
hsa-miR-188-3p	1	0	1	1	1	1	MAP3K2	mitogen-activated protein kinase kinase kinase 2
hsa-miR-188-3p	1	0	1	1	1	1	ZBTB6	zinc finger and BTB domain containing 6
hsa-miR-188-3p	1	0	1	1	1	1	MMP24	matrix metallopeptidase 24 (membrane-inserted)
hsa-miR-188-3p	1	0	1	1	1	1	SLC20A2	solute carrier family 20 (phosphate transporter), member 2
hsa-miR-188-3p	1	0	1	1	1	1	BTG2	BTG family, member 2
hsa-miR-188-3p	1	0	1	1	1	1	CBX1	chromobox homolog 1
hsa-miR-188-3p	0	0	1	1	1	1	TMED10	transmembrane emp24-like trafficking protein 10 (yeast)
hsa-miR-188-3p	1	0	1	1	1	1	SKP1	S-phase kinase-associated protein 1
hsa-miR-188-3p	1	0	1	0	1	1	SLC5A3	solute carrier family 5 (sodium/myo-inositol cotransporter), member 3
hsa-miR-188-3p	0	0	1	1	1	1	SNRPD1	small nuclear ribonucleoprotein D1 polypeptide 16kDa
hsa-miR-188-3p	1	0	1	0	1	1	SOX12	SRY (sex determining region Y)-box 12
hsa-miR-188-3p	1	0	1	1	1	1	ADAMTS5	ADAM metallopeptidase with thrombospondin type 1 motif, 5
hsa-miR-188-3p	0	0	1	1	1	1	ZNF80	zinc finger protein 80
hsa-miR-188-3p	1	0	1	1	1	1	KLF12	Kruppel-like factor 12
hsa-miR-188-3p	1	0	1	1	1	1	TUSC2	tumor suppressor candidate 2
hsa-miR-188-3p	0	0	1	1	1	1	STAT1	signal transducer and activator of transcription 1, 91kDa
hsa-miR-188-3p	1	0	1	1	1	1	CASC3	cancer susceptibility candidate 3
hsa-miR-188-3p	0	0	1	1	1	1	KLRK1	killer cell lectin-like receptor subfamily K, member 1
hsa-miR-188-3p	0	0	1	1	1	1	TMED3	transmembrane emp24 protein transport domain containing 3
hsa-miR-188-3p	1	0	1	1	1	1	TARDBP	TAR DNA binding protein
hsa-miR-188-3p	1	0	1	1	1	1	ELL2	elongation factor, RNA polymerase II, 2
hsa-miR-188-3p	0	0	1	1	1	1	FRAT2	frequently rearranged in advanced T-cell lymphomas 2
hsa-miR-188-3p	1	0	1	1	1	1	ICOS	inducible T-cell co-stimulator
hsa-miR-188-3p	0	0	1	1	1	1	LMOD1	leiomodin 1 (smooth muscle)
hsa-miR-188-3p	1	0	1	1	1	1	RYBP	RING1 and YY1 binding protein
hsa-miR-188-3p	1	0	1	1	1	1	KCNE1L	KCNE1-like
hsa-miR-188-3p	1	0	1	0	1	1	G3BP2	GTPase activating protein (SH3 domain) binding protein 2
hsa-miR-188-3p	1	0	1	1	1	1	PITPNB	phosphatidylinositol transfer protein, beta
hsa-miR-188-3p	1	0	1	1	1	1	RANBP6	RAN binding protein 6
hsa-miR-188-3p	1	0	1	1	1	1	SF3B3	splicing factor 3b, subunit 3, 130kDa
hsa-miR-188-3p	1	0	1	0	1	1	FLRT2	fibronectin leucine rich transmembrane protein 2
hsa-miR-188-3p	0	0	1	1	0	0	ZNF221	zinc finger protein 221
hsa-miR-188-3p	0	0	1	1	0	0	ZDHHC8	zinc finger, DHHC-type containing 8
hsa-miR-188-3p	1	0	1	0	1	1	TRHDE	thyrotropin-releasing hormone degrading enzyme
hsa-miR-188-3p	0	0	1	1	1	1	UBQLN1	ubiquilin 1
hsa-miR-188-3p	1	0	1	1	0	0	HOXC11	homeobox C11
hsa-miR-188-3p	1	0	1	0	1	1	VAMP2	vesicle-associated membrane protein 2 (synaptobrevin 2)
hsa-miR-188-3p	1	0	1	1	1	1	MAPRE2	microtubule-associated protein, RP/EB family, member 2
hsa-miR-188-3p	1	0	1	1	1	1	SLC7A11	solute carrier family 7 (anionic amino acid transporter light chain, xc- system), member 11
hsa-miR-188-3p	1	0	1	0	1	1	FJX1	four jointed box 1 (Drosophila)
hsa-miR-188-3p	0	0	1	1	1	1	HIBCH	3-hydroxyisobutyryl-CoA hydrolase
hsa-miR-188-3p	1	0	1	1	1	1	LHX6	LIM homeobox 6
hsa-miR-188-3p	1	0	1	1	1	1	AFF4	AF4/FMR2 family, member 4
hsa-miR-188-3p	0	0	1	1	1	1	ARFGAP3	ADP-ribosylation factor GTPase activating protein 3
hsa-miR-188-3p	0	0	1	1	1	1	ZNRD1	zinc ribbon domain containing 1
hsa-miR-188-3p	0	0	1	1	1	1	PSME4	proteasome (prosome, macropain) activator subunit 4
hsa-miR-188-3p	1	0	1	0	1	1	ATP11B	ATPase, class VI, type 11B
hsa-miR-188-3p	0	0	1	1	1	1	HOXC4	homeobox C4
hsa-miR-188-3p	1	0	1	1	1	1	RALGPS1	Ral GEF with PH domain and SH3 binding motif 1
hsa-miR-188-3p	0	0	1	1	1	1	PHF14	PHD finger protein 14
hsa-miR-188-3p	1	0	1	0	1	1	MLEC	malectin
hsa-miR-188-3p	1	0	1	1	1	1	RASSF2	Ras association (RalGDS/AF-6) domain family member 2
hsa-miR-188-3p	1	0	1	1	1	1	MRPL19	mitochondrial ribosomal protein L19
hsa-miR-188-3p	1	0	1	0	1	1	LPPR4	lipid phosphate phosphatase-related protein type 4
hsa-miR-188-3p	1	0	1	1	1	1	NUAK1	NUAK family, SNF1-like kinase, 1
hsa-miR-188-3p	0	0	1	0	1	1	PPM1E	protein phosphatase, Mg2+/Mn2+ dependent, 1E
hsa-miR-188-3p	1	0	1	1	1	1	DIP2C	DIP2 disco-interacting protein 2 homolog C (Drosophila)
hsa-miR-188-3p	1	0	1	1	1	1	SORCS3	sortilin-related VPS10 domain containing receptor 3
hsa-miR-188-3p	1	0	1	0	1	1	WDFY3	WD repeat and FYVE domain containing 3
hsa-miR-188-3p	1	0	1	1	1	1	PHLPP2	PH domain and leucine rich repeat protein phosphatase 2
hsa-miR-188-3p	1	0	1	0	1	1	ZNF609	zinc finger protein 609
hsa-miR-188-3p	1	0	1	1	1	1	RTF1	Rtf1, Paf1/RNA polymerase II complex component, homolog (S. cerevisiae)
hsa-miR-188-3p	1	0	1	0	1	1	LARP4B	La ribonucleoprotein domain family, member 4B
hsa-miR-188-3p	1	0	1	1	1	1	SIK2	salt-inducible kinase 2
hsa-miR-188-3p	1	0	1	0	1	1	KHNYN	KH and NYN domain containing
hsa-miR-188-3p	0	0	1	0	1	1	ZDHHC17	zinc finger, DHHC-type containing 17
hsa-miR-188-3p	0	0	1	1	1	1	LEPROTL1	leptin receptor overlapping transcript-like 1
hsa-miR-188-3p	1	0	1	1	1	1	RIMBP2	RIMS binding protein 2
hsa-miR-188-3p	1	0	1	1	1	1	PARM1	prostate androgen-regulated mucin-like protein 1
hsa-miR-188-3p	0	0	1	1	1	1	KBTBD2	kelch repeat and BTB (POZ) domain containing 2
hsa-miR-188-3p	1	0	1	1	1	1	LTN1	listerin E3 ubiquitin protein ligase 1
hsa-miR-188-3p	1	0	1	1	1	1	SLITRK5	SLIT and NTRK-like family, member 5
hsa-miR-188-3p	1	0	1	1	0	0	POLDIP2	polymerase (DNA-directed), delta interacting protein 2
hsa-miR-188-3p	1	0	1	1	1	1	PHF19	PHD finger protein 19
hsa-miR-188-3p	1	0	1	0	1	1	WWC3	WWC family member 3
hsa-miR-188-3p	0	0	1	1	1	1	BRPF3	bromodomain and PHD finger containing, 3
hsa-miR-188-3p	1	0	1	0	1	1	TRIM33	tripartite motif containing 33
hsa-miR-188-3p	1	0	1	1	1	1	UBE2J1	ubiquitin-conjugating enzyme E2, J1
hsa-miR-188-3p	1	0	1	1	1	1	NLK	nemo-like kinase
hsa-miR-188-3p	0	0	1	1	1	1	CYB5R1	cytochrome b5 reductase 1
hsa-miR-188-3p	0	0	1	0	1	1	ZNF44	zinc finger protein 44
hsa-miR-188-3p	0	0	1	1	1	1	WBP11	WW domain binding protein 11
hsa-miR-188-3p	1	0	1	1	0	0	CPA4	carboxypeptidase A4
hsa-miR-188-3p	1	0	1	1	1	1	PHF20	PHD finger protein 20
hsa-miR-188-3p	0	0	1	1	1	1	GNAS	GNAS complex locus
hsa-miR-188-3p	1	0	1	1	1	1	WAC	WW domain containing adaptor with coiled-coil
hsa-miR-188-3p	0	0	1	1	1	1	USP18	ubiquitin specific peptidase 18
hsa-miR-188-3p	1	0	1	1	1	1	SIX4	SIX homeobox 4
hsa-miR-188-3p	0	0	1	1	1	1	SMG6	smg-6 homolog, nonsense mediated mRNA decay factor (C. elegans)
hsa-miR-188-3p	1	0	1	1	1	1	DIRAS2	DIRAS family, GTP-binding RAS-like 2
hsa-miR-188-3p	1	0	1	1	0	0	C17orf59	chromosome 17 open reading frame 59
hsa-miR-188-3p	1	0	1	0	1	1	FAM46C	family with sequence similarity 46, member C
hsa-miR-188-3p	0	0	1	1	1	1	NCAPG2	non-SMC condensin II complex, subunit G2
hsa-miR-188-3p	1	0	1	1	1	1	UBE2R2	ubiquitin-conjugating enzyme E2R 2
hsa-miR-188-3p	0	0	1	1	1	1	DDX27	DEAD (Asp-Glu-Ala-Asp) box polypeptide 27
hsa-miR-188-3p	0	0	1	1	1	1	AKIRIN2	akirin 2
hsa-miR-188-3p	0	0	1	1	1	1	NUDT11	nudix (nucleoside diphosphate linked moiety X)-type motif 11
hsa-miR-188-3p	1	0	1	0	1	1	LIN7C	lin-7 homolog C (C. elegans)
hsa-miR-188-3p	1	0	1	0	1	1	FOXJ2	forkhead box J2
hsa-miR-188-3p	1	0	1	0	1	1	BRK1	BRICK1, SCAR/WAVE actin-nucleating complex subunit
hsa-miR-188-3p	1	0	1	1	1	1	ETNK1	ethanolamine kinase 1
hsa-miR-188-3p	1	0	1	1	1	1	LRRC8A	leucine rich repeat containing 8 family, member A
hsa-miR-188-3p	0	0	1	1	1	1	RPRM	reprimo, TP53 dependent G2 arrest mediator candidate
hsa-miR-188-3p	1	0	1	0	1	1	TM9SF3	transmembrane 9 superfamily member 3
hsa-miR-188-3p	0	0	1	1	1	1	GRIPAP1	GRIP1 associated protein 1
hsa-miR-188-3p	0	0	1	1	1	1	TMEM167B	transmembrane protein 167B
hsa-miR-188-3p	0	0	1	1	1	1	PRTFDC1	phosphoribosyl transferase domain containing 1
hsa-miR-188-3p	1	0	1	0	1	1	MNT	MAX binding protein
hsa-miR-188-3p	0	0	1	1	1	1	PAPPA2	pappalysin 2
hsa-miR-188-3p	0	0	1	1	1	1	PLXDC1	plexin domain containing 1
hsa-miR-188-3p	0	0	1	1	0	0	LYRM4	LYR motif containing 4
hsa-miR-188-3p	0	0	1	1	1	1	S100A14	S100 calcium binding protein A14
hsa-miR-188-3p	1	0	1	1	1	1	RAB22A	RAB22A, member RAS oncogene family
hsa-miR-188-3p	1	0	1	1	1	1	USP31	ubiquitin specific peptidase 31
hsa-miR-188-3p	1	0	1	1	1	1	SEMA6A	sema domain, transmembrane domain (TM), and cytoplasmic domain, (semaphorin) 6A
hsa-miR-188-3p	0	0	1	1	1	1	ARRDC3	arrestin domain containing 3
hsa-miR-188-3p	1	0	1	1	1	1	KLHL14	kelch-like 14 (Drosophila)
hsa-miR-188-3p	0	0	1	0	1	1	SYT13	synaptotagmin XIII
hsa-miR-188-3p	1	0	1	1	1	1	RANBP10	RAN binding protein 10
hsa-miR-188-3p	1	0	1	1	1	1	CNTN3	contactin 3 (plasmacytoma associated)
hsa-miR-188-3p	0	0	1	1	1	1	BCOR	BCL6 corepressor
hsa-miR-188-3p	1	0	1	1	1	1	VAT1L	vesicle amine transport protein 1 homolog (T. californica)-like
hsa-miR-188-3p	0	0	1	1	0	0	CCL3L1	chemokine (C-C motif) ligand 3-like 1
hsa-miR-188-3p	1	0	1	1	1	1	HCN1	hyperpolarization activated cyclic nucleotide-gated potassium channel 1
hsa-miR-188-3p	1	0	1	1	1	1	ADCY1	adenylate cyclase 1 (brain)
hsa-miR-188-3p	1	0	1	1	1	1	PELI2	pellino E3 ubiquitin protein ligase family member 2
hsa-miR-188-3p	1	0	1	1	1	1	SENP2	SUMO1/sentrin/SMT3 specific peptidase 2
hsa-miR-188-3p	1	0	1	1	1	1	TMEM35	transmembrane protein 35
hsa-miR-188-3p	1	0	1	0	1	1	CSNK1G1	casein kinase 1, gamma 1
hsa-miR-188-3p	1	0	1	1	1	1	MRPL17	mitochondrial ribosomal protein L17
hsa-miR-188-3p	0	0	1	1	1	1	PERP	PERP, TP53 apoptosis effector
hsa-miR-188-3p	0	0	1	1	0	0	RRAGC	Ras-related GTP binding C
hsa-miR-188-3p	1	0	1	1	1	1	XYLT2	xylosyltransferase II
hsa-miR-188-3p	1	0	1	1	1	1	ABCG4	ATP-binding cassette, sub-family G (WHITE), member 4
hsa-miR-188-3p	1	0	1	0	1	1	EDAR	ectodysplasin A receptor
hsa-miR-188-3p	0	0	1	1	1	1	HS1BP3	HCLS1 binding protein 3
hsa-miR-188-3p	1	0	1	1	1	1	HIF3A	hypoxia inducible factor 3, alpha subunit
hsa-miR-188-3p	1	0	1	0	1	1	DNMT3A	DNA (cytosine-5-)-methyltransferase 3 alpha
hsa-miR-188-3p	1	0	1	1	1	1	C6orf106	chromosome 6 open reading frame 106
hsa-miR-188-3p	1	0	1	0	1	1	USP46	ubiquitin specific peptidase 46
hsa-miR-188-3p	1	0	1	1	0	0	UBE2Z	ubiquitin-conjugating enzyme E2Z
hsa-miR-188-3p	1	0	1	1	1	1	NEUROG2	neurogenin 2
hsa-miR-188-3p	1	0	1	1	1	1	GID4	GID complex subunit 4, VID24 homolog (S. cerevisiae)
hsa-miR-188-3p	0	0	1	1	0	0	DHRS11	dehydrogenase/reductase (SDR family) member 11
hsa-miR-188-3p	0	0	1	1	0	0	LRFN3	leucine rich repeat and fibronectin type III domain containing 3
hsa-miR-188-3p	1	0	1	1	1	1	GCC1	GRIP and coiled-coil domain containing 1
hsa-miR-188-3p	1	0	1	1	1	1	RNF128	ring finger protein 128, E3 ubiquitin protein ligase
hsa-miR-188-3p	1	0	1	1	1	1	C10orf76	chromosome 10 open reading frame 76
hsa-miR-188-3p	1	0	1	1	1	1	C3orf52	chromosome 3 open reading frame 52
hsa-miR-188-3p	0	0	1	1	1	1	LRRK1	leucine-rich repeat kinase 1
hsa-miR-188-3p	0	0	1	1	1	1	GLT25D1	glycosyltransferase 25 domain containing 1
hsa-miR-188-3p	0	0	1	1	1	1	ZNF768	zinc finger protein 768
hsa-miR-188-3p	0	0	1	0	1	1	C1orf115	chromosome 1 open reading frame 115
hsa-miR-188-3p	1	0	1	1	1	1	CLMP	CXADR-like membrane protein
hsa-miR-188-3p	0	0	1	1	1	1	BTNL8	butyrophilin-like 8
hsa-miR-188-3p	0	0	1	1	1	1	ZNF767	zinc finger family member 767
hsa-miR-188-3p	1	0	1	1	1	1	KLHL18	kelch-like 18 (Drosophila)
hsa-miR-188-3p	1	0	1	1	1	1	PROSER1	proline and serine rich 1
hsa-miR-188-3p	1	0	1	1	1	1	CYB5B	cytochrome b5 type B (outer mitochondrial membrane)
hsa-miR-188-3p	1	0	1	1	1	1	JHDM1D	jumonji C domain containing histone demethylase 1 homolog D (S. cerevisiae)
hsa-miR-188-3p	1	0	1	0	1	1	C1orf21	chromosome 1 open reading frame 21
hsa-miR-188-3p	1	0	1	1	1	1	SNX27	sorting nexin family member 27
hsa-miR-188-3p	0	0	1	1	1	1	ST6GALNAC5	ST6 (alpha-N-acetyl-neuraminyl-2,3-beta-galactosyl-1,3)-N-acetylgalactosaminide alpha-2,6-sialyltransferase 5
hsa-miR-188-3p	0	0	1	1	0	0	TEX13B	testis expressed 13B
hsa-miR-188-3p	0	0	1	1	0	0	CACNG6	calcium channel, voltage-dependent, gamma subunit 6
hsa-miR-188-3p	1	0	1	1	1	1	GPR61	G protein-coupled receptor 61
hsa-miR-188-3p	1	0	1	1	1	1	PATZ1	POZ (BTB) and AT hook containing zinc finger 1
hsa-miR-188-3p	0	0	1	1	1	1	MRPL14	mitochondrial ribosomal protein L14
hsa-miR-188-3p	1	0	1	1	1	1	FAM175B	family with sequence similarity 175, member B
hsa-miR-188-3p	0	0	1	1	1	1	RNASEH2C	ribonuclease H2, subunit C
hsa-miR-188-3p	1	0	1	1	1	1	ARID5B	AT rich interactive domain 5B (MRF1-like)
hsa-miR-188-3p	1	0	1	1	1	1	ANTXR1	anthrax toxin receptor 1
hsa-miR-188-3p	1	0	1	0	1	1	PSD2	pleckstrin and Sec7 domain containing 2
hsa-miR-188-3p	1	0	1	1	1	1	POLDIP3	polymerase (DNA-directed), delta interacting protein 3
hsa-miR-188-3p	1	0	1	1	1	1	DNAJC14	DnaJ (Hsp40) homolog, subfamily C, member 14
hsa-miR-188-3p	1	0	1	1	1	1	TTBK1	tau tubulin kinase 1
hsa-miR-188-3p	1	0	1	1	1	1	AIFM2	apoptosis-inducing factor, mitochondrion-associated, 2
hsa-miR-188-3p	1	0	1	1	1	1	PCDH11Y	protocadherin 11 Y-linked
hsa-miR-188-3p	0	0	1	1	1	1	TRIM4	tripartite motif containing 4
hsa-miR-188-3p	0	0	1	1	1	1	DMRTC1	DMRT-like family C1
hsa-miR-188-3p	1	0	1	1	1	1	TRIM55	tripartite motif containing 55
hsa-miR-188-3p	1	0	1	1	1	1	SURF4	surfeit 4
hsa-miR-188-3p	1	0	1	1	1	1	FOXQ1	forkhead box Q1
hsa-miR-188-3p	1	0	1	1	1	1	RASL10B	RAS-like, family 10, member B
hsa-miR-188-3p	1	0	1	1	1	1	COL4A5	collagen, type IV, alpha 5
hsa-miR-188-3p	1	0	1	1	1	1	TANC1	tetratricopeptide repeat, ankyrin repeat and coiled-coil containing 1
hsa-miR-188-3p	1	0	1	1	0	0	FCHSD1	FCH and double SH3 domains 1
hsa-miR-188-3p	1	0	1	1	1	1	EPT1	ethanolaminephosphotransferase 1 (CDP-ethanolamine-specific)
hsa-miR-188-3p	1	0	1	1	1	1	BRWD1	bromodomain and WD repeat domain containing 1
hsa-miR-188-3p	0	0	1	0	1	1	CCDC97	coiled-coil domain containing 97
hsa-miR-188-3p	1	0	1	0	0	0	ANKRD40	ankyrin repeat domain 40
hsa-miR-188-3p	0	0	1	1	0	0	SIGLEC11	sialic acid binding Ig-like lectin 11
hsa-miR-188-3p	0	0	1	1	1	1	PLEKHG4B	pleckstrin homology domain containing, family G (with RhoGef domain) member 4B
hsa-miR-188-3p	0	0	1	1	1	1	RHPN1	rhophilin, Rho GTPase binding protein 1
hsa-miR-188-3p	1	0	1	0	1	1	TMEM123	transmembrane protein 123
hsa-miR-188-3p	0	0	1	1	0	0	APOA5	apolipoprotein A-V
hsa-miR-188-3p	0	0	1	1	1	1	PRDM7	PR domain containing 7
hsa-miR-188-3p	0	0	1	0	1	1	SLC36A1	solute carrier family 36 (proton/amino acid symporter), member 1
hsa-miR-188-3p	1	0	1	1	0	0	ADAMTS14	ADAM metallopeptidase with thrombospondin type 1 motif, 14
hsa-miR-188-3p	0	0	1	1	1	1	OXGR1	oxoglutarate (alpha-ketoglutarate) receptor 1
hsa-miR-188-3p	0	0	1	1	1	1	PKD1L1	polycystic kidney disease 1 like 1
hsa-miR-188-3p	1	0	1	1	1	1	FAM122A	family with sequence similarity 122A
hsa-miR-188-3p	0	0	1	0	1	1	SP140L	SP140 nuclear body protein-like
hsa-miR-188-3p	1	0	1	0	1	1	SP1	Sp1 transcription factor
hsa-miR-188-3p	0	0	1	1	0	0	KLK15	kallikrein-related peptidase 15
hsa-miR-188-3p	1	0	1	1	1	1	HAS3	hyaluronan synthase 3
hsa-miR-188-3p	0	0	1	1	0	0	MAGEE2	melanoma antigen family E, 2
hsa-miR-188-3p	0	0	1	1	0	0	ESAM	endothelial cell adhesion molecule
hsa-miR-188-3p	0	0	1	0	1	1	MYO3B	myosin IIIB
hsa-miR-188-3p	0	0	1	1	0	0	KLK8	kallikrein-related peptidase 8
hsa-miR-188-3p	0	0	1	0	0	0	CAPN13	calpain 13
hsa-miR-188-3p	1	0	1	1	1	1	KCNH8	potassium voltage-gated channel, subfamily H (eag-related), member 8
hsa-miR-188-3p	1	0	1	0	1	1	DIRAS1	DIRAS family, GTP-binding RAS-like 1
hsa-miR-188-3p	0	0	1	0	1	1	DDIT4L	DNA-damage-inducible transcript 4-like
hsa-miR-188-3p	0	0	1	1	0	0	RNASE11	ribonuclease, RNase A family, 11 (non-active)
hsa-miR-188-3p	0	0	1	1	1	1	FAM100A	family with sequence similarity 100, member A
hsa-miR-188-3p	0	0	1	0	1	1	NUDCD2	NudC domain containing 2
hsa-miR-188-3p	1	0	1	1	1	1	CADM4	cell adhesion molecule 4
hsa-miR-188-3p	0	0	1	1	0	0	KLK12	kallikrein-related peptidase 12
hsa-miR-188-3p	0	0	1	1	1	1	RPP25L	ribonuclease P/MRP 25kDa subunit-like
hsa-miR-188-3p	1	0	1	0	1	1	SYT11	synaptotagmin XI
hsa-miR-188-3p	1	0	1	1	1	1	FGFBP3	fibroblast growth factor binding protein 3
hsa-miR-188-3p	0	0	1	1	1	1	SLC35G3	solute carrier family 35, member G3
hsa-miR-188-3p	1	0	1	1	1	1	ZNF583	zinc finger protein 583
hsa-miR-188-3p	1	0	1	1	1	1	ZNF362	zinc finger protein 362
hsa-miR-188-3p	0	0	1	0	1	1	HORMAD2	HORMA domain containing 2
hsa-miR-188-3p	1	0	1	1	1	1	C7orf60	chromosome 7 open reading frame 60
hsa-miR-188-3p	1	0	1	0	1	1	ARID2	AT rich interactive domain 2 (ARID, RFX-like)
hsa-miR-188-3p	1	0	1	1	1	1	TCTEX1D1	Tctex1 domain containing 1
hsa-miR-188-3p	0	0	1	1	0	0	DOK6	docking protein 6
hsa-miR-188-3p	0	0	1	1	1	1	ASPRV1	aspartic peptidase, retroviral-like 1
hsa-miR-188-3p	1	0	1	1	1	1	PDIK1L	PDLIM1 interacting kinase 1 like
hsa-miR-188-3p	1	0	1	1	1	1	AEBP2	AE binding protein 2
hsa-miR-188-3p	0	0	1	1	1	1	SLC22A7	solute carrier family 22 (organic anion transporter), member 7
hsa-miR-188-3p	1	0	1	1	0	0	TMEM86A	transmembrane protein 86A
hsa-miR-188-3p	1	0	1	1	1	1	HS6ST3	heparan sulfate 6-O-sulfotransferase 3
hsa-miR-188-3p	1	0	1	1	0	0	FAM43A	family with sequence similarity 43, member A
hsa-miR-188-3p	1	0	1	1	1	1	ZNF367	zinc finger protein 367
hsa-miR-188-3p	0	0	1	0	1	1	RTP1	receptor (chemosensory) transporter protein 1
hsa-miR-188-3p	1	0	1	1	1	1	FNDC5	fibronectin type III domain containing 5
hsa-miR-188-3p	0	0	1	1	1	1	SIAE	sialic acid acetylesterase
hsa-miR-188-3p	0	0	1	0	1	1	GTF2A1L	general transcription factor IIA, 1-like
hsa-miR-188-3p	0	0	1	1	1	1	REXO1L1	REX1, RNA exonuclease 1 homolog (S. cerevisiae)-like 1
hsa-miR-188-3p	1	0	1	1	1	1	RFX6	regulatory factor X, 6
hsa-miR-188-3p	0	0	1	1	0	0	CT47A11	cancer/testis antigen family 47, member A11
hsa-miR-188-3p	1	0	1	1	1	1	DIP2B	DIP2 disco-interacting protein 2 homolog B (Drosophila)
hsa-miR-188-3p	1	0	1	1	0	0	TCERG1L	transcription elongation regulator 1-like
hsa-miR-188-3p	1	0	1	1	1	1	RAB3IP	RAB3A interacting protein (rabin3)
hsa-miR-188-3p	0	0	1	1	1	1	MRPL43	mitochondrial ribosomal protein L43
hsa-miR-188-3p	0	0	1	1	0	0	MT1M	metallothionein 1M
hsa-miR-188-3p	0	0	1	1	0	0	CCDC36	coiled-coil domain containing 36
hsa-miR-188-3p	1	0	1	1	1	1	TMEM26	transmembrane protein 26
hsa-miR-188-3p	1	0	1	0	1	1	ZDHHC21	zinc finger, DHHC-type containing 21
hsa-miR-188-3p	1	0	1	0	1	1	ARL5B	ADP-ribosylation factor-like 5B
hsa-miR-188-3p	0	0	1	0	1	1	GATS	GATS, stromal antigen 3 opposite strand
hsa-miR-188-3p	0	0	1	0	1	1	ZNF445	zinc finger protein 445
hsa-miR-188-3p	0	0	1	1	0	0	PRDX2	peroxiredoxin 2
hsa-miR-188-3p	1	0	1	1	1	1	DPY19L4	dpy-19-like 4 (C. elegans)
hsa-miR-188-3p	0	0	1	0	1	1	BAGE5	B melanoma antigen family, member 5
hsa-miR-188-3p	0	0	1	1	0	0	MAGEB10	melanoma antigen family B, 10
hsa-miR-188-3p	0	0	1	1	1	1	ZNF714	zinc finger protein 714
hsa-miR-188-3p	1	0	1	1	1	1	DDX26B	DEAD/H (Asp-Glu-Ala-Asp/His) box polypeptide 26B
hsa-miR-188-3p	0	0	1	0	1	1	VSTM2A	V-set and transmembrane domain containing 2A
hsa-miR-188-3p	0	0	1	1	0	0	CCDC144B	coiled-coil domain containing 144B (pseudogene)
hsa-miR-188-3p	1	0	1	1	1	1	CREM	cAMP responsive element modulator
hsa-miR-188-3p	0	0	1	1	1	1	FLT4	fms-related tyrosine kinase 4
hsa-miR-188-3p	1	0	1	1	1	1	ARRDC4	arrestin domain containing 4
hsa-miR-188-3p	1	0	1	1	1	1	KIF1B	kinesin family member 1B
hsa-miR-188-3p	1	0	1	1	1	1	SPTY2D1	SPT2, Suppressor of Ty, domain containing 1 (S. cerevisiae)
hsa-miR-188-3p	0	0	1	0	1	1	BTNL3	butyrophilin-like 3
hsa-miR-188-3p	0	0	1	1	0	0	KCTD8	potassium channel tetramerisation domain containing 8
hsa-miR-188-3p	1	0	1	0	0	0	RAB15	RAB15, member RAS oncogene family
hsa-miR-188-3p	1	0	1	0	1	1	PRICKLE2	prickle homolog 2 (Drosophila)
hsa-miR-188-3p	0	0	1	1	1	1	KCTD1	potassium channel tetramerisation domain containing 1
hsa-miR-188-3p	1	0	1	1	1	1	NSUN4	NOP2/Sun domain family, member 4
hsa-miR-188-3p	1	0	1	1	1	1	CXCL12	chemokine (C-X-C motif) ligand 12
hsa-miR-188-3p	0	0	1	1	0	0	C6orf108	chromosome 6 open reading frame 108
hsa-miR-188-3p	0	0	1	1	1	1	ARHGAP27	Rho GTPase activating protein 27
hsa-miR-188-3p	1	0	1	1	1	1	THRA	thyroid hormone receptor, alpha
hsa-miR-188-3p	0	0	1	1	0	0	TRIM7	tripartite motif containing 7
hsa-miR-188-3p	1	0	1	1	1	1	E2F7	E2F transcription factor 7
hsa-miR-188-3p	0	0	1	1	1	1	ELP5	elongator acetyltransferase complex subunit 5
hsa-miR-188-3p	0	0	1	1	1	1	APOBEC4	apolipoprotein B mRNA editing enzyme, catalytic polypeptide-like 4 (putative)
hsa-miR-188-3p	1	0	1	1	1	1	FREM2	FRAS1 related extracellular matrix protein 2
hsa-miR-188-3p	1	0	1	1	1	1	SKIDA1	SKI/DACH domain containing 1
hsa-miR-188-3p	0	0	1	1	1	1	C1QTNF8	C1q and tumor necrosis factor related protein 8
hsa-miR-188-3p	1	0	1	1	1	1	RAPH1	Ras association (RalGDS/AF-6) and pleckstrin homology domains 1
hsa-miR-188-3p	0	0	1	0	0	0	ESRRAP2	estrogen-related receptor alpha pseudogene 2
hsa-miR-188-3p	0	0	1	0	0	0	PCDHB17	protocadherin beta 17 pseudogene
hsa-miR-188-3p	0	0	1	0	0	0	MIR155HG	MIR155 host gene (non-protein coding)
hsa-miR-188-3p	0	0	1	0	0	0	TTTY6	testis-specific transcript, Y-linked 6 (non-protein coding)
hsa-miR-188-3p	0	0	1	1	0	0	TTTY8	testis-specific transcript, Y-linked 8 (non-protein coding)
hsa-miR-188-3p	0	0	1	0	0	0	TTTY2	testis-specific transcript, Y-linked 2 (non-protein coding)
hsa-miR-188-3p	0	0	1	0	0	0	TTTY1	testis-specific transcript, Y-linked 1 (non-protein coding)
hsa-miR-188-3p	0	0	1	0	0	0	TTTY15	testis-specific transcript, Y-linked 15 (non-protein coding)
hsa-miR-188-3p	0	0	1	0	0	0	TTTY6B	testis-specific transcript, Y-linked 6B (non-protein coding)
hsa-miR-188-3p	0	0	1	0	0	0	GOLGA2P3Y	golgin A2 pseudogene 3, Y-linked
hsa-miR-188-3p	0	0	1	0	0	0	PDIA3P	protein disulfide isomerase family A, member 3 pseudogene
hsa-miR-188-3p	0	0	1	0	0	0	SNORA41	small nucleolar RNA, H/ACA box 41
hsa-miR-188-3p	0	0	1	0	0	0	HYALP1	hyaluronoglucosaminidase pseudogene 1
hsa-miR-188-3p	0	0	1	0	0	0	AOC4	amine oxidase, copper containing 3 (vascular adhesion protein 1) pseudogene
hsa-miR-188-3p	0	0	1	0	0	0	HTR7P1	5-hydroxytryptamine (serotonin) receptor 7 pseudogene 1
hsa-miR-188-3p	0	0	1	0	0	0	HERC2P8	hect domain and RLD 2 pseudogene 8
hsa-miR-188-3p	0	0	1	0	0	0	NUDT16P1	nudix (nucleoside diphosphate linked moiety X)-type motif 16 pseudogene 1
hsa-miR-188-3p	0	0	1	0	0	0	SNORA39	small nucleolar RNA, H/ACA box 39
hsa-miR-188-3p	0	0	1	0	0	0	LILRP2	leukocyte immunoglobulin-like receptor pseudogene 2
hsa-miR-188-3p	1	0	1	1	1	1	PDE4A	phosphodiesterase 4A, cAMP-specific
hsa-miR-188-3p	1	0	1	0	1	1	NFIX	nuclear factor I/X (CCAAT-binding transcription factor)
hsa-miR-188-3p	1	0	1	1	1	1	ZNF238	zinc finger protein 238
hsa-miR-188-3p	1	0	1	1	1	1	TRIO	trio Rho guanine nucleotide exchange factor
hsa-miR-188-3p	0	0	1	1	1	1	PEG3	paternally expressed 3
hsa-miR-188-3p	1	0	1	1	1	1	IFNAR2	interferon (alpha, beta and omega) receptor 2
hsa-miR-188-3p	1	0	1	1	1	1	CYP26B1	cytochrome P450, family 26, subfamily B, polypeptide 1
hsa-miR-188-3p	1	0	1	1	1	1	HOXA11	homeobox A11
hsa-miR-188-3p	1	0	1	1	0	0	PLEKHG6	pleckstrin homology domain containing, family G (with RhoGef domain) member 6
hsa-miR-188-3p	0	0	0	1	0	0	QPCTL	glutaminyl-peptide cyclotransferase-like
hsa-miR-188-3p	0	0	0	1	0	0	SCTR	secretin receptor
hsa-miR-188-3p	0	0	0	1	0	0	THAP3	THAP domain containing, apoptosis associated protein 3
hsa-miR-188-3p	0	0	1	1	1	1	STYK1	serine/threonine/tyrosine kinase 1
hsa-miR-188-3p	1	0	1	1	1	1	ZNF275	zinc finger protein 275
hsa-miR-188-3p	1	0	0	1	0	0	CAMSAP3	calmodulin regulated spectrin-associated protein family, member 3
hsa-miR-188-3p	0	0	1	1	1	1	AMELY	amelogenin, Y-linked
hsa-miR-188-3p	0	0	1	1	1	1	SNRPD3	small nuclear ribonucleoprotein D3 polypeptide 18kDa
hsa-miR-188-3p	0	0	0	1	0	0	HSCB	HscB iron-sulfur cluster co-chaperone homolog (E. coli)
hsa-miR-188-3p	0	0	0	1	0	0	LMF2	lipase maturation factor 2
hsa-miR-188-3p	0	0	0	1	1	1	RHBDD3	rhomboid domain containing 3
hsa-miR-188-3p	0	0	0	1	0	0	VTI1B	vesicle transport through interaction with t-SNAREs homolog 1B (yeast)
hsa-miR-188-3p	0	0	1	1	0	0	GSTZ1	glutathione S-transferase zeta 1
hsa-miR-188-3p	0	0	1	1	0	0	ACSM2A	acyl-CoA synthetase medium-chain family member 2A
hsa-miR-188-3p	1	0	1	1	1	1	BRF2	BRF2, subunit of RNA polymerase III transcription initiation factor, BRF1-like
hsa-miR-188-3p	0	0	0	1	0	0	TNFRSF10A	tumor necrosis factor receptor superfamily, member 10a
hsa-miR-188-3p	0	0	0	1	1	1	ZNF180	zinc finger protein 180
hsa-miR-188-3p	1	0	1	1	0	0	RUVBL2	RuvB-like 2 (E. coli)
hsa-miR-188-3p	0	0	1	1	0	0	LIM2	lens intrinsic membrane protein 2, 19kDa
hsa-miR-188-3p	0	0	0	1	0	0	EPHB6	EPH receptor B6
hsa-miR-188-3p	0	0	0	1	0	0	MOGAT3	monoacylglycerol O-acyltransferase 3
hsa-miR-188-3p	0	0	0	1	0	0	MYL10	myosin, light chain 10, regulatory
hsa-miR-188-3p	0	0	0	1	1	1	MRPL32	mitochondrial ribosomal protein L32
hsa-miR-188-3p	0	0	0	1	1	1	CSF3	colony stimulating factor 3 (granulocyte)
hsa-miR-188-3p	0	0	1	1	1	1	CCL13	chemokine (C-C motif) ligand 13
hsa-miR-188-3p	0	0	0	1	1	1	NAGLU	N-acetylglucosaminidase, alpha
hsa-miR-188-3p	0	0	1	1	0	0	HIST1H3F	histone cluster 1, H3f
hsa-miR-188-3p	0	0	1	1	0	0	MLH1	mutL homolog 1, colon cancer, nonpolyposis type 2 (E. coli)
hsa-miR-188-3p	0	0	0	1	1	1	DOK1	docking protein 1, 62kDa (downstream of tyrosine kinase 1)
hsa-miR-188-3p	0	0	0	1	1	1	WNT6	wingless-type MMTV integration site family, member 6
hsa-miR-188-3p	0	0	0	1	0	0	SLIRP	SRA stem-loop interacting RNA binding protein
hsa-miR-188-3p	0	0	0	1	0	0	C10orf95	chromosome 10 open reading frame 95
hsa-miR-188-3p	0	0	1	1	0	0	GHRHR	growth hormone releasing hormone receptor
hsa-miR-188-3p	1	0	1	1	0	0	KIAA1549	KIAA1549
hsa-miR-188-3p	0	0	1	1	0	0	PFDN5	prefoldin subunit 5
hsa-miR-188-3p	0	0	0	1	0	0	ZNF350	zinc finger protein 350
hsa-miR-188-3p	0	0	0	1	1	1	LILRB3	leukocyte immunoglobulin-like receptor, subfamily B (with TM and ITIM domains), member 3
hsa-miR-188-3p	0	0	0	1	0	0	SH2D3A	SH2 domain containing 3A
hsa-miR-188-3p	0	0	0	1	0	0	S1PR4	sphingosine-1-phosphate receptor 4
hsa-miR-188-3p	1	0	1	1	1	1	AAMP	angio-associated, migratory cell protein
hsa-miR-188-3p	0	0	1	1	0	0	PMS2P3	postmeiotic segregation increased 2 pseudogene 3
hsa-miR-188-3p	0	0	1	1	0	0	GCAT	glycine C-acetyltransferase
hsa-miR-188-3p	0	0	0	1	0	0	ADAMTS2	ADAM metallopeptidase with thrombospondin type 1 motif, 2
hsa-miR-188-3p	0	0	0	1	1	1	USP40	ubiquitin specific peptidase 40
hsa-miR-188-3p	0	0	0	1	1	1	BST2	bone marrow stromal cell antigen 2
hsa-miR-188-3p	0	0	0	1	0	0	USHBP1	Usher syndrome 1C binding protein 1
hsa-miR-188-3p	1	0	1	1	1	1	PRDM12	PR domain containing 12
hsa-miR-188-3p	0	0	0	1	1	1	ZNF426	zinc finger protein 426
hsa-miR-188-3p	0	0	1	1	0	0	PKDREJ	polycystic kidney disease (polycystin) and REJ homolog (sperm receptor for egg jelly homolog, sea urchin)
hsa-miR-188-3p	1	0	0	1	1	1	ZNF700	zinc finger protein 700
hsa-miR-188-3p	0	0	0	1	0	0	ILKAP	integrin-linked kinase-associated serine/threonine phosphatase
hsa-miR-188-3p	0	0	1	1	1	1	TRIM47	tripartite motif containing 47
hsa-miR-188-3p	0	0	0	1	1	1	SLC52A1	solute carrier family 52, riboflavin transporter, member 1
hsa-miR-188-3p	0	0	0	1	0	0	SSTR4	somatostatin receptor 4
hsa-miR-188-3p	0	0	1	1	0	0	DPH2	DPH2 homolog (S. cerevisiae)
hsa-miR-188-3p	0	0	1	1	0	0	SLC2A11	solute carrier family 2 (facilitated glucose transporter), member 11
hsa-miR-188-3p	0	0	1	1	0	0	CAMK1	calcium/calmodulin-dependent protein kinase I
hsa-miR-188-3p	0	0	0	1	0	0	ERN2	endoplasmic reticulum to nucleus signaling 2
hsa-miR-188-3p	0	0	0	1	0	0	DHX34	DEAH (Asp-Glu-Ala-His) box polypeptide 34
hsa-miR-188-3p	0	0	1	1	1	1	METTL1	methyltransferase like 1
hsa-miR-188-3p	0	0	1	1	0	0	CYP27A1	cytochrome P450, family 27, subfamily A, polypeptide 1
hsa-miR-188-3p	0	0	0	1	1	1	TACO1	translational activator of mitochondrially encoded cytochrome c oxidase I
hsa-miR-188-3p	0	0	0	1	0	0	HIST1H2AB	histone cluster 1, H2ab
hsa-miR-188-3p	0	0	1	1	0	0	LPCAT3	lysophosphatidylcholine acyltransferase 3
hsa-miR-188-3p	0	0	1	1	0	0	PRR11	proline rich 11
hsa-miR-188-3p	0	0	1	1	1	1	RHBDF1	rhomboid 5 homolog 1 (Drosophila)
hsa-miR-188-3p	0	0	0	1	0	0	LIG3	ligase III, DNA, ATP-dependent
hsa-miR-188-3p	1	0	1	1	1	1	KANSL1	KAT8 regulatory NSL complex subunit 1
hsa-miR-188-3p	0	0	0	1	1	1	ATP2C2	ATPase, Ca++ transporting, type 2C, member 2
hsa-miR-188-3p	0	0	1	1	0	0	SLC12A3	solute carrier family 12 (sodium/chloride transporters), member 3
hsa-miR-188-3p	0	0	0	1	0	0	CHST8	carbohydrate (N-acetylgalactosamine 4-0) sulfotransferase 8
hsa-miR-188-3p	0	0	0	1	0	0	MOV10L1	Mov10l1, Moloney leukemia virus 10-like 1, homolog (mouse)
hsa-miR-188-3p	1	0	1	1	1	1	MARK4	MAP/microtubule affinity-regulating kinase 4
hsa-miR-188-3p	0	0	1	1	0	0	FAM83E	family with sequence similarity 83, member E
hsa-miR-188-3p	0	0	0	1	1	1	DCPS	decapping enzyme, scavenger
hsa-miR-188-3p	0	0	1	1	0	0	HSF4	heat shock transcription factor 4
hsa-miR-188-3p	0	0	1	1	0	0	NGEF	neuronal guanine nucleotide exchange factor
hsa-miR-188-3p	1	0	1	1	0	0	BMPR1B	bone morphogenetic protein receptor, type IB
hsa-miR-188-3p	0	0	1	1	0	0	GCKR	glucokinase (hexokinase 4) regulator
hsa-miR-188-3p	1	0	0	1	1	1	MIER2	mesoderm induction early response 1, family member 2
hsa-miR-188-3p	1	0	0	1	0	0	KLF1	Kruppel-like factor 1 (erythroid)
hsa-miR-188-3p	0	0	0	1	1	1	TARS	threonyl-tRNA synthetase
hsa-miR-188-3p	0	0	1	1	0	0	MARK2	MAP/microtubule affinity-regulating kinase 2
hsa-miR-188-3p	1	0	1	1	1	1	CHKA	choline kinase alpha
hsa-miR-188-3p	0	0	1	1	0	0	EIF2B2	eukaryotic translation initiation factor 2B, subunit 2 beta, 39kDa
hsa-miR-188-3p	0	0	1	1	0	0	FOXN4	forkhead box N4
hsa-miR-188-3p	0	0	0	1	0	0	SBNO1	strawberry notch homolog 1 (Drosophila)
hsa-miR-188-3p	0	0	1	1	1	1	SLC27A2	solute carrier family 27 (fatty acid transporter), member 2
hsa-miR-188-3p	0	0	1	1	1	1	DET1	de-etiolated homolog 1 (Arabidopsis)
hsa-miR-188-3p	0	0	1	1	0	0	AFG3L2	AFG3 ATPase family gene 3-like 2 (S. cerevisiae)
hsa-miR-188-3p	1	0	1	1	1	1	ARHGDIA	Rho GDP dissociation inhibitor (GDI) alpha
hsa-miR-188-3p	0	0	1	1	0	0	NT5C3L	5'-nucleotidase, cytosolic III-like
hsa-miR-188-3p	1	0	1	1	1	1	IGFBP4	insulin-like growth factor binding protein 4
hsa-miR-188-3p	0	0	0	1	0	0	IL19	interleukin 19
hsa-miR-188-3p	0	0	1	1	0	0	WRAP73	WD repeat containing, antisense to TP73
hsa-miR-188-3p	0	0	0	1	0	0	ANXA9	annexin A9
hsa-miR-188-3p	0	0	1	1	0	0	CRNN	cornulin
hsa-miR-188-3p	0	0	0	1	1	1	C1orf35	chromosome 1 open reading frame 35
hsa-miR-188-3p	0	0	1	1	1	1	NHP2	NHP2 ribonucleoprotein homolog (yeast)
hsa-miR-188-3p	0	0	1	1	0	0	PRDM14	PR domain containing 14
hsa-miR-188-3p	0	0	0	1	0	0	PNPLA7	patatin-like phospholipase domain containing 7
hsa-miR-188-3p	1	0	0	1	1	1	HMBS	hydroxymethylbilane synthase
hsa-miR-188-3p	0	0	0	1	1	1	ST14	suppression of tumorigenicity 14 (colon carcinoma)
hsa-miR-188-3p	0	0	1	1	0	0	ZP1	zona pellucida glycoprotein 1 (sperm receptor)
hsa-miR-188-3p	0	0	1	1	1	1	TAGLN	transgelin
hsa-miR-188-3p	1	0	1	1	0	0	TMEM219	transmembrane protein 219
hsa-miR-188-3p	0	0	0	1	0	0	FXYD4	FXYD domain containing ion transport regulator 4
hsa-miR-188-3p	0	0	1	1	1	1	TKTL2	transketolase-like 2
hsa-miR-188-3p	1	0	0	1	1	1	ZFP36L2	zinc finger protein 36, C3H type-like 2
hsa-miR-188-3p	1	0	1	1	1	1	CMIP	c-Maf inducing protein
hsa-miR-188-3p	0	0	1	1	1	1	PGM3	phosphoglucomutase 3
hsa-miR-188-3p	0	0	0	1	1	1	HHIPL2	HHIP-like 2
hsa-miR-188-3p	0	0	0	1	0	0	FAM161B	family with sequence similarity 161, member B
hsa-miR-188-3p	1	0	1	1	1	1	ZNF689	zinc finger protein 689
hsa-miR-188-3p	1	0	1	1	1	1	DUSP2	dual specificity phosphatase 2
hsa-miR-188-3p	1	0	1	1	1	1	PPP1R9A	protein phosphatase 1, regulatory subunit 9A
hsa-miR-188-3p	0	0	0	1	0	0	OGFR	opioid growth factor receptor
hsa-miR-188-3p	0	0	1	1	0	0	CPAMD8	C3 and PZP-like, alpha-2-macroglobulin domain containing 8
hsa-miR-188-3p	0	0	0	1	0	0	CLDND2	claudin domain containing 2
hsa-miR-188-3p	0	0	0	1	1	1	ZIM2	zinc finger, imprinted 2
hsa-miR-188-3p	0	0	1	1	0	0	CCDC12	coiled-coil domain containing 12
hsa-miR-188-3p	0	0	1	1	0	0	YDJC	YdjC homolog (bacterial)
hsa-miR-188-3p	0	0	0	1	1	1	ZNF585A	zinc finger protein 585A
hsa-miR-188-3p	0	0	0	1	0	0	RDM1	RAD52 motif 1
hsa-miR-188-3p	0	0	1	1	0	0	ZFPL1	zinc finger protein-like 1
hsa-miR-188-3p	0	0	0	1	0	0	CYP4A22	cytochrome P450, family 4, subfamily A, polypeptide 22
hsa-miR-188-3p	0	0	0	1	0	0	KCNF1	potassium voltage-gated channel, subfamily F, member 1
hsa-miR-188-3p	0	0	0	1	1	1	FAM228A	family with sequence similarity 228, member A
hsa-miR-188-3p	0	0	0	1	0	0	GLB1L	galactosidase, beta 1-like
hsa-miR-188-3p	0	0	1	1	1	1	SGOL2	shugoshin-like 2 (S. pombe)
hsa-miR-188-3p	0	0	1	1	1	1	WDR52	WD repeat domain 52
hsa-miR-188-3p	1	0	1	1	1	1	KLF15	Kruppel-like factor 15
hsa-miR-188-3p	0	0	1	1	0	0	TMEM41A	transmembrane protein 41A
hsa-miR-188-3p	0	0	0	1	1	1	MFI2	antigen p97 (melanoma associated) identified by monoclonal antibodies 133.2 and 96.5
hsa-miR-188-3p	0	0	1	1	0	0	MON1A	MON1 homolog A (yeast)
hsa-miR-188-3p	0	0	1	1	1	1	SPZ1	spermatogenic leucine zipper 1
hsa-miR-188-3p	1	0	1	1	1	1	KIAA1191	KIAA1191
hsa-miR-188-3p	0	0	1	1	1	1	GPR176	G protein-coupled receptor 176
hsa-miR-188-3p	0	0	0	1	1	1	PCBD1	pterin-4 alpha-carbinolamine dehydratase/dimerization cofactor of hepatocyte nuclear factor 1 alpha
hsa-miR-188-3p	0	0	1	1	0	0	PLK1	polo-like kinase 1
hsa-miR-188-3p	0	0	0	1	0	0	ZNF524	zinc finger protein 524
hsa-miR-188-3p	0	0	1	1	1	1	LENG8	leukocyte receptor cluster (LRC) member 8
hsa-miR-188-3p	0	0	1	1	1	1	ZNF146	zinc finger protein 146
hsa-miR-188-3p	0	0	0	1	0	0	RECQL4	RecQ protein-like 4
hsa-miR-188-3p	1	0	0	1	0	0	ITFG3	integrin alpha FG-GAP repeat containing 3
hsa-miR-188-3p	0	0	0	1	0	0	SPSB3	splA/ryanodine receptor domain and SOCS box containing 3
hsa-miR-188-3p	0	0	1	1	0	0	IRX1	iroquois homeobox 1
hsa-miR-188-3p	1	0	0	1	0	0	ATPAF2	ATP synthase mitochondrial F1 complex assembly factor 2
hsa-miR-188-3p	0	0	0	1	1	1	TRH	thyrotropin-releasing hormone
hsa-miR-188-3p	0	0	0	1	0	0	ALKBH3	alkB, alkylation repair homolog 3 (E. coli)
hsa-miR-188-3p	1	0	1	1	1	1	ZBTB46	zinc finger and BTB domain containing 46
hsa-miR-188-3p	0	0	1	1	1	1	MXD3	MAX dimerization protein 3
hsa-miR-188-3p	0	0	1	1	0	0	KREMEN2	kringle containing transmembrane protein 2
hsa-miR-188-3p	0	0	0	1	0	0	ADCYAP1R1	adenylate cyclase activating polypeptide 1 (pituitary) receptor type I
hsa-miR-188-3p	0	0	1	1	1	1	C15orf40	chromosome 15 open reading frame 40
hsa-miR-188-3p	1	0	1	1	1	1	HOMER2	homer homolog 2 (Drosophila)
hsa-miR-188-3p	0	0	1	1	0	0	PEX6	peroxisomal biogenesis factor 6
hsa-miR-188-3p	0	0	1	1	0	0	CST2	cystatin SA
hsa-miR-188-3p	1	0	1	1	0	0	PCNX	pecanex homolog (Drosophila)
hsa-miR-188-3p	0	0	0	1	0	0	BOLA2B	bolA homolog 2B (E. coli)
hsa-miR-188-3p	0	0	1	1	1	1	ITIH5	inter-alpha-trypsin inhibitor heavy chain family, member 5
hsa-miR-188-3p	0	0	0	1	0	0	OR10H2	olfactory receptor, family 10, subfamily H, member 2
hsa-miR-188-3p	0	0	0	1	0	0	ATOH1	atonal homolog 1 (Drosophila)
hsa-miR-188-3p	0	0	1	1	1	1	CCDC91	coiled-coil domain containing 91
hsa-miR-188-3p	0	0	0	1	0	0	REEP4	receptor accessory protein 4
hsa-miR-188-3p	0	0	1	1	0	0	STRA13	stimulated by retinoic acid 13 homolog (mouse)
hsa-miR-188-3p	0	0	1	1	0	0	ZNF584	zinc finger protein 584
hsa-miR-188-3p	0	0	0	1	0	0	ZNF324B	zinc finger protein 324B
hsa-miR-188-3p	0	0	0	1	1	1	COG7	component of oligomeric golgi complex 7
hsa-miR-188-3p	0	0	0	1	0	0	TMEM223	transmembrane protein 223
hsa-miR-188-3p	0	0	1	1	0	0	DNAI2	dynein, axonemal, intermediate chain 2
hsa-miR-188-3p	0	0	1	1	1	1	CCDC8	coiled-coil domain containing 8
hsa-miR-188-3p	0	0	0	1	0	0	ZNF556	zinc finger protein 556
hsa-miR-188-3p	0	0	0	1	1	1	ZNF17	zinc finger protein 17
hsa-miR-188-3p	0	0	0	1	0	0	RXFP1	relaxin/insulin-like family peptide receptor 1
hsa-miR-188-3p	0	0	0	1	1	1	DDX23	DEAD (Asp-Glu-Ala-Asp) box polypeptide 23
hsa-miR-188-3p	1	0	1	1	1	1	PDLIM2	PDZ and LIM domain 2 (mystique)
hsa-miR-188-3p	0	0	1	1	1	1	BTK	Bruton agammaglobulinemia tyrosine kinase
hsa-miR-188-3p	1	0	1	1	0	0	ATG4D	autophagy related 4D, cysteine peptidase
hsa-miR-188-3p	0	0	0	1	1	1	ADORA1	adenosine A1 receptor
hsa-miR-188-3p	0	0	1	1	0	0	CFLAR	CASP8 and FADD-like apoptosis regulator
hsa-miR-188-3p	0	0	0	1	1	1	ATP6V0A4	ATPase, H+ transporting, lysosomal V0 subunit a4
hsa-miR-188-3p	0	0	1	1	0	0	GP6	glycoprotein VI (platelet)
hsa-miR-188-3p	0	0	1	1	0	0	UCP2	uncoupling protein 2 (mitochondrial, proton carrier)
hsa-miR-188-3p	0	0	0	1	1	1	TERT	telomerase reverse transcriptase
hsa-miR-188-3p	0	0	1	1	1	1	CARHSP1	calcium regulated heat stable protein 1, 24kDa
hsa-miR-188-3p	1	0	1	1	1	1	COQ2	coenzyme Q2 homolog, prenyltransferase (yeast)
hsa-miR-188-3p	1	0	0	1	1	1	PDP2	pyruvate dehyrogenase phosphatase catalytic subunit 2
hsa-miR-188-3p	0	0	0	1	0	0	PFKL	phosphofructokinase, liver
hsa-miR-188-3p	0	0	1	1	0	0	CD7	CD7 molecule
hsa-miR-188-3p	0	0	1	1	1	1	MGAM	maltase-glucoamylase (alpha-glucosidase)
hsa-miR-188-3p	0	0	0	1	0	0	UTS2R	urotensin 2 receptor
hsa-miR-188-3p	0	0	1	1	0	0	ZNF821	zinc finger protein 821
hsa-miR-188-3p	0	0	1	1	0	0	ACAD10	acyl-CoA dehydrogenase family, member 10
hsa-miR-188-3p	0	0	0	1	1	1	LOC645212	uncharacterized LOC645212
hsa-miR-188-3p	0	0	1	1	0	0	KCNMB3	potassium large conductance calcium-activated channel, subfamily M beta member 3
hsa-miR-188-3p	0	0	0	1	0	0	OR4C15	olfactory receptor, family 4, subfamily C, member 15
hsa-miR-188-3p	0	0	1	1	0	0	KCNH6	potassium voltage-gated channel, subfamily H (eag-related), member 6
hsa-miR-188-3p	0	0	0	1	1	1	C9orf64	chromosome 9 open reading frame 64
hsa-miR-188-3p	1	0	1	1	1	1	RHOT2	ras homolog family member T2
hsa-miR-188-3p	0	0	0	1	0	0	ZNF487P	zinc finger protein 487, pseudogene
hsa-miR-188-3p	0	0	1	1	1	1	ABCD3	ATP-binding cassette, sub-family D (ALD), member 3
hsa-miR-188-3p	0	0	1	1	0	0	WDR90	WD repeat domain 90
hsa-miR-188-3p	0	0	0	1	0	0	OS9	osteosarcoma amplified 9, endoplasmic reticulum lectin
hsa-miR-188-3p	0	0	1	1	0	0	LCN15	lipocalin 15
hsa-miR-188-3p	0	0	1	1	0	0	SLC12A4	solute carrier family 12 (potassium/chloride transporters), member 4
hsa-miR-188-3p	0	0	1	1	0	0	DNAJC7	DnaJ (Hsp40) homolog, subfamily C, member 7
hsa-miR-188-3p	0	0	1	1	0	0	C8orf31	chromosome 8 open reading frame 31
hsa-miR-188-3p	0	0	0	1	1	1	ZNF569	zinc finger protein 569
hsa-miR-188-3p	0	0	0	1	1	1	DLGAP1-AS1	DLGAP1 antisense RNA 1
hsa-miR-188-3p	0	0	1	1	1	1	MRPS24	mitochondrial ribosomal protein S24
hsa-miR-188-3p	0	0	0	1	0	0	DEFB124	defensin, beta 124
hsa-miR-188-3p	0	0	0	1	0	0	ZNF101	zinc finger protein 101
hsa-miR-188-3p	1	0	1	1	1	1	GLTP	glycolipid transfer protein
hsa-miR-188-3p	0	0	1	1	0	0	MEOX1	mesenchyme homeobox 1
hsa-miR-188-3p	0	0	1	1	1	1	USP54	ubiquitin specific peptidase 54
hsa-miR-188-3p	0	0	0	1	0	0	SHROOM1	shroom family member 1
hsa-miR-188-3p	0	0	0	1	0	0	DOCK6	dedicator of cytokinesis 6
hsa-miR-188-3p	0	0	1	1	1	1	C1orf172	chromosome 1 open reading frame 172
hsa-miR-188-3p	1	0	1	1	1	1	CHORDC1	cysteine and histidine-rich domain (CHORD) containing 1
hsa-miR-188-3p	1	0	0	1	0	0	FAM123C	family with sequence similarity 123C
hsa-miR-188-3p	0	0	0	1	0	0	GJD4	gap junction protein, delta 4, 40.1kDa
hsa-miR-188-3p	0	0	0	1	1	1	ZNF785	zinc finger protein 785
hsa-miR-188-3p	0	0	0	1	0	0	ZNF688	zinc finger protein 688
hsa-miR-188-3p	0	0	1	1	1	1	NAALAD2	N-acetylated alpha-linked acidic dipeptidase 2
hsa-miR-188-3p	0	0	1	1	1	1	CPN2	carboxypeptidase N, polypeptide 2
hsa-miR-188-3p	1	0	1	1	1	1	ST8SIA3	ST8 alpha-N-acetyl-neuraminide alpha-2,8-sialyltransferase 3
hsa-miR-188-3p	0	0	1	1	1	1	LOC284023	uncharacterized LOC284023
hsa-miR-188-3p	0	0	1	1	1	1	SLC34A1	solute carrier family 34 (sodium phosphate), member 1
hsa-miR-188-3p	0	0	0	1	0	0	SLC6A18	solute carrier family 6, member 18
hsa-miR-188-3p	0	0	0	1	0	0	FER1L4	fer-1-like 4 (C. elegans) pseudogene
hsa-miR-188-3p	1	0	1	1	1	1	ZNF562	zinc finger protein 562
hsa-miR-188-3p	0	0	0	1	1	1	ITLN1	intelectin 1 (galactofuranose binding)
hsa-miR-188-3p	0	0	1	1	0	0	MARCO	macrophage receptor with collagenous structure
hsa-miR-188-3p	1	0	1	1	0	0	EXOSC3	exosome component 3
hsa-miR-188-3p	0	0	1	1	0	0	GPX5	glutathione peroxidase 5 (epididymal androgen-related protein)
hsa-miR-188-3p	1	0	1	1	0	0	IGDCC3	immunoglobulin superfamily, DCC subclass, member 3
hsa-miR-188-3p	0	0	1	1	1	1	ZNF181	zinc finger protein 181
hsa-miR-188-3p	0	0	1	1	1	1	FMNL1	formin-like 1
hsa-miR-188-3p	0	0	1	1	1	1	COL7A1	collagen, type VII, alpha 1
hsa-miR-188-3p	0	0	0	1	0	0	DEFB108B	defensin, beta 108B
hsa-miR-188-3p	0	0	0	1	0	0	C19orf71	chromosome 19 open reading frame 71
hsa-miR-188-3p	0	0	1	1	0	0	MFSD5	major facilitator superfamily domain containing 5
hsa-miR-188-3p	0	0	1	1	1	1	MYOM3	myomesin family, member 3
hsa-miR-188-3p	0	0	0	1	0	0	ZNF775	zinc finger protein 775
hsa-miR-188-3p	0	0	1	1	0	0	ACSM2B	acyl-CoA synthetase medium-chain family member 2B
hsa-miR-188-3p	0	0	1	1	0	0	PYCR1	pyrroline-5-carboxylate reductase 1
hsa-miR-188-3p	0	0	0	1	1	1	C14orf80	chromosome 14 open reading frame 80
hsa-miR-188-3p	0	0	0	1	1	1	SIVA1	SIVA1, apoptosis-inducing factor
hsa-miR-188-3p	0	0	0	1	0	0	NOC4L	nucleolar complex associated 4 homolog (S. cerevisiae)
hsa-miR-188-3p	0	0	0	1	0	0	LCN12	lipocalin 12
hsa-miR-188-3p	1	0	0	1	0	0	MAPK11	mitogen-activated protein kinase 11
hsa-miR-188-3p	0	0	0	1	0	0	C19orf24	chromosome 19 open reading frame 24
hsa-miR-188-3p	0	0	0	1	0	0	BOLA2	bolA homolog 2 (E. coli)
hsa-miR-188-3p	0	0	0	1	1	1	IL3RA	interleukin 3 receptor, alpha (low affinity)
hsa-miR-188-3p	0	0	0	1	1	1	GLRX5	glutaredoxin 5
hsa-miR-188-3p	0	0	0	1	0	0	OFCC1	orofacial cleft 1 candidate 1
hsa-miR-188-3p	0	0	1	1	1	1	P4HB	prolyl 4-hydroxylase, beta polypeptide
hsa-miR-188-3p	1	0	1	1	1	1	SETD3	SET domain containing 3
hsa-miR-188-3p	1	0	1	1	1	1	ACPL2	acid phosphatase-like 2
hsa-miR-188-3p	1	0	1	1	0	0	GPR173	G protein-coupled receptor 173
hsa-miR-188-3p	0	0	0	1	1	1	TRIM49B	tripartite motif containing 49B
hsa-miR-188-3p	0	0	0	1	1	1	ANO9	anoctamin 9
hsa-miR-188-3p	0	0	0	1	0	0	FAM200A	family with sequence similarity 200, member A
hsa-miR-188-3p	0	0	0	1	0	0	TSSC4	tumor suppressing subtransferable candidate 4
hsa-miR-188-3p	0	0	1	1	0	0	CASP9	caspase 9, apoptosis-related cysteine peptidase
hsa-miR-188-3p	0	0	1	1	0	0	C17orf74	chromosome 17 open reading frame 74
hsa-miR-188-3p	0	0	0	1	1	1	NME9	NME/NM23 family member 9
hsa-miR-188-3p	0	0	1	1	0	0	RASA3	RAS p21 protein activator 3
hsa-miR-188-3p	0	0	1	1	1	1	KLC1	kinesin light chain 1
hsa-miR-188-3p	0	0	0	1	1	1	TBCD	tubulin folding cofactor D
hsa-miR-188-3p	0	0	0	1	1	1	H1FNT	H1 histone family, member N, testis-specific
hsa-miR-188-3p	0	0	1	1	1	1	KIR3DX1	killer cell immunoglobulin-like receptor, three domains, X1
hsa-miR-188-3p	0	0	0	1	1	1	TESC	tescalcin
hsa-miR-188-3p	0	0	0	1	0	0	TBX10	T-box 10
hsa-miR-188-3p	0	0	0	1	0	0	LCE3B	late cornified envelope 3B
hsa-miR-188-3p	0	0	0	1	0	0	SERPINB6	serpin peptidase inhibitor, clade B (ovalbumin), member 6
hsa-miR-188-3p	0	0	1	1	1	1	UNC119	unc-119 homolog (C. elegans)
hsa-miR-188-3p	0	0	0	1	0	0	ZNF446	zinc finger protein 446
hsa-miR-188-3p	1	0	0	1	1	1	IFFO1	intermediate filament family orphan 1
hsa-miR-188-3p	0	0	1	1	0	0	FADS3	fatty acid desaturase 3
hsa-miR-188-3p	0	0	1	1	0	0	AVPR2	arginine vasopressin receptor 2
hsa-miR-188-3p	1	0	1	1	0	0	ZBTB49	zinc finger and BTB domain containing 49
hsa-miR-188-3p	1	0	1	1	1	1	SLA	Src-like-adaptor
hsa-miR-188-3p	0	0	0	1	0	0	KPTN	kaptin (actin binding protein)
hsa-miR-188-3p	0	0	0	1	0	0	FAM101A	family with sequence similarity 101, member A
hsa-miR-188-3p	1	0	1	1	1	1	ACACB	acetyl-CoA carboxylase beta
hsa-miR-188-3p	0	0	0	1	0	0	DPYSL4	dihydropyrimidinase-like 4
hsa-miR-188-3p	0	0	0	1	0	0	GJB5	gap junction protein, beta 5, 31.1kDa
hsa-miR-188-3p	1	0	1	1	1	1	MTSS1L	metastasis suppressor 1-like
hsa-miR-188-3p	0	0	0	1	1	1	SULT1A3	sulfotransferase family, cytosolic, 1A, phenol-preferring, member 3
hsa-miR-188-3p	0	0	1	1	0	0	GPR17	G protein-coupled receptor 17
hsa-miR-188-3p	0	0	1	1	0	0	KLRG2	killer cell lectin-like receptor subfamily G, member 2
hsa-miR-188-3p	0	0	1	1	1	1	ICAM4	intercellular adhesion molecule 4 (Landsteiner-Wiener blood group)
hsa-miR-188-3p	0	0	0	1	1	1	ZNF823	zinc finger protein 823
hsa-miR-188-3p	0	0	0	1	1	1	SUMF2	sulfatase modifying factor 2
hsa-miR-188-3p	1	0	1	1	1	1	FRMD4A	FERM domain containing 4A
hsa-miR-188-3p	1	0	1	1	0	0	LRRC16B	leucine rich repeat containing 16B
hsa-miR-188-3p	0	0	1	1	0	0	ERAP2	endoplasmic reticulum aminopeptidase 2
hsa-miR-188-3p	0	0	1	1	0	0	SLC12A7	solute carrier family 12 (potassium/chloride transporters), member 7
hsa-miR-188-3p	0	0	1	1	0	0	OSGIN1	oxidative stress induced growth inhibitor 1
hsa-miR-188-3p	1	0	0	1	1	1	EGFR	epidermal growth factor receptor
hsa-miR-188-3p	0	0	0	1	1	1	SULT1A4	sulfotransferase family, cytosolic, 1A, phenol-preferring, member 4
hsa-miR-188-3p	1	0	0	1	1	1	AURKA	aurora kinase A
hsa-miR-188-3p	0	0	1	1	1	1	TJP2	tight junction protein 2
hsa-miR-188-3p	0	0	0	1	1	1	POP1	processing of precursor 1, ribonuclease P/MRP subunit (S. cerevisiae)
hsa-miR-188-3p	0	0	0	1	0	0	SAMM50	sorting and assembly machinery component 50 homolog (S. cerevisiae)
hsa-miR-188-3p	0	0	0	1	0	0	RHBDL1	rhomboid, veinlet-like 1 (Drosophila)
hsa-miR-188-3p	0	0	1	1	1	1	CAPN10	calpain 10
hsa-miR-188-3p	1	0	1	1	1	1	TMEM25	transmembrane protein 25
hsa-miR-188-3p	0	0	0	1	0	0	ATG7	autophagy related 7
hsa-miR-188-3p	1	0	0	1	0	0	ARHGEF1	Rho guanine nucleotide exchange factor (GEF) 1
hsa-miR-188-3p	0	0	0	1	1	1	ZNF565	zinc finger protein 565
hsa-miR-188-3p	1	0	1	1	1	1	TDRD7	tudor domain containing 7
hsa-miR-188-3p	0	0	1	1	0	0	PRMT2	protein arginine methyltransferase 2
hsa-miR-188-3p	0	0	1	1	1	1	CHCHD8	coiled-coil-helix-coiled-coil-helix domain containing 8
hsa-miR-188-3p	0	0	0	1	0	0	TNFRSF14	tumor necrosis factor receptor superfamily, member 14
hsa-miR-188-3p	0	0	0	1	0	0	ARSA	arylsulfatase A
hsa-miR-188-3p	0	0	0	1	1	1	PITPNM1	phosphatidylinositol transfer protein, membrane-associated 1
hsa-miR-188-3p	1	0	1	1	0	0	GPI	glucose-6-phosphate isomerase
hsa-miR-188-3p	0	0	0	1	0	0	SMARCD3	SWI/SNF related, matrix associated, actin dependent regulator of chromatin, subfamily d, member 3
hsa-miR-188-3p	0	0	1	1	0	0	DZANK1	double zinc ribbon and ankyrin repeat domains 1
hsa-miR-188-3p	0	0	0	1	0	0	DNAJC22	DnaJ (Hsp40) homolog, subfamily C, member 22
hsa-miR-188-3p	0	0	1	1	1	1	ZNF74	zinc finger protein 74
hsa-miR-188-3p	0	0	0	1	0	0	TRIM48	tripartite motif containing 48
hsa-miR-188-3p	0	0	0	1	0	0	OR8D1	olfactory receptor, family 8, subfamily D, member 1
hsa-miR-188-3p	0	0	1	1	1	1	ZNF483	zinc finger protein 483
hsa-miR-188-3p	0	0	1	1	0	0	SERPINH1	serpin peptidase inhibitor, clade H (heat shock protein 47), member 1, (collagen binding protein 1)
hsa-miR-188-3p	1	0	1	1	1	1	TNKS1BP1	tankyrase 1 binding protein 1, 182kDa
hsa-miR-188-3p	1	0	1	1	1	1	ENTPD4	ectonucleoside triphosphate diphosphohydrolase 4
hsa-miR-188-3p	1	0	1	1	1	1	TRPM6	transient receptor potential cation channel, subfamily M, member 6
hsa-miR-188-3p	0	0	1	1	0	0	TRAF2	TNF receptor-associated factor 2
hsa-miR-188-3p	0	0	0	1	1	1	MB	myoglobin
hsa-miR-188-3p	0	0	1	1	0	0	HKR1	HKR1, GLI-Kruppel zinc finger family member
hsa-miR-188-3p	0	0	1	1	1	1	GTPBP4	GTP binding protein 4
hsa-miR-188-3p	1	0	1	1	1	1	FGFR2	fibroblast growth factor receptor 2
hsa-miR-188-3p	0	0	0	1	0	0	ZMYND10	zinc finger, MYND-type containing 10
hsa-miR-188-3p	0	0	0	1	1	1	ZNF860	zinc finger protein 860
hsa-miR-188-3p	0	0	1	1	0	0	CLDN7	claudin 7
hsa-miR-188-3p	0	0	1	1	1	1	H2AFY	H2A histone family, member Y
hsa-miR-188-3p	0	0	0	1	0	0	LONP1	lon peptidase 1, mitochondrial
hsa-miR-188-3p	0	0	0	1	0	0	KRTAP12-3	keratin associated protein 12-3
hsa-miR-188-3p	0	0	0	1	0	0	KRTAP10-11	keratin associated protein 10-11
hsa-miR-188-3p	0	0	0	1	1	1	KRTAP10-10	keratin associated protein 10-10
hsa-miR-188-3p	1	0	1	1	1	1	DCAF12	DDB1 and CUL4 associated factor 12
hsa-miR-188-3p	0	0	1	1	0	0	TXNRD2	thioredoxin reductase 2
hsa-miR-188-3p	1	0	1	1	0	0	SMG5	smg-5 homolog, nonsense mediated mRNA decay factor (C. elegans)
hsa-miR-188-3p	1	0	1	1	0	0	DCTN1	dynactin 1
hsa-miR-188-3p	0	0	0	1	1	1	FAM120B	family with sequence similarity 120B
hsa-miR-188-3p	0	0	1	1	0	0	C1orf95	chromosome 1 open reading frame 95
hsa-miR-188-3p	0	0	0	1	0	0	G0S2	G0/G1switch 2
hsa-miR-188-3p	1	0	1	1	0	0	ETNK2	ethanolamine kinase 2
hsa-miR-188-3p	0	0	0	1	0	0	PHLDA3	pleckstrin homology-like domain, family A, member 3
hsa-miR-188-3p	0	0	1	1	0	0	AXDND1	axonemal dynein light chain domain containing 1
hsa-miR-188-3p	1	0	1	1	1	1	TOR3A	torsin family 3, member A
hsa-miR-188-3p	0	0	1	1	1	1	RABGAP1L	RAB GTPase activating protein 1-like
hsa-miR-188-3p	1	0	1	1	1	1	RCSD1	RCSD domain containing 1
hsa-miR-188-3p	1	0	1	1	1	1	CD247	CD247 molecule
hsa-miR-188-3p	0	0	0	1	0	0	RPS12	ribosomal protein S12
hsa-miR-188-3p	1	0	1	1	1	1	PTPRK	protein tyrosine phosphatase, receptor type, K
hsa-miR-188-3p	0	0	0	1	0	0	BGLAP	bone gamma-carboxyglutamate (gla) protein
hsa-miR-188-3p	0	0	1	1	0	0	PMF1	polyamine-modulated factor 1
hsa-miR-188-3p	1	0	1	1	1	1	HCN3	hyperpolarization activated cyclic nucleotide-gated potassium channel 3
hsa-miR-188-3p	0	0	0	1	1	1	SMPDL3A	sphingomyelin phosphodiesterase, acid-like 3A
hsa-miR-188-3p	0	0	1	1	1	1	LCE3E	late cornified envelope 3E
hsa-miR-188-3p	0	0	1	1	0	0	TARS2	threonyl-tRNA synthetase 2, mitochondrial (putative)
hsa-miR-188-3p	0	0	1	1	1	1	C10orf82	chromosome 10 open reading frame 82
hsa-miR-188-3p	0	0	0	1	0	0	CHI3L2	chitinase 3-like 2
hsa-miR-188-3p	0	0	0	1	1	1	PDCD11	programmed cell death 11
hsa-miR-188-3p	0	0	1	1	0	0	AMIGO1	adhesion molecule with Ig-like domain 1
hsa-miR-188-3p	1	0	1	1	1	1	CNNM2	cyclin M2
hsa-miR-188-3p	0	0	1	1	0	0	DPCD	deleted in primary ciliary dyskinesia homolog (mouse)
hsa-miR-188-3p	1	0	1	1	1	1	TLX1	T-cell leukemia homeobox 1
hsa-miR-188-3p	0	0	0	1	1	1	KCNQ2	potassium voltage-gated channel, KQT-like subfamily, member 2
hsa-miR-188-3p	0	0	1	1	0	0	PNMA6A	paraneoplastic Ma antigen family member 6A
hsa-miR-188-3p	0	0	1	1	0	0	FATE1	fetal and adult testis expressed 1
hsa-miR-188-3p	0	0	1	1	1	1	SLC17A9	solute carrier family 17, member 9
hsa-miR-188-3p	0	0	1	1	0	0	AVPI1	arginine vasopressin-induced 1
hsa-miR-188-3p	1	0	0	1	1	1	MMS19	MMS19 nucleotide excision repair homolog (S. cerevisiae)
hsa-miR-188-3p	0	0	1	1	1	1	ELOVL5	ELOVL fatty acid elongase 5
hsa-miR-188-3p	0	0	0	1	1	1	ANGPTL3	angiopoietin-like 3
hsa-miR-188-3p	0	0	1	1	1	1	C1orf177	chromosome 1 open reading frame 177
hsa-miR-188-3p	0	0	0	1	0	0	CT47A2	cancer/testis antigen family 47, member A2
hsa-miR-188-3p	0	0	0	1	0	0	CT47A3	cancer/testis antigen family 47, member A3
hsa-miR-188-3p	0	0	0	1	0	0	CT47A4	cancer/testis antigen family 47, member A4
hsa-miR-188-3p	0	0	0	1	0	0	CT47A5	cancer/testis antigen family 47, member A5
hsa-miR-188-3p	0	0	0	1	0	0	CT47A8	cancer/testis antigen family 47, member A8
hsa-miR-188-3p	0	0	0	1	0	0	CT47A10	cancer/testis antigen family 47, member A10
hsa-miR-188-3p	0	0	0	1	0	0	DNLZ	DNL-type zinc finger
hsa-miR-188-3p	0	0	1	1	0	0	PAEP	progestagen-associated endometrial protein
hsa-miR-188-3p	1	0	1	1	1	1	COL5A1	collagen, type V, alpha 1
hsa-miR-188-3p	1	0	1	1	1	1	WDR44	WD repeat domain 44
hsa-miR-188-3p	0	0	0	1	0	0	SARDH	sarcosine dehydrogenase
hsa-miR-188-3p	0	0	0	1	1	1	CYP4A11	cytochrome P450, family 4, subfamily A, polypeptide 11
hsa-miR-188-3p	0	0	1	1	0	0	UROD	uroporphyrinogen decarboxylase
hsa-miR-188-3p	1	0	1	1	1	1	TSPAN14	tetraspanin 14
hsa-miR-188-3p	0	0	0	1	0	0	NTMT1	N-terminal Xaa-Pro-Lys N-methyltransferase 1
hsa-miR-188-3p	0	0	0	1	0	0	TNNC2	troponin C type 2 (fast)
hsa-miR-188-3p	0	0	1	1	0	0	URM1	ubiquitin related modifier 1
hsa-miR-188-3p	1	0	0	1	1	1	EPHA10	EPH receptor A10
hsa-miR-188-3p	0	0	0	1	0	0	TDRG1	testis development related 1 (non-protein coding)
hsa-miR-188-3p	0	0	0	1	0	0	KCNK16	potassium channel, subfamily K, member 16
hsa-miR-188-3p	0	0	1	1	0	0	C9orf117	chromosome 9 open reading frame 117
hsa-miR-188-3p	0	0	0	1	0	0	LRSAM1	leucine rich repeat and sterile alpha motif containing 1
hsa-miR-188-3p	1	0	1	1	0	0	ADC	arginine decarboxylase
hsa-miR-188-3p	0	0	1	1	1	1	SP140	SP140 nuclear body protein
hsa-miR-188-3p	0	0	1	1	1	1	MAPK13	mitogen-activated protein kinase 13
hsa-miR-188-3p	0	0	1	1	1	1	ZWINT	ZW10 interactor
hsa-miR-188-3p	0	0	1	1	1	1	SLC9A1	solute carrier family 9, subfamily A (NHE1, cation proton antiporter 1), member 1
hsa-miR-188-3p	0	0	0	1	0	0	ARR3	arrestin 3, retinal (X-arrestin)
hsa-miR-188-3p	1	0	1	1	1	1	EIF4G3	eukaryotic translation initiation factor 4 gamma, 3
hsa-miR-188-3p	0	0	0	1	1	1	APEX2	APEX nuclease (apurinic/apyrimidinic endonuclease) 2
hsa-miR-188-3p	1	0	1	1	1	1	MGAT5B	mannosyl (alpha-1,6-)-glycoprotein beta-1,6-N-acetyl-glucosaminyltransferase, isozyme B
hsa-miR-188-3p	0	0	1	1	1	1	DDOST	dolichyl-diphosphooligosaccharide--protein glycosyltransferase
hsa-miR-188-3p	0	0	1	1	0	0	VWA5B1	von Willebrand factor A domain containing 5B1
hsa-miR-188-3p	1	0	0	1	0	0	NBL1	neuroblastoma, suppression of tumorigenicity 1
hsa-miR-188-3p	0	0	0	1	0	0	GRTP1	growth hormone regulated TBC protein 1
hsa-miR-188-3p	1	0	1	1	1	1	PADI2	peptidyl arginine deiminase, type II
hsa-miR-188-3p	0	0	0	1	0	0	FAM156B	family with sequence similarity 156, member B
hsa-miR-188-3p	0	0	0	1	1	1	MFAP2	microfibrillar-associated protein 2
hsa-miR-188-3p	0	0	1	1	0	0	CLIC1	chloride intracellular channel 1
hsa-miR-188-3p	0	0	1	1	1	1	C9orf47	chromosome 9 open reading frame 47
hsa-miR-188-3p	0	0	0	1	0	0	DAOA	D-amino acid oxidase activator
hsa-miR-188-3p	0	0	1	1	0	0	NCR3	natural cytotoxicity triggering receptor 3
hsa-miR-188-3p	0	0	1	1	0	0	CCDC22	coiled-coil domain containing 22
hsa-miR-188-3p	0	0	1	1	0	0	PTPRH	protein tyrosine phosphatase, receptor type, H
hsa-miR-188-3p	0	0	0	1	1	1	SLC15A1	solute carrier family 15 (oligopeptide transporter), member 1
hsa-miR-188-3p	0	0	1	1	0	0	PQBP1	polyglutamine binding protein 1
hsa-miR-188-3p	0	0	1	1	0	0	GNL1	guanine nucleotide binding protein-like 1
hsa-miR-188-3p	0	0	1	1	1	1	HLA-A	major histocompatibility complex, class I, A
hsa-miR-188-3p	0	0	0	1	0	0	HLA-F	major histocompatibility complex, class I, F
hsa-miR-188-3p	0	0	0	1	0	0	NMS	neuromedin S
hsa-miR-188-3p	0	0	1	1	0	0	CST11	cystatin 11
hsa-miR-188-3p	0	0	0	1	1	1	IL31	interleukin 31
hsa-miR-188-3p	0	0	0	1	1	1	TMEM252	transmembrane protein 252
hsa-miR-188-3p	0	0	1	1	0	0	SLC22A6	solute carrier family 22 (organic anion transporter), member 6
hsa-miR-188-3p	1	0	1	1	1	1	NMT2	N-myristoyltransferase 2
hsa-miR-188-3p	0	0	0	1	0	0	AARD	alanine and arginine rich domain containing protein
hsa-miR-188-3p	0	0	1	1	0	0	TP73	tumor protein p73
hsa-miR-188-3p	0	0	1	1	1	1	ACSF3	acyl-CoA synthetase family member 3
hsa-miR-188-3p	0	0	0	1	0	0	CXorf59	chromosome X open reading frame 59
hsa-miR-188-3p	0	0	0	1	0	0	OXER1	oxoeicosanoid (OXE) receptor 1
hsa-miR-188-3p	0	0	1	1	1	1	FUK	fucokinase
hsa-miR-188-3p	0	0	1	1	1	1	KIAA1704	KIAA1704
hsa-miR-188-3p	0	0	0	1	0	0	TECPR1	tectonin beta-propeller repeat containing 1
hsa-miR-188-3p	0	0	1	1	1	1	SMAD9	SMAD family member 9
hsa-miR-188-3p	0	0	1	1	0	0	NABP2	nucleic acid binding protein 2
hsa-miR-188-3p	0	0	1	1	1	1	BPHL	biphenyl hydrolase-like (serine hydrolase)
hsa-miR-188-3p	0	0	0	1	0	0	TFF3	trefoil factor 3 (intestinal)
hsa-miR-188-3p	0	0	1	1	0	0	UMODL1	uromodulin-like 1
hsa-miR-188-3p	1	0	1	1	1	1	NFIB	nuclear factor I/B
hsa-miR-188-3p	0	0	1	1	1	1	CWC27	CWC27 spliceosome-associated protein homolog (S. cerevisiae)
hsa-miR-188-3p	0	0	1	1	1	1	KDM4C	lysine (K)-specific demethylase 4C
hsa-miR-188-3p	0	0	1	1	1	1	CSF2RA	colony stimulating factor 2 receptor, alpha, low-affinity (granulocyte-macrophage)
hsa-miR-188-3p	1	0	1	1	1	1	MTMR12	myotubularin related protein 12
hsa-miR-188-3p	0	0	1	1	1	1	RNF215	ring finger protein 215
hsa-miR-188-3p	0	0	0	1	0	0	DNASE1L2	deoxyribonuclease I-like 2
hsa-miR-188-3p	0	0	0	1	0	0	FAM90A7P	putative protein FAM90A7
hsa-miR-188-3p	0	0	0	1	1	1	RBMY1E	RNA binding motif protein, Y-linked, family 1, member E
hsa-miR-188-3p	0	0	0	1	1	1	RBMY1D	RNA binding motif protein, Y-linked, family 1, member D
hsa-miR-188-3p	1	0	1	1	1	1	NSG1	neuron specific gene family member 1
hsa-miR-188-3p	0	0	1	1	1	1	TM4SF1	transmembrane 4 L six family member 1
hsa-miR-188-3p	0	0	1	1	1	1	SRY	sex determining region Y
hsa-miR-188-3p	0	0	0	1	0	0	TMEM42	transmembrane protein 42
hsa-miR-188-3p	0	0	1	1	0	0	OTOA	otoancorin
hsa-miR-188-3p	0	0	1	1	0	0	INTS1	integrator complex subunit 1
hsa-miR-188-3p	0	0	0	1	0	0	GXYLT2	glucoside xylosyltransferase 2
hsa-miR-188-3p	1	0	1	1	1	1	DCX	doublecortin
hsa-miR-188-3p	1	0	1	0	1	1	GUCY1A3	guanylate cyclase 1, soluble, alpha 3
hsa-miR-188-3p	0	0	1	1	1	1	ABCB1	ATP-binding cassette, sub-family B (MDR/TAP), member 1
hsa-miR-188-3p	0	0	0	1	1	1	RPL37	ribosomal protein L37
hsa-miR-188-3p	1	0	1	0	1	1	GDF6	growth differentiation factor 6
hsa-miR-188-3p	0	0	1	1	1	1	TSPAN17	tetraspanin 17
hsa-miR-188-3p	0	0	1	0	1	1	ZNF37A	zinc finger protein 37A
hsa-miR-188-3p	0	0	1	1	1	1	AKR1CL1	aldo-keto reductase family 1, member C-like 1
hsa-miR-188-3p	0	0	0	0	1	1	IBA57	IBA57, iron-sulfur cluster assembly homolog (S. cerevisiae)
hsa-miR-188-3p	1	0	1	1	1	1	RAP1B	RAP1B, member of RAS oncogene family
hsa-miR-188-3p	1	0	1	1	1	1	ATP11C	ATPase, class VI, type 11C
hsa-miR-188-3p	0	0	0	1	1	1	CYB561	cytochrome b-561
hsa-miR-188-3p	0	0	1	1	1	1	VPS13A	vacuolar protein sorting 13 homolog A (S. cerevisiae)
hsa-miR-188-3p	0	0	1	1	1	1	TTLL3	tubulin tyrosine ligase-like family, member 3
hsa-miR-188-3p	0	0	1	1	1	1	DCAF4L1	DDB1 and CUL4 associated factor 4-like 1
hsa-miR-188-3p	1	0	1	1	1	1	RRM2	ribonucleotide reductase M2
hsa-miR-188-3p	1	0	1	1	1	1	THEMIS2	thymocyte selection associated family member 2
hsa-miR-188-3p	0	0	1	1	1	1	GPX4	glutathione peroxidase 4
hsa-miR-188-3p	0	0	0	0	1	1	ZNF674	zinc finger protein 674
hsa-miR-188-3p	1	0	1	1	1	1	ASB1	ankyrin repeat and SOCS box containing 1
hsa-miR-188-3p	1	0	1	0	1	1	ALDH5A1	aldehyde dehydrogenase 5 family, member A1
hsa-miR-188-3p	1	0	1	0	1	1	KIAA1147	KIAA1147
hsa-miR-188-3p	1	0	1	1	1	1	ZNF697	zinc finger protein 697
hsa-miR-188-3p	0	0	0	1	1	1	AADAC	arylacetamide deacetylase
hsa-miR-188-3p	1	0	1	1	1	1	AHR	aryl hydrocarbon receptor
hsa-miR-188-3p	0	0	1	1	1	1	DST	dystonin
hsa-miR-188-3p	0	0	1	1	1	1	CD1D	CD1d molecule
hsa-miR-188-3p	0	0	1	0	1	1	KCNN1	potassium intermediate/small conductance calcium-activated channel, subfamily N, member 1
hsa-miR-188-3p	0	0	1	1	1	1	MTAP	methylthioadenosine phosphorylase
hsa-miR-188-3p	1	0	1	1	1	1	PRKAR2B	protein kinase, cAMP-dependent, regulatory, type II, beta
hsa-miR-188-3p	0	0	0	1	1	1	QSOX1	quiescin Q6 sulfhydryl oxidase 1
hsa-miR-188-3p	0	0	0	0	1	1	ABCB11	ATP-binding cassette, sub-family B (MDR/TAP), member 11
hsa-miR-188-3p	0	0	1	1	1	1	IL18R1	interleukin 18 receptor 1
hsa-miR-188-3p	0	0	1	1	1	1	CSRP1	cysteine and glycine-rich protein 1
hsa-miR-188-3p	0	0	1	1	1	1	EEF1E1	eukaryotic translation elongation factor 1 epsilon 1
hsa-miR-188-3p	0	0	0	1	1	1	CCR6	chemokine (C-C motif) receptor 6
hsa-miR-188-3p	1	0	1	1	1	1	PRKRIR	protein-kinase, interferon-inducible double stranded RNA dependent inhibitor, repressor of (P58 repressor)
hsa-miR-188-3p	0	0	1	1	1	1	MRPL49	mitochondrial ribosomal protein L49
hsa-miR-188-3p	1	0	1	1	1	1	HMGN1	high mobility group nucleosome binding domain 1
hsa-miR-188-3p	1	0	1	1	1	1	LMO7	LIM domain 7
hsa-miR-188-3p	0	0	1	1	1	1	LIMK2	LIM domain kinase 2
hsa-miR-188-3p	1	0	1	0	1	1	CALCRL	calcitonin receptor-like
hsa-miR-188-3p	0	0	1	1	1	1	KLRG1	killer cell lectin-like receptor subfamily G, member 1
hsa-miR-188-3p	0	0	1	1	1	1	LRRC17	leucine rich repeat containing 17
hsa-miR-188-3p	0	0	1	1	1	1	PPP1R3D	protein phosphatase 1, regulatory subunit 3D
hsa-miR-188-3p	1	0	1	1	1	1	PPP1R1A	protein phosphatase 1, regulatory (inhibitor) subunit 1A
hsa-miR-188-3p	0	0	0	1	1	1	ZNF175	zinc finger protein 175
hsa-miR-188-3p	0	0	0	1	1	1	SEC23IP	SEC23 interacting protein
hsa-miR-188-3p	0	0	1	1	1	1	GALNT6	UDP-N-acetyl-alpha-D-galactosamine:polypeptide N-acetylgalactosaminyltransferase 6 (GalNAc-T6)
hsa-miR-188-3p	1	0	1	0	1	1	KPNA6	karyopherin alpha 6 (importin alpha 7)
hsa-miR-188-3p	0	0	1	1	1	1	TTC33	tetratricopeptide repeat domain 33
hsa-miR-188-3p	0	0	1	1	1	1	MGAT4C	mannosyl (alpha-1,3-)-glycoprotein beta-1,4-N-acetylglucosaminyltransferase, isozyme C (putative)
hsa-miR-188-3p	0	0	1	1	1	1	SHPK	sedoheptulokinase
hsa-miR-188-3p	0	0	1	1	1	1	SNX24	sorting nexin 24
hsa-miR-188-3p	1	0	1	0	1	1	CHMP2B	charged multivesicular body protein 2B
hsa-miR-188-3p	1	0	1	0	1	1	LIMD1	LIM domains containing 1
hsa-miR-188-3p	0	0	0	1	1	1	RAB26	RAB26, member RAS oncogene family
hsa-miR-188-3p	0	0	1	1	1	1	ZNF544	zinc finger protein 544
hsa-miR-188-3p	0	0	0	0	1	1	ZNF229	zinc finger protein 229
hsa-miR-188-3p	0	0	1	0	1	1	DHCR24	24-dehydrocholesterol reductase
hsa-miR-188-3p	1	0	0	1	1	1	ZFP30	zinc finger protein 30 homolog (mouse)
hsa-miR-188-3p	1	0	1	0	1	1	ATG14	autophagy related 14
hsa-miR-188-3p	1	0	0	0	1	1	MLXIP	MLX interacting protein
hsa-miR-188-3p	1	0	0	1	1	1	ZHX2	zinc fingers and homeoboxes 2
hsa-miR-188-3p	1	0	1	1	1	1	METTL21B	methyltransferase like 21B
hsa-miR-188-3p	0	0	1	1	1	1	SBDS	Shwachman-Bodian-Diamond syndrome
hsa-miR-188-3p	1	0	1	1	1	1	GALNT10	UDP-N-acetyl-alpha-D-galactosamine:polypeptide N-acetylgalactosaminyltransferase 10 (GalNAc-T10)
hsa-miR-188-3p	1	0	1	0	1	1	ARL8B	ADP-ribosylation factor-like 8B
hsa-miR-188-3p	0	0	1	1	1	1	RFK	riboflavin kinase
hsa-miR-188-3p	0	0	1	1	1	1	SLC35E3	solute carrier family 35, member E3
hsa-miR-188-3p	0	0	0	1	1	1	ZNF26	zinc finger protein 26
hsa-miR-188-3p	0	0	1	0	1	1	ZC3HAV1	zinc finger CCCH-type, antiviral 1
hsa-miR-188-3p	0	0	0	1	1	1	ADCK3	aarF domain containing kinase 3
hsa-miR-188-3p	1	0	1	1	1	1	RNF150	ring finger protein 150
hsa-miR-188-3p	1	0	1	1	1	1	ZNF624	zinc finger protein 624
hsa-miR-188-3p	0	0	1	1	1	1	CPNE5	copine V
hsa-miR-188-3p	0	0	0	1	1	1	ZNF14	zinc finger protein 14
hsa-miR-188-3p	0	0	1	1	1	1	HEATR6	HEAT repeat containing 6
hsa-miR-188-3p	1	0	1	1	1	1	ZFP106	zinc finger protein 106 homolog (mouse)
hsa-miR-188-3p	1	0	1	0	1	1	MRPS25	mitochondrial ribosomal protein S25
hsa-miR-188-3p	1	0	1	0	1	1	ELOVL4	ELOVL fatty acid elongase 4
hsa-miR-188-3p	0	0	1	1	1	1	C7orf10	chromosome 7 open reading frame 10
hsa-miR-188-3p	0	0	0	1	1	1	BORA	bora, aurora kinase A activator
hsa-miR-188-3p	1	0	1	1	1	1	TMX1	thioredoxin-related transmembrane protein 1
hsa-miR-188-3p	1	0	1	1	1	1	HSDL1	hydroxysteroid dehydrogenase like 1
hsa-miR-188-3p	1	0	1	1	1	1	ZNRF1	zinc and ring finger 1, E3 ubiquitin protein ligase
hsa-miR-188-3p	0	0	1	1	1	1	MED10	mediator complex subunit 10
hsa-miR-188-3p	0	0	1	1	1	1	SYTL2	synaptotagmin-like 2
hsa-miR-188-3p	0	0	0	1	1	1	ZNF559	zinc finger protein 559
hsa-miR-188-3p	0	0	1	1	1	1	ALG10	asparagine-linked glycosylation 10, alpha-1,2-glucosyltransferase homolog (S. pombe)
hsa-miR-188-3p	1	0	1	1	1	1	ARHGAP19	Rho GTPase activating protein 19
hsa-miR-188-3p	1	0	1	1	1	1	MMAB	methylmalonic aciduria (cobalamin deficiency) cblB type
hsa-miR-188-3p	1	0	1	1	1	1	VPS26B	vacuolar protein sorting 26 homolog B (S. pombe)
hsa-miR-188-3p	1	0	1	1	1	1	PIK3IP1	phosphoinositide-3-kinase interacting protein 1
hsa-miR-188-3p	1	0	1	0	1	1	STK35	serine/threonine kinase 35
hsa-miR-188-3p	1	0	1	0	1	1	SOCS4	suppressor of cytokine signaling 4
hsa-miR-188-3p	1	0	1	0	1	1	C5orf20	chromosome 5 open reading frame 20
hsa-miR-188-3p	0	0	1	0	1	1	SYNPO2	synaptopodin 2
hsa-miR-188-3p	1	0	1	1	1	1	ZAK	sterile alpha motif and leucine zipper containing kinase AZK
hsa-miR-188-3p	0	0	1	0	1	1	HINT3	histidine triad nucleotide binding protein 3
hsa-miR-188-3p	0	0	1	1	1	1	WDR36	WD repeat domain 36
hsa-miR-188-3p	0	0	1	1	1	1	HN1L	hematological and neurological expressed 1-like
hsa-miR-188-3p	0	0	0	1	1	1	SDR42E1	short chain dehydrogenase/reductase family 42E, member 1
hsa-miR-188-3p	1	0	1	1	1	1	ZNF563	zinc finger protein 563
hsa-miR-188-3p	0	0	0	1	1	1	NXNL2	nucleoredoxin-like 2
hsa-miR-188-3p	0	0	0	1	1	1	BTNL9	butyrophilin-like 9
hsa-miR-188-3p	0	0	0	1	1	1	C6orf195	chromosome 6 open reading frame 195
hsa-miR-188-3p	0	0	1	1	1	1	ZFP3	zinc finger protein 3 homolog (mouse)
hsa-miR-188-3p	1	0	0	1	1	1	ZFP1	zinc finger protein 1 homolog (mouse)
hsa-miR-188-3p	1	0	0	0	1	1	CACNA2D4	calcium channel, voltage-dependent, alpha 2/delta subunit 4
hsa-miR-188-3p	0	0	1	0	1	1	USH1G	Usher syndrome 1G (autosomal recessive)
hsa-miR-188-3p	0	0	1	1	1	1	APLF	aprataxin and PNKP like factor
hsa-miR-188-3p	1	0	1	0	1	1	KSR2	kinase suppressor of ras 2
hsa-miR-188-3p	1	0	1	0	1	1	ZNF776	zinc finger protein 776
hsa-miR-188-3p	0	0	1	1	1	1	DTWD2	DTW domain containing 2
hsa-miR-188-3p	0	0	1	1	1	1	IL5RA	interleukin 5 receptor, alpha
hsa-miR-188-3p	1	0	1	1	1	1	CNIH2	cornichon homolog 2 (Drosophila)
hsa-miR-188-3p	1	0	1	0	1	1	PTPLB	protein tyrosine phosphatase-like (proline instead of catalytic arginine), member b
hsa-miR-188-3p	0	0	1	1	1	1	CCDC172	coiled-coil domain containing 172
hsa-miR-188-3p	0	0	1	0	1	1	KLHL30	kelch-like 30 (Drosophila)
hsa-miR-188-3p	1	0	1	1	1	1	NHLRC1	NHL repeat containing 1
hsa-miR-188-3p	0	0	0	1	1	1	NUP43	nucleoporin 43kDa
hsa-miR-188-3p	0	0	0	0	1	1	LOC728056	IQ motif and Sec7 domain 3 pseudogene
hsa-miR-188-3p	0	0	0	0	1	1	DDX11L2	DEAD/H (Asp-Glu-Ala-Asp/His) box helicase 11 like 2
hsa-miR-188-3p	0	0	0	0	1	1	LOC440243	Putative golgin subfamily A member 6-like protein 6
