# Supplementary material for: Profiling of Selected MicroRNAs in Proliferative Eutopic Endometrium of Women with Ovarian Endometriosis
Source: Biomed Res Int. 2015 Aug 20;2015:760698. doi: 10.1155/2015/760698 (PMC4558423; doi:10.1155/2015/760698)
Supplement: Supplementary file 1 — Table I: The names of miRNAs significantly differentially expressed between eutopic endometrium of patients with endometriosis vs eutopic endometrium of patients without endometriosis. Table II: The associations between miRNA and mRNA, which presents detailed results of the search of six major databases i.e targetscan, tarbase, miranda, mirbase, mirtarget2 and pictar. [file 760698.f1.zip › 760698.f1/Table II/hsa-miR-190b.tsv]

miR	targetscan	tarbase	miranda	mirbase	mirtarget2	pictar	GeneSymbol	GeneName
hsa-miR-190b	1	0	1	1	1	1	NRXN3	neurexin 3
hsa-miR-190b	1	0	1	1	1	1	PRUNE2	prune homolog 2 (Drosophila)
hsa-miR-190b	1	0	1	1	1	1	STK38L	serine/threonine kinase 38 like
hsa-miR-190b	1	0	1	1	1	1	KCNA4	potassium voltage-gated channel, shaker-related subfamily, member 4
hsa-miR-190b	1	0	1	1	1	1	KCNMB2	potassium large conductance calcium-activated channel, subfamily M, beta member 2
hsa-miR-190b	1	0	1	1	1	1	DMD	dystrophin
hsa-miR-190b	1	0	1	1	1	1	ZADH2	zinc binding alcohol dehydrogenase domain containing 2
hsa-miR-190b	1	0	0	1	1	1	RBAK	RB-associated KRAB zinc finger
hsa-miR-190b	1	0	1	0	1	1	CEP170	centrosomal protein 170kDa
hsa-miR-190b	1	0	1	1	1	1	OSBPL6	oxysterol binding protein-like 6
hsa-miR-190b	1	0	1	1	1	1	RCOR1	REST corepressor 1
hsa-miR-190b	1	0	1	1	1	1	NLGN1	neuroligin 1
hsa-miR-190b	1	0	1	0	1	1	MFAP3L	microfibrillar-associated protein 3-like
hsa-miR-190b	1	0	1	1	1	1	PHLPP1	PH domain and leucine rich repeat protein phosphatase 1
hsa-miR-190b	1	0	1	1	1	1	ROCK1	Rho-associated, coiled-coil containing protein kinase 1
hsa-miR-190b	1	0	1	1	1	1	TCF3	transcription factor 3 (E2A immunoglobulin enhancer binding factors E12/E47)
hsa-miR-190b	1	0	1	1	1	1	NLGN4X	neuroligin 4, X-linked
hsa-miR-190b	1	0	1	1	0	0	ANKRD34A	ankyrin repeat domain 34A
hsa-miR-190b	1	0	1	1	1	1	FAM110B	family with sequence similarity 110, member B
hsa-miR-190b	1	0	1	0	1	1	SGSM1	small G protein signaling modulator 1
hsa-miR-190b	1	0	1	1	1	1	TCF4	transcription factor 4
hsa-miR-190b	1	0	1	1	1	1	FNDC3A	fibronectin type III domain containing 3A
hsa-miR-190b	1	0	1	1	1	1	ERG	v-ets erythroblastosis virus E26 oncogene homolog (avian)
hsa-miR-190b	1	0	1	1	1	1	DAG1	dystroglycan 1 (dystrophin-associated glycoprotein 1)
hsa-miR-190b	1	0	1	1	1	1	RNF180	ring finger protein 180
hsa-miR-190b	1	0	1	0	1	1	DICER1	dicer 1, ribonuclease type III
hsa-miR-190b	1	0	1	1	1	1	TNRC6A	trinucleotide repeat containing 6A
hsa-miR-190b	1	0	1	1	0	0	FOXP2	forkhead box P2
hsa-miR-190b	1	0	1	0	1	1	ZNF652	zinc finger protein 652
hsa-miR-190b	1	0	1	1	1	1	BCL11A	B-cell CLL/lymphoma 11A (zinc finger protein)
hsa-miR-190b	1	0	1	1	1	1	RAB8A	RAB8A, member RAS oncogene family
hsa-miR-190b	1	0	1	1	1	1	EBF3	early B-cell factor 3
hsa-miR-190b	1	0	1	0	1	1	HECA	headcase homolog (Drosophila)
hsa-miR-190b	1	0	1	1	1	1	PAX6	paired box 6
hsa-miR-190b	1	0	1	0	1	1	TNKS	tankyrase, TRF1-interacting ankyrin-related ADP-ribose polymerase
hsa-miR-190b	1	0	1	1	1	1	TBC1D14	TBC1 domain family, member 14
hsa-miR-190b	1	0	1	1	1	1	FOXJ3	forkhead box J3
hsa-miR-190b	1	0	1	0	1	1	CNGB3	cyclic nucleotide gated channel beta 3
hsa-miR-190b	1	0	1	1	1	1	PANX2	pannexin 2
hsa-miR-190b	1	0	1	0	1	1	MEGF10	multiple EGF-like-domains 10
hsa-miR-190b	1	0	1	0	1	1	STC1	stanniocalcin 1
hsa-miR-190b	1	0	1	1	1	1	FBN1	fibrillin 1
hsa-miR-190b	1	0	1	1	1	1	MKL2	MKL/myocardin-like 2
hsa-miR-190b	1	0	1	1	1	1	SRSF1	serine/arginine-rich splicing factor 1
hsa-miR-190b	1	0	1	1	1	1	ROBO2	roundabout, axon guidance receptor, homolog 2 (Drosophila)
hsa-miR-190b	1	0	1	1	1	1	SMAD4	SMAD family member 4
hsa-miR-190b	1	0	1	0	1	1	AGFG1	ArfGAP with FG repeats 1
hsa-miR-190b	1	0	1	1	1	1	AMMECR1	Alport syndrome, mental retardation, midface hypoplasia and elliptocytosis chromosomal region gene 1
hsa-miR-190b	1	0	1	1	1	1	BACH2	BTB and CNC homology 1, basic leucine zipper transcription factor 2
hsa-miR-190b	1	0	1	1	1	1	ATXN7L1	ataxin 7-like 1
hsa-miR-190b	1	0	1	1	1	1	NFIB	nuclear factor I/B
hsa-miR-190b	1	0	1	1	1	1	RIMKLA	ribosomal modification protein rimK-like family member A
hsa-miR-190b	1	0	1	1	1	1	KLF15	Kruppel-like factor 15
hsa-miR-190b	1	0	1	1	1	1	DIRAS2	DIRAS family, GTP-binding RAS-like 2
hsa-miR-190b	1	0	1	1	1	1	CDH2	cadherin 2, type 1, N-cadherin (neuronal)
hsa-miR-190b	1	0	1	1	1	1	NEUROD1	neuronal differentiation 1
hsa-miR-190b	1	0	1	1	1	1	PRDM16	PR domain containing 16
hsa-miR-190b	1	0	1	1	1	1	DENND5B	DENN/MADD domain containing 5B
hsa-miR-190b	1	0	1	0	1	1	TNRC6B	trinucleotide repeat containing 6B
hsa-miR-190b	1	0	1	0	1	1	C15orf41	chromosome 15 open reading frame 41
hsa-miR-190b	1	0	1	0	1	1	NEGR1	neuronal growth regulator 1
hsa-miR-190b	1	0	1	0	1	1	ODZ1	odz, odd Oz/ten-m homolog 1 (Drosophila)
hsa-miR-190b	1	0	1	0	1	1	SYNGAP1	synaptic Ras GTPase activating protein 1
hsa-miR-190b	1	0	1	1	1	1	ZIC3	Zic family member 3
hsa-miR-190b	1	0	1	1	1	1	NOTCH2NL	notch 2 N-terminal like
hsa-miR-190b	1	0	1	1	1	1	EPB41	erythrocyte membrane protein band 4.1 (elliptocytosis 1, RH-linked)
hsa-miR-190b	1	0	1	0	1	1	CPLX2	complexin 2
hsa-miR-190b	1	0	1	1	1	1	CACNA1D	calcium channel, voltage-dependent, L type, alpha 1D subunit
hsa-miR-190b	1	0	1	1	1	1	ESR1	estrogen receptor 1
hsa-miR-190b	1	0	1	1	1	1	MYO5A	myosin VA (heavy chain 12, myoxin)
hsa-miR-190b	1	0	1	1	0	0	KCNQ5	potassium voltage-gated channel, KQT-like subfamily, member 5
hsa-miR-190b	1	0	1	1	1	1	PHF20L1	PHD finger protein 20-like 1
hsa-miR-190b	1	0	1	1	1	1	NAV3	neuron navigator 3
hsa-miR-190b	1	0	1	0	1	1	STK35	serine/threonine kinase 35
hsa-miR-190b	1	0	1	1	1	1	KPNA4	karyopherin alpha 4 (importin alpha 3)
hsa-miR-190b	1	0	1	1	1	1	OVOL1	ovo-like 1(Drosophila)
hsa-miR-190b	1	0	1	1	1	1	YTHDF3	YTH domain family, member 3
hsa-miR-190b	1	0	1	1	1	1	PTCH1	patched 1
hsa-miR-190b	1	0	1	1	1	1	MEX3B	mex-3 homolog B (C. elegans)
hsa-miR-190b	1	0	1	1	0	0	SAMD4A	sterile alpha motif domain containing 4A
hsa-miR-190b	1	0	1	1	1	1	TP53INP1	tumor protein p53 inducible nuclear protein 1
hsa-miR-190b	1	0	1	1	0	0	HOXC5	homeobox C5
hsa-miR-190b	1	0	1	1	1	1	EPC2	enhancer of polycomb homolog 2 (Drosophila)
hsa-miR-190b	1	0	1	1	1	1	PTPRS	protein tyrosine phosphatase, receptor type, S
hsa-miR-190b	1	0	1	1	1	1	MRS2	MRS2 magnesium homeostasis factor homolog (S. cerevisiae)
hsa-miR-190b	1	0	1	0	1	1	FNDC3B	fibronectin type III domain containing 3B
hsa-miR-190b	1	0	1	1	1	1	BAI3	brain-specific angiogenesis inhibitor 3
hsa-miR-190b	1	0	1	0	1	1	MAGI2	membrane associated guanylate kinase, WW and PDZ domain containing 2
hsa-miR-190b	1	0	1	0	1	1	CHD7	chromodomain helicase DNA binding protein 7
hsa-miR-190b	1	0	0	0	0	0	AAK1	AP2 associated kinase 1
hsa-miR-190b	1	0	1	1	1	1	CLOCK	clock homolog (mouse)
hsa-miR-190b	1	0	1	1	1	1	CELF6	CUGBP, Elav-like family member 6
hsa-miR-190b	1	0	1	1	1	1	IGF1	insulin-like growth factor 1 (somatomedin C)
hsa-miR-190b	1	0	1	1	1	1	TAOK3	TAO kinase 3
hsa-miR-190b	1	0	1	1	1	1	GPHN	gephyrin
hsa-miR-190b	1	0	1	1	1	1	C18orf1	chromosome 18 open reading frame 1
hsa-miR-190b	1	0	1	1	1	1	MB21D2	Mab-21 domain containing 2
hsa-miR-190b	1	0	1	1	1	1	STK24	serine/threonine kinase 24
hsa-miR-190b	1	0	1	1	1	1	ARPC5	actin related protein 2/3 complex, subunit 5, 16kDa
hsa-miR-190b	1	0	1	0	1	1	BLOC1S6	biogenesis of lysosomal organelles complex-1, subunit 6, pallidin
hsa-miR-190b	1	0	1	1	1	1	VAPB	VAMP (vesicle-associated membrane protein)-associated protein B and C
hsa-miR-190b	1	0	1	0	0	0	CSMD1	CUB and Sushi multiple domains 1
hsa-miR-190b	1	0	1	1	1	1	ZNF275	zinc finger protein 275
hsa-miR-190b	1	0	1	1	1	1	SHANK2	SH3 and multiple ankyrin repeat domains 2
hsa-miR-190b	1	0	1	1	1	1	NBEA	neurobeachin
hsa-miR-190b	1	0	1	1	1	1	XPO1	exportin 1 (CRM1 homolog, yeast)
hsa-miR-190b	1	0	1	0	1	1	TRPS1	trichorhinophalangeal syndrome I
hsa-miR-190b	1	0	1	1	1	1	HECW2	HECT, C2 and WW domain containing E3 ubiquitin protein ligase 2
hsa-miR-190b	1	0	1	1	1	1	MTMR6	myotubularin related protein 6
hsa-miR-190b	1	0	1	1	1	1	MYH10	myosin, heavy chain 10, non-muscle
hsa-miR-190b	1	0	1	1	1	1	OTUD4	OTU domain containing 4
hsa-miR-190b	1	0	1	1	1	1	CELF4	CUGBP, Elav-like family member 4
hsa-miR-190b	1	0	1	1	1	1	SOCS6	suppressor of cytokine signaling 6
hsa-miR-190b	1	0	1	1	1	1	SYNJ1	synaptojanin 1
hsa-miR-190b	1	0	1	1	1	1	SMC6	structural maintenance of chromosomes 6
hsa-miR-190b	1	0	1	1	1	1	CHD9	chromodomain helicase DNA binding protein 9
hsa-miR-190b	1	0	1	1	0	0	RAPGEF2	Rap guanine nucleotide exchange factor (GEF) 2
hsa-miR-190b	1	0	1	0	1	1	KIAA0355	KIAA0355
hsa-miR-190b	1	0	1	1	1	1	FAM65B	family with sequence similarity 65, member B
hsa-miR-190b	0	0	1	1	1	1	KIAA0391	KIAA0391
hsa-miR-190b	1	0	1	0	1	1	PTPRT	protein tyrosine phosphatase, receptor type, T
hsa-miR-190b	1	0	1	1	1	1	NUPL1	nucleoporin like 1
hsa-miR-190b	1	0	1	1	1	1	ATMIN	ATM interactor
hsa-miR-190b	0	0	1	1	1	1	NEU3	sialidase 3 (membrane sialidase)
hsa-miR-190b	1	0	1	1	1	1	NRXN1	neurexin 1
hsa-miR-190b	1	0	1	0	1	1	CHST15	carbohydrate (N-acetylgalactosamine 4-sulfate 6-O) sulfotransferase 15
hsa-miR-190b	1	0	1	1	0	0	SMCHD1	structural maintenance of chromosomes flexible hinge domain containing 1
hsa-miR-190b	0	0	1	1	1	1	XRCC4	X-ray repair complementing defective repair in Chinese hamster cells 4
hsa-miR-190b	1	0	1	1	1	1	CALCR	calcitonin receptor
hsa-miR-190b	1	0	1	1	1	1	CPEB3	cytoplasmic polyadenylation element binding protein 3
hsa-miR-190b	1	0	1	1	1	1	RGL1	ral guanine nucleotide dissociation stimulator-like 1
hsa-miR-190b	1	0	1	1	1	1	NTNG1	netrin G1
hsa-miR-190b	1	0	1	0	1	1	ZNF507	zinc finger protein 507
hsa-miR-190b	1	0	1	0	1	1	GPR158	G protein-coupled receptor 158
hsa-miR-190b	1	0	1	1	1	1	RIMKLB	ribosomal modification protein rimK-like family member B
hsa-miR-190b	1	0	1	1	1	1	ASAP1	ArfGAP with SH3 domain, ankyrin repeat and PH domain 1
hsa-miR-190b	0	0	1	1	1	1	KIF20B	kinesin family member 20B
hsa-miR-190b	0	0	1	1	1	1	CA10	carbonic anhydrase X
hsa-miR-190b	0	0	1	1	1	1	KLHL13	kelch-like 13 (Drosophila)
hsa-miR-190b	1	0	1	1	1	1	FAM135A	family with sequence similarity 135, member A
hsa-miR-190b	1	0	1	1	0	0	KIAA1462	KIAA1462
hsa-miR-190b	1	0	1	1	1	1	BAZ2B	bromodomain adjacent to zinc finger domain, 2B
hsa-miR-190b	1	0	1	1	1	1	FRAS1	Fraser syndrome 1
hsa-miR-190b	1	0	1	1	0	0	MAGI3	membrane associated guanylate kinase, WW and PDZ domain containing 3
hsa-miR-190b	1	0	1	1	1	1	SH3TC2	SH3 domain and tetratricopeptide repeats 2
hsa-miR-190b	1	0	1	0	0	0	ZBTB34	zinc finger and BTB domain containing 34
hsa-miR-190b	0	0	1	1	1	1	DYNC2H1	dynein, cytoplasmic 2, heavy chain 1
hsa-miR-190b	0	0	1	0	1	1	RASSF8	Ras association (RalGDS/AF-6) domain family (N-terminal) member 8
hsa-miR-190b	1	0	1	0	0	0	ZC3H12C	zinc finger CCCH-type containing 12C
hsa-miR-190b	1	0	1	1	1	1	C11orf57	chromosome 11 open reading frame 57
hsa-miR-190b	1	0	1	1	1	1	PAN3	PAN3 poly(A) specific ribonuclease subunit homolog (S. cerevisiae)
hsa-miR-190b	1	0	1	1	1	1	KCNMA1	potassium large conductance calcium-activated channel, subfamily M, alpha member 1
hsa-miR-190b	1	0	1	1	1	1	SCN5A	sodium channel, voltage-gated, type V, alpha subunit
hsa-miR-190b	1	0	1	1	1	1	FAT2	FAT tumor suppressor homolog 2 (Drosophila)
hsa-miR-190b	1	0	1	1	1	1	TRIM36	tripartite motif containing 36
hsa-miR-190b	1	0	1	1	1	1	AP3D1	adaptor-related protein complex 3, delta 1 subunit
hsa-miR-190b	1	0	1	1	1	1	COL11A1	collagen, type XI, alpha 1
hsa-miR-190b	0	0	1	0	1	1	ATR	ataxia telangiectasia and Rad3 related
hsa-miR-190b	0	0	1	1	1	1	SEPT10	septin 10
hsa-miR-190b	1	0	1	1	0	0	GRIN1	glutamate receptor, ionotropic, N-methyl D-aspartate 1
hsa-miR-190b	1	0	1	1	1	1	RPS6KA3	ribosomal protein S6 kinase, 90kDa, polypeptide 3
hsa-miR-190b	1	0	1	1	1	1	NFYC	nuclear transcription factor Y, gamma
hsa-miR-190b	1	0	1	1	1	1	MEF2A	myocyte enhancer factor 2A
hsa-miR-190b	1	0	1	1	1	1	SYNCRIP	synaptotagmin binding, cytoplasmic RNA interacting protein
hsa-miR-190b	1	0	1	0	1	1	PLAG1	pleiomorphic adenoma gene 1
hsa-miR-190b	0	0	1	1	1	1	DGKI	diacylglycerol kinase, iota
hsa-miR-190b	1	0	1	1	1	1	ZNF207	zinc finger protein 207
hsa-miR-190b	1	0	1	1	1	1	EPHA5	EPH receptor A5
hsa-miR-190b	0	0	1	1	1	1	RYR1	ryanodine receptor 1 (skeletal)
hsa-miR-190b	1	0	1	1	1	1	HNRNPK	heterogeneous nuclear ribonucleoprotein K
hsa-miR-190b	1	0	1	1	1	1	IPO8	importin 8
hsa-miR-190b	0	0	1	1	1	1	HLA-DQA1	major histocompatibility complex, class II, DQ alpha 1
hsa-miR-190b	1	0	1	1	1	1	ARHGEF3	Rho guanine nucleotide exchange factor (GEF) 3
hsa-miR-190b	1	0	1	1	1	1	COL24A1	collagen, type XXIV, alpha 1
hsa-miR-190b	1	0	1	1	1	1	SLC6A8	solute carrier family 6 (neurotransmitter transporter, creatine), member 8
hsa-miR-190b	0	0	1	1	1	1	ELOVL5	ELOVL fatty acid elongase 5
hsa-miR-190b	1	0	1	1	1	1	OSBPL10	oxysterol binding protein-like 10
hsa-miR-190b	0	0	1	1	1	1	DDX10	DEAD (Asp-Glu-Ala-Asp) box polypeptide 10
hsa-miR-190b	0	0	1	1	1	1	PLD1	phospholipase D1, phosphatidylcholine-specific
hsa-miR-190b	1	0	1	0	1	1	CAV1	caveolin 1, caveolae protein, 22kDa
hsa-miR-190b	1	0	1	0	1	1	PDE7B	phosphodiesterase 7B
hsa-miR-190b	1	0	1	1	1	1	SDHC	succinate dehydrogenase complex, subunit C, integral membrane protein, 15kDa
hsa-miR-190b	1	0	1	0	1	1	MLL2	myeloid/lymphoid or mixed-lineage leukemia 2
hsa-miR-190b	1	0	1	1	1	1	PCDH17	protocadherin 17
hsa-miR-190b	1	0	1	1	1	1	SOCS2	suppressor of cytokine signaling 2
hsa-miR-190b	1	0	1	0	0	0	MAP3K1	mitogen-activated protein kinase kinase kinase 1, E3 ubiquitin protein ligase
hsa-miR-190b	1	0	1	1	1	1	POLQ	polymerase (DNA directed), theta
hsa-miR-190b	0	0	1	1	1	1	CD84	CD84 molecule
hsa-miR-190b	1	0	1	1	1	1	PFKFB3	6-phosphofructo-2-kinase/fructose-2,6-biphosphatase 3
hsa-miR-190b	1	0	1	1	1	1	MBNL2	muscleblind-like splicing regulator 2
hsa-miR-190b	0	0	1	1	1	1	BBS9	Bardet-Biedl syndrome 9
hsa-miR-190b	1	0	1	1	1	1	GLS	glutaminase
hsa-miR-190b	0	0	1	1	1	1	SH2D1A	SH2 domain containing 1A
hsa-miR-190b	0	0	1	1	0	0	RBM5	RNA binding motif protein 5
hsa-miR-190b	1	0	1	1	1	1	KAT6B	K(lysine) acetyltransferase 6B
hsa-miR-190b	0	0	1	1	0	0	ABRACL	ABRA C-terminal like
hsa-miR-190b	0	0	1	1	1	1	TIAM2	T-cell lymphoma invasion and metastasis 2
hsa-miR-190b	0	0	1	0	1	1	CLEC5A	C-type lectin domain family 5, member A
hsa-miR-190b	1	0	1	1	1	1	USP15	ubiquitin specific peptidase 15
hsa-miR-190b	0	0	1	0	1	1	PDP1	pyruvate dehyrogenase phosphatase catalytic subunit 1
hsa-miR-190b	0	0	1	1	1	1	FGFR1OP2	FGFR1 oncogene partner 2
hsa-miR-190b	1	0	1	1	0	0	ZCCHC4	zinc finger, CCHC domain containing 4
hsa-miR-190b	0	0	1	1	0	0	PARD3	par-3 partitioning defective 3 homolog (C. elegans)
hsa-miR-190b	1	0	1	1	1	1	SENP7	SUMO1/sentrin specific peptidase 7
hsa-miR-190b	1	0	1	1	1	1	EIF4A2	eukaryotic translation initiation factor 4A2
hsa-miR-190b	1	0	1	1	1	1	SYDE1	synapse defective 1, Rho GTPase, homolog 1 (C. elegans)
hsa-miR-190b	1	0	1	1	0	0	TDRKH	tudor and KH domain containing
hsa-miR-190b	0	0	1	1	1	1	NKX3-1	NK3 homeobox 1
hsa-miR-190b	0	0	1	1	1	1	IFT81	intraflagellar transport 81 homolog (Chlamydomonas)
hsa-miR-190b	0	0	1	1	1	1	GOLGA6A	golgin A6 family, member A
hsa-miR-190b	0	0	1	1	1	1	C21orf7	chromosome 21 open reading frame 7
hsa-miR-190b	0	0	1	1	1	1	LRTOMT	leucine rich transmembrane and 0-methyltransferase domain containing
hsa-miR-190b	0	0	1	1	1	1	MS4A4A	membrane-spanning 4-domains, subfamily A, member 4A
hsa-miR-190b	1	0	1	1	1	1	CASD1	CAS1 domain containing 1
hsa-miR-190b	1	0	1	1	1	1	ATAD1	ATPase family, AAA domain containing 1
hsa-miR-190b	1	0	1	1	1	1	LARP4	La ribonucleoprotein domain family, member 4
hsa-miR-190b	0	0	1	0	0	0	NBPF10	neuroblastoma breakpoint family, member 10
hsa-miR-190b	1	0	1	1	1	1	NTRK2	neurotrophic tyrosine kinase, receptor, type 2
hsa-miR-190b	1	0	1	1	1	1	ST3GAL3	ST3 beta-galactoside alpha-2,3-sialyltransferase 3
hsa-miR-190b	1	0	1	1	1	1	HNRNPU	heterogeneous nuclear ribonucleoprotein U (scaffold attachment factor A)
hsa-miR-190b	1	0	1	1	1	1	CACNB2	calcium channel, voltage-dependent, beta 2 subunit
hsa-miR-190b	1	0	1	0	1	1	NUDCD1	NudC domain containing 1
hsa-miR-190b	1	0	1	1	0	0	BRSK2	BR serine/threonine kinase 2
hsa-miR-190b	1	0	1	0	1	1	IL1RAP	interleukin 1 receptor accessory protein
hsa-miR-190b	1	0	1	1	1	1	DPP9	dipeptidyl-peptidase 9
hsa-miR-190b	1	0	1	1	1	1	AFF2	AF4/FMR2 family, member 2
hsa-miR-190b	0	0	1	0	0	0	SNHG4	small nucleolar RNA host gene 4 (non-protein coding)
hsa-miR-190b	1	0	1	1	1	1	GRM8	glutamate receptor, metabotropic 8
hsa-miR-190b	1	0	1	1	1	1	CACNA2D2	calcium channel, voltage-dependent, alpha 2/delta subunit 2
hsa-miR-190b	0	0	1	0	0	0	CACNA2D3	calcium channel, voltage-dependent, alpha 2/delta subunit 3
hsa-miR-190b	0	0	1	1	1	1	CD1E	CD1e molecule
hsa-miR-190b	1	0	1	1	1	1	PALM2	paralemmin 2
hsa-miR-190b	0	0	1	0	1	1	SRPK1	SRSF protein kinase 1
hsa-miR-190b	1	0	1	1	1	1	NFYA	nuclear transcription factor Y, alpha
hsa-miR-190b	0	0	1	1	1	1	FUT10	fucosyltransferase 10 (alpha (1,3) fucosyltransferase)
hsa-miR-190b	1	0	1	1	1	1	PPP3CB	protein phosphatase 3, catalytic subunit, beta isozyme
hsa-miR-190b	0	0	1	1	1	1	SLC25A13	solute carrier family 25 (aspartate/glutamate carrier), member 13
hsa-miR-190b	1	0	1	1	1	1	ARL4C	ADP-ribosylation factor-like 4C
hsa-miR-190b	0	0	1	1	1	1	DEPDC5	DEP domain containing 5
hsa-miR-190b	0	0	1	1	1	1	DBR1	debranching enzyme homolog 1 (S. cerevisiae)
hsa-miR-190b	1	0	1	1	1	1	AKAP2	A kinase (PRKA) anchor protein 2
hsa-miR-190b	1	0	1	0	1	1	NFAT5	nuclear factor of activated T-cells 5, tonicity-responsive
hsa-miR-190b	1	0	1	1	1	1	ENOX2	ecto-NOX disulfide-thiol exchanger 2
hsa-miR-190b	0	0	1	0	0	0	TUG1	taurine upregulated 1 (non-protein coding)
hsa-miR-190b	1	0	1	1	1	1	MEIS2	Meis homeobox 2
hsa-miR-190b	0	0	1	1	1	1	STOX2	storkhead box 2
hsa-miR-190b	1	0	1	1	1	1	PTBP3	polypyrimidine tract binding protein 3
hsa-miR-190b	1	0	1	1	1	1	LRRN3	leucine rich repeat neuronal 3
hsa-miR-190b	1	0	1	1	1	1	ZNF395	zinc finger protein 395
hsa-miR-190b	1	0	1	1	1	1	MYEF2	myelin expression factor 2
hsa-miR-190b	0	0	1	1	1	1	TCP11L1	t-complex 11 (mouse)-like 1
hsa-miR-190b	1	0	1	1	1	1	MON2	MON2 homolog (S. cerevisiae)
hsa-miR-190b	0	0	1	0	0	0	LOC149134	uncharacterized LOC149134
hsa-miR-190b	0	0	1	0	0	0	DUXAP10	double homeobox A pseudogene 10
hsa-miR-190b	0	0	1	1	1	1	VPRBP	Vpr (HIV-1) binding protein
hsa-miR-190b	0	0	1	0	1	1	GVINP1	GTPase, very large interferon inducible pseudogene 1
hsa-miR-190b	1	0	1	1	1	1	BAIAP2	BAI1-associated protein 2
hsa-miR-190b	0	0	1	0	0	0	LOC284561	uncharacterized LOC284561
hsa-miR-190b	0	0	1	1	1	1	IPP	intracisternal A particle-promoted polypeptide
hsa-miR-190b	0	0	1	0	0	0	IFFO2	intermediate filament family orphan 2
hsa-miR-190b	1	0	1	1	1	1	SLC35A3	solute carrier family 35 (UDP-N-acetylglucosamine (UDP-GlcNAc) transporter), member A3
hsa-miR-190b	0	0	1	0	1	1	ATXN1L	ataxin 1-like
hsa-miR-190b	1	0	1	1	1	1	DLC1	deleted in liver cancer 1
hsa-miR-190b	0	0	1	0	1	1	FLJ22763	uncharacterized LOC401081
hsa-miR-190b	1	0	1	1	1	1	DCAF8	DDB1 and CUL4 associated factor 8
hsa-miR-190b	0	0	1	1	0	0	ZNF276	zinc finger protein 276
hsa-miR-190b	1	0	1	1	1	1	ITGA9	integrin, alpha 9
hsa-miR-190b	0	0	1	0	0	0	LOC729852	uncharacterized LOC729852
hsa-miR-190b	1	0	1	1	1	1	FOXP1	forkhead box P1
hsa-miR-190b	0	0	1	1	1	1	RNF146	ring finger protein 146
hsa-miR-190b	0	0	1	1	1	1	C8orf46	chromosome 8 open reading frame 46
hsa-miR-190b	1	0	1	0	1	1	AP1G1	adaptor-related protein complex 1, gamma 1 subunit
hsa-miR-190b	1	0	1	1	1	1	SULF1	sulfatase 1
hsa-miR-190b	1	0	1	1	1	1	FRMD6	FERM domain containing 6
hsa-miR-190b	0	0	1	0	0	0	LOC157273	uncharacterized LOC157273
hsa-miR-190b	1	0	1	0	1	1	RNF165	ring finger protein 165
hsa-miR-190b	1	0	1	1	1	1	ZNF664	zinc finger protein 664
hsa-miR-190b	0	0	1	0	0	0	BTBD19	BTB (POZ) domain containing 19
hsa-miR-190b	0	0	1	1	0	0	CHPF2	chondroitin polymerizing factor 2
hsa-miR-190b	1	0	1	1	1	1	CLCN5	chloride channel, voltage-sensitive 5
hsa-miR-190b	0	0	1	0	0	0	LOC158376	uncharacterized LOC158376
hsa-miR-190b	0	0	1	0	0	0	ERVV-1	endogenous retrovirus group V, member 1
hsa-miR-190b	0	0	1	1	1	1	DST	dystonin
hsa-miR-190b	1	0	1	1	1	1	TLE4	transducin-like enhancer of split 4 (E(sp1) homolog, Drosophila)
hsa-miR-190b	0	0	1	0	0	0	FLJ32742	uncharacterized locus FLJ32742
hsa-miR-190b	1	0	1	0	1	1	PLEKHA1	pleckstrin homology domain containing, family A (phosphoinositide binding specific) member 1
hsa-miR-190b	0	0	1	1	0	0	ARHGAP9	Rho GTPase activating protein 9
hsa-miR-190b	1	0	1	1	0	0	TCF7	transcription factor 7 (T-cell specific, HMG-box)
hsa-miR-190b	1	0	1	1	1	1	SEC22A	SEC22 vesicle trafficking protein homolog A (S. cerevisiae)
hsa-miR-190b	1	0	1	1	1	1	ANKRD49	ankyrin repeat domain 49
hsa-miR-190b	0	0	1	1	1	1	FXC1	fracture callus 1 homolog (rat)
hsa-miR-190b	0	0	1	0	1	1	CCDC68	coiled-coil domain containing 68
hsa-miR-190b	1	0	1	1	1	1	UXS1	UDP-glucuronate decarboxylase 1
hsa-miR-190b	0	0	1	0	1	1	CADM1	cell adhesion molecule 1
hsa-miR-190b	1	0	1	1	1	1	BOC	Boc homolog (mouse)
hsa-miR-190b	1	0	1	1	1	1	TLK1	tousled-like kinase 1
hsa-miR-190b	0	0	1	1	0	0	ACOT11	acyl-CoA thioesterase 11
hsa-miR-190b	1	0	1	1	1	1	EGR2	early growth response 2
hsa-miR-190b	0	0	1	1	1	1	KBTBD4	kelch repeat and BTB (POZ) domain containing 4
hsa-miR-190b	1	0	1	1	1	1	FBXW2	F-box and WD repeat domain containing 2
hsa-miR-190b	0	0	1	1	1	1	PTGR1	prostaglandin reductase 1
hsa-miR-190b	1	0	1	1	1	1	GNG2	guanine nucleotide binding protein (G protein), gamma 2
hsa-miR-190b	1	0	1	1	1	1	CLGN	calmegin
hsa-miR-190b	1	0	1	1	1	1	SPTBN1	spectrin, beta, non-erythrocytic 1
hsa-miR-190b	0	0	1	1	1	1	CYP11B1	cytochrome P450, family 11, subfamily B, polypeptide 1
hsa-miR-190b	0	0	1	1	1	1	SPOCK1	sparc/osteonectin, cwcv and kazal-like domains proteoglycan (testican) 1
hsa-miR-190b	0	0	1	0	1	1	AGBL4	ATP/GTP binding protein-like 4
hsa-miR-190b	0	0	1	1	1	1	TMEM170A	transmembrane protein 170A
hsa-miR-190b	1	0	1	1	1	1	CPNE8	copine VIII
hsa-miR-190b	0	0	1	1	1	1	LRRC34	leucine rich repeat containing 34
hsa-miR-190b	0	0	1	1	1	1	MOBP	myelin-associated oligodendrocyte basic protein
hsa-miR-190b	0	0	1	1	1	1	CHRM5	cholinergic receptor, muscarinic 5
hsa-miR-190b	1	0	1	1	1	1	EPHB1	EPH receptor B1
hsa-miR-190b	0	0	1	0	1	1	HDAC9	histone deacetylase 9
hsa-miR-190b	1	0	1	0	1	1	STC2	stanniocalcin 2
hsa-miR-190b	0	0	1	1	0	0	MAP7D1	MAP7 domain containing 1
hsa-miR-190b	0	0	1	1	1	1	AIMP1	aminoacyl tRNA synthetase complex-interacting multifunctional protein 1
hsa-miR-190b	0	0	1	0	0	0	FAM66C	family with sequence similarity 66, member C
hsa-miR-190b	0	0	1	0	1	1	FLJ39080	uncharacterized LOC441355
hsa-miR-190b	1	0	1	1	1	1	HDGF	hepatoma-derived growth factor
hsa-miR-190b	0	0	1	0	1	1	TNFAIP8	tumor necrosis factor, alpha-induced protein 8
hsa-miR-190b	0	0	1	0	0	0	LOC400680	uncharacterized LOC400680
hsa-miR-190b	0	0	1	0	0	0	LINC00293	long intergenic non-protein coding RNA 293
hsa-miR-190b	1	0	1	1	1	1	GOLGA8B	golgin A8 family, member B
hsa-miR-190b	0	0	1	1	0	0	PLCZ1	phospholipase C, zeta 1
hsa-miR-190b	1	0	1	1	1	1	UGDH	UDP-glucose 6-dehydrogenase
hsa-miR-190b	0	0	1	1	0	0	FBXO16	F-box protein 16
hsa-miR-190b	1	0	1	1	1	1	NDFIP2	Nedd4 family interacting protein 2
hsa-miR-190b	0	0	1	1	1	1	ZDHHC15	zinc finger, DHHC-type containing 15
hsa-miR-190b	1	0	1	1	1	1	PPP1R21	protein phosphatase 1, regulatory subunit 21
hsa-miR-190b	0	0	1	1	0	0	DCLK3	doublecortin-like kinase 3
hsa-miR-190b	0	0	1	1	1	1	ARHGEF26	Rho guanine nucleotide exchange factor (GEF) 26
hsa-miR-190b	0	0	1	0	0	0	MORN2	MORN repeat containing 2
hsa-miR-190b	1	0	1	1	1	1	PHKB	phosphorylase kinase, beta
hsa-miR-190b	1	0	1	1	1	1	IPPK	inositol 1,3,4,5,6-pentakisphosphate 2-kinase
hsa-miR-190b	1	0	1	0	0	0	GPR137C	G protein-coupled receptor 137C
hsa-miR-190b	1	0	1	1	1	1	SH2D4B	SH2 domain containing 4B
hsa-miR-190b	0	0	1	1	1	1	TMEM17	transmembrane protein 17
hsa-miR-190b	1	0	1	1	1	1	GJC1	gap junction protein, gamma 1, 45kDa
hsa-miR-190b	1	0	1	1	1	1	DAB2IP	DAB2 interacting protein
hsa-miR-190b	1	0	1	1	1	1	FAM122B	family with sequence similarity 122B
hsa-miR-190b	0	0	1	1	1	1	IDS	iduronate 2-sulfatase
hsa-miR-190b	1	0	1	1	1	1	KIF21A	kinesin family member 21A
hsa-miR-190b	0	0	1	1	1	1	KANSL1L	KAT8 regulatory NSL complex subunit 1-like
hsa-miR-190b	0	0	1	1	1	1	MKX	mohawk homeobox
hsa-miR-190b	1	0	1	1	1	1	KPNA1	karyopherin alpha 1 (importin alpha 5)
hsa-miR-190b	0	0	1	0	0	0	FAM95B1	family with sequence similarity 95, member B1
hsa-miR-190b	1	0	1	1	0	0	UBN2	ubinuclein 2
hsa-miR-190b	0	0	1	1	0	0	FSIP2	fibrous sheath interacting protein 2
hsa-miR-190b	1	0	1	1	1	1	CSRNP3	cysteine-serine-rich nuclear protein 3
hsa-miR-190b	1	0	1	1	1	1	LIN9	lin-9 homolog (C. elegans)
hsa-miR-190b	1	0	1	1	1	1	DMXL1	Dmx-like 1
hsa-miR-190b	1	0	1	1	1	1	LRIG1	leucine-rich repeats and immunoglobulin-like domains 1
hsa-miR-190b	1	0	1	1	1	1	DLG2	discs, large homolog 2 (Drosophila)
hsa-miR-190b	1	0	1	1	1	1	C14orf28	chromosome 14 open reading frame 28
hsa-miR-190b	0	0	1	0	0	0	RPL23AP53	ribosomal protein L23a pseudogene 53
hsa-miR-190b	1	0	1	1	1	1	TSHZ1	teashirt zinc finger homeobox 1
hsa-miR-190b	1	0	1	1	1	1	MFSD6	major facilitator superfamily domain containing 6
hsa-miR-190b	0	0	1	1	1	1	DOCK9	dedicator of cytokinesis 9
hsa-miR-190b	0	0	1	0	0	0	LOC100128262	uncharacterized LOC100128262
hsa-miR-190b	1	0	1	0	1	1	CAPRIN1	cell cycle associated protein 1
hsa-miR-190b	0	0	1	0	0	0	FAM205B	transmembrane protein C9orf144B pseudogene
hsa-miR-190b	1	0	1	1	1	1	KALRN	kalirin, RhoGEF kinase
hsa-miR-190b	1	0	1	1	1	1	BCAT1	branched chain amino-acid transaminase 1, cytosolic
hsa-miR-190b	1	0	1	1	1	1	PUS7	pseudouridylate synthase 7 homolog (S. cerevisiae)
hsa-miR-190b	0	0	1	0	0	0	IDO2	indoleamine 2,3-dioxygenase 2
hsa-miR-190b	0	0	1	0	0	0	FLJ26245	uncharacterized LOC400533
hsa-miR-190b	0	0	1	1	1	1	PRAME	preferentially expressed antigen in melanoma
hsa-miR-190b	0	0	1	1	1	1	ENPP2	ectonucleotide pyrophosphatase/phosphodiesterase 2
hsa-miR-190b	1	0	1	1	1	1	ARHGAP24	Rho GTPase activating protein 24
hsa-miR-190b	0	0	1	1	0	0	ISOC2	isochorismatase domain containing 2
hsa-miR-190b	1	0	1	1	1	1	PPP2R5C	protein phosphatase 2, regulatory subunit B', gamma
hsa-miR-190b	0	0	1	1	1	1	RNF19B	ring finger protein 19B
hsa-miR-190b	1	0	1	1	1	1	B3GALNT1	beta-1,3-N-acetylgalactosaminyltransferase 1 (globoside blood group)
hsa-miR-190b	1	0	1	1	1	1	MEAF6	MYST/Esa1-associated factor 6
hsa-miR-190b	1	0	1	1	1	1	PHTF2	putative homeodomain transcription factor 2
hsa-miR-190b	0	0	1	1	1	1	PTPN20B	protein tyrosine phosphatase, non-receptor type 20B
hsa-miR-190b	0	0	1	1	1	1	PTPN20A	protein tyrosine phosphatase, non-receptor type 20A
hsa-miR-190b	0	0	1	0	0	0	POM121L9P	POM121 transmembrane nucleoporin-like 9, pseudogene
hsa-miR-190b	0	0	1	1	1	1	KIDINS220	kinase D-interacting substrate, 220kDa
hsa-miR-190b	1	0	1	1	1	1	SLC25A36	solute carrier family 25 (pyrimidine nucleotide carrier ), member 36
hsa-miR-190b	0	0	1	1	0	0	PCIF1	PDX1 C-terminal inhibiting factor 1
hsa-miR-190b	0	0	1	1	0	0	LRCH3	leucine-rich repeats and calponin homology (CH) domain containing 3
hsa-miR-190b	1	0	1	1	1	1	GOLGA8A	golgin A8 family, member A
hsa-miR-190b	1	0	1	1	1	1	KIAA1033	KIAA1033
hsa-miR-190b	0	0	1	1	1	1	SLC30A10	solute carrier family 30, member 10
hsa-miR-190b	0	0	1	1	1	1	HNRPLL	heterogeneous nuclear ribonucleoprotein L-like
hsa-miR-190b	0	0	1	1	1	1	ING3	inhibitor of growth family, member 3
hsa-miR-190b	1	0	1	0	1	1	FAM19A1	family with sequence similarity 19 (chemokine (C-C motif)-like), member A1
hsa-miR-190b	0	0	1	1	1	1	MARCH1	membrane-associated ring finger (C3HC4) 1, E3 ubiquitin protein ligase
hsa-miR-190b	1	0	1	1	1	1	MIER1	mesoderm induction early response 1 homolog (Xenopus laevis)
hsa-miR-190b	1	0	1	1	1	1	FAM126B	family with sequence similarity 126, member B
hsa-miR-190b	1	0	1	1	1	1	CHMP7	charged multivesicular body protein 7
hsa-miR-190b	0	0	1	1	1	1	C10orf57	chromosome 10 open reading frame 57
hsa-miR-190b	1	0	1	0	1	1	GPCPD1	glycerophosphocholine phosphodiesterase GDE1 homolog (S. cerevisiae)
hsa-miR-190b	1	0	1	1	1	1	HMCN1	hemicentin 1
hsa-miR-190b	1	0	1	0	1	1	MEF2C	myocyte enhancer factor 2C
hsa-miR-190b	0	0	1	1	1	1	NARG2	NMDA receptor regulated 2
hsa-miR-190b	0	0	1	1	0	0	TMEM116	transmembrane protein 116
hsa-miR-190b	0	0	1	0	0	0	LOC286135	uncharacterized LOC286135
hsa-miR-190b	0	0	1	1	1	1	NFE2L1	nuclear factor (erythroid-derived 2)-like 1
hsa-miR-190b	0	0	1	1	1	1	ZNF544	zinc finger protein 544
hsa-miR-190b	0	0	1	0	0	0	ADCY10P1	adenylate cyclase 10 (soluble) pseudogene 1
hsa-miR-190b	0	0	1	1	1	1	PCDH20	protocadherin 20
hsa-miR-190b	0	0	1	1	1	1	CAND1	cullin-associated and neddylation-dissociated 1
hsa-miR-190b	1	0	1	1	1	1	ANKRD12	ankyrin repeat domain 12
hsa-miR-190b	0	0	1	1	1	1	C8orf34	chromosome 8 open reading frame 34
hsa-miR-190b	1	0	1	1	1	1	RICTOR	RPTOR independent companion of MTOR, complex 2
hsa-miR-190b	1	0	1	0	1	1	NR3C1	nuclear receptor subfamily 3, group C, member 1 (glucocorticoid receptor)
hsa-miR-190b	0	0	1	0	1	1	SYNPO2	synaptopodin 2
hsa-miR-190b	1	0	1	0	1	1	PHYHIPL	phytanoyl-CoA 2-hydroxylase interacting protein-like
hsa-miR-190b	1	0	1	0	1	1	APOLD1	apolipoprotein L domain containing 1
hsa-miR-190b	0	0	1	0	1	1	USO1	USO1 vesicle docking protein homolog (yeast)
hsa-miR-190b	0	0	1	1	1	1	AMOTL1	angiomotin like 1
hsa-miR-190b	1	0	1	1	1	1	WDR44	WD repeat domain 44
hsa-miR-190b	1	0	1	1	1	1	RNF38	ring finger protein 38
hsa-miR-190b	1	0	1	1	1	1	IKZF2	IKAROS family zinc finger 2 (Helios)
hsa-miR-190b	0	0	1	1	1	1	KLHL7	kelch-like 7 (Drosophila)
hsa-miR-190b	1	0	1	1	1	1	RCAN2	regulator of calcineurin 2
hsa-miR-190b	0	0	1	1	1	1	CD209	CD209 molecule
hsa-miR-190b	1	0	1	0	1	1	BDNF	brain-derived neurotrophic factor
hsa-miR-190b	1	0	1	1	1	1	TXNRD1	thioredoxin reductase 1
hsa-miR-190b	0	0	1	0	0	0	GRIK1-AS1	GRIK1 antisense RNA 1
hsa-miR-190b	0	0	1	0	0	0	CR1L	complement component (3b/4b) receptor 1-like
hsa-miR-190b	1	0	1	1	1	1	ANGPT1	angiopoietin 1
hsa-miR-190b	0	0	1	1	1	1	DNAJB14	DnaJ (Hsp40) homolog, subfamily B, member 14
hsa-miR-190b	1	0	1	1	1	1	WDR26	WD repeat domain 26
hsa-miR-190b	1	0	1	1	1	1	TPP1	tripeptidyl peptidase I
hsa-miR-190b	0	0	1	1	1	1	GCOM1	GRINL1A complex locus 1
hsa-miR-190b	0	0	1	1	0	0	LRRC28	leucine rich repeat containing 28
hsa-miR-190b	0	0	1	1	1	1	AICDA	activation-induced cytidine deaminase
hsa-miR-190b	0	0	1	1	0	0	ARAP1	ArfGAP with RhoGAP domain, ankyrin repeat and PH domain 1
hsa-miR-190b	1	0	1	1	0	0	ADAM15	ADAM metallopeptidase domain 15
hsa-miR-190b	0	0	1	1	0	0	CLSTN3	calsyntenin 3
hsa-miR-190b	1	0	1	1	1	1	MYB	v-myb myeloblastosis viral oncogene homolog (avian)
hsa-miR-190b	0	0	1	1	1	1	RLIM	ring finger protein, LIM domain interacting
hsa-miR-190b	0	0	1	1	1	1	RAB7L1	RAB7, member RAS oncogene family-like 1
hsa-miR-190b	1	0	1	1	1	1	TSPAN14	tetraspanin 14
hsa-miR-190b	0	0	1	1	1	1	FTO	fat mass and obesity associated
hsa-miR-190b	1	0	1	1	1	1	POU2F2	POU class 2 homeobox 2
hsa-miR-190b	0	0	1	1	1	1	DYDC2	DPY30 domain containing 2
hsa-miR-190b	1	0	1	1	1	1	PCGF5	polycomb group ring finger 5
hsa-miR-190b	0	0	1	1	0	0	PRR11	proline rich 11
hsa-miR-190b	1	0	1	1	1	1	SHOX2	short stature homeobox 2
hsa-miR-190b	0	0	1	0	0	0	ATXN7L3B	ataxin 7-like 3B
hsa-miR-190b	1	0	1	0	1	1	TMEM39A	transmembrane protein 39A
hsa-miR-190b	1	0	1	1	0	0	SIGMAR1	sigma non-opioid intracellular receptor 1
hsa-miR-190b	1	0	1	1	1	1	ZFAND5	zinc finger, AN1-type domain 5
hsa-miR-190b	0	0	1	1	1	1	KLF7	Kruppel-like factor 7 (ubiquitous)
hsa-miR-190b	0	0	1	0	1	1	AHI1	Abelson helper integration site 1
hsa-miR-190b	0	0	1	1	1	1	GIN1	gypsy retrotransposon integrase 1
hsa-miR-190b	0	0	1	0	0	0	KLHL15	kelch-like 15 (Drosophila)
hsa-miR-190b	1	0	1	0	1	1	NR1D2	nuclear receptor subfamily 1, group D, member 2
hsa-miR-190b	0	0	1	1	1	1	RAB37	RAB37, member RAS oncogene family
hsa-miR-190b	0	0	1	1	1	1	POLR3F	polymerase (RNA) III (DNA directed) polypeptide F, 39 kDa
hsa-miR-190b	1	0	1	0	1	1	CYBRD1	cytochrome b reductase 1
hsa-miR-190b	0	0	1	1	0	0	ZDHHC6	zinc finger, DHHC-type containing 6
hsa-miR-190b	0	0	1	1	1	1	CSDE1	cold shock domain containing E1, RNA-binding
hsa-miR-190b	1	0	1	1	1	1	SCAF11	SR-related CTD-associated factor 11
hsa-miR-190b	0	0	1	1	1	1	HIBADH	3-hydroxyisobutyrate dehydrogenase
hsa-miR-190b	1	0	1	0	1	1	BTF3L4	basic transcription factor 3-like 4
hsa-miR-190b	0	0	1	1	1	1	SRGN	serglycin
hsa-miR-190b	1	0	1	1	1	1	C16orf45	chromosome 16 open reading frame 45
hsa-miR-190b	1	0	1	1	1	1	RACGAP1	Rac GTPase activating protein 1
hsa-miR-190b	0	0	1	1	0	0	GLS2	glutaminase 2 (liver, mitochondrial)
hsa-miR-190b	1	0	1	1	1	1	NIPA1	non imprinted in Prader-Willi/Angelman syndrome 1
hsa-miR-190b	1	0	1	1	1	1	RSPO2	R-spondin 2
hsa-miR-190b	0	0	1	0	1	1	PAPOLG	poly(A) polymerase gamma
hsa-miR-190b	0	0	1	0	1	1	KIAA0895	KIAA0895
hsa-miR-190b	1	0	1	0	0	0	KCNU1	potassium channel, subfamily U, member 1
hsa-miR-190b	1	0	1	0	1	1	NCAM1	neural cell adhesion molecule 1
hsa-miR-190b	0	0	1	1	1	1	LRMP	lymphoid-restricted membrane protein
hsa-miR-190b	0	0	1	1	0	0	TOMM5	translocase of outer mitochondrial membrane 5 homolog (yeast)
hsa-miR-190b	0	0	1	1	1	1	SEMA3D	sema domain, immunoglobulin domain (Ig), short basic domain, secreted, (semaphorin) 3D
hsa-miR-190b	1	0	1	1	1	1	PPARGC1A	peroxisome proliferator-activated receptor gamma, coactivator 1 alpha
hsa-miR-190b	0	0	1	1	1	1	CCP110	centriolar coiled coil protein 110kDa
hsa-miR-190b	0	0	1	1	1	1	AADAT	aminoadipate aminotransferase
hsa-miR-190b	1	0	1	1	1	1	PLS1	plastin 1
hsa-miR-190b	1	0	1	1	1	1	ZPLD1	zona pellucida-like domain containing 1
hsa-miR-190b	1	0	1	1	1	1	TTC39C	tetratricopeptide repeat domain 39C
hsa-miR-190b	0	0	1	1	1	1	C5orf22	chromosome 5 open reading frame 22
hsa-miR-190b	1	0	1	1	1	1	PPP2R2C	protein phosphatase 2, regulatory subunit B, gamma
hsa-miR-190b	0	0	1	0	0	0	WDFY3-AS2	WDFY3 antisense RNA 2
hsa-miR-190b	1	0	1	0	1	1	TBC1D2B	TBC1 domain family, member 2B
hsa-miR-190b	0	0	1	1	1	1	ZNF337	zinc finger protein 337
hsa-miR-190b	1	0	1	1	1	1	LPGAT1	lysophosphatidylglycerol acyltransferase 1
hsa-miR-190b	0	0	1	1	1	1	EDA2R	ectodysplasin A2 receptor
hsa-miR-190b	1	0	1	1	1	1	NKAIN2	Na+/K+ transporting ATPase interacting 2
hsa-miR-190b	0	0	1	0	1	1	FAM72A	family with sequence similarity 72, member A
hsa-miR-190b	0	0	1	1	0	0	VPS8	vacuolar protein sorting 8 homolog (S. cerevisiae)
hsa-miR-190b	0	0	1	1	1	1	CLEC12B	C-type lectin domain family 12, member B
hsa-miR-190b	1	0	1	1	1	1	IMPACT	Impact homolog (mouse)
hsa-miR-190b	0	0	1	0	0	0	FAM201A	family with sequence similarity 201, member A
hsa-miR-190b	1	0	1	1	1	1	SLC35G1	solute carrier family 35, member G1
hsa-miR-190b	1	0	1	0	1	1	CPEB4	cytoplasmic polyadenylation element binding protein 4
hsa-miR-190b	1	0	1	1	1	1	BNC2	basonuclin 2
hsa-miR-190b	0	0	1	1	0	0	CDNF	cerebral dopamine neurotrophic factor
hsa-miR-190b	1	0	1	1	1	1	C4orf19	chromosome 4 open reading frame 19
hsa-miR-190b	0	0	1	0	0	0	INHBA-AS1	INHBA antisense RNA 1
hsa-miR-190b	1	0	1	1	0	0	PROSAPIP1	ProSAPiP1 protein
hsa-miR-190b	1	0	1	1	1	1	PAIP2	poly(A) binding protein interacting protein 2
hsa-miR-190b	0	0	1	0	0	0	LINC00620	long intergenic non-protein coding RNA 620
hsa-miR-190b	1	0	1	0	1	1	G2E3	G2/M-phase specific E3 ubiquitin protein ligase
hsa-miR-190b	1	0	1	1	1	1	DPP8	dipeptidyl-peptidase 8
hsa-miR-190b	1	0	1	0	1	1	PACSIN1	protein kinase C and casein kinase substrate in neurons 1
hsa-miR-190b	0	0	1	1	1	1	SIAE	sialic acid acetylesterase
hsa-miR-190b	0	0	1	0	1	1	FAM13B	family with sequence similarity 13, member B
hsa-miR-190b	1	0	1	1	1	1	ARPP21	cAMP-regulated phosphoprotein, 21kDa
hsa-miR-190b	1	0	1	1	1	1	FAM123A	family with sequence similarity 123A
hsa-miR-190b	0	0	1	0	1	1	PDGFC	platelet derived growth factor C
hsa-miR-190b	0	0	1	1	1	1	GOLGA6L9	golgin A6 family-like 9
hsa-miR-190b	0	0	1	1	1	1	RABGAP1L	RAB GTPase activating protein 1-like
hsa-miR-190b	0	0	1	1	0	0	C1orf87	chromosome 1 open reading frame 87
hsa-miR-190b	1	0	1	0	1	1	USP6NL	USP6 N-terminal like
hsa-miR-190b	0	0	1	0	1	1	C12orf74	chromosome 12 open reading frame 74
hsa-miR-190b	1	0	1	1	1	1	PLXND1	plexin D1
hsa-miR-190b	1	0	1	1	1	1	PSIP1	PC4 and SFRS1 interacting protein 1
hsa-miR-190b	1	0	1	0	1	1	PSD3	pleckstrin and Sec7 domain containing 3
hsa-miR-190b	0	0	1	1	1	1	NADKD1	NAD kinase domain containing 1
hsa-miR-190b	0	0	1	0	0	0	LOC283914	uncharacterized LOC283914
hsa-miR-190b	1	0	1	1	1	1	SUPT7L	suppressor of Ty 7 (S. cerevisiae)-like
hsa-miR-190b	0	0	1	1	0	0	FAM72B	family with sequence similarity 72, member B
hsa-miR-190b	0	0	1	0	0	0	LOC339529	uncharacterized LOC339529
hsa-miR-190b	0	0	1	0	1	1	IL33	interleukin 33
hsa-miR-190b	0	0	1	1	0	0	BCAS4	breast carcinoma amplified sequence 4
hsa-miR-190b	1	0	1	1	1	1	KLHL28	kelch-like 28 (Drosophila)
hsa-miR-190b	0	0	1	1	1	1	ZNF365	zinc finger protein 365
hsa-miR-190b	0	0	1	1	1	1	B4GALT4	UDP-Gal:betaGlcNAc beta 1,4- galactosyltransferase, polypeptide 4
hsa-miR-190b	0	0	1	1	1	1	GPATCH2	G patch domain containing 2
hsa-miR-190b	0	0	1	0	0	0	GNN	Grp94 neighboring nucleotidase pseudogene
hsa-miR-190b	1	0	1	1	1	1	UEVLD	UEV and lactate/malate dehyrogenase domains
hsa-miR-190b	0	0	1	1	1	1	STAG1	stromal antigen 1
hsa-miR-190b	0	0	1	1	1	1	ZNF33B	zinc finger protein 33B
hsa-miR-190b	0	0	1	1	1	1	PSMD12	proteasome (prosome, macropain) 26S subunit, non-ATPase, 12
hsa-miR-190b	1	0	1	1	1	1	ZNF449	zinc finger protein 449
hsa-miR-190b	1	0	1	1	1	1	CKAP2	cytoskeleton associated protein 2
hsa-miR-190b	1	0	1	1	1	1	ASPH	aspartate beta-hydroxylase
hsa-miR-190b	1	0	1	0	0	0	TNRC18	trinucleotide repeat containing 18
hsa-miR-190b	1	0	1	1	1	1	SLC26A7	solute carrier family 26, member 7
hsa-miR-190b	0	0	1	0	0	0	SPDYE8P	speedy homolog E8 (Xenopus laevis), pseudogene
hsa-miR-190b	0	0	1	1	0	0	KCTD19	potassium channel tetramerisation domain containing 19
hsa-miR-190b	1	0	1	0	1	1	HMGB3	high mobility group box 3
hsa-miR-190b	1	0	1	0	1	1	TGFBR1	transforming growth factor, beta receptor 1
hsa-miR-190b	1	0	1	0	1	1	TMEM194A	transmembrane protein 194A
hsa-miR-190b	1	0	1	0	1	1	NCOA7	nuclear receptor coactivator 7
hsa-miR-190b	0	0	1	0	0	0	LOC283070	uncharacterized LOC283070
hsa-miR-190b	1	0	1	1	1	1	OPCML	opioid binding protein/cell adhesion molecule-like
hsa-miR-190b	1	0	1	1	1	1	WNT5A	wingless-type MMTV integration site family, member 5A
hsa-miR-190b	0	0	1	1	1	1	C3orf67	chromosome 3 open reading frame 67
hsa-miR-190b	0	0	1	0	0	0	C17orf89	chromosome 17 open reading frame 89
hsa-miR-190b	1	0	1	1	1	1	FMNL3	formin-like 3
hsa-miR-190b	1	0	1	1	1	1	ZMYND11	zinc finger, MYND-type containing 11
hsa-miR-190b	0	0	1	1	1	1	ZCWPW2	zinc finger, CW type with PWWP domain 2
hsa-miR-190b	0	0	1	1	1	1	KCTD3	potassium channel tetramerisation domain containing 3
hsa-miR-190b	1	0	1	1	1	1	ST8SIA2	ST8 alpha-N-acetyl-neuraminide alpha-2,8-sialyltransferase 2
hsa-miR-190b	1	0	1	1	1	1	ACVR2B	activin A receptor, type IIB
hsa-miR-190b	1	0	1	0	1	1	MYBL1	v-myb myeloblastosis viral oncogene homolog (avian)-like 1
hsa-miR-190b	1	0	1	0	1	1	VANGL2	vang-like 2 (van gogh, Drosophila)
hsa-miR-190b	0	0	1	1	1	1	SPHKAP	SPHK1 interactor, AKAP domain containing
hsa-miR-190b	0	0	1	1	0	0	HIST1H2BC	histone cluster 1, H2bc
hsa-miR-190b	1	0	1	1	1	1	GABRB2	gamma-aminobutyric acid (GABA) A receptor, beta 2
hsa-miR-190b	1	0	1	1	1	1	PTPRD	protein tyrosine phosphatase, receptor type, D
hsa-miR-190b	1	0	1	1	1	1	PNISR	PNN-interacting serine/arginine-rich protein
hsa-miR-190b	1	0	1	0	1	1	DNAJC6	DnaJ (Hsp40) homolog, subfamily C, member 6
hsa-miR-190b	1	0	1	0	1	1	BTBD3	BTB (POZ) domain containing 3
hsa-miR-190b	1	0	1	0	1	1	KIF5C	kinesin family member 5C
hsa-miR-190b	0	0	1	1	1	1	STAU2	staufen, RNA binding protein, homolog 2 (Drosophila)
hsa-miR-190b	1	0	1	1	1	1	TET2	tet methylcytosine dioxygenase 2
hsa-miR-190b	1	0	1	1	1	1	SLK	STE20-like kinase
hsa-miR-190b	0	0	1	0	0	0	LRRC37A11P	leucine rich repeat containing 37, member A11, pseudogene
hsa-miR-190b	1	0	1	1	1	1	NR3C2	nuclear receptor subfamily 3, group C, member 2
hsa-miR-190b	1	0	1	0	1	1	ROBO1	roundabout, axon guidance receptor, homolog 1 (Drosophila)
hsa-miR-190b	1	0	1	1	1	1	TMEM132B	transmembrane protein 132B
hsa-miR-190b	1	0	1	1	1	1	PAX3	paired box 3
hsa-miR-190b	1	0	1	0	1	1	PRDM10	PR domain containing 10
hsa-miR-190b	1	0	1	1	1	1	OSBP2	oxysterol binding protein 2
hsa-miR-190b	0	0	1	1	0	0	PLCXD2	phosphatidylinositol-specific phospholipase C, X domain containing 2
hsa-miR-190b	0	0	1	0	0	0	KRT8P12	keratin 8 pseudogene 12
hsa-miR-190b	0	0	1	0	1	1	GOLGA8G	golgin A8 family, member G
hsa-miR-190b	1	0	1	1	1	1	ANK2	ankyrin 2, neuronal
hsa-miR-190b	1	0	1	1	1	1	ZMYM4	zinc finger, MYM-type 4
hsa-miR-190b	0	0	1	0	0	0	FAM225B	family with sequence similarity 225, member B (non-protein coding)
hsa-miR-190b	1	0	1	1	1	1	NUMB	numb homolog (Drosophila)
hsa-miR-190b	0	0	1	0	0	0	FLJ39632	uncharacterized LOC642477
hsa-miR-190b	1	0	1	1	1	1	LITAF	lipopolysaccharide-induced TNF factor
hsa-miR-190b	0	0	1	1	1	1	IP6K2	inositol hexakisphosphate kinase 2
hsa-miR-190b	0	0	1	1	1	1	FUCA2	fucosidase, alpha-L- 2, plasma
hsa-miR-190b	0	0	1	0	0	0	DKFZp686D0853	uncharacterized LOC401613
hsa-miR-190b	1	0	1	1	1	1	ATP2B4	ATPase, Ca++ transporting, plasma membrane 4
hsa-miR-190b	1	0	1	1	1	1	RBL2	retinoblastoma-like 2 (p130)
hsa-miR-190b	0	0	1	0	1	1	AP1S2	adaptor-related protein complex 1, sigma 2 subunit
hsa-miR-190b	0	0	1	1	0	0	EYS	eyes shut homolog (Drosophila)
hsa-miR-190b	1	0	1	1	1	1	SGCD	sarcoglycan, delta (35kDa dystrophin-associated glycoprotein)
hsa-miR-190b	0	0	1	1	1	1	DSG3	desmoglein 3
hsa-miR-190b	1	0	1	1	1	1	ETS1	v-ets erythroblastosis virus E26 oncogene homolog 1 (avian)
hsa-miR-190b	0	0	1	1	0	0	TTC5	tetratricopeptide repeat domain 5
hsa-miR-190b	1	0	1	1	1	1	SLC35F1	solute carrier family 35, member F1
hsa-miR-190b	0	0	1	1	1	1	SLC26A3	solute carrier family 26, member 3
hsa-miR-190b	1	0	1	1	1	1	RAB30	RAB30, member RAS oncogene family
hsa-miR-190b	1	0	1	1	1	1	MYCBP2	MYC binding protein 2, E3 ubiquitin protein ligase
hsa-miR-190b	1	0	1	1	1	1	PRDM2	PR domain containing 2, with ZNF domain
hsa-miR-190b	1	0	1	0	1	1	CPNE3	copine III
hsa-miR-190b	0	0	1	0	1	1	GTF2H2D	general transcription factor IIH, polypeptide 2D
hsa-miR-190b	0	0	1	1	1	1	MLIP	muscular LMNA-interacting protein
hsa-miR-190b	1	0	1	1	1	1	EPS15	epidermal growth factor receptor pathway substrate 15
hsa-miR-190b	1	0	1	1	1	1	GABPA	GA binding protein transcription factor, alpha subunit 60kDa
hsa-miR-190b	0	0	1	1	1	1	ARMCX3	armadillo repeat containing, X-linked 3
hsa-miR-190b	0	0	1	1	1	1	DUSP19	dual specificity phosphatase 19
hsa-miR-190b	0	0	1	0	1	1	MYO3B	myosin IIIB
hsa-miR-190b	1	0	1	1	1	1	CYB5B	cytochrome b5 type B (outer mitochondrial membrane)
hsa-miR-190b	0	0	1	0	0	0	OVOS	ovostatin
hsa-miR-190b	0	0	1	1	1	1	DAZL	deleted in azoospermia-like
hsa-miR-190b	1	0	1	1	1	1	PGAP1	post-GPI attachment to proteins 1
hsa-miR-190b	0	0	1	0	0	0	ANKRD62	ankyrin repeat domain 62
hsa-miR-190b	0	0	1	1	1	1	SSFA2	sperm specific antigen 2
hsa-miR-190b	1	0	1	0	1	1	C1orf21	chromosome 1 open reading frame 21
hsa-miR-190b	0	0	1	1	1	1	HPGD	hydroxyprostaglandin dehydrogenase 15-(NAD)
hsa-miR-190b	1	0	1	0	0	0	PLSCR5	phospholipid scramblase family, member 5
hsa-miR-190b	1	0	1	1	0	0	SMARCA2	SWI/SNF related, matrix associated, actin dependent regulator of chromatin, subfamily a, member 2
hsa-miR-190b	1	0	1	0	1	1	RNF144A	ring finger protein 144A
hsa-miR-190b	0	0	1	1	1	1	CAT	catalase
hsa-miR-190b	0	0	1	1	1	1	RWDD2B	RWD domain containing 2B
hsa-miR-190b	0	0	1	1	0	0	CHCHD3	coiled-coil-helix-coiled-coil-helix domain containing 3
hsa-miR-190b	0	0	1	0	0	0	LOC100128988	uncharacterized LOC100128988
hsa-miR-190b	0	0	1	1	1	1	CETN2	centrin, EF-hand protein, 2
hsa-miR-190b	0	0	1	0	0	0	FLJ30838	uncharacterized LOC400955
hsa-miR-190b	1	0	1	1	1	1	C8orf58	chromosome 8 open reading frame 58
hsa-miR-190b	0	0	1	1	1	1	COPS8	COP9 constitutive photomorphogenic homolog subunit 8 (Arabidopsis)
hsa-miR-190b	0	0	1	1	0	0	ITGB3BP	integrin beta 3 binding protein (beta3-endonexin)
hsa-miR-190b	0	0	1	1	0	0	MRPL37	mitochondrial ribosomal protein L37
hsa-miR-190b	1	0	1	0	1	1	BNIP3L	BCL2/adenovirus E1B 19kDa interacting protein 3-like
hsa-miR-190b	0	0	1	1	1	1	FGL1	fibrinogen-like 1
hsa-miR-190b	1	0	1	1	1	1	SSR1	signal sequence receptor, alpha
hsa-miR-190b	0	0	1	0	1	1	C17orf108	chromosome 17 open reading frame 108
hsa-miR-190b	0	0	1	1	1	1	CD1B	CD1b molecule
hsa-miR-190b	0	0	1	0	0	0	TRIQK	triple QxxK/R motif containing
hsa-miR-190b	1	0	1	1	1	1	TRA2B	transformer 2 beta homolog (Drosophila)
hsa-miR-190b	0	0	1	1	1	1	CYB5R3	cytochrome b5 reductase 3
hsa-miR-190b	0	0	1	0	0	0	LOC654433	uncharacterized LOC654433
hsa-miR-190b	0	0	1	1	0	0	TMEM183A	transmembrane protein 183A
hsa-miR-190b	0	0	1	1	1	1	XBP1	X-box binding protein 1
hsa-miR-190b	1	0	1	1	1	1	PHTF1	putative homeodomain transcription factor 1
hsa-miR-190b	0	0	1	0	1	1	TMEM155	transmembrane protein 155
hsa-miR-190b	1	0	1	1	1	1	KCNIP4	Kv channel interacting protein 4
hsa-miR-190b	0	0	1	0	1	1	SRSF5	serine/arginine-rich splicing factor 5
hsa-miR-190b	1	0	1	1	1	1	LAMTOR3	late endosomal/lysosomal adaptor, MAPK and MTOR activator 3
hsa-miR-190b	1	0	1	1	1	1	NT5DC1	5'-nucleotidase domain containing 1
hsa-miR-190b	0	0	1	1	1	1	TANK	TRAF family member-associated NFKB activator
hsa-miR-190b	0	0	1	1	1	1	CD1C	CD1c molecule
hsa-miR-190b	1	0	1	1	1	1	EIF1	eukaryotic translation initiation factor 1
hsa-miR-190b	1	0	1	1	0	0	ATP6V1B2	ATPase, H+ transporting, lysosomal 56/58kDa, V1 subunit B2
hsa-miR-190b	1	0	1	1	0	0	ANGPTL6	angiopoietin-like 6
hsa-miR-190b	1	0	1	0	1	1	MAP1B	microtubule-associated protein 1B
hsa-miR-190b	0	0	1	1	1	1	HUS1	HUS1 checkpoint homolog (S. pombe)
hsa-miR-190b	1	0	1	1	1	1	ACTN4	actinin, alpha 4
hsa-miR-190b	1	0	1	1	1	1	UBE2K	ubiquitin-conjugating enzyme E2K
hsa-miR-190b	1	0	1	0	1	1	CD47	CD47 molecule
hsa-miR-190b	1	0	1	1	1	1	RUNX1	runt-related transcription factor 1
hsa-miR-190b	1	0	1	1	1	1	ID2	inhibitor of DNA binding 2, dominant negative helix-loop-helix protein
hsa-miR-190b	0	0	1	1	1	1	ZNF75D	zinc finger protein 75D
hsa-miR-190b	1	0	1	1	1	1	PRSS22	protease, serine, 22
hsa-miR-190b	1	0	1	0	1	1	KIAA0240	KIAA0240
hsa-miR-190b	0	0	1	1	1	1	BDP1	B double prime 1, subunit of RNA polymerase III transcription initiation factor IIIB
hsa-miR-190b	1	0	1	1	1	1	KIAA2018	KIAA2018
hsa-miR-190b	1	0	1	0	1	1	PTP4A1	protein tyrosine phosphatase type IVA, member 1
hsa-miR-190b	1	0	1	0	1	1	XRN1	5'-3' exoribonuclease 1
hsa-miR-190b	0	0	1	1	1	1	SLC25A26	solute carrier family 25 (S-adenosylmethionine carrier), member 26
hsa-miR-190b	1	0	1	1	1	1	METAP1	methionyl aminopeptidase 1
hsa-miR-190b	1	0	1	1	1	1	ZFHX3	zinc finger homeobox 3
hsa-miR-190b	1	0	1	1	1	1	PI15	peptidase inhibitor 15
hsa-miR-190b	1	0	1	1	1	1	MAN2A2	mannosidase, alpha, class 2A, member 2
hsa-miR-190b	1	0	1	0	1	1	KLHDC10	kelch domain containing 10
hsa-miR-190b	0	0	1	1	1	1	PARP14	poly (ADP-ribose) polymerase family, member 14
hsa-miR-190b	1	0	1	1	1	1	RSPO1	R-spondin 1
hsa-miR-190b	0	0	1	0	0	0	CDKN2B-AS1	CDKN2B antisense RNA 1
hsa-miR-190b	0	0	1	1	1	1	C1orf27	chromosome 1 open reading frame 27
hsa-miR-190b	0	0	1	0	0	0	POM121L8P	POM121 transmembrane nucleoporin-like 8 pseudogene
hsa-miR-190b	1	0	1	0	1	1	RBBP5	retinoblastoma binding protein 5
hsa-miR-190b	1	0	1	0	1	1	DCBLD2	discoidin, CUB and LCCL domain containing 2
hsa-miR-190b	0	0	1	1	0	0	GNRH1	gonadotropin-releasing hormone 1 (luteinizing-releasing hormone)
hsa-miR-190b	1	0	1	0	1	1	BCL2	B-cell CLL/lymphoma 2
hsa-miR-190b	1	0	1	1	1	1	DBT	dihydrolipoamide branched chain transacylase E2
hsa-miR-190b	0	0	1	1	1	1	ELF1	E74-like factor 1 (ets domain transcription factor)
hsa-miR-190b	1	0	1	1	1	1	FAS	Fas (TNF receptor superfamily, member 6)
hsa-miR-190b	0	0	1	1	1	1	BCHE	butyrylcholinesterase
hsa-miR-190b	1	0	1	1	1	1	CPOX	coproporphyrinogen oxidase
hsa-miR-190b	1	0	1	1	1	1	KCNA1	potassium voltage-gated channel, shaker-related subfamily, member 1 (episodic ataxia with myokymia)
hsa-miR-190b	1	0	1	1	1	1	MITF	microphthalmia-associated transcription factor
hsa-miR-190b	0	0	1	1	1	1	MTM1	myotubularin 1
hsa-miR-190b	1	0	1	1	1	1	OCRL	oculocerebrorenal syndrome of Lowe
hsa-miR-190b	0	0	1	1	1	1	PEX7	peroxisomal biogenesis factor 7
hsa-miR-190b	1	0	1	1	1	1	RB1	retinoblastoma 1
hsa-miR-190b	0	0	1	1	1	1	RPGR	retinitis pigmentosa GTPase regulator
hsa-miR-190b	0	0	1	0	1	1	GNRHR	gonadotropin-releasing hormone receptor
hsa-miR-190b	0	0	1	1	1	1	PLEC	plectin
hsa-miR-190b	1	0	1	1	1	1	CFTR	cystic fibrosis transmembrane conductance regulator (ATP-binding cassette sub-family C, member 7)
hsa-miR-190b	0	0	1	1	1	1	CYP11B2	cytochrome P450, family 11, subfamily B, polypeptide 2
hsa-miR-190b	0	0	1	1	1	1	RHO	rhodopsin
hsa-miR-190b	1	0	1	1	1	1	IL1A	interleukin 1, alpha
hsa-miR-190b	0	0	1	1	1	1	IL2	interleukin 2
hsa-miR-190b	0	0	1	1	1	1	HGF	hepatocyte growth factor (hepapoietin A; scatter factor)
hsa-miR-190b	0	0	1	1	1	1	IFNG	interferon, gamma
hsa-miR-190b	0	0	1	1	1	1	IL11	interleukin 11
hsa-miR-190b	0	0	1	1	0	0	BLVRA	biliverdin reductase A
hsa-miR-190b	0	0	1	1	0	0	CA4	carbonic anhydrase IV
hsa-miR-190b	1	0	1	0	1	1	CACNA1E	calcium channel, voltage-dependent, R type, alpha 1E subunit
hsa-miR-190b	1	0	1	1	1	1	CHRM1	cholinergic receptor, muscarinic 1
hsa-miR-190b	0	0	1	1	1	1	DIO1	deiodinase, iodothyronine, type I
hsa-miR-190b	1	0	1	1	1	1	DIO2	deiodinase, iodothyronine, type II
hsa-miR-190b	1	0	1	0	1	1	GABRA4	gamma-aminobutyric acid (GABA) A receptor, alpha 4
hsa-miR-190b	1	0	1	1	1	1	GABRB3	gamma-aminobutyric acid (GABA) A receptor, beta 3
hsa-miR-190b	0	0	1	1	1	1	GLRB	glycine receptor, beta
hsa-miR-190b	1	0	1	0	1	1	KCNJ2	potassium inwardly-rectifying channel, subfamily J, member 2
hsa-miR-190b	0	0	1	1	1	1	NPY2R	neuropeptide Y receptor Y2
hsa-miR-190b	1	0	1	1	1	1	PTGFR	prostaglandin F receptor (FP)
hsa-miR-190b	0	0	1	1	1	1	BLOC1S2	biogenesis of lysosomal organelles complex-1, subunit 2
hsa-miR-190b	1	0	1	0	1	1	ARHGEF37	Rho guanine nucleotide exchange factor (GEF) 37
hsa-miR-190b	1	0	1	1	1	1	C14orf37	chromosome 14 open reading frame 37
hsa-miR-190b	0	0	1	0	0	0	KLK2	kallikrein-related peptidase 2
hsa-miR-190b	1	0	1	1	1	1	ABLIM1	actin binding LIM protein 1
hsa-miR-190b	1	0	1	0	1	1	SMAD2	SMAD family member 2
hsa-miR-190b	1	0	1	1	1	1	LEPR	leptin receptor
hsa-miR-190b	0	0	1	1	1	1	TSPYL6	TSPY-like 6
hsa-miR-190b	1	0	1	0	1	1	BMF	Bcl2 modifying factor
hsa-miR-190b	0	0	1	1	1	1	CCDC144NL	coiled-coil domain containing 144 family, N-terminal like
hsa-miR-190b	1	0	1	0	1	1	LIN28B	lin-28 homolog B (C. elegans)
hsa-miR-190b	1	0	1	1	1	1	AK4	adenylate kinase 4
hsa-miR-190b	1	0	1	0	1	1	YPEL2	yippee-like 2 (Drosophila)
hsa-miR-190b	1	0	1	1	1	1	PLCXD3	phosphatidylinositol-specific phospholipase C, X domain containing 3
hsa-miR-190b	1	0	1	1	1	1	NFKBIZ	nuclear factor of kappa light polypeptide gene enhancer in B-cells inhibitor, zeta
hsa-miR-190b	1	0	1	1	1	1	ADAM9	ADAM metallopeptidase domain 9
hsa-miR-190b	1	0	1	1	1	1	TCEAL8	transcription elongation factor A (SII)-like 8
hsa-miR-190b	1	0	1	1	1	1	LMBRD2	LMBR1 domain containing 2
hsa-miR-190b	0	0	1	0	0	0	RPS4Y1	ribosomal protein S4, Y-linked 1
hsa-miR-190b	1	0	1	0	1	1	C18orf25	chromosome 18 open reading frame 25
hsa-miR-190b	1	0	1	0	1	1	KIAA2022	KIAA2022
hsa-miR-190b	0	0	1	1	1	1	IL4R	interleukin 4 receptor
hsa-miR-190b	1	0	1	1	1	1	FNIP1	folliculin interacting protein 1
hsa-miR-190b	1	0	1	1	1	1	ZNF468	zinc finger protein 468
hsa-miR-190b	1	0	1	0	1	1	ERMN	ermin, ERM-like protein
hsa-miR-190b	0	0	1	0	1	1	LPPR5	lipid phosphate phosphatase-related protein type 5
hsa-miR-190b	1	0	1	0	1	1	MTX3	metaxin 3
hsa-miR-190b	0	0	1	1	1	1	NCMAP	noncompact myelin associated protein
hsa-miR-190b	1	0	1	0	1	1	CREB5	cAMP responsive element binding protein 5
hsa-miR-190b	0	0	1	0	1	1	ERVMER61-1	endogenous retrovirus group MER61, member 1
hsa-miR-190b	1	0	1	1	1	1	CTNNBIP1	catenin, beta interacting protein 1
hsa-miR-190b	0	0	1	0	1	1	GOLGA8E	golgin A8 family, member E
hsa-miR-190b	0	0	1	1	0	0	FAM221B	family with sequence similarity 221, member B
hsa-miR-190b	1	0	1	0	1	1	RGMB	RGM domain family, member B
hsa-miR-190b	0	0	1	1	1	1	C9orf152	chromosome 9 open reading frame 152
hsa-miR-190b	1	0	1	1	1	1	FXR1	fragile X mental retardation, autosomal homolog 1
hsa-miR-190b	0	0	1	1	1	1	C2orf68	chromosome 2 open reading frame 68
hsa-miR-190b	1	0	1	0	1	1	SYT14L	synaptotagmin XIV-like
hsa-miR-190b	1	0	1	1	1	1	RUNX2	runt-related transcription factor 2
hsa-miR-190b	0	0	1	1	1	1	PGBD2	piggyBac transposable element derived 2
hsa-miR-190b	0	0	1	1	1	1	BTBD11	BTB (POZ) domain containing 11
hsa-miR-190b	0	0	1	1	1	1	KIAA2026	KIAA2026
hsa-miR-190b	1	0	1	1	1	1	SLC6A9	solute carrier family 6 (neurotransmitter transporter, glycine), member 9
hsa-miR-190b	1	0	1	0	1	1	CELF2	CUGBP, Elav-like family member 2
hsa-miR-190b	1	0	1	1	1	1	AFF3	AF4/FMR2 family, member 3
hsa-miR-190b	1	0	1	0	1	1	CLLU1	chronic lymphocytic leukemia up-regulated 1
hsa-miR-190b	1	0	1	1	1	1	TPD52	tumor protein D52
hsa-miR-190b	1	0	1	1	1	1	VEGFA	vascular endothelial growth factor A
hsa-miR-190b	0	0	1	0	1	1	C6orf120	chromosome 6 open reading frame 120
hsa-miR-190b	1	0	1	1	1	1	RGS7BP	regulator of G-protein signaling 7 binding protein
hsa-miR-190b	1	0	1	0	1	1	SAMD5	sterile alpha motif domain containing 5
hsa-miR-190b	1	0	1	1	1	1	MAF	v-maf musculoaponeurotic fibrosarcoma oncogene homolog (avian)
hsa-miR-190b	1	0	1	1	1	1	AMD1	adenosylmethionine decarboxylase 1
hsa-miR-190b	1	0	1	0	1	1	SRGAP3	SLIT-ROBO Rho GTPase activating protein 3
hsa-miR-190b	0	0	1	1	1	1	KCNIP1	Kv channel interacting protein 1
hsa-miR-190b	0	0	1	0	1	1	RGS21	regulator of G-protein signaling 21
hsa-miR-190b	1	0	1	1	1	1	DPP6	dipeptidyl-peptidase 6
hsa-miR-190b	1	0	1	0	1	1	GK5	glycerol kinase 5 (putative)
hsa-miR-190b	1	0	1	1	1	1	KCNC4	potassium voltage-gated channel, Shaw-related subfamily, member 4
hsa-miR-190b	1	0	1	1	1	1	CBLN3	cerebellin 3 precursor
hsa-miR-190b	1	0	1	1	1	1	TCERG1	transcription elongation regulator 1
hsa-miR-190b	0	0	1	0	1	1	OPALIN	oligodendrocytic myelin paranodal and inner loop protein
hsa-miR-190b	1	0	1	1	1	1	SCN2A	sodium channel, voltage-gated, type II, alpha subunit
hsa-miR-190b	0	0	1	0	1	1	SCN3B	sodium channel, voltage-gated, type III, beta subunit
hsa-miR-190b	1	0	1	1	1	1	NCALD	neurocalcin delta
hsa-miR-190b	1	0	1	1	1	1	HMGCLL1	3-hydroxymethyl-3-methylglutaryl-CoA lyase-like 1
hsa-miR-190b	1	0	1	1	1	1	DIAPH3	diaphanous homolog 3 (Drosophila)
hsa-miR-190b	1	0	1	1	1	1	C2orf88	chromosome 2 open reading frame 88
hsa-miR-190b	1	0	1	1	1	1	NSL1	NSL1, MIND kinetochore complex component, homolog (S. cerevisiae)
hsa-miR-190b	1	0	1	1	1	1	KDM5A	lysine (K)-specific demethylase 5A
hsa-miR-190b	1	0	1	0	1	1	SLC12A2	solute carrier family 12 (sodium/potassium/chloride transporters), member 2
hsa-miR-190b	1	0	1	1	1	1	MZT1	mitotic spindle organizing protein 1
hsa-miR-190b	1	0	1	1	1	1	HS6ST2	heparan sulfate 6-O-sulfotransferase 2
hsa-miR-190b	1	0	1	1	1	1	PDE11A	phosphodiesterase 11A
hsa-miR-190b	1	0	1	1	1	1	GRIA4	glutamate receptor, ionotropic, AMPA 4
hsa-miR-190b	1	0	1	1	1	1	IRF2BP2	interferon regulatory factor 2 binding protein 2
hsa-miR-190b	1	0	1	1	1	1	PHF16	PHD finger protein 16
hsa-miR-190b	0	0	1	1	1	1	PPCS	phosphopantothenoylcysteine synthetase
hsa-miR-190b	1	0	1	1	1	1	ALG9	asparagine-linked glycosylation 9, alpha-1,2-mannosyltransferase homolog (S. cerevisiae)
hsa-miR-190b	1	0	1	1	1	1	DACT1	dapper, antagonist of beta-catenin, homolog 1 (Xenopus laevis)
hsa-miR-190b	0	0	1	1	1	1	FKTN	fukutin
hsa-miR-190b	0	0	1	0	0	0	TMEM183B	transmembrane protein 183B
hsa-miR-190b	0	0	1	1	0	0	CT47A1	cancer/testis antigen family 47, member A1
hsa-miR-190b	1	0	1	1	1	1	FAM155A	family with sequence similarity 155, member A
hsa-miR-190b	1	0	1	0	1	1	CCDC85A	coiled-coil domain containing 85A
hsa-miR-190b	1	0	1	1	1	1	ZNF697	zinc finger protein 697
hsa-miR-190b	1	0	1	0	1	1	MEGF9	multiple EGF-like-domains 9
hsa-miR-190b	0	0	1	0	1	1	RBM44	RNA binding motif protein 44
hsa-miR-190b	0	0	1	1	1	1	TBX18	T-box 18
hsa-miR-190b	0	0	1	0	1	1	SPINK8	serine peptidase inhibitor, Kazal type 8 (putative)
hsa-miR-190b	1	0	1	1	1	1	UNC119B	unc-119 homolog B (C. elegans)
hsa-miR-190b	1	0	1	1	1	1	DGKG	diacylglycerol kinase, gamma 90kDa
hsa-miR-190b	1	0	1	1	1	1	REPS2	RALBP1 associated Eps domain containing 2
hsa-miR-190b	1	0	1	0	1	1	PDE5A	phosphodiesterase 5A, cGMP-specific
hsa-miR-190b	0	0	1	0	1	1	ALOX15	arachidonate 15-lipoxygenase
hsa-miR-190b	1	0	1	1	1	1	SLC25A5	solute carrier family 25 (mitochondrial carrier; adenine nucleotide translocator), member 5
hsa-miR-190b	1	0	1	0	1	1	XIAP	X-linked inhibitor of apoptosis
hsa-miR-190b	1	0	1	0	1	1	KLF9	Kruppel-like factor 9
hsa-miR-190b	1	0	1	0	1	1	CDK6	cyclin-dependent kinase 6
hsa-miR-190b	1	0	1	0	1	1	CPD	carboxypeptidase D
hsa-miR-190b	0	0	1	1	0	0	CPN1	carboxypeptidase N, polypeptide 1
hsa-miR-190b	1	0	1	1	1	1	CREBL2	cAMP responsive element binding protein-like 2
hsa-miR-190b	0	0	1	1	1	1	CXADR	coxsackie virus and adenovirus receptor
hsa-miR-190b	1	0	1	1	1	1	DTNA	dystrobrevin, alpha
hsa-miR-190b	0	0	1	0	1	1	EMP1	epithelial membrane protein 1
hsa-miR-190b	1	0	1	1	1	1	FOXC1	forkhead box C1
hsa-miR-190b	1	0	1	1	1	1	GTF2B	general transcription factor IIB
hsa-miR-190b	0	0	1	1	1	1	AOAH	acyloxyacyl hydrolase (neutrophil)
hsa-miR-190b	1	0	1	1	1	1	AQP4	aquaporin 4
hsa-miR-190b	0	0	1	1	1	1	ARF4	ADP-ribosylation factor 4
hsa-miR-190b	0	0	1	1	1	1	RHOA	ras homolog family member A
hsa-miR-190b	1	0	1	0	1	1	ATP1B2	ATPase, Na+/K+ transporting, beta 2 polypeptide
hsa-miR-190b	0	0	1	1	1	1	CD1D	CD1d molecule
hsa-miR-190b	0	0	1	1	1	1	CHGB	chromogranin B (secretogranin 1)
hsa-miR-190b	1	0	1	1	1	1	CNN3	calponin 3, acidic
hsa-miR-190b	1	0	1	1	1	1	MASP1	mannan-binding lectin serine peptidase 1 (C4/C2 activating component of Ra-reactive factor)
hsa-miR-190b	0	0	1	1	1	1	CSN2	casein beta
hsa-miR-190b	0	0	1	1	1	1	CTSE	cathepsin E
hsa-miR-190b	1	0	1	1	1	1	F2R	coagulation factor II (thrombin) receptor
hsa-miR-190b	0	0	1	0	1	1	FGF2	fibroblast growth factor 2 (basic)
hsa-miR-190b	0	0	1	1	1	1	FLI1	Friend leukemia virus integration 1
hsa-miR-190b	0	0	1	0	1	1	GCG	glucagon
hsa-miR-190b	0	0	1	0	1	1	GCLM	glutamate-cysteine ligase, modifier subunit
hsa-miR-190b	0	0	1	1	1	1	GNB1	guanine nucleotide binding protein (G protein), beta polypeptide 1
hsa-miR-190b	1	0	1	1	1	1	GOLGA1	golgin A1
hsa-miR-190b	0	0	1	1	1	1	GTF2E2	general transcription factor IIE, polypeptide 2, beta 34kDa
hsa-miR-190b	0	0	1	1	1	1	IRF8	interferon regulatory factor 8
hsa-miR-190b	0	0	1	0	1	1	ITGAV	integrin, alpha V
hsa-miR-190b	0	0	1	1	1	1	ITGB1	integrin, beta 1 (fibronectin receptor, beta polypeptide, antigen CD29 includes MDF2, MSK12)
hsa-miR-190b	1	0	1	1	1	1	ITGB8	integrin, beta 8
hsa-miR-190b	1	0	1	1	1	1	ITPR2	inositol 1,4,5-trisphosphate receptor, type 2
hsa-miR-190b	1	0	1	1	1	1	KCNJ3	potassium inwardly-rectifying channel, subfamily J, member 3
hsa-miR-190b	1	0	1	1	1	1	KCNJ10	potassium inwardly-rectifying channel, subfamily J, member 10
hsa-miR-190b	1	0	1	1	1	1	KDR	kinase insert domain receptor (a type III receptor tyrosine kinase)
hsa-miR-190b	1	0	1	1	1	1	M6PR	mannose-6-phosphate receptor (cation dependent)
hsa-miR-190b	0	0	1	1	1	1	MAGEB4	melanoma antigen family B, 4
hsa-miR-190b	1	0	1	1	1	1	ME1	malic enzyme 1, NADP(+)-dependent, cytosolic
hsa-miR-190b	0	0	1	1	1	1	MSH4	mutS homolog 4 (E. coli)
hsa-miR-190b	0	0	1	1	1	1	MYC	v-myc myelocytomatosis viral oncogene homolog (avian)
hsa-miR-190b	1	0	1	1	1	1	NPAS2	neuronal PAS domain protein 2
hsa-miR-190b	0	0	1	0	1	1	OAZ2	ornithine decarboxylase antizyme 2
hsa-miR-190b	0	0	1	0	1	1	OPHN1	oligophrenin 1
hsa-miR-190b	1	0	1	0	1	1	PAK2	p21 protein (Cdc42/Rac)-activated kinase 2
hsa-miR-190b	1	0	1	0	1	1	PAPPA	pregnancy-associated plasma protein A, pappalysin 1
hsa-miR-190b	0	0	1	1	1	1	PFDN4	prefoldin subunit 4
hsa-miR-190b	0	0	1	0	1	1	PMP2	peripheral myelin protein 2
hsa-miR-190b	0	0	1	1	1	1	PRKACA	protein kinase, cAMP-dependent, catalytic, alpha
hsa-miR-190b	1	0	1	1	1	1	PTPRK	protein tyrosine phosphatase, receptor type, K
hsa-miR-190b	1	0	1	0	1	1	CCL22	chemokine (C-C motif) ligand 22
hsa-miR-190b	1	0	1	0	1	1	SFRP1	secreted frizzled-related protein 1
hsa-miR-190b	0	0	1	1	1	1	SH3BGRL	SH3 domain binding glutamic acid-rich protein like
hsa-miR-190b	1	0	1	0	1	1	ST6GAL1	ST6 beta-galactosamide alpha-2,6-sialyltranferase 1
hsa-miR-190b	1	0	1	0	1	1	SLC6A1	solute carrier family 6 (neurotransmitter transporter, GABA), member 1
hsa-miR-190b	1	0	1	0	1	1	SOX11	SRY (sex determining region Y)-box 11
hsa-miR-190b	0	0	1	1	0	0	SRP14	signal recognition particle 14kDa (homologous Alu RNA binding protein)
hsa-miR-190b	1	0	1	1	1	1	STAC	SH3 and cysteine rich domain
hsa-miR-190b	1	0	1	0	1	1	TAL1	T-cell acute lymphocytic leukemia 1
hsa-miR-190b	0	0	1	0	1	1	TDGF1	teratocarcinoma-derived growth factor 1
hsa-miR-190b	0	0	1	1	0	0	THBS4	thrombospondin 4
hsa-miR-190b	1	0	1	1	1	1	UBE2B	ubiquitin-conjugating enzyme E2B
hsa-miR-190b	1	0	1	1	1	1	CUL5	cullin 5
hsa-miR-190b	1	0	1	1	1	1	HMGA2	high mobility group AT-hook 2
hsa-miR-190b	1	0	1	1	1	1	CILP	cartilage intermediate layer protein, nucleotide pyrophosphohydrolase
hsa-miR-190b	0	0	1	1	1	1	RGS5	regulator of G-protein signaling 5
hsa-miR-190b	0	0	1	1	1	1	AGPS	alkylglycerone phosphate synthase
hsa-miR-190b	1	0	1	1	1	1	TNFSF11	tumor necrosis factor (ligand) superfamily, member 11
hsa-miR-190b	0	0	1	1	1	1	SLC25A12	solute carrier family 25 (aspartate/glutamate carrier), member 12
hsa-miR-190b	1	0	1	1	1	1	B3GALT2	UDP-Gal:betaGlcNAc beta 1,3-galactosyltransferase, polypeptide 2
hsa-miR-190b	0	0	1	1	1	1	SNX4	sorting nexin 4
hsa-miR-190b	0	0	1	1	1	1	CRADD	CASP2 and RIPK1 domain containing adaptor with death domain
hsa-miR-190b	0	0	1	1	0	0	ADAM7	ADAM metallopeptidase domain 7
hsa-miR-190b	1	0	1	1	1	1	NR5A2	nuclear receptor subfamily 5, group A, member 2
hsa-miR-190b	1	0	1	0	1	1	ST13	suppression of tumorigenicity 13 (colon carcinoma) (Hsp70 interacting protein)
hsa-miR-190b	1	0	1	0	1	1	WASL	Wiskott-Aldrich syndrome-like
hsa-miR-190b	1	0	1	1	1	1	CDKL2	cyclin-dependent kinase-like 2 (CDC2-related kinase)
hsa-miR-190b	0	0	1	1	1	1	MPZL1	myelin protein zero-like 1
hsa-miR-190b	0	0	1	1	1	1	RNF8	ring finger protein 8, E3 ubiquitin protein ligase
hsa-miR-190b	1	0	1	1	1	1	BCL2L2	BCL2-like 2
hsa-miR-190b	1	0	1	1	1	1	CTSS	cathepsin S
hsa-miR-190b	1	0	1	1	1	1	EFNB2	ephrin-B2
hsa-miR-190b	0	0	1	0	1	1	HABP2	hyaluronan binding protein 2
hsa-miR-190b	1	0	1	0	1	1	SLC1A2	solute carrier family 1 (glial high affinity glutamate transporter), member 2
hsa-miR-190b	0	0	1	1	0	0	EBAG9	estrogen receptor binding site associated, antigen, 9
hsa-miR-190b	0	0	1	1	1	1	SEP15	15 kDa selenoprotein
hsa-miR-190b	0	0	1	1	1	1	HOMER1	homer homolog 1 (Drosophila)
hsa-miR-190b	1	0	1	0	1	1	AKAP6	A kinase (PRKA) anchor protein 6
hsa-miR-190b	0	0	1	1	1	1	EEF1E1	eukaryotic translation elongation factor 1 epsilon 1
hsa-miR-190b	1	0	1	1	1	1	GDA	guanine deaminase
hsa-miR-190b	1	0	1	1	1	1	CREB1	cAMP responsive element binding protein 1
hsa-miR-190b	1	0	1	1	1	1	EPS8	epidermal growth factor receptor pathway substrate 8
hsa-miR-190b	1	0	1	0	1	1	FGF5	fibroblast growth factor 5
hsa-miR-190b	1	0	1	0	1	1	ARHGAP35	Rho GTPase activating protein 35
hsa-miR-190b	0	0	1	1	1	1	RAB27A	RAB27A, member RAS oncogene family
hsa-miR-190b	1	0	1	0	1	1	SCN2B	sodium channel, voltage-gated, type II, beta subunit
hsa-miR-190b	0	0	1	1	0	0	SFSWAP	splicing factor, suppressor of white-apricot homolog (Drosophila)
hsa-miR-190b	0	0	1	1	1	1	VNN1	vanin 1
hsa-miR-190b	0	0	1	1	1	1	LATS1	LATS, large tumor suppressor, homolog 1 (Drosophila)
hsa-miR-190b	1	0	1	1	1	1	RPS6KA5	ribosomal protein S6 kinase, 90kDa, polypeptide 5
hsa-miR-190b	1	0	1	1	1	1	STK17A	serine/threonine kinase 17a
hsa-miR-190b	1	0	1	1	1	1	B4GALT6	UDP-Gal:betaGlcNAc beta 1,4- galactosyltransferase, polypeptide 6
hsa-miR-190b	1	0	1	1	1	1	B4GALT5	UDP-Gal:betaGlcNAc beta 1,4- galactosyltransferase, polypeptide 5
hsa-miR-190b	1	0	1	1	1	1	AKAP7	A kinase (PRKA) anchor protein 7
hsa-miR-190b	1	0	1	1	1	1	SEC24C	SEC24 family, member C (S. cerevisiae)
hsa-miR-190b	0	0	1	1	1	1	CALB1	calbindin 1, 28kDa
hsa-miR-190b	0	0	1	1	1	1	CDH6	cadherin 6, type 2, K-cadherin (fetal kidney)
hsa-miR-190b	0	0	1	1	1	1	CDKN2B	cyclin-dependent kinase inhibitor 2B (p15, inhibits CDK4)
hsa-miR-190b	1	0	1	0	1	1	DOCK3	dedicator of cytokinesis 3
hsa-miR-190b	0	0	1	0	1	1	DSC2	desmocollin 2
hsa-miR-190b	0	0	1	1	1	1	JAK2	Janus kinase 2
hsa-miR-190b	1	0	1	0	1	1	KIF5A	kinesin family member 5A
hsa-miR-190b	1	0	1	1	1	1	ATXN3	ataxin 3
hsa-miR-190b	0	0	1	1	1	1	RGPD5	RANBP2-like and GRIP domain containing 5
hsa-miR-190b	1	0	1	0	1	1	SCD	stearoyl-CoA desaturase (delta-9-desaturase)
hsa-miR-190b	1	0	1	0	1	1	SEL1L	sel-1 suppressor of lin-12-like (C. elegans)
hsa-miR-190b	1	0	1	1	1	1	MED13	mediator complex subunit 13
hsa-miR-190b	1	0	1	1	1	1	CRK	v-crk sarcoma virus CT10 oncogene homolog (avian)
hsa-miR-190b	1	0	1	1	1	1	ELK3	ELK3, ETS-domain protein (SRF accessory protein 2)
hsa-miR-190b	1	0	1	1	1	1	GAS2	growth arrest-specific 2
hsa-miR-190b	1	0	1	1	1	1	GEM	GTP binding protein overexpressed in skeletal muscle
hsa-miR-190b	0	0	1	1	1	1	H1F0	H1 histone family, member 0
hsa-miR-190b	1	0	1	1	1	1	HAS2	hyaluronan synthase 2
hsa-miR-190b	1	0	1	1	1	1	HAS3	hyaluronan synthase 3
hsa-miR-190b	0	0	1	1	1	1	ITGAD	integrin, alpha D
hsa-miR-190b	1	0	1	0	1	1	PRKCE	protein kinase C, epsilon
hsa-miR-190b	0	0	1	1	1	1	CXCL11	chemokine (C-X-C motif) ligand 11
hsa-miR-190b	1	0	1	0	0	0	FRAT1	frequently rearranged in advanced T-cell lymphomas
hsa-miR-190b	1	0	1	1	1	1	SCARB2	scavenger receptor class B, member 2
hsa-miR-190b	1	0	1	1	1	1	LPP	LIM domain containing preferred translocation partner in lipoma
hsa-miR-190b	1	0	1	1	1	1	MAB21L1	mab-21-like 1 (C. elegans)
hsa-miR-190b	1	0	1	1	1	1	NHLH2	nescient helix loop helix 2
hsa-miR-190b	0	0	1	0	1	1	POU3F2	POU class 3 homeobox 2
hsa-miR-190b	1	0	1	1	1	1	ST8SIA4	ST8 alpha-N-acetyl-neuraminide alpha-2,8-sialyltransferase 4
hsa-miR-190b	1	0	1	1	1	1	UST	uronyl-2-sulfotransferase
hsa-miR-190b	0	0	1	1	1	1	ACTR3	ARP3 actin-related protein 3 homolog (yeast)
hsa-miR-190b	1	0	1	0	1	1	CLEC3A	C-type lectin domain family 3, member A
hsa-miR-190b	1	0	1	1	1	1	LHFPL2	lipoma HMGIC fusion partner-like 2
hsa-miR-190b	0	0	1	1	1	1	PRG4	proteoglycan 4
hsa-miR-190b	1	0	1	1	1	1	GOLGA3	golgin A3
hsa-miR-190b	1	0	1	1	1	1	PRCC	papillary renal cell carcinoma (translocation-associated)
hsa-miR-190b	1	0	1	1	1	1	DAGLA	diacylglycerol lipase, alpha
hsa-miR-190b	1	0	1	1	1	1	TMEM50B	transmembrane protein 50B
hsa-miR-190b	1	0	1	1	1	1	NCK1	NCK adaptor protein 1
hsa-miR-190b	1	0	1	1	1	1	NFATC1	nuclear factor of activated T-cells, cytoplasmic, calcineurin-dependent 1
hsa-miR-190b	0	0	1	1	1	1	NTS	neurotensin
hsa-miR-190b	1	0	1	0	1	1	PITPNA	phosphatidylinositol transfer protein, alpha
hsa-miR-190b	1	0	1	1	1	1	PPP2R5E	protein phosphatase 2, regulatory subunit B', epsilon isoform
hsa-miR-190b	1	0	1	1	1	1	TACC1	transforming, acidic coiled-coil containing protein 1
hsa-miR-190b	0	0	1	0	1	1	ZNF192	zinc finger protein 192
hsa-miR-190b	1	0	1	1	1	1	SEC23A	Sec23 homolog A (S. cerevisiae)
hsa-miR-190b	0	0	1	1	1	1	CAP2	CAP, adenylate cyclase-associated protein, 2 (yeast)
hsa-miR-190b	1	0	1	1	1	1	SEMA3C	sema domain, immunoglobulin domain (Ig), short basic domain, secreted, (semaphorin) 3C
hsa-miR-190b	1	0	1	0	1	1	APPBP2	amyloid beta precursor protein (cytoplasmic tail) binding protein 2
hsa-miR-190b	1	0	1	1	1	1	SPTLC1	serine palmitoyltransferase, long chain base subunit 1
hsa-miR-190b	1	0	1	1	1	1	PAIP1	poly(A) binding protein interacting protein 1
hsa-miR-190b	0	0	1	1	0	0	STAMBP	STAM binding protein
hsa-miR-190b	1	0	1	1	1	1	MAP3K2	mitogen-activated protein kinase kinase kinase 2
hsa-miR-190b	0	0	1	1	1	1	LYVE1	lymphatic vessel endothelial hyaluronan receptor 1
hsa-miR-190b	1	0	1	1	1	1	MAN1A2	mannosidase, alpha, class 1A, member 2
hsa-miR-190b	0	0	1	1	1	1	NUDT3	nudix (nucleoside diphosphate linked moiety X)-type motif 3
hsa-miR-190b	1	0	1	1	0	0	PSKH1	protein serine kinase H1
hsa-miR-190b	1	0	1	1	1	1	SLC20A2	solute carrier family 20 (phosphate transporter), member 2
hsa-miR-190b	1	0	1	1	1	1	PRDX3	peroxiredoxin 3
hsa-miR-190b	1	0	1	1	1	1	SF3A3	splicing factor 3a, subunit 3, 60kDa
hsa-miR-190b	0	0	1	1	1	1	RAB40B	RAB40B, member RAS oncogene family
hsa-miR-190b	1	0	1	1	1	1	GLIPR1	GLI pathogenesis-related 1
hsa-miR-190b	1	0	1	1	1	1	PRRX1	paired related homeobox 1
hsa-miR-190b	1	0	1	0	1	1	SLC5A3	solute carrier family 5 (sodium/myo-inositol cotransporter), member 3
hsa-miR-190b	1	0	1	1	1	1	SRP72	signal recognition particle 72kDa
hsa-miR-190b	1	0	1	1	1	1	ADAMTS1	ADAM metallopeptidase with thrombospondin type 1 motif, 1
hsa-miR-190b	1	0	1	0	1	1	PAPD7	PAP associated domain containing 7
hsa-miR-190b	1	0	1	1	1	1	WWP1	WW domain containing E3 ubiquitin protein ligase 1
hsa-miR-190b	1	0	1	1	1	1	RAPGEF4	Rap guanine nucleotide exchange factor (GEF) 4
hsa-miR-190b	1	0	1	1	1	1	ADAMTS5	ADAM metallopeptidase with thrombospondin type 1 motif, 5
hsa-miR-190b	1	0	1	1	1	1	UTY	ubiquitously transcribed tetratricopeptide repeat gene, Y-linked
hsa-miR-190b	1	0	1	1	1	1	ZNF81	zinc finger protein 81
hsa-miR-190b	1	0	1	0	1	1	PRSS23	protease, serine, 23
hsa-miR-190b	1	0	1	1	1	1	PALM2-AKAP2	PALM2-AKAP2 readthrough
hsa-miR-190b	1	0	1	1	1	1	CA5B	carbonic anhydrase VB, mitochondrial
hsa-miR-190b	0	0	1	1	1	1	SLC6A14	solute carrier family 6 (amino acid transporter), member 14
hsa-miR-190b	1	0	1	1	1	1	KLF12	Kruppel-like factor 12
hsa-miR-190b	1	0	1	1	1	1	ZNF236	zinc finger protein 236
hsa-miR-190b	0	0	1	0	1	1	AP4E1	adaptor-related protein complex 4, epsilon 1 subunit
hsa-miR-190b	1	0	1	1	1	1	TARDBP	TAR DNA binding protein
hsa-miR-190b	0	0	1	1	0	0	STAP1	signal transducing adaptor family member 1
hsa-miR-190b	1	0	1	1	1	1	FBXL3	F-box and leucine-rich repeat protein 3
hsa-miR-190b	1	0	1	1	1	1	HS2ST1	heparan sulfate 2-O-sulfotransferase 1
hsa-miR-190b	1	0	1	1	1	1	KCND2	potassium voltage-gated channel, Shal-related subfamily, member 2
hsa-miR-190b	1	0	1	0	1	1	FBXL7	F-box and leucine-rich repeat protein 7
hsa-miR-190b	0	0	1	0	1	1	PIGN	phosphatidylinositol glycan anchor biosynthesis, class N
hsa-miR-190b	1	0	1	0	1	1	MYO10	myosin X
hsa-miR-190b	1	0	1	1	1	1	TSPAN12	tetraspanin 12
hsa-miR-190b	1	0	1	1	1	1	RANBP6	RAN binding protein 6
hsa-miR-190b	0	0	1	0	1	1	TLL1	tolloid-like 1
hsa-miR-190b	1	0	1	1	1	1	TLL2	tolloid-like 2
hsa-miR-190b	0	0	1	1	1	1	UCK2	uridine-cytidine kinase 2
hsa-miR-190b	0	0	1	1	1	1	CTNNA3	catenin (cadherin-associated protein), alpha 3
hsa-miR-190b	1	0	1	1	1	1	FLRT3	fibronectin leucine rich transmembrane protein 3
hsa-miR-190b	1	0	1	1	1	1	SLC25A24	solute carrier family 25 (mitochondrial carrier; phosphate carrier), member 24
hsa-miR-190b	0	0	1	1	1	1	CCDC113	coiled-coil domain containing 113
hsa-miR-190b	0	0	1	0	1	1	ADAMTS3	ADAM metallopeptidase with thrombospondin type 1 motif, 3
hsa-miR-190b	0	0	1	1	1	1	TRAM1	translocation associated membrane protein 1
hsa-miR-190b	1	0	1	1	1	1	TGDS	TDP-glucose 4,6-dehydratase
hsa-miR-190b	1	0	1	1	1	1	SLC7A11	solute carrier family 7 (anionic amino acid transporter light chain, xc- system), member 11
hsa-miR-190b	0	0	1	0	1	1	EID1	EP300 interacting inhibitor of differentiation 1
hsa-miR-190b	1	0	1	1	1	1	LHX6	LIM homeobox 6
hsa-miR-190b	1	0	1	1	1	1	GHITM	growth hormone inducible transmembrane protein
hsa-miR-190b	0	0	1	1	1	1	LAMP3	lysosomal-associated membrane protein 3
hsa-miR-190b	0	0	1	1	1	1	CLUL1	clusterin-like 1 (retinal)
hsa-miR-190b	1	0	1	1	1	1	AFF4	AF4/FMR2 family, member 4
hsa-miR-190b	1	0	1	1	1	1	RND1	Rho family GTPase 1
hsa-miR-190b	1	0	1	1	1	1	TOR1B	torsin family 1, member B (torsin B)
hsa-miR-190b	1	0	1	1	1	1	GRHL1	grainyhead-like 1 (Drosophila)
hsa-miR-190b	1	0	1	1	1	1	OTX1	orthodenticle homeobox 1
hsa-miR-190b	1	0	1	1	1	1	SLC40A1	solute carrier family 40 (iron-regulated transporter), member 1
hsa-miR-190b	1	0	1	1	1	1	HERC3	HECT and RLD domain containing E3 ubiquitin protein ligase 3
hsa-miR-190b	1	0	1	1	1	1	GCC2	GRIP and coiled-coil domain containing 2
hsa-miR-190b	1	0	1	1	1	1	RALGPS1	Ral GEF with PH domain and SH3 binding motif 1
hsa-miR-190b	0	0	1	1	1	1	FRMPD4	FERM and PDZ domain containing 4
hsa-miR-190b	1	0	1	1	1	1	KIAA0247	KIAA0247
hsa-miR-190b	1	0	1	0	1	1	RAB11FIP2	RAB11 family interacting protein 2 (class I)
hsa-miR-190b	1	0	1	0	1	1	ICK	intestinal cell (MAK-like) kinase
hsa-miR-190b	1	0	1	0	1	1	WDFY3	WD repeat and FYVE domain containing 3
hsa-miR-190b	1	0	1	0	1	1	PDS5B	PDS5, regulator of cohesion maintenance, homolog B (S. cerevisiae)
hsa-miR-190b	0	0	1	1	1	1	FTSJD2	FtsJ methyltransferase domain containing 2
hsa-miR-190b	1	0	1	1	1	1	ERP44	endoplasmic reticulum protein 44
hsa-miR-190b	1	0	1	1	1	1	HECW1	HECT, C2 and WW domain containing E3 ubiquitin protein ligase 1
hsa-miR-190b	1	0	1	0	1	1	ARHGAP26	Rho GTPase activating protein 26
hsa-miR-190b	1	0	1	1	1	1	TBC1D9	TBC1 domain family, member 9 (with GRAM domain)
hsa-miR-190b	1	0	1	0	1	1	SNX13	sorting nexin 13
hsa-miR-190b	1	0	1	1	1	1	GPD1L	glycerol-3-phosphate dehydrogenase 1-like
hsa-miR-190b	1	0	1	0	1	1	LARP4B	La ribonucleoprotein domain family, member 4B
hsa-miR-190b	1	0	1	1	1	1	PDS5A	PDS5, regulator of cohesion maintenance, homolog A (S. cerevisiae)
hsa-miR-190b	1	0	1	1	1	1	DNAJC13	DnaJ (Hsp40) homolog, subfamily C, member 13
hsa-miR-190b	1	0	1	1	1	1	AHCYL2	adenosylhomocysteinase-like 2
hsa-miR-190b	1	0	1	1	1	1	MED13L	mediator complex subunit 13-like
hsa-miR-190b	1	0	1	0	1	1	KCTD2	potassium channel tetramerisation domain containing 2
hsa-miR-190b	0	0	1	1	1	1	KBTBD2	kelch repeat and BTB (POZ) domain containing 2
hsa-miR-190b	1	0	1	1	1	1	LRRTM2	leucine rich repeat transmembrane neuronal 2
hsa-miR-190b	1	0	1	1	1	1	TOR1AIP1	torsin A interacting protein 1
hsa-miR-190b	1	0	1	1	1	1	WSB1	WD repeat and SOCS box containing 1
hsa-miR-190b	0	0	1	1	1	1	PCF11	PCF11, cleavage and polyadenylation factor subunit, homolog (S. cerevisiae)
hsa-miR-190b	1	0	1	0	1	1	TRIM33	tripartite motif containing 33
hsa-miR-190b	1	0	1	1	1	1	TRMT6	tRNA methyltransferase 6 homolog (S. cerevisiae)
hsa-miR-190b	0	0	1	1	1	1	SCCPDH	saccharopine dehydrogenase (putative)
hsa-miR-190b	1	0	1	1	1	1	UBE2J1	ubiquitin-conjugating enzyme E2, J1
hsa-miR-190b	0	0	1	1	1	1	ISOC1	isochorismatase domain containing 1
hsa-miR-190b	0	0	1	1	1	1	RAB10	RAB10, member RAS oncogene family
hsa-miR-190b	1	0	1	1	1	1	VGLL3	vestigial like 3 (Drosophila)
hsa-miR-190b	1	0	1	1	1	1	NLK	nemo-like kinase
hsa-miR-190b	0	0	1	1	1	1	HSD17B11	hydroxysteroid (17-beta) dehydrogenase 11
hsa-miR-190b	1	0	1	1	1	1	RNF138	ring finger protein 138, E3 ubiquitin protein ligase
hsa-miR-190b	1	0	1	0	1	1	SELT	selenoprotein T
hsa-miR-190b	1	0	1	1	1	1	CMPK1	cytidine monophosphate (UMP-CMP) kinase 1, cytosolic
hsa-miR-190b	0	0	1	1	0	0	CKLF	chemokine-like factor
hsa-miR-190b	1	0	1	1	0	0	CPA4	carboxypeptidase A4
hsa-miR-190b	1	0	1	1	1	1	PHF20	PHD finger protein 20
hsa-miR-190b	1	0	1	0	1	1	TMEM216	transmembrane protein 216
hsa-miR-190b	1	0	1	0	1	1	RAB8B	RAB8B, member RAS oncogene family
hsa-miR-190b	1	0	1	1	1	1	CYP39A1	cytochrome P450, family 39, subfamily A, polypeptide 1
hsa-miR-190b	1	0	1	1	1	1	UFM1	ubiquitin-fold modifier 1
hsa-miR-190b	1	0	1	1	1	1	ZAK	sterile alpha motif and leucine zipper containing kinase AZK
hsa-miR-190b	1	0	1	1	1	1	SIX4	SIX homeobox 4
hsa-miR-190b	0	0	1	1	1	1	NKRF	NFKB repressing factor
hsa-miR-190b	0	0	1	0	1	1	TRIM44	tripartite motif containing 44
hsa-miR-190b	1	0	1	1	1	1	ZC3H7B	zinc finger CCCH-type containing 7B
hsa-miR-190b	1	0	1	0	1	1	KCTD9	potassium channel tetramerisation domain containing 9
hsa-miR-190b	1	0	1	1	1	1	ZNF280C	zinc finger protein 280C
hsa-miR-190b	1	0	1	0	1	1	FAM46C	family with sequence similarity 46, member C
hsa-miR-190b	1	0	1	1	1	1	TBC1D8B	TBC1 domain family, member 8B (with GRAM domain)
hsa-miR-190b	1	0	1	0	1	1	CMTM6	CKLF-like MARVEL transmembrane domain containing 6
hsa-miR-190b	1	0	1	0	1	1	MARCH5	membrane-associated ring finger (C3HC4) 5
hsa-miR-190b	1	0	1	1	1	1	RNF125	ring finger protein 125, E3 ubiquitin protein ligase
hsa-miR-190b	0	0	1	1	1	1	C1orf56	chromosome 1 open reading frame 56
hsa-miR-190b	1	0	1	1	1	1	ARGLU1	arginine and glutamate rich 1
hsa-miR-190b	1	0	1	1	1	1	MAGOHB	mago-nashi homolog B (Drosophila)
hsa-miR-190b	0	0	1	1	1	1	THAP1	THAP domain containing, apoptosis associated protein 1
hsa-miR-190b	1	0	1	0	1	1	MSL2	male-specific lethal 2 homolog (Drosophila)
hsa-miR-190b	1	0	1	1	1	1	UBA6	ubiquitin-like modifier activating enzyme 6
hsa-miR-190b	1	0	1	0	1	1	SEPT11	septin 11
hsa-miR-190b	1	0	1	1	1	1	AGPAT5	1-acylglycerol-3-phosphate O-acyltransferase 5 (lysophosphatidic acid acyltransferase, epsilon)
hsa-miR-190b	1	0	1	0	1	1	LIN7C	lin-7 homolog C (C. elegans)
hsa-miR-190b	1	0	1	1	1	1	RSBN1	round spermatid basic protein 1
hsa-miR-190b	1	0	1	1	1	1	PAG1	phosphoprotein associated with glycosphingolipid microdomains 1
hsa-miR-190b	0	0	1	1	1	1	CISD1	CDGSH iron sulfur domain 1
hsa-miR-190b	1	0	1	1	1	1	ASH1L	ash1 (absent, small, or homeotic)-like (Drosophila)
hsa-miR-190b	1	0	1	0	1	1	LRP1B	low density lipoprotein receptor-related protein 1B
hsa-miR-190b	0	0	1	1	1	1	GOLGA6B	golgin A6 family, member B
hsa-miR-190b	1	0	1	0	1	1	SMPD3	sphingomyelin phosphodiesterase 3, neutral membrane (neutral sphingomyelinase II)
hsa-miR-190b	0	0	1	1	0	0	SNTG2	syntrophin, gamma 2
hsa-miR-190b	0	0	1	1	0	0	TOMM7	translocase of outer mitochondrial membrane 7 homolog (yeast)
hsa-miR-190b	1	0	1	0	1	1	CCNJ	cyclin J
hsa-miR-190b	1	0	1	1	1	1	PLEKHA3	pleckstrin homology domain containing, family A (phosphoinositide binding specific) member 3
hsa-miR-190b	1	0	1	1	1	1	EPB41L4B	erythrocyte membrane protein band 4.1 like 4B
hsa-miR-190b	1	0	1	1	1	1	C5orf15	chromosome 5 open reading frame 15
hsa-miR-190b	1	0	1	0	1	1	OTUD7B	OTU domain containing 7B
hsa-miR-190b	1	0	1	1	1	1	PRDM8	PR domain containing 8
hsa-miR-190b	1	0	1	1	1	1	KIAA1244	KIAA1244
hsa-miR-190b	1	0	1	0	1	1	SLC17A6	solute carrier family 17 (sodium-dependent inorganic phosphate cotransporter), member 6
hsa-miR-190b	1	0	1	0	1	1	EIF5A2	eukaryotic translation initiation factor 5A2
hsa-miR-190b	1	0	1	1	1	1	PCDH9	protocadherin 9
hsa-miR-190b	1	0	1	0	1	1	DCUN1D1	DCN1, defective in cullin neddylation 1, domain containing 1 (S. cerevisiae)
hsa-miR-190b	1	0	1	1	1	1	ZNF608	zinc finger protein 608
hsa-miR-190b	1	0	1	1	1	1	MIB1	mindbomb E3 ubiquitin protein ligase 1
hsa-miR-190b	1	0	1	0	1	1	ALPK3	alpha-kinase 3
hsa-miR-190b	1	0	1	0	1	1	KLHDC5	kelch domain containing 5
hsa-miR-190b	1	0	1	0	1	1	SYT4	synaptotagmin IV
hsa-miR-190b	1	0	1	1	1	1	NCEH1	neutral cholesterol ester hydrolase 1
hsa-miR-190b	1	0	1	1	1	1	SIPA1L2	signal-induced proliferation-associated 1 like 2
hsa-miR-190b	1	0	1	1	1	1	TSHZ3	teashirt zinc finger homeobox 3
hsa-miR-190b	0	0	1	1	1	1	KLHL1	kelch-like 1 (Drosophila)
hsa-miR-190b	1	0	1	1	1	1	ZFP14	zinc finger protein 14 homolog (mouse)
hsa-miR-190b	1	0	1	1	1	1	FAM160B1	family with sequence similarity 160, member B1
hsa-miR-190b	1	0	1	0	1	1	RAP2A	RAP2A, member of RAS oncogene family
hsa-miR-190b	1	0	1	1	1	1	HCN1	hyperpolarization activated cyclic nucleotide-gated potassium channel 1
hsa-miR-190b	1	0	1	1	1	1	PELI2	pellino E3 ubiquitin protein ligase family member 2
hsa-miR-190b	0	0	1	1	1	1	SCPEP1	serine carboxypeptidase 1
hsa-miR-190b	0	0	1	1	1	1	PGM5	phosphoglucomutase 5
hsa-miR-190b	1	0	1	1	1	1	SEC24A	SEC24 family, member A (S. cerevisiae)
hsa-miR-190b	0	0	1	1	1	1	ITM2B	integral membrane protein 2B
hsa-miR-190b	1	0	1	0	1	1	GAN	gigaxonin
hsa-miR-190b	1	0	1	1	1	1	SNX16	sorting nexin 16
hsa-miR-190b	0	0	1	1	1	1	PCNXL4	pecanex-like 4 (Drosophila)
hsa-miR-190b	1	0	1	0	1	1	HOXC8	homeobox C8
hsa-miR-190b	0	0	1	1	1	1	ACBD3	acyl-CoA binding domain containing 3
hsa-miR-190b	1	0	1	1	1	1	RFX7	regulatory factor X, 7
hsa-miR-190b	0	0	1	0	1	1	NAIP	NLR family, apoptosis inhibitory protein
hsa-miR-190b	1	0	1	1	1	1	C7orf23	chromosome 7 open reading frame 23
hsa-miR-190b	1	0	1	1	1	1	LRRC2	leucine rich repeat containing 2
hsa-miR-190b	1	0	1	1	1	1	GCC1	GRIP and coiled-coil domain containing 1
hsa-miR-190b	1	0	1	1	1	1	PGBD5	piggyBac transposable element derived 5
hsa-miR-190b	0	0	1	1	1	1	AKIRIN1	akirin 1
hsa-miR-190b	1	0	1	0	1	1	PLEKHF2	pleckstrin homology domain containing, family F (with FYVE domain) member 2
hsa-miR-190b	0	0	1	1	1	1	STEAP4	STEAP family member 4
hsa-miR-190b	1	0	1	1	1	1	YRDC	yrdC domain containing (E. coli)
hsa-miR-190b	0	0	1	1	1	1	TTLL7	tubulin tyrosine ligase-like family, member 7
hsa-miR-190b	0	0	1	1	1	1	LRRC31	leucine rich repeat containing 31
hsa-miR-190b	1	0	1	1	1	1	CLMP	CXADR-like membrane protein
hsa-miR-190b	1	0	1	1	1	1	EIF2C3	eukaryotic translation initiation factor 2C, 3
hsa-miR-190b	1	0	1	1	0	0	UBTD1	ubiquitin domain containing 1
hsa-miR-190b	0	0	1	1	1	1	GPR110	G protein-coupled receptor 110
hsa-miR-190b	1	0	1	1	1	1	NAA50	N(alpha)-acetyltransferase 50, NatE catalytic subunit
hsa-miR-190b	1	0	1	1	1	1	SLC35F5	solute carrier family 35, member F5
hsa-miR-190b	1	0	1	0	1	1	EDEM3	ER degradation enhancer, mannosidase alpha-like 3
hsa-miR-190b	1	0	1	0	1	1	SETD7	SET domain containing (lysine methyltransferase) 7
hsa-miR-190b	1	0	1	1	1	1	SGPP1	sphingosine-1-phosphate phosphatase 1
hsa-miR-190b	1	0	1	1	1	1	ANKRD13C	ankyrin repeat domain 13C
hsa-miR-190b	1	0	1	1	1	1	SNX27	sorting nexin family member 27
hsa-miR-190b	1	0	1	1	1	1	PPP1R14C	protein phosphatase 1, regulatory (inhibitor) subunit 14C
hsa-miR-190b	0	0	1	1	1	1	SEH1L	SEH1-like (S. cerevisiae)
hsa-miR-190b	0	0	1	1	1	1	TEX15	testis expressed 15
hsa-miR-190b	1	0	1	1	0	0	SCRT1	scratch homolog 1, zinc finger protein (Drosophila)
hsa-miR-190b	1	0	1	0	1	1	TMEM47	transmembrane protein 47
hsa-miR-190b	1	0	1	1	1	1	HSDL1	hydroxysteroid dehydrogenase like 1
hsa-miR-190b	1	0	1	0	1	1	SH3BGRL2	SH3 domain binding glutamic acid-rich protein like 2
hsa-miR-190b	0	0	1	1	1	1	CRISPLD2	cysteine-rich secretory protein LCCL domain containing 2
hsa-miR-190b	1	0	1	0	1	1	ITCH	itchy E3 ubiquitin protein ligase
hsa-miR-190b	0	0	1	0	1	1	ENAM	enamelin
hsa-miR-190b	1	0	1	1	1	1	OTP	orthopedia homeobox
hsa-miR-190b	0	0	1	1	1	1	KBTBD7	kelch repeat and BTB (POZ) domain containing 7
hsa-miR-190b	1	0	1	1	1	1	FBXO30	F-box protein 30
hsa-miR-190b	1	0	1	1	1	1	UTP15	UTP15, U3 small nucleolar ribonucleoprotein, homolog (S. cerevisiae)
hsa-miR-190b	1	0	1	1	1	1	SON	SON DNA binding protein
hsa-miR-190b	1	0	1	1	1	1	ANTXR1	anthrax toxin receptor 1
hsa-miR-190b	1	0	1	0	1	1	FAR1	fatty acyl CoA reductase 1
hsa-miR-190b	1	0	1	1	1	1	BRMS1L	breast cancer metastasis-suppressor 1-like
hsa-miR-190b	0	0	1	1	1	1	FNDC1	fibronectin type III domain containing 1
hsa-miR-190b	1	0	1	1	1	1	HIATL1	hippocampus abundant transcript-like 1
hsa-miR-190b	0	0	1	1	1	1	EMR3	egf-like module containing, mucin-like, hormone receptor-like 3
hsa-miR-190b	0	0	1	1	1	1	SPPL2A	signal peptide peptidase like 2A
hsa-miR-190b	1	0	1	0	1	1	PPP1R15B	protein phosphatase 1, regulatory subunit 15B
hsa-miR-190b	1	0	1	0	1	1	UBASH3B	ubiquitin associated and SH3 domain containing B
hsa-miR-190b	1	0	1	0	1	1	PURB	purine-rich element binding protein B
hsa-miR-190b	1	0	1	1	1	1	XRCC6BP1	XRCC6 binding protein 1
hsa-miR-190b	0	0	1	1	1	1	MRPS36	mitochondrial ribosomal protein S36
hsa-miR-190b	1	0	1	1	1	1	EPT1	ethanolaminephosphotransferase 1 (CDP-ethanolamine-specific)
hsa-miR-190b	1	0	1	1	1	1	LUZP1	leucine zipper protein 1
hsa-miR-190b	0	0	1	1	1	1	TRIM10	tripartite motif containing 10
hsa-miR-190b	1	0	1	1	1	1	MAL2	mal, T-cell differentiation protein 2 (gene/pseudogene)
hsa-miR-190b	0	0	1	1	1	1	PLEKHG4B	pleckstrin homology domain containing, family G (with RhoGef domain) member 4B
hsa-miR-190b	1	0	1	1	1	1	SLITRK1	SLIT and NTRK-like family, member 1
hsa-miR-190b	0	0	1	1	0	0	RPL39L	ribosomal protein L39-like
hsa-miR-190b	0	0	1	1	1	1	MRGPRX2	MAS-related GPR, member X2
hsa-miR-190b	1	0	1	0	1	1	ANTXR2	anthrax toxin receptor 2
hsa-miR-190b	1	0	1	1	1	1	SPSB4	splA/ryanodine receptor domain and SOCS box containing 4
hsa-miR-190b	1	0	1	1	1	1	ADAMTS19	ADAM metallopeptidase with thrombospondin type 1 motif, 19
hsa-miR-190b	0	0	1	1	1	1	PATE1	prostate and testis expressed 1
hsa-miR-190b	1	0	1	1	1	1	FAM122A	family with sequence similarity 122A
hsa-miR-190b	1	0	1	1	1	1	KCTD12	potassium channel tetramerisation domain containing 12
hsa-miR-190b	1	0	1	0	1	1	FCHO2	FCH domain only 2
hsa-miR-190b	0	0	1	1	1	1	KCNC2	potassium voltage-gated channel, Shaw-related subfamily, member 2
hsa-miR-190b	0	0	1	1	1	1	CASC5	cancer susceptibility candidate 5
hsa-miR-190b	1	0	1	1	1	1	RPIA	ribose 5-phosphate isomerase A
hsa-miR-190b	1	0	1	1	1	1	RFTN2	raftlin family member 2
hsa-miR-190b	1	0	1	1	1	1	SAMD8	sterile alpha motif domain containing 8
hsa-miR-190b	0	0	1	0	1	1	UBLCP1	ubiquitin-like domain containing CTD phosphatase 1
hsa-miR-190b	1	0	1	1	1	1	SEPT6	septin 6
hsa-miR-190b	1	0	1	0	1	1	MTPN	myotrophin
hsa-miR-190b	1	0	1	1	1	1	SGMS1	sphingomyelin synthase 1
hsa-miR-190b	0	0	1	1	0	0	CYB5A	cytochrome b5 type A (microsomal)
hsa-miR-190b	0	0	1	1	1	1	LONRF1	LON peptidase N-terminal domain and ring finger 1
hsa-miR-190b	1	0	1	1	1	1	UBTD2	ubiquitin domain containing 2
hsa-miR-190b	0	0	1	1	1	1	ATP1A3	ATPase, Na+/K+ transporting, alpha 3 polypeptide
hsa-miR-190b	0	0	1	1	1	1	EFCAB13	EF-hand calcium binding domain 13
hsa-miR-190b	1	0	1	1	1	1	ZSCAN29	zinc finger and SCAN domain containing 29
hsa-miR-190b	1	0	1	1	1	1	C7orf60	chromosome 7 open reading frame 60
hsa-miR-190b	0	0	1	1	1	1	BBS12	Bardet-Biedl syndrome 12
hsa-miR-190b	1	0	1	0	1	1	TMEM154	transmembrane protein 154
hsa-miR-190b	0	0	1	0	1	1	LIX1	Lix1 homolog (chicken)
hsa-miR-190b	1	0	1	1	1	1	SYT14	synaptotagmin XIV
hsa-miR-190b	1	0	1	1	1	1	ERI1	exoribonuclease 1
hsa-miR-190b	1	0	1	1	1	1	TMEM161B	transmembrane protein 161B
hsa-miR-190b	1	0	1	0	1	1	MDGA1	MAM domain containing glycosylphosphatidylinositol anchor 1
hsa-miR-190b	1	0	1	0	1	1	SEMA6D	sema domain, transmembrane domain (TM), and cytoplasmic domain, (semaphorin) 6D
hsa-miR-190b	0	0	1	1	1	1	CREG2	cellular repressor of E1A-stimulated genes 2
hsa-miR-190b	1	0	1	1	1	1	RC3H1	ring finger and CCCH-type domains 1
hsa-miR-190b	0	0	1	1	1	1	KCNH5	potassium voltage-gated channel, subfamily H (eag-related), member 5
hsa-miR-190b	1	0	1	1	1	1	MOB1B	MOB kinase activator 1B
hsa-miR-190b	1	0	1	1	1	1	CNTD1	cyclin N-terminal domain containing 1
hsa-miR-190b	1	0	1	1	1	1	TTBK2	tau tubulin kinase 2
hsa-miR-190b	1	0	1	0	1	1	RNF152	ring finger protein 152
hsa-miR-190b	0	0	1	1	0	0	CT47A11	cancer/testis antigen family 47, member A11
hsa-miR-190b	1	0	1	0	1	1	KSR2	kinase suppressor of ras 2
hsa-miR-190b	0	0	1	1	1	1	ZCCHC12	zinc finger, CCHC domain containing 12
hsa-miR-190b	1	0	1	1	1	1	PRTG	protogenin
hsa-miR-190b	0	0	1	1	1	1	C3orf38	chromosome 3 open reading frame 38
hsa-miR-190b	1	0	1	0	1	1	SREK1IP1	SREK1-interacting protein 1
hsa-miR-190b	1	0	1	0	1	1	FAM84B	family with sequence similarity 84, member B
hsa-miR-190b	1	0	1	1	1	1	UBR1	ubiquitin protein ligase E3 component n-recognin 1
hsa-miR-190b	0	0	1	1	0	0	PDILT	protein disulfide isomerase-like, testis expressed
hsa-miR-190b	1	0	1	1	1	1	SYT9	synaptotagmin IX
hsa-miR-190b	1	0	1	1	1	1	OLIG3	oligodendrocyte transcription factor 3
hsa-miR-190b	1	0	1	1	1	1	LRRTM3	leucine rich repeat transmembrane neuronal 3
hsa-miR-190b	1	0	1	1	1	1	PRIMA1	proline rich membrane anchor 1
hsa-miR-190b	1	0	1	1	1	1	TMEM26	transmembrane protein 26
hsa-miR-190b	0	0	1	1	1	1	STXBP4	syntaxin binding protein 4
hsa-miR-190b	0	0	1	0	1	1	ITGA1	integrin, alpha 1
hsa-miR-190b	1	0	1	1	1	1	PPP2R1B	protein phosphatase 2, regulatory subunit A, beta
hsa-miR-190b	0	0	1	0	1	1	HCG27	HLA complex group 27 (non-protein coding)
hsa-miR-190b	1	0	1	1	1	1	TMED7	transmembrane emp24 protein transport domain containing 7
hsa-miR-190b	1	0	1	1	1	1	ZSCAN22	zinc finger and SCAN domain containing 22
hsa-miR-190b	1	0	1	1	1	1	APAF1	apoptotic peptidase activating factor 1
hsa-miR-190b	0	0	1	1	1	1	USP12	ubiquitin specific peptidase 12
hsa-miR-190b	0	0	1	0	1	1	VSTM2A	V-set and transmembrane domain containing 2A
hsa-miR-190b	0	0	1	1	1	1	SKA2	spindle and kinetochore associated complex subunit 2
hsa-miR-190b	1	0	1	1	1	1	SP8	Sp8 transcription factor
hsa-miR-190b	1	0	1	0	1	1	RNF144B	ring finger protein 144B
hsa-miR-190b	1	0	1	0	1	1	WDR72	WD repeat domain 72
hsa-miR-190b	0	0	1	0	1	1	CLDN23	claudin 23
hsa-miR-190b	1	0	1	1	1	1	ZBTB41	zinc finger and BTB domain containing 41
hsa-miR-190b	1	0	1	1	1	1	NAIF1	nuclear apoptosis inducing factor 1
hsa-miR-190b	1	0	1	0	1	1	NRK	Nik related kinase
hsa-miR-190b	0	0	1	1	1	1	C5orf34	chromosome 5 open reading frame 34
hsa-miR-190b	1	0	1	1	1	1	PTGER3	prostaglandin E receptor 3 (subtype EP3)
hsa-miR-190b	0	0	1	1	1	1	COL25A1	collagen, type XXV, alpha 1
hsa-miR-190b	0	0	1	1	1	1	PTHLH	parathyroid hormone-like hormone
hsa-miR-190b	1	0	1	0	1	1	DLEU7	deleted in lymphocytic leukemia, 7
hsa-miR-190b	1	0	1	0	1	1	LHFPL3	lipoma HMGIC fusion partner-like 3
hsa-miR-190b	1	0	1	1	1	1	FBXO33	F-box protein 33
hsa-miR-190b	1	0	1	0	1	1	LURAP1L	leucine rich adaptor protein 1-like
hsa-miR-190b	1	0	1	0	1	1	MBLAC2	metallo-beta-lactamase domain containing 2
hsa-miR-190b	1	0	1	1	1	1	IGSF1	immunoglobulin superfamily, member 1
hsa-miR-190b	0	0	1	1	1	1	CMPK2	cytidine monophosphate (UMP-CMP) kinase 2, mitochondrial
hsa-miR-190b	1	0	1	1	1	1	FREM2	FRAS1 related extracellular matrix protein 2
hsa-miR-190b	0	0	1	0	1	1	C11orf92	chromosome 11 open reading frame 92
hsa-miR-190b	0	0	1	1	1	1	C11orf88	chromosome 11 open reading frame 88
hsa-miR-190b	0	0	1	1	0	0	AMTN	amelotin
hsa-miR-190b	1	0	1	1	1	1	XKRX	XK, Kell blood group complex subunit-related, X-linked
hsa-miR-190b	0	0	1	0	0	0	MIR155HG	MIR155 host gene (non-protein coding)
hsa-miR-190b	0	0	1	0	0	0	TTTY2	testis-specific transcript, Y-linked 2 (non-protein coding)
hsa-miR-190b	0	0	1	0	0	0	TTTY4B	testis-specific transcript, Y-linked 4B (non-protein coding)
hsa-miR-190b	0	0	1	0	0	0	RPL23AP32	ribosomal protein L23a pseudogene 32
hsa-miR-190b	0	0	1	0	0	0	SNORA4	small nucleolar RNA, H/ACA box 4
hsa-miR-190b	0	0	1	0	0	0	TDGF1P3	teratocarcinoma-derived growth factor 1 pseudogene 3
hsa-miR-190b	0	0	1	0	0	0	GABPAP	GA binding protein transcription factor, alpha subunit pseudogene
hsa-miR-190b	0	0	1	0	0	0	HTR7P1	5-hydroxytryptamine (serotonin) receptor 7 pseudogene 1
hsa-miR-190b	0	0	1	0	0	0	TRIM78P	tripartite motif containing 78, pseudogene
hsa-miR-190b	0	0	1	0	0	0	SEPHS1P1	selenophosphate synthetase 1 pseudogene 1
hsa-miR-190b	0	0	1	0	0	0	TCAM1P	testicular cell adhesion molecule 1 homolog (mouse), pseudogene
hsa-miR-190b	0	0	1	0	0	0	HSP90B3P	heat shock protein 90kDa beta (Grp94), member 3, pseudogene
hsa-miR-190b	0	0	1	0	0	0	HSP90AB2P	heat shock protein 90kDa alpha (cytosolic), class B member 2, pseudogene
hsa-miR-190b	0	0	1	0	0	0	ANP32AP1	acidic (leucine-rich) nuclear phosphoprotein 32 family, member A pseudogene 1
hsa-miR-190b	0	0	1	0	0	0	SNORD116-28	small nucleolar RNA, C/D box 116-28
hsa-miR-190b	0	0	1	1	0	0	SNRPN	small nuclear ribonucleoprotein polypeptide N
hsa-miR-190b	1	0	1	1	1	1	TRIO	trio Rho guanine nucleotide exchange factor
hsa-miR-190b	0	0	1	1	1	1	PEG3	paternally expressed 3
hsa-miR-190b	1	0	1	1	1	1	TFAP2D	transcription factor AP-2 delta (activating enhancer binding protein 2 delta)
hsa-miR-190b	1	0	1	1	1	1	STARD3NL	STARD3 N-terminal like
hsa-miR-190b	0	0	0	1	0	0	TARBP1	TAR (HIV-1) RNA binding protein 1
hsa-miR-190b	0	0	1	1	0	0	TNFRSF17	tumor necrosis factor receptor superfamily, member 17
hsa-miR-190b	0	0	1	1	0	0	NOX3	NADPH oxidase 3
hsa-miR-190b	0	0	0	1	1	1	TIMM21	translocase of inner mitochondrial membrane 21 homolog (yeast)
hsa-miR-190b	0	0	1	1	0	0	MOGAT2	monoacylglycerol O-acyltransferase 2
hsa-miR-190b	0	0	1	1	0	0	OAS1	2'-5'-oligoadenylate synthetase 1, 40/46kDa
hsa-miR-190b	0	0	1	1	0	0	SEC14L3	SEC14-like 3 (S. cerevisiae)
hsa-miR-190b	0	0	0	1	0	0	EIF3D	eukaryotic translation initiation factor 3, subunit D
hsa-miR-190b	1	0	1	1	1	1	PHF5A	PHD finger protein 5A
hsa-miR-190b	0	0	0	1	0	0	VTI1B	vesicle transport through interaction with t-SNAREs homolog 1B (yeast)
hsa-miR-190b	0	0	0	1	0	0	MTHFD1	methylenetetrahydrofolate dehydrogenase (NADP+ dependent) 1, methenyltetrahydrofolate cyclohydrolase, formyltetrahydrofolate synthetase
hsa-miR-190b	0	0	1	1	1	1	SLCO4A1	solute carrier organic anion transporter family, member 4A1
hsa-miR-190b	0	0	1	1	1	1	EIF3E	eukaryotic translation initiation factor 3, subunit E
hsa-miR-190b	0	0	0	1	0	0	TNFRSF10A	tumor necrosis factor receptor superfamily, member 10a
hsa-miR-190b	0	0	1	1	1	1	HOXA2	homeobox A2
hsa-miR-190b	1	0	1	1	1	1	VIM	vimentin
hsa-miR-190b	0	0	1	1	1	1	CYP26A1	cytochrome P450, family 26, subfamily A, polypeptide 1
hsa-miR-190b	0	0	0	1	0	0	RBP3	retinol binding protein 3, interstitial
hsa-miR-190b	0	0	1	1	1	1	GDF10	growth differentiation factor 10
hsa-miR-190b	1	0	1	1	1	1	UTP18	UTP18 small subunit (SSU) processome component homolog (yeast)
hsa-miR-190b	0	0	1	1	1	1	MRPL27	mitochondrial ribosomal protein L27
hsa-miR-190b	0	0	0	1	1	1	SULT1E1	sulfotransferase family 1E, estrogen-preferring, member 1
hsa-miR-190b	0	0	1	1	1	1	PF4V1	platelet factor 4 variant 1
hsa-miR-190b	1	0	1	1	1	1	HSPA8	heat shock 70kDa protein 8
hsa-miR-190b	0	0	1	1	0	0	AKAP3	A kinase (PRKA) anchor protein 3
hsa-miR-190b	0	0	0	1	1	1	GTF2H3	general transcription factor IIH, polypeptide 3, 34kDa
hsa-miR-190b	0	0	1	1	1	1	C6orf118	chromosome 6 open reading frame 118
hsa-miR-190b	0	0	1	1	1	1	TTK	TTK protein kinase
hsa-miR-190b	0	0	1	1	1	1	CDH9	cadherin 9, type 2 (T1-cadherin)
hsa-miR-190b	0	0	1	1	0	0	RBP2	retinol binding protein 2, cellular
hsa-miR-190b	0	0	1	1	1	1	MORC1	MORC family CW-type zinc finger 1
hsa-miR-190b	0	0	0	1	0	0	KISS1R	KISS1 receptor
hsa-miR-190b	1	0	1	1	1	1	ANGPTL1	angiopoietin-like 1
hsa-miR-190b	0	0	0	1	0	0	MMP8	matrix metallopeptidase 8 (neutrophil collagenase)
hsa-miR-190b	0	0	0	1	0	0	RPS25	ribosomal protein S25
hsa-miR-190b	0	0	0	1	0	0	COQ6	coenzyme Q6 homolog, monooxygenase (S. cerevisiae)
hsa-miR-190b	0	0	0	1	0	0	MTERFD3	MTERF domain containing 3
hsa-miR-190b	0	0	1	1	1	1	PLBD1	phospholipase B domain containing 1
hsa-miR-190b	1	0	0	1	0	0	NEUROD4	neuronal differentiation 4
hsa-miR-190b	0	0	0	1	1	1	MCM9	minichromosome maintenance complex component 9
hsa-miR-190b	0	0	0	1	1	1	MOCS3	molybdenum cofactor synthesis 3
hsa-miR-190b	0	0	0	1	0	0	MCEE	methylmalonyl CoA epimerase
hsa-miR-190b	0	0	0	1	1	1	PSG4	pregnancy specific beta-1-glycoprotein 4
hsa-miR-190b	0	0	1	1	1	1	PSG5	pregnancy specific beta-1-glycoprotein 5
hsa-miR-190b	0	0	1	1	0	0	MEA1	male-enhanced antigen 1
hsa-miR-190b	0	0	0	1	1	1	BBS2	Bardet-Biedl syndrome 2
hsa-miR-190b	1	0	0	1	1	1	WNK4	WNK lysine deficient protein kinase 4
hsa-miR-190b	0	0	1	1	1	1	L3HYPDH	L-3-hydroxyproline dehydratase (trans-)
hsa-miR-190b	0	0	0	1	0	0	TBPL2	TATA box binding protein like 2
hsa-miR-190b	0	0	1	1	1	1	RGS13	regulator of G-protein signaling 13
hsa-miR-190b	0	0	1	1	1	1	TSPAN8	tetraspanin 8
hsa-miR-190b	0	0	0	1	0	0	VPREB3	pre-B lymphocyte 3
hsa-miR-190b	1	0	1	1	1	1	IVD	isovaleryl-CoA dehydrogenase
hsa-miR-190b	0	0	1	1	1	1	NUP37	nucleoporin 37kDa
hsa-miR-190b	0	0	1	1	1	1	TRNT1	tRNA nucleotidyl transferase, CCA-adding, 1
hsa-miR-190b	0	0	0	1	0	0	PLVAP	plasmalemma vesicle associated protein
hsa-miR-190b	0	0	0	1	1	1	FMO5	flavin containing monooxygenase 5
hsa-miR-190b	0	0	0	1	1	1	SLC52A1	solute carrier family 52, riboflavin transporter, member 1
hsa-miR-190b	0	0	1	1	0	0	NXT1	NTF2-like export factor 1
hsa-miR-190b	1	0	1	1	1	1	C20orf111	chromosome 20 open reading frame 111
hsa-miR-190b	0	0	0	1	0	0	MYH4	myosin, heavy chain 4, skeletal muscle
hsa-miR-190b	0	0	1	1	1	1	LRRIQ1	leucine-rich repeats and IQ motif containing 1
hsa-miR-190b	0	0	1	1	1	1	FABP4	fatty acid binding protein 4, adipocyte
hsa-miR-190b	0	0	1	1	0	0	CCDC59	coiled-coil domain containing 59
hsa-miR-190b	0	0	1	1	0	0	HSD17B4	hydroxysteroid (17-beta) dehydrogenase 4
hsa-miR-190b	0	0	1	1	0	0	CCNH	cyclin H
hsa-miR-190b	0	0	1	1	1	1	GIF	gastric intrinsic factor (vitamin B synthesis)
hsa-miR-190b	0	0	0	1	1	1	ESPL1	extra spindle pole bodies homolog 1 (S. cerevisiae)
hsa-miR-190b	0	0	0	1	1	1	DYSF	dysferlin, limb girdle muscular dystrophy 2B (autosomal recessive)
hsa-miR-190b	0	0	0	1	1	1	HTR2B	5-hydroxytryptamine (serotonin) receptor 2B, G protein-coupled
hsa-miR-190b	1	0	0	1	1	1	USP44	ubiquitin specific peptidase 44
hsa-miR-190b	0	0	1	1	0	0	KIF13A	kinesin family member 13A
hsa-miR-190b	0	0	1	1	0	0	CLPS	colipase, pancreatic
hsa-miR-190b	0	0	0	1	1	1	CYP2C9	cytochrome P450, family 2, subfamily C, polypeptide 9
hsa-miR-190b	0	0	1	1	1	1	CHRNA1	cholinergic receptor, nicotinic, alpha 1 (muscle)
hsa-miR-190b	0	0	0	1	0	0	WDR12	WD repeat domain 12
hsa-miR-190b	0	0	1	1	1	1	DIRC2	disrupted in renal carcinoma 2
hsa-miR-190b	0	0	1	1	1	1	ASUN	asunder, spermatogenesis regulator homolog (Drosphila)
hsa-miR-190b	0	0	1	1	0	0	PPWD1	peptidylprolyl isomerase domain and WD repeat containing 1
hsa-miR-190b	0	0	1	1	1	1	KDM2B	lysine (K)-specific demethylase 2B
hsa-miR-190b	0	0	1	1	1	1	PIK3C3	phosphatidylinositol 3-kinase, catalytic subunit type 3
hsa-miR-190b	1	0	0	1	1	1	ATF1	activating transcription factor 1
hsa-miR-190b	0	0	1	1	1	1	ERICH1	glutamate-rich 1
hsa-miR-190b	1	0	1	1	1	1	ARFGEF1	ADP-ribosylation factor guanine nucleotide-exchange factor 1 (brefeldin A-inhibited)
hsa-miR-190b	0	0	0	1	0	0	NUBP2	nucleotide binding protein 2
hsa-miR-190b	1	0	0	1	0	0	ISM1	isthmin 1 homolog (zebrafish)
hsa-miR-190b	0	0	1	1	1	1	ARPC1A	actin related protein 2/3 complex, subunit 1A, 41kDa
hsa-miR-190b	0	0	1	1	1	1	TAF1B	TATA box binding protein (TBP)-associated factor, RNA polymerase I, B, 63kDa
hsa-miR-190b	1	0	1	1	1	1	TP53BP1	tumor protein p53 binding protein 1
hsa-miR-190b	1	0	1	1	1	1	LRP2	low density lipoprotein receptor-related protein 2
hsa-miR-190b	1	0	1	1	1	1	STK17B	serine/threonine kinase 17b
hsa-miR-190b	0	0	0	1	0	0	NOA1	nitric oxide associated 1
hsa-miR-190b	0	0	0	1	0	0	LXN	latexin
hsa-miR-190b	0	0	1	1	1	1	SI	sucrase-isomaltase (alpha-glucosidase)
hsa-miR-190b	0	0	0	1	0	0	NEIL3	nei endonuclease VIII-like 3 (E. coli)
hsa-miR-190b	0	0	0	1	0	0	PPAP2A	phosphatidic acid phosphatase type 2A
hsa-miR-190b	1	0	1	1	1	1	MGAT4A	mannosyl (alpha-1,3-)-glycoprotein beta-1,4-N-acetylglucosaminyltransferase, isozyme A
hsa-miR-190b	0	0	1	1	1	1	MRPL3	mitochondrial ribosomal protein L3
hsa-miR-190b	0	0	1	1	1	1	CCDC99	coiled-coil domain containing 99
hsa-miR-190b	0	0	1	1	1	1	NDUFC1	NADH dehydrogenase (ubiquinone) 1, subcomplex unknown, 1, 6kDa
hsa-miR-190b	0	0	1	1	1	1	PON3	paraoxonase 3
hsa-miR-190b	0	0	1	1	0	0	B4GALNT3	beta-1,4-N-acetyl-galactosaminyl transferase 3
hsa-miR-190b	0	0	1	1	0	0	NDUFA9	NADH dehydrogenase (ubiquinone) 1 alpha subcomplex, 9, 39kDa
hsa-miR-190b	1	0	1	1	1	1	ERBB3	v-erb-b2 erythroblastic leukemia viral oncogene homolog 3 (avian)
hsa-miR-190b	0	0	1	1	0	0	UQCRC2	ubiquinol-cytochrome c reductase core protein II
hsa-miR-190b	0	0	1	1	0	0	DPEP3	dipeptidase 3
hsa-miR-190b	0	0	1	1	0	0	NT5C3L	5'-nucleotidase, cytosolic III-like
hsa-miR-190b	0	0	0	1	1	1	ZNF223	zinc finger protein 223
hsa-miR-190b	0	0	1	1	1	1	DOPEY2	dopey family member 2
hsa-miR-190b	0	0	1	1	1	1	PLK4	polo-like kinase 4
hsa-miR-190b	0	0	0	1	1	1	PROK1	prokineticin 1
hsa-miR-190b	0	0	1	1	1	1	PTH2R	parathyroid hormone 2 receptor
hsa-miR-190b	0	0	1	1	0	0	PLA1A	phospholipase A1 member A
hsa-miR-190b	0	0	1	1	1	1	EIF2A	eukaryotic translation initiation factor 2A, 65kDa
hsa-miR-190b	1	0	1	1	1	1	TRPC1	transient receptor potential cation channel, subfamily C, member 1
hsa-miR-190b	0	0	0	1	1	1	SPATA5	spermatogenesis associated 5
hsa-miR-190b	0	0	1	1	1	1	UGT3A1	UDP glycosyltransferase 3 family, polypeptide A1
hsa-miR-190b	1	0	1	1	1	1	IQGAP2	IQ motif containing GTPase activating protein 2
hsa-miR-190b	0	0	1	1	1	1	FAM217A	family with sequence similarity 217, member A
hsa-miR-190b	0	0	1	1	1	1	VWDE	von Willebrand factor D and EGF domains
hsa-miR-190b	0	0	0	1	0	0	DENND2A	DENN/MADD domain containing 2A
hsa-miR-190b	0	0	0	1	0	0	GPR174	G protein-coupled receptor 174
hsa-miR-190b	0	0	1	1	1	1	IFNK	interferon, kappa
hsa-miR-190b	0	0	1	1	1	1	PLAC1L	placenta-specific 1-like
hsa-miR-190b	0	0	1	1	1	1	CHEK1	checkpoint kinase 1
hsa-miR-190b	0	0	0	1	0	0	TMCO3	transmembrane and coiled-coil domains 3
hsa-miR-190b	0	0	0	1	0	0	SPATA4	spermatogenesis associated 4
hsa-miR-190b	0	0	1	1	0	0	AGAP11	ankyrin repeat and GTPase domain Arf GTPase activating protein 11
hsa-miR-190b	1	0	0	1	1	1	NCAPD3	non-SMC condensin II complex, subunit D3
hsa-miR-190b	1	0	1	1	1	1	ANO4	anoctamin 4
hsa-miR-190b	1	0	0	1	1	1	TMEM45B	transmembrane protein 45B
hsa-miR-190b	0	0	1	1	1	1	CETN3	centrin, EF-hand protein, 3
hsa-miR-190b	0	0	1	1	0	0	FEZF2	FEZ family zinc finger 2
hsa-miR-190b	0	0	1	1	1	1	INO80C	INO80 complex subunit C
hsa-miR-190b	1	0	1	1	1	1	C7orf31	chromosome 7 open reading frame 31
hsa-miR-190b	0	0	0	1	1	1	KCNJ16	potassium inwardly-rectifying channel, subfamily J, member 16
hsa-miR-190b	1	0	1	1	1	1	TOMM70A	translocase of outer mitochondrial membrane 70 homolog A (S. cerevisiae)
hsa-miR-190b	0	0	1	1	0	0	ABCA6	ATP-binding cassette, sub-family A (ABC1), member 6
hsa-miR-190b	0	0	1	1	1	1	PPIL3	peptidylprolyl isomerase (cyclophilin)-like 3
hsa-miR-190b	0	0	1	1	0	0	TRIM42	tripartite motif containing 42
hsa-miR-190b	0	0	1	1	0	0	CCT8	chaperonin containing TCP1, subunit 8 (theta)
hsa-miR-190b	1	0	1	1	1	1	ATAD2	ATPase family, AAA domain containing 2
hsa-miR-190b	0	0	1	1	0	0	SST	somatostatin
hsa-miR-190b	0	0	0	1	0	0	CCNB2	cyclin B2
hsa-miR-190b	0	0	0	1	0	0	GJD2	gap junction protein, delta 2, 36kDa
hsa-miR-190b	0	0	1	1	0	0	ANKLE1	ankyrin repeat and LEM domain containing 1
hsa-miR-190b	0	0	0	1	0	0	TFF2	trefoil factor 2
hsa-miR-190b	0	0	1	1	0	0	C21orf33	chromosome 21 open reading frame 33
hsa-miR-190b	0	0	0	1	0	0	KIR3DL3	killer cell immunoglobulin-like receptor, three domains, long cytoplasmic tail, 3
hsa-miR-190b	0	0	0	1	1	1	KIR2DL1	killer cell immunoglobulin-like receptor, two domains, long cytoplasmic tail, 1
hsa-miR-190b	0	0	1	1	0	0	KIR2DS4	killer cell immunoglobulin-like receptor, two domains, short cytoplasmic tail, 4
hsa-miR-190b	0	0	1	1	0	0	KIR2DL3	killer cell immunoglobulin-like receptor, two domains, long cytoplasmic tail, 3
hsa-miR-190b	0	0	1	1	1	1	ZNF382	zinc finger protein 382
hsa-miR-190b	0	0	1	1	1	1	ARHGAP15	Rho GTPase activating protein 15
hsa-miR-190b	0	0	1	1	0	0	IGFBP7	insulin-like growth factor binding protein 7
hsa-miR-190b	0	0	1	1	1	1	GYG1	glycogenin 1
hsa-miR-190b	0	0	0	1	0	0	OTOP1	otopetrin 1
hsa-miR-190b	0	0	1	1	1	1	HSPA4L	heat shock 70kDa protein 4-like
hsa-miR-190b	0	0	0	1	0	0	TLR3	toll-like receptor 3
hsa-miR-190b	0	0	1	1	1	1	NSA2	NSA2 ribosome biogenesis homolog (S. cerevisiae)
hsa-miR-190b	0	0	1	1	0	0	STEAP1	six transmembrane epithelial antigen of the prostate 1
hsa-miR-190b	0	0	1	1	0	0	KIAA0146	KIAA0146
hsa-miR-190b	1	0	1	1	1	1	OXR1	oxidation resistance 1
hsa-miR-190b	0	0	1	1	1	1	SLC7A13	solute carrier family 7 (anionic amino acid transporter), member 13
hsa-miR-190b	0	0	1	1	1	1	CPA6	carboxypeptidase A6
hsa-miR-190b	0	0	1	1	1	1	KIF27	kinesin family member 27
hsa-miR-190b	0	0	1	1	1	1	STOX1	storkhead box 1
hsa-miR-190b	1	0	1	1	0	0	PPP1R36	protein phosphatase 1, regulatory subunit 36
hsa-miR-190b	0	0	0	1	0	0	CDH16	cadherin 16, KSP-cadherin
hsa-miR-190b	0	0	0	1	0	0	EPB42	erythrocyte membrane protein band 4.2
hsa-miR-190b	0	0	1	1	1	1	PRR15L	proline rich 15-like
hsa-miR-190b	0	0	0	1	0	0	CD3D	CD3d molecule, delta (CD3-TCR complex)
hsa-miR-190b	1	0	1	1	1	1	TMEM99	transmembrane protein 99
hsa-miR-190b	0	0	0	1	0	0	C16orf13	chromosome 16 open reading frame 13
hsa-miR-190b	0	0	1	1	0	0	RPSA	ribosomal protein SA
hsa-miR-190b	0	0	0	1	0	0	OR8U1	olfactory receptor, family 8, subfamily U, member 1
hsa-miR-190b	0	0	1	1	0	0	GPR82	G protein-coupled receptor 82
hsa-miR-190b	1	0	1	1	1	1	TMEM133	transmembrane protein 133
hsa-miR-190b	1	0	1	1	1	1	CRTC2	CREB regulated transcription coactivator 2
hsa-miR-190b	0	0	1	1	0	0	CCDC11	coiled-coil domain containing 11
hsa-miR-190b	0	0	0	1	0	0	NFU1	NFU1 iron-sulfur cluster scaffold homolog (S. cerevisiae)
hsa-miR-190b	0	0	1	1	0	0	HSPB2	heat shock 27kDa protein 2
hsa-miR-190b	0	0	1	1	1	1	GPR22	G protein-coupled receptor 22
hsa-miR-190b	0	0	1	1	0	0	FSHR	follicle stimulating hormone receptor
hsa-miR-190b	0	0	1	1	0	0	TRAPPC12	trafficking protein particle complex 12
hsa-miR-190b	1	0	0	1	1	1	C1GALT1C1	C1GALT1-specific chaperone 1
hsa-miR-190b	0	0	0	1	0	0	OR4K14	olfactory receptor, family 4, subfamily K, member 14
hsa-miR-190b	0	0	0	1	1	1	NINJ2	ninjurin 2
hsa-miR-190b	0	0	1	1	0	0	ARMC4	armadillo repeat containing 4
hsa-miR-190b	0	0	0	1	1	1	SLC9C1	solute carrier family 9, subfamily C (Na+-transporting carboxylic acid decarboxylase), member 1
hsa-miR-190b	0	0	1	1	0	0	CCDC144B	coiled-coil domain containing 144B (pseudogene)
hsa-miR-190b	0	0	1	1	0	0	TBCA	tubulin folding cofactor A
hsa-miR-190b	0	0	0	1	1	1	PPIC	peptidylprolyl isomerase C (cyclophilin C)
hsa-miR-190b	1	0	0	1	0	0	TMEM192	transmembrane protein 192
hsa-miR-190b	0	0	0	1	1	1	FOXD4L1	forkhead box D4-like 1
hsa-miR-190b	0	0	1	1	1	1	CDY1	chromodomain protein, Y-linked, 1
hsa-miR-190b	0	0	0	1	1	1	C14orf142	chromosome 14 open reading frame 142
hsa-miR-190b	0	0	1	1	1	1	MYOZ2	myozenin 2
hsa-miR-190b	0	0	0	1	0	0	MYEOV2	myeloma overexpressed 2
hsa-miR-190b	0	0	1	1	1	1	GLB1	galactosidase, beta 1
hsa-miR-190b	0	0	1	1	1	1	PPID	peptidylprolyl isomerase D
hsa-miR-190b	0	0	0	1	1	1	PSMA8	proteasome (prosome, macropain) subunit, alpha type, 8
hsa-miR-190b	0	0	1	1	0	0	GOLT1A	golgi transport 1A
hsa-miR-190b	0	0	1	1	1	1	GEMIN2	gem (nuclear organelle) associated protein 2
hsa-miR-190b	0	0	0	1	0	0	ALG10B	asparagine-linked glycosylation 10, alpha-1,2-glucosyltransferase homolog B (yeast)
hsa-miR-190b	1	0	1	1	0	0	ASPHD1	aspartate beta-hydroxylase domain containing 1
hsa-miR-190b	0	0	0	1	0	0	ANAPC10	anaphase promoting complex subunit 10
hsa-miR-190b	1	0	1	1	1	1	RIC3	resistance to inhibitors of cholinesterase 3 homolog (C. elegans)
hsa-miR-190b	0	0	1	1	1	1	CD36	CD36 molecule (thrombospondin receptor)
hsa-miR-190b	0	0	1	1	1	1	ZNF407	zinc finger protein 407
hsa-miR-190b	1	0	1	1	1	1	COQ2	coenzyme Q2 homolog, prenyltransferase (yeast)
hsa-miR-190b	0	0	0	1	0	0	OR9Q2	olfactory receptor, family 9, subfamily Q, member 2
hsa-miR-190b	0	0	1	1	1	1	ZNF323	zinc finger protein 323
hsa-miR-190b	1	0	1	1	1	1	PHLDB2	pleckstrin homology-like domain, family B, member 2
hsa-miR-190b	0	0	1	1	1	1	POC1B	POC1 centriolar protein homolog B (Chlamydomonas)
hsa-miR-190b	0	0	1	1	0	0	AP4S1	adaptor-related protein complex 4, sigma 1 subunit
hsa-miR-190b	0	0	0	1	0	0	OR5K2	olfactory receptor, family 5, subfamily K, member 2
hsa-miR-190b	0	0	1	1	1	1	TMPRSS7	transmembrane protease, serine 7
hsa-miR-190b	1	0	1	1	1	1	LAMA3	laminin, alpha 3
hsa-miR-190b	0	0	0	1	0	0	CSNK1G2-AS1	CSNK1G2 antisense RNA 1
hsa-miR-190b	0	0	0	1	0	0	UBXN11	UBX domain protein 11
hsa-miR-190b	0	0	1	1	0	0	CPNE9	copine family member IX
hsa-miR-190b	0	0	0	1	1	1	CCDC111	coiled-coil domain containing 111
hsa-miR-190b	0	0	1	1	1	1	MMP1	matrix metallopeptidase 1 (interstitial collagenase)
hsa-miR-190b	0	0	1	1	0	0	RPUSD2	RNA pseudouridylate synthase domain containing 2
hsa-miR-190b	0	0	0	1	0	0	SPATA9	spermatogenesis associated 9
hsa-miR-190b	0	0	1	1	0	0	C7orf63	chromosome 7 open reading frame 63
hsa-miR-190b	0	0	1	1	0	0	PANK2	pantothenate kinase 2
hsa-miR-190b	0	0	1	1	1	1	ZNF187	zinc finger protein 187
hsa-miR-190b	0	0	0	1	1	1	ZNF569	zinc finger protein 569
hsa-miR-190b	1	0	0	1	1	1	TUBB6	tubulin, beta 6 class V
hsa-miR-190b	0	0	0	1	0	0	RRH	retinal pigment epithelium-derived rhodopsin homolog
hsa-miR-190b	0	0	1	1	1	1	BAG1	BCL2-associated athanogene
hsa-miR-190b	0	0	0	1	0	0	NDUFV2	NADH dehydrogenase (ubiquinone) flavoprotein 2, 24kDa
hsa-miR-190b	0	0	1	1	1	1	RABGGTB	Rab geranylgeranyltransferase, beta subunit
hsa-miR-190b	0	0	0	1	1	1	C8orf40	chromosome 8 open reading frame 40
hsa-miR-190b	1	0	1	1	1	1	ARHGAP21	Rho GTPase activating protein 21
hsa-miR-190b	0	0	1	1	1	1	APITD1	apoptosis-inducing, TAF9-like domain 1
hsa-miR-190b	0	0	1	1	1	1	CORT	cortistatin
hsa-miR-190b	0	0	0	1	0	0	WBSCR28	Williams-Beuren syndrome chromosome region 28
hsa-miR-190b	1	0	1	1	1	1	ITFG1	integrin alpha FG-GAP repeat containing 1
hsa-miR-190b	1	0	1	1	1	1	MAP4	microtubule-associated protein 4
hsa-miR-190b	0	0	1	1	1	1	DYX1C1	dyslexia susceptibility 1 candidate 1
hsa-miR-190b	0	0	0	1	0	0	SLC25A41	solute carrier family 25, member 41
hsa-miR-190b	0	0	1	1	1	1	ZNF543	zinc finger protein 543
hsa-miR-190b	0	0	1	1	0	0	SPACA4	sperm acrosome associated 4
hsa-miR-190b	0	0	0	1	0	0	OR51G1	olfactory receptor, family 51, subfamily G, member 1
hsa-miR-190b	0	0	0	1	0	0	SV2C	synaptic vesicle glycoprotein 2C
hsa-miR-190b	0	0	1	1	1	1	COX5A	cytochrome c oxidase subunit Va
hsa-miR-190b	0	0	1	1	1	1	C12orf40	chromosome 12 open reading frame 40
hsa-miR-190b	0	0	1	1	1	1	CEP192	centrosomal protein 192kDa
hsa-miR-190b	1	0	1	1	1	1	SLC37A3	solute carrier family 37 (glycerol-3-phosphate transporter), member 3
hsa-miR-190b	1	0	0	1	1	1	SSH1	slingshot homolog 1 (Drosophila)
hsa-miR-190b	0	0	1	1	1	1	FHL5	four and a half LIM domains 5
hsa-miR-190b	1	0	1	1	1	1	BRSK1	BR serine/threonine kinase 1
hsa-miR-190b	0	0	0	1	0	0	NOC2L	nucleolar complex associated 2 homolog (S. cerevisiae)
hsa-miR-190b	0	0	0	1	0	0	OXCT2	3-oxoacid CoA transferase 2
hsa-miR-190b	0	0	1	1	0	0	GAS6	growth arrest-specific 6
hsa-miR-190b	0	0	0	1	1	1	DDX53	DEAD (Asp-Glu-Ala-Asp) box polypeptide 53
hsa-miR-190b	0	0	1	1	0	0	ZNF71	zinc finger protein 71
hsa-miR-190b	0	0	0	1	1	1	ZNF623	zinc finger protein 623
hsa-miR-190b	1	0	1	1	1	1	ATP2C1	ATPase, Ca++ transporting, type 2C, member 1
hsa-miR-190b	0	0	1	1	1	1	CAPS2	calcyphosine 2
hsa-miR-190b	0	0	0	1	1	1	CNOT10	CCR4-NOT transcription complex, subunit 10
hsa-miR-190b	0	0	1	1	0	0	PMCH	pro-melanin-concentrating hormone
hsa-miR-190b	0	0	1	1	0	0	TTTY8	testis-specific transcript, Y-linked 8 (non-protein coding)
hsa-miR-190b	0	0	0	1	1	1	TRIM49	tripartite motif containing 49
hsa-miR-190b	0	0	0	1	0	0	AMY1B	amylase, alpha 1B (salivary)
hsa-miR-190b	0	0	0	1	1	1	NR2C1	nuclear receptor subfamily 2, group C, member 1
hsa-miR-190b	0	0	1	1	1	1	BEST3	bestrophin 3
hsa-miR-190b	1	0	1	1	1	1	ACTG1	actin, gamma 1
hsa-miR-190b	0	0	1	1	0	0	KRTAP15-1	keratin associated protein 15-1
hsa-miR-190b	0	0	0	1	0	0	NSAP11	nervous system abundant protein 11
hsa-miR-190b	0	0	0	1	1	1	ANGPTL5	angiopoietin-like 5
hsa-miR-190b	0	0	0	1	1	1	USP16	ubiquitin specific peptidase 16
hsa-miR-190b	1	0	1	1	1	1	FMR1	fragile X mental retardation 1
hsa-miR-190b	0	0	1	1	0	0	RPS19BP1	ribosomal protein S19 binding protein 1
hsa-miR-190b	0	0	1	1	1	1	CCK	cholecystokinin
hsa-miR-190b	0	0	0	1	1	1	INTU	inturned planar cell polarity effector homolog (Drosophila)
hsa-miR-190b	0	0	1	1	0	0	HTR3E	5-hydroxytryptamine (serotonin) receptor 3E, ionotropic
hsa-miR-190b	0	0	1	1	1	1	ATPIF1	ATPase inhibitory factor 1
hsa-miR-190b	0	0	1	1	1	1	PSPC1	paraspeckle component 1
hsa-miR-190b	0	0	1	1	1	1	SLC6A16	solute carrier family 6, member 16
hsa-miR-190b	0	0	1	1	0	0	RAD54B	RAD54 homolog B (S. cerevisiae)
hsa-miR-190b	0	0	1	1	1	1	SPAG17	sperm associated antigen 17
hsa-miR-190b	0	0	0	1	0	0	DNPEP	aspartyl aminopeptidase
hsa-miR-190b	0	0	1	1	1	1	FIBP	fibroblast growth factor (acidic) intracellular binding protein
hsa-miR-190b	0	0	1	1	1	1	TBCCD1	TBCC domain containing 1
hsa-miR-190b	1	0	0	1	1	1	FBXL14	F-box and leucine-rich repeat protein 14
hsa-miR-190b	0	0	1	1	0	0	HAVCR1	hepatitis A virus cellular receptor 1
hsa-miR-190b	0	0	1	1	1	1	SLC13A3	solute carrier family 13 (sodium-dependent dicarboxylate transporter), member 3
hsa-miR-190b	0	0	1	1	1	1	ANKRD6	ankyrin repeat domain 6
hsa-miR-190b	0	0	1	1	1	1	VRK2	vaccinia related kinase 2
hsa-miR-190b	0	0	0	1	1	1	DDC	dopa decarboxylase (aromatic L-amino acid decarboxylase)
hsa-miR-190b	0	0	1	1	0	0	VWC2	von Willebrand factor C domain containing 2
hsa-miR-190b	0	0	1	1	1	1	PPIL4	peptidylprolyl isomerase (cyclophilin)-like 4
hsa-miR-190b	1	0	1	1	1	1	TC2N	tandem C2 domains, nuclear
hsa-miR-190b	0	0	1	1	1	1	WDR64	WD repeat domain 64
hsa-miR-190b	0	0	0	1	1	1	PCDHB13	protocadherin beta 13
hsa-miR-190b	0	0	1	1	0	0	DPY30	dpy-30 homolog (C. elegans)
hsa-miR-190b	0	0	0	1	0	0	GPER	G protein-coupled estrogen receptor 1
hsa-miR-190b	0	0	1	1	0	0	AGAP4	ArfGAP with GTPase domain, ankyrin repeat and PH domain 4
hsa-miR-190b	1	0	1	1	1	1	TMTC4	transmembrane and tetratricopeptide repeat containing 4
hsa-miR-190b	1	0	1	1	1	1	ZNF12	zinc finger protein 12
hsa-miR-190b	0	0	1	1	0	0	NPR2	natriuretic peptide receptor B/guanylate cyclase B (atrionatriuretic peptide receptor B)
hsa-miR-190b	0	0	0	1	0	0	C12orf63	chromosome 12 open reading frame 63
hsa-miR-190b	0	0	1	1	0	0	INTS8	integrator complex subunit 8
hsa-miR-190b	0	0	1	1	0	0	LYAR	Ly1 antibody reactive homolog (mouse)
hsa-miR-190b	0	0	1	1	1	1	POU1F1	POU class 1 homeobox 1
hsa-miR-190b	0	0	0	1	0	0	TAF3	TAF3 RNA polymerase II, TATA box binding protein (TBP)-associated factor, 140kDa
hsa-miR-190b	0	0	0	1	0	0	OR5W2	olfactory receptor, family 5, subfamily W, member 2
hsa-miR-190b	1	0	1	1	1	1	UNC79	unc-79 homolog (C. elegans)
hsa-miR-190b	0	0	0	1	0	0	MRPL20	mitochondrial ribosomal protein L20
hsa-miR-190b	0	0	0	1	0	0	HSFY2	heat shock transcription factor, Y linked 2
hsa-miR-190b	0	0	1	1	1	1	TRAF6	TNF receptor-associated factor 6, E3 ubiquitin protein ligase
hsa-miR-190b	0	0	1	1	1	1	ODAM	odontogenic, ameloblast asssociated
hsa-miR-190b	0	0	1	1	1	1	RSRC2	arginine/serine-rich coiled-coil 2
hsa-miR-190b	0	0	1	1	1	1	TMEM207	transmembrane protein 207
hsa-miR-190b	1	0	1	1	1	1	VPS13B	vacuolar protein sorting 13 homolog B (yeast)
hsa-miR-190b	1	0	1	1	1	1	AGK	acylglycerol kinase
hsa-miR-190b	0	0	1	1	1	1	EFEMP1	EGF containing fibulin-like extracellular matrix protein 1
hsa-miR-190b	0	0	1	1	1	1	VPS13A	vacuolar protein sorting 13 homolog A (S. cerevisiae)
hsa-miR-190b	1	0	1	1	1	1	TMF1	TATA element modulatory factor 1
hsa-miR-190b	0	0	0	1	0	0	HYLS1	hydrolethalus syndrome 1
hsa-miR-190b	0	0	1	1	1	1	MPP3	membrane protein, palmitoylated 3 (MAGUK p55 subfamily member 3)
hsa-miR-190b	0	0	0	1	0	0	HVCN1	hydrogen voltage-gated channel 1
hsa-miR-190b	0	0	1	1	1	1	UHRF1BP1L	UHRF1 binding protein 1-like
hsa-miR-190b	1	0	1	1	1	1	FBXO8	F-box protein 8
hsa-miR-190b	1	0	1	1	1	1	PEX2	peroxisomal biogenesis factor 2
hsa-miR-190b	1	0	1	1	0	0	ATP2A1	ATPase, Ca++ transporting, cardiac muscle, fast twitch 1
hsa-miR-190b	1	0	1	1	0	0	CCDC64	coiled-coil domain containing 64
hsa-miR-190b	0	0	1	1	1	1	ZNF665	zinc finger protein 665
hsa-miR-190b	0	0	1	1	1	1	IRF5	interferon regulatory factor 5
hsa-miR-190b	0	0	1	1	1	1	SMC1B	structural maintenance of chromosomes 1B
hsa-miR-190b	0	0	1	1	1	1	N4BP2L2	NEDD4 binding protein 2-like 2
hsa-miR-190b	0	0	1	1	0	0	APOA4	apolipoprotein A-IV
hsa-miR-190b	0	0	1	1	1	1	CDK5RAP1	CDK5 regulatory subunit associated protein 1
hsa-miR-190b	1	0	0	1	1	1	C14orf102	chromosome 14 open reading frame 102
hsa-miR-190b	0	0	1	1	1	1	LAMA2	laminin, alpha 2
hsa-miR-190b	0	0	0	1	1	1	OR2L13	olfactory receptor, family 2, subfamily L, member 13
hsa-miR-190b	0	0	1	1	0	0	LINC00477	long intergenic non-protein coding RNA 477
hsa-miR-190b	0	0	0	1	0	0	ITIH2	inter-alpha-trypsin inhibitor heavy chain 2
hsa-miR-190b	1	0	1	1	1	1	HELZ	helicase with zinc finger
hsa-miR-190b	0	0	0	1	0	0	GPR1	G protein-coupled receptor 1
hsa-miR-190b	0	0	1	1	0	0	TMC2	transmembrane channel-like 2
hsa-miR-190b	0	0	1	1	1	1	NLRC3	NLR family, CARD domain containing 3
hsa-miR-190b	0	0	1	1	0	0	DNMT1	DNA (cytosine-5-)-methyltransferase 1
hsa-miR-190b	1	0	1	1	0	0	DSG4	desmoglein 4
hsa-miR-190b	0	0	0	1	1	1	RDH14	retinol dehydrogenase 14 (all-trans/9-cis/11-cis)
hsa-miR-190b	1	0	0	1	1	1	NT5C1B	5'-nucleotidase, cytosolic IB
hsa-miR-190b	0	0	1	1	1	1	CNTN1	contactin 1
hsa-miR-190b	0	0	0	1	1	1	SPN	sialophorin
hsa-miR-190b	1	0	1	1	0	0	DPP3	dipeptidyl-peptidase 3
hsa-miR-190b	0	0	1	1	1	1	BBS1	Bardet-Biedl syndrome 1
hsa-miR-190b	0	0	1	1	0	0	ABHD14A	abhydrolase domain containing 14A
hsa-miR-190b	0	0	0	1	0	0	DNASE2B	deoxyribonuclease II beta
hsa-miR-190b	0	0	0	1	0	0	RPL39	ribosomal protein L39
hsa-miR-190b	0	0	0	1	0	0	OR5D13	olfactory receptor, family 5, subfamily D, member 13
hsa-miR-190b	0	0	0	1	0	0	ZNF669	zinc finger protein 669
hsa-miR-190b	0	0	0	1	0	0	MRPL18	mitochondrial ribosomal protein L18
hsa-miR-190b	0	0	0	1	1	1	ULBP2	UL16 binding protein 2
hsa-miR-190b	0	0	1	1	1	1	FAM5C	family with sequence similarity 5, member C
hsa-miR-190b	1	0	1	1	1	1	IVNS1ABP	influenza virus NS1A binding protein
hsa-miR-190b	0	0	1	1	0	0	MR1	major histocompatibility complex, class I-related
hsa-miR-190b	1	0	1	1	1	1	ASTN1	astrotactin 1
hsa-miR-190b	0	0	1	1	0	0	TNR	tenascin R
hsa-miR-190b	0	0	1	1	1	1	MAEL	maelstrom homolog (Drosophila)
hsa-miR-190b	1	0	1	1	1	1	MGST3	microsomal glutathione S-transferase 3
hsa-miR-190b	0	0	1	1	1	1	MED23	mediator complex subunit 23
hsa-miR-190b	0	0	1	1	1	1	LHPP	phospholysine phosphohistidine inorganic pyrophosphate phosphatase
hsa-miR-190b	0	0	1	1	0	0	CUZD1	CUB and zona pellucida-like domains 1
hsa-miR-190b	0	0	1	1	0	0	SLC22A16	solute carrier family 22 (organic cation/carnitine transporter), member 16
hsa-miR-190b	0	0	1	1	0	0	NSMCE4A	non-SMC element 4 homolog A (S. cerevisiae)
hsa-miR-190b	1	0	1	1	1	1	HACE1	HECT domain and ankyrin repeat containing E3 ubiquitin protein ligase 1
hsa-miR-190b	0	0	1	1	1	1	PDE4DIP	phosphodiesterase 4D interacting protein
hsa-miR-190b	0	1	1	1	1	1	SYCP1	synaptonemal complex protein 1
hsa-miR-190b	1	0	1	1	1	1	SLC35A1	solute carrier family 35 (CMP-sialic acid transporter), member A1
hsa-miR-190b	0	0	1	1	0	0	RIPPLY2	ripply2 homolog (zebrafish)
hsa-miR-190b	0	0	1	1	1	1	ABCD1	ATP-binding cassette, sub-family D (ALD), member 1
hsa-miR-190b	0	0	1	1	1	1	C1orf146	chromosome 1 open reading frame 146
hsa-miR-190b	0	0	1	1	1	1	OGFRL1	opioid growth factor receptor-like 1
hsa-miR-190b	1	0	0	1	1	1	COL9A1	collagen, type IX, alpha 1
hsa-miR-190b	0	0	0	1	0	0	SPANXN3	SPANX family, member N3
hsa-miR-190b	0	0	0	1	0	0	CXorf66	chromosome X open reading frame 66
hsa-miR-190b	0	0	1	1	1	1	PRIM2	primase, DNA, polypeptide 2 (58kDa)
hsa-miR-190b	0	0	1	1	1	1	FAM122C	family with sequence similarity 122C
hsa-miR-190b	0	0	1	1	0	0	TNNI3K	TNNI3 interacting kinase
hsa-miR-190b	0	0	1	1	1	1	FPGT	fucose-1-phosphate guanylyltransferase
hsa-miR-190b	0	0	1	1	1	1	EXOSC1	exosome component 1
hsa-miR-190b	0	0	1	1	0	0	LRRIQ3	leucine-rich repeats and IQ motif containing 3
hsa-miR-190b	0	0	0	1	1	1	C20orf85	chromosome 20 open reading frame 85
hsa-miR-190b	0	0	1	1	1	1	RHAG	Rh-associated glycoprotein
hsa-miR-190b	0	0	0	1	0	0	SPO11	SPO11 meiotic protein covalently bound to DSB homolog (S. cerevisiae)
hsa-miR-190b	0	0	0	1	0	0	CYP2C8	cytochrome P450, family 2, subfamily C, polypeptide 8
hsa-miR-190b	0	0	0	1	1	1	TTC22	tetratricopeptide repeat domain 22
hsa-miR-190b	0	0	0	1	0	0	CT47A2	cancer/testis antigen family 47, member A2
hsa-miR-190b	0	0	0	1	0	0	CT47A3	cancer/testis antigen family 47, member A3
hsa-miR-190b	0	0	0	1	0	0	CT47A4	cancer/testis antigen family 47, member A4
hsa-miR-190b	0	0	0	1	0	0	CT47A5	cancer/testis antigen family 47, member A5
hsa-miR-190b	0	0	0	1	0	0	CT47A8	cancer/testis antigen family 47, member A8
hsa-miR-190b	0	0	0	1	0	0	CT47A10	cancer/testis antigen family 47, member A10
hsa-miR-190b	0	0	0	1	0	0	CYP2C19	cytochrome P450, family 2, subfamily C, polypeptide 19
hsa-miR-190b	1	0	1	1	1	1	LONRF3	LON peptidase N-terminal domain and ring finger 3
hsa-miR-190b	0	0	1	1	1	1	C1orf185	chromosome 1 open reading frame 185
hsa-miR-190b	1	0	1	1	1	1	PRPS1	phosphoribosyl pyrophosphate synthetase 1
hsa-miR-190b	0	0	1	1	1	1	ZMYND12	zinc finger, MYND-type containing 12
hsa-miR-190b	0	0	1	1	0	0	PPIE	peptidylprolyl isomerase E (cyclophilin E)
hsa-miR-190b	0	0	1	1	0	0	SWI5	SWI5 recombination repair homolog (yeast)
hsa-miR-190b	0	0	1	1	0	0	ECD	ecdysoneless homolog (Drosophila)
hsa-miR-190b	1	0	1	1	1	1	FAM102A	family with sequence similarity 102, member A
hsa-miR-190b	1	0	1	1	0	0	GRIK3	glutamate receptor, ionotropic, kainate 3
hsa-miR-190b	0	0	1	1	1	1	CPXCR1	CPX chromosome region, candidate 1
hsa-miR-190b	0	0	1	1	1	1	ITM2A	integral membrane protein 2A
hsa-miR-190b	0	0	1	1	1	1	MAGT1	magnesium transporter 1
hsa-miR-190b	0	0	1	1	1	1	BAI2	brain-specific angiogenesis inhibitor 2
hsa-miR-190b	0	0	1	1	1	1	PCDH15	protocadherin-related 15
hsa-miR-190b	0	0	1	1	1	1	ATP6V1G1	ATPase, H+ transporting, lysosomal 13kDa, V1 subunit G1
hsa-miR-190b	0	0	1	1	0	0	CNKSR1	connector enhancer of kinase suppressor of Ras 1
hsa-miR-190b	0	0	1	1	1	1	OR13A1	olfactory receptor, family 13, subfamily A, member 1
hsa-miR-190b	0	0	1	1	1	1	ZNF248	zinc finger protein 248
hsa-miR-190b	0	0	1	1	1	1	SMC2	structural maintenance of chromosomes 2
hsa-miR-190b	0	0	1	1	0	0	ANKAR	ankyrin and armadillo repeat containing
hsa-miR-190b	0	0	0	1	0	0	DFNB59	deafness, autosomal recessive 59
hsa-miR-190b	1	0	1	1	1	1	METTL8	methyltransferase like 8
hsa-miR-190b	0	0	1	1	0	0	FBP1	fructose-1,6-bisphosphatase 1
hsa-miR-190b	0	0	1	1	1	1	ABCA8	ATP-binding cassette, sub-family A (ABC1), member 8
hsa-miR-190b	0	0	1	1	1	1	C6orf48	chromosome 6 open reading frame 48
hsa-miR-190b	1	0	1	1	1	1	IARS	isoleucyl-tRNA synthetase
hsa-miR-190b	1	0	1	1	1	1	ASXL1	additional sex combs like 1 (Drosophila)
hsa-miR-190b	0	0	1	1	1	1	KYNU	kynureninase
hsa-miR-190b	0	0	1	1	1	1	ZCCHC6	zinc finger, CCHC domain containing 6
hsa-miR-190b	0	0	1	1	0	0	GAGE2C	G antigen 2C
hsa-miR-190b	0	0	1	1	0	0	PDSS1	prenyl (decaprenyl) diphosphate synthase, subunit 1
hsa-miR-190b	0	0	1	1	1	1	APBB1IP	amyloid beta (A4) precursor protein-binding, family B, member 1 interacting protein
hsa-miR-190b	0	0	1	1	1	1	FRMD3	FERM domain containing 3
hsa-miR-190b	1	0	1	1	1	1	TLE1	transducin-like enhancer of split 1 (E(sp1) homolog, Drosophila)
hsa-miR-190b	0	0	1	1	0	0	UGGT2	UDP-glucose glycoprotein glucosyltransferase 2
hsa-miR-190b	0	0	1	1	0	0	PCSK5	proprotein convertase subtilisin/kexin type 5
hsa-miR-190b	1	0	1	1	1	1	CLDN10	claudin 10
hsa-miR-190b	0	0	1	1	1	1	BTNL8	butyrophilin-like 8
hsa-miR-190b	1	0	1	1	0	0	DNAJC1	DnaJ (Hsp40) homolog, subfamily C, member 1
hsa-miR-190b	0	0	1	1	0	0	CST9	cystatin 9 (testatin)
hsa-miR-190b	0	0	0	1	1	1	CLN5	ceroid-lipofuscinosis, neuronal 5
hsa-miR-190b	0	0	1	1	0	0	FAM216A	family with sequence similarity 216, member A
hsa-miR-190b	0	0	1	1	0	0	SLC17A1	solute carrier family 17 (sodium phosphate), member 1
hsa-miR-190b	0	0	1	1	0	0	HSPA14	heat shock 70kDa protein 14
hsa-miR-190b	1	0	1	1	1	1	NRSN1	neurensin 1
hsa-miR-190b	0	0	1	1	1	1	C12orf50	chromosome 12 open reading frame 50
hsa-miR-190b	1	0	1	1	1	1	DYNLT3	dynein, light chain, Tctex-type 3
hsa-miR-190b	1	0	1	1	1	1	HAO1	hydroxyacid oxidase (glycolate oxidase) 1
hsa-miR-190b	0	0	0	1	0	0	TMEM88B	transmembrane protein 88B
hsa-miR-190b	1	0	1	1	1	1	GK	glycerol kinase
hsa-miR-190b	0	0	0	1	0	0	NR0B1	nuclear receptor subfamily 0, group B, member 1
hsa-miR-190b	0	0	1	1	0	0	UPK1A	uroplakin 1A
hsa-miR-190b	1	0	1	1	0	0	APOO	apolipoprotein O
hsa-miR-190b	0	0	1	1	0	0	FAM65A	family with sequence similarity 65, member A
hsa-miR-190b	0	0	1	1	1	1	STOML3	stomatin (EPB72)-like 3
hsa-miR-190b	1	0	1	1	1	1	SIAH1	siah E3 ubiquitin protein ligase 1
hsa-miR-190b	1	0	1	1	1	1	TRIM5	tripartite motif containing 5
hsa-miR-190b	0	0	0	1	1	1	ECI2	enoyl-CoA delta isomerase 2
hsa-miR-190b	0	0	1	1	0	0	DDRGK1	DDRGK domain containing 1
hsa-miR-190b	0	0	0	1	0	0	OR52A1	olfactory receptor, family 52, subfamily A, member 1
hsa-miR-190b	0	0	1	1	1	1	PLIN2	perilipin 2
hsa-miR-190b	0	0	0	1	0	0	SAT2	spermidine/spermine N1-acetyltransferase family member 2
hsa-miR-190b	0	0	0	1	0	0	AKR1C3	aldo-keto reductase family 1, member C3 (3-alpha hydroxysteroid dehydrogenase, type II)
hsa-miR-190b	1	0	1	1	1	1	ADRA1A	adrenoceptor alpha 1A
hsa-miR-190b	0	0	1	1	1	1	PRPS2	phosphoribosyl pyrophosphate synthetase 2
hsa-miR-190b	1	0	1	1	1	1	HMGN1	high mobility group nucleosome binding domain 1
hsa-miR-190b	0	0	1	1	1	1	SERF1B	small EDRK-rich factor 1B (centromeric)
hsa-miR-190b	0	0	1	1	1	1	POMP	proteasome maturation protein
hsa-miR-190b	0	0	1	1	1	1	CRYZL1	crystallin, zeta (quinone reductase)-like 1
hsa-miR-190b	0	0	1	1	0	0	RLN2	relaxin 2
hsa-miR-190b	0	0	0	1	1	1	CARD6	caspase recruitment domain family, member 6
hsa-miR-190b	0	0	1	1	0	0	GAGE2A	G antigen 2A
hsa-miR-190b	0	0	1	1	0	0	GAGE2E	G antigen 2E
hsa-miR-190b	0	0	1	1	0	0	GAGE8	G antigen 8
hsa-miR-190b	0	0	0	1	0	0	GAGE2B	G antigen 2B
hsa-miR-190b	0	0	1	1	0	0	GAGE12F	G antigen 12F
hsa-miR-190b	0	0	1	1	0	0	GAGE2D	G antigen 2D
hsa-miR-190b	0	0	0	1	0	0	GAGE12D	G antigen 12D
hsa-miR-190b	0	0	1	1	1	1	SLIT2	slit homolog 2 (Drosophila)
hsa-miR-190b	0	0	0	1	0	0	TAS2R1	taste receptor, type 2, member 1
hsa-miR-190b	0	0	1	1	1	1	DNAJC19	DnaJ (Hsp40) homolog, subfamily C, member 19
hsa-miR-190b	0	0	1	1	0	0	TCP10	t-complex 10 homolog (mouse)
hsa-miR-190b	0	0	1	1	1	1	RBMY1B	RNA binding motif protein, Y-linked, family 1, member B
hsa-miR-190b	0	0	1	1	1	1	RBMY1A1	RNA binding motif protein, Y-linked, family 1, member A1
hsa-miR-190b	0	0	1	1	0	0	HSFY1	heat shock transcription factor, Y-linked 1
hsa-miR-190b	0	0	1	1	1	1	ERI2	ERI1 exoribonuclease family member 2
hsa-miR-190b	0	0	1	1	1	1	KCNN2	potassium intermediate/small conductance calcium-activated channel, subfamily N, member 2
hsa-miR-190b	1	0	1	1	1	1	SPTB	spectrin, beta, erythrocytic
hsa-miR-190b	0	0	0	1	0	0	TAS2R14	taste receptor, type 2, member 14
hsa-miR-190b	0	0	1	0	1	1	MBL2	mannose-binding lectin (protein C) 2, soluble
hsa-miR-190b	0	0	1	1	1	1	SLC2A2	solute carrier family 2 (facilitated glucose transporter), member 2
hsa-miR-190b	0	0	1	1	1	1	STS	steroid sulfatase (microsomal), isozyme S
hsa-miR-190b	0	0	0	1	1	1	RPL37	ribosomal protein L37
hsa-miR-190b	0	0	1	1	1	1	ZNF280D	zinc finger protein 280D
hsa-miR-190b	0	0	1	1	1	1	PLGLB1	plasminogen-like B1
hsa-miR-190b	1	0	1	1	1	1	AP1S3	adaptor-related protein complex 1, sigma 3 subunit
hsa-miR-190b	0	0	1	1	1	1	MUC17	mucin 17, cell surface associated
hsa-miR-190b	0	0	1	1	1	1	MYH11	myosin, heavy chain 11, smooth muscle
hsa-miR-190b	0	0	1	1	1	1	METTL21D	methyltransferase like 21D
hsa-miR-190b	0	0	1	1	1	1	ACPP	acid phosphatase, prostate
hsa-miR-190b	1	0	1	1	1	1	GCLC	glutamate-cysteine ligase, catalytic subunit
hsa-miR-190b	0	0	0	1	1	1	ORC4	origin recognition complex, subunit 4
hsa-miR-190b	0	0	1	1	1	1	PLGLB2	plasminogen-like B2
hsa-miR-190b	0	0	0	1	1	1	ZNF140	zinc finger protein 140
hsa-miR-190b	0	0	1	1	1	1	PRKRA	protein kinase, interferon-inducible double stranded RNA dependent activator
hsa-miR-190b	0	0	1	0	1	1	ASAP2	ArfGAP with SH3 domain, ankyrin repeat and PH domain 2
hsa-miR-190b	0	0	1	1	1	1	CDKN1B	cyclin-dependent kinase inhibitor 1B (p27, Kip1)
hsa-miR-190b	1	0	1	1	1	1	EDIL3	EGF-like repeats and discoidin I-like domains 3
hsa-miR-190b	0	0	0	1	1	1	MPZL2	myelin protein zero-like 2
hsa-miR-190b	1	0	1	1	1	1	RAN	RAN, member RAS oncogene family
hsa-miR-190b	1	0	1	1	1	1	HBS1L	HBS1-like (S. cerevisiae)
hsa-miR-190b	1	0	1	0	1	1	FBXO22	F-box protein 22
hsa-miR-190b	0	0	1	1	1	1	MED4	mediator complex subunit 4
hsa-miR-190b	0	0	1	1	1	1	AMACR	alpha-methylacyl-CoA racemase
hsa-miR-190b	1	0	1	1	1	1	ZBTB11	zinc finger and BTB domain containing 11
hsa-miR-190b	0	0	0	0	1	1	ZNF229	zinc finger protein 229
hsa-miR-190b	1	0	1	0	1	1	EFR3A	EFR3 homolog A (S. cerevisiae)
hsa-miR-190b	1	0	1	0	1	1	ARHGEF12	Rho guanine nucleotide exchange factor (GEF) 12
hsa-miR-190b	0	0	1	1	1	1	GRAMD1C	GRAM domain containing 1C
hsa-miR-190b	0	0	1	1	1	1	SUSD4	sushi domain containing 4
hsa-miR-190b	0	0	1	1	1	1	RFK	riboflavin kinase
hsa-miR-190b	0	0	0	0	1	1	DHX33	DEAH (Asp-Glu-Ala-His) box polypeptide 33
hsa-miR-190b	0	0	0	1	1	1	SPC25	SPC25, NDC80 kinetochore complex component, homolog (S. cerevisiae)
hsa-miR-190b	1	0	1	1	1	1	CROT	carnitine O-octanoyltransferase
hsa-miR-190b	1	0	0	1	1	1	DHRS12	dehydrogenase/reductase (SDR family) member 12
hsa-miR-190b	1	0	1	1	1	1	POF1B	premature ovarian failure, 1B
hsa-miR-190b	1	0	1	1	1	1	OR51E2	olfactory receptor, family 51, subfamily E, member 2
hsa-miR-190b	0	0	1	1	1	1	C18orf21	chromosome 18 open reading frame 21
hsa-miR-190b	0	0	1	1	1	1	KIAA1841	KIAA1841
hsa-miR-190b	0	0	0	1	1	1	LRP11	low density lipoprotein receptor-related protein 11
hsa-miR-190b	1	0	1	1	1	1	CASP2	caspase 2, apoptosis-related cysteine peptidase
hsa-miR-190b	0	0	1	1	1	1	BBS4	Bardet-Biedl syndrome 4
hsa-miR-190b	1	0	1	1	1	1	TRIM55	tripartite motif containing 55
hsa-miR-190b	0	0	1	0	1	1	LNX2	ligand of numb-protein X 2
hsa-miR-190b	1	0	0	1	1	1	ZFP1	zinc finger protein 1 homolog (mouse)
hsa-miR-190b	0	0	1	0	1	1	MMAA	methylmalonic aciduria (cobalamin deficiency) cblA type
hsa-miR-190b	0	0	1	1	1	1	BCKDHB	branched chain keto acid dehydrogenase E1, beta polypeptide
hsa-miR-190b	1	0	0	1	1	1	CYP2U1	cytochrome P450, family 2, subfamily U, polypeptide 1
hsa-miR-190b	0	0	0	0	1	1	LOC728724	hCG1814486
hsa-miR-190b	0	0	0	0	1	1	AK4P3	adenylate kinase 4 pseudogene 3
hsa-miR-190b	0	0	0	0	1	1	LOC644961	actin, gamma 1 pseudogene
