# Supplementary material for: Profiling of Selected MicroRNAs in Proliferative Eutopic Endometrium of Women with Ovarian Endometriosis
Source: Biomed Res Int. 2015 Aug 20;2015:760698. doi: 10.1155/2015/760698 (PMC4558423; doi:10.1155/2015/760698)
Supplement: Supplementary file 1 — Table I: The names of miRNAs significantly differentially expressed between eutopic endometrium of patients with endometriosis vs eutopic endometrium of patients without endometriosis. Table II: The associations between miRNA and mRNA, which presents detailed results of the search of six major databases i.e targetscan, tarbase, miranda, mirbase, mirtarget2 and pictar. [file 760698.f1.zip › 760698.f1/Table II/hsa-miR-198.tsv]

miR	targetscan	tarbase	miranda	mirbase	mirtarget2	pictar	GeneSymbol	GeneName
hsa-miR-198	1	0	1	1	1	1	ZFYVE16	zinc finger, FYVE domain containing 16
hsa-miR-198	1	0	1	1	1	1	CHD9	chromodomain helicase DNA binding protein 9
hsa-miR-198	1	0	1	0	1	1	PTPRT	protein tyrosine phosphatase, receptor type, T
hsa-miR-198	1	0	1	1	1	1	ZHX3	zinc fingers and homeoboxes 3
hsa-miR-198	1	0	1	0	1	1	KIAA0408	KIAA0408
hsa-miR-198	1	0	1	0	1	1	MTSS1	metastasis suppressor 1
hsa-miR-198	1	0	1	1	0	0	OTUD3	OTU domain containing 3
hsa-miR-198	0	0	1	1	1	1	RABGAP1L	RAB GTPase activating protein 1-like
hsa-miR-198	0	0	1	1	0	0	RAP1GAP	RAP1 GTPase activating protein
hsa-miR-198	1	0	1	0	1	1	CEP350	centrosomal protein 350kDa
hsa-miR-198	0	0	1	1	1	1	NEU3	sialidase 3 (membrane sialidase)
hsa-miR-198	1	0	1	1	1	1	BAI3	brain-specific angiogenesis inhibitor 3
hsa-miR-198	1	0	1	1	1	1	GPATCH8	G patch domain containing 8
hsa-miR-198	1	0	1	1	1	1	NRXN1	neurexin 1
hsa-miR-198	1	0	1	0	1	1	CHST15	carbohydrate (N-acetylgalactosamine 4-sulfate 6-O) sulfotransferase 15
hsa-miR-198	1	0	1	1	1	1	SLC4A7	solute carrier family 4, sodium bicarbonate cotransporter, member 7
hsa-miR-198	1	0	1	1	1	1	GIGYF2	GRB10 interacting GYF protein 2
hsa-miR-198	0	0	1	1	1	1	CLUAP1	clusterin associated protein 1
hsa-miR-198	0	0	1	1	0	0	CNOT3	CCR4-NOT transcription complex, subunit 3
hsa-miR-198	1	0	1	1	1	1	ANKRD17	ankyrin repeat domain 17
hsa-miR-198	1	0	1	1	0	0	ESYT1	extended synaptotagmin-like protein 1
hsa-miR-198	1	0	1	0	1	1	RBM12	RNA binding motif protein 12
hsa-miR-198	1	0	1	1	1	1	ARHGEF15	Rho guanine nucleotide exchange factor (GEF) 15
hsa-miR-198	1	0	1	1	1	1	CALCR	calcitonin receptor
hsa-miR-198	1	0	1	0	0	0	DTX4	deltex homolog 4 (Drosophila)
hsa-miR-198	1	0	1	1	1	1	C11orf9	chromosome 11 open reading frame 9
hsa-miR-198	1	0	1	1	1	1	RGL1	ral guanine nucleotide dissociation stimulator-like 1
hsa-miR-198	0	0	1	1	0	0	FAM149B1	family with sequence similarity 149, member B1
hsa-miR-198	1	0	1	1	1	1	RPGRIP1L	RPGRIP1-like
hsa-miR-198	1	0	1	1	0	0	KIAA1045	KIAA1045
hsa-miR-198	0	0	1	1	0	0	RTEL1	regulator of telomere elongation helicase 1
hsa-miR-198	1	0	1	1	1	1	FAM208A	family with sequence similarity 208, member A
hsa-miR-198	1	0	1	1	1	1	PHF8	PHD finger protein 8
hsa-miR-198	1	0	1	1	0	0	PPM1H	protein phosphatase, Mg2+/Mn2+ dependent, 1H
hsa-miR-198	1	0	1	1	1	1	RALGAPB	Ral GTPase activating protein, beta subunit (non-catalytic)
hsa-miR-198	1	0	1	1	1	1	ASAP1	ArfGAP with SH3 domain, ankyrin repeat and PH domain 1
hsa-miR-198	1	0	1	1	1	1	STK36	serine/threonine kinase 36
hsa-miR-198	1	0	1	1	1	1	DKK2	dickkopf 2 homolog (Xenopus laevis)
hsa-miR-198	1	0	1	0	0	0	ODZ4	odz, odd Oz/ten-m homolog 4 (Drosophila)
hsa-miR-198	1	0	1	1	1	1	PCDH19	protocadherin 19
hsa-miR-198	1	0	1	1	1	1	TAOK1	TAO kinase 1
hsa-miR-198	0	0	1	0	1	1	KIAA1468	KIAA1468
hsa-miR-198	1	0	1	1	1	1	TOPORS	topoisomerase I binding, arginine/serine-rich, E3 ubiquitin protein ligase
hsa-miR-198	1	0	1	0	1	1	IGDCC4	immunoglobulin superfamily, DCC subclass, member 4
hsa-miR-198	0	0	1	0	1	1	SETD5	SET domain containing 5
hsa-miR-198	0	0	1	1	1	1	SPEF2	sperm flagellar 2
hsa-miR-198	1	0	1	1	1	1	IKZF4	IKAROS family zinc finger 4 (Eos)
hsa-miR-198	1	0	1	0	1	1	JPH4	junctophilin 4
hsa-miR-198	1	0	1	1	1	1	NAV2	neuron navigator 2
hsa-miR-198	1	0	1	1	1	1	CSRNP1	cysteine-serine-rich nuclear protein 1
hsa-miR-198	1	0	1	1	1	1	HNRPDL	heterogeneous nuclear ribonucleoprotein D-like
hsa-miR-198	1	0	1	0	1	1	KIF5C	kinesin family member 5C
hsa-miR-198	1	0	1	1	0	0	CDH8	cadherin 8, type 2
hsa-miR-198	1	0	1	1	1	1	POGZ	pogo transposable element with ZNF domain
hsa-miR-198	1	0	1	0	1	1	SGSM1	small G protein signaling modulator 1
hsa-miR-198	1	0	1	1	1	1	SH3TC2	SH3 domain and tetratricopeptide repeats 2
hsa-miR-198	0	0	1	1	0	0	CIRH1A	cirrhosis, autosomal recessive 1A (cirhin)
hsa-miR-198	1	0	1	0	0	0	RNF169	ring finger protein 169
hsa-miR-198	0	0	1	1	1	1	NELL1	NEL-like 1 (chicken)
hsa-miR-198	0	0	1	1	0	0	KREMEN2	kringle containing transmembrane protein 2
hsa-miR-198	0	0	1	0	1	1	RASSF8	Ras association (RalGDS/AF-6) domain family (N-terminal) member 8
hsa-miR-198	1	0	1	0	0	0	ZC3H12C	zinc finger CCCH-type containing 12C
hsa-miR-198	0	0	1	1	0	0	DDB2	damage-specific DNA binding protein 2, 48kDa
hsa-miR-198	0	0	1	1	0	0	SSPO	SCO-spondin homolog (Bos taurus)
hsa-miR-198	1	0	1	1	1	1	KCNMA1	potassium large conductance calcium-activated channel, subfamily M, alpha member 1
hsa-miR-198	1	0	1	0	1	1	BEND4	BEN domain containing 4
hsa-miR-198	0	0	1	1	1	1	BIRC5	baculoviral IAP repeat containing 5
hsa-miR-198	1	1	1	1	1	1	BACE1	beta-site APP-cleaving enzyme 1
hsa-miR-198	0	0	1	1	0	0	PTPRF	protein tyrosine phosphatase, receptor type, F
hsa-miR-198	0	0	1	1	1	1	DOCK8	dedicator of cytokinesis 8
hsa-miR-198	0	0	1	0	1	1	ACE2	angiotensin I converting enzyme (peptidyl-dipeptidase A) 2
hsa-miR-198	1	0	1	1	1	1	ADARB1	adenosine deaminase, RNA-specific, B1
hsa-miR-198	1	0	1	1	1	1	SHC1	SHC (Src homology 2 domain containing) transforming protein 1
hsa-miR-198	0	0	1	0	0	0	PIDD	p53-induced death domain protein
hsa-miR-198	1	0	1	1	1	1	PML	promyelocytic leukemia
hsa-miR-198	0	0	1	1	1	1	MAZ	MYC-associated zinc finger protein (purine-binding transcription factor)
hsa-miR-198	1	0	1	1	1	1	SLC8A1	solute carrier family 8 (sodium/calcium exchanger), member 1
hsa-miR-198	1	0	1	1	1	1	RASSF5	Ras association (RalGDS/AF-6) domain family member 5
hsa-miR-198	1	0	1	0	1	1	DPYSL2	dihydropyrimidinase-like 2
hsa-miR-198	1	0	1	0	1	1	ETV1	ets variant 1
hsa-miR-198	0	0	1	1	1	1	DDX39B	DEAD (Asp-Glu-Ala-Asp) box polypeptide 39B
hsa-miR-198	1	0	1	1	0	0	TNK2	tyrosine kinase, non-receptor, 2
hsa-miR-198	1	0	1	1	1	1	EPHA5	EPH receptor A5
hsa-miR-198	0	0	1	1	1	1	STAU1	staufen, RNA binding protein, homolog 1 (Drosophila)
hsa-miR-198	0	0	1	1	1	1	IL10RA	interleukin 10 receptor, alpha
hsa-miR-198	0	0	1	1	0	0	SLC22A8	solute carrier family 22 (organic anion transporter), member 8
hsa-miR-198	1	0	1	1	1	1	SLC6A8	solute carrier family 6 (neurotransmitter transporter, creatine), member 8
hsa-miR-198	1	0	1	1	1	1	HMGA2	high mobility group AT-hook 2
hsa-miR-198	1	0	1	1	1	1	OSBPL10	oxysterol binding protein-like 10
hsa-miR-198	0	0	1	1	0	0	TRIM27	tripartite motif containing 27
hsa-miR-198	0	0	1	1	1	1	SGSH	N-sulfoglucosamine sulfohydrolase
hsa-miR-198	1	0	1	0	1	1	CAV1	caveolin 1, caveolae protein, 22kDa
hsa-miR-198	0	0	1	1	1	1	CENPE	centromere protein E, 312kDa
hsa-miR-198	1	0	1	1	1	1	MYH10	myosin, heavy chain 10, non-muscle
hsa-miR-198	0	0	1	0	0	0	MIAT	myocardial infarction associated transcript (non-protein coding)
hsa-miR-198	1	0	1	1	1	1	TTC39A	tetratricopeptide repeat domain 39A
hsa-miR-198	1	0	1	0	1	1	MLL2	myeloid/lymphoid or mixed-lineage leukemia 2
hsa-miR-198	0	0	1	1	1	1	MFSD11	major facilitator superfamily domain containing 11
hsa-miR-198	1	0	1	1	1	1	PCDH17	protocadherin 17
hsa-miR-198	0	0	1	1	1	1	CD84	CD84 molecule
hsa-miR-198	0	0	1	1	1	1	CYP4F3	cytochrome P450, family 4, subfamily F, polypeptide 3
hsa-miR-198	1	0	1	1	1	1	SHOC2	soc-2 suppressor of clear homolog (C. elegans)
hsa-miR-198	1	0	1	1	1	1	CTNND1	catenin (cadherin-associated protein), delta 1
hsa-miR-198	0	0	1	1	1	1	NOL3	nucleolar protein 3 (apoptosis repressor with CARD domain)
hsa-miR-198	0	0	1	1	1	1	SC5DL	sterol-C5-desaturase (ERG3 delta-5-desaturase homolog, S. cerevisiae)-like
hsa-miR-198	0	0	1	1	0	0	SGK223	homolog of rat pragma of Rnd2
hsa-miR-198	0	0	1	1	1	1	PLEKHB1	pleckstrin homology domain containing, family B (evectins) member 1
hsa-miR-198	1	0	1	1	1	1	KAT6B	K(lysine) acetyltransferase 6B
hsa-miR-198	1	0	1	1	1	1	HMG20A	high mobility group 20A
hsa-miR-198	0	0	1	1	1	1	ZNF317	zinc finger protein 317
hsa-miR-198	0	0	1	1	0	0	SCMH1	sex comb on midleg homolog 1 (Drosophila)
hsa-miR-198	1	0	1	1	1	1	ZNF202	zinc finger protein 202
hsa-miR-198	0	0	1	0	1	1	PDP1	pyruvate dehyrogenase phosphatase catalytic subunit 1
hsa-miR-198	1	0	1	1	1	1	AGPAT3	1-acylglycerol-3-phosphate O-acyltransferase 3
hsa-miR-198	0	0	1	1	1	1	FAM114A2	family with sequence similarity 114, member A2
hsa-miR-198	1	0	1	1	1	1	ATP2C1	ATPase, Ca++ transporting, type 2C, member 1
hsa-miR-198	1	0	1	1	1	1	BCL2L13	BCL2-like 13 (apoptosis facilitator)
hsa-miR-198	0	0	1	1	1	1	CHPT1	choline phosphotransferase 1
hsa-miR-198	0	0	1	0	0	0	ARL17A	ADP-ribosylation factor-like 17A
hsa-miR-198	1	0	1	1	1	1	OGT	O-linked N-acetylglucosamine (GlcNAc) transferase
hsa-miR-198	1	0	1	1	1	1	STRN3	striatin, calmodulin binding protein 3
hsa-miR-198	0	0	1	1	0	0	ELMOD3	ELMO/CED-12 domain containing 3
hsa-miR-198	1	0	1	1	1	1	SH3GLB1	SH3-domain GRB2-like endophilin B1
hsa-miR-198	1	0	1	1	1	1	PUM2	pumilio homolog 2 (Drosophila)
hsa-miR-198	0	0	1	1	1	1	ASUN	asunder, spermatogenesis regulator homolog (Drosphila)
hsa-miR-198	1	0	1	1	1	1	VPS39	vacuolar protein sorting 39 homolog (S. cerevisiae)
hsa-miR-198	0	0	1	0	0	0	LOC645355	uncharacterized LOC645355
hsa-miR-198	1	0	1	1	1	1	DCLRE1B	DNA cross-link repair 1B
hsa-miR-198	0	0	1	0	1	1	KANSL3	KAT8 regulatory NSL complex subunit 3
hsa-miR-198	1	0	1	0	1	1	GLYR1	glyoxylate reductase 1 homolog (Arabidopsis)
hsa-miR-198	1	0	1	1	1	1	LETMD1	LETM1 domain containing 1
hsa-miR-198	0	0	1	1	1	1	FCRL1	Fc receptor-like 1
hsa-miR-198	0	0	1	1	0	0	ZAN	zonadhesin
hsa-miR-198	1	0	1	1	1	1	ACHE	acetylcholinesterase
hsa-miR-198	1	0	1	1	1	1	BIVM	basic, immunoglobulin-like variable motif containing
hsa-miR-198	1	0	1	1	1	1	CALU	calumenin
hsa-miR-198	0	0	1	1	1	1	SLC6A15	solute carrier family 6 (neutral amino acid transporter), member 15
hsa-miR-198	1	0	1	1	1	1	BBC3	BCL2 binding component 3
hsa-miR-198	0	0	1	1	0	0	CTNNBL1	catenin, beta like 1
hsa-miR-198	1	0	1	1	1	1	RGS10	regulator of G-protein signaling 10
hsa-miR-198	1	0	1	0	1	1	WIPF2	WAS/WASL interacting protein family, member 2
hsa-miR-198	1	0	1	1	1	1	ST3GAL3	ST3 beta-galactoside alpha-2,3-sialyltransferase 3
hsa-miR-198	0	0	1	1	0	0	CLEC18A	C-type lectin domain family 18, member A
hsa-miR-198	1	0	1	1	1	1	SLC35A4	solute carrier family 35, member A4
hsa-miR-198	0	0	1	1	0	0	CLEC18C	C-type lectin domain family 18, member C
hsa-miR-198	1	0	1	1	1	1	HNRNPU	heterogeneous nuclear ribonucleoprotein U (scaffold attachment factor A)
hsa-miR-198	1	0	1	0	1	1	NUDCD1	NudC domain containing 1
hsa-miR-198	0	0	1	1	0	0	TREML1	triggering receptor expressed on myeloid cells-like 1
hsa-miR-198	1	0	1	1	1	1	SH2B3	SH2B adaptor protein 3
hsa-miR-198	0	0	1	1	1	1	GNAS	GNAS complex locus
hsa-miR-198	0	0	1	0	0	0	CACNA2D3	calcium channel, voltage-dependent, alpha 2/delta subunit 3
hsa-miR-198	1	0	1	1	1	1	SLAMF6	SLAM family member 6
hsa-miR-198	1	0	1	1	1	1	PALM2	paralemmin 2
hsa-miR-198	1	0	1	1	1	1	NRXN3	neurexin 3
hsa-miR-198	0	0	1	0	0	0	CASC2	cancer susceptibility candidate 2 (non-protein coding)
hsa-miR-198	1	0	1	1	1	1	PDE1B	phosphodiesterase 1B, calmodulin-dependent
hsa-miR-198	1	0	1	1	1	1	NFYA	nuclear transcription factor Y, alpha
hsa-miR-198	0	0	1	1	1	1	SLC25A13	solute carrier family 25 (aspartate/glutamate carrier), member 13
hsa-miR-198	0	0	1	1	1	1	TAF1	TAF1 RNA polymerase II, TATA box binding protein (TBP)-associated factor, 250kDa
hsa-miR-198	1	0	1	1	1	1	ARL4C	ADP-ribosylation factor-like 4C
hsa-miR-198	1	0	1	0	1	1	NAALADL2	N-acetylated alpha-linked acidic dipeptidase-like 2
hsa-miR-198	0	0	1	1	0	0	OTOP2	otopetrin 2
hsa-miR-198	0	0	1	1	0	0	ASAP3	ArfGAP with SH3 domain, ankyrin repeat and PH domain 3
hsa-miR-198	1	0	1	1	0	0	TRPM4	transient receptor potential cation channel, subfamily M, member 4
hsa-miR-198	0	0	1	1	0	0	GPRC5C	G protein-coupled receptor, family C, group 5, member C
hsa-miR-198	1	0	1	1	1	1	AKAP2	A kinase (PRKA) anchor protein 2
hsa-miR-198	1	0	1	1	1	1	ENOX2	ecto-NOX disulfide-thiol exchanger 2
hsa-miR-198	1	0	1	1	1	1	ARHGAP12	Rho GTPase activating protein 12
hsa-miR-198	0	0	1	1	1	1	STOX2	storkhead box 2
hsa-miR-198	0	0	1	1	1	1	ARAP3	ArfGAP with RhoGAP domain, ankyrin repeat and PH domain 3
hsa-miR-198	1	0	1	1	1	1	ARMC8	armadillo repeat containing 8
hsa-miR-198	0	0	1	1	1	1	GBP3	guanylate binding protein 3
hsa-miR-198	1	0	1	1	1	1	LRRN3	leucine rich repeat neuronal 3
hsa-miR-198	0	0	1	1	1	1	STAU2	staufen, RNA binding protein, homolog 2 (Drosophila)
hsa-miR-198	0	0	1	1	0	0	MLST8	MTOR associated protein, LST8 homolog (S. cerevisiae)
hsa-miR-198	0	0	1	1	1	1	SNCAIP	synuclein, alpha interacting protein
hsa-miR-198	1	0	1	1	0	0	DFNB31	deafness, autosomal recessive 31
hsa-miR-198	1	0	1	1	0	0	FASTK	Fas-activated serine/threonine kinase
hsa-miR-198	0	0	1	1	1	1	TTC23	tetratricopeptide repeat domain 23
hsa-miR-198	1	0	1	1	1	1	BAZ2A	bromodomain adjacent to zinc finger domain, 2A
hsa-miR-198	1	0	1	1	1	1	PAX8	paired box 8
hsa-miR-198	1	0	1	0	1	1	C14orf101	chromosome 14 open reading frame 101
hsa-miR-198	0	0	1	0	1	1	FLJ14186	uncharacterized LOC401149
hsa-miR-198	1	0	1	1	1	1	SCAF1	SR-related CTD-associated factor 1
hsa-miR-198	0	0	1	1	1	1	UNC13D	unc-13 homolog D (C. elegans)
hsa-miR-198	1	0	1	0	1	1	STK40	serine/threonine kinase 40
hsa-miR-198	0	0	1	1	1	1	MUC12	mucin 12, cell surface associated
hsa-miR-198	1	0	1	1	1	1	DYRK2	dual-specificity tyrosine-(Y)-phosphorylation regulated kinase 2
hsa-miR-198	1	0	1	0	1	1	ATP2B1	ATPase, Ca++ transporting, plasma membrane 1
hsa-miR-198	0	0	1	0	0	0	RASAL3	RAS protein activator like 3
hsa-miR-198	1	0	1	0	1	1	REPIN1	replication initiator 1
hsa-miR-198	1	0	1	0	1	1	ZCCHC3	zinc finger, CCHC domain containing 3
hsa-miR-198	0	0	1	0	1	1	HEMK1	HemK methyltransferase family member 1
hsa-miR-198	0	0	1	1	1	1	DENND2D	DENN/MADD domain containing 2D
hsa-miR-198	0	0	1	0	0	0	LINC00340	long intergenic non-protein coding RNA 340
hsa-miR-198	1	0	1	1	1	1	HPS3	Hermansky-Pudlak syndrome 3
hsa-miR-198	1	0	1	1	1	1	FBXL12	F-box and leucine-rich repeat protein 12
hsa-miR-198	1	0	1	1	1	1	RNF185	ring finger protein 185
hsa-miR-198	1	0	1	1	1	1	LRP4	low density lipoprotein receptor-related protein 4
hsa-miR-198	1	0	1	1	1	1	SEC63	SEC63 homolog (S. cerevisiae)
hsa-miR-198	1	0	1	1	1	1	STRBP	spermatid perinuclear RNA binding protein
hsa-miR-198	0	0	1	0	0	0	NBLA00301	Nbla00301
hsa-miR-198	0	0	1	1	1	1	SNAP47	synaptosomal-associated protein, 47kDa
hsa-miR-198	1	0	1	1	1	1	MAP4	microtubule-associated protein 4
hsa-miR-198	0	0	1	0	0	0	KIAA0664L3	KIAA0664-like 3
hsa-miR-198	0	0	1	1	0	0	FBXO7	F-box protein 7
hsa-miR-198	0	0	1	0	0	0	LOC283508	uncharacterized LOC283508
hsa-miR-198	0	0	1	1	1	1	PRR5L	proline rich 5 like
hsa-miR-198	0	0	1	1	1	1	TOX2	TOX high mobility group box family member 2
hsa-miR-198	0	0	1	0	0	0	FLJ30838	uncharacterized LOC400955
hsa-miR-198	0	0	1	0	0	0	FLJ31104	uncharacterized LOC441072
hsa-miR-198	0	0	1	1	1	1	GLYATL1	glycine-N-acyltransferase-like 1
hsa-miR-198	1	0	1	1	1	1	ZNF664	zinc finger protein 664
hsa-miR-198	0	0	1	0	0	0	JPX	JPX transcript, XIST activator (non-protein coding)
hsa-miR-198	1	0	1	1	1	1	LMNA	lamin A/C
hsa-miR-198	1	0	1	1	1	1	SHISA5	shisa homolog 5 (Xenopus laevis)
hsa-miR-198	1	0	1	1	1	1	AGPAT1	1-acylglycerol-3-phosphate O-acyltransferase 1 (lysophosphatidic acid acyltransferase, alpha)
hsa-miR-198	0	0	1	1	1	1	GNB2	guanine nucleotide binding protein (G protein), beta polypeptide 2
hsa-miR-198	0	0	1	1	1	1	COQ10A	coenzyme Q10 homolog A (S. cerevisiae)
hsa-miR-198	0	0	1	1	1	1	ZMIZ2	zinc finger, MIZ-type containing 2
hsa-miR-198	0	0	1	1	1	1	PSME3	proteasome (prosome, macropain) activator subunit 3 (PA28 gamma; Ki)
hsa-miR-198	1	0	1	1	1	1	TLE4	transducin-like enhancer of split 4 (E(sp1) homolog, Drosophila)
hsa-miR-198	0	0	1	1	1	1	C14orf79	chromosome 14 open reading frame 79
hsa-miR-198	0	0	1	0	0	0	TUBA3FP	tubulin, alpha 3f, pseudogene
hsa-miR-198	0	0	1	1	0	0	NXF2	nuclear RNA export factor 2
hsa-miR-198	0	0	1	1	1	1	C9orf3	chromosome 9 open reading frame 3
hsa-miR-198	1	0	1	1	1	1	SEC22A	SEC22 vesicle trafficking protein homolog A (S. cerevisiae)
hsa-miR-198	1	0	1	1	0	0	GBA2	glucosidase, beta (bile acid) 2
hsa-miR-198	0	0	1	0	1	1	CHURC1	churchill domain containing 1
hsa-miR-198	1	0	1	1	1	1	IST1	increased sodium tolerance 1 homolog (yeast)
hsa-miR-198	1	0	1	1	1	1	C6orf89	chromosome 6 open reading frame 89
hsa-miR-198	0	0	1	1	1	1	HDAC8	histone deacetylase 8
hsa-miR-198	1	0	1	1	1	1	BLCAP	bladder cancer associated protein
hsa-miR-198	1	0	1	0	1	1	RNF165	ring finger protein 165
hsa-miR-198	1	0	1	1	1	1	PRRT2	proline-rich transmembrane protein 2
hsa-miR-198	0	0	1	1	1	1	SLC52A3	solute carrier family 52, riboflavin transporter, member 3
hsa-miR-198	1	0	1	1	1	1	CNOT4	CCR4-NOT transcription complex, subunit 4
hsa-miR-198	0	0	1	1	0	0	SHKBP1	SH3KBP1 binding protein 1
hsa-miR-198	0	0	1	1	0	0	LGR5	leucine-rich repeat containing G protein-coupled receptor 5
hsa-miR-198	1	0	1	1	1	1	PIP4K2C	phosphatidylinositol-5-phosphate 4-kinase, type II, gamma
hsa-miR-198	0	0	1	1	1	1	STBD1	starch binding domain 1
hsa-miR-198	0	0	1	0	1	1	PIANP	PILR alpha associated neural protein
hsa-miR-198	1	0	1	1	1	1	FBXW2	F-box and WD repeat domain containing 2
hsa-miR-198	0	0	1	1	0	0	RUVBL1	RuvB-like 1 (E. coli)
hsa-miR-198	0	0	1	1	0	0	CDC25B	cell division cycle 25 homolog B (S. pombe)
hsa-miR-198	0	0	1	1	1	1	NRBP1	nuclear receptor binding protein 1
hsa-miR-198	0	0	1	0	1	1	SSPN	sarcospan
hsa-miR-198	1	0	1	1	0	0	TOE1	target of EGR1, member 1 (nuclear)
hsa-miR-198	0	0	1	1	1	1	LZTFL1	leucine zipper transcription factor-like 1
hsa-miR-198	1	0	1	1	1	1	SPTBN1	spectrin, beta, non-erythrocytic 1
hsa-miR-198	0	0	1	1	1	1	TMPRSS11D	transmembrane protease, serine 11D
hsa-miR-198	0	0	1	1	1	1	SLC16A1	solute carrier family 16, member 1 (monocarboxylic acid transporter 1)
hsa-miR-198	0	0	1	1	1	1	CYP11B1	cytochrome P450, family 11, subfamily B, polypeptide 1
hsa-miR-198	0	0	1	1	1	1	MARC1	mitochondrial amidoxime reducing component 1
hsa-miR-198	0	0	1	1	0	0	WBP1	WW domain binding protein 1
hsa-miR-198	1	0	1	1	1	1	KCND1	potassium voltage-gated channel, Shal-related subfamily, member 1
hsa-miR-198	0	0	1	0	1	1	KANSL2	KAT8 regulatory NSL complex subunit 2
hsa-miR-198	1	0	1	1	1	1	SLC7A8	solute carrier family 7 (amino acid transporter light chain, L system), member 8
hsa-miR-198	0	0	1	0	0	0	ZNF806	zinc finger protein 806
hsa-miR-198	0	0	1	1	1	1	ATP6V1H	ATPase, H+ transporting, lysosomal 50/57kDa, V1 subunit H
hsa-miR-198	0	0	1	0	0	0	MYO1H	myosin IH
hsa-miR-198	1	0	1	1	1	1	CPNE8	copine VIII
hsa-miR-198	1	0	1	1	1	1	GLT25D2	glycosyltransferase 25 domain containing 2
hsa-miR-198	1	0	1	1	1	1	RASGEF1A	RasGEF domain family, member 1A
hsa-miR-198	0	0	1	1	1	1	RBM4B	RNA binding motif protein 4B
hsa-miR-198	1	0	1	1	1	1	NDEL1	nudE nuclear distribution E homolog (A. nidulans)-like 1
hsa-miR-198	0	0	1	1	0	0	ZNF185	zinc finger protein 185 (LIM domain)
hsa-miR-198	0	0	1	0	0	0	LOC730101	uncharacterized LOC730101
hsa-miR-198	0	0	1	1	1	1	AQP3	aquaporin 3 (Gill blood group)
hsa-miR-198	0	0	1	1	1	1	FUT11	fucosyltransferase 11 (alpha (1,3) fucosyltransferase)
hsa-miR-198	1	0	1	1	1	1	ANKRD10	ankyrin repeat domain 10
hsa-miR-198	1	0	1	1	1	1	CS	citrate synthase
hsa-miR-198	1	0	1	1	1	1	ZC3H11A	zinc finger CCCH-type containing 11A
hsa-miR-198	1	0	1	1	1	1	PEA15	phosphoprotein enriched in astrocytes 15
hsa-miR-198	1	0	1	1	1	1	EPB41L4A	erythrocyte membrane protein band 4.1 like 4A
hsa-miR-198	0	0	1	1	0	0	TRIM46	tripartite motif containing 46
hsa-miR-198	0	0	1	0	0	0	FAM66C	family with sequence similarity 66, member C
hsa-miR-198	0	0	1	0	0	0	C1orf204	chromosome 1 open reading frame 204
hsa-miR-198	0	0	1	0	0	0	LOC643327	uncharacterized LOC643327
hsa-miR-198	1	0	1	1	1	1	CA12	carbonic anhydrase XII
hsa-miR-198	1	0	1	1	1	1	EPB41L1	erythrocyte membrane protein band 4.1-like 1
hsa-miR-198	1	0	1	1	1	1	CAPN2	calpain 2, (m/II) large subunit
hsa-miR-198	1	0	1	0	1	1	YPEL2	yippee-like 2 (Drosophila)
hsa-miR-198	1	0	1	1	1	1	KL	klotho
hsa-miR-198	0	0	1	0	0	0	LOC400680	uncharacterized LOC400680
hsa-miR-198	0	0	1	0	0	0	LINC00293	long intergenic non-protein coding RNA 293
hsa-miR-198	0	0	1	0	0	0	KIRREL3-AS3	KIRREL3 antisense RNA 3
hsa-miR-198	1	0	1	1	1	1	IGSF11	immunoglobulin superfamily, member 11
hsa-miR-198	1	0	1	1	1	1	LZTS2	leucine zipper, putative tumor suppressor 2
hsa-miR-198	0	0	1	1	0	0	TAPBPL	TAP binding protein-like
hsa-miR-198	0	0	1	1	0	0	TMEM150A	transmembrane protein 150A
hsa-miR-198	0	0	1	0	0	0	LOC100130954	uncharacterized LOC100130954
hsa-miR-198	0	0	1	1	1	1	ARFGAP2	ADP-ribosylation factor GTPase activating protein 2
hsa-miR-198	0	0	1	1	0	0	ZACN	zinc activated ligand-gated ion channel
hsa-miR-198	1	0	1	1	1	1	UHRF2	ubiquitin-like with PHD and ring finger domains 2, E3 ubiquitin protein ligase
hsa-miR-198	0	0	1	1	0	0	FBXO18	F-box protein, helicase, 18
hsa-miR-198	0	0	1	1	0	0	KIAA0146	KIAA0146
hsa-miR-198	0	0	1	1	1	1	ZDHHC15	zinc finger, DHHC-type containing 15
hsa-miR-198	1	0	1	1	0	0	WIZ	widely interspaced zinc finger motifs
hsa-miR-198	0	0	1	1	0	0	CFP	complement factor properdin
hsa-miR-198	0	0	1	1	0	0	MARS	methionyl-tRNA synthetase
hsa-miR-198	1	0	1	1	1	1	ZBTB4	zinc finger and BTB domain containing 4
hsa-miR-198	0	0	1	1	1	1	FRMD5	FERM domain containing 5
hsa-miR-198	1	0	1	1	1	1	KALRN	kalirin, RhoGEF kinase
hsa-miR-198	1	0	1	1	1	1	PLEKHH1	pleckstrin homology domain containing, family H (with MyTH4 domain) member 1
hsa-miR-198	0	0	1	1	1	1	EXOC6	exocyst complex component 6
hsa-miR-198	1	0	1	1	1	1	EGLN3	egl nine homolog 3 (C. elegans)
hsa-miR-198	0	0	1	1	1	1	RGS3	regulator of G-protein signaling 3
hsa-miR-198	0	0	1	1	0	0	TJAP1	tight junction associated protein 1 (peripheral)
hsa-miR-198	1	0	1	0	1	1	KCNK2	potassium channel, subfamily K, member 2
hsa-miR-198	1	0	1	1	1	1	ARHGEF10L	Rho guanine nucleotide exchange factor (GEF) 10-like
hsa-miR-198	0	0	1	0	0	0	LGALS17A	Charcot-Leyden crystal protein pseudogene
hsa-miR-198	0	0	1	0	0	0	LOC650368	asparagine-linked glycosylation 1-like pseudogene
hsa-miR-198	1	0	1	1	1	1	PHKB	phosphorylase kinase, beta
hsa-miR-198	1	0	1	1	1	1	FAM219A	family with sequence similarity 219, member A
hsa-miR-198	0	0	1	1	1	1	BTN2A2	butyrophilin, subfamily 2, member A2
hsa-miR-198	0	0	1	0	0	0	LOC285043	uncharacterized LOC285043
hsa-miR-198	1	0	1	1	1	1	SH2D4B	SH2 domain containing 4B
hsa-miR-198	1	0	1	1	1	1	VPS54	vacuolar protein sorting 54 homolog (S. cerevisiae)
hsa-miR-198	1	0	1	1	1	1	ADIPOR1	adiponectin receptor 1
hsa-miR-198	0	0	1	1	0	0	NPIP	nuclear pore complex interacting protein
hsa-miR-198	0	0	1	1	1	1	IDS	iduronate 2-sulfatase
hsa-miR-198	0	0	1	0	0	0	LINC00282	long intergenic non-protein coding RNA 282
hsa-miR-198	1	0	1	1	1	1	ATXN7	ataxin 7
hsa-miR-198	0	0	1	1	0	0	CPNE6	copine VI (neuronal)
hsa-miR-198	1	0	1	1	1	1	METAP2	methionyl aminopeptidase 2
hsa-miR-198	0	0	1	1	1	1	CTPS2	CTP synthase 2
hsa-miR-198	0	0	1	0	0	0	LOC613266	uncharacterized LOC613266
hsa-miR-198	0	0	1	0	0	0	FAM95B1	family with sequence similarity 95, member B1
hsa-miR-198	0	0	1	1	0	0	RPRD2	regulation of nuclear pre-mRNA domain containing 2
hsa-miR-198	1	0	1	1	1	1	MACROD2	MACRO domain containing 2
hsa-miR-198	1	0	1	0	1	1	PLXNA1	plexin A1
hsa-miR-198	1	0	1	1	1	1	CSRNP3	cysteine-serine-rich nuclear protein 3
hsa-miR-198	0	0	1	0	0	0	LOC729177	uncharacterized LOC729177
hsa-miR-198	1	0	1	1	1	1	MRPL30	mitochondrial ribosomal protein L30
hsa-miR-198	1	0	1	0	1	1	ANO6	anoctamin 6
hsa-miR-198	0	0	1	1	0	0	CLDN4	claudin 4
hsa-miR-198	0	0	1	1	1	1	BDH1	3-hydroxybutyrate dehydrogenase, type 1
hsa-miR-198	1	0	1	1	1	1	NIPBL	Nipped-B homolog (Drosophila)
hsa-miR-198	0	0	1	0	0	0	HNRNPKP3	heterogeneous nuclear ribonucleoprotein K pseudogene 3
hsa-miR-198	1	0	1	1	1	1	CLIP1	CAP-GLY domain containing linker protein 1
hsa-miR-198	1	0	1	1	1	1	EIF4E3	eukaryotic translation initiation factor 4E family member 3
hsa-miR-198	0	0	1	0	0	0	RPL23AP53	ribosomal protein L23a pseudogene 53
hsa-miR-198	0	0	1	1	1	1	MOBP	myelin-associated oligodendrocyte basic protein
hsa-miR-198	1	0	1	1	1	1	TSHZ1	teashirt zinc finger homeobox 1
hsa-miR-198	0	0	1	0	0	0	LOC619207	scavenger receptor protein family member
hsa-miR-198	1	0	1	1	0	0	PTPN5	protein tyrosine phosphatase, non-receptor type 5 (striatum-enriched)
hsa-miR-198	1	0	1	1	1	1	KANK4	KN motif and ankyrin repeat domains 4
hsa-miR-198	1	0	1	1	1	1	SLC26A9	solute carrier family 26, member 9
hsa-miR-198	1	0	1	1	1	1	RALGDS	ral guanine nucleotide dissociation stimulator
hsa-miR-198	1	0	1	1	1	1	CROT	carnitine O-octanoyltransferase
hsa-miR-198	0	0	1	1	0	0	NCF1	neutrophil cytosolic factor 1
hsa-miR-198	0	0	1	1	1	1	MCU	mitochondrial calcium uniporter
hsa-miR-198	0	0	1	0	0	0	FAM205B	transmembrane protein C9orf144B pseudogene
hsa-miR-198	0	0	1	1	0	0	FAM159A	family with sequence similarity 159, member A
hsa-miR-198	1	0	1	0	1	1	KPNA6	karyopherin alpha 6 (importin alpha 7)
hsa-miR-198	0	0	1	1	0	0	HEATR8	HEAT repeat containing 8
hsa-miR-198	0	0	1	0	0	0	LOC390660	FLJ00317 protein
hsa-miR-198	0	0	1	0	1	1	RUFY4	RUN and FYVE domain containing 4
hsa-miR-198	0	0	1	1	0	0	ZNF730	zinc finger protein 730
hsa-miR-198	0	0	1	1	1	1	PDE2A	phosphodiesterase 2A, cGMP-stimulated
hsa-miR-198	1	0	1	0	1	1	ZNF607	zinc finger protein 607
hsa-miR-198	0	0	1	0	0	0	AGAP9	ArfGAP with GTPase domain, ankyrin repeat and PH domain 9
hsa-miR-198	1	0	1	1	1	1	SYS1	SYS1 Golgi-localized integral membrane protein homolog (S. cerevisiae)
hsa-miR-198	1	0	1	1	1	1	NME6	NME/NM23 nucleoside diphosphate kinase 6
hsa-miR-198	0	0	1	1	1	1	CRISP3	cysteine-rich secretory protein 3
hsa-miR-198	1	0	1	0	1	1	SEZ6	seizure related 6 homolog (mouse)
hsa-miR-198	1	0	1	1	0	0	ATP13A3	ATPase type 13A3
hsa-miR-198	1	0	1	1	1	1	CAMK2G	calcium/calmodulin-dependent protein kinase II gamma
hsa-miR-198	0	0	1	1	1	1	TIMMDC1	translocase of inner mitochondrial membrane domain containing 1
hsa-miR-198	1	0	1	1	1	1	NOVA1	neuro-oncological ventral antigen 1
hsa-miR-198	0	0	1	0	1	1	NEK1	NIMA (never in mitosis gene a)-related kinase 1
hsa-miR-198	0	0	1	0	0	0	ANKRD34C	ankyrin repeat domain 34C
hsa-miR-198	1	0	1	1	0	0	MAN1B1	mannosidase, alpha, class 1B, member 1
hsa-miR-198	1	0	1	1	1	1	SMAP2	small ArfGAP2
hsa-miR-198	1	0	1	1	1	1	SMC6	structural maintenance of chromosomes 6
hsa-miR-198	1	0	1	1	1	1	PREX1	phosphatidylinositol-3,4,5-trisphosphate-dependent Rac exchange factor 1
hsa-miR-198	0	0	1	1	1	1	PPA2	pyrophosphatase (inorganic) 2
hsa-miR-198	0	0	1	1	0	0	PCIF1	PDX1 C-terminal inhibiting factor 1
hsa-miR-198	0	0	1	1	1	1	SYNJ2	synaptojanin 2
hsa-miR-198	0	0	1	1	0	0	DOPEY1	dopey family member 1
hsa-miR-198	1	0	1	1	1	1	PKNOX2	PBX/knotted 1 homeobox 2
hsa-miR-198	1	0	1	1	1	1	MIER1	mesoderm induction early response 1 homolog (Xenopus laevis)
hsa-miR-198	1	0	1	1	1	1	KDM6A	lysine (K)-specific demethylase 6A
hsa-miR-198	0	0	1	0	0	0	ZNF720	zinc finger protein 720
hsa-miR-198	1	0	1	1	1	1	QTRTD1	queuine tRNA-ribosyltransferase domain containing 1
hsa-miR-198	1	0	1	1	1	1	NFX1	nuclear transcription factor, X-box binding 1
hsa-miR-198	1	0	1	1	1	1	TMEM182	transmembrane protein 182
hsa-miR-198	0	0	1	0	0	0	FAM225A	family with sequence similarity 225, member A (non-protein coding)
hsa-miR-198	0	0	1	1	1	1	VWA3B	von Willebrand factor A domain containing 3B
hsa-miR-198	0	0	1	1	1	1	AMIGO2	adhesion molecule with Ig-like domain 2
hsa-miR-198	0	0	1	1	1	1	INPP5B	inositol polyphosphate-5-phosphatase, 75kDa
hsa-miR-198	1	0	1	0	1	1	SLC25A37	solute carrier family 25 (mitochondrial iron transporter), member 37
hsa-miR-198	1	0	1	1	1	1	FAM126A	family with sequence similarity 126, member A
hsa-miR-198	0	0	1	0	0	0	C1RL-AS1	C1RL antisense RNA 1
hsa-miR-198	0	0	1	1	1	1	KIAA1841	KIAA1841
hsa-miR-198	1	0	1	1	1	1	DIS3L2	DIS3 mitotic control homolog (S. cerevisiae)-like 2
hsa-miR-198	1	0	1	1	1	1	CAPRIN2	caprin family member 2
hsa-miR-198	1	0	1	1	1	1	MBD6	methyl-CpG binding domain protein 6
hsa-miR-198	1	0	1	0	1	1	JAZF1	JAZF zinc finger 1
hsa-miR-198	1	0	1	1	1	1	CADM2	cell adhesion molecule 2
hsa-miR-198	0	0	1	1	0	0	FIP1L1	FIP1 like 1 (S. cerevisiae)
hsa-miR-198	1	0	1	1	1	1	TAZ	tafazzin
hsa-miR-198	1	0	1	1	1	1	FBXL5	F-box and leucine-rich repeat protein 5
hsa-miR-198	0	0	1	0	0	0	OIP5-AS1	OIP5 antisense RNA 1
hsa-miR-198	0	0	1	1	0	0	TMEM134	transmembrane protein 134
hsa-miR-198	0	0	1	1	0	0	ERAP2	endoplasmic reticulum aminopeptidase 2
hsa-miR-198	0	0	1	1	1	1	CD209	CD209 molecule
hsa-miR-198	1	0	1	0	1	1	BDNF	brain-derived neurotrophic factor
hsa-miR-198	1	0	1	1	1	1	MIPOL1	mirror-image polydactyly 1
hsa-miR-198	1	0	1	1	1	1	RFFL	ring finger and FYVE-like domain containing E3 ubiquitin protein ligase
hsa-miR-198	0	0	1	0	0	0	TDH	L-threonine dehydrogenase
hsa-miR-198	0	0	1	1	0	0	CRB3	crumbs homolog 3 (Drosophila)
hsa-miR-198	1	0	1	1	1	1	KIAA0907	KIAA0907
hsa-miR-198	0	0	1	0	0	0	CR1L	complement component (3b/4b) receptor 1-like
hsa-miR-198	1	0	1	1	1	1	USF2	upstream transcription factor 2, c-fos interacting
hsa-miR-198	1	0	1	1	1	1	RIC8B	resistance to inhibitors of cholinesterase 8 homolog B (C. elegans)
hsa-miR-198	1	0	1	1	1	1	WDR26	WD repeat domain 26
hsa-miR-198	0	0	1	1	1	1	IYD	iodotyrosine deiodinase
hsa-miR-198	0	0	1	0	0	0	MEG3	maternally expressed 3 (non-protein coding)
hsa-miR-198	1	0	1	1	1	1	GFRA2	GDNF family receptor alpha 2
hsa-miR-198	0	0	1	1	1	1	GCOM1	GRINL1A complex locus 1
hsa-miR-198	1	0	1	1	1	1	TAB3	TGF-beta activated kinase 1/MAP3K7 binding protein 3
hsa-miR-198	0	0	1	1	1	1	SLC22A12	solute carrier family 22 (organic anion/urate transporter), member 12
hsa-miR-198	1	0	1	1	1	1	TMCC2	transmembrane and coiled-coil domain family 2
hsa-miR-198	0	0	1	1	1	1	GPR114	G protein-coupled receptor 114
hsa-miR-198	0	0	1	1	1	1	TNFRSF19	tumor necrosis factor receptor superfamily, member 19
hsa-miR-198	0	0	1	1	0	0	GFRA3	GDNF family receptor alpha 3
hsa-miR-198	1	0	1	1	1	1	OPRM1	opioid receptor, mu 1
hsa-miR-198	1	0	1	1	1	1	BCL2L11	BCL2-like 11 (apoptosis facilitator)
hsa-miR-198	0	0	1	1	1	1	PTPRC	protein tyrosine phosphatase, receptor type, C
hsa-miR-198	0	0	1	1	1	1	DIDO1	death inducer-obliterator 1
hsa-miR-198	0	0	1	1	1	1	UGT2B4	UDP glucuronosyltransferase 2 family, polypeptide B4
hsa-miR-198	0	0	1	1	1	1	EHBP1	EH domain binding protein 1
hsa-miR-198	1	0	1	1	1	1	MECP2	methyl CpG binding protein 2 (Rett syndrome)
hsa-miR-198	0	0	1	1	0	0	ARAP1	ArfGAP with RhoGAP domain, ankyrin repeat and PH domain 1
hsa-miR-198	1	0	1	1	0	0	ADAM15	ADAM metallopeptidase domain 15
hsa-miR-198	1	0	1	1	0	0	ZCCHC4	zinc finger, CCHC domain containing 4
hsa-miR-198	1	0	1	1	1	1	BHLHE41	basic helix-loop-helix family, member e41
hsa-miR-198	0	0	1	0	0	0	PTPRVP	protein tyrosine phosphatase, receptor type, V, pseudogene
hsa-miR-198	1	0	1	1	1	1	TBC1D22B	TBC1 domain family, member 22B
hsa-miR-198	0	0	1	1	1	1	IL23R	interleukin 23 receptor
hsa-miR-198	1	0	1	1	1	1	AMOT	angiomotin
hsa-miR-198	1	0	1	0	1	1	FAM46A	family with sequence similarity 46, member A
hsa-miR-198	0	0	1	1	1	1	C20orf24	chromosome 20 open reading frame 24
hsa-miR-198	0	0	1	1	1	1	MRRF	mitochondrial ribosome recycling factor
hsa-miR-198	1	0	1	1	1	1	RIMS3	regulating synaptic membrane exocytosis 3
hsa-miR-198	0	0	1	1	0	0	SNRPB	small nuclear ribonucleoprotein polypeptides B and B1
hsa-miR-198	1	0	1	1	1	1	NUMA1	nuclear mitotic apparatus protein 1
hsa-miR-198	1	0	1	1	1	1	SPRY2	sprouty homolog 2 (Drosophila)
hsa-miR-198	0	0	1	1	0	0	ZNF821	zinc finger protein 821
hsa-miR-198	1	0	1	0	1	1	EIF1AD	eukaryotic translation initiation factor 1A domain containing
hsa-miR-198	1	0	1	1	1	1	POU2F2	POU class 2 homeobox 2
hsa-miR-198	1	0	1	1	0	0	ASRGL1	asparaginase like 1
hsa-miR-198	1	0	1	1	1	1	PTMS	parathymosin
hsa-miR-198	0	0	1	1	1	1	ZNF85	zinc finger protein 85
hsa-miR-198	1	0	1	1	1	1	SHOX2	short stature homeobox 2
hsa-miR-198	1	0	1	1	1	1	HMGA1	high mobility group AT-hook 1
hsa-miR-198	0	0	1	1	0	0	PANK2	pantothenate kinase 2
hsa-miR-198	0	0	1	1	0	0	BARX1	BARX homeobox 1
hsa-miR-198	1	0	1	1	0	0	MARCH9	membrane-associated ring finger (C3HC4) 9
hsa-miR-198	0	0	1	1	0	0	MEF2BNB-MEF2B	MEF2BNB-MEF2B readthrough
hsa-miR-198	0	0	1	1	1	1	ATG12	autophagy related 12
hsa-miR-198	1	0	1	1	1	1	TRIM2	tripartite motif containing 2
hsa-miR-198	1	0	1	1	1	1	IDH1	isocitrate dehydrogenase 1 (NADP+), soluble
hsa-miR-198	0	0	1	1	1	1	PLXDC2	plexin domain containing 2
hsa-miR-198	1	0	1	1	0	0	CAPN12	calpain 12
hsa-miR-198	0	0	1	1	1	1	KEAP1	kelch-like ECH-associated protein 1
hsa-miR-198	1	0	1	1	1	1	ETF1	eukaryotic translation termination factor 1
hsa-miR-198	1	0	1	1	0	0	FHL3	four and a half LIM domains 3
hsa-miR-198	0	0	1	0	0	0	MGC21881	uncharacterized locus MGC21881
hsa-miR-198	1	0	1	1	1	1	TMEM9B	TMEM9 domain family, member B
hsa-miR-198	0	0	1	1	1	1	RECQL5	RecQ protein-like 5
hsa-miR-198	0	0	1	1	0	0	ACOX3	acyl-CoA oxidase 3, pristanoyl
hsa-miR-198	1	0	1	1	1	1	ORMDL3	ORM1-like 3 (S. cerevisiae)
hsa-miR-198	0	0	1	0	0	0	ASH1L-AS1	ASH1L antisense RNA 1
hsa-miR-198	0	0	1	1	0	0	ZDHHC6	zinc finger, DHHC-type containing 6
hsa-miR-198	0	0	1	1	1	1	PARP9	poly (ADP-ribose) polymerase family, member 9
hsa-miR-198	0	0	1	0	0	0	LOC100144602	uncharacterized LOC100144602
hsa-miR-198	0	0	1	0	0	0	TCP11L2	t-complex 11 (mouse)-like 2
hsa-miR-198	1	0	1	1	1	1	ARHGEF9	Cdc42 guanine nucleotide exchange factor (GEF) 9
hsa-miR-198	1	0	1	1	1	1	SUZ12	suppressor of zeste 12 homolog (Drosophila)
hsa-miR-198	0	0	1	0	1	1	CD99P1	CD99 molecule pseudogene 1
hsa-miR-198	0	0	1	1	0	0	ANG	angiogenin, ribonuclease, RNase A family, 5
hsa-miR-198	0	0	1	0	1	1	ZNF718	zinc finger protein 718
hsa-miR-198	1	0	1	0	1	1	BTF3L4	basic transcription factor 3-like 4
hsa-miR-198	0	0	1	1	1	1	SNX17	sorting nexin 17
hsa-miR-198	0	0	1	1	0	0	DPF1	D4, zinc and double PHD fingers family 1
hsa-miR-198	1	0	1	1	1	1	SCML4	sex comb on midleg-like 4 (Drosophila)
hsa-miR-198	0	0	1	0	0	0	NBR2	neighbor of BRCA1 gene 2 (non-protein coding)
hsa-miR-198	0	0	1	1	0	0	LYSMD2	LysM, putative peptidoglycan-binding, domain containing 2
hsa-miR-198	1	0	1	0	1	1	CDK19	cyclin-dependent kinase 19
hsa-miR-198	1	0	1	1	1	1	ASPH	aspartate beta-hydroxylase
hsa-miR-198	0	0	1	1	0	0	GALNTL5	UDP-N-acetyl-alpha-D-galactosamine:polypeptide N-acetylgalactosaminyltransferase-like 5
hsa-miR-198	0	0	1	1	1	1	MAP2	microtubule-associated protein 2
hsa-miR-198	0	0	1	1	1	1	SELP	selectin P (granule membrane protein 140kDa, antigen CD62)
hsa-miR-198	0	0	1	1	0	0	PLSCR3	phospholipid scramblase 3
hsa-miR-198	1	0	1	1	1	1	U2SURP	U2 snRNP-associated SURP domain containing
hsa-miR-198	0	0	1	1	1	1	MLKL	mixed lineage kinase domain-like
hsa-miR-198	0	0	1	1	1	1	ZNF589	zinc finger protein 589
hsa-miR-198	1	0	1	1	1	1	TMEM127	transmembrane protein 127
hsa-miR-198	0	0	1	1	1	1	KDM2B	lysine (K)-specific demethylase 2B
hsa-miR-198	1	0	1	0	0	0	KCNU1	potassium channel, subfamily U, member 1
hsa-miR-198	1	0	1	0	1	1	NCAM1	neural cell adhesion molecule 1
hsa-miR-198	1	0	1	0	1	1	PSMF1	proteasome (prosome, macropain) inhibitor subunit 1 (PI31)
hsa-miR-198	0	0	1	1	1	1	CTNNA3	catenin (cadherin-associated protein), alpha 3
hsa-miR-198	0	0	1	0	0	0	LOC729307	uncharacterized LOC729307
hsa-miR-198	0	0	1	1	0	0	TRIM69	tripartite motif containing 69
hsa-miR-198	1	0	1	1	1	1	PITPNB	phosphatidylinositol transfer protein, beta
hsa-miR-198	1	0	1	0	1	1	RNF4	ring finger protein 4
hsa-miR-198	0	0	1	0	0	0	LOC643648	uncharacterized LOC643648
hsa-miR-198	1	0	1	1	1	1	RAB5B	RAB5B, member RAS oncogene family
hsa-miR-198	1	0	1	1	1	1	MAK	male germ cell-associated kinase
hsa-miR-198	1	0	1	1	1	1	FAM13A	family with sequence similarity 13, member A
hsa-miR-198	0	0	1	1	0	0	C9orf43	chromosome 9 open reading frame 43
hsa-miR-198	1	0	1	1	1	1	SIRPA	signal-regulatory protein alpha
hsa-miR-198	0	0	1	1	1	1	IL20RB	interleukin 20 receptor beta
hsa-miR-198	1	0	1	0	1	1	KCTD2	potassium channel tetramerisation domain containing 2
hsa-miR-198	1	0	1	1	1	1	FAM189B	family with sequence similarity 189, member B
hsa-miR-198	0	0	1	0	1	1	GATS	GATS, stromal antigen 3 opposite strand
hsa-miR-198	0	0	1	1	0	0	ADAP2	ArfGAP with dual PH domains 2
hsa-miR-198	0	0	1	1	1	1	HEXA	hexosaminidase A (alpha polypeptide)
hsa-miR-198	0	0	1	1	1	1	ZNF337	zinc finger protein 337
hsa-miR-198	0	0	1	1	1	1	EDA2R	ectodysplasin A2 receptor
hsa-miR-198	0	0	1	1	1	1	ADAM2	ADAM metallopeptidase domain 2
hsa-miR-198	1	0	1	1	0	0	CHST4	carbohydrate (N-acetylglucosamine 6-O) sulfotransferase 4
hsa-miR-198	0	0	1	1	1	1	CLCNKA	chloride channel, voltage-sensitive Ka
hsa-miR-198	0	0	1	0	1	1	TMSB15B	thymosin beta 15B
hsa-miR-198	1	0	1	1	1	1	CTDSPL2	CTD (carboxy-terminal domain, RNA polymerase II, polypeptide A) small phosphatase like 2
hsa-miR-198	1	0	1	1	1	1	DPP6	dipeptidyl-peptidase 6
hsa-miR-198	0	0	1	1	1	1	SNAPC3	small nuclear RNA activating complex, polypeptide 3, 50kDa
hsa-miR-198	0	0	1	0	0	0	LINC00642	long intergenic non-protein coding RNA 642
hsa-miR-198	1	0	1	1	1	1	MEIS1	Meis homeobox 1
hsa-miR-198	1	0	1	1	0	0	TMEM131	transmembrane protein 131
hsa-miR-198	1	0	1	1	1	1	FAM135B	family with sequence similarity 135, member B
hsa-miR-198	1	0	1	1	1	1	CTBP2	C-terminal binding protein 2
hsa-miR-198	1	0	1	1	1	1	C4orf19	chromosome 4 open reading frame 19
hsa-miR-198	1	0	1	0	1	1	KIAA0930	KIAA0930
hsa-miR-198	1	0	1	1	0	0	CHD4	chromodomain helicase DNA binding protein 4
hsa-miR-198	0	0	1	0	0	0	FLJ36000	uncharacterized FLJ36000
hsa-miR-198	0	0	1	0	0	0	LOC401074	uncharacterized LOC401074
hsa-miR-198	0	0	1	0	1	1	LINC00634	long intergenic non-protein coding RNA 634
hsa-miR-198	1	0	1	1	1	1	FOSB	FBJ murine osteosarcoma viral oncogene homolog B
hsa-miR-198	1	0	1	1	1	1	IL16	interleukin 16
hsa-miR-198	1	0	1	1	1	1	DYNC2LI1	dynein, cytoplasmic 2, light intermediate chain 1
hsa-miR-198	0	0	1	1	1	1	FAM71F1	family with sequence similarity 71, member F1
hsa-miR-198	0	0	1	1	1	1	PCMTD2	protein-L-isoaspartate (D-aspartate) O-methyltransferase domain containing 2
hsa-miR-198	0	0	1	1	1	1	VPS35	vacuolar protein sorting 35 homolog (S. cerevisiae)
hsa-miR-198	1	0	1	1	1	1	ARPP21	cAMP-regulated phosphoprotein, 21kDa
hsa-miR-198	0	0	1	0	0	0	LOC154822	uncharacterized LOC154822
hsa-miR-198	1	0	1	1	1	1	TNFSF4	tumor necrosis factor (ligand) superfamily, member 4
hsa-miR-198	0	0	1	1	1	1	GOLGA6L9	golgin A6 family-like 9
hsa-miR-198	1	0	1	1	1	1	CLOCK	clock homolog (mouse)
hsa-miR-198	0	0	1	1	1	1	C4orf32	chromosome 4 open reading frame 32
hsa-miR-198	1	0	1	1	1	1	C12orf76	chromosome 12 open reading frame 76
hsa-miR-198	0	0	1	0	0	0	LRRC37BP1	leucine rich repeat containing 37B pseudogene 1
hsa-miR-198	0	0	1	1	1	1	SH3GL3	SH3-domain GRB2-like 3
hsa-miR-198	0	0	1	0	0	0	LOC338579	ankyrin repeat domain-containing protein 30B pseudogene
hsa-miR-198	0	0	1	0	0	0	DKFZp686O1327	uncharacterized LOC401014
hsa-miR-198	1	0	1	1	1	1	AGAP3	ArfGAP with GTPase domain, ankyrin repeat and PH domain 3
hsa-miR-198	0	0	1	1	1	1	C14orf45	chromosome 14 open reading frame 45
hsa-miR-198	0	0	1	1	1	1	MST1	macrophage stimulating 1 (hepatocyte growth factor-like)
hsa-miR-198	0	0	1	0	0	0	LOC283914	uncharacterized LOC283914
hsa-miR-198	0	0	1	1	0	0	LILRA1	leukocyte immunoglobulin-like receptor, subfamily A (with TM domain), member 1
hsa-miR-198	0	0	1	0	1	1	CADM1	cell adhesion molecule 1
hsa-miR-198	0	0	1	0	1	1	IL33	interleukin 33
hsa-miR-198	0	0	1	0	0	0	INHBA-AS1	INHBA antisense RNA 1
hsa-miR-198	0	0	1	0	0	0	LOC348120	uncharacterized LOC348120
hsa-miR-198	0	0	1	0	0	0	DPY19L2P4	dpy-19-like 2 pseudogene 4 (C. elegans)
hsa-miR-198	0	0	1	0	0	0	LOC729678	uncharacterized LOC729678
hsa-miR-198	0	0	1	1	1	1	INO80C	INO80 complex subunit C
hsa-miR-198	1	0	1	1	1	1	CLVS1	clavesin 1
hsa-miR-198	1	0	1	0	1	1	RNF182	ring finger protein 182
hsa-miR-198	0	0	1	0	1	1	ITGA1	integrin, alpha 1
hsa-miR-198	0	0	1	1	0	0	ENTPD8	ectonucleoside triphosphate diphosphohydrolase 8
hsa-miR-198	0	0	1	1	0	0	NLRC5	NLR family, CARD domain containing 5
hsa-miR-198	1	0	1	0	1	1	SEMA4G	sema domain, immunoglobulin domain (Ig), transmembrane domain (TM) and short cytoplasmic domain, (semaphorin) 4G
hsa-miR-198	1	0	1	1	1	1	YWHAZ	tyrosine 3-monooxygenase/tryptophan 5-monooxygenase activation protein, zeta polypeptide
hsa-miR-198	1	0	1	0	1	1	HDAC5	histone deacetylase 5
hsa-miR-198	1	0	1	1	1	1	PCGF5	polycomb group ring finger 5
hsa-miR-198	1	0	1	1	1	1	SCUBE3	signal peptide, CUB domain, EGF-like 3
hsa-miR-198	0	0	1	0	0	0	AQP7P1	aquaporin 7 pseudogene 1
hsa-miR-198	0	0	1	1	1	1	GRIK5	glutamate receptor, ionotropic, kainate 5
hsa-miR-198	0	0	1	0	0	0	LINC00265	long intergenic non-protein coding RNA 265
hsa-miR-198	1	0	1	1	1	1	RCC2	regulator of chromosome condensation 2
hsa-miR-198	0	0	1	1	0	0	LYZL6	lysozyme-like 6
hsa-miR-198	0	0	1	1	1	1	ZNF254	zinc finger protein 254
hsa-miR-198	0	0	1	1	1	1	MPP3	membrane protein, palmitoylated 3 (MAGUK p55 subfamily member 3)
hsa-miR-198	1	0	1	1	1	1	KLHL28	kelch-like 28 (Drosophila)
hsa-miR-198	0	0	1	1	0	0	WDR90	WD repeat domain 90
hsa-miR-198	0	0	1	1	0	0	PRR19	proline rich 19
hsa-miR-198	0	0	1	1	0	0	CERS4	ceramide synthase 4
hsa-miR-198	0	0	1	1	1	1	C10orf129	chromosome 10 open reading frame 129
hsa-miR-198	0	0	1	0	0	0	FLJ35390	uncharacterized LOC255031
hsa-miR-198	0	0	1	1	1	1	ZNF333	zinc finger protein 333
hsa-miR-198	0	0	1	1	1	1	ZNF33B	zinc finger protein 33B
hsa-miR-198	0	0	1	0	0	0	LOC727751	uncharacterized LOC727751
hsa-miR-198	0	0	1	0	0	0	AGSK1	golgin subfamily A member 2-like
hsa-miR-198	0	0	1	0	0	0	LOC727849	golgin A2 pseudogene
hsa-miR-198	0	0	1	1	1	1	AQP6	aquaporin 6, kidney specific
hsa-miR-198	0	0	1	0	0	0	KANSL1-AS1	KANSL1 antisense RNA 1
hsa-miR-198	0	0	1	1	1	1	SH2D1B	SH2 domain containing 1B
hsa-miR-198	1	0	1	1	1	1	NRSN1	neurensin 1
hsa-miR-198	0	0	1	1	0	0	TMEM183A	transmembrane protein 183A
hsa-miR-198	0	0	1	0	0	0	ZNF66P	zinc finger protein 66, pseudogene
hsa-miR-198	1	0	1	1	1	1	MAPKAPK3	mitogen-activated protein kinase-activated protein kinase 3
hsa-miR-198	1	0	1	1	1	1	SRPK2	SRSF protein kinase 2
hsa-miR-198	1	0	1	1	1	1	LINGO1	leucine rich repeat and Ig domain containing 1
hsa-miR-198	0	0	1	0	0	0	PTGER4P2	prostaglandin E receptor 4 (subtype EP4) pseudogene 2
hsa-miR-198	1	0	1	1	0	0	CHTOP	chromatin target of PRMT1
hsa-miR-198	1	0	1	1	1	1	AHR	aryl hydrocarbon receptor
hsa-miR-198	1	0	1	0	1	1	TMEM194A	transmembrane protein 194A
hsa-miR-198	0	0	1	1	0	0	TRIM41	tripartite motif containing 41
hsa-miR-198	0	0	1	1	0	0	PPIG	peptidylprolyl isomerase G (cyclophilin G)
hsa-miR-198	0	0	1	1	1	1	C3orf67	chromosome 3 open reading frame 67
hsa-miR-198	1	0	1	0	1	1	AMMECR1L	AMME chromosomal region gene 1-like
hsa-miR-198	0	0	1	1	0	0	DNHD1	dynein heavy chain domain 1
hsa-miR-198	0	0	1	0	0	0	LOC554249	uncharacterized LOC554249
hsa-miR-198	1	0	1	1	1	1	ESRRA	estrogen-related receptor alpha
hsa-miR-198	0	0	1	1	0	0	HERC2P3	hect domain and RLD 2 pseudogene 3
hsa-miR-198	0	0	1	0	0	0	FRG1B	FSHD region gene 1 family, member B
hsa-miR-198	1	0	1	1	1	1	ACVR2B	activin A receptor, type IIB
hsa-miR-198	0	0	1	0	0	0	FAM106A	family with sequence similarity 106, member A
hsa-miR-198	0	0	1	1	1	1	COL8A2	collagen, type VIII, alpha 2
hsa-miR-198	0	0	1	1	1	1	PARPBP	PARP1 binding protein
hsa-miR-198	1	0	1	1	1	1	SLC36A2	solute carrier family 36 (proton/amino acid symporter), member 2
hsa-miR-198	0	0	1	0	0	0	CCDC163P	coiled-coil domain containing 163, pseudogene
hsa-miR-198	0	0	1	0	0	0	LOC441493	uncharacterized LOC441493
hsa-miR-198	0	0	1	1	0	0	RIPPLY1	ripply1 homolog (zebrafish)
hsa-miR-198	0	0	1	1	0	0	ZNF276	zinc finger protein 276
hsa-miR-198	1	0	1	1	1	1	PTPRD	protein tyrosine phosphatase, receptor type, D
hsa-miR-198	0	0	1	1	0	0	BEAN1	brain expressed, associated with NEDD4, 1
hsa-miR-198	0	0	1	1	0	0	FMN1	formin 1
hsa-miR-198	1	0	1	1	1	1	SUV420H1	suppressor of variegation 4-20 homolog 1 (Drosophila)
hsa-miR-198	1	0	1	1	1	1	TBP	TATA box binding protein
hsa-miR-198	1	0	1	0	1	1	DNAJC6	DnaJ (Hsp40) homolog, subfamily C, member 6
hsa-miR-198	0	0	1	1	0	0	RELA	v-rel reticuloendotheliosis viral oncogene homolog A (avian)
hsa-miR-198	0	0	1	1	1	1	SMTNL2	smoothelin-like 2
hsa-miR-198	0	0	1	0	0	0	LRRC37A11P	leucine rich repeat containing 37, member A11, pseudogene
hsa-miR-198	0	0	1	1	0	0	PRAMEF10	PRAME family member 10
hsa-miR-198	1	0	1	1	1	1	TMEM132B	transmembrane protein 132B
hsa-miR-198	1	0	1	1	1	1	PPP6R1	protein phosphatase 6, regulatory subunit 1
hsa-miR-198	0	0	1	1	0	0	PRY	PTPN13-like, Y-linked
hsa-miR-198	1	0	1	1	1	1	CTSC	cathepsin C
hsa-miR-198	1	0	1	1	0	0	MAPKBP1	mitogen-activated protein kinase binding protein 1
hsa-miR-198	1	0	1	1	1	1	RFXANK	regulatory factor X-associated ankyrin-containing protein
hsa-miR-198	0	0	1	0	0	0	CCT6P1	chaperonin containing TCP1, subunit 6 (zeta) pseudogene 1
hsa-miR-198	0	0	1	1	0	0	PPAPDC1A	phosphatidic acid phosphatase type 2 domain containing 1A
hsa-miR-198	1	0	1	0	1	1	CAMSAP2	calmodulin regulated spectrin-associated protein family, member 2
hsa-miR-198	0	0	1	1	1	1	KANSL1L	KAT8 regulatory NSL complex subunit 1-like
hsa-miR-198	1	0	1	1	1	1	MEGF11	multiple EGF-like-domains 11
hsa-miR-198	1	0	1	1	1	1	COLQ	collagen-like tail subunit (single strand of homotrimer) of asymmetric acetylcholinesterase
hsa-miR-198	0	0	1	0	1	1	PIK3C2G	phosphatidylinositol-4-phosphate 3-kinase, catalytic subunit type 2 gamma
hsa-miR-198	0	0	1	0	0	0	FAM225B	family with sequence similarity 225, member B (non-protein coding)
hsa-miR-198	1	0	1	0	1	1	NFAT5	nuclear factor of activated T-cells 5, tonicity-responsive
hsa-miR-198	1	0	1	1	1	1	PCM1	pericentriolar material 1
hsa-miR-198	0	0	1	0	1	1	PDLIM4	PDZ and LIM domain 4
hsa-miR-198	0	0	1	1	1	1	TINF2	TERF1 (TRF1)-interacting nuclear factor 2
hsa-miR-198	0	0	1	1	0	0	DHRS1	dehydrogenase/reductase (SDR family) member 1
hsa-miR-198	1	0	1	1	1	1	ATP2B4	ATPase, Ca++ transporting, plasma membrane 4
hsa-miR-198	1	0	1	0	1	1	NFIX	nuclear factor I/X (CCAAT-binding transcription factor)
hsa-miR-198	0	0	1	0	0	0	RGPD4	RANBP2-like and GRIP domain containing 4
hsa-miR-198	0	0	1	1	1	1	STAT2	signal transducer and activator of transcription 2, 113kDa
hsa-miR-198	1	0	1	1	1	1	NFASC	neurofascin
hsa-miR-198	1	0	1	1	1	1	RAB30	RAB30, member RAS oncogene family
hsa-miR-198	0	0	1	1	1	1	COL6A3	collagen, type VI, alpha 3
hsa-miR-198	1	0	1	1	1	1	MASP1	mannan-binding lectin serine peptidase 1 (C4/C2 activating component of Ra-reactive factor)
hsa-miR-198	0	0	1	1	1	1	PRR14L	proline rich 14-like
hsa-miR-198	1	0	1	1	1	1	CGN	cingulin
hsa-miR-198	1	0	1	1	1	1	SLC39A13	solute carrier family 39 (zinc transporter), member 13
hsa-miR-198	1	0	1	1	1	1	EPS15	epidermal growth factor receptor pathway substrate 15
hsa-miR-198	0	0	1	1	0	0	ANKRD33	ankyrin repeat domain 33
hsa-miR-198	1	0	1	1	1	1	RREB1	ras responsive element binding protein 1
hsa-miR-198	1	0	1	1	1	1	NFIB	nuclear factor I/B
hsa-miR-198	1	0	1	1	1	1	NAV1	neuron navigator 1
hsa-miR-198	0	0	1	0	0	0	LOC286299	uncharacterized LOC286299
hsa-miR-198	1	0	1	1	1	1	PGAP1	post-GPI attachment to proteins 1
hsa-miR-198	1	0	1	1	1	1	RECK	reversion-inducing-cysteine-rich protein with kazal motifs
hsa-miR-198	1	0	1	0	1	1	TTL	tubulin tyrosine ligase
hsa-miR-198	0	0	1	0	0	0	LOC100144603	uncharacterized transcript
hsa-miR-198	0	0	1	1	0	0	CRIP2	cysteine-rich protein 2
hsa-miR-198	0	0	1	1	1	1	RABEPK	Rab9 effector protein with kelch motifs
hsa-miR-198	1	0	1	1	1	1	CLU	clusterin
hsa-miR-198	1	0	1	0	0	0	IGLON5	IgLON family member 5
hsa-miR-198	0	0	1	1	1	1	SMYD5	SMYD family member 5
hsa-miR-198	0	0	1	0	0	0	LOC401127	WD repeat domain 5 pseudogene
hsa-miR-198	1	0	1	1	0	0	RAB24	RAB24, member RAS oncogene family
hsa-miR-198	1	0	1	1	1	1	FUT9	fucosyltransferase 9 (alpha (1,3) fucosyltransferase)
hsa-miR-198	0	0	1	0	0	0	RPS16P10	ribosomal protein S16 pseudogene 10
hsa-miR-198	0	0	1	1	0	0	PHKG2	phosphorylase kinase, gamma 2 (testis)
hsa-miR-198	1	0	1	1	1	1	TARBP2	TAR (HIV-1) RNA binding protein 2
hsa-miR-198	0	0	1	1	1	1	FBXO36	F-box protein 36
hsa-miR-198	0	0	1	1	0	0	URM1	ubiquitin related modifier 1
hsa-miR-198	0	0	1	1	1	1	FANCL	Fanconi anemia, complementation group L
hsa-miR-198	0	0	1	0	0	0	COX4I2	cytochrome c oxidase subunit IV isoform 2 (lung)
hsa-miR-198	0	0	1	1	1	1	IER3	immediate early response 3
hsa-miR-198	0	0	1	1	0	0	TPST2	tyrosylprotein sulfotransferase 2
hsa-miR-198	1	0	1	1	1	1	ARL1	ADP-ribosylation factor-like 1
hsa-miR-198	0	0	1	1	0	0	FCGRT	Fc fragment of IgG, receptor, transporter, alpha
hsa-miR-198	0	0	1	0	0	0	ZBED3-AS1	ZBED3 antisense RNA 1
hsa-miR-198	1	0	1	1	1	1	FGF11	fibroblast growth factor 11
hsa-miR-198	0	0	1	1	1	1	APH1A	anterior pharynx defective 1 homolog A (C. elegans)
hsa-miR-198	0	0	1	1	1	1	HSPB8	heat shock 22kDa protein 8
hsa-miR-198	0	0	1	1	1	1	SLC25A4	solute carrier family 25 (mitochondrial carrier; adenine nucleotide translocator), member 4
hsa-miR-198	0	0	1	1	1	1	FUS	fused in sarcoma
hsa-miR-198	0	0	1	1	1	1	BCL7B	B-cell CLL/lymphoma 7B
hsa-miR-198	0	0	1	1	1	1	FAT1	FAT tumor suppressor homolog 1 (Drosophila)
hsa-miR-198	0	0	1	1	1	1	COPS7A	COP9 constitutive photomorphogenic homolog subunit 7A (Arabidopsis)
hsa-miR-198	0	0	1	1	0	0	TFCP2	transcription factor CP2
hsa-miR-198	1	0	1	0	1	1	ARL6IP6	ADP-ribosylation-like factor 6 interacting protein 6
hsa-miR-198	0	0	1	1	1	1	PLAUR	plasminogen activator, urokinase receptor
hsa-miR-198	0	0	1	0	1	1	C17orf108	chromosome 17 open reading frame 108
hsa-miR-198	0	0	1	1	1	1	SORD	sorbitol dehydrogenase
hsa-miR-198	1	0	1	1	1	1	DAZAP1	DAZ associated protein 1
hsa-miR-198	0	0	1	0	0	0	TRIQK	triple QxxK/R motif containing
hsa-miR-198	0	0	1	0	1	1	EMX2	empty spiracles homeobox 2
hsa-miR-198	0	0	1	1	1	1	IFNGR2	interferon gamma receptor 2 (interferon gamma transducer 1)
hsa-miR-198	0	0	1	1	0	0	FAM64A	family with sequence similarity 64, member A
hsa-miR-198	1	0	1	0	1	1	RPS6KB1	ribosomal protein S6 kinase, 70kDa, polypeptide 1
hsa-miR-198	0	0	1	1	0	0	GPSM3	G-protein signaling modulator 3
hsa-miR-198	0	0	1	1	1	1	ANKRD53	ankyrin repeat domain 53
hsa-miR-198	0	0	1	1	1	1	STON1	stonin 1
hsa-miR-198	1	0	1	1	0	0	YPEL3	yippee-like 3 (Drosophila)
hsa-miR-198	0	0	1	1	0	0	CXorf40A	chromosome X open reading frame 40A
hsa-miR-198	1	0	1	1	1	1	NAP1L1	nucleosome assembly protein 1-like 1
hsa-miR-198	0	0	1	1	0	0	MKS1	Meckel syndrome, type 1
hsa-miR-198	0	0	1	1	1	1	PIGC	phosphatidylinositol glycan anchor biosynthesis, class C
hsa-miR-198	0	0	1	1	0	0	CDK2AP2	cyclin-dependent kinase 2 associated protein 2
hsa-miR-198	0	0	1	1	1	1	ATG4A	autophagy related 4A, cysteine peptidase
hsa-miR-198	0	0	1	0	1	1	TMEM155	transmembrane protein 155
hsa-miR-198	0	0	1	1	0	0	C1orf31	chromosome 1 open reading frame 31
hsa-miR-198	0	0	1	1	1	1	C1orf88	chromosome 1 open reading frame 88
hsa-miR-198	0	0	1	1	1	1	CD3E	CD3e molecule, epsilon (CD3-TCR complex)
hsa-miR-198	0	0	1	0	0	0	LOC100130353	hippocampus abundant transcript-like 1 pseudogene
hsa-miR-198	1	0	1	1	1	1	ARNTL	aryl hydrocarbon receptor nuclear translocator-like
hsa-miR-198	1	0	1	1	1	1	BIN3	bridging integrator 3
hsa-miR-198	0	0	1	1	1	1	BTF3	basic transcription factor 3
hsa-miR-198	0	0	1	1	1	1	DEDD	death effector domain containing
hsa-miR-198	1	0	1	1	1	1	CAMK2A	calcium/calmodulin-dependent protein kinase II alpha
hsa-miR-198	0	0	1	1	0	0	RRNAD1	ribosomal RNA adenine dimethylase domain containing 1
hsa-miR-198	0	0	1	1	0	0	EXOSC8	exosome component 8
hsa-miR-198	1	0	1	0	1	1	NLN	neurolysin (metallopeptidase M3 family)
hsa-miR-198	0	0	1	1	1	1	WIBG	within bgcn homolog (Drosophila)
hsa-miR-198	0	0	1	0	1	1	VSTM2A	V-set and transmembrane domain containing 2A
hsa-miR-198	0	0	1	0	1	1	RPL10	ribosomal protein L10
hsa-miR-198	0	0	1	1	1	1	UBE2A	ubiquitin-conjugating enzyme E2A
hsa-miR-198	0	0	1	1	0	0	PHPT1	phosphohistidine phosphatase 1
hsa-miR-198	0	0	1	1	1	1	LYSMD4	LysM, putative peptidoglycan-binding, domain containing 4
hsa-miR-198	0	0	1	1	1	1	TCTN3	tectonic family member 3
hsa-miR-198	0	0	1	1	0	0	AATF	apoptosis antagonizing transcription factor
hsa-miR-198	0	0	1	1	1	1	GFM1	G elongation factor, mitochondrial 1
hsa-miR-198	1	0	1	0	1	1	GRAMD1A	GRAM domain containing 1A
hsa-miR-198	0	0	1	1	1	1	DNAJC25	DnaJ (Hsp40) homolog, subfamily C , member 25
hsa-miR-198	0	0	1	1	1	1	JAM2	junctional adhesion molecule 2
hsa-miR-198	1	0	1	1	1	1	HMGN2	high mobility group nucleosomal binding domain 2
hsa-miR-198	0	0	1	1	0	0	TMEM41A	transmembrane protein 41A
hsa-miR-198	1	0	1	1	0	0	CCM2	cerebral cavernous malformation 2
hsa-miR-198	1	0	1	0	1	1	CD47	CD47 molecule
hsa-miR-198	0	0	1	0	0	0	CHEK2P2	checkpoint kinase 2 pseudogene 2
hsa-miR-198	0	0	1	1	1	1	ZNF346	zinc finger protein 346
hsa-miR-198	0	0	1	1	1	1	INPP5K	inositol polyphosphate-5-phosphatase K
hsa-miR-198	1	0	1	1	1	1	ATPAF1	ATP synthase mitochondrial F1 complex assembly factor 1
hsa-miR-198	1	0	1	1	1	1	LGALSL	lectin, galactoside-binding-like
hsa-miR-198	0	0	1	0	0	0	LOC731789	uncharacterized LOC731789
hsa-miR-198	1	0	1	1	1	1	FBXW7	F-box and WD repeat domain containing 7, E3 ubiquitin protein ligase
hsa-miR-198	0	0	1	0	0	0	LINC00661	long intergenic non-protein coding RNA 661
hsa-miR-198	1	0	1	1	1	1	ANKS6	ankyrin repeat and sterile alpha motif domain containing 6
hsa-miR-198	0	0	1	0	0	0	DNAJC27-AS1	DNAJC27 antisense RNA 1
hsa-miR-198	1	0	1	1	1	1	BCL2L1	BCL2-like 1
hsa-miR-198	0	0	1	0	0	0	LOC440518	golgin A2 pseudogene
hsa-miR-198	0	0	1	1	0	0	GOLGB1	golgin B1
hsa-miR-198	0	0	1	1	1	1	TMEM41B	transmembrane protein 41B
hsa-miR-198	1	0	1	1	1	1	NKX2-1	NK2 homeobox 1
hsa-miR-198	1	0	1	1	1	1	MAN2A2	mannosidase, alpha, class 2A, member 2
hsa-miR-198	1	0	1	0	1	1	KLHDC10	kelch domain containing 10
hsa-miR-198	1	0	1	1	1	1	QKI	QKI, KH domain containing, RNA binding
hsa-miR-198	1	0	1	0	1	1	MAP2K7	mitogen-activated protein kinase kinase 7
hsa-miR-198	1	0	1	0	1	1	RBBP5	retinoblastoma binding protein 5
hsa-miR-198	0	0	1	1	1	1	HOOK2	hook homolog 2 (Drosophila)
hsa-miR-198	0	0	1	1	1	1	CCL20	chemokine (C-C motif) ligand 20
hsa-miR-198	0	0	1	0	0	0	LCE6A	late cornified envelope 6A
hsa-miR-198	0	0	1	0	0	0	GPR144	G protein-coupled receptor 144
hsa-miR-198	1	0	1	0	1	1	BCL2	B-cell CLL/lymphoma 2
hsa-miR-198	1	0	1	1	1	1	PLAU	plasminogen activator, urokinase
hsa-miR-198	1	0	1	1	1	1	IGF1	insulin-like growth factor 1 (somatomedin C)
hsa-miR-198	0	0	1	1	1	1	COL7A1	collagen, type VII, alpha 1
hsa-miR-198	1	0	1	1	1	1	ESR1	estrogen receptor 1
hsa-miR-198	1	0	1	0	1	1	GLI3	GLI family zinc finger 3
hsa-miR-198	0	0	1	1	1	1	HPRT1	hypoxanthine phosphoribosyltransferase 1
hsa-miR-198	1	0	1	0	1	1	ITGB3	integrin, beta 3 (platelet glycoprotein IIIa, antigen CD61)
hsa-miR-198	1	0	1	1	1	1	KCNA1	potassium voltage-gated channel, shaker-related subfamily, member 1 (episodic ataxia with myokymia)
hsa-miR-198	0	0	1	1	1	1	KRT12	keratin 12
hsa-miR-198	1	0	1	1	1	1	MET	met proto-oncogene (hepatocyte growth factor receptor)
hsa-miR-198	1	0	1	0	1	1	PTEN	phosphatase and tensin homolog
hsa-miR-198	1	0	1	1	1	1	RB1	retinoblastoma 1
hsa-miR-198	1	0	1	1	1	1	ATXN1	ataxin 1
hsa-miR-198	1	0	1	1	1	1	SOX9	SRY (sex determining region Y)-box 9
hsa-miR-198	0	0	1	1	1	1	SLC25A20	solute carrier family 25 (carnitine/acylcarnitine translocase), member 20
hsa-miR-198	1	0	1	1	1	1	HLCS	holocarboxylase synthetase (biotin-(proprionyl-CoA-carboxylase (ATP-hydrolysing)) ligase)
hsa-miR-198	1	0	1	0	1	1	PAFAH1B1	platelet-activating factor acetylhydrolase 1b, regulatory subunit 1 (45kDa)
hsa-miR-198	0	0	1	1	1	1	OXCT1	3-oxoacid CoA transferase 1
hsa-miR-198	1	0	1	1	1	1	HNF1B	HNF1 homeobox B
hsa-miR-198	0	0	1	1	1	1	ALPL	alkaline phosphatase, liver/bone/kidney
hsa-miR-198	0	0	1	1	1	1	CYP11B2	cytochrome P450, family 11, subfamily B, polypeptide 2
hsa-miR-198	1	0	1	1	1	1	PLP1	proteolipid protein 1
hsa-miR-198	1	0	1	1	1	1	DCX	doublecortin
hsa-miR-198	0	0	1	0	1	1	C8A	complement component 8, alpha polypeptide
hsa-miR-198	0	0	1	1	1	1	FCGR1A	Fc fragment of IgG, high affinity Ia, receptor (CD64)
hsa-miR-198	1	0	1	1	1	1	IL10	interleukin 10
hsa-miR-198	0	0	1	1	1	1	C7	complement component 7
hsa-miR-198	0	0	1	1	1	1	CNTF	ciliary neurotrophic factor
hsa-miR-198	1	0	1	0	1	1	CACNA1E	calcium channel, voltage-dependent, R type, alpha 1E subunit
hsa-miR-198	1	0	1	1	1	1	CSF1	colony stimulating factor 1 (macrophage)
hsa-miR-198	0	0	1	1	1	1	DIO1	deiodinase, iodothyronine, type I
hsa-miR-198	1	0	1	1	1	1	DIO2	deiodinase, iodothyronine, type II
hsa-miR-198	1	0	1	1	1	1	HTR4	5-hydroxytryptamine (serotonin) receptor 4, G protein-coupled
hsa-miR-198	1	0	1	0	1	1	KCNJ2	potassium inwardly-rectifying channel, subfamily J, member 2
hsa-miR-198	1	0	1	1	1	1	PPP3R1	protein phosphatase 3, regulatory subunit B, alpha
hsa-miR-198	1	0	1	1	1	1	PTGER4	prostaglandin E receptor 4 (subtype EP4)
hsa-miR-198	1	0	1	0	1	1	UBE2W	ubiquitin-conjugating enzyme E2W (putative)
hsa-miR-198	1	0	1	0	1	1	ARHGEF37	Rho guanine nucleotide exchange factor (GEF) 37
hsa-miR-198	1	0	1	1	1	1	ATP1B1	ATPase, Na+/K+ transporting, beta 1 polypeptide
hsa-miR-198	0	0	1	0	0	0	C10orf55	chromosome 10 open reading frame 55
hsa-miR-198	1	0	1	0	1	1	RAB11FIP1	RAB11 family interacting protein 1 (class I)
hsa-miR-198	1	0	1	1	1	1	GATA3	GATA binding protein 3
hsa-miR-198	0	0	1	1	1	1	STAG3L1	stromal antigen 3-like 1
hsa-miR-198	1	0	1	0	1	1	SMAD2	SMAD family member 2
hsa-miR-198	0	0	1	1	0	0	C1orf95	chromosome 1 open reading frame 95
hsa-miR-198	1	0	1	0	1	1	BMF	Bcl2 modifying factor
hsa-miR-198	1	0	1	1	1	1	FBLN2	fibulin 2
hsa-miR-198	0	0	1	1	0	0	RTP2	receptor (chemosensory) transporter protein 2
hsa-miR-198	0	0	1	1	1	1	DBX2	developing brain homeobox 2
hsa-miR-198	1	0	1	0	1	1	LRRC55	leucine rich repeat containing 55
hsa-miR-198	0	0	1	1	1	1	HMGN2P46	high mobility group nucleosomal binding domain 2 pseudogene 46
hsa-miR-198	0	0	1	1	0	0	KRTAP5-11	keratin associated protein 5-11
hsa-miR-198	0	0	1	1	0	0	MARCH2	membrane-associated ring finger (C3HC4) 2, E3 ubiquitin protein ligase
hsa-miR-198	1	0	1	1	1	1	PLCXD3	phosphatidylinositol-specific phospholipase C, X domain containing 3
hsa-miR-198	0	0	1	1	1	1	LINC00478	long intergenic non-protein coding RNA 478
hsa-miR-198	0	0	1	1	1	1	SUMO1	SMT3 suppressor of mif two 3 homolog 1 (S. cerevisiae)
hsa-miR-198	0	0	1	1	1	1	RYK	receptor-like tyrosine kinase
hsa-miR-198	1	0	1	0	1	1	IP6K1	inositol hexakisphosphate kinase 1
hsa-miR-198	1	0	1	1	1	1	TCEAL8	transcription elongation factor A (SII)-like 8
hsa-miR-198	1	0	1	0	1	1	GOSR1	golgi SNAP receptor complex member 1
hsa-miR-198	1	0	1	1	1	1	NTRK3	neurotrophic tyrosine kinase, receptor, type 3
hsa-miR-198	1	0	1	1	1	1	IGF2BP2	insulin-like growth factor 2 mRNA binding protein 2
hsa-miR-198	1	0	1	1	1	1	EI24	etoposide induced 2.4 mRNA
hsa-miR-198	1	0	1	1	1	1	ZDHHC9	zinc finger, DHHC-type containing 9
hsa-miR-198	1	0	1	0	1	1	C18orf25	chromosome 18 open reading frame 25
hsa-miR-198	1	0	1	0	1	1	KIAA2022	KIAA2022
hsa-miR-198	1	0	1	1	1	1	NUPL1	nucleoporin like 1
hsa-miR-198	0	0	1	0	0	0	CD200R1L	CD200 receptor 1-like
hsa-miR-198	1	0	1	0	1	1	MTX3	metaxin 3
hsa-miR-198	0	0	1	1	1	1	NCMAP	noncompact myelin associated protein
hsa-miR-198	1	0	1	0	1	1	CREB5	cAMP responsive element binding protein 5
hsa-miR-198	0	0	1	1	0	0	CLEC18B	C-type lectin domain family 18, member B
hsa-miR-198	1	0	1	1	1	1	CTNNBIP1	catenin, beta interacting protein 1
hsa-miR-198	0	0	1	1	0	0	KRTAP5-7	keratin associated protein 5-7
hsa-miR-198	0	0	1	0	1	1	LINC00596	long intergenic non-protein coding RNA 596
hsa-miR-198	1	0	1	1	1	1	SLC25A53	solute carrier family 25, member 53
hsa-miR-198	1	0	1	0	1	1	ZKSCAN2	zinc finger with KRAB and SCAN domains 2
hsa-miR-198	1	0	1	1	1	1	SORCS1	sortilin-related VPS10 domain containing receptor 1
hsa-miR-198	1	0	1	1	1	1	C12orf68	chromosome 12 open reading frame 68
hsa-miR-198	0	0	1	1	0	0	VSIG8	V-set and immunoglobulin domain containing 8
hsa-miR-198	0	0	1	0	1	1	LINC00268	long intergenic non-protein coding RNA 268
hsa-miR-198	0	0	1	1	0	0	DDR2	discoidin domain receptor tyrosine kinase 2
hsa-miR-198	1	0	1	1	1	1	PHF6	PHD finger protein 6
hsa-miR-198	1	0	1	1	1	1	DKK3	dickkopf 3 homolog (Xenopus laevis)
hsa-miR-198	1	0	1	1	1	1	ABCC5	ATP-binding cassette, sub-family C (CFTR/MRP), member 5
hsa-miR-198	1	0	1	0	1	1	RGAG4	retrotransposon gag domain containing 4
hsa-miR-198	0	0	1	1	1	1	RGPD1	RANBP2-like and GRIP domain containing 1
hsa-miR-198	1	0	1	0	1	1	TNRC6B	trinucleotide repeat containing 6B
hsa-miR-198	0	0	1	1	0	0	GRB7	growth factor receptor-bound protein 7
hsa-miR-198	0	0	1	1	1	1	ATF3	activating transcription factor 3
hsa-miR-198	1	0	1	1	1	1	NEK10	NIMA (never in mitosis gene a)- related kinase 10
hsa-miR-198	1	0	1	1	1	1	CSNK1G3	casein kinase 1, gamma 3
hsa-miR-198	0	0	1	0	1	1	STXBP1	syntaxin binding protein 1
hsa-miR-198	1	0	1	1	1	1	RCE1	RCE1 homolog, prenyl protein protease (S. cerevisiae)
hsa-miR-198	1	0	1	1	1	1	TMPO	thymopoietin
hsa-miR-198	0	0	1	1	1	1	SLC35A2	solute carrier family 35 (UDP-galactose transporter), member A2
hsa-miR-198	1	0	1	0	1	1	MINOS1	mitochondrial inner membrane organizing system 1
hsa-miR-198	1	0	1	1	1	1	MYCL1	v-myc myelocytomatosis viral oncogene homolog 1, lung carcinoma derived (avian)
hsa-miR-198	1	0	1	0	1	1	SRGAP3	SLIT-ROBO Rho GTPase activating protein 3
hsa-miR-198	0	0	1	1	1	1	PHF12	PHD finger protein 12
hsa-miR-198	0	0	1	1	1	1	FAM134B	family with sequence similarity 134, member B
hsa-miR-198	1	0	1	0	1	1	RYR2	ryanodine receptor 2 (cardiac)
hsa-miR-198	1	0	1	1	1	1	SCD5	stearoyl-CoA desaturase 5
hsa-miR-198	1	0	1	0	1	1	CDC42SE1	CDC42 small effector 1
hsa-miR-198	0	0	1	1	1	1	ATAD3C	ATPase family, AAA domain containing 3C
hsa-miR-198	1	0	1	1	1	1	KCNC4	potassium voltage-gated channel, Shaw-related subfamily, member 4
hsa-miR-198	1	0	1	1	1	1	CHTF8	CTF8, chromosome transmission fidelity factor 8 homolog (S. cerevisiae)
hsa-miR-198	1	0	1	0	1	1	FAM133B	family with sequence similarity 133, member B
hsa-miR-198	0	0	1	0	1	1	SCN3B	sodium channel, voltage-gated, type III, beta subunit
hsa-miR-198	0	0	1	1	1	1	MCHR2	melanin-concentrating hormone receptor 2
hsa-miR-198	1	0	1	1	1	1	MTMR12	myotubularin related protein 12
hsa-miR-198	1	0	1	1	1	1	CYLD	cylindromatosis (turban tumor syndrome)
hsa-miR-198	1	0	1	1	1	1	HMGCLL1	3-hydroxymethyl-3-methylglutaryl-CoA lyase-like 1
hsa-miR-198	1	0	1	1	1	1	NSL1	NSL1, MIND kinetochore complex component, homolog (S. cerevisiae)
hsa-miR-198	1	0	1	1	1	1	FRS2	fibroblast growth factor receptor substrate 2
hsa-miR-198	0	0	1	1	1	1	SEC24B	SEC24 family, member B (S. cerevisiae)
hsa-miR-198	1	0	1	0	1	1	SRGAP2	SLIT-ROBO Rho GTPase activating protein 2
hsa-miR-198	1	0	1	1	1	1	QSER1	glutamine and serine rich 1
hsa-miR-198	1	0	1	1	1	1	ATG9A	autophagy related 9A
hsa-miR-198	1	0	1	1	1	1	GRIA4	glutamate receptor, ionotropic, AMPA 4
hsa-miR-198	1	0	1	1	1	1	NCOR2	nuclear receptor corepressor 2
hsa-miR-198	1	0	1	1	1	1	PRR3	proline rich 3
hsa-miR-198	0	0	1	1	1	1	RGPD2	RANBP2-like and GRIP domain containing 2
hsa-miR-198	1	0	1	0	1	1	TRAPPC6B	trafficking protein particle complex 6B
hsa-miR-198	0	0	1	1	1	1	FKTN	fukutin
hsa-miR-198	0	0	1	0	0	0	TMEM183B	transmembrane protein 183B
hsa-miR-198	0	0	1	1	1	1	DIAPH1	diaphanous homolog 1 (Drosophila)
hsa-miR-198	1	0	1	1	1	1	FAM155A	family with sequence similarity 155, member A
hsa-miR-198	1	0	1	1	0	0	DLGAP3	discs, large (Drosophila) homolog-associated protein 3
hsa-miR-198	1	0	1	1	1	1	SHANK3	SH3 and multiple ankyrin repeat domains 3
hsa-miR-198	1	0	1	0	1	1	ODZ3	odz, odd Oz/ten-m homolog 3 (Drosophila)
hsa-miR-198	1	0	1	1	1	1	ASIC1	acid-sensing (proton-gated) ion channel 1
hsa-miR-198	1	0	1	0	1	1	BMPR2	bone morphogenetic protein receptor, type II (serine/threonine kinase)
hsa-miR-198	1	0	1	0	1	1	CDK6	cyclin-dependent kinase 6
hsa-miR-198	1	0	1	1	1	1	CHD1	chromodomain helicase DNA binding protein 1
hsa-miR-198	1	0	1	1	1	1	CELSR2	cadherin, EGF LAG seven-pass G-type receptor 2 (flamingo homolog, Drosophila)
hsa-miR-198	1	0	1	1	1	1	EIF1AX	eukaryotic translation initiation factor 1A, X-linked
hsa-miR-198	1	0	1	1	1	1	ELAVL1	ELAV (embryonic lethal, abnormal vision, Drosophila)-like 1 (Hu antigen R)
hsa-miR-198	0	0	1	0	1	1	ELF5	E74-like factor 5 (ets domain transcription factor)
hsa-miR-198	0	0	1	1	0	0	FABP5	fatty acid binding protein 5 (psoriasis-associated)
hsa-miR-198	1	0	1	1	1	1	IRAK2	interleukin-1 receptor-associated kinase 2
hsa-miR-198	0	0	1	1	1	1	ALOX5AP	arachidonate 5-lipoxygenase-activating protein
hsa-miR-198	0	0	1	1	1	1	AOAH	acyloxyacyl hydrolase (neutrophil)
hsa-miR-198	0	0	1	1	0	0	APEH	N-acylaminoacyl-peptide hydrolase
hsa-miR-198	0	0	1	1	0	0	ARAF	v-raf murine sarcoma 3611 viral oncogene homolog
hsa-miR-198	1	0	1	1	1	1	ARF3	ADP-ribosylation factor 3
hsa-miR-198	1	0	1	1	1	1	BNC1	basonuclin 1
hsa-miR-198	1	0	1	0	1	1	CCND2	cyclin D2
hsa-miR-198	0	0	1	1	1	1	CD1D	CD1d molecule
hsa-miR-198	1	0	1	1	1	1	CDH11	cadherin 11, type 2, OB-cadherin (osteoblast)
hsa-miR-198	1	0	1	1	1	1	CLTB	clathrin, light chain B
hsa-miR-198	0	0	1	1	0	0	CPA1	carboxypeptidase A1 (pancreatic)
hsa-miR-198	1	0	1	0	0	0	DRP2	dystrophin related protein 2
hsa-miR-198	1	0	1	1	1	1	FMOD	fibromodulin
hsa-miR-198	0	0	1	1	1	1	H2AFX	H2A histone family, member X
hsa-miR-198	1	0	1	1	1	1	TNC	tenascin C
hsa-miR-198	1	0	1	1	1	1	ITGA3	integrin, alpha 3 (antigen CD49C, alpha 3 subunit of VLA-3 receptor)
hsa-miR-198	1	0	1	1	1	1	ITGA5	integrin, alpha 5 (fibronectin receptor, alpha polypeptide)
hsa-miR-198	0	0	1	1	0	0	EIF6	eukaryotic translation initiation factor 6
hsa-miR-198	1	0	1	1	1	1	KPNA3	karyopherin alpha 3 (importin alpha 4)
hsa-miR-198	1	0	1	1	1	1	M6PR	mannose-6-phosphate receptor (cation dependent)
hsa-miR-198	1	0	1	0	1	1	MXD1	MAX dimerization protein 1
hsa-miR-198	0	0	1	0	1	1	CXCL9	chemokine (C-X-C motif) ligand 9
hsa-miR-198	1	0	1	1	1	1	MSR1	macrophage scavenger receptor 1
hsa-miR-198	1	0	1	1	1	1	PPP1R12B	protein phosphatase 1, regulatory subunit 12B
hsa-miR-198	0	0	1	1	1	1	NDUFC1	NADH dehydrogenase (ubiquinone) 1, subcomplex unknown, 1, 6kDa
hsa-miR-198	1	0	1	1	1	1	NGFR	nerve growth factor receptor
hsa-miR-198	1	0	1	1	1	1	NPAT	nuclear protein, ataxia-telangiectasia locus
hsa-miR-198	1	0	1	0	1	1	PAK2	p21 protein (Cdc42/Rac)-activated kinase 2
hsa-miR-198	1	0	1	0	1	1	PAPPA	pregnancy-associated plasma protein A, pappalysin 1
hsa-miR-198	0	0	1	1	1	1	PBX1	pre-B-cell leukemia homeobox 1
hsa-miR-198	1	0	1	1	1	1	PBX2	pre-B-cell leukemia homeobox 2
hsa-miR-198	0	0	1	1	1	1	PIK3C2B	phosphatidylinositol-4-phosphate 3-kinase, catalytic subunit type 2 beta
hsa-miR-198	1	0	1	1	1	1	PLAGL2	pleiomorphic adenoma gene-like 2
hsa-miR-198	1	0	1	0	1	1	POU3F1	POU class 3 homeobox 1
hsa-miR-198	1	0	1	0	0	0	PPP1R10	protein phosphatase 1, regulatory subunit 10
hsa-miR-198	0	0	1	1	1	1	PRKCB	protein kinase C, beta
hsa-miR-198	1	0	1	1	0	0	PSMD7	proteasome (prosome, macropain) 26S subunit, non-ATPase, 7
hsa-miR-198	1	0	1	1	0	0	CCL3	chemokine (C-C motif) ligand 3
hsa-miR-198	1	0	1	0	1	1	ST6GAL1	ST6 beta-galactosamide alpha-2,6-sialyltranferase 1
hsa-miR-198	0	0	1	1	1	1	SLAMF1	signaling lymphocytic activation molecule family member 1
hsa-miR-198	1	0	1	0	1	1	SLC6A1	solute carrier family 6 (neurotransmitter transporter, GABA), member 1
hsa-miR-198	1	0	1	1	1	1	SMARCC1	SWI/SNF related, matrix associated, actin dependent regulator of chromatin, subfamily c, member 1
hsa-miR-198	0	0	1	1	1	1	UAP1	UDP-N-acteylglucosamine pyrophosphorylase 1
hsa-miR-198	1	0	1	1	1	1	SRF	serum response factor (c-fos serum response element-binding transcription factor)
hsa-miR-198	0	0	1	1	1	1	STAT6	signal transducer and activator of transcription 6, interleukin-4 induced
hsa-miR-198	1	0	1	1	1	1	TFAP2B	transcription factor AP-2 beta (activating enhancer binding protein 2 beta)
hsa-miR-198	1	0	1	1	1	1	TGFB3	transforming growth factor, beta 3
hsa-miR-198	1	0	1	0	1	1	THBS1	thrombospondin 1
hsa-miR-198	0	0	1	1	0	0	TIMP1	TIMP metallopeptidase inhibitor 1
hsa-miR-198	1	0	1	1	1	1	TRPC1	transient receptor potential cation channel, subfamily C, member 1
hsa-miR-198	1	0	1	0	1	1	UBE2D2	ubiquitin-conjugating enzyme E2D 2
hsa-miR-198	1	0	1	1	1	1	UBE2D3	ubiquitin-conjugating enzyme E2D 3
hsa-miR-198	1	0	1	0	1	1	BSN	bassoon (presynaptic cytomatrix protein)
hsa-miR-198	0	0	1	1	1	1	SCG2	secretogranin II
hsa-miR-198	1	0	1	1	1	1	DEK	DEK oncogene
hsa-miR-198	1	0	1	1	1	1	ADAM12	ADAM metallopeptidase domain 12
hsa-miR-198	1	0	1	1	1	1	NRIP1	nuclear receptor interacting protein 1
hsa-miR-198	0	0	1	1	0	0	SEMA7A	semaphorin 7A, GPI membrane anchor (John Milton Hagen blood group)
hsa-miR-198	0	0	1	1	1	1	ITGA10	integrin, alpha 10
hsa-miR-198	1	0	1	1	1	1	BARX2	BARX homeobox 2
hsa-miR-198	0	0	1	1	1	1	AP3B1	adaptor-related protein complex 3, beta 1 subunit
hsa-miR-198	1	0	1	1	1	1	CDC14A	CDC14 cell division cycle 14 homolog A (S. cerevisiae)
hsa-miR-198	0	0	1	1	0	0	DCHS1	dachsous 1 (Drosophila)
hsa-miR-198	0	0	1	1	1	1	IL18R1	interleukin 18 receptor 1
hsa-miR-198	1	0	1	0	1	1	CDK5R1	cyclin-dependent kinase 5, regulatory subunit 1 (p35)
hsa-miR-198	1	0	1	1	1	1	ALDH1A2	aldehyde dehydrogenase 1 family, member A2
hsa-miR-198	0	0	1	1	0	0	FCGBP	Fc fragment of IgG binding protein
hsa-miR-198	1	0	1	1	1	1	UBE2M	ubiquitin-conjugating enzyme E2M
hsa-miR-198	0	0	1	0	1	1	FASN	fatty acid synthase
hsa-miR-198	1	0	1	1	1	1	GMFB	glia maturation factor, beta
hsa-miR-198	0	0	1	0	1	1	HABP2	hyaluronan binding protein 2
hsa-miR-198	0	0	1	1	1	1	LBP	lipopolysaccharide binding protein
hsa-miR-198	1	0	1	1	1	1	PPP2CB	protein phosphatase 2, catalytic subunit, beta isozyme
hsa-miR-198	0	0	1	1	0	0	WNT2B	wingless-type MMTV integration site family, member 2B
hsa-miR-198	1	0	1	1	1	1	SLC25A27	solute carrier family 25, member 27
hsa-miR-198	0	0	1	0	1	1	CYTIP	cytohesin 1 interacting protein
hsa-miR-198	1	0	1	0	1	1	ACVR1B	activin A receptor, type IB
hsa-miR-198	1	0	1	1	1	1	ARL3	ADP-ribosylation factor-like 3
hsa-miR-198	1	0	1	1	1	1	BCL9	B-cell CLL/lymphoma 9
hsa-miR-198	0	0	1	1	0	0	CAMP	cathelicidin antimicrobial peptide
hsa-miR-198	0	0	1	1	0	0	COX6A1	cytochrome c oxidase subunit VIa polypeptide 1
hsa-miR-198	1	0	1	1	1	1	EPHA2	EPH receptor A2
hsa-miR-198	1	0	1	0	1	1	ETV5	ets variant 5
hsa-miR-198	1	0	1	1	1	1	FUT8	fucosyltransferase 8 (alpha (1,6) fucosyltransferase)
hsa-miR-198	0	0	1	1	1	1	HOXB7	homeobox B7
hsa-miR-198	1	0	1	1	0	0	HOXC6	homeobox C6
hsa-miR-198	0	0	1	1	0	0	NFKBIE	nuclear factor of kappa light polypeptide gene enhancer in B-cells inhibitor, epsilon
hsa-miR-198	1	0	1	0	1	1	WNT7A	wingless-type MMTV integration site family, member 7A
hsa-miR-198	1	0	1	1	1	1	BAP1	BRCA1 associated protein-1 (ubiquitin carboxy-terminal hydrolase)
hsa-miR-198	1	0	1	1	1	1	RAB11A	RAB11A, member RAS oncogene family
hsa-miR-198	0	0	1	1	1	1	LIN7A	lin-7 homolog A (C. elegans)
hsa-miR-198	0	0	1	1	1	1	CDY1	chromodomain protein, Y-linked, 1
hsa-miR-198	1	0	1	1	1	1	MTMR6	myotubularin related protein 6
hsa-miR-198	1	0	1	1	1	1	MTMR4	myotubularin related protein 4
hsa-miR-198	0	0	1	0	1	1	CXorf1	chromosome X open reading frame 1
hsa-miR-198	0	0	1	1	1	1	BUB3	budding uninhibited by benzimidazoles 3 homolog (yeast)
hsa-miR-198	0	0	1	1	0	0	EIF4E2	eukaryotic translation initiation factor 4E family member 2
hsa-miR-198	1	0	1	1	1	1	ONECUT2	one cut homeobox 2
hsa-miR-198	0	0	1	1	1	1	CLCA3P	chloride channel accessory 3, pseudogene
hsa-miR-198	1	0	1	1	1	1	SEC24C	SEC24 family, member C (S. cerevisiae)
hsa-miR-198	1	0	1	0	1	1	DOCK3	dedicator of cytokinesis 3
hsa-miR-198	1	0	1	0	1	1	SCD	stearoyl-CoA desaturase (delta-9-desaturase)
hsa-miR-198	1	0	1	0	1	1	SEL1L	sel-1 suppressor of lin-12-like (C. elegans)
hsa-miR-198	1	0	1	1	1	1	GFPT2	glutamine-fructose-6-phosphate transaminase 2
hsa-miR-198	0	0	1	1	0	0	ASCL2	achaete-scute complex homolog 2 (Drosophila)
hsa-miR-198	1	0	1	1	1	1	FOXN3	forkhead box N3
hsa-miR-198	1	0	1	1	1	1	CRK	v-crk sarcoma virus CT10 oncogene homolog (avian)
hsa-miR-198	1	0	1	1	1	1	NR2F6	nuclear receptor subfamily 2, group F, member 6
hsa-miR-198	1	0	1	1	1	1	ETS1	v-ets erythroblastosis virus E26 oncogene homolog 1 (avian)
hsa-miR-198	0	0	1	1	0	0	GNL1	guanine nucleotide binding protein-like 1
hsa-miR-198	0	0	1	1	0	0	NCKAP1L	NCK-associated protein 1-like
hsa-miR-198	1	0	1	1	0	0	NNAT	neuronatin
hsa-miR-198	1	0	1	0	1	1	PRKAB2	protein kinase, AMP-activated, beta 2 non-catalytic subunit
hsa-miR-198	1	0	1	0	1	1	PRKCE	protein kinase C, epsilon
hsa-miR-198	0	0	1	1	1	1	SLC20A1	solute carrier family 20 (phosphate transporter), member 1
hsa-miR-198	0	0	1	1	1	1	MALL	mal, T-cell differentiation protein-like
hsa-miR-198	1	0	1	0	1	1	CCDC6	coiled-coil domain containing 6
hsa-miR-198	1	0	1	1	0	0	NOG	noggin
hsa-miR-198	1	0	1	1	0	0	ZBTB22	zinc finger and BTB domain containing 22
hsa-miR-198	1	0	1	1	1	1	AKT3	v-akt murine thymoma viral oncogene homolog 3 (protein kinase B, gamma)
hsa-miR-198	1	0	1	1	1	1	SCARB2	scavenger receptor class B, member 2
hsa-miR-198	1	0	1	1	1	1	HOXA1	homeobox A1
hsa-miR-198	1	0	1	1	1	1	LAMC2	laminin, gamma 2
hsa-miR-198	1	0	1	1	1	1	MAB21L1	mab-21-like 1 (C. elegans)
hsa-miR-198	0	0	1	1	1	1	ACTR3	ARP3 actin-related protein 3 homolog (yeast)
hsa-miR-198	1	0	1	1	1	1	ACTR1A	ARP1 actin-related protein 1 homolog A, centractin alpha (yeast)
hsa-miR-198	0	0	1	1	1	1	TXNDC9	thioredoxin domain containing 9
hsa-miR-198	0	0	1	1	1	1	RNF41	ring finger protein 41
hsa-miR-198	1	0	1	0	1	1	SPRY3	sprouty homolog 3 (Drosophila)
hsa-miR-198	1	0	1	1	1	1	PURA	purine-rich element binding protein A
hsa-miR-198	1	0	1	1	1	1	EFS	embryonal Fyn-associated substrate
hsa-miR-198	1	0	1	1	1	1	MAN1A1	mannosidase, alpha, class 1A, member 1
hsa-miR-198	0	0	1	1	1	1	MFAP3	microfibrillar-associated protein 3
hsa-miR-198	1	0	1	1	1	1	MTF1	metal-regulatory transcription factor 1
hsa-miR-198	0	0	1	1	1	1	S100A2	S100 calcium binding protein A2
hsa-miR-198	0	0	1	1	0	0	UQCRH	ubiquinol-cytochrome c reductase hinge protein
hsa-miR-198	1	0	1	1	1	1	TMEM50B	transmembrane protein 50B
hsa-miR-198	0	0	1	1	1	1	CD28	CD28 molecule
hsa-miR-198	0	0	1	1	1	1	CSF2RA	colony stimulating factor 2 receptor, alpha, low-affinity (granulocyte-macrophage)
hsa-miR-198	1	0	1	1	1	1	DNAJB1	DnaJ (Hsp40) homolog, subfamily B, member 1
hsa-miR-198	1	0	1	1	1	1	LASP1	LIM and SH3 protein 1
hsa-miR-198	1	0	1	1	1	1	ORC2	origin recognition complex, subunit 2
hsa-miR-198	1	0	1	1	1	1	PDGFRA	platelet-derived growth factor receptor, alpha polypeptide
hsa-miR-198	1	0	1	1	1	1	PPP2R5E	protein phosphatase 2, regulatory subunit B', epsilon isoform
hsa-miR-198	0	0	1	1	1	1	RRAS	related RAS viral (r-ras) oncogene homolog
hsa-miR-198	1	0	1	1	1	1	STK4	serine/threonine kinase 4
hsa-miR-198	1	0	1	1	1	1	SMC1A	structural maintenance of chromosomes 1A
hsa-miR-198	1	0	1	1	1	1	ZER1	zer-1 homolog (C. elegans)
hsa-miR-198	1	0	1	1	1	1	NXF1	nuclear RNA export factor 1
hsa-miR-198	1	0	1	1	1	1	VAT1	vesicle amine transport protein 1 homolog (T. californica)
hsa-miR-198	1	0	1	1	1	1	NEBL	nebulette
hsa-miR-198	0	0	1	1	1	1	CXCL13	chemokine (C-X-C motif) ligand 13
hsa-miR-198	0	0	1	1	0	0	STAMBP	STAM binding protein
hsa-miR-198	1	0	1	1	1	1	SLC2A1	solute carrier family 2 (facilitated glucose transporter), member 1
hsa-miR-198	1	0	1	0	1	1	API5	apoptosis inhibitor 5
hsa-miR-198	1	0	1	1	1	1	PLK2	polo-like kinase 2
hsa-miR-198	1	0	1	1	1	1	DIAPH2	diaphanous homolog 2 (Drosophila)
hsa-miR-198	1	0	1	1	1	1	HIVEP2	human immunodeficiency virus type I enhancer binding protein 2
hsa-miR-198	1	0	1	1	0	0	PSKH1	protein serine kinase H1
hsa-miR-198	1	0	1	0	1	1	TCEA1	transcription elongation factor A (SII), 1
hsa-miR-198	1	0	1	1	1	1	KAT6A	K(lysine) acetyltransferase 6A
hsa-miR-198	0	0	1	1	0	0	HNRNPA0	heterogeneous nuclear ribonucleoprotein A0
hsa-miR-198	1	0	1	0	1	1	SOX12	SRY (sex determining region Y)-box 12
hsa-miR-198	1	0	1	1	1	1	SYN1	synapsin I
hsa-miR-198	1	0	1	0	1	1	WASF2	WAS protein family, member 2
hsa-miR-198	1	0	1	1	1	1	ABHD2	abhydrolase domain containing 2
hsa-miR-198	1	0	1	1	1	1	RAPGEF4	Rap guanine nucleotide exchange factor (GEF) 4
hsa-miR-198	0	0	1	1	1	1	TMEM115	transmembrane protein 115
hsa-miR-198	1	0	1	1	1	1	ADAMTS5	ADAM metallopeptidase with thrombospondin type 1 motif, 5
hsa-miR-198	0	0	1	1	1	1	CD160	CD160 molecule
hsa-miR-198	1	0	1	1	1	1	UTY	ubiquitously transcribed tetratricopeptide repeat gene, Y-linked
hsa-miR-198	1	0	1	1	1	1	VCP	valosin containing protein
hsa-miR-198	1	0	1	1	1	1	ZNF81	zinc finger protein 81
hsa-miR-198	0	0	1	0	0	0	ZXDA	zinc finger, X-linked, duplicated A
hsa-miR-198	0	0	1	0	1	1	ZXDB	zinc finger, X-linked, duplicated B
hsa-miR-198	1	0	1	1	1	1	ABCF2	ATP-binding cassette, sub-family F (GCN20), member 2
hsa-miR-198	1	0	1	1	1	1	PALM2-AKAP2	PALM2-AKAP2 readthrough
hsa-miR-198	1	0	1	1	1	1	DUSP10	dual specificity phosphatase 10
hsa-miR-198	1	0	1	1	1	1	KLF12	Kruppel-like factor 12
hsa-miR-198	1	0	1	1	1	1	CASC3	cancer susceptibility candidate 3
hsa-miR-198	1	0	1	1	1	1	PADI2	peptidyl arginine deiminase, type II
hsa-miR-198	1	0	1	1	1	1	ICOS	inducible T-cell co-stimulator
hsa-miR-198	0	0	1	1	1	1	LMOD1	leiomodin 1 (smooth muscle)
hsa-miR-198	0	0	1	1	1	1	SEPHS2	selenophosphate synthetase 2
hsa-miR-198	1	0	1	1	1	1	HEY2	hairy/enhancer-of-split related with YRPW motif 2
hsa-miR-198	1	0	1	1	1	1	KCNE1L	KCNE1-like
hsa-miR-198	1	0	1	1	1	1	KCNH4	potassium voltage-gated channel, subfamily H (eag-related), member 4
hsa-miR-198	1	0	1	1	1	1	KIF4A	kinesin family member 4A
hsa-miR-198	1	0	1	1	1	1	MAPRE1	microtubule-associated protein, RP/EB family, member 1
hsa-miR-198	1	0	1	0	1	1	MYO10	myosin X
hsa-miR-198	0	0	1	1	1	1	TCL6	T-cell leukemia/lymphoma 6 (non-protein coding)
hsa-miR-198	1	0	1	1	1	1	TRPC5	transient receptor potential cation channel, subfamily C, member 5
hsa-miR-198	1	0	1	1	1	1	YWHAG	tyrosine 3-monooxygenase/tryptophan 5-monooxygenase activation protein, gamma polypeptide
hsa-miR-198	1	0	1	1	1	1	ZNF281	zinc finger protein 281
hsa-miR-198	0	0	1	1	1	1	N6AMT1	N-6 adenine-specific DNA methyltransferase 1 (putative)
hsa-miR-198	1	0	1	1	1	1	PADI1	peptidyl arginine deiminase, type I
hsa-miR-198	1	0	1	1	1	1	AK2	adenylate kinase 2
hsa-miR-198	0	0	1	0	1	1	EMR2	egf-like module containing, mucin-like, hormone receptor-like 2
hsa-miR-198	1	0	1	1	0	0	DEXI	Dexi homolog (mouse)
hsa-miR-198	0	0	1	1	1	1	LRP10	low density lipoprotein receptor-related protein 10
hsa-miR-198	1	0	1	1	1	1	RGCC	regulator of cell cycle
hsa-miR-198	1	0	1	1	1	1	VAMP1	vesicle-associated membrane protein 1 (synaptobrevin 1)
hsa-miR-198	1	0	1	0	1	1	LIMD1	LIM domains containing 1
hsa-miR-198	0	0	1	0	1	1	ADAMTS3	ADAM metallopeptidase with thrombospondin type 1 motif, 3
hsa-miR-198	1	0	1	1	1	1	C11orf58	chromosome 11 open reading frame 58
hsa-miR-198	0	0	1	1	0	0	OLFM1	olfactomedin 1
hsa-miR-198	1	0	1	1	1	1	NPTXR	neuronal pentraxin receptor
hsa-miR-198	1	0	1	1	1	1	LHX6	LIM homeobox 6
hsa-miR-198	0	0	1	1	0	0	PKD2L2	polycystic kidney disease 2-like 2
hsa-miR-198	1	0	1	1	1	1	AFF4	AF4/FMR2 family, member 4
hsa-miR-198	0	0	1	1	0	0	TINAG	tubulointerstitial nephritis antigen
hsa-miR-198	1	0	1	1	1	1	OTX1	orthodenticle homeobox 1
hsa-miR-198	1	0	1	1	1	1	ERO1L	ERO1-like (S. cerevisiae)
hsa-miR-198	1	0	1	1	1	1	RALGPS1	Ral GEF with PH domain and SH3 binding motif 1
hsa-miR-198	1	0	1	1	1	1	KDM4A	lysine (K)-specific demethylase 4A
hsa-miR-198	1	0	1	0	1	1	EDEM1	ER degradation enhancer, mannosidase alpha-like 1
hsa-miR-198	1	0	1	1	1	1	ULK2	unc-51-like kinase 2 (C. elegans)
hsa-miR-198	0	0	1	1	1	1	ZNF536	zinc finger protein 536
hsa-miR-198	1	0	1	0	1	1	MLEC	malectin
hsa-miR-198	1	0	1	0	1	1	WDFY3	WD repeat and FYVE domain containing 3
hsa-miR-198	1	0	1	1	1	1	ERP44	endoplasmic reticulum protein 44
hsa-miR-198	1	0	1	0	1	1	PEG10	paternally expressed 10
hsa-miR-198	1	0	1	1	1	1	IQSEC2	IQ motif and Sec7 domain 2
hsa-miR-198	1	0	1	1	1	1	RCOR1	REST corepressor 1
hsa-miR-198	0	0	1	1	1	1	ARL6IP1	ADP-ribosylation factor-like 6 interacting protein 1
hsa-miR-198	0	0	1	1	1	1	FBXO28	F-box protein 28
hsa-miR-198	1	0	1	1	1	1	SIK2	salt-inducible kinase 2
hsa-miR-198	1	0	1	0	1	1	KIAA1024	KIAA1024
hsa-miR-198	1	0	1	0	1	1	LARP1	La ribonucleoprotein domain family, member 1
hsa-miR-198	1	0	1	1	1	1	MED13L	mediator complex subunit 13-like
hsa-miR-198	0	0	1	1	1	1	ADNP	activity-dependent neuroprotector homeobox
hsa-miR-198	0	0	1	1	1	1	LEPROTL1	leptin receptor overlapping transcript-like 1
hsa-miR-198	1	0	1	1	1	1	PARM1	prostate androgen-regulated mucin-like protein 1
hsa-miR-198	1	0	1	1	1	1	PNKD	paroxysmal nonkinesigenic dyskinesia
hsa-miR-198	1	0	1	1	1	1	SLITRK5	SLIT and NTRK-like family, member 5
hsa-miR-198	0	0	1	1	1	1	BRPF3	bromodomain and PHD finger containing, 3
hsa-miR-198	0	0	1	1	1	1	KRT76	keratin 76
hsa-miR-198	1	0	1	1	1	1	ST8SIA3	ST8 alpha-N-acetyl-neuraminide alpha-2,8-sialyltransferase 3
hsa-miR-198	1	0	1	0	1	1	TRIM33	tripartite motif containing 33
hsa-miR-198	1	0	1	0	1	1	KLF13	Kruppel-like factor 13
hsa-miR-198	1	0	1	0	1	1	CNR1	cannabinoid receptor 1 (brain)
hsa-miR-198	1	0	1	1	1	1	NLK	nemo-like kinase
hsa-miR-198	1	0	1	0	1	1	HPCAL4	hippocalcin like 4
hsa-miR-198	0	0	1	1	1	1	UFC1	ubiquitin-fold modifier conjugating enzyme 1
hsa-miR-198	1	0	1	1	1	1	IER5	immediate early response 5
hsa-miR-198	0	0	1	1	0	0	PCDH12	protocadherin 12
hsa-miR-198	1	0	1	0	1	1	FZD3	frizzled family receptor 3
hsa-miR-198	1	0	1	0	1	1	KLHL3	kelch-like 3 (Drosophila)
hsa-miR-198	1	0	1	1	1	1	PLXNA3	plexin A3
hsa-miR-198	1	0	1	1	1	1	ZNF280C	zinc finger protein 280C
hsa-miR-198	0	0	1	1	0	0	NDE1	nudE nuclear distribution E homolog 1 (A. nidulans)
hsa-miR-198	0	0	1	1	0	0	NUP62CL	nucleoporin 62kDa C-terminal like
hsa-miR-198	1	0	1	1	1	1	VPS13C	vacuolar protein sorting 13 homolog C (S. cerevisiae)
hsa-miR-198	0	0	1	1	0	0	PALMD	palmdelphin
hsa-miR-198	0	0	1	1	1	1	WHSC1L1	Wolf-Hirschhorn syndrome candidate 1-like 1
hsa-miR-198	0	0	1	1	1	1	SOHLH2	spermatogenesis and oogenesis specific basic helix-loop-helix 2
hsa-miR-198	1	0	1	1	1	1	GID8	GID complex subunit 8 homolog (S. cerevisiae)
hsa-miR-198	1	0	1	1	1	1	HIF1AN	hypoxia inducible factor 1, alpha subunit inhibitor
hsa-miR-198	0	0	1	1	1	1	FKBP14	FK506 binding protein 14, 22 kDa
hsa-miR-198	0	0	1	1	1	1	AIM1L	absent in melanoma 1-like
hsa-miR-198	1	0	1	1	1	1	BCL11A	B-cell CLL/lymphoma 11A (zinc finger protein)
hsa-miR-198	1	0	1	1	1	1	FIGN	fidgetin
hsa-miR-198	0	0	1	1	1	1	TMEM38B	transmembrane protein 38B
hsa-miR-198	1	0	1	1	1	1	FAM178A	family with sequence similarity 178, member A
hsa-miR-198	1	0	1	0	1	1	ARL8B	ADP-ribosylation factor-like 8B
hsa-miR-198	1	0	1	1	1	1	LRRC20	leucine rich repeat containing 20
hsa-miR-198	1	0	1	1	1	1	UBA6	ubiquitin-like modifier activating enzyme 6
hsa-miR-198	1	0	1	0	1	1	SEPT11	septin 11
hsa-miR-198	1	0	1	1	1	1	SPTLC3	serine palmitoyltransferase, long chain base subunit 3
hsa-miR-198	1	0	1	0	1	1	TMEM106B	transmembrane protein 106B
hsa-miR-198	0	0	1	1	1	1	WDR33	WD repeat domain 33
hsa-miR-198	1	0	1	0	1	1	FOXJ2	forkhead box J2
hsa-miR-198	0	0	1	0	0	0	KDM3A	lysine (K)-specific demethylase 3A
hsa-miR-198	0	0	1	0	0	0	APOBR	apolipoprotein B receptor
hsa-miR-198	1	0	1	0	1	1	TMEM55A	transmembrane protein 55A
hsa-miR-198	1	0	1	1	1	1	GNG12	guanine nucleotide binding protein (G protein), gamma 12
hsa-miR-198	1	0	1	1	0	0	HOXB6	homeobox B6
hsa-miR-198	0	0	1	1	1	1	NPAP1	nuclear pore associated protein 1
hsa-miR-198	1	0	1	1	1	1	KCTD5	potassium channel tetramerisation domain containing 5
hsa-miR-198	0	0	1	1	1	1	KRT24	keratin 24
hsa-miR-198	1	0	1	0	1	1	TMX3	thioredoxin-related transmembrane protein 3
hsa-miR-198	0	0	1	1	0	0	TOMM7	translocase of outer mitochondrial membrane 7 homolog (yeast)
hsa-miR-198	1	0	1	1	1	1	SGTB	small glutamine-rich tetratricopeptide repeat (TPR)-containing, beta
hsa-miR-198	1	0	1	0	1	1	CCNJ	cyclin J
hsa-miR-198	0	0	1	0	1	1	ARL15	ADP-ribosylation factor-like 15
hsa-miR-198	0	0	1	1	1	1	KLHL4	kelch-like 4 (Drosophila)
hsa-miR-198	1	0	1	1	1	1	WDR45L	WDR45-like
hsa-miR-198	1	0	1	1	1	1	CYP26B1	cytochrome P450, family 26, subfamily B, polypeptide 1
hsa-miR-198	1	0	1	0	1	1	SLAMF8	SLAM family member 8
hsa-miR-198	1	0	1	0	1	1	PAPOLB	poly(A) polymerase beta (testis specific)
hsa-miR-198	1	0	1	1	1	1	SAR1A	SAR1 homolog A (S. cerevisiae)
hsa-miR-198	0	0	1	1	1	1	CXCR7	chemokine (C-X-C motif) receptor 7
hsa-miR-198	1	0	1	0	1	1	CNNM1	cyclin M1
hsa-miR-198	1	0	1	0	1	1	EIF5A2	eukaryotic translation initiation factor 5A2
hsa-miR-198	0	0	1	0	1	1	TMEM63C	transmembrane protein 63C
hsa-miR-198	1	0	1	1	1	1	EPHA8	EPH receptor A8
hsa-miR-198	1	0	1	0	1	1	DCUN1D1	DCN1, defective in cullin neddylation 1, domain containing 1 (S. cerevisiae)
hsa-miR-198	1	0	1	1	1	1	DLG3	discs, large homolog 3 (Drosophila)
hsa-miR-198	1	0	1	0	1	1	NUFIP2	nuclear fragile X mental retardation protein interacting protein 2
hsa-miR-198	1	0	1	1	1	1	NLGN2	neuroligin 2
hsa-miR-198	0	0	1	0	1	1	TRMT5	tRNA methyltransferase 5 homolog (S. cerevisiae)
hsa-miR-198	1	0	1	1	1	1	TSHZ3	teashirt zinc finger homeobox 3
hsa-miR-198	0	0	1	1	1	1	AQP9	aquaporin 9
hsa-miR-198	0	0	1	1	0	0	CCL3L1	chemokine (C-C motif) ligand 3-like 1
hsa-miR-198	1	0	1	1	1	1	RPRD1B	regulation of nuclear pre-mRNA domain containing 1B
hsa-miR-198	0	0	1	1	1	1	OSTC	oligosaccharyltransferase complex subunit
hsa-miR-198	1	0	1	1	1	1	NTN4	netrin 4
hsa-miR-198	1	0	1	1	1	1	FAM60A	family with sequence similarity 60, member A
hsa-miR-198	1	0	1	1	1	1	OTX2	orthodenticle homeobox 2
hsa-miR-198	0	0	1	0	1	1	CFL2	cofilin 2 (muscle)
hsa-miR-198	0	0	1	1	1	1	SLC17A9	solute carrier family 17, member 9
hsa-miR-198	0	0	1	1	1	1	CHP2	calcineurin-like EF hand protein 2
hsa-miR-198	0	0	1	1	1	1	CLSPN	claspin
hsa-miR-198	0	0	1	1	0	0	LIN7B	lin-7 homolog B (C. elegans)
hsa-miR-198	1	0	1	1	1	1	XYLT2	xylosyltransferase II
hsa-miR-198	0	0	1	1	1	1	TCTA	T-cell leukemia translocation altered
hsa-miR-198	1	0	1	1	1	1	HIF3A	hypoxia inducible factor 3, alpha subunit
hsa-miR-198	1	0	1	0	1	1	HOXC8	homeobox C8
hsa-miR-198	1	0	1	1	1	1	FBXL17	F-box and leucine-rich repeat protein 17
hsa-miR-198	1	0	1	0	1	1	BCL11B	B-cell CLL/lymphoma 11B (zinc finger protein)
hsa-miR-198	1	0	1	1	1	1	FOXL2	forkhead box L2
hsa-miR-198	1	0	1	1	1	1	C1orf116	chromosome 1 open reading frame 116
hsa-miR-198	0	0	1	1	0	0	DHRS11	dehydrogenase/reductase (SDR family) member 11
hsa-miR-198	0	0	1	1	0	0	DCTN3	dynactin 3 (p22)
hsa-miR-198	1	0	1	1	1	1	LRRC2	leucine rich repeat containing 2
hsa-miR-198	0	0	1	1	0	0	EPS8L3	EPS8-like 3
hsa-miR-198	0	0	1	1	1	1	CHST5	carbohydrate (N-acetylglucosamine 6-O) sulfotransferase 5
hsa-miR-198	0	0	1	1	1	1	GLT25D1	glycosyltransferase 25 domain containing 1
hsa-miR-198	1	0	1	0	1	1	MOB3B	MOB kinase activator 3B
hsa-miR-198	0	0	1	1	1	1	RPAP2	RNA polymerase II associated protein 2
hsa-miR-198	1	0	1	0	1	1	NAA25	N(alpha)-acetyltransferase 25, NatB auxiliary subunit
hsa-miR-198	1	0	1	1	1	1	KLHL18	kelch-like 18 (Drosophila)
hsa-miR-198	0	0	1	1	1	1	CCDC170	coiled-coil domain containing 170
hsa-miR-198	0	0	1	1	0	0	CENPT	centromere protein T
hsa-miR-198	1	0	1	1	1	1	RNF34	ring finger protein 34, E3 ubiquitin protein ligase
hsa-miR-198	1	0	1	1	1	1	HKDC1	hexokinase domain containing 1
hsa-miR-198	1	0	1	1	1	1	NUBPL	nucleotide binding protein-like
hsa-miR-198	1	0	1	0	1	1	EDEM3	ER degradation enhancer, mannosidase alpha-like 3
hsa-miR-198	0	0	1	1	0	0	INTS5	integrator complex subunit 5
hsa-miR-198	1	0	1	1	1	1	JHDM1D	jumonji C domain containing histone demethylase 1 homolog D (S. cerevisiae)
hsa-miR-198	1	0	1	0	1	1	SETD7	SET domain containing (lysine methyltransferase) 7
hsa-miR-198	1	0	1	1	1	1	PTPRO	protein tyrosine phosphatase, receptor type, O
hsa-miR-198	1	0	1	0	1	1	C1orf21	chromosome 1 open reading frame 21
hsa-miR-198	1	0	1	1	1	1	PDRG1	p53 and DNA-damage regulated 1
hsa-miR-198	1	0	1	1	1	1	OR2H1	olfactory receptor, family 2, subfamily H, member 1
hsa-miR-198	1	0	1	1	1	1	TRIM8	tripartite motif containing 8
hsa-miR-198	1	0	1	1	1	1	RAB1B	RAB1B, member RAS oncogene family
hsa-miR-198	0	0	1	1	1	1	SEH1L	SEH1-like (S. cerevisiae)
hsa-miR-198	1	0	1	1	0	0	TCF7L1	transcription factor 7-like 1 (T-cell specific, HMG-box)
hsa-miR-198	0	0	1	1	1	1	MS4A8B	membrane-spanning 4-domains, subfamily A, member 8B
hsa-miR-198	1	0	1	0	1	1	SH3BGRL2	SH3 domain binding glutamic acid-rich protein like 2
hsa-miR-198	1	0	1	1	1	1	CDH20	cadherin 20, type 2
hsa-miR-198	1	0	1	1	1	1	OTP	orthopedia homeobox
hsa-miR-198	1	0	1	1	1	1	UTP15	UTP15, U3 small nucleolar ribonucleoprotein, homolog (S. cerevisiae)
hsa-miR-198	1	0	1	1	1	1	FAM175B	family with sequence similarity 175, member B
hsa-miR-198	1	0	1	1	1	1	PHF20L1	PHD finger protein 20-like 1
hsa-miR-198	0	0	1	0	1	1	LDOC1L	leucine zipper, down-regulated in cancer 1-like
hsa-miR-198	1	0	1	1	1	1	CAMKK1	calcium/calmodulin-dependent protein kinase kinase 1, alpha
hsa-miR-198	0	0	1	1	1	1	POLR3GL	polymerase (RNA) III (DNA directed) polypeptide G (32kD)-like
hsa-miR-198	1	0	1	1	1	1	POLDIP3	polymerase (DNA-directed), delta interacting protein 3
hsa-miR-198	0	0	1	1	0	0	NICN1	nicolin 1
hsa-miR-198	1	0	1	1	1	1	DNAJC14	DnaJ (Hsp40) homolog, subfamily C, member 14
hsa-miR-198	0	0	1	1	1	1	C15orf48	chromosome 15 open reading frame 48
hsa-miR-198	0	0	1	1	0	0	PCDH1	protocadherin 1
hsa-miR-198	1	0	1	1	1	1	HIATL1	hippocampus abundant transcript-like 1
hsa-miR-198	1	0	1	1	1	1	PPP1R9B	protein phosphatase 1, regulatory subunit 9B
hsa-miR-198	0	0	1	1	1	1	FAM136A	family with sequence similarity 136, member A
hsa-miR-198	1	0	1	0	1	1	UBASH3B	ubiquitin associated and SH3 domain containing B
hsa-miR-198	1	0	1	1	1	1	ARHGAP19	Rho GTPase activating protein 19
hsa-miR-198	0	0	1	0	1	1	PIGY	phosphatidylinositol glycan anchor biosynthesis, class Y
hsa-miR-198	1	0	1	0	1	1	C5orf62	chromosome 5 open reading frame 62
hsa-miR-198	0	0	1	1	1	1	POLR2J2	polymerase (RNA) II (DNA directed) polypeptide J2
hsa-miR-198	0	0	1	1	1	1	TRIM4	tripartite motif containing 4
hsa-miR-198	0	0	1	1	1	1	UCN2	urocortin 2
hsa-miR-198	1	0	1	0	1	1	PURB	purine-rich element binding protein B
hsa-miR-198	1	0	1	1	1	1	ADAM19	ADAM metallopeptidase domain 19
hsa-miR-198	1	0	1	1	1	1	RASL10B	RAS-like, family 10, member B
hsa-miR-198	0	0	1	1	1	1	LHX4	LIM homeobox 4
hsa-miR-198	0	0	1	1	0	0	GZMH	granzyme H (cathepsin G-like 2, protein h-CCPX)
hsa-miR-198	0	0	1	0	1	1	C9orf123	chromosome 9 open reading frame 123
hsa-miR-198	1	0	1	1	0	0	FCHSD1	FCH and double SH3 domains 1
hsa-miR-198	1	0	1	1	1	1	EPT1	ethanolaminephosphotransferase 1 (CDP-ethanolamine-specific)
hsa-miR-198	1	0	1	1	0	0	DISP2	dispatched homolog 2 (Drosophila)
hsa-miR-198	1	0	1	1	1	1	TSPYL5	TSPY-like 5
hsa-miR-198	1	0	1	1	1	1	TPD52L3	tumor protein D52-like 3
hsa-miR-198	1	0	1	1	0	0	CCDC120	coiled-coil domain containing 120
hsa-miR-198	1	0	1	0	0	0	ANKRD40	ankyrin repeat domain 40
hsa-miR-198	1	0	1	1	1	1	SLC2A13	solute carrier family 2 (facilitated glucose transporter), member 13
hsa-miR-198	0	0	1	1	1	1	PLEKHG4B	pleckstrin homology domain containing, family G (with RhoGef domain) member 4B
hsa-miR-198	0	0	1	1	0	0	FAM46B	family with sequence similarity 46, member B
hsa-miR-198	0	0	1	1	0	0	TNFRSF13C	tumor necrosis factor receptor superfamily, member 13C
hsa-miR-198	0	0	1	1	0	0	APOA5	apolipoprotein A-V
hsa-miR-198	1	0	1	1	1	1	BTN2A1	butyrophilin, subfamily 2, member A1
hsa-miR-198	1	0	1	1	1	1	ZNF280B	zinc finger protein 280B
hsa-miR-198	1	0	1	1	1	1	FAM210B	family with sequence similarity 210, member B
hsa-miR-198	1	0	1	1	1	1	GPR62	G protein-coupled receptor 62
hsa-miR-198	1	0	1	0	1	1	SOCS4	suppressor of cytokine signaling 4
hsa-miR-198	1	0	1	1	1	1	PRRC1	proline-rich coiled-coil 1
hsa-miR-198	1	0	1	1	1	1	ADAMTS19	ADAM metallopeptidase with thrombospondin type 1 motif, 19
hsa-miR-198	0	0	1	1	0	0	C6orf25	chromosome 6 open reading frame 25
hsa-miR-198	1	0	1	1	1	1	SPTSSA	serine palmitoyltransferase, small subunit A
hsa-miR-198	1	0	1	1	0	0	PYGO2	pygopus homolog 2 (Drosophila)
hsa-miR-198	1	0	1	1	0	0	DCAF15	DDB1 and CUL4 associated factor 15
hsa-miR-198	1	0	1	1	0	0	PKDCC	protein kinase domain containing, cytoplasmic homolog (mouse)
hsa-miR-198	0	0	1	1	1	1	MRAP2	melanocortin 2 receptor accessory protein 2
hsa-miR-198	1	0	1	1	1	1	WDR92	WD repeat domain 92
hsa-miR-198	1	0	1	0	1	1	NUS1	nuclear undecaprenyl pyrophosphate synthase 1 homolog (S. cerevisiae)
hsa-miR-198	1	0	1	1	1	1	ICA1L	islet cell autoantigen 1,69kDa-like
hsa-miR-198	1	0	1	0	1	1	SP1	Sp1 transcription factor
hsa-miR-198	0	0	1	1	1	1	ALKBH8	alkB, alkylation repair homolog 8 (E. coli)
hsa-miR-198	0	0	1	1	1	1	MTFMT	mitochondrial methionyl-tRNA formyltransferase
hsa-miR-198	0	0	1	1	0	0	RHOXF1	Rhox homeobox family, member 1
hsa-miR-198	1	0	1	1	1	1	PPTC7	PTC7 protein phosphatase homolog (S. cerevisiae)
hsa-miR-198	1	0	1	1	1	1	TEX261	testis expressed 261
hsa-miR-198	0	0	1	1	0	0	CMTM2	CKLF-like MARVEL transmembrane domain containing 2
hsa-miR-198	1	0	1	1	1	1	MBNL2	muscleblind-like splicing regulator 2
hsa-miR-198	0	0	1	1	0	0	PEBP4	phosphatidylethanolamine-binding protein 4
hsa-miR-198	0	0	1	1	1	1	ZFC3H1	zinc finger, C3H1-type containing
hsa-miR-198	0	0	1	1	1	1	NXPE3	neurexophilin and PC-esterase domain family, member 3
hsa-miR-198	0	0	1	0	1	1	DDIT4L	DNA-damage-inducible transcript 4-like
hsa-miR-198	1	0	1	1	1	1	MOB3C	MOB kinase activator 3C
hsa-miR-198	0	0	1	0	1	1	OSTCP1	oligosaccharyltransferase complex subunit pseudogene 1
hsa-miR-198	0	0	1	1	1	1	LRTOMT	leucine rich transmembrane and 0-methyltransferase domain containing
hsa-miR-198	1	0	1	0	1	1	MTPN	myotrophin
hsa-miR-198	0	0	1	1	0	0	IL11RA	interleukin 11 receptor, alpha
hsa-miR-198	1	0	1	1	1	1	TPM3	tropomyosin 3
hsa-miR-198	0	0	1	1	1	1	ATP1A3	ATPase, Na+/K+ transporting, alpha 3 polypeptide
hsa-miR-198	1	0	1	1	1	1	LSM12	LSM12 homolog (S. cerevisiae)
hsa-miR-198	1	0	1	1	1	1	C1orf216	chromosome 1 open reading frame 216
hsa-miR-198	1	0	1	1	1	1	FAM123B	family with sequence similarity 123B
hsa-miR-198	0	0	1	1	1	1	PM20D1	peptidase M20 domain containing 1
hsa-miR-198	1	0	1	1	1	1	ZNF362	zinc finger protein 362
hsa-miR-198	1	0	1	1	1	1	PPM1K	protein phosphatase, Mg2+/Mn2+ dependent, 1K
hsa-miR-198	0	0	1	1	0	0	C2orf57	chromosome 2 open reading frame 57
hsa-miR-198	0	0	1	1	0	0	MS4A15	membrane-spanning 4-domains, subfamily A, member 15
hsa-miR-198	1	0	1	1	1	1	HEPACAM	hepatic and glial cell adhesion molecule
hsa-miR-198	1	0	1	1	1	1	NXPH1	neurexophilin 1
hsa-miR-198	1	0	1	1	1	1	ATXN7L1	ataxin 7-like 1
hsa-miR-198	1	0	1	1	1	1	PDIK1L	PDLIM1 interacting kinase 1 like
hsa-miR-198	1	0	1	0	1	1	ST6GALNAC3	ST6 (alpha-N-acetyl-neuraminyl-2,3-beta-galactosyl-1,3)-N-acetylgalactosaminide alpha-2,6-sialyltransferase 3
hsa-miR-198	1	0	1	1	1	1	APCDD1	adenomatosis polyposis coli down-regulated 1
hsa-miR-198	1	0	1	0	1	1	KDM1B	lysine (K)-specific demethylase 1B
hsa-miR-198	0	0	1	1	0	0	DEFB119	defensin, beta 119
hsa-miR-198	0	0	1	1	1	1	SLC22A7	solute carrier family 22 (organic anion transporter), member 7
hsa-miR-198	0	0	1	1	0	0	ALDH16A1	aldehyde dehydrogenase 16 family, member A1
hsa-miR-198	0	0	1	0	1	1	VGLL2	vestigial like 2 (Drosophila)
hsa-miR-198	1	0	1	0	1	1	SEMA6D	sema domain, transmembrane domain (TM), and cytoplasmic domain, (semaphorin) 6D
hsa-miR-198	1	0	1	1	1	1	FNDC5	fibronectin type III domain containing 5
hsa-miR-198	0	0	1	1	1	1	ZFP91-CNTF	ZFP91-CNTF readthrough (non-protein coding)
hsa-miR-198	0	0	1	1	1	1	WFDC13	WAP four-disulfide core domain 13
hsa-miR-198	1	0	1	1	1	1	POM121	POM121 transmembrane nucleoporin
hsa-miR-198	1	0	1	0	1	1	PLEKHH2	pleckstrin homology domain containing, family H (with MyTH4 domain) member 2
hsa-miR-198	0	0	1	0	1	1	GTF2A1L	general transcription factor IIA, 1-like
hsa-miR-198	0	0	1	1	1	1	TAPBP	TAP binding protein (tapasin)
hsa-miR-198	0	0	1	1	1	1	KLF17	Kruppel-like factor 17
hsa-miR-198	1	0	1	1	1	1	CCDC117	coiled-coil domain containing 117
hsa-miR-198	0	0	1	1	1	1	C17orf78	chromosome 17 open reading frame 78
hsa-miR-198	1	0	1	1	1	1	RIMKLA	ribosomal modification protein rimK-like family member A
hsa-miR-198	1	0	1	1	1	1	ATG9B	autophagy related 9B
hsa-miR-198	0	0	1	1	1	1	C3orf38	chromosome 3 open reading frame 38
hsa-miR-198	1	0	1	1	1	1	LDLRAD3	low density lipoprotein receptor class A domain containing 3
hsa-miR-198	1	0	1	0	1	1	TMEM167A	transmembrane protein 167A
hsa-miR-198	1	0	1	1	0	0	KRTAP11-1	keratin associated protein 11-1
hsa-miR-198	0	0	1	1	0	0	CHMP4B	charged multivesicular body protein 4B
hsa-miR-198	0	0	1	1	1	1	HSD17B13	hydroxysteroid (17-beta) dehydrogenase 13
hsa-miR-198	0	0	1	1	0	0	NEK8	NIMA (never in mitosis gene a)- related kinase 8
hsa-miR-198	0	0	1	0	1	1	CDCP1	CUB domain containing protein 1
hsa-miR-198	0	0	1	1	1	1	ATPIF1	ATPase inhibitory factor 1
hsa-miR-198	1	0	1	0	1	1	IQGAP3	IQ motif containing GTPase activating protein 3
hsa-miR-198	1	0	1	0	1	1	RTN4RL1	reticulon 4 receptor-like 1
hsa-miR-198	1	0	1	1	1	1	TCF20	transcription factor 20 (AR1)
hsa-miR-198	0	0	1	1	0	0	KRT25	keratin 25
hsa-miR-198	0	0	1	1	0	0	BCDIN3D	BCDIN3 domain containing
hsa-miR-198	0	0	1	0	1	1	SPATA12	spermatogenesis associated 12
hsa-miR-198	1	0	1	1	1	1	FAM216B	family with sequence similarity 216, member B
hsa-miR-198	1	0	1	0	1	1	C12orf36	chromosome 12 open reading frame 36
hsa-miR-198	1	0	1	1	1	1	SP8	Sp8 transcription factor
hsa-miR-198	0	0	1	0	1	1	C16orf82	chromosome 16 open reading frame 82
hsa-miR-198	1	0	1	0	1	1	RIMS4	regulating synaptic membrane exocytosis 4
hsa-miR-198	1	0	1	1	1	1	RD3	retinal degeneration 3
hsa-miR-198	1	0	1	1	1	1	ARRDC4	arrestin domain containing 4
hsa-miR-198	1	0	1	0	1	1	HNRNPA3	heterogeneous nuclear ribonucleoprotein A3
hsa-miR-198	0	0	1	0	1	1	CLDN23	claudin 23
hsa-miR-198	0	0	1	1	1	1	ZNF169	zinc finger protein 169
hsa-miR-198	1	0	1	1	1	1	E2F6	E2F transcription factor 6
hsa-miR-198	0	0	1	1	0	0	TMEM173	transmembrane protein 173
hsa-miR-198	1	0	1	0	1	1	PTPLB	protein tyrosine phosphatase-like (proline instead of catalytic arginine), member b
hsa-miR-198	0	0	1	1	0	0	ITIH6	inter-alpha-trypsin inhibitor heavy chain family, member 6
hsa-miR-198	0	0	1	0	0	0	IGFL1	IGF-like family member 1
hsa-miR-198	1	0	1	1	0	0	ENHO	energy homeostasis associated
hsa-miR-198	1	0	1	1	1	1	THRA	thyroid hormone receptor, alpha
hsa-miR-198	0	0	1	1	1	1	SFT2D2	SFT2 domain containing 2
hsa-miR-198	0	0	1	1	1	1	ILDR2	immunoglobulin-like domain containing receptor 2
hsa-miR-198	1	0	1	1	1	1	ENSA	endosulfine alpha
hsa-miR-198	1	0	1	1	1	1	ATRNL1	attractin-like 1
hsa-miR-198	1	0	1	1	0	0	TSEN54	tRNA splicing endonuclease 54 homolog (S. cerevisiae)
hsa-miR-198	0	0	1	1	1	1	C15orf53	chromosome 15 open reading frame 53
hsa-miR-198	0	0	1	1	0	0	DUOXA2	dual oxidase maturation factor 2
hsa-miR-198	0	0	1	0	0	0	ESRRAP2	estrogen-related receptor alpha pseudogene 2
hsa-miR-198	0	0	1	0	0	0	PCDHB19P	protocadherin beta 19 pseudogene
hsa-miR-198	0	0	1	0	0	0	LOC339240	keratin 17 pseudogene
hsa-miR-198	0	0	1	0	0	0	FAM224B	family with sequence similarity 224, member B (non-protein coding)
hsa-miR-198	0	0	1	0	0	0	TTTY4B	testis-specific transcript, Y-linked 4B (non-protein coding)
hsa-miR-198	0	0	1	0	0	0	SUMO1P3	SUMO1 pseudogene 3
hsa-miR-198	0	0	1	0	0	0	MSX2P1	msh homeobox 2 pseudogene 1
hsa-miR-198	0	0	1	0	0	0	H3F3AP4	H3 histone, family 3A, pseudogene 4
hsa-miR-198	0	0	1	0	0	0	SCARNA9	small Cajal body-specific RNA 9
hsa-miR-198	0	0	1	0	0	0	TRPC2	transient receptor potential cation channel, subfamily C, member 2, pseudogene
hsa-miR-198	0	0	1	0	0	0	TRIM78P	tripartite motif containing 78, pseudogene
hsa-miR-198	0	0	1	0	0	0	NEAT1	nuclear paraspeckle assembly transcript 1 (non-protein coding)
hsa-miR-198	0	0	1	0	0	0	MALAT1	metastasis associated lung adenocarcinoma transcript 1 (non-protein coding)
hsa-miR-198	0	0	1	0	0	0	CLEC4GP1	C-type lectin domain family 4, member G pseudogene 1
hsa-miR-198	0	0	1	0	0	0	FABP5P3	fatty acid binding protein 5 pseudogene 3
hsa-miR-198	0	0	1	0	0	0	SNORA23	small nucleolar RNA, H/ACA box 23
hsa-miR-198	0	0	1	0	0	0	SNORD11	small nucleolar RNA, C/D box 11
hsa-miR-198	0	0	1	0	0	0	SNORD111	small nucleolar RNA, C/D box 111
hsa-miR-198	0	0	1	0	0	0	HSP90B3P	heat shock protein 90kDa beta (Grp94), member 3, pseudogene
hsa-miR-198	0	0	1	0	0	0	GBP1P1	guanylate binding protein 1, interferon-inducible pseudogene 1
hsa-miR-198	0	0	1	1	0	0	TBL3	transducin (beta)-like 3
hsa-miR-198	1	0	1	1	0	0	KIAA1549L	KIAA1549-like
hsa-miR-198	0	0	1	0	0	0	MST1P9	macrophage stimulating 1 (hepatocyte growth factor-like) pseudogene 9
hsa-miR-198	0	0	1	1	1	1	CAST	calpastatin
hsa-miR-198	1	0	1	1	1	1	TRIO	trio Rho guanine nucleotide exchange factor
hsa-miR-198	0	0	1	1	0	0	SHBG	sex hormone-binding globulin
hsa-miR-198	0	0	1	1	1	1	RXRB	retinoid X receptor, beta
hsa-miR-198	1	0	1	1	1	1	WIPF1	WAS/WASL interacting protein family, member 1
hsa-miR-198	1	0	1	1	1	1	IFNAR2	interferon (alpha, beta and omega) receptor 2
hsa-miR-198	0	0	1	1	0	0	BMP1	bone morphogenetic protein 1
hsa-miR-198	0	0	1	0	0	0	MUC5AC	mucin 5AC, oligomeric mucus/gel-forming
hsa-miR-198	0	0	1	1	0	0	GPR17	G protein-coupled receptor 17
hsa-miR-198	0	0	1	1	1	1	ARF5	ADP-ribosylation factor 5
hsa-miR-198	0	0	1	1	1	1	GRN	granulin
hsa-miR-198	0	0	0	1	1	1	BTN3A1	butyrophilin, subfamily 3, member A1
hsa-miR-198	0	0	0	1	0	0	KLK14	kallikrein-related peptidase 14
hsa-miR-198	1	0	1	1	1	1	PRSS22	protease, serine, 22
hsa-miR-198	0	0	1	1	1	1	TNFRSF1A	tumor necrosis factor receptor superfamily, member 1A
hsa-miR-198	0	0	0	1	1	1	FAP	fibroblast activation protein, alpha
hsa-miR-198	1	0	1	1	1	1	FAM135A	family with sequence similarity 135, member A
hsa-miR-198	0	0	0	1	0	0	RPS5	ribosomal protein S5
hsa-miR-198	1	0	1	1	1	1	TFAP2C	transcription factor AP-2 gamma (activating enhancer binding protein 2 gamma)
hsa-miR-198	0	0	0	1	1	1	ESF1	ESF1, nucleolar pre-rRNA processing protein, homolog (S. cerevisiae)
hsa-miR-198	0	0	0	1	1	1	SLC24A6	solute carrier family 24 (sodium/lithium/calcium exchanger), member 6
hsa-miR-198	0	0	1	1	1	1	TMEM101	transmembrane protein 101
hsa-miR-198	0	0	1	1	0	0	OCEL1	occludin/ELL domain containing 1
hsa-miR-198	0	0	1	1	1	1	POLR2E	polymerase (RNA) II (DNA directed) polypeptide E, 25kDa
hsa-miR-198	1	0	1	1	0	0	MAPK12	mitogen-activated protein kinase 12
hsa-miR-198	1	0	1	1	1	1	CHGA	chromogranin A (parathyroid secretory protein 1)
hsa-miR-198	0	0	1	1	0	0	BIRC7	baculoviral IAP repeat containing 7
hsa-miR-198	0	0	1	1	0	0	ACSM2A	acyl-CoA synthetase medium-chain family member 2A
hsa-miR-198	0	0	0	1	1	1	NME3	NME/NM23 nucleoside diphosphate kinase 3
hsa-miR-198	0	0	1	1	0	0	SLC38A7	solute carrier family 38, member 7
hsa-miR-198	0	0	1	1	0	0	STUB1	STIP1 homology and U-box containing protein 1, E3 ubiquitin protein ligase
hsa-miR-198	1	0	1	1	1	1	HMOX2	heme oxygenase (decycling) 2
hsa-miR-198	0	0	1	1	1	1	SLC6A2	solute carrier family 6 (neurotransmitter transporter, noradrenalin), member 2
hsa-miR-198	0	0	1	1	0	0	DHDH	dihydrodiol dehydrogenase (dimeric)
hsa-miR-198	0	0	1	1	0	0	CKM	creatine kinase, muscle
hsa-miR-198	0	0	0	1	1	1	FZR1	fizzy/cell division cycle 20 related 1 (Drosophila)
hsa-miR-198	0	0	1	1	0	0	LIM2	lens intrinsic membrane protein 2, 19kDa
hsa-miR-198	0	0	0	1	0	0	CNFN	cornifelin
hsa-miR-198	0	0	1	1	0	0	HAS1	hyaluronan synthase 1
hsa-miR-198	0	0	0	1	0	0	BUD31	BUD31 homolog (S. cerevisiae)
hsa-miR-198	1	0	1	1	0	0	SLC25A39	solute carrier family 25, member 39
hsa-miR-198	0	0	0	1	1	1	SUPT4H1	suppressor of Ty 4 homolog 1 (S. cerevisiae)
hsa-miR-198	1	0	0	1	1	1	WNT3	wingless-type MMTV integration site family, member 3
hsa-miR-198	0	0	1	1	0	0	PFN1	profilin 1
hsa-miR-198	0	0	0	1	1	1	KAT2A	K(lysine) acetyltransferase 2A
hsa-miR-198	0	0	1	1	0	0	PPY	pancreatic polypeptide
hsa-miR-198	1	0	1	1	1	1	ENDOU	endonuclease, polyU-specific
hsa-miR-198	1	0	1	1	1	1	FAM65B	family with sequence similarity 65, member B
hsa-miR-198	0	0	0	1	0	0	LAMA4	laminin, alpha 4
hsa-miR-198	0	0	1	1	0	0	HRG	histidine-rich glycoprotein
hsa-miR-198	0	0	1	1	1	1	HES1	hairy and enhancer of split 1, (Drosophila)
hsa-miR-198	1	0	1	1	1	1	TFPI	tissue factor pathway inhibitor (lipoprotein-associated coagulation inhibitor)
hsa-miR-198	0	0	0	1	0	0	PROC	protein C (inactivator of coagulation factors Va and VIIIa)
hsa-miR-198	0	0	0	1	0	0	KISS1R	KISS1 receptor
hsa-miR-198	0	0	0	1	0	0	PRAMEF4	PRAME family member 4
hsa-miR-198	0	0	1	1	1	1	HMGCL	3-hydroxymethyl-3-methylglutaryl-CoA lyase
hsa-miR-198	0	0	1	1	1	1	DLX4	distal-less homeobox 4
hsa-miR-198	1	0	1	1	1	1	CLTA	clathrin, light chain A
hsa-miR-198	1	0	1	1	0	0	SMUG1	single-strand-selective monofunctional uracil-DNA glycosylase 1
hsa-miR-198	0	0	1	1	0	0	FAAH	fatty acid amide hydrolase
hsa-miR-198	0	0	0	1	0	0	B9D2	B9 protein domain 2
hsa-miR-198	0	0	1	1	1	1	CHPF	chondroitin polymerizing factor
hsa-miR-198	0	0	1	1	1	1	PIWIL1	piwi-like 1 (Drosophila)
hsa-miR-198	0	0	1	1	1	1	DSTN	destrin (actin depolymerizing factor)
hsa-miR-198	0	0	0	1	0	0	S1PR4	sphingosine-1-phosphate receptor 4
hsa-miR-198	1	0	1	1	0	0	KDM1A	lysine (K)-specific demethylase 1A
hsa-miR-198	1	0	1	1	1	1	NECAB3	N-terminal EF-hand calcium binding protein 3
hsa-miR-198	0	0	0	1	1	1	KRT13	keratin 13
hsa-miR-198	0	0	0	1	1	1	KRT9	keratin 9
hsa-miR-198	0	0	1	1	1	1	CYTH4	cytohesin 4
hsa-miR-198	1	0	1	1	1	1	GNAZ	guanine nucleotide binding protein (G protein), alpha z polypeptide
hsa-miR-198	0	0	1	1	0	0	CDC42EP1	CDC42 effector protein (Rho GTPase binding) 1
hsa-miR-198	0	0	0	1	1	1	RAC2	ras-related C3 botulinum toxin substrate 2 (rho family, small GTP binding protein Rac2)
hsa-miR-198	0	0	1	1	0	0	CLN6	ceroid-lipofuscinosis, neuronal 6, late infantile, variant
hsa-miR-198	0	0	0	1	0	0	TPH1	tryptophan hydroxylase 1
hsa-miR-198	0	0	0	1	0	0	KLK9	kallikrein-related peptidase 9
hsa-miR-198	0	0	1	1	1	1	C16orf62	chromosome 16 open reading frame 62
hsa-miR-198	0	0	0	1	0	0	LILRA2	leukocyte immunoglobulin-like receptor, subfamily A (with TM domain), member 2
hsa-miR-198	0	0	1	1	0	0	KRT34	keratin 34
hsa-miR-198	0	0	0	1	1	1	TDRD1	tudor domain containing 1
hsa-miR-198	0	0	1	1	1	1	TRPC4AP	transient receptor potential cation channel, subfamily C, member 4 associated protein
hsa-miR-198	1	0	1	1	0	0	C20orf194	chromosome 20 open reading frame 194
hsa-miR-198	0	0	1	1	0	0	KRT5	keratin 5
hsa-miR-198	0	0	0	1	0	0	PRKCSH	protein kinase C substrate 80K-H
hsa-miR-198	0	0	1	1	1	1	CDC16	cell division cycle 16 homolog (S. cerevisiae)
hsa-miR-198	1	0	1	1	1	1	PVRL2	poliovirus receptor-related 2 (herpesvirus entry mediator B)
hsa-miR-198	0	0	0	1	0	0	USHBP1	Usher syndrome 1C binding protein 1
hsa-miR-198	0	0	0	1	0	0	PGLS	6-phosphogluconolactonase
hsa-miR-198	0	0	1	1	1	1	NDUFA10	NADH dehydrogenase (ubiquinone) 1 alpha subcomplex, 10, 42kDa
hsa-miR-198	0	0	1	1	0	0	CACNG6	calcium channel, voltage-dependent, gamma subunit 6
hsa-miR-198	0	0	0	1	0	0	KLHDC7B	kelch domain containing 7B
hsa-miR-198	0	0	0	1	0	0	OR11H1	olfactory receptor, family 11, subfamily H, member 1
hsa-miR-198	0	0	0	1	1	1	HIP1R	huntingtin interacting protein 1 related
hsa-miR-198	0	0	1	1	1	1	PSMC3IP	PSMC3 interacting protein
hsa-miR-198	0	0	1	1	0	0	RAMP1	receptor (G protein-coupled) activity modifying protein 1
hsa-miR-198	0	0	1	1	1	1	TRIM47	tripartite motif containing 47
hsa-miR-198	0	0	0	1	0	0	GUCY2D	guanylate cyclase 2D, membrane (retina-specific)
hsa-miR-198	0	0	1	1	0	0	DPH2	DPH2 homolog (S. cerevisiae)
hsa-miR-198	0	0	0	1	0	0	CHIT1	chitinase 1 (chitotriosidase)
hsa-miR-198	0	0	1	1	1	1	DSG3	desmoglein 3
hsa-miR-198	1	0	1	1	1	1	DTX1	deltex homolog 1 (Drosophila)
hsa-miR-198	1	0	1	1	1	1	TMEM60	transmembrane protein 60
hsa-miR-198	0	0	0	1	1	1	CDK4	cyclin-dependent kinase 4
hsa-miR-198	0	0	0	1	1	1	DYSF	dysferlin, limb girdle muscular dystrophy 2B (autosomal recessive)
hsa-miR-198	0	0	1	1	0	0	FHOD1	formin homology 2 domain containing 1
hsa-miR-198	0	0	0	1	1	1	HTR2B	5-hydroxytryptamine (serotonin) receptor 2B, G protein-coupled
hsa-miR-198	0	0	1	1	1	1	CHST12	carbohydrate (chondroitin 4) sulfotransferase 12
hsa-miR-198	1	0	1	1	1	1	CIB2	calcium and integrin binding family member 2
hsa-miR-198	0	0	0	1	0	0	CD72	CD72 molecule
hsa-miR-198	1	0	1	1	1	1	LRRC32	leucine rich repeat containing 32
hsa-miR-198	0	0	0	1	0	0	FDXACB1	ferredoxin-fold anticodon binding domain containing 1
hsa-miR-198	0	0	1	1	1	1	SQRDL	sulfide quinone reductase-like (yeast)
hsa-miR-198	0	0	0	1	1	1	CYP2C9	cytochrome P450, family 2, subfamily C, polypeptide 9
hsa-miR-198	0	0	0	1	0	0	FASTKD1	FAST kinase domains 1
hsa-miR-198	1	0	1	1	1	1	MRPS27	mitochondrial ribosomal protein S27
hsa-miR-198	0	0	0	1	0	0	GPR133	G protein-coupled receptor 133
hsa-miR-198	0	0	0	1	0	0	AP3B2	adaptor-related protein complex 3, beta 2 subunit
hsa-miR-198	0	0	1	1	1	1	ALDH2	aldehyde dehydrogenase 2 family (mitochondrial)
hsa-miR-198	0	0	0	1	0	0	FAH	fumarylacetoacetate hydrolase (fumarylacetoacetase)
hsa-miR-198	0	0	1	1	0	0	HMGXB3	HMG box domain containing 3
hsa-miR-198	0	0	0	1	0	0	CDHR2	cadherin-related family member 2
hsa-miR-198	0	0	1	1	0	0	ATP5B	ATP synthase, H+ transporting, mitochondrial F1 complex, beta polypeptide
hsa-miR-198	0	0	0	1	0	0	POLD1	polymerase (DNA directed), delta 1, catalytic subunit
hsa-miR-198	0	0	1	1	0	0	RGS9	regulator of G-protein signaling 9
hsa-miR-198	0	0	0	1	1	1	SLC4A1	solute carrier family 4, anion exchanger, member 1 (erythrocyte membrane protein band 3, Diego blood group)
hsa-miR-198	0	0	0	1	1	1	NLRP1	NLR family, pyrin domain containing 1
hsa-miR-198	0	0	0	1	1	1	CECR1	cat eye syndrome chromosome region, candidate 1
hsa-miR-198	0	0	0	1	0	0	ATP4A	ATPase, H+/K+ exchanging, alpha polypeptide
hsa-miR-198	0	0	0	1	0	0	COPE	coatomer protein complex, subunit epsilon
hsa-miR-198	0	0	0	1	0	0	C19orf10	chromosome 19 open reading frame 10
hsa-miR-198	1	0	0	1	0	0	CNN2	calponin 2
hsa-miR-198	0	0	1	1	0	0	AP2S1	adaptor-related protein complex 2, sigma 1 subunit
hsa-miR-198	1	0	1	1	1	1	APLP2	amyloid beta (A4) precursor-like protein 2
hsa-miR-198	0	0	1	1	1	1	PNO1	partner of NOB1 homolog (S. cerevisiae)
hsa-miR-198	0	0	1	1	0	0	LTK	leukocyte receptor tyrosine kinase
hsa-miR-198	1	0	1	1	1	1	STK17B	serine/threonine kinase 17b
hsa-miR-198	0	0	1	1	1	1	PIK3CA	phosphatidylinositol-4,5-bisphosphate 3-kinase, catalytic subunit alpha
hsa-miR-198	0	0	0	1	1	1	GPSM2	G-protein signaling modulator 2
hsa-miR-198	1	0	1	1	1	1	ARHGAP24	Rho GTPase activating protein 24
hsa-miR-198	0	0	1	1	0	0	CAD	carbamoyl-phosphate synthetase 2, aspartate transcarbamylase, and dihydroorotase
hsa-miR-198	0	0	0	1	0	0	LYL1	lymphoblastic leukemia derived sequence 1
hsa-miR-198	1	0	1	1	1	1	ERGIC1	endoplasmic reticulum-golgi intermediate compartment (ERGIC) 1
hsa-miR-198	0	0	0	1	0	0	THOC3	THO complex 3
hsa-miR-198	0	0	1	1	0	0	POR	P450 (cytochrome) oxidoreductase
hsa-miR-198	0	0	1	1	1	1	SLC17A2	solute carrier family 17 (sodium phosphate), member 2
hsa-miR-198	0	0	1	1	0	0	KIF9	kinesin family member 9
hsa-miR-198	0	0	1	1	1	1	ABCB1	ATP-binding cassette, sub-family B (MDR/TAP), member 1
hsa-miR-198	0	0	0	1	1	1	WBSCR22	Williams Beuren syndrome chromosome region 22
hsa-miR-198	0	0	1	1	0	0	B4GALNT3	beta-1,4-N-acetyl-galactosaminyl transferase 3
hsa-miR-198	0	0	0	1	0	0	RBP5	retinol binding protein 5, cellular
hsa-miR-198	0	0	1	1	0	0	SUOX	sulfite oxidase
hsa-miR-198	0	0	0	1	0	0	ITGB7	integrin, beta 7
hsa-miR-198	0	0	1	1	0	0	SIRT6	sirtuin 6
hsa-miR-198	0	0	1	1	0	0	TMEM91	transmembrane protein 91
hsa-miR-198	0	0	0	1	0	0	BCKDHA	branched chain keto acid dehydrogenase E1, alpha polypeptide
hsa-miR-198	0	0	1	1	0	0	LMTK3	lemur tyrosine kinase 3
hsa-miR-198	0	0	0	1	1	1	LILRA6	leukocyte immunoglobulin-like receptor, subfamily A (with TM domain), member 6
hsa-miR-198	0	0	1	1	0	0	ZNF593	zinc finger protein 593
hsa-miR-198	0	0	1	1	0	0	CREB3L4	cAMP responsive element binding protein 3-like 4
hsa-miR-198	0	0	0	1	0	0	CAPN9	calpain 9
hsa-miR-198	1	0	1	1	1	1	LEFTY1	left-right determination factor 1
hsa-miR-198	0	0	1	1	1	1	TMEM177	transmembrane protein 177
hsa-miR-198	0	0	0	1	0	0	KLHL23	kelch-like 23 (Drosophila)
hsa-miR-198	0	0	1	1	1	1	ZNF300	zinc finger protein 300
hsa-miR-198	0	0	1	1	1	1	MUT	methylmalonyl CoA mutase
hsa-miR-198	0	0	0	1	0	0	ANO7	anoctamin 7
hsa-miR-198	0	0	1	1	1	1	INIP	INTS3 and NABP interacting protein
hsa-miR-198	1	0	0	1	1	1	PPRC1	peroxisome proliferator-activated receptor gamma, coactivator-related 1
hsa-miR-198	0	0	0	1	0	0	GRIK4	glutamate receptor, ionotropic, kainate 4
hsa-miR-198	1	0	1	1	1	1	FADS1	fatty acid desaturase 1
hsa-miR-198	0	0	1	1	0	0	FADS3	fatty acid desaturase 3
hsa-miR-198	0	0	1	1	0	0	TM7SF2	transmembrane 7 superfamily member 2
hsa-miR-198	0	0	1	1	1	1	SIRPB1	signal-regulatory protein beta 1
hsa-miR-198	0	0	0	1	0	0	OR8K1	olfactory receptor, family 8, subfamily K, member 1
hsa-miR-198	0	0	1	1	1	1	TRNT1	tRNA nucleotidyl transferase, CCA-adding, 1
hsa-miR-198	0	0	0	1	0	0	PLBD2	phospholipase B domain containing 2
hsa-miR-198	0	0	0	1	1	1	ACAD8	acyl-CoA dehydrogenase family, member 8
hsa-miR-198	0	0	1	1	1	1	FBXO4	F-box protein 4
hsa-miR-198	1	0	1	1	1	1	C17orf103	chromosome 17 open reading frame 103
hsa-miR-198	0	0	0	1	0	0	C16orf74	chromosome 16 open reading frame 74
hsa-miR-198	0	0	0	1	0	0	MED7	mediator complex subunit 7
hsa-miR-198	0	0	1	1	1	1	GNAQ	guanine nucleotide binding protein (G protein), q polypeptide
hsa-miR-198	1	0	1	1	1	1	RPUSD3	RNA pseudouridylate synthase domain containing 3
hsa-miR-198	1	0	1	1	1	1	DUSP2	dual specificity phosphatase 2
hsa-miR-198	1	0	1	1	1	1	PPP1R9A	protein phosphatase 1, regulatory subunit 9A
hsa-miR-198	0	0	1	1	0	0	WNT9B	wingless-type MMTV integration site family, member 9B
hsa-miR-198	0	0	1	1	0	0	PDE9A	phosphodiesterase 9A
hsa-miR-198	0	0	1	1	0	0	CCDC12	coiled-coil domain containing 12
hsa-miR-198	1	0	1	1	0	0	IER2	immediate early response 2
hsa-miR-198	0	0	0	1	0	0	LRWD1	leucine-rich repeats and WD repeat domain containing 1
hsa-miR-198	1	0	1	1	0	0	CELF5	CUGBP, Elav-like family member 5
hsa-miR-198	0	0	1	1	0	0	YDJC	YdjC homolog (bacterial)
hsa-miR-198	0	0	0	1	0	0	CCL23	chemokine (C-C motif) ligand 23
hsa-miR-198	0	0	1	1	1	1	BAX	BCL2-associated X protein
hsa-miR-198	0	0	1	1	0	0	MYL6	myosin, light chain 6, alkali, smooth muscle and non-muscle
hsa-miR-198	0	0	1	1	0	0	SHANK1	SH3 and multiple ankyrin repeat domains 1
hsa-miR-198	0	0	1	1	0	0	CRHR1	corticotropin releasing hormone receptor 1
hsa-miR-198	0	0	0	1	1	1	LHCGR	luteinizing hormone/choriogonadotropin receptor
hsa-miR-198	1	0	1	1	1	1	FZD5	frizzled family receptor 5
hsa-miR-198	0	0	0	1	0	0	CCKAR	cholecystokinin A receptor
hsa-miR-198	0	0	1	1	1	1	ATP1A1	ATPase, Na+/K+ transporting, alpha 1 polypeptide
hsa-miR-198	0	0	0	1	0	0	RNPEP	arginyl aminopeptidase (aminopeptidase B)
hsa-miR-198	0	0	1	1	1	1	WDR52	WD repeat domain 52
hsa-miR-198	0	0	1	1	1	1	MRPL33	mitochondrial ribosomal protein L33
hsa-miR-198	0	0	0	1	0	0	MST1R	macrophage stimulating 1 receptor (c-met-related tyrosine kinase)
hsa-miR-198	0	0	1	1	0	0	SCRG1	stimulator of chondrogenesis 1
hsa-miR-198	0	0	1	1	0	0	IL3	interleukin 3 (colony-stimulating factor, multiple)
hsa-miR-198	0	0	1	1	1	1	SAP30L	SAP30-like
hsa-miR-198	0	0	1	1	0	0	DEFB1	defensin, beta 1
hsa-miR-198	0	0	1	1	1	1	MSMB	microseminoprotein, beta-
hsa-miR-198	0	0	1	1	1	1	BCL2L14	BCL2-like 14 (apoptosis facilitator)
hsa-miR-198	0	0	1	1	1	1	SLC39A2	solute carrier family 39 (zinc transporter), member 2
hsa-miR-198	0	0	0	1	0	0	SERPINA4	serpin peptidase inhibitor, clade A (alpha-1 antiproteinase, antitrypsin), member 4
hsa-miR-198	0	0	1	1	0	0	CCT2	chaperonin containing TCP1, subunit 2 (beta)
hsa-miR-198	0	0	0	1	0	0	C16orf71	chromosome 16 open reading frame 71
hsa-miR-198	0	0	1	1	1	1	MFAP4	microfibrillar-associated protein 4
hsa-miR-198	0	0	1	1	0	0	PLK1	polo-like kinase 1
hsa-miR-198	0	0	1	1	0	0	MS4A5	membrane-spanning 4-domains, subfamily A, member 5
hsa-miR-198	0	0	1	1	0	0	CKMT1A	creatine kinase, mitochondrial 1A
hsa-miR-198	1	0	1	1	1	1	PIP5KL1	phosphatidylinositol-4-phosphate 5-kinase-like 1
hsa-miR-198	0	0	0	1	0	0	COQ4	coenzyme Q4 homolog (S. cerevisiae)
hsa-miR-198	0	0	0	1	0	0	JSRP1	junctional sarcoplasmic reticulum protein 1
hsa-miR-198	0	0	1	1	1	1	SGK494	uncharacterized serine/threonine-protein kinase SgK494
hsa-miR-198	0	0	0	1	0	0	LILRA5	leukocyte immunoglobulin-like receptor, subfamily A (with TM domain), member 5
hsa-miR-198	0	0	0	1	0	0	ATP5H	ATP synthase, H+ transporting, mitochondrial Fo complex, subunit d
hsa-miR-198	0	0	0	1	0	0	ECI1	enoyl-CoA delta isomerase 1
hsa-miR-198	0	0	1	1	0	0	BEST1	bestrophin 1
hsa-miR-198	0	0	0	1	0	0	ULK4	unc-51-like kinase 4 (C. elegans)
hsa-miR-198	0	0	1	1	1	1	OGG1	8-oxoguanine DNA glycosylase
hsa-miR-198	0	0	0	1	1	1	TRH	thyrotropin-releasing hormone
hsa-miR-198	1	0	1	1	1	1	TMEM133	transmembrane protein 133
hsa-miR-198	0	0	1	1	1	1	MXD3	MAX dimerization protein 3
hsa-miR-198	0	0	1	1	0	0	CCDC11	coiled-coil domain containing 11
hsa-miR-198	0	0	1	1	1	1	SDR16C5	short chain dehydrogenase/reductase family 16C, member 5
hsa-miR-198	0	0	0	1	0	0	GPR25	G protein-coupled receptor 25
hsa-miR-198	0	0	0	1	0	0	ATP5I	ATP synthase, H+ transporting, mitochondrial Fo complex, subunit E
hsa-miR-198	0	0	0	1	0	0	ECEL1	endothelin converting enzyme-like 1
hsa-miR-198	0	0	0	1	0	0	BHLHA9	basic helix-loop-helix family, member a9
hsa-miR-198	0	0	0	1	1	1	VASN	vasorin
hsa-miR-198	0	0	1	1	1	1	PPIH	peptidylprolyl isomerase H (cyclophilin H)
hsa-miR-198	0	0	0	1	1	1	NINJ2	ninjurin 2
hsa-miR-198	0	0	0	1	0	0	DEGS2	delta(4)-desaturase, sphingolipid 2
hsa-miR-198	0	0	1	1	0	0	TBC1D10B	TBC1 domain family, member 10B
hsa-miR-198	0	0	1	1	0	0	SOX14	SRY (sex determining region Y)-box 14
hsa-miR-198	0	0	1	1	1	1	SNX7	sorting nexin 7
hsa-miR-198	0	0	1	1	1	1	PIGF	phosphatidylinositol glycan anchor biosynthesis, class F
hsa-miR-198	0	0	1	1	0	0	ZNF584	zinc finger protein 584
hsa-miR-198	0	0	0	1	0	0	ZNF324B	zinc finger protein 324B
hsa-miR-198	0	0	1	1	1	1	CCDC8	coiled-coil domain containing 8
hsa-miR-198	1	0	1	1	0	0	NKIRAS2	NFKB inhibitor interacting Ras-like 2
hsa-miR-198	0	0	0	1	0	0	THOP1	thimet oligopeptidase 1
hsa-miR-198	0	0	0	1	0	0	CYTL1	cytokine-like 1
hsa-miR-198	0	0	0	1	0	0	EFEMP2	EGF containing fibulin-like extracellular matrix protein 2
hsa-miR-198	0	0	0	1	1	1	DDX23	DEAD (Asp-Glu-Ala-Asp) box polypeptide 23
hsa-miR-198	0	0	0	1	0	0	KRTAP5-8	keratin associated protein 5-8
hsa-miR-198	0	0	0	1	0	0	PHYHD1	phytanoyl-CoA dioxygenase domain containing 1
hsa-miR-198	0	0	0	1	0	0	C11orf86	chromosome 11 open reading frame 86
hsa-miR-198	0	0	1	1	1	1	SH3YL1	SH3 domain containing, Ysc84-like 1 (S. cerevisiae)
hsa-miR-198	0	0	0	1	1	1	HFE	hemochromatosis
hsa-miR-198	1	0	1	1	1	1	CHD2	chromodomain helicase DNA binding protein 2
hsa-miR-198	0	0	0	1	1	1	ATP6V0A4	ATPase, H+ transporting, lysosomal V0 subunit a4
hsa-miR-198	1	0	0	1	1	1	ELF3	E74-like factor 3 (ets domain transcription factor, epithelial-specific )
hsa-miR-198	0	0	1	1	1	1	CD34	CD34 molecule
hsa-miR-198	0	0	1	1	0	0	PARL	presenilin associated, rhomboid-like
hsa-miR-198	0	0	0	1	0	0	GPR151	G protein-coupled receptor 151
hsa-miR-198	1	0	1	1	1	1	ZNF624	zinc finger protein 624
hsa-miR-198	0	0	1	1	1	1	ISCA1	iron-sulfur cluster assembly 1 homolog (S. cerevisiae)
hsa-miR-198	1	0	1	1	1	1	GAPVD1	GTPase activating protein and VPS9 domains 1
hsa-miR-198	0	0	0	1	1	1	FBLIM1	filamin binding LIM protein 1
hsa-miR-198	0	0	0	1	0	0	GPR152	G protein-coupled receptor 152
hsa-miR-198	0	0	0	1	0	0	GUK1	guanylate kinase 1
hsa-miR-198	0	0	1	1	0	0	GRINA	glutamate receptor, ionotropic, N-methyl D-aspartate-associated protein 1 (glutamate binding)
hsa-miR-198	0	0	0	1	0	0	FAM20C	family with sequence similarity 20, member C
hsa-miR-198	0	0	0	1	0	0	NOP14	NOP14 nucleolar protein homolog (yeast)
hsa-miR-198	1	0	0	1	0	0	DPM2	dolichyl-phosphate mannosyltransferase polypeptide 2, regulatory subunit
hsa-miR-198	0	0	1	1	0	0	CDPF1	cysteine-rich, DPF motif domain containing 1
hsa-miR-198	0	0	1	1	0	0	HCLS1	hematopoietic cell-specific Lyn substrate 1
hsa-miR-198	0	0	0	1	0	0	OR10K2	olfactory receptor, family 10, subfamily K, member 2
hsa-miR-198	1	0	1	1	0	0	DLGAP1	discs, large (Drosophila) homolog-associated protein 1
hsa-miR-198	0	0	0	1	0	0	MAP7D3	MAP7 domain containing 3
hsa-miR-198	1	0	0	1	0	0	ARHGEF1	Rho guanine nucleotide exchange factor (GEF) 1
hsa-miR-198	0	0	0	1	0	0	PGAM5	phosphoglycerate mutase family member 5
hsa-miR-198	0	0	0	1	1	1	CPNE1	copine I
hsa-miR-198	0	0	1	1	1	1	PCNXL4	pecanex-like 4 (Drosophila)
hsa-miR-198	1	0	1	1	1	1	CERCAM	cerebral endothelial cell adhesion molecule
hsa-miR-198	0	0	0	1	0	0	NKPD1	NTPase, KAP family P-loop domain containing 1
hsa-miR-198	1	0	1	1	1	1	CC2D1A	coiled-coil and C2 domain containing 1A
hsa-miR-198	0	0	1	1	0	0	SYTL1	synaptotagmin-like 1
hsa-miR-198	0	0	1	1	1	1	MBIP	MAP3K12 binding inhibitory protein 1
hsa-miR-198	0	0	0	1	0	0	CYC1	cytochrome c-1
hsa-miR-198	1	0	1	1	0	0	EPC1	enhancer of polycomb homolog 1 (Drosophila)
hsa-miR-198	0	0	0	1	1	1	SPPL2B	signal peptide peptidase like 2B
hsa-miR-198	1	0	1	1	1	1	CAMSAP1	calmodulin regulated spectrin-associated protein 1
hsa-miR-198	1	0	1	1	0	0	SMCHD1	structural maintenance of chromosomes flexible hinge domain containing 1
hsa-miR-198	0	0	0	1	1	1	NUDC	nuclear distribution C homolog (A. nidulans)
hsa-miR-198	0	0	1	1	1	1	CCDC33	coiled-coil domain containing 33
hsa-miR-198	0	0	0	1	0	0	FAM3A	family with sequence similarity 3, member A
hsa-miR-198	0	0	0	1	1	1	ZNF18	zinc finger protein 18
hsa-miR-198	0	0	1	1	0	0	FOXJ1	forkhead box J1
hsa-miR-198	0	0	0	1	0	0	LRRC61	leucine rich repeat containing 61
hsa-miR-198	0	0	1	1	1	1	ANKZF1	ankyrin repeat and zinc finger domain containing 1
hsa-miR-198	0	0	1	1	0	0	CDC25C	cell division cycle 25 homolog C (S. pombe)
hsa-miR-198	0	0	0	1	1	1	TSFM	Ts translation elongation factor, mitochondrial
hsa-miR-198	0	0	1	1	1	1	CNTNAP3	contactin associated protein-like 3
hsa-miR-198	0	0	1	1	1	1	GSG1	germ cell associated 1
hsa-miR-198	0	0	0	1	0	0	PPP1R42	protein phosphatase 1, regulatory subunit 42
hsa-miR-198	0	0	1	1	0	0	MIF4GD	MIF4G domain containing
hsa-miR-198	0	0	1	1	0	0	RIC8A	resistance to inhibitors of cholinesterase 8 homolog A (C. elegans)
hsa-miR-198	1	0	1	1	1	1	FRAS1	Fraser syndrome 1
hsa-miR-198	1	0	1	1	1	1	TOR1AIP1	torsin A interacting protein 1
hsa-miR-198	0	0	1	1	1	1	ARHGEF4	Rho guanine nucleotide exchange factor (GEF) 4
hsa-miR-198	0	0	0	1	0	0	OR51E1	olfactory receptor, family 51, subfamily E, member 1
hsa-miR-198	1	0	0	1	1	1	PLEKHJ1	pleckstrin homology domain containing, family J member 1
hsa-miR-198	1	0	0	1	0	0	GGT5	gamma-glutamyltransferase 5
hsa-miR-198	0	0	0	1	0	0	FAM110C	family with sequence similarity 110, member C
hsa-miR-198	0	0	1	1	0	0	KRT36	keratin 36
hsa-miR-198	1	0	0	1	1	1	SSTR3	somatostatin receptor 3
hsa-miR-198	0	0	0	1	0	0	TSPAN10	tetraspanin 10
hsa-miR-198	1	0	1	1	0	0	PTP4A3	protein tyrosine phosphatase type IVA, member 3
hsa-miR-198	0	0	0	1	1	1	SERPINA5	serpin peptidase inhibitor, clade A (alpha-1 antiproteinase, antitrypsin), member 5
hsa-miR-198	0	0	0	1	0	0	C2orf70	chromosome 2 open reading frame 70
hsa-miR-198	0	0	1	1	0	0	TTTY8	testis-specific transcript, Y-linked 8 (non-protein coding)
hsa-miR-198	0	0	1	1	0	0	IDH2	isocitrate dehydrogenase 2 (NADP+), mitochondrial
hsa-miR-198	0	0	0	1	0	0	PRAMEF15	PRAME family member 15
hsa-miR-198	0	0	0	1	0	0	ACTL10	actin-like 10
hsa-miR-198	0	0	0	1	0	0	A3GALT2P	alpha 1,3-galactosyltransferase 2, pseudogene
hsa-miR-198	0	0	0	1	0	0	ZNF470	zinc finger protein 470
hsa-miR-198	0	0	0	1	0	0	ADSSL1	adenylosuccinate synthase like 1
hsa-miR-198	0	0	0	1	0	0	CLCNKB	chloride channel, voltage-sensitive Kb
hsa-miR-198	0	0	1	1	1	1	BMP8A	bone morphogenetic protein 8a
hsa-miR-198	0	0	0	1	1	1	ZBTB7C	zinc finger and BTB domain containing 7C
hsa-miR-198	1	0	1	1	1	1	TMED9	transmembrane emp24 protein transport domain containing 9
hsa-miR-198	0	0	1	1	0	0	STAC3	SH3 and cysteine rich domain 3
hsa-miR-198	0	0	0	1	1	1	ANO9	anoctamin 9
hsa-miR-198	0	0	0	1	0	0	TSSC4	tumor suppressing subtransferable candidate 4
hsa-miR-198	0	0	0	1	0	0	OR1D5	olfactory receptor, family 1, subfamily D, member 5
hsa-miR-198	0	0	1	1	0	0	USP27X	ubiquitin specific peptidase 27, X-linked
hsa-miR-198	0	0	1	1	1	1	WHSC2	Wolf-Hirschhorn syndrome candidate 2
hsa-miR-198	0	0	1	1	1	1	HTR3D	5-hydroxytryptamine (serotonin) receptor 3D, ionotropic
hsa-miR-198	0	0	0	1	1	1	TTF1	transcription termination factor, RNA polymerase I
hsa-miR-198	0	0	0	1	1	1	USP16	ubiquitin specific peptidase 16
hsa-miR-198	0	0	1	1	1	1	C17orf58	chromosome 17 open reading frame 58
hsa-miR-198	0	0	1	1	0	0	SPATA2L	spermatogenesis associated 2-like
hsa-miR-198	1	0	1	1	1	1	GALNTL1	UDP-N-acetyl-alpha-D-galactosamine:polypeptide N-acetylgalactosaminyltransferase-like 1
hsa-miR-198	1	0	1	1	1	1	ATP9A	ATPase, class II, type 9A
hsa-miR-198	0	0	0	1	0	0	CMTM5	CKLF-like MARVEL transmembrane domain containing 5
hsa-miR-198	0	0	1	1	1	1	FPR3	formyl peptide receptor 3
hsa-miR-198	0	0	0	1	0	0	GFI1B	growth factor independent 1B transcription repressor
hsa-miR-198	0	0	1	1	1	1	VMAC	vimentin-type intermediate filament associated coiled-coil protein
hsa-miR-198	0	0	0	1	1	1	CCDC169	coiled-coil domain containing 169
hsa-miR-198	0	0	0	1	0	0	ZSCAN16	zinc finger and SCAN domain containing 16
hsa-miR-198	1	0	1	1	0	0	RANBP3	RAN binding protein 3
hsa-miR-198	0	0	0	1	1	1	TRIM60	tripartite motif containing 60
hsa-miR-198	0	0	0	1	1	1	NANOS2	nanos homolog 2 (Drosophila)
hsa-miR-198	0	0	1	1	0	0	SLC24A2	solute carrier family 24 (sodium/potassium/calcium exchanger), member 2
hsa-miR-198	0	0	0	1	0	0	CLDN14	claudin 14
hsa-miR-198	1	0	0	1	0	0	IKBKB	inhibitor of kappa light polypeptide gene enhancer in B-cells, kinase beta
hsa-miR-198	1	0	1	1	1	1	BRD1	bromodomain containing 1
hsa-miR-198	0	0	1	1	0	0	DAP3	death associated protein 3
hsa-miR-198	0	0	1	1	0	0	SYCE1	synaptonemal complex central element protein 1
hsa-miR-198	0	0	1	1	1	1	TRIM24	tripartite motif containing 24
hsa-miR-198	0	0	1	1	1	1	C1orf162	chromosome 1 open reading frame 162
hsa-miR-198	0	0	0	1	0	0	ZBP1	Z-DNA binding protein 1
hsa-miR-198	1	0	1	1	1	1	ABCB9	ATP-binding cassette, sub-family B (MDR/TAP), member 9
hsa-miR-198	1	0	1	1	1	1	SLC2A4RG	SLC2A4 regulator
hsa-miR-198	0	0	1	1	0	0	ARHGEF5	Rho guanine nucleotide exchange factor (GEF) 5
hsa-miR-198	0	0	0	1	0	0	HSFY2	heat shock transcription factor, Y linked 2
hsa-miR-198	0	0	0	1	1	1	CRHR2	corticotropin releasing hormone receptor 2
hsa-miR-198	0	0	0	1	1	1	CBS	cystathionine-beta-synthase
hsa-miR-198	0	0	1	1	0	0	MPI	mannose phosphate isomerase
hsa-miR-198	0	0	0	1	1	1	MADCAM1	mucosal vascular addressin cell adhesion molecule 1
hsa-miR-198	0	0	1	1	0	0	HIST1H4I	histone cluster 1, H4i
hsa-miR-198	0	0	0	1	0	0	C9orf163	chromosome 9 open reading frame 163
hsa-miR-198	0	0	0	1	0	0	ANKRD18B	ankyrin repeat domain 18B
hsa-miR-198	0	0	0	1	0	0	GPBAR1	G protein-coupled bile acid receptor 1
hsa-miR-198	0	0	0	1	0	0	CXorf40B	chromosome X open reading frame 40B
hsa-miR-198	0	0	1	1	1	1	ITGB1BP1	integrin beta 1 binding protein 1
hsa-miR-198	0	0	0	1	0	0	MFSD12	major facilitator superfamily domain containing 12
hsa-miR-198	0	0	1	1	0	0	CCDC114	coiled-coil domain containing 114
hsa-miR-198	0	0	0	1	0	0	ZGPAT	zinc finger, CCCH-type with G patch domain
hsa-miR-198	0	0	0	1	0	0	LIPC	lipase, hepatic
hsa-miR-198	1	0	0	1	1	1	ZNF614	zinc finger protein 614
hsa-miR-198	0	0	0	1	0	0	ZNF432	zinc finger protein 432
hsa-miR-198	1	0	1	1	1	1	ARIH2	ariadne homolog 2 (Drosophila)
hsa-miR-198	0	0	1	1	1	1	PGC	progastricsin (pepsinogen C)
hsa-miR-198	0	0	1	1	0	0	IL27	interleukin 27
hsa-miR-198	0	0	1	1	1	1	PICK1	protein interacting with PRKCA 1
hsa-miR-198	1	0	1	1	1	1	GFPT1	glutamine--fructose-6-phosphate transaminase 1
hsa-miR-198	0	0	0	1	0	0	C1QTNF5	C1q and tumor necrosis factor related protein 5
hsa-miR-198	0	0	0	1	0	0	OR51D1	olfactory receptor, family 51, subfamily D, member 1
hsa-miR-198	1	0	1	1	1	1	METTL9	methyltransferase like 9
hsa-miR-198	0	0	1	1	0	0	LINC00176	long intergenic non-protein coding RNA 176
hsa-miR-198	0	0	0	1	1	1	ADORA2A	adenosine A2a receptor
hsa-miR-198	0	0	0	1	0	0	ZNF416	zinc finger protein 416
hsa-miR-198	0	0	0	1	0	0	OR11H12	olfactory receptor, family 11, subfamily H, member 12
hsa-miR-198	0	0	1	1	1	1	TRDN	triadin
hsa-miR-198	0	0	1	1	1	1	MPDU1	mannose-P-dolichol utilization defect 1
hsa-miR-198	0	0	1	1	0	0	TRAF3IP2	TRAF3 interacting protein 2
hsa-miR-198	0	0	1	1	0	0	KCTD8	potassium channel tetramerisation domain containing 8
hsa-miR-198	0	0	1	1	1	1	HOXA4	homeobox A4
hsa-miR-198	0	0	0	1	1	1	LCE1B	late cornified envelope 1B
hsa-miR-198	0	0	0	1	0	0	CD300A	CD300a molecule
hsa-miR-198	0	0	0	1	0	0	OR2T8	olfactory receptor, family 2, subfamily T, member 8
hsa-miR-198	0	0	0	1	0	0	PLEKHG4	pleckstrin homology domain containing, family G (with RhoGef domain) member 4
hsa-miR-198	1	0	1	1	1	1	NMB	neuromedin B
hsa-miR-198	0	0	0	1	0	0	MPHOSPH8	M-phase phosphoprotein 8
hsa-miR-198	0	0	1	1	0	0	EIF3B	eukaryotic translation initiation factor 3, subunit B
hsa-miR-198	0	0	1	1	0	0	ABHD14A	abhydrolase domain containing 14A
hsa-miR-198	0	0	1	1	0	0	RNF208	ring finger protein 208
hsa-miR-198	0	0	1	1	0	0	IFI6	interferon, alpha-inducible protein 6
hsa-miR-198	1	0	1	1	1	1	RUSC2	RUN and SH3 domain containing 2
hsa-miR-198	0	0	1	1	1	1	TAF11	TAF11 RNA polymerase II, TATA box binding protein (TBP)-associated factor, 28kDa
hsa-miR-198	0	0	0	1	1	1	JAK3	Janus kinase 3
hsa-miR-198	0	0	0	1	0	0	INSL3	insulin-like 3 (Leydig cell)
hsa-miR-198	0	0	0	1	1	1	KRTAP5-9	keratin associated protein 5-9
hsa-miR-198	0	0	0	1	1	1	MSRB1	methionine sulfoxide reductase B1
hsa-miR-198	0	0	0	1	1	1	BNIPL	BCL2/adenovirus E1B 19kD interacting protein like
hsa-miR-198	0	0	0	1	0	0	SHISA4	shisa homolog 4 (Xenopus laevis)
hsa-miR-198	0	0	0	1	0	0	C1orf68	chromosome 1 open reading frame 68
hsa-miR-198	0	0	1	1	1	1	SLC9B2	solute carrier family 9, subfamily B (NHA2, cation proton antiporter 2), member 2
hsa-miR-198	0	0	0	1	1	1	TRIM58	tripartite motif containing 58
hsa-miR-198	0	0	0	1	1	1	OBSCN	obscurin, cytoskeletal calmodulin and titin-interacting RhoGEF
hsa-miR-198	1	0	1	1	1	1	MLLT4	myeloid/lymphoid or mixed-lineage leukemia (trithorax homolog, Drosophila); translocated to, 4
hsa-miR-198	0	0	0	1	0	0	MIXL1	Mix paired-like homeobox
hsa-miR-198	0	0	0	1	1	1	H3F3A	H3 histone, family 3A
hsa-miR-198	0	0	1	1	0	0	TLR5	toll-like receptor 5
hsa-miR-198	0	0	0	1	1	1	PTPN14	protein tyrosine phosphatase, non-receptor type 14
hsa-miR-198	0	0	0	1	0	0	G0S2	G0/G1switch 2
hsa-miR-198	0	0	1	1	1	1	DYRK3	dual-specificity tyrosine-(Y)-phosphorylation regulated kinase 3
hsa-miR-198	0	0	0	1	1	1	NUAK2	NUAK family, SNF1-like kinase, 2
hsa-miR-198	1	0	1	1	0	0	ETNK2	ethanolamine kinase 2
hsa-miR-198	0	0	0	1	1	1	GPR37L1	G protein-coupled receptor 37 like 1
hsa-miR-198	1	0	0	1	1	1	SWT1	SWT1 RNA endoribonuclease homolog (S. cerevisiae)
hsa-miR-198	0	0	1	1	1	1	CD244	CD244 molecule, natural killer cell receptor 2B4
hsa-miR-198	0	0	1	1	0	0	CCDC19	coiled-coil domain containing 19
hsa-miR-198	0	0	1	1	0	0	PYHIN1	pyrin and HIN domain family, member 1
hsa-miR-198	0	0	0	1	1	1	MNDA	myeloid cell nuclear differentiation antigen
hsa-miR-198	0	0	0	1	0	0	INSRR	insulin receptor-related receptor
hsa-miR-198	0	0	1	1	0	0	APOA1BP	apolipoprotein A-I binding protein
hsa-miR-198	1	0	1	1	1	1	RSPO3	R-spondin 3
hsa-miR-198	1	0	1	1	1	1	NKAIN2	Na+/K+ transporting ATPase interacting 2
hsa-miR-198	0	0	1	1	1	1	C1orf43	chromosome 1 open reading frame 43
hsa-miR-198	0	0	1	1	1	1	ECHS1	enoyl CoA hydratase, short chain, 1, mitochondrial
hsa-miR-198	0	0	0	1	0	0	CLRN3	clarin 3
hsa-miR-198	0	0	1	1	1	1	S100A3	S100 calcium binding protein A3
hsa-miR-198	0	0	1	1	1	1	LHPP	phospholysine phosphohistidine inorganic pyrophosphate phosphatase
hsa-miR-198	1	0	1	1	1	1	SLC16A10	solute carrier family 16, member 10 (aromatic amino acid transporter)
hsa-miR-198	1	0	0	1	1	1	LACE1	lactation elevated 1
hsa-miR-198	1	0	1	1	1	1	TACC2	transforming, acidic coiled-coil containing protein 2
hsa-miR-198	0	0	1	1	0	0	BAG3	BCL2-associated athanogene 3
hsa-miR-198	0	0	1	1	0	0	C1orf54	chromosome 1 open reading frame 54
hsa-miR-198	0	0	1	1	0	0	HIST2H2AA3	histone cluster 2, H2aa3
hsa-miR-198	0	0	0	1	0	0	FCGR1B	Fc fragment of IgG, high affinity Ib, receptor (CD64)
hsa-miR-198	1	0	0	1	1	1	G6PD	glucose-6-phosphate dehydrogenase
hsa-miR-198	0	0	1	1	0	0	SLC25A28	solute carrier family 25 (mitochondrial iron transporter), member 28
hsa-miR-198	0	0	0	1	0	0	RPF1	ribosome production factor 1 homolog (S. cerevisiae)
hsa-miR-198	0	0	0	1	1	1	HHLA3	HERV-H LTR-associating 3
hsa-miR-198	0	0	0	1	0	0	ACTRT1	actin-related protein T1
hsa-miR-198	0	0	1	1	0	0	BSND	Bartter syndrome, infantile, with sensorineural deafness (Barttin)
hsa-miR-198	0	0	0	1	0	0	CYP2C19	cytochrome P450, family 2, subfamily C, polypeptide 19
hsa-miR-198	0	0	1	1	0	0	PTGDS	prostaglandin D2 synthase 21kDa (brain)
hsa-miR-198	0	0	0	1	0	0	C8G	complement component 8, gamma polypeptide
hsa-miR-198	0	0	0	1	0	0	DNLZ	DNL-type zinc finger
hsa-miR-198	0	0	0	1	0	0	UBAC1	UBA domain containing 1
hsa-miR-198	0	0	1	1	0	0	PAEP	progestagen-associated endometrial protein
hsa-miR-198	0	0	1	1	1	1	FAF1	Fas (TNFRSF6) associated factor 1
hsa-miR-198	1	0	1	1	1	1	COL5A1	collagen, type V, alpha 1
hsa-miR-198	0	0	0	1	0	0	SURF2	surfeit 2
hsa-miR-198	1	0	0	1	0	0	C1orf50	chromosome 1 open reading frame 50
hsa-miR-198	0	0	1	1	0	0	ABCC10	ATP-binding cassette, sub-family C (CFTR/MRP), member 10
hsa-miR-198	0	0	1	1	0	0	WFDC10A	WAP four-disulfide core domain 10A
hsa-miR-198	0	0	1	1	0	0	COL9A2	collagen, type IX, alpha 2
hsa-miR-198	0	0	1	1	0	0	GUCA1A	guanylate cyclase activator 1A (retina)
hsa-miR-198	1	0	1	1	0	0	JPH2	junctophilin 2
hsa-miR-198	0	0	1	1	1	1	L3MBTL1	l(3)mbt-like 1 (Drosophila)
hsa-miR-198	1	0	1	1	0	0	ST6GALNAC6	ST6 (alpha-N-acetyl-neuraminyl-2,3-beta-galactosyl-1,3)-N-acetylgalactosaminide alpha-2,6-sialyltransferase 6
hsa-miR-198	0	0	1	1	1	1	PPA1	pyrophosphatase (inorganic) 1
hsa-miR-198	0	0	1	1	1	1	TGM2	transglutaminase 2 (C polypeptide, protein-glutamine-gamma-glutamyltransferase)
hsa-miR-198	0	0	1	1	0	0	HCRTR1	hypocretin (orexin) receptor 1
hsa-miR-198	1	0	1	1	1	1	NDRG3	NDRG family member 3
hsa-miR-198	0	0	1	1	0	0	FCN3	ficolin (collagen/fibrinogen domain containing) 3 (Hakata antigen)
hsa-miR-198	0	0	0	1	0	0	HDHD3	haloacid dehalogenase-like hydrolase domain containing 3
hsa-miR-198	0	0	1	1	1	1	FAM21C	family with sequence similarity 21, member C
hsa-miR-198	1	0	1	1	1	1	ZFAND4	zinc finger, AN1-type domain 4
hsa-miR-198	0	0	1	1	0	0	GDF5	growth differentiation factor 5
hsa-miR-198	0	0	1	1	0	0	PFKFB1	6-phosphofructo-2-kinase/fructose-2,6-biphosphatase 1
hsa-miR-198	0	0	1	1	1	1	TBC1D2	TBC1 domain family, member 2
hsa-miR-198	0	0	1	1	0	0	CDA	cytidine deaminase
hsa-miR-198	1	0	1	1	1	1	OSBPL6	oxysterol binding protein-like 6
hsa-miR-198	0	0	0	1	0	0	DOM3Z	dom-3 homolog Z (C. elegans)
hsa-miR-198	0	0	1	1	1	1	PADI3	peptidyl arginine deiminase, type III
hsa-miR-198	0	0	1	1	0	0	SPATA21	spermatogenesis associated 21
hsa-miR-198	0	0	0	1	0	0	RSG1	REM2 and RAB-like small GTPase 1
hsa-miR-198	1	0	1	1	1	1	WAC	WW domain containing adaptor with coiled-coil
hsa-miR-198	0	0	0	1	0	0	LY6G5C	lymphocyte antigen 6 complex, locus G5C
hsa-miR-198	0	0	0	1	0	0	CTRC	chymotrypsin C (caldecrin)
hsa-miR-198	0	0	1	1	0	0	PRAMEF9	PRAME family member 9
hsa-miR-198	0	0	1	1	1	1	PRAMEF5	PRAME family member 5
hsa-miR-198	0	0	0	1	1	1	PRAMEF23	PRAME family member 23
hsa-miR-198	0	0	0	1	0	0	PRAMEF6	PRAME family member 6
hsa-miR-198	0	0	0	1	1	1	GDPD4	glycerophosphodiester phosphodiesterase domain containing 4
hsa-miR-198	1	0	1	1	0	0	WDR45	WD repeat domain 45
hsa-miR-198	0	0	1	1	1	1	GATA1	GATA binding protein 1 (globin transcription factor 1)
hsa-miR-198	0	0	0	1	1	1	TRIM15	tripartite motif containing 15
hsa-miR-198	1	0	1	1	0	0	C9orf41	chromosome 9 open reading frame 41
hsa-miR-198	0	0	1	1	0	0	YIF1A	Yip1 interacting factor homolog A (S. cerevisiae)
hsa-miR-198	1	0	1	1	1	1	NKX2-2	NK2 homeobox 2
hsa-miR-198	0	0	0	1	0	0	LOC100128063	uncharacterized LOC100128063
hsa-miR-198	0	0	0	1	0	0	ZKSCAN4	zinc finger with KRAB and SCAN domains 4
hsa-miR-198	0	0	1	1	1	1	CNTNAP3B	contactin associated protein-like 3B
hsa-miR-198	0	0	1	1	0	0	POLR1E	polymerase (RNA) I polypeptide E, 53kDa
hsa-miR-198	1	0	1	1	1	1	CREB3L2	cAMP responsive element binding protein 3-like 2
hsa-miR-198	0	0	1	1	0	0	SLC13A4	solute carrier family 13 (sodium/sulfate symporters), member 4
hsa-miR-198	0	0	0	1	0	0	LIG3	ligase III, DNA, ATP-dependent
hsa-miR-198	0	0	0	1	0	0	CXorf59	chromosome X open reading frame 59
hsa-miR-198	1	0	0	1	1	1	CCNI2	cyclin I family, member 2
hsa-miR-198	0	0	0	1	1	1	CCDC3	coiled-coil domain containing 3
hsa-miR-198	0	0	0	1	0	0	ECHDC3	enoyl CoA hydratase domain containing 3
hsa-miR-198	0	0	0	1	1	1	SIRT5	sirtuin 5
hsa-miR-198	0	0	0	1	0	0	TNFRSF18	tumor necrosis factor receptor superfamily, member 18
hsa-miR-198	0	0	0	1	0	0	ARMC6	armadillo repeat containing 6
hsa-miR-198	1	0	1	1	1	1	KIN	KIN, antigenic determinant of recA protein homolog (mouse)
hsa-miR-198	0	0	1	1	0	0	EXOC3L4	exocyst complex component 3-like 4
hsa-miR-198	0	0	1	1	0	0	CA5BP1	carbonic anhydrase VB pseudogene 1
hsa-miR-198	1	0	1	1	1	1	PAQR3	progestin and adipoQ receptor family member III
hsa-miR-198	0	0	1	1	1	1	SLC30A5	solute carrier family 30 (zinc transporter), member 5
hsa-miR-198	0	0	1	1	1	1	SMR3B	submaxillary gland androgen regulated protein 3B
hsa-miR-198	0	0	1	1	1	1	CD99	CD99 molecule
hsa-miR-198	0	0	0	1	0	0	CIITA	class II, major histocompatibility complex, transactivator
hsa-miR-198	0	0	1	1	0	0	CKMT1B	creatine kinase, mitochondrial 1B
hsa-miR-198	0	0	1	1	1	1	SLC45A2	solute carrier family 45, member 2
hsa-miR-198	0	0	1	1	1	1	DEPDC5	DEP domain containing 5
hsa-miR-198	0	0	0	1	0	0	KRTAP5-3	keratin associated protein 5-3
hsa-miR-198	0	0	0	1	0	0	KRTAP5-2	keratin associated protein 5-2
hsa-miR-198	1	0	1	1	0	0	FSCN1	fascin homolog 1, actin-bundling protein (Strongylocentrotus purpuratus)
hsa-miR-198	1	0	0	1	0	0	UROC1	urocanate hydratase 1
hsa-miR-198	0	0	0	1	0	0	IL17RC	interleukin 17 receptor C
hsa-miR-198	0	0	1	1	1	1	IL5RA	interleukin 5 receptor, alpha
hsa-miR-198	0	0	1	1	0	0	SDK2	sidekick cell adhesion molecule 2
hsa-miR-198	0	0	1	1	1	1	PRIM2	primase, DNA, polypeptide 2 (58kDa)
hsa-miR-198	0	0	0	1	0	0	CYP2D6	cytochrome P450, family 2, subfamily D, polypeptide 6
hsa-miR-198	0	0	0	1	1	1	RFX2	regulatory factor X, 2 (influences HLA class II expression)
hsa-miR-198	1	0	1	1	1	1	GABRB2	gamma-aminobutyric acid (GABA) A receptor, beta 2
hsa-miR-198	0	0	1	1	1	1	C9orf47	chromosome 9 open reading frame 47
hsa-miR-198	0	0	0	1	1	1	CDY1B	chromodomain protein, Y-linked, 1B
hsa-miR-198	0	0	1	1	1	1	OR9Q1	olfactory receptor, family 9, subfamily Q, member 1
hsa-miR-198	1	0	1	1	1	1	DISC1	disrupted in schizophrenia 1
hsa-miR-198	0	0	1	0	1	1	TCAIM	T cell activation inhibitor, mitochondrial
hsa-miR-198	0	0	0	0	1	1	RPL41	ribosomal protein L41
hsa-miR-198	1	0	1	1	1	1	ENTPD6	ectonucleoside triphosphate diphosphohydrolase 6 (putative)
hsa-miR-198	0	0	1	1	1	1	CPS1	carbamoyl-phosphate synthase 1, mitochondrial
hsa-miR-198	0	0	0	1	1	1	EGF	epidermal growth factor
hsa-miR-198	0	0	1	1	1	1	GYS1	glycogen synthase 1 (muscle)
hsa-miR-198	0	0	1	1	1	1	RAD51	RAD51 homolog (S. cerevisiae)
[truncated: 170 more rows]
