# Supplementary material for: Profiling of Selected MicroRNAs in Proliferative Eutopic Endometrium of Women with Ovarian Endometriosis
Source: Biomed Res Int. 2015 Aug 20;2015:760698. doi: 10.1155/2015/760698 (PMC4558423; doi:10.1155/2015/760698)
Supplement: Supplementary file 1 — Table I: The names of miRNAs significantly differentially expressed between eutopic endometrium of patients with endometriosis vs eutopic endometrium of patients without endometriosis. Table II: The associations between miRNA and mRNA, which presents detailed results of the search of six major databases i.e targetscan, tarbase, miranda, mirbase, mirtarget2 and pictar. [file 760698.f1.zip › 760698.f1/Table II/hsa-miR-199b-5p.tsv]

miR	targetscan	tarbase	miranda	mirbase	mirtarget2	pictar	GeneSymbol	GeneName
hsa-miR-199b-5p	1	0	0	1	1	1	ZNF547	zinc finger protein 547
hsa-miR-199b-5p	1	0	1	1	1	1	EPHA7	EPH receptor A7
hsa-miR-199b-5p	1	0	1	0	1	1	GOSR1	golgi SNAP receptor complex member 1
hsa-miR-199b-5p	1	0	1	1	1	1	MIER3	mesoderm induction early response 1, family member 3
hsa-miR-199b-5p	1	0	1	1	0	0	UBN2	ubinuclein 2
hsa-miR-199b-5p	1	0	1	1	1	1	R3HDM2	R3H domain containing 2
hsa-miR-199b-5p	1	0	1	1	1	1	SLC24A3	solute carrier family 24 (sodium/potassium/calcium exchanger), member 3
hsa-miR-199b-5p	1	0	0	0	1	1	CCDC88C	coiled-coil domain containing 88C
hsa-miR-199b-5p	1	0	1	1	1	1	MAP3K11	mitogen-activated protein kinase kinase kinase 11
hsa-miR-199b-5p	1	0	1	1	1	1	EIF5B	eukaryotic translation initiation factor 5B
hsa-miR-199b-5p	1	0	1	1	1	1	CLIP1	CAP-GLY domain containing linker protein 1
hsa-miR-199b-5p	1	0	1	1	1	1	NINL	ninein-like
hsa-miR-199b-5p	1	0	1	1	1	1	TTBK1	tau tubulin kinase 1
hsa-miR-199b-5p	1	0	1	1	1	1	DRAM1	DNA-damage regulated autophagy modulator 1
hsa-miR-199b-5p	1	0	1	1	1	1	SNAI1	snail homolog 1 (Drosophila)
hsa-miR-199b-5p	1	0	1	1	1	1	CRYBG3	beta-gamma crystallin domain containing 3
hsa-miR-199b-5p	1	0	1	1	1	1	TSPAN6	tetraspanin 6
hsa-miR-199b-5p	1	0	1	1	1	1	ZNF329	zinc finger protein 329
hsa-miR-199b-5p	1	0	1	0	1	1	LYSMD3	LysM, putative peptidoglycan-binding, domain containing 3
hsa-miR-199b-5p	1	0	1	1	1	1	ARHGAP12	Rho GTPase activating protein 12
hsa-miR-199b-5p	1	0	1	1	1	1	UBAP1	ubiquitin associated protein 1
hsa-miR-199b-5p	1	0	1	1	1	1	MAP4	microtubule-associated protein 4
hsa-miR-199b-5p	1	0	1	1	1	1	GJA5	gap junction protein, alpha 5, 40kDa
hsa-miR-199b-5p	1	0	1	1	1	1	RAD23B	RAD23 homolog B (S. cerevisiae)
hsa-miR-199b-5p	1	0	1	0	1	1	SH3PXD2A	SH3 and PX domains 2A
hsa-miR-199b-5p	1	0	1	1	1	1	RORB	RAR-related orphan receptor B
hsa-miR-199b-5p	1	0	1	1	1	1	ZNF701	zinc finger protein 701
hsa-miR-199b-5p	1	0	1	0	1	1	CNOT6L	CCR4-NOT transcription complex, subunit 6-like
hsa-miR-199b-5p	1	0	1	1	1	1	ZNF215	zinc finger protein 215
hsa-miR-199b-5p	1	0	1	0	1	1	LIN7C	lin-7 homolog C (C. elegans)
hsa-miR-199b-5p	1	0	1	0	1	1	KIAA0355	KIAA0355
hsa-miR-199b-5p	1	0	1	1	0	0	SMARCA4	SWI/SNF related, matrix associated, actin dependent regulator of chromatin, subfamily a, member 4
hsa-miR-199b-5p	1	0	1	1	1	1	ZNF629	zinc finger protein 629
hsa-miR-199b-5p	1	0	1	1	1	1	RND1	Rho family GTPase 1
hsa-miR-199b-5p	1	0	1	0	1	1	TBL1XR1	transducin (beta)-like 1 X-linked receptor 1
hsa-miR-199b-5p	1	0	1	1	1	1	NLK	nemo-like kinase
hsa-miR-199b-5p	1	0	0	1	0	0	ZNF516	zinc finger protein 516
hsa-miR-199b-5p	1	0	1	1	1	1	ACVR2B	activin A receptor, type IIB
hsa-miR-199b-5p	1	0	1	1	1	1	FAM107B	family with sequence similarity 107, member B
hsa-miR-199b-5p	1	0	1	1	1	1	EPB41L1	erythrocyte membrane protein band 4.1-like 1
hsa-miR-199b-5p	1	0	1	1	1	1	TMEM245	transmembrane protein 245
hsa-miR-199b-5p	1	0	1	1	1	1	CDCA7L	cell division cycle associated 7-like
hsa-miR-199b-5p	1	0	0	1	1	1	ZNF614	zinc finger protein 614
hsa-miR-199b-5p	1	0	1	1	1	1	PODXL	podocalyxin-like
hsa-miR-199b-5p	1	0	1	1	1	1	AUTS2	autism susceptibility candidate 2
hsa-miR-199b-5p	1	0	1	0	1	1	ADD3	adducin 3 (gamma)
hsa-miR-199b-5p	1	0	1	0	1	1	ZNF776	zinc finger protein 776
hsa-miR-199b-5p	1	0	1	0	1	1	HSPA12A	heat shock 70kDa protein 12A
hsa-miR-199b-5p	1	0	1	1	0	0	FAM100B	family with sequence similarity 100, member B
hsa-miR-199b-5p	1	0	1	0	1	1	PPP1R2	protein phosphatase 1, regulatory (inhibitor) subunit 2
hsa-miR-199b-5p	1	0	1	1	1	1	WDR44	WD repeat domain 44
hsa-miR-199b-5p	1	0	1	1	1	1	RHEB	Ras homolog enriched in brain
hsa-miR-199b-5p	1	0	1	0	1	1	FSTL4	follistatin-like 4
hsa-miR-199b-5p	1	0	1	1	1	1	RANBP2	RAN binding protein 2
hsa-miR-199b-5p	1	0	1	1	1	1	GCFC1	GC-rich sequence DNA-binding factor 1
hsa-miR-199b-5p	1	0	1	1	1	1	KPNA4	karyopherin alpha 4 (importin alpha 3)
hsa-miR-199b-5p	1	0	1	1	1	1	KIAA0753	KIAA0753
hsa-miR-199b-5p	1	0	1	0	0	0	TANC2	tetratricopeptide repeat, ankyrin repeat and coiled-coil containing 2
hsa-miR-199b-5p	1	0	1	0	1	1	KIT	v-kit Hardy-Zuckerman 4 feline sarcoma viral oncogene homolog
hsa-miR-199b-5p	1	0	0	1	0	0	IKBKB	inhibitor of kappa light polypeptide gene enhancer in B-cells, kinase beta
hsa-miR-199b-5p	1	0	1	1	0	0	POMGNT1	protein O-linked mannose beta1,2-N-acetylglucosaminyltransferase
hsa-miR-199b-5p	1	0	1	1	1	1	SAT1	spermidine/spermine N1-acetyltransferase 1
hsa-miR-199b-5p	1	0	1	0	1	1	AP1G1	adaptor-related protein complex 1, gamma 1 subunit
hsa-miR-199b-5p	1	0	1	1	1	1	VPS26A	vacuolar protein sorting 26 homolog A (S. pombe)
hsa-miR-199b-5p	1	0	1	1	1	1	AKAP1	A kinase (PRKA) anchor protein 1
hsa-miR-199b-5p	1	0	1	1	1	1	UBL3	ubiquitin-like 3
hsa-miR-199b-5p	1	0	1	1	1	1	SULF1	sulfatase 1
hsa-miR-199b-5p	1	0	1	1	0	0	NCSTN	nicastrin
hsa-miR-199b-5p	1	0	1	1	0	0	TTC9	tetratricopeptide repeat domain 9
hsa-miR-199b-5p	1	0	1	1	1	1	ETS1	v-ets erythroblastosis virus E26 oncogene homolog 1 (avian)
hsa-miR-199b-5p	1	0	1	1	1	1	JAG1	jagged 1
hsa-miR-199b-5p	1	0	1	1	1	1	ETS2	v-ets erythroblastosis virus E26 oncogene homolog 2 (avian)
hsa-miR-199b-5p	1	0	1	1	1	1	ONECUT2	one cut homeobox 2
hsa-miR-199b-5p	1	0	1	1	1	1	ITGA3	integrin, alpha 3 (antigen CD49C, alpha 3 subunit of VLA-3 receptor)
hsa-miR-199b-5p	1	0	1	1	0	0	ASRGL1	asparaginase like 1
hsa-miR-199b-5p	1	0	1	0	1	1	SNN	stannin
hsa-miR-199b-5p	1	0	1	1	1	1	RUNX3	runt-related transcription factor 3
hsa-miR-199b-5p	1	0	1	0	1	1	FZD4	frizzled family receptor 4
hsa-miR-199b-5p	1	0	1	0	1	1	ARHGEF12	Rho guanine nucleotide exchange factor (GEF) 12
hsa-miR-199b-5p	1	0	1	1	1	1	KLF12	Kruppel-like factor 12
hsa-miR-199b-5p	1	0	0	1	1	1	MGAT3	mannosyl (beta-1,4-)-glycoprotein beta-1,4-N-acetylglucosaminyltransferase
hsa-miR-199b-5p	1	0	1	1	1	1	PLXND1	plexin D1
hsa-miR-199b-5p	1	0	1	1	1	1	CELSR1	cadherin, EGF LAG seven-pass G-type receptor 1 (flamingo homolog, Drosophila)
hsa-miR-199b-5p	1	0	1	1	1	1	WAPAL	wings apart-like homolog (Drosophila)
hsa-miR-199b-5p	1	0	1	1	0	0	NAB2	NGFI-A binding protein 2 (EGR1 binding protein 2)
hsa-miR-199b-5p	1	0	1	1	1	1	SMARCD1	SWI/SNF related, matrix associated, actin dependent regulator of chromatin, subfamily d, member 1
hsa-miR-199b-5p	1	0	1	1	1	1	GANAB	glucosidase, alpha; neutral AB
hsa-miR-199b-5p	1	0	1	0	1	1	SRRM4	serine/arginine repetitive matrix 4
hsa-miR-199b-5p	1	0	1	1	1	1	MYO5A	myosin VA (heavy chain 12, myoxin)
hsa-miR-199b-5p	1	0	1	1	1	1	DEPDC1B	DEP domain containing 1B
hsa-miR-199b-5p	1	0	1	1	1	1	ZFP2	zinc finger protein 2 homolog (mouse)
hsa-miR-199b-5p	1	0	1	0	1	1	PPP1R12A	protein phosphatase 1, regulatory subunit 12A
hsa-miR-199b-5p	1	0	1	0	1	1	MAP4K3	mitogen-activated protein kinase kinase kinase kinase 3
hsa-miR-199b-5p	1	0	1	1	0	0	ZNF594	zinc finger protein 594
hsa-miR-199b-5p	1	0	1	1	1	1	GIT1	G protein-coupled receptor kinase interacting ArfGAP 1
hsa-miR-199b-5p	1	0	1	0	1	1	GRB10	growth factor receptor-bound protein 10
hsa-miR-199b-5p	1	0	1	0	1	1	ZNF652	zinc finger protein 652
hsa-miR-199b-5p	1	0	1	1	1	1	B3GNT1	UDP-GlcNAc:betaGal beta-1,3-N-acetylglucosaminyltransferase 1
hsa-miR-199b-5p	1	0	1	1	1	1	BLCAP	bladder cancer associated protein
hsa-miR-199b-5p	1	0	1	0	1	1	FAM116A	family with sequence similarity 116, member A
hsa-miR-199b-5p	1	0	1	1	0	0	FAM108C1	family with sequence similarity 108, member C1
hsa-miR-199b-5p	1	0	1	1	0	0	TSPAN5	tetraspanin 5
hsa-miR-199b-5p	1	0	1	1	1	1	NCEH1	neutral cholesterol ester hydrolase 1
hsa-miR-199b-5p	1	0	1	1	1	1	PLEKHH1	pleckstrin homology domain containing, family H (with MyTH4 domain) member 1
hsa-miR-199b-5p	1	0	1	0	1	1	SRGAP3	SLIT-ROBO Rho GTPase activating protein 3
hsa-miR-199b-5p	1	0	1	0	1	1	NUFIP2	nuclear fragile X mental retardation protein interacting protein 2
hsa-miR-199b-5p	1	0	1	1	1	1	PAN3	PAN3 poly(A) specific ribonuclease subunit homolog (S. cerevisiae)
hsa-miR-199b-5p	1	0	1	1	1	1	C1GALT1	core 1 synthase, glycoprotein-N-acetylgalactosamine 3-beta-galactosyltransferase, 1
hsa-miR-199b-5p	1	0	1	1	1	1	KPNB1	karyopherin (importin) beta 1
hsa-miR-199b-5p	1	0	1	1	1	1	RALGAPA1	Ral GTPase activating protein, alpha subunit 1 (catalytic)
hsa-miR-199b-5p	1	0	1	1	1	1	MFHAS1	malignant fibrous histiocytoma amplified sequence 1
hsa-miR-199b-5p	1	0	1	1	1	1	ADAMTSL3	ADAMTS-like 3
hsa-miR-199b-5p	1	0	1	1	1	1	ZNF439	zinc finger protein 439
hsa-miR-199b-5p	1	0	1	1	1	1	SUN1	Sad1 and UNC84 domain containing 1
hsa-miR-199b-5p	1	0	1	1	0	0	TIMM10	translocase of inner mitochondrial membrane 10 homolog (yeast)
hsa-miR-199b-5p	1	0	1	0	1	1	DDX3Y	DEAD (Asp-Glu-Ala-Asp) box polypeptide 3, Y-linked
hsa-miR-199b-5p	1	0	1	1	1	1	SEC24C	SEC24 family, member C (S. cerevisiae)
hsa-miR-199b-5p	1	0	1	1	1	1	FAM188A	family with sequence similarity 188, member A
hsa-miR-199b-5p	1	0	1	0	1	1	UBE2Q1	ubiquitin-conjugating enzyme E2Q family member 1
hsa-miR-199b-5p	1	0	1	1	1	1	KLHL6	kelch-like 6 (Drosophila)
hsa-miR-199b-5p	1	0	0	1	1	1	ADRBK2	adrenergic, beta, receptor kinase 2
hsa-miR-199b-5p	1	0	1	1	1	1	ZNF654	zinc finger protein 654
hsa-miR-199b-5p	1	0	1	1	1	1	SAR1A	SAR1 homolog A (S. cerevisiae)
hsa-miR-199b-5p	1	0	1	1	0	0	HDLBP	high density lipoprotein binding protein
hsa-miR-199b-5p	1	0	1	1	1	1	CDK7	cyclin-dependent kinase 7
hsa-miR-199b-5p	1	0	1	1	0	0	GPR89A	G protein-coupled receptor 89A
hsa-miR-199b-5p	1	0	0	1	0	0	BTBD9	BTB (POZ) domain containing 9
hsa-miR-199b-5p	1	0	1	1	1	1	ZNF763	zinc finger protein 763
hsa-miR-199b-5p	1	0	1	0	1	1	KCTD16	potassium channel tetramerisation domain containing 16
hsa-miR-199b-5p	1	0	1	1	1	1	ARHGAP21	Rho GTPase activating protein 21
hsa-miR-199b-5p	1	0	0	0	0	0	ABCC1	ATP-binding cassette, sub-family C (CFTR/MRP), member 1
hsa-miR-199b-5p	1	0	1	1	1	1	ZBTB5	zinc finger and BTB domain containing 5
hsa-miR-199b-5p	1	0	1	1	1	1	MARK4	MAP/microtubule affinity-regulating kinase 4
hsa-miR-199b-5p	1	0	1	1	1	1	ZNF238	zinc finger protein 238
hsa-miR-199b-5p	1	0	1	1	1	1	PRDM16	PR domain containing 16
hsa-miR-199b-5p	1	0	1	1	1	1	SNX6	sorting nexin 6
hsa-miR-199b-5p	1	0	1	1	1	1	PDIK1L	PDLIM1 interacting kinase 1 like
hsa-miR-199b-5p	1	0	1	0	1	1	PTPRE	protein tyrosine phosphatase, receptor type, E
hsa-miR-199b-5p	1	0	1	1	1	1	DLC1	deleted in liver cancer 1
hsa-miR-199b-5p	1	0	1	0	1	1	TMEM123	transmembrane protein 123
hsa-miR-199b-5p	1	0	1	1	1	1	FBXO9	F-box protein 9
hsa-miR-199b-5p	1	0	1	1	1	1	SACS	spastic ataxia of Charlevoix-Saguenay (sacsin)
hsa-miR-199b-5p	1	0	1	0	1	1	UBE2G1	ubiquitin-conjugating enzyme E2G 1
hsa-miR-199b-5p	1	0	1	1	1	1	DDR1	discoidin domain receptor tyrosine kinase 1
hsa-miR-199b-5p	1	0	1	1	1	1	ZBTB8A	zinc finger and BTB domain containing 8A
hsa-miR-199b-5p	1	0	1	1	1	1	RBM47	RNA binding motif protein 47
hsa-miR-199b-5p	1	0	1	1	1	1	HSPA5	heat shock 70kDa protein 5 (glucose-regulated protein, 78kDa)
hsa-miR-199b-5p	1	0	1	1	1	1	RBBP4	retinoblastoma binding protein 4
hsa-miR-199b-5p	1	0	0	0	0	0	SOS2	son of sevenless homolog 2 (Drosophila)
hsa-miR-199b-5p	1	0	1	1	1	1	RGS10	regulator of G-protein signaling 10
hsa-miR-199b-5p	1	0	1	1	0	0	GPRC5A	G protein-coupled receptor, family C, group 5, member A
hsa-miR-199b-5p	1	0	0	1	1	1	ZSWIM4	zinc finger, SWIM-type containing 4
hsa-miR-199b-5p	1	0	1	0	1	1	NAALADL2	N-acetylated alpha-linked acidic dipeptidase-like 2
hsa-miR-199b-5p	1	0	1	0	1	1	TOX3	TOX high mobility group box family member 3
hsa-miR-199b-5p	1	0	0	1	0	0	REEP2	receptor accessory protein 2
hsa-miR-199b-5p	1	0	1	1	1	1	E2F3	E2F transcription factor 3
hsa-miR-199b-5p	1	0	1	1	1	1	BZRAP1	benzodiazapine receptor (peripheral) associated protein 1
hsa-miR-199b-5p	1	0	1	1	1	1	MAP2K4	mitogen-activated protein kinase kinase 4
hsa-miR-199b-5p	1	0	1	1	1	1	PMP22	peripheral myelin protein 22
hsa-miR-199b-5p	1	0	1	1	1	1	TAF9B	TAF9B RNA polymerase II, TATA box binding protein (TBP)-associated factor, 31kDa
hsa-miR-199b-5p	1	0	1	1	1	1	OSGIN2	oxidative stress induced growth inhibitor family member 2
hsa-miR-199b-5p	1	0	0	1	1	1	ZNF710	zinc finger protein 710
hsa-miR-199b-5p	1	0	1	0	1	1	KLHL3	kelch-like 3 (Drosophila)
hsa-miR-199b-5p	1	0	1	1	0	0	LMAN2	lectin, mannose-binding 2
hsa-miR-199b-5p	1	0	1	0	0	0	MICAL3	microtubule associated monoxygenase, calponin and LIM domain containing 3
hsa-miR-199b-5p	1	0	1	1	1	1	FAM178A	family with sequence similarity 178, member A
hsa-miR-199b-5p	1	0	1	1	1	1	EXTL3	exostoses (multiple)-like 3
hsa-miR-199b-5p	1	0	1	1	1	1	NOTUM	notum pectinacetylesterase homolog (Drosophila)
hsa-miR-199b-5p	1	0	1	1	1	1	MKL2	MKL/myocardin-like 2
hsa-miR-199b-5p	1	0	0	0	1	1	YPEL1	yippee-like 1 (Drosophila)
hsa-miR-199b-5p	1	0	1	1	0	0	EMC10	ER membrane protein complex subunit 10
hsa-miR-199b-5p	1	0	1	1	1	1	ERBB4	v-erb-a erythroblastic leukemia viral oncogene homolog 4 (avian)
hsa-miR-199b-5p	1	0	1	0	1	1	CELF2	CUGBP, Elav-like family member 2
hsa-miR-199b-5p	1	0	1	0	1	1	RBM23	RNA binding motif protein 23
hsa-miR-199b-5p	1	0	1	1	1	1	SORCS3	sortilin-related VPS10 domain containing receptor 3
hsa-miR-199b-5p	1	0	1	0	1	1	MCFD2	multiple coagulation factor deficiency 2
hsa-miR-199b-5p	1	0	1	1	1	1	NUPL1	nucleoporin like 1
hsa-miR-199b-5p	1	0	1	1	1	1	MAB21L1	mab-21-like 1 (C. elegans)
hsa-miR-199b-5p	1	0	0	1	1	1	WNT2	wingless-type MMTV integration site family member 2
hsa-miR-199b-5p	1	0	1	1	0	0	PNPLA6	patatin-like phospholipase domain containing 6
hsa-miR-199b-5p	1	0	1	0	1	1	ATG14	autophagy related 14
hsa-miR-199b-5p	1	0	1	1	1	1	TMEM135	transmembrane protein 135
hsa-miR-199b-5p	1	0	1	1	1	1	BAAT	bile acid CoA: amino acid N-acyltransferase (glycine N-choloyltransferase)
hsa-miR-199b-5p	1	0	1	1	1	1	TMEM66	transmembrane protein 66
hsa-miR-199b-5p	1	0	1	1	1	1	HEXIM1	hexamethylene bis-acetamide inducible 1
hsa-miR-199b-5p	1	0	1	0	1	1	MPP5	membrane protein, palmitoylated 5 (MAGUK p55 subfamily member 5)
hsa-miR-199b-5p	1	0	1	1	1	1	HIF1A	hypoxia inducible factor 1, alpha subunit (basic helix-loop-helix transcription factor)
hsa-miR-199b-5p	1	0	1	0	1	1	ST6GAL1	ST6 beta-galactosamide alpha-2,6-sialyltranferase 1
hsa-miR-199b-5p	1	0	1	1	1	1	ANKRD42	ankyrin repeat domain 42
hsa-miR-199b-5p	1	0	1	1	0	0	SLC35E4	solute carrier family 35, member E4
hsa-miR-199b-5p	1	0	1	0	1	1	SOX4	SRY (sex determining region Y)-box 4
hsa-miR-199b-5p	1	0	1	1	1	1	PAX3	paired box 3
hsa-miR-199b-5p	1	0	1	1	1	1	MINK1	misshapen-like kinase 1
hsa-miR-199b-5p	1	0	1	0	1	1	ITCH	itchy E3 ubiquitin protein ligase
hsa-miR-199b-5p	1	0	1	0	1	1	RIMS1	regulating synaptic membrane exocytosis 1
hsa-miR-199b-5p	1	0	1	1	1	1	NAA40	N(alpha)-acetyltransferase 40, NatD catalytic subunit, homolog (S. cerevisiae)
hsa-miR-199b-5p	1	0	1	0	1	1	ACVR1B	activin A receptor, type IB
hsa-miR-199b-5p	1	0	1	1	1	1	SMARCAD1	SWI/SNF-related, matrix-associated actin-dependent regulator of chromatin, subfamily a, containing DEAD/H box 1
hsa-miR-199b-5p	1	0	1	0	1	1	DDX3X	DEAD (Asp-Glu-Ala-Asp) box polypeptide 3, X-linked
hsa-miR-199b-5p	1	0	1	1	1	1	ATXN7	ataxin 7
hsa-miR-199b-5p	1	0	1	1	1	1	OTX1	orthodenticle homeobox 1
hsa-miR-199b-5p	1	0	1	1	0	0	ZNF579	zinc finger protein 579
hsa-miR-199b-5p	1	0	1	1	1	1	ANKRD13C	ankyrin repeat domain 13C
hsa-miR-199b-5p	1	0	1	1	0	0	TRPM4	transient receptor potential cation channel, subfamily M, member 4
hsa-miR-199b-5p	1	0	1	1	1	1	DYNC2LI1	dynein, cytoplasmic 2, light intermediate chain 1
hsa-miR-199b-5p	1	0	0	1	1	1	ZNF700	zinc finger protein 700
hsa-miR-199b-5p	1	0	1	1	1	1	HLF	hepatic leukemia factor
hsa-miR-199b-5p	1	0	1	1	1	1	RASSF2	Ras association (RalGDS/AF-6) domain family member 2
hsa-miR-199b-5p	1	0	1	1	1	1	SEMA3F	sema domain, immunoglobulin domain (Ig), short basic domain, secreted, (semaphorin) 3F
hsa-miR-199b-5p	1	0	1	1	1	1	SRSF1	serine/arginine-rich splicing factor 1
hsa-miR-199b-5p	1	0	1	0	0	0	ODZ4	odz, odd Oz/ten-m homolog 4 (Drosophila)
hsa-miR-199b-5p	1	0	1	1	1	1	SEMA6A	sema domain, transmembrane domain (TM), and cytoplasmic domain, (semaphorin) 6A
hsa-miR-199b-5p	1	0	1	1	1	1	CCDC43	coiled-coil domain containing 43
hsa-miR-199b-5p	1	0	0	1	1	1	EHD4	EH-domain containing 4
hsa-miR-199b-5p	1	0	1	0	0	0	PRPF40A	PRP40 pre-mRNA processing factor 40 homolog A (S. cerevisiae)
hsa-miR-199b-5p	1	0	1	1	0	0	GSK3B	glycogen synthase kinase 3 beta
hsa-miR-199b-5p	1	0	1	1	1	1	PBRM1	polybromo 1
hsa-miR-199b-5p	1	0	1	1	1	1	JUNB	jun B proto-oncogene
hsa-miR-199b-5p	1	0	1	1	1	1	ZNF618	zinc finger protein 618
hsa-miR-199b-5p	1	0	1	0	1	1	ARL6IP6	ADP-ribosylation-like factor 6 interacting protein 6
hsa-miR-199b-5p	1	0	1	1	1	1	BEND3	BEN domain containing 3
hsa-miR-199b-5p	1	0	1	1	0	0	TMEM63B	transmembrane protein 63B
hsa-miR-199b-5p	1	0	1	1	1	1	RRP15	ribosomal RNA processing 15 homolog (S. cerevisiae)
hsa-miR-199b-5p	1	0	1	1	1	1	NSG1	neuron specific gene family member 1
hsa-miR-199b-5p	1	0	1	0	1	1	PDE4D	phosphodiesterase 4D, cAMP-specific
hsa-miR-199b-5p	1	0	1	1	1	1	ARHGAP29	Rho GTPase activating protein 29
hsa-miR-199b-5p	1	0	1	1	0	0	SRL	sarcalumenin
hsa-miR-199b-5p	1	0	0	1	0	0	PI4KA	phosphatidylinositol 4-kinase, catalytic, alpha
hsa-miR-199b-5p	1	0	1	1	1	1	PXN	paxillin
hsa-miR-199b-5p	1	0	1	1	1	1	FUT9	fucosyltransferase 9 (alpha (1,3) fucosyltransferase)
hsa-miR-199b-5p	1	0	1	1	1	1	GPATCH8	G patch domain containing 8
hsa-miR-199b-5p	1	0	1	1	1	1	GPR124	G protein-coupled receptor 124
hsa-miR-199b-5p	1	0	1	0	1	1	BTBD3	BTB (POZ) domain containing 3
hsa-miR-199b-5p	1	0	1	1	0	0	RANBP3	RAN binding protein 3
hsa-miR-199b-5p	1	0	1	1	1	1	ROCK1	Rho-associated, coiled-coil containing protein kinase 1
hsa-miR-199b-5p	1	0	1	1	1	1	GPD2	glycerol-3-phosphate dehydrogenase 2 (mitochondrial)
hsa-miR-199b-5p	1	0	1	0	1	1	CSRNP2	cysteine-serine-rich nuclear protein 2
hsa-miR-199b-5p	1	0	1	1	1	1	DDX6	DEAD (Asp-Glu-Ala-Asp) box helicase 6
hsa-miR-199b-5p	1	0	1	1	1	1	WIPI2	WD repeat domain, phosphoinositide interacting 2
hsa-miR-199b-5p	1	0	1	1	1	1	WNK3	WNK lysine deficient protein kinase 3
hsa-miR-199b-5p	1	0	0	1	1	1	SLC35E1	solute carrier family 35, member E1
hsa-miR-199b-5p	1	0	1	1	1	1	CBL	Cbl proto-oncogene, E3 ubiquitin protein ligase
hsa-miR-199b-5p	1	0	1	1	1	1	ZNF706	zinc finger protein 706
hsa-miR-199b-5p	1	0	1	1	1	1	ABCA1	ATP-binding cassette, sub-family A (ABC1), member 1
hsa-miR-199b-5p	1	0	1	1	1	1	ZNF468	zinc finger protein 468
hsa-miR-199b-5p	1	0	1	1	1	1	FXR1	fragile X mental retardation, autosomal homolog 1
hsa-miR-199b-5p	1	0	1	0	1	1	GPR180	G protein-coupled receptor 180
hsa-miR-199b-5p	1	0	1	1	1	1	KIAA2018	KIAA2018
hsa-miR-199b-5p	1	0	1	1	1	1	EXOC8	exocyst complex component 8
hsa-miR-199b-5p	1	0	1	1	1	1	STK4	serine/threonine kinase 4
hsa-miR-199b-5p	1	0	1	1	1	1	HMCN1	hemicentin 1
hsa-miR-199b-5p	1	0	1	1	1	1	SGCD	sarcoglycan, delta (35kDa dystrophin-associated glycoprotein)
hsa-miR-199b-5p	1	0	1	1	0	0	HIPK2	homeodomain interacting protein kinase 2
hsa-miR-199b-5p	1	0	1	1	1	1	CSGALNACT1	chondroitin sulfate N-acetylgalactosaminyltransferase 1
hsa-miR-199b-5p	1	0	1	1	1	1	NAA15	N(alpha)-acetyltransferase 15, NatA auxiliary subunit
hsa-miR-199b-5p	1	0	1	1	1	1	FLRT3	fibronectin leucine rich transmembrane protein 3
hsa-miR-199b-5p	1	0	1	1	0	0	INO80D	INO80 complex subunit D
hsa-miR-199b-5p	1	0	0	1	1	1	CYLC2	cylicin, basic protein of sperm head cytoskeleton 2
hsa-miR-199b-5p	1	0	1	1	1	1	PAQR9	progestin and adipoQ receptor family member IX
hsa-miR-199b-5p	1	0	1	1	1	1	USP31	ubiquitin specific peptidase 31
hsa-miR-199b-5p	1	0	1	1	1	1	RANBP10	RAN binding protein 10
hsa-miR-199b-5p	1	0	1	0	1	1	GCNT2	glucosaminyl (N-acetyl) transferase 2, I-branching enzyme (I blood group)
hsa-miR-199b-5p	1	0	1	1	1	1	MEF2D	myocyte enhancer factor 2D
hsa-miR-199b-5p	1	0	0	1	0	0	ECE1	endothelin converting enzyme 1
hsa-miR-199b-5p	1	0	1	1	1	1	ERLIN1	ER lipid raft associated 1
hsa-miR-199b-5p	1	0	1	1	1	1	PHACTR4	phosphatase and actin regulator 4
hsa-miR-199b-5p	1	0	1	0	1	1	MGAT4B	mannosyl (alpha-1,3-)-glycoprotein beta-1,4-N-acetylglucosaminyltransferase, isozyme B
hsa-miR-199b-5p	1	0	1	0	1	1	SP1	Sp1 transcription factor
hsa-miR-199b-5p	1	0	1	0	1	1	USP37	ubiquitin specific peptidase 37
hsa-miR-199b-5p	1	0	1	1	0	0	ZCCHC4	zinc finger, CCHC domain containing 4
hsa-miR-199b-5p	1	0	1	1	1	1	CNN1	calponin 1, basic, smooth muscle
hsa-miR-199b-5p	1	0	1	1	0	0	TXNL1	thioredoxin-like 1
hsa-miR-199b-5p	1	0	1	1	1	1	AFTPH	aftiphilin
hsa-miR-199b-5p	1	0	1	1	0	0	CCDC120	coiled-coil domain containing 120
hsa-miR-199b-5p	1	0	0	1	0	0	TBC1D8	TBC1 domain family, member 8 (with GRAM domain)
hsa-miR-199b-5p	1	0	1	1	1	1	C11orf9	chromosome 11 open reading frame 9
hsa-miR-199b-5p	1	0	1	1	1	1	PIK3CD	phosphatidylinositol-4,5-bisphosphate 3-kinase, catalytic subunit delta
hsa-miR-199b-5p	1	0	1	1	1	1	CACUL1	CDK2-associated, cullin domain 1
hsa-miR-199b-5p	1	0	1	1	1	1	SLC4A8	solute carrier family 4, sodium bicarbonate cotransporter, member 8
hsa-miR-199b-5p	1	0	1	0	1	1	TM9SF3	transmembrane 9 superfamily member 3
hsa-miR-199b-5p	1	0	1	1	1	1	NUP210	nucleoporin 210kDa
hsa-miR-199b-5p	1	0	1	1	1	1	VEGFA	vascular endothelial growth factor A
hsa-miR-199b-5p	1	0	1	1	1	1	LARGE	like-glycosyltransferase
hsa-miR-199b-5p	1	0	1	1	1	1	MTMR3	myotubularin related protein 3
hsa-miR-199b-5p	1	0	1	1	0	0	HOXB6	homeobox B6
hsa-miR-199b-5p	1	0	1	1	1	1	TBC1D14	TBC1 domain family, member 14
hsa-miR-199b-5p	1	0	1	1	1	1	STRADB	STE20-related kinase adaptor beta
hsa-miR-199b-5p	1	0	1	1	1	1	ZNF148	zinc finger protein 148
hsa-miR-199b-5p	1	0	0	1	0	0	ATP13A2	ATPase type 13A2
hsa-miR-199b-5p	1	0	1	0	1	1	CAPRIN1	cell cycle associated protein 1
hsa-miR-199b-5p	1	0	0	1	1	1	FADS6	fatty acid desaturase domain family, member 6
hsa-miR-199b-5p	1	0	1	0	1	1	NCOA2	nuclear receptor coactivator 2
hsa-miR-199b-5p	1	0	1	1	1	1	LIMD2	LIM domain containing 2
hsa-miR-199b-5p	1	0	1	0	1	1	MRPS25	mitochondrial ribosomal protein S25
hsa-miR-199b-5p	1	0	1	1	1	1	SRRM1	serine/arginine repetitive matrix 1
hsa-miR-199b-5p	1	0	1	1	1	1	MARCH7	membrane-associated ring finger (C3HC4) 7, E3 ubiquitin protein ligase
hsa-miR-199b-5p	1	0	1	1	1	1	ITGA4	integrin, alpha 4 (antigen CD49D, alpha 4 subunit of VLA-4 receptor)
hsa-miR-199b-5p	1	0	1	1	1	1	CDKN1C	cyclin-dependent kinase inhibitor 1C (p57, Kip2)
hsa-miR-199b-5p	1	0	1	1	1	1	SIRT1	sirtuin 1
hsa-miR-199b-5p	1	0	1	0	0	0	KCNU1	potassium channel, subfamily U, member 1
hsa-miR-199b-5p	1	0	1	1	1	1	PCYOX1	prenylcysteine oxidase 1
hsa-miR-199b-5p	1	0	1	0	1	1	APMAP	adipocyte plasma membrane associated protein
hsa-miR-199b-5p	1	0	1	1	1	1	EIF2C1	eukaryotic translation initiation factor 2C, 1
hsa-miR-199b-5p	1	0	1	1	1	1	RAB21	RAB21, member RAS oncogene family
hsa-miR-199b-5p	1	0	1	0	1	1	LAMC1	laminin, gamma 1 (formerly LAMB2)
hsa-miR-199b-5p	1	0	1	1	1	1	RNF38	ring finger protein 38
hsa-miR-199b-5p	1	0	1	0	1	1	RNF11	ring finger protein 11
hsa-miR-199b-5p	1	0	1	1	1	1	FBXO33	F-box protein 33
hsa-miR-199b-5p	1	0	1	1	1	1	ZNF563	zinc finger protein 563
hsa-miR-199b-5p	1	0	1	1	1	1	ZBTB46	zinc finger and BTB domain containing 46
hsa-miR-199b-5p	1	0	0	1	1	1	PARP12	poly (ADP-ribose) polymerase family, member 12
hsa-miR-199b-5p	1	0	1	1	1	1	FZD6	frizzled family receptor 6
hsa-miR-199b-5p	1	0	1	1	1	1	ZNF512B	zinc finger protein 512B
hsa-miR-199b-5p	1	0	0	1	0	0	ITFG3	integrin alpha FG-GAP repeat containing 3
hsa-miR-199b-5p	1	0	1	1	1	1	PPARGC1A	peroxisome proliferator-activated receptor gamma, coactivator 1 alpha
hsa-miR-199b-5p	1	0	1	1	1	1	MFSD6	major facilitator superfamily domain containing 6
hsa-miR-199b-5p	1	0	1	1	1	1	ALS2	amyotrophic lateral sclerosis 2 (juvenile)
hsa-miR-199b-5p	1	0	1	1	1	1	M6PR	mannose-6-phosphate receptor (cation dependent)
hsa-miR-199b-5p	1	0	1	1	1	1	MN1	meningioma (disrupted in balanced translocation) 1
hsa-miR-199b-5p	1	0	0	0	1	1	POGK	pogo transposable element with KRAB domain
hsa-miR-199b-5p	1	0	1	1	1	1	PKN2	protein kinase N2
hsa-miR-199b-5p	1	0	1	1	1	1	OSR1	odd-skipped related 1 (Drosophila)
hsa-miR-199b-5p	1	0	1	1	1	1	RBPMS	RNA binding protein with multiple splicing
hsa-miR-199b-5p	1	0	1	1	1	1	CACNB2	calcium channel, voltage-dependent, beta 2 subunit
hsa-miR-199b-5p	1	0	1	0	1	1	USP46	ubiquitin specific peptidase 46
hsa-miR-199b-5p	1	0	1	1	1	1	LRP4	low density lipoprotein receptor-related protein 4
hsa-miR-199b-5p	1	0	1	1	0	0	FSD1	fibronectin type III and SPRY domain containing 1
hsa-miR-199b-5p	1	0	1	0	1	1	RGMB	RGM domain family, member B
hsa-miR-199b-5p	1	0	0	0	1	1	SLC9A8	solute carrier family 9, subfamily A (NHE8, cation proton antiporter 8), member 8
hsa-miR-199b-5p	1	0	1	1	0	0	SERPINE1	serpin peptidase inhibitor, clade E (nexin, plasminogen activator inhibitor type 1), member 1
hsa-miR-199b-5p	1	0	1	1	1	1	WDTC1	WD and tetratricopeptide repeats 1
hsa-miR-199b-5p	1	0	1	1	1	1	RBM24	RNA binding motif protein 24
hsa-miR-199b-5p	1	0	1	1	1	1	ABCC5	ATP-binding cassette, sub-family C (CFTR/MRP), member 5
hsa-miR-199b-5p	1	0	1	1	0	0	ZFYVE27	zinc finger, FYVE domain containing 27
hsa-miR-199b-5p	1	0	1	1	1	1	PLXNA2	plexin A2
hsa-miR-199b-5p	1	0	1	1	1	1	PVRL1	poliovirus receptor-related 1 (herpesvirus entry mediator C)
hsa-miR-199b-5p	1	0	1	1	1	1	KL	klotho
hsa-miR-199b-5p	1	0	1	0	1	1	ACVR2A	activin A receptor, type IIA
hsa-miR-199b-5p	1	0	1	1	1	1	ATXN7L1	ataxin 7-like 1
hsa-miR-199b-5p	1	0	1	1	1	1	CSDC2	cold shock domain containing C2, RNA binding
hsa-miR-199b-5p	1	0	1	1	1	1	IPO8	importin 8
hsa-miR-199b-5p	1	0	0	1	1	1	TST	thiosulfate sulfurtransferase (rhodanese)
hsa-miR-199b-5p	1	0	1	1	1	1	NTNG1	netrin G1
hsa-miR-199b-5p	1	0	1	0	1	1	ARID2	AT rich interactive domain 2 (ARID, RFX-like)
hsa-miR-199b-5p	1	0	1	1	1	1	TAB3	TGF-beta activated kinase 1/MAP3K7 binding protein 3
hsa-miR-199b-5p	1	0	1	1	1	1	ARIH2	ariadne homolog 2 (Drosophila)
hsa-miR-199b-5p	1	0	1	0	1	1	ZNF740	zinc finger protein 740
hsa-miR-199b-5p	1	0	1	1	0	0	ARRB2	arrestin, beta 2
hsa-miR-199b-5p	1	0	1	1	1	1	FAM222B	family with sequence similarity 222, member B
hsa-miR-199b-5p	1	0	1	0	1	1	SLAMF8	SLAM family member 8
hsa-miR-199b-5p	1	0	1	0	1	1	YAF2	YY1 associated factor 2
hsa-miR-199b-5p	1	0	0	1	0	0	MRPL22	mitochondrial ribosomal protein L22
hsa-miR-199b-5p	1	0	1	1	1	1	RGMA	RGM domain family, member A
hsa-miR-199b-5p	1	0	1	1	0	0	JPH3	junctophilin 3
hsa-miR-199b-5p	1	0	1	0	1	1	APPBP2	amyloid beta precursor protein (cytoplasmic tail) binding protein 2
hsa-miR-199b-5p	1	0	1	1	1	1	LEPREL1	leprecan-like 1
hsa-miR-199b-5p	1	0	1	1	0	0	ATG4D	autophagy related 4D, cysteine peptidase
hsa-miR-199b-5p	1	0	1	1	1	1	GLIPR1	GLI pathogenesis-related 1
hsa-miR-199b-5p	1	0	1	0	1	1	CAV1	caveolin 1, caveolae protein, 22kDa
hsa-miR-199b-5p	1	0	1	1	1	1	SPRYD7	SPRY domain containing 7
hsa-miR-199b-5p	1	0	1	0	1	1	PPFIBP1	PTPRF interacting protein, binding protein 1 (liprin beta 1)
hsa-miR-199b-5p	1	0	1	0	1	1	ETV6	ets variant 6
hsa-miR-199b-5p	1	0	1	0	1	1	PDPN	podoplanin
hsa-miR-199b-5p	1	0	1	1	1	1	ANK3	ankyrin 3, node of Ranvier (ankyrin G)
hsa-miR-199b-5p	1	0	1	1	1	1	MYH9	myosin, heavy chain 9, non-muscle
hsa-miR-199b-5p	1	0	1	1	1	1	CCNL1	cyclin L1
hsa-miR-199b-5p	1	0	1	0	1	1	CCNJ	cyclin J
hsa-miR-199b-5p	1	0	1	1	1	1	LARP4	La ribonucleoprotein domain family, member 4
hsa-miR-199b-5p	1	0	1	1	1	1	ARHGAP19	Rho GTPase activating protein 19
hsa-miR-199b-5p	1	0	1	0	1	1	C18orf25	chromosome 18 open reading frame 25
hsa-miR-199b-5p	1	0	1	1	0	0	GRIK3	glutamate receptor, ionotropic, kainate 3
hsa-miR-199b-5p	1	0	1	1	1	1	PPP1R9A	protein phosphatase 1, regulatory subunit 9A
hsa-miR-199b-5p	1	0	1	1	1	1	NPAS2	neuronal PAS domain protein 2
hsa-miR-199b-5p	1	0	1	1	1	1	CLTC	clathrin, heavy chain (Hc)
hsa-miR-199b-5p	1	0	1	1	0	0	COL5A3	collagen, type V, alpha 3
hsa-miR-199b-5p	1	0	1	1	1	1	ZFYVE16	zinc finger, FYVE domain containing 16
hsa-miR-199b-5p	0	0	1	1	1	1	PPIP5K1	diphosphoinositol pentakisphosphate kinase 1
hsa-miR-199b-5p	0	0	1	1	0	0	PLXNB1	plexin B1
hsa-miR-199b-5p	0	0	1	1	1	1	PREPL	prolyl endopeptidase-like
hsa-miR-199b-5p	1	0	1	1	0	0	DENND4B	DENN/MADD domain containing 4B
hsa-miR-199b-5p	0	0	1	1	1	1	NEU3	sialidase 3 (membrane sialidase)
hsa-miR-199b-5p	1	0	1	1	0	0	PCLO	piccolo (presynaptic cytomatrix protein)
hsa-miR-199b-5p	1	0	1	1	1	1	GIGYF2	GRB10 interacting GYF protein 2
hsa-miR-199b-5p	0	0	1	1	0	0	FKBP15	FK506 binding protein 15, 133kDa
hsa-miR-199b-5p	1	0	1	1	1	1	ANKRD17	ankyrin repeat domain 17
hsa-miR-199b-5p	1	0	1	0	1	1	MAGI2	membrane associated guanylate kinase, WW and PDZ domain containing 2
hsa-miR-199b-5p	0	0	1	1	0	0	AKAP8L	A kinase (PRKA) anchor protein 8-like
hsa-miR-199b-5p	0	0	1	1	1	1	XRCC4	X-ray repair complementing defective repair in Chinese hamster cells 4
hsa-miR-199b-5p	0	0	1	1	1	1	GPR116	G protein-coupled receptor 116
hsa-miR-199b-5p	1	0	1	1	1	1	ARHGEF15	Rho guanine nucleotide exchange factor (GEF) 15
hsa-miR-199b-5p	1	0	1	1	0	0	KIAA1045	KIAA1045
hsa-miR-199b-5p	1	0	1	1	1	1	NLGN1	neuroligin 1
hsa-miR-199b-5p	0	0	1	0	0	0	C11orf21	chromosome 11 open reading frame 21
hsa-miR-199b-5p	1	0	1	0	1	1	ODZ2	odz, odd Oz/ten-m homolog 2 (Drosophila)
hsa-miR-199b-5p	1	0	1	0	1	1	GPR158	G protein-coupled receptor 158
hsa-miR-199b-5p	1	0	1	1	0	0	ATAD2B	ATPase family, AAA domain containing 2B
hsa-miR-199b-5p	1	0	1	0	1	1	INTS2	integrator complex subunit 2
hsa-miR-199b-5p	1	0	1	0	0	0	NYNRIN	NYN domain and retroviral integrase containing
hsa-miR-199b-5p	1	0	1	1	1	1	PCDH19	protocadherin 19
hsa-miR-199b-5p	1	0	1	1	1	1	TAOK1	TAO kinase 1
hsa-miR-199b-5p	0	0	1	1	1	1	IFT80	intraflagellar transport 80 homolog (Chlamydomonas)
hsa-miR-199b-5p	1	0	1	1	1	1	FAM135A	family with sequence similarity 135, member A
hsa-miR-199b-5p	1	0	1	1	1	1	FAM214B	family with sequence similarity 214, member B
hsa-miR-199b-5p	0	0	1	0	0	0	KRT19P2	keratin 19 pseudogene 2
hsa-miR-199b-5p	1	0	1	1	1	1	SLC2A4RG	SLC2A4 regulator
hsa-miR-199b-5p	1	0	1	1	0	0	KIAA1549	KIAA1549
hsa-miR-199b-5p	0	0	1	0	0	0	TTC28-AS1	TTC28 antisense RNA 1
hsa-miR-199b-5p	1	0	1	1	1	1	DDHD1	DDHD domain containing 1
hsa-miR-199b-5p	0	0	1	1	0	0	KNDC1	kinase non-catalytic C-lobe domain (KIND) containing 1
hsa-miR-199b-5p	0	0	1	0	0	0	KIAA1908	uncharacterized LOC114796
hsa-miR-199b-5p	0	0	1	0	0	0	MYSM1	Myb-like, SWIRM and MPN domains 1
hsa-miR-199b-5p	1	0	1	1	1	1	LSM14A	LSM14A, SCD6 homolog A (S. cerevisiae)
hsa-miR-199b-5p	1	0	1	1	1	1	SH3TC2	SH3 domain and tetratricopeptide repeats 2
hsa-miR-199b-5p	1	0	1	1	1	1	UBR3	ubiquitin protein ligase E3 component n-recognin 3 (putative)
hsa-miR-199b-5p	1	0	1	0	0	0	ZC3H12C	zinc finger CCCH-type containing 12C
hsa-miR-199b-5p	0	0	1	1	0	0	SSPO	SCO-spondin homolog (Bos taurus)
hsa-miR-199b-5p	0	0	1	0	1	1	ATR	ataxia telangiectasia and Rad3 related
hsa-miR-199b-5p	1	0	1	1	0	0	NDST2	N-deacetylase/N-sulfotransferase (heparan glucosaminyl) 2
hsa-miR-199b-5p	1	0	1	1	1	1	DAPK1	death-associated protein kinase 1
hsa-miR-199b-5p	0	0	1	1	1	1	CRB1	crumbs homolog 1 (Drosophila)
hsa-miR-199b-5p	1	0	1	1	0	0	ELN	elastin
hsa-miR-199b-5p	0	0	1	1	0	0	STON2	stonin 2
hsa-miR-199b-5p	1	0	1	1	1	1	NFYC	nuclear transcription factor Y, gamma
hsa-miR-199b-5p	1	0	1	1	1	1	PHC1	polyhomeotic homolog 1 (Drosophila)
hsa-miR-199b-5p	1	0	1	1	1	1	RLF	rearranged L-myc fusion
hsa-miR-199b-5p	1	0	1	1	1	1	DTNA	dystrobrevin, alpha
hsa-miR-199b-5p	1	0	1	0	1	1	MPPED2	metallophosphoesterase domain containing 2
hsa-miR-199b-5p	1	0	1	0	1	1	SLC6A6	solute carrier family 6 (neurotransmitter transporter, taurine), member 6
hsa-miR-199b-5p	1	0	1	1	1	1	FMR1	fragile X mental retardation 1
hsa-miR-199b-5p	1	0	1	1	1	1	ABI1	abl-interactor 1
hsa-miR-199b-5p	1	0	1	1	1	1	MTA1	metastasis associated 1
hsa-miR-199b-5p	1	0	1	1	1	1	EPHA5	EPH receptor A5
hsa-miR-199b-5p	1	0	1	1	1	1	NEO1	neogenin 1
hsa-miR-199b-5p	0	0	1	1	1	1	ACO1	aconitase 1, soluble
hsa-miR-199b-5p	1	0	1	1	1	1	CTAGE5	CTAGE family, member 5
hsa-miR-199b-5p	0	0	1	1	1	1	ZNF747	zinc finger protein 747
hsa-miR-199b-5p	0	0	1	1	0	0	HLA-DMB	major histocompatibility complex, class II, DM beta
hsa-miR-199b-5p	0	0	1	1	1	1	ELOVL5	ELOVL fatty acid elongase 5
hsa-miR-199b-5p	0	0	1	1	0	0	CDK10	cyclin-dependent kinase 10
hsa-miR-199b-5p	0	0	1	1	1	1	MYO9A	myosin IXA
hsa-miR-199b-5p	1	0	1	1	1	1	HMGA2	high mobility group AT-hook 2
hsa-miR-199b-5p	1	0	1	1	1	1	TLE1	transducin-like enhancer of split 1 (E(sp1) homolog, Drosophila)
hsa-miR-199b-5p	0	0	1	1	1	1	SGSH	N-sulfoglucosamine sulfohydrolase
hsa-miR-199b-5p	1	0	1	1	0	0	TNPO2	transportin 2
hsa-miR-199b-5p	1	0	1	0	1	1	MLL2	myeloid/lymphoid or mixed-lineage leukemia 2
hsa-miR-199b-5p	0	0	1	1	1	1	MFSD11	major facilitator superfamily domain containing 11
hsa-miR-199b-5p	0	0	1	1	1	1	CD3EAP	CD3e molecule, epsilon associated protein
hsa-miR-199b-5p	1	0	1	1	1	1	PCDH17	protocadherin 17
hsa-miR-199b-5p	0	0	1	1	1	1	SESN1	sestrin 1
hsa-miR-199b-5p	1	0	1	1	1	1	LDB2	LIM domain binding 2
hsa-miR-199b-5p	0	0	1	1	1	1	CD84	CD84 molecule
hsa-miR-199b-5p	1	0	1	1	1	1	SHOC2	soc-2 suppressor of clear homolog (C. elegans)
hsa-miR-199b-5p	1	0	1	1	1	1	CTNND1	catenin (cadherin-associated protein), delta 1
hsa-miR-199b-5p	1	0	1	1	1	1	NUDT4	nudix (nucleoside diphosphate linked moiety X)-type motif 4
hsa-miR-199b-5p	1	0	1	1	0	0	PAK1	p21 protein (Cdc42/Rac)-activated kinase 1
hsa-miR-199b-5p	0	0	1	1	1	1	ERAL1	Era G-protein-like 1 (E. coli)
hsa-miR-199b-5p	0	0	1	0	0	0	ZNF880	zinc finger protein 880
hsa-miR-199b-5p	0	0	1	1	1	1	PANX1	pannexin 1
hsa-miR-199b-5p	1	0	1	0	0	0	PPME1	protein phosphatase methylesterase 1
hsa-miR-199b-5p	1	0	1	1	1	1	LRRFIP1	leucine rich repeat (in FLII) interacting protein 1
hsa-miR-199b-5p	0	0	1	1	1	1	DCAF6	DDB1 and CUL4 associated factor 6
hsa-miR-199b-5p	0	0	1	0	1	1	CLEC5A	C-type lectin domain family 5, member A
hsa-miR-199b-5p	1	0	1	1	1	1	USP15	ubiquitin specific peptidase 15
hsa-miR-199b-5p	1	0	1	1	1	1	ZNF202	zinc finger protein 202
hsa-miR-199b-5p	1	0	1	1	1	1	MARK3	MAP/microtubule affinity-regulating kinase 3
hsa-miR-199b-5p	0	0	1	1	0	0	SLC24A2	solute carrier family 24 (sodium/potassium/calcium exchanger), member 2
hsa-miR-199b-5p	1	0	1	1	1	1	C3orf18	chromosome 3 open reading frame 18
hsa-miR-199b-5p	0	0	1	0	0	0	BPESC1	blepharophimosis, epicanthus inversus and ptosis, candidate 1 (non-protein coding)
hsa-miR-199b-5p	1	0	1	1	1	1	NXT2	nuclear transport factor 2-like export factor 2
hsa-miR-199b-5p	0	0	1	1	1	1	NKX3-1	NK3 homeobox 1
hsa-miR-199b-5p	0	0	1	0	0	0	TIGD7	tigger transposable element derived 7
hsa-miR-199b-5p	0	0	1	1	1	1	ZNF331	zinc finger protein 331
hsa-miR-199b-5p	0	0	1	0	1	1	PRDM6	PR domain containing 6
hsa-miR-199b-5p	1	0	1	1	1	1	NRP1	neuropilin 1
hsa-miR-199b-5p	0	0	1	1	1	1	LRTOMT	leucine rich transmembrane and 0-methyltransferase domain containing
hsa-miR-199b-5p	1	0	1	1	0	0	ZBTB37	zinc finger and BTB domain containing 37
hsa-miR-199b-5p	0	0	1	1	0	0	STX4	syntaxin 4
hsa-miR-199b-5p	1	0	1	1	1	1	SPTBN4	spectrin, beta, non-erythrocytic 4
hsa-miR-199b-5p	0	0	1	0	1	1	ZNF302	zinc finger protein 302
hsa-miR-199b-5p	0	0	1	1	0	0	TTTY7	testis-specific transcript, Y-linked 7 (non-protein coding)
hsa-miR-199b-5p	0	0	1	1	1	1	NMNAT3	nicotinamide nucleotide adenylyltransferase 3
hsa-miR-199b-5p	1	0	1	1	1	1	BBC3	BCL2 binding component 3
hsa-miR-199b-5p	1	0	1	1	1	1	PBX3	pre-B-cell leukemia homeobox 3
hsa-miR-199b-5p	1	0	1	1	1	1	ATAD1	ATPase family, AAA domain containing 1
hsa-miR-199b-5p	1	0	1	1	1	1	CALCOCO1	calcium binding and coiled-coil domain 1
hsa-miR-199b-5p	0	0	1	1	0	0	MYO1G	myosin IG
hsa-miR-199b-5p	0	0	1	1	1	1	ORMDL1	ORM1-like 1 (S. cerevisiae)
hsa-miR-199b-5p	0	0	1	1	0	0	SNRPN	small nuclear ribonucleoprotein polypeptide N
hsa-miR-199b-5p	0	0	1	1	0	0	ELP2	elongator acetyltransferase complex subunit 2
hsa-miR-199b-5p	1	0	1	1	1	1	NTRK2	neurotrophic tyrosine kinase, receptor, type 2
hsa-miR-199b-5p	0	0	1	1	0	0	CNKSR2	connector enhancer of kinase suppressor of Ras 2
hsa-miR-199b-5p	0	0	1	0	0	0	ABCC13	ATP-binding cassette, sub-family C (CFTR/MRP), member 13, pseudogene
hsa-miR-199b-5p	1	0	1	1	1	1	ST3GAL3	ST3 beta-galactoside alpha-2,3-sialyltransferase 3
hsa-miR-199b-5p	0	0	1	1	1	1	CSPG5	chondroitin sulfate proteoglycan 5 (neuroglycan C)
hsa-miR-199b-5p	1	0	1	1	1	1	ZC3H14	zinc finger CCCH-type containing 14
hsa-miR-199b-5p	0	0	1	1	1	1	AMPH	amphiphysin
hsa-miR-199b-5p	0	0	1	1	0	0	MPI	mannose phosphate isomerase
hsa-miR-199b-5p	1	0	1	1	0	0	ST3GAL4	ST3 beta-galactoside alpha-2,3-sialyltransferase 4
hsa-miR-199b-5p	1	0	1	0	1	1	NUDCD1	NudC domain containing 1
hsa-miR-199b-5p	0	0	1	1	1	1	TTLL11	tubulin tyrosine ligase-like family, member 11
hsa-miR-199b-5p	1	0	1	1	0	0	BRSK2	BR serine/threonine kinase 2
hsa-miR-199b-5p	1	0	1	0	1	1	IL1RAP	interleukin 1 receptor accessory protein
hsa-miR-199b-5p	0	0	1	1	1	1	GPR56	G protein-coupled receptor 56
hsa-miR-199b-5p	0	0	1	1	1	1	GNAS	GNAS complex locus
hsa-miR-199b-5p	1	0	1	1	0	0	NAGK	N-acetylglucosamine kinase
hsa-miR-199b-5p	0	0	1	1	1	1	C6orf48	chromosome 6 open reading frame 48
hsa-miR-199b-5p	0	0	1	1	1	1	RANBP17	RAN binding protein 17
hsa-miR-199b-5p	1	0	1	1	1	1	PALM2	paralemmin 2
hsa-miR-199b-5p	1	0	1	1	1	1	NRXN3	neurexin 3
hsa-miR-199b-5p	1	0	1	1	1	1	NFYA	nuclear transcription factor Y, alpha
hsa-miR-199b-5p	0	0	1	1	1	1	TRDN	triadin
hsa-miR-199b-5p	1	0	1	1	1	1	SYT14	synaptotagmin XIV
hsa-miR-199b-5p	0	0	1	1	0	0	C22orf24	chromosome 22 open reading frame 24
hsa-miR-199b-5p	0	0	1	1	1	1	ESRP1	epithelial splicing regulatory protein 1
hsa-miR-199b-5p	1	0	1	1	1	1	ENOX2	ecto-NOX disulfide-thiol exchanger 2
hsa-miR-199b-5p	1	0	1	1	1	1	SIK2	salt-inducible kinase 2
hsa-miR-199b-5p	0	0	1	0	0	0	TUG1	taurine upregulated 1 (non-protein coding)
hsa-miR-199b-5p	1	0	1	1	1	1	BCAP29	B-cell receptor-associated protein 29
hsa-miR-199b-5p	0	0	1	1	0	0	AP4B1	adaptor-related protein complex 4, beta 1 subunit
hsa-miR-199b-5p	1	0	1	1	1	1	MEIS2	Meis homeobox 2
hsa-miR-199b-5p	1	0	1	1	1	1	HNRNPF	heterogeneous nuclear ribonucleoprotein F
hsa-miR-199b-5p	0	0	1	1	1	1	STOX2	storkhead box 2
hsa-miR-199b-5p	1	0	1	1	1	1	RIC8B	resistance to inhibitors of cholinesterase 8 homolog B (C. elegans)
hsa-miR-199b-5p	0	0	1	1	1	1	MCOLN3	mucolipin 3
hsa-miR-199b-5p	1	0	1	1	1	1	MYEF2	myelin expression factor 2
hsa-miR-199b-5p	1	0	1	1	1	1	ACER3	alkaline ceramidase 3
hsa-miR-199b-5p	0	0	1	1	1	1	CCPG1	cell cycle progression 1
hsa-miR-199b-5p	0	0	1	0	0	0	LOC149134	uncharacterized LOC149134
hsa-miR-199b-5p	0	0	1	0	0	0	DUXAP10	double homeobox A pseudogene 10
hsa-miR-199b-5p	0	0	1	1	0	0	JMJD4	jumonji domain containing 4
hsa-miR-199b-5p	0	0	1	1	1	1	ARMC5	armadillo repeat containing 5
hsa-miR-199b-5p	0	0	1	1	0	0	TBCEL	tubulin folding cofactor E-like
hsa-miR-199b-5p	0	0	1	0	1	1	FLJ14186	uncharacterized LOC401149
hsa-miR-199b-5p	1	0	1	1	1	1	COPS7B	COP9 constitutive photomorphogenic homolog subunit 7B (Arabidopsis)
hsa-miR-199b-5p	0	0	1	0	0	0	LOC286059	tumor necrosis factor receptor superfamily, member 10d, decoy with truncated death domain pseudogene
hsa-miR-199b-5p	1	0	1	1	1	1	ZNF385A	zinc finger protein 385A
hsa-miR-199b-5p	0	0	1	0	0	0	IFFO2	intermediate filament family orphan 2
hsa-miR-199b-5p	0	0	1	1	0	0	SPON2	spondin 2, extracellular matrix protein
hsa-miR-199b-5p	1	0	1	1	1	1	DYRK2	dual-specificity tyrosine-(Y)-phosphorylation regulated kinase 2
hsa-miR-199b-5p	0	0	1	0	0	0	FLJ21408	uncharacterized LOC400512
hsa-miR-199b-5p	0	0	1	1	0	0	EIF4ENIF1	eukaryotic translation initiation factor 4E nuclear import factor 1
hsa-miR-199b-5p	1	0	1	0	1	1	MYO5B	myosin VB
hsa-miR-199b-5p	0	0	1	0	1	1	ATXN1L	ataxin 1-like
hsa-miR-199b-5p	0	0	1	0	0	0	ARHGEF28	Rho guanine nucleotide exchange factor (GEF) 28
hsa-miR-199b-5p	1	0	1	1	1	1	ARFGEF1	ADP-ribosylation factor guanine nucleotide-exchange factor 1 (brefeldin A-inhibited)
hsa-miR-199b-5p	1	0	1	1	1	1	NAA30	N(alpha)-acetyltransferase 30, NatC catalytic subunit
hsa-miR-199b-5p	0	0	1	0	1	1	HEMK1	HemK methyltransferase family member 1
hsa-miR-199b-5p	0	0	1	0	1	1	FLJ22447	uncharacterized LOC400221
hsa-miR-199b-5p	0	0	1	1	1	1	FAM124B	family with sequence similarity 124B
hsa-miR-199b-5p	0	0	1	0	0	0	LOC729852	uncharacterized LOC729852
hsa-miR-199b-5p	0	0	1	1	1	1	DUSP14	dual specificity phosphatase 14
hsa-miR-199b-5p	0	0	1	0	0	0	A1BG-AS1	A1BG antisense RNA 1
hsa-miR-199b-5p	1	0	1	1	1	1	FAM53C	family with sequence similarity 53, member C
hsa-miR-199b-5p	0	0	1	1	1	1	KDM2B	lysine (K)-specific demethylase 2B
hsa-miR-199b-5p	0	0	1	1	1	1	CCDC14	coiled-coil domain containing 14
hsa-miR-199b-5p	0	0	1	1	0	0	ZNF252P	zinc finger protein 252, pseudogene
hsa-miR-199b-5p	1	0	1	1	1	1	ZNF462	zinc finger protein 462
hsa-miR-199b-5p	1	0	1	1	1	1	STRBP	spermatid perinuclear RNA binding protein
hsa-miR-199b-5p	0	0	1	0	0	0	KIAA0664L3	KIAA0664-like 3
hsa-miR-199b-5p	1	0	1	0	1	1	ELMOD1	ELMO/CED-12 domain containing 1
hsa-miR-199b-5p	1	0	1	1	1	1	SGK1	serum/glucocorticoid regulated kinase 1
hsa-miR-199b-5p	1	0	1	1	1	1	PPM1L	protein phosphatase, Mg2+/Mn2+ dependent, 1L
hsa-miR-199b-5p	0	0	1	1	1	1	THEM6	thioesterase superfamily member 6
hsa-miR-199b-5p	0	0	1	1	1	1	GABRP	gamma-aminobutyric acid (GABA) A receptor, pi
hsa-miR-199b-5p	1	0	1	1	0	0	SPEG	SPEG complex locus
hsa-miR-199b-5p	0	0	1	0	0	0	FLJ30838	uncharacterized LOC400955
hsa-miR-199b-5p	0	0	1	1	1	1	OPTN	optineurin
hsa-miR-199b-5p	0	0	1	0	0	0	SNHG11	small nucleolar RNA host gene 11 (non-protein coding)
hsa-miR-199b-5p	1	0	1	1	1	1	FRMD6	FERM domain containing 6
hsa-miR-199b-5p	0	0	1	0	0	0	LOC149684	uncharacterized LOC149684
hsa-miR-199b-5p	1	0	1	0	1	1	RAB1A	RAB1A, member RAS oncogene family
hsa-miR-199b-5p	0	0	1	0	0	0	LOC440894	uncharacterized LOC440894
hsa-miR-199b-5p	0	0	1	1	0	0	BEAN1	brain expressed, associated with NEDD4, 1
hsa-miR-199b-5p	0	0	1	0	1	1	FAM70A	family with sequence similarity 70, member A
hsa-miR-199b-5p	0	0	1	0	0	0	LOC284600	uncharacterized LOC284600
hsa-miR-199b-5p	1	0	1	1	1	1	CLCN5	chloride channel, voltage-sensitive 5
hsa-miR-199b-5p	0	0	1	1	0	0	RELT	RELT tumor necrosis factor receptor
hsa-miR-199b-5p	0	0	1	1	1	1	C14orf79	chromosome 14 open reading frame 79
hsa-miR-199b-5p	1	0	1	1	1	1	C20orf26	chromosome 20 open reading frame 26
hsa-miR-199b-5p	1	0	1	0	1	1	PLEKHA1	pleckstrin homology domain containing, family A (phosphoinositide binding specific) member 1
hsa-miR-199b-5p	0	0	1	1	1	1	SEC61A2	Sec61 alpha 2 subunit (S. cerevisiae)
hsa-miR-199b-5p	1	0	1	1	0	0	TCF7	transcription factor 7 (T-cell specific, HMG-box)
hsa-miR-199b-5p	0	0	1	0	1	1	CHURC1	churchill domain containing 1
hsa-miR-199b-5p	0	0	1	1	0	0	KRT86	keratin 86
hsa-miR-199b-5p	0	0	1	1	0	0	PRSS54	protease, serine, 54
hsa-miR-199b-5p	0	0	1	0	1	1	UHMK1	U2AF homology motif (UHM) kinase 1
hsa-miR-199b-5p	0	0	1	1	0	0	TRIM41	tripartite motif containing 41
hsa-miR-199b-5p	0	0	1	1	0	0	GRIP2	glutamate receptor interacting protein 2
hsa-miR-199b-5p	1	0	1	1	1	1	ZNF449	zinc finger protein 449
hsa-miR-199b-5p	0	0	1	1	1	1	HDAC8	histone deacetylase 8
hsa-miR-199b-5p	0	0	1	1	0	0	WDR83	WD repeat domain 83
hsa-miR-199b-5p	0	0	1	1	1	1	ZNF460	zinc finger protein 460
hsa-miR-199b-5p	1	0	1	1	1	1	MYO1B	myosin IB
hsa-miR-199b-5p	0	0	1	1	1	1	PINK1	PTEN induced putative kinase 1
hsa-miR-199b-5p	0	0	1	0	1	1	CADM1	cell adhesion molecule 1
hsa-miR-199b-5p	0	0	1	1	0	0	PPP2R1A	protein phosphatase 2, regulatory subunit A, alpha
hsa-miR-199b-5p	0	0	1	0	1	1	TMSB15B	thymosin beta 15B
hsa-miR-199b-5p	0	0	1	0	0	0	LOC643837	uncharacterized LOC643837
hsa-miR-199b-5p	1	0	1	1	1	1	AMMECR1	Alport syndrome, mental retardation, midface hypoplasia and elliptocytosis chromosomal region gene 1
hsa-miR-199b-5p	1	0	1	1	1	1	TSN	translin
hsa-miR-199b-5p	1	0	1	0	1	1	TEF	thyrotrophic embryonic factor
hsa-miR-199b-5p	0	0	1	1	0	0	HNRNPL	heterogeneous nuclear ribonucleoprotein L
hsa-miR-199b-5p	0	0	1	1	0	0	C6orf163	chromosome 6 open reading frame 163
hsa-miR-199b-5p	0	0	1	1	1	1	WT1	Wilms tumor 1
hsa-miR-199b-5p	0	0	1	0	0	0	CXXC1P1	CXXC finger protein 1 pseudogene 1
hsa-miR-199b-5p	1	0	1	1	1	1	BANP	BTG3 associated nuclear protein
hsa-miR-199b-5p	1	0	1	1	1	1	MAP3K12	mitogen-activated protein kinase kinase kinase 12
hsa-miR-199b-5p	1	0	1	1	1	1	KCND1	potassium voltage-gated channel, Shal-related subfamily, member 1
hsa-miR-199b-5p	0	0	1	1	1	1	SPOCK1	sparc/osteonectin, cwcv and kazal-like domains proteoglycan (testican) 1
hsa-miR-199b-5p	0	0	1	0	0	0	ZNF806	zinc finger protein 806
hsa-miR-199b-5p	0	0	1	0	0	0	FLJ37505	uncharacterized LOC400087
hsa-miR-199b-5p	0	0	1	1	1	1	ATP6V1H	ATPase, H+ transporting, lysosomal 50/57kDa, V1 subunit H
hsa-miR-199b-5p	0	0	1	1	1	1	AIFM3	apoptosis-inducing factor, mitochondrion-associated, 3
hsa-miR-199b-5p	1	0	1	1	1	1	TMEM100	transmembrane protein 100
hsa-miR-199b-5p	0	0	1	1	1	1	CHRM5	cholinergic receptor, muscarinic 5
hsa-miR-199b-5p	0	0	1	0	0	0	LOC730101	uncharacterized LOC730101
hsa-miR-199b-5p	1	0	1	0	1	1	UBXN4	UBX domain protein 4
hsa-miR-199b-5p	0	0	1	1	1	1	SIRPB2	signal-regulatory protein beta 2
hsa-miR-199b-5p	0	0	1	0	0	0	LOC100129858	uncharacterized LOC100129858
hsa-miR-199b-5p	0	0	1	0	1	1	HDAC9	histone deacetylase 9
hsa-miR-199b-5p	1	0	1	0	1	1	CLIC4	chloride intracellular channel 4
hsa-miR-199b-5p	0	0	1	1	1	1	BAG1	BCL2-associated athanogene
hsa-miR-199b-5p	1	0	1	1	1	1	EPB41L4A	erythrocyte membrane protein band 4.1 like 4A
hsa-miR-199b-5p	0	0	1	1	0	0	TRIM46	tripartite motif containing 46
hsa-miR-199b-5p	0	0	1	0	0	0	FAM66C	family with sequence similarity 66, member C
hsa-miR-199b-5p	1	0	1	1	1	1	TCEANC2	transcription elongation factor A (SII) N-terminal and central domain containing 2
hsa-miR-199b-5p	0	0	1	1	1	1	ZNF667	zinc finger protein 667
hsa-miR-199b-5p	0	0	1	0	0	0	ZNF300P1	zinc finger protein 300 pseudogene 1
hsa-miR-199b-5p	0	0	1	0	0	0	FLJ39534	uncharacterized FLJ39534
hsa-miR-199b-5p	0	0	1	1	0	0	CHCHD5	coiled-coil-helix-coiled-coil-helix domain containing 5
hsa-miR-199b-5p	0	0	1	0	0	0	LOC400680	uncharacterized LOC400680
hsa-miR-199b-5p	0	0	1	0	0	0	DNAJB8-AS1	DNAJB8 antisense RNA 1
hsa-miR-199b-5p	1	0	1	1	1	1	GOLGA8B	golgin A8 family, member B
hsa-miR-199b-5p	1	0	1	1	1	1	IGSF11	immunoglobulin superfamily, member 11
hsa-miR-199b-5p	0	0	1	1	0	0	PSAPL1	prosaposin-like 1 (gene/pseudogene)
hsa-miR-199b-5p	0	0	1	0	0	0	CECR7	cat eye syndrome chromosome region, candidate 7 (non-protein coding)
hsa-miR-199b-5p	1	0	1	1	1	1	ZCCHC2	zinc finger, CCHC domain containing 2
hsa-miR-199b-5p	0	0	1	0	0	0	LOC100130954	uncharacterized LOC100130954
hsa-miR-199b-5p	0	0	1	0	0	0	LOC338579	ankyrin repeat domain-containing protein 30B pseudogene
hsa-miR-199b-5p	0	0	1	1	1	1	CHCHD1	coiled-coil-helix-coiled-coil-helix domain containing 1
hsa-miR-199b-5p	0	0	1	1	1	1	ABCC12	ATP-binding cassette, sub-family C (CFTR/MRP), member 12
hsa-miR-199b-5p	1	0	1	1	1	1	HBP1	HMG-box transcription factor 1
hsa-miR-199b-5p	0	0	1	0	1	1	EML5	echinoderm microtubule associated protein like 5
hsa-miR-199b-5p	0	0	1	1	1	1	NFKB1	nuclear factor of kappa light polypeptide gene enhancer in B-cells 1
hsa-miR-199b-5p	0	0	1	1	0	0	YSK4	YSK4 Sps1/Ste20-related kinase homolog (S. cerevisiae)
hsa-miR-199b-5p	0	0	1	1	0	0	ZNF335	zinc finger protein 335
hsa-miR-199b-5p	0	0	1	1	0	0	GPR113	G protein-coupled receptor 113
hsa-miR-199b-5p	0	0	1	0	1	1	PATE4	prostate and testis expressed 4
hsa-miR-199b-5p	0	0	1	1	1	1	DNAJC24	DnaJ (Hsp40) homolog, subfamily C, member 24
hsa-miR-199b-5p	1	0	1	1	0	0	KCNC1	potassium voltage-gated channel, Shaw-related subfamily, member 1
hsa-miR-199b-5p	1	0	1	1	1	1	TPRG1	tumor protein p63 regulated 1
hsa-miR-199b-5p	1	0	1	1	1	1	MDGA2	MAM domain containing glycosylphosphatidylinositol anchor 2
hsa-miR-199b-5p	0	0	1	1	1	1	FAM5B	family with sequence similarity 5, member B
hsa-miR-199b-5p	0	0	1	0	0	0	MORN2	MORN repeat containing 2
hsa-miR-199b-5p	0	0	1	1	1	1	BAI2	brain-specific angiogenesis inhibitor 2
hsa-miR-199b-5p	0	0	1	0	0	0	TMPRSS11BNL	TMPRSS11B N terminal-like
hsa-miR-199b-5p	0	0	1	1	1	1	FAM19A2	family with sequence similarity 19 (chemokine (C-C motif)-like), member A2
hsa-miR-199b-5p	0	0	1	0	0	0	LOC650368	asparagine-linked glycosylation 1-like pseudogene
hsa-miR-199b-5p	1	0	1	1	1	1	EPAS1	endothelial PAS domain protein 1
hsa-miR-199b-5p	0	0	1	1	1	1	TBCCD1	TBCC domain containing 1
hsa-miR-199b-5p	0	0	1	1	1	1	IDS	iduronate 2-sulfatase
hsa-miR-199b-5p	1	0	1	0	1	1	CNTN2	contactin 2 (axonal)
hsa-miR-199b-5p	1	0	1	1	1	1	C17orf85	chromosome 17 open reading frame 85
hsa-miR-199b-5p	0	0	1	0	0	0	TMEM232	transmembrane protein 232
hsa-miR-199b-5p	1	0	1	1	1	1	C11orf30	chromosome 11 open reading frame 30
hsa-miR-199b-5p	1	0	1	1	1	1	PIAS3	protein inhibitor of activated STAT, 3
hsa-miR-199b-5p	1	0	1	1	1	1	IGFBP3	insulin-like growth factor binding protein 3
hsa-miR-199b-5p	1	0	1	0	0	0	ANKRD52	ankyrin repeat domain 52
hsa-miR-199b-5p	1	0	1	0	1	1	HECTD1	HECT domain containing E3 ubiquitin protein ligase 1
hsa-miR-199b-5p	0	0	1	0	0	0	FAM75D4	family with sequence similarity 75, member D4
hsa-miR-199b-5p	0	0	1	0	0	0	FAM95B1	family with sequence similarity 95, member B1
hsa-miR-199b-5p	0	0	1	1	0	0	RPRD2	regulation of nuclear pre-mRNA domain containing 2
hsa-miR-199b-5p	1	0	1	1	1	1	TP53INP1	tumor protein p53 inducible nuclear protein 1
hsa-miR-199b-5p	1	0	1	1	1	1	MACROD2	MACRO domain containing 2
hsa-miR-199b-5p	1	0	1	1	1	1	SACM1L	SAC1 suppressor of actin mutations 1-like (yeast)
hsa-miR-199b-5p	1	0	1	1	1	1	DLG2	discs, large homolog 2 (Drosophila)
hsa-miR-199b-5p	1	0	1	1	1	1	NIPBL	Nipped-B homolog (Drosophila)
hsa-miR-199b-5p	0	0	1	1	1	1	SPICE1	spindle and centriole associated protein 1
hsa-miR-199b-5p	0	0	1	1	0	0	HS3ST5	heparan sulfate (glucosamine) 3-O-sulfotransferase 5
hsa-miR-199b-5p	1	0	1	1	1	1	C14orf28	chromosome 14 open reading frame 28
hsa-miR-199b-5p	0	0	1	0	0	0	RPL23AP53	ribosomal protein L23a pseudogene 53
hsa-miR-199b-5p	1	0	1	0	1	1	ADIPOR2	adiponectin receptor 2
hsa-miR-199b-5p	1	0	1	0	1	1	N4BP3	NEDD4 binding protein 3
hsa-miR-199b-5p	0	0	1	1	1	1	ZNF503	zinc finger protein 503
hsa-miR-199b-5p	0	0	1	1	0	0	IQUB	IQ motif and ubiquitin domain containing
hsa-miR-199b-5p	1	0	1	1	1	1	PLA2G15	phospholipase A2, group XV
hsa-miR-199b-5p	0	0	1	0	0	0	LRRC9	leucine rich repeat containing 9
hsa-miR-199b-5p	0	0	1	1	1	1	SLC35F2	solute carrier family 35, member F2
hsa-miR-199b-5p	1	0	1	1	1	1	NSUN4	NOP2/Sun domain family, member 4
hsa-miR-199b-5p	0	0	1	0	0	0	FAM205B	transmembrane protein C9orf144B pseudogene
hsa-miR-199b-5p	1	0	1	1	1	1	WDR37	WD repeat domain 37
hsa-miR-199b-5p	0	0	1	0	0	0	LINC00514	long intergenic non-protein coding RNA 514
hsa-miR-199b-5p	1	0	1	0	1	1	KDM2A	lysine (K)-specific demethylase 2A
hsa-miR-199b-5p	1	0	1	1	1	1	KCTD12	potassium channel tetramerisation domain containing 12
hsa-miR-199b-5p	1	0	1	1	1	1	BCAT1	branched chain amino-acid transaminase 1, cytosolic
hsa-miR-199b-5p	1	0	1	1	1	1	SDCBP	syndecan binding protein (syntenin)
hsa-miR-199b-5p	0	0	1	0	0	0	IDO2	indoleamine 2,3-dioxygenase 2
hsa-miR-199b-5p	0	0	1	0	0	0	PINLYP	phospholipase A2 inhibitor and LY6/PLAUR domain containing
hsa-miR-199b-5p	0	0	1	1	1	1	TBX19	T-box 19
hsa-miR-199b-5p	0	0	1	1	1	1	LYPD1	LY6/PLAUR domain containing 1
hsa-miR-199b-5p	0	0	1	0	0	0	LOC390660	FLJ00317 protein
hsa-miR-199b-5p	0	0	1	0	1	1	RUFY4	RUN and FYVE domain containing 4
hsa-miR-199b-5p	0	0	1	1	1	1	ZNF346	zinc finger protein 346
hsa-miR-199b-5p	0	0	1	1	0	0	ZNF730	zinc finger protein 730
hsa-miR-199b-5p	0	0	1	0	0	0	AGAP9	ArfGAP with GTPase domain, ankyrin repeat and PH domain 9
hsa-miR-199b-5p	0	0	1	1	0	0	FIZ1	FLT3-interacting zinc finger 1
hsa-miR-199b-5p	0	0	1	1	1	1	ARID1A	AT rich interactive domain 1A (SWI-like)
hsa-miR-199b-5p	1	0	1	1	1	1	CYYR1	cysteine/tyrosine-rich 1
hsa-miR-199b-5p	1	0	1	1	1	1	TRPM6	transient receptor potential cation channel, subfamily M, member 6
hsa-miR-199b-5p	0	0	1	1	1	1	C5orf28	chromosome 5 open reading frame 28
hsa-miR-199b-5p	0	0	1	0	1	1	WDR19	WD repeat domain 19
hsa-miR-199b-5p	0	0	1	1	1	1	CD48	CD48 molecule
hsa-miR-199b-5p	0	0	1	1	1	1	SERPINE2	serpin peptidase inhibitor, clade E (nexin, plasminogen activator inhibitor type 1), member 2
hsa-miR-199b-5p	1	0	1	1	1	1	PHTF2	putative homeodomain transcription factor 2
hsa-miR-199b-5p	1	0	1	1	1	1	NOVA1	neuro-oncological ventral antigen 1
hsa-miR-199b-5p	1	0	1	1	1	1	APBB2	amyloid beta (A4) precursor protein-binding, family B, member 2
hsa-miR-199b-5p	1	0	1	1	1	1	NECAP1	NECAP endocytosis associated 1
hsa-miR-199b-5p	0	0	1	1	0	0	CPNE6	copine VI (neuronal)
hsa-miR-199b-5p	0	0	1	1	0	0	NEK7	NIMA (never in mitosis gene a)-related kinase 7
hsa-miR-199b-5p	0	0	1	0	0	0	POM121L8P	POM121 transmembrane nucleoporin-like 8 pseudogene
hsa-miR-199b-5p	1	0	1	1	1	1	ARF6	ADP-ribosylation factor 6
hsa-miR-199b-5p	0	0	1	1	0	0	MSH5	mutS homolog 5 (E. coli)
hsa-miR-199b-5p	0	0	1	1	0	0	SAPCD1	suppressor APC domain containing 1
hsa-miR-199b-5p	1	0	1	0	1	1	DCDC2	doublecortin domain containing 2
hsa-miR-199b-5p	0	0	1	1	1	1	GMEB2	glucocorticoid modulatory element binding protein 2
hsa-miR-199b-5p	0	0	1	0	0	0	KIAA0913	KIAA0913
hsa-miR-199b-5p	0	0	1	1	1	1	DDX60	DEAD (Asp-Glu-Ala-Asp) box polypeptide 60
hsa-miR-199b-5p	1	0	1	1	1	1	GOLGA8A	golgin A8 family, member A
hsa-miR-199b-5p	0	0	1	1	1	1	SYNJ2	synaptojanin 2
hsa-miR-199b-5p	0	0	1	0	0	0	LRRC37BP1	leucine rich repeat containing 37B pseudogene 1
hsa-miR-199b-5p	1	0	1	0	1	1	GRIN3A	glutamate receptor, ionotropic, N-methyl-D-aspartate 3A
hsa-miR-199b-5p	1	0	1	1	1	1	PKNOX2	PBX/knotted 1 homeobox 2
hsa-miR-199b-5p	1	0	1	0	1	1	ZNF507	zinc finger protein 507
hsa-miR-199b-5p	1	0	1	1	1	1	TMEFF1	transmembrane protein with EGF-like and two follistatin-like domains 1
hsa-miR-199b-5p	0	0	1	1	1	1	ZFP41	zinc finger protein 41 homolog (mouse)
hsa-miR-199b-5p	0	0	1	1	0	0	RPL9	ribosomal protein L9
hsa-miR-199b-5p	0	0	1	1	1	1	BEND7	BEN domain containing 7
hsa-miR-199b-5p	1	0	1	1	1	1	FAM126B	family with sequence similarity 126, member B
hsa-miR-199b-5p	0	0	1	1	1	1	EGFLAM	EGF-like, fibronectin type III and laminin G domains
hsa-miR-199b-5p	1	0	1	1	0	0	USP24	ubiquitin specific peptidase 24
hsa-miR-199b-5p	1	0	1	1	1	1	DNAJC10	DnaJ (Hsp40) homolog, subfamily C, member 10
hsa-miR-199b-5p	0	0	1	1	1	1	ZMYM6	zinc finger, MYM-type 6
hsa-miR-199b-5p	1	0	1	0	1	1	MEF2C	myocyte enhancer factor 2C
hsa-miR-199b-5p	1	0	1	1	1	1	BPTF	bromodomain PHD finger transcription factor
hsa-miR-199b-5p	0	0	1	1	1	1	CEP192	centrosomal protein 192kDa
hsa-miR-199b-5p	0	0	1	1	1	1	NFE2L1	nuclear factor (erythroid-derived 2)-like 1
hsa-miR-199b-5p	0	0	1	1	0	0	CD37	CD37 molecule
hsa-miR-199b-5p	0	0	1	1	1	1	PCDH20	protocadherin 20
hsa-miR-199b-5p	1	0	1	1	1	1	IL17RD	interleukin 17 receptor D
hsa-miR-199b-5p	1	0	1	1	1	1	PRPF38B	PRP38 pre-mRNA processing factor 38 (yeast) domain containing B
hsa-miR-199b-5p	1	0	1	1	1	1	ANKRD12	ankyrin repeat domain 12
hsa-miR-199b-5p	1	0	1	0	1	1	COX18	COX18 cytochrome c oxidase assembly homolog (S. cerevisiae)
hsa-miR-199b-5p	1	0	1	1	1	1	FAM76B	family with sequence similarity 76, member B
hsa-miR-199b-5p	0	0	1	1	1	1	C5orf45	chromosome 5 open reading frame 45
hsa-miR-199b-5p	1	0	1	1	1	1	PPP3CA	protein phosphatase 3, catalytic subunit, alpha isozyme
hsa-miR-199b-5p	0	0	1	1	1	1	MTMR14	myotubularin related protein 14
hsa-miR-199b-5p	0	0	1	1	0	0	TMEM134	transmembrane protein 134
hsa-miR-199b-5p	0	0	1	1	1	1	ELAVL4	ELAV (embryonic lethal, abnormal vision, Drosophila)-like 4
hsa-miR-199b-5p	1	0	1	1	1	1	SYNCRIP	synaptotagmin binding, cytoplasmic RNA interacting protein
hsa-miR-199b-5p	1	0	1	1	1	1	GGT7	gamma-glutamyltransferase 7
hsa-miR-199b-5p	0	0	1	1	1	1	DNAJB14	DnaJ (Hsp40) homolog, subfamily B, member 14
hsa-miR-199b-5p	0	0	1	1	0	0	ESPN	espin
hsa-miR-199b-5p	0	0	1	1	1	1	SUGT1	SGT1, suppressor of G2 allele of SKP1 (S. cerevisiae)
hsa-miR-199b-5p	0	0	1	1	0	0	GLYCTK	glycerate kinase
hsa-miR-199b-5p	1	0	1	1	1	1	OPRM1	opioid receptor, mu 1
hsa-miR-199b-5p	0	0	1	1	1	1	GON4L	gon-4-like (C. elegans)
hsa-miR-199b-5p	1	0	1	1	1	1	CAMTA1	calmodulin binding transcription activator 1
hsa-miR-199b-5p	0	0	1	1	0	0	LRRC28	leucine rich repeat containing 28
hsa-miR-199b-5p	0	0	1	1	0	0	VSIG4	V-set and immunoglobulin domain containing 4
hsa-miR-199b-5p	0	0	1	1	1	1	PIGG	phosphatidylinositol glycan anchor biosynthesis, class G
hsa-miR-199b-5p	0	0	1	1	1	1	TNFRSF19	tumor necrosis factor receptor superfamily, member 19
hsa-miR-199b-5p	0	0	1	1	1	1	POTEG	POTE ankyrin domain family, member G
hsa-miR-199b-5p	1	0	1	1	1	1	ARHGAP20	Rho GTPase activating protein 20
hsa-miR-199b-5p	1	0	1	1	1	1	MYNN	myoneurin
hsa-miR-199b-5p	0	0	1	1	1	1	EHBP1	EH domain binding protein 1
hsa-miR-199b-5p	1	0	1	1	1	1	MECP2	methyl CpG binding protein 2 (Rett syndrome)
hsa-miR-199b-5p	1	0	1	0	1	1	LRAT	lecithin retinol acyltransferase (phosphatidylcholine--retinol O-acyltransferase)
hsa-miR-199b-5p	0	0	1	1	0	0	ASB16	ankyrin repeat and SOCS box containing 16
hsa-miR-199b-5p	0	0	1	1	1	1	NR1I3	nuclear receptor subfamily 1, group I, member 3
hsa-miR-199b-5p	1	0	1	1	1	1	CHRDL1	chordin-like 1
hsa-miR-199b-5p	0	0	1	1	1	1	KLK7	kallikrein-related peptidase 7
hsa-miR-199b-5p	0	0	1	0	1	1	KCNE1	potassium voltage-gated channel, Isk-related family, member 1
hsa-miR-199b-5p	1	0	1	1	0	0	TAF4B	TAF4b RNA polymerase II, TATA box binding protein (TBP)-associated factor, 105kDa
hsa-miR-199b-5p	0	0	1	1	1	1	IL23R	interleukin 23 receptor
hsa-miR-199b-5p	1	0	1	1	1	1	AMOT	angiomotin
hsa-miR-199b-5p	0	0	1	0	0	0	GBAP1	glucosidase, beta, acid pseudogene 1
hsa-miR-199b-5p	1	0	1	0	1	1	FAM46A	family with sequence similarity 46, member A
hsa-miR-199b-5p	1	0	1	1	1	1	TMUB2	transmembrane and ubiquitin-like domain containing 2
hsa-miR-199b-5p	0	0	1	1	1	1	WDR55	WD repeat domain 55
hsa-miR-199b-5p	1	0	1	0	0	0	VGLL4	vestigial like 4 (Drosophila)
hsa-miR-199b-5p	1	0	1	1	1	1	RIMS3	regulating synaptic membrane exocytosis 3
hsa-miR-199b-5p	1	0	1	1	1	1	MBNL1	muscleblind-like splicing regulator 1
hsa-miR-199b-5p	0	0	1	1	1	1	ZNF589	zinc finger protein 589
hsa-miR-199b-5p	1	0	1	1	1	1	KIAA1191	KIAA1191
hsa-miR-199b-5p	1	0	1	1	1	1	U2SURP	U2 snRNP-associated SURP domain containing
hsa-miR-199b-5p	0	0	1	1	1	1	DYNLRB1	dynein, light chain, roadblock-type 1
hsa-miR-199b-5p	0	0	1	1	0	0	AGBL5	ATP/GTP binding protein-like 5
hsa-miR-199b-5p	0	0	1	1	1	1	ACPP	acid phosphatase, prostate
hsa-miR-199b-5p	0	0	1	1	1	1	ICA1	islet cell autoantigen 1, 69kDa
hsa-miR-199b-5p	0	0	1	1	1	1	TMEM30A	transmembrane protein 30A
hsa-miR-199b-5p	0	0	1	1	0	0	ARHGAP8	Rho GTPase activating protein 8
hsa-miR-199b-5p	1	0	1	1	1	1	OTUD5	OTU domain containing 5
hsa-miR-199b-5p	1	0	1	0	1	1	FNDC3B	fibronectin type III domain containing 3B
hsa-miR-199b-5p	0	0	1	1	0	0	USP19	ubiquitin specific peptidase 19
hsa-miR-199b-5p	1	0	1	1	1	1	PAPOLA	poly(A) polymerase alpha
hsa-miR-199b-5p	0	0	1	0	0	0	KLHL15	kelch-like 15 (Drosophila)
hsa-miR-199b-5p	0	0	1	0	1	1	ZNF37A	zinc finger protein 37A
hsa-miR-199b-5p	1	0	1	1	1	1	TIA1	TIA1 cytotoxic granule-associated RNA binding protein
hsa-miR-199b-5p	0	0	1	0	0	0	ABCC6P2	ATP-binding cassette, sub-family C, member 6 pseudogene 2
hsa-miR-199b-5p	0	0	1	1	0	0	PREB	prolactin regulatory element binding
hsa-miR-199b-5p	1	0	1	1	1	1	ORMDL3	ORM1-like 3 (S. cerevisiae)
hsa-miR-199b-5p	0	0	1	1	1	1	TRIM47	tripartite motif containing 47
hsa-miR-199b-5p	0	0	1	1	0	0	ZNF584	zinc finger protein 584
hsa-miR-199b-5p	0	0	1	1	1	1	RDH11	retinol dehydrogenase 11 (all-trans/9-cis/11-cis)
hsa-miR-199b-5p	0	0	1	0	1	1	LOC646736	uncharacterized LOC646736
hsa-miR-199b-5p	0	0	1	0	1	1	ZNF641	zinc finger protein 641
hsa-miR-199b-5p	0	0	1	0	0	0	WDFY3-AS2	WDFY3 antisense RNA 2
hsa-miR-199b-5p	0	0	1	1	0	0	PTPMT1	protein tyrosine phosphatase, mitochondrial 1
hsa-miR-199b-5p	0	0	1	1	1	1	HLA-G	major histocompatibility complex, class I, G
hsa-miR-199b-5p	0	0	1	0	0	0	LOC284260	uncharacterized LOC284260
hsa-miR-199b-5p	0	0	1	1	1	1	SRGN	serglycin
hsa-miR-199b-5p	0	0	1	1	0	0	SLC22A9	solute carrier family 22 (organic anion transporter), member 9
hsa-miR-199b-5p	0	0	1	0	0	0	AZGP1P1	alpha-2-glycoprotein 1, zinc-binding pseudogene 1
hsa-miR-199b-5p	0	0	1	0	0	0	SNX29P2	sorting nexin 29 pseudogene 2
hsa-miR-199b-5p	1	0	1	1	1	1	VASP	vasodilator-stimulated phosphoprotein
hsa-miR-199b-5p	0	0	1	1	0	0	TRO	trophinin
hsa-miR-199b-5p	0	0	1	1	1	1	MAP2	microtubule-associated protein 2
hsa-miR-199b-5p	0	0	1	1	0	0	SPERT	spermatid associated
hsa-miR-199b-5p	1	0	1	1	1	1	RSPO2	R-spondin 2
hsa-miR-199b-5p	1	0	1	1	1	1	PTPRD	protein tyrosine phosphatase, receptor type, D
hsa-miR-199b-5p	0	0	1	1	1	1	SELP	selectin P (granule membrane protein 140kDa, antigen CD62)
hsa-miR-199b-5p	1	0	1	1	1	1	TMEM127	transmembrane protein 127
hsa-miR-199b-5p	0	0	1	0	1	1	KIAA0895	KIAA0895
hsa-miR-199b-5p	1	0	1	1	1	1	SYT9	synaptotagmin IX
hsa-miR-199b-5p	0	0	1	1	0	0	SWI5	SWI5 recombination repair homolog (yeast)
hsa-miR-199b-5p	1	0	1	0	1	1	GPR107	G protein-coupled receptor 107
hsa-miR-199b-5p	0	0	1	1	1	1	CCP110	centriolar coiled coil protein 110kDa
hsa-miR-199b-5p	1	0	1	1	1	1	EYA4	eyes absent homolog 4 (Drosophila)
hsa-miR-199b-5p	0	0	1	1	1	1	RBBP8	retinoblastoma binding protein 8
hsa-miR-199b-5p	0	0	1	1	0	0	AGBL3	ATP/GTP binding protein-like 3
hsa-miR-199b-5p	1	0	1	1	1	1	ADARB1	adenosine deaminase, RNA-specific, B1
hsa-miR-199b-5p	1	0	1	1	1	1	ELAVL2	ELAV (embryonic lethal, abnormal vision, Drosophila)-like 2 (Hu antigen B)
hsa-miR-199b-5p	0	0	1	1	1	1	IQCH	IQ motif containing H
hsa-miR-199b-5p	0	0	1	1	1	1	AADAT	aminoadipate aminotransferase
hsa-miR-199b-5p	0	0	1	1	0	0	TRIM69	tripartite motif containing 69
hsa-miR-199b-5p	0	0	1	1	0	0	ASIC4	acid-sensing (proton-gated) ion channel family member 4
hsa-miR-199b-5p	0	0	1	1	1	1	C7orf53	chromosome 7 open reading frame 53
hsa-miR-199b-5p	1	0	1	1	1	1	SF1	splicing factor 1
hsa-miR-199b-5p	0	0	1	1	1	1	XAF1	XIAP associated factor 1
hsa-miR-199b-5p	1	0	1	1	1	1	SECISBP2L	SECIS binding protein 2-like
hsa-miR-199b-5p	0	0	1	1	1	1	IL20RB	interleukin 20 receptor beta
hsa-miR-199b-5p	1	0	1	1	0	0	DGCR6	DiGeorge syndrome critical region gene 6
hsa-miR-199b-5p	0	0	1	1	0	0	ADAP2	ArfGAP with dual PH domains 2
hsa-miR-199b-5p	0	0	1	1	0	0	TNMD	tenomodulin
hsa-miR-199b-5p	1	0	1	1	1	1	QTRTD1	queuine tRNA-ribosyltransferase domain containing 1
hsa-miR-199b-5p	0	0	1	1	1	1	EDA2R	ectodysplasin A2 receptor
hsa-miR-199b-5p	0	0	1	1	1	1	KIF16B	kinesin family member 16B
hsa-miR-199b-5p	1	0	1	1	1	1	NKAIN2	Na+/K+ transporting ATPase interacting 2
hsa-miR-199b-5p	0	0	1	1	0	0	PLA2G4F	phospholipase A2, group IVF
hsa-miR-199b-5p	0	0	1	1	1	1	ZNF781	zinc finger protein 781
hsa-miR-199b-5p	1	0	1	1	0	0	INO80E	INO80 complex subunit E
hsa-miR-199b-5p	1	0	1	1	1	1	ZEB2	zinc finger E-box binding homeobox 2
hsa-miR-199b-5p	0	0	1	1	1	1	TMEM139	transmembrane protein 139
hsa-miR-199b-5p	0	0	1	1	1	1	ATP1A4	ATPase, Na+/K+ transporting, alpha 4 polypeptide
hsa-miR-199b-5p	0	0	1	0	0	0	FAM201A	family with sequence similarity 201, member A
hsa-miR-199b-5p	1	0	1	1	1	1	HECTD2	HECT domain containing E3 ubiquitin protein ligase 2
hsa-miR-199b-5p	0	0	1	0	0	0	LOC654433	uncharacterized LOC654433
hsa-miR-199b-5p	0	0	1	1	1	1	CELF1	CUGBP, Elav-like family member 1
hsa-miR-199b-5p	0	0	1	0	0	0	LOC286184	uncharacterized LOC286184
hsa-miR-199b-5p	0	0	1	1	1	1	EFCAB13	EF-hand calcium binding domain 13
hsa-miR-199b-5p	0	0	1	0	0	0	CRYBB2P1	crystallin, beta B2 pseudogene 1
hsa-miR-199b-5p	0	0	1	0	0	0	LOC100134868	uncharacterized LOC100134868
hsa-miR-199b-5p	0	0	1	1	0	0	CCDC152	coiled-coil domain containing 152
hsa-miR-199b-5p	0	0	1	0	0	0	FLJ36000	uncharacterized FLJ36000
hsa-miR-199b-5p	1	0	1	0	0	0	MSL1	male-specific lethal 1 homolog (Drosophila)
hsa-miR-199b-5p	0	0	1	0	1	1	HSBP1L1	heat shock factor binding protein 1-like 1
hsa-miR-199b-5p	1	0	1	1	1	1	DPP8	dipeptidyl-peptidase 8
hsa-miR-199b-5p	1	0	1	1	1	1	DACH2	dachshund homolog 2 (Drosophila)
hsa-miR-199b-5p	0	0	1	1	1	1	ZFP90	zinc finger protein 90 homolog (mouse)
hsa-miR-199b-5p	1	0	1	1	1	1	ARPP21	cAMP-regulated phosphoprotein, 21kDa
hsa-miR-199b-5p	1	0	1	1	1	1	FAM123A	family with sequence similarity 123A
hsa-miR-199b-5p	1	0	1	1	0	0	INPP5J	inositol polyphosphate-5-phosphatase J
hsa-miR-199b-5p	1	0	1	0	1	1	DCUN1D4	DCN1, defective in cullin neddylation 1, domain containing 4 (S. cerevisiae)
hsa-miR-199b-5p	1	0	1	0	1	1	TNFAIP3	tumor necrosis factor, alpha-induced protein 3
hsa-miR-199b-5p	0	0	1	1	1	1	C4orf32	chromosome 4 open reading frame 32
hsa-miR-199b-5p	0	0	1	1	0	0	C1orf87	chromosome 1 open reading frame 87
hsa-miR-199b-5p	0	0	1	0	0	0	LOC154822	uncharacterized LOC154822
hsa-miR-199b-5p	1	0	1	1	1	1	FKBP5	FK506 binding protein 5
hsa-miR-199b-5p	0	0	1	1	0	0	PTOV1	prostate tumor overexpressed 1
hsa-miR-199b-5p	0	0	1	0	0	0	LOC340094	uncharacterized LOC340094
hsa-miR-199b-5p	0	0	1	1	1	1	DGKH	diacylglycerol kinase, eta
hsa-miR-199b-5p	0	0	1	0	0	0	DKFZp686O1327	uncharacterized LOC401014
hsa-miR-199b-5p	1	0	1	1	0	0	WNK1	WNK lysine deficient protein kinase 1
hsa-miR-199b-5p	0	0	1	0	0	0	LOC283914	uncharacterized LOC283914
hsa-miR-199b-5p	1	0	1	1	1	1	ZFAND4	zinc finger, AN1-type domain 4
hsa-miR-199b-5p	1	0	1	1	1	1	SF3B1	splicing factor 3b, subunit 1, 155kDa
hsa-miR-199b-5p	0	0	1	1	1	1	EBP	emopamil binding protein (sterol isomerase)
hsa-miR-199b-5p	0	0	1	0	1	1	IL33	interleukin 33
hsa-miR-199b-5p	1	0	1	1	0	0	TBC1D10C	TBC1 domain family, member 10C
hsa-miR-199b-5p	1	0	1	1	1	1	TOMM40	translocase of outer mitochondrial membrane 40 homolog (yeast)
hsa-miR-199b-5p	1	0	1	1	1	1	PTPRG	protein tyrosine phosphatase, receptor type, G
hsa-miR-199b-5p	1	0	1	1	1	1	CLVS1	clavesin 1
hsa-miR-199b-5p	1	0	1	1	1	1	KIF11	kinesin family member 11
hsa-miR-199b-5p	1	0	1	0	1	1	NUDT10	nudix (nucleoside diphosphate linked moiety X)-type motif 10
hsa-miR-199b-5p	1	0	1	1	1	1	FNDC3A	fibronectin type III domain containing 3A
hsa-miR-199b-5p	0	0	1	1	1	1	LINC00086	long intergenic non-protein coding RNA 86
hsa-miR-199b-5p	1	0	1	1	1	1	ZFP91	zinc finger protein 91 homolog (mouse)
hsa-miR-199b-5p	1	0	1	1	1	1	YWHAZ	tyrosine 3-monooxygenase/tryptophan 5-monooxygenase activation protein, zeta polypeptide
hsa-miR-199b-5p	0	0	1	1	1	1	HLA-DQA1	major histocompatibility complex, class II, DQ alpha 1
hsa-miR-199b-5p	1	0	1	1	1	1	SCUBE3	signal peptide, CUB domain, EGF-like 3
hsa-miR-199b-5p	0	0	1	0	1	1	C17orf51	chromosome 17 open reading frame 51
hsa-miR-199b-5p	0	0	1	1	1	1	ZNF254	zinc finger protein 254
hsa-miR-199b-5p	1	0	1	1	1	1	ZSCAN29	zinc finger and SCAN domain containing 29
hsa-miR-199b-5p	0	0	1	1	1	1	P2RX6	purinergic receptor P2X, ligand-gated ion channel, 6
hsa-miR-199b-5p	0	0	1	1	1	1	STAG1	stromal antigen 1
hsa-miR-199b-5p	1	0	1	1	1	1	ADCY6	adenylate cyclase 6
hsa-miR-199b-5p	1	0	1	1	1	1	LMO4	LIM domain only 4
hsa-miR-199b-5p	1	0	1	1	1	1	NRSN1	neurensin 1
hsa-miR-199b-5p	1	0	1	0	1	1	MAGIX	MAGI family member, X-linked
hsa-miR-199b-5p	0	0	1	0	0	0	PABPC1P2	poly(A) binding protein, cytoplasmic 1 pseudogene 2
hsa-miR-199b-5p	1	0	1	1	1	1	MAPKAPK3	mitogen-activated protein kinase-activated protein kinase 3
hsa-miR-199b-5p	0	0	1	0	0	0	SPDYE8P	speedy homolog E8 (Xenopus laevis), pseudogene
hsa-miR-199b-5p	1	0	1	1	0	0	DCAF15	DDB1 and CUL4 associated factor 15
hsa-miR-199b-5p	0	0	1	1	0	0	CYP4F30P	cytochrome P450, family 4, subfamily F, polypeptide 30, pseudogene
hsa-miR-199b-5p	1	0	1	1	1	1	AHR	aryl hydrocarbon receptor
hsa-miR-199b-5p	1	0	1	1	1	1	MED27	mediator complex subunit 27
hsa-miR-199b-5p	0	0	1	1	1	1	PCDH18	protocadherin 18
hsa-miR-199b-5p	1	0	1	0	1	1	TMEM194A	transmembrane protein 194A
hsa-miR-199b-5p	0	0	1	0	0	0	JPX	JPX transcript, XIST activator (non-protein coding)
hsa-miR-199b-5p	0	0	1	0	1	1	SH3RF2	SH3 domain containing ring finger 2
hsa-miR-199b-5p	1	0	1	0	1	1	AMMECR1L	AMME chromosomal region gene 1-like
hsa-miR-199b-5p	0	0	1	0	0	0	LOC643955	zinc finger protein 479 pseudogene
hsa-miR-199b-5p	1	0	1	1	1	1	NOTCH2NL	notch 2 N-terminal like
hsa-miR-199b-5p	0	0	1	0	0	0	GUSBP1	glucuronidase, beta pseudogene 1
hsa-miR-199b-5p	0	0	1	1	1	1	C7orf10	chromosome 7 open reading frame 10
hsa-miR-199b-5p	1	0	1	0	1	1	LRRTM4	leucine rich repeat transmembrane neuronal 4
hsa-miR-199b-5p	0	0	1	0	0	0	FAM106A	family with sequence similarity 106, member A
hsa-miR-199b-5p	1	0	1	0	1	1	ARPP19	cAMP-regulated phosphoprotein, 19kDa
hsa-miR-199b-5p	0	0	1	1	1	1	SPDYE2	speedy homolog E2 (Xenopus laevis)
hsa-miR-199b-5p	0	0	1	1	0	0	ZNF541	zinc finger protein 541
hsa-miR-199b-5p	0	0	1	0	1	1	TCAIM	T cell activation inhibitor, mitochondrial
hsa-miR-199b-5p	1	0	1	1	1	1	LRRC15	leucine rich repeat containing 15
hsa-miR-199b-5p	0	0	1	1	1	1	ZNF365	zinc finger protein 365
hsa-miR-199b-5p	0	0	1	1	0	0	ADAMTS13	ADAM metallopeptidase with thrombospondin type 1 motif, 13
hsa-miR-199b-5p	1	0	1	0	1	1	CPEB2	cytoplasmic polyadenylation element binding protein 2
hsa-miR-199b-5p	0	0	1	1	1	1	CCDC126	coiled-coil domain containing 126
hsa-miR-199b-5p	0	0	1	1	1	1	SPHKAP	SPHK1 interactor, AKAP domain containing
hsa-miR-199b-5p	0	0	1	1	1	1	MUC21	mucin 21, cell surface associated
hsa-miR-199b-5p	1	0	1	1	1	1	FAM135B	family with sequence similarity 135, member B
hsa-miR-199b-5p	1	0	1	1	1	1	SUV420H1	suppressor of variegation 4-20 homolog 1 (Drosophila)
hsa-miR-199b-5p	1	0	1	1	1	1	TBP	TATA box binding protein
hsa-miR-199b-5p	0	0	1	1	0	0	NLRP7	NLR family, pyrin domain containing 7
hsa-miR-199b-5p	1	0	1	1	1	1	LARP1B	La ribonucleoprotein domain family, member 1B
hsa-miR-199b-5p	1	0	1	1	1	1	TET2	tet methylcytosine dioxygenase 2
hsa-miR-199b-5p	0	0	1	1	1	1	ZNF514	zinc finger protein 514
hsa-miR-199b-5p	1	0	1	1	1	1	PPP4R2	protein phosphatase 4, regulatory subunit 2
hsa-miR-199b-5p	0	0	1	1	0	0	NLRX1	NLR family member X1
hsa-miR-199b-5p	1	0	1	1	1	1	SLK	STE20-like kinase
hsa-miR-199b-5p	0	0	1	1	0	0	PRAMEF10	PRAME family member 10
hsa-miR-199b-5p	1	0	1	1	1	1	TMEM132B	transmembrane protein 132B
hsa-miR-199b-5p	1	0	1	1	1	1	TMEM64	transmembrane protein 64
hsa-miR-199b-5p	0	0	1	1	1	1	SLC8A3	solute carrier family 8 (sodium/calcium exchanger), member 3
hsa-miR-199b-5p	1	0	1	1	1	1	SHANK2	SH3 and multiple ankyrin repeat domains 2
hsa-miR-199b-5p	0	0	1	0	0	0	BTF3P11	basic transcription factor 3 pseudogene 11
hsa-miR-199b-5p	1	0	1	1	1	1	ST18	suppression of tumorigenicity 18 (breast carcinoma) (zinc finger protein)
hsa-miR-199b-5p	1	0	1	0	1	1	PRDM10	PR domain containing 10
hsa-miR-199b-5p	0	0	1	0	1	1	NWD1	NACHT and WD repeat domain containing 1
hsa-miR-199b-5p	1	0	1	1	1	1	OTUD4	OTU domain containing 4
hsa-miR-199b-5p	0	0	1	1	0	0	SOCS7	suppressor of cytokine signaling 7
hsa-miR-199b-5p	1	0	1	0	1	1	CAMSAP2	calmodulin regulated spectrin-associated protein family, member 2
hsa-miR-199b-5p	1	0	1	1	1	1	ANK2	ankyrin 2, neuronal
hsa-miR-199b-5p	1	0	1	1	1	1	MEGF11	multiple EGF-like-domains 11
hsa-miR-199b-5p	1	0	1	1	1	1	JMJD1C	jumonji domain containing 1C
hsa-miR-199b-5p	1	0	1	1	1	1	CHIC1	cysteine-rich hydrophobic domain 1
hsa-miR-199b-5p	0	0	1	0	1	1	C20orf202	chromosome 20 open reading frame 202
hsa-miR-199b-5p	1	0	1	1	1	1	PHC2	polyhomeotic homolog 2 (Drosophila)
hsa-miR-199b-5p	1	0	1	1	1	1	KIAA0922	KIAA0922
hsa-miR-199b-5p	0	0	1	1	0	0	TCHH	trichohyalin
hsa-miR-199b-5p	0	0	1	1	0	0	SYNE3	spectrin repeat containing, nuclear envelope family member 3
hsa-miR-199b-5p	0	0	1	1	1	1	CNIH	cornichon homolog (Drosophila)
hsa-miR-199b-5p	0	0	1	0	0	0	FLJ39632	uncharacterized LOC642477
hsa-miR-199b-5p	0	0	1	0	0	0	DKFZp686D0853	uncharacterized LOC401613
hsa-miR-199b-5p	1	0	1	1	1	1	ATP2B4	ATPase, Ca++ transporting, plasma membrane 4
hsa-miR-199b-5p	0	0	1	0	0	0	RGPD4	RANBP2-like and GRIP domain containing 4
hsa-miR-199b-5p	0	0	1	1	1	1	KBTBD12	kelch repeat and BTB (POZ) domain containing 12
hsa-miR-199b-5p	0	0	1	0	0	0	ZNF542	zinc finger protein 542
hsa-miR-199b-5p	1	0	1	1	1	1	SLC35F1	solute carrier family 35, member F1
hsa-miR-199b-5p	0	0	1	1	1	1	GLIPR1L2	GLI pathogenesis-related 1 like 2
hsa-miR-199b-5p	0	0	1	1	1	1	VPS35	vacuolar protein sorting 35 homolog (S. cerevisiae)
hsa-miR-199b-5p	1	0	1	1	1	1	CBX3	chromobox homolog 3
hsa-miR-199b-5p	0	0	1	0	1	1	THAP6	THAP domain containing 6
hsa-miR-199b-5p	0	0	1	1	1	1	FAM9C	family with sequence similarity 9, member C
hsa-miR-199b-5p	1	0	1	1	1	1	TLN2	talin 2
hsa-miR-199b-5p	1	0	1	1	1	1	RREB1	ras responsive element binding protein 1
hsa-miR-199b-5p	0	0	1	1	1	1	ARMCX3	armadillo repeat containing, X-linked 3
hsa-miR-199b-5p	1	0	1	1	1	1	PHC3	polyhomeotic homolog 3 (Drosophila)
hsa-miR-199b-5p	0	0	1	0	0	0	OVOS	ovostatin
hsa-miR-199b-5p	1	0	1	1	1	1	DCAF5	DDB1 and CUL4 associated factor 5
hsa-miR-199b-5p	0	0	1	1	1	1	CCNT2	cyclin T2
hsa-miR-199b-5p	1	0	1	1	1	1	NFIB	nuclear factor I/B
hsa-miR-199b-5p	1	0	1	1	1	1	NAV1	neuron navigator 1
hsa-miR-199b-5p	1	0	1	1	1	1	C5orf24	chromosome 5 open reading frame 24
hsa-miR-199b-5p	1	0	1	1	1	1	PTER	phosphotriesterase related
hsa-miR-199b-5p	1	0	1	1	1	1	PGAP1	post-GPI attachment to proteins 1
hsa-miR-199b-5p	1	0	1	0	1	1	C1orf21	chromosome 1 open reading frame 21
hsa-miR-199b-5p	0	0	1	1	0	0	PITRM1	pitrilysin metallopeptidase 1
hsa-miR-199b-5p	1	0	1	0	1	1	TTL	tubulin tyrosine ligase
hsa-miR-199b-5p	1	0	1	1	0	0	C15orf39	chromosome 15 open reading frame 39
hsa-miR-199b-5p	0	0	1	0	1	1	CD59	CD59 molecule, complement regulatory protein
hsa-miR-199b-5p	0	0	1	1	1	1	HPGD	hydroxyprostaglandin dehydrogenase 15-(NAD)
hsa-miR-199b-5p	0	0	1	0	0	0	DCTN2	dynactin 2 (p50)
hsa-miR-199b-5p	0	0	1	1	0	0	AHSG	alpha-2-HS-glycoprotein
hsa-miR-199b-5p	1	0	1	1	1	1	PGGT1B	protein geranylgeranyltransferase type I, beta subunit
hsa-miR-199b-5p	0	0	1	0	0	0	LOC401127	WD repeat domain 5 pseudogene
hsa-miR-199b-5p	0	0	1	0	0	0	RPS16P10	ribosomal protein S16 pseudogene 10
hsa-miR-199b-5p	1	0	1	1	1	1	TARBP2	TAR (HIV-1) RNA binding protein 2
hsa-miR-199b-5p	1	0	1	1	1	1	ERI3	ERI1 exoribonuclease family member 3
hsa-miR-199b-5p	1	0	1	1	1	1	CNIH2	cornichon homolog 2 (Drosophila)
hsa-miR-199b-5p	1	0	1	1	1	1	CLDN11	claudin 11
hsa-miR-199b-5p	0	0	1	1	1	1	APBB1	amyloid beta (A4) precursor protein-binding, family B, member 1 (Fe65)
hsa-miR-199b-5p	0	0	1	1	0	0	FCGRT	Fc fragment of IgG, receptor, transporter, alpha
hsa-miR-199b-5p	0	0	1	1	1	1	ADK	adenosine kinase
hsa-miR-199b-5p	1	0	1	1	1	1	RAP1A	RAP1A, member of RAS oncogene family
hsa-miR-199b-5p	1	0	1	1	1	1	FGF11	fibroblast growth factor 11
hsa-miR-199b-5p	0	0	1	1	1	1	CHCHD4	coiled-coil-helix-coiled-coil-helix domain containing 4
hsa-miR-199b-5p	0	0	1	0	0	0	H19	H19, imprinted maternally expressed transcript (non-protein coding)
hsa-miR-199b-5p	0	0	1	1	0	0	METTL23	methyltransferase like 23
hsa-miR-199b-5p	1	0	1	1	1	1	TPM4	tropomyosin 4
hsa-miR-199b-5p	1	0	1	1	1	1	CDK18	cyclin-dependent kinase 18
hsa-miR-199b-5p	0	0	1	1	1	1	CCDC91	coiled-coil domain containing 91
hsa-miR-199b-5p	0	0	1	1	1	1	GRAP2	GRB2-related adaptor protein 2
hsa-miR-199b-5p	1	0	1	0	1	1	RPS6KB1	ribosomal protein S6 kinase, 70kDa, polypeptide 1
hsa-miR-199b-5p	1	0	1	1	1	1	LYPLA2	lysophospholipase II
hsa-miR-199b-5p	0	0	1	1	0	0	B9D1	B9 protein domain 1
hsa-miR-199b-5p	0	0	1	0	1	1	MMAA	methylmalonic aciduria (cobalamin deficiency) cblA type
hsa-miR-199b-5p	1	0	1	0	1	1	PLK3	polo-like kinase 3
hsa-miR-199b-5p	0	0	1	1	1	1	TOX4	TOX high mobility group box family member 4
hsa-miR-199b-5p	1	0	1	1	1	1	PEX2	peroxisomal biogenesis factor 2
hsa-miR-199b-5p	0	0	1	1	0	0	ELP4	elongator acetyltransferase complex subunit 4
hsa-miR-199b-5p	0	0	1	1	1	1	SEC11A	SEC11 homolog A (S. cerevisiae)
hsa-miR-199b-5p	1	0	1	1	1	1	NT5DC1	5'-nucleotidase domain containing 1
hsa-miR-199b-5p	0	0	1	1	1	1	RHEBL1	Ras homolog enriched in brain like 1
hsa-miR-199b-5p	1	0	1	1	1	1	SLC39A1	solute carrier family 39 (zinc transporter), member 1
hsa-miR-199b-5p	0	0	1	0	1	1	VSTM2A	V-set and transmembrane domain containing 2A
hsa-miR-199b-5p	1	0	1	1	1	1	ARL4A	ADP-ribosylation factor-like 4A
hsa-miR-199b-5p	0	0	1	1	1	1	LYSMD4	LysM, putative peptidoglycan-binding, domain containing 4
hsa-miR-199b-5p	0	0	1	1	1	1	SLCO4A1	solute carrier organic anion transporter family, member 4A1
hsa-miR-199b-5p	1	0	1	1	0	0	ATP6V1B2	ATPase, H+ transporting, lysosomal 56/58kDa, V1 subunit B2
hsa-miR-199b-5p	1	0	1	1	1	1	F11R	F11 receptor
hsa-miR-199b-5p	1	0	1	1	1	1	ARMC8	armadillo repeat containing 8
hsa-miR-199b-5p	0	0	1	1	0	0	TUBA8	tubulin, alpha 8
hsa-miR-199b-5p	0	0	1	1	1	1	TBRG1	transforming growth factor beta regulator 1
hsa-miR-199b-5p	1	0	1	1	1	1	RUNX1	runt-related transcription factor 1
hsa-miR-199b-5p	0	0	1	1	0	0	CLK2	CDC-like kinase 2
hsa-miR-199b-5p	1	0	1	1	1	1	PHF20L1	PHD finger protein 20-like 1
hsa-miR-199b-5p	0	0	1	1	1	1	BEX4	brain expressed, X-linked 4
hsa-miR-199b-5p	1	0	1	1	1	1	MAN1C1	mannosidase, alpha, class 1C, member 1
hsa-miR-199b-5p	0	0	1	1	1	1	NSDHL	NAD(P) dependent steroid dehydrogenase-like
hsa-miR-199b-5p	0	0	1	1	1	1	C10orf2	chromosome 10 open reading frame 2
hsa-miR-199b-5p	0	0	1	1	0	0	IL11RA	interleukin 11 receptor, alpha
hsa-miR-199b-5p	1	0	1	0	1	1	NMT1	N-myristoyltransferase 1
hsa-miR-199b-5p	1	0	1	1	1	1	PIK3IP1	phosphoinositide-3-kinase interacting protein 1
hsa-miR-199b-5p	0	0	1	0	0	0	FAM47E	family with sequence similarity 47, member E
hsa-miR-199b-5p	1	0	1	1	1	1	FBXW7	F-box and WD repeat domain containing 7, E3 ubiquitin protein ligase
hsa-miR-199b-5p	0	0	1	1	1	1	UPRT	uracil phosphoribosyltransferase (FUR1) homolog (S. cerevisiae)
hsa-miR-199b-5p	0	0	1	1	1	1	ATG5	autophagy related 5
hsa-miR-199b-5p	0	0	1	0	0	0	LINC00661	long intergenic non-protein coding RNA 661
hsa-miR-199b-5p	1	0	1	0	1	1	MEGF10	multiple EGF-like-domains 10
hsa-miR-199b-5p	1	0	1	1	1	1	ANKS6	ankyrin repeat and sterile alpha motif domain containing 6
hsa-miR-199b-5p	0	0	1	0	1	1	ZNF28	zinc finger protein 28
hsa-miR-199b-5p	1	0	1	1	1	1	SP2	Sp2 transcription factor
hsa-miR-199b-5p	0	0	1	1	1	1	PTGS1	prostaglandin-endoperoxide synthase 1 (prostaglandin G/H synthase and cyclooxygenase)
hsa-miR-199b-5p	0	0	1	1	0	0	GPR111	G protein-coupled receptor 111
hsa-miR-199b-5p	0	0	1	0	0	0	CDKN2B-AS1	CDKN2B antisense RNA 1
hsa-miR-199b-5p	0	0	1	1	1	1	EIF1AY	eukaryotic translation initiation factor 1A, Y-linked
hsa-miR-199b-5p	1	0	1	0	1	1	RBBP5	retinoblastoma binding protein 5
hsa-miR-199b-5p	1	0	1	0	1	1	EPDR1	ependymin related protein 1 (zebrafish)
hsa-miR-199b-5p	0	0	1	1	0	0	CEACAM3	carcinoembryonic antigen-related cell adhesion molecule 3
hsa-miR-199b-5p	0	0	1	1	1	1	ADPRH	ADP-ribosylarginine hydrolase
hsa-miR-199b-5p	1	0	1	1	1	1	ATP2B2	ATPase, Ca++ transporting, plasma membrane 2
hsa-miR-199b-5p	1	0	1	1	1	1	AFF1	AF4/FMR2 family, member 1
hsa-miR-199b-5p	1	0	1	1	1	1	RALBP1	ralA binding protein 1
hsa-miR-199b-5p	1	0	1	1	1	1	CCNG2	cyclin G2
hsa-miR-199b-5p	1	0	1	1	1	1	GRM1	glutamate receptor, metabotropic 1
hsa-miR-199b-5p	0	0	1	1	0	0	INHBA	inhibin, beta A
hsa-miR-199b-5p	1	0	1	0	1	1	BCL2	B-cell CLL/lymphoma 2
hsa-miR-199b-5p	0	0	1	1	0	0	APOC1	apolipoprotein C-I
hsa-miR-199b-5p	1	0	1	1	1	1	IGF1	insulin-like growth factor 1 (somatomedin C)
hsa-miR-199b-5p	0	0	1	1	1	1	ATP7A	ATPase, Cu++ transporting, alpha polypeptide
hsa-miR-199b-5p	1	0	1	1	1	1	COL5A1	collagen, type V, alpha 1
hsa-miR-199b-5p	1	0	1	1	1	1	DLD	dihydrolipoamide dehydrogenase
hsa-miR-199b-5p	1	0	1	0	1	1	SLC26A2	solute carrier family 26 (sulfate transporter), member 2
hsa-miR-199b-5p	0	0	1	1	1	1	FABP2	fatty acid binding protein 2, intestinal
hsa-miR-199b-5p	0	0	1	1	0	0	FANCA	Fanconi anemia, complementation group A
hsa-miR-199b-5p	0	0	1	1	0	0	GBA	glucosidase, beta, acid
hsa-miR-199b-5p	1	0	1	1	1	1	GJA1	gap junction protein, alpha 1, 43kDa
hsa-miR-199b-5p	1	0	1	1	1	1	GK	glycerol kinase
hsa-miR-199b-5p	1	0	1	0	1	1	ITGB3	integrin, beta 3 (platelet glycoprotein IIIa, antigen CD61)
hsa-miR-199b-5p	0	0	1	0	1	1	KAL1	Kallmann syndrome 1 sequence
hsa-miR-199b-5p	1	0	1	1	1	1	KCNA1	potassium voltage-gated channel, shaker-related subfamily, member 1 (episodic ataxia with myokymia)
hsa-miR-199b-5p	1	0	1	1	1	1	LEP	leptin
hsa-miR-199b-5p	1	0	1	1	1	1	OCRL	oculocerebrorenal syndrome of Lowe
hsa-miR-199b-5p	1	0	1	1	1	1	RB1	retinoblastoma 1
hsa-miR-199b-5p	1	0	1	1	1	1	ATXN1	ataxin 1
hsa-miR-199b-5p	0	0	1	1	1	1	THBD	thrombomodulin
hsa-miR-199b-5p	1	1	1	1	1	1	CDKN1A	cyclin-dependent kinase inhibitor 1A (p21, Cip1)
hsa-miR-199b-5p	0	0	1	1	0	0	IL2RA	interleukin 2 receptor, alpha
hsa-miR-199b-5p	1	0	1	0	1	1	PAFAH1B1	platelet-activating factor acetylhydrolase 1b, regulatory subunit 1 (45kDa)
hsa-miR-199b-5p	1	0	1	1	1	1	SLC26A4	solute carrier family 26, member 4
hsa-miR-199b-5p	0	0	1	1	1	1	PLEC	plectin
hsa-miR-199b-5p	1	0	1	1	1	1	TWIST1	twist homolog 1 (Drosophila)
hsa-miR-199b-5p	1	0	1	1	1	1	HOXA13	homeobox A13
hsa-miR-199b-5p	0	0	1	1	0	0	REN	renin
hsa-miR-199b-5p	0	0	1	1	1	1	CRX	cone-rod homeobox
hsa-miR-199b-5p	1	0	1	1	1	1	DCX	doublecortin
hsa-miR-199b-5p	0	0	1	1	1	1	AGTR2	angiotensin II receptor, type 2
hsa-miR-199b-5p	1	0	1	1	1	1	CHRM1	cholinergic receptor, muscarinic 1
hsa-miR-199b-5p	1	0	1	1	1	1	CSF1	colony stimulating factor 1 (macrophage)
hsa-miR-199b-5p	1	0	1	1	1	1	DIO2	deiodinase, iodothyronine, type II
hsa-miR-199b-5p	1	0	1	1	1	1	DRD1	dopamine receptor D1
hsa-miR-199b-5p	1	0	1	0	1	1	GABRA4	gamma-aminobutyric acid (GABA) A receptor, alpha 4
hsa-miR-199b-5p	1	0	1	1	1	1	HTR4	5-hydroxytryptamine (serotonin) receptor 4, G protein-coupled
hsa-miR-199b-5p	1	0	1	1	1	1	IGF1R	insulin-like growth factor 1 receptor
hsa-miR-199b-5p	1	0	1	0	1	1	KITLG	KIT ligand
hsa-miR-199b-5p	0	0	1	1	1	1	NPY2R	neuropeptide Y receptor Y2
hsa-miR-199b-5p	1	0	1	1	0	0	PDE3A	phosphodiesterase 3A, cGMP-inhibited
hsa-miR-199b-5p	1	0	1	0	1	1	UBE2W	ubiquitin-conjugating enzyme E2W (putative)
hsa-miR-199b-5p	1	0	1	0	1	1	SPOPL	speckle-type POZ protein-like
hsa-miR-199b-5p	1	0	1	1	1	1	LCLAT1	lysocardiolipin acyltransferase 1
hsa-miR-199b-5p	1	0	1	1	1	1	C1orf173	chromosome 1 open reading frame 173
hsa-miR-199b-5p	1	0	1	1	1	1	TMEM200B	transmembrane protein 200B
hsa-miR-199b-5p	0	0	1	1	1	1	TSPYL6	TSPY-like 6
hsa-miR-199b-5p	0	0	1	1	1	1	ALG11	asparagine-linked glycosylation 11, alpha-1,2-mannosyltransferase homolog (yeast)
hsa-miR-199b-5p	0	0	1	1	1	1	CLEC2D	C-type lectin domain family 2, member D
hsa-miR-199b-5p	1	0	1	1	1	1	NCK2	NCK adaptor protein 2
hsa-miR-199b-5p	0	0	1	1	1	1	SUMO1	SMT3 suppressor of mif two 3 homolog 1 (S. cerevisiae)
hsa-miR-199b-5p	1	0	1	0	1	1	IP6K1	inositol hexakisphosphate kinase 1
hsa-miR-199b-5p	0	0	1	1	1	1	SCP2	sterol carrier protein 2
hsa-miR-199b-5p	1	0	1	0	1	1	SS18	synovial sarcoma translocation, chromosome 18
hsa-miR-199b-5p	1	0	1	1	1	1	ZDHHC9	zinc finger, DHHC-type containing 9
hsa-miR-199b-5p	1	0	1	1	1	1	CTDSPL	CTD (carboxy-terminal domain, RNA polymerase II, polypeptide A) small phosphatase-like
hsa-miR-199b-5p	1	0	1	0	1	1	KIAA2022	KIAA2022
hsa-miR-199b-5p	0	0	1	1	1	1	IL4R	interleukin 4 receptor
hsa-miR-199b-5p	1	0	1	1	1	1	EML1	echinoderm microtubule associated protein like 1
hsa-miR-199b-5p	1	0	1	0	1	1	ERMN	ermin, ERM-like protein
hsa-miR-199b-5p	0	0	1	0	1	1	LPPR5	lipid phosphate phosphatase-related protein type 5
hsa-miR-199b-5p	0	0	1	1	1	1	C1QL3	complement component 1, q subcomponent-like 3
hsa-miR-199b-5p	1	0	1	0	1	1	FYTTD1	forty-two-three domain containing 1
hsa-miR-199b-5p	0	0	1	1	1	1	CHCHD7	coiled-coil-helix-coiled-coil-helix domain containing 7
hsa-miR-199b-5p	1	0	1	1	1	1	DISC1	disrupted in schizophrenia 1
hsa-miR-199b-5p	1	0	1	0	1	1	ZKSCAN2	zinc finger with KRAB and SCAN domains 2
hsa-miR-199b-5p	1	0	1	1	1	1	SORCS1	sortilin-related VPS10 domain containing receptor 1
hsa-miR-199b-5p	0	0	1	1	1	1	CCNC	cyclin C
hsa-miR-199b-5p	0	0	1	0	0	0	LOC441956	uncharacterized LOC441956
hsa-miR-199b-5p	0	0	1	0	1	1	ZNF107	zinc finger protein 107
hsa-miR-199b-5p	1	0	1	1	1	1	PHF6	PHD finger protein 6
hsa-miR-199b-5p	1	0	1	1	1	1	VMA21	VMA21 vacuolar H+-ATPase homolog (S. cerevisiae)
hsa-miR-199b-5p	1	0	1	1	1	1	SERBP1	SERPINE1 mRNA binding protein 1
hsa-miR-199b-5p	0	0	1	1	1	1	MURC	muscle-related coiled-coil protein
hsa-miR-199b-5p	0	0	1	0	1	1	TM2D2	TM2 domain containing 2
hsa-miR-199b-5p	1	0	1	0	1	1	RGAG4	retrotransposon gag domain containing 4
hsa-miR-199b-5p	1	0	1	0	1	1	BCL7A	B-cell CLL/lymphoma 7A
hsa-miR-199b-5p	1	0	1	0	1	1	TNRC6B	trinucleotide repeat containing 6B
hsa-miR-199b-5p	1	0	1	1	1	1	TGFBR2	transforming growth factor, beta receptor II (70/80kDa)
hsa-miR-199b-5p	0	0	1	1	1	1	SC5DL	sterol-C5-desaturase (ERG3 delta-5-desaturase homolog, S. cerevisiae)-like
hsa-miR-199b-5p	0	0	1	1	0	0	ARPC4	actin related protein 2/3 complex, subunit 4, 20kDa
hsa-miR-199b-5p	0	0	1	1	1	1	RPS23	ribosomal protein S23
hsa-miR-199b-5p	0	0	1	1	0	0	KPRP	keratinocyte proline-rich protein
hsa-miR-199b-5p	1	0	1	0	1	1	RAB12	RAB12, member RAS oncogene family
hsa-miR-199b-5p	0	0	1	1	1	1	ARRDC2	arrestin domain containing 2
hsa-miR-199b-5p	1	0	1	1	1	1	KCTD21	potassium channel tetramerisation domain containing 21
hsa-miR-199b-5p	1	0	1	1	1	1	RGS7BP	regulator of G-protein signaling 7 binding protein
hsa-miR-199b-5p	1	0	1	1	1	1	PLEKHG1	pleckstrin homology domain containing, family G (with RhoGef domain) member 1
hsa-miR-199b-5p	0	0	1	1	1	1	ATF3	activating transcription factor 3
hsa-miR-199b-5p	1	0	1	0	1	1	CYB5RL	cytochrome b5 reductase-like
hsa-miR-199b-5p	0	0	1	1	1	1	LRRC17	leucine rich repeat containing 17
hsa-miR-199b-5p	1	0	1	1	0	0	CRELD1	cysteine-rich with EGF-like domains 1
hsa-miR-199b-5p	1	0	1	1	1	1	KLF10	Kruppel-like factor 10
hsa-miR-199b-5p	1	0	1	1	1	1	TMPO	thymopoietin
hsa-miR-199b-5p	0	0	1	1	1	1	SLC35A2	solute carrier family 35 (UDP-galactose transporter), member A2
hsa-miR-199b-5p	0	0	1	1	1	1	HNRNPH2	heterogeneous nuclear ribonucleoprotein H2 (H')
hsa-miR-199b-5p	1	0	1	0	1	1	NPNT	nephronectin
hsa-miR-199b-5p	1	0	1	1	1	1	AMD1	adenosylmethionine decarboxylase 1
hsa-miR-199b-5p	1	0	1	1	1	1	PPM1B	protein phosphatase, Mg2+/Mn2+ dependent, 1B
hsa-miR-199b-5p	0	0	1	1	0	0	CALCA	calcitonin-related polypeptide alpha
hsa-miR-199b-5p	0	0	1	1	1	1	ERP29	endoplasmic reticulum protein 29
hsa-miR-199b-5p	0	0	1	1	1	1	KCNIP1	Kv channel interacting protein 1
hsa-miR-199b-5p	1	0	1	0	1	1	RYR2	ryanodine receptor 2 (cardiac)
hsa-miR-199b-5p	1	0	1	0	1	1	RYR3	ryanodine receptor 3
hsa-miR-199b-5p	1	0	1	1	1	1	PDE4B	phosphodiesterase 4B, cAMP-specific
hsa-miR-199b-5p	0	0	1	1	0	0	SCNN1G	sodium channel, non-voltage-gated 1, gamma subunit
hsa-miR-199b-5p	0	0	1	1	1	1	PRPS2	phosphoribosyl pyrophosphate synthetase 2
hsa-miR-199b-5p	1	0	1	1	1	1	DPP6	dipeptidyl-peptidase 6
hsa-miR-199b-5p	0	0	1	1	1	1	MAP9	microtubule-associated protein 9
hsa-miR-199b-5p	1	0	1	1	1	1	CHN2	chimerin (chimaerin) 2
hsa-miR-199b-5p	1	0	1	1	1	1	MLLT4	myeloid/lymphoid or mixed-lineage leukemia (trithorax homolog, Drosophila); translocated to, 4
hsa-miR-199b-5p	0	0	1	0	1	1	ZNF765	zinc finger protein 765
hsa-miR-199b-5p	0	0	1	1	0	0	AGTRAP	angiotensin II receptor-associated protein
hsa-miR-199b-5p	1	0	1	0	1	1	CD83	CD83 molecule
hsa-miR-199b-5p	1	0	1	1	1	1	PAPD5	PAP associated domain containing 5
hsa-miR-199b-5p	1	0	1	1	1	1	PRKAG2	protein kinase, AMP-activated, gamma 2 non-catalytic subunit
hsa-miR-199b-5p	0	0	1	0	1	1	STEAP2	STEAP family member 2, metalloreductase
hsa-miR-199b-5p	1	0	1	1	1	1	CEP63	centrosomal protein 63kDa
hsa-miR-199b-5p	1	0	1	1	1	1	HMGCLL1	3-hydroxymethyl-3-methylglutaryl-CoA lyase-like 1
hsa-miR-199b-5p	0	0	1	1	1	1	C10orf53	chromosome 10 open reading frame 53
hsa-miR-199b-5p	1	0	1	1	1	1	ZC2HC1C	zinc finger, C2HC-type containing 1C
hsa-miR-199b-5p	1	0	1	1	1	1	NSL1	NSL1, MIND kinetochore complex component, homolog (S. cerevisiae)
hsa-miR-199b-5p	0	0	1	1	1	1	TTC14	tetratricopeptide repeat domain 14
hsa-miR-199b-5p	1	0	1	1	1	1	KDM5A	lysine (K)-specific demethylase 5A
hsa-miR-199b-5p	1	0	1	0	1	1	SRGAP2	SLIT-ROBO Rho GTPase activating protein 2
hsa-miR-199b-5p	1	0	1	1	1	1	NET1	neuroepithelial cell transforming 1
hsa-miR-199b-5p	0	0	1	1	0	0	UBL5	ubiquitin-like 5
hsa-miR-199b-5p	1	0	1	1	1	1	QSER1	glutamine and serine rich 1
hsa-miR-199b-5p	1	0	1	1	1	1	METTL9	methyltransferase like 9
hsa-miR-199b-5p	1	0	1	1	1	1	CDC14B	CDC14 cell division cycle 14 homolog B (S. cerevisiae)
hsa-miR-199b-5p	1	0	1	1	1	1	ZNF436	zinc finger protein 436
hsa-miR-199b-5p	1	0	1	1	1	1	ATG9A	autophagy related 9A
hsa-miR-199b-5p	1	0	1	1	1	1	GRIA4	glutamate receptor, ionotropic, AMPA 4
hsa-miR-199b-5p	0	0	1	1	1	1	ZNF586	zinc finger protein 586
hsa-miR-199b-5p	0	0	1	1	0	0	VPS37D	vacuolar protein sorting 37 homolog D (S. cerevisiae)
hsa-miR-199b-5p	0	0	1	1	0	0	FAM127A	family with sequence similarity 127, member A
hsa-miR-199b-5p	0	0	1	1	1	1	ABCC6	ATP-binding cassette, sub-family C (CFTR/MRP), member 6
hsa-miR-199b-5p	0	0	1	1	0	0	CFC1B	cripto, FRL-1, cryptic family 1B
hsa-miR-199b-5p	1	0	1	1	1	1	DMP1	dentin matrix acidic phosphoprotein 1
hsa-miR-199b-5p	1	0	1	0	1	1	CCDC85A	coiled-coil domain containing 85A
hsa-miR-199b-5p	0	0	1	0	0	0	VWC2L	von Willebrand factor C domain containing protein 2-like
hsa-miR-199b-5p	0	0	1	1	0	0	OVOS2	ovostatin 2
hsa-miR-199b-5p	0	0	1	1	1	1	C15orf57	chromosome 15 open reading frame 57
hsa-miR-199b-5p	1	0	1	0	1	1	SCN3A	sodium channel, voltage-gated, type III, alpha subunit
hsa-miR-199b-5p	1	0	1	0	0	0	ACAN	aggrecan
hsa-miR-199b-5p	0	0	1	1	0	0	AOX1	aldehyde oxidase 1
hsa-miR-199b-5p	1	0	1	1	1	1	PRDM1	PR domain containing 1, with ZNF domain
hsa-miR-199b-5p	1	0	1	0	1	1	BMPR2	bone morphogenetic protein receptor, type II (serine/threonine kinase)
hsa-miR-199b-5p	1	0	1	0	1	1	KLF9	Kruppel-like factor 9
hsa-miR-199b-5p	1	0	1	1	1	1	CASP10	caspase 10, apoptosis-related cysteine peptidase
hsa-miR-199b-5p	0	0	1	0	1	1	CASQ2	calsequestrin 2 (cardiac muscle)
hsa-miR-199b-5p	0	0	1	1	0	0	CDC6	cell division cycle 6 homolog (S. cerevisiae)
hsa-miR-199b-5p	1	0	1	1	1	1	CDK9	cyclin-dependent kinase 9
hsa-miR-199b-5p	1	0	1	1	1	1	CHD1	chromodomain helicase DNA binding protein 1
hsa-miR-199b-5p	0	0	1	1	1	1	CCR1	chemokine (C-C motif) receptor 1
hsa-miR-199b-5p	0	0	1	1	1	1	CSTF3	cleavage stimulation factor, 3' pre-RNA, subunit 3, 77kDa
hsa-miR-199b-5p	1	0	1	1	1	1	CTNND2	catenin (cadherin-associated protein), delta 2
hsa-miR-199b-5p	1	0	1	1	1	1	DYRK1A	dual-specificity tyrosine-(Y)-phosphorylation regulated kinase 1A
hsa-miR-199b-5p	1	0	1	1	1	1	CELSR2	cadherin, EGF LAG seven-pass G-type receptor 2 (flamingo homolog, Drosophila)
hsa-miR-199b-5p	1	0	1	1	1	1	ELAVL1	ELAV (embryonic lethal, abnormal vision, Drosophila)-like 1 (Hu antigen R)
hsa-miR-199b-5p	0	0	1	0	1	1	ELF5	E74-like factor 5 (ets domain transcription factor)
hsa-miR-199b-5p	1	0	1	1	1	1	NDST1	N-deacetylase/N-sulfotransferase (heparan glucosaminyl) 1
hsa-miR-199b-5p	0	0	1	1	0	0	ACP2	acid phosphatase 2, lysosomal
hsa-miR-199b-5p	0	0	1	1	0	0	RHOG	ras homolog family member G
hsa-miR-199b-5p	1	0	1	1	1	1	BNC1	basonuclin 1
hsa-miR-199b-5p	1	0	1	1	1	1	CBFB	core-binding factor, beta subunit
hsa-miR-199b-5p	1	0	1	1	1	1	CDH2	cadherin 2, type 1, N-cadherin (neuronal)
hsa-miR-199b-5p	1	0	1	1	1	1	CDH5	cadherin 5, type 2 (vascular endothelium)
hsa-miR-199b-5p	0	0	1	1	1	1	CEACAM8	carcinoembryonic antigen-related cell adhesion molecule 8
hsa-miR-199b-5p	0	0	1	1	1	1	CKS1B	CDC28 protein kinase regulatory subunit 1B
hsa-miR-199b-5p	1	0	1	1	1	1	CLCN4	chloride channel, voltage-sensitive 4
hsa-miR-199b-5p	1	0	1	1	1	1	SLC31A1	solute carrier family 31 (copper transporters), member 1
hsa-miR-199b-5p	1	0	1	1	1	1	CREM	cAMP responsive element modulator
hsa-miR-199b-5p	0	0	1	1	1	1	GADD45A	growth arrest and DNA-damage-inducible, alpha
hsa-miR-199b-5p	0	0	1	1	0	0	EFNA5	ephrin-A5
hsa-miR-199b-5p	1	0	1	1	1	1	FBN2	fibrillin 2
hsa-miR-199b-5p	0	0	1	1	0	0	FKBP3	FK506 binding protein 3, 25kDa
hsa-miR-199b-5p	0	0	1	1	1	1	FLI1	Friend leukemia virus integration 1
hsa-miR-199b-5p	1	0	1	1	1	1	FRK	fyn-related kinase
hsa-miR-199b-5p	1	0	1	1	1	1	GAB1	GRB2-associated binding protein 1
hsa-miR-199b-5p	1	0	1	1	1	1	GBP1	guanylate binding protein 1, interferon-inducible
hsa-miR-199b-5p	0	0	1	1	1	1	GFAP	glial fibrillary acidic protein
hsa-miR-199b-5p	0	0	1	1	1	1	HOXA4	homeobox A4
hsa-miR-199b-5p	1	0	1	1	1	1	IL13	interleukin 13
hsa-miR-199b-5p	1	0	1	1	1	1	ITGB8	integrin, beta 8
hsa-miR-199b-5p	0	0	1	1	0	0	KRT4	keratin 4
hsa-miR-199b-5p	1	0	1	1	1	1	LY75	lymphocyte antigen 75
hsa-miR-199b-5p	0	0	1	1	1	1	TACSTD2	tumor-associated calcium signal transducer 2
hsa-miR-199b-5p	1	0	1	1	1	1	MARCKS	myristoylated alanine-rich protein kinase C substrate
hsa-miR-199b-5p	1	0	1	1	1	1	MAP1A	microtubule-associated protein 1A
hsa-miR-199b-5p	0	0	1	1	1	1	MTAP	methylthioadenosine phosphorylase
hsa-miR-199b-5p	1	0	1	1	1	1	NGFR	nerve growth factor receptor
hsa-miR-199b-5p	0	0	1	0	1	1	OPHN1	oligophrenin 1
hsa-miR-199b-5p	1	0	1	1	1	1	ORC5	origin recognition complex, subunit 5
hsa-miR-199b-5p	1	0	1	0	1	1	PDK1	pyruvate dehydrogenase kinase, isozyme 1
hsa-miR-199b-5p	0	0	1	1	1	1	SERPINB8	serpin peptidase inhibitor, clade B (ovalbumin), member 8
hsa-miR-199b-5p	1	0	1	0	1	1	POU3F1	POU class 3 homeobox 1
hsa-miR-199b-5p	1	0	1	1	1	1	PPP2R3A	protein phosphatase 2, regulatory subunit B'', alpha
hsa-miR-199b-5p	1	0	1	1	1	1	PRKD1	protein kinase D1
hsa-miR-199b-5p	0	0	1	1	1	1	PTPN12	protein tyrosine phosphatase, non-receptor type 12
hsa-miR-199b-5p	1	0	1	1	1	1	PTPRS	protein tyrosine phosphatase, receptor type, S
hsa-miR-199b-5p	1	0	1	1	1	1	PTX3	pentraxin 3, long
hsa-miR-199b-5p	1	0	1	0	1	1	RAP2B	RAP2B, member of RAS oncogene family
hsa-miR-199b-5p	0	0	1	1	1	1	RARS	arginyl-tRNA synthetase
hsa-miR-199b-5p	1	0	1	1	1	1	ARID4A	AT rich interactive domain 4A (RBP1-like)
hsa-miR-199b-5p	0	0	1	1	1	1	CXCL6	chemokine (C-X-C motif) ligand 6 (granulocyte chemotactic protein 2)
hsa-miR-199b-5p	0	0	1	0	1	1	CXCL5	chemokine (C-X-C motif) ligand 5
hsa-miR-199b-5p	0	0	1	1	1	1	SLAMF1	signaling lymphocytic activation molecule family member 1
hsa-miR-199b-5p	1	0	1	1	1	1	SMARCC1	SWI/SNF related, matrix associated, actin dependent regulator of chromatin, subfamily c, member 1
hsa-miR-199b-5p	1	0	1	0	1	1	SOX11	SRY (sex determining region Y)-box 11
hsa-miR-199b-5p	1	0	1	1	1	1	SRF	serum response factor (c-fos serum response element-binding transcription factor)
hsa-miR-199b-5p	0	0	1	1	1	1	STAT6	signal transducer and activator of transcription 6, interleukin-4 induced
hsa-miR-199b-5p	1	0	1	1	1	1	TFAP2C	transcription factor AP-2 gamma (activating enhancer binding protein 2 gamma)
hsa-miR-199b-5p	1	0	1	0	1	1	THBS1	thrombospondin 1
hsa-miR-199b-5p	0	0	1	1	1	1	TPR	translocated promoter region, nuclear basket protein
hsa-miR-199b-5p	1	0	1	0	1	1	VCL	vinculin
hsa-miR-199b-5p	0	0	1	1	1	1	ZNF137P	zinc finger protein 137, pseudogene
hsa-miR-199b-5p	1	0	1	1	1	1	KCNAB1	potassium voltage-gated channel, shaker-related subfamily, beta member 1
hsa-miR-199b-5p	1	0	1	1	1	1	CUL5	cullin 5
hsa-miR-199b-5p	1	0	1	1	1	1	EEA1	early endosome antigen 1
hsa-miR-199b-5p	0	0	1	1	1	1	PEX3	peroxisomal biogenesis factor 3
hsa-miR-199b-5p	0	0	1	1	1	1	ITGA10	integrin, alpha 10
hsa-miR-199b-5p	0	0	1	1	1	1	BLZF1	basic leucine zipper nuclear factor 1
hsa-miR-199b-5p	1	0	1	1	1	1	BHLHE40	basic helix-loop-helix family, member e40
hsa-miR-199b-5p	0	0	1	1	1	1	EIF3A	eukaryotic translation initiation factor 3, subunit A
hsa-miR-199b-5p	0	0	1	1	1	1	SNX4	sorting nexin 4
hsa-miR-199b-5p	0	0	1	1	1	1	TNFSF13	tumor necrosis factor (ligand) superfamily, member 13
hsa-miR-199b-5p	1	0	1	1	1	1	IQGAP1	IQ motif containing GTPase activating protein 1
hsa-miR-199b-5p	1	0	1	1	1	1	NRP2	neuropilin 2
hsa-miR-199b-5p	1	0	1	1	1	1	FUBP1	far upstream element (FUSE) binding protein 1
hsa-miR-199b-5p	0	0	1	0	1	1	AP1S2	adaptor-related protein complex 1, sigma 2 subunit
hsa-miR-199b-5p	1	0	1	1	1	1	KALRN	kalirin, RhoGEF kinase
hsa-miR-199b-5p	1	0	1	1	1	1	BTAF1	BTAF1 RNA polymerase II, B-TFIID transcription factor-associated, 170kDa (Mot1 homolog, S. cerevisiae)
hsa-miR-199b-5p	1	0	1	1	1	1	EFNB2	ephrin-B2
hsa-miR-199b-5p	0	0	1	1	1	1	FEN1	flap structure-specific endonuclease 1
hsa-miR-199b-5p	1	0	1	1	1	1	GMFB	glia maturation factor, beta
hsa-miR-199b-5p	0	0	1	1	1	1	GZMB	granzyme B (granzyme 2, cytotoxic T-lymphocyte-associated serine esterase 1)
hsa-miR-199b-5p	1	0	1	1	1	1	RAB5A	RAB5A, member RAS oncogene family
hsa-miR-199b-5p	0	0	1	1	1	1	SLC1A1	solute carrier family 1 (neuronal/epithelial high affinity glutamate transporter, system Xag), member 1
hsa-miR-199b-5p	1	0	1	0	1	1	SLC1A2	solute carrier family 1 (glial high affinity glutamate transporter), member 2
hsa-miR-199b-5p	1	0	1	0	1	1	AKAP6	A kinase (PRKA) anchor protein 6
hsa-miR-199b-5p	1	0	1	1	1	1	CALR	calreticulin
hsa-miR-199b-5p	1	0	1	0	1	1	RUNX1T1	runt-related transcription factor 1; translocated to, 1 (cyclin D-related)
hsa-miR-199b-5p	1	0	1	1	1	1	DAG1	dystroglycan 1 (dystrophin-associated glycoprotein 1)
hsa-miR-199b-5p	1	0	1	0	1	1	ETV5	ets variant 5
hsa-miR-199b-5p	1	0	1	1	1	1	MLLT3	myeloid/lymphoid or mixed-lineage leukemia (trithorax homolog, Drosophila); translocated to, 3
hsa-miR-199b-5p	1	0	1	0	1	1	SCN2B	sodium channel, voltage-gated, type II, beta subunit
hsa-miR-199b-5p	1	0	1	1	1	1	WNT11	wingless-type MMTV integration site family, member 11
hsa-miR-199b-5p	0	0	1	1	1	1	PNPLA4	patatin-like phospholipase domain containing 4
hsa-miR-199b-5p	0	0	1	1	0	0	PRPF3	PRP3 pre-mRNA processing factor 3 homolog (S. cerevisiae)
hsa-miR-199b-5p	1	0	1	1	1	1	SCAF11	SR-related CTD-associated factor 11
hsa-miR-199b-5p	1	0	1	1	1	1	XPR1	xenotropic and polytropic retrovirus receptor 1
hsa-miR-199b-5p	1	0	1	1	1	1	RPS6KA5	ribosomal protein S6 kinase, 90kDa, polypeptide 5
hsa-miR-199b-5p	1	0	1	1	1	1	KIF3B	kinesin family member 3B
hsa-miR-199b-5p	0	0	1	1	1	1	CYP7B1	cytochrome P450, family 7, subfamily B, polypeptide 1
hsa-miR-199b-5p	1	0	1	1	1	1	MED26	mediator complex subunit 26
hsa-miR-199b-5p	1	0	1	1	1	1	GABRE	gamma-aminobutyric acid (GABA) A receptor, epsilon
hsa-miR-199b-5p	0	0	1	1	1	1	RGPD5	RANBP2-like and GRIP domain containing 5
hsa-miR-199b-5p	1	0	1	1	1	1	SFPQ	splicing factor proline/glutamine-rich
hsa-miR-199b-5p	1	0	1	0	1	1	NR1D2	nuclear receptor subfamily 1, group D, member 2
hsa-miR-199b-5p	1	0	1	1	1	1	APLNR	apelin receptor
hsa-miR-199b-5p	1	0	1	1	1	1	DLX3	distal-less homeobox 3
hsa-miR-199b-5p	1	0	1	1	1	1	GABPB1	GA binding protein transcription factor, beta subunit 1
hsa-miR-199b-5p	0	0	1	1	1	1	LPAR4	lysophosphatidic acid receptor 4
hsa-miR-199b-5p	1	0	1	1	1	1	HAS3	hyaluronan synthase 3
hsa-miR-199b-5p	0	0	1	1	1	1	NUP98	nucleoporin 98kDa
hsa-miR-199b-5p	1	0	1	0	1	1	PRKAB2	protein kinase, AMP-activated, beta 2 non-catalytic subunit
hsa-miR-199b-5p	1	0	1	1	1	1	RALA	v-ral simian leukemia viral oncogene homolog A (ras related)
hsa-miR-199b-5p	1	0	1	1	1	1	RND2	Rho family GTPase 2
hsa-miR-199b-5p	1	0	1	1	1	1	GABBR2	gamma-aminobutyric acid (GABA) B receptor, 2
hsa-miR-199b-5p	1	0	1	1	1	1	MAFB	v-maf musculoaponeurotic fibrosarcoma oncogene homolog B (avian)
hsa-miR-199b-5p	0	0	1	1	1	1	ITK	IL2-inducible T-cell kinase
hsa-miR-199b-5p	0	0	1	1	1	1	BCAM	basal cell adhesion molecule (Lutheran blood group)
hsa-miR-199b-5p	0	0	1	1	1	1	PDCD7	programmed cell death 7
hsa-miR-199b-5p	1	0	1	1	1	1	UST	uronyl-2-sulfotransferase
hsa-miR-199b-5p	1	0	1	1	1	1	ARPC5	actin related protein 2/3 complex, subunit 5, 16kDa
hsa-miR-199b-5p	0	0	1	1	1	1	TSPAN3	tetraspanin 3
hsa-miR-199b-5p	1	0	1	0	1	1	TSPAN2	tetraspanin 2
hsa-miR-199b-5p	1	0	1	0	1	1	CLEC3A	C-type lectin domain family 3, member A
hsa-miR-199b-5p	0	0	1	1	0	0	GDF11	growth differentiation factor 11
hsa-miR-199b-5p	1	0	1	1	1	1	PRKD3	protein kinase D3
hsa-miR-199b-5p	1	0	1	0	1	1	SPRY3	sprouty homolog 3 (Drosophila)
hsa-miR-199b-5p	0	0	1	1	1	1	CD5L	CD5 molecule-like
hsa-miR-199b-5p	1	0	1	0	1	1	NBR1	neighbor of BRCA1 gene 1
hsa-miR-199b-5p	1	0	1	1	1	1	FOXO4	forkhead box O4
hsa-miR-199b-5p	1	0	1	1	1	1	MMP16	matrix metallopeptidase 16 (membrane-inserted)
hsa-miR-199b-5p	1	0	1	0	1	1	NAB1	NGFI-A binding protein 1 (EGR1 binding protein 1)
hsa-miR-199b-5p	1	0	1	1	1	1	TSNAX	translin-associated factor X
hsa-miR-199b-5p	1	0	1	1	1	1	DAGLA	diacylglycerol lipase, alpha
hsa-miR-199b-5p	1	0	1	1	1	1	DYNC1LI2	dynein, cytoplasmic 1, light intermediate chain 2
hsa-miR-199b-5p	1	0	1	0	1	1	PRKAA2	protein kinase, AMP-activated, alpha 2 catalytic subunit
hsa-miR-199b-5p	0	0	1	0	1	1	ZNF192	zinc finger protein 192
hsa-miR-199b-5p	1	0	1	1	1	1	NPEPPS	aminopeptidase puromycin sensitive
hsa-miR-199b-5p	1	0	1	1	1	1	TIMM17A	translocase of inner mitochondrial membrane 17 homolog A (yeast)
hsa-miR-199b-5p	0	0	1	1	1	1	UBE2E3	ubiquitin-conjugating enzyme E2E 3
hsa-miR-199b-5p	1	0	1	0	1	1	GNAI3	guanine nucleotide binding protein (G protein), alpha inhibiting activity polypeptide 3
hsa-miR-199b-5p	0	0	1	0	1	1	SLC16A2	solute carrier family 16, member 2 (thyroid hormone transporter)
hsa-miR-199b-5p	0	0	1	1	1	1	GLRX3	glutaredoxin 3
hsa-miR-199b-5p	1	0	1	0	1	1	IGF2BP1	insulin-like growth factor 2 mRNA binding protein 1
hsa-miR-199b-5p	1	0	1	1	1	1	RRAGA	Ras-related GTP binding A
hsa-miR-199b-5p	1	0	1	1	1	1	CORIN	corin, serine peptidase
hsa-miR-199b-5p	1	0	1	1	1	1	MMP24	matrix metallopeptidase 24 (membrane-inserted)
hsa-miR-199b-5p	1	0	1	1	1	1	MAN1A2	mannosidase, alpha, class 1A, member 2
hsa-miR-199b-5p	1	0	1	1	1	1	SPIN1	spindlin 1
hsa-miR-199b-5p	1	0	1	1	1	1	SNTB2	syntrophin, beta 2 (dystrophin-associated protein A1, 59kDa, basic component 2)
hsa-miR-199b-5p	1	0	1	1	1	1	BTG2	BTG family, member 2
hsa-miR-199b-5p	1	0	1	0	1	1	SYNGAP1	synaptic Ras GTPase activating protein 1
hsa-miR-199b-5p	1	0	1	1	1	1	ZBTB33	zinc finger and BTB domain containing 33
hsa-miR-199b-5p	1	0	1	1	1	1	RIT1	Ras-like without CAAX 1
hsa-miR-199b-5p	1	0	1	0	1	1	SLC5A3	solute carrier family 5 (sodium/myo-inositol cotransporter), member 3
hsa-miR-199b-5p	1	0	1	1	1	1	HSPA13	heat shock protein 70kDa family, member 13
hsa-miR-199b-5p	1	0	1	1	1	1	ADAMTS5	ADAM metallopeptidase with thrombospondin type 1 motif, 5
hsa-miR-199b-5p	1	0	1	1	1	1	UTRN	utrophin
hsa-miR-199b-5p	0	0	1	0	1	1	ZXDB	zinc finger, X-linked, duplicated B
hsa-miR-199b-5p	0	0	1	1	1	1	XPOT	exportin, tRNA (nuclear export receptor for tRNAs)
hsa-miR-199b-5p	1	0	1	1	1	1	RYBP	RING1 and YY1 binding protein
hsa-miR-199b-5p	0	0	1	1	0	0	SNW1	SNW domain containing 1
hsa-miR-199b-5p	1	0	1	1	1	1	RHOQ	ras homolog family member Q
hsa-miR-199b-5p	1	0	1	1	1	1	HS2ST1	heparan sulfate 2-O-sulfotransferase 1
hsa-miR-199b-5p	1	0	1	1	1	1	KCND2	potassium voltage-gated channel, Shal-related subfamily, member 2
hsa-miR-199b-5p	1	0	1	0	1	1	RAPGEF5	Rap guanine nucleotide exchange factor (GEF) 5
hsa-miR-199b-5p	0	0	1	1	1	1	SLC39A6	solute carrier family 39 (zinc transporter), member 6
hsa-miR-199b-5p	1	0	1	0	1	1	MYCBP	c-myc binding protein
hsa-miR-199b-5p	1	0	1	0	1	1	MYO10	myosin X
hsa-miR-199b-5p	1	0	1	0	1	1	BLOC1S6	biogenesis of lysosomal organelles complex-1, subunit 6, pallidin
hsa-miR-199b-5p	1	0	1	1	1	1	TLL2	tolloid-like 2
hsa-miR-199b-5p	1	0	1	1	1	1	YWHAG	tyrosine 3-monooxygenase/tryptophan 5-monooxygenase activation protein, gamma polypeptide
hsa-miR-199b-5p	0	0	1	1	1	1	CD24	CD24 molecule
hsa-miR-199b-5p	0	0	1	1	1	1	N6AMT1	N-6 adenine-specific DNA methyltransferase 1 (putative)
hsa-miR-199b-5p	1	0	1	1	1	1	SLC30A4	solute carrier family 30 (zinc transporter), member 4
hsa-miR-199b-5p	0	0	1	1	0	0	HILPDA	hypoxia inducible lipid droplet-associated
hsa-miR-199b-5p	0	0	1	1	0	0	KCNJ14	potassium inwardly-rectifying channel, subfamily J, member 14
hsa-miR-199b-5p	0	0	1	1	0	0	ZDHHC8	zinc finger, DHHC-type containing 8
hsa-miR-199b-5p	0	0	1	0	1	1	EMR2	egf-like module containing, mucin-like, hormone receptor-like 2
hsa-miR-199b-5p	1	0	1	1	1	1	ZBTB43	zinc finger and BTB domain containing 43
hsa-miR-199b-5p	0	0	1	1	1	1	NUDT5	nudix (nucleoside diphosphate linked moiety X)-type motif 5
hsa-miR-199b-5p	1	0	1	0	1	1	ODZ1	odz, odd Oz/ten-m homolog 1 (Drosophila)
hsa-miR-199b-5p	0	0	1	1	0	0	CNPY2	canopy 2 homolog (zebrafish)
hsa-miR-199b-5p	1	0	1	1	1	1	MAPRE2	microtubule-associated protein, RP/EB family, member 2
hsa-miR-199b-5p	1	0	1	1	1	1	LEMD3	LEM domain containing 3
hsa-miR-199b-5p	1	0	1	1	1	1	SLC7A11	solute carrier family 7 (anionic amino acid transporter light chain, xc- system), member 11
hsa-miR-199b-5p	0	0	1	1	1	1	KCNV1	potassium channel, subfamily V, member 1
hsa-miR-199b-5p	1	0	1	1	1	1	ZBTB11	zinc finger and BTB domain containing 11
hsa-miR-199b-5p	0	0	1	1	1	1	TCL6	T-cell leukemia/lymphoma 6 (non-protein coding)
hsa-miR-199b-5p	1	0	1	1	1	1	AFF4	AF4/FMR2 family, member 4
hsa-miR-199b-5p	1	0	1	1	1	1	CNOT2	CCR4-NOT transcription complex, subunit 2
hsa-miR-199b-5p	0	0	1	1	1	1	ARFGAP3	ADP-ribosylation factor GTPase activating protein 3
hsa-miR-199b-5p	1	0	1	1	1	1	ZNF592	zinc finger protein 592
hsa-miR-199b-5p	1	0	1	1	1	1	GCC2	GRIP and coiled-coil domain containing 2
hsa-miR-199b-5p	1	0	1	1	1	1	KDM4A	lysine (K)-specific demethylase 4A
hsa-miR-199b-5p	1	0	1	1	1	1	MRPL19	mitochondrial ribosomal protein L19
hsa-miR-199b-5p	1	0	1	0	1	1	SCRN1	secernin 1
hsa-miR-199b-5p	1	0	1	1	1	1	ARHGEF11	Rho guanine nucleotide exchange factor (GEF) 11
hsa-miR-199b-5p	0	0	1	1	0	0	PCNXL2	pecanex-like 2 (Drosophila)
hsa-miR-199b-5p	1	0	1	1	1	1	RUSC2	RUN and SH3 domain containing 2
hsa-miR-199b-5p	1	0	1	0	1	1	ZBTB40	zinc finger and BTB domain containing 40
hsa-miR-199b-5p	0	0	1	0	1	1	PPM1E	protein phosphatase, Mg2+/Mn2+ dependent, 1E
hsa-miR-199b-5p	1	0	1	0	1	1	ZNF609	zinc finger protein 609
hsa-miR-199b-5p	1	0	1	1	1	1	ERP44	endoplasmic reticulum protein 44
hsa-miR-199b-5p	1	0	1	1	1	1	RTF1	Rtf1, Paf1/RNA polymerase II complex component, homolog (S. cerevisiae)
hsa-miR-199b-5p	0	0	1	0	0	0	SLC35D1	solute carrier family 35 (UDP-glucuronic acid/UDP-N-acetylgalactosamine dual transporter), member D1
hsa-miR-199b-5p	1	0	1	1	0	0	RFTN1	raftlin, lipid raft linker 1
hsa-miR-199b-5p	1	0	1	1	1	1	RCOR1	REST corepressor 1
hsa-miR-199b-5p	1	0	1	1	1	1	TRIM9	tripartite motif containing 9
hsa-miR-199b-5p	0	0	1	1	1	1	FBXO28	F-box protein 28
hsa-miR-199b-5p	1	0	1	1	1	1	PLCB1	phospholipase C, beta 1 (phosphoinositide-specific)
hsa-miR-199b-5p	1	0	1	1	1	1	PDS5A	PDS5, regulator of cohesion maintenance, homolog A (S. cerevisiae)
hsa-miR-199b-5p	1	0	1	0	1	1	LPHN3	latrophilin 3
hsa-miR-199b-5p	1	0	1	1	1	1	WDR7	WD repeat domain 7
hsa-miR-199b-5p	1	0	1	1	1	1	MED13L	mediator complex subunit 13-like
hsa-miR-199b-5p	1	0	1	1	1	1	DCAF12	DDB1 and CUL4 associated factor 12
hsa-miR-199b-5p	1	0	1	1	1	1	CNOT6	CCR4-NOT transcription complex, subunit 6
hsa-miR-199b-5p	1	0	1	1	1	1	MYRIP	myosin VIIA and Rab interacting protein
hsa-miR-199b-5p	1	0	1	0	1	1	GLCE	glucuronic acid epimerase
hsa-miR-199b-5p	1	0	1	1	1	1	LRRTM2	leucine rich repeat transmembrane neuronal 2
hsa-miR-199b-5p	0	0	1	1	1	1	BRPF3	bromodomain and PHD finger containing, 3
hsa-miR-199b-5p	1	0	1	0	1	1	RRM2B	ribonucleotide reductase M2 B (TP53 inducible)
hsa-miR-199b-5p	1	0	1	1	1	1	TXNDC12	thioredoxin domain containing 12 (endoplasmic reticulum)
hsa-miR-199b-5p	0	0	1	1	1	1	SCCPDH	saccharopine dehydrogenase (putative)
hsa-miR-199b-5p	1	0	1	1	1	1	DERL2	derlin 2
hsa-miR-199b-5p	1	0	1	1	1	1	PALLD	palladin, cytoskeletal associated protein
hsa-miR-199b-5p	0	0	1	1	1	1	RAB10	RAB10, member RAS oncogene family
hsa-miR-199b-5p	1	0	1	0	1	1	HPCAL4	hippocalcin like 4
hsa-miR-199b-5p	0	0	1	1	1	1	RSL24D1	ribosomal L24 domain containing 1
hsa-miR-199b-5p	1	0	1	1	1	1	RAPGEFL1	Rap guanine nucleotide exchange factor (GEF)-like 1
hsa-miR-199b-5p	1	0	1	0	1	1	CRIM1	cysteine rich transmembrane BMP regulator 1 (chordin-like)
hsa-miR-199b-5p	0	0	1	1	1	1	KLRF1	killer cell lectin-like receptor subfamily F, member 1
hsa-miR-199b-5p	1	0	1	0	1	1	RAB8B	RAB8B, member RAS oncogene family
hsa-miR-199b-5p	1	0	1	1	1	1	DNAJC27	DnaJ (Hsp40) homolog, subfamily C, member 27
hsa-miR-199b-5p	1	0	1	0	1	1	NT5DC3	5'-nucleotidase domain containing 3
hsa-miR-199b-5p	1	0	1	1	1	1	RAB6B	RAB6B, member RAS oncogene family
hsa-miR-199b-5p	0	0	1	1	1	1	KDM3B	lysine (K)-specific demethylase 3B
hsa-miR-199b-5p	1	0	1	1	1	1	SIX2	SIX homeobox 2
hsa-miR-199b-5p	1	0	1	1	1	1	SIX4	SIX homeobox 4
hsa-miR-199b-5p	1	0	1	1	1	1	GALNT7	UDP-N-acetyl-alpha-D-galactosamine:polypeptide N-acetylgalactosaminyltransferase 7 (GalNAc-T7)
hsa-miR-199b-5p	0	0	1	1	1	1	SPA17	sperm autoantigenic protein 17
hsa-miR-199b-5p	0	0	1	1	1	1	POLE3	polymerase (DNA directed), epsilon 3, accessory subunit
hsa-miR-199b-5p	0	0	1	1	1	1	SMG6	smg-6 homolog, nonsense mediated mRNA decay factor (C. elegans)
hsa-miR-199b-5p	1	0	1	0	1	1	ZRANB1	zinc finger, RAN-binding domain containing 1
hsa-miR-199b-5p	0	0	1	0	1	1	VEZT	vezatin, adherens junctions transmembrane protein
hsa-miR-199b-5p	1	0	1	0	1	1	CMTM6	CKLF-like MARVEL transmembrane domain containing 6
hsa-miR-199b-5p	1	0	1	1	1	1	UBE2R2	ubiquitin-conjugating enzyme E2R 2
hsa-miR-199b-5p	1	0	1	0	1	1	MARCH5	membrane-associated ring finger (C3HC4) 5
hsa-miR-199b-5p	0	0	1	1	0	0	THG1L	tRNA-histidine guanylyltransferase 1-like (S. cerevisiae)
hsa-miR-199b-5p	1	0	1	1	1	1	HIF1AN	hypoxia inducible factor 1, alpha subunit inhibitor
hsa-miR-199b-5p	1	0	1	1	1	1	FBXO34	F-box protein 34
hsa-miR-199b-5p	1	0	1	1	1	1	C9orf40	chromosome 9 open reading frame 40
hsa-miR-199b-5p	1	0	1	1	1	1	ARGLU1	arginine and glutamate rich 1
hsa-miR-199b-5p	0	0	1	1	0	0	GPN2	GPN-loop GTPase 2
hsa-miR-199b-5p	1	0	1	1	1	1	FIGN	fidgetin
hsa-miR-199b-5p	0	0	1	1	1	1	THAP1	THAP domain containing, apoptosis associated protein 1
hsa-miR-199b-5p	0	0	1	1	1	1	TMEM38B	transmembrane protein 38B
hsa-miR-199b-5p	0	0	1	1	1	1	TSR1	TSR1, 20S rRNA accumulation, homolog (S. cerevisiae)
hsa-miR-199b-5p	1	0	1	0	1	1	LGI2	leucine-rich repeat LGI family, member 2
hsa-miR-199b-5p	1	0	1	1	1	1	LRRC1	leucine rich repeat containing 1
hsa-miR-199b-5p	1	0	1	1	1	1	UBA6	ubiquitin-like modifier activating enzyme 6
hsa-miR-199b-5p	1	0	1	1	1	1	RRN3	RRN3 RNA polymerase I transcription factor homolog (S. cerevisiae)
hsa-miR-199b-5p	1	0	1	1	1	1	PAG1	phosphoprotein associated with glycosphingolipid microdomains 1
hsa-miR-199b-5p	1	0	1	1	1	1	ETNK1	ethanolamine kinase 1
hsa-miR-199b-5p	1	0	1	1	1	1	MLL5	myeloid/lymphoid or mixed-lineage leukemia 5 (trithorax homolog, Drosophila)
hsa-miR-199b-5p	1	0	1	0	1	1	TMEM55A	transmembrane protein 55A
hsa-miR-199b-5p	0	0	1	1	0	0	TRPV1	transient receptor potential cation channel, subfamily V, member 1
hsa-miR-199b-5p	0	0	1	1	1	1	RIN2	Ras and Rab interactor 2
hsa-miR-199b-5p	1	0	1	0	1	1	FAM190B	family with sequence similarity 190, member B
hsa-miR-199b-5p	1	0	1	1	1	1	CRCT1	cysteine-rich C-terminal 1
hsa-miR-199b-5p	0	0	1	1	1	1	GNL3L	guanine nucleotide binding protein-like 3 (nucleolar)-like
hsa-miR-199b-5p	0	0	1	0	1	1	ARL15	ADP-ribosylation factor-like 15
hsa-miR-199b-5p	0	0	1	1	1	1	KLHL4	kelch-like 4 (Drosophila)
hsa-miR-199b-5p	1	0	1	1	1	1	CCBL2	cysteine conjugate-beta lyase 2
hsa-miR-199b-5p	0	0	1	1	1	1	UBQLN4	ubiquilin 4
hsa-miR-199b-5p	0	0	1	1	1	1	TMEM167B	transmembrane protein 167B
hsa-miR-199b-5p	1	0	1	0	1	1	PAPOLB	poly(A) polymerase beta (testis specific)
hsa-miR-199b-5p	1	0	1	1	1	1	FEM1C	fem-1 homolog c (C. elegans)
hsa-miR-199b-5p	0	0	1	1	0	0	ENTPD7	ectonucleoside triphosphate diphosphohydrolase 7
hsa-miR-199b-5p	1	0	1	0	1	1	EIF5A2	eukaryotic translation initiation factor 5A2
hsa-miR-199b-5p	1	0	1	1	0	0	THAP11	THAP domain containing 11
hsa-miR-199b-5p	1	0	1	0	1	1	ADCY2	adenylate cyclase 2 (brain)
hsa-miR-199b-5p	0	0	1	1	1	1	KIAA1161	KIAA1161
hsa-miR-199b-5p	0	0	1	1	0	0	AMIGO1	adhesion molecule with Ig-like domain 1
hsa-miR-199b-5p	1	0	1	0	1	1	FAM40B	family with sequence similarity 40, member B
hsa-miR-199b-5p	0	0	1	0	1	1	ZNF490	zinc finger protein 490
hsa-miR-199b-5p	0	0	1	1	1	1	SHROOM4	shroom family member 4
hsa-miR-199b-5p	1	0	1	1	1	1	EPB41L5	erythrocyte membrane protein band 4.1 like 5
hsa-miR-199b-5p	1	0	1	0	1	1	GPAM	glycerol-3-phosphate acyltransferase, mitochondrial
hsa-miR-199b-5p	0	0	1	1	1	1	PRX	periaxin
hsa-miR-199b-5p	0	0	1	1	1	1	B3GALT1	UDP-Gal:betaGlcNAc beta 1,3-galactosyltransferase, polypeptide 1
hsa-miR-199b-5p	1	0	1	0	1	1	RAP2A	RAP2A, member of RAS oncogene family
hsa-miR-199b-5p	1	0	1	1	1	1	CLDN1	claudin 1
hsa-miR-199b-5p	0	0	1	1	1	1	RNASEL	ribonuclease L (2',5'-oligoisoadenylate synthetase-dependent)
hsa-miR-199b-5p	0	0	1	1	1	1	IL22RA1	interleukin 22 receptor, alpha 1
hsa-miR-199b-5p	1	0	1	1	1	1	TGIF2	TGFB-induced factor homeobox 2
hsa-miR-199b-5p	1	0	1	1	1	1	BACH2	BTB and CNC homology 1, basic leucine zipper transcription factor 2
hsa-miR-199b-5p	0	0	1	1	1	1	GABBR1	gamma-aminobutyric acid (GABA) B receptor, 1
hsa-miR-199b-5p	0	0	1	0	1	1	CFL2	cofilin 2 (muscle)
hsa-miR-199b-5p	1	0	1	0	1	1	ZNF70	zinc finger protein 70
hsa-miR-199b-5p	1	0	1	1	1	1	GPR88	G protein-coupled receptor 88
hsa-miR-199b-5p	0	0	1	1	1	1	RTP4	receptor (chemosensory) transporter protein 4
hsa-miR-199b-5p	1	0	1	1	1	1	ABCG4	ATP-binding cassette, sub-family G (WHITE), member 4
hsa-miR-199b-5p	0	0	1	1	1	1	TCTA	T-cell leukemia translocation altered
hsa-miR-199b-5p	1	0	1	1	1	1	HIF3A	hypoxia inducible factor 3, alpha subunit
hsa-miR-199b-5p	1	0	1	1	1	1	TMEM168	transmembrane protein 168
hsa-miR-199b-5p	0	0	1	1	1	1	METTL4	methyltransferase like 4
hsa-miR-199b-5p	0	0	1	1	1	1	C8orf33	chromosome 8 open reading frame 33
hsa-miR-199b-5p	0	0	1	1	1	1	WDR77	WD repeat domain 77
hsa-miR-199b-5p	1	0	1	1	0	0	APOO	apolipoprotein O
hsa-miR-199b-5p	1	0	1	1	1	1	GNPTAB	N-acetylglucosamine-1-phosphate transferase, alpha and beta subunits
hsa-miR-199b-5p	1	0	1	1	1	1	CDC73	cell division cycle 73, Paf1/RNA polymerase II complex component, homolog (S. cerevisiae)
hsa-miR-199b-5p	1	0	1	1	1	1	CCNJL	cyclin J-like
hsa-miR-199b-5p	0	0	1	1	1	1	TREML2	triggering receptor expressed on myeloid cells-like 2
hsa-miR-199b-5p	1	0	1	0	1	1	EDEM3	ER degradation enhancer, mannosidase alpha-like 3
hsa-miR-199b-5p	1	0	1	0	1	1	C2orf44	chromosome 2 open reading frame 44
hsa-miR-199b-5p	0	0	1	1	1	1	ITIH5	inter-alpha-trypsin inhibitor heavy chain family, member 5
hsa-miR-199b-5p	1	0	1	1	1	1	CYB5B	cytochrome b5 type B (outer mitochondrial membrane)
hsa-miR-199b-5p	1	0	1	1	1	1	JHDM1D	jumonji C domain containing histone demethylase 1 homolog D (S. cerevisiae)
hsa-miR-199b-5p	1	0	1	0	1	1	SETD7	SET domain containing (lysine methyltransferase) 7
hsa-miR-199b-5p	1	0	1	1	1	1	SYNC	syncoilin, intermediate filament protein
hsa-miR-199b-5p	0	0	1	1	1	1	SEH1L	SEH1-like (S. cerevisiae)
hsa-miR-199b-5p	0	0	1	1	1	1	COG3	component of oligomeric golgi complex 3
hsa-miR-199b-5p	0	0	1	1	1	1	MAGT1	magnesium transporter 1
hsa-miR-199b-5p	1	0	1	1	1	1	FBXO30	F-box protein 30
hsa-miR-199b-5p	1	0	1	1	1	1	DSEL	dermatan sulfate epimerase-like
hsa-miR-199b-5p	1	0	1	0	1	1	ATP11A	ATPase, class VI, type 11A
hsa-miR-199b-5p	1	0	1	1	1	1	ARID5B	AT rich interactive domain 5B (MRF1-like)
hsa-miR-199b-5p	1	0	1	1	1	1	MEX3B	mex-3 homolog B (C. elegans)
hsa-miR-199b-5p	1	0	1	1	1	1	HOOK3	hook homolog 3 (Drosophila)
hsa-miR-199b-5p	0	0	1	1	0	0	CFC1	cripto, FRL-1, cryptic family 1
hsa-miR-199b-5p	1	0	1	1	1	1	USP38	ubiquitin specific peptidase 38
hsa-miR-199b-5p	1	0	1	0	1	1	GLYR1	glyoxylate reductase 1 homolog (Arabidopsis)
hsa-miR-199b-5p	0	0	1	0	1	1	CBR4	carbonyl reductase 4
hsa-miR-199b-5p	1	0	1	1	0	0	ZC3H10	zinc finger CCCH-type containing 10
hsa-miR-199b-5p	1	0	1	1	1	1	ARHGEF39	Rho guanine nucleotide exchange factor (GEF) 39
hsa-miR-199b-5p	0	0	1	1	1	1	FAM136A	family with sequence similarity 136, member A
hsa-miR-199b-5p	1	0	1	1	1	1	ABHD13	abhydrolase domain containing 13
hsa-miR-199b-5p	1	0	1	1	1	1	HIAT1	hippocampus abundant transcript 1
hsa-miR-199b-5p	1	0	1	1	1	1	TRIM55	tripartite motif containing 55
hsa-miR-199b-5p	1	0	1	1	0	0	DMRTB1	DMRT-like family B with proline-rich C-terminal, 1
hsa-miR-199b-5p	0	0	1	1	0	0	ACPT	acid phosphatase, testicular
hsa-miR-199b-5p	1	0	1	1	1	1	FGD3	FYVE, RhoGEF and PH domain containing 3
hsa-miR-199b-5p	0	0	1	1	1	1	CABS1	calcium-binding protein, spermatid-specific 1
hsa-miR-199b-5p	0	0	1	1	1	1	ZIC5	Zic family member 5
hsa-miR-199b-5p	0	0	1	1	1	1	LHX4	LIM homeobox 4
hsa-miR-199b-5p	1	0	1	1	0	0	FCHSD1	FCH and double SH3 domains 1
hsa-miR-199b-5p	1	0	1	1	1	1	EPT1	ethanolaminephosphotransferase 1 (CDP-ethanolamine-specific)
hsa-miR-199b-5p	0	0	1	1	0	0	CTDP1	CTD (carboxy-terminal domain, RNA polymerase II, polypeptide A) phosphatase, subunit 1
hsa-miR-199b-5p	1	0	1	0	1	1	FAM129A	family with sequence similarity 129, member A
hsa-miR-199b-5p	0	0	1	1	1	1	CCNE2	cyclin E2
hsa-miR-199b-5p	0	0	1	1	1	1	FBXO32	F-box protein 32
hsa-miR-199b-5p	0	0	1	1	0	0	S100A16	S100 calcium binding protein A16
hsa-miR-199b-5p	1	0	1	1	1	1	SLC44A1	solute carrier family 44, member 1
hsa-miR-199b-5p	1	0	1	1	1	1	ZNF280B	zinc finger protein 280B
hsa-miR-199b-5p	0	0	1	1	0	0	DEFB129	defensin, beta 129
hsa-miR-199b-5p	0	0	1	1	0	0	DYNLRB2	dynein, light chain, roadblock-type 2
hsa-miR-199b-5p	1	0	1	1	0	0	UNC5A	unc-5 homolog A (C. elegans)
hsa-miR-199b-5p	0	0	1	1	1	1	ZNF431	zinc finger protein 431
hsa-miR-199b-5p	1	0	1	1	1	1	FAM122A	family with sequence similarity 122A
hsa-miR-199b-5p	0	0	1	1	1	1	MRAP2	melanocortin 2 receptor accessory protein 2
hsa-miR-199b-5p	0	0	1	1	1	1	CASC4	cancer susceptibility candidate 4
hsa-miR-199b-5p	1	0	1	1	1	1	GLCCI1	glucocorticoid induced transcript 1
hsa-miR-199b-5p	1	0	1	0	1	1	NUS1	nuclear undecaprenyl pyrophosphate synthase 1 homolog (S. cerevisiae)
hsa-miR-199b-5p	0	0	1	1	1	1	C1orf213	chromosome 1 open reading frame 213
hsa-miR-199b-5p	0	0	1	1	1	1	TAF8	TAF8 RNA polymerase II, TATA box binding protein (TBP)-associated factor, 43kDa
hsa-miR-199b-5p	0	0	1	1	1	1	BAX	BCL2-associated X protein
hsa-miR-199b-5p	0	0	1	1	1	1	ADAMTS17	ADAM metallopeptidase with thrombospondin type 1 motif, 17
hsa-miR-199b-5p	0	0	1	1	1	1	C1orf105	chromosome 1 open reading frame 105
hsa-miR-199b-5p	1	0	1	1	1	1	PPTC7	PTC7 protein phosphatase homolog (S. cerevisiae)
hsa-miR-199b-5p	0	0	1	0	1	1	SLC17A8	solute carrier family 17 (sodium-dependent inorganic phosphate cotransporter), member 8
hsa-miR-199b-5p	1	0	1	1	1	1	ATRN	attractin
hsa-miR-199b-5p	0	0	1	1	1	1	PPM1M	protein phosphatase, Mg2+/Mn2+ dependent, 1M
hsa-miR-199b-5p	0	0	1	1	0	0	DHRS13	dehydrogenase/reductase (SDR family) member 13
hsa-miR-199b-5p	0	0	1	1	1	1	ZFC3H1	zinc finger, C3H1-type containing
hsa-miR-199b-5p	0	0	1	0	1	1	UBLCP1	ubiquitin-like domain containing CTD phosphatase 1
hsa-miR-199b-5p	1	0	1	1	1	1	MAX	MYC associated factor X
hsa-miR-199b-5p	1	0	1	1	1	1	FAM84A	family with sequence similarity 84, member A
hsa-miR-199b-5p	1	0	1	1	1	1	MRPL30	mitochondrial ribosomal protein L30
hsa-miR-199b-5p	0	0	1	1	0	0	TMEM217	transmembrane protein 217
hsa-miR-199b-5p	1	0	1	1	1	1	LPIN1	lipin 1
hsa-miR-199b-5p	1	0	1	1	1	1	POGLUT1	protein O-glucosyltransferase 1
hsa-miR-199b-5p	0	0	1	1	1	1	ARL14EP	ADP-ribosylation factor-like 14 effector protein
hsa-miR-199b-5p	0	0	1	1	1	1	C17orf76-AS1	C17orf76 antisense RNA 1
hsa-miR-199b-5p	0	0	1	1	1	1	ZNF572	zinc finger protein 572
hsa-miR-199b-5p	0	0	1	1	1	1	RNF217	ring finger protein 217
hsa-miR-199b-5p	0	0	1	1	0	0	DOK6	docking protein 6
hsa-miR-199b-5p	1	0	1	1	1	1	HEPACAM	hepatic and glial cell adhesion molecule
hsa-miR-199b-5p	1	0	1	0	1	1	ZBTB9	zinc finger and BTB domain containing 9
hsa-miR-199b-5p	1	0	1	1	1	1	HOXA9	homeobox A9
hsa-miR-199b-5p	1	0	1	1	1	1	NXPH1	neurexophilin 1
hsa-miR-199b-5p	0	0	1	1	1	1	CNPY4	canopy 4 homolog (zebrafish)
hsa-miR-199b-5p	0	0	1	1	0	0	IGLL1	immunoglobulin lambda-like polypeptide 1
hsa-miR-199b-5p	1	0	1	0	1	1	ST6GALNAC3	ST6 (alpha-N-acetyl-neuraminyl-2,3-beta-galactosyl-1,3)-N-acetylgalactosaminide alpha-2,6-sialyltransferase 3
hsa-miR-199b-5p	1	0	1	1	1	1	C3orf45	chromosome 3 open reading frame 45
hsa-miR-199b-5p	1	0	1	1	1	1	CEP120	centrosomal protein 120kDa
hsa-miR-199b-5p	1	0	1	0	1	1	ENPP6	ectonucleotide pyrophosphatase/phosphodiesterase 6
hsa-miR-199b-5p	1	0	1	1	0	0	TMEM86A	transmembrane protein 86A
hsa-miR-199b-5p	1	0	1	1	1	1	HS6ST3	heparan sulfate 6-O-sulfotransferase 3
hsa-miR-199b-5p	0	0	1	1	1	1	IL17RE	interleukin 17 receptor E
hsa-miR-199b-5p	0	0	1	1	1	1	CAMK1D	calcium/calmodulin-dependent protein kinase ID
hsa-miR-199b-5p	1	0	1	1	1	1	ELMOD2	ELMO/CED-12 domain containing 2
hsa-miR-199b-5p	1	0	1	1	1	1	PKHD1	polycystic kidney and hepatic disease 1 (autosomal recessive)
hsa-miR-199b-5p	0	0	1	1	1	1	TEDDM1	transmembrane epididymal protein 1
hsa-miR-199b-5p	0	0	1	1	1	1	TNFSF12-TNFSF13	TNFSF12-TNFSF13 readthrough
hsa-miR-199b-5p	1	0	1	1	1	1	CCDC117	coiled-coil domain containing 117
hsa-miR-199b-5p	1	0	1	0	1	1	C3orf58	chromosome 3 open reading frame 58
hsa-miR-199b-5p	0	0	1	0	1	1	C5orf64	chromosome 5 open reading frame 64
hsa-miR-199b-5p	0	0	1	0	1	1	NKAIN3	Na+/K+ transporting ATPase interacting 3
hsa-miR-199b-5p	1	0	1	1	1	1	LDLRAD3	low density lipoprotein receptor class A domain containing 3
hsa-miR-199b-5p	1	0	1	1	1	1	SCN4B	sodium channel, voltage-gated, type IV, beta subunit
hsa-miR-199b-5p	0	0	1	1	0	0	LYG2	lysozyme G-like 2
hsa-miR-199b-5p	1	0	1	0	1	1	CCDC71L	coiled-coil domain containing 71-like
hsa-miR-199b-5p	1	0	1	1	1	1	STX12	syntaxin 12
hsa-miR-199b-5p	1	0	1	1	1	1	MB21D2	Mab-21 domain containing 2
hsa-miR-199b-5p	0	0	1	1	1	1	LYRM7	Lyrm7 homolog (mouse)
hsa-miR-199b-5p	0	0	1	0	1	1	SPATA12	spermatogenesis associated 12
hsa-miR-199b-5p	1	0	1	1	1	1	NF2	neurofibromin 2 (merlin)
hsa-miR-199b-5p	1	0	1	1	1	1	ADAT2	adenosine deaminase, tRNA-specific 2
hsa-miR-199b-5p	1	0	1	1	1	1	ISM2	isthmin 2 homolog (zebrafish)
hsa-miR-199b-5p	1	0	1	1	1	1	ADAMTS6	ADAM metallopeptidase with thrombospondin type 1 motif, 6
hsa-miR-199b-5p	1	0	1	1	1	1	E2F6	E2F transcription factor 6
hsa-miR-199b-5p	0	0	1	0	1	1	TCF21	transcription factor 21
hsa-miR-199b-5p	1	0	1	0	1	1	ZC3H6	zinc finger CCCH-type containing 6
hsa-miR-199b-5p	1	0	1	1	1	1	PTGER3	prostaglandin E receptor 3 (subtype EP3)
hsa-miR-199b-5p	0	0	1	0	1	1	SIAH3	siah E3 ubiquitin protein ligase family member 3
hsa-miR-199b-5p	0	0	1	1	1	1	FAM5C	family with sequence similarity 5, member C
hsa-miR-199b-5p	1	0	1	1	1	1	GLYAT	glycine-N-acyltransferase
hsa-miR-199b-5p	0	0	1	1	1	1	ZNF321P	zinc finger protein 321, pseudogene
hsa-miR-199b-5p	1	0	1	0	1	1	MBLAC2	metallo-beta-lactamase domain containing 2
hsa-miR-199b-5p	1	0	1	1	1	1	ATRNL1	attractin-like 1
hsa-miR-199b-5p	1	0	1	1	1	1	FAM43B	family with sequence similarity 43, member B
hsa-miR-199b-5p	0	0	1	1	1	1	C8orf86	chromosome 8 open reading frame 86
hsa-miR-199b-5p	0	0	1	0	1	1	TMEM215	transmembrane protein 215
hsa-miR-199b-5p	0	0	1	0	0	0	PPIAP29	peptidylprolyl isomerase A (cyclophilin A) pseudogene 29
hsa-miR-199b-5p	0	0	1	0	0	0	CELP	carboxyl ester lipase pseudogene
hsa-miR-199b-5p	0	0	1	0	0	0	PCDHB19P	protocadherin beta 19 pseudogene
hsa-miR-199b-5p	0	0	1	0	0	0	TFAMP1	transcription factor A, mitochondrial pseudogene 1
hsa-miR-199b-5p	0	0	1	0	0	0	LYPLA2P1	lysophospholipase II pseudogene 1
hsa-miR-199b-5p	0	0	1	0	0	0	MIR155HG	MIR155 host gene (non-protein coding)
hsa-miR-199b-5p	0	0	1	0	0	0	TTTY6	testis-specific transcript, Y-linked 6 (non-protein coding)
hsa-miR-199b-5p	0	0	1	0	0	0	TTTY2	testis-specific transcript, Y-linked 2 (non-protein coding)
hsa-miR-199b-5p	0	0	1	0	0	0	TTTY1	testis-specific transcript, Y-linked 1 (non-protein coding)
hsa-miR-199b-5p	0	0	1	0	0	0	TTTY22	testis-specific transcript, Y-linked 22 (non-protein coding)
hsa-miR-199b-5p	0	0	1	0	0	0	TTTY15	testis-specific transcript, Y-linked 15 (non-protein coding)
hsa-miR-199b-5p	0	0	1	0	0	0	PPP1R2P3	protein phosphatase 1, regulatory (inhibitor) subunit 2 pseudogene 3
hsa-miR-199b-5p	0	0	1	0	0	0	TTTY4B	testis-specific transcript, Y-linked 4B (non-protein coding)
hsa-miR-199b-5p	0	0	1	0	0	0	DKFZP586I1420	uncharacterized protein DKFZp586I1420
hsa-miR-199b-5p	0	0	1	0	0	0	TPI1P2	triosephosphate isomerase 1 pseudogene 2
hsa-miR-199b-5p	0	0	1	0	0	0	COX6B1P1	cytochrome c oxidase subunit VIb polypeptide 1 (ubiquitous) pseudogene 1
hsa-miR-199b-5p	0	0	1	0	0	0	NUDT4P1	nudix (nucleoside diphosphate linked moiety X)-type motif 4 pseudogene 1
hsa-miR-199b-5p	0	0	1	0	0	0	NXF4	nuclear RNA export factor 4 pseudogene
hsa-miR-199b-5p	0	0	1	0	0	0	DPRXP4	divergent-paired related homeobox pseudogene 4
hsa-miR-199b-5p	0	0	1	0	0	0	NPY6R	neuropeptide Y receptor Y6 (pseudogene)
hsa-miR-199b-5p	0	0	1	0	0	0	TOP1P1	topoisomerase (DNA) I pseudogene 1
hsa-miR-199b-5p	0	0	1	0	0	0	PER4	period homolog 3 (Drosophila) pseudogene
hsa-miR-199b-5p	0	0	1	0	0	0	AQP7P1	aquaporin 7 pseudogene 1
hsa-miR-199b-5p	0	0	1	0	0	0	SCARNA6	small Cajal body-specific RNA 6
hsa-miR-199b-5p	0	0	0	1	0	0	LRRC23	leucine rich repeat containing 23
hsa-miR-199b-5p	0	0	0	1	0	0	DNASE1L1	deoxyribonuclease I-like 1
hsa-miR-199b-5p	1	0	1	1	1	1	CDH17	cadherin 17, LI cadherin (liver-intestine)
hsa-miR-199b-5p	0	0	0	1	1	1	NFE2L3	nuclear factor (erythroid-derived 2)-like 3
hsa-miR-199b-5p	0	0	1	1	1	1	YIPF1	Yip1 domain family, member 1
hsa-miR-199b-5p	0	0	1	1	1	1	PIGB	phosphatidylinositol glycan anchor biosynthesis, class B
hsa-miR-199b-5p	0	0	0	1	0	0	RAPGEF3	Rap guanine nucleotide exchange factor (GEF) 3
hsa-miR-199b-5p	0	0	1	1	0	0	MAP2K5	mitogen-activated protein kinase kinase 5
hsa-miR-199b-5p	0	0	1	1	1	1	IMPG2	interphotoreceptor matrix proteoglycan 2
hsa-miR-199b-5p	0	0	0	1	1	1	C4orf6	chromosome 4 open reading frame 6
hsa-miR-199b-5p	1	0	1	1	1	1	LYRM2	LYR motif containing 2
hsa-miR-199b-5p	0	0	1	1	0	0	OAS1	2'-5'-oligoadenylate synthetase 1, 40/46kDa
hsa-miR-199b-5p	0	0	1	1	1	1	SPG21	spastic paraplegia 21 (autosomal recessive, Mast syndrome)
hsa-miR-199b-5p	0	0	1	1	0	0	PLEKHG2	pleckstrin homology domain containing, family G (with RhoGef domain) member 2
hsa-miR-199b-5p	0	0	0	1	0	0	MYL6B	myosin, light chain 6B, alkali, smooth muscle and non-muscle
hsa-miR-199b-5p	0	0	0	1	0	0	TMED1	transmembrane emp24 protein transport domain containing 1
hsa-miR-199b-5p	0	0	0	1	1	1	BIK	BCL2-interacting killer (apoptosis-inducing)
hsa-miR-199b-5p	0	0	1	1	0	0	CGRRF1	cell growth regulator with ring finger domain 1
hsa-miR-199b-5p	0	0	1	1	1	1	ATP6V1D	ATPase, H+ transporting, lysosomal 34kDa, V1 subunit D
hsa-miR-199b-5p	0	0	0	1	1	1	PLEK2	pleckstrin 2
hsa-miR-199b-5p	1	0	1	1	0	0	ERH	enhancer of rudimentary homolog (Drosophila)
hsa-miR-199b-5p	0	0	1	1	1	1	GSS	glutathione synthetase
hsa-miR-199b-5p	0	0	1	1	0	0	TRIB3	tribbles homolog 3 (Drosophila)
hsa-miR-199b-5p	1	0	1	1	1	1	HSDL1	hydroxysteroid dehydrogenase like 1
hsa-miR-199b-5p	1	0	1	1	0	0	RUVBL2	RuvB-like 2 (E. coli)
hsa-miR-199b-5p	0	0	0	1	0	0	C19orf53	chromosome 19 open reading frame 53
hsa-miR-199b-5p	1	0	0	1	1	1	ZNF419	zinc finger protein 419
hsa-miR-199b-5p	0	0	0	1	1	1	POP4	processing of precursor 4, ribonuclease P/MRP subunit (S. cerevisiae)
hsa-miR-199b-5p	0	0	1	1	1	1	CEACAM5	carcinoembryonic antigen-related cell adhesion molecule 5
hsa-miR-199b-5p	0	0	1	1	1	1	GCDH	glutaryl-CoA dehydrogenase
hsa-miR-199b-5p	0	0	0	1	0	0	ZNF574	zinc finger protein 574
hsa-miR-199b-5p	0	0	0	1	0	0	SMG9	smg-9 homolog, nonsense mediated mRNA decay factor (C. elegans)
hsa-miR-199b-5p	0	0	0	1	0	0	EPHB6	EPH receptor B6
hsa-miR-199b-5p	0	0	1	1	1	1	HYAL4	hyaluronoglucosaminidase 4
hsa-miR-199b-5p	0	0	0	1	0	0	FIS1	fission 1 (mitochondrial outer membrane) homolog (S. cerevisiae)
hsa-miR-199b-5p	0	0	0	1	1	1	AEBP1	AE binding protein 1
hsa-miR-199b-5p	0	0	0	1	1	1	ST6GALNAC2	ST6 (alpha-N-acetyl-neuraminyl-2,3-beta-galactosyl-1,3)-N-acetylgalactosaminide alpha-2,6-sialyltransferase 2
hsa-miR-199b-5p	0	0	1	1	1	1	P2RX5	purinergic receptor P2X, ligand-gated ion channel, 5
hsa-miR-199b-5p	0	0	1	1	0	0	KRT37	keratin 37
hsa-miR-199b-5p	0	0	1	1	0	0	PIGL	phosphatidylinositol glycan anchor biosynthesis, class L
hsa-miR-199b-5p	0	0	0	1	0	0	ICAM2	intercellular adhesion molecule 2
hsa-miR-199b-5p	1	0	1	1	1	1	TMEM97	transmembrane protein 97
hsa-miR-199b-5p	1	0	1	1	1	1	HSPA8	heat shock 70kDa protein 8
hsa-miR-199b-5p	1	0	1	1	0	0	RPS13	ribosomal protein S13
hsa-miR-199b-5p	1	0	1	1	1	1	CSDA	cold shock domain protein A
hsa-miR-199b-5p	0	0	1	1	1	1	NANOG	Nanog homeobox
hsa-miR-199b-5p	0	0	1	1	0	0	COX6A1	cytochrome c oxidase subunit VIa polypeptide 1
hsa-miR-199b-5p	0	0	0	1	1	1	RSPH4A	radial spoke head 4 homolog A (Chlamydomonas)
hsa-miR-199b-5p	0	0	0	1	1	1	GPLD1	glycosylphosphatidylinositol specific phospholipase D1
hsa-miR-199b-5p	0	0	0	1	1	1	MRPL2	mitochondrial ribosomal protein L2
hsa-miR-199b-5p	0	0	0	1	0	0	BNIP1	BCL2/adenovirus E1B 19kDa interacting protein 1
hsa-miR-199b-5p	0	0	1	1	1	1	HES1	hairy and enhancer of split 1, (Drosophila)
hsa-miR-199b-5p	0	0	0	1	0	0	CYB561D2	cytochrome b-561 domain containing 2
hsa-miR-199b-5p	0	0	0	1	1	1	WNT6	wingless-type MMTV integration site family, member 6
hsa-miR-199b-5p	0	0	1	1	0	0	GRIN3B	glutamate receptor, ionotropic, N-methyl-D-aspartate 3B
hsa-miR-199b-5p	0	0	1	1	0	0	EBNA1BP2	EBNA1 binding protein 2
hsa-miR-199b-5p	0	0	1	1	1	1	FGF23	fibroblast growth factor 23
hsa-miR-199b-5p	1	0	0	1	1	1	GLRX	glutaredoxin (thioltransferase)
hsa-miR-199b-5p	1	0	0	1	1	1	PIGZ	phosphatidylinositol glycan anchor biosynthesis, class Z
hsa-miR-199b-5p	0	0	1	1	1	1	IFT43	intraflagellar transport 43 homolog (Chlamydomonas)
hsa-miR-199b-5p	1	0	1	1	1	1	IFIT2	interferon-induced protein with tetratricopeptide repeats 2
hsa-miR-199b-5p	0	0	1	1	0	0	HOXB1	homeobox B1
hsa-miR-199b-5p	0	0	0	1	1	1	TTLL2	tubulin tyrosine ligase-like family, member 2
hsa-miR-199b-5p	1	0	0	1	0	0	CD97	CD97 molecule
hsa-miR-199b-5p	0	0	1	1	1	1	RAB9B	RAB9B, member RAS oncogene family
hsa-miR-199b-5p	0	0	0	1	1	1	SLC35C2	solute carrier family 35, member C2
hsa-miR-199b-5p	0	0	0	1	1	1	LILRB3	leukocyte immunoglobulin-like receptor, subfamily B (with TM and ITIM domains), member 3
hsa-miR-199b-5p	1	0	1	1	1	1	CCR7	chemokine (C-C motif) receptor 7
hsa-miR-199b-5p	0	0	1	1	0	0	IFI35	interferon-induced protein 35
hsa-miR-199b-5p	1	0	0	1	1	1	WNK4	WNK lysine deficient protein kinase 4
hsa-miR-199b-5p	0	0	1	1	0	0	PMS2P3	postmeiotic segregation increased 2 pseudogene 3
hsa-miR-199b-5p	0	0	0	1	0	0	SELO	selenoprotein O
hsa-miR-199b-5p	0	0	1	1	1	1	APOL2	apolipoprotein L, 2
hsa-miR-199b-5p	0	0	1	1	1	1	RABGAP1L	RAB GTPase activating protein 1-like
hsa-miR-199b-5p	0	0	0	1	0	0	DHX58	DEXH (Asp-Glu-X-His) box polypeptide 58
hsa-miR-199b-5p	1	0	1	1	1	1	DHX35	DEAH (Asp-Glu-Ala-His) box polypeptide 35
hsa-miR-199b-5p	0	0	0	1	1	1	TRMT2A	tRNA methyltransferase 2 homolog A (S. cerevisiae)
hsa-miR-199b-5p	1	0	1	1	1	1	PVRL2	poliovirus receptor-related 2 (herpesvirus entry mediator B)
hsa-miR-199b-5p	0	0	0	1	1	1	HIP1R	huntingtin interacting protein 1 related
hsa-miR-199b-5p	0	0	1	1	1	1	NOL11	nucleolar protein 11
hsa-miR-199b-5p	0	0	0	1	0	0	CCL25	chemokine (C-C motif) ligand 25
hsa-miR-199b-5p	0	0	1	1	0	0	RPL27	ribosomal protein L27
hsa-miR-199b-5p	0	0	0	1	0	0	USP29	ubiquitin specific peptidase 29
hsa-miR-199b-5p	0	0	0	1	1	1	GAS2L2	growth arrest-specific 2 like 2
hsa-miR-199b-5p	1	0	0	1	1	1	EMILIN2	elastin microfibril interfacer 2
hsa-miR-199b-5p	0	0	0	1	0	0	GUCY2D	guanylate cyclase 2D, membrane (retina-specific)
hsa-miR-199b-5p	0	0	1	1	1	1	USPL1	ubiquitin specific peptidase like 1
hsa-miR-199b-5p	0	0	1	1	1	1	RFXAP	regulatory factor X-associated protein
hsa-miR-199b-5p	0	0	0	1	1	1	C14orf159	chromosome 14 open reading frame 159
hsa-miR-199b-5p	0	0	1	1	1	1	CCNB1	cyclin B1
hsa-miR-199b-5p	0	0	1	1	0	0	EMC7	ER membrane protein complex subunit 7
hsa-miR-199b-5p	0	0	0	1	0	0	REG4	regenerating islet-derived family, member 4
hsa-miR-199b-5p	0	0	0	1	0	0	ERN2	endoplasmic reticulum to nucleus signaling 2
hsa-miR-199b-5p	0	0	1	1	1	1	MED4	mediator complex subunit 4
hsa-miR-199b-5p	0	0	0	1	0	0	C6orf15	chromosome 6 open reading frame 15
hsa-miR-199b-5p	0	0	0	1	1	1	FGFBP2	fibroblast growth factor binding protein 2
hsa-miR-199b-5p	0	0	0	1	1	1	SLC3A1	solute carrier family 3 (cystine, dibasic and neutral amino acid transporters, activator of cystine, dibasic and neutral amino acid transport), member 1
hsa-miR-199b-5p	0	0	1	1	1	1	SIX3	SIX homeobox 3
hsa-miR-199b-5p	0	0	0	1	1	1	SERPINA10	serpin peptidase inhibitor, clade A (alpha-1 antiproteinase, antitrypsin), member 10
hsa-miR-199b-5p	0	0	0	1	0	0	TELO2	TEL2, telomere maintenance 2, homolog (S. cerevisiae)
hsa-miR-199b-5p	0	0	0	1	0	0	IL12RB2	interleukin 12 receptor, beta 2
hsa-miR-199b-5p	0	0	1	1	0	0	HPN	hepsin
hsa-miR-199b-5p	0	0	1	1	1	1	TEP1	telomerase-associated protein 1
hsa-miR-199b-5p	0	0	0	1	0	0	CCDC94	coiled-coil domain containing 94
hsa-miR-199b-5p	1	0	1	1	1	1	TCF3	transcription factor 3 (E2A immunoglobulin enhancer binding factors E12/E47)
hsa-miR-199b-5p	1	0	0	1	0	0	INPP4B	inositol polyphosphate-4-phosphatase, type II, 105kDa
hsa-miR-199b-5p	0	0	1	1	0	0	HIRA	HIR histone cell cycle regulation defective homolog A (S. cerevisiae)
hsa-miR-199b-5p	0	0	0	1	0	0	PLEKHA4	pleckstrin homology domain containing, family A (phosphoinositide binding specific) member 4
hsa-miR-199b-5p	1	0	1	1	1	1	LUC7L2	LUC7-like 2 (S. cerevisiae)
hsa-miR-199b-5p	0	0	0	1	1	1	FOXRED1	FAD-dependent oxidoreductase domain containing 1
hsa-miR-199b-5p	1	0	1	1	1	1	STK17B	serine/threonine kinase 17b
hsa-miR-199b-5p	0	0	0	1	1	1	LCT	lactase
hsa-miR-199b-5p	0	0	1	1	0	0	POPDC2	popeye domain containing 2
hsa-miR-199b-5p	0	0	0	1	0	0	LXN	latexin
hsa-miR-199b-5p	0	0	0	1	1	1	HERC6	HECT and RLD domain containing E3 ubiquitin protein ligase family member 6
hsa-miR-199b-5p	0	0	1	1	1	1	BCHE	butyrylcholinesterase
hsa-miR-199b-5p	0	0	0	1	0	0	TMEM175	transmembrane protein 175
hsa-miR-199b-5p	0	0	1	1	1	1	HOOK2	hook homolog 2 (Drosophila)
hsa-miR-199b-5p	1	0	1	1	1	1	MGLL	monoglyceride lipase
hsa-miR-199b-5p	0	0	0	1	1	1	EGF	epidermal growth factor
hsa-miR-199b-5p	0	0	1	1	0	0	KIF9	kinesin family member 9
hsa-miR-199b-5p	0	0	0	1	0	0	KIAA0020	KIAA0020
hsa-miR-199b-5p	1	0	1	1	1	1	LMBR1L	limb region 1 homolog (mouse)-like
hsa-miR-199b-5p	0	0	0	1	1	1	RNF113B	ring finger protein 113B
hsa-miR-199b-5p	0	0	0	1	1	1	ZNF174	zinc finger protein 174
hsa-miR-199b-5p	0	0	0	1	0	0	SPG7	spastic paraplegia 7 (pure and complicated autosomal recessive)
hsa-miR-199b-5p	0	0	0	1	1	1	MYO19	myosin XIX
hsa-miR-199b-5p	1	0	1	1	0	0	G6PC3	glucose 6 phosphatase, catalytic, 3
hsa-miR-199b-5p	0	0	0	1	0	0	LOC113230	uncharacterized LOC113230
hsa-miR-199b-5p	1	0	1	1	0	0	SOD1	superoxide dismutase 1, soluble
hsa-miR-199b-5p	0	0	1	1	0	0	TMEM44	transmembrane protein 44
hsa-miR-199b-5p	0	0	0	1	1	1	SLC10A4	solute carrier family 10 (sodium/bile acid cotransporter family), member 4
hsa-miR-199b-5p	0	0	1	1	1	1	NAF1	nuclear assembly factor 1 homolog (S. cerevisiae)
hsa-miR-199b-5p	0	0	1	1	1	1	FARS2	phenylalanyl-tRNA synthetase 2, mitochondrial
hsa-miR-199b-5p	0	0	1	1	1	1	MLIP	muscular LMNA-interacting protein
hsa-miR-199b-5p	1	0	0	1	1	1	IGFBP1	insulin-like growth factor binding protein 1
hsa-miR-199b-5p	0	0	0	1	0	0	STRA8	stimulated by retinoic acid gene 8 homolog (mouse)
hsa-miR-199b-5p	0	0	0	1	0	0	GPR119	G protein-coupled receptor 119
hsa-miR-199b-5p	0	0	1	1	0	0	PRDM14	PR domain containing 14
hsa-miR-199b-5p	0	0	0	1	1	1	ST14	suppression of tumorigenicity 14 (colon carcinoma)
hsa-miR-199b-5p	1	0	1	1	1	1	SIDT2	SID1 transmembrane family, member 2
hsa-miR-199b-5p	0	0	1	1	0	0	PIGT	phosphatidylinositol glycan anchor biosynthesis, class T
hsa-miR-199b-5p	1	0	0	1	0	0	CDC42EP2	CDC42 effector protein (Rho GTPase binding) 2
hsa-miR-199b-5p	0	0	1	1	0	0	TM7SF2	transmembrane 7 superfamily member 2
hsa-miR-199b-5p	0	0	1	1	0	0	TBX6	T-box 6
hsa-miR-199b-5p	1	0	1	1	1	1	ANO4	anoctamin 4
hsa-miR-199b-5p	0	0	0	1	1	1	JMY	junction mediating and regulatory protein, p53 cofactor
hsa-miR-199b-5p	0	0	1	1	1	1	CCDC50	coiled-coil domain containing 50
hsa-miR-199b-5p	1	0	1	1	1	1	BMP3	bone morphogenetic protein 3
hsa-miR-199b-5p	0	0	1	1	0	0	NUBP1	nucleotide binding protein 1
hsa-miR-199b-5p	0	0	1	1	1	1	PGM3	phosphoglucomutase 3
hsa-miR-199b-5p	1	0	1	1	1	1	C17orf103	chromosome 17 open reading frame 103
hsa-miR-199b-5p	0	0	1	1	0	0	ABCA6	ATP-binding cassette, sub-family A (ABC1), member 6
hsa-miR-199b-5p	0	0	0	1	1	1	HHIPL2	HHIP-like 2
hsa-miR-199b-5p	0	0	0	1	0	0	SAMD14	sterile alpha motif domain containing 14
hsa-miR-199b-5p	0	0	0	1	1	1	ABCC3	ATP-binding cassette, sub-family C (CFTR/MRP), member 3
hsa-miR-199b-5p	0	0	0	1	1	1	KDM8	lysine (K)-specific demethylase 8
hsa-miR-199b-5p	0	0	0	1	1	1	ALS2CR12	amyotrophic lateral sclerosis 2 (juvenile) chromosome region, candidate 12
hsa-miR-199b-5p	1	0	1	1	1	1	ZDHHC5	zinc finger, DHHC-type containing 5
hsa-miR-199b-5p	0	0	1	1	1	1	PREX2	phosphatidylinositol-3,4,5-trisphosphate-dependent Rac exchange factor 2
hsa-miR-199b-5p	0	0	1	1	1	1	HIST1H2BD	histone cluster 1, H2bd
hsa-miR-199b-5p	0	0	1	1	0	0	VWA5B1	von Willebrand factor A domain containing 5B1
hsa-miR-199b-5p	0	0	1	1	0	0	GPR162	G protein-coupled receptor 162
hsa-miR-199b-5p	0	0	0	1	0	0	LEPREL2	leprecan-like 2
hsa-miR-199b-5p	0	0	1	1	1	1	GPBP1L1	GC-rich promoter binding protein 1-like 1
hsa-miR-199b-5p	0	0	0	1	0	0	ACE	angiotensin I converting enzyme (peptidyl-dipeptidase A) 1
hsa-miR-199b-5p	0	0	0	1	0	0	FTCD	formiminotransferase cyclodeaminase
hsa-miR-199b-5p	0	0	0	1	0	0	GPSM1	G-protein signaling modulator 1
hsa-miR-199b-5p	0	0	0	1	0	0	AMICA1	adhesion molecule, interacts with CXADR antigen 1
hsa-miR-199b-5p	0	0	1	1	0	0	TLCD1	TLC domain containing 1
hsa-miR-199b-5p	0	0	0	1	1	1	ANO10	anoctamin 10
hsa-miR-199b-5p	0	0	0	1	0	0	PPP1R16A	protein phosphatase 1, regulatory subunit 16A
hsa-miR-199b-5p	0	0	0	1	0	0	COX7A1	cytochrome c oxidase subunit VIIa polypeptide 1 (muscle)
hsa-miR-199b-5p	0	0	1	1	0	0	GRIN2C	glutamate receptor, ionotropic, N-methyl D-aspartate 2C
hsa-miR-199b-5p	0	0	1	1	1	1	CXCL16	chemokine (C-X-C motif) ligand 16
hsa-miR-199b-5p	0	0	1	1	1	1	TNFSF12	tumor necrosis factor (ligand) superfamily, member 12
hsa-miR-199b-5p	0	0	0	1	1	1	CHAC2	ChaC, cation transport regulator homolog 2 (E. coli)
hsa-miR-199b-5p	0	0	0	1	0	0	YY1AP1	YY1 associated protein 1
hsa-miR-199b-5p	0	0	1	1	0	0	SUCLG1	succinate-CoA ligase, alpha subunit
hsa-miR-199b-5p	0	0	1	1	0	0	TMEM41A	transmembrane protein 41A
hsa-miR-199b-5p	0	0	1	1	0	0	BTN2A3P	butyrophilin, subfamily 2, member A3, pseudogene
hsa-miR-199b-5p	0	0	1	1	1	1	SCIN	scinderin
hsa-miR-199b-5p	0	0	1	1	1	1	FNDC1	fibronectin type III domain containing 1
hsa-miR-199b-5p	0	0	0	1	0	0	PGAM2	phosphoglycerate mutase 2 (muscle)
hsa-miR-199b-5p	0	0	0	1	0	0	SARDH	sarcosine dehydrogenase
hsa-miR-199b-5p	1	0	1	1	0	0	KIAA1462	KIAA1462
hsa-miR-199b-5p	1	0	1	1	1	1	ABTB2	ankyrin repeat and BTB (POZ) domain containing 2
hsa-miR-199b-5p	0	0	0	1	0	0	SPATA19	spermatogenesis associated 19
hsa-miR-199b-5p	0	0	1	1	0	0	CYB5R2	cytochrome b5 reductase 2
hsa-miR-199b-5p	1	0	1	1	0	0	PPIB	peptidylprolyl isomerase B (cyclophilin B)
hsa-miR-199b-5p	0	0	0	1	0	0	GPR182	G protein-coupled receptor 182
hsa-miR-199b-5p	0	0	0	1	1	1	RCCD1	RCC1 domain containing 1
hsa-miR-199b-5p	0	0	0	1	0	0	BPIFC	BPI fold containing family C
hsa-miR-199b-5p	0	0	0	1	0	0	B4GALNT2	beta-1,4-N-acetyl-galactosaminyl transferase 2
hsa-miR-199b-5p	0	0	1	1	1	1	TBC1D21	TBC1 domain family, member 21
hsa-miR-199b-5p	0	0	0	1	0	0	C16orf92	chromosome 16 open reading frame 92
hsa-miR-199b-5p	0	0	1	1	0	0	TMEM145	transmembrane protein 145
hsa-miR-199b-5p	0	0	0	1	0	0	LILRA5	leukocyte immunoglobulin-like receptor, subfamily A (with TM domain), member 5
hsa-miR-199b-5p	0	0	0	1	0	0	ICT1	immature colon carcinoma transcript 1
hsa-miR-199b-5p	0	0	1	1	0	0	GHDC	GH3 domain containing
hsa-miR-199b-5p	0	0	1	1	1	1	NLRC3	NLR family, CARD domain containing 3
hsa-miR-199b-5p	0	0	0	1	1	1	HSPB3	heat shock 27kDa protein 3
hsa-miR-199b-5p	0	0	1	1	1	1	RFX3	regulatory factor X, 3 (influences HLA class II expression)
hsa-miR-199b-5p	0	0	1	1	1	1	MMADHC	methylmalonic aciduria (cobalamin deficiency) cblD type, with homocystinuria
hsa-miR-199b-5p	0	0	1	1	1	1	SHCBP1	SHC SH2-domain binding protein 1
hsa-miR-199b-5p	0	0	1	1	1	1	CHST11	carbohydrate (chondroitin 4) sulfotransferase 11
hsa-miR-199b-5p	0	0	0	1	0	0	WDR87	WD repeat domain 87
hsa-miR-199b-5p	0	0	1	1	0	0	COPS6	COP9 constitutive photomorphogenic homolog subunit 6 (Arabidopsis)
hsa-miR-199b-5p	0	0	0	1	0	0	GPR25	G protein-coupled receptor 25
hsa-miR-199b-5p	0	0	0	1	0	0	NUDT16L1	nudix (nucleoside diphosphate linked moiety X)-type motif 16-like 1
hsa-miR-199b-5p	0	0	1	1	1	1	GPR22	G protein-coupled receptor 22
hsa-miR-199b-5p	0	0	1	1	1	1	ARL6IP1	ADP-ribosylation factor-like 6 interacting protein 1
hsa-miR-199b-5p	0	0	0	1	0	0	EXOSC10	exosome component 10
hsa-miR-199b-5p	0	0	0	1	0	0	ECEL1	endothelin converting enzyme-like 1
hsa-miR-199b-5p	0	0	0	1	1	1	CXCR6	chemokine (C-X-C motif) receptor 6
hsa-miR-199b-5p	0	0	0	1	0	0	HSFY2	heat shock transcription factor, Y linked 2
hsa-miR-199b-5p	0	0	0	1	0	0	ETV3L	ets variant 3-like
hsa-miR-199b-5p	1	0	0	1	1	1	TACR1	tachykinin receptor 1
hsa-miR-199b-5p	0	0	0	1	1	1	MGAT2	mannosyl (alpha-1,6-)-glycoprotein beta-1,2-N-acetylglucosaminyltransferase
hsa-miR-199b-5p	1	0	1	1	1	1	USP47	ubiquitin specific peptidase 47
hsa-miR-199b-5p	0	0	1	1	0	0	KCNC3	potassium voltage-gated channel, Shaw-related subfamily, member 3
hsa-miR-199b-5p	0	0	0	1	1	1	SLC9C1	solute carrier family 9, subfamily C (Na+-transporting carboxylic acid decarboxylase), member 1
hsa-miR-199b-5p	1	0	1	1	1	1	SOGA2	SOGA family member 2
hsa-miR-199b-5p	0	0	1	1	0	0	STRA13	stimulated by retinoic acid 13 homolog (mouse)
hsa-miR-199b-5p	1	0	0	1	1	1	SLC1A5	solute carrier family 1 (neutral amino acid transporter), member 5
hsa-miR-199b-5p	0	0	1	1	0	0	CNTNAP4	contactin associated protein-like 4
hsa-miR-199b-5p	0	0	1	1	1	1	FAM90A1	family with sequence similarity 90, member A1
hsa-miR-199b-5p	0	0	0	1	1	1	NAT1	N-acetyltransferase 1 (arylamine N-acetyltransferase)
hsa-miR-199b-5p	1	0	0	1	1	1	RPL15	ribosomal protein L15
hsa-miR-199b-5p	0	0	1	1	0	0	PLG	plasminogen
hsa-miR-199b-5p	0	0	0	1	0	0	PIGS	phosphatidylinositol glycan anchor biosynthesis, class S
hsa-miR-199b-5p	0	0	0	1	0	0	SNUPN	snurportin 1
hsa-miR-199b-5p	1	0	1	1	1	1	MARCH3	membrane-associated ring finger (C3HC4) 3, E3 ubiquitin protein ligase
hsa-miR-199b-5p	1	0	1	1	0	0	ASPHD1	aspartate beta-hydroxylase domain containing 1
hsa-miR-199b-5p	0	0	1	1	0	0	SIPA1	signal-induced proliferation-associated 1
hsa-miR-199b-5p	0	0	0	1	0	0	ZNF519	zinc finger protein 519
hsa-miR-199b-5p	1	0	1	1	1	1	GRAMD2	GRAM domain containing 2
hsa-miR-199b-5p	1	0	1	1	1	1	RIC3	resistance to inhibitors of cholinesterase 3 homolog (C. elegans)
hsa-miR-199b-5p	1	0	0	1	1	1	CTSF	cathepsin F
hsa-miR-199b-5p	0	0	1	1	0	0	UCP2	uncoupling protein 2 (mitochondrial, proton carrier)
hsa-miR-199b-5p	0	0	1	1	1	1	CARHSP1	calcium regulated heat stable protein 1, 24kDa
hsa-miR-199b-5p	1	0	1	1	0	0	CSRP2	cysteine and glycine-rich protein 2
hsa-miR-199b-5p	0	0	1	1	1	1	A2ML1	alpha-2-macroglobulin-like 1
hsa-miR-199b-5p	0	0	1	1	1	1	TNK1	tyrosine kinase, non-receptor, 1
hsa-miR-199b-5p	1	0	0	1	0	0	CTU2	cytosolic thiouridylase subunit 2 homolog (S. pombe)
hsa-miR-199b-5p	0	0	0	1	0	0	CMKLR1	chemokine-like receptor 1
hsa-miR-199b-5p	0	0	0	1	0	0	MCTP1	multiple C2 domains, transmembrane 1
hsa-miR-199b-5p	0	0	0	1	0	0	DNAH7	dynein, axonemal, heavy chain 7
hsa-miR-199b-5p	1	0	1	1	0	0	HOXC5	homeobox C5
hsa-miR-199b-5p	1	0	1	1	0	0	CCDC85B	coiled-coil domain containing 85B
hsa-miR-199b-5p	1	0	0	1	1	1	TCHP	trichoplein, keratin filament binding
hsa-miR-199b-5p	0	0	1	1	0	0	MLF1	myeloid leukemia factor 1
hsa-miR-199b-5p	0	0	1	1	0	0	RHBDF2	rhomboid 5 homolog 2 (Drosophila)
hsa-miR-199b-5p	0	0	0	1	1	1	HMHA1	histocompatibility (minor) HA-1
hsa-miR-199b-5p	0	0	0	1	0	0	UTS2R	urotensin 2 receptor
hsa-miR-199b-5p	0	0	1	1	1	1	C7	complement component 7
hsa-miR-199b-5p	1	0	1	1	1	1	GALE	UDP-galactose-4-epimerase
hsa-miR-199b-5p	0	0	1	1	0	0	ZNF821	zinc finger protein 821
hsa-miR-199b-5p	0	0	1	1	1	1	GPR89B	G protein-coupled receptor 89B
hsa-miR-199b-5p	1	0	1	1	1	1	LUZP1	leucine zipper protein 1
hsa-miR-199b-5p	0	0	0	1	0	0	ZNF575	zinc finger protein 575
hsa-miR-199b-5p	0	0	1	1	1	1	IMP3	IMP3, U3 small nucleolar ribonucleoprotein, homolog (yeast)
hsa-miR-199b-5p	0	0	0	1	0	0	OR2A4	olfactory receptor, family 2, subfamily A, member 4
hsa-miR-199b-5p	0	0	1	1	1	1	MPP4	membrane protein, palmitoylated 4 (MAGUK p55 subfamily member 4)
hsa-miR-199b-5p	1	0	1	1	1	1	CNOT4	CCR4-NOT transcription complex, subunit 4
hsa-miR-199b-5p	1	0	1	1	1	1	CLK4	CDC-like kinase 4
hsa-miR-199b-5p	0	0	1	1	0	0	FAM89B	family with sequence similarity 89, member B
hsa-miR-199b-5p	0	0	0	1	0	0	ZFAND2A	zinc finger, AN1-type domain 2A
hsa-miR-199b-5p	0	0	0	1	0	0	OR52N2	olfactory receptor, family 52, subfamily N, member 2
hsa-miR-199b-5p	0	0	0	1	0	0	INSL3	insulin-like 3 (Leydig cell)
hsa-miR-199b-5p	0	0	0	1	1	1	JAK3	Janus kinase 3
hsa-miR-199b-5p	1	0	0	1	1	1	PLEKHA5	pleckstrin homology domain containing, family A member 5
hsa-miR-199b-5p	0	0	1	1	0	0	C22orf43	chromosome 22 open reading frame 43
hsa-miR-199b-5p	0	0	1	1	0	0	FCER1A	Fc fragment of IgE, high affinity I, receptor for; alpha polypeptide
hsa-miR-199b-5p	0	0	0	1	1	1	GRHPR	glyoxylate reductase/hydroxypyruvate reductase
hsa-miR-199b-5p	0	0	1	1	1	1	GAPT	GRB2-binding adaptor protein, transmembrane
hsa-miR-199b-5p	1	0	1	1	1	1	NFX1	nuclear transcription factor, X-box binding 1
hsa-miR-199b-5p	0	0	1	1	1	1	HDDC2	HD domain containing 2
hsa-miR-199b-5p	1	0	1	1	1	1	CTDNEP1	CTD nuclear envelope phosphatase 1
hsa-miR-199b-5p	0	0	0	1	0	0	CHST13	carbohydrate (chondroitin 4) sulfotransferase 13
hsa-miR-199b-5p	1	0	1	1	1	1	UBE2O	ubiquitin-conjugating enzyme E2O
hsa-miR-199b-5p	0	0	1	1	1	1	PCK1	phosphoenolpyruvate carboxykinase 1 (soluble)
hsa-miR-199b-5p	0	0	1	1	1	1	ZNF611	zinc finger protein 611
hsa-miR-199b-5p	1	0	1	1	1	1	NHLH2	nescient helix loop helix 2
hsa-miR-199b-5p	0	0	0	1	0	0	SLC16A8	solute carrier family 16, member 8 (monocarboxylic acid transporter 3)
hsa-miR-199b-5p	0	0	0	1	0	0	OR4F21	olfactory receptor, family 4, subfamily F, member 21
hsa-miR-199b-5p	1	0	1	1	1	1	ZEB1	zinc finger E-box binding homeobox 1
hsa-miR-199b-5p	0	0	1	1	0	0	THAP4	THAP domain containing 4
hsa-miR-199b-5p	0	0	0	1	0	0	ROGDI	rogdi homolog (Drosophila)
hsa-miR-199b-5p	0	0	0	1	0	0	ST20	suppressor of tumorigenicity 20
hsa-miR-199b-5p	1	0	1	1	0	0	SNX29	sorting nexin 29
hsa-miR-199b-5p	0	0	1	1	0	0	STRA6	stimulated by retinoic acid gene 6 homolog (mouse)
hsa-miR-199b-5p	0	0	1	1	1	1	CNTNAP3	contactin associated protein-like 3
hsa-miR-199b-5p	0	0	0	1	0	0	ENO3	enolase 3 (beta, muscle)
hsa-miR-199b-5p	0	0	0	1	1	1	C8orf42	chromosome 8 open reading frame 42
hsa-miR-199b-5p	0	0	1	1	1	1	SAMD3	sterile alpha motif domain containing 3
hsa-miR-199b-5p	0	0	1	1	0	0	ZNF283	zinc finger protein 283
hsa-miR-199b-5p	0	0	1	1	1	1	FCAMR	Fc receptor, IgA, IgM, high affinity
hsa-miR-199b-5p	0	0	0	1	1	1	FBXW5	F-box and WD repeat domain containing 5
hsa-miR-199b-5p	0	0	0	1	0	0	GYLTL1B	glycosyltransferase-like 1B
hsa-miR-199b-5p	1	0	0	1	1	1	ACBD7	acyl-CoA binding domain containing 7
[truncated: 343 more rows]
