# Supplementary material for: Profiling of Selected MicroRNAs in Proliferative Eutopic Endometrium of Women with Ovarian Endometriosis
Source: Biomed Res Int. 2015 Aug 20;2015:760698. doi: 10.1155/2015/760698 (PMC4558423; doi:10.1155/2015/760698)
Supplement: Supplementary file 1 — Table I: The names of miRNAs significantly differentially expressed between eutopic endometrium of patients with endometriosis vs eutopic endometrium of patients without endometriosis. Table II: The associations between miRNA and mRNA, which presents detailed results of the search of six major databases i.e targetscan, tarbase, miranda, mirbase, mirtarget2 and pictar. [file 760698.f1.zip › 760698.f1/Table II/hsa-miR-208a.tsv]

miR	targetscan	tarbase	miranda	mirbase	mirtarget2	pictar	GeneSymbol	GeneName
hsa-miR-208a	1	0	1	1	1	1	SOX6	SRY (sex determining region Y)-box 6
hsa-miR-208a	1	0	1	1	1	1	SOX5	SRY (sex determining region Y)-box 5
hsa-miR-208a	1	0	1	1	1	1	CDCA4	cell division cycle associated 4
hsa-miR-208a	1	0	1	1	0	0	USP24	ubiquitin specific peptidase 24
hsa-miR-208a	1	0	1	1	0	0	UBN2	ubinuclein 2
hsa-miR-208a	1	0	1	1	1	1	FAM110B	family with sequence similarity 110, member B
hsa-miR-208a	1	0	1	0	1	1	SCN4A	sodium channel, voltage-gated, type IV, alpha subunit
hsa-miR-208a	1	0	1	1	1	1	TSPAN12	tetraspanin 12
hsa-miR-208a	1	0	1	1	1	1	PPP2R2C	protein phosphatase 2, regulatory subunit B, gamma
hsa-miR-208a	1	0	1	1	1	1	H3F3B	H3 histone, family 3B (H3.3B)
hsa-miR-208a	1	0	1	1	1	1	MEIS1	Meis homeobox 1
hsa-miR-208a	1	0	1	1	1	1	GABRA1	gamma-aminobutyric acid (GABA) A receptor, alpha 1
hsa-miR-208a	1	0	0	1	1	1	TRIM67	tripartite motif containing 67
hsa-miR-208a	1	0	1	1	0	0	FNIP2	folliculin interacting protein 2
hsa-miR-208a	1	0	1	1	1	1	RFX7	regulatory factor X, 7
hsa-miR-208a	1	0	1	1	1	1	RAB22A	RAB22A, member RAS oncogene family
hsa-miR-208a	1	0	1	0	0	0	PHLDA2	pleckstrin homology-like domain, family A, member 2
hsa-miR-208a	1	0	1	1	1	1	ENAH	enabled homolog (Drosophila)
hsa-miR-208a	1	0	1	1	1	1	COLQ	collagen-like tail subunit (single strand of homotrimer) of asymmetric acetylcholinesterase
hsa-miR-208a	1	0	1	1	1	1	FNIP1	folliculin interacting protein 1
hsa-miR-208a	1	0	1	1	1	1	SATB1	SATB homeobox 1
hsa-miR-208a	1	0	1	0	1	1	EDAR	ectodysplasin A receptor
hsa-miR-208a	1	0	1	1	1	1	COL4A3	collagen, type IV, alpha 3 (Goodpasture antigen)
hsa-miR-208a	1	0	1	1	1	1	EFNB1	ephrin-B1
hsa-miR-208a	1	0	1	0	1	1	TGFBR1	transforming growth factor, beta receptor 1
hsa-miR-208a	1	0	1	1	1	1	CMIP	c-Maf inducing protein
hsa-miR-208a	1	0	1	1	1	1	BNC2	basonuclin 2
hsa-miR-208a	1	0	1	1	1	1	FAM168B	family with sequence similarity 168, member B
hsa-miR-208a	1	0	1	1	1	1	VAV3	vav 3 guanine nucleotide exchange factor
hsa-miR-208a	1	0	1	1	1	1	BHLHE41	basic helix-loop-helix family, member e41
hsa-miR-208a	1	0	1	1	1	1	MED13	mediator complex subunit 13
hsa-miR-208a	1	0	1	1	1	1	NAV2	neuron navigator 2
hsa-miR-208a	1	0	1	1	1	1	DLD	dihydrolipoamide dehydrogenase
hsa-miR-208a	1	0	1	1	1	1	TCF12	transcription factor 12
hsa-miR-208a	1	0	1	1	1	1	ZEB2	zinc finger E-box binding homeobox 2
hsa-miR-208a	1	0	1	1	1	1	ARGLU1	arginine and glutamate rich 1
hsa-miR-208a	1	0	1	1	1	1	EYA4	eyes absent homolog 4 (Drosophila)
hsa-miR-208a	1	0	1	0	1	1	SCRN1	secernin 1
hsa-miR-208a	1	0	1	1	0	0	GXYLT1	glucoside xylosyltransferase 1
hsa-miR-208a	1	0	1	1	1	1	HNRNPC	heterogeneous nuclear ribonucleoprotein C (C1/C2)
hsa-miR-208a	1	0	1	1	1	1	RAB5C	RAB5C, member RAS oncogene family
hsa-miR-208a	1	0	1	1	1	1	EIF5	eukaryotic translation initiation factor 5
hsa-miR-208a	1	0	1	0	1	1	PURB	purine-rich element binding protein B
hsa-miR-208a	1	0	1	1	1	1	PIP5K1C	phosphatidylinositol-4-phosphate 5-kinase, type I, gamma
hsa-miR-208a	1	0	1	1	1	1	ABI1	abl-interactor 1
hsa-miR-208a	1	0	1	1	0	0	PACS2	phosphofurin acidic cluster sorting protein 2
hsa-miR-208a	1	0	1	1	1	1	PHF21B	PHD finger protein 21B
hsa-miR-208a	1	0	1	1	1	1	LRP6	low density lipoprotein receptor-related protein 6
hsa-miR-208a	1	0	1	1	1	1	MTF2	metal response element binding transcription factor 2
hsa-miR-208a	1	0	1	1	0	0	FZD8	frizzled family receptor 8
hsa-miR-208a	1	0	1	0	1	1	GLYR1	glyoxylate reductase 1 homolog (Arabidopsis)
hsa-miR-208a	1	0	1	0	1	1	VCPIP1	valosin containing protein (p97)/p47 complex interacting protein 1
hsa-miR-208a	1	0	1	1	1	1	DCAF12	DDB1 and CUL4 associated factor 12
hsa-miR-208a	1	0	1	0	1	1	CDK14	cyclin-dependent kinase 14
hsa-miR-208a	1	0	1	0	1	1	RIMS1	regulating synaptic membrane exocytosis 1
hsa-miR-208a	1	0	1	1	1	1	GATA4	GATA binding protein 4
hsa-miR-208a	1	0	1	1	1	1	NAP1L1	nucleosome assembly protein 1-like 1
hsa-miR-208a	1	0	1	1	1	1	KPNA3	karyopherin alpha 3 (importin alpha 4)
hsa-miR-208a	1	0	1	1	1	1	REEP1	receptor accessory protein 1
hsa-miR-208a	1	0	1	1	1	1	NRIP1	nuclear receptor interacting protein 1
hsa-miR-208a	1	0	1	1	1	1	ETS1	v-ets erythroblastosis virus E26 oncogene homolog 1 (avian)
hsa-miR-208a	1	0	1	1	1	1	PDCD4	programmed cell death 4 (neoplastic transformation inhibitor)
hsa-miR-208a	1	0	1	1	1	1	ANKRD13C	ankyrin repeat domain 13C
hsa-miR-208a	1	0	1	1	1	1	HIC2	hypermethylated in cancer 2
hsa-miR-208a	1	0	1	0	1	1	EML4	echinoderm microtubule associated protein like 4
hsa-miR-208a	1	0	1	1	1	1	DYRK2	dual-specificity tyrosine-(Y)-phosphorylation regulated kinase 2
hsa-miR-208a	1	0	1	1	1	1	TMBIM6	transmembrane BAX inhibitor motif containing 6
hsa-miR-208a	1	0	1	1	1	1	PTBP2	polypyrimidine tract binding protein 2
hsa-miR-208a	1	0	1	1	1	1	QKI	QKI, KH domain containing, RNA binding
hsa-miR-208a	1	0	1	1	1	1	POGZ	pogo transposable element with ZNF domain
hsa-miR-208a	1	0	1	1	1	1	MYH10	myosin, heavy chain 10, non-muscle
hsa-miR-208a	1	0	1	1	1	1	SECISBP2L	SECIS binding protein 2-like
hsa-miR-208a	1	0	1	0	1	1	DDX3X	DEAD (Asp-Glu-Ala-Asp) box polypeptide 3, X-linked
hsa-miR-208a	1	0	1	1	1	1	PTPRG	protein tyrosine phosphatase, receptor type, G
hsa-miR-208a	1	0	1	1	1	1	PPP3CB	protein phosphatase 3, catalytic subunit, beta isozyme
hsa-miR-208a	1	0	1	1	1	1	CISD2	CDGSH iron sulfur domain 2
hsa-miR-208a	1	0	1	1	0	0	CCRN4L	CCR4 carbon catabolite repression 4-like (S. cerevisiae)
hsa-miR-208a	1	0	1	1	1	1	FEM1C	fem-1 homolog c (C. elegans)
hsa-miR-208a	1	0	1	0	1	1	SNX13	sorting nexin 13
hsa-miR-208a	1	0	1	0	1	1	SRCIN1	SRC kinase signaling inhibitor 1
hsa-miR-208a	1	0	1	0	1	1	ARID2	AT rich interactive domain 2 (ARID, RFX-like)
hsa-miR-208a	1	0	1	1	1	1	SLC41A1	solute carrier family 41, member 1
hsa-miR-208a	1	0	1	1	1	1	CBX1	chromobox homolog 1
hsa-miR-208a	1	0	0	0	0	0	SOS2	son of sevenless homolog 2 (Drosophila)
hsa-miR-208a	1	0	1	1	1	1	AHCYL1	adenosylhomocysteinase-like 1
hsa-miR-208a	1	0	1	1	0	0	DYNLT1	dynein, light chain, Tctex-type 1
hsa-miR-208a	1	0	1	0	1	1	CREBZF	CREB/ATF bZIP transcription factor
hsa-miR-208a	1	0	1	1	0	0	CELF5	CUGBP, Elav-like family member 5
hsa-miR-208a	1	0	1	1	1	1	PTPDC1	protein tyrosine phosphatase domain containing 1
hsa-miR-208a	1	0	1	0	1	1	MINOS1	mitochondrial inner membrane organizing system 1
hsa-miR-208a	1	0	1	1	1	1	RANBP9	RAN binding protein 9
hsa-miR-208a	1	0	1	1	1	1	APC	adenomatous polyposis coli
hsa-miR-208a	1	0	1	1	1	1	CELSR1	cadherin, EGF LAG seven-pass G-type receptor 1 (flamingo homolog, Drosophila)
hsa-miR-208a	1	0	1	1	1	1	HP1BP3	heterochromatin protein 1, binding protein 3
hsa-miR-208a	1	0	1	1	1	1	EIF4G2	eukaryotic translation initiation factor 4 gamma, 2
hsa-miR-208a	1	0	1	0	1	1	FZD4	frizzled family receptor 4
hsa-miR-208a	1	0	1	0	1	1	LRCH2	leucine-rich repeats and calponin homology (CH) domain containing 2
hsa-miR-208a	1	0	1	1	0	0	KCNN3	potassium intermediate/small conductance calcium-activated channel, subfamily N, member 3
hsa-miR-208a	1	0	1	1	1	1	FNDC3A	fibronectin type III domain containing 3A
hsa-miR-208a	1	0	1	0	1	1	CELF2	CUGBP, Elav-like family member 2
hsa-miR-208a	1	0	1	1	1	1	EEA1	early endosome antigen 1
hsa-miR-208a	1	0	1	1	1	1	NLK	nemo-like kinase
hsa-miR-208a	1	0	1	1	1	1	LRRC8A	leucine rich repeat containing 8 family, member A
hsa-miR-208a	1	0	1	1	1	1	UTP18	UTP18 small subunit (SSU) processome component homolog (yeast)
hsa-miR-208a	1	0	1	1	1	1	TBC1D22B	TBC1 domain family, member 22B
hsa-miR-208a	1	0	1	1	1	1	ATRN	attractin
hsa-miR-208a	1	0	1	0	1	1	SCN2B	sodium channel, voltage-gated, type II, beta subunit
hsa-miR-208a	1	0	0	1	1	1	KIF5B	kinesin family member 5B
hsa-miR-208a	1	0	1	1	1	1	JHDM1D	jumonji C domain containing histone demethylase 1 homolog D (S. cerevisiae)
hsa-miR-208a	1	0	1	0	1	1	BCL11B	B-cell CLL/lymphoma 11B (zinc finger protein)
hsa-miR-208a	1	0	1	0	1	1	CSNK1G1	casein kinase 1, gamma 1
hsa-miR-208a	1	0	1	1	1	1	MTMR3	myotubularin related protein 3
hsa-miR-208a	1	0	1	1	1	1	CHD9	chromodomain helicase DNA binding protein 9
hsa-miR-208a	1	0	1	1	1	1	SLC10A7	solute carrier family 10 (sodium/bile acid cotransporter family), member 7
hsa-miR-208a	1	0	1	1	1	1	PRUNE2	prune homolog 2 (Drosophila)
hsa-miR-208a	0	0	1	1	1	1	PEG3	paternally expressed 3
hsa-miR-208a	1	0	1	1	1	1	DNM3	dynamin 3
hsa-miR-208a	1	0	1	0	0	0	KIAA0947	KIAA0947
hsa-miR-208a	1	0	1	1	1	1	CIT	citron (rho-interacting, serine/threonine kinase 21)
hsa-miR-208a	1	0	1	1	0	0	KIAA1045	KIAA1045
hsa-miR-208a	1	0	1	1	0	0	PPM1H	protein phosphatase, Mg2+/Mn2+ dependent, 1H
hsa-miR-208a	1	0	1	1	1	1	ATXN7L1	ataxin 7-like 1
hsa-miR-208a	1	0	1	1	1	1	ZMIZ1	zinc finger, MIZ-type containing 1
hsa-miR-208a	1	0	1	1	1	1	RIMKLB	ribosomal modification protein rimK-like family member B
hsa-miR-208a	1	0	1	0	1	1	KCTD16	potassium channel tetramerisation domain containing 16
hsa-miR-208a	0	0	1	0	1	1	ZSWIM6	zinc finger, SWIM-type containing 6
hsa-miR-208a	1	0	1	1	1	1	SNX3	sorting nexin 3
hsa-miR-208a	0	0	1	0	1	1	SETD5	SET domain containing 5
hsa-miR-208a	1	0	1	1	1	1	BCL2L11	BCL2-like 11 (apoptosis facilitator)
hsa-miR-208a	1	0	1	1	1	1	SH3TC2	SH3 domain and tetratricopeptide repeats 2
hsa-miR-208a	1	0	1	0	0	0	ZBTB34	zinc finger and BTB domain containing 34
hsa-miR-208a	1	0	1	1	1	1	PAM	peptidylglycine alpha-amidating monooxygenase
hsa-miR-208a	1	0	1	0	0	0	ZC3H12C	zinc finger CCCH-type containing 12C
hsa-miR-208a	0	0	1	1	1	1	MICAL2	microtubule associated monoxygenase, calponin and LIM domain containing 2
hsa-miR-208a	0	0	1	1	1	1	SYBU	syntabulin (syntaxin-interacting)
hsa-miR-208a	0	0	1	1	0	0	KCNC3	potassium voltage-gated channel, Shaw-related subfamily, member 3
hsa-miR-208a	1	0	1	1	1	1	PML	promyelocytic leukemia
hsa-miR-208a	0	0	1	1	1	1	PTK2	PTK2 protein tyrosine kinase 2
hsa-miR-208a	1	0	1	1	0	0	GRIA1	glutamate receptor, ionotropic, AMPA 1
hsa-miR-208a	0	0	1	0	1	1	NPY1R	neuropeptide Y receptor Y1
hsa-miR-208a	1	0	1	1	1	1	EPHA7	EPH receptor A7
hsa-miR-208a	1	0	1	1	1	1	NEO1	neogenin 1
hsa-miR-208a	0	0	1	1	0	0	EIF4E2	eukaryotic translation initiation factor 4E family member 2
hsa-miR-208a	1	0	1	1	1	1	ZFX	zinc finger protein, X-linked
hsa-miR-208a	1	0	1	1	1	1	TP63	tumor protein p63
hsa-miR-208a	1	0	1	0	1	1	MAP4K4	mitogen-activated protein kinase kinase kinase kinase 4
hsa-miR-208a	0	0	1	1	1	1	SH2D1A	SH2 domain containing 1A
hsa-miR-208a	0	0	1	1	0	0	COPB1	coatomer protein complex, subunit beta 1
hsa-miR-208a	0	0	1	1	0	0	EVL	Enah/Vasp-like
hsa-miR-208a	1	0	1	0	1	1	FAM19A5	family with sequence similarity 19 (chemokine (C-C motif)-like), member A5
hsa-miR-208a	1	0	1	1	1	1	SORBS1	sorbin and SH3 domain containing 1
hsa-miR-208a	1	0	1	1	1	1	AASDHPPT	aminoadipate-semialdehyde dehydrogenase-phosphopantetheinyl transferase
hsa-miR-208a	0	0	1	1	1	1	SAP30L	SAP30-like
hsa-miR-208a	1	0	1	1	1	1	DESI2	desumoylating isopeptidase 2
hsa-miR-208a	1	0	1	0	1	1	TRPS1	trichorhinophalangeal syndrome I
hsa-miR-208a	1	0	1	1	1	1	LARP4	La ribonucleoprotein domain family, member 4
hsa-miR-208a	1	0	1	1	1	1	NTRK2	neurotrophic tyrosine kinase, receptor, type 2
hsa-miR-208a	1	0	1	1	1	1	AFF2	AF4/FMR2 family, member 2
hsa-miR-208a	1	0	1	1	1	1	VAMP7	vesicle-associated membrane protein 7
hsa-miR-208a	1	0	1	0	1	1	NAALADL2	N-acetylated alpha-linked acidic dipeptidase-like 2
hsa-miR-208a	0	0	1	1	1	1	CXXC5	CXXC finger protein 5
hsa-miR-208a	1	0	1	1	1	1	ZNF395	zinc finger protein 395
hsa-miR-208a	0	0	1	1	0	0	UGGT2	UDP-glucose glycoprotein glucosyltransferase 2
hsa-miR-208a	1	0	1	1	1	1	MACF1	microtubule-actin crosslinking factor 1
hsa-miR-208a	1	0	1	1	1	1	PHF20L1	PHD finger protein 20-like 1
hsa-miR-208a	1	0	1	0	1	1	C14orf101	chromosome 14 open reading frame 101
hsa-miR-208a	0	0	1	1	1	1	CXorf57	chromosome X open reading frame 57
hsa-miR-208a	0	0	1	0	0	0	IFFO2	intermediate filament family orphan 2
hsa-miR-208a	1	0	1	0	1	1	ATP2B1	ATPase, Ca++ transporting, plasma membrane 1
hsa-miR-208a	1	0	1	1	1	1	DLC1	deleted in liver cancer 1
hsa-miR-208a	1	0	1	1	1	1	SEC63	SEC63 homolog (S. cerevisiae)
hsa-miR-208a	1	0	1	1	1	1	GPD2	glycerol-3-phosphate dehydrogenase 2 (mitochondrial)
hsa-miR-208a	1	0	1	1	1	1	HERPUD2	HERPUD family member 2
hsa-miR-208a	0	0	1	1	0	0	PSMA4	proteasome (prosome, macropain) subunit, alpha type, 4
hsa-miR-208a	1	0	1	0	1	1	RNF165	ring finger protein 165
hsa-miR-208a	1	0	1	1	1	1	TLE4	transducin-like enhancer of split 4 (E(sp1) homolog, Drosophila)
hsa-miR-208a	0	0	1	0	1	1	CHURC1	churchill domain containing 1
hsa-miR-208a	0	0	1	0	0	0	LOC285074	anaphase promoting complex subunit 1 pseudogene
hsa-miR-208a	0	0	1	1	1	1	FXC1	fracture callus 1 homolog (rat)
hsa-miR-208a	1	0	1	1	1	1	SH3BP5	SH3-domain binding protein 5 (BTK-associated)
hsa-miR-208a	1	0	1	1	1	1	STXBP5	syntaxin binding protein 5 (tomosyn)
hsa-miR-208a	0	0	1	1	0	0	TMEM9	transmembrane protein 9
hsa-miR-208a	0	0	1	0	1	1	SSPN	sarcospan
hsa-miR-208a	0	0	1	0	0	0	LINC00340	long intergenic non-protein coding RNA 340
hsa-miR-208a	0	0	1	1	1	1	MYO6	myosin VI
hsa-miR-208a	1	0	1	0	1	1	PRKAR1A	protein kinase, cAMP-dependent, regulatory, type I, alpha
hsa-miR-208a	0	0	1	1	1	1	HCCS	holocytochrome c synthase
hsa-miR-208a	0	0	1	1	0	0	FBXO16	F-box protein 16
hsa-miR-208a	1	0	1	1	0	0	FBXL19	F-box and leucine-rich repeat protein 19
hsa-miR-208a	0	0	1	1	1	1	CC2D2B	coiled-coil and C2 domain containing 2B
hsa-miR-208a	1	0	1	1	1	1	SEPHS1	selenophosphate synthetase 1
hsa-miR-208a	0	0	1	1	0	0	LOC100128239	uncharacterized LOC100128239
hsa-miR-208a	1	0	1	1	1	1	KPNA1	karyopherin alpha 1 (importin alpha 5)
hsa-miR-208a	1	0	1	1	1	1	PTPRB	protein tyrosine phosphatase, receptor type, B
hsa-miR-208a	1	0	1	1	1	1	LIN9	lin-9 homolog (C. elegans)
hsa-miR-208a	1	0	1	1	1	1	PIK3R1	phosphoinositide-3-kinase, regulatory subunit 1 (alpha)
hsa-miR-208a	0	0	1	1	0	0	HS3ST5	heparan sulfate (glucosamine) 3-O-sulfotransferase 5
hsa-miR-208a	0	0	1	1	1	1	DOCK9	dedicator of cytokinesis 9
hsa-miR-208a	1	0	1	0	1	1	FNDC3B	fibronectin type III domain containing 3B
hsa-miR-208a	0	0	1	0	1	1	LOC401321	uncharacterized LOC401321
hsa-miR-208a	0	0	1	0	0	0	EMBP1	embigin pseudogene 1
hsa-miR-208a	1	0	1	1	1	1	UPF1	UPF1 regulator of nonsense transcripts homolog (yeast)
hsa-miR-208a	0	0	1	1	1	1	TMEM202	transmembrane protein 202
hsa-miR-208a	1	0	1	1	1	1	PPP2R5C	protein phosphatase 2, regulatory subunit B', gamma
hsa-miR-208a	1	0	1	0	1	1	TMEM106B	transmembrane protein 106B
hsa-miR-208a	1	0	1	1	1	1	RPS6KA4	ribosomal protein S6 kinase, 90kDa, polypeptide 4
hsa-miR-208a	0	0	1	1	1	1	TBC1D3G	TBC1 domain family, member 3G
hsa-miR-208a	0	0	1	1	0	0	CFDP1	craniofacial development protein 1
hsa-miR-208a	1	0	1	1	1	1	APBB2	amyloid beta (A4) precursor protein-binding, family B, member 2
hsa-miR-208a	0	0	1	1	0	0	NEK7	NIMA (never in mitosis gene a)-related kinase 7
hsa-miR-208a	1	0	1	1	1	1	TAB2	TGF-beta activated kinase 1/MAP3K7 binding protein 2
hsa-miR-208a	1	0	1	1	1	1	ARF6	ADP-ribosylation factor 6
hsa-miR-208a	0	0	1	0	1	1	TBC1D3F	TBC1 domain family, member 3F
hsa-miR-208a	0	0	1	0	0	0	LRRC37BP1	leucine rich repeat containing 37B pseudogene 1
hsa-miR-208a	0	0	1	0	0	0	FAM66D	family with sequence similarity 66, member D
hsa-miR-208a	1	0	1	1	1	1	LIMCH1	LIM and calponin homology domains 1
hsa-miR-208a	1	0	1	1	1	1	KDM6A	lysine (K)-specific demethylase 6A
hsa-miR-208a	1	0	1	0	1	1	STYX	serine/threonine/tyrosine interacting protein
hsa-miR-208a	1	0	1	0	1	1	GPCPD1	glycerophosphocholine phosphodiesterase GDE1 homolog (S. cerevisiae)
hsa-miR-208a	0	0	1	1	1	1	NARG2	NMDA receptor regulated 2
hsa-miR-208a	1	0	1	1	1	1	IL17RD	interleukin 17 receptor D
hsa-miR-208a	0	0	1	1	1	1	PNMAL1	paraneoplastic Ma antigen family-like 1
hsa-miR-208a	0	0	1	1	1	1	C8orf34	chromosome 8 open reading frame 34
hsa-miR-208a	1	0	1	1	1	1	RICTOR	RPTOR independent companion of MTOR, complex 2
hsa-miR-208a	1	0	1	1	1	1	IKZF2	IKAROS family zinc finger 2 (Helios)
hsa-miR-208a	1	0	1	1	1	1	CLIC5	chloride intracellular channel 5
hsa-miR-208a	1	0	1	1	1	1	ILF3	interleukin enhancer binding factor 3, 90kDa
hsa-miR-208a	1	0	1	1	1	1	PBRM1	polybromo 1
hsa-miR-208a	0	0	1	0	0	0	MEG3	maternally expressed 3 (non-protein coding)
hsa-miR-208a	1	0	1	1	1	1	NPM1	nucleophosmin (nucleolar phosphoprotein B23, numatrin)
hsa-miR-208a	1	0	1	1	1	1	CAMTA1	calmodulin binding transcription activator 1
hsa-miR-208a	1	0	1	1	1	1	LRRTM3	leucine rich repeat transmembrane neuronal 3
hsa-miR-208a	0	0	1	0	1	1	FAM198B	family with sequence similarity 198, member B
hsa-miR-208a	1	0	1	1	1	1	SP3	Sp3 transcription factor
hsa-miR-208a	1	0	1	0	1	1	NHS	Nance-Horan syndrome (congenital cataracts and dental anomalies)
hsa-miR-208a	0	0	1	1	1	1	HMBOX1	homeobox containing 1
hsa-miR-208a	0	0	1	1	1	1	DIO1	deiodinase, iodothyronine, type I
hsa-miR-208a	0	0	1	1	1	1	TMUB1	transmembrane and ubiquitin-like domain containing 1
hsa-miR-208a	0	0	1	1	0	0	DHRS4	dehydrogenase/reductase (SDR family) member 4
hsa-miR-208a	1	0	1	1	1	1	AMOT	angiomotin
hsa-miR-208a	1	0	1	1	1	1	NEK6	NIMA (never in mitosis gene a)-related kinase 6
hsa-miR-208a	1	0	1	0	1	1	CGGBP1	CGG triplet repeat binding protein 1
hsa-miR-208a	1	0	1	1	1	1	CALM1	calmodulin 1 (phosphorylase kinase, delta)
hsa-miR-208a	0	0	1	0	0	0	ATXN7L3B	ataxin 7-like 3B
hsa-miR-208a	0	0	1	1	1	1	GTPBP8	GTP-binding protein 8 (putative)
hsa-miR-208a	0	0	1	0	0	0	TPTEP1	transmembrane phosphatase with tensin homology pseudogene 1
hsa-miR-208a	0	0	1	1	1	1	CEP70	centrosomal protein 70kDa
hsa-miR-208a	1	0	1	1	1	1	SCAMP1	secretory carrier membrane protein 1
hsa-miR-208a	1	0	1	1	1	1	NRF1	nuclear respiratory factor 1
hsa-miR-208a	0	0	1	1	0	0	ZBTB32	zinc finger and BTB domain containing 32
hsa-miR-208a	1	0	1	1	1	1	ARHGEF9	Cdc42 guanine nucleotide exchange factor (GEF) 9
hsa-miR-208a	1	0	1	1	1	1	HMGA2	high mobility group AT-hook 2
hsa-miR-208a	1	0	1	1	1	1	MID1IP1	MID1 interacting protein 1
hsa-miR-208a	0	0	1	1	1	1	LRRK1	leucine-rich repeat kinase 1
hsa-miR-208a	1	0	1	1	1	1	LIMS1	LIM and senescent cell antigen-like domains 1
hsa-miR-208a	0	0	1	1	1	1	TLR4	toll-like receptor 4
hsa-miR-208a	1	0	1	1	1	1	EPHA4	EPH receptor A4
hsa-miR-208a	1	0	1	1	1	1	HTR2C	5-hydroxytryptamine (serotonin) receptor 2C, G protein-coupled
hsa-miR-208a	0	0	1	1	1	1	B4GALNT1	beta-1,4-N-acetyl-galactosaminyl transferase 1
hsa-miR-208a	1	0	1	1	1	1	ELAVL2	ELAV (embryonic lethal, abnormal vision, Drosophila)-like 2 (Hu antigen B)
hsa-miR-208a	1	0	1	1	1	1	RCOR3	REST corepressor 3
hsa-miR-208a	1	0	1	1	1	1	SORL1	sortilin-related receptor, L(DLR class) A repeats containing
hsa-miR-208a	0	0	1	1	1	1	ZNF337	zinc finger protein 337
hsa-miR-208a	1	0	1	0	1	1	DDX3Y	DEAD (Asp-Glu-Ala-Asp) box polypeptide 3, Y-linked
hsa-miR-208a	0	0	1	1	1	1	NR1H4	nuclear receptor subfamily 1, group H, member 4
hsa-miR-208a	0	0	1	1	1	1	C6	complement component 6
hsa-miR-208a	1	0	1	1	1	1	CTDSPL2	CTD (carboxy-terminal domain, RNA polymerase II, polypeptide A) small phosphatase like 2
hsa-miR-208a	0	0	1	0	0	0	FAM201A	family with sequence similarity 201, member A
hsa-miR-208a	0	0	1	1	1	1	FAM171B	family with sequence similarity 171, member B
hsa-miR-208a	1	0	1	0	1	1	YAF2	YY1 associated factor 2
hsa-miR-208a	1	0	1	1	1	1	SLC35F3	solute carrier family 35, member F3
hsa-miR-208a	1	0	1	1	1	1	FOXK1	forkhead box K1
hsa-miR-208a	1	0	1	1	1	1	MARCKS	myristoylated alanine-rich protein kinase C substrate
hsa-miR-208a	0	0	1	0	0	0	LOC401074	uncharacterized LOC401074
hsa-miR-208a	0	0	1	1	1	1	C17orf104	chromosome 17 open reading frame 104
hsa-miR-208a	0	0	1	0	1	1	IL33	interleukin 33
hsa-miR-208a	1	0	1	1	1	1	YWHAZ	tyrosine 3-monooxygenase/tryptophan 5-monooxygenase activation protein, zeta polypeptide
hsa-miR-208a	1	0	1	1	1	1	PCGF5	polycomb group ring finger 5
hsa-miR-208a	0	0	1	0	1	1	GUCY1B3	guanylate cyclase 1, soluble, beta 3
hsa-miR-208a	0	0	1	1	1	1	METTL15	methyltransferase like 15
hsa-miR-208a	1	0	1	1	1	1	SRPK2	SRSF protein kinase 2
hsa-miR-208a	0	0	1	0	0	0	CHADL	chondroadherin-like
hsa-miR-208a	1	0	1	0	1	1	SLC7A2	solute carrier family 7 (cationic amino acid transporter, y+ system), member 2
hsa-miR-208a	1	0	1	1	1	1	USP47	ubiquitin specific peptidase 47
hsa-miR-208a	1	0	1	0	1	1	TMEM194A	transmembrane protein 194A
hsa-miR-208a	1	0	1	1	1	1	CTBP1	C-terminal binding protein 1
hsa-miR-208a	0	0	1	1	0	0	DNHD1	dynein heavy chain domain 1
hsa-miR-208a	1	0	1	1	1	1	SYNJ1	synaptojanin 1
hsa-miR-208a	0	0	1	1	1	1	HMGB2	high mobility group box 2
hsa-miR-208a	1	0	1	1	1	1	LRRC15	leucine rich repeat containing 15
hsa-miR-208a	0	0	1	1	1	1	ZNF365	zinc finger protein 365
hsa-miR-208a	0	0	1	0	0	0	CCDC163P	coiled-coil domain containing 163, pseudogene
hsa-miR-208a	1	0	1	0	1	1	CPEB2	cytoplasmic polyadenylation element binding protein 2
hsa-miR-208a	1	0	1	1	1	1	PNISR	PNN-interacting serine/arginine-rich protein
hsa-miR-208a	0	0	1	1	1	1	TTN	titin
hsa-miR-208a	1	0	1	1	1	1	HMMR	hyaluronan-mediated motility receptor (RHAMM)
hsa-miR-208a	1	0	1	0	1	1	DNAJC6	DnaJ (Hsp40) homolog, subfamily C, member 6
hsa-miR-208a	1	0	1	1	1	1	HNRNPR	heterogeneous nuclear ribonucleoprotein R
hsa-miR-208a	1	0	1	0	1	1	ROBO1	roundabout, axon guidance receptor, homolog 1 (Drosophila)
hsa-miR-208a	1	0	1	1	1	1	ATP2B4	ATPase, Ca++ transporting, plasma membrane 4
hsa-miR-208a	0	0	1	1	1	1	DSG3	desmoglein 3
hsa-miR-208a	1	0	1	1	1	1	SMAD4	SMAD family member 4
hsa-miR-208a	1	0	1	1	0	0	CECR2	cat eye syndrome chromosome region, candidate 2
hsa-miR-208a	1	0	1	1	1	1	FOXP1	forkhead box P1
hsa-miR-208a	0	0	1	1	1	1	DUSP19	dual specificity phosphatase 19
hsa-miR-208a	1	0	1	1	1	1	NEDD9	neural precursor cell expressed, developmentally down-regulated 9
hsa-miR-208a	0	0	1	1	1	1	EXT2	exostosin 2
hsa-miR-208a	1	0	1	1	1	1	NFIB	nuclear factor I/B
hsa-miR-208a	1	0	1	1	1	1	PGAP1	post-GPI attachment to proteins 1
hsa-miR-208a	0	0	1	1	1	1	CETN2	centrin, EF-hand protein, 2
hsa-miR-208a	0	0	1	0	1	1	BLM	Bloom syndrome, RecQ helicase-like
hsa-miR-208a	0	0	1	1	1	1	ERLEC1	endoplasmic reticulum lectin 1
hsa-miR-208a	1	0	1	1	1	1	E2F5	E2F transcription factor 5, p130-binding
hsa-miR-208a	0	0	1	0	1	1	CD99P1	CD99 molecule pseudogene 1
hsa-miR-208a	1	0	1	1	1	1	NFKBIA	nuclear factor of kappa light polypeptide gene enhancer in B-cells inhibitor, alpha
hsa-miR-208a	1	0	1	0	1	1	RPS6KB1	ribosomal protein S6 kinase, 70kDa, polypeptide 1
hsa-miR-208a	1	0	1	1	1	1	LYPLA2	lysophospholipase II
hsa-miR-208a	0	0	1	1	1	1	EIF3J	eukaryotic translation initiation factor 3, subunit J
hsa-miR-208a	1	0	1	1	1	1	FAM118A	family with sequence similarity 118, member A
hsa-miR-208a	1	0	1	1	1	1	NRN1	neuritin 1
hsa-miR-208a	0	0	1	0	1	1	SRSF5	serine/arginine-rich splicing factor 5
hsa-miR-208a	0	0	1	1	0	0	EEF1A2	eukaryotic translation elongation factor 1 alpha 2
hsa-miR-208a	0	0	1	1	1	1	FUS	fused in sarcoma
hsa-miR-208a	0	0	1	1	1	1	TMEM14C	transmembrane protein 14C
hsa-miR-208a	0	0	1	1	1	1	RNF166	ring finger protein 166
hsa-miR-208a	1	0	1	0	1	1	CD47	CD47 molecule
hsa-miR-208a	1	0	1	1	1	1	FBXW7	F-box and WD repeat domain containing 7, E3 ubiquitin protein ligase
hsa-miR-208a	1	0	1	1	1	1	SLC39A10	solute carrier family 39 (zinc transporter), member 10
hsa-miR-208a	1	0	1	0	1	1	CNTNAP2	contactin associated protein-like 2
hsa-miR-208a	0	0	1	0	1	1	SYNPR	synaptoporin
hsa-miR-208a	1	0	1	0	1	1	KLHDC10	kelch domain containing 10
hsa-miR-208a	1	0	1	0	1	1	CBX7	chromobox homolog 7
hsa-miR-208a	0	0	1	1	0	0	CCNA1	cyclin A1
hsa-miR-208a	1	0	1	0	1	1	DCBLD2	discoidin, CUB and LCCL domain containing 2
hsa-miR-208a	1	0	1	0	1	1	YES1	v-yes-1 Yamaguchi sarcoma viral oncogene homolog 1
hsa-miR-208a	1	0	1	1	1	1	GK	glycerol kinase
hsa-miR-208a	1	0	1	1	1	1	HK2	hexokinase 2
hsa-miR-208a	0	0	1	1	1	1	PAH	phenylalanine hydroxylase
hsa-miR-208a	0	0	1	1	1	1	TSHR	thyroid stimulating hormone receptor
hsa-miR-208a	1	1	1	1	1	1	CDKN1A	cyclin-dependent kinase inhibitor 1A (p21, Cip1)
hsa-miR-208a	1	0	1	1	1	1	DCX	doublecortin
hsa-miR-208a	1	0	1	1	1	1	DIO2	deiodinase, iodothyronine, type II
hsa-miR-208a	0	0	1	1	1	1	PTGS2	prostaglandin-endoperoxide synthase 2 (prostaglandin G/H synthase and cyclooxygenase)
hsa-miR-208a	0	0	1	1	1	1	TBC1D3C	TBC1 domain family, member 3C
hsa-miR-208a	1	0	1	1	1	1	AFTPH	aftiphilin
hsa-miR-208a	1	0	1	1	1	1	WLS	wntless homolog (Drosophila)
hsa-miR-208a	1	0	1	1	1	1	WNK3	WNK lysine deficient protein kinase 3
hsa-miR-208a	0	0	1	0	0	0	OR8G1	olfactory receptor, family 8, subfamily G, member 1
hsa-miR-208a	0	0	1	1	1	1	ZCCHC16	zinc finger, CCHC domain containing 16
hsa-miR-208a	0	0	1	0	0	0	FLJ42842	uncharacterized FLJ42842
hsa-miR-208a	0	0	1	0	1	1	FLJ16124	FLJ16124 protein
hsa-miR-208a	1	0	1	1	1	1	EBF3	early B-cell factor 3
hsa-miR-208a	1	0	1	1	1	1	L3MBTL3	l(3)mbt-like 3 (Drosophila)
hsa-miR-208a	1	0	1	0	1	1	C18orf25	chromosome 18 open reading frame 25
hsa-miR-208a	1	0	1	1	1	1	CTDSPL	CTD (carboxy-terminal domain, RNA polymerase II, polypeptide A) small phosphatase-like
hsa-miR-208a	1	0	1	1	1	1	RBM33	RNA binding motif protein 33
hsa-miR-208a	1	0	1	0	1	1	KIAA2022	KIAA2022
hsa-miR-208a	1	0	1	0	1	1	ZC3H12B	zinc finger CCCH-type containing 12B
hsa-miR-208a	1	0	1	1	1	1	CTNNBIP1	catenin, beta interacting protein 1
hsa-miR-208a	1	0	1	1	1	1	ZHX1	zinc fingers and homeoboxes 1
hsa-miR-208a	0	0	1	0	1	1	TMEM30B	transmembrane protein 30B
hsa-miR-208a	0	0	1	1	1	1	HNMT	histamine N-methyltransferase
hsa-miR-208a	1	0	1	0	1	1	TNRC6B	trinucleotide repeat containing 6B
hsa-miR-208a	0	0	1	1	0	0	ARPC4	actin related protein 2/3 complex, subunit 4, 20kDa
hsa-miR-208a	1	0	1	1	1	1	RGS7BP	regulator of G-protein signaling 7 binding protein
hsa-miR-208a	1	0	1	1	1	1	MAF	v-maf musculoaponeurotic fibrosarcoma oncogene homolog (avian)
hsa-miR-208a	1	0	1	1	1	1	CSNK1G3	casein kinase 1, gamma 3
hsa-miR-208a	0	0	1	0	1	1	STXBP1	syntaxin binding protein 1
hsa-miR-208a	1	0	1	0	1	1	RYR3	ryanodine receptor 3
hsa-miR-208a	1	0	1	0	1	1	GK5	glycerol kinase 5 (putative)
hsa-miR-208a	1	0	1	0	1	1	USP9X	ubiquitin specific peptidase 9, X-linked
hsa-miR-208a	1	0	1	0	1	1	FAM133B	family with sequence similarity 133, member B
hsa-miR-208a	1	0	1	1	1	1	GDAP1	ganglioside induced differentiation associated protein 1
hsa-miR-208a	1	0	1	1	1	1	NSL1	NSL1, MIND kinetochore complex component, homolog (S. cerevisiae)
hsa-miR-208a	1	0	1	1	1	1	FRS2	fibroblast growth factor receptor substrate 2
hsa-miR-208a	1	0	1	1	1	1	PDE11A	phosphodiesterase 11A
hsa-miR-208a	1	0	1	1	1	1	PHF16	PHD finger protein 16
hsa-miR-208a	1	0	1	1	1	1	N4BP2L1	NEDD4 binding protein 2-like 1
hsa-miR-208a	1	0	1	1	1	1	KDM6B	lysine (K)-specific demethylase 6B
hsa-miR-208a	1	0	1	0	1	1	MEGF9	multiple EGF-like-domains 9
hsa-miR-208a	1	0	1	1	1	1	MGA	MAX gene associated
hsa-miR-208a	1	0	1	1	1	1	ADAM10	ADAM metallopeptidase domain 10
hsa-miR-208a	1	0	1	0	1	1	CDK6	cyclin-dependent kinase 6
hsa-miR-208a	1	0	1	1	1	1	CHD1	chromodomain helicase DNA binding protein 1
hsa-miR-208a	0	0	1	1	1	1	CHUK	conserved helix-loop-helix ubiquitous kinase
hsa-miR-208a	0	0	1	1	1	1	ACADL	acyl-CoA dehydrogenase, long chain
hsa-miR-208a	1	0	1	1	1	1	BNC1	basonuclin 1
hsa-miR-208a	1	0	1	1	1	1	CBFB	core-binding factor, beta subunit
hsa-miR-208a	1	0	1	1	1	1	CD69	CD69 molecule
hsa-miR-208a	0	0	1	1	0	0	CSNK2A2	casein kinase 2, alpha prime polypeptide
hsa-miR-208a	1	0	1	1	1	1	DPP4	dipeptidyl-peptidase 4
hsa-miR-208a	1	0	1	1	1	1	FBN2	fibrillin 2
hsa-miR-208a	0	0	1	1	1	1	FYN	FYN oncogene related to SRC, FGR, YES
hsa-miR-208a	0	0	1	0	1	1	CXCL9	chemokine (C-X-C motif) ligand 9
hsa-miR-208a	1	0	1	1	1	1	NPAS2	neuronal PAS domain protein 2
hsa-miR-208a	0	0	1	1	1	1	OMG	oligodendrocyte myelin glycoprotein
hsa-miR-208a	0	0	1	1	1	1	P2RY1	purinergic receptor P2Y, G-protein coupled, 1
hsa-miR-208a	1	0	1	1	1	1	PCSK6	proprotein convertase subtilisin/kexin type 6
hsa-miR-208a	1	0	1	1	1	1	PPP2R1B	protein phosphatase 2, regulatory subunit A, beta
hsa-miR-208a	1	0	1	1	1	1	PVRL1	poliovirus receptor-related 1 (herpesvirus entry mediator C)
hsa-miR-208a	1	0	1	1	1	1	SALL1	sal-like 1 (Drosophila)
hsa-miR-208a	1	0	1	1	1	1	SKI	v-ski sarcoma viral oncogene homolog (avian)
hsa-miR-208a	1	0	1	1	1	1	SLC7A1	solute carrier family 7 (cationic amino acid transporter, y+ system), member 1
hsa-miR-208a	1	0	1	1	1	1	SMARCC1	SWI/SNF related, matrix associated, actin dependent regulator of chromatin, subfamily c, member 1
hsa-miR-208a	1	0	1	0	1	1	SOX11	SRY (sex determining region Y)-box 11
hsa-miR-208a	1	0	1	0	1	1	SEC62	SEC62 homolog (S. cerevisiae)
hsa-miR-208a	1	0	1	0	1	1	TSPYL1	TSPY-like 1
hsa-miR-208a	1	0	1	0	1	1	UBE2D2	ubiquitin-conjugating enzyme E2D 2
hsa-miR-208a	0	0	1	1	0	0	HIST1H2BC	histone cluster 1, H2bc
hsa-miR-208a	0	0	1	1	1	1	PIP5K1A	phosphatidylinositol-4-phosphate 5-kinase, type I, alpha
hsa-miR-208a	0	0	1	1	1	1	CHST1	carbohydrate (keratan sulfate Gal-6) sulfotransferase 1
hsa-miR-208a	1	0	1	0	1	1	CDK5R1	cyclin-dependent kinase 5, regulatory subunit 1 (p35)
hsa-miR-208a	0	0	1	1	1	1	PRPF4B	PRP4 pre-mRNA processing factor 4 homolog B (yeast)
hsa-miR-208a	1	0	1	0	1	1	MED14	mediator complex subunit 14
hsa-miR-208a	1	0	1	1	1	1	SOCS6	suppressor of cytokine signaling 6
hsa-miR-208a	1	0	1	0	1	1	AKAP6	A kinase (PRKA) anchor protein 6
hsa-miR-208a	1	0	1	0	1	1	PKNOX1	PBX/knotted 1 homeobox 1
hsa-miR-208a	1	0	1	1	1	1	RAB11A	RAB11A, member RAS oncogene family
hsa-miR-208a	0	0	1	1	0	0	ZW10	ZW10, kinetochore associated, homolog (Drosophila)
hsa-miR-208a	1	0	1	1	1	1	B4GALT5	UDP-Gal:betaGlcNAc beta 1,4- galactosyltransferase, polypeptide 5
hsa-miR-208a	1	0	1	1	1	1	ONECUT2	one cut homeobox 2
hsa-miR-208a	1	0	1	1	1	1	KIF23	kinesin family member 23
hsa-miR-208a	1	0	1	1	1	1	BMI1	BMI1 polycomb ring finger oncogene
hsa-miR-208a	1	0	1	0	1	1	CEBPD	CCAAT/enhancer binding protein (C/EBP), delta
hsa-miR-208a	1	0	1	1	1	1	GEM	GTP binding protein overexpressed in skeletal muscle
hsa-miR-208a	1	0	1	0	1	1	CCDC6	coiled-coil domain containing 6
hsa-miR-208a	1	0	1	1	1	1	AKT3	v-akt murine thymoma viral oncogene homolog 3 (protein kinase B, gamma)
hsa-miR-208a	0	0	1	0	1	1	POU3F2	POU class 3 homeobox 2
hsa-miR-208a	1	0	1	1	1	1	ST8SIA4	ST8 alpha-N-acetyl-neuraminide alpha-2,8-sialyltransferase 4
hsa-miR-208a	1	0	1	1	1	1	UST	uronyl-2-sulfotransferase
hsa-miR-208a	1	0	1	0	1	1	DCAF7	DDB1 and CUL4 associated factor 7
hsa-miR-208a	0	0	1	0	1	1	STAM2	signal transducing adaptor molecule (SH3 domain and ITAM motif) 2
hsa-miR-208a	1	0	1	0	1	1	HDAC4	histone deacetylase 4
hsa-miR-208a	0	0	1	1	1	1	MICU1	mitochondrial calcium uptake 1
hsa-miR-208a	0	0	1	1	1	1	NPC2	Niemann-Pick disease, type C2
hsa-miR-208a	0	0	1	1	1	1	NUDT3	nudix (nucleoside diphosphate linked moiety X)-type motif 3
hsa-miR-208a	0	0	1	1	0	0	HNRNPA0	heterogeneous nuclear ribonucleoprotein A0
hsa-miR-208a	0	0	1	1	1	1	IFI44L	interferon-induced protein 44-like
hsa-miR-208a	1	0	1	0	1	1	SLC5A3	solute carrier family 5 (sodium/myo-inositol cotransporter), member 3
hsa-miR-208a	1	0	1	1	1	1	NR4A3	nuclear receptor subfamily 4, group A, member 3
hsa-miR-208a	1	0	1	1	1	1	KLF12	Kruppel-like factor 12
hsa-miR-208a	0	0	1	1	1	1	ZNF212	zinc finger protein 212
hsa-miR-208a	1	0	1	0	1	1	MYO10	myosin X
hsa-miR-208a	0	0	1	0	1	1	TLL1	tolloid-like 1
hsa-miR-208a	0	0	1	1	1	1	SNX10	sorting nexin 10
hsa-miR-208a	1	0	1	1	1	1	SLC7A11	solute carrier family 7 (anionic amino acid transporter light chain, xc- system), member 11
hsa-miR-208a	1	0	1	1	1	1	LHX6	LIM homeobox 6
hsa-miR-208a	0	0	1	1	1	1	TAF5L	TAF5-like RNA polymerase II, p300/CBP-associated factor (PCAF)-associated factor, 65kDa
hsa-miR-208a	1	0	1	1	1	1	OTX1	orthodenticle homeobox 1
hsa-miR-208a	1	0	1	1	1	1	ERO1L	ERO1-like (S. cerevisiae)
hsa-miR-208a	0	0	1	1	1	1	HOXC4	homeobox C4
hsa-miR-208a	1	0	1	0	1	1	KIAA0232	KIAA0232
hsa-miR-208a	0	0	1	0	1	1	EPM2AIP1	EPM2A (laforin) interacting protein 1
hsa-miR-208a	1	0	1	1	1	1	NUAK1	NUAK family, SNF1-like kinase, 1
hsa-miR-208a	1	0	1	1	1	1	ZBTB5	zinc finger and BTB domain containing 5
hsa-miR-208a	1	0	1	1	1	1	SPAST	spastin
hsa-miR-208a	1	0	1	0	1	1	WDFY3	WD repeat and FYVE domain containing 3
hsa-miR-208a	1	0	1	0	1	1	PDS5B	PDS5, regulator of cohesion maintenance, homolog B (S. cerevisiae)
hsa-miR-208a	1	0	1	0	1	1	PEG10	paternally expressed 10
hsa-miR-208a	1	0	1	1	1	1	SMG1	smg-1 homolog, phosphatidylinositol 3-kinase-related kinase (C. elegans)
hsa-miR-208a	1	0	1	1	1	1	RCOR1	REST corepressor 1
hsa-miR-208a	0	0	1	1	1	1	FBXO28	F-box protein 28
hsa-miR-208a	1	0	1	0	1	1	SRGAP2	SLIT-ROBO Rho GTPase activating protein 2
hsa-miR-208a	1	0	1	0	1	1	OSBPL3	oxysterol binding protein-like 3
hsa-miR-208a	1	0	1	1	1	1	LTN1	listerin E3 ubiquitin protein ligase 1
hsa-miR-208a	0	0	1	1	1	1	TES	testis derived transcript (3 LIM domains)
hsa-miR-208a	1	0	1	1	1	1	UBE2J1	ubiquitin-conjugating enzyme E2, J1
hsa-miR-208a	1	0	1	1	1	1	RAB14	RAB14, member RAS oncogene family
hsa-miR-208a	1	0	1	0	1	1	CRIM1	cysteine rich transmembrane BMP regulator 1 (chordin-like)
hsa-miR-208a	0	0	1	1	1	1	AMBN	ameloblastin (enamel matrix protein)
hsa-miR-208a	1	0	1	0	1	1	RAB8B	RAB8B, member RAS oncogene family
hsa-miR-208a	1	0	1	0	1	1	KLHL3	kelch-like 3 (Drosophila)
hsa-miR-208a	1	0	1	1	1	1	SIX4	SIX homeobox 4
hsa-miR-208a	1	0	1	1	1	1	GALNT7	UDP-N-acetyl-alpha-D-galactosamine:polypeptide N-acetylgalactosaminyltransferase 7 (GalNAc-T7)
hsa-miR-208a	1	0	1	1	1	1	YTHDF1	YTH domain family, member 1
hsa-miR-208a	1	0	1	0	1	1	MARCH5	membrane-associated ring finger (C3HC4) 5
hsa-miR-208a	1	0	1	1	1	1	HIF1AN	hypoxia inducible factor 1, alpha subunit inhibitor
hsa-miR-208a	0	0	1	1	1	1	ZFP64	zinc finger protein 64 homolog (mouse)
hsa-miR-208a	0	0	1	1	1	1	AP5M1	adaptor-related protein complex 5, mu 1 subunit
hsa-miR-208a	1	0	1	1	0	0	HOXB6	homeobox B6
hsa-miR-208a	1	0	1	0	1	1	FAM190B	family with sequence similarity 190, member B
hsa-miR-208a	1	0	1	1	1	1	EPB41L4B	erythrocyte membrane protein band 4.1 like 4B
hsa-miR-208a	0	0	1	1	0	0	IL36G	interleukin 36, gamma
hsa-miR-208a	0	0	1	1	1	1	TMEM167B	transmembrane protein 167B
hsa-miR-208a	1	0	1	1	0	0	JPH3	junctophilin 3
hsa-miR-208a	1	0	1	0	1	1	NUFIP2	nuclear fragile X mental retardation protein interacting protein 2
hsa-miR-208a	1	0	1	1	1	1	TMEM35	transmembrane protein 35
hsa-miR-208a	0	0	1	1	1	1	DNAJC12	DnaJ (Hsp40) homolog, subfamily C, member 12
hsa-miR-208a	1	0	1	0	1	1	MCL1	myeloid cell leukemia sequence 1 (BCL2-related)
hsa-miR-208a	1	0	1	1	1	1	SEC24A	SEC24 family, member A (S. cerevisiae)
hsa-miR-208a	1	0	1	1	1	1	GPR88	G protein-coupled receptor 88
hsa-miR-208a	1	0	1	1	1	1	LRRC4	leucine rich repeat containing 4
hsa-miR-208a	1	0	1	1	1	1	YTHDC2	YTH domain containing 2
hsa-miR-208a	0	0	1	1	1	1	MARCKSL1	MARCKS-like 1
hsa-miR-208a	1	0	1	1	1	1	PSTPIP2	proline-serine-threonine phosphatase interacting protein 2
hsa-miR-208a	0	0	1	1	1	1	STEAP4	STEAP family member 4
hsa-miR-208a	0	0	1	1	1	1	SHCBP1	SHC SH2-domain binding protein 1
hsa-miR-208a	1	0	1	1	1	1	CPED1	cadherin-like and PC-esterase domain containing 1
hsa-miR-208a	1	0	1	1	1	1	KLHL18	kelch-like 18 (Drosophila)
hsa-miR-208a	0	0	1	0	1	1	PDGFD	platelet derived growth factor D
hsa-miR-208a	1	0	1	1	1	1	TNKS2	tankyrase, TRF1-interacting ankyrin-related ADP-ribose polymerase 2
hsa-miR-208a	1	0	1	0	1	1	C1orf21	chromosome 1 open reading frame 21
hsa-miR-208a	0	0	1	1	1	1	TRMT1L	tRNA methyltransferase 1 homolog (S. cerevisiae)-like
hsa-miR-208a	1	0	1	1	0	0	SCRT1	scratch homolog 1, zinc finger protein (Drosophila)
hsa-miR-208a	1	0	1	0	1	1	ITCH	itchy E3 ubiquitin protein ligase
hsa-miR-208a	1	0	1	0	1	1	SRSF8	serine/arginine-rich splicing factor 8
hsa-miR-208a	1	0	1	1	1	1	ARID5B	AT rich interactive domain 5B (MRF1-like)
hsa-miR-208a	1	0	1	0	1	1	FAR1	fatty acyl CoA reductase 1
hsa-miR-208a	1	0	1	1	1	1	SYVN1	synovial apoptosis inhibitor 1, synoviolin
hsa-miR-208a	0	0	1	1	1	1	DMRTC1	DMRT-like family C1
hsa-miR-208a	1	0	1	1	1	1	HIAT1	hippocampus abundant transcript 1
hsa-miR-208a	1	0	1	1	1	1	SLC45A3	solute carrier family 45, member 3
hsa-miR-208a	0	0	1	0	1	1	C9orf123	chromosome 9 open reading frame 123
hsa-miR-208a	1	0	1	1	1	1	BRWD1	bromodomain and WD repeat domain containing 1
hsa-miR-208a	1	0	1	1	1	1	MAL2	mal, T-cell differentiation protein 2 (gene/pseudogene)
hsa-miR-208a	0	0	1	1	1	1	CLIC6	chloride intracellular channel 6
hsa-miR-208a	1	0	1	1	1	1	ZNF280B	zinc finger protein 280B
hsa-miR-208a	1	0	1	0	1	1	SOCS4	suppressor of cytokine signaling 4
hsa-miR-208a	1	0	1	1	1	1	KLHL6	kelch-like 6 (Drosophila)
hsa-miR-208a	0	0	1	0	1	1	SYNPO2	synaptopodin 2
hsa-miR-208a	1	0	1	1	1	1	SPTSSA	serine palmitoyltransferase, small subunit A
hsa-miR-208a	0	0	1	1	1	1	PKD1L1	polycystic kidney disease 1 like 1
hsa-miR-208a	1	0	1	0	1	1	NUS1	nuclear undecaprenyl pyrophosphate synthase 1 homolog (S. cerevisiae)
hsa-miR-208a	1	0	1	1	1	1	BACE2	beta-site APP-cleaving enzyme 2
hsa-miR-208a	1	0	1	1	1	1	PPTC7	PTC7 protein phosphatase homolog (S. cerevisiae)
hsa-miR-208a	1	0	1	0	1	1	CNOT6L	CCR4-NOT transcription complex, subunit 6-like
hsa-miR-208a	1	0	1	1	1	1	FAM91A1	family with sequence similarity 91, member A1
hsa-miR-208a	0	0	1	1	1	1	SLFN5	schlafen family member 5
hsa-miR-208a	1	0	1	0	1	1	MTPN	myotrophin
hsa-miR-208a	0	0	1	1	1	1	TCEAL7	transcription elongation factor A (SII)-like 7
hsa-miR-208a	0	0	1	1	1	1	ERP27	endoplasmic reticulum protein 27
hsa-miR-208a	1	0	1	1	1	1	FGFBP3	fibroblast growth factor binding protein 3
hsa-miR-208a	1	0	1	1	1	1	TCTEX1D1	Tctex1 domain containing 1
hsa-miR-208a	1	0	1	1	1	1	PDIK1L	PDLIM1 interacting kinase 1 like
hsa-miR-208a	1	0	1	0	1	1	N4BP1	NEDD4 binding protein 1
hsa-miR-208a	1	0	1	1	1	1	IQCK	IQ motif containing K
hsa-miR-208a	1	0	1	1	1	1	LCORL	ligand dependent nuclear receptor corepressor-like
hsa-miR-208a	1	0	1	0	1	1	KLHDC1	kelch domain containing 1
hsa-miR-208a	0	0	1	1	1	1	FAM133A	family with sequence similarity 133, member A
hsa-miR-208a	1	0	1	0	1	1	SREK1IP1	SREK1-interacting protein 1
hsa-miR-208a	1	0	1	1	1	1	SOWAHA	sosondowah ankyrin repeat domain family member A
hsa-miR-208a	1	0	1	1	1	1	EXOC8	exocyst complex component 8
hsa-miR-208a	1	0	1	1	1	1	TMEM26	transmembrane protein 26
hsa-miR-208a	1	0	1	1	1	1	MTDH	metadherin
hsa-miR-208a	1	0	1	1	1	1	LRRTM1	leucine rich repeat transmembrane neuronal 1
hsa-miR-208a	1	0	1	1	1	1	ADAT2	adenosine deaminase, tRNA-specific 2
hsa-miR-208a	1	0	1	1	1	1	ARRDC4	arrestin domain containing 4
hsa-miR-208a	1	0	1	1	1	1	ZBTB41	zinc finger and BTB domain containing 41
hsa-miR-208a	0	0	1	1	0	0	DHRS4L2	dehydrogenase/reductase (SDR family) member 4 like 2
hsa-miR-208a	1	0	1	1	1	1	GPRIN3	GPRIN family member 3
hsa-miR-208a	0	0	1	1	1	1	EMB	embigin
hsa-miR-208a	1	0	1	1	1	1	PTGER3	prostaglandin E receptor 3 (subtype EP3)
hsa-miR-208a	1	0	1	1	1	1	E2F7	E2F transcription factor 7
hsa-miR-208a	0	0	1	0	1	1	FSD1L	fibronectin type III and SPRY domain containing 1-like
hsa-miR-208a	0	0	1	0	0	0	MIR155HG	MIR155 host gene (non-protein coding)
hsa-miR-208a	0	0	1	0	0	0	TTTY15	testis-specific transcript, Y-linked 15 (non-protein coding)
hsa-miR-208a	0	0	1	0	0	0	NXF4	nuclear RNA export factor 4 pseudogene
hsa-miR-208a	0	0	1	0	0	0	HOXA11-AS	HOXA11 antisense RNA
hsa-miR-208a	0	0	1	0	0	0	HAS2-AS1	HAS2 antisense RNA 1
hsa-miR-208a	0	0	1	0	0	0	GMCL1P1	germ cell-less, spermatogenesis associated 1 pseudogene 1
hsa-miR-208a	1	0	1	1	1	1	WIPF1	WAS/WASL interacting protein family, member 1
