# Supplementary material for: Profiling of Selected MicroRNAs in Proliferative Eutopic Endometrium of Women with Ovarian Endometriosis
Source: Biomed Res Int. 2015 Aug 20;2015:760698. doi: 10.1155/2015/760698 (PMC4558423; doi:10.1155/2015/760698)
Supplement: Supplementary file 1 — Table I: The names of miRNAs significantly differentially expressed between eutopic endometrium of patients with endometriosis vs eutopic endometrium of patients without endometriosis. Table II: The associations between miRNA and mRNA, which presents detailed results of the search of six major databases i.e targetscan, tarbase, miranda, mirbase, mirtarget2 and pictar. [file 760698.f1.zip › 760698.f1/Table II/hsa-miR-210.tsv]

miR	targetscan	tarbase	miranda	mirbase	mirtarget2	pictar	GeneSymbol	GeneName
hsa-miR-210	1	0	1	1	1	1	C11orf87	chromosome 11 open reading frame 87
hsa-miR-210	1	0	1	1	0	0	SCRT1	scratch homolog 1, zinc finger protein (Drosophila)
hsa-miR-210	1	0	1	0	1	1	KCMF1	potassium channel modulatory factor 1
hsa-miR-210	1	0	1	0	1	1	MLL2	myeloid/lymphoid or mixed-lineage leukemia 2
hsa-miR-210	1	0	1	1	1	1	DIMT1	DIM1 dimethyladenosine transferase 1 homolog (S. cerevisiae)
hsa-miR-210	1	0	1	0	1	1	BDNF	brain-derived neurotrophic factor
hsa-miR-210	1	0	1	1	1	1	NDUFA4	NADH dehydrogenase (ubiquinone) 1 alpha subcomplex, 4, 9kDa
hsa-miR-210	1	0	1	0	1	1	GIT2	G protein-coupled receptor kinase interacting ArfGAP 2
hsa-miR-210	1	0	1	0	1	1	SYNGAP1	synaptic Ras GTPase activating protein 1
hsa-miR-210	1	0	1	1	1	1	ISCU	iron-sulfur cluster scaffold homolog (E. coli)
hsa-miR-210	1	0	1	1	1	1	FAM73B	family with sequence similarity 73, member B
hsa-miR-210	1	0	1	0	1	1	ARMC1	armadillo repeat containing 1
hsa-miR-210	1	0	1	1	1	1	ZNF462	zinc finger protein 462
hsa-miR-210	1	0	1	1	1	1	C15orf52	chromosome 15 open reading frame 52
hsa-miR-210	1	0	1	1	1	1	ELFN2	extracellular leucine-rich repeat and fibronectin type III domain containing 2
hsa-miR-210	1	0	1	1	1	1	FAM222A	family with sequence similarity 222, member A
hsa-miR-210	1	1	1	1	0	0	EFNA3	ephrin-A3
hsa-miR-210	1	0	1	0	1	1	FAM116A	family with sequence similarity 116, member A
hsa-miR-210	1	0	1	1	1	1	NEUROD2	neuronal differentiation 2
hsa-miR-210	1	0	1	1	1	1	MID1IP1	MID1 interacting protein 1
hsa-miR-210	1	0	1	1	1	1	B4GALT5	UDP-Gal:betaGlcNAc beta 1,4- galactosyltransferase, polypeptide 5
hsa-miR-210	1	0	1	1	0	0	SRCAP	Snf2-related CREBBP activator protein
hsa-miR-210	1	0	1	1	0	0	RAPGEF2	Rap guanine nucleotide exchange factor (GEF) 2
hsa-miR-210	1	0	1	0	1	1	MAGI2	membrane associated guanylate kinase, WW and PDZ domain containing 2
hsa-miR-210	0	0	1	1	1	1	WDR47	WD repeat domain 47
hsa-miR-210	1	0	1	1	1	1	CPEB3	cytoplasmic polyadenylation element binding protein 3
hsa-miR-210	0	0	1	1	1	1	TBC1D30	TBC1 domain family, member 30
hsa-miR-210	1	0	1	1	1	1	SPIRE1	spire homolog 1 (Drosophila)
hsa-miR-210	1	0	1	1	1	1	ZMIZ1	zinc finger, MIZ-type containing 1
hsa-miR-210	1	0	1	0	1	1	KCTD16	potassium channel tetramerisation domain containing 16
hsa-miR-210	1	0	1	1	1	1	BAZ2B	bromodomain adjacent to zinc finger domain, 2B
hsa-miR-210	0	0	1	0	1	1	SETD5	SET domain containing 5
hsa-miR-210	1	0	1	0	1	1	RIMS1	regulating synaptic membrane exocytosis 1
hsa-miR-210	1	0	1	1	1	1	NAV2	neuron navigator 2
hsa-miR-210	0	0	1	1	1	1	C3orf15	chromosome 3 open reading frame 15
hsa-miR-210	1	0	1	1	1	1	TET2	tet methylcytosine dioxygenase 2
hsa-miR-210	1	0	1	1	1	1	RFX4	regulatory factor X, 4 (influences HLA class II expression)
hsa-miR-210	0	0	1	1	0	0	SSPO	SCO-spondin homolog (Bos taurus)
hsa-miR-210	1	1	1	1	1	1	BACE1	beta-site APP-cleaving enzyme 1
hsa-miR-210	0	0	1	0	1	1	ATR	ataxia telangiectasia and Rad3 related
hsa-miR-210	0	0	1	1	1	1	MAZ	MYC-associated zinc finger protein (purine-binding transcription factor)
hsa-miR-210	1	0	1	0	1	1	ETV1	ets variant 1
hsa-miR-210	0	0	1	0	1	1	NPY1R	neuropeptide Y receptor Y1
hsa-miR-210	0	0	1	1	1	1	TFRC	transferrin receptor (p90, CD71)
hsa-miR-210	0	0	1	1	1	1	PPP1R12C	protein phosphatase 1, regulatory subunit 12C
hsa-miR-210	0	0	1	1	0	0	EIF2B4	eukaryotic translation initiation factor 2B, subunit 4 delta, 67kDa
hsa-miR-210	0	0	1	1	0	0	ITGA2B	integrin, alpha 2b (platelet glycoprotein IIb of IIb/IIIa complex, antigen CD41)
hsa-miR-210	1	0	1	0	1	1	TBL1X	transducin (beta)-like 1X-linked
hsa-miR-210	1	0	1	1	1	1	EPB41	erythrocyte membrane protein band 4.1 (elliptocytosis 1, RH-linked)
hsa-miR-210	0	0	1	1	1	1	CHN1	chimerin (chimaerin) 1
hsa-miR-210	1	0	1	1	0	0	TNPO2	transportin 2
hsa-miR-210	1	0	1	1	1	1	MYT1L	myelin transcription factor 1-like
hsa-miR-210	1	0	1	1	1	1	MBNL2	muscleblind-like splicing regulator 2
hsa-miR-210	1	0	1	1	1	1	ERLIN1	ER lipid raft associated 1
hsa-miR-210	0	0	1	1	1	1	PCBP4	poly(rC) binding protein 4
hsa-miR-210	1	0	1	0	1	1	MAP4K4	mitogen-activated protein kinase kinase kinase kinase 4
hsa-miR-210	1	0	1	1	1	1	ZNF202	zinc finger protein 202
hsa-miR-210	1	0	1	1	1	1	C3orf18	chromosome 3 open reading frame 18
hsa-miR-210	1	0	1	1	1	1	TSC22D2	TSC22 domain family, member 2
hsa-miR-210	0	0	1	1	1	1	CELF1	CUGBP, Elav-like family member 1
hsa-miR-210	0	0	1	1	0	0	DAB1	disabled homolog 1 (Drosophila)
hsa-miR-210	1	0	1	1	1	1	ERGIC1	endoplasmic reticulum-golgi intermediate compartment (ERGIC) 1
hsa-miR-210	1	0	1	1	1	1	ABCA2	ATP-binding cassette, sub-family A (ABC1), member 2
hsa-miR-210	1	0	1	1	1	1	CALCOCO1	calcium binding and coiled-coil domain 1
hsa-miR-210	1	0	1	1	1	1	ST3GAL3	ST3 beta-galactoside alpha-2,3-sialyltransferase 3
hsa-miR-210	1	0	1	1	0	0	SEPT8	septin 8
hsa-miR-210	0	0	1	1	1	1	SAMD9L	sterile alpha motif domain containing 9-like
hsa-miR-210	1	0	1	1	1	1	IQCK	IQ motif containing K
hsa-miR-210	1	0	1	1	1	1	ADARB1	adenosine deaminase, RNA-specific, B1
hsa-miR-210	1	0	1	1	1	1	FLNC	filamin C, gamma
hsa-miR-210	1	0	1	1	1	1	SH2B3	SH2B adaptor protein 3
hsa-miR-210	1	0	1	1	1	1	SUCO	SUN domain containing ossification factor
hsa-miR-210	1	0	1	1	1	1	VAMP7	vesicle-associated membrane protein 7
hsa-miR-210	1	0	1	1	1	1	NRXN3	neurexin 3
hsa-miR-210	1	0	1	1	1	1	NOX4	NADPH oxidase 4
hsa-miR-210	0	0	1	1	1	1	SLC8A3	solute carrier family 8 (sodium/calcium exchanger), member 3
hsa-miR-210	1	0	1	1	1	1	PPP1R9A	protein phosphatase 1, regulatory subunit 9A
hsa-miR-210	1	0	1	1	1	1	AKAP2	A kinase (PRKA) anchor protein 2
hsa-miR-210	1	0	1	1	1	1	ENOX2	ecto-NOX disulfide-thiol exchanger 2
hsa-miR-210	0	0	1	1	1	1	SEMA5B	sema domain, seven thrombospondin repeats (type 1 and type 1-like), transmembrane domain (TM) and short cytoplasmic domain, (semaphorin) 5B
hsa-miR-210	0	0	1	1	1	1	STOX2	storkhead box 2
hsa-miR-210	1	0	1	1	1	1	PTBP3	polypyrimidine tract binding protein 3
hsa-miR-210	0	0	1	0	0	0	SOX2-OT	SOX2 overlapping transcript (non-protein coding)
hsa-miR-210	1	0	1	0	1	1	STK40	serine/threonine kinase 40
hsa-miR-210	0	0	1	0	1	1	ATXN1L	ataxin 1-like
hsa-miR-210	0	0	1	0	0	0	KIAA1671	KIAA1671
hsa-miR-210	0	0	1	1	1	1	CC2D2A	coiled-coil and C2 domain containing 2A
hsa-miR-210	0	0	1	0	1	1	FLJ22447	uncharacterized LOC400221
hsa-miR-210	1	0	1	1	1	1	FOXP1	forkhead box P1
hsa-miR-210	1	0	1	1	1	1	SLC38A1	solute carrier family 38, member 1
hsa-miR-210	0	0	1	0	0	0	KIAA0664L3	KIAA0664-like 3
hsa-miR-210	1	0	1	1	1	1	SGK1	serum/glucocorticoid regulated kinase 1
hsa-miR-210	1	0	1	1	1	1	DLGAP4	discs, large (Drosophila) homolog-associated protein 4
hsa-miR-210	0	0	1	0	0	0	LOC401242	uncharacterized LOC401242
hsa-miR-210	0	0	1	0	0	0	BTBD19	BTB (POZ) domain containing 19
hsa-miR-210	1	0	1	1	1	1	SORBS2	sorbin and SH3 domain containing 2
hsa-miR-210	1	0	1	0	1	1	NCAM1	neural cell adhesion molecule 1
hsa-miR-210	1	0	1	1	1	1	ANKRD49	ankyrin repeat domain 49
hsa-miR-210	0	0	1	0	0	0	LINC00301	long intergenic non-protein coding RNA 301
hsa-miR-210	1	0	1	1	1	1	TTC13	tetratricopeptide repeat domain 13
hsa-miR-210	1	0	1	1	1	1	STXBP5	syntaxin binding protein 5 (tomosyn)
hsa-miR-210	0	0	1	1	1	1	AIFM3	apoptosis-inducing factor, mitochondrion-associated, 3
hsa-miR-210	0	0	1	1	1	1	WBSCR17	Williams-Beuren syndrome chromosome region 17
hsa-miR-210	0	0	1	1	1	1	AES	amino-terminal enhancer of split
hsa-miR-210	0	0	1	1	1	1	SETD2	SET domain containing 2
hsa-miR-210	0	0	1	0	0	0	LOC284577	uncharacterized LOC284577
hsa-miR-210	1	0	1	1	1	1	CS	citrate synthase
hsa-miR-210	0	0	1	1	0	0	MAP7D1	MAP7 domain containing 1
hsa-miR-210	0	0	1	1	0	0	C11orf74	chromosome 11 open reading frame 74
hsa-miR-210	0	0	1	0	0	0	METTL21CP1	methyltransferase like 21C pseudogene 1
hsa-miR-210	1	0	1	1	1	1	TCEANC2	transcription elongation factor A (SII) N-terminal and central domain containing 2
hsa-miR-210	1	0	1	1	1	1	EPB41L1	erythrocyte membrane protein band 4.1-like 1
hsa-miR-210	0	0	1	0	0	0	LINC00293	long intergenic non-protein coding RNA 293
hsa-miR-210	1	0	1	1	1	1	HOOK1	hook homolog 1 (Drosophila)
hsa-miR-210	0	0	1	1	0	0	DCBLD1	discoidin, CUB and LCCL domain containing 1
hsa-miR-210	0	0	1	0	0	0	LOC338579	ankyrin repeat domain-containing protein 30B pseudogene
hsa-miR-210	1	0	1	1	1	1	NAP1L1	nucleosome assembly protein 1-like 1
hsa-miR-210	1	0	1	1	1	1	AGAP2	ArfGAP with GTPase domain, ankyrin repeat and PH domain 2
hsa-miR-210	0	0	1	1	1	1	ZDHHC15	zinc finger, DHHC-type containing 15
hsa-miR-210	1	0	1	0	1	1	KCNK2	potassium channel, subfamily K, member 2
hsa-miR-210	1	0	1	1	0	0	OSBPL5	oxysterol binding protein-like 5
hsa-miR-210	0	0	1	1	0	0	ZNHIT1	zinc finger, HIT-type containing 1
hsa-miR-210	1	0	1	1	1	1	SGSM2	small G protein signaling modulator 2
hsa-miR-210	0	0	1	1	1	1	SRPX	sushi-repeat containing protein, X-linked
hsa-miR-210	1	0	1	1	1	1	SACM1L	SAC1 suppressor of actin mutations 1-like (yeast)
hsa-miR-210	1	0	1	1	1	1	MFSD6	major facilitator superfamily domain containing 6
hsa-miR-210	1	0	1	0	1	1	YAF2	YY1 associated factor 2
hsa-miR-210	0	0	1	0	0	0	SHISA6	shisa homolog 6 (Xenopus laevis)
hsa-miR-210	1	0	1	1	1	1	AIF1L	allograft inflammatory factor 1-like
hsa-miR-210	0	0	1	1	0	0	WFIKKN1	WAP, follistatin/kazal, immunoglobulin, kunitz and netrin domain containing 1
hsa-miR-210	1	0	1	1	1	1	RBM24	RNA binding motif protein 24
hsa-miR-210	0	0	1	1	1	1	MRPL49	mitochondrial ribosomal protein L49
hsa-miR-210	0	0	1	0	0	0	LOC390660	FLJ00317 protein
hsa-miR-210	1	0	1	1	1	1	WDR20	WD repeat domain 20
hsa-miR-210	0	0	1	1	1	1	CCKBR	cholecystokinin B receptor
hsa-miR-210	1	0	1	1	1	1	PKNOX2	PBX/knotted 1 homeobox 2
hsa-miR-210	0	0	1	1	1	1	SRSF11	serine/arginine-rich splicing factor 11
hsa-miR-210	0	0	1	1	1	1	KIAA1841	KIAA1841
hsa-miR-210	1	0	1	1	1	1	MARCH7	membrane-associated ring finger (C3HC4) 7, E3 ubiquitin protein ligase
hsa-miR-210	1	0	1	1	1	1	IL17RD	interleukin 17 receptor D
hsa-miR-210	1	0	1	0	1	1	LMBR1	limb region 1 homolog (mouse)
hsa-miR-210	1	0	1	0	1	1	PHYHIPL	phytanoyl-CoA 2-hydroxylase interacting protein-like
hsa-miR-210	1	0	1	1	1	1	PPP3CA	protein phosphatase 3, catalytic subunit, alpha isozyme
hsa-miR-210	1	0	1	1	1	1	RCAN2	regulator of calcineurin 2
hsa-miR-210	1	0	1	1	1	1	DUSP16	dual specificity phosphatase 16
hsa-miR-210	0	0	1	1	1	1	CD209	CD209 molecule
hsa-miR-210	0	0	1	0	0	0	GRIK1-AS1	GRIK1 antisense RNA 1
hsa-miR-210	0	0	1	0	0	0	KGFLP1	fibroblast growth factor 7 pseudogene
hsa-miR-210	0	0	1	0	0	0	CLCN1	chloride channel, voltage-sensitive 1
hsa-miR-210	1	0	1	1	1	1	ANGPT1	angiopoietin 1
hsa-miR-210	1	0	1	1	1	1	CAMTA1	calmodulin binding transcription activator 1
hsa-miR-210	0	0	1	1	1	1	GCOM1	GRINL1A complex locus 1
hsa-miR-210	1	0	1	1	1	1	FGD4	FYVE, RhoGEF and PH domain containing 4
hsa-miR-210	0	0	1	1	1	1	KLK7	kallikrein-related peptidase 7
hsa-miR-210	1	0	1	1	1	1	ELOVL6	ELOVL fatty acid elongase 6
hsa-miR-210	1	0	1	1	1	1	POU2F2	POU class 2 homeobox 2
hsa-miR-210	1	0	1	1	1	1	HMGA1	high mobility group AT-hook 1
hsa-miR-210	0	0	1	0	0	0	LRRC14	leucine rich repeat containing 14
hsa-miR-210	0	0	1	0	1	1	GDE1	glycerophosphodiester phosphodiesterase 1
hsa-miR-210	0	0	1	1	1	1	KLF7	Kruppel-like factor 7 (ubiquitous)
hsa-miR-210	0	0	1	1	1	1	H2AFY	H2A histone family, member Y
hsa-miR-210	1	0	1	1	0	0	LRFN1	leucine rich repeat and fibronectin type III domain containing 1
hsa-miR-210	1	0	1	1	1	1	ELF4	E74-like factor 4 (ets domain transcription factor)
hsa-miR-210	1	0	1	1	1	1	SUZ12	suppressor of zeste 12 homolog (Drosophila)
hsa-miR-210	1	0	1	1	1	1	ZMAT4	zinc finger, matrin-type 4
hsa-miR-210	0	0	1	1	1	1	TMEM40	transmembrane protein 40
hsa-miR-210	0	0	1	1	0	0	FAM89B	family with sequence similarity 89, member B
hsa-miR-210	0	0	1	1	0	0	PRRG2	proline rich Gla (G-carboxyglutamic acid) 2
hsa-miR-210	0	0	1	0	0	0	EVPLL	envoplakin-like
hsa-miR-210	0	0	1	1	1	1	PIK3AP1	phosphoinositide-3-kinase adaptor protein 1
hsa-miR-210	1	0	1	1	1	1	DCLK2	doublecortin-like kinase 2
hsa-miR-210	1	0	1	1	1	1	DFFB	DNA fragmentation factor, 40kDa, beta polypeptide (caspase-activated DNase)
hsa-miR-210	0	0	1	0	0	0	LOC415056	uncharacterized LOC415056
hsa-miR-210	0	0	1	1	1	1	ZNF337	zinc finger protein 337
hsa-miR-210	0	0	1	0	0	0	FLJ10661	family with sequence similarity 86, member A pseudogene
hsa-miR-210	1	0	1	1	1	1	PEX5L	peroxisomal biogenesis factor 5-like
hsa-miR-210	1	0	1	1	1	1	HECTD2	HECT domain containing E3 ubiquitin protein ligase 2
hsa-miR-210	1	0	1	1	1	1	MEIS1	Meis homeobox 1
hsa-miR-210	0	0	1	0	0	0	CYP4F35P	cytochrome P450, family 4, subfamily F, polypeptide 35, pseudogene
hsa-miR-210	0	0	1	1	1	1	EFCAB13	EF-hand calcium binding domain 13
hsa-miR-210	0	0	1	1	0	0	ADAMTS13	ADAM metallopeptidase with thrombospondin type 1 motif, 13
hsa-miR-210	0	0	1	0	0	0	USP32P1	ubiquitin specific peptidase 32 pseudogene 1
hsa-miR-210	0	0	1	1	1	1	MGC57346	uncharacterized LOC401884
hsa-miR-210	1	0	1	1	1	1	SENP1	SUMO1/sentrin specific peptidase 1
hsa-miR-210	1	0	1	1	1	1	RECK	reversion-inducing-cysteine-rich protein with kazal motifs
hsa-miR-210	0	0	1	1	0	0	NSUN5P2	NOP2/Sun domain family, member 5 pseudogene 2
hsa-miR-210	1	0	1	0	1	1	SEMA4G	sema domain, immunoglobulin domain (Ig), transmembrane domain (TM) and short cytoplasmic domain, (semaphorin) 4G
hsa-miR-210	1	0	1	1	1	1	CCAR1	cell division cycle and apoptosis regulator 1
hsa-miR-210	1	0	1	1	1	1	INPP5A	inositol polyphosphate-5-phosphatase, 40kDa
hsa-miR-210	1	0	1	1	0	0	XRRA1	X-ray radiation resistance associated 1
hsa-miR-210	0	0	1	0	0	0	ZRANB2-AS1	ZRANB2 antisense RNA 1
hsa-miR-210	0	0	1	1	1	1	ABHD14B	abhydrolase domain containing 14B
hsa-miR-210	0	0	1	1	0	0	C8orf31	chromosome 8 open reading frame 31
hsa-miR-210	0	0	1	1	1	1	C3orf67	chromosome 3 open reading frame 67
hsa-miR-210	0	0	1	0	0	0	FAM106A	family with sequence similarity 106, member A
hsa-miR-210	0	0	1	1	1	1	TMEM52B	transmembrane protein 52B
hsa-miR-210	0	0	1	0	0	0	TP53TG3B	TP53 target 3B
hsa-miR-210	0	0	1	0	1	1	TP53TG3	TP53 target 3
hsa-miR-210	1	0	1	1	1	1	IL28RA	interleukin 28 receptor, alpha (interferon, lambda receptor)
hsa-miR-210	1	0	1	1	1	1	GABRB2	gamma-aminobutyric acid (GABA) A receptor, beta 2
hsa-miR-210	0	0	1	1	1	1	SLC25A35	solute carrier family 25, member 35
hsa-miR-210	1	0	1	1	1	1	NR3C2	nuclear receptor subfamily 3, group C, member 2
hsa-miR-210	1	0	1	1	1	1	ZNF827	zinc finger protein 827
hsa-miR-210	0	0	1	0	0	0	FAM27E3	family with sequence similarity 27, member E3
hsa-miR-210	0	0	1	0	0	0	FAM225B	family with sequence similarity 225, member B (non-protein coding)
hsa-miR-210	1	0	1	0	1	1	NFAT5	nuclear factor of activated T-cells 5, tonicity-responsive
hsa-miR-210	1	0	1	0	1	1	FAM196A	family with sequence similarity 196, member A
hsa-miR-210	0	0	1	0	0	0	FLJ39632	uncharacterized LOC642477
hsa-miR-210	1	0	1	1	1	1	SGCD	sarcoglycan, delta (35kDa dystrophin-associated glycoprotein)
hsa-miR-210	0	0	1	1	1	1	SLC12A8	solute carrier family 12 (potassium/chloride transporters), member 8
hsa-miR-210	1	0	1	1	1	1	DCAF5	DDB1 and CUL4 associated factor 5
hsa-miR-210	0	0	1	1	1	1	CCNT2	cyclin T2
hsa-miR-210	1	0	1	1	1	1	NFIB	nuclear factor I/B
hsa-miR-210	1	0	1	1	1	1	NAV1	neuron navigator 1
hsa-miR-210	1	0	1	0	1	1	IGF2BP3	insulin-like growth factor 2 mRNA binding protein 3
hsa-miR-210	1	0	1	1	1	1	SIN3A	SIN3 transcription regulator homolog A (yeast)
hsa-miR-210	0	0	1	0	1	1	CD59	CD59 molecule, complement regulatory protein
hsa-miR-210	1	0	1	0	0	0	IGLON5	IgLON family member 5
hsa-miR-210	0	0	1	1	0	0	H2AFY2	H2A histone family, member Y2
hsa-miR-210	0	0	1	1	1	1	TMEM53	transmembrane protein 53
hsa-miR-210	0	0	1	1	0	0	PSG8	pregnancy specific beta-1-glycoprotein 8
hsa-miR-210	0	0	1	1	0	0	CYGB	cytoglobin
hsa-miR-210	0	0	1	1	1	1	PISD	phosphatidylserine decarboxylase
hsa-miR-210	0	0	1	0	0	0	PRMT1	protein arginine methyltransferase 1
hsa-miR-210	1	0	1	1	1	1	ACTG1	actin, gamma 1
hsa-miR-210	0	0	1	0	0	0	C12orf75	chromosome 12 open reading frame 75
hsa-miR-210	1	0	1	0	1	1	PLK3	polo-like kinase 3
hsa-miR-210	1	0	1	1	1	1	WIPF1	WAS/WASL interacting protein family, member 1
hsa-miR-210	0	0	1	1	1	1	GNAS	GNAS complex locus
hsa-miR-210	1	0	1	1	1	1	BTBD10	BTB (POZ) domain containing 10
hsa-miR-210	1	0	1	1	1	1	NRN1	neuritin 1
hsa-miR-210	0	0	1	1	0	0	PLB1	phospholipase B1
hsa-miR-210	0	0	1	1	1	1	ACSF3	acyl-CoA synthetase family member 3
hsa-miR-210	1	0	1	1	1	1	PSAP	prosaposin
hsa-miR-210	0	0	1	1	0	0	ATP6V0C	ATPase, H+ transporting, lysosomal 16kDa, V0 subunit c
hsa-miR-210	1	0	1	1	0	0	SAP30BP	SAP30 binding protein
hsa-miR-210	0	0	1	0	0	0	LOC100132984	uncharacterized LOC100132984
hsa-miR-210	1	0	1	0	1	1	KIAA0240	KIAA0240
hsa-miR-210	0	0	1	1	1	1	SLC25A26	solute carrier family 25 (S-adenosylmethionine carrier), member 26
hsa-miR-210	1	0	1	0	1	1	KLHDC10	kelch domain containing 10
hsa-miR-210	0	0	1	1	1	1	ALDH3B1	aldehyde dehydrogenase 3 family, member B1
hsa-miR-210	0	0	1	0	0	0	CTSL1P2	cathepsin L1 pseudogene 2
hsa-miR-210	1	0	1	0	1	1	YES1	v-yes-1 Yamaguchi sarcoma viral oncogene homolog 1
hsa-miR-210	0	0	1	1	0	0	COL6A2	collagen, type VI, alpha 2
hsa-miR-210	1	0	1	1	1	1	TFAP2A	transcription factor AP-2 alpha (activating enhancer binding protein 2 alpha)
hsa-miR-210	0	0	1	1	1	1	HLA-G	major histocompatibility complex, class I, G
hsa-miR-210	0	0	1	0	1	1	TOR1A	torsin family 1, member A (torsin A)
hsa-miR-210	1	0	1	1	1	1	PMP22	peripheral myelin protein 22
hsa-miR-210	0	0	1	1	1	1	PTS	6-pyruvoyltetrahydropterin synthase
hsa-miR-210	1	0	1	1	1	1	CHM	choroideremia (Rab escort protein 1)
hsa-miR-210	0	0	1	1	1	1	PECAM1	platelet/endothelial cell adhesion molecule 1
hsa-miR-210	1	0	1	1	1	1	CSF1	colony stimulating factor 1 (macrophage)
hsa-miR-210	1	0	1	1	1	1	WLS	wntless homolog (Drosophila)
hsa-miR-210	0	0	1	1	1	1	STAG3L1	stromal antigen 3-like 1
hsa-miR-210	1	0	1	1	1	1	KCTD11	potassium channel tetramerisation domain containing 11
hsa-miR-210	1	0	1	1	1	1	ABLIM1	actin binding LIM protein 1
hsa-miR-210	0	0	1	1	1	1	AGMO	alkylglycerol monooxygenase
hsa-miR-210	1	0	1	0	1	1	IP6K1	inositol hexakisphosphate kinase 1
hsa-miR-210	0	0	1	1	0	0	CCT3	chaperonin containing TCP1, subunit 3 (gamma)
hsa-miR-210	1	0	1	1	1	1	CA7	carbonic anhydrase VII
hsa-miR-210	1	0	1	1	1	1	RUNX2	runt-related transcription factor 2
hsa-miR-210	1	0	1	1	1	1	PFKFB2	6-phosphofructo-2-kinase/fructose-2,6-biphosphatase 2
hsa-miR-210	1	0	1	0	1	1	TNRC6B	trinucleotide repeat containing 6B
hsa-miR-210	1	0	1	0	1	1	CELF2	CUGBP, Elav-like family member 2
hsa-miR-210	1	0	1	0	1	1	C3orf70	chromosome 3 open reading frame 70
hsa-miR-210	1	0	1	1	1	1	VEGFA	vascular endothelial growth factor A
hsa-miR-210	1	0	1	1	1	1	RUNX3	runt-related transcription factor 3
hsa-miR-210	1	0	1	0	1	1	SRGAP3	SLIT-ROBO Rho GTPase activating protein 3
hsa-miR-210	1	0	1	1	1	1	SCN1B	sodium channel, voltage-gated, type I, beta subunit
hsa-miR-210	1	0	1	1	1	1	DLX1	distal-less homeobox 1
hsa-miR-210	1	0	1	0	1	1	CCNL2	cyclin L2
hsa-miR-210	1	0	1	0	1	1	CREBZF	CREB/ATF bZIP transcription factor
hsa-miR-210	0	0	1	1	0	0	SSX4B	synovial sarcoma, X breakpoint 4B
hsa-miR-210	0	0	1	1	1	1	SEC24B	SEC24 family, member B (S. cerevisiae)
hsa-miR-210	1	0	1	0	1	1	TMEM237	transmembrane protein 237
hsa-miR-210	1	0	1	1	1	1	QSER1	glutamine and serine rich 1
hsa-miR-210	1	0	1	1	1	1	CREBBP	CREB binding protein
hsa-miR-210	1	0	1	1	1	1	FAM155A	family with sequence similarity 155, member A
hsa-miR-210	1	0	1	1	1	1	DGKG	diacylglycerol kinase, gamma 90kDa
hsa-miR-210	1	0	1	0	1	1	KLF9	Kruppel-like factor 9
hsa-miR-210	1	0	1	1	1	1	CHD1	chromodomain helicase DNA binding protein 1
hsa-miR-210	1	0	1	1	1	1	KLF6	Kruppel-like factor 6
hsa-miR-210	0	0	1	1	0	0	GPR39	G protein-coupled receptor 39
hsa-miR-210	1	0	1	1	1	1	BAAT	bile acid CoA: amino acid N-acyltransferase (glycine N-choloyltransferase)
hsa-miR-210	0	0	1	1	1	1	DSG1	desmoglein 1
hsa-miR-210	1	0	1	1	1	1	E2F3	E2F transcription factor 3
hsa-miR-210	0	0	1	1	1	1	HMGCS1	3-hydroxy-3-methylglutaryl-CoA synthase 1 (soluble)
hsa-miR-210	1	0	1	1	0	0	INHBB	inhibin, beta B
hsa-miR-210	1	0	1	1	1	1	ITGB8	integrin, beta 8
hsa-miR-210	1	0	1	1	0	0	JUP	junction plakoglobin
hsa-miR-210	1	0	1	1	1	1	NGFR	nerve growth factor receptor
hsa-miR-210	1	0	1	1	1	1	NPTX1	neuronal pentraxin I
hsa-miR-210	1	0	1	1	1	1	PPP1CB	protein phosphatase 1, catalytic subunit, beta isozyme
hsa-miR-210	1	0	1	1	1	1	PTPRK	protein tyrosine phosphatase, receptor type, K
hsa-miR-210	0	0	1	0	1	1	RAB3B	RAB3B, member RAS oncogene family
hsa-miR-210	1	0	1	0	1	1	RAP2B	RAP2B, member of RAS oncogene family
hsa-miR-210	1	0	1	0	1	1	ST6GAL1	ST6 beta-galactosamide alpha-2,6-sialyltranferase 1
hsa-miR-210	1	0	1	0	1	1	SLC6A1	solute carrier family 6 (neurotransmitter transporter, GABA), member 1
hsa-miR-210	0	0	1	1	0	0	SSX2	synovial sarcoma, X breakpoint 2
hsa-miR-210	0	0	1	1	1	1	STAT6	signal transducer and activator of transcription 6, interleukin-4 induced
hsa-miR-210	1	0	1	0	1	1	TAL1	T-cell acute lymphocytic leukemia 1
hsa-miR-210	1	0	1	1	1	1	DYRK2	dual-specificity tyrosine-(Y)-phosphorylation regulated kinase 2
hsa-miR-210	0	0	1	1	1	1	CHST1	carbohydrate (keratan sulfate Gal-6) sulfotransferase 1
hsa-miR-210	0	0	1	1	0	0	DCHS1	dachsous 1 (Drosophila)
hsa-miR-210	0	0	1	0	1	1	AP1S2	adaptor-related protein complex 1, sigma 2 subunit
hsa-miR-210	0	0	1	1	1	1	RAB27B	RAB27B, member RAS oncogene family
hsa-miR-210	1	0	1	0	1	1	SLC1A2	solute carrier family 1 (glial high affinity glutamate transporter), member 2
hsa-miR-210	1	0	1	0	1	1	ACVR1B	activin A receptor, type IB
hsa-miR-210	1	0	1	0	1	1	RUNX1T1	runt-related transcription factor 1; translocated to, 1 (cyclin D-related)
hsa-miR-210	1	0	1	1	1	1	EGR3	early growth response 3
hsa-miR-210	1	0	1	1	1	1	EPHB2	EPH receptor B2
hsa-miR-210	1	0	1	1	1	1	FOXD2	forkhead box D2
hsa-miR-210	1	0	1	0	1	1	ROCK2	Rho-associated, coiled-coil containing protein kinase 2
hsa-miR-210	1	0	1	1	1	1	ONECUT2	one cut homeobox 2
hsa-miR-210	1	0	1	1	1	1	CTNS	cystinosin, lysosomal cystine transporter
hsa-miR-210	0	0	1	0	1	1	DSC2	desmocollin 2
hsa-miR-210	1	0	1	1	1	1	JARID2	jumonji, AT rich interactive domain 2
hsa-miR-210	1	0	1	0	1	1	KRAS	v-Ki-ras2 Kirsten rat sarcoma viral oncogene homolog
hsa-miR-210	1	0	1	0	1	1	SEL1L	sel-1 suppressor of lin-12-like (C. elegans)
hsa-miR-210	1	0	1	0	1	1	NR1D2	nuclear receptor subfamily 1, group D, member 2
hsa-miR-210	0	0	1	1	0	0	GLI1	GLI family zinc finger 1
hsa-miR-210	1	0	1	1	1	1	NEFM	neurofilament, medium polypeptide
hsa-miR-210	0	0	1	1	1	1	SLC20A1	solute carrier family 20 (phosphate transporter), member 1
hsa-miR-210	1	0	1	1	1	1	HCN4	hyperpolarization activated cyclic nucleotide-gated potassium channel 4
hsa-miR-210	1	0	1	1	1	1	TLX1	T-cell leukemia homeobox 1
hsa-miR-210	1	0	1	1	1	1	INSIG1	insulin induced gene 1
hsa-miR-210	1	0	1	1	1	1	LAMP1	lysosomal-associated membrane protein 1
hsa-miR-210	0	0	1	1	1	1	SSX1	synovial sarcoma, X breakpoint 1
hsa-miR-210	0	0	1	1	0	0	PLXNC1	plexin C1
hsa-miR-210	0	0	1	1	1	1	RNF41	ring finger protein 41
hsa-miR-210	1	0	1	1	1	1	MMP16	matrix metallopeptidase 16 (membrane-inserted)
hsa-miR-210	1	0	1	0	1	1	HDAC4	histone deacetylase 4
hsa-miR-210	0	0	1	1	0	0	SNAPC5	small nuclear RNA activating complex, polypeptide 5, 19kDa
hsa-miR-210	1	0	1	1	1	1	DYNC1LI2	dynein, cytoplasmic 1, light intermediate chain 2
hsa-miR-210	1	0	1	1	1	1	NFATC1	nuclear factor of activated T-cells, cytoplasmic, calcineurin-dependent 1
hsa-miR-210	1	0	1	0	1	1	PPP1R2	protein phosphatase 1, regulatory (inhibitor) subunit 2
hsa-miR-210	1	0	1	1	1	1	DIAPH2	diaphanous homolog 2 (Drosophila)
hsa-miR-210	1	0	1	1	1	1	HIVEP2	human immunodeficiency virus type I enhancer binding protein 2
hsa-miR-210	1	0	1	1	1	1	KAT6A	K(lysine) acetyltransferase 6A
hsa-miR-210	1	0	1	1	1	1	MORF4L1	mortality factor 4 like 1
hsa-miR-210	1	0	1	0	1	1	SOX12	SRY (sex determining region Y)-box 12
hsa-miR-210	1	0	1	1	1	1	ABHD2	abhydrolase domain containing 2
hsa-miR-210	1	0	1	1	1	1	UTRN	utrophin
hsa-miR-210	0	0	1	0	1	1	ZXDB	zinc finger, X-linked, duplicated B
hsa-miR-210	1	0	1	1	1	1	PALM2-AKAP2	PALM2-AKAP2 readthrough
hsa-miR-210	0	0	1	1	1	1	HRH3	histamine receptor H3
hsa-miR-210	1	0	1	1	1	1	KLF12	Kruppel-like factor 12
hsa-miR-210	1	0	1	0	1	1	CASP8AP2	caspase 8 associated protein 2
hsa-miR-210	1	0	1	0	1	1	FZD4	frizzled family receptor 4
hsa-miR-210	1	0	1	1	1	1	RHOQ	ras homolog family member Q
hsa-miR-210	1	0	1	1	1	1	LAMP5	lysosomal-associated membrane protein family, member 5
hsa-miR-210	0	0	1	1	1	1	N6AMT1	N-6 adenine-specific DNA methyltransferase 1 (putative)
hsa-miR-210	0	0	1	1	1	1	UBQLN1	ubiquilin 1
hsa-miR-210	1	0	1	1	1	1	ZBTB43	zinc finger and BTB domain containing 43
hsa-miR-210	1	0	1	0	1	1	C16orf72	chromosome 16 open reading frame 72
hsa-miR-210	1	0	1	1	1	1	C11orf58	chromosome 11 open reading frame 58
hsa-miR-210	0	0	1	1	1	1	CAPN6	calpain 6
hsa-miR-210	0	0	1	1	1	1	TAF5L	TAF5-like RNA polymerase II, p300/CBP-associated factor (PCAF)-associated factor, 65kDa
hsa-miR-210	1	0	1	1	1	1	FAF2	Fas associated factor family member 2
hsa-miR-210	0	0	1	1	1	1	FRMPD4	FERM and PDZ domain containing 4
hsa-miR-210	1	0	1	0	1	1	SERTAD2	SERTA domain containing 2
hsa-miR-210	1	0	1	1	1	1	FCHSD2	FCH and double SH3 domains 2
hsa-miR-210	1	0	1	1	1	1	PLEKHA6	pleckstrin homology domain containing, family A member 6
hsa-miR-210	1	0	1	1	1	1	SORCS3	sortilin-related VPS10 domain containing receptor 3
hsa-miR-210	1	0	1	0	1	1	PEG10	paternally expressed 10
hsa-miR-210	1	0	1	1	1	1	PHF15	PHD finger protein 15
hsa-miR-210	1	0	1	0	1	1	ARHGEF12	Rho guanine nucleotide exchange factor (GEF) 12
hsa-miR-210	1	0	1	1	0	0	SMG5	smg-5 homolog, nonsense mediated mRNA decay factor (C. elegans)
hsa-miR-210	0	0	1	1	1	1	LEPROTL1	leptin receptor overlapping transcript-like 1
hsa-miR-210	1	0	1	1	1	1	CCDC28A	coiled-coil domain containing 28A
hsa-miR-210	1	0	1	0	1	1	MTMR9	myotubularin related protein 9
hsa-miR-210	1	0	1	1	1	1	MYRIP	myosin VIIA and Rab interacting protein
hsa-miR-210	1	0	1	1	1	1	CNRIP1	cannabinoid receptor interacting protein 1
hsa-miR-210	1	0	1	1	1	1	SLITRK5	SLIT and NTRK-like family, member 5
hsa-miR-210	0	0	1	1	0	0	GET4	golgi to ER traffic protein 4 homolog (S. cerevisiae)
hsa-miR-210	1	0	1	1	1	1	GPRC5B	G protein-coupled receptor, family C, group 5, member B
hsa-miR-210	0	0	1	1	1	1	AMBN	ameloblastin (enamel matrix protein)
hsa-miR-210	0	0	1	1	1	1	KDM3B	lysine (K)-specific demethylase 3B
hsa-miR-210	0	0	1	1	1	1	DEC1	deleted in esophageal cancer 1
hsa-miR-210	0	0	1	0	1	1	TRIM44	tripartite motif containing 44
hsa-miR-210	1	0	1	1	1	1	WDR6	WD repeat domain 6
hsa-miR-210	1	0	1	1	1	1	FAM178A	family with sequence similarity 178, member A
hsa-miR-210	1	0	1	1	1	1	LRRC8A	leucine rich repeat containing 8 family, member A
hsa-miR-210	1	0	1	0	1	1	MNT	MAX binding protein
hsa-miR-210	1	0	1	1	1	1	PITHD1	PITH (C-terminal proteasome-interacting domain of thioredoxin-like) domain containing 1
hsa-miR-210	0	0	1	1	1	1	PPP4R4	protein phosphatase 4, regulatory subunit 4
hsa-miR-210	1	0	1	1	1	1	CLDN1	claudin 1
hsa-miR-210	1	0	1	1	1	1	NTN4	netrin 4
hsa-miR-210	1	0	1	1	1	1	FAM60A	family with sequence similarity 60, member A
hsa-miR-210	0	0	1	1	1	1	KCNN2	potassium intermediate/small conductance calcium-activated channel, subfamily N, member 2
hsa-miR-210	1	0	1	1	1	1	TMEM35	transmembrane protein 35
hsa-miR-210	1	0	1	1	1	1	GPR88	G protein-coupled receptor 88
hsa-miR-210	1	0	1	1	1	1	GOLPH3	golgi phosphoprotein 3 (coat-protein)
hsa-miR-210	1	0	1	1	1	1	HIF3A	hypoxia inducible factor 3, alpha subunit
hsa-miR-210	0	0	1	1	1	1	HHIP	hedgehog interacting protein
hsa-miR-210	1	0	1	1	1	1	C1orf116	chromosome 1 open reading frame 116
hsa-miR-210	1	0	1	1	1	1	GID4	GID complex subunit 4, VID24 homolog (S. cerevisiae)
hsa-miR-210	0	0	1	1	1	1	GGNBP2	gametogenetin binding protein 2
hsa-miR-210	0	0	1	1	1	1	ZNF767	zinc finger family member 767
hsa-miR-210	1	0	1	0	1	1	EDEM3	ER degradation enhancer, mannosidase alpha-like 3
hsa-miR-210	1	0	1	1	1	1	CYB5B	cytochrome b5 type B (outer mitochondrial membrane)
hsa-miR-210	1	0	1	0	1	1	C1orf21	chromosome 1 open reading frame 21
hsa-miR-210	0	0	1	1	1	1	TRMT1L	tRNA methyltransferase 1 homolog (S. cerevisiae)-like
hsa-miR-210	0	0	1	1	1	1	SEH1L	SEH1-like (S. cerevisiae)
hsa-miR-210	1	0	1	1	1	1	GABARAPL1	GABA(A) receptor-associated protein like 1
hsa-miR-210	0	0	1	1	0	0	SLC4A11	solute carrier family 4, sodium borate transporter, member 11
hsa-miR-210	0	0	1	1	1	1	ANKRD27	ankyrin repeat domain 27 (VPS9 domain)
hsa-miR-210	1	0	1	1	1	1	ANTXR1	anthrax toxin receptor 1
hsa-miR-210	1	0	1	1	1	1	ZNRF1	zinc and ring finger 1, E3 ubiquitin protein ligase
hsa-miR-210	0	0	1	1	0	0	NICN1	nicolin 1
hsa-miR-210	1	0	1	1	1	1	HIATL1	hippocampus abundant transcript-like 1
hsa-miR-210	1	0	1	1	1	1	ARHGAP19	Rho GTPase activating protein 19
hsa-miR-210	1	0	1	1	1	1	STX1B	syntaxin 1B
hsa-miR-210	0	0	1	1	1	1	PLEKHG4B	pleckstrin homology domain containing, family G (with RhoGef domain) member 4B
hsa-miR-210	1	0	1	1	0	0	UNC5A	unc-5 homolog A (C. elegans)
hsa-miR-210	0	0	1	1	1	1	ADAMTS17	ADAM metallopeptidase with thrombospondin type 1 motif, 17
hsa-miR-210	1	0	1	1	1	1	TSTD2	thiosulfate sulfurtransferase (rhodanese)-like domain containing 2
hsa-miR-210	0	0	1	1	1	1	KCNH5	potassium voltage-gated channel, subfamily H (eag-related), member 5
hsa-miR-210	1	0	1	1	1	1	ATRN	attractin
hsa-miR-210	0	0	1	1	1	1	PPM1M	protein phosphatase, Mg2+/Mn2+ dependent, 1M
hsa-miR-210	0	0	1	1	0	0	NKX2-3	NK2 homeobox 3
hsa-miR-210	0	0	1	1	1	1	APOBEC3F	apolipoprotein B mRNA editing enzyme, catalytic polypeptide-like 3F
hsa-miR-210	0	0	1	1	1	1	ERP27	endoplasmic reticulum protein 27
hsa-miR-210	0	0	1	0	1	1	MAB21L3	mab-21-like 3 (C. elegans)
hsa-miR-210	1	0	1	1	1	1	SLC16A14	solute carrier family 16, member 14 (monocarboxylic acid transporter 14)
hsa-miR-210	1	0	1	1	1	1	HS6ST3	heparan sulfate 6-O-sulfotransferase 3
hsa-miR-210	0	0	1	1	1	1	REXO1L1	REX1, RNA exonuclease 1 homolog (S. cerevisiae)-like 1
hsa-miR-210	0	0	1	1	0	0	SSX6	synovial sarcoma, X breakpoint 6 (pseudogene)
hsa-miR-210	0	0	1	1	0	0	SSX4	synovial sarcoma, X breakpoint 4
hsa-miR-210	1	0	1	1	1	1	GRIK2	glutamate receptor, ionotropic, kainate 2
hsa-miR-210	1	0	1	1	0	0	KRTAP11-1	keratin associated protein 11-1
hsa-miR-210	1	0	1	1	1	1	ZADH2	zinc binding alcohol dehydrogenase domain containing 2
hsa-miR-210	0	0	1	0	1	1	HCG27	HLA complex group 27 (non-protein coding)
hsa-miR-210	1	0	1	1	1	1	NIN	ninein (GSK3B interacting protein)
hsa-miR-210	0	0	1	1	1	1	OLFML1	olfactomedin-like 1
hsa-miR-210	1	0	1	1	1	1	PAQR9	progestin and adipoQ receptor family member IX
hsa-miR-210	0	0	1	1	1	1	COL18A1-AS1	COL18A1 antisense RNA 1
hsa-miR-210	0	0	1	1	1	1	C8orf86	chromosome 8 open reading frame 86
hsa-miR-210	0	0	1	0	0	0	RAB9BP1	RAB9B, member RAS oncogene family pseudogene 1
hsa-miR-210	0	0	1	0	0	0	SCARNA9	small Cajal body-specific RNA 9
hsa-miR-210	0	0	1	0	0	0	ATXN8OS	ATXN8 opposite strand (non-protein coding)
hsa-miR-210	0	0	1	0	0	0	TOP1P1	topoisomerase (DNA) I pseudogene 1
hsa-miR-210	0	0	1	0	0	0	TPTE2P6	transmembrane phosphoinositide 3-phosphatase and tensin homolog 2 pseudogene 6
hsa-miR-210	0	0	1	0	0	0	HAS2-AS1	HAS2 antisense RNA 1
hsa-miR-210	1	0	1	1	0	0	KIAA1549L	KIAA1549-like
hsa-miR-210	1	0	1	0	1	1	NFIX	nuclear factor I/X (CCAAT-binding transcription factor)
hsa-miR-210	0	0	1	1	0	0	KIR2DL4	killer cell immunoglobulin-like receptor, two domains, long cytoplasmic tail, 4
hsa-miR-210	0	0	1	1	0	0	GPR17	G protein-coupled receptor 17
hsa-miR-210	1	0	1	1	1	1	STARD3NL	STARD3 N-terminal like
hsa-miR-210	0	0	1	1	1	1	KLRAP1	killer cell lectin-like receptor subfamily A pseudogene 1
hsa-miR-210	1	0	1	1	1	1	B4GALT7	xylosylprotein beta 1,4-galactosyltransferase, polypeptide 7
hsa-miR-210	0	0	1	1	1	1	TNIP3	TNFAIP3 interacting protein 3
hsa-miR-210	0	0	1	1	1	1	ENPP2	ectonucleotide pyrophosphatase/phosphodiesterase 2
hsa-miR-210	0	0	1	1	1	1	CD22	CD22 molecule
hsa-miR-210	1	0	1	1	1	1	PDZD4	PDZ domain containing 4
hsa-miR-210	0	0	1	1	1	1	P2RY10	purinergic receptor P2Y, G-protein coupled, 10
hsa-miR-210	1	0	1	1	0	0	ITGB4	integrin, beta 4
hsa-miR-210	0	0	0	1	0	0	NAT14	N-acetyltransferase 14 (GCN5-related, putative)
hsa-miR-210	0	0	0	1	1	1	RAB26	RAB26, member RAS oncogene family
hsa-miR-210	0	0	0	1	0	0	FGF22	fibroblast growth factor 22
hsa-miR-210	0	0	1	1	1	1	LRP5L	low density lipoprotein receptor-related protein 5-like
hsa-miR-210	0	0	1	1	0	0	GSTZ1	glutathione S-transferase zeta 1
hsa-miR-210	0	0	1	1	1	1	VRK1	vaccinia related kinase 1
hsa-miR-210	0	0	0	1	0	0	SRMS	src-related kinase lacking C-terminal regulatory tyrosine and N-terminal myristylation sites
hsa-miR-210	1	0	1	1	1	1	CHRDL1	chordin-like 1
hsa-miR-210	0	0	1	1	1	1	ATP12A	ATPase, H+/K+ transporting, nongastric, alpha polypeptide
hsa-miR-210	1	0	1	1	1	1	C16orf70	chromosome 16 open reading frame 70
hsa-miR-210	0	0	1	1	0	0	MT4	metallothionein 4
hsa-miR-210	1	0	1	1	0	0	RUVBL2	RuvB-like 2 (E. coli)
hsa-miR-210	0	0	1	1	0	0	PPP1R37	protein phosphatase 1, regulatory subunit 37
hsa-miR-210	0	0	0	1	0	0	RETN	resistin
hsa-miR-210	0	0	0	1	0	0	POLR2I	polymerase (RNA) II (DNA directed) polypeptide I, 14.5kDa
hsa-miR-210	1	0	1	1	1	1	SIPA1L3	signal-induced proliferation-associated 1 like 3
hsa-miR-210	1	0	0	1	0	0	P2RX1	purinergic receptor P2X, ligand-gated ion channel, 1
hsa-miR-210	0	0	0	1	1	1	ALDH3A1	aldehyde dehydrogenase 3 family, member A1
hsa-miR-210	0	0	0	1	0	0	HSD17B1	hydroxysteroid (17-beta) dehydrogenase 1
hsa-miR-210	1	0	1	1	1	1	HSPA8	heat shock 70kDa protein 8
hsa-miR-210	0	0	0	1	1	1	POU2AF1	POU class 2 associating factor 1
hsa-miR-210	0	0	1	1	1	1	RAD52	RAD52 homolog (S. cerevisiae)
hsa-miR-210	0	0	1	1	1	1	FANCE	Fanconi anemia, complementation group E
hsa-miR-210	1	0	0	1	1	1	KIF20A	kinesin family member 20A
hsa-miR-210	0	0	1	1	1	1	MRPS30	mitochondrial ribosomal protein S30
hsa-miR-210	0	0	0	1	1	1	HRH2	histamine receptor H2
hsa-miR-210	1	0	1	1	0	0	GNAT1	guanine nucleotide binding protein (G protein), alpha transducing activity polypeptide 1
hsa-miR-210	1	0	0	1	0	0	ABTB1	ankyrin repeat and BTB (POZ) domain containing 1
hsa-miR-210	0	0	1	1	0	0	GRIN3B	glutamate receptor, ionotropic, N-methyl-D-aspartate 3B
hsa-miR-210	1	0	1	1	1	1	PHTF1	putative homeodomain transcription factor 1
hsa-miR-210	0	0	0	1	0	0	OSCP1	organic solute carrier partner 1
hsa-miR-210	0	0	1	1	0	0	GSC	goosecoid homeobox
hsa-miR-210	0	0	1	1	1	1	CCDC53	coiled-coil domain containing 53
hsa-miR-210	0	0	0	1	1	1	FTSJ2	FtsJ RNA methyltransferase homolog 2 (E. coli)
hsa-miR-210	0	0	0	1	1	1	NEUROG3	neurogenin 3
hsa-miR-210	0	0	1	1	1	1	CDH26	cadherin 26
hsa-miR-210	0	0	1	1	0	0	LIPE	lipase, hormone-sensitive
hsa-miR-210	0	0	0	1	1	1	PSG4	pregnancy specific beta-1-glycoprotein 4
hsa-miR-210	0	0	1	1	1	1	PSG5	pregnancy specific beta-1-glycoprotein 5
hsa-miR-210	0	0	1	1	0	0	IRGC	immunity-related GTPase family, cinema
hsa-miR-210	1	0	1	1	1	1	EML2	echinoderm microtubule associated protein like 2
hsa-miR-210	1	0	1	1	0	0	BCL2L12	BCL2-like 12 (proline rich)
hsa-miR-210	0	0	0	1	1	1	SDF2	stromal cell-derived factor 2
hsa-miR-210	0	0	1	1	0	0	SIX1	SIX homeobox 1
hsa-miR-210	1	0	1	1	1	1	FBXL12	F-box and leucine-rich repeat protein 12
hsa-miR-210	0	0	0	1	0	0	SELO	selenoprotein O
hsa-miR-210	0	0	0	1	0	0	CLEC11A	C-type lectin domain family 11, member A
hsa-miR-210	0	0	1	1	1	1	CNGB1	cyclic nucleotide gated channel beta 1
hsa-miR-210	0	0	1	1	0	0	MAST1	microtubule associated serine/threonine kinase 1
hsa-miR-210	0	0	1	1	1	1	RABGAP1L	RAB GTPase activating protein 1-like
hsa-miR-210	0	0	0	1	0	0	DHX58	DEXH (Asp-Glu-X-His) box polypeptide 58
hsa-miR-210	0	0	1	1	0	0	ALLC	allantoicase
hsa-miR-210	0	0	1	1	1	1	CREB3L3	cAMP responsive element binding protein 3-like 3
hsa-miR-210	0	0	0	1	0	0	NSUN5	NOP2/Sun domain family, member 5
hsa-miR-210	1	0	1	1	1	1	MNX1	motor neuron and pancreas homeobox 1
hsa-miR-210	0	0	1	1	1	1	DEFB118	defensin, beta 118
hsa-miR-210	0	0	1	1	1	1	SH3BGRL	SH3 domain binding glutamic acid-rich protein like
hsa-miR-210	0	0	0	1	1	1	TMEM204	transmembrane protein 204
hsa-miR-210	1	0	0	1	1	1	ADCY7	adenylate cyclase 7
hsa-miR-210	0	0	1	1	1	1	HSD17B7	hydroxysteroid (17-beta) dehydrogenase 7
hsa-miR-210	0	0	1	1	0	0	CHRM3	cholinergic receptor, muscarinic 3
hsa-miR-210	1	0	0	1	0	0	PI4KA	phosphatidylinositol 4-kinase, catalytic, alpha
hsa-miR-210	0	0	1	1	0	0	CD180	CD180 molecule
hsa-miR-210	0	0	1	1	1	1	ZCCHC11	zinc finger, CCHC domain containing 11
hsa-miR-210	1	0	1	1	1	1	DTX1	deltex homolog 1 (Drosophila)
hsa-miR-210	1	0	1	1	1	1	TRAFD1	TRAF-type zinc finger domain containing 1
hsa-miR-210	0	0	1	1	0	0	TFCP2	transcription factor CP2
hsa-miR-210	0	0	1	1	1	1	EGR4	early growth response 4
hsa-miR-210	0	0	1	1	0	0	FHOD1	formin homology 2 domain containing 1
hsa-miR-210	1	0	0	1	1	1	TGFBRAP1	transforming growth factor, beta receptor associated protein 1
hsa-miR-210	0	0	1	1	1	1	CHST12	carbohydrate (chondroitin 4) sulfotransferase 12
hsa-miR-210	0	0	1	1	1	1	NUPL2	nucleoporin like 2
hsa-miR-210	1	0	1	1	0	0	NKX2-8	NK2 homeobox 8
hsa-miR-210	0	0	1	1	0	0	ADAMTS7	ADAM metallopeptidase with thrombospondin type 1 motif, 7
hsa-miR-210	0	0	0	1	0	0	CHAD	chondroadherin
hsa-miR-210	1	0	1	1	1	1	PDCL	phosducin-like
hsa-miR-210	0	0	1	1	0	0	YIPF3	Yip1 domain family, member 3
hsa-miR-210	0	0	0	1	0	0	GPR87	G protein-coupled receptor 87
hsa-miR-210	1	0	1	1	1	1	FOXN3	forkhead box N3
hsa-miR-210	0	0	1	1	1	1	ZNF397	zinc finger protein 397
hsa-miR-210	0	0	0	1	0	0	NUP133	nucleoporin 133kDa
hsa-miR-210	1	0	1	1	1	1	IPO5	importin 5
hsa-miR-210	0	0	0	1	1	1	COX10	COX10 homolog, cytochrome c oxidase assembly protein, heme A: farnesyltransferase (yeast)
hsa-miR-210	1	0	0	1	0	0	SERPINA3	serpin peptidase inhibitor, clade A (alpha-1 antiproteinase, antitrypsin), member 3
hsa-miR-210	0	0	0	1	0	0	MCM4	minichromosome maintenance complex component 4
hsa-miR-210	0	0	1	1	1	1	CSPP1	centrosome and spindle pole associated protein 1
hsa-miR-210	1	0	1	1	1	1	YY1	YY1 transcription factor
hsa-miR-210	0	0	1	1	0	0	PRR11	proline rich 11
hsa-miR-210	0	0	1	1	0	0	NPRL3	nitrogen permease regulator-like 3 (S. cerevisiae)
hsa-miR-210	0	0	0	1	0	0	GNA15	guanine nucleotide binding protein (G protein), alpha 15 (Gq class)
hsa-miR-210	1	0	1	1	0	0	NOMO3	NODAL modulator 3
hsa-miR-210	1	0	1	1	1	1	AKAP7	A kinase (PRKA) anchor protein 7
hsa-miR-210	0	0	1	1	1	1	EHD2	EH-domain containing 2
hsa-miR-210	0	0	0	1	0	0	ELANE	elastase, neutrophil expressed
hsa-miR-210	1	0	1	1	0	0	ARHGEF17	Rho guanine nucleotide exchange factor (GEF) 17
hsa-miR-210	0	0	1	1	1	1	DNAJC8	DnaJ (Hsp40) homolog, subfamily C, member 8
hsa-miR-210	1	0	1	1	1	1	GRIA2	glutamate receptor, ionotropic, AMPA 2
hsa-miR-210	0	0	0	1	0	0	FGF10	fibroblast growth factor 10
hsa-miR-210	0	0	1	1	1	1	FGFRL1	fibroblast growth factor receptor-like 1
hsa-miR-210	0	0	0	1	0	0	PPAP2A	phosphatidic acid phosphatase type 2A
hsa-miR-210	1	0	1	1	1	1	SOX30	SRY (sex determining region Y)-box 30
hsa-miR-210	0	0	0	1	0	0	SIL1	SIL1 homolog, endoplasmic reticulum chaperone (S. cerevisiae)
hsa-miR-210	1	0	1	1	1	1	TNPO3	transportin 3
hsa-miR-210	1	0	1	1	1	1	ANK1	ankyrin 1, erythrocytic
hsa-miR-210	0	0	1	1	1	1	SQLE	squalene epoxidase
hsa-miR-210	0	0	1	1	1	1	HYAL1	hyaluronoglucosaminidase 1
hsa-miR-210	0	0	1	1	1	1	ASCL1	achaete-scute complex homolog 1 (Drosophila)
hsa-miR-210	0	0	1	1	0	0	DUOXA1	dual oxidase maturation factor 1
hsa-miR-210	0	0	1	1	1	1	POLR2M	polymerase (RNA) II (DNA directed) polypeptide M
hsa-miR-210	0	0	1	1	0	0	COMMD4	COMM domain containing 4
hsa-miR-210	1	0	1	1	1	1	IGF1R	insulin-like growth factor 1 receptor
hsa-miR-210	1	0	0	1	0	0	UNC45A	unc-45 homolog A (C. elegans)
hsa-miR-210	0	0	0	1	0	0	SEPT12	septin 12
hsa-miR-210	0	0	1	1	0	0	DPEP2	dipeptidase 2
hsa-miR-210	0	0	0	1	1	1	MYO19	myosin XIX
hsa-miR-210	0	0	1	1	0	0	SPACA3	sperm acrosome associated 3
hsa-miR-210	0	0	0	1	0	0	PIK3R5	phosphoinositide-3-kinase, regulatory subunit 5
hsa-miR-210	0	0	0	1	0	0	ILVBL	ilvB (bacterial acetolactate synthase)-like
hsa-miR-210	0	0	0	1	1	1	ZNF45	zinc finger protein 45
hsa-miR-210	0	0	1	1	1	1	SCYL1	SCY1-like 1 (S. cerevisiae)
hsa-miR-210	0	0	1	1	1	1	CAPN10	calpain 10
hsa-miR-210	0	0	1	1	0	0	KLHDC4	kelch domain containing 4
hsa-miR-210	0	0	0	1	0	0	KIAA1751	KIAA1751
hsa-miR-210	1	0	0	1	0	0	SF3B4	splicing factor 3b, subunit 4, 49kDa
hsa-miR-210	0	0	0	1	1	1	ACP1	acid phosphatase 1, soluble
hsa-miR-210	0	0	1	1	1	1	MARCH4	membrane-associated ring finger (C3HC4) 4, E3 ubiquitin protein ligase
hsa-miR-210	0	0	1	1	1	1	CCBP2	chemokine binding protein 2
hsa-miR-210	0	0	1	1	0	0	PLA1A	phospholipase A1 member A
hsa-miR-210	1	0	1	1	0	0	RASSF1	Ras association (RalGDS/AF-6) domain family member 1
hsa-miR-210	1	0	1	1	1	1	FGF18	fibroblast growth factor 18
hsa-miR-210	0	0	0	1	0	0	KCNMB1	potassium large conductance calcium-activated channel, subfamily M, beta member 1
hsa-miR-210	0	0	0	1	0	0	KAAG1	kidney associated antigen 1
hsa-miR-210	0	0	0	1	0	0	PTGES2	prostaglandin E synthase 2
hsa-miR-210	0	0	0	1	1	1	IDI2	isopentenyl-diphosphate delta isomerase 2
hsa-miR-210	0	0	1	1	1	1	SLC43A1	solute carrier family 43, member 1
hsa-miR-210	0	0	1	1	0	0	TTC12	tetratricopeptide repeat domain 12
hsa-miR-210	1	0	1	1	0	0	LAMTOR1	late endosomal/lysosomal adaptor, MAPK and MTOR activator 1
hsa-miR-210	1	0	1	1	1	1	SIDT2	SID1 transmembrane family, member 2
hsa-miR-210	0	0	1	1	1	1	KIAA1755	KIAA1755
hsa-miR-210	0	0	1	1	0	0	VPS51	vacuolar protein sorting 51 homolog (S. cerevisiae)
hsa-miR-210	0	0	1	1	1	1	HIRIP3	HIRA interacting protein 3
hsa-miR-210	1	0	1	1	1	1	ANO4	anoctamin 4
hsa-miR-210	0	0	0	1	0	0	TAKR	aldo-keto reductase, truncated
hsa-miR-210	0	0	1	1	0	0	BICD1	bicaudal D homolog 1 (Drosophila)
hsa-miR-210	1	0	1	1	1	1	GPD1L	glycerol-3-phosphate dehydrogenase 1-like
hsa-miR-210	1	0	1	1	1	1	SCOC	short coiled-coil protein
hsa-miR-210	0	0	1	1	1	1	CETN3	centrin, EF-hand protein, 3
hsa-miR-210	0	0	0	1	1	1	CD8A	CD8a molecule
hsa-miR-210	1	0	1	1	1	1	FAM105B	family with sequence similarity 105, member B
hsa-miR-210	0	0	1	1	1	1	PANX3	pannexin 3
hsa-miR-210	1	0	1	1	1	1	NRGN	neurogranin (protein kinase C substrate, RC3)
hsa-miR-210	1	0	1	1	1	1	PDLIM3	PDZ and LIM domain 3
hsa-miR-210	0	0	1	1	0	0	TRMT44	tRNA methyltransferase 44 homolog (S. cerevisiae)
hsa-miR-210	0	0	1	1	1	1	CCDC146	coiled-coil domain containing 146
hsa-miR-210	1	0	1	1	1	1	TIAM1	T-cell lymphoma invasion and metastasis 1
hsa-miR-210	0	0	1	1	1	1	MPV17L	MPV17 mitochondrial membrane protein-like
hsa-miR-210	0	0	1	1	0	0	MX1	myxovirus (influenza virus) resistance 1, interferon-inducible protein p78 (mouse)
hsa-miR-210	1	0	1	1	0	0	UBN2	ubinuclein 2
hsa-miR-210	0	0	0	1	1	1	PEX10	peroxisomal biogenesis factor 10
hsa-miR-210	0	0	0	1	1	1	WDR66	WD repeat domain 66
hsa-miR-210	0	0	1	1	0	0	GPR153	G protein-coupled receptor 153
hsa-miR-210	0	0	1	1	0	0	VWA5B1	von Willebrand factor A domain containing 5B1
hsa-miR-210	1	0	1	1	1	1	ARHGAP17	Rho GTPase activating protein 17
hsa-miR-210	0	0	1	1	0	0	WNT9B	wingless-type MMTV integration site family, member 9B
hsa-miR-210	1	0	1	1	1	1	ACTC1	actin, alpha, cardiac muscle 1
hsa-miR-210	0	0	1	1	1	1	IRX6	iroquois homeobox 6
hsa-miR-210	1	0	1	1	1	1	CPNE2	copine II
hsa-miR-210	0	0	1	1	0	0	TNFRSF13C	tumor necrosis factor receptor superfamily, member 13C
hsa-miR-210	1	0	1	1	1	1	ZNF583	zinc finger protein 583
hsa-miR-210	0	0	0	1	0	0	KIR3DL3	killer cell immunoglobulin-like receptor, three domains, long cytoplasmic tail, 3
hsa-miR-210	0	0	1	1	0	0	KIR2DS4	killer cell immunoglobulin-like receptor, two domains, short cytoplasmic tail, 4
hsa-miR-210	0	0	0	1	1	1	KIR2DL1	killer cell immunoglobulin-like receptor, two domains, long cytoplasmic tail, 1
hsa-miR-210	0	0	1	1	0	0	KIR2DL3	killer cell immunoglobulin-like receptor, two domains, long cytoplasmic tail, 3
hsa-miR-210	1	0	1	1	0	0	HK3	hexokinase 3 (white cell)
hsa-miR-210	0	0	0	1	0	0	PPP1R16A	protein phosphatase 1, regulatory subunit 16A
hsa-miR-210	1	0	1	1	0	0	FAM108A1	family with sequence similarity 108, member A1
hsa-miR-210	0	0	1	1	1	1	PSME3	proteasome (prosome, macropain) activator subunit 3 (PA28 gamma; Ki)
hsa-miR-210	0	0	0	1	1	1	JOSD2	Josephin domain containing 2
hsa-miR-210	0	0	1	1	1	1	IP6K3	inositol hexakisphosphate kinase 3
hsa-miR-210	0	0	1	1	0	0	GNG3	guanine nucleotide binding protein (G protein), gamma 3
hsa-miR-210	0	0	1	1	1	1	MEGF6	multiple EGF-like-domains 6
hsa-miR-210	0	0	1	1	1	1	PEX13	peroxisomal biogenesis factor 13
hsa-miR-210	1	0	1	1	1	1	WDR92	WD repeat domain 92
hsa-miR-210	1	0	1	1	1	1	PPP3R1	protein phosphatase 3, regulatory subunit B, alpha
hsa-miR-210	0	0	1	1	1	1	IWS1	IWS1 homolog (S. cerevisiae)
hsa-miR-210	0	0	1	1	0	0	C3orf30	chromosome 3 open reading frame 30
hsa-miR-210	0	0	1	1	0	0	STT3B	STT3, subunit of the oligosaccharyltransferase complex, homolog B (S. cerevisiae)
hsa-miR-210	0	0	0	1	0	0	LRPAP1	low density lipoprotein receptor-related protein associated protein 1
hsa-miR-210	0	0	1	1	1	1	SAP30L	SAP30-like
hsa-miR-210	1	0	1	1	1	1	LMTK2	lemur tyrosine kinase 2
hsa-miR-210	0	0	1	1	1	1	NFIL3	nuclear factor, interleukin 3 regulated
hsa-miR-210	1	0	1	1	1	1	WDFY2	WD repeat and FYVE domain containing 2
hsa-miR-210	0	0	1	1	0	0	NOXRED1	NADP-dependent oxidoreductase domain containing 1
hsa-miR-210	0	0	1	1	1	1	AKR1E2	aldo-keto reductase family 1, member E2
hsa-miR-210	1	0	1	1	1	1	COL4A2	collagen, type IV, alpha 2
hsa-miR-210	0	0	1	1	0	0	LOC643923	uncharacterized LOC643923
hsa-miR-210	0	0	1	1	0	0	CYB5R2	cytochrome b5 reductase 2
hsa-miR-210	0	0	1	1	1	1	MYH11	myosin, heavy chain 11, smooth muscle
hsa-miR-210	0	0	1	1	0	0	PLK1	polo-like kinase 1
hsa-miR-210	0	0	1	1	1	1	MS4A8B	membrane-spanning 4-domains, subfamily A, member 8B
hsa-miR-210	1	0	1	1	1	1	C18orf34	chromosome 18 open reading frame 34
hsa-miR-210	0	0	0	1	0	0	GNG8	guanine nucleotide binding protein (G protein), gamma 8
hsa-miR-210	0	0	0	1	1	1	LAIR2	leukocyte-associated immunoglobulin-like receptor 2
hsa-miR-210	0	0	0	1	0	0	EVPL	envoplakin
hsa-miR-210	0	0	0	1	0	0	NXNL1	nucleoredoxin-like 1
hsa-miR-210	0	0	1	1	1	1	OGG1	8-oxoguanine DNA glycosylase
hsa-miR-210	0	0	1	1	0	0	ZNF467	zinc finger protein 467
hsa-miR-210	0	0	1	1	0	0	FNTA	farnesyltransferase, CAAX box, alpha
hsa-miR-210	0	0	0	1	0	0	C1QTNF4	C1q and tumor necrosis factor related protein 4
hsa-miR-210	0	0	0	1	1	1	PYDC1	PYD (pyrin domain) containing 1
hsa-miR-210	0	0	1	1	1	1	ARFRP1	ADP-ribosylation factor related protein 1
hsa-miR-210	0	0	1	1	1	1	SHCBP1	SHC SH2-domain binding protein 1
hsa-miR-210	0	0	0	1	0	0	ANKS3	ankyrin repeat and sterile alpha motif domain containing 3
hsa-miR-210	0	0	0	1	1	1	DRD5	dopamine receptor D5
hsa-miR-210	0	0	1	1	0	0	SLC6A19	solute carrier family 6 (neutral amino acid transporter), member 19
hsa-miR-210	1	0	1	1	0	0	INO80E	INO80 complex subunit E
hsa-miR-210	1	0	1	1	1	1	MAP6	microtubule-associated protein 6
hsa-miR-210	0	0	1	1	1	1	TPST1	tyrosylprotein sulfotransferase 1
hsa-miR-210	0	0	0	1	0	0	ASL	argininosuccinate lyase
hsa-miR-210	0	0	0	1	0	0	OR4K14	olfactory receptor, family 4, subfamily K, member 14
hsa-miR-210	0	0	1	1	0	0	ARMC4	armadillo repeat containing 4
hsa-miR-210	0	0	0	1	1	1	PTAFR	platelet-activating factor receptor
hsa-miR-210	0	0	0	1	1	1	NRG4	neuregulin 4
hsa-miR-210	1	0	1	1	1	1	GRM5	glutamate receptor, metabotropic 5
hsa-miR-210	0	0	0	1	0	0	CHRNB1	cholinergic receptor, nicotinic, beta 1 (muscle)
hsa-miR-210	0	0	1	1	1	1	HSPBAP1	HSPB (heat shock 27kDa) associated protein 1
hsa-miR-210	1	0	1	1	1	1	LGI3	leucine-rich repeat LGI family, member 3
hsa-miR-210	0	0	0	1	0	0	RLN3	relaxin 3
hsa-miR-210	0	0	1	1	1	1	C11orf63	chromosome 11 open reading frame 63
hsa-miR-210	0	0	1	1	1	1	FAM90A1	family with sequence similarity 90, member A1
hsa-miR-210	0	0	1	1	0	0	HPCAL1	hippocalcin-like 1
hsa-miR-210	0	0	0	1	0	0	CLDN15	claudin 15
hsa-miR-210	0	0	1	1	0	0	APOBEC3G	apolipoprotein B mRNA editing enzyme, catalytic polypeptide-like 3G
hsa-miR-210	1	0	1	1	1	1	DBN1	drebrin 1
hsa-miR-210	1	0	1	1	1	1	CTBP2	C-terminal binding protein 2
hsa-miR-210	0	0	0	1	0	0	XCR1	chemokine (C motif) receptor 1
hsa-miR-210	0	0	1	1	1	1	ZMIZ2	zinc finger, MIZ-type containing 2
hsa-miR-210	0	0	1	1	1	1	KLRC4	killer cell lectin-like receptor subfamily C, member 4
hsa-miR-210	1	0	1	1	0	0	ATG4D	autophagy related 4D, cysteine peptidase
hsa-miR-210	0	0	1	1	0	0	LMAN1L	lectin, mannose-binding, 1 like
hsa-miR-210	0	0	1	1	1	1	TRMT10C	tRNA methyltransferase 10 homolog C (S. cerevisiae)
hsa-miR-210	1	0	0	1	1	1	XXYLT1	xyloside xylosyltransferase 1
hsa-miR-210	0	0	1	1	1	1	TBC1D16	TBC1 domain family, member 16
hsa-miR-210	1	0	1	1	0	0	HDLBP	high density lipoprotein binding protein
hsa-miR-210	0	0	1	1	0	0	GLS2	glutaminase 2 (liver, mitochondrial)
hsa-miR-210	0	0	1	1	1	1	GLIS1	GLIS family zinc finger 1
hsa-miR-210	0	0	0	1	0	0	PODN	podocan
hsa-miR-210	1	0	0	1	1	1	TCHP	trichoplein, keratin filament binding
hsa-miR-210	0	0	0	1	0	0	ZNF585B	zinc finger protein 585B
hsa-miR-210	0	0	0	1	0	0	ZNF227	zinc finger protein 227
hsa-miR-210	1	0	1	1	1	1	LAMA3	laminin, alpha 3
hsa-miR-210	0	0	1	1	1	1	OSBPL2	oxysterol binding protein-like 2
hsa-miR-210	0	0	1	1	0	0	GAK	cyclin G associated kinase
hsa-miR-210	0	0	0	1	0	0	CSNK1G2-AS1	CSNK1G2 antisense RNA 1
hsa-miR-210	0	0	1	1	0	0	AGTRAP	angiotensin II receptor-associated protein
hsa-miR-210	1	0	0	1	1	1	ZHX2	zinc fingers and homeoboxes 2
hsa-miR-210	0	0	1	1	1	1	TSEN2	tRNA splicing endonuclease 2 homolog (S. cerevisiae)
hsa-miR-210	1	0	1	1	1	1	ZNF148	zinc finger protein 148
hsa-miR-210	0	0	1	1	0	0	EIF3B	eukaryotic translation initiation factor 3, subunit B
hsa-miR-210	0	0	1	1	1	1	IMP3	IMP3, U3 small nucleolar ribonucleoprotein, homolog (yeast)
hsa-miR-210	1	0	0	1	0	0	TNIP1	TNFAIP3 interacting protein 1
hsa-miR-210	1	0	1	1	1	1	COL4A3	collagen, type IV, alpha 3 (Goodpasture antigen)
hsa-miR-210	0	0	1	1	0	0	CARD9	caspase recruitment domain family, member 9
hsa-miR-210	0	0	1	1	1	1	C9orf78	chromosome 9 open reading frame 78
hsa-miR-210	1	0	1	1	1	1	PRIMA1	proline rich membrane anchor 1
hsa-miR-210	1	0	1	1	1	1	PDCD6	programmed cell death 6
hsa-miR-210	1	0	1	1	1	1	AHRR	aryl-hydrocarbon receptor repressor
hsa-miR-210	0	0	1	1	1	1	TIGD2	tigger transposable element derived 2
hsa-miR-210	0	0	1	1	0	0	ASCC1	activating signal cointegrator 1 complex subunit 1
hsa-miR-210	1	0	1	1	1	1	EBF3	early B-cell factor 3
hsa-miR-210	0	0	1	1	1	1	CD276	CD276 molecule
hsa-miR-210	1	0	1	1	0	0	UBASH3A	ubiquitin associated and SH3 domain containing A
hsa-miR-210	1	0	1	1	1	1	UBE2O	ubiquitin-conjugating enzyme E2O
hsa-miR-210	1	0	0	1	0	0	RUFY1	RUN and FYVE domain containing 1
hsa-miR-210	0	0	0	1	0	0	OTOS	otospiralin
hsa-miR-210	1	0	1	1	1	1	NT5DC1	5'-nucleotidase domain containing 1
hsa-miR-210	1	0	0	1	0	0	ZFPM1	zinc finger protein, multitype 1
hsa-miR-210	0	0	0	1	0	0	OR2T8	olfactory receptor, family 2, subfamily T, member 8
hsa-miR-210	1	0	1	1	0	0	PHF23	PHD finger protein 23
hsa-miR-210	0	0	1	1	1	1	CIRBP	cold inducible RNA binding protein
hsa-miR-210	0	0	0	1	0	0	TIGD5	tigger transposable element derived 5
hsa-miR-210	0	0	1	1	0	0	DNAJC4	DnaJ (Hsp40) homolog, subfamily C, member 4
hsa-miR-210	0	0	0	1	0	0	STAB1	stabilin 1
hsa-miR-210	0	0	1	1	0	0	SPACA4	sperm acrosome associated 4
hsa-miR-210	0	0	0	1	0	0	P2RY11	purinergic receptor P2Y, G-protein coupled, 11
hsa-miR-210	0	0	0	1	0	0	PPAN	peter pan homolog (Drosophila)
hsa-miR-210	0	0	0	1	0	0	PPAN-P2RY11	PPAN-P2RY11 readthrough
hsa-miR-210	0	0	1	1	1	1	MFAP3	microfibrillar-associated protein 3
hsa-miR-210	0	0	0	1	0	0	SPEM1	spermatid maturation 1
hsa-miR-210	0	0	0	1	0	0	AGXT2L2	alanine-glyoxylate aminotransferase 2-like 2
hsa-miR-210	0	0	1	1	1	1	FANCB	Fanconi anemia, complementation group B
hsa-miR-210	1	0	1	1	1	1	FBXL16	F-box and leucine-rich repeat protein 16
hsa-miR-210	0	0	1	1	0	0	PPIE	peptidylprolyl isomerase E (cyclophilin E)
hsa-miR-210	0	0	1	1	1	1	BAIAP3	BAI1-associated protein 3
hsa-miR-210	0	0	1	1	1	1	NUPR1	nuclear protein, transcriptional regulator, 1
hsa-miR-210	1	0	1	1	0	0	SMARCA2	SWI/SNF related, matrix associated, actin dependent regulator of chromatin, subfamily a, member 2
hsa-miR-210	0	0	0	1	0	0	FER1L4	fer-1-like 4 (C. elegans) pseudogene
hsa-miR-210	0	0	0	1	0	0	PLCB3	phospholipase C, beta 3 (phosphatidylinositol-specific)
hsa-miR-210	0	0	0	1	1	1	FBXW5	F-box and WD repeat domain containing 5
hsa-miR-210	0	0	0	1	1	1	ZNF274	zinc finger protein 274
hsa-miR-210	1	0	1	1	1	1	APLNR	apelin receptor
hsa-miR-210	0	0	1	1	0	0	EDDM3A	epididymal protein 3A
hsa-miR-210	0	0	1	1	1	1	PARPBP	PARP1 binding protein
hsa-miR-210	0	0	1	1	1	1	SDHA	succinate dehydrogenase complex, subunit A, flavoprotein (Fp)
hsa-miR-210	0	0	1	1	0	0	PHKG2	phosphorylase kinase, gamma 2 (testis)
hsa-miR-210	0	0	0	1	0	0	OR2V2	olfactory receptor, family 2, subfamily V, member 2
hsa-miR-210	0	0	0	1	0	0	TSPAN10	tetraspanin 10
hsa-miR-210	0	0	1	1	0	0	PCP4	Purkinje cell protein 4
hsa-miR-210	0	0	1	1	1	1	IP6K2	inositol hexakisphosphate kinase 2
hsa-miR-210	0	0	0	1	0	0	SH2D7	SH2 domain containing 7
hsa-miR-210	0	0	0	1	1	1	C1S	complement component 1, s subcomponent
hsa-miR-210	0	0	0	1	0	0	KRTAP5-3	keratin associated protein 5-3
hsa-miR-210	0	0	1	1	1	1	OAF	OAF homolog (Drosophila)
hsa-miR-210	0	0	0	1	0	0	DDX51	DEAD (Asp-Glu-Ala-Asp) box polypeptide 51
hsa-miR-210	0	0	0	1	0	0	NKX2-5	NK2 homeobox 5
hsa-miR-210	0	0	0	1	0	0	PTCHD3	patched domain containing 3
hsa-miR-210	1	0	1	1	0	0	ORAI1	ORAI calcium release-activated calcium modulator 1
hsa-miR-210	0	0	1	1	1	1	CEND1	cell cycle exit and neuronal differentiation 1
hsa-miR-210	0	0	1	1	0	0	HIST1H2AK	histone cluster 1, H2ak
hsa-miR-210	0	0	1	1	1	1	C1orf110	chromosome 1 open reading frame 110
hsa-miR-210	0	0	1	1	1	1	MINA	MYC induced nuclear antigen
hsa-miR-210	1	0	1	1	1	1	GJC1	gap junction protein, gamma 1, 45kDa
hsa-miR-210	0	0	0	1	1	1	WDR5B	WD repeat domain 5B
hsa-miR-210	0	0	0	1	0	0	DDX24	DEAD (Asp-Glu-Ala-Asp) box polypeptide 24
hsa-miR-210	0	0	0	1	0	0	KANK3	KN motif and ankyrin repeat domains 3
hsa-miR-210	0	0	0	1	1	1	IL3RA	interleukin 3 receptor, alpha (low affinity)
hsa-miR-210	0	0	0	1	0	0	CYP2F1	cytochrome P450, family 2, subfamily F, polypeptide 1
hsa-miR-210	0	0	0	1	0	0	FEZF1	FEZ family zinc finger 1
hsa-miR-210	0	0	1	1	0	0	HIST1H1B	histone cluster 1, H1b
hsa-miR-210	0	0	1	1	1	1	P4HA3	prolyl 4-hydroxylase, alpha polypeptide III
hsa-miR-210	1	0	1	1	1	1	OLFML2A	olfactomedin-like 2A
hsa-miR-210	0	0	1	1	0	0	DGKA	diacylglycerol kinase, alpha 80kDa
hsa-miR-210	0	0	1	1	0	0	EPGN	epithelial mitogen homolog (mouse)
hsa-miR-210	0	0	1	1	0	0	GPR19	G protein-coupled receptor 19
hsa-miR-210	0	0	0	1	0	0	PRHOXNB	parahox cluster neighbor
hsa-miR-210	0	0	1	1	1	1	SUMO3	SMT3 suppressor of mif two 3 homolog 3 (S. cerevisiae)
hsa-miR-210	0	0	0	1	1	1	CDHR1	cadherin-related family member 1
hsa-miR-210	0	0	0	1	0	0	LCK	lymphocyte-specific protein tyrosine kinase
hsa-miR-210	0	0	0	1	0	0	C19orf59	chromosome 19 open reading frame 59
hsa-miR-210	1	0	1	1	1	1	FAM120A	family with sequence similarity 120A
hsa-miR-210	0	0	1	1	0	0	ACTL7A	actin-like 7A
hsa-miR-210	1	0	0	1	0	0	EMID1	EMI domain containing 1
hsa-miR-210	0	0	0	1	1	1	TOM1L2	target of myb1-like 2 (chicken)
hsa-miR-210	0	0	0	1	1	1	TTF1	transcription termination factor, RNA polymerase I
hsa-miR-210	0	0	1	1	0	0	TPGS2	tubulin polyglutamylase complex subunit 2
hsa-miR-210	0	0	0	1	0	0	TAC4	tachykinin 4 (hemokinin)
hsa-miR-210	0	0	1	1	0	0	GSTA1	glutathione S-transferase alpha 1
hsa-miR-210	0	0	1	1	1	1	RASSF6	Ras association (RalGDS/AF-6) domain family member 6
hsa-miR-210	1	0	1	1	1	1	SF3B1	splicing factor 3b, subunit 1, 155kDa
hsa-miR-210	0	0	1	1	1	1	PRICKLE4	prickle homolog 4 (Drosophila)
hsa-miR-210	1	0	1	1	1	1	SPTB	spectrin, beta, erythrocytic
hsa-miR-210	0	0	0	1	1	1	ZDHHC4	zinc finger, DHHC-type containing 4
hsa-miR-210	0	0	1	1	0	0	SARNP	SAP domain containing ribonucleoprotein
hsa-miR-210	1	0	1	1	1	1	LRRC8D	leucine rich repeat containing 8 family, member D
hsa-miR-210	0	0	0	1	1	1	ELAC2	elaC homolog 2 (E. coli)
hsa-miR-210	0	0	0	1	0	0	LOC642131	putative V-set and immunoglobulin domain-containing-like protein IGHV4OR15-8-like
hsa-miR-210	0	0	1	1	0	0	SREBF1	sterol regulatory element binding transcription factor 1
hsa-miR-210	0	0	0	1	0	0	HELT	helt bHLH transcription factor
hsa-miR-210	0	0	0	1	0	0	NUDT6	nudix (nucleoside diphosphate linked moiety X)-type motif 6
hsa-miR-210	0	0	1	1	1	1	SLC26A3	solute carrier family 26, member 3
hsa-miR-210	0	0	0	1	0	0	TTC24	tetratricopeptide repeat domain 24
hsa-miR-210	1	0	1	1	1	1	RNF207	ring finger protein 207
hsa-miR-210	1	0	1	1	1	1	PPP1CC	protein phosphatase 1, catalytic subunit, gamma isozyme
hsa-miR-210	0	0	1	1	1	1	C15orf43	chromosome 15 open reading frame 43
hsa-miR-210	0	0	0	1	0	0	FAM25C	family with sequence similarity 25, member C
hsa-miR-210	0	0	0	1	0	0	FAM25B	family with sequence similarity 25, member B
hsa-miR-210	0	0	1	1	0	0	SENP8	SUMO/sentrin specific peptidase family member 8
hsa-miR-210	0	0	0	1	0	0	SERPINA12	serpin peptidase inhibitor, clade A (alpha-1 antiproteinase, antitrypsin), member 12
hsa-miR-210	0	0	1	1	0	0	SPRR2B	small proline-rich protein 2B
hsa-miR-210	0	0	0	1	1	1	FHIT	fragile histidine triad
hsa-miR-210	0	0	1	1	0	0	NYX	nyctalopin
hsa-miR-210	0	0	0	1	0	0	SCGB1C1	secretoglobin, family 1C, member 1
hsa-miR-210	0	0	0	1	0	0	RIBC2	RIB43A domain with coiled-coils 2
hsa-miR-210	0	0	0	1	0	0	TTLL1	tubulin tyrosine ligase-like family, member 1
hsa-miR-210	0	0	0	1	0	0	TMEM194B	transmembrane protein 194B
hsa-miR-210	0	0	0	1	1	1	B3GALT5	UDP-Gal:betaGlcNAc beta 1,3-galactosyltransferase, polypeptide 5
hsa-miR-210	0	0	1	1	1	1	DUSP28	dual specificity phosphatase 28
hsa-miR-210	0	0	1	1	1	1	PRSS16	protease, serine, 16 (thymus)
hsa-miR-210	0	0	1	1	1	1	MED22	mediator complex subunit 22
hsa-miR-210	1	0	0	1	0	0	CCDC17	coiled-coil domain containing 17
hsa-miR-210	1	0	0	1	1	1	COL9A3	collagen, type IX, alpha 3
hsa-miR-210	0	0	0	1	0	0	TAF6	TAF6 RNA polymerase II, TATA box binding protein (TBP)-associated factor, 80kDa
hsa-miR-210	0	0	0	1	0	0	RSC1A1	regulatory solute carrier protein, family 1, member 1
hsa-miR-210	0	0	0	1	0	0	TBC1D28	TBC1 domain family, member 28
hsa-miR-210	0	0	0	1	0	0	MUC4	mucin 4, cell surface associated
hsa-miR-210	0	0	0	1	1	1	F7	coagulation factor VII (serum prothrombin conversion accelerator)
hsa-miR-210	1	0	1	1	1	1	ATP2B3	ATPase, Ca++ transporting, plasma membrane 3
hsa-miR-210	0	0	1	1	1	1	TCF7L2	transcription factor 7-like 2 (T-cell specific, HMG-box)
hsa-miR-210	0	0	1	1	1	1	LDHB	lactate dehydrogenase B
hsa-miR-210	0	0	1	1	1	1	SLC37A1	solute carrier family 37 (glycerol-3-phosphate transporter), member 1
hsa-miR-210	0	0	1	1	0	0	ANAPC7	anaphase promoting complex subunit 7
hsa-miR-210	0	0	1	1	0	0	CUL9	cullin 9
hsa-miR-210	0	0	0	1	0	0	CAPN9	calpain 9
hsa-miR-210	0	0	0	1	0	0	CRYBA4	crystallin, beta A4
hsa-miR-210	0	0	1	1	0	0	EVL	Enah/Vasp-like
hsa-miR-210	1	0	0	1	0	0	LMX1B	LIM homeobox transcription factor 1, beta
hsa-miR-210	0	0	0	1	0	0	TRIM17	tripartite motif containing 17
hsa-miR-210	0	0	1	1	0	0	PRMT2	protein arginine methyltransferase 2
hsa-miR-210	0	0	1	1	0	0	FAM149A	family with sequence similarity 149, member A
hsa-miR-210	1	0	1	1	1	1	ATN1	atrophin 1
hsa-miR-210	0	0	1	1	1	1	ZMYM6	zinc finger, MYM-type 6
hsa-miR-210	1	0	1	1	1	1	DLK2	delta-like 2 homolog (Drosophila)
hsa-miR-210	0	0	1	1	0	0	GAS6	growth arrest-specific 6
hsa-miR-210	0	0	0	1	0	0	FAM25G	family with sequence similarity 25, member G
hsa-miR-210	0	0	1	1	1	1	SYNE2	spectrin repeat containing, nuclear envelope 2
hsa-miR-210	0	0	0	1	0	0	THOC5	THO complex 5
hsa-miR-210	0	0	0	1	1	1	ARSD	arylsulfatase D
hsa-miR-210	1	0	1	1	1	1	EPHA2	EPH receptor A2
hsa-miR-210	0	0	1	1	1	1	APOL2	apolipoprotein L, 2
hsa-miR-210	1	0	1	1	1	1	HELZ	helicase with zinc finger
hsa-miR-210	0	0	1	1	0	0	STIP1	stress-induced-phosphoprotein 1
hsa-miR-210	0	0	0	1	0	0	CCNB1IP1	cyclin B1 interacting protein 1, E3 ubiquitin protein ligase
hsa-miR-210	1	0	1	1	0	0	USP21	ubiquitin specific peptidase 21
hsa-miR-210	1	0	1	1	0	0	PDE3A	phosphodiesterase 3A, cGMP-inhibited
hsa-miR-210	0	0	1	1	0	0	DARC	Duffy blood group, chemokine receptor
hsa-miR-210	1	0	1	1	1	1	FBXL17	F-box and leucine-rich repeat protein 17
hsa-miR-210	0	0	0	1	0	0	LPPR3	lipid phosphate phosphatase-related protein type 3
hsa-miR-210	1	0	1	1	1	1	FAM84A	family with sequence similarity 84, member A
hsa-miR-210	0	0	0	1	0	0	PYY	peptide YY
hsa-miR-210	0	0	0	1	0	0	TP53TG3C	TP53 target 3C
hsa-miR-210	0	0	1	1	0	0	NPSR1	neuropeptide S receptor 1
hsa-miR-210	1	0	1	1	1	1	MEF2D	myocyte enhancer factor 2D
hsa-miR-210	1	0	1	1	1	1	FUT8	fucosyltransferase 8 (alpha (1,6) fucosyltransferase)
hsa-miR-210	1	0	1	1	1	1	MPC1	mitochondrial pyruvate carrier 1
hsa-miR-210	1	0	1	1	1	1	CACNA2D2	calcium channel, voltage-dependent, alpha 2/delta subunit 2
hsa-miR-210	0	0	1	1	0	0	RNF208	ring finger protein 208
hsa-miR-210	0	0	1	1	1	1	CHD1L	chromodomain helicase DNA binding protein 1-like
hsa-miR-210	1	0	1	1	0	0	DCTN1	dynactin 1
hsa-miR-210	0	0	0	1	0	0	SDCCAG8	serologically defined colon cancer antigen 8
hsa-miR-210	0	0	1	1	1	1	WDR64	WD repeat domain 64
hsa-miR-210	0	0	1	1	1	1	ACTA1	actin, alpha 1, skeletal muscle
hsa-miR-210	0	0	1	1	1	1	PARK2	parkinson protein 2, E3 ubiquitin protein ligase (parkin)
hsa-miR-210	1	0	1	1	1	1	MARK1	MAP/microtubule affinity-regulating kinase 1
hsa-miR-210	0	0	0	1	0	0	G0S2	G0/G1switch 2
hsa-miR-210	1	0	1	1	1	1	CR1	complement component (3b/4b) receptor 1 (Knops blood group)
hsa-miR-210	0	0	1	1	1	1	CD55	CD55 molecule, decay accelerating factor for complement (Cromer blood group)
hsa-miR-210	0	0	1	1	0	0	AVPR1B	arginine vasopressin receptor 1B
hsa-miR-210	0	0	1	1	1	1	MFSD4	major facilitator superfamily domain containing 4
hsa-miR-210	0	0	0	1	1	1	CFHR2	complement factor H-related 2
hsa-miR-210	0	0	0	1	1	1	STX11	syntaxin 11
hsa-miR-210	0	0	0	1	0	0	SF3B5	splicing factor 3b, subunit 5, 10kDa
hsa-miR-210	1	0	1	1	0	0	ABL2	v-abl Abelson murine leukemia viral oncogene homolog 2
hsa-miR-210	0	0	1	1	1	1	RASAL2	RAS protein activator like 2
hsa-miR-210	1	0	1	1	1	1	OLIG3	oligodendrocyte transcription factor 3
hsa-miR-210	0	0	1	1	1	1	FMO1	flavin containing monooxygenase 1
hsa-miR-210	0	0	0	1	0	0	METTL11B	methyltransferase like 11B
hsa-miR-210	1	0	1	1	1	1	SCYL3	SCY1-like 3 (S. cerevisiae)
hsa-miR-210	1	0	1	1	1	1	ATP1B1	ATPase, Na+/K+ transporting, beta 1 polypeptide
hsa-miR-210	0	0	1	1	1	1	PBX1	pre-B-cell leukemia homeobox 1
hsa-miR-210	1	0	1	1	1	1	RGS4	regulator of G-protein signaling 4
hsa-miR-210	0	0	0	1	0	0	C1orf111	chromosome 1 open reading frame 111
hsa-miR-210	0	0	1	1	1	1	DUSP12	dual specificity phosphatase 12
hsa-miR-210	0	0	1	1	1	1	CASQ1	calsequestrin 1 (fast-twitch, skeletal muscle)
hsa-miR-210	0	0	1	1	0	0	TMEM244	transmembrane protein 244
hsa-miR-210	0	0	1	1	0	0	PAOX	polyamine oxidase (exo-N4-amino)
hsa-miR-210	0	0	1	1	0	0	RPS27	ribosomal protein S27
hsa-miR-210	0	0	1	1	1	1	NPR1	natriuretic peptide receptor A/guanylate cyclase A (atrionatriuretic peptide receptor A)
hsa-miR-210	0	0	1	1	0	0	FANK1	fibronectin type III and ankyrin repeat domains 1
hsa-miR-210	0	0	0	1	1	1	SPRR2D	small proline-rich protein 2D
hsa-miR-210	0	0	0	1	0	0	UROS	uroporphyrinogen III synthase
hsa-miR-210	0	0	1	1	1	1	LCE3E	late cornified envelope 3E
hsa-miR-210	0	0	1	1	1	1	LHPP	phospholysine phosphohistidine inorganic pyrophosphate phosphatase
hsa-miR-210	0	0	1	1	1	1	HTRA1	HtrA serine peptidase 1
hsa-miR-210	1	0	1	1	1	1	ENSA	endosulfine alpha
hsa-miR-210	0	0	0	1	0	0	FAM108A2	Abhydrolase domain-containing protein FAM108A2
hsa-miR-210	0	0	1	1	1	1	BCAS2	breast carcinoma amplified sequence 2
hsa-miR-210	0	0	1	1	0	0	IKBKG	inhibitor of kappa light polypeptide gene enhancer in B-cells, kinase gamma
hsa-miR-210	0	0	1	1	0	0	CUEDC2	CUE domain containing 2
hsa-miR-210	1	0	1	1	1	1	PRPF38B	PRP38 pre-mRNA processing factor 38 (yeast) domain containing B
hsa-miR-210	0	0	1	1	0	0	C20orf195	chromosome 20 open reading frame 195
hsa-miR-210	0	0	1	1	1	1	NPM3	nucleophosmin/nucleoplasmin 3
hsa-miR-210	0	0	1	1	1	1	ABCD1	ATP-binding cassette, sub-family D (ALD), member 1
hsa-miR-210	0	0	0	1	1	1	KCNQ2	potassium voltage-gated channel, KQT-like subfamily, member 2
hsa-miR-210	0	0	1	1	1	1	NSDHL	NAD(P) dependent steroid dehydrogenase-like
hsa-miR-210	0	0	1	1	0	0	KHDC1	KH homology domain containing 1
hsa-miR-210	0	0	0	1	0	0	KHDC1L	KH homology domain containing 1-like
hsa-miR-210	0	0	0	1	0	0	C6orf57	chromosome 6 open reading frame 57
hsa-miR-210	0	0	1	1	0	0	SLC25A28	solute carrier family 25 (mitochondrial iron transporter), member 28
hsa-miR-210	0	0	1	1	1	1	SAMD13	sterile alpha motif domain containing 13
hsa-miR-210	0	0	0	1	0	0	LAMA5	laminin, alpha 5
hsa-miR-210	0	0	0	1	0	0	GSTA2	glutathione S-transferase alpha 2
hsa-miR-210	0	0	0	1	0	0	SPO11	SPO11 meiotic protein covalently bound to DSB homolog (S. cerevisiae)
hsa-miR-210	0	0	1	1	0	0	HEATR8	HEAT repeat containing 8
hsa-miR-210	0	0	1	1	1	1	TTC4	tetratricopeptide repeat domain 4
hsa-miR-210	1	0	1	1	0	0	MAN1B1	mannosidase, alpha, class 1B, member 1
hsa-miR-210	1	0	1	1	0	0	RABL6	RAB, member RAS oncogene family-like 6
hsa-miR-210	0	0	0	1	0	0	LCN8	lipocalin 8
hsa-miR-210	0	0	0	1	0	0	AGPAT2	1-acylglycerol-3-phosphate O-acyltransferase 2 (lysophosphatidic acid acyltransferase, beta)
hsa-miR-210	1	0	1	1	1	1	EPS15	epidermal growth factor receptor pathway substrate 15
hsa-miR-210	0	0	0	1	0	0	GBGT1	globoside alpha-1,3-N-acetylgalactosaminyltransferase 1
hsa-miR-210	1	0	1	1	1	1	RALGDS	ral guanine nucleotide dissociation stimulator
hsa-miR-210	0	0	0	1	0	0	CCDC24	coiled-coil domain containing 24
hsa-miR-210	1	0	1	1	1	1	SLC2A1	solute carrier family 2 (facilitated glucose transporter), member 1
hsa-miR-210	0	0	0	1	1	1	ZDHHC12	zinc finger, DHHC-type containing 12
hsa-miR-210	0	0	1	1	0	0	RBPJL	recombination signal binding protein for immunoglobulin kappa J region-like
hsa-miR-210	1	0	1	1	1	1	CAMK2G	calcium/calmodulin-dependent protein kinase II gamma
hsa-miR-210	0	0	1	1	1	1	PABPC1L	poly(A) binding protein, cytoplasmic 1-like
hsa-miR-210	0	0	1	1	0	0	URM1	ubiquitin related modifier 1
hsa-miR-210	0	0	1	1	0	0	WISP2	WNT1 inducible signaling pathway protein 2
hsa-miR-210	0	0	0	1	1	1	ADA	adenosine deaminase
hsa-miR-210	1	0	1	1	1	1	GDAP1L1	ganglioside induced differentiation associated protein 1-like 1
hsa-miR-210	1	0	1	1	0	0	ST6GALNAC6	ST6 (alpha-N-acetyl-neuraminyl-2,3-beta-galactosyl-1,3)-N-acetylgalactosaminide alpha-2,6-sialyltransferase 6
hsa-miR-210	1	0	1	1	1	1	POF1B	premature ovarian failure, 1B
hsa-miR-210	0	0	0	1	0	0	LRSAM1	leucine rich repeat and sterile alpha motif containing 1
hsa-miR-210	0	0	1	1	1	1	ZSCAN20	zinc finger and SCAN domain containing 20
hsa-miR-210	0	0	1	1	1	1	HPCA	hippocalcin
hsa-miR-210	1	0	1	1	1	1	GOLGA1	golgin A1
hsa-miR-210	0	0	0	1	0	0	WDR38	WD repeat domain 38
hsa-miR-210	1	0	1	1	1	1	NR6A1	nuclear receptor subfamily 6, group A, member 1
hsa-miR-210	1	0	1	1	0	0	CCDC28B	coiled-coil domain containing 28B
hsa-miR-210	1	0	1	1	1	1	COL16A1	collagen, type XVI, alpha 1
hsa-miR-210	0	0	1	1	1	1	MNF1	mitochondrial nucleoid factor 1
hsa-miR-210	0	0	1	1	1	1	SUSD1	sushi domain containing 1
hsa-miR-210	0	0	1	1	1	1	SYT15	synaptotagmin XV
hsa-miR-210	1	0	1	1	1	1	LYPLA2	lysophospholipase II
hsa-miR-210	0	0	0	1	0	0	OR10G8	olfactory receptor, family 10, subfamily G, member 8
hsa-miR-210	1	0	1	1	1	1	FGD1	FYVE, RhoGEF and PH domain containing 1
hsa-miR-210	1	0	1	1	1	1	ALDH4A1	aldehyde dehydrogenase 4 family, member A1
hsa-miR-210	0	0	0	1	0	0	CD300LD	CD300 molecule-like family member d
hsa-miR-210	0	0	1	1	1	1	IGSF21	immunoglobin superfamily, member 21
hsa-miR-210	0	0	0	1	0	0	C9orf129	chromosome 9 open reading frame 129
hsa-miR-210	1	0	1	1	1	1	PADI1	peptidyl arginine deiminase, type I
hsa-miR-210	0	0	1	1	1	1	ZBTB12	zinc finger and BTB domain containing 12
hsa-miR-210	1	0	1	1	1	1	MBD5	methyl-CpG binding domain protein 5
hsa-miR-210	0	0	1	1	1	1	SHC3	SHC (Src homology 2 domain containing) transforming protein 3
hsa-miR-210	1	0	1	1	1	1	DNAJC16	DnaJ (Hsp40) homolog, subfamily C, member 16
hsa-miR-210	1	0	1	1	0	0	MCCD1	mitochondrial coiled-coil domain 1
hsa-miR-210	0	0	0	1	1	1	FOXP3	forkhead box P3
hsa-miR-210	0	0	1	1	1	1	DHRS3	dehydrogenase/reductase (SDR family) member 3
hsa-miR-210	0	0	0	1	1	1	KLHL35	kelch-like 35 (Drosophila)
hsa-miR-210	0	0	0	1	1	1	SLC15A1	solute carrier family 15 (oligopeptide transporter), member 1
hsa-miR-210	0	0	1	1	0	0	KIAA2013	KIAA2013
hsa-miR-210	1	0	1	1	0	0	TIMM17B	translocase of inner mitochondrial membrane 17 homolog B (yeast)
hsa-miR-210	0	0	1	1	0	0	HAS1	hyaluronan synthase 1
hsa-miR-210	1	0	1	1	1	1	RBM3	RNA binding motif (RNP1, RRM) protein 3
hsa-miR-210	1	0	0	1	0	0	TBC1D8	TBC1 domain family, member 8 (with GRAM domain)
hsa-miR-210	0	0	1	1	0	0	SLC38A5	solute carrier family 38, member 5
hsa-miR-210	0	0	1	1	0	0	CST3	cystatin C
hsa-miR-210	0	0	0	1	0	0	EXOSC10	exosome component 10
hsa-miR-210	1	0	1	1	1	1	SOX21	SRY (sex determining region Y)-box 21
hsa-miR-210	0	0	1	1	0	0	TIMP1	TIMP metallopeptidase inhibitor 1
hsa-miR-210	0	0	1	1	1	1	C9orf85	chromosome 9 open reading frame 85
hsa-miR-210	0	0	1	1	1	1	CYP11B1	cytochrome P450, family 11, subfamily B, polypeptide 1
hsa-miR-210	0	0	0	1	0	0	ITGA8	integrin, alpha 8
hsa-miR-210	1	0	1	1	1	1	NEK3	NIMA (never in mitosis gene a)-related kinase 3
hsa-miR-210	0	0	0	1	0	0	C20orf94	chromosome 20 open reading frame 94
hsa-miR-210	0	0	1	1	0	0	C1orf86	chromosome 1 open reading frame 86
hsa-miR-210	0	0	0	1	0	0	CDK11B	cyclin-dependent kinase 11B
hsa-miR-210	0	0	1	1	1	1	LEAP2	liver expressed antimicrobial peptide 2
hsa-miR-210	0	0	0	1	0	0	GALT	galactose-1-phosphate uridylyltransferase
hsa-miR-210	0	0	1	1	1	1	MCM8	minichromosome maintenance complex component 8
hsa-miR-210	0	0	1	1	1	1	VIT	vitrin
hsa-miR-210	1	0	1	1	1	1	SH3KBP1	SH3-domain kinase binding protein 1
hsa-miR-210	1	0	1	1	1	1	SIN3B	SIN3 transcription regulator homolog B (yeast)
hsa-miR-210	0	0	0	1	0	0	IZUMO3	IZUMO family member 3
hsa-miR-210	0	0	0	1	0	0	LOC100131831	uncharacterized LOC100131831
hsa-miR-210	1	0	1	1	1	1	FRY	furry homolog (Drosophila)
hsa-miR-210	0	0	1	1	1	1	PXDC1	PX domain containing 1
hsa-miR-210	0	0	0	1	0	0	AVP	arginine vasopressin
hsa-miR-210	0	0	1	1	0	0	UMODL1	uromodulin-like 1
hsa-miR-210	0	0	1	1	0	0	NQO2	NAD(P)H dehydrogenase, quinone 2
hsa-miR-210	0	0	0	1	0	0	LOC100131878	uncharacterized LOC100131878
hsa-miR-210	0	0	0	1	1	1	SH3BGR	SH3 domain binding glutamic acid-rich protein
hsa-miR-210	0	0	1	1	0	0	CCDC171	coiled-coil domain containing 171
hsa-miR-210	1	0	1	1	1	1	CDKN1C	cyclin-dependent kinase inhibitor 1C (p57, Kip2)
hsa-miR-210	0	0	0	1	0	0	LOC100128946	uncharacterized LOC100128946
hsa-miR-210	1	0	0	1	1	1	CDX2	caudal type homeobox 2
hsa-miR-210	0	0	0	1	1	1	PDX1	pancreatic and duodenal homeobox 1
hsa-miR-210	0	0	1	1	1	1	CD99	CD99 molecule
hsa-miR-210	1	0	0	1	1	1	NT5C1B	5'-nucleotidase, cytosolic IB
hsa-miR-210	0	0	0	1	1	1	RDH14	retinol dehydrogenase 14 (all-trans/9-cis/11-cis)
hsa-miR-210	0	0	1	1	0	0	NOMO2	NODAL modulator 2
hsa-miR-210	1	0	1	1	1	1	GREB1	growth regulation by estrogen in breast cancer 1
hsa-miR-210	1	0	1	1	1	1	RALGAPA1	Ral GTPase activating protein, alpha subunit 1 (catalytic)
hsa-miR-210	0	0	1	1	0	0	CHEK2	checkpoint kinase 2
hsa-miR-210	0	0	0	1	0	0	FAM90A7P	putative protein FAM90A7
hsa-miR-210	0	0	0	1	0	0	MRPL36	mitochondrial ribosomal protein L36
hsa-miR-210	0	0	1	1	1	1	FAHD1	fumarylacetoacetate hydrolase domain containing 1
hsa-miR-210	0	0	0	1	1	1	RBMY1E	RNA binding motif protein, Y-linked, family 1, member E
hsa-miR-210	0	0	0	1	1	1	RBMY1D	RNA binding motif protein, Y-linked, family 1, member D
hsa-miR-210	0	0	0	1	0	0	IGLL3P	immunoglobulin lambda-like polypeptide 3, pseudogene
hsa-miR-210	0	0	0	1	1	1	RNF212	ring finger protein 212
hsa-miR-210	0	0	1	1	0	0	LIPI	lipase, member I
hsa-miR-210	0	0	1	1	0	0	TSNAXIP1	translin-associated factor X interacting protein 1
hsa-miR-210	0	0	0	1	0	0	FAM159B	family with sequence similarity 159, member B
hsa-miR-210	0	0	0	1	1	1	C17orf64	chromosome 17 open reading frame 64
hsa-miR-210	0	0	1	1	1	1	IGF2	insulin-like growth factor 2 (somatomedin A)
hsa-miR-210	1	0	1	0	1	1	CACNA1C	calcium channel, voltage-dependent, L type, alpha 1C subunit
hsa-miR-210	0	0	1	1	1	1	METTL13	methyltransferase like 13
hsa-miR-210	1	0	1	1	1	1	C10orf114	chromosome 10 open reading frame 114
hsa-miR-210	0	0	1	1	1	1	GEMIN8	gem (nuclear organelle) associated protein 8
hsa-miR-210	0	0	1	1	1	1	MSANTD1	Myb/SANT-like DNA-binding domain containing 1
hsa-miR-210	1	0	1	0	1	1	ALDH5A1	aldehyde dehydrogenase 5 family, member A1
hsa-miR-210	1	0	1	1	1	1	KPNA1	karyopherin alpha 1 (importin alpha 5)
hsa-miR-210	1	0	1	1	1	1	CORO2B	coronin, actin binding protein, 2B
hsa-miR-210	1	0	1	0	1	1	ATP11A	ATPase, class VI, type 11A
hsa-miR-210	0	0	1	1	1	1	C1orf212	chromosome 1 open reading frame 212
hsa-miR-210	1	0	1	1	1	1	SLC35G1	solute carrier family 35, member G1
hsa-miR-210	1	0	1	1	1	1	SPRED2	sprouty-related, EVH1 domain containing 2
hsa-miR-210	1	0	1	1	1	1	HOXA3	homeobox A3
hsa-miR-210	0	0	1	0	1	1	CCDC97	coiled-coil domain containing 97
hsa-miR-210	1	0	1	0	1	1	MDGA1	MAM domain containing glycosylphosphatidylinositol anchor 1
