# Supplementary material for: Profiling of Selected MicroRNAs in Proliferative Eutopic Endometrium of Women with Ovarian Endometriosis
Source: Biomed Res Int. 2015 Aug 20;2015:760698. doi: 10.1155/2015/760698 (PMC4558423; doi:10.1155/2015/760698)
Supplement: Supplementary file 1 — Table I: The names of miRNAs significantly differentially expressed between eutopic endometrium of patients with endometriosis vs eutopic endometrium of patients without endometriosis. Table II: The associations between miRNA and mRNA, which presents detailed results of the search of six major databases i.e targetscan, tarbase, miranda, mirbase, mirtarget2 and pictar. [file 760698.f1.zip › 760698.f1/Table II/hsa-miR-216b.tsv]

miR	targetscan	tarbase	miranda	mirbase	mirtarget2	pictar	GeneSymbol	GeneName
hsa-miR-216b	1	0	1	1	1	1	SETD3	SET domain containing 3
hsa-miR-216b	1	0	1	0	1	1	AKAP6	A kinase (PRKA) anchor protein 6
hsa-miR-216b	1	0	1	1	1	1	PTBP1	polypyrimidine tract binding protein 1
hsa-miR-216b	1	0	1	0	1	1	HTT	huntingtin
hsa-miR-216b	1	0	1	1	1	1	ASH1L	ash1 (absent, small, or homeotic)-like (Drosophila)
hsa-miR-216b	1	0	1	1	1	1	EBF1	early B-cell factor 1
hsa-miR-216b	1	0	1	1	1	1	CDR2L	cerebellar degeneration-related protein 2-like
hsa-miR-216b	1	0	1	1	1	1	CLK4	CDC-like kinase 4
hsa-miR-216b	1	0	1	1	1	1	KIAA2018	KIAA2018
hsa-miR-216b	1	0	1	0	1	1	KIAA0240	KIAA0240
hsa-miR-216b	1	0	1	0	1	1	HS3ST3B1	heparan sulfate (glucosamine) 3-O-sulfotransferase 3B1
hsa-miR-216b	1	0	1	1	1	1	BCL6B	B-cell CLL/lymphoma 6, member B
hsa-miR-216b	1	0	1	1	1	1	TMF1	TATA element modulatory factor 1
hsa-miR-216b	1	0	1	1	1	1	ETNK1	ethanolamine kinase 1
hsa-miR-216b	1	0	1	0	1	1	CEP44	centrosomal protein 44kDa
hsa-miR-216b	1	0	1	1	1	1	FZD5	frizzled family receptor 5
hsa-miR-216b	1	0	1	1	1	1	C11orf57	chromosome 11 open reading frame 57
hsa-miR-216b	1	0	1	0	1	1	DCUN1D4	DCN1, defective in cullin neddylation 1, domain containing 4 (S. cerevisiae)
hsa-miR-216b	1	0	1	0	1	1	PLXNA1	plexin A1
hsa-miR-216b	1	0	1	1	1	1	SLC50A1	solute carrier family 50 (sugar transporter), member 1
hsa-miR-216b	1	0	1	1	1	1	SRSF7	serine/arginine-rich splicing factor 7
hsa-miR-216b	1	0	1	0	1	1	SPATS2L	spermatogenesis associated, serine-rich 2-like
hsa-miR-216b	1	0	1	1	1	1	PPP1R9A	protein phosphatase 1, regulatory subunit 9A
hsa-miR-216b	1	0	1	1	1	1	C9orf40	chromosome 9 open reading frame 40
hsa-miR-216b	1	0	1	1	1	1	STK36	serine/threonine kinase 36
hsa-miR-216b	1	0	1	1	1	1	SOCS6	suppressor of cytokine signaling 6
hsa-miR-216b	1	0	1	1	1	1	FRMD4A	FERM domain containing 4A
hsa-miR-216b	1	0	1	1	1	1	CYP4V2	cytochrome P450, family 4, subfamily V, polypeptide 2
hsa-miR-216b	1	0	1	1	1	1	DLX2	distal-less homeobox 2
hsa-miR-216b	1	0	0	1	0	0	PLEKHA2	pleckstrin homology domain containing, family A (phosphoinositide binding specific) member 2
hsa-miR-216b	1	0	1	1	1	1	MME	membrane metallo-endopeptidase
hsa-miR-216b	1	0	1	1	1	1	LRP4	low density lipoprotein receptor-related protein 4
hsa-miR-216b	1	0	1	1	1	1	NFYB	nuclear transcription factor Y, beta
hsa-miR-216b	1	0	1	0	1	1	SAMD5	sterile alpha motif domain containing 5
hsa-miR-216b	1	0	1	1	1	1	ABLIM1	actin binding LIM protein 1
hsa-miR-216b	1	0	1	1	0	0	SRL	sarcalumenin
hsa-miR-216b	1	0	1	1	1	1	MSR1	macrophage scavenger receptor 1
hsa-miR-216b	1	0	1	1	1	1	STX12	syntaxin 12
hsa-miR-216b	1	0	1	1	1	1	JUN	jun proto-oncogene
hsa-miR-216b	1	0	1	1	1	1	LIMA1	LIM domain and actin binding 1
hsa-miR-216b	1	0	1	0	1	1	ADAMTS9	ADAM metallopeptidase with thrombospondin type 1 motif, 9
hsa-miR-216b	1	0	1	1	0	0	HDLBP	high density lipoprotein binding protein
hsa-miR-216b	1	0	1	1	1	1	HOXD13	homeobox D13
hsa-miR-216b	1	0	1	1	1	1	BCL2L15	BCL2-like 15
hsa-miR-216b	1	0	1	1	1	1	PXN	paxillin
hsa-miR-216b	1	0	1	1	0	0	ST3GAL4	ST3 beta-galactoside alpha-2,3-sialyltransferase 4
hsa-miR-216b	1	0	1	1	1	1	CNTN3	contactin 3 (plasmacytoma associated)
hsa-miR-216b	1	0	1	0	1	1	ANKFY1	ankyrin repeat and FYVE domain containing 1
hsa-miR-216b	1	0	1	1	1	1	CCR9	chemokine (C-C motif) receptor 9
hsa-miR-216b	1	0	1	1	1	1	BLCAP	bladder cancer associated protein
hsa-miR-216b	1	0	1	1	1	1	SERBP1	SERPINE1 mRNA binding protein 1
hsa-miR-216b	1	0	1	1	1	1	HOXA1	homeobox A1
hsa-miR-216b	1	0	1	1	1	1	RCE1	RCE1 homolog, prenyl protein protease (S. cerevisiae)
hsa-miR-216b	1	0	1	1	1	1	FNDC3A	fibronectin type III domain containing 3A
hsa-miR-216b	1	0	1	1	1	1	NFYA	nuclear transcription factor Y, alpha
hsa-miR-216b	1	0	1	1	1	1	C1orf116	chromosome 1 open reading frame 116
hsa-miR-216b	1	0	1	1	0	0	XPO6	exportin 6
hsa-miR-216b	1	0	1	1	1	1	KLF12	Kruppel-like factor 12
hsa-miR-216b	1	0	1	0	1	1	SLC6A6	solute carrier family 6 (neurotransmitter transporter, taurine), member 6
hsa-miR-216b	1	0	1	0	1	1	RAB11FIP3	RAB11 family interacting protein 3 (class II)
hsa-miR-216b	1	0	1	1	1	1	BAHD1	bromo adjacent homology domain containing 1
hsa-miR-216b	1	0	1	1	1	1	ARL3	ADP-ribosylation factor-like 3
hsa-miR-216b	1	0	1	1	1	1	ZBTB2	zinc finger and BTB domain containing 2
hsa-miR-216b	1	0	1	0	1	1	DCP2	DCP2 decapping enzyme homolog (S. cerevisiae)
hsa-miR-216b	1	0	1	1	1	1	AUTS2	autism susceptibility candidate 2
hsa-miR-216b	1	0	1	1	1	1	ETV3	ets variant 3
hsa-miR-216b	1	0	1	1	1	1	CUX1	cut-like homeobox 1
hsa-miR-216b	1	0	1	1	1	1	PATZ1	POZ (BTB) and AT hook containing zinc finger 1
hsa-miR-216b	1	0	1	1	0	0	CIC	capicua homolog (Drosophila)
hsa-miR-216b	1	0	1	1	1	1	WDR1	WD repeat domain 1
hsa-miR-216b	1	0	1	0	1	1	TBL1XR1	transducin (beta)-like 1 X-linked receptor 1
hsa-miR-216b	1	0	1	1	1	1	CUX2	cut-like homeobox 2
hsa-miR-216b	1	0	1	0	1	1	UNC5D	unc-5 homolog D (C. elegans)
hsa-miR-216b	1	0	1	1	1	1	GABPA	GA binding protein transcription factor, alpha subunit 60kDa
hsa-miR-216b	1	0	1	1	1	1	TRIM39	tripartite motif containing 39
hsa-miR-216b	1	0	1	0	1	1	AP2B1	adaptor-related protein complex 2, beta 1 subunit
hsa-miR-216b	1	0	1	1	1	1	FGFR1	fibroblast growth factor receptor 1
hsa-miR-216b	1	0	1	0	1	1	KRAS	v-Ki-ras2 Kirsten rat sarcoma viral oncogene homolog
hsa-miR-216b	1	0	1	1	1	1	RALY	RNA binding protein, autoantigenic (hnRNP-associated with lethal yellow homolog (mouse))
hsa-miR-216b	1	0	1	1	1	1	RBM47	RNA binding motif protein 47
hsa-miR-216b	1	0	1	1	1	1	F11R	F11 receptor
hsa-miR-216b	1	0	1	1	1	1	DDX26B	DEAD/H (Asp-Glu-Ala-Asp/His) box polypeptide 26B
hsa-miR-216b	1	0	1	1	1	1	CSNK2A1	casein kinase 2, alpha 1 polypeptide
hsa-miR-216b	1	0	1	0	0	0	RNF169	ring finger protein 169
hsa-miR-216b	1	0	1	1	1	1	TRPC5	transient receptor potential cation channel, subfamily C, member 5
hsa-miR-216b	1	0	1	0	1	1	CEP350	centrosomal protein 350kDa
hsa-miR-216b	1	0	1	1	0	0	CLYBL	citrate lyase beta like
hsa-miR-216b	1	0	1	0	1	1	SMAD3	SMAD family member 3
hsa-miR-216b	1	0	1	1	0	0	ITPRIPL2	inositol 1,4,5-trisphosphate receptor interacting protein-like 2
hsa-miR-216b	1	0	1	1	1	1	ENAH	enabled homolog (Drosophila)
hsa-miR-216b	1	0	1	1	1	1	IGF2BP2	insulin-like growth factor 2 mRNA binding protein 2
hsa-miR-216b	1	0	1	1	1	1	PDCD6IP	programmed cell death 6 interacting protein
hsa-miR-216b	1	0	1	0	1	1	NFIX	nuclear factor I/X (CCAAT-binding transcription factor)
hsa-miR-216b	1	0	1	1	1	1	AQP2	aquaporin 2 (collecting duct)
hsa-miR-216b	1	0	1	1	1	1	PLS1	plastin 1
hsa-miR-216b	1	0	1	1	1	1	NEO1	neogenin 1
hsa-miR-216b	1	0	1	1	1	1	DSEL	dermatan sulfate epimerase-like
hsa-miR-216b	1	0	1	0	1	1	UVRAG	UV radiation resistance associated gene
hsa-miR-216b	1	0	1	1	1	1	NEUROG2	neurogenin 2
hsa-miR-216b	1	0	1	1	1	1	CLIP3	CAP-GLY domain containing linker protein 3
hsa-miR-216b	1	0	1	0	1	1	CPEB2	cytoplasmic polyadenylation element binding protein 2
hsa-miR-216b	1	0	1	1	1	1	HLF	hepatic leukemia factor
hsa-miR-216b	1	0	1	1	1	1	FAM178A	family with sequence similarity 178, member A
hsa-miR-216b	1	0	1	0	1	1	YWHAB	tyrosine 3-monooxygenase/tryptophan 5-monooxygenase activation protein, beta polypeptide
hsa-miR-216b	1	0	1	1	1	1	CPOX	coproporphyrinogen oxidase
hsa-miR-216b	1	0	0	1	0	0	DLG1	discs, large homolog 1 (Drosophila)
hsa-miR-216b	1	0	1	0	1	1	KCNT2	potassium channel, subfamily T, member 2
hsa-miR-216b	1	0	1	1	1	1	WDR92	WD repeat domain 92
hsa-miR-216b	1	0	1	0	1	1	MNT	MAX binding protein
hsa-miR-216b	1	0	1	1	1	1	TSC22D3	TSC22 domain family, member 3
hsa-miR-216b	1	1	1	1	1	1	NFIA	nuclear factor I/A
hsa-miR-216b	1	0	1	1	0	0	PEAK1	NKF3 kinase family member
hsa-miR-216b	1	0	1	1	1	1	PTCHD1	patched domain containing 1
hsa-miR-216b	1	0	1	1	1	1	SCAF8	SR-related CTD-associated factor 8
hsa-miR-216b	1	0	1	1	1	1	PDIK1L	PDLIM1 interacting kinase 1 like
hsa-miR-216b	1	0	1	0	1	1	SLC1A2	solute carrier family 1 (glial high affinity glutamate transporter), member 2
hsa-miR-216b	1	0	1	1	1	1	COL4A4	collagen, type IV, alpha 4
hsa-miR-216b	1	0	1	1	1	1	DCAF12	DDB1 and CUL4 associated factor 12
hsa-miR-216b	1	0	1	1	1	1	UBN1	ubinuclein 1
hsa-miR-216b	1	0	1	1	1	1	VPS39	vacuolar protein sorting 39 homolog (S. cerevisiae)
hsa-miR-216b	1	0	1	0	1	1	BECN1	beclin 1, autophagy related
hsa-miR-216b	1	0	1	0	1	1	TMEM106B	transmembrane protein 106B
hsa-miR-216b	1	0	1	1	1	1	TRIOBP	TRIO and F-actin binding protein
hsa-miR-216b	1	0	1	1	1	1	FAM126B	family with sequence similarity 126, member B
hsa-miR-216b	1	0	1	1	1	1	TBX2	T-box 2
hsa-miR-216b	1	0	1	0	1	1	ENC1	ectodermal-neural cortex 1 (with BTB-like domain)
hsa-miR-216b	1	0	1	1	1	1	JHDM1D	jumonji C domain containing histone demethylase 1 homolog D (S. cerevisiae)
hsa-miR-216b	1	0	1	1	0	0	FAM150B	family with sequence similarity 150, member B
hsa-miR-216b	1	0	1	1	1	1	VTI1A	vesicle transport through interaction with t-SNAREs homolog 1A (yeast)
hsa-miR-216b	1	0	1	0	1	1	FOXD1	forkhead box D1
hsa-miR-216b	1	0	1	1	1	1	TAB3	TGF-beta activated kinase 1/MAP3K7 binding protein 3
hsa-miR-216b	1	0	1	0	1	1	RAB1A	RAB1A, member RAS oncogene family
hsa-miR-216b	1	0	1	0	1	1	RAB11FIP1	RAB11 family interacting protein 1 (class I)
hsa-miR-216b	1	0	1	1	1	1	PCGF5	polycomb group ring finger 5
hsa-miR-216b	1	0	1	1	1	1	RPS6KA3	ribosomal protein S6 kinase, 90kDa, polypeptide 3
hsa-miR-216b	1	0	1	1	1	1	NPAS2	neuronal PAS domain protein 2
hsa-miR-216b	1	0	1	1	1	1	DNAJB9	DnaJ (Hsp40) homolog, subfamily B, member 9
hsa-miR-216b	1	0	1	1	1	1	HELZ	helicase with zinc finger
hsa-miR-216b	1	0	1	0	1	1	GATAD2B	GATA zinc finger domain containing 2B
hsa-miR-216b	1	0	1	0	1	1	BTN3A2	butyrophilin, subfamily 3, member A2
hsa-miR-216b	1	0	1	1	1	1	CDC23	cell division cycle 23 homolog (S. cerevisiae)
hsa-miR-216b	1	0	1	1	1	1	DIXDC1	DIX domain containing 1
hsa-miR-216b	1	0	1	1	1	1	TMEM200B	transmembrane protein 200B
hsa-miR-216b	1	0	1	1	1	1	ZNF148	zinc finger protein 148
hsa-miR-216b	1	0	1	1	0	0	TTC9	tetratricopeptide repeat domain 9
hsa-miR-216b	1	0	1	1	1	1	ZNF207	zinc finger protein 207
hsa-miR-216b	1	0	1	1	1	1	SMOC1	SPARC related modular calcium binding 1
hsa-miR-216b	1	0	1	1	1	1	TCF4	transcription factor 4
hsa-miR-216b	1	0	1	0	1	1	UBFD1	ubiquitin family domain containing 1
hsa-miR-216b	1	0	1	1	1	1	GALNT1	UDP-N-acetyl-alpha-D-galactosamine:polypeptide N-acetylgalactosaminyltransferase 1 (GalNAc-T1)
hsa-miR-216b	1	0	1	1	0	0	E2F4	E2F transcription factor 4, p107/p130-binding
hsa-miR-216b	1	0	1	1	1	1	BAZ2A	bromodomain adjacent to zinc finger domain, 2A
hsa-miR-216b	1	0	1	0	1	1	TM9SF3	transmembrane 9 superfamily member 3
hsa-miR-216b	1	0	1	1	1	1	CRY2	cryptochrome 2 (photolyase-like)
hsa-miR-216b	1	0	1	1	1	1	C22orf13	chromosome 22 open reading frame 13
hsa-miR-216b	1	0	1	1	1	1	SDHC	succinate dehydrogenase complex, subunit C, integral membrane protein, 15kDa
hsa-miR-216b	1	0	1	1	0	0	GRIN2A	glutamate receptor, ionotropic, N-methyl D-aspartate 2A
hsa-miR-216b	1	0	1	1	1	1	CDKL2	cyclin-dependent kinase-like 2 (CDC2-related kinase)
hsa-miR-216b	1	0	1	0	1	1	ITCH	itchy E3 ubiquitin protein ligase
hsa-miR-216b	1	0	1	0	1	1	NUDCD1	NudC domain containing 1
hsa-miR-216b	1	0	1	1	1	1	AKIP1	A kinase (PRKA) interacting protein 1
hsa-miR-216b	1	0	1	1	1	1	BCL2L11	BCL2-like 11 (apoptosis facilitator)
hsa-miR-216b	1	0	1	1	1	1	ZNF423	zinc finger protein 423
hsa-miR-216b	1	0	1	1	1	1	RFX4	regulatory factor X, 4 (influences HLA class II expression)
hsa-miR-216b	1	0	1	1	1	1	TBC1D4	TBC1 domain family, member 4
hsa-miR-216b	1	0	1	1	1	1	RANBP10	RAN binding protein 10
hsa-miR-216b	1	0	1	0	1	1	RUNX1T1	runt-related transcription factor 1; translocated to, 1 (cyclin D-related)
hsa-miR-216b	1	0	1	0	1	1	ZNF652	zinc finger protein 652
hsa-miR-216b	1	0	1	1	1	1	TMEM245	transmembrane protein 245
hsa-miR-216b	1	0	1	1	1	1	ACOX1	acyl-CoA oxidase 1, palmitoyl
hsa-miR-216b	1	0	1	0	1	1	FAM196A	family with sequence similarity 196, member A
hsa-miR-216b	1	0	1	1	1	1	TOB2	transducer of ERBB2, 2
hsa-miR-216b	1	0	1	1	1	1	KIAA1324L	KIAA1324-like
hsa-miR-216b	1	0	0	0	0	0	TMEM170B	transmembrane protein 170B
hsa-miR-216b	1	0	1	1	1	1	FBXO8	F-box protein 8
hsa-miR-216b	1	0	1	0	1	1	PRKCA	protein kinase C, alpha
hsa-miR-216b	1	0	1	1	1	1	CHD9	chromodomain helicase DNA binding protein 9
hsa-miR-216b	1	0	1	1	1	1	IGSF1	immunoglobulin superfamily, member 1
hsa-miR-216b	1	0	1	1	1	1	PRUNE2	prune homolog 2 (Drosophila)
hsa-miR-216b	1	0	1	1	1	1	ABCC5	ATP-binding cassette, sub-family C (CFTR/MRP), member 5
hsa-miR-216b	1	0	1	0	1	1	PTPRT	protein tyrosine phosphatase, receptor type, T
hsa-miR-216b	1	0	1	1	1	1	NUPL1	nucleoporin like 1
hsa-miR-216b	1	0	1	0	1	1	MTSS1	metastasis suppressor 1
hsa-miR-216b	1	0	1	1	1	1	PPIP5K2	diphosphoinositol pentakisphosphate kinase 2
hsa-miR-216b	1	0	1	1	1	1	RNGTT	RNA guanylyltransferase and 5'-phosphatase
hsa-miR-216b	1	0	1	1	1	1	IQSEC2	IQ motif and Sec7 domain 2
hsa-miR-216b	1	0	1	1	1	1	GPATCH8	G patch domain containing 8
hsa-miR-216b	1	0	1	1	0	0	PCLO	piccolo (presynaptic cytomatrix protein)
hsa-miR-216b	1	0	1	1	1	1	KIF1B	kinesin family member 1B
hsa-miR-216b	1	0	1	1	1	1	HIPK1	homeodomain interacting protein kinase 1
hsa-miR-216b	1	0	1	1	1	1	ATG13	autophagy related 13
hsa-miR-216b	1	0	1	0	1	1	SNX13	sorting nexin 13
hsa-miR-216b	1	0	1	0	1	1	DOCK4	dedicator of cytokinesis 4
hsa-miR-216b	1	0	1	1	1	1	MATR3	matrin 3
hsa-miR-216b	1	0	1	1	1	1	LPHN2	latrophilin 2
hsa-miR-216b	1	0	1	1	1	1	ARHGEF15	Rho guanine nucleotide exchange factor (GEF) 15
hsa-miR-216b	1	0	1	1	1	1	CALCR	calcitonin receptor
hsa-miR-216b	1	0	1	1	1	1	RGL1	ral guanine nucleotide dissociation stimulator-like 1
hsa-miR-216b	1	0	1	1	1	1	FAM208A	family with sequence similarity 208, member A
hsa-miR-216b	1	0	1	1	1	1	PHF8	PHD finger protein 8
hsa-miR-216b	1	0	1	0	1	1	ODZ2	odz, odd Oz/ten-m homolog 2 (Drosophila)
hsa-miR-216b	1	0	1	0	1	1	SRGAP3	SLIT-ROBO Rho GTPase activating protein 3
hsa-miR-216b	1	0	1	1	0	0	KIAA1210	KIAA1210
hsa-miR-216b	1	0	1	1	1	1	ATXN7L1	ataxin 7-like 1
hsa-miR-216b	1	0	1	1	1	1	RALGAPB	Ral GTPase activating protein, beta subunit (non-catalytic)
hsa-miR-216b	1	0	1	1	0	0	ATAD2B	ATPase family, AAA domain containing 2B
hsa-miR-216b	1	0	1	1	1	1	MKL2	MKL/myocardin-like 2
hsa-miR-216b	1	0	1	0	1	1	INTS2	integrator complex subunit 2
hsa-miR-216b	1	0	1	1	1	1	BAZ2B	bromodomain adjacent to zinc finger domain, 2B
hsa-miR-216b	1	0	1	1	1	1	USP28	ubiquitin specific peptidase 28
hsa-miR-216b	1	0	1	1	1	1	PPP6R3	protein phosphatase 6, regulatory subunit 3
hsa-miR-216b	0	0	1	0	0	0	TTC28-AS1	TTC28 antisense RNA 1
hsa-miR-216b	0	0	1	1	1	1	KIAA1704	KIAA1704
hsa-miR-216b	1	0	1	0	1	1	RIMS1	regulating synaptic membrane exocytosis 1
hsa-miR-216b	1	0	1	1	1	1	LCOR	ligand dependent nuclear receptor corepressor
hsa-miR-216b	0	0	1	0	0	0	MYSM1	Myb-like, SWIRM and MPN domains 1
hsa-miR-216b	0	0	1	1	1	1	LENG8	leukocyte receptor cluster (LRC) member 8
hsa-miR-216b	1	0	1	1	1	1	POGZ	pogo transposable element with ZNF domain
hsa-miR-216b	1	0	1	1	1	1	SH3TC2	SH3 domain and tetratricopeptide repeats 2
hsa-miR-216b	1	0	1	0	0	0	FAT3	FAT tumor suppressor homolog 3 (Drosophila)
hsa-miR-216b	1	0	1	0	0	0	ZBTB34	zinc finger and BTB domain containing 34
hsa-miR-216b	1	0	1	1	1	1	SMEK1	SMEK homolog 1, suppressor of mek1 (Dictyostelium)
hsa-miR-216b	0	0	1	1	1	1	SHPRH	SNF2 histone linker PHD RING helicase, E3 ubiquitin protein ligase
hsa-miR-216b	0	0	1	1	0	0	HELLS	helicase, lymphoid-specific
hsa-miR-216b	0	0	1	1	1	1	IL7	interleukin 7
hsa-miR-216b	0	0	1	1	0	0	DDB2	damage-specific DNA binding protein 2, 48kDa
hsa-miR-216b	1	1	1	1	1	1	BACE1	beta-site APP-cleaving enzyme 1
hsa-miR-216b	0	0	1	1	0	0	MARK2	MAP/microtubule affinity-regulating kinase 2
hsa-miR-216b	0	0	1	0	1	1	ATR	ataxia telangiectasia and Rad3 related
hsa-miR-216b	1	0	1	1	1	1	SHC1	SHC (Src homology 2 domain containing) transforming protein 1
hsa-miR-216b	0	0	1	0	1	1	ATF6	activating transcription factor 6
hsa-miR-216b	0	0	1	1	0	0	STON2	stonin 2
hsa-miR-216b	0	0	1	0	0	0	PIDD	p53-induced death domain protein
hsa-miR-216b	1	0	1	1	1	1	DTNA	dystrobrevin, alpha
hsa-miR-216b	1	0	1	1	1	1	E2F5	E2F transcription factor 5, p130-binding
hsa-miR-216b	0	0	1	0	1	1	NPY1R	neuropeptide Y receptor Y1
hsa-miR-216b	1	0	1	1	1	1	TWF1	twinfilin, actin-binding protein, homolog 1 (Drosophila)
hsa-miR-216b	1	0	1	1	1	1	MAP4	microtubule-associated protein 4
hsa-miR-216b	1	0	1	1	1	1	PDLIM5	PDZ and LIM domain 5
hsa-miR-216b	1	0	1	1	1	1	DDX17	DEAD (Asp-Glu-Ala-Asp) box helicase 17
hsa-miR-216b	0	0	1	1	1	1	CHN1	chimerin (chimaerin) 1
hsa-miR-216b	1	0	1	1	1	1	TEAD1	TEA domain family member 1 (SV40 transcriptional enhancer factor)
hsa-miR-216b	1	0	1	1	1	1	ZFX	zinc finger protein, X-linked
hsa-miR-216b	0	0	1	1	1	1	PLD1	phospholipase D1, phosphatidylcholine-specific
hsa-miR-216b	1	0	1	0	1	1	PDE7B	phosphodiesterase 7B
hsa-miR-216b	1	0	1	1	1	1	MEF2D	myocyte enhancer factor 2D
hsa-miR-216b	0	0	1	1	1	1	HDAC3	histone deacetylase 3
hsa-miR-216b	1	0	1	1	1	1	MID1	midline 1 (Opitz/BBB syndrome)
hsa-miR-216b	0	0	1	1	1	1	CYP4F3	cytochrome P450, family 4, subfamily F, polypeptide 3
hsa-miR-216b	1	0	1	1	1	1	SHOC2	soc-2 suppressor of clear homolog (C. elegans)
hsa-miR-216b	1	0	1	1	1	1	PFKFB3	6-phosphofructo-2-kinase/fructose-2,6-biphosphatase 3
hsa-miR-216b	1	0	1	1	1	1	MBNL2	muscleblind-like splicing regulator 2
hsa-miR-216b	1	0	1	1	1	1	CTNND1	catenin (cadherin-associated protein), delta 1
hsa-miR-216b	1	0	1	1	1	1	ERLIN1	ER lipid raft associated 1
hsa-miR-216b	1	0	1	1	1	1	NUDT4	nudix (nucleoside diphosphate linked moiety X)-type motif 4
hsa-miR-216b	1	0	1	1	1	1	CBFA2T2	core-binding factor, runt domain, alpha subunit 2; translocated to, 2
hsa-miR-216b	1	0	1	1	1	1	TP63	tumor protein p63
hsa-miR-216b	0	0	1	0	0	0	ZNF880	zinc finger protein 880
hsa-miR-216b	1	0	1	0	1	1	DDX3X	DEAD (Asp-Glu-Ala-Asp) box polypeptide 3, X-linked
hsa-miR-216b	0	0	1	1	0	0	RBM5	RNA binding motif protein 5
hsa-miR-216b	1	0	1	0	1	1	FAM19A5	family with sequence similarity 19 (chemokine (C-C motif)-like), member A5
hsa-miR-216b	1	0	1	0	1	1	WDR82	WD repeat domain 82
hsa-miR-216b	1	0	1	1	1	1	CAB39	calcium binding protein 39
hsa-miR-216b	1	0	1	1	1	1	SORBS1	sorbin and SH3 domain containing 1
hsa-miR-216b	1	0	1	1	1	1	SCHIP1	schwannomin interacting protein 1
hsa-miR-216b	1	0	1	1	1	1	USP15	ubiquitin specific peptidase 15
hsa-miR-216b	1	0	1	1	1	1	NXT2	nuclear transport factor 2-like export factor 2
hsa-miR-216b	0	0	1	1	1	1	BRD7	bromodomain containing 7
hsa-miR-216b	0	0	1	1	1	1	CD28	CD28 molecule
hsa-miR-216b	1	0	1	1	1	1	OGT	O-linked N-acetylglucosamine (GlcNAc) transferase
hsa-miR-216b	1	0	1	1	1	1	DESI2	desumoylating isopeptidase 2
hsa-miR-216b	1	0	1	1	1	1	SNTB2	syntrophin, beta 2 (dystrophin-associated protein A1, 59kDa, basic component 2)
hsa-miR-216b	0	0	1	1	0	0	NYX	nyctalopin
hsa-miR-216b	1	0	1	1	1	1	ABI2	abl-interactor 2
hsa-miR-216b	0	0	1	1	1	1	PJA1	praja ring finger 1, E3 ubiquitin protein ligase
hsa-miR-216b	1	0	1	0	1	1	PARP11	poly (ADP-ribose) polymerase family, member 11
hsa-miR-216b	0	0	1	1	1	1	ZNF331	zinc finger protein 331
hsa-miR-216b	0	0	1	0	1	1	PRDM6	PR domain containing 6
hsa-miR-216b	0	0	1	0	1	1	ERBB2IP	erbb2 interacting protein
hsa-miR-216b	0	0	1	1	0	0	CDC25C	cell division cycle 25 homolog C (S. pombe)
hsa-miR-216b	0	0	1	1	1	1	FCRL1	Fc receptor-like 1
hsa-miR-216b	0	0	1	1	1	1	RERG	RAS-like, estrogen-regulated, growth inhibitor
hsa-miR-216b	1	0	1	1	1	1	BIVM	basic, immunoglobulin-like variable motif containing
hsa-miR-216b	1	0	1	1	1	1	NF2	neurofibromin 2 (merlin)
hsa-miR-216b	1	0	1	1	1	1	CALCOCO1	calcium binding and coiled-coil domain 1
hsa-miR-216b	1	0	1	1	1	1	LARP4	La ribonucleoprotein domain family, member 4
hsa-miR-216b	0	0	1	0	0	0	NBPF10	neuroblastoma breakpoint family, member 10
hsa-miR-216b	1	0	1	1	1	1	SON	SON DNA binding protein
hsa-miR-216b	0	0	1	0	0	0	CLRN1-AS1	CLRN1 antisense RNA 1
hsa-miR-216b	0	0	1	1	1	1	ORMDL1	ORM1-like 1 (S. cerevisiae)
hsa-miR-216b	0	0	1	1	1	1	OLFM3	olfactomedin 3
hsa-miR-216b	1	0	1	1	1	1	MAGI1	membrane associated guanylate kinase, WW and PDZ domain containing 1
hsa-miR-216b	1	0	1	1	1	1	NTRK2	neurotrophic tyrosine kinase, receptor, type 2
hsa-miR-216b	0	0	1	0	0	0	ABCC13	ATP-binding cassette, sub-family C (CFTR/MRP), member 13, pseudogene
hsa-miR-216b	1	0	1	1	1	1	ST3GAL3	ST3 beta-galactoside alpha-2,3-sialyltransferase 3
hsa-miR-216b	1	0	1	1	1	1	CACNB2	calcium channel, voltage-dependent, beta 2 subunit
hsa-miR-216b	1	0	1	1	1	1	WAPAL	wings apart-like homolog (Drosophila)
hsa-miR-216b	0	0	1	1	1	1	SLC2A14	solute carrier family 2 (facilitated glucose transporter), member 14
hsa-miR-216b	0	0	1	1	1	1	CARD8	caspase recruitment domain family, member 8
hsa-miR-216b	0	0	1	1	1	1	TTLL11	tubulin tyrosine ligase-like family, member 11
hsa-miR-216b	0	0	1	1	1	1	PTK7	PTK7 protein tyrosine kinase 7
hsa-miR-216b	0	0	1	1	1	1	TPO	thyroid peroxidase
hsa-miR-216b	1	0	1	0	1	1	IL1RAP	interleukin 1 receptor accessory protein
hsa-miR-216b	1	0	1	1	1	1	AFF2	AF4/FMR2 family, member 2
hsa-miR-216b	1	0	1	1	1	1	PLAGL1	pleiomorphic adenoma gene-like 1
hsa-miR-216b	1	0	1	0	1	1	DICER1	dicer 1, ribonuclease type III
hsa-miR-216b	0	0	1	1	1	1	C6orf48	chromosome 6 open reading frame 48
hsa-miR-216b	1	0	1	1	1	1	SUCO	SUN domain containing ossification factor
hsa-miR-216b	1	0	1	1	1	1	ILF3	interleukin enhancer binding factor 3, 90kDa
hsa-miR-216b	0	0	1	1	1	1	SLC37A1	solute carrier family 37 (glycerol-3-phosphate transporter), member 1
hsa-miR-216b	0	0	1	1	1	1	CD1E	CD1e molecule
hsa-miR-216b	0	0	1	0	0	0	CD177	CD177 molecule
hsa-miR-216b	1	0	1	1	1	1	NRXN3	neurexin 3
hsa-miR-216b	1	0	1	1	1	1	PPP3CB	protein phosphatase 3, catalytic subunit, beta isozyme
hsa-miR-216b	0	0	1	1	0	0	MBD1	methyl-CpG binding domain protein 1
hsa-miR-216b	1	0	1	1	1	1	MYB	v-myb myeloblastosis viral oncogene homolog (avian)
hsa-miR-216b	1	0	1	0	1	1	NFAT5	nuclear factor of activated T-cells 5, tonicity-responsive
hsa-miR-216b	0	0	1	1	1	1	PARP16	poly (ADP-ribose) polymerase family, member 16
hsa-miR-216b	0	0	1	0	0	0	TUG1	taurine upregulated 1 (non-protein coding)
hsa-miR-216b	0	0	1	1	1	1	OLFM4	olfactomedin 4
hsa-miR-216b	1	0	1	1	1	1	ARHGAP12	Rho GTPase activating protein 12
hsa-miR-216b	0	0	1	1	1	1	ARAP3	ArfGAP with RhoGAP domain, ankyrin repeat and PH domain 3
hsa-miR-216b	1	0	1	1	1	1	PTBP3	polypyrimidine tract binding protein 3
hsa-miR-216b	0	0	1	0	0	0	LINC00284	long intergenic non-protein coding RNA 284
hsa-miR-216b	0	0	1	1	1	1	TCP11L1	t-complex 11 (mouse)-like 1
hsa-miR-216b	1	0	1	1	1	1	C12orf23	chromosome 12 open reading frame 23
hsa-miR-216b	1	0	1	1	1	1	S100PBP	S100P binding protein
hsa-miR-216b	1	0	1	0	1	1	DCAF17	DDB1 and CUL4 associated factor 17
hsa-miR-216b	0	0	1	1	1	1	TTC23	tetratricopeptide repeat domain 23
hsa-miR-216b	0	0	1	1	0	0	POLR3E	polymerase (RNA) III (DNA directed) polypeptide E (80kD)
hsa-miR-216b	0	0	1	1	1	1	VPRBP	Vpr (HIV-1) binding protein
hsa-miR-216b	0	0	1	0	0	0	MIRLET7BHG	MIRLET7B host gene (non-protein coding)
hsa-miR-216b	1	0	1	0	1	1	C14orf101	chromosome 14 open reading frame 101
hsa-miR-216b	0	0	1	1	0	0	ELMO3	engulfment and cell motility 3
hsa-miR-216b	0	0	1	1	0	0	PFDN5	prefoldin subunit 5
hsa-miR-216b	1	0	1	1	1	1	SLC35A3	solute carrier family 35 (UDP-N-acetylglucosamine (UDP-GlcNAc) transporter), member A3
hsa-miR-216b	1	0	1	0	1	1	MYO5B	myosin VB
hsa-miR-216b	0	0	1	0	1	1	ATXN1L	ataxin 1-like
hsa-miR-216b	1	0	1	1	1	1	KANK1	KN motif and ankyrin repeat domains 1
hsa-miR-216b	1	0	1	1	1	1	DENND4C	DENN/MADD domain containing 4C
hsa-miR-216b	1	0	1	1	1	1	NAA30	N(alpha)-acetyltransferase 30, NatC catalytic subunit
hsa-miR-216b	1	0	1	1	1	1	DCAF8	DDB1 and CUL4 associated factor 8
hsa-miR-216b	0	0	1	0	1	1	ZCCHC8	zinc finger, CCHC domain containing 8
hsa-miR-216b	1	0	1	1	1	1	GORASP2	golgi reassembly stacking protein 2, 55kDa
hsa-miR-216b	0	0	1	1	1	1	DUSP14	dual specificity phosphatase 14
hsa-miR-216b	1	0	1	0	1	1	ZKSCAN1	zinc finger with KRAB and SCAN domains 1
hsa-miR-216b	1	0	1	0	1	1	ELMOD1	ELMO/CED-12 domain containing 1
hsa-miR-216b	0	0	1	1	1	1	C8orf46	chromosome 8 open reading frame 46
hsa-miR-216b	1	0	1	1	1	1	SGK1	serum/glucocorticoid regulated kinase 1
hsa-miR-216b	1	0	1	1	1	1	MBD5	methyl-CpG binding domain protein 5
hsa-miR-216b	0	0	1	0	0	0	LOC154092	uncharacterized LOC154092
hsa-miR-216b	0	0	1	1	0	0	INTS3	integrator complex subunit 3
hsa-miR-216b	0	0	1	1	0	0	C21orf59	chromosome 21 open reading frame 59
hsa-miR-216b	1	0	1	1	0	0	SPEG	SPEG complex locus
hsa-miR-216b	0	0	1	0	0	0	FLJ31104	uncharacterized LOC441072
hsa-miR-216b	0	0	1	1	0	0	PSMA4	proteasome (prosome, macropain) subunit, alpha type, 4
hsa-miR-216b	1	0	1	1	1	1	MAP3K7	mitogen-activated protein kinase kinase kinase 7
hsa-miR-216b	1	0	1	1	0	0	MEPCE	methylphosphate capping enzyme
hsa-miR-216b	0	0	1	0	0	0	JPX	JPX transcript, XIST activator (non-protein coding)
hsa-miR-216b	1	0	1	1	1	1	PPP1R3F	protein phosphatase 1, regulatory subunit 3F
hsa-miR-216b	1	0	1	1	1	1	SHISA5	shisa homolog 5 (Xenopus laevis)
hsa-miR-216b	0	0	1	1	0	0	CHRM3	cholinergic receptor, muscarinic 3
hsa-miR-216b	1	0	1	1	1	1	CLCN5	chloride channel, voltage-sensitive 5
hsa-miR-216b	0	0	1	1	1	1	MOCS1	molybdenum cofactor synthesis 1
hsa-miR-216b	1	0	1	1	1	1	PCMTD1	protein-L-isoaspartate (D-aspartate) O-methyltransferase domain containing 1
hsa-miR-216b	1	0	1	1	1	1	HMGB1	high mobility group box 1
hsa-miR-216b	0	0	1	1	1	1	RANBP17	RAN binding protein 17
hsa-miR-216b	0	0	1	0	1	1	CHURC1	churchill domain containing 1
hsa-miR-216b	0	0	1	1	1	1	ZNF385B	zinc finger protein 385B
hsa-miR-216b	0	0	1	0	0	0	FLJ25363	uncharacterized LOC401082
hsa-miR-216b	0	0	1	1	0	0	PIGO	phosphatidylinositol glycan anchor biosynthesis, class O
hsa-miR-216b	1	0	1	1	1	1	FAM102A	family with sequence similarity 102, member A
hsa-miR-216b	0	0	1	1	1	1	HDAC8	histone deacetylase 8
hsa-miR-216b	0	0	1	1	0	0	GPR19	G protein-coupled receptor 19
hsa-miR-216b	0	0	1	1	1	1	PINK1	PTEN induced putative kinase 1
hsa-miR-216b	0	0	1	0	1	1	CADM1	cell adhesion molecule 1
hsa-miR-216b	0	0	1	1	0	0	CTNNBL1	catenin, beta like 1
hsa-miR-216b	1	0	1	1	1	1	EGR2	early growth response 2
hsa-miR-216b	1	0	1	1	1	1	AMMECR1	Alport syndrome, mental retardation, midface hypoplasia and elliptocytosis chromosomal region gene 1
hsa-miR-216b	1	0	1	1	1	1	TSN	translin
hsa-miR-216b	1	0	1	1	1	1	EPN2	epsin 2
hsa-miR-216b	1	0	1	1	1	1	CLGN	calmegin
hsa-miR-216b	1	0	1	1	1	1	GPD2	glycerol-3-phosphate dehydrogenase 2 (mitochondrial)
hsa-miR-216b	0	0	1	1	1	1	LZTFL1	leucine zipper transcription factor-like 1
hsa-miR-216b	0	0	1	1	1	1	SLC16A1	solute carrier family 16, member 1 (monocarboxylic acid transporter 1)
hsa-miR-216b	0	0	1	0	0	0	CXXC1P1	CXXC finger protein 1 pseudogene 1
hsa-miR-216b	0	0	1	0	0	0	PART1	prostate androgen-regulated transcript 1 (non-protein coding)
hsa-miR-216b	1	0	1	1	1	1	SLC7A8	solute carrier family 7 (amino acid transporter light chain, L system), member 8
hsa-miR-216b	0	0	1	0	0	0	ZNF806	zinc finger protein 806
hsa-miR-216b	0	0	1	0	0	0	FLJ37505	uncharacterized LOC400087
hsa-miR-216b	0	0	1	0	1	1	AGBL4	ATP/GTP binding protein-like 4
hsa-miR-216b	0	0	1	1	1	1	TMEM170A	transmembrane protein 170A
hsa-miR-216b	1	0	1	1	1	1	GCLC	glutamate-cysteine ligase, catalytic subunit
hsa-miR-216b	1	0	1	1	1	1	UBA6	ubiquitin-like modifier activating enzyme 6
hsa-miR-216b	1	0	1	1	1	1	RASGEF1A	RasGEF domain family, member 1A
hsa-miR-216b	1	0	1	1	1	1	NDEL1	nudE nuclear distribution E homolog (A. nidulans)-like 1
hsa-miR-216b	0	0	1	1	1	1	MOBP	myelin-associated oligodendrocyte basic protein
hsa-miR-216b	1	0	1	0	1	1	SLC39A11	solute carrier family 39 (metal ion transporter), member 11
hsa-miR-216b	0	0	1	1	1	1	FUT11	fucosyltransferase 11 (alpha (1,3) fucosyltransferase)
hsa-miR-216b	0	0	1	0	0	0	LOC100129620	uncharacterized LOC100129620
hsa-miR-216b	1	0	1	1	1	1	ACSL1	acyl-CoA synthetase long-chain family member 1
hsa-miR-216b	0	0	1	1	1	1	RPE	ribulose-5-phosphate-3-epimerase
hsa-miR-216b	1	0	1	1	1	1	GAPVD1	GTPase activating protein and VPS9 domains 1
hsa-miR-216b	0	0	1	0	0	0	OTUD1	OTU domain containing 1
hsa-miR-216b	1	0	1	0	1	1	COL21A1	collagen, type XXI, alpha 1
hsa-miR-216b	1	0	1	1	1	1	NPEPPS	aminopeptidase puromycin sensitive
hsa-miR-216b	1	0	1	0	1	1	THRB	thyroid hormone receptor, beta
hsa-miR-216b	1	0	1	0	1	1	KBTBD8	kelch repeat and BTB (POZ) domain containing 8
hsa-miR-216b	0	0	1	1	1	1	SC5DL	sterol-C5-desaturase (ERG3 delta-5-desaturase homolog, S. cerevisiae)-like
hsa-miR-216b	0	0	1	0	0	0	CCDC150	coiled-coil domain containing 150
hsa-miR-216b	0	0	1	0	1	1	HDAC9	histone deacetylase 9
hsa-miR-216b	1	0	1	1	1	1	LCP1	lymphocyte cytosolic protein 1 (L-plastin)
hsa-miR-216b	1	0	1	1	1	1	KL	klotho
hsa-miR-216b	0	0	1	0	0	0	LOC400680	uncharacterized LOC400680
hsa-miR-216b	0	0	1	0	0	0	LINC00293	long intergenic non-protein coding RNA 293
hsa-miR-216b	0	0	1	0	0	0	LOC100128560	uncharacterized LOC100128560
hsa-miR-216b	1	0	1	1	1	1	NSUN4	NOP2/Sun domain family, member 4
hsa-miR-216b	0	0	1	1	1	1	CBWD5	COBW domain containing 5
hsa-miR-216b	1	0	1	1	1	1	IGSF11	immunoglobulin superfamily, member 11
hsa-miR-216b	0	0	1	1	1	1	POLR1D	polymerase (RNA) I polypeptide D, 16kDa
hsa-miR-216b	0	0	1	1	1	1	CPXCR1	CPX chromosome region, candidate 1
hsa-miR-216b	1	0	1	1	1	1	NDFIP2	Nedd4 family interacting protein 2
hsa-miR-216b	0	0	1	1	1	1	CHCHD1	coiled-coil-helix-coiled-coil-helix domain containing 1
hsa-miR-216b	0	0	1	1	1	1	SLFN13	schlafen family member 13
hsa-miR-216b	0	0	1	1	0	0	PROKR1	prokineticin receptor 1
hsa-miR-216b	0	0	1	1	0	0	CFP	complement factor properdin
hsa-miR-216b	1	0	1	1	1	1	ABHD6	abhydrolase domain containing 6
hsa-miR-216b	0	0	1	0	1	1	PATE4	prostate and testis expressed 4
hsa-miR-216b	0	0	1	0	0	0	C1orf132	chromosome 1 open reading frame 132
hsa-miR-216b	0	0	1	0	1	1	FLJ41200	uncharacterized LOC401492
hsa-miR-216b	0	0	1	1	1	1	FAM5B	family with sequence similarity 5, member B
hsa-miR-216b	1	0	1	0	1	1	KCNK2	potassium channel, subfamily K, member 2
hsa-miR-216b	0	0	1	1	1	1	CC2D2B	coiled-coil and C2 domain containing 2B
hsa-miR-216b	0	0	1	1	1	1	BTN2A2	butyrophilin, subfamily 2, member A2
hsa-miR-216b	0	0	1	1	1	1	SLC27A2	solute carrier family 27 (fatty acid transporter), member 2
hsa-miR-216b	0	0	1	0	0	0	LOC285043	uncharacterized LOC285043
hsa-miR-216b	1	0	1	0	0	0	GPR137C	G protein-coupled receptor 137C
hsa-miR-216b	0	0	1	0	0	0	LOC100133029	sirtuin 5 pseudogene
hsa-miR-216b	0	0	1	1	1	1	PKP4	plakophilin 4
hsa-miR-216b	1	0	1	1	1	1	FAM122B	family with sequence similarity 122B
hsa-miR-216b	0	0	1	1	0	0	GABRA2	gamma-aminobutyric acid (GABA) A receptor, alpha 2
hsa-miR-216b	1	0	1	1	1	1	IGFBP3	insulin-like growth factor binding protein 3
hsa-miR-216b	1	0	1	0	1	1	KIAA1456	KIAA1456
hsa-miR-216b	0	0	1	0	1	1	CTBP1-AS1	CTBP1 antisense RNA 1
hsa-miR-216b	0	0	1	0	0	0	FAM95B1	family with sequence similarity 95, member B1
hsa-miR-216b	1	0	1	1	1	1	TP53INP1	tumor protein p53 inducible nuclear protein 1
hsa-miR-216b	1	0	1	1	1	1	MACROD2	MACRO domain containing 2
hsa-miR-216b	0	0	1	1	0	0	FSIP2	fibrous sheath interacting protein 2
hsa-miR-216b	1	0	1	1	1	1	CSRNP3	cysteine-serine-rich nuclear protein 3
hsa-miR-216b	1	0	1	1	1	1	SACM1L	SAC1 suppressor of actin mutations 1-like (yeast)
hsa-miR-216b	0	0	1	1	1	1	C18orf54	chromosome 18 open reading frame 54
hsa-miR-216b	1	0	1	1	1	1	LRIG1	leucine-rich repeats and immunoglobulin-like domains 1
hsa-miR-216b	1	0	1	1	1	1	DLG2	discs, large homolog 2 (Drosophila)
hsa-miR-216b	1	0	1	1	1	1	IBTK	inhibitor of Bruton agammaglobulinemia tyrosine kinase
hsa-miR-216b	0	0	1	0	0	0	HNRNPKP3	heterogeneous nuclear ribonucleoprotein K pseudogene 3
hsa-miR-216b	0	0	1	1	1	1	SPICE1	spindle and centriole associated protein 1
hsa-miR-216b	0	0	1	0	0	0	RPL23AP53	ribosomal protein L23a pseudogene 53
hsa-miR-216b	1	0	1	1	0	0	SNX30	sorting nexin family member 30
hsa-miR-216b	1	0	1	0	1	1	SP6	Sp6 transcription factor
hsa-miR-216b	1	0	1	0	1	1	FNDC3B	fibronectin type III domain containing 3B
hsa-miR-216b	0	0	1	1	1	1	MCU	mitochondrial calcium uniporter
hsa-miR-216b	0	0	1	0	0	0	LRRC9	leucine rich repeat containing 9
hsa-miR-216b	1	0	1	1	1	1	KCTD12	potassium channel tetramerisation domain containing 12
hsa-miR-216b	0	0	1	1	0	0	C17orf107	chromosome 17 open reading frame 107
hsa-miR-216b	1	0	1	1	1	1	FRYL	FRY-like
hsa-miR-216b	1	0	1	1	1	1	FBXO3	F-box protein 3
hsa-miR-216b	1	0	1	1	1	1	BCAT1	branched chain amino-acid transaminase 1, cytosolic
hsa-miR-216b	1	0	1	1	1	1	SDCBP	syndecan binding protein (syntenin)
hsa-miR-216b	0	0	1	0	0	0	AFG3L1P	AFG3 ATPase family gene 3-like 1 (S. cerevisiae), pseudogene
hsa-miR-216b	1	0	1	1	1	1	DPY19L3	dpy-19-like 3 (C. elegans)
hsa-miR-216b	0	0	1	0	0	0	LOC494141	mitochondrial carrier triple repeat 1 pseudogene
hsa-miR-216b	0	0	1	0	0	0	LOC390660	FLJ00317 protein
hsa-miR-216b	1	0	1	0	1	1	ESRRG	estrogen-related receptor gamma
hsa-miR-216b	1	0	1	1	0	0	FOXP2	forkhead box P2
hsa-miR-216b	1	0	1	1	1	1	PPP2R5C	protein phosphatase 2, regulatory subunit B', gamma
hsa-miR-216b	0	0	1	1	1	1	RNF19B	ring finger protein 19B
hsa-miR-216b	0	0	1	0	0	0	AGAP9	ArfGAP with GTPase domain, ankyrin repeat and PH domain 9
hsa-miR-216b	0	0	1	1	0	0	ZSCAN18	zinc finger and SCAN domain containing 18
hsa-miR-216b	1	0	1	1	1	1	SYS1	SYS1 Golgi-localized integral membrane protein homolog (S. cerevisiae)
hsa-miR-216b	0	0	1	0	1	1	PEX5	peroxisomal biogenesis factor 5
hsa-miR-216b	1	0	1	0	1	1	CHD7	chromodomain helicase DNA binding protein 7
hsa-miR-216b	0	0	1	1	1	1	PDSS2	prenyl (decaprenyl) diphosphate synthase, subunit 2
hsa-miR-216b	0	0	1	1	1	1	TBC1D3G	TBC1 domain family, member 3G
hsa-miR-216b	1	0	1	1	1	1	NCOA1	nuclear receptor coactivator 1
hsa-miR-216b	0	0	1	1	0	0	TRIM69	tripartite motif containing 69
hsa-miR-216b	1	0	1	1	1	1	APBB2	amyloid beta (A4) precursor protein-binding, family B, member 2
hsa-miR-216b	0	0	1	1	1	1	PTPN20B	protein tyrosine phosphatase, non-receptor type 20B
hsa-miR-216b	0	0	1	1	1	1	PTPN20A	protein tyrosine phosphatase, non-receptor type 20A
hsa-miR-216b	1	0	1	1	1	1	RIF1	RAP1 interacting factor homolog (yeast)
hsa-miR-216b	0	0	1	1	0	0	PLK1S1	polo-like kinase 1 substrate 1
hsa-miR-216b	1	0	1	0	1	1	SLC2A3	solute carrier family 2 (facilitated glucose transporter), member 3
hsa-miR-216b	1	0	1	1	1	1	SLC25A36	solute carrier family 25 (pyrimidine nucleotide carrier ), member 36
hsa-miR-216b	0	0	1	1	0	0	PACSIN2	protein kinase C and casein kinase substrate in neurons 2
hsa-miR-216b	0	0	1	0	1	1	TBC1D3F	TBC1 domain family, member 3F
hsa-miR-216b	0	0	1	1	1	1	ATG10	autophagy related 10
hsa-miR-216b	0	0	1	1	1	1	STAG3L1	stromal antigen 3-like 1
hsa-miR-216b	0	0	1	0	0	0	LRRC37BP1	leucine rich repeat containing 37B pseudogene 1
hsa-miR-216b	0	0	1	1	1	1	STOX2	storkhead box 2
hsa-miR-216b	0	0	1	1	1	1	HNRNPM	heterogeneous nuclear ribonucleoprotein M
hsa-miR-216b	0	0	1	0	0	0	ZNF720	zinc finger protein 720
hsa-miR-216b	1	0	1	1	0	0	USP24	ubiquitin specific peptidase 24
hsa-miR-216b	0	0	1	1	1	1	VWA3B	von Willebrand factor A domain containing 3B
hsa-miR-216b	1	0	1	1	1	1	TMEM182	transmembrane protein 182
hsa-miR-216b	0	0	1	0	1	1	CEP95	centrosomal protein 95kDa
hsa-miR-216b	0	0	1	0	0	0	DDX60L	DEAD (Asp-Glu-Ala-Asp) box polypeptide 60-like
hsa-miR-216b	1	0	1	0	1	1	MEF2C	myocyte enhancer factor 2C
hsa-miR-216b	0	0	1	1	0	0	FAM18A	family with sequence similarity 18, member A
hsa-miR-216b	0	0	1	0	0	0	EPHA1-AS1	EPHA1 antisense RNA 1
hsa-miR-216b	1	0	1	0	1	1	CNOT7	CCR4-NOT transcription complex, subunit 7
hsa-miR-216b	0	0	1	1	1	1	PCDH20	protocadherin 20
hsa-miR-216b	0	0	1	1	1	1	C20orf132	chromosome 20 open reading frame 132
hsa-miR-216b	0	0	1	1	1	1	TDRD9	tudor domain containing 9
hsa-miR-216b	1	0	1	1	1	1	PRPF38B	PRP38 pre-mRNA processing factor 38 (yeast) domain containing B
hsa-miR-216b	1	0	1	1	0	0	KIAA0895L	KIAA0895-like
hsa-miR-216b	1	0	1	1	1	1	ANKRD12	ankyrin repeat domain 12
hsa-miR-216b	0	0	1	1	1	1	TEX2	testis expressed 2
hsa-miR-216b	0	0	1	1	1	1	C8orf34	chromosome 8 open reading frame 34
hsa-miR-216b	1	0	1	0	1	1	NR3C1	nuclear receptor subfamily 3, group C, member 1 (glucocorticoid receptor)
hsa-miR-216b	1	0	1	0	1	1	APOLD1	apolipoprotein L domain containing 1
hsa-miR-216b	1	0	1	1	1	1	FBXL5	F-box and leucine-rich repeat protein 5
hsa-miR-216b	0	0	1	0	1	1	USO1	USO1 vesicle docking protein homolog (yeast)
hsa-miR-216b	1	0	1	1	1	1	IKZF2	IKAROS family zinc finger 2 (Helios)
hsa-miR-216b	0	0	1	0	0	0	PMCHL1	pro-melanin-concentrating hormone-like 1, pseudogene
hsa-miR-216b	0	0	1	0	0	0	PMCHL2	pro-melanin-concentrating hormone-like 2, pseudogene
hsa-miR-216b	1	0	1	1	1	1	CLIC5	chloride intracellular channel 5
hsa-miR-216b	0	0	1	1	1	1	RUNDC3B	RUN domain containing 3B
hsa-miR-216b	1	0	1	1	1	1	DUSP16	dual specificity phosphatase 16
hsa-miR-216b	1	0	1	1	1	1	RBBP6	retinoblastoma binding protein 6
hsa-miR-216b	0	0	1	0	0	0	KGFLP1	fibroblast growth factor 7 pseudogene
hsa-miR-216b	1	0	1	1	1	1	KIAA0907	KIAA0907
hsa-miR-216b	0	0	1	0	0	0	CR1L	complement component (3b/4b) receptor 1-like
hsa-miR-216b	0	0	1	1	1	1	GCOM1	GRINL1A complex locus 1
hsa-miR-216b	0	0	1	0	1	1	ANKS1B	ankyrin repeat and sterile alpha motif domain containing 1B
hsa-miR-216b	0	0	1	1	1	1	SLC22A12	solute carrier family 22 (organic anion/urate transporter), member 12
hsa-miR-216b	0	0	1	1	1	1	TNFRSF19	tumor necrosis factor receptor superfamily, member 19
hsa-miR-216b	1	0	1	1	1	1	ECT2	epithelial cell transforming sequence 2 oncogene
hsa-miR-216b	0	0	1	1	1	1	RPTN	repetin
hsa-miR-216b	0	0	1	1	1	1	TIMM50	translocase of inner mitochondrial membrane 50 homolog (S. cerevisiae)
hsa-miR-216b	1	0	1	1	1	1	FAM120A	family with sequence similarity 120A
hsa-miR-216b	0	0	1	1	1	1	DIDO1	death inducer-obliterator 1
hsa-miR-216b	0	0	1	0	1	1	XKR5	XK, Kell blood group complex subunit-related family, member 5
hsa-miR-216b	1	0	1	1	1	1	MECP2	methyl CpG binding protein 2 (Rett syndrome)
hsa-miR-216b	1	0	1	0	1	1	LRAT	lecithin retinol acyltransferase (phosphatidylcholine--retinol O-acyltransferase)
hsa-miR-216b	1	0	1	1	1	1	MOG	myelin oligodendrocyte glycoprotein
hsa-miR-216b	0	0	1	1	1	1	ANXA10	annexin A10
hsa-miR-216b	0	0	1	1	1	1	RPAIN	RPA interacting protein
hsa-miR-216b	1	0	1	1	1	1	NTNG1	netrin G1
hsa-miR-216b	0	0	1	1	0	0	NBPF8	neuroblastoma breakpoint family, member 8
hsa-miR-216b	1	0	1	1	1	1	PRKACB	protein kinase, cAMP-dependent, catalytic, beta
hsa-miR-216b	1	0	1	1	1	1	NOL4	nucleolar protein 4
hsa-miR-216b	0	0	1	1	1	1	SLC6A2	solute carrier family 6 (neurotransmitter transporter, noradrenalin), member 2
hsa-miR-216b	1	0	1	0	1	1	FAM46A	family with sequence similarity 46, member A
hsa-miR-216b	0	0	1	1	1	1	PAFAH1B2	platelet-activating factor acetylhydrolase 1b, catalytic subunit 2 (30kDa)
hsa-miR-216b	1	0	1	1	1	1	AZI2	5-azacytidine induced 2
hsa-miR-216b	1	0	1	1	1	1	RIMS3	regulating synaptic membrane exocytosis 3
hsa-miR-216b	1	0	1	1	1	1	NONO	non-POU domain containing, octamer-binding
hsa-miR-216b	1	0	1	1	1	1	PPP1R11	protein phosphatase 1, regulatory (inhibitor) subunit 11
hsa-miR-216b	0	0	1	1	1	1	FTO	fat mass and obesity associated
hsa-miR-216b	0	0	1	1	1	1	ZNF589	zinc finger protein 589
hsa-miR-216b	0	0	1	1	1	1	LZIC	leucine zipper and CTNNBIP1 domain containing
hsa-miR-216b	0	0	1	1	1	1	KIRREL2	kin of IRRE like 2 (Drosophila)
hsa-miR-216b	0	0	1	1	1	1	MLIP	muscular LMNA-interacting protein
hsa-miR-216b	0	0	1	0	0	0	ATXN7L3B	ataxin 7-like 3B
hsa-miR-216b	1	0	1	1	0	0	MARCH9	membrane-associated ring finger (C3HC4) 9
hsa-miR-216b	1	0	1	0	1	1	TMEM39A	transmembrane protein 39A
hsa-miR-216b	1	0	1	1	1	1	DNAJB5	DnaJ (Hsp40) homolog, subfamily B, member 5
hsa-miR-216b	1	0	1	1	1	1	CAP1	CAP, adenylate cyclase-associated protein 1 (yeast)
hsa-miR-216b	1	0	1	1	1	1	PRDM2	PR domain containing 2, with ZNF domain
hsa-miR-216b	0	0	1	1	0	0	CCDC36	coiled-coil domain containing 36
hsa-miR-216b	0	0	1	0	0	0	MGC21881	uncharacterized locus MGC21881
hsa-miR-216b	0	0	1	0	0	0	KLHL15	kelch-like 15 (Drosophila)
hsa-miR-216b	1	0	1	1	1	1	ZBTB38	zinc finger and BTB domain containing 38
hsa-miR-216b	0	0	1	0	1	1	ZNF37A	zinc finger protein 37A
hsa-miR-216b	1	0	1	1	1	1	FAM199X	family with sequence similarity 199, X-linked
hsa-miR-216b	0	0	1	1	1	1	RDH11	retinol dehydrogenase 11 (all-trans/9-cis/11-cis)
hsa-miR-216b	0	0	1	1	0	0	RPS21	ribosomal protein S21
hsa-miR-216b	0	0	1	0	1	1	TMSB15B	thymosin beta 15B
hsa-miR-216b	0	0	1	1	1	1	LRRK1	leucine-rich repeat kinase 1
hsa-miR-216b	0	0	1	0	1	1	ZNF718	zinc finger protein 718
hsa-miR-216b	1	0	1	0	1	1	BTF3L4	basic transcription factor 3-like 4
hsa-miR-216b	1	0	1	1	1	1	TM9SF4	transmembrane 9 superfamily protein member 4
hsa-miR-216b	0	0	1	1	1	1	RNF103	ring finger protein 103
hsa-miR-216b	1	0	1	1	1	1	SPRYD7	SPRY domain containing 7
hsa-miR-216b	0	0	1	0	0	0	SNX29P2	sorting nexin 29 pseudogene 2
hsa-miR-216b	0	0	1	1	1	1	TLR4	toll-like receptor 4
hsa-miR-216b	1	0	1	1	1	1	NIPA1	non imprinted in Prader-Willi/Angelman syndrome 1
hsa-miR-216b	1	0	1	1	1	1	SPG20	spastic paraplegia 20 (Troyer syndrome)
hsa-miR-216b	0	0	1	1	1	1	RDH5	retinol dehydrogenase 5 (11-cis/9-cis)
hsa-miR-216b	0	0	1	0	0	0	ANKRD19P	ankyrin repeat domain 19, pseudogene
hsa-miR-216b	0	0	1	1	0	0	TSPAN16	tetraspanin 16
hsa-miR-216b	0	0	1	1	1	1	PIK3AP1	phosphoinositide-3-kinase adaptor protein 1
hsa-miR-216b	0	0	1	1	1	1	CD48	CD48 molecule
hsa-miR-216b	0	0	1	1	1	1	TMEM117	transmembrane protein 117
hsa-miR-216b	1	0	1	1	1	1	EYA4	eyes absent homolog 4 (Drosophila)
hsa-miR-216b	1	0	1	1	1	1	ZNF518A	zinc finger protein 518A
hsa-miR-216b	1	0	1	1	0	0	FAM83F	family with sequence similarity 83, member F
hsa-miR-216b	1	0	1	1	1	1	PITPNB	phosphatidylinositol transfer protein, beta
hsa-miR-216b	0	0	1	0	0	0	CFL1P1	cofilin 1 (non-muscle) pseudogene 1
hsa-miR-216b	1	0	1	1	1	1	SF1	splicing factor 1
hsa-miR-216b	1	0	1	1	1	1	FGF1	fibroblast growth factor 1 (acidic)
hsa-miR-216b	0	0	1	1	1	1	CDADC1	cytidine and dCMP deaminase domain containing 1
hsa-miR-216b	1	0	1	1	1	1	SORL1	sortilin-related receptor, L(DLR class) A repeats containing
hsa-miR-216b	1	0	1	1	1	1	PPP2R2C	protein phosphatase 2, regulatory subunit B, gamma
hsa-miR-216b	1	0	1	1	1	1	SECISBP2L	SECIS binding protein 2-like
hsa-miR-216b	0	0	1	1	0	0	STK31	serine/threonine kinase 31
hsa-miR-216b	1	0	1	1	1	1	SIRPA	signal-regulatory protein alpha
hsa-miR-216b	1	0	1	1	1	1	PLEKHA7	pleckstrin homology domain containing, family A member 7
hsa-miR-216b	0	0	1	0	0	0	LINC00238	long intergenic non-protein coding RNA 238
hsa-miR-216b	1	0	1	1	1	1	HMGCR	3-hydroxy-3-methylglutaryl-CoA reductase
hsa-miR-216b	0	0	1	1	1	1	ZNF337	zinc finger protein 337
hsa-miR-216b	1	0	1	1	1	1	LPGAT1	lysophosphatidylglycerol acyltransferase 1
hsa-miR-216b	0	0	1	1	1	1	NUB1	negative regulator of ubiquitin-like proteins 1
hsa-miR-216b	1	0	1	0	1	1	DDX3Y	DEAD (Asp-Glu-Ala-Asp) box polypeptide 3, Y-linked
hsa-miR-216b	0	0	1	0	0	0	TMPRSS12	transmembrane (C-terminal) protease, serine 12
hsa-miR-216b	1	0	1	1	0	0	CHST4	carbohydrate (N-acetylglucosamine 6-O) sulfotransferase 4
hsa-miR-216b	1	0	1	1	1	1	RAP2C	RAP2C, member of RAS oncogene family
hsa-miR-216b	1	0	1	1	1	1	COL4A5	collagen, type IV, alpha 5
hsa-miR-216b	0	0	1	0	0	0	LOC339862	uncharacterized LOC339862
hsa-miR-216b	0	0	1	0	0	0	C12orf77	chromosome 12 open reading frame 77
hsa-miR-216b	0	0	1	1	1	1	CLEC12B	C-type lectin domain family 12, member B
hsa-miR-216b	0	0	1	1	1	1	ATP1A4	ATPase, Na+/K+ transporting, alpha 4 polypeptide
hsa-miR-216b	0	0	1	0	0	0	FAM201A	family with sequence similarity 201, member A
hsa-miR-216b	1	0	1	1	1	1	SLC38A9	solute carrier family 38, member 9
hsa-miR-216b	0	0	1	0	1	1	C9orf57	chromosome 9 open reading frame 57
hsa-miR-216b	0	0	1	1	1	1	FAM171B	family with sequence similarity 171, member B
hsa-miR-216b	1	0	1	0	1	1	CLDN12	claudin 12
hsa-miR-216b	1	0	1	1	0	0	RASGEF1B	RasGEF domain family, member 1B
hsa-miR-216b	1	0	1	0	1	1	CPEB4	cytoplasmic polyadenylation element binding protein 4
hsa-miR-216b	0	0	1	1	1	1	FAM71F1	family with sequence similarity 71, member F1
hsa-miR-216b	1	0	1	1	1	1	FAM135B	family with sequence similarity 135, member B
hsa-miR-216b	1	0	1	0	1	1	RAG1	recombination activating gene 1
hsa-miR-216b	0	0	1	0	0	0	LOC286184	uncharacterized LOC286184
hsa-miR-216b	0	0	1	0	0	0	LOC283922	pyruvate dehydrogenase phosphatase regulatory subunit pseudogene
hsa-miR-216b	0	0	1	0	0	0	INHBA-AS1	INHBA antisense RNA 1
hsa-miR-216b	0	0	1	1	1	1	TTC39B	tetratricopeptide repeat domain 39B
hsa-miR-216b	0	0	1	1	0	0	HSPA14	heat shock 70kDa protein 14
hsa-miR-216b	0	0	1	0	0	0	FLJ36000	uncharacterized FLJ36000
hsa-miR-216b	0	0	1	1	1	1	SLC14A1	solute carrier family 14 (urea transporter), member 1 (Kidd blood group)
hsa-miR-216b	1	0	1	1	1	1	DACH2	dachshund homolog 2 (Drosophila)
hsa-miR-216b	1	0	1	1	1	1	BVES	blood vessel epicardial substance
hsa-miR-216b	0	0	1	0	0	0	SLC7A11-AS1	SLC7A11 antisense RNA 1
hsa-miR-216b	1	0	1	0	1	1	KIAA0430	KIAA0430
hsa-miR-216b	1	0	1	1	1	1	FAM123A	family with sequence similarity 123A
hsa-miR-216b	1	0	1	1	1	1	TNFSF4	tumor necrosis factor (ligand) superfamily, member 4
hsa-miR-216b	1	0	1	0	1	1	TNFAIP3	tumor necrosis factor, alpha-induced protein 3
hsa-miR-216b	0	0	1	1	1	1	MTHFD2L	methylenetetrahydrofolate dehydrogenase (NADP+ dependent) 2-like
hsa-miR-216b	1	0	1	1	1	1	MEIS3	Meis homeobox 3
hsa-miR-216b	0	0	1	1	1	1	SH3GL3	SH3-domain GRB2-like 3
hsa-miR-216b	0	0	1	0	0	0	LOC340094	uncharacterized LOC340094
hsa-miR-216b	1	0	1	1	1	1	ARHGAP30	Rho GTPase activating protein 30
hsa-miR-216b	0	0	1	0	0	0	LOC646168	uncharacterized LOC646168
hsa-miR-216b	1	0	1	1	1	1	UBR3	ubiquitin protein ligase E3 component n-recognin 3 (putative)
hsa-miR-216b	1	0	1	1	1	1	PSIP1	PC4 and SFRS1 interacting protein 1
hsa-miR-216b	0	0	1	0	0	0	LOC283914	uncharacterized LOC283914
hsa-miR-216b	1	0	1	1	1	1	PPP2R5B	protein phosphatase 2, regulatory subunit B', beta
hsa-miR-216b	0	0	1	1	0	0	SDK2	sidekick cell adhesion molecule 2
hsa-miR-216b	0	0	1	0	0	0	MDP1	magnesium-dependent phosphatase 1
hsa-miR-216b	0	0	1	0	1	1	FBXO42	F-box protein 42
hsa-miR-216b	0	0	1	0	0	0	LOC348120	uncharacterized LOC348120
hsa-miR-216b	1	0	1	0	1	1	KDM2A	lysine (K)-specific demethylase 2A
hsa-miR-216b	1	0	1	1	1	1	RTKN2	rhotekin 2
hsa-miR-216b	1	0	1	1	1	1	CLVS1	clavesin 1
hsa-miR-216b	1	0	1	0	1	1	ARHGAP5	Rho GTPase activating protein 5
hsa-miR-216b	1	0	1	0	1	1	FAM131B	family with sequence similarity 131, member B
hsa-miR-216b	1	0	1	1	1	1	PTPDC1	protein tyrosine phosphatase domain containing 1
hsa-miR-216b	1	0	1	1	1	1	ZFP91	zinc finger protein 91 homolog (mouse)
hsa-miR-216b	0	0	1	1	1	1	RHOT1	ras homolog family member T1
hsa-miR-216b	1	0	1	1	1	1	MKRN1	makorin ring finger protein 1
hsa-miR-216b	1	0	1	1	1	1	HP1BP3	heterochromatin protein 1, binding protein 3
hsa-miR-216b	0	0	1	0	0	0	LINC00265	long intergenic non-protein coding RNA 265
hsa-miR-216b	0	0	1	1	0	0	TENC1	tensin like C1 domain containing phosphatase (tensin 2)
hsa-miR-216b	0	0	1	0	0	0	ADAM5	ADAM metallopeptidase domain 5, pseudogene
hsa-miR-216b	1	0	1	1	1	1	RAB3IP	RAB3A interacting protein (rabin3)
hsa-miR-216b	1	0	1	1	1	1	SOX5	SRY (sex determining region Y)-box 5
hsa-miR-216b	1	0	1	1	1	1	GTDC1	glycosyltransferase-like domain containing 1
hsa-miR-216b	0	0	1	0	0	0	LOC550643	uncharacterized LOC550643
hsa-miR-216b	0	0	1	0	0	0	LOC387647	patched domain containing 3 pseudogene
hsa-miR-216b	1	0	1	1	1	1	ADCY6	adenylate cyclase 6
hsa-miR-216b	0	0	1	0	0	0	LINC00052	long intergenic non-protein coding RNA 52
hsa-miR-216b	0	0	1	1	0	0	CELF3	CUGBP, Elav-like family member 3
hsa-miR-216b	1	0	1	1	1	1	SLC26A7	solute carrier family 26, member 7
hsa-miR-216b	0	0	1	1	0	0	GPRC5C	G protein-coupled receptor, family C, group 5, member C
hsa-miR-216b	0	0	1	0	0	0	AQP7P2	aquaporin 7 pseudogene 2
hsa-miR-216b	0	0	1	1	0	0	RPS16	ribosomal protein S16
hsa-miR-216b	1	0	1	1	1	1	WBP1L	WW domain binding protein 1-like
hsa-miR-216b	1	0	1	1	1	1	C1orf173	chromosome 1 open reading frame 173
hsa-miR-216b	1	0	1	1	1	1	OPCML	opioid binding protein/cell adhesion molecule-like
hsa-miR-216b	1	0	1	1	1	1	WNT5A	wingless-type MMTV integration site family, member 5A
hsa-miR-216b	0	0	1	1	1	1	IRX5	iroquois homeobox 5
hsa-miR-216b	0	0	1	0	0	0	ABCC6P1	ATP-binding cassette, sub-family C, member 6 pseudogene 1
hsa-miR-216b	0	0	1	1	1	1	C3orf67	chromosome 3 open reading frame 67
hsa-miR-216b	1	0	1	0	1	1	DPYSL3	dihydropyrimidinase-like 3
hsa-miR-216b	1	0	1	0	1	1	AMMECR1L	AMME chromosomal region gene 1-like
hsa-miR-216b	0	0	1	0	0	0	LOC554249	uncharacterized LOC554249
hsa-miR-216b	1	0	1	1	1	1	SYNE1	spectrin repeat containing, nuclear envelope 1
hsa-miR-216b	1	0	1	1	1	1	ZMYND11	zinc finger, MYND-type containing 11
hsa-miR-216b	0	0	1	1	1	1	COBL	cordon-bleu homolog (mouse)
hsa-miR-216b	1	0	1	1	1	1	ST8SIA2	ST8 alpha-N-acetyl-neuraminide alpha-2,8-sialyltransferase 2
hsa-miR-216b	0	0	1	0	0	0	ABCA11P	ATP-binding cassette, sub-family A (ABC1), member 11, pseudogene
hsa-miR-216b	1	0	1	1	1	1	LRRC15	leucine rich repeat containing 15
hsa-miR-216b	1	0	1	0	1	1	MYBL1	v-myb myeloblastosis viral oncogene homolog (avian)-like 1
hsa-miR-216b	1	0	1	1	1	1	ARFIP1	ADP-ribosylation factor interacting protein 1
hsa-miR-216b	0	0	1	1	1	1	SPHKAP	SPHK1 interactor, AKAP domain containing
hsa-miR-216b	0	0	1	1	1	1	MUC21	mucin 21, cell surface associated
hsa-miR-216b	0	0	1	1	1	1	SLC25A35	solute carrier family 25, member 35
hsa-miR-216b	0	0	1	1	0	0	C9orf153	chromosome 9 open reading frame 153
hsa-miR-216b	1	0	1	1	1	1	CERS6	ceramide synthase 6
hsa-miR-216b	1	0	1	0	1	1	BTBD3	BTB (POZ) domain containing 3
hsa-miR-216b	0	0	1	1	1	1	RASAL2	RAS protein activator like 2
hsa-miR-216b	0	0	1	1	1	1	SMTNL2	smoothelin-like 2
hsa-miR-216b	0	0	1	0	0	0	LRRC37A11P	leucine rich repeat containing 37, member A11, pseudogene
hsa-miR-216b	0	0	1	1	1	1	UNC13B	unc-13 homolog B (C. elegans)
hsa-miR-216b	0	0	1	1	0	0	PAEP	progestagen-associated endometrial protein
hsa-miR-216b	1	0	1	1	0	0	MAPKBP1	mitogen-activated protein kinase binding protein 1
hsa-miR-216b	1	0	1	1	1	1	KIAA0528	KIAA0528
hsa-miR-216b	0	0	1	0	0	0	KRT8P12	keratin 8 pseudogene 12
hsa-miR-216b	1	0	1	1	1	1	ANK2	ankyrin 2, neuronal
hsa-miR-216b	0	0	1	1	1	1	KANSL1L	KAT8 regulatory NSL complex subunit 1-like
hsa-miR-216b	1	0	1	1	1	1	MEGF11	multiple EGF-like-domains 11
hsa-miR-216b	0	0	1	0	0	0	FAM225B	family with sequence similarity 225, member B (non-protein coding)
hsa-miR-216b	0	0	1	0	0	0	LOC100133207	uncharacterized LOC100133207
hsa-miR-216b	0	0	1	1	1	1	CNIH	cornichon homolog (Drosophila)
hsa-miR-216b	1	0	1	1	1	1	BTBD7	BTB (POZ) domain containing 7
hsa-miR-216b	1	0	1	1	1	1	LITAF	lipopolysaccharide-induced TNF factor
hsa-miR-216b	1	0	1	1	0	0	KRT80	keratin 80
hsa-miR-216b	0	0	1	0	0	0	DKFZp686D0853	uncharacterized LOC401613
hsa-miR-216b	0	0	1	0	1	1	FEZ2	fasciculation and elongation protein zeta 2 (zygin II)
hsa-miR-216b	1	0	1	1	1	1	MIER3	mesoderm induction early response 1, family member 3
hsa-miR-216b	1	0	1	1	1	1	HECTD2	HECT domain containing E3 ubiquitin protein ligase 2
hsa-miR-216b	1	0	1	1	1	1	TRIM37	tripartite motif containing 37
hsa-miR-216b	0	0	1	1	1	1	NUP54	nucleoporin 54kDa
hsa-miR-216b	1	0	1	1	0	0	CCDC30	coiled-coil domain containing 30
hsa-miR-216b	0	0	1	1	1	1	AIG1	androgen-induced 1
hsa-miR-216b	0	0	1	1	1	1	KLHL8	kelch-like 8 (Drosophila)
hsa-miR-216b	0	0	1	1	1	1	PSMA2	proteasome (prosome, macropain) subunit, alpha type, 2
hsa-miR-216b	0	0	1	1	1	1	PRR14L	proline rich 14-like
hsa-miR-216b	0	0	1	0	0	0	SMG1P1	smg-1 homolog, phosphatidylinositol 3-kinase-related kinase pseudogene 1
hsa-miR-216b	1	0	1	1	1	1	CASP3	caspase 3, apoptosis-related cysteine peptidase
hsa-miR-216b	1	0	1	1	1	1	EPS15	epidermal growth factor receptor pathway substrate 15
hsa-miR-216b	1	0	1	1	1	1	RREB1	ras responsive element binding protein 1
hsa-miR-216b	1	0	1	1	1	1	VPS26A	vacuolar protein sorting 26 homolog A (S. pombe)
hsa-miR-216b	1	0	1	0	1	1	VPS36	vacuolar protein sorting 36 homolog (S. cerevisiae)
hsa-miR-216b	1	0	1	1	1	1	CYB5B	cytochrome b5 type B (outer mitochondrial membrane)
hsa-miR-216b	0	0	1	1	0	0	LRR1	leucine rich repeat protein 1
hsa-miR-216b	1	0	1	1	1	1	NEDD9	neural precursor cell expressed, developmentally down-regulated 9
hsa-miR-216b	1	0	1	1	1	1	DDAH1	dimethylarginine dimethylaminohydrolase 1
hsa-miR-216b	0	0	1	1	1	1	CCNT2	cyclin T2
hsa-miR-216b	1	0	1	1	1	1	NFIB	nuclear factor I/B
hsa-miR-216b	1	0	1	1	1	1	SOGA2	SOGA family member 2
hsa-miR-216b	1	0	1	1	1	1	RDX	radixin
hsa-miR-216b	1	0	1	1	1	1	PGAP1	post-GPI attachment to proteins 1
hsa-miR-216b	0	0	1	0	0	0	ZNRD1-AS1	ZNRD1 antisense RNA 1
hsa-miR-216b	1	0	1	1	1	1	CALD1	caldesmon 1
hsa-miR-216b	0	0	1	1	1	1	TTLL5	tubulin tyrosine ligase-like family, member 5
hsa-miR-216b	0	0	1	1	0	0	FDPS	farnesyl diphosphate synthase
hsa-miR-216b	0	0	1	1	1	1	FGG	fibrinogen gamma chain
hsa-miR-216b	0	0	1	1	0	0	TMEM222	transmembrane protein 222
hsa-miR-216b	0	0	1	0	0	0	LOC401127	WD repeat domain 5 pseudogene
hsa-miR-216b	0	0	1	0	0	0	RPS16P10	ribosomal protein S16 pseudogene 10
hsa-miR-216b	1	0	1	1	1	1	DDX19B	DEAD (Asp-Glu-Ala-Asp) box polypeptide 19B
hsa-miR-216b	0	0	1	1	1	1	RTCA	RNA 3'-terminal phosphate cyclase
hsa-miR-216b	0	0	1	1	0	0	ITGB3BP	integrin beta 3 binding protein (beta3-endonexin)
hsa-miR-216b	0	0	1	1	1	1	CYTH2	cytohesin 2
hsa-miR-216b	0	0	1	0	0	0	H19	H19, imprinted maternally expressed transcript (non-protein coding)
hsa-miR-216b	0	0	1	0	0	0	MYCT1	myc target 1
hsa-miR-216b	0	0	1	1	1	1	CD99	CD99 molecule
hsa-miR-216b	1	0	1	1	1	1	TPM4	tropomyosin 4
hsa-miR-216b	1	0	1	1	1	1	COPS2	COP9 constitutive photomorphogenic homolog subunit 2 (Arabidopsis)
hsa-miR-216b	0	0	1	1	0	0	CGRRF1	cell growth regulator with ring finger domain 1
hsa-miR-216b	0	0	1	1	1	1	ZNF263	zinc finger protein 263
hsa-miR-216b	0	0	1	0	0	0	TRIQK	triple QxxK/R motif containing
hsa-miR-216b	1	0	1	1	1	1	NTM	neurotrimin
hsa-miR-216b	1	0	1	1	1	1	BAI3	brain-specific angiogenesis inhibitor 3
hsa-miR-216b	0	0	1	1	0	0	CCDC112	coiled-coil domain containing 112
hsa-miR-216b	1	0	1	0	1	1	RPS6KB1	ribosomal protein S6 kinase, 70kDa, polypeptide 1
hsa-miR-216b	1	0	1	1	1	1	TFAP2A	transcription factor AP-2 alpha (activating enhancer binding protein 2 alpha)
hsa-miR-216b	1	0	1	1	1	1	NAP1L1	nucleosome assembly protein 1-like 1
hsa-miR-216b	1	0	1	1	1	1	DKK3	dickkopf 3 homolog (Xenopus laevis)
hsa-miR-216b	0	0	1	0	1	1	TMEM155	transmembrane protein 155
hsa-miR-216b	0	0	1	1	1	1	GLRX3	glutaredoxin 3
hsa-miR-216b	0	0	1	1	0	0	MAST1	microtubule associated serine/threonine kinase 1
hsa-miR-216b	1	0	1	1	1	1	GPR137B	G protein-coupled receptor 137B
hsa-miR-216b	1	0	1	1	1	1	LAMTOR3	late endosomal/lysosomal adaptor, MAPK and MTOR activator 3
hsa-miR-216b	0	0	1	1	0	0	WDR43	WD repeat domain 43
hsa-miR-216b	1	0	1	1	1	1	FUBP3	far upstream element (FUSE) binding protein 3
hsa-miR-216b	0	0	1	1	1	1	MAEL	maelstrom homolog (Drosophila)
hsa-miR-216b	0	0	1	1	1	1	CD1C	CD1c molecule
hsa-miR-216b	0	0	1	1	0	0	AATF	apoptosis antagonizing transcription factor
hsa-miR-216b	1	0	1	1	1	1	ARHGEF40	Rho guanine nucleotide exchange factor (GEF) 40
hsa-miR-216b	0	0	1	1	1	1	FAM18B1	family with sequence similarity 18, member B1
hsa-miR-216b	0	0	1	0	0	0	ZNF674-AS1	ZNF674 antisense RNA 1
hsa-miR-216b	0	0	1	1	0	0	CCNDBP1	cyclin D-type binding-protein 1
hsa-miR-216b	0	0	1	1	0	0	OXA1L	oxidase (cytochrome c) assembly 1-like
hsa-miR-216b	0	0	1	1	1	1	HS3ST2	heparan sulfate (glucosamine) 3-O-sulfotransferase 2
hsa-miR-216b	1	0	1	1	1	1	SRSF2	serine/arginine-rich splicing factor 2
hsa-miR-216b	0	0	1	1	1	1	ZNF259	zinc finger protein 259
hsa-miR-216b	1	0	1	0	1	1	CD47	CD47 molecule
hsa-miR-216b	1	0	1	1	1	1	RUNX1	runt-related transcription factor 1
hsa-miR-216b	0	0	1	1	1	1	COMMD3	COMM domain containing 3
hsa-miR-216b	1	0	1	1	1	1	RND3	Rho family GTPase 3
hsa-miR-216b	0	0	1	0	0	0	LOC731789	uncharacterized LOC731789
hsa-miR-216b	1	0	1	1	1	1	DNAJC16	DnaJ (Hsp40) homolog, subfamily C, member 16
hsa-miR-216b	0	0	1	1	1	1	BDP1	B double prime 1, subunit of RNA polymerase III transcription initiation factor IIIB
hsa-miR-216b	0	0	1	1	1	1	ATG5	autophagy related 5
hsa-miR-216b	1	0	1	0	1	1	MEGF10	multiple EGF-like-domains 10
hsa-miR-216b	0	0	1	1	0	0	FMN1	formin 1
hsa-miR-216b	0	0	1	0	0	0	MUC19	mucin 19, oligomeric
hsa-miR-216b	1	0	1	0	1	1	OSBPL8	oxysterol binding protein-like 8
hsa-miR-216b	1	0	1	1	1	1	SLC39A10	solute carrier family 39 (zinc transporter), member 10
hsa-miR-216b	1	0	1	0	1	1	CNTNAP2	contactin associated protein-like 2
hsa-miR-216b	1	0	1	1	1	1	BCL2L1	BCL2-like 1
hsa-miR-216b	1	0	1	1	1	1	SLC30A7	solute carrier family 30 (zinc transporter), member 7
hsa-miR-216b	0	0	1	1	1	1	SLC39A14	solute carrier family 39 (zinc transporter), member 14
hsa-miR-216b	1	0	1	1	1	1	SEC14L1	SEC14-like 1 (S. cerevisiae)
hsa-miR-216b	1	0	1	0	1	1	LONRF2	LON peptidase N-terminal domain and ring finger 2
hsa-miR-216b	0	0	1	1	1	1	CD274	CD274 molecule
hsa-miR-216b	1	0	1	1	1	1	ITSN1	intersectin 1 (SH3 domain protein)
hsa-miR-216b	0	0	1	0	0	0	POM121L8P	POM121 transmembrane nucleoporin-like 8 pseudogene
hsa-miR-216b	0	0	1	0	0	0	PILRB	paired immunoglobin-like type 2 receptor beta
hsa-miR-216b	1	0	1	0	1	1	RBBP5	retinoblastoma binding protein 5
hsa-miR-216b	1	0	1	1	1	1	SLC4A8	solute carrier family 4, sodium bicarbonate cotransporter, member 8
hsa-miR-216b	0	0	1	0	0	0	C1orf81	chromosome 1 open reading frame 81
hsa-miR-216b	1	0	1	1	1	1	ATP2B2	ATPase, Ca++ transporting, plasma membrane 2
hsa-miR-216b	0	0	1	0	0	0	CTSL1P2	cathepsin L1 pseudogene 2
hsa-miR-216b	0	0	1	0	0	0	CTSL1P8	cathepsin L1 pseudogene 8
hsa-miR-216b	1	0	1	0	0	0	YLPM1	YLP motif containing 1
hsa-miR-216b	1	0	1	0	1	1	BCL2	B-cell CLL/lymphoma 2
hsa-miR-216b	0	0	1	1	1	1	CD55	CD55 molecule, decay accelerating factor for complement (Cromer blood group)
hsa-miR-216b	1	0	1	0	1	1	ACVR2A	activin A receptor, type IIA
hsa-miR-216b	1	0	1	1	1	1	ADRB2	adrenoceptor beta 2, surface
hsa-miR-216b	0	0	1	1	1	1	CA2	carbonic anhydrase II
hsa-miR-216b	1	0	1	1	1	1	COL4A3	collagen, type IV, alpha 3 (Goodpasture antigen)
hsa-miR-216b	1	0	1	1	1	1	CYP19A1	cytochrome P450, family 19, subfamily A, polypeptide 1
hsa-miR-216b	1	0	1	0	1	1	SLC26A2	solute carrier family 26 (sulfate transporter), member 2
hsa-miR-216b	1	0	1	1	1	1	FBN1	fibrillin 1
hsa-miR-216b	0	0	1	0	1	1	MS4A2	membrane-spanning 4-domains, subfamily A, member 2
hsa-miR-216b	1	0	1	1	1	1	HK2	hexokinase 2
hsa-miR-216b	1	0	1	0	1	1	ITGB3	integrin, beta 3 (platelet glycoprotein IIIa, antigen CD61)
hsa-miR-216b	1	0	1	1	1	1	KCNA1	potassium voltage-gated channel, shaker-related subfamily, member 1 (episodic ataxia with myokymia)
hsa-miR-216b	1	0	1	0	1	1	KIT	v-kit Hardy-Zuckerman 4 feline sarcoma viral oncogene homolog
hsa-miR-216b	1	0	1	0	1	1	SGCB	sarcoglycan, beta (43kDa dystrophin-associated glycoprotein)
hsa-miR-216b	1	0	1	1	1	1	MITF	microphthalmia-associated transcription factor
hsa-miR-216b	1	0	1	1	1	1	NPC1	Niemann-Pick disease, type C1
hsa-miR-216b	1	0	1	1	1	1	PEX12	peroxisomal biogenesis factor 12
hsa-miR-216b	1	0	1	1	1	1	RB1	retinoblastoma 1
hsa-miR-216b	1	0	1	1	1	1	ATXN1	ataxin 1
hsa-miR-216b	1	0	1	1	1	1	SOX9	SRY (sex determining region Y)-box 9
hsa-miR-216b	1	0	1	1	1	1	CHM	choroideremia (Rab escort protein 1)
hsa-miR-216b	0	0	1	1	1	1	PECAM1	platelet/endothelial cell adhesion molecule 1
hsa-miR-216b	1	0	1	1	1	1	APP	amyloid beta (A4) precursor protein
hsa-miR-216b	1	0	1	1	1	1	ATRX	alpha thalassemia/mental retardation syndrome X-linked
hsa-miR-216b	0	0	1	1	1	1	FCGR1A	Fc fragment of IgG, high affinity Ia, receptor (CD64)
hsa-miR-216b	0	0	1	1	1	1	CYP7A1	cytochrome P450, family 7, subfamily A, polypeptide 1
hsa-miR-216b	1	0	1	1	1	1	DRD2	dopamine receptor D2
hsa-miR-216b	1	0	1	1	1	1	GAD1	glutamate decarboxylase 1 (brain, 67kDa)
hsa-miR-216b	1	0	1	1	1	1	GRM5	glutamate receptor, metabotropic 5
hsa-miR-216b	1	0	1	1	1	1	GUCY1A2	guanylate cyclase 1, soluble, alpha 2
hsa-miR-216b	0	0	1	1	1	1	HTR1D	5-hydroxytryptamine (serotonin) receptor 1D, G protein-coupled
hsa-miR-216b	1	0	1	1	1	1	IGF1R	insulin-like growth factor 1 receptor
hsa-miR-216b	0	0	1	1	0	0	LTA4H	leukotriene A4 hydrolase
hsa-miR-216b	1	0	1	1	1	1	PPP3R1	protein phosphatase 3, regulatory subunit B, alpha
hsa-miR-216b	1	0	1	1	1	1	PTGFR	prostaglandin F receptor (FP)
hsa-miR-216b	0	0	1	1	1	1	TBC1D3C	TBC1 domain family, member 3C
hsa-miR-216b	1	0	1	0	1	1	SMAD5	SMAD family member 5
hsa-miR-216b	0	0	1	1	1	1	C16orf87	chromosome 16 open reading frame 87
hsa-miR-216b	1	0	1	0	1	1	SPOPL	speckle-type POZ protein-like
hsa-miR-216b	1	0	1	0	1	1	ARHGEF37	Rho guanine nucleotide exchange factor (GEF) 37
hsa-miR-216b	0	0	1	1	1	1	DDI1	DNA-damage inducible 1 homolog 1 (S. cerevisiae)
hsa-miR-216b	0	0	1	0	0	0	KLK2	kallikrein-related peptidase 2
hsa-miR-216b	1	0	1	1	1	1	AFTPH	aftiphilin
hsa-miR-216b	1	0	1	1	0	0	AWAT2	acyl-CoA wax alcohol acyltransferase 2
hsa-miR-216b	0	0	1	1	1	1	SMAD1	SMAD family member 1
hsa-miR-216b	1	0	1	1	1	1	GLE1	GLE1 RNA export mediator homolog (yeast)
hsa-miR-216b	1	0	1	1	1	1	HNRNPD	heterogeneous nuclear ribonucleoprotein D (AU-rich element RNA binding protein 1, 37kDa)
hsa-miR-216b	0	0	1	1	0	0	MANBAL	mannosidase, beta A, lysosomal-like
hsa-miR-216b	0	0	1	1	1	1	DYRK3	dual-specificity tyrosine-(Y)-phosphorylation regulated kinase 3
hsa-miR-216b	0	0	1	1	1	1	ALG11	asparagine-linked glycosylation 11, alpha-1,2-mannosyltransferase homolog (yeast)
hsa-miR-216b	0	0	1	1	0	0	LRRC52	leucine rich repeat containing 52
hsa-miR-216b	1	0	1	0	1	1	YPEL2	yippee-like 2 (Drosophila)
hsa-miR-216b	0	0	1	1	0	0	DUSP13	dual specificity phosphatase 13
hsa-miR-216b	1	0	1	1	1	1	EI24	etoposide induced 2.4 mRNA
hsa-miR-216b	0	0	1	1	1	1	TRIM13	tripartite motif containing 13
hsa-miR-216b	1	0	1	1	1	1	ZDHHC9	zinc finger, DHHC-type containing 9
hsa-miR-216b	0	0	1	1	1	1	PIWIL3	piwi-like 3 (Drosophila)
hsa-miR-216b	1	0	1	0	1	1	KIAA2022	KIAA2022
hsa-miR-216b	1	0	1	1	1	1	RBPMS	RNA binding protein with multiple splicing
hsa-miR-216b	1	0	1	1	1	1	CUL4A	cullin 4A
hsa-miR-216b	0	0	1	1	1	1	C1QL3	complement component 1, q subcomponent-like 3
hsa-miR-216b	1	0	1	1	1	1	FAM171A1	family with sequence similarity 171, member A1
hsa-miR-216b	0	0	1	1	1	1	SAMD13	sterile alpha motif domain containing 13
hsa-miR-216b	0	0	1	1	1	1	NCMAP	noncompact myelin associated protein
hsa-miR-216b	0	0	1	1	0	0	PNLIPRP3	pancreatic lipase-related protein 3
hsa-miR-216b	0	0	1	1	1	1	SEC61G	Sec61 gamma subunit
hsa-miR-216b	1	0	1	1	1	1	SLC25A53	solute carrier family 25, member 53
hsa-miR-216b	0	0	1	1	1	1	BEX5	brain expressed, X-linked 5
hsa-miR-216b	1	0	1	1	1	1	SORCS1	sortilin-related VPS10 domain containing receptor 1
hsa-miR-216b	1	0	1	1	1	1	KCNMA1	potassium large conductance calcium-activated channel, subfamily M, alpha member 1
hsa-miR-216b	0	0	1	1	0	0	LAT	linker for activation of T cells
hsa-miR-216b	1	0	1	1	1	1	RUNX2	runt-related transcription factor 2
hsa-miR-216b	0	0	1	1	1	1	PAPSS2	3'-phosphoadenosine 5'-phosphosulfate synthase 2
hsa-miR-216b	1	0	1	1	1	1	TMCC1	transmembrane and coiled-coil domain family 1
hsa-miR-216b	1	0	1	1	1	1	ZNF2	zinc finger protein 2
hsa-miR-216b	0	0	1	1	1	1	BTBD11	BTB (POZ) domain containing 11
hsa-miR-216b	0	0	1	1	0	0	CCDC58	coiled-coil domain containing 58
hsa-miR-216b	0	0	1	1	1	1	NARG2	NMDA receptor regulated 2
hsa-miR-216b	0	0	1	1	1	1	ZNF187	zinc finger protein 187
hsa-miR-216b	1	0	1	1	1	1	IQCB1	IQ motif containing B1
hsa-miR-216b	1	0	1	0	1	1	TNRC6B	trinucleotide repeat containing 6B
hsa-miR-216b	0	0	1	0	0	0	CSN1S1	casein alpha s1
hsa-miR-216b	1	0	1	1	1	1	AFF3	AF4/FMR2 family, member 3
hsa-miR-216b	0	0	1	0	1	1	STAG3L2	stromal antigen 3-like 2
hsa-miR-216b	1	0	1	1	1	1	FAM108B1	family with sequence similarity 108, member B1
hsa-miR-216b	1	0	1	1	1	1	SLC35F1	solute carrier family 35, member F1
hsa-miR-216b	1	0	1	1	1	1	CSNK1G3	casein kinase 1, gamma 3
hsa-miR-216b	1	0	1	1	1	1	TMPO	thymopoietin
hsa-miR-216b	1	0	1	0	1	1	GPR126	G protein-coupled receptor 126
hsa-miR-216b	0	0	1	1	1	1	HAT1	histone acetyltransferase 1
hsa-miR-216b	1	0	1	1	1	1	SAR1B	SAR1 homolog B (S. cerevisiae)
hsa-miR-216b	0	0	1	1	1	1	CSTF3	cleavage stimulation factor, 3' pre-RNA, subunit 3, 77kDa
hsa-miR-216b	1	0	1	1	1	1	PPM1B	protein phosphatase, Mg2+/Mn2+ dependent, 1B
hsa-miR-216b	1	0	1	1	1	1	ZNF704	zinc finger protein 704
hsa-miR-216b	1	0	1	1	1	1	GALNTL6	UDP-N-acetyl-alpha-D-galactosamine:polypeptide N-acetylgalactosaminyltransferase-like 6
hsa-miR-216b	1	0	1	0	1	1	RYR2	ryanodine receptor 2 (cardiac)
hsa-miR-216b	1	0	1	1	1	1	PDE4B	phosphodiesterase 4B, cAMP-specific
hsa-miR-216b	1	0	1	1	1	1	SCD5	stearoyl-CoA desaturase 5
hsa-miR-216b	0	0	1	0	1	1	FER1L6-AS1	FER1L6 antisense RNA 1
hsa-miR-216b	1	1	1	1	1	1	TRIM71	tripartite motif containing 71, E3 ubiquitin protein ligase
hsa-miR-216b	0	0	1	0	1	1	RGS21	regulator of G-protein signaling 21
hsa-miR-216b	1	0	1	1	1	1	THEMIS2	thymocyte selection associated family member 2
hsa-miR-216b	1	0	1	0	1	1	GK5	glycerol kinase 5 (putative)
hsa-miR-216b	1	0	1	1	1	1	KREMEN1	kringle containing transmembrane protein 1
hsa-miR-216b	1	0	1	0	1	1	USP9X	ubiquitin specific peptidase 9, X-linked
hsa-miR-216b	0	0	1	0	1	1	C15orf56	chromosome 15 open reading frame 56
hsa-miR-216b	1	0	1	1	1	1	FAM3C	family with sequence similarity 3, member C
hsa-miR-216b	0	0	1	1	0	0	CKLF	chemokine-like factor
hsa-miR-216b	1	0	1	1	1	1	PAPD5	PAP associated domain containing 5
hsa-miR-216b	1	0	1	1	1	1	MTMR12	myotubularin related protein 12
hsa-miR-216b	0	0	1	1	1	1	ZXDC	ZXD family zinc finger C
hsa-miR-216b	0	0	1	0	1	1	STEAP2	STEAP family member 2, metalloreductase
hsa-miR-216b	1	0	1	1	1	1	GLIS3	GLIS family zinc finger 3
hsa-miR-216b	1	0	1	1	1	1	CEP85L	centrosomal protein 85kDa-like
hsa-miR-216b	0	0	1	1	1	1	GEMIN8	gem (nuclear organelle) associated protein 8
hsa-miR-216b	0	0	1	1	1	1	TTC14	tetratricopeptide repeat domain 14
hsa-miR-216b	1	0	1	1	1	1	KDM5A	lysine (K)-specific demethylase 5A
hsa-miR-216b	0	0	1	1	1	1	TRAK1	trafficking protein, kinesin binding 1
hsa-miR-216b	1	0	1	1	1	1	TPM3	tropomyosin 3
hsa-miR-216b	1	0	1	0	1	1	TMEM237	transmembrane protein 237
hsa-miR-216b	1	0	1	1	1	1	IRF2BP2	interferon regulatory factor 2 binding protein 2
hsa-miR-216b	1	0	1	0	1	1	UBXN2B	UBX domain protein 2B
hsa-miR-216b	1	0	1	1	1	1	SRSF1	serine/arginine-rich splicing factor 1
hsa-miR-216b	1	0	1	1	1	1	HNRNPUL2	heterogeneous nuclear ribonucleoprotein U-like 2
hsa-miR-216b	1	0	1	1	1	1	LDB3	LIM domain binding 3
hsa-miR-216b	0	0	1	1	1	1	HSF5	heat shock transcription factor family member 5
hsa-miR-216b	0	0	1	0	1	1	ISCA1P1	iron-sulfur cluster assembly 1 homolog (S. cerevisiae) pseudogene 1
hsa-miR-216b	1	0	1	1	1	1	MGA	MAX gene associated
hsa-miR-216b	1	0	1	0	1	1	SCN3A	sodium channel, voltage-gated, type III, alpha subunit
hsa-miR-216b	1	0	1	1	0	0	ASIC2	acid-sensing (proton-gated) ion channel 2
hsa-miR-216b	1	0	1	1	1	1	ASIC1	acid-sensing (proton-gated) ion channel 1
hsa-miR-216b	0	0	1	1	1	1	ADSS	adenylosuccinate synthase
hsa-miR-216b	1	0	1	0	1	1	XIAP	X-linked inhibitor of apoptosis
hsa-miR-216b	1	0	1	0	1	1	BACH1	BTB and CNC homology 1, basic leucine zipper transcription factor 1
hsa-miR-216b	1	0	1	0	1	1	BMPR2	bone morphogenetic protein receptor, type II (serine/threonine kinase)
hsa-miR-216b	1	0	1	1	1	1	CDH13	cadherin 13, H-cadherin (heart)
hsa-miR-216b	1	0	1	0	1	1	CDK6	cyclin-dependent kinase 6
hsa-miR-216b	0	0	1	1	1	1	CHI3L1	chitinase 3-like 1 (cartilage glycoprotein-39)
hsa-miR-216b	1	0	1	1	1	1	CHKA	choline kinase alpha
hsa-miR-216b	1	0	1	0	1	1	CPD	carboxypeptidase D
hsa-miR-216b	1	0	1	1	1	1	MAPK14	mitogen-activated protein kinase 14
hsa-miR-216b	0	0	1	1	1	1	DARS	aspartyl-tRNA synthetase
hsa-miR-216b	1	0	1	1	1	1	CELSR3	cadherin, EGF LAG seven-pass G-type receptor 3 (flamingo homolog, Drosophila)
hsa-miR-216b	1	0	1	1	1	1	CELSR2	cadherin, EGF LAG seven-pass G-type receptor 2 (flamingo homolog, Drosophila)
hsa-miR-216b	1	0	1	1	1	1	EIF1AX	eukaryotic translation initiation factor 1A, X-linked
hsa-miR-216b	1	0	1	0	1	1	EIF2S3	eukaryotic translation initiation factor 2, subunit 3 gamma, 52kDa
hsa-miR-216b	0	0	1	0	1	1	EMP1	epithelial membrane protein 1
hsa-miR-216b	0	0	1	0	1	1	FMO2	flavin containing monooxygenase 2 (non-functional)
hsa-miR-216b	0	0	1	1	0	0	ARAF	v-raf murine sarcoma 3611 viral oncogene homolog
hsa-miR-216b	1	0	1	0	1	1	ARNT	aryl hydrocarbon receptor nuclear translocator
hsa-miR-216b	1	0	1	1	1	1	BNC1	basonuclin 1
hsa-miR-216b	1	0	1	0	1	1	BMP8B	bone morphogenetic protein 8b
hsa-miR-216b	1	0	1	1	1	1	CDC25A	cell division cycle 25 homolog A (S. pombe)
hsa-miR-216b	0	0	1	1	1	1	CTSE	cathepsin E
hsa-miR-216b	1	0	1	1	1	1	DUSP6	dual specificity phosphatase 6
hsa-miR-216b	1	0	1	0	1	1	FUT4	fucosyltransferase 4 (alpha (1,3) fucosyltransferase, myeloid-specific)
hsa-miR-216b	1	0	1	1	1	1	TNC	tenascin C
hsa-miR-216b	1	0	1	1	1	1	JAG2	jagged 2
hsa-miR-216b	1	0	1	1	1	1	KCNA3	potassium voltage-gated channel, shaker-related subfamily, member 3
hsa-miR-216b	1	0	1	1	1	1	KCNA5	potassium voltage-gated channel, shaker-related subfamily, member 5
hsa-miR-216b	1	0	1	1	1	1	MARCKS	myristoylated alanine-rich protein kinase C substrate
hsa-miR-216b	1	0	1	0	1	1	MXD1	MAX dimerization protein 1
hsa-miR-216b	1	0	1	1	1	1	MAN2A1	mannosidase, alpha, class 2A, member 1
hsa-miR-216b	1	0	1	1	1	1	MAX	MYC associated factor X
hsa-miR-216b	0	0	1	0	1	1	CXCL9	chemokine (C-X-C motif) ligand 9
hsa-miR-216b	0	0	1	1	1	1	MTRR	5-methyltetrahydrofolate-homocysteine methyltransferase reductase
hsa-miR-216b	1	0	1	1	1	1	PPP1R12B	protein phosphatase 1, regulatory subunit 12B
hsa-miR-216b	0	0	1	1	1	1	NID1	nidogen 1
hsa-miR-216b	1	0	1	1	1	1	NPAT	nuclear protein, ataxia-telangiectasia locus
hsa-miR-216b	0	0	1	0	1	1	OPHN1	oligophrenin 1
hsa-miR-216b	1	0	1	1	1	1	OSBP	oxysterol binding protein
hsa-miR-216b	1	0	1	0	1	1	CDK17	cyclin-dependent kinase 17
hsa-miR-216b	1	0	1	1	1	1	PHF1	PHD finger protein 1
hsa-miR-216b	0	0	1	1	1	1	SERPINB5	serpin peptidase inhibitor, clade B (ovalbumin), member 5
hsa-miR-216b	0	0	1	1	1	1	PIGF	phosphatidylinositol glycan anchor biosynthesis, class F
hsa-miR-216b	0	0	1	0	1	1	PMP2	peripheral myelin protein 2
hsa-miR-216b	1	0	1	1	1	1	PPP1CB	protein phosphatase 1, catalytic subunit, beta isozyme
hsa-miR-216b	0	0	1	1	0	0	PPP1R8	protein phosphatase 1, regulatory subunit 8
hsa-miR-216b	0	0	1	1	1	1	MAPK9	mitogen-activated protein kinase 9
hsa-miR-216b	0	0	1	0	0	0	PSMB10	proteasome (prosome, macropain) subunit, beta type, 10
hsa-miR-216b	0	0	1	1	1	1	PTPN12	protein tyrosine phosphatase, non-receptor type 12
hsa-miR-216b	0	0	1	1	1	1	PTPRC	protein tyrosine phosphatase, receptor type, C
hsa-miR-216b	1	0	1	1	1	1	PTPRO	protein tyrosine phosphatase, receptor type, O
hsa-miR-216b	0	0	1	1	1	1	PTPRR	protein tyrosine phosphatase, receptor type, R
hsa-miR-216b	1	0	1	0	1	1	SORT1	sortilin 1
hsa-miR-216b	0	0	1	1	1	1	XCL1	chemokine (C motif) ligand 1
hsa-miR-216b	1	0	1	1	1	1	SH3GL2	SH3-domain GRB2-like 2
hsa-miR-216b	0	0	1	1	1	1	SNAPC1	small nuclear RNA activating complex, polypeptide 1, 43kDa
hsa-miR-216b	1	0	1	0	1	1	SOX11	SRY (sex determining region Y)-box 11
hsa-miR-216b	1	0	1	1	1	1	TDG	thymine-DNA glycosylase
hsa-miR-216b	1	0	1	1	1	1	UBE2B	ubiquitin-conjugating enzyme E2B
hsa-miR-216b	1	0	1	0	1	1	UBE2D2	ubiquitin-conjugating enzyme E2D 2
hsa-miR-216b	1	0	1	1	1	1	UBE2D3	ubiquitin-conjugating enzyme E2D 3
hsa-miR-216b	1	0	1	1	1	1	VAV2	vav 2 guanine nucleotide exchange factor
hsa-miR-216b	1	0	1	1	1	1	YY1	YY1 transcription factor
hsa-miR-216b	1	0	1	1	1	1	DEK	DEK oncogene
hsa-miR-216b	0	0	1	1	1	1	PIP5K1A	phosphatidylinositol-4-phosphate 5-kinase, type I, alpha
hsa-miR-216b	1	0	1	0	1	1	VAPA	VAMP (vesicle-associated membrane protein)-associated protein A, 33kDa
hsa-miR-216b	1	0	1	1	1	1	DYRK2	dual-specificity tyrosine-(Y)-phosphorylation regulated kinase 2
hsa-miR-216b	1	0	1	0	1	1	CUL3	cullin 3
hsa-miR-216b	1	0	1	0	1	1	CNTNAP1	contactin associated protein 1
hsa-miR-216b	0	0	1	1	1	1	DDO	D-aspartate oxidase
hsa-miR-216b	1	0	1	1	1	1	CDC14A	CDC14 cell division cycle 14 homolog A (S. cerevisiae)
hsa-miR-216b	1	0	1	1	1	1	EXO1	exonuclease 1
hsa-miR-216b	0	0	1	1	0	0	TNFRSF25	tumor necrosis factor receptor superfamily, member 25
hsa-miR-216b	1	0	1	1	1	1	ADAM9	ADAM metallopeptidase domain 9
hsa-miR-216b	1	0	1	1	1	1	PEX11B	peroxisomal biogenesis factor 11 beta
hsa-miR-216b	0	0	1	1	1	1	SUCLA2	succinate-CoA ligase, ADP-forming, beta subunit
hsa-miR-216b	1	0	1	1	1	1	IQGAP1	IQ motif containing GTPase activating protein 1
hsa-miR-216b	1	0	1	1	1	1	KAT2B	K(lysine) acetyltransferase 2B
hsa-miR-216b	0	0	1	1	1	1	PRPF4B	PRP4 pre-mRNA processing factor 4 homolog B (yeast)
hsa-miR-216b	1	0	1	0	1	1	WASL	Wiskott-Aldrich syndrome-like
hsa-miR-216b	0	0	1	1	1	1	MPZL1	myelin protein zero-like 1
hsa-miR-216b	0	0	1	1	1	1	RNF8	ring finger protein 8, E3 ubiquitin protein ligase
hsa-miR-216b	0	0	1	1	1	1	UBA3	ubiquitin-like modifier activating enzyme 3
hsa-miR-216b	1	0	1	1	1	1	CDH17	cadherin 17, LI cadherin (liver-intestine)
hsa-miR-216b	0	0	1	1	1	1	DDIT3	DNA-damage-inducible transcript 3
hsa-miR-216b	1	0	1	1	1	1	FGF12	fibroblast growth factor 12
hsa-miR-216b	0	0	1	1	1	1	GYG1	glycogenin 1
hsa-miR-216b	0	0	1	1	1	1	LBP	lipopolysaccharide binding protein
hsa-miR-216b	1	0	1	1	1	1	PPP2CB	protein phosphatase 2, catalytic subunit, beta isozyme
hsa-miR-216b	0	0	1	1	1	1	SLC1A1	solute carrier family 1 (neuronal/epithelial high affinity glutamate transporter, system Xag), member 1
hsa-miR-216b	0	0	1	0	1	1	SLC1A3	solute carrier family 1 (glial high affinity glutamate transporter), member 3
hsa-miR-216b	0	0	1	1	0	0	WNT2B	wingless-type MMTV integration site family, member 2B
hsa-miR-216b	1	0	1	1	0	0	SYNGR3	synaptogyrin 3
hsa-miR-216b	1	0	1	1	1	1	GDA	guanine deaminase
hsa-miR-216b	0	0	1	1	1	1	ASCL1	achaete-scute complex homolog 1 (Drosophila)
hsa-miR-216b	1	0	1	0	1	1	ETV5	ets variant 5
hsa-miR-216b	1	0	1	0	1	1	ACSL4	acyl-CoA synthetase long-chain family member 4
hsa-miR-216b	1	0	1	1	1	1	FOXK2	forkhead box K2
hsa-miR-216b	1	0	1	1	1	1	MLLT3	myeloid/lymphoid or mixed-lineage leukemia (trithorax homolog, Drosophila); translocated to, 3
hsa-miR-216b	1	0	1	1	1	1	RAB11A	RAB11A, member RAS oncogene family
hsa-miR-216b	1	0	1	1	0	0	PIAS2	protein inhibitor of activated STAT, 2
hsa-miR-216b	0	0	1	1	0	0	PRY	PTPN13-like, Y-linked
hsa-miR-216b	0	0	1	1	1	1	EIF2AK3	eukaryotic translation initiation factor 2-alpha kinase 3
hsa-miR-216b	1	0	1	0	1	1	ROCK2	Rho-associated, coiled-coil containing protein kinase 2
hsa-miR-216b	0	0	1	1	1	1	ITM2A	integral membrane protein 2A
hsa-miR-216b	0	0	1	1	1	1	CDH6	cadherin 6, type 2, K-cadherin (fetal kidney)
hsa-miR-216b	0	0	1	1	1	1	CDKN2B	cyclin-dependent kinase inhibitor 2B (p15, inhibits CDK4)
hsa-miR-216b	1	0	1	0	1	1	DOCK3	dedicator of cytokinesis 3
hsa-miR-216b	0	0	1	1	1	1	DSC1	desmocollin 1
hsa-miR-216b	0	0	1	1	1	1	GDF10	growth differentiation factor 10
hsa-miR-216b	0	0	1	1	1	1	PRCP	prolylcarboxypeptidase (angiotensinase C)
hsa-miR-216b	1	0	1	1	1	1	RELN	reelin
hsa-miR-216b	1	0	1	0	1	1	NUP153	nucleoporin 153kDa
hsa-miR-216b	0	0	1	0	1	1	EPHA3	EPH receptor A3
hsa-miR-216b	1	0	1	1	1	1	ETS1	v-ets erythroblastosis virus E26 oncogene homolog 1 (avian)
hsa-miR-216b	0	0	1	0	1	1	FOSL2	FOS-like antigen 2
hsa-miR-216b	0	0	1	1	1	1	MSTN	myostatin
hsa-miR-216b	1	0	1	1	1	1	GJA5	gap junction protein, alpha 5, 40kDa
hsa-miR-216b	1	0	1	1	1	1	GPR3	G protein-coupled receptor 3
hsa-miR-216b	1	0	1	0	1	1	RAPGEF1	Rap guanine nucleotide exchange factor (GEF) 1
hsa-miR-216b	0	0	1	1	0	0	NCKAP1L	NCK-associated protein 1-like
hsa-miR-216b	0	0	1	1	1	1	ITGAD	integrin, alpha D
hsa-miR-216b	1	0	1	1	1	1	MYCL1	v-myc myelocytomatosis viral oncogene homolog 1, lung carcinoma derived (avian)
hsa-miR-216b	0	0	1	1	1	1	NUP98	nucleoporin 98kDa
hsa-miR-216b	1	0	1	0	1	1	PRKAB2	protein kinase, AMP-activated, beta 2 non-catalytic subunit
hsa-miR-216b	0	0	1	1	1	1	SKIL	SKI-like oncogene
hsa-miR-216b	1	0	1	0	1	1	CCDC6	coiled-coil domain containing 6
hsa-miR-216b	1	0	1	1	1	1	RND2	Rho family GTPase 2
hsa-miR-216b	1	0	1	1	1	1	PIGK	phosphatidylinositol glycan anchor biosynthesis, class K
hsa-miR-216b	1	0	1	1	1	1	SCARB2	scavenger receptor class B, member 2
hsa-miR-216b	1	0	1	1	1	1	LPP	LIM domain containing preferred translocation partner in lipoma
hsa-miR-216b	0	0	1	1	1	1	CCL8	chemokine (C-C motif) ligand 8
hsa-miR-216b	1	0	1	1	1	1	TERF2	telomeric repeat binding factor 2
hsa-miR-216b	1	0	1	1	1	1	EVI5	ecotropic viral integration site 5
hsa-miR-216b	1	0	1	1	1	1	ARPC5	actin related protein 2/3 complex, subunit 5, 16kDa
hsa-miR-216b	1	0	1	0	1	1	TSPAN2	tetraspanin 2
hsa-miR-216b	1	0	1	1	1	1	NAMPT	nicotinamide phosphoribosyltransferase
hsa-miR-216b	0	0	1	1	1	1	RNF41	ring finger protein 41
hsa-miR-216b	0	0	1	1	1	1	MPHOSPH6	M-phase phosphoprotein 6
hsa-miR-216b	0	0	1	1	1	1	SLC17A2	solute carrier family 17 (sodium phosphate), member 2
hsa-miR-216b	1	0	1	0	1	1	SPRY3	sprouty homolog 3 (Drosophila)
hsa-miR-216b	0	0	1	0	1	1	STAM2	signal transducing adaptor molecule (SH3 domain and ITAM motif) 2
hsa-miR-216b	0	0	1	1	1	1	DSCR4	Down syndrome critical region gene 4
hsa-miR-216b	0	0	1	1	1	1	MFAP3	microfibrillar-associated protein 3
hsa-miR-216b	1	0	1	1	1	1	FOXO4	forkhead box O4
hsa-miR-216b	1	0	1	1	1	1	SEMA3A	sema domain, immunoglobulin domain (Ig), short basic domain, secreted, (semaphorin) 3A
hsa-miR-216b	1	0	1	1	1	1	BPNT1	3'(2'), 5'-bisphosphate nucleotidase 1
hsa-miR-216b	1	0	1	1	1	1	SPON1	spondin 1, extracellular matrix protein
hsa-miR-216b	0	0	1	1	1	1	IRF6	interferon regulatory factor 6
hsa-miR-216b	0	0	1	1	1	1	PA2G4	proliferation-associated 2G4, 38kDa
hsa-miR-216b	1	0	1	1	1	1	PDGFRA	platelet-derived growth factor receptor, alpha polypeptide
hsa-miR-216b	1	0	1	1	1	1	PRKAA1	protein kinase, AMP-activated, alpha 1 catalytic subunit
hsa-miR-216b	1	0	1	1	1	1	STK4	serine/threonine kinase 4
hsa-miR-216b	0	0	1	1	1	1	SLC25A17	solute carrier family 25 (mitochondrial carrier; peroxisomal membrane protein, 34kDa), member 17
hsa-miR-216b	1	0	1	1	1	1	NEBL	nebulette
hsa-miR-216b	1	0	1	1	1	1	HEXIM1	hexamethylene bis-acetamide inducible 1
hsa-miR-216b	1	0	1	0	1	1	IGF2BP1	insulin-like growth factor 2 mRNA binding protein 1
hsa-miR-216b	0	0	1	1	1	1	CLDN16	claudin 16
hsa-miR-216b	0	0	1	1	1	1	SYPL1	synaptophysin-like 1
hsa-miR-216b	1	0	1	1	1	1	ZBTB33	zinc finger and BTB domain containing 33
hsa-miR-216b	1	0	1	1	1	1	PRDX3	peroxiredoxin 3
hsa-miR-216b	1	0	1	1	1	1	RAB35	RAB35, member RAS oncogene family
hsa-miR-216b	1	0	1	0	1	1	SLC5A3	solute carrier family 5 (sodium/myo-inositol cotransporter), member 3
hsa-miR-216b	1	0	1	0	1	1	SOX12	SRY (sex determining region Y)-box 12
hsa-miR-216b	1	0	1	1	1	1	ZNF12	zinc finger protein 12
hsa-miR-216b	0	0	1	1	1	1	DMC1	DMC1 dosage suppressor of mck1 homolog, meiosis-specific homologous recombination (yeast)
hsa-miR-216b	0	0	1	1	0	0	TCEB2	transcription elongation factor B (SIII), polypeptide 2 (18kDa, elongin B)
hsa-miR-216b	0	0	1	1	0	0	USF1	upstream transcription factor 1
hsa-miR-216b	1	0	1	1	1	1	UTRN	utrophin
hsa-miR-216b	0	0	1	1	1	1	ZNF80	zinc finger protein 80
hsa-miR-216b	1	0	1	1	1	1	ZNF81	zinc finger protein 81
hsa-miR-216b	1	0	1	0	1	1	PRSS23	protease, serine, 23
hsa-miR-216b	0	0	1	1	1	1	WIF1	WNT inhibitory factor 1
hsa-miR-216b	1	0	1	1	1	1	DUSP10	dual specificity phosphatase 10
hsa-miR-216b	0	0	1	1	1	1	STXBP3	syntaxin binding protein 3
hsa-miR-216b	1	0	1	1	1	1	ZNF236	zinc finger protein 236
hsa-miR-216b	1	0	1	1	1	1	CASC3	cancer susceptibility candidate 3
hsa-miR-216b	0	0	1	1	1	1	KLRK1	killer cell lectin-like receptor subfamily K, member 1
hsa-miR-216b	0	0	1	1	1	1	FRAT2	frequently rearranged in advanced T-cell lymphomas 2
hsa-miR-216b	1	0	1	1	1	1	ICOS	inducible T-cell co-stimulator
hsa-miR-216b	1	0	1	1	1	1	FBXL2	F-box and leucine-rich repeat protein 2
hsa-miR-216b	1	0	1	1	1	1	MGAT4A	mannosyl (alpha-1,3-)-glycoprotein beta-1,4-N-acetylglucosaminyltransferase, isozyme A
hsa-miR-216b	1	0	1	1	1	1	RYBP	RING1 and YY1 binding protein
hsa-miR-216b	1	0	1	1	1	1	RHOQ	ras homolog family member Q
hsa-miR-216b	1	0	1	1	1	1	HEY2	hairy/enhancer-of-split related with YRPW motif 2
hsa-miR-216b	1	0	1	1	1	1	HS2ST1	heparan sulfate 2-O-sulfotransferase 1
hsa-miR-216b	0	0	1	1	1	1	SLC39A6	solute carrier family 39 (zinc transporter), member 6
hsa-miR-216b	1	0	1	1	1	1	MAPRE1	microtubule-associated protein, RP/EB family, member 1
hsa-miR-216b	1	0	1	1	1	1	RANBP6	RAN binding protein 6
hsa-miR-216b	1	0	1	1	1	1	SF3B1	splicing factor 3b, subunit 1, 155kDa
hsa-miR-216b	1	0	1	0	1	1	FLRT2	fibronectin leucine rich transmembrane protein 2
hsa-miR-216b	1	0	1	1	1	1	LRP12	low density lipoprotein receptor-related protein 12
hsa-miR-216b	0	0	1	1	1	1	UBQLN1	ubiquilin 1
hsa-miR-216b	1	0	1	1	1	1	BAZ1A	bromodomain adjacent to zinc finger domain, 1A
hsa-miR-216b	1	0	1	0	1	1	CLIC4	chloride intracellular channel 4
hsa-miR-216b	1	0	1	1	1	1	LAMP2	lysosomal-associated membrane protein 2
hsa-miR-216b	1	0	1	0	1	1	C16orf72	chromosome 16 open reading frame 72
hsa-miR-216b	1	0	1	1	1	1	ZBTB44	zinc finger and BTB domain containing 44
hsa-miR-216b	0	0	1	1	1	1	ORMDL2	ORM1-like 2 (S. cerevisiae)
hsa-miR-216b	1	0	1	1	1	1	CELSR1	cadherin, EGF LAG seven-pass G-type receptor 1 (flamingo homolog, Drosophila)
hsa-miR-216b	1	0	1	0	1	1	ODZ1	odz, odd Oz/ten-m homolog 1 (Drosophila)
hsa-miR-216b	0	0	1	1	1	1	TRAM1	translocation associated membrane protein 1
hsa-miR-216b	1	0	1	1	1	1	LHX6	LIM homeobox 6
hsa-miR-216b	0	0	1	1	1	1	KCNV1	potassium channel, subfamily V, member 1
hsa-miR-216b	1	0	1	0	1	1	DIEXF	digestive organ expansion factor homolog (zebrafish)
hsa-miR-216b	0	0	1	0	0	0	SND1-IT1	SND1 intronic transcript 1 (non-protein coding)
hsa-miR-216b	1	0	1	1	1	1	DKK2	dickkopf 2 homolog (Xenopus laevis)
hsa-miR-216b	1	0	1	1	0	0	RBMXL2	RNA binding motif protein, X-linked-like 2
hsa-miR-216b	0	0	1	1	1	1	DZIP3	DAZ interacting protein 3, zinc finger
hsa-miR-216b	0	0	1	1	0	0	EMC2	ER membrane protein complex subunit 2
hsa-miR-216b	1	0	1	1	1	1	ULK2	unc-51-like kinase 2 (C. elegans)
hsa-miR-216b	1	0	1	0	1	1	TOX	thymocyte selection-associated high mobility group box
hsa-miR-216b	1	0	1	0	1	1	MLEC	malectin
hsa-miR-216b	0	0	1	0	1	1	EPM2AIP1	EPM2A (laforin) interacting protein 1
hsa-miR-216b	1	0	1	1	1	1	NUAK1	NUAK family, SNF1-like kinase, 1
hsa-miR-216b	1	0	1	0	1	1	ICK	intestinal cell (MAK-like) kinase
hsa-miR-216b	1	0	1	1	1	1	RALGAPA1	Ral GTPase activating protein, alpha subunit 1 (catalytic)
hsa-miR-216b	1	0	1	0	1	1	WDFY3	WD repeat and FYVE domain containing 3
hsa-miR-216b	1	0	1	1	1	1	RAB21	RAB21, member RAS oncogene family
hsa-miR-216b	1	0	1	1	1	1	STK38L	serine/threonine kinase 38 like
hsa-miR-216b	1	0	1	0	1	1	ZNF609	zinc finger protein 609
hsa-miR-216b	1	0	1	0	1	1	PEG10	paternally expressed 10
hsa-miR-216b	1	0	1	1	1	1	SIK2	salt-inducible kinase 2
hsa-miR-216b	1	0	1	1	1	1	PLCB1	phospholipase C, beta 1 (phosphoinositide-specific)
hsa-miR-216b	1	0	1	1	1	1	WDR7	WD repeat domain 7
hsa-miR-216b	1	0	1	1	0	0	SMG5	smg-5 homolog, nonsense mediated mRNA decay factor (C. elegans)
hsa-miR-216b	1	0	1	1	1	1	NIPBL	Nipped-B homolog (Drosophila)
hsa-miR-216b	1	0	1	1	1	1	CCDC28A	coiled-coil domain containing 28A
hsa-miR-216b	1	0	1	1	1	1	CNOT6	CCR4-NOT transcription complex, subunit 6
hsa-miR-216b	1	0	1	1	1	1	MYRIP	myosin VIIA and Rab interacting protein
hsa-miR-216b	0	0	1	1	1	1	NOL11	nucleolar protein 11
hsa-miR-216b	0	0	1	1	1	1	TMEM87A	transmembrane protein 87A
hsa-miR-216b	1	0	1	1	1	1	WSB1	WD repeat and SOCS box containing 1
hsa-miR-216b	0	0	1	1	1	1	TES	testis derived transcript (3 LIM domains)
hsa-miR-216b	1	0	1	1	1	1	PHF19	PHD finger protein 19
hsa-miR-216b	1	0	1	0	1	1	RRM2B	ribonucleotide reductase M2 B (TP53 inducible)
hsa-miR-216b	1	0	1	1	0	0	COL5A3	collagen, type V, alpha 3
hsa-miR-216b	0	0	1	1	1	1	PCF11	PCF11, cleavage and polyadenylation factor subunit, homolog (S. cerevisiae)
hsa-miR-216b	1	0	1	1	1	1	TAF9B	TAF9B RNA polymerase II, TATA box binding protein (TBP)-associated factor, 31kDa
hsa-miR-216b	0	0	1	1	1	1	LACTB2	lactamase, beta 2
hsa-miR-216b	0	0	1	1	1	1	CCDC53	coiled-coil domain containing 53
hsa-miR-216b	0	0	1	1	1	1	PPIL1	peptidylprolyl isomerase (cyclophilin)-like 1
hsa-miR-216b	0	0	1	1	1	1	MRPS16	mitochondrial ribosomal protein S16
hsa-miR-216b	1	0	1	1	1	1	GOLT1B	golgi transport 1B
hsa-miR-216b	1	0	1	1	1	1	PALLD	palladin, cytoskeletal associated protein
hsa-miR-216b	0	0	1	1	1	1	ZFR	zinc finger RNA binding protein
hsa-miR-216b	0	0	1	1	0	0	CPQ	carboxypeptidase Q
hsa-miR-216b	1	0	1	0	1	1	HPCAL4	hippocalcin like 4
hsa-miR-216b	0	0	1	1	1	1	CDH9	cadherin 9, type 2 (T1-cadherin)
hsa-miR-216b	0	0	1	1	1	1	WBP11	WW domain binding protein 11
hsa-miR-216b	1	0	1	0	1	1	RNF141	ring finger protein 141
hsa-miR-216b	1	0	1	0	1	1	CRIM1	cysteine rich transmembrane BMP regulator 1 (chordin-like)
hsa-miR-216b	0	0	1	1	1	1	DTL	denticleless E3 ubiquitin protein ligase homolog (Drosophila)
hsa-miR-216b	1	0	1	1	1	1	C20orf111	chromosome 20 open reading frame 111
hsa-miR-216b	0	0	1	1	0	0	ATP8A2	ATPase, aminophospholipid transporter, class I, type 8A, member 2
hsa-miR-216b	1	0	1	0	1	1	RAB8B	RAB8B, member RAS oncogene family
hsa-miR-216b	1	0	1	1	1	1	IER5	immediate early response 5
hsa-miR-216b	1	0	1	0	1	1	FZD3	frizzled family receptor 3
hsa-miR-216b	0	0	1	1	1	1	USP18	ubiquitin specific peptidase 18
hsa-miR-216b	1	0	1	0	1	1	KLHL3	kelch-like 3 (Drosophila)
hsa-miR-216b	1	0	1	1	1	1	CPSF2	cleavage and polyadenylation specific factor 2, 100kDa
hsa-miR-216b	1	0	1	1	1	1	INO80	INO80 homolog (S. cerevisiae)
hsa-miR-216b	1	0	1	0	1	1	UBE2Q1	ubiquitin-conjugating enzyme E2Q family member 1
hsa-miR-216b	1	0	1	1	1	1	HAUS6	HAUS augmin-like complex, subunit 6
hsa-miR-216b	0	0	1	1	0	0	NUP62CL	nucleoporin 62kDa C-terminal like
hsa-miR-216b	1	0	1	0	1	1	DCAF16	DDB1 and CUL4 associated factor 16
hsa-miR-216b	1	0	1	1	1	1	TBC1D8B	TBC1 domain family, member 8B (with GRAM domain)
hsa-miR-216b	0	0	1	1	1	1	WHSC1L1	Wolf-Hirschhorn syndrome candidate 1-like 1
hsa-miR-216b	1	0	1	1	1	1	RNF125	ring finger protein 125, E3 ubiquitin protein ligase
hsa-miR-216b	0	0	1	1	1	1	C1orf56	chromosome 1 open reading frame 56
hsa-miR-216b	1	0	1	1	0	0	STX17	syntaxin 17
hsa-miR-216b	0	0	1	0	1	1	MREG	melanoregulin
hsa-miR-216b	0	0	1	1	1	1	TMEM38B	transmembrane protein 38B
hsa-miR-216b	0	0	1	1	1	1	TSR1	TSR1, 20S rRNA accumulation, homolog (S. cerevisiae)
hsa-miR-216b	1	0	1	0	1	1	LGI2	leucine-rich repeat LGI family, member 2
hsa-miR-216b	1	0	1	1	1	1	C20orf20	chromosome 20 open reading frame 20
hsa-miR-216b	0	0	1	1	1	1	RBM41	RNA binding motif protein 41
hsa-miR-216b	1	0	1	1	1	1	LARP6	La ribonucleoprotein domain family, member 6
hsa-miR-216b	1	0	1	0	1	1	LIN7C	lin-7 homolog C (C. elegans)
hsa-miR-216b	1	0	1	1	1	1	NRP2	neuropilin 2
hsa-miR-216b	1	0	1	1	1	1	CAMK2N1	calcium/calmodulin-dependent protein kinase II inhibitor 1
hsa-miR-216b	1	0	1	1	1	1	GNG12	guanine nucleotide binding protein (G protein), gamma 12
hsa-miR-216b	0	0	1	1	1	1	ERRFI1	ERBB receptor feedback inhibitor 1
hsa-miR-216b	1	0	1	1	1	1	KCTD5	potassium channel tetramerisation domain containing 5
hsa-miR-216b	1	0	1	0	1	1	FAM190B	family with sequence similarity 190, member B
hsa-miR-216b	1	0	1	0	1	1	CCNJ	cyclin J
hsa-miR-216b	1	0	1	1	1	1	PLEKHA3	pleckstrin homology domain containing, family A (phosphoinositide binding specific) member 3
hsa-miR-216b	0	0	1	1	1	1	KLHL4	kelch-like 4 (Drosophila)
hsa-miR-216b	0	0	1	1	1	1	IFNK	interferon, kappa
hsa-miR-216b	1	0	1	0	1	1	SLAMF8	SLAM family member 8
hsa-miR-216b	1	0	1	0	1	1	PAPOLB	poly(A) polymerase beta (testis specific)
hsa-miR-216b	1	0	1	1	1	1	C1GALT1	core 1 synthase, glycoprotein-N-acetylgalactosamine 3-beta-galactosyltransferase, 1
hsa-miR-216b	0	0	1	1	1	1	CMC2	COX assembly mitochondrial protein 2 homolog (S. cerevisiae)
hsa-miR-216b	0	0	1	1	1	1	ANKMY2	ankyrin repeat and MYND domain containing 2
hsa-miR-216b	1	0	1	1	1	1	KIAA1244	KIAA1244
hsa-miR-216b	1	0	1	0	1	1	EIF5A2	eukaryotic translation initiation factor 5A2
hsa-miR-216b	1	0	1	1	0	0	THAP11	THAP domain containing 11
hsa-miR-216b	1	0	1	1	1	1	RAB22A	RAB22A, member RAS oncogene family
hsa-miR-216b	1	0	1	0	1	1	FAM40B	family with sequence similarity 40, member B
hsa-miR-216b	1	0	1	1	1	1	DLG3	discs, large homolog 3 (Drosophila)
hsa-miR-216b	1	0	1	1	1	1	SIPA1L2	signal-induced proliferation-associated 1 like 2
hsa-miR-216b	1	0	1	0	1	1	WDFY1	WD repeat and FYVE domain containing 1
hsa-miR-216b	0	0	1	1	1	1	KLHL1	kelch-like 1 (Drosophila)
hsa-miR-216b	1	0	1	0	1	1	SH3RF1	SH3 domain containing ring finger 1
hsa-miR-216b	1	0	1	0	1	1	GPAM	glycerol-3-phosphate acyltransferase, mitochondrial
hsa-miR-216b	1	0	1	1	1	1	FAM160B1	family with sequence similarity 160, member B1
hsa-miR-216b	1	0	1	0	1	1	RAP2A	RAP2A, member of RAS oncogene family
hsa-miR-216b	1	0	1	0	1	1	XK	X-linked Kx blood group (McLeod syndrome)
hsa-miR-216b	1	0	1	1	1	1	MTMR3	myotubularin related protein 3
hsa-miR-216b	0	0	1	1	0	0	TRIB3	tribbles homolog 3 (Drosophila)
hsa-miR-216b	1	0	1	1	1	1	PELI2	pellino E3 ubiquitin protein ligase family member 2
hsa-miR-216b	1	0	1	1	1	1	SENP2	SUMO1/sentrin/SMT3 specific peptidase 2
hsa-miR-216b	0	0	1	0	1	1	CFL2	cofilin 2 (muscle)
hsa-miR-216b	1	0	1	1	1	1	FOXM1	forkhead box M1
hsa-miR-216b	0	0	1	1	0	0	TMSB15A	thymosin beta 15a
hsa-miR-216b	0	0	1	1	1	1	ITM2B	integral membrane protein 2B
hsa-miR-216b	1	0	1	0	1	1	CSNK1G1	casein kinase 1, gamma 1
hsa-miR-216b	0	0	1	1	1	1	CHP2	calcineurin-like EF hand protein 2
hsa-miR-216b	1	0	1	1	1	1	GOLPH3	golgi phosphoprotein 3 (coat-protein)
hsa-miR-216b	0	0	1	1	1	1	TCTA	T-cell leukemia translocation altered
hsa-miR-216b	0	0	1	1	1	1	HHIP	hedgehog interacting protein
hsa-miR-216b	0	0	1	1	0	0	NUCKS1	nuclear casein kinase and cyclin-dependent kinase substrate 1
hsa-miR-216b	0	0	1	1	1	1	ACBD3	acyl-CoA binding domain containing 3
hsa-miR-216b	0	0	1	1	1	1	SFXN1	sideroflexin 1
hsa-miR-216b	1	0	1	1	1	1	C6orf106	chromosome 6 open reading frame 106
hsa-miR-216b	1	0	1	1	1	1	PER2	period homolog 2 (Drosophila)
hsa-miR-216b	1	0	1	1	1	1	RFX7	regulatory factor X, 7
hsa-miR-216b	0	0	1	0	1	1	TRPM8	transient receptor potential cation channel, subfamily M, member 8
hsa-miR-216b	0	0	1	0	1	1	C2orf49	chromosome 2 open reading frame 49
hsa-miR-216b	1	0	1	1	1	1	EFHD2	EF-hand domain family, member D2
hsa-miR-216b	1	0	1	1	1	1	PSTPIP2	proline-serine-threonine phosphatase interacting protein 2
hsa-miR-216b	1	0	1	1	1	1	LRRC2	leucine rich repeat containing 2
hsa-miR-216b	1	0	1	1	1	1	CDC73	cell division cycle 73, Paf1/RNA polymerase II complex component, homolog (S. cerevisiae)
hsa-miR-216b	1	0	1	1	1	1	RNF128	ring finger protein 128, E3 ubiquitin protein ligase
hsa-miR-216b	0	0	1	1	1	1	NDNF	neuron-derived neurotrophic factor
hsa-miR-216b	0	0	1	1	1	1	AKIRIN1	akirin 1
hsa-miR-216b	1	0	1	1	1	1	PPP1R3B	protein phosphatase 1, regulatory subunit 3B
hsa-miR-216b	1	0	1	0	1	1	ZFHX4	zinc finger homeobox 4
hsa-miR-216b	0	0	1	1	1	1	WDR78	WD repeat domain 78
hsa-miR-216b	1	0	1	1	1	1	CPED1	cadherin-like and PC-esterase domain containing 1
hsa-miR-216b	1	0	1	1	1	1	POF1B	premature ovarian failure, 1B
hsa-miR-216b	1	0	1	1	0	0	UBTD1	ubiquitin domain containing 1
hsa-miR-216b	1	0	1	1	1	1	KLHL18	kelch-like 18 (Drosophila)
hsa-miR-216b	0	0	1	1	1	1	ZNF606	zinc finger protein 606
hsa-miR-216b	1	0	1	0	1	1	VCPIP1	valosin containing protein (p97)/p47 complex interacting protein 1
hsa-miR-216b	0	0	1	1	1	1	CWH43	cell wall biogenesis 43 C-terminal homolog (S. cerevisiae)
hsa-miR-216b	1	0	1	0	1	1	EDEM3	ER degradation enhancer, mannosidase alpha-like 3
hsa-miR-216b	1	0	1	1	1	1	SGPP1	sphingosine-1-phosphate phosphatase 1
hsa-miR-216b	1	0	1	1	1	1	FAM117A	family with sequence similarity 117, member A
hsa-miR-216b	1	0	1	0	1	1	C1orf21	chromosome 1 open reading frame 21
hsa-miR-216b	1	0	1	1	0	0	PVRL4	poliovirus receptor-related 4
hsa-miR-216b	0	0	1	1	1	1	TRMT1L	tRNA methyltransferase 1 homolog (S. cerevisiae)-like
hsa-miR-216b	1	0	1	1	1	1	C6orf62	chromosome 6 open reading frame 62
hsa-miR-216b	0	0	1	1	1	1	ISCA1	iron-sulfur cluster assembly 1 homolog (S. cerevisiae)
hsa-miR-216b	0	0	1	1	1	1	FCRL4	Fc receptor-like 4
hsa-miR-216b	1	0	1	1	1	1	GABARAPL1	GABA(A) receptor-associated protein like 1
hsa-miR-216b	1	0	1	0	1	1	TMEM47	transmembrane protein 47
hsa-miR-216b	0	0	1	1	1	1	MS4A8B	membrane-spanning 4-domains, subfamily A, member 8B
hsa-miR-216b	0	0	1	0	1	1	ENAM	enamelin
hsa-miR-216b	1	0	1	0	1	1	FAM172A	family with sequence similarity 172, member A
hsa-miR-216b	1	0	1	1	1	1	SLC10A7	solute carrier family 10 (sodium/bile acid cotransporter family), member 7
hsa-miR-216b	1	0	1	1	1	1	ARID5B	AT rich interactive domain 5B (MRF1-like)
hsa-miR-216b	0	0	1	1	1	1	C5orf4	chromosome 5 open reading frame 4
hsa-miR-216b	0	0	1	1	1	1	PPIL3	peptidylprolyl isomerase (cyclophilin)-like 3
hsa-miR-216b	1	0	1	1	1	1	USP38	ubiquitin specific peptidase 38
hsa-miR-216b	1	0	1	1	1	1	HIATL1	hippocampus abundant transcript-like 1
hsa-miR-216b	0	0	1	1	1	1	RNASE7	ribonuclease, RNase A family, 7
hsa-miR-216b	0	0	1	1	1	1	ADTRP	androgen-dependent TFPI-regulating protein
hsa-miR-216b	0	0	1	0	1	1	CBR4	carbonyl reductase 4
hsa-miR-216b	0	0	1	1	1	1	MICALCL	MICAL C-terminal like
hsa-miR-216b	0	0	1	1	1	1	FBXL20	F-box and leucine-rich repeat protein 20
hsa-miR-216b	1	0	1	1	1	1	RBM17	RNA binding motif protein 17
hsa-miR-216b	0	0	1	1	1	1	TMEM241	transmembrane protein 241
hsa-miR-216b	1	0	1	0	1	1	C5orf62	chromosome 5 open reading frame 62
hsa-miR-216b	0	0	1	1	1	1	POLR2J2	polymerase (RNA) II (DNA directed) polypeptide J2
hsa-miR-216b	0	0	1	0	1	1	TSLP	thymic stromal lymphopoietin
hsa-miR-216b	0	0	1	1	1	1	ZIC5	Zic family member 5
hsa-miR-216b	1	0	1	0	1	1	PURB	purine-rich element binding protein B
hsa-miR-216b	1	0	1	1	1	1	ADAM19	ADAM metallopeptidase domain 19
hsa-miR-216b	1	0	1	1	1	1	EPT1	ethanolaminephosphotransferase 1 (CDP-ethanolamine-specific)
hsa-miR-216b	0	0	1	1	1	1	PLEKHG4B	pleckstrin homology domain containing, family G (with RhoGef domain) member 4B
hsa-miR-216b	1	0	1	1	1	1	SLITRK1	SLIT and NTRK-like family, member 1
hsa-miR-216b	1	0	1	0	1	1	FAM129A	family with sequence similarity 129, member A
hsa-miR-216b	0	0	1	1	1	1	PRDM7	PR domain containing 7
hsa-miR-216b	0	0	1	1	0	0	THEM4	thioesterase superfamily member 4
hsa-miR-216b	1	0	1	1	1	1	NAA15	N(alpha)-acetyltransferase 15, NatA auxiliary subunit
hsa-miR-216b	1	0	1	1	1	1	BTN2A1	butyrophilin, subfamily 2, member A1
hsa-miR-216b	0	0	1	1	0	0	ZNF280A	zinc finger protein 280A
hsa-miR-216b	0	0	1	1	1	1	PABPC5	poly(A) binding protein, cytoplasmic 5
hsa-miR-216b	0	0	1	0	1	1	PAQR8	progestin and adipoQ receptor family member VIII
hsa-miR-216b	0	0	1	1	1	1	ZNF431	zinc finger protein 431
hsa-miR-216b	1	0	1	1	0	0	PYGO2	pygopus homolog 2 (Drosophila)
hsa-miR-216b	1	0	1	1	1	1	PCSK6	proprotein convertase subtilisin/kexin type 6
hsa-miR-216b	1	0	1	0	1	1	SP1	Sp1 transcription factor
hsa-miR-216b	1	0	1	0	1	1	FCHO2	FCH domain only 2
hsa-miR-216b	0	0	1	1	1	1	CASC5	cancer susceptibility candidate 5
hsa-miR-216b	0	0	1	1	0	0	LINC00477	long intergenic non-protein coding RNA 477
hsa-miR-216b	0	0	1	1	1	1	ZFC3H1	zinc finger, C3H1-type containing
hsa-miR-216b	1	0	1	1	1	1	UBQLNL	ubiquilin-like
hsa-miR-216b	1	0	1	1	1	1	MRPL30	mitochondrial ribosomal protein L30
hsa-miR-216b	0	0	1	1	1	1	APOBEC3F	apolipoprotein B mRNA editing enzyme, catalytic polypeptide-like 3F
hsa-miR-216b	0	0	1	1	1	1	LRTOMT	leucine rich transmembrane and 0-methyltransferase domain containing
hsa-miR-216b	1	0	1	1	1	1	ZNF396	zinc finger protein 396
hsa-miR-216b	1	0	1	0	1	1	SYT11	synaptotagmin XI
hsa-miR-216b	0	0	1	1	0	0	ACOT4	acyl-CoA thioesterase 4
hsa-miR-216b	1	0	1	1	1	1	LSM12	LSM12 homolog (S. cerevisiae)
hsa-miR-216b	1	0	1	1	1	1	FGFBP3	fibroblast growth factor binding protein 3
hsa-miR-216b	0	0	1	1	1	1	C12orf66	chromosome 12 open reading frame 66
hsa-miR-216b	1	0	1	1	1	1	FAM81A	family with sequence similarity 81, member A
hsa-miR-216b	0	0	1	1	0	0	TMCO5A	transmembrane and coiled-coil domains 5A
hsa-miR-216b	0	0	1	1	1	1	TMEM199	transmembrane protein 199
hsa-miR-216b	0	0	1	1	0	0	C2orf57	chromosome 2 open reading frame 57
hsa-miR-216b	0	0	1	1	1	1	METTL15	methyltransferase like 15
hsa-miR-216b	0	0	1	0	0	0	TCP11L2	t-complex 11 (mouse)-like 2
hsa-miR-216b	1	0	1	1	1	1	WTAP	Wilms tumor 1 associated protein
hsa-miR-216b	1	0	1	1	1	1	FAS	Fas (TNF receptor superfamily, member 6)
hsa-miR-216b	0	0	1	0	1	1	KBTBD6	kelch repeat and BTB (POZ) domain containing 6
hsa-miR-216b	1	0	1	0	1	1	ST6GALNAC3	ST6 (alpha-N-acetyl-neuraminyl-2,3-beta-galactosyl-1,3)-N-acetylgalactosaminide alpha-2,6-sialyltransferase 3
hsa-miR-216b	1	0	1	1	1	1	TCEANC2	transcription elongation factor A (SII) N-terminal and central domain containing 2
hsa-miR-216b	1	0	1	1	1	1	TXLNB	taxilin beta
hsa-miR-216b	1	0	1	1	1	1	HS6ST3	heparan sulfate 6-O-sulfotransferase 3
hsa-miR-216b	1	0	1	1	1	1	C2orf69	chromosome 2 open reading frame 69
hsa-miR-216b	1	0	1	1	1	1	NAP1L5	nucleosome assembly protein 1-like 5
hsa-miR-216b	0	0	1	1	1	1	GPR112	G protein-coupled receptor 112
hsa-miR-216b	0	0	1	1	1	1	SIAE	sialic acid acetylesterase
hsa-miR-216b	0	0	1	1	1	1	ZFP91-CNTF	ZFP91-CNTF readthrough (non-protein coding)
hsa-miR-216b	0	0	1	1	1	1	REXO1L1	REX1, RNA exonuclease 1 homolog (S. cerevisiae)-like 1
hsa-miR-216b	1	0	1	1	1	1	MMGT1	membrane magnesium transporter 1
hsa-miR-216b	1	0	1	1	1	1	FAM117B	family with sequence similarity 117, member B
hsa-miR-216b	0	0	1	1	0	0	REM2	RAS (RAD and GEM)-like GTP binding 2
hsa-miR-216b	1	0	1	0	1	1	PGM2L1	phosphoglucomutase 2-like 1
hsa-miR-216b	1	0	1	0	1	1	SREK1IP1	SREK1-interacting protein 1
hsa-miR-216b	1	0	1	1	1	1	UBR1	ubiquitin protein ligase E3 component n-recognin 1
hsa-miR-216b	1	0	1	1	1	1	EXOC8	exocyst complex component 8
hsa-miR-216b	1	0	1	1	1	1	ASB6	ankyrin repeat and SOCS box containing 6
hsa-miR-216b	0	0	1	1	1	1	STXBP4	syntaxin binding protein 4
hsa-miR-216b	1	0	1	1	1	1	MTDH	metadherin
hsa-miR-216b	0	0	1	1	1	1	CCDC67	coiled-coil domain containing 67
hsa-miR-216b	1	0	1	1	1	1	QSOX2	quiescin Q6 sulfhydryl oxidase 2
hsa-miR-216b	0	0	1	1	1	1	LYRM7	Lyrm7 homolog (mouse)
hsa-miR-216b	1	0	1	1	1	1	DPY19L4	dpy-19-like 4 (C. elegans)
hsa-miR-216b	0	0	1	1	1	1	ZSWIM2	zinc finger, SWIM-type containing 2
hsa-miR-216b	0	0	1	1	1	1	SKA2	spindle and kinetochore associated complex subunit 2
hsa-miR-216b	0	0	1	0	1	1	NBPF11	neuroblastoma breakpoint family, member 11
hsa-miR-216b	1	0	1	1	1	1	SPTY2D1	SPT2, Suppressor of Ty, domain containing 1 (S. cerevisiae)
hsa-miR-216b	1	0	1	0	1	1	NRK	Nik related kinase
hsa-miR-216b	1	0	1	1	1	1	PAQR9	progestin and adipoQ receptor family member IX
hsa-miR-216b	1	0	1	1	1	1	TMEM110	transmembrane protein 110
hsa-miR-216b	1	0	1	0	1	1	ZC3H6	zinc finger CCCH-type containing 6
hsa-miR-216b	1	0	1	1	1	1	PTGER3	prostaglandin E receptor 3 (subtype EP3)
hsa-miR-216b	0	0	1	1	1	1	PFN4	profilin family, member 4
hsa-miR-216b	0	0	1	1	1	1	GPX1	glutathione peroxidase 1
hsa-miR-216b	0	0	1	1	1	1	CBWD3	COBW domain containing 3
hsa-miR-216b	1	0	1	1	1	1	GLYAT	glycine-N-acyltransferase
hsa-miR-216b	0	0	1	1	0	0	TRIM7	tripartite motif containing 7
hsa-miR-216b	0	0	1	1	1	1	SHC4	SHC (Src homology 2 domain containing) family, member 4
hsa-miR-216b	0	0	1	1	1	1	ZRANB2	zinc finger, RAN-binding domain containing 2
hsa-miR-216b	0	0	1	1	1	1	AMACR	alpha-methylacyl-CoA racemase
hsa-miR-216b	1	0	1	0	1	1	MBLAC2	metallo-beta-lactamase domain containing 2
hsa-miR-216b	0	0	1	1	1	1	ELP5	elongator acetyltransferase complex subunit 5
hsa-miR-216b	1	0	1	1	1	1	GADL1	glutamate decarboxylase-like 1
hsa-miR-216b	1	0	1	1	1	1	FREM2	FRAS1 related extracellular matrix protein 2
hsa-miR-216b	1	0	1	0	1	1	NCKAP5	NCK-associated protein 5
hsa-miR-216b	0	0	1	0	1	1	FSD1L	fibronectin type III and SPRY domain containing 1-like
hsa-miR-216b	1	0	1	1	1	1	XKRX	XK, Kell blood group complex subunit-related, X-linked
hsa-miR-216b	0	0	1	1	0	0	KRT39	keratin 39
hsa-miR-216b	0	0	1	0	0	0	PCDHB19P	protocadherin beta 19 pseudogene
hsa-miR-216b	0	0	1	0	0	0	LOC339240	keratin 17 pseudogene
hsa-miR-216b	0	0	1	0	0	0	TTTY23	testis-specific transcript, Y-linked 23 (non-protein coding)
hsa-miR-216b	0	0	1	0	0	0	TTTY15	testis-specific transcript, Y-linked 15 (non-protein coding)
hsa-miR-216b	0	0	1	0	0	0	TTTY12	testis-specific transcript, Y-linked 12 (non-protein coding)
hsa-miR-216b	0	0	1	0	0	0	PPP1R2P3	protein phosphatase 1, regulatory (inhibitor) subunit 2 pseudogene 3
hsa-miR-216b	0	0	1	0	0	0	DKFZP586I1420	uncharacterized protein DKFZp586I1420
hsa-miR-216b	0	0	1	0	0	0	MEIS3P1	Meis homeobox 3 pseudogene 1
hsa-miR-216b	0	0	1	0	0	0	NUDT4P1	nudix (nucleoside diphosphate linked moiety X)-type motif 4 pseudogene 1
hsa-miR-216b	0	0	1	0	0	0	SNORD96A	small nucleolar RNA, C/D box 96A
hsa-miR-216b	0	0	1	0	0	0	GABPAP	GA binding protein transcription factor, alpha subunit pseudogene
hsa-miR-216b	0	0	1	0	0	0	SEPHS1P1	selenophosphate synthetase 1 pseudogene 1
hsa-miR-216b	0	0	1	0	0	0	PER4	period homolog 3 (Drosophila) pseudogene
hsa-miR-216b	0	0	1	0	0	0	LOC285453	TXNDC9 pseudogene
hsa-miR-216b	0	0	1	0	0	0	AQP7P1	aquaporin 7 pseudogene 1
hsa-miR-216b	0	0	1	0	0	0	MALAT1	metastasis associated lung adenocarcinoma transcript 1 (non-protein coding)
hsa-miR-216b	0	0	1	0	0	0	TCAM1P	testicular cell adhesion molecule 1 homolog (mouse), pseudogene
hsa-miR-216b	0	0	1	0	0	0	GBP1P1	guanylate binding protein 1, interferon-inducible pseudogene 1
hsa-miR-216b	0	0	1	0	0	0	MYADML	myeloid-associated differentiation marker-like (pseudogene)
hsa-miR-216b	0	0	1	0	0	0	HAR1A	highly accelerated region 1A (non-protein coding)
hsa-miR-216b	0	0	1	1	0	0	SNRPN	small nuclear ribonucleoprotein polypeptide N
hsa-miR-216b	0	0	1	0	0	0	SNORD115-38	small nucleolar RNA, C/D box 115-38
hsa-miR-216b	0	0	1	0	0	0	SNORD115-40	small nucleolar RNA, C/D box 115-40
hsa-miR-216b	0	0	1	0	0	0	SNORD116-28	small nucleolar RNA, C/D box 116-28
hsa-miR-216b	1	0	1	1	1	1	FGFR2	fibroblast growth factor receptor 2
hsa-miR-216b	1	0	1	1	1	1	TRIO	trio Rho guanine nucleotide exchange factor
hsa-miR-216b	0	0	1	0	0	0	PLGLA	plasminogen-like A
hsa-miR-216b	0	0	0	1	1	1	MGST1	microsomal glutathione S-transferase 1
hsa-miR-216b	0	0	1	1	1	1	GRIPAP1	GRIP1 associated protein 1
hsa-miR-216b	1	0	1	1	1	1	DLD	dihydrolipoamide dehydrogenase
hsa-miR-216b	0	0	1	1	1	1	SF3A1	splicing factor 3a, subunit 1, 120kDa
hsa-miR-216b	1	0	1	1	1	1	ASPHD2	aspartate beta-hydroxylase domain containing 2
hsa-miR-216b	0	0	0	1	0	0	PMM1	phosphomannomutase 1
hsa-miR-216b	0	0	1	1	0	0	PIGU	phosphatidylinositol glycan anchor biosynthesis, class U
hsa-miR-216b	0	0	0	1	1	1	H2BFWT	H2B histone family, member W, testis-specific
hsa-miR-216b	1	0	0	1	1	1	C16orf88	chromosome 16 open reading frame 88
hsa-miR-216b	0	0	1	1	1	1	MTFMT	mitochondrial methionyl-tRNA formyltransferase
hsa-miR-216b	1	0	1	1	1	1	BRF2	BRF2, subunit of RNA polymerase III transcription initiation factor, BRF1-like
hsa-miR-216b	0	0	0	1	0	0	TNFRSF10A	tumor necrosis factor receptor superfamily, member 10a
hsa-miR-216b	0	0	1	1	1	1	FGL1	fibrinogen-like 1
hsa-miR-216b	1	0	1	1	1	1	RAB3D	RAB3D, member RAS oncogene family
hsa-miR-216b	0	0	1	1	1	1	UBE2D4	ubiquitin-conjugating enzyme E2D 4 (putative)
hsa-miR-216b	0	0	1	1	1	1	TFPI2	tissue factor pathway inhibitor 2
hsa-miR-216b	0	0	1	1	1	1	OGDH	oxoglutarate (alpha-ketoglutarate) dehydrogenase (lipoamide)
hsa-miR-216b	0	0	0	1	0	0	CYP3A5	cytochrome P450, family 3, subfamily A, polypeptide 5
hsa-miR-216b	0	0	1	1	0	0	PLOD3	procollagen-lysine, 2-oxoglutarate 5-dioxygenase 3
hsa-miR-216b	0	0	0	1	0	0	ZNF688	zinc finger protein 688
hsa-miR-216b	0	0	0	1	1	1	ZNF785	zinc finger protein 785
hsa-miR-216b	0	0	0	1	1	1	SUPT4H1	suppressor of Ty 4 homolog 1 (S. cerevisiae)
hsa-miR-216b	1	0	1	1	1	1	GOSR2	golgi SNAP receptor complex member 2
hsa-miR-216b	0	0	0	1	1	1	MANBA	mannosidase, beta A, lysosomal
hsa-miR-216b	0	0	1	1	1	1	SPA17	sperm autoantigenic protein 17
hsa-miR-216b	0	0	1	1	0	0	MVK	mevalonate kinase
hsa-miR-216b	0	0	1	1	0	0	GLI1	GLI family zinc finger 1
hsa-miR-216b	0	0	0	1	1	1	RERGL	RERG/RAS-like
hsa-miR-216b	1	0	1	1	1	1	SRSF9	serine/arginine-rich splicing factor 9
hsa-miR-216b	1	0	1	1	1	1	ZNF76	zinc finger protein 76
hsa-miR-216b	0	0	1	1	0	0	ARMC4	armadillo repeat containing 4
hsa-miR-216b	0	0	1	1	1	1	FBXO24	F-box protein 24
hsa-miR-216b	1	0	1	1	0	0	KIAA1549	KIAA1549
hsa-miR-216b	0	0	1	1	1	1	DDX39A	DEAD (Asp-Glu-Ala-Asp) box polypeptide 39A
hsa-miR-216b	0	0	0	1	1	1	TTC21B	tetratricopeptide repeat domain 21B
hsa-miR-216b	0	0	1	1	0	0	IL9R	interleukin 9 receptor
hsa-miR-216b	0	0	0	1	1	1	TBCC	tubulin folding cofactor C
hsa-miR-216b	1	0	1	1	1	1	LRRFIP1	leucine rich repeat (in FLII) interacting protein 1
hsa-miR-216b	0	0	0	1	0	0	KATNAL2	katanin p60 subunit A-like 2
hsa-miR-216b	0	0	0	1	1	1	HTN1	histatin 1
hsa-miR-216b	0	0	1	1	0	0	SIX1	SIX homeobox 1
hsa-miR-216b	0	0	1	1	1	1	HSPA2	heat shock 70kDa protein 2
hsa-miR-216b	0	0	1	1	0	0	MAGEC2	melanoma antigen family C, 2
hsa-miR-216b	1	0	1	1	1	1	KCTD17	potassium channel tetramerisation domain containing 17
hsa-miR-216b	0	0	1	1	1	1	MBD4	methyl-CpG binding domain protein 4
hsa-miR-216b	0	0	1	1	0	0	TMCO6	transmembrane and coiled-coil domains 6
hsa-miR-216b	0	0	1	1	0	0	CACNG6	calcium channel, voltage-dependent, gamma subunit 6
hsa-miR-216b	0	0	1	1	1	1	ZNF747	zinc finger protein 747
hsa-miR-216b	0	0	0	1	0	0	LAMA5	laminin, alpha 5
hsa-miR-216b	0	0	1	1	1	1	FUS	fused in sarcoma
hsa-miR-216b	0	0	1	1	1	1	VIMP	VCP-interacting membrane protein
hsa-miR-216b	0	0	1	1	1	1	LRRC41	leucine rich repeat containing 41
hsa-miR-216b	0	0	1	1	1	1	HSD17B7	hydroxysteroid (17-beta) dehydrogenase 7
hsa-miR-216b	1	0	0	1	1	1	COQ3	coenzyme Q3 homolog, methyltransferase (S. cerevisiae)
hsa-miR-216b	0	0	0	1	0	0	GUCY2D	guanylate cyclase 2D, membrane (retina-specific)
hsa-miR-216b	0	0	1	1	1	1	ERAL1	Era G-protein-like 1 (E. coli)
hsa-miR-216b	0	0	1	1	1	1	PDE6A	phosphodiesterase 6A, cGMP-specific, rod, alpha
hsa-miR-216b	0	0	0	1	0	0	MYBPH	myosin binding protein H
hsa-miR-216b	0	0	1	1	0	0	KLB	klotho beta
hsa-miR-216b	0	0	1	1	0	0	ORC3	origin recognition complex, subunit 3
hsa-miR-216b	0	0	0	1	1	1	CDK4	cyclin-dependent kinase 4
hsa-miR-216b	0	0	0	1	1	1	NUDT15	nudix (nucleoside diphosphate linked moiety X)-type motif 15
hsa-miR-216b	0	0	0	1	0	0	CHAD	chondroadherin
hsa-miR-216b	0	0	0	1	1	1	BRIP1	BRCA1 interacting protein C-terminal helicase 1
hsa-miR-216b	0	0	1	1	1	1	CCDC90B	coiled-coil domain containing 90B
hsa-miR-216b	0	0	1	1	1	1	SSB	Sjogren syndrome antigen B (autoantigen La)
hsa-miR-216b	0	0	0	1	0	0	WDR12	WD repeat domain 12
hsa-miR-216b	0	0	1	1	1	1	DIRC2	disrupted in renal carcinoma 2
hsa-miR-216b	0	0	1	1	1	1	CDK2AP1	cyclin-dependent kinase 2 associated protein 1
hsa-miR-216b	0	0	0	1	0	0	C14orf166	chromosome 14 open reading frame 166
hsa-miR-216b	1	0	0	1	0	0	LHX5	LIM homeobox 5
hsa-miR-216b	0	0	1	1	0	0	AARS	alanyl-tRNA synthetase
hsa-miR-216b	0	0	0	1	0	0	MCM4	minichromosome maintenance complex component 4
hsa-miR-216b	1	0	1	1	1	1	CEP76	centrosomal protein 76kDa
hsa-miR-216b	1	0	1	1	1	1	ARHGAP28	Rho GTPase activating protein 28
hsa-miR-216b	0	0	0	1	1	1	RPE65	retinal pigment epithelium-specific protein 65kDa
hsa-miR-216b	0	0	0	1	1	1	BPI	bactericidal/permeability-increasing protein
hsa-miR-216b	0	0	1	1	1	1	MSH4	mutS homolog 4 (E. coli)
hsa-miR-216b	0	0	1	1	1	1	GLTSCR1	glioma tumor suppressor candidate region gene 1
hsa-miR-216b	0	0	0	1	0	0	WDR76	WD repeat domain 76
hsa-miR-216b	1	0	1	1	1	1	TP53BP1	tumor protein p53 binding protein 1
hsa-miR-216b	1	0	1	1	0	0	BMPR1B	bone morphogenetic protein receptor, type IB
hsa-miR-216b	0	0	1	1	1	1	DNAJB11	DnaJ (Hsp40) homolog, subfamily B, member 11
hsa-miR-216b	0	0	1	1	0	0	RPL26L1	ribosomal protein L26-like 1
hsa-miR-216b	0	0	0	1	0	0	CLCN2	chloride channel, voltage-sensitive 2
hsa-miR-216b	1	0	1	1	1	1	NPTX2	neuronal pentraxin II
hsa-miR-216b	1	0	1	1	0	0	KIAA1549L	KIAA1549-like
hsa-miR-216b	0	0	1	1	1	1	RBM48	RNA binding motif protein 48
hsa-miR-216b	0	0	1	1	0	0	NT5C3L	5'-nucleotidase, cytosolic III-like
hsa-miR-216b	0	0	0	1	0	0	CAPN9	calpain 9
hsa-miR-216b	0	0	1	1	1	1	EAF2	ELL associated factor 2
hsa-miR-216b	1	0	1	1	1	1	CCNA2	cyclin A2
hsa-miR-216b	0	0	1	1	1	1	GIN1	gypsy retrotransposon integrase 1
hsa-miR-216b	0	0	0	1	1	1	LAT2	linker for activation of T cells family, member 2
hsa-miR-216b	1	0	1	1	1	1	SLC12A9	solute carrier family 12 (potassium/chloride transporters), member 9
hsa-miR-216b	0	0	1	1	1	1	BCCIP	BRCA2 and CDKN1A interacting protein
hsa-miR-216b	0	0	0	1	1	1	APIP	APAF1 interacting protein
hsa-miR-216b	1	0	0	1	1	1	HMBS	hydroxymethylbilane synthase
hsa-miR-216b	1	0	1	1	1	1	SNPH	syntaphilin
hsa-miR-216b	0	0	0	1	0	0	TRIM48	tripartite motif containing 48
hsa-miR-216b	0	0	0	1	1	1	LDHAL6A	lactate dehydrogenase A-like 6A
hsa-miR-216b	1	0	1	1	1	1	QTRTD1	queuine tRNA-ribosyltransferase domain containing 1
hsa-miR-216b	0	0	0	1	1	1	AMN1	antagonist of mitotic exit network 1 homolog (S. cerevisiae)
hsa-miR-216b	0	0	1	1	1	1	FAM151B	family with sequence similarity 151, member B
hsa-miR-216b	0	0	0	1	1	1	JMY	junction mediating and regulatory protein, p53 cofactor
hsa-miR-216b	1	0	1	1	1	1	GPD1L	glycerol-3-phosphate dehydrogenase 1-like
hsa-miR-216b	1	0	1	1	1	1	SCOC	short coiled-coil protein
hsa-miR-216b	0	0	1	1	1	1	TMEM87B	transmembrane protein 87B
hsa-miR-216b	0	0	1	1	1	1	GPR115	G protein-coupled receptor 115
hsa-miR-216b	0	0	1	1	1	1	PGM3	phosphoglucomutase 3
hsa-miR-216b	1	0	1	1	1	1	MSI2	musashi homolog 2 (Drosophila)
hsa-miR-216b	0	0	0	1	0	0	MKI67IP	MKI67 (FHA domain) interacting nucleolar phosphoprotein
hsa-miR-216b	0	0	0	1	0	0	RBM45	RNA binding motif protein 45
hsa-miR-216b	1	0	1	1	1	1	DRAM2	DNA-damage regulated autophagy modulator 2
hsa-miR-216b	0	0	1	1	0	0	VPS8	vacuolar protein sorting 8 homolog (S. cerevisiae)
hsa-miR-216b	0	0	0	1	0	0	TIMP4	TIMP metallopeptidase inhibitor 4
hsa-miR-216b	0	0	1	1	1	1	ZFAND2B	zinc finger, AN1-type domain 2B
hsa-miR-216b	0	0	1	1	0	0	KCNE2	potassium voltage-gated channel, Isk-related family, member 2
hsa-miR-216b	0	0	0	1	1	1	AP1M1	adaptor-related protein complex 1, mu 1 subunit
hsa-miR-216b	1	0	1	1	1	1	AGPAT3	1-acylglycerol-3-phosphate O-acyltransferase 3
hsa-miR-216b	0	0	1	1	1	1	ZNF626	zinc finger protein 626
hsa-miR-216b	0	0	0	1	0	0	PAQR6	progestin and adipoQ receptor family member VI
hsa-miR-216b	1	0	0	1	0	0	NBEAL2	neurobeachin-like 2
hsa-miR-216b	0	0	0	1	0	0	PPP1R16A	protein phosphatase 1, regulatory subunit 16A
hsa-miR-216b	1	0	1	1	0	0	CELF5	CUGBP, Elav-like family member 5
hsa-miR-216b	0	0	0	1	0	0	AQP5	aquaporin 5
hsa-miR-216b	0	0	0	1	0	0	PRSS33	protease, serine, 33
hsa-miR-216b	0	0	1	1	0	0	HFM1	HFM1, ATP-dependent DNA helicase homolog (S. cerevisiae)
hsa-miR-216b	0	0	0	1	1	1	PDHA2	pyruvate dehydrogenase (lipoamide) alpha 2
hsa-miR-216b	0	0	1	1	1	1	PACRGL	PARK2 co-regulated-like
hsa-miR-216b	0	0	1	1	1	1	SLC23A3	solute carrier family 23 (nucleobase transporters), member 3
hsa-miR-216b	0	0	1	1	0	0	PSMD6	proteasome (prosome, macropain) 26S subunit, non-ATPase, 6
hsa-miR-216b	0	0	1	1	0	0	TGM4	transglutaminase 4 (prostate)
hsa-miR-216b	0	0	0	1	1	1	MFI2	antigen p97 (melanoma associated) identified by monoclonal antibodies 133.2 and 96.5
hsa-miR-216b	0	0	0	1	0	0	POC1A	POC1 centriolar protein homolog A (Chlamydomonas)
hsa-miR-216b	0	0	0	1	1	1	F2RL1	coagulation factor II (thrombin) receptor-like 1
hsa-miR-216b	0	0	1	1	1	1	NSA2	NSA2 ribosome biogenesis homolog (S. cerevisiae)
hsa-miR-216b	0	0	1	1	1	1	C5orf54	chromosome 5 open reading frame 54
hsa-miR-216b	1	0	0	1	1	1	SOX17	SRY (sex determining region Y)-box 17
hsa-miR-216b	0	0	0	1	0	0	ALDH7A1	aldehyde dehydrogenase 7 family, member A1
hsa-miR-216b	0	0	1	1	1	1	OSR2	odd-skipped related 2 (Drosophila)
hsa-miR-216b	0	0	1	1	1	1	RPP25L	ribonuclease P/MRP 25kDa subunit-like
hsa-miR-216b	1	0	1	1	1	1	NLGN4Y	neuroligin 4, Y-linked
hsa-miR-216b	0	0	1	1	1	1	C9orf3	chromosome 9 open reading frame 3
hsa-miR-216b	0	0	1	1	0	0	AQP7	aquaporin 7
hsa-miR-216b	0	0	0	1	0	0	MC4R	melanocortin 4 receptor
hsa-miR-216b	0	0	1	1	1	1	PLIN1	perilipin 1
hsa-miR-216b	0	0	1	1	0	0	PEX11A	peroxisomal biogenesis factor 11 alpha
hsa-miR-216b	0	0	1	1	0	0	PLK1	polo-like kinase 1
hsa-miR-216b	1	0	1	1	1	1	RRM1	ribonucleotide reductase M1
hsa-miR-216b	0	0	1	1	1	1	NTF4	neurotrophin 4
hsa-miR-216b	0	0	0	1	0	0	ACER1	alkaline ceramidase 1
hsa-miR-216b	0	0	1	1	0	0	CD320	CD320 molecule
hsa-miR-216b	1	0	1	1	1	1	UNKL	unkempt homolog (Drosophila)-like
hsa-miR-216b	0	0	0	1	0	0	NXNL1	nucleoredoxin-like 1
hsa-miR-216b	0	0	0	1	0	0	CCBL1	cysteine conjugate-beta lyase, cytoplasmic
hsa-miR-216b	0	0	1	1	1	1	ZNF561	zinc finger protein 561
hsa-miR-216b	1	0	0	1	0	0	TRABD	TraB domain containing
hsa-miR-216b	0	0	0	1	0	0	OR10G3	olfactory receptor, family 10, subfamily G, member 3
hsa-miR-216b	0	0	0	1	1	1	HINT1	histidine triad nucleotide binding protein 1
hsa-miR-216b	0	0	1	1	1	1	INSL5	insulin-like 5
hsa-miR-216b	0	0	1	1	1	1	PPIH	peptidylprolyl isomerase H (cyclophilin H)
hsa-miR-216b	0	0	1	1	1	1	UGT2B4	UDP glucuronosyltransferase 2 family, polypeptide B4
hsa-miR-216b	0	0	0	1	0	0	UGT2B11	UDP glucuronosyltransferase 2 family, polypeptide B11
hsa-miR-216b	0	0	1	1	1	1	FOXI1	forkhead box I1
hsa-miR-216b	0	0	0	1	1	1	PPIC	peptidylprolyl isomerase C (cyclophilin C)
hsa-miR-216b	1	0	1	1	1	1	CEP120	centrosomal protein 120kDa
hsa-miR-216b	0	0	1	1	1	1	MPLKIP	M-phase specific PLK1 interacting protein
hsa-miR-216b	0	0	0	1	0	0	FOXB1	forkhead box B1
hsa-miR-216b	0	0	0	1	1	1	COG7	component of oligomeric golgi complex 7
hsa-miR-216b	0	0	1	1	1	1	GLB1	galactosidase, beta 1
hsa-miR-216b	0	0	0	1	0	0	OR52A5	olfactory receptor, family 52, subfamily A, member 5
hsa-miR-216b	0	0	1	1	1	1	ZBBX	zinc finger, B-box domain containing
hsa-miR-216b	0	0	0	1	0	0	OR52K1	olfactory receptor, family 52, subfamily K, member 1
hsa-miR-216b	0	0	1	1	1	1	PPID	peptidylprolyl isomerase D
hsa-miR-216b	0	0	0	1	1	1	ETFDH	electron-transferring-flavoprotein dehydrogenase
hsa-miR-216b	0	0	0	1	0	0	RXFP1	relaxin/insulin-like family peptide receptor 1
hsa-miR-216b	0	0	1	1	0	0	WFDC5	WAP four-disulfide core domain 5
hsa-miR-216b	0	0	0	1	0	0	EFEMP2	EGF containing fibulin-like extracellular matrix protein 2
hsa-miR-216b	0	0	1	1	1	1	DLEC1	deleted in lung and esophageal cancer 1
hsa-miR-216b	0	0	1	1	0	0	PLG	plasminogen
hsa-miR-216b	0	0	1	1	1	1	SLC17A3	solute carrier family 17 (sodium phosphate), member 3
hsa-miR-216b	0	0	0	1	1	1	LGR6	leucine-rich repeat containing G protein-coupled receptor 6
hsa-miR-216b	0	0	1	1	1	1	APITD1	apoptosis-inducing, TAF9-like domain 1
hsa-miR-216b	0	0	1	1	1	1	CORT	cortistatin
hsa-miR-216b	0	0	0	1	1	1	UGT2B15	UDP glucuronosyltransferase 2 family, polypeptide B15
hsa-miR-216b	0	0	1	1	0	0	EEF2	eukaryotic translation elongation factor 2
hsa-miR-216b	0	0	0	1	0	0	OR5B3	olfactory receptor, family 5, subfamily B, member 3
hsa-miR-216b	0	0	0	1	1	1	FAM86B2	family with sequence similarity 86, member B2
hsa-miR-216b	0	0	0	1	1	1	SULT1B1	sulfotransferase family, cytosolic, 1B, member 1
hsa-miR-216b	1	0	1	1	1	1	ANKRD10	ankyrin repeat domain 10
hsa-miR-216b	1	0	1	1	1	1	KIAA1033	KIAA1033
hsa-miR-216b	0	0	1	1	0	0	CD248	CD248 molecule, endosialin
hsa-miR-216b	0	0	1	1	1	1	RFESD	Rieske (Fe-S) domain containing
hsa-miR-216b	1	0	1	1	1	1	ZMAT3	zinc finger, matrin-type 3
hsa-miR-216b	1	0	1	1	1	1	HOXB3	homeobox B3
hsa-miR-216b	0	0	0	1	0	0	ZNF408	zinc finger protein 408
hsa-miR-216b	0	0	1	1	0	0	FAM170B	family with sequence similarity 170, member B
hsa-miR-216b	1	0	1	1	1	1	TAF15	TAF15 RNA polymerase II, TATA box binding protein (TBP)-associated factor, 68kDa
hsa-miR-216b	0	0	0	1	1	1	USP36	ubiquitin specific peptidase 36
hsa-miR-216b	0	0	1	1	1	1	CHMP2A	charged multivesicular body protein 2A
hsa-miR-216b	1	0	1	1	1	1	PHLDB2	pleckstrin homology-like domain, family B, member 2
hsa-miR-216b	0	0	1	1	0	0	PLCXD2	phosphatidylinositol-specific phospholipase C, X domain containing 2
hsa-miR-216b	1	0	1	1	1	1	ATG9B	autophagy related 9B
hsa-miR-216b	1	0	1	1	1	1	GALE	UDP-galactose-4-epimerase
hsa-miR-216b	0	0	1	1	1	1	LOH12CR1	loss of heterozygosity, 12, chromosomal region 1
hsa-miR-216b	1	0	1	1	1	1	SAMD12	sterile alpha motif domain containing 12
hsa-miR-216b	0	0	1	1	1	1	PENK	proenkephalin
hsa-miR-216b	1	0	1	1	1	1	CCDC43	coiled-coil domain containing 43
hsa-miR-216b	0	0	1	1	0	0	YSK4	YSK4 Sps1/Ste20-related kinase homolog (S. cerevisiae)
hsa-miR-216b	0	0	0	1	1	1	ZNF843	zinc finger protein 843
hsa-miR-216b	0	0	0	1	0	0	METAP1D	methionyl aminopeptidase type 1D (mitochondrial)
hsa-miR-216b	0	0	0	1	1	1	ASB2	ankyrin repeat and SOCS box containing 2
hsa-miR-216b	0	0	1	1	1	1	LRRC34	leucine rich repeat containing 34
hsa-miR-216b	0	0	1	1	1	1	MRPS24	mitochondrial ribosomal protein S24
hsa-miR-216b	0	0	0	1	0	0	RRH	retinal pigment epithelium-derived rhodopsin homolog
hsa-miR-216b	0	0	1	1	1	1	HADHB	hydroxyacyl-CoA dehydrogenase/3-ketoacyl-CoA thiolase/enoyl-CoA hydratase (trifunctional protein), beta subunit
hsa-miR-216b	0	0	1	1	0	0	IL11RA	interleukin 11 receptor, alpha
hsa-miR-216b	1	0	1	1	1	1	RALGPS1	Ral GEF with PH domain and SH3 binding motif 1
hsa-miR-216b	1	0	0	1	0	0	MPDZ	multiple PDZ domain protein
hsa-miR-216b	0	0	1	1	0	0	DCTPP1	dCTP pyrophosphatase 1
hsa-miR-216b	0	0	1	1	1	1	USP54	ubiquitin specific peptidase 54
hsa-miR-216b	0	0	0	1	0	0	SHROOM1	shroom family member 1
hsa-miR-216b	0	0	0	1	0	0	WBSCR28	Williams-Beuren syndrome chromosome region 28
hsa-miR-216b	0	0	0	1	1	1	VN1R1	vomeronasal 1 receptor 1
hsa-miR-216b	0	0	0	1	1	1	ZYX	zyxin
hsa-miR-216b	0	0	1	1	0	0	SPNS1	spinster homolog 1 (Drosophila)
hsa-miR-216b	1	0	1	1	0	0	SNX29	sorting nexin 29
hsa-miR-216b	1	0	1	1	1	1	DDHD1	DDHD domain containing 1
hsa-miR-216b	0	0	0	1	0	0	SPEM1	spermatid maturation 1
hsa-miR-216b	0	0	1	1	1	1	SAMD3	sterile alpha motif domain containing 3
hsa-miR-216b	0	0	1	1	0	0	ZNF283	zinc finger protein 283
hsa-miR-216b	0	0	0	1	0	0	STARD5	StAR-related lipid transfer (START) domain containing 5
hsa-miR-216b	0	0	0	1	0	0	SLC47A2	solute carrier family 47, member 2
hsa-miR-216b	1	0	1	1	1	1	KDSR	3-ketodihydrosphingosine reductase
hsa-miR-216b	0	0	0	1	1	1	GSTM4	glutathione S-transferase mu 4
hsa-miR-216b	1	0	1	1	1	1	BRSK1	BR serine/threonine kinase 1
hsa-miR-216b	0	0	1	1	0	0	NLRP7	NLR family, pyrin domain containing 7
hsa-miR-216b	0	0	0	1	1	1	PIGW	phosphatidylinositol glycan anchor biosynthesis, class W
hsa-miR-216b	0	0	1	1	1	1	C1QTNF8	C1q and tumor necrosis factor related protein 8
hsa-miR-216b	0	0	0	1	0	0	OR4N4	olfactory receptor, family 4, subfamily N, member 4
hsa-miR-216b	1	0	1	1	1	1	DRD1	dopamine receptor D1
hsa-miR-216b	0	0	0	1	0	0	SPPL2C	signal peptide peptidase like 2C
hsa-miR-216b	1	0	1	1	1	1	IL25	interleukin 25
hsa-miR-216b	1	0	0	1	1	1	EPHA10	EPH receptor A10
hsa-miR-216b	0	0	1	1	1	1	MINA	MYC induced nuclear antigen
hsa-miR-216b	1	0	1	1	1	1	EPHB3	EPH receptor B3
hsa-miR-216b	0	0	1	1	1	1	ADAMTSL5	ADAMTS-like 5
hsa-miR-216b	0	0	0	1	1	1	GLRX5	glutaredoxin 5
hsa-miR-216b	0	0	0	1	0	0	SLC25A10	solute carrier family 25 (mitochondrial carrier; dicarboxylate transporter), member 10
hsa-miR-216b	0	0	0	1	0	0	FBXL6	F-box and leucine-rich repeat protein 6
hsa-miR-216b	0	0	1	1	1	1	ZNRD1	zinc ribbon domain containing 1
hsa-miR-216b	0	0	1	1	0	0	MILR1	mast cell immunoglobulin-like receptor 1
hsa-miR-216b	0	0	0	1	0	0	FAM200A	family with sequence similarity 200, member A
hsa-miR-216b	0	0	0	1	0	0	OR4N5	olfactory receptor, family 4, subfamily N, member 5
hsa-miR-216b	0	0	0	1	0	0	TAS2R38	taste receptor, type 2, member 38
hsa-miR-216b	0	0	1	1	0	0	CASP9	caspase 9, apoptosis-related cysteine peptidase
hsa-miR-216b	0	0	1	1	0	0	KRTAP15-1	keratin associated protein 15-1
hsa-miR-216b	0	0	0	1	0	0	KRTAP9-4	keratin associated protein 9-4
hsa-miR-216b	1	0	1	1	1	1	ZSCAN2	zinc finger and SCAN domain containing 2
hsa-miR-216b	0	0	1	1	0	0	KRTAP19-5	keratin associated protein 19-5
hsa-miR-216b	0	0	0	1	0	0	ZNF347	zinc finger protein 347
hsa-miR-216b	1	0	1	1	1	1	DLST	dihydrolipoamide S-succinyltransferase (E2 component of 2-oxo-glutarate complex)
hsa-miR-216b	0	0	0	1	1	1	TTF1	transcription termination factor, RNA polymerase I
hsa-miR-216b	0	0	1	1	1	1	SOWAHB	sosondowah ankyrin repeat domain family member B
hsa-miR-216b	0	0	0	1	0	0	ZNF578	zinc finger protein 578
hsa-miR-216b	0	0	0	1	1	1	ZNF528	zinc finger protein 528
hsa-miR-216b	0	0	1	1	1	1	LGMN	legumain
hsa-miR-216b	0	0	1	1	0	0	IGFN1	immunoglobulin-like and fibronectin type III domain containing 1
hsa-miR-216b	0	0	0	1	1	1	INTU	inturned planar cell polarity effector homolog (Drosophila)
hsa-miR-216b	0	0	0	1	0	0	UGT2B28	UDP glucuronosyltransferase 2 family, polypeptide B28
hsa-miR-216b	0	0	0	1	0	0	OFCC1	orofacial cleft 1 candidate 1
hsa-miR-216b	0	0	1	1	1	1	SPAG17	sperm associated antigen 17
hsa-miR-216b	0	0	1	1	0	0	WFDC6	WAP four-disulfide core domain 6
hsa-miR-216b	0	0	1	1	1	1	EPPIN	epididymal peptidase inhibitor
hsa-miR-216b	0	0	1	1	0	0	PPP2R2B	protein phosphatase 2, regulatory subunit B, beta
hsa-miR-216b	0	0	0	1	1	1	TRIM16	tripartite motif containing 16
hsa-miR-216b	1	0	1	1	1	1	CDRT1	CMT1A duplicated region transcript 1
hsa-miR-216b	0	0	0	1	1	1	GJD3	gap junction protein, delta 3, 31.9kDa
hsa-miR-216b	0	0	0	1	0	0	DOM3Z	dom-3 homolog Z (C. elegans)
hsa-miR-216b	0	0	1	1	0	0	IL1F10	interleukin 1 family, member 10 (theta)
hsa-miR-216b	1	0	1	1	1	1	MYH9	myosin, heavy chain 9, non-muscle
hsa-miR-216b	0	0	1	1	0	0	SNTG1	syntrophin, gamma 1
hsa-miR-216b	1	0	0	1	1	1	CYLC2	cylicin, basic protein of sperm head cytoskeleton 2
hsa-miR-216b	0	0	1	1	1	1	PARK7	parkinson protein 7
hsa-miR-216b	0	0	1	1	1	1	ZNF621	zinc finger protein 621
hsa-miR-216b	0	0	1	1	0	0	STAMBP	STAM binding protein
hsa-miR-216b	0	0	1	1	1	1	VRK2	vaccinia related kinase 2
hsa-miR-216b	0	0	0	1	1	1	CCDC169	coiled-coil domain containing 169
hsa-miR-216b	0	0	0	1	1	1	GFRAL	GDNF family receptor alpha like
hsa-miR-216b	0	0	0	1	0	0	FAM86B1	family with sequence similarity 86, member B1
hsa-miR-216b	0	0	1	1	0	0	MCCC2	methylcrotonoyl-CoA carboxylase 2 (beta)
hsa-miR-216b	1	0	1	1	1	1	ACER2	alkaline ceramidase 2
hsa-miR-216b	1	0	1	1	1	1	SRSF10	serine/arginine-rich splicing factor 10
hsa-miR-216b	1	0	1	1	1	1	NIPAL2	NIPA-like domain containing 2
hsa-miR-216b	1	0	1	1	1	1	SH2B3	SH2B adaptor protein 3
hsa-miR-216b	0	0	1	1	0	0	SBSN	suprabasin
hsa-miR-216b	0	0	1	1	1	1	TRIM14	tripartite motif containing 14
hsa-miR-216b	1	0	0	1	0	0	IKBKB	inhibitor of kappa light polypeptide gene enhancer in B-cells, kinase beta
hsa-miR-216b	1	0	1	1	0	0	CECR2	cat eye syndrome chromosome region, candidate 2
hsa-miR-216b	0	0	1	1	0	0	EYS	eyes shut homolog (Drosophila)
hsa-miR-216b	0	0	1	1	1	1	RNFT1	ring finger protein, transmembrane 1
hsa-miR-216b	0	0	1	1	0	0	INTS8	integrator complex subunit 8
hsa-miR-216b	0	0	0	1	0	0	TAF6	TAF6 RNA polymerase II, TATA box binding protein (TBP)-associated factor, 80kDa
hsa-miR-216b	1	0	1	1	1	1	RNF13	ring finger protein 13
hsa-miR-216b	0	0	0	1	1	1	DTNBP1	dystrobrevin binding protein 1
hsa-miR-216b	0	0	1	1	1	1	CR2	complement component (3d/Epstein Barr virus) receptor 2
hsa-miR-216b	0	0	1	1	0	0	MAGED2	melanoma antigen family D, 2
hsa-miR-216b	1	0	1	1	1	1	SPOP	speckle-type POZ protein
hsa-miR-216b	0	0	1	1	1	1	CKB	creatine kinase, brain
hsa-miR-216b	1	0	1	1	1	1	FADS1	fatty acid desaturase 1
hsa-miR-216b	0	0	1	1	0	0	FADS3	fatty acid desaturase 3
hsa-miR-216b	1	0	0	1	0	0	NKX2-4	NK2 homeobox 4
hsa-miR-216b	0	0	1	1	1	1	ATP2A3	ATPase, Ca++ transporting, ubiquitous
hsa-miR-216b	0	0	1	1	1	1	C11orf54	chromosome 11 open reading frame 54
hsa-miR-216b	0	0	0	1	0	0	OR8B3	olfactory receptor, family 8, subfamily B, member 3
hsa-miR-216b	1	0	1	1	1	1	ANXA4	annexin A4
hsa-miR-216b	1	0	1	1	1	1	MLL3	myeloid/lymphoid or mixed-lineage leukemia 3
hsa-miR-216b	0	0	1	1	1	1	RSL1D1	ribosomal L1 domain containing 1
hsa-miR-216b	0	0	1	1	1	1	PXDNL	peroxidasin homolog (Drosophila)-like
hsa-miR-216b	0	0	1	1	1	1	CBWD1	COBW domain containing 1
hsa-miR-216b	0	0	1	1	1	1	TMEM67	transmembrane protein 67
hsa-miR-216b	0	0	1	1	1	1	RAB28	RAB28, member RAS oncogene family
hsa-miR-216b	0	0	1	1	1	1	RNF146	ring finger protein 146
hsa-miR-216b	1	0	1	1	0	0	TNPO2	transportin 2
hsa-miR-216b	0	0	1	1	1	1	ZMYM6	zinc finger, MYM-type 6
hsa-miR-216b	0	0	1	1	1	1	WFDC8	WAP four-disulfide core domain 8
hsa-miR-216b	0	0	1	1	0	0	DZANK1	double zinc ribbon and ankyrin repeat domains 1
hsa-miR-216b	0	0	0	1	1	1	PHF11	PHD finger protein 11
hsa-miR-216b	0	0	1	1	1	1	CCDC147	coiled-coil domain containing 147
hsa-miR-216b	0	0	0	1	0	0	HMX3	H6 family homeobox 3
hsa-miR-216b	0	0	1	1	0	0	ANKRD18A	ankyrin repeat domain 18A
hsa-miR-216b	0	0	1	1	1	1	BDH1	3-hydroxybutyrate dehydrogenase, type 1
hsa-miR-216b	0	0	1	1	0	0	ELP2	elongator acetyltransferase complex subunit 2
hsa-miR-216b	0	0	1	1	1	1	PPHLN1	periphilin 1
hsa-miR-216b	0	0	1	1	0	0	ZCWPW1	zinc finger, CW type with PWWP domain 1
hsa-miR-216b	0	0	0	1	1	1	CBWD2	COBW domain containing 2
hsa-miR-216b	1	0	1	1	1	1	TRPM6	transient receptor potential cation channel, subfamily M, member 6
hsa-miR-216b	1	0	1	1	0	0	EMP2	epithelial membrane protein 2
hsa-miR-216b	0	0	0	1	0	0	SHARPIN	SHANK-associated RH domain interactor
hsa-miR-216b	1	0	1	1	1	1	LFNG	LFNG O-fucosylpeptide 3-beta-N-acetylglucosaminyltransferase
hsa-miR-216b	0	0	1	1	0	0	NIF3L1	NIF3 NGG1 interacting factor 3-like 1 (S. cerevisiae)
hsa-miR-216b	0	0	1	1	1	1	C17orf97	chromosome 17 open reading frame 97
hsa-miR-216b	0	0	0	1	1	1	ZNF681	zinc finger protein 681
hsa-miR-216b	0	0	1	1	0	0	CUEDC1	CUE domain containing 1
hsa-miR-216b	0	0	0	1	0	0	MPHOSPH8	M-phase phosphoprotein 8
hsa-miR-216b	0	0	1	1	0	0	NLRC4	NLR family, CARD domain containing 4
hsa-miR-216b	0	0	0	1	0	0	OR10Z1	olfactory receptor, family 10, subfamily Z, member 1
hsa-miR-216b	0	0	1	1	1	1	NOS1AP	nitric oxide synthase 1 (neuronal) adaptor protein
hsa-miR-216b	0	0	1	1	1	1	MRPS6	mitochondrial ribosomal protein S6
hsa-miR-216b	1	0	1	1	1	1	KIAA1804	mixed lineage kinase 4
hsa-miR-216b	1	0	1	1	1	1	SMYD2	SET and MYND domain containing 2
hsa-miR-216b	0	0	1	1	1	1	ANGEL2	angel homolog 2 (Drosophila)
hsa-miR-216b	0	0	1	1	1	1	HSD11B1	hydroxysteroid (11-beta) dehydrogenase 1
hsa-miR-216b	0	0	0	1	1	1	LAX1	lymphocyte transmembrane adaptor 1
hsa-miR-216b	0	0	1	1	1	1	ATP6V1G3	ATPase, H+ transporting, lysosomal 13kDa, V1 subunit G3
hsa-miR-216b	0	0	1	1	1	1	GINM1	glycoprotein integral membrane 1
hsa-miR-216b	1	0	1	1	1	1	NPL	N-acetylneuraminate pyruvate lyase (dihydrodipicolinate synthase)
hsa-miR-216b	1	0	1	1	1	1	ADAT2	adenosine deaminase, tRNA-specific 2
hsa-miR-216b	0	0	1	1	0	0	ABRACL	ABRA C-terminal like
hsa-miR-216b	0	0	1	1	0	0	IFNGR1	interferon gamma receptor 1
hsa-miR-216b	1	0	1	1	1	1	IL20RA	interleukin 20 receptor, alpha
hsa-miR-216b	0	0	1	1	1	1	FMO3	flavin containing monooxygenase 3
hsa-miR-216b	0	0	1	1	1	1	DCAF6	DDB1 and CUL4 associated factor 6
hsa-miR-216b	0	0	1	1	1	1	TMCO1	transmembrane and coiled-coil domains 1
hsa-miR-216b	0	0	1	1	1	1	C1orf110	chromosome 1 open reading frame 110
hsa-miR-216b	0	0	0	1	0	0	FCRL6	Fc receptor-like 6
hsa-miR-216b	1	0	1	1	1	1	PTPRK	protein tyrosine phosphatase, receptor type, K
hsa-miR-216b	0	0	0	1	0	0	TTC24	tetratricopeptide repeat domain 24
hsa-miR-216b	0	0	1	1	1	1	CENPW	centromere protein W
hsa-miR-216b	1	0	1	1	1	1	NKAIN2	Na+/K+ transporting ATPase interacting 2
hsa-miR-216b	0	0	1	1	1	1	PKIB	protein kinase (cAMP-dependent, catalytic) inhibitor beta
hsa-miR-216b	0	0	1	1	1	1	C10orf90	chromosome 10 open reading frame 90
hsa-miR-216b	1	0	1	1	1	1	CRCT1	cysteine-rich C-terminal 1
hsa-miR-216b	1	0	1	1	0	0	TDRKH	tudor and KH domain containing
hsa-miR-216b	0	0	1	1	1	1	MLLT11	myeloid/lymphoid or mixed-lineage leukemia (trithorax homolog, Drosophila); translocated to, 11
hsa-miR-216b	1	0	1	1	1	1	RGS10	regulator of G-protein signaling 10
hsa-miR-216b	0	0	0	1	0	0	FCGR1B	Fc fragment of IgG, high affinity Ib, receptor (CD64)
hsa-miR-216b	0	0	0	1	1	1	WDR3	WD repeat domain 3
hsa-miR-216b	0	0	0	1	1	1	CD2	CD2 molecule
hsa-miR-216b	0	0	1	1	1	1	SLC22A15	solute carrier family 22, member 15
hsa-miR-216b	0	0	1	1	0	0	AP4B1	adaptor-related protein complex 4, beta 1 subunit
hsa-miR-216b	0	0	1	1	1	1	C10orf32	chromosome 10 open reading frame 32
hsa-miR-216b	0	0	1	1	0	0	SARS	seryl-tRNA synthetase
hsa-miR-216b	1	0	0	1	1	1	CLCC1	chloride channel CLIC-like 1
hsa-miR-216b	0	0	1	1	1	1	DPYD	dihydropyrimidine dehydrogenase
hsa-miR-216b	0	0	0	1	0	0	MAGEA10	melanoma antigen family A, 10
hsa-miR-216b	0	0	1	1	0	0	DPPA5	developmental pluripotency associated 5
hsa-miR-216b	1	0	1	1	1	1	PKN2	protein kinase N2
hsa-miR-216b	1	0	0	1	1	1	BAG2	BCL2-associated athanogene 2
hsa-miR-216b	0	0	1	1	1	1	KIAA1586	KIAA1586
hsa-miR-216b	1	0	1	1	1	1	LRRC1	leucine rich repeat containing 1
hsa-miR-216b	0	0	1	1	0	0	LRRIQ3	leucine-rich repeats and IQ motif containing 3
hsa-miR-216b	0	0	1	1	0	0	HEATR8	HEAT repeat containing 8
hsa-miR-216b	0	0	1	1	1	1	TTC4	tetratricopeptide repeat domain 4
hsa-miR-216b	0	0	1	1	1	1	NKAP	NFKB activating protein
hsa-miR-216b	0	0	1	1	1	1	PFDN4	prefoldin subunit 4
hsa-miR-216b	0	0	0	1	1	1	CPT2	carnitine palmitoyltransferase 2
hsa-miR-216b	0	0	0	1	0	0	TCTE1	t-complex-associated-testis-expressed 1
hsa-miR-216b	0	0	1	1	0	0	CYP4X1	cytochrome P450, family 4, subfamily X, polypeptide 1
hsa-miR-216b	1	0	0	1	0	0	ANKRD22	ankyrin repeat domain 22
hsa-miR-216b	0	0	1	1	1	1	MED22	mediator complex subunit 22
hsa-miR-216b	0	0	1	1	1	1	MRPL14	mitochondrial ribosomal protein L14
hsa-miR-216b	0	0	0	1	1	1	DDX31	DEAD (Asp-Glu-Ala-Asp) box polypeptide 31
hsa-miR-216b	0	0	1	1	1	1	C10orf57	chromosome 10 open reading frame 57
hsa-miR-216b	1	0	1	1	1	1	PRPS1	phosphoribosyl pyrophosphate synthetase 1
hsa-miR-216b	0	0	1	1	0	0	CCDC23	coiled-coil domain containing 23
hsa-miR-216b	0	0	1	1	1	1	WBP5	WW domain binding protein 5
hsa-miR-216b	1	0	1	1	1	1	CAMK2G	calcium/calmodulin-dependent protein kinase II gamma
hsa-miR-216b	0	0	1	1	0	0	TCEAL2	transcription elongation factor A (SII)-like 2
hsa-miR-216b	0	0	1	1	0	0	WISP2	WNT1 inducible signaling pathway protein 2
hsa-miR-216b	0	0	0	1	1	1	NOX1	NADPH oxidase 1
hsa-miR-216b	0	0	1	1	1	1	APOOL	apolipoprotein O-like
hsa-miR-216b	0	0	0	1	0	0	KIF6	kinesin family member 6
hsa-miR-216b	0	0	1	1	0	0	H2AFY2	H2A histone family, member Y2
hsa-miR-216b	0	0	0	1	0	0	CYSLTR1	cysteinyl leukotriene receptor 1
hsa-miR-216b	0	0	1	1	0	0	GARNL3	GTPase activating Rap/RanGAP domain-like 3
hsa-miR-216b	0	0	0	1	0	0	BMP2KL	BMP2 inducible kinase-like
hsa-miR-216b	0	0	1	1	1	1	FGD2	FYVE, RhoGEF and PH domain containing 2
hsa-miR-216b	0	0	1	1	1	1	CTNNA3	catenin (cadherin-associated protein), alpha 3
hsa-miR-216b	0	0	1	1	0	0	MORN5	MORN repeat containing 5
hsa-miR-216b	1	0	1	1	1	1	EPB41	erythrocyte membrane protein band 4.1 (elliptocytosis 1, RH-linked)
hsa-miR-216b	0	0	1	1	1	1	ASTN2	astrotactin 2
hsa-miR-216b	0	0	1	1	0	0	GDPD2	glycerophosphodiester phosphodiesterase domain containing 2
hsa-miR-216b	0	0	1	1	0	0	TXNDC8	thioredoxin domain containing 8 (spermatozoa)
hsa-miR-216b	0	0	0	1	0	0	BMS1	BMS1 homolog, ribosome assembly protein (yeast)
hsa-miR-216b	1	0	1	1	1	1	CASP10	caspase 10, apoptosis-related cysteine peptidase
hsa-miR-216b	0	0	0	1	0	0	OR8B2	olfactory receptor, family 8, subfamily B, member 2
hsa-miR-216b	1	0	1	1	0	0	OTUD3	OTU domain containing 3
hsa-miR-216b	0	0	0	1	1	1	EMC1	ER membrane protein complex subunit 1
hsa-miR-216b	0	0	0	1	0	0	CD300LD	CD300 molecule-like family member d
hsa-miR-216b	0	0	0	1	0	0	GRTP1	growth hormone regulated TBC protein 1
hsa-miR-216b	0	0	0	1	0	0	PADI4	peptidyl arginine deiminase, type IV
hsa-miR-216b	1	0	1	1	0	0	EHMT2	euchromatic histone-lysine N-methyltransferase 2
hsa-miR-216b	0	0	0	1	0	0	HSPA1A	heat shock 70kDa protein 1A
hsa-miR-216b	0	0	1	1	1	1	LSM2	LSM2 homolog, U6 small nuclear RNA associated (S. cerevisiae)
hsa-miR-216b	1	0	1	1	1	1	C20orf112	chromosome 20 open reading frame 112
hsa-miR-216b	0	0	1	1	1	1	DYNC2H1	dynein, cytoplasmic 2, heavy chain 1
hsa-miR-216b	0	0	1	1	1	1	TEX30	testis expressed 30
hsa-miR-216b	0	0	1	1	1	1	TPP2	tripeptidyl peptidase II
hsa-miR-216b	0	0	1	1	0	0	CCDC22	coiled-coil domain containing 22
hsa-miR-216b	0	0	1	1	0	0	HLA-C	major histocompatibility complex, class I, C
hsa-miR-216b	0	0	0	1	1	1	SLC15A1	solute carrier family 15 (oligopeptide transporter), member 1
hsa-miR-216b	0	0	0	1	1	1	C10orf67	chromosome 10 open reading frame 67
hsa-miR-216b	0	0	0	1	1	1	MSRB2	methionine sulfoxide reductase B2
hsa-miR-216b	0	0	0	1	0	0	TMC4	transmembrane channel-like 4
hsa-miR-216b	0	0	1	1	1	1	HLA-A	major histocompatibility complex, class I, A
hsa-miR-216b	0	0	0	1	1	1	BTNL9	butyrophilin-like 9
hsa-miR-216b	0	0	1	1	0	0	YIF1A	Yip1 interacting factor homolog A (S. cerevisiae)
hsa-miR-216b	1	0	1	1	1	1	TMEM2	transmembrane protein 2
hsa-miR-216b	0	0	1	1	0	0	MED25	mediator complex subunit 25
hsa-miR-216b	0	0	0	1	0	0	ZNF311	zinc finger protein 311
hsa-miR-216b	0	0	1	1	1	1	PLXDC2	plexin domain containing 2
hsa-miR-216b	0	0	0	1	1	1	TMEM252	transmembrane protein 252
hsa-miR-216b	0	0	0	1	0	0	CBWD6	COBW domain containing 6
hsa-miR-216b	0	0	1	1	1	1	HMGN4	high mobility group nucleosomal binding domain 4
hsa-miR-216b	0	0	0	1	0	0	CBWD7	COBW domain containing 7
hsa-miR-216b	0	0	0	1	1	1	KRTAP9-3	keratin associated protein 9-3
hsa-miR-216b	0	0	1	1	1	1	LRRC16A	leucine rich repeat containing 16A
hsa-miR-216b	1	0	1	1	1	1	CHD5	chromodomain helicase DNA binding protein 5
hsa-miR-216b	0	0	0	1	1	1	ARHGEF35	Rho guanine nucleotide exchange factor (GEF) 35
hsa-miR-216b	1	0	1	1	1	1	PCDHA5	protocadherin alpha 5
hsa-miR-216b	1	0	1	1	1	1	CASK	calcium/calmodulin-dependent serine protein kinase (MAGUK family)
hsa-miR-216b	1	0	1	1	1	1	FAM107B	family with sequence similarity 107, member B
hsa-miR-216b	1	0	1	1	1	1	NRSN1	neurensin 1
hsa-miR-216b	0	0	0	1	0	0	LIG3	ligase III, DNA, ATP-dependent
hsa-miR-216b	0	0	1	1	0	0	MORN1	MORN repeat containing 1
hsa-miR-216b	1	0	1	1	1	1	DYNLT3	dynein, light chain, Tctex-type 3
hsa-miR-216b	1	0	1	1	1	1	AFF4	AF4/FMR2 family, member 4
hsa-miR-216b	1	0	0	1	1	1	LANCL3	LanC lantibiotic synthetase component C-like 3 (bacterial)
hsa-miR-216b	0	0	0	1	0	0	PHYH	phytanoyl-CoA 2-hydroxylase
hsa-miR-216b	0	0	1	1	0	0	KIAA0226L	KIAA0226-like
hsa-miR-216b	0	0	0	1	0	0	LRRC63	leucine rich repeat containing 63
hsa-miR-216b	0	0	1	1	0	0	KIF13A	kinesin family member 13A
hsa-miR-216b	0	0	1	1	1	1	ZC3H13	zinc finger CCCH-type containing 13
hsa-miR-216b	0	0	1	1	0	0	TPT1	tumor protein, translationally-controlled 1
hsa-miR-216b	0	0	1	1	0	0	PDK3	pyruvate dehydrogenase kinase, isozyme 3
hsa-miR-216b	0	0	1	1	0	0	ELP4	elongator acetyltransferase complex subunit 4
hsa-miR-216b	0	0	1	1	1	1	VIT	vitrin
hsa-miR-216b	0	0	1	1	0	0	FAM65A	family with sequence similarity 65, member A
hsa-miR-216b	0	0	1	1	1	1	PDE7A	phosphodiesterase 7A
hsa-miR-216b	0	0	1	1	1	1	TMEM14B	transmembrane protein 14B
hsa-miR-216b	0	0	0	1	0	0	ITIH2	inter-alpha-trypsin inhibitor heavy chain 2
hsa-miR-216b	0	0	0	1	0	0	LOC100131796	LP2570
hsa-miR-216b	0	0	1	1	0	0	FOCAD	focadhesin
hsa-miR-216b	0	0	1	1	0	0	TEX26	testis expressed 26
hsa-miR-216b	0	0	1	1	1	1	EPHX2	epoxide hydrolase 2, cytoplasmic
hsa-miR-216b	0	0	1	1	0	0	CEP152	centrosomal protein 152kDa
hsa-miR-216b	0	0	1	1	1	1	XG	Xg blood group
hsa-miR-216b	1	0	1	1	1	1	WDR37	WD repeat domain 37
hsa-miR-216b	0	0	1	1	1	1	CSF2RA	colony stimulating factor 2 receptor, alpha, low-affinity (granulocyte-macrophage)
hsa-miR-216b	0	0	0	1	1	1	SHOX	short stature homeobox
hsa-miR-216b	1	0	1	1	1	1	GPR125	G protein-coupled receptor 125
hsa-miR-216b	0	0	1	1	1	1	FGFBP1	fibroblast growth factor binding protein 1
hsa-miR-216b	0	0	0	1	1	1	BPY2B	basic charge, Y-linked, 2B
hsa-miR-216b	0	0	1	1	1	1	DEFB125	defensin, beta 125
hsa-miR-216b	0	0	0	1	0	0	FAM90A7P	putative protein FAM90A7
hsa-miR-216b	0	0	1	1	0	0	TBL1Y	transducin (beta)-like 1, Y-linked
hsa-miR-216b	1	0	1	1	1	1	NKTR	natural killer-tumor recognition sequence
hsa-miR-216b	0	0	0	1	1	1	METTL6	methyltransferase like 6
hsa-miR-216b	1	0	0	1	1	1	NKIRAS1	NFKB inhibitor interacting Ras-like 1
hsa-miR-216b	0	0	1	1	1	1	HDDC2	HD domain containing 2
hsa-miR-216b	0	0	1	1	0	0	SLCO6A1	solute carrier organic anion transporter family, member 6A1
hsa-miR-216b	0	0	1	1	1	1	ERI2	ERI1 exoribonuclease family member 2
hsa-miR-216b	0	0	1	1	0	0	ADAL	adenosine deaminase-like
hsa-miR-216b	0	0	1	1	1	1	LRCH1	leucine-rich repeats and calponin homology (CH) domain containing 1
hsa-miR-216b	1	0	1	1	1	1	EDNRB	endothelin receptor type B
hsa-miR-216b	1	0	1	0	1	1	GLI3	GLI family zinc finger 3
hsa-miR-216b	0	0	1	1	1	1	PRNP	prion protein
hsa-miR-216b	1	0	1	1	1	1	SGCD	sarcoglycan, delta (35kDa dystrophin-associated glycoprotein)
hsa-miR-216b	1	0	1	1	1	1	SLC26A4	solute carrier family 26, member 4
hsa-miR-216b	1	0	0	1	1	1	HNF4A	hepatocyte nuclear factor 4, alpha
hsa-miR-216b	0	0	1	1	1	1	PTGS1	prostaglandin-endoperoxide synthase 1 (prostaglandin G/H synthase and cyclooxygenase)
hsa-miR-216b	1	0	1	1	1	1	STX16	syntaxin 16
hsa-miR-216b	1	0	1	0	1	1	PLEKHA1	pleckstrin homology domain containing, family A (phosphoinositide binding specific) member 1
hsa-miR-216b	1	0	1	1	1	1	C18orf1	chromosome 18 open reading frame 1
hsa-miR-216b	0	0	1	1	1	1	CLEC2D	C-type lectin domain family 2, member D
hsa-miR-216b	0	0	1	0	1	1	NWD1	NACHT and WD repeat domain containing 1
hsa-miR-216b	1	0	1	1	1	1	CISD2	CDGSH iron sulfur domain 2
hsa-miR-216b	1	0	1	0	1	1	PM20D2	peptidase M20 domain containing 2
hsa-miR-216b	0	0	0	0	1	1	IBA57	IBA57, iron-sulfur cluster assembly homolog (S. cerevisiae)
hsa-miR-216b	1	0	1	1	1	1	RAP1B	RAP1B, member of RAS oncogene family
hsa-miR-216b	1	0	1	1	1	1	ATP11C	ATPase, class VI, type 11C
hsa-miR-216b	0	0	0	0	1	1	LOC389834	ankyrin repeat domain 57 pseudogene
hsa-miR-216b	1	0	1	1	1	1	FAM13A	family with sequence similarity 13, member A
hsa-miR-216b	0	0	1	0	1	1	C3orf17	chromosome 3 open reading frame 17
hsa-miR-216b	0	0	1	1	1	1	DUT	deoxyuridine triphosphatase
hsa-miR-216b	0	0	1	1	1	1	ZFAT	zinc finger and AT hook domain containing
hsa-miR-216b	0	0	0	1	1	1	SLC25A29	solute carrier family 25 (mitochondrial carnitine/acylcarnitine carrier), member 29
hsa-miR-216b	0	0	1	1	1	1	SP100	SP100 nuclear antigen
hsa-miR-216b	1	0	1	1	1	1	BMP3	bone morphogenetic protein 3
hsa-miR-216b	0	0	0	1	1	1	COL8A1	collagen, type VIII, alpha 1
hsa-miR-216b	0	0	1	1	1	1	EDNRA	endothelin receptor type A
hsa-miR-216b	1	0	1	1	1	1	MDM4	Mdm4 p53 binding protein homolog (mouse)
hsa-miR-216b	0	0	1	1	1	1	MSX2	msh homeobox 2
hsa-miR-216b	0	0	1	1	1	1	P2RX7	purinergic receptor P2X, ligand-gated ion channel, 7
hsa-miR-216b	1	0	1	0	1	1	PAK2	p21 protein (Cdc42/Rac)-activated kinase 2
hsa-miR-216b	1	0	1	0	1	1	PAPPA	pregnancy-associated plasma protein A, pappalysin 1
hsa-miR-216b	0	0	1	1	1	1	RFX3	regulatory factor X, 3 (influences HLA class II expression)
hsa-miR-216b	0	0	1	1	1	1	SH3BGRL	SH3 domain binding glutamic acid-rich protein like
hsa-miR-216b	1	0	1	1	1	1	SYN2	synapsin II
hsa-miR-216b	1	0	1	1	1	1	NR2C2	nuclear receptor subfamily 2, group C, member 2
hsa-miR-216b	0	0	1	1	1	1	UBE2E1	ubiquitin-conjugating enzyme E2E 1
hsa-miR-216b	1	0	0	1	1	1	ZNF264	zinc finger protein 264
hsa-miR-216b	1	0	1	1	1	1	KCNAB1	potassium voltage-gated channel, shaker-related subfamily, beta member 1
hsa-miR-216b	1	0	1	0	1	1	EIF2S1	eukaryotic translation initiation factor 2, subunit 1 alpha, 35kDa
hsa-miR-216b	0	0	0	1	1	1	FDX1	ferredoxin 1
[truncated: 87 more rows]
