# Supplementary material for: Profiling of Selected MicroRNAs in Proliferative Eutopic Endometrium of Women with Ovarian Endometriosis
Source: Biomed Res Int. 2015 Aug 20;2015:760698. doi: 10.1155/2015/760698 (PMC4558423; doi:10.1155/2015/760698)
Supplement: Supplementary file 1 — Table I: The names of miRNAs significantly differentially expressed between eutopic endometrium of patients with endometriosis vs eutopic endometrium of patients without endometriosis. Table II: The associations between miRNA and mRNA, which presents detailed results of the search of six major databases i.e targetscan, tarbase, miranda, mirbase, mirtarget2 and pictar. [file 760698.f1.zip › 760698.f1/Table II/hsa-miR-217.tsv]

miR	targetscan	tarbase	miranda	mirbase	mirtarget2	pictar	GeneSymbol	GeneName
hsa-miR-217	1	0	1	1	1	1	MIER3	mesoderm induction early response 1, family member 3
hsa-miR-217	1	0	1	1	1	1	PAX3	paired box 3
hsa-miR-217	1	0	1	1	1	1	SENP5	SUMO1/sentrin specific peptidase 5
hsa-miR-217	1	0	1	1	1	1	ZFAND5	zinc finger, AN1-type domain 5
hsa-miR-217	1	0	1	1	1	1	USP47	ubiquitin specific peptidase 47
hsa-miR-217	1	0	1	0	1	1	TM9SF3	transmembrane 9 superfamily member 3
hsa-miR-217	1	0	1	0	1	1	CREB5	cAMP responsive element binding protein 5
hsa-miR-217	1	0	1	1	1	1	CORO1C	coronin, actin binding protein, 1C
hsa-miR-217	1	0	1	1	1	1	MAF	v-maf musculoaponeurotic fibrosarcoma oncogene homolog (avian)
hsa-miR-217	1	0	1	1	1	1	INSIG2	insulin induced gene 2
hsa-miR-217	1	0	1	1	1	1	KCNA3	potassium voltage-gated channel, shaker-related subfamily, member 3
hsa-miR-217	1	0	1	1	1	1	EHMT1	euchromatic histone-lysine N-methyltransferase 1
hsa-miR-217	1	0	1	1	1	1	GDI2	GDP dissociation inhibitor 2
hsa-miR-217	1	0	1	1	1	1	CERS6	ceramide synthase 6
hsa-miR-217	1	0	1	0	1	1	SEL1L	sel-1 suppressor of lin-12-like (C. elegans)
hsa-miR-217	1	0	1	0	1	1	DNAJC5	DnaJ (Hsp40) homolog, subfamily C, member 5
hsa-miR-217	1	0	1	0	1	1	NUFIP2	nuclear fragile X mental retardation protein interacting protein 2
hsa-miR-217	1	0	1	1	1	1	RAB4A	RAB4A, member RAS oncogene family
hsa-miR-217	1	0	1	0	1	1	BCL11B	B-cell CLL/lymphoma 11B (zinc finger protein)
hsa-miR-217	1	0	1	0	1	1	CREBZF	CREB/ATF bZIP transcription factor
hsa-miR-217	1	0	1	1	1	1	CSMD2	CUB and Sushi multiple domains 2
hsa-miR-217	1	0	1	1	1	1	YME1L1	YME1-like 1 (S. cerevisiae)
hsa-miR-217	1	0	1	1	1	1	TCF12	transcription factor 12
hsa-miR-217	1	0	1	1	1	1	RANBP2	RAN binding protein 2
hsa-miR-217	1	0	1	1	1	1	ELAVL2	ELAV (embryonic lethal, abnormal vision, Drosophila)-like 2 (Hu antigen B)
hsa-miR-217	1	0	1	1	1	1	ASF1A	ASF1 anti-silencing function 1 homolog A (S. cerevisiae)
hsa-miR-217	1	0	1	0	1	1	WDR82	WD repeat domain 82
hsa-miR-217	1	0	1	1	1	1	EEA1	early endosome antigen 1
hsa-miR-217	1	0	1	1	1	1	ANK3	ankyrin 3, node of Ranvier (ankyrin G)
hsa-miR-217	1	0	1	0	1	1	CCNL2	cyclin L2
hsa-miR-217	1	0	1	1	1	1	NF1	neurofibromin 1
hsa-miR-217	1	0	1	0	1	1	REEP5	receptor accessory protein 5
hsa-miR-217	1	0	1	1	1	1	TMEM68	transmembrane protein 68
hsa-miR-217	1	0	1	0	1	1	SLC1A2	solute carrier family 1 (glial high affinity glutamate transporter), member 2
hsa-miR-217	1	0	1	1	1	1	CHN2	chimerin (chimaerin) 2
hsa-miR-217	1	0	1	1	1	1	AKAP7	A kinase (PRKA) anchor protein 7
hsa-miR-217	1	0	1	0	0	0	ASXL3	additional sex combs like 3 (Drosophila)
hsa-miR-217	1	0	1	1	1	1	NUPL1	nucleoporin like 1
hsa-miR-217	1	0	1	0	1	1	DCP2	DCP2 decapping enzyme homolog (S. cerevisiae)
hsa-miR-217	1	0	1	1	1	1	RUNX2	runt-related transcription factor 2
hsa-miR-217	1	0	1	1	1	1	HNF1B	HNF1 homeobox B
hsa-miR-217	1	0	1	1	1	1	ATP9A	ATPase, class II, type 9A
hsa-miR-217	1	0	1	1	1	1	ESCO1	establishment of cohesion 1 homolog 1 (S. cerevisiae)
hsa-miR-217	1	0	0	0	0	0	AAK1	AP2 associated kinase 1
hsa-miR-217	1	0	1	1	1	1	DLGAP2	discs, large (Drosophila) homolog-associated protein 2
hsa-miR-217	1	0	1	1	1	1	PNRC2	proline-rich nuclear receptor coactivator 2
hsa-miR-217	1	0	1	1	1	1	SENP7	SUMO1/sentrin specific peptidase 7
hsa-miR-217	1	0	1	1	1	1	YTHDC1	YTH domain containing 1
hsa-miR-217	1	0	1	1	1	1	AEBP2	AE binding protein 2
hsa-miR-217	1	0	1	0	1	1	ACVR2A	activin A receptor, type IIA
hsa-miR-217	1	0	1	1	1	1	RICTOR	RPTOR independent companion of MTOR, complex 2
hsa-miR-217	1	0	1	1	1	1	ZNF711	zinc finger protein 711
hsa-miR-217	1	0	1	1	1	1	SLC4A4	solute carrier family 4, sodium bicarbonate cotransporter, member 4
hsa-miR-217	1	0	1	1	0	0	PLXNA4	plexin A4
hsa-miR-217	1	0	0	1	1	1	ZFYVE20	zinc finger, FYVE domain containing 20
hsa-miR-217	1	0	1	0	1	1	DOCK4	dedicator of cytokinesis 4
hsa-miR-217	1	0	1	0	1	1	CDK5R1	cyclin-dependent kinase 5, regulatory subunit 1 (p35)
hsa-miR-217	1	0	1	0	1	1	SH3PXD2A	SH3 and PX domains 2A
hsa-miR-217	1	0	1	1	0	0	ZC3H4	zinc finger CCCH-type containing 4
hsa-miR-217	1	0	1	0	1	1	ATP8A1	ATPase, aminophospholipid transporter (APLT), class I, type 8A, member 1
hsa-miR-217	1	0	1	0	1	1	PURB	purine-rich element binding protein B
hsa-miR-217	1	0	1	1	1	1	VSNL1	visinin-like 1
hsa-miR-217	1	0	1	1	1	1	GID8	GID complex subunit 8 homolog (S. cerevisiae)
hsa-miR-217	1	0	0	0	1	1	MRE11A	MRE11 meiotic recombination 11 homolog A (S. cerevisiae)
hsa-miR-217	1	0	1	1	1	1	USP38	ubiquitin specific peptidase 38
hsa-miR-217	1	0	1	1	1	1	MAPK1	mitogen-activated protein kinase 1
hsa-miR-217	1	0	1	1	1	1	TLK2	tousled-like kinase 2
hsa-miR-217	1	0	1	1	1	1	PPP4R2	protein phosphatase 4, regulatory subunit 2
hsa-miR-217	1	0	1	1	1	1	ENAH	enabled homolog (Drosophila)
hsa-miR-217	1	0	1	0	1	1	ELMOD1	ELMO/CED-12 domain containing 1
hsa-miR-217	1	0	0	1	1	1	TUBB6	tubulin, beta 6 class V
hsa-miR-217	1	0	1	1	1	1	MMGT1	membrane magnesium transporter 1
hsa-miR-217	1	0	1	1	1	1	TDG	thymine-DNA glycosylase
hsa-miR-217	1	0	1	1	1	1	METTL8	methyltransferase like 8
hsa-miR-217	1	0	1	1	1	1	NOVA1	neuro-oncological ventral antigen 1
hsa-miR-217	1	0	1	1	1	1	TMTC4	transmembrane and tetratricopeptide repeat containing 4
hsa-miR-217	1	0	1	1	1	1	CSGALNACT2	chondroitin sulfate N-acetylgalactosaminyltransferase 2
hsa-miR-217	1	0	1	1	1	1	SNX27	sorting nexin family member 27
hsa-miR-217	1	0	1	1	1	1	TMSB4X	thymosin beta 4, X-linked
hsa-miR-217	1	0	1	1	1	1	GDPD1	glycerophosphodiester phosphodiesterase domain containing 1
hsa-miR-217	1	0	1	1	1	1	PCMT1	protein-L-isoaspartate (D-aspartate) O-methyltransferase
hsa-miR-217	1	0	1	0	1	1	COL21A1	collagen, type XXI, alpha 1
hsa-miR-217	1	0	1	1	1	1	VAT1L	vesicle amine transport protein 1 homolog (T. californica)-like
hsa-miR-217	1	0	1	1	1	1	ATG2B	autophagy related 2B
hsa-miR-217	1	0	1	1	1	1	KLF12	Kruppel-like factor 12
hsa-miR-217	1	0	1	0	1	1	SLC6A1	solute carrier family 6 (neurotransmitter transporter, GABA), member 1
hsa-miR-217	1	0	1	1	1	1	BCL11A	B-cell CLL/lymphoma 11A (zinc finger protein)
hsa-miR-217	1	0	1	1	1	1	CHSY1	chondroitin sulfate synthase 1
hsa-miR-217	1	0	1	1	1	1	TPD52L2	tumor protein D52-like 2
hsa-miR-217	1	0	1	1	1	1	ANTXR1	anthrax toxin receptor 1
hsa-miR-217	1	0	1	1	1	1	FGFR2	fibroblast growth factor receptor 2
hsa-miR-217	1	0	1	1	1	1	ADAM9	ADAM metallopeptidase domain 9
hsa-miR-217	1	0	1	1	1	1	AP3M1	adaptor-related protein complex 3, mu 1 subunit
hsa-miR-217	1	0	1	1	1	1	SLC39A10	solute carrier family 39 (zinc transporter), member 10
hsa-miR-217	1	0	1	0	1	1	CADPS2	Ca++-dependent secretion activator 2
hsa-miR-217	1	0	1	0	1	1	SLC6A6	solute carrier family 6 (neurotransmitter transporter, taurine), member 6
hsa-miR-217	1	0	1	1	1	1	TACC1	transforming, acidic coiled-coil containing protein 1
hsa-miR-217	1	0	1	1	1	1	ATP1B1	ATPase, Na+/K+ transporting, beta 1 polypeptide
hsa-miR-217	1	0	1	1	1	1	LRRTM3	leucine rich repeat transmembrane neuronal 3
hsa-miR-217	1	0	1	1	1	1	RABL3	RAB, member of RAS oncogene family-like 3
hsa-miR-217	1	0	1	1	1	1	NLGN1	neuroligin 1
hsa-miR-217	1	0	1	0	1	1	PSMF1	proteasome (prosome, macropain) inhibitor subunit 1 (PI31)
hsa-miR-217	1	0	1	1	1	1	NDN	necdin homolog (mouse)
hsa-miR-217	1	0	1	1	1	1	ACER3	alkaline ceramidase 3
hsa-miR-217	1	0	1	1	1	1	GALNTL6	UDP-N-acetyl-alpha-D-galactosamine:polypeptide N-acetylgalactosaminyltransferase-like 6
hsa-miR-217	1	0	1	1	1	1	ATP11C	ATPase, class VI, type 11C
hsa-miR-217	1	0	1	1	1	1	DACH2	dachshund homolog 2 (Drosophila)
hsa-miR-217	1	0	1	1	1	1	DACH1	dachshund homolog 1 (Drosophila)
hsa-miR-217	1	0	1	0	1	1	G3BP2	GTPase activating protein (SH3 domain) binding protein 2
hsa-miR-217	1	0	1	1	1	1	HOMER2	homer homolog 2 (Drosophila)
hsa-miR-217	1	0	1	1	1	1	MAMDC2	MAM domain containing 2
hsa-miR-217	1	0	0	1	1	1	PDHA1	pyruvate dehydrogenase (lipoamide) alpha 1
hsa-miR-217	1	0	1	1	1	1	RUNX1	runt-related transcription factor 1
hsa-miR-217	1	0	1	1	1	1	SFPQ	splicing factor proline/glutamine-rich
hsa-miR-217	1	0	1	1	1	1	LIMCH1	LIM and calponin homology domains 1
hsa-miR-217	1	0	1	0	1	1	KRAS	v-Ki-ras2 Kirsten rat sarcoma viral oncogene homolog
hsa-miR-217	1	0	1	1	1	1	PPP1CB	protein phosphatase 1, catalytic subunit, beta isozyme
hsa-miR-217	1	0	1	1	1	1	CHRDL1	chordin-like 1
hsa-miR-217	1	0	1	1	1	1	MACF1	microtubule-actin crosslinking factor 1
hsa-miR-217	1	0	1	1	1	1	CUL5	cullin 5
hsa-miR-217	1	0	1	1	1	1	CALD1	caldesmon 1
hsa-miR-217	1	0	1	1	1	1	PDCD6IP	programmed cell death 6 interacting protein
hsa-miR-217	1	0	1	0	1	1	COX18	COX18 cytochrome c oxidase assembly homolog (S. cerevisiae)
hsa-miR-217	1	0	1	1	1	1	GPM6A	glycoprotein M6A
hsa-miR-217	1	0	1	1	1	1	LMO7	LIM domain 7
hsa-miR-217	1	0	1	0	1	1	PDS5B	PDS5, regulator of cohesion maintenance, homolog B (S. cerevisiae)
hsa-miR-217	1	0	1	1	1	1	SH3BP4	SH3-domain binding protein 4
hsa-miR-217	1	0	0	1	1	1	SDCCAG3	serologically defined colon cancer antigen 3
hsa-miR-217	1	0	1	1	1	1	DSC3	desmocollin 3
hsa-miR-217	1	0	1	0	1	1	GATAD2B	GATA zinc finger domain containing 2B
hsa-miR-217	1	0	0	0	0	0	ABCC1	ATP-binding cassette, sub-family C (CFTR/MRP), member 1
hsa-miR-217	1	0	1	1	0	0	STX1A	syntaxin 1A (brain)
hsa-miR-217	1	0	1	0	1	1	NCOA7	nuclear receptor coactivator 7
hsa-miR-217	1	0	1	1	1	1	C11orf87	chromosome 11 open reading frame 87
hsa-miR-217	1	0	1	1	1	1	DKK1	dickkopf 1 homolog (Xenopus laevis)
hsa-miR-217	1	0	1	1	1	1	ANKRD50	ankyrin repeat domain 50
hsa-miR-217	1	0	1	1	1	1	PLEKHM1	pleckstrin homology domain containing, family M (with RUN domain) member 1
hsa-miR-217	1	0	1	1	1	1	ONECUT2	one cut homeobox 2
hsa-miR-217	1	0	1	1	1	1	LUC7L3	LUC7-like 3 (S. cerevisiae)
hsa-miR-217	1	0	1	0	1	1	TMSB4XP8	thymosin beta 4, X-linked pseudogene 8
hsa-miR-217	1	0	1	1	1	1	RAD23B	RAD23 homolog B (S. cerevisiae)
hsa-miR-217	1	0	1	1	1	1	SYN2	synapsin II
hsa-miR-217	1	0	1	0	1	1	WWC3	WWC family member 3
hsa-miR-217	1	0	1	0	1	1	HNRNPA3	heterogeneous nuclear ribonucleoprotein A3
hsa-miR-217	1	0	1	1	1	1	HSPA9	heat shock 70kDa protein 9 (mortalin)
hsa-miR-217	1	0	1	0	1	1	SOX11	SRY (sex determining region Y)-box 11
hsa-miR-217	1	0	1	1	1	1	NAP1L1	nucleosome assembly protein 1-like 1
hsa-miR-217	1	0	1	0	1	1	AGFG1	ArfGAP with FG repeats 1
hsa-miR-217	1	0	1	1	1	1	GMFB	glia maturation factor, beta
hsa-miR-217	1	0	1	1	1	1	PLXNA2	plexin A2
hsa-miR-217	1	0	1	1	1	1	FXR1	fragile X mental retardation, autosomal homolog 1
hsa-miR-217	1	0	1	0	1	1	NCAM1	neural cell adhesion molecule 1
hsa-miR-217	1	0	1	0	1	1	SLC19A2	solute carrier family 19 (thiamine transporter), member 2
hsa-miR-217	1	0	1	1	1	1	NAP1L2	nucleosome assembly protein 1-like 2
hsa-miR-217	1	0	1	1	1	1	ATRN	attractin
hsa-miR-217	1	0	1	0	1	1	USP37	ubiquitin specific peptidase 37
hsa-miR-217	1	0	1	0	1	1	SPOPL	speckle-type POZ protein-like
hsa-miR-217	1	0	1	1	1	1	SATB1	SATB homeobox 1
hsa-miR-217	1	0	1	1	1	1	FAF2	Fas associated factor family member 2
hsa-miR-217	1	0	1	0	1	1	ANKH	ankylosis, progressive homolog (mouse)
hsa-miR-217	1	0	1	1	1	1	SLC23A2	solute carrier family 23 (nucleobase transporters), member 2
hsa-miR-217	1	0	1	0	1	1	LIN54	lin-54 homolog (C. elegans)
hsa-miR-217	1	0	1	1	1	1	TACC2	transforming, acidic coiled-coil containing protein 2
hsa-miR-217	1	0	1	1	1	1	FOXG1	forkhead box G1
hsa-miR-217	1	0	1	1	1	1	RMND5A	required for meiotic nuclear division 5 homolog A (S. cerevisiae)
hsa-miR-217	1	0	1	0	1	1	ARID2	AT rich interactive domain 2 (ARID, RFX-like)
hsa-miR-217	1	0	1	1	1	1	AFF3	AF4/FMR2 family, member 3
hsa-miR-217	1	0	1	1	1	1	PSIP1	PC4 and SFRS1 interacting protein 1
hsa-miR-217	1	0	0	1	0	0	SOS1	son of sevenless homolog 1 (Drosophila)
hsa-miR-217	1	0	1	1	0	0	ACOT12	acyl-CoA thioesterase 12
hsa-miR-217	1	0	1	0	1	1	SCN9A	sodium channel, voltage-gated, type IX, alpha subunit
hsa-miR-217	1	0	1	1	1	1	MPC1	mitochondrial pyruvate carrier 1
hsa-miR-217	1	0	1	1	1	1	AKAP2	A kinase (PRKA) anchor protein 2
hsa-miR-217	1	0	1	1	1	1	MTF1	metal-regulatory transcription factor 1
hsa-miR-217	1	0	1	1	1	1	ANO3	anoctamin 3
hsa-miR-217	1	0	1	1	1	1	SIRT1	sirtuin 1
hsa-miR-217	1	0	1	0	1	1	C18orf25	chromosome 18 open reading frame 25
hsa-miR-217	1	0	1	1	1	1	FIGN	fidgetin
hsa-miR-217	1	0	1	1	1	1	DYRK1A	dual-specificity tyrosine-(Y)-phosphorylation regulated kinase 1A
hsa-miR-217	1	0	1	0	1	1	TRPS1	trichorhinophalangeal syndrome I
hsa-miR-217	1	0	1	1	1	1	SEMA3A	sema domain, immunoglobulin domain (Ig), short basic domain, secreted, (semaphorin) 3A
hsa-miR-217	1	0	1	1	1	1	IARS	isoleucyl-tRNA synthetase
hsa-miR-217	1	0	1	0	1	1	CELF2	CUGBP, Elav-like family member 2
hsa-miR-217	1	0	1	1	1	1	RTF1	Rtf1, Paf1/RNA polymerase II complex component, homolog (S. cerevisiae)
hsa-miR-217	1	0	1	1	1	1	CLOCK	clock homolog (mouse)
hsa-miR-217	1	0	1	1	1	1	UBL3	ubiquitin-like 3
hsa-miR-217	1	0	1	0	1	1	ICK	intestinal cell (MAK-like) kinase
hsa-miR-217	1	0	1	0	1	1	PPM1F	protein phosphatase, Mg2+/Mn2+ dependent, 1F
hsa-miR-217	1	0	1	1	1	1	BAI3	brain-specific angiogenesis inhibitor 3
hsa-miR-217	1	0	1	1	1	1	KCNH8	potassium voltage-gated channel, subfamily H (eag-related), member 8
hsa-miR-217	1	0	1	1	1	1	MGAT4A	mannosyl (alpha-1,3-)-glycoprotein beta-1,4-N-acetylglucosaminyltransferase, isozyme A
hsa-miR-217	1	0	1	1	0	0	HOXC11	homeobox C11
hsa-miR-217	1	0	1	1	1	1	RALGPS1	Ral GEF with PH domain and SH3 binding motif 1
hsa-miR-217	1	0	1	1	1	1	EPT1	ethanolaminephosphotransferase 1 (CDP-ethanolamine-specific)
hsa-miR-217	1	0	1	1	0	0	ABL2	v-abl Abelson murine leukemia viral oncogene homolog 2
hsa-miR-217	1	0	1	1	1	1	RILPL1	Rab interacting lysosomal protein-like 1
hsa-miR-217	1	0	1	1	1	1	YWHAG	tyrosine 3-monooxygenase/tryptophan 5-monooxygenase activation protein, gamma polypeptide
hsa-miR-217	1	0	1	1	0	0	USP7	ubiquitin specific peptidase 7 (herpes virus-associated)
hsa-miR-217	1	0	1	0	1	1	ZIC1	Zic family member 1
hsa-miR-217	1	0	1	0	1	1	CLIC4	chloride intracellular channel 4
hsa-miR-217	1	0	1	1	1	1	SLITRK3	SLIT and NTRK-like family, member 3
hsa-miR-217	1	0	1	1	1	1	HIVEP3	human immunodeficiency virus type I enhancer binding protein 3
hsa-miR-217	1	0	1	1	1	1	RIMKLA	ribosomal modification protein rimK-like family member A
hsa-miR-217	1	0	1	1	1	1	ANLN	anillin, actin binding protein
hsa-miR-217	1	0	1	1	1	1	PALM2-AKAP2	PALM2-AKAP2 readthrough
hsa-miR-217	1	0	1	1	1	1	NIPBL	Nipped-B homolog (Drosophila)
hsa-miR-217	1	0	1	0	1	1	KCTD9	potassium channel tetramerisation domain containing 9
hsa-miR-217	1	0	1	0	1	1	G6PC	glucose-6-phosphatase, catalytic subunit
hsa-miR-217	1	0	1	1	1	1	FAM60A	family with sequence similarity 60, member A
hsa-miR-217	1	0	1	1	1	1	ZNF280C	zinc finger protein 280C
hsa-miR-217	1	0	1	1	1	1	RBFOX1	RNA binding protein, fox-1 homolog (C. elegans) 1
hsa-miR-217	1	0	1	0	1	1	SEPT11	septin 11
hsa-miR-217	1	0	1	1	1	1	SETD8	SET domain containing (lysine methyltransferase) 8
hsa-miR-217	1	0	1	1	1	1	HNRNPA2B1	heterogeneous nuclear ribonucleoprotein A2/B1
hsa-miR-217	1	0	1	1	1	1	XPO4	exportin 4
hsa-miR-217	1	0	1	1	1	1	PICALM	phosphatidylinositol binding clathrin assembly protein
hsa-miR-217	1	0	1	1	1	1	PIKFYVE	phosphoinositide kinase, FYVE finger containing
hsa-miR-217	1	0	1	0	1	1	C2orf71	chromosome 2 open reading frame 71
hsa-miR-217	1	0	1	0	1	1	YWHAB	tyrosine 3-monooxygenase/tryptophan 5-monooxygenase activation protein, beta polypeptide
hsa-miR-217	1	0	1	1	1	1	FOXJ3	forkhead box J3
hsa-miR-217	1	0	1	0	1	1	MLL2	myeloid/lymphoid or mixed-lineage leukemia 2
hsa-miR-217	1	0	1	1	1	1	FOXO4	forkhead box O4
hsa-miR-217	1	0	1	1	1	1	AFF2	AF4/FMR2 family, member 2
hsa-miR-217	1	0	1	0	1	1	PDPN	podoplanin
hsa-miR-217	1	0	1	1	1	1	YY1	YY1 transcription factor
hsa-miR-217	1	0	1	1	1	1	TMEM178A	transmembrane protein 178A
hsa-miR-217	1	0	1	1	1	1	HNRNPUL1	heterogeneous nuclear ribonucleoprotein U-like 1
hsa-miR-217	1	0	1	0	1	1	PTP4A1	protein tyrosine phosphatase type IVA, member 1
hsa-miR-217	1	0	1	1	1	1	DCLK1	doublecortin-like kinase 1
hsa-miR-217	1	0	1	0	1	1	YAF2	YY1 associated factor 2
hsa-miR-217	1	0	1	1	1	1	WAPAL	wings apart-like homolog (Drosophila)
hsa-miR-217	1	0	1	1	1	1	FBN2	fibrillin 2
hsa-miR-217	1	0	1	1	1	1	ATP6V1A	ATPase, H+ transporting, lysosomal 70kDa, V1 subunit A
hsa-miR-217	1	0	1	1	1	1	GLS	glutaminase
hsa-miR-217	1	0	1	1	1	1	GOLGA1	golgin A1
hsa-miR-217	1	0	1	1	1	1	SLC38A2	solute carrier family 38, member 2
hsa-miR-217	1	0	1	1	1	1	PPM1D	protein phosphatase, Mg2+/Mn2+ dependent, 1D
hsa-miR-217	1	0	1	1	0	0	SRCAP	Snf2-related CREBBP activator protein
hsa-miR-217	0	0	1	1	1	1	HSPH1	heat shock 105kDa/110kDa protein 1
hsa-miR-217	1	0	1	0	1	1	PTPRT	protein tyrosine phosphatase, receptor type, T
hsa-miR-217	1	0	1	0	1	1	KIAA0408	KIAA0408
hsa-miR-217	1	0	1	1	1	1	ATMIN	ATM interactor
hsa-miR-217	1	0	1	1	0	0	OTUD3	OTU domain containing 3
hsa-miR-217	0	0	1	1	0	0	ZNF862	zinc finger protein 862
hsa-miR-217	1	0	1	0	1	1	CHST15	carbohydrate (N-acetylgalactosamine 4-sulfate 6-O) sulfotransferase 15
hsa-miR-217	1	0	1	1	1	1	GIGYF2	GRB10 interacting GYF protein 2
hsa-miR-217	1	0	1	1	1	1	MATR3	matrin 3
hsa-miR-217	1	0	1	0	1	1	LPHN3	latrophilin 3
hsa-miR-217	0	0	1	1	0	0	FAM169A	family with sequence similarity 169, member A
hsa-miR-217	0	0	1	1	1	1	WDR47	WD repeat domain 47
hsa-miR-217	1	0	1	1	1	1	CALCR	calcitonin receptor
hsa-miR-217	1	0	1	1	1	1	CPEB3	cytoplasmic polyadenylation element binding protein 3
hsa-miR-217	1	0	1	1	1	1	CIT	citron (rho-interacting, serine/threonine kinase 21)
hsa-miR-217	0	0	1	1	1	1	FASTKD2	FAST kinase domains 2
hsa-miR-217	0	0	1	1	0	0	FAM149B1	family with sequence similarity 149, member B1
hsa-miR-217	0	0	1	1	1	1	TBC1D30	TBC1 domain family, member 30
hsa-miR-217	1	0	1	1	1	1	PALLD	palladin, cytoskeletal associated protein
hsa-miR-217	1	0	1	1	1	1	RPGRIP1L	RPGRIP1-like
hsa-miR-217	0	0	1	1	0	0	RTEL1	regulator of telomere elongation helicase 1
hsa-miR-217	1	0	1	1	1	1	PHF8	PHD finger protein 8
hsa-miR-217	1	0	1	0	1	1	GPR158	G protein-coupled receptor 158
hsa-miR-217	1	0	1	1	0	0	PPM1H	protein phosphatase, Mg2+/Mn2+ dependent, 1H
hsa-miR-217	1	0	1	1	0	0	ATAD2B	ATPase family, AAA domain containing 2B
hsa-miR-217	1	0	1	1	1	1	ASAP1	ArfGAP with SH3 domain, ankyrin repeat and PH domain 1
hsa-miR-217	1	0	1	0	1	1	ANKFY1	ankyrin repeat and FYVE domain containing 1
hsa-miR-217	1	0	1	0	1	1	INTS2	integrator complex subunit 2
hsa-miR-217	0	0	1	1	1	1	GKAP1	G kinase anchoring protein 1
hsa-miR-217	1	0	1	1	1	1	DKK2	dickkopf 2 homolog (Xenopus laevis)
hsa-miR-217	1	0	1	1	1	1	PCDH19	protocadherin 19
hsa-miR-217	1	0	1	1	1	1	LRRC7	leucine rich repeat containing 7
hsa-miR-217	1	0	1	1	1	1	UPF2	UPF2 regulator of nonsense transcripts homolog (yeast)
hsa-miR-217	1	1	1	1	1	1	NFIA	nuclear factor I/A
hsa-miR-217	1	0	1	1	1	1	FRAS1	Fraser syndrome 1
hsa-miR-217	0	0	1	0	0	0	COL20A1	collagen, type XX, alpha 1
hsa-miR-217	1	0	1	0	1	1	ZNF295	zinc finger protein 295
hsa-miR-217	1	0	1	1	1	1	INADL	InaD-like (Drosophila)
hsa-miR-217	1	0	1	1	1	1	TOPORS	topoisomerase I binding, arginine/serine-rich, E3 ubiquitin protein ligase
hsa-miR-217	1	0	1	0	0	0	TANC2	tetratricopeptide repeat, ankyrin repeat and coiled-coil containing 2
hsa-miR-217	0	0	1	0	1	1	SETD5	SET domain containing 5
hsa-miR-217	1	0	1	1	1	1	DOCK7	dedicator of cytokinesis 7
hsa-miR-217	1	0	1	1	0	0	ZNF527	zinc finger protein 527
hsa-miR-217	1	0	1	0	1	1	JPH4	junctophilin 4
hsa-miR-217	0	0	1	1	0	0	ARMC9	armadillo repeat containing 9
hsa-miR-217	0	0	1	1	0	0	COL27A1	collagen, type XXVII, alpha 1
hsa-miR-217	1	0	1	1	1	1	AHCTF1	AT hook containing transcription factor 1
hsa-miR-217	1	0	1	1	1	1	CSMD3	CUB and Sushi multiple domains 3
hsa-miR-217	1	0	1	1	1	1	BCL2L11	BCL2-like 11 (apoptosis facilitator)
hsa-miR-217	1	0	1	1	1	1	SH3TC2	SH3 domain and tetratricopeptide repeats 2
hsa-miR-217	1	0	1	0	0	0	FAT3	FAT tumor suppressor homolog 3 (Drosophila)
hsa-miR-217	1	0	1	0	0	0	ZBTB34	zinc finger and BTB domain containing 34
hsa-miR-217	0	0	1	1	0	0	HELLS	helicase, lymphoid-specific
hsa-miR-217	0	0	1	1	1	1	IL7	interleukin 7
hsa-miR-217	1	0	1	1	1	1	PAN3	PAN3 poly(A) specific ribonuclease subunit homolog (S. cerevisiae)
hsa-miR-217	0	0	1	1	1	1	FN1	fibronectin 1
hsa-miR-217	1	0	1	1	1	1	LTBP1	latent transforming growth factor beta binding protein 1
hsa-miR-217	1	0	1	1	1	1	AP3D1	adaptor-related protein complex 3, delta 1 subunit
hsa-miR-217	1	0	1	1	1	1	BACH2	BTB and CNC homology 1, basic leucine zipper transcription factor 2
hsa-miR-217	1	0	1	1	0	0	ELN	elastin
hsa-miR-217	1	0	1	1	1	1	HMGB1	high mobility group box 1
hsa-miR-217	1	0	1	1	1	1	PML	promyelocytic leukemia
hsa-miR-217	1	0	1	1	1	1	SYNCRIP	synaptotagmin binding, cytoplasmic RNA interacting protein
hsa-miR-217	1	0	1	1	0	0	TSPYL2	TSPY-like 2
hsa-miR-217	1	0	1	1	1	1	EPHA7	EPH receptor A7
hsa-miR-217	1	0	1	0	1	1	CDON	Cdon homolog (mouse)
hsa-miR-217	0	0	1	1	0	0	DNMT1	DNA (cytosine-5-)-methyltransferase 1
hsa-miR-217	0	0	1	1	0	0	IFT27	intraflagellar transport 27 homolog (Chlamydomonas)
hsa-miR-217	0	0	1	1	0	0	IGFBP2	insulin-like growth factor binding protein 2, 36kDa
hsa-miR-217	0	0	1	1	0	0	ITGA2B	integrin, alpha 2b (platelet glycoprotein IIb of IIb/IIIa complex, antigen CD41)
hsa-miR-217	1	0	1	1	1	1	DDX17	DEAD (Asp-Glu-Ala-Asp) box helicase 17
hsa-miR-217	1	0	1	1	1	1	IPO8	importin 8
hsa-miR-217	1	0	1	1	1	1	TEAD1	TEA domain family member 1 (SV40 transcriptional enhancer factor)
hsa-miR-217	1	0	1	1	1	1	ZFX	zinc finger protein, X-linked
hsa-miR-217	1	0	1	1	1	1	PHLDB2	pleckstrin homology-like domain, family B, member 2
hsa-miR-217	0	0	1	1	1	1	PLD1	phospholipase D1, phosphatidylcholine-specific
hsa-miR-217	1	0	1	0	1	1	CAV1	caveolin 1, caveolae protein, 22kDa
hsa-miR-217	0	0	1	1	0	0	MUC3A	mucin 3A, cell surface associated
hsa-miR-217	1	0	1	1	1	1	PCDH17	protocadherin 17
hsa-miR-217	1	0	1	1	1	1	MBNL2	muscleblind-like splicing regulator 2
hsa-miR-217	1	0	1	1	1	1	CTNND1	catenin (cadherin-associated protein), delta 1
hsa-miR-217	0	0	1	1	1	1	LYPLA1	lysophospholipase I
hsa-miR-217	1	0	1	1	1	1	ZNF236	zinc finger protein 236
hsa-miR-217	0	0	1	1	1	1	BBS9	Bardet-Biedl syndrome 9
hsa-miR-217	0	0	1	1	0	0	RBM5	RNA binding motif protein 5
hsa-miR-217	0	0	1	1	1	1	MSTO1	misato homolog 1 (Drosophila)
hsa-miR-217	1	0	1	0	0	0	PPME1	protein phosphatase methylesterase 1
hsa-miR-217	0	0	1	1	1	1	SMC2	structural maintenance of chromosomes 2
hsa-miR-217	1	0	1	0	1	1	SLC25A37	solute carrier family 25 (mitochondrial iron transporter), member 37
hsa-miR-217	1	0	1	1	1	1	EDNRB	endothelin receptor type B
hsa-miR-217	0	0	1	1	1	1	DMRT2	doublesex and mab-3 related transcription factor 2
hsa-miR-217	1	0	1	1	1	1	C14orf129	chromosome 14 open reading frame 129
hsa-miR-217	1	0	1	1	1	1	USP15	ubiquitin specific peptidase 15
hsa-miR-217	1	0	1	1	1	1	ANKRD13A	ankyrin repeat domain 13A
hsa-miR-217	1	0	1	1	1	1	FAM49B	family with sequence similarity 49, member B
hsa-miR-217	1	0	1	1	1	1	EIF4A2	eukaryotic translation initiation factor 4A2
hsa-miR-217	0	0	1	1	1	1	HERPUD1	homocysteine-inducible, endoplasmic reticulum stress-inducible, ubiquitin-like domain member 1
hsa-miR-217	0	0	1	1	1	1	MFF	mitochondrial fission factor
hsa-miR-217	1	0	1	1	0	0	TDRKH	tudor and KH domain containing
hsa-miR-217	1	0	1	1	1	1	DESI2	desumoylating isopeptidase 2
hsa-miR-217	0	0	1	1	0	0	ZNF692	zinc finger protein 692
hsa-miR-217	1	0	1	1	1	1	RBM47	RNA binding motif protein 47
hsa-miR-217	1	0	1	1	1	1	SH3GLB1	SH3-domain GRB2-like endophilin B1
hsa-miR-217	0	0	1	0	1	1	PRDM6	PR domain containing 6
hsa-miR-217	0	0	1	1	0	0	RNF17	ring finger protein 17
hsa-miR-217	0	0	1	1	1	1	ITPA	inosine triphosphatase (nucleoside triphosphate pyrophosphatase)
hsa-miR-217	0	0	1	1	1	1	SLC6A15	solute carrier family 6 (neutral amino acid transporter), member 15
hsa-miR-217	0	0	1	1	0	0	FGFR4	fibroblast growth factor receptor 4
hsa-miR-217	1	0	1	1	1	1	LARP4	La ribonucleoprotein domain family, member 4
hsa-miR-217	0	0	1	0	1	1	ZNF268	zinc finger protein 268
hsa-miR-217	0	0	1	1	1	1	OLFM3	olfactomedin 3
hsa-miR-217	1	0	1	1	1	1	RCAN1	regulator of calcineurin 1
hsa-miR-217	0	0	1	0	0	0	MIR155HG	MIR155 host gene (non-protein coding)
hsa-miR-217	1	0	1	1	1	1	NTRK2	neurotrophic tyrosine kinase, receptor, type 2
hsa-miR-217	0	0	1	0	0	0	MYO15B	myosin XVB pseudogene
hsa-miR-217	0	0	1	1	0	0	BRE	brain and reproductive organ-expressed (TNFRSF1A modulator)
hsa-miR-217	1	0	1	1	0	0	SEPT8	septin 8
hsa-miR-217	1	0	1	1	0	0	FOXP2	forkhead box P2
hsa-miR-217	1	0	1	1	1	1	ZC3H14	zinc finger CCCH-type containing 14
hsa-miR-217	0	0	1	1	1	1	CHODL	chondrolectin
hsa-miR-217	0	0	1	1	1	1	R3HCC1L	R3H domain and coiled-coil containing 1-like
hsa-miR-217	1	0	1	1	0	0	PNPLA6	patatin-like phospholipase domain containing 6
hsa-miR-217	1	0	1	1	1	1	PLAGL1	pleiomorphic adenoma gene-like 1
hsa-miR-217	0	0	1	1	1	1	C6orf48	chromosome 6 open reading frame 48
hsa-miR-217	1	0	1	1	1	1	SLAMF6	SLAM family member 6
hsa-miR-217	0	0	1	1	1	1	RNASE7	ribonuclease, RNase A family, 7
hsa-miR-217	1	0	1	1	1	1	PALM2	paralemmin 2
hsa-miR-217	1	0	1	1	1	1	RAB3IP	RAB3A interacting protein (rabin3)
hsa-miR-217	1	0	1	1	1	1	PPP1R9A	protein phosphatase 1, regulatory subunit 9A
hsa-miR-217	0	0	1	1	1	1	ESRP1	epithelial splicing regulatory protein 1
hsa-miR-217	1	0	1	0	1	1	NFAT5	nuclear factor of activated T-cells 5, tonicity-responsive
hsa-miR-217	0	0	1	0	1	1	TRMT10A	tRNA methyltransferase 10 homolog A (S. cerevisiae)
hsa-miR-217	1	0	1	1	1	1	SIK2	salt-inducible kinase 2
hsa-miR-217	1	0	1	1	1	1	ARHGAP12	Rho GTPase activating protein 12
hsa-miR-217	0	0	1	1	0	0	ZCWPW1	zinc finger, CW type with PWWP domain 1
hsa-miR-217	0	0	1	1	0	0	MANSC1	MANSC domain containing 1
hsa-miR-217	0	0	1	1	1	1	STOX2	storkhead box 2
hsa-miR-217	1	0	1	1	1	1	RIC8B	resistance to inhibitors of cholinesterase 8 homolog B (C. elegans)
hsa-miR-217	1	0	1	1	1	1	SCAMP1	secretory carrier membrane protein 1
hsa-miR-217	1	0	1	1	1	1	EIF2C1	eukaryotic translation initiation factor 2C, 1
hsa-miR-217	1	0	1	1	1	1	PTBP3	polypyrimidine tract binding protein 3
hsa-miR-217	0	0	1	1	1	1	CXXC5	CXXC finger protein 5
hsa-miR-217	0	0	1	1	0	0	MTERFD1	MTERF domain containing 1
hsa-miR-217	0	0	1	1	0	0	PARP2	poly (ADP-ribose) polymerase 2
hsa-miR-217	0	0	1	1	1	1	PRPF39	PRP39 pre-mRNA processing factor 39 homolog (S. cerevisiae)
hsa-miR-217	1	0	1	1	1	1	MYEF2	myelin expression factor 2
hsa-miR-217	0	0	1	1	1	1	STAU2	staufen, RNA binding protein, homolog 2 (Drosophila)
hsa-miR-217	1	0	1	1	0	0	SLC35C1	solute carrier family 35, member C1
hsa-miR-217	1	0	1	1	1	1	C12orf23	chromosome 12 open reading frame 23
hsa-miR-217	1	0	1	1	1	1	MON2	MON2 homolog (S. cerevisiae)
hsa-miR-217	1	0	1	0	0	0	ZNRF3	zinc and ring finger 3
hsa-miR-217	1	0	1	1	1	1	S100PBP	S100P binding protein
hsa-miR-217	1	0	1	1	1	1	PHF20L1	PHD finger protein 20-like 1
hsa-miR-217	1	0	1	1	1	1	DERL1	derlin 1
hsa-miR-217	1	0	1	1	0	0	ST6GALNAC6	ST6 (alpha-N-acetyl-neuraminyl-2,3-beta-galactosyl-1,3)-N-acetylgalactosaminide alpha-2,6-sialyltransferase 6
hsa-miR-217	1	0	1	1	1	1	NAA30	N(alpha)-acetyltransferase 30, NatC catalytic subunit
hsa-miR-217	0	0	1	0	1	1	HEMK1	HemK methyltransferase family member 1
hsa-miR-217	1	0	1	1	1	1	LRP4	low density lipoprotein receptor-related protein 4
hsa-miR-217	0	0	1	1	1	1	GPBP1L1	GC-rich promoter binding protein 1-like 1
hsa-miR-217	0	0	1	1	1	1	DTL	denticleless E3 ubiquitin protein ligase homolog (Drosophila)
hsa-miR-217	1	0	1	1	1	1	STRBP	spermatid perinuclear RNA binding protein
hsa-miR-217	0	0	1	1	1	1	IGBP1	immunoglobulin (CD79A) binding protein 1
hsa-miR-217	1	0	1	1	1	1	RAP1GDS1	RAP1, GTP-GDP dissociation stimulator 1
hsa-miR-217	1	0	1	1	1	1	FRMD6	FERM domain containing 6
hsa-miR-217	0	0	1	1	0	0	IFT172	intraflagellar transport 172 homolog (Chlamydomonas)
hsa-miR-217	1	0	1	1	1	1	MAP3K7	mitogen-activated protein kinase kinase kinase 7
hsa-miR-217	1	0	1	0	1	1	PTPRE	protein tyrosine phosphatase, receptor type, E
hsa-miR-217	1	0	1	1	0	0	SLC26A6	solute carrier family 26, member 6
hsa-miR-217	1	0	1	1	1	1	CLCN5	chloride channel, voltage-sensitive 5
hsa-miR-217	0	0	1	1	0	0	PYGM	phosphorylase, glycogen, muscle
hsa-miR-217	1	0	1	0	1	1	RABGEF1	RAB guanine nucleotide exchange factor (GEF) 1
hsa-miR-217	1	0	1	1	1	1	APLP2	amyloid beta (A4) precursor-like protein 2
hsa-miR-217	1	0	1	1	1	1	TLE4	transducin-like enhancer of split 4 (E(sp1) homolog, Drosophila)
hsa-miR-217	1	0	1	1	1	1	MPP7	membrane protein, palmitoylated 7 (MAGUK p55 subfamily member 7)
hsa-miR-217	0	0	1	1	1	1	RANBP17	RAN binding protein 17
hsa-miR-217	0	0	1	1	1	1	SEC61A2	Sec61 alpha 2 subunit (S. cerevisiae)
hsa-miR-217	1	0	1	1	1	1	ANKRD49	ankyrin repeat domain 49
hsa-miR-217	0	0	1	1	0	0	PTOV1	prostate tumor overexpressed 1
hsa-miR-217	0	0	1	1	0	0	KRT86	keratin 86
hsa-miR-217	0	0	1	1	1	1	KIDINS220	kinase D-interacting substrate, 220kDa
hsa-miR-217	0	0	1	1	1	1	HDAC8	histone deacetylase 8
hsa-miR-217	0	0	1	1	0	0	WDR83	WD repeat domain 83
hsa-miR-217	1	0	1	0	1	1	MAP4K4	mitogen-activated protein kinase kinase kinase kinase 4
hsa-miR-217	1	0	1	1	1	1	KCTD6	potassium channel tetramerisation domain containing 6
hsa-miR-217	1	0	1	1	1	1	STXBP5	syntaxin binding protein 5 (tomosyn)
hsa-miR-217	1	0	1	1	1	1	TLK1	tousled-like kinase 1
hsa-miR-217	0	0	1	1	0	0	CTNNBL1	catenin, beta like 1
hsa-miR-217	1	0	1	1	1	1	FBXW2	F-box and WD repeat domain containing 2
hsa-miR-217	0	0	1	1	1	1	NRCAM	neuronal cell adhesion molecule
hsa-miR-217	1	0	1	1	1	1	GPD2	glycerol-3-phosphate dehydrogenase 2 (mitochondrial)
hsa-miR-217	0	0	1	1	0	0	ARPC2	actin related protein 2/3 complex, subunit 2, 34kDa
hsa-miR-217	1	0	1	0	1	1	KIAA1456	KIAA1456
hsa-miR-217	1	0	1	1	1	1	SIAH1	siah E3 ubiquitin protein ligase 1
hsa-miR-217	0	0	1	1	0	0	C9orf24	chromosome 9 open reading frame 24
hsa-miR-217	0	0	1	1	1	1	HOGA1	4-hydroxy-2-oxoglutarate aldolase 1
hsa-miR-217	0	0	1	0	1	1	AGBL4	ATP/GTP binding protein-like 4
hsa-miR-217	1	0	1	1	1	1	EPB41L3	erythrocyte membrane protein band 4.1-like 3
hsa-miR-217	1	0	1	1	1	1	NDEL1	nudE nuclear distribution E homolog (A. nidulans)-like 1
hsa-miR-217	0	0	1	1	1	1	RTN4IP1	reticulon 4 interacting protein 1
hsa-miR-217	1	0	1	1	1	1	EPHB1	EPH receptor B1
hsa-miR-217	1	0	1	1	1	1	FAM222B	family with sequence similarity 222, member B
hsa-miR-217	1	0	1	1	1	1	PEA15	phosphoprotein enriched in astrocytes 15
hsa-miR-217	1	0	1	1	1	1	FAM98A	family with sequence similarity 98, member A
hsa-miR-217	0	0	1	0	0	0	OTUD1	OTU domain containing 1
hsa-miR-217	0	0	1	1	1	1	ZNF673	zinc finger family member 673
hsa-miR-217	0	0	1	0	0	0	C1orf204	chromosome 1 open reading frame 204
hsa-miR-217	0	0	1	1	1	1	MPHOSPH9	M-phase phosphoprotein 9
hsa-miR-217	1	0	1	0	1	1	THRB	thyroid hormone receptor, beta
hsa-miR-217	1	0	1	1	1	1	STIM2	stromal interaction molecule 2
hsa-miR-217	1	0	1	1	1	1	CDV3	CDV3 homolog (mouse)
hsa-miR-217	1	0	1	0	1	1	YPEL2	yippee-like 2 (Drosophila)
hsa-miR-217	0	0	1	1	1	1	CBWD5	COBW domain containing 5
hsa-miR-217	0	0	1	0	0	0	LOC284385	uncharacterized LOC284385
hsa-miR-217	0	0	1	0	0	0	HLA-DQB2	major histocompatibility complex, class II, DQ beta 2
hsa-miR-217	1	0	1	1	1	1	ZCCHC2	zinc finger, CCHC domain containing 2
hsa-miR-217	0	0	1	1	1	1	ANKZF1	ankyrin repeat and zinc finger domain containing 1
hsa-miR-217	0	0	1	0	1	1	LOC155060	AI894139 pseudogene
hsa-miR-217	0	0	1	0	0	0	LOC338579	ankyrin repeat domain-containing protein 30B pseudogene
hsa-miR-217	1	0	1	1	1	1	ACSL6	acyl-CoA synthetase long-chain family member 6
hsa-miR-217	0	0	1	1	1	1	UPP2	uridine phosphorylase 2
hsa-miR-217	0	0	1	1	0	0	MARCH10	membrane-associated ring finger (C3HC4) 10, E3 ubiquitin protein ligase
hsa-miR-217	0	0	1	1	0	0	MARS	methionyl-tRNA synthetase
hsa-miR-217	0	0	1	1	1	1	SLC13A3	solute carrier family 13 (sodium-dependent dicarboxylate transporter), member 3
hsa-miR-217	0	0	1	0	0	0	LOC285043	uncharacterized LOC285043
hsa-miR-217	1	0	1	1	1	1	MBTD1	mbt domain containing 1
hsa-miR-217	1	0	1	1	1	1	SMAP1	small ArfGAP 1
hsa-miR-217	1	0	1	1	1	1	FAM122B	family with sequence similarity 122B
hsa-miR-217	1	0	1	1	1	1	KIF21A	kinesin family member 21A
hsa-miR-217	0	0	1	1	1	1	C2orf91	chromosome 2 open reading frame 91
hsa-miR-217	1	0	1	1	0	0	GXYLT1	glucoside xylosyltransferase 1
hsa-miR-217	1	0	1	0	1	1	CHRM2	cholinergic receptor, muscarinic 2
hsa-miR-217	1	0	1	1	1	1	ERMAP	erythroblast membrane-associated protein (Scianna blood group)
hsa-miR-217	1	0	1	1	1	1	DPY19L3	dpy-19-like 3 (C. elegans)
hsa-miR-217	1	0	1	1	1	1	TP53INP1	tumor protein p53 inducible nuclear protein 1
hsa-miR-217	1	0	1	1	1	1	DCTN4	dynactin 4 (p62)
hsa-miR-217	0	0	1	1	1	1	EPPIN	epididymal peptidase inhibitor
hsa-miR-217	0	0	1	1	1	1	MORF4L2	mortality factor 4 like 2
hsa-miR-217	1	0	1	1	0	0	ATXN7L3	ataxin 7-like 3
hsa-miR-217	0	0	1	1	1	1	RBM39	RNA binding motif protein 39
hsa-miR-217	1	0	1	1	1	1	LIN9	lin-9 homolog (C. elegans)
hsa-miR-217	1	0	1	1	0	0	SPEG	SPEG complex locus
hsa-miR-217	1	0	1	1	1	1	DMXL1	Dmx-like 1
hsa-miR-217	1	0	1	1	1	1	DLG2	discs, large homolog 2 (Drosophila)
hsa-miR-217	0	0	1	0	0	0	HNRNPKP3	heterogeneous nuclear ribonucleoprotein K pseudogene 3
hsa-miR-217	0	0	1	1	0	0	TMEM151B	transmembrane protein 151B
hsa-miR-217	1	0	1	1	0	0	SNX30	sorting nexin family member 30
hsa-miR-217	1	0	1	1	1	1	MKRN1	makorin ring finger protein 1
hsa-miR-217	1	0	1	1	1	1	TSHZ1	teashirt zinc finger homeobox 1
hsa-miR-217	0	0	1	1	1	1	MTHFD1L	methylenetetrahydrofolate dehydrogenase (NADP+ dependent) 1-like
hsa-miR-217	1	0	1	0	1	1	ADIPOR2	adiponectin receptor 2
hsa-miR-217	1	0	1	0	1	1	KIAA0182	KIAA0182
hsa-miR-217	0	0	1	1	0	0	SLC22A25	solute carrier family 22, member 25
hsa-miR-217	0	0	1	1	1	1	MGAT4C	mannosyl (alpha-1,3-)-glycoprotein beta-1,4-N-acetylglucosaminyltransferase, isozyme C (putative)
hsa-miR-217	1	0	1	0	1	1	FNDC3B	fibronectin type III domain containing 3B
hsa-miR-217	0	0	1	0	0	0	ERVFRD-2	endogenous retrovirus group FRD, member 2
hsa-miR-217	1	0	1	0	1	1	YOD1	YOD1 OTU deubiquinating enzyme 1 homolog (S. cerevisiae)
hsa-miR-217	0	0	1	1	1	1	MCU	mitochondrial calcium uniporter
hsa-miR-217	0	0	1	1	0	0	LOC100128682	uncharacterized LOC100128682
hsa-miR-217	0	0	1	0	0	0	EP400NL	EP400 N-terminal like
hsa-miR-217	0	0	1	0	0	0	FLJ46361	deleted in malignant brain tumors 1 pseudogene
hsa-miR-217	1	0	1	1	1	1	BCAT1	branched chain amino-acid transaminase 1, cytosolic
hsa-miR-217	0	0	1	0	0	0	EMBP1	embigin pseudogene 1
hsa-miR-217	0	0	1	1	1	1	G3BP1	GTPase activating protein (SH3 domain) binding protein 1
hsa-miR-217	0	0	1	0	0	0	LOC494141	mitochondrial carrier triple repeat 1 pseudogene
hsa-miR-217	0	0	1	1	1	1	SLTM	SAFB-like, transcription modulator
hsa-miR-217	1	0	1	1	1	1	RABGAP1	RAB GTPase activating protein 1
hsa-miR-217	0	0	1	1	1	1	SYPL2	synaptophysin-like 2
hsa-miR-217	1	0	1	1	1	1	MAP2K4	mitogen-activated protein kinase kinase 4
hsa-miR-217	0	0	1	0	0	0	AGAP9	ArfGAP with GTPase domain, ankyrin repeat and PH domain 9
hsa-miR-217	1	0	1	1	1	1	CTSA	cathepsin A
hsa-miR-217	0	0	1	1	1	1	AKTIP	AKT interacting protein
hsa-miR-217	1	0	1	1	1	1	TBC1D15	TBC1 domain family, member 15
hsa-miR-217	1	0	1	1	1	1	MEAF6	MYST/Esa1-associated factor 6
hsa-miR-217	1	0	1	0	1	1	MAP3K3	mitogen-activated protein kinase kinase kinase 3
hsa-miR-217	0	0	1	1	1	1	SERPINE2	serpin peptidase inhibitor, clade E (nexin, plasminogen activator inhibitor type 1), member 2
hsa-miR-217	1	0	1	1	1	1	PHTF2	putative homeodomain transcription factor 2
hsa-miR-217	1	0	1	1	0	0	PRRC2B	proline-rich coiled-coil 2B
hsa-miR-217	1	0	1	1	1	1	NECAP1	NECAP endocytosis associated 1
hsa-miR-217	1	0	1	1	1	1	ARF6	ADP-ribosylation factor 6
hsa-miR-217	0	0	1	1	0	0	MSH5	mutS homolog 5 (E. coli)
hsa-miR-217	0	0	1	1	0	0	SAPCD1	suppressor APC domain containing 1
hsa-miR-217	0	0	1	1	1	1	TTLL5	tubulin tyrosine ligase-like family, member 5
hsa-miR-217	0	0	1	0	0	0	KIAA0913	KIAA0913
hsa-miR-217	0	0	1	1	1	1	RHOT1	ras homolog family member T1
hsa-miR-217	0	0	1	1	0	0	BAG3	BCL2-associated athanogene 3
hsa-miR-217	1	0	1	0	1	1	GPR85	G protein-coupled receptor 85
hsa-miR-217	0	0	1	1	0	0	DOPEY1	dopey family member 1
hsa-miR-217	1	0	1	1	1	1	CTTNBP2NL	CTTNBP2 N-terminal like
hsa-miR-217	1	0	1	1	1	1	SLC30A8	solute carrier family 30 (zinc transporter), member 8
hsa-miR-217	0	0	1	1	0	0	KRBA1	KRAB-A domain containing 1
hsa-miR-217	1	0	1	1	1	1	ZEB1	zinc finger E-box binding homeobox 1
hsa-miR-217	1	0	1	1	1	1	MIER1	mesoderm induction early response 1 homolog (Xenopus laevis)
hsa-miR-217	1	0	1	1	1	1	LYPD3	LY6/PLAUR domain containing 3
hsa-miR-217	0	0	1	1	1	1	BEND7	BEN domain containing 7
hsa-miR-217	1	0	1	1	1	1	FAM126B	family with sequence similarity 126, member B
hsa-miR-217	1	0	1	1	1	1	MLL3	myeloid/lymphoid or mixed-lineage leukemia 3
hsa-miR-217	1	0	1	1	1	1	KANK1	KN motif and ankyrin repeat domains 1
hsa-miR-217	1	0	1	1	0	0	PTAR1	protein prenyltransferase alpha subunit repeat containing 1
hsa-miR-217	0	0	1	1	1	1	CCDC132	coiled-coil domain containing 132
hsa-miR-217	0	0	1	1	1	1	C12orf50	chromosome 12 open reading frame 50
hsa-miR-217	0	0	1	1	1	1	TAF8	TAF8 RNA polymerase II, TATA box binding protein (TBP)-associated factor, 43kDa
hsa-miR-217	1	0	1	1	1	1	NRP1	neuropilin 1
hsa-miR-217	1	0	1	1	1	1	PRPF38B	PRP38 pre-mRNA processing factor 38 (yeast) domain containing B
hsa-miR-217	1	0	1	1	1	1	ANKRD12	ankyrin repeat domain 12
hsa-miR-217	0	0	1	1	1	1	C8orf34	chromosome 8 open reading frame 34
hsa-miR-217	1	0	1	1	1	1	TSHZ3	teashirt zinc finger homeobox 3
hsa-miR-217	0	0	1	0	1	1	PSG1	pregnancy specific beta-1-glycoprotein 1
hsa-miR-217	1	0	1	1	1	1	IKZF2	IKAROS family zinc finger 2 (Helios)
hsa-miR-217	1	0	1	1	1	1	SORCS1	sortilin-related VPS10 domain containing receptor 1
hsa-miR-217	0	0	1	1	0	0	CRB3	crumbs homolog 3 (Drosophila)
hsa-miR-217	0	0	1	0	1	1	ARMC10	armadillo repeat containing 10
hsa-miR-217	0	0	1	1	1	1	BCOR	BCL6 corepressor
hsa-miR-217	1	0	1	1	1	1	LAMA3	laminin, alpha 3
hsa-miR-217	0	0	1	1	1	1	GCOM1	GRINL1A complex locus 1
hsa-miR-217	0	0	1	1	1	1	MFAP5	microfibrillar associated protein 5
hsa-miR-217	1	0	1	0	1	1	LRAT	lecithin retinol acyltransferase (phosphatidylcholine--retinol O-acyltransferase)
hsa-miR-217	0	0	1	0	0	0	THOC1	THO complex 1
hsa-miR-217	0	0	1	1	1	1	SMPD1	sphingomyelin phosphodiesterase 1, acid lysosomal
hsa-miR-217	1	0	1	1	1	1	QKI	QKI, KH domain containing, RNA binding
hsa-miR-217	0	0	1	1	1	1	IL23R	interleukin 23 receptor
hsa-miR-217	1	0	1	1	1	1	AMOT	angiomotin
hsa-miR-217	1	0	1	1	1	1	RPRD1A	regulation of nuclear pre-mRNA domain containing 1A
hsa-miR-217	1	0	1	0	1	1	FAM46A	family with sequence similarity 46, member A
hsa-miR-217	0	0	1	1	1	1	ASB9	ankyrin repeat and SOCS box containing 9
hsa-miR-217	0	0	1	1	1	1	PTDSS1	phosphatidylserine synthase 1
hsa-miR-217	0	0	1	1	1	1	TMOD1	tropomodulin 1
hsa-miR-217	1	0	1	1	1	1	SEC23B	Sec23 homolog B (S. cerevisiae)
hsa-miR-217	1	0	1	1	1	1	ATAT1	alpha tubulin acetyltransferase 1
hsa-miR-217	0	0	1	1	0	0	RBM14	RNA binding motif protein 14
hsa-miR-217	0	0	1	1	0	0	MYLK2	myosin light chain kinase 2
hsa-miR-217	0	0	1	1	1	1	ZNF85	zinc finger protein 85
hsa-miR-217	0	0	1	0	0	0	ATXN7L3B	ataxin 7-like 3B
hsa-miR-217	1	0	1	1	1	1	SLC50A1	solute carrier family 50 (sugar transporter), member 1
hsa-miR-217	0	0	1	1	0	0	MPRIP	myosin phosphatase Rho interacting protein
hsa-miR-217	1	0	1	0	1	1	TMEM39A	transmembrane protein 39A
hsa-miR-217	0	0	1	1	0	0	ARHGAP8	Rho GTPase activating protein 8
hsa-miR-217	1	0	1	1	1	1	DNAJB5	DnaJ (Hsp40) homolog, subfamily B, member 5
hsa-miR-217	0	0	1	0	1	1	GDE1	glycerophosphodiester phosphodiesterase 1
hsa-miR-217	0	0	1	1	1	1	C17orf76-AS1	C17orf76 antisense RNA 1
hsa-miR-217	0	0	1	1	0	0	ELP4	elongator acetyltransferase complex subunit 4
hsa-miR-217	1	0	1	1	1	1	SUPT16H	suppressor of Ty 16 homolog (S. cerevisiae)
hsa-miR-217	0	0	1	1	0	0	KLHDC3	kelch domain containing 3
hsa-miR-217	0	0	1	1	1	1	KLHL29	kelch-like 29 (Drosophila)
hsa-miR-217	1	0	1	1	1	1	PAPOLA	poly(A) polymerase alpha
hsa-miR-217	0	0	1	0	0	0	MGC21881	uncharacterized locus MGC21881
hsa-miR-217	0	0	1	0	0	0	KLHL15	kelch-like 15 (Drosophila)
hsa-miR-217	1	0	1	1	1	1	ZBTB38	zinc finger and BTB domain containing 38
hsa-miR-217	0	0	1	1	1	1	TRIM47	tripartite motif containing 47
hsa-miR-217	1	0	1	1	0	0	ATP6V0A1	ATPase, H+ transporting, lysosomal V0 subunit a1
hsa-miR-217	0	0	1	1	0	0	DTWD1	DTW domain containing 1
hsa-miR-217	1	0	1	1	1	1	SUZ12	suppressor of zeste 12 homolog (Drosophila)
hsa-miR-217	0	0	1	1	1	1	SRP19	signal recognition particle 19kDa
hsa-miR-217	0	0	1	0	1	1	CD99P1	CD99 molecule pseudogene 1
hsa-miR-217	0	0	1	1	1	1	HIBADH	3-hydroxyisobutyrate dehydrogenase
hsa-miR-217	0	0	1	0	0	0	LOC283693	actin, alpha 2, smooth muscle, aorta pseudogene
hsa-miR-217	0	0	1	1	1	1	TMEM40	transmembrane protein 40
hsa-miR-217	1	0	1	0	1	1	BTF3L4	basic transcription factor 3-like 4
hsa-miR-217	0	0	1	1	1	1	SRGN	serglycin
hsa-miR-217	0	0	1	1	1	1	CDC42SE2	CDC42 small effector 2
hsa-miR-217	1	0	1	1	1	1	SPOCK2	sparc/osteonectin, cwcv and kazal-like domains proteoglycan (testican) 2
hsa-miR-217	1	0	1	0	1	1	CDK19	cyclin-dependent kinase 19
hsa-miR-217	0	0	1	1	1	1	UCHL5	ubiquitin carboxyl-terminal hydrolase L5
hsa-miR-217	1	0	1	1	1	1	ZDHHC5	zinc finger, DHHC-type containing 5
hsa-miR-217	0	0	1	0	0	0	TRGV7	T cell receptor gamma variable 7 (pseudogene)
hsa-miR-217	1	0	1	1	1	1	HTR2C	5-hydroxytryptamine (serotonin) receptor 2C, G protein-coupled
hsa-miR-217	0	0	1	1	0	0	FCRL3	Fc receptor-like 3
hsa-miR-217	0	0	1	1	1	1	SEMA3D	sema domain, immunoglobulin domain (Ig), short basic domain, secreted, (semaphorin) 3D
hsa-miR-217	1	0	1	1	1	1	ATRNL1	attractin-like 1
hsa-miR-217	1	0	1	1	1	1	TIAL1	TIA1 cytotoxic granule-associated RNA binding protein-like 1
hsa-miR-217	0	0	1	1	1	1	RBBP8	retinoblastoma binding protein 8
hsa-miR-217	1	0	1	1	1	1	ADARB1	adenosine deaminase, RNA-specific, B1
hsa-miR-217	1	0	1	1	1	1	SECISBP2L	SECIS binding protein 2-like
hsa-miR-217	1	0	1	1	1	1	LPGAT1	lysophosphatidylglycerol acyltransferase 1
hsa-miR-217	0	0	1	0	0	0	FAM66C	family with sequence similarity 66, member C
hsa-miR-217	1	0	1	1	1	1	NKAIN2	Na+/K+ transporting ATPase interacting 2
hsa-miR-217	1	0	1	1	1	1	CTDSPL2	CTD (carboxy-terminal domain, RNA polymerase II, polypeptide A) small phosphatase like 2
hsa-miR-217	1	0	1	1	1	1	MIPOL1	mirror-image polydactyly 1
hsa-miR-217	0	0	1	0	0	0	FAM201A	family with sequence similarity 201, member A
hsa-miR-217	1	0	1	1	1	1	MACROD2	MACRO domain containing 2
hsa-miR-217	0	0	1	1	1	1	FAM171B	family with sequence similarity 171, member B
hsa-miR-217	1	0	1	1	1	1	HECTD2	HECT domain containing E3 ubiquitin protein ligase 2
hsa-miR-217	1	0	1	1	1	1	MEIS1	Meis homeobox 1
hsa-miR-217	1	0	1	1	1	1	ACVR1	activin A receptor, type I
hsa-miR-217	1	0	1	0	1	1	NEGR1	neuronal growth regulator 1
hsa-miR-217	0	0	1	0	0	0	TMEM235	transmembrane protein 235
hsa-miR-217	0	0	1	1	1	1	ZNF141	zinc finger protein 141
hsa-miR-217	0	0	1	0	0	0	SRGAP2C	SLIT-ROBO Rho GTPase activating protein 2C
hsa-miR-217	0	0	1	0	0	0	LOC286184	uncharacterized LOC286184
hsa-miR-217	1	0	1	1	1	1	SOX6	SRY (sex determining region Y)-box 6
hsa-miR-217	0	0	1	0	0	0	FLJ36000	uncharacterized FLJ36000
hsa-miR-217	0	0	1	1	1	1	CACHD1	cache domain containing 1
hsa-miR-217	1	0	1	1	1	1	MARCKS	myristoylated alanine-rich protein kinase C substrate
hsa-miR-217	0	0	1	1	1	1	VBP1	von Hippel-Lindau binding protein 1
hsa-miR-217	0	0	1	0	0	0	LRRC48	leucine rich repeat containing 48
hsa-miR-217	0	0	1	0	0	0	LOC339622	uncharacterized LOC339622
hsa-miR-217	1	0	1	1	1	1	INTS6	integrator complex subunit 6
hsa-miR-217	0	0	1	1	0	0	MTCH1	mitochondrial carrier 1
hsa-miR-217	1	0	1	1	1	1	UNC13C	unc-13 homolog C (C. elegans)
hsa-miR-217	0	0	1	0	1	1	FAM13B	family with sequence similarity 13, member B
hsa-miR-217	1	0	1	1	1	1	ARPP21	cAMP-regulated phosphoprotein, 21kDa
hsa-miR-217	1	0	1	1	1	1	GNG2	guanine nucleotide binding protein (G protein), gamma 2
hsa-miR-217	1	0	1	0	1	1	USP6NL	USP6 N-terminal like
hsa-miR-217	1	0	1	1	1	1	TXNRD1	thioredoxin reductase 1
hsa-miR-217	0	0	1	1	0	0	LCA5L	Leber congenital amaurosis 5-like
hsa-miR-217	0	0	1	0	1	1	C12orf74	chromosome 12 open reading frame 74
hsa-miR-217	0	0	1	0	0	0	SLC8A1-AS1	SLC8A1 antisense RNA 1
hsa-miR-217	1	0	1	1	1	1	HLTF	helicase-like transcription factor
hsa-miR-217	1	0	1	0	1	1	PSD3	pleckstrin and Sec7 domain containing 3
hsa-miR-217	1	0	1	1	1	1	SENP1	SUMO1/sentrin specific peptidase 1
hsa-miR-217	1	0	1	0	1	1	LYPD6	LY6/PLAUR domain containing 6
hsa-miR-217	0	0	1	1	1	1	DDX4	DEAD (Asp-Glu-Ala-Asp) box polypeptide 4
hsa-miR-217	0	0	1	0	0	0	LOC348120	uncharacterized LOC348120
hsa-miR-217	0	0	1	0	0	0	DPY19L2P4	dpy-19-like 2 pseudogene 4 (C. elegans)
hsa-miR-217	1	0	1	0	1	1	KDM2A	lysine (K)-specific demethylase 2A
hsa-miR-217	1	0	1	1	1	1	RTKN2	rhotekin 2
hsa-miR-217	0	0	1	0	0	0	LOC255025	uncharacterized LOC255025
hsa-miR-217	0	0	1	1	0	0	FKBP11	FK506 binding protein 11, 19 kDa
hsa-miR-217	1	0	1	1	1	1	CLVS1	clavesin 1
hsa-miR-217	1	0	1	1	1	1	WASF3	WAS protein family, member 3
hsa-miR-217	0	0	1	1	1	1	FBXO38	F-box protein 38
hsa-miR-217	0	0	1	1	0	0	POLG	polymerase (DNA directed), gamma
hsa-miR-217	1	0	1	1	1	1	PCGF5	polycomb group ring finger 5
hsa-miR-217	0	0	1	1	1	1	KDELC1	KDEL (Lys-Asp-Glu-Leu) containing 1
hsa-miR-217	0	0	1	1	1	1	SLC25A35	solute carrier family 25, member 35
hsa-miR-217	0	0	1	1	1	1	ZNF365	zinc finger protein 365
hsa-miR-217	1	0	1	1	1	1	ZEB2	zinc finger E-box binding homeobox 2
hsa-miR-217	1	0	1	1	1	1	GTDC1	glycosyltransferase-like domain containing 1
hsa-miR-217	0	0	1	1	0	0	WDR90	WD repeat domain 90
hsa-miR-217	1	0	1	0	1	1	C7orf41	chromosome 7 open reading frame 41
hsa-miR-217	0	0	1	0	1	1	ASAP2	ArfGAP with SH3 domain, ankyrin repeat and PH domain 2
hsa-miR-217	1	0	1	1	0	0	ANKIB1	ankyrin repeat and IBR domain containing 1
hsa-miR-217	1	0	1	1	1	1	MYLK	myosin light chain kinase
hsa-miR-217	1	0	1	1	1	1	EIF4G2	eukaryotic translation initiation factor 4 gamma, 2
hsa-miR-217	0	0	1	0	0	0	LINC00052	long intergenic non-protein coding RNA 52
hsa-miR-217	0	0	1	1	1	1	SH2D1B	SH2 domain containing 1B
hsa-miR-217	1	0	1	1	1	1	CKAP2	cytoskeleton associated protein 2
hsa-miR-217	0	0	1	0	1	1	CCNYL1	cyclin Y-like 1
hsa-miR-217	0	0	1	0	0	0	PTGER4P2	prostaglandin E receptor 4 (subtype EP4) pseudogene 2
hsa-miR-217	1	0	1	1	1	1	EED	embryonic ectoderm development
hsa-miR-217	0	0	1	0	0	0	C17orf69	chromosome 17 open reading frame 69
hsa-miR-217	0	0	1	1	1	1	CTXN3	cortexin 3
hsa-miR-217	0	0	1	0	0	0	LINC00152	long intergenic non-protein coding RNA 152
hsa-miR-217	1	0	1	1	1	1	OPCML	opioid binding protein/cell adhesion molecule-like
hsa-miR-217	1	0	1	1	1	1	WNT5A	wingless-type MMTV integration site family, member 5A
hsa-miR-217	0	0	1	1	1	1	C3orf67	chromosome 3 open reading frame 67
hsa-miR-217	0	0	1	0	0	0	LOC554249	uncharacterized LOC554249
hsa-miR-217	0	0	1	0	1	1	LOC389043	uncharacterized LOC389043
hsa-miR-217	1	0	1	1	1	1	ZMYND11	zinc finger, MYND-type containing 11
hsa-miR-217	0	0	1	0	0	0	TCEB1	transcription elongation factor B (SIII), polypeptide 1 (15kDa, elongin C)
hsa-miR-217	1	0	1	0	1	1	PIK3R3	phosphoinositide-3-kinase, regulatory subunit 3 (gamma)
hsa-miR-217	1	0	1	1	1	1	ELOVL7	ELOVL fatty acid elongase 7
hsa-miR-217	1	0	1	1	1	1	ST8SIA2	ST8 alpha-N-acetyl-neuraminide alpha-2,8-sialyltransferase 2
hsa-miR-217	1	0	1	1	1	1	ACVR2B	activin A receptor, type IIB
hsa-miR-217	0	0	1	1	0	0	FBXW12	F-box and WD repeat domain containing 12
hsa-miR-217	1	0	1	0	1	1	CPEB2	cytoplasmic polyadenylation element binding protein 2
hsa-miR-217	1	0	1	1	1	1	GABRB2	gamma-aminobutyric acid (GABA) A receptor, beta 2
hsa-miR-217	0	0	1	1	0	0	FMN1	formin 1
hsa-miR-217	0	0	1	1	1	1	TTN	titin
hsa-miR-217	0	0	1	1	0	0	TMEM126B	transmembrane protein 126B
hsa-miR-217	1	0	1	1	1	1	TBP	TATA box binding protein
hsa-miR-217	0	0	1	1	0	0	SLC17A4	solute carrier family 17 (sodium phosphate), member 4
hsa-miR-217	1	0	1	0	1	1	DNAJC6	DnaJ (Hsp40) homolog, subfamily C, member 6
hsa-miR-217	1	0	1	0	1	1	BTBD3	BTB (POZ) domain containing 3
hsa-miR-217	0	0	1	1	1	1	GOLGA2P5	golgin A2 pseudogene 5
hsa-miR-217	1	0	1	1	1	1	LARP1B	La ribonucleoprotein domain family, member 1B
hsa-miR-217	1	0	1	1	1	1	TET2	tet methylcytosine dioxygenase 2
hsa-miR-217	0	0	1	1	1	1	ZNF514	zinc finger protein 514
hsa-miR-217	0	0	1	0	0	0	LRRC37A11P	leucine rich repeat containing 37, member A11, pseudogene
hsa-miR-217	1	0	1	1	1	1	TMEM64	transmembrane protein 64
hsa-miR-217	1	0	1	1	1	1	TRIP12	thyroid hormone receptor interactor 12
hsa-miR-217	1	0	1	1	1	1	SHANK2	SH3 and multiple ankyrin repeat domains 2
hsa-miR-217	1	0	1	1	1	1	ST18	suppression of tumorigenicity 18 (breast carcinoma) (zinc finger protein)
hsa-miR-217	1	0	1	1	1	1	OTUD4	OTU domain containing 4
hsa-miR-217	0	0	1	1	0	0	RGSL1	regulator of G-protein signaling like 1
hsa-miR-217	0	0	1	0	1	1	GOLGA8G	golgin A8 family, member G
hsa-miR-217	1	0	1	0	1	1	LRCH2	leucine-rich repeats and calponin homology (CH) domain containing 2
hsa-miR-217	0	0	1	1	0	0	HSF4	heat shock transcription factor 4
hsa-miR-217	0	0	1	0	0	0	FAM225B	family with sequence similarity 225, member B (non-protein coding)
hsa-miR-217	1	0	1	1	1	1	TDRD5	tudor domain containing 5
hsa-miR-217	0	0	1	1	0	0	CCDC144A	coiled-coil domain containing 144A
hsa-miR-217	1	0	1	1	1	1	EIF5	eukaryotic translation initiation factor 5
hsa-miR-217	0	0	1	1	0	0	C2	complement component 2
hsa-miR-217	1	0	1	1	1	1	SASH1	SAM and SH3 domain containing 1
hsa-miR-217	1	0	1	1	1	1	RBL2	retinoblastoma-like 2 (p130)
hsa-miR-217	0	0	1	1	1	1	SLC12A8	solute carrier family 12 (potassium/chloride transporters), member 8
hsa-miR-217	0	0	1	1	0	0	NHLRC2	NHL repeat containing 2
hsa-miR-217	0	0	1	0	0	0	ZNF542	zinc finger protein 542
hsa-miR-217	0	0	1	1	1	1	PDZRN4	PDZ domain containing ring finger 4
hsa-miR-217	1	0	1	1	1	1	MLLT10	myeloid/lymphoid or mixed-lineage leukemia (trithorax homolog, Drosophila); translocated to, 10
hsa-miR-217	0	0	1	1	1	1	TSGA10	testis specific, 10
hsa-miR-217	0	0	1	1	1	1	PRR14L	proline rich 14-like
hsa-miR-217	1	0	1	1	1	1	CASP3	caspase 3, apoptosis-related cysteine peptidase
hsa-miR-217	1	0	1	1	1	1	TC2N	tandem C2 domains, nuclear
hsa-miR-217	0	0	1	1	0	0	TMEM41A	transmembrane protein 41A
hsa-miR-217	1	0	1	1	1	1	LCA5	Leber congenital amaurosis 5
hsa-miR-217	1	0	1	1	1	1	KLHL6	kelch-like 6 (Drosophila)
hsa-miR-217	0	0	1	1	1	1	DDX21	DEAD (Asp-Glu-Ala-Asp) box helicase 21
hsa-miR-217	1	0	1	0	1	1	PCGF3	polycomb group ring finger 3
hsa-miR-217	0	0	1	0	0	0	LOC286299	uncharacterized LOC286299
hsa-miR-217	1	0	1	1	1	1	C5orf24	chromosome 5 open reading frame 24
hsa-miR-217	1	0	1	1	1	1	RDX	radixin
hsa-miR-217	1	0	1	1	1	1	PTER	phosphotriesterase related
hsa-miR-217	1	0	1	1	1	1	PGAP1	post-GPI attachment to proteins 1
hsa-miR-217	1	0	1	1	1	1	TMEM135	transmembrane protein 135
hsa-miR-217	1	0	1	1	1	1	CACNB4	calcium channel, voltage-dependent, beta 4 subunit
hsa-miR-217	1	0	1	1	1	1	HIF1A	hypoxia inducible factor 1, alpha subunit (basic helix-loop-helix transcription factor)
hsa-miR-217	0	0	1	1	1	1	KIAA1328	KIAA1328
hsa-miR-217	0	0	1	1	1	1	SSFA2	sperm specific antigen 2
hsa-miR-217	0	0	1	1	1	1	C4orf40	chromosome 4 open reading frame 40
hsa-miR-217	0	0	1	0	1	1	STT3A	STT3, subunit of the oligosaccharyltransferase complex, homolog A (S. cerevisiae)
hsa-miR-217	0	0	1	1	1	1	IPO11	importin 11
hsa-miR-217	1	0	1	1	1	1	SIN3A	SIN3 transcription regulator homolog A (yeast)
hsa-miR-217	1	0	1	1	1	1	HIC2	hypermethylated in cancer 2
hsa-miR-217	0	0	1	0	1	1	CD59	CD59 molecule, complement regulatory protein
hsa-miR-217	0	0	1	1	0	0	MARCH11	membrane-associated ring finger (C3HC4) 11
hsa-miR-217	0	0	1	1	0	0	CSH1	chorionic somatomammotropin hormone 1 (placental lactogen)
hsa-miR-217	0	0	1	1	1	1	SNRNP27	small nuclear ribonucleoprotein 27kDa (U4/U6.U5)
hsa-miR-217	0	0	1	1	1	1	SMYD5	SMYD family member 5
hsa-miR-217	1	0	1	1	1	1	FUT9	fucosyltransferase 9 (alpha (1,3) fucosyltransferase)
hsa-miR-217	0	0	1	1	1	1	UPRT	uracil phosphoribosyltransferase (FUR1) homolog (S. cerevisiae)
hsa-miR-217	0	0	1	1	1	1	DGCR14	DiGeorge syndrome critical region gene 14
hsa-miR-217	0	0	1	0	0	0	LOC400768	uncharacterized LOC400768
hsa-miR-217	1	0	1	1	1	1	EIF4B	eukaryotic translation initiation factor 4B
hsa-miR-217	0	0	1	1	0	0	TCEAL4	transcription elongation factor A (SII)-like 4
hsa-miR-217	1	0	1	1	1	1	LETMD1	LETM1 domain containing 1
hsa-miR-217	0	0	1	1	0	0	PSG8	pregnancy specific beta-1-glycoprotein 8
hsa-miR-217	1	0	1	1	1	1	AP3S1	adaptor-related protein complex 3, sigma 1 subunit
hsa-miR-217	1	0	1	1	1	1	FGF11	fibroblast growth factor 11
hsa-miR-217	1	0	1	0	1	1	BNIP3L	BCL2/adenovirus E1B 19kDa interacting protein 3-like
hsa-miR-217	1	0	1	1	1	1	CAAP1	caspase activity and apoptosis inhibitor 1
hsa-miR-217	0	0	1	1	1	1	PMPCB	peptidase (mitochondrial processing) beta
hsa-miR-217	0	0	1	1	0	0	TFCP2	transcription factor CP2
hsa-miR-217	1	0	1	1	1	1	HMGN3	high mobility group nucleosomal binding domain 3
hsa-miR-217	0	0	1	1	0	0	METTL23	methyltransferase like 23
hsa-miR-217	1	0	1	0	1	1	EIF4H	eukaryotic translation initiation factor 4H
hsa-miR-217	1	0	1	1	1	1	CHTF8	CTF8, chromosome transmission fidelity factor 8 homolog (S. cerevisiae)
hsa-miR-217	0	0	1	1	1	1	PPHLN1	periphilin 1
hsa-miR-217	0	0	1	1	1	1	ZNF263	zinc finger protein 263
hsa-miR-217	0	0	1	0	0	0	TRIQK	triple QxxK/R motif containing
hsa-miR-217	1	0	1	1	1	1	PLEKHB2	pleckstrin homology domain containing, family B (evectins) member 2
hsa-miR-217	0	0	1	1	1	1	GRAP2	GRB2-related adaptor protein 2
hsa-miR-217	1	0	1	0	1	1	RPS6KB1	ribosomal protein S6 kinase, 70kDa, polypeptide 1
hsa-miR-217	1	0	1	1	1	1	TMEM248	transmembrane protein 248
hsa-miR-217	1	0	1	1	1	1	CCDC25	coiled-coil domain containing 25
hsa-miR-217	1	0	1	1	1	1	NUP160	nucleoporin 160kDa
hsa-miR-217	0	0	1	0	0	0	FLJ45248	FLJ45248 protein
hsa-miR-217	1	0	1	1	1	1	TMEM66	transmembrane protein 66
hsa-miR-217	0	0	1	1	1	1	MPDU1	mannose-P-dolichol utilization defect 1
hsa-miR-217	0	0	1	1	0	0	CSHL1	chorionic somatomammotropin hormone-like 1
hsa-miR-217	1	0	1	1	1	1	ARNTL	aryl hydrocarbon receptor nuclear translocator-like
hsa-miR-217	1	0	1	1	1	1	NT5DC1	5'-nucleotidase domain containing 1
hsa-miR-217	1	0	1	1	1	1	YWHAQ	tyrosine 3-monooxygenase/tryptophan 5-monooxygenase activation protein, theta polypeptide
hsa-miR-217	1	0	1	1	1	1	ARL4A	ADP-ribosylation factor-like 4A
hsa-miR-217	1	0	1	1	1	1	PFN2	profilin 2
hsa-miR-217	1	0	1	1	1	1	NFYB	nuclear transcription factor Y, beta
hsa-miR-217	1	0	1	1	1	1	ZNF207	zinc finger protein 207
hsa-miR-217	1	0	1	1	0	0	ATP6V1B2	ATPase, H+ transporting, lysosomal 56/58kDa, V1 subunit B2
hsa-miR-217	0	0	1	0	0	0	ZNF674-AS1	ZNF674 antisense RNA 1
hsa-miR-217	1	0	1	0	1	1	MAP1B	microtubule-associated protein 1B
hsa-miR-217	0	0	1	1	1	1	TBRG1	transforming growth factor beta regulator 1
hsa-miR-217	1	0	1	1	0	0	SOD1	superoxide dismutase 1, soluble
hsa-miR-217	0	0	1	1	1	1	PLAC8	placenta-specific 8
hsa-miR-217	0	0	1	0	1	1	DENR	density-regulated protein
hsa-miR-217	0	0	1	0	1	1	SEPT7	septin 7
hsa-miR-217	0	0	1	1	1	1	OTOR	otoraplin
hsa-miR-217	1	0	1	1	1	1	LGALSL	lectin, galactoside-binding-like
hsa-miR-217	0	0	1	1	0	0	FAM3B	family with sequence similarity 3, member B
hsa-miR-217	1	0	1	1	1	1	SLMAP	sarcolemma associated protein
hsa-miR-217	1	0	1	1	1	1	STAG2	stromal antigen 2
hsa-miR-217	1	0	1	0	1	1	KIAA0664	KIAA0664
hsa-miR-217	0	0	1	1	1	1	CCP110	centriolar coiled coil protein 110kDa
hsa-miR-217	1	0	1	1	1	1	PHACTR2	phosphatase and actin regulator 2
hsa-miR-217	0	0	1	1	0	0	TENC1	tensin like C1 domain containing phosphatase (tensin 2)
hsa-miR-217	0	0	1	0	1	1	SYNPR	synaptoporin
hsa-miR-217	1	0	1	1	1	1	ZFHX3	zinc finger homeobox 3
hsa-miR-217	1	0	1	1	1	1	METAP1	methionyl aminopeptidase 1
hsa-miR-217	1	0	1	1	1	1	PI15	peptidase inhibitor 15
hsa-miR-217	1	0	1	1	1	1	MAN2A2	mannosidase, alpha, class 2A, member 2
hsa-miR-217	1	0	1	1	1	1	TTC3	tetratricopeptide repeat domain 3
hsa-miR-217	0	0	1	1	1	1	FCAR	Fc fragment of IgA, receptor for
hsa-miR-217	1	0	1	0	1	1	LONRF2	LON peptidase N-terminal domain and ring finger 2
hsa-miR-217	0	0	1	1	1	1	PARP14	poly (ADP-ribose) polymerase family, member 14
hsa-miR-217	0	0	1	1	0	0	SPATA20	spermatogenesis associated 20
hsa-miR-217	1	0	1	1	1	1	MOSPD1	motile sperm domain containing 1
hsa-miR-217	0	0	1	0	0	0	DYTN	dystrotelin
hsa-miR-217	0	0	1	1	1	1	MARVELD2	MARVEL domain containing 2
hsa-miR-217	1	0	1	0	1	1	DCBLD2	discoidin, CUB and LCCL domain containing 2
hsa-miR-217	1	0	1	1	1	1	MLL	myeloid/lymphoid or mixed-lineage leukemia (trithorax homolog, Drosophila)
hsa-miR-217	1	0	1	1	1	1	RALBP1	ralA binding protein 1
hsa-miR-217	1	0	1	0	1	1	BCL2	B-cell CLL/lymphoma 2
hsa-miR-217	1	0	1	0	1	1	YES1	v-yes-1 Yamaguchi sarcoma viral oncogene homolog 1
hsa-miR-217	0	0	1	1	1	1	GAD2	glutamate decarboxylase 2 (pancreatic islets and brain, 65kDa)
hsa-miR-217	1	0	1	1	0	0	ADRB3	adrenoceptor beta 3
hsa-miR-217	1	0	1	1	1	1	FAS	Fas (TNF receptor superfamily, member 6)
hsa-miR-217	1	0	1	0	1	1	ATM	ataxia telangiectasia mutated
hsa-miR-217	1	0	1	1	1	1	COL4A4	collagen, type IV, alpha 4
hsa-miR-217	1	0	1	0	1	1	SLC26A2	solute carrier family 26 (sulfate transporter), member 2
hsa-miR-217	0	0	1	1	1	1	F5	coagulation factor V (proaccelerin, labile factor)
hsa-miR-217	0	0	1	1	1	1	FABP2	fatty acid binding protein 2, intestinal
hsa-miR-217	0	0	1	0	1	1	MS4A2	membrane-spanning 4-domains, subfamily A, member 2
hsa-miR-217	0	0	1	1	1	1	FXN	frataxin
hsa-miR-217	1	0	1	1	1	1	GALC	galactosylceramidase
hsa-miR-217	0	0	1	0	1	1	GBE1	glucan (1,4-alpha-), branching enzyme 1
hsa-miR-217	1	0	1	0	1	1	GLI3	GLI family zinc finger 3
hsa-miR-217	1	0	1	1	1	1	KCNA1	potassium voltage-gated channel, shaker-related subfamily, member 1 (episodic ataxia with myokymia)
hsa-miR-217	1	0	1	1	1	1	LEP	leptin
hsa-miR-217	1	0	1	1	1	1	OCRL	oculocerebrorenal syndrome of Lowe
hsa-miR-217	0	0	1	0	1	1	PGK1	phosphoglycerate kinase 1
hsa-miR-217	1	0	1	1	1	1	ATXN1	ataxin 1
hsa-miR-217	0	0	1	1	1	1	GM2A	GM2 ganglioside activator
hsa-miR-217	0	0	1	1	0	0	IAPP	islet amyloid polypeptide
hsa-miR-217	1	0	1	0	1	1	PAFAH1B1	platelet-activating factor acetylhydrolase 1b, regulatory subunit 1 (45kDa)
hsa-miR-217	0	0	1	1	1	1	CYP11B2	cytochrome P450, family 11, subfamily B, polypeptide 2
hsa-miR-217	1	0	1	1	1	1	IL1A	interleukin 1, alpha
hsa-miR-217	0	0	1	1	1	1	IL6	interleukin 6 (interferon, beta 2)
hsa-miR-217	0	0	1	1	1	1	CNTF	ciliary neurotrophic factor
hsa-miR-217	0	0	1	0	1	1	ADRA2A	adrenoceptor alpha 2A
hsa-miR-217	0	0	1	1	1	1	DIO1	deiodinase, iodothyronine, type I
hsa-miR-217	1	0	1	1	1	1	DIO2	deiodinase, iodothyronine, type II
hsa-miR-217	1	0	1	0	1	1	GABRA4	gamma-aminobutyric acid (GABA) A receptor, alpha 4
hsa-miR-217	1	0	1	0	1	1	KCNJ2	potassium inwardly-rectifying channel, subfamily J, member 2
hsa-miR-217	1	0	1	1	1	1	PTGFR	prostaglandin F receptor (FP)
hsa-miR-217	1	0	1	1	1	1	C14orf37	chromosome 14 open reading frame 37
hsa-miR-217	1	0	1	0	1	1	SMAD2	SMAD family member 2
hsa-miR-217	1	0	1	1	1	1	HNRNPD	heterogeneous nuclear ribonucleoprotein D (AU-rich element RNA binding protein 1, 37kDa)
hsa-miR-217	0	0	1	0	0	0	FIGLA	folliculogenesis specific basic helix-loop-helix
hsa-miR-217	1	0	1	0	1	1	LIN28B	lin-28 homolog B (C. elegans)
hsa-miR-217	1	0	1	0	1	1	IP6K1	inositol hexakisphosphate kinase 1
hsa-miR-217	0	0	1	1	1	1	CR2	complement component (3d/Epstein Barr virus) receptor 2
hsa-miR-217	1	0	1	1	1	1	ATN1	atrophin 1
hsa-miR-217	0	0	1	1	1	1	SCP2	sterol carrier protein 2
hsa-miR-217	1	0	1	1	1	1	L3MBTL3	l(3)mbt-like 3 (Drosophila)
hsa-miR-217	1	0	1	1	1	1	SPOP	speckle-type POZ protein
hsa-miR-217	0	0	1	1	1	1	TRIM13	tripartite motif containing 13
hsa-miR-217	1	0	1	1	1	1	LMBRD2	LMBR1 domain containing 2
hsa-miR-217	0	0	1	1	1	1	MXI1	MAX interactor 1
hsa-miR-217	1	0	1	1	1	1	EML1	echinoderm microtubule associated protein like 1
hsa-miR-217	0	0	1	1	0	0	ARMCX6	armadillo repeat containing, X-linked 6
hsa-miR-217	1	0	1	1	1	1	LUZP2	leucine zipper protein 2
hsa-miR-217	0	0	1	0	1	1	LPPR5	lipid phosphate phosphatase-related protein type 5
hsa-miR-217	1	0	1	0	1	1	FAM102B	family with sequence similarity 102, member B
hsa-miR-217	1	0	1	0	1	1	FYTTD1	forty-two-three domain containing 1
hsa-miR-217	1	0	1	1	0	0	RPL21P44	ribosomal protein L21 pseudogene 44
hsa-miR-217	0	0	1	1	1	1	CHCHD7	coiled-coil-helix-coiled-coil-helix domain containing 7
hsa-miR-217	1	0	1	1	1	1	CENPP	centromere protein P
hsa-miR-217	0	0	1	0	1	1	GOLGA8E	golgin A8 family, member E
hsa-miR-217	0	0	1	0	1	1	LINC00268	long intergenic non-protein coding RNA 268
hsa-miR-217	1	0	1	0	1	1	SYT14L	synaptotagmin XIV-like
hsa-miR-217	1	0	1	1	1	1	PHF6	PHD finger protein 6
hsa-miR-217	1	0	1	1	1	1	TMCC1	transmembrane and coiled-coil domain family 1
hsa-miR-217	1	0	1	0	1	1	GOPC	golgi-associated PDZ and coiled-coil motif containing
hsa-miR-217	1	0	1	0	1	1	KCNK2	potassium channel, subfamily K, member 2
hsa-miR-217	0	0	1	1	1	1	BTBD11	BTB (POZ) domain containing 11
hsa-miR-217	0	0	1	1	0	0	PAGE3	P antigen family, member 3 (prostate associated)
hsa-miR-217	0	0	1	1	1	1	FAM78B	family with sequence similarity 78, member B
hsa-miR-217	0	0	1	1	1	1	KIAA2026	KIAA2026
hsa-miR-217	0	0	1	1	1	1	ACTBL2	actin, beta-like 2
hsa-miR-217	1	0	1	1	1	1	CANX	calnexin
hsa-miR-217	1	0	1	1	1	1	KALRN	kalirin, RhoGEF kinase
hsa-miR-217	1	0	1	0	1	1	BCL7A	B-cell CLL/lymphoma 7A
hsa-miR-217	1	0	1	0	1	1	TNRC6B	trinucleotide repeat containing 6B
hsa-miR-217	1	0	1	1	1	1	TGFBR2	transforming growth factor, beta receptor II (70/80kDa)
hsa-miR-217	0	0	1	0	0	0	CSN1S1	casein alpha s1
hsa-miR-217	1	0	1	1	1	1	VEGFA	vascular endothelial growth factor A
hsa-miR-217	1	0	1	1	1	1	FAM108B1	family with sequence similarity 108, member B1
hsa-miR-217	1	0	1	1	1	1	SLC35F1	solute carrier family 35, member F1
hsa-miR-217	0	0	1	1	0	0	SFMBT2	Scm-like with four mbt domains 2
hsa-miR-217	1	0	1	1	1	1	PLEKHG1	pleckstrin homology domain containing, family G (with RhoGef domain) member 1
hsa-miR-217	1	0	1	1	1	1	SLC10A7	solute carrier family 10 (sodium/bile acid cotransporter family), member 7
hsa-miR-217	1	0	1	1	1	1	CSNK1G3	casein kinase 1, gamma 3
hsa-miR-217	1	0	1	1	1	1	TFAP2A	transcription factor AP-2 alpha (activating enhancer binding protein 2 alpha)
hsa-miR-217	0	0	1	1	1	1	SLC35A2	solute carrier family 35 (UDP-galactose transporter), member A2
hsa-miR-217	0	0	1	1	1	1	HNRNPH2	heterogeneous nuclear ribonucleoprotein H2 (H')
hsa-miR-217	1	0	1	1	1	1	AMD1	adenosylmethionine decarboxylase 1
hsa-miR-217	0	0	1	1	1	1	NHP2	NHP2 ribonucleoprotein homolog (yeast)
hsa-miR-217	1	0	1	1	1	1	ACPL2	acid phosphatase-like 2
hsa-miR-217	1	0	1	1	1	1	SCD5	stearoyl-CoA desaturase 5
hsa-miR-217	1	0	1	0	1	1	CDC42SE1	CDC42 small effector 1
hsa-miR-217	1	0	1	1	1	1	ATP6V1C2	ATPase, H+ transporting, lysosomal 42kDa, V1 subunit C2
hsa-miR-217	0	0	1	1	1	1	SPATA6L	spermatogenesis associated 6-like
hsa-miR-217	1	0	1	1	1	1	SCN2A	sodium channel, voltage-gated, type II, alpha subunit
hsa-miR-217	0	0	1	1	1	1	SERPINB7	serpin peptidase inhibitor, clade B (ovalbumin), member 7
hsa-miR-217	0	0	1	1	1	1	SPOCK3	sparc/osteonectin, cwcv and kazal-like domains proteoglycan (testican) 3
hsa-miR-217	1	0	1	0	1	1	CD83	CD83 molecule
hsa-miR-217	1	0	1	1	1	1	GDAP1	ganglioside induced differentiation associated protein 1
hsa-miR-217	1	0	1	1	1	1	RUFY2	RUN and FYVE domain containing 2
hsa-miR-217	0	0	1	1	1	1	C10orf53	chromosome 10 open reading frame 53
hsa-miR-217	1	0	1	1	1	1	FRS2	fibroblast growth factor receptor substrate 2
hsa-miR-217	0	0	1	1	1	1	SLC6A3	solute carrier family 6 (neurotransmitter transporter, dopamine), member 3
hsa-miR-217	1	0	1	0	1	1	TMEM237	transmembrane protein 237
hsa-miR-217	0	0	1	1	1	1	FAM22G	family with sequence similarity 22, member G
hsa-miR-217	1	0	1	1	1	1	HIPK3	homeodomain interacting protein kinase 3
hsa-miR-217	1	0	1	1	1	1	MZT1	mitotic spindle organizing protein 1
hsa-miR-217	1	0	1	1	1	1	PRR3	proline rich 3
hsa-miR-217	1	0	1	0	1	1	UBXN2B	UBX domain protein 2B
hsa-miR-217	1	0	1	1	1	1	DACT1	dapper, antagonist of beta-catenin, homolog 1 (Xenopus laevis)
hsa-miR-217	1	0	1	1	1	1	CUL4B	cullin 4B
hsa-miR-217	0	0	1	1	0	0	ARHGAP9	Rho GTPase activating protein 9
hsa-miR-217	0	0	1	1	1	1	TMEM202	transmembrane protein 202
hsa-miR-217	1	0	1	1	1	1	MGA	MAX gene associated
hsa-miR-217	1	0	1	0	1	1	SCN3A	sodium channel, voltage-gated, type III, alpha subunit
hsa-miR-217	0	0	1	1	1	1	ADSS	adenylosuccinate synthase
hsa-miR-217	1	0	1	0	1	1	KLF9	Kruppel-like factor 9
hsa-miR-217	1	0	1	1	1	1	CDH13	cadherin 13, H-cadherin (heart)
hsa-miR-217	1	0	1	0	1	1	CDK6	cyclin-dependent kinase 6
hsa-miR-217	1	0	1	1	1	1	CDS1	CDP-diacylglycerol synthase (phosphatidate cytidylyltransferase) 1
hsa-miR-217	0	0	1	0	1	1	EMP1	epithelial membrane protein 1
hsa-miR-217	1	0	1	1	1	1	EREG	epiregulin
hsa-miR-217	1	0	1	1	1	1	GCNT1	glucosaminyl (N-acetyl) transferase 1, core 2
hsa-miR-217	0	0	1	1	1	1	TNFRSF9	tumor necrosis factor receptor superfamily, member 9
hsa-miR-217	0	0	1	1	1	1	CXCL10	chemokine (C-X-C motif) ligand 10
hsa-miR-217	1	0	1	1	1	1	ARF3	ADP-ribosylation factor 3
hsa-miR-217	1	0	1	1	1	1	BAAT	bile acid CoA: amino acid N-acyltransferase (glycine N-choloyltransferase)
hsa-miR-217	0	0	1	0	0	0	BAI1	brain-specific angiogenesis inhibitor 1
hsa-miR-217	1	0	1	1	1	1	BCL6	B-cell CLL/lymphoma 6
hsa-miR-217	1	0	1	1	1	1	KLF5	Kruppel-like factor 5 (intestinal)
hsa-miR-217	1	0	1	1	1	1	CBFB	core-binding factor, beta subunit
hsa-miR-217	1	0	1	1	1	1	CNN3	calponin 3, acidic
hsa-miR-217	1	0	1	1	1	1	COL4A6	collagen, type IV, alpha 6
hsa-miR-217	0	0	1	0	0	0	CPE	carboxypeptidase E
hsa-miR-217	1	0	1	1	1	1	CSNK2A1	casein kinase 2, alpha 1 polypeptide
hsa-miR-217	1	0	1	1	1	1	DR1	down-regulator of transcription 1, TBP-binding (negative cofactor 2)
hsa-miR-217	0	0	1	1	1	1	DSG1	desmoglein 1
hsa-miR-217	1	0	1	1	1	1	E2F3	E2F transcription factor 3
hsa-miR-217	1	0	1	1	1	1	EGR1	early growth response 1
hsa-miR-217	0	0	1	1	1	1	FPR3	formyl peptide receptor 3
hsa-miR-217	1	0	1	0	1	1	FUT4	fucosyltransferase 4 (alpha (1,3) fucosyltransferase, myeloid-specific)
hsa-miR-217	1	0	1	1	1	1	GAB1	GRB2-associated binding protein 1
hsa-miR-217	1	0	1	1	1	1	CXCL2	chemokine (C-X-C motif) ligand 2
hsa-miR-217	0	0	1	1	1	1	FOXN2	forkhead box N2
hsa-miR-217	0	0	1	1	1	1	IL12B	interleukin 12B (natural killer cell stimulatory factor 2, cytotoxic lymphocyte maturation factor 2, p40)
hsa-miR-217	0	0	1	0	1	1	ITGAV	integrin, alpha V
hsa-miR-217	1	0	1	1	1	1	ITGB8	integrin, beta 8
hsa-miR-217	1	0	1	1	1	1	KCNA6	potassium voltage-gated channel, shaker-related subfamily, member 6
hsa-miR-217	1	0	1	0	1	1	KIF3C	kinesin family member 3C
hsa-miR-217	1	0	1	1	1	1	KPNB1	karyopherin (importin) beta 1
hsa-miR-217	1	0	1	1	1	1	LBR	lamin B receptor
hsa-miR-217	1	0	1	1	1	1	LIFR	leukemia inhibitory factor receptor alpha
hsa-miR-217	0	0	1	0	1	1	CXCL9	chemokine (C-X-C motif) ligand 9
hsa-miR-217	1	0	1	1	1	1	MSN	moesin
hsa-miR-217	1	0	1	1	1	1	NEUROD1	neuronal differentiation 1
hsa-miR-217	1	0	1	0	1	1	PAPPA	pregnancy-associated plasma protein A, pappalysin 1
hsa-miR-217	1	0	1	1	1	1	PBX2	pre-B-cell leukemia homeobox 2
hsa-miR-217	1	0	1	0	1	1	CDK17	cyclin-dependent kinase 17
hsa-miR-217	1	0	1	1	1	1	PLAGL2	pleiomorphic adenoma gene-like 2
hsa-miR-217	0	0	1	1	1	1	EIF2AK2	eukaryotic translation initiation factor 2-alpha kinase 2
hsa-miR-217	0	0	1	1	1	1	HTRA1	HtrA serine peptidase 1
hsa-miR-217	0	0	1	0	0	0	PSMB10	proteasome (prosome, macropain) subunit, beta type, 10
hsa-miR-217	1	0	1	1	1	1	PTPN9	protein tyrosine phosphatase, non-receptor type 9
hsa-miR-217	0	0	1	1	1	1	PTPRR	protein tyrosine phosphatase, receptor type, R
hsa-miR-217	1	0	1	1	1	1	PVRL1	poliovirus receptor-related 1 (herpesvirus entry mediator C)
hsa-miR-217	1	0	1	0	1	1	SORT1	sortilin 1
hsa-miR-217	1	0	1	1	1	1	SALL1	sal-like 1 (Drosophila)
hsa-miR-217	1	0	1	1	1	1	SAT1	spermidine/spermine N1-acetyltransferase 1
hsa-miR-217	1	0	1	0	1	1	ST6GAL1	ST6 beta-galactosamide alpha-2,6-sialyltranferase 1
hsa-miR-217	1	0	1	1	1	1	ST8SIA1	ST8 alpha-N-acetyl-neuraminide alpha-2,8-sialyltransferase 1
hsa-miR-217	0	0	1	1	1	1	SLAMF1	signaling lymphocytic activation molecule family member 1
hsa-miR-217	0	0	1	1	0	0	SNRPC	small nuclear ribonucleoprotein polypeptide C
hsa-miR-217	1	0	1	1	1	1	SPAM1	sperm adhesion molecule 1 (PH-20 hyaluronidase, zona pellucida binding)
hsa-miR-217	0	0	1	1	0	0	TG	thyroglobulin
hsa-miR-217	1	0	1	1	1	1	TGFB3	transforming growth factor, beta 3
hsa-miR-217	1	0	1	0	1	1	THBS1	thrombospondin 1
hsa-miR-217	1	0	1	0	1	1	SEC62	SEC62 homolog (S. cerevisiae)
hsa-miR-217	1	0	1	0	1	1	UBE2G1	ubiquitin-conjugating enzyme E2G 1
hsa-miR-217	1	0	1	1	1	1	UBE2N	ubiquitin-conjugating enzyme E2N
hsa-miR-217	0	0	1	1	1	1	ZNF137P	zinc finger protein 137, pseudogene
hsa-miR-217	1	0	1	0	1	1	BSN	bassoon (presynaptic cytomatrix protein)
hsa-miR-217	1	0	1	1	1	1	ADAM12	ADAM metallopeptidase domain 12
hsa-miR-217	1	0	1	0	1	1	ENC1	ectodermal-neural cortex 1 (with BTB-like domain)
hsa-miR-217	1	0	1	1	1	1	TNFSF11	tumor necrosis factor (ligand) superfamily, member 11
hsa-miR-217	1	0	1	1	1	1	B3GALT2	UDP-Gal:betaGlcNAc beta 1,3-galactosyltransferase, polypeptide 2
hsa-miR-217	1	0	1	1	1	1	MBTPS1	membrane-bound transcription factor peptidase, site 1
hsa-miR-217	1	0	1	1	1	1	URI1	URI1, prefoldin-like chaperone
hsa-miR-217	0	0	1	1	1	1	SUCLA2	succinate-CoA ligase, ADP-forming, beta subunit
hsa-miR-217	0	0	1	0	0	0	GMPS	guanine monphosphate synthetase
hsa-miR-217	1	0	1	1	1	1	KAT2B	K(lysine) acetyltransferase 2B
hsa-miR-217	0	0	1	1	1	1	HERC1	HECT and RLD domain containing E3 ubiquitin protein ligase family member 1
hsa-miR-217	1	0	1	0	1	1	SKAP2	src kinase associated phosphoprotein 2
hsa-miR-217	1	0	1	0	1	1	ST13	suppression of tumorigenicity 13 (colon carcinoma) (Hsp70 interacting protein)
hsa-miR-217	1	0	1	0	1	1	WASL	Wiskott-Aldrich syndrome-like
hsa-miR-217	0	0	1	0	1	1	SLC1A3	solute carrier family 1 (glial high affinity glutamate transporter), member 3
hsa-miR-217	1	0	1	1	0	0	SYNGR3	synaptogyrin 3
hsa-miR-217	0	0	1	1	1	1	HOMER1	homer homolog 1 (Drosophila)
hsa-miR-217	1	0	1	0	1	1	AKAP6	A kinase (PRKA) anchor protein 6
hsa-miR-217	1	0	1	1	1	1	SLC25A27	solute carrier family 25, member 27
hsa-miR-217	1	0	1	1	1	1	ASTN1	astrotactin 1
hsa-miR-217	1	0	1	1	1	1	EGR3	early growth response 3
hsa-miR-217	1	0	1	1	1	1	ERG	v-ets erythroblastosis virus E26 oncogene homolog (avian)
hsa-miR-217	1	0	1	1	0	0	ERH	enhancer of rudimentary homolog (Drosophila)
hsa-miR-217	1	0	1	1	1	1	EZH2	enhancer of zeste homolog 2 (Drosophila)
hsa-miR-217	1	0	1	0	1	1	ACSL4	acyl-CoA synthetase long-chain family member 4
hsa-miR-217	1	0	1	0	1	1	FGF5	fibroblast growth factor 5
hsa-miR-217	0	0	1	1	1	1	GPC5	glypican 5
hsa-miR-217	0	0	1	0	1	1	GALNT3	UDP-N-acetyl-alpha-D-galactosamine:polypeptide N-acetylgalactosaminyltransferase 3 (GalNAc-T3)
hsa-miR-217	0	0	1	1	1	1	PIGH	phosphatidylinositol glycan anchor biosynthesis, class H
hsa-miR-217	1	0	1	0	1	1	SCN2B	sodium channel, voltage-gated, type II, beta subunit
hsa-miR-217	0	0	1	1	1	1	SLC33A1	solute carrier family 33 (acetyl-CoA transporter), member 1
hsa-miR-217	1	0	1	1	1	1	NREP	neuronal regeneration related protein homolog (rat)
hsa-miR-217	1	0	1	1	1	1	MED1	mediator complex subunit 1
hsa-miR-217	1	0	1	0	1	1	ROCK2	Rho-associated, coiled-coil containing protein kinase 2
hsa-miR-217	0	0	1	1	1	1	ITM2A	integral membrane protein 2A
hsa-miR-217	1	0	1	1	1	1	CXCL14	chemokine (C-X-C motif) ligand 14
hsa-miR-217	0	0	1	1	1	1	MRPL33	mitochondrial ribosomal protein L33
hsa-miR-217	0	0	1	1	1	1	CDH6	cadherin 6, type 2, K-cadherin (fetal kidney)
hsa-miR-217	0	0	1	1	1	1	CDKN2B	cyclin-dependent kinase inhibitor 2B (p15, inhibits CDK4)
hsa-miR-217	1	0	1	0	1	1	DOCK3	dedicator of cytokinesis 3
hsa-miR-217	0	0	1	0	1	1	DSC2	desmocollin 2
hsa-miR-217	1	0	1	1	1	1	MED13	mediator complex subunit 13
hsa-miR-217	1	0	1	1	1	1	DCC	deleted in colorectal carcinoma
hsa-miR-217	1	0	1	1	1	1	DLX3	distal-less homeobox 3
hsa-miR-217	1	0	1	1	1	1	GFRA1	GDNF family receptor alpha 1
hsa-miR-217	0	0	1	1	1	1	PDIA3	protein disulfide isomerase family A, member 3
hsa-miR-217	1	0	1	1	1	1	HIP1	huntingtin interacting protein 1
hsa-miR-217	1	0	1	1	0	0	NNAT	neuronatin
hsa-miR-217	0	0	1	1	1	1	PPP1R3C	protein phosphatase 1, regulatory subunit 3C
hsa-miR-217	0	0	1	1	1	1	SEPP1	selenoprotein P, plasma, 1
hsa-miR-217	0	0	1	1	1	1	ST5	suppression of tumorigenicity 5
hsa-miR-217	1	0	1	0	1	1	CCDC6	coiled-coil domain containing 6
hsa-miR-217	0	0	1	1	1	1	MAPK8IP1	mitogen-activated protein kinase 8 interacting protein 1
hsa-miR-217	1	0	1	1	1	1	AKT3	v-akt murine thymoma viral oncogene homolog 3 (protein kinase B, gamma)
hsa-miR-217	1	0	1	1	1	1	KCNE3	potassium voltage-gated channel, Isk-related family, member 3
hsa-miR-217	1	0	1	1	1	1	SCARB2	scavenger receptor class B, member 2
hsa-miR-217	0	0	1	1	1	1	LMAN1	lectin, mannose-binding, 1
hsa-miR-217	0	0	1	1	1	1	CCL8	chemokine (C-C motif) ligand 8
hsa-miR-217	1	0	1	1	1	1	SYT1	synaptotagmin I
hsa-miR-217	1	0	1	1	1	1	EVI5	ecotropic viral integration site 5
hsa-miR-217	1	0	1	1	1	1	LHFP	lipoma HMGIC fusion partner
hsa-miR-217	1	0	1	0	1	1	SPRY3	sprouty homolog 3 (Drosophila)
hsa-miR-217	1	0	1	1	1	1	MAN1A1	mannosidase, alpha, class 1A, member 1
hsa-miR-217	1	0	1	1	1	1	MMP16	matrix metallopeptidase 16 (membrane-inserted)
hsa-miR-217	1	0	1	0	1	1	NAB1	NGFI-A binding protein 1 (EGR1 binding protein 1)
hsa-miR-217	0	0	1	1	1	1	STK10	serine/threonine kinase 10
hsa-miR-217	1	0	1	0	1	1	SPATA2	spermatogenesis associated 2
hsa-miR-217	1	0	1	1	1	1	CITED2	Cbp/p300-interacting transactivator, with Glu/Asp-rich carboxy-terminal domain, 2
hsa-miR-217	1	0	1	1	1	1	DYNC1LI2	dynein, cytoplasmic 1, light intermediate chain 2
hsa-miR-217	1	0	1	1	1	1	NCK1	NCK adaptor protein 1
hsa-miR-217	1	0	1	1	1	1	NEFL	neurofilament, light polypeptide
hsa-miR-217	1	0	1	1	1	1	NR4A2	nuclear receptor subfamily 4, group A, member 2
hsa-miR-217	0	0	1	0	1	1	OAS3	2'-5'-oligoadenylate synthetase 3, 100kDa
hsa-miR-217	1	0	1	1	1	1	PRKAA1	protein kinase, AMP-activated, alpha 1 catalytic subunit
hsa-miR-217	1	0	1	1	1	1	PRKCD	protein kinase C, delta
hsa-miR-217	1	0	1	1	1	1	SMC1A	structural maintenance of chromosomes 1A
hsa-miR-217	1	0	1	1	1	1	FBLN5	fibulin 5
hsa-miR-217	0	0	1	1	1	1	UBE2E3	ubiquitin-conjugating enzyme E2E 3
hsa-miR-217	1	0	1	0	1	1	APPBP2	amyloid beta precursor protein (cytoplasmic tail) binding protein 2
hsa-miR-217	0	0	1	1	1	1	TM9SF1	transmembrane 9 superfamily member 1
hsa-miR-217	1	0	1	0	1	1	GNAI3	guanine nucleotide binding protein (G protein), alpha inhibiting activity polypeptide 3
hsa-miR-217	1	0	1	1	1	1	DYNLT3	dynein, light chain, Tctex-type 3
hsa-miR-217	1	0	1	1	1	1	KHDRBS1	KH domain containing, RNA binding, signal transduction associated 1
hsa-miR-217	0	0	1	1	1	1	CCT6B	chaperonin containing TCP1, subunit 6B (zeta 2)
hsa-miR-217	0	0	1	1	1	1	POLD3	polymerase (DNA-directed), delta 3, accessory subunit
hsa-miR-217	1	0	1	1	1	1	PLK2	polo-like kinase 2
hsa-miR-217	1	0	1	1	1	1	SRSF10	serine/arginine-rich splicing factor 10
hsa-miR-217	0	0	1	1	1	1	PPP1R17	protein phosphatase 1, regulatory subunit 17
hsa-miR-217	0	0	1	1	1	1	TMED10	transmembrane emp24-like trafficking protein 10 (yeast)
hsa-miR-217	1	0	1	1	1	1	RAC1	ras-related C3 botulinum toxin substrate 1 (rho family, small GTP binding protein Rac1)
hsa-miR-217	1	0	1	0	1	1	SOX12	SRY (sex determining region Y)-box 12
hsa-miR-217	1	0	1	1	1	1	ZNF12	zinc finger protein 12
hsa-miR-217	1	0	1	1	1	1	ABHD2	abhydrolase domain containing 2
hsa-miR-217	1	0	1	1	1	1	ESM1	endothelial cell-specific molecule 1
hsa-miR-217	1	0	1	1	1	1	ADAMTS5	ADAM metallopeptidase with thrombospondin type 1 motif, 5
hsa-miR-217	1	0	1	1	1	1	ZNF81	zinc finger protein 81
hsa-miR-217	1	0	1	1	1	1	VEZF1	vascular endothelial zinc finger 1
hsa-miR-217	1	0	1	1	1	1	ERLIN2	ER lipid raft associated 2
hsa-miR-217	1	0	1	1	1	1	ABCF2	ATP-binding cassette, sub-family F (GCN20), member 2
hsa-miR-217	0	0	1	1	1	1	WIF1	WNT inhibitory factor 1
hsa-miR-217	0	0	1	1	0	0	IRAK3	interleukin-1 receptor-associated kinase 3
hsa-miR-217	0	0	1	1	1	1	AKAP10	A kinase (PRKA) anchor protein 10
hsa-miR-217	1	0	1	1	1	1	CA5B	carbonic anhydrase VB, mitochondrial
hsa-miR-217	0	0	1	0	1	1	PNMA2	paraneoplastic Ma antigen 2
hsa-miR-217	1	0	1	0	1	1	ZFPM2	zinc finger protein, multitype 2
hsa-miR-217	1	0	1	1	1	1	APPL1	adaptor protein, phosphotyrosine interaction, PH domain and leucine zipper containing 1
hsa-miR-217	1	0	1	0	1	1	CD2AP	CD2-associated protein
hsa-miR-217	1	0	1	1	1	1	RYBP	RING1 and YY1 binding protein
hsa-miR-217	0	0	1	1	1	1	ZNF212	zinc finger protein 212
hsa-miR-217	1	0	1	1	1	1	KCND2	potassium voltage-gated channel, Shal-related subfamily, member 2
hsa-miR-217	1	0	1	1	1	1	KCNE1L	KCNE1-like
hsa-miR-217	1	0	1	0	1	1	ACAP2	ArfGAP with coiled-coil, ankyrin repeat and PH domains 2
hsa-miR-217	1	0	1	0	1	1	MYCBP	c-myc binding protein
hsa-miR-217	1	0	1	1	1	1	TSPAN12	tetraspanin 12
hsa-miR-217	1	0	1	1	1	1	NNT	nicotinamide nucleotide transhydrogenase
hsa-miR-217	1	0	1	1	1	1	PITPNB	phosphatidylinositol transfer protein, beta
hsa-miR-217	1	0	1	1	1	1	NPTN	neuroplastin
hsa-miR-217	0	0	1	0	1	1	TLL1	tolloid-like 1
hsa-miR-217	1	0	1	1	1	1	TLL2	tolloid-like 2
hsa-miR-217	0	0	1	1	1	1	N6AMT1	N-6 adenine-specific DNA methyltransferase 1 (putative)
hsa-miR-217	1	0	1	1	1	1	CLCF1	cardiotrophin-like cytokine factor 1
hsa-miR-217	0	0	1	1	1	1	TBK1	TANK-binding kinase 1
hsa-miR-217	1	0	1	1	1	1	PPARGC1A	peroxisome proliferator-activated receptor gamma, coactivator 1 alpha
hsa-miR-217	1	0	1	1	1	1	LAMP2	lysosomal-associated membrane protein 2
hsa-miR-217	1	0	1	1	1	1	SOCS5	suppressor of cytokine signaling 5
hsa-miR-217	1	0	1	0	1	1	OSTM1	osteopetrosis associated transmembrane protein 1
hsa-miR-217	0	0	1	1	1	1	MRPL42	mitochondrial ribosomal protein L42
hsa-miR-217	1	0	1	0	1	1	C16orf72	chromosome 16 open reading frame 72
hsa-miR-217	1	0	1	0	1	1	ODZ1	odz, odd Oz/ten-m homolog 1 (Drosophila)
hsa-miR-217	0	0	1	1	1	1	HSPA4L	heat shock 70kDa protein 4-like
hsa-miR-217	1	0	1	1	1	1	LEMD3	LEM domain containing 3
hsa-miR-217	1	0	1	1	1	1	SLC7A11	solute carrier family 7 (anionic amino acid transporter light chain, xc- system), member 11
hsa-miR-217	1	0	1	0	1	1	RNF11	ring finger protein 11
hsa-miR-217	1	0	1	1	1	1	GHITM	growth hormone inducible transmembrane protein
hsa-miR-217	0	0	1	0	1	1	VPS41	vacuolar protein sorting 41 homolog (S. cerevisiae)
hsa-miR-217	1	0	1	1	1	1	AFF4	AF4/FMR2 family, member 4
hsa-miR-217	1	0	1	1	1	1	GRHL1	grainyhead-like 1 (Drosophila)
hsa-miR-217	1	0	1	0	1	1	HEYL	hairy/enhancer-of-split related with YRPW motif-like
hsa-miR-217	1	0	1	1	1	1	ZNF592	zinc finger protein 592
hsa-miR-217	0	0	1	0	1	1	LPIN2	lipin 2
hsa-miR-217	1	0	1	1	1	1	ULK2	unc-51-like kinase 2 (C. elegans)
hsa-miR-217	1	0	1	0	1	1	TOMM20	translocase of outer mitochondrial membrane 20 homolog (yeast)
hsa-miR-217	0	0	1	0	1	1	EPM2AIP1	EPM2A (laforin) interacting protein 1
hsa-miR-217	1	0	1	0	1	1	TRIL	TLR4 interactor with leucine-rich repeats
hsa-miR-217	1	0	1	0	1	1	LPPR4	lipid phosphate phosphatase-related protein type 4
hsa-miR-217	0	0	1	0	1	1	PPM1E	protein phosphatase, Mg2+/Mn2+ dependent, 1E
hsa-miR-217	1	0	1	1	1	1	DIP2C	DIP2 disco-interacting protein 2 homolog C (Drosophila)
hsa-miR-217	1	0	1	0	1	1	WDFY3	WD repeat and FYVE domain containing 3
hsa-miR-217	1	0	1	1	1	1	GPD1L	glycerol-3-phosphate dehydrogenase 1-like
hsa-miR-217	0	0	1	1	1	1	FBXO28	F-box protein 28
hsa-miR-217	1	0	1	1	1	1	MED13L	mediator complex subunit 13-like
hsa-miR-217	0	0	1	0	1	1	ZDHHC17	zinc finger, DHHC-type containing 17
hsa-miR-217	1	0	1	1	1	1	ASXL1	additional sex combs like 1 (Drosophila)
hsa-miR-217	1	0	1	1	1	1	CNOT6	CCR4-NOT transcription complex, subunit 6
hsa-miR-217	0	0	1	1	1	1	KBTBD2	kelch repeat and BTB (POZ) domain containing 2
hsa-miR-217	1	0	1	1	1	1	PNKD	paroxysmal nonkinesigenic dyskinesia
hsa-miR-217	0	0	1	1	1	1	TMEM87A	transmembrane protein 87A
hsa-miR-217	1	0	1	0	1	1	OSBPL3	oxysterol binding protein-like 3
hsa-miR-217	1	0	1	1	1	1	LTN1	listerin E3 ubiquitin protein ligase 1
hsa-miR-217	0	0	1	1	1	1	TES	testis derived transcript (3 LIM domains)
hsa-miR-217	0	0	1	1	1	1	C10orf12	chromosome 10 open reading frame 12
hsa-miR-217	0	0	1	1	0	0	GPKOW	G patch domain and KOW motifs
hsa-miR-217	0	0	1	1	1	1	POLR1D	polymerase (RNA) I polypeptide D, 16kDa
hsa-miR-217	0	0	1	1	1	1	RBMX2	RNA binding motif protein, X-linked 2
hsa-miR-217	1	0	1	0	1	1	CNR1	cannabinoid receptor 1 (brain)
hsa-miR-217	0	0	1	1	1	1	DYNC1LI1	dynein, cytoplasmic 1, light intermediate chain 1
hsa-miR-217	0	0	1	1	0	0	CRNN	cornulin
hsa-miR-217	1	0	1	1	1	1	VGLL3	vestigial like 3 (Drosophila)
hsa-miR-217	1	0	1	1	1	1	CYB5R4	cytochrome b5 reductase 4
hsa-miR-217	1	0	1	1	1	1	AKAP11	A kinase (PRKA) anchor protein 11
hsa-miR-217	0	0	1	0	1	1	FAM8A1	family with sequence similarity 8, member A1
hsa-miR-217	1	0	1	1	1	1	RNF138	ring finger protein 138, E3 ubiquitin protein ligase
hsa-miR-217	0	0	1	1	1	1	WBP11	WW domain binding protein 11
hsa-miR-217	1	0	1	1	1	1	GLTP	glycolipid transfer protein
hsa-miR-217	1	0	1	1	1	1	PHF20	PHD finger protein 20
hsa-miR-217	1	0	1	1	1	1	CPSF2	cleavage and polyadenylation specific factor 2, 100kDa
hsa-miR-217	0	0	1	0	1	1	VEZT	vezatin, adherens junctions transmembrane protein
hsa-miR-217	1	0	1	0	1	1	EIF2C4	eukaryotic translation initiation factor 2C, 4
hsa-miR-217	0	0	1	0	1	1	GIPC2	GIPC PDZ domain containing family, member 2
hsa-miR-217	1	0	1	0	1	1	FAM46C	family with sequence similarity 46, member C
hsa-miR-217	1	0	1	0	1	1	MARCH5	membrane-associated ring finger (C3HC4) 5
hsa-miR-217	0	0	1	1	1	1	PIGX	phosphatidylinositol glycan anchor biosynthesis, class X
hsa-miR-217	1	0	1	1	1	1	HIF1AN	hypoxia inducible factor 1, alpha subunit inhibitor
hsa-miR-217	1	0	1	1	1	1	ARGLU1	arginine and glutamate rich 1
hsa-miR-217	1	0	1	1	1	1	SPTLC3	serine palmitoyltransferase, long chain base subunit 3
hsa-miR-217	1	0	1	0	1	1	LIN7C	lin-7 homolog C (C. elegans)
hsa-miR-217	1	0	1	1	1	1	ETNK1	ethanolamine kinase 1
hsa-miR-217	0	0	1	1	1	1	DHTKD1	dehydrogenase E1 and transketolase domain containing 1
hsa-miR-217	1	0	1	1	1	1	AJAP1	adherens junctions associated protein 1
hsa-miR-217	1	0	1	0	1	1	KLHL9	kelch-like 9 (Drosophila)
hsa-miR-217	0	0	1	1	1	1	ERRFI1	ERBB receptor feedback inhibitor 1
hsa-miR-217	0	0	1	1	1	1	RIN2	Ras and Rab interactor 2
hsa-miR-217	1	0	1	0	1	1	FAM190B	family with sequence similarity 190, member B
hsa-miR-217	1	0	1	0	1	1	CCDC93	coiled-coil domain containing 93
hsa-miR-217	1	0	1	0	1	1	CNGB3	cyclic nucleotide gated channel beta 3
hsa-miR-217	1	0	1	1	1	1	POLE4	polymerase (DNA-directed), epsilon 4, accessory subunit
hsa-miR-217	1	0	1	1	1	1	MDM1	Mdm1 nuclear protein homolog (mouse)
hsa-miR-217	1	0	1	1	1	1	ASPH	aspartate beta-hydroxylase
hsa-miR-217	1	0	1	1	1	1	FEM1C	fem-1 homolog c (C. elegans)
hsa-miR-217	1	0	1	1	1	1	CCDC47	coiled-coil domain containing 47
hsa-miR-217	0	0	1	1	1	1	CXCR7	chemokine (C-X-C motif) receptor 7
hsa-miR-217	1	0	1	1	1	1	SCYL3	SCY1-like 3 (S. cerevisiae)
hsa-miR-217	1	0	1	1	0	0	JPH2	junctophilin 2
hsa-miR-217	0	0	1	1	0	0	AMHR2	anti-Mullerian hormone receptor, type II
hsa-miR-217	1	0	1	0	1	1	DCUN1D1	DCN1, defective in cullin neddylation 1, domain containing 1 (S. cerevisiae)
hsa-miR-217	0	0	1	0	1	1	TWSG1	twisted gastrulation homolog 1 (Drosophila)
hsa-miR-217	1	0	1	0	1	1	KCNS2	potassium voltage-gated channel, delayed-rectifier, subfamily S, member 2
hsa-miR-217	0	0	1	0	1	1	ZNF490	zinc finger protein 490
hsa-miR-217	0	0	1	1	1	1	SHROOM4	shroom family member 4
hsa-miR-217	1	0	1	1	1	1	RNF150	ring finger protein 150
hsa-miR-217	1	0	1	1	1	1	SIPA1L2	signal-induced proliferation-associated 1 like 2
hsa-miR-217	1	0	1	1	1	1	HOMEZ	homeobox and leucine zipper encoding
hsa-miR-217	1	0	1	1	1	1	WDR48	WD repeat domain 48
hsa-miR-217	0	0	1	1	1	1	KLHL1	kelch-like 1 (Drosophila)
hsa-miR-217	1	0	1	1	1	1	CNTN3	contactin 3 (plasmacytoma associated)
hsa-miR-217	1	0	1	1	1	1	FAM160B1	family with sequence similarity 160, member B1
hsa-miR-217	1	0	1	1	1	1	ZNFX1	zinc finger, NFX1-type containing 1
hsa-miR-217	1	0	1	1	1	1	NMB	neuromedin B
hsa-miR-217	1	0	1	0	1	1	NMT1	N-myristoyltransferase 1
hsa-miR-217	1	0	1	1	1	1	RTN1	reticulon 1
hsa-miR-217	1	0	1	0	1	1	TP53INP2	tumor protein p53 inducible nuclear protein 2
hsa-miR-217	0	0	1	1	1	1	SELK	selenoprotein K
hsa-miR-217	0	0	1	1	0	0	FCGR2A	Fc fragment of IgG, low affinity IIa, receptor (CD32)
hsa-miR-217	0	0	1	1	1	1	DNAJC12	DnaJ (Hsp40) homolog, subfamily C, member 12
hsa-miR-217	0	0	1	0	1	1	CFL2	cofilin 2 (muscle)
hsa-miR-217	1	0	1	1	1	1	GRIK2	glutamate receptor, ionotropic, kainate 2
hsa-miR-217	1	0	1	0	1	1	MCL1	myeloid cell leukemia sequence 1 (BCL2-related)
hsa-miR-217	0	0	1	1	0	0	TMSB15A	thymosin beta 15a
hsa-miR-217	1	0	1	0	1	1	CSNK1G1	casein kinase 1, gamma 1
hsa-miR-217	1	0	1	1	1	1	GPR88	G protein-coupled receptor 88
hsa-miR-217	0	0	1	1	1	1	CHP2	calcineurin-like EF hand protein 2
hsa-miR-217	0	0	1	1	1	1	NOD2	nucleotide-binding oligomerization domain containing 2
hsa-miR-217	1	0	1	0	1	1	MRPS25	mitochondrial ribosomal protein S25
hsa-miR-217	0	0	1	1	1	1	CLEC7A	C-type lectin domain family 7, member A
hsa-miR-217	0	0	1	1	0	0	CSH2	chorionic somatomammotropin hormone 2
hsa-miR-217	1	0	1	1	1	1	YTHDC2	YTH domain containing 2
hsa-miR-217	1	0	1	1	1	1	RFX7	regulatory factor X, 7
hsa-miR-217	1	0	1	1	1	1	REEP1	receptor accessory protein 1
hsa-miR-217	1	0	1	1	1	1	SOWAHC	sosondowah ankyrin repeat domain family member C
hsa-miR-217	1	0	1	0	1	1	OTUB2	OTU domain, ubiquitin aldehyde binding 2
hsa-miR-217	1	0	1	1	1	1	NEUROG2	neurogenin 2
hsa-miR-217	0	0	1	1	1	1	SLC30A5	solute carrier family 30 (zinc transporter), member 5
hsa-miR-217	0	0	1	1	1	1	WDR77	WD repeat domain 77
hsa-miR-217	0	0	1	1	0	0	DCTN3	dynactin 3 (p22)
hsa-miR-217	1	0	1	1	1	1	MUL1	mitochondrial E3 ubiquitin protein ligase 1
hsa-miR-217	1	0	1	1	1	1	DHX40	DEAH (Asp-Glu-Ala-His) box polypeptide 40
hsa-miR-217	0	0	1	1	1	1	GLT25D1	glycosyltransferase 25 domain containing 1
hsa-miR-217	0	0	1	1	1	1	SHCBP1	SHC SH2-domain binding protein 1
hsa-miR-217	0	0	1	1	0	0	TMEM156	transmembrane protein 156
hsa-miR-217	1	0	1	0	1	1	NAA25	N(alpha)-acetyltransferase 25, NatB auxiliary subunit
hsa-miR-217	1	0	1	0	1	1	VCPIP1	valosin containing protein (p97)/p47 complex interacting protein 1
hsa-miR-217	0	0	1	1	1	1	CWH43	cell wall biogenesis 43 C-terminal homolog (S. cerevisiae)
hsa-miR-217	1	0	1	1	1	1	FBXO11	F-box protein 11
hsa-miR-217	1	0	1	1	1	1	OPA3	optic atrophy 3 (autosomal recessive, with chorea and spastic paraplegia)
hsa-miR-217	1	0	1	1	1	1	PROSER1	proline and serine rich 1
hsa-miR-217	1	0	1	1	1	1	NAA50	N(alpha)-acetyltransferase 50, NatE catalytic subunit
hsa-miR-217	0	0	1	1	0	0	C6orf25	chromosome 6 open reading frame 25
hsa-miR-217	1	0	1	1	1	1	CYB5B	cytochrome b5 type B (outer mitochondrial membrane)
hsa-miR-217	1	0	1	1	1	1	HOXA3	homeobox A3
hsa-miR-217	1	0	1	0	1	1	VOPP1	vesicular, overexpressed in cancer, prosurvival protein 1
hsa-miR-217	1	0	1	0	1	1	CSRNP2	cysteine-serine-rich nuclear protein 2
hsa-miR-217	1	0	1	1	1	1	C6orf62	chromosome 6 open reading frame 62
hsa-miR-217	0	0	1	1	1	1	SPACA1	sperm acrosome associated 1
hsa-miR-217	0	0	1	1	1	1	TEX15	testis expressed 15
hsa-miR-217	0	0	1	1	1	1	FCRL5	Fc receptor-like 5
hsa-miR-217	0	0	1	1	0	0	MRPL9	mitochondrial ribosomal protein L9
hsa-miR-217	0	0	1	1	1	1	COG3	component of oligomeric golgi complex 3
hsa-miR-217	1	0	1	0	1	1	TMEM47	transmembrane protein 47
hsa-miR-217	0	0	1	0	1	1	ENAM	enamelin
hsa-miR-217	0	0	1	1	0	0	KRTAP17-1	keratin associated protein 17-1
hsa-miR-217	1	0	1	0	1	1	SRSF8	serine/arginine-rich splicing factor 8
hsa-miR-217	1	0	1	1	1	1	FBXO30	F-box protein 30
hsa-miR-217	1	0	1	1	1	1	ZDHHC18	zinc finger, DHHC-type containing 18
hsa-miR-217	0	0	1	0	1	1	LDOC1L	leucine zipper, down-regulated in cancer 1-like
hsa-miR-217	0	0	1	1	0	0	NICN1	nicolin 1
hsa-miR-217	0	0	1	0	1	1	TMEM246	transmembrane protein 246
hsa-miR-217	1	0	1	1	1	1	BRMS1L	breast cancer metastasis-suppressor 1-like
hsa-miR-217	0	0	1	1	0	0	PCDH1	protocadherin 1
hsa-miR-217	0	0	1	1	1	1	FNDC1	fibronectin type III domain containing 1
hsa-miR-217	1	0	1	1	1	1	ABHD13	abhydrolase domain containing 13
hsa-miR-217	1	0	1	0	1	1	C5orf62	chromosome 5 open reading frame 62
hsa-miR-217	0	0	1	0	1	1	TSLP	thymic stromal lymphopoietin
hsa-miR-217	1	0	1	1	0	0	DMRTB1	DMRT-like family B with proline-rich C-terminal, 1
hsa-miR-217	1	0	1	1	1	1	FGD3	FYVE, RhoGEF and PH domain containing 3
hsa-miR-217	0	0	1	1	1	1	ZIC5	Zic family member 5
hsa-miR-217	1	0	1	1	1	1	SSH2	slingshot homolog 2 (Drosophila)
hsa-miR-217	1	0	1	1	0	0	FCHSD1	FCH and double SH3 domains 1
hsa-miR-217	1	0	1	1	1	1	BRWD1	bromodomain and WD repeat domain containing 1
hsa-miR-217	0	0	1	1	1	1	NALCN	sodium leak channel, non-selective
hsa-miR-217	0	0	1	1	1	1	FBXO32	F-box protein 32
hsa-miR-217	0	0	1	1	1	1	RSAD2	radical S-adenosyl methionine domain containing 2
hsa-miR-217	0	0	1	1	0	0	B3GAT2	beta-1,3-glucuronyltransferase 2 (glucuronosyltransferase S)
hsa-miR-217	0	0	1	1	1	1	CHST14	carbohydrate (N-acetylgalactosamine 4-0) sulfotransferase 14
hsa-miR-217	0	0	1	1	1	1	ZNF483	zinc finger protein 483
hsa-miR-217	1	0	1	1	1	1	KCTD12	potassium channel tetramerisation domain containing 12
hsa-miR-217	1	0	1	0	1	1	SP1	Sp1 transcription factor
hsa-miR-217	0	0	1	1	1	1	GALM	galactose mutarotase (aldose 1-epimerase)
hsa-miR-217	0	0	1	1	1	1	KCNH5	potassium voltage-gated channel, subfamily H (eag-related), member 5
hsa-miR-217	1	0	1	0	1	1	CNOT6L	CCR4-NOT transcription complex, subunit 6-like
hsa-miR-217	0	0	1	1	1	1	C15orf40	chromosome 15 open reading frame 40
hsa-miR-217	0	0	1	1	1	1	C10orf82	chromosome 10 open reading frame 82
hsa-miR-217	1	0	1	1	1	1	FAM91A1	family with sequence similarity 91, member A1
hsa-miR-217	1	0	1	1	1	1	VTI1A	vesicle transport through interaction with t-SNAREs homolog 1A (yeast)
hsa-miR-217	1	0	1	0	1	1	MTPN	myotrophin
hsa-miR-217	1	0	1	1	1	1	BOD1L1	biorientation of chromosomes in cell division 1-like 1
hsa-miR-217	0	0	1	1	0	0	C16orf46	chromosome 16 open reading frame 46
hsa-miR-217	0	0	1	1	1	1	EFCAB13	EF-hand calcium binding domain 13
hsa-miR-217	1	0	1	0	1	1	UBXN10	UBX domain protein 10
hsa-miR-217	0	0	1	0	1	1	AFAP1L1	actin filament associated protein 1-like 1
hsa-miR-217	1	0	1	1	1	1	FAM123B	family with sequence similarity 123B
hsa-miR-217	1	0	1	1	1	1	SPRED1	sprouty-related, EVH1 domain containing 1
hsa-miR-217	1	0	1	0	1	1	FAM116A	family with sequence similarity 116, member A
hsa-miR-217	1	0	1	0	1	1	TMEM154	transmembrane protein 154
hsa-miR-217	0	0	1	0	0	0	TCP11L2	t-complex 11 (mouse)-like 2
hsa-miR-217	1	0	1	1	1	1	PDIK1L	PDLIM1 interacting kinase 1 like
hsa-miR-217	0	0	1	1	1	1	SLC22A7	solute carrier family 22 (organic anion transporter), member 7
hsa-miR-217	0	0	1	1	1	1	IL12RB1	interleukin 12 receptor, beta 1
hsa-miR-217	0	0	1	1	0	0	LIX1L	Lix1 homolog (mouse)-like
hsa-miR-217	0	0	1	1	1	1	ZFP91-CNTF	ZFP91-CNTF readthrough (non-protein coding)
hsa-miR-217	1	0	1	1	1	1	CCDC149	coiled-coil domain containing 149
hsa-miR-217	1	0	1	1	1	1	FAM117B	family with sequence similarity 117, member B
hsa-miR-217	1	0	1	1	1	1	RFX6	regulatory factor X, 6
hsa-miR-217	1	0	1	0	1	1	PGM2L1	phosphoglucomutase 2-like 1
hsa-miR-217	1	0	1	1	1	1	SLC41A1	solute carrier family 41, member 1
hsa-miR-217	1	0	1	1	1	1	LDLRAD3	low density lipoprotein receptor class A domain containing 3
hsa-miR-217	1	0	1	1	1	1	SCN4B	sodium channel, voltage-gated, type IV, beta subunit
hsa-miR-217	1	0	1	1	0	0	TCERG1L	transcription elongation regulator 1-like
hsa-miR-217	0	0	1	1	1	1	ZDHHC22	zinc finger, DHHC-type containing 22
hsa-miR-217	1	0	1	1	1	1	ZADH2	zinc binding alcohol dehydrogenase domain containing 2
hsa-miR-217	0	0	1	1	0	0	HRAS	v-Ha-ras Harvey rat sarcoma viral oncogene homolog
hsa-miR-217	1	0	1	1	1	1	PPAP2B	phosphatidic acid phosphatase type 2B
hsa-miR-217	1	0	1	1	1	1	PPM1B	protein phosphatase, Mg2+/Mn2+ dependent, 1B
hsa-miR-217	1	0	1	1	1	1	TMEM26	transmembrane protein 26
hsa-miR-217	1	0	1	0	1	1	ZDHHC21	zinc finger, DHHC-type containing 21
hsa-miR-217	1	0	1	1	1	1	MTDH	metadherin
hsa-miR-217	0	0	1	0	1	1	SLCO4C1	solute carrier organic anion transporter family, member 4C1
hsa-miR-217	0	0	1	1	1	1	CCDC67	coiled-coil domain containing 67
hsa-miR-217	0	0	1	1	0	0	CENPV	centromere protein V
hsa-miR-217	1	0	1	1	1	1	DPY19L4	dpy-19-like 4 (C. elegans)
hsa-miR-217	1	0	1	1	1	1	ZSCAN22	zinc finger and SCAN domain containing 22
hsa-miR-217	0	0	1	1	1	1	USP12	ubiquitin specific peptidase 12
hsa-miR-217	0	0	1	0	1	1	VSTM2A	V-set and transmembrane domain containing 2A
hsa-miR-217	0	0	1	1	1	1	SKA2	spindle and kinetochore associated complex subunit 2
hsa-miR-217	1	0	1	1	1	1	RBM38	RNA binding motif protein 38
hsa-miR-217	1	0	1	1	1	1	SPTY2D1	SPT2, Suppressor of Ty, domain containing 1 (S. cerevisiae)
hsa-miR-217	1	0	1	1	1	1	TMEM65	transmembrane protein 65
hsa-miR-217	1	0	1	0	1	1	SLC16A9	solute carrier family 16, member 9 (monocarboxylic acid transporter 9)
hsa-miR-217	0	0	1	1	1	1	APOOL	apolipoprotein O-like
hsa-miR-217	1	0	1	0	1	1	NRK	Nik related kinase
hsa-miR-217	0	0	1	1	0	0	DGAT2L6	diacylglycerol O-acyltransferase 2-like 6
hsa-miR-217	1	0	1	1	1	1	PTGER3	prostaglandin E receptor 3 (subtype EP3)
hsa-miR-217	0	0	1	1	0	0	HEATR4	HEAT repeat containing 4
hsa-miR-217	1	0	1	0	1	1	MBLAC2	metallo-beta-lactamase domain containing 2
hsa-miR-217	1	0	1	1	1	1	CYP4V2	cytochrome P450, family 4, subfamily V, polypeptide 2
hsa-miR-217	0	0	1	1	1	1	C8orf86	chromosome 8 open reading frame 86
hsa-miR-217	0	0	1	0	1	1	FSD1L	fibronectin type III and SPRY domain containing 1-like
hsa-miR-217	1	0	1	1	1	1	CAPN3	calpain 3, (p94)
hsa-miR-217	1	0	1	0	1	1	STAT3	signal transducer and activator of transcription 3 (acute-phase response factor)
hsa-miR-217	0	0	1	0	0	0	TPI1P2	triosephosphate isomerase 1 pseudogene 2
hsa-miR-217	0	0	1	0	0	0	CSNK2A1P	casein kinase 2, alpha 1 polypeptide pseudogene
hsa-miR-217	0	0	1	0	0	0	SNORA4	small nucleolar RNA, H/ACA box 4
hsa-miR-217	0	0	1	0	0	0	HNRNPA3P1	heterogeneous nuclear ribonucleoprotein A3 pseudogene 1
hsa-miR-217	0	0	1	0	0	0	SNORD56	small nucleolar RNA, C/D box 56
hsa-miR-217	0	0	1	0	0	0	NEAT1	nuclear paraspeckle assembly transcript 1 (non-protein coding)
hsa-miR-217	0	0	1	0	0	0	MALAT1	metastasis associated lung adenocarcinoma transcript 1 (non-protein coding)
hsa-miR-217	0	0	1	0	0	0	IGBP1P1	immunoglobulin (CD79A) binding protein 1 pseudogene 1
hsa-miR-217	0	0	1	0	0	0	SNORD98	small nucleolar RNA, C/D box 98
hsa-miR-217	0	0	1	0	0	0	USP32P1	ubiquitin specific peptidase 32 pseudogene 1
hsa-miR-217	0	0	1	0	0	0	SNORD116-28	small nucleolar RNA, C/D box 116-28
hsa-miR-217	0	0	1	1	0	0	SNRPN	small nuclear ribonucleoprotein polypeptide N
hsa-miR-217	0	0	1	0	0	0	GAGE3	G antigen 3
hsa-miR-217	0	0	1	0	0	0	MST1P9	macrophage stimulating 1 (hepatocyte growth factor-like) pseudogene 9
hsa-miR-217	1	0	1	1	1	1	HNRNPA1	heterogeneous nuclear ribonucleoprotein A1
hsa-miR-217	1	0	1	1	1	1	WIPF1	WAS/WASL interacting protein family, member 1
hsa-miR-217	0	0	1	1	0	0	BMP1	bone morphogenetic protein 1
hsa-miR-217	0	0	1	1	0	0	GPR17	G protein-coupled receptor 17
hsa-miR-217	0	0	1	1	1	1	SS18L2	synovial sarcoma translocation gene on chromosome 18-like 2
hsa-miR-217	0	0	1	1	0	0	CCT8L1P	chaperonin containing TCP1, subunit 8 (theta)-like 1, pseudogene
hsa-miR-217	0	0	1	1	0	0	OTC	ornithine carbamoyltransferase
hsa-miR-217	0	0	1	1	0	0	PSMA4	proteasome (prosome, macropain) subunit, alpha type, 4
hsa-miR-217	0	0	0	1	1	1	COMT	catechol-O-methyltransferase
hsa-miR-217	0	0	0	1	0	0	SLC25A1	solute carrier family 25 (mitochondrial carrier; citrate transporter), member 1
hsa-miR-217	0	0	0	1	1	1	HMOX1	heme oxygenase (decycling) 1
hsa-miR-217	0	0	0	1	0	0	CTSZ	cathepsin Z
hsa-miR-217	0	0	1	1	1	1	SLC52A3	solute carrier family 52, riboflavin transporter, member 3
hsa-miR-217	1	0	0	1	1	1	SGCG	sarcoglycan, gamma (35kDa dystrophin-associated glycoprotein)
hsa-miR-217	0	0	1	1	0	0	EMC2	ER membrane protein complex subunit 2
hsa-miR-217	0	0	0	1	0	0	LAMB1	laminin, beta 1
hsa-miR-217	0	0	1	1	1	1	MPP6	membrane protein, palmitoylated 6 (MAGUK p55 subfamily member 6)
hsa-miR-217	0	0	0	1	0	0	RBP3	retinol binding protein 3, interstitial
hsa-miR-217	0	0	1	1	1	1	ZNF259	zinc finger protein 259
hsa-miR-217	1	0	1	1	0	0	ATG2A	autophagy related 2A
hsa-miR-217	0	0	0	1	1	1	CDCA3	cell division cycle associated 3
hsa-miR-217	1	0	0	1	1	1	KIF20A	kinesin family member 20A
hsa-miR-217	0	0	0	1	1	1	AADAC	arylacetamide deacetylase
hsa-miR-217	0	0	1	1	1	1	HEATR5B	HEAT repeat containing 5B
hsa-miR-217	0	0	0	1	1	1	DOK1	docking protein 1, 62kDa (downstream of tyrosine kinase 1)
hsa-miR-217	0	0	1	1	1	1	FANCL	Fanconi anemia, complementation group L
hsa-miR-217	0	0	0	1	0	0	KISS1R	KISS1 receptor
hsa-miR-217	0	0	1	1	0	0	COLEC11	collectin sub-family member 11
hsa-miR-217	0	0	1	1	0	0	PMFBP1	polyamine modulated factor 1 binding protein 1
hsa-miR-217	0	0	1	1	1	1	RNF103	ring finger protein 103
hsa-miR-217	0	0	1	1	0	0	FKBP15	FK506 binding protein 15, 133kDa
hsa-miR-217	1	0	0	1	1	1	CNTRL	centriolin
hsa-miR-217	0	0	1	1	0	0	LIPF	lipase, gastric
hsa-miR-217	0	0	1	1	1	1	TNFSF10	tumor necrosis factor (ligand) superfamily, member 10
hsa-miR-217	1	0	1	1	0	0	C19orf43	chromosome 19 open reading frame 43
hsa-miR-217	0	0	1	1	1	1	CHPF	chondroitin polymerizing factor
hsa-miR-217	0	0	0	1	0	0	ACTR5	ARP5 actin-related protein 5 homolog (yeast)
hsa-miR-217	0	0	1	1	1	1	MRPS7	mitochondrial ribosomal protein S7
hsa-miR-217	0	0	0	1	0	0	KRT35	keratin 35
hsa-miR-217	0	0	0	1	0	0	PLA2G2C	phospholipase A2, group IIC
hsa-miR-217	0	0	1	1	1	1	GNG11	guanine nucleotide binding protein (G protein), gamma 11
hsa-miR-217	1	0	1	1	1	1	GNAZ	guanine nucleotide binding protein (G protein), alpha z polypeptide
hsa-miR-217	0	0	0	1	1	1	ARHGAP22	Rho GTPase activating protein 22
hsa-miR-217	0	0	1	1	0	0	COPB1	coatomer protein complex, subunit beta 1
hsa-miR-217	0	0	0	1	1	1	AP1M2	adaptor-related protein complex 1, mu 2 subunit
hsa-miR-217	0	0	1	1	1	1	DAD1	defender against cell death 1
hsa-miR-217	0	0	0	1	0	0	ADAMTS2	ADAM metallopeptidase with thrombospondin type 1 motif, 2
hsa-miR-217	1	0	1	1	1	1	MED17	mediator complex subunit 17
hsa-miR-217	0	0	0	1	0	0	KRT6B	keratin 6B
hsa-miR-217	0	0	0	1	1	1	EFCAB4B	EF-hand calcium binding domain 4B
hsa-miR-217	0	0	1	1	0	0	CACNG6	calcium channel, voltage-dependent, gamma subunit 6
hsa-miR-217	0	0	1	1	1	1	TEX101	testis expressed 101
hsa-miR-217	1	0	1	1	1	1	ACTR10	actin-related protein 10 homolog (S. cerevisiae)
hsa-miR-217	0	0	1	1	0	0	MATN4	matrilin 4
hsa-miR-217	0	0	0	1	1	1	SCO1	SCO cytochrome oxidase deficient homolog 1 (yeast)
hsa-miR-217	0	0	1	1	0	0	HSPBP1	HSPA (heat shock 70kDa) binding protein, cytoplasmic cochaperone 1
hsa-miR-217	1	0	0	1	0	0	PI4KA	phosphatidylinositol 4-kinase, catalytic, alpha
hsa-miR-217	0	0	1	1	1	1	ATPBD4	ATP binding domain 4
hsa-miR-217	0	0	0	1	0	0	ERN2	endoplasmic reticulum to nucleus signaling 2
hsa-miR-217	1	0	1	1	1	1	TMEM60	transmembrane protein 60
hsa-miR-217	0	0	0	1	1	1	EPB41L2	erythrocyte membrane protein band 4.1-like 2
hsa-miR-217	0	0	0	1	1	1	CCDC102A	coiled-coil domain containing 102A
hsa-miR-217	0	0	1	1	1	1	URB2	URB2 ribosome biogenesis 2 homolog (S. cerevisiae)
hsa-miR-217	0	0	0	1	0	0	ALDH1L2	aldehyde dehydrogenase 1 family, member L2
hsa-miR-217	1	0	0	1	0	0	STAB2	stabilin 2
hsa-miR-217	1	0	1	1	1	1	APPL2	adaptor protein, phosphotyrosine interaction, PH domain and leucine zipper containing 2
hsa-miR-217	0	0	0	1	0	0	IL36A	interleukin 36, alpha
hsa-miR-217	0	0	1	1	1	1	USP2	ubiquitin specific peptidase 2
hsa-miR-217	0	0	0	1	1	1	ABCG5	ATP-binding cassette, sub-family G (WHITE), member 5
hsa-miR-217	0	0	1	1	0	0	CALHM2	calcium homeostasis modulator 2
hsa-miR-217	0	0	0	1	0	0	WDR12	WD repeat domain 12
hsa-miR-217	0	0	0	1	0	0	TNFRSF13B	tumor necrosis factor receptor superfamily, member 13B
hsa-miR-217	1	0	1	1	1	1	L2HGDH	L-2-hydroxyglutarate dehydrogenase
hsa-miR-217	0	0	1	1	1	1	PFDN1	prefoldin subunit 1
hsa-miR-217	0	0	0	1	0	0	CDHR2	cadherin-related family member 2
hsa-miR-217	0	0	1	1	0	0	PRR11	proline rich 11
hsa-miR-217	0	0	1	1	0	0	NOVA2	neuro-oncological ventral antigen 2
hsa-miR-217	0	0	0	1	0	0	HSD17B14	hydroxysteroid (17-beta) dehydrogenase 14
hsa-miR-217	1	0	1	1	0	0	SLC10A3	solute carrier family 10 (sodium/bile acid cotransporter family), member 3
hsa-miR-217	1	0	0	1	1	1	DDX25	DEAD (Asp-Glu-Ala-Asp) box helicase 25
hsa-miR-217	0	0	1	1	1	1	SIAE	sialic acid acetylesterase
hsa-miR-217	1	0	1	1	0	0	ARHGEF17	Rho guanine nucleotide exchange factor (GEF) 17
hsa-miR-217	1	0	1	1	1	1	SNRNP40	small nuclear ribonucleoprotein 40kDa (U5)
hsa-miR-217	1	0	1	1	1	1	EIF2AK4	eukaryotic translation initiation factor 2 alpha kinase 4
hsa-miR-217	0	0	0	1	0	0	LCAT	lecithin-cholesterol acyltransferase
hsa-miR-217	0	0	0	1	1	1	SLC25A23	solute carrier family 25 (mitochondrial carrier; phosphate carrier), member 23
hsa-miR-217	1	0	1	1	0	0	KIAA1211	KIAA1211
hsa-miR-217	1	0	1	1	1	1	POLQ	polymerase (DNA directed), theta
hsa-miR-217	0	0	0	1	0	0	FGF10	fibroblast growth factor 10
hsa-miR-217	0	0	1	1	1	1	ERCC8	excision repair cross-complementing rodent repair deficiency, complementation group 8
hsa-miR-217	0	0	1	1	0	0	RPL24	ribosomal protein L24
hsa-miR-217	0	0	1	1	0	0	POLB	polymerase (DNA directed), beta
hsa-miR-217	0	0	1	1	1	1	NDUFC1	NADH dehydrogenase (ubiquinone) 1, subcomplex unknown, 1, 6kDa
hsa-miR-217	0	0	1	1	0	0	KIF9	kinesin family member 9
hsa-miR-217	0	0	0	1	0	0	KIAA0020	KIAA0020
hsa-miR-217	0	0	1	1	1	1	TTC28	tetratricopeptide repeat domain 28
hsa-miR-217	0	0	1	1	0	0	FBXO7	F-box protein 7
hsa-miR-217	1	0	1	1	1	1	MESDC1	mesoderm development candidate 1
hsa-miR-217	1	0	1	1	0	0	SCAMP2	secretory carrier membrane protein 2
hsa-miR-217	0	0	0	1	0	0	SPG7	spastic paraplegia 7 (pure and complicated autosomal recessive)
hsa-miR-217	0	0	1	1	1	1	CDH1	cadherin 1, type 1, E-cadherin (epithelial)
hsa-miR-217	0	0	1	1	1	1	ELAC1	elaC homolog 1 (E. coli)
hsa-miR-217	0	0	1	1	0	0	KLHDC4	kelch domain containing 4
hsa-miR-217	0	0	0	1	0	0	RCN3	reticulocalbin 3, EF-hand calcium binding domain
hsa-miR-217	0	0	0	1	0	0	DUSP27	dual specificity phosphatase 27 (putative)
hsa-miR-217	0	0	0	1	0	0	NAT8	N-acetyltransferase 8 (GCN5-related, putative)
hsa-miR-217	0	0	0	1	0	0	CPO	carboxypeptidase O
hsa-miR-217	0	0	1	1	1	1	PPP1R7	protein phosphatase 1, regulatory subunit 7
hsa-miR-217	0	0	1	1	1	1	PELO	pelota homolog (Drosophila)
hsa-miR-217	1	0	1	1	1	1	TRIM23	tripartite motif containing 23
hsa-miR-217	0	0	1	1	1	1	GTF2H2	general transcription factor IIH, polypeptide 2, 44kDa
hsa-miR-217	0	0	1	1	1	1	FAM217A	family with sequence similarity 217, member A
hsa-miR-217	1	0	0	1	1	1	CHST7	carbohydrate (N-acetylglucosamine 6-O) sulfotransferase 7
hsa-miR-217	0	0	1	1	1	1	TCF7L2	transcription factor 7-like 2 (T-cell specific, HMG-box)
hsa-miR-217	1	0	0	1	1	1	PPRC1	peroxisome proliferator-activated receptor gamma, coactivator-related 1
hsa-miR-217	1	0	1	1	1	1	CD44	CD44 molecule (Indian blood group)
hsa-miR-217	0	0	1	1	0	0	SSRP1	structure specific recognition protein 1
hsa-miR-217	0	0	0	1	0	0	GRIK4	glutamate receptor, ionotropic, kainate 4
hsa-miR-217	0	0	0	1	0	0	C20orf78	chromosome 20 open reading frame 78
hsa-miR-217	0	0	0	1	0	0	TMCO3	transmembrane and coiled-coil domains 3
hsa-miR-217	1	0	1	1	1	1	FREM2	FRAS1 related extracellular matrix protein 2
hsa-miR-217	0	0	0	1	1	1	AMN1	antagonist of mitotic exit network 1 homolog (S. cerevisiae)
hsa-miR-217	0	0	0	1	1	1	TDO2	tryptophan 2,3-dioxygenase
hsa-miR-217	0	0	1	1	1	1	DST	dystonin
hsa-miR-217	0	0	1	1	1	1	TXNDC16	thioredoxin domain containing 16
hsa-miR-217	0	0	1	1	1	1	DSPP	dentin sialophosphoprotein
hsa-miR-217	0	0	1	1	1	1	INO80C	INO80 complex subunit C
hsa-miR-217	0	0	1	1	0	0	ITGB3BP	integrin beta 3 binding protein (beta3-endonexin)
hsa-miR-217	0	0	0	1	0	0	TGIF2LX	TGFB-induced factor homeobox 2-like, X-linked
hsa-miR-217	1	0	1	1	1	1	FAM105B	family with sequence similarity 105, member B
hsa-miR-217	0	0	0	1	1	1	UCHL1	ubiquitin carboxyl-terminal esterase L1 (ubiquitin thiolesterase)
hsa-miR-217	0	0	0	1	1	1	HHIPL2	HHIP-like 2
hsa-miR-217	0	0	0	1	0	0	DISP1	dispatched homolog 1 (Drosophila)
hsa-miR-217	0	0	1	1	0	0	TRMT44	tRNA methyltransferase 44 homolog (S. cerevisiae)
hsa-miR-217	0	0	1	1	1	1	AKR1B1	aldo-keto reductase family 1, member B1 (aldose reductase)
hsa-miR-217	0	0	0	1	1	1	NDUFAF6	NADH dehydrogenase (ubiquinone) complex I, assembly factor 6
hsa-miR-217	1	0	1	1	1	1	ATAD2	ATPase family, AAA domain containing 2
hsa-miR-217	0	0	1	1	0	0	TMEM171	transmembrane protein 171
hsa-miR-217	0	0	1	1	0	0	MMEL1	membrane metallo-endopeptidase-like 1
hsa-miR-217	0	0	1	1	1	1	RAB28	RAB28, member RAS oncogene family
hsa-miR-217	0	0	0	1	0	0	CBR1	carbonyl reductase 1
hsa-miR-217	0	0	1	1	1	1	MT1A	metallothionein 1A
hsa-miR-217	0	0	1	1	0	0	ATP6V0D1	ATPase, H+ transporting, lysosomal 38kDa, V0 subunit d1
hsa-miR-217	0	0	1	1	0	0	CPAMD8	C3 and PZP-like, alpha-2-macroglobulin domain containing 8
hsa-miR-217	0	0	0	1	0	0	RSPH1	radial spoke head 1 homolog (Chlamydomonas)
hsa-miR-217	0	0	1	1	0	0	PDE9A	phosphodiesterase 9A
hsa-miR-217	0	0	0	1	0	0	MCM3AP	minichromosome maintenance complex component 3 associated protein
hsa-miR-217	0	0	0	1	0	0	AQP5	aquaporin 5
hsa-miR-217	0	0	0	1	0	0	CABP2	calcium binding protein 2
hsa-miR-217	0	0	0	1	0	0	CCKAR	cholecystokinin A receptor
hsa-miR-217	0	0	1	1	1	1	THOC7	THO complex 7 homolog (Drosophila)
hsa-miR-217	0	0	1	1	0	0	CPA3	carboxypeptidase A3 (mast cell)
hsa-miR-217	1	0	1	1	1	1	HPS3	Hermansky-Pudlak syndrome 3
hsa-miR-217	1	0	1	1	1	1	T	T, brachyury homolog (mouse)
hsa-miR-217	0	0	0	1	1	1	RP9	retinitis pigmentosa 9 (autosomal dominant)
hsa-miR-217	1	0	1	1	1	1	XKR6	XK, Kell blood group complex subunit-related family, member 6
hsa-miR-217	1	0	1	1	0	0	FIGF	c-fos induced growth factor (vascular endothelial growth factor D)
hsa-miR-217	0	0	1	1	1	1	KCNC2	potassium voltage-gated channel, Shaw-related subfamily, member 2
hsa-miR-217	0	0	1	1	1	1	IKBIP	IKBKB interacting protein
hsa-miR-217	0	0	0	1	0	0	ADAMTS15	ADAM metallopeptidase with thrombospondin type 1 motif, 15
hsa-miR-217	0	0	1	1	0	0	POLR3E	polymerase (RNA) III (DNA directed) polypeptide E (80kD)
hsa-miR-217	0	0	1	1	0	0	SCG5	secretogranin V (7B2 protein)
hsa-miR-217	0	0	0	1	1	1	RCCD1	RCC1 domain containing 1
hsa-miR-217	0	0	1	1	1	1	TUBA1A	tubulin, alpha 1a
hsa-miR-217	0	0	0	1	0	0	LILRA5	leukocyte immunoglobulin-like receptor, subfamily A (with TM domain), member 5
hsa-miR-217	0	0	1	1	1	1	ZFP28	zinc finger protein 28 homolog (mouse)
hsa-miR-217	0	0	0	1	0	0	MFSD3	major facilitator superfamily domain containing 3
hsa-miR-217	0	0	0	1	1	1	ZNF443	zinc finger protein 443
hsa-miR-217	0	0	1	1	0	0	PRELID1	PRELI domain containing 1
hsa-miR-217	0	0	1	1	1	1	MMADHC	methylmalonic aciduria (cobalamin deficiency) cblD type, with homocystinuria
hsa-miR-217	0	0	1	1	0	0	SYCE1	synaptonemal complex central element protein 1
hsa-miR-217	0	0	0	1	0	0	OR1F1	olfactory receptor, family 1, subfamily F, member 1
hsa-miR-217	0	0	0	1	1	1	CST5	cystatin D
hsa-miR-217	0	0	1	1	1	1	NANP	N-acetylneuraminic acid phosphatase
hsa-miR-217	0	0	0	1	0	0	OR2AT4	olfactory receptor, family 2, subfamily AT, member 4
hsa-miR-217	0	0	0	1	0	0	AMY2A	amylase, alpha 2A (pancreatic)
hsa-miR-217	0	0	1	1	1	1	DPYD	dihydropyrimidine dehydrogenase
hsa-miR-217	0	0	0	1	0	0	RPL36P8	ribosomal protein L36 pseudogene 8
hsa-miR-217	0	0	1	1	1	1	COMMD8	COMM domain containing 8
hsa-miR-217	0	0	0	1	0	0	FAM83B	family with sequence similarity 83, member B
hsa-miR-217	1	0	1	1	1	1	RAPH1	Ras association (RalGDS/AF-6) and pleckstrin homology domains 1
hsa-miR-217	0	0	0	1	1	1	PSMA8	proteasome (prosome, macropain) subunit, alpha type, 8
hsa-miR-217	0	0	0	1	0	0	ALG10B	asparagine-linked glycosylation 10, alpha-1,2-glucosyltransferase homolog B (yeast)
hsa-miR-217	0	0	0	1	0	0	XCR1	chemokine (C motif) receptor 1
hsa-miR-217	0	0	0	1	0	0	STON1-GTF2A1L	STON1-GTF2A1L readthrough
hsa-miR-217	0	0	1	1	1	1	STON1	stonin 1
hsa-miR-217	0	0	0	1	0	0	GPR148	G protein-coupled receptor 148
hsa-miR-217	0	0	0	1	1	1	EPS8L1	EPS8-like 1
hsa-miR-217	0	0	1	1	0	0	CCDC13	coiled-coil domain containing 13
hsa-miR-217	0	0	1	1	1	1	ZNF431	zinc finger protein 431
hsa-miR-217	0	0	1	1	1	1	CEP19	centrosomal protein 19kDa
hsa-miR-217	0	0	1	1	1	1	BTC	betacellulin
hsa-miR-217	0	0	0	1	0	0	TRHR	thyrotropin-releasing hormone receptor
hsa-miR-217	1	0	1	1	1	1	AKNA	AT-hook transcription factor
hsa-miR-217	0	0	0	1	1	1	HMHA1	histocompatibility (minor) HA-1
hsa-miR-217	1	0	1	1	0	0	ATOX1	ATX1 antioxidant protein 1 homolog (yeast)
hsa-miR-217	1	0	1	1	1	1	ANP32E	acidic (leucine-rich) nuclear phosphoprotein 32 family, member E
hsa-miR-217	0	0	1	1	1	1	MKRN3	makorin ring finger protein 3
hsa-miR-217	0	0	1	1	1	1	LOH12CR1	loss of heterozygosity, 12, chromosomal region 1
hsa-miR-217	0	0	1	1	1	1	NSUN3	NOP2/Sun domain family, member 3
hsa-miR-217	0	0	1	1	0	0	KCNH6	potassium voltage-gated channel, subfamily H (eag-related), member 6
hsa-miR-217	0	0	1	1	0	0	TCEANC	transcription elongation factor A (SII) N-terminal and central domain containing
hsa-miR-217	0	0	1	1	0	0	TRIM41	tripartite motif containing 41
hsa-miR-217	0	0	0	1	1	1	WSB2	WD repeat and SOCS box containing 2
hsa-miR-217	0	0	0	1	1	1	ZNF843	zinc finger protein 843
hsa-miR-217	0	0	0	1	0	0	GPR156	G protein-coupled receptor 156
hsa-miR-217	0	0	1	1	1	1	LRRC31	leucine rich repeat containing 31
hsa-miR-217	0	0	0	1	0	0	SERPINB6	serpin peptidase inhibitor, clade B (ovalbumin), member 6
hsa-miR-217	0	0	1	1	1	1	ATG4C	autophagy related 4C, cysteine peptidase
hsa-miR-217	0	0	0	1	0	0	OR4C3	olfactory receptor, family 4, subfamily C, member 3
hsa-miR-217	0	0	1	1	1	1	GALNT11	UDP-N-acetyl-alpha-D-galactosamine:polypeptide N-acetylgalactosaminyltransferase 11 (GalNAc-T11)
hsa-miR-217	0	0	0	1	1	1	C16orf53	chromosome 16 open reading frame 53
hsa-miR-217	1	0	0	1	0	0	FAM123C	family with sequence similarity 123C
hsa-miR-217	1	0	1	1	0	0	DUOX1	dual oxidase 1
hsa-miR-217	0	0	1	1	1	1	PINK1	PTEN induced putative kinase 1
hsa-miR-217	0	0	1	1	0	0	VARS2	valyl-tRNA synthetase 2, mitochondrial (putative)
hsa-miR-217	0	0	1	1	1	1	KLHL7	kelch-like 7 (Drosophila)
hsa-miR-217	0	0	1	1	0	0	POLR2A	polymerase (RNA) II (DNA directed) polypeptide A, 220kDa
hsa-miR-217	0	0	1	1	1	1	TMEM67	transmembrane protein 67
hsa-miR-217	1	0	0	1	1	1	ADRBK2	adrenergic, beta, receptor kinase 2
hsa-miR-217	0	0	1	1	1	1	SH3GL3	SH3-domain GRB2-like 3
hsa-miR-217	1	0	1	1	1	1	SAV1	salvador homolog 1 (Drosophila)
hsa-miR-217	0	0	1	1	1	1	DYNC1I1	dynein, cytoplasmic 1, intermediate chain 1
hsa-miR-217	0	0	0	1	1	1	CABP4	calcium binding protein 4
hsa-miR-217	0	0	1	1	1	1	PPM1A	protein phosphatase, Mg2+/Mn2+ dependent, 1A
hsa-miR-217	1	0	1	1	1	1	FGFR1	fibroblast growth factor receptor 1
hsa-miR-217	0	0	1	1	1	1	CCDC66	coiled-coil domain containing 66
hsa-miR-217	1	0	1	1	1	1	RIT2	Ras-like without CAAX 2
hsa-miR-217	0	0	1	1	1	1	SULT1C2	sulfotransferase family, cytosolic, 1C, member 2
hsa-miR-217	0	0	0	1	1	1	CLRN1	clarin 1
hsa-miR-217	0	0	1	1	0	0	TIMM22	translocase of inner mitochondrial membrane 22 homolog (yeast)
hsa-miR-217	1	0	1	1	1	1	TMEM151A	transmembrane protein 151A
hsa-miR-217	0	0	1	1	0	0	BRAP	BRCA1 associated protein
hsa-miR-217	0	0	0	1	1	1	DDX53	DEAD (Asp-Glu-Ala-Asp) box polypeptide 53
hsa-miR-217	0	0	1	1	0	0	PHKG2	phosphorylase kinase, gamma 2 (testis)
hsa-miR-217	0	0	1	1	0	0	LRRC33	leucine rich repeat containing 33
hsa-miR-217	0	0	1	1	1	1	IP6K2	inositol hexakisphosphate kinase 2
hsa-miR-217	1	0	1	1	1	1	PTPN21	protein tyrosine phosphatase, non-receptor type 21
hsa-miR-217	0	0	1	1	0	0	C1orf64	chromosome 1 open reading frame 64
hsa-miR-217	0	0	0	1	1	1	CXorf69	chromosome X open reading frame 69
hsa-miR-217	1	0	1	1	0	0	HDDC3	HD domain containing 3
hsa-miR-217	0	0	1	1	1	1	ADAMTSL5	ADAMTS-like 5
hsa-miR-217	1	0	0	1	1	1	C1orf210	chromosome 1 open reading frame 210
hsa-miR-217	1	0	1	1	1	1	SULT4A1	sulfotransferase family 4A, member 1
hsa-miR-217	1	0	1	1	1	1	FBXW4	F-box and WD repeat domain containing 4
hsa-miR-217	0	0	0	1	1	1	SGK196	protein kinase-like protein SgK196
hsa-miR-217	0	0	1	1	0	0	HIST1H1B	histone cluster 1, H1b
hsa-miR-217	0	0	0	1	0	0	OR6A2	olfactory receptor, family 6, subfamily A, member 2
hsa-miR-217	0	0	1	1	1	1	AIFM3	apoptosis-inducing factor, mitochondrion-associated, 3
hsa-miR-217	0	0	1	1	1	1	WHSC2	Wolf-Hirschhorn syndrome candidate 2
hsa-miR-217	0	0	0	1	0	0	NSAP11	nervous system abundant protein 11
hsa-miR-217	0	0	0	1	1	1	KRTAP4-1	keratin associated protein 4-1
hsa-miR-217	0	0	0	1	0	0	ZNF347	zinc finger protein 347
hsa-miR-217	0	0	0	1	0	0	DEFB128	defensin, beta 128
hsa-miR-217	0	0	0	1	1	1	PDCD1	programmed cell death 1
hsa-miR-217	1	0	1	1	1	1	FMR1	fragile X mental retardation 1
hsa-miR-217	0	0	1	1	0	0	RPS19BP1	ribosomal protein S19 binding protein 1
hsa-miR-217	0	0	1	1	1	1	NEXN	nexilin (F actin binding protein)
hsa-miR-217	0	0	1	1	1	1	DNAH10	dynein, axonemal, heavy chain 10
hsa-miR-217	0	0	0	1	1	1	H1FNT	H1 histone family, member N, testis-specific
hsa-miR-217	0	0	0	1	1	1	GLDN	gliomedin
hsa-miR-217	0	0	1	1	0	0	KATNA1	katanin p60 (ATPase containing) subunit A 1
hsa-miR-217	0	0	0	1	0	0	RASSF3	Ras association (RalGDS/AF-6) domain family member 3
hsa-miR-217	0	0	1	1	0	0	WFDC6	WAP four-disulfide core domain 6
hsa-miR-217	0	0	0	1	0	0	FTSJ3	FtsJ homolog 3 (E. coli)
hsa-miR-217	0	0	1	1	1	1	ZNF385B	zinc finger protein 385B
hsa-miR-217	0	0	0	1	0	0	ZNF224	zinc finger protein 224
hsa-miR-217	0	0	0	1	1	1	PKD1L2	polycystic kidney disease 1-like 2
hsa-miR-217	0	0	0	1	0	0	SEC13	SEC13 homolog (S. cerevisiae)
hsa-miR-217	0	0	0	1	0	0	TSPO	translocator protein (18kDa)
hsa-miR-217	1	0	1	1	1	1	DTX3	deltex homolog 3 (Drosophila)
hsa-miR-217	0	0	0	1	1	1	ZNF600	zinc finger protein 600
hsa-miR-217	0	0	0	1	1	1	NPY5R	neuropeptide Y receptor Y5
hsa-miR-217	0	0	1	1	1	1	ING3	inhibitor of growth family, member 3
hsa-miR-217	0	0	1	1	0	0	HAVCR1	hepatitis A virus cellular receptor 1
hsa-miR-217	0	0	0	1	0	0	ZNF573	zinc finger protein 573
hsa-miR-217	0	0	0	1	0	0	DUSP15	dual specificity phosphatase 15
hsa-miR-217	0	0	0	1	1	1	ZNF239	zinc finger protein 239
hsa-miR-217	0	0	1	1	1	1	ZNF695	zinc finger protein 695
hsa-miR-217	1	0	1	1	1	1	ACER2	alkaline ceramidase 2
hsa-miR-217	0	0	1	1	1	1	MCOLN3	mucolipin 3
hsa-miR-217	0	0	0	1	1	1	ZNF167	zinc finger protein 167
hsa-miR-217	0	0	0	1	1	1	FHIT	fragile histidine triad
hsa-miR-217	0	0	0	1	0	0	NLRP13	NLR family, pyrin domain containing 13
hsa-miR-217	0	0	1	1	0	0	DAP3	death associated protein 3
hsa-miR-217	0	0	0	1	1	1	KRTAP4-5	keratin associated protein 4-5
hsa-miR-217	0	0	0	1	1	1	DOCK2	dedicator of cytokinesis 2
hsa-miR-217	0	0	1	1	0	0	KRTAP12-2	keratin associated protein 12-2
hsa-miR-217	0	0	0	1	1	1	TACC3	transforming, acidic coiled-coil containing protein 3
hsa-miR-217	0	0	1	1	0	0	OSGIN1	oxidative stress induced growth inhibitor 1
hsa-miR-217	0	0	0	1	0	0	FGF16	fibroblast growth factor 16
hsa-miR-217	0	0	1	1	0	0	C10orf11	chromosome 10 open reading frame 11
hsa-miR-217	0	0	1	1	0	0	CCDC81	coiled-coil domain containing 81
hsa-miR-217	0	0	1	1	0	0	SLC38A6	solute carrier family 38, member 6
hsa-miR-217	0	0	1	1	0	0	EIF5A	eukaryotic translation initiation factor 5A
hsa-miR-217	0	0	0	1	1	1	ZNF565	zinc finger protein 565
hsa-miR-217	0	0	1	1	1	1	SUSD1	sushi domain containing 1
hsa-miR-217	1	0	0	1	0	0	CARD11	caspase recruitment domain family, member 11
hsa-miR-217	0	0	0	1	0	0	ZNF578	zinc finger protein 578
hsa-miR-217	0	0	0	1	1	1	ZNF528	zinc finger protein 528
hsa-miR-217	0	0	0	1	0	0	LIPC	lipase, hepatic
hsa-miR-217	0	0	0	1	0	0	LSS	lanosterol synthase (2,3-oxidosqualene-lanosterol cyclase)
hsa-miR-217	1	0	1	1	1	1	SPTBN1	spectrin, beta, non-erythrocytic 1
hsa-miR-217	0	0	1	1	0	0	ATRIP	ATR interacting protein
hsa-miR-217	1	0	1	1	1	1	SMC4	structural maintenance of chromosomes 4
hsa-miR-217	0	0	0	1	0	0	TRIM48	tripartite motif containing 48
hsa-miR-217	0	0	0	1	0	0	ZNF799	zinc finger protein 799
hsa-miR-217	1	0	1	1	0	0	SMARCA4	SWI/SNF related, matrix associated, actin dependent regulator of chromatin, subfamily a, member 4
hsa-miR-217	1	0	1	1	1	1	DNA2	DNA replication helicase 2 homolog (yeast)
hsa-miR-217	1	0	1	1	1	1	CELSR3	cadherin, EGF LAG seven-pass G-type receptor 3 (flamingo homolog, Drosophila)
hsa-miR-217	1	0	1	1	1	1	CD163	CD163 molecule
hsa-miR-217	0	0	1	1	0	0	HIST1H3J	histone cluster 1, H3j
hsa-miR-217	0	0	0	1	1	1	RDH14	retinol dehydrogenase 14 (all-trans/9-cis/11-cis)
hsa-miR-217	1	0	0	1	1	1	NT5C1B	5'-nucleotidase, cytosolic IB
hsa-miR-217	0	0	0	1	0	0	PARVB	parvin, beta
hsa-miR-217	0	0	1	1	0	0	ISLR2	immunoglobulin superfamily containing leucine-rich repeat 2
hsa-miR-217	0	0	0	1	1	1	SLC26A11	solute carrier family 26, member 11
hsa-miR-217	1	0	1	1	1	1	TLR10	toll-like receptor 10
hsa-miR-217	0	0	0	1	0	0	ZNF358	zinc finger protein 358
hsa-miR-217	0	0	1	1	1	1	PCDH15	protocadherin-related 15
hsa-miR-217	1	0	1	1	1	1	ENSA	endosulfine alpha
hsa-miR-217	0	0	0	1	0	0	ZNF669	zinc finger protein 669
hsa-miR-217	0	0	1	1	1	1	WDR64	WD repeat domain 64
hsa-miR-217	0	0	0	1	1	1	B3GALNT2	beta-1,3-N-acetylgalactosaminyltransferase 2
hsa-miR-217	0	0	1	1	0	0	PSEN2	presenilin 2 (Alzheimer disease 4)
hsa-miR-217	0	0	0	1	0	0	TMEM63A	transmembrane protein 63A
hsa-miR-217	0	0	1	1	1	1	PARK2	parkinson protein 2, E3 ubiquitin protein ligase (parkin)
hsa-miR-217	0	0	1	1	1	1	MARC2	mitochondrial amidoxime reducing component 2
hsa-miR-217	1	0	1	1	1	1	MARK1	MAP/microtubule affinity-regulating kinase 1
hsa-miR-217	0	0	0	1	1	1	PTPN14	protein tyrosine phosphatase, non-receptor type 14
hsa-miR-217	0	0	1	1	1	1	TIAM2	T-cell lymphoma invasion and metastasis 2
hsa-miR-217	0	0	1	1	1	1	CFHR3	complement factor H-related 3
hsa-miR-217	0	0	1	1	1	1	TSEN15	tRNA splicing endonuclease 15 homolog (S. cerevisiae)
hsa-miR-217	0	0	1	1	0	0	ABRACL	ABRA C-terminal like
hsa-miR-217	0	0	1	1	1	1	FMO3	flavin containing monooxygenase 3
hsa-miR-217	0	0	1	1	1	1	FCGR2B	Fc fragment of IgG, low affinity IIb, receptor (CD32)
hsa-miR-217	1	0	1	1	1	1	KIAA0907	KIAA0907
hsa-miR-217	1	0	1	1	1	1	HCN3	hyperpolarization activated cyclic nucleotide-gated potassium channel 3
hsa-miR-217	0	0	1	1	0	0	S100A1	S100 calcium binding protein A1
hsa-miR-217	0	0	0	1	0	0	HAO2	hydroxyacid oxidase 2 (long chain)
hsa-miR-217	1	0	1	1	1	1	SYT6	synaptotagmin VI
hsa-miR-217	0	0	1	1	0	0	MYBPHL	myosin binding protein H-like
hsa-miR-217	0	0	1	1	1	1	PSRC1	proline/serine-rich coiled-coil 1
hsa-miR-217	1	0	0	1	0	0	TMEM180	transmembrane protein 180
hsa-miR-217	1	0	1	1	1	1	SEC31B	SEC31 homolog B (S. cerevisiae)
hsa-miR-217	0	0	1	1	0	0	PRRG3	proline rich Gla (G-carboxyglutamic acid) 3 (transmembrane)
hsa-miR-217	0	0	0	1	1	1	CRTAC1	cartilage acidic protein 1
hsa-miR-217	1	0	1	1	1	1	BEND6	BEN domain containing 6
hsa-miR-217	0	0	1	1	0	0	LSM14B	LSM14B, SCD6 homolog B (S. cerevisiae)
hsa-miR-217	0	0	0	1	0	0	UTP14A	UTP14, U3 small nucleolar ribonucleoprotein, homolog A (yeast)
hsa-miR-217	0	0	0	1	1	1	EFCAB7	EF-hand calcium binding domain 7
hsa-miR-217	0	0	1	1	0	0	ALDH18A1	aldehyde dehydrogenase 18 family, member A1
hsa-miR-217	0	0	0	1	0	0	TMEM61	transmembrane protein 61
hsa-miR-217	0	0	0	1	1	1	TTC22	tetratricopeptide repeat domain 22
hsa-miR-217	0	0	1	1	0	0	NDUFA1	NADH dehydrogenase (ubiquinone) 1 alpha subcomplex, 1, 7.5kDa
hsa-miR-217	0	0	1	1	1	1	CDC5L	CDC5 cell division cycle 5-like (S. pombe)
hsa-miR-217	0	0	1	1	1	1	KCNG1	potassium voltage-gated channel, subfamily G, member 1
hsa-miR-217	0	0	0	1	0	0	NPDC1	neural proliferation, differentiation and control, 1
hsa-miR-217	0	0	1	1	1	1	KTI12	KTI12 homolog, chromatin associated (S. cerevisiae)
hsa-miR-217	1	0	1	1	1	1	PANK1	pantothenate kinase 1
hsa-miR-217	0	0	0	1	1	1	IFIT1	interferon-induced protein with tetratricopeptide repeats 1
hsa-miR-217	1	0	0	1	0	0	DMRTA2	DMRT-like family A2
hsa-miR-217	0	0	0	1	0	0	SURF2	surfeit 2
hsa-miR-217	0	0	0	1	1	1	SURF1	surfeit 1
hsa-miR-217	0	0	1	1	0	0	TMCO2	transmembrane and coiled-coil domains 2
hsa-miR-217	0	0	1	1	1	1	SEMG1	semenogelin I
hsa-miR-217	0	0	1	1	1	1	TRUB2	TruB pseudouridine (psi) synthase homolog 2 (E. coli)
hsa-miR-217	0	0	0	1	1	1	USP49	ubiquitin specific peptidase 49
hsa-miR-217	1	0	1	1	1	1	TSPAN6	tetraspanin 6
hsa-miR-217	0	0	1	1	1	1	KLHL4	kelch-like 4 (Drosophila)
hsa-miR-217	0	0	1	1	0	0	GARNL3	GTPase activating Rap/RanGAP domain-like 3
hsa-miR-217	0	0	1	1	1	1	MYPN	myopalladin
hsa-miR-217	0	0	1	1	1	1	MRRF	mitochondrial ribosome recycling factor
hsa-miR-217	0	0	1	1	0	0	GPN2	GPN-loop GTPase 2
hsa-miR-217	1	0	1	1	0	0	RPS6KA1	ribosomal protein S6 kinase, 90kDa, polypeptide 1
hsa-miR-217	1	0	1	1	0	0	DHDDS	dehydrodolichyl diphosphate synthase
hsa-miR-217	0	0	1	1	0	0	ZNF593	zinc finger protein 593
hsa-miR-217	0	0	1	1	1	1	SYT15	synaptotagmin XV
hsa-miR-217	0	0	1	1	0	0	EIF6	eukaryotic translation initiation factor 6
hsa-miR-217	0	0	0	1	0	0	ARR3	arrestin 3, retinal (X-arrestin)
hsa-miR-217	1	0	1	1	1	1	LYPLA2	lysophospholipase II
hsa-miR-217	0	0	0	1	1	1	PSMB9	proteasome (prosome, macropain) subunit, beta type, 9 (large multifunctional peptidase 2)
hsa-miR-217	1	0	1	1	1	1	EIF4G3	eukaryotic translation initiation factor 4 gamma, 3
hsa-miR-217	0	0	1	1	0	0	C6orf10	chromosome 6 open reading frame 10
hsa-miR-217	0	0	1	1	1	1	PRRT1	proline-rich transmembrane protein 1
hsa-miR-217	0	0	0	1	1	1	AAED1	AhpC/TSA antioxidant enzyme domain containing 1
hsa-miR-217	0	0	0	1	0	0	CD300LD	CD300 molecule-like family member d
hsa-miR-217	0	0	1	1	1	1	SHC3	SHC (Src homology 2 domain containing) transforming protein 3
hsa-miR-217	0	0	0	1	1	1	GDPD4	glycerophosphodiester phosphodiesterase domain containing 4
hsa-miR-217	0	0	1	1	0	0	SLC35B1	solute carrier family 35, member B1
hsa-miR-217	0	0	1	1	1	1	SSX3	synovial sarcoma, X breakpoint 3
hsa-miR-217	0	0	1	1	1	1	SLC39A12	solute carrier family 39 (zinc transporter), member 12
hsa-miR-217	0	0	1	1	1	1	DTD1	D-tyrosyl-tRNA deacylase 1 homolog (S. cerevisiae)
hsa-miR-217	0	0	0	1	1	1	ST8SIA6	ST8 alpha-N-acetyl-neuraminide alpha-2,8-sialyltransferase 6
hsa-miR-217	0	0	1	1	0	0	FAM216A	family with sequence similarity 216, member A
hsa-miR-217	0	0	0	1	0	0	IGFBPL1	insulin-like growth factor binding protein-like 1
hsa-miR-217	0	0	0	1	0	0	ASB10	ankyrin repeat and SOCS box containing 10
hsa-miR-217	0	0	1	1	0	0	MEIG1	meiosis expressed gene 1 homolog (mouse)
hsa-miR-217	1	0	1	1	1	1	ANKRD11	ankyrin repeat domain 11
hsa-miR-217	0	0	1	1	1	1	CDADC1	cytidine and dCMP deaminase domain containing 1
hsa-miR-217	1	0	1	1	1	1	PRDM16	PR domain containing 16
hsa-miR-217	0	0	1	1	1	1	PREPL	prolyl endopeptidase-like
hsa-miR-217	0	0	1	1	1	1	CAMK1D	calcium/calmodulin-dependent protein kinase ID
hsa-miR-217	0	0	0	1	0	0	GALT	galactose-1-phosphate uridylyltransferase
hsa-miR-217	0	0	1	1	1	1	MCM8	minichromosome maintenance complex component 8
hsa-miR-217	0	0	0	1	0	0	NR0B1	nuclear receptor subfamily 0, group B, member 1
hsa-miR-217	0	0	1	1	1	1	PCNA	proliferating cell nuclear antigen
hsa-miR-217	1	0	1	1	1	1	KIN	KIN, antigenic determinant of recA protein homolog (mouse)
hsa-miR-217	0	0	1	1	1	1	MICAL2	microtubule associated monoxygenase, calponin and LIM domain containing 2
hsa-miR-217	1	0	1	1	1	1	DSP	desmoplakin
hsa-miR-217	0	0	0	1	1	1	SAMD9	sterile alpha motif domain containing 9
hsa-miR-217	0	0	1	1	0	0	SLC4A11	solute carrier family 4, sodium borate transporter, member 11
hsa-miR-217	0	0	0	1	0	0	C12orf54	chromosome 12 open reading frame 54
hsa-miR-217	0	0	1	1	0	0	GTF2H2C	general transcription factor IIH, polypeptide 2C
hsa-miR-217	0	0	1	1	1	1	FKBP1B	FK506 binding protein 1B, 12.6 kDa
hsa-miR-217	0	0	1	1	0	0	SNRPB	small nuclear ribonucleoprotein polypeptides B and B1
hsa-miR-217	1	0	1	1	1	1	UHRF2	ubiquitin-like with PHD and ring finger domains 2, E3 ubiquitin protein ligase
hsa-miR-217	1	0	1	1	1	1	FKBP1A	FK506 binding protein 1A, 12kDa
hsa-miR-217	0	0	1	1	1	1	RFC1	replication factor C (activator 1) 1, 145kDa
hsa-miR-217	0	0	0	1	0	0	ANGPT4	angiopoietin 4
hsa-miR-217	1	0	1	1	1	1	VLDLR	very low density lipoprotein receptor
hsa-miR-217	0	0	1	1	1	1	TNFRSF19	tumor necrosis factor receptor superfamily, member 19
hsa-miR-217	0	0	1	1	0	0	TBL1Y	transducin (beta)-like 1, Y-linked
hsa-miR-217	1	0	1	1	1	1	ADAMTSL1	ADAMTS-like 1
hsa-miR-217	0	0	1	1	0	0	C6orf163	chromosome 6 open reading frame 163
hsa-miR-217	0	0	0	1	0	0	TBX20	T-box 20
hsa-miR-217	0	0	1	1	0	0	FANCA	Fanconi anemia, complementation group A
hsa-miR-217	1	0	1	1	1	1	RAB11FIP5	RAB11 family interacting protein 5 (class I)
hsa-miR-217	0	0	1	1	1	1	PKP1	plakophilin 1 (ectodermal dysplasia/skin fragility syndrome)
hsa-miR-217	1	0	1	1	1	1	SLC26A4	solute carrier family 26, member 4
hsa-miR-217	1	0	1	1	1	1	AMPD3	adenosine monophosphate deaminase 3
hsa-miR-217	0	0	1	1	1	1	BDKRB2	bradykinin receptor B2
hsa-miR-217	0	0	1	1	1	1	GLRB	glycine receptor, beta
hsa-miR-217	0	0	0	1	1	1	HTR3A	5-hydroxytryptamine (serotonin) receptor 3A, ionotropic
hsa-miR-217	1	0	1	1	1	1	C18orf1	chromosome 18 open reading frame 1
hsa-miR-217	1	0	1	1	1	1	LEPR	leptin receptor
hsa-miR-217	1	0	1	1	1	1	BICD2	bicaudal D homolog 2 (Drosophila)
hsa-miR-217	0	0	1	1	1	1	ZNF599	zinc finger protein 599
hsa-miR-217	1	0	1	1	1	1	STEAP3	STEAP family member 3, metalloreductase
hsa-miR-217	0	0	1	1	1	1	XKR9	XK, Kell blood group complex subunit-related family, member 9
hsa-miR-217	0	0	1	0	1	1	ZNF302	zinc finger protein 302
hsa-miR-217	0	0	1	1	1	1	EXOC6	exocyst complex component 6
hsa-miR-217	0	0	1	1	1	1	MURC	muscle-related coiled-coil protein
hsa-miR-217	0	0	1	1	1	1	DCAF4L1	DDB1 and CUL4 associated factor 4-like 1
hsa-miR-217	1	0	1	0	1	1	GPR126	G protein-coupled receptor 126
hsa-miR-217	0	0	1	1	1	1	EXTL2	exostoses (multiple)-like 2
hsa-miR-217	0	0	1	0	1	1	GTF2H2D	general transcription factor IIH, polypeptide 2D
hsa-miR-217	1	0	1	1	1	1	ATPAF1	ATP synthase mitochondrial F1 complex assembly factor 1
hsa-miR-217	0	0	1	1	1	1	TMPRSS7	transmembrane protease, serine 7
hsa-miR-217	1	0	1	1	1	1	BCLAF1	BCL2-associated transcription factor 1
hsa-miR-217	1	0	1	0	1	1	PDE5A	phosphodiesterase 5A, cGMP-specific
hsa-miR-217	1	0	1	1	1	1	BMP3	bone morphogenetic protein 3
hsa-miR-217	0	0	1	1	1	1	LPAR1	lysophosphatidic acid receptor 1
hsa-miR-217	0	0	0	1	1	1	ARSD	arylsulfatase D
hsa-miR-217	1	0	1	1	1	1	DBT	dihydrolipoamide branched chain transacylase E2
hsa-miR-217	0	0	1	1	1	1	EDNRA	endothelin receptor type A
hsa-miR-217	0	0	1	1	1	1	MTAP	methylthioadenosine phosphorylase
hsa-miR-217	0	0	0	0	1	1	PSG7	pregnancy specific beta-1-glycoprotein 7 (gene/pseudogene)
hsa-miR-217	1	0	1	1	1	1	ZFP161	zinc finger protein 161 homolog (mouse)
hsa-miR-217	0	0	0	1	1	1	ZNF45	zinc finger protein 45
hsa-miR-217	0	0	1	1	1	1	CDS2	CDP-diacylglycerol synthase (phosphatidate cytidylyltransferase) 2
hsa-miR-217	0	0	1	1	1	1	TRDMT1	tRNA aspartic acid methyltransferase 1
hsa-miR-217	1	0	1	1	1	1	GLUD1	glutamate dehydrogenase 1
hsa-miR-217	0	0	1	1	1	1	UBXN8	UBX domain protein 8
hsa-miR-217	1	0	1	1	1	1	EDIL3	EGF-like repeats and discoidin I-like domains 3
hsa-miR-217	1	0	1	1	1	1	PRKD3	protein kinase D3
hsa-miR-217	1	0	1	0	1	1	STX6	syntaxin 6
hsa-miR-217	0	0	1	1	1	1	ZMPSTE24	zinc metallopeptidase STE24 homolog (S. cerevisiae)
hsa-miR-217	1	0	0	1	1	1	NEDD4	neural precursor cell expressed, developmentally down-regulated 4, E3 ubiquitin protein ligase
hsa-miR-217	1	0	1	0	1	1	EXOC5	exocyst complex component 5
hsa-miR-217	1	0	1	1	1	1	HBS1L	HBS1-like (S. cerevisiae)
hsa-miR-217	0	0	0	1	1	1	WDR3	WD repeat domain 3
hsa-miR-217	0	0	1	1	1	1	TMED2	transmembrane emp24 domain trafficking protein 2
hsa-miR-217	0	0	1	1	1	1	ZNF33A	zinc finger protein 33A
hsa-miR-217	0	0	1	1	1	1	ZNF33B	zinc finger protein 33B
hsa-miR-217	0	0	1	1	1	1	ZNF92	zinc finger protein 92
hsa-miR-217	0	0	0	1	1	1	SEC23IP	SEC23 interacting protein
hsa-miR-217	1	0	1	0	1	1	FZD4	frizzled family receptor 4
hsa-miR-217	1	0	1	1	1	1	FBXW11	F-box and WD repeat domain containing 11
hsa-miR-217	1	0	1	1	1	1	TNFRSF21	tumor necrosis factor receptor superfamily, member 21
hsa-miR-217	0	0	0	1	1	1	NPHS2	nephrosis 2, idiopathic, steroid-resistant (podocin)
hsa-miR-217	0	0	1	0	1	1	ZBTB24	zinc finger and BTB domain containing 24
hsa-miR-217	1	0	1	1	1	1	KIAA0528	KIAA0528
hsa-miR-217	1	0	1	1	1	1	FBXO21	F-box protein 21
hsa-miR-217	1	0	1	1	1	1	LSM14A	LSM14A, SCD6 homolog A (S. cerevisiae)
hsa-miR-217	1	0	1	1	1	1	ST8SIA3	ST8 alpha-N-acetyl-neuraminide alpha-2,8-sialyltransferase 3
hsa-miR-217	0	0	1	0	1	1	OTUD6B	OTU domain containing 6B
hsa-miR-217	0	0	0	1	1	1	CRBN	cereblon
hsa-miR-217	0	0	1	1	1	1	RAPGEF6	Rap guanine nucleotide exchange factor (GEF) 6
hsa-miR-217	0	0	0	1	1	1	SETD4	SET domain containing 4
hsa-miR-217	0	0	1	0	1	1	CHRAC1	chromatin accessibility complex 1
hsa-miR-217	1	0	0	1	1	1	CNNM3	cyclin M3
hsa-miR-217	1	0	1	1	1	1	VPS13C	vacuolar protein sorting 13 homolog C (S. cerevisiae)
hsa-miR-217	1	0	1	1	1	1	AGGF1	angiogenic factor with G patch and FHA domains 1
hsa-miR-217	0	0	0	1	1	1	CEP72	centrosomal protein 72kDa
hsa-miR-217	0	0	1	1	1	1	GBP3	guanylate binding protein 3
hsa-miR-217	0	0	0	1	1	1	TMA16	translation machinery associated 16 homolog (S. cerevisiae)
hsa-miR-217	1	0	1	1	1	1	KIAA1217	KIAA1217
hsa-miR-217	0	0	0	0	1	1	DHX33	DEAH (Asp-Glu-Ala-His) box polypeptide 33
hsa-miR-217	1	0	1	0	1	1	OTUD7B	OTU domain containing 7B
hsa-miR-217	1	0	0	1	1	1	ABCC9	ATP-binding cassette, sub-family C (CFTR/MRP), member 9
hsa-miR-217	0	0	1	1	1	1	PDSS2	prenyl (decaprenyl) diphosphate synthase, subunit 2
hsa-miR-217	0	0	1	1	1	1	EXOC4	exocyst complex component 4
hsa-miR-217	0	0	1	1	1	1	LHPP	phospholysine phosphohistidine inorganic pyrophosphate phosphatase
hsa-miR-217	0	0	0	1	1	1	RAB17	RAB17, member RAS oncogene family
hsa-miR-217	1	0	1	1	1	1	RIC3	resistance to inhibitors of cholinesterase 3 homolog (C. elegans)
hsa-miR-217	0	0	0	1	1	1	EPHX3	epoxide hydrolase 3
hsa-miR-217	1	0	1	1	1	1	GRHL2	grainyhead-like 2 (Drosophila)
hsa-miR-217	0	0	1	1	1	1	C10orf88	chromosome 10 open reading frame 88
hsa-miR-217	1	0	1	0	1	1	SEMA6D	sema domain, transmembrane domain (TM), and cytoplasmic domain, (semaphorin) 6D
hsa-miR-217	1	0	1	0	1	1	KIAA1715	KIAA1715
hsa-miR-217	1	0	1	1	1	1	TUBB1	tubulin, beta 1 class VI
hsa-miR-217	1	0	0	1	1	1	SFT2D3	SFT2 domain containing 3
hsa-miR-217	0	0	1	1	1	1	RFT1	RFT1 homolog (S. cerevisiae)
hsa-miR-217	1	0	1	1	1	1	NRSN1	neurensin 1
hsa-miR-217	0	0	1	1	1	1	ZNF721	zinc finger protein 721
hsa-miR-217	0	0	1	1	1	1	SLC4A5	solute carrier family 4, sodium bicarbonate cotransporter, member 5
hsa-miR-217	1	0	1	1	1	1	ICA1L	islet cell autoantigen 1,69kDa-like
hsa-miR-217	0	0	1	1	1	1	SLFN13	schlafen family member 13
hsa-miR-217	0	0	0	1	1	1	SKA3	spindle and kinetochore associated complex subunit 3
hsa-miR-217	0	0	0	1	1	1	FRA10AC1	fragile site, folic acid type, rare, fra(10)(q23.3) or fra(10)(q24.2) candidate 1
hsa-miR-217	0	0	1	1	1	1	TTC30A	tetratricopeptide repeat domain 30A
hsa-miR-217	0	0	0	1	1	1	PQLC3	PQ loop repeat containing 3
hsa-miR-217	1	0	1	1	1	1	PTPDC1	protein tyrosine phosphatase domain containing 1
hsa-miR-217	1	0	0	1	1	1	NPHP3	nephronophthisis 3 (adolescent)
hsa-miR-217	0	0	1	1	1	1	ZNF100	zinc finger protein 100
hsa-miR-217	1	0	1	0	1	1	KCTD20	potassium channel tetramerisation domain containing 20
hsa-miR-217	0	0	1	1	1	1	RASSF6	Ras association (RalGDS/AF-6) domain family member 6
hsa-miR-217	0	0	1	1	1	1	ZNF680	zinc finger protein 680
hsa-miR-217	1	0	1	0	1	1	CERS3	ceramide synthase 3
hsa-miR-217	0	0	1	1	1	1	CMTM4	CKLF-like MARVEL transmembrane domain containing 4
hsa-miR-217	1	0	1	0	1	1	EFHA2	EF-hand domain family, member A2
hsa-miR-217	0	0	0	1	1	1	ZNF438	zinc finger protein 438
hsa-miR-217	0	0	1	1	1	1	ZNF254	zinc finger protein 254
hsa-miR-217	0	0	0	0	1	1	AK4P3	adenylate kinase 4 pseudogene 3
hsa-miR-217	0	0	0	0	1	1	LINC00520	long intergenic non-protein coding RNA 520
hsa-miR-217	0	0	1	0	1	1	DNAH14	dynein, axonemal, heavy chain 14
hsa-miR-217	0	0	1	1	1	1	RBM20	RNA binding motif protein 20
hsa-miR-217	0	0	0	0	1	1	LOC284801	uncharacterized LOC284801
hsa-miR-217	0	0	0	0	1	1	RPS26P8	ribosomal protein S26 pseudogene 8
hsa-miR-217	1	0	1	1	1	1	IGF1R	insulin-like growth factor 1 receptor
hsa-miR-217	1	0	1	0	1	1	ATP2B1	ATPase, Ca++ transporting, plasma membrane 1
hsa-miR-217	1	0	1	1	1	1	EP300	E1A binding protein p300
hsa-miR-217	1	0	1	0	1	1	ESRRG	estrogen-related receptor gamma
hsa-miR-217	0	0	1	1	0	0	DNAJA1	DnaJ (Hsp40) homolog, subfamily A, member 1
hsa-miR-217	1	0	1	1	1	1	CLU	clusterin
hsa-miR-217	1	0	1	1	1	1	SLC31A1	solute carrier family 31 (copper transporters), member 1
hsa-miR-217	1	0	1	1	1	1	CTNNB1	catenin (cadherin-associated protein), beta 1, 88kDa
hsa-miR-217	1	0	1	1	1	1	KPNA4	karyopherin alpha 4 (importin alpha 3)
hsa-miR-217	0	0	1	1	1	1	MSX2	msh homeobox 2
hsa-miR-217	1	0	1	1	1	1	PCDH8	protocadherin 8
hsa-miR-217	1	0	1	1	1	1	PHF1	PHD finger protein 1
hsa-miR-217	1	0	1	1	1	1	CDC14A	CDC14 cell division cycle 14 homolog A (S. cerevisiae)
hsa-miR-217	0	0	1	1	1	1	EIF3J	eukaryotic translation initiation factor 3, subunit J
hsa-miR-217	0	0	0	1	0	0	CCBL1	cysteine conjugate-beta lyase, cytoplasmic
hsa-miR-217	0	0	1	1	1	1	SRSF11	serine/arginine-rich splicing factor 11
hsa-miR-217	1	0	1	0	1	1	PRKAB2	protein kinase, AMP-activated, beta 2 non-catalytic subunit
hsa-miR-217	1	0	1	1	1	1	MAT2A	methionine adenosyltransferase II, alpha
hsa-miR-217	0	0	1	1	1	1	ARID1A	AT rich interactive domain 1A (SWI-like)
hsa-miR-217	1	0	1	1	1	1	STAT5B	signal transducer and activator of transcription 5B
hsa-miR-217	1	0	1	1	1	1	CNOT4	CCR4-NOT transcription complex, subunit 4
hsa-miR-217	1	0	1	1	1	1	FAM179B	family with sequence similarity 179, member B
hsa-miR-217	1	0	1	1	1	1	RAP1B	RAP1B, member of RAS oncogene family
hsa-miR-217	1	0	1	1	1	1	EIF5B	eukaryotic translation initiation factor 5B
hsa-miR-217	1	0	1	1	1	1	C5orf15	chromosome 5 open reading frame 15
hsa-miR-217	1	0	1	1	1	1	RAP2C	RAP2C, member of RAS oncogene family
hsa-miR-217	1	0	1	0	1	1	ELOVL4	ELOVL fatty acid elongase 4
hsa-miR-217	1	0	1	1	1	1	CHD9	chromodomain helicase DNA binding protein 9
hsa-miR-217	1	0	1	1	1	1	LCOR	ligand dependent nuclear receptor corepressor
hsa-miR-217	0	0	1	1	1	1	FRMD5	FERM domain containing 5
hsa-miR-217	0	0	1	1	1	1	C3orf15	chromosome 3 open reading frame 15
hsa-miR-217	1	0	1	1	1	1	SLC30A7	solute carrier family 30 (zinc transporter), member 7
hsa-miR-217	1	0	1	1	1	1	SEPT6	septin 6
hsa-miR-217	0	0	1	1	0	0	DOK6	docking protein 6
hsa-miR-217	0	0	1	1	1	1	POC1B	POC1 centriolar protein homolog B (Chlamydomonas)
hsa-miR-217	1	0	1	1	1	1	WDR20	WD repeat domain 20
hsa-miR-217	1	0	1	0	1	1	NHS	Nance-Horan syndrome (congenital cataracts and dental anomalies)
hsa-miR-217	0	0	0	1	1	1	LINC00610	long intergenic non-protein coding RNA 610
