# Supplementary material for: Profiling of Selected MicroRNAs in Proliferative Eutopic Endometrium of Women with Ovarian Endometriosis
Source: Biomed Res Int. 2015 Aug 20;2015:760698. doi: 10.1155/2015/760698 (PMC4558423; doi:10.1155/2015/760698)
Supplement: Supplementary file 1 — Table I: The names of miRNAs significantly differentially expressed between eutopic endometrium of patients with endometriosis vs eutopic endometrium of patients without endometriosis. Table II: The associations between miRNA and mRNA, which presents detailed results of the search of six major databases i.e targetscan, tarbase, miranda, mirbase, mirtarget2 and pictar. [file 760698.f1.zip › 760698.f1/Table II/hsa-miR-219-2-3p.tsv]

miR	targetscan	tarbase	miranda	mirbase	mirtarget2	pictar	GeneSymbol	GeneName
hsa-miR-219-2-3p	1	0	1	1	0	0	SRCAP	Snf2-related CREBBP activator protein
hsa-miR-219-2-3p	1	0	1	1	1	1	ABCC5	ATP-binding cassette, sub-family C (CFTR/MRP), member 5
hsa-miR-219-2-3p	1	0	1	0	1	1	PTPRT	protein tyrosine phosphatase, receptor type, T
hsa-miR-219-2-3p	0	0	1	1	0	0	PCNT	pericentrin
hsa-miR-219-2-3p	1	0	1	1	1	1	BAI3	brain-specific angiogenesis inhibitor 3
hsa-miR-219-2-3p	1	0	1	1	1	1	GPATCH8	G patch domain containing 8
hsa-miR-219-2-3p	1	0	1	1	0	0	TBC1D12	TBC1 domain family, member 12
hsa-miR-219-2-3p	1	0	1	0	1	1	DOCK4	dedicator of cytokinesis 4
hsa-miR-219-2-3p	1	0	1	1	1	1	DNM3	dynamin 3
hsa-miR-219-2-3p	1	0	1	1	1	1	DMXL2	Dmx-like 2
hsa-miR-219-2-3p	0	0	1	1	1	1	MAU2	MAU2 chromatid cohesion factor homolog (C. elegans)
hsa-miR-219-2-3p	1	0	1	1	1	1	UBE2K	ubiquitin-conjugating enzyme E2K
hsa-miR-219-2-3p	1	0	1	1	1	1	CPEB3	cytoplasmic polyadenylation element binding protein 3
hsa-miR-219-2-3p	1	0	1	1	1	1	RPGRIP1L	RPGRIP1-like
hsa-miR-219-2-3p	1	0	1	1	1	1	NLGN1	neuroligin 1
hsa-miR-219-2-3p	1	0	1	1	1	1	SPIRE1	spire homolog 1 (Drosophila)
hsa-miR-219-2-3p	1	0	1	1	0	0	KIAA1210	KIAA1210
hsa-miR-219-2-3p	1	0	1	1	1	1	ATXN7L1	ataxin 7-like 1
hsa-miR-219-2-3p	0	0	1	1	0	0	ODF2L	outer dense fiber of sperm tails 2-like
hsa-miR-219-2-3p	1	0	1	1	0	0	ATAD2B	ATPase family, AAA domain containing 2B
hsa-miR-219-2-3p	1	0	1	1	1	1	MKL2	MKL/myocardin-like 2
hsa-miR-219-2-3p	1	0	1	0	1	1	ANKFY1	ankyrin repeat and FYVE domain containing 1
hsa-miR-219-2-3p	1	0	1	0	1	1	INTS2	integrator complex subunit 2
hsa-miR-219-2-3p	0	0	1	1	1	1	CA10	carbonic anhydrase X
hsa-miR-219-2-3p	1	0	1	1	1	1	PCDH19	protocadherin 19
hsa-miR-219-2-3p	1	0	1	1	1	1	HACE1	HECT domain and ankyrin repeat containing E3 ubiquitin protein ligase 1
hsa-miR-219-2-3p	1	1	1	1	1	1	NFIA	nuclear factor I/A
hsa-miR-219-2-3p	1	0	1	0	0	0	TANC2	tetratricopeptide repeat, ankyrin repeat and coiled-coil containing 2
hsa-miR-219-2-3p	0	0	1	1	1	1	BHLHB9	basic helix-loop-helix domain containing, class B, 9
hsa-miR-219-2-3p	0	0	1	0	1	1	SETD5	SET domain containing 5
hsa-miR-219-2-3p	1	0	1	1	1	1	CDK13	cyclin-dependent kinase 13
hsa-miR-219-2-3p	1	0	1	1	1	1	LCOR	ligand dependent nuclear receptor corepressor
hsa-miR-219-2-3p	0	0	1	1	1	1	UNC80	unc-80 homolog (C. elegans)
hsa-miR-219-2-3p	0	0	1	1	0	0	NTNG2	netrin G2
hsa-miR-219-2-3p	1	0	1	1	1	1	AHCTF1	AT hook containing transcription factor 1
hsa-miR-219-2-3p	0	0	1	1	0	0	SEC16B	SEC16 homolog B (S. cerevisiae)
hsa-miR-219-2-3p	1	0	1	1	1	1	ANKRD12	ankyrin repeat domain 12
hsa-miR-219-2-3p	0	0	1	1	1	1	KIAA1967	KIAA1967
hsa-miR-219-2-3p	1	0	1	1	1	1	SH3TC2	SH3 domain and tetratricopeptide repeats 2
hsa-miR-219-2-3p	0	0	1	1	0	0	CIRH1A	cirrhosis, autosomal recessive 1A (cirhin)
hsa-miR-219-2-3p	0	0	1	1	1	1	NELL1	NEL-like 1 (chicken)
hsa-miR-219-2-3p	1	0	1	1	1	1	PAM	peptidylglycine alpha-amidating monooxygenase
hsa-miR-219-2-3p	1	0	1	1	1	1	SMEK1	SMEK homolog 1, suppressor of mek1 (Dictyostelium)
hsa-miR-219-2-3p	1	0	1	1	1	1	KCNMA1	potassium large conductance calcium-activated channel, subfamily M, alpha member 1
hsa-miR-219-2-3p	0	0	1	0	0	0	TIFAB	TRAF-interacting protein with forkhead-associated domain, family member B
hsa-miR-219-2-3p	1	1	1	1	1	1	BACE1	beta-site APP-cleaving enzyme 1
hsa-miR-219-2-3p	0	0	1	1	1	1	DOCK8	dedicator of cytokinesis 8
hsa-miR-219-2-3p	1	0	1	0	1	1	PCDHA13	protocadherin alpha 13
hsa-miR-219-2-3p	1	0	1	1	1	1	PCDHA4	protocadherin alpha 4
hsa-miR-219-2-3p	0	0	1	1	0	0	TNNI3K	TNNI3 interacting kinase
hsa-miR-219-2-3p	1	0	1	1	1	1	PCCB	propionyl CoA carboxylase, beta polypeptide
hsa-miR-219-2-3p	1	0	1	0	1	1	MPPED2	metallophosphoesterase domain containing 2
hsa-miR-219-2-3p	0	0	1	1	1	1	DGKI	diacylglycerol kinase, iota
hsa-miR-219-2-3p	1	0	1	1	0	0	TSPYL2	TSPY-like 2
hsa-miR-219-2-3p	0	0	1	0	1	1	NPY1R	neuropeptide Y receptor Y1
hsa-miR-219-2-3p	0	0	1	1	1	1	DGKE	diacylglycerol kinase, epsilon 64kDa
hsa-miR-219-2-3p	1	0	1	1	1	1	AEBP2	AE binding protein 2
hsa-miR-219-2-3p	0	0	1	1	0	0	IFT27	intraflagellar transport 27 homolog (Chlamydomonas)
hsa-miR-219-2-3p	1	0	1	1	1	1	MINK1	misshapen-like kinase 1
hsa-miR-219-2-3p	1	0	1	1	1	1	MYO5A	myosin VA (heavy chain 12, myoxin)
hsa-miR-219-2-3p	0	0	1	0	1	1	ACTN2	actinin, alpha 2
hsa-miR-219-2-3p	1	0	1	1	1	1	HNRNPK	heterogeneous nuclear ribonucleoprotein K
hsa-miR-219-2-3p	1	0	1	1	1	1	DDX17	DEAD (Asp-Glu-Ala-Asp) box helicase 17
hsa-miR-219-2-3p	0	0	1	1	0	0	SLC22A8	solute carrier family 22 (organic anion transporter), member 8
hsa-miR-219-2-3p	0	0	1	1	1	1	KIF3A	kinesin family member 3A
hsa-miR-219-2-3p	1	0	1	1	1	1	TEAD1	TEA domain family member 1 (SV40 transcriptional enhancer factor)
hsa-miR-219-2-3p	1	0	1	1	1	1	ZFX	zinc finger protein, X-linked
hsa-miR-219-2-3p	1	0	1	1	1	1	PHLDB2	pleckstrin homology-like domain, family B, member 2
hsa-miR-219-2-3p	1	0	1	0	1	1	CAV1	caveolin 1, caveolae protein, 22kDa
hsa-miR-219-2-3p	1	0	1	1	1	1	SDHC	succinate dehydrogenase complex, subunit C, integral membrane protein, 15kDa
hsa-miR-219-2-3p	0	0	1	1	1	1	CD55	CD55 molecule, decay accelerating factor for complement (Cromer blood group)
hsa-miR-219-2-3p	0	0	1	1	0	0	MUC3A	mucin 3A, cell surface associated
hsa-miR-219-2-3p	0	0	1	1	0	0	KIR2DL3	killer cell immunoglobulin-like receptor, two domains, long cytoplasmic tail, 3
hsa-miR-219-2-3p	1	0	1	0	1	1	CELF2	CUGBP, Elav-like family member 2
hsa-miR-219-2-3p	1	0	1	0	0	0	MAP3K1	mitogen-activated protein kinase kinase kinase 1, E3 ubiquitin protein ligase
hsa-miR-219-2-3p	0	0	1	1	1	1	CD84	CD84 molecule
hsa-miR-219-2-3p	1	0	1	1	1	1	SHOC2	soc-2 suppressor of clear homolog (C. elegans)
hsa-miR-219-2-3p	1	0	1	1	1	1	ERLIN1	ER lipid raft associated 1
hsa-miR-219-2-3p	1	0	1	1	1	1	LDB2	LIM domain binding 2
hsa-miR-219-2-3p	0	0	1	1	1	1	ERAL1	Era G-protein-like 1 (E. coli)
hsa-miR-219-2-3p	0	0	1	1	1	1	MINPP1	multiple inositol-polyphosphate phosphatase 1
hsa-miR-219-2-3p	1	0	1	1	1	1	GLS	glutaminase
hsa-miR-219-2-3p	0	0	1	1	1	1	FHL1	four and a half LIM domains 1
hsa-miR-219-2-3p	0	0	1	1	0	0	RBM5	RNA binding motif protein 5
hsa-miR-219-2-3p	0	0	1	1	1	1	GUCA1C	guanylate cyclase activator 1C
hsa-miR-219-2-3p	0	0	1	1	1	1	DMRT2	doublesex and mab-3 related transcription factor 2
hsa-miR-219-2-3p	0	0	1	0	1	1	CLEC5A	C-type lectin domain family 5, member A
hsa-miR-219-2-3p	0	0	1	0	1	1	CLDN2	claudin 2
hsa-miR-219-2-3p	1	0	1	1	1	1	SENP7	SUMO1/sentrin specific peptidase 7
hsa-miR-219-2-3p	1	0	1	1	1	1	TSC22D2	TSC22 domain family, member 2
hsa-miR-219-2-3p	1	0	1	1	1	1	KCNMB2	potassium large conductance calcium-activated channel, subfamily M, beta member 2
hsa-miR-219-2-3p	0	0	1	1	1	1	SLC30A5	solute carrier family 30 (zinc transporter), member 5
hsa-miR-219-2-3p	1	0	1	1	1	1	RSF1	remodeling and spacing factor 1
hsa-miR-219-2-3p	0	0	1	0	0	0	TIGD7	tigger transposable element derived 7
hsa-miR-219-2-3p	1	0	1	1	1	1	RBM47	RNA binding motif protein 47
hsa-miR-219-2-3p	1	0	1	1	1	1	SH3GLB1	SH3-domain GRB2-like endophilin B1
hsa-miR-219-2-3p	0	0	1	1	1	1	GOLGA6A	golgin A6 family, member A
hsa-miR-219-2-3p	1	0	1	1	1	1	CALU	calumenin
hsa-miR-219-2-3p	0	0	1	0	1	1	MYO3B	myosin IIIB
hsa-miR-219-2-3p	0	0	1	1	1	1	OLFM3	olfactomedin 3
hsa-miR-219-2-3p	1	0	1	1	1	1	RCAN1	regulator of calcineurin 1
hsa-miR-219-2-3p	1	0	1	1	1	1	MAGI1	membrane associated guanylate kinase, WW and PDZ domain containing 1
hsa-miR-219-2-3p	1	0	1	1	1	1	NTRK2	neurotrophic tyrosine kinase, receptor, type 2
hsa-miR-219-2-3p	0	0	1	1	0	0	TTC18	tetratricopeptide repeat domain 18
hsa-miR-219-2-3p	0	0	1	1	1	1	PPP1R1B	protein phosphatase 1, regulatory (inhibitor) subunit 1B
hsa-miR-219-2-3p	1	0	1	1	0	0	FOXP2	forkhead box P2
hsa-miR-219-2-3p	1	0	1	1	1	1	HNRNPU	heterogeneous nuclear ribonucleoprotein U (scaffold attachment factor A)
hsa-miR-219-2-3p	1	0	1	1	1	1	WAPAL	wings apart-like homolog (Drosophila)
hsa-miR-219-2-3p	0	0	1	1	1	1	AMPH	amphiphysin
hsa-miR-219-2-3p	1	0	1	0	1	1	NUDCD1	NudC domain containing 1
hsa-miR-219-2-3p	1	0	1	1	1	1	PTBP2	polypyrimidine tract binding protein 2
hsa-miR-219-2-3p	0	0	1	1	1	1	GNAS	GNAS complex locus
hsa-miR-219-2-3p	0	0	1	0	1	1	SRPK1	SRSF protein kinase 1
hsa-miR-219-2-3p	1	0	1	1	1	1	PCDH11X	protocadherin 11 X-linked
hsa-miR-219-2-3p	0	0	1	0	0	0	LINC00271	long intergenic non-protein coding RNA 271
hsa-miR-219-2-3p	1	0	1	1	1	1	PPP1R9A	protein phosphatase 1, regulatory subunit 9A
hsa-miR-219-2-3p	0	0	1	1	0	0	ACSS2	acyl-CoA synthetase short-chain family member 2
hsa-miR-219-2-3p	0	0	1	1	0	0	ASAP3	ArfGAP with SH3 domain, ankyrin repeat and PH domain 3
hsa-miR-219-2-3p	1	0	1	1	1	1	AKAP2	A kinase (PRKA) anchor protein 2
hsa-miR-219-2-3p	1	0	1	0	1	1	NFAT5	nuclear factor of activated T-cells 5, tonicity-responsive
hsa-miR-219-2-3p	0	0	1	0	0	0	TUG1	taurine upregulated 1 (non-protein coding)
hsa-miR-219-2-3p	1	0	1	1	1	1	MEIS2	Meis homeobox 2
hsa-miR-219-2-3p	0	0	1	1	1	1	STOX2	storkhead box 2
hsa-miR-219-2-3p	1	0	1	1	1	1	RIC8B	resistance to inhibitors of cholinesterase 8 homolog B (C. elegans)
hsa-miR-219-2-3p	1	0	1	1	1	1	EIF2C1	eukaryotic translation initiation factor 2C, 1
hsa-miR-219-2-3p	1	0	1	1	1	1	SLC38A2	solute carrier family 38, member 2
hsa-miR-219-2-3p	0	0	1	1	1	1	LRIF1	ligand dependent nuclear receptor interacting factor 1
hsa-miR-219-2-3p	1	0	1	1	1	1	LRRN3	leucine rich repeat neuronal 3
hsa-miR-219-2-3p	0	0	1	1	1	1	STAU2	staufen, RNA binding protein, homolog 2 (Drosophila)
hsa-miR-219-2-3p	1	0	1	1	1	1	C12orf23	chromosome 12 open reading frame 23
hsa-miR-219-2-3p	0	0	1	0	0	0	DUXAP10	double homeobox A pseudogene 10
hsa-miR-219-2-3p	0	0	1	1	0	0	BUB1	budding uninhibited by benzimidazoles 1 homolog (yeast)
hsa-miR-219-2-3p	0	0	1	0	0	0	LOC284561	uncharacterized LOC284561
hsa-miR-219-2-3p	1	0	1	0	1	1	C14orf101	chromosome 14 open reading frame 101
hsa-miR-219-2-3p	1	0	1	1	1	1	PHACTR4	phosphatase and actin regulator 4
hsa-miR-219-2-3p	1	0	1	1	1	1	DYRK2	dual-specificity tyrosine-(Y)-phosphorylation regulated kinase 2
hsa-miR-219-2-3p	1	0	1	0	1	1	ATP2B1	ATPase, Ca++ transporting, plasma membrane 1
hsa-miR-219-2-3p	1	0	1	1	1	1	ABHD3	abhydrolase domain containing 3
hsa-miR-219-2-3p	1	0	1	1	1	1	NAA30	N(alpha)-acetyltransferase 30, NatC catalytic subunit
hsa-miR-219-2-3p	1	0	1	0	1	1	ZCCHC3	zinc finger, CCHC domain containing 3
hsa-miR-219-2-3p	0	0	1	0	1	1	FLJ22763	uncharacterized LOC401081
hsa-miR-219-2-3p	1	0	1	1	1	1	ITGA9	integrin, alpha 9
hsa-miR-219-2-3p	1	0	1	1	1	1	FOXP1	forkhead box P1
hsa-miR-219-2-3p	0	0	1	1	1	1	MINA	MYC induced nuclear antigen
hsa-miR-219-2-3p	1	0	1	1	1	1	FAM53C	family with sequence similarity 53, member C
hsa-miR-219-2-3p	0	0	1	1	1	1	NETO2	neuropilin (NRP) and tolloid (TLL)-like 2
hsa-miR-219-2-3p	1	0	1	1	1	1	FAM40A	family with sequence similarity 40, member A
hsa-miR-219-2-3p	1	0	1	1	1	1	KCTD15	potassium channel tetramerisation domain containing 15
hsa-miR-219-2-3p	1	0	1	0	1	1	ZKSCAN1	zinc finger with KRAB and SCAN domains 1
hsa-miR-219-2-3p	1	0	1	0	1	1	ELMOD1	ELMO/CED-12 domain containing 1
hsa-miR-219-2-3p	0	0	1	1	1	1	C8orf46	chromosome 8 open reading frame 46
hsa-miR-219-2-3p	0	0	1	1	1	1	GABRP	gamma-aminobutyric acid (GABA) A receptor, pi
hsa-miR-219-2-3p	1	0	1	1	1	1	SULF1	sulfatase 1
hsa-miR-219-2-3p	0	0	1	0	0	0	LOC157273	uncharacterized LOC157273
hsa-miR-219-2-3p	0	0	1	1	1	1	SLCO1B3	solute carrier organic anion transporter family, member 1B3
hsa-miR-219-2-3p	0	0	1	1	1	1	SDK1	sidekick cell adhesion molecule 1
hsa-miR-219-2-3p	1	0	1	1	1	1	ZBTB10	zinc finger and BTB domain containing 10
hsa-miR-219-2-3p	1	0	1	1	1	1	PCMTD1	protein-L-isoaspartate (D-aspartate) O-methyltransferase domain containing 1
hsa-miR-219-2-3p	0	0	1	0	1	1	THAP6	THAP domain containing 6
hsa-miR-219-2-3p	0	0	1	1	1	1	C14orf79	chromosome 14 open reading frame 79
hsa-miR-219-2-3p	0	0	1	1	1	1	MS4A14	membrane-spanning 4-domains, subfamily A, member 14
hsa-miR-219-2-3p	1	0	1	1	1	1	ANKRD49	ankyrin repeat domain 49
hsa-miR-219-2-3p	0	0	1	0	1	1	UHMK1	U2AF homology motif (UHM) kinase 1
hsa-miR-219-2-3p	0	0	1	1	0	0	RHBDF2	rhomboid 5 homolog 2 (Drosophila)
hsa-miR-219-2-3p	0	0	1	1	1	1	STBD1	starch binding domain 1
hsa-miR-219-2-3p	0	0	1	0	0	0	LOC643837	uncharacterized LOC643837
hsa-miR-219-2-3p	0	0	1	1	0	0	ACOT11	acyl-CoA thioesterase 11
hsa-miR-219-2-3p	1	0	1	1	1	1	FRY	furry homolog (Drosophila)
hsa-miR-219-2-3p	0	0	1	0	1	1	TBX5-AS1	TBX5 antisense RNA 1
hsa-miR-219-2-3p	0	0	1	1	1	1	CD34	CD34 molecule
hsa-miR-219-2-3p	1	0	1	1	1	1	GNG2	guanine nucleotide binding protein (G protein), gamma 2
hsa-miR-219-2-3p	0	0	1	1	0	0	APOBEC3G	apolipoprotein B mRNA editing enzyme, catalytic polypeptide-like 3G
hsa-miR-219-2-3p	1	0	1	1	1	1	CLGN	calmegin
hsa-miR-219-2-3p	0	0	1	1	1	1	TGFBI	transforming growth factor, beta-induced, 68kDa
hsa-miR-219-2-3p	0	0	1	1	1	1	CYP11B1	cytochrome P450, family 11, subfamily B, polypeptide 1
hsa-miR-219-2-3p	1	0	1	1	1	1	KCND1	potassium voltage-gated channel, Shal-related subfamily, member 1
hsa-miR-219-2-3p	1	0	1	1	1	1	SNAP25	synaptosomal-associated protein, 25kDa
hsa-miR-219-2-3p	1	0	1	1	1	1	SYT1	synaptotagmin I
hsa-miR-219-2-3p	0	0	1	1	0	0	IL11RA	interleukin 11 receptor, alpha
hsa-miR-219-2-3p	1	0	1	0	1	1	ARL6IP6	ADP-ribosylation-like factor 6 interacting protein 6
hsa-miR-219-2-3p	1	0	1	1	1	1	ARHGEF7	Rho guanine nucleotide exchange factor (GEF) 7
hsa-miR-219-2-3p	1	0	1	1	1	1	ANKRD46	ankyrin repeat domain 46
hsa-miR-219-2-3p	0	0	1	1	1	1	MYO6	myosin VI
hsa-miR-219-2-3p	0	0	1	0	0	0	LOC730101	uncharacterized LOC730101
hsa-miR-219-2-3p	1	0	1	1	1	1	CNEP1R1	CTD nuclear envelope phosphatase 1 regulatory subunit 1
hsa-miR-219-2-3p	1	0	1	1	1	1	SPATS2	spermatogenesis associated, serine-rich 2
hsa-miR-219-2-3p	0	0	1	0	0	0	CCDC150	coiled-coil domain containing 150
hsa-miR-219-2-3p	1	0	1	1	1	1	FAM98A	family with sequence similarity 98, member A
hsa-miR-219-2-3p	0	0	1	1	0	0	RPN2	ribophorin II
hsa-miR-219-2-3p	0	0	1	0	0	0	ZNF815P	zinc finger protein 815, pseudogene
hsa-miR-219-2-3p	0	0	1	0	0	0	OTUD1	OTU domain containing 1
hsa-miR-219-2-3p	0	0	1	1	1	1	MPHOSPH9	M-phase phosphoprotein 9
hsa-miR-219-2-3p	1	0	1	0	1	1	THRB	thyroid hormone receptor, beta
hsa-miR-219-2-3p	1	0	1	1	1	1	SLC30A6	solute carrier family 30 (zinc transporter), member 6
hsa-miR-219-2-3p	0	0	1	0	1	1	FLJ39639	uncharacterized protein FLJ39639
hsa-miR-219-2-3p	0	0	1	0	1	1	TNFAIP8	tumor necrosis factor, alpha-induced protein 8
hsa-miR-219-2-3p	0	0	1	0	0	0	LOC400680	uncharacterized LOC400680
hsa-miR-219-2-3p	0	0	1	1	0	0	NUCB2	nucleobindin 2
hsa-miR-219-2-3p	0	0	1	1	1	1	FAM217A	family with sequence similarity 217, member A
hsa-miR-219-2-3p	1	0	1	1	1	1	GOLGA8B	golgin A8 family, member B
hsa-miR-219-2-3p	0	0	1	1	0	0	PSAPL1	prosaposin-like 1 (gene/pseudogene)
hsa-miR-219-2-3p	1	0	1	1	1	1	HOOK1	hook homolog 1 (Drosophila)
hsa-miR-219-2-3p	0	0	1	1	1	1	ATP9B	ATPase, class II, type 9B
hsa-miR-219-2-3p	0	0	1	1	0	0	ZNF283	zinc finger protein 283
hsa-miR-219-2-3p	0	0	1	1	0	0	DCBLD1	discoidin, CUB and LCCL domain containing 1
hsa-miR-219-2-3p	0	0	1	1	1	1	FAM76A	family with sequence similarity 76, member A
hsa-miR-219-2-3p	0	0	1	1	0	0	KIAA0146	KIAA0146
hsa-miR-219-2-3p	0	0	1	1	1	1	ARHGEF26	Rho guanine nucleotide exchange factor (GEF) 26
hsa-miR-219-2-3p	1	0	1	1	1	1	MDGA2	MAM domain containing glycosylphosphatidylinositol anchor 2
hsa-miR-219-2-3p	1	0	1	1	1	1	PPFIA1	protein tyrosine phosphatase, receptor type, f polypeptide (PTPRF), interacting protein (liprin), alpha 1
hsa-miR-219-2-3p	1	0	1	1	1	1	EGLN3	egl nine homolog 3 (C. elegans)
hsa-miR-219-2-3p	1	0	1	0	1	1	KCNK2	potassium channel, subfamily K, member 2
hsa-miR-219-2-3p	0	0	1	0	0	0	LGALS17A	Charcot-Leyden crystal protein pseudogene
hsa-miR-219-2-3p	0	0	1	1	0	0	LIX1L	Lix1 homolog (mouse)-like
hsa-miR-219-2-3p	1	0	1	1	1	1	KIF21A	kinesin family member 21A
hsa-miR-219-2-3p	1	0	1	1	1	1	ERBB3	v-erb-b2 erythroblastic leukemia viral oncogene homolog 3 (avian)
hsa-miR-219-2-3p	1	0	1	1	1	1	SEPHS1	selenophosphate synthetase 1
hsa-miR-219-2-3p	1	0	1	1	1	1	C11orf30	chromosome 11 open reading frame 30
hsa-miR-219-2-3p	1	0	1	1	1	1	METAP2	methionyl aminopeptidase 2
hsa-miR-219-2-3p	0	0	1	1	1	1	CTPS2	CTP synthase 2
hsa-miR-219-2-3p	0	0	1	0	1	1	RASGRP3	RAS guanyl releasing protein 3 (calcium and DAG-regulated)
hsa-miR-219-2-3p	0	0	1	1	1	1	RBM46	RNA binding motif protein 46
hsa-miR-219-2-3p	1	0	1	1	1	1	MACROD2	MACRO domain containing 2
hsa-miR-219-2-3p	1	0	1	1	0	0	UBN2	ubinuclein 2
hsa-miR-219-2-3p	1	0	1	1	1	1	KALRN	kalirin, RhoGEF kinase
hsa-miR-219-2-3p	0	0	1	1	0	0	FSIP2	fibrous sheath interacting protein 2
hsa-miR-219-2-3p	1	0	1	1	1	1	SIKE1	suppressor of IKBKE 1
hsa-miR-219-2-3p	1	0	1	1	1	1	PIK3R1	phosphoinositide-3-kinase, regulatory subunit 1 (alpha)
hsa-miR-219-2-3p	0	0	1	1	1	1	PLEKHS1	pleckstrin homology domain containing, family S member 1
hsa-miR-219-2-3p	1	0	1	0	0	0	CPLX1	complexin 1
hsa-miR-219-2-3p	0	0	1	1	1	1	BDH1	3-hydroxybutyrate dehydrogenase, type 1
hsa-miR-219-2-3p	1	0	1	1	1	1	DLG2	discs, large homolog 2 (Drosophila)
hsa-miR-219-2-3p	0	0	1	1	0	0	NPIP	nuclear pore complex interacting protein
hsa-miR-219-2-3p	1	0	1	1	1	1	C14orf28	chromosome 14 open reading frame 28
hsa-miR-219-2-3p	1	0	1	1	1	1	EIF4E3	eukaryotic translation initiation factor 4E family member 3
hsa-miR-219-2-3p	0	0	1	0	0	0	RPL23AP53	ribosomal protein L23a pseudogene 53
hsa-miR-219-2-3p	0	0	1	1	1	1	MOBP	myelin-associated oligodendrocyte basic protein
hsa-miR-219-2-3p	1	0	1	1	1	1	TSHZ1	teashirt zinc finger homeobox 1
hsa-miR-219-2-3p	1	0	1	1	0	0	PTPN5	protein tyrosine phosphatase, non-receptor type 5 (striatum-enriched)
hsa-miR-219-2-3p	1	0	1	1	1	1	ENAH	enabled homolog (Drosophila)
hsa-miR-219-2-3p	0	0	1	1	1	1	ZNF503	zinc finger protein 503
hsa-miR-219-2-3p	1	0	1	1	0	0	PEAK1	NKF3 kinase family member
hsa-miR-219-2-3p	1	0	1	0	1	1	FNDC3B	fibronectin type III domain containing 3B
hsa-miR-219-2-3p	0	0	1	0	0	0	ERVFRD-2	endogenous retrovirus group FRD, member 2
hsa-miR-219-2-3p	1	0	1	0	1	1	CAPRIN1	cell cycle associated protein 1
hsa-miR-219-2-3p	1	0	1	0	1	1	YOD1	YOD1 OTU deubiquinating enzyme 1 homolog (S. cerevisiae)
hsa-miR-219-2-3p	1	0	1	1	1	1	SLC12A6	solute carrier family 12 (potassium/chloride transporters), member 6
hsa-miR-219-2-3p	0	0	1	0	0	0	FAM205B	transmembrane protein C9orf144B pseudogene
hsa-miR-219-2-3p	1	0	1	0	1	1	PLSCR4	phospholipid scramblase 4
hsa-miR-219-2-3p	1	0	1	0	0	0	SP7	Sp7 transcription factor
hsa-miR-219-2-3p	0	0	1	1	1	1	TPK1	thiamin pyrophosphokinase 1
hsa-miR-219-2-3p	0	0	1	0	0	0	EMBP1	embigin pseudogene 1
hsa-miR-219-2-3p	1	0	1	0	1	1	CYB561D1	cytochrome b-561 domain containing 1
hsa-miR-219-2-3p	0	0	1	1	1	1	G3BP1	GTPase activating protein (SH3 domain) binding protein 1
hsa-miR-219-2-3p	0	0	1	0	0	0	LOC494141	mitochondrial carrier triple repeat 1 pseudogene
hsa-miR-219-2-3p	1	0	1	0	1	1	ESRRG	estrogen-related receptor gamma
hsa-miR-219-2-3p	1	0	1	0	1	1	STK3	serine/threonine kinase 3
hsa-miR-219-2-3p	0	0	1	1	0	0	ZNF730	zinc finger protein 730
hsa-miR-219-2-3p	0	0	1	1	0	0	FIZ1	FLT3-interacting zinc finger 1
hsa-miR-219-2-3p	0	0	1	1	1	1	AKTIP	AKT interacting protein
hsa-miR-219-2-3p	0	0	1	1	1	1	C5orf28	chromosome 5 open reading frame 28
hsa-miR-219-2-3p	1	0	1	1	1	1	PHTF2	putative homeodomain transcription factor 2
hsa-miR-219-2-3p	0	0	1	1	0	0	NEK7	NIMA (never in mitosis gene a)-related kinase 7
hsa-miR-219-2-3p	0	0	1	1	1	1	TTLL3	tubulin tyrosine ligase-like family, member 3
hsa-miR-219-2-3p	0	0	1	0	0	0	POM121L9P	POM121 transmembrane nucleoporin-like 9, pseudogene
hsa-miR-219-2-3p	1	0	1	1	1	1	ARF6	ADP-ribosylation factor 6
hsa-miR-219-2-3p	0	0	1	1	1	1	ARIH1	ariadne homolog, ubiquitin-conjugating enzyme E2 binding protein, 1 (Drosophila)
hsa-miR-219-2-3p	1	0	1	1	1	1	SMAP2	small ArfGAP2
hsa-miR-219-2-3p	0	0	1	1	0	0	H2AFJ	H2A histone family, member J
hsa-miR-219-2-3p	1	0	1	1	1	1	GOLGA8A	golgin A8 family, member A
hsa-miR-219-2-3p	1	0	1	1	1	1	NBEA	neurobeachin
hsa-miR-219-2-3p	1	0	1	0	1	1	GPR85	G protein-coupled receptor 85
hsa-miR-219-2-3p	0	0	1	1	0	0	DOPEY1	dopey family member 1
hsa-miR-219-2-3p	0	0	1	0	0	0	FAM66D	family with sequence similarity 66, member D
hsa-miR-219-2-3p	1	0	1	1	1	1	MIER1	mesoderm induction early response 1 homolog (Xenopus laevis)
hsa-miR-219-2-3p	0	0	1	0	0	0	ZNF720	zinc finger protein 720
hsa-miR-219-2-3p	1	0	1	0	1	1	HNRNPA3	heterogeneous nuclear ribonucleoprotein A3
hsa-miR-219-2-3p	1	0	1	1	0	0	USP24	ubiquitin specific peptidase 24
hsa-miR-219-2-3p	1	0	1	1	1	1	MLL3	myeloid/lymphoid or mixed-lineage leukemia 3
hsa-miR-219-2-3p	1	0	1	1	1	1	NABP1	nucleic acid binding protein 1
hsa-miR-219-2-3p	1	0	1	1	1	1	BPTF	bromodomain PHD finger transcription factor
hsa-miR-219-2-3p	1	0	1	1	0	0	KIAA1109	KIAA1109
hsa-miR-219-2-3p	0	0	1	1	0	0	FAM18A	family with sequence similarity 18, member A
hsa-miR-219-2-3p	0	0	1	0	0	0	EPHA1-AS1	EPHA1 antisense RNA 1
hsa-miR-219-2-3p	1	0	1	1	1	1	ANP32E	acidic (leucine-rich) nuclear phosphoprotein 32 family, member E
hsa-miR-219-2-3p	0	0	1	1	1	1	CAND1	cullin-associated and neddylation-dissociated 1
hsa-miR-219-2-3p	1	0	1	1	1	1	IL17RD	interleukin 17 receptor D
hsa-miR-219-2-3p	1	0	1	1	1	1	CAPRIN2	caprin family member 2
hsa-miR-219-2-3p	1	0	1	0	1	1	JAZF1	JAZF zinc finger 1
hsa-miR-219-2-3p	1	0	1	1	1	1	RICTOR	RPTOR independent companion of MTOR, complex 2
hsa-miR-219-2-3p	1	0	1	1	1	1	BOLL	bol, boule-like (Drosophila)
hsa-miR-219-2-3p	0	0	1	1	1	1	SLAMF7	SLAM family member 7
hsa-miR-219-2-3p	0	0	1	0	1	1	USO1	USO1 vesicle docking protein homolog (yeast)
hsa-miR-219-2-3p	0	0	1	1	0	0	PPP3CC	protein phosphatase 3, catalytic subunit, gamma isozyme
hsa-miR-219-2-3p	0	0	1	1	1	1	CRB1	crumbs homolog 1 (Drosophila)
hsa-miR-219-2-3p	1	0	1	1	1	1	CKAP2	cytoskeleton associated protein 2
hsa-miR-219-2-3p	1	0	1	1	1	1	TPP1	tripeptidyl peptidase I
hsa-miR-219-2-3p	1	0	1	1	1	1	TAB3	TGF-beta activated kinase 1/MAP3K7 binding protein 3
hsa-miR-219-2-3p	1	0	1	1	0	0	LAYN	layilin
hsa-miR-219-2-3p	0	0	1	0	0	0	LINC00085	long intergenic non-protein coding RNA 85
hsa-miR-219-2-3p	0	0	1	1	0	0	MUC1	mucin 1, cell surface associated
hsa-miR-219-2-3p	0	0	1	1	1	1	DIDO1	death inducer-obliterator 1
hsa-miR-219-2-3p	1	0	1	1	1	1	MECP2	methyl CpG binding protein 2 (Rett syndrome)
hsa-miR-219-2-3p	1	0	1	1	1	1	RBM24	RNA binding motif protein 24
hsa-miR-219-2-3p	1	0	1	1	1	1	HMGA2	high mobility group AT-hook 2
hsa-miR-219-2-3p	1	0	1	1	1	1	PLCH1	phospholipase C, eta 1
hsa-miR-219-2-3p	1	0	1	1	1	1	RTN3	reticulon 3
hsa-miR-219-2-3p	0	0	1	1	1	1	IL23R	interleukin 23 receptor
hsa-miR-219-2-3p	0	0	1	1	0	0	NPSR1	neuropeptide S receptor 1
hsa-miR-219-2-3p	1	0	1	1	1	1	AMOT	angiomotin
hsa-miR-219-2-3p	0	0	1	1	1	1	RAB7L1	RAB7, member RAS oncogene family-like 1
hsa-miR-219-2-3p	0	0	1	1	1	1	TMOD1	tropomodulin 1
hsa-miR-219-2-3p	1	0	1	1	1	1	TSPAN14	tetraspanin 14
hsa-miR-219-2-3p	1	0	1	0	1	1	DCAF10	DDB1 and CUL4 associated factor 10
hsa-miR-219-2-3p	1	0	1	0	1	1	CGGBP1	CGG triplet repeat binding protein 1
hsa-miR-219-2-3p	1	0	1	1	1	1	MBNL1	muscleblind-like splicing regulator 1
hsa-miR-219-2-3p	0	0	1	1	1	1	LZIC	leucine zipper and CTNNBIP1 domain containing
hsa-miR-219-2-3p	0	0	1	1	1	1	DPYD	dihydropyrimidine dehydrogenase
hsa-miR-219-2-3p	0	0	1	1	1	1	TMEM30A	transmembrane protein 30A
hsa-miR-219-2-3p	1	0	1	1	1	1	RBM7	RNA binding motif protein 7
hsa-miR-219-2-3p	0	0	1	0	0	0	LOC729013	uncharacterized LOC729013
hsa-miR-219-2-3p	1	0	1	1	1	1	PAPOLA	poly(A) polymerase alpha
hsa-miR-219-2-3p	0	0	1	1	1	1	C1QTNF3	C1q and tumor necrosis factor related protein 3
hsa-miR-219-2-3p	1	0	1	1	1	1	NRF1	nuclear respiratory factor 1
hsa-miR-219-2-3p	0	0	1	0	0	0	ASH1L-AS1	ASH1L antisense RNA 1
hsa-miR-219-2-3p	0	0	1	1	1	1	PARP9	poly (ADP-ribose) polymerase family, member 9
hsa-miR-219-2-3p	0	0	1	0	0	0	LOC100144602	uncharacterized LOC100144602
hsa-miR-219-2-3p	1	0	1	1	1	1	ARHGEF9	Cdc42 guanine nucleotide exchange factor (GEF) 9
hsa-miR-219-2-3p	0	0	1	1	1	1	PARPBP	PARP1 binding protein
hsa-miR-219-2-3p	0	0	1	1	1	1	C10orf88	chromosome 10 open reading frame 88
hsa-miR-219-2-3p	0	0	1	1	1	1	FHL5	four and a half LIM domains 5
hsa-miR-219-2-3p	1	0	1	1	1	1	TMEM71	transmembrane protein 71
hsa-miR-219-2-3p	1	0	1	1	1	1	LIMS1	LIM and senescent cell antigen-like domains 1
hsa-miR-219-2-3p	1	0	1	1	1	1	NIPA1	non imprinted in Prader-Willi/Angelman syndrome 1
hsa-miR-219-2-3p	0	0	1	1	1	1	VWA3B	von Willebrand factor A domain containing 3B
hsa-miR-219-2-3p	0	0	1	0	0	0	ZBED3-AS1	ZBED3 antisense RNA 1
hsa-miR-219-2-3p	1	0	1	1	1	1	APPL2	adaptor protein, phosphotyrosine interaction, PH domain and leucine zipper containing 2
hsa-miR-219-2-3p	1	0	1	0	0	0	KCNU1	potassium channel, subfamily U, member 1
hsa-miR-219-2-3p	0	0	1	0	0	0	LOC145837	uncharacterized LOC145837
hsa-miR-219-2-3p	0	0	1	0	0	0	C3orf55	chromosome 3 open reading frame 55
hsa-miR-219-2-3p	1	0	1	0	1	1	SV2B	synaptic vesicle glycoprotein 2B
hsa-miR-219-2-3p	1	0	1	1	1	1	TIAL1	TIA1 cytotoxic granule-associated RNA binding protein-like 1
hsa-miR-219-2-3p	0	0	1	1	1	1	TMEM117	transmembrane protein 117
hsa-miR-219-2-3p	1	0	1	1	1	1	MLLT3	myeloid/lymphoid or mixed-lineage leukemia (trithorax homolog, Drosophila); translocated to, 3
hsa-miR-219-2-3p	1	0	1	1	1	1	EYA4	eyes absent homolog 4 (Drosophila)
hsa-miR-219-2-3p	0	0	1	0	1	1	FLJ25328	uncharacterized LOC148231
hsa-miR-219-2-3p	1	0	1	1	1	1	TBC1D1	TBC1 (tre-2/USP6, BUB2, cdc16) domain family, member 1
hsa-miR-219-2-3p	1	0	1	1	1	1	RHOBTB1	Rho-related BTB domain containing 1
hsa-miR-219-2-3p	1	0	1	1	1	1	SORL1	sortilin-related receptor, L(DLR class) A repeats containing
hsa-miR-219-2-3p	1	0	1	1	1	1	PPP2R2C	protein phosphatase 2, regulatory subunit B, gamma
hsa-miR-219-2-3p	0	0	1	1	1	1	IL20RB	interleukin 20 receptor beta
hsa-miR-219-2-3p	1	0	1	1	1	1	PCDHA5	protocadherin alpha 5
hsa-miR-219-2-3p	1	0	1	1	1	1	LPGAT1	lysophosphatidylglycerol acyltransferase 1
hsa-miR-219-2-3p	0	0	1	0	1	1	DKFZP434I0714	uncharacterized protein DKFZP434I0714
hsa-miR-219-2-3p	0	0	1	1	1	1	EDA2R	ectodysplasin A2 receptor
hsa-miR-219-2-3p	0	0	1	1	1	1	ZNF781	zinc finger protein 781
hsa-miR-219-2-3p	1	0	1	1	1	1	CTDSPL2	CTD (carboxy-terminal domain, RNA polymerase II, polypeptide A) small phosphatase like 2
hsa-miR-219-2-3p	0	0	1	1	1	1	CBLN2	cerebellin 2 precursor
hsa-miR-219-2-3p	0	0	1	0	0	0	LOC339862	uncharacterized LOC339862
hsa-miR-219-2-3p	0	0	1	0	0	0	HOXA-AS2	HOXA cluster antisense RNA 2
hsa-miR-219-2-3p	1	0	1	1	1	1	PEX5L	peroxisomal biogenesis factor 5-like
hsa-miR-219-2-3p	0	0	1	0	0	0	FAM201A	family with sequence similarity 201, member A
hsa-miR-219-2-3p	0	0	1	0	1	1	C9orf57	chromosome 9 open reading frame 57
hsa-miR-219-2-3p	1	0	1	1	1	1	HECTD2	HECT domain containing E3 ubiquitin protein ligase 2
hsa-miR-219-2-3p	1	0	1	1	1	1	BNC2	basonuclin 2
hsa-miR-219-2-3p	1	0	1	0	0	0	RAVER1	ribonucleoprotein, PTB-binding 1
hsa-miR-219-2-3p	1	0	1	0	1	1	YAF2	YY1 associated factor 2
hsa-miR-219-2-3p	0	0	1	0	0	0	INHBA-AS1	INHBA antisense RNA 1
hsa-miR-219-2-3p	1	0	1	1	0	0	CCDC138	coiled-coil domain containing 138
hsa-miR-219-2-3p	0	0	1	0	0	0	FLJ36000	uncharacterized FLJ36000
hsa-miR-219-2-3p	1	0	1	1	1	1	PAIP2	poly(A) binding protein interacting protein 2
hsa-miR-219-2-3p	1	0	1	0	0	0	CT62	cancer/testis antigen 62
hsa-miR-219-2-3p	0	0	1	0	0	0	LOC100132735	uncharacterized LOC100132735
hsa-miR-219-2-3p	0	0	1	0	0	0	DLGAP1-AS3	DLGAP1 antisense RNA 3
hsa-miR-219-2-3p	1	0	1	1	1	1	FOSB	FBJ murine osteosarcoma viral oncogene homolog B
hsa-miR-219-2-3p	1	0	1	1	1	1	FBXO8	F-box protein 8
hsa-miR-219-2-3p	0	0	1	1	1	1	ZFP90	zinc finger protein 90 homolog (mouse)
hsa-miR-219-2-3p	1	0	1	1	1	1	ARPP21	cAMP-regulated phosphoprotein, 21kDa
hsa-miR-219-2-3p	0	0	1	1	1	1	GOLGA6L9	golgin A6 family-like 9
hsa-miR-219-2-3p	0	0	1	1	1	1	MTHFD2L	methylenetetrahydrofolate dehydrogenase (NADP+ dependent) 2-like
hsa-miR-219-2-3p	0	0	1	1	0	0	C1orf87	chromosome 1 open reading frame 87
hsa-miR-219-2-3p	0	0	1	1	1	1	NSUN7	NOP2/Sun domain family, member 7
hsa-miR-219-2-3p	0	0	1	0	0	0	C10orf108	chromosome 10 open reading frame 108
hsa-miR-219-2-3p	1	0	1	0	1	1	USP6NL	USP6 N-terminal like
hsa-miR-219-2-3p	1	0	1	1	1	1	HLTF	helicase-like transcription factor
hsa-miR-219-2-3p	0	0	1	0	0	0	LOC283914	uncharacterized LOC283914
hsa-miR-219-2-3p	1	0	1	1	1	1	SF3B1	splicing factor 3b, subunit 1, 155kDa
hsa-miR-219-2-3p	1	0	1	0	1	1	LYPD6	LY6/PLAUR domain containing 6
hsa-miR-219-2-3p	0	0	1	1	1	1	OLFML2B	olfactomedin-like 2B
hsa-miR-219-2-3p	1	0	1	1	1	1	PELI1	pellino E3 ubiquitin protein ligase 1
hsa-miR-219-2-3p	0	0	1	0	1	1	ITGA1	integrin, alpha 1
hsa-miR-219-2-3p	0	0	1	1	1	1	FBXO38	F-box protein 38
hsa-miR-219-2-3p	1	0	1	1	1	1	ANGPTL1	angiopoietin-like 1
hsa-miR-219-2-3p	0	0	1	0	0	0	IDI2-AS1	IDI2 antisense RNA 1
hsa-miR-219-2-3p	1	0	1	0	1	1	SEMA4G	sema domain, immunoglobulin domain (Ig), transmembrane domain (TM) and short cytoplasmic domain, (semaphorin) 4G
hsa-miR-219-2-3p	1	0	1	1	1	1	LIMD2	LIM domain containing 2
hsa-miR-219-2-3p	1	0	1	1	1	1	PCGF5	polycomb group ring finger 5
hsa-miR-219-2-3p	1	0	1	1	1	1	ZFP161	zinc finger protein 161 homolog (mouse)
hsa-miR-219-2-3p	0	0	1	1	0	0	LRRIQ3	leucine-rich repeats and IQ motif containing 3
hsa-miR-219-2-3p	0	0	1	0	1	1	ASAP2	ArfGAP with SH3 domain, ankyrin repeat and PH domain 2
hsa-miR-219-2-3p	0	0	1	0	0	0	USP32P1	ubiquitin specific peptidase 32 pseudogene 1
hsa-miR-219-2-3p	1	0	1	1	1	1	UEVLD	UEV and lactate/malate dehyrogenase domains
hsa-miR-219-2-3p	1	0	1	1	1	1	MYLK	myosin light chain kinase
hsa-miR-219-2-3p	1	0	1	1	1	1	VTCN1	V-set domain containing T cell activation inhibitor 1
hsa-miR-219-2-3p	0	0	1	1	1	1	SH2D1B	SH2 domain containing 1B
hsa-miR-219-2-3p	1	0	1	1	1	1	GRHL1	grainyhead-like 1 (Drosophila)
hsa-miR-219-2-3p	1	0	1	1	1	1	PDCD6IP	programmed cell death 6 interacting protein
hsa-miR-219-2-3p	0	0	1	1	1	1	CBWD3	COBW domain containing 3
hsa-miR-219-2-3p	0	0	1	1	0	0	TRIM46	tripartite motif containing 46
hsa-miR-219-2-3p	1	0	1	1	1	1	AHR	aryl hydrocarbon receptor
hsa-miR-219-2-3p	1	0	1	1	1	1	USP47	ubiquitin specific peptidase 47
hsa-miR-219-2-3p	1	0	1	0	1	1	TMEM194A	transmembrane protein 194A
hsa-miR-219-2-3p	0	0	1	0	0	0	ULK4P3	unc-51-like kinase 4 (C. elegans) pseudogene 3
hsa-miR-219-2-3p	0	0	1	1	0	0	S100A1	S100 calcium binding protein A1
hsa-miR-219-2-3p	0	0	1	0	0	0	PHKA2-AS1	PHKA2 antisense RNA 1
hsa-miR-219-2-3p	0	0	1	0	0	0	LINC00152	long intergenic non-protein coding RNA 152
hsa-miR-219-2-3p	1	0	1	1	1	1	WNT5A	wingless-type MMTV integration site family, member 5A
hsa-miR-219-2-3p	0	0	1	1	0	0	UGT8	UDP glycosyltransferase 8
hsa-miR-219-2-3p	1	0	1	0	1	1	AMMECR1L	AMME chromosomal region gene 1-like
hsa-miR-219-2-3p	1	0	1	1	1	1	WNT10B	wingless-type MMTV integration site family, member 10B
hsa-miR-219-2-3p	1	0	1	0	1	1	LRRTM4	leucine rich repeat transmembrane neuronal 4
hsa-miR-219-2-3p	0	0	1	1	1	1	XG	Xg blood group
hsa-miR-219-2-3p	0	0	1	0	1	1	TCAIM	T cell activation inhibitor, mitochondrial
hsa-miR-219-2-3p	0	0	1	1	1	1	ZNF365	zinc finger protein 365
hsa-miR-219-2-3p	1	0	1	1	1	1	GABRB2	gamma-aminobutyric acid (GABA) A receptor, beta 2
hsa-miR-219-2-3p	1	0	1	0	1	1	DNAJC6	DnaJ (Hsp40) homolog, subfamily C, member 6
hsa-miR-219-2-3p	1	0	1	1	1	1	CERS6	ceramide synthase 6
hsa-miR-219-2-3p	1	0	1	0	1	1	BTBD3	BTB (POZ) domain containing 3
hsa-miR-219-2-3p	0	0	1	1	1	1	SMTNL2	smoothelin-like 2
hsa-miR-219-2-3p	0	0	1	1	0	0	ASB3	ankyrin repeat and SOCS box containing 3
hsa-miR-219-2-3p	0	0	1	0	0	0	LRRC37A11P	leucine rich repeat containing 37, member A11, pseudogene
hsa-miR-219-2-3p	1	0	1	1	1	1	NR3C2	nuclear receptor subfamily 3, group C, member 2
hsa-miR-219-2-3p	1	0	1	0	1	1	ROBO1	roundabout, axon guidance receptor, homolog 1 (Drosophila)
hsa-miR-219-2-3p	1	0	1	1	1	1	PAX3	paired box 3
hsa-miR-219-2-3p	1	0	1	1	1	1	SHANK2	SH3 and multiple ankyrin repeat domains 2
hsa-miR-219-2-3p	1	0	1	1	1	1	SLMAP	sarcolemma associated protein
hsa-miR-219-2-3p	1	0	1	0	1	1	PRDM10	PR domain containing 10
hsa-miR-219-2-3p	0	0	1	0	0	0	LINC00661	long intergenic non-protein coding RNA 661
hsa-miR-219-2-3p	0	0	1	0	0	0	LRRC37BP1	leucine rich repeat containing 37B pseudogene 1
hsa-miR-219-2-3p	1	0	1	1	1	1	OTUD4	OTU domain containing 4
hsa-miR-219-2-3p	1	0	1	1	1	1	PIKFYVE	phosphoinositide kinase, FYVE finger containing
hsa-miR-219-2-3p	0	0	1	0	1	1	GOLGA8G	golgin A8 family, member G
hsa-miR-219-2-3p	1	0	1	1	1	1	CHIC1	cysteine-rich hydrophobic domain 1
hsa-miR-219-2-3p	0	0	1	0	0	0	FAM225B	family with sequence similarity 225, member B (non-protein coding)
hsa-miR-219-2-3p	0	0	1	1	1	1	MAPK8	mitogen-activated protein kinase 8
hsa-miR-219-2-3p	1	0	1	1	1	1	FNDC3A	fibronectin type III domain containing 3A
hsa-miR-219-2-3p	0	0	1	1	1	1	PRKAR2A	protein kinase, cAMP-dependent, regulatory, type II, alpha
hsa-miR-219-2-3p	1	0	1	0	1	1	TTC7B	tetratricopeptide repeat domain 7B
hsa-miR-219-2-3p	1	0	1	1	1	1	PPP2R5C	protein phosphatase 2, regulatory subunit B', gamma
hsa-miR-219-2-3p	0	0	1	0	0	0	FLJ39632	uncharacterized LOC642477
hsa-miR-219-2-3p	1	0	1	1	1	1	EIF5	eukaryotic translation initiation factor 5
hsa-miR-219-2-3p	0	0	1	1	1	1	DNAJB14	DnaJ (Hsp40) homolog, subfamily B, member 14
hsa-miR-219-2-3p	1	0	1	1	1	1	JPH1	junctophilin 1
hsa-miR-219-2-3p	1	0	1	1	1	1	MIER3	mesoderm induction early response 1, family member 3
hsa-miR-219-2-3p	0	0	1	1	1	1	NUP54	nucleoporin 54kDa
hsa-miR-219-2-3p	1	0	1	0	1	1	MTX3	metaxin 3
hsa-miR-219-2-3p	1	0	1	1	1	1	ETS1	v-ets erythroblastosis virus E26 oncogene homolog 1 (avian)
hsa-miR-219-2-3p	0	0	1	1	1	1	KLHL8	kelch-like 8 (Drosophila)
hsa-miR-219-2-3p	0	0	1	1	1	1	MAP2K6	mitogen-activated protein kinase kinase 6
hsa-miR-219-2-3p	0	0	1	1	1	1	VPS35	vacuolar protein sorting 35 homolog (S. cerevisiae)
hsa-miR-219-2-3p	0	0	1	0	1	1	NHSL1	NHS-like 1
hsa-miR-219-2-3p	0	0	1	1	1	1	PRR14L	proline rich 14-like
hsa-miR-219-2-3p	0	0	1	0	0	0	SMG1P1	smg-1 homolog, phosphatidylinositol 3-kinase-related kinase pseudogene 1
hsa-miR-219-2-3p	0	0	1	1	1	1	MLIP	muscular LMNA-interacting protein
hsa-miR-219-2-3p	1	0	1	1	1	1	TLN2	talin 2
hsa-miR-219-2-3p	0	0	1	0	1	1	ANKRD36	ankyrin repeat domain 36
hsa-miR-219-2-3p	1	0	1	1	1	1	GTDC1	glycosyltransferase-like domain containing 1
hsa-miR-219-2-3p	0	0	1	1	0	0	LRR1	leucine rich repeat protein 1
hsa-miR-219-2-3p	1	0	1	1	1	1	DDAH1	dimethylarginine dimethylaminohydrolase 1
hsa-miR-219-2-3p	0	0	1	1	0	0	FBXO7	F-box protein 7
hsa-miR-219-2-3p	1	0	1	1	1	1	BCLAF1	BCL2-associated transcription factor 1
hsa-miR-219-2-3p	1	0	1	1	1	1	C5orf24	chromosome 5 open reading frame 24
hsa-miR-219-2-3p	1	0	1	1	1	1	PTER	phosphotriesterase related
hsa-miR-219-2-3p	1	0	1	1	1	1	TMEM135	transmembrane protein 135
hsa-miR-219-2-3p	1	0	1	1	1	1	FAM179B	family with sequence similarity 179, member B
hsa-miR-219-2-3p	1	0	1	1	1	1	HIF1A	hypoxia inducible factor 1, alpha subunit (basic helix-loop-helix transcription factor)
hsa-miR-219-2-3p	0	0	1	1	1	1	IFRD1	interferon-related developmental regulator 1
hsa-miR-219-2-3p	1	0	1	1	1	1	CALD1	caldesmon 1
hsa-miR-219-2-3p	1	0	1	0	1	1	TBL1XR1	transducin (beta)-like 1 X-linked receptor 1
hsa-miR-219-2-3p	0	0	1	1	1	1	HPGD	hydroxyprostaglandin dehydrogenase 15-(NAD)
hsa-miR-219-2-3p	1	0	1	1	1	1	MDK	midkine (neurite growth-promoting factor 2)
hsa-miR-219-2-3p	0	0	1	1	0	0	PPT2	palmitoyl-protein thioesterase 2
hsa-miR-219-2-3p	1	0	1	0	1	1	RNF144A	ring finger protein 144A
hsa-miR-219-2-3p	1	0	1	0	1	1	STX6	syntaxin 6
hsa-miR-219-2-3p	0	0	1	1	1	1	TMEM53	transmembrane protein 53
hsa-miR-219-2-3p	1	0	1	1	1	1	FUT9	fucosyltransferase 9 (alpha (1,3) fucosyltransferase)
hsa-miR-219-2-3p	0	0	1	1	0	0	TCEAL4	transcription elongation factor A (SII)-like 4
hsa-miR-219-2-3p	0	0	1	1	1	1	CIRBP	cold inducible RNA binding protein
hsa-miR-219-2-3p	1	0	1	1	1	1	CAAP1	caspase activity and apoptosis inhibitor 1
hsa-miR-219-2-3p	1	0	1	1	1	1	SSR1	signal sequence receptor, alpha
hsa-miR-219-2-3p	0	0	1	1	1	1	MTCP1	mature T-cell proliferation 1
hsa-miR-219-2-3p	0	0	1	1	1	1	SORD	sorbitol dehydrogenase
hsa-miR-219-2-3p	0	0	1	1	1	1	ACTR3B	ARP3 actin-related protein 3 homolog B (yeast)
hsa-miR-219-2-3p	1	0	1	1	1	1	STK38L	serine/threonine kinase 38 like
hsa-miR-219-2-3p	0	0	1	1	0	0	DOK5	docking protein 5
hsa-miR-219-2-3p	1	0	1	1	1	1	TMEM245	transmembrane protein 245
hsa-miR-219-2-3p	1	0	1	1	1	1	WIPF1	WAS/WASL interacting protein family, member 1
hsa-miR-219-2-3p	1	0	1	1	1	1	BTBD10	BTB (POZ) domain containing 10
hsa-miR-219-2-3p	0	0	1	1	1	1	ZDHHC16	zinc finger, DHHC-type containing 16
hsa-miR-219-2-3p	1	0	1	1	1	1	GPR137B	G protein-coupled receptor 137B
hsa-miR-219-2-3p	1	0	1	1	1	1	LAMTOR3	late endosomal/lysosomal adaptor, MAPK and MTOR activator 3
hsa-miR-219-2-3p	1	0	1	1	1	1	TLK2	tousled-like kinase 2
hsa-miR-219-2-3p	0	0	1	1	1	1	PEX19	peroxisomal biogenesis factor 19
hsa-miR-219-2-3p	1	0	1	1	1	1	FUBP3	far upstream element (FUSE) binding protein 3
hsa-miR-219-2-3p	1	0	1	1	1	1	ARL4A	ADP-ribosylation factor-like 4A
hsa-miR-219-2-3p	0	0	1	1	1	1	UBE2F	ubiquitin-conjugating enzyme E2F (putative)
hsa-miR-219-2-3p	1	0	1	1	1	1	NFYB	nuclear transcription factor Y, beta
hsa-miR-219-2-3p	0	0	1	1	1	1	GFM1	G elongation factor, mitochondrial 1
hsa-miR-219-2-3p	1	0	1	1	1	1	AZI2	5-azacytidine induced 2
hsa-miR-219-2-3p	1	0	1	1	1	1	RNF2	ring finger protein 2
hsa-miR-219-2-3p	0	0	1	1	0	0	OXA1L	oxidase (cytochrome c) assembly 1-like
hsa-miR-219-2-3p	1	0	1	0	1	1	MAP1B	microtubule-associated protein 1B
hsa-miR-219-2-3p	1	0	1	1	1	1	SRSF2	serine/arginine-rich splicing factor 2
hsa-miR-219-2-3p	1	0	1	1	1	1	RUNX1	runt-related transcription factor 1
hsa-miR-219-2-3p	1	0	1	1	1	1	YWHAE	tyrosine 3-monooxygenase/tryptophan 5-monooxygenase activation protein, epsilon polypeptide
hsa-miR-219-2-3p	1	0	1	1	0	0	PPP4C	protein phosphatase 4, catalytic subunit
hsa-miR-219-2-3p	1	0	1	1	1	1	PHF20L1	PHD finger protein 20-like 1
hsa-miR-219-2-3p	0	0	1	0	0	0	LOC100132984	uncharacterized LOC100132984
hsa-miR-219-2-3p	1	0	1	1	1	1	MAN1C1	mannosidase, alpha, class 1C, member 1
hsa-miR-219-2-3p	0	0	1	1	1	1	FAM118B	family with sequence similarity 118, member B
hsa-miR-219-2-3p	1	0	1	1	1	1	LGALSL	lectin, galactoside-binding-like
hsa-miR-219-2-3p	0	0	1	1	1	1	NUB1	negative regulator of ubiquitin-like proteins 1
hsa-miR-219-2-3p	1	0	1	1	1	1	GABPB2	GA binding protein transcription factor, beta subunit 2
hsa-miR-219-2-3p	0	0	1	0	0	0	LOC731789	uncharacterized LOC731789
hsa-miR-219-2-3p	0	0	1	1	1	1	UPRT	uracil phosphoribosyltransferase (FUR1) homolog (S. cerevisiae)
hsa-miR-219-2-3p	0	0	1	1	1	1	MRPL42	mitochondrial ribosomal protein L42
hsa-miR-219-2-3p	1	0	1	0	1	1	PTP4A1	protein tyrosine phosphatase type IVA, member 1
hsa-miR-219-2-3p	0	0	1	0	0	0	DNAJC27-AS1	DNAJC27 antisense RNA 1
hsa-miR-219-2-3p	0	0	1	1	1	1	RBM48	RNA binding motif protein 48
hsa-miR-219-2-3p	0	0	1	1	0	0	STK25	serine/threonine kinase 25
hsa-miR-219-2-3p	1	0	1	1	1	1	ZFHX3	zinc finger homeobox 3
hsa-miR-219-2-3p	0	0	1	1	1	1	SLC39A14	solute carrier family 39 (zinc transporter), member 14
hsa-miR-219-2-3p	1	0	1	0	1	1	LONRF2	LON peptidase N-terminal domain and ring finger 2
hsa-miR-219-2-3p	0	0	1	1	1	1	LTA	lymphotoxin alpha (TNF superfamily, member 1)
hsa-miR-219-2-3p	1	0	1	1	1	1	KCNE3	potassium voltage-gated channel, Isk-related family, member 3
hsa-miR-219-2-3p	1	0	1	0	1	1	RBBP5	retinoblastoma binding protein 5
hsa-miR-219-2-3p	0	0	1	1	1	1	PROS1	protein S (alpha)
hsa-miR-219-2-3p	1	0	1	1	1	1	DAPK1	death-associated protein kinase 1
hsa-miR-219-2-3p	1	0	1	1	1	1	AFF1	AF4/FMR2 family, member 1
hsa-miR-219-2-3p	0	0	1	0	1	1	OPRK1	opioid receptor, kappa 1
hsa-miR-219-2-3p	0	0	1	1	1	1	PLCB4	phospholipase C, beta 4
hsa-miR-219-2-3p	1	0	1	1	1	1	GRM1	glutamate receptor, metabotropic 1
hsa-miR-219-2-3p	1	0	1	0	1	1	BCL2	B-cell CLL/lymphoma 2
hsa-miR-219-2-3p	1	0	1	0	1	1	YES1	v-yes-1 Yamaguchi sarcoma viral oncogene homolog 1
hsa-miR-219-2-3p	1	0	1	1	1	1	IGF1	insulin-like growth factor 1 (somatomedin C)
hsa-miR-219-2-3p	0	0	1	1	1	1	CA2	carbonic anhydrase II
hsa-miR-219-2-3p	1	0	1	1	1	1	COL3A1	collagen, type III, alpha 1
hsa-miR-219-2-3p	1	0	1	1	1	1	CPOX	coproporphyrinogen oxidase
hsa-miR-219-2-3p	1	0	1	1	1	1	CYP19A1	cytochrome P450, family 19, subfamily A, polypeptide 1
hsa-miR-219-2-3p	1	0	1	1	1	1	ESR1	estrogen receptor 1
hsa-miR-219-2-3p	0	0	1	0	1	1	MS4A2	membrane-spanning 4-domains, subfamily A, member 2
hsa-miR-219-2-3p	1	0	1	1	1	1	GALC	galactosylceramidase
hsa-miR-219-2-3p	1	0	1	0	1	1	GHR	growth hormone receptor
hsa-miR-219-2-3p	1	0	1	1	1	1	KCNA1	potassium voltage-gated channel, shaker-related subfamily, member 1 (episodic ataxia with myokymia)
hsa-miR-219-2-3p	0	0	1	1	1	1	KRT12	keratin 12
hsa-miR-219-2-3p	0	0	1	1	1	1	LPL	lipoprotein lipase
hsa-miR-219-2-3p	0	0	1	1	1	1	NDP	Norrie disease (pseudoglioma)
hsa-miR-219-2-3p	1	0	1	1	1	1	NF1	neurofibromin 1
hsa-miR-219-2-3p	0	0	1	1	0	0	PCCA	propionyl CoA carboxylase, alpha polypeptide
hsa-miR-219-2-3p	1	0	1	0	1	1	PTEN	phosphatase and tensin homolog
hsa-miR-219-2-3p	0	0	1	1	1	1	RPGR	retinitis pigmentosa GTPase regulator
hsa-miR-219-2-3p	1	0	1	1	1	1	TIMP3	TIMP metallopeptidase inhibitor 3
hsa-miR-219-2-3p	0	0	1	1	1	1	LTBP2	latent transforming growth factor beta binding protein 2
hsa-miR-219-2-3p	1	0	1	0	1	1	PAFAH1B1	platelet-activating factor acetylhydrolase 1b, regulatory subunit 1 (45kDa)
hsa-miR-219-2-3p	0	0	1	1	1	1	OXCT1	3-oxoacid CoA transferase 1
hsa-miR-219-2-3p	1	0	1	1	1	1	ATRX	alpha thalassemia/mental retardation syndrome X-linked
hsa-miR-219-2-3p	1	0	1	1	1	1	PLP1	proteolipid protein 1
hsa-miR-219-2-3p	1	0	1	1	1	1	DCX	doublecortin
hsa-miR-219-2-3p	0	0	1	1	1	1	C7	complement component 7
hsa-miR-219-2-3p	0	0	1	1	1	1	IFNG	interferon, gamma
hsa-miR-219-2-3p	1	0	1	0	1	1	ABAT	4-aminobutyrate aminotransferase
hsa-miR-219-2-3p	0	0	1	1	1	1	ADH4	alcohol dehydrogenase 4 (class II), pi polypeptide
hsa-miR-219-2-3p	1	0	1	1	1	1	DIO2	deiodinase, iodothyronine, type II
hsa-miR-219-2-3p	0	0	1	1	1	1	GABRA5	gamma-aminobutyric acid (GABA) A receptor, alpha 5
hsa-miR-219-2-3p	0	0	1	1	1	1	GLRB	glycine receptor, beta
hsa-miR-219-2-3p	1	0	1	1	1	1	GRIA4	glutamate receptor, ionotropic, AMPA 4
hsa-miR-219-2-3p	0	0	1	1	1	1	GRM3	glutamate receptor, metabotropic 3
hsa-miR-219-2-3p	1	0	1	1	1	1	IGF1R	insulin-like growth factor 1 receptor
hsa-miR-219-2-3p	0	0	1	1	1	1	IL1R1	interleukin 1 receptor, type I
hsa-miR-219-2-3p	0	0	1	1	0	0	LTA4H	leukotriene A4 hydrolase
hsa-miR-219-2-3p	1	0	1	0	1	1	KITLG	KIT ligand
hsa-miR-219-2-3p	1	0	1	1	0	0	PDE3A	phosphodiesterase 3A, cGMP-inhibited
hsa-miR-219-2-3p	0	0	1	0	1	1	PTGIS	prostaglandin I2 (prostacyclin) synthase
hsa-miR-219-2-3p	0	0	1	1	1	1	PTGS2	prostaglandin-endoperoxide synthase 2 (prostaglandin G/H synthase and cyclooxygenase)
hsa-miR-219-2-3p	1	0	1	0	1	1	SMAD5	SMAD family member 5
hsa-miR-219-2-3p	1	0	1	0	1	1	UBE2W	ubiquitin-conjugating enzyme E2W (putative)
hsa-miR-219-2-3p	0	0	1	1	0	0	SNCB	synuclein, beta
hsa-miR-219-2-3p	1	0	1	0	1	1	GDF6	growth differentiation factor 6
hsa-miR-219-2-3p	1	0	1	1	1	1	WNK3	WNK lysine deficient protein kinase 3
hsa-miR-219-2-3p	1	0	1	1	1	1	BICD2	bicaudal D homolog 2 (Drosophila)
hsa-miR-219-2-3p	0	0	1	1	1	1	CCDC144NL	coiled-coil domain containing 144 family, N-terminal like
hsa-miR-219-2-3p	0	0	1	1	1	1	ZCCHC16	zinc finger, CCHC domain containing 16
hsa-miR-219-2-3p	0	0	1	1	1	1	FRG2	FSHD region gene 2
hsa-miR-219-2-3p	1	0	1	0	1	1	YPEL2	yippee-like 2 (Drosophila)
hsa-miR-219-2-3p	1	0	1	1	1	1	EBF3	early B-cell factor 3
hsa-miR-219-2-3p	0	0	1	1	1	1	RYK	receptor-like tyrosine kinase
hsa-miR-219-2-3p	0	0	1	0	0	0	FSD2	fibronectin type III and SPRY domain containing 2
hsa-miR-219-2-3p	1	0	1	1	1	1	TULP4	tubby like protein 4
hsa-miR-219-2-3p	1	0	1	0	1	1	C18orf25	chromosome 18 open reading frame 25
hsa-miR-219-2-3p	1	0	1	1	1	1	CTDSPL	CTD (carboxy-terminal domain, RNA polymerase II, polypeptide A) small phosphatase-like
hsa-miR-219-2-3p	1	0	1	0	1	1	KIAA2022	KIAA2022
hsa-miR-219-2-3p	0	0	1	1	1	1	MXI1	MAX interactor 1
hsa-miR-219-2-3p	1	0	1	1	1	1	NUPL1	nucleoporin like 1
hsa-miR-219-2-3p	0	0	1	1	1	1	CCDC147	coiled-coil domain containing 147
hsa-miR-219-2-3p	1	0	1	1	1	1	LUZP2	leucine zipper protein 2
hsa-miR-219-2-3p	1	0	1	0	1	1	ERMN	ermin, ERM-like protein
hsa-miR-219-2-3p	1	0	1	1	1	1	FAM168B	family with sequence similarity 168, member B
hsa-miR-219-2-3p	1	0	1	0	1	1	FAM102B	family with sequence similarity 102, member B
hsa-miR-219-2-3p	0	0	1	0	1	1	THEMIS	thymocyte selection associated
hsa-miR-219-2-3p	0	0	1	0	1	1	GOLGA8E	golgin A8 family, member E
hsa-miR-219-2-3p	0	0	1	1	1	1	SPIN4	spindlin family, member 4
hsa-miR-219-2-3p	0	0	1	1	1	1	CCNC	cyclin C
hsa-miR-219-2-3p	1	0	1	1	1	1	FXR1	fragile X mental retardation, autosomal homolog 1
hsa-miR-219-2-3p	0	0	1	1	1	1	C2orf68	chromosome 2 open reading frame 68
hsa-miR-219-2-3p	0	0	1	0	1	1	LINC00268	long intergenic non-protein coding RNA 268
hsa-miR-219-2-3p	1	0	1	0	1	1	GOPC	golgi-associated PDZ and coiled-coil motif containing
hsa-miR-219-2-3p	0	0	1	1	1	1	NPIPL1	nuclear pore complex interacting protein-like 1
hsa-miR-219-2-3p	1	0	1	1	1	1	GPHN	gephyrin
hsa-miR-219-2-3p	1	0	1	0	1	1	TNRC6B	trinucleotide repeat containing 6B
hsa-miR-219-2-3p	1	0	1	0	1	1	C3orf70	chromosome 3 open reading frame 70
hsa-miR-219-2-3p	1	0	1	1	1	1	SLC35F1	solute carrier family 35, member F1
hsa-miR-219-2-3p	1	0	1	1	1	1	TFAP2A	transcription factor AP-2 alpha (activating enhancer binding protein 2 alpha)
hsa-miR-219-2-3p	1	0	1	1	1	1	AMD1	adenosylmethionine decarboxylase 1
hsa-miR-219-2-3p	0	0	1	1	0	0	NGRN	neugrin, neurite outgrowth associated
hsa-miR-219-2-3p	1	0	1	1	1	1	RRM2	ribonucleotide reductase M2
hsa-miR-219-2-3p	0	0	1	1	1	1	KCNIP1	Kv channel interacting protein 1
hsa-miR-219-2-3p	1	0	1	1	1	1	GALNTL6	UDP-N-acetyl-alpha-D-galactosamine:polypeptide N-acetylgalactosaminyltransferase-like 6
hsa-miR-219-2-3p	0	0	1	1	1	1	BTF3	basic transcription factor 3
hsa-miR-219-2-3p	1	0	1	0	1	1	CDC42SE1	CDC42 small effector 1
hsa-miR-219-2-3p	0	0	1	1	1	1	EFEMP1	EGF containing fibulin-like extracellular matrix protein 1
hsa-miR-219-2-3p	1	0	1	1	1	1	ATP6V1C2	ATPase, H+ transporting, lysosomal 42kDa, V1 subunit C2
hsa-miR-219-2-3p	1	0	1	1	1	1	KIAA0317	KIAA0317
hsa-miR-219-2-3p	1	0	1	0	1	1	USP9X	ubiquitin specific peptidase 9, X-linked
hsa-miR-219-2-3p	1	0	1	1	1	1	CHN2	chimerin (chimaerin) 2
hsa-miR-219-2-3p	0	0	1	1	1	1	SPOCK3	sparc/osteonectin, cwcv and kazal-like domains proteoglycan (testican) 3
hsa-miR-219-2-3p	1	0	1	1	1	1	MTMR12	myotubularin related protein 12
hsa-miR-219-2-3p	0	0	1	0	1	1	STEAP2	STEAP family member 2, metalloreductase
hsa-miR-219-2-3p	0	0	1	1	1	1	SI	sucrase-isomaltase (alpha-glucosidase)
hsa-miR-219-2-3p	0	0	1	1	1	1	GEMIN8	gem (nuclear organelle) associated protein 8
hsa-miR-219-2-3p	1	0	1	1	1	1	ZNF706	zinc finger protein 706
hsa-miR-219-2-3p	1	0	1	1	1	1	C2orf88	chromosome 2 open reading frame 88
hsa-miR-219-2-3p	1	0	1	1	1	1	ERBB4	v-erb-a erythroblastic leukemia viral oncogene homolog 4 (avian)
hsa-miR-219-2-3p	1	0	1	1	1	1	KDM5A	lysine (K)-specific demethylase 5A
hsa-miR-219-2-3p	1	0	1	1	1	1	SNX21	sorting nexin family member 21
hsa-miR-219-2-3p	1	0	1	0	1	1	SLC12A2	solute carrier family 12 (sodium/potassium/chloride transporters), member 2
hsa-miR-219-2-3p	1	0	1	1	1	1	CDC14B	CDC14 cell division cycle 14 homolog B (S. cerevisiae)
hsa-miR-219-2-3p	1	0	1	1	1	1	IRF2BP2	interferon regulatory factor 2 binding protein 2
hsa-miR-219-2-3p	1	0	1	1	1	1	SRSF1	serine/arginine-rich splicing factor 1
hsa-miR-219-2-3p	1	0	1	0	1	1	FAM127C	family with sequence similarity 127, member C
hsa-miR-219-2-3p	1	0	1	1	1	1	PACRG	PARK2 co-regulated
hsa-miR-219-2-3p	1	0	1	0	1	1	CCDC85A	coiled-coil domain containing 85A
hsa-miR-219-2-3p	0	0	1	1	1	1	IGSF5	immunoglobulin superfamily, member 5
hsa-miR-219-2-3p	1	0	1	1	1	1	ZNF697	zinc finger protein 697
hsa-miR-219-2-3p	0	0	1	0	1	1	ISCA1P1	iron-sulfur cluster assembly 1 homolog (S. cerevisiae) pseudogene 1
hsa-miR-219-2-3p	1	0	1	0	1	1	SCN3A	sodium channel, voltage-gated, type III, alpha subunit
hsa-miR-219-2-3p	0	0	1	1	1	1	CRISP1	cysteine-rich secretory protein 1
hsa-miR-219-2-3p	0	0	1	0	1	1	CASQ2	calsequestrin 2 (cardiac muscle)
hsa-miR-219-2-3p	1	0	1	0	1	1	CDK6	cyclin-dependent kinase 6
hsa-miR-219-2-3p	0	0	1	1	1	1	CCR1	chemokine (C-C motif) receptor 1
hsa-miR-219-2-3p	1	0	1	0	1	1	CPD	carboxypeptidase D
hsa-miR-219-2-3p	1	0	1	1	1	1	CREBL2	cAMP responsive element binding protein-like 2
hsa-miR-219-2-3p	0	0	1	1	0	0	DNAH9	dynein, axonemal, heavy chain 9
hsa-miR-219-2-3p	0	0	1	1	1	1	DSCAM	Down syndrome cell adhesion molecule
hsa-miR-219-2-3p	1	0	1	1	1	1	EIF1AX	eukaryotic translation initiation factor 1A, X-linked
hsa-miR-219-2-3p	1	0	1	0	1	1	EIF2S3	eukaryotic translation initiation factor 2, subunit 3 gamma, 52kDa
hsa-miR-219-2-3p	0	0	1	0	1	1	EMP1	epithelial membrane protein 1
hsa-miR-219-2-3p	1	0	1	1	1	1	EN2	engrailed homeobox 2
hsa-miR-219-2-3p	1	0	1	1	1	1	EP300	E1A binding protein p300
hsa-miR-219-2-3p	1	0	1	1	1	1	FOXC1	forkhead box C1
hsa-miR-219-2-3p	0	0	1	0	1	1	FMO2	flavin containing monooxygenase 2 (non-functional)
hsa-miR-219-2-3p	0	0	1	1	0	0	GAGE1	G antigen 1
hsa-miR-219-2-3p	1	0	1	0	1	1	B4GALT1	UDP-Gal:betaGlcNAc beta 1,4- galactosyltransferase, polypeptide 1
hsa-miR-219-2-3p	0	0	1	1	1	1	CXCL10	chemokine (C-X-C motif) ligand 10
hsa-miR-219-2-3p	1	0	1	1	1	1	ARL4D	ADP-ribosylation factor-like 4D
hsa-miR-219-2-3p	1	0	1	1	1	1	KLF5	Kruppel-like factor 5 (intestinal)
hsa-miR-219-2-3p	1	0	1	1	1	1	CD69	CD69 molecule
hsa-miR-219-2-3p	1	0	1	1	1	1	CDH5	cadherin 5, type 2 (vascular endothelium)
hsa-miR-219-2-3p	0	0	1	1	1	1	CHGB	chromogranin B (secretogranin 1)
hsa-miR-219-2-3p	0	0	1	1	0	0	CNTFR	ciliary neurotrophic factor receptor
hsa-miR-219-2-3p	0	0	1	1	1	1	CNTN1	contactin 1
hsa-miR-219-2-3p	1	0	1	1	1	1	DBT	dihydrolipoamide branched chain transacylase E2
hsa-miR-219-2-3p	0	0	1	1	1	1	DLAT	dihydrolipoamide S-acetyltransferase
hsa-miR-219-2-3p	1	0	1	1	1	1	E2F3	E2F transcription factor 3
hsa-miR-219-2-3p	1	0	1	0	1	1	FOXO1	forkhead box O1
hsa-miR-219-2-3p	1	0	1	1	1	1	GAB1	GRB2-associated binding protein 1
hsa-miR-219-2-3p	0	0	1	1	1	1	HLA-DPB1	major histocompatibility complex, class II, DP beta 1
hsa-miR-219-2-3p	0	0	1	1	1	1	HMGCS1	3-hydroxy-3-methylglutaryl-CoA synthase 1 (soluble)
hsa-miR-219-2-3p	1	0	1	1	1	1	HOXB3	homeobox B3
hsa-miR-219-2-3p	1	0	1	1	0	0	INHBB	inhibin, beta B
hsa-miR-219-2-3p	1	0	1	1	1	1	ITGA5	integrin, alpha 5 (fibronectin receptor, alpha polypeptide)
hsa-miR-219-2-3p	0	0	1	0	1	1	ITGAV	integrin, alpha V
hsa-miR-219-2-3p	1	0	1	1	1	1	JUN	jun proto-oncogene
hsa-miR-219-2-3p	1	0	1	1	1	1	KCNA5	potassium voltage-gated channel, shaker-related subfamily, member 5
hsa-miR-219-2-3p	0	0	1	1	1	1	KCNK1	potassium channel, subfamily K, member 1
hsa-miR-219-2-3p	0	0	1	1	1	1	KPNA5	karyopherin alpha 5 (importin alpha 6)
hsa-miR-219-2-3p	0	0	1	1	1	1	KRT8	keratin 8
hsa-miR-219-2-3p	0	0	1	1	1	1	MSH4	mutS homolog 4 (E. coli)
hsa-miR-219-2-3p	0	0	1	1	1	1	MSX2	msh homeobox 2
hsa-miR-219-2-3p	0	0	1	1	1	1	MTRR	5-methyltetrahydrofolate-homocysteine methyltransferase reductase
hsa-miR-219-2-3p	1	0	1	1	1	1	NPAT	nuclear protein, ataxia-telangiectasia locus
hsa-miR-219-2-3p	1	0	1	1	1	1	TNFRSF11B	tumor necrosis factor receptor superfamily, member 11b
hsa-miR-219-2-3p	0	0	1	0	1	1	OPHN1	oligophrenin 1
hsa-miR-219-2-3p	1	0	1	0	1	1	PAPPA	pregnancy-associated plasma protein A, pappalysin 1
hsa-miR-219-2-3p	1	0	1	0	1	1	CDK17	cyclin-dependent kinase 17
hsa-miR-219-2-3p	0	0	1	1	1	1	PRKCB	protein kinase C, beta
hsa-miR-219-2-3p	1	0	1	1	1	1	PROX1	prospero homeobox 1
hsa-miR-219-2-3p	1	0	1	0	1	1	RAB6A	RAB6A, member RAS oncogene family
hsa-miR-219-2-3p	0	0	1	1	1	1	RFC3	replication factor C (activator 1) 3, 38kDa
hsa-miR-219-2-3p	0	0	1	0	1	1	CXCL5	chemokine (C-X-C motif) ligand 5
hsa-miR-219-2-3p	0	0	1	1	1	1	SDC2	syndecan 2
hsa-miR-219-2-3p	1	0	1	1	1	1	SFRP2	secreted frizzled-related protein 2
hsa-miR-219-2-3p	1	0	1	1	1	1	SH3GL2	SH3-domain GRB2-like 2
hsa-miR-219-2-3p	1	0	1	0	1	1	ST6GAL1	ST6 beta-galactosamide alpha-2,6-sialyltranferase 1
hsa-miR-219-2-3p	1	0	1	0	1	1	SOX4	SRY (sex determining region Y)-box 4
hsa-miR-219-2-3p	0	0	1	1	1	1	SUPT6H	suppressor of Ty 6 homolog (S. cerevisiae)
hsa-miR-219-2-3p	0	0	1	1	1	1	TAF2	TAF2 RNA polymerase II, TATA box binding protein (TBP)-associated factor, 150kDa
hsa-miR-219-2-3p	0	0	1	0	1	1	TDGF1	teratocarcinoma-derived growth factor 1
hsa-miR-219-2-3p	1	0	1	1	1	1	UBE2B	ubiquitin-conjugating enzyme E2B
hsa-miR-219-2-3p	1	0	1	0	1	1	UBE2D2	ubiquitin-conjugating enzyme E2D 2
hsa-miR-219-2-3p	0	0	1	1	1	1	UBE2E1	ubiquitin-conjugating enzyme E2E 1
hsa-miR-219-2-3p	1	0	1	1	1	1	YY1	YY1 transcription factor
hsa-miR-219-2-3p	1	0	1	0	1	1	YWHAB	tyrosine 3-monooxygenase/tryptophan 5-monooxygenase activation protein, beta polypeptide
hsa-miR-219-2-3p	1	0	1	1	1	1	ZIC3	Zic family member 3
hsa-miR-219-2-3p	1	0	1	1	1	1	FZD5	frizzled family receptor 5
hsa-miR-219-2-3p	1	0	1	1	1	1	CUL5	cullin 5
hsa-miR-219-2-3p	1	0	1	1	1	1	NRIP1	nuclear receptor interacting protein 1
hsa-miR-219-2-3p	1	0	1	1	1	1	SUPT3H	suppressor of Ty 3 homolog (S. cerevisiae)
hsa-miR-219-2-3p	1	0	1	1	1	1	PPM1D	protein phosphatase, Mg2+/Mn2+ dependent, 1D
hsa-miR-219-2-3p	1	0	1	0	1	1	ENC1	ectodermal-neural cortex 1 (with BTB-like domain)
hsa-miR-219-2-3p	0	0	1	1	1	1	ITGA10	integrin, alpha 10
hsa-miR-219-2-3p	0	0	1	1	1	1	BLZF1	basic leucine zipper nuclear factor 1
hsa-miR-219-2-3p	1	0	1	1	1	1	CDC14A	CDC14 cell division cycle 14 homolog A (S. cerevisiae)
hsa-miR-219-2-3p	1	0	1	0	1	1	TNKS	tankyrase, TRF1-interacting ankyrin-related ADP-ribose polymerase
hsa-miR-219-2-3p	0	0	1	1	1	1	CRADD	CASP2 and RIPK1 domain containing adaptor with death domain
hsa-miR-219-2-3p	1	0	1	1	1	1	NR5A2	nuclear receptor subfamily 5, group A, member 2
hsa-miR-219-2-3p	0	0	1	1	1	1	SCEL	sciellin
hsa-miR-219-2-3p	0	0	1	1	1	1	IL18R1	interleukin 18 receptor 1
hsa-miR-219-2-3p	1	0	1	1	1	1	IQGAP1	IQ motif containing GTPase activating protein 1
hsa-miR-219-2-3p	1	0	1	1	1	1	ALDH1A2	aldehyde dehydrogenase 1 family, member A2
hsa-miR-219-2-3p	0	0	1	1	1	1	PRPF4B	PRP4 pre-mRNA processing factor 4 homolog B (yeast)
hsa-miR-219-2-3p	0	0	1	1	1	1	CRY1	cryptochrome 1 (photolyase-like)
hsa-miR-219-2-3p	0	0	1	0	1	1	EIF4EBP2	eukaryotic translation initiation factor 4E binding protein 2
hsa-miR-219-2-3p	1	0	1	1	1	1	FGF12	fibroblast growth factor 12
hsa-miR-219-2-3p	0	0	1	1	1	1	GYG1	glycogenin 1
hsa-miR-219-2-3p	1	0	1	0	1	1	SLC1A2	solute carrier family 1 (glial high affinity glutamate transporter), member 2
hsa-miR-219-2-3p	1	0	1	1	1	1	GDA	guanine deaminase
hsa-miR-219-2-3p	1	0	1	1	1	1	ARL3	ADP-ribosylation factor-like 3
hsa-miR-219-2-3p	0	0	1	1	1	1	CDH1	cadherin 1, type 1, E-cadherin (epithelial)
hsa-miR-219-2-3p	0	0	1	1	1	1	COL12A1	collagen, type XII, alpha 1
hsa-miR-219-2-3p	1	0	1	1	1	1	DACH1	dachshund homolog 1 (Drosophila)
hsa-miR-219-2-3p	1	0	1	1	1	1	DAG1	dystroglycan 1 (dystrophin-associated glycoprotein 1)
hsa-miR-219-2-3p	1	0	1	0	1	1	FOXD1	forkhead box D1
hsa-miR-219-2-3p	1	0	1	1	1	1	RAB7A	RAB7A, member RAS oncogene family
hsa-miR-219-2-3p	0	0	1	1	1	1	CDK2AP1	cyclin-dependent kinase 2 associated protein 1
hsa-miR-219-2-3p	1	0	1	1	1	1	MTMR6	myotubularin related protein 6
hsa-miR-219-2-3p	0	0	1	0	1	1	CXorf1	chromosome X open reading frame 1
hsa-miR-219-2-3p	0	0	1	1	1	1	BUB3	budding uninhibited by benzimidazoles 3 homolog (yeast)
hsa-miR-219-2-3p	1	0	1	0	1	1	VAMP3	vesicle-associated membrane protein 3 (cellubrevin)
hsa-miR-219-2-3p	1	0	1	1	1	1	ZFYVE9	zinc finger, FYVE domain containing 9
hsa-miR-219-2-3p	1	0	1	1	1	1	MED26	mediator complex subunit 26
hsa-miR-219-2-3p	1	0	1	1	1	1	ONECUT2	one cut homeobox 2
hsa-miR-219-2-3p	1	0	1	1	1	1	KIF23	kinesin family member 23
hsa-miR-219-2-3p	0	0	1	1	1	1	ATP6V1G1	ATPase, H+ transporting, lysosomal 13kDa, V1 subunit G1
hsa-miR-219-2-3p	1	0	1	0	1	1	SEC22B	SEC22 vesicle trafficking protein homolog B (S. cerevisiae) (gene/pseudogene)
hsa-miR-219-2-3p	0	0	1	1	0	0	NDUFA9	NADH dehydrogenase (ubiquinone) 1 alpha subcomplex, 9, 39kDa
hsa-miR-219-2-3p	1	0	1	0	1	1	SEL1L	sel-1 suppressor of lin-12-like (C. elegans)
hsa-miR-219-2-3p	0	0	1	1	0	0	ALDOC	aldolase C, fructose-bisphosphate
hsa-miR-219-2-3p	1	0	1	1	1	1	BMI1	BMI1 polycomb ring finger oncogene
hsa-miR-219-2-3p	1	0	1	1	1	1	FOXN3	forkhead box N3
hsa-miR-219-2-3p	1	0	1	1	1	1	ELK3	ELK3, ETS-domain protein (SRF accessory protein 2)
hsa-miR-219-2-3p	0	0	1	0	1	1	EPHA3	EPH receptor A3
hsa-miR-219-2-3p	1	0	1	1	1	1	GAS2	growth arrest-specific 2
hsa-miR-219-2-3p	1	0	1	1	1	1	GPM6A	glycoprotein M6A
hsa-miR-219-2-3p	0	0	1	1	1	1	GRPR	gastrin-releasing peptide receptor
hsa-miR-219-2-3p	0	0	1	1	1	1	NUP98	nucleoporin 98kDa
hsa-miR-219-2-3p	0	0	1	1	1	1	PPP1R3C	protein phosphatase 1, regulatory subunit 3C
hsa-miR-219-2-3p	1	0	1	0	1	1	PRKAB2	protein kinase, AMP-activated, beta 2 non-catalytic subunit
hsa-miR-219-2-3p	0	0	1	1	1	1	SEPP1	selenoprotein P, plasma, 1
hsa-miR-219-2-3p	1	0	1	0	1	1	SRC	v-src sarcoma (Schmidt-Ruppin A-2) viral oncogene homolog (avian)
hsa-miR-219-2-3p	1	0	1	0	1	1	CCDC6	coiled-coil domain containing 6
hsa-miR-219-2-3p	0	0	1	1	1	1	FOSL1	FOS-like antigen 1
hsa-miR-219-2-3p	0	0	1	1	1	1	ZRANB2	zinc finger, RAN-binding domain containing 2
hsa-miR-219-2-3p	1	0	1	0	0	0	FRAT1	frequently rearranged in advanced T-cell lymphomas
hsa-miR-219-2-3p	1	0	1	1	1	1	HOXA1	homeobox A1
hsa-miR-219-2-3p	0	0	1	0	1	1	POU3F2	POU class 3 homeobox 2
hsa-miR-219-2-3p	1	0	1	1	1	1	ST8SIA4	ST8 alpha-N-acetyl-neuraminide alpha-2,8-sialyltransferase 4
hsa-miR-219-2-3p	1	0	1	0	1	1	SPRY3	sprouty homolog 3 (Drosophila)
hsa-miR-219-2-3p	0	0	1	1	1	1	CD5L	CD5 molecule-like
hsa-miR-219-2-3p	1	0	1	1	1	1	MMP16	matrix metallopeptidase 16 (membrane-inserted)
hsa-miR-219-2-3p	1	0	1	0	1	1	NAB1	NGFI-A binding protein 1 (EGR1 binding protein 1)
hsa-miR-219-2-3p	1	0	1	1	1	1	RNF6	ring finger protein (C3H2C3 type) 6
hsa-miR-219-2-3p	1	0	1	1	1	1	TSNAX	translin-associated factor X
hsa-miR-219-2-3p	0	0	1	1	1	1	LANCL1	LanC lantibiotic synthetase component C-like 1 (bacterial)
hsa-miR-219-2-3p	1	0	1	1	1	1	TMEM50B	transmembrane protein 50B
hsa-miR-219-2-3p	1	0	1	1	1	1	NEFL	neurofilament, light polypeptide
hsa-miR-219-2-3p	0	0	1	1	1	1	NTF4	neurotrophin 4
hsa-miR-219-2-3p	1	0	1	1	1	1	PDGFRA	platelet-derived growth factor receptor, alpha polypeptide
hsa-miR-219-2-3p	1	0	1	0	1	1	PPP1R2	protein phosphatase 1, regulatory (inhibitor) subunit 2
hsa-miR-219-2-3p	1	0	1	1	1	1	RANBP2	RAN binding protein 2
hsa-miR-219-2-3p	1	0	1	1	1	1	SMC1A	structural maintenance of chromosomes 1A
hsa-miR-219-2-3p	1	0	1	1	1	1	NPEPPS	aminopeptidase puromycin sensitive
hsa-miR-219-2-3p	1	0	1	1	1	1	DYNLT3	dynein, light chain, Tctex-type 3
hsa-miR-219-2-3p	1	0	1	0	1	1	IGF2BP1	insulin-like growth factor 2 mRNA binding protein 1
hsa-miR-219-2-3p	1	0	1	1	1	1	PLK2	polo-like kinase 2
hsa-miR-219-2-3p	0	0	1	1	1	1	FGL2	fibrinogen-like 2
hsa-miR-219-2-3p	0	0	1	1	1	1	NUDT3	nudix (nucleoside diphosphate linked moiety X)-type motif 3
hsa-miR-219-2-3p	1	0	1	1	1	1	DIAPH2	diaphanous homolog 2 (Drosophila)
hsa-miR-219-2-3p	1	0	1	1	1	1	LAPTM5	lysosomal protein transmembrane 5
hsa-miR-219-2-3p	0	0	1	1	1	1	TMED2	transmembrane emp24 domain trafficking protein 2
hsa-miR-219-2-3p	0	0	1	1	1	1	IFI44L	interferon-induced protein 44-like
hsa-miR-219-2-3p	1	0	1	1	1	1	GLIPR1	GLI pathogenesis-related 1
hsa-miR-219-2-3p	1	0	1	1	1	1	RIT1	Ras-like without CAAX 1
hsa-miR-219-2-3p	1	0	1	1	1	1	RP2	retinitis pigmentosa 2 (X-linked recessive)
hsa-miR-219-2-3p	1	0	1	0	1	1	SLC5A3	solute carrier family 5 (sodium/myo-inositol cotransporter), member 3
hsa-miR-219-2-3p	1	0	1	1	1	1	ABHD2	abhydrolase domain containing 2
hsa-miR-219-2-3p	1	0	1	1	1	1	PTPN21	protein tyrosine phosphatase, non-receptor type 21
hsa-miR-219-2-3p	1	0	1	1	1	1	SOX21	SRY (sex determining region Y)-box 21
hsa-miR-219-2-3p	1	0	1	1	1	1	UBL3	ubiquitin-like 3
hsa-miR-219-2-3p	1	0	1	1	1	1	TMF1	TATA element modulatory factor 1
hsa-miR-219-2-3p	1	0	1	1	1	1	UTRN	utrophin
hsa-miR-219-2-3p	1	0	1	1	1	1	VCP	valosin containing protein
hsa-miR-219-2-3p	1	0	1	1	1	1	VEZF1	vascular endothelial zinc finger 1
hsa-miR-219-2-3p	1	0	1	0	1	1	PRSS23	protease, serine, 23
hsa-miR-219-2-3p	1	0	1	1	1	1	PALM2-AKAP2	PALM2-AKAP2 readthrough
hsa-miR-219-2-3p	1	0	1	1	1	1	KLF12	Kruppel-like factor 12
hsa-miR-219-2-3p	1	0	1	1	1	1	APPL1	adaptor protein, phosphotyrosine interaction, PH domain and leucine zipper containing 1
hsa-miR-219-2-3p	0	0	1	1	1	1	COPG2	coatomer protein complex, subunit gamma 2
hsa-miR-219-2-3p	0	0	1	1	1	1	EHF	ets homologous factor
hsa-miR-219-2-3p	1	0	1	1	1	1	FBXL2	F-box and leucine-rich repeat protein 2
hsa-miR-219-2-3p	1	0	1	1	1	1	MGEA5	meningioma expressed antigen 5 (hyaluronidase)
hsa-miR-219-2-3p	1	0	1	1	1	1	HEY2	hairy/enhancer-of-split related with YRPW motif 2
hsa-miR-219-2-3p	1	0	1	1	1	1	KCND2	potassium voltage-gated channel, Shal-related subfamily, member 2
hsa-miR-219-2-3p	1	0	1	0	1	1	G3BP2	GTPase activating protein (SH3 domain) binding protein 2
hsa-miR-219-2-3p	0	0	1	1	0	0	KIR2DS4	killer cell immunoglobulin-like receptor, two domains, short cytoplasmic tail, 4
hsa-miR-219-2-3p	1	0	1	1	1	1	NNT	nicotinamide nucleotide transhydrogenase
hsa-miR-219-2-3p	1	0	1	0	1	1	BLOC1S6	biogenesis of lysosomal organelles complex-1, subunit 6, pallidin
hsa-miR-219-2-3p	1	0	1	1	1	1	ATP6V0A2	ATPase, H+ transporting, lysosomal V0 subunit a2
hsa-miR-219-2-3p	0	0	1	0	1	1	TLL1	tolloid-like 1
hsa-miR-219-2-3p	0	0	1	1	1	1	N6AMT1	N-6 adenine-specific DNA methyltransferase 1 (putative)
hsa-miR-219-2-3p	0	0	1	1	1	1	TBK1	TANK-binding kinase 1
hsa-miR-219-2-3p	1	0	1	1	1	1	PPARGC1A	peroxisome proliferator-activated receptor gamma, coactivator 1 alpha
hsa-miR-219-2-3p	1	0	1	1	1	1	FLRT3	fibronectin leucine rich transmembrane protein 3
hsa-miR-219-2-3p	1	0	1	0	1	1	TRHDE	thyrotropin-releasing hormone degrading enzyme
hsa-miR-219-2-3p	0	0	1	0	1	1	EMR2	egf-like module containing, mucin-like, hormone receptor-like 2
hsa-miR-219-2-3p	1	0	1	0	1	1	C16orf72	chromosome 16 open reading frame 72
hsa-miR-219-2-3p	0	0	1	1	1	1	ORMDL2	ORM1-like 2 (S. cerevisiae)
hsa-miR-219-2-3p	0	0	1	0	1	1	SCN8A	sodium channel, voltage gated, type VIII, alpha subunit
hsa-miR-219-2-3p	1	0	1	0	1	1	VAMP2	vesicle-associated membrane protein 2 (synaptobrevin 2)
hsa-miR-219-2-3p	1	0	1	1	1	1	SLC25A15	solute carrier family 25 (mitochondrial carrier; ornithine transporter) member 15
hsa-miR-219-2-3p	1	0	1	0	1	1	ODZ1	odz, odd Oz/ten-m homolog 1 (Drosophila)
hsa-miR-219-2-3p	0	0	1	1	1	1	HSPA4L	heat shock 70kDa protein 4-like
hsa-miR-219-2-3p	1	0	1	1	1	1	SLC7A11	solute carrier family 7 (anionic amino acid transporter light chain, xc- system), member 11
hsa-miR-219-2-3p	0	0	1	1	1	1	LAMP3	lysosomal-associated membrane protein 3
hsa-miR-219-2-3p	0	0	1	0	0	0	SND1-IT1	SND1 intronic transcript 1 (non-protein coding)
hsa-miR-219-2-3p	1	0	1	1	1	1	AFF4	AF4/FMR2 family, member 4
hsa-miR-219-2-3p	1	0	1	1	1	1	SERP1	stress-associated endoplasmic reticulum protein 1
hsa-miR-219-2-3p	0	0	1	1	1	1	LSM3	LSM3 homolog, U6 small nuclear RNA associated (S. cerevisiae)
hsa-miR-219-2-3p	1	0	1	1	1	1	CNOT2	CCR4-NOT transcription complex, subunit 2
hsa-miR-219-2-3p	0	0	1	1	0	0	LMCD1	LIM and cysteine-rich domains 1
hsa-miR-219-2-3p	1	0	1	1	1	1	ERO1L	ERO1-like (S. cerevisiae)
hsa-miR-219-2-3p	0	0	1	0	1	1	CTR9	Ctr9, Paf1/RNA polymerase II complex component, homolog (S. cerevisiae)
hsa-miR-219-2-3p	1	0	1	1	1	1	RALGPS1	Ral GEF with PH domain and SH3 binding motif 1
hsa-miR-219-2-3p	1	0	1	1	1	1	UBE3C	ubiquitin protein ligase E3C
hsa-miR-219-2-3p	0	0	1	1	0	0	EMC2	ER membrane protein complex subunit 2
hsa-miR-219-2-3p	0	0	1	1	1	1	AQR	aquarius homolog (mouse)
hsa-miR-219-2-3p	1	0	1	0	1	1	SERTAD2	SERTA domain containing 2
hsa-miR-219-2-3p	1	0	1	1	1	1	JOSD1	Josephin domain containing 1
hsa-miR-219-2-3p	1	0	1	1	1	1	CHSY1	chondroitin sulfate synthase 1
hsa-miR-219-2-3p	1	0	1	1	1	1	SPAST	spastin
hsa-miR-219-2-3p	1	0	1	0	1	1	WDFY3	WD repeat and FYVE domain containing 3
hsa-miR-219-2-3p	1	0	1	1	1	1	ERP44	endoplasmic reticulum protein 44
hsa-miR-219-2-3p	0	0	1	1	1	1	ARL6IP1	ADP-ribosylation factor-like 6 interacting protein 1
hsa-miR-219-2-3p	1	0	1	1	1	1	SIK2	salt-inducible kinase 2
hsa-miR-219-2-3p	1	0	1	1	1	1	MORC3	MORC family CW-type zinc finger 3
hsa-miR-219-2-3p	1	0	1	1	1	1	DSTYK	dual serine/threonine and tyrosine protein kinase
hsa-miR-219-2-3p	1	0	1	1	1	1	MOB4	MOB family member 4, phocein
hsa-miR-219-2-3p	1	0	1	1	1	1	PARM1	prostate androgen-regulated mucin-like protein 1
hsa-miR-219-2-3p	1	0	1	1	1	1	RNF19A	ring finger protein 19A, E3 ubiquitin protein ligase
hsa-miR-219-2-3p	1	0	1	1	1	1	CNOT6	CCR4-NOT transcription complex, subunit 6
hsa-miR-219-2-3p	1	0	1	1	0	0	POLDIP2	polymerase (DNA-directed), delta interacting protein 2
hsa-miR-219-2-3p	0	0	1	1	1	1	HERC4	HECT and RLD domain containing E3 ubiquitin protein ligase 4
hsa-miR-219-2-3p	1	0	1	1	1	1	TOR1AIP1	torsin A interacting protein 1
hsa-miR-219-2-3p	1	0	1	0	1	1	RRM2B	ribonucleotide reductase M2 B (TP53 inducible)
hsa-miR-219-2-3p	1	0	1	1	1	1	AZIN1	antizyme inhibitor 1
hsa-miR-219-2-3p	1	0	1	1	1	1	EIF5B	eukaryotic translation initiation factor 5B
hsa-miR-219-2-3p	1	0	1	1	1	1	UBE2J1	ubiquitin-conjugating enzyme E2, J1
hsa-miR-219-2-3p	0	0	1	1	1	1	TCEB3B	transcription elongation factor B polypeptide 3B (elongin A2)
hsa-miR-219-2-3p	0	0	1	1	1	1	AMBN	ameloblastin (enamel matrix protein)
hsa-miR-219-2-3p	1	0	1	1	1	1	DNAJC27	DnaJ (Hsp40) homolog, subfamily C, member 27
hsa-miR-219-2-3p	1	0	1	0	1	1	NT5DC3	5'-nucleotidase domain containing 3
hsa-miR-219-2-3p	1	0	1	1	1	1	MEX3C	mex-3 homolog C (C. elegans)
hsa-miR-219-2-3p	1	0	1	0	1	1	KLHL3	kelch-like 3 (Drosophila)
hsa-miR-219-2-3p	0	0	1	1	1	1	PRKAG3	protein kinase, AMP-activated, gamma 3 non-catalytic subunit
hsa-miR-219-2-3p	1	0	1	1	1	1	ARID1B	AT rich interactive domain 1B (SWI1-like)
hsa-miR-219-2-3p	1	0	1	1	1	1	ZC3H7B	zinc finger CCCH-type containing 7B
hsa-miR-219-2-3p	1	0	1	1	1	1	LPPR1	lipid phosphate phosphatase-related protein type 1
hsa-miR-219-2-3p	0	0	1	1	1	1	WHSC1L1	Wolf-Hirschhorn syndrome candidate 1-like 1
hsa-miR-219-2-3p	1	0	1	1	1	1	RNF125	ring finger protein 125, E3 ubiquitin protein ligase
hsa-miR-219-2-3p	1	0	1	1	1	1	FAM120C	family with sequence similarity 120C
hsa-miR-219-2-3p	1	0	1	1	1	1	VPS13B	vacuolar protein sorting 13 homolog B (yeast)
hsa-miR-219-2-3p	1	0	1	1	1	1	CDCA4	cell division cycle associated 4
hsa-miR-219-2-3p	0	0	1	1	1	1	GPATCH2	G patch domain containing 2
hsa-miR-219-2-3p	1	0	1	0	1	1	CCDC88A	coiled-coil domain containing 88A
hsa-miR-219-2-3p	0	0	1	1	1	1	TMEM38B	transmembrane protein 38B
hsa-miR-219-2-3p	0	0	1	1	1	1	NUDT11	nudix (nucleoside diphosphate linked moiety X)-type motif 11
hsa-miR-219-2-3p	0	0	1	0	1	1	GOLPH3L	golgi phosphoprotein 3-like
hsa-miR-219-2-3p	1	0	1	0	1	1	PARVA	parvin, alpha
hsa-miR-219-2-3p	0	0	1	1	1	1	SLC47A1	solute carrier family 47, member 1
hsa-miR-219-2-3p	0	0	1	1	1	1	ADI1	acireductone dioxygenase 1
hsa-miR-219-2-3p	0	0	1	1	1	1	QRSL1	glutaminyl-tRNA synthase (glutamine-hydrolyzing)-like 1
hsa-miR-219-2-3p	1	0	1	1	1	1	RSBN1	round spermatid basic protein 1
hsa-miR-219-2-3p	0	0	1	1	1	1	GOLGA6B	golgin A6 family, member B
hsa-miR-219-2-3p	1	0	1	1	1	1	TAP2	transporter 2, ATP-binding cassette, sub-family B (MDR/TAP)
hsa-miR-219-2-3p	1	0	1	0	1	1	PCDHAC1	protocadherin alpha subfamily C, 1
hsa-miR-219-2-3p	1	0	1	0	1	1	PCDHAC2	protocadherin alpha subfamily C, 2
hsa-miR-219-2-3p	1	0	1	1	1	1	PCDHA1	protocadherin alpha 1
hsa-miR-219-2-3p	1	0	1	0	1	1	PCDHA10	protocadherin alpha 10
hsa-miR-219-2-3p	1	0	1	0	1	1	PCDHA11	protocadherin alpha 11
hsa-miR-219-2-3p	1	0	1	0	1	1	PCDHA12	protocadherin alpha 12
hsa-miR-219-2-3p	1	0	1	1	1	1	PCDHA2	protocadherin alpha 2
hsa-miR-219-2-3p	1	0	1	1	1	1	PCDHA3	protocadherin alpha 3
hsa-miR-219-2-3p	1	0	1	1	1	1	PCDHA6	protocadherin alpha 6
hsa-miR-219-2-3p	1	0	1	0	1	1	PCDHA7	protocadherin alpha 7
hsa-miR-219-2-3p	1	0	1	1	1	1	PCDHA8	protocadherin alpha 8
hsa-miR-219-2-3p	1	0	1	1	1	1	HOXA10	homeobox A10
hsa-miR-219-2-3p	0	0	1	1	1	1	NPAP1	nuclear pore associated protein 1
hsa-miR-219-2-3p	1	0	1	1	0	0	GPR173	G protein-coupled receptor 173
hsa-miR-219-2-3p	1	0	1	0	1	1	TMX3	thioredoxin-related transmembrane protein 3
hsa-miR-219-2-3p	0	0	1	0	1	1	ARL15	ADP-ribosylation factor-like 15
hsa-miR-219-2-3p	1	0	1	0	1	1	CNGB3	cyclic nucleotide gated channel beta 3
hsa-miR-219-2-3p	0	0	1	1	1	1	KLHL4	kelch-like 4 (Drosophila)
hsa-miR-219-2-3p	0	0	1	1	1	1	FMN2	formin 2
hsa-miR-219-2-3p	0	0	1	1	1	1	TMEM167B	transmembrane protein 167B
hsa-miR-219-2-3p	1	0	1	0	1	1	PMEPA1	prostate transmembrane protein, androgen induced 1
hsa-miR-219-2-3p	0	0	1	1	1	1	ACN9	ACN9 homolog (S. cerevisiae)
hsa-miR-219-2-3p	1	0	1	1	1	1	C5orf15	chromosome 5 open reading frame 15
hsa-miR-219-2-3p	1	0	1	1	1	1	KIAA1244	KIAA1244
hsa-miR-219-2-3p	1	0	1	0	1	1	EIF5A2	eukaryotic translation initiation factor 5A2
hsa-miR-219-2-3p	1	0	1	1	1	1	PCDH9	protocadherin 9
hsa-miR-219-2-3p	1	0	1	1	1	1	EPHA8	EPH receptor A8
hsa-miR-219-2-3p	1	0	1	0	1	1	DCUN1D1	DCN1, defective in cullin neddylation 1, domain containing 1 (S. cerevisiae)
hsa-miR-219-2-3p	1	0	1	1	0	0	JPH3	junctophilin 3
hsa-miR-219-2-3p	0	0	1	1	1	1	TMEM27	transmembrane protein 27
hsa-miR-219-2-3p	0	0	1	1	0	0	AMIGO1	adhesion molecule with Ig-like domain 1
hsa-miR-219-2-3p	0	0	1	0	1	1	SERINC1	serine incorporator 1
hsa-miR-219-2-3p	1	0	1	0	1	1	NUFIP2	nuclear fragile X mental retardation protein interacting protein 2
hsa-miR-219-2-3p	1	0	1	1	1	1	MIB1	mindbomb E3 ubiquitin protein ligase 1
hsa-miR-219-2-3p	0	0	1	1	1	1	ARRDC3	arrestin domain containing 3
hsa-miR-219-2-3p	1	0	1	1	1	1	KLHL14	kelch-like 14 (Drosophila)
hsa-miR-219-2-3p	1	0	1	1	1	1	ZFP14	zinc finger protein 14 homolog (mouse)
hsa-miR-219-2-3p	1	0	1	1	1	1	FAM160B1	family with sequence similarity 160, member B1
hsa-miR-219-2-3p	0	0	1	1	1	1	AQP9	aquaporin 9
hsa-miR-219-2-3p	0	0	1	1	1	1	PPM1A	protein phosphatase, Mg2+/Mn2+ dependent, 1A
hsa-miR-219-2-3p	1	0	1	0	1	1	RAP2A	RAP2A, member of RAS oncogene family
hsa-miR-219-2-3p	1	0	1	1	1	1	HCN1	hyperpolarization activated cyclic nucleotide-gated potassium channel 1
hsa-miR-219-2-3p	0	0	1	1	1	1	RNASEL	ribonuclease L (2',5'-oligoisoadenylate synthetase-dependent)
hsa-miR-219-2-3p	0	0	1	1	0	0	HOXD11	homeobox D11
hsa-miR-219-2-3p	1	0	1	1	1	1	FAM60A	family with sequence similarity 60, member A
hsa-miR-219-2-3p	1	0	1	1	1	1	PELI2	pellino E3 ubiquitin protein ligase family member 2
hsa-miR-219-2-3p	1	0	1	1	1	1	ZFYVE1	zinc finger, FYVE domain containing 1
hsa-miR-219-2-3p	0	0	1	1	1	1	PRDM13	PR domain containing 13
hsa-miR-219-2-3p	1	0	1	1	1	1	BACH2	BTB and CNC homology 1, basic leucine zipper transcription factor 2
hsa-miR-219-2-3p	1	0	1	1	1	1	TIA1	TIA1 cytotoxic granule-associated RNA binding protein
hsa-miR-219-2-3p	1	0	1	0	1	1	CSNK1G1	casein kinase 1, gamma 1
hsa-miR-219-2-3p	1	0	1	0	1	1	CERS2	ceramide synthase 2
hsa-miR-219-2-3p	1	0	1	1	1	1	GOLPH3	golgi phosphoprotein 3 (coat-protein)
hsa-miR-219-2-3p	0	0	1	1	1	1	CLEC7A	C-type lectin domain family 7, member A
hsa-miR-219-2-3p	1	0	1	1	1	1	PRRX1	paired related homeobox 1
hsa-miR-219-2-3p	1	0	1	1	1	1	YTHDC2	YTH domain containing 2
hsa-miR-219-2-3p	1	0	1	0	1	1	BCL11B	B-cell CLL/lymphoma 11B (zinc finger protein)
hsa-miR-219-2-3p	1	0	1	1	1	1	DSC3	desmocollin 3
hsa-miR-219-2-3p	1	0	1	1	1	1	LRRC2	leucine rich repeat containing 2
hsa-miR-219-2-3p	0	0	1	1	1	1	RNF219	ring finger protein 219
hsa-miR-219-2-3p	1	0	1	1	1	1	PPP1R3B	protein phosphatase 1, regulatory subunit 3B
hsa-miR-219-2-3p	0	0	1	1	1	1	SNIP1	Smad nuclear interacting protein 1
hsa-miR-219-2-3p	0	0	1	1	1	1	ZNF665	zinc finger protein 665
hsa-miR-219-2-3p	0	0	1	1	1	1	WDR78	WD repeat domain 78
hsa-miR-219-2-3p	0	0	1	1	1	1	GGNBP2	gametogenetin binding protein 2
hsa-miR-219-2-3p	0	0	1	1	1	1	PREX2	phosphatidylinositol-3,4,5-trisphosphate-dependent Rac exchange factor 2
hsa-miR-219-2-3p	0	0	1	1	1	1	ESRP2	epithelial splicing regulatory protein 2
hsa-miR-219-2-3p	1	0	1	0	1	1	NAA25	N(alpha)-acetyltransferase 25, NatB auxiliary subunit
hsa-miR-219-2-3p	0	0	1	1	1	1	CCDC170	coiled-coil domain containing 170
hsa-miR-219-2-3p	1	0	1	1	1	1	NAA50	N(alpha)-acetyltransferase 50, NatE catalytic subunit
hsa-miR-219-2-3p	1	0	1	0	1	1	EDEM3	ER degradation enhancer, mannosidase alpha-like 3
hsa-miR-219-2-3p	1	0	1	0	1	1	SETD7	SET domain containing (lysine methyltransferase) 7
hsa-miR-219-2-3p	1	0	1	1	1	1	PTPRO	protein tyrosine phosphatase, receptor type, O
hsa-miR-219-2-3p	1	0	1	1	1	1	TMX1	thioredoxin-related transmembrane protein 1
hsa-miR-219-2-3p	1	0	1	1	1	1	SGPP1	sphingosine-1-phosphate phosphatase 1
hsa-miR-219-2-3p	1	0	1	1	1	1	FAM117A	family with sequence similarity 117, member A
hsa-miR-219-2-3p	0	0	1	1	1	1	ISCA1	iron-sulfur cluster assembly 1 homolog (S. cerevisiae)
hsa-miR-219-2-3p	0	0	1	1	1	1	TEX15	testis expressed 15
hsa-miR-219-2-3p	1	0	1	0	1	1	TMEM47	transmembrane protein 47
hsa-miR-219-2-3p	0	0	1	1	1	1	RIOK1	RIO kinase 1 (yeast)
hsa-miR-219-2-3p	1	0	1	1	1	1	PCDHA9	protocadherin alpha 9
hsa-miR-219-2-3p	0	0	1	0	1	1	ENAM	enamelin
hsa-miR-219-2-3p	1	0	1	0	1	1	PSD2	pleckstrin and Sec7 domain containing 2
hsa-miR-219-2-3p	0	0	1	1	1	1	COG8	component of oligomeric golgi complex 8
hsa-miR-219-2-3p	1	0	1	1	1	1	HOOK3	hook homolog 3 (Drosophila)
hsa-miR-219-2-3p	1	0	1	0	1	1	GLYR1	glyoxylate reductase 1 homolog (Arabidopsis)
hsa-miR-219-2-3p	0	0	1	1	1	1	HAVCR2	hepatitis A virus cellular receptor 2
hsa-miR-219-2-3p	1	0	1	1	1	1	PCDH11Y	protocadherin 11 Y-linked
hsa-miR-219-2-3p	1	0	1	0	1	1	PURB	purine-rich element binding protein B
hsa-miR-219-2-3p	0	0	1	1	0	0	TBL1Y	transducin (beta)-like 1, Y-linked
hsa-miR-219-2-3p	0	0	1	1	1	1	ARHGAP18	Rho GTPase activating protein 18
hsa-miR-219-2-3p	1	0	1	1	1	1	TPD52L3	tumor protein D52-like 3
hsa-miR-219-2-3p	1	0	1	1	0	0	CCDC120	coiled-coil domain containing 120
hsa-miR-219-2-3p	1	0	1	1	1	1	LUZP1	leucine zipper protein 1
hsa-miR-219-2-3p	1	0	1	1	1	1	BRWD1	bromodomain and WD repeat domain containing 1
hsa-miR-219-2-3p	0	0	1	0	1	1	CCDC97	coiled-coil domain containing 97
hsa-miR-219-2-3p	0	0	1	1	1	1	IL22RA2	interleukin 22 receptor, alpha 2
hsa-miR-219-2-3p	1	0	1	0	1	1	FAM129A	family with sequence similarity 129, member A
hsa-miR-219-2-3p	0	0	1	1	1	1	ANKRD30A	ankyrin repeat domain 30A
hsa-miR-219-2-3p	1	0	1	1	1	1	GCFC1	GC-rich sequence DNA-binding factor 1
hsa-miR-219-2-3p	0	0	1	1	1	1	ABCA10	ATP-binding cassette, sub-family A (ABC1), member 10
hsa-miR-219-2-3p	0	0	1	1	1	1	CTCFL	CCCTC-binding factor (zinc finger protein)-like
hsa-miR-219-2-3p	1	0	1	1	1	1	FAM210B	family with sequence similarity 210, member B
hsa-miR-219-2-3p	1	0	1	1	1	1	DYRK1A	dual-specificity tyrosine-(Y)-phosphorylation regulated kinase 1A
hsa-miR-219-2-3p	0	0	1	1	1	1	ATP6V1G2	ATPase, H+ transporting, lysosomal 13kDa, V1 subunit G2
hsa-miR-219-2-3p	1	0	1	0	1	1	C5orf20	chromosome 5 open reading frame 20
hsa-miR-219-2-3p	0	0	1	0	1	1	PAQR8	progestin and adipoQ receptor family member VIII
hsa-miR-219-2-3p	1	0	1	1	1	1	ADAMTS19	ADAM metallopeptidase with thrombospondin type 1 motif, 19
hsa-miR-219-2-3p	0	0	1	1	1	1	CASC4	cancer susceptibility candidate 4
hsa-miR-219-2-3p	1	0	1	1	1	1	GLCCI1	glucocorticoid induced transcript 1
hsa-miR-219-2-3p	1	0	1	1	1	1	KCTD12	potassium channel tetramerisation domain containing 12
hsa-miR-219-2-3p	1	0	1	1	1	1	HAS3	hyaluronan synthase 3
hsa-miR-219-2-3p	0	0	1	1	0	0	GRIN3B	glutamate receptor, ionotropic, N-methyl-D-aspartate 3B
hsa-miR-219-2-3p	1	0	1	0	1	1	FCHO2	FCH domain only 2
hsa-miR-219-2-3p	0	0	1	1	0	0	BRD8	bromodomain containing 8
hsa-miR-219-2-3p	1	0	1	1	1	1	MAPK1IP1L	mitogen-activated protein kinase 1 interacting protein 1-like
hsa-miR-219-2-3p	1	0	1	1	1	1	RFTN2	raftlin family member 2
hsa-miR-219-2-3p	1	0	1	1	1	1	TMEM182	transmembrane protein 182
hsa-miR-219-2-3p	0	0	1	1	1	1	SPICE1	spindle and centriole associated protein 1
hsa-miR-219-2-3p	0	0	1	0	1	1	PIGM	phosphatidylinositol glycan anchor biosynthesis, class M
hsa-miR-219-2-3p	0	0	1	1	1	1	DNAJC19	DnaJ (Hsp40) homolog, subfamily C, member 19
hsa-miR-219-2-3p	0	0	1	0	1	1	SPATA18	spermatogenesis associated 18
hsa-miR-219-2-3p	0	0	1	1	1	1	C7orf45	chromosome 7 open reading frame 45
hsa-miR-219-2-3p	0	0	1	1	1	1	APOBEC3F	apolipoprotein B mRNA editing enzyme, catalytic polypeptide-like 3F
hsa-miR-219-2-3p	0	0	1	1	0	0	TCEB3C	transcription elongation factor B polypeptide 3C (elongin A3)
hsa-miR-219-2-3p	0	0	1	1	0	0	CCL28	chemokine (C-C motif) ligand 28
hsa-miR-219-2-3p	0	0	1	0	1	1	CHKB	choline kinase beta
hsa-miR-219-2-3p	1	0	1	1	1	1	UBTD2	ubiquitin domain containing 2
hsa-miR-219-2-3p	0	0	1	1	1	1	TCEAL7	transcription elongation factor A (SII)-like 7
hsa-miR-219-2-3p	0	0	1	1	0	0	C1orf158	chromosome 1 open reading frame 158
hsa-miR-219-2-3p	1	0	1	1	1	1	TBX15	T-box 15
hsa-miR-219-2-3p	1	0	1	1	1	1	BHLHE22	basic helix-loop-helix family, member e22
hsa-miR-219-2-3p	1	0	1	1	1	1	CEP128	centrosomal protein 128kDa
hsa-miR-219-2-3p	1	0	1	1	1	1	FAM81A	family with sequence similarity 81, member A
hsa-miR-219-2-3p	0	0	1	1	1	1	DUSP18	dual specificity phosphatase 18
hsa-miR-219-2-3p	1	0	1	1	1	1	SLC16A14	solute carrier family 16, member 14 (monocarboxylic acid transporter 14)
hsa-miR-219-2-3p	1	0	1	1	1	1	SPRED1	sprouty-related, EVH1 domain containing 1
hsa-miR-219-2-3p	0	0	1	1	1	1	C1orf177	chromosome 1 open reading frame 177
hsa-miR-219-2-3p	0	0	1	1	1	1	FAM227B	family with sequence similarity 227, member B
hsa-miR-219-2-3p	0	0	1	1	1	1	KHDRBS2	KH domain containing, RNA binding, signal transduction associated 2
hsa-miR-219-2-3p	0	0	1	1	1	1	CCDC89	coiled-coil domain containing 89
hsa-miR-219-2-3p	0	0	1	1	1	1	C6orf170	chromosome 6 open reading frame 170
hsa-miR-219-2-3p	1	0	1	0	1	1	TMEM196	transmembrane protein 196
hsa-miR-219-2-3p	1	0	1	1	1	1	PDIK1L	PDLIM1 interacting kinase 1 like
hsa-miR-219-2-3p	1	0	1	0	1	1	ST6GALNAC3	ST6 (alpha-N-acetyl-neuraminyl-2,3-beta-galactosyl-1,3)-N-acetylgalactosaminide alpha-2,6-sialyltransferase 3
hsa-miR-219-2-3p	0	0	1	0	0	0	FLJ32955	uncharacterized protein FLJ32955
hsa-miR-219-2-3p	0	0	1	1	1	1	RNF19B	ring finger protein 19B
hsa-miR-219-2-3p	1	0	1	0	1	1	ZCCHC24	zinc finger, CCHC domain containing 24
hsa-miR-219-2-3p	1	0	1	1	1	1	HS6ST3	heparan sulfate 6-O-sulfotransferase 3
hsa-miR-219-2-3p	0	0	1	1	1	1	CAMK1D	calcium/calmodulin-dependent protein kinase ID
hsa-miR-219-2-3p	1	0	1	1	1	1	FNDC5	fibronectin type III domain containing 5
hsa-miR-219-2-3p	0	0	1	1	1	1	CATSPER2	cation channel, sperm associated 2
hsa-miR-219-2-3p	1	0	1	1	1	1	FAM117B	family with sequence similarity 117, member B
hsa-miR-219-2-3p	1	0	1	0	1	1	PGM2L1	phosphoglucomutase 2-like 1
hsa-miR-219-2-3p	1	0	1	1	1	1	RABL3	RAB, member of RAS oncogene family-like 3
hsa-miR-219-2-3p	1	0	1	1	1	1	UBR1	ubiquitin protein ligase E3 component n-recognin 1
hsa-miR-219-2-3p	0	0	1	1	1	1	FRMD3	FERM domain containing 3
hsa-miR-219-2-3p	0	0	1	1	1	1	XKR3	XK, Kell blood group complex subunit-related family, member 3
hsa-miR-219-2-3p	0	0	1	1	1	1	RASSF6	Ras association (RalGDS/AF-6) domain family member 6
hsa-miR-219-2-3p	0	0	1	1	0	0	TAS1R1	taste receptor, type 1, member 1
hsa-miR-219-2-3p	1	0	1	0	1	1	PDE12	phosphodiesterase 12
hsa-miR-219-2-3p	1	0	1	1	1	1	PPM1B	protein phosphatase, Mg2+/Mn2+ dependent, 1B
hsa-miR-219-2-3p	0	0	1	1	1	1	HSD17B13	hydroxysteroid (17-beta) dehydrogenase 13
hsa-miR-219-2-3p	1	0	1	1	1	1	DCAF12L1	DDB1 and CUL4 associated factor 12-like 1
hsa-miR-219-2-3p	1	0	1	1	1	1	TMEM26	transmembrane protein 26
hsa-miR-219-2-3p	1	0	1	1	1	1	MTDH	metadherin
hsa-miR-219-2-3p	1	0	1	0	1	1	ARL5B	ADP-ribosylation factor-like 5B
hsa-miR-219-2-3p	0	0	1	1	0	0	C1orf64	chromosome 1 open reading frame 64
hsa-miR-219-2-3p	1	0	1	1	1	1	NF2	neurofibromin 2 (merlin)
hsa-miR-219-2-3p	1	0	1	1	1	1	FAM216B	family with sequence similarity 216, member B
hsa-miR-219-2-3p	1	0	1	1	1	1	DDX26B	DEAD/H (Asp-Glu-Ala-Asp/His) box polypeptide 26B
hsa-miR-219-2-3p	0	0	1	0	1	1	VSTM2A	V-set and transmembrane domain containing 2A
hsa-miR-219-2-3p	1	0	1	0	1	1	C12orf36	chromosome 12 open reading frame 36
hsa-miR-219-2-3p	0	0	1	1	1	1	ZNF169	zinc finger protein 169
hsa-miR-219-2-3p	0	0	1	0	1	1	TCF21	transcription factor 21
hsa-miR-219-2-3p	1	0	1	1	1	1	MIA3	melanoma inhibitory activity family, member 3
hsa-miR-219-2-3p	1	0	1	1	1	1	PTGER3	prostaglandin E receptor 3 (subtype EP3)
hsa-miR-219-2-3p	1	0	1	0	1	1	PRICKLE2	prickle homolog 2 (Drosophila)
hsa-miR-219-2-3p	0	0	1	1	1	1	MDFIC	MyoD family inhibitor domain containing
hsa-miR-219-2-3p	1	0	1	1	1	1	CXCL12	chemokine (C-X-C motif) ligand 12
hsa-miR-219-2-3p	0	0	1	1	0	0	FOXD4L4	forkhead box D4-like 4
hsa-miR-219-2-3p	0	0	1	1	1	1	ILDR2	immunoglobulin-like domain containing receptor 2
hsa-miR-219-2-3p	1	0	1	1	1	1	FBXO33	F-box protein 33
hsa-miR-219-2-3p	1	0	1	1	1	1	PPAPDC2	phosphatidic acid phosphatase type 2 domain containing 2
hsa-miR-219-2-3p	1	0	1	0	1	1	NAALADL2	N-acetylated alpha-linked acidic dipeptidase-like 2
hsa-miR-219-2-3p	0	0	1	0	1	1	NPSR1-AS1	NPSR1 antisense RNA 1
hsa-miR-219-2-3p	0	0	1	1	1	1	ZNF474	zinc finger protein 474
hsa-miR-219-2-3p	1	0	1	1	1	1	SPRYD4	SPRY domain containing 4
hsa-miR-219-2-3p	1	0	1	1	1	1	GADL1	glutamate decarboxylase-like 1
hsa-miR-219-2-3p	0	0	1	1	1	1	DNAH10	dynein, axonemal, heavy chain 10
hsa-miR-219-2-3p	1	0	1	1	1	1	RAPH1	Ras association (RalGDS/AF-6) and pleckstrin homology domains 1
hsa-miR-219-2-3p	0	0	1	0	0	0	RAB9BP1	RAB9B, member RAS oncogene family pseudogene 1
hsa-miR-219-2-3p	0	0	1	0	0	0	PCDHB19P	protocadherin beta 19 pseudogene
hsa-miR-219-2-3p	0	0	1	0	0	0	TTTY2	testis-specific transcript, Y-linked 2 (non-protein coding)
hsa-miR-219-2-3p	0	0	1	0	0	0	TTTY15	testis-specific transcript, Y-linked 15 (non-protein coding)
hsa-miR-219-2-3p	0	0	1	0	0	0	TTTY12	testis-specific transcript, Y-linked 12 (non-protein coding)
hsa-miR-219-2-3p	0	0	1	0	0	0	PPP1R2P3	protein phosphatase 1, regulatory (inhibitor) subunit 2 pseudogene 3
hsa-miR-219-2-3p	0	0	1	0	0	0	TTTY6B	testis-specific transcript, Y-linked 6B (non-protein coding)
hsa-miR-219-2-3p	0	0	1	0	0	0	TPI1P2	triosephosphate isomerase 1 pseudogene 2
hsa-miR-219-2-3p	0	0	1	0	0	0	SUMO1P1	SUMO1 pseudogene 1
hsa-miR-219-2-3p	0	0	1	0	0	0	NXF4	nuclear RNA export factor 4 pseudogene
hsa-miR-219-2-3p	0	0	1	0	0	0	SNORD96A	small nucleolar RNA, C/D box 96A
hsa-miR-219-2-3p	0	0	1	0	0	0	TDGF1P3	teratocarcinoma-derived growth factor 1 pseudogene 3
hsa-miR-219-2-3p	0	0	1	0	0	0	MBL1P	mannose-binding lectin (protein A) 1, pseudogene
hsa-miR-219-2-3p	0	0	1	0	0	0	HNRNPA3P1	heterogeneous nuclear ribonucleoprotein A3 pseudogene 1
hsa-miR-219-2-3p	0	0	1	0	0	0	SEPHS1P1	selenophosphate synthetase 1 pseudogene 1
hsa-miR-219-2-3p	0	0	1	0	0	0	TPTE2P6	transmembrane phosphoinositide 3-phosphatase and tensin homolog 2 pseudogene 6
hsa-miR-219-2-3p	0	0	1	0	0	0	SNX29P2	sorting nexin 29 pseudogene 2
hsa-miR-219-2-3p	0	0	1	0	0	0	SNORA28	small nucleolar RNA, H/ACA box 28
hsa-miR-219-2-3p	0	0	1	0	0	0	SNORD92	small nucleolar RNA, C/D box 92
hsa-miR-219-2-3p	0	0	1	1	1	1	BBS9	Bardet-Biedl syndrome 9
hsa-miR-219-2-3p	0	0	1	1	1	1	PEG3	paternally expressed 3
hsa-miR-219-2-3p	0	0	0	1	1	1	ABHD5	abhydrolase domain containing 5
hsa-miR-219-2-3p	1	0	1	1	0	0	GPRC5A	G protein-coupled receptor, family C, group 5, member A
hsa-miR-219-2-3p	0	0	1	1	1	1	ST6GALNAC1	ST6 (alpha-N-acetyl-neuraminyl-2,3-beta-galactosyl-1,3)-N-acetylgalactosaminide alpha-2,6-sialyltransferase 1
hsa-miR-219-2-3p	0	0	1	1	1	1	CTTNBP2	cortactin binding protein 2
hsa-miR-219-2-3p	0	0	1	1	0	0	KIF22	kinesin family member 22
hsa-miR-219-2-3p	1	0	1	1	1	1	DIMT1	DIM1 dimethyladenosine transferase 1 homolog (S. cerevisiae)
hsa-miR-219-2-3p	0	0	1	1	0	0	PPP1R15A	protein phosphatase 1, regulatory subunit 15A
hsa-miR-219-2-3p	0	0	0	1	1	1	ESF1	ESF1, nucleolar pre-rRNA processing protein, homolog (S. cerevisiae)
hsa-miR-219-2-3p	0	0	1	1	1	1	GNPTG	N-acetylglucosamine-1-phosphate transferase, gamma subunit
hsa-miR-219-2-3p	0	0	0	1	1	1	LAMB4	laminin, beta 4
hsa-miR-219-2-3p	0	0	1	1	1	1	LRP5L	low density lipoprotein receptor-related protein 5-like
hsa-miR-219-2-3p	1	0	1	1	1	1	PATZ1	POZ (BTB) and AT hook containing zinc finger 1
hsa-miR-219-2-3p	0	0	1	1	0	0	CENPM	centromere protein M
hsa-miR-219-2-3p	1	0	1	1	1	1	COCH	coagulation factor C homolog, cochlin (Limulus polyphemus)
hsa-miR-219-2-3p	0	0	1	1	1	1	VRK1	vaccinia related kinase 1
hsa-miR-219-2-3p	0	0	1	1	1	1	AQP8	aquaporin 8
hsa-miR-219-2-3p	0	0	1	1	1	1	GSR	glutathione reductase
hsa-miR-219-2-3p	0	0	0	1	0	0	SARS2	seryl-tRNA synthetase 2, mitochondrial
hsa-miR-219-2-3p	0	0	1	1	1	1	NPVF	neuropeptide VF precursor
hsa-miR-219-2-3p	0	0	0	1	1	1	NOD1	nucleotide-binding oligomerization domain containing 1
hsa-miR-219-2-3p	0	0	1	1	1	1	CCL2	chemokine (C-C motif) ligand 2
hsa-miR-219-2-3p	0	0	1	1	1	1	LDHA	lactate dehydrogenase A
hsa-miR-219-2-3p	0	0	0	1	1	1	RFC5	replication factor C (activator 1) 5, 36.5kDa
hsa-miR-219-2-3p	0	0	0	1	1	1	GPLD1	glycosylphosphatidylinositol specific phospholipase D1
hsa-miR-219-2-3p	0	0	0	1	1	1	FIG4	FIG4 homolog, SAC1 lipid phosphatase domain containing (S. cerevisiae)
hsa-miR-219-2-3p	0	0	1	1	1	1	C6orf118	chromosome 6 open reading frame 118
hsa-miR-219-2-3p	0	0	0	1	0	0	LTF	lactotransferrin
hsa-miR-219-2-3p	0	0	1	1	0	0	HRG	histidine-rich glycoprotein
hsa-miR-219-2-3p	0	0	0	1	1	1	AADAC	arylacetamide deacetylase
hsa-miR-219-2-3p	0	0	1	1	1	1	CENPA	centromere protein A
hsa-miR-219-2-3p	0	0	1	1	0	0	CCT4	chaperonin containing TCP1, subunit 4 (delta)
hsa-miR-219-2-3p	0	0	1	1	0	0	CCNI	cyclin I
hsa-miR-219-2-3p	1	0	0	1	1	1	GLRX	glutaredoxin (thioltransferase)
hsa-miR-219-2-3p	0	0	1	1	1	1	MLH3	mutL homolog 3 (E. coli)
hsa-miR-219-2-3p	0	0	1	1	1	1	TMEM214	transmembrane protein 214
hsa-miR-219-2-3p	0	0	0	1	1	1	ZNF415	zinc finger protein 415
hsa-miR-219-2-3p	0	0	1	1	0	0	CTAG2	cancer/testis antigen 2
hsa-miR-219-2-3p	0	0	0	1	0	0	TICAM1	toll-like receptor adaptor molecule 1
hsa-miR-219-2-3p	0	0	1	1	0	0	COPB1	coatomer protein complex, subunit beta 1
hsa-miR-219-2-3p	0	0	1	1	1	1	SOX15	SRY (sex determining region Y)-box 15
hsa-miR-219-2-3p	0	0	0	1	0	0	ZNF232	zinc finger protein 232
hsa-miR-219-2-3p	0	0	1	1	1	1	CNGB1	cyclic nucleotide gated channel beta 1
hsa-miR-219-2-3p	0	0	1	1	0	0	ZNF221	zinc finger protein 221
hsa-miR-219-2-3p	0	0	1	1	0	0	LILRA1	leukocyte immunoglobulin-like receptor, subfamily A (with TM domain), member 1
hsa-miR-219-2-3p	0	0	0	1	0	0	PDGFRL	platelet-derived growth factor receptor-like
hsa-miR-219-2-3p	0	0	1	1	0	0	ROPN1B	rhophilin associated tail protein 1B
hsa-miR-219-2-3p	0	0	1	1	0	0	KRT5	keratin 5
hsa-miR-219-2-3p	0	0	0	1	0	0	KRT6B	keratin 6B
hsa-miR-219-2-3p	0	0	0	1	1	1	APOC2	apolipoprotein C-II
hsa-miR-219-2-3p	1	0	1	1	1	1	ATXN10	ataxin 10
hsa-miR-219-2-3p	0	0	1	1	1	1	TEX101	testis expressed 101
hsa-miR-219-2-3p	0	0	0	1	0	0	GINS2	GINS complex subunit 2 (Psf2 homolog)
hsa-miR-219-2-3p	1	0	1	1	1	1	ACTR10	actin-related protein 10 homolog (S. cerevisiae)
hsa-miR-219-2-3p	0	0	1	1	0	0	CATSPERB	catsper channel auxiliary subunit beta
hsa-miR-219-2-3p	0	0	1	1	1	1	CCNB1	cyclin B1
hsa-miR-219-2-3p	0	0	1	1	0	0	CD180	CD180 molecule
hsa-miR-219-2-3p	0	0	0	1	1	1	TRPM1	transient receptor potential cation channel, subfamily M, member 1
hsa-miR-219-2-3p	0	0	1	1	1	1	COQ10A	coenzyme Q10 homolog A (S. cerevisiae)
hsa-miR-219-2-3p	0	0	1	1	0	0	KRT84	keratin 84
hsa-miR-219-2-3p	0	0	0	1	1	1	KRT82	keratin 82
hsa-miR-219-2-3p	0	0	1	1	1	1	PWP1	PWP1 homolog (S. cerevisiae)
hsa-miR-219-2-3p	0	0	0	1	0	0	DDX56	DEAD (Asp-Glu-Ala-Asp) box helicase 56
hsa-miR-219-2-3p	0	0	1	1	0	0	ADAMTS7	ADAM metallopeptidase with thrombospondin type 1 motif, 7
hsa-miR-219-2-3p	0	0	1	1	1	1	HEMGN	hemogen
hsa-miR-219-2-3p	0	0	0	1	0	0	PSMB7	proteasome (prosome, macropain) subunit, beta type, 7
hsa-miR-219-2-3p	0	0	1	1	1	1	CTSL2	cathepsin L2
hsa-miR-219-2-3p	0	0	1	1	1	1	NUSAP1	nucleolar and spindle associated protein 1
hsa-miR-219-2-3p	0	0	1	1	0	0	PARP6	poly (ADP-ribose) polymerase family, member 6
hsa-miR-219-2-3p	0	0	1	1	1	1	MNS1	meiosis-specific nuclear structural 1
hsa-miR-219-2-3p	0	0	1	1	1	1	SLC16A7	solute carrier family 16, member 7 (monocarboxylic acid transporter 2)
hsa-miR-219-2-3p	0	0	1	1	1	1	ASUN	asunder, spermatogenesis regulator homolog (Drosphila)
hsa-miR-219-2-3p	0	0	1	1	1	1	HS3ST2	heparan sulfate (glucosamine) 3-O-sulfotransferase 2
hsa-miR-219-2-3p	0	0	0	1	1	1	PALB2	partner and localizer of BRCA2
hsa-miR-219-2-3p	0	0	0	1	0	0	DPEP1	dipeptidase 1 (renal)
hsa-miR-219-2-3p	0	0	1	1	1	1	BFAR	bifunctional apoptosis regulator
hsa-miR-219-2-3p	0	0	1	1	1	1	THSD4	thrombospondin, type I, domain containing 4
hsa-miR-219-2-3p	0	0	0	1	0	0	RBFA	ribosome binding factor A (putative)
hsa-miR-219-2-3p	1	0	1	1	1	1	ZNF423	zinc finger protein 423
hsa-miR-219-2-3p	0	0	0	1	0	0	CHST8	carbohydrate (N-acetylgalactosamine 4-0) sulfotransferase 8
hsa-miR-219-2-3p	0	0	0	1	0	0	HCK	hemopoietic cell kinase
hsa-miR-219-2-3p	0	0	1	1	1	1	CDKN2C	cyclin-dependent kinase inhibitor 2C (p18, inhibits CDK4)
hsa-miR-219-2-3p	0	0	1	1	1	1	MID2	midline 2
hsa-miR-219-2-3p	0	0	0	1	0	0	UCP1	uncoupling protein 1 (mitochondrial, proton carrier)
hsa-miR-219-2-3p	0	0	1	1	0	0	ASPA	aspartoacylase
hsa-miR-219-2-3p	1	0	0	1	1	1	SMARCB1	SWI/SNF related, matrix associated, actin dependent regulator of chromatin, subfamily b, member 1
hsa-miR-219-2-3p	0	0	1	1	0	0	DESI1	desumoylating isopeptidase 1
hsa-miR-219-2-3p	0	0	1	1	1	1	NLRP2	NLR family, pyrin domain containing 2
hsa-miR-219-2-3p	1	0	0	1	1	1	PARP12	poly (ADP-ribose) polymerase family, member 12
hsa-miR-219-2-3p	1	0	1	1	1	1	STK17B	serine/threonine kinase 17b
hsa-miR-219-2-3p	0	0	1	1	0	0	UPK2	uroplakin 2
hsa-miR-219-2-3p	1	0	1	1	1	1	DNAJC10	DnaJ (Hsp40) homolog, subfamily C, member 10
hsa-miR-219-2-3p	1	0	1	1	1	1	IKZF2	IKAROS family zinc finger 2 (Helios)
hsa-miR-219-2-3p	1	0	0	1	1	1	PPAT	phosphoribosyl pyrophosphate amidotransferase
hsa-miR-219-2-3p	1	0	1	1	1	1	LARP1B	La ribonucleoprotein domain family, member 1B
hsa-miR-219-2-3p	0	0	0	1	0	0	KLKB1	kallikrein B, plasma (Fletcher factor) 1
hsa-miR-219-2-3p	0	0	1	1	1	1	MMRN1	multimerin 1
hsa-miR-219-2-3p	0	0	1	1	0	0	KNG1	kininogen 1
hsa-miR-219-2-3p	0	0	1	1	0	0	RPL26L1	ribosomal protein L26-like 1
hsa-miR-219-2-3p	1	0	1	1	0	0	RBM27	RNA binding motif protein 27
hsa-miR-219-2-3p	0	0	1	1	0	0	STAP1	signal transducing adaptor family member 1
hsa-miR-219-2-3p	1	0	1	1	1	1	HECW1	HECT, C2 and WW domain containing E3 ubiquitin protein ligase 1
hsa-miR-219-2-3p	0	0	1	1	1	1	HYAL1	hyaluronoglucosaminidase 1
hsa-miR-219-2-3p	0	0	1	1	0	0	DHX38	DEAH (Asp-Glu-Ala-His) box polypeptide 38
hsa-miR-219-2-3p	0	0	1	1	0	0	GALNS	galactosamine (N-acetyl)-6-sulfate sulfatase
hsa-miR-219-2-3p	0	0	1	1	1	1	SLC39A6	solute carrier family 39 (zinc transporter), member 6
hsa-miR-219-2-3p	1	0	1	1	1	1	FAM59A	family with sequence similarity 59, member A
hsa-miR-219-2-3p	0	0	0	1	1	1	TXNL4A	thioredoxin-like 4A
hsa-miR-219-2-3p	0	0	0	1	0	0	LOC113230	uncharacterized LOC113230
hsa-miR-219-2-3p	0	0	0	1	1	1	BCL10	B-cell CLL/lymphoma 10
hsa-miR-219-2-3p	0	0	1	1	0	0	EIF2D	eukaryotic translation initiation factor 2D
hsa-miR-219-2-3p	0	0	0	1	0	0	FLG	filaggrin
hsa-miR-219-2-3p	1	0	1	1	1	1	ASXL2	additional sex combs like 2 (Drosophila)
hsa-miR-219-2-3p	0	0	0	1	0	0	CPO	carboxypeptidase O
hsa-miR-219-2-3p	1	0	1	1	1	1	CASP10	caspase 10, apoptosis-related cysteine peptidase
hsa-miR-219-2-3p	0	0	1	1	0	0	SLC22A14	solute carrier family 22, member 14
hsa-miR-219-2-3p	0	0	1	1	0	0	PLA1A	phospholipase A1 member A
hsa-miR-219-2-3p	1	0	1	1	1	1	BOC	Boc homolog (mouse)
hsa-miR-219-2-3p	0	0	1	1	1	1	EIF2A	eukaryotic translation initiation factor 2A, 65kDa
hsa-miR-219-2-3p	0	0	0	1	1	1	SLC10A4	solute carrier family 10 (sodium/bile acid cotransporter family), member 4
hsa-miR-219-2-3p	1	0	1	1	0	0	OSMR	oncostatin M receptor
hsa-miR-219-2-3p	0	0	0	1	1	1	BHMT	betaine--homocysteine S-methyltransferase
hsa-miR-219-2-3p	0	0	0	1	0	0	GPR174	G protein-coupled receptor 174
hsa-miR-219-2-3p	0	0	1	1	0	0	GNRH1	gonadotropin-releasing hormone 1 (luteinizing-releasing hormone)
hsa-miR-219-2-3p	0	0	0	1	1	1	IFNA1	interferon, alpha 1
hsa-miR-219-2-3p	0	0	1	1	1	1	IDNK	idnK, gluconokinase homolog (E. coli)
hsa-miR-219-2-3p	0	0	0	1	1	1	MSRB2	methionine sulfoxide reductase B2
hsa-miR-219-2-3p	0	0	1	1	0	0	SSRP1	structure specific recognition protein 1
hsa-miR-219-2-3p	0	0	1	1	1	1	CHEK1	checkpoint kinase 1
hsa-miR-219-2-3p	0	0	1	1	0	0	ANKAR	ankyrin and armadillo repeat containing
hsa-miR-219-2-3p	0	0	0	1	1	1	TDO2	tryptophan 2,3-dioxygenase
hsa-miR-219-2-3p	0	0	1	1	1	1	CCDC75	coiled-coil domain containing 75
hsa-miR-219-2-3p	0	0	0	1	0	0	GRID2	glutamate receptor, ionotropic, delta 2
hsa-miR-219-2-3p	0	0	1	1	1	1	FAM151B	family with sequence similarity 151, member B
hsa-miR-219-2-3p	0	0	1	1	0	0	JAKMIP1	janus kinase and microtubule interacting protein 1
hsa-miR-219-2-3p	0	0	1	1	0	0	SMARCA5	SWI/SNF related, matrix associated, actin dependent regulator of chromatin, subfamily a, member 5
hsa-miR-219-2-3p	0	0	1	1	1	1	PGM3	phosphoglucomutase 3
hsa-miR-219-2-3p	0	0	0	1	0	0	DISP1	dispatched homolog 1 (Drosophila)
hsa-miR-219-2-3p	0	0	0	1	0	0	KBTBD10	kelch repeat and BTB (POZ) domain containing 10
hsa-miR-219-2-3p	1	0	1	1	1	1	PDLIM3	PDZ and LIM domain 3
hsa-miR-219-2-3p	0	0	1	1	1	1	SETD9	SET domain containing 9
hsa-miR-219-2-3p	0	0	0	1	0	0	CYP2C18	cytochrome P450, family 2, subfamily C, polypeptide 18
hsa-miR-219-2-3p	0	0	0	1	0	0	MAGEA8	melanoma antigen family A, 8
hsa-miR-219-2-3p	1	0	1	1	1	1	ATAD2	ATPase family, AAA domain containing 2
hsa-miR-219-2-3p	0	0	0	1	1	1	FANCD2	Fanconi anemia, complementation group D2
hsa-miR-219-2-3p	0	0	1	1	0	0	SHCBP1L	SHC SH2-domain binding protein 1-like
hsa-miR-219-2-3p	0	0	0	1	1	1	PDF	peptide deformylase (mitochondrial)
hsa-miR-219-2-3p	0	0	0	1	1	1	COQ5	coenzyme Q5 homolog, methyltransferase (S. cerevisiae)
hsa-miR-219-2-3p	1	0	1	1	1	1	SMAD6	SMAD family member 6
hsa-miR-219-2-3p	1	0	1	1	1	1	NCK1	NCK adaptor protein 1
hsa-miR-219-2-3p	0	0	1	1	1	1	CRYZL1	crystallin, zeta (quinone reductase)-like 1
hsa-miR-219-2-3p	0	0	1	1	1	1	CES5A	carboxylesterase 5A
hsa-miR-219-2-3p	0	0	1	1	0	0	CCDC58	coiled-coil domain containing 58
hsa-miR-219-2-3p	0	0	0	1	0	0	TFF3	trefoil factor 3 (intestinal)
hsa-miR-219-2-3p	0	0	1	1	0	0	PDE9A	phosphodiesterase 9A
hsa-miR-219-2-3p	0	0	0	1	0	0	KIR3DL3	killer cell immunoglobulin-like receptor, three domains, long cytoplasmic tail, 3
hsa-miR-219-2-3p	0	0	0	1	1	1	KIR2DL1	killer cell immunoglobulin-like receptor, two domains, long cytoplasmic tail, 1
hsa-miR-219-2-3p	0	0	0	1	0	0	FTCD	formiminotransferase cyclodeaminase
hsa-miR-219-2-3p	0	0	1	1	1	1	ZNF250	zinc finger protein 250
hsa-miR-219-2-3p	0	0	1	1	1	1	ZNF382	zinc finger protein 382
hsa-miR-219-2-3p	0	0	0	1	0	0	LRRC53	leucine rich repeat containing 53
hsa-miR-219-2-3p	0	0	0	1	1	1	CHAC2	ChaC, cation transport regulator homolog 2 (E. coli)
hsa-miR-219-2-3p	1	0	1	1	1	1	DHX57	DEAH (Asp-Glu-Ala-Asp/His) box polypeptide 57
hsa-miR-219-2-3p	0	0	0	1	0	0	DRD3	dopamine receptor D3
hsa-miR-219-2-3p	0	0	0	1	1	1	CLRN1	clarin 1
hsa-miR-219-2-3p	0	0	1	1	1	1	RSRC1	arginine/serine-rich coiled-coil 1
hsa-miR-219-2-3p	0	0	0	1	1	1	WDR65	WD repeat domain 65
hsa-miR-219-2-3p	0	0	0	1	0	0	TLR3	toll-like receptor 3
hsa-miR-219-2-3p	0	0	0	1	0	0	DAGLB	diacylglycerol lipase, beta
hsa-miR-219-2-3p	0	0	0	1	0	0	RSPH10B2	radial spoke head 10 homolog B2 (Chlamydomonas)
hsa-miR-219-2-3p	0	0	1	1	0	0	DCSTAMP	dendrocyte expressed seven transmembrane protein
hsa-miR-219-2-3p	0	0	1	1	1	1	PRPF18	PRP18 pre-mRNA processing factor 18 homolog (S. cerevisiae)
hsa-miR-219-2-3p	0	0	1	1	1	1	BCL2L14	BCL2-like 14 (apoptosis facilitator)
hsa-miR-219-2-3p	0	0	1	1	1	1	MRPL43	mitochondrial ribosomal protein L43
hsa-miR-219-2-3p	0	0	0	1	1	1	NLRP14	NLR family, pyrin domain containing 14
hsa-miR-219-2-3p	0	0	0	1	0	0	WDR16	WD repeat domain 16
hsa-miR-219-2-3p	0	0	1	1	0	0	POLR3E	polymerase (RNA) III (DNA directed) polypeptide E (80kD)
hsa-miR-219-2-3p	1	0	1	1	1	1	C16orf45	chromosome 16 open reading frame 45
hsa-miR-219-2-3p	0	0	1	1	1	1	KIF7	kinesin family member 7
hsa-miR-219-2-3p	0	0	1	1	1	1	PLIN1	perilipin 1
hsa-miR-219-2-3p	0	0	1	1	0	0	ZNF646	zinc finger protein 646
hsa-miR-219-2-3p	0	0	0	1	0	0	ZC3H18	zinc finger CCCH-type containing 18
hsa-miR-219-2-3p	0	0	1	1	1	1	SGK494	uncharacterized serine/threonine-protein kinase SgK494
hsa-miR-219-2-3p	1	0	1	1	1	1	ZNF83	zinc finger protein 83
hsa-miR-219-2-3p	0	0	0	1	1	1	LAIR2	leukocyte-associated immunoglobulin-like receptor 2
hsa-miR-219-2-3p	0	0	0	1	0	0	DAPK3	death-associated protein kinase 3
hsa-miR-219-2-3p	0	0	1	1	0	0	DDB1	damage-specific DNA binding protein 1, 127kDa
hsa-miR-219-2-3p	1	0	1	1	1	1	ING2	inhibitor of growth family, member 2
hsa-miR-219-2-3p	0	0	0	1	0	0	OR5B12	olfactory receptor, family 5, subfamily B, member 12
hsa-miR-219-2-3p	0	0	1	1	1	1	EMB	embigin
hsa-miR-219-2-3p	0	0	0	1	0	0	OR2B2	olfactory receptor, family 2, subfamily B, member 2
hsa-miR-219-2-3p	0	0	1	1	0	0	SYCE1	synaptonemal complex central element protein 1
hsa-miR-219-2-3p	0	0	0	1	1	1	HINT1	histidine triad nucleotide binding protein 1
hsa-miR-219-2-3p	0	0	1	1	0	0	FSHR	follicle stimulating hormone receptor
hsa-miR-219-2-3p	0	0	0	1	0	0	TMEM126A	transmembrane protein 126A
hsa-miR-219-2-3p	1	0	1	1	1	1	RNASE6	ribonuclease, RNase A family, k6
hsa-miR-219-2-3p	0	0	1	1	1	1	SCG2	secretogranin II
hsa-miR-219-2-3p	0	0	0	1	0	0	DTYMK	deoxythymidylate kinase (thymidylate kinase)
hsa-miR-219-2-3p	0	0	0	1	1	1	MRPL13	mitochondrial ribosomal protein L13
hsa-miR-219-2-3p	0	0	0	1	1	1	LDHAL6B	lactate dehydrogenase A-like 6B
hsa-miR-219-2-3p	0	0	1	1	0	0	AVPI1	arginine vasopressin-induced 1
hsa-miR-219-2-3p	0	0	1	1	1	1	CMTM8	CKLF-like MARVEL transmembrane domain containing 8
hsa-miR-219-2-3p	0	0	1	1	0	0	MUS81	MUS81 endonuclease homolog (S. cerevisiae)
hsa-miR-219-2-3p	0	0	0	1	1	1	TLR1	toll-like receptor 1
hsa-miR-219-2-3p	0	0	1	1	1	1	ATP6V1G3	ATPase, H+ transporting, lysosomal 13kDa, V1 subunit G3
hsa-miR-219-2-3p	0	0	1	1	1	1	GRIK1	glutamate receptor, ionotropic, kainate 1
hsa-miR-219-2-3p	0	0	0	1	1	1	LOC729317	voltage-dependent anion channel 2 pseudogene
hsa-miR-219-2-3p	0	0	0	1	1	1	KRT2	keratin 2
hsa-miR-219-2-3p	0	0	1	1	1	1	TRIM59	tripartite motif containing 59
hsa-miR-219-2-3p	0	0	0	1	0	0	STON1-GTF2A1L	STON1-GTF2A1L readthrough
hsa-miR-219-2-3p	0	0	1	1	1	1	STON1	stonin 1
hsa-miR-219-2-3p	0	0	1	1	1	1	TRMT10C	tRNA methyltransferase 10 homolog C (S. cerevisiae)
hsa-miR-219-2-3p	0	0	0	1	1	1	CCDC96	coiled-coil domain containing 96
hsa-miR-219-2-3p	0	0	1	1	1	1	CHRNA9	cholinergic receptor, nicotinic, alpha 9 (neuronal)
hsa-miR-219-2-3p	0	0	1	1	0	0	GP6	glycoprotein VI (platelet)
hsa-miR-219-2-3p	0	0	1	1	0	0	SPESP1	sperm equatorial segment protein 1
hsa-miR-219-2-3p	0	0	1	1	1	1	REP15	RAB15 effector protein
hsa-miR-219-2-3p	1	0	1	1	1	1	DNAL1	dynein, axonemal, light chain 1
hsa-miR-219-2-3p	0	0	1	1	1	1	MAP9	microtubule-associated protein 9
hsa-miR-219-2-3p	1	0	1	1	1	1	COQ2	coenzyme Q2 homolog, prenyltransferase (yeast)
hsa-miR-219-2-3p	0	0	0	1	1	1	RAG2	recombination activating gene 2
hsa-miR-219-2-3p	0	0	0	1	1	1	TLR8	toll-like receptor 8
hsa-miR-219-2-3p	0	0	1	1	1	1	CYP3A43	cytochrome P450, family 3, subfamily A, polypeptide 43
hsa-miR-219-2-3p	0	0	1	1	0	0	KRT25	keratin 25
hsa-miR-219-2-3p	0	0	1	1	1	1	DCAF6	DDB1 and CUL4 associated factor 6
hsa-miR-219-2-3p	1	0	1	1	1	1	ZBTB11	zinc finger and BTB domain containing 11
hsa-miR-219-2-3p	0	0	1	1	1	1	MGAM	maltase-glucoamylase (alpha-glucosidase)
hsa-miR-219-2-3p	0	0	0	1	1	1	LAIR1	leukocyte-associated immunoglobulin-like receptor 1
hsa-miR-219-2-3p	0	0	1	1	1	1	VDAC2	voltage-dependent anion channel 2
hsa-miR-219-2-3p	0	0	0	1	0	0	OR5AS1	olfactory receptor, family 5, subfamily AS, member 1
hsa-miR-219-2-3p	0	0	1	1	0	0	AP4S1	adaptor-related protein complex 4, sigma 1 subunit
hsa-miR-219-2-3p	0	0	1	1	0	0	STX4	syntaxin 4
hsa-miR-219-2-3p	1	0	1	1	1	1	MTMR10	myotubularin related protein 10
hsa-miR-219-2-3p	0	0	0	1	0	0	OR2A4	olfactory receptor, family 2, subfamily A, member 4
hsa-miR-219-2-3p	0	0	1	1	0	0	CTC1	CTS telomere maintenance complex component 1
hsa-miR-219-2-3p	0	0	1	1	0	0	BCAT2	branched chain amino-acid transaminase 2, mitochondrial
hsa-miR-219-2-3p	1	0	1	1	1	1	CLK4	CDC-like kinase 4
hsa-miR-219-2-3p	0	0	1	1	1	1	SYTL2	synaptotagmin-like 2
hsa-miR-219-2-3p	0	0	0	1	0	0	OR2AE1	olfactory receptor, family 2, subfamily AE, member 1
hsa-miR-219-2-3p	1	0	1	1	1	1	ICOS	inducible T-cell co-stimulator
hsa-miR-219-2-3p	1	0	1	1	1	1	SOX6	SRY (sex determining region Y)-box 6
hsa-miR-219-2-3p	1	0	1	1	1	1	PDCD6	programmed cell death 6
hsa-miR-219-2-3p	1	0	1	1	1	1	AHRR	aryl-hydrocarbon receptor repressor
hsa-miR-219-2-3p	0	0	1	1	0	0	PANK2	pantothenate kinase 2
hsa-miR-219-2-3p	0	0	1	1	0	0	CDK1	cyclin-dependent kinase 1
hsa-miR-219-2-3p	0	0	0	1	0	0	C3orf32	chromosome 3 open reading frame 32
hsa-miR-219-2-3p	1	0	0	1	1	1	PLEKHA5	pleckstrin homology domain containing, family A member 5
hsa-miR-219-2-3p	0	0	1	1	1	1	PRF1	perforin 1 (pore forming protein)
hsa-miR-219-2-3p	0	0	0	1	0	0	GEMIN4	gem (nuclear organelle) associated protein 4
hsa-miR-219-2-3p	1	0	1	1	1	1	ATAT1	alpha tubulin acetyltransferase 1
hsa-miR-219-2-3p	0	0	1	1	1	1	SHISA3	shisa homolog 3 (Xenopus laevis)
hsa-miR-219-2-3p	1	0	1	1	1	1	B4GALT3	UDP-Gal:betaGlcNAc beta 1,4- galactosyltransferase, polypeptide 3
hsa-miR-219-2-3p	0	0	1	1	1	1	RABGGTB	Rab geranylgeranyltransferase, beta subunit
hsa-miR-219-2-3p	0	0	0	1	0	0	OR10G4	olfactory receptor, family 10, subfamily G, member 4
hsa-miR-219-2-3p	0	0	0	1	0	0	C10orf91	chromosome 10 open reading frame 91
hsa-miR-219-2-3p	0	0	1	1	1	1	NCBP2	nuclear cap binding protein subunit 2, 20kDa
hsa-miR-219-2-3p	0	0	1	1	1	1	CCDC33	coiled-coil domain containing 33
hsa-miR-219-2-3p	0	0	1	1	1	1	MFAP3	microfibrillar-associated protein 3
hsa-miR-219-2-3p	0	0	0	1	0	0	ZNF491	zinc finger protein 491
hsa-miR-219-2-3p	0	0	0	1	0	0	SPEM1	spermatid maturation 1
hsa-miR-219-2-3p	0	0	1	1	1	1	C18orf56	chromosome 18 open reading frame 56
hsa-miR-219-2-3p	0	0	0	1	0	0	ZNF687	zinc finger protein 687
hsa-miR-219-2-3p	0	0	1	1	1	1	LILRB1	leukocyte immunoglobulin-like receptor, subfamily B (with TM and ITIM domains), member 1
hsa-miR-219-2-3p	0	0	1	1	1	1	KLHDC7A	kelch domain containing 7A
hsa-miR-219-2-3p	0	0	0	1	0	0	SLC47A2	solute carrier family 47, member 2
hsa-miR-219-2-3p	0	0	1	1	0	0	CYP4F8	cytochrome P450, family 4, subfamily F, polypeptide 8
hsa-miR-219-2-3p	1	0	1	1	1	1	FAM91A1	family with sequence similarity 91, member A1
hsa-miR-219-2-3p	0	0	0	1	0	0	GTPBP6	GTP binding protein 6 (putative)
hsa-miR-219-2-3p	0	0	0	1	0	0	KIR3DL2	killer cell immunoglobulin-like receptor, three domains, long cytoplasmic tail, 2
hsa-miR-219-2-3p	1	0	1	1	1	1	RIT2	Ras-like without CAAX 2
hsa-miR-219-2-3p	1	0	1	1	1	1	RBM26	RNA binding motif protein 26
hsa-miR-219-2-3p	0	0	1	1	0	0	CCDC158	coiled-coil domain containing 158
hsa-miR-219-2-3p	0	0	0	1	1	1	CCDC60	coiled-coil domain containing 60
hsa-miR-219-2-3p	0	0	0	1	1	1	ZNF84	zinc finger protein 84
hsa-miR-219-2-3p	0	0	1	1	0	0	NDUFA12	NADH dehydrogenase (ubiquinone) 1 alpha subcomplex, 12
hsa-miR-219-2-3p	0	0	1	1	1	1	HIST2H2BE	histone cluster 2, H2be
hsa-miR-219-2-3p	0	0	1	1	1	1	ZNF662	zinc finger protein 662
hsa-miR-219-2-3p	0	0	0	1	1	1	CRELD2	cysteine-rich with EGF-like domains 2
hsa-miR-219-2-3p	0	0	0	1	0	0	OR2V2	olfactory receptor, family 2, subfamily V, member 2
hsa-miR-219-2-3p	0	0	0	1	0	0	OR6C76	olfactory receptor, family 6, subfamily C, member 76
hsa-miR-219-2-3p	0	0	0	1	1	1	BCAN	brevican
hsa-miR-219-2-3p	0	0	1	1	1	1	MAGEC3	melanoma antigen family C, 3
hsa-miR-219-2-3p	0	0	1	1	1	1	HOXB2	homeobox B2
hsa-miR-219-2-3p	0	0	1	1	0	0	SGK223	homolog of rat pragma of Rnd2
hsa-miR-219-2-3p	0	0	0	1	0	0	ALG12	asparagine-linked glycosylation 12, alpha-1,6-mannosyltransferase homolog (S. cerevisiae)
hsa-miR-219-2-3p	0	0	1	1	0	0	EWSR1	Ewing sarcoma breakpoint region 1
hsa-miR-219-2-3p	1	0	1	1	1	1	TRIOBP	TRIO and F-actin binding protein
hsa-miR-219-2-3p	0	0	1	1	1	1	C11orf54	chromosome 11 open reading frame 54
hsa-miR-219-2-3p	0	0	1	1	0	0	NXF5	nuclear RNA export factor 5
hsa-miR-219-2-3p	1	0	1	1	1	1	CCDC28A	coiled-coil domain containing 28A
hsa-miR-219-2-3p	0	0	0	1	0	0	TSSC4	tumor suppressing subtransferable candidate 4
hsa-miR-219-2-3p	0	0	1	1	0	0	C6orf201	chromosome 6 open reading frame 201
hsa-miR-219-2-3p	0	0	1	1	1	1	TRMT11	tRNA methyltransferase 11 homolog (S. cerevisiae)
hsa-miR-219-2-3p	0	0	0	1	0	0	ZNF578	zinc finger protein 578
hsa-miR-219-2-3p	0	0	0	1	1	1	ZNF528	zinc finger protein 528
hsa-miR-219-2-3p	0	0	1	1	0	0	LINC00207	long intergenic non-protein coding RNA 207
hsa-miR-219-2-3p	0	0	0	1	1	1	HSP90AA1	heat shock protein 90kDa alpha (cytosolic), class A member 1
hsa-miR-219-2-3p	0	0	0	1	1	1	CDKN3	cyclin-dependent kinase inhibitor 3
hsa-miR-219-2-3p	0	0	1	1	0	0	HTR3E	5-hydroxytryptamine (serotonin) receptor 3E, ionotropic
hsa-miR-219-2-3p	0	0	0	1	0	0	TNRC6C	trinucleotide repeat containing 6C
hsa-miR-219-2-3p	1	0	1	1	1	1	FADS1	fatty acid desaturase 1
hsa-miR-219-2-3p	0	0	1	1	0	0	FADS3	fatty acid desaturase 3
hsa-miR-219-2-3p	0	0	0	1	0	0	RSPH10B	radial spoke head 10 homolog B (Chlamydomonas)
hsa-miR-219-2-3p	1	0	1	1	1	1	DTX3	deltex homolog 3 (Drosophila)
hsa-miR-219-2-3p	1	0	1	1	1	1	OSBPL9	oxysterol binding protein-like 9
hsa-miR-219-2-3p	0	0	1	1	0	0	SNTG1	syntrophin, gamma 1
hsa-miR-219-2-3p	0	0	0	1	0	0	TEKT1	tektin 1
hsa-miR-219-2-3p	0	0	1	1	0	0	PRY	PTPN13-like, Y-linked
hsa-miR-219-2-3p	0	0	1	1	1	1	PSPC1	paraspeckle component 1
hsa-miR-219-2-3p	1	0	1	1	1	1	SRFBP1	serum response factor binding protein 1
hsa-miR-219-2-3p	0	0	1	1	1	1	LRRC17	leucine rich repeat containing 17
hsa-miR-219-2-3p	0	0	1	1	0	0	RNF17	ring finger protein 17
hsa-miR-219-2-3p	0	0	1	1	1	1	ZCCHC13	zinc finger, CCHC domain containing 13
hsa-miR-219-2-3p	0	0	1	1	0	0	DMKN	dermokine
hsa-miR-219-2-3p	0	0	1	1	1	1	DNAJC12	DnaJ (Hsp40) homolog, subfamily C, member 12
hsa-miR-219-2-3p	0	0	1	1	1	1	ETV7	ets variant 7
hsa-miR-219-2-3p	0	0	0	1	1	1	ZNF239	zinc finger protein 239
hsa-miR-219-2-3p	1	0	1	1	1	1	RET	ret proto-oncogene
hsa-miR-219-2-3p	0	0	1	1	0	0	LIPT1	lipoyltransferase 1
hsa-miR-219-2-3p	0	0	1	1	1	1	SP100	SP100 nuclear antigen
hsa-miR-219-2-3p	1	0	1	1	1	1	NHLRC1	NHL repeat containing 1
hsa-miR-219-2-3p	1	0	1	1	1	1	PPP1CC	protein phosphatase 1, catalytic subunit, gamma isozyme
hsa-miR-219-2-3p	0	0	1	1	0	0	SPRR2B	small proline-rich protein 2B
hsa-miR-219-2-3p	0	0	0	1	1	1	MYL1	myosin, light chain 1, alkali; skeletal, fast
hsa-miR-219-2-3p	0	0	1	1	1	1	DLGAP5	discs, large (Drosophila) homolog-associated protein 5
hsa-miR-219-2-3p	0	0	0	1	0	0	EXD3	exonuclease 3'-5' domain containing 3
hsa-miR-219-2-3p	0	0	0	1	1	1	CTSL1	cathepsin L1
hsa-miR-219-2-3p	0	0	0	1	0	0	CDHR4	cadherin-related family member 4
hsa-miR-219-2-3p	0	0	1	1	0	0	CCDC109B	coiled-coil domain containing 109B
hsa-miR-219-2-3p	0	0	0	1	0	0	LARP7	La ribonucleoprotein domain family, member 7
hsa-miR-219-2-3p	0	0	1	1	1	1	CR2	complement component (3d/Epstein Barr virus) receptor 2
hsa-miR-219-2-3p	1	0	1	1	1	1	MEF2A	myocyte enhancer factor 2A
hsa-miR-219-2-3p	1	0	0	1	0	0	DLG1	discs, large homolog 1 (Drosophila)
hsa-miR-219-2-3p	0	0	1	1	1	1	C8orf34	chromosome 8 open reading frame 34
hsa-miR-219-2-3p	1	0	1	1	1	1	ARHGEF10	Rho guanine nucleotide exchange factor (GEF) 10
hsa-miR-219-2-3p	0	0	0	1	1	1	TAF1A	TATA box binding protein (TBP)-associated factor, RNA polymerase I, A, 48kDa
hsa-miR-219-2-3p	0	0	1	1	1	1	TEX9	testis expressed 9
hsa-miR-219-2-3p	0	0	1	1	1	1	SERPINB8	serpin peptidase inhibitor, clade B (ovalbumin), member 8
hsa-miR-219-2-3p	0	0	1	1	1	1	GIN1	gypsy retrotransposon integrase 1
hsa-miR-219-2-3p	0	0	0	1	1	1	GNL3	guanine nucleotide binding protein-like 3 (nucleolar)
hsa-miR-219-2-3p	0	0	1	1	1	1	SUV39H2	suppressor of variegation 3-9 homolog 2 (Drosophila)
hsa-miR-219-2-3p	1	0	1	1	1	1	MSR1	macrophage scavenger receptor 1
hsa-miR-219-2-3p	0	0	1	1	1	1	ITGB1BP1	integrin beta 1 binding protein 1
hsa-miR-219-2-3p	0	0	0	1	0	0	OR52B4	olfactory receptor, family 52, subfamily B, member 4
hsa-miR-219-2-3p	0	0	0	1	0	0	KIR3DL1	killer cell immunoglobulin-like receptor, three domains, long cytoplasmic tail, 1
hsa-miR-219-2-3p	1	0	1	1	1	1	FAM208A	family with sequence similarity 208, member A
hsa-miR-219-2-3p	1	0	0	1	1	1	MKL1	megakaryoblastic leukemia (translocation) 1
hsa-miR-219-2-3p	0	0	1	1	0	0	PXK	PX domain containing serine/threonine kinase
hsa-miR-219-2-3p	1	0	1	1	1	1	TMED7	transmembrane emp24 protein transport domain containing 7
hsa-miR-219-2-3p	0	0	0	1	1	1	TICAM2	toll-like receptor adaptor molecule 2
hsa-miR-219-2-3p	1	0	1	1	1	1	PEX2	peroxisomal biogenesis factor 2
hsa-miR-219-2-3p	0	0	1	1	1	1	CLEC4M	C-type lectin domain family 4, member M
hsa-miR-219-2-3p	0	0	1	1	1	1	SMC1B	structural maintenance of chromosomes 1B
hsa-miR-219-2-3p	0	0	0	1	0	0	LCA10	lung carcinoma-associated protein 10
hsa-miR-219-2-3p	1	0	1	1	1	1	HMGCLL1	3-hydroxymethyl-3-methylglutaryl-CoA lyase-like 1
hsa-miR-219-2-3p	0	0	1	1	0	0	RTP2	receptor (chemosensory) transporter protein 2
hsa-miR-219-2-3p	0	0	1	1	1	1	FAM104B	family with sequence similarity 104, member B
hsa-miR-219-2-3p	0	0	0	1	0	0	HIST1H2AI	histone cluster 1, H2ai
hsa-miR-219-2-3p	1	0	1	1	1	1	MAMLD1	mastermind-like domain containing 1
hsa-miR-219-2-3p	0	0	0	1	1	1	AASS	aminoadipate-semialdehyde synthase
hsa-miR-219-2-3p	0	0	1	1	0	0	KIR2DL4	killer cell immunoglobulin-like receptor, two domains, long cytoplasmic tail, 4
hsa-miR-219-2-3p	0	0	0	1	1	1	C20orf166-AS1	C20orf166 antisense RNA 1
hsa-miR-219-2-3p	0	0	0	1	1	1	FRA10AC1	fragile site, folic acid type, rare, fra(10)(q23.3) or fra(10)(q24.2) candidate 1
hsa-miR-219-2-3p	0	0	1	1	1	1	MYOF	myoferlin
hsa-miR-219-2-3p	1	0	1	1	1	1	OSBPL6	oxysterol binding protein-like 6
hsa-miR-219-2-3p	0	0	1	1	0	0	SPINK5	serine peptidase inhibitor, Kazal type 5
hsa-miR-219-2-3p	0	0	0	1	0	0	CHCHD2	coiled-coil-helix-coiled-coil-helix domain containing 2
hsa-miR-219-2-3p	0	0	0	1	0	0	HIST1H2BF	histone cluster 1, H2bf
hsa-miR-219-2-3p	0	0	1	1	1	1	HLA-G	major histocompatibility complex, class I, G
hsa-miR-219-2-3p	0	0	0	1	1	1	SPRR2D	small proline-rich protein 2D
hsa-miR-219-2-3p	0	0	0	1	1	1	SLC26A11	solute carrier family 26, member 11
hsa-miR-219-2-3p	1	0	1	1	1	1	FAM135A	family with sequence similarity 135, member A
hsa-miR-219-2-3p	0	0	0	1	0	0	ALPK2	alpha-kinase 2
hsa-miR-219-2-3p	0	0	1	1	1	1	ZNF277	zinc finger protein 277
hsa-miR-219-2-3p	0	0	1	1	0	0	FAM19A3	family with sequence similarity 19 (chemokine (C-C motif)-like), member A3
hsa-miR-219-2-3p	0	0	1	1	1	1	ZNF695	zinc finger protein 695
hsa-miR-219-2-3p	0	0	0	1	1	1	TBCE	tubulin folding cofactor E
hsa-miR-219-2-3p	0	0	1	1	1	1	LYPLAL1	lysophospholipase-like 1
hsa-miR-219-2-3p	0	0	0	1	0	0	C4BPA	complement component 4 binding protein, alpha
hsa-miR-219-2-3p	0	0	0	1	0	0	C6orf99	chromosome 6 open reading frame 99
hsa-miR-219-2-3p	0	0	1	1	0	0	UBE2T	ubiquitin-conjugating enzyme E2T (putative)
hsa-miR-219-2-3p	0	0	1	1	1	1	PTPRC	protein tyrosine phosphatase, receptor type, C
hsa-miR-219-2-3p	0	0	0	1	1	1	RAB32	RAB32, member RAS oncogene family
hsa-miR-219-2-3p	0	0	1	1	0	0	TNR	tenascin R
hsa-miR-219-2-3p	0	0	1	1	1	1	C1orf105	chromosome 1 open reading frame 105
hsa-miR-219-2-3p	1	0	1	1	1	1	SCYL3	SCY1-like 3 (S. cerevisiae)
hsa-miR-219-2-3p	0	0	1	1	1	1	C1orf110	chromosome 1 open reading frame 110
hsa-miR-219-2-3p	0	0	1	1	1	1	FCRLA	Fc receptor-like A
hsa-miR-219-2-3p	0	0	1	1	1	1	CD244	CD244 molecule, natural killer cell receptor 2B4
hsa-miR-219-2-3p	0	0	1	1	1	1	TPD52L1	tumor protein D52-like 1
hsa-miR-219-2-3p	1	0	1	1	1	1	NKAIN2	Na+/K+ transporting ATPase interacting 2
hsa-miR-219-2-3p	0	0	0	1	1	1	MCM9	minichromosome maintenance complex component 9
hsa-miR-219-2-3p	1	0	1	1	1	1	NT5DC1	5'-nucleotidase domain containing 1
hsa-miR-219-2-3p	0	0	0	1	0	0	CLRN3	clarin 3
hsa-miR-219-2-3p	1	0	1	1	1	1	ILF2	interleukin enhancer binding factor 2, 45kDa
hsa-miR-219-2-3p	0	0	0	1	0	0	MMP21	matrix metallopeptidase 21
hsa-miR-219-2-3p	1	0	1	1	1	1	TACC2	transforming, acidic coiled-coil containing protein 2
hsa-miR-219-2-3p	0	0	0	1	1	1	SEC23IP	SEC23 interacting protein
hsa-miR-219-2-3p	0	0	0	1	0	0	LOC100129852	uncharacterized LOC100129852
hsa-miR-219-2-3p	0	0	0	1	0	0	ENO4	enolase family member 4
hsa-miR-219-2-3p	0	0	0	1	0	0	HIST1H3H	histone cluster 1, H3h
hsa-miR-219-2-3p	0	0	1	1	0	0	ZDHHC6	zinc finger, DHHC-type containing 6
hsa-miR-219-2-3p	0	0	1	1	0	0	CD58	CD58 molecule
hsa-miR-219-2-3p	0	0	0	1	0	0	AMPD1	adenosine monophosphate deaminase 1
hsa-miR-219-2-3p	0	0	0	1	1	1	NT5E	5'-nucleotidase, ecto (CD73)
hsa-miR-219-2-3p	0	0	1	1	0	0	KIAA1324	KIAA1324
hsa-miR-219-2-3p	0	0	1	1	1	1	IRAK1BP1	interleukin-1 receptor-associated kinase 1 binding protein 1
hsa-miR-219-2-3p	0	0	1	1	0	0	NAA10	N(alpha)-acetyltransferase 10, NatA catalytic subunit
hsa-miR-219-2-3p	0	0	1	1	0	0	LRRC39	leucine rich repeat containing 39
hsa-miR-219-2-3p	1	0	1	1	0	0	LBX1	ladybird homeobox 1
hsa-miR-219-2-3p	0	0	1	1	1	1	KAZALD1	Kazal-type serine peptidase inhibitor domain 1
hsa-miR-219-2-3p	1	0	1	1	1	1	MTF2	metal response element binding transcription factor 2
hsa-miR-219-2-3p	0	0	1	1	0	0	CPN1	carboxypeptidase N, polypeptide 1
hsa-miR-219-2-3p	0	0	1	1	0	0	HFM1	HFM1, ATP-dependent DNA helicase homolog (S. cerevisiae)
hsa-miR-219-2-3p	1	0	1	1	1	1	SMAP1	small ArfGAP 1
hsa-miR-219-2-3p	0	0	1	1	1	1	CUTC	cutC copper transporter homolog (E. coli)
hsa-miR-219-2-3p	0	0	1	1	0	0	PYROXD2	pyridine nucleotide-disulphide oxidoreductase domain 2
hsa-miR-219-2-3p	1	0	1	1	1	1	BEND6	BEN domain containing 6
hsa-miR-219-2-3p	0	0	1	1	1	1	FAM122C	family with sequence similarity 122C
hsa-miR-219-2-3p	0	0	0	1	0	0	PSMA7	proteasome (prosome, macropain) subunit, alpha type, 7
hsa-miR-219-2-3p	0	0	1	1	1	1	FPGT	fucose-1-phosphate guanylyltransferase
hsa-miR-219-2-3p	0	0	1	1	1	1	GADD45A	growth arrest and DNA-damage-inducible, alpha
hsa-miR-219-2-3p	1	0	1	1	1	1	SERBP1	SERPINE1 mRNA binding protein 1
hsa-miR-219-2-3p	1	0	1	1	1	1	LEPR	leptin receptor
hsa-miR-219-2-3p	1	0	1	1	1	1	STAG2	stromal antigen 2
hsa-miR-219-2-3p	0	0	0	1	0	0	C8B	complement component 8, beta polypeptide
hsa-miR-219-2-3p	0	0	1	1	0	0	RNF113A	ring finger protein 113A
hsa-miR-219-2-3p	0	0	0	1	0	0	SLC1A7	solute carrier family 1 (glutamate transporter), member 7
hsa-miR-219-2-3p	0	0	1	1	1	1	MED22	mediator complex subunit 22
hsa-miR-219-2-3p	0	0	1	1	0	0	C10orf116	chromosome 10 open reading frame 116
hsa-miR-219-2-3p	0	0	1	1	1	1	EIF2B3	eukaryotic translation initiation factor 2B, subunit 3 gamma, 58kDa
hsa-miR-219-2-3p	0	0	0	1	0	0	POLR1C	polymerase (RNA) I polypeptide C, 30kDa
hsa-miR-219-2-3p	1	0	1	1	1	1	PRPS1	phosphoribosyl pyrophosphate synthetase 1
hsa-miR-219-2-3p	0	0	1	1	0	0	SERPINA7	serpin peptidase inhibitor, clade A (alpha-1 antiproteinase, antitrypsin), member 7
hsa-miR-219-2-3p	1	0	1	1	1	1	NFYC	nuclear transcription factor Y, gamma
hsa-miR-219-2-3p	0	0	1	1	1	1	EPPIN	epididymal peptidase inhibitor
hsa-miR-219-2-3p	0	0	1	1	0	0	WFDC6	WAP four-disulfide core domain 6
hsa-miR-219-2-3p	0	0	1	1	0	0	COL9A2	collagen, type IX, alpha 2
hsa-miR-219-2-3p	1	0	1	1	1	1	CAMK2G	calcium/calmodulin-dependent protein kinase II gamma
hsa-miR-219-2-3p	1	0	1	1	1	1	RBM17	RNA binding motif protein 17
hsa-miR-219-2-3p	0	0	1	1	1	1	FUT11	fucosyltransferase 11 (alpha (1,3) fucosyltransferase)
hsa-miR-219-2-3p	0	0	1	1	1	1	MRPS16	mitochondrial ribosomal protein S16
hsa-miR-219-2-3p	0	0	1	1	1	1	SRPX2	sushi-repeat containing protein, X-linked 2
hsa-miR-219-2-3p	1	0	1	1	0	0	GRIK3	glutamate receptor, ionotropic, kainate 3
hsa-miR-219-2-3p	0	0	0	1	1	1	TBX22	T-box 22
hsa-miR-219-2-3p	0	0	0	1	0	0	RC3H2	ring finger and CCCH-type domains 2
hsa-miR-219-2-3p	1	0	1	1	1	1	NONO	non-POU domain containing, octamer-binding
hsa-miR-219-2-3p	1	0	1	1	1	1	SRSF10	serine/arginine-rich splicing factor 10
hsa-miR-219-2-3p	0	0	0	1	1	1	RAB41	RAB41, member RAS oncogene family
hsa-miR-219-2-3p	1	0	1	1	1	1	ABCA1	ATP-binding cassette, sub-family A (ABC1), member 1
hsa-miR-219-2-3p	0	0	1	1	1	1	TBRG1	transforming growth factor beta regulator 1
hsa-miR-219-2-3p	0	0	0	1	0	0	OR10G9	olfactory receptor, family 10, subfamily G, member 9
hsa-miR-219-2-3p	1	0	1	1	1	1	RCC2	regulator of chromosome condensation 2
hsa-miR-219-2-3p	0	0	0	1	0	0	SPANXN5	SPANX family, member N5
hsa-miR-219-2-3p	1	0	1	1	1	1	MCF2L	MCF.2 cell line derived transforming sequence-like
hsa-miR-219-2-3p	1	0	0	1	1	1	HSPA1B	heat shock 70kDa protein 1B
hsa-miR-219-2-3p	1	0	1	1	0	0	ROR2	receptor tyrosine kinase-like orphan receptor 2
hsa-miR-219-2-3p	0	0	0	1	0	0	CARS2	cysteinyl-tRNA synthetase 2, mitochondrial (putative)
hsa-miR-219-2-3p	0	0	0	1	1	1	LY6G5B	lymphocyte antigen 6 complex, locus G5B
hsa-miR-219-2-3p	0	0	1	1	0	0	CSNK2B	casein kinase 2, beta polypeptide
hsa-miR-219-2-3p	1	0	1	1	1	1	FAM155A	family with sequence similarity 155, member A
hsa-miR-219-2-3p	1	0	1	1	1	1	GDPD1	glycerophosphodiester phosphodiesterase domain containing 1
hsa-miR-219-2-3p	0	0	1	1	1	1	CDSN	corneodesmosin
hsa-miR-219-2-3p	1	0	1	1	0	0	CLYBL	citrate lyase beta like
hsa-miR-219-2-3p	0	0	1	1	1	1	GKAP1	G kinase anchoring protein 1
hsa-miR-219-2-3p	1	0	0	1	1	1	ZNF615	zinc finger protein 615
hsa-miR-219-2-3p	1	0	0	1	0	0	TBC1D8	TBC1 domain family, member 8 (with GRAM domain)
hsa-miR-219-2-3p	0	0	0	1	1	1	DCT	dopachrome tautomerase (dopachrome delta-isomerase, tyrosine-related protein 2)
hsa-miR-219-2-3p	1	0	0	1	0	0	PGD	phosphogluconate dehydrogenase
hsa-miR-219-2-3p	0	0	0	1	0	0	CBWD6	COBW domain containing 6
hsa-miR-219-2-3p	0	0	1	1	0	0	FAM216A	family with sequence similarity 216, member A
hsa-miR-219-2-3p	0	0	0	1	0	0	ASB10	ankyrin repeat and SOCS box containing 10
hsa-miR-219-2-3p	1	0	1	1	1	1	DIAPH3	diaphanous homolog 3 (Drosophila)
hsa-miR-219-2-3p	0	0	1	1	1	1	GLIPR2	GLI pathogenesis-related 2
hsa-miR-219-2-3p	0	0	1	1	1	1	SUGT1	SGT1, suppressor of G2 allele of SKP1 (S. cerevisiae)
hsa-miR-219-2-3p	0	0	0	1	1	1	OLAH	oleoyl-ACP hydrolase
hsa-miR-219-2-3p	0	0	0	1	1	1	DCLRE1C	DNA cross-link repair 1C
hsa-miR-219-2-3p	0	0	0	1	0	0	LOC100129697	uncharacterized LOC100129697
hsa-miR-219-2-3p	1	0	1	1	1	1	NRSN1	neurensin 1
hsa-miR-219-2-3p	0	0	1	1	1	1	SRPX	sushi-repeat containing protein, X-linked
hsa-miR-219-2-3p	0	0	0	1	1	1	GDF9	growth differentiation factor 9
hsa-miR-219-2-3p	0	0	0	1	0	0	NR0B1	nuclear receptor subfamily 0, group B, member 1
hsa-miR-219-2-3p	0	0	1	1	1	1	SERP2	stress-associated endoplasmic reticulum protein family member 2
hsa-miR-219-2-3p	0	0	0	1	0	0	ECHDC3	enoyl CoA hydratase domain containing 3
hsa-miR-219-2-3p	0	0	1	1	1	1	VIT	vitrin
hsa-miR-219-2-3p	0	0	1	1	0	0	FAM65A	family with sequence similarity 65, member A
hsa-miR-219-2-3p	0	0	0	1	0	0	PRDX4	peroxiredoxin 4
hsa-miR-219-2-3p	0	0	0	1	1	1	TRIM16	tripartite motif containing 16
hsa-miR-219-2-3p	1	0	1	1	1	1	CDRT1	CMT1A duplicated region transcript 1
hsa-miR-219-2-3p	0	0	1	1	0	0	TRPC4	transient receptor potential cation channel, subfamily C, member 4
hsa-miR-219-2-3p	0	0	1	1	1	1	POSTN	periostin, osteoblast specific factor
hsa-miR-219-2-3p	1	0	1	1	1	1	F13A1	coagulation factor XIII, A1 polypeptide
hsa-miR-219-2-3p	1	0	1	1	1	1	SIAH1	siah E3 ubiquitin protein ligase 1
hsa-miR-219-2-3p	0	0	0	1	0	0	IZUMO3	IZUMO family member 3
hsa-miR-219-2-3p	0	0	0	1	0	0	IFNA5	interferon, alpha 5
hsa-miR-219-2-3p	0	0	0	1	0	0	HBG2	hemoglobin, gamma G
hsa-miR-219-2-3p	0	0	1	1	0	0	CA5BP1	carbonic anhydrase VB pseudogene 1
hsa-miR-219-2-3p	0	0	1	1	1	1	BPHL	biphenyl hydrolase-like (serine hydrolase)
hsa-miR-219-2-3p	1	0	1	1	1	1	ARHGAP24	Rho GTPase activating protein 24
hsa-miR-219-2-3p	0	0	1	1	1	1	ALOX5AP	arachidonate 5-lipoxygenase-activating protein
hsa-miR-219-2-3p	1	0	1	1	1	1	WRNIP1	Werner helicase interacting protein 1
hsa-miR-219-2-3p	0	0	1	1	0	0	NOXRED1	NADP-dependent oxidoreductase domain containing 1
hsa-miR-219-2-3p	0	0	1	1	0	0	FREM1	FRAS1 related extracellular matrix 1
hsa-miR-219-2-3p	0	0	0	1	0	0	GPR143	G protein-coupled receptor 143
hsa-miR-219-2-3p	0	0	0	1	0	0	DENND1C	DENN/MADD domain containing 1C
hsa-miR-219-2-3p	0	0	1	1	0	0	BAIAP2L2	BAI1-associated protein 2-like 2
hsa-miR-219-2-3p	0	0	1	1	0	0	KLRD1	killer cell lectin-like receptor subfamily D, member 1
hsa-miR-219-2-3p	1	0	1	1	1	1	NIN	ninein (GSK3B interacting protein)
hsa-miR-219-2-3p	0	0	0	1	1	1	BPY2C	basic charge, Y-linked, 2C
hsa-miR-219-2-3p	0	0	1	1	0	0	DEFB127	defensin, beta 127
hsa-miR-219-2-3p	0	0	0	1	1	1	BPY2B	basic charge, Y-linked, 2B
hsa-miR-219-2-3p	1	0	0	1	0	0	HEATR5A	HEAT repeat containing 5A
hsa-miR-219-2-3p	0	0	0	1	0	0	TAS2R1	taste receptor, type 2, member 1
hsa-miR-219-2-3p	0	0	1	1	1	1	C18orf62	chromosome 18 open reading frame 62
hsa-miR-219-2-3p	0	0	1	1	1	1	RBMY1B	RNA binding motif protein, Y-linked, family 1, member B
hsa-miR-219-2-3p	0	0	1	1	1	1	RBMY1A1	RNA binding motif protein, Y-linked, family 1, member A1
hsa-miR-219-2-3p	0	0	0	1	0	0	CDY2B	chromodomain protein, Y-linked, 2B
hsa-miR-219-2-3p	0	0	0	1	0	0	OR5K3	olfactory receptor, family 5, subfamily K, member 3
hsa-miR-219-2-3p	1	0	1	1	0	0	SLC26A6	solute carrier family 26, member 6
hsa-miR-219-2-3p	1	0	1	1	1	1	CELSR3	cadherin, EGF LAG seven-pass G-type receptor 3 (flamingo homolog, Drosophila)
hsa-miR-219-2-3p	0	0	1	1	1	1	ZCWPW2	zinc finger, CW type with PWWP domain 2
hsa-miR-219-2-3p	0	0	1	1	1	1	TPH2	tryptophan hydroxylase 2
hsa-miR-219-2-3p	0	0	1	1	1	1	TBR1	T-box, brain, 1
hsa-miR-219-2-3p	0	0	0	1	0	0	CCL25	chemokine (C-C motif) ligand 25
hsa-miR-219-2-3p	0	0	1	0	1	1	KAL1	Kallmann syndrome 1 sequence
hsa-miR-219-2-3p	0	0	1	1	1	1	MAOA	monoamine oxidase A
hsa-miR-219-2-3p	1	0	1	1	1	1	SELE	selectin E
hsa-miR-219-2-3p	1	0	1	1	1	1	COL4A5	collagen, type IV, alpha 5
hsa-miR-219-2-3p	0	0	0	1	1	1	DDC	dopa decarboxylase (aromatic L-amino acid decarboxylase)
hsa-miR-219-2-3p	0	0	1	0	1	1	DHFR	dihydrofolate reductase
hsa-miR-219-2-3p	0	0	1	1	1	1	TECRL	trans-2,3-enoyl-CoA reductase-like
hsa-miR-219-2-3p	0	0	1	1	1	1	C9orf152	chromosome 9 open reading frame 152
hsa-miR-219-2-3p	1	0	1	1	1	1	SH3BP5	SH3-domain binding protein 5 (BTK-associated)
hsa-miR-219-2-3p	0	0	0	1	1	1	ZNF658B	zinc finger protein 658B, pseudogene
hsa-miR-219-2-3p	1	0	0	1	1	1	ACBD7	acyl-CoA binding domain containing 7
hsa-miR-219-2-3p	1	0	1	1	1	1	MLLT4	myeloid/lymphoid or mixed-lineage leukemia (trithorax homolog, Drosophila); translocated to, 4
hsa-miR-219-2-3p	0	0	0	1	1	1	ZNF596	zinc finger protein 596
hsa-miR-219-2-3p	1	0	1	1	1	1	USP45	ubiquitin specific peptidase 45
hsa-miR-219-2-3p	1	0	1	1	1	1	DSE	dermatan sulfate epimerase
hsa-miR-219-2-3p	1	0	1	1	1	1	AQP4	aquaporin 4
hsa-miR-219-2-3p	1	0	1	1	1	1	SFRP4	secreted frizzled-related protein 4
hsa-miR-219-2-3p	0	0	0	1	1	1	DNALI1	dynein, axonemal, light intermediate chain 1
hsa-miR-219-2-3p	0	0	1	1	1	1	RGS5	regulator of G-protein signaling 5
hsa-miR-219-2-3p	1	0	1	1	1	1	B3GALT2	UDP-Gal:betaGlcNAc beta 1,3-galactosyltransferase, polypeptide 2
hsa-miR-219-2-3p	1	0	1	1	1	1	SYNJ1	synaptojanin 1
hsa-miR-219-2-3p	0	0	1	0	1	1	SLC1A3	solute carrier family 1 (glial high affinity glutamate transporter), member 3
hsa-miR-219-2-3p	1	0	1	1	1	1	KDM5C	lysine (K)-specific demethylase 5C
hsa-miR-219-2-3p	0	0	1	1	1	1	CYP8B1	cytochrome P450, family 8, subfamily B, polypeptide 1
hsa-miR-219-2-3p	0	0	1	1	1	1	NFATC4	nuclear factor of activated T-cells, cytoplasmic, calcineurin-dependent 4
hsa-miR-219-2-3p	1	0	1	1	1	1	SNRNP40	small nuclear ribonucleoprotein 40kDa (U5)
hsa-miR-219-2-3p	0	0	1	0	1	1	PRH2	proline-rich protein HaeIII subfamily 2
hsa-miR-219-2-3p	1	0	0	1	1	1	AKAP12	A kinase (PRKA) anchor protein 12
hsa-miR-219-2-3p	1	0	1	1	1	1	NKTR	natural killer-tumor recognition sequence
hsa-miR-219-2-3p	0	0	1	1	1	1	ING1	inhibitor of growth family, member 1
hsa-miR-219-2-3p	1	0	0	1	1	1	NEDD4	neural precursor cell expressed, developmentally down-regulated 4, E3 ubiquitin protein ligase
hsa-miR-219-2-3p	0	0	0	1	1	1	CLN5	ceroid-lipofuscinosis, neuronal 5
hsa-miR-219-2-3p	1	0	1	1	1	1	CORIN	corin, serine peptidase
hsa-miR-219-2-3p	1	0	1	1	1	1	ZBTB6	zinc finger and BTB domain containing 6
hsa-miR-219-2-3p	0	0	0	1	1	1	ZNF184	zinc finger protein 184
hsa-miR-219-2-3p	0	0	0	1	1	1	FOXD4L1	forkhead box D4-like 1
hsa-miR-219-2-3p	1	0	1	1	1	1	EPB41L3	erythrocyte membrane protein band 4.1-like 3
hsa-miR-219-2-3p	1	0	1	1	1	1	KIN	KIN, antigenic determinant of recA protein homolog (mouse)
hsa-miR-219-2-3p	1	0	1	1	1	1	RPS6KC1	ribosomal protein S6 kinase, 52kDa, polypeptide 1
hsa-miR-219-2-3p	1	0	1	1	1	1	SACM1L	SAC1 suppressor of actin mutations 1-like (yeast)
hsa-miR-219-2-3p	1	0	1	1	1	1	KLHL20	kelch-like 20 (Drosophila)
hsa-miR-219-2-3p	1	0	1	1	1	1	MRPL19	mitochondrial ribosomal protein L19
hsa-miR-219-2-3p	1	0	1	0	1	1	ZNF652	zinc finger protein 652
hsa-miR-219-2-3p	0	0	0	0	1	1	ZNF510	zinc finger protein 510
hsa-miR-219-2-3p	1	0	1	1	1	1	RUFY3	RUN and FYVE domain containing 3
hsa-miR-219-2-3p	1	0	1	1	1	1	NELF	nasal embryonic LHRH factor
hsa-miR-219-2-3p	1	0	0	1	1	1	CRLF3	cytokine receptor-like factor 3
hsa-miR-219-2-3p	0	0	1	1	1	1	RDH11	retinol dehydrogenase 11 (all-trans/9-cis/11-cis)
hsa-miR-219-2-3p	0	0	1	1	1	1	ACSL5	acyl-CoA synthetase long-chain family member 5
hsa-miR-219-2-3p	0	0	1	1	1	1	CENPF	centromere protein F, 350/400kDa (mitosin)
hsa-miR-219-2-3p	1	0	1	0	1	1	KLHL24	kelch-like 24 (Drosophila)
hsa-miR-219-2-3p	0	0	1	1	1	1	ASPN	asporin
hsa-miR-219-2-3p	0	0	1	1	1	1	ABHD10	abhydrolase domain containing 10
hsa-miR-219-2-3p	0	0	0	1	1	1	PCDHB13	protocadherin beta 13
hsa-miR-219-2-3p	1	0	1	0	1	1	SEMA4B	sema domain, immunoglobulin domain (Ig), transmembrane domain (TM) and short cytoplasmic domain, (semaphorin) 4B
hsa-miR-219-2-3p	0	0	0	1	1	1	C12orf5	chromosome 12 open reading frame 5
hsa-miR-219-2-3p	1	0	1	0	1	1	LRCH2	leucine-rich repeats and calponin homology (CH) domain containing 2
hsa-miR-219-2-3p	1	0	1	1	1	1	SLC8A1	solute carrier family 8 (sodium/calcium exchanger), member 1
hsa-miR-219-2-3p	0	0	0	1	1	1	ZNF20	zinc finger protein 20
hsa-miR-219-2-3p	0	0	1	0	1	1	LRRC19	leucine rich repeat containing 19
hsa-miR-219-2-3p	0	0	0	1	1	1	P2RY13	purinergic receptor P2Y, G-protein coupled, 13
hsa-miR-219-2-3p	1	0	1	1	1	1	CLIP4	CAP-GLY domain containing linker protein family, member 4
hsa-miR-219-2-3p	0	0	0	1	1	1	GJA9	gap junction protein, alpha 9, 59kDa
hsa-miR-219-2-3p	1	0	1	0	1	1	APOLD1	apolipoprotein L domain containing 1
hsa-miR-219-2-3p	1	0	1	1	1	1	CECR6	cat eye syndrome chromosome region, candidate 6
hsa-miR-219-2-3p	0	0	1	0	1	1	C1QTNF7	C1q and tumor necrosis factor related protein 7
hsa-miR-219-2-3p	0	0	1	1	1	1	JAGN1	jagunal homolog 1 (Drosophila)
hsa-miR-219-2-3p	0	0	0	1	1	1	ZNF559	zinc finger protein 559
hsa-miR-219-2-3p	0	0	1	0	1	1	CBR4	carbonyl reductase 4
hsa-miR-219-2-3p	0	0	1	1	1	1	SERAC1	serine active site containing 1
hsa-miR-219-2-3p	0	0	1	0	1	1	PNPT1	polyribonucleotide nucleotidyltransferase 1
hsa-miR-219-2-3p	0	0	0	1	1	1	ZNF658	zinc finger protein 658
hsa-miR-219-2-3p	1	0	0	1	1	1	TMEM45B	transmembrane protein 45B
hsa-miR-219-2-3p	0	0	0	1	1	1	ZNF627	zinc finger protein 627
hsa-miR-219-2-3p	0	0	0	1	1	1	SLC5A8	solute carrier family 5 (iodide transporter), member 8
hsa-miR-219-2-3p	1	0	1	1	1	1	MUM1L1	melanoma associated antigen (mutated) 1-like 1
hsa-miR-219-2-3p	0	0	1	1	1	1	EXD1	exonuclease 3'-5' domain containing 1
hsa-miR-219-2-3p	1	0	1	1	1	1	SYT14	synaptotagmin XIV
hsa-miR-219-2-3p	1	0	1	1	1	1	MMGT1	membrane magnesium transporter 1
hsa-miR-219-2-3p	1	0	1	1	1	1	EXOC8	exocyst complex component 8
hsa-miR-219-2-3p	0	0	1	1	1	1	MFSD4	major facilitator superfamily domain containing 4
hsa-miR-219-2-3p	0	0	0	1	1	1	GLDN	gliomedin
hsa-miR-219-2-3p	0	0	1	1	1	1	SLC6A15	solute carrier family 6 (neutral amino acid transporter), member 15
hsa-miR-219-2-3p	1	0	1	1	1	1	GPRIN3	GPRIN family member 3
hsa-miR-219-2-3p	0	0	1	0	1	1	SIAH3	siah E3 ubiquitin protein ligase family member 3
hsa-miR-219-2-3p	0	0	0	1	1	1	FOXD4L3	forkhead box D4-like 3
hsa-miR-219-2-3p	0	0	1	0	1	1	ASB18	ankyrin repeat and SOCS box containing 18
hsa-miR-219-2-3p	0	0	0	0	1	1	LOC727909	Golgin subfamily A member 8-like protein 2-like
hsa-miR-219-2-3p	0	0	0	0	1	1	LOC728047	golgin subfamily A member 8-like protein 2-like
hsa-miR-219-2-3p	0	0	0	1	1	1	LOC729420	uncharacterized LOC729420
hsa-miR-219-2-3p	0	0	1	1	1	1	TBC1D30	TBC1 domain family, member 30
hsa-miR-219-2-3p	0	0	0	0	1	1	GOLGA6D	golgin A6 family, member D
hsa-miR-219-2-3p	0	0	1	0	1	1	LOC285556	uncharacterized LOC285556
hsa-miR-219-2-3p	0	0	0	1	1	1	GOLGA6C	golgin A6 family, member C
hsa-miR-219-2-3p	0	0	0	0	1	1	LOC643699	golgin subfamily A member 8-like
hsa-miR-219-2-3p	0	0	0	1	1	1	FLJ32154	uncharacterized protein FLJ32154
hsa-miR-219-2-3p	0	0	0	0	1	1	RPS26P8	ribosomal protein S26 pseudogene 8
hsa-miR-219-2-3p	0	0	0	0	1	1	LOC645752	golgin A6 family, member A pseudogene
