# Supplementary material for: Profiling of Selected MicroRNAs in Proliferative Eutopic Endometrium of Women with Ovarian Endometriosis
Source: Biomed Res Int. 2015 Aug 20;2015:760698. doi: 10.1155/2015/760698 (PMC4558423; doi:10.1155/2015/760698)
Supplement: Supplementary file 1 — Table I: The names of miRNAs significantly differentially expressed between eutopic endometrium of patients with endometriosis vs eutopic endometrium of patients without endometriosis. Table II: The associations between miRNA and mRNA, which presents detailed results of the search of six major databases i.e targetscan, tarbase, miranda, mirbase, mirtarget2 and pictar. [file 760698.f1.zip › 760698.f1/Table II/hsa-miR-219-5p.tsv]

miR	targetscan	tarbase	miranda	mirbase	mirtarget2	pictar	GeneSymbol	GeneName
hsa-miR-219-5p	1	0	1	1	1	1	UBE2N	ubiquitin-conjugating enzyme E2N
hsa-miR-219-5p	1	0	1	1	1	1	PODXL	podocalyxin-like
hsa-miR-219-5p	1	0	1	1	1	1	FAM20B	family with sequence similarity 20, member B
hsa-miR-219-5p	1	0	1	1	1	1	HPS3	Hermansky-Pudlak syndrome 3
hsa-miR-219-5p	1	0	1	1	1	1	PALM2	paralemmin 2
hsa-miR-219-5p	1	0	1	1	1	1	ABHD2	abhydrolase domain containing 2
hsa-miR-219-5p	1	0	1	1	1	1	NR2C2	nuclear receptor subfamily 2, group C, member 2
hsa-miR-219-5p	1	0	1	1	1	1	SREK1	splicing regulatory glutamine/lysine-rich protein 1
hsa-miR-219-5p	1	0	1	1	1	1	SCN5A	sodium channel, voltage-gated, type V, alpha subunit
hsa-miR-219-5p	1	0	1	1	1	1	PNRC1	proline-rich nuclear receptor coactivator 1
hsa-miR-219-5p	1	0	1	0	1	1	RIMS1	regulating synaptic membrane exocytosis 1
hsa-miR-219-5p	1	0	1	1	1	1	PARM1	prostate androgen-regulated mucin-like protein 1
hsa-miR-219-5p	1	0	1	1	1	1	WEE1	WEE1 homolog (S. pombe)
hsa-miR-219-5p	1	0	1	0	1	1	ZNF800	zinc finger protein 800
hsa-miR-219-5p	1	0	1	1	1	1	INSIG1	insulin induced gene 1
hsa-miR-219-5p	1	0	1	0	1	1	XIAP	X-linked inhibitor of apoptosis
hsa-miR-219-5p	1	0	1	1	1	1	AGPAT3	1-acylglycerol-3-phosphate O-acyltransferase 3
hsa-miR-219-5p	1	0	1	0	1	1	LIN7C	lin-7 homolog C (C. elegans)
hsa-miR-219-5p	1	0	1	0	1	1	THSD7B	thrombospondin, type I, domain containing 7B
hsa-miR-219-5p	1	0	1	1	1	1	NAV1	neuron navigator 1
hsa-miR-219-5p	1	0	1	1	1	1	TTBK1	tau tubulin kinase 1
hsa-miR-219-5p	1	0	1	0	1	1	THRB	thyroid hormone receptor, beta
hsa-miR-219-5p	1	0	1	0	1	1	DNAJC6	DnaJ (Hsp40) homolog, subfamily C, member 6
hsa-miR-219-5p	1	0	1	0	1	1	SEMA4G	sema domain, immunoglobulin domain (Ig), transmembrane domain (TM) and short cytoplasmic domain, (semaphorin) 4G
hsa-miR-219-5p	1	0	1	1	1	1	PHACTR2	phosphatase and actin regulator 2
hsa-miR-219-5p	1	0	1	0	1	1	ARHGAP26	Rho GTPase activating protein 26
hsa-miR-219-5p	1	0	1	0	1	1	AKAP6	A kinase (PRKA) anchor protein 6
hsa-miR-219-5p	1	0	1	1	1	1	ASH1L	ash1 (absent, small, or homeotic)-like (Drosophila)
hsa-miR-219-5p	1	0	1	1	1	1	PGGT1B	protein geranylgeranyltransferase type I, beta subunit
hsa-miR-219-5p	1	0	1	1	1	1	SLC35F5	solute carrier family 35, member F5
hsa-miR-219-5p	1	0	1	0	1	1	AKAP13	A kinase (PRKA) anchor protein 13
hsa-miR-219-5p	1	0	1	0	1	1	PKNOX1	PBX/knotted 1 homeobox 1
hsa-miR-219-5p	1	0	1	1	0	0	ZC3H4	zinc finger CCCH-type containing 4
hsa-miR-219-5p	1	0	1	0	1	1	CPEB2	cytoplasmic polyadenylation element binding protein 2
hsa-miR-219-5p	1	0	1	1	1	1	MIER3	mesoderm induction early response 1, family member 3
hsa-miR-219-5p	1	0	1	1	1	1	DLG2	discs, large homolog 2 (Drosophila)
hsa-miR-219-5p	1	0	1	1	1	1	OCRL	oculocerebrorenal syndrome of Lowe
hsa-miR-219-5p	1	0	1	0	1	1	PRKCI	protein kinase C, iota
hsa-miR-219-5p	1	0	1	1	1	1	CHMP7	charged multivesicular body protein 7
hsa-miR-219-5p	1	0	1	1	1	1	SP4	Sp4 transcription factor
hsa-miR-219-5p	1	0	1	1	1	1	APPL2	adaptor protein, phosphotyrosine interaction, PH domain and leucine zipper containing 2
hsa-miR-219-5p	1	0	1	0	1	1	CELF2	CUGBP, Elav-like family member 2
hsa-miR-219-5p	1	0	1	0	0	0	PITPNM2	phosphatidylinositol transfer protein, membrane-associated 2
hsa-miR-219-5p	1	0	1	0	1	1	PDE4D	phosphodiesterase 4D, cAMP-specific
hsa-miR-219-5p	1	0	1	1	1	1	PPP2R2C	protein phosphatase 2, regulatory subunit B, gamma
hsa-miR-219-5p	1	0	1	1	1	1	EGR3	early growth response 3
hsa-miR-219-5p	1	0	1	1	1	1	PRDM16	PR domain containing 16
hsa-miR-219-5p	1	0	1	1	0	0	GXYLT1	glucoside xylosyltransferase 1
hsa-miR-219-5p	1	0	1	1	0	0	ABL2	v-abl Abelson murine leukemia viral oncogene homolog 2
hsa-miR-219-5p	1	0	1	1	1	1	GPR61	G protein-coupled receptor 61
hsa-miR-219-5p	1	0	1	1	0	0	INO80D	INO80 complex subunit D
hsa-miR-219-5p	1	0	1	1	1	1	CCDC28A	coiled-coil domain containing 28A
hsa-miR-219-5p	1	0	1	0	1	1	ANKH	ankylosis, progressive homolog (mouse)
hsa-miR-219-5p	1	0	1	1	1	1	ELOVL7	ELOVL fatty acid elongase 7
hsa-miR-219-5p	1	0	0	1	1	1	COL9A1	collagen, type IX, alpha 1
hsa-miR-219-5p	1	0	1	1	1	1	HAS3	hyaluronan synthase 3
hsa-miR-219-5p	1	0	1	1	1	1	DAZAP1	DAZ associated protein 1
hsa-miR-219-5p	1	0	1	1	1	1	TACC1	transforming, acidic coiled-coil containing protein 1
hsa-miR-219-5p	1	0	1	1	1	1	SMC4	structural maintenance of chromosomes 4
hsa-miR-219-5p	1	0	1	1	1	1	TLK1	tousled-like kinase 1
hsa-miR-219-5p	1	0	1	1	1	1	ZNF148	zinc finger protein 148
hsa-miR-219-5p	1	0	1	1	1	1	FBXO3	F-box protein 3
hsa-miR-219-5p	1	0	1	0	1	1	KIAA0182	KIAA0182
hsa-miR-219-5p	1	0	1	0	1	1	RXRA	retinoid X receptor, alpha
hsa-miR-219-5p	1	0	1	1	1	1	RAD23B	RAD23 homolog B (S. cerevisiae)
hsa-miR-219-5p	1	0	1	1	1	1	SATB1	SATB homeobox 1
hsa-miR-219-5p	1	0	1	1	1	1	MAPK1IP1L	mitogen-activated protein kinase 1 interacting protein 1-like
hsa-miR-219-5p	1	0	1	1	1	1	TCF12	transcription factor 12
hsa-miR-219-5p	1	0	1	1	1	1	RNF207	ring finger protein 207
hsa-miR-219-5p	1	0	1	0	1	1	ATG14	autophagy related 14
hsa-miR-219-5p	1	0	1	1	1	1	REPS2	RALBP1 associated Eps domain containing 2
hsa-miR-219-5p	1	0	1	1	1	1	RORB	RAR-related orphan receptor B
hsa-miR-219-5p	1	0	1	0	1	1	ETV5	ets variant 5
hsa-miR-219-5p	1	0	1	1	1	1	PCDH17	protocadherin 17
hsa-miR-219-5p	1	0	1	1	1	1	PI4K2A	phosphatidylinositol 4-kinase type 2 alpha
hsa-miR-219-5p	1	0	1	1	0	0	GBA2	glucosidase, beta (bile acid) 2
hsa-miR-219-5p	1	0	1	0	1	1	CLASP1	cytoplasmic linker associated protein 1
hsa-miR-219-5p	1	0	1	1	1	1	FLRT3	fibronectin leucine rich transmembrane protein 3
hsa-miR-219-5p	1	0	1	1	1	1	FAM91A1	family with sequence similarity 91, member A1
hsa-miR-219-5p	1	0	1	1	1	1	T	T, brachyury homolog (mouse)
hsa-miR-219-5p	1	0	1	1	1	1	NCOA1	nuclear receptor coactivator 1
hsa-miR-219-5p	1	0	1	1	1	1	TGFBR2	transforming growth factor, beta receptor II (70/80kDa)
hsa-miR-219-5p	1	0	1	0	1	1	KIAA0240	KIAA0240
hsa-miR-219-5p	1	0	1	1	0	0	CECR2	cat eye syndrome chromosome region, candidate 2
hsa-miR-219-5p	1	0	1	1	1	1	ZNF827	zinc finger protein 827
hsa-miR-219-5p	1	0	1	1	1	1	BCL11A	B-cell CLL/lymphoma 11A (zinc finger protein)
hsa-miR-219-5p	1	0	1	1	1	1	LAPTM5	lysosomal protein transmembrane 5
hsa-miR-219-5p	1	0	1	1	1	1	FAM160A2	family with sequence similarity 160, member A2
hsa-miR-219-5p	1	0	0	1	0	0	PI4KA	phosphatidylinositol 4-kinase, catalytic, alpha
hsa-miR-219-5p	1	0	1	1	1	1	SHC1	SHC (Src homology 2 domain containing) transforming protein 1
hsa-miR-219-5p	1	0	1	1	1	1	RECK	reversion-inducing-cysteine-rich protein with kazal motifs
hsa-miR-219-5p	1	0	1	1	0	0	KIAA1549	KIAA1549
hsa-miR-219-5p	1	0	1	1	1	1	ADCYAP1	adenylate cyclase activating polypeptide 1 (pituitary)
hsa-miR-219-5p	1	0	1	1	1	1	TAB3	TGF-beta activated kinase 1/MAP3K7 binding protein 3
hsa-miR-219-5p	1	0	1	0	1	1	CHD7	chromodomain helicase DNA binding protein 7
hsa-miR-219-5p	1	0	1	1	1	1	UBE2H	ubiquitin-conjugating enzyme E2H
hsa-miR-219-5p	1	0	1	1	1	1	PPARGC1A	peroxisome proliferator-activated receptor gamma, coactivator 1 alpha
hsa-miR-219-5p	1	0	1	1	1	1	RBPMS	RNA binding protein with multiple splicing
hsa-miR-219-5p	1	0	1	1	1	1	FAM160B1	family with sequence similarity 160, member B1
hsa-miR-219-5p	1	0	1	1	1	1	FGFR1OP	FGFR1 oncogene partner
hsa-miR-219-5p	1	0	1	0	1	1	SMPD3	sphingomyelin phosphodiesterase 3, neutral membrane (neutral sphingomyelinase II)
hsa-miR-219-5p	1	0	1	1	1	1	MEF2D	myocyte enhancer factor 2D
hsa-miR-219-5p	1	0	1	1	1	1	LEF1	lymphoid enhancer-binding factor 1
hsa-miR-219-5p	1	0	1	1	1	1	HOXD13	homeobox D13
hsa-miR-219-5p	1	0	1	1	1	1	FBXW2	F-box and WD repeat domain containing 2
hsa-miR-219-5p	1	0	1	0	1	1	KBTBD8	kelch repeat and BTB (POZ) domain containing 8
hsa-miR-219-5p	1	0	1	0	1	1	DCAF10	DDB1 and CUL4 associated factor 10
hsa-miR-219-5p	1	0	1	1	1	1	SNRK	SNF related kinase
hsa-miR-219-5p	1	0	1	1	1	1	HMGA2	high mobility group AT-hook 2
hsa-miR-219-5p	1	0	0	1	1	1	AKAP12	A kinase (PRKA) anchor protein 12
hsa-miR-219-5p	1	0	1	1	1	1	MKNK2	MAP kinase interacting serine/threonine kinase 2
hsa-miR-219-5p	1	0	1	1	1	1	LAPTM4A	lysosomal protein transmembrane 4 alpha
hsa-miR-219-5p	1	0	1	0	1	1	KCNJ2	potassium inwardly-rectifying channel, subfamily J, member 2
hsa-miR-219-5p	1	0	1	1	1	1	FZD5	frizzled family receptor 5
hsa-miR-219-5p	1	0	1	1	0	0	PAX2	paired box 2
hsa-miR-219-5p	1	0	1	1	1	1	SLC31A1	solute carrier family 31 (copper transporters), member 1
hsa-miR-219-5p	1	0	1	1	1	1	FGF7	fibroblast growth factor 7
hsa-miR-219-5p	1	0	1	1	1	1	OTP	orthopedia homeobox
hsa-miR-219-5p	1	0	0	1	1	1	RBMS1	RNA binding motif, single stranded interacting protein 1
hsa-miR-219-5p	1	0	1	1	1	1	CPEB3	cytoplasmic polyadenylation element binding protein 3
hsa-miR-219-5p	1	0	1	1	1	1	ESR1	estrogen receptor 1
hsa-miR-219-5p	1	0	0	1	1	1	MKL1	megakaryoblastic leukemia (translocation) 1
hsa-miR-219-5p	1	0	1	0	1	1	FBXO41	F-box protein 41
hsa-miR-219-5p	1	0	1	1	1	1	LRP6	low density lipoprotein receptor-related protein 6
hsa-miR-219-5p	1	0	1	1	1	1	C4orf19	chromosome 4 open reading frame 19
hsa-miR-219-5p	1	0	1	1	1	1	BTBD7	BTB (POZ) domain containing 7
hsa-miR-219-5p	1	0	1	1	1	1	SCARB2	scavenger receptor class B, member 2
hsa-miR-219-5p	1	0	1	0	1	1	RNF165	ring finger protein 165
hsa-miR-219-5p	1	0	1	1	1	1	GATA2	GATA binding protein 2
hsa-miR-219-5p	1	0	1	1	1	1	RBM24	RNA binding motif protein 24
hsa-miR-219-5p	1	0	1	1	1	1	ZBTB44	zinc finger and BTB domain containing 44
hsa-miR-219-5p	1	0	1	0	1	1	ZCCHC24	zinc finger, CCHC domain containing 24
hsa-miR-219-5p	1	0	1	0	1	1	PRKAA2	protein kinase, AMP-activated, alpha 2 catalytic subunit
hsa-miR-219-5p	1	0	1	1	1	1	SMAD4	SMAD family member 4
hsa-miR-219-5p	1	0	1	1	1	1	TMEM98	transmembrane protein 98
hsa-miR-219-5p	1	0	1	1	1	1	LCLAT1	lysocardiolipin acyltransferase 1
hsa-miR-219-5p	1	0	1	1	1	1	LCOR	ligand dependent nuclear receptor corepressor
hsa-miR-219-5p	1	0	1	1	1	1	ZNF238	zinc finger protein 238
hsa-miR-219-5p	1	0	1	1	1	1	TOB2	transducer of ERBB2, 2
hsa-miR-219-5p	1	0	1	1	1	1	FURIN	furin (paired basic amino acid cleaving enzyme)
hsa-miR-219-5p	1	0	1	1	1	1	RYBP	RING1 and YY1 binding protein
hsa-miR-219-5p	1	0	1	1	1	1	CCSAP	centriole, cilia and spindle-associated protein
hsa-miR-219-5p	1	0	1	1	1	1	PDGFRA	platelet-derived growth factor receptor, alpha polypeptide
hsa-miR-219-5p	1	0	1	1	1	1	HEPACAM	hepatic and glial cell adhesion molecule
hsa-miR-219-5p	1	0	1	1	1	1	RGAG1	retrotransposon gag domain containing 1
hsa-miR-219-5p	1	0	1	1	1	1	CENPP	centromere protein P
hsa-miR-219-5p	1	0	1	1	1	1	ELMOD2	ELMO/CED-12 domain containing 2
hsa-miR-219-5p	1	0	1	1	1	1	CC2D1A	coiled-coil and C2 domain containing 1A
hsa-miR-219-5p	1	0	1	0	1	1	DCBLD2	discoidin, CUB and LCCL domain containing 2
hsa-miR-219-5p	1	0	1	0	1	1	ZNF398	zinc finger protein 398
hsa-miR-219-5p	1	0	0	1	1	1	MMS19	MMS19 nucleotide excision repair homolog (S. cerevisiae)
hsa-miR-219-5p	1	0	1	1	1	1	NPAS2	neuronal PAS domain protein 2
hsa-miR-219-5p	1	0	1	1	1	1	FOXJ3	forkhead box J3
hsa-miR-219-5p	1	0	1	1	1	1	LPHN1	latrophilin 1
hsa-miR-219-5p	1	0	1	1	1	1	WHSC1	Wolf-Hirschhorn syndrome candidate 1
hsa-miR-219-5p	1	0	0	1	1	1	SALL4	sal-like 4 (Drosophila)
hsa-miR-219-5p	1	0	1	1	1	1	TNPO3	transportin 3
hsa-miR-219-5p	1	0	1	1	1	1	SLC30A4	solute carrier family 30 (zinc transporter), member 4
hsa-miR-219-5p	1	0	1	1	0	0	SLAIN2	SLAIN motif family, member 2
hsa-miR-219-5p	1	0	1	0	1	1	ENPP6	ectonucleotide pyrophosphatase/phosphodiesterase 6
hsa-miR-219-5p	1	0	1	0	0	0	ANKRD52	ankyrin repeat domain 52
hsa-miR-219-5p	1	0	1	0	1	1	TRHDE	thyrotropin-releasing hormone degrading enzyme
hsa-miR-219-5p	1	0	1	1	1	1	PHF19	PHD finger protein 19
hsa-miR-219-5p	1	0	1	1	1	1	SPTBN1	spectrin, beta, non-erythrocytic 1
hsa-miR-219-5p	1	0	1	1	1	1	DDAH1	dimethylarginine dimethylaminohydrolase 1
hsa-miR-219-5p	1	0	1	1	1	1	FBXW7	F-box and WD repeat domain containing 7, E3 ubiquitin protein ligase
hsa-miR-219-5p	1	0	1	1	1	1	ERG	v-ets erythroblastosis virus E26 oncogene homolog (avian)
hsa-miR-219-5p	1	0	1	1	0	0	CLIP2	CAP-GLY domain containing linker protein 2
hsa-miR-219-5p	1	0	1	1	1	1	STK38L	serine/threonine kinase 38 like
hsa-miR-219-5p	1	0	1	0	1	1	LARP4B	La ribonucleoprotein domain family, member 4B
hsa-miR-219-5p	1	0	1	1	1	1	MAPT	microtubule-associated protein tau
hsa-miR-219-5p	1	0	1	1	1	1	WWP2	WW domain containing E3 ubiquitin protein ligase 2
hsa-miR-219-5p	1	0	1	1	1	1	MCF2L2	MCF.2 cell line derived transforming sequence-like 2
hsa-miR-219-5p	1	0	1	0	1	1	C1orf21	chromosome 1 open reading frame 21
hsa-miR-219-5p	1	0	1	1	1	1	ZDHHC2	zinc finger, DHHC-type containing 2
hsa-miR-219-5p	1	0	1	1	0	0	ABHD8	abhydrolase domain containing 8
hsa-miR-219-5p	1	0	1	1	1	1	LAMTOR3	late endosomal/lysosomal adaptor, MAPK and MTOR activator 3
hsa-miR-219-5p	1	0	1	0	1	1	FZD4	frizzled family receptor 4
hsa-miR-219-5p	1	0	1	1	1	1	DIAPH3	diaphanous homolog 3 (Drosophila)
hsa-miR-219-5p	1	0	1	1	1	1	NECAP1	NECAP endocytosis associated 1
hsa-miR-219-5p	1	0	1	1	1	1	MOB4	MOB family member 4, phocein
hsa-miR-219-5p	1	0	1	1	0	0	PKDCC	protein kinase domain containing, cytoplasmic homolog (mouse)
hsa-miR-219-5p	1	0	1	1	1	1	TSC22D2	TSC22 domain family, member 2
hsa-miR-219-5p	1	0	1	0	1	1	CD2AP	CD2-associated protein
hsa-miR-219-5p	1	0	1	1	1	1	NDRG4	NDRG family member 4
hsa-miR-219-5p	1	0	1	1	1	1	ISL1	ISL LIM homeobox 1
hsa-miR-219-5p	1	0	1	0	1	1	GPR26	G protein-coupled receptor 26
hsa-miR-219-5p	1	0	1	0	0	0	TANC2	tetratricopeptide repeat, ankyrin repeat and coiled-coil containing 2
hsa-miR-219-5p	1	0	1	1	1	1	FBXL17	F-box and leucine-rich repeat protein 17
hsa-miR-219-5p	1	0	1	1	1	1	NHLH1	nescient helix loop helix 1
hsa-miR-219-5p	1	0	1	0	1	1	MLL2	myeloid/lymphoid or mixed-lineage leukemia 2
hsa-miR-219-5p	1	0	1	1	1	1	CNRIP1	cannabinoid receptor interacting protein 1
hsa-miR-219-5p	1	0	1	1	1	1	MECOM	MDS1 and EVI1 complex locus
hsa-miR-219-5p	1	0	1	1	1	1	CORO1C	coronin, actin binding protein, 1C
hsa-miR-219-5p	1	0	1	1	1	1	RAB35	RAB35, member RAS oncogene family
hsa-miR-219-5p	1	0	1	0	1	1	TMX4	thioredoxin-related transmembrane protein 4
hsa-miR-219-5p	1	0	1	0	1	1	TSPAN2	tetraspanin 2
hsa-miR-219-5p	1	0	1	0	1	1	ARHGEF12	Rho guanine nucleotide exchange factor (GEF) 12
hsa-miR-219-5p	1	0	1	1	1	1	ATP6V1C1	ATPase, H+ transporting, lysosomal 42kDa, V1 subunit C1
hsa-miR-219-5p	1	0	1	0	1	1	GLCE	glucuronic acid epimerase
hsa-miR-219-5p	1	0	1	0	1	1	RAPGEF5	Rap guanine nucleotide exchange factor (GEF) 5
hsa-miR-219-5p	1	0	1	0	1	1	ZC3H6	zinc finger CCCH-type containing 6
hsa-miR-219-5p	1	0	1	1	1	1	SOX5	SRY (sex determining region Y)-box 5
hsa-miR-219-5p	1	0	1	1	1	1	NTNG1	netrin G1
hsa-miR-219-5p	1	0	1	1	0	0	OTUD3	OTU domain containing 3
hsa-miR-219-5p	1	0	1	1	1	1	AFAP1L2	actin filament associated protein 1-like 2
hsa-miR-219-5p	1	0	1	1	1	1	KCNH8	potassium voltage-gated channel, subfamily H (eag-related), member 8
hsa-miR-219-5p	1	0	1	1	1	1	SORCS1	sortilin-related VPS10 domain containing receptor 1
hsa-miR-219-5p	1	0	1	1	1	1	FCHSD2	FCH and double SH3 domains 2
hsa-miR-219-5p	1	0	1	1	0	0	UBE2Z	ubiquitin-conjugating enzyme E2Z
hsa-miR-219-5p	1	0	1	0	1	1	RAPGEF1	Rap guanine nucleotide exchange factor (GEF) 1
hsa-miR-219-5p	1	0	1	1	1	1	CBX2	chromobox homolog 2
hsa-miR-219-5p	1	0	1	1	1	1	FAM120C	family with sequence similarity 120C
hsa-miR-219-5p	1	0	1	1	1	1	EYA2	eyes absent homolog 2 (Drosophila)
hsa-miR-219-5p	1	0	1	1	1	1	CBFA2T3	core-binding factor, runt domain, alpha subunit 2; translocated to, 3
hsa-miR-219-5p	1	0	1	1	0	0	MEGF8	multiple EGF-like-domains 8
hsa-miR-219-5p	1	0	1	1	1	1	LPGAT1	lysophosphatidylglycerol acyltransferase 1
hsa-miR-219-5p	1	0	1	1	1	1	LGALSL	lectin, galactoside-binding-like
hsa-miR-219-5p	1	0	1	1	1	1	ZNF697	zinc finger protein 697
hsa-miR-219-5p	1	0	1	1	0	0	INPP5J	inositol polyphosphate-5-phosphatase J
hsa-miR-219-5p	1	0	1	1	1	1	ANAPC16	anaphase promoting complex subunit 16
hsa-miR-219-5p	1	0	1	1	1	1	SLC39A10	solute carrier family 39 (zinc transporter), member 10
hsa-miR-219-5p	1	0	1	1	1	1	UBE3A	ubiquitin protein ligase E3A
hsa-miR-219-5p	1	0	1	1	1	1	S100PBP	S100P binding protein
hsa-miR-219-5p	1	0	1	1	1	1	SKIDA1	SKI/DACH domain containing 1
hsa-miR-219-5p	1	0	1	1	1	1	CGNL1	cingulin-like 1
hsa-miR-219-5p	1	0	1	1	1	1	ARHGEF9	Cdc42 guanine nucleotide exchange factor (GEF) 9
hsa-miR-219-5p	1	0	1	0	0	0	CDH3	cadherin 3, type 1, P-cadherin (placental)
hsa-miR-219-5p	1	0	1	0	1	1	ZNF609	zinc finger protein 609
hsa-miR-219-5p	1	0	0	1	1	1	SYT5	synaptotagmin V
hsa-miR-219-5p	1	0	1	0	1	1	CD164	CD164 molecule, sialomucin
hsa-miR-219-5p	1	0	1	1	1	1	SOBP	sine oculis binding protein homolog (Drosophila)
hsa-miR-219-5p	1	0	1	1	1	1	UBR1	ubiquitin protein ligase E3 component n-recognin 1
hsa-miR-219-5p	1	0	0	1	1	1	CRLF3	cytokine receptor-like factor 3
hsa-miR-219-5p	1	0	1	1	1	1	OTX2	orthodenticle homeobox 2
hsa-miR-219-5p	1	0	1	1	1	1	SLC41A1	solute carrier family 41, member 1
hsa-miR-219-5p	1	0	1	1	1	1	RNF6	ring finger protein (C3H2C3 type) 6
hsa-miR-219-5p	1	0	1	1	1	1	PTPRU	protein tyrosine phosphatase, receptor type, U
hsa-miR-219-5p	1	0	1	1	1	1	USP14	ubiquitin specific peptidase 14 (tRNA-guanine transglycosylase)
hsa-miR-219-5p	1	0	1	0	1	1	LMO3	LIM domain only 3 (rhombotin-like 2)
hsa-miR-219-5p	1	0	1	1	1	1	DMXL1	Dmx-like 1
hsa-miR-219-5p	1	0	1	1	1	1	NOL4	nucleolar protein 4
hsa-miR-219-5p	1	0	1	1	1	1	ABHD13	abhydrolase domain containing 13
hsa-miR-219-5p	1	0	1	1	1	1	FOXK2	forkhead box K2
hsa-miR-219-5p	1	0	1	1	1	1	FAM63B	family with sequence similarity 63, member B
hsa-miR-219-5p	1	0	1	1	1	1	SPRED2	sprouty-related, EVH1 domain containing 2
hsa-miR-219-5p	1	0	1	1	1	1	FAM199X	family with sequence similarity 199, X-linked
hsa-miR-219-5p	1	0	1	1	1	1	EFNB2	ephrin-B2
hsa-miR-219-5p	1	0	1	0	1	1	GTPBP1	GTP binding protein 1
hsa-miR-219-5p	1	0	1	1	1	1	PIP5K1C	phosphatidylinositol-4-phosphate 5-kinase, type I, gamma
hsa-miR-219-5p	1	0	1	1	0	0	CACNB3	calcium channel, voltage-dependent, beta 3 subunit
hsa-miR-219-5p	1	0	1	1	1	1	DNAL1	dynein, axonemal, light chain 1
hsa-miR-219-5p	1	0	1	1	1	1	NUMB	numb homolog (Drosophila)
hsa-miR-219-5p	1	0	1	1	1	1	LPP	LIM domain containing preferred translocation partner in lipoma
hsa-miR-219-5p	1	0	1	0	1	1	KLF3	Kruppel-like factor 3 (basic)
hsa-miR-219-5p	1	0	1	0	1	1	UBASH3B	ubiquitin associated and SH3 domain containing B
hsa-miR-219-5p	1	0	0	1	0	0	APC2	adenomatosis polyposis coli 2
hsa-miR-219-5p	1	0	1	1	1	1	PIGR	polymeric immunoglobulin receptor
hsa-miR-219-5p	1	0	1	0	1	1	DCP2	DCP2 decapping enzyme homolog (S. cerevisiae)
hsa-miR-219-5p	1	0	1	1	1	1	SLK	STE20-like kinase
hsa-miR-219-5p	1	0	1	1	1	1	AFF4	AF4/FMR2 family, member 4
hsa-miR-219-5p	1	0	1	1	1	1	CACUL1	CDK2-associated, cullin domain 1
hsa-miR-219-5p	1	0	1	1	1	1	ZCCHC14	zinc finger, CCHC domain containing 14
hsa-miR-219-5p	1	0	1	1	1	1	XPR1	xenotropic and polytropic retrovirus receptor 1
hsa-miR-219-5p	1	0	1	0	0	0	TNRC18	trinucleotide repeat containing 18
hsa-miR-219-5p	1	0	1	1	1	1	ACOX1	acyl-CoA oxidase 1, palmitoyl
hsa-miR-219-5p	1	0	1	1	1	1	EYA1	eyes absent homolog 1 (Drosophila)
hsa-miR-219-5p	1	0	1	1	1	1	SH3D19	SH3 domain containing 19
hsa-miR-219-5p	1	0	1	1	1	1	ZNRF1	zinc and ring finger 1, E3 ubiquitin protein ligase
hsa-miR-219-5p	1	0	1	1	1	1	ARID3B	AT rich interactive domain 3B (BRIGHT-like)
hsa-miR-219-5p	1	0	1	0	1	1	ODZ2	odz, odd Oz/ten-m homolog 2 (Drosophila)
hsa-miR-219-5p	1	0	1	0	1	1	ROBO1	roundabout, axon guidance receptor, homolog 1 (Drosophila)
hsa-miR-219-5p	1	0	1	1	1	1	SOX6	SRY (sex determining region Y)-box 6
hsa-miR-219-5p	1	0	1	1	1	1	PPIP5K2	diphosphoinositol pentakisphosphate kinase 2
hsa-miR-219-5p	1	0	1	1	1	1	GPATCH8	G patch domain containing 8
hsa-miR-219-5p	1	0	1	0	1	1	MAGI2	membrane associated guanylate kinase, WW and PDZ domain containing 2
hsa-miR-219-5p	1	0	1	1	1	1	SMOC2	SPARC related modular calcium binding 2
hsa-miR-219-5p	0	0	1	1	1	1	CLEC4M	C-type lectin domain family 4, member M
hsa-miR-219-5p	1	0	1	0	1	1	RBM12	RNA binding motif protein 12
hsa-miR-219-5p	1	0	1	1	1	1	DNM3	dynamin 3
hsa-miR-219-5p	1	0	1	1	1	1	CALCR	calcitonin receptor
hsa-miR-219-5p	1	0	1	1	0	0	KIAA1210	KIAA1210
hsa-miR-219-5p	0	0	1	1	1	1	CA10	carbonic anhydrase X
hsa-miR-219-5p	1	0	1	1	1	1	UPF2	UPF2 regulator of nonsense transcripts homolog (yeast)
hsa-miR-219-5p	1	0	1	1	1	1	FAM135A	family with sequence similarity 135, member A
hsa-miR-219-5p	1	0	1	1	1	1	TOPORS	topoisomerase I binding, arginine/serine-rich, E3 ubiquitin protein ligase
hsa-miR-219-5p	0	0	1	0	0	0	KIAA1671	KIAA1671
hsa-miR-219-5p	0	0	1	1	1	1	SLC11A2	solute carrier family 11 (proton-coupled divalent metal ion transporters), member 2
hsa-miR-219-5p	0	0	1	1	1	1	IL7	interleukin 7
hsa-miR-219-5p	1	0	1	1	1	1	BACH2	BTB and CNC homology 1, basic leucine zipper transcription factor 2
hsa-miR-219-5p	1	0	1	1	1	1	RPS6KA3	ribosomal protein S6 kinase, 90kDa, polypeptide 3
hsa-miR-219-5p	1	0	1	0	1	1	CDON	Cdon homolog (mouse)
hsa-miR-219-5p	0	0	1	1	1	1	STAU1	staufen, RNA binding protein, homolog 1 (Drosophila)
hsa-miR-219-5p	1	0	1	1	1	1	TLE1	transducin-like enhancer of split 1 (E(sp1) homolog, Drosophila)
hsa-miR-219-5p	0	0	1	1	0	0	TRIM27	tripartite motif containing 27
hsa-miR-219-5p	1	0	1	1	0	0	PAK1	p21 protein (Cdc42/Rac)-activated kinase 1
hsa-miR-219-5p	1	0	1	1	1	1	MTF2	metal response element binding transcription factor 2
hsa-miR-219-5p	1	0	1	0	1	1	FAM19A5	family with sequence similarity 19 (chemokine (C-C motif)-like), member A5
hsa-miR-219-5p	1	0	1	1	1	1	USP15	ubiquitin specific peptidase 15
hsa-miR-219-5p	0	0	1	1	1	1	SLC25A14	solute carrier family 25 (mitochondrial carrier, brain), member 14
hsa-miR-219-5p	0	0	1	0	1	1	ZDHHC17	zinc finger, DHHC-type containing 17
hsa-miR-219-5p	0	0	1	1	1	1	MPP6	membrane protein, palmitoylated 6 (MAGUK p55 subfamily member 6)
hsa-miR-219-5p	1	0	1	0	1	1	AMOTL2	angiomotin like 2
hsa-miR-219-5p	0	0	1	0	0	0	BPESC1	blepharophimosis, epicanthus inversus and ptosis, candidate 1 (non-protein coding)
hsa-miR-219-5p	1	0	1	1	1	1	C21orf91	chromosome 21 open reading frame 91
hsa-miR-219-5p	0	0	1	1	1	1	RANGRF	RAN guanine nucleotide release factor
hsa-miR-219-5p	1	0	1	1	1	1	ERGIC1	endoplasmic reticulum-golgi intermediate compartment (ERGIC) 1
hsa-miR-219-5p	1	0	1	1	1	1	CALN1	calneuron 1
hsa-miR-219-5p	1	0	1	1	1	1	SPTBN4	spectrin, beta, non-erythrocytic 4
hsa-miR-219-5p	1	0	1	1	1	1	CALU	calumenin
hsa-miR-219-5p	0	0	1	1	1	1	SLC6A15	solute carrier family 6 (neutral amino acid transporter), member 15
hsa-miR-219-5p	1	0	1	1	1	1	ATAD1	ATPase family, AAA domain containing 1
hsa-miR-219-5p	1	0	1	1	1	1	CALCOCO1	calcium binding and coiled-coil domain 1
hsa-miR-219-5p	0	0	1	0	0	0	NBPF10	neuroblastoma breakpoint family, member 10
hsa-miR-219-5p	0	0	1	1	1	1	CASP8	caspase 8, apoptosis-related cysteine peptidase
hsa-miR-219-5p	1	0	1	1	1	1	ST3GAL3	ST3 beta-galactoside alpha-2,3-sialyltransferase 3
hsa-miR-219-5p	1	0	1	1	1	1	RBFOX1	RNA binding protein, fox-1 homolog (C. elegans) 1
hsa-miR-219-5p	1	0	1	1	1	1	AFF2	AF4/FMR2 family, member 2
hsa-miR-219-5p	0	0	1	1	1	1	GNAS	GNAS complex locus
hsa-miR-219-5p	0	0	1	1	0	0	SERGEF	secretion regulating guanine nucleotide exchange factor
hsa-miR-219-5p	0	0	1	0	0	0	CACNA2D3	calcium channel, voltage-dependent, alpha 2/delta subunit 3
hsa-miR-219-5p	1	0	1	1	1	1	NRXN3	neurexin 3
hsa-miR-219-5p	0	0	1	1	1	1	TAF1	TAF1 RNA polymerase II, TATA box binding protein (TBP)-associated factor, 250kDa
hsa-miR-219-5p	1	0	1	0	1	1	NFAT5	nuclear factor of activated T-cells 5, tonicity-responsive
hsa-miR-219-5p	0	0	1	0	0	0	TUG1	taurine upregulated 1 (non-protein coding)
hsa-miR-219-5p	0	0	1	1	1	1	CXXC5	CXXC finger protein 5
hsa-miR-219-5p	1	0	1	1	1	1	DERL1	derlin 1
hsa-miR-219-5p	0	0	1	1	1	1	CNOT8	CCR4-NOT transcription complex, subunit 8
hsa-miR-219-5p	1	0	1	1	1	1	NAA30	N(alpha)-acetyltransferase 30, NatC catalytic subunit
hsa-miR-219-5p	0	0	1	0	0	0	NEURL1B	neuralized homolog 1B (Drosophila)
hsa-miR-219-5p	0	0	1	1	1	1	SPRTN	SprT-like N-terminal domain
hsa-miR-219-5p	0	0	1	1	1	1	PKP4	plakophilin 4
hsa-miR-219-5p	1	0	1	0	1	1	AP1G1	adaptor-related protein complex 1, gamma 1 subunit
hsa-miR-219-5p	1	0	1	1	1	1	TPM1	tropomyosin 1 (alpha)
hsa-miR-219-5p	0	0	1	1	1	1	GABRP	gamma-aminobutyric acid (GABA) A receptor, pi
hsa-miR-219-5p	1	0	1	1	0	0	SPEG	SPEG complex locus
hsa-miR-219-5p	1	0	1	1	1	1	SULF1	sulfatase 1
hsa-miR-219-5p	0	0	1	1	1	1	SDK1	sidekick cell adhesion molecule 1
hsa-miR-219-5p	0	0	1	1	1	1	ANKRD36B	ankyrin repeat domain 36B
hsa-miR-219-5p	1	0	1	1	1	1	LMNA	lamin A/C
hsa-miR-219-5p	0	0	1	0	0	0	JPX	JPX transcript, XIST activator (non-protein coding)
hsa-miR-219-5p	0	0	1	1	1	1	XAF1	XIAP associated factor 1
hsa-miR-219-5p	0	0	1	1	1	1	C14orf79	chromosome 14 open reading frame 79
hsa-miR-219-5p	0	0	1	1	0	0	LGR5	leucine-rich repeat containing G protein-coupled receptor 5
hsa-miR-219-5p	1	0	1	1	1	1	PIP4K2C	phosphatidylinositol-5-phosphate 4-kinase, type II, gamma
hsa-miR-219-5p	0	0	1	1	1	1	MTR	5-methyltetrahydrofolate-homocysteine methyltransferase
hsa-miR-219-5p	1	0	1	1	1	1	FRY	furry homolog (Drosophila)
hsa-miR-219-5p	0	0	1	0	0	0	LOC440910	uncharacterized LOC440910
hsa-miR-219-5p	0	0	1	1	1	1	ZDHHC14	zinc finger, DHHC-type containing 14
hsa-miR-219-5p	0	0	1	0	0	0	LOC283887	uncharacterized LOC283887
hsa-miR-219-5p	0	0	1	1	1	1	N4BP2L2	NEDD4 binding protein 2-like 2
hsa-miR-219-5p	0	0	1	1	0	0	ARPC2	actin related protein 2/3 complex, subunit 2, 34kDa
hsa-miR-219-5p	0	0	1	1	1	1	RBM25	RNA binding motif protein 25
hsa-miR-219-5p	1	0	1	1	1	1	KLF4	Kruppel-like factor 4 (gut)
hsa-miR-219-5p	0	0	1	0	0	0	LOC100129858	uncharacterized LOC100129858
hsa-miR-219-5p	0	0	1	0	1	1	FLJ39639	uncharacterized protein FLJ39639
hsa-miR-219-5p	1	0	1	1	1	1	GATA4	GATA binding protein 4
hsa-miR-219-5p	0	0	1	1	1	1	CBWD5	COBW domain containing 5
hsa-miR-219-5p	1	0	1	1	0	0	ENTPD1	ectonucleoside triphosphate diphosphohydrolase 1
hsa-miR-219-5p	0	0	1	1	0	0	GPR82	G protein-coupled receptor 82
hsa-miR-219-5p	1	0	1	1	1	1	ACSL6	acyl-CoA synthetase long-chain family member 6
hsa-miR-219-5p	1	0	1	1	1	1	UHRF2	ubiquitin-like with PHD and ring finger domains 2, E3 ubiquitin protein ligase
hsa-miR-219-5p	1	0	1	1	1	1	TPRG1	tumor protein p63 regulated 1
hsa-miR-219-5p	1	0	1	1	1	1	EPAS1	endothelial PAS domain protein 1
hsa-miR-219-5p	1	0	1	1	1	1	KIF21A	kinesin family member 21A
hsa-miR-219-5p	1	0	1	1	1	1	METAP2	methionyl aminopeptidase 2
hsa-miR-219-5p	0	0	1	1	1	1	MKX	mohawk homeobox
hsa-miR-219-5p	1	0	1	0	1	1	KIAA1456	KIAA1456
hsa-miR-219-5p	1	0	1	1	1	1	DPY19L3	dpy-19-like 3 (C. elegans)
hsa-miR-219-5p	1	0	1	1	1	1	CSRNP3	cysteine-serine-rich nuclear protein 3
hsa-miR-219-5p	0	0	1	1	1	1	PDIA6	protein disulfide isomerase family A, member 6
hsa-miR-219-5p	1	0	1	0	1	1	CAPRIN1	cell cycle associated protein 1
hsa-miR-219-5p	1	0	1	1	1	1	MRFAP1	Morf4 family associated protein 1
hsa-miR-219-5p	0	0	1	1	1	1	PDE2A	phosphodiesterase 2A, cGMP-stimulated
hsa-miR-219-5p	0	0	1	1	1	1	CRISP3	cysteine-rich secretory protein 3
hsa-miR-219-5p	0	0	1	0	0	0	RRN3P2	RNA polymerase I transcription factor homolog (S. cerevisiae) pseudogene 2
hsa-miR-219-5p	1	0	1	1	1	1	CAMK2G	calcium/calmodulin-dependent protein kinase II gamma
hsa-miR-219-5p	0	0	1	1	1	1	RNF135	ring finger protein 135
hsa-miR-219-5p	1	0	1	1	1	1	RIF1	RAP1 interacting factor homolog (yeast)
hsa-miR-219-5p	1	0	1	1	1	1	TAB2	TGF-beta activated kinase 1/MAP3K7 binding protein 2
hsa-miR-219-5p	0	0	1	1	1	1	ARIH1	ariadne homolog, ubiquitin-conjugating enzyme E2 binding protein, 1 (Drosophila)
hsa-miR-219-5p	0	0	1	0	0	0	TPTE2P6	transmembrane phosphoinositide 3-phosphatase and tensin homolog 2 pseudogene 6
hsa-miR-219-5p	0	0	1	0	0	0	DNAJC5B	DnaJ (Hsp40) homolog, subfamily C, member 5 beta
hsa-miR-219-5p	1	0	1	1	1	1	SECISBP2	SECIS binding protein 2
hsa-miR-219-5p	0	0	1	0	0	0	FAM66D	family with sequence similarity 66, member D
hsa-miR-219-5p	0	0	1	1	1	1	ING3	inhibitor of growth family, member 3
hsa-miR-219-5p	1	0	1	1	1	1	NFX1	nuclear transcription factor, X-box binding 1
hsa-miR-219-5p	1	0	1	0	1	1	MEF2C	myocyte enhancer factor 2C
hsa-miR-219-5p	0	0	1	0	0	0	KGFLP1	fibroblast growth factor 7 pseudogene
hsa-miR-219-5p	0	0	1	1	1	1	GBP5	guanylate binding protein 5
hsa-miR-219-5p	0	0	1	1	1	1	PTPLA	protein tyrosine phosphatase-like (proline instead of catalytic arginine), member A
hsa-miR-219-5p	1	0	1	1	1	1	MECP2	methyl CpG binding protein 2 (Rett syndrome)
hsa-miR-219-5p	1	0	1	1	1	1	CD109	CD109 molecule
hsa-miR-219-5p	1	0	1	1	0	0	TAF4B	TAF4b RNA polymerase II, TATA box binding protein (TBP)-associated factor, 105kDa
hsa-miR-219-5p	0	0	1	1	0	0	NBPF8	neuroblastoma breakpoint family, member 8
hsa-miR-219-5p	1	0	1	1	1	1	AMOT	angiomotin
hsa-miR-219-5p	1	0	1	1	1	1	HOXC13	homeobox C13
hsa-miR-219-5p	1	0	1	1	1	1	KIAA1191	KIAA1191
hsa-miR-219-5p	1	0	1	1	1	1	U2SURP	U2 snRNP-associated SURP domain containing
hsa-miR-219-5p	0	0	1	1	0	0	RBM14	RNA binding motif protein 14
hsa-miR-219-5p	1	0	1	0	1	1	MINOS1	mitochondrial inner membrane organizing system 1
hsa-miR-219-5p	1	0	1	1	1	1	LRRFIP1	leucine rich repeat (in FLII) interacting protein 1
hsa-miR-219-5p	0	0	1	0	0	0	GRAMD1B	GRAM domain containing 1B
hsa-miR-219-5p	0	0	1	0	1	1	SETD5	SET domain containing 5
hsa-miR-219-5p	1	0	1	1	1	1	MEIS3	Meis homeobox 3
hsa-miR-219-5p	1	0	1	1	1	1	ZNF512	zinc finger protein 512
hsa-miR-219-5p	0	0	1	1	1	1	C1QTNF3	C1q and tumor necrosis factor related protein 3
hsa-miR-219-5p	0	0	1	0	0	0	GNN	Grp94 neighboring nucleotidase pseudogene
hsa-miR-219-5p	0	0	1	0	1	1	ZNF718	zinc finger protein 718
hsa-miR-219-5p	1	0	1	1	1	1	EPHA4	EPH receptor A4
hsa-miR-219-5p	0	0	1	1	1	1	MAP2	microtubule-associated protein 2
hsa-miR-219-5p	1	0	1	1	1	1	SENP6	SUMO1/sentrin specific peptidase 6
hsa-miR-219-5p	0	0	1	1	1	1	SLC51A	solute carrier family 51, alpha subunit
hsa-miR-219-5p	1	0	1	1	1	1	ZNF518A	zinc finger protein 518A
hsa-miR-219-5p	1	0	1	1	1	1	CEP57	centrosomal protein 57kDa
hsa-miR-219-5p	1	0	1	1	1	1	PDZD2	PDZ domain containing 2
hsa-miR-219-5p	1	0	1	1	1	1	SPATS2	spermatogenesis associated, serine-rich 2
hsa-miR-219-5p	1	0	1	0	1	1	CCDC88A	coiled-coil domain containing 88A
hsa-miR-219-5p	1	0	1	1	1	1	RHOBTB1	Rho-related BTB domain containing 1
hsa-miR-219-5p	1	0	1	1	0	0	TMEM181	transmembrane protein 181
hsa-miR-219-5p	1	0	1	1	1	1	ATF7IP2	activating transcription factor 7 interacting protein 2
hsa-miR-219-5p	0	0	1	1	0	0	TNMD	tenomodulin
hsa-miR-219-5p	1	0	1	1	1	1	CLK4	CDC-like kinase 4
hsa-miR-219-5p	1	0	1	1	1	1	PEX5L	peroxisomal biogenesis factor 5-like
hsa-miR-219-5p	0	0	1	1	1	1	DUSP28	dual specificity phosphatase 28
hsa-miR-219-5p	0	0	1	0	0	0	FAM201A	family with sequence similarity 201, member A
hsa-miR-219-5p	0	0	1	1	1	1	FAM171B	family with sequence similarity 171, member B
hsa-miR-219-5p	0	0	1	0	0	0	INHBA-AS1	INHBA antisense RNA 1
hsa-miR-219-5p	1	0	1	0	1	1	LPHN3	latrophilin 3
hsa-miR-219-5p	0	0	1	0	0	0	LOC401074	uncharacterized LOC401074
hsa-miR-219-5p	1	0	1	1	1	1	FOSB	FBJ murine osteosarcoma viral oncogene homolog B
hsa-miR-219-5p	0	0	1	1	1	1	STAG1	stromal antigen 1
hsa-miR-219-5p	0	0	1	0	0	0	LOC154822	uncharacterized LOC154822
hsa-miR-219-5p	0	0	1	0	0	0	LOC338579	ankyrin repeat domain-containing protein 30B pseudogene
hsa-miR-219-5p	0	0	1	0	0	0	LOC339260	uncharacterized LOC339260
hsa-miR-219-5p	1	0	1	0	1	1	NUDT10	nudix (nucleoside diphosphate linked moiety X)-type motif 10
hsa-miR-219-5p	1	0	1	1	1	1	NCOA5	nuclear receptor coactivator 5
hsa-miR-219-5p	0	0	1	1	1	1	MCOLN3	mucolipin 3
hsa-miR-219-5p	0	0	1	1	1	1	CLEC2D	C-type lectin domain family 2, member D
hsa-miR-219-5p	1	0	1	1	1	1	AHR	aryl hydrocarbon receptor
hsa-miR-219-5p	0	0	1	0	0	0	ULK4P1	unc-51-like kinase 4 (C. elegans) pseudogene 1
hsa-miR-219-5p	0	0	1	0	0	0	ULK4P3	unc-51-like kinase 4 (C. elegans) pseudogene 3
hsa-miR-219-5p	0	0	1	0	1	1	WDR27	WD repeat domain 27
hsa-miR-219-5p	0	0	1	0	0	0	LOC283070	uncharacterized LOC283070
hsa-miR-219-5p	0	0	1	1	0	0	PPIG	peptidylprolyl isomerase G (cyclophilin G)
hsa-miR-219-5p	0	0	1	0	0	0	TBC1D25	TBC1 domain family, member 25
hsa-miR-219-5p	0	0	1	1	1	1	CYP3A43	cytochrome P450, family 3, subfamily A, polypeptide 43
hsa-miR-219-5p	0	0	1	0	1	1	GALNT13	UDP-N-acetyl-alpha-D-galactosamine:polypeptide N-acetylgalactosaminyltransferase 13 (GalNAc-T13)
hsa-miR-219-5p	0	0	1	1	1	1	ZNF365	zinc finger protein 365
hsa-miR-219-5p	1	0	1	1	1	1	PTPRD	protein tyrosine phosphatase, receptor type, D
hsa-miR-219-5p	0	0	1	1	0	0	SLC17A4	solute carrier family 17 (sodium phosphate), member 4
hsa-miR-219-5p	1	0	1	1	1	1	ITSN1	intersectin 1 (SH3 domain protein)
hsa-miR-219-5p	1	0	1	1	1	1	KIAA0528	KIAA0528
hsa-miR-219-5p	0	0	1	0	0	0	LINC00314	long intergenic non-protein coding RNA 314
hsa-miR-219-5p	0	0	1	0	1	1	PIK3C2G	phosphatidylinositol-4-phosphate 3-kinase, catalytic subunit type 2 gamma
hsa-miR-219-5p	1	0	1	1	1	1	NIPAL2	NIPA-like domain containing 2
hsa-miR-219-5p	1	0	1	1	1	1	SGCD	sarcoglycan, delta (35kDa dystrophin-associated glycoprotein)
hsa-miR-219-5p	0	0	1	1	1	1	SLC12A8	solute carrier family 12 (potassium/chloride transporters), member 8
hsa-miR-219-5p	0	0	1	1	1	1	STAT2	signal transducer and activator of transcription 2, 113kDa
hsa-miR-219-5p	0	0	1	1	1	1	PDZRN4	PDZ domain containing ring finger 4
hsa-miR-219-5p	0	0	1	1	1	1	KLHL8	kelch-like 8 (Drosophila)
hsa-miR-219-5p	0	0	1	1	1	1	PRR14L	proline rich 14-like
hsa-miR-219-5p	1	0	1	1	1	1	CBX3	chromobox homolog 3
hsa-miR-219-5p	0	0	1	0	1	1	THAP6	THAP domain containing 6
hsa-miR-219-5p	0	0	1	1	0	0	LRR1	leucine rich repeat protein 1
hsa-miR-219-5p	1	0	1	1	1	1	ZNF711	zinc finger protein 711
hsa-miR-219-5p	1	0	1	1	1	1	TMEM135	transmembrane protein 135
hsa-miR-219-5p	0	0	1	1	1	1	HPGD	hydroxyprostaglandin dehydrogenase 15-(NAD)
hsa-miR-219-5p	0	0	1	1	1	1	FGG	fibrinogen gamma chain
hsa-miR-219-5p	0	0	1	0	1	1	IDO1	indoleamine 2,3-dioxygenase 1
hsa-miR-219-5p	0	0	1	1	1	1	GSTM3	glutathione S-transferase mu 3 (brain)
hsa-miR-219-5p	0	0	1	0	0	0	RPS16P10	ribosomal protein S16 pseudogene 10
hsa-miR-219-5p	1	0	1	1	1	1	POU2F3	POU class 2 homeobox 3
hsa-miR-219-5p	1	0	1	1	1	1	SLC35D2	solute carrier family 35, member D2
hsa-miR-219-5p	0	0	1	0	0	0	MYCT1	myc target 1
hsa-miR-219-5p	0	0	1	1	1	1	MRPS36	mitochondrial ribosomal protein S36
hsa-miR-219-5p	0	0	1	0	0	0	LOC643837	uncharacterized LOC643837
hsa-miR-219-5p	0	0	1	1	1	1	GGPS1	geranylgeranyl diphosphate synthase 1
hsa-miR-219-5p	0	0	1	0	0	0	C12orf75	chromosome 12 open reading frame 75
hsa-miR-219-5p	0	0	1	1	0	0	NRSN2	neurensin 2
hsa-miR-219-5p	0	0	1	0	1	1	PSG1	pregnancy specific beta-1-glycoprotein 1
hsa-miR-219-5p	1	0	1	1	1	1	IMPA2	inositol(myo)-1(or 4)-monophosphatase 2
hsa-miR-219-5p	0	0	1	1	0	0	RGS9	regulator of G-protein signaling 9
hsa-miR-219-5p	0	0	1	1	0	0	CD53	CD53 molecule
hsa-miR-219-5p	0	0	1	1	1	1	GFM1	G elongation factor, mitochondrial 1
hsa-miR-219-5p	1	0	1	1	0	0	ZCCHC4	zinc finger, CCHC domain containing 4
hsa-miR-219-5p	1	0	1	1	1	1	VLDLR	very low density lipoprotein receptor
hsa-miR-219-5p	0	0	1	1	0	0	HEBP1	heme binding protein 1
hsa-miR-219-5p	0	0	1	1	1	1	LGI1	leucine-rich, glioma inactivated 1
hsa-miR-219-5p	1	0	1	0	1	1	CD47	CD47 molecule
hsa-miR-219-5p	1	0	1	1	1	1	RUNX1	runt-related transcription factor 1
hsa-miR-219-5p	0	0	1	1	1	1	LIMK2	LIM domain kinase 2
hsa-miR-219-5p	1	0	1	1	1	1	LHX9	LIM homeobox 9
hsa-miR-219-5p	0	0	1	0	0	0	LOC731789	uncharacterized LOC731789
hsa-miR-219-5p	1	0	1	1	1	1	RB1CC1	RB1-inducible coiled-coil 1
hsa-miR-219-5p	1	0	1	1	1	1	CAPZA2	capping protein (actin filament) muscle Z-line, alpha 2
hsa-miR-219-5p	1	0	1	0	1	1	BCL2	B-cell CLL/lymphoma 2
hsa-miR-219-5p	1	0	1	1	1	1	ELK1	ELK1, member of ETS oncogene family
hsa-miR-219-5p	0	0	1	0	1	1	MS4A2	membrane-spanning 4-domains, subfamily A, member 2
hsa-miR-219-5p	0	0	1	0	1	1	MYO7A	myosin VIIA
hsa-miR-219-5p	1	0	1	0	1	1	PKD2	polycystic kidney disease 2 (autosomal dominant)
hsa-miR-219-5p	0	0	1	1	1	1	RHAG	Rh-associated glycoprotein
hsa-miR-219-5p	1	0	1	1	1	1	CHM	choroideremia (Rab escort protein 1)
hsa-miR-219-5p	1	0	1	1	1	1	HNF1B	HNF1 homeobox B
hsa-miR-219-5p	1	0	1	1	1	1	FASLG	Fas ligand (TNF superfamily, member 6)
hsa-miR-219-5p	0	0	1	0	0	0	ADRA2C	adrenoceptor alpha 2C
hsa-miR-219-5p	1	0	1	0	1	1	CACNA1E	calcium channel, voltage-dependent, R type, alpha 1E subunit
hsa-miR-219-5p	0	0	1	1	1	1	GABRA5	gamma-aminobutyric acid (GABA) A receptor, alpha 5
hsa-miR-219-5p	1	0	1	1	1	1	GABRB3	gamma-aminobutyric acid (GABA) A receptor, beta 3
hsa-miR-219-5p	1	0	1	1	1	1	MME	membrane metallo-endopeptidase
hsa-miR-219-5p	0	0	1	0	1	1	PTGIS	prostaglandin I2 (prostacyclin) synthase
hsa-miR-219-5p	0	0	1	1	1	1	SLC2A9	solute carrier family 2 (facilitated glucose transporter), member 9
hsa-miR-219-5p	1	0	1	0	1	1	SMAD5	SMAD family member 5
hsa-miR-219-5p	1	0	1	1	1	1	RORC	RAR-related orphan receptor C
hsa-miR-219-5p	1	0	1	1	1	1	GATA3	GATA binding protein 3
hsa-miR-219-5p	0	0	1	1	1	1	TSPYL6	TSPY-like 6
hsa-miR-219-5p	0	0	1	1	1	1	FRG2	FSHD region gene 2
hsa-miR-219-5p	1	0	1	1	1	1	EDA	ectodysplasin A
hsa-miR-219-5p	0	0	1	1	1	1	SCP2	sterol carrier protein 2
hsa-miR-219-5p	0	0	1	0	1	1	C8orf22	chromosome 8 open reading frame 22
hsa-miR-219-5p	1	0	1	1	1	1	TULP4	tubby like protein 4
hsa-miR-219-5p	0	0	1	1	0	0	F8A3	coagulation factor VIII-associated 3
hsa-miR-219-5p	1	0	1	0	1	1	ERMN	ermin, ERM-like protein
hsa-miR-219-5p	0	0	1	0	1	1	LINC00596	long intergenic non-protein coding RNA 596
hsa-miR-219-5p	0	0	1	0	1	1	LINC00268	long intergenic non-protein coding RNA 268
hsa-miR-219-5p	0	0	1	1	1	1	PURG	purine-rich element binding protein G
hsa-miR-219-5p	1	0	1	1	1	1	ZNF2	zinc finger protein 2
hsa-miR-219-5p	1	0	1	1	1	1	ZHX1	zinc fingers and homeoboxes 1
hsa-miR-219-5p	1	0	1	1	1	1	FNBP1L	formin binding protein 1-like
hsa-miR-219-5p	1	0	1	0	1	1	RAB12	RAB12, member RAS oncogene family
hsa-miR-219-5p	1	0	1	1	1	1	SLC35F1	solute carrier family 35, member F1
hsa-miR-219-5p	0	0	1	1	1	1	TRMT11	tRNA methyltransferase 11 homolog (S. cerevisiae)
hsa-miR-219-5p	0	0	1	1	1	1	PLGLB1	plasminogen-like B1
hsa-miR-219-5p	1	0	1	1	1	1	MAGI1	membrane associated guanylate kinase, WW and PDZ domain containing 1
hsa-miR-219-5p	0	0	1	1	1	1	EXOC4	exocyst complex component 4
hsa-miR-219-5p	1	0	1	1	1	1	SPTSSB	serine palmitoyltransferase, small subunit B
hsa-miR-219-5p	1	0	1	0	1	1	CEP44	centrosomal protein 44kDa
hsa-miR-219-5p	1	0	1	1	1	1	NSL1	NSL1, MIND kinetochore complex component, homolog (S. cerevisiae)
hsa-miR-219-5p	1	0	1	1	1	1	KDM5A	lysine (K)-specific demethylase 5A
hsa-miR-219-5p	1	0	1	0	1	1	NCAM1	neural cell adhesion molecule 1
hsa-miR-219-5p	1	0	1	0	1	1	SLC7A6	solute carrier family 7 (amino acid transporter light chain, y+L system), member 6
hsa-miR-219-5p	1	0	1	1	1	1	METTL9	methyltransferase like 9
hsa-miR-219-5p	1	0	1	1	1	1	SRSF1	serine/arginine-rich splicing factor 1
hsa-miR-219-5p	1	0	1	1	1	1	CREBBP	CREB binding protein
hsa-miR-219-5p	1	0	1	1	1	1	ADCY9	adenylate cyclase 9
hsa-miR-219-5p	1	0	1	0	1	1	KLF9	Kruppel-like factor 9
hsa-miR-219-5p	1	0	1	1	1	1	CREBL2	cAMP responsive element binding protein-like 2
hsa-miR-219-5p	1	0	1	1	1	1	DYRK1A	dual-specificity tyrosine-(Y)-phosphorylation regulated kinase 1A
hsa-miR-219-5p	1	0	1	1	1	1	FOXC1	forkhead box C1
hsa-miR-219-5p	1	0	1	1	1	1	ADD2	adducin 2 (beta)
hsa-miR-219-5p	0	0	1	1	1	1	BTN1A1	butyrophilin, subfamily 1, member A1
hsa-miR-219-5p	1	0	1	0	1	1	CCND2	cyclin D2
hsa-miR-219-5p	0	0	1	1	0	0	IFNB1	interferon, beta 1, fibroblast
hsa-miR-219-5p	0	0	1	1	1	1	IL12B	interleukin 12B (natural killer cell stimulatory factor 2, cytotoxic lymphocyte maturation factor 2, p40)
hsa-miR-219-5p	1	0	1	1	1	1	KPNA4	karyopherin alpha 4 (importin alpha 3)
hsa-miR-219-5p	0	0	1	0	1	1	MFNG	MFNG O-fucosylpeptide 3-beta-N-acetylglucosaminyltransferase
hsa-miR-219-5p	1	0	1	1	1	1	MN1	meningioma (disrupted in balanced translocation) 1
hsa-miR-219-5p	1	0	1	1	1	1	MSN	moesin
hsa-miR-219-5p	0	0	1	1	1	1	MTAP	methylthioadenosine phosphorylase
hsa-miR-219-5p	0	0	1	0	1	1	OAZ2	ornithine decarboxylase antizyme 2
hsa-miR-219-5p	1	0	1	0	1	1	PAK2	p21 protein (Cdc42/Rac)-activated kinase 2
hsa-miR-219-5p	0	0	1	1	1	1	PLGLB2	plasminogen-like B2
hsa-miR-219-5p	1	0	1	0	1	1	SORT1	sortilin 1
hsa-miR-219-5p	1	0	1	0	1	1	CCL22	chemokine (C-C motif) ligand 22
hsa-miR-219-5p	1	0	1	1	1	1	SMARCC1	SWI/SNF related, matrix associated, actin dependent regulator of chromatin, subfamily c, member 1
hsa-miR-219-5p	1	0	1	0	1	1	SOX11	SRY (sex determining region Y)-box 11
hsa-miR-219-5p	0	0	1	1	1	1	SRY	sex determining region Y
hsa-miR-219-5p	1	0	1	0	1	1	RPS6KB1	ribosomal protein S6 kinase, 70kDa, polypeptide 1
hsa-miR-219-5p	0	0	1	1	0	0	HIRA	HIR histone cell cycle regulation defective homolog A (S. cerevisiae)
hsa-miR-219-5p	1	0	1	1	1	1	UBE2D3	ubiquitin-conjugating enzyme E2D 3
hsa-miR-219-5p	1	0	1	1	1	1	NRIP1	nuclear receptor interacting protein 1
hsa-miR-219-5p	1	0	1	1	1	1	DYRK2	dual-specificity tyrosine-(Y)-phosphorylation regulated kinase 2
hsa-miR-219-5p	0	0	1	1	1	1	JRKL	jerky homolog-like (mouse)
hsa-miR-219-5p	1	0	1	1	1	1	NR5A2	nuclear receptor subfamily 5, group A, member 2
hsa-miR-219-5p	1	0	1	1	1	1	GMFB	glia maturation factor, beta
hsa-miR-219-5p	1	0	1	1	1	1	MFHAS1	malignant fibrous histiocytoma amplified sequence 1
hsa-miR-219-5p	0	0	1	0	1	1	CYTIP	cytohesin 1 interacting protein
hsa-miR-219-5p	1	0	1	1	1	1	DACH1	dachshund homolog 1 (Drosophila)
hsa-miR-219-5p	1	0	1	1	1	1	MTMR4	myotubularin related protein 4
hsa-miR-219-5p	1	0	1	0	1	1	ARHGEF6	Rac/Cdc42 guanine nucleotide exchange factor (GEF) 6
hsa-miR-219-5p	1	0	1	1	1	1	ONECUT2	one cut homeobox 2
hsa-miR-219-5p	0	0	1	1	1	1	ATP6V1G1	ATPase, H+ transporting, lysosomal 13kDa, V1 subunit G1
hsa-miR-219-5p	0	0	1	1	1	1	DNAJB6	DnaJ (Hsp40) homolog, subfamily B, member 6
hsa-miR-219-5p	0	0	1	1	1	1	PRG4	proteoglycan 4
hsa-miR-219-5p	1	0	1	1	1	1	MEOX2	mesenchyme homeobox 2
hsa-miR-219-5p	1	0	1	0	1	1	NAB1	NGFI-A binding protein 1 (EGR1 binding protein 1)
hsa-miR-219-5p	0	0	1	0	1	1	HCAR3	hydroxycarboxylic acid receptor 3
hsa-miR-219-5p	0	0	1	1	1	1	TRDN	triadin
hsa-miR-219-5p	1	0	1	1	1	1	SPON1	spondin 1, extracellular matrix protein
hsa-miR-219-5p	1	0	1	1	1	1	TMEM50B	transmembrane protein 50B
hsa-miR-219-5p	1	0	1	1	1	1	NEFL	neurofilament, light polypeptide
hsa-miR-219-5p	0	0	1	1	1	1	NKX3-1	NK3 homeobox 1
hsa-miR-219-5p	1	0	1	1	1	1	NPEPPS	aminopeptidase puromycin sensitive
hsa-miR-219-5p	1	0	1	1	1	1	SEC23A	Sec23 homolog A (S. cerevisiae)
hsa-miR-219-5p	1	0	1	1	1	1	NEBL	nebulette
hsa-miR-219-5p	1	0	1	0	1	1	GNAI3	guanine nucleotide binding protein (G protein), alpha inhibiting activity polypeptide 3
hsa-miR-219-5p	0	0	1	0	1	1	SLC16A2	solute carrier family 16, member 2 (thyroid hormone transporter)
hsa-miR-219-5p	0	0	1	1	1	1	CD226	CD226 molecule
hsa-miR-219-5p	1	0	1	1	1	1	PLK2	polo-like kinase 2
hsa-miR-219-5p	1	0	1	0	1	1	SYNGAP1	synaptic Ras GTPase activating protein 1
hsa-miR-219-5p	0	0	1	1	0	0	HNRNPA0	heterogeneous nuclear ribonucleoprotein A0
hsa-miR-219-5p	0	0	1	1	1	1	PKIA	protein kinase (cAMP-dependent, catalytic) inhibitor alpha
hsa-miR-219-5p	1	0	1	1	1	1	RP2	retinitis pigmentosa 2 (X-linked recessive)
hsa-miR-219-5p	1	0	1	1	1	1	NR4A3	nuclear receptor subfamily 4, group A, member 3
hsa-miR-219-5p	1	0	1	1	1	1	ZNF81	zinc finger protein 81
hsa-miR-219-5p	1	0	1	1	1	1	VEZF1	vascular endothelial zinc finger 1
hsa-miR-219-5p	1	0	1	1	1	1	ERLIN2	ER lipid raft associated 2
hsa-miR-219-5p	0	0	1	1	1	1	AKAP10	A kinase (PRKA) anchor protein 10
hsa-miR-219-5p	1	0	1	0	1	1	ZFPM2	zinc finger protein, multitype 2
hsa-miR-219-5p	1	0	1	1	1	1	KCND2	potassium voltage-gated channel, Shal-related subfamily, member 2
hsa-miR-219-5p	0	0	1	0	1	1	TLL1	tolloid-like 1
hsa-miR-219-5p	1	0	1	0	1	1	FLRT2	fibronectin leucine rich transmembrane protein 2
hsa-miR-219-5p	1	0	1	1	1	1	EEF2K	eukaryotic elongation factor-2 kinase
hsa-miR-219-5p	1	0	1	1	1	1	AK2	adenylate kinase 2
hsa-miR-219-5p	0	0	1	0	1	1	EMR2	egf-like module containing, mucin-like, hormone receptor-like 2
hsa-miR-219-5p	0	0	1	1	1	1	HSPA4L	heat shock 70kDa protein 4-like
hsa-miR-219-5p	1	0	1	1	1	1	ERO1L	ERO1-like (S. cerevisiae)
hsa-miR-219-5p	0	0	1	1	1	1	DZIP3	DAZ interacting protein 3, zinc finger
hsa-miR-219-5p	0	0	1	0	1	1	EPM2AIP1	EPM2A (laforin) interacting protein 1
hsa-miR-219-5p	1	0	1	0	1	1	PDAP1	PDGFA associated protein 1
hsa-miR-219-5p	1	0	1	1	1	1	CHSY1	chondroitin sulfate synthase 1
hsa-miR-219-5p	1	0	1	0	1	1	PEG10	paternally expressed 10
hsa-miR-219-5p	1	0	1	0	1	1	SRGAP2	SLIT-ROBO Rho GTPase activating protein 2
hsa-miR-219-5p	1	0	1	1	1	1	RNF19A	ring finger protein 19A, E3 ubiquitin protein ligase
hsa-miR-219-5p	1	0	1	1	1	1	PLA2G3	phospholipase A2, group III
hsa-miR-219-5p	0	0	1	1	1	1	NAA20	N(alpha)-acetyltransferase 20, NatB catalytic subunit
hsa-miR-219-5p	1	0	1	1	1	1	NLK	nemo-like kinase
hsa-miR-219-5p	1	0	1	1	1	1	AKAP11	A kinase (PRKA) anchor protein 11
hsa-miR-219-5p	1	0	1	0	1	1	HPCAL4	hippocalcin like 4
hsa-miR-219-5p	0	0	1	0	1	1	ERAP1	endoplasmic reticulum aminopeptidase 1
hsa-miR-219-5p	1	0	1	0	1	1	KLHL3	kelch-like 3 (Drosophila)
hsa-miR-219-5p	1	0	1	1	1	1	SIX4	SIX homeobox 4
hsa-miR-219-5p	1	0	1	1	1	1	PLXNA3	plexin A3
hsa-miR-219-5p	0	0	1	0	1	1	TRIM44	tripartite motif containing 44
hsa-miR-219-5p	1	0	1	1	1	1	VPS13C	vacuolar protein sorting 13 homolog C (S. cerevisiae)
hsa-miR-219-5p	1	0	1	0	1	1	FAM46C	family with sequence similarity 46, member C
hsa-miR-219-5p	0	0	1	1	1	1	SOHLH2	spermatogenesis and oogenesis specific basic helix-loop-helix 2
hsa-miR-219-5p	1	0	1	1	1	1	IFT57	intraflagellar transport 57 homolog (Chlamydomonas)
hsa-miR-219-5p	1	0	1	1	1	1	MAGOHB	mago-nashi homolog B (Drosophila)
hsa-miR-219-5p	1	0	1	1	1	1	FAM178A	family with sequence similarity 178, member A
hsa-miR-219-5p	1	0	1	1	1	1	RFWD3	ring finger and WD repeat domain 3
hsa-miR-219-5p	0	0	1	1	1	1	VIMP	VCP-interacting membrane protein
hsa-miR-219-5p	0	0	1	1	1	1	ZC3H15	zinc finger CCCH-type containing 15
hsa-miR-219-5p	1	0	1	0	1	1	KLHL9	kelch-like 9 (Drosophila)
hsa-miR-219-5p	0	0	1	1	0	0	SH3BP1	SH3-domain binding protein 1
hsa-miR-219-5p	0	0	1	1	1	1	GNL3L	guanine nucleotide binding protein-like 3 (nucleolar)-like
hsa-miR-219-5p	1	0	1	1	1	1	LRRC8A	leucine rich repeat containing 8 family, member A
hsa-miR-219-5p	1	0	1	1	1	1	CYP26B1	cytochrome P450, family 26, subfamily B, polypeptide 1
hsa-miR-219-5p	0	0	1	1	1	1	EPPIN	epididymal peptidase inhibitor
hsa-miR-219-5p	0	0	1	1	1	1	TMEM27	transmembrane protein 27
hsa-miR-219-5p	1	0	1	0	1	1	SYT4	synaptotagmin IV
hsa-miR-219-5p	1	0	1	1	1	1	NLGN2	neuroligin 2
hsa-miR-219-5p	0	0	1	0	1	1	TRMT5	tRNA methyltransferase 5 homolog (S. cerevisiae)
hsa-miR-219-5p	0	0	1	1	1	1	PPP4R4	protein phosphatase 4, regulatory subunit 4
hsa-miR-219-5p	0	0	1	1	1	1	AQP9	aquaporin 9
hsa-miR-219-5p	0	0	1	1	1	1	VPS11	vacuolar protein sorting 11 homolog (S. cerevisiae)
hsa-miR-219-5p	0	0	1	1	1	1	RINT1	RAD50 interactor 1
hsa-miR-219-5p	1	0	1	1	1	1	SEC24A	SEC24 family, member A (S. cerevisiae)
hsa-miR-219-5p	1	0	1	1	1	1	ABCG4	ATP-binding cassette, sub-family G (WHITE), member 4
hsa-miR-219-5p	0	0	1	1	1	1	ACBD3	acyl-CoA binding domain containing 3
hsa-miR-219-5p	1	0	1	1	1	1	MARCH7	membrane-associated ring finger (C3HC4) 7, E3 ubiquitin protein ligase
hsa-miR-219-5p	1	0	1	1	1	1	GRAMD3	GRAM domain containing 3
hsa-miR-219-5p	1	0	1	1	1	1	HOXB8	homeobox B8
hsa-miR-219-5p	0	0	1	1	0	0	ZBED2	zinc finger, BED-type containing 2
hsa-miR-219-5p	0	0	1	1	1	1	RNF219	ring finger protein 219
hsa-miR-219-5p	0	0	1	1	1	1	ZNF606	zinc finger protein 606
hsa-miR-219-5p	1	0	1	1	1	1	OR2H1	olfactory receptor, family 2, subfamily H, member 1
hsa-miR-219-5p	1	0	1	1	1	1	SNX27	sorting nexin family member 27
hsa-miR-219-5p	1	0	1	0	1	1	TMEM47	transmembrane protein 47
hsa-miR-219-5p	0	0	1	1	1	1	KBTBD7	kelch repeat and BTB (POZ) domain containing 7
hsa-miR-219-5p	1	0	1	1	1	1	FBXO30	F-box protein 30
hsa-miR-219-5p	1	0	1	1	1	1	SLITRK6	SLIT and NTRK-like family, member 6
hsa-miR-219-5p	1	0	1	1	1	1	DNAJC14	DnaJ (Hsp40) homolog, subfamily C, member 14
hsa-miR-219-5p	1	0	1	1	1	1	DCTN5	dynactin 5 (p25)
hsa-miR-219-5p	1	0	1	1	0	0	ZC3H10	zinc finger CCCH-type containing 10
hsa-miR-219-5p	0	0	1	1	1	1	SPPL2A	signal peptide peptidase like 2A
hsa-miR-219-5p	0	0	1	1	1	1	FAM136A	family with sequence similarity 136, member A
hsa-miR-219-5p	0	0	1	1	0	0	NXF5	nuclear RNA export factor 5
hsa-miR-219-5p	1	0	1	0	1	1	PURB	purine-rich element binding protein B
hsa-miR-219-5p	1	0	1	1	1	1	SLC2A13	solute carrier family 2 (facilitated glucose transporter), member 13
hsa-miR-219-5p	1	0	1	1	1	1	ADAMTS19	ADAM metallopeptidase with thrombospondin type 1 motif, 19
hsa-miR-219-5p	1	0	1	1	1	1	KCTD12	potassium channel tetramerisation domain containing 12
hsa-miR-219-5p	0	0	1	1	0	0	PPP1R14B	protein phosphatase 1, regulatory (inhibitor) subunit 14B
hsa-miR-219-5p	1	0	1	0	1	1	CNOT6L	CCR4-NOT transcription complex, subunit 6-like
hsa-miR-219-5p	0	0	1	1	1	1	ZNF558	zinc finger protein 558
hsa-miR-219-5p	0	0	1	0	1	1	PIGM	phosphatidylinositol glycan anchor biosynthesis, class M
hsa-miR-219-5p	1	0	1	1	1	1	FAM110B	family with sequence similarity 110, member B
hsa-miR-219-5p	0	0	1	1	1	1	ATP1A3	ATPase, Na+/K+ transporting, alpha 3 polypeptide
hsa-miR-219-5p	0	0	1	1	1	1	C17orf76-AS1	C17orf76 antisense RNA 1
hsa-miR-219-5p	0	0	1	1	1	1	PIWIL4	piwi-like 4 (Drosophila)
hsa-miR-219-5p	1	0	1	0	1	1	TMEM154	transmembrane protein 154
hsa-miR-219-5p	1	0	1	1	1	1	ABCA13	ATP-binding cassette, sub-family A (ABC1), member 13
hsa-miR-219-5p	1	0	1	1	1	1	BEND6	BEN domain containing 6
hsa-miR-219-5p	0	0	1	0	0	0	FLJ32955	uncharacterized protein FLJ32955
hsa-miR-219-5p	0	0	1	0	1	1	LNX2	ligand of numb-protein X 2
hsa-miR-219-5p	1	0	1	0	1	1	PLEKHH2	pleckstrin homology domain containing, family H (with MyTH4 domain) member 2
hsa-miR-219-5p	0	0	1	1	1	1	TPH2	tryptophan hydroxylase 2
hsa-miR-219-5p	1	0	1	1	1	1	LRRTM3	leucine rich repeat transmembrane neuronal 3
hsa-miR-219-5p	0	0	1	1	1	1	HSD17B13	hydroxysteroid (17-beta) dehydrogenase 13
hsa-miR-219-5p	0	0	1	1	0	0	KRT25	keratin 25
hsa-miR-219-5p	0	0	1	1	1	1	DNAJC24	DnaJ (Hsp40) homolog, subfamily C, member 24
hsa-miR-219-5p	1	0	1	1	1	1	APAF1	apoptotic peptidase activating factor 1
hsa-miR-219-5p	0	0	1	0	1	1	NBPF11	neuroblastoma breakpoint family, member 11
hsa-miR-219-5p	1	0	1	1	1	1	KIF1B	kinesin family member 1B
hsa-miR-219-5p	1	0	1	0	1	1	HNRNPA3	heterogeneous nuclear ribonucleoprotein A3
hsa-miR-219-5p	1	0	1	1	1	1	RALGAPA1	Ral GTPase activating protein, alpha subunit 1 (catalytic)
hsa-miR-219-5p	1	0	1	1	1	1	ADAMTS6	ADAM metallopeptidase with thrombospondin type 1 motif, 6
hsa-miR-219-5p	0	0	1	0	0	0	MPZL3	myelin protein zero-like 3
hsa-miR-219-5p	1	0	1	1	0	0	HDDC3	HD domain containing 3
hsa-miR-219-5p	0	0	1	1	1	1	ILDR2	immunoglobulin-like domain containing receptor 2
hsa-miR-219-5p	0	0	1	1	1	1	SHC4	SHC (Src homology 2 domain containing) family, member 4
hsa-miR-219-5p	1	0	1	0	1	1	LURAP1L	leucine rich adaptor protein 1-like
hsa-miR-219-5p	0	0	1	1	1	1	C5orf46	chromosome 5 open reading frame 46
hsa-miR-219-5p	1	0	1	0	1	1	C17orf102	chromosome 17 open reading frame 102
hsa-miR-219-5p	1	0	1	1	1	1	TEX19	testis expressed 19
hsa-miR-219-5p	1	0	1	1	1	1	CAPN3	calpain 3, (p94)
hsa-miR-219-5p	0	0	1	0	0	0	TTTY15	testis-specific transcript, Y-linked 15 (non-protein coding)
hsa-miR-219-5p	0	0	1	0	0	0	ST13P6	suppression of tumorigenicity 13 (colon carcinoma) (Hsp70 interacting protein) pseudogene 6
hsa-miR-219-5p	0	0	1	0	0	0	H3F3AP4	H3 histone, family 3A, pseudogene 4
hsa-miR-219-5p	0	0	1	0	0	0	HNRNPA3P1	heterogeneous nuclear ribonucleoprotein A3 pseudogene 1
hsa-miR-219-5p	0	0	1	0	0	0	TCAM1P	testicular cell adhesion molecule 1 homolog (mouse), pseudogene
hsa-miR-219-5p	1	0	1	1	1	1	CBLB	Cbl proto-oncogene, E3 ubiquitin protein ligase B
hsa-miR-219-5p	0	0	1	1	1	1	BBS9	Bardet-Biedl syndrome 9
hsa-miR-219-5p	0	0	1	1	1	1	GGCT	gamma-glutamylcyclotransferase
hsa-miR-219-5p	0	0	1	1	1	1	CRY1	cryptochrome 1 (photolyase-like)
hsa-miR-219-5p	0	0	0	1	0	0	TARBP1	TAR (HIV-1) RNA binding protein 1
hsa-miR-219-5p	0	0	0	1	1	1	NFE2L3	nuclear factor (erythroid-derived 2)-like 3
hsa-miR-219-5p	0	0	0	1	1	1	KRT13	keratin 13
hsa-miR-219-5p	1	0	0	1	0	0	CAMSAP3	calmodulin regulated spectrin-associated protein family, member 3
hsa-miR-219-5p	0	0	0	1	0	0	KRT14	keratin 14
hsa-miR-219-5p	1	0	1	1	0	0	REXO1	REX1, RNA exonuclease 1 homolog (S. cerevisiae)
hsa-miR-219-5p	0	0	0	1	0	0	RPS5	ribosomal protein S5
hsa-miR-219-5p	0	0	0	1	0	0	TEKT2	tektin 2 (testicular)
hsa-miR-219-5p	0	0	0	1	0	0	IGFALS	insulin-like growth factor binding protein, acid labile subunit
hsa-miR-219-5p	0	0	0	1	1	1	GADD45B	growth arrest and DNA-damage-inducible, beta
hsa-miR-219-5p	0	0	1	1	1	1	RASL10A	RAS-like, family 10, member A
hsa-miR-219-5p	0	0	0	1	1	1	FOXRED2	FAD-dependent oxidoreductase domain containing 2
hsa-miR-219-5p	0	0	0	1	1	1	RIPK3	receptor-interacting serine-threonine kinase 3
hsa-miR-219-5p	0	0	1	1	1	1	C14orf105	chromosome 14 open reading frame 105
hsa-miR-219-5p	0	0	1	1	0	0	TRIB3	tribbles homolog 3 (Drosophila)
hsa-miR-219-5p	0	0	1	1	0	0	TIMP1	TIMP metallopeptidase inhibitor 1
hsa-miR-219-5p	0	0	1	1	1	1	RP1	retinitis pigmentosa 1 (autosomal dominant)
hsa-miR-219-5p	0	0	1	1	1	1	ARHGAP33	Rho GTPase activating protein 33
hsa-miR-219-5p	0	0	0	1	1	1	MRPL32	mitochondrial ribosomal protein L32
hsa-miR-219-5p	0	0	1	1	1	1	CCL8	chemokine (C-C motif) ligand 8
hsa-miR-219-5p	0	0	1	1	1	1	PUS3	pseudouridylate synthase 3
hsa-miR-219-5p	0	0	1	1	0	0	LTA4H	leukotriene A4 hydrolase
hsa-miR-219-5p	1	0	1	1	1	1	CNOT2	CCR4-NOT transcription complex, subunit 2
hsa-miR-219-5p	0	0	0	1	0	0	SPSB2	splA/ryanodine receptor domain and SOCS box containing 2
hsa-miR-219-5p	0	0	1	1	1	1	FBXO5	F-box protein 5
hsa-miR-219-5p	0	0	0	1	1	1	SKIV2L2	superkiller viralicidic activity 2-like 2 (S. cerevisiae)
hsa-miR-219-5p	0	0	1	1	1	1	RARS	arginyl-tRNA synthetase
hsa-miR-219-5p	1	0	0	1	0	0	CDX1	caudal type homeobox 1
hsa-miR-219-5p	0	0	0	1	0	0	NPRL2	nitrogen permease regulator-like 2 (S. cerevisiae)
hsa-miR-219-5p	0	0	0	1	0	0	CYB561D2	cytochrome b-561 domain containing 2
hsa-miR-219-5p	0	0	1	1	0	0	MDH1	malate dehydrogenase 1, NAD (soluble)
hsa-miR-219-5p	0	0	1	1	1	1	CENPA	centromere protein A
hsa-miR-219-5p	0	0	0	1	1	1	DOK1	docking protein 1, 62kDa (downstream of tyrosine kinase 1)
hsa-miR-219-5p	0	0	0	1	1	1	PASK	PAS domain containing serine/threonine kinase
hsa-miR-219-5p	0	0	1	1	0	0	MASP2	mannan-binding lectin serine peptidase 2
hsa-miR-219-5p	0	0	1	1	1	1	SPP1	secreted phosphoprotein 1
hsa-miR-219-5p	0	0	1	1	1	1	RARRES1	retinoic acid receptor responder (tazarotene induced) 1
hsa-miR-219-5p	0	0	1	1	1	1	IFT43	intraflagellar transport 43 homolog (Chlamydomonas)
hsa-miR-219-5p	1	0	1	1	1	1	AFTPH	aftiphilin
hsa-miR-219-5p	0	0	0	1	1	1	PCDHB14	protocadherin beta 14
hsa-miR-219-5p	0	0	1	1	1	1	CCDC77	coiled-coil domain containing 77
hsa-miR-219-5p	0	0	1	1	0	0	OCM	oncomodulin
hsa-miR-219-5p	0	0	1	1	1	1	HOXA7	homeobox A7
hsa-miR-219-5p	0	0	0	1	0	0	MC3R	melanocortin 3 receptor
hsa-miR-219-5p	0	0	0	1	0	0	HMGB1P1	high mobility group box 1 pseudogene 1
hsa-miR-219-5p	0	0	0	1	0	0	KATNAL2	katanin p60 subunit A-like 2
hsa-miR-219-5p	1	0	1	1	1	1	THOC2	THO complex 2
hsa-miR-219-5p	1	0	1	1	1	1	PITHD1	PITH (C-terminal proteasome-interacting domain of thioredoxin-like) domain containing 1
hsa-miR-219-5p	0	0	1	1	0	0	UROD	uroporphyrinogen decarboxylase
hsa-miR-219-5p	0	0	0	1	1	1	MPV17L2	MPV17 mitochondrial membrane protein-like 2
hsa-miR-219-5p	0	0	1	1	1	1	ZNF598	zinc finger protein 598
hsa-miR-219-5p	0	0	1	1	1	1	FGL2	fibrinogen-like 2
hsa-miR-219-5p	0	0	0	1	0	0	GSTT1	glutathione S-transferase theta 1
hsa-miR-219-5p	0	0	0	1	1	1	EAPP	E2F-associated phosphoprotein
hsa-miR-219-5p	0	0	0	1	0	0	ART1	ADP-ribosyltransferase 1
hsa-miR-219-5p	1	0	1	1	1	1	CAPRIN2	caprin family member 2
hsa-miR-219-5p	0	0	0	1	0	0	LILRA2	leukocyte immunoglobulin-like receptor, subfamily A (with TM domain), member 2
hsa-miR-219-5p	0	0	1	1	0	0	ROPN1B	rhophilin associated tail protein 1B
hsa-miR-219-5p	0	0	1	1	0	0	NXPE1	neurexophilin and PC-esterase domain family, member 1
hsa-miR-219-5p	0	0	1	1	1	1	NOL11	nucleolar protein 11
hsa-miR-219-5p	1	0	0	1	1	1	HAUS8	HAUS augmin-like complex, subunit 8
hsa-miR-219-5p	0	0	1	1	1	1	EMR3	egf-like module containing, mucin-like, hormone receptor-like 3
hsa-miR-219-5p	0	0	1	1	1	1	PSMC3IP	PSMC3 interacting protein
hsa-miR-219-5p	0	0	1	1	0	0	BARX1	BARX homeobox 1
hsa-miR-219-5p	0	0	1	1	1	1	IMMT	inner membrane protein, mitochondrial
hsa-miR-219-5p	0	0	0	1	1	1	UTP3	UTP3, small subunit (SSU) processome component, homolog (S. cerevisiae)
hsa-miR-219-5p	0	0	1	1	0	0	BRD8	bromodomain containing 8
hsa-miR-219-5p	0	0	0	1	1	1	C14orf159	chromosome 14 open reading frame 159
hsa-miR-219-5p	0	0	1	1	0	0	SPOCD1	SPOC domain containing 1
hsa-miR-219-5p	1	0	1	1	1	1	GOLM1	golgi membrane protein 1
hsa-miR-219-5p	0	0	1	1	1	1	OCM2	oncomodulin 2
hsa-miR-219-5p	0	0	0	1	1	1	CDK4	cyclin-dependent kinase 4
hsa-miR-219-5p	0	0	1	1	0	0	DCTN3	dynactin 3 (p22)
hsa-miR-219-5p	0	0	1	1	0	0	YIPF3	Yip1 domain family, member 3
hsa-miR-219-5p	0	0	1	1	0	0	GGH	gamma-glutamyl hydrolase (conjugase, folylpolygammaglutamyl hydrolase)
hsa-miR-219-5p	0	0	1	1	1	1	MMP7	matrix metallopeptidase 7 (matrilysin, uterine)
hsa-miR-219-5p	0	0	0	1	0	0	RPLP1	ribosomal protein, large, P1
hsa-miR-219-5p	0	0	1	1	1	1	MNS1	meiosis-specific nuclear structural 1
hsa-miR-219-5p	0	0	1	1	1	1	RTCA	RNA 3'-terminal phosphate cyclase
hsa-miR-219-5p	0	0	1	1	1	1	SIX3	SIX homeobox 3
hsa-miR-219-5p	0	0	1	1	1	1	SLC16A7	solute carrier family 16, member 7 (monocarboxylic acid transporter 2)
hsa-miR-219-5p	0	0	1	1	0	0	DNAH3	dynein, axonemal, heavy chain 3
hsa-miR-219-5p	0	0	0	1	0	0	DPEP1	dipeptidase 1 (renal)
hsa-miR-219-5p	0	0	1	1	1	1	CDH1	cadherin 1, type 1, E-cadherin (epithelial)
hsa-miR-219-5p	0	0	1	1	1	1	MYO9A	myosin IXA
hsa-miR-219-5p	0	0	0	1	0	0	CDHR2	cadherin-related family member 2
hsa-miR-219-5p	0	0	1	1	1	1	ERICH1	glutamate-rich 1
hsa-miR-219-5p	0	0	1	1	0	0	HAGH	hydroxyacylglutathione hydrolase
hsa-miR-219-5p	0	0	0	1	1	1	RPE65	retinal pigment epithelium-specific protein 65kDa
hsa-miR-219-5p	0	0	1	1	1	1	INVS	inversin
hsa-miR-219-5p	0	0	1	1	1	1	SLC27A6	solute carrier family 27 (fatty acid transporter), member 6
hsa-miR-219-5p	1	0	1	1	1	1	HSDL2	hydroxysteroid dehydrogenase like 2
hsa-miR-219-5p	0	0	1	1	0	0	DOK5	docking protein 5
hsa-miR-219-5p	0	0	0	1	0	0	ATP4A	ATPase, H+/K+ exchanging, alpha polypeptide
hsa-miR-219-5p	0	0	1	1	0	0	TYROBP	TYRO protein tyrosine kinase binding protein
hsa-miR-219-5p	0	0	1	1	0	0	ZBTB32	zinc finger and BTB domain containing 32
hsa-miR-219-5p	0	0	0	1	0	0	MOV10L1	Mov10l1, Moloney leukemia virus 10-like 1, homolog (mouse)
hsa-miR-219-5p	1	0	1	1	1	1	CSE1L	CSE1 chromosome segregation 1-like (yeast)
hsa-miR-219-5p	1	0	0	1	0	0	INPP4B	inositol polyphosphate-4-phosphatase, type II, 105kDa
hsa-miR-219-5p	0	0	1	1	1	1	ITGAE	integrin, alpha E (antigen CD103, human mucosal lymphocyte antigen 1; alpha polypeptide)
hsa-miR-219-5p	0	0	1	1	0	0	PALMD	palmdelphin
hsa-miR-219-5p	0	0	1	1	0	0	DESI1	desumoylating isopeptidase 1
hsa-miR-219-5p	0	0	0	1	1	1	SGOL1	shugoshin-like 1 (S. pombe)
hsa-miR-219-5p	1	0	1	1	1	1	DESI2	desumoylating isopeptidase 2
hsa-miR-219-5p	1	0	1	1	1	1	USP34	ubiquitin specific peptidase 34
hsa-miR-219-5p	0	0	1	1	1	1	MFSD1	major facilitator superfamily domain containing 1
hsa-miR-219-5p	0	0	0	1	1	1	RAB17	RAB17, member RAS oncogene family
hsa-miR-219-5p	0	0	0	1	1	1	MLPH	melanophilin
hsa-miR-219-5p	0	0	1	1	1	1	KRT24	keratin 24
hsa-miR-219-5p	0	0	0	1	0	0	KLKB1	kallikrein B, plasma (Fletcher factor) 1
hsa-miR-219-5p	0	0	0	1	1	1	POMC	proopiomelanocortin
hsa-miR-219-5p	0	0	1	1	1	1	RIOK1	RIO kinase 1 (yeast)
hsa-miR-219-5p	0	0	0	1	1	1	ANXA3	annexin A3
hsa-miR-219-5p	0	0	0	1	1	1	CEP72	centrosomal protein 72kDa
hsa-miR-219-5p	0	0	0	1	1	1	NME5	NME/NM23 family member 5
hsa-miR-219-5p	1	0	1	1	0	0	RBM27	RNA binding motif protein 27
hsa-miR-219-5p	1	0	1	1	1	1	SEMA3A	sema domain, immunoglobulin domain (Ig), short basic domain, secreted, (semaphorin) 3A
hsa-miR-219-5p	0	0	1	1	1	1	HIBADH	3-hydroxyisobutyrate dehydrogenase
hsa-miR-219-5p	0	0	1	1	1	1	SLC17A2	solute carrier family 17 (sodium phosphate), member 2
hsa-miR-219-5p	0	0	1	1	0	0	MCCC1	methylcrotonoyl-CoA carboxylase 1 (alpha)
hsa-miR-219-5p	0	0	1	1	1	1	GAL	galanin prepropeptide
hsa-miR-219-5p	0	0	1	1	1	1	ADAM22	ADAM metallopeptidase domain 22
hsa-miR-219-5p	0	0	1	1	1	1	GTF2H1	general transcription factor IIH, polypeptide 1, 62kDa
hsa-miR-219-5p	0	0	1	1	0	0	C12orf52	chromosome 12 open reading frame 52
hsa-miR-219-5p	0	0	0	1	1	1	VPS33A	vacuolar protein sorting 33 homolog A (S. cerevisiae)
hsa-miR-219-5p	1	0	1	1	1	1	TRIP11	thyroid hormone receptor interactor 11
hsa-miR-219-5p	0	0	0	1	1	1	ZNF174	zinc finger protein 174
hsa-miR-219-5p	0	0	1	1	1	1	NCOR1	nuclear receptor corepressor 1
hsa-miR-219-5p	0	0	1	1	1	1	PRPSAP2	phosphoribosyl pyrophosphate synthetase-associated protein 2
hsa-miR-219-5p	0	0	1	1	0	0	CCDC40	coiled-coil domain containing 40
hsa-miR-219-5p	0	0	1	1	1	1	KRT10	keratin 10
hsa-miR-219-5p	0	0	1	1	0	0	ZNF593	zinc finger protein 593
hsa-miR-219-5p	0	0	1	1	1	1	PSMA5	proteasome (prosome, macropain) subunit, alpha type, 5
hsa-miR-219-5p	0	0	1	1	0	0	ADCY10	adenylate cyclase 10 (soluble)
hsa-miR-219-5p	1	0	1	1	1	1	CALM2	calmodulin 2 (phosphorylase kinase, delta)
hsa-miR-219-5p	1	0	1	1	1	1	ASXL2	additional sex combs like 2 (Drosophila)
hsa-miR-219-5p	0	0	1	1	1	1	SLC20A1	solute carrier family 20 (phosphate transporter), member 1
hsa-miR-219-5p	0	0	0	1	0	0	ANKMY1	ankyrin repeat and MYND domain containing 1
hsa-miR-219-5p	0	0	0	1	0	0	FAM198A	family with sequence similarity 198, member A
hsa-miR-219-5p	0	0	0	1	1	1	PCYOX1L	prenylcysteine oxidase 1 like
hsa-miR-219-5p	0	0	1	1	1	1	ARG1	arginase, liver
hsa-miR-219-5p	0	0	0	1	0	0	TAAR6	trace amine associated receptor 6
hsa-miR-219-5p	1	0	1	1	1	1	SLC18B1	solute carrier family 18, subfamily B, member 1
hsa-miR-219-5p	0	0	1	1	0	0	PMS2P3	postmeiotic segregation increased 2 pseudogene 3
hsa-miR-219-5p	1	0	1	1	0	0	AWAT2	acyl-CoA wax alcohol acyltransferase 2
hsa-miR-219-5p	0	0	1	1	0	0	IL2RG	interleukin 2 receptor, gamma
hsa-miR-219-5p	0	0	1	1	1	1	UPF3B	UPF3 regulator of nonsense transcripts homolog B (yeast)
hsa-miR-219-5p	0	0	1	1	1	1	SLC43A1	solute carrier family 43, member 1
hsa-miR-219-5p	0	0	1	1	0	0	RPS3	ribosomal protein S3
hsa-miR-219-5p	0	0	0	1	0	0	ROM1	retinal outer segment membrane protein 1
hsa-miR-219-5p	0	0	0	1	0	0	DUSP15	dual specificity phosphatase 15
hsa-miR-219-5p	0	0	1	1	1	1	DST	dystonin
hsa-miR-219-5p	0	0	0	1	1	1	NVL	nuclear VCP-like
hsa-miR-219-5p	1	0	1	1	1	1	TNFSF4	tumor necrosis factor (ligand) superfamily, member 4
hsa-miR-219-5p	0	0	1	1	1	1	CCDC75	coiled-coil domain containing 75
hsa-miR-219-5p	1	0	1	1	1	1	RIT2	Ras-like without CAAX 2
hsa-miR-219-5p	1	0	1	1	1	1	PTH	parathyroid hormone
hsa-miR-219-5p	0	0	0	1	1	1	ZNF551	zinc finger protein 551
hsa-miR-219-5p	1	0	1	1	1	1	SPARCL1	SPARC-like 1 (hevin)
hsa-miR-219-5p	0	0	0	1	1	1	CENPH	centromere protein H
hsa-miR-219-5p	0	0	0	1	0	0	C16orf74	chromosome 16 open reading frame 74
hsa-miR-219-5p	0	0	0	1	0	0	OR4K1	olfactory receptor, family 4, subfamily K, member 1
hsa-miR-219-5p	0	0	1	1	1	1	SETD9	SET domain containing 9
hsa-miR-219-5p	0	0	0	1	0	0	CYP2C18	cytochrome P450, family 2, subfamily C, polypeptide 18
hsa-miR-219-5p	0	0	0	1	0	0	RBM45	RNA binding motif protein 45
hsa-miR-219-5p	0	0	0	1	0	0	MED7	mediator complex subunit 7
hsa-miR-219-5p	1	0	1	1	1	1	ADAMTSL3	ADAMTS-like 3
hsa-miR-219-5p	0	0	0	1	0	0	CLDN17	claudin 17
hsa-miR-219-5p	0	0	1	1	1	1	TDRD9	tudor domain containing 9
hsa-miR-219-5p	1	0	1	1	1	1	ATAD2	ATPase family, AAA domain containing 2
hsa-miR-219-5p	0	0	1	1	1	1	FBXO32	F-box protein 32
hsa-miR-219-5p	0	0	1	1	0	0	FRRS1	ferric-chelate reductase 1
hsa-miR-219-5p	0	0	1	1	1	1	MPV17L	MPV17 mitochondrial membrane protein-like
hsa-miR-219-5p	0	0	0	1	1	1	FANCD2	Fanconi anemia, complementation group D2
hsa-miR-219-5p	0	0	0	1	0	0	TIMP4	TIMP metallopeptidase inhibitor 4
hsa-miR-219-5p	0	0	1	1	1	1	HTR5A	5-hydroxytryptamine (serotonin) receptor 5A, G protein-coupled
hsa-miR-219-5p	0	0	1	1	0	0	LCA5L	Leber congenital amaurosis 5-like
hsa-miR-219-5p	0	0	1	1	1	1	PREX2	phosphatidylinositol-3,4,5-trisphosphate-dependent Rac exchange factor 2
hsa-miR-219-5p	0	0	1	1	0	0	MMEL1	membrane metallo-endopeptidase-like 1
hsa-miR-219-5p	0	0	0	1	0	0	PIK3CB	phosphatidylinositol-4,5-bisphosphate 3-kinase, catalytic subunit beta
hsa-miR-219-5p	0	0	1	1	1	1	MED8	mediator complex subunit 8
hsa-miR-219-5p	1	0	1	1	1	1	CPNE2	copine II
hsa-miR-219-5p	0	0	1	1	1	1	TPPP3	tubulin polymerization-promoting protein family member 3
hsa-miR-219-5p	0	0	0	1	0	0	OR3A3	olfactory receptor, family 3, subfamily A, member 3
hsa-miR-219-5p	0	0	0	1	0	0	FTCD	formiminotransferase cyclodeaminase
hsa-miR-219-5p	0	0	0	1	1	1	ZNF20	zinc finger protein 20
hsa-miR-219-5p	0	0	1	1	0	0	PGLYRP2	peptidoglycan recognition protein 2
hsa-miR-219-5p	0	0	1	1	0	0	THAP8	THAP domain containing 8
hsa-miR-219-5p	1	0	1	1	1	1	PLEKHH3	pleckstrin homology domain containing, family H (with MyTH4 domain) member 3
hsa-miR-219-5p	0	0	0	1	0	0	SDR9C7	short chain dehydrogenase/reductase family 9C, member 7
hsa-miR-219-5p	0	0	0	1	0	0	SYCE2	synaptonemal complex central element protein 2
hsa-miR-219-5p	0	0	1	1	0	0	PDZK1IP1	PDZK1 interacting protein 1
hsa-miR-219-5p	0	0	1	1	0	0	PCDP1	primary ciliary dyskinesia protein 1
hsa-miR-219-5p	0	0	1	1	1	1	ATP13A4	ATPase type 13A4
hsa-miR-219-5p	0	0	0	1	0	0	RNPEP	arginyl aminopeptidase (aminopeptidase B)
hsa-miR-219-5p	0	0	0	1	0	0	DRD3	dopamine receptor D3
hsa-miR-219-5p	0	0	1	1	0	0	PSMD6	proteasome (prosome, macropain) 26S subunit, non-ATPase, 6
hsa-miR-219-5p	0	0	0	1	1	1	CLRN1	clarin 1
hsa-miR-219-5p	0	0	1	1	0	0	RPL39L	ribosomal protein L39-like
hsa-miR-219-5p	0	0	0	1	0	0	S100P	S100 calcium binding protein P
hsa-miR-219-5p	0	0	0	1	1	1	WDR65	WD repeat domain 65
hsa-miR-219-5p	0	0	0	1	1	1	MFSD8	major facilitator superfamily domain containing 8
hsa-miR-219-5p	0	0	0	1	0	0	AGXT2L1	alanine-glyoxylate aminotransferase 2-like 1
hsa-miR-219-5p	0	0	1	1	1	1	HMGB2	high mobility group box 2
hsa-miR-219-5p	0	0	1	1	1	1	ZNF474	zinc finger protein 474
hsa-miR-219-5p	0	0	1	1	1	1	RPS23	ribosomal protein S23
hsa-miR-219-5p	0	0	0	1	0	0	TLR3	toll-like receptor 3
hsa-miR-219-5p	1	0	1	1	1	1	KIAA1429	KIAA1429
hsa-miR-219-5p	0	0	1	1	0	0	WNK2	WNK lysine deficient protein kinase 2
hsa-miR-219-5p	0	0	1	1	1	1	RPL10L	ribosomal protein L10-like
hsa-miR-219-5p	1	0	1	1	1	1	NEMF	nuclear export mediator factor
hsa-miR-219-5p	0	0	1	1	1	1	PRPF18	PRP18 pre-mRNA processing factor 18 homolog (S. cerevisiae)
hsa-miR-219-5p	0	0	1	1	1	1	C12orf50	chromosome 12 open reading frame 50
hsa-miR-219-5p	0	0	0	1	0	0	IFI27L1	interferon, alpha-inducible protein 27-like 1
hsa-miR-219-5p	0	0	1	1	1	1	MRPL43	mitochondrial ribosomal protein L43
hsa-miR-219-5p	0	0	0	1	0	0	HPS6	Hermansky-Pudlak syndrome 6
hsa-miR-219-5p	0	0	0	1	1	1	SERPINB2	serpin peptidase inhibitor, clade B (ovalbumin), member 2
hsa-miR-219-5p	0	0	1	1	1	1	CPLX4	complexin 4
hsa-miR-219-5p	0	0	1	1	1	1	KIF7	kinesin family member 7
hsa-miR-219-5p	0	0	1	1	0	0	MESP1	mesoderm posterior 1 homolog (mouse)
hsa-miR-219-5p	0	0	1	1	0	0	SLC26A10	solute carrier family 26, member 10
hsa-miR-219-5p	0	0	1	1	1	1	ARHGEF25	Rho guanine nucleotide exchange factor (GEF) 25
hsa-miR-219-5p	1	0	1	1	1	1	C18orf34	chromosome 18 open reading frame 34
hsa-miR-219-5p	0	0	1	1	1	1	GOLGA6L9	golgin A6 family-like 9
hsa-miR-219-5p	0	0	0	1	0	0	ICT1	immature colon carcinoma transcript 1
hsa-miR-219-5p	0	0	0	1	0	0	TK1	thymidine kinase 1, soluble
hsa-miR-219-5p	0	0	0	1	0	0	SPSB3	splA/ryanodine receptor domain and SOCS box containing 3
hsa-miR-219-5p	1	0	1	1	1	1	SF3B3	splicing factor 3b, subunit 3, 130kDa
hsa-miR-219-5p	0	0	1	1	0	0	BUB1	budding uninhibited by benzimidazoles 1 homolog (yeast)
hsa-miR-219-5p	1	0	1	1	0	0	RAB24	RAB24, member RAS oncogene family
hsa-miR-219-5p	0	0	0	1	0	0	OR2B2	olfactory receptor, family 2, subfamily B, member 2
hsa-miR-219-5p	0	0	1	1	1	1	PRKCB	protein kinase C, beta
hsa-miR-219-5p	0	0	0	1	1	1	HINT1	histidine triad nucleotide binding protein 1
hsa-miR-219-5p	0	0	1	1	1	1	FRMPD4	FERM and PDZ domain containing 4
hsa-miR-219-5p	0	0	0	1	0	0	OR1A1	olfactory receptor, family 1, subfamily A, member 1
hsa-miR-219-5p	1	0	1	1	1	1	RNASE6	ribonuclease, RNase A family, k6
hsa-miR-219-5p	0	0	0	1	0	0	ASL	argininosuccinate lyase
hsa-miR-219-5p	1	0	1	1	0	0	TSPAN5	tetraspanin 5
hsa-miR-219-5p	0	0	0	1	1	1	SLC9C1	solute carrier family 9, subfamily C (Na+-transporting carboxylic acid decarboxylase), member 1
hsa-miR-219-5p	0	0	1	1	0	0	MTBP	Mdm2, transformed 3T3 cell double minute 2, p53 binding protein (mouse) binding protein, 104kDa
hsa-miR-219-5p	1	0	1	1	1	1	PTGDR	prostaglandin D2 receptor (DP)
hsa-miR-219-5p	1	0	1	1	1	1	ZNF608	zinc finger protein 608
hsa-miR-219-5p	1	0	1	1	1	1	CEP120	centrosomal protein 120kDa
hsa-miR-219-5p	0	0	1	1	1	1	CXCL11	chemokine (C-X-C motif) ligand 11
hsa-miR-219-5p	0	0	1	1	1	1	MPLKIP	M-phase specific PLK1 interacting protein
hsa-miR-219-5p	0	0	1	1	0	0	C3orf78	chromosome 3 open reading frame 78
hsa-miR-219-5p	0	0	1	1	1	1	CMTM8	CKLF-like MARVEL transmembrane domain containing 8
hsa-miR-219-5p	0	0	0	1	1	1	C3AR1	complement component 3a receptor 1
hsa-miR-219-5p	0	0	0	1	0	0	RNASE8	ribonuclease, RNase A family, 8
hsa-miR-219-5p	1	0	0	1	1	1	FAM57A	family with sequence similarity 57, member A
hsa-miR-219-5p	1	0	1	1	1	1	PHC3	polyhomeotic homolog 3 (Drosophila)
hsa-miR-219-5p	0	0	1	1	1	1	LINGO2	leucine rich repeat and Ig domain containing 2
hsa-miR-219-5p	1	0	1	1	0	0	ASPHD1	aspartate beta-hydroxylase domain containing 1
hsa-miR-219-5p	0	0	1	1	1	1	LINC00478	long intergenic non-protein coding RNA 478
hsa-miR-219-5p	0	0	0	1	0	0	OR10H5	olfactory receptor, family 10, subfamily H, member 5
hsa-miR-219-5p	1	0	1	1	1	1	IQCA1	IQ motif containing with AAA domain 1
hsa-miR-219-5p	0	0	0	1	1	1	LOC729317	voltage-dependent anion channel 2 pseudogene
hsa-miR-219-5p	0	0	1	1	0	0	SPTBN2	spectrin, beta, non-erythrocytic 2
hsa-miR-219-5p	0	0	0	1	1	1	EPS8L1	EPS8-like 1
hsa-miR-219-5p	0	0	0	1	0	0	ATP8B3	ATPase, aminophospholipid transporter, class I, type 8B, member 3
hsa-miR-219-5p	1	0	1	1	1	1	TBC1D8B	TBC1 domain family, member 8B (with GRAM domain)
hsa-miR-219-5p	0	0	1	1	0	0	UCP2	uncoupling protein 2 (mitochondrial, proton carrier)
hsa-miR-219-5p	0	0	0	1	1	1	SULT1B1	sulfotransferase family, cytosolic, 1B, member 1
hsa-miR-219-5p	1	0	1	1	1	1	NEFH	neurofilament, heavy polypeptide
hsa-miR-219-5p	1	0	1	1	0	0	CSRP2	cysteine and glycine-rich protein 2
hsa-miR-219-5p	0	0	1	1	0	0	PARL	presenilin associated, rhomboid-like
hsa-miR-219-5p	0	0	1	1	1	1	LSM1	LSM1 homolog, U6 small nuclear RNA associated (S. cerevisiae)
hsa-miR-219-5p	0	0	1	1	1	1	FAM71D	family with sequence similarity 71, member D
hsa-miR-219-5p	0	0	1	1	0	0	SCFD1	sec1 family domain containing 1
hsa-miR-219-5p	0	0	0	1	1	1	FNDC9	fibronectin type III domain containing 9
hsa-miR-219-5p	0	0	1	1	0	0	MRPL46	mitochondrial ribosomal protein L46
hsa-miR-219-5p	1	0	1	1	1	1	AGGF1	angiogenic factor with G patch and FHA domains 1
hsa-miR-219-5p	0	0	0	1	0	0	LOC100129455	uncharacterized LOC100129455
hsa-miR-219-5p	0	0	1	1	1	1	KLF8	Kruppel-like factor 8
hsa-miR-219-5p	0	0	1	1	0	0	AP4S1	adaptor-related protein complex 4, sigma 1 subunit
hsa-miR-219-5p	1	0	1	1	1	1	AQP11	aquaporin 11
hsa-miR-219-5p	0	0	1	1	0	0	ACAD10	acyl-CoA dehydrogenase family, member 10
hsa-miR-219-5p	1	0	1	1	0	0	RELL1	RELT-like 1
hsa-miR-219-5p	0	0	0	1	0	0	NOP14	NOP14 nucleolar protein homolog (yeast)
hsa-miR-219-5p	0	0	0	1	0	0	FUT7	fucosyltransferase 7 (alpha (1,3) fucosyltransferase)
hsa-miR-219-5p	1	0	0	1	1	1	RECQL	RecQ protein-like (DNA helicase Q1-like)
hsa-miR-219-5p	0	0	1	1	0	0	GARNL3	GTPase activating Rap/RanGAP domain-like 3
hsa-miR-219-5p	0	0	0	1	0	0	MATK	megakaryocyte-associated tyrosine kinase
hsa-miR-219-5p	0	0	1	1	0	0	LSM10	LSM10, U7 small nuclear RNA associated
hsa-miR-219-5p	0	0	0	1	0	0	MAP7D3	MAP7 domain containing 3
hsa-miR-219-5p	0	0	1	1	1	1	CCDC89	coiled-coil domain containing 89
hsa-miR-219-5p	0	0	1	1	0	0	TTC9C	tetratricopeptide repeat domain 9C
hsa-miR-219-5p	0	0	0	1	0	0	OR56B4	olfactory receptor, family 56, subfamily B, member 4
hsa-miR-219-5p	0	0	1	1	0	0	PANK2	pantothenate kinase 2
hsa-miR-219-5p	1	0	1	1	1	1	GBA3	glucosidase, beta, acid 3 (cytosolic)
hsa-miR-219-5p	0	0	0	1	0	0	C3orf32	chromosome 3 open reading frame 32
hsa-miR-219-5p	1	0	1	1	1	1	DISC1	disrupted in schizophrenia 1
hsa-miR-219-5p	0	0	0	1	0	0	C2orf73	chromosome 2 open reading frame 73
hsa-miR-219-5p	0	0	0	1	0	0	RRH	retinal pigment epithelium-derived rhodopsin homolog
hsa-miR-219-5p	0	0	1	1	1	1	ZNF318	zinc finger protein 318
hsa-miR-219-5p	0	0	1	1	0	0	DNASE1L3	deoxyribonuclease I-like 3
hsa-miR-219-5p	1	0	1	1	1	1	IGSF3	immunoglobulin superfamily, member 3
hsa-miR-219-5p	0	0	1	1	1	1	ZDHHC22	zinc finger, DHHC-type containing 22
hsa-miR-219-5p	0	0	0	1	1	1	ZNF454	zinc finger protein 454
hsa-miR-219-5p	1	0	1	1	1	1	EZH2	enhancer of zeste homolog 2 (Drosophila)
hsa-miR-219-5p	0	0	1	1	1	1	ALS2CR8	amyotrophic lateral sclerosis 2 (juvenile) chromosome region, candidate 8
hsa-miR-219-5p	0	0	1	1	1	1	RAB39A	RAB39A, member RAS oncogene family
hsa-miR-219-5p	0	0	1	1	0	0	RPLP2	ribosomal protein, large, P2
hsa-miR-219-5p	0	0	0	1	0	0	SHARPIN	SHANK-associated RH domain interactor
hsa-miR-219-5p	0	0	1	1	1	1	NCBP2	nuclear cap binding protein subunit 2, 20kDa
hsa-miR-219-5p	1	0	1	1	0	0	SENP3	SUMO1/sentrin/SMT3 specific peptidase 3
hsa-miR-219-5p	0	0	1	1	1	1	CLK1	CDC-like kinase 1
hsa-miR-219-5p	0	0	1	1	0	0	VARS2	valyl-tRNA synthetase 2, mitochondrial (putative)
hsa-miR-219-5p	0	0	0	1	0	0	OR51G1	olfactory receptor, family 51, subfamily G, member 1
hsa-miR-219-5p	0	0	0	1	0	0	DNPEP	aspartyl aminopeptidase
hsa-miR-219-5p	0	0	1	1	0	0	NDUFV1	NADH dehydrogenase (ubiquinone) flavoprotein 1, 51kDa
hsa-miR-219-5p	0	0	1	1	1	1	KCNH5	potassium voltage-gated channel, subfamily H (eag-related), member 5
hsa-miR-219-5p	0	0	1	1	0	0	DUOXA2	dual oxidase maturation factor 2
hsa-miR-219-5p	1	0	0	1	1	1	ZNRF2	zinc and ring finger 2
hsa-miR-219-5p	0	0	0	1	0	0	HTR1A	5-hydroxytryptamine (serotonin) receptor 1A, G protein-coupled
hsa-miR-219-5p	0	0	1	1	1	1	EDNRA	endothelin receptor type A
hsa-miR-219-5p	0	0	1	1	1	1	GSG1	germ cell associated 1
hsa-miR-219-5p	1	0	1	1	0	0	FOXP2	forkhead box P2
hsa-miR-219-5p	0	0	1	1	0	0	IQUB	IQ motif and ubiquitin domain containing
hsa-miR-219-5p	0	0	1	1	0	0	ODF3	outer dense fiber of sperm tails 3
hsa-miR-219-5p	0	0	1	1	1	1	HNRNPM	heterogeneous nuclear ribonucleoprotein M
hsa-miR-219-5p	0	0	1	1	1	1	MARVELD2	MARVEL domain containing 2
hsa-miR-219-5p	1	0	1	1	1	1	FRAS1	Fraser syndrome 1
hsa-miR-219-5p	0	0	1	1	1	1	ARHGEF4	Rho guanine nucleotide exchange factor (GEF) 4
hsa-miR-219-5p	1	0	0	1	0	0	KRT17	keratin 17
hsa-miR-219-5p	0	0	1	1	1	1	LRRC3B	leucine rich repeat containing 3B
hsa-miR-219-5p	0	0	0	1	1	1	ZNF274	zinc finger protein 274
hsa-miR-219-5p	0	0	1	1	1	1	FAM9B	family with sequence similarity 9, member B
hsa-miR-219-5p	0	0	1	1	0	0	CCDC107	coiled-coil domain containing 107
hsa-miR-219-5p	0	0	1	1	1	1	C22orf25	chromosome 22 open reading frame 25
hsa-miR-219-5p	0	0	0	1	1	1	ZNF84	zinc finger protein 84
hsa-miR-219-5p	0	0	0	1	0	0	FAM65C	family with sequence similarity 65, member C
hsa-miR-219-5p	0	0	1	1	0	0	PTRHD1	peptidyl-tRNA hydrolase domain containing 1
hsa-miR-219-5p	0	0	1	1	0	0	PCP4	Purkinje cell protein 4
hsa-miR-219-5p	0	0	1	1	1	1	CAPS2	calcyphosine 2
hsa-miR-219-5p	1	0	1	1	1	1	PTPN21	protein tyrosine phosphatase, non-receptor type 21
hsa-miR-219-5p	1	0	1	1	0	0	ARMCX2	armadillo repeat containing, X-linked 2
hsa-miR-219-5p	0	0	0	1	1	1	NOP10	NOP10 ribonucleoprotein homolog (yeast)
hsa-miR-219-5p	0	0	0	1	0	0	RP1L1	retinitis pigmentosa 1-like 1
hsa-miR-219-5p	0	0	1	1	0	0	C10orf120	chromosome 10 open reading frame 120
hsa-miR-219-5p	0	0	1	1	0	0	PRR23B	proline rich 23B
hsa-miR-219-5p	0	0	0	1	0	0	GDPGP1	GDP-D-glucose phosphorylase 1
hsa-miR-219-5p	0	0	0	1	1	1	C6orf58	chromosome 6 open reading frame 58
hsa-miR-219-5p	0	0	1	1	1	1	NEXN	nexilin (F actin binding protein)
hsa-miR-219-5p	0	0	1	1	1	1	C10orf107	chromosome 10 open reading frame 107
hsa-miR-219-5p	0	0	1	1	1	1	F8	coagulation factor VIII, procoagulant component
hsa-miR-219-5p	0	0	1	1	1	1	MTCP1	mature T-cell proliferation 1
hsa-miR-219-5p	0	0	1	1	0	0	USP51	ubiquitin specific peptidase 51
hsa-miR-219-5p	0	0	0	1	1	1	SNX20	sorting nexin 20
hsa-miR-219-5p	0	0	1	1	0	0	KRBA2	KRAB-A domain containing 2
hsa-miR-219-5p	0	0	1	1	0	0	DRG1	developmentally regulated GTP binding protein 1
hsa-miR-219-5p	0	0	1	1	1	1	EFCAB13	EF-hand calcium binding domain 13
hsa-miR-219-5p	0	0	1	1	0	0	C1orf186	chromosome 1 open reading frame 186
hsa-miR-219-5p	1	0	1	1	0	0	GPR173	G protein-coupled receptor 173
hsa-miR-219-5p	0	0	1	1	0	0	WDR53	WD repeat domain 53
hsa-miR-219-5p	1	0	1	1	1	1	ATL3	atlastin GTPase 3
hsa-miR-219-5p	0	0	0	1	0	0	FAM200A	family with sequence similarity 200, member A
hsa-miR-219-5p	0	0	1	1	1	1	CCDC172	coiled-coil domain containing 172
hsa-miR-219-5p	0	0	0	1	0	0	TSSC4	tumor suppressing subtransferable candidate 4
hsa-miR-219-5p	0	0	1	1	0	0	MT1F	metallothionein 1F
hsa-miR-219-5p	0	0	0	1	0	0	ZNF578	zinc finger protein 578
hsa-miR-219-5p	0	0	0	1	1	1	ZNF528	zinc finger protein 528
hsa-miR-219-5p	1	0	1	1	1	1	RSBN1L	round spermatid basic protein 1-like
hsa-miR-219-5p	0	0	1	1	0	0	HEATR4	HEAT repeat containing 4
hsa-miR-219-5p	1	0	1	1	1	1	MARK3	MAP/microtubule affinity-regulating kinase 3
hsa-miR-219-5p	0	0	1	1	0	0	ADAM7	ADAM metallopeptidase domain 7
hsa-miR-219-5p	0	0	0	1	0	0	OR5D14	olfactory receptor, family 5, subfamily D, member 14
hsa-miR-219-5p	0	0	1	1	0	0	MORN4	MORN repeat containing 4
hsa-miR-219-5p	0	0	0	1	0	0	TMEM39B	transmembrane protein 39B
hsa-miR-219-5p	0	0	1	1	0	0	ACOT9	acyl-CoA thioesterase 9
hsa-miR-219-5p	0	0	1	1	1	1	MFSD11	major facilitator superfamily domain containing 11
hsa-miR-219-5p	0	0	0	1	0	0	FTSJ3	FtsJ homolog 3 (E. coli)
hsa-miR-219-5p	0	0	1	1	0	0	IL1F10	interleukin 1 family, member 10 (theta)
hsa-miR-219-5p	1	0	1	1	1	1	SUPT7L	suppressor of Ty 7 (S. cerevisiae)-like
hsa-miR-219-5p	1	0	1	1	1	1	SPTLC1	serine palmitoyltransferase, long chain base subunit 1
hsa-miR-219-5p	0	0	0	1	0	0	HIST1H1T	histone cluster 1, H1t
hsa-miR-219-5p	0	0	1	1	1	1	QPCT	glutaminyl-peptide cyclotransferase
hsa-miR-219-5p	1	0	1	1	1	1	SLC25A15	solute carrier family 25 (mitochondrial carrier; ornithine transporter) member 15
hsa-miR-219-5p	0	0	1	1	1	1	PARK7	parkinson protein 7
hsa-miR-219-5p	0	0	1	1	1	1	PSPC1	paraspeckle component 1
hsa-miR-219-5p	0	0	1	1	1	1	RPL14	ribosomal protein L14
hsa-miR-219-5p	0	0	1	1	1	1	ZNF721	zinc finger protein 721
hsa-miR-219-5p	1	0	1	1	1	1	SRFBP1	serum response factor binding protein 1
hsa-miR-219-5p	1	0	1	1	1	1	PHKA1	phosphorylase kinase, alpha 1 (muscle)
hsa-miR-219-5p	0	0	1	1	1	1	ZCCHC13	zinc finger, CCHC domain containing 13
hsa-miR-219-5p	0	0	1	1	1	1	ETV7	ets variant 7
hsa-miR-219-5p	0	0	1	1	0	0	HMX2	H6 family homeobox 2
hsa-miR-219-5p	0	0	1	1	1	1	VRK2	vaccinia related kinase 2
hsa-miR-219-5p	0	0	0	1	1	1	DDC	dopa decarboxylase (aromatic L-amino acid decarboxylase)
hsa-miR-219-5p	0	0	1	1	1	1	MCM3	minichromosome maintenance complex component 3
hsa-miR-219-5p	0	0	0	1	0	0	ZSCAN16	zinc finger and SCAN domain containing 16
hsa-miR-219-5p	0	0	1	1	1	1	UTS2D	urotensin 2 domain containing
hsa-miR-219-5p	0	0	1	1	0	0	METTL23	methyltransferase like 23
hsa-miR-219-5p	0	0	0	1	1	1	MYL1	myosin, light chain 1, alkali; skeletal, fast
hsa-miR-219-5p	0	0	1	1	0	0	CIR1	corepressor interacting with RBPJ, 1
hsa-miR-219-5p	0	0	0	1	0	0	CLDN14	claudin 14
hsa-miR-219-5p	1	0	1	1	1	1	SAT1	spermidine/spermine N1-acetyltransferase 1
hsa-miR-219-5p	1	0	1	1	1	1	WDR20	WD repeat domain 20
hsa-miR-219-5p	1	0	1	1	1	1	CTNNA2	catenin (cadherin-associated protein), alpha 2
hsa-miR-219-5p	1	0	1	1	1	1	N4BP2L1	NEDD4 binding protein 2-like 1
hsa-miR-219-5p	0	0	0	1	1	1	DOCK2	dedicator of cytokinesis 2
hsa-miR-219-5p	0	0	0	1	0	0	CDHR4	cadherin-related family member 4
hsa-miR-219-5p	1	0	1	1	1	1	MKL2	MKL/myocardin-like 2
hsa-miR-219-5p	0	0	1	1	1	1	VDAC2	voltage-dependent anion channel 2
hsa-miR-219-5p	0	0	1	1	1	1	LRRC27	leucine rich repeat containing 27
hsa-miR-219-5p	0	0	1	1	0	0	TRPV1	transient receptor potential cation channel, subfamily V, member 1
hsa-miR-219-5p	0	0	1	1	1	1	CC2D2B	coiled-coil and C2 domain containing 2B
hsa-miR-219-5p	1	0	0	1	1	1	EGFR	epidermal growth factor receptor
hsa-miR-219-5p	0	0	1	1	0	0	CCDC15	coiled-coil domain containing 15
hsa-miR-219-5p	0	0	0	1	0	0	SDSL	serine dehydratase-like
hsa-miR-219-5p	0	0	0	1	0	0	DHRS7B	dehydrogenase/reductase (SDR family) member 7B
hsa-miR-219-5p	0	0	0	1	0	0	MKKS	McKusick-Kaufman syndrome
hsa-miR-219-5p	0	0	0	1	0	0	SRRT	serrate RNA effector molecule homolog (Arabidopsis)
hsa-miR-219-5p	0	0	1	1	1	1	GMPR2	guanosine monophosphate reductase 2
hsa-miR-219-5p	0	0	1	1	0	0	C9orf9	chromosome 9 open reading frame 9
hsa-miR-219-5p	0	0	1	1	0	0	ASS1	argininosuccinate synthase 1
hsa-miR-219-5p	0	0	0	1	0	0	RHBDL1	rhomboid, veinlet-like 1 (Drosophila)
hsa-miR-219-5p	0	0	1	1	1	1	ARPC5L	actin related protein 2/3 complex, subunit 5-like
hsa-miR-219-5p	0	0	0	1	0	0	PRAMEF19	PRAME family member 19
hsa-miR-219-5p	1	0	1	1	1	1	SKP1	S-phase kinase-associated protein 1
hsa-miR-219-5p	0	0	1	1	1	1	PLA2G4C	phospholipase A2, group IVC (cytosolic, calcium-independent)
hsa-miR-219-5p	0	0	1	1	1	1	RFPL1	ret finger protein-like 1
hsa-miR-219-5p	0	0	1	1	1	1	GIN1	gypsy retrotransposon integrase 1
hsa-miR-219-5p	1	0	1	1	1	1	CCNG2	cyclin G2
hsa-miR-219-5p	0	0	0	1	1	1	CYP3A4	cytochrome P450, family 3, subfamily A, polypeptide 4
hsa-miR-219-5p	0	0	1	1	0	0	GAGE1	G antigen 1
hsa-miR-219-5p	0	0	0	1	1	1	ARSG	arylsulfatase G
hsa-miR-219-5p	1	0	0	1	0	0	CARD11	caspase recruitment domain family, member 11
hsa-miR-219-5p	1	0	1	1	1	1	DIAPH2	diaphanous homolog 2 (Drosophila)
hsa-miR-219-5p	1	0	1	1	1	1	LSM14A	LSM14A, SCD6 homolog A (S. cerevisiae)
hsa-miR-219-5p	1	0	0	1	1	1	ZNF614	zinc finger protein 614
hsa-miR-219-5p	0	0	0	1	0	0	ZNF432	zinc finger protein 432
hsa-miR-219-5p	0	0	1	1	0	0	ACOX3	acyl-CoA oxidase 3, pristanoyl
hsa-miR-219-5p	0	0	1	1	0	0	PDXP	pyridoxal (pyridoxine, vitamin B6) phosphatase
hsa-miR-219-5p	0	0	0	1	0	0	HVCN1	hydrogen voltage-gated channel 1
hsa-miR-219-5p	1	0	1	1	1	1	IGF2R	insulin-like growth factor 2 receptor
hsa-miR-219-5p	1	0	1	1	0	0	RASSF1	Ras association (RalGDS/AF-6) domain family member 1
hsa-miR-219-5p	0	0	0	1	0	0	TTC30B	tetratricopeptide repeat domain 30B
hsa-miR-219-5p	0	0	0	1	1	1	TMEM79	transmembrane protein 79
hsa-miR-219-5p	0	0	1	1	1	1	AP1B1	adaptor-related protein complex 1, beta 1 subunit
hsa-miR-219-5p	0	0	0	1	1	1	DCLRE1C	DNA cross-link repair 1C
hsa-miR-219-5p	0	0	1	1	1	1	CDK5RAP1	CDK5 regulatory subunit associated protein 1
hsa-miR-219-5p	0	0	1	1	0	0	FAM3B	family with sequence similarity 3, member B
hsa-miR-219-5p	1	0	1	1	1	1	HMGCLL1	3-hydroxymethyl-3-methylglutaryl-CoA lyase-like 1
hsa-miR-219-5p	0	0	1	1	0	0	RTP2	receptor (chemosensory) transporter protein 2
hsa-miR-219-5p	1	0	1	1	1	1	PCSK6	proprotein convertase subtilisin/kexin type 6
hsa-miR-219-5p	0	0	1	1	0	0	TOMM7	translocase of outer mitochondrial membrane 7 homolog (yeast)
hsa-miR-219-5p	0	0	1	1	1	1	ATP5S	ATP synthase, H+ transporting, mitochondrial Fo complex, subunit s (factor B)
hsa-miR-219-5p	0	0	1	1	0	0	SIPA1L1	signal-induced proliferation-associated 1 like 1
hsa-miR-219-5p	1	0	1	1	0	0	ADC	arginine decarboxylase
hsa-miR-219-5p	1	0	1	1	1	1	MRPL19	mitochondrial ribosomal protein L19
hsa-miR-219-5p	0	0	1	1	0	0	PLCG2	phospholipase C, gamma 2 (phosphatidylinositol-specific)
hsa-miR-219-5p	1	0	1	1	1	1	SPTLC3	serine palmitoyltransferase, long chain base subunit 3
hsa-miR-219-5p	0	0	0	1	0	0	HAPLN3	hyaluronan and proteoglycan link protein 3
hsa-miR-219-5p	0	0	0	1	0	0	OR6K2	olfactory receptor, family 6, subfamily K, member 2
hsa-miR-219-5p	0	0	0	1	1	1	ZNF681	zinc finger protein 681
hsa-miR-219-5p	0	0	1	1	0	0	FAM48A	family with sequence similarity 48, member A
hsa-miR-219-5p	0	0	1	1	1	1	LRRCC1	leucine rich repeat and coiled-coil centrosomal protein 1
hsa-miR-219-5p	1	0	1	1	1	1	PCMTD1	protein-L-isoaspartate (D-aspartate) O-methyltransferase domain containing 1
hsa-miR-219-5p	0	0	1	1	0	0	ABHD14A	abhydrolase domain containing 14A
hsa-miR-219-5p	0	0	1	1	0	0	CCL28	chemokine (C-C motif) ligand 28
hsa-miR-219-5p	1	0	1	1	1	1	PTGER3	prostaglandin E receptor 3 (subtype EP3)
hsa-miR-219-5p	0	0	0	1	0	0	OR10Z1	olfactory receptor, family 10, subfamily Z, member 1
hsa-miR-219-5p	0	0	1	1	0	0	CTNNBL1	catenin, beta like 1
hsa-miR-219-5p	0	0	0	1	1	1	C16orf59	chromosome 16 open reading frame 59
hsa-miR-219-5p	0	0	1	1	0	0	FAM19A3	family with sequence similarity 19 (chemokine (C-C motif)-like), member A3
hsa-miR-219-5p	1	0	1	1	0	0	PLXNB3	plexin B3
hsa-miR-219-5p	0	0	1	1	1	1	ADSS	adenylosuccinate synthase
hsa-miR-219-5p	0	0	0	1	1	1	B3GALNT2	beta-1,3-N-acetylgalactosaminyltransferase 2
hsa-miR-219-5p	0	0	0	1	0	0	PYCR2	pyrroline-5-carboxylate reductase family, member 2
hsa-miR-219-5p	1	0	1	1	1	1	PACRG	PARK2 co-regulated
hsa-miR-219-5p	1	0	1	1	1	1	AGPAT4	1-acylglycerol-3-phosphate O-acyltransferase 4 (lysophosphatidic acid acyltransferase, delta)
hsa-miR-219-5p	0	0	0	1	0	0	EPRS	glutamyl-prolyl-tRNA synthetase
hsa-miR-219-5p	0	0	1	1	0	0	PLG	plasminogen
hsa-miR-219-5p	1	0	0	1	1	1	ACAT2	acetyl-CoA acetyltransferase 2
hsa-miR-219-5p	0	0	1	1	1	1	IL24	interleukin 24
hsa-miR-219-5p	1	0	1	1	1	1	DSTYK	dual serine/threonine and tyrosine protein kinase
hsa-miR-219-5p	0	0	0	1	0	0	TMEM81	transmembrane protein 81
hsa-miR-219-5p	1	0	1	1	1	1	TIMM17A	translocase of inner mitochondrial membrane 17 homolog A (yeast)
hsa-miR-219-5p	0	0	1	1	1	1	IYD	iodotyrosine deiodinase
hsa-miR-219-5p	0	0	0	1	0	0	RAET1L	retinoic acid early transcript 1L
hsa-miR-219-5p	0	0	0	1	1	1	ULBP2	UL16 binding protein 2
hsa-miR-219-5p	0	0	1	1	1	1	PTPRC	protein tyrosine phosphatase, receptor type, C
hsa-miR-219-5p	0	0	0	1	1	1	RAB32	RAB32, member RAS oncogene family
hsa-miR-219-5p	1	0	0	1	1	1	SWT1	SWT1 RNA endoribonuclease homolog (S. cerevisiae)
hsa-miR-219-5p	0	0	1	1	1	1	AIG1	androgen-induced 1
hsa-miR-219-5p	1	0	1	1	1	1	VTA1	Vps20-associated 1 homolog (S. cerevisiae)
hsa-miR-219-5p	1	0	1	1	0	0	REPS1	RALBP1 associated Eps domain containing 1
hsa-miR-219-5p	0	0	1	1	1	1	GORAB	golgin, RAB6-interacting
hsa-miR-219-5p	1	0	1	1	1	1	MGST3	microsomal glutathione S-transferase 3
hsa-miR-219-5p	0	0	0	1	0	0	RPS12	ribosomal protein S12
hsa-miR-219-5p	0	0	1	1	1	1	DUSP12	dual specificity phosphatase 12
hsa-miR-219-5p	0	0	1	1	1	1	UFC1	ubiquitin-fold modifier conjugating enzyme 1
hsa-miR-219-5p	0	0	1	1	1	1	CD48	CD48 molecule
hsa-miR-219-5p	0	0	1	1	1	1	ATP1A4	ATPase, Na+/K+ transporting, alpha 4 polypeptide
hsa-miR-219-5p	0	0	0	1	0	0	OR10R2	olfactory receptor, family 10, subfamily R, member 2
hsa-miR-219-5p	0	0	1	1	1	1	CD5L	CD5 molecule-like
hsa-miR-219-5p	1	0	1	1	1	1	PTPRK	protein tyrosine phosphatase, receptor type, K
hsa-miR-219-5p	0	0	0	1	0	0	LAMTOR2	late endosomal/lysosomal adaptor, MAPK and MTOR activator 2
hsa-miR-219-5p	1	0	1	1	1	1	SSR2	signal sequence receptor, beta (translocon-associated protein beta)
hsa-miR-219-5p	1	0	1	1	1	1	NKAIN2	Na+/K+ transporting ATPase interacting 2
hsa-miR-219-5p	0	0	1	1	0	0	CREB3L4	cAMP responsive element binding protein 3-like 4
hsa-miR-219-5p	1	0	1	1	1	1	HDAC2	histone deacetylase 2
hsa-miR-219-5p	0	0	0	1	0	0	CLRN3	clarin 3
hsa-miR-219-5p	0	0	1	1	0	0	MRPL9	mitochondrial ribosomal protein L9
hsa-miR-219-5p	0	0	1	1	1	1	SESN1	sestrin 1
hsa-miR-219-5p	0	0	1	1	1	1	HTRA1	HtrA serine peptidase 1
hsa-miR-219-5p	0	1	1	1	1	1	SYCP1	synaptonemal complex protein 1
hsa-miR-219-5p	1	0	1	1	1	1	CYB5R4	cytochrome b5 reductase 4
hsa-miR-219-5p	1	0	1	1	1	1	CNNM2	cyclin M2
hsa-miR-219-5p	0	0	1	1	0	0	KIAA1324	KIAA1324
hsa-miR-219-5p	0	0	1	1	0	0	AKNAD1	AKNA domain containing 1
hsa-miR-219-5p	0	0	1	1	0	0	LRRC39	leucine rich repeat containing 39
hsa-miR-219-5p	0	0	1	1	1	1	KAZALD1	Kazal-type serine peptidase inhibitor domain 1
hsa-miR-219-5p	0	0	1	1	1	1	RWDD3	RWD domain containing 3
hsa-miR-219-5p	0	0	1	1	1	1	ALG14	asparagine-linked glycosylation 14 homolog (S. cerevisiae)
hsa-miR-219-5p	1	0	1	1	1	1	ERLIN1	ER lipid raft associated 1
hsa-miR-219-5p	0	0	0	1	0	0	CXorf40B	chromosome X open reading frame 40B
hsa-miR-219-5p	0	0	1	1	1	1	IDS	iduronate 2-sulfatase
hsa-miR-219-5p	0	0	1	1	1	1	CUTC	cutC copper transporter homolog (E. coli)
hsa-miR-219-5p	0	0	1	1	1	1	FAM122C	family with sequence similarity 122C
hsa-miR-219-5p	1	0	1	1	1	1	USP33	ubiquitin specific peptidase 33
hsa-miR-219-5p	0	0	1	1	0	0	GPC3	glypican 3
hsa-miR-219-5p	0	0	1	1	1	1	ZDHHC16	zinc finger, DHHC-type containing 16
hsa-miR-219-5p	0	0	1	1	1	1	EXOSC1	exosome component 1
hsa-miR-219-5p	0	0	0	1	1	1	CYP2J2	cytochrome P450, family 2, subfamily J, polypeptide 2
hsa-miR-219-5p	0	0	0	1	0	0	FAM209A	family with sequence similarity 209, member A
hsa-miR-219-5p	0	0	1	1	0	0	HSPB11	heat shock protein family B (small), member 11
hsa-miR-219-5p	0	0	1	1	1	1	MINPP1	multiple inositol-polyphosphate phosphatase 1
hsa-miR-219-5p	0	0	1	1	1	1	EIF2B3	eukaryotic translation initiation factor 2B, subunit 3 gamma, 58kDa
hsa-miR-219-5p	0	0	1	1	1	1	TMEM53	transmembrane protein 53
hsa-miR-219-5p	1	0	1	1	1	1	SLC12A5	solute carrier family 12 (potassium/chloride transporter), member 5
hsa-miR-219-5p	0	0	0	1	0	0	POLR1C	polymerase (RNA) I polypeptide C, 30kDa
hsa-miR-219-5p	0	0	1	1	1	1	PPIH	peptidylprolyl isomerase H (cyclophilin H)
hsa-miR-219-5p	0	0	0	1	0	0	TNNC2	troponin C type 2 (fast)
hsa-miR-219-5p	0	0	1	1	0	0	WFDC5	WAP four-disulfide core domain 5
hsa-miR-219-5p	1	0	1	1	1	1	RBM17	RNA binding motif protein 17
hsa-miR-219-5p	1	0	1	1	1	1	STK4	serine/threonine kinase 4
hsa-miR-219-5p	0	0	1	1	1	1	PKIG	protein kinase (cAMP-dependent, catalytic) inhibitor gamma
hsa-miR-219-5p	0	0	0	1	0	0	CENPI	centromere protein I
hsa-miR-219-5p	0	0	1	1	1	1	SYTL4	synaptotagmin-like 4
hsa-miR-219-5p	0	0	0	1	0	0	UTP11L	UTP11-like, U3 small nucleolar ribonucleoprotein, (yeast)
hsa-miR-219-5p	0	0	1	1	1	1	INPP5B	inositol polyphosphate-5-phosphatase, 75kDa
hsa-miR-219-5p	1	0	1	1	1	1	PCDH19	protocadherin 19
hsa-miR-219-5p	1	0	1	1	1	1	RSPO1	R-spondin 1
hsa-miR-219-5p	0	0	0	1	0	0	LOC100127947	uncharacterized LOC100127947
hsa-miR-219-5p	0	0	0	1	0	0	KCNK16	potassium channel, subfamily K, member 16
hsa-miR-219-5p	0	0	1	1	1	1	ITM2A	integral membrane protein 2A
hsa-miR-219-5p	0	0	0	1	0	0	HJURP	Holliday junction recognition protein
hsa-miR-219-5p	1	0	1	1	1	1	ZBTB43	zinc finger and BTB domain containing 43
hsa-miR-219-5p	1	0	1	1	1	1	NEK6	NIMA (never in mitosis gene a)-related kinase 6
hsa-miR-219-5p	0	0	1	1	1	1	DSN1	DSN1, MIND kinetochore complex component, homolog (S. cerevisiae)
hsa-miR-219-5p	0	0	0	1	0	0	SMPDL3B	sphingomyelin phosphodiesterase, acid-like 3B
hsa-miR-219-5p	0	0	1	1	0	0	FCN3	ficolin (collagen/fibrinogen domain containing) 3 (Hakata antigen)
hsa-miR-219-5p	0	0	1	1	0	0	C10orf128	chromosome 10 open reading frame 128
hsa-miR-219-5p	0	0	0	1	1	1	KIAA1958	KIAA1958
hsa-miR-219-5p	0	0	1	1	0	0	ASAP3	ArfGAP with SH3 domain, ankyrin repeat and PH domain 3
hsa-miR-219-5p	0	0	1	1	0	0	FRRS1L	ferric-chelate reductase 1-like
hsa-miR-219-5p	1	0	1	1	1	1	HNRNPR	heterogeneous nuclear ribonucleoprotein R
hsa-miR-219-5p	1	0	1	1	1	1	CASP10	caspase 10, apoptosis-related cysteine peptidase
hsa-miR-219-5p	0	0	1	1	1	1	RXRB	retinoid X receptor, beta
hsa-miR-219-5p	0	0	1	1	1	1	HEPH	hephaestin
hsa-miR-219-5p	0	0	0	1	0	0	TMEM225	transmembrane protein 225
hsa-miR-219-5p	0	0	0	1	0	0	PLA2G2E	phospholipase A2, group IIE
hsa-miR-219-5p	1	0	0	1	0	0	NBL1	neuroblastoma, suppression of tumorigenicity 1
hsa-miR-219-5p	0	0	0	1	1	1	MFAP2	microfibrillar-associated protein 2
hsa-miR-219-5p	0	0	1	1	1	1	KDELC1	KDEL (Lys-Asp-Glu-Leu) containing 1
hsa-miR-219-5p	0	0	1	1	0	0	LST1	leukocyte specific transcript 1
hsa-miR-219-5p	0	0	0	1	0	0	PRAMEF18	PRAME family member 18
hsa-miR-219-5p	0	0	0	1	1	1	PRAMEF3	PRAME family member 3
hsa-miR-219-5p	1	0	1	1	1	1	PTF1A	pancreas specific transcription factor, 1a
hsa-miR-219-5p	0	0	0	1	1	1	TRIM15	tripartite motif containing 15
hsa-miR-219-5p	0	0	1	1	0	0	UGGT2	UDP-glucose glycoprotein glucosyltransferase 2
hsa-miR-219-5p	0	0	0	1	0	0	TRIM31	tripartite motif containing 31
hsa-miR-219-5p	1	0	1	1	0	0	DNAJC1	DnaJ (Hsp40) homolog, subfamily C, member 1
hsa-miR-219-5p	0	0	0	1	0	0	IRF3	interferon regulatory factor 3
hsa-miR-219-5p	0	0	1	1	0	0	GPAT2	glycerol-3-phosphate acyltransferase 2, mitochondrial
hsa-miR-219-5p	0	0	1	1	1	1	CBWD3	COBW domain containing 3
hsa-miR-219-5p	0	0	0	1	0	0	POM121L2	POM121 transmembrane nucleoporin-like 2
hsa-miR-219-5p	0	0	1	1	1	1	SLC22A12	solute carrier family 22 (organic anion/urate transporter), member 12
hsa-miR-219-5p	0	0	1	1	1	1	SCGN	secretagogin, EF-hand calcium binding protein
hsa-miR-219-5p	0	0	0	1	0	0	GRXCR2	glutaredoxin, cysteine rich 2
hsa-miR-219-5p	1	0	1	1	1	1	NMT2	N-myristoyltransferase 2
hsa-miR-219-5p	1	0	1	1	1	1	CASK	calcium/calmodulin-dependent serine protein kinase (MAGUK family)
hsa-miR-219-5p	0	0	1	1	1	1	TAF2	TAF2 RNA polymerase II, TATA box binding protein (TBP)-associated factor, 150kDa
hsa-miR-219-5p	0	0	1	1	1	1	EBPL	emopamil binding protein-like
hsa-miR-219-5p	0	0	0	1	0	0	LPAR6	lysophosphatidic acid receptor 6
hsa-miR-219-5p	0	0	1	1	0	0	HES5	hairy and enhancer of split 5 (Drosophila)
hsa-miR-219-5p	1	0	1	1	1	1	DYNLT3	dynein, light chain, Tctex-type 3
hsa-miR-219-5p	0	0	1	1	0	0	GABRD	gamma-aminobutyric acid (GABA) A receptor, delta
hsa-miR-219-5p	0	0	1	1	0	0	C17orf79	chromosome 17 open reading frame 79
hsa-miR-219-5p	0	0	0	1	0	0	NR0B1	nuclear receptor subfamily 0, group B, member 1
hsa-miR-219-5p	1	0	1	1	1	1	FAM219A	family with sequence similarity 219, member A
hsa-miR-219-5p	1	0	1	1	1	1	ZBTB10	zinc finger and BTB domain containing 10
hsa-miR-219-5p	1	0	1	1	0	0	AEN	apoptosis enhancing nuclease
hsa-miR-219-5p	0	0	1	1	1	1	VIT	vitrin
hsa-miR-219-5p	0	0	0	1	0	0	C1orf159	chromosome 1 open reading frame 159
hsa-miR-219-5p	1	0	1	1	1	1	HIVEP1	human immunodeficiency virus type I enhancer binding protein 1
hsa-miR-219-5p	0	0	1	1	0	0	CCDC112	coiled-coil domain containing 112
hsa-miR-219-5p	0	0	1	1	0	0	SLC35B3	solute carrier family 35, member B3
hsa-miR-219-5p	0	0	1	1	0	0	TRPC4	transient receptor potential cation channel, subfamily C, member 4
hsa-miR-219-5p	0	0	0	1	0	0	OR10A5	olfactory receptor, family 10, subfamily A, member 5
hsa-miR-219-5p	0	0	1	1	0	0	SGCE	sarcoglycan, epsilon
hsa-miR-219-5p	1	0	1	1	1	1	F13A1	coagulation factor XIII, A1 polypeptide
hsa-miR-219-5p	1	0	1	1	1	1	SIAH1	siah E3 ubiquitin protein ligase 1
hsa-miR-219-5p	0	0	0	1	0	0	ATP6AP1L	ATPase, H+ transporting, lysosomal accessory protein 1-like
hsa-miR-219-5p	0	0	0	1	0	0	HBG2	hemoglobin, gamma G
hsa-miR-219-5p	0	0	1	1	0	0	TEX26	testis expressed 26
hsa-miR-219-5p	1	0	1	1	1	1	ADRA1A	adrenoceptor alpha 1A
hsa-miR-219-5p	0	0	1	1	0	0	GTF2H2C	general transcription factor IIH, polypeptide 2C
hsa-miR-219-5p	0	0	1	1	1	1	SERF1B	small EDRK-rich factor 1B (centromeric)
hsa-miR-219-5p	0	0	1	1	0	0	NOXRED1	NADP-dependent oxidoreductase domain containing 1
hsa-miR-219-5p	0	0	1	1	0	0	CEP152	centrosomal protein 152kDa
hsa-miR-219-5p	0	0	1	1	1	1	FAM9A	family with sequence similarity 9, member A
hsa-miR-219-5p	0	0	1	1	1	1	NPC1L1	NPC1 (Niemann-Pick disease, type C1, gene)-like 1
hsa-miR-219-5p	0	0	1	1	0	0	POLR2B	polymerase (RNA) II (DNA directed) polypeptide B, 140kDa
hsa-miR-219-5p	1	0	1	1	1	1	TPD52L3	tumor protein D52-like 3
hsa-miR-219-5p	1	0	1	1	1	1	GREB1	growth regulation by estrogen in breast cancer 1
hsa-miR-219-5p	0	0	1	1	0	0	NPSR1	neuropeptide S receptor 1
hsa-miR-219-5p	0	0	1	1	0	0	BAIAP2L2	BAI1-associated protein 2-like 2
hsa-miR-219-5p	1	0	1	1	1	1	HOXA10	homeobox A10
hsa-miR-219-5p	1	0	1	1	1	1	FAM123A	family with sequence similarity 123A
hsa-miR-219-5p	0	0	0	1	0	0	TPTE2P1	transmembrane phosphoinositide 3-phosphatase and tensin homolog 2 pseudogene 1
hsa-miR-219-5p	0	0	0	1	1	1	BPY2B	basic charge, Y-linked, 2B
hsa-miR-219-5p	0	0	1	1	1	1	CBWD1	COBW domain containing 1
hsa-miR-219-5p	0	0	1	1	1	1	HTRA3	HtrA serine peptidase 3
hsa-miR-219-5p	1	0	1	1	1	1	CD9	CD9 molecule
hsa-miR-219-5p	0	0	1	1	0	0	CHEK2	checkpoint kinase 2
hsa-miR-219-5p	0	0	1	1	1	1	RAD51	RAD51 homolog (S. cerevisiae)
hsa-miR-219-5p	0	0	1	1	1	1	RBMY1B	RNA binding motif protein, Y-linked, family 1, member B
hsa-miR-219-5p	0	0	1	1	1	1	RBMY1A1	RNA binding motif protein, Y-linked, family 1, member A1
hsa-miR-219-5p	0	0	0	1	0	0	SERPINB11	serpin peptidase inhibitor, clade B (ovalbumin), member 11 (gene/pseudogene)
hsa-miR-219-5p	0	0	1	1	1	1	CD24	CD24 molecule
hsa-miR-219-5p	0	0	0	1	0	0	CDY2B	chromodomain protein, Y-linked, 2B
hsa-miR-219-5p	0	0	0	1	0	0	TPTE2	transmembrane phosphoinositide 3-phosphatase and tensin homolog 2
hsa-miR-219-5p	0	0	0	1	0	0	TSPY4	testis specific protein, Y-linked 4
hsa-miR-219-5p	0	0	0	1	0	0	LRRC30	leucine rich repeat containing 30
hsa-miR-219-5p	0	0	1	1	1	1	C3orf15	chromosome 3 open reading frame 15
hsa-miR-219-5p	0	0	0	1	0	0	OR5H14	olfactory receptor, family 5, subfamily H, member 14
hsa-miR-219-5p	0	0	1	1	1	1	SEPP1	selenoprotein P, plasma, 1
hsa-miR-219-5p	1	0	1	1	0	0	ACOXL	acyl-CoA oxidase-like
hsa-miR-219-5p	0	0	1	1	1	1	COX16	COX16 cytochrome c oxidase assembly homolog (S. cerevisiae)
hsa-miR-219-5p	0	0	1	1	1	1	PRNP	prion protein
hsa-miR-219-5p	0	0	1	1	1	1	C9orf47	chromosome 9 open reading frame 47
hsa-miR-219-5p	1	0	1	0	1	1	C6orf222	chromosome 6 open reading frame 222
hsa-miR-219-5p	0	0	1	0	1	1	WTH3DI	RAB6C-like
hsa-miR-219-5p	1	0	1	1	1	1	MYCL1	v-myc myelocytomatosis viral oncogene homolog 1, lung carcinoma derived (avian)
hsa-miR-219-5p	1	0	1	0	1	1	SPRY3	sprouty homolog 3 (Drosophila)
hsa-miR-219-5p	0	0	1	1	1	1	ABCB10	ATP-binding cassette, sub-family B (MDR/TAP), member 10
hsa-miR-219-5p	1	0	1	1	1	1	ERP44	endoplasmic reticulum protein 44
hsa-miR-219-5p	0	0	0	1	1	1	TTLL2	tubulin tyrosine ligase-like family, member 2
hsa-miR-219-5p	0	0	0	1	1	1	KRTAP4-5	keratin associated protein 4-5
hsa-miR-219-5p	0	0	1	1	1	1	FAM175A	family with sequence similarity 175, member A
hsa-miR-219-5p	0	0	1	1	1	1	TTC30A	tetratricopeptide repeat domain 30A
hsa-miR-219-5p	0	0	1	1	1	1	WFDC13	WAP four-disulfide core domain 13
hsa-miR-219-5p	0	0	1	0	1	1	SLCO4C1	solute carrier organic anion transporter family, member 4C1
hsa-miR-219-5p	1	0	0	1	1	1	SLC46A3	solute carrier family 46, member 3
