# Supplementary material for: Profiling of Selected MicroRNAs in Proliferative Eutopic Endometrium of Women with Ovarian Endometriosis
Source: Biomed Res Int. 2015 Aug 20;2015:760698. doi: 10.1155/2015/760698 (PMC4558423; doi:10.1155/2015/760698)
Supplement: Supplementary file 1 — Table I: The names of miRNAs significantly differentially expressed between eutopic endometrium of patients with endometriosis vs eutopic endometrium of patients without endometriosis. Table II: The associations between miRNA and mRNA, which presents detailed results of the search of six major databases i.e targetscan, tarbase, miranda, mirbase, mirtarget2 and pictar. [file 760698.f1.zip › 760698.f1/Table II/hsa-miR-296-3p.tsv]

miR	targetscan	tarbase	miranda	mirbase	mirtarget2	pictar	GeneSymbol	GeneName
hsa-miR-296-3p	1	0	1	0	1	1	JAZF1	JAZF zinc finger 1
hsa-miR-296-3p	1	0	1	1	1	1	UBQLNL	ubiquilin-like
hsa-miR-296-3p	1	0	1	1	1	1	SOCS6	suppressor of cytokine signaling 6
hsa-miR-296-3p	1	0	1	0	1	1	CHL1	cell adhesion molecule with homology to L1CAM (close homolog of L1)
hsa-miR-296-3p	1	0	1	0	1	1	GLI3	GLI family zinc finger 3
hsa-miR-296-3p	1	0	1	1	0	0	KIAA1211	KIAA1211
hsa-miR-296-3p	1	0	1	1	1	1	COL4A4	collagen, type IV, alpha 4
hsa-miR-296-3p	1	0	1	0	0	0	CACNA1A	calcium channel, voltage-dependent, P/Q type, alpha 1A subunit
hsa-miR-296-3p	1	0	1	1	0	0	DHDDS	dehydrodolichyl diphosphate synthase
hsa-miR-296-3p	1	0	1	0	0	0	ZNRF3	zinc and ring finger 3
hsa-miR-296-3p	1	0	1	1	1	1	KCTD21	potassium channel tetramerisation domain containing 21
hsa-miR-296-3p	1	0	1	1	1	1	PPP1R12B	protein phosphatase 1, regulatory subunit 12B
hsa-miR-296-3p	1	0	1	1	1	1	FAT2	FAT tumor suppressor homolog 2 (Drosophila)
hsa-miR-296-3p	1	0	1	0	1	1	PRKCA	protein kinase C, alpha
hsa-miR-296-3p	1	0	1	1	1	1	OTP	orthopedia homeobox
hsa-miR-296-3p	1	0	1	1	1	1	PDE11A	phosphodiesterase 11A
hsa-miR-296-3p	1	0	1	1	1	1	JOSD1	Josephin domain containing 1
hsa-miR-296-3p	1	0	1	0	0	0	CX3CL1	chemokine (C-X3-C motif) ligand 1
hsa-miR-296-3p	1	0	0	0	1	1	TMEM209	transmembrane protein 209
hsa-miR-296-3p	1	0	1	1	1	1	ONECUT2	one cut homeobox 2
hsa-miR-296-3p	1	0	1	1	1	1	SERBP1	SERPINE1 mRNA binding protein 1
hsa-miR-296-3p	1	0	1	0	0	0	TNPO1	transportin 1
hsa-miR-296-3p	1	0	1	1	1	1	LHX6	LIM homeobox 6
hsa-miR-296-3p	1	0	1	1	1	1	CALN1	calneuron 1
hsa-miR-296-3p	1	0	1	1	1	1	ANKRD23	ankyrin repeat domain 23
hsa-miR-296-3p	1	0	1	1	1	1	BACH2	BTB and CNC homology 1, basic leucine zipper transcription factor 2
hsa-miR-296-3p	1	0	1	1	1	1	ZBTB20	zinc finger and BTB domain containing 20
hsa-miR-296-3p	1	0	1	1	1	1	ZNF629	zinc finger protein 629
hsa-miR-296-3p	1	0	1	1	1	1	SERF2	small EDRK-rich factor 2
hsa-miR-296-3p	1	0	1	0	1	1	MNT	MAX binding protein
hsa-miR-296-3p	1	0	1	1	1	1	PTCH1	patched 1
hsa-miR-296-3p	1	0	1	1	1	1	KDM6B	lysine (K)-specific demethylase 6B
hsa-miR-296-3p	1	0	1	1	0	0	DLGAP1	discs, large (Drosophila) homolog-associated protein 1
hsa-miR-296-3p	1	0	1	0	1	1	CPEB2	cytoplasmic polyadenylation element binding protein 2
hsa-miR-296-3p	1	0	0	1	1	1	KCTD10	potassium channel tetramerisation domain containing 10
hsa-miR-296-3p	1	0	1	1	1	1	NLGN2	neuroligin 2
hsa-miR-296-3p	1	0	1	1	1	1	PLAU	plasminogen activator, urokinase
hsa-miR-296-3p	1	0	1	1	0	0	SRCAP	Snf2-related CREBBP activator protein
hsa-miR-296-3p	1	0	1	1	0	0	RAPGEF2	Rap guanine nucleotide exchange factor (GEF) 2
hsa-miR-296-3p	1	0	1	0	1	1	KIAA0355	KIAA0355
hsa-miR-296-3p	1	0	1	0	1	1	PTPRT	protein tyrosine phosphatase, receptor type, T
hsa-miR-296-3p	1	0	1	1	1	1	SGSM2	small G protein signaling modulator 2
hsa-miR-296-3p	1	0	1	0	1	1	NEDD4L	neural precursor cell expressed, developmentally down-regulated 4-like, E3 ubiquitin protein ligase
hsa-miR-296-3p	1	0	1	1	1	1	IQSEC2	IQ motif and Sec7 domain 2
hsa-miR-296-3p	1	0	1	0	1	1	CHST15	carbohydrate (N-acetylgalactosamine 4-sulfate 6-O) sulfotransferase 15
hsa-miR-296-3p	0	0	1	1	1	1	PHLDB1	pleckstrin homology-like domain, family B, member 1
hsa-miR-296-3p	0	0	1	1	0	0	FKBP15	FK506 binding protein 15, 133kDa
hsa-miR-296-3p	0	0	1	1	0	0	ATP10B	ATPase, class V, type 10B
hsa-miR-296-3p	1	0	1	1	0	0	ESYT1	extended synaptotagmin-like protein 1
hsa-miR-296-3p	1	0	1	1	1	1	CAMKK2	calcium/calmodulin-dependent protein kinase kinase 2, beta
hsa-miR-296-3p	1	0	1	1	1	1	CDK12	cyclin-dependent kinase 12
hsa-miR-296-3p	1	0	1	1	1	1	ARHGEF15	Rho guanine nucleotide exchange factor (GEF) 15
hsa-miR-296-3p	1	0	1	1	1	1	CIT	citron (rho-interacting, serine/threonine kinase 21)
hsa-miR-296-3p	1	0	1	1	1	1	C11orf9	chromosome 11 open reading frame 9
hsa-miR-296-3p	0	0	1	0	0	0	THSD7A	thrombospondin, type I, domain containing 7A
hsa-miR-296-3p	1	0	1	1	1	1	RPGRIP1L	RPGRIP1-like
hsa-miR-296-3p	1	0	1	1	0	0	STXBP5L	syntaxin binding protein 5-like
hsa-miR-296-3p	1	0	1	1	1	1	FNBP4	formin binding protein 4
hsa-miR-296-3p	1	0	1	1	0	0	KIAA1045	KIAA1045
hsa-miR-296-3p	0	0	1	1	0	0	RTEL1	regulator of telomere elongation helicase 1
hsa-miR-296-3p	1	0	1	1	1	1	PRRC2C	proline-rich coiled-coil 2C
hsa-miR-296-3p	1	0	1	1	1	1	PHF8	PHD finger protein 8
hsa-miR-296-3p	0	0	1	1	0	0	ZC4H2	zinc finger, C4H2 domain containing
hsa-miR-296-3p	1	0	1	1	1	1	ATXN7L1	ataxin 7-like 1
hsa-miR-296-3p	1	0	1	1	1	1	RIMKLB	ribosomal modification protein rimK-like family member B
hsa-miR-296-3p	1	0	1	1	0	0	ATAD2B	ATPase family, AAA domain containing 2B
hsa-miR-296-3p	1	0	1	1	1	1	ASAP1	ArfGAP with SH3 domain, ankyrin repeat and PH domain 1
hsa-miR-296-3p	0	0	1	1	1	1	FSTL5	follistatin-like 5
hsa-miR-296-3p	1	0	1	0	0	0	ODZ4	odz, odd Oz/ten-m homolog 4 (Drosophila)
hsa-miR-296-3p	1	0	1	1	1	1	HACE1	HECT domain and ankyrin repeat containing E3 ubiquitin protein ligase 1
hsa-miR-296-3p	1	1	1	1	1	1	NFIA	nuclear factor I/A
hsa-miR-296-3p	0	0	1	0	1	1	MUC3B	mucin 3B, cell surface associated
hsa-miR-296-3p	0	0	1	0	0	0	COL20A1	collagen, type XX, alpha 1
hsa-miR-296-3p	1	0	1	1	0	0	NCKAP5L	NCK-associated protein 5-like
hsa-miR-296-3p	1	0	1	0	1	1	IGDCC4	immunoglobulin superfamily, DCC subclass, member 4
hsa-miR-296-3p	0	0	1	0	0	0	TTC28-AS1	TTC28 antisense RNA 1
hsa-miR-296-3p	1	0	1	1	1	1	PHF21A	PHD finger protein 21A
hsa-miR-296-3p	1	0	1	1	1	1	SBF2	SET binding factor 2
hsa-miR-296-3p	0	0	1	1	1	1	SPEF2	sperm flagellar 2
hsa-miR-296-3p	0	0	1	1	1	1	POC1B	POC1 centriolar protein homolog B (Chlamydomonas)
hsa-miR-296-3p	1	0	1	1	1	1	IKZF4	IKAROS family zinc finger 4 (Eos)
hsa-miR-296-3p	1	0	1	1	1	1	LZTS2	leucine zipper, putative tumor suppressor 2
hsa-miR-296-3p	1	0	1	0	1	1	JPH4	junctophilin 4
hsa-miR-296-3p	0	0	1	1	0	0	COL27A1	collagen, type XXVII, alpha 1
hsa-miR-296-3p	1	0	1	1	1	1	LSM14A	LSM14A, SCD6 homolog A (S. cerevisiae)
hsa-miR-296-3p	1	0	1	1	1	1	SSH3	slingshot homolog 3 (Drosophila)
hsa-miR-296-3p	1	0	1	1	1	1	POGZ	pogo transposable element with ZNF domain
hsa-miR-296-3p	1	0	1	1	1	1	SH3TC2	SH3 domain and tetratricopeptide repeats 2
hsa-miR-296-3p	1	0	1	0	0	0	FAT3	FAT tumor suppressor homolog 3 (Drosophila)
hsa-miR-296-3p	1	0	1	0	1	1	RNF43	ring finger protein 43
hsa-miR-296-3p	1	0	1	0	0	0	RNF169	ring finger protein 169
hsa-miR-296-3p	0	0	1	1	0	0	IL2RG	interleukin 2 receptor, gamma
hsa-miR-296-3p	0	0	1	1	1	1	ACPP	acid phosphatase, prostate
hsa-miR-296-3p	0	0	1	1	0	0	DDB2	damage-specific DNA binding protein 2, 48kDa
hsa-miR-296-3p	1	0	1	1	1	1	PAN3	PAN3 poly(A) specific ribonuclease subunit homolog (S. cerevisiae)
hsa-miR-296-3p	1	0	1	0	1	1	BEND4	BEN domain containing 4
hsa-miR-296-3p	1	1	1	1	1	1	BACE1	beta-site APP-cleaving enzyme 1
hsa-miR-296-3p	0	0	1	1	0	0	PTPRF	protein tyrosine phosphatase, receptor type, F
hsa-miR-296-3p	0	0	1	1	1	1	DOCK8	dedicator of cytokinesis 8
hsa-miR-296-3p	0	0	1	1	1	1	ING4	inhibitor of growth family, member 4
hsa-miR-296-3p	0	0	1	1	0	0	DBP	D site of albumin promoter (albumin D-box) binding protein
hsa-miR-296-3p	1	0	1	1	1	1	SHC1	SHC (Src homology 2 domain containing) transforming protein 1
hsa-miR-296-3p	0	0	1	1	0	0	KCNC3	potassium voltage-gated channel, Shaw-related subfamily, member 3
hsa-miR-296-3p	1	0	1	1	1	1	RPS6KA3	ribosomal protein S6 kinase, 90kDa, polypeptide 3
hsa-miR-296-3p	1	0	1	1	1	1	PML	promyelocytic leukemia
hsa-miR-296-3p	0	0	1	1	1	1	MAZ	MYC-associated zinc finger protein (purine-binding transcription factor)
hsa-miR-296-3p	1	0	1	1	1	1	SLC8A1	solute carrier family 8 (sodium/calcium exchanger), member 1
hsa-miR-296-3p	1	0	1	1	1	1	DTNA	dystrobrevin, alpha
hsa-miR-296-3p	1	0	1	1	1	1	RASSF5	Ras association (RalGDS/AF-6) domain family member 5
hsa-miR-296-3p	0	0	1	1	1	1	DGKI	diacylglycerol kinase, iota
hsa-miR-296-3p	1	0	1	0	1	1	SLC6A6	solute carrier family 6 (neurotransmitter transporter, taurine), member 6
hsa-miR-296-3p	1	0	1	1	0	0	CACNB1	calcium channel, voltage-dependent, beta 1 subunit
hsa-miR-296-3p	1	0	1	1	0	0	TSPYL2	TSPY-like 2
hsa-miR-296-3p	0	0	1	1	1	1	TFRC	transferrin receptor (p90, CD71)
hsa-miR-296-3p	1	0	1	1	1	1	DMPK	dystrophia myotonica-protein kinase
hsa-miR-296-3p	1	0	1	0	1	1	AKAP13	A kinase (PRKA) anchor protein 13
hsa-miR-296-3p	1	0	1	1	1	1	SPTB	spectrin, beta, erythrocytic
hsa-miR-296-3p	1	0	1	1	1	1	ANK1	ankyrin 1, erythrocytic
hsa-miR-296-3p	0	0	1	1	0	0	ASIC3	acid-sensing (proton-gated) ion channel 3
hsa-miR-296-3p	0	0	1	1	1	1	RYR1	ryanodine receptor 1 (skeletal)
hsa-miR-296-3p	0	0	1	1	0	0	PSMB2	proteasome (prosome, macropain) subunit, beta type, 2
hsa-miR-296-3p	1	0	1	1	1	1	MYO5A	myosin VA (heavy chain 12, myoxin)
hsa-miR-296-3p	0	0	1	1	0	0	EIF4E2	eukaryotic translation initiation factor 4E family member 2
hsa-miR-296-3p	0	0	1	1	0	0	HLA-DMB	major histocompatibility complex, class II, DM beta
hsa-miR-296-3p	0	0	1	1	0	0	BMP1	bone morphogenetic protein 1
hsa-miR-296-3p	1	0	1	1	1	1	EPB41	erythrocyte membrane protein band 4.1 (elliptocytosis 1, RH-linked)
hsa-miR-296-3p	0	0	1	1	0	0	SLC22A8	solute carrier family 22 (organic anion transporter), member 8
hsa-miR-296-3p	0	0	1	1	0	0	MBD1	methyl-CpG binding domain protein 1
hsa-miR-296-3p	0	0	1	1	0	0	CDK10	cyclin-dependent kinase 10
hsa-miR-296-3p	0	0	1	1	1	1	MYO9A	myosin IXA
hsa-miR-296-3p	1	0	1	1	1	1	MEF2D	myocyte enhancer factor 2D
hsa-miR-296-3p	0	0	1	0	0	0	MIAT	myocardial infarction associated transcript (non-protein coding)
hsa-miR-296-3p	0	0	1	0	1	1	PARG	poly (ADP-ribose) glycohydrolase
hsa-miR-296-3p	1	0	1	1	1	1	STX16	syntaxin 16
hsa-miR-296-3p	1	0	1	0	1	1	MLL2	myeloid/lymphoid or mixed-lineage leukemia 2
hsa-miR-296-3p	1	0	1	1	1	1	CBFA2T2	core-binding factor, runt domain, alpha subunit 2; translocated to, 2
hsa-miR-296-3p	0	0	1	1	1	1	PPEF2	protein phosphatase, EF-hand calcium binding domain 2
hsa-miR-296-3p	1	0	1	1	1	1	MRAS	muscle RAS oncogene homolog
hsa-miR-296-3p	0	0	1	1	1	1	CD84	CD84 molecule
hsa-miR-296-3p	1	0	1	1	1	1	CTNND1	catenin (cadherin-associated protein), delta 1
hsa-miR-296-3p	0	0	1	1	0	0	MRPS22	mitochondrial ribosomal protein S22
hsa-miR-296-3p	1	0	1	1	1	1	ERLIN1	ER lipid raft associated 1
hsa-miR-296-3p	0	0	1	1	1	1	PCF11	PCF11, cleavage and polyadenylation factor subunit, homolog (S. cerevisiae)
hsa-miR-296-3p	0	0	1	1	0	0	CARD10	caspase recruitment domain family, member 10
hsa-miR-296-3p	0	0	1	1	1	1	RER1	RER1 retention in endoplasmic reticulum 1 homolog (S. cerevisiae)
hsa-miR-296-3p	0	0	1	1	1	1	FHL1	four and a half LIM domains 1
hsa-miR-296-3p	0	0	1	1	1	1	IL18BP	interleukin 18 binding protein
hsa-miR-296-3p	0	0	1	1	0	0	ADAMTS7	ADAM metallopeptidase with thrombospondin type 1 motif, 7
hsa-miR-296-3p	0	0	1	1	0	0	CNTROB	centrobin, centrosomal BRCA2 interacting protein
hsa-miR-296-3p	0	0	1	1	1	1	CNPPD1	cyclin Pas1/PHO80 domain containing 1
hsa-miR-296-3p	1	0	1	1	1	1	ZNF202	zinc finger protein 202
hsa-miR-296-3p	0	0	1	1	1	1	SAP30L	SAP30-like
hsa-miR-296-3p	0	0	1	1	1	1	NBPF14	neuroblastoma breakpoint family, member 14
hsa-miR-296-3p	1	0	1	1	1	1	C16orf70	chromosome 16 open reading frame 70
hsa-miR-296-3p	0	0	1	0	1	1	CLDN2	claudin 2
hsa-miR-296-3p	0	0	1	1	0	0	FXYD5	FXYD domain containing ion transport regulator 5
hsa-miR-296-3p	0	0	1	1	0	0	SLC24A2	solute carrier family 24 (sodium/potassium/calcium exchanger), member 2
hsa-miR-296-3p	1	0	1	1	1	1	SNPH	syntaphilin
hsa-miR-296-3p	0	0	1	0	0	0	BPESC1	blepharophimosis, epicanthus inversus and ptosis, candidate 1 (non-protein coding)
hsa-miR-296-3p	0	0	1	1	0	0	DBNDD2	dysbindin (dystrobrevin binding protein 1) domain containing 2
hsa-miR-296-3p	1	0	1	1	1	1	SUFU	suppressor of fused homolog (Drosophila)
hsa-miR-296-3p	1	0	1	1	0	0	TDRKH	tudor and KH domain containing
hsa-miR-296-3p	1	0	1	1	1	1	STRN3	striatin, calmodulin binding protein 3
hsa-miR-296-3p	0	0	1	1	1	1	NKX3-1	NK3 homeobox 1
hsa-miR-296-3p	0	0	1	0	0	0	TIGD7	tigger transposable element derived 7
hsa-miR-296-3p	0	0	1	1	0	0	NYX	nyctalopin
hsa-miR-296-3p	0	0	1	1	0	0	TRIM41	tripartite motif containing 41
hsa-miR-296-3p	0	0	1	1	0	0	HES6	hairy and enhancer of split 6 (Drosophila)
hsa-miR-296-3p	0	0	1	1	1	1	CCR3	chemokine (C-C motif) receptor 3
hsa-miR-296-3p	1	0	1	0	1	1	TRPS1	trichorhinophalangeal syndrome I
hsa-miR-296-3p	0	0	1	1	0	0	CSAG2	CSAG family, member 2
hsa-miR-296-3p	0	0	1	0	0	0	CSAG3	CSAG family, member 3
hsa-miR-296-3p	0	0	1	0	1	1	PRDM6	PR domain containing 6
hsa-miR-296-3p	1	0	1	1	1	1	VPS39	vacuolar protein sorting 39 homolog (S. cerevisiae)
hsa-miR-296-3p	1	0	1	1	1	1	TMUB2	transmembrane and ubiquitin-like domain containing 2
hsa-miR-296-3p	0	0	1	0	0	0	LOC645355	uncharacterized LOC645355
hsa-miR-296-3p	1	0	1	1	1	1	MGEA5	meningioma expressed antigen 5 (hyaluronidase)
hsa-miR-296-3p	1	0	1	1	1	1	VEGFA	vascular endothelial growth factor A
hsa-miR-296-3p	0	0	1	1	0	0	ZAN	zonadhesin
hsa-miR-296-3p	0	0	1	1	1	1	SLC6A15	solute carrier family 6 (neutral amino acid transporter), member 15
hsa-miR-296-3p	0	0	1	1	0	0	CTNNBL1	catenin, beta like 1
hsa-miR-296-3p	1	0	1	0	1	1	WIPF2	WAS/WASL interacting protein family, member 2
hsa-miR-296-3p	1	0	1	1	1	1	CALCOCO1	calcium binding and coiled-coil domain 1
hsa-miR-296-3p	1	0	1	1	1	1	LARP4	La ribonucleoprotein domain family, member 4
hsa-miR-296-3p	0	0	1	1	0	0	SPNS1	spinster homolog 1 (Drosophila)
hsa-miR-296-3p	1	0	1	1	1	1	CD300LF	CD300 molecule-like family member f
hsa-miR-296-3p	0	0	1	0	0	0	NBPF10	neuroblastoma breakpoint family, member 10
hsa-miR-296-3p	0	0	1	1	1	1	PLEKHA8	pleckstrin homology domain containing, family A (phosphoinositide binding specific) member 8
hsa-miR-296-3p	0	0	1	1	1	1	SPSB1	splA/ryanodine receptor domain and SOCS box containing 1
hsa-miR-296-3p	0	0	1	0	1	1	NBPF15	neuroblastoma breakpoint family, member 15
hsa-miR-296-3p	1	0	1	1	0	0	XRRA1	X-ray radiation resistance associated 1
hsa-miR-296-3p	1	0	1	1	0	0	SEPT8	septin 8
hsa-miR-296-3p	0	0	1	1	0	0	RASGEF1C	RasGEF domain family, member 1C
hsa-miR-296-3p	1	0	1	1	1	1	ASB8	ankyrin repeat and SOCS box containing 8
hsa-miR-296-3p	1	0	1	1	1	1	WAPAL	wings apart-like homolog (Drosophila)
hsa-miR-296-3p	1	0	1	1	1	1	IQCK	IQ motif containing K
hsa-miR-296-3p	0	0	1	1	1	1	TPO	thyroid peroxidase
hsa-miR-296-3p	1	0	1	0	1	1	IL1RAP	interleukin 1 receptor accessory protein
hsa-miR-296-3p	1	0	1	1	1	1	AFF2	AF4/FMR2 family, member 2
hsa-miR-296-3p	1	0	1	1	0	0	BRSK2	BR serine/threonine kinase 2
hsa-miR-296-3p	0	0	1	1	1	1	GNAS	GNAS complex locus
hsa-miR-296-3p	1	0	1	0	1	1	CACNA1C	calcium channel, voltage-dependent, L type, alpha 1C subunit
hsa-miR-296-3p	0	0	1	1	1	1	TCFL5	transcription factor-like 5 (basic helix-loop-helix)
hsa-miR-296-3p	1	0	1	1	1	1	RAB3IP	RAB3A interacting protein (rabin3)
hsa-miR-296-3p	1	0	1	1	1	1	EMID2	EMI domain containing 2
hsa-miR-296-3p	0	0	1	0	0	0	TOMM6	translocase of outer mitochondrial membrane 6 homolog (yeast)
hsa-miR-296-3p	1	0	1	1	1	1	VAMP7	vesicle-associated membrane protein 7
hsa-miR-296-3p	1	0	1	1	1	1	MYB	v-myb myeloblastosis viral oncogene homolog (avian)
hsa-miR-296-3p	1	0	1	0	1	1	NAALADL2	N-acetylated alpha-linked acidic dipeptidase-like 2
hsa-miR-296-3p	0	0	1	1	0	0	ASAP3	ArfGAP with SH3 domain, ankyrin repeat and PH domain 3
hsa-miR-296-3p	1	0	1	1	1	1	SIK2	salt-inducible kinase 2
hsa-miR-296-3p	0	0	1	1	1	1	PIWIL2	piwi-like 2 (Drosophila)
hsa-miR-296-3p	0	0	1	1	0	0	VSIG2	V-set and immunoglobulin domain containing 2
hsa-miR-296-3p	0	0	1	0	0	0	TUG1	taurine upregulated 1 (non-protein coding)
hsa-miR-296-3p	0	0	1	1	1	1	OLFM4	olfactomedin 4
hsa-miR-296-3p	0	0	1	1	0	0	SLC6A19	solute carrier family 6 (neutral amino acid transporter), member 19
hsa-miR-296-3p	1	0	1	1	1	1	ARHGAP12	Rho GTPase activating protein 12
hsa-miR-296-3p	0	0	1	1	0	0	C19orf60	chromosome 19 open reading frame 60
hsa-miR-296-3p	1	0	1	1	1	1	ARHGAP17	Rho GTPase activating protein 17
hsa-miR-296-3p	0	0	1	1	0	0	RFWD2	ring finger and WD repeat domain 2, E3 ubiquitin protein ligase
hsa-miR-296-3p	1	0	1	1	1	1	CADM3	cell adhesion molecule 3
hsa-miR-296-3p	1	0	1	1	1	1	SLC38A2	solute carrier family 38, member 2
hsa-miR-296-3p	1	0	1	1	1	1	WDTC1	WD and tetratricopeptide repeats 1
hsa-miR-296-3p	1	0	1	1	1	1	HNRNPUL1	heterogeneous nuclear ribonucleoprotein U-like 1
hsa-miR-296-3p	0	0	1	1	0	0	ADCK4	aarF domain containing kinase 4
hsa-miR-296-3p	0	0	1	1	1	1	CCPG1	cell cycle progression 1
hsa-miR-296-3p	1	0	1	0	1	1	LIN28A	lin-28 homolog A (C. elegans)
hsa-miR-296-3p	0	0	1	1	1	1	AMACR	alpha-methylacyl-CoA racemase
hsa-miR-296-3p	0	0	1	0	0	0	DUXAP10	double homeobox A pseudogene 10
hsa-miR-296-3p	1	0	1	1	1	1	YME1L1	YME1-like 1 (S. cerevisiae)
hsa-miR-296-3p	0	0	1	1	0	0	JMJD4	jumonji domain containing 4
hsa-miR-296-3p	1	0	1	1	1	1	PSTPIP2	proline-serine-threonine phosphatase interacting protein 2
hsa-miR-296-3p	1	0	1	0	1	1	UBP1	upstream binding protein 1 (LBP-1a)
hsa-miR-296-3p	1	0	1	1	1	1	MACF1	microtubule-actin crosslinking factor 1
hsa-miR-296-3p	0	0	1	1	0	0	BUB1	budding uninhibited by benzimidazoles 1 homolog (yeast)
hsa-miR-296-3p	0	0	1	1	1	1	CLEC4M	C-type lectin domain family 4, member M
hsa-miR-296-3p	1	0	1	1	1	1	POMT2	protein-O-mannosyltransferase 2
hsa-miR-296-3p	1	0	1	1	1	1	BAZ2A	bromodomain adjacent to zinc finger domain, 2A
hsa-miR-296-3p	1	0	1	1	1	1	PAX8	paired box 8
hsa-miR-296-3p	1	0	1	1	1	1	CEP85	centrosomal protein 85kDa
hsa-miR-296-3p	0	0	1	0	1	1	FLJ14186	uncharacterized LOC401149
hsa-miR-296-3p	1	0	1	1	1	1	ZNF385A	zinc finger protein 385A
hsa-miR-296-3p	1	0	1	0	1	1	ATP2B1	ATPase, Ca++ transporting, plasma membrane 1
hsa-miR-296-3p	0	0	1	0	0	0	RASAL3	RAS protein activator like 3
hsa-miR-296-3p	0	0	1	0	1	1	HEMK1	HemK methyltransferase family member 1
hsa-miR-296-3p	1	0	1	1	1	1	HPS3	Hermansky-Pudlak syndrome 3
hsa-miR-296-3p	1	0	1	1	0	0	UBXN7	UBX domain protein 7
hsa-miR-296-3p	1	0	1	1	1	1	DCAF8	DDB1 and CUL4 associated factor 8
hsa-miR-296-3p	1	0	1	1	1	1	TAF7L	TAF7-like RNA polymerase II, TATA box binding protein (TBP)-associated factor, 50kDa
hsa-miR-296-3p	1	0	1	1	1	1	GORASP2	golgi reassembly stacking protein 2, 55kDa
hsa-miR-296-3p	0	0	1	1	1	1	DUSP14	dual specificity phosphatase 14
hsa-miR-296-3p	0	0	1	1	1	1	GPBP1L1	GC-rich promoter binding protein 1-like 1
hsa-miR-296-3p	1	0	1	1	0	0	RAB34	RAB34, member RAS oncogene family
hsa-miR-296-3p	0	0	1	1	1	1	NETO2	neuropilin (NRP) and tolloid (TLL)-like 2
hsa-miR-296-3p	1	0	1	1	1	1	SLC38A1	solute carrier family 38, member 1
hsa-miR-296-3p	0	0	1	0	0	0	KIAA0664L3	KIAA0664-like 3
hsa-miR-296-3p	0	0	1	1	1	1	FAM107A	family with sequence similarity 107, member A
hsa-miR-296-3p	0	0	1	1	0	0	HAGHL	hydroxyacylglutathione hydrolase-like
hsa-miR-296-3p	0	0	1	0	0	0	LOC254559	uncharacterized LOC254559
hsa-miR-296-3p	1	0	1	1	1	1	DLGAP4	discs, large (Drosophila) homolog-associated protein 4
hsa-miR-296-3p	1	0	1	1	0	0	AUP1	ancient ubiquitous protein 1
hsa-miR-296-3p	0	0	1	0	0	0	LOC201617	uncharacterized LOC201617
hsa-miR-296-3p	0	0	1	1	0	0	BEAN1	brain expressed, associated with NEDD4, 1
hsa-miR-296-3p	0	0	1	0	0	0	BTBD19	BTB (POZ) domain containing 19
hsa-miR-296-3p	0	0	1	0	0	0	JPX	JPX transcript, XIST activator (non-protein coding)
hsa-miR-296-3p	0	0	1	1	0	0	CHRM3	cholinergic receptor, muscarinic 3
hsa-miR-296-3p	0	0	1	1	1	1	TP53I11	tumor protein p53 inducible protein 11
hsa-miR-296-3p	0	0	1	0	0	0	FLJ12825	uncharacterized LOC440101
hsa-miR-296-3p	0	0	1	1	0	0	ATP13A1	ATPase type 13A1
hsa-miR-296-3p	1	0	1	1	1	1	SCAMP5	secretory carrier membrane protein 5
hsa-miR-296-3p	0	0	1	1	1	1	BRD2	bromodomain containing 2
hsa-miR-296-3p	0	0	1	1	0	0	PYGM	phosphorylase, glycogen, muscle
hsa-miR-296-3p	1	0	1	1	1	1	PUM1	pumilio homolog 1 (Drosophila)
hsa-miR-296-3p	0	0	1	0	0	0	LOC158376	uncharacterized LOC158376
hsa-miR-296-3p	0	0	1	1	1	1	GNB2	guanine nucleotide binding protein (G protein), beta polypeptide 2
hsa-miR-296-3p	0	0	1	0	1	1	SNRNP48	small nuclear ribonucleoprotein 48kDa (U11/U12)
hsa-miR-296-3p	0	0	1	1	0	0	HECTD3	HECT domain containing E3 ubiquitin protein ligase 3
hsa-miR-296-3p	1	0	1	1	1	1	TPM3	tropomyosin 3
hsa-miR-296-3p	0	0	1	0	0	0	LOC157381	uncharacterized LOC157381
hsa-miR-296-3p	0	0	1	1	0	0	RELT	RELT tumor necrosis factor receptor
hsa-miR-296-3p	1	0	1	1	0	0	SLC29A2	solute carrier family 29 (nucleoside transporters), member 2
hsa-miR-296-3p	0	0	1	1	0	0	MEF2BNB-MEF2B	MEF2BNB-MEF2B readthrough
hsa-miR-296-3p	0	0	1	1	1	1	PSME3	proteasome (prosome, macropain) activator subunit 3 (PA28 gamma; Ki)
hsa-miR-296-3p	0	0	1	0	0	0	FLJ32742	uncharacterized locus FLJ32742
hsa-miR-296-3p	1	0	1	1	0	0	ZBTB37	zinc finger and BTB domain containing 37
hsa-miR-296-3p	0	0	1	1	1	1	TAF8	TAF8 RNA polymerase II, TATA box binding protein (TBP)-associated factor, 43kDa
hsa-miR-296-3p	0	0	1	1	1	1	RANBP17	RAN binding protein 17
hsa-miR-296-3p	1	0	1	1	0	0	ZFYVE27	zinc finger, FYVE domain containing 27
hsa-miR-296-3p	1	0	1	1	0	0	TCF7	transcription factor 7 (T-cell specific, HMG-box)
hsa-miR-296-3p	1	0	1	1	0	0	GBA2	glucosidase, beta (bile acid) 2
hsa-miR-296-3p	0	0	1	1	0	0	CD320	CD320 molecule
hsa-miR-296-3p	0	0	1	1	1	1	FXC1	fracture callus 1 homolog (rat)
hsa-miR-296-3p	0	0	1	0	1	1	UHMK1	U2AF homology motif (UHM) kinase 1
hsa-miR-296-3p	1	0	1	1	1	1	FAM102A	family with sequence similarity 102, member A
hsa-miR-296-3p	1	0	1	1	1	1	PRRT2	proline-rich transmembrane protein 2
hsa-miR-296-3p	0	0	1	1	1	1	PDZRN3	PDZ domain containing ring finger 3
hsa-miR-296-3p	1	0	1	1	1	1	CNOT4	CCR4-NOT transcription complex, subunit 4
hsa-miR-296-3p	1	0	1	1	0	0	APBB3	amyloid beta (A4) precursor protein-binding, family B, member 3
hsa-miR-296-3p	1	0	1	1	1	1	UBAP1	ubiquitin associated protein 1
hsa-miR-296-3p	0	0	1	1	0	0	LGR5	leucine-rich repeat containing G protein-coupled receptor 5
hsa-miR-296-3p	0	0	1	1	0	0	PIGO	phosphatidylinositol glycan anchor biosynthesis, class O
hsa-miR-296-3p	0	0	1	1	0	0	ATP6AP1	ATPase, H+ transporting, lysosomal accessory protein 1
hsa-miR-296-3p	0	0	1	1	0	0	PPP2R1A	protein phosphatase 2, regulatory subunit A, alpha
hsa-miR-296-3p	1	0	1	1	1	1	DPH1	DPH1 homolog (S. cerevisiae)
hsa-miR-296-3p	0	0	1	0	0	0	LOC152225	uncharacterized LOC152225
hsa-miR-296-3p	0	0	1	0	0	0	LOC643837	uncharacterized LOC643837
hsa-miR-296-3p	0	0	1	1	0	0	ACOT11	acyl-CoA thioesterase 11
hsa-miR-296-3p	1	0	1	1	1	1	EGR2	early growth response 2
hsa-miR-296-3p	0	0	1	0	0	0	SEC14L2	SEC14-like 2 (S. cerevisiae)
hsa-miR-296-3p	1	0	1	1	1	1	SUPT16H	suppressor of Ty 16 homolog (S. cerevisiae)
hsa-miR-296-3p	0	0	1	1	0	0	CDK15	cyclin-dependent kinase 15
hsa-miR-296-3p	1	0	1	1	1	1	FBXW2	F-box and WD repeat domain containing 2
hsa-miR-296-3p	0	0	1	1	1	1	CD34	CD34 molecule
hsa-miR-296-3p	0	0	1	1	1	1	CHPT1	choline phosphotransferase 1
hsa-miR-296-3p	0	0	1	0	0	0	LOC283887	uncharacterized LOC283887
hsa-miR-296-3p	1	0	1	1	1	1	HMOX2	heme oxygenase (decycling) 2
hsa-miR-296-3p	0	0	1	1	1	1	N4BP2L2	NEDD4 binding protein 2-like 2
hsa-miR-296-3p	0	0	1	1	1	1	C19orf47	chromosome 19 open reading frame 47
hsa-miR-296-3p	1	0	1	1	1	1	KCND1	potassium voltage-gated channel, Shal-related subfamily, member 1
hsa-miR-296-3p	0	0	1	1	1	1	SPOCK1	sparc/osteonectin, cwcv and kazal-like domains proteoglycan (testican) 1
hsa-miR-296-3p	1	0	1	1	1	1	SLC7A8	solute carrier family 7 (amino acid transporter light chain, L system), member 8
hsa-miR-296-3p	1	0	1	1	1	1	NSG1	neuron specific gene family member 1
hsa-miR-296-3p	1	0	1	1	1	1	KLC2	kinesin light chain 2
hsa-miR-296-3p	1	0	1	1	1	1	GALNTL2	UDP-N-acetyl-alpha-D-galactosamine:polypeptide N-acetylgalactosaminyltransferase-like 2
hsa-miR-296-3p	0	0	1	1	0	0	CES4A	carboxylesterase 4A
hsa-miR-296-3p	1	0	1	1	1	1	GCLC	glutamate-cysteine ligase, catalytic subunit
hsa-miR-296-3p	0	0	1	1	0	0	TMEM108	transmembrane protein 108
hsa-miR-296-3p	0	0	1	1	1	1	AES	amino-terminal enhancer of split
hsa-miR-296-3p	0	0	1	1	1	1	MOBP	myelin-associated oligodendrocyte basic protein
hsa-miR-296-3p	1	0	1	1	0	0	SAP30BP	SAP30 binding protein
hsa-miR-296-3p	1	0	1	1	0	0	DOT1L	DOT1-like, histone H3 methyltransferase (S. cerevisiae)
hsa-miR-296-3p	1	0	1	1	1	1	ATXN10	ataxin 10
hsa-miR-296-3p	1	0	1	0	1	1	UVRAG	UV radiation resistance associated gene
hsa-miR-296-3p	0	0	1	1	1	1	AQP3	aquaporin 3 (Gill blood group)
hsa-miR-296-3p	0	0	1	1	1	1	CHI3L1	chitinase 3-like 1 (cartilage glycoprotein-39)
hsa-miR-296-3p	0	0	1	1	1	1	FUT11	fucosyltransferase 11 (alpha (1,3) fucosyltransferase)
hsa-miR-296-3p	0	0	1	1	1	1	SETD2	SET domain containing 2
hsa-miR-296-3p	0	0	1	1	1	1	SIRPB2	signal-regulatory protein beta 2
hsa-miR-296-3p	0	0	1	0	0	0	LOC100129620	uncharacterized LOC100129620
hsa-miR-296-3p	1	0	1	1	1	1	FAM222B	family with sequence similarity 222, member B
hsa-miR-296-3p	0	0	1	0	0	0	LOC284577	uncharacterized LOC284577
hsa-miR-296-3p	1	0	1	1	1	1	CS	citrate synthase
hsa-miR-296-3p	1	0	1	1	1	1	PEA15	phosphoprotein enriched in astrocytes 15
hsa-miR-296-3p	1	0	1	1	1	1	FAM98A	family with sequence similarity 98, member A
hsa-miR-296-3p	0	0	1	1	1	1	KIAA1755	KIAA1755
hsa-miR-296-3p	1	0	1	1	1	1	SLITRK2	SLIT and NTRK-like family, member 2
hsa-miR-296-3p	0	0	1	0	0	0	FAM66C	family with sequence similarity 66, member C
hsa-miR-296-3p	0	0	1	0	0	0	OTUD1	OTU domain containing 1
hsa-miR-296-3p	0	0	1	1	1	1	ZNF673	zinc finger family member 673
hsa-miR-296-3p	1	0	1	1	0	0	CHD3	chromodomain helicase DNA binding protein 3
hsa-miR-296-3p	1	0	1	0	1	1	KIAA1737	KIAA1737
hsa-miR-296-3p	1	0	1	0	1	1	THRB	thyroid hormone receptor, beta
hsa-miR-296-3p	1	0	1	0	0	0	PID1	phosphotyrosine interaction domain containing 1
hsa-miR-296-3p	1	0	1	1	1	1	SYT6	synaptotagmin VI
hsa-miR-296-3p	1	0	1	1	1	1	SNRNP70	small nuclear ribonucleoprotein 70kDa (U1)
hsa-miR-296-3p	1	0	1	1	1	1	EPB41L1	erythrocyte membrane protein band 4.1-like 1
hsa-miR-296-3p	1	0	1	1	1	1	SPARC	secreted protein, acidic, cysteine-rich (osteonectin)
hsa-miR-296-3p	0	0	1	0	1	1	TNFAIP8	tumor necrosis factor, alpha-induced protein 8
hsa-miR-296-3p	1	0	1	1	1	1	RAB11FIP4	RAB11 family interacting protein 4 (class II)
hsa-miR-296-3p	1	0	1	0	1	1	AGFG1	ArfGAP with FG repeats 1
hsa-miR-296-3p	0	0	1	0	0	0	LOC100128560	uncharacterized LOC100128560
hsa-miR-296-3p	1	0	1	1	1	1	NSUN4	NOP2/Sun domain family, member 4
hsa-miR-296-3p	1	0	1	1	1	1	PRKAG1	protein kinase, AMP-activated, gamma 1 non-catalytic subunit
hsa-miR-296-3p	0	0	1	1	0	0	AHCY	adenosylhomocysteinase
hsa-miR-296-3p	1	0	1	1	1	1	IGSF11	immunoglobulin superfamily, member 11
hsa-miR-296-3p	0	0	1	0	0	0	LOC284385	uncharacterized LOC284385
hsa-miR-296-3p	0	0	1	1	0	0	PSAPL1	prosaposin-like 1 (gene/pseudogene)
hsa-miR-296-3p	0	0	1	1	0	0	TMEM150A	transmembrane protein 150A
hsa-miR-296-3p	0	0	1	1	1	1	RP1	retinitis pigmentosa 1 (autosomal dominant)
hsa-miR-296-3p	0	0	1	0	0	0	LOC100130954	uncharacterized LOC100130954
hsa-miR-296-3p	0	0	1	1	1	1	ANKZF1	ankyrin repeat and zinc finger domain containing 1
hsa-miR-296-3p	1	0	1	1	1	1	IL20RA	interleukin 20 receptor, alpha
hsa-miR-296-3p	1	0	1	1	1	1	NDFIP2	Nedd4 family interacting protein 2
hsa-miR-296-3p	1	0	1	1	1	1	NAP1L1	nucleosome assembly protein 1-like 1
hsa-miR-296-3p	0	0	1	1	1	1	UPP2	uridine phosphorylase 2
hsa-miR-296-3p	0	0	1	1	1	1	SLFN13	schlafen family member 13
hsa-miR-296-3p	0	0	1	1	0	0	KIAA0146	KIAA0146
hsa-miR-296-3p	1	0	1	1	1	1	AGAP2	ArfGAP with GTPase domain, ankyrin repeat and PH domain 2
hsa-miR-296-3p	0	0	1	1	0	0	PROKR1	prokineticin receptor 1
hsa-miR-296-3p	0	0	1	1	0	0	MX2	myxovirus (influenza virus) resistance 2 (mouse)
hsa-miR-296-3p	1	0	1	1	1	1	ZBTB4	zinc finger and BTB domain containing 4
hsa-miR-296-3p	0	0	1	1	0	0	SLC26A10	solute carrier family 26, member 10
hsa-miR-296-3p	0	0	1	1	1	1	GFI1	growth factor independent 1 transcription repressor
hsa-miR-296-3p	0	0	1	0	1	1	PATE4	prostate and testis expressed 4
hsa-miR-296-3p	1	0	1	1	1	1	CBLB	Cbl proto-oncogene, E3 ubiquitin protein ligase B
hsa-miR-296-3p	0	0	1	1	0	0	SSPO	SCO-spondin homolog (Bos taurus)
hsa-miR-296-3p	0	0	1	1	1	1	BAI2	brain-specific angiogenesis inhibitor 2
hsa-miR-296-3p	0	0	1	1	0	0	TJAP1	tight junction associated protein 1 (peripheral)
hsa-miR-296-3p	0	0	1	0	0	0	LOC650368	asparagine-linked glycosylation 1-like pseudogene
hsa-miR-296-3p	0	0	1	1	0	0	C16orf86	chromosome 16 open reading frame 86
hsa-miR-296-3p	1	0	1	1	1	1	EPAS1	endothelial PAS domain protein 1
hsa-miR-296-3p	1	0	1	1	1	1	FAM219A	family with sequence similarity 219, member A
hsa-miR-296-3p	0	0	1	0	0	0	DKFZP434H168	uncharacterized LOC26077
hsa-miR-296-3p	0	0	1	1	1	1	SLC9A1	solute carrier family 9, subfamily A (NHE1, cation proton antiporter 1), member 1
hsa-miR-296-3p	1	0	1	1	0	0	KCNC1	potassium voltage-gated channel, Shaw-related subfamily, member 1
hsa-miR-296-3p	1	0	1	1	1	1	NECAB3	N-terminal EF-hand calcium binding protein 3
hsa-miR-296-3p	1	0	1	0	1	1	TTYH3	tweety homolog 3 (Drosophila)
hsa-miR-296-3p	1	0	1	1	1	1	FAM122B	family with sequence similarity 122B
hsa-miR-296-3p	0	0	1	1	1	1	IDS	iduronate 2-sulfatase
hsa-miR-296-3p	0	0	1	0	0	0	LINC00282	long intergenic non-protein coding RNA 282
hsa-miR-296-3p	0	0	1	1	1	1	KANSL1L	KAT8 regulatory NSL complex subunit 1-like
hsa-miR-296-3p	0	0	1	1	1	1	ATPBD4	ATP binding domain 4
hsa-miR-296-3p	1	0	1	1	0	0	GXYLT1	glucoside xylosyltransferase 1
hsa-miR-296-3p	0	0	1	1	0	0	LOC100128239	uncharacterized LOC100128239
hsa-miR-296-3p	0	0	1	1	1	1	MKX	mohawk homeobox
hsa-miR-296-3p	0	0	1	1	0	0	ANKHD1-EIF4EBP3	ANKHD1-EIF4EBP3 readthrough
hsa-miR-296-3p	1	0	1	1	1	1	SH3BP5L	SH3-binding domain protein 5-like
hsa-miR-296-3p	0	0	1	0	0	0	FAM75D4	family with sequence similarity 75, member D4
hsa-miR-296-3p	0	0	1	0	0	0	FAM95B1	family with sequence similarity 95, member B1
hsa-miR-296-3p	0	0	1	1	0	0	RPRD2	regulation of nuclear pre-mRNA domain containing 2
hsa-miR-296-3p	1	0	1	1	1	1	TP53INP1	tumor protein p53 inducible nuclear protein 1
hsa-miR-296-3p	0	0	1	1	0	0	C20orf141	chromosome 20 open reading frame 141
hsa-miR-296-3p	0	0	1	1	0	0	FSIP2	fibrous sheath interacting protein 2
hsa-miR-296-3p	1	0	1	1	1	1	PLEKHB2	pleckstrin homology domain containing, family B (evectins) member 2
hsa-miR-296-3p	0	0	1	0	1	1	LOC388942	uncharacterized LOC388942
hsa-miR-296-3p	1	0	1	1	1	1	ATP1A2	ATPase, Na+/K+ transporting, alpha 2 polypeptide
hsa-miR-296-3p	1	0	1	1	1	1	NCAN	neurocan
hsa-miR-296-3p	0	0	1	1	0	0	SPATS1	spermatogenesis associated, serine-rich 1
hsa-miR-296-3p	1	0	1	1	0	0	TNK2	tyrosine kinase, non-receptor, 2
hsa-miR-296-3p	1	0	1	1	1	1	DLG2	discs, large homolog 2 (Drosophila)
hsa-miR-296-3p	0	0	1	1	1	1	SZT2	seizure threshold 2 homolog (mouse)
hsa-miR-296-3p	1	0	1	1	1	1	MKRN1	makorin ring finger protein 1
hsa-miR-296-3p	0	0	1	1	0	0	FAM54B	family with sequence similarity 54, member B
hsa-miR-296-3p	1	0	1	0	1	1	YAF2	YY1 associated factor 2
hsa-miR-296-3p	0	0	1	0	0	0	LOC285812	uncharacterized LOC285812
hsa-miR-296-3p	0	0	1	0	0	0	LOC100128262	uncharacterized LOC100128262
hsa-miR-296-3p	0	0	1	1	1	1	SLC35F2	solute carrier family 35, member F2
hsa-miR-296-3p	0	0	1	1	0	0	LOC100128682	uncharacterized LOC100128682
hsa-miR-296-3p	1	0	1	1	1	1	SLC12A6	solute carrier family 12 (potassium/chloride transporters), member 6
hsa-miR-296-3p	0	0	1	0	0	0	FAM205B	transmembrane protein C9orf144B pseudogene
hsa-miR-296-3p	0	0	1	1	0	0	FAM159A	family with sequence similarity 159, member A
hsa-miR-296-3p	1	0	1	1	0	0	MAN1B1	mannosidase, alpha, class 1B, member 1
hsa-miR-296-3p	1	0	1	0	1	1	KDM2A	lysine (K)-specific demethylase 2A
hsa-miR-296-3p	0	0	1	0	0	0	LOC440993	uncharacterized LOC440993
hsa-miR-296-3p	1	0	1	1	1	1	TXNRD1	thioredoxin reductase 1
hsa-miR-296-3p	0	0	1	1	1	1	ATXN2	ataxin 2
hsa-miR-296-3p	0	0	1	0	0	0	IDO2	indoleamine 2,3-dioxygenase 2
hsa-miR-296-3p	0	0	1	0	0	0	EMBP1	embigin pseudogene 1
hsa-miR-296-3p	1	0	1	0	1	1	CYB561D1	cytochrome b-561 domain containing 1
hsa-miR-296-3p	0	0	1	0	0	0	FLJ26245	uncharacterized LOC400533
hsa-miR-296-3p	0	0	1	1	0	0	HEATR8	HEAT repeat containing 8
hsa-miR-296-3p	0	0	1	1	1	1	ST8SIA5	ST8 alpha-N-acetyl-neuraminide alpha-2,8-sialyltransferase 5
hsa-miR-296-3p	1	0	1	0	1	1	RXRA	retinoid X receptor, alpha
hsa-miR-296-3p	1	0	1	0	1	1	ESRRG	estrogen-related receptor gamma
hsa-miR-296-3p	0	0	1	0	1	1	RUFY4	RUN and FYVE domain containing 4
hsa-miR-296-3p	1	0	1	0	1	1	FMNL2	formin-like 2
hsa-miR-296-3p	0	0	1	1	0	0	ISOC2	isochorismatase domain containing 2
hsa-miR-296-3p	0	0	1	1	0	0	MAMSTR	MEF2 activating motif and SAP domain containing transcriptional regulator
hsa-miR-296-3p	0	0	1	1	1	1	ZNF346	zinc finger protein 346
hsa-miR-296-3p	0	0	1	1	0	0	ZNF730	zinc finger protein 730
hsa-miR-296-3p	0	0	1	1	1	1	PDE2A	phosphodiesterase 2A, cGMP-stimulated
hsa-miR-296-3p	0	0	1	1	1	1	PHF12	PHD finger protein 12
hsa-miR-296-3p	0	0	1	0	0	0	AGAP9	ArfGAP with GTPase domain, ankyrin repeat and PH domain 9
hsa-miR-296-3p	0	0	1	1	0	0	SCNN1A	sodium channel, non-voltage-gated 1 alpha subunit
hsa-miR-296-3p	1	0	1	1	1	1	RBBP4	retinoblastoma binding protein 4
hsa-miR-296-3p	1	0	1	1	1	1	TAP2	transporter 2, ATP-binding cassette, sub-family B (MDR/TAP)
hsa-miR-296-3p	1	0	1	1	1	1	TBC1D15	TBC1 domain family, member 15
hsa-miR-296-3p	1	0	1	1	1	1	PTPN2	protein tyrosine phosphatase, non-receptor type 2
hsa-miR-296-3p	1	0	1	1	0	0	ABLIM3	actin binding LIM protein family, member 3
hsa-miR-296-3p	1	0	1	0	1	1	MAP3K3	mitogen-activated protein kinase kinase kinase 3
hsa-miR-296-3p	0	0	1	1	1	1	SERPINE2	serpin peptidase inhibitor, clade E (nexin, plasminogen activator inhibitor type 1), member 2
hsa-miR-296-3p	1	0	1	1	1	1	BIN2	bridging integrator 2
hsa-miR-296-3p	0	0	1	1	1	1	RNF135	ring finger protein 135
hsa-miR-296-3p	1	0	1	1	1	1	NCOA1	nuclear receptor coactivator 1
hsa-miR-296-3p	0	0	1	1	0	0	TRIM69	tripartite motif containing 69
hsa-miR-296-3p	1	0	1	0	1	1	TEAD3	TEA domain family member 3
hsa-miR-296-3p	1	0	1	1	1	1	DUSP3	dual specificity phosphatase 3
hsa-miR-296-3p	0	0	1	1	0	0	MCM7	minichromosome maintenance complex component 7
hsa-miR-296-3p	1	0	1	1	1	1	SHISA5	shisa homolog 5 (Xenopus laevis)
hsa-miR-296-3p	0	0	1	1	1	1	ARIH1	ariadne homolog, ubiquitin-conjugating enzyme E2 binding protein, 1 (Drosophila)
hsa-miR-296-3p	0	0	1	1	0	0	ODF3	outer dense fiber of sperm tails 3
hsa-miR-296-3p	0	0	1	0	0	0	KIAA0913	KIAA0913
hsa-miR-296-3p	0	0	1	1	1	1	ZNF280D	zinc finger protein 280D
hsa-miR-296-3p	1	0	1	1	1	1	TFE3	transcription factor binding to IGHM enhancer 3
hsa-miR-296-3p	0	0	1	1	0	0	DOPEY1	dopey family member 1
hsa-miR-296-3p	0	0	1	0	0	0	FAM66D	family with sequence similarity 66, member D
hsa-miR-296-3p	1	0	1	1	1	1	MSANTD2	Myb/SANT-like DNA-binding domain containing 2
hsa-miR-296-3p	1	0	1	0	1	1	FAM19A1	family with sequence similarity 19 (chemokine (C-C motif)-like), member A1
hsa-miR-296-3p	1	0	1	1	1	1	USP45	ubiquitin specific peptidase 45
hsa-miR-296-3p	1	0	1	1	1	1	KDM6A	lysine (K)-specific demethylase 6A
hsa-miR-296-3p	0	0	1	1	1	1	PDE4DIP	phosphodiesterase 4D interacting protein
hsa-miR-296-3p	1	0	1	1	0	0	USP24	ubiquitin specific peptidase 24
hsa-miR-296-3p	0	0	1	1	1	1	C10orf57	chromosome 10 open reading frame 57
hsa-miR-296-3p	0	0	1	1	1	1	U2AF1	U2 small nuclear RNA auxiliary factor 1
hsa-miR-296-3p	0	0	1	0	0	0	FAM225A	family with sequence similarity 225, member A (non-protein coding)
hsa-miR-296-3p	0	0	1	1	1	1	CYR61	cysteine-rich, angiogenic inducer, 61
hsa-miR-296-3p	1	0	1	1	1	1	EZH1	enhancer of zeste homolog 1 (Drosophila)
hsa-miR-296-3p	0	0	1	1	1	1	NARG2	NMDA receptor regulated 2
hsa-miR-296-3p	0	0	1	1	1	1	ZNF323	zinc finger protein 323
hsa-miR-296-3p	0	0	1	1	0	0	LRRN2	leucine rich repeat neuronal 2
hsa-miR-296-3p	0	0	1	0	0	0	EPHA1-AS1	EPHA1 antisense RNA 1
hsa-miR-296-3p	0	0	1	0	0	0	ADCY10P1	adenylate cyclase 10 (soluble) pseudogene 1
hsa-miR-296-3p	1	0	1	1	1	1	IL17RD	interleukin 17 receptor D
hsa-miR-296-3p	1	0	1	0	0	0	NPEPL1	aminopeptidase-like 1
hsa-miR-296-3p	1	0	1	1	0	0	LRRC16B	leucine rich repeat containing 16B
hsa-miR-296-3p	1	0	1	1	1	1	MBD6	methyl-CpG binding domain protein 6
hsa-miR-296-3p	0	0	1	1	1	1	BAIAP3	BAI1-associated protein 3
hsa-miR-296-3p	1	0	1	1	1	1	RICTOR	RPTOR independent companion of MTOR, complex 2
hsa-miR-296-3p	1	0	1	0	1	1	KIF21B	kinesin family member 21B
hsa-miR-296-3p	0	0	1	1	1	1	LMAN2L	lectin, mannose-binding 2-like
hsa-miR-296-3p	0	0	1	1	1	1	TMEM130	transmembrane protein 130
hsa-miR-296-3p	1	0	1	1	1	1	RNF38	ring finger protein 38
hsa-miR-296-3p	0	0	1	1	0	0	TMEM134	transmembrane protein 134
hsa-miR-296-3p	0	0	1	1	1	1	CRB1	crumbs homolog 1 (Drosophila)
hsa-miR-296-3p	0	0	1	1	1	1	GPRASP1	G protein-coupled receptor associated sorting protein 1
hsa-miR-296-3p	1	0	1	0	1	1	BDNF	brain-derived neurotrophic factor
hsa-miR-296-3p	1	0	1	1	1	1	RBBP6	retinoblastoma binding protein 6
hsa-miR-296-3p	0	0	1	1	0	0	EIF5A	eukaryotic translation initiation factor 5A
hsa-miR-296-3p	1	0	1	1	1	1	GGT7	gamma-glutamyltransferase 7
hsa-miR-296-3p	1	0	1	1	1	1	USF2	upstream transcription factor 2, c-fos interacting
hsa-miR-296-3p	0	0	1	1	1	1	CYP4B1	cytochrome P450, family 4, subfamily B, polypeptide 1
hsa-miR-296-3p	0	0	1	1	0	0	CMTM1	CKLF-like MARVEL transmembrane domain containing 1
hsa-miR-296-3p	0	0	1	1	1	1	LBX2	ladybird homeobox 2
hsa-miR-296-3p	0	0	1	1	0	0	ZSCAN30	zinc finger and SCAN domain containing 30
hsa-miR-296-3p	1	0	1	1	1	1	MAEA	macrophage erythroblast attacher
hsa-miR-296-3p	0	0	1	1	0	0	CUZD1	CUB and zona pellucida-like domains 1
hsa-miR-296-3p	1	0	1	1	1	1	TPP1	tripeptidyl peptidase I
hsa-miR-296-3p	1	0	1	1	1	1	PBRM1	polybromo 1
hsa-miR-296-3p	1	0	1	1	1	1	OPRM1	opioid receptor, mu 1
hsa-miR-296-3p	1	0	1	1	1	1	GFRA2	GDNF family receptor alpha 2
hsa-miR-296-3p	1	0	1	1	1	1	TAB3	TGF-beta activated kinase 1/MAP3K7 binding protein 3
hsa-miR-296-3p	0	0	1	1	1	1	MFAP5	microfibrillar associated protein 5
hsa-miR-296-3p	0	0	1	0	1	1	ANKS1B	ankyrin repeat and sterile alpha motif domain containing 1B
hsa-miR-296-3p	0	0	1	1	0	0	ART5	ADP-ribosyltransferase 5
hsa-miR-296-3p	0	0	1	1	0	0	TMEM54	transmembrane protein 54
hsa-miR-296-3p	1	0	1	1	1	1	ECT2	epithelial cell transforming sequence 2 oncogene
hsa-miR-296-3p	0	0	1	1	1	1	RPTN	repetin
hsa-miR-296-3p	0	0	1	1	1	1	PTGR2	prostaglandin reductase 2
hsa-miR-296-3p	0	0	1	1	1	1	PTPRC	protein tyrosine phosphatase, receptor type, C
hsa-miR-296-3p	0	0	1	1	1	1	TIMM50	translocase of inner mitochondrial membrane 50 homolog (S. cerevisiae)
hsa-miR-296-3p	1	0	1	1	1	1	VPS45	vacuolar protein sorting 45 homolog (S. cerevisiae)
hsa-miR-296-3p	0	0	1	1	0	0	SH2D6	SH2 domain containing 6
hsa-miR-296-3p	0	0	1	1	1	1	AICDA	activation-induced cytidine deaminase
hsa-miR-296-3p	0	0	1	1	0	0	ART3	ADP-ribosyltransferase 3
hsa-miR-296-3p	1	0	1	1	1	1	HMGA2	high mobility group AT-hook 2
hsa-miR-296-3p	0	0	1	1	0	0	DHRS4	dehydrogenase/reductase (SDR family) member 4
hsa-miR-296-3p	1	0	1	1	0	0	ZCCHC4	zinc finger, CCHC domain containing 4
hsa-miR-296-3p	0	0	1	1	1	1	IL24	interleukin 24
hsa-miR-296-3p	1	0	1	1	1	1	RTN3	reticulon 3
hsa-miR-296-3p	0	0	1	1	1	1	AGER	advanced glycosylation end product-specific receptor
hsa-miR-296-3p	1	0	1	1	1	1	NTNG1	netrin G1
hsa-miR-296-3p	0	0	1	1	0	0	NBPF8	neuroblastoma breakpoint family, member 8
hsa-miR-296-3p	0	0	1	1	0	0	KLK4	kallikrein-related peptidase 4
hsa-miR-296-3p	1	0	1	1	1	1	TBC1D22B	TBC1 domain family, member 22B
hsa-miR-296-3p	1	0	1	1	0	0	PLXNB3	plexin B3
hsa-miR-296-3p	0	0	1	1	1	1	FAM115A	family with sequence similarity 115, member A
hsa-miR-296-3p	1	0	1	0	1	1	FAM46A	family with sequence similarity 46, member A
hsa-miR-296-3p	1	0	1	1	0	0	PPP4C	protein phosphatase 4, catalytic subunit
hsa-miR-296-3p	0	0	1	1	1	1	B4GALT2	UDP-Gal:betaGlcNAc beta 1,4- galactosyltransferase, polypeptide 2
hsa-miR-296-3p	1	0	1	1	1	1	NRGN	neurogranin (protein kinase C substrate, RC3)
hsa-miR-296-3p	1	0	1	0	1	1	DPYSL5	dihydropyrimidinase-like 5
hsa-miR-296-3p	0	0	1	1	1	1	TUFT1	tuftelin 1
hsa-miR-296-3p	1	0	1	1	0	0	STX1A	syntaxin 1A (brain)
hsa-miR-296-3p	1	0	1	1	1	1	RIMS3	regulating synaptic membrane exocytosis 3
hsa-miR-296-3p	0	0	1	1	0	0	SCG5	secretogranin V (7B2 protein)
hsa-miR-296-3p	0	0	1	1	1	1	ZNF589	zinc finger protein 589
hsa-miR-296-3p	1	0	1	1	1	1	POU2F2	POU class 2 homeobox 2
hsa-miR-296-3p	1	0	1	1	1	1	U2SURP	U2 snRNP-associated SURP domain containing
hsa-miR-296-3p	1	0	1	0	1	1	FAXC	failed axon connections homolog (Drosophila)
hsa-miR-296-3p	0	0	1	1	1	1	SGK2	serum/glucocorticoid regulated kinase 2
hsa-miR-296-3p	0	0	1	1	0	0	MYLK2	myosin light chain kinase 2
hsa-miR-296-3p	1	0	1	1	1	1	SLC27A4	solute carrier family 27 (fatty acid transporter), member 4
hsa-miR-296-3p	0	0	1	1	0	0	FUZ	fuzzy homolog (Drosophila)
hsa-miR-296-3p	1	0	1	1	0	0	SIGMAR1	sigma non-opioid intracellular receptor 1
hsa-miR-296-3p	1	0	1	1	1	1	ATP6AP2	ATPase, H+ transporting, lysosomal accessory protein 2
hsa-miR-296-3p	1	0	1	1	1	1	OTUD5	OTU domain containing 5
hsa-miR-296-3p	0	0	1	0	0	0	GRAMD1B	GRAM domain containing 1B
hsa-miR-296-3p	0	0	1	1	0	0	WISP3	WNT1 inducible signaling pathway protein 3
hsa-miR-296-3p	1	0	1	0	1	1	RNF165	ring finger protein 165
hsa-miR-296-3p	1	0	1	0	1	1	FNDC3B	fibronectin type III domain containing 3B
hsa-miR-296-3p	1	0	1	0	1	1	TBC1D5	TBC1 domain family, member 5
hsa-miR-296-3p	0	0	1	1	1	1	ATP5SL	ATP5S-like
hsa-miR-296-3p	1	0	1	1	1	1	ZNF3	zinc finger protein 3
hsa-miR-296-3p	0	0	1	1	1	1	KLHL29	kelch-like 29 (Drosophila)
hsa-miR-296-3p	1	0	1	1	1	1	ETF1	eukaryotic translation termination factor 1
hsa-miR-296-3p	1	0	1	1	1	1	PRDM2	PR domain containing 2, with ZNF domain
hsa-miR-296-3p	0	0	1	1	1	1	C2orf65	chromosome 2 open reading frame 65
hsa-miR-296-3p	0	0	1	1	1	1	PTK7	PTK7 protein tyrosine kinase 7
hsa-miR-296-3p	0	0	1	0	0	0	MGC21881	uncharacterized locus MGC21881
hsa-miR-296-3p	1	0	1	1	1	1	ZBTB38	zinc finger and BTB domain containing 38
hsa-miR-296-3p	1	0	1	1	1	1	NUMBL	numb homolog (Drosophila)-like
hsa-miR-296-3p	0	0	1	1	1	1	CMAS	cytidine monophosphate N-acetylneuraminic acid synthetase
hsa-miR-296-3p	0	0	1	0	0	0	FAM86DP	family with sequence similarity 86, member D, pseudogene
hsa-miR-296-3p	0	0	1	1	1	1	FAM122C	family with sequence similarity 122C
hsa-miR-296-3p	1	0	1	0	1	1	CYBRD1	cytochrome b reductase 1
hsa-miR-296-3p	1	0	1	1	1	1	NRF1	nuclear respiratory factor 1
hsa-miR-296-3p	1	0	1	1	1	1	CMPK1	cytidine monophosphate (UMP-CMP) kinase 1, cytosolic
hsa-miR-296-3p	0	0	1	1	1	1	TARP	TCR gamma alternate reading frame protein
hsa-miR-296-3p	0	0	1	0	0	0	ZNF720	zinc finger protein 720
hsa-miR-296-3p	0	0	1	0	0	0	WDFY3-AS2	WDFY3 antisense RNA 2
hsa-miR-296-3p	1	0	1	1	1	1	ZMAT4	zinc finger, matrin-type 4
hsa-miR-296-3p	0	0	1	0	1	1	CD99P1	CD99 molecule pseudogene 1
hsa-miR-296-3p	0	0	1	0	1	1	ZNF718	zinc finger protein 718
hsa-miR-296-3p	0	0	1	0	0	0	LOC728196	uncharacterized LOC728196
hsa-miR-296-3p	0	0	1	1	1	1	CDC42SE2	CDC42 small effector 2
hsa-miR-296-3p	1	0	1	1	1	1	SPOCK2	sparc/osteonectin, cwcv and kazal-like domains proteoglycan (testican) 2
hsa-miR-296-3p	0	0	1	1	0	0	ENOX1	ecto-NOX disulfide-thiol exchanger 1
hsa-miR-296-3p	0	0	1	0	0	0	FLJ35390	uncharacterized LOC255031
hsa-miR-296-3p	0	0	1	1	1	1	HYAL1	hyaluronoglucosaminidase 1
hsa-miR-296-3p	0	0	1	0	0	0	LOC494141	mitochondrial carrier triple repeat 1 pseudogene
hsa-miR-296-3p	0	0	1	0	0	0	EVPLL	envoplakin-like
hsa-miR-296-3p	1	0	1	1	1	1	RSPO2	R-spondin 2
hsa-miR-296-3p	0	0	1	1	1	1	SELP	selectin P (granule membrane protein 140kDa, antigen CD62)
hsa-miR-296-3p	1	0	1	1	1	1	TMEM127	transmembrane protein 127
hsa-miR-296-3p	0	0	1	0	1	1	VEZT	vezatin, adherens junctions transmembrane protein
hsa-miR-296-3p	1	0	1	1	1	1	HTR2C	5-hydroxytryptamine (serotonin) receptor 2C, G protein-coupled
hsa-miR-296-3p	1	0	1	0	0	0	KCNU1	potassium channel, subfamily U, member 1
hsa-miR-296-3p	0	0	1	0	0	0	LOC145837	uncharacterized LOC145837
hsa-miR-296-3p	0	0	1	1	1	1	SEMA3D	sema domain, immunoglobulin domain (Ig), short basic domain, secreted, (semaphorin) 3D
hsa-miR-296-3p	1	0	1	0	1	1	PSMF1	proteasome (prosome, macropain) inhibitor subunit 1 (PI31)
hsa-miR-296-3p	1	0	1	0	1	1	TFEC	transcription factor EC
hsa-miR-296-3p	0	0	1	1	1	1	TMEM117	transmembrane protein 117
hsa-miR-296-3p	1	0	1	1	1	1	ZBTB44	zinc finger and BTB domain containing 44
hsa-miR-296-3p	0	0	1	1	1	1	PIP5K1B	phosphatidylinositol-4-phosphate 5-kinase, type I, beta
hsa-miR-296-3p	0	0	1	1	1	1	LPAR1	lysophosphatidic acid receptor 1
hsa-miR-296-3p	1	0	1	1	1	1	ADARB1	adenosine deaminase, RNA-specific, B1
hsa-miR-296-3p	0	0	1	0	1	1	ZDHHC17	zinc finger, DHHC-type containing 17
hsa-miR-296-3p	0	0	1	1	0	0	ASIC4	acid-sensing (proton-gated) ion channel family member 4
hsa-miR-296-3p	1	0	1	1	1	1	PDZD2	PDZ domain containing 2
hsa-miR-296-3p	0	0	1	0	1	1	PLEKHM1P	pleckstrin homology domain containing, family M (with RUN domain) member 1 pseudogene
hsa-miR-296-3p	1	0	1	1	1	1	RAB5B	RAB5B, member RAS oncogene family
hsa-miR-296-3p	0	0	1	0	0	0	FAM86JP	family with sequence similarity 86, member A pseudogene
hsa-miR-296-3p	1	0	1	1	1	1	SIRPA	signal-regulatory protein alpha
hsa-miR-296-3p	0	0	1	1	0	0	IGFN1	immunoglobulin-like and fibronectin type III domain containing 1
hsa-miR-296-3p	0	0	1	0	0	0	BCAS3	breast carcinoma amplified sequence 3
hsa-miR-296-3p	1	0	1	1	1	1	CRKL	v-crk sarcoma virus CT10 oncogene homolog (avian)-like
hsa-miR-296-3p	0	0	1	1	1	1	IL20RB	interleukin 20 receptor beta
hsa-miR-296-3p	0	0	1	1	0	0	ADAP2	ArfGAP with dual PH domains 2
hsa-miR-296-3p	1	0	1	1	1	1	FBXL16	F-box and leucine-rich repeat protein 16
hsa-miR-296-3p	0	0	1	0	0	0	NBR2	neighbor of BRCA1 gene 2 (non-protein coding)
hsa-miR-296-3p	0	0	1	1	1	1	ZNF337	zinc finger protein 337
hsa-miR-296-3p	0	0	1	0	0	0	C9orf62	chromosome 9 open reading frame 62
hsa-miR-296-3p	0	0	1	0	1	1	DKFZP434I0714	uncharacterized protein DKFZP434I0714
hsa-miR-296-3p	1	0	1	1	1	1	NKAIN2	Na+/K+ transporting ATPase interacting 2
hsa-miR-296-3p	0	0	1	0	0	0	LINC00486	long intergenic non-protein coding RNA 486
hsa-miR-296-3p	0	0	1	0	1	1	KSR1	kinase suppressor of ras 1
hsa-miR-296-3p	1	0	1	1	1	1	GRIA4	glutamate receptor, ionotropic, AMPA 4
hsa-miR-296-3p	0	0	1	0	0	0	C12orf77	chromosome 12 open reading frame 77
hsa-miR-296-3p	0	0	1	0	0	0	HOXA-AS2	HOXA cluster antisense RNA 2
hsa-miR-296-3p	1	0	1	1	1	1	ZNF618	zinc finger protein 618
hsa-miR-296-3p	1	0	1	1	0	0	EGLN2	egl nine homolog 2 (C. elegans)
hsa-miR-296-3p	0	0	1	0	0	0	LINC00642	long intergenic non-protein coding RNA 642
hsa-miR-296-3p	1	0	1	1	1	1	MEIS1	Meis homeobox 1
hsa-miR-296-3p	0	0	1	0	0	0	CYP4F35P	cytochrome P450, family 4, subfamily F, polypeptide 35, pseudogene
hsa-miR-296-3p	0	0	1	0	0	0	LOC286184	uncharacterized LOC286184
hsa-miR-296-3p	0	0	1	1	1	1	ZNF138	zinc finger protein 138
hsa-miR-296-3p	0	0	1	1	1	1	TPPP3	tubulin polymerization-promoting protein family member 3
hsa-miR-296-3p	0	0	1	1	1	1	EFCAB13	EF-hand calcium binding domain 13
hsa-miR-296-3p	1	0	1	1	1	1	C4orf19	chromosome 4 open reading frame 19
hsa-miR-296-3p	0	0	1	0	0	0	INHBA-AS1	INHBA antisense RNA 1
hsa-miR-296-3p	1	0	1	0	1	1	KIAA0930	KIAA0930
hsa-miR-296-3p	0	0	1	1	0	0	VMO1	vitelline membrane outer layer 1 homolog (chicken)
hsa-miR-296-3p	0	0	1	0	0	0	LOC100134868	uncharacterized LOC100134868
hsa-miR-296-3p	1	0	1	1	0	0	PROSAPIP1	ProSAPiP1 protein
hsa-miR-296-3p	0	0	1	1	1	1	RMI2	RMI2, RecQ mediated genome instability 2, homolog (S. cerevisiae)
hsa-miR-296-3p	0	0	1	0	0	0	RNASEK	ribonuclease, RNase K
hsa-miR-296-3p	1	0	1	1	1	1	FOSB	FBJ murine osteosarcoma viral oncogene homolog B
hsa-miR-296-3p	1	0	1	1	1	1	DACH2	dachshund homolog 2 (Drosophila)
hsa-miR-296-3p	1	0	1	1	1	1	IL16	interleukin 16
hsa-miR-296-3p	1	0	1	1	1	1	BVES	blood vessel epicardial substance
hsa-miR-296-3p	1	0	1	1	1	1	INTS6	integrator complex subunit 6
hsa-miR-296-3p	0	0	1	0	1	1	TSLP	thymic stromal lymphopoietin
hsa-miR-296-3p	1	0	1	1	1	1	KCNJ11	potassium inwardly-rectifying channel, subfamily J, member 11
hsa-miR-296-3p	0	0	1	1	0	0	TMEM95	transmembrane protein 95
hsa-miR-296-3p	0	0	1	1	0	0	AQP12B	aquaporin 12B
hsa-miR-296-3p	0	0	1	1	0	0	PTGDS	prostaglandin D2 synthase 21kDa (brain)
hsa-miR-296-3p	1	0	1	0	1	1	DCUN1D4	DCN1, defective in cullin neddylation 1, domain containing 4 (S. cerevisiae)
hsa-miR-296-3p	1	0	1	1	1	1	DOC2A	double C2-like domains, alpha
hsa-miR-296-3p	1	0	1	1	1	1	CLOCK	clock homolog (mouse)
hsa-miR-296-3p	0	0	1	1	1	1	C4orf32	chromosome 4 open reading frame 32
hsa-miR-296-3p	0	0	1	0	0	0	OR7E47P	olfactory receptor, family 7, subfamily E, member 47 pseudogene
hsa-miR-296-3p	1	0	1	1	1	1	FKBP5	FK506 binding protein 5
hsa-miR-296-3p	1	0	1	1	1	1	ADD1	adducin 1 (alpha)
hsa-miR-296-3p	0	0	1	0	0	0	LOC338579	ankyrin repeat domain-containing protein 30B pseudogene
hsa-miR-296-3p	0	0	1	1	1	1	LDLRAD2	low density lipoprotein receptor class A domain containing 2
hsa-miR-296-3p	0	0	1	1	1	1	STRADA	STE20-related kinase adaptor alpha
hsa-miR-296-3p	0	0	1	1	1	1	MST1	macrophage stimulating 1 (hepatocyte growth factor-like)
hsa-miR-296-3p	1	0	1	1	1	1	MAMDC2	MAM domain containing 2
hsa-miR-296-3p	0	0	1	0	0	0	LOC283914	uncharacterized LOC283914
hsa-miR-296-3p	1	0	1	1	1	1	PCYT1B	phosphate cytidylyltransferase 1, choline, beta
hsa-miR-296-3p	1	0	1	1	1	1	SENP1	SUMO1/sentrin specific peptidase 1
hsa-miR-296-3p	0	0	1	0	0	0	LOC348120	uncharacterized LOC348120
hsa-miR-296-3p	0	0	1	0	0	0	CLEC4GP1	C-type lectin domain family 4, member G pseudogene 1
hsa-miR-296-3p	0	0	1	0	1	1	LOC401021	uncharacterized LOC401021
hsa-miR-296-3p	1	0	1	1	0	0	TTC9	tetratricopeptide repeat domain 9
hsa-miR-296-3p	0	0	1	1	1	1	RANGAP1	Ran GTPase activating protein 1
hsa-miR-296-3p	1	0	1	1	1	1	CLVS1	clavesin 1
hsa-miR-296-3p	1	0	1	1	1	1	MBNL1	muscleblind-like splicing regulator 1
hsa-miR-296-3p	1	0	1	0	1	1	SEMA4G	sema domain, immunoglobulin domain (Ig), transmembrane domain (TM) and short cytoplasmic domain, (semaphorin) 4G
hsa-miR-296-3p	0	0	1	1	0	0	SREBF2	sterol regulatory element binding transcription factor 2
hsa-miR-296-3p	1	0	1	1	1	1	ZFP91	zinc finger protein 91 homolog (mouse)
hsa-miR-296-3p	1	0	1	1	1	1	LIMD2	LIM domain containing 2
hsa-miR-296-3p	0	0	1	1	1	1	RAB3IL1	RAB3A interacting protein (rabin3)-like 1
hsa-miR-296-3p	1	0	1	1	1	1	SCUBE3	signal peptide, CUB domain, EGF-like 3
hsa-miR-296-3p	1	0	1	1	1	1	HP1BP3	heterochromatin protein 1, binding protein 3
hsa-miR-296-3p	0	0	1	1	1	1	C17orf97	chromosome 17 open reading frame 97
hsa-miR-296-3p	0	0	1	1	0	0	WDR62	WD repeat domain 62
hsa-miR-296-3p	0	0	1	1	0	0	GRIN2C	glutamate receptor, ionotropic, N-methyl D-aspartate 2C
hsa-miR-296-3p	1	0	1	1	1	1	PRRG1	proline rich Gla (G-carboxyglutamic acid) 1
hsa-miR-296-3p	0	0	1	0	1	1	GUCY1B3	guanylate cyclase 1, soluble, beta 3
hsa-miR-296-3p	0	0	1	1	1	1	ELL3	elongation factor RNA polymerase II-like 3
hsa-miR-296-3p	0	0	1	0	0	0	LOC550643	uncharacterized LOC550643
hsa-miR-296-3p	0	0	1	1	1	1	GPATCH2	G patch domain containing 2
hsa-miR-296-3p	0	0	1	1	0	0	C8orf31	chromosome 8 open reading frame 31
hsa-miR-296-3p	0	0	1	1	1	1	CAMLG	calcium modulating ligand
hsa-miR-296-3p	1	0	1	0	0	0	PRRT4	proline-rich transmembrane protein 4
hsa-miR-296-3p	0	0	1	1	0	0	PRSS55	protease, serine, 55
hsa-miR-296-3p	0	0	1	1	0	0	CLIC1	chloride intracellular channel 1
hsa-miR-296-3p	1	0	1	1	1	1	MYLK	myosin light chain kinase
hsa-miR-296-3p	0	0	1	1	1	1	ATP2A2	ATPase, Ca++ transporting, cardiac muscle, slow twitch 2
hsa-miR-296-3p	0	0	1	1	1	1	SLAMF1	signaling lymphocytic activation molecule family member 1
hsa-miR-296-3p	0	0	1	0	0	0	ADAM5	ADAM metallopeptidase domain 5, pseudogene
hsa-miR-296-3p	0	0	1	0	0	0	LINC00442	long intergenic non-protein coding RNA 442
hsa-miR-296-3p	0	0	1	1	0	0	LNP1	leukemia NUP98 fusion partner 1
hsa-miR-296-3p	1	0	1	1	1	1	PDCD6IP	programmed cell death 6 interacting protein
hsa-miR-296-3p	1	0	1	1	1	1	PHACTR4	phosphatase and actin regulator 4
hsa-miR-296-3p	0	0	1	1	1	1	TTLL9	tubulin tyrosine ligase-like family, member 9
hsa-miR-296-3p	0	0	1	0	0	0	PTGER4P2	prostaglandin E receptor 4 (subtype EP4) pseudogene 2
hsa-miR-296-3p	0	0	1	0	0	0	FOXN3-AS2	FOXN3 antisense RNA 2
hsa-miR-296-3p	0	0	1	1	0	0	CYP4F30P	cytochrome P450, family 4, subfamily F, polypeptide 30, pseudogene
hsa-miR-296-3p	1	0	1	1	1	1	LRRC32	leucine rich repeat containing 32
hsa-miR-296-3p	1	0	1	1	1	1	AHR	aryl hydrocarbon receptor
hsa-miR-296-3p	0	0	1	0	0	0	ZRANB2-AS1	ZRANB2 antisense RNA 1
hsa-miR-296-3p	0	0	1	1	0	0	SLAMF9	SLAM family member 9
hsa-miR-296-3p	1	0	1	0	1	1	TMEM194A	transmembrane protein 194A
hsa-miR-296-3p	0	0	1	0	0	0	LOC100147773	uncharacterized LOC100147773
hsa-miR-296-3p	1	0	1	1	1	1	LOXL3	lysyl oxidase-like 3
hsa-miR-296-3p	1	0	1	1	1	1	RARG	retinoic acid receptor, gamma
hsa-miR-296-3p	0	0	1	0	0	0	PHKA2-AS1	PHKA2 antisense RNA 1
hsa-miR-296-3p	1	0	1	1	1	1	OPCML	opioid binding protein/cell adhesion molecule-like
hsa-miR-296-3p	0	0	1	0	0	0	LINC00537	long intergenic non-protein coding RNA 537
hsa-miR-296-3p	1	0	1	1	1	1	SAMD4B	sterile alpha motif domain containing 4B
hsa-miR-296-3p	0	0	1	1	0	0	DNHD1	dynein heavy chain domain 1
hsa-miR-296-3p	1	0	1	1	1	1	ZBTB7A	zinc finger and BTB domain containing 7A
hsa-miR-296-3p	0	0	1	0	0	0	LOC554249	uncharacterized LOC554249
hsa-miR-296-3p	0	0	1	1	1	1	MAPK13	mitogen-activated protein kinase 13
hsa-miR-296-3p	1	0	1	1	1	1	STK38	serine/threonine kinase 38
hsa-miR-296-3p	1	0	1	1	1	1	ACVR2B	activin A receptor, type IIB
hsa-miR-296-3p	1	0	1	1	1	1	WNT10B	wingless-type MMTV integration site family, member 10B
hsa-miR-296-3p	0	0	1	1	1	1	R3HCC1L	R3H domain and coiled-coil containing 1-like
hsa-miR-296-3p	0	0	1	1	0	0	HOXB1	homeobox B1
hsa-miR-296-3p	0	0	1	1	1	1	ZNF365	zinc finger protein 365
hsa-miR-296-3p	1	0	1	1	1	1	PHKA1	phosphorylase kinase, alpha 1 (muscle)
hsa-miR-296-3p	0	0	1	1	0	0	ZNHIT3	zinc finger, HIT-type containing 3
hsa-miR-296-3p	1	0	1	1	1	1	ZNF763	zinc finger protein 763
hsa-miR-296-3p	1	0	1	0	1	1	RBM23	RNA binding motif protein 23
hsa-miR-296-3p	0	0	1	1	1	1	POSTN	periostin, osteoblast specific factor
hsa-miR-296-3p	1	0	1	1	1	1	USP34	ubiquitin specific peptidase 34
hsa-miR-296-3p	0	0	1	0	0	0	FAM86C2P	family with sequence similarity 86, member A pseudogene
hsa-miR-296-3p	0	0	1	1	0	0	RELA	v-rel reticuloendotheliosis viral oncogene homolog A (avian)
hsa-miR-296-3p	0	0	1	0	0	0	INTS4L1	integrator complex subunit 4-like 1
hsa-miR-296-3p	0	0	1	0	0	0	LRRC37A11P	leucine rich repeat containing 37, member A11, pseudogene
hsa-miR-296-3p	0	0	1	1	0	0	C9orf84	chromosome 9 open reading frame 84
hsa-miR-296-3p	0	0	1	1	1	1	LRCH1	leucine-rich repeats and calponin homology (CH) domain containing 1
hsa-miR-296-3p	1	0	1	1	1	1	SHANK2	SH3 and multiple ankyrin repeat domains 2
hsa-miR-296-3p	0	0	1	1	0	0	C20orf152	chromosome 20 open reading frame 152
hsa-miR-296-3p	0	0	1	0	0	0	BTF3P11	basic transcription factor 3 pseudogene 11
hsa-miR-296-3p	1	0	1	1	1	1	ITSN1	intersectin 1 (SH3 domain protein)
hsa-miR-296-3p	0	0	1	0	0	0	LRRC37BP1	leucine rich repeat containing 37B pseudogene 1
hsa-miR-296-3p	1	0	1	1	1	1	OSBP2	oxysterol binding protein 2
hsa-miR-296-3p	0	0	1	0	0	0	TUBA4B	tubulin, alpha 4b (pseudogene)
hsa-miR-296-3p	0	0	1	1	1	1	C9orf171	chromosome 9 open reading frame 171
hsa-miR-296-3p	1	0	1	1	1	1	MEGF11	multiple EGF-like-domains 11
hsa-miR-296-3p	1	0	1	1	1	1	MACROD2	MACRO domain containing 2
hsa-miR-296-3p	0	0	1	1	0	0	HSF4	heat shock transcription factor 4
hsa-miR-296-3p	0	0	1	0	0	0	FAM225B	family with sequence similarity 225, member B (non-protein coding)
hsa-miR-296-3p	1	0	1	0	1	1	NFAT5	nuclear factor of activated T-cells 5, tonicity-responsive
hsa-miR-296-3p	0	0	1	0	0	0	LILRP2	leukocyte immunoglobulin-like receptor pseudogene 2
hsa-miR-296-3p	1	0	1	1	1	1	CADPS	Ca++-dependent secretion activator
hsa-miR-296-3p	1	0	1	1	1	1	PCM1	pericentriolar material 1
hsa-miR-296-3p	0	0	1	1	0	0	CHMP4A	charged multivesicular body protein 4A
hsa-miR-296-3p	0	0	1	1	0	0	NDRG2	NDRG family member 2
hsa-miR-296-3p	0	0	1	0	0	0	TMED8	transmembrane emp24 protein transport domain containing 8
hsa-miR-296-3p	0	0	1	1	1	1	IP6K2	inositol hexakisphosphate kinase 2
hsa-miR-296-3p	1	0	1	1	0	0	KRT80	keratin 80
hsa-miR-296-3p	1	0	1	1	1	1	SASH1	SAM and SH3 domain containing 1
hsa-miR-296-3p	1	0	1	1	1	1	ATP2B4	ATPase, Ca++ transporting, plasma membrane 4
hsa-miR-296-3p	1	0	1	1	0	0	MAPK12	mitogen-activated protein kinase 12
hsa-miR-296-3p	1	0	1	1	1	1	NFASC	neurofascin
hsa-miR-296-3p	0	0	1	1	1	1	GTF3C2	general transcription factor IIIC, polypeptide 2, beta 110kDa
hsa-miR-296-3p	1	0	1	1	1	1	MASP1	mannan-binding lectin serine peptidase 1 (C4/C2 activating component of Ra-reactive factor)
hsa-miR-296-3p	1	0	1	1	0	0	CECR2	cat eye syndrome chromosome region, candidate 2
hsa-miR-296-3p	1	0	1	1	1	1	ABCA13	ATP-binding cassette, sub-family A (ABC1), member 13
hsa-miR-296-3p	0	0	1	1	1	1	NIPSNAP3B	nipsnap homolog 3B (C. elegans)
hsa-miR-296-3p	1	0	1	1	1	1	FOXP1	forkhead box P1
hsa-miR-296-3p	1	0	1	1	1	1	STARD13	StAR-related lipid transfer (START) domain containing 13
hsa-miR-296-3p	1	0	1	1	1	1	GTDC1	glycosyltransferase-like domain containing 1
hsa-miR-296-3p	1	0	1	1	1	1	TSC22D3	TSC22 domain family, member 3
hsa-miR-296-3p	0	0	1	0	1	1	MYO3B	myosin IIIB
hsa-miR-296-3p	1	0	1	1	1	1	ATP6V1C1	ATPase, H+ transporting, lysosomal 42kDa, V1 subunit C1
hsa-miR-296-3p	1	0	1	1	1	1	PLEKHH1	pleckstrin homology domain containing, family H (with MyTH4 domain) member 1
hsa-miR-296-3p	1	0	1	0	1	1	PCGF3	polycomb group ring finger 3
hsa-miR-296-3p	1	0	1	1	1	1	NAV1	neuron navigator 1
hsa-miR-296-3p	0	0	1	0	0	0	LOC286299	uncharacterized LOC286299
hsa-miR-296-3p	1	0	1	1	1	1	EDIL3	EGF-like repeats and discoidin I-like domains 3
hsa-miR-296-3p	0	0	1	0	0	0	ZNRD1-AS1	ZNRD1 antisense RNA 1
hsa-miR-296-3p	0	0	1	1	1	1	KIAA1328	KIAA1328
hsa-miR-296-3p	0	0	1	1	0	0	APOBEC3H	apolipoprotein B mRNA editing enzyme, catalytic polypeptide-like 3H
hsa-miR-296-3p	1	0	1	1	1	1	BSDC1	BSD domain containing 1
hsa-miR-296-3p	0	0	1	1	0	0	CRIP2	cysteine-rich protein 2
hsa-miR-296-3p	0	0	1	1	0	0	MRPL48	mitochondrial ribosomal protein L48
hsa-miR-296-3p	1	0	1	0	0	0	IGLON5	IgLON family member 5
hsa-miR-296-3p	0	0	1	1	1	1	DNM1	dynamin 1
hsa-miR-296-3p	0	0	1	1	1	1	CDC123	cell division cycle 123 homolog (S. cerevisiae)
hsa-miR-296-3p	0	0	1	1	0	0	CDC37	cell division cycle 37 homolog (S. cerevisiae)
hsa-miR-296-3p	0	0	1	1	0	0	APOA1BP	apolipoprotein A-I binding protein
hsa-miR-296-3p	0	0	1	1	1	1	DGCR14	DiGeorge syndrome critical region gene 14
hsa-miR-296-3p	1	0	1	1	1	1	TARBP2	TAR (HIV-1) RNA binding protein 2
hsa-miR-296-3p	0	0	1	1	0	0	TMEM62	transmembrane protein 62
hsa-miR-296-3p	1	0	1	1	1	1	DDX19B	DEAD (Asp-Glu-Ala-Asp) box polypeptide 19B
hsa-miR-296-3p	0	0	1	1	0	0	F2	coagulation factor II (thrombin)
hsa-miR-296-3p	1	0	1	1	1	1	ATAT1	alpha tubulin acetyltransferase 1
hsa-miR-296-3p	1	0	1	1	1	1	CNIH2	cornichon homolog 2 (Drosophila)
hsa-miR-296-3p	1	0	1	1	0	0	PHGDH	phosphoglycerate dehydrogenase
hsa-miR-296-3p	0	0	1	1	1	1	DMWD	dystrophia myotonica, WD repeat containing
hsa-miR-296-3p	1	0	1	0	1	1	SLCO2A1	solute carrier organic anion transporter family, member 2A1
hsa-miR-296-3p	0	0	1	1	1	1	BTF3	basic transcription factor 3
hsa-miR-296-3p	1	0	1	1	1	1	AP3S1	adaptor-related protein complex 3, sigma 1 subunit
hsa-miR-296-3p	1	1	1	1	0	0	EFNA3	ephrin-A3
hsa-miR-296-3p	1	0	1	1	1	1	NEU1	sialidase 1 (lysosomal sialidase)
hsa-miR-296-3p	1	0	1	1	1	1	FGF11	fibroblast growth factor 11
hsa-miR-296-3p	0	0	1	1	1	1	HSPB8	heat shock 22kDa protein 8
hsa-miR-296-3p	1	0	1	1	1	1	SIX5	SIX homeobox 5
hsa-miR-296-3p	0	0	1	1	1	1	KIAA0141	KIAA0141
hsa-miR-296-3p	0	0	1	1	1	1	INCENP	inner centromere protein antigens 135/155kDa
hsa-miR-296-3p	1	0	1	1	1	1	CDK18	cyclin-dependent kinase 18
hsa-miR-296-3p	0	0	1	1	1	1	PLAUR	plasminogen activator, urokinase receptor
hsa-miR-296-3p	0	0	1	0	1	1	IGF2-AS	IGF2 antisense RNA
hsa-miR-296-3p	1	0	1	1	1	1	DRAM2	DNA-damage regulated autophagy modulator 2
hsa-miR-296-3p	1	0	1	1	1	1	NTM	neurotrimin
hsa-miR-296-3p	0	0	1	0	0	0	LOC654433	uncharacterized LOC654433
hsa-miR-296-3p	0	0	1	1	1	1	GRAP2	GRB2-related adaptor protein 2
hsa-miR-296-3p	1	0	1	0	1	1	RPS6KB1	ribosomal protein S6 kinase, 70kDa, polypeptide 1
hsa-miR-296-3p	0	0	1	1	0	0	GPSM3	G-protein signaling modulator 3
hsa-miR-296-3p	0	0	1	1	1	1	STON1	stonin 1
hsa-miR-296-3p	0	0	1	1	0	0	BRE	brain and reproductive organ-expressed (TNFRSF1A modulator)
hsa-miR-296-3p	1	0	1	0	1	1	PLK3	polo-like kinase 3
hsa-miR-296-3p	0	0	1	1	1	1	ATG4A	autophagy related 4A, cysteine peptidase
hsa-miR-296-3p	0	0	1	1	1	1	NFATC4	nuclear factor of activated T-cells, cytoplasmic, calcineurin-dependent 4
hsa-miR-296-3p	0	0	1	0	0	0	FLJ45248	FLJ45248 protein
hsa-miR-296-3p	1	0	1	1	1	1	MMP2	matrix metallopeptidase 2 (gelatinase A, 72kDa gelatinase, 72kDa type IV collagenase)
hsa-miR-296-3p	0	0	1	1	1	1	CD3E	CD3e molecule, epsilon (CD3-TCR complex)
hsa-miR-296-3p	0	0	1	1	0	0	C1orf122	chromosome 1 open reading frame 122
hsa-miR-296-3p	0	0	1	1	1	1	CPZ	carboxypeptidase Z
hsa-miR-296-3p	0	0	1	1	1	1	CXCL16	chemokine (C-X-C motif) ligand 16
hsa-miR-296-3p	1	0	1	1	1	1	ARNTL	aryl hydrocarbon receptor nuclear translocator-like
hsa-miR-296-3p	1	0	1	1	1	1	CAMK2A	calcium/calmodulin-dependent protein kinase II alpha
hsa-miR-296-3p	0	0	1	1	0	0	RGS9	regulator of G-protein signaling 9
hsa-miR-296-3p	0	0	1	1	1	1	WIBG	within bgcn homolog (Drosophila)
hsa-miR-296-3p	0	0	1	0	1	1	VSTM2A	V-set and transmembrane domain containing 2A
hsa-miR-296-3p	1	0	1	1	1	1	FUBP3	far upstream element (FUSE) binding protein 3
hsa-miR-296-3p	0	0	1	1	0	0	CD53	CD53 molecule
hsa-miR-296-3p	0	0	1	1	1	1	CD1C	CD1c molecule
hsa-miR-296-3p	1	0	1	1	1	1	BAALC	brain and acute leukemia, cytoplasmic
hsa-miR-296-3p	0	0	1	1	1	1	ACSF3	acyl-CoA synthetase family member 3
hsa-miR-296-3p	1	0	1	1	1	1	PFN2	profilin 2
hsa-miR-296-3p	0	0	1	1	1	1	NGLY1	N-glycanase 1
hsa-miR-296-3p	1	0	1	1	1	1	ARHGEF40	Rho guanine nucleotide exchange factor (GEF) 40
hsa-miR-296-3p	0	0	1	1	1	1	FAM18B1	family with sequence similarity 18, member B1
hsa-miR-296-3p	1	0	1	1	1	1	AZI2	5-azacytidine induced 2
hsa-miR-296-3p	1	0	1	1	1	1	HMGN2	high mobility group nucleosomal binding domain 2
hsa-miR-296-3p	1	0	1	1	1	1	TMEM55B	transmembrane protein 55B
hsa-miR-296-3p	1	0	1	1	1	1	RALY	RNA binding protein, autoantigenic (hnRNP-associated with lethal yellow homolog (mouse))
hsa-miR-296-3p	1	0	1	1	1	1	GALE	UDP-galactose-4-epimerase
hsa-miR-296-3p	0	0	1	1	1	1	NCAPH	non-SMC condensin I complex, subunit H
hsa-miR-296-3p	0	0	1	1	1	1	HS3ST2	heparan sulfate (glucosamine) 3-O-sulfotransferase 2
hsa-miR-296-3p	0	0	1	1	0	0	TMEM41A	transmembrane protein 41A
hsa-miR-296-3p	0	0	1	1	1	1	ZNF259	zinc finger protein 259
hsa-miR-296-3p	1	0	1	1	0	0	CCM2	cerebral cavernous malformation 2
hsa-miR-296-3p	0	0	1	1	0	0	TESK1	testis-specific kinase 1
hsa-miR-296-3p	0	0	1	1	1	1	PTMA	prothymosin, alpha
hsa-miR-296-3p	0	0	1	0	0	0	LOC100132984	uncharacterized LOC100132984
hsa-miR-296-3p	0	0	1	1	1	1	ZNF75D	zinc finger protein 75D
hsa-miR-296-3p	1	0	1	1	0	0	RAD9A	RAD9 homolog A (S. pombe)
hsa-miR-296-3p	1	0	1	0	1	1	DNMT3A	DNA (cytosine-5-)-methyltransferase 3 alpha
hsa-miR-296-3p	1	0	1	1	0	0	MMP11	matrix metallopeptidase 11 (stromelysin 3)
hsa-miR-296-3p	1	0	1	1	1	1	STAG2	stromal antigen 2
hsa-miR-296-3p	0	0	1	0	0	0	LOC731789	uncharacterized LOC731789
hsa-miR-296-3p	0	0	1	1	1	1	BDP1	B double prime 1, subunit of RNA polymerase III transcription initiation factor IIIB
hsa-miR-296-3p	1	0	1	0	1	1	BTRC	beta-transducin repeat containing E3 ubiquitin protein ligase
hsa-miR-296-3p	1	0	1	1	1	1	FBXW7	F-box and WD repeat domain containing 7, E3 ubiquitin protein ligase
hsa-miR-296-3p	0	0	1	0	0	0	LINC00661	long intergenic non-protein coding RNA 661
hsa-miR-296-3p	1	0	1	1	0	0	POMGNT1	protein O-linked mannose beta1,2-N-acetylglucosaminyltransferase
hsa-miR-296-3p	1	0	1	0	1	1	CNTNAP2	contactin associated protein-like 2
hsa-miR-296-3p	1	0	1	1	1	1	METAP1	methionyl aminopeptidase 1
hsa-miR-296-3p	1	0	1	1	1	1	BCL2L1	BCL2-like 1
hsa-miR-296-3p	0	0	1	1	0	0	TENC1	tensin like C1 domain containing phosphatase (tensin 2)
hsa-miR-296-3p	0	0	1	1	1	1	ZMYM1	zinc finger, MYM-type 1
hsa-miR-296-3p	1	0	1	1	1	1	RBPJ	recombination signal binding protein for immunoglobulin kappa J region
hsa-miR-296-3p	0	0	1	1	0	0	GOLGB1	golgin B1
hsa-miR-296-3p	0	0	1	1	0	0	HMGXB3	HMG box domain containing 3
hsa-miR-296-3p	0	0	1	1	1	1	PTGS1	prostaglandin-endoperoxide synthase 1 (prostaglandin G/H synthase and cyclooxygenase)
hsa-miR-296-3p	1	0	1	1	1	1	TRIOBP	TRIO and F-actin binding protein
hsa-miR-296-3p	1	0	1	1	1	1	GLIS3	GLIS family zinc finger 3
hsa-miR-296-3p	0	0	1	1	0	0	SLCO3A1	solute carrier organic anion transporter family, member 3A1
hsa-miR-296-3p	1	0	1	1	1	1	SLC4A8	solute carrier family 4, sodium bicarbonate cotransporter, member 8
hsa-miR-296-3p	0	0	1	0	0	0	C1orf81	chromosome 1 open reading frame 81
hsa-miR-296-3p	0	0	1	1	0	0	CEACAM3	carcinoembryonic antigen-related cell adhesion molecule 3
hsa-miR-296-3p	1	0	1	1	1	1	MLL	myeloid/lymphoid or mixed-lineage leukemia (trithorax homolog, Drosophila)
hsa-miR-296-3p	0	0	1	1	1	1	ADPRH	ADP-ribosylarginine hydrolase
hsa-miR-296-3p	0	0	1	1	0	0	SGCA	sarcoglycan, alpha (50kDa dystrophin-associated glycoprotein)
hsa-miR-296-3p	1	0	1	1	1	1	ELK1	ELK1, member of ETS oncogene family
hsa-miR-296-3p	1	0	1	1	1	1	IGF1	insulin-like growth factor 1 (somatomedin C)
hsa-miR-296-3p	1	0	1	1	1	1	CD44	CD44 molecule (Indian blood group)
hsa-miR-296-3p	0	0	1	1	1	1	ALDOB	aldolase B, fructose-bisphosphate
hsa-miR-296-3p	0	0	1	0	0	0	AR	androgen receptor
hsa-miR-296-3p	1	0	1	1	1	1	COL1A1	collagen, type I, alpha 1
hsa-miR-296-3p	1	0	1	1	1	1	CYP19A1	cytochrome P450, family 19, subfamily A, polypeptide 1
hsa-miR-296-3p	0	0	1	1	1	1	EDN3	endothelin 3
hsa-miR-296-3p	1	0	1	1	1	1	F13A1	coagulation factor XIII, A1 polypeptide
hsa-miR-296-3p	1	0	1	1	1	1	TBX5	T-box 5
hsa-miR-296-3p	1	0	1	0	1	1	ITGB3	integrin, beta 3 (platelet glycoprotein IIIa, antigen CD61)
hsa-miR-296-3p	1	0	1	0	1	1	KIT	v-kit Hardy-Zuckerman 4 feline sarcoma viral oncogene homolog
hsa-miR-296-3p	1	0	1	1	1	1	LEP	leptin
hsa-miR-296-3p	1	0	1	0	1	1	SGCB	sarcoglycan, beta (43kDa dystrophin-associated glycoprotein)
hsa-miR-296-3p	0	0	1	1	0	0	KCNH2	potassium voltage-gated channel, subfamily H (eag-related), member 2
hsa-miR-296-3p	0	0	1	1	1	1	PRNP	prion protein
hsa-miR-296-3p	1	0	1	0	1	1	PTEN	phosphatase and tensin homolog
hsa-miR-296-3p	0	0	1	1	0	0	IL2RA	interleukin 2 receptor, alpha
hsa-miR-296-3p	1	0	1	1	0	0	LOR	loricrin
hsa-miR-296-3p	0	0	1	1	1	1	LTBP2	latent transforming growth factor beta binding protein 2
hsa-miR-296-3p	1	0	1	0	1	1	PAFAH1B1	platelet-activating factor acetylhydrolase 1b, regulatory subunit 1 (45kDa)
hsa-miR-296-3p	0	0	1	1	1	1	PLEC	plectin
hsa-miR-296-3p	1	0	1	0	1	1	RAG1	recombination activating gene 1
hsa-miR-296-3p	0	0	1	1	0	0	AK1	adenylate kinase 1
hsa-miR-296-3p	0	0	1	1	1	1	ALPL	alkaline phosphatase, liver/bone/kidney
hsa-miR-296-3p	1	0	1	1	1	1	AQP2	aquaporin 2 (collecting duct)
hsa-miR-296-3p	0	0	1	0	0	0	FUT2	fucosyltransferase 2 (secretor status included)
hsa-miR-296-3p	1	0	1	1	1	1	HOXA13	homeobox A13
hsa-miR-296-3p	1	0	1	1	1	1	HOXD13	homeobox D13
hsa-miR-296-3p	1	0	1	1	1	1	PLP1	proteolipid protein 1
hsa-miR-296-3p	0	0	1	1	0	0	REN	renin
hsa-miR-296-3p	1	0	1	1	1	1	IL10	interleukin 10
hsa-miR-296-3p	0	0	1	1	0	0	IL1B	interleukin 1, beta
hsa-miR-296-3p	1	0	1	1	1	1	TNF	tumor necrosis factor
hsa-miR-296-3p	1	0	1	1	1	1	CXCL12	chemokine (C-X-C motif) ligand 12
hsa-miR-296-3p	0	0	1	0	1	1	ADRA2A	adrenoceptor alpha 2A
hsa-miR-296-3p	1	0	1	1	1	1	CHRM1	cholinergic receptor, muscarinic 1
hsa-miR-296-3p	0	0	1	1	0	0	GAST	gastrin
hsa-miR-296-3p	1	0	1	0	1	1	GABRA4	gamma-aminobutyric acid (GABA) A receptor, alpha 4
hsa-miR-296-3p	1	0	1	1	1	1	GABRG2	gamma-aminobutyric acid (GABA) A receptor, gamma 2
hsa-miR-296-3p	1	0	1	1	0	0	GRIK3	glutamate receptor, ionotropic, kainate 3
hsa-miR-296-3p	0	0	1	1	1	1	GRIN2B	glutamate receptor, ionotropic, N-methyl D-aspartate 2B
hsa-miR-296-3p	0	0	1	1	1	1	GRM3	glutamate receptor, metabotropic 3
hsa-miR-296-3p	1	0	1	1	1	1	GRM7	glutamate receptor, metabotropic 7
hsa-miR-296-3p	1	0	1	1	1	1	HTR4	5-hydroxytryptamine (serotonin) receptor 4, G protein-coupled
hsa-miR-296-3p	1	0	1	1	1	1	IGF1R	insulin-like growth factor 1 receptor
hsa-miR-296-3p	1	0	1	0	1	1	KCNJ2	potassium inwardly-rectifying channel, subfamily J, member 2
hsa-miR-296-3p	0	0	1	1	0	0	KNG1	kininogen 1
hsa-miR-296-3p	0	0	1	1	1	1	NQO1	NAD(P)H dehydrogenase, quinone 1
hsa-miR-296-3p	1	0	1	1	1	1	PPP3R1	protein phosphatase 3, regulatory subunit B, alpha
hsa-miR-296-3p	1	0	1	1	1	1	PTGFR	prostaglandin F receptor (FP)
hsa-miR-296-3p	0	0	1	0	1	1	PTGIS	prostaglandin I2 (prostacyclin) synthase
hsa-miR-296-3p	1	0	1	1	1	1	RARA	retinoic acid receptor, alpha
hsa-miR-296-3p	0	0	1	1	0	0	SNCB	synuclein, beta
hsa-miR-296-3p	1	0	1	0	1	1	ARHGEF37	Rho guanine nucleotide exchange factor (GEF) 37
hsa-miR-296-3p	1	0	1	1	1	1	TPD52L3	tumor protein D52-like 3
hsa-miR-296-3p	0	0	1	0	0	0	KLK2	kallikrein-related peptidase 2
hsa-miR-296-3p	0	0	1	1	1	1	PTRH1	peptidyl-tRNA hydrolase 1 homolog (S. cerevisiae)
hsa-miR-296-3p	1	0	1	0	1	1	CACNA1I	calcium channel, voltage-dependent, T type, alpha 1I subunit
hsa-miR-296-3p	1	0	1	1	1	1	ABLIM1	actin binding LIM protein 1
hsa-miR-296-3p	1	0	1	0	1	1	ZNF740	zinc finger protein 740
hsa-miR-296-3p	0	0	1	1	1	1	ZCCHC16	zinc finger, CCHC domain containing 16
hsa-miR-296-3p	0	0	1	0	1	1	ZNF705A	zinc finger protein 705A
hsa-miR-296-3p	1	0	1	0	1	1	LRRC55	leucine rich repeat containing 55
hsa-miR-296-3p	0	0	1	1	1	1	HMGN2P46	high mobility group nucleosomal binding domain 2 pseudogene 46
hsa-miR-296-3p	1	0	1	0	1	1	YPEL2	yippee-like 2 (Drosophila)
hsa-miR-296-3p	1	0	1	0	1	1	CPM	carboxypeptidase M
hsa-miR-296-3p	0	0	1	1	1	1	SUMO1	SMT3 suppressor of mif two 3 homolog 1 (S. cerevisiae)
hsa-miR-296-3p	0	0	1	1	1	1	TCEAL6	transcription elongation factor A (SII)-like 6
hsa-miR-296-3p	0	0	1	1	0	0	DUSP13	dual specificity phosphatase 13
hsa-miR-296-3p	0	0	1	0	1	1	C3orf56	chromosome 3 open reading frame 56
hsa-miR-296-3p	1	0	1	1	1	1	ZDHHC9	zinc finger, DHHC-type containing 9
hsa-miR-296-3p	0	0	1	1	0	0	C1QL4	complement component 1, q subcomponent-like 4
hsa-miR-296-3p	1	0	1	1	1	1	CTDSPL	CTD (carboxy-terminal domain, RNA polymerase II, polypeptide A) small phosphatase-like
hsa-miR-296-3p	1	0	1	1	1	1	BCAP29	B-cell receptor-associated protein 29
hsa-miR-296-3p	1	0	1	1	1	1	RBM33	RNA binding motif protein 33
hsa-miR-296-3p	1	0	1	1	1	1	FNIP1	folliculin interacting protein 1
hsa-miR-296-3p	0	0	1	1	1	1	GCSAM	germinal center-associated, signaling and motility
hsa-miR-296-3p	0	0	1	1	1	1	ZCCHC11	zinc finger, CCHC domain containing 11
hsa-miR-296-3p	1	0	1	0	1	1	ERMN	ermin, ERM-like protein
hsa-miR-296-3p	0	0	1	1	1	1	PIK3R6	phosphoinositide-3-kinase, regulatory subunit 6
hsa-miR-296-3p	0	0	1	1	0	0	LELP1	late cornified envelope-like proline-rich 1
hsa-miR-296-3p	0	0	1	1	1	1	SPIN3	spindlin family, member 3
hsa-miR-296-3p	1	0	1	0	1	1	ZC3H12B	zinc finger CCCH-type containing 12B
hsa-miR-296-3p	1	0	1	0	1	1	MTX3	metaxin 3
hsa-miR-296-3p	0	0	1	1	1	1	SERP2	stress-associated endoplasmic reticulum protein family member 2
hsa-miR-296-3p	1	0	1	1	1	1	FAM171A1	family with sequence similarity 171, member A1
hsa-miR-296-3p	0	0	1	1	1	1	NCMAP	noncompact myelin associated protein
hsa-miR-296-3p	1	0	1	0	1	1	CREB5	cAMP responsive element binding protein 5
hsa-miR-296-3p	1	0	1	1	1	1	CTNNBIP1	catenin, beta interacting protein 1
hsa-miR-296-3p	0	0	1	1	0	0	SOHLH1	spermatogenesis and oogenesis specific basic helix-loop-helix 1
hsa-miR-296-3p	1	0	1	1	1	1	GOSR2	golgi SNAP receptor complex member 2
hsa-miR-296-3p	0	0	1	1	0	0	MYPOP	Myb-related transcription factor, partner of profilin
hsa-miR-296-3p	0	0	1	1	0	0	NUDT17	nudix (nucleoside diphosphate linked moiety X)-type motif 17
hsa-miR-296-3p	1	0	1	1	1	1	PABPC1L2A	poly(A) binding protein, cytoplasmic 1-like 2A
hsa-miR-296-3p	1	0	1	0	1	1	ZKSCAN2	zinc finger with KRAB and SCAN domains 2
hsa-miR-296-3p	0	0	1	0	1	1	ARL13A	ADP-ribosylation factor-like 13A
hsa-miR-296-3p	1	0	1	1	1	1	SORCS1	sortilin-related VPS10 domain containing receptor 1
hsa-miR-296-3p	0	0	1	1	1	1	C2orf68	chromosome 2 open reading frame 68
hsa-miR-296-3p	0	0	1	0	1	1	LINC00268	long intergenic non-protein coding RNA 268
hsa-miR-296-3p	1	0	1	0	1	1	SYT14L	synaptotagmin XIV-like
hsa-miR-296-3p	1	0	1	1	1	1	KCNMA1	potassium large conductance calcium-activated channel, subfamily M, alpha member 1
hsa-miR-296-3p	0	0	1	1	0	0	LAT	linker for activation of T cells
hsa-miR-296-3p	1	0	1	1	1	1	PHF6	PHD finger protein 6
hsa-miR-296-3p	0	0	1	1	1	1	BTBD11	BTB (POZ) domain containing 11
hsa-miR-296-3p	1	0	1	1	1	1	SORBS3	sorbin and SH3 domain containing 3
hsa-miR-296-3p	0	0	1	0	0	0	ADIG	adipogenin
hsa-miR-296-3p	1	0	1	0	1	1	TNRC6B	trinucleotide repeat containing 6B
hsa-miR-296-3p	1	0	1	1	1	1	SLC6A9	solute carrier family 6 (neurotransmitter transporter, glycine), member 9
hsa-miR-296-3p	1	0	1	1	1	1	FNBP1L	formin binding protein 1-like
hsa-miR-296-3p	0	0	1	1	0	0	PLAC8L1	PLAC8-like 1
hsa-miR-296-3p	1	0	1	1	1	1	RGS7BP	regulator of G-protein signaling 7 binding protein
hsa-miR-296-3p	0	0	1	1	0	0	KLK3	kallikrein-related peptidase 3
hsa-miR-296-3p	1	0	1	0	1	1	CYB5RL	cytochrome b5 reductase-like
hsa-miR-296-3p	1	0	1	1	1	1	MAF	v-maf musculoaponeurotic fibrosarcoma oncogene homolog (avian)
hsa-miR-296-3p	1	0	1	1	1	1	ALDH3A2	aldehyde dehydrogenase 3 family, member A2
hsa-miR-296-3p	0	0	1	1	1	1	SLC35A2	solute carrier family 35 (UDP-galactose transporter), member A2
hsa-miR-296-3p	1	0	1	1	1	1	MAGI1	membrane associated guanylate kinase, WW and PDZ domain containing 1
hsa-miR-296-3p	1	0	1	1	1	1	AMD1	adenosylmethionine decarboxylase 1
hsa-miR-296-3p	0	0	1	1	1	1	KCNIP1	Kv channel interacting protein 1
hsa-miR-296-3p	0	0	1	1	1	1	C18orf62	chromosome 18 open reading frame 62
hsa-miR-296-3p	1	0	1	0	1	1	CDC42SE1	CDC42 small effector 1
hsa-miR-296-3p	0	0	1	0	0	0	FER1L6	fer-1-like 6 (C. elegans)
hsa-miR-296-3p	1	0	1	1	1	1	DPP6	dipeptidyl-peptidase 6
hsa-miR-296-3p	1	0	1	1	1	1	ELMO1	engulfment and cell motility 1
hsa-miR-296-3p	1	0	1	1	1	1	KCNC4	potassium voltage-gated channel, Shaw-related subfamily, member 4
hsa-miR-296-3p	1	0	1	0	1	1	USP9X	ubiquitin specific peptidase 9, X-linked
hsa-miR-296-3p	0	0	1	0	1	1	ZNF705D	zinc finger protein 705D
hsa-miR-296-3p	1	0	1	1	1	1	CHTF8	CTF8, chromosome transmission fidelity factor 8 homolog (S. cerevisiae)
hsa-miR-296-3p	1	0	1	1	1	1	C3orf65	chromosome 3 open reading frame 65
hsa-miR-296-3p	1	0	1	1	1	1	ZNF384	zinc finger protein 384
hsa-miR-296-3p	1	0	1	1	1	1	TCERG1	transcription elongation regulator 1
hsa-miR-296-3p	1	0	1	1	1	1	CRCP	CGRP receptor component
hsa-miR-296-3p	0	0	1	1	0	0	FAM110A	family with sequence similarity 110, member A
hsa-miR-296-3p	1	0	1	1	1	1	CYLD	cylindromatosis (turban tumor syndrome)
hsa-miR-296-3p	1	0	1	1	1	1	PPP4R1	protein phosphatase 4, regulatory subunit 1
hsa-miR-296-3p	1	0	1	1	1	1	HMGCLL1	3-hydroxymethyl-3-methylglutaryl-CoA lyase-like 1
hsa-miR-296-3p	0	0	1	1	1	1	C10orf53	chromosome 10 open reading frame 53
hsa-miR-296-3p	0	0	1	1	1	1	MST4	serine/threonine protein kinase MST4
hsa-miR-296-3p	0	0	1	1	1	1	GEMIN8	gem (nuclear organelle) associated protein 8
hsa-miR-296-3p	0	0	1	1	1	1	NUPR1	nuclear protein, transcriptional regulator, 1
hsa-miR-296-3p	1	0	1	1	1	1	PABPC1L2B	poly(A) binding protein, cytoplasmic 1-like 2B
hsa-miR-296-3p	1	0	1	1	1	1	ZNF706	zinc finger protein 706
hsa-miR-296-3p	1	0	1	1	1	1	NSL1	NSL1, MIND kinetochore complex component, homolog (S. cerevisiae)
hsa-miR-296-3p	1	0	1	1	1	1	ERBB4	v-erb-a erythroblastic leukemia viral oncogene homolog 4 (avian)
hsa-miR-296-3p	0	0	1	1	1	1	RCC1	regulator of chromosome condensation 1
hsa-miR-296-3p	0	0	1	1	1	1	ZNF493	zinc finger protein 493
hsa-miR-296-3p	1	0	1	1	1	1	ATG9A	autophagy related 9A
hsa-miR-296-3p	1	0	1	1	1	1	PRR3	proline rich 3
hsa-miR-296-3p	0	0	1	1	1	1	KLK10	kallikrein-related peptidase 10
hsa-miR-296-3p	0	0	1	1	1	1	MTMR14	myotubularin related protein 14
hsa-miR-296-3p	1	0	1	1	1	1	UBN1	ubinuclein 1
hsa-miR-296-3p	0	0	1	1	1	1	DIAPH1	diaphanous homolog 1 (Drosophila)
hsa-miR-296-3p	1	0	1	1	1	1	HAP1	huntingtin-associated protein 1
hsa-miR-296-3p	1	0	1	1	1	1	VAV3	vav 3 guanine nucleotide exchange factor
hsa-miR-296-3p	0	0	1	1	0	0	ARHGAP9	Rho GTPase activating protein 9
hsa-miR-296-3p	1	0	1	1	1	1	FAM155A	family with sequence similarity 155, member A
hsa-miR-296-3p	1	0	1	0	1	1	FBXO41	F-box protein 41
hsa-miR-296-3p	1	0	1	1	0	0	DLGAP3	discs, large (Drosophila) homolog-associated protein 3
hsa-miR-296-3p	1	0	1	1	1	1	SHANK3	SH3 and multiple ankyrin repeat domains 3
hsa-miR-296-3p	1	0	1	0	1	1	UNC13A	unc-13 homolog A (C. elegans)
hsa-miR-296-3p	1	0	1	1	1	1	MGA	MAX gene associated
hsa-miR-296-3p	1	0	1	1	1	1	DGKG	diacylglycerol kinase, gamma 90kDa
hsa-miR-296-3p	1	0	1	1	1	1	MYO1C	myosin IC
hsa-miR-296-3p	1	0	1	1	1	1	NXF1	nuclear RNA export factor 1
hsa-miR-296-3p	0	0	1	1	0	0	CASP4	caspase 4, apoptosis-related cysteine peptidase
hsa-miR-296-3p	1	0	1	1	1	1	CDK9	cyclin-dependent kinase 9
hsa-miR-296-3p	1	0	1	1	1	1	CLCN6	chloride channel, voltage-sensitive 6
hsa-miR-296-3p	1	0	1	0	1	1	CPD	carboxypeptidase D
hsa-miR-296-3p	1	0	1	1	1	1	CTNND2	catenin (cadherin-associated protein), delta 2
hsa-miR-296-3p	0	0	1	1	1	1	FRZB	frizzled-related protein
hsa-miR-296-3p	0	0	1	1	0	0	GCKR	glucokinase (hexokinase 4) regulator
hsa-miR-296-3p	0	0	1	1	0	0	BLOC1S1	biogenesis of lysosomal organelles complex-1, subunit 1
hsa-miR-296-3p	1	0	1	1	0	0	GDI1	GDP dissociation inhibitor 1
hsa-miR-296-3p	0	0	1	1	0	0	AARS	alanyl-tRNA synthetase
hsa-miR-296-3p	1	0	1	1	1	1	ADD2	adducin 2 (beta)
hsa-miR-296-3p	0	0	1	1	1	1	AOAH	acyloxyacyl hydrolase (neutrophil)
hsa-miR-296-3p	1	0	1	0	1	1	ARCN1	archain 1
hsa-miR-296-3p	1	0	1	1	1	1	ARF3	ADP-ribosylation factor 3
hsa-miR-296-3p	0	0	1	1	1	1	ARF4	ADP-ribosylation factor 4
hsa-miR-296-3p	1	0	1	1	1	1	ARL4D	ADP-ribosylation factor-like 4D
hsa-miR-296-3p	0	0	1	1	1	1	AXL	AXL receptor tyrosine kinase
hsa-miR-296-3p	0	0	1	0	0	0	BAI1	brain-specific angiogenesis inhibitor 1
hsa-miR-296-3p	0	0	1	1	1	1	CALB2	calbindin 2
hsa-miR-296-3p	1	0	1	1	1	1	CD69	CD69 molecule
hsa-miR-296-3p	1	0	1	1	1	1	CDK2	cyclin-dependent kinase 2
hsa-miR-296-3p	0	0	1	1	0	0	CNTFR	ciliary neurotrophic factor receptor
hsa-miR-296-3p	0	0	1	1	1	1	CNTN1	contactin 1
hsa-miR-296-3p	1	0	1	1	1	1	COL4A6	collagen, type IV, alpha 6
hsa-miR-296-3p	0	0	1	1	1	1	CTSE	cathepsin E
hsa-miR-296-3p	0	0	1	1	0	0	DDB1	damage-specific DNA binding protein 1, 127kDa
hsa-miR-296-3p	1	0	1	0	0	0	DRP2	dystrophin related protein 2
hsa-miR-296-3p	0	0	1	1	0	0	EDN2	endothelin 2
hsa-miR-296-3p	0	0	1	1	0	0	EFNA5	ephrin-A5
hsa-miR-296-3p	1	0	1	1	1	1	EPB49	erythrocyte membrane protein band 4.9 (dematin)
hsa-miR-296-3p	0	0	1	1	0	0	GLP1R	glucagon-like peptide 1 receptor
hsa-miR-296-3p	1	0	1	1	0	0	GRK6	G protein-coupled receptor kinase 6
hsa-miR-296-3p	0	0	1	1	0	0	GPX2	glutathione peroxidase 2 (gastrointestinal)
hsa-miR-296-3p	0	0	1	0	1	1	GYPE	glycophorin E (MNS blood group)
hsa-miR-296-3p	1	0	1	1	1	1	ITGA5	integrin, alpha 5 (fibronectin receptor, alpha polypeptide)
hsa-miR-296-3p	1	0	1	1	1	1	ITGA9	integrin, alpha 9
hsa-miR-296-3p	0	0	1	1	0	0	EIF6	eukaryotic translation initiation factor 6
hsa-miR-296-3p	1	0	1	1	1	1	ITGB8	integrin, beta 8
hsa-miR-296-3p	1	0	1	1	1	1	ITPKB	inositol-trisphosphate 3-kinase B
hsa-miR-296-3p	1	0	1	1	0	0	JUP	junction plakoglobin
hsa-miR-296-3p	1	0	1	1	1	1	KCNA3	potassium voltage-gated channel, shaker-related subfamily, member 3
hsa-miR-296-3p	1	0	1	0	1	1	KIF3C	kinesin family member 3C
hsa-miR-296-3p	0	0	1	1	0	0	KLK1	kallikrein 1
hsa-miR-296-3p	1	0	1	1	1	1	IPO5	importin 5
hsa-miR-296-3p	1	0	1	0	1	1	MXD1	MAX dimerization protein 1
hsa-miR-296-3p	1	0	1	1	1	1	MAP1A	microtubule-associated protein 1A
hsa-miR-296-3p	1	0	1	1	1	1	MAX	MYC associated factor X
hsa-miR-296-3p	0	0	1	1	0	0	MGAT5	mannosyl (alpha-1,6-)-glycoprotein beta-1,6-N-acetyl-glucosaminyltransferase
hsa-miR-296-3p	0	0	1	0	1	1	CXCL9	chemokine (C-X-C motif) ligand 9
hsa-miR-296-3p	1	0	1	1	1	1	MSN	moesin
hsa-miR-296-3p	1	0	1	1	1	1	MSR1	macrophage scavenger receptor 1
hsa-miR-296-3p	1	0	1	1	1	1	NGFR	nerve growth factor receptor
hsa-miR-296-3p	0	0	1	1	1	1	NID1	nidogen 1
hsa-miR-296-3p	0	0	1	1	0	0	NPPB	natriuretic peptide B
hsa-miR-296-3p	1	0	1	1	1	1	NTF3	neurotrophin 3
hsa-miR-296-3p	1	0	1	1	1	1	PBX2	pre-B-cell leukemia homeobox 2
hsa-miR-296-3p	1	0	1	0	1	1	PCDHGC3	protocadherin gamma subfamily C, 3
hsa-miR-296-3p	1	0	1	0	1	1	PDK1	pyruvate dehydrogenase kinase, isozyme 1
hsa-miR-296-3p	1	0	1	1	1	1	PHF1	PHD finger protein 1
hsa-miR-296-3p	1	0	1	1	1	1	PLAGL2	pleiomorphic adenoma gene-like 2
hsa-miR-296-3p	1	0	1	1	1	1	PLCG1	phospholipase C, gamma 1
hsa-miR-296-3p	0	0	1	1	0	0	PLP2	proteolipid protein 2 (colonic epithelium-enriched)
hsa-miR-296-3p	0	0	1	1	0	0	PPBP	pro-platelet basic protein (chemokine (C-X-C motif) ligand 7)
hsa-miR-296-3p	1	0	1	1	1	1	PPP1CB	protein phosphatase 1, catalytic subunit, beta isozyme
hsa-miR-296-3p	1	0	1	1	1	1	PVRL1	poliovirus receptor-related 1 (herpesvirus entry mediator C)
hsa-miR-296-3p	1	0	1	1	0	0	RFX1	regulatory factor X, 1 (influences HLA class II expression)
hsa-miR-296-3p	1	0	1	0	1	1	SORT1	sortilin 1
hsa-miR-296-3p	1	0	1	0	1	1	CCL22	chemokine (C-C motif) ligand 22
hsa-miR-296-3p	0	0	1	1	1	1	SDC4	syndecan 4
hsa-miR-296-3p	1	0	1	1	1	1	SHB	Src homology 2 domain containing adaptor protein B
hsa-miR-296-3p	1	0	1	1	0	0	SLN	sarcolipin
hsa-miR-296-3p	1	0	1	1	1	1	SMARCD1	SWI/SNF related, matrix associated, actin dependent regulator of chromatin, subfamily d, member 1
hsa-miR-296-3p	1	0	1	1	1	1	SMARCD2	SWI/SNF related, matrix associated, actin dependent regulator of chromatin, subfamily d, member 2
hsa-miR-296-3p	0	0	1	1	0	0	SNTA1	syntrophin, alpha 1
hsa-miR-296-3p	1	0	1	1	1	1	SRF	serum response factor (c-fos serum response element-binding transcription factor)
hsa-miR-296-3p	1	0	1	1	1	1	SRPR	signal recognition particle receptor (docking protein)
hsa-miR-296-3p	1	0	1	1	1	1	SSR2	signal sequence receptor, beta (translocon-associated protein beta)
hsa-miR-296-3p	1	0	1	0	1	1	STC1	stanniocalcin 1
hsa-miR-296-3p	0	0	1	1	1	1	STIM1	stromal interaction molecule 1
hsa-miR-296-3p	0	0	1	0	1	1	STXBP1	syntaxin binding protein 1
hsa-miR-296-3p	1	0	1	1	1	1	SUV39H1	suppressor of variegation 3-9 homolog 1 (Drosophila)
hsa-miR-296-3p	1	0	1	1	0	0	SYP	synaptophysin
hsa-miR-296-3p	1	0	1	1	1	1	TEC	tec protein tyrosine kinase
hsa-miR-296-3p	1	0	1	1	1	1	TFAP2B	transcription factor AP-2 beta (activating enhancer binding protein 2 beta)
hsa-miR-296-3p	1	0	1	1	1	1	TFAP4	transcription factor AP-4 (activating enhancer binding protein 4)
hsa-miR-296-3p	1	0	1	1	1	1	TGFB3	transforming growth factor, beta 3
hsa-miR-296-3p	0	0	1	1	0	0	THBS4	thrombospondin 4
hsa-miR-296-3p	1	0	1	1	1	1	UBE2B	ubiquitin-conjugating enzyme E2B
hsa-miR-296-3p	1	0	1	0	1	1	UBE2D2	ubiquitin-conjugating enzyme E2D 2
hsa-miR-296-3p	1	0	1	1	1	1	VAV2	vav 2 guanine nucleotide exchange factor
hsa-miR-296-3p	0	0	1	1	0	0	VGF	VGF nerve growth factor inducible
hsa-miR-296-3p	0	0	1	1	1	1	XPNPEP2	X-prolyl aminopeptidase (aminopeptidase P) 2, membrane-bound
hsa-miR-296-3p	0	0	1	1	1	1	ZNF141	zinc finger protein 141
hsa-miR-296-3p	1	0	1	0	1	1	BSN	bassoon (presynaptic cytomatrix protein)
hsa-miR-296-3p	1	0	1	1	1	1	TAF15	TAF15 RNA polymerase II, TATA box binding protein (TBP)-associated factor, 68kDa
hsa-miR-296-3p	0	0	1	1	0	0	HIST1H2BL	histone cluster 1, H2bl
hsa-miR-296-3p	0	0	1	1	1	1	HIST2H2BE	histone cluster 2, H2be
hsa-miR-296-3p	0	0	1	1	1	1	PIP5K1A	phosphatidylinositol-4-phosphate 5-kinase, type I, alpha
hsa-miR-296-3p	0	0	1	1	0	0	SEMA7A	semaphorin 7A, GPI membrane anchor (John Milton Hagen blood group)
hsa-miR-296-3p	0	0	1	1	1	1	RGS5	regulator of G-protein signaling 5
hsa-miR-296-3p	1	0	1	0	1	1	CNTNAP1	contactin associated protein 1
hsa-miR-296-3p	0	0	1	1	1	1	ITGA10	integrin, alpha 10
hsa-miR-296-3p	0	0	1	1	0	0	EIF4EBP3	eukaryotic translation initiation factor 4E binding protein 3
hsa-miR-296-3p	1	0	1	0	1	1	PCDHGA12	protocadherin gamma subfamily A, 12
hsa-miR-296-3p	1	0	1	0	1	1	PCDHGB4	protocadherin gamma subfamily B, 4
hsa-miR-296-3p	0	0	1	1	1	1	TNFSF12	tumor necrosis factor (ligand) superfamily, member 12
hsa-miR-296-3p	1	0	1	1	1	1	FGF18	fibroblast growth factor 18
hsa-miR-296-3p	1	0	1	1	1	1	NRP2	neuropilin 2
hsa-miR-296-3p	1	0	1	1	1	1	KAT2B	K(lysine) acetyltransferase 2B
hsa-miR-296-3p	0	0	1	1	1	1	LDB1	LIM domain binding 1
hsa-miR-296-3p	0	0	1	0	1	1	RHOB	ras homolog family member B
hsa-miR-296-3p	1	0	1	1	1	1	BCL2L2	BCL2-like 2
hsa-miR-296-3p	1	0	1	0	1	1	DGKB	diacylglycerol kinase, beta 90kDa
hsa-miR-296-3p	1	0	1	0	1	1	E2F2	E2F transcription factor 2
hsa-miR-296-3p	1	0	1	1	1	1	EYA4	eyes absent homolog 4 (Drosophila)
hsa-miR-296-3p	1	0	1	1	1	1	GMFB	glia maturation factor, beta
hsa-miR-296-3p	1	0	1	0	1	1	SLC1A2	solute carrier family 1 (glial high affinity glutamate transporter), member 2
hsa-miR-296-3p	1	0	1	0	1	1	MED14	mediator complex subunit 14
hsa-miR-296-3p	1	0	1	0	1	1	AKAP6	A kinase (PRKA) anchor protein 6
hsa-miR-296-3p	1	0	1	1	1	1	SLC25A27	solute carrier family 25, member 27
hsa-miR-296-3p	1	0	1	0	1	1	GTPBP1	GTP binding protein 1
hsa-miR-296-3p	1	0	1	1	1	1	GDA	guanine deaminase
hsa-miR-296-3p	1	0	1	0	1	1	ACVR1B	activin A receptor, type IB
hsa-miR-296-3p	0	0	1	1	1	1	BST1	bone marrow stromal cell antigen 1
hsa-miR-296-3p	0	0	1	1	1	1	COPA	coatomer protein complex, subunit alpha
hsa-miR-296-3p	0	0	1	1	0	0	CPT1B	carnitine palmitoyltransferase 1B (muscle)
hsa-miR-296-3p	1	0	1	1	1	1	DUSP2	dual specificity phosphatase 2
hsa-miR-296-3p	1	0	1	1	1	1	EGR3	early growth response 3
hsa-miR-296-3p	1	0	1	1	1	1	FOXD2	forkhead box D2
hsa-miR-296-3p	1	0	1	1	1	1	FLOT2	flotillin 2
hsa-miR-296-3p	0	0	1	1	1	1	HOXB7	homeobox B7
hsa-miR-296-3p	1	0	1	1	0	0	HOXC6	homeobox C6
hsa-miR-296-3p	0	0	1	1	1	1	PEX14	peroxisomal biogenesis factor 14
hsa-miR-296-3p	0	0	1	0	1	1	POU4F2	POU class 4 homeobox 2
hsa-miR-296-3p	0	0	1	0	0	0	RABGGTA	Rab geranylgeranyltransferase, alpha subunit
hsa-miR-296-3p	1	0	1	1	1	1	TCF15	transcription factor 15 (basic helix-loop-helix)
hsa-miR-296-3p	0	0	1	1	0	0	NPHS1	nephrosis 1, congenital, Finnish type (nephrin)
hsa-miR-296-3p	1	0	1	1	1	1	BAP1	BRCA1 associated protein-1 (ubiquitin carboxy-terminal hydrolase)
hsa-miR-296-3p	0	0	1	1	0	0	PRY	PTPN13-like, Y-linked
hsa-miR-296-3p	1	0	1	1	1	1	DCLK1	doublecortin-like kinase 1
hsa-miR-296-3p	1	0	1	1	1	1	XPR1	xenotropic and polytropic retrovirus receptor 1
hsa-miR-296-3p	1	0	1	1	1	1	LARGE	like-glycosyltransferase
hsa-miR-296-3p	1	0	1	0	1	1	MAPKAPK2	mitogen-activated protein kinase-activated protein kinase 2
hsa-miR-296-3p	1	0	1	1	1	1	STK17A	serine/threonine kinase 17a
hsa-miR-296-3p	1	0	1	1	1	1	NREP	neuronal regeneration related protein homolog (rat)
hsa-miR-296-3p	0	0	1	1	0	0	SLC22A14	solute carrier family 22, member 14
hsa-miR-296-3p	0	0	1	1	1	1	EIF2AK3	eukaryotic translation initiation factor 2-alpha kinase 3
hsa-miR-296-3p	1	0	1	0	1	1	ARHGEF6	Rac/Cdc42 guanine nucleotide exchange factor (GEF) 6
hsa-miR-296-3p	1	0	1	0	1	1	ROCK2	Rho-associated, coiled-coil containing protein kinase 2
hsa-miR-296-3p	1	0	1	1	1	1	KIF23	kinesin family member 23
hsa-miR-296-3p	0	0	1	1	1	1	ITM2A	integral membrane protein 2A
hsa-miR-296-3p	1	0	1	1	1	1	SEC24C	SEC24 family, member C (S. cerevisiae)
hsa-miR-296-3p	0	0	1	1	1	1	CD8B	CD8b molecule
hsa-miR-296-3p	0	0	1	1	0	0	NR5A1	nuclear receptor subfamily 5, group A, member 1
hsa-miR-296-3p	1	0	1	1	1	1	GABRE	gamma-aminobutyric acid (GABA) A receptor, epsilon
hsa-miR-296-3p	1	0	1	1	0	0	MMP14	matrix metallopeptidase 14 (membrane-inserted)
hsa-miR-296-3p	0	0	1	1	0	0	PITX3	paired-like homeodomain 3
hsa-miR-296-3p	0	0	1	1	0	0	PLK1	polo-like kinase 1
hsa-miR-296-3p	0	0	1	1	0	0	FXYD1	FXYD domain containing ion transport regulator 1
hsa-miR-296-3p	1	0	1	1	1	1	SIAH2	siah E3 ubiquitin protein ligase 2
hsa-miR-296-3p	1	0	1	1	0	0	ADAMTS4	ADAM metallopeptidase with thrombospondin type 1 motif, 4
hsa-miR-296-3p	1	0	1	1	1	1	OXSR1	oxidative-stress responsive 1
hsa-miR-296-3p	1	0	1	1	1	1	MED13	mediator complex subunit 13
hsa-miR-296-3p	0	0	1	1	1	1	SART1	squamous cell carcinoma antigen recognized by T cells
hsa-miR-296-3p	1	0	1	1	0	0	BCL3	B-cell CLL/lymphoma 3
hsa-miR-296-3p	1	0	1	1	1	1	ARID3A	AT rich interactive domain 3A (BRIGHT-like)
hsa-miR-296-3p	0	0	1	0	1	1	FOSL2	FOS-like antigen 2
hsa-miR-296-3p	1	0	1	1	1	1	GPM6A	glycoprotein M6A
hsa-miR-296-3p	1	0	1	1	1	1	GPR3	G protein-coupled receptor 3
hsa-miR-296-3p	0	0	1	1	0	0	HIST1H1E	histone cluster 1, H1e
hsa-miR-296-3p	1	0	1	1	0	0	NNAT	neuronatin
hsa-miR-296-3p	0	0	1	1	1	1	PPP1R3C	protein phosphatase 1, regulatory subunit 3C
hsa-miR-296-3p	1	0	1	0	1	1	PRKAB2	protein kinase, AMP-activated, beta 2 non-catalytic subunit
hsa-miR-296-3p	0	0	1	1	1	1	FOSL1	FOS-like antigen 1
hsa-miR-296-3p	1	0	1	1	1	1	RND2	Rho family GTPase 2
hsa-miR-296-3p	0	0	1	1	1	1	FAIM3	Fas apoptotic inhibitory molecule 3
hsa-miR-296-3p	1	0	1	1	0	0	ZBTB22	zinc finger and BTB domain containing 22
hsa-miR-296-3p	1	0	1	1	1	1	GABBR2	gamma-aminobutyric acid (GABA) B receptor, 2
hsa-miR-296-3p	1	0	1	1	1	1	INSIG1	insulin induced gene 1
hsa-miR-296-3p	1	0	1	1	0	0	LOXL1	lysyl oxidase-like 1
hsa-miR-296-3p	0	0	1	1	1	1	BCAM	basal cell adhesion molecule (Lutheran blood group)
hsa-miR-296-3p	1	0	1	1	1	1	TERF2	telomeric repeat binding factor 2
hsa-miR-296-3p	1	0	1	0	1	1	TSPAN2	tetraspanin 2
hsa-miR-296-3p	0	0	1	1	1	1	RNF41	ring finger protein 41
hsa-miR-296-3p	1	0	1	0	1	1	SPRY3	sprouty homolog 3 (Drosophila)
hsa-miR-296-3p	0	0	1	1	1	1	MFAP3	microfibrillar-associated protein 3
hsa-miR-296-3p	1	0	1	1	1	1	FOXO4	forkhead box O4
hsa-miR-296-3p	0	0	1	1	1	1	MT1A	metallothionein 1A
hsa-miR-296-3p	0	0	1	0	1	1	MT1X	metallothionein 1X
hsa-miR-296-3p	0	0	1	1	1	1	MT2A	metallothionein 2A
hsa-miR-296-3p	1	0	1	1	0	0	NAB2	NGFI-A binding protein 2 (EGR1 binding protein 2)
hsa-miR-296-3p	1	0	1	1	1	1	ENDOU	endonuclease, polyU-specific
hsa-miR-296-3p	1	0	1	1	1	1	IRF9	interferon regulatory factor 9
hsa-miR-296-3p	1	0	1	1	1	1	DAGLA	diacylglycerol lipase, alpha
hsa-miR-296-3p	1	0	1	1	1	1	PFKFB2	6-phosphofructo-2-kinase/fructose-2,6-biphosphatase 2
hsa-miR-296-3p	0	0	1	1	0	0	PNOC	prepronociceptin
hsa-miR-296-3p	1	0	1	1	1	1	PKN2	protein kinase N2
hsa-miR-296-3p	1	0	1	1	1	1	TLN1	talin 1
hsa-miR-296-3p	0	0	1	1	1	1	TYRO3	TYRO3 protein tyrosine kinase
hsa-miR-296-3p	1	0	1	1	1	1	SMC1A	structural maintenance of chromosomes 1A
hsa-miR-296-3p	1	0	1	1	1	1	NPEPPS	aminopeptidase puromycin sensitive
hsa-miR-296-3p	1	0	1	1	1	1	BASP1	brain abundant, membrane attached signal protein 1
hsa-miR-296-3p	1	0	1	1	1	1	ZER1	zer-1 homolog (C. elegans)
hsa-miR-296-3p	0	0	1	1	0	0	UBD	ubiquitin D
hsa-miR-296-3p	1	0	1	1	1	1	PAIP1	poly(A) binding protein interacting protein 1
hsa-miR-296-3p	1	0	1	0	1	1	MXD4	MAX dimerization protein 4
hsa-miR-296-3p	1	0	1	1	1	1	TRIM3	tripartite motif containing 3
hsa-miR-296-3p	0	0	1	0	1	1	SLC16A2	solute carrier family 16, member 2 (thyroid hormone transporter)
hsa-miR-296-3p	1	0	1	1	1	1	DYNLT3	dynein, light chain, Tctex-type 3
hsa-miR-296-3p	1	0	1	0	1	1	IGF2BP1	insulin-like growth factor 2 mRNA binding protein 1
hsa-miR-296-3p	0	0	1	1	1	1	CCT6B	chaperonin containing TCP1, subunit 6B (zeta 2)
hsa-miR-296-3p	1	0	1	1	1	1	PGRMC1	progesterone receptor membrane component 1
hsa-miR-296-3p	1	0	1	1	1	1	MMP24	matrix metallopeptidase 24 (membrane-inserted)
hsa-miR-296-3p	0	0	1	1	1	1	JTB	jumping translocation breakpoint
hsa-miR-296-3p	0	0	1	1	1	1	HOXA2	homeobox A2
hsa-miR-296-3p	0	0	1	1	0	0	DNAJB2	DnaJ (Hsp40) homolog, subfamily B, member 2
hsa-miR-296-3p	1	0	1	1	0	0	PSKH1	protein serine kinase H1
hsa-miR-296-3p	1	0	1	1	1	1	BTG2	BTG family, member 2
hsa-miR-296-3p	1	0	1	1	1	1	KAT6A	K(lysine) acetyltransferase 6A
hsa-miR-296-3p	1	0	1	0	1	1	SYNGAP1	synaptic Ras GTPase activating protein 1
hsa-miR-296-3p	1	0	1	1	1	1	CBX1	chromobox homolog 1
hsa-miR-296-3p	0	0	1	1	1	1	PKIA	protein kinase (cAMP-dependent, catalytic) inhibitor alpha
hsa-miR-296-3p	0	0	1	1	1	1	TMED10	transmembrane emp24-like trafficking protein 10 (yeast)
hsa-miR-296-3p	0	0	1	1	0	0	PIM2	pim-2 oncogene
hsa-miR-296-3p	1	0	1	1	1	1	RP2	retinitis pigmentosa 2 (X-linked recessive)
hsa-miR-296-3p	1	0	1	0	1	1	SOX12	SRY (sex determining region Y)-box 12
hsa-miR-296-3p	1	0	1	1	1	1	SYN1	synapsin I
hsa-miR-296-3p	0	0	1	1	1	1	ALX1	ALX homeobox 1
hsa-miR-296-3p	1	0	1	0	1	1	WASF2	WAS protein family, member 2
hsa-miR-296-3p	1	0	1	0	1	1	PAPD7	PAP associated domain containing 7
hsa-miR-296-3p	0	0	1	1	1	1	FAF1	Fas (TNFRSF6) associated factor 1
hsa-miR-296-3p	0	0	1	0	1	1	ZNF208	zinc finger protein 208
hsa-miR-296-3p	1	0	1	0	1	1	PRSS23	protease, serine, 23
hsa-miR-296-3p	0	0	1	1	1	1	HRH3	histamine receptor H3
hsa-miR-296-3p	1	0	1	1	1	1	KLF12	Kruppel-like factor 12
hsa-miR-296-3p	0	0	1	0	0	0	PHB2	prohibitin 2
hsa-miR-296-3p	1	0	1	1	1	1	TUSC2	tumor suppressor candidate 2
hsa-miR-296-3p	0	0	1	0	1	1	AP4E1	adaptor-related protein complex 4, epsilon 1 subunit
hsa-miR-296-3p	1	0	1	1	1	1	PADI2	peptidyl arginine deiminase, type II
hsa-miR-296-3p	1	0	1	1	1	1	TARDBP	TAR DNA binding protein
hsa-miR-296-3p	0	0	1	1	0	0	PRDX5	peroxiredoxin 5
hsa-miR-296-3p	0	0	1	1	1	1	LMOD1	leiomodin 1 (smooth muscle)
hsa-miR-296-3p	1	0	1	1	1	1	DKK1	dickkopf 1 homolog (Xenopus laevis)
hsa-miR-296-3p	1	0	1	1	1	1	RHOQ	ras homolog family member Q
hsa-miR-296-3p	1	0	1	1	1	1	HS2ST1	heparan sulfate 2-O-sulfotransferase 1
hsa-miR-296-3p	1	0	1	1	1	1	KCNE1L	KCNE1-like
hsa-miR-296-3p	1	0	1	0	1	1	MYCBP	c-myc binding protein
hsa-miR-296-3p	0	0	1	0	1	1	TLL1	tolloid-like 1
hsa-miR-296-3p	1	0	1	1	1	1	TRPC5	transient receptor potential cation channel, subfamily C, member 5
hsa-miR-296-3p	1	0	1	1	1	1	STK39	serine threonine kinase 39
hsa-miR-296-3p	1	0	1	1	1	1	PADI1	peptidyl arginine deiminase, type I
hsa-miR-296-3p	0	0	1	1	0	0	ZDHHC8	zinc finger, DHHC-type containing 8
hsa-miR-296-3p	1	0	1	1	1	1	NRG1	neuregulin 1
hsa-miR-296-3p	1	0	1	1	1	1	RGCC	regulator of cell cycle
hsa-miR-296-3p	0	0	1	1	1	1	CCDC113	coiled-coil domain containing 113
hsa-miR-296-3p	1	0	1	1	1	1	VAMP1	vesicle-associated membrane protein 1 (synaptobrevin 1)
hsa-miR-296-3p	1	0	1	0	1	1	VAMP2	vesicle-associated membrane protein 2 (synaptobrevin 2)
hsa-miR-296-3p	1	0	1	1	1	1	RNF7	ring finger protein 7
hsa-miR-296-3p	1	0	1	1	1	1	C11orf58	chromosome 11 open reading frame 58
hsa-miR-296-3p	1	0	1	1	1	1	CBX6	chromobox homolog 6
hsa-miR-296-3p	0	0	1	1	0	0	QPRT	quinolinate phosphoribosyltransferase
hsa-miR-296-3p	0	0	1	1	1	1	C22orf28	chromosome 22 open reading frame 28
hsa-miR-296-3p	1	0	1	1	1	1	PATZ1	POZ (BTB) and AT hook containing zinc finger 1
hsa-miR-296-3p	0	0	1	1	1	1	LAMP3	lysosomal-associated membrane protein 3
hsa-miR-296-3p	0	0	1	1	1	1	SRPX2	sushi-repeat containing protein, X-linked 2
hsa-miR-296-3p	0	0	1	1	0	0	UBE2S	ubiquitin-conjugating enzyme E2S
hsa-miR-296-3p	0	0	1	1	0	0	APOBEC3C	apolipoprotein B mRNA editing enzyme, catalytic polypeptide-like 3C
hsa-miR-296-3p	1	0	1	1	1	1	HERC3	HECT and RLD domain containing E3 ubiquitin protein ligase 3
hsa-miR-296-3p	0	0	1	1	1	1	HOXC4	homeobox C4
hsa-miR-296-3p	1	0	1	1	1	1	ZNF592	zinc finger protein 592
hsa-miR-296-3p	1	0	1	0	1	1	SH3PXD2A	SH3 and PX domains 2A
hsa-miR-296-3p	0	0	1	1	0	0	SLC25A44	solute carrier family 25, member 44
hsa-miR-296-3p	0	0	1	1	1	1	VPRBP	Vpr (HIV-1) binding protein
hsa-miR-296-3p	1	0	1	1	1	1	TBKBP1	TBK1 binding protein 1
hsa-miR-296-3p	1	0	1	1	1	1	MLL4	myeloid/lymphoid or mixed-lineage leukemia 4
hsa-miR-296-3p	1	0	1	0	1	1	MLEC	malectin
hsa-miR-296-3p	1	0	1	1	1	1	KIAA0247	KIAA0247
hsa-miR-296-3p	0	0	1	1	1	1	SNX19	sorting nexin 19
hsa-miR-296-3p	1	0	1	1	1	1	DAZAP2	DAZ associated protein 2
hsa-miR-296-3p	1	0	1	0	1	1	KIAA0494	KIAA0494
hsa-miR-296-3p	1	0	1	1	1	1	ARHGEF11	Rho guanine nucleotide exchange factor (GEF) 11
hsa-miR-296-3p	1	0	1	1	1	1	JAKMIP2	janus kinase and microtubule interacting protein 2
hsa-miR-296-3p	0	0	1	1	0	0	PCNXL2	pecanex-like 2 (Drosophila)
hsa-miR-296-3p	1	0	1	1	1	1	RUSC2	RUN and SH3 domain containing 2
hsa-miR-296-3p	0	0	1	1	1	1	TOX4	TOX high mobility group box family member 4
hsa-miR-296-3p	1	0	1	1	1	1	ZBTB39	zinc finger and BTB domain containing 39
hsa-miR-296-3p	1	0	1	1	1	1	SV2A	synaptic vesicle glycoprotein 2A
hsa-miR-296-3p	1	0	1	0	1	1	PDAP1	PDGFA associated protein 1
hsa-miR-296-3p	1	0	1	1	1	1	RNF44	ring finger protein 44
hsa-miR-296-3p	0	0	1	0	1	1	PPM1E	protein phosphatase, Mg2+/Mn2+ dependent, 1E
hsa-miR-296-3p	1	0	1	1	1	1	PLEKHA6	pleckstrin homology domain containing, family A member 6
hsa-miR-296-3p	0	0	1	1	0	0	MORC2	MORC family CW-type zinc finger 2
hsa-miR-296-3p	1	0	1	0	1	1	ZBTB1	zinc finger and BTB domain containing 1
hsa-miR-296-3p	1	0	1	1	1	1	PHLPP2	PH domain and leucine rich repeat protein phosphatase 2
hsa-miR-296-3p	1	0	1	0	1	1	NMNAT2	nicotinamide nucleotide adenylyltransferase 2
hsa-miR-296-3p	0	0	1	1	1	1	FTSJD2	FtsJ methyltransferase domain containing 2
hsa-miR-296-3p	1	0	1	0	1	1	PEG10	paternally expressed 10
hsa-miR-296-3p	1	0	1	1	1	1	DDN	dendrin
hsa-miR-296-3p	1	0	1	1	1	1	RCOR1	REST corepressor 1
hsa-miR-296-3p	1	0	1	1	1	1	PDS5A	PDS5, regulator of cohesion maintenance, homolog A (S. cerevisiae)
hsa-miR-296-3p	1	0	1	1	1	1	PHF15	PHD finger protein 15
hsa-miR-296-3p	0	0	1	1	1	1	ANGEL1	angel homolog 1 (Drosophila)
hsa-miR-296-3p	1	0	1	0	1	1	LARP1	La ribonucleoprotein domain family, member 1
hsa-miR-296-3p	1	0	1	0	1	1	SRGAP2	SLIT-ROBO Rho GTPase activating protein 2
hsa-miR-296-3p	1	0	1	1	1	1	MED13L	mediator complex subunit 13-like
hsa-miR-296-3p	0	0	1	1	1	1	LEPROTL1	leptin receptor overlapping transcript-like 1
hsa-miR-296-3p	1	0	1	1	1	1	PARM1	prostate androgen-regulated mucin-like protein 1
hsa-miR-296-3p	1	0	1	1	1	1	CLIP3	CAP-GLY domain containing linker protein 3
hsa-miR-296-3p	1	0	1	0	1	1	PPP1R16B	protein phosphatase 1, regulatory subunit 16B
hsa-miR-296-3p	0	0	1	1	0	0	CCDC9	coiled-coil domain containing 9
hsa-miR-296-3p	1	0	1	1	1	1	FAM155B	family with sequence similarity 155, member B
hsa-miR-296-3p	1	0	1	1	1	1	PLA2G3	phospholipase A2, group III
hsa-miR-296-3p	1	0	1	1	0	0	COL5A3	collagen, type V, alpha 3
hsa-miR-296-3p	0	0	1	1	0	0	ZNF117	zinc finger protein 117
hsa-miR-296-3p	1	0	1	1	1	1	EIF5B	eukaryotic translation initiation factor 5B
hsa-miR-296-3p	0	0	1	1	1	1	NOP58	NOP58 ribonucleoprotein homolog (yeast)
hsa-miR-296-3p	0	0	1	1	1	1	LACTB2	lactamase, beta 2
hsa-miR-296-3p	1	0	1	1	1	1	RRP15	ribosomal RNA processing 15 homolog (S. cerevisiae)
hsa-miR-296-3p	1	0	1	1	1	1	PALLD	palladin, cytoskeletal associated protein
hsa-miR-296-3p	1	0	1	0	1	1	CNR1	cannabinoid receptor 1 (brain)
hsa-miR-296-3p	1	0	1	1	1	1	MPC1	mitochondrial pyruvate carrier 1
hsa-miR-296-3p	0	0	1	1	1	1	RAB10	RAB10, member RAS oncogene family
hsa-miR-296-3p	1	0	1	0	1	1	HPCAL4	hippocalcin like 4
hsa-miR-296-3p	0	0	1	1	0	0	SRRM2	serine/arginine repetitive matrix 2
hsa-miR-296-3p	1	0	1	1	1	1	RAPGEFL1	Rap guanine nucleotide exchange factor (GEF)-like 1
hsa-miR-296-3p	1	0	1	0	1	1	TMEM216	transmembrane protein 216
hsa-miR-296-3p	1	0	1	1	1	1	HOXC10	homeobox C10
hsa-miR-296-3p	1	0	1	0	1	1	FZD3	frizzled family receptor 3
hsa-miR-296-3p	1	0	1	0	1	1	KLHL3	kelch-like 3 (Drosophila)
hsa-miR-296-3p	0	0	1	1	1	1	PRKAG3	protein kinase, AMP-activated, gamma 3 non-catalytic subunit
hsa-miR-296-3p	0	0	1	1	1	1	NKRF	NFKB repressing factor
hsa-miR-296-3p	0	0	1	1	1	1	SMG6	smg-6 homolog, nonsense mediated mRNA decay factor (C. elegans)
hsa-miR-296-3p	1	0	1	0	1	1	UBE2Q1	ubiquitin-conjugating enzyme E2Q family member 1
hsa-miR-296-3p	1	0	1	1	0	0	C17orf59	chromosome 17 open reading frame 59
hsa-miR-296-3p	0	0	1	1	1	1	LRRC16A	leucine rich repeat containing 16A
hsa-miR-296-3p	1	0	1	1	1	1	HAUS6	HAUS augmin-like complex, subunit 6
hsa-miR-296-3p	1	0	1	0	1	1	FAM46C	family with sequence similarity 46, member C
hsa-miR-296-3p	0	0	1	1	1	1	LRRC40	leucine rich repeat containing 40
hsa-miR-296-3p	0	0	1	1	1	1	WHSC1L1	Wolf-Hirschhorn syndrome candidate 1-like 1
hsa-miR-296-3p	0	0	1	1	1	1	C2orf42	chromosome 2 open reading frame 42
hsa-miR-296-3p	0	0	1	1	0	0	VPS37C	vacuolar protein sorting 37 homolog C (S. cerevisiae)
hsa-miR-296-3p	0	0	1	1	1	1	AIM1L	absent in melanoma 1-like
hsa-miR-296-3p	0	0	1	1	1	1	WIPI1	WD repeat domain, phosphoinositide interacting 1
hsa-miR-296-3p	1	0	1	1	1	1	ARGLU1	arginine and glutamate rich 1
hsa-miR-296-3p	1	0	1	1	1	1	FIGN	fidgetin
hsa-miR-296-3p	1	0	1	1	1	1	FAM178A	family with sequence similarity 178, member A
hsa-miR-296-3p	1	0	1	1	1	1	TMEM33	transmembrane protein 33
hsa-miR-296-3p	1	0	1	0	1	1	MSL2	male-specific lethal 2 homolog (Drosophila)
hsa-miR-296-3p	0	0	1	1	0	0	DNAJC17	DnaJ (Hsp40) homolog, subfamily C, member 17
hsa-miR-296-3p	1	0	1	1	1	1	RPRD1A	regulation of nuclear pre-mRNA domain containing 1A
hsa-miR-296-3p	0	0	1	0	1	1	FAM86C1	family with sequence similarity 86, member C1
hsa-miR-296-3p	0	0	1	0	1	1	GOLPH3L	golgi phosphoprotein 3-like
hsa-miR-296-3p	0	0	1	0	1	1	TMEM57	transmembrane protein 57
hsa-miR-296-3p	0	0	1	1	1	1	TRIM62	tripartite motif containing 62
hsa-miR-296-3p	1	0	1	1	1	1	PI4K2B	phosphatidylinositol 4-kinase type 2 beta
hsa-miR-296-3p	0	0	1	1	1	1	TMEM144	transmembrane protein 144
hsa-miR-296-3p	0	0	1	0	1	1	BLOC1S4	biogenesis of lysosomal organelles complex-1, subunit 4, cappuccino
hsa-miR-296-3p	1	0	1	0	1	1	FOXJ2	forkhead box J2
hsa-miR-296-3p	0	0	1	0	0	0	FAM45B	family with sequence similarity 45, member A pseudogene
hsa-miR-296-3p	1	0	1	1	1	1	ASH1L	ash1 (absent, small, or homeotic)-like (Drosophila)
hsa-miR-296-3p	1	0	1	1	1	1	LRRC59	leucine rich repeat containing 59
hsa-miR-296-3p	1	0	1	0	1	1	LRP1B	low density lipoprotein receptor-related protein 1B
hsa-miR-296-3p	0	0	1	1	1	1	LENEP	lens epithelial protein
hsa-miR-296-3p	1	0	1	0	1	1	KLHL9	kelch-like 9 (Drosophila)
hsa-miR-296-3p	1	0	1	1	1	1	PCDHGA1	protocadherin gamma subfamily A, 1
hsa-miR-296-3p	1	0	1	0	1	1	PCDHGA10	protocadherin gamma subfamily A, 10
hsa-miR-296-3p	1	0	1	0	1	1	PCDHGA11	protocadherin gamma subfamily A, 11
hsa-miR-296-3p	1	0	1	1	1	1	PCDHGA2	protocadherin gamma subfamily A, 2
hsa-miR-296-3p	1	0	1	0	1	1	PCDHGA3	protocadherin gamma subfamily A, 3
hsa-miR-296-3p	1	0	1	0	1	1	PCDHGA4	protocadherin gamma subfamily A, 4
hsa-miR-296-3p	1	0	1	0	1	1	PCDHGA5	protocadherin gamma subfamily A, 5
hsa-miR-296-3p	1	0	1	0	1	1	PCDHGA6	protocadherin gamma subfamily A, 6
hsa-miR-296-3p	1	0	1	0	1	1	PCDHGA7	protocadherin gamma subfamily A, 7
hsa-miR-296-3p	1	0	1	0	1	1	PCDHGA9	protocadherin gamma subfamily A, 9
hsa-miR-296-3p	1	0	1	0	1	1	PCDHGB1	protocadherin gamma subfamily B, 1
hsa-miR-296-3p	1	0	1	0	1	1	PCDHGB2	protocadherin gamma subfamily B, 2
hsa-miR-296-3p	1	0	1	0	1	1	PCDHGB3	protocadherin gamma subfamily B, 3
hsa-miR-296-3p	1	0	1	0	1	1	PCDHGB5	protocadherin gamma subfamily B, 5
hsa-miR-296-3p	1	0	1	0	1	1	PCDHGB6	protocadherin gamma subfamily B, 6
hsa-miR-296-3p	1	0	1	0	1	1	PCDHGB7	protocadherin gamma subfamily B, 7
hsa-miR-296-3p	1	0	1	0	1	1	PCDHGC4	protocadherin gamma subfamily C, 4
hsa-miR-296-3p	1	0	1	0	1	1	PCDHGC5	protocadherin gamma subfamily C, 5
hsa-miR-296-3p	0	0	1	1	0	0	RNF186	ring finger protein 186
hsa-miR-296-3p	0	0	1	1	1	1	GNL3L	guanine nucleotide binding protein-like 3 (nucleolar)-like
hsa-miR-296-3p	1	0	1	1	1	1	SEPT3	septin 3
hsa-miR-296-3p	0	0	1	1	1	1	FMN2	formin 2
hsa-miR-296-3p	1	0	1	1	1	1	SAR1A	SAR1 homolog A (S. cerevisiae)
hsa-miR-296-3p	1	0	1	1	0	0	SLC17A7	solute carrier family 17 (sodium-dependent inorganic phosphate cotransporter), member 7
hsa-miR-296-3p	0	0	1	1	1	1	PAPPA2	pappalysin 2
hsa-miR-296-3p	1	0	1	1	1	1	SCYL3	SCY1-like 3 (S. cerevisiae)
hsa-miR-296-3p	1	0	1	1	1	1	EPHA8	EPH receptor A8
hsa-miR-296-3p	1	0	1	0	1	1	FAM40B	family with sequence similarity 40, member B
hsa-miR-296-3p	0	0	1	0	1	1	ZNF490	zinc finger protein 490
hsa-miR-296-3p	0	0	1	1	1	1	SHROOM4	shroom family member 4
hsa-miR-296-3p	0	0	1	0	1	1	SERINC1	serine incorporator 1
hsa-miR-296-3p	0	0	1	1	1	1	ARRDC3	arrestin domain containing 3
hsa-miR-296-3p	1	0	1	1	1	1	HOMEZ	homeobox and leucine zipper encoding
hsa-miR-296-3p	1	0	1	1	1	1	TSHZ3	teashirt zinc finger homeobox 3
hsa-miR-296-3p	1	0	1	0	1	1	SH3RF1	SH3 domain containing ring finger 1
hsa-miR-296-3p	0	0	1	1	1	1	B3GALT1	UDP-Gal:betaGlcNAc beta 1,3-galactosyltransferase, polypeptide 1
hsa-miR-296-3p	0	0	1	1	1	1	GNAO1	guanine nucleotide binding protein (G protein), alpha activating activity polypeptide O
hsa-miR-296-3p	1	0	1	1	1	1	ZNFX1	zinc finger, NFX1-type containing 1
hsa-miR-296-3p	0	0	1	1	0	0	HIST1H2BJ	histone cluster 1, H2bj
hsa-miR-296-3p	1	0	1	1	1	1	MTMR3	myotubularin related protein 3
hsa-miR-296-3p	1	0	1	1	1	1	ADCY1	adenylate cyclase 1 (brain)
hsa-miR-296-3p	1	0	1	0	1	1	TP53INP2	tumor protein p53 inducible nuclear protein 2
hsa-miR-296-3p	0	0	1	0	1	1	PROL1	proline rich, lacrimal 1
hsa-miR-296-3p	0	0	1	1	1	1	OSTC	oligosaccharyltransferase complex subunit
hsa-miR-296-3p	0	0	1	1	1	1	HRH4	histamine receptor H4
hsa-miR-296-3p	0	0	1	1	1	1	NR1D1	nuclear receptor subfamily 1, group D, member 1
hsa-miR-296-3p	1	0	1	1	1	1	PPP1R11	protein phosphatase 1, regulatory (inhibitor) subunit 11
hsa-miR-296-3p	1	0	1	0	1	1	GAN	gigaxonin
hsa-miR-296-3p	1	0	1	0	1	1	CSNK1G1	casein kinase 1, gamma 1
hsa-miR-296-3p	1	0	1	0	1	1	CERS2	ceramide synthase 2
hsa-miR-296-3p	1	0	1	1	1	1	ABCG4	ATP-binding cassette, sub-family G (WHITE), member 4
hsa-miR-296-3p	1	0	1	1	1	1	HIF3A	hypoxia inducible factor 3, alpha subunit
hsa-miR-296-3p	1	0	1	0	1	1	GREM2	gremlin 2
hsa-miR-296-3p	1	0	1	1	1	1	GIGYF1	GRB10 interacting GYF protein 1
hsa-miR-296-3p	0	0	1	1	1	1	ACBD3	acyl-CoA binding domain containing 3
hsa-miR-296-3p	1	0	1	1	1	1	DEPTOR	DEP domain containing MTOR-interacting protein
hsa-miR-296-3p	1	0	1	1	1	1	MARCH7	membrane-associated ring finger (C3HC4) 7, E3 ubiquitin protein ligase
hsa-miR-296-3p	0	0	1	0	1	1	NAIP	NLR family, apoptosis inhibitory protein
hsa-miR-296-3p	1	0	1	1	1	1	GRAMD3	GRAM domain containing 3
hsa-miR-296-3p	1	0	1	1	1	1	C1orf116	chromosome 1 open reading frame 116
hsa-miR-296-3p	1	0	1	1	1	1	C7orf23	chromosome 7 open reading frame 23
hsa-miR-296-3p	0	0	1	1	0	0	IRX3	iroquois homeobox 3
hsa-miR-296-3p	1	0	1	1	1	1	NKAIN1	Na+/K+ transporting ATPase interacting 1
hsa-miR-296-3p	0	0	1	1	1	1	GALNT12	UDP-N-acetyl-alpha-D-galactosamine:polypeptide N-acetylgalactosaminyltransferase 12 (GalNAc-T12)
hsa-miR-296-3p	1	0	1	0	1	1	ZFHX4	zinc finger homeobox 4
hsa-miR-296-3p	1	0	1	1	1	1	CCDC82	coiled-coil domain containing 82
hsa-miR-296-3p	1	0	1	1	0	0	CCDC48	coiled-coil domain containing 48
hsa-miR-296-3p	1	0	1	1	1	1	L2HGDH	L-2-hydroxyglutarate dehydrogenase
hsa-miR-296-3p	1	0	1	1	1	1	KLHL18	kelch-like 18 (Drosophila)
hsa-miR-296-3p	1	0	1	0	1	1	EDEM3	ER degradation enhancer, mannosidase alpha-like 3
hsa-miR-296-3p	1	0	1	0	1	1	DNAJC5	DnaJ (Hsp40) homolog, subfamily C, member 5
hsa-miR-296-3p	1	0	1	1	1	1	JHDM1D	jumonji C domain containing histone demethylase 1 homolog D (S. cerevisiae)
hsa-miR-296-3p	1	0	1	0	1	1	SETD7	SET domain containing (lysine methyltransferase) 7
hsa-miR-296-3p	1	0	1	1	1	1	HOXA3	homeobox A3
hsa-miR-296-3p	1	0	1	1	1	1	SYNC	syncoilin, intermediate filament protein
hsa-miR-296-3p	1	0	1	1	1	1	FAM117A	family with sequence similarity 117, member A
hsa-miR-296-3p	1	0	1	0	1	1	CSRNP2	cysteine-serine-rich nuclear protein 2
hsa-miR-296-3p	1	0	1	1	0	0	PVRL4	poliovirus receptor-related 4
hsa-miR-296-3p	1	0	1	1	1	1	VMP1	vacuole membrane protein 1
hsa-miR-296-3p	1	0	1	0	1	1	SPRY4	sprouty homolog 4 (Drosophila)
hsa-miR-296-3p	1	0	1	1	0	0	TCF7L1	transcription factor 7-like 1 (T-cell specific, HMG-box)
hsa-miR-296-3p	1	0	1	1	0	0	SCRT1	scratch homolog 1, zinc finger protein (Drosophila)
hsa-miR-296-3p	1	0	1	1	1	1	SOX7	SRY (sex determining region Y)-box 7
hsa-miR-296-3p	1	0	1	0	1	1	TMEM47	transmembrane protein 47
hsa-miR-296-3p	0	0	1	1	1	1	INHBE	inhibin, beta E
hsa-miR-296-3p	1	0	1	0	1	1	ITCH	itchy E3 ubiquitin protein ligase
hsa-miR-296-3p	1	0	1	0	1	1	PCDHGA8	protocadherin gamma subfamily A, 8
hsa-miR-296-3p	0	0	1	1	1	1	MAGT1	magnesium transporter 1
hsa-miR-296-3p	1	0	1	1	1	1	ANTXR1	anthrax toxin receptor 1
hsa-miR-296-3p	1	0	1	0	1	1	FAR1	fatty acyl CoA reductase 1
hsa-miR-296-3p	1	0	1	1	1	1	ZNRF1	zinc and ring finger 1, E3 ubiquitin protein ligase
hsa-miR-296-3p	0	0	1	0	1	1	LDOC1L	leucine zipper, down-regulated in cancer 1-like
hsa-miR-296-3p	0	0	1	1	1	1	VPS25	vacuolar protein sorting 25 homolog (S. cerevisiae)
hsa-miR-296-3p	0	0	1	1	1	1	MAML2	mastermind-like 2 (Drosophila)
hsa-miR-296-3p	1	0	1	1	1	1	SYVN1	synovial apoptosis inhibitor 1, synoviolin
hsa-miR-296-3p	0	0	1	1	1	1	ZNF333	zinc finger protein 333
hsa-miR-296-3p	0	0	1	1	0	0	TRIM54	tripartite motif containing 54
hsa-miR-296-3p	0	0	1	1	1	1	HAVCR2	hepatitis A virus cellular receptor 2
hsa-miR-296-3p	1	0	1	1	0	0	ZC3H10	zinc finger CCCH-type containing 10
hsa-miR-296-3p	1	0	1	1	1	1	ARHGEF39	Rho guanine nucleotide exchange factor (GEF) 39
hsa-miR-296-3p	0	0	1	1	0	0	TNS4	tensin 4
hsa-miR-296-3p	0	0	1	1	1	1	ARHGEF4	Rho guanine nucleotide exchange factor (GEF) 4
hsa-miR-296-3p	1	0	1	0	1	1	PURB	purine-rich element binding protein B
hsa-miR-296-3p	1	0	1	1	1	1	RASL10B	RAS-like, family 10, member B
hsa-miR-296-3p	0	0	1	1	1	1	LHX4	LIM homeobox 4
hsa-miR-296-3p	0	0	1	1	0	0	CGB2	chorionic gonadotropin, beta polypeptide 2
hsa-miR-296-3p	1	0	1	1	1	1	SSH2	slingshot homolog 2 (Drosophila)
hsa-miR-296-3p	0	0	1	1	0	0	SLC38A5	solute carrier family 38, member 5
hsa-miR-296-3p	1	0	1	1	1	1	LUZP1	leucine zipper protein 1
hsa-miR-296-3p	1	0	1	1	1	1	BRWD1	bromodomain and WD repeat domain containing 1
hsa-miR-296-3p	0	0	1	1	0	0	PGLYRP3	peptidoglycan recognition protein 3
hsa-miR-296-3p	1	0	1	1	1	1	ELFN2	extracellular leucine-rich repeat and fibronectin type III domain containing 2
hsa-miR-296-3p	0	0	1	1	1	1	PLEKHG4B	pleckstrin homology domain containing, family G (with RhoGef domain) member 4B
hsa-miR-296-3p	1	0	1	0	1	1	FAM129A	family with sequence similarity 129, member A
hsa-miR-296-3p	1	0	1	0	1	1	CCND1	cyclin D1
hsa-miR-296-3p	1	0	1	1	1	1	NAA15	N(alpha)-acetyltransferase 15, NatA auxiliary subunit
hsa-miR-296-3p	1	0	1	1	0	0	BRD4	bromodomain containing 4
hsa-miR-296-3p	1	0	1	1	1	1	SEPT4	septin 4
hsa-miR-296-3p	0	0	1	1	1	1	SELM	selenoprotein M
hsa-miR-296-3p	0	0	1	1	1	1	SLC32A1	solute carrier family 32 (GABA vesicular transporter), member 1
hsa-miR-296-3p	0	0	1	1	0	0	ACY3	aspartoacylase (aminocyclase) 3
hsa-miR-296-3p	1	0	1	1	1	1	KLHL6	kelch-like 6 (Drosophila)
hsa-miR-296-3p	0	0	1	1	1	1	ATP6V1G2	ATPase, H+ transporting, lysosomal 13kDa, V1 subunit G2
hsa-miR-296-3p	0	0	1	1	1	1	RGS18	regulator of G-protein signaling 18
hsa-miR-296-3p	1	0	1	1	1	1	BMPER	BMP binding endothelial regulator
hsa-miR-296-3p	0	0	1	0	1	1	SYNPO2	synaptopodin 2
hsa-miR-296-3p	1	0	1	1	0	0	PKDCC	protein kinase domain containing, cytoplasmic homolog (mouse)
hsa-miR-296-3p	0	0	1	1	1	1	MRAP2	melanocortin 2 receptor accessory protein 2
hsa-miR-296-3p	0	0	1	1	1	1	C1orf213	chromosome 1 open reading frame 213
hsa-miR-296-3p	0	0	1	1	0	0	ESAM	endothelial cell adhesion molecule
hsa-miR-296-3p	0	0	1	1	1	1	ADAMTS17	ADAM metallopeptidase with thrombospondin type 1 motif, 17
hsa-miR-296-3p	1	0	1	0	1	1	CNOT6L	CCR4-NOT transcription complex, subunit 6-like
hsa-miR-296-3p	1	0	1	1	1	1	TEX261	testis expressed 261
hsa-miR-296-3p	1	0	1	1	1	1	RFTN2	raftlin family member 2
hsa-miR-296-3p	0	0	1	1	0	0	LINC00477	long intergenic non-protein coding RNA 477
hsa-miR-296-3p	1	0	1	1	0	0	SMCR8	Smith-Magenis syndrome chromosome region, candidate 8
hsa-miR-296-3p	0	0	1	1	1	1	TMEM106A	transmembrane protein 106A
hsa-miR-296-3p	0	0	1	1	0	0	NSMCE1	non-SMC element 1 homolog (S. cerevisiae)
hsa-miR-296-3p	1	0	1	0	1	1	DIRAS1	DIRAS family, GTP-binding RAS-like 1
hsa-miR-296-3p	1	0	1	1	1	1	FAM84A	family with sequence similarity 84, member A
hsa-miR-296-3p	1	0	1	1	0	0	NAPRT1	nicotinate phosphoribosyltransferase domain containing 1
hsa-miR-296-3p	0	0	1	1	0	0	SENP8	SUMO/sentrin specific peptidase family member 8
hsa-miR-296-3p	0	0	1	0	0	0	MRPL10	mitochondrial ribosomal protein L10
hsa-miR-296-3p	0	0	1	1	1	1	CD300LG	CD300 molecule-like family member g
hsa-miR-296-3p	1	0	1	1	1	1	CADM4	cell adhesion molecule 4
hsa-miR-296-3p	0	0	1	1	1	1	APOBEC3F	apolipoprotein B mRNA editing enzyme, catalytic polypeptide-like 3F
hsa-miR-296-3p	0	0	1	1	0	0	TMEM217	transmembrane protein 217
hsa-miR-296-3p	0	0	1	1	0	0	TCEB3C	transcription elongation factor B polypeptide 3C (elongin A3)
hsa-miR-296-3p	1	0	1	1	1	1	FAM110B	family with sequence similarity 110, member B
hsa-miR-296-3p	0	0	1	0	1	1	CHKB	choline kinase beta
hsa-miR-296-3p	1	0	1	1	1	1	POGLUT1	protein O-glucosyltransferase 1
hsa-miR-296-3p	1	0	1	1	1	1	LSM12	LSM12 homolog (S. cerevisiae)
hsa-miR-296-3p	1	0	1	1	1	1	TMEM178A	transmembrane protein 178A
hsa-miR-296-3p	1	0	1	1	1	1	FAM123B	family with sequence similarity 123B
hsa-miR-296-3p	1	0	1	1	1	1	ZNF362	zinc finger protein 362
hsa-miR-296-3p	0	0	1	0	1	1	HORMAD2	HORMA domain containing 2
hsa-miR-296-3p	1	0	1	1	1	1	C7orf60	chromosome 7 open reading frame 60
hsa-miR-296-3p	0	0	1	1	0	0	WBSCR27	Williams Beuren syndrome chromosome region 27
hsa-miR-296-3p	0	0	1	1	0	0	MARCH10	membrane-associated ring finger (C3HC4) 10, E3 ubiquitin protein ligase
hsa-miR-296-3p	1	0	1	0	1	1	TMEM154	transmembrane protein 154
hsa-miR-296-3p	0	0	1	1	0	0	ODF4	outer dense fiber of sperm tails 4
hsa-miR-296-3p	1	0	1	1	1	1	TXLNB	taxilin beta
hsa-miR-296-3p	0	0	1	1	0	0	DEFB119	defensin, beta 119
hsa-miR-296-3p	0	0	1	1	0	0	ALDH16A1	aldehyde dehydrogenase 16 family, member A1
hsa-miR-296-3p	1	0	1	0	1	1	TAPT1	transmembrane anterior posterior transformation 1
hsa-miR-296-3p	1	0	1	0	1	1	GPR26	G protein-coupled receptor 26
hsa-miR-296-3p	1	0	1	0	1	1	MDGA1	MAM domain containing glycosylphosphatidylinositol anchor 1
hsa-miR-296-3p	1	0	1	0	1	1	SEMA6D	sema domain, transmembrane domain (TM), and cytoplasmic domain, (semaphorin) 6D
hsa-miR-296-3p	1	0	1	1	0	0	FAM43A	family with sequence similarity 43, member A
hsa-miR-296-3p	0	0	1	1	1	1	GPR112	G protein-coupled receptor 112
hsa-miR-296-3p	0	0	1	1	1	1	TEDDM1	transmembrane epididymal protein 1
hsa-miR-296-3p	0	0	1	1	1	1	WFDC13	WAP four-disulfide core domain 13
hsa-miR-296-3p	1	0	1	1	1	1	POM121	POM121 transmembrane nucleoporin
hsa-miR-296-3p	1	0	1	1	1	1	RDH10	retinol dehydrogenase 10 (all-trans)
hsa-miR-296-3p	1	0	1	1	1	1	RC3H1	ring finger and CCCH-type domains 1
hsa-miR-296-3p	1	0	1	1	1	1	CAMK2D	calcium/calmodulin-dependent protein kinase II delta
hsa-miR-296-3p	0	0	1	1	1	1	TAPBP	TAP binding protein (tapasin)
hsa-miR-296-3p	1	0	1	1	1	1	CSF1	colony stimulating factor 1 (macrophage)
hsa-miR-296-3p	1	0	1	1	1	1	TFAP2D	transcription factor AP-2 delta (activating enhancer binding protein 2 delta)
hsa-miR-296-3p	1	0	1	1	1	1	IL28RA	interleukin 28 receptor, alpha (interferon, lambda receptor)
hsa-miR-296-3p	1	0	1	1	1	1	MMGT1	membrane magnesium transporter 1
hsa-miR-296-3p	1	0	1	1	1	1	DCUN1D3	DCN1, defective in cullin neddylation 1, domain containing 3 (S. cerevisiae)
hsa-miR-296-3p	0	0	1	1	1	1	FAM163A	family with sequence similarity 163, member A
hsa-miR-296-3p	1	0	1	1	1	1	FAM117B	family with sequence similarity 117, member B
hsa-miR-296-3p	0	0	1	1	0	0	CLEC4F	C-type lectin domain family 4, member F
hsa-miR-296-3p	1	0	1	0	1	1	KSR2	kinase suppressor of ras 2
hsa-miR-296-3p	1	0	1	1	1	1	DIP2B	DIP2 disco-interacting protein 2 homolog B (Drosophila)
hsa-miR-296-3p	0	0	1	1	1	1	ZCCHC12	zinc finger, CCHC domain containing 12
hsa-miR-296-3p	1	0	1	1	1	1	RABL3	RAB, member of RAS oncogene family-like 3
hsa-miR-296-3p	0	0	1	0	1	1	C17orf49	chromosome 17 open reading frame 49
hsa-miR-296-3p	0	0	1	1	1	1	C1orf162	chromosome 1 open reading frame 162
hsa-miR-296-3p	1	0	1	0	1	1	FAM84B	family with sequence similarity 84, member B
hsa-miR-296-3p	0	0	1	1	0	0	C17orf74	chromosome 17 open reading frame 74
hsa-miR-296-3p	0	0	1	1	1	1	IL6ST	interleukin 6 signal transducer (gp130, oncostatin M receptor)
hsa-miR-296-3p	0	0	1	1	1	1	KRT79	keratin 79
hsa-miR-296-3p	1	0	1	1	0	0	KRTAP11-1	keratin associated protein 11-1
hsa-miR-296-3p	1	0	1	1	1	1	PPM1B	protein phosphatase, Mg2+/Mn2+ dependent, 1B
hsa-miR-296-3p	1	0	1	1	1	1	LRRTM3	leucine rich repeat transmembrane neuronal 3
hsa-miR-296-3p	0	0	1	1	1	1	STXBP4	syntaxin binding protein 4
hsa-miR-296-3p	0	0	1	1	0	0	C2orf53	chromosome 2 open reading frame 53
hsa-miR-296-3p	1	0	1	1	1	1	LRRTM1	leucine rich repeat transmembrane neuronal 1
hsa-miR-296-3p	0	0	1	0	1	1	PITPNC1	phosphatidylinositol transfer protein, cytoplasmic 1
hsa-miR-296-3p	0	0	1	1	1	1	BMP8A	bone morphogenetic protein 8a
hsa-miR-296-3p	1	0	1	1	1	1	TMED7	transmembrane emp24 protein transport domain containing 7
hsa-miR-296-3p	1	0	1	1	1	1	ISM2	isthmin 2 homolog (zebrafish)
hsa-miR-296-3p	0	0	1	1	0	0	BPIFB4	BPI fold containing family B, member 4
hsa-miR-296-3p	1	0	1	1	1	1	TMEM229B	transmembrane protein 229B
hsa-miR-296-3p	0	0	1	1	1	1	HTR3D	5-hydroxytryptamine (serotonin) receptor 3D, ionotropic
hsa-miR-296-3p	1	0	1	1	1	1	DDX26B	DEAD/H (Asp-Glu-Ala-Asp/His) box polypeptide 26B
hsa-miR-296-3p	1	0	1	0	1	1	C12orf36	chromosome 12 open reading frame 36
hsa-miR-296-3p	1	0	1	0	1	1	RIMS4	regulating synaptic membrane exocytosis 4
hsa-miR-296-3p	1	0	1	1	1	1	PXMP4	peroxisomal membrane protein 4, 24kDa
hsa-miR-296-3p	1	0	1	1	1	1	ZBTB41	zinc finger and BTB domain containing 41
hsa-miR-296-3p	0	0	1	0	1	1	TCF21	transcription factor 21
hsa-miR-296-3p	0	0	1	1	0	0	NRN1L	neuritin 1-like
hsa-miR-296-3p	0	0	1	1	0	0	ITIH6	inter-alpha-trypsin inhibitor heavy chain family, member 6
hsa-miR-296-3p	1	0	1	1	1	1	MIA3	melanoma inhibitory activity family, member 3
hsa-miR-296-3p	1	0	1	0	0	0	RAB15	RAB15, member RAS oncogene family
hsa-miR-296-3p	1	0	1	1	1	1	PTGER3	prostaglandin E receptor 3 (subtype EP3)
hsa-miR-296-3p	0	0	1	1	1	1	ARHGAP27	Rho GTPase activating protein 27
hsa-miR-296-3p	0	0	1	1	0	0	USP51	ubiquitin specific peptidase 51
hsa-miR-296-3p	1	0	1	1	0	0	KAZN	kazrin, periplakin interacting protein
hsa-miR-296-3p	0	0	1	1	0	0	TMEM88	transmembrane protein 88
hsa-miR-296-3p	0	0	1	1	0	0	LST1	leukocyte specific transcript 1
hsa-miR-296-3p	1	0	1	1	1	1	ASTN1	astrotactin 1
hsa-miR-296-3p	0	0	1	1	1	1	FAM211A	family with sequence similarity 211, member A
hsa-miR-296-3p	1	0	1	0	1	1	C17orf102	chromosome 17 open reading frame 102
hsa-miR-296-3p	1	0	1	1	1	1	XKRX	XK, Kell blood group complex subunit-related, X-linked
hsa-miR-296-3p	1	0	1	0	1	1	STAT3	signal transducer and activator of transcription 3 (acute-phase response factor)
hsa-miR-296-3p	0	0	1	0	0	0	PCDHB17	protocadherin beta 17 pseudogene
hsa-miR-296-3p	0	0	1	0	0	0	MIR155HG	MIR155 host gene (non-protein coding)
hsa-miR-296-3p	0	0	1	0	0	0	TTTY2	testis-specific transcript, Y-linked 2 (non-protein coding)
hsa-miR-296-3p	0	0	1	0	0	0	TTTY1	testis-specific transcript, Y-linked 1 (non-protein coding)
hsa-miR-296-3p	0	0	1	0	0	0	TTTY12	testis-specific transcript, Y-linked 12 (non-protein coding)
hsa-miR-296-3p	0	0	1	0	0	0	DKFZP586I1420	uncharacterized protein DKFZp586I1420
hsa-miR-296-3p	0	0	1	0	0	0	TPI1P2	triosephosphate isomerase 1 pseudogene 2
hsa-miR-296-3p	0	0	1	0	0	0	SUMO1P3	SUMO1 pseudogene 3
hsa-miR-296-3p	0	0	1	0	0	0	NXF4	nuclear RNA export factor 4 pseudogene
hsa-miR-296-3p	0	0	1	0	0	0	DGCR5	DiGeorge syndrome critical region gene 5 (non-protein coding)
hsa-miR-296-3p	0	0	1	0	0	0	HTR7P1	5-hydroxytryptamine (serotonin) receptor 7 pseudogene 1
hsa-miR-296-3p	0	0	1	0	0	0	RPL29P2	ribosomal protein L29 pseudogene 2
hsa-miR-296-3p	0	0	1	0	0	0	HOXA11-AS	HOXA11 antisense RNA
hsa-miR-296-3p	0	0	1	0	0	0	TPTE2P6	transmembrane phosphoinositide 3-phosphatase and tensin homolog 2 pseudogene 6
hsa-miR-296-3p	0	0	1	0	0	0	HAS2-AS1	HAS2 antisense RNA 1
hsa-miR-296-3p	0	0	1	0	0	0	PTPRVP	protein tyrosine phosphatase, receptor type, V, pseudogene
hsa-miR-296-3p	0	0	1	0	0	0	SNORA45	small nucleolar RNA, H/ACA box 45
hsa-miR-296-3p	0	0	1	0	0	0	SCARNA16	small Cajal body-specific RNA 16
hsa-miR-296-3p	0	0	1	0	0	0	SCARNA2	small Cajal body-specific RNA 2
hsa-miR-296-3p	0	0	1	0	0	0	SNORD69	small nucleolar RNA, C/D box 69
hsa-miR-296-3p	0	0	1	0	0	0	SYS1-DBNDD2	SYS1-DBNDD2 readthrough (non-protein coding)
hsa-miR-296-3p	0	0	1	0	0	0	LOC729603	calcium binding protein P22 pseudogene
hsa-miR-296-3p	0	0	1	0	0	0	SNORD115-7	small nucleolar RNA, C/D box 115-7
hsa-miR-296-3p	0	0	1	1	0	0	SNRPN	small nuclear ribonucleoprotein polypeptide N
hsa-miR-296-3p	1	0	1	1	1	1	CTNNA1	catenin (cadherin-associated protein), alpha 1, 102kDa
hsa-miR-296-3p	1	0	1	0	1	1	NFIX	nuclear factor I/X (CCAAT-binding transcription factor)
hsa-miR-296-3p	1	0	1	1	1	1	AKAP1	A kinase (PRKA) anchor protein 1
hsa-miR-296-3p	0	0	1	1	1	1	CAST	calpastatin
hsa-miR-296-3p	1	0	1	1	1	1	IFNAR2	interferon (alpha, beta and omega) receptor 2
hsa-miR-296-3p	0	0	1	1	1	1	HSPB6	heat shock protein, alpha-crystallin-related, B6
hsa-miR-296-3p	0	0	1	1	0	0	USH1C	Usher syndrome 1C (autosomal recessive, severe)
hsa-miR-296-3p	0	0	0	1	0	0	COPZ2	coatomer protein complex, subunit zeta 2
hsa-miR-296-3p	1	0	1	1	0	0	GPRC5A	G protein-coupled receptor, family C, group 5, member A
hsa-miR-296-3p	0	0	1	1	1	1	GRN	granulin
hsa-miR-296-3p	0	0	1	1	0	0	FNDC8	fibronectin type III domain containing 8
hsa-miR-296-3p	0	0	0	1	0	0	ZNF416	zinc finger protein 416
hsa-miR-296-3p	0	0	0	1	0	0	HBQ1	hemoglobin, theta 1
hsa-miR-296-3p	0	0	1	1	0	0	REM1	RAS (RAD and GEM)-like GTP-binding 1
hsa-miR-296-3p	0	0	1	1	0	0	TGM6	transglutaminase 6
hsa-miR-296-3p	0	0	0	1	0	0	FLT3LG	fms-related tyrosine kinase 3 ligand
hsa-miR-296-3p	0	0	1	1	0	0	TPSD1	tryptase delta 1
hsa-miR-296-3p	0	0	1	1	0	0	OCEL1	occludin/ELL domain containing 1
hsa-miR-296-3p	0	0	0	1	0	0	C19orf21	chromosome 19 open reading frame 21
hsa-miR-296-3p	0	0	1	1	0	0	MIF	macrophage migration inhibitory factor (glycosylation-inhibiting factor)
hsa-miR-296-3p	0	0	0	1	0	0	CRYBB1	crystallin, beta B1
hsa-miR-296-3p	0	0	0	1	0	0	LMF2	lipase maturation factor 2
hsa-miR-296-3p	0	0	1	1	0	0	NIPSNAP1	nipsnap homolog 1 (C. elegans)
hsa-miR-296-3p	0	0	1	1	0	0	MCM5	minichromosome maintenance complex component 5
hsa-miR-296-3p	0	0	1	1	1	1	RASD2	RASD family, member 2
hsa-miR-296-3p	0	0	1	1	0	0	TXN2	thioredoxin 2
hsa-miR-296-3p	0	0	1	1	0	0	CGRRF1	cell growth regulator with ring finger domain 1
hsa-miR-296-3p	0	0	1	1	1	1	AHSA1	AHA1, activator of heat shock 90kDa protein ATPase homolog 1 (yeast)
hsa-miR-296-3p	0	0	1	1	0	0	CPNE6	copine VI (neuronal)
hsa-miR-296-3p	0	0	1	1	1	1	PABPC1L	poly(A) binding protein, cytoplasmic 1-like
hsa-miR-296-3p	0	0	1	1	0	0	BIRC7	baculoviral IAP repeat containing 7
hsa-miR-296-3p	0	0	1	1	0	0	EEF1A2	eukaryotic translation elongation factor 1 alpha 2
hsa-miR-296-3p	0	0	0	1	0	0	WDR13	WD repeat domain 13
hsa-miR-296-3p	0	0	1	1	0	0	PCSK1N	proprotein convertase subtilisin/kexin type 1 inhibitor
hsa-miR-296-3p	1	0	1	1	1	1	SOLH	small optic lobes homolog (Drosophila)
hsa-miR-296-3p	0	0	1	1	1	1	SLC6A2	solute carrier family 6 (neurotransmitter transporter, noradrenalin), member 2
hsa-miR-296-3p	0	0	1	1	0	0	CNOT3	CCR4-NOT transcription complex, subunit 3
hsa-miR-296-3p	0	0	1	1	0	0	HNRNPL	heterogeneous nuclear ribonucleoprotein L
hsa-miR-296-3p	0	0	0	1	0	0	LHB	luteinizing hormone beta polypeptide
hsa-miR-296-3p	0	0	0	1	0	0	SF3A2	splicing factor 3a, subunit 2, 66kDa
hsa-miR-296-3p	0	0	0	1	0	0	CCDC130	coiled-coil domain containing 130
hsa-miR-296-3p	0	0	1	1	0	0	CLC	Charcot-Leyden crystal protein
hsa-miR-296-3p	0	0	0	1	0	0	CD79A	CD79a molecule, immunoglobulin-associated alpha
hsa-miR-296-3p	0	0	0	1	0	0	NKG7	natural killer cell group 7 sequence
hsa-miR-296-3p	0	0	0	1	0	0	CAPS	calcyphosine
hsa-miR-296-3p	0	0	0	1	1	1	COMP	cartilage oligomeric matrix protein
hsa-miR-296-3p	0	0	0	1	0	0	EPHB6	EPH receptor B6
hsa-miR-296-3p	0	0	0	1	0	0	CCL24	chemokine (C-C motif) ligand 24
hsa-miR-296-3p	0	0	1	1	0	0	PCOLCE	procollagen C-endopeptidase enhancer
hsa-miR-296-3p	0	0	1	1	0	0	AATF	apoptosis antagonizing transcription factor
hsa-miR-296-3p	1	0	0	1	1	1	WNT3	wingless-type MMTV integration site family, member 3
hsa-miR-296-3p	0	0	0	1	0	0	ICAM2	intercellular adhesion molecule 2
hsa-miR-296-3p	0	0	1	1	0	0	PPY	pancreatic polypeptide
hsa-miR-296-3p	1	0	1	1	1	1	CDR2L	cerebellar degeneration-related protein 2-like
hsa-miR-296-3p	0	0	1	1	1	1	ARHGDIB	Rho GDP dissociation inhibitor (GDI) beta
hsa-miR-296-3p	0	0	0	1	1	1	GNB3	guanine nucleotide binding protein (G protein), beta polypeptide 3
hsa-miR-296-3p	0	0	0	1	0	0	SPSB2	splA/ryanodine receptor domain and SOCS box containing 2
hsa-miR-296-3p	0	0	0	1	0	0	ENO2	enolase 2 (gamma, neuronal)
hsa-miR-296-3p	1	0	1	1	0	0	MDFI	MyoD family inhibitor
hsa-miR-296-3p	1	0	1	1	1	1	HAND1	heart and neural crest derivatives expressed 1
hsa-miR-296-3p	0	0	1	1	1	1	RRP9	ribosomal RNA processing 9, small subunit (SSU) processome component, homolog (yeast)
hsa-miR-296-3p	0	0	0	1	0	0	RPS15	ribosomal protein S15
hsa-miR-296-3p	1	0	1	1	1	1	POLE4	polymerase (DNA-directed), epsilon 4, accessory subunit
hsa-miR-296-3p	0	0	1	1	0	0	LEPRE1	leucine proline-enriched proteoglycan (leprecan) 1
hsa-miR-296-3p	0	0	1	1	1	1	ATP6V0B	ATPase, H+ transporting, lysosomal 21kDa, V0 subunit b
hsa-miR-296-3p	1	0	1	1	1	1	SLC8A2	solute carrier family 8 (sodium/calcium exchanger), member 2
hsa-miR-296-3p	0	0	1	1	1	1	DLX4	distal-less homeobox 4
hsa-miR-296-3p	0	0	1	1	0	0	MRPS2	mitochondrial ribosomal protein S2
hsa-miR-296-3p	0	0	0	1	0	0	ACADS	acyl-CoA dehydrogenase, C-2 to C-3 short chain
hsa-miR-296-3p	1	0	1	1	1	1	ATP7B	ATPase, Cu++ transporting, beta polypeptide
hsa-miR-296-3p	0	0	1	1	0	0	PFDN5	prefoldin subunit 5
hsa-miR-296-3p	0	0	1	1	0	0	IL9R	interleukin 9 receptor
hsa-miR-296-3p	1	0	1	1	1	1	FBXO9	F-box protein 9
hsa-miR-296-3p	0	0	0	1	1	1	KRT9	keratin 9
hsa-miR-296-3p	0	0	1	1	0	0	DDX49	DEAD (Asp-Glu-Ala-Asp) box polypeptide 49
hsa-miR-296-3p	0	0	1	1	0	0	SIX1	SIX homeobox 1
hsa-miR-296-3p	0	0	1	1	0	0	CDC42EP1	CDC42 effector protein (Rho GTPase binding) 1
hsa-miR-296-3p	0	0	1	1	0	0	IGLL1	immunoglobulin lambda-like polypeptide 1
hsa-miR-296-3p	0	0	1	1	0	0	ATP6V1F	ATPase, H+ transporting, lysosomal 14kDa, V1 subunit F
hsa-miR-296-3p	0	0	1	1	0	0	CHAC1	ChaC, cation transport regulator homolog 1 (E. coli)
hsa-miR-296-3p	1	0	0	1	1	1	SBNO2	strawberry notch homolog 2 (Drosophila)
hsa-miR-296-3p	1	0	1	1	1	1	KLF16	Kruppel-like factor 16
hsa-miR-296-3p	0	0	0	1	0	0	TMEM8A	transmembrane protein 8A
hsa-miR-296-3p	0	0	1	1	0	0	TUBG2	tubulin, gamma 2
hsa-miR-296-3p	0	0	0	1	0	0	NARFL	nuclear prelamin A recognition factor-like
hsa-miR-296-3p	0	0	1	1	0	0	KRT5	keratin 5
hsa-miR-296-3p	0	0	0	1	0	0	KRT6C	keratin 6C
hsa-miR-296-3p	0	0	0	1	0	0	GAMT	guanidinoacetate N-methyltransferase
hsa-miR-296-3p	0	0	0	1	0	0	PRKCSH	protein kinase C substrate 80K-H
hsa-miR-296-3p	0	0	0	1	0	0	EXOC3L2	exocyst complex component 3-like 2
hsa-miR-296-3p	0	0	0	1	1	1	APOC2	apolipoprotein C-II
hsa-miR-296-3p	0	0	0	1	0	0	PGLS	6-phosphogluconolactonase
hsa-miR-296-3p	0	0	1	1	1	1	ZNF557	zinc finger protein 557
hsa-miR-296-3p	0	0	0	1	0	0	C20orf151	chromosome 20 open reading frame 151
hsa-miR-296-3p	1	0	1	1	1	1	PRDM12	PR domain containing 12
hsa-miR-296-3p	0	0	0	1	0	0	P2RY11	purinergic receptor P2Y, G-protein coupled, 11
hsa-miR-296-3p	0	0	0	1	0	0	PPAN-P2RY11	PPAN-P2RY11 readthrough
hsa-miR-296-3p	0	0	0	1	0	0	PPAN	peter pan homolog (Drosophila)
hsa-miR-296-3p	0	0	1	1	1	1	EMR3	egf-like module containing, mucin-like, hormone receptor-like 3
hsa-miR-296-3p	0	0	1	1	0	0	C3orf20	chromosome 3 open reading frame 20
hsa-miR-296-3p	1	0	1	1	0	0	EEFSEC	eukaryotic elongation factor, selenocysteine-tRNA-specific
hsa-miR-296-3p	0	0	1	1	1	1	TRIM47	tripartite motif containing 47
hsa-miR-296-3p	0	0	1	1	0	0	NXT1	NTF2-like export factor 1
hsa-miR-296-3p	1	0	0	1	0	0	HAPLN2	hyaluronan and proteoglycan link protein 2
hsa-miR-296-3p	0	0	1	1	0	0	ZSWIM3	zinc finger, SWIM-type containing 3
hsa-miR-296-3p	0	0	1	1	0	0	MACROD1	MACRO domain containing 1
hsa-miR-296-3p	0	0	0	1	1	1	C14orf159	chromosome 14 open reading frame 159
hsa-miR-296-3p	0	0	1	1	0	0	UPK3B	uroplakin 3B
hsa-miR-296-3p	0	0	0	1	0	0	NACAD	NAC alpha domain containing
hsa-miR-296-3p	0	0	0	1	0	0	CHAD	chondroadherin
hsa-miR-296-3p	0	0	0	1	0	0	CASP5	caspase 5, apoptosis-related cysteine peptidase
hsa-miR-296-3p	0	0	0	1	0	0	AP3B2	adaptor-related protein complex 3, beta 2 subunit
hsa-miR-296-3p	0	0	0	1	0	0	FAH	fumarylacetoacetate hydrolase (fumarylacetoacetase)
hsa-miR-296-3p	0	0	1	1	1	1	CSNK1A1	casein kinase 1, alpha 1
hsa-miR-296-3p	0	0	1	1	0	0	TCEB2	transcription elongation factor B (SIII), polypeptide 2 (18kDa, elongin B)
hsa-miR-296-3p	1	0	0	1	1	1	FAM86A	family with sequence similarity 86, member A
hsa-miR-296-3p	1	0	1	1	0	0	ZC3H3	zinc finger CCCH-type containing 3
hsa-miR-296-3p	0	0	1	1	1	1	ACIN1	apoptotic chromatin condensation inducer 1
hsa-miR-296-3p	0	0	0	1	0	0	COPE	coatomer protein complex, subunit epsilon
hsa-miR-296-3p	0	0	0	1	1	1	MAP2K2	mitogen-activated protein kinase kinase 2
hsa-miR-296-3p	0	0	1	1	1	1	ITGAE	integrin, alpha E (antigen CD103, human mucosal lymphocyte antigen 1; alpha polypeptide)
hsa-miR-296-3p	1	0	0	1	1	1	SMARCB1	SWI/SNF related, matrix associated, actin dependent regulator of chromatin, subfamily b, member 1
hsa-miR-296-3p	0	0	0	1	1	1	TYR	tyrosinase (oculocutaneous albinism IA)
hsa-miR-296-3p	0	0	0	1	1	1	FOXRED1	FAD-dependent oxidoreductase domain containing 1
hsa-miR-296-3p	0	0	1	1	1	1	BARHL1	BarH-like homeobox 1
hsa-miR-296-3p	1	0	1	1	1	1	TTBK2	tau tubulin kinase 2
hsa-miR-296-3p	1	0	1	1	1	1	VAMP8	vesicle-associated membrane protein 8 (endobrevin)
hsa-miR-296-3p	0	0	0	1	1	1	PET112	PET112 homolog (yeast)
hsa-miR-296-3p	0	0	0	1	0	0	SHC2	SHC (Src homology 2 domain containing) transforming protein 2
hsa-miR-296-3p	0	0	0	1	0	0	TYK2	tyrosine kinase 2
hsa-miR-296-3p	0	0	0	1	0	0	LYL1	lymphoblastic leukemia derived sequence 1
hsa-miR-296-3p	0	0	0	1	0	0	DNAH5	dynein, axonemal, heavy chain 5
hsa-miR-296-3p	0	0	0	1	0	0	SIL1	SIL1 homolog, endoplasmic reticulum chaperone (S. cerevisiae)
hsa-miR-296-3p	0	0	1	1	0	0	POR	P450 (cytochrome) oxidoreductase
hsa-miR-296-3p	0	0	0	1	1	1	PMS2	PMS2 postmeiotic segregation increased 2 (S. cerevisiae)
hsa-miR-296-3p	0	0	1	1	1	1	TCTN3	tectonic family member 3
hsa-miR-296-3p	0	0	0	1	0	0	CD27	CD27 molecule
hsa-miR-296-3p	0	0	1	1	0	0	C12orf52	chromosome 12 open reading frame 52
hsa-miR-296-3p	0	0	1	1	0	0	GALNS	galactosamine (N-acetyl)-6-sulfate sulfatase
hsa-miR-296-3p	0	0	1	1	0	0	B9D1	B9 protein domain 1
hsa-miR-296-3p	0	0	1	1	0	0	EPN3	epsin 3
hsa-miR-296-3p	0	0	0	1	0	0	LRRC46	leucine rich repeat containing 46
hsa-miR-296-3p	0	0	0	1	0	0	LOC113230	uncharacterized LOC113230
hsa-miR-296-3p	0	0	0	1	0	0	SAMD1	sterile alpha motif domain containing 1
hsa-miR-296-3p	0	0	0	1	0	0	PPAP2C	phosphatidic acid phosphatase type 2C
hsa-miR-296-3p	0	0	0	1	0	0	LRRC56	leucine rich repeat containing 56
hsa-miR-296-3p	0	0	1	1	0	0	FXYD7	FXYD domain containing ion transport regulator 7
hsa-miR-296-3p	1	0	1	1	0	0	ADAMTS10	ADAM metallopeptidase with thrombospondin type 1 motif, 10
hsa-miR-296-3p	0	0	1	1	1	1	SPIB	Spi-B transcription factor (Spi-1/PU.1 related)
hsa-miR-296-3p	0	0	0	1	0	0	RCN3	reticulocalbin 3, EF-hand calcium binding domain
hsa-miR-296-3p	0	0	0	1	0	0	FAM176B	family with sequence similarity 176, member B
hsa-miR-296-3p	0	0	0	1	1	1	TINAGL1	tubulointerstitial nephritis antigen-like 1
hsa-miR-296-3p	0	0	1	1	0	0	SETDB1	SET domain, bifurcated 1
hsa-miR-296-3p	0	0	0	1	0	0	KCNH1	potassium voltage-gated channel, subfamily H (eag-related), member 1
hsa-miR-296-3p	1	0	1	1	1	1	OSR1	odd-skipped related 1 (Drosophila)
hsa-miR-296-3p	0	0	0	1	0	0	NAT8	N-acetyltransferase 8 (GCN5-related, putative)
hsa-miR-296-3p	0	0	1	1	0	0	SLC4A3	solute carrier family 4, anion exchanger, member 3
hsa-miR-296-3p	0	0	1	1	1	1	VWDE	von Willebrand factor D and EGF domains
hsa-miR-296-3p	0	0	0	1	1	1	TMEM140	transmembrane protein 140
hsa-miR-296-3p	1	0	1	1	1	1	BIN3	bridging integrator 3
hsa-miR-296-3p	0	0	1	1	1	1	PLIN2	perilipin 2
hsa-miR-296-3p	0	0	1	1	0	0	FUOM	fucose mutarotase
hsa-miR-296-3p	0	0	1	1	1	1	FEZ1	fasciculation and elongation protein zeta 1 (zygin I)
hsa-miR-296-3p	0	0	0	1	0	0	DUSP15	dual specificity phosphatase 15
hsa-miR-296-3p	0	0	0	1	0	0	GPHA2	glycoprotein hormone alpha 2
hsa-miR-296-3p	0	0	1	1	0	0	TM7SF2	transmembrane 7 superfamily member 2
hsa-miR-296-3p	0	0	0	1	0	0	DRD3	dopamine receptor D3
hsa-miR-296-3p	1	0	1	1	1	1	MED21	mediator complex subunit 21
hsa-miR-296-3p	0	0	0	1	1	1	CD8A	CD8a molecule
hsa-miR-296-3p	0	0	0	1	1	1	LRGUK	leucine-rich repeats and guanylate kinase domain containing
hsa-miR-296-3p	0	0	1	1	0	0	PDIA4	protein disulfide isomerase family A, member 4
hsa-miR-296-3p	0	0	1	1	1	1	ARHGEF25	Rho guanine nucleotide exchange factor (GEF) 25
hsa-miR-296-3p	0	0	1	1	0	0	PARP6	poly (ADP-ribose) polymerase family, member 6
hsa-miR-296-3p	0	0	0	1	1	1	LYZL4	lysozyme-like 4
hsa-miR-296-3p	0	0	1	1	1	1	HYDIN	HYDIN, axonemal central pair apparatus protein
hsa-miR-296-3p	1	0	1	1	1	1	TPM1	tropomyosin 1 (alpha)
hsa-miR-296-3p	0	0	1	1	1	1	CREB3L1	cAMP responsive element binding protein 3-like 1
hsa-miR-296-3p	0	0	0	1	0	0	SLC38A10	solute carrier family 38, member 10
hsa-miR-296-3p	1	0	1	1	0	0	DTNB	dystrobrevin, beta
hsa-miR-296-3p	0	0	0	1	0	0	HPD	4-hydroxyphenylpyruvate dioxygenase
hsa-miR-296-3p	0	0	0	1	0	0	LRRC43	leucine rich repeat containing 43
hsa-miR-296-3p	0	0	0	1	1	1	CD1A	CD1a molecule
hsa-miR-296-3p	0	0	1	1	0	0	SPATA2L	spermatogenesis associated 2-like
hsa-miR-296-3p	0	0	0	1	0	0	NPM2	nucleophosmin/nucleoplasmin 2
hsa-miR-296-3p	0	0	0	1	0	0	FCER1G	Fc fragment of IgE, high affinity I, receptor for; gamma polypeptide
hsa-miR-296-3p	0	0	1	1	0	0	ARAF	v-raf murine sarcoma 3611 viral oncogene homolog
hsa-miR-296-3p	0	0	0	1	0	0	OGFR	opioid growth factor receptor
hsa-miR-296-3p	1	0	0	1	0	0	UROC1	urocanate hydratase 1
hsa-miR-296-3p	1	0	1	1	0	0	SHF	Src homology 2 domain containing F
hsa-miR-296-3p	0	0	1	1	0	0	ATP6V0D1	ATPase, H+ transporting, lysosomal 38kDa, V0 subunit d1
hsa-miR-296-3p	0	0	0	1	0	0	CILP2	cartilage intermediate layer protein 2
hsa-miR-296-3p	0	0	1	1	0	0	CRYAA	crystallin, alpha A
hsa-miR-296-3p	0	0	1	1	1	1	ZNF714	zinc finger protein 714
hsa-miR-296-3p	1	0	1	1	1	1	ZBTB7B	zinc finger and BTB domain containing 7B
hsa-miR-296-3p	0	0	0	1	1	1	ALKBH4	alkB, alkylation repair homolog 4 (E. coli)
hsa-miR-296-3p	0	0	1	1	0	0	PGLYRP2	peptidoglycan recognition protein 2
hsa-miR-296-3p	0	0	1	1	0	0	ABCF3	ATP-binding cassette, sub-family F (GCN20), member 3
hsa-miR-296-3p	0	0	1	1	1	1	KRT8	keratin 8
hsa-miR-296-3p	0	0	0	1	0	0	AQP5	aquaporin 5
hsa-miR-296-3p	1	0	0	1	1	1	KRT72	keratin 72
hsa-miR-296-3p	0	0	0	1	0	0	PRSS33	protease, serine, 33
hsa-miR-296-3p	0	0	1	1	0	0	LUC7L	LUC7-like (S. cerevisiae)
hsa-miR-296-3p	0	0	0	1	0	0	NTN3	netrin 3
hsa-miR-296-3p	0	0	1	1	0	0	GNG3	guanine nucleotide binding protein (G protein), gamma 3
hsa-miR-296-3p	1	0	1	1	0	0	C11orf84	chromosome 11 open reading frame 84
hsa-miR-296-3p	0	0	0	1	0	0	CYP4A22	cytochrome P450, family 4, subfamily A, polypeptide 22
hsa-miR-296-3p	0	0	1	1	1	1	FCGR3B	Fc fragment of IgG, low affinity IIIb, receptor (CD16b)
hsa-miR-296-3p	0	0	0	1	0	0	KCNF1	potassium voltage-gated channel, subfamily F, member 1
hsa-miR-296-3p	0	0	1	1	1	1	ZNF514	zinc finger protein 514
hsa-miR-296-3p	0	0	1	1	1	1	MSX1	msh homeobox 1
hsa-miR-296-3p	0	0	0	1	0	0	NPPC	natriuretic peptide C
hsa-miR-296-3p	0	0	0	1	1	1	ALPI	alkaline phosphatase, intestinal
hsa-miR-296-3p	0	0	0	1	0	0	RNPEP	arginyl aminopeptidase (aminopeptidase B)
hsa-miR-296-3p	0	0	0	1	0	0	FEV	FEV (ETS oncogene family)
hsa-miR-296-3p	1	0	1	1	1	1	KLF15	Kruppel-like factor 15
hsa-miR-296-3p	0	0	1	1	1	1	SLC51A	solute carrier family 51, alpha subunit
hsa-miR-296-3p	0	0	1	1	1	1	COG5	component of oligomeric golgi complex 5
hsa-miR-296-3p	0	0	1	1	1	1	ANKHD1	ankyrin repeat and KH domain containing 1
hsa-miR-296-3p	0	0	1	1	1	1	BRI3	brain protein I3
hsa-miR-296-3p	0	0	0	1	0	0	GBX1	gastrulation brain homeobox 1
hsa-miR-296-3p	1	0	1	1	0	0	FIGF	c-fos induced growth factor (vascular endothelial growth factor D)
hsa-miR-296-3p	0	0	0	1	1	1	FOLR2	folate receptor 2 (fetal)
hsa-miR-296-3p	0	0	0	1	0	0	SPATA19	spermatogenesis associated 19
hsa-miR-296-3p	0	0	1	1	0	0	CTDP1	CTD (carboxy-terminal domain, RNA polymerase II, polypeptide A) phosphatase, subunit 1
hsa-miR-296-3p	0	0	1	1	0	0	MAPK7	mitogen-activated protein kinase 7
hsa-miR-296-3p	0	0	0	1	0	0	CDH16	cadherin 16, KSP-cadherin
hsa-miR-296-3p	1	0	1	1	1	1	TAC3	tachykinin 3
hsa-miR-296-3p	0	0	0	1	0	0	EPB42	erythrocyte membrane protein band 4.2
hsa-miR-296-3p	0	0	0	1	0	0	FER1L4	fer-1-like 4 (C. elegans) pseudogene
hsa-miR-296-3p	0	0	0	1	0	0	C16orf92	chromosome 16 open reading frame 92
hsa-miR-296-3p	0	0	1	1	1	1	GCN1L1	GCN1 general control of amino-acid synthesis 1-like 1 (yeast)
hsa-miR-296-3p	0	0	1	1	1	1	ATP5L	ATP synthase, H+ transporting, mitochondrial Fo complex, subunit G
hsa-miR-296-3p	0	0	1	1	0	0	IRGQ	immunity-related GTPase family, Q
hsa-miR-296-3p	0	0	1	1	0	0	TMEM145	transmembrane protein 145
hsa-miR-296-3p	0	0	0	1	0	0	PSCA	prostate stem cell antigen
hsa-miR-296-3p	0	0	0	1	0	0	UBXN6	UBX domain protein 6
hsa-miR-296-3p	0	0	0	1	0	0	RILP	Rab interacting lysosomal protein
hsa-miR-296-3p	0	0	0	1	1	1	CYB5D2	cytochrome b5 domain containing 2
hsa-miR-296-3p	0	0	1	1	0	0	CGB1	chorionic gonadotropin, beta polypeptide 1
hsa-miR-296-3p	0	0	1	1	0	0	CDK2AP2	cyclin-dependent kinase 2 associated protein 2
hsa-miR-296-3p	0	0	0	1	0	0	EVPL	envoplakin
hsa-miR-296-3p	1	0	0	1	1	1	RNF157	ring finger protein 157
hsa-miR-296-3p	0	0	0	1	0	0	ULK4	unc-51-like kinase 4 (C. elegans)
hsa-miR-296-3p	0	0	1	1	0	0	C11orf85	chromosome 11 open reading frame 85
hsa-miR-296-3p	0	0	1	1	0	0	CD14	CD14 molecule
hsa-miR-296-3p	0	0	1	1	0	0	LGALS9	lectin, galactoside-binding, soluble, 9
hsa-miR-296-3p	1	0	0	1	1	1	MCC	mutated in colorectal cancers
hsa-miR-296-3p	1	0	1	1	1	1	JUNB	jun B proto-oncogene
hsa-miR-296-3p	0	0	1	1	0	0	C20orf196	chromosome 20 open reading frame 196
hsa-miR-296-3p	0	0	0	1	1	1	FUT3	fucosyltransferase 3 (galactoside 3(4)-L-fucosyltransferase, Lewis blood group)
hsa-miR-296-3p	1	0	1	1	1	1	PCBP1	poly(rC) binding protein 1
hsa-miR-296-3p	0	0	0	1	0	0	KCNJ4	potassium inwardly-rectifying channel, subfamily J, member 4
hsa-miR-296-3p	0	0	0	1	0	0	CEL	carboxyl ester lipase (bile salt-stimulated lipase)
hsa-miR-296-3p	0	0	1	1	0	0	COPS6	COP9 constitutive photomorphogenic homolog subunit 6 (Arabidopsis)
hsa-miR-296-3p	0	0	0	1	0	0	RPAP1	RNA polymerase II associated protein 1
hsa-miR-296-3p	0	0	0	1	0	0	TUBB3	tubulin, beta 3 class III
hsa-miR-296-3p	0	0	1	1	1	1	FAM178B	family with sequence similarity 178, member B
hsa-miR-296-3p	0	0	0	1	0	0	REEP4	receptor accessory protein 4
hsa-miR-296-3p	0	0	0	1	0	0	RLN3	relaxin 3
hsa-miR-296-3p	0	0	0	1	0	0	RBFA	ribosome binding factor A (putative)
hsa-miR-296-3p	0	0	0	1	0	0	AGXT	alanine-glyoxylate aminotransferase
hsa-miR-296-3p	0	0	1	1	1	1	CCDC8	coiled-coil domain containing 8
hsa-miR-296-3p	0	0	1	1	1	1	DLEC1	deleted in lung and esophageal cancer 1
hsa-miR-296-3p	0	0	0	1	0	0	KRTAP5-8	keratin associated protein 5-8
hsa-miR-296-3p	0	0	1	1	0	0	KRTAP5-7	keratin associated protein 5-7
hsa-miR-296-3p	0	0	0	1	1	1	KCNG4	potassium voltage-gated channel, subfamily G, member 4
hsa-miR-296-3p	1	0	1	1	1	1	PDLIM2	PDZ and LIM domain 2 (mystique)
hsa-miR-296-3p	0	0	1	1	0	0	TRMT112	tRNA methyltransferase 11-2 homolog (S. cerevisiae)
hsa-miR-296-3p	0	0	1	1	1	1	TAOK2	TAO kinase 2
hsa-miR-296-3p	0	0	1	1	0	0	CYP2W1	cytochrome P450, family 2, subfamily W, polypeptide 1
hsa-miR-296-3p	0	0	0	1	0	0	OR10H5	olfactory receptor, family 10, subfamily H, member 5
hsa-miR-296-3p	0	0	0	1	0	0	PPM1J	protein phosphatase, Mg2+/Mn2+ dependent, 1J
hsa-miR-296-3p	0	0	1	1	0	0	VEGFB	vascular endothelial growth factor B
hsa-miR-296-3p	1	0	1	1	1	1	RCE1	RCE1 homolog, prenyl protein protease (S. cerevisiae)
hsa-miR-296-3p	0	0	1	1	1	1	KLK6	kallikrein-related peptidase 6
hsa-miR-296-3p	0	0	1	1	0	0	RNASET2	ribonuclease T2
hsa-miR-296-3p	0	0	0	1	0	0	IQCF1	IQ motif containing F1
hsa-miR-296-3p	0	0	0	1	0	0	DAK	dihydroxyacetone kinase 2 homolog (S. cerevisiae)
hsa-miR-296-3p	0	0	0	1	1	1	RAG2	recombination activating gene 2
hsa-miR-296-3p	0	0	1	1	0	0	FAM170B	family with sequence similarity 170, member B
hsa-miR-296-3p	0	0	0	1	0	0	NFE2	nuclear factor (erythroid-derived 2), 45kDa
hsa-miR-296-3p	0	0	1	1	0	0	BANF1	barrier to autointegration factor 1
hsa-miR-296-3p	0	0	1	1	1	1	CHMP2A	charged multivesicular body protein 2A
hsa-miR-296-3p	1	0	1	1	1	1	PTH1R	parathyroid hormone 1 receptor
hsa-miR-296-3p	0	0	1	1	0	0	RHBDF2	rhomboid 5 homolog 2 (Drosophila)
hsa-miR-296-3p	0	0	1	1	0	0	SLC6A13	solute carrier family 6 (neurotransmitter transporter, GABA), member 13
hsa-miR-296-3p	0	0	1	1	0	0	GRINA	glutamate receptor, ionotropic, N-methyl D-aspartate-associated protein 1 (glutamate binding)
hsa-miR-296-3p	0	0	1	1	0	0	TTC12	tetratricopeptide repeat domain 12
hsa-miR-296-3p	0	0	1	1	0	0	PRSS50	protease, serine, 50
hsa-miR-296-3p	0	0	1	1	1	1	FAM71F1	family with sequence similarity 71, member F1
hsa-miR-296-3p	0	0	0	1	0	0	CHDH	choline dehydrogenase
hsa-miR-296-3p	0	0	0	1	0	0	TMEM125	transmembrane protein 125
hsa-miR-296-3p	0	0	0	1	0	0	METAP1D	methionyl aminopeptidase type 1D (mitochondrial)
hsa-miR-296-3p	0	0	1	1	0	0	SLC41A3	solute carrier family 41, member 3
hsa-miR-296-3p	0	0	0	1	0	0	OS9	osteosarcoma amplified 9, endoplasmic reticulum lectin
hsa-miR-296-3p	1	0	0	1	0	0	ARHGEF1	Rho guanine nucleotide exchange factor (GEF) 1
hsa-miR-296-3p	0	0	1	1	0	0	FAM89B	family with sequence similarity 89, member B
hsa-miR-296-3p	1	0	1	1	1	1	CALR	calreticulin
hsa-miR-296-3p	1	0	0	1	1	1	LLGL1	lethal giant larvae homolog 1 (Drosophila)
hsa-miR-296-3p	0	0	1	1	0	0	RAD23A	RAD23 homolog A (S. cerevisiae)
hsa-miR-296-3p	0	0	0	1	0	0	ISYNA1	inositol-3-phosphate synthase 1
hsa-miR-296-3p	0	0	1	1	0	0	ASCC1	activating signal cointegrator 1 complex subunit 1
hsa-miR-296-3p	0	0	0	1	1	1	CPNE1	copine I
hsa-miR-296-3p	0	0	1	1	0	0	DNASE1L3	deoxyribonuclease I-like 3
hsa-miR-296-3p	0	0	1	1	0	0	FAM211B	family with sequence similarity 211, member B
hsa-miR-296-3p	0	0	1	1	0	0	PTPN6	protein tyrosine phosphatase, non-receptor type 6
hsa-miR-296-3p	0	0	0	1	0	0	CTXN1	cortexin 1
hsa-miR-296-3p	0	0	0	1	0	0	DNAJB8	DnaJ (Hsp40) homolog, subfamily B, member 8
hsa-miR-296-3p	1	0	0	1	1	1	TTC7A	tetratricopeptide repeat domain 7A
hsa-miR-296-3p	0	0	1	1	0	0	TMX2	thioredoxin-related transmembrane protein 2
hsa-miR-296-3p	1	0	1	1	1	1	TFAP2A	transcription factor AP-2 alpha (activating enhancer binding protein 2 alpha)
hsa-miR-296-3p	0	0	1	1	0	0	RPP40	ribonuclease P/MRP 40kDa subunit
hsa-miR-296-3p	1	0	0	1	0	0	ZFPM1	zinc finger protein, multitype 1
hsa-miR-296-3p	0	0	1	1	0	0	KLK12	kallikrein-related peptidase 12
hsa-miR-296-3p	0	1	1	1	0	0	PKM	pyruvate kinase, muscle
hsa-miR-296-3p	1	0	1	1	1	1	SLC25A22	solute carrier family 25 (mitochondrial carrier: glutamate), member 22
[truncated: 385 more rows]
