# Supplementary material for: Profiling of Selected MicroRNAs in Proliferative Eutopic Endometrium of Women with Ovarian Endometriosis
Source: Biomed Res Int. 2015 Aug 20;2015:760698. doi: 10.1155/2015/760698 (PMC4558423; doi:10.1155/2015/760698)
Supplement: Supplementary file 1 — Table I: The names of miRNAs significantly differentially expressed between eutopic endometrium of patients with endometriosis vs eutopic endometrium of patients without endometriosis. Table II: The associations between miRNA and mRNA, which presents detailed results of the search of six major databases i.e targetscan, tarbase, miranda, mirbase, mirtarget2 and pictar. [file 760698.f1.zip › 760698.f1/Table II/hsa-miR-296-5p.tsv]

miR	targetscan	tarbase	miranda	mirbase	mirtarget2	pictar	GeneSymbol	GeneName
hsa-miR-296-5p	1	0	1	1	1	1	PLAU	plasminogen activator, urokinase
hsa-miR-296-5p	1	0	1	1	0	0	SRCAP	Snf2-related CREBBP activator protein
hsa-miR-296-5p	0	0	1	1	0	0	PLCH2	phospholipase C, eta 2
hsa-miR-296-5p	1	0	1	1	0	0	OTUD3	OTU domain containing 3
hsa-miR-296-5p	1	0	1	1	1	1	HIPK1	homeodomain interacting protein kinase 1
hsa-miR-296-5p	0	0	1	1	0	0	ARHGEF2	Rho/Rac guanine nucleotide exchange factor (GEF) 2
hsa-miR-296-5p	1	0	1	1	1	1	ARHGEF15	Rho guanine nucleotide exchange factor (GEF) 15
hsa-miR-296-5p	1	0	1	1	1	1	BAHD1	bromo adjacent homology domain containing 1
hsa-miR-296-5p	1	0	1	1	1	1	NTNG1	netrin G1
hsa-miR-296-5p	0	0	1	1	0	0	RTEL1	regulator of telomere elongation helicase 1
hsa-miR-296-5p	1	0	1	0	1	1	SRGAP3	SLIT-ROBO Rho GTPase activating protein 3
hsa-miR-296-5p	0	0	1	0	0	0	MTA3	metastasis associated 1 family, member 3
hsa-miR-296-5p	0	0	1	1	1	1	TCF7L2	transcription factor 7-like 2 (T-cell specific, HMG-box)
hsa-miR-296-5p	1	0	1	0	0	0	NYNRIN	NYN domain and retroviral integrase containing
hsa-miR-296-5p	1	0	1	1	0	0	EBF4	early B-cell factor 4
hsa-miR-296-5p	0	0	1	0	1	1	MUC3B	mucin 3B, cell surface associated
hsa-miR-296-5p	1	0	1	0	0	0	PITPNM2	phosphatidylinositol transfer protein, membrane-associated 2
hsa-miR-296-5p	0	0	1	0	0	0	COL20A1	collagen, type XX, alpha 1
hsa-miR-296-5p	0	0	1	1	0	0	TMEM132A	transmembrane protein 132A
hsa-miR-296-5p	1	0	1	1	0	0	NCKAP5L	NCK-associated protein 5-like
hsa-miR-296-5p	1	0	1	0	0	0	TANC2	tetratricopeptide repeat, ankyrin repeat and coiled-coil containing 2
hsa-miR-296-5p	0	0	1	1	1	1	BHLHB9	basic helix-loop-helix domain containing, class B, 9
hsa-miR-296-5p	1	0	1	1	0	0	SEMA4C	sema domain, immunoglobulin domain (Ig), transmembrane domain (TM) and short cytoplasmic domain, (semaphorin) 4C
hsa-miR-296-5p	0	0	1	1	0	0	COL27A1	collagen, type XXVII, alpha 1
hsa-miR-296-5p	1	0	1	1	1	1	NAV2	neuron navigator 2
hsa-miR-296-5p	1	0	1	1	1	1	BCL2L11	BCL2-like 11 (apoptosis facilitator)
hsa-miR-296-5p	1	0	1	1	1	1	SSH3	slingshot homolog 3 (Drosophila)
hsa-miR-296-5p	0	0	1	1	1	1	KIAA1967	KIAA1967
hsa-miR-296-5p	0	0	1	1	0	0	KREMEN2	kringle containing transmembrane protein 2
hsa-miR-296-5p	0	0	1	1	0	0	MED12	mediator complex subunit 12
hsa-miR-296-5p	0	0	1	1	0	0	SSPO	SCO-spondin homolog (Bos taurus)
hsa-miR-296-5p	1	0	1	1	1	1	HIF3A	hypoxia inducible factor 3, alpha subunit
hsa-miR-296-5p	0	0	1	1	0	0	COLEC11	collectin sub-family member 11
hsa-miR-296-5p	0	0	1	1	0	0	DBP	D site of albumin promoter (albumin D-box) binding protein
hsa-miR-296-5p	1	0	1	1	1	1	SHC1	SHC (Src homology 2 domain containing) transforming protein 1
hsa-miR-296-5p	0	0	1	1	1	1	MAZ	MYC-associated zinc finger protein (purine-binding transcription factor)
hsa-miR-296-5p	1	0	1	1	0	0	CACNB1	calcium channel, voltage-dependent, beta 1 subunit
hsa-miR-296-5p	1	0	1	1	0	0	TSPYL2	TSPY-like 2
hsa-miR-296-5p	1	0	1	0	1	1	DPYSL2	dihydropyrimidinase-like 2
hsa-miR-296-5p	1	0	1	0	1	1	ETV1	ets variant 1
hsa-miR-296-5p	0	0	1	1	1	1	DVL1	dishevelled, dsh homolog 1 (Drosophila)
hsa-miR-296-5p	1	0	1	1	1	1	TBX2	T-box 2
hsa-miR-296-5p	1	0	1	1	1	1	PML	promyelocytic leukemia
hsa-miR-296-5p	0	0	1	1	1	1	RYR1	ryanodine receptor 1 (skeletal)
hsa-miR-296-5p	1	0	1	1	1	1	MINK1	misshapen-like kinase 1
hsa-miR-296-5p	0	0	1	1	0	0	IGFBP2	insulin-like growth factor binding protein 2, 36kDa
hsa-miR-296-5p	0	0	1	1	1	1	ELOVL5	ELOVL fatty acid elongase 5
hsa-miR-296-5p	0	0	1	1	0	0	MSH5	mutS homolog 5 (E. coli)
hsa-miR-296-5p	1	0	1	1	1	1	MEF2D	myocyte enhancer factor 2D
hsa-miR-296-5p	1	0	1	1	0	0	TNPO2	transportin 2
hsa-miR-296-5p	1	0	1	1	1	1	PICALM	phosphatidylinositol binding clathrin assembly protein
hsa-miR-296-5p	1	0	1	1	1	1	SDHC	succinate dehydrogenase complex, subunit C, integral membrane protein, 15kDa
hsa-miR-296-5p	0	0	1	1	1	1	HDAC3	histone deacetylase 3
hsa-miR-296-5p	1	0	1	0	1	1	MLL2	myeloid/lymphoid or mixed-lineage leukemia 2
hsa-miR-296-5p	0	0	1	1	0	0	PLA1A	phospholipase A1 member A
hsa-miR-296-5p	0	0	1	1	1	1	CD84	CD84 molecule
hsa-miR-296-5p	1	0	1	1	1	1	LDB2	LIM domain binding 2
hsa-miR-296-5p	0	0	1	1	1	1	BIN1	bridging integrator 1
hsa-miR-296-5p	1	0	1	1	0	0	ASPHD1	aspartate beta-hydroxylase domain containing 1
hsa-miR-296-5p	0	0	1	1	1	1	EPN1	epsin 1
hsa-miR-296-5p	0	0	1	1	0	0	SGK223	homolog of rat pragma of Rnd2
hsa-miR-296-5p	0	0	1	1	1	1	CRYL1	crystallin, lambda 1
hsa-miR-296-5p	0	0	1	1	1	1	PCBP4	poly(rC) binding protein 4
hsa-miR-296-5p	1	0	1	1	1	1	TAOK3	TAO kinase 3
hsa-miR-296-5p	0	0	1	1	1	1	SLCO2B1	solute carrier organic anion transporter family, member 2B1
hsa-miR-296-5p	1	0	1	1	1	1	SYDE1	synapse defective 1, Rho GTPase, homolog 1 (C. elegans)
hsa-miR-296-5p	1	0	1	1	1	1	SNTB2	syntrophin, beta 2 (dystrophin-associated protein A1, 59kDa, basic component 2)
hsa-miR-296-5p	0	0	1	1	1	1	NKX3-1	NK3 homeobox 1
hsa-miR-296-5p	0	0	1	1	1	1	CTDSP1	CTD (carboxy-terminal domain, RNA polymerase II, polypeptide A) small phosphatase 1
hsa-miR-296-5p	0	0	1	1	0	0	HYI	hydroxypyruvate isomerase (putative)
hsa-miR-296-5p	1	0	1	1	1	1	SPTBN4	spectrin, beta, non-erythrocytic 4
hsa-miR-296-5p	0	0	1	1	1	1	ITPA	inosine triphosphatase (nucleoside triphosphate pyrophosphatase)
hsa-miR-296-5p	1	0	1	1	1	1	BBC3	BCL2 binding component 3
hsa-miR-296-5p	1	0	1	1	1	1	PBX3	pre-B-cell leukemia homeobox 3
hsa-miR-296-5p	1	0	1	1	1	1	CALCOCO1	calcium binding and coiled-coil domain 1
hsa-miR-296-5p	0	0	1	0	1	1	MYO3B	myosin IIIB
hsa-miR-296-5p	1	0	1	1	1	1	NTRK2	neurotrophic tyrosine kinase, receptor, type 2
hsa-miR-296-5p	0	0	1	0	0	0	MYO15B	myosin XVB pseudogene
hsa-miR-296-5p	1	0	1	1	1	1	STX16	syntaxin 16
hsa-miR-296-5p	0	0	1	1	1	1	RNF32	ring finger protein 32
hsa-miR-296-5p	0	0	1	1	1	1	PTK7	PTK7 protein tyrosine kinase 7
hsa-miR-296-5p	0	0	1	1	1	1	GPR56	G protein-coupled receptor 56
hsa-miR-296-5p	0	0	1	1	1	1	GNAS	GNAS complex locus
hsa-miR-296-5p	0	0	1	0	0	0	TOMM6	translocase of outer mitochondrial membrane 6 homolog (yeast)
hsa-miR-296-5p	0	0	1	1	0	0	IL4I1	interleukin 4 induced 1
hsa-miR-296-5p	1	0	1	1	1	1	SIK2	salt-inducible kinase 2
hsa-miR-296-5p	0	0	1	1	1	1	UBE2Q2	ubiquitin-conjugating enzyme E2Q family member 2
hsa-miR-296-5p	1	0	1	1	0	0	SENP3	SUMO1/sentrin/SMT3 specific peptidase 3
hsa-miR-296-5p	1	0	1	1	1	1	CADM3	cell adhesion molecule 3
hsa-miR-296-5p	0	0	1	1	1	1	CXXC5	CXXC finger protein 5
hsa-miR-296-5p	1	0	1	1	1	1	ACER3	alkaline ceramidase 3
hsa-miR-296-5p	1	0	1	0	1	1	LIN28A	lin-28 homolog A (C. elegans)
hsa-miR-296-5p	1	0	1	1	1	1	SLCO5A1	solute carrier organic anion transporter family, member 5A1
hsa-miR-296-5p	0	0	1	1	0	0	JMJD4	jumonji domain containing 4
hsa-miR-296-5p	1	0	1	1	1	1	WDTC1	WD and tetratricopeptide repeats 1
hsa-miR-296-5p	0	0	1	1	1	1	ARMC5	armadillo repeat containing 5
hsa-miR-296-5p	0	0	1	1	1	1	SPATA5L1	spermatogenesis associated 5-like 1
hsa-miR-296-5p	1	0	1	1	1	1	MACF1	microtubule-actin crosslinking factor 1
hsa-miR-296-5p	0	0	1	1	1	1	CLEC4M	C-type lectin domain family 4, member M
hsa-miR-296-5p	1	0	1	1	1	1	POMT2	protein-O-mannosyltransferase 2
hsa-miR-296-5p	0	0	1	1	0	0	RAD54L2	RAD54-like 2 (S. cerevisiae)
hsa-miR-296-5p	1	0	1	1	1	1	PPFIA3	protein tyrosine phosphatase, receptor type, f polypeptide (PTPRF), interacting protein (liprin), alpha 3
hsa-miR-296-5p	1	0	1	1	0	0	MEX3A	mex-3 homolog A (C. elegans)
hsa-miR-296-5p	1	0	1	1	1	1	ZNF385A	zinc finger protein 385A
hsa-miR-296-5p	1	0	1	1	1	1	ZMIZ1	zinc finger, MIZ-type containing 1
hsa-miR-296-5p	1	0	1	1	1	1	DLC1	deleted in liver cancer 1
hsa-miR-296-5p	1	0	1	0	1	1	ZCCHC3	zinc finger, CCHC domain containing 3
hsa-miR-296-5p	0	0	1	1	0	0	STPG1	sperm-tail PG-rich repeat containing 1
hsa-miR-296-5p	0	0	1	0	1	1	HEMK1	HemK methyltransferase family member 1
hsa-miR-296-5p	0	0	1	1	0	0	ZNF276	zinc finger protein 276
hsa-miR-296-5p	1	0	1	1	1	1	GORASP2	golgi reassembly stacking protein 2, 55kDa
hsa-miR-296-5p	1	0	1	1	1	1	FOXP1	forkhead box P1
hsa-miR-296-5p	1	0	1	1	1	1	FAM53C	family with sequence similarity 53, member C
hsa-miR-296-5p	0	0	1	1	1	1	BBS1	Bardet-Biedl syndrome 1
hsa-miR-296-5p	1	0	1	1	1	1	KCTD15	potassium channel tetramerisation domain containing 15
hsa-miR-296-5p	0	0	1	0	0	0	KIAA0664L3	KIAA0664-like 3
hsa-miR-296-5p	1	0	1	1	0	0	C15orf27	chromosome 15 open reading frame 27
hsa-miR-296-5p	1	0	1	0	1	1	AP1G1	adaptor-related protein complex 1, gamma 1 subunit
hsa-miR-296-5p	1	0	1	1	1	1	DLGAP4	discs, large (Drosophila) homolog-associated protein 4
hsa-miR-296-5p	1	0	1	1	0	0	SMARCA4	SWI/SNF related, matrix associated, actin dependent regulator of chromatin, subfamily a, member 4
hsa-miR-296-5p	1	0	1	1	0	0	SPEG	SPEG complex locus
hsa-miR-296-5p	0	0	1	0	0	0	LOC219688	uncharacterized LOC219688
hsa-miR-296-5p	0	0	1	1	0	0	IFT172	intraflagellar transport 172 homolog (Chlamydomonas)
hsa-miR-296-5p	0	0	1	0	0	0	LOC157273	uncharacterized LOC157273
hsa-miR-296-5p	1	0	1	1	1	1	TMEM25	transmembrane protein 25
hsa-miR-296-5p	1	0	1	1	1	1	SHISA5	shisa homolog 5 (Xenopus laevis)
hsa-miR-296-5p	0	0	1	1	0	0	CHPF2	chondroitin polymerizing factor 2
hsa-miR-296-5p	0	0	1	1	1	1	BRD2	bromodomain containing 2
hsa-miR-296-5p	0	0	1	1	1	1	GNB2	guanine nucleotide binding protein (G protein), beta polypeptide 2
hsa-miR-296-5p	0	0	1	1	0	0	RGL3	ral guanine nucleotide dissociation stimulator-like 3
hsa-miR-296-5p	0	0	1	1	0	0	MEF2BNB-MEF2B	MEF2BNB-MEF2B readthrough
hsa-miR-296-5p	0	0	1	1	0	0	TBC1D7	TBC1 domain family, member 7
hsa-miR-296-5p	1	0	1	1	1	1	MAP3K11	mitogen-activated protein kinase kinase kinase 11
hsa-miR-296-5p	0	0	1	0	0	0	TUBA3FP	tubulin, alpha 3f, pseudogene
hsa-miR-296-5p	0	0	1	1	0	0	NXF2	nuclear RNA export factor 2
hsa-miR-296-5p	1	0	1	1	0	0	ZFYVE27	zinc finger, FYVE domain containing 27
hsa-miR-296-5p	1	0	1	0	1	1	BLOC1S6	biogenesis of lysosomal organelles complex-1, subunit 6, pallidin
hsa-miR-296-5p	0	0	1	1	0	0	PTOV1	prostate tumor overexpressed 1
hsa-miR-296-5p	1	0	1	1	1	1	C6orf89	chromosome 6 open reading frame 89
hsa-miR-296-5p	0	0	1	1	0	0	CD37	CD37 molecule
hsa-miR-296-5p	1	0	1	1	1	1	AKNA	AT-hook transcription factor
hsa-miR-296-5p	0	0	1	1	0	0	TRIM41	tripartite motif containing 41
hsa-miR-296-5p	1	0	1	1	1	1	FAM73B	family with sequence similarity 73, member B
hsa-miR-296-5p	0	0	1	0	1	1	CDHR3	cadherin-related family member 3
hsa-miR-296-5p	1	0	1	0	1	1	RNF165	ring finger protein 165
hsa-miR-296-5p	1	0	1	1	1	1	UBAP1	ubiquitin associated protein 1
hsa-miR-296-5p	0	0	1	1	0	0	NISCH	nischarin
hsa-miR-296-5p	0	0	1	1	1	1	KDELR1	KDEL (Lys-Asp-Glu-Leu) endoplasmic reticulum protein retention receptor 1
hsa-miR-296-5p	1	0	1	0	1	1	SLC25A37	solute carrier family 25 (mitochondrial iron transporter), member 37
hsa-miR-296-5p	0	0	1	1	0	0	PIGO	phosphatidylinositol glycan anchor biosynthesis, class O
hsa-miR-296-5p	1	0	1	1	1	1	CYP46A1	cytochrome P450, family 46, subfamily A, polypeptide 1
hsa-miR-296-5p	1	0	1	1	1	1	SUPT16H	suppressor of Ty 16 homolog (S. cerevisiae)
hsa-miR-296-5p	0	0	1	0	0	0	LOC440910	uncharacterized LOC440910
hsa-miR-296-5p	0	0	1	1	1	1	CD34	CD34 molecule
hsa-miR-296-5p	1	0	1	0	1	1	TEF	thyrotrophic embryonic factor
hsa-miR-296-5p	0	0	1	1	1	1	NRBP1	nuclear receptor binding protein 1
hsa-miR-296-5p	0	0	1	1	1	1	TGFBI	transforming growth factor, beta-induced, 68kDa
hsa-miR-296-5p	0	0	1	1	0	0	MAD2L2	MAD2 mitotic arrest deficient-like 2 (yeast)
hsa-miR-296-5p	1	0	1	1	1	1	KLC2	kinesin light chain 2
hsa-miR-296-5p	1	0	1	0	1	1	GATAD2B	GATA zinc finger domain containing 2B
hsa-miR-296-5p	1	0	1	1	1	1	PTPRU	protein tyrosine phosphatase, receptor type, U
hsa-miR-296-5p	0	0	1	1	0	0	PPOX	protoporphyrinogen oxidase
hsa-miR-296-5p	1	0	1	1	1	1	LPPR2	lipid phosphate phosphatase-related protein type 2
hsa-miR-296-5p	0	0	1	1	1	1	AQP3	aquaporin 3 (Gill blood group)
hsa-miR-296-5p	0	0	1	1	0	0	MAP7D1	MAP7 domain containing 1
hsa-miR-296-5p	0	0	1	0	0	0	FAM66C	family with sequence similarity 66, member C
hsa-miR-296-5p	1	0	1	1	0	0	FBRS	fibrosin
hsa-miR-296-5p	1	0	1	0	1	1	KIAA1737	KIAA1737
hsa-miR-296-5p	1	0	1	1	1	1	EPB41L1	erythrocyte membrane protein band 4.1-like 1
hsa-miR-296-5p	0	0	1	1	1	1	PPP1R27	protein phosphatase 1, regulatory subunit 27
hsa-miR-296-5p	0	0	1	1	1	1	ITGAD	integrin, alpha D
hsa-miR-296-5p	0	0	1	1	0	0	AHCY	adenosylhomocysteinase
hsa-miR-296-5p	0	0	1	1	0	0	PSAPL1	prosaposin-like 1 (gene/pseudogene)
hsa-miR-296-5p	0	0	1	0	0	0	CECR7	cat eye syndrome chromosome region, candidate 7 (non-protein coding)
hsa-miR-296-5p	1	0	1	0	1	1	SQSTM1	sequestosome 1
hsa-miR-296-5p	1	0	1	1	0	0	FBXL19	F-box and leucine-rich repeat protein 19
hsa-miR-296-5p	1	0	1	1	1	1	DDX42	DEAD (Asp-Glu-Ala-Asp) box polypeptide 42
hsa-miR-296-5p	1	0	1	1	1	1	ZMAT3	zinc finger, matrin-type 3
hsa-miR-296-5p	0	0	1	1	0	0	ZFYVE19	zinc finger, FYVE domain containing 19
hsa-miR-296-5p	0	0	1	1	0	0	KIAA0146	KIAA0146
hsa-miR-296-5p	1	0	1	1	0	0	WIZ	widely interspaced zinc finger motifs
hsa-miR-296-5p	1	0	1	1	0	0	CACNB3	calcium channel, voltage-dependent, beta 3 subunit
hsa-miR-296-5p	0	0	1	1	0	0	CFP	complement factor properdin
hsa-miR-296-5p	1	0	1	1	1	1	ZBTB4	zinc finger and BTB domain containing 4
hsa-miR-296-5p	0	0	1	1	0	0	SLC26A10	solute carrier family 26, member 10
hsa-miR-296-5p	0	0	1	0	1	1	PATE4	prostate and testis expressed 4
hsa-miR-296-5p	0	0	1	1	1	1	RGS3	regulator of G-protein signaling 3
hsa-miR-296-5p	0	0	1	1	0	0	TJAP1	tight junction associated protein 1 (peripheral)
hsa-miR-296-5p	0	0	1	1	0	0	TTLL12	tubulin tyrosine ligase-like family, member 12
hsa-miR-296-5p	1	0	1	1	1	1	FAM219A	family with sequence similarity 219, member A
hsa-miR-296-5p	0	0	1	1	1	1	BTN2A2	butyrophilin, subfamily 2, member A2
hsa-miR-296-5p	1	0	1	1	1	1	PRDM2	PR domain containing 2, with ZNF domain
hsa-miR-296-5p	0	0	1	1	0	0	SH3BP1	SH3-domain binding protein 1
hsa-miR-296-5p	0	0	1	1	0	0	NPIP	nuclear pore complex interacting protein
hsa-miR-296-5p	0	0	1	1	0	0	PI16	peptidase inhibitor 16
hsa-miR-296-5p	1	0	1	1	1	1	FAM122B	family with sequence similarity 122B
hsa-miR-296-5p	1	0	1	1	1	1	METAP2	methionyl aminopeptidase 2
hsa-miR-296-5p	0	0	1	0	0	0	FAM95B1	family with sequence similarity 95, member B1
hsa-miR-296-5p	0	0	1	1	0	0	RPRD2	regulation of nuclear pre-mRNA domain containing 2
hsa-miR-296-5p	0	0	1	1	1	1	EPPIN	epididymal peptidase inhibitor
hsa-miR-296-5p	0	0	1	1	0	0	C20orf141	chromosome 20 open reading frame 141
hsa-miR-296-5p	1	0	1	1	0	0	ATXN7L3	ataxin 7-like 3
hsa-miR-296-5p	0	0	1	0	1	1	LOC388942	uncharacterized LOC388942
hsa-miR-296-5p	0	0	1	1	0	0	CLDN4	claudin 4
hsa-miR-296-5p	1	0	1	1	0	0	TNK2	tyrosine kinase, non-receptor, 2
hsa-miR-296-5p	0	0	1	1	0	0	CCDC88B	coiled-coil domain containing 88B
hsa-miR-296-5p	0	0	1	0	0	0	LOC100127955	uncharacterized LOC100127955
hsa-miR-296-5p	0	0	1	1	1	1	RAB37	RAB37, member RAS oncogene family
hsa-miR-296-5p	1	0	1	0	1	1	N4BP3	NEDD4 binding protein 3
hsa-miR-296-5p	0	0	1	1	1	1	ARHGAP33	Rho GTPase activating protein 33
hsa-miR-296-5p	1	0	1	1	0	0	SLC30A3	solute carrier family 30 (zinc transporter), member 3
hsa-miR-296-5p	1	0	1	1	0	0	PTPN5	protein tyrosine phosphatase, non-receptor type 5 (striatum-enriched)
hsa-miR-296-5p	1	0	1	0	0	0	SLC16A3	solute carrier family 16, member 3 (monocarboxylic acid transporter 4)
hsa-miR-296-5p	1	0	1	0	1	1	YAF2	YY1 associated factor 2
hsa-miR-296-5p	0	0	1	1	1	1	NT5C2	5'-nucleotidase, cytosolic II
hsa-miR-296-5p	1	0	1	1	1	1	NFYC	nuclear transcription factor Y, gamma
hsa-miR-296-5p	1	0	1	0	1	1	SP6	Sp6 transcription factor
hsa-miR-296-5p	1	0	1	1	1	1	PLA2G15	phospholipase A2, group XV
hsa-miR-296-5p	0	0	1	1	0	0	NCF1	neutrophil cytosolic factor 1
hsa-miR-296-5p	0	0	1	0	0	0	FLJ46361	deleted in malignant brain tumors 1 pseudogene
hsa-miR-296-5p	0	0	1	1	0	0	SMTN	smoothelin
hsa-miR-296-5p	1	0	1	0	1	1	CYB561D1	cytochrome b-561 domain containing 1
hsa-miR-296-5p	0	0	1	1	0	0	HEATR8	HEAT repeat containing 8
hsa-miR-296-5p	1	0	1	1	1	1	GPD1	glycerol-3-phosphate dehydrogenase 1 (soluble)
hsa-miR-296-5p	0	0	1	0	0	0	LOC390660	FLJ00317 protein
hsa-miR-296-5p	0	0	1	1	0	0	B4GALNT3	beta-1,4-N-acetyl-galactosaminyl transferase 3
hsa-miR-296-5p	1	0	1	0	1	1	KIF21B	kinesin family member 21B
hsa-miR-296-5p	0	0	1	1	0	0	ISOC2	isochorismatase domain containing 2
hsa-miR-296-5p	0	0	1	1	0	0	C3orf20	chromosome 3 open reading frame 20
hsa-miR-296-5p	1	0	1	1	1	1	MAP2K4	mitogen-activated protein kinase kinase 4
hsa-miR-296-5p	0	0	1	0	1	1	ATP6V0E2	ATPase, H+ transporting V0 subunit e2
hsa-miR-296-5p	1	0	1	1	1	1	SYS1	SYS1 Golgi-localized integral membrane protein homolog (S. cerevisiae)
hsa-miR-296-5p	0	0	1	1	1	1	KAZALD1	Kazal-type serine peptidase inhibitor domain 1
hsa-miR-296-5p	1	0	1	1	1	1	RPS6KA4	ribosomal protein S6 kinase, 90kDa, polypeptide 4
hsa-miR-296-5p	1	0	1	0	1	1	SEZ6	seizure related 6 homolog (mouse)
hsa-miR-296-5p	0	0	1	1	0	0	NADSYN1	NAD synthetase 1
hsa-miR-296-5p	0	0	1	1	0	0	PCSK5	proprotein convertase subtilisin/kexin type 5
hsa-miR-296-5p	1	0	1	1	1	1	ACTN1	actinin, alpha 1
hsa-miR-296-5p	1	0	1	1	1	1	TGFBR3	transforming growth factor, beta receptor III
hsa-miR-296-5p	1	0	1	1	0	0	ZNF219	zinc finger protein 219
hsa-miR-296-5p	1	0	1	0	1	1	TEAD3	TEA domain family member 3
hsa-miR-296-5p	0	0	1	1	0	0	FAAH	fatty acid amide hydrolase
hsa-miR-296-5p	0	0	1	1	1	1	ENGASE	endo-beta-N-acetylglucosaminidase
hsa-miR-296-5p	0	0	1	0	0	0	POM121L9P	POM121 transmembrane nucleoporin-like 9, pseudogene
hsa-miR-296-5p	0	0	1	1	0	0	ODF3	outer dense fiber of sperm tails 3
hsa-miR-296-5p	0	0	1	0	0	0	KIAA0913	KIAA0913
hsa-miR-296-5p	1	0	1	1	1	1	PREX1	phosphatidylinositol-3,4,5-trisphosphate-dependent Rac exchange factor 1
hsa-miR-296-5p	1	0	1	1	1	1	NEO1	neogenin 1
hsa-miR-296-5p	0	0	1	0	0	0	FAM66D	family with sequence similarity 66, member D
hsa-miR-296-5p	1	0	1	0	1	1	BRPF1	bromodomain and PHD finger containing, 1
hsa-miR-296-5p	1	0	1	1	1	1	LYPD3	LY6/PLAUR domain containing 3
hsa-miR-296-5p	0	0	1	1	1	1	EGFLAM	EGF-like, fibronectin type III and laminin G domains
hsa-miR-296-5p	0	0	1	1	0	0	YIF1B	Yip1 interacting factor homolog B (S. cerevisiae)
hsa-miR-296-5p	1	0	1	1	1	1	DIS3L2	DIS3 mitotic control homolog (S. cerevisiae)-like 2
hsa-miR-296-5p	1	0	1	1	1	1	GAL3ST3	galactose-3-O-sulfotransferase 3
hsa-miR-296-5p	0	0	1	1	1	1	CYP4B1	cytochrome P450, family 4, subfamily B, polypeptide 1
hsa-miR-296-5p	0	0	1	1	0	0	GLYCTK	glycerate kinase
hsa-miR-296-5p	0	0	1	0	0	0	MEG3	maternally expressed 3 (non-protein coding)
hsa-miR-296-5p	0	0	1	1	0	0	KRTCAP3	keratinocyte associated protein 3
hsa-miR-296-5p	0	0	1	1	1	1	NYAP1	neuronal tyrosine-phosphorylated phosphoinositide-3-kinase adaptor 1
hsa-miR-296-5p	0	0	1	1	1	1	TNFSF15	tumor necrosis factor (ligand) superfamily, member 15
hsa-miR-296-5p	1	0	1	1	1	1	MECP2	methyl CpG binding protein 2 (Rett syndrome)
hsa-miR-296-5p	0	0	1	1	0	0	ARAP1	ArfGAP with RhoGAP domain, ankyrin repeat and PH domain 1
hsa-miR-296-5p	0	0	1	1	1	1	TERF1	telomeric repeat binding factor (NIMA-interacting) 1
hsa-miR-296-5p	0	0	1	1	1	1	TMUB1	transmembrane and ubiquitin-like domain containing 1
hsa-miR-296-5p	0	0	1	1	1	1	SMPD1	sphingomyelin phosphodiesterase 1, acid lysosomal
hsa-miR-296-5p	0	0	1	1	0	0	CLSTN3	calsyntenin 3
hsa-miR-296-5p	0	0	1	1	1	1	AGER	advanced glycosylation end product-specific receptor
hsa-miR-296-5p	1	0	1	1	1	1	PFKFB4	6-phosphofructo-2-kinase/fructose-2,6-biphosphatase 4
hsa-miR-296-5p	1	0	1	1	1	1	TBC1D22B	TBC1 domain family, member 22B
hsa-miR-296-5p	0	0	1	1	0	0	CXorf26	chromosome X open reading frame 26
hsa-miR-296-5p	0	0	1	1	0	0	DHCR7	7-dehydrocholesterol reductase
hsa-miR-296-5p	1	0	1	0	1	1	DPYSL5	dihydropyrimidinase-like 5
hsa-miR-296-5p	1	0	1	1	1	1	NUMA1	nuclear mitotic apparatus protein 1
hsa-miR-296-5p	0	0	1	1	0	0	RUSC1	RUN and SH3 domain containing 1
hsa-miR-296-5p	0	0	1	1	1	1	C20orf24	chromosome 20 open reading frame 24
hsa-miR-296-5p	1	0	1	1	0	0	POLR3D	polymerase (RNA) III (DNA directed) polypeptide D, 44kDa
hsa-miR-296-5p	0	0	1	1	0	0	ZNF821	zinc finger protein 821
hsa-miR-296-5p	1	0	1	1	1	1	POU2F2	POU class 2 homeobox 2
hsa-miR-296-5p	1	0	1	1	1	1	ATAT1	alpha tubulin acetyltransferase 1
hsa-miR-296-5p	0	0	1	0	0	0	LOC93622	Morf4 family associated protein 1-like 1 pseudogene
hsa-miR-296-5p	0	0	1	0	0	0	DNM1P33	DNM1 pseudogene 33
hsa-miR-296-5p	0	0	1	1	0	0	OBSL1	obscurin-like 1
hsa-miR-296-5p	0	0	1	1	0	0	AGBL5	ATP/GTP binding protein-like 5
hsa-miR-296-5p	0	0	1	1	0	0	MYLK2	myosin light chain kinase 2
hsa-miR-296-5p	1	0	1	1	1	1	HMGA1	high mobility group AT-hook 1
hsa-miR-296-5p	0	0	1	1	0	0	PANK2	pantothenate kinase 2
hsa-miR-296-5p	0	0	1	1	0	0	BARX1	BARX homeobox 1
hsa-miR-296-5p	0	0	1	1	0	0	PSENEN	presenilin enhancer 2 homolog (C. elegans)
hsa-miR-296-5p	1	0	1	1	1	1	SLC50A1	solute carrier family 50 (sugar transporter), member 1
hsa-miR-296-5p	1	0	1	1	1	1	KCTD17	potassium channel tetramerisation domain containing 17
hsa-miR-296-5p	0	0	1	1	1	1	WSCD1	WSC domain containing 1
hsa-miR-296-5p	1	0	1	1	0	0	SIGMAR1	sigma non-opioid intracellular receptor 1
hsa-miR-296-5p	0	0	1	1	1	1	RWDD3	RWD domain containing 3
hsa-miR-296-5p	0	0	1	0	0	0	LRRC14	leucine rich repeat containing 14
hsa-miR-296-5p	0	0	1	0	0	0	GRAMD1B	GRAM domain containing 1B
hsa-miR-296-5p	0	0	1	1	1	1	KLHL29	kelch-like 29 (Drosophila)
hsa-miR-296-5p	1	0	1	1	0	0	CAPN12	calpain 12
hsa-miR-296-5p	0	0	1	1	1	1	KEAP1	kelch-like ECH-associated protein 1
hsa-miR-296-5p	1	0	1	1	0	0	FHL3	four and a half LIM domains 3
hsa-miR-296-5p	1	0	1	1	0	0	LRFN1	leucine rich repeat and fibronectin type III domain containing 1
hsa-miR-296-5p	0	0	1	1	1	1	TOMM40L	translocase of outer mitochondrial membrane 40 homolog (yeast)-like
hsa-miR-296-5p	0	0	1	0	0	0	MGC21881	uncharacterized locus MGC21881
hsa-miR-296-5p	0	0	1	1	0	0	PARP6	poly (ADP-ribose) polymerase family, member 6
hsa-miR-296-5p	0	0	1	0	1	1	ZNF37A	zinc finger protein 37A
hsa-miR-296-5p	1	0	1	1	0	0	AKT1S1	AKT1 substrate 1 (proline-rich)
hsa-miR-296-5p	1	0	1	1	1	1	NUMBL	numb homolog (Drosophila)-like
hsa-miR-296-5p	0	0	1	1	0	0	ZBTB32	zinc finger and BTB domain containing 32
hsa-miR-296-5p	1	0	1	1	1	1	ADPGK	ADP-dependent glucokinase
hsa-miR-296-5p	1	0	1	1	1	1	ARHGEF9	Cdc42 guanine nucleotide exchange factor (GEF) 9
hsa-miR-296-5p	0	0	1	1	1	1	SOX10	SRY (sex determining region Y)-box 10
hsa-miR-296-5p	1	0	1	1	1	1	ZMAT4	zinc finger, matrin-type 4
hsa-miR-296-5p	0	0	1	0	1	1	TMSB15B	thymosin beta 15B
hsa-miR-296-5p	0	0	1	1	1	1	TMEM40	transmembrane protein 40
hsa-miR-296-5p	0	0	1	0	0	0	EEF1DP3	eukaryotic translation elongation factor 1 delta pseudogene 3
hsa-miR-296-5p	0	0	1	0	1	1	ERICH1-AS1	ERICH1 antisense RNA 1
hsa-miR-296-5p	1	0	1	1	0	0	TMEM63B	transmembrane protein 63B
hsa-miR-296-5p	0	0	1	1	0	0	SLC22A9	solute carrier family 22 (organic anion transporter), member 9
hsa-miR-296-5p	1	0	1	1	1	1	SPOCK2	sparc/osteonectin, cwcv and kazal-like domains proteoglycan (testican) 2
hsa-miR-296-5p	1	0	1	1	1	1	C16orf45	chromosome 16 open reading frame 45
hsa-miR-296-5p	0	0	1	1	1	1	HYAL1	hyaluronoglucosaminidase 1
hsa-miR-296-5p	0	0	1	1	0	0	TRO	trophinin
hsa-miR-296-5p	1	0	1	1	1	1	ZDHHC5	zinc finger, DHHC-type containing 5
hsa-miR-296-5p	0	0	1	1	0	0	TSPAN16	tetraspanin 16
hsa-miR-296-5p	1	0	1	0	1	1	SV2B	synaptic vesicle glycoprotein 2B
hsa-miR-296-5p	0	0	1	1	1	1	CD48	CD48 molecule
hsa-miR-296-5p	0	0	1	1	1	1	SH3TC1	SH3 domain and tetratricopeptide repeats 1
hsa-miR-296-5p	0	0	1	0	0	0	ATP8B5P	ATPase, class I, type 8B, member 5, pseudogene
hsa-miR-296-5p	0	0	1	1	1	1	C7orf53	chromosome 7 open reading frame 53
hsa-miR-296-5p	0	0	1	1	1	1	FBXO24	F-box protein 24
hsa-miR-296-5p	1	0	1	1	0	0	ANKRD13B	ankyrin repeat domain 13B
hsa-miR-296-5p	0	0	1	1	1	1	UBXN1	UBX domain protein 1
hsa-miR-296-5p	1	0	1	1	1	1	DCLK2	doublecortin-like kinase 2
hsa-miR-296-5p	1	0	1	1	0	0	MRC2	mannose receptor, C type 2
hsa-miR-296-5p	0	0	1	1	0	0	RAB4B	RAB4B, member RAS oncogene family
hsa-miR-296-5p	1	0	1	1	1	1	SIRPA	signal-regulatory protein alpha
hsa-miR-296-5p	0	0	1	1	0	0	IGFN1	immunoglobulin-like and fibronectin type III domain containing 1
hsa-miR-296-5p	0	0	1	1	1	1	IL20RB	interleukin 20 receptor beta
hsa-miR-296-5p	1	0	1	0	1	1	RHOBTB2	Rho-related BTB domain containing 2
hsa-miR-296-5p	1	0	1	1	0	0	TBC1D10C	TBC1 domain family, member 10C
hsa-miR-296-5p	0	0	1	0	0	0	TMEM235	transmembrane protein 235
hsa-miR-296-5p	0	0	1	0	0	0	CYP4F35P	cytochrome P450, family 4, subfamily F, polypeptide 35, pseudogene
hsa-miR-296-5p	0	0	1	1	0	0	FNTA	farnesyltransferase, CAAX box, alpha
hsa-miR-296-5p	1	0	1	0	0	0	RAVER1	ribonucleoprotein, PTB-binding 1
hsa-miR-296-5p	0	0	1	0	0	0	CRYBB2P1	crystallin, beta B2 pseudogene 1
hsa-miR-296-5p	0	0	1	1	0	0	BLK	B lymphoid tyrosine kinase
hsa-miR-296-5p	1	0	1	0	1	1	ARID2	AT rich interactive domain 2 (ARID, RFX-like)
hsa-miR-296-5p	0	0	1	0	0	0	FLJ36000	uncharacterized FLJ36000
hsa-miR-296-5p	1	0	1	1	1	1	PAIP2	poly(A) binding protein interacting protein 2
hsa-miR-296-5p	0	0	1	0	0	0	USP32P1	ubiquitin specific peptidase 32 pseudogene 1
hsa-miR-296-5p	0	0	1	0	0	0	DLGAP1-AS3	DLGAP1 antisense RNA 3
hsa-miR-296-5p	0	0	1	0	1	1	LINC00634	long intergenic non-protein coding RNA 634
hsa-miR-296-5p	0	0	1	1	0	0	MTCH1	mitochondrial carrier 1
hsa-miR-296-5p	0	0	1	1	0	0	KIAA1432	KIAA1432
hsa-miR-296-5p	1	0	1	1	0	0	INPP5J	inositol polyphosphate-5-phosphatase J
hsa-miR-296-5p	1	0	1	1	1	1	CTIF	CBP80/20-dependent translation initiation factor
hsa-miR-296-5p	1	0	1	1	1	1	TNFRSF1B	tumor necrosis factor receptor superfamily, member 1B
hsa-miR-296-5p	1	0	1	1	1	1	PLXND1	plexin D1
hsa-miR-296-5p	1	0	1	1	1	1	PSIP1	PC4 and SFRS1 interacting protein 1
hsa-miR-296-5p	0	0	1	1	1	1	MGC57346	uncharacterized LOC401884
hsa-miR-296-5p	1	0	1	1	1	1	SENP1	SUMO1/sentrin specific peptidase 1
hsa-miR-296-5p	1	0	1	1	1	1	CARM1	coactivator-associated arginine methyltransferase 1
hsa-miR-296-5p	0	0	1	0	0	0	SUZ12P1	suppressor of zeste 12 homolog pseudogene 1
hsa-miR-296-5p	1	0	1	1	1	1	PTPRG	protein tyrosine phosphatase, receptor type, G
hsa-miR-296-5p	0	0	1	1	0	0	ENTPD8	ectonucleoside triphosphate diphosphohydrolase 8
hsa-miR-296-5p	1	0	1	1	1	1	TMPO	thymopoietin
hsa-miR-296-5p	0	0	1	1	1	1	LINC00086	long intergenic non-protein coding RNA 86
hsa-miR-296-5p	0	0	1	1	1	1	HLA-DQA1	major histocompatibility complex, class II, DQ alpha 1
hsa-miR-296-5p	1	0	1	1	1	1	PCGF5	polycomb group ring finger 5
hsa-miR-296-5p	0	0	1	1	1	1	SLC25A35	solute carrier family 25, member 35
hsa-miR-296-5p	0	0	1	1	0	0	LY6H	lymphocyte antigen 6 complex, locus H
hsa-miR-296-5p	0	0	1	1	0	0	CUEDC1	CUE domain containing 1
hsa-miR-296-5p	1	0	1	1	1	1	KLHL28	kelch-like 28 (Drosophila)
hsa-miR-296-5p	0	0	1	1	0	0	GRIN2C	glutamate receptor, ionotropic, N-methyl D-aspartate 2C
hsa-miR-296-5p	0	0	1	1	0	0	SPNS2	spinster homolog 2 (Drosophila)
hsa-miR-296-5p	1	0	1	1	1	1	C5orf25	chromosome 5 open reading frame 25
hsa-miR-296-5p	1	0	1	1	1	1	FAM129B	family with sequence similarity 129, member B
hsa-miR-296-5p	1	0	1	1	1	1	CCDC149	coiled-coil domain containing 149
hsa-miR-296-5p	0	0	1	1	0	0	TMEM183A	transmembrane protein 183A
hsa-miR-296-5p	1	0	1	0	1	1	MAGIX	MAGI family member, X-linked
hsa-miR-296-5p	0	0	1	0	0	0	LEF1-AS1	LEF1 antisense RNA 1
hsa-miR-296-5p	1	0	1	1	1	1	LINGO1	leucine rich repeat and Ig domain containing 1
hsa-miR-296-5p	0	0	1	1	1	1	AQPEP	laeverin
hsa-miR-296-5p	0	0	1	1	0	0	CYP4F30P	cytochrome P450, family 4, subfamily F, polypeptide 30, pseudogene
hsa-miR-296-5p	0	0	1	1	1	1	PTPRN	protein tyrosine phosphatase, receptor type, N
hsa-miR-296-5p	0	0	1	1	1	1	MSTO1	misato homolog 1 (Drosophila)
hsa-miR-296-5p	0	0	1	1	1	1	SLC11A1	solute carrier family 11 (proton-coupled divalent metal ion transporters), member 1
hsa-miR-296-5p	0	0	1	0	0	0	JPX	JPX transcript, XIST activator (non-protein coding)
hsa-miR-296-5p	0	0	1	1	1	1	TNFSF12	tumor necrosis factor (ligand) superfamily, member 12
hsa-miR-296-5p	0	0	1	0	0	0	ULK4P3	unc-51-like kinase 4 (C. elegans) pseudogene 3
hsa-miR-296-5p	0	0	1	0	0	0	LOC440416	uncharacterized LOC440416
hsa-miR-296-5p	0	0	1	1	0	0	C8orf31	chromosome 8 open reading frame 31
hsa-miR-296-5p	0	0	1	0	0	0	OAZ3	ornithine decarboxylase antizyme 3
hsa-miR-296-5p	1	0	1	0	1	1	AMMECR1L	AMME chromosomal region gene 1-like
hsa-miR-296-5p	0	0	1	0	0	0	LINC00537	long intergenic non-protein coding RNA 537
hsa-miR-296-5p	1	0	1	1	1	1	SAMD4B	sterile alpha motif domain containing 4B
hsa-miR-296-5p	0	0	1	0	0	0	TBC1D25	TBC1 domain family, member 25
hsa-miR-296-5p	0	0	1	1	0	0	DNHD1	dynein heavy chain domain 1
hsa-miR-296-5p	0	0	1	0	0	0	LOC554249	uncharacterized LOC554249
hsa-miR-296-5p	1	0	1	1	0	0	SRRM3	serine/arginine repetitive matrix 3
hsa-miR-296-5p	0	0	1	0	0	0	FAM106A	family with sequence similarity 106, member A
hsa-miR-296-5p	0	0	1	1	1	1	COL8A2	collagen, type VIII, alpha 2
hsa-miR-296-5p	0	0	1	1	1	1	XG	Xg blood group
hsa-miR-296-5p	0	0	1	1	1	1	TTLL9	tubulin tyrosine ligase-like family, member 9
hsa-miR-296-5p	0	0	1	1	1	1	SPHKAP	SPHK1 interactor, AKAP domain containing
hsa-miR-296-5p	0	0	1	0	0	0	FBXL19-AS1	FBXL19 antisense RNA 1 (head to head)
hsa-miR-296-5p	0	0	1	1	0	0	RELA	v-rel reticuloendotheliosis viral oncogene homolog A (avian)
hsa-miR-296-5p	0	0	1	0	0	0	INTS4L1	integrator complex subunit 4-like 1
hsa-miR-296-5p	1	0	1	1	0	0	MAPKBP1	mitogen-activated protein kinase binding protein 1
hsa-miR-296-5p	0	0	1	0	0	0	CCT6P1	chaperonin containing TCP1, subunit 6 (zeta) pseudogene 1
hsa-miR-296-5p	0	0	1	1	0	0	SOCS7	suppressor of cytokine signaling 7
hsa-miR-296-5p	0	0	1	0	0	0	TUBA4B	tubulin, alpha 4b (pseudogene)
hsa-miR-296-5p	0	0	1	1	0	0	HSF4	heat shock transcription factor 4
hsa-miR-296-5p	1	0	1	1	1	1	PHC2	polyhomeotic homolog 2 (Drosophila)
hsa-miR-296-5p	1	0	1	1	1	1	TMEM218	transmembrane protein 218
hsa-miR-296-5p	0	0	1	1	0	0	NDRG2	NDRG family member 2
hsa-miR-296-5p	0	0	1	0	0	0	FLJ39632	uncharacterized LOC642477
hsa-miR-296-5p	1	0	1	1	0	0	KRT80	keratin 80
hsa-miR-296-5p	1	0	1	1	1	1	ETS1	v-ets erythroblastosis virus E26 oncogene homolog 1 (avian)
hsa-miR-296-5p	1	0	1	1	1	1	SPPL3	signal peptide peptidase like 3
hsa-miR-296-5p	1	0	1	1	1	1	RAB30	RAB30, member RAS oncogene family
hsa-miR-296-5p	1	0	1	1	1	1	SMAD4	SMAD family member 4
hsa-miR-296-5p	0	0	1	1	1	1	PRR14L	proline rich 14-like
hsa-miR-296-5p	1	0	1	1	1	1	CGN	cingulin
hsa-miR-296-5p	0	0	1	0	1	1	TYW5	tRNA-yW synthesizing protein 5
hsa-miR-296-5p	1	0	1	1	1	1	KLHL6	kelch-like 6 (Drosophila)
hsa-miR-296-5p	1	0	1	1	1	1	TMEM135	transmembrane protein 135
hsa-miR-296-5p	0	0	1	1	1	1	ZCCHC11	zinc finger, CCHC domain containing 11
hsa-miR-296-5p	0	0	1	1	1	1	IPO11	importin 11
hsa-miR-296-5p	0	0	1	1	1	1	PICK1	protein interacting with PRKCA 1
hsa-miR-296-5p	1	0	1	1	1	1	MDK	midkine (neurite growth-promoting factor 2)
hsa-miR-296-5p	0	0	1	1	1	1	POLR2H	polymerase (RNA) II (DNA directed) polypeptide H
hsa-miR-296-5p	0	0	1	1	1	1	CAT	catalase
hsa-miR-296-5p	1	0	1	0	0	0	IGLON5	IgLON family member 5
hsa-miR-296-5p	0	0	1	1	0	0	SLC39A7	solute carrier family 39 (zinc transporter), member 7
hsa-miR-296-5p	0	0	1	1	1	1	DNM1	dynamin 1
hsa-miR-296-5p	0	0	1	1	0	0	CDC37	cell division cycle 37 homolog (S. cerevisiae)
hsa-miR-296-5p	0	0	1	1	1	1	CCS	copper chaperone for superoxide dismutase
hsa-miR-296-5p	0	0	1	1	1	1	TBC1D10A	TBC1 domain family, member 10A
hsa-miR-296-5p	0	0	1	1	1	1	GTPBP3	GTP binding protein 3 (mitochondrial)
hsa-miR-296-5p	0	0	1	1	0	0	TBC1D22A	TBC1 domain family, member 22A
hsa-miR-296-5p	1	0	1	1	1	1	SYNGR1	synaptogyrin 1
hsa-miR-296-5p	1	0	1	1	1	1	LETMD1	LETM1 domain containing 1
hsa-miR-296-5p	0	0	1	1	1	1	DMWD	dystrophia myotonica, WD repeat containing
hsa-miR-296-5p	0	0	1	1	0	0	CYGB	cytoglobin
hsa-miR-296-5p	0	0	1	0	0	0	PRMT1	protein arginine methyltransferase 1
hsa-miR-296-5p	1	1	1	1	0	0	EFNA3	ephrin-A3
hsa-miR-296-5p	1	0	1	1	1	1	FGF11	fibroblast growth factor 11
hsa-miR-296-5p	1	0	1	1	1	1	E2F3	E2F transcription factor 3
hsa-miR-296-5p	1	0	1	1	0	0	ELOVL1	ELOVL fatty acid elongase 1
hsa-miR-296-5p	0	0	1	1	1	1	CHCHD4	coiled-coil-helix-coiled-coil-helix domain containing 4
hsa-miR-296-5p	0	0	1	1	0	0	DNAJB2	DnaJ (Hsp40) homolog, subfamily B, member 2
hsa-miR-296-5p	0	0	1	1	1	1	MRPS36	mitochondrial ribosomal protein S36
hsa-miR-296-5p	0	0	1	1	0	0	MFSD10	major facilitator superfamily domain containing 10
hsa-miR-296-5p	1	0	1	1	1	1	PLEKHB2	pleckstrin homology domain containing, family B (evectins) member 2
hsa-miR-296-5p	0	0	1	1	0	0	F10	coagulation factor X
hsa-miR-296-5p	0	0	1	1	0	0	FAM64A	family with sequence similarity 64, member A
hsa-miR-296-5p	0	0	1	1	0	0	IKBKG	inhibitor of kappa light polypeptide gene enhancer in B-cells, kinase gamma
hsa-miR-296-5p	0	0	1	1	0	0	MUS81	MUS81 endonuclease homolog (S. cerevisiae)
hsa-miR-296-5p	1	0	1	1	1	1	LYPLA2	lysophospholipase II
hsa-miR-296-5p	0	0	1	0	0	0	TMEM208	transmembrane protein 208
hsa-miR-296-5p	1	0	1	1	1	1	TMEM245	transmembrane protein 245
hsa-miR-296-5p	1	0	1	0	1	1	PLK3	polo-like kinase 3
hsa-miR-296-5p	0	0	1	1	0	0	C11orf68	chromosome 11 open reading frame 68
hsa-miR-296-5p	1	0	1	1	0	0	THY1	Thy-1 cell surface antigen
hsa-miR-296-5p	0	0	1	1	1	1	VPS16	vacuolar protein sorting 16 homolog (S. cerevisiae)
hsa-miR-296-5p	0	0	1	1	0	0	CSHL1	chorionic somatomammotropin hormone-like 1
hsa-miR-296-5p	1	0	1	1	1	1	PPP5C	protein phosphatase 5, catalytic subunit
hsa-miR-296-5p	0	0	1	1	0	0	GMPPA	GDP-mannose pyrophosphorylase A
hsa-miR-296-5p	0	0	1	1	0	0	ELP4	elongator acetyltransferase complex subunit 4
hsa-miR-296-5p	0	0	1	1	1	1	RPUSD1	RNA pseudouridylate synthase domain containing 1
hsa-miR-296-5p	1	0	1	1	1	1	TAGLN2	transgelin 2
hsa-miR-296-5p	1	0	1	1	1	1	TIMP3	TIMP metallopeptidase inhibitor 3
hsa-miR-296-5p	0	0	1	1	0	0	FAM57B	family with sequence similarity 57, member B
hsa-miR-296-5p	0	0	1	1	1	1	ACSF3	acyl-CoA synthetase family member 3
hsa-miR-296-5p	0	0	1	1	0	0	AHSG	alpha-2-HS-glycoprotein
hsa-miR-296-5p	1	0	1	1	1	1	F11R	F11 receptor
hsa-miR-296-5p	0	0	1	1	0	0	TUSC3	tumor suppressor candidate 3
hsa-miR-296-5p	1	0	1	1	1	1	PDCL	phosducin-like
hsa-miR-296-5p	1	0	1	1	0	0	INO80E	INO80 complex subunit E
hsa-miR-296-5p	0	0	1	0	0	0	NUDT18	nudix (nucleoside diphosphate linked moiety X)-type motif 18
hsa-miR-296-5p	0	0	1	1	0	0	GPRC5C	G protein-coupled receptor, family C, group 5, member C
hsa-miR-296-5p	0	0	1	1	1	1	INPP5K	inositol polyphosphate-5-phosphatase K
hsa-miR-296-5p	0	0	1	1	0	0	CLK2	CDC-like kinase 2
hsa-miR-296-5p	0	0	1	0	0	0	EEF1G	eukaryotic translation elongation factor 1 gamma
hsa-miR-296-5p	0	0	1	1	0	0	TESK1	testis-specific kinase 1
hsa-miR-296-5p	0	0	1	1	1	1	ARHGEF25	Rho guanine nucleotide exchange factor (GEF) 25
hsa-miR-296-5p	0	0	1	1	1	1	RNF126	ring finger protein 126
hsa-miR-296-5p	0	0	1	1	0	0	KAT8	K(lysine) acetyltransferase 8
hsa-miR-296-5p	0	0	1	1	1	1	PSMC3IP	PSMC3 interacting protein
hsa-miR-296-5p	1	0	1	1	1	1	JUNB	jun B proto-oncogene
hsa-miR-296-5p	0	0	1	1	0	0	CD2BP2	CD2 (cytoplasmic tail) binding protein 2
hsa-miR-296-5p	0	0	1	1	1	1	TOP3B	topoisomerase (DNA) III beta
hsa-miR-296-5p	0	0	1	1	0	0	INO80B	INO80 complex subunit B
hsa-miR-296-5p	0	0	1	1	1	1	C10orf2	chromosome 10 open reading frame 2
hsa-miR-296-5p	0	0	1	1	0	0	IL11RA	interleukin 11 receptor, alpha
hsa-miR-296-5p	0	0	1	0	0	0	LOC731789	uncharacterized LOC731789
hsa-miR-296-5p	0	0	1	1	1	1	UPRT	uracil phosphoribosyltransferase (FUR1) homolog (S. cerevisiae)
hsa-miR-296-5p	0	0	1	0	0	0	LINC00661	long intergenic non-protein coding RNA 661
hsa-miR-296-5p	1	0	1	1	0	0	GSK3A	glycogen synthase kinase 3 alpha
hsa-miR-296-5p	1	0	1	1	0	0	POMGNT1	protein O-linked mannose beta1,2-N-acetylglucosaminyltransferase
hsa-miR-296-5p	0	0	1	1	0	0	TENC1	tensin like C1 domain containing phosphatase (tensin 2)
hsa-miR-296-5p	0	0	1	1	0	0	GSTT2	glutathione S-transferase theta 2
hsa-miR-296-5p	0	0	1	1	1	1	SLC39A14	solute carrier family 39 (zinc transporter), member 14
hsa-miR-296-5p	0	0	1	1	1	1	LTA	lymphotoxin alpha (TNF superfamily, member 1)
hsa-miR-296-5p	1	0	1	1	1	1	ATP2B3	ATPase, Ca++ transporting, plasma membrane 3
hsa-miR-296-5p	1	0	1	0	1	1	MAP2K7	mitogen-activated protein kinase kinase 7
hsa-miR-296-5p	0	0	1	0	0	0	PILRB	paired immunoglobin-like type 2 receptor beta
hsa-miR-296-5p	0	0	1	1	0	0	CEACAM3	carcinoembryonic antigen-related cell adhesion molecule 3
hsa-miR-296-5p	0	0	1	1	1	1	ALDH3B1	aldehyde dehydrogenase 3 family, member B1
hsa-miR-296-5p	1	0	1	1	1	1	MLL	myeloid/lymphoid or mixed-lineage leukemia (trithorax homolog, Drosophila)
hsa-miR-296-5p	1	0	1	1	1	1	GRM1	glutamate receptor, metabotropic 1
hsa-miR-296-5p	1	0	1	0	1	1	BCL2	B-cell CLL/lymphoma 2
hsa-miR-296-5p	1	0	1	1	1	1	ELK1	ELK1, member of ETS oncogene family
hsa-miR-296-5p	0	0	1	1	0	0	COL6A2	collagen, type VI, alpha 2
hsa-miR-296-5p	0	0	1	1	1	1	HLA-G	major histocompatibility complex, class I, G
hsa-miR-296-5p	1	0	1	0	1	1	ALAD	aminolevulinate dehydratase
hsa-miR-296-5p	0	0	1	1	1	1	GCDH	glutaryl-CoA dehydrogenase
hsa-miR-296-5p	1	0	1	1	1	1	KCNA1	potassium voltage-gated channel, shaker-related subfamily, member 1 (episodic ataxia with myokymia)
hsa-miR-296-5p	1	0	1	1	1	1	LEP	leptin
hsa-miR-296-5p	0	0	1	1	1	1	PLEC	plectin
hsa-miR-296-5p	1	0	1	1	1	1	MPZ	myelin protein zero
hsa-miR-296-5p	1	0	1	1	1	1	CD44	CD44 molecule (Indian blood group)
hsa-miR-296-5p	0	0	1	1	1	1	IGF2	insulin-like growth factor 2 (somatomedin A)
hsa-miR-296-5p	0	0	1	1	1	1	IL11	interleukin 11
hsa-miR-296-5p	1	0	1	0	1	1	ALDH1A3	aldehyde dehydrogenase 1 family, member A3
hsa-miR-296-5p	0	0	1	1	1	1	ITGAX	integrin, alpha X (complement component 3 receptor 4 subunit)
hsa-miR-296-5p	1	0	1	1	1	1	RARA	retinoic acid receptor, alpha
hsa-miR-296-5p	0	0	1	0	0	0	KLK2	kallikrein-related peptidase 2
hsa-miR-296-5p	0	0	1	1	0	0	C1orf95	chromosome 1 open reading frame 95
hsa-miR-296-5p	1	0	1	1	1	1	TMEM200B	transmembrane protein 200B
hsa-miR-296-5p	1	0	1	0	1	1	BMF	Bcl2 modifying factor
hsa-miR-296-5p	1	0	1	0	1	1	ZNF740	zinc finger protein 740
hsa-miR-296-5p	0	0	1	0	1	1	ZNF705A	zinc finger protein 705A
hsa-miR-296-5p	0	0	1	0	0	0	RNASEK	ribonuclease, RNase K
hsa-miR-296-5p	0	0	1	0	0	0	C9orf173	chromosome 9 open reading frame 173
hsa-miR-296-5p	1	0	1	0	1	1	LRRC55	leucine rich repeat containing 55
hsa-miR-296-5p	0	0	1	0	1	1	FLJ46347	uncharacterized LOC389064
hsa-miR-296-5p	0	0	1	1	1	1	TCEAL6	transcription elongation factor A (SII)-like 6
hsa-miR-296-5p	0	0	1	1	1	1	MXI1	MAX interactor 1
hsa-miR-296-5p	1	0	1	1	1	1	LPHN1	latrophilin 1
hsa-miR-296-5p	0	0	1	0	1	1	LPPR5	lipid phosphate phosphatase-related protein type 5
hsa-miR-296-5p	1	0	1	1	1	1	FOXP4	forkhead box P4
hsa-miR-296-5p	0	0	1	1	0	0	VSIG8	V-set and immunoglobulin domain containing 8
hsa-miR-296-5p	0	0	1	1	1	1	LDLRAD2	low density lipoprotein receptor class A domain containing 2
hsa-miR-296-5p	1	0	1	1	1	1	SBK1	SH3-binding domain kinase 1
hsa-miR-296-5p	0	0	1	1	0	0	ARPC4	actin related protein 2/3 complex, subunit 4, 20kDa
hsa-miR-296-5p	0	0	1	1	0	0	IRAK1	interleukin-1 receptor-associated kinase 1
hsa-miR-296-5p	0	0	1	0	1	1	C6orf120	chromosome 6 open reading frame 120
hsa-miR-296-5p	0	0	1	1	0	0	KLK3	kallikrein-related peptidase 3
hsa-miR-296-5p	1	0	1	1	1	1	MASP1	mannan-binding lectin serine peptidase 1 (C4/C2 activating component of Ra-reactive factor)
hsa-miR-296-5p	0	0	1	1	1	1	PLGLB1	plasminogen-like B1
hsa-miR-296-5p	1	0	1	1	1	1	SCN1B	sodium channel, voltage-gated, type I, beta subunit
hsa-miR-296-5p	1	0	1	1	1	1	KCNC4	potassium voltage-gated channel, Shaw-related subfamily, member 4
hsa-miR-296-5p	0	0	1	0	1	1	ZNF705D	zinc finger protein 705D
hsa-miR-296-5p	1	0	1	1	1	1	NCALD	neurocalcin delta
hsa-miR-296-5p	1	0	1	1	1	1	CRCP	CGRP receptor component
hsa-miR-296-5p	0	0	1	1	1	1	ZXDC	ZXD family zinc finger C
hsa-miR-296-5p	0	0	1	1	0	0	FAM110A	family with sequence similarity 110, member A
hsa-miR-296-5p	1	0	1	1	1	1	ERBB4	v-erb-a erythroblastic leukemia viral oncogene homolog 4 (avian)
hsa-miR-296-5p	1	0	1	1	1	1	SNX21	sorting nexin family member 21
hsa-miR-296-5p	0	0	1	1	1	1	FAM22G	family with sequence similarity 22, member G
hsa-miR-296-5p	1	0	1	1	1	1	ATG9A	autophagy related 9A
hsa-miR-296-5p	1	0	1	1	1	1	PHF16	PHD finger protein 16
hsa-miR-296-5p	0	0	1	1	0	0	EXOC3L4	exocyst complex component 3-like 4
hsa-miR-296-5p	0	0	1	1	0	0	VPS37D	vacuolar protein sorting 37 homolog D (S. cerevisiae)
hsa-miR-296-5p	0	0	1	1	1	1	FKTN	fukutin
hsa-miR-296-5p	1	0	1	0	1	1	FBXO41	F-box protein 41
hsa-miR-296-5p	1	0	1	1	1	1	SHANK3	SH3 and multiple ankyrin repeat domains 3
hsa-miR-296-5p	0	0	1	1	0	0	GSTT2B	glutathione S-transferase theta 2B (gene/pseudogene)
hsa-miR-296-5p	1	0	1	1	1	1	NXF1	nuclear RNA export factor 1
hsa-miR-296-5p	1	0	1	0	1	1	XIAP	X-linked inhibitor of apoptosis
hsa-miR-296-5p	1	0	1	1	1	1	CNN1	calponin 1, basic, smooth muscle
hsa-miR-296-5p	1	0	1	1	1	1	DUSP4	dual specificity phosphatase 4
hsa-miR-296-5p	1	0	1	1	1	1	CELSR3	cadherin, EGF LAG seven-pass G-type receptor 3 (flamingo homolog, Drosophila)
hsa-miR-296-5p	1	0	1	1	1	1	CELSR2	cadherin, EGF LAG seven-pass G-type receptor 2 (flamingo homolog, Drosophila)
hsa-miR-296-5p	1	0	1	0	1	1	ELAVL3	ELAV (embryonic lethal, abnormal vision, Drosophila)-like 3 (Hu antigen C)
hsa-miR-296-5p	0	0	1	0	1	1	EMP1	epithelial membrane protein 1
hsa-miR-296-5p	0	0	1	1	0	0	GCKR	glucokinase (hexokinase 4) regulator
hsa-miR-296-5p	1	0	1	1	0	0	GDI1	GDP dissociation inhibitor 1
hsa-miR-296-5p	1	0	1	1	1	1	NDST1	N-deacetylase/N-sulfotransferase (heparan glucosaminyl) 1
hsa-miR-296-5p	0	0	1	1	0	0	ARAF	v-raf murine sarcoma 3611 viral oncogene homolog
hsa-miR-296-5p	1	0	1	1	1	1	BCL6	B-cell CLL/lymphoma 6
hsa-miR-296-5p	1	0	1	1	1	1	CDC25A	cell division cycle 25 homolog A (S. pombe)
hsa-miR-296-5p	0	0	1	1	0	0	CNTFR	ciliary neurotrophic factor receptor
hsa-miR-296-5p	0	0	1	1	0	0	DDB1	damage-specific DNA binding protein 1, 127kDa
hsa-miR-296-5p	1	0	1	1	1	1	EPB49	erythrocyte membrane protein band 4.9 (dematin)
hsa-miR-296-5p	1	0	1	0	1	1	FUT4	fucosyltransferase 4 (alpha (1,3) fucosyltransferase, myeloid-specific)
hsa-miR-296-5p	0	0	1	1	1	1	GFAP	glial fibrillary acidic protein
hsa-miR-296-5p	1	0	1	1	1	1	GNAZ	guanine nucleotide binding protein (G protein), alpha z polypeptide
hsa-miR-296-5p	0	0	1	1	0	0	GPX3	glutathione peroxidase 3 (plasma)
hsa-miR-296-5p	1	0	1	1	1	1	HOXD10	homeobox D10
hsa-miR-296-5p	0	0	1	1	0	0	KCNK3	potassium channel, subfamily K, member 3
hsa-miR-296-5p	1	0	1	1	1	1	LRP6	low density lipoprotein receptor-related protein 6
hsa-miR-296-5p	0	0	1	1	0	0	LTB	lymphotoxin beta (TNF superfamily, member 3)
hsa-miR-296-5p	0	0	1	1	0	0	LTK	leukocyte receptor tyrosine kinase
hsa-miR-296-5p	0	0	1	0	1	1	MFNG	MFNG O-fucosylpeptide 3-beta-N-acetylglucosaminyltransferase
hsa-miR-296-5p	1	0	1	1	1	1	NGFR	nerve growth factor receptor
hsa-miR-296-5p	0	0	1	1	0	0	NOVA2	neuro-oncological ventral antigen 2
hsa-miR-296-5p	1	0	1	1	1	1	OSBP	oxysterol binding protein
hsa-miR-296-5p	0	0	1	1	1	1	PDE2A	phosphodiesterase 2A, cGMP-stimulated
hsa-miR-296-5p	0	0	1	1	1	1	PIM1	pim-1 oncogene
hsa-miR-296-5p	1	0	1	0	1	1	POU3F1	POU class 3 homeobox 1
hsa-miR-296-5p	1	0	1	1	1	1	PPP1CC	protein phosphatase 1, catalytic subunit, gamma isozyme
hsa-miR-296-5p	0	0	1	1	1	1	PRKACA	protein kinase, cAMP-dependent, catalytic, alpha
hsa-miR-296-5p	1	0	1	1	1	1	PTPN9	protein tyrosine phosphatase, non-receptor type 9
hsa-miR-296-5p	1	0	1	1	1	1	PVRL1	poliovirus receptor-related 1 (herpesvirus entry mediator C)
hsa-miR-296-5p	0	0	1	1	1	1	RAB3A	RAB3A, member RAS oncogene family
hsa-miR-296-5p	1	0	1	1	0	0	RFX1	regulatory factor X, 1 (influences HLA class II expression)
hsa-miR-296-5p	1	0	1	1	1	1	SALL1	sal-like 1 (Drosophila)
hsa-miR-296-5p	1	0	1	1	1	1	CCL21	chemokine (C-C motif) ligand 21
hsa-miR-296-5p	1	0	1	0	1	1	CCL22	chemokine (C-C motif) ligand 22
hsa-miR-296-5p	0	0	1	1	0	0	SNTA1	syntrophin, alpha 1
hsa-miR-296-5p	1	0	1	0	1	1	SOX11	SRY (sex determining region Y)-box 11
hsa-miR-296-5p	0	0	1	1	1	1	SPIB	Spi-B transcription factor (Spi-1/PU.1 related)
hsa-miR-296-5p	1	0	1	1	1	1	SRF	serum response factor (c-fos serum response element-binding transcription factor)
hsa-miR-296-5p	1	0	1	1	1	1	STAC	SH3 and cysteine rich domain
hsa-miR-296-5p	1	0	1	1	1	1	SUV39H1	suppressor of variegation 3-9 homolog 1 (Drosophila)
hsa-miR-296-5p	1	0	1	1	1	1	TFAP4	transcription factor AP-4 (activating enhancer binding protein 4)
hsa-miR-296-5p	0	0	1	1	1	1	XPNPEP2	X-prolyl aminopeptidase (aminopeptidase P) 2, membrane-bound
hsa-miR-296-5p	1	0	1	1	1	1	FZD5	frizzled family receptor 5
hsa-miR-296-5p	1	0	1	1	0	0	TCAP	titin-cap (telethonin)
hsa-miR-296-5p	1	0	1	0	1	1	IRS2	insulin receptor substrate 2
hsa-miR-296-5p	0	0	1	0	0	0	ARRB1	arrestin, beta 1
hsa-miR-296-5p	1	0	1	1	1	1	BCL2L2	BCL2-like 2
hsa-miR-296-5p	1	0	1	0	1	1	E2F2	E2F transcription factor 2
hsa-miR-296-5p	1	0	1	1	1	1	SEMA3F	sema domain, immunoglobulin domain (Ig), short basic domain, secreted, (semaphorin) 3F
hsa-miR-296-5p	0	0	1	1	1	1	EFTUD2	elongation factor Tu GTP binding domain containing 2
hsa-miR-296-5p	1	0	1	0	1	1	GTPBP1	GTP binding protein 1
hsa-miR-296-5p	0	0	1	1	1	1	COL12A1	collagen, type XII, alpha 1
hsa-miR-296-5p	1	0	1	1	1	1	DAG1	dystroglycan 1 (dystrophin-associated glycoprotein 1)
hsa-miR-296-5p	1	0	1	1	1	1	DBN1	drebrin 1
hsa-miR-296-5p	1	0	1	1	1	1	DUSP8	dual specificity phosphatase 8
hsa-miR-296-5p	1	0	1	1	1	1	EFNB1	ephrin-B1
hsa-miR-296-5p	1	0	1	1	1	1	MLLT3	myeloid/lymphoid or mixed-lineage leukemia (trithorax homolog, Drosophila); translocated to, 3
hsa-miR-296-5p	1	0	1	1	1	1	RAB5C	RAB5C, member RAS oncogene family
hsa-miR-296-5p	1	0	1	0	1	1	SCN2B	sodium channel, voltage-gated, type II, beta subunit
hsa-miR-296-5p	0	0	1	1	0	0	MAP3K6	mitogen-activated protein kinase kinase kinase 6
hsa-miR-296-5p	0	0	1	1	0	0	DYRK1B	dual-specificity tyrosine-(Y)-phosphorylation regulated kinase 1B
hsa-miR-296-5p	0	0	1	1	1	1	KCNAB3	potassium voltage-gated channel, shaker-related subfamily, beta member 3
hsa-miR-296-5p	1	0	1	1	1	1	LARGE	like-glycosyltransferase
hsa-miR-296-5p	1	0	1	0	1	1	MAPKAPK2	mitogen-activated protein kinase-activated protein kinase 2
hsa-miR-296-5p	0	0	1	1	0	0	BCL7C	B-cell CLL/lymphoma 7C
hsa-miR-296-5p	0	0	1	1	0	0	SLC22A6	solute carrier family 22 (organic anion transporter), member 6
hsa-miR-296-5p	1	0	1	0	1	1	ARHGEF6	Rac/Cdc42 guanine nucleotide exchange factor (GEF) 6
hsa-miR-296-5p	1	0	1	1	1	1	ONECUT2	one cut homeobox 2
hsa-miR-296-5p	1	0	1	1	0	0	ZMYM3	zinc finger, MYM-type 3
hsa-miR-296-5p	1	0	1	1	1	1	APLNR	apelin receptor
hsa-miR-296-5p	1	0	1	1	0	0	BCL3	B-cell CLL/lymphoma 3
hsa-miR-296-5p	1	0	1	0	1	1	E2F1	E2F transcription factor 1
hsa-miR-296-5p	1	0	1	1	1	1	GPR3	G protein-coupled receptor 3
hsa-miR-296-5p	1	0	1	1	0	0	NNAT	neuronatin
hsa-miR-296-5p	1	0	1	1	1	1	MLF2	myeloid leukemia factor 2
hsa-miR-296-5p	1	0	1	1	1	1	RND2	Rho family GTPase 2
hsa-miR-296-5p	1	0	1	1	0	0	NOG	noggin
hsa-miR-296-5p	1	0	1	1	1	1	ITGA3	integrin, alpha 3 (antigen CD49C, alpha 3 subunit of VLA-3 receptor)
hsa-miR-296-5p	1	0	1	1	0	0	LOXL1	lysyl oxidase-like 1
hsa-miR-296-5p	0	0	1	1	1	1	BCAM	basal cell adhesion molecule (Lutheran blood group)
hsa-miR-296-5p	1	0	1	1	1	1	NHLH1	nescient helix loop helix 1
hsa-miR-296-5p	0	0	1	1	0	0	RTN2	reticulon 2
hsa-miR-296-5p	0	0	1	1	0	0	SNURF	SNRPN upstream reading frame
hsa-miR-296-5p	1	0	1	1	1	1	GIPC1	GIPC PDZ domain containing family, member 1
hsa-miR-296-5p	1	0	1	1	1	1	ACTR1A	ARP1 actin-related protein 1 homolog A, centractin alpha (yeast)
hsa-miR-296-5p	0	0	1	1	1	1	ZNF263	zinc finger protein 263
hsa-miR-296-5p	1	0	1	0	1	1	SPRY3	sprouty homolog 3 (Drosophila)
hsa-miR-296-5p	0	0	1	1	0	0	RAMP1	receptor (G protein-coupled) activity modifying protein 1
hsa-miR-296-5p	0	0	1	1	1	1	FSTL3	follistatin-like 3 (secreted glycoprotein)
hsa-miR-296-5p	1	0	1	1	1	1	EFS	embryonal Fyn-associated substrate
hsa-miR-296-5p	1	0	1	1	1	1	SNAI1	snail homolog 1 (Drosophila)
hsa-miR-296-5p	0	0	1	1	0	0	BMP1	bone morphogenetic protein 1
hsa-miR-296-5p	1	0	1	1	1	1	NEUROD2	neuronal differentiation 2
hsa-miR-296-5p	1	0	1	1	1	1	CDK16	cyclin-dependent kinase 16
hsa-miR-296-5p	1	0	1	1	1	1	TLN1	talin 1
hsa-miR-296-5p	0	0	1	1	1	1	LRRC41	leucine rich repeat containing 41
hsa-miR-296-5p	0	0	1	0	1	1	SLC16A2	solute carrier family 16, member 2 (thyroid hormone transporter)
hsa-miR-296-5p	1	0	1	0	1	1	IGF2BP1	insulin-like growth factor 2 mRNA binding protein 1
hsa-miR-296-5p	0	0	1	1	0	0	PMVK	phosphomevalonate kinase
hsa-miR-296-5p	1	0	1	1	1	1	TSPAN9	tetraspanin 9
hsa-miR-296-5p	1	0	1	1	1	1	MMP24	matrix metallopeptidase 24 (membrane-inserted)
hsa-miR-296-5p	1	0	1	1	1	1	BTG2	BTG family, member 2
hsa-miR-296-5p	1	0	1	0	1	1	SYNGAP1	synaptic Ras GTPase activating protein 1
hsa-miR-296-5p	1	0	1	0	1	1	SOX12	SRY (sex determining region Y)-box 12
hsa-miR-296-5p	1	0	1	1	1	1	NR4A3	nuclear receptor subfamily 4, group A, member 3
hsa-miR-296-5p	0	0	1	1	1	1	TMEM115	transmembrane protein 115
hsa-miR-296-5p	1	0	1	1	1	1	KAT7	K(lysine) acetyltransferase 7
hsa-miR-296-5p	0	0	1	1	0	0	USF1	upstream transcription factor 1
hsa-miR-296-5p	1	0	1	1	1	1	ABCF2	ATP-binding cassette, sub-family F (GCN20), member 2
hsa-miR-296-5p	0	0	1	1	1	1	HRH3	histamine receptor H3
hsa-miR-296-5p	1	0	1	1	1	1	KLF12	Kruppel-like factor 12
hsa-miR-296-5p	1	0	1	1	1	1	PHLDA1	pleckstrin homology-like domain, family A, member 1
hsa-miR-296-5p	1	0	1	1	1	1	PADI2	peptidyl arginine deiminase, type II
hsa-miR-296-5p	0	0	1	1	0	0	PRDX5	peroxiredoxin 5
hsa-miR-296-5p	0	0	1	1	0	0	TMEM59L	transmembrane protein 59-like
hsa-miR-296-5p	0	0	1	1	1	1	AHSA1	AHA1, activator of heat shock 90kDa protein ATPase homolog 1 (yeast)
hsa-miR-296-5p	0	0	1	1	1	1	LMOD1	leiomodin 1 (smooth muscle)
hsa-miR-296-5p	1	0	1	1	1	1	RHOQ	ras homolog family member Q
hsa-miR-296-5p	1	0	1	0	1	1	GAB2	GRB2-associated binding protein 2
hsa-miR-296-5p	1	0	1	1	0	0	MYO1F	myosin IF
hsa-miR-296-5p	1	0	1	1	0	0	ZDHHC1	zinc finger, DHHC-type containing 1
hsa-miR-296-5p	0	0	1	1	0	0	KCNJ14	potassium inwardly-rectifying channel, subfamily J, member 14
hsa-miR-296-5p	0	0	1	1	0	0	ZDHHC8	zinc finger, DHHC-type containing 8
hsa-miR-296-5p	1	0	1	1	1	1	AK2	adenylate kinase 2
hsa-miR-296-5p	0	0	1	0	1	1	EMR2	egf-like module containing, mucin-like, hormone receptor-like 2
hsa-miR-296-5p	1	0	1	0	1	1	VAMP2	vesicle-associated membrane protein 2 (synaptobrevin 2)
hsa-miR-296-5p	0	0	1	1	1	1	CAPN6	calpain 6
hsa-miR-296-5p	1	0	1	1	1	1	CBX6	chromobox homolog 6
hsa-miR-296-5p	0	0	1	1	1	1	C22orf28	chromosome 22 open reading frame 28
hsa-miR-296-5p	1	0	1	0	1	1	DIEXF	digestive organ expansion factor homolog (zebrafish)
hsa-miR-296-5p	1	0	1	1	1	1	AFF4	AF4/FMR2 family, member 4
hsa-miR-296-5p	1	0	1	1	1	1	RND1	Rho family GTPase 1
hsa-miR-296-5p	1	0	1	1	1	1	CDR2L	cerebellar degeneration-related protein 2-like
hsa-miR-296-5p	1	0	1	0	1	1	SH3PXD2A	SH3 and PX domains 2A
hsa-miR-296-5p	1	0	1	1	1	1	RALGPS1	Ral GEF with PH domain and SH3 binding motif 1
hsa-miR-296-5p	0	0	1	1	1	1	FAM53B	family with sequence similarity 53, member B
hsa-miR-296-5p	1	0	1	1	1	1	TBKBP1	TBK1 binding protein 1
hsa-miR-296-5p	1	0	1	1	1	1	MLL4	myeloid/lymphoid or mixed-lineage leukemia 4
hsa-miR-296-5p	1	0	1	0	1	1	MLEC	malectin
hsa-miR-296-5p	1	0	1	1	1	1	SV2A	synaptic vesicle glycoprotein 2A
hsa-miR-296-5p	1	0	1	1	1	1	RNF44	ring finger protein 44
hsa-miR-296-5p	1	0	1	1	1	1	IQSEC2	IQ motif and Sec7 domain 2
hsa-miR-296-5p	1	0	1	1	0	0	CIC	capicua homolog (Drosophila)
hsa-miR-296-5p	1	0	1	1	1	1	PHF15	PHD finger protein 15
hsa-miR-296-5p	1	0	1	0	1	1	KHNYN	KH and NYN domain containing
hsa-miR-296-5p	0	0	1	1	1	1	ANGEL1	angel homolog 1 (Drosophila)
hsa-miR-296-5p	1	0	1	1	0	0	SMG5	smg-5 homolog, nonsense mediated mRNA decay factor (C. elegans)
hsa-miR-296-5p	1	0	1	1	1	1	ASXL1	additional sex combs like 1 (Drosophila)
hsa-miR-296-5p	0	0	1	1	0	0	SPEF1	sperm flagellar 1
hsa-miR-296-5p	0	0	1	0	1	1	TMEM158	transmembrane protein 158 (gene/pseudogene)
hsa-miR-296-5p	1	0	1	1	1	1	PNKD	paroxysmal nonkinesigenic dyskinesia
hsa-miR-296-5p	1	0	1	1	1	1	MAGI1	membrane associated guanylate kinase, WW and PDZ domain containing 1
hsa-miR-296-5p	1	0	1	1	1	1	CLIP3	CAP-GLY domain containing linker protein 3
hsa-miR-296-5p	1	0	1	0	1	1	PPP1R16B	protein phosphatase 1, regulatory subunit 16B
hsa-miR-296-5p	0	0	1	1	1	1	TRPC4AP	transient receptor potential cation channel, subfamily C, member 4 associated protein
hsa-miR-296-5p	1	0	1	1	1	1	FAM155B	family with sequence similarity 155, member B
hsa-miR-296-5p	0	0	1	1	0	0	EMC9	ER membrane protein complex subunit 9
hsa-miR-296-5p	1	0	1	1	1	1	CERCAM	cerebral endothelial cell adhesion molecule
hsa-miR-296-5p	0	0	1	1	1	1	RBM19	RNA binding motif protein 19
hsa-miR-296-5p	1	0	1	1	1	1	SNX9	sorting nexin 9
hsa-miR-296-5p	1	0	1	1	1	1	RAPGEFL1	Rap guanine nucleotide exchange factor (GEF)-like 1
hsa-miR-296-5p	0	0	1	0	1	1	APLN	apelin
hsa-miR-296-5p	0	0	1	1	1	1	A4GALT	alpha 1,4-galactosyltransferase
hsa-miR-296-5p	0	0	1	1	0	0	UBQLN3	ubiquilin 3
hsa-miR-296-5p	0	0	1	1	0	0	FNDC8	fibronectin type III domain containing 8
hsa-miR-296-5p	0	0	1	1	1	1	SMG6	smg-6 homolog, nonsense mediated mRNA decay factor (C. elegans)
hsa-miR-296-5p	1	0	1	1	1	1	ZC3H7B	zinc finger CCCH-type containing 7B
hsa-miR-296-5p	1	0	1	0	1	1	FAM46C	family with sequence similarity 46, member C
hsa-miR-296-5p	1	0	1	1	1	1	TBC1D8B	TBC1 domain family, member 8B (with GRAM domain)
hsa-miR-296-5p	1	0	1	1	0	0	LAMTOR1	late endosomal/lysosomal adaptor, MAPK and MTOR activator 1
hsa-miR-296-5p	0	0	1	1	1	1	ECHDC1	enoyl CoA hydratase domain containing 1
hsa-miR-296-5p	1	0	1	1	0	0	GPR173	G protein-coupled receptor 173
hsa-miR-296-5p	1	0	1	1	1	1	DLL4	delta-like 4 (Drosophila)
hsa-miR-296-5p	1	0	1	0	1	1	UBFD1	ubiquitin family domain containing 1
hsa-miR-296-5p	1	0	1	1	1	1	CNNM4	cyclin M4
hsa-miR-296-5p	0	0	1	1	0	0	LYRM4	LYR motif containing 4
hsa-miR-296-5p	0	0	1	0	1	1	TMEM63C	transmembrane protein 63C
hsa-miR-296-5p	1	0	1	1	0	0	JPH2	junctophilin 2
hsa-miR-296-5p	1	0	1	1	1	1	ATP8B2	ATPase, aminophospholipid transporter, class I, type 8B, member 2
hsa-miR-296-5p	1	0	1	1	1	1	SLC24A3	solute carrier family 24 (sodium/potassium/calcium exchanger), member 3
hsa-miR-296-5p	1	0	1	1	1	1	CASKIN1	CASK interacting protein 1
hsa-miR-296-5p	1	0	1	0	1	1	ALPK3	alpha-kinase 3
hsa-miR-296-5p	0	0	1	1	1	1	UVSSA	UV-stimulated scaffold protein A
hsa-miR-296-5p	0	0	1	1	1	1	PRX	periaxin
hsa-miR-296-5p	0	0	1	1	1	1	TLX3	T-cell leukemia homeobox 3
hsa-miR-296-5p	1	0	1	1	1	1	TGIF2	TGFB-induced factor homeobox 2
hsa-miR-296-5p	1	0	1	0	1	1	MCL1	myeloid cell leukemia sequence 1 (BCL2-related)
hsa-miR-296-5p	1	0	1	1	0	0	HAND2	heart and neural crest derivatives expressed 2
hsa-miR-296-5p	1	0	1	1	1	1	ABCG4	ATP-binding cassette, sub-family G (WHITE), member 4
hsa-miR-296-5p	0	0	1	1	1	1	TCTA	T-cell leukemia translocation altered
hsa-miR-296-5p	1	0	1	1	1	1	TMEM168	transmembrane protein 168
hsa-miR-296-5p	1	0	1	1	1	1	GIGYF1	GRB10 interacting GYF protein 1
hsa-miR-296-5p	1	0	1	1	1	1	FAM160B2	family with sequence similarity 160, member B2
hsa-miR-296-5p	1	0	1	1	1	1	C6orf106	chromosome 6 open reading frame 106
hsa-miR-296-5p	1	0	1	1	1	1	FNDC4	fibronectin type III domain containing 4
hsa-miR-296-5p	1	0	1	1	1	1	RFX7	regulatory factor X, 7
hsa-miR-296-5p	1	0	1	1	0	0	UBE2Z	ubiquitin-conjugating enzyme E2Z
hsa-miR-296-5p	0	0	1	1	0	0	CUEDC2	CUE domain containing 2
hsa-miR-296-5p	0	0	1	1	0	0	CHAC1	ChaC, cation transport regulator homolog 1 (E. coli)
hsa-miR-296-5p	0	0	1	1	1	1	SH3D21	SH3 domain containing 21
hsa-miR-296-5p	1	0	1	1	0	0	UBTD1	ubiquitin domain containing 1
hsa-miR-296-5p	0	0	1	1	0	0	NRSN2	neurensin 2
hsa-miR-296-5p	0	0	1	1	0	0	BAIAP2L2	BAI1-associated protein 2-like 2
hsa-miR-296-5p	1	0	1	0	1	1	DNAJC5	DnaJ (Hsp40) homolog, subfamily C, member 5
hsa-miR-296-5p	1	0	1	0	1	1	SRCIN1	SRC kinase signaling inhibitor 1
hsa-miR-296-5p	1	0	1	0	1	1	SETD7	SET domain containing (lysine methyltransferase) 7
hsa-miR-296-5p	1	0	1	1	1	1	FAM117A	family with sequence similarity 117, member A
hsa-miR-296-5p	1	0	1	1	1	1	RAB1B	RAB1B, member RAS oncogene family
hsa-miR-296-5p	1	0	1	1	0	0	SCRT1	scratch homolog 1, zinc finger protein (Drosophila)
hsa-miR-296-5p	0	0	1	1	0	0	CACNG6	calcium channel, voltage-dependent, gamma subunit 6
hsa-miR-296-5p	0	0	1	1	1	1	FRMD8	FERM domain containing 8
hsa-miR-296-5p	1	0	1	1	1	1	GPR61	G protein-coupled receptor 61
hsa-miR-296-5p	1	0	1	1	1	1	PATZ1	POZ (BTB) and AT hook containing zinc finger 1
hsa-miR-296-5p	1	0	1	1	1	1	ARID5B	AT rich interactive domain 5B (MRF1-like)
hsa-miR-296-5p	1	0	1	1	1	1	ZDHHC18	zinc finger, DHHC-type containing 18
hsa-miR-296-5p	1	0	1	1	1	1	TRIM63	tripartite motif containing 63, E3 ubiquitin protein ligase
hsa-miR-296-5p	1	0	1	1	0	0	ZC3H10	zinc finger CCCH-type containing 10
hsa-miR-296-5p	1	0	1	1	1	1	ARHGEF39	Rho guanine nucleotide exchange factor (GEF) 39
hsa-miR-296-5p	0	0	1	1	1	1	POLR2J2	polymerase (RNA) II (DNA directed) polypeptide J2
hsa-miR-296-5p	0	0	1	1	0	0	HIST3H2A	histone cluster 3, H2a
hsa-miR-296-5p	1	0	1	1	0	0	FCHSD1	FCH and double SH3 domains 1
hsa-miR-296-5p	1	0	1	1	1	1	EPT1	ethanolaminephosphotransferase 1 (CDP-ethanolamine-specific)
hsa-miR-296-5p	0	0	1	0	0	0	CEACAM21	carcinoembryonic antigen-related cell adhesion molecule 21
hsa-miR-296-5p	1	0	1	1	0	0	CCDC120	coiled-coil domain containing 120
hsa-miR-296-5p	1	0	1	1	1	1	LUZP1	leucine zipper protein 1
hsa-miR-296-5p	0	0	1	1	1	1	PLEKHG4B	pleckstrin homology domain containing, family G (with RhoGef domain) member 4B
hsa-miR-296-5p	1	0	1	1	1	1	JDP2	Jun dimerization protein 2
hsa-miR-296-5p	1	0	1	1	0	0	UNC5A	unc-5 homolog A (C. elegans)
hsa-miR-296-5p	1	0	1	1	0	0	PKDCC	protein kinase domain containing, cytoplasmic homolog (mouse)
hsa-miR-296-5p	0	0	1	1	1	1	TMEM129	transmembrane protein 129
hsa-miR-296-5p	1	0	1	1	1	1	KCTD12	potassium channel tetramerisation domain containing 12
hsa-miR-296-5p	1	0	1	0	1	1	SP1	Sp1 transcription factor
hsa-miR-296-5p	1	0	1	1	1	1	PKHD1	polycystic kidney and hepatic disease 1 (autosomal recessive)
hsa-miR-296-5p	1	0	1	1	1	1	ATRN	attractin
hsa-miR-296-5p	1	0	1	1	0	0	GNAT1	guanine nucleotide binding protein (G protein), alpha transducing activity polypeptide 1
hsa-miR-296-5p	1	0	1	1	1	1	RPIA	ribose 5-phosphate isomerase A
hsa-miR-296-5p	0	0	1	1	0	0	DHRS13	dehydrogenase/reductase (SDR family) member 13
hsa-miR-296-5p	1	0	1	1	1	1	ZMAT2	zinc finger, matrin-type 2
hsa-miR-296-5p	0	0	1	1	1	1	DACT3	dapper, antagonist of beta-catenin, homolog 3 (Xenopus laevis)
hsa-miR-296-5p	1	0	1	0	1	1	DIRAS1	DIRAS family, GTP-binding RAS-like 1
hsa-miR-296-5p	0	0	1	1	1	1	C7orf33	chromosome 7 open reading frame 33
hsa-miR-296-5p	0	0	1	1	1	1	SCARF1	scavenger receptor class F, member 1
hsa-miR-296-5p	0	0	1	1	0	0	WFDC5	WAP four-disulfide core domain 5
hsa-miR-296-5p	0	0	1	1	0	0	IL27	interleukin 27
hsa-miR-296-5p	0	0	1	1	0	0	KLK12	kallikrein-related peptidase 12
hsa-miR-296-5p	0	0	1	0	1	1	CHKB	choline kinase beta
hsa-miR-296-5p	1	0	1	1	1	1	FAM123B	family with sequence similarity 123B
hsa-miR-296-5p	1	0	1	1	1	1	ZNF362	zinc finger protein 362
hsa-miR-296-5p	0	0	1	1	1	1	DNAJC18	DnaJ (Hsp40) homolog, subfamily C, member 18
hsa-miR-296-5p	0	0	1	1	0	0	GPC2	glypican 2
hsa-miR-296-5p	1	0	1	1	1	1	TMEM151A	transmembrane protein 151A
hsa-miR-296-5p	1	0	1	1	0	0	TMEM86A	transmembrane protein 86A
hsa-miR-296-5p	1	0	1	0	1	1	MDGA1	MAM domain containing glycosylphosphatidylinositol anchor 1
hsa-miR-296-5p	0	0	1	1	1	1	CAMK1D	calcium/calmodulin-dependent protein kinase ID
hsa-miR-296-5p	0	0	1	0	1	1	RTP1	receptor (chemosensory) transporter protein 1
hsa-miR-296-5p	1	0	1	1	1	1	DAZAP1	DAZ associated protein 1
hsa-miR-296-5p	1	0	1	1	1	1	POM121	POM121 transmembrane nucleoporin
hsa-miR-296-5p	0	0	1	0	1	1	TUSC5	tumor suppressor candidate 5
hsa-miR-296-5p	1	0	1	1	1	1	SMG7	smg-7 homolog, nonsense mediated mRNA decay factor (C. elegans)
hsa-miR-296-5p	1	0	1	1	1	1	VKORC1L1	vitamin K epoxide reductase complex, subunit 1-like 1
hsa-miR-296-5p	1	0	1	1	1	1	XKR6	XK, Kell blood group complex subunit-related family, member 6
hsa-miR-296-5p	0	0	1	1	0	0	SEC14L4	SEC14-like 4 (S. cerevisiae)
hsa-miR-296-5p	1	0	1	1	1	1	GGT7	gamma-glutamyltransferase 7
hsa-miR-296-5p	1	0	1	1	1	1	FAM134C	family with sequence similarity 134, member C
hsa-miR-296-5p	0	0	1	1	0	0	HM13	histocompatibility (minor) 13
hsa-miR-296-5p	1	0	1	1	1	1	TMEM229B	transmembrane protein 229B
hsa-miR-296-5p	1	0	1	1	1	1	ANKRD42	ankyrin repeat domain 42
hsa-miR-296-5p	1	0	1	0	1	1	RIMS4	regulating synaptic membrane exocytosis 4
hsa-miR-296-5p	1	0	1	0	1	1	NRK	Nik related kinase
hsa-miR-296-5p	0	0	1	0	0	0	IGFL1	IGF-like family member 1
hsa-miR-296-5p	0	0	1	1	1	1	LHFPL4	lipoma HMGIC fusion partner-like 4
hsa-miR-296-5p	1	0	1	0	1	1	PRICKLE2	prickle homolog 2 (Drosophila)
hsa-miR-296-5p	0	0	1	0	1	1	WASH3P	WAS protein family homolog 3 pseudogene
hsa-miR-296-5p	0	0	1	1	1	1	COL18A1-AS1	COL18A1 antisense RNA 1
hsa-miR-296-5p	0	0	1	1	1	1	ARHGAP27	Rho GTPase activating protein 27
hsa-miR-296-5p	0	0	1	1	1	1	SHC4	SHC (Src homology 2 domain containing) family, member 4
hsa-miR-296-5p	0	0	1	1	0	0	IER5L	immediate early response 5-like
hsa-miR-296-5p	1	0	1	1	1	1	ENSA	endosulfine alpha
hsa-miR-296-5p	0	0	1	0	1	1	CLEC17A	C-type lectin domain family 17, member A
hsa-miR-296-5p	0	0	1	0	1	1	C1orf229	chromosome 1 open reading frame 229
hsa-miR-296-5p	1	0	1	1	1	1	C11orf87	chromosome 11 open reading frame 87
hsa-miR-296-5p	1	0	1	0	1	1	STAT3	signal transducer and activator of transcription 3 (acute-phase response factor)
hsa-miR-296-5p	0	0	1	0	0	0	CELP	carboxyl ester lipase pseudogene
hsa-miR-296-5p	0	0	1	0	0	0	HLA-H	major histocompatibility complex, class I, H (pseudogene)
hsa-miR-296-5p	0	0	1	0	0	0	HLA-DPB2	major histocompatibility complex, class II, DP beta 2 (pseudogene)
hsa-miR-296-5p	0	0	1	0	0	0	LYPLA2P1	lysophospholipase II pseudogene 1
hsa-miR-296-5p	0	0	1	0	0	0	MT1L	metallothionein 1L (gene/pseudogene)
hsa-miR-296-5p	0	0	1	0	0	0	TTTY6	testis-specific transcript, Y-linked 6 (non-protein coding)
hsa-miR-296-5p	0	0	1	0	0	0	TTTY2	testis-specific transcript, Y-linked 2 (non-protein coding)
hsa-miR-296-5p	0	0	1	0	0	0	TTTY15	testis-specific transcript, Y-linked 15 (non-protein coding)
hsa-miR-296-5p	0	0	1	0	0	0	MBL1P	mannose-binding lectin (protein A) 1, pseudogene
hsa-miR-296-5p	0	0	1	0	0	0	HTR7P1	5-hydroxytryptamine (serotonin) receptor 7 pseudogene 1
hsa-miR-296-5p	0	0	1	0	0	0	SIGLEC16	sialic acid binding Ig-like lectin 16 (gene/pseudogene)
hsa-miR-296-5p	0	0	1	0	0	0	PTPRVP	protein tyrosine phosphatase, receptor type, V, pseudogene
hsa-miR-296-5p	0	0	1	0	0	0	CLEC4GP1	C-type lectin domain family 4, member G pseudogene 1
hsa-miR-296-5p	0	0	1	0	0	0	SNORA11	small nucleolar RNA, H/ACA box 11
hsa-miR-296-5p	0	0	1	0	0	0	SCARNA2	small Cajal body-specific RNA 2
hsa-miR-296-5p	1	0	1	0	1	1	NFIX	nuclear factor I/X (CCAAT-binding transcription factor)
hsa-miR-296-5p	1	0	1	1	1	1	TRIO	trio Rho guanine nucleotide exchange factor
hsa-miR-296-5p	1	0	1	1	0	0	TNXB	tenascin XB
hsa-miR-296-5p	1	0	1	1	1	1	ATF6B	activating transcription factor 6 beta
hsa-miR-296-5p	0	0	1	1	0	0	EPX	eosinophil peroxidase
hsa-miR-296-5p	0	0	1	1	0	0	MUC1	mucin 1, cell surface associated
hsa-miR-296-5p	0	0	1	1	0	0	STK19	serine/threonine kinase 19
hsa-miR-296-5p	1	0	1	1	1	1	PSD	pleckstrin and Sec7 domain containing
hsa-miR-296-5p	0	0	0	1	0	0	FAM65C	family with sequence similarity 65, member C
hsa-miR-296-5p	0	0	1	1	1	1	GRN	granulin
hsa-miR-296-5p	0	0	0	1	0	0	ADCK2	aarF domain containing kinase 2
hsa-miR-296-5p	1	0	1	1	1	1	PANX2	pannexin 2
hsa-miR-296-5p	1	0	1	1	1	1	PRSS22	protease, serine, 22
hsa-miR-296-5p	0	0	0	1	0	0	TMEM161A	transmembrane protein 161A
hsa-miR-296-5p	0	0	1	1	1	1	TNFRSF1A	tumor necrosis factor receptor superfamily, member 1A
hsa-miR-296-5p	1	0	1	1	0	0	ITGB4	integrin, beta 4
hsa-miR-296-5p	0	0	1	1	0	0	LTBP4	latent transforming growth factor beta binding protein 4
hsa-miR-296-5p	0	0	1	1	1	1	MAPK13	mitogen-activated protein kinase 13
hsa-miR-296-5p	0	0	1	1	0	0	C19orf26	chromosome 19 open reading frame 26
hsa-miR-296-5p	0	0	1	1	0	0	TECR	trans-2,3-enoyl-CoA reductase
hsa-miR-296-5p	0	0	1	1	1	1	POLR2E	polymerase (RNA) II (DNA directed) polypeptide E, 25kDa
hsa-miR-296-5p	0	0	1	1	1	1	LZTR1	leucine-zipper-like transcription regulator 1
hsa-miR-296-5p	1	0	1	1	1	1	ASPHD2	aspartate beta-hydroxylase domain containing 2
hsa-miR-296-5p	0	0	0	1	1	1	PNPLA3	patatin-like phospholipase domain containing 3
hsa-miR-296-5p	0	0	1	1	1	1	ACO2	aconitase 2, mitochondrial
hsa-miR-296-5p	0	0	0	1	0	0	PMM1	phosphomannomutase 1
hsa-miR-296-5p	0	0	1	1	1	1	PABPC1L	poly(A) binding protein, cytoplasmic 1-like
hsa-miR-296-5p	0	0	1	1	0	0	BIRC7	baculoviral IAP repeat containing 7
hsa-miR-296-5p	1	0	1	1	0	0	FA2H	fatty acid 2-hydroxylase
hsa-miR-296-5p	0	0	0	1	1	1	TSC2	tuberous sclerosis 2
hsa-miR-296-5p	0	0	0	1	0	0	METRN	meteorin, glial cell differentiation regulator
hsa-miR-296-5p	0	0	1	1	0	0	CNOT3	CCR4-NOT transcription complex, subunit 3
hsa-miR-296-5p	1	0	1	1	0	0	PNPLA6	patatin-like phospholipase domain containing 6
hsa-miR-296-5p	0	0	0	1	1	1	PEX11G	peroxisomal biogenesis factor 11 gamma
hsa-miR-296-5p	0	0	0	1	0	0	C19orf53	chromosome 19 open reading frame 53
hsa-miR-296-5p	0	0	1	1	0	0	CCDC9	coiled-coil domain containing 9
hsa-miR-296-5p	0	0	1	1	0	0	LIM2	lens intrinsic membrane protein 2, 19kDa
hsa-miR-296-5p	0	0	0	1	1	1	COMP	cartilage oligomeric matrix protein
hsa-miR-296-5p	0	0	0	1	0	0	FKBP8	FK506 binding protein 8, 38kDa
hsa-miR-296-5p	0	0	1	1	1	1	OGDH	oxoglutarate (alpha-ketoglutarate) dehydrogenase (lipoamide)
hsa-miR-296-5p	0	0	0	1	1	1	CRHR2	corticotropin releasing hormone receptor 2
hsa-miR-296-5p	0	0	1	1	0	0	GALK1	galactokinase 1
hsa-miR-296-5p	1	0	1	1	0	0	HOXB6	homeobox B6
hsa-miR-296-5p	0	0	0	1	1	1	KAT2A	K(lysine) acetyltransferase 2A
hsa-miR-296-5p	0	0	0	1	1	1	ABI3	ABI family, member 3
hsa-miR-296-5p	0	0	1	1	0	0	CACNG1	calcium channel, voltage-dependent, gamma subunit 1
hsa-miR-296-5p	1	0	1	1	1	1	ASIC1	acid-sensing (proton-gated) ion channel 1
hsa-miR-296-5p	0	0	0	1	0	0	DAO	D-amino-acid oxidase
hsa-miR-296-5p	1	0	1	1	0	0	MYL2	myosin, light chain 2, regulatory, cardiac, slow
hsa-miR-296-5p	1	0	1	1	1	1	ZNF76	zinc finger protein 76
hsa-miR-296-5p	1	0	1	1	0	0	MDFI	MyoD family inhibitor
hsa-miR-296-5p	1	0	0	1	0	0	CDX1	caudal type homeobox 1
hsa-miR-296-5p	1	0	1	1	0	0	SEMA3G	sema domain, immunoglobulin domain (Ig), short basic domain, secreted, (semaphorin) 3G
hsa-miR-296-5p	0	0	0	1	0	0	LTF	lactotransferrin
hsa-miR-296-5p	1	0	0	1	0	0	ABTB1	ankyrin repeat and BTB (POZ) domain containing 1
hsa-miR-296-5p	0	0	0	1	0	0	TNNC1	troponin C type 1 (slow)
hsa-miR-296-5p	0	0	0	1	1	1	DOK1	docking protein 1, 62kDa (downstream of tyrosine kinase 1)
hsa-miR-296-5p	0	0	0	1	0	0	AZU1	azurocidin 1
hsa-miR-296-5p	0	0	0	1	0	0	PEX16	peroxisomal biogenesis factor 16
hsa-miR-296-5p	0	0	1	1	1	1	HOXA7	homeobox A7
hsa-miR-296-5p	0	0	1	1	1	1	POLM	polymerase (DNA directed), mu
hsa-miR-296-5p	0	0	0	1	0	0	RAMP3	receptor (G protein-coupled) activity modifying protein 3
hsa-miR-296-5p	0	0	1	1	1	1	CDH26	cadherin 26
hsa-miR-296-5p	0	0	1	1	0	0	IL9R	interleukin 9 receptor
hsa-miR-296-5p	0	0	0	1	0	0	IL17C	interleukin 17C
hsa-miR-296-5p	1	0	1	1	1	1	SPHK2	sphingosine kinase 2
hsa-miR-296-5p	1	0	0	1	1	1	CLPP	ClpP caseinolytic peptidase, ATP-dependent, proteolytic subunit homolog (E. coli)
hsa-miR-296-5p	1	0	1	1	1	1	RALY	RNA binding protein, autoantigenic (hnRNP-associated with lethal yellow homolog (mouse))
hsa-miR-296-5p	0	0	1	1	0	0	COX6B1	cytochrome c oxidase subunit VIb polypeptide 1 (ubiquitous)
hsa-miR-296-5p	0	0	0	1	1	1	KRT13	keratin 13
hsa-miR-296-5p	1	0	0	1	1	1	WNK4	WNK lysine deficient protein kinase 4
hsa-miR-296-5p	0	0	1	1	0	0	AHDC1	AT hook, DNA binding motif, containing 1
hsa-miR-296-5p	0	0	1	1	0	0	SIX1	SIX homeobox 1
hsa-miR-296-5p	0	0	1	1	0	0	PIN1	peptidylprolyl cis/trans isomerase, NIMA-interacting 1
hsa-miR-296-5p	0	0	1	1	0	0	EMC6	ER membrane protein complex subunit 6
hsa-miR-296-5p	1	0	1	1	1	1	AAMP	angio-associated, migratory cell protein
hsa-miR-296-5p	0	0	0	1	0	0	DGCR6L	DiGeorge syndrome critical region gene 6-like
hsa-miR-296-5p	1	0	1	1	0	0	SDF2L1	stromal cell-derived factor 2-like 1
hsa-miR-296-5p	0	0	1	1	0	0	VGF	VGF nerve growth factor inducible
hsa-miR-296-5p	0	0	1	1	1	1	HOXD3	homeobox D3
hsa-miR-296-5p	0	0	0	1	0	0	MRM1	mitochondrial rRNA methyltransferase 1 homolog (S. cerevisiae)
hsa-miR-296-5p	1	0	0	1	1	1	SBNO2	strawberry notch homolog 2 (Drosophila)
hsa-miR-296-5p	1	0	1	1	1	1	KLF16	Kruppel-like factor 16
hsa-miR-296-5p	0	0	0	1	1	1	DOHH	deoxyhypusine hydroxylase/monooxygenase
hsa-miR-296-5p	1	0	1	1	0	0	HCN2	hyperpolarization activated cyclic nucleotide-gated potassium channel 2
hsa-miR-296-5p	0	0	1	1	0	0	CERS4	ceramide synthase 4
hsa-miR-296-5p	0	0	1	1	0	0	TMCO6	transmembrane and coiled-coil domains 6
hsa-miR-296-5p	0	0	0	1	0	0	PRKCSH	protein kinase C substrate 80K-H
hsa-miR-296-5p	0	0	1	1	0	0	APOC1	apolipoprotein C-I
hsa-miR-296-5p	1	0	0	1	0	0	GADD45G	growth arrest and DNA-damage-inducible, gamma
hsa-miR-296-5p	0	0	0	1	0	0	INF2	inverted formin, FH2 and WH2 domain containing
hsa-miR-296-5p	0	0	1	1	0	0	FUT5	fucosyltransferase 5 (alpha (1,3) fucosyltransferase)
hsa-miR-296-5p	0	0	1	1	0	0	SAG	S-antigen; retina and pineal gland (arrestin)
hsa-miR-296-5p	1	0	0	1	1	1	YIPF2	Yip1 domain family, member 2
hsa-miR-296-5p	1	0	1	1	0	0	MAP3K10	mitogen-activated protein kinase kinase kinase 10
hsa-miR-296-5p	0	0	0	1	0	0	P2RY11	purinergic receptor P2Y, G-protein coupled, 11
hsa-miR-296-5p	0	0	0	1	0	0	PPAN-P2RY11	PPAN-P2RY11 readthrough
hsa-miR-296-5p	0	0	0	1	0	0	PPAN	peter pan homolog (Drosophila)
hsa-miR-296-5p	0	0	0	1	0	0	FAM22F	family with sequence similarity 22, member F
hsa-miR-296-5p	0	0	0	1	0	0	CHIT1	chitinase 1 (chitotriosidase)
hsa-miR-296-5p	0	0	0	1	1	1	PRAM1	PML-RARA regulated adaptor molecule 1
hsa-miR-296-5p	0	0	1	1	0	0	ZNF414	zinc finger protein 414
hsa-miR-296-5p	1	0	1	1	0	0	TTLL4	tubulin tyrosine ligase-like family, member 4
hsa-miR-296-5p	0	0	0	1	0	0	GMPR	guanosine monophosphate reductase
hsa-miR-296-5p	0	0	1	1	0	0	NOX5	NADPH oxidase, EF-hand calcium binding domain 5
hsa-miR-296-5p	0	0	0	1	0	0	RASAL1	RAS protein activator like 1 (GAP1 like)
hsa-miR-296-5p	1	0	0	1	0	0	LHX5	LIM homeobox 5
hsa-miR-296-5p	0	0	0	1	0	0	TRPV4	transient receptor potential cation channel, subfamily V, member 4
hsa-miR-296-5p	1	0	1	1	1	1	ATG2B	autophagy related 2B
hsa-miR-296-5p	0	0	1	1	1	1	THSD4	thrombospondin, type I, domain containing 4
hsa-miR-296-5p	1	0	0	1	0	0	SERPINA3	serpin peptidase inhibitor, clade A (alpha-1 antiproteinase, antitrypsin), member 3
hsa-miR-296-5p	0	0	1	1	0	0	KCNH2	potassium voltage-gated channel, subfamily H (eag-related), member 2
hsa-miR-296-5p	0	0	1	1	0	0	PKMYT1	protein kinase, membrane associated tyrosine/threonine 1
hsa-miR-296-5p	0	0	1	1	0	0	RGS9	regulator of G-protein signaling 9
hsa-miR-296-5p	0	0	0	1	1	1	ATP2C2	ATPase, Ca++ transporting, type 2C, member 2
hsa-miR-296-5p	0	0	1	1	0	0	SETD1A	SET domain containing 1A
hsa-miR-296-5p	0	0	0	1	0	0	GSDMD	gasdermin D
hsa-miR-296-5p	0	0	0	1	0	0	CHST8	carbohydrate (N-acetylgalactosamine 4-0) sulfotransferase 8
hsa-miR-296-5p	0	0	0	1	0	0	ATP4A	ATPase, H+/K+ exchanging, alpha polypeptide
hsa-miR-296-5p	0	0	0	1	0	0	QRICH2	glutamine rich 2
hsa-miR-296-5p	0	0	1	1	0	0	KCNN4	potassium intermediate/small conductance calcium-activated channel, subfamily N, member 4
hsa-miR-296-5p	0	0	0	1	0	0	SLC27A5	solute carrier family 27 (fatty acid transporter), member 5
hsa-miR-296-5p	0	0	0	1	1	1	CABIN1	calcineurin binding protein 1
hsa-miR-296-5p	1	0	0	1	1	1	SMARCB1	SWI/SNF related, matrix associated, actin dependent regulator of chromatin, subfamily b, member 1
hsa-miR-296-5p	0	0	0	1	0	0	TTC40	tetratricopeptide repeat domain 40
hsa-miR-296-5p	1	0	1	1	0	0	GRIN2D	glutamate receptor, ionotropic, N-methyl D-aspartate 2D
hsa-miR-296-5p	0	0	0	1	0	0	HSD17B14	hydroxysteroid (17-beta) dehydrogenase 14
hsa-miR-296-5p	0	0	1	1	1	1	LY9	lymphocyte antigen 9
hsa-miR-296-5p	0	0	1	1	1	1	IL27RA	interleukin 27 receptor, alpha
hsa-miR-296-5p	0	0	1	1	1	1	BARHL1	BarH-like homeobox 1
hsa-miR-296-5p	0	0	0	1	1	1	FARP2	FERM, RhoGEF and pleckstrin domain protein 2
hsa-miR-296-5p	0	0	0	1	0	0	GPR108	G protein-coupled receptor 108
hsa-miR-296-5p	0	0	0	1	0	0	KLKB1	kallikrein B, plasma (Fletcher factor) 1
hsa-miR-296-5p	0	0	1	1	0	0	CAD	carbamoyl-phosphate synthetase 2, aspartate transcarbamylase, and dihydroorotase
hsa-miR-296-5p	0	0	0	1	0	0	EFR3B	EFR3 homolog B (S. cerevisiae)
hsa-miR-296-5p	1	0	0	1	1	1	MIER2	mesoderm induction early response 1, family member 2
hsa-miR-296-5p	1	0	1	1	0	0	CCDC48	coiled-coil domain containing 48
hsa-miR-296-5p	0	0	1	1	1	1	PITX1	paired-like homeodomain 1
hsa-miR-296-5p	0	0	0	1	0	0	SCAP	SREBF chaperone
hsa-miR-296-5p	0	0	0	1	0	0	CLCN2	chloride channel, voltage-sensitive 2
hsa-miR-296-5p	0	0	0	1	0	0	ADAP1	ArfGAP with dual PH domains 1
hsa-miR-296-5p	0	0	0	1	0	0	CD27	CD27 molecule
hsa-miR-296-5p	1	0	1	1	0	0	CDH24	cadherin 24, type 2
hsa-miR-296-5p	0	0	1	1	1	1	FAM181A	family with sequence similarity 181, member A
hsa-miR-296-5p	0	0	0	1	0	0	CYP11A1	cytochrome P450, family 11, subfamily A, polypeptide 1
hsa-miR-296-5p	0	0	0	1	0	0	RHCG	Rh family, C glycoprotein
hsa-miR-296-5p	0	0	0	1	0	0	MFGE8	milk fat globule-EGF factor 8 protein
hsa-miR-296-5p	1	0	0	1	0	0	UNC45A	unc-45 homolog A (C. elegans)
hsa-miR-296-5p	0	0	1	1	0	0	CLEC18B	C-type lectin domain family 18, member B
hsa-miR-296-5p	0	0	0	1	0	0	LRRC46	leucine rich repeat containing 46
hsa-miR-296-5p	0	0	0	1	1	1	NLRP1	NLR family, pyrin domain containing 1
hsa-miR-296-5p	0	0	0	1	0	0	SECTM1	secreted and transmembrane 1
hsa-miR-296-5p	1	0	1	1	1	1	CBX2	chromobox homolog 2
hsa-miR-296-5p	0	0	1	1	0	0	NT5C3L	5'-nucleotidase, cytosolic III-like
hsa-miR-296-5p	0	0	0	1	1	1	TXNL4A	thioredoxin-like 4A
hsa-miR-296-5p	0	0	0	1	0	0	SSBP4	single stranded DNA binding protein 4
hsa-miR-296-5p	0	0	1	1	0	0	WTIP	Wilms tumor 1 interacting protein
hsa-miR-296-5p	0	0	0	1	0	0	CACNG8	calcium channel, voltage-dependent, gamma subunit 8
hsa-miR-296-5p	0	0	1	1	1	1	FBN3	fibrillin 3
hsa-miR-296-5p	0	0	0	1	0	0	SLC27A3	solute carrier family 27 (fatty acid transporter), member 3
hsa-miR-296-5p	1	0	0	1	1	1	SOX13	SRY (sex determining region Y)-box 13
hsa-miR-296-5p	1	0	1	1	1	1	OSR1	odd-skipped related 1 (Drosophila)
hsa-miR-296-5p	0	0	1	1	0	0	SLC4A3	solute carrier family 4, anion exchanger, member 3
hsa-miR-296-5p	0	0	1	1	0	0	CLVS2	clavesin 2
hsa-miR-296-5p	0	0	1	1	0	0	SRCRB4D	scavenger receptor cysteine rich domain containing, group B (4 domains)
hsa-miR-296-5p	0	0	0	1	1	1	LAT2	linker for activation of T cells family, member 2
hsa-miR-296-5p	0	0	0	1	1	1	TMEM140	transmembrane protein 140
hsa-miR-296-5p	0	0	1	1	0	0	FUOM	fucose mutarotase
hsa-miR-296-5p	0	0	0	1	0	0	GRIK4	glutamate receptor, ionotropic, kainate 4
hsa-miR-296-5p	0	0	0	1	1	1	ST14	suppression of tumorigenicity 14 (colon carcinoma)
hsa-miR-296-5p	0	0	1	1	1	1	FEZ1	fasciculation and elongation protein zeta 1 (zygin I)
hsa-miR-296-5p	1	0	1	1	1	1	SIDT2	SID1 transmembrane family, member 2
hsa-miR-296-5p	0	0	0	1	0	0	MYL9	myosin, light chain 9, regulatory
hsa-miR-296-5p	0	0	0	1	0	0	FERMT3	fermitin family member 3
hsa-miR-296-5p	1	0	0	1	0	0	CDC42EP2	CDC42 effector protein (Rho GTPase binding) 2
hsa-miR-296-5p	0	0	1	1	0	0	TBX6	T-box 6
hsa-miR-296-5p	0	0	0	1	0	0	ZNF837	zinc finger protein 837
hsa-miR-296-5p	0	0	0	1	1	1	CD8A	CD8a molecule
hsa-miR-296-5p	0	0	1	1	0	0	TBCEL	tubulin folding cofactor E-like
hsa-miR-296-5p	1	0	1	1	1	1	FAM105B	family with sequence similarity 105, member B
hsa-miR-296-5p	0	0	1	1	0	0	OTOA	otoancorin
hsa-miR-296-5p	1	0	1	1	1	1	RPUSD3	RNA pseudouridylate synthase domain containing 3
hsa-miR-296-5p	0	0	1	1	0	0	CLEC18A	C-type lectin domain family 18, member A
hsa-miR-296-5p	0	0	1	1	1	1	HYDIN	HYDIN, axonemal central pair apparatus protein
hsa-miR-296-5p	0	0	1	1	1	1	C2orf62	chromosome 2 open reading frame 62
hsa-miR-296-5p	0	0	0	1	0	0	TMEM141	transmembrane protein 141
hsa-miR-296-5p	0	0	0	1	0	0	KIAA1984	KIAA1984
hsa-miR-296-5p	0	0	1	1	0	0	GFRA4	GDNF family receptor alpha 4
hsa-miR-296-5p	0	0	1	1	0	0	GPR162	G protein-coupled receptor 162
hsa-miR-296-5p	0	0	0	1	0	0	LEPREL2	leprecan-like 2
hsa-miR-296-5p	0	0	1	1	1	1	MT1A	metallothionein 1A
hsa-miR-296-5p	0	0	0	1	0	0	TRMU	tRNA 5-methylaminomethyl-2-thiouridylate methyltransferase
hsa-miR-296-5p	1	0	0	1	0	0	UROC1	urocanate hydratase 1
hsa-miR-296-5p	0	0	0	1	1	1	AP1M1	adaptor-related protein complex 1, mu 1 subunit
hsa-miR-296-5p	0	0	0	1	0	0	PWP2	PWP2 periodic tryptophan protein homolog (yeast)
hsa-miR-296-5p	1	0	1	1	1	1	ZBTB7B	zinc finger and BTB domain containing 7B
hsa-miR-296-5p	1	0	0	1	0	0	NBEAL2	neurobeachin-like 2
hsa-miR-296-5p	0	0	1	1	1	1	NACC1	nucleus accumbens associated 1, BEN and BTB (POZ) domain containing
hsa-miR-296-5p	0	0	0	1	0	0	PPP1R16A	protein phosphatase 1, regulatory subunit 16A
hsa-miR-296-5p	0	0	1	1	1	1	FBXO27	F-box protein 27
hsa-miR-296-5p	0	0	1	1	0	0	NCKAP1L	NCK-associated protein 1-like
hsa-miR-296-5p	1	0	1	1	0	0	GRASP	GRP1 (general receptor for phosphoinositides 1)-associated scaffold protein
hsa-miR-296-5p	0	0	1	1	0	0	LUC7L	LUC7-like (S. cerevisiae)
hsa-miR-296-5p	0	0	0	1	0	0	MSLNL	mesothelin-like
hsa-miR-296-5p	0	0	1	1	0	0	RPL29	ribosomal protein L29
hsa-miR-296-5p	0	0	0	1	0	0	CCDC27	coiled-coil domain containing 27
hsa-miR-296-5p	0	0	0	1	1	1	CAND2	cullin-associated and neddylation-dissociated 2 (putative)
hsa-miR-296-5p	0	0	1	1	1	1	MTMR14	myotubularin related protein 14
hsa-miR-296-5p	1	0	1	1	0	0	RPN1	ribophorin I
hsa-miR-296-5p	0	0	0	1	0	0	MST1R	macrophage stimulating 1 receptor (c-met-related tyrosine kinase)
hsa-miR-296-5p	1	0	1	1	1	1	LMTK2	lemur tyrosine kinase 2
hsa-miR-296-5p	0	0	0	1	0	0	PHKG1	phosphorylase kinase, gamma 1 (muscle)
hsa-miR-296-5p	1	0	1	1	0	0	FASTK	Fas-activated serine/threonine kinase
hsa-miR-296-5p	0	0	0	1	1	1	FRMD7	FERM domain containing 7
hsa-miR-296-5p	0	0	1	1	0	0	PACSIN3	protein kinase C and casein kinase substrate in neurons 3
hsa-miR-296-5p	0	0	0	1	0	0	SERPINA4	serpin peptidase inhibitor, clade A (alpha-1 antiproteinase, antitrypsin), member 4
hsa-miR-296-5p	0	0	0	1	0	0	TBATA	thymus, brain and testes associated
hsa-miR-296-5p	0	0	1	1	0	0	PLD4	phospholipase D family, member 4
hsa-miR-296-5p	0	0	1	1	0	0	PLK1	polo-like kinase 1
hsa-miR-296-5p	1	0	1	1	0	0	AGFG2	ArfGAP with FG repeats 2
hsa-miR-296-5p	1	0	1	1	1	1	SLC27A4	solute carrier family 27 (fatty acid transporter), member 4
hsa-miR-296-5p	0	0	1	1	0	0	IRGQ	immunity-related GTPase family, Q
hsa-miR-296-5p	1	0	0	1	1	1	MIDN	midnolin
hsa-miR-296-5p	0	0	0	1	0	0	TRAPPC2L	trafficking protein particle complex 2-like
hsa-miR-296-5p	0	0	0	1	0	0	CYP2A7	cytochrome P450, family 2, subfamily A, polypeptide 7
hsa-miR-296-5p	0	0	1	1	0	0	TMEM145	transmembrane protein 145
hsa-miR-296-5p	0	0	0	1	0	0	PSCA	prostate stem cell antigen
hsa-miR-296-5p	0	0	1	1	0	0	CGB1	chorionic gonadotropin, beta polypeptide 1
hsa-miR-296-5p	0	0	1	1	0	0	CGB2	chorionic gonadotropin, beta polypeptide 2
hsa-miR-296-5p	1	0	0	1	1	1	RNF157	ring finger protein 157
hsa-miR-296-5p	0	0	0	1	0	0	SPSB3	splA/ryanodine receptor domain and SOCS box containing 3
hsa-miR-296-5p	0	0	0	1	0	0	GAA	glucosidase, alpha; acid
hsa-miR-296-5p	1	0	1	1	1	1	UBTF	upstream binding transcription factor, RNA polymerase I
hsa-miR-296-5p	0	0	0	1	0	0	AMDHD2	amidohydrolase domain containing 2
hsa-miR-296-5p	1	0	1	1	1	1	RFXANK	regulatory factor X-associated ankyrin-containing protein
hsa-miR-296-5p	1	0	1	1	1	1	CRTC2	CREB regulated transcription coactivator 2
hsa-miR-296-5p	1	0	0	1	0	0	TRAPPC1	trafficking protein particle complex 1
hsa-miR-296-5p	0	0	0	1	0	0	ECEL1	endothelin converting enzyme-like 1
hsa-miR-296-5p	0	0	0	1	0	0	PTCRA	pre T-cell antigen receptor alpha
hsa-miR-296-5p	0	0	1	1	0	0	STIP1	stress-induced-phosphoprotein 1
hsa-miR-296-5p	0	0	1	1	1	1	ITIH5	inter-alpha-trypsin inhibitor heavy chain family, member 5
hsa-miR-296-5p	0	0	1	1	0	0	TWF2	twinfilin, actin-binding protein, homolog 2 (Drosophila)
hsa-miR-296-5p	0	0	0	1	0	0	TLR9	toll-like receptor 9
hsa-miR-296-5p	0	0	1	1	0	0	CYHR1	cysteine/histidine-rich 1
hsa-miR-296-5p	0	0	1	1	0	0	RNF181	ring finger protein 181
hsa-miR-296-5p	0	0	1	1	1	1	HTRA3	HtrA serine peptidase 3
hsa-miR-296-5p	0	0	1	1	1	1	C2orf54	chromosome 2 open reading frame 54
hsa-miR-296-5p	0	0	0	1	0	0	EFEMP2	EGF containing fibulin-like extracellular matrix protein 2
hsa-miR-296-5p	0	0	0	1	0	0	SLC16A13	solute carrier family 16, member 13 (monocarboxylic acid transporter 13)
hsa-miR-296-5p	0	0	0	1	0	0	CLDN15	claudin 15
hsa-miR-296-5p	1	0	1	1	1	1	ADRBK1	adrenergic, beta, receptor kinase 1
hsa-miR-296-5p	0	0	0	1	0	0	ATAD3B	ATPase family, AAA domain containing 3B
hsa-miR-296-5p	1	0	0	1	0	0	AP1G2	adaptor-related protein complex 1, gamma 2 subunit
hsa-miR-296-5p	0	0	1	1	0	0	DHX37	DEAH (Asp-Glu-Ala-His) box polypeptide 37
hsa-miR-296-5p	0	0	0	1	0	0	ADCK5	aarF domain containing kinase 5
hsa-miR-296-5p	0	0	0	1	0	0	PTPN7	protein tyrosine phosphatase, non-receptor type 7
hsa-miR-296-5p	0	0	1	1	0	0	PPP1R14B	protein phosphatase 1, regulatory (inhibitor) subunit 14B
hsa-miR-296-5p	1	0	1	1	0	0	ATG4D	autophagy related 4D, cysteine peptidase
hsa-miR-296-5p	1	0	1	1	0	0	LRFN4	leucine rich repeat and fibronectin type III domain containing 4
hsa-miR-296-5p	1	0	0	1	1	1	ELF3	E74-like factor 3 (ets domain transcription factor, epithelial-specific )
hsa-miR-296-5p	1	0	1	1	0	0	LRCH4	leucine-rich repeats and calponin homology (CH) domain containing 4
hsa-miR-296-5p	0	0	1	1	0	0	SLC4A2	solute carrier family 4, anion exchanger, member 2 (erythrocyte membrane protein band 3-like 1)
hsa-miR-296-5p	1	0	0	1	1	1	CTSF	cathepsin F
hsa-miR-296-5p	1	0	1	1	1	1	CLTB	clathrin, light chain B
hsa-miR-296-5p	0	0	1	1	0	0	ZDHHC24	zinc finger, DHHC-type containing 24
hsa-miR-296-5p	1	0	1	1	1	1	FAM131A	family with sequence similarity 131, member A
hsa-miR-296-5p	1	0	1	1	1	1	FGFR1	fibroblast growth factor receptor 1
hsa-miR-296-5p	0	0	0	1	0	0	IQCF1	IQ motif containing F1
hsa-miR-296-5p	0	0	1	1	1	1	KLF14	Kruppel-like factor 14
hsa-miR-296-5p	0	0	1	1	0	0	SPNS1	spinster homolog 1 (Drosophila)
hsa-miR-296-5p	0	0	1	1	0	0	RIN1	Ras and Rab interactor 1
hsa-miR-296-5p	0	0	0	1	0	0	CATSPER1	cation channel, sperm associated 1
hsa-miR-296-5p	0	0	0	1	0	0	PFKL	phosphofructokinase, liver
hsa-miR-296-5p	0	0	1	1	0	0	LAS1L	LAS1-like (S. cerevisiae)
hsa-miR-296-5p	0	0	1	1	1	1	RNF166	ring finger protein 166
hsa-miR-296-5p	0	0	1	1	0	0	MPRIP	myosin phosphatase Rho interacting protein
hsa-miR-296-5p	0	0	0	1	0	0	PRODH	proline dehydrogenase (oxidase) 1
hsa-miR-296-5p	1	0	1	1	1	1	UCP3	uncoupling protein 3 (mitochondrial, proton carrier)
hsa-miR-296-5p	1	0	1	1	0	0	COX8A	cytochrome c oxidase subunit VIIIA (ubiquitous)
hsa-miR-296-5p	0	0	1	1	0	0	CLEC18C	C-type lectin domain family 18, member C
hsa-miR-296-5p	0	0	0	1	0	0	FUT7	fucosyltransferase 7 (alpha (1,3) fucosyltransferase)
hsa-miR-296-5p	0	0	0	1	0	0	FARSA	phenylalanyl-tRNA synthetase, alpha subunit
hsa-miR-296-5p	0	0	1	1	0	0	FZD2	frizzled family receptor 2
hsa-miR-296-5p	0	0	0	1	0	0	MATK	megakaryocyte-associated tyrosine kinase
hsa-miR-296-5p	0	0	0	1	0	0	OS9	osteosarcoma amplified 9, endoplasmic reticulum lectin
hsa-miR-296-5p	1	0	0	1	0	0	ARHGEF1	Rho guanine nucleotide exchange factor (GEF) 1
hsa-miR-296-5p	0	0	0	1	0	0	KCNG2	potassium voltage-gated channel, subfamily G, member 2
hsa-miR-296-5p	0	0	1	1	0	0	FAM89B	family with sequence similarity 89, member B
hsa-miR-296-5p	1	0	1	1	1	1	CABP1	calcium binding protein 1
hsa-miR-296-5p	1	0	0	1	1	1	LLGL1	lethal giant larvae homolog 1 (Drosophila)
hsa-miR-296-5p	0	0	1	1	0	0	STOML1	stomatin (EPB72)-like 1
hsa-miR-296-5p	0	0	0	1	0	0	PGAM5	phosphoglycerate mutase family member 5
hsa-miR-296-5p	1	0	1	1	1	1	SIX5	SIX homeobox 5
hsa-miR-296-5p	0	0	1	1	0	0	MAMSTR	MEF2 activating motif and SAP domain containing transcriptional regulator
hsa-miR-296-5p	0	0	1	1	0	0	DGKZ	diacylglycerol kinase, zeta
hsa-miR-296-5p	1	0	1	1	1	1	IFNAR2	interferon (alpha, beta and omega) receptor 2
hsa-miR-296-5p	0	0	0	1	1	1	EPS8L2	EPS8-like 2
hsa-miR-296-5p	0	0	1	1	0	0	FAM211B	family with sequence similarity 211, member B
hsa-miR-296-5p	1	0	0	1	1	1	TTC7A	tetratricopeptide repeat domain 7A
hsa-miR-296-5p	0	0	1	1	1	1	ZNF771	zinc finger protein 771
hsa-miR-296-5p	0	0	1	1	0	0	D2HGDH	D-2-hydroxyglutarate dehydrogenase
hsa-miR-296-5p	0	0	0	1	0	0	ACBD4	acyl-CoA binding domain containing 4
hsa-miR-296-5p	0	0	1	1	0	0	PPP2R1A	protein phosphatase 2, regulatory subunit A, alpha
hsa-miR-296-5p	0	0	0	1	0	0	TRIM72	tripartite motif containing 72
hsa-miR-296-5p	0	0	0	1	0	0	FAM3A	family with sequence similarity 3, member A
hsa-miR-296-5p	0	0	0	1	0	0	SV2C	synaptic vesicle glycoprotein 2C
hsa-miR-296-5p	0	0	0	1	0	0	SSNA1	Sjogren syndrome nuclear autoantigen 1
hsa-miR-296-5p	0	0	0	1	0	0	TMEM102	transmembrane protein 102
hsa-miR-296-5p	0	0	0	1	0	0	AGXT2L2	alanine-glyoxylate aminotransferase 2-like 2
hsa-miR-296-5p	0	0	1	1	1	1	C19orf12	chromosome 19 open reading frame 12
hsa-miR-296-5p	0	0	1	1	1	1	ZNF513	zinc finger protein 513
hsa-miR-296-5p	0	0	0	1	0	0	SLC6A18	solute carrier family 6, member 18
hsa-miR-296-5p	0	0	1	1	0	0	PLSCR3	phospholipid scramblase 3
hsa-miR-296-5p	0	0	0	1	0	0	PLCB3	phospholipase C, beta 3 (phosphatidylinositol-specific)
hsa-miR-296-5p	0	0	0	1	1	1	FBXW5	F-box and WD repeat domain containing 5
hsa-miR-296-5p	1	0	1	1	0	0	PACS2	phosphofurin acidic cluster sorting protein 2
hsa-miR-296-5p	0	0	0	1	0	0	GYLTL1B	glycosyltransferase-like 1B
hsa-miR-296-5p	0	0	1	1	0	0	GHRHR	growth hormone releasing hormone receptor
hsa-miR-296-5p	1	0	1	1	1	1	ITM2C	integral membrane protein 2C
hsa-miR-296-5p	0	0	0	1	1	1	NR2E3	nuclear receptor subfamily 2, group E, member 3
hsa-miR-296-5p	0	0	0	1	1	1	FLII	flightless I homolog (Drosophila)
hsa-miR-296-5p	0	0	1	1	0	0	MARCO	macrophage receptor with collagenous structure
hsa-miR-296-5p	0	0	1	1	0	0	GAS6	growth arrest-specific 6
hsa-miR-296-5p	0	0	0	1	0	0	HEXDC	hexosaminidase (glycosyl hydrolase family 20, catalytic domain) containing
hsa-miR-296-5p	1	0	1	1	0	0	IGDCC3	immunoglobulin superfamily, DCC subclass, member 3
hsa-miR-296-5p	0	0	0	1	0	0	RAB11B	RAB11B, member RAS oncogene family
hsa-miR-296-5p	0	0	0	1	1	1	ENPP7	ectonucleotide pyrophosphatase/phosphodiesterase 7
hsa-miR-296-5p	0	0	0	1	0	0	TNFRSF18	tumor necrosis factor receptor superfamily, member 18
hsa-miR-296-5p	0	0	1	1	0	0	HGS	hepatocyte growth factor-regulated tyrosine kinase substrate
hsa-miR-296-5p	0	0	0	1	0	0	C11orf89	chromosome 11 open reading frame 89
hsa-miR-296-5p	0	0	0	1	0	0	MAPK8IP2	mitogen-activated protein kinase 8 interacting protein 2
hsa-miR-296-5p	0	0	0	1	0	0	C19orf71	chromosome 19 open reading frame 71
hsa-miR-296-5p	1	0	0	1	0	0	FAM193B	family with sequence similarity 193, member B
hsa-miR-296-5p	0	0	0	1	1	1	ZNF616	zinc finger protein 616
hsa-miR-296-5p	0	0	0	1	1	1	TMEM121	transmembrane protein 121
hsa-miR-296-5p	1	0	1	1	0	0	FAT4	FAT tumor suppressor homolog 4 (Drosophila)
hsa-miR-296-5p	1	0	1	1	1	1	FOXL2	forkhead box L2
hsa-miR-296-5p	0	0	1	1	0	0	SLC5A2	solute carrier family 5 (sodium/glucose cotransporter), member 2
hsa-miR-296-5p	0	0	0	1	0	0	NOC4L	nucleolar complex associated 4 homolog (S. cerevisiae)
hsa-miR-296-5p	1	0	1	1	1	1	NOTUM	notum pectinacetylesterase homolog (Drosophila)
hsa-miR-296-5p	0	0	1	1	1	1	FBLN7	fibulin 7
hsa-miR-296-5p	1	0	1	1	0	0	DGCR6	DiGeorge syndrome critical region gene 6
hsa-miR-296-5p	0	0	1	1	0	0	PKP3	plakophilin 3
hsa-miR-296-5p	0	0	1	1	0	0	ZNF703	zinc finger protein 703
hsa-miR-296-5p	0	0	1	1	1	1	BMP8A	bone morphogenetic protein 8a
hsa-miR-296-5p	1	0	1	1	1	1	DND1	dead end homolog 1 (zebrafish)
hsa-miR-296-5p	1	0	1	1	1	1	KCNJ12	potassium inwardly-rectifying channel, subfamily J, member 12
hsa-miR-296-5p	0	0	1	1	0	0	SOCS1	suppressor of cytokine signaling 1
hsa-miR-296-5p	1	0	1	1	1	1	TMED9	transmembrane emp24 protein transport domain containing 9
hsa-miR-296-5p	0	0	0	1	1	1	TBX1	T-box 1
hsa-miR-296-5p	0	0	1	1	0	0	SIGIRR	single immunoglobulin and toll-interleukin 1 receptor (TIR) domain
hsa-miR-296-5p	1	0	1	1	0	0	SYN3	synapsin III
hsa-miR-296-5p	0	0	1	1	1	1	TNFAIP2	tumor necrosis factor, alpha-induced protein 2
hsa-miR-296-5p	0	0	1	1	0	0	RPS19BP1	ribosomal protein S19 binding protein 1
hsa-miR-296-5p	0	0	0	1	1	1	RAX	retina and anterior neural fold homeobox
hsa-miR-296-5p	0	0	1	1	0	0	PGS1	phosphatidylglycerophosphate synthase 1
hsa-miR-296-5p	0	0	0	1	0	0	RTN4RL2	reticulon 4 receptor-like 2
hsa-miR-296-5p	0	0	0	1	0	0	C17orf82	chromosome 17 open reading frame 82
hsa-miR-296-5p	0	0	0	1	1	1	ATP4B	ATPase, H+/K+ exchanging, beta polypeptide
hsa-miR-296-5p	0	0	0	1	0	0	VWCE	von Willebrand factor C and EGF domains
hsa-miR-296-5p	0	0	1	1	1	1	APOBEC3B	apolipoprotein B mRNA editing enzyme, catalytic polypeptide-like 3B
hsa-miR-296-5p	0	0	1	1	1	1	IFRD2	interferon-related developmental regulator 2
hsa-miR-296-5p	0	0	1	1	1	1	LRRFIP2	leucine rich repeat (in FLII) interacting protein 2
hsa-miR-296-5p	1	0	0	1	0	0	CIDEC	cell death-inducing DFFA-like effector c
hsa-miR-296-5p	0	0	1	1	0	0	C12orf44	chromosome 12 open reading frame 44
hsa-miR-296-5p	0	0	0	1	0	0	KLC3	kinesin light chain 3
hsa-miR-296-5p	0	0	1	1	0	0	AVPR2	arginine vasopressin receptor 2
hsa-miR-296-5p	0	0	1	1	0	0	SIRT6	sirtuin 6
hsa-miR-296-5p	0	0	1	1	0	0	IL1F10	interleukin 1 family, member 10 (theta)
hsa-miR-296-5p	0	0	0	1	0	0	MAPK15	mitogen-activated protein kinase 15
hsa-miR-296-5p	1	0	1	1	1	1	ERAS	ES cell expressed Ras
hsa-miR-296-5p	1	0	1	1	1	1	CSMD2	CUB and Sushi multiple domains 2
hsa-miR-296-5p	0	0	0	1	0	0	CDK5RAP3	CDK5 regulatory subunit associated protein 3
hsa-miR-296-5p	0	0	0	1	0	0	DUPD1	dual specificity phosphatase and pro isomerase domain containing 1
hsa-miR-296-5p	0	0	1	1	0	0	RGS12	regulator of G-protein signaling 12
hsa-miR-296-5p	1	0	1	1	1	1	ATP9A	ATPase, class II, type 9A
hsa-miR-296-5p	0	0	0	1	0	0	CATSPER4	cation channel, sperm associated 4
hsa-miR-296-5p	0	0	0	1	0	0	HELT	helt bHLH transcription factor
hsa-miR-296-5p	0	0	0	1	0	0	PTGES2	prostaglandin E synthase 2
hsa-miR-296-5p	0	0	0	1	0	0	FCRL6	Fc receptor-like 6
hsa-miR-296-5p	0	0	0	1	0	0	TAS1R3	taste receptor, type 1, member 3
hsa-miR-296-5p	0	0	0	1	1	1	SDCBP2	syndecan binding protein (syntenin) 2
hsa-miR-296-5p	0	0	0	1	0	0	GLI4	GLI family zinc finger 4
hsa-miR-296-5p	0	0	1	1	1	1	ZFP41	zinc finger protein 41 homolog (mouse)
hsa-miR-296-5p	0	0	0	1	0	0	PAQR6	progestin and adipoQ receptor family member VI
hsa-miR-296-5p	1	0	1	1	1	1	XIRP1	xin actin-binding repeat containing 1
hsa-miR-296-5p	1	0	1	1	0	0	NAPRT1	nicotinate phosphoribosyltransferase domain containing 1
hsa-miR-296-5p	0	0	0	1	0	0	PRSS33	protease, serine, 33
hsa-miR-296-5p	0	0	1	1	0	0	MPST	mercaptopyruvate sulfurtransferase
hsa-miR-296-5p	0	0	0	1	0	0	LCN6	lipocalin 6
hsa-miR-296-5p	1	0	1	1	0	0	KAT5	K(lysine) acetyltransferase 5
hsa-miR-296-5p	0	0	0	1	0	0	NOXA1	NADPH oxidase activator 1
hsa-miR-296-5p	0	0	1	1	1	1	LBX2	ladybird homeobox 2
hsa-miR-296-5p	0	0	0	1	0	0	HHATL	hedgehog acyltransferase-like
hsa-miR-296-5p	0	0	1	1	1	1	LRRC29	leucine rich repeat containing 29
hsa-miR-296-5p	0	0	0	1	0	0	SAMD11	sterile alpha motif domain containing 11
hsa-miR-296-5p	0	0	0	1	0	0	JMJD7-PLA2G4B	JMJD7-PLA2G4B readthrough
hsa-miR-296-5p	0	0	1	1	0	0	GJA4	gap junction protein, alpha 4, 37kDa
hsa-miR-296-5p	0	0	0	1	0	0	COBRA1	cofactor of BRCA1
hsa-miR-296-5p	0	0	1	1	0	0	FAM98C	family with sequence similarity 98, member C
hsa-miR-296-5p	0	0	1	1	1	1	MED22	mediator complex subunit 22
hsa-miR-296-5p	0	0	1	1	1	1	LRRC27	leucine rich repeat containing 27
hsa-miR-296-5p	0	0	1	1	1	1	OGG1	8-oxoguanine DNA glycosylase
hsa-miR-296-5p	0	0	0	1	0	0	ASPSCR1	alveolar soft part sarcoma chromosome region, candidate 1
hsa-miR-296-5p	0	0	1	1	0	0	KCNQ1	potassium voltage-gated channel, KQT-like subfamily, member 1
hsa-miR-296-5p	0	0	1	1	1	1	LYNX1	Ly6/neurotoxin 1
hsa-miR-296-5p	0	0	0	1	0	0	C19orf48	chromosome 19 open reading frame 48
hsa-miR-296-5p	1	0	0	1	0	0	TSPAN4	tetraspanin 4
hsa-miR-296-5p	1	0	0	1	1	1	PCBP3	poly(rC) binding protein 3
hsa-miR-296-5p	0	0	0	1	0	0	ARHGAP4	Rho GTPase activating protein 4
hsa-miR-296-5p	0	0	1	1	1	1	C16orf89	chromosome 16 open reading frame 89
hsa-miR-296-5p	0	0	1	1	0	0	ASS1	argininosuccinate synthase 1
hsa-miR-296-5p	0	0	0	1	0	0	NOXO1	NADPH oxidase organizer 1
hsa-miR-296-5p	0	0	0	1	1	1	RNH1	ribonuclease/angiogenin inhibitor 1
hsa-miR-296-5p	1	0	1	1	0	0	ADAMTSL2	ADAMTS-like 2
hsa-miR-296-5p	0	0	0	1	0	0	ENTPD2	ectonucleoside triphosphate diphosphohydrolase 2
hsa-miR-296-5p	0	0	0	1	1	1	LIMS2	LIM and senescent cell antigen-like domains 2
hsa-miR-296-5p	0	0	0	1	0	0	SLC35E2	solute carrier family 35, member E2
hsa-miR-296-5p	1	0	1	1	0	0	DNM2	dynamin 2
hsa-miR-296-5p	0	0	0	1	1	1	CLEC12A	C-type lectin domain family 12, member A
hsa-miR-296-5p	0	0	1	1	1	1	CLEC12B	C-type lectin domain family 12, member B
hsa-miR-296-5p	0	0	0	1	0	0	TNFRSF14	tumor necrosis factor receptor superfamily, member 14
hsa-miR-296-5p	0	0	1	1	1	1	UBE2I	ubiquitin-conjugating enzyme E2I
hsa-miR-296-5p	0	0	1	1	0	0	SREBF1	sterol regulatory element binding transcription factor 1
hsa-miR-296-5p	0	0	1	1	1	1	NUB1	negative regulator of ubiquitin-like proteins 1
hsa-miR-296-5p	0	0	0	1	0	0	WDR88	WD repeat domain 88
hsa-miR-296-5p	1	0	1	1	1	1	SH3BP2	SH3-domain binding protein 2
hsa-miR-296-5p	0	0	0	1	1	1	PITPNM1	phosphatidylinositol transfer protein, membrane-associated 1
hsa-miR-296-5p	1	0	1	1	1	1	C19orf6	chromosome 19 open reading frame 6
hsa-miR-296-5p	1	0	1	1	1	1	PTBP1	polypyrimidine tract binding protein 1
hsa-miR-296-5p	1	0	1	1	0	0	ADAM15	ADAM metallopeptidase domain 15
hsa-miR-296-5p	1	0	1	1	1	1	ZFP161	zinc finger protein 161 homolog (mouse)
hsa-miR-296-5p	0	0	1	1	1	1	CAPN10	calpain 10
hsa-miR-296-5p	0	0	0	1	0	0	HHIPL1	HHIP-like 1
hsa-miR-296-5p	0	0	1	1	0	0	ASNA1	arsA arsenite transporter, ATP-binding, homolog 1 (bacterial)
hsa-miR-296-5p	1	0	1	1	1	1	NXN	nucleoredoxin
hsa-miR-296-5p	0	0	0	1	0	0	ARID5A	AT rich interactive domain 5A (MRF1-like)
hsa-miR-296-5p	0	0	0	1	1	1	TMEM79	transmembrane protein 79
hsa-miR-296-5p	1	0	1	1	1	1	EHMT1	euchromatic histone-lysine N-methyltransferase 1
hsa-miR-296-5p	1	0	0	1	0	0	RABEP2	rabaptin, RAB GTPase binding effector protein 2
hsa-miR-296-5p	0	0	0	1	1	1	ZNF707	zinc finger protein 707
hsa-miR-296-5p	0	0	0	1	0	0	ABCB8	ATP-binding cassette, sub-family B (MDR/TAP), member 8
hsa-miR-296-5p	1	0	1	1	0	0	DUS2L	dihydrouridine synthase 2-like, SMM1 homolog (S. cerevisiae)
hsa-miR-296-5p	0	0	0	1	0	0	BCS1L	BCS1-like (S. cerevisiae)
hsa-miR-296-5p	0	0	0	1	0	0	HAPLN3	hyaluronan and proteoglycan link protein 3
hsa-miR-296-5p	0	0	0	1	1	1	KCNQ2	potassium voltage-gated channel, KQT-like subfamily, member 2
hsa-miR-296-5p	1	0	0	1	1	1	CRB2	crumbs homolog 2 (Drosophila)
hsa-miR-296-5p	0	0	0	1	0	0	PYY	peptide YY
hsa-miR-296-5p	1	0	0	1	0	0	TSTA3	tissue specific transplantation antigen P35B
hsa-miR-296-5p	0	0	1	1	1	1	PRKAR1B	protein kinase, cAMP-dependent, regulatory, type I, beta
hsa-miR-296-5p	0	0	0	1	0	0	FLNA	filamin A, alpha
hsa-miR-296-5p	0	0	0	1	0	0	TMEM119	transmembrane protein 119
hsa-miR-296-5p	0	0	0	1	0	0	MMP17	matrix metallopeptidase 17 (membrane-inserted)
hsa-miR-296-5p	0	0	1	1	0	0	NTNG2	netrin G2
hsa-miR-296-5p	0	0	1	1	0	0	SLC34A3	solute carrier family 34 (sodium phosphate), member 3
hsa-miR-296-5p	0	0	0	1	1	1	SLC26A11	solute carrier family 26, member 11
hsa-miR-296-5p	1	0	1	1	1	1	CD300LF	CD300 molecule-like family member f
hsa-miR-296-5p	0	0	1	1	0	0	TXNRD2	thioredoxin reductase 2
hsa-miR-296-5p	0	0	0	1	0	0	SHISA4	shisa homolog 4 (Xenopus laevis)
hsa-miR-296-5p	0	0	1	1	1	1	GJC2	gap junction protein, gamma 2, 47kDa
hsa-miR-296-5p	0	0	0	1	1	1	C1orf35	chromosome 1 open reading frame 35
hsa-miR-296-5p	0	0	0	1	1	1	DACT2	dapper, antagonist of beta-catenin, homolog 2 (Xenopus laevis)
hsa-miR-296-5p	1	0	1	1	0	0	ETNK2	ethanolamine kinase 2
hsa-miR-296-5p	0	0	0	1	0	0	PHLDA3	pleckstrin homology-like domain, family A, member 3
hsa-miR-296-5p	1	0	1	1	0	0	ADAMTS4	ADAM metallopeptidase with thrombospondin type 1 motif, 4
hsa-miR-296-5p	0	0	1	1	1	1	ATP1A4	ATPase, Na+/K+ transporting, alpha 4 polypeptide
hsa-miR-296-5p	0	0	0	1	0	0	INSRR	insulin receptor-related receptor
hsa-miR-296-5p	0	0	0	1	0	0	TTC24	tetratricopeptide repeat domain 24
hsa-miR-296-5p	0	0	0	1	0	0	BGLAP	bone gamma-carboxyglutamate (gla) protein
hsa-miR-296-5p	0	0	1	1	0	0	PMF1	polyamine-modulated factor 1
hsa-miR-296-5p	0	0	0	1	0	0	LAMTOR2	late endosomal/lysosomal adaptor, MAPK and MTOR activator 2
hsa-miR-296-5p	1	0	1	1	0	0	EFNA4	ephrin-A4
hsa-miR-296-5p	0	0	0	1	0	0	CALY	calcyon neuron-specific vesicular protein
hsa-miR-296-5p	0	0	1	1	0	0	KNDC1	kinase non-catalytic C-lobe domain (KIND) containing 1
hsa-miR-296-5p	0	0	0	1	0	0	NKX6-2	NK6 homeobox 2
hsa-miR-296-5p	0	0	0	1	0	0	DPYSL4	dihydropyrimidinase-like 4
hsa-miR-296-5p	0	0	0	1	1	1	SNAPIN	SNAP-associated protein
hsa-miR-296-5p	0	0	1	1	1	1	S100A3	S100 calcium binding protein A3
hsa-miR-296-5p	0	0	0	1	0	0	S100A4	S100 calcium binding protein A4
hsa-miR-296-5p	0	0	1	1	0	0	S100A6	S100 calcium binding protein A6
hsa-miR-296-5p	0	0	0	1	0	0	S100A9	S100 calcium binding protein A9
hsa-miR-296-5p	1	0	1	1	0	0	PI4KB	phosphatidylinositol 4-kinase, catalytic, beta
hsa-miR-296-5p	1	0	1	1	1	1	MPP1	membrane protein, palmitoylated 1, 55kDa
hsa-miR-296-5p	1	0	1	1	1	1	PLXNA3	plexin A3
hsa-miR-296-5p	0	0	1	1	1	1	CCDC147	coiled-coil domain containing 147
hsa-miR-296-5p	0	0	0	1	0	0	DNASE1L1	deoxyribonuclease I-like 1
hsa-miR-296-5p	1	0	1	1	1	1	TRIM8	tripartite motif containing 8
hsa-miR-296-5p	0	0	0	1	0	0	TNFRSF6B	tumor necrosis factor receptor superfamily, member 6b, decoy
hsa-miR-296-5p	1	0	1	1	0	0	POLL	polymerase (DNA directed), lambda
hsa-miR-296-5p	0	0	0	1	0	0	PNMA6B	paraneoplastic Ma antigen family member 6B
hsa-miR-296-5p	0	0	0	1	0	0	BHLHE23	basic helix-loop-helix family, member e23
hsa-miR-296-5p	0	0	1	1	0	0	SLC25A28	solute carrier family 25 (mitochondrial iron transporter), member 28
hsa-miR-296-5p	0	0	1	1	1	1	GADD45A	growth arrest and DNA-damage-inducible, alpha
hsa-miR-296-5p	1	0	1	1	1	1	NELF	nasal embryonic LHRH factor
hsa-miR-296-5p	0	0	1	1	1	1	MYOF	myoferlin
hsa-miR-296-5p	0	0	0	1	0	0	DPP7	dipeptidyl-peptidase 7
hsa-miR-296-5p	0	0	0	1	0	0	EGFL7	EGF-like-domain, multiple 7
hsa-miR-296-5p	0	0	0	1	0	0	IFIT3	interferon-induced protein with tetratricopeptide repeats 3
hsa-miR-296-5p	0	0	1	1	0	0	MUTYH	mutY homolog (E. coli)
hsa-miR-296-5p	0	0	1	1	0	0	MRPS18A	mitochondrial ribosomal protein S18A
hsa-miR-296-5p	0	0	1	1	0	0	PPAPDC3	phosphatidic acid phosphatase type 2 domain containing 3
hsa-miR-296-5p	0	0	0	1	0	0	DMAP1	DNA methyltransferase 1 associated protein 1
hsa-miR-296-5p	0	0	0	1	0	0	FIBCD1	fibrinogen C domain containing 1
hsa-miR-296-5p	1	0	1	1	0	0	LRRC73	leucine rich repeat containing 73
hsa-miR-296-5p	0	0	0	1	0	0	NTMT1	N-terminal Xaa-Pro-Lys N-methyltransferase 1
hsa-miR-296-5p	1	0	1	1	1	1	DLK2	delta-like 2 homolog (Drosophila)
hsa-miR-296-5p	0	0	1	1	0	0	GUCA2B	guanylate cyclase activator 2B (uroguanylin)
hsa-miR-296-5p	0	0	0	1	1	1	ZDHHC12	zinc finger, DHHC-type containing 12
hsa-miR-296-5p	0	0	1	1	1	1	PKIG	protein kinase (cAMP-dependent, catalytic) inhibitor gamma
hsa-miR-296-5p	0	0	0	1	1	1	USP49	ubiquitin specific peptidase 49
hsa-miR-296-5p	1	0	0	1	1	1	EPHA10	EPH receptor A10
hsa-miR-296-5p	0	0	1	1	1	1	TREML2	triggering receptor expressed on myeloid cells-like 2
hsa-miR-296-5p	0	0	0	1	0	0	MRPS15	mitochondrial ribosomal protein S15
hsa-miR-296-5p	0	0	0	1	0	0	KCNK16	potassium channel, subfamily K, member 16
hsa-miR-296-5p	0	0	1	1	1	1	TOR2A	torsin family 2, member A
hsa-miR-296-5p	0	0	0	1	0	0	LRSAM1	leucine rich repeat and sterile alpha motif containing 1
hsa-miR-296-5p	1	0	1	1	0	0	CCDC167	coiled-coil domain containing 167
hsa-miR-296-5p	1	0	0	1	0	0	LMX1B	LIM homeobox transcription factor 1, beta
hsa-miR-296-5p	0	0	1	1	1	1	SP140	SP140 nuclear body protein
hsa-miR-296-5p	0	0	1	1	1	1	BAI2	brain-specific angiogenesis inhibitor 2
hsa-miR-296-5p	0	0	1	1	0	0	SCAND1	SCAN domain containing 1
hsa-miR-296-5p	0	0	1	1	1	1	C1orf172	chromosome 1 open reading frame 172
hsa-miR-296-5p	0	0	1	1	0	0	IL2RG	interleukin 2 receptor, gamma
hsa-miR-296-5p	0	0	1	1	1	1	AIM1L	absent in melanoma 1-like
hsa-miR-296-5p	0	0	1	1	0	0	GPRIN2	G protein regulated inducer of neurite outgrowth 2
hsa-miR-296-5p	0	0	1	1	1	1	SYT15	synaptotagmin XV
hsa-miR-296-5p	0	0	1	1	1	1	HMGCL	3-hydroxymethyl-3-methylglutaryl-CoA lyase
hsa-miR-296-5p	0	0	0	1	1	1	B3GALT4	UDP-Gal:betaGlcNAc beta 1,3-galactosyltransferase, polypeptide 4
hsa-miR-296-5p	1	0	1	1	1	1	MGAT5B	mannosyl (alpha-1,6-)-glycoprotein beta-1,6-N-acetyl-glucosaminyltransferase, isozyme B
hsa-miR-296-5p	1	0	1	1	1	1	FGD1	FYVE, RhoGEF and PH domain containing 1
hsa-miR-296-5p	0	0	1	1	1	1	ZNF341	zinc finger protein 341
hsa-miR-296-5p	0	0	0	1	0	0	FAM70B	family with sequence similarity 70, member B
hsa-miR-296-5p	1	0	0	1	0	0	ATP13A2	ATPase type 13A2
hsa-miR-296-5p	0	0	1	1	1	1	ZBTB12	zinc finger and BTB domain containing 12
hsa-miR-296-5p	0	0	0	1	1	1	MFAP2	microfibrillar-associated protein 2
hsa-miR-296-5p	0	0	1	1	0	0	CLIC1	chloride intracellular channel 1
hsa-miR-296-5p	1	0	0	1	0	0	PLEKHM2	pleckstrin homology domain containing, family M (with RUN domain) member 2
hsa-miR-296-5p	0	0	1	1	0	0	CSNK2B	casein kinase 2, beta polypeptide
hsa-miR-296-5p	0	0	0	1	1	1	LY6G5B	lymphocyte antigen 6 complex, locus G5B
hsa-miR-296-5p	0	0	0	1	0	0	DUSP15	dual specificity phosphatase 15
hsa-miR-296-5p	0	0	1	1	0	0	FOXS1	forkhead box S1
hsa-miR-296-5p	0	0	0	1	0	0	PYY3	peptide YY, 3 (pseudogene)
hsa-miR-296-5p	0	0	1	1	0	0	CCDC22	coiled-coil domain containing 22
hsa-miR-296-5p	0	0	1	1	0	0	KIAA2013	KIAA2013
hsa-miR-296-5p	1	0	1	1	0	0	TIMM17B	translocase of inner mitochondrial membrane 17 homolog B (yeast)
hsa-miR-296-5p	0	0	1	1	1	1	PSAT1	phosphoserine aminotransferase 1
hsa-miR-296-5p	0	0	1	1	0	0	NR1H2	nuclear receptor subfamily 1, group H, member 2
hsa-miR-296-5p	0	0	1	1	0	0	MED25	mediator complex subunit 25
hsa-miR-296-5p	1	0	1	1	0	0	SLC25A39	solute carrier family 25, member 39
hsa-miR-296-5p	0	0	0	1	0	0	IRF3	interferon regulatory factor 3
hsa-miR-296-5p	0	0	1	1	0	0	PRKACG	protein kinase, cAMP-dependent, catalytic, gamma
hsa-miR-296-5p	1	0	1	1	0	0	ARHGAP39	Rho GTPase activating protein 39
hsa-miR-296-5p	0	0	0	1	1	1	TMEM252	transmembrane protein 252
hsa-miR-296-5p	0	0	1	1	1	1	SCRIB	scribbled homolog (Drosophila)
hsa-miR-296-5p	0	0	1	1	1	1	RBM10	RNA binding motif protein 10
hsa-miR-296-5p	0	0	0	1	0	0	OR13J1	olfactory receptor, family 13, subfamily J, member 1
hsa-miR-296-5p	0	0	1	1	0	0	KCNAB2	potassium voltage-gated channel, shaker-related subfamily, beta member 2
hsa-miR-296-5p	1	0	1	1	1	1	PRDM16	PR domain containing 16
hsa-miR-296-5p	0	0	1	1	1	1	UNC13B	unc-13 homolog B (C. elegans)
hsa-miR-296-5p	0	0	1	1	0	0	MORN1	MORN repeat containing 1
hsa-miR-296-5p	0	0	0	1	0	0	SPI1	spleen focus forming virus (SFFV) proviral integration oncogene spi1
hsa-miR-296-5p	0	0	0	1	0	0	CDK11B	cyclin-dependent kinase 11B
hsa-miR-296-5p	0	0	0	1	0	0	ETV2	ets variant 2
hsa-miR-296-5p	0	0	0	1	0	0	PUSL1	pseudouridylate synthase-like 1
hsa-miR-296-5p	0	0	0	1	0	0	PLEKHN1	pleckstrin homology domain containing, family N member 1
hsa-miR-296-5p	0	0	1	1	0	0	KATNB1	katanin p80 (WD repeat containing) subunit B 1
hsa-miR-296-5p	0	0	1	1	0	0	TRIM54	tripartite motif containing 54
hsa-miR-296-5p	0	0	1	1	0	0	DDRGK1	DDRGK domain containing 1
hsa-miR-296-5p	0	0	1	1	1	1	ZNF768	zinc finger protein 768
hsa-miR-296-5p	1	0	1	1	1	1	ADRA1A	adrenoceptor alpha 1A
hsa-miR-296-5p	0	0	0	1	1	1	POMC	proopiomelanocortin
hsa-miR-296-5p	0	0	0	1	0	0	GPR143	G protein-coupled receptor 143
hsa-miR-296-5p	0	0	1	1	0	0	PITRM1	pitrilysin metallopeptidase 1
hsa-miR-296-5p	1	0	0	1	1	1	CDX2	caudal type homeobox 2
hsa-miR-296-5p	0	0	0	1	1	1	PDX1	pancreatic and duodenal homeobox 1
hsa-miR-296-5p	0	0	1	1	0	0	LIN52	lin-52 homolog (C. elegans)
hsa-miR-296-5p	0	0	1	1	0	0	SLC25A6	solute carrier family 25 (mitochondrial carrier; adenine nucleotide translocator), member 6
hsa-miR-296-5p	1	0	1	1	1	1	DIP2C	DIP2 disco-interacting protein 2 homolog C (Drosophila)
hsa-miR-296-5p	0	0	0	1	0	0	MRPL23	mitochondrial ribosomal protein L23
hsa-miR-296-5p	0	0	0	1	0	0	FAM22A	family with sequence similarity 22, member A
hsa-miR-296-5p	1	0	1	1	1	1	RCL1	RNA terminal phosphate cyclase-like 1
hsa-miR-296-5p	0	0	1	1	0	0	TMEM74B	transmembrane protein 74B
hsa-miR-296-5p	0	0	0	1	0	0	ANGPT4	angiopoietin 4
hsa-miR-296-5p	0	0	0	1	0	0	ZNF205	zinc finger protein 205
hsa-miR-296-5p	0	0	1	1	1	1	TOLLIP	toll interacting protein
hsa-miR-296-5p	0	0	0	1	0	0	ZNF316	zinc finger protein 316
hsa-miR-296-5p	0	0	0	1	0	0	IFITM5	interferon induced transmembrane protein 5
hsa-miR-296-5p	0	0	1	1	0	0	SNRNP25	small nuclear ribonucleoprotein 25kDa (U11/U12)
hsa-miR-296-5p	0	0	0	1	1	1	MRPL2	mitochondrial ribosomal protein L2
hsa-miR-296-5p	1	0	1	1	1	1	FOXI2	forkhead box I2
hsa-miR-296-5p	0	0	0	1	0	0	ASPDH	aspartate dehydrogenase domain containing
hsa-miR-296-5p	0	0	1	1	0	0	FANCA	Fanconi anemia, complementation group A
hsa-miR-296-5p	0	0	1	1	0	0	INTS1	integrator complex subunit 1
hsa-miR-296-5p	1	0	1	1	1	1	RAB11FIP5	RAB11 family interacting protein 5 (class I)
hsa-miR-296-5p	0	0	0	1	0	0	CCDC57	coiled-coil domain containing 57
hsa-miR-296-5p	0	0	1	1	1	1	ABCD1	ATP-binding cassette, sub-family D (ALD), member 1
hsa-miR-296-5p	0	0	1	1	1	1	OXCT1	3-oxoacid CoA transferase 1
hsa-miR-296-5p	1	0	1	1	1	1	FARP1	FERM, RhoGEF (ARHGEF) and pleckstrin domain protein 1 (chondrocyte-derived)
hsa-miR-296-5p	0	0	1	1	1	1	AKR1CL1	aldo-keto reductase family 1, member C-like 1
hsa-miR-296-5p	0	0	1	1	1	1	RPS23	ribosomal protein S23
hsa-miR-296-5p	0	0	1	0	1	1	GAB4	GRB2-associated binding protein family, member 4
hsa-miR-296-5p	0	0	0	1	1	1	SUMF2	sulfatase modifying factor 2
hsa-miR-296-5p	1	0	1	1	1	1	CDC14B	CDC14 cell division cycle 14 homolog B (S. cerevisiae)
hsa-miR-296-5p	1	0	1	1	1	1	KIAA0368	KIAA0368
hsa-miR-296-5p	0	0	1	0	1	1	FLNB	filamin B, beta
hsa-miR-296-5p	0	0	1	1	1	1	CXCL10	chemokine (C-X-C motif) ligand 10
hsa-miR-296-5p	0	0	1	1	1	1	CD22	CD22 molecule
hsa-miR-296-5p	1	0	0	1	1	1	GPC1	glypican 1
hsa-miR-296-5p	0	0	0	1	1	1	CHMP1A	charged multivesicular body protein 1A
hsa-miR-296-5p	1	0	1	1	1	1	PAX8	paired box 8
hsa-miR-296-5p	1	0	1	0	1	1	GAS7	growth arrest-specific 7
hsa-miR-296-5p	0	0	1	1	1	1	MBD4	methyl-CpG binding domain protein 4
hsa-miR-296-5p	1	0	1	1	1	1	EPHB4	EPH receptor B4
hsa-miR-296-5p	1	0	0	1	1	1	MAP4K2	mitogen-activated protein kinase kinase kinase kinase 2
hsa-miR-296-5p	0	0	1	1	1	1	P2RX6	purinergic receptor P2X, ligand-gated ion channel, 6
hsa-miR-296-5p	1	0	1	0	1	1	RBM12	RNA binding motif protein 12
hsa-miR-296-5p	1	0	1	1	1	1	PPP1R1A	protein phosphatase 1, regulatory (inhibitor) subunit 1A
hsa-miR-296-5p	1	0	1	1	1	1	SGSM2	small G protein signaling modulator 2
hsa-miR-296-5p	0	0	0	1	1	1	RPP25	ribonuclease P/MRP 25kDa subunit
hsa-miR-296-5p	1	0	1	1	1	1	AGPAT4	1-acylglycerol-3-phosphate O-acyltransferase 4 (lysophosphatidic acid acyltransferase, delta)
hsa-miR-296-5p	1	0	1	1	1	1	NAV1	neuron navigator 1
hsa-miR-296-5p	1	0	1	1	1	1	ZNF512B	zinc finger protein 512B
hsa-miR-296-5p	1	0	1	1	1	1	PIEZO2	piezo-type mechanosensitive ion channel component 2
hsa-miR-296-5p	0	0	0	1	1	1	PYCRL	pyrroline-5-carboxylate reductase-like
hsa-miR-296-5p	1	0	1	1	1	1	ATF7IP2	activating transcription factor 7 interacting protein 2
hsa-miR-296-5p	1	0	0	1	1	1	KCTD10	potassium channel tetramerisation domain containing 10
hsa-miR-296-5p	0	0	0	1	1	1	BOK	BCL2-related ovarian killer
hsa-miR-296-5p	1	0	1	0	1	1	GLYR1	glyoxylate reductase 1 homolog (Arabidopsis)
hsa-miR-296-5p	0	0	1	1	1	1	LNX1	ligand of numb-protein X 1, E3 ubiquitin protein ligase
hsa-miR-296-5p	0	0	1	1	1	1	COMMD7	COMM domain containing 7
hsa-miR-296-5p	0	0	0	1	1	1	KCNG4	potassium voltage-gated channel, subfamily G, member 4
hsa-miR-296-5p	0	0	0	1	1	1	GLT1D1	glycosyltransferase 1 domain containing 1
hsa-miR-296-5p	1	0	1	1	1	1	TXLNB	taxilin beta
hsa-miR-296-5p	0	0	0	1	1	1	TREML4	triggering receptor expressed on myeloid cells-like 4
hsa-miR-296-5p	0	0	1	1	1	1	FAM211A	family with sequence similarity 211, member A
hsa-miR-296-5p	0	0	1	0	1	1	TBX5-AS1	TBX5 antisense RNA 1
hsa-miR-296-5p	0	0	0	0	1	1	C7orf73	chromosome 7 open reading frame 73
