# Supplementary material for: Profiling of Selected MicroRNAs in Proliferative Eutopic Endometrium of Women with Ovarian Endometriosis
Source: Biomed Res Int. 2015 Aug 20;2015:760698. doi: 10.1155/2015/760698 (PMC4558423; doi:10.1155/2015/760698)
Supplement: Supplementary file 1 — Table I: The names of miRNAs significantly differentially expressed between eutopic endometrium of patients with endometriosis vs eutopic endometrium of patients without endometriosis. Table II: The associations between miRNA and mRNA, which presents detailed results of the search of six major databases i.e targetscan, tarbase, miranda, mirbase, mirtarget2 and pictar. [file 760698.f1.zip › 760698.f1/Table II/hsa-miR-297.tsv]

miR	targetscan	tarbase	miranda	mirbase	mirtarget2	pictar	GeneSymbol	GeneName
hsa-miR-297	1	0	1	1	1	1	ZFYVE16	zinc finger, FYVE domain containing 16
hsa-miR-297	1	0	1	1	0	0	SRCAP	Snf2-related CREBBP activator protein
hsa-miR-297	1	0	1	0	1	1	GAS7	growth arrest-specific 7
hsa-miR-297	1	0	1	0	1	1	CEP350	centrosomal protein 350kDa
hsa-miR-297	1	0	1	1	1	1	RNGTT	RNA guanylyltransferase and 5'-phosphatase
hsa-miR-297	1	0	1	1	0	0	SUSD5	sushi domain containing 5
hsa-miR-297	1	0	1	1	0	0	PCLO	piccolo (presynaptic cytomatrix protein)
hsa-miR-297	1	0	1	1	1	1	NRXN1	neurexin 1
hsa-miR-297	1	0	1	1	1	1	SLC4A7	solute carrier family 4, sodium bicarbonate cotransporter, member 7
hsa-miR-297	0	0	1	1	1	1	PHLDB1	pleckstrin homology-like domain, family B, member 1
hsa-miR-297	1	0	1	1	1	1	GIGYF2	GRB10 interacting GYF protein 2
hsa-miR-297	1	0	1	1	0	0	SMCHD1	structural maintenance of chromosomes flexible hinge domain containing 1
hsa-miR-297	0	0	1	1	1	1	L3MBTL1	l(3)mbt-like 1 (Drosophila)
hsa-miR-297	1	0	1	1	1	1	ANKRD17	ankyrin repeat domain 17
hsa-miR-297	1	0	1	1	1	1	SMOC2	SPARC related modular calcium binding 2
hsa-miR-297	0	0	1	1	1	1	XRCC4	X-ray repair complementing defective repair in Chinese hamster cells 4
hsa-miR-297	1	0	1	0	1	1	SNX13	sorting nexin 13
hsa-miR-297	0	0	1	1	0	0	ATP10B	ATPase, class V, type 10B
hsa-miR-297	1	0	1	0	1	1	DOCK4	dedicator of cytokinesis 4
hsa-miR-297	1	0	1	0	1	1	LPHN3	latrophilin 3
hsa-miR-297	1	0	1	1	1	1	LPHN2	latrophilin 2
hsa-miR-297	1	0	1	1	1	1	CPEB3	cytoplasmic polyadenylation element binding protein 3
hsa-miR-297	0	0	1	1	0	0	FAM149B1	family with sequence similarity 149, member B1
hsa-miR-297	1	0	1	1	1	1	NTNG1	netrin G1
hsa-miR-297	1	0	1	1	1	1	PALLD	palladin, cytoskeletal associated protein
hsa-miR-297	1	0	1	1	0	0	FRMD4B	FERM domain containing 4B
hsa-miR-297	1	0	1	1	1	1	FNBP4	formin binding protein 4
hsa-miR-297	1	0	1	1	1	1	NLGN1	neuroligin 1
hsa-miR-297	1	0	1	0	1	1	ODZ2	odz, odd Oz/ten-m homolog 2 (Drosophila)
hsa-miR-297	1	0	1	0	1	1	SRGAP3	SLIT-ROBO Rho GTPase activating protein 3
hsa-miR-297	1	0	1	1	1	1	KIAA1217	KIAA1217
hsa-miR-297	1	0	1	1	1	1	ZMIZ1	zinc finger, MIZ-type containing 1
hsa-miR-297	1	0	1	0	1	1	PPFIBP1	PTPRF interacting protein, binding protein 1 (liprin beta 1)
hsa-miR-297	1	0	1	1	1	1	RIMKLB	ribosomal modification protein rimK-like family member B
hsa-miR-297	0	0	1	1	1	1	CA10	carbonic anhydrase X
hsa-miR-297	1	0	1	1	1	1	LRRC7	leucine rich repeat containing 7
hsa-miR-297	1	0	1	1	1	1	BAZ2B	bromodomain adjacent to zinc finger domain, 2B
hsa-miR-297	0	0	1	1	1	1	NLGN3	neuroligin 3
hsa-miR-297	1	0	1	1	1	1	FRAS1	Fraser syndrome 1
hsa-miR-297	1	0	1	1	1	1	KIAA1522	KIAA1522
hsa-miR-297	1	0	1	1	1	1	HIVEP3	human immunodeficiency virus type I enhancer binding protein 3
hsa-miR-297	0	0	1	0	1	1	ZSWIM6	zinc finger, SWIM-type containing 6
hsa-miR-297	0	0	1	1	1	1	KIAA1704	KIAA1704
hsa-miR-297	1	0	1	0	1	1	RIMS1	regulating synaptic membrane exocytosis 1
hsa-miR-297	1	0	1	1	1	1	IKZF4	IKAROS family zinc finger 4 (Eos)
hsa-miR-297	1	0	1	0	1	1	JPH4	junctophilin 4
hsa-miR-297	1	0	1	1	1	1	HNRPDL	heterogeneous nuclear ribonucleoprotein D-like
hsa-miR-297	1	0	1	1	1	1	CSMD3	CUB and Sushi multiple domains 3
hsa-miR-297	1	0	1	1	1	1	SH3TC2	SH3 domain and tetratricopeptide repeats 2
hsa-miR-297	1	0	1	0	0	0	RNF169	ring finger protein 169
hsa-miR-297	1	0	1	0	0	0	ZBTB34	zinc finger and BTB domain containing 34
hsa-miR-297	1	0	1	1	1	1	ACBD5	acyl-CoA binding domain containing 5
hsa-miR-297	1	0	1	1	1	1	FHOD3	formin homology 2 domain containing 3
hsa-miR-297	1	0	1	1	1	1	RFX4	regulatory factor X, 4 (influences HLA class II expression)
hsa-miR-297	1	0	1	1	1	1	UBR3	ubiquitin protein ligase E3 component n-recognin 3 (putative)
hsa-miR-297	1	0	1	1	1	1	C11orf57	chromosome 11 open reading frame 57
hsa-miR-297	0	0	1	1	1	1	ACPP	acid phosphatase, prostate
hsa-miR-297	1	0	1	0	1	1	LIN54	lin-54 homolog (C. elegans)
hsa-miR-297	0	0	1	0	0	0	TIFAB	TRAF-interacting protein with forkhead-associated domain, family member B
hsa-miR-297	1	0	1	1	1	1	NRXN2	neurexin 2
hsa-miR-297	0	0	1	1	1	1	ING4	inhibitor of growth family, member 4
hsa-miR-297	1	0	1	1	1	1	VLDLR	very low density lipoprotein receptor
hsa-miR-297	1	0	1	0	1	1	LRBA	LPS-responsive vesicle trafficking, beach and anchor containing
hsa-miR-297	1	0	1	1	1	1	DAPK1	death-associated protein kinase 1
hsa-miR-297	1	0	1	1	1	1	MEF2A	myocyte enhancer factor 2A
hsa-miR-297	1	0	1	1	1	1	PCCB	propionyl CoA carboxylase, beta polypeptide
hsa-miR-297	1	0	1	1	1	1	SLC8A1	solute carrier family 8 (sodium/calcium exchanger), member 1
hsa-miR-297	1	0	1	1	1	1	EIF4G3	eukaryotic translation initiation factor 4 gamma, 3
hsa-miR-297	1	0	1	0	1	1	PLAG1	pleiomorphic adenoma gene 1
hsa-miR-297	1	0	1	0	1	1	MPPED2	metallophosphoesterase domain containing 2
hsa-miR-297	1	0	1	0	1	1	SLC6A6	solute carrier family 6 (neurotransmitter transporter, taurine), member 6
hsa-miR-297	0	0	1	1	1	1	DDX39B	DEAD (Asp-Glu-Ala-Asp) box polypeptide 39B
hsa-miR-297	1	0	1	0	1	1	CHL1	cell adhesion molecule with homology to L1CAM (close homolog of L1)
hsa-miR-297	0	0	1	1	1	1	DGKE	diacylglycerol kinase, epsilon 64kDa
hsa-miR-297	1	0	1	1	1	1	AEBP2	AE binding protein 2
hsa-miR-297	1	0	1	0	1	1	CDON	Cdon homolog (mouse)
hsa-miR-297	1	0	1	1	0	0	FGFR3	fibroblast growth factor receptor 3
hsa-miR-297	0	0	1	0	0	0	CACNA1B	calcium channel, voltage-dependent, N type, alpha 1B subunit
hsa-miR-297	1	0	1	1	1	1	LIMA1	LIM domain and actin binding 1
hsa-miR-297	0	0	1	1	1	1	GPM6B	glycoprotein M6B
hsa-miR-297	0	0	1	1	0	0	BMP1	bone morphogenetic protein 1
hsa-miR-297	1	0	1	0	1	1	TBL1X	transducin (beta)-like 1X-linked
hsa-miR-297	1	0	1	1	1	1	COL24A1	collagen, type XXIV, alpha 1
hsa-miR-297	0	0	1	1	1	1	KIF3A	kinesin family member 3A
hsa-miR-297	1	0	1	1	1	1	HMGA2	high mobility group AT-hook 2
hsa-miR-297	1	0	1	1	1	1	TEAD1	TEA domain family member 1 (SV40 transcriptional enhancer factor)
hsa-miR-297	1	0	1	1	0	0	PPP2R5D	protein phosphatase 2, regulatory subunit B', delta
hsa-miR-297	1	0	1	1	1	1	ZFX	zinc finger protein, X-linked
hsa-miR-297	0	0	1	1	1	1	CENPE	centromere protein E, 312kDa
hsa-miR-297	1	0	1	1	1	1	MEF2D	myocyte enhancer factor 2D
hsa-miR-297	1	0	1	1	1	1	PICALM	phosphatidylinositol binding clathrin assembly protein
hsa-miR-297	1	0	1	1	1	1	MYH10	myosin, heavy chain 10, non-muscle
hsa-miR-297	0	0	1	1	1	1	ACLY	ATP citrate lyase
hsa-miR-297	1	0	1	0	1	1	FYB	FYN binding protein
hsa-miR-297	1	0	1	1	1	1	TTC39A	tetratricopeptide repeat domain 39A
hsa-miR-297	0	0	1	1	0	0	MUC3A	mucin 3A, cell surface associated
hsa-miR-297	1	0	1	0	1	1	MLL2	myeloid/lymphoid or mixed-lineage leukemia 2
hsa-miR-297	1	0	1	0	1	1	PDE4D	phosphodiesterase 4D, cAMP-specific
hsa-miR-297	1	0	1	1	1	1	PCDH17	protocadherin 17
hsa-miR-297	0	0	1	1	1	1	SESN1	sestrin 1
hsa-miR-297	1	0	1	0	0	0	MAP3K1	mitogen-activated protein kinase kinase kinase 1, E3 ubiquitin protein ligase
hsa-miR-297	1	0	1	1	1	1	MRAS	muscle RAS oncogene homolog
hsa-miR-297	1	0	1	1	1	1	SHOC2	soc-2 suppressor of clear homolog (C. elegans)
hsa-miR-297	0	0	1	1	1	1	NOL3	nucleolar protein 3 (apoptosis repressor with CARD domain)
hsa-miR-297	0	0	1	1	1	1	TEX30	testis expressed 30
hsa-miR-297	0	0	1	1	1	1	SSBP2	single-stranded DNA binding protein 2
hsa-miR-297	0	0	1	1	1	1	LYPLA1	lysophospholipase I
hsa-miR-297	1	0	1	1	1	1	VAPB	VAMP (vesicle-associated membrane protein)-associated protein B and C
hsa-miR-297	0	0	1	1	1	1	FHL1	four and a half LIM domains 1
hsa-miR-297	1	0	1	0	1	1	CD164	CD164 molecule, sialomucin
hsa-miR-297	1	0	1	1	1	1	KAT6B	K(lysine) acetyltransferase 6B
hsa-miR-297	1	0	1	1	1	1	EDNRB	endothelin receptor type B
hsa-miR-297	1	0	1	0	1	1	CDK14	cyclin-dependent kinase 14
hsa-miR-297	0	0	1	1	1	1	ACIN1	apoptotic chromatin condensation inducer 1
hsa-miR-297	1	0	1	1	1	1	HNRNPH3	heterogeneous nuclear ribonucleoprotein H3 (2H9)
hsa-miR-297	1	0	1	1	1	1	ANKRD13A	ankyrin repeat domain 13A
hsa-miR-297	0	0	1	0	1	1	PDP1	pyruvate dehyrogenase phosphatase catalytic subunit 1
hsa-miR-297	1	0	1	1	1	1	USP25	ubiquitin specific peptidase 25
hsa-miR-297	0	0	1	0	1	1	SLC38A4	solute carrier family 38, member 4
hsa-miR-297	1	0	1	1	1	1	NXT2	nuclear transport factor 2-like export factor 2
hsa-miR-297	1	0	1	1	0	0	TDRKH	tudor and KH domain containing
hsa-miR-297	1	0	1	1	1	1	STRN3	striatin, calmodulin binding protein 3
hsa-miR-297	0	0	1	0	0	0	TIGD7	tigger transposable element derived 7
hsa-miR-297	1	0	1	1	1	1	ELF2	E74-like factor 2 (ets domain transcription factor)
hsa-miR-297	1	0	1	1	1	1	RBM47	RNA binding motif protein 47
hsa-miR-297	1	0	1	1	1	1	SH3GLB1	SH3-domain GRB2-like endophilin B1
hsa-miR-297	1	0	1	0	1	1	TRPS1	trichorhinophalangeal syndrome I
hsa-miR-297	1	0	1	1	1	1	VPS39	vacuolar protein sorting 39 homolog (S. cerevisiae)
hsa-miR-297	1	0	1	1	1	1	MGEA5	meningioma expressed antigen 5 (hyaluronidase)
hsa-miR-297	0	0	1	1	0	0	FEZF2	FEZ family zinc finger 2
hsa-miR-297	1	0	1	1	1	1	CALU	calumenin
hsa-miR-297	1	0	1	1	1	1	ATAD1	ATPase family, AAA domain containing 1
hsa-miR-297	0	0	1	1	1	1	U2AF1	U2 small nuclear RNA auxiliary factor 1
hsa-miR-297	1	0	1	1	1	1	CALCOCO1	calcium binding and coiled-coil domain 1
hsa-miR-297	1	0	1	1	1	1	LARP4	La ribonucleoprotein domain family, member 4
hsa-miR-297	0	0	1	1	0	0	SNRPN	small nuclear ribonucleoprotein polypeptide N
hsa-miR-297	0	0	1	1	1	1	SPSB1	splA/ryanodine receptor domain and SOCS box containing 1
hsa-miR-297	0	0	1	1	0	0	BRE	brain and reproductive organ-expressed (TNFRSF1A modulator)
hsa-miR-297	1	0	1	1	0	0	XRRA1	X-ray radiation resistance associated 1
hsa-miR-297	1	0	1	1	1	1	RBFOX1	RNA binding protein, fox-1 homolog (C. elegans) 1
hsa-miR-297	0	0	1	1	1	1	AMPH	amphiphysin
hsa-miR-297	0	0	1	1	1	1	CHODL	chondrolectin
hsa-miR-297	1	0	1	0	1	1	IL1RAP	interleukin 1 receptor accessory protein
hsa-miR-297	1	0	1	1	1	1	GPR64	G protein-coupled receptor 64
hsa-miR-297	0	0	1	1	1	1	ANKRD36B	ankyrin repeat domain 36B
hsa-miR-297	1	0	1	1	1	1	AFF2	AF4/FMR2 family, member 2
hsa-miR-297	1	0	1	1	1	1	PLAGL1	pleiomorphic adenoma gene-like 1
hsa-miR-297	0	0	1	1	1	1	HIRIP3	HIRA interacting protein 3
hsa-miR-297	1	0	1	1	1	1	SUCO	SUN domain containing ossification factor
hsa-miR-297	1	0	1	1	1	1	CACNA2D2	calcium channel, voltage-dependent, alpha 2/delta subunit 2
hsa-miR-297	0	0	1	0	0	0	CACNA2D3	calcium channel, voltage-dependent, alpha 2/delta subunit 3
hsa-miR-297	1	0	1	1	1	1	RAB3IP	RAB3A interacting protein (rabin3)
hsa-miR-297	1	0	1	1	1	1	NRXN3	neurexin 3
hsa-miR-297	0	0	1	1	1	1	SLC8A3	solute carrier family 8 (sodium/calcium exchanger), member 3
hsa-miR-297	0	0	1	1	1	1	DBR1	debranching enzyme homolog 1 (S. cerevisiae)
hsa-miR-297	0	0	1	1	0	0	NHLRC2	NHL repeat containing 2
hsa-miR-297	0	0	1	1	1	1	ESRP1	epithelial splicing regulatory protein 1
hsa-miR-297	1	0	1	1	1	1	AKAP2	A kinase (PRKA) anchor protein 2
hsa-miR-297	0	0	1	1	1	1	PARPBP	PARP1 binding protein
hsa-miR-297	1	0	1	1	1	1	ARHGAP12	Rho GTPase activating protein 12
hsa-miR-297	0	0	1	0	0	0	TUG1	taurine upregulated 1 (non-protein coding)
hsa-miR-297	1	0	1	1	1	1	BCAP29	B-cell receptor-associated protein 29
hsa-miR-297	1	0	1	1	1	1	ARGLU1	arginine and glutamate rich 1
hsa-miR-297	0	0	1	1	1	1	STOX2	storkhead box 2
hsa-miR-297	0	0	1	1	1	1	RNF220	ring finger protein 220
hsa-miR-297	1	0	1	0	1	1	CLIC4	chloride intracellular channel 4
hsa-miR-297	1	0	1	1	1	1	PTBP3	polypyrimidine tract binding protein 3
hsa-miR-297	1	0	1	1	1	1	ARMC8	armadillo repeat containing 8
hsa-miR-297	0	0	1	1	1	1	PRPF39	PRP39 pre-mRNA processing factor 39 homolog (S. cerevisiae)
hsa-miR-297	1	0	1	0	1	1	SPATS2L	spermatogenesis associated, serine-rich 2-like
hsa-miR-297	1	0	1	1	1	1	ACER3	alkaline ceramidase 3
hsa-miR-297	1	0	1	1	1	1	INSIG2	insulin induced gene 2
hsa-miR-297	0	0	1	0	0	0	SOX2-OT	SOX2 overlapping transcript (non-protein coding)
hsa-miR-297	0	0	1	0	0	0	LOC286059	tumor necrosis factor receptor superfamily, member 10d, decoy with truncated death domain pseudogene
hsa-miR-297	0	0	1	1	0	0	SPON2	spondin 2, extracellular matrix protein
hsa-miR-297	1	0	1	1	1	1	DYRK2	dual-specificity tyrosine-(Y)-phosphorylation regulated kinase 2
hsa-miR-297	1	0	1	1	1	1	ABHD3	abhydrolase domain containing 3
hsa-miR-297	1	0	1	0	1	1	MYO5B	myosin VB
hsa-miR-297	1	0	1	1	1	1	DLC1	deleted in liver cancer 1
hsa-miR-297	1	0	1	1	1	1	DENND4C	DENN/MADD domain containing 4C
hsa-miR-297	1	0	1	1	1	1	YPEL5	yippee-like 5 (Drosophila)
hsa-miR-297	0	0	1	0	1	1	FLJ22447	uncharacterized LOC400221
hsa-miR-297	0	0	1	0	0	0	CCDC85C	coiled-coil domain containing 85C
hsa-miR-297	1	0	1	1	0	0	MAGI3	membrane associated guanylate kinase, WW and PDZ domain containing 3
hsa-miR-297	1	0	1	1	1	1	DCAF8	DDB1 and CUL4 associated factor 8
hsa-miR-297	1	0	1	1	1	1	EML2	echinoderm microtubule associated protein like 2
hsa-miR-297	0	0	1	1	1	1	TGIF1	TGFB-induced factor homeobox 1
hsa-miR-297	1	0	1	1	1	1	ITGA9	integrin, alpha 9
hsa-miR-297	0	0	1	1	1	1	GTF2H1	general transcription factor IIH, polypeptide 1, 62kDa
hsa-miR-297	1	0	1	1	1	1	RNF185	ring finger protein 185
hsa-miR-297	1	0	1	1	1	1	GORASP2	golgi reassembly stacking protein 2, 55kDa
hsa-miR-297	1	0	1	1	1	1	MARK1	MAP/microtubule affinity-regulating kinase 1
hsa-miR-297	1	0	1	1	1	1	NFASC	neurofascin
hsa-miR-297	1	0	1	0	1	1	ATP10D	ATPase, class V, type 10D
hsa-miR-297	0	0	1	1	1	1	NETO2	neuropilin (NRP) and tolloid (TLL)-like 2
hsa-miR-297	1	0	1	1	1	1	FAM40A	family with sequence similarity 40, member A
hsa-miR-297	1	0	1	1	1	1	RAP1GDS1	RAP1, GTP-GDP dissociation stimulator 1
hsa-miR-297	1	0	1	1	1	1	DLGAP4	discs, large (Drosophila) homolog-associated protein 4
hsa-miR-297	0	0	1	0	0	0	CASC2	cancer susceptibility candidate 2 (non-protein coding)
hsa-miR-297	1	0	1	1	1	1	TPM1	tropomyosin 1 (alpha)
hsa-miR-297	0	0	1	1	0	0	ABHD16A	abhydrolase domain containing 16A
hsa-miR-297	0	0	1	1	1	1	BCAR3	breast cancer anti-estrogen resistance 3
hsa-miR-297	1	0	1	1	1	1	FRMD6	FERM domain containing 6
hsa-miR-297	1	0	1	1	1	1	MAP3K7	mitogen-activated protein kinase kinase kinase 7
hsa-miR-297	1	0	1	0	0	0	PWWP2A	PWWP domain containing 2A
hsa-miR-297	1	0	1	1	1	1	TMTC1	transmembrane and tetratricopeptide repeat containing 1
hsa-miR-297	1	0	1	1	1	1	ZNF664	zinc finger protein 664
hsa-miR-297	0	0	1	1	0	0	BEAN1	brain expressed, associated with NEDD4, 1
hsa-miR-297	0	0	1	0	0	0	JPX	JPX transcript, XIST activator (non-protein coding)
hsa-miR-297	0	0	1	0	0	0	LOC441204	uncharacterized LOC441204
hsa-miR-297	1	0	1	1	1	1	CLCN5	chloride channel, voltage-sensitive 5
hsa-miR-297	1	0	1	1	1	1	SORBS2	sorbin and SH3 domain containing 2
hsa-miR-297	1	0	1	1	1	1	PUM1	pumilio homolog 1 (Drosophila)
hsa-miR-297	0	0	1	1	1	1	GNB2	guanine nucleotide binding protein (G protein), beta polypeptide 2
hsa-miR-297	0	0	1	1	1	1	XAF1	XIAP associated factor 1
hsa-miR-297	0	0	1	1	1	1	PSME3	proteasome (prosome, macropain) activator subunit 3 (PA28 gamma; Ki)
hsa-miR-297	0	0	1	1	0	0	NXF2	nuclear RNA export factor 2
hsa-miR-297	0	0	1	1	1	1	RANBP17	RAN binding protein 17
hsa-miR-297	1	0	1	0	1	1	NCAM1	neural cell adhesion molecule 1
hsa-miR-297	1	0	1	1	1	1	ANKRD49	ankyrin repeat domain 49
hsa-miR-297	0	0	1	1	1	1	LYRM5	LYR motif containing 5
hsa-miR-297	1	0	1	1	1	1	ANKRD29	ankyrin repeat domain 29
hsa-miR-297	1	0	1	1	1	1	IST1	increased sodium tolerance 1 homolog (yeast)
hsa-miR-297	0	0	1	1	1	1	A2ML1	alpha-2-macroglobulin-like 1
hsa-miR-297	0	0	1	1	1	1	ZBTB26	zinc finger and BTB domain containing 26
hsa-miR-297	0	0	1	0	1	1	CCDC68	coiled-coil domain containing 68
hsa-miR-297	1	0	1	1	1	1	TBCK	TBC1 domain containing kinase
hsa-miR-297	0	0	1	0	0	0	CAPN13	calpain 13
hsa-miR-297	1	0	1	1	1	1	BLCAP	bladder cancer associated protein
hsa-miR-297	0	0	1	1	1	1	TCF7L2	transcription factor 7-like 2 (T-cell specific, HMG-box)
hsa-miR-297	1	0	1	1	1	1	NOTCH2NL	notch 2 N-terminal like
hsa-miR-297	1	0	1	1	1	1	NDFIP1	Nedd4 family interacting protein 1
hsa-miR-297	1	0	1	1	1	1	STXBP5	syntaxin binding protein 5 (tomosyn)
hsa-miR-297	0	0	1	0	0	0	LOC643837	uncharacterized LOC643837
hsa-miR-297	0	0	1	1	1	1	CCDC102B	coiled-coil domain containing 102B
hsa-miR-297	0	0	1	1	0	0	ACOT11	acyl-CoA thioesterase 11
hsa-miR-297	1	0	1	1	1	1	AMMECR1	Alport syndrome, mental retardation, midface hypoplasia and elliptocytosis chromosomal region gene 1
hsa-miR-297	0	0	1	1	1	1	POU2F1	POU class 2 homeobox 1
hsa-miR-297	1	0	1	1	1	1	FBXW2	F-box and WD repeat domain containing 2
hsa-miR-297	0	0	1	1	1	1	NRCAM	neuronal cell adhesion molecule
hsa-miR-297	1	0	1	1	1	1	GNG2	guanine nucleotide binding protein (G protein), gamma 2
hsa-miR-297	0	0	1	1	0	0	ADH6	alcohol dehydrogenase 6 (class V)
hsa-miR-297	1	0	1	1	1	1	IVNS1ABP	influenza virus NS1A binding protein
hsa-miR-297	1	0	1	1	1	1	TIAM1	T-cell lymphoma invasion and metastasis 1
hsa-miR-297	1	0	1	1	0	0	PRMT8	protein arginine methyltransferase 8
hsa-miR-297	0	0	1	1	1	1	LZTFL1	leucine zipper transcription factor-like 1
hsa-miR-297	1	0	1	0	0	0	SH3RF3	SH3 domain containing ring finger 3
hsa-miR-297	0	0	1	0	0	0	CXXC1P1	CXXC finger protein 1 pseudogene 1
hsa-miR-297	1	0	1	1	1	1	MAP3K12	mitogen-activated protein kinase kinase kinase 12
hsa-miR-297	0	0	1	1	0	0	WBP1	WW domain binding protein 1
hsa-miR-297	0	0	1	1	1	1	SPOCK1	sparc/osteonectin, cwcv and kazal-like domains proteoglycan (testican) 1
hsa-miR-297	1	0	1	1	1	1	SIAH1	siah E3 ubiquitin protein ligase 1
hsa-miR-297	1	0	1	0	1	1	NCOA7	nuclear receptor coactivator 7
hsa-miR-297	0	0	1	0	0	0	FLJ37505	uncharacterized LOC400087
hsa-miR-297	0	0	1	0	1	1	AGBL4	ATP/GTP binding protein-like 4
hsa-miR-297	0	0	1	1	0	0	PPOX	protoporphyrinogen oxidase
hsa-miR-297	1	0	1	1	1	1	NMT2	N-myristoyltransferase 2
hsa-miR-297	0	0	1	1	1	1	TMEM170A	transmembrane protein 170A
hsa-miR-297	0	0	1	1	1	1	AES	amino-terminal enhancer of split
hsa-miR-297	0	0	1	1	1	1	MOBP	myelin-associated oligodendrocyte basic protein
hsa-miR-297	1	0	1	1	1	1	EPHB1	EPH receptor B1
hsa-miR-297	1	0	1	1	1	1	ATXN10	ataxin 10
hsa-miR-297	0	0	1	0	0	0	LOC730101	uncharacterized LOC730101
hsa-miR-297	0	0	1	1	1	1	AQP3	aquaporin 3 (Gill blood group)
hsa-miR-297	0	0	1	1	1	1	SIRPB2	signal-regulatory protein beta 2
hsa-miR-297	1	0	1	1	1	1	CS	citrate synthase
hsa-miR-297	1	0	1	1	1	1	PEA15	phosphoprotein enriched in astrocytes 15
hsa-miR-297	0	0	1	1	0	0	MAP7D1	MAP7 domain containing 1
hsa-miR-297	0	0	1	1	0	0	C11orf74	chromosome 11 open reading frame 74
hsa-miR-297	1	0	1	1	1	1	ACSL1	acyl-CoA synthetase long-chain family member 1
hsa-miR-297	0	0	1	0	0	0	ZNF815P	zinc finger protein 815, pseudogene
hsa-miR-297	0	0	1	1	1	1	XRCC5	X-ray repair complementing defective repair in Chinese hamster cells 5 (double-strand-break rejoining)
hsa-miR-297	0	0	1	0	0	0	METTL21CP1	methyltransferase like 21C pseudogene 1
hsa-miR-297	0	0	1	0	1	1	SWAP70	SWAP switching B-cell complex 70kDa subunit
hsa-miR-297	0	0	1	1	1	1	GBAS	glioblastoma amplified sequence
hsa-miR-297	0	0	1	0	0	0	LOC401463	uncharacterized LOC401463
hsa-miR-297	1	0	1	1	1	1	KL	klotho
hsa-miR-297	0	0	1	0	0	0	LOC400680	uncharacterized LOC400680
hsa-miR-297	0	0	1	0	0	0	LINC00293	long intergenic non-protein coding RNA 293
hsa-miR-297	0	0	1	1	0	0	C10orf68	chromosome 10 open reading frame 68
hsa-miR-297	1	0	1	1	1	1	HOOK1	hook homolog 1 (Drosophila)
hsa-miR-297	1	0	1	1	1	1	PIGA	phosphatidylinositol glycan anchor biosynthesis, class A
hsa-miR-297	0	0	1	1	1	1	RGS14	regulator of G-protein signaling 14
hsa-miR-297	1	0	1	1	1	1	IL20RA	interleukin 20 receptor, alpha
hsa-miR-297	1	0	1	1	1	1	NDFIP2	Nedd4 family interacting protein 2
hsa-miR-297	1	0	1	1	1	1	PCMT1	protein-L-isoaspartate (D-aspartate) O-methyltransferase
hsa-miR-297	0	0	1	1	0	0	SYT17	synaptotagmin XVII
hsa-miR-297	1	0	1	1	1	1	HBP1	HMG-box transcription factor 1
hsa-miR-297	0	0	1	1	1	1	GPR128	G protein-coupled receptor 128
hsa-miR-297	0	0	1	1	1	1	STRC	stereocilin
hsa-miR-297	0	0	1	1	1	1	ZDHHC15	zinc finger, DHHC-type containing 15
hsa-miR-297	1	0	1	1	0	0	WIZ	widely interspaced zinc finger motifs
hsa-miR-297	1	0	1	1	1	1	RPS6KC1	ribosomal protein S6 kinase, 52kDa, polypeptide 1
hsa-miR-297	0	0	1	1	0	0	CFP	complement factor properdin
hsa-miR-297	0	0	1	1	0	0	DGKA	diacylglycerol kinase, alpha 80kDa
hsa-miR-297	1	0	1	1	1	1	ZNF275	zinc finger protein 275
hsa-miR-297	0	0	1	1	1	1	FAM5B	family with sequence similarity 5, member B
hsa-miR-297	0	0	1	0	0	0	MORN2	MORN repeat containing 2
hsa-miR-297	1	0	1	0	1	1	KCNK2	potassium channel, subfamily K, member 2
hsa-miR-297	0	0	1	1	1	1	FAM19A2	family with sequence similarity 19 (chemokine (C-C motif)-like), member A2
hsa-miR-297	1	0	1	1	1	1	IPPK	inositol 1,3,4,5,6-pentakisphosphate 2-kinase
hsa-miR-297	1	0	1	0	1	1	WDR82	WD repeat domain 82
hsa-miR-297	1	0	1	1	1	1	OSBPL9	oxysterol binding protein-like 9
hsa-miR-297	1	0	1	1	1	1	GJC1	gap junction protein, gamma 1, 45kDa
hsa-miR-297	0	0	1	1	1	1	QDPR	quinoid dihydropteridine reductase
hsa-miR-297	0	0	1	1	0	0	SSPO	SCO-spondin homolog (Bos taurus)
hsa-miR-297	1	0	1	1	1	1	FAM122B	family with sequence similarity 122B
hsa-miR-297	1	0	1	1	1	1	FAM118A	family with sequence similarity 118, member A
hsa-miR-297	1	0	1	1	1	1	C11orf30	chromosome 11 open reading frame 30
hsa-miR-297	1	0	1	1	1	1	IGFBP3	insulin-like growth factor binding protein 3
hsa-miR-297	1	0	1	1	1	1	METAP2	methionyl aminopeptidase 2
hsa-miR-297	1	0	1	1	1	1	DENND5B	DENN/MADD domain containing 5B
hsa-miR-297	0	0	1	1	1	1	CTPS2	CTP synthase 2
hsa-miR-297	0	0	1	1	1	1	MKX	mohawk homeobox
hsa-miR-297	1	0	1	1	1	1	KPNA1	karyopherin alpha 1 (importin alpha 5)
hsa-miR-297	1	0	1	0	1	1	HECTD1	HECT domain containing E3 ubiquitin protein ligase 1
hsa-miR-297	0	0	1	1	1	1	RBM46	RNA binding motif protein 46
hsa-miR-297	1	0	1	1	1	1	MACROD2	MACRO domain containing 2
hsa-miR-297	1	0	1	1	0	0	UBN2	ubinuclein 2
hsa-miR-297	0	0	1	1	0	0	FSIP2	fibrous sheath interacting protein 2
hsa-miR-297	0	0	1	0	0	0	ADCY10P1	adenylate cyclase 10 (soluble) pseudogene 1
hsa-miR-297	1	0	1	0	1	1	PLXNA1	plexin A1
hsa-miR-297	1	0	1	1	1	1	CSRNP3	cysteine-serine-rich nuclear protein 3
hsa-miR-297	1	0	1	1	1	1	LIN9	lin-9 homolog (C. elegans)
hsa-miR-297	1	0	1	1	1	1	PIK3R1	phosphoinositide-3-kinase, regulatory subunit 1 (alpha)
hsa-miR-297	0	0	1	1	1	1	PLEKHS1	pleckstrin homology domain containing, family S member 1
hsa-miR-297	1	0	1	1	1	1	DLG2	discs, large homolog 2 (Drosophila)
hsa-miR-297	0	0	1	1	0	0	TMEM151B	transmembrane protein 151B
hsa-miR-297	0	0	1	1	0	0	HS3ST5	heparan sulfate (glucosamine) 3-O-sulfotransferase 5
hsa-miR-297	1	0	1	1	1	1	CLIP1	CAP-GLY domain containing linker protein 1
hsa-miR-297	0	0	1	0	0	0	RPL23AP53	ribosomal protein L23a pseudogene 53
hsa-miR-297	0	0	1	0	0	0	GRAMD1B	GRAM domain containing 1B
hsa-miR-297	1	0	1	1	1	1	KANK4	KN motif and ankyrin repeat domains 4
hsa-miR-297	1	0	1	1	1	1	CXorf23	chromosome X open reading frame 23
hsa-miR-297	1	0	1	0	1	1	FNDC3B	fibronectin type III domain containing 3B
hsa-miR-297	1	0	1	0	1	1	CAPRIN1	cell cycle associated protein 1
hsa-miR-297	1	0	1	0	1	1	YOD1	YOD1 OTU deubiquinating enzyme 1 homolog (S. cerevisiae)
hsa-miR-297	1	0	1	1	1	1	SLC12A6	solute carrier family 12 (potassium/chloride transporters), member 6
hsa-miR-297	1	0	1	0	1	1	PLSCR4	phospholipid scramblase 4
hsa-miR-297	1	0	1	1	1	1	SH3D19	SH3 domain containing 19
hsa-miR-297	1	0	1	1	1	1	DPY19L3	dpy-19-like 3 (C. elegans)
hsa-miR-297	0	0	1	0	0	0	FLJ26245	uncharacterized LOC400533
hsa-miR-297	1	0	1	1	1	1	CD200	CD200 molecule
hsa-miR-297	0	0	1	1	1	1	G3BP1	GTPase activating protein (SH3 domain) binding protein 1
hsa-miR-297	0	0	1	0	0	0	LOC494141	mitochondrial carrier triple repeat 1 pseudogene
hsa-miR-297	1	0	1	0	1	1	ESRRG	estrogen-related receptor gamma
hsa-miR-297	1	0	1	1	0	0	FOXP2	forkhead box P2
hsa-miR-297	1	0	1	0	1	1	FMNL2	formin-like 2
hsa-miR-297	1	0	1	1	1	1	PPP2R5C	protein phosphatase 2, regulatory subunit B', gamma
hsa-miR-297	1	0	1	1	1	1	MAP3K14	mitogen-activated protein kinase kinase kinase 14
hsa-miR-297	0	0	1	1	1	1	ZNF346	zinc finger protein 346
hsa-miR-297	0	0	1	1	1	1	NR4A1	nuclear receptor subfamily 4, group A, member 1
hsa-miR-297	0	0	1	1	1	1	ARID1A	AT rich interactive domain 1A (SWI-like)
hsa-miR-297	1	0	1	1	1	1	GATA6	GATA binding protein 6
hsa-miR-297	1	0	1	0	1	1	MGAT4B	mannosyl (alpha-1,3-)-glycoprotein beta-1,4-N-acetylglucosaminyltransferase, isozyme B
hsa-miR-297	1	0	1	1	1	1	COBLL1	COBL-like 1
hsa-miR-297	0	0	1	1	1	1	PUS7L	pseudouridylate synthase 7 homolog (S. cerevisiae)-like
hsa-miR-297	1	0	1	1	1	1	LUC7L3	LUC7-like 3 (S. cerevisiae)
hsa-miR-297	1	0	1	1	1	1	NCOA1	nuclear receptor coactivator 1
hsa-miR-297	0	0	1	1	0	0	NEK7	NIMA (never in mitosis gene a)-related kinase 7
hsa-miR-297	1	0	1	1	1	1	TAB2	TGF-beta activated kinase 1/MAP3K7 binding protein 2
hsa-miR-297	0	0	1	0	0	0	POM121L8P	POM121 transmembrane nucleoporin-like 8 pseudogene
hsa-miR-297	0	0	1	1	1	1	ARIH1	ariadne homolog, ubiquitin-conjugating enzyme E2 binding protein, 1 (Drosophila)
hsa-miR-297	1	0	1	1	1	1	SMC6	structural maintenance of chromosomes 6
hsa-miR-297	0	0	1	1	1	1	ZNF280D	zinc finger protein 280D
hsa-miR-297	1	0	1	1	1	1	SLC25A36	solute carrier family 25 (pyrimidine nucleotide carrier ), member 36
hsa-miR-297	0	0	1	1	1	1	RHOT1	ras homolog family member T1
hsa-miR-297	1	0	1	1	1	1	KIAA1033	KIAA1033
hsa-miR-297	1	0	1	1	1	1	CTTNBP2NL	CTTNBP2 N-terminal like
hsa-miR-297	0	0	1	0	0	0	RPL23AP82	ribosomal protein L23a pseudogene 82
hsa-miR-297	1	0	1	1	1	1	PKNOX2	PBX/knotted 1 homeobox 2
hsa-miR-297	1	0	1	0	1	1	FAM19A1	family with sequence similarity 19 (chemokine (C-C motif)-like), member A1
hsa-miR-297	1	0	1	0	1	1	ZNF507	zinc finger protein 507
hsa-miR-297	0	0	1	1	1	1	COBL	cordon-bleu homolog (mouse)
hsa-miR-297	1	0	1	1	1	1	MIER1	mesoderm induction early response 1 homolog (Xenopus laevis)
hsa-miR-297	0	0	1	1	0	0	THADA	thyroid adenoma associated
hsa-miR-297	1	0	1	1	1	1	NFX1	nuclear transcription factor, X-box binding 1
hsa-miR-297	0	0	1	1	1	1	YAP1	Yes-associated protein 1
hsa-miR-297	1	0	1	1	1	1	SBF2	SET binding factor 2
hsa-miR-297	1	0	1	0	1	1	GPCPD1	glycerophosphocholine phosphodiesterase GDE1 homolog (S. cerevisiae)
hsa-miR-297	0	0	1	1	1	1	CCDC132	coiled-coil domain containing 132
hsa-miR-297	1	0	1	0	1	1	MEF2C	myocyte enhancer factor 2C
hsa-miR-297	1	0	1	1	1	1	SOX6	SRY (sex determining region Y)-box 6
hsa-miR-297	1	0	1	1	1	1	CAMK4	calcium/calmodulin-dependent protein kinase IV
hsa-miR-297	1	0	1	1	1	1	BPTF	bromodomain PHD finger transcription factor
hsa-miR-297	0	0	1	1	1	1	KIAA1841	KIAA1841
hsa-miR-297	1	0	1	0	1	1	JAZF1	JAZF zinc finger 1
hsa-miR-297	1	0	1	1	1	1	CADM2	cell adhesion molecule 2
hsa-miR-297	1	0	1	0	0	0	XPNPEP3	X-prolyl aminopeptidase (aminopeptidase P) 3, putative
hsa-miR-297	1	0	1	1	1	1	RICTOR	RPTOR independent companion of MTOR, complex 2
hsa-miR-297	0	0	1	1	1	1	KLHL29	kelch-like 29 (Drosophila)
hsa-miR-297	1	0	1	0	1	1	COX18	COX18 cytochrome c oxidase assembly homolog (S. cerevisiae)
hsa-miR-297	1	0	1	0	1	1	NR3C1	nuclear receptor subfamily 3, group C, member 1 (glucocorticoid receptor)
hsa-miR-297	1	0	1	1	1	1	FAM76B	family with sequence similarity 76, member B
hsa-miR-297	1	0	1	0	1	1	PATL1	protein associated with topoisomerase II homolog 1 (yeast)
hsa-miR-297	0	0	1	1	1	1	AMOTL1	angiomotin like 1
hsa-miR-297	1	0	1	1	1	1	WDR44	WD repeat domain 44
hsa-miR-297	1	0	1	1	1	1	RNF38	ring finger protein 38
hsa-miR-297	1	0	1	1	1	1	IKZF2	IKAROS family zinc finger 2 (Helios)
hsa-miR-297	0	0	1	0	0	0	PMCHL1	pro-melanin-concentrating hormone-like 1, pseudogene
hsa-miR-297	0	0	1	0	0	0	PMCHL2	pro-melanin-concentrating hormone-like 2, pseudogene
hsa-miR-297	0	0	1	1	0	0	ERAP2	endoplasmic reticulum aminopeptidase 2
hsa-miR-297	0	0	1	1	1	1	ELAVL4	ELAV (embryonic lethal, abnormal vision, Drosophila)-like 4
hsa-miR-297	1	0	1	1	1	1	DUSP16	dual specificity phosphatase 16
hsa-miR-297	1	0	1	0	1	1	BDNF	brain-derived neurotrophic factor
hsa-miR-297	1	0	1	1	1	1	ANGPT1	angiopoietin 1
hsa-miR-297	1	0	1	1	1	1	LUZP2	leucine zipper protein 2
hsa-miR-297	0	0	1	1	1	1	CEP41	centrosomal protein 41kDa
hsa-miR-297	0	0	1	1	1	1	DNAJB14	DnaJ (Hsp40) homolog, subfamily B, member 14
hsa-miR-297	1	0	1	1	1	1	BCL11A	B-cell CLL/lymphoma 11A (zinc finger protein)
hsa-miR-297	0	0	1	1	1	1	IYD	iodotyrosine deiodinase
hsa-miR-297	1	0	1	1	1	1	PNRC1	proline-rich nuclear receptor coactivator 1
hsa-miR-297	0	0	1	1	1	1	STAG3L3	stromal antigen 3-like 3
hsa-miR-297	1	0	1	1	1	1	GFRA2	GDNF family receptor alpha 2
hsa-miR-297	1	0	1	1	1	1	TAB3	TGF-beta activated kinase 1/MAP3K7 binding protein 3
hsa-miR-297	0	0	1	1	1	1	MFAP5	microfibrillar associated protein 5
hsa-miR-297	1	0	1	1	1	1	CAMTA1	calmodulin binding transcription activator 1
hsa-miR-297	1	0	1	1	1	1	NLGN4X	neuroligin 4, X-linked
hsa-miR-297	1	0	1	0	1	1	ANKRD28	ankyrin repeat domain 28
hsa-miR-297	1	0	1	0	1	1	NHS	Nance-Horan syndrome (congenital cataracts and dental anomalies)
hsa-miR-297	0	0	1	0	1	1	BRWD3	bromodomain and WD repeat domain containing 3
hsa-miR-297	0	0	1	0	0	0	ZNFX1-AS1	ZNFX1 antisense RNA 1
hsa-miR-297	0	0	1	1	0	0	SH2D6	SH2 domain containing 6
hsa-miR-297	0	0	1	0	1	1	RAB18	RAB18, member RAS oncogene family
hsa-miR-297	1	0	1	1	0	0	ZCCHC4	zinc finger, CCHC domain containing 4
hsa-miR-297	0	0	1	1	1	1	SMPD1	sphingomyelin phosphodiesterase 1, acid lysosomal
hsa-miR-297	1	0	1	1	1	1	MAPT	microtubule-associated protein tau
hsa-miR-297	1	0	1	1	1	1	QKI	QKI, KH domain containing, RNA binding
hsa-miR-297	1	0	1	1	1	1	MYB	v-myb myeloblastosis viral oncogene homolog (avian)
hsa-miR-297	1	0	1	1	1	1	ZNF449	zinc finger protein 449
hsa-miR-297	0	0	1	1	1	1	IL23R	interleukin 23 receptor
hsa-miR-297	1	0	1	1	1	1	AMOT	angiomotin
hsa-miR-297	1	0	1	0	1	1	FAM46A	family with sequence similarity 46, member A
hsa-miR-297	1	0	1	1	1	1	ELOVL6	ELOVL fatty acid elongase 6
hsa-miR-297	0	0	1	1	0	0	ANXA5	annexin A5
hsa-miR-297	1	0	1	1	1	1	TSPAN14	tetraspanin 14
hsa-miR-297	1	0	1	1	1	1	NONO	non-POU domain containing, octamer-binding
hsa-miR-297	1	0	1	1	1	1	POU2F2	POU class 2 homeobox 2
hsa-miR-297	0	0	1	1	1	1	C1orf94	chromosome 1 open reading frame 94
hsa-miR-297	1	0	1	0	1	1	DDX3X	DEAD (Asp-Glu-Ala-Asp) box polypeptide 3, X-linked
hsa-miR-297	1	0	1	1	1	1	CALM1	calmodulin 1 (phosphorylase kinase, delta)
hsa-miR-297	0	0	1	1	1	1	ZNF85	zinc finger protein 85
hsa-miR-297	1	0	1	1	1	1	HMGA1	high mobility group AT-hook 1
hsa-miR-297	1	0	1	1	0	0	SIGMAR1	sigma non-opioid intracellular receptor 1
hsa-miR-297	1	0	1	1	1	1	GRIA2	glutamate receptor, ionotropic, AMPA 2
hsa-miR-297	1	0	1	1	1	1	ZFAND5	zinc finger, AN1-type domain 5
hsa-miR-297	1	0	1	1	1	1	TRIM2	tripartite motif containing 2
hsa-miR-297	0	0	1	0	0	0	LRRC14	leucine rich repeat containing 14
hsa-miR-297	0	0	1	0	0	0	TPTEP1	transmembrane phosphatase with tensin homology pseudogene 1
hsa-miR-297	0	0	1	0	1	1	GDE1	glycerophosphodiester phosphodiesterase 1
hsa-miR-297	1	0	1	0	1	1	GUCY1A3	guanylate cyclase 1, soluble, alpha 3
hsa-miR-297	0	0	1	1	1	1	KLF7	Kruppel-like factor 7 (ubiquitous)
hsa-miR-297	1	0	1	1	1	1	RBM7	RNA binding motif protein 7
hsa-miR-297	1	0	1	1	1	1	ETF1	eukaryotic translation termination factor 1
hsa-miR-297	0	0	1	1	1	1	GIN1	gypsy retrotransposon integrase 1
hsa-miR-297	0	0	1	0	0	0	KLHL15	kelch-like 15 (Drosophila)
hsa-miR-297	1	0	1	1	1	1	ZBTB38	zinc finger and BTB domain containing 38
hsa-miR-297	1	0	1	1	1	1	ZNF512	zinc finger protein 512
hsa-miR-297	0	0	1	0	1	1	ZNF37A	zinc finger protein 37A
hsa-miR-297	1	0	1	0	1	1	NR1D2	nuclear receptor subfamily 1, group D, member 2
hsa-miR-297	1	0	1	0	1	1	NECAB1	N-terminal EF-hand calcium binding protein 1
hsa-miR-297	1	0	1	1	1	1	FAM199X	family with sequence similarity 199, X-linked
hsa-miR-297	1	0	1	1	1	1	NRF1	nuclear respiratory factor 1
hsa-miR-297	0	0	1	0	0	0	FAM200B	family with sequence similarity 200, member B
hsa-miR-297	1	0	1	1	1	1	ZMAT4	zinc finger, matrin-type 4
hsa-miR-297	0	0	1	1	1	1	LRRK1	leucine-rich repeat kinase 1
hsa-miR-297	1	0	1	1	1	1	WHSC1	Wolf-Hirschhorn syndrome candidate 1
hsa-miR-297	0	0	1	0	1	1	ZNF718	zinc finger protein 718
hsa-miR-297	0	0	1	1	1	1	RNF103	ring finger protein 103
hsa-miR-297	1	0	1	1	1	1	SPRYD7	SPRY domain containing 7
hsa-miR-297	0	0	1	1	1	1	CDC42SE2	CDC42 small effector 2
hsa-miR-297	1	0	1	1	1	1	SPOCK2	sparc/osteonectin, cwcv and kazal-like domains proteoglycan (testican) 2
hsa-miR-297	1	0	1	0	1	1	CDK19	cyclin-dependent kinase 19
hsa-miR-297	0	0	1	1	0	0	GLS2	glutaminase 2 (liver, mitochondrial)
hsa-miR-297	0	0	1	1	1	1	C1orf114	chromosome 1 open reading frame 114
hsa-miR-297	1	0	1	1	1	1	CNTN4	contactin 4
hsa-miR-297	1	0	1	1	1	1	ZDHHC5	zinc finger, DHHC-type containing 5
hsa-miR-297	0	0	1	1	1	1	MAP2	microtubule-associated protein 2
hsa-miR-297	1	0	1	1	1	1	RSPO2	R-spondin 2
hsa-miR-297	1	0	1	1	1	1	APPL2	adaptor protein, phosphotyrosine interaction, PH domain and leucine zipper containing 2
hsa-miR-297	0	0	1	0	1	1	PAPOLG	poly(A) polymerase gamma
hsa-miR-297	1	0	1	1	1	1	HTR2C	5-hydroxytryptamine (serotonin) receptor 2C, G protein-coupled
hsa-miR-297	0	0	1	1	1	1	PIK3AP1	phosphoinositide-3-kinase adaptor protein 1
hsa-miR-297	0	0	1	1	1	1	PIP5K1B	phosphatidylinositol-4-phosphate 5-kinase, type I, beta
hsa-miR-297	1	0	1	1	1	1	EYA4	eyes absent homolog 4 (Drosophila)
hsa-miR-297	1	0	1	1	1	1	ADARB1	adenosine deaminase, RNA-specific, B1
hsa-miR-297	1	0	1	1	1	1	GABRA1	gamma-aminobutyric acid (GABA) A receptor, alpha 1
hsa-miR-297	1	0	1	1	1	1	MUM1L1	melanoma associated antigen (mutated) 1-like 1
hsa-miR-297	0	0	1	1	0	0	TRIM69	tripartite motif containing 69
hsa-miR-297	1	0	1	1	1	1	PITPNB	phosphatidylinositol transfer protein, beta
hsa-miR-297	1	0	1	1	1	1	RCOR3	REST corepressor 3
hsa-miR-297	1	0	1	1	1	1	DFFB	DNA fragmentation factor, 40kDa, beta polypeptide (caspase-activated DNase)
hsa-miR-297	1	0	1	1	1	1	RHOBTB1	Rho-related BTB domain containing 1
hsa-miR-297	1	0	1	1	1	1	SECISBP2L	SECIS binding protein 2-like
hsa-miR-297	1	0	1	1	1	1	SLC25A27	solute carrier family 25, member 27
hsa-miR-297	1	0	1	1	1	1	SIRPA	signal-regulatory protein alpha
hsa-miR-297	0	0	1	0	0	0	LOC415056	uncharacterized LOC415056
hsa-miR-297	0	0	1	0	0	0	NBR2	neighbor of BRCA1 gene 2 (non-protein coding)
hsa-miR-297	0	0	1	1	1	1	ZNF337	zinc finger protein 337
hsa-miR-297	0	0	1	1	1	1	EDA2R	ectodysplasin A2 receptor
hsa-miR-297	1	0	1	1	1	1	FAM120A	family with sequence similarity 120A
hsa-miR-297	0	0	1	1	1	1	SLC6A16	solute carrier family 6, member 16
hsa-miR-297	1	0	1	1	1	1	NKAIN2	Na+/K+ transporting ATPase interacting 2
hsa-miR-297	1	0	1	1	1	1	ZZZ3	zinc finger, ZZ-type containing 3
hsa-miR-297	1	0	1	1	1	1	ZEB2	zinc finger E-box binding homeobox 2
hsa-miR-297	1	0	1	1	1	1	CTDSPL2	CTD (carboxy-terminal domain, RNA polymerase II, polypeptide A) small phosphatase like 2
hsa-miR-297	0	0	1	1	1	1	UBE3D	ubiquitin protein ligase E3D
hsa-miR-297	1	0	1	1	1	1	PEX5L	peroxisomal biogenesis factor 5-like
hsa-miR-297	0	0	1	0	0	0	FAM201A	family with sequence similarity 201, member A
hsa-miR-297	1	0	1	1	1	1	MEIS1	Meis homeobox 1
hsa-miR-297	1	0	1	0	1	1	CLDN12	claudin 12
hsa-miR-297	0	0	1	1	1	1	CELF1	CUGBP, Elav-like family member 1
hsa-miR-297	1	0	1	1	0	0	RASGEF1B	RasGEF domain family, member 1B
hsa-miR-297	0	0	1	0	0	0	SRGAP2C	SLIT-ROBO Rho GTPase activating protein 2C
hsa-miR-297	1	0	1	0	1	1	RAG1	recombination activating gene 1
hsa-miR-297	0	0	1	0	0	0	LOC286184	uncharacterized LOC286184
hsa-miR-297	1	0	1	1	1	1	GALNT1	UDP-N-acetyl-alpha-D-galactosamine:polypeptide N-acetylgalactosaminyltransferase 1 (GalNAc-T1)
hsa-miR-297	1	0	1	1	1	1	DPP10	dipeptidyl-peptidase 10 (non-functional)
hsa-miR-297	1	0	1	1	0	0	CHD4	chromodomain helicase DNA binding protein 4
hsa-miR-297	1	0	1	1	1	1	PLS3	plastin 3
hsa-miR-297	0	0	1	1	0	0	ADAMTS13	ADAM metallopeptidase with thrombospondin type 1 motif, 13
hsa-miR-297	0	0	1	0	0	0	USP32P1	ubiquitin specific peptidase 32 pseudogene 1
hsa-miR-297	1	0	1	1	1	1	TIMP2	TIMP metallopeptidase inhibitor 2
hsa-miR-297	1	0	1	1	1	1	DACH2	dachshund homolog 2 (Drosophila)
hsa-miR-297	1	0	1	1	1	1	BVES	blood vessel epicardial substance
hsa-miR-297	1	0	1	0	1	1	PCSK2	proprotein convertase subtilisin/kexin type 2
hsa-miR-297	1	0	1	1	1	1	INTS6	integrator complex subunit 6
hsa-miR-297	0	0	1	0	0	0	LOC339240	keratin 17 pseudogene
hsa-miR-297	1	0	1	1	1	1	UNC13C	unc-13 homolog C (C. elegans)
hsa-miR-297	1	0	1	1	0	0	RGL2	ral guanine nucleotide dissociation stimulator-like 2
hsa-miR-297	0	0	1	0	1	1	FAM13B	family with sequence similarity 13, member B
hsa-miR-297	1	0	1	1	1	1	ARPP21	cAMP-regulated phosphoprotein, 21kDa
hsa-miR-297	0	0	1	1	0	0	NT5DC4	5'-nucleotidase domain containing 4
hsa-miR-297	1	0	1	1	1	1	TNFSF4	tumor necrosis factor (ligand) superfamily, member 4
hsa-miR-297	1	0	1	0	1	1	TNFAIP3	tumor necrosis factor, alpha-induced protein 3
hsa-miR-297	1	0	1	1	1	1	CLOCK	clock homolog (mouse)
hsa-miR-297	0	0	1	1	1	1	MTHFD2L	methylenetetrahydrofolate dehydrogenase (NADP+ dependent) 2-like
hsa-miR-297	1	0	1	0	1	1	USP6NL	USP6 N-terminal like
hsa-miR-297	1	0	1	1	1	1	TXNRD1	thioredoxin reductase 1
hsa-miR-297	0	0	1	0	0	0	SLC8A1-AS1	SLC8A1 antisense RNA 1
hsa-miR-297	0	0	1	0	0	0	LOC339260	uncharacterized LOC339260
hsa-miR-297	0	0	1	0	0	0	KIF18B	kinesin family member 18B
hsa-miR-297	1	0	1	1	1	1	MAMDC2	MAM domain containing 2
hsa-miR-297	1	0	1	1	1	1	PCYT1B	phosphate cytidylyltransferase 1, choline, beta
hsa-miR-297	1	0	1	1	1	1	SENP1	SUMO1/sentrin specific peptidase 1
hsa-miR-297	1	0	1	1	1	1	KIF2A	kinesin heavy chain member 2A
hsa-miR-297	1	0	1	1	1	1	CLVS1	clavesin 1
hsa-miR-297	1	0	1	0	1	1	ARHGAP5	Rho GTPase activating protein 5
hsa-miR-297	0	0	1	1	1	1	FBXO38	F-box protein 38
hsa-miR-297	1	0	1	1	1	1	FNDC3A	fibronectin type III domain containing 3A
hsa-miR-297	1	0	1	0	1	1	SEMA4G	sema domain, immunoglobulin domain (Ig), transmembrane domain (TM) and short cytoplasmic domain, (semaphorin) 4G
hsa-miR-297	1	0	1	1	1	1	ZFP91	zinc finger protein 91 homolog (mouse)
hsa-miR-297	1	0	1	1	1	1	PCGF5	polycomb group ring finger 5
hsa-miR-297	0	0	1	1	0	0	CRYM-AS1	CRYM antisense RNA 1
hsa-miR-297	0	0	1	1	1	1	ZNF365	zinc finger protein 365
hsa-miR-297	0	0	1	1	0	0	WDR90	WD repeat domain 90
hsa-miR-297	1	0	1	1	1	1	PTPN3	protein tyrosine phosphatase, non-receptor type 3
hsa-miR-297	1	0	1	1	1	1	IARS	isoleucyl-tRNA synthetase
hsa-miR-297	1	0	1	1	1	1	CKAP2	cytoskeleton associated protein 2
hsa-miR-297	1	0	1	1	1	1	C18orf1	chromosome 18 open reading frame 1
hsa-miR-297	1	0	1	1	1	1	KPNA2	karyopherin alpha 2 (RAG cohort 1, importin alpha 1)
hsa-miR-297	0	0	1	0	0	0	LINC00442	long intergenic non-protein coding RNA 442
hsa-miR-297	1	0	1	1	1	1	PDCD6IP	programmed cell death 6 interacting protein
hsa-miR-297	1	0	1	1	1	1	SLC26A7	solute carrier family 26, member 7
hsa-miR-297	0	0	1	0	0	0	SPDYE8P	speedy homolog E8 (Xenopus laevis), pseudogene
hsa-miR-297	1	0	1	1	0	0	CHTOP	chromatin target of PRMT1
hsa-miR-297	1	0	1	1	1	1	TBX2	T-box 2
hsa-miR-297	1	0	1	0	1	1	MAP4K3	mitogen-activated protein kinase kinase kinase kinase 3
hsa-miR-297	0	0	1	1	0	0	RPS3	ribosomal protein S3
hsa-miR-297	0	0	1	1	1	1	ABHD14B	abhydrolase domain containing 14B
hsa-miR-297	0	0	1	0	0	0	LOC440416	uncharacterized LOC440416
hsa-miR-297	1	0	1	1	1	1	OPCML	opioid binding protein/cell adhesion molecule-like
hsa-miR-297	1	0	1	1	1	1	WNT5A	wingless-type MMTV integration site family, member 5A
hsa-miR-297	0	0	1	1	1	1	IRX5	iroquois homeobox 5
hsa-miR-297	1	0	1	1	0	0	SLC45A4	solute carrier family 45, member 4
hsa-miR-297	1	0	1	1	1	1	SYNE1	spectrin repeat containing, nuclear envelope 1
hsa-miR-297	0	0	1	1	0	0	HEATR8	HEAT repeat containing 8
hsa-miR-297	1	0	1	1	1	1	ACVR2B	activin A receptor, type IIB
hsa-miR-297	0	0	1	0	0	0	FAM106A	family with sequence similarity 106, member A
hsa-miR-297	1	0	1	1	1	1	SYNJ1	synaptojanin 1
hsa-miR-297	1	0	1	0	1	1	MYBL1	v-myb myeloblastosis viral oncogene homolog (avian)-like 1
hsa-miR-297	1	0	1	0	1	1	CPEB2	cytoplasmic polyadenylation element binding protein 2
hsa-miR-297	1	0	1	0	1	1	KCNT2	potassium channel, subfamily T, member 2
hsa-miR-297	0	0	1	0	0	0	LOC441493	uncharacterized LOC441493
hsa-miR-297	0	0	1	0	0	0	LSAMP-AS3	LSAMP antisense RNA 3
hsa-miR-297	0	0	1	1	1	1	CCDC126	coiled-coil domain containing 126
hsa-miR-297	0	0	1	1	1	1	SPHKAP	SPHK1 interactor, AKAP domain containing
hsa-miR-297	1	0	1	1	1	1	GABRB2	gamma-aminobutyric acid (GABA) A receptor, beta 2
hsa-miR-297	1	0	1	1	1	1	PTPRD	protein tyrosine phosphatase, receptor type, D
hsa-miR-297	0	0	1	1	0	0	C9orf153	chromosome 9 open reading frame 153
hsa-miR-297	0	0	1	1	1	1	DET1	de-etiolated homolog 1 (Arabidopsis)
hsa-miR-297	1	0	1	1	1	1	ANO4	anoctamin 4
hsa-miR-297	1	0	1	1	1	1	TET2	tet methylcytosine dioxygenase 2
hsa-miR-297	0	0	1	1	1	1	ZNF514	zinc finger protein 514
hsa-miR-297	1	0	1	1	1	1	PPP4R2	protein phosphatase 4, regulatory subunit 2
hsa-miR-297	0	0	1	1	0	0	TMC2	transmembrane channel-like 2
hsa-miR-297	1	0	1	1	1	1	SLK	STE20-like kinase
hsa-miR-297	0	0	1	0	0	0	LRRC37A11P	leucine rich repeat containing 37, member A11, pseudogene
hsa-miR-297	1	0	1	1	1	1	NR3C2	nuclear receptor subfamily 3, group C, member 2
hsa-miR-297	0	0	1	1	1	1	UNC13B	unc-13 homolog B (C. elegans)
hsa-miR-297	0	0	1	1	1	1	LRCH1	leucine-rich repeats and calponin homology (CH) domain containing 1
hsa-miR-297	1	0	1	1	1	1	TMEM132B	transmembrane protein 132B
hsa-miR-297	1	0	1	1	1	1	SLMAP	sarcolemma associated protein
hsa-miR-297	1	0	1	1	1	1	TNS1	tensin 1
hsa-miR-297	1	0	1	1	1	1	GRIA3	glutamate receptor, ionotropic, AMPA 3
hsa-miR-297	1	0	1	1	1	1	OTUD4	OTU domain containing 4
hsa-miR-297	0	0	1	0	0	0	FAM27E3	family with sequence similarity 27, member E3
hsa-miR-297	0	0	1	1	1	1	TSHR	thyroid stimulating hormone receptor
hsa-miR-297	0	0	1	0	0	0	LINC00314	long intergenic non-protein coding RNA 314
hsa-miR-297	1	0	1	1	1	1	JMJD1C	jumonji domain containing 1C
hsa-miR-297	0	0	1	0	0	0	FAM225B	family with sequence similarity 225, member B (non-protein coding)
hsa-miR-297	1	0	1	0	1	1	NFAT5	nuclear factor of activated T-cells 5, tonicity-responsive
hsa-miR-297	1	0	1	0	1	1	FAM196A	family with sequence similarity 196, member A
hsa-miR-297	1	0	1	1	1	1	NIPAL2	NIPA-like domain containing 2
hsa-miR-297	0	0	1	1	1	1	PRKAR2A	protein kinase, cAMP-dependent, regulatory, type II, alpha
hsa-miR-297	0	0	1	0	0	0	MEG3	maternally expressed 3 (non-protein coding)
hsa-miR-297	0	0	1	1	1	1	TINF2	TERF1 (TRF1)-interacting nuclear factor 2
hsa-miR-297	1	0	1	1	1	1	BTBD7	BTB (POZ) domain containing 7
hsa-miR-297	0	0	1	0	0	0	DKFZp686D0853	uncharacterized LOC401613
hsa-miR-297	0	0	1	0	1	1	AP1S2	adaptor-related protein complex 1, sigma 2 subunit
hsa-miR-297	0	0	1	0	0	0	ZNF542	zinc finger protein 542
hsa-miR-297	0	0	1	1	1	1	AIG1	androgen-induced 1
hsa-miR-297	0	0	1	1	1	1	CRB1	crumbs homolog 1 (Drosophila)
hsa-miR-297	1	0	1	1	1	1	SPPL3	signal peptide peptidase like 3
hsa-miR-297	1	0	1	1	1	1	TJP1	tight junction protein 1
hsa-miR-297	0	0	1	0	1	1	THUMPD1	THUMP domain containing 1
hsa-miR-297	1	0	1	1	1	1	RORB	RAR-related orphan receptor B
hsa-miR-297	0	0	1	0	1	1	NHSL1	NHS-like 1
hsa-miR-297	1	0	1	1	1	1	PRDM2	PR domain containing 2, with ZNF domain
hsa-miR-297	0	0	1	1	1	1	CC2D2A	coiled-coil and C2 domain containing 2A
hsa-miR-297	1	0	1	1	0	0	RBM27	RNA binding motif protein 27
hsa-miR-297	0	0	1	1	1	1	ADH1B	alcohol dehydrogenase 1B (class I), beta polypeptide
hsa-miR-297	0	0	1	0	1	1	THAP6	THAP domain containing 6
hsa-miR-297	0	0	1	0	1	1	TYW5	tRNA-yW synthesizing protein 5
hsa-miR-297	1	0	1	1	1	1	FOXP1	forkhead box P1
hsa-miR-297	1	0	1	1	1	1	TSC22D3	TSC22 domain family, member 3
hsa-miR-297	0	0	1	0	0	0	OVOS	ovostatin
hsa-miR-297	1	0	1	1	1	1	PDXDC1	pyridoxal-dependent decarboxylase domain containing 1
hsa-miR-297	0	0	1	1	1	1	CCNT2	cyclin T2
hsa-miR-297	1	0	1	1	1	1	AZI2	5-azacytidine induced 2
hsa-miR-297	1	0	1	1	1	1	PTER	phosphotriesterase related
hsa-miR-297	0	0	1	1	1	1	DAZL	deleted in azoospermia-like
hsa-miR-297	1	0	1	1	1	1	PGAP1	post-GPI attachment to proteins 1
hsa-miR-297	1	0	1	1	1	1	RECK	reversion-inducing-cysteine-rich protein with kazal motifs
hsa-miR-297	1	0	1	1	1	1	CALD1	caldesmon 1
hsa-miR-297	1	0	1	1	1	1	EOGT	EGF domain-specific O-linked N-acetylglucosamine (GlcNAc) transferase
hsa-miR-297	1	0	1	0	1	1	TBL1XR1	transducin (beta)-like 1 X-linked receptor 1
hsa-miR-297	1	0	1	0	1	1	C1orf21	chromosome 1 open reading frame 21
hsa-miR-297	0	0	1	1	1	1	USP54	ubiquitin specific peptidase 54
hsa-miR-297	1	0	1	0	1	1	TTL	tubulin tyrosine ligase
hsa-miR-297	1	0	1	1	1	1	SIN3A	SIN3 transcription regulator homolog A (yeast)
hsa-miR-297	0	0	1	1	1	1	HPGD	hydroxyprostaglandin dehydrogenase 15-(NAD)
hsa-miR-297	1	0	1	0	0	0	PLSCR5	phospholipid scramblase family, member 5
hsa-miR-297	1	0	1	1	1	1	SEL1L3	sel-1 suppressor of lin-12-like 3 (C. elegans)
hsa-miR-297	1	0	1	1	0	0	SMARCA2	SWI/SNF related, matrix associated, actin dependent regulator of chromatin, subfamily a, member 2
hsa-miR-297	0	0	1	1	1	1	DUSP26	dual specificity phosphatase 26 (putative)
hsa-miR-297	1	0	1	0	0	0	IGLON5	IgLON family member 5
hsa-miR-297	0	0	1	0	0	0	LOC401127	WD repeat domain 5 pseudogene
hsa-miR-297	1	0	1	1	1	1	GPBP1	GC-rich promoter binding protein 1
hsa-miR-297	0	0	1	1	1	1	TMEM53	transmembrane protein 53
hsa-miR-297	1	0	1	0	1	1	OLA1	Obg-like ATPase 1
hsa-miR-297	0	0	1	0	0	0	CMAHP	cytidine monophospho-N-acetylneuraminic acid hydroxylase, pseudogene
hsa-miR-297	0	0	1	1	0	0	CYGB	cytoglobin
hsa-miR-297	0	0	1	1	1	1	ADK	adenosine kinase
hsa-miR-297	0	0	1	1	1	1	CHCHD4	coiled-coil-helix-coiled-coil-helix domain containing 4
hsa-miR-297	0	0	1	1	1	1	TASP1	taspase, threonine aspartase, 1
hsa-miR-297	0	0	1	1	1	1	TUBA1A	tubulin, alpha 1a
hsa-miR-297	1	0	1	1	1	1	SSR1	signal sequence receptor, alpha
hsa-miR-297	1	0	1	1	1	1	ADM	adrenomedullin
hsa-miR-297	0	0	1	1	0	0	METTL23	methyltransferase like 23
hsa-miR-297	0	0	1	0	1	1	CD99P1	CD99 molecule pseudogene 1
hsa-miR-297	1	0	1	1	1	1	EI24	etoposide induced 2.4 mRNA
hsa-miR-297	1	0	1	1	1	1	TMED5	transmembrane emp24 protein transport domain containing 5
hsa-miR-297	0	0	1	1	1	1	ZNF263	zinc finger protein 263
hsa-miR-297	0	0	1	0	0	0	TRIQK	triple QxxK/R motif containing
hsa-miR-297	1	0	1	1	1	1	NTM	neurotrimin
hsa-miR-297	1	0	1	1	1	1	MBNL1	muscleblind-like splicing regulator 1
hsa-miR-297	1	0	1	0	1	1	RPS6KB1	ribosomal protein S6 kinase, 70kDa, polypeptide 1
hsa-miR-297	0	0	1	1	1	1	STON1	stonin 1
hsa-miR-297	1	0	1	1	1	1	TMEM248	transmembrane protein 248
hsa-miR-297	0	0	1	1	1	1	EIF3J	eukaryotic translation initiation factor 3, subunit J
hsa-miR-297	1	0	1	1	1	1	TMEM245	transmembrane protein 245
hsa-miR-297	1	0	1	1	1	1	WIPF1	WAS/WASL interacting protein family, member 1
hsa-miR-297	0	0	1	1	1	1	PSMA1	proteasome (prosome, macropain) subunit, alpha type, 1
hsa-miR-297	0	0	1	1	1	1	BMPR1A	bone morphogenetic protein receptor, type IA
hsa-miR-297	0	0	1	1	0	0	MAST1	microtubule associated serine/threonine kinase 1
hsa-miR-297	0	0	1	0	0	0	LOC645513	uncharacterized LOC645513
hsa-miR-297	0	0	1	1	1	1	DEDD	death effector domain containing
hsa-miR-297	1	0	1	1	1	1	YWHAQ	tyrosine 3-monooxygenase/tryptophan 5-monooxygenase activation protein, theta polypeptide
hsa-miR-297	1	0	1	1	1	1	ARL4A	ADP-ribosylation factor-like 4A
hsa-miR-297	0	0	1	1	1	1	CD1C	CD1c molecule
hsa-miR-297	0	0	1	1	1	1	ACSF3	acyl-CoA synthetase family member 3
hsa-miR-297	1	0	1	1	1	1	CNBP	CCHC-type zinc finger, nucleic acid binding protein
hsa-miR-297	0	0	1	1	0	0	TBCEL	tubulin folding cofactor E-like
hsa-miR-297	0	0	1	1	1	1	HOXC9	homeobox C9
hsa-miR-297	0	0	1	1	1	1	STRAP	serine/threonine kinase receptor associated protein
hsa-miR-297	1	0	1	1	1	1	RALY	RNA binding protein, autoantigenic (hnRNP-associated with lethal yellow homolog (mouse))
hsa-miR-297	1	0	1	0	1	1	CD47	CD47 molecule
hsa-miR-297	1	0	1	1	1	1	RUNX1	runt-related transcription factor 1
hsa-miR-297	0	0	1	0	1	1	DENR	density-regulated protein
hsa-miR-297	0	0	1	0	1	1	SEPT7	septin 7
hsa-miR-297	1	0	1	1	1	1	TIPRL	TIP41, TOR signaling pathway regulator-like (S. cerevisiae)
hsa-miR-297	0	0	1	0	0	0	LOC100132984	uncharacterized LOC100132984
hsa-miR-297	0	0	1	1	1	1	ANXA7	annexin A7
hsa-miR-297	1	0	1	1	1	1	MAN1C1	mannosidase, alpha, class 1C, member 1
hsa-miR-297	0	0	1	1	1	1	NUDT21	nudix (nucleoside diphosphate linked moiety X)-type motif 21
hsa-miR-297	0	0	1	1	1	1	EPCAM	epithelial cell adhesion molecule
hsa-miR-297	1	0	1	1	1	1	TFPI	tissue factor pathway inhibitor (lipoprotein-associated coagulation inhibitor)
hsa-miR-297	0	0	1	0	0	0	LOC100132352	FSHD region gene 1 pseudogene
hsa-miR-297	1	0	1	1	1	1	PTPRG	protein tyrosine phosphatase, receptor type, G
hsa-miR-297	1	0	1	1	1	1	FBXW7	F-box and WD repeat domain containing 7, E3 ubiquitin protein ligase
hsa-miR-297	0	0	1	1	1	1	ATG5	autophagy related 5
hsa-miR-297	1	0	1	1	1	1	KIAA2018	KIAA2018
hsa-miR-297	1	0	1	1	1	1	ANKS6	ankyrin repeat and sterile alpha motif domain containing 6
hsa-miR-297	1	0	1	0	1	1	OSBPL8	oxysterol binding protein-like 8
hsa-miR-297	1	0	1	1	1	1	TIPARP	TCDD-inducible poly(ADP-ribose) polymerase
hsa-miR-297	0	0	1	0	1	1	ZNF28	zinc finger protein 28
hsa-miR-297	0	0	1	1	0	0	TENC1	tensin like C1 domain containing phosphatase (tensin 2)
hsa-miR-297	0	0	1	1	1	1	RBM48	RNA binding motif protein 48
hsa-miR-297	0	0	1	1	0	0	GSTT2	glutathione S-transferase theta 2
hsa-miR-297	1	0	1	1	1	1	PI15	peptidase inhibitor 15
hsa-miR-297	1	0	1	1	1	1	MAN2A2	mannosidase, alpha, class 2A, member 2
hsa-miR-297	1	0	1	0	1	1	KLHDC10	kelch domain containing 10
hsa-miR-297	0	0	1	1	1	1	ATF2	activating transcription factor 2
hsa-miR-297	0	0	1	1	0	0	SPINK5	serine peptidase inhibitor, Kazal type 5
hsa-miR-297	1	0	1	1	1	1	RSPO1	R-spondin 1
hsa-miR-297	0	0	1	1	1	1	MARVELD2	MARVEL domain containing 2
hsa-miR-297	0	0	1	1	1	1	EIF1AY	eukaryotic translation initiation factor 1A, Y-linked
hsa-miR-297	1	0	1	0	1	1	DCBLD2	discoidin, CUB and LCCL domain containing 2
hsa-miR-297	0	0	1	1	1	1	KLRG1	killer cell lectin-like receptor subfamily G, member 1
hsa-miR-297	0	0	1	0	0	0	GPR144	G protein-coupled receptor 144
hsa-miR-297	0	0	1	1	1	1	MORC4	MORC family CW-type zinc finger 4
hsa-miR-297	0	0	1	1	0	0	SUOX	sulfite oxidase
hsa-miR-297	0	0	1	1	0	0	INHBA	inhibin, beta A
hsa-miR-297	1	0	1	0	1	1	BCL2	B-cell CLL/lymphoma 2
hsa-miR-297	1	0	1	1	1	1	IGF1	insulin-like growth factor 1 (somatomedin C)
hsa-miR-297	0	0	1	1	1	1	GAD2	glutamate decarboxylase 2 (pancreatic islets and brain, 65kDa)
hsa-miR-297	0	0	1	1	1	1	ATP7A	ATPase, Cu++ transporting, alpha polypeptide
hsa-miR-297	1	0	1	1	1	1	CYP19A1	cytochrome P450, family 19, subfamily A, polypeptide 1
hsa-miR-297	1	0	1	1	1	1	DMD	dystrophin
hsa-miR-297	0	0	1	1	1	1	DPYD	dihydropyrimidine dehydrogenase
hsa-miR-297	0	0	1	1	1	1	F8	coagulation factor VIII, procoagulant component
hsa-miR-297	0	0	1	0	1	1	MS4A2	membrane-spanning 4-domains, subfamily A, member 2
hsa-miR-297	1	0	1	1	1	1	GJA1	gap junction protein, alpha 1, 43kDa
hsa-miR-297	1	0	1	1	1	1	GK	glycerol kinase
hsa-miR-297	0	0	1	1	0	0	GP1BA	glycoprotein Ib (platelet), alpha polypeptide
hsa-miR-297	1	0	1	1	1	1	JAG1	jagged 1
hsa-miR-297	1	0	1	0	1	1	SGCB	sarcoglycan, beta (43kDa dystrophin-associated glycoprotein)
hsa-miR-297	0	0	1	1	1	1	LPL	lipoprotein lipase
hsa-miR-297	1	0	1	1	1	1	MET	met proto-oncogene (hepatocyte growth factor receptor)
hsa-miR-297	0	0	1	1	0	0	MPO	myeloperoxidase
hsa-miR-297	0	0	1	1	1	1	MTR	5-methyltetrahydrofolate-homocysteine methyltransferase
hsa-miR-297	1	0	1	0	1	1	PTEN	phosphatase and tensin homolog
hsa-miR-297	1	0	1	1	1	1	ATXN1	ataxin 1
hsa-miR-297	0	0	1	1	1	1	SRD5A2	steroid-5-alpha-reductase, alpha polypeptide 2 (3-oxo-5 alpha-steroid delta 4-dehydrogenase alpha 2)
hsa-miR-297	1	0	1	0	1	1	COL5A2	collagen, type V, alpha 2
hsa-miR-297	0	0	1	1	1	1	LTBP2	latent transforming growth factor beta binding protein 2
hsa-miR-297	1	0	1	0	1	1	PAFAH1B1	platelet-activating factor acetylhydrolase 1b, regulatory subunit 1 (45kDa)
hsa-miR-297	1	0	1	1	1	1	RFX5	regulatory factor X, 5 (influences HLA class II expression)
hsa-miR-297	1	0	1	1	1	1	AQP2	aquaporin 2 (collecting duct)
hsa-miR-297	1	0	1	1	1	1	HOXD13	homeobox D13
hsa-miR-297	1	0	1	1	1	1	PLP1	proteolipid protein 1
hsa-miR-297	0	0	1	1	1	1	CRX	cone-rod homeobox
hsa-miR-297	1	0	1	1	1	1	DCX	doublecortin
hsa-miR-297	1	0	1	0	1	1	IGFBP5	insulin-like growth factor binding protein 5
hsa-miR-297	0	0	1	1	1	1	CNTF	ciliary neurotrophic factor
hsa-miR-297	0	0	1	1	1	1	ALDH1A1	aldehyde dehydrogenase 1 family, member A1
hsa-miR-297	0	0	1	1	1	1	ALDH1B1	aldehyde dehydrogenase 1 family, member B1
hsa-miR-297	1	0	1	1	1	1	CACNB4	calcium channel, voltage-dependent, beta 4 subunit
hsa-miR-297	1	0	1	1	1	1	DIO2	deiodinase, iodothyronine, type II
hsa-miR-297	1	0	1	0	1	1	GABRA4	gamma-aminobutyric acid (GABA) A receptor, alpha 4
hsa-miR-297	1	0	1	1	1	1	GABRB3	gamma-aminobutyric acid (GABA) A receptor, beta 3
hsa-miR-297	1	0	1	1	1	1	GAD1	glutamate decarboxylase 1 (brain, 67kDa)
hsa-miR-297	1	0	1	1	1	1	GRM1	glutamate receptor, metabotropic 1
hsa-miR-297	1	0	1	1	1	1	GUCY1A2	guanylate cyclase 1, soluble, alpha 2
hsa-miR-297	0	0	1	1	0	0	MGP	matrix Gla protein
hsa-miR-297	0	0	1	1	1	1	NPY2R	neuropeptide Y receptor Y2
hsa-miR-297	1	0	1	1	1	1	PPP3R1	protein phosphatase 3, regulatory subunit B, alpha
hsa-miR-297	1	0	1	1	1	1	PTGER3	prostaglandin E receptor 3 (subtype EP3)
hsa-miR-297	1	0	1	1	1	1	PTGFR	prostaglandin F receptor (FP)
hsa-miR-297	1	0	1	1	1	1	RARB	retinoic acid receptor, beta
hsa-miR-297	0	0	1	1	1	1	C16orf87	chromosome 16 open reading frame 87
hsa-miR-297	1	0	1	1	1	1	C14orf37	chromosome 14 open reading frame 37
hsa-miR-297	0	0	1	1	1	1	STAG3L1	stromal antigen 3-like 1
hsa-miR-297	1	0	1	0	1	1	CACNA1I	calcium channel, voltage-dependent, T type, alpha 1I subunit
hsa-miR-297	1	0	1	0	1	1	SMAD2	SMAD family member 2
hsa-miR-297	1	0	1	1	1	1	HMGXB4	HMG box domain containing 4
hsa-miR-297	1	0	1	0	1	1	BMF	Bcl2 modifying factor
hsa-miR-297	0	0	1	1	1	1	ZCCHC16	zinc finger, CCHC domain containing 16
hsa-miR-297	0	0	1	1	1	1	DBX2	developing brain homeobox 2
hsa-miR-297	0	0	1	1	1	1	CLEC2D	C-type lectin domain family 2, member D
hsa-miR-297	1	0	1	1	1	1	PLCXD3	phosphatidylinositol-specific phospholipase C, X domain containing 3
hsa-miR-297	0	0	1	1	0	0	SPIN2B	spindlin family, member 2B
hsa-miR-297	1	0	1	1	1	1	TCEAL8	transcription elongation factor A (SII)-like 8
hsa-miR-297	1	0	1	1	1	1	L3MBTL3	l(3)mbt-like 3 (Drosophila)
hsa-miR-297	0	0	1	0	1	1	C3orf56	chromosome 3 open reading frame 56
hsa-miR-297	1	0	1	0	1	1	C18orf25	chromosome 18 open reading frame 25
hsa-miR-297	0	0	1	1	1	1	WDHD1	WD repeat and HMG-box DNA binding protein 1
hsa-miR-297	0	0	1	1	1	1	TCHHL1	trichohyalin-like 1
hsa-miR-297	1	0	1	0	1	1	KIAA2022	KIAA2022
hsa-miR-297	1	0	1	1	1	1	NUPL1	nucleoporin like 1
hsa-miR-297	0	0	1	1	1	1	IL4R	interleukin 4 receptor
hsa-miR-297	0	0	1	1	1	1	CCDC147	coiled-coil domain containing 147
hsa-miR-297	0	0	1	1	1	1	GCSAM	germinal center-associated, signaling and motility
hsa-miR-297	0	0	1	1	1	1	SLC35D3	solute carrier family 35, member D3
hsa-miR-297	1	0	1	1	1	1	CUL4A	cullin 4A
hsa-miR-297	1	0	1	1	1	1	ZNF655	zinc finger protein 655
hsa-miR-297	0	0	1	1	1	1	SAMD13	sterile alpha motif domain containing 13
hsa-miR-297	1	0	1	1	1	1	ATP11C	ATPase, class VI, type 11C
hsa-miR-297	1	0	1	0	1	1	CREB5	cAMP responsive element binding protein 5
hsa-miR-297	1	0	1	1	1	1	NTRK3	neurotrophic tyrosine kinase, receptor, type 3
hsa-miR-297	1	0	1	1	1	1	FOXP4	forkhead box P4
hsa-miR-297	1	0	1	1	1	1	SORCS1	sortilin-related VPS10 domain containing receptor 1
hsa-miR-297	1	0	1	1	1	1	FXR1	fragile X mental retardation, autosomal homolog 1
hsa-miR-297	1	0	1	0	1	1	ZNF793	zinc finger protein 793
hsa-miR-297	1	0	1	1	1	1	RUNX2	runt-related transcription factor 2
hsa-miR-297	0	0	1	1	1	1	BTBD11	BTB (POZ) domain containing 11
hsa-miR-297	0	0	1	1	1	1	ACTBL2	actin, beta-like 2
hsa-miR-297	1	0	1	0	1	1	BRCC3	BRCA1/BRCA2-containing complex, subunit 3
hsa-miR-297	1	0	1	0	1	1	TFEC	transcription factor EC
hsa-miR-297	1	0	1	1	1	1	SERBP1	SERPINE1 mRNA binding protein 1
hsa-miR-297	1	0	1	1	1	1	KALRN	kalirin, RhoGEF kinase
hsa-miR-297	1	0	1	0	1	1	TNRC6B	trinucleotide repeat containing 6B
hsa-miR-297	1	0	1	1	1	1	TGFBR2	transforming growth factor, beta receptor II (70/80kDa)
hsa-miR-297	0	0	1	1	1	1	WASF1	WAS protein family, member 1
hsa-miR-297	1	0	1	1	1	1	FNBP1L	formin binding protein 1-like
hsa-miR-297	1	0	1	0	1	1	CELF2	CUGBP, Elav-like family member 2
hsa-miR-297	1	0	1	1	1	1	AFF3	AF4/FMR2 family, member 3
hsa-miR-297	1	0	1	0	1	1	RAB12	RAB12, member RAS oncogene family
hsa-miR-297	1	0	1	1	1	1	VEGFA	vascular endothelial growth factor A
hsa-miR-297	1	0	1	1	1	1	FAM108B1	family with sequence similarity 108, member B1
hsa-miR-297	1	0	1	1	1	1	RGS7BP	regulator of G-protein signaling 7 binding protein
hsa-miR-297	1	0	1	0	1	1	SAMD5	sterile alpha motif domain containing 5
hsa-miR-297	1	0	1	1	1	1	TMPO	thymopoietin
hsa-miR-297	1	0	1	1	1	1	MAGI1	membrane associated guanylate kinase, WW and PDZ domain containing 1
hsa-miR-297	0	0	1	1	1	1	PHF12	PHD finger protein 12
hsa-miR-297	1	0	1	1	0	0	MTUS2	microtubule associated tumor suppressor candidate 2
hsa-miR-297	1	0	1	1	1	1	ZNF704	zinc finger protein 704
hsa-miR-297	0	0	1	1	0	0	BOLA3	bolA homolog 3 (E. coli)
hsa-miR-297	0	0	1	1	1	1	CTLA4	cytotoxic T-lymphocyte-associated protein 4
hsa-miR-297	1	0	1	1	1	1	AP1S3	adaptor-related protein complex 1, sigma 3 subunit
hsa-miR-297	1	0	1	1	1	1	KCNC4	potassium voltage-gated channel, Shaw-related subfamily, member 4
hsa-miR-297	1	0	1	0	1	1	USP9X	ubiquitin specific peptidase 9, X-linked
hsa-miR-297	1	0	1	0	1	1	CREBZF	CREB/ATF bZIP transcription factor
hsa-miR-297	1	0	1	1	1	1	CDC42	cell division cycle 42 (GTP binding protein, 25kDa)
hsa-miR-297	1	0	1	1	0	0	ANKRD34A	ankyrin repeat domain 34A
hsa-miR-297	1	0	1	1	1	1	CHN2	chimerin (chimaerin) 2
hsa-miR-297	1	0	1	1	1	1	MLLT4	myeloid/lymphoid or mixed-lineage leukemia (trithorax homolog, Drosophila); translocated to, 4
hsa-miR-297	1	0	1	1	1	1	TCERG1	transcription elongation regulator 1
hsa-miR-297	1	0	1	0	1	1	FAM133B	family with sequence similarity 133, member B
hsa-miR-297	0	0	1	1	1	1	MLH3	mutL homolog 3 (E. coli)
hsa-miR-297	0	0	1	1	1	1	MCHR2	melanin-concentrating hormone receptor 2
hsa-miR-297	1	0	1	1	1	1	PAPD5	PAP associated domain containing 5
hsa-miR-297	1	0	1	1	1	1	ZBTB8A	zinc finger and BTB domain containing 8A
hsa-miR-297	1	0	1	1	1	1	MTMR12	myotubularin related protein 12
hsa-miR-297	0	0	1	0	1	1	STEAP2	STEAP family member 2, metalloreductase
hsa-miR-297	1	0	1	1	1	1	PPP4R1	protein phosphatase 4, regulatory subunit 1
hsa-miR-297	1	0	1	1	1	1	GLIS3	GLIS family zinc finger 3
hsa-miR-297	1	0	1	1	1	1	RUFY2	RUN and FYVE domain containing 2
hsa-miR-297	0	0	1	1	1	1	MST4	serine/threonine protein kinase MST4
hsa-miR-297	1	0	1	1	1	1	FILIP1L	filamin A interacting protein 1-like
hsa-miR-297	1	0	1	1	1	1	NSL1	NSL1, MIND kinetochore complex component, homolog (S. cerevisiae)
hsa-miR-297	0	0	1	1	1	1	SMC2	structural maintenance of chromosomes 2
hsa-miR-297	1	0	1	1	1	1	FRS2	fibroblast growth factor receptor substrate 2
hsa-miR-297	1	0	1	1	1	1	ERBB4	v-erb-a erythroblastic leukemia viral oncogene homolog 4 (avian)
hsa-miR-297	1	0	1	0	1	1	SLC12A2	solute carrier family 12 (sodium/potassium/chloride transporters), member 2
hsa-miR-297	0	0	1	1	1	1	TOP2B	topoisomerase (DNA) II beta 180kDa
hsa-miR-297	1	0	1	1	1	1	METTL9	methyltransferase like 9
hsa-miR-297	1	0	1	1	1	1	HS6ST2	heparan sulfate 6-O-sulfotransferase 2
hsa-miR-297	1	0	1	1	1	1	IRF2BP2	interferon regulatory factor 2 binding protein 2
hsa-miR-297	1	0	1	0	1	1	UBXN2B	UBX domain protein 2B
hsa-miR-297	1	0	1	1	1	1	DACT1	dapper, antagonist of beta-catenin, homolog 1 (Xenopus laevis)
hsa-miR-297	0	0	1	1	1	1	DIAPH1	diaphanous homolog 1 (Drosophila)
hsa-miR-297	1	0	1	1	1	1	CASZ1	castor zinc finger 1
hsa-miR-297	1	0	1	1	1	1	CREBBP	CREB binding protein
hsa-miR-297	1	0	1	1	1	1	FAM155A	family with sequence similarity 155, member A
hsa-miR-297	1	0	1	1	1	1	SHANK3	SH3 and multiple ankyrin repeat domains 3
hsa-miR-297	1	0	1	0	1	1	CCDC85A	coiled-coil domain containing 85A
hsa-miR-297	1	0	1	0	1	1	ODZ3	odz, odd Oz/ten-m homolog 3 (Drosophila)
hsa-miR-297	0	0	1	1	1	1	TBX18	T-box 18
hsa-miR-297	0	0	1	0	1	1	WIPF3	WAS/WASL interacting protein family, member 3
hsa-miR-297	1	0	1	1	1	1	DGKG	diacylglycerol kinase, gamma 90kDa
hsa-miR-297	0	0	1	1	0	0	GSTT2B	glutathione S-transferase theta 2B (gene/pseudogene)
hsa-miR-297	1	0	1	0	1	1	PDE5A	phosphodiesterase 5A, cGMP-specific
hsa-miR-297	1	0	1	1	1	1	ADAM10	ADAM metallopeptidase domain 10
hsa-miR-297	1	0	1	1	1	1	ADCY9	adenylate cyclase 9
hsa-miR-297	0	0	1	1	1	1	CRISP1	cysteine-rich secretory protein 1
hsa-miR-297	1	0	1	1	1	1	APAF1	apoptotic peptidase activating factor 1
hsa-miR-297	1	0	1	0	1	1	BMPR2	bone morphogenetic protein receptor, type II (serine/threonine kinase)
hsa-miR-297	1	0	1	1	1	1	CDH13	cadherin 13, H-cadherin (heart)
hsa-miR-297	1	0	1	0	1	1	CDK6	cyclin-dependent kinase 6
hsa-miR-297	0	0	1	1	1	1	CLIC2	chloride intracellular channel 2
hsa-miR-297	1	0	1	0	1	1	CPD	carboxypeptidase D
hsa-miR-297	1	0	1	1	1	1	CREBL2	cAMP responsive element binding protein-like 2
hsa-miR-297	1	0	1	1	1	1	MAPK14	mitogen-activated protein kinase 14
hsa-miR-297	1	0	1	1	1	1	CTNND2	catenin (cadherin-associated protein), delta 2
hsa-miR-297	1	0	1	1	1	1	EN2	engrailed homeobox 2
hsa-miR-297	1	0	1	1	1	1	EREG	epiregulin
hsa-miR-297	0	0	1	1	1	1	CXCL10	chemokine (C-X-C motif) ligand 10
hsa-miR-297	1	0	1	1	1	1	AHNAK	AHNAK nucleoprotein
hsa-miR-297	1	0	1	1	1	1	AHR	aryl hydrocarbon receptor
hsa-miR-297	1	0	1	1	1	1	AQP4	aquaporin 4
hsa-miR-297	1	0	1	1	1	1	ARF3	ADP-ribosylation factor 3
hsa-miR-297	1	0	1	0	1	1	ARNT	aryl hydrocarbon receptor nuclear translocator
hsa-miR-297	1	0	1	1	1	1	ATP6V1A	ATPase, H+ transporting, lysosomal 70kDa, V1 subunit A
hsa-miR-297	1	0	1	1	1	1	BAAT	bile acid CoA: amino acid N-acyltransferase (glycine N-choloyltransferase)
hsa-miR-297	1	0	1	1	1	1	BNC1	basonuclin 1
hsa-miR-297	1	0	1	1	1	1	KLF5	Kruppel-like factor 5 (intestinal)
hsa-miR-297	1	0	1	1	1	1	CBFB	core-binding factor, beta subunit
hsa-miR-297	1	0	1	0	1	1	CCND2	cyclin D2
hsa-miR-297	1	0	1	0	1	1	CHML	choroideremia-like (Rab escort protein 2)
hsa-miR-297	1	0	1	1	1	1	CLCN3	chloride channel, voltage-sensitive 3
hsa-miR-297	0	0	1	1	0	0	CNTFR	ciliary neurotrophic factor receptor
hsa-miR-297	0	0	1	1	1	1	DPT	dermatopontin
hsa-miR-297	1	0	1	1	1	1	DR1	down-regulator of transcription 1, TBP-binding (negative cofactor 2)
hsa-miR-297	1	0	1	1	1	1	DSC3	desmocollin 3
hsa-miR-297	0	0	1	1	1	1	FLI1	Friend leukemia virus integration 1
hsa-miR-297	1	0	1	0	1	1	FUT4	fucosyltransferase 4 (alpha (1,3) fucosyltransferase, myeloid-specific)
hsa-miR-297	0	0	1	1	0	0	GLP1R	glucagon-like peptide 1 receptor
hsa-miR-297	1	0	1	0	1	1	GNAI1	guanine nucleotide binding protein (G protein), alpha inhibiting activity polypeptide 1
hsa-miR-297	1	0	1	1	1	1	GRB2	growth factor receptor-bound protein 2
hsa-miR-297	0	0	1	1	1	1	HOXA4	homeobox A4
hsa-miR-297	1	0	1	1	1	1	INSM1	insulinoma-associated 1
hsa-miR-297	0	0	1	0	1	1	ITGAV	integrin, alpha V
hsa-miR-297	1	0	1	1	1	1	ITGB8	integrin, beta 8
hsa-miR-297	1	0	1	1	1	1	JUN	jun proto-oncogene
hsa-miR-297	1	0	1	1	1	1	KCNA4	potassium voltage-gated channel, shaker-related subfamily, member 4
hsa-miR-297	1	0	1	1	1	1	KCNJ3	potassium inwardly-rectifying channel, subfamily J, member 3
hsa-miR-297	1	0	1	1	1	1	KDR	kinase insert domain receptor (a type III receptor tyrosine kinase)
hsa-miR-297	1	0	1	1	1	1	KPNB1	karyopherin (importin) beta 1
hsa-miR-297	1	0	1	1	1	1	KPNA3	karyopherin alpha 3 (importin alpha 4)
hsa-miR-297	1	0	1	1	1	1	KPNA4	karyopherin alpha 4 (importin alpha 3)
hsa-miR-297	0	0	1	1	1	1	LUM	lumican
hsa-miR-297	1	0	1	1	1	1	M6PR	mannose-6-phosphate receptor (cation dependent)
hsa-miR-297	1	0	1	0	1	1	MXD1	MAX dimerization protein 1
hsa-miR-297	0	0	1	1	1	1	MTAP	methylthioadenosine phosphorylase
hsa-miR-297	1	0	1	1	1	1	NDN	necdin homolog (mouse)
hsa-miR-297	1	0	1	1	1	1	NEUROD1	neuronal differentiation 1
hsa-miR-297	1	0	1	1	1	1	NGFR	nerve growth factor receptor
hsa-miR-297	0	0	1	1	1	1	NOV	nephroblastoma overexpressed
hsa-miR-297	1	0	1	0	1	1	PAPPA	pregnancy-associated plasma protein A, pappalysin 1
hsa-miR-297	1	0	1	1	1	1	PCDH8	protocadherin 8
hsa-miR-297	0	0	1	1	1	1	PDE6D	phosphodiesterase 6D, cGMP-specific, rod, delta
hsa-miR-297	0	0	1	1	1	1	PDE7A	phosphodiesterase 7A
hsa-miR-297	1	0	1	0	0	0	PPP1R10	protein phosphatase 1, regulatory subunit 10
hsa-miR-297	1	0	1	1	1	1	PRKAR2B	protein kinase, cAMP-dependent, regulatory, type II, beta
hsa-miR-297	1	0	1	1	1	1	PTPN9	protein tyrosine phosphatase, non-receptor type 9
hsa-miR-297	1	0	1	1	1	1	ARID4A	AT rich interactive domain 4A (RBP1-like)
hsa-miR-297	1	0	1	1	1	1	ROBO2	roundabout, axon guidance receptor, homolog 2 (Drosophila)
hsa-miR-297	1	0	1	0	1	1	SORT1	sortilin 1
hsa-miR-297	0	0	1	1	1	1	SDC2	syndecan 2
hsa-miR-297	0	0	1	1	1	1	SH3BGRL	SH3 domain binding glutamic acid-rich protein like
hsa-miR-297	1	0	1	0	1	1	ST6GAL1	ST6 beta-galactosamide alpha-2,6-sialyltranferase 1
hsa-miR-297	0	0	1	1	1	1	SLAMF1	signaling lymphocytic activation molecule family member 1
hsa-miR-297	1	0	1	0	1	1	SLC6A1	solute carrier family 6 (neurotransmitter transporter, GABA), member 1
hsa-miR-297	1	0	1	1	1	1	SNAI2	snail homolog 2 (Drosophila)
hsa-miR-297	1	0	1	1	1	1	STAC	SH3 and cysteine rich domain
hsa-miR-297	1	0	1	0	1	1	STC1	stanniocalcin 1
hsa-miR-297	1	0	1	1	1	1	SVIL	supervillin
hsa-miR-297	1	0	1	1	1	1	SYN2	synapsin II
hsa-miR-297	0	0	1	1	1	1	TAF2	TAF2 RNA polymerase II, TATA box binding protein (TBP)-associated factor, 150kDa
hsa-miR-297	1	0	1	1	1	1	UBE2N	ubiquitin-conjugating enzyme E2N
hsa-miR-297	1	0	1	1	1	1	FZD5	frizzled family receptor 5
hsa-miR-297	1	0	1	1	1	1	KCNAB1	potassium voltage-gated channel, shaker-related subfamily, beta member 1
hsa-miR-297	1	0	1	1	1	1	DEK	DEK oncogene
hsa-miR-297	1	0	1	1	1	1	CUL5	cullin 5
hsa-miR-297	1	0	1	1	1	1	NRIP1	nuclear receptor interacting protein 1
hsa-miR-297	1	0	1	0	1	1	CUL3	cullin 3
hsa-miR-297	1	0	1	1	1	1	CILP	cartilage intermediate layer protein, nucleotide pyrophosphohydrolase
hsa-miR-297	0	0	1	1	1	1	PEX3	peroxisomal biogenesis factor 3
hsa-miR-297	1	0	1	0	1	1	ENC1	ectodermal-neural cortex 1 (with BTB-like domain)
hsa-miR-297	0	0	1	1	1	1	CHST1	carbohydrate (keratan sulfate Gal-6) sulfotransferase 1
hsa-miR-297	0	0	1	1	1	1	SLC25A12	solute carrier family 25 (aspartate/glutamate carrier), member 12
hsa-miR-297	1	0	1	0	1	1	KCNK5	potassium channel, subfamily K, member 5
hsa-miR-297	0	0	1	1	0	0	SOCS1	suppressor of cytokine signaling 1
hsa-miR-297	1	0	1	0	1	1	TNKS	tankyrase, TRF1-interacting ankyrin-related ADP-ribose polymerase
hsa-miR-297	0	0	1	1	1	1	JRKL	jerky homolog-like (mouse)
hsa-miR-297	1	0	1	1	1	1	B3GALT2	UDP-Gal:betaGlcNAc beta 1,3-galactosyltransferase, polypeptide 2
hsa-miR-297	0	0	1	1	1	1	SNX4	sorting nexin 4
hsa-miR-297	1	0	1	1	1	1	ADAM9	ADAM metallopeptidase domain 9
hsa-miR-297	0	0	1	1	0	0	FBP2	fructose-1,6-bisphosphatase 2
hsa-miR-297	1	0	1	1	1	1	IQGAP1	IQ motif containing GTPase activating protein 1
hsa-miR-297	1	0	1	1	1	1	BTAF1	BTAF1 RNA polymerase II, B-TFIID transcription factor-associated, 170kDa (Mot1 homolog, S. cerevisiae)
hsa-miR-297	1	0	1	1	1	1	EFNB2	ephrin-B2
hsa-miR-297	1	0	1	1	1	1	FGF12	fibroblast growth factor 12
hsa-miR-297	1	0	1	1	1	1	GMFB	glia maturation factor, beta
hsa-miR-297	1	0	1	0	1	1	SLC1A2	solute carrier family 1 (glial high affinity glutamate transporter), member 2
hsa-miR-297	0	0	1	0	1	1	SLC1A3	solute carrier family 1 (glial high affinity glutamate transporter), member 3
hsa-miR-297	0	0	1	1	0	0	EBAG9	estrogen receptor binding site associated, antigen, 9
hsa-miR-297	1	0	1	0	1	1	MED14	mediator complex subunit 14
hsa-miR-297	1	0	1	1	1	1	SOCS6	suppressor of cytokine signaling 6
hsa-miR-297	0	0	1	1	1	1	HOMER1	homer homolog 1 (Drosophila)
hsa-miR-297	1	0	1	1	1	1	CREB1	cAMP responsive element binding protein 1
hsa-miR-297	1	0	1	1	1	1	EGR3	early growth response 3
hsa-miR-297	1	0	1	0	1	1	ACSL4	acyl-CoA synthetase long-chain family member 4
hsa-miR-297	1	0	1	0	1	1	FGF5	fibroblast growth factor 5
hsa-miR-297	0	0	1	1	1	1	GPC5	glypican 5
hsa-miR-297	1	0	1	1	1	1	FUT8	fucosyltransferase 8 (alpha (1,6) fucosyltransferase)
hsa-miR-297	1	0	1	1	1	1	LRP2	low density lipoprotein receptor-related protein 2
hsa-miR-297	1	0	1	1	1	1	NCAM2	neural cell adhesion molecule 2
hsa-miR-297	1	0	1	0	1	1	SCN2B	sodium channel, voltage-gated, type II, beta subunit
hsa-miR-297	1	0	1	0	1	1	USP9Y	ubiquitin specific peptidase 9, Y-linked
hsa-miR-297	0	0	1	1	1	1	SDPR	serum deprivation response
hsa-miR-297	0	0	1	1	1	1	LIN7A	lin-7 homolog A (C. elegans)
hsa-miR-297	0	0	1	0	0	0	XKRY	XK, Kell blood group complex subunit-related, Y-linked
hsa-miR-297	1	0	1	1	1	1	MTMR4	myotubularin related protein 4
hsa-miR-297	0	0	1	1	0	0	HGS	hepatocyte growth factor-regulated tyrosine kinase substrate
hsa-miR-297	0	0	1	1	1	1	KCNAB3	potassium voltage-gated channel, shaker-related subfamily, beta member 3
hsa-miR-297	1	0	1	1	0	0	TXNL1	thioredoxin-like 1
hsa-miR-297	1	0	1	1	1	1	KIF3B	kinesin family member 3B
hsa-miR-297	1	0	1	0	1	1	ROCK2	Rho-associated, coiled-coil containing protein kinase 2
hsa-miR-297	1	0	1	1	1	1	ONECUT2	one cut homeobox 2
hsa-miR-297	1	0	1	1	1	1	VPS4B	vacuolar protein sorting 4 homolog B (S. cerevisiae)
hsa-miR-297	1	0	1	1	1	1	ZFP36L1	zinc finger protein 36, C3H type-like 1
hsa-miR-297	0	0	1	1	1	1	CALB1	calbindin 1, 28kDa
hsa-miR-297	1	0	1	1	1	1	JARID2	jumonji, AT rich interactive domain 2
hsa-miR-297	1	0	1	0	1	1	SCD	stearoyl-CoA desaturase (delta-9-desaturase)
hsa-miR-297	1	0	1	1	1	1	GFPT2	glutamine-fructose-6-phosphate transaminase 2
hsa-miR-297	1	0	1	1	0	0	BCL3	B-cell CLL/lymphoma 3
hsa-miR-297	1	0	1	1	1	1	BMI1	BMI1 polycomb ring finger oncogene
hsa-miR-297	1	1	1	1	1	1	MAP3K8	mitogen-activated protein kinase kinase kinase 8
hsa-miR-297	1	0	1	1	1	1	DCC	deleted in colorectal carcinoma
hsa-miR-297	1	0	1	1	1	1	ARID3A	AT rich interactive domain 3A (BRIGHT-like)
hsa-miR-297	1	0	1	0	1	1	E2F1	E2F transcription factor 1
hsa-miR-297	1	0	1	1	1	1	ETS1	v-ets erythroblastosis virus E26 oncogene homolog 1 (avian)
hsa-miR-297	1	0	1	1	1	1	GAS2	growth arrest-specific 2
hsa-miR-297	0	0	1	1	1	1	MSTN	myostatin
hsa-miR-297	1	0	1	1	1	1	GPR3	G protein-coupled receptor 3
hsa-miR-297	1	0	1	1	1	1	GPR6	G protein-coupled receptor 6
hsa-miR-297	0	0	1	1	1	1	H1F0	H1 histone family, member 0
hsa-miR-297	1	0	1	0	1	1	PRKAB2	protein kinase, AMP-activated, beta 2 non-catalytic subunit
hsa-miR-297	1	0	1	0	1	1	PRKCE	protein kinase C, epsilon
hsa-miR-297	1	0	1	1	0	0	SALL2	sal-like 2 (Drosophila)
hsa-miR-297	1	0	1	0	1	1	CCDC6	coiled-coil domain containing 6
hsa-miR-297	1	0	1	1	1	1	AKT3	v-akt murine thymoma viral oncogene homolog 3 (protein kinase B, gamma)
hsa-miR-297	1	0	1	1	1	1	ITGA3	integrin, alpha 3 (antigen CD49C, alpha 3 subunit of VLA-3 receptor)
hsa-miR-297	1	0	1	1	1	1	LPP	LIM domain containing preferred translocation partner in lipoma
hsa-miR-297	1	0	1	1	1	1	RGS4	regulator of G-protein signaling 4
hsa-miR-297	0	0	1	1	1	1	SSX1	synovial sarcoma, X breakpoint 1
hsa-miR-297	1	0	1	1	1	1	EVI5	ecotropic viral integration site 5
hsa-miR-297	1	0	1	1	1	1	ST8SIA4	ST8 alpha-N-acetyl-neuraminide alpha-2,8-sialyltransferase 4
hsa-miR-297	0	0	1	1	1	1	TAF1B	TATA box binding protein (TBP)-associated factor, RNA polymerase I, B, 63kDa
hsa-miR-297	1	0	1	1	1	1	NAMPT	nicotinamide phosphoribosyltransferase
hsa-miR-297	1	0	1	1	1	1	LHFPL2	lipoma HMGIC fusion partner-like 2
hsa-miR-297	1	0	1	1	1	1	LHFP	lipoma HMGIC fusion partner
hsa-miR-297	1	0	1	0	1	1	CALCRL	calcitonin receptor-like
hsa-miR-297	1	0	1	0	1	1	DCAF7	DDB1 and CUL4 associated factor 7
hsa-miR-297	1	0	1	1	1	1	SRRM1	serine/arginine repetitive matrix 1
hsa-miR-297	1	0	1	0	1	1	SPRY3	sprouty homolog 3 (Drosophila)
hsa-miR-297	1	0	1	1	1	1	MTF1	metal-regulatory transcription factor 1
hsa-miR-297	1	0	1	0	1	1	NAB1	NGFI-A binding protein 1 (EGR1 binding protein 1)
hsa-miR-297	1	0	1	0	1	1	HDAC4	histone deacetylase 4
hsa-miR-297	1	0	1	0	1	1	SPATA2	spermatogenesis associated 2
hsa-miR-297	1	0	1	1	1	1	SEMA3A	sema domain, immunoglobulin domain (Ig), short basic domain, secreted, (semaphorin) 3A
hsa-miR-297	1	0	1	1	1	1	SPON1	spondin 1, extracellular matrix protein
hsa-miR-297	1	0	1	1	1	1	NEUROD2	neuronal differentiation 2
hsa-miR-297	1	0	1	1	1	1	NR4A2	nuclear receptor subfamily 4, group A, member 2
hsa-miR-297	1	0	1	0	1	1	PPP1R2	protein phosphatase 1, regulatory (inhibitor) subunit 2
hsa-miR-297	1	0	1	1	1	1	PRKAA1	protein kinase, AMP-activated, alpha 1 catalytic subunit
hsa-miR-297	0	0	1	0	0	0	PTPN13	protein tyrosine phosphatase, non-receptor type 13 (APO-1/CD95 (Fas)-associated phosphatase)
hsa-miR-297	1	0	1	1	1	1	STK4	serine/threonine kinase 4
hsa-miR-297	0	0	1	0	1	1	ZNF192	zinc finger protein 192
hsa-miR-297	1	0	1	1	1	1	SMC1A	structural maintenance of chromosomes 1A
hsa-miR-297	0	0	1	1	1	1	PGRMC2	progesterone receptor membrane component 2
hsa-miR-297	0	0	1	1	1	1	FST	follistatin
hsa-miR-297	1	0	1	1	1	1	ZNF238	zinc finger protein 238
hsa-miR-297	1	0	1	0	1	1	APPBP2	amyloid beta precursor protein (cytoplasmic tail) binding protein 2
hsa-miR-297	1	0	1	1	1	1	HEXIM1	hexamethylene bis-acetamide inducible 1
hsa-miR-297	0	0	1	1	1	1	CLCA2	chloride channel accessory 2
hsa-miR-297	1	0	1	0	1	1	IGF2BP1	insulin-like growth factor 2 mRNA binding protein 1
hsa-miR-297	1	0	1	0	1	1	MAP4K5	mitogen-activated protein kinase kinase kinase kinase 5
hsa-miR-297	1	0	1	0	1	1	API5	apoptosis inhibitor 5
hsa-miR-297	1	0	1	1	1	1	PGRMC1	progesterone receptor membrane component 1
hsa-miR-297	1	0	1	1	1	1	DIAPH2	diaphanous homolog 2 (Drosophila)
hsa-miR-297	1	0	1	1	1	1	HIVEP2	human immunodeficiency virus type I enhancer binding protein 2
hsa-miR-297	1	0	1	1	1	1	SNTB2	syntrophin, beta 2 (dystrophin-associated protein A1, 59kDa, basic component 2)
hsa-miR-297	0	0	1	1	1	1	SYPL1	synaptophysin-like 1
hsa-miR-297	1	0	1	0	1	1	SYNGAP1	synaptic Ras GTPase activating protein 1
hsa-miR-297	1	0	1	1	1	1	ZBTB33	zinc finger and BTB domain containing 33
hsa-miR-297	1	0	1	1	1	1	PRDX3	peroxiredoxin 3
hsa-miR-297	0	0	1	1	0	0	HNRNPA0	heterogeneous nuclear ribonucleoprotein A0
hsa-miR-297	1	0	1	1	1	1	CBX1	chromobox homolog 1
hsa-miR-297	0	0	1	1	1	1	CEACAM7	carcinoembryonic antigen-related cell adhesion molecule 7
hsa-miR-297	1	0	1	1	1	1	RP2	retinitis pigmentosa 2 (X-linked recessive)
hsa-miR-297	0	0	1	1	0	0	SMTN	smoothelin
hsa-miR-297	1	0	1	0	1	1	SOX12	SRY (sex determining region Y)-box 12
hsa-miR-297	0	0	1	1	1	1	TAF5	TAF5 RNA polymerase II, TATA box binding protein (TBP)-associated factor, 100kDa
hsa-miR-297	0	0	1	1	0	0	UPK1A	uroplakin 1A
hsa-miR-297	1	0	1	1	1	1	WWP1	WW domain containing E3 ubiquitin protein ligase 1
hsa-miR-297	1	0	1	1	1	1	ESM1	endothelial cell-specific molecule 1
hsa-miR-297	1	0	1	1	1	1	ADAMTS5	ADAM metallopeptidase with thrombospondin type 1 motif, 5
hsa-miR-297	0	0	1	1	1	1	TEP1	telomerase-associated protein 1
hsa-miR-297	1	0	1	1	1	1	TMF1	TATA element modulatory factor 1
hsa-miR-297	1	0	1	1	1	1	UTY	ubiquitously transcribed tetratricopeptide repeat gene, Y-linked
hsa-miR-297	1	0	1	1	1	1	ZIC2	Zic family member 2
hsa-miR-297	0	0	1	0	1	1	ZXDB	zinc finger, X-linked, duplicated B
hsa-miR-297	1	0	1	1	1	1	PALM2-AKAP2	PALM2-AKAP2 readthrough
hsa-miR-297	1	0	1	1	1	1	KLF12	Kruppel-like factor 12
hsa-miR-297	0	0	1	0	1	1	AP4E1	adaptor-related protein complex 4, epsilon 1 subunit
hsa-miR-297	1	0	1	1	1	1	PHLDA1	pleckstrin homology-like domain, family A, member 1
hsa-miR-297	0	0	1	1	1	1	KLRK1	killer cell lectin-like receptor subfamily K, member 1
hsa-miR-297	1	0	1	1	1	1	ICOS	inducible T-cell co-stimulator
hsa-miR-297	0	0	1	1	0	0	STAP1	signal transducing adaptor family member 1
hsa-miR-297	1	0	1	0	1	1	CASP8AP2	caspase 8 associated protein 2
hsa-miR-297	1	0	1	1	1	1	FBXL3	F-box and leucine-rich repeat protein 3
hsa-miR-297	1	0	1	1	1	1	RABGAP1	RAB GTPase activating protein 1
hsa-miR-297	1	0	1	1	1	1	MGAT4A	mannosyl (alpha-1,3-)-glycoprotein beta-1,4-N-acetylglucosaminyltransferase, isozyme A
hsa-miR-297	1	0	1	1	1	1	DKK1	dickkopf 1 homolog (Xenopus laevis)
hsa-miR-297	0	0	1	1	0	0	SNW1	SNW domain containing 1
hsa-miR-297	1	0	1	1	1	1	RHOQ	ras homolog family member Q
hsa-miR-297	0	0	1	1	1	1	RRAS2	related RAS viral (r-ras) oncogene homolog 2
hsa-miR-297	1	0	1	1	1	1	HEY2	hairy/enhancer-of-split related with YRPW motif 2
hsa-miR-297	1	0	1	1	1	1	HS2ST1	heparan sulfate 2-O-sulfotransferase 1
hsa-miR-297	1	0	1	1	1	1	KCND2	potassium voltage-gated channel, Shal-related subfamily, member 2
hsa-miR-297	1	0	1	0	1	1	ACAP2	ArfGAP with coiled-coil, ankyrin repeat and PH domains 2
hsa-miR-297	1	0	1	0	1	1	G3BP2	GTPase activating protein (SH3 domain) binding protein 2
hsa-miR-297	0	0	1	0	1	1	PIGN	phosphatidylinositol glycan anchor biosynthesis, class N
hsa-miR-297	1	0	1	1	1	1	TSPAN12	tetraspanin 12
hsa-miR-297	1	0	1	1	1	1	SF3B1	splicing factor 3b, subunit 1, 155kDa
hsa-miR-297	1	0	1	1	0	0	TIMM10	translocase of inner mitochondrial membrane 10 homolog (yeast)
hsa-miR-297	0	0	1	1	1	1	UCK2	uridine-cytidine kinase 2
hsa-miR-297	1	0	1	0	1	1	FLRT2	fibronectin leucine rich transmembrane protein 2
hsa-miR-297	0	0	1	1	0	0	SLCO3A1	solute carrier organic anion transporter family, member 3A1
hsa-miR-297	1	0	1	0	1	1	TRHDE	thyrotropin-releasing hormone degrading enzyme
hsa-miR-297	1	0	1	1	1	1	SLC25A24	solute carrier family 25 (mitochondrial carrier; phosphate carrier), member 24
hsa-miR-297	1	0	1	1	1	1	NCKAP1	NCK-associated protein 1
hsa-miR-297	1	0	1	1	1	1	LRP12	low density lipoprotein receptor-related protein 12
hsa-miR-297	0	0	1	0	1	1	EMR2	egf-like module containing, mucin-like, hormone receptor-like 2
hsa-miR-297	0	0	1	1	1	1	METTL7A	methyltransferase like 7A
hsa-miR-297	1	0	1	0	1	1	C16orf72	chromosome 16 open reading frame 72
hsa-miR-297	0	0	1	1	1	1	ORMDL2	ORM1-like 2 (S. cerevisiae)
hsa-miR-297	0	0	1	0	1	1	SCN8A	sodium channel, voltage gated, type VIII, alpha subunit
hsa-miR-297	1	0	1	0	1	1	VAMP2	vesicle-associated membrane protein 2 (synaptobrevin 2)
hsa-miR-297	0	0	1	0	1	1	ADAMTS3	ADAM metallopeptidase with thrombospondin type 1 motif, 3
hsa-miR-297	1	0	1	0	1	1	ODZ1	odz, odd Oz/ten-m homolog 1 (Drosophila)
hsa-miR-297	1	0	1	1	1	1	MAPRE2	microtubule-associated protein, RP/EB family, member 2
hsa-miR-297	0	0	1	1	1	1	IL1RAPL1	interleukin 1 receptor accessory protein-like 1
hsa-miR-297	0	0	1	1	1	1	HSPA4L	heat shock 70kDa protein 4-like
hsa-miR-297	0	0	1	1	1	1	TRAM1	translocation associated membrane protein 1
hsa-miR-297	1	0	1	1	1	1	LEMD3	LEM domain containing 3
hsa-miR-297	1	0	1	1	1	1	LHX6	LIM homeobox 6
hsa-miR-297	1	0	1	0	1	1	RNF11	ring finger protein 11
hsa-miR-297	1	0	1	1	1	1	ZBTB11	zinc finger and BTB domain containing 11
hsa-miR-297	1	0	1	1	1	1	AFF4	AF4/FMR2 family, member 4
hsa-miR-297	0	0	1	1	1	1	ZNF330	zinc finger protein 330
hsa-miR-297	1	0	1	1	1	1	GRHL1	grainyhead-like 1 (Drosophila)
hsa-miR-297	1	0	1	1	1	1	OTX1	orthodenticle homeobox 1
hsa-miR-297	1	0	1	1	1	1	ERO1L	ERO1-like (S. cerevisiae)
hsa-miR-297	1	0	1	1	1	1	SLC40A1	solute carrier family 40 (iron-regulated transporter), member 1
hsa-miR-297	0	0	1	1	1	1	EHD2	EH-domain containing 2
hsa-miR-297	1	0	1	0	1	1	ATP11B	ATPase, class VI, type 11B
hsa-miR-297	0	0	1	1	0	0	EMC2	ER membrane protein complex subunit 2
hsa-miR-297	0	0	1	1	1	1	FRMPD4	FERM and PDZ domain containing 4
hsa-miR-297	1	0	1	0	1	1	SERTAD2	SERTA domain containing 2
hsa-miR-297	1	0	1	1	1	1	ARHGEF11	Rho guanine nucleotide exchange factor (GEF) 11
hsa-miR-297	0	0	1	0	1	1	EPM2AIP1	EPM2A (laforin) interacting protein 1
hsa-miR-297	1	0	1	1	1	1	TBC1D4	TBC1 domain family, member 4
hsa-miR-297	1	0	1	1	1	1	SV2A	synaptic vesicle glycoprotein 2A
hsa-miR-297	1	0	1	0	1	1	RAB11FIP2	RAB11 family interacting protein 2 (class I)
hsa-miR-297	1	0	1	1	1	1	R3HDM2	R3H domain containing 2
hsa-miR-297	1	0	1	1	1	1	PLEKHA6	pleckstrin homology domain containing, family A member 6
hsa-miR-297	1	0	1	1	1	1	SPAST	spastin
hsa-miR-297	1	0	1	1	1	1	DIP2C	DIP2 disco-interacting protein 2 homolog C (Drosophila)
hsa-miR-297	1	0	1	1	1	1	SORCS3	sortilin-related VPS10 domain containing receptor 3
hsa-miR-297	1	0	1	0	1	1	WDFY3	WD repeat and FYVE domain containing 3
hsa-miR-297	1	0	1	1	1	1	USP33	ubiquitin specific peptidase 33
hsa-miR-297	1	0	1	0	1	1	PDS5B	PDS5, regulator of cohesion maintenance, homolog B (S. cerevisiae)
hsa-miR-297	1	0	1	0	1	1	ZNF609	zinc finger protein 609
hsa-miR-297	1	0	1	1	1	1	TRAK2	trafficking protein, kinesin binding 2
hsa-miR-297	1	0	1	1	1	1	ERP44	endoplasmic reticulum protein 44
hsa-miR-297	1	0	1	1	1	1	HECW1	HECT, C2 and WW domain containing E3 ubiquitin protein ligase 1
hsa-miR-297	0	0	1	1	0	0	AVL9	AVL9 homolog (S. cerevisiase)
hsa-miR-297	1	0	1	0	1	1	PEG10	paternally expressed 10
hsa-miR-297	1	0	1	1	1	1	RTF1	Rtf1, Paf1/RNA polymerase II complex component, homolog (S. cerevisiae)
hsa-miR-297	1	0	1	1	1	1	GPD1L	glycerol-3-phosphate dehydrogenase 1-like
hsa-miR-297	0	0	1	1	1	1	FBXO28	F-box protein 28
hsa-miR-297	1	0	1	1	1	1	PLCB1	phospholipase C, beta 1 (phosphoinositide-specific)
hsa-miR-297	1	0	1	1	1	1	MYO1D	myosin ID
hsa-miR-297	1	0	1	1	1	1	CUX2	cut-like homeobox 2
hsa-miR-297	1	0	1	0	1	1	ARHGEF12	Rho guanine nucleotide exchange factor (GEF) 12
hsa-miR-297	1	0	1	0	1	1	LARP1	La ribonucleoprotein domain family, member 1
hsa-miR-297	1	0	1	1	1	1	MED13L	mediator complex subunit 13-like
hsa-miR-297	0	0	1	0	1	1	ZDHHC17	zinc finger, DHHC-type containing 17
hsa-miR-297	0	0	1	1	1	1	ADNP	activity-dependent neuroprotector homeobox
hsa-miR-297	0	0	1	1	1	1	LEPROTL1	leptin receptor overlapping transcript-like 1
hsa-miR-297	1	0	1	1	1	1	MOB4	MOB family member 4, phocein
hsa-miR-297	1	0	1	1	1	1	PARM1	prostate androgen-regulated mucin-like protein 1
hsa-miR-297	0	0	1	1	1	1	ZNF10	zinc finger protein 10
hsa-miR-297	1	0	1	1	1	1	CNOT6	CCR4-NOT transcription complex, subunit 6
hsa-miR-297	1	0	1	0	1	1	MTMR9	myotubularin related protein 9
hsa-miR-297	1	0	1	1	1	1	CNRIP1	cannabinoid receptor interacting protein 1
hsa-miR-297	1	0	1	0	1	1	GLCE	glucuronic acid epimerase
hsa-miR-297	1	0	1	0	1	1	PPP1R16B	protein phosphatase 1, regulatory subunit 16B
hsa-miR-297	1	0	1	1	1	1	TOR1AIP1	torsin A interacting protein 1
hsa-miR-297	1	0	1	1	1	1	WSB1	WD repeat and SOCS box containing 1
hsa-miR-297	1	0	1	0	1	1	WWC3	WWC family member 3
hsa-miR-297	1	0	1	1	1	1	PLA2G3	phospholipase A2, group III
hsa-miR-297	1	0	1	1	1	1	AZIN1	antizyme inhibitor 1
hsa-miR-297	1	0	1	0	1	1	TRIM33	tripartite motif containing 33
hsa-miR-297	1	0	1	1	1	1	MEMO1	mediator of cell motility 1
hsa-miR-297	1	0	1	1	1	1	TAF9B	TAF9B RNA polymerase II, TATA box binding protein (TBP)-associated factor, 31kDa
hsa-miR-297	0	0	1	1	0	0	ZC2HC1A	zinc finger, C2HC-type containing 1A
hsa-miR-297	1	0	1	1	1	1	RRP15	ribosomal RNA processing 15 homolog (S. cerevisiae)
hsa-miR-297	1	0	1	1	1	1	SNX9	sorting nexin 9
hsa-miR-297	1	0	1	1	1	1	CYB5R4	cytochrome b5 reductase 4
hsa-miR-297	1	0	1	1	1	1	BIRC6	baculoviral IAP repeat containing 6
hsa-miR-297	1	0	1	0	1	1	HPCAL4	hippocalcin like 4
hsa-miR-297	1	0	1	1	1	1	RNF138	ring finger protein 138, E3 ubiquitin protein ligase
hsa-miR-297	0	0	1	1	1	1	FBXO40	F-box protein 40
hsa-miR-297	0	0	1	1	1	1	CENPF	centromere protein F, 350/400kDa (mitosin)
hsa-miR-297	0	0	1	1	1	1	UFC1	ubiquitin-fold modifier conjugating enzyme 1
hsa-miR-297	1	0	1	0	1	1	CRIM1	cysteine rich transmembrane BMP regulator 1 (chordin-like)
hsa-miR-297	1	0	1	1	1	1	VTA1	Vps20-associated 1 homolog (S. cerevisiae)
hsa-miR-297	1	0	1	0	1	1	RAB8B	RAB8B, member RAS oncogene family
hsa-miR-297	0	0	1	1	1	1	C1RL	complement component 1, r subcomponent-like
hsa-miR-297	1	0	1	1	1	1	UFM1	ubiquitin-fold modifier 1
hsa-miR-297	1	0	1	1	1	1	SIX4	SIX homeobox 4
hsa-miR-297	1	0	1	1	1	1	CPSF2	cleavage and polyadenylation specific factor 2, 100kDa
hsa-miR-297	1	0	1	1	1	1	ARID1B	AT rich interactive domain 1B (SWI1-like)
hsa-miR-297	1	0	1	1	1	1	ZC3H7B	zinc finger CCCH-type containing 7B
hsa-miR-297	1	0	1	1	1	1	DIRAS2	DIRAS family, GTP-binding RAS-like 2
hsa-miR-297	1	0	1	1	1	1	MBTD1	mbt domain containing 1
hsa-miR-297	1	0	1	0	1	1	FAM46C	family with sequence similarity 46, member C
hsa-miR-297	0	0	1	1	1	1	QRICH1	glutamine-rich 1
hsa-miR-297	0	0	1	1	1	1	ANKHD1	ankyrin repeat and KH domain containing 1
hsa-miR-297	1	0	1	0	1	1	CHD7	chromodomain helicase DNA binding protein 7
hsa-miR-297	1	0	1	1	0	0	LAMTOR1	late endosomal/lysosomal adaptor, MAPK and MTOR activator 1
hsa-miR-297	0	0	1	0	1	1	MREG	melanoregulin
hsa-miR-297	1	0	1	0	1	1	CCDC88A	coiled-coil domain containing 88A
hsa-miR-297	1	0	1	1	1	1	LRRC8D	leucine rich repeat containing 8 family, member D
hsa-miR-297	1	0	1	1	1	1	RIC8B	resistance to inhibitors of cholinesterase 8 homolog B (C. elegans)
hsa-miR-297	1	0	1	1	1	1	RPRD1A	regulation of nuclear pre-mRNA domain containing 1A
hsa-miR-297	1	0	1	1	1	1	LRRC1	leucine rich repeat containing 1
hsa-miR-297	1	0	1	0	1	1	PARVA	parvin, alpha
hsa-miR-297	0	0	1	1	1	1	TMEM144	transmembrane protein 144
hsa-miR-297	1	0	1	1	1	1	DRAM1	DNA-damage regulated autophagy modulator 1
hsa-miR-297	1	0	1	0	1	1	FOXJ2	forkhead box J2
hsa-miR-297	1	0	1	1	1	1	EPB41L4B	erythrocyte membrane protein band 4.1 like 4B
hsa-miR-297	1	0	1	0	1	1	BRK1	BRICK1, SCAR/WAVE actin-nucleating complex subunit
hsa-miR-297	1	0	1	1	1	1	ASH1L	ash1 (absent, small, or homeotic)-like (Drosophila)
hsa-miR-297	1	0	1	1	1	1	STRADB	STE20-related kinase adaptor beta
hsa-miR-297	1	0	1	1	1	1	CAMK2N1	calcium/calmodulin-dependent protein kinase II inhibitor 1
hsa-miR-297	1	0	1	1	1	1	MLL5	myeloid/lymphoid or mixed-lineage leukemia 5 (trithorax homolog, Drosophila)
hsa-miR-297	1	0	1	1	1	1	AJAP1	adherens junctions associated protein 1
hsa-miR-297	1	0	1	1	1	1	GNG12	guanine nucleotide binding protein (G protein), gamma 12
hsa-miR-297	1	0	1	0	1	1	KLHL9	kelch-like 9 (Drosophila)
hsa-miR-297	0	0	1	1	1	1	ERRFI1	ERBB receptor feedback inhibitor 1
hsa-miR-297	1	0	1	1	1	1	HOXA10	homeobox A10
hsa-miR-297	1	0	1	0	1	1	FAM190B	family with sequence similarity 190, member B
hsa-miR-297	0	0	1	1	0	0	SPIN2A	spindlin family, member 2A
hsa-miR-297	0	0	1	1	1	1	GNL3L	guanine nucleotide binding protein-like 3 (nucleolar)-like
hsa-miR-297	0	0	1	1	1	1	TRMT13	tRNA methyltransferase 13 homolog (S. cerevisiae)
hsa-miR-297	1	0	1	1	1	1	SEPT3	septin 3
hsa-miR-297	0	0	1	1	1	1	KLHL4	kelch-like 4 (Drosophila)
hsa-miR-297	1	0	1	1	1	1	MDM1	Mdm1 nuclear protein homolog (mouse)
hsa-miR-297	0	0	1	1	1	1	ACN9	ACN9 homolog (S. cerevisiae)
hsa-miR-297	0	0	1	1	1	1	CXCR7	chemokine (C-X-C motif) receptor 7
hsa-miR-297	1	0	1	1	1	1	ANKRD50	ankyrin repeat domain 50
hsa-miR-297	1	0	1	1	1	1	PCDH9	protocadherin 9
hsa-miR-297	0	0	1	1	1	1	PLXDC1	plexin domain containing 1
hsa-miR-297	1	0	1	1	1	1	PTGFRN	prostaglandin F2 receptor negative regulator
hsa-miR-297	1	0	1	1	1	1	ATP8B2	ATPase, aminophospholipid transporter, class I, type 8B, member 2
hsa-miR-297	1	0	1	1	1	1	NRIP3	nuclear receptor interacting protein 3
hsa-miR-297	1	0	1	1	1	1	RAB22A	RAB22A, member RAS oncogene family
hsa-miR-297	1	0	1	1	1	1	DSCAML1	Down syndrome cell adhesion molecule like 1
hsa-miR-297	0	0	1	1	1	1	KIAA1161	KIAA1161
hsa-miR-297	1	0	1	1	1	1	SLC12A5	solute carrier family 12 (potassium/chloride transporter), member 5
hsa-miR-297	1	0	1	1	1	1	RNF150	ring finger protein 150
hsa-miR-297	1	0	1	1	1	1	ZNF608	zinc finger protein 608
hsa-miR-297	1	0	1	0	1	1	NUFIP2	nuclear fragile X mental retardation protein interacting protein 2
hsa-miR-297	1	0	1	1	1	1	MIB1	mindbomb E3 ubiquitin protein ligase 1
hsa-miR-297	1	0	1	1	1	1	NCEH1	neutral cholesterol ester hydrolase 1
hsa-miR-297	1	0	1	1	1	1	NLGN2	neuroligin 2
hsa-miR-297	0	0	1	1	1	1	ARRDC3	arrestin domain containing 3
hsa-miR-297	1	0	1	1	1	1	SIPA1L2	signal-induced proliferation-associated 1 like 2
hsa-miR-297	1	0	1	0	1	1	CRAMP1L	Crm, cramped-like (Drosophila)
hsa-miR-297	1	0	1	1	1	1	CNTN3	contactin 3 (plasmacytoma associated)
hsa-miR-297	0	0	1	1	1	1	KIAA1586	KIAA1586
hsa-miR-297	1	0	1	1	1	1	FAM160B1	family with sequence similarity 160, member B1
hsa-miR-297	0	0	1	1	1	1	PPP4R4	protein phosphatase 4, regulatory subunit 4
hsa-miR-297	0	0	1	1	1	1	SSX3	synovial sarcoma, X breakpoint 3
hsa-miR-297	1	0	1	1	1	1	HCN1	hyperpolarization activated cyclic nucleotide-gated potassium channel 1
hsa-miR-297	1	0	1	1	1	1	NMB	neuromedin B
hsa-miR-297	1	0	1	1	1	1	CLDN1	claudin 1
hsa-miR-297	1	0	1	1	1	1	NTN4	netrin 4
hsa-miR-297	0	0	1	1	1	1	HRH4	histamine receptor H4
hsa-miR-297	1	0	1	1	1	1	SLC5A7	solute carrier family 5 (choline transporter), member 7
hsa-miR-297	0	0	1	1	1	1	GABBR1	gamma-aminobutyric acid (GABA) B receptor, 1
hsa-miR-297	0	0	1	1	1	1	ITM2B	integral membrane protein 2B
hsa-miR-297	1	0	1	1	1	1	GOLPH3	golgi phosphoprotein 3 (coat-protein)
hsa-miR-297	1	0	1	1	1	1	ABCG4	ATP-binding cassette, sub-family G (WHITE), member 4
hsa-miR-297	0	0	1	1	1	1	GLIPR2	GLI pathogenesis-related 2
hsa-miR-297	1	0	1	1	1	1	HIF3A	hypoxia inducible factor 3, alpha subunit
hsa-miR-297	0	0	1	1	1	1	HHIP	hedgehog interacting protein
hsa-miR-297	0	0	1	1	1	1	SUSD1	sushi domain containing 1
hsa-miR-297	1	0	1	0	1	1	MRPS25	mitochondrial ribosomal protein S25
hsa-miR-297	1	0	1	0	1	1	DNMT3A	DNA (cytosine-5-)-methyltransferase 3 alpha
hsa-miR-297	1	0	1	1	1	1	MARCH7	membrane-associated ring finger (C3HC4) 7, E3 ubiquitin protein ligase
hsa-miR-297	1	0	1	0	1	1	BCL11B	B-cell CLL/lymphoma 11B (zinc finger protein)
hsa-miR-297	0	0	1	0	1	1	LRRC19	leucine rich repeat containing 19
hsa-miR-297	0	0	1	1	1	1	HTR5A	5-hydroxytryptamine (serotonin) receptor 5A, G protein-coupled
hsa-miR-297	0	0	1	1	0	0	CUEDC2	CUE domain containing 2
hsa-miR-297	0	0	1	1	1	1	SLC30A5	solute carrier family 30 (zinc transporter), member 5
hsa-miR-297	0	0	1	1	0	0	IRX3	iroquois homeobox 3
hsa-miR-297	0	0	1	1	1	1	PLA2G4A	phospholipase A2, group IVA (cytosolic, calcium-dependent)
hsa-miR-297	1	0	1	1	1	1	HOXD1	homeobox D1
hsa-miR-297	0	0	1	1	1	1	NDNF	neuron-derived neurotrophic factor
hsa-miR-297	0	0	1	1	1	1	TTLL7	tubulin tyrosine ligase-like family, member 7
hsa-miR-297	1	0	1	1	1	1	C15orf29	chromosome 15 open reading frame 29
hsa-miR-297	1	0	1	0	1	1	MOB3B	MOB kinase activator 3B
hsa-miR-297	1	0	1	1	0	0	SYNDIG1	synapse differentiation inducing 1
hsa-miR-297	1	0	1	1	1	1	CPED1	cadherin-like and PC-esterase domain containing 1
hsa-miR-297	1	0	1	1	1	1	POF1B	premature ovarian failure, 1B
hsa-miR-297	0	0	1	1	1	1	DOCK5	dedicator of cytokinesis 5
hsa-miR-297	0	0	1	1	1	1	CCDC170	coiled-coil domain containing 170
hsa-miR-297	1	0	1	1	1	1	FBXO11	F-box protein 11
hsa-miR-297	1	0	1	1	1	1	TRIB1	tribbles homolog 1 (Drosophila)
hsa-miR-297	0	0	1	1	0	0	WNT10A	wingless-type MMTV integration site family, member 10A
hsa-miR-297	1	0	1	1	1	1	TNKS2	tankyrase, TRF1-interacting ankyrin-related ADP-ribose polymerase 2
hsa-miR-297	1	0	1	0	1	1	TET1	tet methylcytosine dioxygenase 1
hsa-miR-297	1	0	1	1	1	1	JHDM1D	jumonji C domain containing histone demethylase 1 homolog D (S. cerevisiae)
hsa-miR-297	1	0	1	0	1	1	SETD7	SET domain containing (lysine methyltransferase) 7
hsa-miR-297	1	0	1	1	1	1	RAI1	retinoic acid induced 1
hsa-miR-297	1	0	1	1	1	1	SYNC	syncoilin, intermediate filament protein
hsa-miR-297	1	0	1	1	1	1	SGPP1	sphingosine-1-phosphate phosphatase 1
hsa-miR-297	1	0	1	1	1	1	SNX27	sorting nexin family member 27
hsa-miR-297	0	0	1	1	1	1	SPACA1	sperm acrosome associated 1
hsa-miR-297	0	0	1	1	1	1	PUS3	pseudouridylate synthase 3
hsa-miR-297	1	0	1	1	1	1	GABARAPL1	GABA(A) receptor-associated protein like 1
hsa-miR-297	1	0	1	0	1	1	TMEM47	transmembrane protein 47
hsa-miR-297	1	0	1	0	1	1	ITCH	itchy E3 ubiquitin protein ligase
hsa-miR-297	1	0	1	1	1	1	TMEM133	transmembrane protein 133
hsa-miR-297	1	0	1	0	1	1	FAM172A	family with sequence similarity 172, member A
hsa-miR-297	1	0	1	1	1	1	FBXO30	F-box protein 30
hsa-miR-297	1	0	1	1	1	1	ANTXR1	anthrax toxin receptor 1
hsa-miR-297	1	0	1	0	1	1	FAR1	fatty acyl CoA reductase 1
hsa-miR-297	1	0	1	1	1	1	CAMKK1	calcium/calmodulin-dependent protein kinase kinase 1, alpha
hsa-miR-297	0	0	1	1	1	1	YIPF4	Yip1 domain family, member 4
hsa-miR-297	0	0	1	1	1	1	VPS25	vacuolar protein sorting 25 homolog (S. cerevisiae)
hsa-miR-297	1	0	1	1	1	1	PHF6	PHD finger protein 6
hsa-miR-297	0	0	1	1	1	1	FNDC1	fibronectin type III domain containing 1
hsa-miR-297	1	0	1	1	1	1	HIATL1	hippocampus abundant transcript-like 1
hsa-miR-297	1	0	1	1	1	1	TRIM63	tripartite motif containing 63, E3 ubiquitin protein ligase
hsa-miR-297	0	0	1	1	1	1	SPPL2A	signal peptide peptidase like 2A
hsa-miR-297	0	0	1	1	1	1	TMEM87B	transmembrane protein 87B
hsa-miR-297	1	0	1	0	1	1	PPP1R15B	protein phosphatase 1, regulatory subunit 15B
hsa-miR-297	1	0	1	1	1	1	ABHD13	abhydrolase domain containing 13
hsa-miR-297	1	0	1	1	1	1	CGNL1	cingulin-like 1
hsa-miR-297	0	0	1	1	1	1	FBXL20	F-box and leucine-rich repeat protein 20
hsa-miR-297	0	0	1	1	1	1	TMEM241	transmembrane protein 241
hsa-miR-297	0	0	1	1	1	1	POLR2J2	polymerase (RNA) II (DNA directed) polypeptide J2
hsa-miR-297	1	0	1	1	1	1	PCDH10	protocadherin 10
hsa-miR-297	0	0	1	0	1	1	TSLP	thymic stromal lymphopoietin
hsa-miR-297	0	0	1	1	1	1	ZIC5	Zic family member 5
hsa-miR-297	0	0	1	1	1	1	UCN2	urocortin 2
hsa-miR-297	1	0	1	1	0	0	KCNH7	potassium voltage-gated channel, subfamily H (eag-related), member 7
hsa-miR-297	1	0	1	1	1	1	EPT1	ethanolaminephosphotransferase 1 (CDP-ethanolamine-specific)
hsa-miR-297	1	0	1	1	1	1	TSPYL5	TSPY-like 5
hsa-miR-297	1	0	1	1	1	1	BRWD1	bromodomain and WD repeat domain containing 1
hsa-miR-297	1	0	1	1	1	1	STX1B	syntaxin 1B
hsa-miR-297	1	0	1	1	1	1	MAL2	mal, T-cell differentiation protein 2 (gene/pseudogene)
hsa-miR-297	1	0	1	1	1	1	ESCO1	establishment of cohesion 1 homolog 1 (S. cerevisiae)
hsa-miR-297	1	0	1	0	1	1	TMEM123	transmembrane protein 123
hsa-miR-297	0	0	1	0	1	1	ZNF518B	zinc finger protein 518B
hsa-miR-297	0	0	1	1	0	0	THEM4	thioesterase superfamily member 4
hsa-miR-297	1	0	1	1	1	1	SLC44A1	solute carrier family 44, member 1
hsa-miR-297	1	0	1	0	1	1	SOCS4	suppressor of cytokine signaling 4
hsa-miR-297	0	0	1	1	1	1	COLEC12	collectin sub-family member 12
hsa-miR-297	1	0	1	1	1	1	DYRK1A	dual-specificity tyrosine-(Y)-phosphorylation regulated kinase 1A
hsa-miR-297	1	0	1	1	1	1	KLHL6	kelch-like 6 (Drosophila)
hsa-miR-297	1	0	1	1	1	1	BMPER	BMP binding endothelial regulator
hsa-miR-297	1	0	1	1	1	1	ZAK	sterile alpha motif and leucine zipper containing kinase AZK
hsa-miR-297	1	0	1	1	1	1	GLCCI1	glucocorticoid induced transcript 1
hsa-miR-297	1	0	1	1	1	1	KCTD12	potassium channel tetramerisation domain containing 12
hsa-miR-297	1	0	1	0	1	1	NUS1	nuclear undecaprenyl pyrophosphate synthase 1 homolog (S. cerevisiae)
hsa-miR-297	1	0	1	1	1	1	ICA1L	islet cell autoantigen 1,69kDa-like
hsa-miR-297	1	0	1	0	1	1	SP1	Sp1 transcription factor
hsa-miR-297	0	0	1	1	0	0	SGCZ	sarcoglycan, zeta
hsa-miR-297	1	0	1	1	1	1	PPTC7	PTC7 protein phosphatase homolog (S. cerevisiae)
hsa-miR-297	0	0	1	1	1	1	KCNH5	potassium voltage-gated channel, subfamily H (eag-related), member 5
hsa-miR-297	1	0	1	1	1	1	ATRN	attractin
hsa-miR-297	1	0	1	1	1	1	MAPK1IP1L	mitogen-activated protein kinase 1 interacting protein 1-like
hsa-miR-297	1	0	1	1	1	1	TMEM182	transmembrane protein 182
hsa-miR-297	0	0	1	1	1	1	ADHFE1	alcohol dehydrogenase, iron containing, 1
hsa-miR-297	0	0	1	0	1	1	TTC23L	tetratricopeptide repeat domain 23-like
hsa-miR-297	1	0	1	1	0	0	SMCR8	Smith-Magenis syndrome chromosome region, candidate 8
hsa-miR-297	1	0	1	1	1	1	MBNL2	muscleblind-like splicing regulator 2
hsa-miR-297	1	0	1	1	1	1	FAM91A1	family with sequence similarity 91, member A1
hsa-miR-297	0	0	1	1	1	1	C6orf118	chromosome 6 open reading frame 118
hsa-miR-297	1	0	1	1	1	1	C11orf82	chromosome 11 open reading frame 82
hsa-miR-297	1	0	1	1	1	1	VTI1A	vesicle transport through interaction with t-SNAREs homolog 1A (yeast)
hsa-miR-297	0	0	1	1	1	1	SLC25A43	solute carrier family 25, member 43
hsa-miR-297	0	0	1	1	0	0	TMEM217	transmembrane protein 217
hsa-miR-297	1	0	1	1	1	1	SEPT6	septin 6
hsa-miR-297	1	0	1	1	1	1	SGMS1	sphingomyelin synthase 1
hsa-miR-297	0	0	1	1	1	1	TCEAL7	transcription elongation factor A (SII)-like 7
hsa-miR-297	0	0	1	1	1	1	ERP27	endoplasmic reticulum protein 27
hsa-miR-297	1	0	1	1	1	1	TBX15	T-box 15
hsa-miR-297	1	0	1	1	1	1	BHLHE22	basic helix-loop-helix family, member e22
hsa-miR-297	1	0	1	1	1	1	ZSCAN29	zinc finger and SCAN domain containing 29
hsa-miR-297	0	0	1	1	1	1	CNIH3	cornichon homolog 3 (Drosophila)
hsa-miR-297	0	0	1	1	0	0	C3orf30	chromosome 3 open reading frame 30
hsa-miR-297	0	0	1	1	1	1	RNF217	ring finger protein 217
hsa-miR-297	1	0	1	0	1	1	MOSPD2	motile sperm domain containing 2
hsa-miR-297	1	0	1	1	1	1	SPRED1	sprouty-related, EVH1 domain containing 1
hsa-miR-297	0	0	1	1	0	0	TRIM42	tripartite motif containing 42
hsa-miR-297	1	0	1	0	1	1	ARID2	AT rich interactive domain 2 (ARID, RFX-like)
hsa-miR-297	0	0	1	1	0	0	MS4A15	membrane-spanning 4-domains, subfamily A, member 15
hsa-miR-297	1	0	1	1	1	1	NXPH1	neurexophilin 1
hsa-miR-297	1	0	1	1	1	1	ATXN7L1	ataxin 7-like 1
hsa-miR-297	1	0	1	0	1	1	C7orf41	chromosome 7 open reading frame 41
hsa-miR-297	1	0	1	1	1	1	PDIK1L	PDLIM1 interacting kinase 1 like
hsa-miR-297	1	0	1	1	1	1	FAS	Fas (TNF receptor superfamily, member 6)
hsa-miR-297	1	0	1	0	1	1	ST6GALNAC3	ST6 (alpha-N-acetyl-neuraminyl-2,3-beta-galactosyl-1,3)-N-acetylgalactosaminide alpha-2,6-sialyltransferase 3
hsa-miR-297	1	0	1	1	1	1	APCDD1	adenomatosis polyposis coli down-regulated 1
hsa-miR-297	1	0	1	1	1	1	TCEANC2	transcription elongation factor A (SII) N-terminal and central domain containing 2
hsa-miR-297	0	0	1	1	1	1	BEND2	BEN domain containing 2
hsa-miR-297	1	0	1	1	1	1	CREBRF	CREB3 regulatory factor
hsa-miR-297	1	0	1	0	1	1	SEMA6D	sema domain, transmembrane domain (TM), and cytoplasmic domain, (semaphorin) 6D
hsa-miR-297	1	0	1	1	1	1	CACUL1	CDK2-associated, cullin domain 1
hsa-miR-297	1	0	1	1	1	1	RC3H1	ring finger and CCCH-type domains 1
hsa-miR-297	1	0	1	0	1	1	KLHDC1	kelch domain containing 1
hsa-miR-297	1	0	1	1	1	1	AQP11	aquaporin 11
hsa-miR-297	0	0	1	1	0	0	SSX6	synovial sarcoma, X breakpoint 6 (pseudogene)
hsa-miR-297	0	0	1	1	0	0	C3orf24	chromosome 3 open reading frame 24
hsa-miR-297	1	0	1	1	1	1	DCUN1D3	DCN1, defective in cullin neddylation 1, domain containing 3 (S. cerevisiae)
hsa-miR-297	0	0	1	1	1	1	C15orf26	chromosome 15 open reading frame 26
hsa-miR-297	0	0	1	1	0	0	EPHX4	epoxide hydrolase 4
hsa-miR-297	0	0	1	0	1	1	KRT18P55	keratin 18 pseudogene 55
hsa-miR-297	1	0	1	1	1	1	XKR6	XK, Kell blood group complex subunit-related family, member 6
hsa-miR-297	1	0	1	1	1	1	SYT9	synaptotagmin IX
hsa-miR-297	1	0	1	0	1	1	CCDC71L	coiled-coil domain containing 71-like
hsa-miR-297	1	0	1	1	1	1	INADL	InaD-like (Drosophila)
hsa-miR-297	1	0	1	1	1	1	LRRTM3	leucine rich repeat transmembrane neuronal 3
hsa-miR-297	1	0	1	1	1	1	PRIMA1	proline rich membrane anchor 1
hsa-miR-297	1	0	1	1	1	1	MARCH3	membrane-associated ring finger (C3HC4) 3, E3 ubiquitin protein ligase
hsa-miR-297	0	0	1	0	1	1	ZNF445	zinc finger protein 445
hsa-miR-297	1	0	1	0	1	1	EFHA2	EF-hand domain family, member A2
hsa-miR-297	0	0	1	1	1	1	SKA2	spindle and kinetochore associated complex subunit 2
hsa-miR-297	1	0	1	1	1	1	SPTY2D1	SPT2, Suppressor of Ty, domain containing 1 (S. cerevisiae)
hsa-miR-297	1	0	1	1	1	1	TMEM65	transmembrane protein 65
hsa-miR-297	1	0	1	1	1	1	E2F6	E2F transcription factor 6
hsa-miR-297	1	0	1	0	1	1	NRK	Nik related kinase
hsa-miR-297	1	0	1	0	1	1	FAM73A	family with sequence similarity 73, member A
hsa-miR-297	1	0	1	0	1	1	ACACA	acetyl-CoA carboxylase alpha
hsa-miR-297	1	0	1	0	1	1	PRICKLE2	prickle homolog 2 (Drosophila)
hsa-miR-297	0	0	1	1	1	1	PTHLH	parathyroid hormone-like hormone
hsa-miR-297	0	0	1	1	0	0	FOXD4L4	forkhead box D4-like 4
hsa-miR-297	0	0	1	1	1	1	ILDR2	immunoglobulin-like domain containing receptor 2
hsa-miR-297	0	0	1	1	1	1	IKBIP	IKBKB interacting protein
hsa-miR-297	1	0	1	0	1	1	MBLAC2	metallo-beta-lactamase domain containing 2
hsa-miR-297	1	0	1	1	1	1	ATRNL1	attractin-like 1
hsa-miR-297	1	0	1	1	0	0	CCDC64	coiled-coil domain containing 64
hsa-miR-297	0	0	1	1	1	1	ZNF474	zinc finger protein 474
hsa-miR-297	0	0	1	0	1	1	C11orf92	chromosome 11 open reading frame 92
hsa-miR-297	0	0	1	1	1	1	C11orf88	chromosome 11 open reading frame 88
hsa-miR-297	0	0	1	0	1	1	TMEM215	transmembrane protein 215
hsa-miR-297	1	0	1	1	1	1	RAPH1	Ras association (RalGDS/AF-6) and pleckstrin homology domains 1
hsa-miR-297	0	0	1	0	0	0	TFAMP1	transcription factor A, mitochondrial pseudogene 1
hsa-miR-297	0	0	1	0	0	0	PPP1R2P3	protein phosphatase 1, regulatory (inhibitor) subunit 2 pseudogene 3
hsa-miR-297	0	0	1	0	0	0	TTTY4B	testis-specific transcript, Y-linked 4B (non-protein coding)
hsa-miR-297	0	0	1	0	0	0	FTH1P3	ferritin, heavy polypeptide 1 pseudogene 3
hsa-miR-297	0	0	1	0	0	0	DPRXP4	divergent-paired related homeobox pseudogene 4
hsa-miR-297	0	0	1	0	0	0	TOP1P1	topoisomerase (DNA) I pseudogene 1
hsa-miR-297	0	0	1	0	0	0	HNRNPA3P1	heterogeneous nuclear ribonucleoprotein A3 pseudogene 1
hsa-miR-297	0	0	1	0	0	0	PER4	period homolog 3 (Drosophila) pseudogene
hsa-miR-297	0	0	1	0	0	0	MALAT1	metastasis associated lung adenocarcinoma transcript 1 (non-protein coding)
hsa-miR-297	0	0	1	0	0	0	RNASEH2CP1	ribonuclease H2, subunit C pseudogene 1
hsa-miR-297	0	0	1	0	0	0	SNX29P2	sorting nexin 29 pseudogene 2
hsa-miR-297	0	0	1	0	0	0	GMCL1P1	germ cell-less, spermatogenesis associated 1 pseudogene 1
hsa-miR-297	0	0	1	0	0	0	SNORD116-11	small nucleolar RNA, C/D box 116-11
hsa-miR-297	0	0	1	0	0	0	SNORD116-13	small nucleolar RNA, C/D box 116-13
hsa-miR-297	0	0	1	0	0	0	SNORD116-14	small nucleolar RNA, C/D box 116-14
hsa-miR-297	0	0	1	0	0	0	SNORD116-15	small nucleolar RNA, C/D box 116-15
hsa-miR-297	0	0	1	0	0	0	SNORD116-17	small nucleolar RNA, C/D box 116-17
hsa-miR-297	0	0	1	0	0	0	SNORD116-18	small nucleolar RNA, C/D box 116-18
hsa-miR-297	0	0	1	0	0	0	SNORD116-20	small nucleolar RNA, C/D box 116-20
hsa-miR-297	0	0	1	0	0	0	SNORD116-23	small nucleolar RNA, C/D box 116-23
hsa-miR-297	1	0	1	1	1	1	TRIO	trio Rho guanine nucleotide exchange factor
hsa-miR-297	0	0	1	1	1	1	RGPD5	RANBP2-like and GRIP domain containing 5
hsa-miR-297	0	0	1	0	0	0	PLGLA	plasminogen-like A
hsa-miR-297	0	0	1	1	1	1	PEG3	paternally expressed 3
hsa-miR-297	0	0	1	1	1	1	CD84	CD84 molecule
hsa-miR-297	0	0	1	1	0	0	OTC	ornithine carbamoyltransferase
hsa-miR-297	0	0	1	1	0	0	RTN4R	reticulon 4 receptor
hsa-miR-297	0	0	1	1	1	1	HEBP2	heme binding protein 2
hsa-miR-297	0	0	1	1	1	1	CREB3L3	cAMP responsive element binding protein 3-like 3
hsa-miR-297	0	0	0	1	1	1	MRPS35	mitochondrial ribosomal protein S35
hsa-miR-297	0	0	1	1	1	1	CD22	CD22 molecule
hsa-miR-297	0	0	1	1	0	0	NOX3	NADPH oxidase 3
hsa-miR-297	0	0	1	1	1	1	TNFRSF1A	tumor necrosis factor receptor superfamily, member 1A
hsa-miR-297	0	0	0	1	1	1	RDH8	retinol dehydrogenase 8 (all-trans)
hsa-miR-297	0	0	1	1	0	0	NME8	NME/NM23 family member 8
hsa-miR-297	0	0	1	1	1	1	LRP5L	low density lipoprotein receptor-related protein 5-like
hsa-miR-297	0	0	0	1	0	0	ACR	acrosin
hsa-miR-297	0	0	1	1	1	1	AHSA1	AHA1, activator of heat shock 90kDa protein ATPase homolog 1 (yeast)
hsa-miR-297	0	0	1	1	1	1	VRK1	vaccinia related kinase 1
hsa-miR-297	0	0	1	1	1	1	STS	steroid sulfatase (microsomal), isozyme S
hsa-miR-297	0	0	1	1	1	1	F9	coagulation factor IX
hsa-miR-297	0	0	1	1	0	0	USP11	ubiquitin specific peptidase 11
hsa-miR-297	0	0	1	1	1	1	FGL1	fibrinogen-like 1
hsa-miR-297	0	0	0	1	1	1	FZR1	fizzy/cell division cycle 20 related 1 (Drosophila)
hsa-miR-297	0	0	0	1	0	0	ZNF574	zinc finger protein 574
hsa-miR-297	0	0	1	1	1	1	TFPI2	tissue factor pathway inhibitor 2
hsa-miR-297	0	0	1	1	1	1	HYAL4	hyaluronoglucosaminidase 4
hsa-miR-297	0	0	1	1	0	0	CRYBA1	crystallin, beta A1
hsa-miR-297	0	0	0	1	1	1	PNPO	pyridoxamine 5'-phosphate oxidase
hsa-miR-297	1	0	1	1	1	1	MYH3	myosin, heavy chain 3, skeletal muscle, embryonic
hsa-miR-297	0	0	0	1	1	1	GPN3	GPN-loop GTPase 3
hsa-miR-297	1	0	1	1	1	1	REV3L	REV3-like, polymerase (DNA directed), zeta, catalytic subunit
hsa-miR-297	0	0	0	1	1	1	RSPH4A	radial spoke head 4 homolog A (Chlamydomonas)
hsa-miR-297	0	0	1	1	1	1	MORC1	MORC family CW-type zinc finger 1
hsa-miR-297	0	0	1	1	0	0	INO80B	INO80 complex subunit B
hsa-miR-297	0	0	1	1	1	1	KCNJ13	potassium inwardly-rectifying channel, subfamily J, member 13
hsa-miR-297	0	0	0	1	0	0	OSCP1	organic solute carrier partner 1
hsa-miR-297	0	0	0	1	0	0	MMP8	matrix metallopeptidase 8 (neutrophil collagenase)
hsa-miR-297	0	0	1	1	0	0	CCNI	cyclin I
hsa-miR-297	0	0	1	1	0	0	INSL4	insulin-like 4 (placenta)
hsa-miR-297	1	0	1	1	1	1	TBX4	T-box 4
hsa-miR-297	0	0	1	1	1	1	FBXO24	F-box protein 24
hsa-miR-297	0	0	1	1	1	1	EXOSC9	exosome component 9
hsa-miR-297	0	0	0	1	0	0	ZNF350	zinc finger protein 350
hsa-miR-297	0	0	0	1	0	0	KATNAL2	katanin p60 subunit A-like 2
hsa-miR-297	1	0	1	1	1	1	MAX	MYC associated factor X
hsa-miR-297	0	0	0	1	1	1	SDF2	stromal cell-derived factor 2
hsa-miR-297	0	0	1	1	1	1	L3HYPDH	L-3-hydroxyproline dehydratase (trans-)
hsa-miR-297	0	0	1	1	1	1	METTL25	methyltransferase like 25
hsa-miR-297	0	0	1	1	1	1	PMPCB	peptidase (mitochondrial processing) beta
hsa-miR-297	0	0	1	1	1	1	E2F8	E2F transcription factor 8
hsa-miR-297	0	0	1	1	1	1	SOX15	SRY (sex determining region Y)-box 15
hsa-miR-297	0	0	1	1	1	1	TUBG1	tubulin, gamma 1
hsa-miR-297	0	0	0	1	0	0	PDGFRL	platelet-derived growth factor receptor-like
hsa-miR-297	1	0	1	1	1	1	MED17	mediator complex subunit 17
hsa-miR-297	0	0	0	1	0	0	ZSCAN5A	zinc finger and SCAN domain containing 5A
hsa-miR-297	1	0	1	1	1	1	CHSY1	chondroitin sulfate synthase 1
hsa-miR-297	0	0	0	1	0	0	PEMT	phosphatidylethanolamine N-methyltransferase
hsa-miR-297	0	0	0	1	1	1	PRAM1	PML-RARA regulated adaptor molecule 1
hsa-miR-297	0	0	1	1	1	1	SYNJ2BP	synaptojanin 2 binding protein
hsa-miR-297	1	0	1	1	1	1	ANO3	anoctamin 3
hsa-miR-297	0	0	1	1	0	0	UPK3B	uroplakin 3B
hsa-miR-297	0	0	1	1	0	0	ORC3	origin recognition complex, subunit 3
hsa-miR-297	1	0	1	1	1	1	PHF21A	PHD finger protein 21A
hsa-miR-297	0	0	1	1	0	0	AMHR2	anti-Mullerian hormone receptor, type II
hsa-miR-297	0	0	1	1	1	1	MPHOSPH6	M-phase phosphoprotein 6
hsa-miR-297	1	0	0	1	1	1	TGFBRAP1	transforming growth factor, beta receptor associated protein 1
hsa-miR-297	0	0	1	1	1	1	NUPL2	nucleoporin like 2
hsa-miR-297	0	0	0	1	0	0	ZFHX2	zinc finger homeobox 2
hsa-miR-297	0	0	0	1	0	0	IL36A	interleukin 36, alpha
hsa-miR-297	0	0	0	1	1	1	IL36B	interleukin 36, beta
hsa-miR-297	0	0	1	1	1	1	HEMGN	hemogen
hsa-miR-297	0	0	0	1	0	0	CCL27	chemokine (C-C motif) ligand 27
hsa-miR-297	0	0	1	1	1	1	DDX60	DEAD (Asp-Glu-Ala-Asp) box polypeptide 60
hsa-miR-297	0	0	1	1	1	1	MMP7	matrix metallopeptidase 7 (matrilysin, uterine)
hsa-miR-297	0	0	0	1	0	0	FXYD2	FXYD domain containing ion transport regulator 2
hsa-miR-297	0	0	0	1	1	1	BCL2L10	BCL2-like 10 (apoptosis facilitator)
hsa-miR-297	0	0	1	1	1	1	SIX3	SIX homeobox 3
hsa-miR-297	0	0	1	1	0	0	PLCE1	phospholipase C, epsilon 1
hsa-miR-297	0	0	1	1	1	1	SLC16A7	solute carrier family 16, member 7 (monocarboxylic acid transporter 2)
hsa-miR-297	0	0	1	1	0	0	PPWD1	peptidylprolyl isomerase domain and WD repeat containing 1
hsa-miR-297	0	0	0	1	1	1	PALB2	partner and localizer of BRCA2
hsa-miR-297	0	0	0	1	0	0	DSG2	desmoglein 2
hsa-miR-297	0	0	0	1	0	0	DPEP1	dipeptidase 1 (renal)
hsa-miR-297	1	0	0	1	1	1	SCARB1	scavenger receptor class B, member 1
hsa-miR-297	0	0	0	1	1	1	VAC14	Vac14 homolog (S. cerevisiae)
hsa-miR-297	1	0	0	1	0	0	SERPINA3	serpin peptidase inhibitor, clade A (alpha-1 antiproteinase, antitrypsin), member 3
hsa-miR-297	0	0	0	1	1	1	SERPINA10	serpin peptidase inhibitor, clade A (alpha-1 antiproteinase, antitrypsin), member 10
hsa-miR-297	1	0	0	1	1	1	ATF1	activating transcription factor 1
hsa-miR-297	0	0	1	1	1	1	TMED2	transmembrane emp24 domain trafficking protein 2
hsa-miR-297	1	0	1	1	1	1	WLS	wntless homolog (Drosophila)
hsa-miR-297	0	0	1	1	0	0	RNF167	ring finger protein 167
hsa-miR-297	0	0	1	1	0	0	DZANK1	double zinc ribbon and ankyrin repeat domains 1
hsa-miR-297	0	0	1	1	1	1	RPS6KA6	ribosomal protein S6 kinase, 90kDa, polypeptide 6
hsa-miR-297	0	0	1	1	0	0	PGS1	phosphatidylglycerophosphate synthase 1
hsa-miR-297	0	0	1	1	1	1	KLHL13	kelch-like 13 (Drosophila)
hsa-miR-297	1	0	1	1	1	1	TFAP2B	transcription factor AP-2 beta (activating enhancer binding protein 2 beta)
hsa-miR-297	0	0	1	1	0	0	WDR11	WD repeat domain 11
hsa-miR-297	0	0	0	1	1	1	SGOL1	shugoshin-like 1 (S. pombe)
hsa-miR-297	1	0	0	1	1	1	PPAT	phosphoribosyl pyrophosphate amidotransferase
hsa-miR-297	0	0	1	1	1	1	TIMMDC1	translocase of inner mitochondrial membrane domain containing 1
hsa-miR-297	0	0	1	1	0	0	ADAM23	ADAM metallopeptidase domain 23
hsa-miR-297	1	0	1	1	1	1	IFT57	intraflagellar transport 57 homolog (Chlamydomonas)
hsa-miR-297	0	0	1	1	1	1	FGFRL1	fibroblast growth factor receptor-like 1
hsa-miR-297	0	0	0	1	0	0	PPAP2A	phosphatidic acid phosphatase type 2A
hsa-miR-297	0	0	1	1	1	1	CCDC99	coiled-coil domain containing 99
hsa-miR-297	1	0	1	1	1	1	TNPO3	transportin 3
hsa-miR-297	0	0	1	1	1	1	NDUFC1	NADH dehydrogenase (ubiquinone) 1, subcomplex unknown, 1, 6kDa
hsa-miR-297	0	0	1	1	1	1	EXPH5	exophilin 5
hsa-miR-297	0	0	1	1	1	1	REXO2	REX2, RNA exonuclease 2 homolog (S. cerevisiae)
hsa-miR-297	1	0	0	1	0	0	PIK3C2A	phosphatidylinositol-4-phosphate 3-kinase, catalytic subunit type 2 alpha
hsa-miR-297	0	0	1	1	1	1	HYAL1	hyaluronoglucosaminidase 1
hsa-miR-297	0	0	0	1	1	1	ZCRB1	zinc finger CCHC-type and RNA binding motif 1
hsa-miR-297	0	0	1	1	1	1	AMDHD1	amidohydrolase domain containing 1
hsa-miR-297	0	0	0	1	0	0	SBNO1	strawberry notch homolog 1 (Drosophila)
hsa-miR-297	0	0	1	1	1	1	HDC	histidine decarboxylase
hsa-miR-297	0	0	1	1	1	1	SEC11A	SEC11 homolog A (S. cerevisiae)
hsa-miR-297	0	0	0	1	0	0	PIK3R5	phosphoinositide-3-kinase, regulatory subunit 5
hsa-miR-297	0	0	1	1	0	0	ITGB3BP	integrin beta 3 binding protein (beta3-endonexin)
hsa-miR-297	0	0	0	1	0	0	ADAMTSL4	ADAMTS-like 4
hsa-miR-297	0	0	1	1	0	0	CREB3L4	cAMP responsive element binding protein 3-like 4
hsa-miR-297	0	0	1	1	0	0	DUSP11	dual specificity phosphatase 11 (RNA/RNP complex 1-interacting)
hsa-miR-297	1	0	1	1	1	1	OSBPL10	oxysterol binding protein-like 10
hsa-miR-297	0	0	1	1	0	0	AHSG	alpha-2-HS-glycoprotein
hsa-miR-297	0	0	0	1	1	1	SLC10A4	solute carrier family 10 (sodium/bile acid cotransporter family), member 4
hsa-miR-297	0	0	1	1	1	1	ENOPH1	enolase-phosphatase 1
hsa-miR-297	0	0	0	1	1	1	SPATA5	spermatogenesis associated 5
hsa-miR-297	0	0	1	1	1	1	FABP2	fatty acid binding protein 2, intestinal
hsa-miR-297	1	0	1	1	0	0	USP53	ubiquitin specific peptidase 53
hsa-miR-297	0	0	0	1	0	0	CDH18	cadherin 18, type 2
hsa-miR-297	0	0	1	1	1	1	MUT	methylmalonyl CoA mutase
hsa-miR-297	1	0	0	1	1	1	IGFBP1	insulin-like growth factor binding protein 1
hsa-miR-297	0	0	0	1	1	1	ZC3HAV1L	zinc finger CCCH-type, antiviral 1-like
hsa-miR-297	0	0	0	1	0	0	DENND2A	DENN/MADD domain containing 2A
hsa-miR-297	0	0	0	1	0	0	TTTY7B	testis-specific transcript, Y-linked 7B (non-protein coding)
hsa-miR-297	0	0	0	1	0	0	FAM75A3	family with sequence similarity 75, member A3
hsa-miR-297	1	0	0	1	1	1	C10orf47	chromosome 10 open reading frame 47
hsa-miR-297	0	0	1	1	1	1	SLC43A1	solute carrier family 43, member 1
hsa-miR-297	0	0	0	1	0	0	OR5M9	olfactory receptor, family 5, subfamily M, member 9
hsa-miR-297	0	0	1	1	1	1	PTS	6-pyruvoyltetrahydropterin synthase
hsa-miR-297	1	0	1	1	1	1	USP15	ubiquitin specific peptidase 15
hsa-miR-297	1	0	1	1	1	1	SLC7A11	solute carrier family 7 (anionic amino acid transporter light chain, xc- system), member 11
hsa-miR-297	0	0	1	1	1	1	FAM53B	family with sequence similarity 53, member B
hsa-miR-297	1	0	1	1	1	1	MAT2B	methionine adenosyltransferase II, beta
hsa-miR-297	0	0	1	1	0	0	NARS2	asparaginyl-tRNA synthetase 2, mitochondrial (putative)
hsa-miR-297	0	0	0	1	1	1	TDO2	tryptophan 2,3-dioxygenase
hsa-miR-297	0	0	1	1	0	0	HAUS1	HAUS augmin-like complex, subunit 1
hsa-miR-297	0	0	1	1	1	1	G6PC2	glucose-6-phosphatase, catalytic, 2
hsa-miR-297	0	0	1	1	1	1	PANX3	pannexin 3
hsa-miR-297	0	0	1	1	1	1	CEP112	centrosomal protein 112kDa
hsa-miR-297	1	0	1	1	1	1	PDLIM3	PDZ and LIM domain 3
hsa-miR-297	0	0	0	1	1	1	MAGEC1	melanoma antigen family C, 1
hsa-miR-297	1	0	1	1	1	1	DEPTOR	DEP domain containing MTOR-interacting protein
hsa-miR-297	0	0	0	1	1	1	NDUFAF6	NADH dehydrogenase (ubiquinone) complex I, assembly factor 6
hsa-miR-297	0	0	0	1	1	1	NAAA	N-acylethanolamine acid amidase
hsa-miR-297	0	0	1	1	1	1	UQCRB	ubiquinol-cytochrome c reductase binding protein
hsa-miR-297	0	0	1	1	0	0	MTERFD1	MTERF domain containing 1
hsa-miR-297	0	0	0	1	1	1	FANCD2	Fanconi anemia, complementation group D2
hsa-miR-297	0	0	0	1	0	0	CCNB2	cyclin B2
hsa-miR-297	0	0	0	1	1	1	WDR66	WD repeat domain 66
hsa-miR-297	0	0	1	1	0	0	EXOC6B	exocyst complex component 6B
hsa-miR-297	1	0	1	1	0	0	WNT4	wingless-type MMTV integration site family, member 4
hsa-miR-297	0	0	1	1	1	1	C21orf62	chromosome 21 open reading frame 62
hsa-miR-297	0	0	0	1	1	1	SSU72	SSU72 RNA polymerase II CTD phosphatase homolog (S. cerevisiae)
hsa-miR-297	1	0	1	1	1	1	AGPAT3	1-acylglycerol-3-phosphate O-acyltransferase 3
hsa-miR-297	0	0	1	1	0	0	CCDC12	coiled-coil domain containing 12
hsa-miR-297	0	0	1	1	1	1	ZNF333	zinc finger protein 333
hsa-miR-297	0	0	1	1	1	1	ZNF382	zinc finger protein 382
hsa-miR-297	0	0	1	1	0	0	TTC9C	tetratricopeptide repeat domain 9C
hsa-miR-297	0	0	0	1	0	0	WDR63	WD repeat domain 63
hsa-miR-297	0	0	1	1	1	1	C2orf47	chromosome 2 open reading frame 47
hsa-miR-297	1	0	1	1	1	1	VSNL1	visinin-like 1
hsa-miR-297	1	0	0	1	1	1	MRPS18C	mitochondrial ribosomal protein S18C
hsa-miR-297	0	0	1	1	1	1	SLC15A2	solute carrier family 15 (H+/peptide transporter), member 2
hsa-miR-297	0	0	1	1	1	1	TTC14	tetratricopeptide repeat domain 14
hsa-miR-297	1	0	1	1	1	1	KIAA1324L	KIAA1324-like
hsa-miR-297	0	0	1	1	0	0	FABP5	fatty acid binding protein 5 (psoriasis-associated)
hsa-miR-297	0	0	1	1	1	1	KCNV1	potassium channel, subfamily V, member 1
hsa-miR-297	0	0	1	1	0	0	DCSTAMP	dendrocyte expressed seven transmembrane protein
hsa-miR-297	0	0	1	1	1	1	KIF27	kinesin family member 27
hsa-miR-297	0	0	1	1	1	1	CXorf22	chromosome X open reading frame 22
hsa-miR-297	0	0	1	1	1	1	TMEM52B	transmembrane protein 52B
hsa-miR-297	0	0	1	1	1	1	TSPAN17	tetraspanin 17
hsa-miR-297	0	0	1	1	1	1	NELL1	NEL-like 1 (chicken)
hsa-miR-297	0	0	1	1	1	1	R3HCC1L	R3H domain and coiled-coil containing 1-like
hsa-miR-297	0	0	0	1	0	0	HPS6	Hermansky-Pudlak syndrome 6
hsa-miR-297	0	0	1	1	0	0	CTDP1	CTD (carboxy-terminal domain, RNA polymerase II, polypeptide A) phosphatase, subunit 1
hsa-miR-297	0	0	1	1	0	0	RRAD	Ras-related associated with diabetes
hsa-miR-297	0	0	1	1	1	1	STAT6	signal transducer and activator of transcription 6, interleukin-4 induced
hsa-miR-297	0	0	1	1	1	1	MS4A8B	membrane-spanning 4-domains, subfamily A, member 8B
hsa-miR-297	0	0	1	1	1	1	PRR15L	proline rich 15-like
hsa-miR-297	1	0	1	1	1	1	RNF214	ring finger protein 214
hsa-miR-297	1	0	1	1	1	1	ZNF83	zinc finger protein 83
hsa-miR-297	0	0	1	1	0	0	ANKRD33	ankyrin repeat domain 33
hsa-miR-297	0	0	0	1	1	1	LAIR2	leukocyte-associated immunoglobulin-like receptor 2
hsa-miR-297	0	0	0	1	0	0	OR8U1	olfactory receptor, family 8, subfamily U, member 1
hsa-miR-297	0	0	1	1	1	1	DMRT2	doublesex and mab-3 related transcription factor 2
hsa-miR-297	1	0	1	1	1	1	PTGER4	prostaglandin E receptor 4 (subtype EP4)
hsa-miR-297	1	0	1	1	1	1	ZNF25	zinc finger protein 25
hsa-miR-297	0	0	0	1	0	0	IARS2	isoleucyl-tRNA synthetase 2, mitochondrial
hsa-miR-297	0	0	0	1	1	1	ACYP2	acylphosphatase 2, muscle type
hsa-miR-297	0	0	0	1	1	1	MRAP	melanocortin 2 receptor accessory protein
hsa-miR-297	0	0	1	1	0	0	HIST1H2AE	histone cluster 1, H2ae
hsa-miR-297	0	0	0	1	0	0	EXOSC10	exosome component 10
hsa-miR-297	0	0	1	1	0	0	SLC6A19	solute carrier family 6 (neutral amino acid transporter), member 19
hsa-miR-297	0	0	0	1	1	1	CXCR6	chemokine (C-X-C motif) receptor 6
hsa-miR-297	1	0	1	1	1	1	MAP6	microtubule-associated protein 6
hsa-miR-297	0	0	0	1	0	0	OR4K14	olfactory receptor, family 4, subfamily K, member 14
hsa-miR-297	1	0	1	1	0	0	TET3	tet methylcytosine dioxygenase 3
hsa-miR-297	1	0	1	1	1	1	ALCAM	activated leukocyte cell adhesion molecule
hsa-miR-297	0	0	1	1	0	0	TBCA	tubulin folding cofactor A
hsa-miR-297	0	0	1	1	1	1	PITX2	paired-like homeodomain 2
hsa-miR-297	0	0	1	1	1	1	GLB1	galactosidase, beta 1
hsa-miR-297	0	0	0	1	0	0	ZNF556	zinc finger protein 556
hsa-miR-297	0	0	1	1	1	1	GEMIN2	gem (nuclear organelle) associated protein 2
hsa-miR-297	0	0	0	1	1	1	UGT2B15	UDP glucuronosyltransferase 2 family, polypeptide B15
hsa-miR-297	1	0	1	1	1	1	CHD6	chromodomain helicase DNA binding protein 6
hsa-miR-297	0	0	1	1	1	1	KLRC4	killer cell lectin-like receptor subfamily C, member 4
hsa-miR-297	0	0	0	1	0	0	OR5B3	olfactory receptor, family 5, subfamily B, member 3
hsa-miR-297	0	0	1	1	0	0	ALPK1	alpha-kinase 1
hsa-miR-297	0	0	0	1	1	1	KRT2	keratin 2
hsa-miR-297	0	0	1	1	1	1	KLK6	kallikrein-related peptidase 6
hsa-miR-297	0	0	1	1	0	0	ANKHD1-EIF4EBP3	ANKHD1-EIF4EBP3 readthrough
hsa-miR-297	0	0	1	1	0	0	EIF4EBP3	eukaryotic translation initiation factor 4E binding protein 3
hsa-miR-297	0	0	1	1	0	0	GP6	glycoprotein VI (platelet)
hsa-miR-297	1	0	1	1	1	1	ITPK1	inositol-tetrakisphosphate 1-kinase
hsa-miR-297	0	0	1	1	0	0	RPS14	ribosomal protein S14
hsa-miR-297	0	0	0	1	0	0	OR5T2	olfactory receptor, family 5, subfamily T, member 2
hsa-miR-297	0	0	1	1	1	1	KAZALD1	Kazal-type serine peptidase inhibitor domain 1
hsa-miR-297	0	0	0	1	0	0	ZNF575	zinc finger protein 575
hsa-miR-297	0	0	0	1	1	1	SNX14	sorting nexin 14
hsa-miR-297	0	0	0	1	0	0	UBXN11	UBX domain protein 11
hsa-miR-297	0	0	0	1	0	0	OR4A16	olfactory receptor, family 4, subfamily A, member 16
hsa-miR-297	1	0	1	1	1	1	RTKN2	rhotekin 2
hsa-miR-297	0	0	1	1	1	1	SSTR2	somatostatin receptor 2
hsa-miR-297	0	0	0	1	1	1	ZNF354C	zinc finger protein 354C
hsa-miR-297	0	0	1	1	0	0	C7orf63	chromosome 7 open reading frame 63
hsa-miR-297	1	0	1	1	1	1	PRKAG1	protein kinase, AMP-activated, gamma 1 non-catalytic subunit
hsa-miR-297	0	0	0	1	0	0	OR2AE1	olfactory receptor, family 2, subfamily AE, member 1
hsa-miR-297	1	0	1	1	1	1	PDCD6	programmed cell death 6
hsa-miR-297	1	0	1	1	1	1	AHRR	aryl-hydrocarbon receptor repressor
hsa-miR-297	0	0	1	1	1	1	HYDIN	HYDIN, axonemal central pair apparatus protein
hsa-miR-297	1	0	1	1	1	1	CCZ1B	CCZ1 vacuolar protein trafficking and biogenesis associated homolog B (S. cerevisiae)
hsa-miR-297	0	0	1	1	0	0	EFCAB11	EF-hand calcium binding domain 11
hsa-miR-297	0	0	1	1	1	1	MSRA	methionine sulfoxide reductase A
hsa-miR-297	0	0	0	1	0	0	ZNF554	zinc finger protein 554
hsa-miR-297	0	0	1	1	1	1	ICA1	islet cell autoantigen 1, 69kDa
hsa-miR-297	0	0	0	1	0	0	C3orf32	chromosome 3 open reading frame 32
hsa-miR-297	0	0	1	1	1	1	PSMG2	proteasome (prosome, macropain) assembly chaperone 2
hsa-miR-297	0	0	0	1	0	0	C2orf73	chromosome 2 open reading frame 73
hsa-miR-297	0	0	1	1	0	0	FCER1A	Fc fragment of IgE, high affinity I, receptor for; alpha polypeptide
hsa-miR-297	0	0	1	1	0	0	MAMSTR	MEF2 activating motif and SAP domain containing transcriptional regulator
hsa-miR-297	0	0	1	1	0	0	TMC8	transmembrane channel-like 8
hsa-miR-297	0	0	1	1	1	1	C3orf38	chromosome 3 open reading frame 38
hsa-miR-297	1	0	1	1	1	1	F2R	coagulation factor II (thrombin) receptor
hsa-miR-297	0	0	0	1	0	0	OR4C12	olfactory receptor, family 4, subfamily C, member 12
hsa-miR-297	0	0	1	1	1	1	PRPF18	PRP18 pre-mRNA processing factor 18 homolog (S. cerevisiae)
hsa-miR-297	0	0	0	1	0	0	OR2G2	olfactory receptor, family 2, subfamily G, member 2
hsa-miR-297	0	0	1	1	1	1	ASPRV1	aspartic peptidase, retroviral-like 1
hsa-miR-297	0	0	1	1	1	1	TGIF2LY	TGFB-induced factor homeobox 2-like, Y-linked
hsa-miR-297	0	0	0	1	0	0	TIGD5	tigger transposable element derived 5
hsa-miR-297	1	0	0	1	0	0	FAM123C	family with sequence similarity 123C
hsa-miR-297	0	0	1	1	0	0	TMEM108	transmembrane protein 108
hsa-miR-297	0	0	0	1	0	0	FCRL6	Fc receptor-like 6
hsa-miR-297	0	0	0	1	0	0	OR51G1	olfactory receptor, family 51, subfamily G, member 1
hsa-miR-297	0	0	0	1	0	0	DEFB112	defensin, beta 112
hsa-miR-297	0	0	1	1	1	1	KLHL7	kelch-like 7 (Drosophila)
hsa-miR-297	0	0	1	1	0	0	RPS15A	ribosomal protein S15a
hsa-miR-297	1	0	1	1	1	1	NR2C2	nuclear receptor subfamily 2, group C, member 2
hsa-miR-297	0	0	0	1	0	0	SPEM1	spermatid maturation 1
hsa-miR-297	1	0	1	1	1	1	SENP5	SUMO1/sentrin specific peptidase 5
hsa-miR-297	0	0	1	1	1	1	DDX39A	DEAD (Asp-Glu-Ala-Asp) box polypeptide 39A
hsa-miR-297	0	0	1	1	1	1	SLC34A1	solute carrier family 34 (sodium phosphate), member 1
hsa-miR-297	0	0	0	1	0	0	ACTL9	actin-like 9
hsa-miR-297	0	0	1	1	1	1	GSG1	germ cell associated 1
hsa-miR-297	0	0	0	1	0	0	ZNF7	zinc finger protein 7
hsa-miR-297	0	0	1	1	0	0	CCZ1	CCZ1 vacuolar protein trafficking and biogenesis associated homolog (S. cerevisiae)
hsa-miR-297	0	0	0	1	0	0	KIR3DL2	killer cell immunoglobulin-like receptor, three domains, long cytoplasmic tail, 2
hsa-miR-297	0	0	0	1	0	0	NDUFAF3	NADH dehydrogenase (ubiquinone) complex I, assembly factor 3
hsa-miR-297	0	0	1	1	0	0	GBA	glucosidase, beta, acid
hsa-miR-297	0	0	1	1	1	1	C22orf25	chromosome 22 open reading frame 25
hsa-miR-297	0	0	0	1	0	0	OR8B8	olfactory receptor, family 8, subfamily B, member 8
hsa-miR-297	0	0	0	1	0	0	OR4C46	olfactory receptor, family 4, subfamily C, member 46
hsa-miR-297	0	0	0	1	0	0	OR6C76	olfactory receptor, family 6, subfamily C, member 76
hsa-miR-297	0	0	1	1	0	0	TAF9	TAF9 RNA polymerase II, TATA box binding protein (TBP)-associated factor, 32kDa
hsa-miR-297	0	0	0	1	0	0	OR51B2	olfactory receptor, family 51, subfamily B, member 2
hsa-miR-297	0	0	0	1	0	0	KRTAP5-3	keratin associated protein 5-3
hsa-miR-297	0	0	1	1	1	1	ZNF599	zinc finger protein 599
hsa-miR-297	0	0	0	1	0	0	OR52E8	olfactory receptor, family 52, subfamily E, member 8
hsa-miR-297	0	0	1	1	0	0	MRPL37	mitochondrial ribosomal protein L37
hsa-miR-297	0	0	1	1	1	1	IL20RB	interleukin 20 receptor beta
hsa-miR-297	0	0	0	1	0	0	DAOA	D-amino acid oxidase activator
hsa-miR-297	0	0	0	1	1	1	TRIM49	tripartite motif containing 49
hsa-miR-297	1	0	1	1	0	0	ORAI1	ORAI calcium release-activated calcium modulator 1
hsa-miR-297	0	0	1	1	0	0	EIF4ENIF1	eukaryotic translation initiation factor 4E nuclear import factor 1
hsa-miR-297	0	0	0	1	0	0	DDX41	DEAD (Asp-Glu-Ala-Asp) box polypeptide 41
hsa-miR-297	0	0	0	1	0	0	LCN12	lipocalin 12
hsa-miR-297	0	0	0	1	0	0	TREX2	three prime repair exonuclease 2
hsa-miR-297	0	0	1	1	1	1	EVI2B	ecotropic viral integration site 2B
hsa-miR-297	1	0	1	1	1	1	NTF3	neurotrophin 3
hsa-miR-297	0	0	1	1	1	1	C15orf60	chromosome 15 open reading frame 60
hsa-miR-297	1	0	1	1	1	1	TRIOBP	TRIO and F-actin binding protein
hsa-miR-297	0	0	0	1	0	0	FEZF1	FEZ family zinc finger 1
hsa-miR-297	1	0	0	1	1	1	IKZF1	IKAROS family zinc finger 1 (Ikaros)
hsa-miR-297	0	0	0	1	0	0	C2orf82	chromosome 2 open reading frame 82
hsa-miR-297	1	0	1	1	1	1	OLFML2A	olfactomedin-like 2A
hsa-miR-297	0	0	1	1	0	0	TEX34	testis expressed 34
hsa-miR-297	0	0	0	1	0	0	OR10J3	olfactory receptor, family 10, subfamily J, member 3
hsa-miR-297	0	0	0	1	0	0	ALG12	asparagine-linked glycosylation 12, alpha-1,6-mannosyltransferase homolog (S. cerevisiae)
hsa-miR-297	0	0	0	1	1	1	SNAI3	snail homolog 3 (Drosophila)
hsa-miR-297	1	0	1	1	1	1	ATL2	atlastin GTPase 2
hsa-miR-297	0	0	0	1	0	0	ZNF484	zinc finger protein 484
hsa-miR-297	1	0	1	1	0	0	NOG	noggin
hsa-miR-297	0	0	1	1	0	0	LYG2	lysozyme G-like 2
hsa-miR-297	0	0	0	1	0	0	LCK	lymphocyte-specific protein tyrosine kinase
hsa-miR-297	0	0	0	1	0	0	C19orf59	chromosome 19 open reading frame 59
hsa-miR-297	0	0	0	1	1	1	TTF1	transcription termination factor, RNA polymerase I
hsa-miR-297	0	0	0	1	0	0	NBPF6	neuroblastoma breakpoint family, member 6
hsa-miR-297	0	0	0	1	0	0	C20orf94	chromosome 20 open reading frame 94
hsa-miR-297	0	0	0	1	0	0	ZNF578	zinc finger protein 578
hsa-miR-297	0	0	0	1	1	1	ZNF528	zinc finger protein 528
hsa-miR-297	0	0	1	1	1	1	TRAPPC11	trafficking protein particle complex 11
hsa-miR-297	0	0	1	1	1	1	RASSF6	Ras association (RalGDS/AF-6) domain family member 6
hsa-miR-297	0	0	0	1	1	1	CDKN3	cyclin-dependent kinase inhibitor 3
hsa-miR-297	0	0	0	1	1	1	INTU	inturned planar cell polarity effector homolog (Drosophila)
hsa-miR-297	0	0	1	1	0	0	LOXHD1	lipoxygenase homology domains 1
hsa-miR-297	1	0	0	1	1	1	CENPQ	centromere protein Q
hsa-miR-297	0	0	1	1	0	0	SARNP	SAP domain containing ribonucleoprotein
hsa-miR-297	0	0	0	1	0	0	EEF1D	eukaryotic translation elongation factor 1 delta (guanine nucleotide exchange protein)
hsa-miR-297	1	0	1	1	1	1	GALNTL1	UDP-N-acetyl-alpha-D-galactosamine:polypeptide N-acetylgalactosaminyltransferase-like 1
hsa-miR-297	0	0	1	1	0	0	PYCR1	pyrroline-5-carboxylate reductase 1
hsa-miR-297	0	0	1	1	1	1	PSMD10	proteasome (prosome, macropain) 26S subunit, non-ATPase, 10
hsa-miR-297	1	0	1	1	1	1	ATP9A	ATPase, class II, type 9A
hsa-miR-297	1	0	1	1	1	1	SPRY1	sprouty homolog 1, antagonist of FGF signaling (Drosophila)
hsa-miR-297	0	0	1	1	1	1	RGPD1	RANBP2-like and GRIP domain containing 1
hsa-miR-297	0	0	1	1	0	0	DMKN	dermokine
hsa-miR-297	1	0	1	1	1	1	PRDM8	PR domain containing 8
hsa-miR-297	0	0	1	1	0	0	HMX2	H6 family homeobox 2
hsa-miR-297	0	0	1	1	1	1	ABCA9	ATP-binding cassette, sub-family A (ABC1), member 9
hsa-miR-297	1	0	1	1	1	1	KRIT1	KRIT1, ankyrin repeat containing
hsa-miR-297	0	0	1	1	1	1	FOXN2	forkhead box N2
hsa-miR-297	0	0	1	1	1	1	RHBDD1	rhomboid domain containing 1
hsa-miR-297	0	0	0	1	1	1	VCX	variable charge, X-linked
hsa-miR-297	1	0	1	1	1	1	SLC20A2	solute carrier family 20 (phosphate transporter), member 2
hsa-miR-297	0	0	1	1	0	0	C2orf78	chromosome 2 open reading frame 78
hsa-miR-297	0	0	1	1	1	1	LPAL2	lipoprotein, Lp(a)-like 2, pseudogene
hsa-miR-297	0	0	0	1	0	0	C2orf66	chromosome 2 open reading frame 66
hsa-miR-297	0	0	1	1	1	1	SLCO4A1	solute carrier organic anion transporter family, member 4A1
hsa-miR-297	0	0	1	1	0	0	NPR2	natriuretic peptide receptor B/guanylate cyclase B (atrionatriuretic peptide receptor B)
hsa-miR-297	0	0	1	1	0	0	INTS8	integrator complex subunit 8
hsa-miR-297	0	0	0	1	0	0	OR6C75	olfactory receptor, family 6, subfamily C, member 75
hsa-miR-297	0	0	0	1	0	0	OR2G6	olfactory receptor, family 2, subfamily G, member 6
hsa-miR-297	0	0	0	1	0	0	NKAPL	NFKB activating protein-like
hsa-miR-297	1	0	1	1	1	1	LRRK2	leucine-rich repeat kinase 2
hsa-miR-297	0	0	0	1	1	1	FAM69C	family with sequence similarity 69, member C
hsa-miR-297	0	0	0	1	0	0	TAF6	TAF6 RNA polymerase II, TATA box binding protein (TBP)-associated factor, 80kDa
hsa-miR-297	0	0	1	1	1	1	GRAP2	GRB2-related adaptor protein 2
hsa-miR-297	0	0	1	1	0	0	EVC2	Ellis van Creveld syndrome 2
hsa-miR-297	0	0	1	1	1	1	C4orf40	chromosome 4 open reading frame 40
hsa-miR-297	0	0	0	1	0	0	TBC1D23	TBC1 domain family, member 23
hsa-miR-297	0	0	0	1	0	0	RSC1A1	regulatory solute carrier protein, family 1, member 1
hsa-miR-297	0	0	0	1	0	0	MUC4	mucin 4, cell surface associated
hsa-miR-297	0	0	1	1	0	0	DOPEY1	dopey family member 1
hsa-miR-297	0	0	0	1	1	1	WDR3	WD repeat domain 3
hsa-miR-297	1	0	1	1	1	1	ATP2B3	ATPase, Ca++ transporting, plasma membrane 3
hsa-miR-297	1	0	1	1	1	1	DOC2A	double C2-like domains, alpha
hsa-miR-297	0	0	1	1	1	1	NUP214	nucleoporin 214kDa
hsa-miR-297	0	0	0	1	1	1	MADCAM1	mucosal vascular addressin cell adhesion molecule 1
hsa-miR-297	0	0	0	1	0	0	FAM75A7	family with sequence similarity 75, member A7
hsa-miR-297	0	0	1	1	1	1	HRH1	histamine receptor H1
hsa-miR-297	0	0	1	1	1	1	ATG10	autophagy related 10
hsa-miR-297	0	0	0	1	1	1	ARSG	arylsulfatase G
hsa-miR-297	0	0	0	1	0	0	HIST1H2BE	histone cluster 1, H2be
hsa-miR-297	0	0	0	1	0	0	FAM75A5	family with sequence similarity 75, member A5
hsa-miR-297	0	0	1	1	1	1	ARG1	arginase, liver
hsa-miR-297	0	0	1	1	0	0	AHSA2	AHA1, activator of heat shock 90kDa protein ATPase homolog 2 (yeast)
hsa-miR-297	1	0	1	1	1	1	LMO7	LIM domain 7
hsa-miR-297	0	0	0	1	0	0	MCTP2	multiple C2 domains, transmembrane 2
hsa-miR-297	1	0	0	1	1	1	C14orf102	chromosome 14 open reading frame 102
hsa-miR-297	0	0	1	1	1	1	LAMA2	laminin, alpha 2
hsa-miR-297	0	0	0	1	1	1	OR2L13	olfactory receptor, family 2, subfamily L, member 13
hsa-miR-297	0	0	1	1	0	0	ELP2	elongator acetyltransferase complex subunit 2
hsa-miR-297	0	0	0	1	0	0	ITIH2	inter-alpha-trypsin inhibitor heavy chain 2
hsa-miR-297	0	0	1	1	1	1	APOL2	apolipoprotein L, 2
hsa-miR-297	1	0	1	1	0	0	KCNN3	potassium intermediate/small conductance calcium-activated channel, subfamily N, member 3
hsa-miR-297	0	0	1	1	1	1	OMA1	OMA1 zinc metallopeptidase homolog (S. cerevisiae)
hsa-miR-297	1	0	1	1	1	1	SLC4A8	solute carrier family 4, sodium bicarbonate cotransporter, member 8
hsa-miR-297	0	0	1	1	0	0	KIAA2013	KIAA2013
hsa-miR-297	0	0	1	1	0	0	FAM114A1	family with sequence similarity 114, member A1
hsa-miR-297	1	0	1	1	0	0	USP21	ubiquitin specific peptidase 21
hsa-miR-297	1	0	1	1	0	0	PDE3A	phosphodiesterase 3A, cGMP-inhibited
hsa-miR-297	0	0	1	1	0	0	KIR2DL4	killer cell immunoglobulin-like receptor, two domains, long cytoplasmic tail, 4
hsa-miR-297	1	0	1	1	1	1	PDLIM5	PDZ and LIM domain 5
hsa-miR-297	0	0	0	1	1	1	INPP5D	inositol polyphosphate-5-phosphatase, 145kDa
hsa-miR-297	0	0	0	1	0	0	OR13G1	olfactory receptor, family 13, subfamily G, member 1
hsa-miR-297	0	0	0	1	1	1	IFI16	interferon, gamma-inducible protein 16
hsa-miR-297	0	0	0	1	1	1	HHLA3	HERV-H LTR-associating 3
hsa-miR-297	0	0	1	1	1	1	SDF4	stromal cell derived factor 4
hsa-miR-297	1	0	1	1	1	1	CEP85L	centrosomal protein 85kDa-like
hsa-miR-297	1	0	1	1	1	1	MEGF11	multiple EGF-like-domains 11
hsa-miR-297	0	0	1	1	0	0	CALCA	calcitonin-related polypeptide alpha
hsa-miR-297	1	0	1	1	1	1	ZFP2	zinc finger protein 2 homolog (mouse)
hsa-miR-297	0	0	1	1	1	1	C1orf174	chromosome 1 open reading frame 174
hsa-miR-297	1	0	1	1	1	1	SORBS1	sorbin and SH3 domain containing 1
hsa-miR-297	0	0	1	1	1	1	SLC9B2	solute carrier family 9, subfamily B (NHA2, cation proton antiporter 2), member 2
hsa-miR-297	1	0	1	1	1	1	GPR137B	G protein-coupled receptor 137B
hsa-miR-297	0	0	1	1	0	0	C1orf31	chromosome 1 open reading frame 31
hsa-miR-297	1	0	1	1	1	1	DISC1	disrupted in schizophrenia 1
hsa-miR-297	0	0	1	1	1	1	ACTA1	actin, alpha 1, skeletal muscle
hsa-miR-297	1	0	1	1	0	0	DYNLT1	dynein, light chain, Tctex-type 1
hsa-miR-297	0	0	0	1	1	1	DDX59	DEAD (Asp-Glu-Ala-Asp) box polypeptide 59
hsa-miR-297	0	0	1	1	0	0	MR1	major histocompatibility complex, class I-related
hsa-miR-297	1	0	1	1	1	1	TXLNB	taxilin beta
hsa-miR-297	0	0	1	1	0	0	IFNGR1	interferon gamma receptor 1
hsa-miR-297	0	0	1	1	0	0	DDR2	discoidin domain receptor tyrosine kinase 2
hsa-miR-297	0	0	1	1	1	1	FCRLA	Fc receptor-like A
hsa-miR-297	0	0	1	1	0	0	FCGR2A	Fc fragment of IgG, low affinity IIa, receptor (CD32)
hsa-miR-297	1	0	1	1	0	0	ADAMTS4	ADAM metallopeptidase with thrombospondin type 1 motif, 4
hsa-miR-297	0	0	1	1	1	1	FCRL1	Fc receptor-like 1
hsa-miR-297	0	0	0	1	1	1	ZNF684	zinc finger protein 684
hsa-miR-297	1	0	1	1	0	0	PBXIP1	pre-B-cell leukemia homeobox interacting protein 1
hsa-miR-297	0	0	1	1	0	0	RPS27	ribosomal protein S27
hsa-miR-297	0	0	1	1	0	0	TUBE1	tubulin, epsilon 1
hsa-miR-297	0	0	1	1	0	0	SPRR1A	small proline-rich protein 1A
hsa-miR-297	0	0	0	1	0	0	LCE1E	late cornified envelope 1E
hsa-miR-297	1	0	1	1	1	1	GABPB2	GA binding protein transcription factor, beta subunit 2
hsa-miR-297	1	0	1	1	1	1	TACC2	transforming, acidic coiled-coil containing protein 2
hsa-miR-297	0	0	0	1	0	0	FCGR1B	Fc fragment of IgG, high affinity Ib, receptor (CD64)
hsa-miR-297	0	0	0	1	0	0	AMPD1	adenosine monophosphate deaminase 1
hsa-miR-297	1	0	1	1	1	1	PHTF1	putative homeodomain transcription factor 1
hsa-miR-297	1	0	1	1	1	1	KCNA2	potassium voltage-gated channel, shaker-related subfamily, member 2
hsa-miR-297	0	0	1	1	1	1	NT5C2	5'-nucleotidase, cytosolic II
hsa-miR-297	1	0	1	1	1	1	SFXN2	sideroflexin 2
hsa-miR-297	0	0	1	1	1	1	IRAK1BP1	interleukin-1 receptor-associated kinase 1 binding protein 1
hsa-miR-297	0	0	1	1	1	1	IMPG1	interphotoreceptor matrix proteoglycan 1
hsa-miR-297	0	0	1	1	1	1	SFXN3	sideroflexin 3
hsa-miR-297	0	0	0	1	1	1	KCNQ2	potassium voltage-gated channel, KQT-like subfamily, member 2
hsa-miR-297	0	0	1	1	1	1	NSDHL	NAD(P) dependent steroid dehydrogenase-like
hsa-miR-297	0	0	1	1	1	1	C1orf146	chromosome 1 open reading frame 146
hsa-miR-297	0	0	0	1	1	1	ABCC2	ATP-binding cassette, sub-family C (CFTR/MRP), member 2
hsa-miR-297	0	0	1	1	1	1	GOT1	glutamic-oxaloacetic transaminase 1, soluble (aspartate aminotransferase 1)
hsa-miR-297	0	0	1	1	0	0	PYROXD2	pyridine nucleotide-disulphide oxidoreductase domain 2
hsa-miR-297	1	0	0	1	0	0	GNG5	guanine nucleotide binding protein (G protein), gamma 5
hsa-miR-297	0	0	0	1	0	0	RPF1	ribosome production factor 1 homolog (S. cerevisiae)
hsa-miR-297	0	0	0	1	0	0	C8B	complement component 8, beta polypeptide
hsa-miR-297	1	0	1	1	1	1	NOC3L	nucleolar complex associated 3 homolog (S. cerevisiae)
hsa-miR-297	0	0	1	1	1	1	NKAP	NFKB activating protein
hsa-miR-297	0	0	1	1	0	0	SELRC1	Sel1 repeat containing 1
hsa-miR-297	0	0	1	1	0	0	PMPCA	peptidase (mitochondrial processing) alpha
hsa-miR-297	0	0	1	1	0	0	CARD9	caspase recruitment domain family, member 9
hsa-miR-297	0	0	0	1	0	0	SARDH	sarcosine dehydrogenase
hsa-miR-297	1	0	1	1	1	1	CMPK1	cytidine monophosphate (UMP-CMP) kinase 1, cytosolic
hsa-miR-297	1	0	1	1	1	1	ZMYND8	zinc finger, MYND-type containing 8
hsa-miR-297	1	0	0	1	0	0	CCDC17	coiled-coil domain containing 17
hsa-miR-297	0	0	1	1	1	1	SLC13A3	solute carrier family 13 (sodium-dependent dicarboxylate transporter), member 3
hsa-miR-297	0	0	0	1	0	0	PTCH2	patched 2
hsa-miR-297	1	0	1	1	0	0	ZSWIM1	zinc finger, SWIM-type containing 1
hsa-miR-297	0	0	1	1	1	1	SLC22A7	solute carrier family 22 (organic anion transporter), member 7
hsa-miR-297	0	0	1	1	1	1	WBP5	WW domain binding protein 5
hsa-miR-297	1	0	1	1	1	1	CAMK2G	calcium/calmodulin-dependent protein kinase II gamma
hsa-miR-297	0	0	1	1	1	1	PABPC1L	poly(A) binding protein, cytoplasmic 1-like
hsa-miR-297	0	0	0	1	1	1	ADA	adenosine deaminase
hsa-miR-297	1	0	0	1	1	1	HNF4A	hepatocyte nuclear factor 4, alpha
hsa-miR-297	0	0	0	1	0	0	BMP2KL	BMP2 inducible kinase-like
hsa-miR-297	1	0	1	1	1	1	CHIC1	cysteine-rich hydrophobic domain 1
hsa-miR-297	0	0	1	1	1	1	BAI2	brain-specific angiogenesis inhibitor 2
hsa-miR-297	0	0	0	1	1	1	ZFP37	zinc finger protein 37 homolog (mouse)
hsa-miR-297	0	0	1	1	0	0	TXNDC8	thioredoxin domain containing 8 (spermatozoa)
hsa-miR-297	0	0	1	1	1	1	ZNF248	zinc finger protein 248
hsa-miR-297	0	0	0	1	1	1	TMCO4	transmembrane and coiled-coil domains 4
hsa-miR-297	1	0	1	1	1	1	MCF2L	MCF.2 cell line derived transforming sequence-like
hsa-miR-297	0	0	1	1	1	1	CCDC148	coiled-coil domain containing 148
hsa-miR-297	0	0	1	1	0	0	AUH	AU RNA binding protein/enoyl-CoA hydratase
hsa-miR-297	0	0	1	1	1	1	CDSN	corneodesmosin
hsa-miR-297	1	0	1	1	0	0	CLYBL	citrate lyase beta like
hsa-miR-297	0	0	1	1	1	1	ENKUR	enkurin, TRPC channel interacting protein
hsa-miR-297	0	0	1	1	0	0	NMRK1	nicotinamide riboside kinase 1
hsa-miR-297	1	0	1	1	1	1	CLDN10	claudin 10
hsa-miR-297	0	0	0	1	0	0	HLA-F	major histocompatibility complex, class I, F
hsa-miR-297	0	0	1	1	0	0	SLC38A5	solute carrier family 38, member 5
hsa-miR-297	0	0	1	1	1	1	CNGA3	cyclic nucleotide gated channel alpha 3
hsa-miR-297	1	0	1	1	1	1	SOX21	SRY (sex determining region Y)-box 21
hsa-miR-297	1	0	1	1	1	1	ZNF81	zinc finger protein 81
hsa-miR-297	1	0	0	1	1	1	OR11A1	olfactory receptor, family 11, subfamily A, member 1
hsa-miR-297	0	0	0	1	0	0	FOXD4L5	forkhead box D4-like 5
hsa-miR-297	0	0	0	1	0	0	FOXD4L2	forkhead box D4-like 2
hsa-miR-297	1	0	1	1	1	1	BTN2A1	butyrophilin, subfamily 2, member A1
hsa-miR-297	0	0	0	1	1	1	COMMD6	COMM domain containing 6
hsa-miR-297	0	0	0	1	0	0	FAM75A4	family with sequence similarity 75, member A4
hsa-miR-297	0	0	0	1	0	0	FAM75A2	family with sequence similarity 75, member A2
hsa-miR-297	0	0	0	1	0	0	FAM75A1	family with sequence similarity 75, member A1
hsa-miR-297	0	0	1	1	0	0	FAM216A	family with sequence similarity 216, member A
hsa-miR-297	0	0	0	1	0	0	CUBN	cubilin (intrinsic factor-cobalamin receptor)
hsa-miR-297	1	0	1	1	1	1	YIPF5	Yip1 domain family, member 5
hsa-miR-297	0	0	1	1	0	0	SEL1L2	sel-1 suppressor of lin-12-like 2 (C. elegans)
hsa-miR-297	1	0	1	1	1	1	SPTLC3	serine palmitoyltransferase, long chain base subunit 3
hsa-miR-297	0	0	0	1	0	0	PANK4	pantothenate kinase 4
hsa-miR-297	1	0	1	1	0	0	TCF7	transcription factor 7 (T-cell specific, HMG-box)
hsa-miR-297	0	0	1	1	0	0	KIAA0226L	KIAA0226-like
hsa-miR-297	0	0	0	1	0	0	NR0B1	nuclear receptor subfamily 0, group B, member 1
hsa-miR-297	0	0	0	1	0	0	C11orf91	chromosome 11 open reading frame 91
hsa-miR-297	0	0	1	1	0	0	FBXL13	F-box and leucine-rich repeat protein 13
hsa-miR-297	1	0	1	1	1	1	KIN	KIN, antigenic determinant of recA protein homolog (mouse)
hsa-miR-297	0	0	0	1	1	1	PAK1IP1	PAK1 interacting protein 1
hsa-miR-297	0	0	0	1	0	0	OR6C1	olfactory receptor, family 6, subfamily C, member 1
hsa-miR-297	0	0	1	1	0	0	TRPC4	transient receptor potential cation channel, subfamily C, member 4
hsa-miR-297	0	0	1	1	1	1	STEAP4	STEAP family member 4
hsa-miR-297	0	0	0	1	0	0	LOC100131831	uncharacterized LOC100131831
hsa-miR-297	0	0	0	1	0	0	OR52A4	olfactory receptor, family 52, subfamily A, member 4
hsa-miR-297	0	0	0	1	0	0	ASB11	ankyrin repeat and SOCS box containing 11
hsa-miR-297	0	0	1	1	1	1	FAM9C	family with sequence similarity 9, member C
hsa-miR-297	0	0	1	1	1	1	PRPS2	phosphoribosyl pyrophosphate synthetase 2
hsa-miR-297	1	0	1	1	1	1	BNC2	basonuclin 2
hsa-miR-297	0	0	0	1	1	1	FLJ45139	FLJ45139 protein
hsa-miR-297	1	0	1	1	1	1	HDHD1	haloacid dehalogenase-like hydrolase domain containing 1
hsa-miR-297	0	0	1	1	1	1	RPAIN	RPA interacting protein
hsa-miR-297	0	0	0	1	0	0	TPTE2P1	transmembrane phosphoinositide 3-phosphatase and tensin homolog 2 pseudogene 1
hsa-miR-297	0	0	1	1	1	1	C1QTNF9	C1q and tumor necrosis factor related protein 9
hsa-miR-297	0	0	0	1	0	0	KCNV2	potassium channel, subfamily V, member 2
hsa-miR-297	0	0	0	1	0	0	DEFB135	defensin, beta 135
hsa-miR-297	0	0	1	1	1	1	DOCK8	dedicator of cytokinesis 8
[truncated: 179 more rows]
