# Supplementary material for: Profiling of Selected MicroRNAs in Proliferative Eutopic Endometrium of Women with Ovarian Endometriosis
Source: Biomed Res Int. 2015 Aug 20;2015:760698. doi: 10.1155/2015/760698 (PMC4558423; doi:10.1155/2015/760698)
Supplement: Supplementary file 1 — Table I: The names of miRNAs significantly differentially expressed between eutopic endometrium of patients with endometriosis vs eutopic endometrium of patients without endometriosis. Table II: The associations between miRNA and mRNA, which presents detailed results of the search of six major databases i.e targetscan, tarbase, miranda, mirbase, mirtarget2 and pictar. [file 760698.f1.zip › 760698.f1/Table II/hsa-miR-300.tsv]

miR	targetscan	tarbase	miranda	mirbase	mirtarget2	pictar	GeneSymbol	GeneName
hsa-miR-300	1	0	1	1	1	1	ANTXR1	anthrax toxin receptor 1
hsa-miR-300	1	0	1	1	1	1	MAFG	v-maf musculoaponeurotic fibrosarcoma oncogene homolog G (avian)
hsa-miR-300	1	0	1	1	1	1	KLF12	Kruppel-like factor 12
hsa-miR-300	1	0	1	1	1	1	ARHGAP29	Rho GTPase activating protein 29
hsa-miR-300	1	0	1	1	1	1	ACSL3	acyl-CoA synthetase long-chain family member 3
hsa-miR-300	1	0	1	1	1	1	ZNF532	zinc finger protein 532
hsa-miR-300	1	0	1	1	1	1	BCL2L11	BCL2-like 11 (apoptosis facilitator)
hsa-miR-300	1	0	1	1	1	1	YTHDC1	YTH domain containing 1
hsa-miR-300	1	0	1	1	1	1	CDC42BPA	CDC42 binding protein kinase alpha (DMPK-like)
hsa-miR-300	1	0	1	1	1	1	MYH10	myosin, heavy chain 10, non-muscle
hsa-miR-300	1	0	1	1	1	1	ZNF148	zinc finger protein 148
hsa-miR-300	1	0	1	1	1	1	SIPA1L2	signal-induced proliferation-associated 1 like 2
hsa-miR-300	1	0	1	0	1	1	C18orf25	chromosome 18 open reading frame 25
hsa-miR-300	1	0	1	1	0	0	EMP2	epithelial membrane protein 2
hsa-miR-300	1	0	1	1	1	1	PNRC1	proline-rich nuclear receptor coactivator 1
hsa-miR-300	1	0	1	1	1	1	ZNF384	zinc finger protein 384
hsa-miR-300	1	0	1	1	1	1	SLC24A3	solute carrier family 24 (sodium/potassium/calcium exchanger), member 3
hsa-miR-300	1	0	1	1	1	1	STK38L	serine/threonine kinase 38 like
hsa-miR-300	1	0	1	1	1	1	BTBD1	BTB (POZ) domain containing 1
hsa-miR-300	1	0	1	0	1	1	HDAC4	histone deacetylase 4
hsa-miR-300	1	0	1	1	1	1	SLC7A1	solute carrier family 7 (cationic amino acid transporter, y+ system), member 1
hsa-miR-300	1	0	1	1	1	1	NDEL1	nudE nuclear distribution E homolog (A. nidulans)-like 1
hsa-miR-300	1	0	1	1	1	1	NLGN1	neuroligin 1
hsa-miR-300	1	0	1	0	1	1	BDNF	brain-derived neurotrophic factor
hsa-miR-300	1	0	1	1	1	1	CPSF6	cleavage and polyadenylation specific factor 6, 68kDa
hsa-miR-300	1	0	1	1	1	1	SNX9	sorting nexin 9
hsa-miR-300	1	0	1	0	1	1	KPNA6	karyopherin alpha 6 (importin alpha 7)
hsa-miR-300	1	0	1	1	1	1	SOCS6	suppressor of cytokine signaling 6
hsa-miR-300	1	0	1	1	1	1	EML1	echinoderm microtubule associated protein like 1
hsa-miR-300	1	0	1	0	1	1	PDAP1	PDGFA associated protein 1
hsa-miR-300	1	0	1	1	1	1	NAP1L5	nucleosome assembly protein 1-like 5
hsa-miR-300	1	0	1	1	1	1	ARHGAP44	Rho GTPase activating protein 44
hsa-miR-300	1	0	1	0	1	1	NR3C1	nuclear receptor subfamily 3, group C, member 1 (glucocorticoid receptor)
hsa-miR-300	1	0	1	0	1	1	NHS	Nance-Horan syndrome (congenital cataracts and dental anomalies)
hsa-miR-300	1	0	1	1	1	1	LPHN1	latrophilin 1
hsa-miR-300	1	0	1	1	1	1	MARCKS	myristoylated alanine-rich protein kinase C substrate
hsa-miR-300	1	0	1	1	1	1	SETX	senataxin
hsa-miR-300	1	0	1	1	1	1	ANO1	anoctamin 1, calcium activated chloride channel
hsa-miR-300	1	0	1	1	1	1	MED13L	mediator complex subunit 13-like
hsa-miR-300	1	0	1	1	1	1	SORBS1	sorbin and SH3 domain containing 1
hsa-miR-300	1	0	1	0	1	1	PURB	purine-rich element binding protein B
hsa-miR-300	1	0	1	1	1	1	HMGN2	high mobility group nucleosomal binding domain 2
hsa-miR-300	1	0	1	0	1	1	LARP4B	La ribonucleoprotein domain family, member 4B
hsa-miR-300	1	0	1	1	0	0	CHD4	chromodomain helicase DNA binding protein 4
hsa-miR-300	1	0	1	1	1	1	UBAP2L	ubiquitin associated protein 2-like
hsa-miR-300	1	0	1	1	1	1	OSBP	oxysterol binding protein
hsa-miR-300	1	0	1	1	1	1	ITM2C	integral membrane protein 2C
hsa-miR-300	1	0	1	1	1	1	DEK	DEK oncogene
hsa-miR-300	1	0	0	0	0	0	AAK1	AP2 associated kinase 1
hsa-miR-300	1	0	1	1	1	1	NRXN1	neurexin 1
hsa-miR-300	1	0	1	1	1	1	HNRNPD	heterogeneous nuclear ribonucleoprotein D (AU-rich element RNA binding protein 1, 37kDa)
hsa-miR-300	1	0	1	1	1	1	ZMIZ1	zinc finger, MIZ-type containing 1
hsa-miR-300	1	0	1	1	1	1	OTUD4	OTU domain containing 4
hsa-miR-300	1	0	1	1	1	1	IRF2BP2	interferon regulatory factor 2 binding protein 2
hsa-miR-300	1	0	1	1	1	1	NDUFAB1	NADH dehydrogenase (ubiquinone) 1, alpha/beta subcomplex, 1, 8kDa
hsa-miR-300	1	0	1	0	1	1	LIN7C	lin-7 homolog C (C. elegans)
hsa-miR-300	1	0	1	0	1	1	RNF165	ring finger protein 165
hsa-miR-300	1	0	1	1	1	1	IQSEC2	IQ motif and Sec7 domain 2
hsa-miR-300	1	0	1	0	1	1	AKAP6	A kinase (PRKA) anchor protein 6
hsa-miR-300	1	0	1	1	0	0	KIAA1211	KIAA1211
hsa-miR-300	1	0	1	1	1	1	TXNDC5	thioredoxin domain containing 5 (endoplasmic reticulum)
hsa-miR-300	1	0	1	1	1	1	EPB41L1	erythrocyte membrane protein band 4.1-like 1
hsa-miR-300	1	0	1	1	1	1	CNOT2	CCR4-NOT transcription complex, subunit 2
hsa-miR-300	1	0	1	1	0	0	RFX1	regulatory factor X, 1 (influences HLA class II expression)
hsa-miR-300	1	0	1	1	1	1	IER5	immediate early response 5
hsa-miR-300	1	0	1	1	1	1	AZIN1	antizyme inhibitor 1
hsa-miR-300	1	0	1	1	1	1	CNKSR3	CNKSR family member 3
hsa-miR-300	1	0	1	1	1	1	ELAVL1	ELAV (embryonic lethal, abnormal vision, Drosophila)-like 1 (Hu antigen R)
hsa-miR-300	1	0	1	0	1	1	NFAT5	nuclear factor of activated T-cells 5, tonicity-responsive
hsa-miR-300	1	0	1	1	1	1	SUV420H1	suppressor of variegation 4-20 homolog 1 (Drosophila)
hsa-miR-300	1	0	1	0	1	1	LARP1	La ribonucleoprotein domain family, member 1
hsa-miR-300	1	0	1	0	1	1	KIAA0494	KIAA0494
hsa-miR-300	1	0	1	0	1	1	NCAM1	neural cell adhesion molecule 1
hsa-miR-300	1	0	1	1	1	1	MLL	myeloid/lymphoid or mixed-lineage leukemia (trithorax homolog, Drosophila)
hsa-miR-300	1	0	1	1	1	1	KLF4	Kruppel-like factor 4 (gut)
hsa-miR-300	1	0	1	1	1	1	FAM168B	family with sequence similarity 168, member B
hsa-miR-300	1	0	1	1	1	1	TCF3	transcription factor 3 (E2A immunoglobulin enhancer binding factors E12/E47)
hsa-miR-300	1	0	1	1	1	1	XPO7	exportin 7
hsa-miR-300	1	0	1	1	1	1	ELF2	E74-like factor 2 (ets domain transcription factor)
hsa-miR-300	1	0	1	1	1	1	ETS1	v-ets erythroblastosis virus E26 oncogene homolog 1 (avian)
hsa-miR-300	1	0	1	1	0	0	ZBTB49	zinc finger and BTB domain containing 49
hsa-miR-300	1	0	1	1	1	1	ARAP2	ArfGAP with RhoGAP domain, ankyrin repeat and PH domain 2
hsa-miR-300	1	0	1	0	1	1	SLC1A2	solute carrier family 1 (glial high affinity glutamate transporter), member 2
hsa-miR-300	1	0	1	1	1	1	ZMYM4	zinc finger, MYM-type 4
hsa-miR-300	1	0	1	1	1	1	ITGA3	integrin, alpha 3 (antigen CD49C, alpha 3 subunit of VLA-3 receptor)
hsa-miR-300	1	0	1	1	1	1	ZBTB38	zinc finger and BTB domain containing 38
hsa-miR-300	1	0	1	1	1	1	PARD6B	par-6 partitioning defective 6 homolog beta (C. elegans)
hsa-miR-300	1	0	1	0	1	1	ZFPM2	zinc finger protein, multitype 2
hsa-miR-300	1	0	1	1	1	1	MBNL1	muscleblind-like splicing regulator 1
hsa-miR-300	1	0	1	1	1	1	ZDHHC23	zinc finger, DHHC-type containing 23
hsa-miR-300	1	0	1	1	1	1	JPH1	junctophilin 1
hsa-miR-300	1	0	1	0	1	1	FAM19A5	family with sequence similarity 19 (chemokine (C-C motif)-like), member A5
hsa-miR-300	1	0	1	1	1	1	MMGT1	membrane magnesium transporter 1
hsa-miR-300	1	0	1	1	1	1	GABRB3	gamma-aminobutyric acid (GABA) A receptor, beta 3
hsa-miR-300	1	0	1	1	1	1	PCDH7	protocadherin 7
hsa-miR-300	1	0	1	1	1	1	DLX2	distal-less homeobox 2
hsa-miR-300	1	1	1	1	1	1	NFIA	nuclear factor I/A
hsa-miR-300	1	0	1	1	1	1	ZMYND11	zinc finger, MYND-type containing 11
hsa-miR-300	1	0	1	1	1	1	GRM8	glutamate receptor, metabotropic 8
hsa-miR-300	1	0	1	0	1	1	BMPR2	bone morphogenetic protein receptor, type II (serine/threonine kinase)
hsa-miR-300	1	0	1	1	0	0	NOTCH3	notch 3
hsa-miR-300	1	0	1	1	1	1	ACVR2B	activin A receptor, type IIB
hsa-miR-300	1	0	1	1	1	1	ACTG1	actin, gamma 1
hsa-miR-300	1	0	1	1	1	1	RCAN2	regulator of calcineurin 2
hsa-miR-300	1	0	1	1	1	1	NOC3L	nucleolar complex associated 3 homolog (S. cerevisiae)
hsa-miR-300	1	0	1	1	1	1	PAN3	PAN3 poly(A) specific ribonuclease subunit homolog (S. cerevisiae)
hsa-miR-300	1	0	1	1	1	1	RPRD1A	regulation of nuclear pre-mRNA domain containing 1A
hsa-miR-300	1	0	1	0	1	1	NUFIP2	nuclear fragile X mental retardation protein interacting protein 2
hsa-miR-300	1	0	1	1	1	1	UBE4A	ubiquitination factor E4A
hsa-miR-300	1	0	1	1	1	1	SNX27	sorting nexin family member 27
hsa-miR-300	1	0	1	1	1	1	ZFYVE21	zinc finger, FYVE domain containing 21
hsa-miR-300	1	0	1	1	1	1	WAC	WW domain containing adaptor with coiled-coil
hsa-miR-300	1	0	1	0	1	1	CNOT6L	CCR4-NOT transcription complex, subunit 6-like
hsa-miR-300	1	0	1	1	1	1	GALNT7	UDP-N-acetyl-alpha-D-galactosamine:polypeptide N-acetylgalactosaminyltransferase 7 (GalNAc-T7)
hsa-miR-300	1	0	1	1	1	1	PVRL1	poliovirus receptor-related 1 (herpesvirus entry mediator C)
hsa-miR-300	1	0	1	1	1	1	TP53BP1	tumor protein p53 binding protein 1
hsa-miR-300	1	0	1	0	1	1	AGFG1	ArfGAP with FG repeats 1
hsa-miR-300	1	0	1	0	1	1	LYSMD3	LysM, putative peptidoglycan-binding, domain containing 3
hsa-miR-300	1	0	1	1	1	1	CREBBP	CREB binding protein
hsa-miR-300	1	0	1	1	1	1	ELOVL2	ELOVL fatty acid elongase 2
hsa-miR-300	1	0	1	1	1	1	SNRNP40	small nuclear ribonucleoprotein 40kDa (U5)
hsa-miR-300	1	0	1	1	1	1	USP6	ubiquitin specific peptidase 6 (Tre-2 oncogene)
hsa-miR-300	1	0	1	1	1	1	EN1	engrailed homeobox 1
hsa-miR-300	1	0	1	1	1	1	KCTD15	potassium channel tetramerisation domain containing 15
hsa-miR-300	1	0	1	1	1	1	LMO4	LIM domain only 4
hsa-miR-300	1	0	1	1	1	1	NEUROG2	neurogenin 2
hsa-miR-300	1	0	1	0	1	1	BCL11B	B-cell CLL/lymphoma 11B (zinc finger protein)
hsa-miR-300	1	0	1	0	1	1	CNOT7	CCR4-NOT transcription complex, subunit 7
hsa-miR-300	1	0	1	1	1	1	PTCH1	patched 1
hsa-miR-300	1	0	1	1	0	0	BMPR1B	bone morphogenetic protein receptor, type IB
hsa-miR-300	1	0	1	1	1	1	R3HDM2	R3H domain containing 2
hsa-miR-300	1	0	1	0	1	1	ITCH	itchy E3 ubiquitin protein ligase
hsa-miR-300	1	0	1	1	1	1	HMGXB4	HMG box domain containing 4
hsa-miR-300	1	0	1	1	1	1	BAZ1B	bromodomain adjacent to zinc finger domain, 1B
hsa-miR-300	1	0	1	1	1	1	CNOT1	CCR4-NOT transcription complex, subunit 1
hsa-miR-300	1	0	1	0	1	1	DCBLD2	discoidin, CUB and LCCL domain containing 2
hsa-miR-300	1	0	1	1	1	1	PPP2R2C	protein phosphatase 2, regulatory subunit B, gamma
hsa-miR-300	1	0	1	0	1	1	HECTD1	HECT domain containing E3 ubiquitin protein ligase 1
hsa-miR-300	1	0	1	1	1	1	RICTOR	RPTOR independent companion of MTOR, complex 2
hsa-miR-300	1	0	1	1	1	1	DLGAP2	discs, large (Drosophila) homolog-associated protein 2
hsa-miR-300	1	0	1	1	0	0	FBXL19	F-box and leucine-rich repeat protein 19
hsa-miR-300	1	0	1	1	1	1	TLN2	talin 2
hsa-miR-300	1	0	1	1	1	1	ID1	inhibitor of DNA binding 1, dominant negative helix-loop-helix protein
hsa-miR-300	1	0	1	1	1	1	GNB4	guanine nucleotide binding protein (G protein), beta polypeptide 4
hsa-miR-300	1	0	1	0	1	1	PPP1R2	protein phosphatase 1, regulatory (inhibitor) subunit 2
hsa-miR-300	1	0	1	1	1	1	LPHN2	latrophilin 2
hsa-miR-300	1	0	1	1	1	1	KIAA2018	KIAA2018
hsa-miR-300	1	0	1	1	1	1	UTRN	utrophin
hsa-miR-300	1	0	1	1	1	1	EXO1	exonuclease 1
hsa-miR-300	1	0	1	1	1	1	KCNE3	potassium voltage-gated channel, Isk-related family, member 3
hsa-miR-300	1	0	1	1	1	1	KCTD12	potassium channel tetramerisation domain containing 12
hsa-miR-300	1	0	1	1	1	1	NRP2	neuropilin 2
hsa-miR-300	1	0	1	1	1	1	ZBTB5	zinc finger and BTB domain containing 5
hsa-miR-300	1	0	1	1	1	1	SPAST	spastin
hsa-miR-300	1	0	1	1	1	1	IL15RA	interleukin 15 receptor, alpha
hsa-miR-300	1	0	1	1	1	1	PFKFB3	6-phosphofructo-2-kinase/fructose-2,6-biphosphatase 3
hsa-miR-300	1	0	1	1	1	1	GRHL1	grainyhead-like 1 (Drosophila)
hsa-miR-300	1	0	1	1	1	1	CRTC3	CREB regulated transcription coactivator 3
hsa-miR-300	1	0	1	0	1	1	GPR158	G protein-coupled receptor 158
hsa-miR-300	1	0	1	1	1	1	JAG1	jagged 1
hsa-miR-300	1	0	1	1	1	1	EGR3	early growth response 3
hsa-miR-300	1	0	1	1	1	1	C17orf85	chromosome 17 open reading frame 85
hsa-miR-300	1	0	1	1	1	1	MEX3B	mex-3 homolog B (C. elegans)
hsa-miR-300	1	0	1	1	1	1	SELE	selectin E
hsa-miR-300	1	0	1	1	1	1	DENND4C	DENN/MADD domain containing 4C
hsa-miR-300	1	0	1	1	1	1	PPFIA1	protein tyrosine phosphatase, receptor type, f polypeptide (PTPRF), interacting protein (liprin), alpha 1
hsa-miR-300	1	0	1	1	1	1	FAM102A	family with sequence similarity 102, member A
hsa-miR-300	1	0	1	1	1	1	RPL22	ribosomal protein L22
hsa-miR-300	1	0	1	1	0	0	OTUD3	OTU domain containing 3
hsa-miR-300	1	0	1	1	1	1	ASPHD2	aspartate beta-hydroxylase domain containing 2
hsa-miR-300	1	0	1	1	1	1	SHANK2	SH3 and multiple ankyrin repeat domains 2
hsa-miR-300	1	0	1	1	1	1	USP34	ubiquitin specific peptidase 34
hsa-miR-300	1	0	1	0	1	1	TNS3	tensin 3
hsa-miR-300	1	0	1	1	0	0	RAB33A	RAB33A, member RAS oncogene family
hsa-miR-300	1	0	1	1	0	0	ZNF292	zinc finger protein 292
hsa-miR-300	1	0	1	1	1	1	APPL1	adaptor protein, phosphotyrosine interaction, PH domain and leucine zipper containing 1
hsa-miR-300	1	0	1	1	1	1	INTS6	integrator complex subunit 6
hsa-miR-300	1	0	1	0	1	1	ADIPOR2	adiponectin receptor 2
hsa-miR-300	1	0	1	1	1	1	WNT5A	wingless-type MMTV integration site family, member 5A
hsa-miR-300	1	0	1	0	1	1	DCAF10	DDB1 and CUL4 associated factor 10
hsa-miR-300	1	0	1	1	1	1	LRRC1	leucine rich repeat containing 1
hsa-miR-300	1	0	1	1	0	0	PCLO	piccolo (presynaptic cytomatrix protein)
hsa-miR-300	1	0	1	1	1	1	R3HDM1	R3H domain containing 1
hsa-miR-300	1	0	0	1	0	0	HEATR5A	HEAT repeat containing 5A
hsa-miR-300	1	0	1	1	1	1	VPS13B	vacuolar protein sorting 13 homolog B (yeast)
hsa-miR-300	1	0	1	1	0	0	FBXO45	F-box protein 45
hsa-miR-300	1	0	1	1	1	1	CALM2	calmodulin 2 (phosphorylase kinase, delta)
hsa-miR-300	1	0	1	1	1	1	KCNJ3	potassium inwardly-rectifying channel, subfamily J, member 3
hsa-miR-300	1	0	0	1	1	1	SLC35E1	solute carrier family 35, member E1
hsa-miR-300	1	0	1	1	1	1	PCDH19	protocadherin 19
hsa-miR-300	1	0	1	1	1	1	COL1A2	collagen, type I, alpha 2
hsa-miR-300	1	0	1	1	1	1	ITGA6	integrin, alpha 6
hsa-miR-300	1	0	1	0	1	1	LMO3	LIM domain only 3 (rhombotin-like 2)
hsa-miR-300	1	0	1	1	1	1	BIVM	basic, immunoglobulin-like variable motif containing
hsa-miR-300	1	0	1	0	1	1	SPRY3	sprouty homolog 3 (Drosophila)
hsa-miR-300	1	0	1	1	1	1	RASGEF1A	RasGEF domain family, member 1A
hsa-miR-300	1	0	1	1	1	1	MEAF6	MYST/Esa1-associated factor 6
hsa-miR-300	1	0	1	1	1	1	ARX	aristaless related homeobox
hsa-miR-300	1	0	1	1	0	0	INO80D	INO80 complex subunit D
hsa-miR-300	1	0	1	1	1	1	XPO1	exportin 1 (CRM1 homolog, yeast)
hsa-miR-300	1	0	1	1	1	1	ELOVL7	ELOVL fatty acid elongase 7
hsa-miR-300	1	0	1	1	1	1	SYVN1	synovial apoptosis inhibitor 1, synoviolin
hsa-miR-300	1	0	1	1	1	1	FILIP1L	filamin A interacting protein 1-like
hsa-miR-300	1	0	1	1	1	1	SIAH1	siah E3 ubiquitin protein ligase 1
hsa-miR-300	1	0	1	1	0	0	EIF4A1	eukaryotic translation initiation factor 4A1
hsa-miR-300	1	0	1	1	1	1	EFNB2	ephrin-B2
hsa-miR-300	1	0	1	1	1	1	TET2	tet methylcytosine dioxygenase 2
hsa-miR-300	1	0	1	1	1	1	FAM134C	family with sequence similarity 134, member C
hsa-miR-300	1	0	1	1	1	1	GTF2I	general transcription factor IIi
hsa-miR-300	1	0	1	1	1	1	PHACTR2	phosphatase and actin regulator 2
hsa-miR-300	1	0	1	1	1	1	GATAD2A	GATA zinc finger domain containing 2A
hsa-miR-300	1	0	1	1	1	1	GULP1	GULP, engulfment adaptor PTB domain containing 1
hsa-miR-300	1	0	1	1	0	0	HIPK2	homeodomain interacting protein kinase 2
hsa-miR-300	1	0	1	0	1	1	PATL1	protein associated with topoisomerase II homolog 1 (yeast)
hsa-miR-300	1	0	1	1	1	1	HNRNPR	heterogeneous nuclear ribonucleoprotein R
hsa-miR-300	1	0	1	0	1	1	MYCBP	c-myc binding protein
hsa-miR-300	1	0	1	1	1	1	ATRN	attractin
hsa-miR-300	1	0	1	1	1	1	F3	coagulation factor III (thromboplastin, tissue factor)
hsa-miR-300	1	0	1	1	1	1	LIPG	lipase, endothelial
hsa-miR-300	1	0	1	1	0	0	STXBP5L	syntaxin binding protein 5-like
hsa-miR-300	1	0	1	1	1	1	EPHB4	EPH receptor B4
hsa-miR-300	1	0	1	0	1	1	KIAA0240	KIAA0240
hsa-miR-300	1	0	1	1	1	1	DDX6	DEAD (Asp-Glu-Ala-Asp) box helicase 6
hsa-miR-300	1	0	1	1	1	1	SHOX2	short stature homeobox 2
hsa-miR-300	1	0	1	1	1	1	RIF1	RAP1 interacting factor homolog (yeast)
hsa-miR-300	1	0	1	1	0	0	TCERG1L	transcription elongation regulator 1-like
hsa-miR-300	1	0	1	1	0	0	CCDC30	coiled-coil domain containing 30
hsa-miR-300	1	0	1	1	1	1	UNC119B	unc-119 homolog B (C. elegans)
hsa-miR-300	1	0	1	1	1	1	MNX1	motor neuron and pancreas homeobox 1
hsa-miR-300	1	0	1	1	1	1	RC3H1	ring finger and CCCH-type domains 1
hsa-miR-300	1	0	1	0	1	1	CUL3	cullin 3
hsa-miR-300	1	0	1	1	1	1	SEPT9	septin 9
hsa-miR-300	1	0	0	0	1	1	RNF216	ring finger protein 216
hsa-miR-300	1	0	1	1	1	1	APP	amyloid beta (A4) precursor protein
hsa-miR-300	1	0	1	0	1	1	LURAP1L	leucine rich adaptor protein 1-like
hsa-miR-300	1	0	1	0	1	1	CPEB4	cytoplasmic polyadenylation element binding protein 4
hsa-miR-300	1	0	1	1	1	1	SPRY1	sprouty homolog 1, antagonist of FGF signaling (Drosophila)
hsa-miR-300	1	0	1	0	1	1	PRKCE	protein kinase C, epsilon
hsa-miR-300	1	0	1	0	1	1	CEBPA	CCAAT/enhancer binding protein (C/EBP), alpha
hsa-miR-300	1	0	1	0	1	1	TMEM39A	transmembrane protein 39A
hsa-miR-300	1	0	1	0	1	1	THRB	thyroid hormone receptor, beta
hsa-miR-300	1	0	1	1	1	1	SOX9	SRY (sex determining region Y)-box 9
hsa-miR-300	1	0	1	1	1	1	FGF7	fibroblast growth factor 7
hsa-miR-300	1	0	1	0	1	1	ZC3H12B	zinc finger CCCH-type containing 12B
hsa-miR-300	1	0	1	1	1	1	SCAMP1	secretory carrier membrane protein 1
hsa-miR-300	1	0	1	0	1	1	ZIC1	Zic family member 1
hsa-miR-300	1	0	1	0	1	1	KLF3	Kruppel-like factor 3 (basic)
hsa-miR-300	1	0	1	1	1	1	C19orf6	chromosome 19 open reading frame 6
hsa-miR-300	1	0	1	1	1	1	UBL3	ubiquitin-like 3
hsa-miR-300	1	0	1	1	1	1	FOXJ3	forkhead box J3
hsa-miR-300	1	0	1	1	1	1	FNIP1	folliculin interacting protein 1
hsa-miR-300	1	0	1	1	1	1	EIF4G2	eukaryotic translation initiation factor 4 gamma, 2
hsa-miR-300	1	0	1	1	1	1	COL11A1	collagen, type XI, alpha 1
hsa-miR-300	1	0	1	1	0	0	UBXN7	UBX domain protein 7
hsa-miR-300	1	0	1	0	1	1	RAPGEF5	Rap guanine nucleotide exchange factor (GEF) 5
hsa-miR-300	1	0	1	1	0	0	PRRC2A	proline-rich coiled-coil 2A
hsa-miR-300	1	0	1	1	1	1	HMGB1	high mobility group box 1
hsa-miR-300	1	0	1	1	1	1	PPP1R21	protein phosphatase 1, regulatory subunit 21
hsa-miR-300	1	0	0	1	0	0	CTU2	cytosolic thiouridylase subunit 2 homolog (S. pombe)
hsa-miR-300	1	0	1	1	1	1	PSIP1	PC4 and SFRS1 interacting protein 1
hsa-miR-300	1	0	1	1	1	1	BHLHE40	basic helix-loop-helix family, member e40
hsa-miR-300	1	0	1	1	1	1	SYF2	SYF2 homolog, RNA splicing factor (S. cerevisiae)
hsa-miR-300	1	0	1	1	1	1	PAPOLA	poly(A) polymerase alpha
hsa-miR-300	1	0	1	1	1	1	REV3L	REV3-like, polymerase (DNA directed), zeta, catalytic subunit
hsa-miR-300	1	0	1	1	1	1	PIAS1	protein inhibitor of activated STAT, 1
hsa-miR-300	1	0	1	1	1	1	CHD9	chromodomain helicase DNA binding protein 9
hsa-miR-300	1	0	0	1	0	0	HIC1	hypermethylated in cancer 1
hsa-miR-300	1	0	0	1	1	1	MCC	mutated in colorectal cancers
hsa-miR-300	1	0	1	1	1	1	RNF111	ring finger protein 111
hsa-miR-300	1	0	1	1	1	1	ZNF238	zinc finger protein 238
hsa-miR-300	1	0	1	1	1	1	TMEM184C	transmembrane protein 184C
hsa-miR-300	1	0	1	1	1	1	SMAD4	SMAD family member 4
hsa-miR-300	1	0	1	1	1	1	RAC1	ras-related C3 botulinum toxin substrate 1 (rho family, small GTP binding protein Rac1)
hsa-miR-300	1	0	1	1	1	1	RAP1GDS1	RAP1, GTP-GDP dissociation stimulator 1
hsa-miR-300	1	0	1	1	0	0	LRRC58	leucine rich repeat containing 58
hsa-miR-300	1	0	1	1	1	1	CEP76	centrosomal protein 76kDa
hsa-miR-300	1	0	1	1	1	1	FRMD4A	FERM domain containing 4A
hsa-miR-300	1	0	1	1	1	1	ERBB4	v-erb-a erythroblastic leukemia viral oncogene homolog 4 (avian)
hsa-miR-300	1	0	1	1	1	1	SLC6A17	solute carrier family 6, member 17
hsa-miR-300	1	0	1	1	1	1	NFASC	neurofascin
hsa-miR-300	1	0	1	1	1	1	MEIS2	Meis homeobox 2
hsa-miR-300	1	0	1	1	1	1	DLC1	deleted in liver cancer 1
hsa-miR-300	1	0	1	1	1	1	ATP6V0A2	ATPase, H+ transporting, lysosomal V0 subunit a2
hsa-miR-300	1	0	1	0	1	1	MEGF10	multiple EGF-like-domains 10
hsa-miR-300	1	0	1	1	1	1	ANKRD50	ankyrin repeat domain 50
hsa-miR-300	1	0	1	1	1	1	MAGI1	membrane associated guanylate kinase, WW and PDZ domain containing 1
hsa-miR-300	1	0	1	0	1	1	PCSK2	proprotein convertase subtilisin/kexin type 2
hsa-miR-300	1	0	1	1	0	0	NKX2-8	NK2 homeobox 8
hsa-miR-300	1	0	1	1	1	1	GAS2	growth arrest-specific 2
hsa-miR-300	1	0	1	1	1	1	MYH9	myosin, heavy chain 9, non-muscle
hsa-miR-300	1	0	1	1	1	1	ASXL2	additional sex combs like 2 (Drosophila)
hsa-miR-300	1	0	1	1	1	1	TGFB3	transforming growth factor, beta 3
hsa-miR-300	1	0	1	0	1	1	KRAS	v-Ki-ras2 Kirsten rat sarcoma viral oncogene homolog
hsa-miR-300	1	0	1	1	1	1	CDC42	cell division cycle 42 (GTP binding protein, 25kDa)
hsa-miR-300	1	0	1	1	1	1	HIATL1	hippocampus abundant transcript-like 1
hsa-miR-300	1	0	1	0	1	1	MSL2	male-specific lethal 2 homolog (Drosophila)
hsa-miR-300	1	0	1	1	1	1	ESR1	estrogen receptor 1
hsa-miR-300	1	0	1	1	1	1	CDC73	cell division cycle 73, Paf1/RNA polymerase II complex component, homolog (S. cerevisiae)
hsa-miR-300	1	0	1	1	1	1	DHX40	DEAH (Asp-Glu-Ala-His) box polypeptide 40
hsa-miR-300	1	0	1	1	1	1	DCUN1D3	DCN1, defective in cullin neddylation 1, domain containing 3 (S. cerevisiae)
hsa-miR-300	1	0	1	1	1	1	APC	adenomatous polyposis coli
hsa-miR-300	1	0	1	1	0	0	FA2H	fatty acid 2-hydroxylase
hsa-miR-300	1	0	1	1	1	1	LGR4	leucine-rich repeat containing G protein-coupled receptor 4
hsa-miR-300	1	0	1	0	1	1	YES1	v-yes-1 Yamaguchi sarcoma viral oncogene homolog 1
hsa-miR-300	1	0	1	1	1	1	JHDM1D	jumonji C domain containing histone demethylase 1 homolog D (S. cerevisiae)
hsa-miR-300	1	0	1	1	1	1	KIN	KIN, antigenic determinant of recA protein homolog (mouse)
hsa-miR-300	1	0	1	0	1	1	CREBZF	CREB/ATF bZIP transcription factor
hsa-miR-300	1	0	1	1	1	1	MITF	microphthalmia-associated transcription factor
hsa-miR-300	1	0	1	0	1	1	ICK	intestinal cell (MAK-like) kinase
hsa-miR-300	1	0	1	1	0	0	WNK1	WNK lysine deficient protein kinase 1
hsa-miR-300	1	0	1	1	1	1	FAM210B	family with sequence similarity 210, member B
hsa-miR-300	1	0	1	1	1	1	MYT1L	myelin transcription factor 1-like
hsa-miR-300	1	0	1	0	1	1	SOX4	SRY (sex determining region Y)-box 4
hsa-miR-300	1	0	1	1	1	1	ZNF592	zinc finger protein 592
hsa-miR-300	1	0	1	1	1	1	DACH1	dachshund homolog 1 (Drosophila)
hsa-miR-300	1	0	1	1	1	1	RAB2A	RAB2A, member RAS oncogene family
hsa-miR-300	1	0	0	1	1	1	GPC1	glypican 1
hsa-miR-300	1	0	1	1	1	1	EBF3	early B-cell factor 3
hsa-miR-300	1	0	1	1	1	1	SOCS5	suppressor of cytokine signaling 5
hsa-miR-300	1	0	1	0	1	1	RNF114	ring finger protein 114
hsa-miR-300	1	0	1	1	1	1	TMEM168	transmembrane protein 168
hsa-miR-300	1	0	1	1	1	1	POU4F1	POU class 4 homeobox 1
hsa-miR-300	1	0	1	0	1	1	CACNA1C	calcium channel, voltage-dependent, L type, alpha 1C subunit
hsa-miR-300	1	0	1	1	1	1	DIO2	deiodinase, iodothyronine, type II
hsa-miR-300	1	0	1	1	1	1	KCNE4	potassium voltage-gated channel, Isk-related family, member 4
hsa-miR-300	1	0	1	1	0	0	FOXP2	forkhead box P2
hsa-miR-300	1	0	1	1	1	1	TNRC6A	trinucleotide repeat containing 6A
hsa-miR-300	1	0	1	1	1	1	SH2B3	SH2B adaptor protein 3
hsa-miR-300	1	0	1	1	1	1	KPNA3	karyopherin alpha 3 (importin alpha 4)
hsa-miR-300	1	0	1	0	1	1	VAPA	VAMP (vesicle-associated membrane protein)-associated protein A, 33kDa
hsa-miR-300	1	0	1	1	1	1	FAM76B	family with sequence similarity 76, member B
hsa-miR-300	1	0	1	1	1	1	SFRP2	secreted frizzled-related protein 2
hsa-miR-300	1	0	1	1	1	1	NFKBIA	nuclear factor of kappa light polypeptide gene enhancer in B-cells inhibitor, alpha
hsa-miR-300	1	0	1	0	1	1	PAFAH1B1	platelet-activating factor acetylhydrolase 1b, regulatory subunit 1 (45kDa)
hsa-miR-300	1	0	1	1	1	1	TMEM68	transmembrane protein 68
hsa-miR-300	1	0	1	0	1	1	ZNF652	zinc finger protein 652
hsa-miR-300	1	0	1	1	1	1	KIAA1217	KIAA1217
hsa-miR-300	1	0	1	1	1	1	KIF11	kinesin family member 11
hsa-miR-300	1	0	1	1	1	1	PRKRIR	protein-kinase, interferon-inducible double stranded RNA dependent inhibitor, repressor of (P58 repressor)
hsa-miR-300	1	0	0	1	0	0	WNT5B	wingless-type MMTV integration site family, member 5B
hsa-miR-300	1	0	1	1	1	1	ANK3	ankyrin 3, node of Ranvier (ankyrin G)
hsa-miR-300	1	0	1	1	1	1	MIR22HG	MIR22 host gene (non-protein coding)
hsa-miR-300	1	0	1	0	1	1	LIN28A	lin-28 homolog A (C. elegans)
hsa-miR-300	1	0	1	0	1	1	LIN54	lin-54 homolog (C. elegans)
hsa-miR-300	1	0	1	1	0	0	ATAD5	ATPase family, AAA domain containing 5
hsa-miR-300	1	0	1	1	1	1	NIPBL	Nipped-B homolog (Drosophila)
hsa-miR-300	1	0	1	1	1	1	CTNNB1	catenin (cadherin-associated protein), beta 1, 88kDa
hsa-miR-300	1	0	1	1	1	1	SOX2	SRY (sex determining region Y)-box 2
hsa-miR-300	1	0	1	1	1	1	FAM117A	family with sequence similarity 117, member A
hsa-miR-300	1	0	1	0	1	1	FAM46A	family with sequence similarity 46, member A
hsa-miR-300	1	0	1	0	1	1	MED14	mediator complex subunit 14
hsa-miR-300	1	0	1	1	1	1	CTNNA2	catenin (cadherin-associated protein), alpha 2
hsa-miR-300	1	0	1	1	1	1	UBE2E2	ubiquitin-conjugating enzyme E2E 2
hsa-miR-300	1	0	1	1	1	1	ZFHX3	zinc finger homeobox 3
hsa-miR-300	1	0	1	1	1	1	CRISPLD1	cysteine-rich secretory protein LCCL domain containing 1
hsa-miR-300	1	0	1	1	1	1	BASP1	brain abundant, membrane attached signal protein 1
hsa-miR-300	1	0	1	1	1	1	GTF2E1	general transcription factor IIE, polypeptide 1, alpha 56kDa
hsa-miR-300	1	0	1	1	1	1	FGF1	fibroblast growth factor 1 (acidic)
hsa-miR-300	1	0	1	1	1	1	BMPER	BMP binding endothelial regulator
hsa-miR-300	1	0	1	1	1	1	SIK3	SIK family kinase 3
hsa-miR-300	1	0	1	1	0	0	TAF4B	TAF4b RNA polymerase II, TATA box binding protein (TBP)-associated factor, 105kDa
hsa-miR-300	1	0	1	1	1	1	SGK3	serum/glucocorticoid regulated kinase family, member 3
hsa-miR-300	1	0	1	1	1	1	RABGAP1	RAB GTPase activating protein 1
hsa-miR-300	1	0	1	0	1	1	SP1	Sp1 transcription factor
hsa-miR-300	1	0	1	1	1	1	MARCH6	membrane-associated ring finger (C3HC4) 6, E3 ubiquitin protein ligase
hsa-miR-300	1	0	1	0	1	1	ESRRG	estrogen-related receptor gamma
hsa-miR-300	1	0	1	0	1	1	PTPRE	protein tyrosine phosphatase, receptor type, E
hsa-miR-300	1	0	1	1	1	1	HOXA9	homeobox A9
hsa-miR-300	1	0	1	1	1	1	ZFAND3	zinc finger, AN1-type domain 3
hsa-miR-300	1	0	1	1	0	0	SYNGR3	synaptogyrin 3
hsa-miR-300	1	0	1	1	1	1	SNRK	SNF related kinase
hsa-miR-300	1	0	1	1	1	1	ANO4	anoctamin 4
hsa-miR-300	1	0	1	1	1	1	ZBTB39	zinc finger and BTB domain containing 39
hsa-miR-300	1	0	1	1	1	1	ZNF521	zinc finger protein 521
hsa-miR-300	1	0	1	1	1	1	ANKRD12	ankyrin repeat domain 12
hsa-miR-300	1	0	1	0	1	1	ZFHX4	zinc finger homeobox 4
hsa-miR-300	1	0	1	1	1	1	LZTS2	leucine zipper, putative tumor suppressor 2
hsa-miR-300	1	0	1	1	1	1	SMARCAD1	SWI/SNF-related, matrix-associated actin-dependent regulator of chromatin, subfamily a, containing DEAD/H box 1
hsa-miR-300	1	0	1	1	1	1	PHACTR4	phosphatase and actin regulator 4
hsa-miR-300	1	0	1	1	1	1	CPEB3	cytoplasmic polyadenylation element binding protein 3
hsa-miR-300	1	0	1	1	0	0	PRPF8	PRP8 pre-mRNA processing factor 8 homolog (S. cerevisiae)
hsa-miR-300	1	0	1	1	1	1	PTMS	parathymosin
hsa-miR-300	1	0	1	0	1	1	SOX11	SRY (sex determining region Y)-box 11
hsa-miR-300	1	0	1	1	1	1	MYCN	v-myc myelocytomatosis viral related oncogene, neuroblastoma derived (avian)
hsa-miR-300	1	0	1	0	1	1	KIAA0408	KIAA0408
hsa-miR-300	1	0	1	0	0	0	PPP1R10	protein phosphatase 1, regulatory subunit 10
hsa-miR-300	1	0	1	1	0	0	TET3	tet methylcytosine dioxygenase 3
hsa-miR-300	1	0	1	1	1	1	TEAD1	TEA domain family member 1 (SV40 transcriptional enhancer factor)
hsa-miR-300	1	0	1	1	1	1	KDM5B	lysine (K)-specific demethylase 5B
hsa-miR-300	1	0	1	1	1	1	UBN1	ubinuclein 1
hsa-miR-300	1	0	1	1	1	1	CAMTA1	calmodulin binding transcription activator 1
hsa-miR-300	1	0	1	1	1	1	ID4	inhibitor of DNA binding 4, dominant negative helix-loop-helix protein
hsa-miR-300	1	0	1	1	1	1	SLMAP	sarcolemma associated protein
hsa-miR-300	1	0	1	1	1	1	SUN1	Sad1 and UNC84 domain containing 1
hsa-miR-300	1	0	1	1	1	1	SIRPA	signal-regulatory protein alpha
hsa-miR-300	1	0	1	0	1	1	OSBPL3	oxysterol binding protein-like 3
hsa-miR-300	1	0	1	1	1	1	STX12	syntaxin 12
hsa-miR-300	1	0	1	0	1	1	PLAG1	pleiomorphic adenoma gene 1
hsa-miR-300	1	0	1	1	1	1	NEUROD1	neuronal differentiation 1
hsa-miR-300	1	0	1	1	1	1	RIMKLB	ribosomal modification protein rimK-like family member B
hsa-miR-300	1	0	1	1	1	1	CUX2	cut-like homeobox 2
hsa-miR-300	1	0	1	1	1	1	NKTR	natural killer-tumor recognition sequence
hsa-miR-300	1	0	1	1	1	1	EFNB1	ephrin-B1
hsa-miR-300	1	0	1	1	1	1	RAB6B	RAB6B, member RAS oncogene family
hsa-miR-300	1	0	1	1	1	1	EIF1AX	eukaryotic translation initiation factor 1A, X-linked
hsa-miR-300	1	0	1	1	1	1	RPRD1B	regulation of nuclear pre-mRNA domain containing 1B
hsa-miR-300	1	0	1	1	1	1	WDR26	WD repeat domain 26
hsa-miR-300	1	0	1	1	1	1	CFTR	cystic fibrosis transmembrane conductance regulator (ATP-binding cassette sub-family C, member 7)
hsa-miR-300	1	0	1	1	0	0	PLXNA4	plexin A4
hsa-miR-300	1	0	1	1	1	1	PRDM12	PR domain containing 12
hsa-miR-300	1	0	1	1	1	1	MARK1	MAP/microtubule affinity-regulating kinase 1
hsa-miR-300	1	0	1	1	1	1	GTDC1	glycosyltransferase-like domain containing 1
hsa-miR-300	1	0	1	1	1	1	DLL1	delta-like 1 (Drosophila)
hsa-miR-300	1	0	1	1	1	1	TFAP2B	transcription factor AP-2 beta (activating enhancer binding protein 2 beta)
hsa-miR-300	1	0	1	1	0	0	LRFN1	leucine rich repeat and fibronectin type III domain containing 1
hsa-miR-300	1	0	1	1	1	1	ETS2	v-ets erythroblastosis virus E26 oncogene homolog 2 (avian)
hsa-miR-300	1	0	1	1	1	1	KDSR	3-ketodihydrosphingosine reductase
hsa-miR-300	1	0	1	1	0	0	ZC3H4	zinc finger CCCH-type containing 4
hsa-miR-300	1	0	1	1	1	1	NFYB	nuclear transcription factor Y, beta
hsa-miR-300	1	0	1	1	1	1	KALRN	kalirin, RhoGEF kinase
hsa-miR-300	1	0	1	0	1	1	FYTTD1	forty-two-three domain containing 1
hsa-miR-300	1	0	1	1	1	1	DVL2	dishevelled, dsh homolog 2 (Drosophila)
hsa-miR-300	1	0	1	1	1	1	ASXL1	additional sex combs like 1 (Drosophila)
hsa-miR-300	1	0	1	1	1	1	CBL	Cbl proto-oncogene, E3 ubiquitin protein ligase
hsa-miR-300	1	0	1	1	1	1	SYNCRIP	synaptotagmin binding, cytoplasmic RNA interacting protein
hsa-miR-300	1	0	1	0	1	1	CPEB2	cytoplasmic polyadenylation element binding protein 2
hsa-miR-300	1	0	1	1	1	1	CUL1	cullin 1
hsa-miR-300	1	0	1	1	1	1	ETF1	eukaryotic translation termination factor 1
hsa-miR-300	1	0	1	0	1	1	PM20D2	peptidase M20 domain containing 2
hsa-miR-300	1	0	1	1	1	1	ARHGAP20	Rho GTPase activating protein 20
hsa-miR-300	1	0	1	1	0	0	SNX29	sorting nexin 29
hsa-miR-300	1	0	1	1	1	1	MLLT6	myeloid/lymphoid or mixed-lineage leukemia (trithorax homolog, Drosophila); translocated to, 6
hsa-miR-300	1	0	1	0	1	1	SLC34A2	solute carrier family 34 (sodium phosphate), member 2
hsa-miR-300	1	0	1	0	1	1	ROCK2	Rho-associated, coiled-coil containing protein kinase 2
hsa-miR-300	1	0	1	1	1	1	ADAMTSL3	ADAMTS-like 3
hsa-miR-300	1	0	1	1	1	1	SAMD12	sterile alpha motif domain containing 12
hsa-miR-300	1	0	1	1	1	1	SPTSSA	serine palmitoyltransferase, small subunit A
hsa-miR-300	1	0	1	0	1	1	PDS5B	PDS5, regulator of cohesion maintenance, homolog B (S. cerevisiae)
hsa-miR-300	1	0	1	1	0	0	ATP13A3	ATPase type 13A3
hsa-miR-300	1	0	1	1	1	1	FLRT3	fibronectin leucine rich transmembrane protein 3
hsa-miR-300	1	0	1	0	1	1	STK40	serine/threonine kinase 40
hsa-miR-300	1	0	1	1	1	1	ORC2	origin recognition complex, subunit 2
hsa-miR-300	1	0	1	1	1	1	ST8SIA2	ST8 alpha-N-acetyl-neuraminide alpha-2,8-sialyltransferase 2
hsa-miR-300	1	0	0	1	1	1	AKAP12	A kinase (PRKA) anchor protein 12
hsa-miR-300	1	0	1	0	1	1	UBXN2B	UBX domain protein 2B
hsa-miR-300	1	0	1	1	1	1	YY1	YY1 transcription factor
hsa-miR-300	1	0	1	1	1	1	WWC2	WW and C2 domain containing 2
hsa-miR-300	1	0	1	0	1	1	RNF144A	ring finger protein 144A
hsa-miR-300	1	0	1	1	1	1	USP25	ubiquitin specific peptidase 25
hsa-miR-300	1	0	1	1	1	1	PI15	peptidase inhibitor 15
hsa-miR-300	1	0	1	1	1	1	UBE3A	ubiquitin protein ligase E3A
hsa-miR-300	1	0	1	0	1	1	SPRY4	sprouty homolog 4 (Drosophila)
hsa-miR-300	1	0	1	1	1	1	LRP6	low density lipoprotein receptor-related protein 6
hsa-miR-300	1	0	1	1	0	0	ZMYM3	zinc finger, MYM-type 3
hsa-miR-300	1	0	0	1	0	0	MAP2K3	mitogen-activated protein kinase kinase 3
hsa-miR-300	1	0	1	1	1	1	GFRA1	GDNF family receptor alpha 1
hsa-miR-300	1	0	1	1	1	1	SLC6A8	solute carrier family 6 (neurotransmitter transporter, creatine), member 8
hsa-miR-300	1	0	1	1	1	1	TMED7	transmembrane emp24 protein transport domain containing 7
hsa-miR-300	1	0	1	0	1	1	VCPIP1	valosin containing protein (p97)/p47 complex interacting protein 1
hsa-miR-300	1	0	1	1	1	1	AFF1	AF4/FMR2 family, member 1
hsa-miR-300	1	0	1	1	1	1	TRIM63	tripartite motif containing 63, E3 ubiquitin protein ligase
hsa-miR-300	1	0	1	0	1	1	NBR1	neighbor of BRCA1 gene 1
hsa-miR-300	1	0	1	1	1	1	KANSL1	KAT8 regulatory NSL complex subunit 1
hsa-miR-300	1	0	1	0	1	1	FOXO1	forkhead box O1
hsa-miR-300	1	0	1	1	1	1	NAMPT	nicotinamide phosphoribosyltransferase
hsa-miR-300	1	0	1	0	1	1	ZNF740	zinc finger protein 740
hsa-miR-300	1	0	1	1	1	1	FAM107B	family with sequence similarity 107, member B
hsa-miR-300	1	0	1	1	1	1	CLDN1	claudin 1
hsa-miR-300	1	0	1	1	1	1	SP8	Sp8 transcription factor
hsa-miR-300	1	0	1	1	1	1	UBR5	ubiquitin protein ligase E3 component n-recognin 5
hsa-miR-300	1	0	1	1	1	1	RPS6KA3	ribosomal protein S6 kinase, 90kDa, polypeptide 3
hsa-miR-300	1	0	1	0	1	1	PCGF3	polycomb group ring finger 3
hsa-miR-300	1	0	1	1	1	1	DMTF1	cyclin D binding myb-like transcription factor 1
hsa-miR-300	1	0	1	0	1	1	DCUN1D4	DCN1, defective in cullin neddylation 1, domain containing 4 (S. cerevisiae)
hsa-miR-300	1	0	1	1	1	1	GIGYF2	GRB10 interacting GYF protein 2
hsa-miR-300	1	0	1	0	1	1	ST6GALNAC3	ST6 (alpha-N-acetyl-neuraminyl-2,3-beta-galactosyl-1,3)-N-acetylgalactosaminide alpha-2,6-sialyltransferase 3
hsa-miR-300	1	0	0	0	0	0	TMEM170B	transmembrane protein 170B
hsa-miR-300	1	0	1	1	1	1	EPB41	erythrocyte membrane protein band 4.1 (elliptocytosis 1, RH-linked)
hsa-miR-300	1	0	1	1	1	1	MTMR12	myotubularin related protein 12
hsa-miR-300	1	0	1	1	1	1	ARHGAP24	Rho GTPase activating protein 24
hsa-miR-300	1	0	1	0	0	0	KIAA0947	KIAA0947
hsa-miR-300	1	0	1	1	1	1	BTBD7	BTB (POZ) domain containing 7
hsa-miR-300	1	0	1	1	1	1	LRRC4	leucine rich repeat containing 4
hsa-miR-300	1	0	1	1	1	1	SLC35A5	solute carrier family 35, member A5
hsa-miR-300	1	0	1	1	1	1	NBEA	neurobeachin
hsa-miR-300	1	0	1	1	1	1	LDB2	LIM domain binding 2
hsa-miR-300	1	0	1	1	1	1	HIPK1	homeodomain interacting protein kinase 1
hsa-miR-300	1	0	1	1	1	1	ACBD5	acyl-CoA binding domain containing 5
hsa-miR-300	1	0	1	1	1	1	NASP	nuclear autoantigenic sperm protein (histone-binding)
hsa-miR-300	1	0	1	1	1	1	GRM1	glutamate receptor, metabotropic 1
hsa-miR-300	1	0	1	1	1	1	CCNK	cyclin K
hsa-miR-300	1	0	1	1	1	1	JAG2	jagged 2
hsa-miR-300	1	0	1	1	1	1	PPM1K	protein phosphatase, Mg2+/Mn2+ dependent, 1K
hsa-miR-300	1	0	1	1	1	1	BIRC6	baculoviral IAP repeat containing 6
hsa-miR-300	1	0	0	1	1	1	ZFYVE20	zinc finger, FYVE domain containing 20
hsa-miR-300	1	0	1	1	1	1	MMAB	methylmalonic aciduria (cobalamin deficiency) cblB type
hsa-miR-300	1	0	1	1	1	1	BCL11A	B-cell CLL/lymphoma 11A (zinc finger protein)
hsa-miR-300	1	0	1	1	1	1	PTBP3	polypyrimidine tract binding protein 3
hsa-miR-300	1	0	1	1	1	1	ID2	inhibitor of DNA binding 2, dominant negative helix-loop-helix protein
hsa-miR-300	1	0	1	0	1	1	SRGAP2	SLIT-ROBO Rho GTPase activating protein 2
hsa-miR-300	1	0	1	1	1	1	MED13	mediator complex subunit 13
hsa-miR-300	1	0	1	0	1	1	KIAA2022	KIAA2022
hsa-miR-300	1	0	1	1	1	1	CYFIP1	cytoplasmic FMR1 interacting protein 1
hsa-miR-300	1	0	1	1	1	1	HIVEP2	human immunodeficiency virus type I enhancer binding protein 2
hsa-miR-300	1	0	1	1	1	1	ATRX	alpha thalassemia/mental retardation syndrome X-linked
hsa-miR-300	1	0	1	1	1	1	PHF21A	PHD finger protein 21A
hsa-miR-300	1	0	1	1	1	1	NR5A2	nuclear receptor subfamily 5, group A, member 2
hsa-miR-300	1	0	1	1	1	1	SPPL3	signal peptide peptidase like 3
hsa-miR-300	1	0	1	1	1	1	ATXN7L1	ataxin 7-like 1
hsa-miR-300	1	0	0	1	0	0	PRR12	proline rich 12
hsa-miR-300	1	0	1	1	1	1	RNF19A	ring finger protein 19A, E3 ubiquitin protein ligase
hsa-miR-300	1	0	1	1	1	1	MTF1	metal-regulatory transcription factor 1
hsa-miR-300	1	0	1	1	1	1	CDC14B	CDC14 cell division cycle 14 homolog B (S. cerevisiae)
hsa-miR-300	1	0	1	0	1	1	ARHGAP35	Rho GTPase activating protein 35
hsa-miR-300	1	0	1	1	1	1	DLL4	delta-like 4 (Drosophila)
hsa-miR-300	1	0	1	1	1	1	PHF2	PHD finger protein 2
hsa-miR-300	1	0	1	1	1	1	AFF3	AF4/FMR2 family, member 3
hsa-miR-300	1	0	0	1	1	1	SMARCB1	SWI/SNF related, matrix associated, actin dependent regulator of chromatin, subfamily b, member 1
hsa-miR-300	1	0	1	1	1	1	FAM222A	family with sequence similarity 222, member A
hsa-miR-300	1	0	1	1	1	1	NLK	nemo-like kinase
hsa-miR-300	1	0	1	1	1	1	UBR1	ubiquitin protein ligase E3 component n-recognin 1
hsa-miR-300	1	0	1	0	1	1	GABRG1	gamma-aminobutyric acid (GABA) A receptor, gamma 1
hsa-miR-300	1	0	1	1	1	1	SATB1	SATB homeobox 1
hsa-miR-300	1	0	1	1	1	1	AMMECR1	Alport syndrome, mental retardation, midface hypoplasia and elliptocytosis chromosomal region gene 1
hsa-miR-300	1	0	1	1	1	1	PLEKHA6	pleckstrin homology domain containing, family A member 6
hsa-miR-300	1	0	1	0	1	1	HOXC8	homeobox C8
hsa-miR-300	1	0	1	1	0	0	LRRC16B	leucine rich repeat containing 16B
hsa-miR-300	1	0	1	1	1	1	EBF1	early B-cell factor 1
hsa-miR-300	1	0	1	1	1	1	HSPA13	heat shock protein 70kDa family, member 13
hsa-miR-300	1	0	1	1	1	1	KIF1B	kinesin family member 1B
hsa-miR-300	1	0	1	1	1	1	HNRNPA1	heterogeneous nuclear ribonucleoprotein A1
hsa-miR-300	1	0	1	1	1	1	RNF2	ring finger protein 2
hsa-miR-300	1	0	1	1	0	0	ZBTB22	zinc finger and BTB domain containing 22
hsa-miR-300	1	0	1	1	1	1	B3GNT2	UDP-GlcNAc:betaGal beta-1,3-N-acetylglucosaminyltransferase 2
hsa-miR-300	1	0	1	1	0	0	EIF2B5	eukaryotic translation initiation factor 2B, subunit 5 epsilon, 82kDa
hsa-miR-300	1	0	1	1	1	1	GRHL3	grainyhead-like 3 (Drosophila)
hsa-miR-300	1	0	1	1	1	1	NR2F2	nuclear receptor subfamily 2, group F, member 2
hsa-miR-300	1	0	1	1	1	1	SBF2	SET binding factor 2
hsa-miR-300	1	0	1	1	1	1	ZNF236	zinc finger protein 236
hsa-miR-300	1	0	1	1	1	1	RRN3	RRN3 RNA polymerase I transcription factor homolog (S. cerevisiae)
hsa-miR-300	1	0	1	1	1	1	RYBP	RING1 and YY1 binding protein
hsa-miR-300	1	0	1	1	1	1	CREBRF	CREB3 regulatory factor
hsa-miR-300	1	0	1	1	1	1	KAT6B	K(lysine) acetyltransferase 6B
hsa-miR-300	1	0	1	1	1	1	GDAP2	ganglioside induced differentiation associated protein 2
hsa-miR-300	1	0	1	1	1	1	HS6ST2	heparan sulfate 6-O-sulfotransferase 2
hsa-miR-300	1	0	1	1	1	1	ACVR1	activin A receptor, type I
hsa-miR-300	1	0	1	0	1	1	BTF3L4	basic transcription factor 3-like 4
hsa-miR-300	1	0	1	1	1	1	PPP1R14C	protein phosphatase 1, regulatory (inhibitor) subunit 14C
hsa-miR-300	1	0	1	1	1	1	NRF1	nuclear respiratory factor 1
hsa-miR-300	1	0	1	1	1	1	CUL5	cullin 5
hsa-miR-300	1	0	1	1	1	1	WEE1	WEE1 homolog (S. pombe)
hsa-miR-300	1	0	1	1	1	1	HBP1	HMG-box transcription factor 1
hsa-miR-300	1	0	1	0	1	1	PTP4A1	protein tyrosine phosphatase type IVA, member 1
hsa-miR-300	1	0	1	1	1	1	NR2C2	nuclear receptor subfamily 2, group C, member 2
hsa-miR-300	1	0	1	0	1	1	SS18	synovial sarcoma translocation, chromosome 18
hsa-miR-300	1	0	1	1	1	1	HIVEP1	human immunodeficiency virus type I enhancer binding protein 1
hsa-miR-300	1	0	1	1	1	1	WAPAL	wings apart-like homolog (Drosophila)
hsa-miR-300	1	0	1	1	1	1	FRS2	fibroblast growth factor receptor substrate 2
hsa-miR-300	1	0	1	0	1	1	PRICKLE2	prickle homolog 2 (Drosophila)
hsa-miR-300	1	0	1	1	1	1	GRAMD4	GRAM domain containing 4
hsa-miR-300	1	0	1	1	1	1	NUDT4	nudix (nucleoside diphosphate linked moiety X)-type motif 4
hsa-miR-300	1	0	1	0	0	0	TANC2	tetratricopeptide repeat, ankyrin repeat and coiled-coil containing 2
hsa-miR-300	1	0	1	1	1	1	SENP6	SUMO1/sentrin specific peptidase 6
hsa-miR-300	1	0	1	1	1	1	SMEK2	SMEK homolog 2, suppressor of mek1 (Dictyostelium)
hsa-miR-300	1	0	1	1	1	1	PHF15	PHD finger protein 15
hsa-miR-300	1	0	1	0	1	1	IREB2	iron-responsive element binding protein 2
hsa-miR-300	1	0	1	0	1	1	UBE2W	ubiquitin-conjugating enzyme E2W (putative)
hsa-miR-300	1	0	1	1	1	1	GREB1	growth regulation by estrogen in breast cancer 1
hsa-miR-300	1	0	1	1	1	1	RBFOX2	RNA binding protein, fox-1 homolog (C. elegans) 2
hsa-miR-300	1	0	1	1	1	1	ABI3BP	ABI family, member 3 (NESH) binding protein
hsa-miR-300	1	0	1	1	1	1	TIAL1	TIA1 cytotoxic granule-associated RNA binding protein-like 1
hsa-miR-300	1	0	1	1	1	1	RAPGEFL1	Rap guanine nucleotide exchange factor (GEF)-like 1
hsa-miR-300	1	0	0	1	1	1	ZSWIM4	zinc finger, SWIM-type containing 4
hsa-miR-300	1	0	1	0	1	1	FMNL2	formin-like 2
hsa-miR-300	1	0	1	1	1	1	NACC2	NACC family member 2, BEN and BTB (POZ) domain containing
hsa-miR-300	1	0	1	0	0	0	HECTD4	HECT domain containing E3 ubiquitin protein ligase 4
hsa-miR-300	1	0	1	0	1	1	CASP8AP2	caspase 8 associated protein 2
hsa-miR-300	1	0	1	1	1	1	DPP6	dipeptidyl-peptidase 6
hsa-miR-300	1	0	1	1	1	1	RAB39B	RAB39B, member RAS oncogene family
hsa-miR-300	1	0	1	1	1	1	SLC23A2	solute carrier family 23 (nucleobase transporters), member 2
hsa-miR-300	1	0	1	1	1	1	CNNM4	cyclin M4
hsa-miR-300	1	0	1	1	1	1	TLE1	transducin-like enhancer of split 1 (E(sp1) homolog, Drosophila)
hsa-miR-300	1	0	1	1	1	1	ST18	suppression of tumorigenicity 18 (breast carcinoma) (zinc finger protein)
hsa-miR-300	1	0	1	1	1	1	SLC38A1	solute carrier family 38, member 1
hsa-miR-300	1	0	1	1	1	1	EEA1	early endosome antigen 1
hsa-miR-300	1	0	1	1	1	1	GAD1	glutamate decarboxylase 1 (brain, 67kDa)
hsa-miR-300	1	0	1	1	1	1	SRSF1	serine/arginine-rich splicing factor 1
hsa-miR-300	1	0	1	1	1	1	MLL3	myeloid/lymphoid or mixed-lineage leukemia 3
hsa-miR-300	1	0	1	1	1	1	CLCF1	cardiotrophin-like cytokine factor 1
hsa-miR-300	1	0	1	1	1	1	WASF3	WAS protein family, member 3
hsa-miR-300	1	0	1	1	1	1	DKK3	dickkopf 3 homolog (Xenopus laevis)
hsa-miR-300	1	0	1	1	1	1	RALGPS1	Ral GEF with PH domain and SH3 binding motif 1
hsa-miR-300	1	0	1	1	1	1	ZDHHC2	zinc finger, DHHC-type containing 2
hsa-miR-300	1	0	1	1	0	0	USP7	ubiquitin specific peptidase 7 (herpes virus-associated)
hsa-miR-300	1	0	1	0	1	1	CADPS2	Ca++-dependent secretion activator 2
hsa-miR-300	1	0	1	1	1	1	ITFG1	integrin alpha FG-GAP repeat containing 1
hsa-miR-300	1	0	1	1	1	1	GAS1	growth arrest-specific 1
hsa-miR-300	1	0	1	1	1	1	USP15	ubiquitin specific peptidase 15
hsa-miR-300	1	0	1	1	1	1	SCAF8	SR-related CTD-associated factor 8
hsa-miR-300	1	0	1	1	1	1	BNC1	basonuclin 1
hsa-miR-300	1	0	1	1	1	1	PTGFR	prostaglandin F receptor (FP)
hsa-miR-300	1	0	1	0	1	1	SEMA6D	sema domain, transmembrane domain (TM), and cytoplasmic domain, (semaphorin) 6D
hsa-miR-300	1	0	1	1	1	1	AKNA	AT-hook transcription factor
hsa-miR-300	1	0	1	1	1	1	RBPJ	recombination signal binding protein for immunoglobulin kappa J region
hsa-miR-300	1	0	1	1	1	1	HOOK3	hook homolog 3 (Drosophila)
hsa-miR-300	1	0	1	1	0	0	JUP	junction plakoglobin
hsa-miR-300	1	0	1	1	1	1	WWC1	WW and C2 domain containing 1
hsa-miR-300	1	0	1	1	1	1	RRP15	ribosomal RNA processing 15 homolog (S. cerevisiae)
hsa-miR-300	1	0	1	1	1	1	ARHGEF3	Rho guanine nucleotide exchange factor (GEF) 3
hsa-miR-300	1	0	1	1	1	1	IGF1R	insulin-like growth factor 1 receptor
hsa-miR-300	1	0	1	1	1	1	SSH2	slingshot homolog 2 (Drosophila)
hsa-miR-300	1	0	1	1	1	1	KHDRBS1	KH domain containing, RNA binding, signal transduction associated 1
hsa-miR-300	1	0	1	1	1	1	SRSF10	serine/arginine-rich splicing factor 10
hsa-miR-300	1	0	1	1	1	1	GOLGA1	golgin A1
hsa-miR-300	1	0	1	1	1	1	KDM6A	lysine (K)-specific demethylase 6A
hsa-miR-300	1	0	1	1	1	1	SMOC1	SPARC related modular calcium binding 1
hsa-miR-300	1	0	1	0	1	1	SEPT11	septin 11
hsa-miR-300	1	0	1	1	1	1	CHD2	chromodomain helicase DNA binding protein 2
hsa-miR-300	1	0	1	1	1	1	RNF149	ring finger protein 149
hsa-miR-300	1	0	1	1	1	1	YTHDF1	YTH domain family, member 1
hsa-miR-300	1	0	1	1	1	1	RAP2C	RAP2C, member of RAS oncogene family
hsa-miR-300	1	0	1	1	1	1	CRK	v-crk sarcoma virus CT10 oncogene homolog (avian)
hsa-miR-300	1	0	1	1	1	1	BNC2	basonuclin 2
hsa-miR-300	1	0	1	1	1	1	ATP1B1	ATPase, Na+/K+ transporting, beta 1 polypeptide
hsa-miR-300	1	0	1	1	1	1	DAGLA	diacylglycerol lipase, alpha
hsa-miR-300	1	0	1	1	1	1	LIN9	lin-9 homolog (C. elegans)
hsa-miR-300	1	0	1	1	1	1	DCAF12	DDB1 and CUL4 associated factor 12
hsa-miR-300	1	0	1	1	1	1	EPS8	epidermal growth factor receptor pathway substrate 8
hsa-miR-300	1	0	1	1	1	1	STK24	serine/threonine kinase 24
hsa-miR-300	1	0	1	1	1	1	FGFR2	fibroblast growth factor receptor 2
hsa-miR-300	1	0	1	0	1	1	CELF2	CUGBP, Elav-like family member 2
hsa-miR-300	1	0	1	1	1	1	EIF1	eukaryotic translation initiation factor 1
hsa-miR-300	1	0	1	1	1	1	GOLGA2	golgin A2
hsa-miR-300	1	0	1	1	1	1	BRF2	BRF2, subunit of RNA polymerase III transcription initiation factor, BRF1-like
hsa-miR-300	1	0	0	1	1	1	LANCL3	LanC lantibiotic synthetase component C-like 3 (bacterial)
hsa-miR-300	1	0	1	1	0	0	JPH3	junctophilin 3
hsa-miR-300	1	0	1	1	0	0	FSCN1	fascin homolog 1, actin-bundling protein (Strongylocentrotus purpuratus)
hsa-miR-300	1	0	1	1	1	1	AFF4	AF4/FMR2 family, member 4
hsa-miR-300	1	0	1	1	0	0	RAPGEF2	Rap guanine nucleotide exchange factor (GEF) 2
hsa-miR-300	1	0	1	0	1	1	PTPRT	protein tyrosine phosphatase, receptor type, T
hsa-miR-300	1	0	1	0	1	1	MTSS1	metastasis suppressor 1
hsa-miR-300	1	0	1	0	1	1	NEDD4L	neural precursor cell expressed, developmentally down-regulated 4-like, E3 ubiquitin protein ligase
hsa-miR-300	0	0	1	1	1	1	RABGAP1L	RAB GTPase activating protein 1-like
hsa-miR-300	1	0	1	0	1	1	CEP350	centrosomal protein 350kDa
hsa-miR-300	1	0	1	0	1	1	MFAP3L	microfibrillar-associated protein 3-like
hsa-miR-300	1	0	1	1	1	1	ANKRD17	ankyrin repeat domain 17
hsa-miR-300	1	0	1	0	1	1	DOCK4	dedicator of cytokinesis 4
hsa-miR-300	1	0	1	1	1	1	DNM3	dynamin 3
hsa-miR-300	1	0	1	0	1	1	ATG14	autophagy related 14
hsa-miR-300	0	0	1	0	0	0	THSD7A	thrombospondin, type I, domain containing 7A
hsa-miR-300	0	0	1	1	0	0	FAM149B1	family with sequence similarity 149, member B1
hsa-miR-300	1	0	1	1	1	1	FNBP4	formin binding protein 4
hsa-miR-300	1	0	1	0	1	1	ZNF507	zinc finger protein 507
hsa-miR-300	0	0	1	1	1	1	TMCC3	transmembrane and coiled-coil domain family 3
hsa-miR-300	1	0	1	0	1	1	SRGAP3	SLIT-ROBO Rho GTPase activating protein 3
hsa-miR-300	1	0	1	1	1	1	RALGAPB	Ral GTPase activating protein, beta subunit (non-catalytic)
hsa-miR-300	1	0	1	1	1	1	MKL2	MKL/myocardin-like 2
hsa-miR-300	1	0	1	0	1	1	KCTD16	potassium channel tetramerisation domain containing 16
hsa-miR-300	0	0	1	0	1	1	MUC3B	mucin 3B, cell surface associated
hsa-miR-300	0	0	1	1	1	1	CEP192	centrosomal protein 192kDa
hsa-miR-300	0	0	1	0	1	1	ZSWIM6	zinc finger, SWIM-type containing 6
hsa-miR-300	1	0	1	1	1	1	SYNE1	spectrin repeat containing, nuclear envelope 1
hsa-miR-300	1	0	1	0	1	1	RIMS1	regulating synaptic membrane exocytosis 1
hsa-miR-300	0	0	1	1	0	0	SLC22A16	solute carrier family 22 (organic cation/carnitine transporter), member 16
hsa-miR-300	1	0	1	1	1	1	IKZF4	IKAROS family zinc finger 4 (Eos)
hsa-miR-300	1	0	1	1	1	1	LCOR	ligand dependent nuclear receptor corepressor
hsa-miR-300	1	0	1	1	1	1	AHCTF1	AT hook containing transcription factor 1
hsa-miR-300	0	0	1	1	1	1	SLC11A2	solute carrier family 11 (proton-coupled divalent metal ion transporters), member 2
hsa-miR-300	1	0	1	1	1	1	MAT2B	methionine adenosyltransferase II, beta
hsa-miR-300	0	0	1	1	1	1	KIAA1967	KIAA1967
hsa-miR-300	1	0	1	1	1	1	SH3TC2	SH3 domain and tetratricopeptide repeats 2
hsa-miR-300	0	0	1	1	0	0	CIRH1A	cirrhosis, autosomal recessive 1A (cirhin)
hsa-miR-300	1	0	1	0	0	0	FAT3	FAT tumor suppressor homolog 3 (Drosophila)
hsa-miR-300	1	0	1	1	1	1	PRDM16	PR domain containing 16
hsa-miR-300	1	0	1	0	0	0	ZBTB34	zinc finger and BTB domain containing 34
hsa-miR-300	1	0	1	1	1	1	UBR3	ubiquitin protein ligase E3 component n-recognin 3 (putative)
hsa-miR-300	1	0	1	1	1	1	KCNMA1	potassium large conductance calcium-activated channel, subfamily M, alpha member 1
hsa-miR-300	0	0	1	0	1	1	ACE2	angiotensin I converting enzyme (peptidyl-dipeptidase A) 2
hsa-miR-300	0	0	1	0	1	1	ATR	ataxia telangiectasia and Rad3 related
hsa-miR-300	1	0	1	1	1	1	DAPK1	death-associated protein kinase 1
hsa-miR-300	1	0	1	0	1	1	PCDHA13	protocadherin alpha 13
hsa-miR-300	1	0	1	1	1	1	PCDHA4	protocadherin alpha 4
hsa-miR-300	1	0	1	1	0	0	ELN	elastin
hsa-miR-300	0	0	1	1	1	1	NME7	NME/NM23 family member 7
hsa-miR-300	0	0	1	1	1	1	PTK2	PTK2 protein tyrosine kinase 2
hsa-miR-300	1	0	1	1	1	1	EIF4G3	eukaryotic translation initiation factor 4 gamma, 3
hsa-miR-300	1	0	1	0	1	1	SLC6A6	solute carrier family 6 (neurotransmitter transporter, taurine), member 6
hsa-miR-300	1	0	1	1	1	1	FMR1	fragile X mental retardation 1
hsa-miR-300	1	0	1	1	1	1	PRKACB	protein kinase, cAMP-dependent, catalytic, beta
hsa-miR-300	0	0	1	0	1	1	NPY1R	neuropeptide Y receptor Y1
hsa-miR-300	1	0	1	0	1	1	CHL1	cell adhesion molecule with homology to L1CAM (close homolog of L1)
hsa-miR-300	1	0	1	1	1	1	SATB2	SATB homeobox 2
hsa-miR-300	1	0	1	1	1	1	MAP4	microtubule-associated protein 4
hsa-miR-300	1	0	1	1	1	1	AEBP2	AE binding protein 2
hsa-miR-300	1	0	1	0	1	1	CDON	Cdon homolog (mouse)
hsa-miR-300	1	0	1	1	1	1	IPO8	importin 8
hsa-miR-300	0	0	1	1	1	1	HNRNPM	heterogeneous nuclear ribonucleoprotein M
hsa-miR-300	0	0	1	1	1	1	CHN1	chimerin (chimaerin) 1
hsa-miR-300	0	0	1	1	1	1	MYO9A	myosin IXA
hsa-miR-300	0	0	1	1	0	0	TRIM27	tripartite motif containing 27
hsa-miR-300	1	0	1	0	1	1	PDE7B	phosphodiesterase 7B
hsa-miR-300	1	0	1	1	1	1	MEF2D	myocyte enhancer factor 2D
hsa-miR-300	1	0	1	1	0	0	TNPO2	transportin 2
hsa-miR-300	1	0	1	1	1	1	PDLIM3	PDZ and LIM domain 3
hsa-miR-300	1	0	1	1	1	1	STX16	syntaxin 16
hsa-miR-300	1	0	1	1	1	1	PCDH17	protocadherin 17
hsa-miR-300	1	0	1	1	1	1	MID1	midline 1 (Opitz/BBB syndrome)
hsa-miR-300	0	0	1	0	1	1	C9orf91	chromosome 9 open reading frame 91
hsa-miR-300	0	0	1	0	0	0	PLD2	phospholipase D2
hsa-miR-300	1	0	1	0	0	0	MAP3K1	mitogen-activated protein kinase kinase kinase 1, E3 ubiquitin protein ligase
hsa-miR-300	0	0	1	1	0	0	BANF1	barrier to autointegration factor 1
hsa-miR-300	0	0	1	1	1	1	CD84	CD84 molecule
hsa-miR-300	1	0	1	1	1	1	MBNL2	muscleblind-like splicing regulator 2
hsa-miR-300	1	0	1	1	1	1	ERLIN1	ER lipid raft associated 1
hsa-miR-300	0	0	1	1	1	1	SC5DL	sterol-C5-desaturase (ERG3 delta-5-desaturase homolog, S. cerevisiae)-like
hsa-miR-300	1	0	1	1	1	1	CBFA2T2	core-binding factor, runt domain, alpha subunit 2; translocated to, 2
hsa-miR-300	1	0	1	1	1	1	TMEM159	transmembrane protein 159
hsa-miR-300	1	0	1	1	1	1	AKAP9	A kinase (PRKA) anchor protein (yotiao) 9
hsa-miR-300	0	0	1	1	0	0	CARD10	caspase recruitment domain family, member 10
hsa-miR-300	0	0	1	1	1	1	COG6	component of oligomeric golgi complex 6
hsa-miR-300	1	0	1	0	1	1	CDK14	cyclin-dependent kinase 14
hsa-miR-300	1	0	1	1	1	1	CAB39	calcium binding protein 39
hsa-miR-300	1	0	1	1	1	1	AASDHPPT	aminoadipate-semialdehyde dehydrogenase-phosphopantetheinyl transferase
hsa-miR-300	1	0	1	1	1	1	ANKRD13A	ankyrin repeat domain 13A
hsa-miR-300	1	0	1	1	1	1	AGPAT3	1-acylglycerol-3-phosphate O-acyltransferase 3
hsa-miR-300	1	0	1	1	1	1	TSC22D2	TSC22 domain family, member 2
hsa-miR-300	0	0	1	1	0	0	NCOA6	nuclear receptor coactivator 6
hsa-miR-300	1	0	1	1	1	1	KCNMB2	potassium large conductance calcium-activated channel, subfamily M, beta member 2
hsa-miR-300	1	0	1	1	1	1	NXT2	nuclear transport factor 2-like export factor 2
hsa-miR-300	0	0	1	1	1	1	BRD7	bromodomain containing 7
hsa-miR-300	1	0	1	1	1	1	DESI2	desumoylating isopeptidase 2
hsa-miR-300	1	0	1	1	1	1	ABI2	abl-interactor 2
hsa-miR-300	1	0	1	1	1	1	SH3GLB1	SH3-domain GRB2-like endophilin B1
hsa-miR-300	1	0	1	1	1	1	PUM2	pumilio homolog 2 (Drosophila)
hsa-miR-300	1	0	1	1	1	1	NRP1	neuropilin 1
hsa-miR-300	1	0	1	1	1	1	KLHL12	kelch-like 12 (Drosophila)
hsa-miR-300	0	0	1	1	0	0	TTTY7	testis-specific transcript, Y-linked 7 (non-protein coding)
hsa-miR-300	0	0	1	1	1	1	RERG	RAS-like, estrogen-regulated, growth inhibitor
hsa-miR-300	1	0	1	1	1	1	CALU	calumenin
hsa-miR-300	1	0	1	1	1	1	CASD1	CAS1 domain containing 1
hsa-miR-300	1	0	1	1	1	1	LARP4	La ribonucleoprotein domain family, member 4
hsa-miR-300	1	0	1	1	1	1	SON	SON DNA binding protein
hsa-miR-300	0	0	1	0	0	0	CLRN1-AS1	CLRN1 antisense RNA 1
hsa-miR-300	0	0	1	1	1	1	RAPGEF6	Rap guanine nucleotide exchange factor (GEF) 6
hsa-miR-300	0	0	1	1	1	1	SPSB1	splA/ryanodine receptor domain and SOCS box containing 1
hsa-miR-300	1	0	1	1	1	1	NTRK2	neurotrophic tyrosine kinase, receptor, type 2
hsa-miR-300	0	0	1	1	0	0	CNKSR2	connector enhancer of kinase suppressor of Ras 2
hsa-miR-300	1	0	1	1	0	0	YTHDF2	YTH domain family, member 2
hsa-miR-300	1	0	1	1	1	1	RBFOX1	RNA binding protein, fox-1 homolog (C. elegans) 1
hsa-miR-300	0	0	1	1	1	1	CSPG5	chondroitin sulfate proteoglycan 5 (neuroglycan C)
hsa-miR-300	1	0	1	1	1	1	ASB8	ankyrin repeat and SOCS box containing 8
hsa-miR-300	1	0	1	1	1	1	CPNE4	copine IV
hsa-miR-300	0	0	1	1	1	1	CARD8	caspase recruitment domain family, member 8
hsa-miR-300	1	0	1	0	1	1	NUDCD1	NudC domain containing 1
hsa-miR-300	1	0	1	0	1	1	IL1RAP	interleukin 1 receptor accessory protein
hsa-miR-300	1	0	1	1	1	1	GPR64	G protein-coupled receptor 64
hsa-miR-300	0	0	1	1	1	1	ANKRD36B	ankyrin repeat domain 36B
hsa-miR-300	1	0	1	1	1	1	AFF2	AF4/FMR2 family, member 2
hsa-miR-300	1	0	1	1	0	0	ENTPD1	ectonucleoside triphosphate diphosphohydrolase 1
hsa-miR-300	1	0	1	1	1	1	SUCO	SUN domain containing ossification factor
hsa-miR-300	1	0	1	0	1	1	GRB10	growth factor receptor-bound protein 10
hsa-miR-300	0	0	1	1	1	1	CD1E	CD1e molecule
hsa-miR-300	0	0	1	1	0	0	KIF13A	kinesin family member 13A
hsa-miR-300	1	0	1	1	1	1	NRXN3	neurexin 3
hsa-miR-300	1	0	1	1	1	1	NAV3	neuron navigator 3
hsa-miR-300	0	0	1	1	1	1	ZNF248	zinc finger protein 248
hsa-miR-300	1	0	1	1	1	1	MYB	v-myb myeloblastosis viral oncogene homolog (avian)
hsa-miR-300	0	0	1	1	1	1	PARP16	poly (ADP-ribose) polymerase family, member 16
hsa-miR-300	0	0	1	0	0	0	FLJ20518	FSHD region gene 2 family, member C pseudogene
hsa-miR-300	0	0	1	0	1	1	OAS3	2'-5'-oligoadenylate synthetase 3, 100kDa
hsa-miR-300	0	0	1	0	0	0	TUG1	taurine upregulated 1 (non-protein coding)
hsa-miR-300	0	0	1	1	1	1	BANK1	B-cell scaffold protein with ankyrin repeats 1
hsa-miR-300	1	0	1	1	1	1	ZC3H7A	zinc finger CCCH-type containing 7A
hsa-miR-300	1	0	1	1	0	0	SENP3	SUMO1/sentrin/SMT3 specific peptidase 3
hsa-miR-300	1	0	1	1	0	0	SALL2	sal-like 2 (Drosophila)
hsa-miR-300	1	0	1	0	1	1	VPS13D	vacuolar protein sorting 13 homolog D (S. cerevisiae)
hsa-miR-300	1	0	1	1	1	1	RIC8B	resistance to inhibitors of cholinesterase 8 homolog B (C. elegans)
hsa-miR-300	1	0	1	1	1	1	EIF2C1	eukaryotic translation initiation factor 2C, 1
hsa-miR-300	0	0	1	1	1	1	LRIF1	ligand dependent nuclear receptor interacting factor 1
hsa-miR-300	0	0	1	1	1	1	FAM175A	family with sequence similarity 175, member A
hsa-miR-300	1	0	1	1	1	1	INSIG2	insulin induced gene 2
hsa-miR-300	1	0	1	1	1	1	BAIAP2	BAI1-associated protein 2
hsa-miR-300	0	0	1	0	0	0	LOC284561	uncharacterized LOC284561
hsa-miR-300	1	0	1	1	1	1	BAZ2A	bromodomain adjacent to zinc finger domain, 2A
hsa-miR-300	0	0	1	1	1	1	RBM15	RNA binding motif protein 15
hsa-miR-300	1	0	1	1	1	1	KANK1	KN motif and ankyrin repeat domains 1
hsa-miR-300	1	0	1	1	1	1	NAA30	N(alpha)-acetyltransferase 30, NatC catalytic subunit
hsa-miR-300	0	0	1	0	1	1	FLJ22447	uncharacterized LOC400221
hsa-miR-300	0	0	1	1	1	1	GTF2H1	general transcription factor IIH, polypeptide 1, 62kDa
hsa-miR-300	1	0	1	1	1	1	RNF185	ring finger protein 185
hsa-miR-300	0	0	1	1	1	1	SUV39H2	suppressor of variegation 3-9 homolog 2 (Drosophila)
hsa-miR-300	1	0	1	1	1	1	GORASP2	golgi reassembly stacking protein 2, 55kDa
hsa-miR-300	1	0	1	1	1	1	SEC63	SEC63 homolog (S. cerevisiae)
hsa-miR-300	0	0	1	1	1	1	KDM2B	lysine (K)-specific demethylase 2B
hsa-miR-300	0	0	1	0	1	1	TWSG1	twisted gastrulation homolog 1 (Drosophila)
hsa-miR-300	1	0	1	1	1	1	TMEM2	transmembrane protein 2
hsa-miR-300	0	0	1	1	1	1	SNAP47	synaptosomal-associated protein, 47kDa
hsa-miR-300	1	0	1	1	1	1	C7orf43	chromosome 7 open reading frame 43
hsa-miR-300	0	0	1	1	1	1	PKP4	plakophilin 4
hsa-miR-300	0	0	1	1	1	1	C8orf46	chromosome 8 open reading frame 46
hsa-miR-300	0	0	1	0	0	0	CASC2	cancer susceptibility candidate 2 (non-protein coding)
hsa-miR-300	0	0	1	0	0	0	FLJ30838	uncharacterized LOC400955
hsa-miR-300	0	0	1	1	1	1	OPTN	optineurin
hsa-miR-300	0	0	1	1	0	0	BEAN1	brain expressed, associated with NEDD4, 1
hsa-miR-300	0	0	1	1	1	1	PDE1C	phosphodiesterase 1C, calmodulin-dependent 70kDa
hsa-miR-300	0	0	1	0	1	1	FAM70A	family with sequence similarity 70, member A
hsa-miR-300	0	0	1	1	1	1	BRD2	bromodomain containing 2
hsa-miR-300	1	0	1	1	1	1	CLCN5	chloride channel, voltage-sensitive 5
hsa-miR-300	1	0	1	1	1	1	ZBTB10	zinc finger and BTB domain containing 10
hsa-miR-300	0	0	1	1	1	1	VWA3B	von Willebrand factor A domain containing 3B
hsa-miR-300	0	0	1	0	0	0	FLJ32742	uncharacterized locus FLJ32742
hsa-miR-300	1	0	1	1	1	1	C20orf26	chromosome 20 open reading frame 26
hsa-miR-300	1	0	1	1	1	1	SEC22A	SEC22 vesicle trafficking protein homolog A (S. cerevisiae)
hsa-miR-300	1	0	1	1	1	1	ANKRD49	ankyrin repeat domain 49
hsa-miR-300	1	0	1	1	1	1	IST1	increased sodium tolerance 1 homolog (yeast)
hsa-miR-300	0	0	1	1	0	0	CERS5	ceramide synthase 5
hsa-miR-300	0	0	1	1	1	1	ZBTB26	zinc finger and BTB domain containing 26
hsa-miR-300	1	0	1	1	1	1	C6orf89	chromosome 6 open reading frame 89
hsa-miR-300	0	0	1	0	1	1	CCDC68	coiled-coil domain containing 68
hsa-miR-300	0	0	1	1	1	1	HDAC8	histone deacetylase 8
hsa-miR-300	1	0	1	0	1	1	CLASP1	cytoplasmic linker associated protein 1
hsa-miR-300	1	0	1	1	1	1	CNOT4	CCR4-NOT transcription complex, subunit 4
hsa-miR-300	1	0	1	1	1	1	NOTCH2NL	notch 2 N-terminal like
hsa-miR-300	1	0	1	1	0	0	B3GAT3	beta-1,3-glucuronyltransferase 3 (glucuronosyltransferase I)
hsa-miR-300	1	0	1	1	1	1	DPH1	DPH1 homolog (S. cerevisiae)
hsa-miR-300	1	0	1	1	1	1	STXBP5	syntaxin binding protein 5 (tomosyn)
hsa-miR-300	0	0	1	1	1	1	PIK3C3	phosphatidylinositol 3-kinase, catalytic subunit type 3
hsa-miR-300	1	0	1	1	1	1	ARIH2	ariadne homolog 2 (Drosophila)
hsa-miR-300	1	0	1	1	1	1	EGR2	early growth response 2
hsa-miR-300	0	0	1	0	0	0	LOC440910	uncharacterized LOC440910
hsa-miR-300	0	0	1	1	1	1	SP100	SP100 nuclear antigen
hsa-miR-300	0	0	1	1	1	1	PTGR1	prostaglandin reductase 1
hsa-miR-300	1	0	1	1	1	1	LUC7L2	LUC7-like 2 (S. cerevisiae)
hsa-miR-300	1	0	1	1	1	1	SLBP	stem-loop binding protein
hsa-miR-300	1	0	1	1	1	1	SPTBN1	spectrin, beta, non-erythrocytic 1
hsa-miR-300	0	0	1	1	1	1	TMPRSS11D	transmembrane protease, serine 11D
hsa-miR-300	0	0	1	1	1	1	SLC16A1	solute carrier family 16, member 1 (monocarboxylic acid transporter 1)
hsa-miR-300	0	0	1	0	0	0	CXXC1P1	CXXC finger protein 1 pseudogene 1
hsa-miR-300	0	0	1	1	1	1	SPOCK1	sparc/osteonectin, cwcv and kazal-like domains proteoglycan (testican) 1
hsa-miR-300	0	0	1	0	0	0	PART1	prostate androgen-regulated transcript 1 (non-protein coding)
hsa-miR-300	0	0	1	0	1	1	RALYL	RALY RNA binding protein-like
hsa-miR-300	1	0	1	1	1	1	SNAP25	synaptosomal-associated protein, 25kDa
hsa-miR-300	0	0	1	0	1	1	AGBL4	ATP/GTP binding protein-like 4
hsa-miR-300	1	0	1	0	1	1	SLC39A11	solute carrier family 39 (metal ion transporter), member 11
hsa-miR-300	1	0	1	1	1	1	ANKRD46	ankyrin repeat domain 46
hsa-miR-300	0	0	1	1	1	1	MYO6	myosin VI
hsa-miR-300	1	0	1	0	1	1	UVRAG	UV radiation resistance associated gene
hsa-miR-300	1	0	1	1	1	1	CNEP1R1	CTD nuclear envelope phosphatase 1 regulatory subunit 1
hsa-miR-300	1	0	1	1	1	1	SPATS2	spermatogenesis associated, serine-rich 2
hsa-miR-300	1	0	1	1	1	1	ZC3H11A	zinc finger CCCH-type containing 11A
hsa-miR-300	1	0	1	0	1	1	STC2	stanniocalcin 2
hsa-miR-300	0	0	1	1	0	0	MAP7D1	MAP7 domain containing 1
hsa-miR-300	0	0	1	1	1	1	BAG1	BCL2-associated athanogene
hsa-miR-300	0	0	1	1	1	1	CDKN2AIP	CDKN2A interacting protein
hsa-miR-300	0	0	1	1	1	1	ZMYM1	zinc finger, MYM-type 1
hsa-miR-300	1	0	1	1	1	1	GAPVD1	GTPase activating protein and VPS9 domains 1
hsa-miR-300	0	0	1	0	0	0	OTUD1	OTU domain containing 1
hsa-miR-300	0	0	1	1	1	1	MPHOSPH9	M-phase phosphoprotein 9
hsa-miR-300	0	0	1	1	1	1	STAT1	signal transducer and activator of transcription 1, 91kDa
hsa-miR-300	0	0	1	1	0	0	TCEANC	transcription elongation factor A (SII) N-terminal and central domain containing
hsa-miR-300	0	0	1	1	1	1	GBAS	glioblastoma amplified sequence
hsa-miR-300	0	0	1	0	0	0	LOC400680	uncharacterized LOC400680
hsa-miR-300	1	0	1	1	1	1	TMEM185A	transmembrane protein 185A
hsa-miR-300	0	0	1	0	0	0	LINC00293	long intergenic non-protein coding RNA 293
hsa-miR-300	1	0	1	1	1	1	GOLGA8B	golgin A8 family, member B
hsa-miR-300	0	0	1	1	1	1	CBWD5	COBW domain containing 5
hsa-miR-300	0	0	1	0	0	0	LOC284385	uncharacterized LOC284385
hsa-miR-300	1	0	1	1	0	0	CFL1	cofilin 1 (non-muscle)
hsa-miR-300	0	0	1	1	1	1	HCCS	holocytochrome c synthase
hsa-miR-300	0	0	1	0	1	1	TNFAIP8	tumor necrosis factor, alpha-induced protein 8
hsa-miR-300	0	0	1	0	0	0	CECR7	cat eye syndrome chromosome region, candidate 7 (non-protein coding)
hsa-miR-300	0	0	1	1	1	1	CPXCR1	CPX chromosome region, candidate 1
hsa-miR-300	0	0	1	0	0	0	GTF2IP1	general transcription factor IIi, pseudogene 1
hsa-miR-300	0	0	1	1	1	1	SLFN13	schlafen family member 13
hsa-miR-300	0	0	1	1	1	1	GPR128	G protein-coupled receptor 128
hsa-miR-300	0	0	1	1	1	1	ZNF182	zinc finger protein 182
hsa-miR-300	0	0	1	1	0	0	MX2	myxovirus (influenza virus) resistance 2 (mouse)
hsa-miR-300	1	0	1	1	1	1	PXN	paxillin
hsa-miR-300	1	0	1	1	1	1	ZBTB4	zinc finger and BTB domain containing 4
hsa-miR-300	0	0	1	1	1	1	FRMD5	FERM domain containing 5
hsa-miR-300	0	0	1	1	1	1	ARHGEF26	Rho guanine nucleotide exchange factor (GEF) 26
hsa-miR-300	0	0	1	1	1	1	FAM5B	family with sequence similarity 5, member B
hsa-miR-300	1	0	1	1	1	1	EGLN3	egl nine homolog 3 (C. elegans)
hsa-miR-300	0	0	1	0	0	0	MORN2	MORN repeat containing 2
hsa-miR-300	0	0	1	0	1	1	CWC22	CWC22 spliceosome-associated protein homolog (S. cerevisiae)
hsa-miR-300	1	0	1	1	1	1	PHKB	phosphorylase kinase, beta
hsa-miR-300	0	0	1	1	1	1	BTN2A2	butyrophilin, subfamily 2, member A2
hsa-miR-300	1	0	1	1	1	1	GJC1	gap junction protein, gamma 1, 45kDa
hsa-miR-300	0	0	1	1	1	1	QDPR	quinoid dihydropteridine reductase
hsa-miR-300	1	0	1	1	1	1	FAM122B	family with sequence similarity 122B
hsa-miR-300	1	0	1	1	1	1	KIF21A	kinesin family member 21A
hsa-miR-300	0	0	1	1	1	1	C2orf91	chromosome 2 open reading frame 91
hsa-miR-300	0	0	1	1	1	1	ATPBD4	ATP binding domain 4
hsa-miR-300	1	0	1	1	1	1	C11orf30	chromosome 11 open reading frame 30
hsa-miR-300	1	0	1	1	1	1	METAP2	methionyl aminopeptidase 2
hsa-miR-300	0	0	1	1	0	0	LOC100128239	uncharacterized LOC100128239
hsa-miR-300	1	0	1	0	0	0	MSL1	male-specific lethal 1 homolog (Drosophila)
hsa-miR-300	1	0	1	1	1	1	DPY19L3	dpy-19-like 3 (C. elegans)
hsa-miR-300	1	0	1	1	1	1	TP53INP1	tumor protein p53 inducible nuclear protein 1
hsa-miR-300	1	0	1	1	0	0	UBN2	ubinuclein 2
hsa-miR-300	0	0	1	1	1	1	C2orf65	chromosome 2 open reading frame 65
hsa-miR-300	1	0	1	1	1	1	DLG2	discs, large homolog 2 (Drosophila)
hsa-miR-300	1	0	1	1	1	1	CLIP1	CAP-GLY domain containing linker protein 1
hsa-miR-300	0	0	1	0	0	0	RPL23AP53	ribosomal protein L23a pseudogene 53
hsa-miR-300	1	0	1	1	0	0	SNX30	sorting nexin family member 30
hsa-miR-300	1	0	1	1	1	1	TSHZ1	teashirt zinc finger homeobox 1
hsa-miR-300	1	0	1	0	1	1	YAF2	YY1 associated factor 2
hsa-miR-300	1	0	1	1	1	1	ENAH	enabled homolog (Drosophila)
hsa-miR-300	1	0	1	0	1	1	SP6	Sp6 transcription factor
hsa-miR-300	1	0	1	0	1	1	FNDC3B	fibronectin type III domain containing 3B
hsa-miR-300	1	0	1	0	1	1	YOD1	YOD1 OTU deubiquinating enzyme 1 homolog (S. cerevisiae)
hsa-miR-300	1	0	1	1	1	1	SLC12A6	solute carrier family 12 (potassium/chloride transporters), member 6
hsa-miR-300	1	0	1	1	1	1	FRYL	FRY-like
hsa-miR-300	1	0	1	0	0	0	SP7	Sp7 transcription factor
hsa-miR-300	1	0	1	1	1	1	BCAT1	branched chain amino-acid transaminase 1, cytosolic
hsa-miR-300	1	0	1	0	1	1	BLOC1S6	biogenesis of lysosomal organelles complex-1, subunit 6, pallidin
hsa-miR-300	0	0	1	0	0	0	LOC100129940	uncharacterized LOC100129940
hsa-miR-300	0	0	1	0	0	0	FLJ26245	uncharacterized LOC400533
hsa-miR-300	0	0	1	1	1	1	TBX19	T-box 19
hsa-miR-300	1	0	1	1	1	1	RBM24	RNA binding motif protein 24
hsa-miR-300	0	0	1	1	1	1	G3BP1	GTPase activating protein (SH3 domain) binding protein 1
hsa-miR-300	0	0	1	0	0	0	FAM27A	family with sequence similarity 27, member A
hsa-miR-300	1	0	1	0	0	0	ASXL3	additional sex combs like 3 (Drosophila)
hsa-miR-300	0	0	1	1	0	0	ZNF730	zinc finger protein 730
hsa-miR-300	1	0	1	1	1	1	SYS1	SYS1 Golgi-localized integral membrane protein homolog (S. cerevisiae)
hsa-miR-300	1	0	1	1	1	1	RBBP4	retinoblastoma binding protein 4
hsa-miR-300	1	0	1	1	1	1	TAP2	transporter 2, ATP-binding cassette, sub-family B (MDR/TAP)
hsa-miR-300	0	0	1	1	1	1	AGPAT9	1-acylglycerol-3-phosphate O-acyltransferase 9
hsa-miR-300	1	0	1	1	1	1	TRPM6	transient receptor potential cation channel, subfamily M, member 6
hsa-miR-300	0	0	1	1	1	1	C5orf28	chromosome 5 open reading frame 28
hsa-miR-300	1	0	1	1	1	1	TBC1D15	TBC1 domain family, member 15
hsa-miR-300	1	0	1	1	1	1	PTPN2	protein tyrosine phosphatase, non-receptor type 2
hsa-miR-300	1	0	1	1	0	0	ABLIM3	actin binding LIM protein family, member 3
hsa-miR-300	1	0	1	1	1	1	COBLL1	COBL-like 1
hsa-miR-300	1	0	1	1	1	1	PHTF2	putative homeodomain transcription factor 2
hsa-miR-300	0	0	1	1	1	1	TBC1D3G	TBC1 domain family, member 3G
hsa-miR-300	1	0	1	1	1	1	DUSP3	dual specificity phosphatase 3
hsa-miR-300	0	0	1	1	0	0	NEK7	NIMA (never in mitosis gene a)-related kinase 7
hsa-miR-300	1	0	1	1	1	1	TAB2	TGF-beta activated kinase 1/MAP3K7 binding protein 2
hsa-miR-300	0	0	1	0	0	0	POM121L8P	POM121 transmembrane nucleoporin-like 8 pseudogene
hsa-miR-300	1	0	1	0	1	1	DCDC2	doublecortin domain containing 2
hsa-miR-300	0	0	1	1	1	1	GMEB2	glucocorticoid modulatory element binding protein 2
hsa-miR-300	0	0	1	0	1	1	TBC1D3F	TBC1 domain family, member 3F
hsa-miR-300	1	0	1	0	1	1	DNAJC5	DnaJ (Hsp40) homolog, subfamily C, member 5
hsa-miR-300	1	0	1	1	1	1	GOLGA8A	golgin A8 family, member A
hsa-miR-300	1	0	1	0	1	1	GPR85	G protein-coupled receptor 85
hsa-miR-300	0	0	1	1	0	0	DOPEY1	dopey family member 1
hsa-miR-300	1	0	1	0	1	1	GRIN3A	glutamate receptor, ionotropic, N-methyl-D-aspartate 3A
hsa-miR-300	0	0	1	0	0	0	FAM66D	family with sequence similarity 66, member D
hsa-miR-300	1	0	1	1	1	1	LYPD3	LY6/PLAUR domain containing 3
hsa-miR-300	0	0	1	0	0	0	ZNF720	zinc finger protein 720
hsa-miR-300	1	0	1	1	1	1	NABP1	nucleic acid binding protein 1
hsa-miR-300	1	0	1	0	1	1	GPCPD1	glycerophosphocholine phosphodiesterase GDE1 homolog (S. cerevisiae)
hsa-miR-300	0	0	1	1	1	1	CCDC132	coiled-coil domain containing 132
hsa-miR-300	1	0	1	1	1	1	FAM126A	family with sequence similarity 126, member A
hsa-miR-300	1	0	1	1	1	1	SOX6	SRY (sex determining region Y)-box 6
hsa-miR-300	0	0	1	1	0	0	TMEM116	transmembrane protein 116
hsa-miR-300	1	0	1	1	1	1	FAM63B	family with sequence similarity 63, member B
hsa-miR-300	1	0	1	0	1	1	EXOC5	exocyst complex component 5
hsa-miR-300	0	0	1	1	1	1	PCDH20	protocadherin 20
hsa-miR-300	0	0	1	1	1	1	CAND1	cullin-associated and neddylation-dissociated 1
hsa-miR-300	1	0	1	1	1	1	IL17RD	interleukin 17 receptor D
hsa-miR-300	1	0	1	1	1	1	PRPF38B	PRP38 pre-mRNA processing factor 38 (yeast) domain containing B
hsa-miR-300	1	0	1	1	1	1	HERC2	HECT and RLD domain containing E3 ubiquitin protein ligase 2
hsa-miR-300	1	0	1	1	1	1	SLC24A4	solute carrier family 24 (sodium/potassium/calcium exchanger), member 4
hsa-miR-300	1	0	1	1	1	1	RBM26	RNA binding motif protein 26
hsa-miR-300	0	0	1	1	1	1	C8orf34	chromosome 8 open reading frame 34
hsa-miR-300	1	0	1	1	1	1	SET	SET nuclear oncogene
hsa-miR-300	0	0	1	1	1	1	AMOTL1	angiomotin like 1
hsa-miR-300	1	0	1	1	1	1	PPP3CA	protein phosphatase 3, catalytic subunit, alpha isozyme
hsa-miR-300	1	0	1	1	1	1	RNF38	ring finger protein 38
hsa-miR-300	1	0	1	1	1	1	IKZF2	IKAROS family zinc finger 2 (Helios)
hsa-miR-300	0	0	1	0	0	0	PMCHL1	pro-melanin-concentrating hormone-like 1, pseudogene
hsa-miR-300	0	0	1	0	0	0	PMCHL2	pro-melanin-concentrating hormone-like 2, pseudogene
hsa-miR-300	1	0	1	1	1	1	GAL3ST3	galactose-3-O-sulfotransferase 3
hsa-miR-300	0	0	1	1	1	1	CRB1	crumbs homolog 1 (Drosophila)
hsa-miR-300	0	0	1	1	1	1	LEAP2	liver expressed antimicrobial peptide 2
hsa-miR-300	1	0	1	1	1	1	RBBP6	retinoblastoma binding protein 6
hsa-miR-300	0	0	1	0	0	0	KGFLP1	fibroblast growth factor 7 pseudogene
hsa-miR-300	1	0	1	1	1	1	KIAA0907	KIAA0907
hsa-miR-300	0	0	1	1	1	1	CEP41	centrosomal protein 41kDa
hsa-miR-300	1	0	1	1	0	0	DSG4	desmoglein 4
hsa-miR-300	1	0	1	1	1	1	PBRM1	polybromo 1
hsa-miR-300	0	0	1	1	1	1	STAG3L3	stromal antigen 3-like 3
hsa-miR-300	1	0	1	1	1	1	TAB3	TGF-beta activated kinase 1/MAP3K7 binding protein 3
hsa-miR-300	0	0	1	0	0	0	ZNFX1-AS1	ZNFX1 antisense RNA 1
hsa-miR-300	0	0	1	1	1	1	GCOM1	GRINL1A complex locus 1
hsa-miR-300	0	0	1	0	1	1	ANKS1B	ankyrin repeat and sterile alpha motif domain containing 1B
hsa-miR-300	0	0	1	1	1	1	LHFPL1	lipoma HMGIC fusion partner-like 1
hsa-miR-300	0	0	1	1	1	1	IL20	interleukin 20
hsa-miR-300	0	0	1	1	1	1	VWA5A	von Willebrand factor A domain containing 5A
hsa-miR-300	1	0	1	1	1	1	SSX2IP	synovial sarcoma, X breakpoint 2 interacting protein
hsa-miR-300	1	0	1	0	1	1	ANKRD28	ankyrin repeat domain 28
hsa-miR-300	0	0	1	1	1	1	PTGR2	prostaglandin reductase 2
hsa-miR-300	0	0	1	1	1	1	TNFSF15	tumor necrosis factor (ligand) superfamily, member 15
hsa-miR-300	0	0	1	1	1	1	PLD5	phospholipase D family, member 5
hsa-miR-300	0	0	1	1	1	1	POTEG	POTE ankyrin domain family, member G
hsa-miR-300	0	0	1	0	1	1	BRWD3	bromodomain and WD repeat domain containing 3
hsa-miR-300	0	0	1	1	1	1	HMBOX1	homeobox containing 1
hsa-miR-300	1	0	1	1	1	1	MECP2	methyl CpG binding protein 2 (Rett syndrome)
hsa-miR-300	1	0	1	0	1	1	LRAT	lecithin retinol acyltransferase (phosphatidylcholine--retinol O-acyltransferase)
hsa-miR-300	0	0	1	1	0	0	ART3	ADP-ribosyltransferase 3
hsa-miR-300	0	0	1	1	1	1	KANK2	KN motif and ankyrin repeat domains 2
hsa-miR-300	0	0	1	1	1	1	IL24	interleukin 24
hsa-miR-300	1	0	1	1	1	1	PLCH1	phospholipase C, eta 1
hsa-miR-300	1	0	1	1	1	1	TRIT1	tRNA isopentenyltransferase 1
hsa-miR-300	1	0	1	1	0	0	CDK8	cyclin-dependent kinase 8
hsa-miR-300	1	0	1	1	1	1	QKI	QKI, KH domain containing, RNA binding
hsa-miR-300	1	0	1	1	1	1	PCDH11X	protocadherin 11 X-linked
hsa-miR-300	1	0	1	1	1	1	AMOT	angiomotin
hsa-miR-300	0	0	1	0	1	1	MIS12	MIS12, MIND kinetochore complex component, homolog (S. pombe)
hsa-miR-300	0	0	1	1	0	0	ANXA5	annexin A5
hsa-miR-300	0	0	1	1	1	1	PAFAH1B2	platelet-activating factor acetylhydrolase 1b, catalytic subunit 2 (30kDa)
hsa-miR-300	0	0	1	1	1	1	RLIM	ring finger protein, LIM domain interacting
hsa-miR-300	1	0	1	1	1	1	RIMS3	regulating synaptic membrane exocytosis 3
hsa-miR-300	1	0	1	1	0	0	POLR3D	polymerase (RNA) III (DNA directed) polypeptide D, 44kDa
hsa-miR-300	1	0	1	0	1	1	CGGBP1	CGG triplet repeat binding protein 1
hsa-miR-300	0	0	1	0	0	0	MGC13053	uncharacterized MGC13053
hsa-miR-300	1	0	1	1	1	1	U2SURP	U2 snRNP-associated SURP domain containing
hsa-miR-300	1	0	1	1	1	1	CALM1	calmodulin 1 (phosphorylase kinase, delta)
hsa-miR-300	1	0	1	1	1	1	GRIA2	glutamate receptor, ionotropic, AMPA 2
hsa-miR-300	1	0	1	1	1	1	TRIM2	tripartite motif containing 2
hsa-miR-300	0	0	1	1	1	1	GNL3L	guanine nucleotide binding protein-like 3 (nucleolar)-like
hsa-miR-300	0	0	1	1	0	0	WISP3	WNT1 inducible signaling pathway protein 3
hsa-miR-300	1	0	1	1	1	1	RBM7	RNA binding motif protein 7
hsa-miR-300	0	0	1	1	1	1	PCNP	PEST proteolytic signal containing nuclear protein
hsa-miR-300	0	0	1	0	0	0	LOC729013	uncharacterized LOC729013
hsa-miR-300	0	0	1	1	0	0	STAP1	signal transducing adaptor family member 1
hsa-miR-300	0	0	1	0	0	0	KLHL15	kelch-like 15 (Drosophila)
hsa-miR-300	1	0	1	0	1	1	NUP50	nucleoporin 50kDa
hsa-miR-300	0	0	1	1	1	1	FAM122C	family with sequence similarity 122C
hsa-miR-300	1	0	1	1	0	0	UBR7	ubiquitin protein ligase E3 component n-recognin 7 (putative)
hsa-miR-300	0	0	1	1	0	0	RPL35A	ribosomal protein L35a
hsa-miR-300	0	0	1	1	1	1	RDH11	retinol dehydrogenase 11 (all-trans/9-cis/11-cis)
hsa-miR-300	0	0	1	0	0	0	FAM200B	family with sequence similarity 200, member B
hsa-miR-300	1	0	1	1	1	1	ARHGEF9	Cdc42 guanine nucleotide exchange factor (GEF) 9
hsa-miR-300	1	0	1	0	1	1	SLC19A2	solute carrier family 19 (thiamine transporter), member 2
hsa-miR-300	0	0	1	1	1	1	HLA-G	major histocompatibility complex, class I, G
hsa-miR-300	1	0	1	0	1	1	ARHGAP26	Rho GTPase activating protein 26
hsa-miR-300	1	0	1	1	1	1	LIMS1	LIM and senescent cell antigen-like domains 1
hsa-miR-300	1	0	1	1	1	1	SPRYD7	SPRY domain containing 7
hsa-miR-300	1	0	1	1	1	1	SPOCK2	sparc/osteonectin, cwcv and kazal-like domains proteoglycan (testican) 2
hsa-miR-300	1	0	1	0	1	1	CDK19	cyclin-dependent kinase 19
hsa-miR-300	0	0	1	0	0	0	FLJ35390	uncharacterized LOC255031
hsa-miR-300	1	0	1	1	1	1	APPL2	adaptor protein, phosphotyrosine interaction, PH domain and leucine zipper containing 2
hsa-miR-300	1	0	1	1	1	1	B3GNT5	UDP-GlcNAc:betaGal beta-1,3-N-acetylglucosaminyltransferase 5
hsa-miR-300	1	0	1	1	1	1	SMYD2	SET and MYND domain containing 2
hsa-miR-300	0	0	1	1	1	1	ZNF589	zinc finger protein 589
hsa-miR-300	0	0	1	1	1	1	ANKZF1	ankyrin repeat and zinc finger domain containing 1
hsa-miR-300	0	0	1	0	1	1	PAPOLG	poly(A) polymerase gamma
hsa-miR-300	1	0	1	1	1	1	HTR2C	5-hydroxytryptamine (serotonin) receptor 2C, G protein-coupled
hsa-miR-300	1	0	1	0	0	0	KCNU1	potassium channel, subfamily U, member 1
hsa-miR-300	0	0	1	0	0	0	BCAS3	breast carcinoma amplified sequence 3
hsa-miR-300	0	0	1	1	1	1	TMEM117	transmembrane protein 117
hsa-miR-300	1	0	1	1	1	1	ZNF518A	zinc finger protein 518A
hsa-miR-300	0	0	1	1	1	1	IQCH	IQ motif containing H
hsa-miR-300	1	0	1	1	1	1	PLS1	plastin 1
hsa-miR-300	0	0	1	1	0	0	C7orf57	chromosome 7 open reading frame 57
hsa-miR-300	1	0	1	1	1	1	ADAM19	ADAM metallopeptidase domain 19
hsa-miR-300	0	0	1	0	0	0	MGC45922	uncharacterized LOC284365
hsa-miR-300	1	0	1	1	0	0	TMEM181	transmembrane protein 181
hsa-miR-300	1	0	1	1	1	1	PCDHA5	protocadherin alpha 5
hsa-miR-300	0	0	1	1	0	0	TNMD	tenomodulin
hsa-miR-300	0	0	1	0	1	1	DKFZP434I0714	uncharacterized protein DKFZP434I0714
hsa-miR-300	1	0	1	0	1	1	PDE12	phosphodiesterase 12
hsa-miR-300	1	0	1	1	1	1	CTDSPL2	CTD (carboxy-terminal domain, RNA polymerase II, polypeptide A) small phosphatase like 2
hsa-miR-300	0	0	1	0	0	0	LOC339862	uncharacterized LOC339862
hsa-miR-300	1	0	1	1	1	1	IMPACT	Impact homolog (mouse)
hsa-miR-300	1	0	1	1	1	1	LHX8	LIM homeobox 8
hsa-miR-300	0	0	1	1	1	1	FAM171B	family with sequence similarity 171, member B
hsa-miR-300	1	0	1	1	1	1	HECTD2	HECT domain containing E3 ubiquitin protein ligase 2
hsa-miR-300	1	0	1	1	1	1	MEIS1	Meis homeobox 1
hsa-miR-300	1	0	1	1	0	0	RASGEF1B	RasGEF domain family, member 1B
hsa-miR-300	1	0	1	1	1	1	FAM135B	family with sequence similarity 135, member B
hsa-miR-300	0	0	1	0	0	0	INHBA-AS1	INHBA antisense RNA 1
hsa-miR-300	0	0	1	1	0	0	CCDC152	coiled-coil domain containing 152
hsa-miR-300	0	0	1	1	1	1	VBP1	von Hippel-Lindau binding protein 1
hsa-miR-300	0	0	1	1	1	1	SLTM	SAFB-like, transcription modulator
hsa-miR-300	1	0	1	1	1	1	FOSB	FBJ murine osteosarcoma viral oncogene homolog B
hsa-miR-300	1	0	1	1	1	1	SLITRK3	SLIT and NTRK-like family, member 3
hsa-miR-300	1	0	1	1	1	1	BVES	blood vessel epicardial substance
hsa-miR-300	1	0	1	1	1	1	LEF1	lymphoid enhancer-binding factor 1
hsa-miR-300	1	0	1	1	1	1	ARPP21	cAMP-regulated phosphoprotein, 21kDa
hsa-miR-300	0	0	1	1	0	0	NT5DC4	5'-nucleotidase domain containing 4
hsa-miR-300	1	0	1	1	1	1	TNFSF4	tumor necrosis factor (ligand) superfamily, member 4
hsa-miR-300	0	0	1	0	1	1	PDGFC	platelet derived growth factor C
hsa-miR-300	0	0	1	1	1	1	C4orf32	chromosome 4 open reading frame 32
hsa-miR-300	0	0	1	1	1	1	DGKH	diacylglycerol kinase, eta
hsa-miR-300	0	0	1	0	0	0	LOC339260	uncharacterized LOC339260
hsa-miR-300	0	0	1	1	1	1	MYO3A	myosin IIIA
hsa-miR-300	1	0	1	1	1	1	SF3B1	splicing factor 3b, subunit 1, 155kDa
hsa-miR-300	0	0	1	1	0	0	TOM1	target of myb1 (chicken)
hsa-miR-300	1	0	1	0	1	1	LYPD6	LY6/PLAUR domain containing 6
hsa-miR-300	0	0	1	1	1	1	DDX4	DEAD (Asp-Glu-Ala-Asp) box polypeptide 4
hsa-miR-300	0	0	1	0	0	0	LOC348120	uncharacterized LOC348120
hsa-miR-300	1	0	1	1	1	1	PELI1	pellino E3 ubiquitin protein ligase 1
hsa-miR-300	1	0	1	0	1	1	RNF182	ring finger protein 182
hsa-miR-300	1	0	1	1	1	1	PDCD6	programmed cell death 6
hsa-miR-300	0	0	1	1	1	1	LINC00086	long intergenic non-protein coding RNA 86
hsa-miR-300	1	0	1	1	1	1	ZFP91	zinc finger protein 91 homolog (mouse)
hsa-miR-300	1	0	1	1	1	1	MKRN1	makorin ring finger protein 1
hsa-miR-300	1	0	1	0	1	1	HDAC5	histone deacetylase 5
hsa-miR-300	1	0	1	1	1	1	PCGF5	polycomb group ring finger 5
hsa-miR-300	1	0	1	1	1	1	SCUBE3	signal peptide, CUB domain, EGF-like 3
hsa-miR-300	0	0	1	0	0	0	LOC255411	uncharacterized LOC255411
hsa-miR-300	0	0	1	1	0	0	TINAG	tubulointerstitial nephritis antigen
hsa-miR-300	0	0	1	1	0	0	C14orf2	chromosome 14 open reading frame 2
hsa-miR-300	0	0	1	1	1	1	GPATCH2	G patch domain containing 2
hsa-miR-300	0	0	1	1	1	1	CAMLG	calcium modulating ligand
hsa-miR-300	1	0	1	1	0	0	MANEAL	mannosidase, endo-alpha-like
hsa-miR-300	0	0	1	1	0	0	ADORA3	adenosine A3 receptor
hsa-miR-300	0	0	1	1	1	1	SCLT1	sodium channel and clathrin linker 1
hsa-miR-300	0	0	1	1	1	1	ZNF333	zinc finger protein 333
hsa-miR-300	0	0	1	1	1	1	VNN2	vanin 2
hsa-miR-300	0	0	1	1	1	1	STAG1	stromal antigen 1
hsa-miR-300	1	0	1	1	1	1	GANAB	glucosidase, alpha; neutral AB
hsa-miR-300	0	0	1	1	1	1	SH2D1B	SH2 domain containing 1B
hsa-miR-300	1	0	1	1	1	1	NRSN1	neurensin 1
hsa-miR-300	0	0	1	0	0	0	PCP4L1	Purkinje cell protein 4 like 1
hsa-miR-300	1	0	1	1	1	1	PDCD6IP	programmed cell death 6 interacting protein
hsa-miR-300	0	0	1	0	0	0	PTGER4P2	prostaglandin E receptor 4 (subtype EP4) pseudogene 2
hsa-miR-300	0	0	1	0	0	0	FOXN3-AS2	FOXN3 antisense RNA 2
hsa-miR-300	0	0	1	1	0	0	CYP4F30P	cytochrome P450, family 4, subfamily F, polypeptide 30, pseudogene
hsa-miR-300	1	0	1	1	0	0	CHTOP	chromatin target of PRMT1
hsa-miR-300	0	0	1	1	0	0	CSF2RB	colony stimulating factor 2 receptor, beta, low-affinity (granulocyte-macrophage)
hsa-miR-300	0	0	1	1	0	0	RPS16	ribosomal protein S16
hsa-miR-300	0	0	1	0	1	1	WDR27	WD repeat domain 27
hsa-miR-300	1	0	1	1	1	1	OPCML	opioid binding protein/cell adhesion molecule-like
hsa-miR-300	0	0	1	1	1	1	HOXD8	homeobox D8
hsa-miR-300	0	0	1	1	1	1	ABCG2	ATP-binding cassette, sub-family G (WHITE), member 2
hsa-miR-300	0	0	1	1	1	1	KCTD3	potassium channel tetramerisation domain containing 3
hsa-miR-300	1	0	1	1	1	1	STK38	serine/threonine kinase 38
hsa-miR-300	0	0	1	1	1	1	NELL1	NEL-like 1 (chicken)
hsa-miR-300	0	0	1	1	1	1	TMEM52B	transmembrane protein 52B
hsa-miR-300	1	0	1	1	1	1	IL28RA	interleukin 28 receptor, alpha (interferon, lambda receptor)
hsa-miR-300	0	0	1	1	0	0	C10orf128	chromosome 10 open reading frame 128
hsa-miR-300	0	0	1	1	1	1	CCDC126	coiled-coil domain containing 126
hsa-miR-300	0	0	1	1	1	1	SPHKAP	SPHK1 interactor, AKAP domain containing
hsa-miR-300	1	0	1	0	1	1	RBM23	RNA binding motif protein 23
hsa-miR-300	1	0	1	1	1	1	PNISR	PNN-interacting serine/arginine-rich protein
hsa-miR-300	1	0	1	1	1	1	SP4	Sp4 transcription factor
hsa-miR-300	1	0	1	0	1	1	BTBD3	BTB (POZ) domain containing 3
hsa-miR-300	1	0	1	1	1	1	LARP1B	La ribonucleoprotein domain family, member 1B
hsa-miR-300	0	0	1	1	1	1	SLC8A3	solute carrier family 8 (sodium/calcium exchanger), member 3
hsa-miR-300	0	0	1	1	1	1	LRCH1	leucine-rich repeats and calponin homology (CH) domain containing 1
hsa-miR-300	0	0	1	0	0	0	LRRC37BP1	leucine rich repeat containing 37B pseudogene 1
hsa-miR-300	0	0	1	1	0	0	RGSL1	regulator of G-protein signaling like 1
hsa-miR-300	1	0	1	1	1	1	MEGF11	multiple EGF-like-domains 11
hsa-miR-300	1	0	1	1	1	1	GPR68	G protein-coupled receptor 68
hsa-miR-300	1	0	1	1	1	1	MLLT10	myeloid/lymphoid or mixed-lineage leukemia (trithorax homolog, Drosophila); translocated to, 10
hsa-miR-300	0	0	1	0	1	1	PIK3C2G	phosphatidylinositol-4-phosphate 3-kinase, catalytic subunit type 2 gamma
hsa-miR-300	0	0	1	0	0	0	FAM225B	family with sequence similarity 225, member B (non-protein coding)
hsa-miR-300	0	0	1	0	0	0	MEG3	maternally expressed 3 (non-protein coding)
hsa-miR-300	0	0	1	1	1	1	IP6K2	inositol hexakisphosphate kinase 2
hsa-miR-300	0	0	1	0	0	0	DKFZp686D0853	uncharacterized LOC401613
hsa-miR-300	1	0	1	1	1	1	ATP2B4	ATPase, Ca++ transporting, plasma membrane 4
hsa-miR-300	1	0	1	1	1	1	RBL2	retinoblastoma-like 2 (p130)
hsa-miR-300	0	0	1	0	1	1	AP1S2	adaptor-related protein complex 1, sigma 2 subunit
hsa-miR-300	0	0	1	0	1	1	FEZ2	fasciculation and elongation protein zeta 2 (zygin II)
hsa-miR-300	1	0	1	1	1	1	MIER3	mesoderm induction early response 1, family member 3
hsa-miR-300	1	0	1	0	1	1	MTX3	metaxin 3
hsa-miR-300	1	0	1	0	1	1	CLASP2	cytoplasmic linker associated protein 2
hsa-miR-300	1	0	1	1	1	1	TJP1	tight junction protein 1
hsa-miR-300	0	0	1	1	1	1	IPCEF1	interaction protein for cytohesin exchange factors 1
hsa-miR-300	1	0	1	1	1	1	PRDM2	PR domain containing 2, with ZNF domain
hsa-miR-300	0	0	1	0	1	1	TYW5	tRNA-yW synthesizing protein 5
hsa-miR-300	1	0	1	1	1	1	FOXP1	forkhead box P1
hsa-miR-300	1	0	1	1	1	1	VPS26A	vacuolar protein sorting 26 homolog A (S. pombe)
hsa-miR-300	0	0	1	0	0	0	OVOS	ovostatin
hsa-miR-300	1	0	1	1	1	1	DCAF5	DDB1 and CUL4 associated factor 5
hsa-miR-300	0	0	1	1	0	0	LRR1	leucine rich repeat protein 1
hsa-miR-300	1	0	1	1	1	1	NEDD9	neural precursor cell expressed, developmentally down-regulated 9
hsa-miR-300	1	0	1	1	1	1	ATP6V1C1	ATPase, H+ transporting, lysosomal 42kDa, V1 subunit C1
hsa-miR-300	0	0	1	1	1	1	CCNT2	cyclin T2
hsa-miR-300	0	0	1	1	1	1	ATP2A2	ATPase, Ca++ transporting, cardiac muscle, slow twitch 2
hsa-miR-300	1	0	1	1	1	1	GPR125	G protein-coupled receptor 125
hsa-miR-300	1	0	1	0	1	1	TMEM184B	transmembrane protein 184B
hsa-miR-300	1	0	1	1	1	1	NFIB	nuclear factor I/B
hsa-miR-300	1	0	1	1	1	1	RDX	radixin
hsa-miR-300	0	0	1	1	1	1	RBM20	RNA binding motif protein 20
hsa-miR-300	1	0	1	1	1	1	PGAP1	post-GPI attachment to proteins 1
hsa-miR-300	1	0	1	1	1	1	RECK	reversion-inducing-cysteine-rich protein with kazal motifs
hsa-miR-300	1	0	1	1	1	1	TMEM135	transmembrane protein 135
hsa-miR-300	0	0	1	1	1	1	ABCD3	ATP-binding cassette, sub-family D (ALD), member 3
hsa-miR-300	0	0	1	0	0	0	ZNRD1-AS1	ZNRD1 antisense RNA 1
hsa-miR-300	0	0	1	1	1	1	ZCCHC11	zinc finger, CCHC domain containing 11
hsa-miR-300	1	0	1	1	1	1	CREB3L2	cAMP responsive element binding protein 3-like 2
hsa-miR-300	0	0	1	1	1	1	IPO11	importin 11
hsa-miR-300	1	0	1	1	1	1	HIC2	hypermethylated in cancer 2
hsa-miR-300	0	0	1	1	1	1	POLR2H	polymerase (RNA) II (DNA directed) polypeptide H
hsa-miR-300	0	0	1	1	1	1	CDC123	cell division cycle 123 homolog (S. cerevisiae)
hsa-miR-300	0	0	1	1	1	1	TBC1D10A	TBC1 domain family, member 10A
hsa-miR-300	0	0	1	0	0	0	LOC100128988	uncharacterized LOC100128988
hsa-miR-300	0	0	1	1	1	1	PTPLAD2	protein tyrosine phosphatase-like A domain containing 2
hsa-miR-300	0	0	1	1	1	1	MFAP4	microfibrillar-associated protein 4
hsa-miR-300	0	0	1	1	1	1	SEC22C	SEC22 vesicle trafficking protein homolog C (S. cerevisiae)
hsa-miR-300	0	0	1	1	0	0	PTTG1	pituitary tumor-transforming 1
hsa-miR-300	0	0	1	1	1	1	CIRBP	cold inducible RNA binding protein
hsa-miR-300	0	0	1	1	0	0	CCNDBP1	cyclin D-type binding-protein 1
hsa-miR-300	0	0	1	0	0	0	ZBED3-AS1	ZBED3 antisense RNA 1
hsa-miR-300	1	0	1	1	1	1	SIX5	SIX homeobox 5
hsa-miR-300	1	0	1	0	1	1	BNIP3L	BCL2/adenovirus E1B 19kDa interacting protein 3-like
hsa-miR-300	1	0	1	1	1	1	CAAP1	caspase activity and apoptosis inhibitor 1
hsa-miR-300	0	0	1	1	1	1	PMPCB	peptidase (mitochondrial processing) beta
hsa-miR-300	0	0	1	1	0	0	DNAJB2	DnaJ (Hsp40) homolog, subfamily B, member 2
hsa-miR-300	0	0	1	1	1	1	FBXO4	F-box protein 4
hsa-miR-300	0	0	1	1	1	1	MRPS36	mitochondrial ribosomal protein S36
hsa-miR-300	0	0	1	0	1	1	CD99P1	CD99 molecule pseudogene 1
hsa-miR-300	0	0	1	1	1	1	SORD	sorbitol dehydrogenase
hsa-miR-300	0	0	1	1	0	0	ZFYVE19	zinc finger, FYVE domain containing 19
hsa-miR-300	0	0	1	1	1	1	DCTD	dCMP deaminase
hsa-miR-300	1	0	1	0	1	1	RPS6KB1	ribosomal protein S6 kinase, 70kDa, polypeptide 1
hsa-miR-300	1	0	1	1	1	1	TMEM245	transmembrane protein 245
hsa-miR-300	1	0	1	1	1	1	PTBP1	polypyrimidine tract binding protein 1
hsa-miR-300	0	0	1	1	1	1	KLHDC2	kelch domain containing 2
hsa-miR-300	1	0	1	1	1	1	MMP2	matrix metallopeptidase 2 (gelatinase A, 72kDa gelatinase, 72kDa type IV collagenase)
hsa-miR-300	0	0	1	1	1	1	TMEM109	transmembrane protein 109
hsa-miR-300	0	0	1	1	0	0	NOX5	NADPH oxidase, EF-hand calcium binding domain 5
hsa-miR-300	1	0	1	1	1	1	GPR137B	G protein-coupled receptor 137B
hsa-miR-300	0	0	1	1	0	0	NUP205	nucleoporin 205kDa
hsa-miR-300	0	0	1	1	0	0	TUSC3	tumor suppressor candidate 3
hsa-miR-300	1	0	1	1	1	1	ARNTL	aryl hydrocarbon receptor nuclear translocator-like
hsa-miR-300	1	0	1	0	1	1	C15orf41	chromosome 15 open reading frame 41
hsa-miR-300	0	0	1	1	1	1	SMNDC1	survival motor neuron domain containing 1
hsa-miR-300	1	0	1	0	1	1	NLN	neurolysin (metallopeptidase M3 family)
hsa-miR-300	1	0	1	1	1	1	ZNF562	zinc finger protein 562
hsa-miR-300	1	0	1	1	1	1	YWHAQ	tyrosine 3-monooxygenase/tryptophan 5-monooxygenase activation protein, theta polypeptide
hsa-miR-300	1	0	1	1	1	1	FUBP3	far upstream element (FUSE) binding protein 3
hsa-miR-300	0	0	1	1	1	1	CD1C	CD1c molecule
hsa-miR-300	0	0	1	1	1	1	TCTN3	tectonic family member 3
hsa-miR-300	0	0	1	1	1	1	GFM1	G elongation factor, mitochondrial 1
hsa-miR-300	1	0	1	1	1	1	F11R	F11 receptor
hsa-miR-300	1	0	1	1	1	1	ARMC8	armadillo repeat containing 8
hsa-miR-300	0	0	1	1	1	1	TMEM14C	transmembrane protein 14C
hsa-miR-300	1	0	1	1	1	1	RPUSD3	RNA pseudouridylate synthase domain containing 3
hsa-miR-300	0	0	1	1	1	1	FAM18B1	family with sequence similarity 18, member B1
hsa-miR-300	0	0	1	1	1	1	SAMD3	sterile alpha motif domain containing 3
hsa-miR-300	0	0	1	1	0	0	NUF2	NUF2, NDC80 kinetochore complex component, homolog (S. cerevisiae)
hsa-miR-300	0	0	1	0	0	0	A2M	alpha-2-macroglobulin
hsa-miR-300	1	0	1	1	1	1	MTFR1	mitochondrial fission regulator 1
hsa-miR-300	1	0	1	0	1	1	CD47	CD47 molecule
hsa-miR-300	0	0	1	0	1	1	DENR	density-regulated protein
hsa-miR-300	1	0	1	1	0	0	FOXO3	forkhead box O3
hsa-miR-300	0	0	1	1	1	1	BEX4	brain expressed, X-linked 4
hsa-miR-300	1	0	1	1	1	1	MAN1C1	mannosidase, alpha, class 1C, member 1
hsa-miR-300	0	0	1	1	1	1	NUDT21	nudix (nucleoside diphosphate linked moiety X)-type motif 21
hsa-miR-300	1	0	1	1	1	1	LHX9	LIM homeobox 9
hsa-miR-300	0	0	1	0	0	0	LOC731789	uncharacterized LOC731789
hsa-miR-300	0	0	1	1	1	1	BDP1	B double prime 1, subunit of RNA polymerase III transcription initiation factor IIIB
hsa-miR-300	1	0	1	0	1	1	OSBPL8	oxysterol binding protein-like 8
hsa-miR-300	0	0	1	1	1	1	SDAD1	SDA1 domain containing 1
hsa-miR-300	1	0	1	1	1	1	SLC39A10	solute carrier family 39 (zinc transporter), member 10
hsa-miR-300	0	0	1	1	0	0	TENC1	tensin like C1 domain containing phosphatase (tensin 2)
hsa-miR-300	1	0	1	1	1	1	SLC30A7	solute carrier family 30 (zinc transporter), member 7
hsa-miR-300	0	0	1	1	1	1	TMEM41B	transmembrane protein 41B
hsa-miR-300	1	0	1	0	1	1	EFR3A	EFR3 homolog A (S. cerevisiae)
hsa-miR-300	1	0	1	1	1	1	SEC14L1	SEC14-like 1 (S. cerevisiae)
hsa-miR-300	1	0	1	0	1	1	LONRF2	LON peptidase N-terminal domain and ring finger 2
hsa-miR-300	0	0	1	1	1	1	PTGS1	prostaglandin-endoperoxide synthase 1 (prostaglandin G/H synthase and cyclooxygenase)
hsa-miR-300	1	0	1	1	0	0	DPY19L1	dpy-19-like 1 (C. elegans)
hsa-miR-300	0	0	1	1	1	1	MARVELD2	MARVEL domain containing 2
hsa-miR-300	1	0	1	0	1	1	RBBP5	retinoblastoma binding protein 5
hsa-miR-300	1	0	1	0	1	1	EPDR1	ependymin related protein 1 (zebrafish)
hsa-miR-300	0	0	1	0	0	0	C1orf81	chromosome 1 open reading frame 81
hsa-miR-300	0	0	1	1	1	1	ADPRH	ADP-ribosylarginine hydrolase
hsa-miR-300	0	0	1	0	1	1	OPRK1	opioid receptor, kappa 1
hsa-miR-300	1	0	1	0	0	0	YLPM1	YLP motif containing 1
hsa-miR-300	1	0	1	0	1	1	ACVR2A	activin A receptor, type IIA
hsa-miR-300	1	0	1	1	1	1	ARSB	arylsulfatase B
hsa-miR-300	0	0	1	1	0	0	ASPA	aspartoacylase
hsa-miR-300	0	0	1	1	1	1	ATP7A	ATPase, Cu++ transporting, alpha polypeptide
hsa-miR-300	1	0	1	1	1	1	COL3A1	collagen, type III, alpha 1
hsa-miR-300	1	0	1	0	1	1	SLC26A2	solute carrier family 26 (sulfate transporter), member 2
hsa-miR-300	1	0	1	0	1	1	G6PC	glucose-6-phosphatase, catalytic subunit
hsa-miR-300	1	0	1	1	1	1	GALC	galactosylceramidase
hsa-miR-300	1	0	1	1	1	1	GJA1	gap junction protein, alpha 1, 43kDa
hsa-miR-300	1	0	1	0	1	1	GLI3	GLI family zinc finger 3
hsa-miR-300	1	0	1	0	1	1	KIT	v-kit Hardy-Zuckerman 4 feline sarcoma viral oncogene homolog
hsa-miR-300	1	0	1	1	1	1	MET	met proto-oncogene (hepatocyte growth factor receptor)
hsa-miR-300	1	0	1	1	1	1	PMP22	peripheral myelin protein 22
hsa-miR-300	1	0	1	1	1	1	ATXN1	ataxin 1
hsa-miR-300	0	0	1	1	1	1	SRD5A2	steroid-5-alpha-reductase, alpha polypeptide 2 (3-oxo-5 alpha-steroid delta 4-dehydrogenase alpha 2)
hsa-miR-300	0	0	1	1	1	1	STS	steroid sulfatase (microsomal), isozyme S
hsa-miR-300	0	0	1	1	0	0	SERPINA7	serpin peptidase inhibitor, clade A (alpha-1 antiproteinase, antitrypsin), member 7
hsa-miR-300	1	0	1	0	1	1	TSC1	tuberous sclerosis 1
hsa-miR-300	0	0	1	1	1	1	LTBP2	latent transforming growth factor beta binding protein 2
hsa-miR-300	0	0	1	0	1	1	SLC10A2	solute carrier family 10 (sodium/bile acid cotransporter family), member 2
hsa-miR-300	1	0	1	1	1	1	TEK	TEK tyrosine kinase, endothelial
hsa-miR-300	1	0	1	1	1	1	DCX	doublecortin
hsa-miR-300	0	0	1	1	1	1	IL1RN	interleukin 1 receptor antagonist
hsa-miR-300	0	0	1	0	1	1	ADH1C	alcohol dehydrogenase 1C (class I), gamma polypeptide
hsa-miR-300	1	0	1	1	0	0	ADRA1B	adrenoceptor alpha 1B
hsa-miR-300	0	0	1	0	1	1	ADRA2A	adrenoceptor alpha 2A
hsa-miR-300	1	0	1	0	1	1	ADRB1	adrenoceptor beta 1
hsa-miR-300	1	0	1	0	1	1	CACNA1E	calcium channel, voltage-dependent, R type, alpha 1E subunit
hsa-miR-300	1	0	1	0	1	1	GABRA4	gamma-aminobutyric acid (GABA) A receptor, alpha 4
hsa-miR-300	1	0	1	1	1	1	GABRG2	gamma-aminobutyric acid (GABA) A receptor, gamma 2
hsa-miR-300	0	0	1	1	1	1	HTR7	5-hydroxytryptamine (serotonin) receptor 7, adenylate cyclase-coupled
hsa-miR-300	1	0	1	0	1	1	KITLG	KIT ligand
hsa-miR-300	1	0	1	1	1	1	PPP3R1	protein phosphatase 3, regulatory subunit B, alpha
hsa-miR-300	0	0	1	1	1	1	PTGS2	prostaglandin-endoperoxide synthase 2 (prostaglandin G/H synthase and cyclooxygenase)
hsa-miR-300	0	0	1	1	1	1	TBC1D3C	TBC1 domain family, member 3C
hsa-miR-300	1	0	1	0	1	1	SPOPL	speckle-type POZ protein-like
hsa-miR-300	1	0	1	1	1	1	WLS	wntless homolog (Drosophila)
hsa-miR-300	1	0	1	1	1	1	WNK3	WNK lysine deficient protein kinase 3
hsa-miR-300	0	0	1	1	1	1	DYRK3	dual-specificity tyrosine-(Y)-phosphorylation regulated kinase 3
hsa-miR-300	0	0	1	1	1	1	CCDC144NL	coiled-coil domain containing 144 family, N-terminal like
hsa-miR-300	1	0	1	0	1	1	LRRC55	leucine rich repeat containing 55
hsa-miR-300	0	0	1	1	1	1	FRG2	FSHD region gene 2
hsa-miR-300	0	0	1	0	1	1	FLJ46347	uncharacterized LOC389064
hsa-miR-300	1	0	1	1	0	0	MAGED1	melanoma antigen family D, 1
hsa-miR-300	1	0	1	1	1	1	PLCXD3	phosphatidylinositol-specific phospholipase C, X domain containing 3
hsa-miR-300	1	0	1	1	1	1	NFKBIZ	nuclear factor of kappa light polypeptide gene enhancer in B-cells inhibitor, zeta
hsa-miR-300	1	0	1	1	1	1	EDA	ectodysplasin A
hsa-miR-300	0	0	1	1	1	1	RYK	receptor-like tyrosine kinase
hsa-miR-300	1	0	1	1	1	1	IGF2BP2	insulin-like growth factor 2 mRNA binding protein 2
hsa-miR-300	1	0	1	1	1	1	BRWD1	bromodomain and WD repeat domain containing 1
hsa-miR-300	0	0	1	1	1	1	CXCR4	chemokine (C-X-C motif) receptor 4
hsa-miR-300	1	0	1	0	1	1	RCHY1	ring finger and CHY zinc finger domain containing 1, E3 ubiquitin protein ligase
hsa-miR-300	0	0	1	1	1	1	TMEM230	transmembrane protein 230
hsa-miR-300	1	0	1	1	1	1	ZNF655	zinc finger protein 655
hsa-miR-300	0	0	1	1	1	1	IRAK1BP1	interleukin-1 receptor-associated kinase 1 binding protein 1
hsa-miR-300	0	0	1	1	1	1	C1QL3	complement component 1, q subcomponent-like 3
hsa-miR-300	1	0	1	1	1	1	BCL2L15	BCL2-like 15
hsa-miR-300	1	0	1	0	1	1	CREB5	cAMP responsive element binding protein 5
hsa-miR-300	1	0	1	1	1	1	SLC25A53	solute carrier family 25, member 53
hsa-miR-300	0	0	1	1	1	1	SPIN4	spindlin family, member 4
hsa-miR-300	0	0	1	1	1	1	C9orf152	chromosome 9 open reading frame 152
hsa-miR-300	1	0	1	1	1	1	FXR1	fragile X mental retardation, autosomal homolog 1
hsa-miR-300	1	0	1	0	1	1	SYT14L	synaptotagmin XIV-like
hsa-miR-300	1	0	1	1	0	0	USP21	ubiquitin specific peptidase 21
hsa-miR-300	0	0	1	1	1	1	PURG	purine-rich element binding protein G
hsa-miR-300	1	0	1	1	1	1	PHF6	PHD finger protein 6
hsa-miR-300	0	0	1	1	1	1	USP1	ubiquitin specific peptidase 1
hsa-miR-300	0	0	1	1	0	0	ALDH18A1	aldehyde dehydrogenase 18 family, member A1
hsa-miR-300	0	0	1	1	1	1	PGBD2	piggyBac transposable element derived 2
hsa-miR-300	0	0	1	1	1	1	CARD16	caspase recruitment domain family, member 16
hsa-miR-300	0	0	1	1	1	1	RAB28	RAB28, member RAS oncogene family
hsa-miR-300	0	0	1	1	1	1	ACTBL2	actin, beta-like 2
hsa-miR-300	1	0	1	1	1	1	SH3PXD2B	SH3 and PX domains 2B
hsa-miR-300	1	0	1	1	1	1	SERBP1	SERPINE1 mRNA binding protein 1
hsa-miR-300	0	0	1	1	0	0	FNTA	farnesyltransferase, CAAX box, alpha
hsa-miR-300	1	0	1	1	1	1	GPHN	gephyrin
hsa-miR-300	1	0	1	0	1	1	RGAG4	retrotransposon gag domain containing 4
hsa-miR-300	0	0	1	1	1	1	C1orf53	chromosome 1 open reading frame 53
hsa-miR-300	1	0	1	0	1	1	TNRC6B	trinucleotide repeat containing 6B
hsa-miR-300	1	0	1	1	1	1	YIPF5	Yip1 domain family, member 5
hsa-miR-300	0	0	1	1	0	0	ARPC4	actin related protein 2/3 complex, subunit 4, 20kDa
hsa-miR-300	1	0	1	1	1	1	VEGFA	vascular endothelial growth factor A
hsa-miR-300	0	0	1	1	1	1	CELF1	CUGBP, Elav-like family member 1
hsa-miR-300	1	0	1	0	1	1	CYB5RL	cytochrome b5 reductase-like
hsa-miR-300	1	0	1	1	1	1	CSNK1G3	casein kinase 1, gamma 3
hsa-miR-300	0	0	1	1	1	1	HNRNPH2	heterogeneous nuclear ribonucleoprotein H2 (H')
hsa-miR-300	0	0	1	1	1	1	DYNLL1	dynein, light chain, LC8-type 1
hsa-miR-300	1	0	1	1	1	1	NPM1	nucleophosmin (nucleolar phosphoprotein B23, numatrin)
hsa-miR-300	0	0	1	1	1	1	PRPS2	phosphoribosyl pyrophosphate synthetase 2
hsa-miR-300	1	0	1	0	1	1	GK5	glycerol kinase 5 (putative)
hsa-miR-300	1	0	1	1	1	1	KCNC4	potassium voltage-gated channel, Shaw-related subfamily, member 4
hsa-miR-300	0	0	1	1	1	1	MDH1B	malate dehydrogenase 1B, NAD (soluble)
hsa-miR-300	1	0	1	1	1	1	CHN2	chimerin (chimaerin) 2
hsa-miR-300	1	0	1	0	1	1	FAM133B	family with sequence similarity 133, member B
hsa-miR-300	0	0	1	1	1	1	MLH3	mutL homolog 3 (E. coli)
hsa-miR-300	1	0	1	1	1	1	SCN2A	sodium channel, voltage-gated, type II, alpha subunit
hsa-miR-300	0	0	1	1	1	1	MTHFD2	methylenetetrahydrofolate dehydrogenase (NADP+ dependent) 2, methenyltetrahydrofolate cyclohydrolase
hsa-miR-300	1	0	1	1	1	1	HEY1	hairy/enhancer-of-split related with YRPW motif 1
hsa-miR-300	1	0	1	1	1	1	ZNF706	zinc finger protein 706
hsa-miR-300	1	0	1	1	1	1	DIAPH3	diaphanous homolog 3 (Drosophila)
hsa-miR-300	1	0	1	1	1	1	C2orf88	chromosome 2 open reading frame 88
hsa-miR-300	1	0	1	0	1	1	TMEM237	transmembrane protein 237
hsa-miR-300	0	0	1	0	1	1	WTH3DI	RAB6C-like
hsa-miR-300	1	0	1	0	1	1	FAM127C	family with sequence similarity 127, member C
hsa-miR-300	0	0	1	1	1	1	XIRP2	xin actin-binding repeat containing 2
hsa-miR-300	1	0	1	1	1	1	CUL4B	cullin 4B
hsa-miR-300	1	0	1	1	1	1	VAV3	vav 3 guanine nucleotide exchange factor
hsa-miR-300	1	0	1	0	1	1	FBXO41	F-box protein 41
hsa-miR-300	1	0	1	0	1	1	THSD7B	thrombospondin, type I, domain containing 7B
hsa-miR-300	1	0	1	0	1	1	CCDC85A	coiled-coil domain containing 85A
hsa-miR-300	0	0	1	1	1	1	HSF5	heat shock transcription factor family member 5
hsa-miR-300	1	0	1	1	1	1	ZNF697	zinc finger protein 697
hsa-miR-300	0	0	1	0	0	0	ARHGEF28	Rho guanine nucleotide exchange factor (GEF) 28
hsa-miR-300	1	0	1	0	1	1	MEGF9	multiple EGF-like-domains 9
hsa-miR-300	0	0	1	0	0	0	C16orf90	chromosome 16 open reading frame 90
hsa-miR-300	0	0	1	1	1	1	C15orf57	chromosome 15 open reading frame 57
hsa-miR-300	0	0	1	1	0	0	MEIG1	meiosis expressed gene 1 homolog (mouse)
hsa-miR-300	1	0	1	1	1	1	REPS2	RALBP1 associated Eps domain containing 2
hsa-miR-300	1	0	1	0	1	1	PDE5A	phosphodiesterase 5A, cGMP-specific
hsa-miR-300	1	0	1	1	0	0	ASIC2	acid-sensing (proton-gated) ion channel 2
hsa-miR-300	1	0	1	0	1	1	XIAP	X-linked inhibitor of apoptosis
hsa-miR-300	0	0	1	0	1	1	BAGE	B melanoma antigen
hsa-miR-300	1	0	1	0	1	1	KLF9	Kruppel-like factor 9
hsa-miR-300	0	0	1	1	0	0	CDC6	cell division cycle 6 homolog (S. cerevisiae)
hsa-miR-300	1	0	1	1	1	1	CDH13	cadherin 13, H-cadherin (heart)
hsa-miR-300	1	0	1	0	1	1	CPD	carboxypeptidase D
hsa-miR-300	1	0	1	1	1	1	MAPK14	mitogen-activated protein kinase 14
hsa-miR-300	0	0	1	1	1	1	CSTF3	cleavage stimulation factor, 3' pre-RNA, subunit 3, 77kDa
hsa-miR-300	1	0	1	1	1	1	DYRK1A	dual-specificity tyrosine-(Y)-phosphorylation regulated kinase 1A
hsa-miR-300	1	0	1	1	1	1	EXTL3	exostoses (multiple)-like 3
hsa-miR-300	1	0	1	1	1	1	FOXF2	forkhead box F2
hsa-miR-300	0	0	1	1	1	1	GALR1	galanin receptor 1
hsa-miR-300	1	0	1	1	1	1	GCNT1	glucosaminyl (N-acetyl) transferase 1, core 2
hsa-miR-300	1	0	1	1	0	0	GDI1	GDP dissociation inhibitor 1
hsa-miR-300	1	0	1	1	1	1	NDST1	N-deacetylase/N-sulfotransferase (heparan glucosaminyl) 1
hsa-miR-300	0	0	1	1	0	0	ATF4	activating transcription factor 4 (tax-responsive enhancer element B67)
hsa-miR-300	1	0	1	1	1	1	ATP6V1A	ATPase, H+ transporting, lysosomal 70kDa, V1 subunit A
hsa-miR-300	1	0	1	1	1	1	BCL6	B-cell CLL/lymphoma 6
hsa-miR-300	1	0	1	1	1	1	BTG1	B-cell translocation gene 1, anti-proliferative
hsa-miR-300	0	0	1	1	0	0	CD19	CD19 molecule
hsa-miR-300	1	0	1	1	1	1	COL4A6	collagen, type IV, alpha 6
hsa-miR-300	1	0	1	0	1	1	COL19A1	collagen, type XIX, alpha 1
hsa-miR-300	1	0	1	1	1	1	SLC31A1	solute carrier family 31 (copper transporters), member 1
hsa-miR-300	0	0	1	1	1	1	CSN2	casein beta
hsa-miR-300	1	0	1	1	1	1	HBEGF	heparin-binding EGF-like growth factor
hsa-miR-300	1	0	1	1	1	1	EGR1	early growth response 1
hsa-miR-300	1	0	1	1	1	1	EIF4E	eukaryotic translation initiation factor 4E
hsa-miR-300	1	0	1	1	1	1	F2R	coagulation factor II (thrombin) receptor
hsa-miR-300	1	0	1	1	1	1	GBP1	guanylate binding protein 1, interferon-inducible
hsa-miR-300	0	0	1	0	1	1	GCLM	glutamate-cysteine ligase, modifier subunit
hsa-miR-300	1	0	1	0	1	1	GNAI1	guanine nucleotide binding protein (G protein), alpha inhibiting activity polypeptide 1
hsa-miR-300	0	0	1	1	1	1	CXCL3	chemokine (C-X-C motif) ligand 3
hsa-miR-300	0	0	1	0	1	1	GYPA	glycophorin A (MNS blood group)
hsa-miR-300	0	0	1	1	1	1	GZMK	granzyme K (granzyme 3; tryptase II)
hsa-miR-300	0	0	1	1	1	1	HOXA4	homeobox A4
hsa-miR-300	0	0	1	1	1	1	FOXN2	forkhead box N2
hsa-miR-300	1	0	1	1	1	1	IL13	interleukin 13
hsa-miR-300	0	0	1	0	1	1	ITGAV	integrin, alpha V
hsa-miR-300	1	0	1	1	1	1	ITGB8	integrin, beta 8
hsa-miR-300	1	0	1	1	1	1	KCNA4	potassium voltage-gated channel, shaker-related subfamily, member 4
hsa-miR-300	1	0	1	1	1	1	KPNB1	karyopherin (importin) beta 1
hsa-miR-300	0	0	1	1	0	0	KRT83	keratin 83
hsa-miR-300	0	0	1	1	1	1	LUM	lumican
hsa-miR-300	0	0	1	1	1	1	TACSTD2	tumor-associated calcium signal transducer 2
hsa-miR-300	1	0	1	0	1	1	MXD1	MAX dimerization protein 1
hsa-miR-300	0	0	1	0	1	1	CXCL9	chemokine (C-X-C motif) ligand 9
hsa-miR-300	1	0	1	1	1	1	MSN	moesin
hsa-miR-300	1	0	1	1	1	1	MSR1	macrophage scavenger receptor 1
hsa-miR-300	0	0	1	1	1	1	NDUFC1	NADH dehydrogenase (ubiquinone) 1, subcomplex unknown, 1, 6kDa
hsa-miR-300	0	0	1	1	1	1	NID1	nidogen 1
hsa-miR-300	1	0	1	1	1	1	NPAS2	neuronal PAS domain protein 2
hsa-miR-300	0	0	1	0	1	1	OPHN1	oligophrenin 1
hsa-miR-300	1	0	1	1	1	1	FURIN	furin (paired basic amino acid cleaving enzyme)
hsa-miR-300	1	0	1	0	1	1	PAK2	p21 protein (Cdc42/Rac)-activated kinase 2
hsa-miR-300	1	0	1	1	1	1	PBX2	pre-B-cell leukemia homeobox 2
hsa-miR-300	1	0	1	1	1	1	PCDH8	protocadherin 8
hsa-miR-300	1	0	1	1	1	1	PHB	prohibitin
hsa-miR-300	0	0	1	1	1	1	PIK3C2B	phosphatidylinositol-4-phosphate 3-kinase, catalytic subunit type 2 beta
hsa-miR-300	1	0	1	1	1	1	PLAGL2	pleiomorphic adenoma gene-like 2
hsa-miR-300	1	0	1	1	1	1	PPP6C	protein phosphatase 6, catalytic subunit
hsa-miR-300	0	0	1	1	0	0	PRKACG	protein kinase, cAMP-dependent, catalytic, gamma
hsa-miR-300	0	0	1	1	1	1	PRKCB	protein kinase C, beta
hsa-miR-300	1	0	1	0	1	1	MAPK4	mitogen-activated protein kinase 4
hsa-miR-300	1	0	1	1	1	1	MAPK6	mitogen-activated protein kinase 6
hsa-miR-300	0	0	1	0	1	1	PSMD3	proteasome (prosome, macropain) 26S subunit, non-ATPase, 3
hsa-miR-300	1	0	1	1	1	1	PTPRS	protein tyrosine phosphatase, receptor type, S
hsa-miR-300	1	0	1	1	1	1	RAD23B	RAD23 homolog B (S. cerevisiae)
hsa-miR-300	1	0	1	1	1	1	ARID4A	AT rich interactive domain 4A (RBP1-like)
hsa-miR-300	1	0	1	1	1	1	SALL1	sal-like 1 (Drosophila)
hsa-miR-300	0	0	1	1	1	1	CXCL6	chemokine (C-X-C motif) ligand 6 (granulocyte chemotactic protein 2)
hsa-miR-300	0	0	1	1	1	1	XCL1	chemokine (C motif) ligand 1
hsa-miR-300	0	0	1	1	1	1	SNAPC1	small nuclear RNA activating complex, polypeptide 1, 43kDa
hsa-miR-300	0	0	1	1	0	0	SNRPC	small nuclear ribonucleoprotein polypeptide C
hsa-miR-300	1	0	1	1	1	1	SRF	serum response factor (c-fos serum response element-binding transcription factor)
hsa-miR-300	0	0	1	1	1	1	SULT2A1	sulfotransferase family, cytosolic, 2A, dehydroepiandrosterone (DHEA)-preferring, member 1
hsa-miR-300	1	0	1	1	1	1	SUV39H1	suppressor of variegation 3-9 homolog 1 (Drosophila)
hsa-miR-300	0	0	1	1	1	1	XCL2	chemokine (C motif) ligand 2
hsa-miR-300	0	0	1	1	1	1	TTK	TTK protein kinase
hsa-miR-300	0	0	1	1	0	0	HIRA	HIR histone cell cycle regulation defective homolog A (S. cerevisiae)
hsa-miR-300	0	0	1	1	1	1	UBE2V2	ubiquitin-conjugating enzyme E2 variant 2
hsa-miR-300	1	0	1	1	1	1	VSNL1	visinin-like 1
hsa-miR-300	1	0	1	1	1	1	YWHAH	tyrosine 3-monooxygenase/tryptophan 5-monooxygenase activation protein, eta polypeptide
hsa-miR-300	1	0	1	1	0	0	ZFP36	zinc finger protein 36, C3H type, homolog (mouse)
hsa-miR-300	0	0	1	0	1	1	ZFY	zinc finger protein, Y-linked
hsa-miR-300	0	0	1	1	1	1	SOAT2	sterol O-acyltransferase 2
hsa-miR-300	1	0	1	1	1	1	PPM1D	protein phosphatase, Mg2+/Mn2+ dependent, 1D
hsa-miR-300	0	0	1	1	1	1	DGKD	diacylglycerol kinase, delta 130kDa
hsa-miR-300	0	0	1	1	1	1	AGPS	alkylglycerone phosphate synthase
hsa-miR-300	0	0	1	1	1	1	EIF3A	eukaryotic translation initiation factor 3, subunit A
hsa-miR-300	1	0	1	1	1	1	IQGAP1	IQ motif containing GTPase activating protein 1
hsa-miR-300	1	0	1	1	1	1	BCL2L2	BCL2-like 2
hsa-miR-300	1	0	1	1	0	0	COX8A	cytochrome c oxidase subunit VIIIA (ubiquitous)
hsa-miR-300	0	0	1	1	1	1	DDIT3	DNA-damage-inducible transcript 3
hsa-miR-300	0	0	1	1	1	1	TIMM8A	translocase of inner mitochondrial membrane 8 homolog A (yeast)
hsa-miR-300	1	0	1	0	1	1	E2F2	E2F transcription factor 2
hsa-miR-300	1	0	1	1	1	1	EYA4	eyes absent homolog 4 (Drosophila)
hsa-miR-300	0	0	1	1	0	0	DRG1	developmentally regulated GTP binding protein 1
hsa-miR-300	1	0	1	1	1	1	PPP2CB	protein phosphatase 2, catalytic subunit, beta isozyme
hsa-miR-300	0	0	1	1	1	1	SLC1A1	solute carrier family 1 (neuronal/epithelial high affinity glutamate transporter, system Xag), member 1
hsa-miR-300	0	0	1	1	1	1	CARTPT	CART prepropeptide
hsa-miR-300	1	0	1	1	1	1	GDA	guanine deaminase
hsa-miR-300	0	0	1	1	1	1	BST1	bone marrow stromal cell antigen 1
hsa-miR-300	0	0	1	1	0	0	COX6A1	cytochrome c oxidase subunit VIa polypeptide 1
hsa-miR-300	0	0	1	1	0	0	CRABP1	cellular retinoic acid binding protein 1
hsa-miR-300	1	0	1	1	1	1	CREB1	cAMP responsive element binding protein 1
hsa-miR-300	1	0	1	1	1	1	DAG1	dystroglycan 1 (dystrophin-associated glycoprotein 1)
hsa-miR-300	1	0	1	1	1	1	DBN1	drebrin 1
hsa-miR-300	0	0	1	1	1	1	GCSH	glycine cleavage system protein H (aminomethyl carrier)
hsa-miR-300	0	0	1	0	1	1	KCNQ3	potassium voltage-gated channel, KQT-like subfamily, member 3
hsa-miR-300	1	0	1	1	1	1	MLLT3	myeloid/lymphoid or mixed-lineage leukemia (trithorax homolog, Drosophila); translocated to, 3
hsa-miR-300	0	0	1	1	1	1	PIGH	phosphatidylinositol glycan anchor biosynthesis, class H
hsa-miR-300	1	0	1	0	1	1	PKNOX1	PBX/knotted 1 homeobox 1
hsa-miR-300	0	0	1	1	1	1	RAB27A	RAB27A, member RAS oncogene family
hsa-miR-300	0	0	1	1	1	1	CDK2AP1	cyclin-dependent kinase 2 associated protein 1
hsa-miR-300	1	0	1	1	1	1	B4GALT6	UDP-Gal:betaGlcNAc beta 1,4- galactosyltransferase, polypeptide 6
hsa-miR-300	1	0	1	0	1	1	VAMP3	vesicle-associated membrane protein 3 (cellubrevin)
hsa-miR-300	0	0	1	0	1	1	ADIPOQ	adiponectin, C1Q and collagen domain containing
hsa-miR-300	1	0	1	1	1	1	KIF3B	kinesin family member 3B
hsa-miR-300	1	0	1	1	1	1	ONECUT2	one cut homeobox 2
hsa-miR-300	1	0	1	1	1	1	KIF23	kinesin family member 23
hsa-miR-300	1	0	1	0	1	1	SPTLC2	serine palmitoyltransferase, long chain base subunit 2
hsa-miR-300	0	0	1	1	1	1	JAK2	Janus kinase 2
hsa-miR-300	1	0	1	1	1	1	JARID2	jumonji, AT rich interactive domain 2
hsa-miR-300	0	0	1	1	1	1	PRCP	prolylcarboxypeptidase (angiotensinase C)
hsa-miR-300	1	0	1	1	1	1	SFPQ	splicing factor proline/glutamine-rich
hsa-miR-300	1	0	1	1	1	1	FGF19	fibroblast growth factor 19
hsa-miR-300	1	0	1	0	1	1	NUP153	nucleoporin 153kDa
hsa-miR-300	0	0	1	1	1	1	CEBPB	CCAAT/enhancer binding protein (C/EBP), beta
hsa-miR-300	1	0	1	1	1	1	FOXN3	forkhead box N3
hsa-miR-300	0	0	1	0	1	1	EPHA3	EPH receptor A3
hsa-miR-300	1	0	1	1	1	1	GABPB1	GA binding protein transcription factor, beta subunit 1
hsa-miR-300	1	0	1	1	1	1	GEM	GTP binding protein overexpressed in skeletal muscle
hsa-miR-300	0	0	1	1	1	1	NFIL3	nuclear factor, interleukin 3 regulated
hsa-miR-300	1	0	1	0	1	1	PRKAB2	protein kinase, AMP-activated, beta 2 non-catalytic subunit
hsa-miR-300	1	0	1	0	1	1	CCDC6	coiled-coil domain containing 6
hsa-miR-300	0	0	1	1	1	1	SMC3	structural maintenance of chromosomes 3
hsa-miR-300	1	0	1	1	1	1	GABBR2	gamma-aminobutyric acid (GABA) B receptor, 2
hsa-miR-300	1	0	1	1	1	1	ABCA1	ATP-binding cassette, sub-family A (ABC1), member 1
hsa-miR-300	1	0	1	1	1	1	SCARB2	scavenger receptor class B, member 2
hsa-miR-300	0	0	1	1	1	1	HES1	hairy and enhancer of split 1, (Drosophila)
hsa-miR-300	1	0	1	1	1	1	INSIG1	insulin induced gene 1
hsa-miR-300	1	0	1	1	1	1	NHLH2	nescient helix loop helix 2
hsa-miR-300	1	0	1	1	1	1	ST8SIA4	ST8 alpha-N-acetyl-neuraminide alpha-2,8-sialyltransferase 4
hsa-miR-300	0	0	1	1	1	1	TSPAN3	tetraspanin 3
hsa-miR-300	1	0	1	0	1	1	TSPAN2	tetraspanin 2
hsa-miR-300	1	0	1	1	1	1	LHFP	lipoma HMGIC fusion partner
hsa-miR-300	0	0	1	1	1	1	TXNDC9	thioredoxin domain containing 9
hsa-miR-300	0	0	1	1	1	1	KLRG1	killer cell lectin-like receptor subfamily G, member 1
hsa-miR-300	1	0	1	1	1	1	PRKD3	protein kinase D3
hsa-miR-300	0	0	1	1	1	1	LRRC17	leucine rich repeat containing 17
hsa-miR-300	1	0	1	0	1	1	DCAF7	DDB1 and CUL4 associated factor 7
hsa-miR-300	1	0	1	1	1	1	SRRM1	serine/arginine repetitive matrix 1
hsa-miR-300	1	0	1	1	1	1	PURA	purine-rich element binding protein A
hsa-miR-300	0	0	1	1	1	1	DSCR4	Down syndrome critical region gene 4
hsa-miR-300	1	0	1	1	1	1	MEOX2	mesenchyme homeobox 2
hsa-miR-300	1	0	1	1	1	1	ENDOU	endonuclease, polyU-specific
hsa-miR-300	1	0	1	1	1	1	HS3ST4	heparan sulfate (glucosamine) 3-O-sulfotransferase 4
hsa-miR-300	0	0	1	1	1	1	LANCL1	LanC lantibiotic synthetase component C-like 1 (bacterial)
hsa-miR-300	0	0	1	1	0	0	RRAGB	Ras-related GTP binding B
hsa-miR-300	0	0	1	1	1	1	TRDN	triadin
hsa-miR-300	1	0	1	1	1	1	SPON1	spondin 1, extracellular matrix protein
hsa-miR-300	1	0	1	1	1	1	DYNC1LI2	dynein, cytoplasmic 1, light intermediate chain 2
hsa-miR-300	1	0	1	1	1	1	NEFL	neurofilament, light polypeptide
hsa-miR-300	1	0	1	1	1	1	NR4A2	nuclear receptor subfamily 4, group A, member 2
hsa-miR-300	1	0	1	1	1	1	ENPP1	ectonucleotide pyrophosphatase/phosphodiesterase 1
hsa-miR-300	0	0	1	1	1	1	PPP2R5A	protein phosphatase 2, regulatory subunit B', alpha
hsa-miR-300	0	0	1	1	1	1	PRKG2	protein kinase, cGMP-dependent, type II
hsa-miR-300	1	0	1	1	1	1	RANBP2	RAN binding protein 2
hsa-miR-300	1	0	1	1	1	1	STK4	serine/threonine kinase 4
hsa-miR-300	1	0	1	1	1	1	TACC1	transforming, acidic coiled-coil containing protein 1
hsa-miR-300	0	0	1	1	1	1	TNFAIP2	tumor necrosis factor, alpha-induced protein 2
hsa-miR-300	0	0	1	1	1	1	TYRO3	TYRO3 protein tyrosine kinase
hsa-miR-300	0	0	1	1	1	1	SLC30A9	solute carrier family 30 (zinc transporter), member 9
hsa-miR-300	0	0	1	1	1	1	UBE2E3	ubiquitin-conjugating enzyme E2E 3
hsa-miR-300	1	0	1	1	1	1	VAT1	vesicle amine transport protein 1 homolog (T. californica)
hsa-miR-300	1	0	1	1	1	1	SEMA3C	sema domain, immunoglobulin domain (Ig), short basic domain, secreted, (semaphorin) 3C
hsa-miR-300	1	0	1	0	1	1	APPBP2	amyloid beta precursor protein (cytoplasmic tail) binding protein 2
hsa-miR-300	1	0	1	1	1	1	HEXIM1	hexamethylene bis-acetamide inducible 1
hsa-miR-300	0	0	1	1	0	0	STAMBP	STAM binding protein
hsa-miR-300	0	0	1	0	1	1	SLC16A2	solute carrier family 16, member 2 (thyroid hormone transporter)
hsa-miR-300	1	0	1	1	1	1	CTCF	CCCTC-binding factor (zinc finger protein)
hsa-miR-300	0	0	1	1	1	1	CD226	CD226 molecule
hsa-miR-300	0	0	1	1	1	1	CLPX	ClpX caseinolytic peptidase X homolog (E. coli)
hsa-miR-300	1	0	1	1	1	1	MMP24	matrix metallopeptidase 24 (membrane-inserted)
hsa-miR-300	0	0	1	1	1	1	JTB	jumping translocation breakpoint
hsa-miR-300	1	0	1	1	1	1	SPIN1	spindlin 1
hsa-miR-300	1	0	1	1	1	1	LAPTM5	lysosomal protein transmembrane 5
hsa-miR-300	1	0	1	1	1	1	PRDX3	peroxiredoxin 3
hsa-miR-300	1	0	1	1	1	1	SF3A3	splicing factor 3a, subunit 3, 60kDa
hsa-miR-300	0	0	1	1	1	1	SNRNP27	small nuclear ribonucleoprotein 27kDa (U4/U6.U5)
hsa-miR-300	1	0	1	1	1	1	PRRX1	paired related homeobox 1
hsa-miR-300	0	0	1	1	1	1	RLN1	relaxin 1
hsa-miR-300	1	0	1	1	1	1	RIT1	Ras-like without CAAX 1
hsa-miR-300	1	0	1	0	1	1	SLC5A3	solute carrier family 5 (sodium/myo-inositol cotransporter), member 3
hsa-miR-300	1	0	1	1	1	1	NR4A3	nuclear receptor subfamily 4, group A, member 3
hsa-miR-300	1	0	1	1	1	1	DDX52	DEAD (Asp-Glu-Ala-Asp) box polypeptide 52
hsa-miR-300	0	0	1	1	0	0	UBE2C	ubiquitin-conjugating enzyme E2C
hsa-miR-300	1	0	1	1	1	1	ESM1	endothelial cell-specific molecule 1
hsa-miR-300	1	0	1	1	1	1	ADAMTS5	ADAM metallopeptidase with thrombospondin type 1 motif, 5
hsa-miR-300	1	0	1	1	1	1	FSTL1	follistatin-like 1
hsa-miR-300	1	0	1	1	1	1	TRIO	trio Rho guanine nucleotide exchange factor
hsa-miR-300	1	0	1	1	1	1	ZNF81	zinc finger protein 81
hsa-miR-300	1	0	1	1	1	1	VEZF1	vascular endothelial zinc finger 1
hsa-miR-300	0	0	1	0	1	1	ZXDB	zinc finger, X-linked, duplicated B
hsa-miR-300	1	0	1	1	1	1	ERLIN2	ER lipid raft associated 2
hsa-miR-300	0	0	1	1	0	0	GABARAP	GABA(A) receptor-associated protein
hsa-miR-300	1	0	1	1	1	1	RNF13	ring finger protein 13
hsa-miR-300	1	0	1	1	1	1	PHLDA1	pleckstrin homology-like domain, family A, member 1
hsa-miR-300	0	0	1	1	1	1	MMRN1	multimerin 1
hsa-miR-300	1	0	1	0	1	1	CD2AP	CD2-associated protein
hsa-miR-300	1	0	1	1	1	1	FBXL3	F-box and leucine-rich repeat protein 3
hsa-miR-300	1	0	1	0	1	1	FZD4	frizzled family receptor 4
hsa-miR-300	0	0	1	1	1	1	RAB3GAP1	RAB3 GTPase activating protein subunit 1 (catalytic)
hsa-miR-300	1	0	1	1	1	1	RHOQ	ras homolog family member Q
hsa-miR-300	1	0	1	1	1	1	HS2ST1	heparan sulfate 2-O-sulfotransferase 1
hsa-miR-300	0	0	1	1	1	1	IL36RN	interleukin 36 receptor antagonist
hsa-miR-300	1	0	1	1	1	1	KCND2	potassium voltage-gated channel, Shal-related subfamily, member 2
hsa-miR-300	1	0	1	0	1	1	ACAP2	ArfGAP with coiled-coil, ankyrin repeat and PH domains 2
hsa-miR-300	1	0	1	1	1	1	MMD	monocyte to macrophage differentiation-associated
hsa-miR-300	1	0	1	1	1	1	NUFIP1	nuclear fragile X mental retardation protein interacting protein 1
hsa-miR-300	1	0	1	1	1	1	RANBP6	RAN binding protein 6
hsa-miR-300	0	0	1	0	1	1	TLL1	tolloid-like 1
hsa-miR-300	1	0	1	1	1	1	YWHAG	tyrosine 3-monooxygenase/tryptophan 5-monooxygenase activation protein, gamma polypeptide
hsa-miR-300	0	0	1	1	1	1	DNAJC15	DnaJ (Hsp40) homolog, subfamily C, member 15
hsa-miR-300	0	0	1	1	1	1	TBK1	TANK-binding kinase 1
hsa-miR-300	0	0	1	1	1	1	SNX10	sorting nexin 10
hsa-miR-300	1	0	1	1	1	1	SLC25A24	solute carrier family 25 (mitochondrial carrier; phosphate carrier), member 24
hsa-miR-300	1	0	1	1	1	1	NCKAP1	NCK-associated protein 1
hsa-miR-300	1	0	1	1	1	1	BAZ1A	bromodomain adjacent to zinc finger domain, 1A
hsa-miR-300	1	0	1	1	1	1	WDR37	WD repeat domain 37
hsa-miR-300	0	0	1	1	1	1	FAM32A	family with sequence similarity 32, member A
hsa-miR-300	1	0	1	1	0	0	HOXD9	homeobox D9
hsa-miR-300	0	0	1	1	1	1	TM4SF1	transmembrane 4 L six family member 1
hsa-miR-300	1	0	1	1	1	1	VAMP1	vesicle-associated membrane protein 1 (synaptobrevin 1)
hsa-miR-300	1	0	1	0	1	1	VAMP2	vesicle-associated membrane protein 2 (synaptobrevin 2)
hsa-miR-300	0	0	1	0	1	1	ADAMTS3	ADAM metallopeptidase with thrombospondin type 1 motif, 3
hsa-miR-300	1	0	1	0	1	1	ODZ1	odz, odd Oz/ten-m homolog 1 (Drosophila)
hsa-miR-300	1	0	1	1	1	1	C11orf58	chromosome 11 open reading frame 58
hsa-miR-300	1	0	1	1	1	1	TGDS	TDP-glucose 4,6-dehydratase
hsa-miR-300	1	0	1	1	1	1	LEMD3	LEM domain containing 3
hsa-miR-300	1	0	1	1	1	1	CORO1C	coronin, actin binding protein, 1C
hsa-miR-300	1	0	1	1	1	1	SLC7A11	solute carrier family 7 (anionic amino acid transporter light chain, xc- system), member 11
hsa-miR-300	1	0	1	1	1	1	ZBTB11	zinc finger and BTB domain containing 11
hsa-miR-300	1	0	1	1	1	1	TNFRSF21	tumor necrosis factor receptor superfamily, member 21
hsa-miR-300	1	0	1	1	1	1	KLHL20	kelch-like 20 (Drosophila)
hsa-miR-300	1	0	1	1	0	0	RBMXL2	RNA binding motif protein, X-linked-like 2
hsa-miR-300	0	0	1	1	1	1	KCNMB4	potassium large conductance calcium-activated channel, subfamily M, beta member 4
hsa-miR-300	1	0	1	1	1	1	ERO1L	ERO1-like (S. cerevisiae)
hsa-miR-300	1	0	1	0	1	1	SH3PXD2A	SH3 and PX domains 2A
hsa-miR-300	1	0	1	1	1	1	ULK2	unc-51-like kinase 2 (C. elegans)
hsa-miR-300	1	0	1	0	1	1	SERTAD2	SERTA domain containing 2
hsa-miR-300	1	0	1	0	1	1	TOMM20	translocase of outer mitochondrial membrane 20 homolog (yeast)
hsa-miR-300	1	0	1	1	1	1	FCHSD2	FCH and double SH3 domains 2
hsa-miR-300	1	0	1	1	1	1	TBC1D4	TBC1 domain family, member 4
hsa-miR-300	1	0	1	0	1	1	ZBTB40	zinc finger and BTB domain containing 40
hsa-miR-300	1	0	1	0	1	1	RAB11FIP2	RAB11 family interacting protein 2 (class I)
hsa-miR-300	0	0	1	0	1	1	PPM1E	protein phosphatase, Mg2+/Mn2+ dependent, 1E
hsa-miR-300	1	0	1	0	1	1	WDFY3	WD repeat and FYVE domain containing 3
hsa-miR-300	1	0	1	1	1	1	SPEN	spen homolog, transcriptional regulator (Drosophila)
hsa-miR-300	1	0	1	1	1	1	FBXO21	F-box protein 21
hsa-miR-300	1	0	1	1	1	1	PHLPP2	PH domain and leucine rich repeat protein phosphatase 2
hsa-miR-300	1	0	1	1	1	1	DDN	dendrin
hsa-miR-300	1	0	1	1	1	1	GPD1L	glycerol-3-phosphate dehydrogenase 1-like
hsa-miR-300	1	0	1	1	1	1	PDS5A	PDS5, regulator of cohesion maintenance, homolog A (S. cerevisiae)
hsa-miR-300	1	0	1	1	1	1	NUP160	nucleoporin 160kDa
hsa-miR-300	1	0	1	1	1	1	WDR7	WD repeat domain 7
hsa-miR-300	1	0	1	0	1	1	ARHGEF12	Rho guanine nucleotide exchange factor (GEF) 12
hsa-miR-300	0	0	1	1	1	1	ADNP	activity-dependent neuroprotector homeobox
hsa-miR-300	0	0	1	1	1	1	LEPROTL1	leptin receptor overlapping transcript-like 1
hsa-miR-300	0	0	1	0	1	1	TMEM158	transmembrane protein 158 (gene/pseudogene)
hsa-miR-300	1	0	1	1	1	1	CNOT6	CCR4-NOT transcription complex, subunit 6
hsa-miR-300	1	0	1	1	1	1	CLIP3	CAP-GLY domain containing linker protein 3
hsa-miR-300	1	0	1	1	1	1	LRRTM2	leucine rich repeat transmembrane neuronal 2
hsa-miR-300	1	0	1	1	1	1	LTN1	listerin E3 ubiquitin protein ligase 1
hsa-miR-300	0	0	1	1	1	1	TRPC4AP	transient receptor potential cation channel, subfamily C, member 4 associated protein
hsa-miR-300	0	0	1	1	1	1	TES	testis derived transcript (3 LIM domains)
hsa-miR-300	0	0	1	1	1	1	C10orf12	chromosome 10 open reading frame 12
hsa-miR-300	1	0	1	0	1	1	RRM2B	ribonucleotide reductase M2 B (TP53 inducible)
hsa-miR-300	1	0	1	1	1	1	FGFR1	fibroblast growth factor receptor 1
hsa-miR-300	1	0	1	1	1	1	ST8SIA3	ST8 alpha-N-acetyl-neuraminide alpha-2,8-sialyltransferase 3
hsa-miR-300	1	0	1	0	1	1	TRIM33	tripartite motif containing 33
hsa-miR-300	0	0	1	0	1	1	OTUD6B	OTU domain containing 6B
hsa-miR-300	1	0	1	1	1	1	SLMO2	slowmo homolog 2 (Drosophila)
hsa-miR-300	0	0	1	1	1	1	MRPS16	mitochondrial ribosomal protein S16
hsa-miR-300	1	0	1	0	1	1	CNR1	cannabinoid receptor 1 (brain)
hsa-miR-300	0	0	1	1	1	1	RAB10	RAB10, member RAS oncogene family
hsa-miR-300	1	0	1	1	1	1	VGLL3	vestigial like 3 (Drosophila)
hsa-miR-300	0	0	1	1	1	1	RSL24D1	ribosomal L24 domain containing 1
hsa-miR-300	1	0	1	1	1	1	CMPK1	cytidine monophosphate (UMP-CMP) kinase 1, cytosolic
hsa-miR-300	0	0	1	1	0	0	SRRM2	serine/arginine repetitive matrix 2
hsa-miR-300	1	0	1	1	0	0	CPA4	carboxypeptidase A4
hsa-miR-300	1	0	1	1	1	1	ARID4B	AT rich interactive domain 4B (RBP1-like)
hsa-miR-300	0	0	1	1	1	1	DTL	denticleless E3 ubiquitin protein ligase homolog (Drosophila)
hsa-miR-300	0	0	1	1	0	0	CXorf26	chromosome X open reading frame 26
hsa-miR-300	0	0	1	1	0	0	DLL3	delta-like 3 (Drosophila)
hsa-miR-300	0	0	1	1	1	1	USP18	ubiquitin specific peptidase 18
hsa-miR-300	1	0	1	1	1	1	SIX4	SIX homeobox 4
hsa-miR-300	0	0	1	1	0	0	UBQLN3	ubiquilin 3
hsa-miR-300	1	0	1	1	1	1	ARID1B	AT rich interactive domain 1B (SWI1-like)
hsa-miR-300	0	0	1	1	1	1	NKRF	NFKB repressing factor
hsa-miR-300	0	0	1	0	1	1	TRIM44	tripartite motif containing 44
hsa-miR-300	0	0	1	0	1	1	VEZT	vezatin, adherens junctions transmembrane protein
hsa-miR-300	1	0	1	1	0	0	C17orf59	chromosome 17 open reading frame 59
hsa-miR-300	1	0	1	0	1	1	EIF2C4	eukaryotic translation initiation factor 2C, 4
hsa-miR-300	1	0	1	0	1	1	FAM46C	family with sequence similarity 46, member C
hsa-miR-300	0	0	1	0	1	1	THUMPD1	THUMP domain containing 1
hsa-miR-300	1	0	1	0	1	1	DCAF16	DDB1 and CUL4 associated factor 16
hsa-miR-300	0	0	1	1	1	1	ANKHD1	ankyrin repeat and KH domain containing 1
hsa-miR-300	1	0	1	1	1	1	TBC1D8B	TBC1 domain family, member 8B (with GRAM domain)
hsa-miR-300	1	0	1	1	1	1	PNRC2	proline-rich nuclear receptor coactivator 2
hsa-miR-300	1	0	1	1	1	1	CASZ1	castor zinc finger 1
hsa-miR-300	0	0	1	1	1	1	WHSC1L1	Wolf-Hirschhorn syndrome candidate 1-like 1
hsa-miR-300	1	0	1	1	1	1	RNF125	ring finger protein 125, E3 ubiquitin protein ligase
hsa-miR-300	0	0	1	1	1	1	ACSM5	acyl-CoA synthetase medium-chain family member 5
hsa-miR-300	1	0	1	1	1	1	CDC37L1	cell division cycle 37 homolog (S. cerevisiae)-like 1
hsa-miR-300	1	0	1	1	1	1	FBXO34	F-box protein 34
hsa-miR-300	1	0	1	1	1	1	ZNHIT6	zinc finger, HIT-type containing 6
hsa-miR-300	0	0	1	1	1	1	WIPI1	WD repeat domain, phosphoinositide interacting 1
hsa-miR-300	0	0	1	0	1	1	MREG	melanoregulin
hsa-miR-300	1	0	1	1	1	1	ARGLU1	arginine and glutamate rich 1
hsa-miR-300	1	0	1	1	1	1	FIGN	fidgetin
hsa-miR-300	0	0	1	1	1	1	THAP1	THAP domain containing, apoptosis associated protein 1
hsa-miR-300	1	0	1	0	1	1	ARMC1	armadillo repeat containing 1
hsa-miR-300	1	0	1	1	1	1	FAM178A	family with sequence similarity 178, member A
hsa-miR-300	1	0	1	0	1	1	PARVA	parvin, alpha
hsa-miR-300	1	0	1	1	1	1	UBA6	ubiquitin-like modifier activating enzyme 6
hsa-miR-300	0	0	1	1	1	1	LAPTM4B	lysosomal protein transmembrane 4 beta
hsa-miR-300	0	0	1	1	1	1	ZC3H15	zinc finger CCCH-type containing 15
hsa-miR-300	1	0	1	0	1	1	LRP1B	low density lipoprotein receptor-related protein 1B
hsa-miR-300	1	0	1	1	1	1	ETNK1	ethanolamine kinase 1
hsa-miR-300	1	0	1	0	1	1	ELMOD1	ELMO/CED-12 domain containing 1
hsa-miR-300	1	0	1	0	1	1	PCDHAC1	protocadherin alpha subfamily C, 1
hsa-miR-300	1	0	1	0	1	1	PCDHAC2	protocadherin alpha subfamily C, 2
hsa-miR-300	1	0	1	1	1	1	PCDHA1	protocadherin alpha 1
hsa-miR-300	1	0	1	0	1	1	PCDHA10	protocadherin alpha 10
hsa-miR-300	1	0	1	0	1	1	PCDHA11	protocadherin alpha 11
hsa-miR-300	1	0	1	0	1	1	PCDHA12	protocadherin alpha 12
hsa-miR-300	1	0	1	1	1	1	PCDHA2	protocadherin alpha 2
hsa-miR-300	1	0	1	1	1	1	PCDHA3	protocadherin alpha 3
hsa-miR-300	1	0	1	1	1	1	PCDHA6	protocadherin alpha 6
hsa-miR-300	1	0	1	0	1	1	PCDHA7	protocadherin alpha 7
hsa-miR-300	1	0	1	1	1	1	PCDHA8	protocadherin alpha 8
hsa-miR-300	0	0	1	1	1	1	ERRFI1	ERBB receptor feedback inhibitor 1
hsa-miR-300	1	0	1	1	1	1	SASH3	SAM and SH3 domain containing 3
hsa-miR-300	0	0	1	1	1	1	RIN2	Ras and Rab interactor 2
hsa-miR-300	1	0	1	0	1	1	CCDC93	coiled-coil domain containing 93
hsa-miR-300	1	0	1	1	1	1	SEPT3	septin 3
hsa-miR-300	0	0	1	1	1	1	KLHL4	kelch-like 4 (Drosophila)
hsa-miR-300	1	0	1	1	1	1	LRRC8A	leucine rich repeat containing 8 family, member A
hsa-miR-300	0	0	1	1	0	0	NGEF	neuronal guanine nucleotide exchange factor
hsa-miR-300	1	0	1	0	1	1	PMEPA1	prostate transmembrane protein, androgen induced 1
hsa-miR-300	0	0	1	1	1	1	ACN9	ACN9 homolog (S. cerevisiae)
hsa-miR-300	1	0	1	1	1	1	CCDC47	coiled-coil domain containing 47
hsa-miR-300	1	0	1	0	1	1	OTUD7B	OTU domain containing 7B
hsa-miR-300	1	0	1	1	1	1	C1orf63	chromosome 1 open reading frame 63
hsa-miR-300	0	0	1	1	1	1	CYSLTR2	cysteinyl leukotriene receptor 2
hsa-miR-300	1	0	1	0	1	1	DCUN1D1	DCN1, defective in cullin neddylation 1, domain containing 1 (S. cerevisiae)
hsa-miR-300	1	0	1	1	1	1	ZNF608	zinc finger protein 608
hsa-miR-300	1	0	1	1	1	1	ARHGAP31	Rho GTPase activating protein 31
hsa-miR-300	0	0	1	0	1	1	SERINC1	serine incorporator 1
hsa-miR-300	1	0	1	1	1	1	RGAG1	retrotransposon gag domain containing 1
hsa-miR-300	1	0	1	0	1	1	SYT4	synaptotagmin IV
hsa-miR-300	0	0	1	1	1	1	ARRDC3	arrestin domain containing 3
hsa-miR-300	1	0	1	1	1	1	KLHL14	kelch-like 14 (Drosophila)
hsa-miR-300	1	0	1	1	1	1	PCDH10	protocadherin 10
hsa-miR-300	1	0	1	1	1	1	ARHGAP21	Rho GTPase activating protein 21
hsa-miR-300	1	0	1	0	1	1	WDFY1	WD repeat and FYVE domain containing 1
hsa-miR-300	0	0	1	1	1	1	KLHL1	kelch-like 1 (Drosophila)
hsa-miR-300	1	0	1	1	1	1	CNTN3	contactin 3 (plasmacytoma associated)
hsa-miR-300	1	0	1	1	1	1	EPB41L5	erythrocyte membrane protein band 4.1 like 5
hsa-miR-300	1	0	1	1	1	1	ZFP14	zinc finger protein 14 homolog (mouse)
hsa-miR-300	1	0	1	1	1	1	FAM160B1	family with sequence similarity 160, member B1
hsa-miR-300	0	0	1	1	1	1	PPP4R4	protein phosphatase 4, regulatory subunit 4
hsa-miR-300	0	0	1	1	1	1	PPM1A	protein phosphatase, Mg2+/Mn2+ dependent, 1A
hsa-miR-300	1	0	1	1	1	1	SNTB1	syntrophin, beta 1 (dystrophin-associated protein A1, 59kDa, basic component 1)
hsa-miR-300	1	0	1	0	1	1	RAP2A	RAP2A, member of RAS oncogene family
hsa-miR-300	1	0	1	1	1	1	HCN1	hyperpolarization activated cyclic nucleotide-gated potassium channel 1
hsa-miR-300	0	0	1	1	0	0	TRIB3	tribbles homolog 3 (Drosophila)
hsa-miR-300	1	0	1	0	1	1	TP53INP2	tumor protein p53 inducible nuclear protein 2
hsa-miR-300	1	0	1	1	1	1	NTN4	netrin 4
hsa-miR-300	1	0	1	1	1	1	FAM60A	family with sequence similarity 60, member A
hsa-miR-300	1	0	1	1	1	1	DMRT3	doublesex and mab-3 related transcription factor 3
hsa-miR-300	0	0	1	1	0	0	IL21	interleukin 21
hsa-miR-300	0	0	1	0	1	1	CFL2	cofilin 2 (muscle)
hsa-miR-300	1	0	1	1	1	1	NAP1L2	nucleosome assembly protein 1-like 2
hsa-miR-300	1	0	1	1	1	1	SEC24A	SEC24 family, member A (S. cerevisiae)
hsa-miR-300	1	0	1	0	1	1	CSNK1G1	casein kinase 1, gamma 1
hsa-miR-300	0	0	1	1	1	1	GLIPR2	GLI pathogenesis-related 2
hsa-miR-300	0	0	1	1	1	1	POPDC3	popeye domain containing 3
hsa-miR-300	0	0	1	1	1	1	ICAM4	intercellular adhesion molecule 4 (Landsteiner-Wiener blood group)
hsa-miR-300	1	0	1	1	1	1	HIF3A	hypoxia inducible factor 3, alpha subunit
hsa-miR-300	1	0	1	1	1	1	GIGYF1	GRB10 interacting GYF protein 1
hsa-miR-300	0	0	1	1	1	1	ACBD3	acyl-CoA binding domain containing 3
hsa-miR-300	1	0	1	1	1	1	FAM59A	family with sequence similarity 59, member A
hsa-miR-300	0	0	1	1	1	1	METTL4	methyltransferase like 4
hsa-miR-300	0	0	1	1	1	1	UPF3B	UPF3 regulator of nonsense transcripts homolog B (yeast)
hsa-miR-300	1	0	1	1	1	1	SOWAHC	sosondowah ankyrin repeat domain family member C
hsa-miR-300	1	0	1	1	0	0	UBE2Z	ubiquitin-conjugating enzyme E2Z
hsa-miR-300	0	0	1	1	0	0	IRX3	iroquois homeobox 3
hsa-miR-300	0	0	1	1	1	1	AKIRIN1	akirin 1
hsa-miR-300	0	0	1	1	1	1	BBS10	Bardet-Biedl syndrome 10
hsa-miR-300	1	0	1	1	1	1	C15orf29	chromosome 15 open reading frame 29
hsa-miR-300	1	0	1	1	1	1	PIP4K2C	phosphatidylinositol-5-phosphate 4-kinase, type II, gamma
hsa-miR-300	1	0	1	1	1	1	L2HGDH	L-2-hydroxyglutarate dehydrogenase
hsa-miR-300	1	0	1	1	1	1	KLHL18	kelch-like 18 (Drosophila)
hsa-miR-300	0	0	1	1	0	0	BAIAP2L2	BAI1-associated protein 2-like 2
hsa-miR-300	1	0	1	1	1	1	PROSER1	proline and serine rich 1
hsa-miR-300	1	0	1	0	1	1	EDEM3	ER degradation enhancer, mannosidase alpha-like 3
hsa-miR-300	0	0	1	0	1	1	PDGFD	platelet derived growth factor D
hsa-miR-300	1	0	1	1	1	1	CYB5B	cytochrome b5 type B (outer mitochondrial membrane)
hsa-miR-300	1	0	1	1	1	1	TMX1	thioredoxin-related transmembrane protein 1
hsa-miR-300	0	0	1	1	1	1	BCL2L14	BCL2-like 14 (apoptosis facilitator)
hsa-miR-300	0	0	1	1	1	1	CCDC34	coiled-coil domain containing 34
hsa-miR-300	1	0	1	0	1	1	C1orf21	chromosome 1 open reading frame 21
hsa-miR-300	1	0	1	1	1	1	RAB1B	RAB1B, member RAS oncogene family
hsa-miR-300	0	0	1	1	1	1	PUS3	pseudouridylate synthase 3
hsa-miR-300	1	0	1	1	1	1	GABARAPL1	GABA(A) receptor-associated protein like 1
hsa-miR-300	1	0	1	0	1	1	SH3BGRL2	SH3 domain binding glutamic acid-rich protein like 2
hsa-miR-300	1	0	1	1	1	1	PCDHA9	protocadherin alpha 9
hsa-miR-300	1	0	1	1	1	1	CDH20	cadherin 20, type 2
hsa-miR-300	0	0	1	1	1	1	MAGT1	magnesium transporter 1
hsa-miR-300	0	0	1	1	1	1	TKTL2	transketolase-like 2
hsa-miR-300	1	0	1	1	1	1	LOXL4	lysyl oxidase-like 4
hsa-miR-300	1	0	1	1	1	1	SLITRK6	SLIT and NTRK-like family, member 6
hsa-miR-300	1	0	1	1	0	0	MAF1	MAF1 homolog (S. cerevisiae)
hsa-miR-300	0	0	1	1	1	1	YIPF4	Yip1 domain family, member 4
hsa-miR-300	1	0	1	1	1	1	RSPO3	R-spondin 3
hsa-miR-300	1	0	1	0	1	1	PPP1R15B	protein phosphatase 1, regulatory subunit 15B
hsa-miR-300	1	0	1	1	1	1	PCDH11Y	protocadherin 11 Y-linked
hsa-miR-300	0	0	1	1	1	1	ZIC5	Zic family member 5
hsa-miR-300	1	0	1	1	1	1	EPT1	ethanolaminephosphotransferase 1 (CDP-ethanolamine-specific)
hsa-miR-300	0	0	1	1	1	1	MYL12B	myosin, light chain 12B, regulatory
hsa-miR-300	0	0	1	1	1	1	ZNF830	zinc finger protein 830
hsa-miR-300	1	0	1	1	1	1	RCSD1	RCSD domain containing 1
hsa-miR-300	1	0	1	1	1	1	SLC2A13	solute carrier family 2 (facilitated glucose transporter), member 13
hsa-miR-300	0	0	1	1	0	0	PGLYRP3	peptidoglycan recognition protein 3
hsa-miR-300	1	0	1	0	1	1	TMEM123	transmembrane protein 123
hsa-miR-300	1	0	1	1	1	1	PFN2	profilin 2
hsa-miR-300	1	0	1	1	1	1	GCFC1	GC-rich sequence DNA-binding factor 1
hsa-miR-300	1	0	1	1	1	1	BTN2A1	butyrophilin, subfamily 2, member A1
hsa-miR-300	0	0	1	1	1	1	ABCA9	ATP-binding cassette, sub-family A (ABC1), member 9
hsa-miR-300	0	0	1	1	1	1	CLEC4D	C-type lectin domain family 4, member D
hsa-miR-300	1	0	1	1	1	1	SLC44A1	solute carrier family 44, member 1
hsa-miR-300	1	0	1	1	1	1	PRRC1	proline-rich coiled-coil 1
hsa-miR-300	0	0	1	1	1	1	WFDC8	WAP four-disulfide core domain 8
hsa-miR-300	0	0	1	1	1	1	RAD51B	RAD51 homolog B (S. cerevisiae)
hsa-miR-300	1	0	1	1	1	1	ZAK	sterile alpha motif and leucine zipper containing kinase AZK
hsa-miR-300	0	0	1	1	1	1	DTX3L	deltex 3-like (Drosophila)
hsa-miR-300	0	0	1	1	1	1	PKD1L1	polycystic kidney disease 1 like 1
hsa-miR-300	1	0	1	0	1	1	NUS1	nuclear undecaprenyl pyrophosphate synthase 1 homolog (S. cerevisiae)
hsa-miR-300	1	0	1	0	1	1	FCHO2	FCH domain only 2
hsa-miR-300	1	0	1	1	1	1	CD200R1	CD200 receptor 1
hsa-miR-300	0	0	1	1	1	1	KCNC2	potassium voltage-gated channel, Shaw-related subfamily, member 2
hsa-miR-300	0	0	1	1	1	1	TGIF2LY	TGFB-induced factor homeobox 2-like, Y-linked
hsa-miR-300	0	0	1	1	1	1	MTFMT	mitochondrial methionyl-tRNA formyltransferase
hsa-miR-300	0	0	1	1	1	1	KCNH5	potassium voltage-gated channel, subfamily H (eag-related), member 5
hsa-miR-300	1	0	1	1	1	1	MAPK1IP1L	mitogen-activated protein kinase 1 interacting protein 1-like
hsa-miR-300	0	0	1	1	1	1	SLFN5	schlafen family member 5
hsa-miR-300	0	0	1	1	1	1	RANBP3L	RAN binding protein 3-like
hsa-miR-300	0	0	1	1	0	0	CCDC11	coiled-coil domain containing 11
hsa-miR-300	0	0	1	0	1	1	UBLCP1	ubiquitin-like domain containing CTD phosphatase 1
hsa-miR-300	0	0	1	0	1	1	PIGM	phosphatidylinositol glycan anchor biosynthesis, class M
hsa-miR-300	0	0	1	1	1	1	APOBEC3F	apolipoprotein B mRNA editing enzyme, catalytic polypeptide-like 3F
hsa-miR-300	1	0	1	1	1	1	LPIN1	lipin 1
hsa-miR-300	1	0	1	1	1	1	SEPT6	septin 6
hsa-miR-300	1	0	1	0	1	1	SYT11	synaptotagmin XI
hsa-miR-300	0	0	1	1	1	1	MRFAP1L1	Morf4 family associated protein 1-like 1
hsa-miR-300	0	0	1	0	1	1	AFAP1L1	actin filament associated protein 1-like 1
hsa-miR-300	0	0	1	1	1	1	ZNF572	zinc finger protein 572
hsa-miR-300	1	0	1	1	1	1	BHLHE22	basic helix-loop-helix family, member e22
hsa-miR-300	1	0	1	1	1	1	FAM81A	family with sequence similarity 81, member A
hsa-miR-300	1	0	1	1	1	1	ZNF362	zinc finger protein 362
hsa-miR-300	1	0	1	1	1	1	SLC16A14	solute carrier family 16, member 14 (monocarboxylic acid transporter 14)
hsa-miR-300	1	0	1	1	1	1	C7orf60	chromosome 7 open reading frame 60
hsa-miR-300	1	0	1	0	1	1	DCP2	DCP2 decapping enzyme homolog (S. cerevisiae)
hsa-miR-300	1	0	1	1	1	1	BEND6	BEN domain containing 6
hsa-miR-300	1	0	1	1	1	1	NXPH1	neurexophilin 1
hsa-miR-300	1	0	1	1	1	1	PDIK1L	PDLIM1 interacting kinase 1 like
hsa-miR-300	1	0	1	1	1	1	SYT14	synaptotagmin XIV
hsa-miR-300	1	0	1	1	1	1	TMEM161B	transmembrane protein 161B
hsa-miR-300	1	0	1	0	1	1	ZCCHC24	zinc finger, CCHC domain containing 24
hsa-miR-300	0	0	1	1	1	1	CAMK1D	calcium/calmodulin-dependent protein kinase ID
hsa-miR-300	1	0	1	1	1	1	RDH10	retinol dehydrogenase 10 (all-trans)
hsa-miR-300	0	0	1	1	1	1	TAPBP	TAP binding protein (tapasin)
hsa-miR-300	0	0	1	1	1	1	REXO1L1	REX1, RNA exonuclease 1 homolog (S. cerevisiae)-like 1
hsa-miR-300	1	0	1	1	1	1	MOB1B	MOB kinase activator 1B
hsa-miR-300	1	0	1	1	1	1	LSM11	LSM11, U7 small nuclear RNA associated
hsa-miR-300	1	0	1	1	1	1	TTBK2	tau tubulin kinase 2
hsa-miR-300	1	0	1	0	1	1	C3orf58	chromosome 3 open reading frame 58
hsa-miR-300	0	0	1	1	1	1	C17orf78	chromosome 17 open reading frame 78
hsa-miR-300	0	0	1	0	1	1	C5orf64	chromosome 5 open reading frame 64
hsa-miR-300	0	0	1	1	1	1	FAM133A	family with sequence similarity 133, member A
hsa-miR-300	1	0	1	0	1	1	SREK1IP1	SREK1-interacting protein 1
hsa-miR-300	1	0	1	1	1	1	EXOC8	exocyst complex component 8
hsa-miR-300	0	0	1	0	1	1	C15orf37	chromosome 15 open reading frame 37
hsa-miR-300	0	0	1	1	0	0	CHMP4B	charged multivesicular body protein 4B
hsa-miR-300	1	0	1	1	1	1	PPAP2B	phosphatidic acid phosphatase type 2B
hsa-miR-300	1	0	1	1	1	1	PKHD1L1	polycystic kidney and hepatic disease 1 (autosomal recessive)-like 1
hsa-miR-300	1	0	1	1	1	1	PPM1B	protein phosphatase, Mg2+/Mn2+ dependent, 1B
hsa-miR-300	0	0	1	0	0	0	PPIAL4A	peptidylprolyl isomerase A (cyclophilin A)-like 4A
hsa-miR-300	0	0	1	1	1	1	ZNF831	zinc finger protein 831
hsa-miR-300	1	0	1	1	1	1	DCAF12L1	DDB1 and CUL4 associated factor 12-like 1
hsa-miR-300	1	0	1	1	1	1	MB21D2	Mab-21 domain containing 2
hsa-miR-300	1	0	1	1	1	1	TMEM26	transmembrane protein 26
hsa-miR-300	1	0	1	0	1	1	ARL5B	ADP-ribosylation factor-like 5B
hsa-miR-300	1	0	1	0	1	1	EFHA2	EF-hand domain family, member A2
hsa-miR-300	1	0	1	1	1	1	SPRED2	sprouty-related, EVH1 domain containing 2
hsa-miR-300	0	0	1	1	0	0	MAGEB10	melanoma antigen family B, 10
hsa-miR-300	1	0	1	1	1	1	FAM216B	family with sequence similarity 216, member B
hsa-miR-300	1	0	1	0	1	1	RNF144B	ring finger protein 144B
hsa-miR-300	1	0	1	0	1	1	SLC16A9	solute carrier family 16, member 9 (monocarboxylic acid transporter 9)
hsa-miR-300	0	0	1	1	1	1	KIF24	kinesin family member 24
hsa-miR-300	1	0	1	1	1	1	ADAMTS6	ADAM metallopeptidase with thrombospondin type 1 motif, 6
hsa-miR-300	1	0	1	1	1	1	ASB7	ankyrin repeat and SOCS box containing 7
hsa-miR-300	1	0	1	1	1	1	E2F6	E2F transcription factor 6
hsa-miR-300	0	0	1	1	1	1	EFCAB5	EF-hand calcium binding domain 5
hsa-miR-300	1	0	1	0	1	1	ZC3H6	zinc finger CCCH-type containing 6
hsa-miR-300	0	0	1	1	1	1	COL25A1	collagen, type XXV, alpha 1
hsa-miR-300	0	0	1	1	1	1	MDFIC	MyoD family inhibitor domain containing
hsa-miR-300	0	0	1	1	1	1	ZNF321P	zinc finger protein 321, pseudogene
hsa-miR-300	1	0	1	1	1	1	RBM12B	RNA binding motif protein 12B
hsa-miR-300	1	0	1	0	1	1	MBLAC2	metallo-beta-lactamase domain containing 2
hsa-miR-300	0	0	1	1	1	1	VIMP	VCP-interacting membrane protein
hsa-miR-300	0	0	1	1	1	1	ZNF474	zinc finger protein 474
hsa-miR-300	0	0	1	1	1	1	ERICH1	glutamate-rich 1
hsa-miR-300	1	0	1	1	1	1	FREM2	FRAS1 related extracellular matrix protein 2
hsa-miR-300	0	0	1	0	0	0	C16orf47	chromosome 16 open reading frame 47
hsa-miR-300	1	0	1	1	0	0	CD164L2	CD164 sialomucin-like 2
hsa-miR-300	1	0	1	0	1	1	STAT3	signal transducer and activator of transcription 3 (acute-phase response factor)
hsa-miR-300	0	0	1	1	0	0	SNRPN	small nuclear ribonucleoprotein polypeptide N
hsa-miR-300	0	0	1	0	0	0	SNORD108	small nucleolar RNA, C/D box 108
hsa-miR-300	0	0	1	0	0	0	PAR5	Prader-Willi/Angelman syndrome-5
hsa-miR-300	0	0	1	0	0	0	MIR155HG	MIR155 host gene (non-protein coding)
hsa-miR-300	0	0	1	0	0	0	TTTY6	testis-specific transcript, Y-linked 6 (non-protein coding)
hsa-miR-300	0	0	1	0	0	0	TTTY1	testis-specific transcript, Y-linked 1 (non-protein coding)
hsa-miR-300	0	0	1	0	0	0	TTTY15	testis-specific transcript, Y-linked 15 (non-protein coding)
hsa-miR-300	0	0	1	0	0	0	DKFZP586I1420	uncharacterized protein DKFZp586I1420
hsa-miR-300	0	0	1	0	0	0	SNORD57	small nucleolar RNA, C/D box 57
hsa-miR-300	0	0	1	0	0	0	SNORD56	small nucleolar RNA, C/D box 56
hsa-miR-300	0	0	1	0	0	0	NUDT9P1	nudix (nucleoside diphosphate linked moiety X)-type motif 9 pseudogene 1
hsa-miR-300	0	0	1	0	0	0	MALAT1	metastasis associated lung adenocarcinoma transcript 1 (non-protein coding)
hsa-miR-300	0	0	1	0	0	0	SNORD7	small nucleolar RNA, C/D box 7
hsa-miR-300	0	0	1	0	0	0	HSP90B3P	heat shock protein 90kDa beta (Grp94), member 3, pseudogene
hsa-miR-300	0	0	1	0	0	0	MYADML	myeloid-associated differentiation marker-like (pseudogene)
hsa-miR-300	0	0	1	0	0	0	SNORD115-7	small nucleolar RNA, C/D box 115-7
hsa-miR-300	0	0	1	0	0	0	SNORD115-35	small nucleolar RNA, C/D box 115-35
hsa-miR-300	0	0	1	0	0	0	SNORD116-28	small nucleolar RNA, C/D box 116-28
hsa-miR-300	0	0	1	1	0	0	GLP1R	glucagon-like peptide 1 receptor
hsa-miR-300	1	0	1	0	1	1	NFIX	nuclear factor I/X (CCAAT-binding transcription factor)
hsa-miR-300	0	0	1	1	0	0	RHBDD2	rhomboid domain containing 2
hsa-miR-300	1	0	1	1	1	1	PPP1R3F	protein phosphatase 1, regulatory subunit 3F
hsa-miR-300	1	0	1	1	1	1	QSER1	glutamine and serine rich 1
hsa-miR-300	0	0	1	1	1	1	AQR	aquarius homolog (mouse)
hsa-miR-300	0	0	1	1	0	0	KIF22	kinesin family member 22
hsa-miR-300	0	0	0	1	1	1	PCDHB4	protocadherin beta 4
hsa-miR-300	0	0	0	1	0	0	PCDHB2	protocadherin beta 2
hsa-miR-300	0	0	1	1	1	1	SPG21	spastic paraplegia 21 (autosomal recessive, Mast syndrome)
hsa-miR-300	0	0	0	1	1	1	AASDH	aminoadipate-semialdehyde dehydrogenase
hsa-miR-300	0	0	0	1	0	0	HMGB1P10	high mobility group box 1 pseudogene 10
hsa-miR-300	0	0	1	1	1	1	L3MBTL2	l(3)mbt-like 2 (Drosophila)
hsa-miR-300	0	0	0	1	0	0	PMM1	phosphomannomutase 1
hsa-miR-300	0	0	1	1	1	1	METTL21D	methyltransferase like 21D
hsa-miR-300	0	0	1	1	1	1	AHSA1	AHA1, activator of heat shock 90kDa protein ATPase homolog 1 (yeast)
hsa-miR-300	0	0	1	1	1	1	PSMD10	proteasome (prosome, macropain) 26S subunit, non-ATPase, 10
hsa-miR-300	0	0	1	1	1	1	PIN4	protein (peptidylprolyl cis/trans isomerase) NIMA-interacting, 4 (parvulin)
hsa-miR-300	0	0	0	1	0	0	MLNR	motilin receptor
hsa-miR-300	0	0	0	1	1	1	MEFV	Mediterranean fever
hsa-miR-300	0	0	1	1	1	1	RP1	retinitis pigmentosa 1 (autosomal dominant)
hsa-miR-300	0	0	1	1	0	0	HNRNPL	heterogeneous nuclear ribonucleoprotein L
hsa-miR-300	0	0	0	1	1	1	PEX11G	peroxisomal biogenesis factor 11 gamma
hsa-miR-300	0	0	0	1	0	0	SF3A2	splicing factor 3a, subunit 2, 66kDa
hsa-miR-300	0	0	0	1	1	1	POP4	processing of precursor 4, ribonuclease P/MRP subunit (S. cerevisiae)
hsa-miR-300	0	0	0	1	0	0	SLC5A5	solute carrier family 5 (sodium iodide symporter), member 5
hsa-miR-300	0	0	0	1	0	0	LAMB1	laminin, beta 1
hsa-miR-300	0	0	1	1	1	1	MPP6	membrane protein, palmitoylated 6 (MAGUK p55 subfamily member 6)
hsa-miR-300	1	0	1	1	1	1	HOXA5	homeobox A5
hsa-miR-300	0	0	0	1	0	0	AIMP2	aminoacyl tRNA synthetase complex-interacting multifunctional protein 2
hsa-miR-300	0	0	1	1	1	1	C1QBP	complement component 1, q subcomponent binding protein
hsa-miR-300	1	0	1	1	1	1	COL1A1	collagen, type I, alpha 1
hsa-miR-300	0	0	0	1	0	0	DBX1	developing brain homeobox 1
hsa-miR-300	0	0	0	1	1	1	RERGL	RERG/RAS-like
hsa-miR-300	0	0	0	1	0	0	MRPL51	mitochondrial ribosomal protein L51
hsa-miR-300	0	0	0	1	1	1	CDCA3	cell division cycle associated 3
hsa-miR-300	0	0	1	1	1	1	FBXO5	F-box protein 5
hsa-miR-300	0	0	1	1	1	1	MRPS30	mitochondrial ribosomal protein S30
hsa-miR-300	0	0	1	1	1	1	RRP9	ribosomal RNA processing 9, small subunit (SSU) processome component, homolog (yeast)
hsa-miR-300	0	0	0	1	1	1	AADAC	arylacetamide deacetylase
hsa-miR-300	0	0	1	1	1	1	HEATR5B	HEAT repeat containing 5B
hsa-miR-300	0	0	1	1	1	1	PRKAG3	protein kinase, AMP-activated, gamma 3 non-catalytic subunit
hsa-miR-300	0	0	0	1	0	0	PRAMEF4	PRAME family member 4
hsa-miR-300	0	0	0	1	0	0	C2orf40	chromosome 2 open reading frame 40
hsa-miR-300	1	0	1	1	1	1	TSHZ3	teashirt zinc finger homeobox 3
hsa-miR-300	0	0	1	1	1	1	EBPL	emopamil binding protein-like
hsa-miR-300	0	0	1	1	0	0	HIST1H2BJ	histone cluster 1, H2bj
hsa-miR-300	0	0	1	1	0	0	PDCD2L	programmed cell death 2-like
hsa-miR-300	0	0	1	1	1	1	L3HYPDH	L-3-hydroxyproline dehydratase (trans-)
hsa-miR-300	0	0	1	1	0	0	MAGEC2	melanoma antigen family C, 2
hsa-miR-300	1	0	1	1	1	1	AAMP	angio-associated, migratory cell protein
hsa-miR-300	0	0	0	1	0	0	GSTT1	glutathione S-transferase theta 1
hsa-miR-300	1	0	1	1	0	0	SDF2L1	stromal cell-derived factor 2-like 1
hsa-miR-300	0	0	0	1	1	1	ARHGAP22	Rho GTPase activating protein 22
hsa-miR-300	0	0	0	1	1	1	SIGLEC9	sialic acid binding Ig-like lectin 9
hsa-miR-300	1	0	1	1	1	1	KLF16	Kruppel-like factor 16
hsa-miR-300	1	0	1	1	1	1	ACTR10	actin-related protein 10 homolog (S. cerevisiae)
hsa-miR-300	0	0	1	1	1	1	IMMT	inner membrane protein, mitochondrial
hsa-miR-300	0	0	1	1	1	1	USPL1	ubiquitin specific peptidase like 1
hsa-miR-300	0	0	1	1	1	1	GIMAP4	GTPase, IMAP family member 4
hsa-miR-300	0	0	1	1	1	1	IL5RA	interleukin 5 receptor, alpha
hsa-miR-300	0	0	1	1	1	1	HBXIP	hepatitis B virus x interacting protein
hsa-miR-300	1	0	1	1	0	0	CCDC64	coiled-coil domain containing 64
hsa-miR-300	0	0	1	1	1	1	KIAA1009	KIAA1009
hsa-miR-300	0	0	1	1	1	1	EHF	ets homologous factor
[truncated: 496 more rows]
