# Supplementary material for: Profiling of Selected MicroRNAs in Proliferative Eutopic Endometrium of Women with Ovarian Endometriosis
Source: Biomed Res Int. 2015 Aug 20;2015:760698. doi: 10.1155/2015/760698 (PMC4558423; doi:10.1155/2015/760698)
Supplement: Supplementary file 1 — Table I: The names of miRNAs significantly differentially expressed between eutopic endometrium of patients with endometriosis vs eutopic endometrium of patients without endometriosis. Table II: The associations between miRNA and mRNA, which presents detailed results of the search of six major databases i.e targetscan, tarbase, miranda, mirbase, mirtarget2 and pictar. [file 760698.f1.zip › 760698.f1/Table II/hsa-miR-302e.tsv]

miR	targetscan	tarbase	miranda	mirbase	mirtarget2	pictar	GeneSymbol	GeneName
hsa-miR-302e	1	0	1	1	1	1	MYLK	myosin light chain kinase
hsa-miR-302e	1	0	1	1	1	1	DKK1	dickkopf 1 homolog (Xenopus laevis)
hsa-miR-302e	1	0	1	1	1	1	ZBTB6	zinc finger and BTB domain containing 6
hsa-miR-302e	1	0	1	1	1	1	C2CD2	C2 calcium-dependent domain containing 2
hsa-miR-302e	1	0	1	0	0	0	ZC3H12C	zinc finger CCCH-type containing 12C
hsa-miR-302e	1	0	1	0	0	0	TANC2	tetratricopeptide repeat, ankyrin repeat and coiled-coil containing 2
hsa-miR-302e	1	0	1	1	1	1	MTF1	metal-regulatory transcription factor 1
hsa-miR-302e	1	0	1	1	1	1	RORB	RAR-related orphan receptor B
hsa-miR-302e	1	0	1	1	1	1	ST3GAL5	ST3 beta-galactoside alpha-2,3-sialyltransferase 5
hsa-miR-302e	1	0	1	1	0	0	PEAK1	NKF3 kinase family member
hsa-miR-302e	1	0	1	1	1	1	FAM175B	family with sequence similarity 175, member B
hsa-miR-302e	1	0	1	0	1	1	MFAP3L	microfibrillar-associated protein 3-like
hsa-miR-302e	1	0	1	1	1	1	ODF2	outer dense fiber of sperm tails 2
hsa-miR-302e	1	0	1	1	1	1	IKZF2	IKAROS family zinc finger 2 (Helios)
hsa-miR-302e	1	0	1	1	0	0	MEX3A	mex-3 homolog A (C. elegans)
hsa-miR-302e	1	0	1	0	1	1	SQSTM1	sequestosome 1
hsa-miR-302e	1	0	1	1	1	1	RUNX1	runt-related transcription factor 1
hsa-miR-302e	1	0	1	1	1	1	FNDC3A	fibronectin type III domain containing 3A
hsa-miR-302e	1	0	1	1	0	0	OSBPL5	oxysterol binding protein-like 5
hsa-miR-302e	1	0	1	1	1	1	DLGAP2	discs, large (Drosophila) homolog-associated protein 2
hsa-miR-302e	1	0	1	1	1	1	EDNRB	endothelin receptor type B
hsa-miR-302e	1	0	1	1	1	1	MLLT6	myeloid/lymphoid or mixed-lineage leukemia (trithorax homolog, Drosophila); translocated to, 6
hsa-miR-302e	1	0	0	1	1	1	ASF1B	ASF1 anti-silencing function 1 homolog B (S. cerevisiae)
hsa-miR-302e	1	0	1	1	0	0	RELL1	RELT-like 1
hsa-miR-302e	1	0	1	1	1	1	NFIB	nuclear factor I/B
hsa-miR-302e	1	0	1	1	1	1	PCDH7	protocadherin 7
hsa-miR-302e	1	0	1	1	1	1	CROT	carnitine O-octanoyltransferase
hsa-miR-302e	1	0	1	1	1	1	PTPRD	protein tyrosine phosphatase, receptor type, D
hsa-miR-302e	1	0	1	1	1	1	TIPARP	TCDD-inducible poly(ADP-ribose) polymerase
hsa-miR-302e	1	0	1	1	1	1	TRAFD1	TRAF-type zinc finger domain containing 1
hsa-miR-302e	1	0	1	1	0	0	RORA	RAR-related orphan receptor A
hsa-miR-302e	1	0	1	1	1	1	SUV39H1	suppressor of variegation 3-9 homolog 1 (Drosophila)
hsa-miR-302e	1	0	0	1	0	0	TRPV6	transient receptor potential cation channel, subfamily V, member 6
hsa-miR-302e	1	0	1	1	1	1	VEGFA	vascular endothelial growth factor A
hsa-miR-302e	1	0	1	0	1	1	HDAC4	histone deacetylase 4
hsa-miR-302e	1	0	1	1	1	1	RUNX3	runt-related transcription factor 3
hsa-miR-302e	1	0	1	1	1	1	FGD5	FYVE, RhoGEF and PH domain containing 5
hsa-miR-302e	1	0	1	1	1	1	RAPGEFL1	Rap guanine nucleotide exchange factor (GEF)-like 1
hsa-miR-302e	1	0	1	1	1	1	AJUBA	ajuba LIM protein
hsa-miR-302e	1	0	1	1	1	1	ARHGEF10	Rho guanine nucleotide exchange factor (GEF) 10
hsa-miR-302e	1	0	1	0	1	1	VAPA	VAMP (vesicle-associated membrane protein)-associated protein A, 33kDa
hsa-miR-302e	1	0	1	0	1	1	CELF2	CUGBP, Elav-like family member 2
hsa-miR-302e	1	0	1	1	0	0	RAPGEF2	Rap guanine nucleotide exchange factor (GEF) 2
hsa-miR-302e	1	0	1	1	1	1	MYT1L	myelin transcription factor 1-like
hsa-miR-302e	1	0	1	1	1	1	GPM6A	glycoprotein M6A
hsa-miR-302e	1	0	1	0	1	1	WIPF2	WAS/WASL interacting protein family, member 2
hsa-miR-302e	1	0	1	0	1	1	NUFIP2	nuclear fragile X mental retardation protein interacting protein 2
hsa-miR-302e	1	0	1	1	1	1	KCNJ8	potassium inwardly-rectifying channel, subfamily J, member 8
hsa-miR-302e	1	0	1	0	1	1	BCL7A	B-cell CLL/lymphoma 7A
hsa-miR-302e	1	0	1	1	1	1	NPM1	nucleophosmin (nucleolar phosphoprotein B23, numatrin)
hsa-miR-302e	1	0	1	1	1	1	GIGYF1	GRB10 interacting GYF protein 1
hsa-miR-302e	1	0	1	1	1	1	E2F7	E2F transcription factor 7
hsa-miR-302e	1	0	1	1	1	1	PRRT2	proline-rich transmembrane protein 2
hsa-miR-302e	1	0	1	1	1	1	MASP1	mannan-binding lectin serine peptidase 1 (C4/C2 activating component of Ra-reactive factor)
hsa-miR-302e	1	0	1	1	1	1	MAP3K2	mitogen-activated protein kinase kinase kinase 2
hsa-miR-302e	1	0	1	0	1	1	TAL1	T-cell acute lymphocytic leukemia 1
hsa-miR-302e	1	0	1	1	1	1	PDLIM5	PDZ and LIM domain 5
hsa-miR-302e	1	0	1	0	1	1	UHRF1BP1	UHRF1 binding protein 1
hsa-miR-302e	1	0	1	1	1	1	RGMA	RGM domain family, member A
hsa-miR-302e	1	0	1	1	1	1	HS3ST4	heparan sulfate (glucosamine) 3-O-sulfotransferase 4
hsa-miR-302e	1	0	1	1	1	1	RBL1	retinoblastoma-like 1 (p107)
hsa-miR-302e	1	0	1	1	1	1	ASAP1	ArfGAP with SH3 domain, ankyrin repeat and PH domain 1
hsa-miR-302e	1	0	1	0	1	1	CRIM1	cysteine rich transmembrane BMP regulator 1 (chordin-like)
hsa-miR-302e	1	0	1	1	1	1	ZDHHC9	zinc finger, DHHC-type containing 9
hsa-miR-302e	1	0	1	1	1	1	RALGDS	ral guanine nucleotide dissociation stimulator
hsa-miR-302e	1	0	1	1	1	1	SNTB2	syntrophin, beta 2 (dystrophin-associated protein A1, 59kDa, basic component 2)
hsa-miR-302e	1	0	1	1	1	1	CAMK2N1	calcium/calmodulin-dependent protein kinase II inhibitor 1
hsa-miR-302e	1	0	1	1	1	1	EZH1	enhancer of zeste homolog 1 (Drosophila)
hsa-miR-302e	1	0	1	1	0	0	TTC9	tetratricopeptide repeat domain 9
hsa-miR-302e	1	0	1	1	1	1	PPP1R9A	protein phosphatase 1, regulatory subunit 9A
hsa-miR-302e	1	0	1	1	1	1	ZNFX1	zinc finger, NFX1-type containing 1
hsa-miR-302e	1	0	1	1	1	1	FAM168B	family with sequence similarity 168, member B
hsa-miR-302e	1	0	1	1	1	1	PARP8	poly (ADP-ribose) polymerase family, member 8
hsa-miR-302e	1	0	1	1	1	1	MKRN1	makorin ring finger protein 1
hsa-miR-302e	1	0	1	0	1	1	TMEM123	transmembrane protein 123
hsa-miR-302e	1	0	1	0	1	1	ADRB1	adrenoceptor beta 1
hsa-miR-302e	1	0	1	0	1	1	ZNF800	zinc finger protein 800
hsa-miR-302e	1	0	1	1	1	1	FEM1C	fem-1 homolog c (C. elegans)
hsa-miR-302e	1	0	1	1	1	1	WDR26	WD repeat domain 26
hsa-miR-302e	1	0	1	1	1	1	PPP3R1	protein phosphatase 3, regulatory subunit B, alpha
hsa-miR-302e	1	0	0	0	0	0	AAK1	AP2 associated kinase 1
hsa-miR-302e	1	0	1	1	1	1	KAT2B	K(lysine) acetyltransferase 2B
hsa-miR-302e	1	0	1	1	1	1	NR2C2	nuclear receptor subfamily 2, group C, member 2
hsa-miR-302e	1	0	1	1	0	0	KIAA1210	KIAA1210
hsa-miR-302e	1	0	1	0	1	1	DCDC2	doublecortin domain containing 2
hsa-miR-302e	1	0	1	0	1	1	KDM1B	lysine (K)-specific demethylase 1B
hsa-miR-302e	1	0	1	1	1	1	TRIM8	tripartite motif containing 8
hsa-miR-302e	1	0	1	1	1	1	CUX2	cut-like homeobox 2
hsa-miR-302e	1	0	1	1	1	1	PDCD4	programmed cell death 4 (neoplastic transformation inhibitor)
hsa-miR-302e	1	0	1	0	1	1	CCNJ	cyclin J
hsa-miR-302e	1	0	0	1	1	1	PCBP3	poly(rC) binding protein 3
hsa-miR-302e	1	0	1	1	1	1	HIC2	hypermethylated in cancer 2
hsa-miR-302e	1	0	1	1	0	0	ANKRD13B	ankyrin repeat domain 13B
hsa-miR-302e	1	0	1	0	1	1	TNRC6B	trinucleotide repeat containing 6B
hsa-miR-302e	1	0	1	1	1	1	TLX1	T-cell leukemia homeobox 1
hsa-miR-302e	1	0	1	1	1	1	SOWAHC	sosondowah ankyrin repeat domain family member C
hsa-miR-302e	1	0	1	1	1	1	KPNA1	karyopherin alpha 1 (importin alpha 5)
hsa-miR-302e	1	0	1	1	1	1	MAP3K11	mitogen-activated protein kinase kinase kinase 11
hsa-miR-302e	1	0	1	1	1	1	RAB5C	RAB5C, member RAS oncogene family
hsa-miR-302e	1	0	1	1	1	1	NCOA3	nuclear receptor coactivator 3
hsa-miR-302e	1	0	1	0	1	1	BCL11B	B-cell CLL/lymphoma 11B (zinc finger protein)
hsa-miR-302e	1	0	1	1	1	1	CERS6	ceramide synthase 6
hsa-miR-302e	1	0	1	0	0	0	ZNRF3	zinc and ring finger 3
hsa-miR-302e	1	0	1	1	1	1	BNC2	basonuclin 2
hsa-miR-302e	1	0	1	1	1	1	CRTC2	CREB regulated transcription coactivator 2
hsa-miR-302e	1	0	1	1	1	1	ZBTB5	zinc finger and BTB domain containing 5
hsa-miR-302e	1	0	1	0	1	1	PKD2	polycystic kidney disease 2 (autosomal dominant)
hsa-miR-302e	1	0	1	1	1	1	TESK2	testis-specific kinase 2
hsa-miR-302e	1	0	1	0	1	1	RGMB	RGM domain family, member B
hsa-miR-302e	1	0	1	1	1	1	PALLD	palladin, cytoskeletal associated protein
hsa-miR-302e	1	0	1	0	1	1	E2F1	E2F transcription factor 1
hsa-miR-302e	1	0	1	1	1	1	KLHL28	kelch-like 28 (Drosophila)
hsa-miR-302e	1	0	1	0	1	1	TMTC2	transmembrane and tetratricopeptide repeat containing 2
hsa-miR-302e	1	0	1	1	1	1	CMPK1	cytidine monophosphate (UMP-CMP) kinase 1, cytosolic
hsa-miR-302e	1	0	1	1	0	0	KIAA1549	KIAA1549
hsa-miR-302e	1	0	1	1	1	1	YTHDF3	YTH domain family, member 3
hsa-miR-302e	1	0	1	1	1	1	HIP1	huntingtin interacting protein 1
hsa-miR-302e	1	0	1	1	1	1	RAB22A	RAB22A, member RAS oncogene family
hsa-miR-302e	1	0	1	0	1	1	UBE2W	ubiquitin-conjugating enzyme E2W (putative)
hsa-miR-302e	1	0	1	1	1	1	ZNF518A	zinc finger protein 518A
hsa-miR-302e	1	0	1	0	1	1	ZCCHC24	zinc finger, CCHC domain containing 24
hsa-miR-302e	1	0	1	1	1	1	ZNF697	zinc finger protein 697
hsa-miR-302e	1	0	1	1	1	1	HIVEP2	human immunodeficiency virus type I enhancer binding protein 2
hsa-miR-302e	1	0	1	0	1	1	KIF26B	kinesin family member 26B
hsa-miR-302e	1	0	1	0	1	1	SCRT2	scratch homolog 2, zinc finger protein (Drosophila)
hsa-miR-302e	1	0	1	1	1	1	ZNF385A	zinc finger protein 385A
hsa-miR-302e	1	0	0	1	0	0	SYDE2	synapse defective 1, Rho GTPase, homolog 2 (C. elegans)
hsa-miR-302e	1	0	1	1	1	1	MLL	myeloid/lymphoid or mixed-lineage leukemia (trithorax homolog, Drosophila)
hsa-miR-302e	1	0	1	1	1	1	VLDLR	very low density lipoprotein receptor
hsa-miR-302e	1	0	1	1	1	1	RUNX2	runt-related transcription factor 2
hsa-miR-302e	1	0	1	1	1	1	CADM2	cell adhesion molecule 2
hsa-miR-302e	1	0	1	1	1	1	TMEM100	transmembrane protein 100
hsa-miR-302e	1	0	1	1	1	1	PTGDR	prostaglandin D2 receptor (DP)
hsa-miR-302e	1	0	1	1	1	1	FOXF2	forkhead box F2
hsa-miR-302e	1	0	1	1	1	1	TNFAIP1	tumor necrosis factor, alpha-induced protein 1 (endothelial)
hsa-miR-302e	1	0	1	1	1	1	CC2D1A	coiled-coil and C2 domain containing 1A
hsa-miR-302e	1	0	1	0	1	1	ETV1	ets variant 1
hsa-miR-302e	1	0	1	1	1	1	RAD23B	RAD23 homolog B (S. cerevisiae)
hsa-miR-302e	1	0	1	1	1	1	GLIS3	GLIS family zinc finger 3
hsa-miR-302e	1	0	1	1	0	0	USP53	ubiquitin specific peptidase 53
hsa-miR-302e	1	0	1	0	1	1	RAPGEF5	Rap guanine nucleotide exchange factor (GEF) 5
hsa-miR-302e	1	0	1	1	1	1	RAB8A	RAB8A, member RAS oncogene family
hsa-miR-302e	1	0	1	1	1	1	SLC22A5	solute carrier family 22 (organic cation/carnitine transporter), member 5
hsa-miR-302e	1	0	1	1	1	1	CDK2	cyclin-dependent kinase 2
hsa-miR-302e	1	0	1	1	1	1	NR4A3	nuclear receptor subfamily 4, group A, member 3
hsa-miR-302e	1	0	1	1	1	1	KIAA1522	KIAA1522
hsa-miR-302e	1	0	1	0	1	1	TOX3	TOX high mobility group box family member 3
hsa-miR-302e	1	0	1	1	1	1	FGF19	fibroblast growth factor 19
hsa-miR-302e	1	0	1	1	1	1	MTUS1	microtubule associated tumor suppressor 1
hsa-miR-302e	1	0	1	0	1	1	KLF13	Kruppel-like factor 13
hsa-miR-302e	1	0	1	0	1	1	GATAD2B	GATA zinc finger domain containing 2B
hsa-miR-302e	1	0	1	1	1	1	ST8SIA3	ST8 alpha-N-acetyl-neuraminide alpha-2,8-sialyltransferase 3
hsa-miR-302e	1	0	1	1	1	1	ASF1A	ASF1 anti-silencing function 1 homolog A (S. cerevisiae)
hsa-miR-302e	1	0	1	1	1	1	PHF6	PHD finger protein 6
hsa-miR-302e	1	0	1	1	1	1	ARHGEF3	Rho guanine nucleotide exchange factor (GEF) 3
hsa-miR-302e	1	0	1	1	1	1	OXR1	oxidation resistance 1
hsa-miR-302e	1	0	1	1	0	0	SDC1	syndecan 1
hsa-miR-302e	1	0	1	1	1	1	FTSJD1	FtsJ methyltransferase domain containing 1
hsa-miR-302e	1	0	1	1	1	1	PHACTR4	phosphatase and actin regulator 4
hsa-miR-302e	1	0	1	0	1	1	LYPD6	LY6/PLAUR domain containing 6
hsa-miR-302e	1	0	1	1	1	1	C11orf9	chromosome 11 open reading frame 9
hsa-miR-302e	1	0	0	1	1	1	RHOC	ras homolog family member C
hsa-miR-302e	1	0	1	1	1	1	PAK7	p21 protein (Cdc42/Rac)-activated kinase 7
hsa-miR-302e	1	0	1	1	1	1	ATAD2	ATPase family, AAA domain containing 2
hsa-miR-302e	1	0	1	1	1	1	MARCH8	membrane-associated ring finger (C3HC4) 8, E3 ubiquitin protein ligase
hsa-miR-302e	1	0	1	1	1	1	KIF3B	kinesin family member 3B
hsa-miR-302e	1	0	1	1	1	1	PHC3	polyhomeotic homolog 3 (Drosophila)
hsa-miR-302e	1	0	1	1	1	1	PTPN21	protein tyrosine phosphatase, non-receptor type 21
hsa-miR-302e	1	0	1	0	1	1	DCUN1D1	DCN1, defective in cullin neddylation 1, domain containing 1 (S. cerevisiae)
hsa-miR-302e	1	0	1	1	1	1	ZBTB41	zinc finger and BTB domain containing 41
hsa-miR-302e	1	0	1	1	1	1	MTMR3	myotubularin related protein 3
hsa-miR-302e	1	0	1	0	1	1	LONRF2	LON peptidase N-terminal domain and ring finger 2
hsa-miR-302e	1	0	1	1	1	1	RSBN1	round spermatid basic protein 1
hsa-miR-302e	1	0	1	1	1	1	FOXJ3	forkhead box J3
hsa-miR-302e	1	0	1	1	1	1	DYRK4	dual-specificity tyrosine-(Y)-phosphorylation regulated kinase 4
hsa-miR-302e	1	0	1	1	1	1	STX16	syntaxin 16
hsa-miR-302e	1	0	1	1	1	1	ZNF2	zinc finger protein 2
hsa-miR-302e	1	0	1	0	1	1	MPP5	membrane protein, palmitoylated 5 (MAGUK p55 subfamily member 5)
hsa-miR-302e	1	0	1	1	1	1	TFAP4	transcription factor AP-4 (activating enhancer binding protein 4)
hsa-miR-302e	1	0	1	0	1	1	IGF2BP1	insulin-like growth factor 2 mRNA binding protein 1
hsa-miR-302e	1	0	1	1	1	1	PLCL1	phospholipase C-like 1
hsa-miR-302e	1	0	1	1	1	1	FGF9	fibroblast growth factor 9 (glia-activating factor)
hsa-miR-302e	1	0	0	1	1	1	CNNM3	cyclin M3
hsa-miR-302e	1	0	1	1	1	1	LAMA3	laminin, alpha 3
hsa-miR-302e	1	0	1	1	1	1	OPCML	opioid binding protein/cell adhesion molecule-like
hsa-miR-302e	1	0	0	0	1	1	ZNF473	zinc finger protein 473
hsa-miR-302e	1	0	1	1	1	1	LEFTY1	left-right determination factor 1
hsa-miR-302e	1	0	1	1	1	1	ITGB8	integrin, beta 8
hsa-miR-302e	1	0	1	1	1	1	ARID4A	AT rich interactive domain 4A (RBP1-like)
hsa-miR-302e	1	0	1	1	1	1	LUC7L2	LUC7-like 2 (S. cerevisiae)
hsa-miR-302e	1	0	1	1	1	1	ASXL2	additional sex combs like 2 (Drosophila)
hsa-miR-302e	1	0	1	0	1	1	MARCH5	membrane-associated ring finger (C3HC4) 5
hsa-miR-302e	1	0	1	0	0	0	SRSF12	serine/arginine-rich splicing factor 12
hsa-miR-302e	1	0	1	1	1	1	RB1CC1	RB1-inducible coiled-coil 1
hsa-miR-302e	1	0	1	1	1	1	NAPEPLD	N-acyl phosphatidylethanolamine phospholipase D
hsa-miR-302e	1	0	1	1	1	1	PRR16	proline rich 16
hsa-miR-302e	1	0	1	1	1	1	LEFTY2	left-right determination factor 2
hsa-miR-302e	1	0	1	1	1	1	TBC1D20	TBC1 domain family, member 20
hsa-miR-302e	1	0	1	1	1	1	POU6F1	POU class 6 homeobox 1
hsa-miR-302e	1	0	1	0	1	1	TOX	thymocyte selection-associated high mobility group box
hsa-miR-302e	1	0	1	1	1	1	FBXO11	F-box protein 11
hsa-miR-302e	1	0	0	1	1	1	UHRF1	ubiquitin-like with PHD and ring finger domains 1
hsa-miR-302e	1	0	1	0	1	1	PLAG1	pleiomorphic adenoma gene 1
hsa-miR-302e	1	0	1	0	1	1	TXLNA	taxilin alpha
hsa-miR-302e	1	0	1	1	1	1	PRDM4	PR domain containing 4
hsa-miR-302e	1	0	1	1	1	1	GNG12	guanine nucleotide binding protein (G protein), gamma 12
hsa-miR-302e	1	0	1	1	1	1	RASSF2	Ras association (RalGDS/AF-6) domain family member 2
hsa-miR-302e	1	0	1	1	1	1	RND3	Rho family GTPase 3
hsa-miR-302e	1	0	1	1	1	1	IRF2BP2	interferon regulatory factor 2 binding protein 2
hsa-miR-302e	1	0	1	0	1	1	SMAD2	SMAD family member 2
hsa-miR-302e	1	0	1	1	1	1	ARL4C	ADP-ribosylation factor-like 4C
hsa-miR-302e	1	0	1	1	1	1	ST8SIA2	ST8 alpha-N-acetyl-neuraminide alpha-2,8-sialyltransferase 2
hsa-miR-302e	1	0	1	1	1	1	GLS	glutaminase
hsa-miR-302e	1	0	1	1	1	1	SLC2A4	solute carrier family 2 (facilitated glucose transporter), member 4
hsa-miR-302e	1	0	1	1	1	1	JOSD1	Josephin domain containing 1
hsa-miR-302e	1	0	1	1	1	1	PDIK1L	PDLIM1 interacting kinase 1 like
hsa-miR-302e	1	0	1	1	1	1	LHX8	LIM homeobox 8
hsa-miR-302e	1	0	1	1	1	1	BARX2	BARX homeobox 2
hsa-miR-302e	1	0	1	0	1	1	MEF2C	myocyte enhancer factor 2C
hsa-miR-302e	1	0	1	1	1	1	RNF180	ring finger protein 180
hsa-miR-302e	1	0	1	1	1	1	TNKS2	tankyrase, TRF1-interacting ankyrin-related ADP-ribose polymerase 2
hsa-miR-302e	1	0	1	1	1	1	ALKBH5	alkB, alkylation repair homolog 5 (E. coli)
hsa-miR-302e	1	0	1	1	1	1	UNKL	unkempt homolog (Drosophila)-like
hsa-miR-302e	1	0	1	0	1	1	TP53INP2	tumor protein p53 inducible nuclear protein 2
hsa-miR-302e	1	0	1	1	1	1	CXCL14	chemokine (C-X-C motif) ligand 14
hsa-miR-302e	1	0	1	1	1	1	WEE1	WEE1 homolog (S. pombe)
hsa-miR-302e	1	0	1	1	1	1	CRK	v-crk sarcoma virus CT10 oncogene homolog (avian)
hsa-miR-302e	1	0	1	0	1	1	TTPAL	tocopherol (alpha) transfer protein-like
hsa-miR-302e	1	0	1	1	1	1	PRRG1	proline rich Gla (G-carboxyglutamic acid) 1
hsa-miR-302e	1	0	1	0	1	1	DPYSL5	dihydropyrimidinase-like 5
hsa-miR-302e	1	0	1	1	1	1	TIAM1	T-cell lymphoma invasion and metastasis 1
hsa-miR-302e	1	0	1	0	1	1	USP46	ubiquitin specific peptidase 46
hsa-miR-302e	1	0	1	1	1	1	ATXN7L1	ataxin 7-like 1
hsa-miR-302e	1	0	1	1	1	1	TCF20	transcription factor 20 (AR1)
hsa-miR-302e	1	0	1	0	1	1	FAM40B	family with sequence similarity 40, member B
hsa-miR-302e	1	0	1	1	1	1	CTSA	cathepsin A
hsa-miR-302e	1	0	1	1	1	1	UBE2R2	ubiquitin-conjugating enzyme E2R 2
hsa-miR-302e	1	0	1	0	1	1	MAP1B	microtubule-associated protein 1B
hsa-miR-302e	1	0	1	1	1	1	TGFBR2	transforming growth factor, beta receptor II (70/80kDa)
hsa-miR-302e	1	0	1	1	1	1	SKIDA1	SKI/DACH domain containing 1
hsa-miR-302e	1	0	1	1	1	1	MYCN	v-myc myelocytomatosis viral related oncogene, neuroblastoma derived (avian)
hsa-miR-302e	1	0	1	1	1	1	SYDE1	synapse defective 1, Rho GTPase, homolog 1 (C. elegans)
hsa-miR-302e	1	0	1	0	1	1	PLXNA1	plexin A1
hsa-miR-302e	1	0	1	1	1	1	PRKACB	protein kinase, cAMP-dependent, catalytic, beta
hsa-miR-302e	1	0	1	1	1	1	SPRYD3	SPRY domain containing 3
hsa-miR-302e	1	0	0	1	1	1	FAM219B	family with sequence similarity 219, member B
hsa-miR-302e	1	0	1	1	1	1	TMEM25	transmembrane protein 25
hsa-miR-302e	1	0	1	1	1	1	SPOP	speckle-type POZ protein
hsa-miR-302e	1	0	1	1	1	1	HIF1AN	hypoxia inducible factor 1, alpha subunit inhibitor
hsa-miR-302e	1	0	1	1	1	1	KPNA2	karyopherin alpha 2 (RAG cohort 1, importin alpha 1)
hsa-miR-302e	1	0	1	0	1	1	C7orf41	chromosome 7 open reading frame 41
hsa-miR-302e	1	0	1	1	1	1	MMP24	matrix metallopeptidase 24 (membrane-inserted)
hsa-miR-302e	1	0	1	1	0	0	IGDCC3	immunoglobulin superfamily, DCC subclass, member 3
hsa-miR-302e	1	0	1	0	1	1	FBXO10	F-box protein 10
hsa-miR-302e	1	0	1	1	1	1	SIK1	salt-inducible kinase 1
hsa-miR-302e	1	0	1	0	1	1	MYBL1	v-myb myeloblastosis viral oncogene homolog (avian)-like 1
hsa-miR-302e	1	0	1	1	1	1	REEP3	receptor accessory protein 3
hsa-miR-302e	1	0	1	0	1	1	YOD1	YOD1 OTU deubiquinating enzyme 1 homolog (S. cerevisiae)
hsa-miR-302e	1	0	1	1	1	1	SLC16A12	solute carrier family 16, member 12 (monocarboxylic acid transporter 12)
hsa-miR-302e	1	0	1	1	1	1	WFS1	Wolfram syndrome 1 (wolframin)
hsa-miR-302e	1	0	1	1	1	1	ERBB4	v-erb-a erythroblastic leukemia viral oncogene homolog 4 (avian)
hsa-miR-302e	1	0	1	1	0	0	AGFG2	ArfGAP with FG repeats 2
hsa-miR-302e	1	0	1	0	1	1	FBXO41	F-box protein 41
hsa-miR-302e	1	0	0	1	1	1	PKD1	polycystic kidney disease 1 (autosomal dominant)
hsa-miR-302e	1	0	1	1	1	1	ZBTB33	zinc finger and BTB domain containing 33
hsa-miR-302e	1	0	1	1	1	1	SCD5	stearoyl-CoA desaturase 5
hsa-miR-302e	1	0	1	0	1	1	SLC16A9	solute carrier family 16, member 9 (monocarboxylic acid transporter 9)
hsa-miR-302e	1	0	1	1	1	1	LEF1	lymphoid enhancer-binding factor 1
hsa-miR-302e	1	0	1	1	1	1	ZNF512B	zinc finger protein 512B
hsa-miR-302e	1	0	1	1	1	1	CDC23	cell division cycle 23 homolog (S. cerevisiae)
hsa-miR-302e	1	0	1	1	0	0	TET3	tet methylcytosine dioxygenase 3
hsa-miR-302e	1	0	1	1	1	1	SUCO	SUN domain containing ossification factor
hsa-miR-302e	1	0	1	1	1	1	UBE3A	ubiquitin protein ligase E3A
hsa-miR-302e	1	0	1	1	1	1	PIGA	phosphatidylinositol glycan anchor biosynthesis, class A
hsa-miR-302e	1	0	1	0	1	1	JAZF1	JAZF zinc finger 1
hsa-miR-302e	1	0	1	0	1	1	OSTM1	osteopetrosis associated transmembrane protein 1
hsa-miR-302e	1	0	1	1	1	1	ADAMTS18	ADAM metallopeptidase with thrombospondin type 1 motif, 18
hsa-miR-302e	1	0	1	0	1	1	ANO6	anoctamin 6
hsa-miR-302e	1	0	1	0	0	0	ALX4	ALX homeobox 4
hsa-miR-302e	1	0	1	1	1	1	SNRK	SNF related kinase
hsa-miR-302e	1	0	1	1	1	1	INTS6	integrator complex subunit 6
hsa-miR-302e	1	0	1	1	1	1	RPS6KA3	ribosomal protein S6 kinase, 90kDa, polypeptide 3
hsa-miR-302e	1	0	1	1	1	1	CLIP4	CAP-GLY domain containing linker protein family, member 4
hsa-miR-302e	1	0	1	1	1	1	EIF2C1	eukaryotic translation initiation factor 2C, 1
hsa-miR-302e	1	0	1	1	1	1	DNAJA2	DnaJ (Hsp40) homolog, subfamily A, member 2
hsa-miR-302e	1	0	1	1	0	0	USP24	ubiquitin specific peptidase 24
hsa-miR-302e	1	0	1	0	1	1	CCND1	cyclin D1
hsa-miR-302e	1	0	1	1	1	1	PBX3	pre-B-cell leukemia homeobox 3
hsa-miR-302e	1	0	1	0	1	1	LMO3	LIM domain only 3 (rhombotin-like 2)
hsa-miR-302e	1	0	1	1	1	1	TUSC2	tumor suppressor candidate 2
hsa-miR-302e	1	0	1	0	1	1	SRCIN1	SRC kinase signaling inhibitor 1
hsa-miR-302e	1	0	1	1	1	1	UBE2J1	ubiquitin-conjugating enzyme E2, J1
hsa-miR-302e	1	0	1	0	1	1	CUL3	cullin 3
hsa-miR-302e	1	0	1	1	1	1	ACBD5	acyl-CoA binding domain containing 5
hsa-miR-302e	1	0	1	1	1	1	SLITRK3	SLIT and NTRK-like family, member 3
hsa-miR-302e	1	0	1	1	1	1	FOXL2	forkhead box L2
hsa-miR-302e	1	0	1	1	1	1	MAP3K14	mitogen-activated protein kinase kinase kinase 14
hsa-miR-302e	1	0	1	1	1	1	ACPL2	acid phosphatase-like 2
hsa-miR-302e	1	0	1	1	1	1	RPS6KA2	ribosomal protein S6 kinase, 90kDa, polypeptide 2
hsa-miR-302e	1	0	1	0	1	1	PSD3	pleckstrin and Sec7 domain containing 3
hsa-miR-302e	1	0	1	1	1	1	RTN1	reticulon 1
hsa-miR-302e	1	0	1	1	1	1	BAHD1	bromo adjacent homology domain containing 1
hsa-miR-302e	1	0	1	0	1	1	CYBRD1	cytochrome b reductase 1
hsa-miR-302e	1	0	1	1	1	1	ADAM9	ADAM metallopeptidase domain 9
hsa-miR-302e	1	0	1	0	1	1	CREB5	cAMP responsive element binding protein 5
hsa-miR-302e	1	0	1	1	1	1	ANKRD54	ankyrin repeat domain 54
hsa-miR-302e	1	0	1	1	1	1	FYCO1	FYVE and coiled-coil domain containing 1
hsa-miR-302e	1	0	1	1	1	1	SLC40A1	solute carrier family 40 (iron-regulated transporter), member 1
hsa-miR-302e	1	0	1	1	1	1	CPEB3	cytoplasmic polyadenylation element binding protein 3
hsa-miR-302e	1	0	1	1	1	1	MINK1	misshapen-like kinase 1
hsa-miR-302e	1	0	1	1	0	0	C19orf43	chromosome 19 open reading frame 43
hsa-miR-302e	1	0	1	0	1	1	KIAA0240	KIAA0240
hsa-miR-302e	1	0	1	1	1	1	USP42	ubiquitin specific peptidase 42
hsa-miR-302e	1	0	1	1	1	1	MTERFD2	MTERF domain containing 2
hsa-miR-302e	1	0	1	1	1	1	ZNF148	zinc finger protein 148
hsa-miR-302e	1	0	1	1	1	1	EFNB2	ephrin-B2
hsa-miR-302e	1	0	1	0	1	1	C16orf72	chromosome 16 open reading frame 72
hsa-miR-302e	1	0	1	1	1	1	EPHA2	EPH receptor A2
hsa-miR-302e	1	0	1	1	1	1	PRDM8	PR domain containing 8
hsa-miR-302e	1	0	1	1	1	1	FRS2	fibroblast growth factor receptor substrate 2
hsa-miR-302e	1	0	1	1	1	1	ATP2C1	ATPase, Ca++ transporting, type 2C, member 1
hsa-miR-302e	1	0	1	1	1	1	PTCHD1	patched domain containing 1
hsa-miR-302e	1	0	1	1	1	1	PGBD5	piggyBac transposable element derived 5
hsa-miR-302e	1	0	1	1	1	1	FRMD4A	FERM domain containing 4A
hsa-miR-302e	1	0	1	1	1	1	BTG1	B-cell translocation gene 1, anti-proliferative
hsa-miR-302e	1	0	1	1	1	1	PRDM16	PR domain containing 16
hsa-miR-302e	1	0	1	1	1	1	NPAS3	neuronal PAS domain protein 3
hsa-miR-302e	1	0	1	1	1	1	PKN2	protein kinase N2
hsa-miR-302e	1	0	1	1	1	1	NECAP1	NECAP endocytosis associated 1
hsa-miR-302e	1	0	1	1	1	1	DDX6	DEAD (Asp-Glu-Ala-Asp) box helicase 6
hsa-miR-302e	1	0	0	1	1	1	LRIT1	leucine-rich repeat, immunoglobulin-like and transmembrane domains 1
hsa-miR-302e	1	0	1	1	0	0	UBN2	ubinuclein 2
hsa-miR-302e	1	0	1	1	1	1	WDR20	WD repeat domain 20
hsa-miR-302e	1	0	1	1	1	1	DPP8	dipeptidyl-peptidase 8
hsa-miR-302e	1	0	1	1	1	1	KREMEN1	kringle containing transmembrane protein 1
hsa-miR-302e	1	0	1	1	1	1	SYT14	synaptotagmin XIV
hsa-miR-302e	1	0	0	1	1	1	GPR146	G protein-coupled receptor 146
hsa-miR-302e	1	0	1	0	1	1	TRPS1	trichorhinophalangeal syndrome I
hsa-miR-302e	1	0	1	1	1	1	FAM123A	family with sequence similarity 123A
hsa-miR-302e	1	0	1	1	1	1	CAMTA1	calmodulin binding transcription activator 1
hsa-miR-302e	1	0	1	1	1	1	APBB2	amyloid beta (A4) precursor protein-binding, family B, member 2
hsa-miR-302e	1	0	1	1	1	1	MED12L	mediator complex subunit 12-like
hsa-miR-302e	1	0	1	1	1	1	LCLAT1	lysocardiolipin acyltransferase 1
hsa-miR-302e	1	0	1	1	1	1	FOXP1	forkhead box P1
hsa-miR-302e	1	0	1	0	0	0	HEG1	HEG homolog 1 (zebrafish)
hsa-miR-302e	1	0	1	1	1	1	ZFYVE26	zinc finger, FYVE domain containing 26
hsa-miR-302e	1	0	1	1	1	1	CD44	CD44 molecule (Indian blood group)
hsa-miR-302e	1	0	1	1	1	1	PFN2	profilin 2
hsa-miR-302e	1	0	1	0	1	1	C5orf20	chromosome 5 open reading frame 20
hsa-miR-302e	1	0	1	0	1	1	OTUD7B	OTU domain containing 7B
hsa-miR-302e	1	0	1	0	1	1	C2orf44	chromosome 2 open reading frame 44
hsa-miR-302e	1	0	0	0	0	0	TMEM170B	transmembrane protein 170B
hsa-miR-302e	1	0	1	1	1	1	CDC40	cell division cycle 40 homolog (S. cerevisiae)
hsa-miR-302e	1	0	1	1	1	1	ARID5B	AT rich interactive domain 5B (MRF1-like)
hsa-miR-302e	1	0	1	0	1	1	GUCY1A3	guanylate cyclase 1, soluble, alpha 3
hsa-miR-302e	1	0	1	1	1	1	FAM155B	family with sequence similarity 155, member B
hsa-miR-302e	1	0	1	0	1	1	TET1	tet methylcytosine dioxygenase 1
hsa-miR-302e	1	0	1	0	1	1	IRF2	interferon regulatory factor 2
hsa-miR-302e	1	0	1	1	1	1	SIPA1L3	signal-induced proliferation-associated 1 like 3
hsa-miR-302e	1	0	1	1	1	1	CCDC25	coiled-coil domain containing 25
hsa-miR-302e	1	0	1	1	1	1	ZBTB44	zinc finger and BTB domain containing 44
hsa-miR-302e	1	0	1	1	1	1	PDE8A	phosphodiesterase 8A
hsa-miR-302e	1	0	1	0	1	1	ZBTB47	zinc finger and BTB domain containing 47
hsa-miR-302e	1	0	1	1	1	1	PPP6C	protein phosphatase 6, catalytic subunit
hsa-miR-302e	1	0	1	0	1	1	MRPS25	mitochondrial ribosomal protein S25
hsa-miR-302e	1	0	1	1	1	1	UBE2B	ubiquitin-conjugating enzyme E2B
hsa-miR-302e	1	0	1	1	1	1	CREBRF	CREB3 regulatory factor
hsa-miR-302e	1	0	1	1	1	1	C7orf43	chromosome 7 open reading frame 43
hsa-miR-302e	1	0	1	0	1	1	MNT	MAX binding protein
hsa-miR-302e	1	0	1	0	1	1	PPARA	peroxisome proliferator-activated receptor alpha
hsa-miR-302e	1	0	1	1	1	1	DCX	doublecortin
hsa-miR-302e	1	0	1	0	0	0	PPP1R10	protein phosphatase 1, regulatory subunit 10
hsa-miR-302e	1	0	1	0	1	1	NCOA7	nuclear receptor coactivator 7
hsa-miR-302e	1	0	0	1	1	1	PRMT6	protein arginine methyltransferase 6
hsa-miR-302e	1	0	1	1	1	1	BAMBI	BMP and activin membrane-bound inhibitor homolog (Xenopus laevis)
hsa-miR-302e	1	0	1	1	1	1	ARHGAP30	Rho GTPase activating protein 30
hsa-miR-302e	1	0	1	1	0	0	ITPRIPL2	inositol 1,4,5-trisphosphate receptor interacting protein-like 2
hsa-miR-302e	1	0	1	1	1	1	TP53INP1	tumor protein p53 inducible nuclear protein 1
hsa-miR-302e	1	0	1	1	1	1	CDCA7	cell division cycle associated 7
hsa-miR-302e	1	0	1	0	0	0	MSL1	male-specific lethal 1 homolog (Drosophila)
hsa-miR-302e	1	0	1	1	1	1	RSF1	remodeling and spacing factor 1
hsa-miR-302e	1	0	1	0	1	1	DIEXF	digestive organ expansion factor homolog (zebrafish)
hsa-miR-302e	1	0	1	1	0	0	WDR45	WD repeat domain 45
hsa-miR-302e	1	0	1	1	1	1	MFN2	mitofusin 2
hsa-miR-302e	1	0	0	1	0	0	ISM1	isthmin 1 homolog (zebrafish)
hsa-miR-302e	1	0	1	1	1	1	DNAJC27	DnaJ (Hsp40) homolog, subfamily C, member 27
hsa-miR-302e	1	0	1	1	1	1	IL28RA	interleukin 28 receptor, alpha (interferon, lambda receptor)
hsa-miR-302e	1	0	1	1	1	1	TRIP11	thyroid hormone receptor interactor 11
hsa-miR-302e	1	0	1	0	1	1	ZFHX4	zinc finger homeobox 4
hsa-miR-302e	1	0	1	1	0	0	FAT4	FAT tumor suppressor homolog 4 (Drosophila)
hsa-miR-302e	1	0	1	1	1	1	KLHL18	kelch-like 18 (Drosophila)
hsa-miR-302e	1	0	1	1	1	1	DCTN4	dynactin 4 (p62)
hsa-miR-302e	1	0	1	1	1	1	C11orf30	chromosome 11 open reading frame 30
hsa-miR-302e	1	0	1	1	1	1	INO80	INO80 homolog (S. cerevisiae)
hsa-miR-302e	1	0	1	0	1	1	ZKSCAN1	zinc finger with KRAB and SCAN domains 1
hsa-miR-302e	1	0	1	0	1	1	CPEB2	cytoplasmic polyadenylation element binding protein 2
hsa-miR-302e	1	0	0	1	0	0	AKAP5	A kinase (PRKA) anchor protein 5
hsa-miR-302e	1	0	1	1	0	0	IQSEC1	IQ motif and Sec7 domain 1
hsa-miR-302e	1	0	1	1	1	1	LARP4	La ribonucleoprotein domain family, member 4
hsa-miR-302e	1	0	1	1	1	1	EIF4B	eukaryotic translation initiation factor 4B
hsa-miR-302e	1	0	1	1	1	1	CYP26B1	cytochrome P450, family 26, subfamily B, polypeptide 1
hsa-miR-302e	1	0	1	1	1	1	HOXB3	homeobox B3
hsa-miR-302e	1	0	1	1	1	1	PRRX1	paired related homeobox 1
hsa-miR-302e	1	0	1	1	1	1	FAM134C	family with sequence similarity 134, member C
hsa-miR-302e	1	0	1	1	1	1	METAP1	methionyl aminopeptidase 1
hsa-miR-302e	1	0	1	1	1	1	ATP2B2	ATPase, Ca++ transporting, plasma membrane 2
hsa-miR-302e	1	0	1	0	1	1	CDK19	cyclin-dependent kinase 19
hsa-miR-302e	1	0	1	1	1	1	NR2F2	nuclear receptor subfamily 2, group F, member 2
hsa-miR-302e	1	0	1	0	1	1	UBASH3B	ubiquitin associated and SH3 domain containing B
hsa-miR-302e	1	0	1	1	1	1	AEBP2	AE binding protein 2
hsa-miR-302e	1	0	1	1	1	1	PHLPP2	PH domain and leucine rich repeat protein phosphatase 2
hsa-miR-302e	1	0	1	1	1	1	UPF3A	UPF3 regulator of nonsense transcripts homolog A (yeast)
hsa-miR-302e	1	0	1	1	1	1	NTN4	netrin 4
hsa-miR-302e	1	0	0	1	1	1	ZNF566	zinc finger protein 566
hsa-miR-302e	1	0	1	0	1	1	DCAF7	DDB1 and CUL4 associated factor 7
hsa-miR-302e	1	0	1	1	1	1	BTBD7	BTB (POZ) domain containing 7
hsa-miR-302e	1	0	1	1	1	1	ANKRD50	ankyrin repeat domain 50
hsa-miR-302e	1	0	1	0	1	1	PAPOLB	poly(A) polymerase beta (testis specific)
hsa-miR-302e	1	0	1	1	1	1	NLGN2	neuroligin 2
hsa-miR-302e	1	0	1	1	1	1	TNS1	tensin 1
hsa-miR-302e	1	0	1	0	1	1	GAB2	GRB2-associated binding protein 2
hsa-miR-302e	1	0	1	1	1	1	WDR37	WD repeat domain 37
hsa-miR-302e	1	0	1	1	0	0	KIAA0226	KIAA0226
hsa-miR-302e	1	0	1	1	1	1	DERL2	derlin 2
hsa-miR-302e	1	0	1	1	1	1	ORMDL3	ORM1-like 3 (S. cerevisiae)
hsa-miR-302e	1	0	1	1	1	1	BCL2L11	BCL2-like 11 (apoptosis facilitator)
hsa-miR-302e	1	0	1	0	1	1	E2F2	E2F transcription factor 2
hsa-miR-302e	1	0	1	1	1	1	FGD4	FYVE, RhoGEF and PH domain containing 4
hsa-miR-302e	1	0	1	1	1	1	HLF	hepatic leukemia factor
hsa-miR-302e	1	0	1	0	1	1	KLF3	Kruppel-like factor 3 (basic)
hsa-miR-302e	1	0	1	0	1	1	PURB	purine-rich element binding protein B
hsa-miR-302e	1	0	1	1	1	1	FAM117A	family with sequence similarity 117, member A
hsa-miR-302e	1	0	1	1	1	1	GNPDA2	glucosamine-6-phosphate deaminase 2
hsa-miR-302e	1	0	1	1	1	1	FZD6	frizzled family receptor 6
hsa-miR-302e	1	0	1	1	1	1	PLAGL2	pleiomorphic adenoma gene-like 2
hsa-miR-302e	1	0	1	0	1	1	FAM102B	family with sequence similarity 102, member B
hsa-miR-302e	1	0	1	1	0	0	STXBP5L	syntaxin binding protein 5-like
hsa-miR-302e	1	0	1	1	1	1	POLK	polymerase (DNA directed) kappa
hsa-miR-302e	1	0	1	0	1	1	RAB11FIP1	RAB11 family interacting protein 1 (class I)
hsa-miR-302e	1	0	1	1	1	1	TIMP3	TIMP metallopeptidase inhibitor 3
hsa-miR-302e	1	0	1	1	1	1	MIER3	mesoderm induction early response 1, family member 3
hsa-miR-302e	1	0	1	1	1	1	PLEKHM1	pleckstrin homology domain containing, family M (with RUN domain) member 1
hsa-miR-302e	1	0	1	0	1	1	NHLRC3	NHL repeat containing 3
hsa-miR-302e	1	0	1	1	1	1	NFYA	nuclear transcription factor Y, alpha
hsa-miR-302e	1	0	1	0	1	1	ZRANB1	zinc finger, RAN-binding domain containing 1
hsa-miR-302e	1	0	1	1	1	1	ISM2	isthmin 2 homolog (zebrafish)
hsa-miR-302e	1	0	1	1	1	1	ATXN1	ataxin 1
hsa-miR-302e	1	0	1	1	1	1	RSBN1L	round spermatid basic protein 1-like
hsa-miR-302e	1	0	1	1	1	1	ZBTB11	zinc finger and BTB domain containing 11
hsa-miR-302e	1	0	1	1	1	1	NR2E1	nuclear receptor subfamily 2, group E, member 1
hsa-miR-302e	1	0	1	1	0	0	ARHGEF17	Rho guanine nucleotide exchange factor (GEF) 17
hsa-miR-302e	1	0	1	0	1	1	FAM78A	family with sequence similarity 78, member A
hsa-miR-302e	1	0	1	1	1	1	C1orf173	chromosome 1 open reading frame 173
hsa-miR-302e	1	0	1	1	1	1	CAPRIN2	caprin family member 2
hsa-miR-302e	1	0	1	1	0	0	SLAIN2	SLAIN motif family, member 2
hsa-miR-302e	1	0	1	0	1	1	SS18L1	synovial sarcoma translocation gene on chromosome 18-like 1
hsa-miR-302e	1	0	0	1	1	1	VDR	vitamin D (1,25- dihydroxyvitamin D3) receptor
hsa-miR-302e	1	0	1	1	1	1	SNX21	sorting nexin family member 21
hsa-miR-302e	1	0	1	1	1	1	TSEN34	tRNA splicing endonuclease 34 homolog (S. cerevisiae)
hsa-miR-302e	1	0	1	1	1	1	KCNA1	potassium voltage-gated channel, shaker-related subfamily, member 1 (episodic ataxia with myokymia)
hsa-miR-302e	1	0	1	1	1	1	RDX	radixin
hsa-miR-302e	1	0	1	1	1	1	MPC1	mitochondrial pyruvate carrier 1
hsa-miR-302e	1	0	1	0	1	1	BMPR2	bone morphogenetic protein receptor, type II (serine/threonine kinase)
hsa-miR-302e	1	0	0	1	0	0	SH2D5	SH2 domain containing 5
hsa-miR-302e	1	0	1	1	1	1	ZMYND11	zinc finger, MYND-type containing 11
hsa-miR-302e	1	0	1	1	1	1	HNRNPUL2	heterogeneous nuclear ribonucleoprotein U-like 2
hsa-miR-302e	1	0	1	1	1	1	RAB11FIP5	RAB11 family interacting protein 5 (class I)
hsa-miR-302e	1	0	1	1	1	1	SIRPA	signal-regulatory protein alpha
hsa-miR-302e	1	0	1	1	0	0	ABL2	v-abl Abelson murine leukemia viral oncogene homolog 2
hsa-miR-302e	1	0	1	1	1	1	C3orf18	chromosome 3 open reading frame 18
hsa-miR-302e	1	0	1	1	1	1	UNK	unkempt homolog (Drosophila)
hsa-miR-302e	1	0	1	1	1	1	CORIN	corin, serine peptidase
hsa-miR-302e	1	0	1	1	1	1	BCL11A	B-cell CLL/lymphoma 11A (zinc finger protein)
hsa-miR-302e	1	0	1	1	1	1	SCN5A	sodium channel, voltage-gated, type V, alpha subunit
hsa-miR-302e	1	0	1	0	1	1	EIF2S1	eukaryotic translation initiation factor 2, subunit 1 alpha, 35kDa
hsa-miR-302e	1	0	1	1	0	0	PIP4K2A	phosphatidylinositol-5-phosphate 4-kinase, type II, alpha
hsa-miR-302e	1	0	1	0	1	1	MCL1	myeloid cell leukemia sequence 1 (BCL2-related)
hsa-miR-302e	1	0	1	0	0	0	RRAGD	Ras-related GTP binding D
hsa-miR-302e	1	0	1	0	1	1	POLR3G	polymerase (RNA) III (DNA directed) polypeptide G (32kD)
hsa-miR-302e	1	0	1	1	1	1	CNOT6	CCR4-NOT transcription complex, subunit 6
hsa-miR-302e	1	0	1	1	1	1	ELAVL2	ELAV (embryonic lethal, abnormal vision, Drosophila)-like 2 (Hu antigen B)
hsa-miR-302e	1	0	1	1	0	0	ITGB4	integrin, beta 4
hsa-miR-302e	1	1	1	1	1	1	LATS2	LATS, large tumor suppressor, homolog 2 (Drosophila)
hsa-miR-302e	1	0	1	0	0	0	ANKRD52	ankyrin repeat domain 52
hsa-miR-302e	1	0	1	1	1	1	QSER1	glutamine and serine rich 1
hsa-miR-302e	1	0	1	1	1	1	IL8	interleukin 8
hsa-miR-302e	1	0	1	1	1	1	CXCL12	chemokine (C-X-C motif) ligand 12
hsa-miR-302e	1	0	1	1	1	1	NHLH2	nescient helix loop helix 2
hsa-miR-302e	1	0	1	1	1	1	MLL3	myeloid/lymphoid or mixed-lineage leukemia 3
hsa-miR-302e	1	0	1	1	0	0	INHBB	inhibin, beta B
hsa-miR-302e	1	0	1	1	1	1	SNX9	sorting nexin 9
hsa-miR-302e	1	0	1	1	1	1	NR4A2	nuclear receptor subfamily 4, group A, member 2
hsa-miR-302e	1	0	1	1	1	1	ZBTB7A	zinc finger and BTB domain containing 7A
hsa-miR-302e	1	0	1	0	1	1	PHYHIPL	phytanoyl-CoA 2-hydroxylase interacting protein-like
hsa-miR-302e	1	0	1	0	0	0	GPR137C	G protein-coupled receptor 137C
hsa-miR-302e	1	0	1	1	1	1	HN1	hematological and neurological expressed 1
hsa-miR-302e	1	0	0	1	1	1	TAGAP	T-cell activation RhoGTPase activating protein
hsa-miR-302e	1	0	1	1	1	1	MBD2	methyl-CpG binding domain protein 2
hsa-miR-302e	1	0	1	1	1	1	ZNF25	zinc finger protein 25
hsa-miR-302e	1	0	1	1	1	1	BCL6	B-cell CLL/lymphoma 6
hsa-miR-302e	1	0	1	1	1	1	TP63	tumor protein p63
hsa-miR-302e	1	0	1	0	1	1	MXD1	MAX dimerization protein 1
hsa-miR-302e	1	0	1	1	1	1	ABCA1	ATP-binding cassette, sub-family A (ABC1), member 1
hsa-miR-302e	1	0	1	1	1	1	DMTF1	cyclin D binding myb-like transcription factor 1
hsa-miR-302e	1	0	1	1	1	1	C2orf69	chromosome 2 open reading frame 69
hsa-miR-302e	1	0	1	1	1	1	LYRM2	LYR motif containing 2
hsa-miR-302e	1	0	1	1	1	1	RABEP1	rabaptin, RAB GTPase binding effector protein 1
hsa-miR-302e	1	0	1	1	1	1	ARHGAP24	Rho GTPase activating protein 24
hsa-miR-302e	1	0	1	1	1	1	PFKP	phosphofructokinase, platelet
hsa-miR-302e	1	0	1	1	1	1	ITFG1	integrin alpha FG-GAP repeat containing 1
hsa-miR-302e	1	0	1	0	1	1	YPEL2	yippee-like 2 (Drosophila)
hsa-miR-302e	1	0	1	1	1	1	DENND5B	DENN/MADD domain containing 5B
hsa-miR-302e	1	0	1	0	1	1	TRHDE	thyrotropin-releasing hormone degrading enzyme
hsa-miR-302e	1	0	1	0	0	0	TNRC18	trinucleotide repeat containing 18
hsa-miR-302e	1	0	1	1	1	1	BCAT1	branched chain amino-acid transaminase 1, cytosolic
hsa-miR-302e	1	0	1	1	1	1	SYNC	syncoilin, intermediate filament protein
hsa-miR-302e	1	0	1	0	1	1	KIAA0513	KIAA0513
hsa-miR-302e	1	0	1	1	1	1	PCGF5	polycomb group ring finger 5
hsa-miR-302e	1	1	1	1	1	1	NFIA	nuclear factor I/A
hsa-miR-302e	1	0	1	0	1	1	CCND2	cyclin D2
hsa-miR-302e	1	0	1	1	1	1	RGL1	ral guanine nucleotide dissociation stimulator-like 1
hsa-miR-302e	1	0	1	0	1	1	MAML1	mastermind-like 1 (Drosophila)
hsa-miR-302e	1	0	1	1	1	1	ASH1L	ash1 (absent, small, or homeotic)-like (Drosophila)
hsa-miR-302e	1	0	0	1	1	1	CHAF1A	chromatin assembly factor 1, subunit A (p150)
hsa-miR-302e	1	0	1	1	1	1	AHNAK	AHNAK nucleoprotein
hsa-miR-302e	1	0	1	1	1	1	AGAP2	ArfGAP with GTPase domain, ankyrin repeat and PH domain 2
hsa-miR-302e	1	0	1	1	1	1	MYO1D	myosin ID
hsa-miR-302e	1	0	1	1	1	1	ATF6B	activating transcription factor 6 beta
hsa-miR-302e	1	0	1	0	1	1	KSR2	kinase suppressor of ras 2
hsa-miR-302e	1	0	1	0	1	1	SPOPL	speckle-type POZ protein-like
hsa-miR-302e	1	0	1	1	1	1	HAUS6	HAUS augmin-like complex, subunit 6
hsa-miR-302e	1	0	1	1	1	1	RIMKLA	ribosomal modification protein rimK-like family member A
hsa-miR-302e	1	0	1	1	1	1	TMUB2	transmembrane and ubiquitin-like domain containing 2
hsa-miR-302e	1	0	1	1	1	1	TRIM36	tripartite motif containing 36
hsa-miR-302e	1	0	0	1	1	1	SLC46A2	solute carrier family 46, member 2
hsa-miR-302e	1	0	1	1	1	1	RAB11A	RAB11A, member RAS oncogene family
hsa-miR-302e	1	0	1	1	1	1	ULK1	unc-51-like kinase 1 (C. elegans)
hsa-miR-302e	1	0	1	0	1	1	FOXJ2	forkhead box J2
hsa-miR-302e	1	0	1	1	1	1	ECT2	epithelial cell transforming sequence 2 oncogene
hsa-miR-302e	1	0	1	0	1	1	UBFD1	ubiquitin family domain containing 1
hsa-miR-302e	1	0	1	1	1	1	SLC9A2	solute carrier family 9, subfamily A (NHE2, cation proton antiporter 2), member 2
hsa-miR-302e	1	0	1	0	1	1	TMEM167A	transmembrane protein 167A
hsa-miR-302e	1	0	1	1	1	1	ZNF238	zinc finger protein 238
hsa-miR-302e	1	0	1	1	1	1	HIPK3	homeodomain interacting protein kinase 3
hsa-miR-302e	1	0	1	1	1	1	ZNF362	zinc finger protein 362
hsa-miR-302e	1	0	1	0	1	1	PIK3R3	phosphoinositide-3-kinase, regulatory subunit 3 (gamma)
hsa-miR-302e	1	0	1	0	1	1	TAPT1	transmembrane anterior posterior transformation 1
hsa-miR-302e	1	0	1	1	1	1	GOLGA1	golgin A1
hsa-miR-302e	1	0	1	1	1	1	DAZAP2	DAZ associated protein 2
hsa-miR-302e	1	0	1	1	0	0	MCCD1	mitochondrial coiled-coil domain 1
hsa-miR-302e	1	0	1	1	0	0	IRX4	iroquois homeobox 4
hsa-miR-302e	1	0	1	1	1	1	B4GALT6	UDP-Gal:betaGlcNAc beta 1,4- galactosyltransferase, polypeptide 6
hsa-miR-302e	1	0	1	1	0	0	RPS6KA1	ribosomal protein S6 kinase, 90kDa, polypeptide 1
hsa-miR-302e	1	0	1	1	1	1	LHX6	LIM homeobox 6
hsa-miR-302e	1	0	1	1	1	1	CNN1	calponin 1, basic, smooth muscle
hsa-miR-302e	1	0	1	0	1	1	KDM2A	lysine (K)-specific demethylase 2A
hsa-miR-302e	1	0	1	1	1	1	E2F5	E2F transcription factor 5, p130-binding
hsa-miR-302e	1	0	1	1	1	1	POLQ	polymerase (DNA directed), theta
hsa-miR-302e	1	0	1	1	1	1	TXNIP	thioredoxin interacting protein
hsa-miR-302e	1	0	0	1	1	1	SLC46A3	solute carrier family 46, member 3
hsa-miR-302e	1	0	1	1	1	1	LIF	leukemia inhibitory factor
hsa-miR-302e	1	0	1	1	1	1	GRHL2	grainyhead-like 2 (Drosophila)
hsa-miR-302e	1	0	1	1	1	1	ANKRD13C	ankyrin repeat domain 13C
hsa-miR-302e	1	0	1	0	1	1	ZFPM2	zinc finger protein, multitype 2
hsa-miR-302e	1	0	0	1	1	1	P2RX4	purinergic receptor P2X, ligand-gated ion channel, 4
hsa-miR-302e	1	0	1	1	0	0	FOXO3	forkhead box O3
hsa-miR-302e	1	0	1	0	1	1	ZBTB9	zinc finger and BTB domain containing 9
hsa-miR-302e	1	0	1	1	1	1	APP	amyloid beta (A4) precursor protein
hsa-miR-302e	1	0	1	1	1	1	TLE4	transducin-like enhancer of split 4 (E(sp1) homolog, Drosophila)
hsa-miR-302e	1	0	1	1	1	1	RNF6	ring finger protein (C3H2C3 type) 6
hsa-miR-302e	1	0	1	1	1	1	TMCC1	transmembrane and coiled-coil domain family 1
hsa-miR-302e	1	0	1	1	1	1	ARHGAP29	Rho GTPase activating protein 29
hsa-miR-302e	1	0	1	1	1	1	FOXK2	forkhead box K2
hsa-miR-302e	1	0	0	1	1	1	FAM57A	family with sequence similarity 57, member A
hsa-miR-302e	1	0	0	1	0	0	ZFPM1	zinc finger protein, multitype 1
hsa-miR-302e	1	0	1	1	1	1	SSX2IP	synovial sarcoma, X breakpoint 2 interacting protein
hsa-miR-302e	1	0	1	1	1	1	RASGEF1A	RasGEF domain family, member 1A
hsa-miR-302e	1	0	1	0	1	1	PAK2	p21 protein (Cdc42/Rac)-activated kinase 2
hsa-miR-302e	1	0	0	1	1	1	ZNF260	zinc finger protein 260
hsa-miR-302e	1	0	1	1	0	0	MAGI3	membrane associated guanylate kinase, WW and PDZ domain containing 3
hsa-miR-302e	1	0	1	1	1	1	ZNF236	zinc finger protein 236
hsa-miR-302e	1	0	1	1	0	0	SNX30	sorting nexin family member 30
hsa-miR-302e	1	0	1	0	0	0	HK1	hexokinase 1
hsa-miR-302e	1	0	1	0	1	1	GLCE	glucuronic acid epimerase
hsa-miR-302e	1	0	1	1	1	1	EIF5	eukaryotic translation initiation factor 5
hsa-miR-302e	1	0	1	1	1	1	TSHZ3	teashirt zinc finger homeobox 3
hsa-miR-302e	1	0	0	0	1	1	RNF216	ring finger protein 216
hsa-miR-302e	1	0	1	1	1	1	LMX1A	LIM homeobox transcription factor 1, alpha
hsa-miR-302e	1	0	1	1	1	1	DCAF12	DDB1 and CUL4 associated factor 12
hsa-miR-302e	1	0	1	1	1	1	VSX1	visual system homeobox 1
hsa-miR-302e	1	0	1	0	1	1	UVRAG	UV radiation resistance associated gene
hsa-miR-302e	1	0	1	1	1	1	ERI1	exoribonuclease 1
hsa-miR-302e	1	0	0	0	1	1	ARHGEF18	Rho/Rac guanine nucleotide exchange factor (GEF) 18
hsa-miR-302e	1	0	1	1	1	1	TRIM2	tripartite motif containing 2
hsa-miR-302e	1	0	1	1	1	1	GNB5	guanine nucleotide binding protein (G protein), beta 5
hsa-miR-302e	1	0	1	1	1	1	SLC25A27	solute carrier family 25, member 27
hsa-miR-302e	1	0	1	0	1	1	RAB6A	RAB6A, member RAS oncogene family
hsa-miR-302e	1	0	1	1	1	1	IRF9	interferon regulatory factor 9
hsa-miR-302e	1	0	1	1	1	1	AKT1	v-akt murine thymoma viral oncogene homolog 1
hsa-miR-302e	1	0	1	1	1	1	DRD1	dopamine receptor D1
hsa-miR-302e	1	0	1	1	1	1	TARDBP	TAR DNA binding protein
hsa-miR-302e	1	0	1	1	1	1	SAMD12	sterile alpha motif domain containing 12
hsa-miR-302e	1	0	1	1	1	1	DUSP2	dual specificity phosphatase 2
hsa-miR-302e	1	0	1	1	1	1	GTDC1	glycosyltransferase-like domain containing 1
hsa-miR-302e	1	0	1	1	1	1	MED13L	mediator complex subunit 13-like
hsa-miR-302e	1	0	1	0	1	1	PTPRT	protein tyrosine phosphatase, receptor type, T
hsa-miR-302e	1	0	1	1	1	1	NUPL1	nucleoporin like 1
hsa-miR-302e	0	0	1	1	0	0	ZNF862	zinc finger protein 862
hsa-miR-302e	1	0	1	1	1	1	GPATCH8	G patch domain containing 8
hsa-miR-302e	1	0	1	1	0	0	PCLO	piccolo (presynaptic cytomatrix protein)
hsa-miR-302e	0	0	1	1	0	0	FAM169A	family with sequence similarity 169, member A
hsa-miR-302e	1	0	1	0	0	0	DTX4	deltex homolog 4 (Drosophila)
hsa-miR-302e	0	0	1	1	1	1	TBC1D30	TBC1 domain family, member 30
hsa-miR-302e	1	0	1	0	1	1	ODZ2	odz, odd Oz/ten-m homolog 2 (Drosophila)
hsa-miR-302e	1	0	1	0	1	1	GPR158	G protein-coupled receptor 158
hsa-miR-302e	1	0	1	0	1	1	SRGAP3	SLIT-ROBO Rho GTPase activating protein 3
hsa-miR-302e	1	0	1	1	0	0	ATAD2B	ATPase family, AAA domain containing 2B
hsa-miR-302e	1	0	1	1	1	1	MKL2	MKL/myocardin-like 2
hsa-miR-302e	0	0	1	0	1	1	KIAA1468	KIAA1468
hsa-miR-302e	1	0	1	1	0	0	NCKAP5L	NCK-associated protein 5-like
hsa-miR-302e	1	0	1	1	1	1	ZNF532	zinc finger protein 532
hsa-miR-302e	1	0	1	1	1	1	SH3TC2	SH3 domain and tetratricopeptide repeats 2
hsa-miR-302e	1	0	1	0	0	0	RNF169	ring finger protein 169
hsa-miR-302e	1	0	1	0	0	0	ZBTB34	zinc finger and BTB domain containing 34
hsa-miR-302e	1	0	1	1	1	1	PAM	peptidylglycine alpha-amidating monooxygenase
hsa-miR-302e	1	0	1	1	1	1	UBR3	ubiquitin protein ligase E3 component n-recognin 3 (putative)
hsa-miR-302e	1	0	1	1	1	1	PAN3	PAN3 poly(A) specific ribonuclease subunit homolog (S. cerevisiae)
hsa-miR-302e	1	0	1	1	1	1	KCNMA1	potassium large conductance calcium-activated channel, subfamily M, alpha member 1
hsa-miR-302e	0	0	1	1	0	0	APH1B	anterior pharynx defective 1 homolog B (C. elegans)
hsa-miR-302e	0	0	1	1	1	1	NLRP3	NLR family, pyrin domain containing 3
hsa-miR-302e	1	0	1	0	1	1	PCDHA13	protocadherin alpha 13
hsa-miR-302e	1	0	1	1	1	1	PCDHA4	protocadherin alpha 4
hsa-miR-302e	0	0	1	1	0	0	KCNC3	potassium voltage-gated channel, Shaw-related subfamily, member 3
hsa-miR-302e	0	0	1	1	1	1	DNM1	dynamin 1
hsa-miR-302e	1	0	1	1	1	1	FMR1	fragile X mental retardation 1
hsa-miR-302e	1	0	1	1	1	1	TWF1	twinfilin, actin-binding protein, homolog 1 (Drosophila)
hsa-miR-302e	1	0	1	1	1	1	PPFIA1	protein tyrosine phosphatase, receptor type, f polypeptide (PTPRF), interacting protein (liprin), alpha 1
hsa-miR-302e	1	0	1	0	1	1	CHL1	cell adhesion molecule with homology to L1CAM (close homolog of L1)
hsa-miR-302e	1	0	1	1	1	1	NEO1	neogenin 1
hsa-miR-302e	0	0	1	1	0	0	IFT27	intraflagellar transport 27 homolog (Chlamydomonas)
hsa-miR-302e	0	0	1	1	1	1	RYR1	ryanodine receptor 1 (skeletal)
hsa-miR-302e	0	0	1	1	1	1	HLA-DQA1	major histocompatibility complex, class II, DQ alpha 1
hsa-miR-302e	1	0	1	1	1	1	PTPRK	protein tyrosine phosphatase, receptor type, K
hsa-miR-302e	0	0	1	1	0	0	SLC22A8	solute carrier family 22 (organic anion transporter), member 8
hsa-miR-302e	0	0	1	1	1	1	MYO9A	myosin IXA
hsa-miR-302e	1	0	1	1	1	1	HMGA2	high mobility group AT-hook 2
hsa-miR-302e	1	0	1	1	1	1	TLE1	transducin-like enhancer of split 1 (E(sp1) homolog, Drosophila)
hsa-miR-302e	1	0	1	1	1	1	TEAD1	TEA domain family member 1 (SV40 transcriptional enhancer factor)
hsa-miR-302e	1	0	1	1	1	1	ZFX	zinc finger protein, X-linked
hsa-miR-302e	1	0	1	0	1	1	CAV1	caveolin 1, caveolae protein, 22kDa
hsa-miR-302e	1	0	1	0	1	1	PDE7B	phosphodiesterase 7B
hsa-miR-302e	1	0	1	1	1	1	PCDH17	protocadherin 17
hsa-miR-302e	1	0	1	0	0	0	MAP3K1	mitogen-activated protein kinase kinase kinase 1, E3 ubiquitin protein ligase
hsa-miR-302e	0	0	1	1	1	1	SLC16A7	solute carrier family 16, member 7 (monocarboxylic acid transporter 2)
hsa-miR-302e	1	0	1	1	1	1	MBNL2	muscleblind-like splicing regulator 2
hsa-miR-302e	1	0	1	1	1	1	ERLIN1	ER lipid raft associated 1
hsa-miR-302e	0	0	1	1	1	1	GUCA1C	guanylate cyclase activator 1C
hsa-miR-302e	1	0	1	1	1	1	HP1BP3	heterochromatin protein 1, binding protein 3
hsa-miR-302e	0	0	1	1	1	1	DCAF6	DDB1 and CUL4 associated factor 6
hsa-miR-302e	1	0	1	1	1	1	CAB39	calcium binding protein 39
hsa-miR-302e	1	0	1	1	1	1	MYNN	myoneurin
hsa-miR-302e	0	0	1	1	1	1	CD28	CD28 molecule
hsa-miR-302e	1	0	1	1	0	0	TDRKH	tudor and KH domain containing
hsa-miR-302e	0	0	1	1	1	1	NKX3-1	NK3 homeobox 1
hsa-miR-302e	0	0	1	1	0	0	TRIM41	tripartite motif containing 41
hsa-miR-302e	1	0	1	1	1	1	ABI2	abl-interactor 2
hsa-miR-302e	1	0	1	0	1	1	PARP11	poly (ADP-ribose) polymerase family, member 11
hsa-miR-302e	0	0	1	0	1	1	ERBB2IP	erbb2 interacting protein
hsa-miR-302e	1	0	1	1	1	1	DCLRE1B	DNA cross-link repair 1B
hsa-miR-302e	1	0	1	1	1	1	LETMD1	LETM1 domain containing 1
hsa-miR-302e	1	0	1	1	1	1	CABLES1	Cdk5 and Abl enzyme substrate 1
hsa-miR-302e	0	0	1	1	1	1	SLC6A15	solute carrier family 6 (neutral amino acid transporter), member 15
hsa-miR-302e	0	0	1	1	1	1	MS4A4A	membrane-spanning 4-domains, subfamily A, member 4A
hsa-miR-302e	0	0	1	1	1	1	CASP8	caspase 8, apoptosis-related cysteine peptidase
hsa-miR-302e	1	0	1	1	1	1	RBFOX1	RNA binding protein, fox-1 homolog (C. elegans) 1
hsa-miR-302e	1	0	1	1	0	0	FOXP2	forkhead box P2
hsa-miR-302e	0	0	1	1	0	0	SLC6A13	solute carrier family 6 (neurotransmitter transporter, GABA), member 13
hsa-miR-302e	1	0	1	1	1	1	NCOA5	nuclear receptor coactivator 5
hsa-miR-302e	1	0	1	1	1	1	AFF2	AF4/FMR2 family, member 2
hsa-miR-302e	0	0	1	0	0	0	CACNA2D3	calcium channel, voltage-dependent, alpha 2/delta subunit 3
hsa-miR-302e	0	0	1	1	1	1	RANBP17	RAN binding protein 17
hsa-miR-302e	0	0	1	1	1	1	STK33	serine/threonine kinase 33
hsa-miR-302e	1	0	1	1	1	1	NAV3	neuron navigator 3
hsa-miR-302e	1	0	1	1	1	1	NAV2	neuron navigator 2
hsa-miR-302e	0	0	1	1	1	1	UBE2Q2	ubiquitin-conjugating enzyme E2Q family member 2
hsa-miR-302e	0	0	1	0	0	0	TPTEP1	transmembrane phosphatase with tensin homology pseudogene 1
hsa-miR-302e	0	0	1	1	1	1	STOX2	storkhead box 2
hsa-miR-302e	1	0	1	1	1	1	RIC8B	resistance to inhibitors of cholinesterase 8 homolog B (C. elegans)
hsa-miR-302e	1	0	1	1	1	1	PTBP3	polypyrimidine tract binding protein 3
hsa-miR-302e	0	0	1	1	1	1	RSRC2	arginine/serine-rich coiled-coil 2
hsa-miR-302e	1	0	1	1	1	1	KLHDC8B	kelch domain containing 8B
hsa-miR-302e	0	0	1	1	0	0	C17orf53	chromosome 17 open reading frame 53
hsa-miR-302e	0	0	1	0	0	0	DUXAP10	double homeobox A pseudogene 10
hsa-miR-302e	0	0	1	1	0	0	RPS15A	ribosomal protein S15a
hsa-miR-302e	0	0	1	0	0	0	MIRLET7BHG	MIRLET7B host gene (non-protein coding)
hsa-miR-302e	1	0	1	1	1	1	PHF20L1	PHD finger protein 20-like 1
hsa-miR-302e	1	0	1	0	1	1	C14orf101	chromosome 14 open reading frame 101
hsa-miR-302e	1	0	1	0	1	1	STK40	serine/threonine kinase 40
hsa-miR-302e	1	0	1	0	1	1	REPIN1	replication initiator 1
hsa-miR-302e	1	0	1	1	1	1	LRP4	low density lipoprotein receptor-related protein 4
hsa-miR-302e	0	0	1	1	1	1	PLEKHS1	pleckstrin homology domain containing, family S member 1
hsa-miR-302e	0	0	1	1	1	1	SPRTN	SprT-like N-terminal domain
hsa-miR-302e	1	0	1	1	1	1	MARK1	MAP/microtubule affinity-regulating kinase 1
hsa-miR-302e	0	0	1	0	0	0	KIAA0664L3	KIAA0664-like 3
hsa-miR-302e	0	0	1	0	0	0	LOC283508	uncharacterized LOC283508
hsa-miR-302e	0	0	1	1	0	0	FAM153B	family with sequence similarity 153, member B
hsa-miR-302e	0	0	1	1	1	1	PRR5L	proline rich 5 like
hsa-miR-302e	0	0	1	0	0	0	CHST9-AS1	CHST9 antisense RNA 1
hsa-miR-302e	0	0	1	0	0	0	LOC100131060	uncharacterized LOC100131060
hsa-miR-302e	0	0	1	0	0	0	LOC154092	uncharacterized LOC154092
hsa-miR-302e	0	0	1	0	0	0	FLJ30838	uncharacterized LOC400955
hsa-miR-302e	0	0	1	0	0	0	FLJ31104	uncharacterized LOC441072
hsa-miR-302e	1	0	1	1	1	1	SFXN2	sideroflexin 2
hsa-miR-302e	1	0	1	1	1	1	MAP3K7	mitogen-activated protein kinase kinase kinase 7
hsa-miR-302e	1	0	1	0	1	1	RNF165	ring finger protein 165
hsa-miR-302e	0	0	1	1	1	1	ANKRD36B	ankyrin repeat domain 36B
hsa-miR-302e	0	0	1	0	0	0	LOC440894	uncharacterized LOC440894
hsa-miR-302e	1	0	1	1	1	1	CLCN5	chloride channel, voltage-sensitive 5
hsa-miR-302e	0	0	1	1	1	1	DST	dystonin
hsa-miR-302e	1	0	1	1	0	0	QARS	glutaminyl-tRNA synthetase
hsa-miR-302e	0	0	1	0	0	0	MAGI1-IT1	MAGI1 intronic transcript 1 (non-protein coding)
hsa-miR-302e	0	0	1	1	1	1	XAF1	XIAP associated factor 1
hsa-miR-302e	0	0	1	1	0	0	COMMD4	COMM domain containing 4
hsa-miR-302e	1	0	1	1	0	0	ZBTB37	zinc finger and BTB domain containing 37
hsa-miR-302e	0	0	1	0	1	1	CHURC1	churchill domain containing 1
hsa-miR-302e	1	0	1	1	1	1	ANKRD29	ankyrin repeat domain 29
hsa-miR-302e	0	0	1	1	0	0	CD320	CD320 molecule
hsa-miR-302e	0	0	1	0	1	1	CCDC68	coiled-coil domain containing 68
hsa-miR-302e	0	0	1	1	0	0	ANKAR	ankyrin and armadillo repeat containing
hsa-miR-302e	0	0	1	1	0	0	PIGO	phosphatidylinositol glycan anchor biosynthesis, class O
hsa-miR-302e	1	0	1	1	1	1	FAM73B	family with sequence similarity 73, member B
hsa-miR-302e	0	0	1	0	1	1	CDHR3	cadherin-related family member 3
hsa-miR-302e	0	0	1	1	1	1	STBD1	starch binding domain 1
hsa-miR-302e	0	0	1	0	0	0	LOC643837	uncharacterized LOC643837
hsa-miR-302e	1	0	1	1	1	1	AMMECR1	Alport syndrome, mental retardation, midface hypoplasia and elliptocytosis chromosomal region gene 1
hsa-miR-302e	0	0	1	0	0	0	LOC440910	uncharacterized LOC440910
hsa-miR-302e	1	0	1	1	1	1	FBXW2	F-box and WD repeat domain containing 2
hsa-miR-302e	1	0	1	1	1	1	TSN	translin
hsa-miR-302e	1	0	1	0	1	1	ERC1	ELKS/RAB6-interacting/CAST family member 1
hsa-miR-302e	0	0	1	1	1	1	NRCAM	neuronal cell adhesion molecule
hsa-miR-302e	0	0	1	1	0	0	METTL3	methyltransferase like 3
hsa-miR-302e	1	0	1	1	0	0	TSEN54	tRNA splicing endonuclease 54 homolog (S. cerevisiae)
hsa-miR-302e	0	0	1	0	0	0	ZNF806	zinc finger protein 806
hsa-miR-302e	1	0	1	1	1	1	GALNTL2	UDP-N-acetyl-alpha-D-galactosamine:polypeptide N-acetylgalactosaminyltransferase-like 2
hsa-miR-302e	0	0	1	1	1	1	WBSCR17	Williams-Beuren syndrome chromosome region 17
hsa-miR-302e	0	0	1	0	0	0	LOC730101	uncharacterized LOC730101
hsa-miR-302e	0	0	1	1	1	1	SIRPB2	signal-regulatory protein beta 2
hsa-miR-302e	1	0	1	1	1	1	SPATS2	spermatogenesis associated, serine-rich 2
hsa-miR-302e	1	0	1	1	1	1	ZC3H11A	zinc finger CCCH-type containing 11A
hsa-miR-302e	0	0	1	1	1	1	VDAC1	voltage-dependent anion channel 1
hsa-miR-302e	1	0	1	1	1	1	GAPVD1	GTPase activating protein and VPS9 domains 1
hsa-miR-302e	0	0	1	0	0	0	ZNF815P	zinc finger protein 815, pseudogene
hsa-miR-302e	0	0	1	0	0	0	OTUD1	OTU domain containing 1
hsa-miR-302e	1	0	1	0	1	1	KBTBD8	kelch repeat and BTB (POZ) domain containing 8
hsa-miR-302e	1	0	1	1	1	1	CCDC141	coiled-coil domain containing 141
hsa-miR-302e	1	0	1	1	1	1	CDV3	CDV3 homolog (mouse)
hsa-miR-302e	0	0	1	0	0	0	LOC400680	uncharacterized LOC400680
hsa-miR-302e	0	0	1	1	1	1	PPFIBP2	PTPRF interacting protein, binding protein 2 (liprin beta 2)
hsa-miR-302e	1	0	1	1	1	1	GOLGA8B	golgin A8 family, member B
hsa-miR-302e	1	0	1	1	1	1	HOOK1	hook homolog 1 (Drosophila)
hsa-miR-302e	0	0	1	1	1	1	ATP9B	ATPase, class II, type 9B
hsa-miR-302e	0	0	1	0	0	0	LOC100130954	uncharacterized LOC100130954
hsa-miR-302e	0	0	1	1	1	1	ARFGAP2	ADP-ribosylation factor GTPase activating protein 2
hsa-miR-302e	1	0	1	1	1	1	LARP1B	La ribonucleoprotein domain family, member 1B
hsa-miR-302e	0	0	1	1	0	0	FBXO18	F-box protein, helicase, 18
hsa-miR-302e	0	0	1	1	0	0	MARCH10	membrane-associated ring finger (C3HC4) 10, E3 ubiquitin protein ligase
hsa-miR-302e	1	0	1	1	1	1	ZBTB4	zinc finger and BTB domain containing 4
hsa-miR-302e	1	0	1	1	1	1	ZNF275	zinc finger protein 275
hsa-miR-302e	0	0	1	1	1	1	FRMPD2	FERM and PDZ domain containing 2
hsa-miR-302e	1	0	1	0	1	1	KCNK2	potassium channel, subfamily K, member 2
hsa-miR-302e	1	0	1	1	1	1	MBTD1	mbt domain containing 1
hsa-miR-302e	1	0	1	1	1	1	ABR	active BCR-related
hsa-miR-302e	1	0	1	1	1	1	ERBB3	v-erb-b2 erythroblastic leukemia viral oncogene homolog 3 (avian)
hsa-miR-302e	1	0	1	1	1	1	CORO2B	coronin, actin binding protein, 2B
hsa-miR-302e	0	0	1	1	1	1	ATPBD4	ATP binding domain 4
hsa-miR-302e	1	0	1	1	1	1	CTGF	connective tissue growth factor
hsa-miR-302e	0	0	1	1	0	0	LOC442075	uncharacterized LOC442075
hsa-miR-302e	0	0	1	1	1	1	RBM46	RNA binding motif protein 46
hsa-miR-302e	0	0	1	1	1	1	C18orf54	chromosome 18 open reading frame 54
hsa-miR-302e	1	0	1	0	1	1	GPR180	G protein-coupled receptor 180
hsa-miR-302e	0	0	1	1	0	0	HS3ST5	heparan sulfate (glucosamine) 3-O-sulfotransferase 5
hsa-miR-302e	0	0	1	0	0	0	RPL23AP53	ribosomal protein L23a pseudogene 53
hsa-miR-302e	1	0	1	0	1	1	FNDC3B	fibronectin type III domain containing 3B
hsa-miR-302e	0	0	1	1	0	0	TRIM46	tripartite motif containing 46
hsa-miR-302e	0	0	1	0	0	0	LOC440993	uncharacterized LOC440993
hsa-miR-302e	1	0	1	0	1	1	NBR1	neighbor of BRCA1 gene 1
hsa-miR-302e	1	0	1	1	1	1	ADAMTSL1	ADAMTS-like 1
hsa-miR-302e	1	0	1	0	1	1	CYB561D1	cytochrome b-561 domain containing 1
hsa-miR-302e	1	0	1	1	1	1	CHMP3	charged multivesicular body protein 3
hsa-miR-302e	0	0	1	1	1	1	SQRDL	sulfide quinone reductase-like (yeast)
hsa-miR-302e	0	0	1	0	1	1	GALNT13	UDP-N-acetyl-alpha-D-galactosamine:polypeptide N-acetylgalactosaminyltransferase 13 (GalNAc-T13)
hsa-miR-302e	0	0	1	0	1	1	RUFY4	RUN and FYVE domain containing 4
hsa-miR-302e	0	0	1	1	1	1	AKTIP	AKT interacting protein
hsa-miR-302e	0	0	1	1	1	1	MSH2	mutS homolog 2, colon cancer, nonpolyposis type 1 (E. coli)
hsa-miR-302e	0	0	1	0	1	1	NEK1	NIMA (never in mitosis gene a)-related kinase 1
hsa-miR-302e	0	0	1	1	1	1	ARIH1	ariadne homolog, ubiquitin-conjugating enzyme E2 binding protein, 1 (Drosophila)
hsa-miR-302e	0	0	1	1	1	1	TTLL5	tubulin tyrosine ligase-like family, member 5
hsa-miR-302e	0	0	1	0	0	0	DNAJC5B	DnaJ (Hsp40) homolog, subfamily C, member 5 beta
hsa-miR-302e	1	0	1	1	1	1	SLC25A36	solute carrier family 25 (pyrimidine nucleotide carrier ), member 36
hsa-miR-302e	1	0	1	1	1	1	GOLGA8A	golgin A8 family, member A
hsa-miR-302e	0	0	1	1	0	0	WDR11	WD repeat domain 11
hsa-miR-302e	0	0	1	1	1	1	TAOK2	TAO kinase 2
hsa-miR-302e	0	0	1	1	1	1	SYNJ2	synaptojanin 2
hsa-miR-302e	1	0	1	1	1	1	CTTNBP2NL	CTTNBP2 N-terminal like
hsa-miR-302e	1	0	1	0	1	1	GRIN3A	glutamate receptor, ionotropic, N-methyl-D-aspartate 3A
hsa-miR-302e	0	0	1	1	1	1	ARL13B	ADP-ribosylation factor-like 13B
hsa-miR-302e	0	0	1	0	1	1	GAB3	GRB2-associated binding protein 3
hsa-miR-302e	0	0	1	1	1	1	BEND7	BEN domain containing 7
hsa-miR-302e	0	0	1	0	0	0	ZNF720	zinc finger protein 720
hsa-miR-302e	1	0	1	0	1	1	HNRNPA3	heterogeneous nuclear ribonucleoprotein A3
hsa-miR-302e	0	0	1	1	1	1	YAP1	Yes-associated protein 1
hsa-miR-302e	0	0	1	1	1	1	NEK9	NIMA (never in mitosis gene a)- related kinase 9
hsa-miR-302e	0	0	1	1	1	1	U2AF1	U2 small nuclear RNA auxiliary factor 1
hsa-miR-302e	1	0	1	1	1	1	FBXO3	F-box protein 3
hsa-miR-302e	1	0	1	1	1	1	SBF2	SET binding factor 2
hsa-miR-302e	0	0	1	1	1	1	INPP5B	inositol polyphosphate-5-phosphatase, 75kDa
hsa-miR-302e	1	0	1	0	1	1	GPCPD1	glycerophosphocholine phosphodiesterase GDE1 homolog (S. cerevisiae)
hsa-miR-302e	0	0	1	0	1	1	PAPD4	PAP associated domain containing 4
hsa-miR-302e	1	0	1	1	1	1	LPP	LIM domain containing preferred translocation partner in lipoma
hsa-miR-302e	1	0	1	1	1	1	FAM126A	family with sequence similarity 126, member A
hsa-miR-302e	0	0	1	0	1	1	PLEKHM1P	pleckstrin homology domain containing, family M (with RUN domain) member 1 pseudogene
hsa-miR-302e	0	0	1	1	1	1	NARG2	NMDA receptor regulated 2
hsa-miR-302e	0	0	1	1	0	0	TMEM116	transmembrane protein 116
hsa-miR-302e	1	0	1	0	1	1	CLINT1	clathrin interactor 1
hsa-miR-302e	1	0	1	1	1	1	MARCH7	membrane-associated ring finger (C3HC4) 7, E3 ubiquitin protein ligase
hsa-miR-302e	1	0	1	1	1	1	IL17RD	interleukin 17 receptor D
hsa-miR-302e	1	0	1	1	1	1	STXBP5	syntaxin binding protein 5 (tomosyn)
hsa-miR-302e	0	0	1	0	1	1	SYNPO2	synaptopodin 2
hsa-miR-302e	0	0	1	1	1	1	AMOTL1	angiomotin like 1
hsa-miR-302e	1	0	1	1	1	1	RNF38	ring finger protein 38
hsa-miR-302e	1	0	1	1	1	1	RCAN2	regulator of calcineurin 2
hsa-miR-302e	1	0	1	1	1	1	CNRIP1	cannabinoid receptor interacting protein 1
hsa-miR-302e	1	0	1	1	1	1	PBRM1	polybromo 1
hsa-miR-302e	1	0	1	1	1	1	RAI14	retinoic acid induced 14
hsa-miR-302e	0	0	1	1	1	1	MFAP5	microfibrillar associated protein 5
hsa-miR-302e	1	0	1	1	1	1	TMCC2	transmembrane and coiled-coil domain family 2
hsa-miR-302e	0	0	1	1	1	1	PIGG	phosphatidylinositol glycan anchor biosynthesis, class G
hsa-miR-302e	0	0	1	1	0	0	SH2D6	SH2 domain containing 6
hsa-miR-302e	1	0	1	1	1	1	MECP2	methyl CpG binding protein 2 (Rett syndrome)
hsa-miR-302e	0	0	1	1	0	0	USP27X	ubiquitin specific peptidase 27, X-linked
hsa-miR-302e	1	0	1	1	1	1	QKI	QKI, KH domain containing, RNA binding
hsa-miR-302e	0	0	1	1	1	1	IYD	iodotyrosine deiodinase
hsa-miR-302e	1	0	1	0	1	1	FAM46A	family with sequence similarity 46, member A
hsa-miR-302e	0	0	1	1	1	1	SNX11	sorting nexin 11
hsa-miR-302e	0	0	1	1	1	1	PTDSS1	phosphatidylserine synthase 1
hsa-miR-302e	1	0	1	1	1	1	KIAA1191	KIAA1191
hsa-miR-302e	1	0	1	1	1	1	U2SURP	U2 snRNP-associated SURP domain containing
hsa-miR-302e	0	0	1	1	0	0	PRR11	proline rich 11
hsa-miR-302e	0	0	1	1	1	1	TMEM30A	transmembrane protein 30A
hsa-miR-302e	1	0	1	1	1	1	GATAD2A	GATA zinc finger domain containing 2A
hsa-miR-302e	1	0	1	1	0	0	BSCL2	Berardinelli-Seip congenital lipodystrophy 2 (seipin)
hsa-miR-302e	0	0	1	1	1	1	GNL3L	guanine nucleotide binding protein-like 3 (nucleolar)-like
hsa-miR-302e	0	0	1	1	0	0	CAPNS1	calpain, small subunit 1
hsa-miR-302e	1	0	1	1	1	1	ETF1	eukaryotic translation termination factor 1
hsa-miR-302e	1	0	1	1	1	1	PAPOLA	poly(A) polymerase alpha
hsa-miR-302e	0	0	1	0	0	0	KLHL15	kelch-like 15 (Drosophila)
hsa-miR-302e	0	0	1	1	1	1	RDH11	retinol dehydrogenase 11 (all-trans/9-cis/11-cis)
hsa-miR-302e	1	0	1	1	1	1	ARHGEF9	Cdc42 guanine nucleotide exchange factor (GEF) 9
hsa-miR-302e	1	0	1	1	1	1	SUZ12	suppressor of zeste 12 homolog (Drosophila)
hsa-miR-302e	1	0	1	1	1	1	SUV420H2	suppressor of variegation 4-20 homolog 2 (Drosophila)
hsa-miR-302e	0	0	1	0	1	1	TP53RK	TP53 regulating kinase
hsa-miR-302e	0	0	1	1	0	0	C16orf91	chromosome 16 open reading frame 91
hsa-miR-302e	0	0	1	0	0	0	SNX29P2	sorting nexin 29 pseudogene 2
hsa-miR-302e	0	0	1	0	0	0	FLJ35390	uncharacterized LOC255031
hsa-miR-302e	0	0	1	1	1	1	TRIM4	tripartite motif containing 4
hsa-miR-302e	0	0	1	0	0	0	EVPLL	envoplakin-like
hsa-miR-302e	1	0	1	1	1	1	B3GNT5	UDP-GlcNAc:betaGal beta-1,3-N-acetylglucosaminyltransferase 5
hsa-miR-302e	0	0	1	1	1	1	ZNF589	zinc finger protein 589
hsa-miR-302e	0	0	1	1	1	1	CASC1	cancer susceptibility candidate 1
hsa-miR-302e	1	0	1	0	0	0	KCNU1	potassium channel, subfamily U, member 1
hsa-miR-302e	0	0	1	0	0	0	C3orf55	chromosome 3 open reading frame 55
hsa-miR-302e	0	0	1	1	0	0	SWI5	SWI5 recombination repair homolog (yeast)
hsa-miR-302e	0	0	1	1	1	1	PIP5K1B	phosphatidylinositol-4-phosphate 5-kinase, type I, beta
hsa-miR-302e	1	0	1	1	1	1	MUM1L1	melanoma associated antigen (mutated) 1-like 1
hsa-miR-302e	1	0	1	1	1	1	PITPNB	phosphatidylinositol transfer protein, beta
hsa-miR-302e	1	0	1	1	1	1	RCOR3	REST corepressor 3
hsa-miR-302e	1	0	1	1	1	1	GLUL	glutamate-ammonia ligase
hsa-miR-302e	1	0	1	1	1	1	CCNG2	cyclin G2
hsa-miR-302e	0	0	1	0	0	0	LOC643648	uncharacterized LOC643648
hsa-miR-302e	1	0	1	1	1	1	DCLK2	doublecortin-like kinase 2
hsa-miR-302e	1	0	1	1	1	1	CEP76	centrosomal protein 76kDa
hsa-miR-302e	1	0	1	0	1	1	KCTD2	potassium channel tetramerisation domain containing 2
hsa-miR-302e	1	0	1	1	1	1	PCDHA5	protocadherin alpha 5
hsa-miR-302e	1	0	1	1	1	1	CUL1	cullin 1
hsa-miR-302e	1	0	1	0	1	1	PDE12	phosphodiesterase 12
hsa-miR-302e	0	0	1	0	0	0	TMPRSS12	transmembrane (C-terminal) protease, serine 12
hsa-miR-302e	0	0	1	1	1	1	C12orf29	chromosome 12 open reading frame 29
hsa-miR-302e	0	0	1	0	1	1	KSR1	kinase suppressor of ras 1
hsa-miR-302e	0	0	1	1	1	1	APBB1IP	amyloid beta (A4) precursor protein-binding, family B, member 1 interacting protein
hsa-miR-302e	0	0	1	0	0	0	LOC339862	uncharacterized LOC339862
hsa-miR-302e	0	0	1	1	1	1	FAM171B	family with sequence similarity 171, member B
hsa-miR-302e	1	0	1	1	1	1	ELMO2	engulfment and cell motility 2
hsa-miR-302e	1	0	1	1	1	1	HECTD2	HECT domain containing E3 ubiquitin protein ligase 2
hsa-miR-302e	0	0	1	0	0	0	LOC654433	uncharacterized LOC654433
hsa-miR-302e	0	0	1	0	0	0	LOC286184	uncharacterized LOC286184
hsa-miR-302e	1	0	1	1	1	1	SOX6	SRY (sex determining region Y)-box 6
hsa-miR-302e	0	0	1	0	0	0	LOC100134868	uncharacterized LOC100134868
hsa-miR-302e	1	0	1	1	1	1	TIMP2	TIMP metallopeptidase inhibitor 2
hsa-miR-302e	0	0	1	0	0	0	TOB1-AS1	TOB1 antisense RNA 1
hsa-miR-302e	0	0	1	1	1	1	FBXL4	F-box and leucine-rich repeat protein 4
hsa-miR-302e	1	0	1	1	1	1	BVES	blood vessel epicardial substance
hsa-miR-302e	0	0	1	0	0	0	SLC7A11-AS1	SLC7A11 antisense RNA 1
hsa-miR-302e	0	0	1	0	1	1	FAM13B	family with sequence similarity 13, member B
hsa-miR-302e	0	0	1	1	1	1	VPS35	vacuolar protein sorting 35 homolog (S. cerevisiae)
hsa-miR-302e	1	0	1	1	1	1	ARPP21	cAMP-regulated phosphoprotein, 21kDa
hsa-miR-302e	0	0	1	1	0	0	FAM159A	family with sequence similarity 159, member A
hsa-miR-302e	1	0	1	1	1	1	TXNRD1	thioredoxin reductase 1
hsa-miR-302e	0	0	1	0	0	0	LOC338579	ankyrin repeat domain-containing protein 30B pseudogene
hsa-miR-302e	0	0	1	0	0	0	LOC157381	uncharacterized LOC157381
hsa-miR-302e	0	0	1	0	0	0	LOC339260	uncharacterized LOC339260
hsa-miR-302e	0	0	1	1	1	1	MICB	MHC class I polypeptide-related sequence B
hsa-miR-302e	0	0	1	1	1	1	MYO3A	myosin IIIA
hsa-miR-302e	1	0	1	1	1	1	MAMDC2	MAM domain containing 2
hsa-miR-302e	0	0	1	0	0	0	LOC283914	uncharacterized LOC283914
hsa-miR-302e	1	0	1	1	1	1	SENP1	SUMO1/sentrin specific peptidase 1
hsa-miR-302e	1	0	1	1	1	1	SON	SON DNA binding protein
hsa-miR-302e	0	0	1	0	1	1	FBXO42	F-box protein 42
hsa-miR-302e	0	0	1	0	0	0	INHBA-AS1	INHBA antisense RNA 1
hsa-miR-302e	0	0	1	1	0	0	OXLD1	oxidoreductase-like domain containing 1
hsa-miR-302e	1	0	1	1	1	1	ANKRD46	ankyrin repeat domain 46
hsa-miR-302e	0	0	1	0	0	0	BMS1P6	BMS1 pseudogene 6
hsa-miR-302e	1	0	1	1	1	1	ZFP91	zinc finger protein 91 homolog (mouse)
hsa-miR-302e	1	0	1	1	1	1	YWHAZ	tyrosine 3-monooxygenase/tryptophan 5-monooxygenase activation protein, zeta polypeptide
hsa-miR-302e	0	0	1	1	1	1	IDI1	isopentenyl-diphosphate delta isomerase 1
hsa-miR-302e	1	0	1	1	1	1	ZEB2	zinc finger E-box binding homeobox 2
hsa-miR-302e	0	0	1	1	0	0	AGAP11	ankyrin repeat and GTPase domain Arf GTPase activating protein 11
hsa-miR-302e	0	0	1	1	0	0	C8orf31	chromosome 8 open reading frame 31
hsa-miR-302e	0	0	1	0	0	0	GNN	Grp94 neighboring nucleotidase pseudogene
hsa-miR-302e	0	0	1	1	0	0	CLIC1	chloride intracellular channel 1
hsa-miR-302e	1	0	1	1	1	1	ADCY6	adenylate cyclase 6
hsa-miR-302e	0	0	1	1	1	1	TRIM6	tripartite motif containing 6
hsa-miR-302e	0	0	1	1	0	0	PLAC1	placenta-specific 1
hsa-miR-302e	0	0	1	1	1	1	KCTD18	potassium channel tetramerisation domain containing 18
hsa-miR-302e	1	0	1	0	1	1	MAGIX	MAGI family member, X-linked
hsa-miR-302e	1	0	1	1	1	1	SLC26A7	solute carrier family 26, member 7
hsa-miR-302e	1	0	1	1	1	1	MYEF2	myelin expression factor 2
hsa-miR-302e	0	0	1	0	0	0	PTGER4P2	prostaglandin E receptor 4 (subtype EP4) pseudogene 2
hsa-miR-302e	0	0	1	1	0	0	RELA	v-rel reticuloendotheliosis viral oncogene homolog A (avian)
hsa-miR-302e	0	0	1	1	0	0	CYP4F30P	cytochrome P450, family 4, subfamily F, polypeptide 30, pseudogene
hsa-miR-302e	0	0	1	1	1	1	MSTO1	misato homolog 1 (Drosophila)
hsa-miR-302e	0	0	1	0	0	0	AQP7P2	aquaporin 7 pseudogene 2
hsa-miR-302e	0	0	1	0	0	0	JPX	JPX transcript, XIST activator (non-protein coding)
hsa-miR-302e	1	0	1	1	1	1	WNT5A	wingless-type MMTV integration site family, member 5A
hsa-miR-302e	1	0	1	0	1	1	AMMECR1L	AMME chromosomal region gene 1-like
hsa-miR-302e	1	0	1	1	1	1	EIF2AK4	eukaryotic translation initiation factor 2 alpha kinase 4
hsa-miR-302e	0	0	1	1	1	1	HOXD8	homeobox D8
hsa-miR-302e	0	0	1	1	1	1	XG	Xg blood group
hsa-miR-302e	1	0	1	0	1	1	VANGL2	vang-like 2 (van gogh, Drosophila)
hsa-miR-302e	0	0	1	0	0	0	GUSBP9	glucuronidase, beta pseudogene 9
hsa-miR-302e	1	0	1	1	1	1	SUV420H1	suppressor of variegation 4-20 homolog 1 (Drosophila)
hsa-miR-302e	1	0	1	1	1	1	TET2	tet methylcytosine dioxygenase 2
hsa-miR-302e	1	0	1	1	1	1	SLK	STE20-like kinase
hsa-miR-302e	0	0	1	0	0	0	LRRC37A11P	leucine rich repeat containing 37, member A11, pseudogene
hsa-miR-302e	1	0	1	1	1	1	TMEM64	transmembrane protein 64
hsa-miR-302e	1	0	1	0	1	1	PRDM10	PR domain containing 10
hsa-miR-302e	1	0	1	1	1	1	OTUD4	OTU domain containing 4
hsa-miR-302e	0	0	1	0	0	0	FAM27E3	family with sequence similarity 27, member E3
hsa-miR-302e	0	0	1	1	0	0	RGSL1	regulator of G-protein signaling like 1
hsa-miR-302e	1	0	1	1	1	1	ANK2	ankyrin 2, neuronal
hsa-miR-302e	0	0	1	0	1	1	RBM44	RNA binding motif protein 44
hsa-miR-302e	0	0	1	1	1	1	SLC22A23	solute carrier family 22, member 23
hsa-miR-302e	1	0	1	1	1	1	MLLT10	myeloid/lymphoid or mixed-lineage leukemia (trithorax homolog, Drosophila); translocated to, 10
hsa-miR-302e	0	0	1	1	0	0	TTC21A	tetratricopeptide repeat domain 21A
hsa-miR-302e	0	0	1	1	0	0	HSF4	heat shock transcription factor 4
hsa-miR-302e	0	0	1	0	0	0	FAM225B	family with sequence similarity 225, member B (non-protein coding)
hsa-miR-302e	0	0	1	0	0	0	SMA4	glucuronidase, beta pseudogene
hsa-miR-302e	0	0	1	0	0	0	LOC100133207	uncharacterized LOC100133207
hsa-miR-302e	0	0	1	0	0	0	FLJ39632	uncharacterized LOC642477
hsa-miR-302e	0	0	1	0	0	0	ADCY10P1	adenylate cyclase 10 (soluble) pseudogene 1
hsa-miR-302e	1	0	1	1	1	1	RBL2	retinoblastoma-like 2 (p130)
hsa-miR-302e	1	0	1	1	1	1	RAB7A	RAB7A, member RAS oncogene family
hsa-miR-302e	0	0	1	0	1	1	FEZ2	fasciculation and elongation protein zeta 2 (zygin II)
hsa-miR-302e	0	0	1	1	1	1	TRDMT1	tRNA aspartic acid methyltransferase 1
hsa-miR-302e	1	0	1	1	1	1	CCNG1	cyclin G1
hsa-miR-302e	1	0	1	1	0	0	CCDC30	coiled-coil domain containing 30
hsa-miR-302e	1	0	1	0	1	1	GALNT4	UDP-N-acetyl-alpha-D-galactosamine:polypeptide N-acetylgalactosaminyltransferase 4 (GalNAc-T4)
hsa-miR-302e	0	0	1	1	1	1	PRR14L	proline rich 14-like
hsa-miR-302e	0	0	1	1	1	1	PPP1R1C	protein phosphatase 1, regulatory (inhibitor) subunit 1C
hsa-miR-302e	1	0	1	1	1	1	S100PBP	S100P binding protein
hsa-miR-302e	0	0	1	0	1	1	ANKRD36	ankyrin repeat domain 36
hsa-miR-302e	1	0	1	1	1	1	KLHL2	kelch-like 2, Mayven (Drosophila)
hsa-miR-302e	0	0	1	0	0	0	OVOS	ovostatin
hsa-miR-302e	1	0	1	1	1	1	DCAF5	DDB1 and CUL4 associated factor 5
hsa-miR-302e	0	0	1	0	0	0	LINC00338	long intergenic non-protein coding RNA 338
hsa-miR-302e	1	0	1	1	1	1	BCLAF1	BCL2-associated transcription factor 1
hsa-miR-302e	1	0	1	1	1	1	C5orf24	chromosome 5 open reading frame 24
hsa-miR-302e	1	0	1	1	1	1	EOGT	EGF domain-specific O-linked N-acetylglucosamine (GlcNAc) transferase
hsa-miR-302e	0	0	1	1	1	1	SSFA2	sperm specific antigen 2
hsa-miR-302e	0	0	1	0	0	0	DKFZp686K1684	uncharacterized LOC440034
hsa-miR-302e	1	0	1	1	1	1	LYST	lysosomal trafficking regulator
hsa-miR-302e	0	0	1	1	0	0	MARCH11	membrane-associated ring finger (C3HC4) 11
hsa-miR-302e	1	0	1	0	0	0	PLSCR5	phospholipid scramblase family, member 5
hsa-miR-302e	1	0	1	1	0	0	RAB24	RAB24, member RAS oncogene family
hsa-miR-302e	0	0	1	1	1	1	DGCR14	DiGeorge syndrome critical region gene 14
hsa-miR-302e	0	0	1	1	0	0	TMEM62	transmembrane protein 62
hsa-miR-302e	0	0	1	1	1	1	IER3	immediate early response 3
hsa-miR-302e	0	0	1	1	0	0	ITGB3BP	integrin beta 3 binding protein (beta3-endonexin)
hsa-miR-302e	1	0	1	0	1	1	BNIP3L	BCL2/adenovirus E1B 19kDa interacting protein 3-like
hsa-miR-302e	0	0	1	1	1	1	PMPCB	peptidase (mitochondrial processing) beta
hsa-miR-302e	0	0	1	0	0	0	SBDSP1	Shwachman-Bodian-Diamond syndrome pseudogene 1
hsa-miR-302e	1	0	1	1	0	0	CCM2	cerebral cavernous malformation 2
hsa-miR-302e	0	0	1	1	1	1	MTCP1	mature T-cell proliferation 1
hsa-miR-302e	0	0	1	0	1	1	CD99P1	CD99 molecule pseudogene 1
hsa-miR-302e	1	0	1	1	1	1	DRAM2	DNA-damage regulated autophagy modulator 2
hsa-miR-302e	0	0	1	1	0	0	SAC3D1	SAC3 domain containing 1
hsa-miR-302e	0	0	1	0	0	0	MEG3	maternally expressed 3 (non-protein coding)
hsa-miR-302e	0	0	1	1	0	0	NRSN2	neurensin 2
hsa-miR-302e	0	0	1	1	1	1	BMPR1A	bone morphogenetic protein receptor, type IA
hsa-miR-302e	0	0	1	1	0	0	TUSC3	tumor suppressor candidate 3
hsa-miR-302e	0	0	1	1	0	0	XRCC6	X-ray repair complementing defective repair in Chinese hamster cells 6
hsa-miR-302e	1	0	1	1	1	1	YWHAQ	tyrosine 3-monooxygenase/tryptophan 5-monooxygenase activation protein, theta polypeptide
hsa-miR-302e	1	0	1	1	1	1	ARL4A	ADP-ribosylation factor-like 4A
hsa-miR-302e	0	0	1	1	1	1	FKBP1B	FK506 binding protein 1B, 12.6 kDa
hsa-miR-302e	1	0	1	1	1	1	SYAP1	synapse associated protein 1
hsa-miR-302e	1	0	1	1	1	1	RBBP7	retinoblastoma binding protein 7
hsa-miR-302e	1	0	1	1	1	1	ANAPC16	anaphase promoting complex subunit 16
hsa-miR-302e	0	0	1	1	1	1	ZNF333	zinc finger protein 333
hsa-miR-302e	1	0	1	1	1	1	ARHGEF40	Rho guanine nucleotide exchange factor (GEF) 40
hsa-miR-302e	0	0	1	1	1	1	FAM18B1	family with sequence similarity 18, member B1
hsa-miR-302e	0	0	1	1	0	0	HEBP1	heme binding protein 1
hsa-miR-302e	0	0	1	1	1	1	PLAC8	placenta-specific 8
hsa-miR-302e	1	0	1	0	1	1	CD47	CD47 molecule
hsa-miR-302e	0	0	1	1	1	1	ZNF75D	zinc finger protein 75D
hsa-miR-302e	0	0	1	1	1	1	C9orf3	chromosome 9 open reading frame 3
hsa-miR-302e	1	0	1	1	1	1	SLMAP	sarcolemma associated protein
hsa-miR-302e	0	0	1	1	1	1	CCP110	centriolar coiled coil protein 110kDa
hsa-miR-302e	1	0	1	0	1	1	XRN1	5'-3' exoribonuclease 1
hsa-miR-302e	0	0	1	0	1	1	SYNPR	synaptoporin
hsa-miR-302e	0	0	1	0	0	0	ZNFX1-AS1	ZNFX1 antisense RNA 1
hsa-miR-302e	1	0	1	1	1	1	ZFHX3	zinc finger homeobox 3
hsa-miR-302e	0	0	1	1	1	1	GPR34	G protein-coupled receptor 34
hsa-miR-302e	0	0	1	1	1	1	PTGS1	prostaglandin-endoperoxide synthase 1 (prostaglandin G/H synthase and cyclooxygenase)
hsa-miR-302e	0	0	1	1	1	1	BBOX1	butyrobetaine (gamma), 2-oxoglutarate dioxygenase (gamma-butyrobetaine hydroxylase) 1
hsa-miR-302e	0	0	1	1	1	1	TNFSF10	tumor necrosis factor (ligand) superfamily, member 10
hsa-miR-302e	0	0	1	1	0	0	CCNA1	cyclin A1
hsa-miR-302e	1	0	1	1	1	1	LGR4	leucine-rich repeat containing G protein-coupled receptor 4
hsa-miR-302e	0	0	1	1	1	1	ALDH3B1	aldehyde dehydrogenase 3 family, member B1
hsa-miR-302e	0	0	1	1	1	1	NPR3	natriuretic peptide receptor C/guanylate cyclase C (atrionatriuretic peptide receptor C)
hsa-miR-302e	1	0	1	1	1	1	CPOX	coproporphyrinogen oxidase
hsa-miR-302e	1	0	1	0	1	1	ITGB3	integrin, beta 3 (platelet glycoprotein IIIa, antigen CD61)
hsa-miR-302e	1	0	1	0	1	1	KIT	v-kit Hardy-Zuckerman 4 feline sarcoma viral oncogene homolog
hsa-miR-302e	1	0	1	1	1	1	OCRL	oculocerebrorenal syndrome of Lowe
hsa-miR-302e	0	0	1	1	1	1	THBD	thrombomodulin
hsa-miR-302e	1	0	1	0	1	1	CYBB	cytochrome b-245, beta polypeptide
hsa-miR-302e	0	0	1	1	1	1	VHL	von Hippel-Lindau tumor suppressor, E3 ubiquitin protein ligase
hsa-miR-302e	0	0	1	1	1	1	CRX	cone-rod homeobox
hsa-miR-302e	1	0	1	1	1	1	FASLG	Fas ligand (TNF superfamily, member 6)
hsa-miR-302e	1	0	1	1	1	1	IGF1R	insulin-like growth factor 1 receptor
hsa-miR-302e	1	0	1	0	1	1	KCNJ2	potassium inwardly-rectifying channel, subfamily J, member 2
hsa-miR-302e	1	0	1	1	1	1	PTGFR	prostaglandin F receptor (FP)
hsa-miR-302e	1	0	1	1	1	1	MIR22HG	MIR22 host gene (non-protein coding)
hsa-miR-302e	1	0	1	1	1	1	TPD52L3	tumor protein D52-like 3
hsa-miR-302e	0	0	1	0	0	0	KLK2	kallikrein-related peptidase 2
hsa-miR-302e	0	0	1	0	0	0	OR8G1	olfactory receptor, family 8, subfamily G, member 1
hsa-miR-302e	1	0	1	1	1	1	HMGXB4	HMG box domain containing 4
hsa-miR-302e	1	0	1	1	1	1	KLHL31	kelch-like 31 (Drosophila)
hsa-miR-302e	0	0	1	1	0	0	TXNDC8	thioredoxin domain containing 8 (spermatozoa)
hsa-miR-302e	0	0	1	1	1	1	C1orf168	chromosome 1 open reading frame 168
hsa-miR-302e	0	0	1	1	1	1	CLEC2D	C-type lectin domain family 2, member D
hsa-miR-302e	1	0	1	1	1	1	EBF3	early B-cell factor 3
hsa-miR-302e	1	0	1	1	1	1	PLCXD3	phosphatidylinositol-specific phospholipase C, X domain containing 3
hsa-miR-302e	1	0	1	1	1	1	EDA	ectodysplasin A
hsa-miR-302e	1	0	1	0	1	1	IP6K1	inositol hexakisphosphate kinase 1
hsa-miR-302e	1	0	1	1	1	1	BRWD1	bromodomain and WD repeat domain containing 1
hsa-miR-302e	0	0	1	0	1	1	C3orf56	chromosome 3 open reading frame 56
hsa-miR-302e	1	0	1	1	1	1	CTDSPL	CTD (carboxy-terminal domain, RNA polymerase II, polypeptide A) small phosphatase-like
hsa-miR-302e	0	0	1	1	1	1	TCHHL1	trichohyalin-like 1
hsa-miR-302e	0	0	1	1	1	1	MXI1	MAX interactor 1
hsa-miR-302e	0	0	1	1	1	1	SLC35D3	solute carrier family 35, member D3
hsa-miR-302e	1	0	1	1	1	1	SHE	Src homology 2 domain containing E
hsa-miR-302e	1	0	1	1	1	1	BCL2L15	BCL2-like 15
hsa-miR-302e	0	0	1	1	0	0	PNLIPRP3	pancreatic lipase-related protein 3
hsa-miR-302e	1	0	1	1	1	1	SLC25A53	solute carrier family 25, member 53
hsa-miR-302e	1	0	1	0	1	1	SYT14L	synaptotagmin XIV-like
hsa-miR-302e	1	0	1	0	1	1	RGAG4	retrotransposon gag domain containing 4
hsa-miR-302e	0	0	1	1	1	1	LRRC66	leucine rich repeat containing 66
hsa-miR-302e	0	0	1	1	1	1	SC5DL	sterol-C5-desaturase (ERG3 delta-5-desaturase homolog, S. cerevisiae)-like
hsa-miR-302e	1	0	1	0	1	1	CLLU1	chronic lymphocytic leukemia up-regulated 1
hsa-miR-302e	1	0	1	1	1	1	YTHDC1	YTH domain containing 1
hsa-miR-302e	1	0	1	1	0	0	MANEAL	mannosidase, endo-alpha-like
hsa-miR-302e	0	0	1	0	1	1	STXBP1	syntaxin binding protein 1
hsa-miR-302e	1	0	1	1	1	1	MAGI1	membrane associated guanylate kinase, WW and PDZ domain containing 1
hsa-miR-302e	1	0	1	1	1	1	SAR1B	SAR1 homolog B (S. cerevisiae)
hsa-miR-302e	1	0	1	0	1	1	RYR2	ryanodine receptor 2 (cardiac)
hsa-miR-302e	1	0	1	1	1	1	KIAA0317	KIAA0317
hsa-miR-302e	1	0	1	0	1	1	USP9X	ubiquitin specific peptidase 9, X-linked
hsa-miR-302e	0	0	1	1	1	1	ANKRD55	ankyrin repeat domain 55
hsa-miR-302e	1	0	1	1	1	1	CHN2	chimerin (chimaerin) 2
hsa-miR-302e	1	0	1	1	1	1	FAM3C	family with sequence similarity 3, member C
hsa-miR-302e	1	0	1	1	1	1	SCN2A	sodium channel, voltage-gated, type II, alpha subunit
hsa-miR-302e	1	0	1	0	1	1	DCUN1D4	DCN1, defective in cullin neddylation 1, domain containing 4 (S. cerevisiae)
hsa-miR-302e	1	0	1	1	1	1	ZBTB8A	zinc finger and BTB domain containing 8A
hsa-miR-302e	0	0	1	1	1	1	SI	sucrase-isomaltase (alpha-glucosidase)
hsa-miR-302e	1	0	1	1	1	1	C2orf88	chromosome 2 open reading frame 88
hsa-miR-302e	0	0	1	1	1	1	FRMPD2P1	FERM and PDZ domain containing 2 pseudogene 1
hsa-miR-302e	1	0	1	0	1	1	SLC7A6	solute carrier family 7 (amino acid transporter light chain, y+L system), member 6
hsa-miR-302e	1	0	1	1	1	1	ZNF436	zinc finger protein 436
hsa-miR-302e	0	0	1	0	1	1	WTH3DI	RAB6C-like
hsa-miR-302e	1	0	1	1	1	1	ALG9	asparagine-linked glycosylation 9, alpha-1,2-mannosyltransferase homolog (S. cerevisiae)
hsa-miR-302e	1	0	1	1	1	1	DACT1	dapper, antagonist of beta-catenin, homolog 1 (Xenopus laevis)
hsa-miR-302e	1	0	1	1	1	1	DMP1	dentin matrix acidic phosphoprotein 1
hsa-miR-302e	1	0	1	1	1	1	ZNF629	zinc finger protein 629
hsa-miR-302e	0	0	1	1	1	1	IGSF5	immunoglobulin superfamily, member 5
hsa-miR-302e	0	0	1	1	1	1	TMEM202	transmembrane protein 202
hsa-miR-302e	1	0	1	0	1	1	MEGF9	multiple EGF-like-domains 9
hsa-miR-302e	1	0	1	1	1	1	MGA	MAX gene associated
hsa-miR-302e	1	0	1	1	1	1	ADCYAP1	adenylate cyclase activating polypeptide 1 (pituitary)
hsa-miR-302e	1	0	1	0	1	1	BACH1	BTB and CNC homology 1, basic leucine zipper transcription factor 1
hsa-miR-302e	1	0	1	0	1	1	KLF9	Kruppel-like factor 9
hsa-miR-302e	1	0	1	1	1	1	CAMK2D	calcium/calmodulin-dependent protein kinase II delta
hsa-miR-302e	1	0	1	0	1	1	CDK6	cyclin-dependent kinase 6
hsa-miR-302e	1	0	1	0	1	1	EFNB3	ephrin-B3
hsa-miR-302e	0	0	1	0	1	1	CXCL1	chemokine (C-X-C motif) ligand 1 (melanoma growth stimulating activity, alpha)
hsa-miR-302e	1	0	1	1	1	1	IRAK2	interleukin-1 receptor-associated kinase 2
hsa-miR-302e	1	0	1	1	1	1	AK2	adenylate kinase 2
hsa-miR-302e	1	0	1	1	1	1	AQP4	aquaporin 4
hsa-miR-302e	1	0	1	1	1	1	ARF3	ADP-ribosylation factor 3
hsa-miR-302e	0	0	1	1	1	1	BTN1A1	butyrophilin, subfamily 1, member A1
hsa-miR-302e	0	0	1	1	1	1	CD1D	CD1d molecule
hsa-miR-302e	1	0	1	1	1	1	CDC25A	cell division cycle 25 homolog A (S. pombe)
hsa-miR-302e	1	0	1	1	1	1	CLCN4	chloride channel, voltage-sensitive 4
hsa-miR-302e	0	0	1	1	1	1	SLC31A2	solute carrier family 31 (copper transporters), member 2
hsa-miR-302e	1	0	1	1	1	1	E2F3	E2F transcription factor 3
hsa-miR-302e	1	0	1	1	1	1	FGF7	fibroblast growth factor 7
hsa-miR-302e	0	0	1	1	1	1	GFAP	glial fibrillary acidic protein
hsa-miR-302e	1	0	1	1	1	1	HSPA4	heat shock 70kDa protein 4
hsa-miR-302e	1	0	1	1	1	1	IL13	interleukin 13
hsa-miR-302e	1	0	1	0	1	1	KIF3C	kinesin family member 3C
hsa-miR-302e	0	0	1	1	0	0	KRT4	keratin 4
hsa-miR-302e	0	0	1	1	1	1	TACSTD2	tumor-associated calcium signal transducer 2
hsa-miR-302e	1	0	1	1	1	1	ADAM11	ADAM metallopeptidase domain 11
hsa-miR-302e	0	0	1	1	1	1	MTAP	methylthioadenosine phosphorylase
hsa-miR-302e	1	0	1	1	1	1	NDN	necdin homolog (mouse)
hsa-miR-302e	1	0	1	1	1	1	NEUROD1	neuronal differentiation 1
hsa-miR-302e	0	0	1	1	1	1	NOV	nephroblastoma overexpressed
hsa-miR-302e	0	0	1	0	1	1	OPHN1	oligophrenin 1
hsa-miR-302e	0	0	1	1	1	1	MAPK9	mitogen-activated protein kinase 9
hsa-miR-302e	1	0	1	1	1	1	PVRL1	poliovirus receptor-related 1 (herpesvirus entry mediator C)
hsa-miR-302e	0	0	1	1	0	0	RDBP	RD RNA binding protein
hsa-miR-302e	0	0	1	1	1	1	RNASE4	ribonuclease, RNase A family, 4
hsa-miR-302e	1	0	1	0	1	1	SORT1	sortilin 1
hsa-miR-302e	0	0	1	1	1	1	UAP1	UDP-N-acteylglucosamine pyrophosphorylase 1
hsa-miR-302e	1	0	1	1	1	1	STAC	SH3 and cysteine rich domain
hsa-miR-302e	0	0	1	1	1	1	SULT2A1	sulfotransferase family, cytosolic, 2A, dehydroepiandrosterone (DHEA)-preferring, member 1
hsa-miR-302e	0	0	1	1	1	1	SUPT6H	suppressor of Ty 6 homolog (S. cerevisiae)
hsa-miR-302e	1	0	1	1	1	1	TEC	tec protein tyrosine kinase
hsa-miR-302e	0	0	1	0	1	1	ZFY	zinc finger protein, Y-linked
hsa-miR-302e	1	0	1	1	1	1	ZIC3	Zic family member 3
hsa-miR-302e	0	0	1	1	1	1	ZNF137P	zinc finger protein 137, pseudogene
hsa-miR-302e	1	0	1	0	1	1	BSN	bassoon (presynaptic cytomatrix protein)
hsa-miR-302e	1	0	1	1	1	1	PAX8	paired box 8
hsa-miR-302e	1	0	1	1	1	1	NRIP1	nuclear receptor interacting protein 1
hsa-miR-302e	1	0	1	1	1	1	DYRK2	dual-specificity tyrosine-(Y)-phosphorylation regulated kinase 2
hsa-miR-302e	1	0	1	1	1	1	CILP	cartilage intermediate layer protein, nucleotide pyrophosphohydrolase
hsa-miR-302e	0	0	1	1	1	1	JRKL	jerky homolog-like (mouse)
hsa-miR-302e	1	0	1	1	1	1	URI1	URI1, prefoldin-like chaperone
hsa-miR-302e	0	0	1	1	0	0	PEX11A	peroxisomal biogenesis factor 11 alpha
hsa-miR-302e	1	0	1	0	1	1	ST13	suppression of tumorigenicity 13 (colon carcinoma) (Hsp70 interacting protein)
hsa-miR-302e	0	0	1	1	1	1	MPZL1	myelin protein zero-like 1
hsa-miR-302e	0	0	1	1	1	1	RNF8	ring finger protein 8, E3 ubiquitin protein ligase
hsa-miR-302e	0	0	1	1	1	1	UBA3	ubiquitin-like modifier activating enzyme 3
hsa-miR-302e	1	0	1	1	1	1	CTSS	cathepsin S
hsa-miR-302e	1	0	1	1	1	1	GMFB	glia maturation factor, beta
hsa-miR-302e	1	0	1	1	1	1	HNF4G	hepatocyte nuclear factor 4, gamma
hsa-miR-302e	1	0	1	0	1	1	CYTH3	cytohesin 3
hsa-miR-302e	1	0	1	1	1	1	MED17	mediator complex subunit 17
hsa-miR-302e	1	0	1	1	1	1	ARL3	ADP-ribosylation factor-like 3
hsa-miR-302e	0	0	1	1	1	1	DDX10	DEAD (Asp-Glu-Ala-Asp) box polypeptide 10
hsa-miR-302e	1	0	1	1	1	1	EPS8	epidermal growth factor receptor pathway substrate 8
hsa-miR-302e	1	0	1	1	0	0	ERH	enhancer of rudimentary homolog (Drosophila)
hsa-miR-302e	0	0	1	0	1	1	GALNT3	UDP-N-acetyl-alpha-D-galactosamine:polypeptide N-acetylgalactosaminyltransferase 3 (GalNAc-T3)
hsa-miR-302e	1	0	1	1	1	1	DCLK1	doublecortin-like kinase 1
hsa-miR-302e	1	0	1	1	1	1	XPR1	xenotropic and polytropic retrovirus receptor 1
hsa-miR-302e	1	0	1	1	1	1	RPS6KA5	ribosomal protein S6 kinase, 90kDa, polypeptide 5
hsa-miR-302e	0	0	1	1	1	1	CALB1	calbindin 1, 28kDa
hsa-miR-302e	1	0	1	1	1	1	GABRE	gamma-aminobutyric acid (GABA) A receptor, epsilon
hsa-miR-302e	0	0	1	1	0	0	SLC17A1	solute carrier family 17 (sodium phosphate), member 1
hsa-miR-302e	0	0	1	1	1	1	CLEC2B	C-type lectin domain family 2, member B
hsa-miR-302e	1	0	1	1	1	1	GABPB1	GA binding protein transcription factor, beta subunit 1
hsa-miR-302e	1	0	1	1	1	1	GPR6	G protein-coupled receptor 6
hsa-miR-302e	1	0	1	1	0	0	NNAT	neuronatin
hsa-miR-302e	1	0	1	0	1	1	PRKAB2	protein kinase, AMP-activated, beta 2 non-catalytic subunit
hsa-miR-302e	1	0	1	0	1	1	CCDC6	coiled-coil domain containing 6
hsa-miR-302e	1	0	1	1	1	1	MED6	mediator complex subunit 6
hsa-miR-302e	1	0	1	1	1	1	LAMC2	laminin, gamma 2
hsa-miR-302e	0	0	1	1	0	0	LMNB1	lamin B1
hsa-miR-302e	1	0	1	1	1	1	LNPEP	leucyl/cystinyl aminopeptidase
hsa-miR-302e	1	0	1	1	1	1	ST8SIA4	ST8 alpha-N-acetyl-neuraminide alpha-2,8-sialyltransferase 4
hsa-miR-302e	1	0	1	1	0	0	DPP3	dipeptidyl-peptidase 3
hsa-miR-302e	1	0	1	1	1	1	UST	uronyl-2-sulfotransferase
hsa-miR-302e	1	0	1	1	1	1	NAMPT	nicotinamide phosphoribosyltransferase
hsa-miR-302e	1	0	1	1	1	1	PURA	purine-rich element binding protein A
hsa-miR-302e	0	0	1	1	1	1	LANCL1	LanC lantibiotic synthetase component C-like 1 (bacterial)
hsa-miR-302e	0	0	1	1	1	1	TRDN	triadin
hsa-miR-302e	1	0	1	1	1	1	TMEM50B	transmembrane protein 50B
hsa-miR-302e	1	0	1	1	1	1	CAPZA1	capping protein (actin filament) muscle Z-line, alpha 1
hsa-miR-302e	0	0	1	1	1	1	CSF2RA	colony stimulating factor 2 receptor, alpha, low-affinity (granulocyte-macrophage)
hsa-miR-302e	0	0	1	1	1	1	PIK3CA	phosphatidylinositol-4,5-bisphosphate 3-kinase, catalytic subunit alpha
hsa-miR-302e	1	0	1	1	1	1	TIMM17A	translocase of inner mitochondrial membrane 17 homolog A (yeast)
hsa-miR-302e	1	0	1	1	1	1	SEC23A	Sec23 homolog A (S. cerevisiae)
hsa-miR-302e	1	0	1	0	1	1	APPBP2	amyloid beta precursor protein (cytoplasmic tail) binding protein 2
hsa-miR-302e	0	0	1	1	1	1	NPC2	Niemann-Pick disease, type C2
hsa-miR-302e	1	0	1	1	1	1	DYNLT3	dynein, light chain, Tctex-type 3
hsa-miR-302e	1	0	1	1	1	1	PGRMC1	progesterone receptor membrane component 1
hsa-miR-302e	0	0	1	1	1	1	FGL2	fibrinogen-like 2
hsa-miR-302e	1	0	1	1	1	1	DIAPH2	diaphanous homolog 2 (Drosophila)
hsa-miR-302e	1	0	1	1	1	1	KAT6A	K(lysine) acetyltransferase 6A
hsa-miR-302e	1	0	1	1	1	1	RIT1	Ras-like without CAAX 1
hsa-miR-302e	1	0	1	1	1	1	SCN1A	sodium channel, voltage-gated, type I, alpha subunit
hsa-miR-302e	1	0	1	1	1	1	ADAMTS5	ADAM metallopeptidase with thrombospondin type 1 motif, 5
hsa-miR-302e	0	0	1	1	1	1	RPP14	ribonuclease P/MRP 14kDa subunit
hsa-miR-302e	1	0	1	1	1	1	TMF1	TATA element modulatory factor 1
hsa-miR-302e	1	0	1	1	1	1	VEZF1	vascular endothelial zinc finger 1
hsa-miR-302e	0	0	1	0	1	1	ZXDB	zinc finger, X-linked, duplicated B
hsa-miR-302e	1	0	1	1	1	1	HPS5	Hermansky-Pudlak syndrome 5
hsa-miR-302e	1	0	1	1	1	1	RABGAP1	RAB GTPase activating protein 1
hsa-miR-302e	1	0	1	1	1	1	MGAT4A	mannosyl (alpha-1,3-)-glycoprotein beta-1,4-N-acetylglucosaminyltransferase, isozyme A
hsa-miR-302e	1	0	1	1	1	1	LAMP5	lysosomal-associated membrane protein family, member 5
hsa-miR-302e	1	0	1	1	1	1	HS2ST1	heparan sulfate 2-O-sulfotransferase 1
hsa-miR-302e	1	0	1	0	1	1	BLOC1S6	biogenesis of lysosomal organelles complex-1, subunit 6, pallidin
hsa-miR-302e	1	0	1	1	1	1	RANBP6	RAN binding protein 6
hsa-miR-302e	0	0	1	0	1	1	TLL1	tolloid-like 1
hsa-miR-302e	1	0	1	1	1	1	TLL2	tolloid-like 2
hsa-miR-302e	0	0	1	1	1	1	CD24	CD24 molecule
hsa-miR-302e	0	0	1	0	1	1	LINC00312	long intergenic non-protein coding RNA 312
hsa-miR-302e	0	0	1	0	1	1	EMR2	egf-like module containing, mucin-like, hormone receptor-like 2
hsa-miR-302e	1	0	1	1	1	1	SOCS5	suppressor of cytokine signaling 5
hsa-miR-302e	0	0	1	1	1	1	METTL7A	methyltransferase like 7A
hsa-miR-302e	0	0	1	1	1	1	DAPK2	death-associated protein kinase 2
hsa-miR-302e	1	0	1	1	1	1	SLC7A11	solute carrier family 7 (anionic amino acid transporter light chain, xc- system), member 11
hsa-miR-302e	1	0	1	1	1	1	MTCH2	mitochondrial carrier 2
hsa-miR-302e	0	0	1	1	1	1	LAMP3	lysosomal-associated membrane protein 3
hsa-miR-302e	1	0	1	1	1	1	SERP1	stress-associated endoplasmic reticulum protein 1
hsa-miR-302e	1	0	1	1	1	1	KLHL20	kelch-like 20 (Drosophila)
hsa-miR-302e	1	0	1	1	1	1	OTX1	orthodenticle homeobox 1
hsa-miR-302e	0	0	1	1	1	1	EHD2	EH-domain containing 2
hsa-miR-302e	1	0	1	1	1	1	RALGPS1	Ral GEF with PH domain and SH3 binding motif 1
hsa-miR-302e	1	0	1	0	1	1	SERTAD2	SERTA domain containing 2
hsa-miR-302e	1	0	1	0	1	1	SCRN1	secernin 1
hsa-miR-302e	1	0	1	0	1	1	LPPR4	lipid phosphate phosphatase-related protein type 4
hsa-miR-302e	1	0	1	0	1	1	RAB11FIP2	RAB11 family interacting protein 2 (class I)
hsa-miR-302e	1	0	1	1	1	1	RAB21	RAB21, member RAS oncogene family
hsa-miR-302e	0	0	1	0	1	1	ZDHHC17	zinc finger, DHHC-type containing 17
hsa-miR-302e	1	0	1	1	1	1	DSTYK	dual serine/threonine and tyrosine protein kinase
hsa-miR-302e	1	0	1	1	1	1	ATL3	atlastin GTPase 3
hsa-miR-302e	1	0	1	1	1	1	CHD5	chromodomain helicase DNA binding protein 5
hsa-miR-302e	0	0	1	1	1	1	C10orf12	chromosome 10 open reading frame 12
hsa-miR-302e	1	0	1	1	1	1	PLA2G3	phospholipase A2, group III
hsa-miR-302e	1	0	1	0	1	1	TRIM33	tripartite motif containing 33
hsa-miR-302e	1	0	1	1	1	1	CYB5R4	cytochrome b5 reductase 4
hsa-miR-302e	1	0	1	1	1	1	AKAP11	A kinase (PRKA) anchor protein 11
hsa-miR-302e	0	0	1	1	1	1	FBXO40	F-box protein 40
hsa-miR-302e	1	0	1	1	1	1	ARID4B	AT rich interactive domain 4B (RBP1-like)
hsa-miR-302e	1	0	1	1	1	1	VTA1	Vps20-associated 1 homolog (S. cerevisiae)
hsa-miR-302e	0	0	1	1	1	1	BET1L	blocked early in transport 1 homolog (S. cerevisiae)-like
hsa-miR-302e	1	0	1	0	1	1	KLHL3	kelch-like 3 (Drosophila)
hsa-miR-302e	0	0	1	1	1	1	POLE3	polymerase (DNA directed), epsilon 3, accessory subunit
hsa-miR-302e	1	0	1	0	1	1	UBE2Q1	ubiquitin-conjugating enzyme E2Q family member 1
hsa-miR-302e	0	0	1	0	1	1	VEZT	vezatin, adherens junctions transmembrane protein
hsa-miR-302e	1	0	1	1	1	1	DNAJB12	DnaJ (Hsp40) homolog, subfamily B, member 12
hsa-miR-302e	0	0	1	0	1	1	GIPC2	GIPC PDZ domain containing family, member 2
hsa-miR-302e	1	0	1	0	1	1	FAM46C	family with sequence similarity 46, member C
hsa-miR-302e	1	0	1	1	1	1	TBC1D8B	TBC1 domain family, member 8B (with GRAM domain)
hsa-miR-302e	1	0	1	1	1	1	C9orf40	chromosome 9 open reading frame 40
hsa-miR-302e	0	0	1	1	0	0	CEP55	centrosomal protein 55kDa
hsa-miR-302e	0	0	1	1	1	1	NUDT11	nudix (nucleoside diphosphate linked moiety X)-type motif 11
hsa-miR-302e	1	0	1	0	1	1	ARL8B	ADP-ribosylation factor-like 8B
hsa-miR-302e	1	0	1	1	1	1	LRRC20	leucine rich repeat containing 20
hsa-miR-302e	1	0	1	1	1	1	DRAM1	DNA-damage regulated autophagy modulator 1
hsa-miR-302e	0	0	1	1	1	1	BDP1	B double prime 1, subunit of RNA polymerase III transcription initiation factor IIIB
hsa-miR-302e	0	0	1	1	0	0	TMEM176A	transmembrane protein 176A
hsa-miR-302e	1	0	1	1	1	1	LRRC59	leucine rich repeat containing 59
hsa-miR-302e	1	0	1	0	1	1	SMPD3	sphingomyelin phosphodiesterase 3, neutral membrane (neutral sphingomyelinase II)
hsa-miR-302e	1	0	1	0	1	1	PCDHAC1	protocadherin alpha subfamily C, 1
hsa-miR-302e	1	0	1	0	1	1	PCDHAC2	protocadherin alpha subfamily C, 2
hsa-miR-302e	1	0	1	1	1	1	PCDHA1	protocadherin alpha 1
hsa-miR-302e	1	0	1	0	1	1	PCDHA10	protocadherin alpha 10
hsa-miR-302e	1	0	1	0	1	1	PCDHA11	protocadherin alpha 11
hsa-miR-302e	1	0	1	0	1	1	PCDHA12	protocadherin alpha 12
hsa-miR-302e	1	0	1	1	1	1	PCDHA2	protocadherin alpha 2
hsa-miR-302e	1	0	1	1	1	1	PCDHA3	protocadherin alpha 3
hsa-miR-302e	1	0	1	1	1	1	PCDHA6	protocadherin alpha 6
hsa-miR-302e	1	0	1	0	1	1	PCDHA7	protocadherin alpha 7
hsa-miR-302e	1	0	1	1	1	1	PCDHA8	protocadherin alpha 8
hsa-miR-302e	0	0	1	1	1	1	NPAP1	nuclear pore associated protein 1
hsa-miR-302e	1	0	1	1	1	1	PLEKHA3	pleckstrin homology domain containing, family A (phosphoinositide binding specific) member 3
hsa-miR-302e	1	0	1	0	1	1	CNGB3	cyclic nucleotide gated channel beta 3
hsa-miR-302e	1	0	1	1	1	1	SEPT3	septin 3
hsa-miR-302e	1	0	1	1	1	1	EPB41L4B	erythrocyte membrane protein band 4.1 like 4B
hsa-miR-302e	0	0	1	1	1	1	ACN9	ACN9 homolog (S. cerevisiae)
hsa-miR-302e	1	0	1	1	1	1	CCDC47	coiled-coil domain containing 47
hsa-miR-302e	1	0	1	1	1	1	PCDH9	protocadherin 9
hsa-miR-302e	1	0	1	1	1	1	ZNF608	zinc finger protein 608
hsa-miR-302e	1	0	1	1	1	1	MIB1	mindbomb E3 ubiquitin protein ligase 1
hsa-miR-302e	1	0	1	0	1	1	ZNF398	zinc finger protein 398
hsa-miR-302e	1	0	1	1	1	1	ZFP14	zinc finger protein 14 homolog (mouse)
hsa-miR-302e	1	0	1	0	1	1	USP37	ubiquitin specific peptidase 37
hsa-miR-302e	1	0	1	1	1	1	FAM160B1	family with sequence similarity 160, member B1
hsa-miR-302e	0	0	1	1	0	0	HIST1H2BB	histone cluster 1, H2bb
hsa-miR-302e	0	0	1	1	0	0	CYLC1	cylicin, basic protein of sperm head cytoskeleton 1
hsa-miR-302e	0	0	1	1	1	1	RNASEL	ribonuclease L (2',5'-oligoisoadenylate synthetase-dependent)
hsa-miR-302e	1	0	1	1	1	1	CLCN6	chloride channel, voltage-sensitive 6
hsa-miR-302e	0	0	1	0	1	1	CFL2	cofilin 2 (muscle)
hsa-miR-302e	1	0	1	1	1	1	EGLN1	egl nine homolog 1 (C. elegans)
hsa-miR-302e	1	0	1	1	1	1	MRPL17	mitochondrial ribosomal protein L17
hsa-miR-302e	0	0	1	1	0	0	KIF9	kinesin family member 9
hsa-miR-302e	0	0	1	1	1	1	GLIPR2	GLI pathogenesis-related 2
hsa-miR-302e	0	0	1	1	1	1	SUSD1	sushi domain containing 1
hsa-miR-302e	1	0	1	1	1	1	NEUROD6	neuronal differentiation 6
hsa-miR-302e	1	0	1	1	1	1	YTHDC2	YTH domain containing 2
hsa-miR-302e	0	0	1	1	1	1	METTL4	methyltransferase like 4
hsa-miR-302e	0	0	1	1	1	1	AUNIP	aurora kinase A and ninein interacting protein
hsa-miR-302e	1	0	1	0	1	1	NOTCH2	notch 2
hsa-miR-302e	1	0	1	1	1	1	PSTPIP2	proline-serine-threonine phosphatase interacting protein 2
hsa-miR-302e	1	0	1	1	1	1	C10orf76	chromosome 10 open reading frame 76
hsa-miR-302e	0	0	1	1	1	1	RNF219	ring finger protein 219
hsa-miR-302e	1	0	1	1	1	1	DHX40	DEAH (Asp-Glu-Ala-His) box polypeptide 40
hsa-miR-302e	0	0	1	0	1	1	ZYG11B	zyg-11 homolog B (C. elegans)
hsa-miR-302e	0	0	1	1	1	1	LRRK1	leucine-rich repeat kinase 1
hsa-miR-302e	1	0	1	1	1	1	C15orf29	chromosome 15 open reading frame 29
hsa-miR-302e	0	0	1	1	1	1	AGBL2	ATP/GTP binding protein-like 2
hsa-miR-302e	0	0	1	1	1	1	ZNF767	zinc finger family member 767
hsa-miR-302e	0	0	1	1	0	0	TMEM156	transmembrane protein 156
hsa-miR-302e	1	0	1	1	1	1	SLC35F5	solute carrier family 35, member F5
hsa-miR-302e	1	0	1	1	1	1	TRIB1	tribbles homolog 1 (Drosophila)
hsa-miR-302e	0	0	1	0	1	1	PDGFD	platelet derived growth factor D
hsa-miR-302e	1	0	1	1	1	1	CYB5B	cytochrome b5 type B (outer mitochondrial membrane)
hsa-miR-302e	1	0	1	1	1	1	JHDM1D	jumonji C domain containing histone demethylase 1 homolog D (S. cerevisiae)
hsa-miR-302e	1	0	1	0	1	1	SETD7	SET domain containing (lysine methyltransferase) 7
hsa-miR-302e	1	0	1	1	1	1	PTPRO	protein tyrosine phosphatase, receptor type, O
hsa-miR-302e	1	0	1	1	1	1	SNX27	sorting nexin family member 27
hsa-miR-302e	0	0	1	1	1	1	SPACA1	sperm acrosome associated 1
hsa-miR-302e	0	0	1	1	1	1	FAHD1	fumarylacetoacetate hydrolase domain containing 1
hsa-miR-302e	1	0	1	1	0	0	TCF7L1	transcription factor 7-like 1 (T-cell specific, HMG-box)
hsa-miR-302e	1	0	1	1	1	1	PCDHA9	protocadherin alpha 9
hsa-miR-302e	0	0	1	0	1	1	ENAM	enamelin
hsa-miR-302e	0	0	1	0	1	1	RAB6C	RAB6C, member RAS oncogene family
hsa-miR-302e	1	0	1	1	1	1	ANTXR1	anthrax toxin receptor 1
hsa-miR-302e	0	0	1	0	1	1	LDOC1L	leucine zipper, down-regulated in cancer 1-like
hsa-miR-302e	1	0	1	1	1	1	BRMS1L	breast cancer metastasis-suppressor 1-like
hsa-miR-302e	1	0	1	1	1	1	HOOK3	hook homolog 3 (Drosophila)
hsa-miR-302e	1	0	1	0	1	1	C5orf62	chromosome 5 open reading frame 62
hsa-miR-302e	0	0	1	1	1	1	POLR2J2	polymerase (RNA) II (DNA directed) polypeptide J2
hsa-miR-302e	0	0	1	0	1	1	TSLP	thymic stromal lymphopoietin
hsa-miR-302e	0	0	1	1	0	0	MUC13	mucin 13, cell surface associated
hsa-miR-302e	1	0	1	1	1	1	ADAM19	ADAM metallopeptidase domain 19
hsa-miR-302e	1	0	1	1	1	1	TANC1	tetratricopeptide repeat, ankyrin repeat and coiled-coil containing 1
hsa-miR-302e	0	0	1	1	1	1	ARHGAP18	Rho GTPase activating protein 18
hsa-miR-302e	0	0	1	1	1	1	MYL12B	myosin, light chain 12B, regulatory
hsa-miR-302e	0	0	1	1	1	1	ZNF830	zinc finger protein 830
hsa-miR-302e	0	0	1	1	1	1	PLEKHG4B	pleckstrin homology domain containing, family G (with RhoGef domain) member 4B
hsa-miR-302e	0	0	1	1	0	0	APOA5	apolipoprotein A-V
hsa-miR-302e	1	0	1	1	1	1	TRIM9	tripartite motif containing 9
hsa-miR-302e	1	0	1	1	1	1	SRSF10	serine/arginine-rich splicing factor 10
hsa-miR-302e	0	0	1	1	1	1	BCCIP	BRCA2 and CDKN1A interacting protein
hsa-miR-302e	0	0	1	1	1	1	ABCA10	ATP-binding cassette, sub-family A (ABC1), member 10
hsa-miR-302e	0	0	1	1	1	1	CLEC4D	C-type lectin domain family 4, member D
hsa-miR-302e	1	0	1	1	1	1	KLHL6	kelch-like 6 (Drosophila)
hsa-miR-302e	0	0	1	1	0	0	COX7B2	cytochrome c oxidase subunit VIIb2
hsa-miR-302e	0	0	1	0	1	1	SP140L	SP140 nuclear body protein-like
hsa-miR-302e	0	0	1	1	1	1	CASC4	cancer susceptibility candidate 4
hsa-miR-302e	1	0	1	1	1	1	MBOAT2	membrane bound O-acyltransferase domain containing 2
hsa-miR-302e	0	0	1	1	1	1	KCNC2	potassium voltage-gated channel, Shaw-related subfamily, member 2
hsa-miR-302e	1	0	1	1	1	1	RPIA	ribose 5-phosphate isomerase A
hsa-miR-302e	0	0	1	0	0	0	CAPN13	calpain 13
hsa-miR-302e	0	0	1	1	0	0	ZUFSP	zinc finger with UFM1-specific peptidase domain
hsa-miR-302e	0	0	1	0	1	1	PIGM	phosphatidylinositol glycan anchor biosynthesis, class M
hsa-miR-302e	0	0	1	1	0	0	SFT2D1	SFT2 domain containing 1
hsa-miR-302e	1	0	1	1	1	1	FAM84A	family with sequence similarity 84, member A
hsa-miR-302e	1	0	1	1	1	1	UBTD2	ubiquitin domain containing 2
hsa-miR-302e	0	0	1	1	1	1	DEPDC4	DEP domain containing 4
hsa-miR-302e	1	0	1	1	1	1	FAM123B	family with sequence similarity 123B
hsa-miR-302e	1	0	1	1	1	1	CEP128	centrosomal protein 128kDa
hsa-miR-302e	0	0	1	0	1	1	HORMAD2	HORMA domain containing 2
hsa-miR-302e	1	0	1	1	1	1	SLC16A14	solute carrier family 16, member 14 (monocarboxylic acid transporter 14)
hsa-miR-302e	1	0	1	0	1	1	TMEM154	transmembrane protein 154
hsa-miR-302e	1	0	1	0	1	1	ST6GALNAC3	ST6 (alpha-N-acetyl-neuraminyl-2,3-beta-galactosyl-1,3)-N-acetylgalactosaminide alpha-2,6-sialyltransferase 3
hsa-miR-302e	1	0	1	0	1	1	N4BP1	NEDD4 binding protein 1
hsa-miR-302e	0	0	1	1	1	1	FBXO39	F-box protein 39
hsa-miR-302e	0	0	1	1	1	1	FAM154A	family with sequence similarity 154, member A
hsa-miR-302e	1	0	1	1	1	1	CACUL1	CDK2-associated, cullin domain 1
hsa-miR-302e	0	0	1	1	1	1	CATSPER2	cation channel, sperm associated 2
hsa-miR-302e	0	0	1	1	1	1	REXO1L1	REX1, RNA exonuclease 1 homolog (S. cerevisiae)-like 1
hsa-miR-302e	0	0	1	1	1	1	FNDC7	fibronectin type III domain containing 7
hsa-miR-302e	1	0	1	1	1	1	XKR6	XK, Kell blood group complex subunit-related family, member 6
hsa-miR-302e	0	0	1	1	1	1	SCARA5	scavenger receptor class A, member 5 (putative)
hsa-miR-302e	1	0	1	1	1	1	PKHD1L1	polycystic kidney and hepatic disease 1 (autosomal recessive)-like 1
hsa-miR-302e	0	0	1	1	0	0	TAS1R1	taste receptor, type 1, member 1
hsa-miR-302e	1	0	1	1	1	1	GMCL1	germ cell-less, spermatogenesis associated 1
hsa-miR-302e	0	0	1	1	1	1	FBXO27	F-box protein 27
hsa-miR-302e	1	0	1	1	1	1	DPY19L4	dpy-19-like 4 (C. elegans)
hsa-miR-302e	1	0	1	1	1	1	BCL6B	B-cell CLL/lymphoma 6, member B
hsa-miR-302e	1	0	1	1	1	1	ZSCAN22	zinc finger and SCAN domain containing 22
hsa-miR-302e	0	0	1	0	1	1	BAGE5	B melanoma antigen family, member 5
hsa-miR-302e	1	0	1	1	1	1	ADAT2	adenosine deaminase, tRNA-specific 2
hsa-miR-302e	1	0	1	0	1	1	C12orf36	chromosome 12 open reading frame 36
hsa-miR-302e	0	0	1	0	1	1	C16orf82	chromosome 16 open reading frame 82
hsa-miR-302e	1	0	1	1	1	1	TMEM65	transmembrane protein 65
hsa-miR-302e	1	0	1	1	1	1	ASB7	ankyrin repeat and SOCS box containing 7
hsa-miR-302e	0	0	1	0	1	1	ANKRD45	ankyrin repeat domain 45
hsa-miR-302e	0	0	1	1	1	1	EFCAB5	EF-hand calcium binding domain 5
hsa-miR-302e	1	0	1	1	1	1	PTGER3	prostaglandin E receptor 3 (subtype EP3)
hsa-miR-302e	1	0	1	0	1	1	PRICKLE2	prickle homolog 2 (Drosophila)
hsa-miR-302e	0	0	1	1	0	0	FOXD4L4	forkhead box D4-like 4
hsa-miR-302e	1	0	1	1	1	1	BLOC1S5	biogenesis of lysosomal organelles complex-1, subunit 5, muted
hsa-miR-302e	0	0	1	0	0	0	RPL23AP82	ribosomal protein L23a pseudogene 82
hsa-miR-302e	0	0	1	1	1	1	SHC4	SHC (Src homology 2 domain containing) family, member 4
hsa-miR-302e	1	0	1	0	1	1	MBLAC2	metallo-beta-lactamase domain containing 2
hsa-miR-302e	0	0	1	1	1	1	ZNF474	zinc finger protein 474
hsa-miR-302e	1	0	1	1	1	1	CYP4V2	cytochrome P450, family 4, subfamily V, polypeptide 2
hsa-miR-302e	0	0	1	0	1	1	C1orf220	chromosome 1 open reading frame 220
hsa-miR-302e	0	0	1	1	1	1	FAM177B	family with sequence similarity 177, member B
hsa-miR-302e	0	0	1	0	0	0	PPIAP29	peptidylprolyl isomerase A (cyclophilin A) pseudogene 29
hsa-miR-302e	0	0	1	0	0	0	TTTY15	testis-specific transcript, Y-linked 15 (non-protein coding)
hsa-miR-302e	0	0	1	0	0	0	HYALP1	hyaluronoglucosaminidase pseudogene 1
hsa-miR-302e	0	0	1	0	0	0	LOC374443	C-type lectin domain family 2, member D pseudogene
hsa-miR-302e	0	0	1	0	0	0	TPTE2P6	transmembrane phosphoinositide 3-phosphatase and tensin homolog 2 pseudogene 6
hsa-miR-302e	0	0	1	0	0	0	AQP7P1	aquaporin 7 pseudogene 1
hsa-miR-302e	0	0	1	0	0	0	DUSP5P	dual specificity phosphatase 5 pseudogene
hsa-miR-302e	0	0	1	0	0	0	SCARNA1	small Cajal body-specific RNA 1
hsa-miR-302e	0	0	1	0	0	0	NBR2	neighbor of BRCA1 gene 2 (non-protein coding)
hsa-miR-302e	0	0	1	0	0	0	GBP1P1	guanylate binding protein 1, interferon-inducible pseudogene 1
hsa-miR-302e	0	0	1	0	0	0	GMCL1P1	germ cell-less, spermatogenesis associated 1 pseudogene 1
hsa-miR-302e	1	0	1	1	1	1	ESR1	estrogen receptor 1
hsa-miR-302e	0	0	1	1	0	0	EPX	eosinophil peroxidase
