# Supplementary material for: Profiling of Selected MicroRNAs in Proliferative Eutopic Endometrium of Women with Ovarian Endometriosis
Source: Biomed Res Int. 2015 Aug 20;2015:760698. doi: 10.1155/2015/760698 (PMC4558423; doi:10.1155/2015/760698)
Supplement: Supplementary file 1 — Table I: The names of miRNAs significantly differentially expressed between eutopic endometrium of patients with endometriosis vs eutopic endometrium of patients without endometriosis. Table II: The associations between miRNA and mRNA, which presents detailed results of the search of six major databases i.e targetscan, tarbase, miranda, mirbase, mirtarget2 and pictar. [file 760698.f1.zip › 760698.f1/Table II/hsa-miR-302f.tsv]

miR	targetscan	tarbase	miranda	mirbase	mirtarget2	pictar	GeneSymbol	GeneName
hsa-miR-302f	1	0	1	1	0	0	SRCAP	Snf2-related CREBBP activator protein
hsa-miR-302f	0	0	1	1	0	0	PLXNB2	plexin B2
hsa-miR-302f	1	0	1	0	1	1	PTPRT	protein tyrosine phosphatase, receptor type, T
hsa-miR-302f	1	0	1	0	1	1	KIAA0408	KIAA0408
hsa-miR-302f	1	0	1	1	1	1	TTC39A	tetratricopeptide repeat domain 39A
hsa-miR-302f	1	0	1	0	1	1	CEP350	centrosomal protein 350kDa
hsa-miR-302f	0	0	1	1	0	0	ZNF862	zinc finger protein 862
hsa-miR-302f	1	0	1	1	1	1	SLC4A7	solute carrier family 4, sodium bicarbonate cotransporter, member 7
hsa-miR-302f	1	0	1	1	1	1	HIPK1	homeodomain interacting protein kinase 1
hsa-miR-302f	1	0	1	0	1	1	MAGI2	membrane associated guanylate kinase, WW and PDZ domain containing 2
hsa-miR-302f	0	0	1	1	0	0	PAN2	PAN2 poly(A) specific ribonuclease subunit homolog (S. cerevisiae)
hsa-miR-302f	1	0	1	1	1	1	SMOC2	SPARC related modular calcium binding 2
hsa-miR-302f	1	0	1	0	1	1	LPHN3	latrophilin 3
hsa-miR-302f	0	0	1	0	0	0	THSD7A	thrombospondin, type I, domain containing 7A
hsa-miR-302f	1	0	1	1	1	1	NTNG1	netrin G1
hsa-miR-302f	1	0	1	1	1	1	NLGN1	neuroligin 1
hsa-miR-302f	1	0	1	0	1	1	SRGAP3	SLIT-ROBO Rho GTPase activating protein 3
hsa-miR-302f	1	0	1	1	1	1	ATXN7L1	ataxin 7-like 1
hsa-miR-302f	1	0	1	0	0	0	HEG1	HEG homolog 1 (zebrafish)
hsa-miR-302f	1	0	1	1	1	1	MKL2	MKL/myocardin-like 2
hsa-miR-302f	1	0	1	1	1	1	ASAP1	ArfGAP with SH3 domain, ankyrin repeat and PH domain 1
hsa-miR-302f	0	0	1	1	1	1	FSTL5	follistatin-like 5
hsa-miR-302f	1	0	1	1	1	1	UPF2	UPF2 regulator of nonsense transcripts homolog (yeast)
hsa-miR-302f	1	0	1	1	1	1	BAZ2B	bromodomain adjacent to zinc finger domain, 2B
hsa-miR-302f	0	0	1	0	1	1	ZSWIM6	zinc finger, SWIM-type containing 6
hsa-miR-302f	1	0	1	1	1	1	LCOR	ligand dependent nuclear receptor corepressor
hsa-miR-302f	0	0	1	1	1	1	UNC80	unc-80 homolog (C. elegans)
hsa-miR-302f	1	0	1	1	1	1	SH3TC2	SH3 domain and tetratricopeptide repeats 2
hsa-miR-302f	1	0	1	0	0	0	FAT3	FAT tumor suppressor homolog 3 (Drosophila)
hsa-miR-302f	1	0	1	0	0	0	ZBTB34	zinc finger and BTB domain containing 34
hsa-miR-302f	1	0	1	1	1	1	RFX4	regulatory factor X, 4 (influences HLA class II expression)
hsa-miR-302f	1	0	1	0	0	0	ZC3H12C	zinc finger CCCH-type containing 12C
hsa-miR-302f	1	0	1	1	1	1	C11orf57	chromosome 11 open reading frame 57
hsa-miR-302f	1	0	1	1	1	1	SPHK2	sphingosine kinase 2
hsa-miR-302f	0	0	1	1	0	0	SSPO	SCO-spondin homolog (Bos taurus)
hsa-miR-302f	1	0	1	1	1	1	SCN5A	sodium channel, voltage-gated, type V, alpha subunit
hsa-miR-302f	1	1	1	1	1	1	BACE1	beta-site APP-cleaving enzyme 1
hsa-miR-302f	1	0	1	1	1	1	COL11A1	collagen, type XI, alpha 1
hsa-miR-302f	0	0	1	1	1	1	CRB1	crumbs homolog 1 (Drosophila)
hsa-miR-302f	0	0	1	1	1	1	NME7	NME/NM23 family member 7
hsa-miR-302f	1	0	1	1	1	1	RLF	rearranged L-myc fusion
hsa-miR-302f	1	0	1	1	1	1	DTNA	dystrobrevin, alpha
hsa-miR-302f	1	0	1	0	1	1	SLC6A6	solute carrier family 6 (neurotransmitter transporter, taurine), member 6
hsa-miR-302f	1	0	1	1	1	1	FMR1	fragile X mental retardation 1
hsa-miR-302f	1	0	1	1	1	1	ABI1	abl-interactor 1
hsa-miR-302f	1	0	1	1	1	1	SATB2	SATB homeobox 2
hsa-miR-302f	1	0	1	0	1	1	CDON	Cdon homolog (mouse)
hsa-miR-302f	0	0	1	1	0	0	EIF4E2	eukaryotic translation initiation factor 4E family member 2
hsa-miR-302f	1	0	1	1	1	1	SATB1	SATB homeobox 1
hsa-miR-302f	0	0	1	1	1	1	KIF3A	kinesin family member 3A
hsa-miR-302f	1	0	1	0	1	1	ADD3	adducin 3 (gamma)
hsa-miR-302f	1	0	1	0	1	1	PDE7B	phosphodiesterase 7B
hsa-miR-302f	1	0	1	1	1	1	PICALM	phosphatidylinositol binding clathrin assembly protein
hsa-miR-302f	1	0	1	1	1	1	ADARB1	adenosine deaminase, RNA-specific, B1
hsa-miR-302f	1	0	1	1	1	1	STX16	syntaxin 16
hsa-miR-302f	1	0	1	0	1	1	PDE4D	phosphodiesterase 4D, cAMP-specific
hsa-miR-302f	1	0	1	1	1	1	MBNL2	muscleblind-like splicing regulator 2
hsa-miR-302f	1	0	1	1	1	1	CTNND1	catenin (cadherin-associated protein), delta 1
hsa-miR-302f	0	0	1	1	0	0	SLC38A6	solute carrier family 38, member 6
hsa-miR-302f	1	0	1	1	1	1	TP63	tumor protein p63
hsa-miR-302f	0	0	1	1	1	1	C11orf54	chromosome 11 open reading frame 54
hsa-miR-302f	1	0	1	1	1	1	KAT6B	K(lysine) acetyltransferase 6B
hsa-miR-302f	1	0	1	1	1	1	PRUNE	prune homolog (Drosophila)
hsa-miR-302f	0	0	1	0	1	1	PDP1	pyruvate dehyrogenase phosphatase catalytic subunit 1
hsa-miR-302f	0	0	1	1	1	1	FGFR1OP2	FGFR1 oncogene partner 2
hsa-miR-302f	1	0	1	1	0	0	ZCCHC4	zinc finger, CCHC domain containing 4
hsa-miR-302f	1	0	1	1	1	1	MARK3	MAP/microtubule affinity-regulating kinase 3
hsa-miR-302f	0	0	1	0	0	0	BPESC1	blepharophimosis, epicanthus inversus and ptosis, candidate 1 (non-protein coding)
hsa-miR-302f	0	0	1	1	0	0	NCOA6	nuclear receptor coactivator 6
hsa-miR-302f	0	0	1	1	1	1	MFF	mitochondrial fission factor
hsa-miR-302f	0	0	1	1	1	1	NKX3-1	NK3 homeobox 1
hsa-miR-302f	1	0	1	1	1	1	ELF2	E74-like factor 2 (ets domain transcription factor)
hsa-miR-302f	1	0	1	1	1	1	SH3GLB1	SH3-domain GRB2-like endophilin B1
hsa-miR-302f	1	0	1	0	1	1	TRPS1	trichorhinophalangeal syndrome I
hsa-miR-302f	1	0	1	1	1	1	DCLRE1B	DNA cross-link repair 1B
hsa-miR-302f	1	0	1	1	1	1	CASD1	CAS1 domain containing 1
hsa-miR-302f	0	0	1	0	1	1	MYO3B	myosin IIIB
hsa-miR-302f	1	0	1	1	1	1	ST3GAL3	ST3 beta-galactoside alpha-2,3-sialyltransferase 3
hsa-miR-302f	1	0	1	1	0	0	FOXP2	forkhead box P2
hsa-miR-302f	0	0	1	1	0	0	HOPX	HOP homeobox
hsa-miR-302f	0	0	1	1	1	1	CHODL	chondrolectin
hsa-miR-302f	0	0	1	1	1	1	CLDND1	claudin domain containing 1
hsa-miR-302f	0	0	1	1	1	1	TCFL5	transcription factor-like 5 (basic helix-loop-helix)
hsa-miR-302f	1	0	1	1	1	1	PALM2	paralemmin 2
hsa-miR-302f	0	0	1	0	1	1	SRPK1	SRSF protein kinase 1
hsa-miR-302f	0	0	1	1	1	1	ZNF248	zinc finger protein 248
hsa-miR-302f	1	0	1	1	1	1	NRXN3	neurexin 3
hsa-miR-302f	1	0	1	1	1	1	ARL4C	ADP-ribosylation factor-like 4C
hsa-miR-302f	1	0	1	1	1	1	AKAP2	A kinase (PRKA) anchor protein 2
hsa-miR-302f	1	0	1	1	1	1	NIP7	nuclear import 7 homolog (S. cerevisiae)
hsa-miR-302f	0	0	1	1	0	0	FAM64A	family with sequence similarity 64, member A
hsa-miR-302f	1	0	1	1	1	1	HNRNPF	heterogeneous nuclear ribonucleoprotein F
hsa-miR-302f	1	0	1	1	1	1	PTBP3	polypyrimidine tract binding protein 3
hsa-miR-302f	0	0	1	1	1	1	VPS52	vacuolar protein sorting 52 homolog (S. cerevisiae)
hsa-miR-302f	0	0	1	1	1	1	GBP3	guanylate binding protein 3
hsa-miR-302f	0	0	1	1	1	1	STAU2	staufen, RNA binding protein, homolog 2 (Drosophila)
hsa-miR-302f	1	0	1	1	1	1	INSIG2	insulin induced gene 2
hsa-miR-302f	0	0	1	0	1	1	ARHGAP42	Rho GTPase activating protein 42
hsa-miR-302f	0	0	1	0	0	0	FLJ21408	uncharacterized LOC400512
hsa-miR-302f	1	0	1	1	1	1	YPEL5	yippee-like 5 (Drosophila)
hsa-miR-302f	0	0	1	0	1	1	FLJ22763	uncharacterized LOC401081
hsa-miR-302f	1	0	1	0	1	1	TOX3	TOX high mobility group box family member 3
hsa-miR-302f	1	0	1	1	1	1	LRP4	low density lipoprotein receptor-related protein 4
hsa-miR-302f	0	0	1	1	1	1	GPBP1L1	GC-rich promoter binding protein 1-like 1
hsa-miR-302f	0	0	1	1	1	1	SPRTN	SprT-like N-terminal domain
hsa-miR-302f	1	0	1	1	1	1	SLC38A1	solute carrier family 38, member 1
hsa-miR-302f	0	0	1	1	1	1	C8orf46	chromosome 8 open reading frame 46
hsa-miR-302f	1	0	1	1	1	1	FAM123A	family with sequence similarity 123A
hsa-miR-302f	0	0	1	0	0	0	LOC201617	uncharacterized LOC201617
hsa-miR-302f	0	0	1	0	0	0	JPX	JPX transcript, XIST activator (non-protein coding)
hsa-miR-302f	0	0	1	1	0	0	ZNF185	zinc finger protein 185 (LIM domain)
hsa-miR-302f	0	0	1	0	0	0	LOC255187	hCG1980447
hsa-miR-302f	0	0	1	1	1	1	DST	dystonin
hsa-miR-302f	1	0	1	1	1	1	TLE4	transducin-like enhancer of split 4 (E(sp1) homolog, Drosophila)
hsa-miR-302f	0	0	1	0	0	0	FLJ32742	uncharacterized locus FLJ32742
hsa-miR-302f	1	0	1	1	1	1	ZFYVE21	zinc finger, FYVE domain containing 21
hsa-miR-302f	1	0	1	1	1	1	IST1	increased sodium tolerance 1 homolog (yeast)
hsa-miR-302f	0	0	1	0	0	0	CAPN13	calpain 13
hsa-miR-302f	1	0	1	1	0	0	B3GAT3	beta-1,3-glucuronyltransferase 3 (glucuronosyltransferase I)
hsa-miR-302f	0	0	1	1	1	1	TFPI2	tissue factor pathway inhibitor 2
hsa-miR-302f	0	0	1	0	0	0	LOC643837	uncharacterized LOC643837
hsa-miR-302f	1	0	1	1	1	1	ARIH2	ariadne homolog 2 (Drosophila)
hsa-miR-302f	0	0	1	1	1	1	DYNC1I1	dynein, cytoplasmic 1, intermediate chain 1
hsa-miR-302f	0	0	1	0	0	0	FLJ34208	uncharacterized LOC401106
hsa-miR-302f	1	0	1	1	1	1	POLK	polymerase (DNA directed) kappa
hsa-miR-302f	0	0	1	1	1	1	USP8	ubiquitin specific peptidase 8
hsa-miR-302f	0	0	1	0	0	0	KIAA1430	KIAA1430
hsa-miR-302f	1	0	1	1	1	1	LUC7L2	LUC7-like 2 (S. cerevisiae)
hsa-miR-302f	1	0	1	1	1	1	GNG2	guanine nucleotide binding protein (G protein), gamma 2
hsa-miR-302f	1	0	1	1	1	1	GPD2	glycerol-3-phosphate dehydrogenase 2 (mitochondrial)
hsa-miR-302f	1	0	1	1	1	1	GCFC1	GC-rich sequence DNA-binding factor 1
hsa-miR-302f	0	0	1	1	0	0	WBP1	WW domain binding protein 1
hsa-miR-302f	0	0	1	1	0	0	CYHR1	cysteine/histidine-rich 1
hsa-miR-302f	0	0	1	0	0	0	PART1	prostate androgen-regulated transcript 1 (non-protein coding)
hsa-miR-302f	0	0	1	1	1	1	CORO7	coronin 7
hsa-miR-302f	0	0	1	0	1	1	AGBL4	ATP/GTP binding protein-like 4
hsa-miR-302f	0	0	1	1	1	1	CHRM5	cholinergic receptor, muscarinic 5
hsa-miR-302f	1	0	1	1	1	1	CTNNB1	catenin (cadherin-associated protein), beta 1, 88kDa
hsa-miR-302f	0	0	1	0	0	0	LOC100129858	uncharacterized LOC100129858
hsa-miR-302f	1	0	1	1	1	1	SPATS2	spermatogenesis associated, serine-rich 2
hsa-miR-302f	0	0	1	1	0	0	RPL5	ribosomal protein L5
hsa-miR-302f	1	0	1	1	1	1	FAM98A	family with sequence similarity 98, member A
hsa-miR-302f	0	0	1	0	0	0	OTUD1	OTU domain containing 1
hsa-miR-302f	0	0	1	0	0	0	C1orf204	chromosome 1 open reading frame 204
hsa-miR-302f	1	0	1	0	1	1	THRB	thyroid hormone receptor, beta
hsa-miR-302f	1	0	1	0	0	0	PID1	phosphotyrosine interaction domain containing 1
hsa-miR-302f	1	0	1	0	1	1	KBTBD8	kelch repeat and BTB (POZ) domain containing 8
hsa-miR-302f	0	0	1	1	1	1	ARMCX5	armadillo repeat containing, X-linked 5
hsa-miR-302f	1	0	1	1	1	1	EPB41L1	erythrocyte membrane protein band 4.1-like 1
hsa-miR-302f	1	0	1	1	1	1	LCP1	lymphocyte cytosolic protein 1 (L-plastin)
hsa-miR-302f	0	0	1	1	1	1	PPFIBP2	PTPRF interacting protein, binding protein 2 (liprin beta 2)
hsa-miR-302f	0	0	1	1	1	1	ADGB	androglobin
hsa-miR-302f	0	0	1	1	1	1	ATP9B	ATPase, class II, type 9B
hsa-miR-302f	1	0	1	1	0	0	FBXL19	F-box and leucine-rich repeat protein 19
hsa-miR-302f	0	0	1	0	1	1	MYLK4	myosin light chain kinase family, member 4
hsa-miR-302f	0	0	1	1	1	1	ABCC12	ATP-binding cassette, sub-family C (CFTR/MRP), member 12
hsa-miR-302f	1	0	1	1	1	1	DDX42	DEAD (Asp-Glu-Ala-Asp) box polypeptide 42
hsa-miR-302f	1	0	1	1	1	1	AGAP2	ArfGAP with GTPase domain, ankyrin repeat and PH domain 2
hsa-miR-302f	0	0	1	1	0	0	CFP	complement factor properdin
hsa-miR-302f	1	0	1	1	1	1	PXN	paxillin
hsa-miR-302f	1	0	1	1	1	1	KALRN	kalirin, RhoGEF kinase
hsa-miR-302f	0	0	1	1	1	1	DNAJC24	DnaJ (Hsp40) homolog, subfamily C, member 24
hsa-miR-302f	1	0	1	1	1	1	PLEKHH1	pleckstrin homology domain containing, family H (with MyTH4 domain) member 1
hsa-miR-302f	1	0	1	1	1	1	MDGA2	MAM domain containing glycosylphosphatidylinositol anchor 2
hsa-miR-302f	0	0	1	0	0	0	TMPRSS11BNL	TMPRSS11B N terminal-like
hsa-miR-302f	0	0	1	0	0	0	LOC285043	uncharacterized LOC285043
hsa-miR-302f	0	0	1	1	1	1	KANSL1L	KAT8 regulatory NSL complex subunit 1-like
hsa-miR-302f	1	0	1	1	1	1	SGIP1	SH3-domain GRB2-like (endophilin) interacting protein 1
hsa-miR-302f	0	0	1	1	1	1	C11orf45	chromosome 11 open reading frame 45
hsa-miR-302f	1	0	1	1	1	1	TP53INP1	tumor protein p53 inducible nuclear protein 1
hsa-miR-302f	0	0	1	1	1	1	EPPIN	epididymal peptidase inhibitor
hsa-miR-302f	1	0	1	1	1	1	DPY19L3	dpy-19-like 3 (C. elegans)
hsa-miR-302f	1	0	1	1	1	1	SIKE1	suppressor of IKBKE 1
hsa-miR-302f	1	0	1	0	1	1	ANO6	anoctamin 6
hsa-miR-302f	1	0	1	0	1	1	GPR180	G protein-coupled receptor 180
hsa-miR-302f	0	0	1	0	0	0	RPL23AP53	ribosomal protein L23a pseudogene 53
hsa-miR-302f	0	0	1	1	1	1	ERI2	ERI1 exoribonuclease family member 2
hsa-miR-302f	1	0	1	1	1	1	ENAH	enabled homolog (Drosophila)
hsa-miR-302f	0	0	1	1	0	0	TTC16	tetratricopeptide repeat domain 16
hsa-miR-302f	1	0	1	0	1	1	YOD1	YOD1 OTU deubiquinating enzyme 1 homolog (S. cerevisiae)
hsa-miR-302f	0	0	1	0	0	0	LRRC9	leucine rich repeat containing 9
hsa-miR-302f	1	0	1	1	1	1	ZNF655	zinc finger protein 655
hsa-miR-302f	1	0	1	1	1	1	BCAT1	branched chain amino-acid transaminase 1, cytosolic
hsa-miR-302f	0	0	1	0	0	0	IDO2	indoleamine 2,3-dioxygenase 2
hsa-miR-302f	1	0	1	1	1	1	PHC2	polyhomeotic homolog 2 (Drosophila)
hsa-miR-302f	1	0	1	1	1	1	RBM24	RNA binding motif protein 24
hsa-miR-302f	0	0	1	1	1	1	ST8SIA5	ST8 alpha-N-acetyl-neuraminide alpha-2,8-sialyltransferase 5
hsa-miR-302f	0	0	1	0	0	0	LOC494141	mitochondrial carrier triple repeat 1 pseudogene
hsa-miR-302f	1	0	1	0	1	1	ESRRG	estrogen-related receptor gamma
hsa-miR-302f	0	0	1	1	1	1	SLTM	SAFB-like, transcription modulator
hsa-miR-302f	1	0	1	0	1	1	FMNL2	formin-like 2
hsa-miR-302f	1	0	1	0	1	1	STK3	serine/threonine kinase 3
hsa-miR-302f	1	0	1	0	0	0	ASXL3	additional sex combs like 3 (Drosophila)
hsa-miR-302f	1	0	1	1	1	1	MAP2K4	mitogen-activated protein kinase kinase 4
hsa-miR-302f	0	0	1	1	1	1	FANCC	Fanconi anemia, complementation group C
hsa-miR-302f	1	0	1	1	1	1	CAMK2G	calcium/calmodulin-dependent protein kinase II gamma
hsa-miR-302f	1	0	1	1	1	1	COBLL1	COBL-like 1
hsa-miR-302f	1	0	1	1	1	1	PHTF2	putative homeodomain transcription factor 2
hsa-miR-302f	1	0	1	1	1	1	SETX	senataxin
hsa-miR-302f	0	0	1	1	0	0	MTMR1	myotubularin related protein 1
hsa-miR-302f	1	0	1	1	1	1	NECAP1	NECAP endocytosis associated 1
hsa-miR-302f	0	0	1	0	1	1	NEK1	NIMA (never in mitosis gene a)-related kinase 1
hsa-miR-302f	1	0	1	1	1	1	RIF1	RAP1 interacting factor homolog (yeast)
hsa-miR-302f	0	0	1	1	1	1	WDR52	WD repeat domain 52
hsa-miR-302f	1	0	1	0	1	1	GPR85	G protein-coupled receptor 85
hsa-miR-302f	0	0	1	0	0	0	RPL23AP82	ribosomal protein L23a pseudogene 82
hsa-miR-302f	0	0	1	1	1	1	ZNF277	zinc finger protein 277
hsa-miR-302f	1	0	1	1	1	1	YTHDF3	YTH domain family, member 3
hsa-miR-302f	1	0	1	1	1	1	KDM6A	lysine (K)-specific demethylase 6A
hsa-miR-302f	0	0	1	1	1	1	FILIP1	filamin A interacting protein 1
hsa-miR-302f	0	0	1	0	1	1	GAB3	GRB2-associated binding protein 3
hsa-miR-302f	1	0	1	1	1	1	LYPD3	LY6/PLAUR domain containing 3
hsa-miR-302f	1	0	1	1	1	1	GNPTAB	N-acetylglucosamine-1-phosphate transferase, alpha and beta subunits
hsa-miR-302f	0	0	1	0	0	0	ZNF720	zinc finger protein 720
hsa-miR-302f	0	0	1	1	1	1	MYPN	myopalladin
hsa-miR-302f	0	0	1	1	1	1	VWA3B	von Willebrand factor A domain containing 3B
hsa-miR-302f	1	0	1	1	1	1	NABP1	nucleic acid binding protein 1
hsa-miR-302f	1	0	1	1	1	1	HMCN1	hemicentin 1
hsa-miR-302f	0	0	1	1	1	1	CCDC14	coiled-coil domain containing 14
hsa-miR-302f	1	0	1	1	1	1	CAMK4	calcium/calmodulin-dependent protein kinase IV
hsa-miR-302f	1	0	1	1	1	1	BPTF	bromodomain PHD finger transcription factor
hsa-miR-302f	1	0	1	0	1	1	CLINT1	clathrin interactor 1
hsa-miR-302f	0	0	1	0	0	0	EPHA1-AS1	EPHA1 antisense RNA 1
hsa-miR-302f	0	0	1	1	1	1	KIAA1841	KIAA1841
hsa-miR-302f	1	0	1	1	1	1	MARCH7	membrane-associated ring finger (C3HC4) 7, E3 ubiquitin protein ligase
hsa-miR-302f	1	0	1	1	1	1	ANP32E	acidic (leucine-rich) nuclear phosphoprotein 32 family, member E
hsa-miR-302f	1	0	1	1	1	1	CAPRIN2	caprin family member 2
hsa-miR-302f	1	0	1	0	1	1	JAZF1	JAZF zinc finger 1
hsa-miR-302f	0	0	1	1	0	0	SCAF4	SR-related CTD-associated factor 4
hsa-miR-302f	1	0	1	1	1	1	IKZF2	IKAROS family zinc finger 2 (Helios)
hsa-miR-302f	1	0	1	0	1	1	BDNF	brain-derived neurotrophic factor
hsa-miR-302f	1	0	1	1	1	1	TXNRD1	thioredoxin reductase 1
hsa-miR-302f	0	0	1	1	1	1	DNAJB14	DnaJ (Hsp40) homolog, subfamily B, member 14
hsa-miR-302f	1	0	1	1	1	1	PIH1D3	PIH1 domain containing 3
hsa-miR-302f	1	0	1	1	1	1	OPRM1	opioid receptor, mu 1
hsa-miR-302f	1	0	1	1	1	1	RAI14	retinoic acid induced 14
hsa-miR-302f	1	0	1	1	1	1	TAB3	TGF-beta activated kinase 1/MAP3K7 binding protein 3
hsa-miR-302f	0	0	1	1	1	1	GCOM1	GRINL1A complex locus 1
hsa-miR-302f	0	0	1	1	0	0	RAET1E	retinoic acid early transcript 1E
hsa-miR-302f	1	0	1	1	1	1	ECT2	epithelial cell transforming sequence 2 oncogene
hsa-miR-302f	0	0	1	1	1	1	RPTN	repetin
hsa-miR-302f	1	0	1	1	1	1	VPS45	vacuolar protein sorting 45 homolog (S. cerevisiae)
hsa-miR-302f	0	0	1	1	1	1	ANXA10	annexin A10
hsa-miR-302f	0	0	1	1	1	1	ILDR1	immunoglobulin-like domain containing receptor 1
hsa-miR-302f	1	0	1	1	1	1	PLCH1	phospholipase C, eta 1
hsa-miR-302f	1	0	1	1	1	1	QKI	QKI, KH domain containing, RNA binding
hsa-miR-302f	1	0	1	1	1	1	PCDH11X	protocadherin 11 X-linked
hsa-miR-302f	0	0	1	1	1	1	IL23R	interleukin 23 receptor
hsa-miR-302f	0	0	1	0	1	1	MIS12	MIS12, MIND kinetochore complex component, homolog (S. pombe)
hsa-miR-302f	1	0	1	1	1	1	CPSF6	cleavage and polyadenylation specific factor 6, 68kDa
hsa-miR-302f	1	0	1	1	1	1	ELOVL6	ELOVL fatty acid elongase 6
hsa-miR-302f	0	0	1	1	0	0	ZNF576	zinc finger protein 576
hsa-miR-302f	1	0	1	1	1	1	RIMS3	regulating synaptic membrane exocytosis 3
hsa-miR-302f	1	0	1	0	1	1	DCAF10	DDB1 and CUL4 associated factor 10
hsa-miR-302f	0	0	1	0	0	0	LOC93622	Morf4 family associated protein 1-like 1 pseudogene
hsa-miR-302f	0	0	1	1	1	1	FAM104B	family with sequence similarity 104, member B
hsa-miR-302f	1	0	1	0	1	1	VAMP4	vesicle-associated membrane protein 4
hsa-miR-302f	1	0	1	0	1	1	DDX3X	DEAD (Asp-Glu-Ala-Asp) box polypeptide 3, X-linked
hsa-miR-302f	1	0	1	1	0	0	SIGMAR1	sigma non-opioid intracellular receptor 1
hsa-miR-302f	0	0	1	0	0	0	MGC21881	uncharacterized locus MGC21881
hsa-miR-302f	0	0	1	1	1	1	KRCC1	lysine-rich coiled-coil 1
hsa-miR-302f	1	0	1	0	1	1	NR1D2	nuclear receptor subfamily 1, group D, member 2
hsa-miR-302f	1	0	1	0	1	1	NECAB1	N-terminal EF-hand calcium binding protein 1
hsa-miR-302f	1	0	1	1	1	1	FAM199X	family with sequence similarity 199, X-linked
hsa-miR-302f	0	0	1	1	1	1	FAM122C	family with sequence similarity 122C
hsa-miR-302f	0	0	1	1	1	1	RDH11	retinol dehydrogenase 11 (all-trans/9-cis/11-cis)
hsa-miR-302f	1	0	1	1	0	0	ATP6V0A1	ATPase, H+ transporting, lysosomal V0 subunit a1
hsa-miR-302f	0	0	1	0	0	0	TCP11L2	t-complex 11 (mouse)-like 2
hsa-miR-302f	0	0	1	1	1	1	NDUFB5	NADH dehydrogenase (ubiquinone) 1 beta subcomplex, 5, 16kDa
hsa-miR-302f	1	0	1	1	1	1	SUZ12	suppressor of zeste 12 homolog (Drosophila)
hsa-miR-302f	0	0	1	1	0	0	MORN1	MORN repeat containing 1
hsa-miR-302f	0	0	1	0	0	0	FAM92A1P2	family with sequence similarity 92, member A3
hsa-miR-302f	0	0	1	0	0	0	NBR2	neighbor of BRCA1 gene 2 (non-protein coding)
hsa-miR-302f	1	0	1	1	1	1	ASPH	aspartate beta-hydroxylase
hsa-miR-302f	1	0	1	1	1	1	U2SURP	U2 snRNP-associated SURP domain containing
hsa-miR-302f	0	0	1	1	1	1	LRMP	lymphoid-restricted membrane protein
hsa-miR-302f	0	0	1	1	1	1	SEMA3D	sema domain, immunoglobulin domain (Ig), short basic domain, secreted, (semaphorin) 3D
hsa-miR-302f	0	0	1	1	1	1	CD48	CD48 molecule
hsa-miR-302f	0	0	1	1	1	1	ZNF100	zinc finger protein 100
hsa-miR-302f	1	0	1	1	1	1	ZPLD1	zona pellucida-like domain containing 1
hsa-miR-302f	1	0	1	1	1	1	RCOR3	REST corepressor 3
hsa-miR-302f	0	0	1	1	1	1	C7orf53	chromosome 7 open reading frame 53
hsa-miR-302f	1	0	1	1	1	1	RAB5B	RAB5B, member RAS oncogene family
hsa-miR-302f	1	0	1	1	1	1	SECISBP2L	SECIS binding protein 2-like
hsa-miR-302f	0	0	1	1	1	1	IL20RB	interleukin 20 receptor beta
hsa-miR-302f	0	0	1	0	0	0	LOC415056	uncharacterized LOC415056
hsa-miR-302f	0	0	1	0	1	1	DKFZP434I0714	uncharacterized protein DKFZP434I0714
hsa-miR-302f	0	0	1	1	1	1	EDA2R	ectodysplasin A2 receptor
hsa-miR-302f	1	0	1	0	1	1	DDX3Y	DEAD (Asp-Glu-Ala-Asp) box polypeptide 3, Y-linked
hsa-miR-302f	0	0	1	0	0	0	TMPRSS12	transmembrane (C-terminal) protease, serine 12
hsa-miR-302f	0	0	1	0	0	0	LINC00494	long intergenic non-protein coding RNA 494
hsa-miR-302f	0	0	1	1	0	0	SNRPN	small nuclear ribonucleoprotein polypeptide N
hsa-miR-302f	0	0	1	0	1	1	DDX12P	DEAD/H (Asp-Glu-Ala-Asp/His) box polypeptide 12, pseudogene
hsa-miR-302f	1	0	1	1	1	1	ZEB2	zinc finger E-box binding homeobox 2
hsa-miR-302f	0	0	1	1	1	1	CBLN2	cerebellin 2 precursor
hsa-miR-302f	0	0	1	0	0	0	LOC339862	uncharacterized LOC339862
hsa-miR-302f	0	0	1	1	1	1	UBE3D	ubiquitin protein ligase E3D
hsa-miR-302f	0	0	1	0	0	0	FAM201A	family with sequence similarity 201, member A
hsa-miR-302f	1	0	1	1	1	1	MEIS1	Meis homeobox 1
hsa-miR-302f	1	0	1	0	1	1	NEGR1	neuronal growth regulator 1
hsa-miR-302f	1	0	1	1	1	1	RNMT	RNA (guanine-7-) methyltransferase
hsa-miR-302f	1	0	1	1	1	1	BNC2	basonuclin 2
hsa-miR-302f	0	0	1	0	0	0	LOC255130	uncharacterized LOC255130
hsa-miR-302f	1	0	1	1	1	1	BVES	blood vessel epicardial substance
hsa-miR-302f	1	0	1	1	1	1	DYNC2LI1	dynein, cytoplasmic 2, light intermediate chain 1
hsa-miR-302f	1	0	1	1	1	1	LEF1	lymphoid enhancer-binding factor 1
hsa-miR-302f	1	0	1	1	0	0	ZNF292	zinc finger protein 292
hsa-miR-302f	1	0	1	1	0	0	RGL2	ral guanine nucleotide dissociation stimulator-like 2
hsa-miR-302f	1	0	1	1	0	0	WNK1	WNK lysine deficient protein kinase 1
hsa-miR-302f	0	0	1	0	0	0	LOC339529	uncharacterized LOC339529
hsa-miR-302f	0	0	1	0	1	1	IL33	interleukin 33
hsa-miR-302f	0	0	1	0	0	0	INHBA-AS1	INHBA antisense RNA 1
hsa-miR-302f	1	0	1	0	1	1	KDM2A	lysine (K)-specific demethylase 2A
hsa-miR-302f	1	0	1	1	0	0	TTC9	tetratricopeptide repeat domain 9
hsa-miR-302f	0	0	1	0	0	0	LOC283038	uncharacterized LOC283038
hsa-miR-302f	1	0	1	1	1	1	PELI1	pellino E3 ubiquitin protein ligase 1
hsa-miR-302f	0	0	1	1	1	1	RHOT1	ras homolog family member T1
hsa-miR-302f	0	0	1	1	1	1	HLA-DQA1	major histocompatibility complex, class II, DQ alpha 1
hsa-miR-302f	1	0	1	1	1	1	PCGF5	polycomb group ring finger 5
hsa-miR-302f	0	0	1	0	0	0	LINC00265	long intergenic non-protein coding RNA 265
hsa-miR-302f	1	0	1	1	1	1	ATP8B4	ATPase, class I, type 8B, member 4
hsa-miR-302f	0	0	1	1	1	1	C17orf97	chromosome 17 open reading frame 97
hsa-miR-302f	1	0	1	1	1	1	SOX5	SRY (sex determining region Y)-box 5
hsa-miR-302f	0	0	1	0	0	0	LMOD2	leiomodin 2 (cardiac)
hsa-miR-302f	0	0	1	1	0	0	LRRIQ3	leucine-rich repeats and IQ motif containing 3
hsa-miR-302f	1	0	1	1	1	1	MYLK	myosin light chain kinase
hsa-miR-302f	0	0	1	1	1	1	ZNF33B	zinc finger protein 33B
hsa-miR-302f	0	0	1	1	1	1	SH2D1B	SH2 domain containing 1B
hsa-miR-302f	1	0	1	1	1	1	AP3M1	adaptor-related protein complex 3, mu 1 subunit
hsa-miR-302f	0	0	1	0	0	0	PABPC1P2	poly(A) binding protein, cytoplasmic 1 pseudogene 2
hsa-miR-302f	0	0	1	0	1	1	ANKS1B	ankyrin repeat and sterile alpha motif domain containing 1B
hsa-miR-302f	1	0	1	1	1	1	SRPK2	SRSF protein kinase 2
hsa-miR-302f	1	0	1	0	1	1	AMMECR1L	AMME chromosomal region gene 1-like
hsa-miR-302f	0	0	1	0	0	0	LINC00537	long intergenic non-protein coding RNA 537
hsa-miR-302f	0	0	1	1	0	0	TMEM222	transmembrane protein 222
hsa-miR-302f	0	0	1	1	1	1	C1orf141	chromosome 1 open reading frame 141
hsa-miR-302f	1	0	1	1	1	1	ZMYND11	zinc finger, MYND-type containing 11
hsa-miR-302f	0	0	1	0	0	0	GUSBP1	glucuronidase, beta pseudogene 1
hsa-miR-302f	0	0	1	1	1	1	TMBIM4	transmembrane BAX inhibitor motif containing 4
hsa-miR-302f	1	0	1	1	1	1	ST8SIA2	ST8 alpha-N-acetyl-neuraminide alpha-2,8-sialyltransferase 2
hsa-miR-302f	1	0	1	0	1	1	LRRTM4	leucine rich repeat transmembrane neuronal 4
hsa-miR-302f	1	0	1	0	1	1	MYBL1	v-myb myeloblastosis viral oncogene homolog (avian)-like 1
hsa-miR-302f	1	0	1	0	1	1	KCNT2	potassium channel, subfamily T, member 2
hsa-miR-302f	0	0	1	0	1	1	FLJ25328	uncharacterized LOC148231
hsa-miR-302f	0	0	1	1	0	0	C10orf128	chromosome 10 open reading frame 128
hsa-miR-302f	0	0	1	1	1	1	CCDC126	coiled-coil domain containing 126
hsa-miR-302f	1	0	1	1	1	1	GABRB2	gamma-aminobutyric acid (GABA) A receptor, beta 2
hsa-miR-302f	0	0	1	1	0	0	TLR5	toll-like receptor 5
hsa-miR-302f	0	0	1	1	1	1	TBRG1	transforming growth factor beta regulator 1
hsa-miR-302f	1	0	1	1	1	1	TET2	tet methylcytosine dioxygenase 2
hsa-miR-302f	1	0	1	1	1	1	NR3C2	nuclear receptor subfamily 3, group C, member 2
hsa-miR-302f	0	0	1	1	1	1	FSHB	follicle stimulating hormone, beta polypeptide
hsa-miR-302f	1	0	1	1	1	1	SHANK2	SH3 and multiple ankyrin repeat domains 2
hsa-miR-302f	1	0	1	1	1	1	OTUD4	OTU domain containing 4
hsa-miR-302f	0	0	1	1	0	0	SOCS7	suppressor of cytokine signaling 7
hsa-miR-302f	1	0	1	1	1	1	CHIC1	cysteine-rich hydrophobic domain 1
hsa-miR-302f	1	0	1	1	1	1	PTPRZ1	protein tyrosine phosphatase, receptor-type, Z polypeptide 1
hsa-miR-302f	0	0	1	0	0	0	LINC00643	long intergenic non-protein coding RNA 643
hsa-miR-302f	1	0	1	1	1	1	JPH1	junctophilin 1
hsa-miR-302f	1	0	1	1	1	1	MIER3	mesoderm induction early response 1, family member 3
hsa-miR-302f	0	0	1	1	1	1	KBTBD12	kelch repeat and BTB (POZ) domain containing 12
hsa-miR-302f	0	0	1	1	1	1	NUP54	nucleoporin 54kDa
hsa-miR-302f	1	0	1	0	1	1	CLASP2	cytoplasmic linker associated protein 2
hsa-miR-302f	0	0	1	1	0	0	TTC5	tetratricopeptide repeat domain 5
hsa-miR-302f	0	0	1	1	0	0	CDK5RAP2	CDK5 regulatory subunit associated protein 2
hsa-miR-302f	0	0	1	1	1	1	PSMA2	proteasome (prosome, macropain) subunit, alpha type, 2
hsa-miR-302f	1	0	1	1	1	1	PRDM2	PR domain containing 2, with ZNF domain
hsa-miR-302f	0	0	1	0	1	1	GTF2H2D	general transcription factor IIH, polypeptide 2D
hsa-miR-302f	0	0	1	1	1	1	FAM9C	family with sequence similarity 9, member C
hsa-miR-302f	0	0	1	0	0	0	LINC00240	long intergenic non-protein coding RNA 240
hsa-miR-302f	0	0	1	1	1	1	HTR2A	5-hydroxytryptamine (serotonin) receptor 2A, G protein-coupled
hsa-miR-302f	0	0	1	1	1	1	ARMCX3	armadillo repeat containing, X-linked 3
hsa-miR-302f	0	0	1	1	0	0	PPP2R2B	protein phosphatase 2, regulatory subunit B, beta
hsa-miR-302f	1	0	1	1	1	1	CYB5B	cytochrome b5 type B (outer mitochondrial membrane)
hsa-miR-302f	0	0	1	1	1	1	CCNT2	cyclin T2
hsa-miR-302f	1	0	1	1	1	1	NFIB	nuclear factor I/B
hsa-miR-302f	0	0	1	0	0	0	TMEM232	transmembrane protein 232
hsa-miR-302f	1	0	1	1	1	1	RDX	radixin
hsa-miR-302f	0	0	1	1	1	1	RBM20	RNA binding motif protein 20
hsa-miR-302f	1	0	1	1	1	1	PGAP1	post-GPI attachment to proteins 1
hsa-miR-302f	1	0	1	1	1	1	TMEM135	transmembrane protein 135
hsa-miR-302f	1	0	1	1	1	1	CALD1	caldesmon 1
hsa-miR-302f	0	0	1	1	1	1	PRPSAP2	phosphoribosyl pyrophosphate synthetase-associated protein 2
hsa-miR-302f	1	0	1	1	1	1	SLC30A7	solute carrier family 30 (zinc transporter), member 7
hsa-miR-302f	0	0	1	1	1	1	SSFA2	sperm specific antigen 2
hsa-miR-302f	1	0	1	1	1	1	FAM208A	family with sequence similarity 208, member A
hsa-miR-302f	1	0	1	1	1	1	HIC2	hypermethylated in cancer 2
hsa-miR-302f	0	0	1	1	1	1	SNRNP27	small nuclear ribonucleoprotein 27kDa (U4/U6.U5)
hsa-miR-302f	1	0	1	1	1	1	FUT9	fucosyltransferase 9 (alpha (1,3) fucosyltransferase)
hsa-miR-302f	0	0	1	0	0	0	RPS16P10	ribosomal protein S16 pseudogene 10
hsa-miR-302f	0	0	1	1	0	0	TBC1D22A	TBC1 domain family, member 22A
hsa-miR-302f	1	0	1	1	1	1	PTN	pleiotrophin
hsa-miR-302f	1	0	1	1	1	1	RBM3	RNA binding motif (RNP1, RRM) protein 3
hsa-miR-302f	1	0	1	1	1	1	RAP1A	RAP1A, member of RAS oncogene family
hsa-miR-302f	0	0	1	1	1	1	COPS7A	COP9 constitutive photomorphogenic homolog subunit 7A (Arabidopsis)
hsa-miR-302f	1	0	1	1	1	1	ADM	adrenomedullin
hsa-miR-302f	0	0	1	1	1	1	MRPS36	mitochondrial ribosomal protein S36
hsa-miR-302f	0	0	1	1	1	1	MTCP1	mature T-cell proliferation 1
hsa-miR-302f	0	0	1	0	1	1	CD99P1	CD99 molecule pseudogene 1
hsa-miR-302f	0	0	1	1	0	0	RAD54B	RAD54 homolog B (S. cerevisiae)
hsa-miR-302f	1	0	1	1	1	1	TMEM245	transmembrane protein 245
hsa-miR-302f	0	0	1	1	1	1	MRPS7	mitochondrial ribosomal protein S7
hsa-miR-302f	0	0	1	1	1	1	KLHDC2	kelch domain containing 2
hsa-miR-302f	1	0	1	1	1	1	DOK4	docking protein 4
hsa-miR-302f	0	0	1	1	1	1	SAP130	Sin3A-associated protein, 130kDa
hsa-miR-302f	1	0	1	0	1	1	C15orf41	chromosome 15 open reading frame 41
hsa-miR-302f	1	0	1	1	1	1	ANAPC16	anaphase promoting complex subunit 16
hsa-miR-302f	1	0	1	1	1	1	PFN2	profilin 2
hsa-miR-302f	1	0	1	1	1	1	AKAP7	A kinase (PRKA) anchor protein 7
hsa-miR-302f	1	0	1	0	1	1	MAP1B	microtubule-associated protein 1B
hsa-miR-302f	1	0	1	1	1	1	UBE2K	ubiquitin-conjugating enzyme E2K
hsa-miR-302f	1	0	1	0	1	1	CD47	CD47 molecule
hsa-miR-302f	0	0	1	1	1	1	TRNT1	tRNA nucleotidyl transferase, CCA-adding, 1
hsa-miR-302f	1	0	1	1	1	1	TIPRL	TIP41, TOR signaling pathway regulator-like (S. cerevisiae)
hsa-miR-302f	0	0	1	0	1	1	TSPAN7	tetraspanin 7
hsa-miR-302f	0	0	1	0	1	1	UBA52	ubiquitin A-52 residue ribosomal protein fusion product 1
hsa-miR-302f	0	0	1	1	1	1	COMMD3	COMM domain containing 3
hsa-miR-302f	1	0	1	1	1	1	LGALSL	lectin, galactoside-binding-like
hsa-miR-302f	1	0	1	0	1	1	DNMT3A	DNA (cytosine-5-)-methyltransferase 3 alpha
hsa-miR-302f	0	0	1	0	0	0	MYSM1	Myb-like, SWIRM and MPN domains 1
hsa-miR-302f	1	0	1	0	1	1	KIAA0240	KIAA0240
hsa-miR-302f	0	0	1	0	0	0	LOC731789	uncharacterized LOC731789
hsa-miR-302f	0	0	1	1	1	1	ATG5	autophagy related 5
hsa-miR-302f	1	0	1	1	1	1	HECW2	HECT, C2 and WW domain containing E3 ubiquitin protein ligase 2
hsa-miR-302f	0	0	1	0	0	0	DNAJC27-AS1	DNAJC27 antisense RNA 1
hsa-miR-302f	1	0	1	0	1	1	ZNF652	zinc finger protein 652
hsa-miR-302f	1	0	1	1	1	1	SP2	Sp2 transcription factor
hsa-miR-302f	1	0	1	1	1	1	PI15	peptidase inhibitor 15
hsa-miR-302f	1	0	1	1	1	1	PRKG1	protein kinase, cGMP-dependent, type I
hsa-miR-302f	1	0	1	1	1	1	LGR4	leucine-rich repeat containing G protein-coupled receptor 4
hsa-miR-302f	1	0	1	0	1	1	EPDR1	ependymin related protein 1 (zebrafish)
hsa-miR-302f	0	0	1	1	1	1	ADPRH	ADP-ribosylarginine hydrolase
hsa-miR-302f	0	0	1	1	1	1	PLCB4	phospholipase C, beta 4
hsa-miR-302f	1	0	1	0	1	1	BCL2	B-cell CLL/lymphoma 2
hsa-miR-302f	0	0	1	1	0	0	MYH7	myosin, heavy chain 7, cardiac muscle, beta
hsa-miR-302f	1	0	1	1	1	1	COL4A3	collagen, type IV, alpha 3 (Goodpasture antigen)
hsa-miR-302f	1	0	1	1	1	1	COL4A4	collagen, type IV, alpha 4
hsa-miR-302f	1	0	1	0	1	1	SLC26A2	solute carrier family 26 (sulfate transporter), member 2
hsa-miR-302f	0	0	1	1	0	0	FH	fumarate hydratase
hsa-miR-302f	1	0	1	1	1	1	GK	glycerol kinase
hsa-miR-302f	1	0	1	0	1	1	GLI3	GLI family zinc finger 3
hsa-miR-302f	1	0	1	1	1	1	MET	met proto-oncogene (hepatocyte growth factor receptor)
hsa-miR-302f	1	0	1	1	1	1	TIMP3	TIMP metallopeptidase inhibitor 3
hsa-miR-302f	1	0	1	1	1	1	CHM	choroideremia (Rab escort protein 1)
hsa-miR-302f	0	0	1	0	1	1	GNRHR	gonadotropin-releasing hormone receptor
hsa-miR-302f	0	0	1	1	0	0	IL2RA	interleukin 2 receptor, alpha
hsa-miR-302f	0	0	1	1	1	1	PECAM1	platelet/endothelial cell adhesion molecule 1
hsa-miR-302f	0	0	1	1	1	1	PLEC	plectin
hsa-miR-302f	1	0	1	1	1	1	DCX	doublecortin
hsa-miR-302f	0	0	1	1	1	1	IL11	interleukin 11
hsa-miR-302f	0	0	1	1	1	1	ADH4	alcohol dehydrogenase 4 (class II), pi polypeptide
hsa-miR-302f	0	0	1	1	1	1	ALDH1B1	aldehyde dehydrogenase 1 family, member B1
hsa-miR-302f	1	0	1	0	1	1	CACNA1E	calcium channel, voltage-dependent, R type, alpha 1E subunit
hsa-miR-302f	1	0	1	1	1	1	DIO2	deiodinase, iodothyronine, type II
hsa-miR-302f	1	0	1	0	1	1	GABRA4	gamma-aminobutyric acid (GABA) A receptor, alpha 4
hsa-miR-302f	1	0	1	1	0	0	GRIN2A	glutamate receptor, ionotropic, N-methyl D-aspartate 2A
hsa-miR-302f	0	0	1	1	1	1	HTR7	5-hydroxytryptamine (serotonin) receptor 7, adenylate cyclase-coupled
hsa-miR-302f	1	0	1	1	1	1	MME	membrane metallo-endopeptidase
hsa-miR-302f	1	0	1	1	1	1	PTGFR	prostaglandin F receptor (FP)
hsa-miR-302f	1	0	1	0	1	1	SPOPL	speckle-type POZ protein-like
hsa-miR-302f	0	0	1	1	1	1	CC2D2B	coiled-coil and C2 domain containing 2B
hsa-miR-302f	1	0	1	1	1	1	FAM13C	family with sequence similarity 13, member C
hsa-miR-302f	1	0	1	1	1	1	LCLAT1	lysocardiolipin acyltransferase 1
hsa-miR-302f	0	0	1	1	1	1	ALG11	asparagine-linked glycosylation 11, alpha-1,2-mannosyltransferase homolog (yeast)
hsa-miR-302f	1	0	1	0	1	1	LIN28B	lin-28 homolog B (C. elegans)
hsa-miR-302f	0	0	1	1	1	1	AGMO	alkylglycerol monooxygenase
hsa-miR-302f	0	0	1	1	1	1	MTHFD2L	methylenetetrahydrofolate dehydrogenase (NADP+ dependent) 2-like
hsa-miR-302f	1	0	1	0	1	1	PKP2	plakophilin 2
hsa-miR-302f	1	0	1	0	1	1	YPEL2	yippee-like 2 (Drosophila)
hsa-miR-302f	1	0	1	1	1	1	EBF3	early B-cell factor 3
hsa-miR-302f	0	0	1	1	1	1	SUMO1	SMT3 suppressor of mif two 3 homolog 1 (S. cerevisiae)
hsa-miR-302f	1	0	1	1	1	1	ADAM9	ADAM metallopeptidase domain 9
hsa-miR-302f	0	0	1	1	1	1	MAPKAP1	mitogen-activated protein kinase associated protein 1
hsa-miR-302f	1	0	1	1	1	1	TCEAL1	transcription elongation factor A (SII)-like 1
hsa-miR-302f	1	0	1	1	1	1	IGSF3	immunoglobulin superfamily, member 3
hsa-miR-302f	0	0	1	1	0	0	NTRK1	neurotrophic tyrosine kinase, receptor, type 1
hsa-miR-302f	0	0	1	1	1	1	UACA	uveal autoantigen with coiled-coil domains and ankyrin repeats
hsa-miR-302f	1	0	1	0	1	1	KIAA2022	KIAA2022
hsa-miR-302f	1	0	1	1	1	1	EML1	echinoderm microtubule associated protein like 1
hsa-miR-302f	0	0	1	1	1	1	HRNR	hornerin
hsa-miR-302f	1	0	1	0	1	1	ERMN	ermin, ERM-like protein
hsa-miR-302f	1	0	1	0	1	1	ZC3H12B	zinc finger CCCH-type containing 12B
hsa-miR-302f	1	0	1	0	1	1	CREB5	cAMP responsive element binding protein 5
hsa-miR-302f	0	0	1	1	1	1	BEX5	brain expressed, X-linked 5
hsa-miR-302f	1	0	1	0	1	1	ZKSCAN2	zinc finger with KRAB and SCAN domains 2
hsa-miR-302f	0	0	1	1	0	0	EMC6	ER membrane protein complex subunit 6
hsa-miR-302f	1	0	1	1	1	1	RUNX2	runt-related transcription factor 2
hsa-miR-302f	1	0	1	1	1	1	PHF6	PHD finger protein 6
hsa-miR-302f	1	0	1	0	1	1	GOPC	golgi-associated PDZ and coiled-coil motif containing
hsa-miR-302f	0	0	1	1	1	1	RAB28	RAB28, member RAS oncogene family
hsa-miR-302f	1	0	1	1	1	1	SH3PXD2B	SH3 and PX domains 2B
hsa-miR-302f	1	0	1	0	1	1	BRCC3	BRCA1/BRCA2-containing complex, subunit 3
hsa-miR-302f	0	0	1	1	1	1	POLR2M	polymerase (RNA) II (DNA directed) polypeptide M
hsa-miR-302f	0	0	1	1	1	1	NBN	nibrin
hsa-miR-302f	1	0	1	0	1	1	BCL7A	B-cell CLL/lymphoma 7A
hsa-miR-302f	1	0	1	0	1	1	TNRC6B	trinucleotide repeat containing 6B
hsa-miR-302f	1	0	1	1	1	1	FAM108B1	family with sequence similarity 108, member B1
hsa-miR-302f	1	0	1	1	1	1	SLC35F1	solute carrier family 35, member F1
hsa-miR-302f	0	0	1	1	1	1	SOWAHB	sosondowah ankyrin repeat domain family member B
hsa-miR-302f	1	0	1	1	1	1	SLC10A7	solute carrier family 10 (sodium/bile acid cotransporter family), member 7
hsa-miR-302f	1	0	1	0	1	1	SAMD5	sterile alpha motif domain containing 5
hsa-miR-302f	1	0	1	0	1	1	MSRB3	methionine sulfoxide reductase B3
hsa-miR-302f	0	0	1	1	1	1	CALML4	calmodulin-like 4
hsa-miR-302f	1	0	1	1	1	1	TFAP2A	transcription factor AP-2 alpha (activating enhancer binding protein 2 alpha)
hsa-miR-302f	1	0	1	1	1	1	UBE2V1	ubiquitin-conjugating enzyme E2 variant 1
hsa-miR-302f	1	0	1	1	1	1	ZNF704	zinc finger protein 704
hsa-miR-302f	1	0	1	1	1	1	GALNTL6	UDP-N-acetyl-alpha-D-galactosamine:polypeptide N-acetylgalactosaminyltransferase-like 6
hsa-miR-302f	1	0	1	1	1	1	ACPL2	acid phosphatase-like 2
hsa-miR-302f	0	0	1	1	1	1	CTLA4	cytotoxic T-lymphocyte-associated protein 4
hsa-miR-302f	1	0	1	0	1	1	USP9X	ubiquitin specific peptidase 9, X-linked
hsa-miR-302f	1	0	1	1	1	1	CHN2	chimerin (chimaerin) 2
hsa-miR-302f	1	0	1	1	1	1	SPTSSB	serine palmitoyltransferase, small subunit B
hsa-miR-302f	0	0	1	1	1	1	MUC17	mucin 17, cell surface associated
hsa-miR-302f	0	0	1	1	1	1	MLH3	mutL homolog 3 (E. coli)
hsa-miR-302f	1	0	1	1	1	1	C2orf88	chromosome 2 open reading frame 88
hsa-miR-302f	1	0	1	1	1	1	PVRL2	poliovirus receptor-related 2 (herpesvirus entry mediator B)
hsa-miR-302f	1	0	1	1	1	1	MZT1	mitotic spindle organizing protein 1
hsa-miR-302f	1	0	1	1	1	1	SRSF1	serine/arginine-rich splicing factor 1
hsa-miR-302f	1	0	1	1	1	1	UBN1	ubinuclein 1
hsa-miR-302f	1	0	1	1	1	1	CREBBP	CREB binding protein
hsa-miR-302f	1	0	1	1	1	1	PACRG	PARK2 co-regulated
hsa-miR-302f	1	0	1	0	1	1	FBXO41	F-box protein 41
hsa-miR-302f	1	0	1	1	1	1	ZNF697	zinc finger protein 697
hsa-miR-302f	1	0	1	0	1	1	MEGF9	multiple EGF-like-domains 9
hsa-miR-302f	1	0	1	0	1	1	XIAP	X-linked inhibitor of apoptosis
hsa-miR-302f	1	0	1	0	1	1	BMPR2	bone morphogenetic protein receptor, type II (serine/threonine kinase)
hsa-miR-302f	0	0	1	0	1	1	CASQ2	calsequestrin 2 (cardiac muscle)
hsa-miR-302f	0	0	1	1	1	1	TNFSF8	tumor necrosis factor (ligand) superfamily, member 8
hsa-miR-302f	0	0	1	1	1	1	DPYS	dihydropyrimidinase
hsa-miR-302f	1	0	1	1	1	1	DYRK1A	dual-specificity tyrosine-(Y)-phosphorylation regulated kinase 1A
hsa-miR-302f	1	0	1	1	1	1	CELSR2	cadherin, EGF LAG seven-pass G-type receptor 2 (flamingo homolog, Drosophila)
hsa-miR-302f	1	0	1	1	1	1	EREG	epiregulin
hsa-miR-302f	0	0	1	0	1	1	FMO2	flavin containing monooxygenase 2 (non-functional)
hsa-miR-302f	1	0	1	0	1	1	GCNT2	glucosaminyl (N-acetyl) transferase 2, I-branching enzyme (I blood group)
hsa-miR-302f	1	0	1	0	1	1	ATP1B2	ATPase, Na+/K+ transporting, beta 2 polypeptide
hsa-miR-302f	0	0	1	1	0	0	BMP6	bone morphogenetic protein 6
hsa-miR-302f	1	0	1	0	1	1	CCND2	cyclin D2
hsa-miR-302f	1	0	1	1	1	1	CDH2	cadherin 2, type 1, N-cadherin (neuronal)
hsa-miR-302f	1	0	1	1	1	1	CLCN4	chloride channel, voltage-sensitive 4
hsa-miR-302f	1	0	1	1	1	1	COL4A1	collagen, type IV, alpha 1
hsa-miR-302f	1	0	1	0	1	1	COL19A1	collagen, type XIX, alpha 1
hsa-miR-302f	1	0	1	1	1	1	CREM	cAMP responsive element modulator
hsa-miR-302f	1	0	1	1	1	1	E2F3	E2F transcription factor 3
hsa-miR-302f	1	0	1	1	1	1	EIF4E	eukaryotic translation initiation factor 4E
hsa-miR-302f	1	0	1	1	1	1	GBP1	guanylate binding protein 1, interferon-inducible
hsa-miR-302f	0	0	1	0	1	1	GCLM	glutamate-cysteine ligase, modifier subunit
hsa-miR-302f	0	0	1	0	1	1	GYPA	glycophorin A (MNS blood group)
hsa-miR-302f	0	0	1	1	1	1	FOXN2	forkhead box N2
hsa-miR-302f	1	0	1	1	1	1	KDR	kinase insert domain receptor (a type III receptor tyrosine kinase)
hsa-miR-302f	1	0	1	0	1	1	KIF3C	kinesin family member 3C
hsa-miR-302f	1	0	1	1	1	1	MAN2A1	mannosidase, alpha, class 2A, member 1
hsa-miR-302f	1	0	1	1	1	1	MAX	MYC associated factor X
hsa-miR-302f	0	0	1	1	1	1	MTAP	methylthioadenosine phosphorylase
hsa-miR-302f	1	0	1	1	1	1	NPTX1	neuronal pentraxin I
hsa-miR-302f	1	0	1	0	1	1	PAK2	p21 protein (Cdc42/Rac)-activated kinase 2
hsa-miR-302f	0	0	1	1	1	1	SERPINB8	serpin peptidase inhibitor, clade B (ovalbumin), member 8
hsa-miR-302f	1	0	1	1	1	1	PLAGL2	pleiomorphic adenoma gene-like 2
hsa-miR-302f	1	0	1	1	1	1	PPP1CC	protein phosphatase 1, catalytic subunit, gamma isozyme
hsa-miR-302f	1	0	1	1	1	1	MAPK6	mitogen-activated protein kinase 6
hsa-miR-302f	1	0	1	1	1	1	PTPN2	protein tyrosine phosphatase, non-receptor type 2
hsa-miR-302f	1	0	1	1	1	1	ROBO2	roundabout, axon guidance receptor, homolog 2 (Drosophila)
hsa-miR-302f	1	0	1	1	1	1	SRSF3	serine/arginine-rich splicing factor 3
hsa-miR-302f	1	0	1	0	1	1	SLC6A1	solute carrier family 6 (neurotransmitter transporter, GABA), member 1
hsa-miR-302f	1	0	1	0	1	1	SOX11	SRY (sex determining region Y)-box 11
hsa-miR-302f	1	0	1	0	1	1	STC1	stanniocalcin 1
hsa-miR-302f	0	0	1	1	1	1	TAF2	TAF2 RNA polymerase II, TATA box binding protein (TBP)-associated factor, 150kDa
hsa-miR-302f	1	0	1	1	1	1	TDG	thymine-DNA glycosylase
hsa-miR-302f	1	0	1	0	1	1	SEC62	SEC62 homolog (S. cerevisiae)
hsa-miR-302f	1	0	1	1	1	1	NR2C2	nuclear receptor subfamily 2, group C, member 2
hsa-miR-302f	1	0	1	1	1	1	UBE2H	ubiquitin-conjugating enzyme E2H
hsa-miR-302f	0	0	1	1	1	1	ZNF143	zinc finger protein 143
hsa-miR-302f	1	0	1	1	1	1	PAX8	paired box 8
hsa-miR-302f	1	0	1	1	1	1	HMGA2	high mobility group AT-hook 2
hsa-miR-302f	1	0	1	1	1	1	NRIP1	nuclear receptor interacting protein 1
hsa-miR-302f	1	0	1	1	0	0	KHSRP	KH-type splicing regulatory protein
hsa-miR-302f	1	0	1	1	1	1	TNFSF11	tumor necrosis factor (ligand) superfamily, member 11
hsa-miR-302f	1	0	1	0	1	1	IRS2	insulin receptor substrate 2
hsa-miR-302f	0	0	1	1	1	1	EIF3A	eukaryotic translation initiation factor 3, subunit A
hsa-miR-302f	1	0	1	0	1	1	SGPL1	sphingosine-1-phosphate lyase 1
hsa-miR-302f	0	0	1	1	1	1	MPZL1	myelin protein zero-like 1
hsa-miR-302f	0	0	1	1	1	1	CRY1	cryptochrome 1 (photolyase-like)
hsa-miR-302f	1	0	1	1	1	1	EFNB2	ephrin-B2
hsa-miR-302f	0	0	1	1	1	1	GYG1	glycogenin 1
hsa-miR-302f	1	0	1	0	1	1	SLC1A2	solute carrier family 1 (glial high affinity glutamate transporter), member 2
hsa-miR-302f	1	0	1	0	1	1	MED14	mediator complex subunit 14
hsa-miR-302f	1	0	1	1	1	1	MED21	mediator complex subunit 21
hsa-miR-302f	0	0	1	1	0	0	CAMP	cathelicidin antimicrobial peptide
hsa-miR-302f	1	0	1	1	1	1	EGR3	early growth response 3
hsa-miR-302f	1	0	1	1	1	1	EPHB2	EPH receptor B2
hsa-miR-302f	1	0	1	0	1	1	FOXD1	forkhead box D1
hsa-miR-302f	0	0	1	1	1	1	GP5	glycoprotein V (platelet)
hsa-miR-302f	1	0	1	0	1	1	PKNOX1	PBX/knotted 1 homeobox 1
hsa-miR-302f	1	0	1	1	1	1	RAB11A	RAB11A, member RAS oncogene family
hsa-miR-302f	0	0	1	1	1	1	VNN1	vanin 1
hsa-miR-302f	0	0	1	1	0	0	SLC22A14	solute carrier family 22, member 14
hsa-miR-302f	1	0	1	1	1	1	KCNA2	potassium voltage-gated channel, shaker-related subfamily, member 2
hsa-miR-302f	1	0	1	0	1	1	KIF5A	kinesin family member 5A
hsa-miR-302f	1	0	1	1	1	1	ATXN3	ataxin 3
hsa-miR-302f	1	0	1	1	1	1	MYO1E	myosin IE
hsa-miR-302f	0	0	1	1	1	1	PTH2R	parathyroid hormone 2 receptor
hsa-miR-302f	1	0	1	1	1	1	MED13	mediator complex subunit 13
hsa-miR-302f	1	0	1	1	1	1	FOXN3	forkhead box N3
hsa-miR-302f	1	0	1	1	1	1	GABPB1	GA binding protein transcription factor, beta subunit 1
hsa-miR-302f	0	0	1	1	1	1	MSTN	myostatin
hsa-miR-302f	0	0	1	1	1	1	CXCL11	chemokine (C-X-C motif) ligand 11
hsa-miR-302f	1	0	1	1	1	1	RND2	Rho family GTPase 2
hsa-miR-302f	0	0	1	1	1	1	FAIM3	Fas apoptotic inhibitory molecule 3
hsa-miR-302f	1	0	1	1	1	1	AKT3	v-akt murine thymoma viral oncogene homolog 3 (protein kinase B, gamma)
hsa-miR-302f	0	0	1	1	1	1	ING1	inhibitor of growth family, member 1
hsa-miR-302f	1	0	1	1	1	1	RGS4	regulator of G-protein signaling 4
hsa-miR-302f	1	0	1	1	1	1	EVI5	ecotropic viral integration site 5
hsa-miR-302f	1	0	1	1	1	1	ST8SIA4	ST8 alpha-N-acetyl-neuraminide alpha-2,8-sialyltransferase 4
hsa-miR-302f	0	0	1	1	1	1	KLRG1	killer cell lectin-like receptor subfamily G, member 1
hsa-miR-302f	1	0	1	1	1	1	PURA	purine-rich element binding protein A
hsa-miR-302f	0	0	1	1	1	1	EIF1B	eukaryotic translation initiation factor 1B
hsa-miR-302f	1	0	1	0	1	1	HDAC4	histone deacetylase 4
hsa-miR-302f	1	0	1	0	1	1	HS3ST3B1	heparan sulfate (glucosamine) 3-O-sulfotransferase 3B1
hsa-miR-302f	1	0	1	1	1	1	SPON1	spondin 1, extracellular matrix protein
hsa-miR-302f	1	0	1	1	1	1	NEFL	neurofilament, light polypeptide
hsa-miR-302f	1	0	1	1	1	1	SMC1A	structural maintenance of chromosomes 1A
hsa-miR-302f	1	0	1	1	1	1	NPEPPS	aminopeptidase puromycin sensitive
hsa-miR-302f	1	0	1	1	1	1	TUBGCP3	tubulin, gamma complex associated protein 3
hsa-miR-302f	1	0	1	0	1	1	APPBP2	amyloid beta precursor protein (cytoplasmic tail) binding protein 2
hsa-miR-302f	1	0	1	1	1	1	NEBL	nebulette
hsa-miR-302f	0	0	1	1	1	1	PARP4	poly (ADP-ribose) polymerase family, member 4
hsa-miR-302f	1	0	1	1	1	1	HEXIM1	hexamethylene bis-acetamide inducible 1
hsa-miR-302f	1	0	1	1	1	1	DYNLT3	dynein, light chain, Tctex-type 3
hsa-miR-302f	0	0	1	1	1	1	GLRX3	glutaredoxin 3
hsa-miR-302f	1	0	1	0	1	1	IGF2BP1	insulin-like growth factor 2 mRNA binding protein 1
hsa-miR-302f	1	0	1	1	1	1	RRAGA	Ras-related GTP binding A
hsa-miR-302f	1	0	1	0	1	1	MAP4K5	mitogen-activated protein kinase kinase kinase kinase 5
hsa-miR-302f	0	0	1	1	1	1	CLDN16	claudin 16
hsa-miR-302f	1	0	1	1	1	1	CORIN	corin, serine peptidase
hsa-miR-302f	1	0	1	1	1	1	MAP3K2	mitogen-activated protein kinase kinase kinase 2
hsa-miR-302f	0	0	1	1	1	1	FGL2	fibrinogen-like 2
hsa-miR-302f	0	0	1	1	1	1	GLO1	glyoxalase I
hsa-miR-302f	1	0	1	1	1	1	LAPTM5	lysosomal protein transmembrane 5
hsa-miR-302f	1	0	1	0	1	1	SLC5A3	solute carrier family 5 (sodium/myo-inositol cotransporter), member 3
hsa-miR-302f	1	0	1	1	1	1	ESM1	endothelial cell-specific molecule 1
hsa-miR-302f	1	0	1	1	1	1	ADAMTS5	ADAM metallopeptidase with thrombospondin type 1 motif, 5
hsa-miR-302f	1	0	1	1	1	1	ZNF81	zinc finger protein 81
hsa-miR-302f	1	0	1	1	1	1	PROSC	proline synthetase co-transcribed homolog (bacterial)
hsa-miR-302f	1	0	1	1	1	1	PALM2-AKAP2	PALM2-AKAP2 readthrough
hsa-miR-302f	1	0	1	1	1	1	CA5B	carbonic anhydrase VB, mitochondrial
hsa-miR-302f	1	0	1	1	1	1	KLF12	Kruppel-like factor 12
hsa-miR-302f	1	0	1	1	1	1	HEY2	hairy/enhancer-of-split related with YRPW motif 2
hsa-miR-302f	1	0	1	1	1	1	PRDM4	PR domain containing 4
hsa-miR-302f	1	0	1	1	1	1	RGS17	regulator of G-protein signaling 17
hsa-miR-302f	1	0	1	1	1	1	CLCF1	cardiotrophin-like cytokine factor 1
hsa-miR-302f	1	0	1	1	1	1	PPARGC1A	peroxisome proliferator-activated receptor gamma, coactivator 1 alpha
hsa-miR-302f	0	0	1	1	1	1	UBQLN1	ubiquilin 1
hsa-miR-302f	1	0	1	1	1	1	NRG1	neuregulin 1
hsa-miR-302f	1	0	1	1	1	1	RNF7	ring finger protein 7
hsa-miR-302f	1	0	1	0	1	1	ODZ1	odz, odd Oz/ten-m homolog 1 (Drosophila)
hsa-miR-302f	0	0	1	1	0	0	CLEC4E	C-type lectin domain family 4, member E
hsa-miR-302f	0	0	1	1	0	0	NGFRAP1	nerve growth factor receptor (TNFRSF16) associated protein 1
hsa-miR-302f	0	0	1	1	1	1	ZNF330	zinc finger protein 330
hsa-miR-302f	0	0	1	1	0	0	APOBEC3C	apolipoprotein B mRNA editing enzyme, catalytic polypeptide-like 3C
hsa-miR-302f	1	0	1	1	1	1	ZNF592	zinc finger protein 592
hsa-miR-302f	0	0	1	0	1	1	LPIN2	lipin 2
hsa-miR-302f	0	0	1	1	1	1	FRMPD4	FERM and PDZ domain containing 4
hsa-miR-302f	1	0	1	0	1	1	SERTAD2	SERTA domain containing 2
hsa-miR-302f	0	0	1	1	1	1	SNX19	sorting nexin 19
hsa-miR-302f	0	0	1	1	1	1	KIAA0141	KIAA0141
hsa-miR-302f	1	0	1	0	1	1	KIAA0494	KIAA0494
hsa-miR-302f	1	0	1	1	1	1	ZBTB5	zinc finger and BTB domain containing 5
hsa-miR-302f	0	0	1	1	1	1	NSA2	NSA2 ribosome biogenesis homolog (S. cerevisiae)
hsa-miR-302f	1	0	1	0	1	1	RAB11FIP2	RAB11 family interacting protein 2 (class I)
hsa-miR-302f	1	0	1	0	1	1	ICK	intestinal cell (MAK-like) kinase
hsa-miR-302f	1	0	1	1	1	1	DIP2C	DIP2 disco-interacting protein 2 homolog C (Drosophila)
hsa-miR-302f	1	0	1	1	1	1	RAB21	RAB21, member RAS oncogene family
hsa-miR-302f	1	0	1	1	1	1	STK38L	serine/threonine kinase 38 like
hsa-miR-302f	1	0	1	1	1	1	PRRC2C	proline-rich coiled-coil 2C
hsa-miR-302f	1	0	1	1	1	1	PDS5A	PDS5, regulator of cohesion maintenance, homolog A (S. cerevisiae)
hsa-miR-302f	1	0	1	1	1	1	PHF15	PHD finger protein 15
hsa-miR-302f	1	0	1	1	1	1	MOB4	MOB family member 4, phocein
hsa-miR-302f	1	0	1	1	1	1	LTN1	listerin E3 ubiquitin protein ligase 1
hsa-miR-302f	1	0	1	0	1	1	RRM2B	ribonucleotide reductase M2 B (TP53 inducible)
hsa-miR-302f	1	0	1	1	1	1	ST8SIA3	ST8 alpha-N-acetyl-neuraminide alpha-2,8-sialyltransferase 3
hsa-miR-302f	0	0	1	1	1	1	GAL	galanin prepropeptide
hsa-miR-302f	0	0	1	1	0	0	CYB5R2	cytochrome b5 reductase 2
hsa-miR-302f	0	0	1	1	1	1	DNAJB11	DnaJ (Hsp40) homolog, subfamily B, member 11
hsa-miR-302f	0	0	1	1	1	1	CD244	CD244 molecule, natural killer cell receptor 2B4
hsa-miR-302f	1	0	1	0	1	1	CRIM1	cysteine rich transmembrane BMP regulator 1 (chordin-like)
hsa-miR-302f	1	0	1	0	1	1	RAB8B	RAB8B, member RAS oncogene family
hsa-miR-302f	0	0	1	0	1	1	GPR83	G protein-coupled receptor 83
hsa-miR-302f	1	0	1	1	1	1	CYP39A1	cytochrome P450, family 39, subfamily A, polypeptide 1
hsa-miR-302f	0	0	1	1	1	1	MYOZ2	myozenin 2
hsa-miR-302f	0	0	1	1	1	1	PRKAG3	protein kinase, AMP-activated, gamma 3 non-catalytic subunit
hsa-miR-302f	0	0	1	0	1	1	TRIM44	tripartite motif containing 44
hsa-miR-302f	0	0	1	1	1	1	LRRC16A	leucine rich repeat containing 16A
hsa-miR-302f	1	0	1	1	1	1	MBTD1	mbt domain containing 1
hsa-miR-302f	1	0	1	0	1	1	CHD7	chromodomain helicase DNA binding protein 7
hsa-miR-302f	1	0	1	0	1	1	CMTM6	CKLF-like MARVEL transmembrane domain containing 6
hsa-miR-302f	1	0	1	0	1	1	MARCH5	membrane-associated ring finger (C3HC4) 5
hsa-miR-302f	1	0	1	1	1	1	RNF125	ring finger protein 125, E3 ubiquitin protein ligase
hsa-miR-302f	0	0	1	1	1	1	NUDT11	nudix (nucleoside diphosphate linked moiety X)-type motif 11
hsa-miR-302f	1	0	1	1	1	1	UBA6	ubiquitin-like modifier activating enzyme 6
hsa-miR-302f	0	0	1	1	1	1	SLC47A1	solute carrier family 47, member 1
hsa-miR-302f	1	0	1	1	1	1	C9orf72	chromosome 9 open reading frame 72
hsa-miR-302f	0	0	1	1	1	1	BDP1	B double prime 1, subunit of RNA polymerase III transcription initiation factor IIIB
hsa-miR-302f	0	0	1	1	1	1	HDAC8	histone deacetylase 8
hsa-miR-302f	1	0	1	1	1	1	AJAP1	adherens junctions associated protein 1
hsa-miR-302f	1	0	1	0	1	1	PCDHAC1	protocadherin alpha subfamily C, 1
hsa-miR-302f	1	0	1	0	1	1	PCDHAC2	protocadherin alpha subfamily C, 2
hsa-miR-302f	1	0	1	1	1	1	PCDHA1	protocadherin alpha 1
hsa-miR-302f	1	0	1	0	1	1	PCDHA10	protocadherin alpha 10
hsa-miR-302f	1	0	1	0	1	1	PCDHA11	protocadherin alpha 11
hsa-miR-302f	1	0	1	0	1	1	PCDHA12	protocadherin alpha 12
hsa-miR-302f	1	0	1	0	1	1	PCDHA13	protocadherin alpha 13
hsa-miR-302f	1	0	1	1	1	1	PCDHA2	protocadherin alpha 2
hsa-miR-302f	1	0	1	1	1	1	PCDHA3	protocadherin alpha 3
hsa-miR-302f	1	0	1	1	1	1	PCDHA4	protocadherin alpha 4
hsa-miR-302f	1	0	1	1	1	1	PCDHA5	protocadherin alpha 5
hsa-miR-302f	1	0	1	1	1	1	PCDHA6	protocadherin alpha 6
hsa-miR-302f	1	0	1	0	1	1	PCDHA7	protocadherin alpha 7
hsa-miR-302f	1	0	1	1	1	1	PCDHA8	protocadherin alpha 8
hsa-miR-302f	0	0	1	1	1	1	NPAP1	nuclear pore associated protein 1
hsa-miR-302f	1	0	1	0	1	1	FAM190B	family with sequence similarity 190, member B
hsa-miR-302f	1	0	1	1	1	1	SEPT3	septin 3
hsa-miR-302f	1	0	1	0	1	1	UBFD1	ubiquitin family domain containing 1
hsa-miR-302f	1	0	1	1	1	1	CCBL2	cysteine conjugate-beta lyase 2
hsa-miR-302f	0	0	1	1	0	0	IL36G	interleukin 36, gamma
hsa-miR-302f	0	0	1	1	1	1	RAD18	RAD18 homolog (S. cerevisiae)
hsa-miR-302f	1	0	1	1	1	1	C5orf15	chromosome 5 open reading frame 15
hsa-miR-302f	1	0	1	0	1	1	OTUD7B	OTU domain containing 7B
hsa-miR-302f	0	0	1	1	1	1	ANKMY2	ankyrin repeat and MYND domain containing 2
hsa-miR-302f	1	0	1	1	1	1	PAK7	p21 protein (Cdc42/Rac)-activated kinase 7
hsa-miR-302f	1	0	1	0	1	1	EIF5A2	eukaryotic translation initiation factor 5A2
hsa-miR-302f	1	0	1	1	0	0	THAP11	THAP domain containing 11
hsa-miR-302f	1	0	1	1	1	1	DSCAML1	Down syndrome cell adhesion molecule like 1
hsa-miR-302f	0	0	1	0	1	1	ZNF490	zinc finger protein 490
hsa-miR-302f	0	0	1	1	1	1	SHROOM4	shroom family member 4
hsa-miR-302f	1	0	1	1	1	1	USP31	ubiquitin specific peptidase 31
hsa-miR-302f	1	0	1	0	1	1	NUFIP2	nuclear fragile X mental retardation protein interacting protein 2
hsa-miR-302f	1	0	1	1	1	1	MIB1	mindbomb E3 ubiquitin protein ligase 1
hsa-miR-302f	1	0	1	0	1	1	SYT4	synaptotagmin IV
hsa-miR-302f	0	0	1	1	1	1	TXNDC16	thioredoxin domain containing 16
hsa-miR-302f	1	0	1	1	1	1	SIPA1L2	signal-induced proliferation-associated 1 like 2
hsa-miR-302f	1	0	1	1	1	1	ALS2	amyotrophic lateral sclerosis 2 (juvenile)
hsa-miR-302f	0	0	1	1	1	1	PPM1A	protein phosphatase, Mg2+/Mn2+ dependent, 1A
hsa-miR-302f	0	0	1	0	1	1	PSG3	pregnancy specific beta-1-glycoprotein 3
hsa-miR-302f	1	0	1	0	1	1	RAP2A	RAP2A, member of RAS oncogene family
hsa-miR-302f	1	0	1	1	1	1	HCN1	hyperpolarization activated cyclic nucleotide-gated potassium channel 1
hsa-miR-302f	1	0	1	1	1	1	RPRD1B	regulation of nuclear pre-mRNA domain containing 1B
hsa-miR-302f	0	0	1	1	0	0	FCGR2A	Fc fragment of IgG, low affinity IIa, receptor (CD32)
hsa-miR-302f	0	0	1	0	1	1	CFL2	cofilin 2 (muscle)
hsa-miR-302f	1	0	1	1	1	1	SEC24A	SEC24 family, member A (S. cerevisiae)
hsa-miR-302f	1	0	1	1	1	1	TIA1	TIA1 cytotoxic granule-associated RNA binding protein
hsa-miR-302f	1	0	1	0	1	1	CSNK1G1	casein kinase 1, gamma 1
hsa-miR-302f	0	0	1	1	1	1	FAM204A	family with sequence similarity 204, member A
hsa-miR-302f	1	0	1	0	1	1	EDAR	ectodysplasin A receptor
hsa-miR-302f	0	0	1	1	1	1	POPDC3	popeye domain containing 3
hsa-miR-302f	1	0	1	1	1	1	TMEM168	transmembrane protein 168
hsa-miR-302f	1	0	1	1	1	1	ALDH8A1	aldehyde dehydrogenase 8 family, member A1
hsa-miR-302f	1	0	1	1	1	1	RFX7	regulatory factor X, 7
hsa-miR-302f	1	0	1	1	1	1	REEP1	receptor accessory protein 1
hsa-miR-302f	1	0	1	1	1	1	SOWAHC	sosondowah ankyrin repeat domain family member C
hsa-miR-302f	0	0	1	1	1	1	C8orf33	chromosome 8 open reading frame 33
hsa-miR-302f	1	0	1	0	1	1	OTUB2	OTU domain, ubiquitin aldehyde binding 2
hsa-miR-302f	0	0	1	1	0	0	DCTN3	dynactin 3 (p22)
hsa-miR-302f	0	0	1	1	1	1	CEP70	centrosomal protein 70kDa
hsa-miR-302f	1	0	1	1	1	1	USB1	U6 snRNA biogenesis 1
hsa-miR-302f	1	0	1	0	1	1	PLEKHF2	pleckstrin homology domain containing, family F (with FYVE domain) member 2
hsa-miR-302f	0	0	1	1	1	1	TTLL7	tubulin tyrosine ligase-like family, member 7
hsa-miR-302f	1	0	1	1	1	1	CLMP	CXADR-like membrane protein
hsa-miR-302f	0	0	1	1	1	1	CCDC34	coiled-coil domain containing 34
hsa-miR-302f	1	0	1	1	1	1	SYNC	syncoilin, intermediate filament protein
hsa-miR-302f	0	0	1	1	1	1	APOL2	apolipoprotein L, 2
hsa-miR-302f	1	0	1	1	1	1	TIGD6	tigger transposable element derived 6
hsa-miR-302f	1	0	1	1	0	0	TCF7L1	transcription factor 7-like 1 (T-cell specific, HMG-box)
hsa-miR-302f	1	0	1	0	1	1	TMEM47	transmembrane protein 47
hsa-miR-302f	1	0	1	0	1	1	SH3BGRL2	SH3 domain binding glutamic acid-rich protein like 2
hsa-miR-302f	1	0	1	0	1	1	ITCH	itchy E3 ubiquitin protein ligase
hsa-miR-302f	1	0	1	1	1	1	PCDHA9	protocadherin alpha 9
hsa-miR-302f	1	0	1	1	1	1	PPP1R12B	protein phosphatase 1, regulatory subunit 12B
hsa-miR-302f	0	0	1	1	1	1	MRPL14	mitochondrial ribosomal protein L14
hsa-miR-302f	0	0	1	1	0	0	ARL6	ADP-ribosylation factor-like 6
hsa-miR-302f	0	0	1	1	1	1	POLR3GL	polymerase (RNA) III (DNA directed) polypeptide G (32kD)-like
hsa-miR-302f	0	0	1	1	1	1	YIPF4	Yip1 domain family, member 4
hsa-miR-302f	1	0	1	0	1	1	PPP1R15B	protein phosphatase 1, regulatory subunit 15B
hsa-miR-302f	1	0	1	1	1	1	FAM104A	family with sequence similarity 104, member A
hsa-miR-302f	1	0	1	0	1	1	LACTB	lactamase, beta
hsa-miR-302f	1	0	1	1	1	1	PCDH11Y	protocadherin 11 Y-linked
hsa-miR-302f	1	0	1	1	1	1	TRIM5	tripartite motif containing 5
hsa-miR-302f	0	0	1	0	1	1	TSLP	thymic stromal lymphopoietin
hsa-miR-302f	1	0	1	1	0	0	DMRTB1	DMRT-like family B with proline-rich C-terminal, 1
hsa-miR-302f	1	0	1	0	1	1	SCRT2	scratch homolog 2, zinc finger protein (Drosophila)
hsa-miR-302f	1	0	1	0	1	1	PURB	purine-rich element binding protein B
hsa-miR-302f	1	0	1	1	1	1	FOXQ1	forkhead box Q1
hsa-miR-302f	0	0	1	1	1	1	SEC11C	SEC11 homolog C (S. cerevisiae)
hsa-miR-302f	1	0	1	1	1	1	EPT1	ethanolaminephosphotransferase 1 (CDP-ethanolamine-specific)
hsa-miR-302f	1	0	1	1	1	1	TPD52L3	tumor protein D52-like 3
hsa-miR-302f	1	0	1	1	1	1	STX1B	syntaxin 1B
hsa-miR-302f	1	0	1	1	1	1	SLC2A13	solute carrier family 2 (facilitated glucose transporter), member 13
hsa-miR-302f	1	0	1	1	1	1	SLITRK1	SLIT and NTRK-like family, member 1
hsa-miR-302f	0	0	1	1	1	1	SCAND3	SCAN domain containing 3
hsa-miR-302f	1	0	1	1	1	1	SLC44A1	solute carrier family 44, member 1
hsa-miR-302f	1	0	1	1	1	1	NRSN1	neurensin 1
hsa-miR-302f	1	0	1	1	1	1	NUP35	nucleoporin 35kDa
hsa-miR-302f	1	0	1	1	1	1	FAM122A	family with sequence similarity 122A
hsa-miR-302f	0	0	1	1	0	0	FAM114A1	family with sequence similarity 114, member A1
hsa-miR-302f	1	0	1	1	1	1	KCTD12	potassium channel tetramerisation domain containing 12
hsa-miR-302f	1	0	1	1	1	1	ICA1L	islet cell autoantigen 1,69kDa-like
hsa-miR-302f	1	0	1	1	1	1	TSTD2	thiosulfate sulfurtransferase (rhodanese)-like domain containing 2
hsa-miR-302f	1	0	1	1	1	1	PPTC7	PTC7 protein phosphatase homolog (S. cerevisiae)
hsa-miR-302f	1	0	1	1	1	1	ATRN	attractin
hsa-miR-302f	1	0	1	1	1	1	RPIA	ribose 5-phosphate isomerase A
hsa-miR-302f	0	0	1	1	0	0	C2orf15	chromosome 2 open reading frame 15
hsa-miR-302f	1	0	1	1	1	1	VTI1A	vesicle transport through interaction with t-SNAREs homolog 1A (yeast)
hsa-miR-302f	0	0	1	1	1	1	APOBEC3F	apolipoprotein B mRNA editing enzyme, catalytic polypeptide-like 3F
hsa-miR-302f	1	0	1	0	1	1	MTPN	myotrophin
hsa-miR-302f	0	0	1	1	1	1	LONRF1	LON peptidase N-terminal domain and ring finger 1
hsa-miR-302f	1	0	1	1	1	1	POGLUT1	protein O-glucosyltransferase 1
hsa-miR-302f	1	0	1	1	1	1	MUM1L1	melanoma associated antigen (mutated) 1-like 1
hsa-miR-302f	0	0	1	1	1	1	C12orf66	chromosome 12 open reading frame 66
hsa-miR-302f	1	0	1	1	1	1	CEP128	centrosomal protein 128kDa
hsa-miR-302f	1	0	1	1	1	1	C7orf60	chromosome 7 open reading frame 60
hsa-miR-302f	0	0	1	1	0	0	HSFY1	heat shock transcription factor, Y-linked 1
hsa-miR-302f	0	0	1	1	1	1	CCER1	coiled-coil glutamate-rich protein 1
hsa-miR-302f	1	0	1	1	1	1	ZCCHC5	zinc finger, CCHC domain containing 5
hsa-miR-302f	1	0	1	1	1	1	ABCA13	ATP-binding cassette, sub-family A (ABC1), member 13
hsa-miR-302f	1	0	1	1	1	1	BEND6	BEN domain containing 6
hsa-miR-302f	1	0	1	1	1	1	PDIK1L	PDLIM1 interacting kinase 1 like
hsa-miR-302f	0	0	1	0	1	1	KBTBD6	kelch repeat and BTB (POZ) domain containing 6
hsa-miR-302f	0	0	1	0	1	1	LNX2	ligand of numb-protein X 2
hsa-miR-302f	1	0	1	1	1	1	CREBRF	CREB3 regulatory factor
hsa-miR-302f	1	0	1	1	1	1	NAP1L5	nucleosome assembly protein 1-like 5
hsa-miR-302f	1	0	1	1	1	1	PKHD1	polycystic kidney and hepatic disease 1 (autosomal recessive)
hsa-miR-302f	1	0	1	1	1	1	RC3H1	ring finger and CCCH-type domains 1
hsa-miR-302f	1	0	1	1	1	1	NR4A3	nuclear receptor subfamily 4, group A, member 3
hsa-miR-302f	1	0	1	1	1	1	MOB1B	MOB kinase activator 1B
hsa-miR-302f	1	0	1	1	1	1	MMGT1	membrane magnesium transporter 1
hsa-miR-302f	1	0	1	1	1	1	FAM117B	family with sequence similarity 117, member B
hsa-miR-302f	1	0	1	0	1	1	C3orf58	chromosome 3 open reading frame 58
hsa-miR-302f	1	0	1	0	1	1	RNF152	ring finger protein 152
hsa-miR-302f	1	0	1	1	1	1	DIP2B	DIP2 disco-interacting protein 2 homolog B (Drosophila)
hsa-miR-302f	0	0	1	0	1	1	C5orf64	chromosome 5 open reading frame 64
hsa-miR-302f	1	0	1	1	1	1	XKR6	XK, Kell blood group complex subunit-related family, member 6
hsa-miR-302f	0	0	1	1	1	1	CCDC50	coiled-coil domain containing 50
hsa-miR-302f	0	0	1	1	1	1	ODF3L1	outer dense fiber of sperm tails 3-like 1
hsa-miR-302f	0	0	1	1	1	1	RASSF6	Ras association (RalGDS/AF-6) domain family member 6
hsa-miR-302f	1	0	1	0	1	1	PDE12	phosphodiesterase 12
hsa-miR-302f	1	0	1	1	1	1	PPM1B	protein phosphatase, Mg2+/Mn2+ dependent, 1B
hsa-miR-302f	1	0	1	1	1	1	LRRTM3	leucine rich repeat transmembrane neuronal 3
hsa-miR-302f	0	0	1	1	1	1	SESTD1	SEC14 and spectrin domains 1
hsa-miR-302f	0	0	1	1	1	1	ZNF831	zinc finger protein 831
hsa-miR-302f	1	0	1	1	1	1	MTDH	metadherin
hsa-miR-302f	1	0	1	0	1	1	EFHA2	EF-hand domain family, member A2
hsa-miR-302f	1	0	1	1	1	1	ZSCAN22	zinc finger and SCAN domain containing 22
hsa-miR-302f	0	0	1	1	1	1	USP12	ubiquitin specific peptidase 12
hsa-miR-302f	1	0	1	1	1	1	TMEM65	transmembrane protein 65
hsa-miR-302f	1	0	1	1	1	1	ZBTB41	zinc finger and BTB domain containing 41
hsa-miR-302f	1	0	1	1	1	1	ADAMTS6	ADAM metallopeptidase with thrombospondin type 1 motif, 6
hsa-miR-302f	0	0	1	1	1	1	GJB7	gap junction protein, beta 7, 25kDa
hsa-miR-302f	1	0	1	0	1	1	ZC3H6	zinc finger CCCH-type containing 6
hsa-miR-302f	1	0	1	0	1	1	SS18L1	synovial sarcoma translocation gene on chromosome 18-like 1
hsa-miR-302f	0	0	1	1	1	1	FAM5C	family with sequence similarity 5, member C
hsa-miR-302f	1	0	1	1	1	1	TMEM189-UBE2V1	TMEM189-UBE2V1 readthrough
hsa-miR-302f	0	0	1	1	1	1	PFN4	profilin family, member 4
hsa-miR-302f	0	0	1	1	1	1	SHC4	SHC (Src homology 2 domain containing) family, member 4
hsa-miR-302f	1	0	1	0	1	1	MBLAC2	metallo-beta-lactamase domain containing 2
hsa-miR-302f	1	0	1	0	1	1	NAALADL2	N-acetylated alpha-linked acidic dipeptidase-like 2
hsa-miR-302f	0	0	1	0	1	1	NPSR1-AS1	NPSR1 antisense RNA 1
hsa-miR-302f	0	0	1	1	1	1	SEPT14	septin 14
hsa-miR-302f	1	0	1	1	1	1	TEX19	testis expressed 19
hsa-miR-302f	0	0	1	0	1	1	ASB18	ankyrin repeat and SOCS box containing 18
hsa-miR-302f	0	0	1	0	1	1	TMEM215	transmembrane protein 215
hsa-miR-302f	0	0	1	0	0	0	MIR155HG	MIR155 host gene (non-protein coding)
hsa-miR-302f	0	0	1	0	0	0	TPTEP1	transmembrane phosphatase with tensin homology pseudogene 1
hsa-miR-302f	0	0	1	0	0	0	SUMO1P1	SUMO1 pseudogene 1
hsa-miR-302f	0	0	1	0	0	0	SUMO1P3	SUMO1 pseudogene 3
hsa-miR-302f	0	0	1	0	0	0	RBMXP3	RNA binding motif protein, X-linked pseudogene 3
hsa-miR-302f	0	0	1	0	0	0	NXF4	nuclear RNA export factor 4 pseudogene
hsa-miR-302f	0	0	1	0	0	0	SNORA4	small nucleolar RNA, H/ACA box 4
hsa-miR-302f	0	0	1	0	0	0	SNORA41	small nucleolar RNA, H/ACA box 41
hsa-miR-302f	0	0	1	0	0	0	AOC4	amine oxidase, copper containing 3 (vascular adhesion protein 1) pseudogene
hsa-miR-302f	0	0	1	0	0	0	HTR7P1	5-hydroxytryptamine (serotonin) receptor 7 pseudogene 1
hsa-miR-302f	0	0	1	0	0	0	LOC285359	phosducin-like 3 pseudogene
hsa-miR-302f	0	0	1	0	0	0	TCAM1P	testicular cell adhesion molecule 1 homolog (mouse), pseudogene
hsa-miR-302f	0	0	1	0	0	0	NUDT16P1	nudix (nucleoside diphosphate linked moiety X)-type motif 16 pseudogene 1
hsa-miR-302f	0	0	1	0	0	0	LILRP2	leukocyte immunoglobulin-like receptor pseudogene 2
hsa-miR-302f	0	0	1	0	0	0	HSP90B3P	heat shock protein 90kDa beta (Grp94), member 3, pseudogene
hsa-miR-302f	0	0	1	0	0	0	GMCL1P1	germ cell-less, spermatogenesis associated 1 pseudogene 1
hsa-miR-302f	0	0	1	0	0	0	GK3P	glycerol kinase 3 pseudogene
