# Supplementary material for: Profiling of Selected MicroRNAs in Proliferative Eutopic Endometrium of Women with Ovarian Endometriosis
Source: Biomed Res Int. 2015 Aug 20;2015:760698. doi: 10.1155/2015/760698 (PMC4558423; doi:10.1155/2015/760698)
Supplement: Supplementary file 1 — Table I: The names of miRNAs significantly differentially expressed between eutopic endometrium of patients with endometriosis vs eutopic endometrium of patients without endometriosis. Table II: The associations between miRNA and mRNA, which presents detailed results of the search of six major databases i.e targetscan, tarbase, miranda, mirbase, mirtarget2 and pictar. [file 760698.f1.zip › 760698.f1/Table II/hsa-miR-320d.tsv]

miR	targetscan	tarbase	miranda	mirbase	mirtarget2	pictar	GeneSymbol	GeneName
hsa-miR-320d	1	0	1	1	0	0	SLC35C1	solute carrier family 35, member C1
hsa-miR-320d	1	0	1	1	1	1	ARHGAP44	Rho GTPase activating protein 44
hsa-miR-320d	1	0	1	1	1	1	GRB2	growth factor receptor-bound protein 2
hsa-miR-320d	1	0	1	1	1	1	ZBTB33	zinc finger and BTB domain containing 33
hsa-miR-320d	1	0	0	1	1	1	EMILIN2	elastin microfibril interfacer 2
hsa-miR-320d	1	0	1	1	0	0	TRAF7	TNF receptor-associated factor 7, E3 ubiquitin protein ligase
hsa-miR-320d	1	0	1	1	1	1	MMP16	matrix metallopeptidase 16 (membrane-inserted)
hsa-miR-320d	1	0	1	0	1	1	ARHGAP26	Rho GTPase activating protein 26
hsa-miR-320d	1	0	1	1	1	1	BVES	blood vessel epicardial substance
hsa-miR-320d	1	0	1	1	1	1	C16orf58	chromosome 16 open reading frame 58
hsa-miR-320d	1	0	1	1	1	1	CDH2	cadherin 2, type 1, N-cadherin (neuronal)
hsa-miR-320d	1	0	1	1	1	1	MAPK1IP1L	mitogen-activated protein kinase 1 interacting protein 1-like
hsa-miR-320d	1	0	1	1	1	1	AK4	adenylate kinase 4
hsa-miR-320d	1	0	1	0	1	1	MYO10	myosin X
hsa-miR-320d	1	0	1	0	1	1	GNS	glucosamine (N-acetyl)-6-sulfatase
hsa-miR-320d	1	0	1	1	1	1	PAK7	p21 protein (Cdc42/Rac)-activated kinase 7
hsa-miR-320d	1	0	1	1	1	1	PRKG1	protein kinase, cGMP-dependent, type I
hsa-miR-320d	1	0	1	0	1	1	LHFPL3	lipoma HMGIC fusion partner-like 3
hsa-miR-320d	1	0	1	1	1	1	MTDH	metadherin
hsa-miR-320d	1	0	1	0	1	1	SP1	Sp1 transcription factor
hsa-miR-320d	1	0	1	1	1	1	HOXA10	homeobox A10
hsa-miR-320d	1	0	1	1	1	1	ZMIZ1	zinc finger, MIZ-type containing 1
hsa-miR-320d	1	0	1	1	1	1	FAM117B	family with sequence similarity 117, member B
hsa-miR-320d	1	0	1	0	1	1	AGFG1	ArfGAP with FG repeats 1
hsa-miR-320d	1	0	1	1	1	1	ATF7IP2	activating transcription factor 7 interacting protein 2
hsa-miR-320d	1	0	1	1	1	1	SNTB2	syntrophin, beta 2 (dystrophin-associated protein A1, 59kDa, basic component 2)
hsa-miR-320d	1	0	1	1	1	1	TFAP2C	transcription factor AP-2 gamma (activating enhancer binding protein 2 gamma)
hsa-miR-320d	1	0	1	1	1	1	YWHAQ	tyrosine 3-monooxygenase/tryptophan 5-monooxygenase activation protein, theta polypeptide
hsa-miR-320d	1	0	1	0	1	1	CCND2	cyclin D2
hsa-miR-320d	1	0	1	1	1	1	PIGK	phosphatidylinositol glycan anchor biosynthesis, class K
hsa-miR-320d	1	0	1	1	1	1	HAS3	hyaluronan synthase 3
hsa-miR-320d	1	0	1	1	1	1	CHFR	checkpoint with forkhead and ring finger domains, E3 ubiquitin protein ligase
hsa-miR-320d	1	0	0	1	1	1	LPIN3	lipin 3
hsa-miR-320d	1	0	1	1	1	1	GABPB1	GA binding protein transcription factor, beta subunit 1
hsa-miR-320d	1	0	1	1	1	1	FLRT3	fibronectin leucine rich transmembrane protein 3
hsa-miR-320d	1	0	1	1	0	0	VPS37B	vacuolar protein sorting 37 homolog B (S. cerevisiae)
hsa-miR-320d	1	0	1	0	1	1	ATG14	autophagy related 14
hsa-miR-320d	1	0	1	0	1	1	RXRA	retinoid X receptor, alpha
hsa-miR-320d	1	0	1	0	1	1	CNOT7	CCR4-NOT transcription complex, subunit 7
hsa-miR-320d	1	0	1	0	1	1	KITLG	KIT ligand
hsa-miR-320d	1	0	1	1	1	1	ATL3	atlastin GTPase 3
hsa-miR-320d	1	0	1	0	1	1	PCGF3	polycomb group ring finger 3
hsa-miR-320d	1	0	1	1	1	1	SMARCC1	SWI/SNF related, matrix associated, actin dependent regulator of chromatin, subfamily c, member 1
hsa-miR-320d	1	0	1	0	1	1	CACNA1C	calcium channel, voltage-dependent, L type, alpha 1C subunit
hsa-miR-320d	1	0	1	0	1	1	KCTD2	potassium channel tetramerisation domain containing 2
hsa-miR-320d	1	0	1	1	1	1	PHF8	PHD finger protein 8
hsa-miR-320d	1	0	1	0	1	1	TBL1XR1	transducin (beta)-like 1 X-linked receptor 1
hsa-miR-320d	1	0	1	1	1	1	ANKRD13A	ankyrin repeat domain 13A
hsa-miR-320d	1	0	1	1	0	0	PPM1H	protein phosphatase, Mg2+/Mn2+ dependent, 1H
hsa-miR-320d	1	0	1	1	1	1	STAG2	stromal antigen 2
hsa-miR-320d	1	0	1	0	1	1	NR3C1	nuclear receptor subfamily 3, group C, member 1 (glucocorticoid receptor)
hsa-miR-320d	1	0	1	1	1	1	BLCAP	bladder cancer associated protein
hsa-miR-320d	1	0	1	0	1	1	PDE4D	phosphodiesterase 4D, cAMP-specific
hsa-miR-320d	1	0	1	1	1	1	HSPA4	heat shock 70kDa protein 4
hsa-miR-320d	1	0	1	1	1	1	FAM160B1	family with sequence similarity 160, member B1
hsa-miR-320d	1	0	1	1	1	1	BOD1L1	biorientation of chromosomes in cell division 1-like 1
hsa-miR-320d	1	0	1	1	1	1	AUTS2	autism susceptibility candidate 2
hsa-miR-320d	1	0	1	1	0	0	PFKM	phosphofructokinase, muscle
hsa-miR-320d	1	0	1	1	1	1	GHITM	growth hormone inducible transmembrane protein
hsa-miR-320d	1	0	1	1	1	1	AK2	adenylate kinase 2
hsa-miR-320d	1	0	1	1	1	1	NONO	non-POU domain containing, octamer-binding
hsa-miR-320d	1	0	1	1	1	1	SASH1	SAM and SH3 domain containing 1
hsa-miR-320d	1	0	1	1	1	1	SH2B3	SH2B adaptor protein 3
hsa-miR-320d	1	0	1	1	1	1	PBX3	pre-B-cell leukemia homeobox 3
hsa-miR-320d	1	0	1	1	1	1	CHGA	chromogranin A (parathyroid secretory protein 1)
hsa-miR-320d	1	0	1	1	1	1	DLX1	distal-less homeobox 1
hsa-miR-320d	1	0	1	0	1	1	RIMS4	regulating synaptic membrane exocytosis 4
hsa-miR-320d	1	0	1	1	1	1	TMCC1	transmembrane and coiled-coil domain family 1
hsa-miR-320d	1	0	1	1	1	1	CRKL	v-crk sarcoma virus CT10 oncogene homolog (avian)-like
hsa-miR-320d	1	0	1	1	1	1	NCDN	neurochondrin
hsa-miR-320d	1	0	1	1	1	1	ATRX	alpha thalassemia/mental retardation syndrome X-linked
hsa-miR-320d	1	0	1	1	1	1	PTPRB	protein tyrosine phosphatase, receptor type, B
hsa-miR-320d	1	0	1	1	1	1	ETS2	v-ets erythroblastosis virus E26 oncogene homolog 2 (avian)
hsa-miR-320d	1	0	1	1	1	1	SUPT16H	suppressor of Ty 16 homolog (S. cerevisiae)
hsa-miR-320d	1	0	1	0	1	1	TSC1	tuberous sclerosis 1
hsa-miR-320d	1	0	1	1	1	1	SERBP1	SERPINE1 mRNA binding protein 1
hsa-miR-320d	1	0	1	0	1	1	PDE12	phosphodiesterase 12
hsa-miR-320d	1	0	1	1	1	1	SIAH2	siah E3 ubiquitin protein ligase 2
hsa-miR-320d	1	0	0	1	1	1	USP44	ubiquitin specific peptidase 44
hsa-miR-320d	1	0	1	1	1	1	LRP6	low density lipoprotein receptor-related protein 6
hsa-miR-320d	1	0	1	1	1	1	XKRX	XK, Kell blood group complex subunit-related, X-linked
hsa-miR-320d	1	0	1	0	1	1	ERMN	ermin, ERM-like protein
hsa-miR-320d	1	0	1	1	1	1	RBM24	RNA binding motif protein 24
hsa-miR-320d	1	0	1	1	1	1	CYLD	cylindromatosis (turban tumor syndrome)
hsa-miR-320d	1	0	1	0	0	0	TANC2	tetratricopeptide repeat, ankyrin repeat and coiled-coil containing 2
hsa-miR-320d	1	0	1	1	1	1	IPO5	importin 5
hsa-miR-320d	1	0	1	1	0	0	RAD9A	RAD9 homolog A (S. pombe)
hsa-miR-320d	1	0	1	1	1	1	RAD23B	RAD23 homolog B (S. cerevisiae)
hsa-miR-320d	1	0	1	0	1	1	PCDHA13	protocadherin alpha 13
hsa-miR-320d	1	0	1	0	1	1	CYBRD1	cytochrome b reductase 1
hsa-miR-320d	1	0	1	1	1	1	BAHD1	bromo adjacent homology domain containing 1
hsa-miR-320d	1	0	1	0	1	1	TGFBR1	transforming growth factor, beta receptor 1
hsa-miR-320d	1	0	1	0	1	1	GNAI1	guanine nucleotide binding protein (G protein), alpha inhibiting activity polypeptide 1
hsa-miR-320d	1	0	1	0	1	1	FZD3	frizzled family receptor 3
hsa-miR-320d	1	0	1	1	1	1	CNOT4	CCR4-NOT transcription complex, subunit 4
hsa-miR-320d	1	0	1	0	1	1	CD99L2	CD99 molecule-like 2
hsa-miR-320d	1	0	1	1	1	1	ZFP36L1	zinc finger protein 36, C3H type-like 1
hsa-miR-320d	1	0	1	0	1	1	CPD	carboxypeptidase D
hsa-miR-320d	1	0	1	1	1	1	PGR	progesterone receptor
hsa-miR-320d	1	0	1	1	1	1	DAZAP1	DAZ associated protein 1
hsa-miR-320d	1	0	1	0	1	1	CNOT6L	CCR4-NOT transcription complex, subunit 6-like
hsa-miR-320d	1	0	1	1	1	1	RIT1	Ras-like without CAAX 1
hsa-miR-320d	1	0	1	1	1	1	FLNC	filamin C, gamma
hsa-miR-320d	1	0	1	1	1	1	HIAT1	hippocampus abundant transcript 1
hsa-miR-320d	1	0	0	0	0	0	PCSK7	proprotein convertase subtilisin/kexin type 7
hsa-miR-320d	1	0	1	1	1	1	NR2C2	nuclear receptor subfamily 2, group C, member 2
hsa-miR-320d	1	0	1	1	1	1	NRP1	neuropilin 1
hsa-miR-320d	1	0	1	0	1	1	RAP2B	RAP2B, member of RAS oncogene family
hsa-miR-320d	1	0	1	1	1	1	SPTSSA	serine palmitoyltransferase, small subunit A
hsa-miR-320d	1	0	1	0	1	1	KIAA2022	KIAA2022
hsa-miR-320d	1	0	1	0	1	1	DCP1A	DCP1 decapping enzyme homolog A (S. cerevisiae)
hsa-miR-320d	1	0	1	1	1	1	RAPGEFL1	Rap guanine nucleotide exchange factor (GEF)-like 1
hsa-miR-320d	1	0	1	0	1	1	TMEM47	transmembrane protein 47
hsa-miR-320d	1	0	1	1	1	1	MIER3	mesoderm induction early response 1, family member 3
hsa-miR-320d	1	0	1	0	1	1	MBLAC2	metallo-beta-lactamase domain containing 2
hsa-miR-320d	1	0	1	1	1	1	GPR88	G protein-coupled receptor 88
hsa-miR-320d	1	0	1	1	1	1	MED21	mediator complex subunit 21
hsa-miR-320d	1	0	1	1	1	1	DMD	dystrophin
hsa-miR-320d	1	0	1	1	1	1	GLIS3	GLIS family zinc finger 3
hsa-miR-320d	1	0	1	1	1	1	PARD6B	par-6 partitioning defective 6 homolog beta (C. elegans)
hsa-miR-320d	1	0	1	1	1	1	PHF1	PHD finger protein 1
hsa-miR-320d	1	0	1	1	1	1	GMFB	glia maturation factor, beta
hsa-miR-320d	1	0	1	1	1	1	RAD21	RAD21 homolog (S. pombe)
hsa-miR-320d	1	0	1	0	1	1	SYT11	synaptotagmin XI
hsa-miR-320d	1	0	1	1	1	1	PHTF2	putative homeodomain transcription factor 2
hsa-miR-320d	1	0	1	0	1	1	NEGR1	neuronal growth regulator 1
hsa-miR-320d	1	0	0	1	1	1	NCAPD3	non-SMC condensin II complex, subunit D3
hsa-miR-320d	1	0	1	1	1	1	JHDM1D	jumonji C domain containing histone demethylase 1 homolog D (S. cerevisiae)
hsa-miR-320d	1	0	1	1	0	0	ATP13A3	ATPase type 13A3
hsa-miR-320d	1	0	1	1	1	1	PCDHA3	protocadherin alpha 3
hsa-miR-320d	1	0	1	0	1	1	MRPS25	mitochondrial ribosomal protein S25
hsa-miR-320d	1	0	0	0	0	0	EMR4P	egf-like module containing, mucin-like, hormone receptor-like 4 pseudogene
hsa-miR-320d	1	0	1	1	1	1	BMI1	BMI1 polycomb ring finger oncogene
hsa-miR-320d	1	0	1	1	1	1	ST7	suppression of tumorigenicity 7
hsa-miR-320d	1	0	1	1	1	1	ZNF664	zinc finger protein 664
hsa-miR-320d	1	0	1	1	1	1	GMCL1	germ cell-less, spermatogenesis associated 1
hsa-miR-320d	1	0	1	1	1	1	DNER	delta/notch-like EGF repeat containing
hsa-miR-320d	1	0	1	0	1	1	ZNF652	zinc finger protein 652
hsa-miR-320d	1	0	1	1	1	1	LIMCH1	LIM and calponin homology domains 1
hsa-miR-320d	1	0	1	1	0	0	RELL1	RELT-like 1
hsa-miR-320d	1	0	1	1	1	1	ID4	inhibitor of DNA binding 4, dominant negative helix-loop-helix protein
hsa-miR-320d	1	0	1	1	1	1	TFAP2B	transcription factor AP-2 beta (activating enhancer binding protein 2 beta)
hsa-miR-320d	1	0	1	1	1	1	NRN1	neuritin 1
hsa-miR-320d	1	0	1	1	1	1	VGLL3	vestigial like 3 (Drosophila)
hsa-miR-320d	1	0	1	1	1	1	SH2D4B	SH2 domain containing 4B
hsa-miR-320d	1	0	1	0	1	1	DCBLD2	discoidin, CUB and LCCL domain containing 2
hsa-miR-320d	1	0	1	1	1	1	PCDHA2	protocadherin alpha 2
hsa-miR-320d	1	0	1	0	1	1	PCDHA7	protocadherin alpha 7
hsa-miR-320d	1	0	1	1	1	1	HNRNPF	heterogeneous nuclear ribonucleoprotein F
hsa-miR-320d	1	0	1	1	1	1	RAP2C	RAP2C, member of RAS oncogene family
hsa-miR-320d	1	0	1	0	1	1	YES1	v-yes-1 Yamaguchi sarcoma viral oncogene homolog 1
hsa-miR-320d	1	0	1	1	1	1	TNKS2	tankyrase, TRF1-interacting ankyrin-related ADP-ribose polymerase 2
hsa-miR-320d	1	0	1	1	1	1	TBX2	T-box 2
hsa-miR-320d	1	0	1	1	0	0	KIAA1549	KIAA1549
hsa-miR-320d	1	0	1	0	1	1	TNKS	tankyrase, TRF1-interacting ankyrin-related ADP-ribose polymerase
hsa-miR-320d	1	0	1	1	1	1	PPP2R2C	protein phosphatase 2, regulatory subunit B, gamma
hsa-miR-320d	1	0	1	1	1	1	TNFRSF21	tumor necrosis factor receptor superfamily, member 21
hsa-miR-320d	1	0	1	0	1	1	NUFIP2	nuclear fragile X mental retardation protein interacting protein 2
hsa-miR-320d	1	0	1	1	1	1	PHC1	polyhomeotic homolog 1 (Drosophila)
hsa-miR-320d	1	0	1	1	1	1	PRPS1	phosphoribosyl pyrophosphate synthetase 1
hsa-miR-320d	1	0	1	1	1	1	C11orf9	chromosome 11 open reading frame 9
hsa-miR-320d	1	0	1	1	1	1	MEX3B	mex-3 homolog B (C. elegans)
hsa-miR-320d	1	0	1	1	1	1	GDAP1	ganglioside induced differentiation associated protein 1
hsa-miR-320d	1	0	1	1	1	1	RSU1	Ras suppressor protein 1
hsa-miR-320d	1	0	1	1	1	1	SIN3A	SIN3 transcription regulator homolog A (yeast)
hsa-miR-320d	1	0	1	1	1	1	H3F3B	H3 histone, family 3B (H3.3B)
hsa-miR-320d	1	0	1	1	0	0	HS6ST1	heparan sulfate 6-O-sulfotransferase 1
hsa-miR-320d	1	0	1	1	1	1	HELZ	helicase with zinc finger
hsa-miR-320d	1	0	0	1	0	0	NKX2-4	NK2 homeobox 4
hsa-miR-320d	1	0	1	1	1	1	TRAPPC8	trafficking protein particle complex 8
hsa-miR-320d	1	0	0	1	0	0	KLHL36	kelch-like 36 (Drosophila)
hsa-miR-320d	1	0	1	1	1	1	SEPT6	septin 6
hsa-miR-320d	1	0	1	1	0	0	GSPT2	G1 to S phase transition 2
hsa-miR-320d	1	0	1	0	1	1	E2F1	E2F transcription factor 1
hsa-miR-320d	1	0	1	1	1	1	NPC1	Niemann-Pick disease, type C1
hsa-miR-320d	1	0	1	1	1	1	DLGAP4	discs, large (Drosophila) homolog-associated protein 4
hsa-miR-320d	1	0	1	0	1	1	C12orf36	chromosome 12 open reading frame 36
hsa-miR-320d	1	0	1	1	1	1	DLG2	discs, large homolog 2 (Drosophila)
hsa-miR-320d	1	0	1	1	1	1	PI15	peptidase inhibitor 15
hsa-miR-320d	1	0	1	1	1	1	ALG9	asparagine-linked glycosylation 9, alpha-1,2-mannosyltransferase homolog (S. cerevisiae)
hsa-miR-320d	1	0	1	1	1	1	ZMYM4	zinc finger, MYM-type 4
hsa-miR-320d	1	0	1	1	1	1	AIF1L	allograft inflammatory factor 1-like
hsa-miR-320d	1	0	1	1	1	1	MN1	meningioma (disrupted in balanced translocation) 1
hsa-miR-320d	1	0	1	1	1	1	ONECUT1	one cut homeobox 1
hsa-miR-320d	1	0	1	1	1	1	C18orf1	chromosome 18 open reading frame 1
hsa-miR-320d	1	0	1	1	1	1	PCGF5	polycomb group ring finger 5
hsa-miR-320d	1	0	1	1	1	1	RHOBTB3	Rho-related BTB domain containing 3
hsa-miR-320d	1	0	1	0	1	1	KLF13	Kruppel-like factor 13
hsa-miR-320d	1	0	1	0	1	1	CAPRIN1	cell cycle associated protein 1
hsa-miR-320d	1	0	1	1	1	1	TLL2	tolloid-like 2
hsa-miR-320d	1	0	1	1	1	1	YIPF5	Yip1 domain family, member 5
hsa-miR-320d	1	0	1	1	1	1	WLS	wntless homolog (Drosophila)
hsa-miR-320d	1	0	1	1	1	1	SMARCD2	SWI/SNF related, matrix associated, actin dependent regulator of chromatin, subfamily d, member 2
hsa-miR-320d	1	0	1	1	1	1	C5orf43	chromosome 5 open reading frame 43
hsa-miR-320d	1	0	1	1	1	1	EYA4	eyes absent homolog 4 (Drosophila)
hsa-miR-320d	1	0	1	1	1	1	CALN1	calneuron 1
hsa-miR-320d	1	0	1	0	1	1	ATP11A	ATPase, class VI, type 11A
hsa-miR-320d	1	0	1	1	1	1	BMP3	bone morphogenetic protein 3
hsa-miR-320d	1	0	1	1	1	1	B4GALT6	UDP-Gal:betaGlcNAc beta 1,4- galactosyltransferase, polypeptide 6
hsa-miR-320d	1	0	1	1	1	1	QSOX2	quiescin Q6 sulfhydryl oxidase 2
hsa-miR-320d	1	0	1	1	1	1	NAP1L5	nucleosome assembly protein 1-like 5
hsa-miR-320d	1	0	1	0	1	1	CLASP2	cytoplasmic linker associated protein 2
hsa-miR-320d	1	0	1	0	1	1	OTUD7B	OTU domain containing 7B
hsa-miR-320d	1	0	1	1	1	1	SOBP	sine oculis binding protein homolog (Drosophila)
hsa-miR-320d	1	0	0	1	0	0	DLG1	discs, large homolog 1 (Drosophila)
hsa-miR-320d	1	0	1	1	1	1	STK4	serine/threonine kinase 4
hsa-miR-320d	1	0	1	1	0	0	TSC22D4	TSC22 domain family, member 4
hsa-miR-320d	1	0	1	1	1	1	HNRNPC	heterogeneous nuclear ribonucleoprotein C (C1/C2)
hsa-miR-320d	1	0	1	1	1	1	WDR1	WD repeat domain 1
hsa-miR-320d	1	0	1	0	1	1	SLC5A3	solute carrier family 5 (sodium/myo-inositol cotransporter), member 3
hsa-miR-320d	1	0	1	0	1	1	SPOPL	speckle-type POZ protein-like
hsa-miR-320d	1	0	1	1	1	1	RIMKLA	ribosomal modification protein rimK-like family member A
hsa-miR-320d	1	0	1	1	1	1	CMPK1	cytidine monophosphate (UMP-CMP) kinase 1, cytosolic
hsa-miR-320d	1	0	1	1	1	1	ENPEP	glutamyl aminopeptidase (aminopeptidase A)
hsa-miR-320d	1	0	1	1	1	1	TWF1	twinfilin, actin-binding protein, homolog 1 (Drosophila)
hsa-miR-320d	1	0	1	1	1	1	GCNT4	glucosaminyl (N-acetyl) transferase 4, core 2
hsa-miR-320d	1	0	1	0	1	1	PURB	purine-rich element binding protein B
hsa-miR-320d	1	0	1	1	1	1	PHOX2B	paired-like homeobox 2b
hsa-miR-320d	1	0	1	1	1	1	GID4	GID complex subunit 4, VID24 homolog (S. cerevisiae)
hsa-miR-320d	1	0	1	0	0	0	CTSB	cathepsin B
hsa-miR-320d	1	0	1	1	1	1	RASA1	RAS p21 protein activator (GTPase activating protein) 1
hsa-miR-320d	1	0	1	0	1	1	TNRC6B	trinucleotide repeat containing 6B
hsa-miR-320d	1	0	1	0	1	1	N4BP1	NEDD4 binding protein 1
hsa-miR-320d	1	0	1	1	1	1	DNAJA2	DnaJ (Hsp40) homolog, subfamily A, member 2
hsa-miR-320d	1	0	1	0	1	1	HDAC4	histone deacetylase 4
hsa-miR-320d	1	0	1	1	1	1	DESI2	desumoylating isopeptidase 2
hsa-miR-320d	1	0	1	1	1	1	EFS	embryonal Fyn-associated substrate
hsa-miR-320d	1	0	1	1	1	1	EIF2B1	eukaryotic translation initiation factor 2B, subunit 1 alpha, 26kDa
hsa-miR-320d	1	0	1	1	1	1	IFT57	intraflagellar transport 57 homolog (Chlamydomonas)
hsa-miR-320d	1	0	1	1	1	1	ABCC5	ATP-binding cassette, sub-family C (CFTR/MRP), member 5
hsa-miR-320d	1	0	1	1	1	1	MAPK8IP3	mitogen-activated protein kinase 8 interacting protein 3
hsa-miR-320d	1	0	1	1	1	1	EPB41L4B	erythrocyte membrane protein band 4.1 like 4B
hsa-miR-320d	1	0	1	1	1	1	SUPT7L	suppressor of Ty 7 (S. cerevisiae)-like
hsa-miR-320d	1	0	1	1	1	1	PCDHA1	protocadherin alpha 1
hsa-miR-320d	1	0	1	1	1	1	NDRG3	NDRG family member 3
hsa-miR-320d	1	0	1	1	0	0	NRL	neural retina leucine zipper
hsa-miR-320d	1	0	0	1	0	0	C16orf85	chromosome 16 open reading frame 85
hsa-miR-320d	1	0	1	1	1	1	TSC22D3	TSC22 domain family, member 3
hsa-miR-320d	1	0	1	1	1	1	MEIS2	Meis homeobox 2
hsa-miR-320d	1	0	1	1	1	1	ALKBH5	alkB, alkylation repair homolog 5 (E. coli)
hsa-miR-320d	1	0	1	1	1	1	ING5	inhibitor of growth family, member 5
hsa-miR-320d	1	0	1	1	1	1	ADIPOR1	adiponectin receptor 1
hsa-miR-320d	1	0	1	1	1	1	PCDHA5	protocadherin alpha 5
hsa-miR-320d	1	0	1	0	1	1	CYTH3	cytohesin 3
hsa-miR-320d	1	0	1	1	1	1	FBXW7	F-box and WD repeat domain containing 7, E3 ubiquitin protein ligase
hsa-miR-320d	1	0	1	1	1	1	NIPA1	non imprinted in Prader-Willi/Angelman syndrome 1
hsa-miR-320d	1	0	1	1	1	1	FKBP5	FK506 binding protein 5
hsa-miR-320d	1	0	1	1	1	1	LAMP1	lysosomal-associated membrane protein 1
hsa-miR-320d	1	0	1	0	1	1	PLAG1	pleiomorphic adenoma gene 1
hsa-miR-320d	1	0	1	1	1	1	CPEB3	cytoplasmic polyadenylation element binding protein 3
hsa-miR-320d	1	0	1	1	1	1	SRSF7	serine/arginine-rich splicing factor 7
hsa-miR-320d	1	0	1	1	1	1	NAA40	N(alpha)-acetyltransferase 40, NatD catalytic subunit, homolog (S. cerevisiae)
hsa-miR-320d	1	0	1	1	1	1	RTKN2	rhotekin 2
hsa-miR-320d	1	0	0	1	1	1	FANCF	Fanconi anemia, complementation group F
hsa-miR-320d	1	0	1	1	1	1	TMEM2	transmembrane protein 2
hsa-miR-320d	1	0	1	1	1	1	GSPT1	G1 to S phase transition 1
hsa-miR-320d	1	0	1	1	1	1	CLCN5	chloride channel, voltage-sensitive 5
hsa-miR-320d	1	0	1	1	1	1	NXT2	nuclear transport factor 2-like export factor 2
hsa-miR-320d	1	0	1	1	1	1	SMAP2	small ArfGAP2
hsa-miR-320d	1	0	1	0	1	1	USP46	ubiquitin specific peptidase 46
hsa-miR-320d	1	0	1	0	1	1	SGCB	sarcoglycan, beta (43kDa dystrophin-associated glycoprotein)
hsa-miR-320d	1	0	1	1	1	1	UNKL	unkempt homolog (Drosophila)-like
hsa-miR-320d	1	0	1	1	1	1	E2F3	E2F transcription factor 3
hsa-miR-320d	1	0	1	1	1	1	PDS5A	PDS5, regulator of cohesion maintenance, homolog A (S. cerevisiae)
hsa-miR-320d	1	0	1	1	1	1	RAC1	ras-related C3 botulinum toxin substrate 1 (rho family, small GTP binding protein Rac1)
hsa-miR-320d	1	0	1	0	1	1	YAF2	YY1 associated factor 2
hsa-miR-320d	1	0	1	1	1	1	TLK2	tousled-like kinase 2
hsa-miR-320d	1	0	1	1	1	1	MIER1	mesoderm induction early response 1 homolog (Xenopus laevis)
hsa-miR-320d	1	0	1	0	1	1	ARMC1	armadillo repeat containing 1
hsa-miR-320d	1	0	1	1	1	1	RAI2	retinoic acid induced 2
hsa-miR-320d	1	0	1	1	0	0	DHDDS	dehydrodolichyl diphosphate synthase
hsa-miR-320d	1	0	1	1	1	1	HIVEP2	human immunodeficiency virus type I enhancer binding protein 2
hsa-miR-320d	1	0	1	1	1	1	HEY1	hairy/enhancer-of-split related with YRPW motif 1
hsa-miR-320d	1	0	1	0	0	0	TNPO1	transportin 1
hsa-miR-320d	1	0	1	1	1	1	TMEM64	transmembrane protein 64
hsa-miR-320d	1	0	1	1	0	0	WNK1	WNK lysine deficient protein kinase 1
hsa-miR-320d	1	0	1	0	1	1	IL6R	interleukin 6 receptor
hsa-miR-320d	1	0	1	1	1	1	SHB	Src homology 2 domain containing adaptor protein B
hsa-miR-320d	1	0	1	1	1	1	MZT1	mitotic spindle organizing protein 1
hsa-miR-320d	1	0	1	1	1	1	TOMM70A	translocase of outer mitochondrial membrane 70 homolog A (S. cerevisiae)
hsa-miR-320d	1	0	1	1	1	1	TSPYL5	TSPY-like 5
hsa-miR-320d	1	0	1	1	1	1	SLC6A8	solute carrier family 6 (neurotransmitter transporter, creatine), member 8
hsa-miR-320d	1	0	1	1	1	1	NELF	nasal embryonic LHRH factor
hsa-miR-320d	1	0	1	1	1	1	SNX16	sorting nexin 16
hsa-miR-320d	1	0	1	1	1	1	TPD52L2	tumor protein D52-like 2
hsa-miR-320d	1	0	1	1	1	1	GTPBP2	GTP binding protein 2
hsa-miR-320d	1	0	1	1	1	1	SEMA3A	sema domain, immunoglobulin domain (Ig), short basic domain, secreted, (semaphorin) 3A
hsa-miR-320d	1	0	1	1	1	1	SPCS2	signal peptidase complex subunit 2 homolog (S. cerevisiae)
hsa-miR-320d	1	0	1	1	1	1	ELOVL6	ELOVL fatty acid elongase 6
hsa-miR-320d	1	0	1	1	1	1	RANBP2	RAN binding protein 2
hsa-miR-320d	1	0	1	0	1	1	NRK	Nik related kinase
hsa-miR-320d	1	0	1	1	1	1	PER2	period homolog 2 (Drosophila)
hsa-miR-320d	1	0	1	1	1	1	EREG	epiregulin
hsa-miR-320d	1	0	0	0	0	0	LOC646227	cAMP-regulated phosphoprotein 19 pseudogene
hsa-miR-320d	1	0	1	1	1	1	PTBP3	polypyrimidine tract binding protein 3
hsa-miR-320d	1	0	1	0	1	1	ARPP19	cAMP-regulated phosphoprotein, 19kDa
hsa-miR-320d	1	0	1	1	0	0	INO80D	INO80 complex subunit D
hsa-miR-320d	1	0	1	1	1	1	MTMR12	myotubularin related protein 12
hsa-miR-320d	1	0	1	1	1	1	CPEB1	cytoplasmic polyadenylation element binding protein 1
hsa-miR-320d	1	0	1	0	1	1	ESRRG	estrogen-related receptor gamma
hsa-miR-320d	1	0	1	1	1	1	PCDHA8	protocadherin alpha 8
hsa-miR-320d	1	0	1	1	1	1	IGF1R	insulin-like growth factor 1 receptor
hsa-miR-320d	1	0	1	1	1	1	SNTB1	syntrophin, beta 1 (dystrophin-associated protein A1, 59kDa, basic component 1)
hsa-miR-320d	1	0	1	1	1	1	RBBP6	retinoblastoma binding protein 6
hsa-miR-320d	1	0	1	1	1	1	OXSR1	oxidative-stress responsive 1
hsa-miR-320d	1	0	1	1	1	1	SMG7	smg-7 homolog, nonsense mediated mRNA decay factor (C. elegans)
hsa-miR-320d	1	0	1	0	1	1	SPTLC2	serine palmitoyltransferase, long chain base subunit 2
hsa-miR-320d	1	0	1	0	1	1	TFCP2L1	transcription factor CP2-like 1
hsa-miR-320d	1	0	1	1	1	1	BANP	BTG3 associated nuclear protein
hsa-miR-320d	1	0	1	1	1	1	PRRG1	proline rich Gla (G-carboxyglutamic acid) 1
hsa-miR-320d	1	0	1	1	1	1	PCSK6	proprotein convertase subtilisin/kexin type 6
hsa-miR-320d	1	0	1	1	0	0	KIAA1210	KIAA1210
hsa-miR-320d	1	0	1	1	1	1	SUZ12	suppressor of zeste 12 homolog (Drosophila)
hsa-miR-320d	1	0	1	1	1	1	RAP1A	RAP1A, member of RAS oncogene family
hsa-miR-320d	1	0	1	1	1	1	IGF1	insulin-like growth factor 1 (somatomedin C)
hsa-miR-320d	1	0	1	0	1	1	SREK1IP1	SREK1-interacting protein 1
hsa-miR-320d	1	0	1	0	1	1	CYTH1	cytohesin 1
hsa-miR-320d	1	0	1	1	1	1	ENAH	enabled homolog (Drosophila)
hsa-miR-320d	1	0	1	0	1	1	PTPLAD1	protein tyrosine phosphatase-like A domain containing 1
hsa-miR-320d	1	0	1	1	1	1	CUX1	cut-like homeobox 1
hsa-miR-320d	1	0	1	0	1	1	PRKAR1A	protein kinase, cAMP-dependent, regulatory, type I, alpha
hsa-miR-320d	1	0	1	1	1	1	MSANTD4	Myb/SANT-like DNA-binding domain containing 4 with coiled-coils
hsa-miR-320d	1	0	1	1	1	1	RGS9BP	regulator of G protein signaling 9 binding protein
hsa-miR-320d	1	0	1	1	1	1	F13A1	coagulation factor XIII, A1 polypeptide
hsa-miR-320d	1	0	0	1	0	0	ZNF516	zinc finger protein 516
hsa-miR-320d	1	0	0	1	0	0	CD97	CD97 molecule
hsa-miR-320d	1	0	1	0	1	1	C14orf43	chromosome 14 open reading frame 43
hsa-miR-320d	1	0	1	1	1	1	WARS2	tryptophanyl tRNA synthetase 2, mitochondrial
hsa-miR-320d	1	0	1	0	1	1	PLK3	polo-like kinase 3
hsa-miR-320d	1	0	1	1	1	1	ARFIP1	ADP-ribosylation factor interacting protein 1
hsa-miR-320d	1	0	1	0	1	1	DPYSL3	dihydropyrimidinase-like 3
hsa-miR-320d	1	0	0	0	0	0	SFTA3	surfactant associated 3
hsa-miR-320d	1	0	1	0	1	1	CDK6	cyclin-dependent kinase 6
hsa-miR-320d	1	0	1	0	0	0	KIF26A	kinesin family member 26A
hsa-miR-320d	1	0	1	1	1	1	SORBS2	sorbin and SH3 domain containing 2
hsa-miR-320d	1	0	1	1	1	1	SDHC	succinate dehydrogenase complex, subunit C, integral membrane protein, 15kDa
hsa-miR-320d	1	0	1	1	1	1	SCOC	short coiled-coil protein
hsa-miR-320d	1	0	1	0	1	1	PCDHAC2	protocadherin alpha subfamily C, 2
hsa-miR-320d	1	0	1	1	1	1	ATP6V1A	ATPase, H+ transporting, lysosomal 70kDa, V1 subunit A
hsa-miR-320d	1	0	1	0	1	1	ARL8B	ADP-ribosylation factor-like 8B
hsa-miR-320d	1	0	1	1	1	1	ARHGEF39	Rho guanine nucleotide exchange factor (GEF) 39
hsa-miR-320d	1	0	1	1	1	1	DENND5B	DENN/MADD domain containing 5B
hsa-miR-320d	1	0	1	1	1	1	CHIC1	cysteine-rich hydrophobic domain 1
hsa-miR-320d	1	0	1	1	1	1	ASH2L	ash2 (absent, small, or homeotic)-like (Drosophila)
hsa-miR-320d	1	0	1	1	1	1	CRK	v-crk sarcoma virus CT10 oncogene homolog (avian)
hsa-miR-320d	1	0	1	0	1	1	DICER1	dicer 1, ribonuclease type III
hsa-miR-320d	1	0	1	1	1	1	PPP1R11	protein phosphatase 1, regulatory (inhibitor) subunit 11
hsa-miR-320d	1	0	1	1	1	1	WWC2	WW and C2 domain containing 2
hsa-miR-320d	1	0	1	0	1	1	XIAP	X-linked inhibitor of apoptosis
hsa-miR-320d	1	0	1	1	1	1	GOLGA3	golgin A3
hsa-miR-320d	1	0	1	1	1	1	ONECUT2	one cut homeobox 2
hsa-miR-320d	1	0	1	0	1	1	OSBPL3	oxysterol binding protein-like 3
hsa-miR-320d	1	0	1	1	0	0	CKAP5	cytoskeleton associated protein 5
hsa-miR-320d	1	0	1	1	1	1	FAM120C	family with sequence similarity 120C
hsa-miR-320d	1	0	1	1	1	1	LPHN1	latrophilin 1
hsa-miR-320d	1	0	1	1	1	1	GOLGA1	golgin A1
hsa-miR-320d	1	0	1	1	1	1	DTNA	dystrobrevin, alpha
hsa-miR-320d	1	0	1	1	1	1	SENP5	SUMO1/sentrin specific peptidase 5
hsa-miR-320d	1	0	1	0	1	1	CSNK1E	casein kinase 1, epsilon
hsa-miR-320d	1	0	1	1	1	1	CXCL14	chemokine (C-X-C motif) ligand 14
hsa-miR-320d	1	0	1	1	0	0	MEX3A	mex-3 homolog A (C. elegans)
hsa-miR-320d	1	0	1	0	1	1	ACAP2	ArfGAP with coiled-coil, ankyrin repeat and PH domains 2
hsa-miR-320d	1	0	1	1	1	1	ZC3H7B	zinc finger CCCH-type containing 7B
hsa-miR-320d	1	0	1	1	1	1	PPP2R5B	protein phosphatase 2, regulatory subunit B', beta
hsa-miR-320d	1	0	1	1	1	1	SMARCE1	SWI/SNF related, matrix associated, actin dependent regulator of chromatin, subfamily e, member 1
hsa-miR-320d	1	0	1	1	1	1	PTGER3	prostaglandin E receptor 3 (subtype EP3)
hsa-miR-320d	1	0	1	0	1	1	ANKFY1	ankyrin repeat and FYVE domain containing 1
hsa-miR-320d	1	0	1	1	1	1	CNBP	CCHC-type zinc finger, nucleic acid binding protein
hsa-miR-320d	1	0	1	1	1	1	PCDHA6	protocadherin alpha 6
hsa-miR-320d	1	0	1	1	1	1	PDCD4	programmed cell death 4 (neoplastic transformation inhibitor)
hsa-miR-320d	1	0	1	0	1	1	PCDHA11	protocadherin alpha 11
hsa-miR-320d	1	0	1	1	0	0	PYGO2	pygopus homolog 2 (Drosophila)
hsa-miR-320d	1	0	1	1	1	1	ZIC3	Zic family member 3
hsa-miR-320d	1	0	0	1	0	0	DPM2	dolichyl-phosphate mannosyltransferase polypeptide 2, regulatory subunit
hsa-miR-320d	1	0	1	0	0	0	CCDC64B	coiled-coil domain containing 64B
hsa-miR-320d	1	0	1	0	1	1	SOX4	SRY (sex determining region Y)-box 4
hsa-miR-320d	1	0	1	1	1	1	MAX	MYC associated factor X
hsa-miR-320d	1	0	1	1	1	1	RNF150	ring finger protein 150
hsa-miR-320d	1	0	1	1	1	1	MAGI1	membrane associated guanylate kinase, WW and PDZ domain containing 1
hsa-miR-320d	1	0	1	1	1	1	EGR3	early growth response 3
hsa-miR-320d	1	0	1	1	1	1	STK24	serine/threonine kinase 24
hsa-miR-320d	1	0	1	0	1	1	EIF5A2	eukaryotic translation initiation factor 5A2
hsa-miR-320d	1	0	1	1	1	1	FAM155A	family with sequence similarity 155, member A
hsa-miR-320d	1	0	1	1	1	1	SYNGR2	synaptogyrin 2
hsa-miR-320d	1	0	1	1	1	1	ARL4A	ADP-ribosylation factor-like 4A
hsa-miR-320d	1	0	1	1	1	1	RHOBTB1	Rho-related BTB domain containing 1
hsa-miR-320d	1	0	1	0	1	1	ZFHX4	zinc finger homeobox 4
hsa-miR-320d	1	0	1	0	1	1	PCDHA12	protocadherin alpha 12
hsa-miR-320d	1	0	1	0	1	1	LMO3	LIM domain only 3 (rhombotin-like 2)
hsa-miR-320d	1	0	1	1	0	0	HIPK2	homeodomain interacting protein kinase 2
hsa-miR-320d	1	0	1	0	1	1	CALM3	calmodulin 3 (phosphorylase kinase, delta)
hsa-miR-320d	1	0	1	1	1	1	KIAA0247	KIAA0247
hsa-miR-320d	1	0	1	0	1	1	PCDHAC1	protocadherin alpha subfamily C, 1
hsa-miR-320d	1	0	1	1	1	1	S1PR1	sphingosine-1-phosphate receptor 1
hsa-miR-320d	1	0	1	1	1	1	WTAP	Wilms tumor 1 associated protein
hsa-miR-320d	1	0	1	1	1	1	PHF20L1	PHD finger protein 20-like 1
hsa-miR-320d	1	0	1	0	1	1	OLA1	Obg-like ATPase 1
hsa-miR-320d	1	0	1	1	0	0	ARMCX2	armadillo repeat containing, X-linked 2
hsa-miR-320d	1	0	1	1	1	1	AP3M1	adaptor-related protein complex 3, mu 1 subunit
hsa-miR-320d	1	0	1	0	1	1	CCNL2	cyclin L2
hsa-miR-320d	1	0	1	1	1	1	POLE4	polymerase (DNA-directed), epsilon 4, accessory subunit
hsa-miR-320d	1	0	1	1	1	1	LRRTM1	leucine rich repeat transmembrane neuronal 1
hsa-miR-320d	1	0	1	1	1	1	FOXQ1	forkhead box Q1
hsa-miR-320d	1	0	1	1	1	1	MYT1L	myelin transcription factor 1-like
hsa-miR-320d	1	0	1	0	1	1	MAP1LC3B	microtubule-associated protein 1 light chain 3 beta
hsa-miR-320d	1	0	1	1	1	1	ARF1	ADP-ribosylation factor 1
hsa-miR-320d	1	0	1	1	1	1	CREBRF	CREB3 regulatory factor
hsa-miR-320d	1	0	1	1	1	1	PCDHA4	protocadherin alpha 4
hsa-miR-320d	1	0	1	1	1	1	DHX15	DEAH (Asp-Glu-Ala-His) box polypeptide 15
hsa-miR-320d	1	0	1	1	1	1	ACVR2B	activin A receptor, type IIB
hsa-miR-320d	1	0	1	1	1	1	PPP1CB	protein phosphatase 1, catalytic subunit, beta isozyme
hsa-miR-320d	1	0	1	1	1	1	PALM2-AKAP2	PALM2-AKAP2 readthrough
hsa-miR-320d	1	0	1	1	1	1	CALD1	caldesmon 1
hsa-miR-320d	1	0	1	1	0	0	ITPRIPL2	inositol 1,4,5-trisphosphate receptor interacting protein-like 2
hsa-miR-320d	1	0	1	1	1	1	AKAP2	A kinase (PRKA) anchor protein 2
hsa-miR-320d	1	0	1	1	0	0	PPIL2	peptidylprolyl isomerase (cyclophilin)-like 2
hsa-miR-320d	1	0	1	0	1	1	CLASP1	cytoplasmic linker associated protein 1
hsa-miR-320d	1	0	1	1	1	1	BCAT1	branched chain amino-acid transaminase 1, cytosolic
hsa-miR-320d	1	0	0	1	0	0	MRPL22	mitochondrial ribosomal protein L22
hsa-miR-320d	1	0	1	1	1	1	UBE2D3	ubiquitin-conjugating enzyme E2D 3
hsa-miR-320d	1	0	1	1	1	1	KDSR	3-ketodihydrosphingosine reductase
hsa-miR-320d	1	0	1	1	1	1	PUS7	pseudouridylate synthase 7 homolog (S. cerevisiae)
hsa-miR-320d	1	0	0	1	1	1	RPL15	ribosomal protein L15
hsa-miR-320d	1	0	1	1	1	1	EPN2	epsin 2
hsa-miR-320d	1	0	1	1	1	1	SLITRK3	SLIT and NTRK-like family, member 3
hsa-miR-320d	1	0	0	0	0	0	PAIP2B	poly(A) binding protein interacting protein 2B
hsa-miR-320d	1	0	1	1	1	1	YWHAE	tyrosine 3-monooxygenase/tryptophan 5-monooxygenase activation protein, epsilon polypeptide
hsa-miR-320d	1	0	1	0	1	1	KIAA1715	KIAA1715
hsa-miR-320d	1	0	1	0	1	1	TMEM106B	transmembrane protein 106B
hsa-miR-320d	1	0	1	0	1	1	KCTD9	potassium channel tetramerisation domain containing 9
hsa-miR-320d	1	0	1	1	1	1	TGFBR2	transforming growth factor, beta receptor II (70/80kDa)
hsa-miR-320d	1	0	1	1	0	0	FOXO3	forkhead box O3
hsa-miR-320d	1	0	1	0	1	1	LIN7C	lin-7 homolog C (C. elegans)
hsa-miR-320d	1	0	1	1	1	1	VKORC1L1	vitamin K epoxide reductase complex, subunit 1-like 1
hsa-miR-320d	1	0	1	1	1	1	APBA2	amyloid beta (A4) precursor protein-binding, family A, member 2
hsa-miR-320d	1	0	1	1	1	1	SATB2	SATB homeobox 2
hsa-miR-320d	1	0	1	1	1	1	ULK1	unc-51-like kinase 1 (C. elegans)
hsa-miR-320d	1	0	1	1	1	1	GPBP1	GC-rich promoter binding protein 1
hsa-miR-320d	1	0	1	0	1	1	PTEN	phosphatase and tensin homolog
hsa-miR-320d	1	0	1	1	1	1	MEX3D	mex-3 homolog D (C. elegans)
hsa-miR-320d	1	0	1	0	1	1	SLC6A6	solute carrier family 6 (neurotransmitter transporter, taurine), member 6
hsa-miR-320d	1	0	1	1	1	1	DBN1	drebrin 1
hsa-miR-320d	1	0	1	1	1	1	PALM2	paralemmin 2
hsa-miR-320d	1	0	1	1	1	1	PCDH19	protocadherin 19
hsa-miR-320d	1	0	1	1	1	1	BHLHE22	basic helix-loop-helix family, member e22
hsa-miR-320d	1	0	1	0	1	1	PCDHA10	protocadherin alpha 10
hsa-miR-320d	1	0	1	1	1	1	MAT2A	methionine adenosyltransferase II, alpha
hsa-miR-320d	1	0	1	1	1	1	KRIT1	KRIT1, ankyrin repeat containing
hsa-miR-320d	1	0	1	1	1	1	PIK3R1	phosphoinositide-3-kinase, regulatory subunit 1 (alpha)
hsa-miR-320d	1	0	0	1	0	0	SEPN1	selenoprotein N, 1
hsa-miR-320d	1	0	1	0	1	1	ETV1	ets variant 1
hsa-miR-320d	1	0	1	1	1	1	ELL2	elongation factor, RNA polymerase II, 2
hsa-miR-320d	1	0	1	1	1	1	METTL10	methyltransferase like 10
hsa-miR-320d	1	0	1	1	1	1	DIXDC1	DIX domain containing 1
hsa-miR-320d	1	0	1	0	0	0	ANKRD52	ankyrin repeat domain 52
hsa-miR-320d	1	0	1	1	0	0	SALL2	sal-like 2 (Drosophila)
hsa-miR-320d	1	0	1	1	1	1	ABHD13	abhydrolase domain containing 13
hsa-miR-320d	1	0	1	1	1	1	YWHAZ	tyrosine 3-monooxygenase/tryptophan 5-monooxygenase activation protein, zeta polypeptide
hsa-miR-320d	1	0	1	1	1	1	YTHDF1	YTH domain family, member 1
hsa-miR-320d	1	0	1	0	1	1	PPP1R16B	protein phosphatase 1, regulatory subunit 16B
hsa-miR-320d	1	0	1	1	1	1	GLRA3	glycine receptor, alpha 3
hsa-miR-320d	1	0	1	0	1	1	SS18	synovial sarcoma translocation, chromosome 18
hsa-miR-320d	1	0	1	1	1	1	ZNF3	zinc finger protein 3
hsa-miR-320d	1	0	1	0	1	1	MOB3B	MOB kinase activator 3B
hsa-miR-320d	1	0	1	1	1	1	HIPK3	homeodomain interacting protein kinase 3
hsa-miR-320d	1	0	0	0	0	0	CEP68	centrosomal protein 68kDa
hsa-miR-320d	1	0	1	1	1	1	IKZF2	IKAROS family zinc finger 2 (Helios)
hsa-miR-320d	1	0	1	1	0	0	GRASP	GRP1 (general receptor for phosphoinositides 1)-associated scaffold protein
hsa-miR-320d	1	0	1	0	1	1	TCEA1	transcription elongation factor A (SII), 1
hsa-miR-320d	1	0	1	1	1	1	NABP1	nucleic acid binding protein 1
hsa-miR-320d	1	0	1	1	1	1	COPS2	COP9 constitutive photomorphogenic homolog subunit 2 (Arabidopsis)
hsa-miR-320d	1	0	1	0	1	1	ANKH	ankylosis, progressive homolog (mouse)
hsa-miR-320d	1	0	1	1	1	1	CBL	Cbl proto-oncogene, E3 ubiquitin protein ligase
hsa-miR-320d	1	0	1	1	1	1	DIP2C	DIP2 disco-interacting protein 2 homolog C (Drosophila)
hsa-miR-320d	1	0	1	1	1	1	XPO1	exportin 1 (CRM1 homolog, yeast)
hsa-miR-320d	1	0	1	1	1	1	ARPC5	actin related protein 2/3 complex, subunit 5, 16kDa
hsa-miR-320d	1	0	1	1	1	1	FAM49B	family with sequence similarity 49, member B
hsa-miR-320d	1	0	1	1	1	1	PAPD5	PAP associated domain containing 5
hsa-miR-320d	1	0	1	1	1	1	EVI5	ecotropic viral integration site 5
hsa-miR-320d	1	0	1	1	0	0	UNC5A	unc-5 homolog A (C. elegans)
hsa-miR-320d	1	0	1	1	1	1	NPAS2	neuronal PAS domain protein 2
hsa-miR-320d	1	0	1	0	1	1	GPR107	G protein-coupled receptor 107
hsa-miR-320d	1	0	1	1	1	1	KDM5A	lysine (K)-specific demethylase 5A
hsa-miR-320d	1	0	1	1	1	1	BAK1	BCL2-antagonist/killer 1
hsa-miR-320d	1	0	1	1	1	1	PAN3	PAN3 poly(A) specific ribonuclease subunit homolog (S. cerevisiae)
hsa-miR-320d	1	0	1	1	1	1	MKLN1	muskelin 1, intracellular mediator containing kelch motifs
hsa-miR-320d	1	0	1	0	1	1	DCUN1D4	DCN1, defective in cullin neddylation 1, domain containing 4 (S. cerevisiae)
hsa-miR-320d	1	0	1	1	1	1	TPD52	tumor protein D52
hsa-miR-320d	1	0	1	1	1	1	MDK	midkine (neurite growth-promoting factor 2)
hsa-miR-320d	1	0	1	1	1	1	LOXL3	lysyl oxidase-like 3
hsa-miR-320d	1	0	1	1	1	1	PRKAG2	protein kinase, AMP-activated, gamma 2 non-catalytic subunit
hsa-miR-320d	1	0	1	1	1	1	TIAM1	T-cell lymphoma invasion and metastasis 1
hsa-miR-320d	1	0	1	1	1	1	MYH10	myosin, heavy chain 10, non-muscle
hsa-miR-320d	1	0	1	1	1	1	HS2ST1	heparan sulfate 2-O-sulfotransferase 1
hsa-miR-320d	1	0	1	1	1	1	CDK13	cyclin-dependent kinase 13
hsa-miR-320d	1	0	1	1	1	1	SORCS1	sortilin-related VPS10 domain containing receptor 1
hsa-miR-320d	1	0	1	1	1	1	LRRC4	leucine rich repeat containing 4
hsa-miR-320d	1	0	1	0	1	1	KCMF1	potassium channel modulatory factor 1
hsa-miR-320d	1	0	1	1	1	1	TRIAP1	TP53 regulated inhibitor of apoptosis 1
hsa-miR-320d	1	0	1	1	1	1	TANC1	tetratricopeptide repeat, ankyrin repeat and coiled-coil containing 1
hsa-miR-320d	1	0	1	0	1	1	ARL5A	ADP-ribosylation factor-like 5A
hsa-miR-320d	1	0	1	1	1	1	TSHZ3	teashirt zinc finger homeobox 3
hsa-miR-320d	1	0	1	1	1	1	PLCG1	phospholipase C, gamma 1
hsa-miR-320d	1	0	1	1	1	1	FXR1	fragile X mental retardation, autosomal homolog 1
hsa-miR-320d	1	0	1	1	1	1	TC2N	tandem C2 domains, nuclear
hsa-miR-320d	1	0	1	1	1	1	SHMT1	serine hydroxymethyltransferase 1 (soluble)
hsa-miR-320d	1	0	1	0	1	1	PCSK1	proprotein convertase subtilisin/kexin type 1
hsa-miR-320d	1	0	1	1	1	1	MEGF11	multiple EGF-like-domains 11
hsa-miR-320d	1	0	1	0	1	1	MGRN1	mahogunin ring finger 1, E3 ubiquitin protein ligase
hsa-miR-320d	1	0	1	1	1	1	TRIM36	tripartite motif containing 36
hsa-miR-320d	1	0	1	1	1	1	KAT6B	K(lysine) acetyltransferase 6B
hsa-miR-320d	1	0	1	1	1	1	USP14	ubiquitin specific peptidase 14 (tRNA-guanine transglycosylase)
hsa-miR-320d	1	0	1	1	0	0	GXYLT1	glucoside xylosyltransferase 1
hsa-miR-320d	1	0	1	1	1	1	GOT2	glutamic-oxaloacetic transaminase 2, mitochondrial (aspartate aminotransferase 2)
hsa-miR-320d	1	0	1	1	1	1	PPP1R3F	protein phosphatase 1, regulatory subunit 3F
hsa-miR-320d	1	0	1	1	1	1	HLTF	helicase-like transcription factor
hsa-miR-320d	1	0	1	1	0	0	SND1	staphylococcal nuclease and tudor domain containing 1
hsa-miR-320d	1	0	1	1	1	1	CECR6	cat eye syndrome chromosome region, candidate 6
hsa-miR-320d	1	0	1	1	1	1	KIAA0368	KIAA0368
hsa-miR-320d	1	0	1	1	1	1	SPRED2	sprouty-related, EVH1 domain containing 2
hsa-miR-320d	1	0	1	1	1	1	AIM1	absent in melanoma 1
hsa-miR-320d	1	0	1	1	1	1	INSM1	insulinoma-associated 1
hsa-miR-320d	1	0	1	1	1	1	DCAF12	DDB1 and CUL4 associated factor 12
hsa-miR-320d	1	0	1	0	1	1	IGF2BP3	insulin-like growth factor 2 mRNA binding protein 3
hsa-miR-320d	1	0	1	1	0	0	UBE2Z	ubiquitin-conjugating enzyme E2Z
hsa-miR-320d	1	0	1	1	1	1	MLLT3	myeloid/lymphoid or mixed-lineage leukemia (trithorax homolog, Drosophila); translocated to, 3
hsa-miR-320d	1	0	1	1	1	1	LPPR1	lipid phosphate phosphatase-related protein type 1
hsa-miR-320d	1	0	1	1	1	1	KCNS3	potassium voltage-gated channel, delayed-rectifier, subfamily S, member 3
hsa-miR-320d	1	0	1	1	1	1	CDH20	cadherin 20, type 2
hsa-miR-320d	1	0	1	1	1	1	MOB3C	MOB kinase activator 3C
hsa-miR-320d	1	0	1	1	1	1	FAM63B	family with sequence similarity 63, member B
hsa-miR-320d	1	0	1	1	1	1	VIM	vimentin
hsa-miR-320d	1	0	1	1	1	1	FIGN	fidgetin
hsa-miR-320d	1	0	1	0	1	1	SKAP2	src kinase associated phosphoprotein 2
hsa-miR-320d	1	0	1	1	1	1	MRFAP1	Morf4 family associated protein 1
hsa-miR-320d	1	0	1	1	1	1	C21orf91	chromosome 21 open reading frame 91
hsa-miR-320d	1	0	1	1	1	1	MAPK1	mitogen-activated protein kinase 1
hsa-miR-320d	1	0	1	1	1	1	VPS39	vacuolar protein sorting 39 homolog (S. cerevisiae)
hsa-miR-320d	1	0	1	1	1	1	CDKN1C	cyclin-dependent kinase inhibitor 1C (p57, Kip2)
hsa-miR-320d	1	0	1	0	0	0	TRANK1	tetratricopeptide repeat and ankyrin repeat containing 1
hsa-miR-320d	1	0	1	0	1	1	PTPRT	protein tyrosine phosphatase, receptor type, T
hsa-miR-320d	1	0	1	1	1	1	NUPL1	nucleoporin like 1
hsa-miR-320d	1	0	1	0	1	1	MTSS1	metastasis suppressor 1
hsa-miR-320d	0	0	1	1	0	0	PLCH2	phospholipase C, eta 2
hsa-miR-320d	1	0	1	0	1	1	CEP350	centrosomal protein 350kDa
hsa-miR-320d	0	0	1	1	0	0	ZNF862	zinc finger protein 862
hsa-miR-320d	1	0	1	1	1	1	GPATCH8	G patch domain containing 8
hsa-miR-320d	1	0	1	1	1	1	GREB1	growth regulation by estrogen in breast cancer 1
hsa-miR-320d	1	0	1	1	0	0	TBC1D12	TBC1 domain family, member 12
hsa-miR-320d	1	0	1	0	1	1	MFAP3L	microfibrillar-associated protein 3-like
hsa-miR-320d	1	0	1	1	1	1	HIPK1	homeodomain interacting protein kinase 1
hsa-miR-320d	0	0	1	1	1	1	XRCC4	X-ray repair complementing defective repair in Chinese hamster cells 4
hsa-miR-320d	1	0	1	0	1	1	DOCK4	dedicator of cytokinesis 4
hsa-miR-320d	1	0	1	1	0	0	ESYT1	extended synaptotagmin-like protein 1
hsa-miR-320d	1	0	1	1	1	1	WWC1	WW and C2 domain containing 1
hsa-miR-320d	0	0	1	1	1	1	WDR47	WD repeat domain 47
hsa-miR-320d	1	0	1	1	1	1	CALCR	calcitonin receptor
hsa-miR-320d	1	0	1	1	1	1	UBE2K	ubiquitin-conjugating enzyme E2K
hsa-miR-320d	1	0	1	1	1	1	CIT	citron (rho-interacting, serine/threonine kinase 21)
hsa-miR-320d	1	0	1	1	1	1	RGL1	ral guanine nucleotide dissociation stimulator-like 1
hsa-miR-320d	0	0	1	1	1	1	FASTKD2	FAST kinase domains 2
hsa-miR-320d	1	0	1	1	1	1	PALLD	palladin, cytoskeletal associated protein
hsa-miR-320d	0	0	1	1	1	1	DBF4	DBF4 homolog (S. cerevisiae)
hsa-miR-320d	1	0	1	1	0	0	KIAA1045	KIAA1045
hsa-miR-320d	1	0	1	1	1	1	PRRC2C	proline-rich coiled-coil 2C
hsa-miR-320d	0	0	1	0	0	0	ELTD1	EGF, latrophilin and seven transmembrane domain containing 1
hsa-miR-320d	1	0	1	1	0	0	ATAD2B	ATPase family, AAA domain containing 2B
hsa-miR-320d	1	0	1	1	1	1	MKL2	MKL/myocardin-like 2
hsa-miR-320d	1	0	1	1	1	1	ASAP1	ArfGAP with SH3 domain, ankyrin repeat and PH domain 1
hsa-miR-320d	0	0	1	0	0	0	MTA3	metastasis associated 1 family, member 3
hsa-miR-320d	1	0	1	0	1	1	KCTD16	potassium channel tetramerisation domain containing 16
hsa-miR-320d	1	0	1	1	1	1	HACE1	HECT domain and ankyrin repeat containing E3 ubiquitin protein ligase 1
hsa-miR-320d	1	0	1	0	1	1	SEMA6D	sema domain, transmembrane domain (TM), and cytoplasmic domain, (semaphorin) 6D
hsa-miR-320d	1	0	1	1	1	1	FAM214B	family with sequence similarity 214, member B
hsa-miR-320d	1	0	1	1	1	1	INADL	InaD-like (Drosophila)
hsa-miR-320d	1	0	1	1	1	1	PPP6R3	protein phosphatase 6, regulatory subunit 3
hsa-miR-320d	0	0	1	0	1	1	ZSWIM6	zinc finger, SWIM-type containing 6
hsa-miR-320d	1	0	1	1	1	1	SNX3	sorting nexin 3
hsa-miR-320d	1	0	1	1	0	0	ARHGAP39	Rho GTPase activating protein 39
hsa-miR-320d	0	0	1	0	1	1	SETD5	SET domain containing 5
hsa-miR-320d	1	0	1	1	1	1	IKZF4	IKAROS family zinc finger 4 (Eos)
hsa-miR-320d	1	0	1	1	1	1	LCOR	ligand dependent nuclear receptor corepressor
hsa-miR-320d	0	0	1	0	0	0	KIAA1908	uncharacterized LOC114796
hsa-miR-320d	0	0	1	0	0	0	MYSM1	Myb-like, SWIRM and MPN domains 1
hsa-miR-320d	1	0	1	1	1	1	ANKRD12	ankyrin repeat domain 12
hsa-miR-320d	1	0	1	1	1	1	POGZ	pogo transposable element with ZNF domain
hsa-miR-320d	1	0	1	1	1	1	TET2	tet methylcytosine dioxygenase 2
hsa-miR-320d	1	0	1	1	1	1	SH3TC2	SH3 domain and tetratricopeptide repeats 2
hsa-miR-320d	1	0	1	0	1	1	RNF43	ring finger protein 43
hsa-miR-320d	1	0	1	1	1	1	ACBD5	acyl-CoA binding domain containing 5
hsa-miR-320d	0	0	1	1	1	1	NELL1	NEL-like 1 (chicken)
hsa-miR-320d	0	0	1	1	1	1	MCF2	MCF.2 cell line derived transforming sequence
hsa-miR-320d	1	1	1	1	1	1	BACE1	beta-site APP-cleaving enzyme 1
hsa-miR-320d	0	0	1	0	1	1	RASSF8	Ras association (RalGDS/AF-6) domain family (N-terminal) member 8
hsa-miR-320d	0	0	1	1	0	0	FAM208B	family with sequence similarity 208, member B
hsa-miR-320d	0	0	1	1	1	1	SHPRH	SNF2 histone linker PHD RING helicase, E3 ubiquitin protein ligase
hsa-miR-320d	1	0	1	0	0	0	ZC3H12C	zinc finger CCCH-type containing 12C
hsa-miR-320d	0	0	1	1	0	0	KRTAP24-1	keratin associated protein 24-1
hsa-miR-320d	0	0	1	1	1	1	ACPP	acid phosphatase, prostate
hsa-miR-320d	0	0	1	0	0	0	TIFAB	TRAF-interacting protein with forkhead-associated domain, family member B
hsa-miR-320d	0	0	1	1	0	0	PTPRF	protein tyrosine phosphatase, receptor type, F
hsa-miR-320d	1	0	1	1	1	1	UBE3A	ubiquitin protein ligase E3A
hsa-miR-320d	0	0	1	1	1	1	SYBU	syntabulin (syntaxin-interacting)
hsa-miR-320d	1	0	1	1	1	1	LTBP1	latent transforming growth factor beta binding protein 1
hsa-miR-320d	0	0	1	1	1	1	DYNC1I2	dynein, cytoplasmic 1, intermediate chain 2
hsa-miR-320d	1	0	1	1	1	1	CLIP4	CAP-GLY domain containing linker protein family, member 4
hsa-miR-320d	1	0	1	1	1	1	PML	promyelocytic leukemia
hsa-miR-320d	0	0	1	1	1	1	MAZ	MYC-associated zinc finger protein (purine-binding transcription factor)
hsa-miR-320d	0	0	1	0	1	1	DCAF11	DDB1 and CUL4 associated factor 11
hsa-miR-320d	1	0	1	1	1	1	SYNCRIP	synaptotagmin binding, cytoplasmic RNA interacting protein
hsa-miR-320d	1	0	1	1	1	1	RASSF5	Ras association (RalGDS/AF-6) domain family member 5
hsa-miR-320d	1	0	1	1	0	0	TSPYL2	TSPY-like 2
hsa-miR-320d	1	0	1	1	1	1	SPTB	spectrin, beta, erythrocytic
hsa-miR-320d	0	0	1	1	0	0	IFT27	intraflagellar transport 27 homolog (Chlamydomonas)
hsa-miR-320d	0	0	1	1	1	1	ACO1	aconitase 1, soluble
hsa-miR-320d	0	0	1	1	1	1	STAU1	staufen, RNA binding protein, homolog 1 (Drosophila)
hsa-miR-320d	1	0	1	1	1	1	DDX17	DEAD (Asp-Glu-Ala-Asp) box helicase 17
hsa-miR-320d	1	0	1	1	1	1	COL24A1	collagen, type XXIV, alpha 1
hsa-miR-320d	0	0	1	1	0	0	PXK	PX domain containing serine/threonine kinase
hsa-miR-320d	0	0	1	1	0	0	SLC22A8	solute carrier family 22 (organic anion transporter), member 8
hsa-miR-320d	1	0	1	1	1	1	GOLGA4	golgin A4
hsa-miR-320d	0	0	1	1	1	1	MYO9A	myosin IXA
hsa-miR-320d	1	0	1	0	1	1	CAV1	caveolin 1, caveolae protein, 22kDa
hsa-miR-320d	1	0	1	0	1	1	PDE7B	phosphodiesterase 7B
hsa-miR-320d	1	0	1	1	1	1	MEF2D	myocyte enhancer factor 2D
hsa-miR-320d	1	0	1	1	0	0	TNPO2	transportin 2
hsa-miR-320d	0	0	1	0	0	0	MIAT	myocardial infarction associated transcript (non-protein coding)
hsa-miR-320d	0	0	1	0	1	1	PARG	poly (ADP-ribose) glycohydrolase
hsa-miR-320d	1	0	1	1	1	1	STX16	syntaxin 16
hsa-miR-320d	1	0	1	1	1	1	DLGAP2	discs, large (Drosophila) homolog-associated protein 2
hsa-miR-320d	1	0	1	0	1	1	MLL2	myeloid/lymphoid or mixed-lineage leukemia 2
hsa-miR-320d	1	0	1	1	1	1	SLC4A4	solute carrier family 4, sodium bicarbonate cotransporter, member 4
hsa-miR-320d	1	0	1	0	1	1	CELF2	CUGBP, Elav-like family member 2
hsa-miR-320d	0	0	1	0	1	1	C9orf91	chromosome 9 open reading frame 91
hsa-miR-320d	0	0	1	1	1	1	NAT6	N-acetyltransferase 6 (GCN5-related)
hsa-miR-320d	0	0	1	1	0	0	BANF1	barrier to autointegration factor 1
hsa-miR-320d	1	0	1	1	1	1	LDB2	LIM domain binding 2
hsa-miR-320d	0	0	1	1	0	0	SLC12A4	solute carrier family 12 (potassium/chloride transporters), member 4
hsa-miR-320d	0	0	1	0	1	1	GPR98	G protein-coupled receptor 98
hsa-miR-320d	1	0	1	1	1	1	NUDT4	nudix (nucleoside diphosphate linked moiety X)-type motif 4
hsa-miR-320d	1	0	1	1	0	0	PAK1	p21 protein (Cdc42/Rac)-activated kinase 1
hsa-miR-320d	1	0	1	1	1	1	TP63	tumor protein p63
hsa-miR-320d	0	0	1	1	1	1	PCGF1	polycomb group ring finger 1
hsa-miR-320d	0	0	1	1	1	1	PANX1	pannexin 1
hsa-miR-320d	0	0	1	1	0	0	RBM5	RNA binding motif protein 5
hsa-miR-320d	0	0	1	1	1	1	MSTO1	misato homolog 1 (Drosophila)
hsa-miR-320d	1	0	1	1	1	1	KLF12	Kruppel-like factor 12
hsa-miR-320d	1	0	1	1	1	1	LRRFIP1	leucine rich repeat (in FLII) interacting protein 1
hsa-miR-320d	1	0	1	1	1	1	CAB39	calcium binding protein 39
hsa-miR-320d	1	0	1	1	1	1	SORBS1	sorbin and SH3 domain containing 1
hsa-miR-320d	1	0	1	1	1	1	USP15	ubiquitin specific peptidase 15
hsa-miR-320d	0	0	1	0	1	1	PDP1	pyruvate dehyrogenase phosphatase catalytic subunit 1
hsa-miR-320d	1	0	1	1	1	1	USP25	ubiquitin specific peptidase 25
hsa-miR-320d	1	0	1	1	1	1	C16orf70	chromosome 16 open reading frame 70
hsa-miR-320d	1	0	1	1	1	1	TACC2	transforming, acidic coiled-coil containing protein 2
hsa-miR-320d	1	0	1	1	1	1	FBN2	fibrillin 2
hsa-miR-320d	0	0	1	1	1	1	CHST12	carbohydrate (chondroitin 4) sulfotransferase 12
hsa-miR-320d	0	0	1	1	1	1	NKX3-1	NK3 homeobox 1
hsa-miR-320d	0	0	1	1	0	0	TRIM41	tripartite motif containing 41
hsa-miR-320d	1	0	1	1	1	1	SH3GLB1	SH3-domain GRB2-like endophilin B1
hsa-miR-320d	1	0	1	1	1	1	ERGIC1	endoplasmic reticulum-golgi intermediate compartment (ERGIC) 1
hsa-miR-320d	1	0	1	1	1	1	PUM2	pumilio homolog 2 (Drosophila)
hsa-miR-320d	1	0	1	1	1	1	MGEA5	meningioma expressed antigen 5 (hyaluronidase)
hsa-miR-320d	1	0	1	1	1	1	LETMD1	LETM1 domain containing 1
hsa-miR-320d	0	0	1	1	0	0	TTTY7	testis-specific transcript, Y-linked 7 (non-protein coding)
hsa-miR-320d	1	0	1	1	1	1	RGS10	regulator of G-protein signaling 10
hsa-miR-320d	1	0	1	0	1	1	WIPF2	WAS/WASL interacting protein family, member 2
hsa-miR-320d	0	0	1	1	0	0	SPNS1	spinster homolog 1 (Drosophila)
hsa-miR-320d	0	0	1	0	0	0	MIR155HG	MIR155 host gene (non-protein coding)
hsa-miR-320d	0	0	1	0	0	0	MYO15B	myosin XVB pseudogene
hsa-miR-320d	0	0	1	0	0	0	ABCC13	ATP-binding cassette, sub-family C (CFTR/MRP), member 13, pseudogene
hsa-miR-320d	0	0	1	1	0	0	BRE	brain and reproductive organ-expressed (TNFRSF1A modulator)
hsa-miR-320d	1	0	1	1	0	0	XRRA1	X-ray radiation resistance associated 1
hsa-miR-320d	1	0	1	1	1	1	RBFOX1	RNA binding protein, fox-1 homolog (C. elegans) 1
hsa-miR-320d	1	0	1	1	1	1	CPNE4	copine IV
hsa-miR-320d	0	0	1	1	1	1	SLC2A14	solute carrier family 2 (facilitated glucose transporter), member 14
hsa-miR-320d	1	0	1	1	1	1	LRRC7	leucine rich repeat containing 7
hsa-miR-320d	1	0	1	1	1	1	IQCK	IQ motif containing K
hsa-miR-320d	0	0	1	1	1	1	MBD4	methyl-CpG binding domain protein 4
hsa-miR-320d	1	0	1	0	1	1	IL1RAP	interleukin 1 receptor accessory protein
hsa-miR-320d	0	0	1	1	1	1	GNAS	GNAS complex locus
hsa-miR-320d	1	0	1	1	1	1	SUCO	SUN domain containing ossification factor
hsa-miR-320d	1	0	1	1	1	1	ILF3	interleukin enhancer binding factor 3, 90kDa
hsa-miR-320d	0	0	1	0	0	0	CACNA2D3	calcium channel, voltage-dependent, alpha 2/delta subunit 3
hsa-miR-320d	0	0	1	1	1	1	SLC37A1	solute carrier family 37 (glycerol-3-phosphate transporter), member 1
hsa-miR-320d	0	0	1	0	0	0	CD177	CD177 molecule
hsa-miR-320d	1	0	1	1	1	1	RAB3IP	RAB3A interacting protein (rabin3)
hsa-miR-320d	1	0	1	1	1	1	NRXN3	neurexin 3
hsa-miR-320d	1	0	1	1	1	1	EMID2	EMI domain containing 2
hsa-miR-320d	0	0	1	1	0	0	RNASET2	ribonuclease T2
hsa-miR-320d	1	0	1	1	1	1	NFYA	nuclear transcription factor Y, alpha
hsa-miR-320d	1	0	1	1	1	1	NAV3	neuron navigator 3
hsa-miR-320d	0	0	1	1	1	1	TAF1	TAF1 RNA polymerase II, TATA box binding protein (TBP)-associated factor, 250kDa
hsa-miR-320d	1	0	1	0	1	1	NAALADL2	N-acetylated alpha-linked acidic dipeptidase-like 2
hsa-miR-320d	1	0	1	1	1	1	PPP1R9A	protein phosphatase 1, regulatory subunit 9A
hsa-miR-320d	0	0	1	1	0	0	ACSS2	acyl-CoA synthetase short-chain family member 2
hsa-miR-320d	1	0	1	0	1	1	NFAT5	nuclear factor of activated T-cells 5, tonicity-responsive
hsa-miR-320d	0	0	1	0	1	1	TRMT10A	tRNA methyltransferase 10 homolog A (S. cerevisiae)
hsa-miR-320d	0	0	1	1	1	1	UBE2Q2	ubiquitin-conjugating enzyme E2Q family member 2
hsa-miR-320d	0	0	1	0	0	0	TUG1	taurine upregulated 1 (non-protein coding)
hsa-miR-320d	1	0	1	1	1	1	BCAP29	B-cell receptor-associated protein 29
hsa-miR-320d	1	0	1	1	1	1	ZC3H7A	zinc finger CCCH-type containing 7A
hsa-miR-320d	1	0	1	1	1	1	NIP7	nuclear import 7 homolog (S. cerevisiae)
hsa-miR-320d	0	0	1	1	1	1	STOX2	storkhead box 2
hsa-miR-320d	1	0	1	1	1	1	CADM3	cell adhesion molecule 3
hsa-miR-320d	1	0	1	1	1	1	EIF2C1	eukaryotic translation initiation factor 2C, 1
hsa-miR-320d	0	0	1	1	1	1	LRIF1	ligand dependent nuclear receptor interacting factor 1
hsa-miR-320d	1	0	1	1	1	1	MBD5	methyl-CpG binding domain protein 5
hsa-miR-320d	1	0	1	0	1	1	SPATS2L	spermatogenesis associated, serine-rich 2-like
hsa-miR-320d	1	0	1	1	1	1	MYEF2	myelin expression factor 2
hsa-miR-320d	0	0	1	1	0	0	UBR4	ubiquitin protein ligase E3 component n-recognin 4
hsa-miR-320d	0	0	1	1	1	1	CCPG1	cell cycle progression 1
hsa-miR-320d	1	0	1	1	1	1	SLCO5A1	solute carrier organic anion transporter family, member 5A1
hsa-miR-320d	0	0	1	1	0	0	JMJD4	jumonji domain containing 4
hsa-miR-320d	0	0	1	1	1	1	ARMC5	armadillo repeat containing 5
hsa-miR-320d	0	0	1	1	1	1	VPRBP	Vpr (HIV-1) binding protein
hsa-miR-320d	1	0	1	1	0	0	CCDC136	coiled-coil domain containing 136
hsa-miR-320d	1	0	1	1	1	1	BAZ2A	bromodomain adjacent to zinc finger domain, 2A
hsa-miR-320d	0	0	1	1	0	0	OBSL1	obscurin-like 1
hsa-miR-320d	1	0	1	1	1	1	COPS7B	COP9 constitutive photomorphogenic homolog subunit 7B (Arabidopsis)
hsa-miR-320d	1	0	1	0	0	0	ZDBF2	zinc finger, DBF-type containing 2
hsa-miR-320d	0	0	1	0	0	0	RASAL3	RAS protein activator like 3
hsa-miR-320d	1	0	1	1	1	1	ABI3BP	ABI family, member 3 (NESH) binding protein
hsa-miR-320d	0	0	1	0	1	1	ATXN1L	ataxin 1-like
hsa-miR-320d	1	0	1	1	1	1	KANK1	KN motif and ankyrin repeat domains 1
hsa-miR-320d	1	0	1	1	1	1	YPEL5	yippee-like 5 (Drosophila)
hsa-miR-320d	1	0	1	1	1	1	NAA30	N(alpha)-acetyltransferase 30, NatC catalytic subunit
hsa-miR-320d	0	0	1	1	0	0	MOGAT2	monoacylglycerol O-acyltransferase 2
hsa-miR-320d	1	0	1	1	1	1	HPS3	Hermansky-Pudlak syndrome 3
hsa-miR-320d	1	0	1	1	1	1	ITGA9	integrin, alpha 9
hsa-miR-320d	0	0	1	0	1	1	ZCCHC8	zinc finger, CCHC domain containing 8
hsa-miR-320d	1	0	1	1	1	1	FBXL12	F-box and leucine-rich repeat protein 12
hsa-miR-320d	1	0	1	1	1	1	RNF185	ring finger protein 185
hsa-miR-320d	0	0	1	0	0	0	LOC729852	uncharacterized LOC729852
hsa-miR-320d	1	0	1	1	1	1	LRP4	low density lipoprotein receptor-related protein 4
hsa-miR-320d	1	0	1	1	1	1	SEC63	SEC63 homolog (S. cerevisiae)
hsa-miR-320d	0	0	1	1	1	1	RNF146	ring finger protein 146
hsa-miR-320d	1	0	1	1	1	1	MARK1	MAP/microtubule affinity-regulating kinase 1
hsa-miR-320d	0	0	1	1	0	0	FAM48A	family with sequence similarity 48, member A
hsa-miR-320d	0	0	1	1	1	1	CHD1L	chromodomain helicase DNA binding protein 1-like
hsa-miR-320d	1	0	1	1	1	1	SLC38A1	solute carrier family 38, member 1
hsa-miR-320d	0	0	1	0	0	0	LOC254559	uncharacterized LOC254559
hsa-miR-320d	0	0	1	1	1	1	C8orf46	chromosome 8 open reading frame 46
hsa-miR-320d	0	0	1	1	1	1	MTRF1	mitochondrial translational release factor 1
hsa-miR-320d	1	0	1	0	1	1	AP1G1	adaptor-related protein complex 1, gamma 1 subunit
hsa-miR-320d	0	0	1	1	1	1	GABRP	gamma-aminobutyric acid (GABA) A receptor, pi
hsa-miR-320d	0	0	1	0	0	0	FLJ30838	uncharacterized LOC400955
hsa-miR-320d	1	0	1	1	1	1	FRMD6	FERM domain containing 6
hsa-miR-320d	0	0	1	0	0	0	FLJ31104	uncharacterized LOC441072
hsa-miR-320d	1	0	1	1	1	1	SFXN2	sideroflexin 2
hsa-miR-320d	1	0	1	1	1	1	TMTC1	transmembrane and tetratricopeptide repeat containing 1
hsa-miR-320d	0	0	1	1	1	1	SDK1	sidekick cell adhesion molecule 1
hsa-miR-320d	1	0	1	1	0	0	SH2D3C	SH2 domain containing 3C
hsa-miR-320d	1	0	1	1	1	1	AGPAT1	1-acylglycerol-3-phosphate O-acyltransferase 1 (lysophosphatidic acid acyltransferase, alpha)
hsa-miR-320d	0	0	1	0	1	1	FAM70A	family with sequence similarity 70, member A
hsa-miR-320d	0	0	1	0	0	0	FLG-AS1	FLG antisense RNA 1
hsa-miR-320d	0	0	1	1	1	1	BRD2	bromodomain containing 2
hsa-miR-320d	0	0	1	1	1	1	ZNF606	zinc finger protein 606
hsa-miR-320d	0	0	1	0	0	0	LOC157381	uncharacterized LOC157381
hsa-miR-320d	0	0	1	0	1	1	ZNF498	zinc finger protein 498
hsa-miR-320d	0	0	1	1	1	1	PSME3	proteasome (prosome, macropain) activator subunit 3 (PA28 gamma; Ki)
hsa-miR-320d	1	0	1	1	1	1	TLE4	transducin-like enhancer of split 4 (E(sp1) homolog, Drosophila)
hsa-miR-320d	1	0	1	0	1	1	NCAM1	neural cell adhesion molecule 1
hsa-miR-320d	1	0	1	1	1	1	IST1	increased sodium tolerance 1 homolog (yeast)
hsa-miR-320d	0	0	1	1	0	0	CD37	CD37 molecule
hsa-miR-320d	0	0	1	0	0	0	C6orf228	chromosome 6 open reading frame 228
hsa-miR-320d	1	0	1	1	1	1	HLF	hepatic leukemia factor
hsa-miR-320d	1	0	1	0	1	1	RNF165	ring finger protein 165
hsa-miR-320d	0	0	1	1	1	1	ZFAND2B	zinc finger, AN1-type domain 2B
hsa-miR-320d	1	0	1	0	1	1	MAP4K4	mitogen-activated protein kinase kinase kinase kinase 4
hsa-miR-320d	1	0	1	1	1	1	NOTCH2NL	notch 2 N-terminal like
hsa-miR-320d	0	0	1	1	0	0	CPAMD8	C3 and PZP-like, alpha-2-macroglobulin domain containing 8
hsa-miR-320d	0	0	1	0	0	0	LOC643837	uncharacterized LOC643837
hsa-miR-320d	1	0	1	1	1	1	ARIH2	ariadne homolog 2 (Drosophila)
hsa-miR-320d	1	0	1	1	1	1	AMMECR1	Alport syndrome, mental retardation, midface hypoplasia and elliptocytosis chromosomal region gene 1
hsa-miR-320d	0	0	1	0	0	0	LOC440910	uncharacterized LOC440910
hsa-miR-320d	1	0	1	1	1	1	FBXW2	F-box and WD repeat domain containing 2
hsa-miR-320d	1	0	1	1	1	1	TSN	translin
hsa-miR-320d	1	0	1	1	1	1	LUC7L2	LUC7-like 2 (S. cerevisiae)
hsa-miR-320d	1	0	1	1	1	1	ZNF286A	zinc finger protein 286A
hsa-miR-320d	0	0	1	1	1	1	HNRNPH1	heterogeneous nuclear ribonucleoprotein H1 (H)
hsa-miR-320d	1	0	1	1	1	1	GCFC1	GC-rich sequence DNA-binding factor 1
hsa-miR-320d	0	0	1	1	1	1	SLC16A1	solute carrier family 16, member 1 (monocarboxylic acid transporter 1)
hsa-miR-320d	1	0	1	1	1	1	SLC7A8	solute carrier family 7 (amino acid transporter light chain, L system), member 8
hsa-miR-320d	0	0	1	0	0	0	ZNF806	zinc finger protein 806
hsa-miR-320d	1	0	1	0	1	1	GATAD2B	GATA zinc finger domain containing 2B
hsa-miR-320d	0	0	1	1	1	1	RBM25	RNA binding motif protein 25
hsa-miR-320d	0	0	1	1	0	0	CES4A	carboxylesterase 4A
hsa-miR-320d	0	0	1	0	1	1	AGBL4	ATP/GTP binding protein-like 4
hsa-miR-320d	0	0	1	1	1	1	SDHA	succinate dehydrogenase complex, subunit A, flavoprotein (Fp)
hsa-miR-320d	0	0	1	0	0	0	LOC285500	uncharacterized LOC285500
hsa-miR-320d	0	0	1	1	0	0	TMEM108	transmembrane protein 108
hsa-miR-320d	1	0	1	1	1	1	TMEM100	transmembrane protein 100
hsa-miR-320d	1	0	1	1	1	1	ANKRD46	ankyrin repeat domain 46
hsa-miR-320d	0	0	1	1	1	1	MYO6	myosin VI
hsa-miR-320d	0	0	1	1	1	1	AQP3	aquaporin 3 (Gill blood group)
hsa-miR-320d	1	0	1	1	1	1	CNEP1R1	CTD nuclear envelope phosphatase 1 regulatory subunit 1
hsa-miR-320d	0	0	1	0	0	0	LOC100129858	uncharacterized LOC100129858
hsa-miR-320d	1	0	1	1	1	1	SPATS2	spermatogenesis associated, serine-rich 2
hsa-miR-320d	0	0	1	1	1	1	CDK5RAP1	CDK5 regulatory subunit associated protein 1
hsa-miR-320d	0	0	1	0	1	1	HDAC9	histone deacetylase 9
hsa-miR-320d	0	0	1	1	1	1	VDAC1	voltage-dependent anion channel 1
hsa-miR-320d	0	0	1	0	0	0	LOC100133029	sirtuin 5 pseudogene
hsa-miR-320d	0	0	1	1	1	1	CDKN2AIP	CDKN2A interacting protein
hsa-miR-320d	0	0	1	0	0	0	ZNF815P	zinc finger protein 815, pseudogene
hsa-miR-320d	0	0	1	0	0	0	OTUD1	OTU domain containing 1
hsa-miR-320d	0	0	1	1	0	0	ASCC1	activating signal cointegrator 1 complex subunit 1
hsa-miR-320d	0	0	1	1	0	0	ERGIC3	ERGIC and golgi 3
hsa-miR-320d	0	0	1	1	1	1	MPHOSPH9	M-phase phosphoprotein 9
hsa-miR-320d	1	0	1	0	1	1	THRB	thyroid hormone receptor, beta
hsa-miR-320d	1	0	1	0	0	0	PID1	phosphotyrosine interaction domain containing 1
hsa-miR-320d	0	0	1	0	0	0	LOC285505	uncharacterized LOC285505
hsa-miR-320d	1	0	1	1	1	1	C3orf62	chromosome 3 open reading frame 62
hsa-miR-320d	1	0	1	1	1	1	CA12	carbonic anhydrase XII
hsa-miR-320d	0	0	1	1	1	1	PPP1R27	protein phosphatase 1, regulatory subunit 27
hsa-miR-320d	0	0	1	1	0	0	TCEANC	transcription elongation factor A (SII) N-terminal and central domain containing
hsa-miR-320d	0	0	1	1	1	1	GBAS	glioblastoma amplified sequence
hsa-miR-320d	0	0	1	1	1	1	PPFIBP2	PTPRF interacting protein, binding protein 2 (liprin beta 2)
hsa-miR-320d	0	0	1	1	0	0	PSAPL1	prosaposin-like 1 (gene/pseudogene)
hsa-miR-320d	0	0	1	0	0	0	CECR7	cat eye syndrome chromosome region, candidate 7 (non-protein coding)
hsa-miR-320d	1	0	1	1	1	1	ZCCHC2	zinc finger, CCHC domain containing 2
hsa-miR-320d	0	0	1	1	0	0	SYT17	synaptotagmin XVII
hsa-miR-320d	1	0	1	1	1	1	DDX42	DEAD (Asp-Glu-Ala-Asp) box polypeptide 42
hsa-miR-320d	1	0	1	1	1	1	ZMAT3	zinc finger, matrin-type 3
hsa-miR-320d	0	0	1	1	1	1	DGKH	diacylglycerol kinase, eta
hsa-miR-320d	0	0	1	1	0	0	GPR113	G protein-coupled receptor 113
hsa-miR-320d	0	0	1	1	1	1	ARHGEF26	Rho guanine nucleotide exchange factor (GEF) 26
hsa-miR-320d	1	0	1	1	1	1	KALRN	kalirin, RhoGEF kinase
hsa-miR-320d	1	0	1	1	1	1	MDGA2	MAM domain containing glycosylphosphatidylinositol anchor 2
hsa-miR-320d	0	0	1	0	0	0	LGALS17A	Charcot-Leyden crystal protein pseudogene
hsa-miR-320d	0	0	1	0	0	0	LOC650368	asparagine-linked glycosylation 1-like pseudogene
hsa-miR-320d	1	0	1	0	1	1	WDR82	WD repeat domain 82
hsa-miR-320d	0	0	1	1	1	1	BTN2A2	butyrophilin, subfamily 2, member A2
hsa-miR-320d	0	0	1	0	0	0	LOC285043	uncharacterized LOC285043
hsa-miR-320d	0	0	1	1	1	1	ANKRD44	ankyrin repeat domain 44
hsa-miR-320d	1	0	1	1	1	1	SMAP1	small ArfGAP 1
hsa-miR-320d	0	0	1	0	1	1	NAIP	NLR family, apoptosis inhibitory protein
hsa-miR-320d	0	0	1	0	0	0	EML6	echinoderm microtubule associated protein like 6
hsa-miR-320d	1	0	1	0	1	1	TTYH3	tweety homolog 3 (Drosophila)
hsa-miR-320d	0	0	1	1	0	0	KCNAB2	potassium voltage-gated channel, shaker-related subfamily, beta member 2
hsa-miR-320d	0	0	1	1	1	1	C2orf91	chromosome 2 open reading frame 91
hsa-miR-320d	0	0	1	1	1	1	ATPBD4	ATP binding domain 4
hsa-miR-320d	0	0	1	0	0	0	TMEM232	transmembrane protein 232
hsa-miR-320d	1	0	1	1	1	1	C11orf30	chromosome 11 open reading frame 30
hsa-miR-320d	0	0	1	1	0	0	CUL9	cullin 9
hsa-miR-320d	1	0	1	1	1	1	METAP2	methionyl aminopeptidase 2
hsa-miR-320d	1	0	1	0	0	0	MSL1	male-specific lethal 1 homolog (Drosophila)
hsa-miR-320d	0	0	1	0	1	1	CTBP1-AS1	CTBP1 antisense RNA 1
hsa-miR-320d	1	0	1	1	1	1	DPY19L3	dpy-19-like 3 (C. elegans)
hsa-miR-320d	0	0	1	1	0	0	RPRD2	regulation of nuclear pre-mRNA domain containing 2
hsa-miR-320d	1	0	1	1	1	1	DCTN4	dynactin 4 (p62)
hsa-miR-320d	0	0	1	1	1	1	EPPIN	epididymal peptidase inhibitor
hsa-miR-320d	1	0	1	1	0	0	SMCHD1	structural maintenance of chromosomes flexible hinge domain containing 1
hsa-miR-320d	1	0	1	0	1	1	ANO6	anoctamin 6
hsa-miR-320d	0	0	1	1	1	1	RHPN2	rhophilin, Rho GTPase binding protein 2
hsa-miR-320d	0	0	1	1	1	1	UTP6	UTP6, small subunit (SSU) processome component, homolog (yeast)
hsa-miR-320d	1	0	1	1	1	1	DMXL1	Dmx-like 1
hsa-miR-320d	1	0	1	1	1	1	C14orf28	chromosome 14 open reading frame 28
hsa-miR-320d	0	0	1	0	0	0	RPL23AP53	ribosomal protein L23a pseudogene 53
hsa-miR-320d	1	0	1	1	0	0	SNX30	sorting nexin family member 30
hsa-miR-320d	1	0	1	1	1	1	PHF17	PHD finger protein 17
hsa-miR-320d	1	0	1	0	1	1	FNDC3B	fibronectin type III domain containing 3B
hsa-miR-320d	0	0	1	0	0	0	ERVFRD-2	endogenous retrovirus group FRD, member 2
hsa-miR-320d	0	0	1	1	0	0	BPIFB1	BPI fold containing family B, member 1
hsa-miR-320d	0	0	1	0	1	1	LOC401321	uncharacterized LOC401321
hsa-miR-320d	1	0	1	0	1	1	YOD1	YOD1 OTU deubiquinating enzyme 1 homolog (S. cerevisiae)
hsa-miR-320d	0	0	1	1	0	0	TMEM136	transmembrane protein 136
hsa-miR-320d	1	0	1	1	1	1	SLC12A6	solute carrier family 12 (potassium/chloride transporters), member 6
hsa-miR-320d	0	0	1	0	0	0	FAM205B	transmembrane protein C9orf144B pseudogene
hsa-miR-320d	0	0	1	1	1	1	CD160	CD160 molecule
hsa-miR-320d	1	0	1	1	1	1	FBXO3	F-box protein 3
hsa-miR-320d	0	0	1	0	0	0	FLJ26245	uncharacterized LOC400533
hsa-miR-320d	0	0	1	0	0	0	LOC494141	mitochondrial carrier triple repeat 1 pseudogene
hsa-miR-320d	0	0	1	0	1	1	RUFY4	RUN and FYVE domain containing 4
hsa-miR-320d	1	0	1	1	0	0	FOXP2	forkhead box P2
hsa-miR-320d	0	0	1	1	1	1	RAD51	RAD51 homolog (S. cerevisiae)
hsa-miR-320d	1	0	1	0	0	0	ASXL3	additional sex combs like 3 (Drosophila)
hsa-miR-320d	0	0	1	1	1	1	PDE2A	phosphodiesterase 2A, cGMP-stimulated
hsa-miR-320d	1	0	1	1	1	1	TAP2	transporter 2, ATP-binding cassette, sub-family B (MDR/TAP)
hsa-miR-320d	0	0	1	1	1	1	DHRS3	dehydrogenase/reductase (SDR family) member 3
hsa-miR-320d	1	0	1	1	1	1	UPK1B	uroplakin 1B
hsa-miR-320d	0	0	1	1	1	1	ENPP3	ectonucleotide pyrophosphatase/phosphodiesterase 3
hsa-miR-320d	1	0	1	1	1	1	DUSP3	dual specificity phosphatase 3
hsa-miR-320d	1	0	1	1	1	1	APBB2	amyloid beta (A4) precursor protein-binding, family B, member 2
hsa-miR-320d	1	0	1	1	1	1	AHCYL1	adenosylhomocysteinase-like 1
hsa-miR-320d	0	0	1	0	0	0	PART1	prostate androgen-regulated transcript 1 (non-protein coding)
hsa-miR-320d	1	0	1	1	1	1	NECAP1	NECAP endocytosis associated 1
hsa-miR-320d	1	0	1	0	1	1	SLC2A3	solute carrier family 2 (facilitated glucose transporter), member 3
hsa-miR-320d	0	0	1	1	1	1	ARIH1	ariadne homolog, ubiquitin-conjugating enzyme E2 binding protein, 1 (Drosophila)
hsa-miR-320d	0	0	1	1	0	0	MSH5	mutS homolog 5 (E. coli)
hsa-miR-320d	0	0	1	1	0	0	SAPCD1	suppressor APC domain containing 1
hsa-miR-320d	0	0	1	1	1	1	MTPAP	mitochondrial poly(A) polymerase
hsa-miR-320d	1	0	1	1	1	1	KIAA1033	KIAA1033
hsa-miR-320d	0	0	1	1	1	1	SYNJ2	synaptojanin 2
hsa-miR-320d	1	0	1	1	1	1	TFE3	transcription factor binding to IGHM enhancer 3
hsa-miR-320d	0	0	1	1	0	0	DOPEY1	dopey family member 1
hsa-miR-320d	0	0	1	0	0	0	RPL23AP82	ribosomal protein L23a pseudogene 82
hsa-miR-320d	1	0	1	1	1	1	YTHDF3	YTH domain family, member 3
hsa-miR-320d	0	0	1	1	1	1	PDE4DIP	phosphodiesterase 4D interacting protein
hsa-miR-320d	1	0	1	0	1	1	HNRNPA3	heterogeneous nuclear ribonucleoprotein A3
hsa-miR-320d	1	0	1	1	1	1	CHMP7	charged multivesicular body protein 7
hsa-miR-320d	1	0	1	0	0	0	YLPM1	YLP motif containing 1
hsa-miR-320d	0	0	1	1	1	1	NEK9	NIMA (never in mitosis gene a)- related kinase 9
hsa-miR-320d	0	0	1	1	1	1	VIT	vitrin
hsa-miR-320d	1	0	1	1	0	0	PTAR1	protein prenyltransferase alpha subunit repeat containing 1
hsa-miR-320d	0	0	1	0	0	0	LOC387647	patched domain containing 3 pseudogene
hsa-miR-320d	0	0	1	0	1	1	CEP95	centrosomal protein 95kDa
hsa-miR-320d	1	0	1	0	1	1	GPCPD1	glycerophosphocholine phosphodiesterase GDE1 homolog (S. cerevisiae)
hsa-miR-320d	0	0	1	1	1	1	ZMYM6	zinc finger, MYM-type 6
hsa-miR-320d	0	0	1	1	1	1	NARG2	NMDA receptor regulated 2
hsa-miR-320d	0	0	1	1	0	0	PPIE	peptidylprolyl isomerase E (cyclophilin E)
hsa-miR-320d	0	0	1	0	0	0	EPHA1-AS1	EPHA1 antisense RNA 1
hsa-miR-320d	0	0	1	1	1	1	SOAT1	sterol O-acyltransferase 1
hsa-miR-320d	1	0	1	0	1	1	EXOC5	exocyst complex component 5
hsa-miR-320d	0	0	1	1	1	1	PCDH20	protocadherin 20
hsa-miR-320d	1	0	1	1	1	1	IL17RD	interleukin 17 receptor D
hsa-miR-320d	1	0	1	0	0	0	XPNPEP3	X-prolyl aminopeptidase (aminopeptidase P) 3, putative
hsa-miR-320d	1	0	1	1	1	1	FBXL5	F-box and leucine-rich repeat protein 5
hsa-miR-320d	1	0	1	1	1	1	RNF38	ring finger protein 38
hsa-miR-320d	0	0	1	1	1	1	CD209	CD209 molecule
hsa-miR-320d	1	0	1	1	1	1	TXNRD1	thioredoxin reductase 1
hsa-miR-320d	0	0	1	0	0	0	KGFLP1	fibroblast growth factor 7 pseudogene
hsa-miR-320d	0	0	1	1	1	1	CEP41	centrosomal protein 41kDa
hsa-miR-320d	0	0	1	1	1	1	DNAJB14	DnaJ (Hsp40) homolog, subfamily B, member 14
hsa-miR-320d	1	0	1	1	1	1	WDR26	WD repeat domain 26
hsa-miR-320d	0	0	1	1	0	0	DNAH1	dynein, axonemal, heavy chain 1
hsa-miR-320d	0	0	1	1	1	1	IYD	iodotyrosine deiodinase
hsa-miR-320d	0	0	1	1	1	1	SUGT1	SGT1, suppressor of G2 allele of SKP1 (S. cerevisiae)
hsa-miR-320d	0	0	1	1	0	0	LRRC36	leucine rich repeat containing 36
hsa-miR-320d	0	0	1	1	1	1	BCOR	BCL6 corepressor
hsa-miR-320d	1	0	1	1	1	1	TAB3	TGF-beta activated kinase 1/MAP3K7 binding protein 3
hsa-miR-320d	0	0	1	1	1	1	BRDT	bromodomain, testis-specific
hsa-miR-320d	0	0	1	1	1	1	MFAP5	microfibrillar associated protein 5
hsa-miR-320d	1	0	1	1	1	1	CAMTA1	calmodulin binding transcription activator 1
hsa-miR-320d	0	0	1	1	0	0	VSIG4	V-set and immunoglobulin domain containing 4
hsa-miR-320d	1	0	1	1	0	0	CLASRP	CLK4-associating serine/arginine rich protein
hsa-miR-320d	1	0	1	1	1	1	VPS45	vacuolar protein sorting 45 homolog (S. cerevisiae)
hsa-miR-320d	1	0	1	1	1	1	MECP2	methyl CpG binding protein 2 (Rett syndrome)
hsa-miR-320d	0	0	1	0	1	1	RAB18	RAB18, member RAS oncogene family
hsa-miR-320d	1	0	1	1	1	1	PLCH1	phospholipase C, eta 1
hsa-miR-320d	1	0	1	1	1	1	MAPT	microtubule-associated protein tau
hsa-miR-320d	0	0	1	1	0	0	SERPING1	serpin peptidase inhibitor, clade G (C1 inhibitor), member 1
hsa-miR-320d	1	0	1	1	1	1	RTN3	reticulon 3
hsa-miR-320d	0	0	1	1	1	1	RHD	Rh blood group, D antigen
hsa-miR-320d	1	0	1	1	1	1	NTNG1	netrin G1
hsa-miR-320d	1	0	1	1	0	0	DGAT2	diacylglycerol O-acyltransferase 2
hsa-miR-320d	1	0	1	1	1	1	PCDH11X	protocadherin 11 X-linked
hsa-miR-320d	0	0	1	1	0	0	CXorf26	chromosome X open reading frame 26
hsa-miR-320d	0	0	1	1	1	1	IL23R	interleukin 23 receptor
hsa-miR-320d	1	0	1	0	1	1	FAM46A	family with sequence similarity 46, member A
hsa-miR-320d	1	0	1	0	1	1	BAG4	BCL2-associated athanogene 4
hsa-miR-320d	0	0	1	1	1	1	RAB7L1	RAB7, member RAS oncogene family-like 1
hsa-miR-320d	1	0	1	1	1	1	HOXC13	homeobox C13
hsa-miR-320d	1	0	1	0	0	0	VGLL4	vestigial like 4 (Drosophila)
hsa-miR-320d	1	0	1	1	0	0	POLR3D	polymerase (RNA) III (DNA directed) polypeptide D, 44kDa
hsa-miR-320d	1	0	1	1	0	0	SLC10A3	solute carrier family 10 (sodium/bile acid cotransporter family), member 3
hsa-miR-320d	1	0	1	0	1	1	CGGBP1	CGG triplet repeat binding protein 1
hsa-miR-320d	1	0	1	1	1	1	MBNL1	muscleblind-like splicing regulator 1
hsa-miR-320d	0	0	1	1	1	1	PDXK	pyridoxal (pyridoxine, vitamin B6) kinase
hsa-miR-320d	1	0	1	1	1	1	U2SURP	U2 snRNP-associated SURP domain containing
hsa-miR-320d	0	0	1	1	0	0	AGBL5	ATP/GTP binding protein-like 5
hsa-miR-320d	1	0	1	0	1	1	DDX3X	DEAD (Asp-Glu-Ala-Asp) box polypeptide 3, X-linked
hsa-miR-320d	1	0	1	1	1	1	HMGA1	high mobility group AT-hook 1
hsa-miR-320d	0	0	1	1	1	1	TMEM30A	transmembrane protein 30A
hsa-miR-320d	0	0	1	1	1	1	MLIP	muscular LMNA-interacting protein
hsa-miR-320d	0	0	1	1	0	0	PANK2	pantothenate kinase 2
hsa-miR-320d	1	0	1	1	0	0	MARCH9	membrane-associated ring finger (C3HC4) 9
hsa-miR-320d	0	0	1	1	0	0	FPGS	folylpolyglutamate synthase
hsa-miR-320d	1	0	1	0	1	1	TMEM39A	transmembrane protein 39A
hsa-miR-320d	0	0	1	0	0	0	GRAMD1B	GRAM domain containing 1B
hsa-miR-320d	0	0	1	0	0	0	TPTEP1	transmembrane phosphatase with tensin homology pseudogene 1
hsa-miR-320d	1	0	1	1	1	1	DNAJB5	DnaJ (Hsp40) homolog, subfamily B, member 5
hsa-miR-320d	1	0	1	1	1	1	RBM7	RNA binding motif protein 7
hsa-miR-320d	0	0	1	1	1	1	H2AFY	H2A histone family, member Y
hsa-miR-320d	0	0	1	1	1	1	PCNP	PEST proteolytic signal containing nuclear protein
hsa-miR-320d	1	0	1	1	1	1	CAP1	CAP, adenylate cyclase-associated protein 1 (yeast)
hsa-miR-320d	0	0	1	1	1	1	DLX4	distal-less homeobox 4
hsa-miR-320d	0	0	1	1	1	1	TOMM40L	translocase of outer mitochondrial membrane 40 homolog (yeast)-like
hsa-miR-320d	0	0	1	0	0	0	KLHL15	kelch-like 15 (Drosophila)
hsa-miR-320d	1	0	1	1	1	1	ZBTB38	zinc finger and BTB domain containing 38
hsa-miR-320d	0	0	1	0	0	0	NUDT16P1	nudix (nucleoside diphosphate linked moiety X)-type motif 16 pseudogene 1
hsa-miR-320d	1	0	1	1	1	1	ZNF512	zinc finger protein 512
hsa-miR-320d	0	0	1	0	1	1	ZNF37A	zinc finger protein 37A
hsa-miR-320d	1	0	1	1	1	1	TMEM9B	TMEM9 domain family, member B
hsa-miR-320d	1	0	1	0	1	1	NR1D2	nuclear receptor subfamily 1, group D, member 2
hsa-miR-320d	0	0	1	1	0	0	DPY30	dpy-30 homolog (C. elegans)
hsa-miR-320d	0	0	1	1	1	1	MYL12A	myosin, light chain 12A, regulatory, non-sarcomeric
hsa-miR-320d	1	0	1	1	1	1	FAM199X	family with sequence similarity 199, X-linked
hsa-miR-320d	1	0	1	1	1	1	NRF1	nuclear respiratory factor 1
hsa-miR-320d	0	0	1	1	0	0	SARNP	SAP domain containing ribonucleoprotein
hsa-miR-320d	1	0	1	1	1	1	DNAJC14	DnaJ (Hsp40) homolog, subfamily C, member 14
hsa-miR-320d	0	0	1	1	1	1	CSDE1	cold shock domain containing E1, RNA-binding
hsa-miR-320d	0	0	1	1	1	1	RDH11	retinol dehydrogenase 11 (all-trans/9-cis/11-cis)
hsa-miR-320d	0	0	1	1	1	1	GLIPR2	GLI pathogenesis-related 2
hsa-miR-320d	0	0	1	0	0	0	FAM200B	family with sequence similarity 200, member B
hsa-miR-320d	1	0	1	1	1	1	ARHGEF9	Cdc42 guanine nucleotide exchange factor (GEF) 9
hsa-miR-320d	0	0	1	1	1	1	SRP19	signal recognition particle 19kDa
hsa-miR-320d	0	0	1	0	0	0	WDFY3-AS2	WDFY3 antisense RNA 2
hsa-miR-320d	0	0	1	1	0	0	HIST2H4A	histone cluster 2, H4a
hsa-miR-320d	0	0	1	1	0	0	HIST2H4B	histone cluster 2, H4b
hsa-miR-320d	0	0	1	1	1	1	NELL2	NEL-like 2 (chicken)
hsa-miR-320d	1	0	1	1	1	1	WHSC1	Wolf-Hirschhorn syndrome candidate 1
hsa-miR-320d	1	0	1	1	1	1	FAM188A	family with sequence similarity 188, member A
hsa-miR-320d	1	0	1	0	1	1	BTF3L4	basic transcription factor 3-like 4
hsa-miR-320d	0	0	1	0	0	0	NBR2	neighbor of BRCA1 gene 2 (non-protein coding)
hsa-miR-320d	0	0	1	1	0	0	LYSMD2	LysM, putative peptidoglycan-binding, domain containing 2
hsa-miR-320d	0	0	1	1	1	1	TRAPPC11	trafficking protein particle complex 11
hsa-miR-320d	0	0	1	1	1	1	C18orf32	chromosome 18 open reading frame 32
hsa-miR-320d	1	0	1	1	1	1	ASPH	aspartate beta-hydroxylase
hsa-miR-320d	1	0	1	1	1	1	CNTN4	contactin 4
hsa-miR-320d	0	0	1	0	0	0	RNF216P1	ring finger protein 216 pseudogene 1
hsa-miR-320d	0	0	1	0	0	0	ZBED3-AS1	ZBED3 antisense RNA 1
hsa-miR-320d	0	0	1	0	0	0	LOC400891	chromosome 14 open reading frame 166B pseudogene
hsa-miR-320d	0	0	1	1	1	1	CLK1	CDC-like kinase 1
hsa-miR-320d	0	0	1	0	1	1	PAPOLG	poly(A) polymerase gamma
hsa-miR-320d	0	0	1	1	1	1	SEMA3D	sema domain, immunoglobulin domain (Ig), short basic domain, secreted, (semaphorin) 3D
hsa-miR-320d	1	0	1	1	1	1	MRO	maestro
hsa-miR-320d	1	0	1	1	1	1	TAF15	TAF15 RNA polymerase II, TATA box binding protein (TBP)-associated factor, 68kDa
hsa-miR-320d	0	0	1	1	1	1	STAT4	signal transducer and activator of transcription 4
hsa-miR-320d	1	0	1	1	1	1	ZPLD1	zona pellucida-like domain containing 1
hsa-miR-320d	1	0	1	1	1	1	BZRAP1	benzodiazapine receptor (peripheral) associated protein 1
hsa-miR-320d	1	0	1	1	1	1	FGF1	fibroblast growth factor 1 (acidic)
hsa-miR-320d	1	0	1	1	1	1	RAB5B	RAB5B, member RAS oncogene family
hsa-miR-320d	0	0	1	1	1	1	C5orf22	chromosome 5 open reading frame 22
hsa-miR-320d	1	0	1	1	1	1	SECISBP2L	SECIS binding protein 2-like
hsa-miR-320d	1	0	1	1	1	1	SIRPA	signal-regulatory protein alpha
hsa-miR-320d	1	0	1	1	1	1	HMGCR	3-hydroxy-3-methylglutaryl-CoA reductase
hsa-miR-320d	0	0	1	1	1	1	NUB1	negative regulator of ubiquitin-like proteins 1
hsa-miR-320d	0	0	1	0	1	1	DKFZP434I0714	uncharacterized protein DKFZP434I0714
hsa-miR-320d	1	0	1	1	1	1	FAM120A	family with sequence similarity 120A
hsa-miR-320d	0	0	1	1	0	0	TMEM171	transmembrane protein 171
hsa-miR-320d	0	0	1	0	1	1	KSR1	kinase suppressor of ras 1
hsa-miR-320d	1	0	1	1	1	1	GRIA4	glutamate receptor, ionotropic, AMPA 4
hsa-miR-320d	0	0	1	1	1	1	C6	complement component 6
hsa-miR-320d	0	0	1	1	1	1	SEC24D	SEC24 family, member D (S. cerevisiae)
hsa-miR-320d	0	0	1	1	1	1	ARHGAP6	Rho GTPase activating protein 6
hsa-miR-320d	0	0	1	0	0	0	LOC339862	uncharacterized LOC339862
hsa-miR-320d	0	0	1	1	1	1	TMEM139	transmembrane protein 139
hsa-miR-320d	0	0	1	1	1	1	UBE3D	ubiquitin protein ligase E3D
hsa-miR-320d	1	0	1	1	1	1	MIPOL1	mirror-image polydactyly 1
hsa-miR-320d	0	0	1	0	0	0	FAM201A	family with sequence similarity 201, member A
hsa-miR-320d	1	0	1	1	1	1	MACROD2	MACRO domain containing 2
hsa-miR-320d	1	0	1	1	1	1	LMO7	LIM domain 7
hsa-miR-320d	0	0	1	1	1	1	FAM171B	family with sequence similarity 171, member B
hsa-miR-320d	1	0	1	1	1	1	ELMO2	engulfment and cell motility 2
hsa-miR-320d	1	0	1	1	1	1	HECTD2	HECT domain containing E3 ubiquitin protein ligase 2
hsa-miR-320d	1	0	1	1	1	1	DAAM1	dishevelled associated activator of morphogenesis 1
hsa-miR-320d	1	0	1	1	0	0	CHD4	chromodomain helicase DNA binding protein 4
hsa-miR-320d	1	0	1	1	0	0	PROSAPIP1	ProSAPiP1 protein
hsa-miR-320d	0	0	1	1	0	0	ZAP70	zeta-chain (TCR) associated protein kinase 70kDa
hsa-miR-320d	0	0	1	1	0	0	CCDC152	coiled-coil domain containing 152
hsa-miR-320d	0	0	1	0	0	0	FLJ36000	uncharacterized FLJ36000
hsa-miR-320d	1	0	1	1	1	1	DACH2	dachshund homolog 2 (Drosophila)
hsa-miR-320d	0	0	1	1	0	0	MTCH1	mitochondrial carrier 1
hsa-miR-320d	0	0	1	0	0	0	CST13P	cystatin 13, pseudogene
hsa-miR-320d	0	0	1	0	0	0	CDKL3	cyclin-dependent kinase-like 3
hsa-miR-320d	0	0	1	0	0	0	LRRC37BP1	leucine rich repeat containing 37B pseudogene 1
hsa-miR-320d	0	0	1	0	1	1	C12orf74	chromosome 12 open reading frame 74
hsa-miR-320d	0	0	1	0	0	0	DKFZp686O1327	uncharacterized LOC401014
hsa-miR-320d	0	0	1	0	0	0	LOC283914	uncharacterized LOC283914
hsa-miR-320d	0	0	1	1	1	1	DOCK8	dedicator of cytokinesis 8
hsa-miR-320d	1	0	1	1	1	1	SON	SON DNA binding protein
hsa-miR-320d	0	0	1	0	0	0	LOC348120	uncharacterized LOC348120
hsa-miR-320d	1	0	1	1	1	1	TOMM40	translocase of outer mitochondrial membrane 40 homolog (yeast)
hsa-miR-320d	1	0	1	1	0	0	NCSTN	nicastrin
hsa-miR-320d	1	0	1	1	1	1	WSB1	WD repeat and SOCS box containing 1
hsa-miR-320d	0	0	1	1	0	0	OXLD1	oxidoreductase-like domain containing 1
hsa-miR-320d	0	0	1	0	0	0	LOC255025	uncharacterized LOC255025
hsa-miR-320d	0	0	1	1	1	1	ZNF74	zinc finger protein 74
hsa-miR-320d	1	0	1	1	1	1	CLVS1	clavesin 1
hsa-miR-320d	1	0	1	0	1	1	ARHGAP5	Rho GTPase activating protein 5
hsa-miR-320d	0	0	1	0	1	1	ITGA1	integrin, alpha 1
hsa-miR-320d	1	0	1	1	0	0	EIF2B5	eukaryotic translation initiation factor 2B, subunit 5 epsilon, 82kDa
hsa-miR-320d	0	0	1	1	0	0	NLRC5	NLR family, CARD domain containing 5
hsa-miR-320d	1	0	1	1	1	1	FNDC3A	fibronectin type III domain containing 3A
hsa-miR-320d	1	0	1	1	1	1	ZFP91	zinc finger protein 91 homolog (mouse)
hsa-miR-320d	0	0	1	1	0	0	HYAL3	hyaluronoglucosaminidase 3
hsa-miR-320d	0	0	1	1	1	1	HLA-DQA1	major histocompatibility complex, class II, DQ alpha 1
hsa-miR-320d	1	0	1	1	1	1	BZW2	basic leucine zipper and W2 domains 2
hsa-miR-320d	1	0	1	1	1	1	SCUBE3	signal peptide, CUB domain, EGF-like 3
hsa-miR-320d	1	0	1	1	1	1	HP1BP3	heterochromatin protein 1, binding protein 3
hsa-miR-320d	0	0	1	0	1	1	C17orf51	chromosome 17 open reading frame 51
hsa-miR-320d	1	0	1	1	1	1	OLFML2A	olfactomedin-like 2A
hsa-miR-320d	1	0	1	1	1	1	ZFP161	zinc finger protein 161 homolog (mouse)
hsa-miR-320d	1	0	1	1	1	1	KLHL28	kelch-like 28 (Drosophila)
hsa-miR-320d	0	0	1	1	1	1	ZBTB8OS	zinc finger and BTB domain containing 8 opposite strand
hsa-miR-320d	0	0	1	1	0	0	WDR62	WD repeat domain 62
hsa-miR-320d	1	0	1	1	1	1	ZEB2	zinc finger E-box binding homeobox 2
hsa-miR-320d	0	0	1	0	0	0	CCDC150	coiled-coil domain containing 150
hsa-miR-320d	1	0	1	1	1	1	ZSCAN29	zinc finger and SCAN domain containing 29
hsa-miR-320d	0	0	1	1	1	1	CDH26	cadherin 26
hsa-miR-320d	0	0	1	1	1	1	B4GALT4	UDP-Gal:betaGlcNAc beta 1,4- galactosyltransferase, polypeptide 4
hsa-miR-320d	0	0	1	0	0	0	FRG1B	FSHD region gene 1 family, member B
hsa-miR-320d	0	0	1	1	1	1	GPATCH2	G patch domain containing 2
hsa-miR-320d	0	0	1	1	0	0	TM6SF1	transmembrane 6 superfamily member 1
hsa-miR-320d	0	0	1	1	0	0	DHX30	DEAH (Asp-Glu-Ala-His) box polypeptide 30
hsa-miR-320d	0	0	1	1	0	0	SLC2A11	solute carrier family 2 (facilitated glucose transporter), member 11
hsa-miR-320d	1	0	1	1	0	0	MANEAL	mannosidase, endo-alpha-like
hsa-miR-320d	0	0	1	1	0	0	PDSS1	prenyl (decaprenyl) diphosphate synthase, subunit 1
hsa-miR-320d	1	0	1	1	1	1	ANXA4	annexin A4
hsa-miR-320d	0	0	1	1	1	1	ZNF333	zinc finger protein 333
hsa-miR-320d	1	0	1	1	1	1	ADCY6	adenylate cyclase 6
hsa-miR-320d	0	0	1	0	0	0	LOC158435	uncharacterized LOC158435
hsa-miR-320d	0	0	1	1	1	1	TRIM6	tripartite motif containing 6
hsa-miR-320d	0	0	1	0	0	0	LINC00052	long intergenic non-protein coding RNA 52
hsa-miR-320d	0	0	1	1	1	1	SH2D1B	SH2 domain containing 1B
hsa-miR-320d	0	0	1	1	1	1	CTSL2	cathepsin L2
hsa-miR-320d	1	0	1	0	1	1	MAGIX	MAGI family member, X-linked
hsa-miR-320d	0	0	1	1	1	1	SLAMF1	signaling lymphocytic activation molecule family member 1
hsa-miR-320d	0	0	1	0	0	0	PABPC1P2	poly(A) binding protein, cytoplasmic 1 pseudogene 2
hsa-miR-320d	0	0	1	0	0	0	PTGER4P2	prostaglandin E receptor 4 (subtype EP4) pseudogene 2
hsa-miR-320d	1	0	1	1	0	0	CHTOP	chromatin target of PRMT1
hsa-miR-320d	1	0	1	0	1	1	HMGB3	high mobility group box 3
hsa-miR-320d	1	0	1	1	1	1	USP47	ubiquitin specific peptidase 47
hsa-miR-320d	1	0	1	0	1	1	TMEM194A	transmembrane protein 194A
hsa-miR-320d	0	0	1	0	0	0	JPX	JPX transcript, XIST activator (non-protein coding)
hsa-miR-320d	1	0	1	1	1	1	WNT5A	wingless-type MMTV integration site family, member 5A
hsa-miR-320d	1	0	1	1	1	1	NTRK2	neurotrophic tyrosine kinase, receptor, type 2
hsa-miR-320d	1	0	1	0	1	1	AMMECR1L	AMME chromosomal region gene 1-like
hsa-miR-320d	1	0	1	1	0	0	SLC45A4	solute carrier family 45, member 4
hsa-miR-320d	1	0	1	1	1	1	SYNE1	spectrin repeat containing, nuclear envelope 1
hsa-miR-320d	1	0	1	1	1	1	GBF1	golgi brefeldin A resistant guanine nucleotide exchange factor 1
hsa-miR-320d	1	0	1	1	1	1	STK38	serine/threonine kinase 38
hsa-miR-320d	0	0	1	1	0	0	DNASE1	deoxyribonuclease I
hsa-miR-320d	1	0	1	1	1	1	WNT10B	wingless-type MMTV integration site family, member 10B
hsa-miR-320d	0	0	1	1	1	1	COL8A2	collagen, type VIII, alpha 2
hsa-miR-320d	0	0	1	1	1	1	PARPBP	PARP1 binding protein
hsa-miR-320d	0	0	1	1	1	1	XG	Xg blood group
hsa-miR-320d	0	0	1	1	0	0	MTMR11	myotubularin related protein 11
hsa-miR-320d	0	0	1	0	1	1	TCAIM	T cell activation inhibitor, mitochondrial
hsa-miR-320d	0	0	1	1	0	0	TMC1	transmembrane channel-like 1
hsa-miR-320d	0	0	1	0	0	0	LSAMP-AS3	LSAMP antisense RNA 3
hsa-miR-320d	0	0	1	1	0	0	SFTPC	surfactant protein C
hsa-miR-320d	0	0	1	1	0	0	HIST1H2BC	histone cluster 1, H2bc
hsa-miR-320d	1	0	1	1	1	1	GABRB2	gamma-aminobutyric acid (GABA) A receptor, beta 2
hsa-miR-320d	0	0	1	1	1	1	SLC25A35	solute carrier family 25, member 35
hsa-miR-320d	1	0	1	1	1	1	NR2F2	nuclear receptor subfamily 2, group F, member 2
hsa-miR-320d	1	0	1	1	1	1	PTPRD	protein tyrosine phosphatase, receptor type, D
hsa-miR-320d	1	0	1	1	1	1	SUV420H1	suppressor of variegation 4-20 homolog 1 (Drosophila)
hsa-miR-320d	0	0	1	1	0	0	SLC17A4	solute carrier family 17 (sodium phosphate), member 4
hsa-miR-320d	1	0	1	1	1	1	CERS6	ceramide synthase 6
hsa-miR-320d	1	0	1	0	1	1	BTBD3	BTB (POZ) domain containing 3
hsa-miR-320d	0	0	1	1	0	0	YDJC	YdjC homolog (bacterial)
hsa-miR-320d	0	0	1	0	0	0	LRRC37A11P	leucine rich repeat containing 37, member A11, pseudogene
hsa-miR-320d	1	0	1	1	1	1	NR3C2	nuclear receptor subfamily 3, group C, member 2
hsa-miR-320d	0	0	1	0	0	0	MAGEL2	MAGE-like 2
hsa-miR-320d	0	0	1	1	0	0	C14orf178	chromosome 14 open reading frame 178
hsa-miR-320d	1	0	1	1	1	1	OSBP2	oxysterol binding protein 2
hsa-miR-320d	0	0	1	0	0	0	FAM27E3	family with sequence similarity 27, member E3
hsa-miR-320d	1	0	1	1	1	1	FKBP1A	FK506 binding protein 1A, 12kDa
hsa-miR-320d	0	0	1	1	0	0	RGSL1	regulator of G-protein signaling like 1
hsa-miR-320d	0	0	1	0	1	1	GOLGA8G	golgin A8 family, member G
hsa-miR-320d	1	0	1	0	1	1	CAMSAP2	calmodulin regulated spectrin-associated protein family, member 2
hsa-miR-320d	1	0	1	1	1	1	MLLT10	myeloid/lymphoid or mixed-lineage leukemia (trithorax homolog, Drosophila); translocated to, 10
hsa-miR-320d	0	0	1	0	0	0	FAM225B	family with sequence similarity 225, member B (non-protein coding)
hsa-miR-320d	0	0	1	0	0	0	FLJ38723	uncharacterized FLJ38723
hsa-miR-320d	0	0	1	1	1	1	AGPHD1	aminoglycoside phosphotransferase domain containing 1
hsa-miR-320d	0	0	1	1	0	0	CCDC144A	coiled-coil domain containing 144A
hsa-miR-320d	0	0	1	1	1	1	PRKAR2A	protein kinase, cAMP-dependent, regulatory, type II, alpha
hsa-miR-320d	1	0	1	1	1	1	EIF5	eukaryotic translation initiation factor 5
hsa-miR-320d	1	0	1	1	0	0	RGS6	regulator of G-protein signaling 6
hsa-miR-320d	1	0	1	1	1	1	ATP2B4	ATPase, Ca++ transporting, plasma membrane 4
hsa-miR-320d	1	0	1	0	1	1	MTX3	metaxin 3
hsa-miR-320d	0	0	1	1	1	1	KLHL8	kelch-like 8 (Drosophila)
hsa-miR-320d	1	0	1	1	1	1	TGOLN2	trans-golgi network protein 2
hsa-miR-320d	0	0	1	1	0	0	CDK5RAP2	CDK5 regulatory subunit associated protein 2
hsa-miR-320d	1	0	1	1	1	1	CSGALNACT2	chondroitin sulfate N-acetylgalactosaminyltransferase 2
hsa-miR-320d	1	0	1	0	1	1	FAM73A	family with sequence similarity 73, member A
hsa-miR-320d	1	0	1	1	1	1	SMAD4	SMAD family member 4
hsa-miR-320d	0	0	1	0	1	1	PRH2	proline-rich protein HaeIII subfamily 2
hsa-miR-320d	0	0	1	1	1	1	VPS35	vacuolar protein sorting 35 homolog (S. cerevisiae)
hsa-miR-320d	0	0	1	1	1	1	PRR14L	proline rich 14-like
hsa-miR-320d	0	0	1	0	0	0	SMG1P1	smg-1 homolog, phosphatidylinositol 3-kinase-related kinase pseudogene 1
hsa-miR-320d	1	0	1	1	1	1	CGN	cingulin
hsa-miR-320d	1	0	1	1	0	0	RBM27	RNA binding motif protein 27
hsa-miR-320d	1	0	1	1	1	1	CBX3	chromobox homolog 3
hsa-miR-320d	1	0	1	1	0	0	CECR2	cat eye syndrome chromosome region, candidate 2
hsa-miR-320d	0	0	1	0	1	1	THAP6	THAP domain containing 6
hsa-miR-320d	1	0	1	1	1	1	CASP3	caspase 3, apoptosis-related cysteine peptidase
hsa-miR-320d	1	0	1	1	1	1	FOXP1	forkhead box P1
hsa-miR-320d	0	0	1	1	1	1	ARMCX3	armadillo repeat containing, X-linked 3
hsa-miR-320d	0	0	1	1	0	0	PPP2R2B	protein phosphatase 2, regulatory subunit B, beta
hsa-miR-320d	0	0	1	0	0	0	OVOS	ovostatin
hsa-miR-320d	1	0	1	1	1	1	DCAF5	DDB1 and CUL4 associated factor 5
hsa-miR-320d	1	0	1	1	1	1	ATP6V1C1	ATPase, H+ transporting, lysosomal 42kDa, V1 subunit C1
hsa-miR-320d	1	0	1	1	1	1	PHF3	PHD finger protein 3
hsa-miR-320d	0	0	1	1	1	1	DOCK5	dedicator of cytokinesis 5
hsa-miR-320d	1	0	1	1	1	1	NFIB	nuclear factor I/B
hsa-miR-320d	1	0	1	1	1	1	POLA1	polymerase (DNA directed), alpha 1, catalytic subunit
hsa-miR-320d	0	0	1	1	0	0	SAMD7	sterile alpha motif domain containing 7
hsa-miR-320d	1	0	1	1	1	1	PGAP1	post-GPI attachment to proteins 1
hsa-miR-320d	0	0	1	0	0	0	ANKRD62	ankyrin repeat domain 62
hsa-miR-320d	1	0	1	1	1	1	FAM179B	family with sequence similarity 179, member B
hsa-miR-320d	0	0	1	0	0	0	ZNRD1-AS1	ZNRD1 antisense RNA 1
hsa-miR-320d	1	0	1	1	1	1	EOGT	EGF domain-specific O-linked N-acetylglucosamine (GlcNAc) transferase
hsa-miR-320d	0	0	1	1	1	1	SSFA2	sperm specific antigen 2
hsa-miR-320d	1	0	1	1	1	1	CREB3L2	cAMP responsive element binding protein 3-like 2
hsa-miR-320d	0	0	1	0	1	1	CD59	CD59 molecule, complement regulatory protein
hsa-miR-320d	0	0	1	1	1	1	HPGD	hydroxyprostaglandin dehydrogenase 15-(NAD)
hsa-miR-320d	0	0	1	0	0	0	DCTN2	dynactin 2 (p50)
hsa-miR-320d	1	0	1	1	0	0	SMARCA2	SWI/SNF related, matrix associated, actin dependent regulator of chromatin, subfamily a, member 2
hsa-miR-320d	0	0	1	1	1	1	CHEK1	checkpoint kinase 1
hsa-miR-320d	0	0	1	1	1	1	ARFGAP2	ADP-ribosylation factor GTPase activating protein 2
hsa-miR-320d	1	0	1	0	0	0	IGLON5	IgLON family member 5
hsa-miR-320d	0	0	1	1	0	0	SPATA6	spermatogenesis associated 6
hsa-miR-320d	1	0	1	1	1	1	FUT9	fucosyltransferase 9 (alpha (1,3) fucosyltransferase)
hsa-miR-320d	1	0	1	1	1	1	TOM1L1	target of myb1 (chicken)-like 1
hsa-miR-320d	0	0	1	0	0	0	LOC400768	uncharacterized LOC400768
hsa-miR-320d	1	0	1	1	1	1	EIF4B	eukaryotic translation initiation factor 4B
hsa-miR-320d	1	0	1	0	0	0	SCAMP3	secretory carrier membrane protein 3
hsa-miR-320d	1	0	1	1	1	1	C8orf58	chromosome 8 open reading frame 58
hsa-miR-320d	0	0	1	1	0	0	CYGB	cytoglobin
hsa-miR-320d	1	0	1	1	1	1	SLC35D2	solute carrier family 35, member D2
hsa-miR-320d	0	0	1	1	1	1	CIRBP	cold inducible RNA binding protein
hsa-miR-320d	0	0	1	1	1	1	PTGES3	prostaglandin E synthase 3 (cytosolic)
hsa-miR-320d	1	0	1	1	1	1	FGF11	fibroblast growth factor 11
hsa-miR-320d	1	0	1	1	0	0	CRELD1	cysteine-rich with EGF-like domains 1
hsa-miR-320d	1	0	1	0	1	1	BNIP3L	BCL2/adenovirus E1B 19kDa interacting protein 3-like
hsa-miR-320d	0	0	1	1	1	1	FUS	fused in sarcoma
hsa-miR-320d	0	0	1	1	1	1	PMPCB	peptidase (mitochondrial processing) beta
hsa-miR-320d	0	0	1	1	1	1	SDE2	SDE2 telomere maintenance homolog (S. pombe)
hsa-miR-320d	1	0	1	1	1	1	TPM4	tropomyosin 4
hsa-miR-320d	1	0	1	1	1	1	CHTF8	CTF8, chromosome transmission fidelity factor 8 homolog (S. cerevisiae)
hsa-miR-320d	1	0	1	1	0	0	CCM2	cerebral cavernous malformation 2
hsa-miR-320d	1	0	1	0	1	1	ARL6IP6	ADP-ribosylation-like factor 6 interacting protein 6
hsa-miR-320d	0	0	1	1	1	1	PLAUR	plasminogen activator, urokinase receptor
hsa-miR-320d	0	0	1	0	1	1	ANKS1B	ankyrin repeat and sterile alpha motif domain containing 1B
hsa-miR-320d	1	0	1	1	1	1	PLEKHB2	pleckstrin homology domain containing, family B (evectins) member 2
hsa-miR-320d	0	0	1	1	0	0	EMC7	ER membrane protein complex subunit 7
hsa-miR-320d	0	0	1	1	0	0	NR1H2	nuclear receptor subfamily 1, group H, member 2
hsa-miR-320d	0	0	1	0	0	0	LOC654433	uncharacterized LOC654433
hsa-miR-320d	0	0	1	1	1	1	BFAR	bifunctional apoptosis regulator
hsa-miR-320d	0	0	1	1	1	1	CDS2	CDP-diacylglycerol synthase (phosphatidate cytidylyltransferase) 2
hsa-miR-320d	0	0	1	1	1	1	XBP1	X-box binding protein 1
hsa-miR-320d	1	0	1	1	1	1	NAP1L1	nucleosome assembly protein 1-like 1
hsa-miR-320d	1	0	1	1	1	1	BAMBI	BMP and activin membrane-bound inhibitor homolog (Xenopus laevis)
hsa-miR-320d	1	0	1	1	1	1	WIPF1	WAS/WASL interacting protein family, member 1
hsa-miR-320d	0	0	1	1	1	1	NFATC4	nuclear factor of activated T-cells, cytoplasmic, calcineurin-dependent 4
hsa-miR-320d	0	0	1	1	1	1	BMPR1A	bone morphogenetic protein receptor, type IA
hsa-miR-320d	1	0	1	1	1	1	PEX2	peroxisomal biogenesis factor 2
hsa-miR-320d	0	0	1	1	0	0	NOX5	NADPH oxidase, EF-hand calcium binding domain 5
hsa-miR-320d	0	0	1	1	0	0	CCDC22	coiled-coil domain containing 22
hsa-miR-320d	0	0	1	1	1	1	BTF3	basic transcription factor 3
hsa-miR-320d	1	0	1	1	1	1	NT5DC1	5'-nucleotidase domain containing 1
hsa-miR-320d	1	0	1	1	1	1	PPP3CB	protein phosphatase 3, catalytic subunit, beta isozyme
hsa-miR-320d	0	0	1	1	0	0	STUB1	STIP1 homology and U-box containing protein 1, E3 ubiquitin protein ligase
hsa-miR-320d	1	0	1	1	1	1	BAALC	brain and acute leukemia, cytoplasmic
hsa-miR-320d	0	0	1	1	1	1	ACSF3	acyl-CoA synthetase family member 3
hsa-miR-320d	0	0	1	1	1	1	TMEM14C	transmembrane protein 14C
hsa-miR-320d	1	0	1	1	1	1	LAPTM4A	lysosomal protein transmembrane 4 alpha
hsa-miR-320d	0	0	1	1	0	0	BCKDK	branched chain ketoacid dehydrogenase kinase
hsa-miR-320d	1	0	1	1	1	1	VLDLR	very low density lipoprotein receptor
hsa-miR-320d	1	0	1	0	1	1	CD47	CD47 molecule
hsa-miR-320d	0	0	1	1	1	1	ZNF346	zinc finger protein 346
hsa-miR-320d	0	0	1	1	1	1	SPECC1	sperm antigen with calponin homology and coiled-coil domains 1
hsa-miR-320d	0	0	1	1	1	1	TNK1	tyrosine kinase, non-receptor, 1
hsa-miR-320d	1	0	1	1	1	1	TIPRL	TIP41, TOR signaling pathway regulator-like (S. cerevisiae)
hsa-miR-320d	0	0	1	0	0	0	LOC100132984	uncharacterized LOC100132984
hsa-miR-320d	0	0	1	1	1	1	FAM118B	family with sequence similarity 118, member B
hsa-miR-320d	1	0	1	1	1	1	SLMAP	sarcolemma associated protein
hsa-miR-320d	1	0	1	0	1	1	KIAA0240	KIAA0240
hsa-miR-320d	0	0	1	0	0	0	FAM47E	family with sequence similarity 47, member E
hsa-miR-320d	1	0	1	1	1	1	PTPRG	protein tyrosine phosphatase, receptor type, G
hsa-miR-320d	0	0	1	1	1	1	BDP1	B double prime 1, subunit of RNA polymerase III transcription initiation factor IIIB
hsa-miR-320d	0	0	1	0	0	0	LINC00661	long intergenic non-protein coding RNA 661
hsa-miR-320d	1	0	1	1	1	1	KIAA2018	KIAA2018
hsa-miR-320d	0	0	1	0	0	0	MUC19	mucin 19, oligomeric
hsa-miR-320d	1	0	1	1	1	1	TIPARP	TCDD-inducible poly(ADP-ribose) polymerase
hsa-miR-320d	1	0	1	1	1	1	SLC39A10	solute carrier family 39 (zinc transporter), member 10
hsa-miR-320d	0	0	1	1	1	1	SLC39A14	solute carrier family 39 (zinc transporter), member 14
hsa-miR-320d	0	0	1	0	0	0	61E3.4	nuclear pore complex interacting protein-like
hsa-miR-320d	1	0	1	0	1	1	KLHDC10	kelch domain containing 10
hsa-miR-320d	0	0	1	1	0	0	SPINK5	serine peptidase inhibitor, Kazal type 5
hsa-miR-320d	0	0	1	1	1	1	PTGS1	prostaglandin-endoperoxide synthase 1 (prostaglandin G/H synthase and cyclooxygenase)
hsa-miR-320d	1	0	1	1	1	1	QKI	QKI, KH domain containing, RNA binding
hsa-miR-320d	0	0	1	0	0	0	CDKN2B-AS1	CDKN2B antisense RNA 1
hsa-miR-320d	0	0	1	1	1	1	DHX36	DEAH (Asp-Glu-Ala-His) box polypeptide 36
hsa-miR-320d	0	0	1	1	1	1	PROS1	protein S (alpha)
hsa-miR-320d	0	0	1	1	1	1	MLF1IP	MLF1 interacting protein
hsa-miR-320d	0	0	1	1	1	1	ALDH3B1	aldehyde dehydrogenase 3 family, member B1
hsa-miR-320d	0	0	1	1	1	1	ADPRH	ADP-ribosylarginine hydrolase
hsa-miR-320d	1	0	1	0	1	1	STAT3	signal transducer and activator of transcription 3 (acute-phase response factor)
hsa-miR-320d	0	0	1	0	1	1	OPRK1	opioid receptor, kappa 1
hsa-miR-320d	0	0	1	1	1	1	HLA-DRB5	major histocompatibility complex, class II, DR beta 5
hsa-miR-320d	1	0	1	1	1	1	COL1A1	collagen, type I, alpha 1
hsa-miR-320d	1	0	1	1	1	1	ESR1	estrogen receptor 1
hsa-miR-320d	1	0	1	0	1	1	GHR	growth hormone receptor
hsa-miR-320d	1	0	1	0	1	1	GLI3	GLI family zinc finger 3
hsa-miR-320d	1	0	1	1	1	1	INSR	insulin receptor
hsa-miR-320d	1	0	1	0	1	1	ITGB3	integrin, beta 3 (platelet glycoprotein IIIa, antigen CD61)
hsa-miR-320d	0	0	1	1	1	1	LPL	lipoprotein lipase
hsa-miR-320d	0	0	1	1	1	1	MAOA	monoamine oxidase A
hsa-miR-320d	0	0	1	0	1	1	MBL2	mannose-binding lectin (protein C) 2, soluble
hsa-miR-320d	1	0	1	1	1	1	MITF	microphthalmia-associated transcription factor
hsa-miR-320d	0	0	1	1	1	1	NDP	Norrie disease (pseudoglioma)
hsa-miR-320d	0	0	1	1	1	1	CASR	calcium-sensing receptor
hsa-miR-320d	1	0	1	0	1	1	CYBB	cytochrome b-245, beta polypeptide
hsa-miR-320d	1	0	1	1	1	1	HLCS	holocarboxylase synthetase (biotin-(proprionyl-CoA-carboxylase (ATP-hydrolysing)) ligase)
hsa-miR-320d	1	0	1	0	1	1	PAFAH1B1	platelet-activating factor acetylhydrolase 1b, regulatory subunit 1 (45kDa)
hsa-miR-320d	0	0	1	1	0	0	PHEX	phosphate regulating endopeptidase homolog, X-linked
hsa-miR-320d	1	0	1	1	1	1	IL10	interleukin 10
hsa-miR-320d	1	0	1	1	1	1	TNF	tumor necrosis factor
hsa-miR-320d	0	0	1	1	1	1	SELL	selectin L
hsa-miR-320d	1	0	1	0	1	1	CACNA1E	calcium channel, voltage-dependent, R type, alpha 1E subunit
hsa-miR-320d	1	0	1	1	1	1	CACNB4	calcium channel, voltage-dependent, beta 4 subunit
hsa-miR-320d	0	0	1	1	1	1	CYP7A1	cytochrome P450, family 7, subfamily A, polypeptide 1
hsa-miR-320d	0	0	1	1	1	1	DCK	deoxycytidine kinase
hsa-miR-320d	1	0	1	1	1	1	DIO2	deiodinase, iodothyronine, type II
hsa-miR-320d	0	0	1	1	1	1	EPO	erythropoietin
hsa-miR-320d	1	0	1	1	1	1	GABRB3	gamma-aminobutyric acid (GABA) A receptor, beta 3
hsa-miR-320d	1	0	1	1	0	0	GRIN2A	glutamate receptor, ionotropic, N-methyl D-aspartate 2A
hsa-miR-320d	1	0	1	1	1	1	HTR4	5-hydroxytryptamine (serotonin) receptor 4, G protein-coupled
hsa-miR-320d	1	0	1	1	1	1	PPP3R1	protein phosphatase 3, regulatory subunit B, alpha
hsa-miR-320d	1	0	1	1	1	1	PTGDR	prostaglandin D2 receptor (DP)
hsa-miR-320d	1	0	1	1	1	1	REEP3	receptor accessory protein 3
hsa-miR-320d	0	0	1	0	1	1	DNAJB3	DnaJ (Hsp40) homolog, subfamily B, member 3
hsa-miR-320d	1	0	1	0	1	1	SMAD5	SMAD family member 5
hsa-miR-320d	1	0	1	1	1	1	RORC	RAR-related orphan receptor C
hsa-miR-320d	0	0	1	1	1	1	GALK2	galactokinase 2
hsa-miR-320d	1	0	1	1	1	1	FARP1	FERM, RhoGEF (ARHGEF) and pleckstrin domain protein 1 (chondrocyte-derived)
hsa-miR-320d	1	0	1	1	1	1	DNAJB12	DnaJ (Hsp40) homolog, subfamily B, member 12
hsa-miR-320d	0	0	1	1	0	0	C1orf95	chromosome 1 open reading frame 95
hsa-miR-320d	1	0	1	1	1	1	LEPR	leptin receptor
hsa-miR-320d	1	0	1	1	1	1	RBMS3	RNA binding motif, single stranded interacting protein 3
hsa-miR-320d	1	0	1	1	1	1	HNRNPD	heterogeneous nuclear ribonucleoprotein D (AU-rich element RNA binding protein 1, 37kDa)
hsa-miR-320d	0	0	1	1	1	1	TSPYL6	TSPY-like 6
hsa-miR-320d	0	0	1	1	1	1	ZCCHC16	zinc finger, CCHC domain containing 16
hsa-miR-320d	1	0	1	0	1	1	LIN28B	lin-28 homolog B (C. elegans)
hsa-miR-320d	1	0	1	1	1	1	NCK2	NCK adaptor protein 2
hsa-miR-320d	1	0	1	0	1	1	IP6K1	inositol hexakisphosphate kinase 1
hsa-miR-320d	0	0	1	1	1	1	MAPKAP1	mitogen-activated protein kinase associated protein 1
hsa-miR-320d	1	0	1	1	0	0	RPS6KA1	ribosomal protein S6 kinase, 90kDa, polypeptide 1
hsa-miR-320d	1	0	1	1	1	1	TAC3	tachykinin 3
hsa-miR-320d	1	0	1	1	1	1	TCEAL8	transcription elongation factor A (SII)-like 8
hsa-miR-320d	0	0	1	1	1	1	TCEAL6	transcription elongation factor A (SII)-like 6
hsa-miR-320d	0	0	1	1	1	1	SCP2	sterol carrier protein 2
hsa-miR-320d	0	0	1	1	1	1	KLHDC9	kelch domain containing 9
hsa-miR-320d	0	0	1	1	1	1	TRIM13	tripartite motif containing 13
hsa-miR-320d	1	0	1	0	1	1	C18orf25	chromosome 18 open reading frame 25
hsa-miR-320d	0	0	1	1	1	1	MXI1	MAX interactor 1
hsa-miR-320d	0	0	1	1	0	0	CCT3	chaperonin containing TCP1, subunit 3 (gamma)
hsa-miR-320d	1	0	1	1	1	1	ARHGAP28	Rho GTPase activating protein 28
hsa-miR-320d	0	0	1	1	1	1	C1QL3	complement component 1, q subcomponent-like 3
hsa-miR-320d	0	0	1	1	1	1	MUC21	mucin 21, cell surface associated
hsa-miR-320d	1	0	1	1	1	1	PDLIM5	PDZ and LIM domain 5
hsa-miR-320d	1	0	1	0	1	1	FYTTD1	forty-two-three domain containing 1
hsa-miR-320d	0	0	1	1	1	1	ZMAT1	zinc finger, matrin-type 1
hsa-miR-320d	1	0	1	0	1	1	CREB5	cAMP responsive element binding protein 5
hsa-miR-320d	0	0	1	0	1	1	GOLGA8E	golgin A8 family, member E
hsa-miR-320d	1	0	1	1	1	1	SLC25A53	solute carrier family 25, member 53
hsa-miR-320d	1	0	1	1	1	1	DISC1	disrupted in schizophrenia 1
hsa-miR-320d	0	0	1	1	1	1	SPIN4	spindlin family, member 4
hsa-miR-320d	0	0	1	1	1	1	FAM53A	family with sequence similarity 53, member A
hsa-miR-320d	1	0	1	1	1	1	RUNX2	runt-related transcription factor 2
hsa-miR-320d	0	0	1	1	0	0	RTKN	rhotekin
hsa-miR-320d	0	0	1	1	1	1	PURG	purine-rich element binding protein G
hsa-miR-320d	1	0	1	1	1	1	PHF6	PHD finger protein 6
hsa-miR-320d	1	0	1	0	1	1	GOPC	golgi-associated PDZ and coiled-coil motif containing
hsa-miR-320d	0	0	1	1	0	0	DAPL1	death associated protein-like 1
hsa-miR-320d	1	0	1	1	1	1	ZHX1	zinc fingers and homeoboxes 1
hsa-miR-320d	1	0	1	1	1	1	VMA21	VMA21 vacuolar H+-ATPase homolog (S. cerevisiae)
hsa-miR-320d	0	0	1	1	1	1	POLR2M	polymerase (RNA) II (DNA directed) polypeptide M
hsa-miR-320d	0	0	1	1	1	1	ZNF187	zinc finger protein 187
hsa-miR-320d	0	0	1	1	1	1	LRRC66	leucine rich repeat containing 66
hsa-miR-320d	1	0	1	1	1	1	CANX	calnexin
hsa-miR-320d	1	0	1	0	1	1	ADAR	adenosine deaminase, RNA-specific
hsa-miR-320d	1	0	1	1	1	1	AFF3	AF4/FMR2 family, member 3
hsa-miR-320d	0	0	1	1	0	0	CES1	carboxylesterase 1
hsa-miR-320d	1	0	1	1	1	1	VEGFA	vascular endothelial growth factor A
hsa-miR-320d	1	0	1	1	1	1	RGS7BP	regulator of G-protein signaling 7 binding protein
hsa-miR-320d	1	0	1	0	1	1	MSRB3	methionine sulfoxide reductase B3
hsa-miR-320d	0	0	1	1	1	1	HNRNPH2	heterogeneous nuclear ribonucleoprotein H2 (H')
hsa-miR-320d	1	0	1	0	1	1	NPNT	nephronectin
hsa-miR-320d	1	0	1	1	1	1	TMEM98	transmembrane protein 98
hsa-miR-320d	1	0	1	1	1	1	PPM1B	protein phosphatase, Mg2+/Mn2+ dependent, 1B
hsa-miR-320d	1	0	1	1	1	1	ZNF704	zinc finger protein 704
hsa-miR-320d	1	0	1	1	1	1	ACPL2	acid phosphatase-like 2
hsa-miR-320d	1	0	1	1	1	1	ATP6V1C2	ATPase, H+ transporting, lysosomal 42kDa, V1 subunit C2
hsa-miR-320d	0	0	1	0	0	0	PRSS53	protease, serine, 53
hsa-miR-320d	0	0	1	1	1	1	SKA1	spindle and kinetochore associated complex subunit 1
hsa-miR-320d	1	0	1	1	1	1	KREMEN1	kringle containing transmembrane protein 1
hsa-miR-320d	1	0	1	0	1	1	USP9X	ubiquitin specific peptidase 9, X-linked
hsa-miR-320d	1	0	1	1	1	1	CBLN3	cerebellin 3 precursor
hsa-miR-320d	0	0	1	0	1	1	OPALIN	oligodendrocytic myelin paranodal and inner loop protein
hsa-miR-320d	1	0	1	1	1	1	SCN2A	sodium channel, voltage-gated, type II, alpha subunit
hsa-miR-320d	0	0	1	0	1	1	SCN3B	sodium channel, voltage-gated, type III, beta subunit
hsa-miR-320d	0	0	1	1	1	1	METTL21D	methyltransferase like 21D
hsa-miR-320d	1	0	1	1	1	1	RUFY2	RUN and FYVE domain containing 2
hsa-miR-320d	0	0	1	1	1	1	MST4	serine/threonine protein kinase MST4
hsa-miR-320d	1	0	1	1	1	1	CEP85L	centrosomal protein 85kDa-like
hsa-miR-320d	1	0	1	1	1	1	SLC9A6	solute carrier family 9, subfamily A (NHE6, cation proton antiporter 6), member 6
hsa-miR-320d	1	0	1	0	1	1	SRGAP2	SLIT-ROBO Rho GTPase activating protein 2
hsa-miR-320d	1	0	1	0	1	1	TMEM237	transmembrane protein 237
hsa-miR-320d	1	0	1	1	1	1	METTL9	methyltransferase like 9
hsa-miR-320d	1	0	1	1	1	1	PDE11A	phosphodiesterase 11A
hsa-miR-320d	1	0	1	1	1	1	SREK1	splicing regulatory glutamine/lysine-rich protein 1
hsa-miR-320d	1	0	1	1	1	1	IRF2BP2	interferon regulatory factor 2 binding protein 2
hsa-miR-320d	0	0	1	1	1	1	TCF19	transcription factor 19
hsa-miR-320d	1	0	1	1	1	1	UBN1	ubinuclein 1
hsa-miR-320d	0	0	1	1	0	0	ASAH2B	N-acylsphingosine amidohydrolase (non-lysosomal ceramidase) 2B
hsa-miR-320d	1	0	1	1	1	1	OCIAD1	OCIA domain containing 1
hsa-miR-320d	1	0	1	1	1	1	LDB3	LIM domain binding 3
hsa-miR-320d	1	0	1	1	1	1	PACRG	PARK2 co-regulated
hsa-miR-320d	1	0	1	0	1	1	THSD7B	thrombospondin, type I, domain containing 7B
hsa-miR-320d	0	0	1	1	1	1	FTO	fat mass and obesity associated
hsa-miR-320d	0	0	1	1	1	1	HSF5	heat shock transcription factor family member 5
hsa-miR-320d	0	0	1	1	1	1	IGSF5	immunoglobulin superfamily, member 5
hsa-miR-320d	0	0	1	0	1	1	EPHA6	EPH receptor A6
hsa-miR-320d	1	0	1	0	1	1	ODZ3	odz, odd Oz/ten-m homolog 3 (Drosophila)
hsa-miR-320d	1	0	1	1	1	1	MBOAT1	membrane bound O-acyltransferase domain containing 1
hsa-miR-320d	1	0	1	0	1	1	MEGF9	multiple EGF-like-domains 9
hsa-miR-320d	0	0	1	1	1	1	TBX18	T-box 18
hsa-miR-320d	1	0	1	1	1	1	UNC119B	unc-119 homolog B (C. elegans)
hsa-miR-320d	1	0	1	0	1	1	SCN3A	sodium channel, voltage-gated, type III, alpha subunit
hsa-miR-320d	1	0	1	1	1	1	ADAM10	ADAM metallopeptidase domain 10
hsa-miR-320d	0	0	1	1	1	1	ADSS	adenylosuccinate synthase
hsa-miR-320d	1	0	1	1	1	1	APAF1	apoptotic peptidase activating factor 1
hsa-miR-320d	0	0	1	1	0	0	TNFRSF17	tumor necrosis factor receptor superfamily, member 17
hsa-miR-320d	1	0	1	1	1	1	BMP2	bone morphogenetic protein 2
hsa-miR-320d	0	0	1	1	1	1	CASQ1	calsequestrin 1 (fast-twitch, skeletal muscle)
hsa-miR-320d	1	0	1	1	1	1	CDH13	cadherin 13, H-cadherin (heart)
hsa-miR-320d	1	0	1	1	1	1	CREBL2	cAMP responsive element binding protein-like 2
hsa-miR-320d	1	0	1	1	1	1	DUSP4	dual specificity phosphatase 4
hsa-miR-320d	1	0	1	1	1	1	DYRK1A	dual-specificity tyrosine-(Y)-phosphorylation regulated kinase 1A
hsa-miR-320d	1	0	1	0	1	1	EFNB3	ephrin-B3
hsa-miR-320d	1	0	1	1	1	1	CELSR3	cadherin, EGF LAG seven-pass G-type receptor 3 (flamingo homolog, Drosophila)
hsa-miR-320d	1	0	1	1	1	1	GPC4	glypican 4
hsa-miR-320d	1	0	1	1	1	1	GCNT1	glucosaminyl (N-acetyl) transferase 1, core 2
hsa-miR-320d	1	0	1	1	1	1	IRAK2	interleukin-1 receptor-associated kinase 2
hsa-miR-320d	1	0	1	0	1	1	MPPED2	metallophosphoesterase domain containing 2
hsa-miR-320d	1	0	1	0	1	1	ARCN1	archain 1
hsa-miR-320d	1	0	1	1	1	1	ARF3	ADP-ribosylation factor 3
hsa-miR-320d	0	0	1	1	0	0	RHOG	ras homolog family member G
hsa-miR-320d	1	0	1	0	1	1	ARNT	aryl hydrocarbon receptor nuclear translocator
hsa-miR-320d	1	0	1	1	1	1	BNC1	basonuclin 1
hsa-miR-320d	0	0	1	1	0	0	BMP6	bone morphogenetic protein 6
hsa-miR-320d	1	0	1	1	1	1	KLF5	Kruppel-like factor 5 (intestinal)
hsa-miR-320d	1	0	1	1	1	1	BTG1	B-cell translocation gene 1, anti-proliferative
hsa-miR-320d	0	0	1	1	1	1	BTN1A1	butyrophilin, subfamily 1, member A1
hsa-miR-320d	1	0	1	0	1	1	CHML	choroideremia-like (Rab escort protein 2)
hsa-miR-320d	1	0	1	1	1	1	SLC31A1	solute carrier family 31 (copper transporters), member 1
hsa-miR-320d	0	0	1	1	1	1	CPS1	carbamoyl-phosphate synthase 1, mitochondrial
hsa-miR-320d	0	0	1	1	0	0	EDN2	endothelin 2
hsa-miR-320d	1	0	1	1	1	1	EIF4E	eukaryotic translation initiation factor 4E
hsa-miR-320d	0	0	1	1	0	0	FKBP3	FK506 binding protein 3, 25kDa
hsa-miR-320d	1	0	1	0	1	1	FOXO1	forkhead box O1
hsa-miR-320d	1	0	1	0	1	1	FUT4	fucosyltransferase 4 (alpha (1,3) fucosyltransferase, myeloid-specific)
hsa-miR-320d	1	0	1	1	1	1	GAB1	GRB2-associated binding protein 1
hsa-miR-320d	0	0	1	0	1	1	GCG	glucagon
hsa-miR-320d	1	0	1	1	1	1	GNAZ	guanine nucleotide binding protein (G protein), alpha z polypeptide
hsa-miR-320d	0	0	1	1	1	1	GYS1	glycogen synthase 1 (muscle)
hsa-miR-320d	0	0	1	0	0	0	HLA-DRB1	major histocompatibility complex, class II, DR beta 1
hsa-miR-320d	0	0	1	1	1	1	IL12B	interleukin 12B (natural killer cell stimulatory factor 2, cytotoxic lymphocyte maturation factor 2, p40)
hsa-miR-320d	1	0	1	1	1	1	ITGB8	integrin, beta 8
hsa-miR-320d	1	0	1	1	1	1	KDR	kinase insert domain receptor (a type III receptor tyrosine kinase)
hsa-miR-320d	1	0	1	0	1	1	KIF3C	kinesin family member 3C
hsa-miR-320d	1	0	1	1	1	1	KPNA3	karyopherin alpha 3 (importin alpha 4)
hsa-miR-320d	1	0	1	0	1	1	MXD1	MAX dimerization protein 1
hsa-miR-320d	0	0	1	0	1	1	CXCL9	chemokine (C-X-C motif) ligand 9
hsa-miR-320d	0	0	1	1	1	1	MRC1	mannose receptor, C type 1
hsa-miR-320d	0	0	1	1	1	1	MTAP	methylthioadenosine phosphorylase
hsa-miR-320d	0	0	1	1	0	0	NOVA2	neuro-oncological ventral antigen 2
hsa-miR-320d	1	0	1	1	1	1	NPAT	nuclear protein, ataxia-telangiectasia locus
hsa-miR-320d	0	0	1	0	1	1	OAZ2	ornithine decarboxylase antizyme 2
hsa-miR-320d	1	0	1	0	1	1	PAK2	p21 protein (Cdc42/Rac)-activated kinase 2
hsa-miR-320d	1	0	1	0	1	1	PAPPA	pregnancy-associated plasma protein A, pappalysin 1
hsa-miR-320d	1	0	1	0	1	1	CDK17	cyclin-dependent kinase 17
hsa-miR-320d	1	0	1	1	1	1	PLAGL2	pleiomorphic adenoma gene-like 2
hsa-miR-320d	0	0	1	1	1	1	PPP1R3A	protein phosphatase 1, regulatory subunit 3A
hsa-miR-320d	1	0	1	1	1	1	PROX1	prospero homeobox 1
hsa-miR-320d	0	0	1	1	1	1	PTPN12	protein tyrosine phosphatase, non-receptor type 12
hsa-miR-320d	0	0	1	1	1	1	RING1	ring finger protein 1
hsa-miR-320d	0	0	1	1	0	0	RNASE3	ribonuclease, RNase A family, 3
hsa-miR-320d	1	0	1	0	1	1	SORT1	sortilin 1
hsa-miR-320d	0	0	1	1	1	1	CCL2	chemokine (C-C motif) ligand 2
hsa-miR-320d	0	0	1	1	1	1	XCL1	chemokine (C motif) ligand 1
hsa-miR-320d	0	0	1	1	1	1	SDC2	syndecan 2
hsa-miR-320d	1	0	1	0	1	1	SLC6A1	solute carrier family 6 (neurotransmitter transporter, GABA), member 1
hsa-miR-320d	1	0	1	1	1	1	SLC9A2	solute carrier family 9, subfamily A (NHE2, cation proton antiporter 2), member 2
hsa-miR-320d	1	0	1	0	1	1	SOX11	SRY (sex determining region Y)-box 11
hsa-miR-320d	1	0	1	1	1	1	SRPR	signal recognition particle receptor (docking protein)
hsa-miR-320d	1	0	1	0	1	1	STC1	stanniocalcin 1
hsa-miR-320d	0	0	1	1	1	1	STIM1	stromal interaction molecule 1
hsa-miR-320d	1	0	1	0	1	1	TAL1	T-cell acute lymphocytic leukemia 1
hsa-miR-320d	1	0	1	1	1	1	TDG	thymine-DNA glycosylase
hsa-miR-320d	0	0	1	1	0	0	TUFM	Tu translation elongation factor, mitochondrial
hsa-miR-320d	0	0	1	1	1	1	UBE2D1	ubiquitin-conjugating enzyme E2D 1
hsa-miR-320d	0	0	1	1	0	0	UGCG	UDP-glucose ceramide glucosyltransferase
hsa-miR-320d	1	0	1	1	1	1	YWHAH	tyrosine 3-monooxygenase/tryptophan 5-monooxygenase activation protein, eta polypeptide
hsa-miR-320d	1	0	1	0	1	1	BSN	bassoon (presynaptic cytomatrix protein)
hsa-miR-320d	1	0	1	1	1	1	HMGA2	high mobility group AT-hook 2
hsa-miR-320d	1	0	1	1	1	1	FZD7	frizzled family receptor 7
hsa-miR-320d	0	0	1	1	0	0	HIST1H4F	histone cluster 1, H4f
hsa-miR-320d	0	0	1	1	1	1	PIP5K1A	phosphatidylinositol-4-phosphate 5-kinase, type I, alpha
hsa-miR-320d	0	0	1	1	1	1	RGS5	regulator of G-protein signaling 5
hsa-miR-320d	0	0	1	1	1	1	ITGA10	integrin, alpha 10
hsa-miR-320d	1	0	1	1	1	1	BHLHE40	basic helix-loop-helix family, member e40
hsa-miR-320d	0	0	1	1	1	1	SNX4	sorting nexin 4
hsa-miR-320d	0	0	1	1	1	1	TRIM24	tripartite motif containing 24
hsa-miR-320d	1	0	1	0	1	1	CDK5R1	cyclin-dependent kinase 5, regulatory subunit 1 (p35)
hsa-miR-320d	1	0	1	1	1	1	ALDH1A2	aldehyde dehydrogenase 1 family, member A2
hsa-miR-320d	0	0	1	1	1	1	PRPF4B	PRP4 pre-mRNA processing factor 4 homolog B (yeast)
hsa-miR-320d	1	0	1	0	1	1	SEMA5A	sema domain, seven thrombospondin repeats (type 1 and type 1-like), transmembrane domain (TM) and short cytoplasmic domain, (semaphorin) 5A
hsa-miR-320d	1	0	1	1	1	1	MAP7	microtubule-associated protein 7
hsa-miR-320d	1	0	1	0	1	1	SLC1A2	solute carrier family 1 (glial high affinity glutamate transporter), member 2
hsa-miR-320d	0	0	1	1	1	1	SEP15	15 kDa selenoprotein
hsa-miR-320d	1	0	1	0	1	1	GTPBP1	GTP binding protein 1
hsa-miR-320d	0	0	1	0	1	1	CYTIP	cytohesin 1 interacting protein
hsa-miR-320d	1	0	1	1	1	1	GDA	guanine deaminase
hsa-miR-320d	1	0	1	1	1	1	ARL3	ADP-ribosylation factor-like 3
hsa-miR-320d	0	0	1	1	1	1	COPA	coatomer protein complex, subunit alpha
hsa-miR-320d	1	0	1	1	1	1	DACH1	dachshund homolog 1 (Drosophila)
hsa-miR-320d	1	0	1	1	1	1	DAG1	dystroglycan 1 (dystrophin-associated glycoprotein 1)
hsa-miR-320d	1	0	1	1	1	1	EPHA4	EPH receptor A4
hsa-miR-320d	1	0	1	1	1	1	EPHB2	EPH receptor B2
hsa-miR-320d	1	0	1	1	1	1	ERG	v-ets erythroblastosis virus E26 oncogene homolog (avian)
hsa-miR-320d	1	0	1	0	1	1	ACSL4	acyl-CoA synthetase long-chain family member 4
hsa-miR-320d	0	0	1	0	1	1	FOXE1	forkhead box E1 (thyroid transcription factor 2)
hsa-miR-320d	0	0	1	1	1	1	GCSH	glycine cleavage system protein H (aminomethyl carrier)
hsa-miR-320d	1	0	1	1	0	0	ROR2	receptor tyrosine kinase-like orphan receptor 2
hsa-miR-320d	0	0	1	1	1	1	RAB27A	RAB27A, member RAS oncogene family
hsa-miR-320d	0	0	1	1	1	1	TRAF6	TNF receptor-associated factor 6, E3 ubiquitin protein ligase
hsa-miR-320d	1	0	1	1	1	1	WNT11	wingless-type MMTV integration site family, member 11
hsa-miR-320d	1	0	1	1	1	1	RAB11A	RAB11A, member RAS oncogene family
hsa-miR-320d	0	0	1	1	1	1	BUB3	budding uninhibited by benzimidazoles 3 homolog (yeast)
hsa-miR-320d	1	0	1	1	1	1	XPR1	xenotropic and polytropic retrovirus receptor 1
hsa-miR-320d	1	0	1	0	1	1	MAPKAPK2	mitogen-activated protein kinase-activated protein kinase 2
hsa-miR-320d	1	0	1	1	1	1	STK17A	serine/threonine kinase 17a
hsa-miR-320d	1	0	1	1	1	1	NREP	neuronal regeneration related protein homolog (rat)
hsa-miR-320d	1	0	1	1	1	1	MED26	mediator complex subunit 26
hsa-miR-320d	0	0	1	1	1	1	EIF2AK3	eukaryotic translation initiation factor 2-alpha kinase 3
hsa-miR-320d	1	0	1	0	1	1	ARHGEF6	Rac/Cdc42 guanine nucleotide exchange factor (GEF) 6
hsa-miR-320d	1	0	1	1	1	1	KIF23	kinesin family member 23
hsa-miR-320d	0	0	1	1	1	1	ATP6V1G1	ATPase, H+ transporting, lysosomal 13kDa, V1 subunit G1
hsa-miR-320d	0	0	1	0	1	1	DSC2	desmocollin 2
hsa-miR-320d	1	0	1	1	1	1	GABRE	gamma-aminobutyric acid (GABA) A receptor, epsilon
hsa-miR-320d	0	0	1	1	1	1	JAK2	Janus kinase 2
hsa-miR-320d	0	0	1	1	0	0	PFN1	profilin 1
hsa-miR-320d	1	0	1	1	1	1	MED13	mediator complex subunit 13
hsa-miR-320d	1	0	1	0	1	1	NUP153	nucleoporin 153kDa
hsa-miR-320d	0	0	1	1	1	1	CLEC2B	C-type lectin domain family 2, member B
hsa-miR-320d	1	0	1	1	1	1	FOXN3	forkhead box N3
hsa-miR-320d	1	0	1	1	1	1	ETS1	v-ets erythroblastosis virus E26 oncogene homolog 1 (avian)
hsa-miR-320d	0	0	1	1	1	1	PPP1R3C	protein phosphatase 1, regulatory subunit 3C
hsa-miR-320d	1	0	1	0	1	1	PRKAB2	protein kinase, AMP-activated, beta 2 non-catalytic subunit
hsa-miR-320d	1	0	1	1	1	1	RALA	v-ral simian leukemia viral oncogene homolog A (ras related)
hsa-miR-320d	0	0	1	1	1	1	SEPP1	selenoprotein P, plasma, 1
hsa-miR-320d	0	0	1	1	1	1	FOSL1	FOS-like antigen 1
hsa-miR-320d	1	0	1	1	0	0	NOG	noggin
hsa-miR-320d	0	0	1	1	1	1	ZRANB2	zinc finger, RAN-binding domain containing 2
hsa-miR-320d	1	0	1	1	1	1	AKT3	v-akt murine thymoma viral oncogene homolog 3 (protein kinase B, gamma)
hsa-miR-320d	1	0	1	1	1	1	MAB21L1	mab-21-like 1 (C. elegans)
hsa-miR-320d	0	0	1	1	1	1	ALDH6A1	aldehyde dehydrogenase 6 family, member A1
hsa-miR-320d	0	0	1	0	1	1	POU3F2	POU class 3 homeobox 2
hsa-miR-320d	1	0	1	1	1	1	UST	uronyl-2-sulfotransferase
hsa-miR-320d	1	0	1	1	0	0	TSPAN5	tetraspanin 5
hsa-miR-320d	0	0	1	1	1	1	TSPAN3	tetraspanin 3
hsa-miR-320d	1	0	1	1	1	1	NAMPT	nicotinamide phosphoribosyltransferase
hsa-miR-320d	0	0	1	1	0	0	PLXNC1	plexin C1
hsa-miR-320d	0	0	1	1	1	1	SAP18	Sin3A-associated protein, 18kDa
hsa-miR-320d	1	0	1	1	1	1	MTF1	metal-regulatory transcription factor 1
hsa-miR-320d	1	0	1	0	1	1	NAB1	NGFI-A binding protein 1 (EGR1 binding protein 1)
hsa-miR-320d	0	0	1	1	1	1	PNMA1	paraneoplastic Ma antigen 1
hsa-miR-320d	1	0	1	1	1	1	BPNT1	3'(2'), 5'-bisphosphate nucleotidase 1
hsa-miR-320d	1	0	1	1	1	1	DAGLA	diacylglycerol lipase, alpha
hsa-miR-320d	1	0	1	1	1	1	TMEM50B	transmembrane protein 50B
hsa-miR-320d	1	0	1	1	1	1	DYNC1LI2	dynein, cytoplasmic 1, light intermediate chain 2
hsa-miR-320d	0	0	1	1	1	1	IRF6	interferon regulatory factor 6
hsa-miR-320d	1	0	1	1	1	1	NR4A2	nuclear receptor subfamily 4, group A, member 2
hsa-miR-320d	1	0	1	1	1	1	ORC2	origin recognition complex, subunit 2
hsa-miR-320d	1	0	1	0	1	1	PPP1R2	protein phosphatase 1, regulatory (inhibitor) subunit 2
hsa-miR-320d	1	0	1	0	1	1	SRSF6	serine/arginine-rich splicing factor 6
hsa-miR-320d	1	0	1	1	1	1	BASP1	brain abundant, membrane attached signal protein 1
hsa-miR-320d	0	0	1	1	1	1	FST	follistatin
hsa-miR-320d	1	0	1	1	1	1	SEMA3C	sema domain, immunoglobulin domain (Ig), short basic domain, secreted, (semaphorin) 3C
hsa-miR-320d	0	0	1	1	0	0	IPO7	importin 7
hsa-miR-320d	1	0	1	1	1	1	NEBL	nebulette
hsa-miR-320d	0	0	1	1	1	1	TM9SF1	transmembrane 9 superfamily member 1
hsa-miR-320d	1	0	1	1	1	1	TXNIP	thioredoxin interacting protein
hsa-miR-320d	0	0	1	0	1	1	SLC16A2	solute carrier family 16, member 2 (thyroid hormone transporter)
hsa-miR-320d	1	0	1	1	1	1	DYNLT3	dynein, light chain, Tctex-type 3
hsa-miR-320d	0	0	1	1	1	1	CLCA2	chloride channel accessory 2
hsa-miR-320d	1	0	1	0	1	1	IGF2BP1	insulin-like growth factor 2 mRNA binding protein 1
hsa-miR-320d	1	0	1	1	1	1	CORIN	corin, serine peptidase
hsa-miR-320d	1	0	1	1	1	1	MAP3K2	mitogen-activated protein kinase kinase kinase 2
hsa-miR-320d	1	0	1	1	1	1	PLK2	polo-like kinase 2
hsa-miR-320d	1	0	1	1	1	1	ZBTB6	zinc finger and BTB domain containing 6
hsa-miR-320d	0	0	1	1	1	1	CLPX	ClpX caseinolytic peptidase X homolog (E. coli)
hsa-miR-320d	0	0	1	0	1	1	SUB1	SUB1 homolog (S. cerevisiae)
hsa-miR-320d	1	0	1	1	0	0	PSKH1	protein serine kinase H1
hsa-miR-320d	0	0	1	1	0	0	TUSC3	tumor suppressor candidate 3
hsa-miR-320d	0	0	1	1	1	1	SERINC3	serine incorporator 3
hsa-miR-320d	0	0	1	1	0	0	EIF2D	eukaryotic translation initiation factor 2D
hsa-miR-320d	1	0	1	1	1	1	RP2	retinitis pigmentosa 2 (X-linked recessive)
hsa-miR-320d	1	0	1	1	1	1	SCN1A	sodium channel, voltage-gated, type I, alpha subunit
hsa-miR-320d	0	0	1	1	1	1	TAF5	TAF5 RNA polymerase II, TATA box binding protein (TBP)-associated factor, 100kDa
hsa-miR-320d	1	0	1	0	1	1	WASF2	WAS protein family, member 2
hsa-miR-320d	1	0	1	1	1	1	ABHD2	abhydrolase domain containing 2
hsa-miR-320d	1	0	1	1	1	1	ESM1	endothelial cell-specific molecule 1
hsa-miR-320d	1	0	1	1	1	1	ADAMTS5	ADAM metallopeptidase with thrombospondin type 1 motif, 5
hsa-miR-320d	1	0	1	1	1	1	UTY	ubiquitously transcribed tetratricopeptide repeat gene, Y-linked
hsa-miR-320d	1	0	1	1	1	1	ZNF81	zinc finger protein 81
hsa-miR-320d	1	0	1	1	1	1	VEZF1	vascular endothelial zinc finger 1
hsa-miR-320d	1	0	1	0	1	1	PRSS23	protease, serine, 23
hsa-miR-320d	0	0	1	1	1	1	AKAP10	A kinase (PRKA) anchor protein 10
hsa-miR-320d	1	0	1	1	1	1	RNF139	ring finger protein 139
hsa-miR-320d	0	0	1	0	1	1	AP4E1	adaptor-related protein complex 4, epsilon 1 subunit
hsa-miR-320d	0	0	1	1	1	1	MMRN1	multimerin 1
hsa-miR-320d	0	0	1	0	1	1	CD93	CD93 molecule
hsa-miR-320d	1	0	1	1	1	1	ICOS	inducible T-cell co-stimulator
hsa-miR-320d	1	0	1	1	1	1	APPL1	adaptor protein, phosphotyrosine interaction, PH domain and leucine zipper containing 1
hsa-miR-320d	0	0	1	1	1	1	COPG2	coatomer protein complex, subunit gamma 2
hsa-miR-320d	1	0	1	1	1	1	FBXL3	F-box and leucine-rich repeat protein 3
hsa-miR-320d	1	0	1	1	1	1	LAMP5	lysosomal-associated membrane protein family, member 5
hsa-miR-320d	1	0	1	0	1	1	RAPGEF5	Rap guanine nucleotide exchange factor (GEF) 5
hsa-miR-320d	0	0	1	0	1	1	PIGN	phosphatidylinositol glycan anchor biosynthesis, class N
hsa-miR-320d	1	0	1	1	1	1	NNT	nicotinamide nucleotide transhydrogenase
hsa-miR-320d	0	0	1	0	0	0	OR2F1	olfactory receptor, family 2, subfamily F, member 1
hsa-miR-320d	1	0	1	1	1	1	PITPNB	phosphatidylinositol transfer protein, beta
hsa-miR-320d	0	0	1	0	1	1	TLL1	tolloid-like 1
hsa-miR-320d	1	0	1	1	1	1	TRPC5	transient receptor potential cation channel, subfamily C, member 5
hsa-miR-320d	1	0	1	1	1	1	YWHAG	tyrosine 3-monooxygenase/tryptophan 5-monooxygenase activation protein, gamma polypeptide
hsa-miR-320d	1	0	1	1	1	1	ZNF281	zinc finger protein 281
hsa-miR-320d	1	0	1	0	1	1	FLRT2	fibronectin leucine rich transmembrane protein 2
hsa-miR-320d	1	0	1	1	1	1	PPARGC1A	peroxisome proliferator-activated receptor gamma, coactivator 1 alpha
hsa-miR-320d	1	0	1	1	1	1	SLC30A4	solute carrier family 30 (zinc transporter), member 4
hsa-miR-320d	1	0	1	1	1	1	BAZ1A	bromodomain adjacent to zinc finger domain, 1A
hsa-miR-320d	1	0	1	1	1	1	LAMP2	lysosomal-associated membrane protein 2
hsa-miR-320d	1	0	1	1	1	1	ZBTB43	zinc finger and BTB domain containing 43
hsa-miR-320d	0	0	1	1	1	1	METTL7A	methyltransferase like 7A
hsa-miR-320d	0	0	1	1	1	1	MRPS18B	mitochondrial ribosomal protein S18B
hsa-miR-320d	1	0	1	1	1	1	RGCC	regulator of cell cycle
hsa-miR-320d	0	0	1	1	0	0	CNIH4	cornichon homolog 4 (Drosophila)
hsa-miR-320d	1	0	1	0	1	1	ODZ1	odz, odd Oz/ten-m homolog 1 (Drosophila)
hsa-miR-320d	0	0	1	1	1	1	ADAM28	ADAM metallopeptidase domain 28
hsa-miR-320d	1	0	1	1	1	1	SLC7A11	solute carrier family 7 (anionic amino acid transporter light chain, xc- system), member 11
hsa-miR-320d	1	0	1	0	1	1	FJX1	four jointed box 1 (Drosophila)
hsa-miR-320d	1	0	1	0	1	1	DIEXF	digestive organ expansion factor homolog (zebrafish)
hsa-miR-320d	1	0	1	1	1	1	ZBTB11	zinc finger and BTB domain containing 11
hsa-miR-320d	1	0	1	1	1	1	AFF4	AF4/FMR2 family, member 4
hsa-miR-320d	1	0	1	0	1	1	HUNK	hormonally up-regulated Neu-associated kinase
hsa-miR-320d	1	0	1	1	1	1	RALGPS1	Ral GEF with PH domain and SH3 binding motif 1
hsa-miR-320d	0	0	1	1	1	1	FAM53B	family with sequence similarity 53, member B
hsa-miR-320d	0	0	1	1	1	1	SART3	squamous cell carcinoma antigen recognized by T cells 3
hsa-miR-320d	0	0	1	1	1	1	FRMPD4	FERM and PDZ domain containing 4
hsa-miR-320d	1	0	1	0	1	1	TOX	thymocyte selection-associated high mobility group box
hsa-miR-320d	1	0	1	0	1	1	MLEC	malectin
hsa-miR-320d	1	0	1	0	1	1	KIAA0232	KIAA0232
hsa-miR-320d	0	0	1	1	1	1	PPP1R26	protein phosphatase 1, regulatory subunit 26
hsa-miR-320d	1	0	1	1	1	1	FCHSD2	FCH and double SH3 domains 2
hsa-miR-320d	0	0	1	1	1	1	TOX4	TOX high mobility group box family member 4
hsa-miR-320d	1	0	1	1	1	1	NUAK1	NUAK family, SNF1-like kinase, 1
hsa-miR-320d	1	0	1	1	1	1	SV2A	synaptic vesicle glycoprotein 2A
hsa-miR-320d	1	0	1	1	0	0	IQSEC1	IQ motif and Sec7 domain 1
hsa-miR-320d	0	0	1	1	1	1	ADNP2	ADNP homeobox 2
hsa-miR-320d	1	0	1	1	1	1	CHSY1	chondroitin sulfate synthase 1
hsa-miR-320d	1	0	1	1	1	1	SPEN	spen homolog, transcriptional regulator (Drosophila)
hsa-miR-320d	1	0	1	0	1	1	PDS5B	PDS5, regulator of cohesion maintenance, homolog B (S. cerevisiae)
hsa-miR-320d	1	0	1	0	1	1	SNX13	sorting nexin 13
hsa-miR-320d	1	0	1	1	1	1	RTF1	Rtf1, Paf1/RNA polymerase II complex component, homolog (S. cerevisiae)
hsa-miR-320d	1	0	1	1	1	1	ANKS1A	ankyrin repeat and sterile alpha motif domain containing 1A
hsa-miR-320d	1	0	1	1	1	1	WDR7	WD repeat domain 7
hsa-miR-320d	0	0	1	1	1	1	ANGEL1	angel homolog 1 (Drosophila)
hsa-miR-320d	1	0	1	1	1	1	MORC3	MORC family CW-type zinc finger 3
hsa-miR-320d	1	0	1	1	1	1	CNOT6	CCR4-NOT transcription complex, subunit 6
hsa-miR-320d	1	0	1	1	1	1	CNRIP1	cannabinoid receptor interacting protein 1
hsa-miR-320d	1	0	1	1	0	0	POLDIP2	polymerase (DNA-directed), delta interacting protein 2
hsa-miR-320d	1	0	1	1	0	0	LDLRAP1	low density lipoprotein receptor adaptor protein 1
hsa-miR-320d	1	0	1	1	1	1	PHF19	PHD finger protein 19
hsa-miR-320d	1	0	1	1	1	1	ABCA12	ATP-binding cassette, sub-family A (ABC1), member 12
hsa-miR-320d	0	0	1	1	1	1	GIMAP2	GTPase, IMAP family member 2
hsa-miR-320d	1	0	1	1	1	1	FAM155B	family with sequence similarity 155, member B
hsa-miR-320d	1	0	1	1	1	1	PLA2G3	phospholipase A2, group III
hsa-miR-320d	0	0	1	1	1	1	KRT76	keratin 76
hsa-miR-320d	1	0	1	1	1	1	AZIN1	antizyme inhibitor 1
hsa-miR-320d	0	0	1	1	0	0	GET4	golgi to ER traffic protein 4 homolog (S. cerevisiae)
hsa-miR-320d	1	0	1	1	0	0	YBX2	Y box binding protein 2
hsa-miR-320d	0	0	1	1	0	0	HEBP1	heme binding protein 1
hsa-miR-320d	1	0	1	1	1	1	SUFU	suppressor of fused homolog (Drosophila)
hsa-miR-320d	0	0	1	0	1	1	FAM8A1	family with sequence similarity 8, member A1
hsa-miR-320d	1	0	1	0	1	1	HPCAL4	hippocalcin like 4
hsa-miR-320d	0	0	1	1	1	1	CD244	CD244 molecule, natural killer cell receptor 2B4
hsa-miR-320d	0	0	1	1	0	0	NCKIPSD	NCK interacting protein with SH3 domain
hsa-miR-320d	1	0	1	1	1	1	VTA1	Vps20-associated 1 homolog (S. cerevisiae)
hsa-miR-320d	0	0	1	1	1	1	AMBN	ameloblastin (enamel matrix protein)
hsa-miR-320d	1	0	1	0	1	1	RAB8B	RAB8B, member RAS oncogene family
hsa-miR-320d	1	0	1	0	1	1	NT5DC3	5'-nucleotidase domain containing 3
hsa-miR-320d	1	0	1	0	1	1	KLHL3	kelch-like 3 (Drosophila)
hsa-miR-320d	0	0	1	1	1	1	POLE3	polymerase (DNA directed), epsilon 3, accessory subunit
hsa-miR-320d	0	0	1	1	1	1	NKRF	NFKB repressing factor
hsa-miR-320d	0	0	1	0	1	1	TRIM44	tripartite motif containing 44
hsa-miR-320d	1	0	1	1	1	1	HAUS6	HAUS augmin-like complex, subunit 6
hsa-miR-320d	1	0	1	1	1	1	ZNF280C	zinc finger protein 280C
hsa-miR-320d	1	0	1	1	1	1	HIF1AN	hypoxia inducible factor 1, alpha subunit inhibitor
hsa-miR-320d	1	0	1	1	1	1	CDCA4	cell division cycle associated 4
hsa-miR-320d	1	0	1	1	1	1	C9orf40	chromosome 9 open reading frame 40
hsa-miR-320d	0	0	1	0	1	1	MREG	melanoregulin
hsa-miR-320d	1	0	1	1	1	1	RFWD3	ring finger and WD repeat domain 3
hsa-miR-320d	1	0	1	0	1	1	MSL2	male-specific lethal 2 homolog (Drosophila)
hsa-miR-320d	0	0	1	1	1	1	MRPS10	mitochondrial ribosomal protein S10
hsa-miR-320d	0	0	1	1	1	1	TRIM62	tripartite motif containing 62
hsa-miR-320d	1	0	1	1	1	1	C20orf20	chromosome 20 open reading frame 20
hsa-miR-320d	0	0	1	1	1	1	RBM41	RNA binding motif protein 41
hsa-miR-320d	1	0	1	1	1	1	SPTLC3	serine palmitoyltransferase, long chain base subunit 3
hsa-miR-320d	1	0	1	1	1	1	KIAA1598	KIAA1598
hsa-miR-320d	1	0	1	1	1	1	AGPAT5	1-acylglycerol-3-phosphate O-acyltransferase 5 (lysophosphatidic acid acyltransferase, epsilon)
hsa-miR-320d	1	0	1	1	1	1	PAG1	phosphoprotein associated with glycosphingolipid microdomains 1
hsa-miR-320d	0	0	1	1	1	1	CISD1	CDGSH iron sulfur domain 1
hsa-miR-320d	0	0	1	1	1	1	ZC3H15	zinc finger CCCH-type containing 15
hsa-miR-320d	1	0	1	1	1	1	SLC16A10	solute carrier family 16, member 10 (aromatic amino acid transporter)
hsa-miR-320d	1	0	1	1	1	1	MLL5	myeloid/lymphoid or mixed-lineage leukemia 5 (trithorax homolog, Drosophila)
hsa-miR-320d	0	0	1	1	1	1	NPAP1	nuclear pore associated protein 1
hsa-miR-320d	1	0	1	1	1	1	SASH3	SAM and SH3 domain containing 3
hsa-miR-320d	1	0	1	0	1	1	FAM190B	family with sequence similarity 190, member B
hsa-miR-320d	1	0	1	1	1	1	SGTB	small glutamine-rich tetratricopeptide repeat (TPR)-containing, beta
hsa-miR-320d	1	0	1	0	1	1	CCNJ	cyclin J
hsa-miR-320d	1	0	1	0	1	1	UBFD1	ubiquitin family domain containing 1
hsa-miR-320d	1	0	1	1	1	1	CCBL2	cysteine conjugate-beta lyase 2
hsa-miR-320d	1	0	1	0	1	1	SLAMF8	SLAM family member 8
hsa-miR-320d	1	0	1	1	1	1	MDM1	Mdm1 nuclear protein homolog (mouse)
hsa-miR-320d	1	0	1	1	1	1	WRNIP1	Werner helicase interacting protein 1
hsa-miR-320d	0	0	1	1	1	1	TMEM167B	transmembrane protein 167B
hsa-miR-320d	0	0	1	1	1	1	RAD18	RAD18 homolog (S. cerevisiae)
hsa-miR-320d	1	0	1	1	1	1	C5orf15	chromosome 5 open reading frame 15
hsa-miR-320d	0	0	1	1	1	1	PRTFDC1	phosphoribosyl transferase domain containing 1
hsa-miR-320d	1	0	1	1	1	1	PRDM8	PR domain containing 8
hsa-miR-320d	1	0	1	0	1	1	SLC17A6	solute carrier family 17 (sodium-dependent inorganic phosphate cotransporter), member 6
hsa-miR-320d	0	0	1	1	0	0	LYRM4	LYR motif containing 4
hsa-miR-320d	0	0	1	1	0	0	XAGE1D	X antigen family, member 1D
hsa-miR-320d	1	0	1	1	0	0	JPH2	junctophilin 2
hsa-miR-320d	1	0	1	1	1	1	PTGFRN	prostaglandin F2 receptor negative regulator
hsa-miR-320d	1	0	1	0	1	1	DCUN1D1	DCN1, defective in cullin neddylation 1, domain containing 1 (S. cerevisiae)
hsa-miR-320d	0	0	1	1	1	1	SHROOM4	shroom family member 4
hsa-miR-320d	1	0	1	1	1	1	ARHGAP31	Rho GTPase activating protein 31
hsa-miR-320d	1	0	1	1	1	1	MIB1	mindbomb E3 ubiquitin protein ligase 1
hsa-miR-320d	0	0	1	0	0	0	SORCS2	sortilin-related VPS10 domain containing receptor 2
hsa-miR-320d	1	0	1	1	1	1	SEMA6A	sema domain, transmembrane domain (TM), and cytoplasmic domain, (semaphorin) 6A
hsa-miR-320d	1	0	1	1	1	1	KLHL14	kelch-like 14 (Drosophila)
hsa-miR-320d	1	0	1	1	1	1	ARHGAP21	Rho GTPase activating protein 21
hsa-miR-320d	1	0	1	0	1	1	WDFY1	WD repeat and FYVE domain containing 1
hsa-miR-320d	1	0	1	1	1	1	RANBP10	RAN binding protein 10
hsa-miR-320d	1	0	1	0	1	1	SH3RF1	SH3 domain containing ring finger 1
hsa-miR-320d	1	0	1	0	1	1	LRCH2	leucine-rich repeats and calponin homology (CH) domain containing 2
hsa-miR-320d	1	0	1	1	1	1	NIN	ninein (GSK3B interacting protein)
hsa-miR-320d	0	0	1	1	0	0	CTAG2	cancer/testis antigen 2
hsa-miR-320d	1	0	1	1	1	1	KCNJ12	potassium inwardly-rectifying channel, subfamily J, member 12
hsa-miR-320d	0	0	1	1	0	0	MAGEA5	melanoma antigen family A, 5
hsa-miR-320d	0	0	1	1	1	1	RNASEL	ribonuclease L (2',5'-oligoisoadenylate synthetase-dependent)
hsa-miR-320d	1	0	1	1	1	1	C6orf47	chromosome 6 open reading frame 47
hsa-miR-320d	0	0	1	1	1	1	OSTC	oligosaccharyltransferase complex subunit
hsa-miR-320d	1	0	1	1	1	1	NTN4	netrin 4
hsa-miR-320d	1	0	1	1	1	1	PELI2	pellino E3 ubiquitin protein ligase family member 2
hsa-miR-320d	0	0	1	1	1	1	UTP14C	UTP14, U3 small nucleolar ribonucleoprotein, homolog C (yeast)
hsa-miR-320d	0	0	1	1	1	1	MS4A1	membrane-spanning 4-domains, subfamily A, member 1
hsa-miR-320d	1	0	1	1	1	1	FOXM1	forkhead box M1
hsa-miR-320d	1	0	1	0	1	1	MCL1	myeloid cell leukemia sequence 1 (BCL2-related)
hsa-miR-320d	0	0	1	1	0	0	TMSB15A	thymosin beta 15a
hsa-miR-320d	0	0	1	1	0	0	ABHD4	abhydrolase domain containing 4
hsa-miR-320d	0	0	1	1	1	1	CHP2	calcineurin-like EF hand protein 2
hsa-miR-320d	1	0	1	1	1	1	GOLPH3	golgi phosphoprotein 3 (coat-protein)
hsa-miR-320d	0	0	1	1	0	0	MCCC2	methylcrotonoyl-CoA carboxylase 2 (beta)
hsa-miR-320d	0	0	1	1	1	1	NOD2	nucleotide-binding oligomerization domain containing 2
hsa-miR-320d	0	0	1	1	1	1	ICAM4	intercellular adhesion molecule 4 (Landsteiner-Wiener blood group)
hsa-miR-320d	1	0	1	1	1	1	HIF3A	hypoxia inducible factor 3, alpha subunit
hsa-miR-320d	0	0	1	1	1	1	ACBD3	acyl-CoA binding domain containing 3
hsa-miR-320d	1	0	1	1	0	0	AEN	apoptosis enhancing nuclease
hsa-miR-320d	0	0	1	1	1	1	UPF3B	UPF3 regulator of nonsense transcripts homolog B (yeast)
hsa-miR-320d	1	0	1	1	1	1	HOXB4	homeobox B4
hsa-miR-320d	1	0	1	0	1	1	NOTCH2	notch 2
hsa-miR-320d	0	0	1	1	1	1	CEP70	centrosomal protein 70kDa
hsa-miR-320d	1	0	1	1	1	1	HOXD1	homeobox D1
hsa-miR-320d	1	0	1	1	1	1	CCDC82	coiled-coil domain containing 82
hsa-miR-320d	1	0	1	1	1	1	CPED1	cadherin-like and PC-esterase domain containing 1
hsa-miR-320d	1	0	1	0	1	1	NAA25	N(alpha)-acetyltransferase 25, NatB auxiliary subunit
hsa-miR-320d	1	0	1	0	1	1	VCPIP1	valosin containing protein (p97)/p47 complex interacting protein 1
hsa-miR-320d	1	0	1	1	1	1	FBXO11	F-box protein 11
hsa-miR-320d	0	0	1	1	1	1	COQ10B	coenzyme Q10 homolog B (S. cerevisiae)
hsa-miR-320d	1	0	1	1	1	1	SLC35F5	solute carrier family 35, member F5
hsa-miR-320d	0	0	1	0	1	1	PDGFD	platelet derived growth factor D
hsa-miR-320d	1	0	1	1	1	1	HOXA3	homeobox A3
hsa-miR-320d	1	0	1	0	1	1	C1orf21	chromosome 1 open reading frame 21
hsa-miR-320d	1	0	1	0	1	1	CSRNP2	cysteine-serine-rich nuclear protein 2
hsa-miR-320d	1	0	1	1	1	1	TRIM8	tripartite motif containing 8
hsa-miR-320d	1	0	1	0	1	1	SPRY4	sprouty homolog 4 (Drosophila)
hsa-miR-320d	0	0	1	1	1	1	SEH1L	SEH1-like (S. cerevisiae)
hsa-miR-320d	0	0	1	1	1	1	FCRL4	Fc receptor-like 4
hsa-miR-320d	1	0	1	1	0	0	TCF7L1	transcription factor 7-like 1 (T-cell specific, HMG-box)
hsa-miR-320d	1	0	1	1	0	0	SCRT1	scratch homolog 1, zinc finger protein (Drosophila)
hsa-miR-320d	1	0	1	1	1	1	ANO3	anoctamin 3
hsa-miR-320d	1	0	1	0	1	1	NUDT12	nudix (nucleoside diphosphate linked moiety X)-type motif 12
hsa-miR-320d	1	0	1	1	1	1	FAM103A1	family with sequence similarity 103, member A1
hsa-miR-320d	1	0	1	1	1	1	SESN2	sestrin 2
hsa-miR-320d	1	0	1	0	1	1	SH3BGRL2	SH3 domain binding glutamic acid-rich protein like 2
hsa-miR-320d	1	0	1	1	1	1	PCDHA9	protocadherin alpha 9
hsa-miR-320d	0	0	1	0	1	1	ENAM	enamelin
hsa-miR-320d	1	0	1	1	1	1	GPR61	G protein-coupled receptor 61
hsa-miR-320d	0	0	1	1	0	0	KRTAP17-1	keratin associated protein 17-1
hsa-miR-320d	0	0	1	1	1	1	MAGT1	magnesium transporter 1
hsa-miR-320d	1	0	1	1	1	1	FBXO30	F-box protein 30
hsa-miR-320d	1	0	1	1	1	1	ARID5B	AT rich interactive domain 5B (MRF1-like)
hsa-miR-320d	0	0	1	0	1	1	LDOC1L	leucine zipper, down-regulated in cancer 1-like
hsa-miR-320d	1	0	1	1	1	1	DCTN5	dynactin 5 (p25)
hsa-miR-320d	0	0	1	1	1	1	RETNLB	resistin like beta
hsa-miR-320d	1	0	1	1	1	1	PPP1R9B	protein phosphatase 1, regulatory subunit 9B
hsa-miR-320d	1	0	1	0	1	1	INA	internexin neuronal intermediate filament protein, alpha
hsa-miR-320d	0	0	1	0	1	1	TRIM52	tripartite motif containing 52
hsa-miR-320d	1	0	1	1	1	1	ARHGAP19	Rho GTPase activating protein 19
hsa-miR-320d	1	0	1	0	1	1	C5orf62	chromosome 5 open reading frame 62
hsa-miR-320d	1	0	1	1	1	1	PCDH11Y	protocadherin 11 Y-linked
hsa-miR-320d	1	0	1	1	1	1	PDGFA	platelet-derived growth factor alpha polypeptide
hsa-miR-320d	0	0	1	1	0	0	MUC13	mucin 13, cell surface associated
hsa-miR-320d	1	0	1	1	1	1	SSH2	slingshot homolog 2 (Drosophila)
hsa-miR-320d	1	0	1	1	0	0	FCHSD1	FCH and double SH3 domains 1
hsa-miR-320d	1	0	1	1	1	1	EPT1	ethanolaminephosphotransferase 1 (CDP-ethanolamine-specific)
hsa-miR-320d	1	0	1	1	1	1	TPD52L3	tumor protein D52-like 3
hsa-miR-320d	0	0	1	1	1	1	MYL12B	myosin, light chain 12B, regulatory
hsa-miR-320d	1	0	1	1	1	1	SLC18B1	solute carrier family 18, subfamily B, member 1
hsa-miR-320d	1	0	1	1	1	1	SLC2A13	solute carrier family 2 (facilitated glucose transporter), member 13
hsa-miR-320d	1	0	1	1	1	1	GPRIN1	G protein regulated inducer of neurite outgrowth 1
hsa-miR-320d	1	0	1	0	1	1	TMEM123	transmembrane protein 123
hsa-miR-320d	0	0	1	1	0	0	FAM46B	family with sequence similarity 46, member B
hsa-miR-320d	0	0	1	1	0	0	RBP7	retinol binding protein 7, cellular
hsa-miR-320d	1	0	1	1	1	1	NAA15	N(alpha)-acetyltransferase 15, NatA auxiliary subunit
hsa-miR-320d	0	0	1	1	0	0	WNT8A	wingless-type MMTV integration site family, member 8A
hsa-miR-320d	0	0	1	1	1	1	CCDC34	coiled-coil domain containing 34
hsa-miR-320d	1	0	1	1	1	1	GPR62	G protein-coupled receptor 62
hsa-miR-320d	1	0	1	1	1	1	KLHL6	kelch-like 6 (Drosophila)
hsa-miR-320d	0	0	1	1	1	1	XAGE3	X antigen family, member 3
hsa-miR-320d	0	0	1	1	0	0	RXFP2	relaxin/insulin-like family peptide receptor 2
hsa-miR-320d	0	0	1	1	0	0	CITED4	Cbp/p300-interacting transactivator, with Glu/Asp-rich carboxy-terminal domain, 4
hsa-miR-320d	1	0	1	1	1	1	SLC30A7	solute carrier family 30 (zinc transporter), member 7
hsa-miR-320d	0	0	1	1	1	1	MRAP2	melanocortin 2 receptor accessory protein 2
hsa-miR-320d	1	0	1	1	1	1	KCTD12	potassium channel tetramerisation domain containing 12
hsa-miR-320d	1	0	1	0	1	1	NUS1	nuclear undecaprenyl pyrophosphate synthase 1 homolog (S. cerevisiae)
hsa-miR-320d	1	0	1	1	1	1	MAPK14	mitogen-activated protein kinase 14
hsa-miR-320d	0	0	1	1	1	1	MTFMT	mitochondrial methionyl-tRNA formyltransferase
hsa-miR-320d	1	0	1	1	0	0	LIPH	lipase, member H
hsa-miR-320d	0	0	1	0	1	1	SLC17A8	solute carrier family 17 (sodium-dependent inorganic phosphate cotransporter), member 8
hsa-miR-320d	0	0	1	1	1	1	CASC5	cancer susceptibility candidate 5
hsa-miR-320d	1	0	1	1	1	1	TEX261	testis expressed 261
hsa-miR-320d	1	0	1	1	0	0	SMCR8	Smith-Magenis syndrome chromosome region, candidate 8
hsa-miR-320d	1	0	1	1	1	1	FAM91A1	family with sequence similarity 91, member A1
hsa-miR-320d	0	0	1	1	1	1	C6orf118	chromosome 6 open reading frame 118
hsa-miR-320d	0	0	1	1	1	1	RANBP3L	RAN binding protein 3-like
hsa-miR-320d	0	0	1	0	1	1	SPATA18	spermatogenesis associated 18
hsa-miR-320d	0	0	1	1	1	1	APOBEC3F	apolipoprotein B mRNA editing enzyme, catalytic polypeptide-like 3F
hsa-miR-320d	1	0	1	1	1	1	TBX15	T-box 15
hsa-miR-320d	0	0	1	1	0	0	OCIAD2	OCIA domain containing 2
hsa-miR-320d	1	0	1	1	1	1	FAM123B	family with sequence similarity 123B
hsa-miR-320d	1	0	1	1	1	1	CEP128	centrosomal protein 128kDa
hsa-miR-320d	0	0	1	1	1	1	C15orf43	chromosome 15 open reading frame 43
hsa-miR-320d	1	0	1	1	1	1	SLC16A14	solute carrier family 16, member 14 (monocarboxylic acid transporter 14)
hsa-miR-320d	1	0	1	1	1	1	C7orf60	chromosome 7 open reading frame 60
hsa-miR-320d	0	0	1	1	0	0	TRIM42	tripartite motif containing 42
hsa-miR-320d	1	0	1	0	1	1	TMEM154	transmembrane protein 154
hsa-miR-320d	1	0	1	0	1	1	RWDD4	RWD domain containing 4
hsa-miR-320d	0	0	1	1	1	1	DNAJC18	DnaJ (Hsp40) homolog, subfamily C, member 18
hsa-miR-320d	0	0	1	1	1	1	GAPT	GRB2-binding adaptor protein, transmembrane
hsa-miR-320d	1	0	1	1	1	1	ATXN7L1	ataxin 7-like 1
hsa-miR-320d	0	0	1	1	1	1	CNPY4	canopy 4 homolog (zebrafish)
hsa-miR-320d	1	0	1	1	1	1	PDIK1L	PDLIM1 interacting kinase 1 like
hsa-miR-320d	0	0	1	0	1	1	KBTBD6	kelch repeat and BTB (POZ) domain containing 6
hsa-miR-320d	1	0	1	1	1	1	EED	embryonic ectoderm development
hsa-miR-320d	1	0	1	0	1	1	KDM1B	lysine (K)-specific demethylase 1B
hsa-miR-320d	1	0	1	1	1	1	CEP120	centrosomal protein 120kDa
hsa-miR-320d	0	0	1	1	1	1	COL6A5	collagen, type VI, alpha 5
hsa-miR-320d	1	0	1	0	1	1	TAPT1	transmembrane anterior posterior transformation 1
hsa-miR-320d	1	0	1	1	1	1	HS6ST3	heparan sulfate 6-O-sulfotransferase 3
hsa-miR-320d	0	0	1	0	1	1	RTP1	receptor (chemosensory) transporter protein 1
hsa-miR-320d	0	0	1	1	0	0	LIX1L	Lix1 homolog (mouse)-like
hsa-miR-320d	1	0	1	1	1	1	POM121	POM121 transmembrane nucleoporin
hsa-miR-320d	1	0	1	1	1	1	RC3H1	ring finger and CCCH-type domains 1
hsa-miR-320d	0	0	1	1	1	1	REXO1L1	REX1, RNA exonuclease 1 homolog (S. cerevisiae)-like 1
hsa-miR-320d	1	0	1	1	0	0	KCNH7	potassium voltage-gated channel, subfamily H (eag-related), member 7
hsa-miR-320d	1	0	1	1	1	1	DCUN1D3	DCN1, defective in cullin neddylation 1, domain containing 3 (S. cerevisiae)
hsa-miR-320d	1	0	1	1	1	1	CCDC117	coiled-coil domain containing 117
hsa-miR-320d	1	0	1	0	1	1	PGM2L1	phosphoglucomutase 2-like 1
hsa-miR-320d	1	0	1	1	1	1	DIP2B	DIP2 disco-interacting protein 2 homolog B (Drosophila)
hsa-miR-320d	0	0	1	1	1	1	ZCCHC12	zinc finger, CCHC domain containing 12
hsa-miR-320d	0	0	1	1	1	1	MPV17L	MPV17 mitochondrial membrane protein-like
hsa-miR-320d	0	0	1	1	1	1	C1orf162	chromosome 1 open reading frame 162
hsa-miR-320d	1	0	1	0	1	1	TMEM167A	transmembrane protein 167A
hsa-miR-320d	1	0	1	0	1	1	FAM84B	family with sequence similarity 84, member B
hsa-miR-320d	0	0	1	1	1	1	FRMD3	FERM domain containing 3
hsa-miR-320d	1	0	1	1	1	1	OLIG3	oligodendrocyte transcription factor 3
hsa-miR-320d	1	0	1	1	1	1	PDLIM2	PDZ and LIM domain 2 (mystique)
hsa-miR-320d	1	0	1	1	1	1	FAM134C	family with sequence similarity 134, member C
hsa-miR-320d	0	0	1	1	1	1	ATPIF1	ATPase inhibitory factor 1
hsa-miR-320d	0	0	1	1	0	0	PILRA	paired immunoglobin-like type 2 receptor alpha
hsa-miR-320d	1	0	1	1	1	1	DCAF12L1	DDB1 and CUL4 associated factor 12-like 1
hsa-miR-320d	1	0	1	1	1	1	TMEM26	transmembrane protein 26
hsa-miR-320d	1	0	1	0	1	1	ZDHHC21	zinc finger, DHHC-type containing 21
hsa-miR-320d	0	0	1	1	1	1	NLRC3	NLR family, CARD domain containing 3
hsa-miR-320d	1	0	1	0	1	1	EFHA2	EF-hand domain family, member A2
hsa-miR-320d	0	0	1	1	0	0	UBE2C	ubiquitin-conjugating enzyme E2C
hsa-miR-320d	1	0	1	1	1	1	TMED7	transmembrane emp24 protein transport domain containing 7
hsa-miR-320d	1	0	1	1	1	1	SP8	Sp8 transcription factor
hsa-miR-320d	0	0	1	1	1	1	TMEM37	transmembrane protein 37
hsa-miR-320d	1	0	1	1	1	1	TMEM65	transmembrane protein 65
hsa-miR-320d	1	0	1	1	1	1	AQP1	aquaporin 1 (Colton blood group)
hsa-miR-320d	1	0	1	1	1	1	ASB7	ankyrin repeat and SOCS box containing 7
hsa-miR-320d	1	0	1	0	1	1	LYSMD3	LysM, putative peptidoglycan-binding, domain containing 3
hsa-miR-320d	0	0	1	1	1	1	EMB	embigin
hsa-miR-320d	0	0	1	1	1	1	OLFML1	olfactomedin-like 1
hsa-miR-320d	1	0	1	1	1	1	CXCL12	chemokine (C-X-C motif) ligand 12
hsa-miR-320d	1	0	1	1	1	1	BLOC1S5	biogenesis of lysosomal organelles complex-1, subunit 5, muted
hsa-miR-320d	1	0	1	1	1	1	FBXO33	F-box protein 33
hsa-miR-320d	1	0	1	1	1	1	E2F7	E2F transcription factor 7
hsa-miR-320d	1	0	1	1	1	1	IGSF1	immunoglobulin superfamily, member 1
hsa-miR-320d	0	0	1	1	1	1	SPINK6	serine peptidase inhibitor, Kazal type 6
hsa-miR-320d	1	0	1	1	1	1	ATRNL1	attractin-like 1
hsa-miR-320d	0	0	1	0	1	1	TP73-AS1	TP73 antisense RNA 1
hsa-miR-320d	0	0	1	0	0	0	AATK-AS1	AATK antisense RNA 1
hsa-miR-320d	1	0	1	1	0	0	CD164L2	CD164 sialomucin-like 2
hsa-miR-320d	1	0	1	1	1	1	RAPH1	Ras association (RalGDS/AF-6) and pleckstrin homology domains 1
hsa-miR-320d	0	0	1	0	0	0	LOC339240	keratin 17 pseudogene
hsa-miR-320d	0	0	1	0	0	0	TTTY2	testis-specific transcript, Y-linked 2 (non-protein coding)
hsa-miR-320d	0	0	1	0	0	0	TTTY15	testis-specific transcript, Y-linked 15 (non-protein coding)
hsa-miR-320d	0	0	1	0	0	0	PPP1R2P3	protein phosphatase 1, regulatory (inhibitor) subunit 2 pseudogene 3
hsa-miR-320d	0	0	1	0	0	0	NUDT4P1	nudix (nucleoside diphosphate linked moiety X)-type motif 4 pseudogene 1
hsa-miR-320d	0	0	1	0	0	0	ST7-OT4	ST7 overlapping transcript 4 (non-protein coding)
hsa-miR-320d	0	0	1	0	0	0	RPLP0P2	ribosomal protein, large, P0 pseudogene 2
hsa-miR-320d	0	0	1	0	0	0	NUDT9P1	nudix (nucleoside diphosphate linked moiety X)-type motif 9 pseudogene 1
hsa-miR-320d	0	0	1	0	0	0	PER4	period homolog 3 (Drosophila) pseudogene
hsa-miR-320d	0	0	1	0	0	0	NEAT1	nuclear paraspeckle assembly transcript 1 (non-protein coding)
hsa-miR-320d	0	0	1	0	0	0	MALAT1	metastasis associated lung adenocarcinoma transcript 1 (non-protein coding)
hsa-miR-320d	0	0	1	0	0	0	DUSP5P	dual specificity phosphatase 5 pseudogene
hsa-miR-320d	0	0	1	0	0	0	HAS2-AS1	HAS2 antisense RNA 1
hsa-miR-320d	0	0	1	0	0	0	SNX29P2	sorting nexin 29 pseudogene 2
hsa-miR-320d	0	0	1	0	0	0	SNORA38	small nucleolar RNA, H/ACA box 38
hsa-miR-320d	0	0	1	0	0	0	SNORD111	small nucleolar RNA, C/D box 111
hsa-miR-320d	0	0	1	0	0	0	HSP90AB2P	heat shock protein 90kDa alpha (cytosolic), class B member 2, pseudogene
hsa-miR-320d	0	0	1	0	0	0	GBP1P1	guanylate binding protein 1, interferon-inducible pseudogene 1
hsa-miR-320d	0	0	1	0	0	0	GMCL1P1	germ cell-less, spermatogenesis associated 1 pseudogene 1
hsa-miR-320d	1	0	1	1	0	0	TNXB	tenascin XB
hsa-miR-320d	1	0	1	1	1	1	ATF6B	activating transcription factor 6 beta
hsa-miR-320d	0	0	1	1	0	0	MUC1	mucin 1, cell surface associated
hsa-miR-320d	0	0	1	1	1	1	CD46	CD46 molecule, complement regulatory protein
