# Supplementary material for: Profiling of Selected MicroRNAs in Proliferative Eutopic Endometrium of Women with Ovarian Endometriosis
Source: Biomed Res Int. 2015 Aug 20;2015:760698. doi: 10.1155/2015/760698 (PMC4558423; doi:10.1155/2015/760698)
Supplement: Supplementary file 1 — Table I: The names of miRNAs significantly differentially expressed between eutopic endometrium of patients with endometriosis vs eutopic endometrium of patients without endometriosis. Table II: The associations between miRNA and mRNA, which presents detailed results of the search of six major databases i.e targetscan, tarbase, miranda, mirbase, mirtarget2 and pictar. [file 760698.f1.zip › 760698.f1/Table II/hsa-miR-325.tsv]

miR	targetscan	tarbase	miranda	mirbase	mirtarget2	pictar	GeneSymbol	GeneName
hsa-miR-325	1	0	1	1	1	1	CHD9	chromodomain helicase DNA binding protein 9
hsa-miR-325	1	0	1	1	0	0	SRCAP	Snf2-related CREBBP activator protein
hsa-miR-325	1	0	1	0	1	1	PTPRT	protein tyrosine phosphatase, receptor type, T
hsa-miR-325	0	0	1	1	0	0	PLXNB1	plexin B1
hsa-miR-325	1	0	1	0	1	1	KIAA0408	KIAA0408
hsa-miR-325	1	0	1	1	1	1	NUPL1	nucleoporin like 1
hsa-miR-325	1	0	1	0	1	1	CEP350	centrosomal protein 350kDa
hsa-miR-325	1	0	1	1	1	1	GREB1	growth regulation by estrogen in breast cancer 1
hsa-miR-325	0	0	1	1	0	0	ATP10B	ATPase, class V, type 10B
hsa-miR-325	1	0	1	1	1	1	MATR3	matrin 3
hsa-miR-325	1	0	1	1	1	1	LPHN2	latrophilin 2
hsa-miR-325	1	0	1	1	1	1	DNM3	dynamin 3
hsa-miR-325	1	0	1	1	1	1	DMXL2	Dmx-like 2
hsa-miR-325	1	0	1	1	1	1	CDK12	cyclin-dependent kinase 12
hsa-miR-325	1	0	1	1	1	1	ARHGEF15	Rho guanine nucleotide exchange factor (GEF) 15
hsa-miR-325	1	0	1	1	1	1	CPEB3	cytoplasmic polyadenylation element binding protein 3
hsa-miR-325	1	0	1	1	1	1	NLGN4Y	neuroligin 4, Y-linked
hsa-miR-325	1	0	1	1	1	1	RGL1	ral guanine nucleotide dissociation stimulator-like 1
hsa-miR-325	0	0	1	0	0	0	THSD7A	thrombospondin, type I, domain containing 7A
hsa-miR-325	0	0	1	1	1	1	FASTKD2	FAST kinase domains 2
hsa-miR-325	1	0	1	1	1	1	NLGN1	neuroligin 1
hsa-miR-325	1	0	1	1	1	1	SPIRE1	spire homolog 1 (Drosophila)
hsa-miR-325	1	0	1	0	1	1	GPR158	G protein-coupled receptor 158
hsa-miR-325	1	0	1	0	0	0	HEG1	HEG homolog 1 (zebrafish)
hsa-miR-325	1	0	1	1	1	1	RIMKLB	ribosomal modification protein rimK-like family member B
hsa-miR-325	1	0	1	1	1	1	MKL2	MKL/myocardin-like 2
hsa-miR-325	0	0	1	1	1	1	GKAP1	G kinase anchoring protein 1
hsa-miR-325	0	0	1	1	1	1	TCF7L2	transcription factor 7-like 2 (T-cell specific, HMG-box)
hsa-miR-325	1	0	1	1	1	1	PCDH19	protocadherin 19
hsa-miR-325	1	0	1	1	1	1	USP28	ubiquitin specific peptidase 28
hsa-miR-325	1	0	1	1	0	0	KIAA1549	KIAA1549
hsa-miR-325	1	0	1	0	0	0	TANC2	tetratricopeptide repeat, ankyrin repeat and coiled-coil containing 2
hsa-miR-325	1	0	1	0	1	1	RIMS1	regulating synaptic membrane exocytosis 1
hsa-miR-325	0	0	1	0	0	0	MYSM1	Myb-like, SWIRM and MPN domains 1
hsa-miR-325	1	0	1	1	1	1	OXR1	oxidation resistance 1
hsa-miR-325	1	0	1	1	1	1	SH3TC2	SH3 domain and tetratricopeptide repeats 2
hsa-miR-325	1	0	1	0	0	0	FAT3	FAT tumor suppressor homolog 3 (Drosophila)
hsa-miR-325	1	0	1	1	1	1	ACBD5	acyl-CoA binding domain containing 5
hsa-miR-325	0	0	1	0	1	1	CADM1	cell adhesion molecule 1
hsa-miR-325	0	0	1	1	0	0	FAM22D	family with sequence similarity 22, member D
hsa-miR-325	1	0	1	1	1	1	UBR3	ubiquitin protein ligase E3 component n-recognin 3 (putative)
hsa-miR-325	0	0	1	1	0	0	KRTAP24-1	keratin associated protein 24-1
hsa-miR-325	1	0	1	1	1	1	PAN3	PAN3 poly(A) specific ribonuclease subunit homolog (S. cerevisiae)
hsa-miR-325	1	0	1	0	1	1	LIN54	lin-54 homolog (C. elegans)
hsa-miR-325	0	0	1	0	0	0	TIFAB	TRAF-interacting protein with forkhead-associated domain, family member B
hsa-miR-325	1	0	1	1	1	1	VLDLR	very low density lipoprotein receptor
hsa-miR-325	0	0	1	1	0	0	CASP9	caspase 9, apoptosis-related cysteine peptidase
hsa-miR-325	0	0	1	1	0	0	HTATSF1	HIV-1 Tat specific factor 1
hsa-miR-325	1	0	1	1	1	1	SATB2	SATB homeobox 2
hsa-miR-325	1	0	1	1	1	1	TBX2	T-box 2
hsa-miR-325	1	0	1	1	1	1	ANK1	ankyrin 1, erythrocytic
hsa-miR-325	1	0	1	1	1	1	MINK1	misshapen-like kinase 1
hsa-miR-325	0	0	1	1	1	1	ACO1	aconitase 1, soluble
hsa-miR-325	1	0	1	1	1	1	LIMA1	LIM domain and actin binding 1
hsa-miR-325	0	0	1	1	0	0	EIF2B4	eukaryotic translation initiation factor 2B, subunit 4 delta, 67kDa
hsa-miR-325	0	0	1	1	0	0	HLA-DMB	major histocompatibility complex, class II, DM beta
hsa-miR-325	1	0	1	1	0	0	GRIN2A	glutamate receptor, ionotropic, N-methyl D-aspartate 2A
hsa-miR-325	0	0	1	1	1	1	ELOVL5	ELOVL fatty acid elongase 5
hsa-miR-325	0	0	1	1	1	1	DDX10	DEAD (Asp-Glu-Ala-Asp) box polypeptide 10
hsa-miR-325	1	0	1	1	1	1	ZFX	zinc finger protein, X-linked
hsa-miR-325	0	0	1	1	1	1	PLD1	phospholipase D1, phosphatidylcholine-specific
hsa-miR-325	1	0	1	1	1	1	MYH10	myosin, heavy chain 10, non-muscle
hsa-miR-325	0	0	1	0	0	0	MIAT	myocardial infarction associated transcript (non-protein coding)
hsa-miR-325	1	0	1	1	1	1	DLGAP2	discs, large (Drosophila) homolog-associated protein 2
hsa-miR-325	1	0	1	1	1	1	PCDH17	protocadherin 17
hsa-miR-325	0	0	1	0	0	0	ZNRD1-AS1	ZNRD1 antisense RNA 1
hsa-miR-325	1	0	1	1	1	1	TMBIM6	transmembrane BAX inhibitor motif containing 6
hsa-miR-325	1	0	1	0	0	0	MAP3K1	mitogen-activated protein kinase kinase kinase 1, E3 ubiquitin protein ligase
hsa-miR-325	0	0	1	0	0	0	ZNF880	zinc finger protein 880
hsa-miR-325	0	0	1	1	0	0	CARD10	caspase recruitment domain family, member 10
hsa-miR-325	0	0	1	1	1	1	SH2D1A	SH2 domain containing 1A
hsa-miR-325	0	0	1	1	0	0	SLC45A1	solute carrier family 45, member 1
hsa-miR-325	0	0	1	1	0	0	CALHM2	calcium homeostasis modulator 2
hsa-miR-325	1	0	1	1	1	1	HNRNPH3	heterogeneous nuclear ribonucleoprotein H3 (2H9)
hsa-miR-325	1	0	1	1	1	1	ZBTB20	zinc finger and BTB domain containing 20
hsa-miR-325	0	0	1	0	1	1	CLEC5A	C-type lectin domain family 5, member A
hsa-miR-325	1	0	1	0	1	1	AMOTL2	angiomotin like 2
hsa-miR-325	0	0	1	1	1	1	CSNK1A1	casein kinase 1, alpha 1
hsa-miR-325	1	0	1	1	0	0	TDRKH	tudor and KH domain containing
hsa-miR-325	0	0	1	1	1	1	C21orf7	chromosome 21 open reading frame 7
hsa-miR-325	1	0	1	1	1	1	PUM2	pumilio homolog 2 (Drosophila)
hsa-miR-325	0	0	1	0	1	1	ERBB2IP	erbb2 interacting protein
hsa-miR-325	0	0	1	1	1	1	RASD2	RASD family, member 2
hsa-miR-325	1	0	1	1	1	1	VEGFA	vascular endothelial growth factor A
hsa-miR-325	1	0	1	1	1	1	LETMD1	LETM1 domain containing 1
hsa-miR-325	0	0	1	1	1	1	U2AF1	U2 small nuclear RNA auxiliary factor 1
hsa-miR-325	1	0	1	1	1	1	LARP4	La ribonucleoprotein domain family, member 4
hsa-miR-325	1	0	1	1	1	1	NTRK2	neurotrophic tyrosine kinase, receptor, type 2
hsa-miR-325	0	0	1	1	0	0	TTC18	tetratricopeptide repeat domain 18
hsa-miR-325	1	0	1	1	1	1	PTBP2	polypyrimidine tract binding protein 2
hsa-miR-325	1	0	1	0	1	1	IL1RAP	interleukin 1 receptor accessory protein
hsa-miR-325	1	0	1	1	1	1	VAMP7	vesicle-associated membrane protein 7
hsa-miR-325	1	0	1	1	1	1	RAB3IP	RAB3A interacting protein (rabin3)
hsa-miR-325	0	0	1	0	0	0	LY6G6E	lymphocyte antigen 6 complex, locus G6E (pseudogene)
hsa-miR-325	0	0	1	0	1	1	SRPK1	SRSF protein kinase 1
hsa-miR-325	0	0	1	1	1	1	ZNF248	zinc finger protein 248
hsa-miR-325	1	0	1	1	1	1	ARL4C	ADP-ribosylation factor-like 4C
hsa-miR-325	1	0	1	1	1	1	SLC35A1	solute carrier family 35 (CMP-sialic acid transporter), member A1
hsa-miR-325	1	0	1	1	1	1	PPP1R9A	protein phosphatase 1, regulatory subunit 9A
hsa-miR-325	0	0	1	1	1	1	DBR1	debranching enzyme homolog 1 (S. cerevisiae)
hsa-miR-325	1	0	1	1	1	1	AKAP2	A kinase (PRKA) anchor protein 2
hsa-miR-325	1	0	1	0	1	1	NFAT5	nuclear factor of activated T-cells 5, tonicity-responsive
hsa-miR-325	0	0	1	1	1	1	PARP16	poly (ADP-ribose) polymerase family, member 16
hsa-miR-325	0	0	1	1	1	1	BANK1	B-cell scaffold protein with ankyrin repeats 1
hsa-miR-325	1	0	1	1	1	1	ARHGAP12	Rho GTPase activating protein 12
hsa-miR-325	0	0	1	0	0	0	RNF31	ring finger protein 31
hsa-miR-325	1	0	1	1	1	1	PTBP3	polypyrimidine tract binding protein 3
hsa-miR-325	1	0	1	1	1	1	SLC38A2	solute carrier family 38, member 2
hsa-miR-325	1	0	1	1	1	1	ACER3	alkaline ceramidase 3
hsa-miR-325	1	0	1	1	1	1	KLHDC8B	kelch domain containing 8B
hsa-miR-325	1	0	1	0	1	1	LIN28A	lin-28 homolog A (C. elegans)
hsa-miR-325	1	0	1	1	1	1	WDTC1	WD and tetratricopeptide repeats 1
hsa-miR-325	0	0	1	1	1	1	PCBP2	poly(rC) binding protein 2
hsa-miR-325	1	0	1	1	1	1	POMT2	protein-O-mannosyltransferase 2
hsa-miR-325	0	0	1	0	0	0	LOC284561	uncharacterized LOC284561
hsa-miR-325	1	0	1	1	1	1	DERL1	derlin 1
hsa-miR-325	1	0	1	1	0	0	MEX3A	mex-3 homolog A (C. elegans)
hsa-miR-325	0	0	1	1	1	1	CXorf57	chromosome X open reading frame 57
hsa-miR-325	1	0	1	0	1	1	STK40	serine/threonine kinase 40
hsa-miR-325	1	0	1	0	1	1	ATP2B1	ATPase, Ca++ transporting, plasma membrane 1
hsa-miR-325	0	0	1	0	1	1	ATXN1L	ataxin 1-like
hsa-miR-325	0	0	1	0	0	0	KIAA1671	KIAA1671
hsa-miR-325	0	0	1	0	1	1	FLJ22763	uncharacterized LOC401081
hsa-miR-325	0	0	1	1	0	0	C15orf23	chromosome 15 open reading frame 23
hsa-miR-325	0	0	1	1	1	1	STMN1	stathmin 1
hsa-miR-325	0	0	1	1	1	1	C8orf46	chromosome 8 open reading frame 46
hsa-miR-325	0	0	1	0	0	0	CHST9-AS1	CHST9 antisense RNA 1
hsa-miR-325	1	0	1	1	1	1	PPM1L	protein phosphatase, Mg2+/Mn2+ dependent, 1L
hsa-miR-325	1	0	1	0	1	1	AP1G1	adaptor-related protein complex 1, gamma 1 subunit
hsa-miR-325	0	0	1	1	1	1	TOX2	TOX high mobility group box family member 2
hsa-miR-325	0	0	1	0	0	0	CASC2	cancer susceptibility candidate 2 (non-protein coding)
hsa-miR-325	0	0	1	1	0	0	SLC26A8	solute carrier family 26, member 8
hsa-miR-325	0	0	1	0	0	0	FLJ30838	uncharacterized LOC400955
hsa-miR-325	0	0	1	1	1	1	GLYATL1	glycine-N-acyltransferase-like 1
hsa-miR-325	1	0	1	0	1	1	RNF165	ring finger protein 165
hsa-miR-325	0	0	1	0	0	0	BTBD19	BTB (POZ) domain containing 19
hsa-miR-325	1	0	1	1	1	1	TMEM25	transmembrane protein 25
hsa-miR-325	1	0	1	1	1	1	PUM1	pumilio homolog 1 (Drosophila)
hsa-miR-325	0	0	1	0	0	0	LOC255187	hCG1980447
hsa-miR-325	0	0	1	1	1	1	LNX1	ligand of numb-protein X 1, E3 ubiquitin protein ligase
hsa-miR-325	0	0	1	1	0	0	HECTD3	HECT domain containing E3 ubiquitin protein ligase 3
hsa-miR-325	0	0	1	0	0	0	LOC157381	uncharacterized LOC157381
hsa-miR-325	0	0	1	1	1	1	COQ10A	coenzyme Q10 homolog A (S. cerevisiae)
hsa-miR-325	0	0	1	1	0	0	LOC285033	uncharacterized LOC285033
hsa-miR-325	1	0	1	1	0	0	TCF7	transcription factor 7 (T-cell specific, HMG-box)
hsa-miR-325	0	0	1	1	0	0	CERS5	ceramide synthase 5
hsa-miR-325	0	0	1	0	1	1	UHMK1	U2AF homology motif (UHM) kinase 1
hsa-miR-325	1	0	1	1	1	1	PHF15	PHD finger protein 15
hsa-miR-325	1	0	1	1	1	1	HLF	hepatic leukemia factor
hsa-miR-325	0	0	1	1	1	1	HDAC8	histone deacetylase 8
hsa-miR-325	0	0	1	1	0	0	ABHD1	abhydrolase domain containing 1
hsa-miR-325	1	0	1	0	1	1	TPBG	trophoblast glycoprotein
hsa-miR-325	1	0	1	1	1	1	SIRT1	sirtuin 1
hsa-miR-325	0	0	1	1	0	0	GHDC	GH3 domain containing
hsa-miR-325	0	0	1	1	0	0	PIGO	phosphatidylinositol glycan anchor biosynthesis, class O
hsa-miR-325	0	0	1	0	0	0	LOC643837	uncharacterized LOC643837
hsa-miR-325	0	0	1	0	1	1	TBX5-AS1	TBX5 antisense RNA 1
hsa-miR-325	0	0	1	0	0	0	LOC440910	uncharacterized LOC440910
hsa-miR-325	0	0	1	1	0	0	RBM6	RNA binding motif protein 6
hsa-miR-325	1	0	1	1	1	1	SPTBN1	spectrin, beta, non-erythrocytic 1
hsa-miR-325	0	0	1	1	0	0	WBP1	WW domain binding protein 1
hsa-miR-325	0	0	1	1	1	1	C9orf47	chromosome 9 open reading frame 47
hsa-miR-325	0	0	1	1	0	0	PPOX	protoporphyrinogen oxidase
hsa-miR-325	1	0	1	1	1	1	NDEL1	nudE nuclear distribution E homolog (A. nidulans)-like 1
hsa-miR-325	1	0	1	1	1	1	ANKRD46	ankyrin repeat domain 46
hsa-miR-325	1	0	1	0	1	1	UBXN4	UBX domain protein 4
hsa-miR-325	1	0	1	1	1	1	CS	citrate synthase
hsa-miR-325	1	0	1	1	1	1	PEA15	phosphoprotein enriched in astrocytes 15
hsa-miR-325	1	0	1	1	1	1	EPB41L4A	erythrocyte membrane protein band 4.1 like 4A
hsa-miR-325	1	0	1	1	1	1	FAM98A	family with sequence similarity 98, member A
hsa-miR-325	0	0	1	0	0	0	FAM66C	family with sequence similarity 66, member C
hsa-miR-325	1	0	1	1	1	1	HDGF	hepatoma-derived growth factor
hsa-miR-325	0	0	1	1	0	0	CHCHD5	coiled-coil-helix-coiled-coil-helix domain containing 5
hsa-miR-325	1	0	1	0	1	1	AGFG1	ArfGAP with FG repeats 1
hsa-miR-325	0	0	1	0	0	0	LINC00293	long intergenic non-protein coding RNA 293
hsa-miR-325	0	0	1	1	1	1	CBWD5	COBW domain containing 5
hsa-miR-325	0	0	1	1	1	1	ATP9B	ATPase, class II, type 9B
hsa-miR-325	0	0	1	1	0	0	MEI1	meiosis inhibitor 1
hsa-miR-325	1	0	1	1	1	1	NDFIP2	Nedd4 family interacting protein 2
hsa-miR-325	1	0	1	1	0	0	CACNB3	calcium channel, voltage-dependent, beta 3 subunit
hsa-miR-325	0	0	1	1	0	0	CFP	complement factor properdin
hsa-miR-325	0	0	1	1	1	1	ARHGEF26	Rho guanine nucleotide exchange factor (GEF) 26
hsa-miR-325	0	0	1	1	1	1	DNAJC24	DnaJ (Hsp40) homolog, subfamily C, member 24
hsa-miR-325	0	0	1	0	1	1	FLJ41200	uncharacterized LOC401492
hsa-miR-325	1	0	1	1	1	1	MDGA2	MAM domain containing glycosylphosphatidylinositol anchor 2
hsa-miR-325	1	0	1	1	1	1	IPPK	inositol 1,3,4,5,6-pentakisphosphate 2-kinase
hsa-miR-325	0	0	1	1	0	0	KRT37	keratin 37
hsa-miR-325	1	0	1	1	1	1	SH2D4B	SH2 domain containing 4B
hsa-miR-325	1	0	1	1	1	1	GJC1	gap junction protein, gamma 1, 45kDa
hsa-miR-325	0	0	1	1	1	1	IDS	iduronate 2-sulfatase
hsa-miR-325	1	0	1	1	1	1	DCTN4	dynactin 4 (p62)
hsa-miR-325	1	0	1	1	1	1	FAM122B	family with sequence similarity 122B
hsa-miR-325	0	0	1	1	0	0	FSIP2	fibrous sheath interacting protein 2
hsa-miR-325	1	0	1	1	1	1	DLG2	discs, large homolog 2 (Drosophila)
hsa-miR-325	0	0	1	1	0	0	TMEM151B	transmembrane protein 151B
hsa-miR-325	1	0	1	1	1	1	CTNNA2	catenin (cadherin-associated protein), alpha 2
hsa-miR-325	0	0	1	1	1	1	NEXN	nexilin (F actin binding protein)
hsa-miR-325	1	0	1	1	1	1	CXorf23	chromosome X open reading frame 23
hsa-miR-325	0	0	1	0	0	0	ERVFRD-2	endogenous retrovirus group FRD, member 2
hsa-miR-325	1	0	1	1	1	1	PLA2G15	phospholipase A2, group XV
hsa-miR-325	0	0	1	0	0	0	FAM205B	transmembrane protein C9orf144B pseudogene
hsa-miR-325	1	0	1	0	1	1	PLSCR4	phospholipid scramblase 4
hsa-miR-325	1	0	1	1	1	1	BCAT1	branched chain amino-acid transaminase 1, cytosolic
hsa-miR-325	1	0	1	1	1	1	CD200	CD200 molecule
hsa-miR-325	0	0	1	1	0	0	CPA5	carboxypeptidase A5
hsa-miR-325	0	0	1	1	0	0	HSH2D	hematopoietic SH2 domain containing
hsa-miR-325	0	0	1	1	1	1	SLC36A3	solute carrier family 36 (proton/amino acid symporter), member 3
hsa-miR-325	1	0	1	1	1	1	MAP2K4	mitogen-activated protein kinase kinase 4
hsa-miR-325	0	0	1	1	1	1	KAZALD1	Kazal-type serine peptidase inhibitor domain 1
hsa-miR-325	1	0	1	1	1	1	MEAF6	MYST/Esa1-associated factor 6
hsa-miR-325	0	0	1	1	1	1	CD48	CD48 molecule
hsa-miR-325	1	0	1	1	1	1	NOVA1	neuro-oncological ventral antigen 1
hsa-miR-325	1	0	1	1	1	1	DUSP3	dual specificity phosphatase 3
hsa-miR-325	0	0	1	1	1	1	PTPN20B	protein tyrosine phosphatase, non-receptor type 20B
hsa-miR-325	0	0	1	1	1	1	PTPN20A	protein tyrosine phosphatase, non-receptor type 20A
hsa-miR-325	0	0	1	1	1	1	ARIH1	ariadne homolog, ubiquitin-conjugating enzyme E2 binding protein, 1 (Drosophila)
hsa-miR-325	1	0	1	0	1	1	DCDC2	doublecortin domain containing 2
hsa-miR-325	1	0	1	1	1	1	ARPP21	cAMP-regulated phosphoprotein, 21kDa
hsa-miR-325	0	0	1	0	0	0	DNAJC5B	DnaJ (Hsp40) homolog, subfamily C, member 5 beta
hsa-miR-325	0	0	1	0	0	0	KIAA0913	KIAA0913
hsa-miR-325	1	0	1	0	1	1	GPR85	G protein-coupled receptor 85
hsa-miR-325	0	0	1	1	0	0	DOPEY1	dopey family member 1
hsa-miR-325	1	0	1	0	1	1	FAM19A1	family with sequence similarity 19 (chemokine (C-C motif)-like), member A1
hsa-miR-325	1	0	1	1	1	1	YTHDF3	YTH domain family, member 3
hsa-miR-325	0	0	1	1	1	1	FILIP1	filamin A interacting protein 1
hsa-miR-325	0	0	1	1	1	1	BEND7	BEN domain containing 7
hsa-miR-325	1	0	1	1	1	1	CHMP7	charged multivesicular body protein 7
hsa-miR-325	0	0	1	1	1	1	AMIGO2	adhesion molecule with Ig-like domain 2
hsa-miR-325	0	0	1	1	0	0	TMEM44	transmembrane protein 44
hsa-miR-325	0	0	1	1	1	1	CCDC132	coiled-coil domain containing 132
hsa-miR-325	0	0	1	1	0	0	ATL1	atlastin GTPase 1
hsa-miR-325	1	0	1	1	1	1	RBM26	RNA binding motif protein 26
hsa-miR-325	1	0	1	1	1	1	FAM76B	family with sequence similarity 76, member B
hsa-miR-325	0	0	1	0	1	1	PSG1	pregnancy specific beta-1-glycoprotein 1
hsa-miR-325	1	0	1	1	1	1	PPP3CA	protein phosphatase 3, catalytic subunit, alpha isozyme
hsa-miR-325	1	0	1	1	1	1	WDR44	WD repeat domain 44
hsa-miR-325	1	0	1	1	1	1	RNF38	ring finger protein 38
hsa-miR-325	1	0	1	1	1	1	IKZF2	IKAROS family zinc finger 2 (Helios)
hsa-miR-325	1	0	1	1	1	1	BCL11A	B-cell CLL/lymphoma 11A (zinc finger protein)
hsa-miR-325	1	0	1	1	1	1	PBRM1	polybromo 1
hsa-miR-325	1	0	1	1	1	1	OPRM1	opioid receptor, mu 1
hsa-miR-325	0	0	1	1	1	1	CBWD1	COBW domain containing 1
hsa-miR-325	0	0	1	1	1	1	MFAP5	microfibrillar associated protein 5
hsa-miR-325	1	0	1	1	1	1	NLGN4X	neuroligin 4, X-linked
hsa-miR-325	1	0	1	0	1	1	ANKRD28	ankyrin repeat domain 28
hsa-miR-325	0	0	1	1	1	1	POTEG	POTE ankyrin domain family, member G
hsa-miR-325	1	0	1	1	1	1	MECP2	methyl CpG binding protein 2 (Rett syndrome)
hsa-miR-325	1	0	1	1	0	0	ADAM15	ADAM metallopeptidase domain 15
hsa-miR-325	0	0	1	0	1	1	RAB18	RAB18, member RAS oncogene family
hsa-miR-325	0	0	1	1	1	1	ANXA10	annexin A10
hsa-miR-325	1	0	1	1	1	1	QKI	QKI, KH domain containing, RNA binding
hsa-miR-325	1	0	1	1	1	1	MYB	v-myb myeloblastosis viral oncogene homolog (avian)
hsa-miR-325	1	0	1	1	1	1	PCDH11X	protocadherin 11 X-linked
hsa-miR-325	1	0	1	1	1	1	PRKACB	protein kinase, cAMP-dependent, catalytic, beta
hsa-miR-325	1	0	1	0	1	1	BAG4	BCL2-associated athanogene 4
hsa-miR-325	0	0	1	1	1	1	RAB7L1	RAB7, member RAS oncogene family-like 1
hsa-miR-325	1	0	1	1	1	1	HOXC13	homeobox C13
hsa-miR-325	0	0	1	1	1	1	SGK2	serum/glucocorticoid regulated kinase 2
hsa-miR-325	0	0	1	0	0	0	DNM1P33	DNM1 pseudogene 33
hsa-miR-325	1	0	1	1	1	1	PCGF5	polycomb group ring finger 5
hsa-miR-325	0	0	1	1	0	0	AGBL5	ATP/GTP binding protein-like 5
hsa-miR-325	0	0	1	1	0	0	RBM14	RNA binding motif protein 14
hsa-miR-325	0	0	1	1	0	0	MYLK2	myosin light chain kinase 2
hsa-miR-325	1	0	1	0	1	1	MTMR2	myotubularin related protein 2
hsa-miR-325	1	0	1	1	1	1	IDH1	isocitrate dehydrogenase 1 (NADP+), soluble
hsa-miR-325	0	0	1	1	1	1	H2AFY	H2A histone family, member Y
hsa-miR-325	1	0	1	1	1	1	TMEM185A	transmembrane protein 185A
hsa-miR-325	0	0	1	1	1	1	PCNP	PEST proteolytic signal containing nuclear protein
hsa-miR-325	0	0	1	1	1	1	CCDC148	coiled-coil domain containing 148
hsa-miR-325	0	0	1	0	0	0	KLHL15	kelch-like 15 (Drosophila)
hsa-miR-325	0	0	1	0	0	0	NUDT16P1	nudix (nucleoside diphosphate linked moiety X)-type motif 16 pseudogene 1
hsa-miR-325	0	0	1	0	1	1	ZNF37A	zinc finger protein 37A
hsa-miR-325	1	0	1	1	1	1	TMEM9B	TMEM9 domain family, member B
hsa-miR-325	0	0	1	1	1	1	RDH11	retinol dehydrogenase 11 (all-trans/9-cis/11-cis)
hsa-miR-325	1	0	1	1	1	1	SUZ12	suppressor of zeste 12 homolog (Drosophila)
hsa-miR-325	0	0	1	0	0	0	WDFY3-AS2	WDFY3 antisense RNA 2
hsa-miR-325	0	0	1	0	1	1	TMSB15B	thymosin beta 15B
hsa-miR-325	1	0	1	1	1	1	FAM188A	family with sequence similarity 188, member A
hsa-miR-325	0	0	1	1	1	1	RNF103	ring finger protein 103
hsa-miR-325	1	0	1	0	1	1	CDK19	cyclin-dependent kinase 19
hsa-miR-325	1	0	1	1	1	1	ZDHHC5	zinc finger, DHHC-type containing 5
hsa-miR-325	0	0	1	1	1	1	ZNF589	zinc finger protein 589
hsa-miR-325	1	0	1	1	1	1	RCOR3	REST corepressor 3
hsa-miR-325	0	0	1	0	0	0	CFL1P1	cofilin 1 (non-muscle) pseudogene 1
hsa-miR-325	1	0	1	0	1	1	RNF4	ring finger protein 4
hsa-miR-325	0	0	1	1	1	1	IL20RB	interleukin 20 receptor beta
hsa-miR-325	1	0	1	1	1	1	ABCA1	ATP-binding cassette, sub-family A (ABC1), member 1
hsa-miR-325	0	0	1	1	1	1	EDA2R	ectodysplasin A2 receptor
hsa-miR-325	0	0	1	1	1	1	TOX4	TOX high mobility group box family member 4
hsa-miR-325	1	0	1	1	1	1	NKAIN2	Na+/K+ transporting ATPase interacting 2
hsa-miR-325	0	0	1	0	0	0	TMPRSS12	transmembrane (C-terminal) protease, serine 12
hsa-miR-325	0	0	1	1	1	1	TMEM139	transmembrane protein 139
hsa-miR-325	0	0	1	1	1	1	CLEC12B	C-type lectin domain family 12, member B
hsa-miR-325	0	0	1	1	1	1	UBE3D	ubiquitin protein ligase E3D
hsa-miR-325	1	0	1	1	1	1	SLC38A9	solute carrier family 38, member 9
hsa-miR-325	1	0	1	1	1	1	MACROD2	MACRO domain containing 2
hsa-miR-325	1	0	1	1	1	1	HECTD2	HECT domain containing E3 ubiquitin protein ligase 2
hsa-miR-325	1	0	1	1	0	0	RASGEF1B	RasGEF domain family, member 1B
hsa-miR-325	0	0	1	0	0	0	CYP4F35P	cytochrome P450, family 4, subfamily F, polypeptide 35, pseudogene
hsa-miR-325	1	0	1	1	1	1	FAM135B	family with sequence similarity 135, member B
hsa-miR-325	0	0	1	0	0	0	LOC286184	uncharacterized LOC286184
hsa-miR-325	1	0	1	0	1	1	YAF2	YY1 associated factor 2
hsa-miR-325	0	0	1	0	0	0	CRYBB2P1	crystallin, beta B2 pseudogene 1
hsa-miR-325	0	0	1	0	0	0	LINC00264	long intergenic non-protein coding RNA 264
hsa-miR-325	1	0	1	1	1	1	DACH2	dachshund homolog 2 (Drosophila)
hsa-miR-325	0	0	1	1	1	1	TMEM45A	transmembrane protein 45A
hsa-miR-325	0	0	1	0	0	0	SLC7A11-AS1	SLC7A11 antisense RNA 1
hsa-miR-325	0	0	1	0	1	1	METTL12	methyltransferase like 12
hsa-miR-325	1	0	1	1	1	1	FAM123A	family with sequence similarity 123A
hsa-miR-325	1	0	1	0	1	1	HSPA12A	heat shock 70kDa protein 12A
hsa-miR-325	0	0	1	1	0	0	FAM159A	family with sequence similarity 159, member A
hsa-miR-325	1	0	1	1	1	1	TNFSF4	tumor necrosis factor (ligand) superfamily, member 4
hsa-miR-325	1	0	1	0	1	1	TNFAIP3	tumor necrosis factor, alpha-induced protein 3
hsa-miR-325	1	0	1	1	1	1	ROCK1	Rho-associated, coiled-coil containing protein kinase 1
hsa-miR-325	1	0	1	1	1	1	TXNRD1	thioredoxin reductase 1
hsa-miR-325	0	0	1	0	0	0	LOC339260	uncharacterized LOC339260
hsa-miR-325	0	0	1	1	1	1	MGC57346	uncharacterized LOC401884
hsa-miR-325	1	0	1	1	1	1	ZFAND4	zinc finger, AN1-type domain 4
hsa-miR-325	0	0	1	0	1	1	IL33	interleukin 33
hsa-miR-325	1	0	1	0	1	1	KDM2A	lysine (K)-specific demethylase 2A
hsa-miR-325	1	0	1	1	1	1	RTKN2	rhotekin 2
hsa-miR-325	0	0	1	1	0	0	FKBP11	FK506 binding protein 11, 19 kDa
hsa-miR-325	1	0	1	1	1	1	ZFP91	zinc finger protein 91 homolog (mouse)
hsa-miR-325	0	0	1	1	1	1	RAB3IL1	RAB3A interacting protein (rabin3)-like 1
hsa-miR-325	1	0	1	1	1	1	OLFML2A	olfactomedin-like 2A
hsa-miR-325	0	0	1	0	0	0	LOC255411	uncharacterized LOC255411
hsa-miR-325	1	0	1	1	1	1	NCOA5	nuclear receptor coactivator 5
hsa-miR-325	1	0	1	1	1	1	SOX5	SRY (sex determining region Y)-box 5
hsa-miR-325	1	0	1	1	1	1	SCOC	short coiled-coil protein
hsa-miR-325	1	0	1	1	1	1	ZNF449	zinc finger protein 449
hsa-miR-325	1	0	1	1	1	1	ASPH	aspartate beta-hydroxylase
hsa-miR-325	1	0	1	1	1	1	KPNA2	karyopherin alpha 2 (RAG cohort 1, importin alpha 1)
hsa-miR-325	0	0	1	0	0	0	FLJ12334	uncharacterized LOC400946
hsa-miR-325	0	0	1	1	0	0	CYP4F30P	cytochrome P450, family 4, subfamily F, polypeptide 30, pseudogene
hsa-miR-325	1	0	1	1	0	0	CHTOP	chromatin target of PRMT1
hsa-miR-325	1	0	1	1	1	1	ANLN	anillin, actin binding protein
hsa-miR-325	1	0	1	1	1	1	KLHL32	kelch-like 32 (Drosophila)
hsa-miR-325	1	0	1	0	1	1	NCOA7	nuclear receptor coactivator 7
hsa-miR-325	0	0	1	1	0	0	UGT8	UDP glycosyltransferase 8
hsa-miR-325	0	0	1	1	1	1	C3orf67	chromosome 3 open reading frame 67
hsa-miR-325	1	0	1	1	1	1	FMNL3	formin-like 3
hsa-miR-325	1	0	1	1	1	1	FGD4	FYVE, RhoGEF and PH domain containing 4
hsa-miR-325	1	0	1	1	1	1	SYNJ1	synaptojanin 1
hsa-miR-325	0	0	1	1	1	1	ZNF365	zinc finger protein 365
hsa-miR-325	1	0	1	0	1	1	CPEB2	cytoplasmic polyadenylation element binding protein 2
hsa-miR-325	1	0	1	0	1	1	KCNT2	potassium channel, subfamily T, member 2
hsa-miR-325	1	0	1	1	1	1	GABRB2	gamma-aminobutyric acid (GABA) A receptor, beta 2
hsa-miR-325	0	0	1	1	0	0	SLC17A4	solute carrier family 17 (sodium phosphate), member 4
hsa-miR-325	1	0	1	0	1	1	BTBD3	BTB (POZ) domain containing 3
hsa-miR-325	0	0	1	1	1	1	STAU2	staufen, RNA binding protein, homolog 2 (Drosophila)
hsa-miR-325	0	0	1	1	1	1	RASAL2	RAS protein activator like 2
hsa-miR-325	0	0	1	1	1	1	RBM25	RNA binding motif protein 25
hsa-miR-325	1	0	1	1	1	1	UBE4A	ubiquitination factor E4A
hsa-miR-325	0	0	1	1	1	1	FSHB	follicle stimulating hormone, beta polypeptide
hsa-miR-325	1	0	1	1	1	1	TMEM64	transmembrane protein 64
hsa-miR-325	1	0	1	1	1	1	SHANK2	SH3 and multiple ankyrin repeat domains 2
hsa-miR-325	0	0	1	0	0	0	LOC286094	uncharacterized LOC286094
hsa-miR-325	0	0	1	0	0	0	CLEC19A	C-type lectin domain family 19, member A
hsa-miR-325	0	0	1	0	0	0	LRRC37BP1	leucine rich repeat containing 37B pseudogene 1
hsa-miR-325	0	0	1	1	0	0	AQP7	aquaporin 7
hsa-miR-325	0	0	1	1	0	0	HOXD12	homeobox D12
hsa-miR-325	0	0	1	0	0	0	FAM225B	family with sequence similarity 225, member B (non-protein coding)
hsa-miR-325	0	0	1	0	0	0	MEG3	maternally expressed 3 (non-protein coding)
hsa-miR-325	1	0	1	1	1	1	MIER3	mesoderm induction early response 1, family member 3
hsa-miR-325	0	0	1	1	1	1	KBTBD12	kelch repeat and BTB (POZ) domain containing 12
hsa-miR-325	0	0	1	1	1	1	DSG3	desmoglein 3
hsa-miR-325	0	0	1	1	0	0	CDK5RAP2	CDK5 regulatory subunit associated protein 2
hsa-miR-325	0	0	1	1	1	1	GLIPR1L2	GLI pathogenesis-related 1 like 2
hsa-miR-325	0	0	1	0	0	0	PCNXL3	pecanex-like 3 (Drosophila)
hsa-miR-325	0	0	1	1	1	1	PSMA2	proteasome (prosome, macropain) subunit, alpha type, 2
hsa-miR-325	1	0	1	1	1	1	RORB	RAR-related orphan receptor B
hsa-miR-325	0	0	1	0	0	0	TRAF3IP2-AS1	TRAF3IP2 antisense RNA 1
hsa-miR-325	1	0	1	1	1	1	SLC39A13	solute carrier family 39 (zinc transporter), member 13
hsa-miR-325	0	0	1	1	1	1	PPP1R1C	protein phosphatase 1, regulatory (inhibitor) subunit 1C
hsa-miR-325	1	0	1	1	1	1	DCAF5	DDB1 and CUL4 associated factor 5
hsa-miR-325	1	0	1	0	0	0	CTSB	cathepsin B
hsa-miR-325	1	0	1	1	1	1	NFIB	nuclear factor I/B
hsa-miR-325	1	0	1	1	1	1	NAV1	neuron navigator 1
hsa-miR-325	1	0	1	1	1	1	RDX	radixin
hsa-miR-325	1	0	1	1	1	1	RECK	reversion-inducing-cysteine-rich protein with kazal motifs
hsa-miR-325	1	0	1	1	1	1	CALD1	caldesmon 1
hsa-miR-325	0	0	1	1	1	1	SSFA2	sperm specific antigen 2
hsa-miR-325	1	0	1	0	1	1	TBL1XR1	transducin (beta)-like 1 X-linked receptor 1
hsa-miR-325	1	0	1	0	1	1	C1orf21	chromosome 1 open reading frame 21
hsa-miR-325	1	0	1	1	1	1	LYST	lysosomal trafficking regulator
hsa-miR-325	1	0	1	0	1	1	TTL	tubulin tyrosine ligase
hsa-miR-325	0	0	1	1	1	1	PLA2G4C	phospholipase A2, group IVC (cytosolic, calcium-independent)
hsa-miR-325	0	0	1	0	1	1	GINS3	GINS complex subunit 3 (Psf3 homolog)
hsa-miR-325	0	0	1	0	1	1	CD59	CD59 molecule, complement regulatory protein
hsa-miR-325	0	0	1	1	1	1	KIAA0141	KIAA0141
hsa-miR-325	1	0	1	1	1	1	TARBP2	TAR (HIV-1) RNA binding protein 2
hsa-miR-325	0	0	1	0	0	0	LOC400768	uncharacterized LOC400768
hsa-miR-325	0	0	1	1	1	1	SEC22C	SEC22 vesicle trafficking protein homolog C (S. cerevisiae)
hsa-miR-325	0	0	1	1	0	0	PSG8	pregnancy specific beta-1-glycoprotein 8
hsa-miR-325	1	0	1	1	1	1	ARL1	ADP-ribosylation factor-like 1
hsa-miR-325	0	0	1	1	1	1	PTGES3	prostaglandin E synthase 3 (cytosolic)
hsa-miR-325	1	0	1	1	1	1	FGF11	fibroblast growth factor 11
hsa-miR-325	0	0	1	1	1	1	CHCHD4	coiled-coil-helix-coiled-coil-helix domain containing 4
hsa-miR-325	1	0	1	1	1	1	SSR1	signal sequence receptor, alpha
hsa-miR-325	1	0	1	1	1	1	HMGN3	high mobility group nucleosomal binding domain 3
hsa-miR-325	1	0	1	1	1	1	DCN	decorin
hsa-miR-325	0	0	1	1	0	0	RAD54B	RAD54 homolog B (S. cerevisiae)
hsa-miR-325	1	0	1	0	1	1	RPS6KB1	ribosomal protein S6 kinase, 70kDa, polypeptide 1
hsa-miR-325	1	0	1	1	1	1	PCTP	phosphatidylcholine transfer protein
hsa-miR-325	0	0	1	1	1	1	EIF3J	eukaryotic translation initiation factor 3, subunit J
hsa-miR-325	1	0	1	1	1	1	TMEM245	transmembrane protein 245
hsa-miR-325	0	0	1	0	1	1	TMEM155	transmembrane protein 155
hsa-miR-325	1	0	1	1	1	1	OSBPL9	oxysterol binding protein-like 9
hsa-miR-325	1	0	1	1	1	1	KCNIP4	Kv channel interacting protein 4
hsa-miR-325	1	0	1	1	1	1	NRN1	neuritin 1
hsa-miR-325	0	0	1	1	1	1	CD3E	CD3e molecule, epsilon (CD3-TCR complex)
hsa-miR-325	0	0	1	0	0	0	ZNF720	zinc finger protein 720
hsa-miR-325	1	0	1	1	1	1	BAALC	brain and acute leukemia, cytoplasmic
hsa-miR-325	1	0	1	1	1	1	EIF1	eukaryotic translation initiation factor 1
hsa-miR-325	0	0	1	1	0	0	ZNF511	zinc finger protein 511
hsa-miR-325	1	0	1	1	0	0	CRELD1	cysteine-rich with EGF-like domains 1
hsa-miR-325	1	0	1	1	1	1	RPUSD3	RNA pseudouridylate synthase domain containing 3
hsa-miR-325	0	0	1	0	0	0	ZNF674-AS1	ZNF674 antisense RNA 1
hsa-miR-325	1	0	1	1	1	1	RBFOX2	RNA binding protein, fox-1 homolog (C. elegans) 2
hsa-miR-325	1	0	1	1	1	1	HIGD1A	HIG1 hypoxia inducible domain family, member 1A
hsa-miR-325	1	0	1	1	1	1	ATP1B1	ATPase, Na+/K+ transporting, beta 1 polypeptide
hsa-miR-325	0	0	1	0	0	0	CHEK2P2	checkpoint kinase 2 pseudogene 2
hsa-miR-325	0	0	1	1	1	1	ZNF346	zinc finger protein 346
hsa-miR-325	0	0	1	1	1	1	NUDT21	nudix (nucleoside diphosphate linked moiety X)-type motif 21
hsa-miR-325	0	0	1	1	0	0	KAT8	K(lysine) acetyltransferase 8
hsa-miR-325	0	0	1	0	0	0	LOC731789	uncharacterized LOC731789
hsa-miR-325	1	0	1	1	1	1	PTPRG	protein tyrosine phosphatase, receptor type, G
hsa-miR-325	0	0	1	1	1	1	SYNE2	spectrin repeat containing, nuclear envelope 2
hsa-miR-325	0	0	1	0	0	0	C18orf63	chromosome 18 open reading frame 63
hsa-miR-325	1	0	1	0	1	1	MCFD2	multiple coagulation factor deficiency 2
hsa-miR-325	1	0	1	1	1	1	SLC39A10	solute carrier family 39 (zinc transporter), member 10
hsa-miR-325	0	0	1	1	1	1	SLC39A14	solute carrier family 39 (zinc transporter), member 14
hsa-miR-325	0	0	1	1	0	0	SETDB1	SET domain, bifurcated 1
hsa-miR-325	1	0	1	1	1	1	PI15	peptidase inhibitor 15
hsa-miR-325	0	0	1	1	1	1	PTGS1	prostaglandin-endoperoxide synthase 1 (prostaglandin G/H synthase and cyclooxygenase)
hsa-miR-325	0	0	1	1	0	0	SPATA20	spermatogenesis associated 20
hsa-miR-325	1	0	1	1	1	1	ANKRD42	ankyrin repeat domain 42
hsa-miR-325	1	0	1	0	1	1	DCBLD2	discoidin, CUB and LCCL domain containing 2
hsa-miR-325	1	0	1	1	1	1	LGR4	leucine-rich repeat containing G protein-coupled receptor 4
hsa-miR-325	1	0	1	1	1	1	TNFAIP1	tumor necrosis factor, alpha-induced protein 1 (endothelial)
hsa-miR-325	0	0	1	1	1	1	ALDH3B1	aldehyde dehydrogenase 3 family, member B1
hsa-miR-325	1	0	1	1	1	1	MLL	myeloid/lymphoid or mixed-lineage leukemia (trithorax homolog, Drosophila)
hsa-miR-325	1	0	1	1	1	1	GRM1	glutamate receptor, metabotropic 1
hsa-miR-325	1	0	1	1	1	1	ARSB	arylsulfatase B
hsa-miR-325	0	0	1	1	1	1	BCHE	butyrylcholinesterase
hsa-miR-325	1	0	1	1	1	1	COL1A2	collagen, type I, alpha 2
hsa-miR-325	1	0	1	1	1	1	COL4A4	collagen, type IV, alpha 4
hsa-miR-325	1	0	1	0	1	1	SLC26A2	solute carrier family 26 (sulfate transporter), member 2
hsa-miR-325	0	0	1	1	1	1	F5	coagulation factor V (proaccelerin, labile factor)
hsa-miR-325	1	0	1	1	1	1	GK	glycerol kinase
hsa-miR-325	1	0	1	1	1	1	KCNA1	potassium voltage-gated channel, shaker-related subfamily, member 1 (episodic ataxia with myokymia)
hsa-miR-325	0	0	1	1	1	1	LPL	lipoprotein lipase
hsa-miR-325	0	0	1	1	0	0	MPO	myeloperoxidase
hsa-miR-325	1	0	1	1	1	1	NF1	neurofibromin 1
hsa-miR-325	1	0	1	0	1	1	PTEN	phosphatase and tensin homolog
hsa-miR-325	0	0	1	1	1	1	SRD5A2	steroid-5-alpha-reductase, alpha polypeptide 2 (3-oxo-5 alpha-steroid delta 4-dehydrogenase alpha 2)
hsa-miR-325	1	0	1	0	1	1	PAFAH1B1	platelet-activating factor acetylhydrolase 1b, regulatory subunit 1 (45kDa)
hsa-miR-325	1	0	1	1	1	1	RFX5	regulatory factor X, 5 (influences HLA class II expression)
hsa-miR-325	1	0	1	1	1	1	PLP1	proteolipid protein 1
hsa-miR-325	0	0	1	1	1	1	HGF	hepatocyte growth factor (hepapoietin A; scatter factor)
hsa-miR-325	1	0	1	1	1	1	DIO2	deiodinase, iodothyronine, type II
hsa-miR-325	1	0	1	1	1	1	GABRG2	gamma-aminobutyric acid (GABA) A receptor, gamma 2
hsa-miR-325	1	0	1	1	1	1	GRIA4	glutamate receptor, ionotropic, AMPA 4
hsa-miR-325	0	0	1	1	1	1	GRIN2B	glutamate receptor, ionotropic, N-methyl D-aspartate 2B
hsa-miR-325	0	0	1	1	1	1	GRM3	glutamate receptor, metabotropic 3
hsa-miR-325	1	0	1	1	1	1	MME	membrane metallo-endopeptidase
hsa-miR-325	1	0	1	1	1	1	RARA	retinoic acid receptor, alpha
hsa-miR-325	1	0	1	1	1	1	FARP1	FERM, RhoGEF (ARHGEF) and pleckstrin domain protein 1 (chondrocyte-derived)
hsa-miR-325	1	0	1	1	0	0	AWAT2	acyl-CoA wax alcohol acyltransferase 2
hsa-miR-325	1	0	1	1	1	1	WNK3	WNK lysine deficient protein kinase 3
hsa-miR-325	1	0	1	1	1	1	HMGXB4	HMG box domain containing 4
hsa-miR-325	0	0	1	0	1	1	FLJ16124	FLJ16124 protein
hsa-miR-325	1	0	1	1	1	1	PLCXD3	phosphatidylinositol-specific phospholipase C, X domain containing 3
hsa-miR-325	0	0	1	1	1	1	SCP2	sterol carrier protein 2
hsa-miR-325	1	0	1	1	1	1	NTRK3	neurotrophic tyrosine kinase, receptor, type 3
hsa-miR-325	1	0	1	0	1	1	C18orf25	chromosome 18 open reading frame 25
hsa-miR-325	0	0	1	1	1	1	GCSAM	germinal center-associated, signaling and motility
hsa-miR-325	1	0	1	0	1	1	RCHY1	ring finger and CHY zinc finger domain containing 1, E3 ubiquitin protein ligase
hsa-miR-325	0	0	1	1	1	1	HRNR	hornerin
hsa-miR-325	1	0	1	1	0	0	RPL21P44	ribosomal protein L21 pseudogene 44
hsa-miR-325	1	0	1	1	1	1	SLC25A53	solute carrier family 25, member 53
hsa-miR-325	1	0	1	1	1	1	FXR1	fragile X mental retardation, autosomal homolog 1
hsa-miR-325	1	0	1	1	1	1	H3F3C	H3 histone, family 3C
hsa-miR-325	1	0	1	1	1	1	TMCC1	transmembrane and coiled-coil domain family 1
hsa-miR-325	1	0	1	0	1	1	GOPC	golgi-associated PDZ and coiled-coil motif containing
hsa-miR-325	0	0	1	1	1	1	DNTT	deoxynucleotidyltransferase, terminal
hsa-miR-325	0	0	1	1	1	1	VPS13A	vacuolar protein sorting 13 homolog A (S. cerevisiae)
hsa-miR-325	0	0	1	1	1	1	HNMT	histamine N-methyltransferase
hsa-miR-325	1	0	1	1	1	1	AFF3	AF4/FMR2 family, member 3
hsa-miR-325	1	0	1	1	1	1	TPD52	tumor protein D52
hsa-miR-325	1	0	1	0	1	1	C3orf70	chromosome 3 open reading frame 70
hsa-miR-325	1	0	1	1	1	1	SLC35F1	solute carrier family 35, member F1
hsa-miR-325	1	0	1	1	1	1	CSNK1G3	casein kinase 1, gamma 3
hsa-miR-325	0	0	1	1	1	1	SLC35A2	solute carrier family 35 (UDP-galactose transporter), member A2
hsa-miR-325	1	0	1	1	1	1	PPM1B	protein phosphatase, Mg2+/Mn2+ dependent, 1B
hsa-miR-325	1	0	1	1	1	1	PDE4B	phosphodiesterase 4B, cAMP-specific
hsa-miR-325	0	0	1	1	1	1	EFEMP1	EGF containing fibulin-like extracellular matrix protein 1
hsa-miR-325	1	0	1	1	1	1	KIAA0317	KIAA0317
hsa-miR-325	1	0	1	0	1	1	FAM133B	family with sequence similarity 133, member B
hsa-miR-325	0	0	1	0	1	1	SCN3B	sodium channel, voltage-gated, type III, beta subunit
hsa-miR-325	0	0	1	0	1	1	ABCE1	ATP-binding cassette, sub-family E (OABP), member 1
hsa-miR-325	0	0	1	1	1	1	C10orf53	chromosome 10 open reading frame 53
hsa-miR-325	1	0	1	1	1	1	NSL1	NSL1, MIND kinetochore complex component, homolog (S. cerevisiae)
hsa-miR-325	1	0	1	1	1	1	ERBB4	v-erb-a erythroblastic leukemia viral oncogene homolog 4 (avian)
hsa-miR-325	0	0	1	1	1	1	SEC24B	SEC24 family, member B (S. cerevisiae)
hsa-miR-325	1	0	1	0	1	1	TMEM237	transmembrane protein 237
hsa-miR-325	0	0	1	1	1	1	SLC6A4	solute carrier family 6 (neurotransmitter transporter, serotonin), member 4
hsa-miR-325	0	0	1	1	1	1	RCC1	regulator of chromosome condensation 1
hsa-miR-325	1	0	1	1	1	1	MZT1	mitotic spindle organizing protein 1
hsa-miR-325	1	0	1	1	1	1	PDE11A	phosphodiesterase 11A
hsa-miR-325	1	0	1	0	1	1	UBXN2B	UBX domain protein 2B
hsa-miR-325	1	0	1	1	1	1	PACRG	PARK2 co-regulated
hsa-miR-325	0	0	1	0	0	0	LRRIQ4	leucine-rich repeats and IQ motif containing 4
hsa-miR-325	0	0	1	1	1	1	SNTN	sentan, cilia apical structure protein
hsa-miR-325	0	0	1	1	1	1	ADSS	adenylosuccinate synthase
hsa-miR-325	0	0	1	1	0	0	AOX1	aldehyde oxidase 1
hsa-miR-325	1	0	1	0	1	1	KLF9	Kruppel-like factor 9
hsa-miR-325	0	0	1	1	1	1	DARS	aspartyl-tRNA synthetase
hsa-miR-325	1	0	1	0	1	1	EFNB3	ephrin-B3
hsa-miR-325	1	0	1	1	1	1	AHR	aryl hydrocarbon receptor
hsa-miR-325	1	0	1	1	1	1	BAAT	bile acid CoA: amino acid N-acyltransferase (glycine N-choloyltransferase)
hsa-miR-325	1	0	1	1	1	1	BTG1	B-cell translocation gene 1, anti-proliferative
hsa-miR-325	0	0	1	1	1	1	BTN1A1	butyrophilin, subfamily 1, member A1
hsa-miR-325	1	0	1	1	1	1	CDH2	cadherin 2, type 1, N-cadherin (neuronal)
hsa-miR-325	1	0	1	1	1	1	COL4A1	collagen, type IV, alpha 1
hsa-miR-325	1	0	1	1	1	1	MASP1	mannan-binding lectin serine peptidase 1 (C4/C2 activating component of Ra-reactive factor)
hsa-miR-325	1	0	1	1	1	1	EIF4E	eukaryotic translation initiation factor 4E
hsa-miR-325	0	0	1	0	1	1	STX2	syntaxin 2
hsa-miR-325	0	0	1	0	1	1	GCG	glucagon
hsa-miR-325	0	0	1	1	1	1	GFAP	glial fibrillary acidic protein
hsa-miR-325	0	0	1	0	1	1	GCLM	glutamate-cysteine ligase, modifier subunit
hsa-miR-325	1	0	1	1	1	1	GLRA2	glycine receptor, alpha 2
hsa-miR-325	1	0	1	1	1	1	GNAL	guanine nucleotide binding protein (G protein), alpha activating activity polypeptide, olfactory type
hsa-miR-325	1	0	1	1	1	1	GNAZ	guanine nucleotide binding protein (G protein), alpha z polypeptide
hsa-miR-325	0	0	1	1	0	0	GPX2	glutathione peroxidase 2 (gastrointestinal)
hsa-miR-325	0	0	1	1	1	1	LUM	lumican
hsa-miR-325	1	0	1	0	1	1	MXD1	MAX dimerization protein 1
hsa-miR-325	1	0	1	1	1	1	SCGB2A1	secretoglobin, family 2A, member 1
hsa-miR-325	1	0	1	1	1	1	PPP1R12B	protein phosphatase 1, regulatory subunit 12B
hsa-miR-325	1	0	1	1	1	1	OSBP	oxysterol binding protein
hsa-miR-325	1	0	1	1	1	1	PCDH7	protocadherin 7
hsa-miR-325	0	0	1	1	1	1	PCK1	phosphoenolpyruvate carboxykinase 1 (soluble)
hsa-miR-325	0	0	1	1	1	1	PF4	platelet factor 4
hsa-miR-325	0	0	1	1	1	1	PF4V1	platelet factor 4 variant 1
hsa-miR-325	1	0	1	1	1	1	PPP2R3A	protein phosphatase 2, regulatory subunit B'', alpha
hsa-miR-325	0	0	1	1	1	1	EIF2AK2	eukaryotic translation initiation factor 2-alpha kinase 2
hsa-miR-325	1	0	1	1	1	1	PTPN9	protein tyrosine phosphatase, non-receptor type 9
hsa-miR-325	1	0	1	1	1	1	PTPN11	protein tyrosine phosphatase, non-receptor type 11
hsa-miR-325	0	0	1	1	0	0	ROS1	c-ros oncogene 1 , receptor tyrosine kinase
hsa-miR-325	1	0	1	0	1	1	SORT1	sortilin 1
hsa-miR-325	1	0	1	1	1	1	SRSF2	serine/arginine-rich splicing factor 2
hsa-miR-325	1	0	1	1	1	1	SMARCD1	SWI/SNF related, matrix associated, actin dependent regulator of chromatin, subfamily d, member 1
hsa-miR-325	1	0	1	0	1	1	STC1	stanniocalcin 1
hsa-miR-325	1	0	1	0	1	1	SEC62	SEC62 homolog (S. cerevisiae)
hsa-miR-325	0	0	1	1	1	1	TPR	translocated promoter region, nuclear basket protein
hsa-miR-325	1	0	1	1	1	1	UBE2B	ubiquitin-conjugating enzyme E2B
hsa-miR-325	0	0	1	1	1	1	UBE2V2	ubiquitin-conjugating enzyme E2 variant 2
hsa-miR-325	1	0	1	1	1	1	NRIP1	nuclear receptor interacting protein 1
hsa-miR-325	1	0	1	0	1	1	VAPA	VAMP (vesicle-associated membrane protein)-associated protein A, 33kDa
hsa-miR-325	1	0	1	1	1	1	CBX4	chromobox homolog 4
hsa-miR-325	0	0	1	1	1	1	BLZF1	basic leucine zipper nuclear factor 1
hsa-miR-325	1	0	1	1	1	1	CDC14A	CDC14 cell division cycle 14 homolog A (S. cerevisiae)
hsa-miR-325	1	0	1	0	1	1	TNKS	tankyrase, TRF1-interacting ankyrin-related ADP-ribose polymerase
hsa-miR-325	0	0	1	1	1	1	LDB1	LIM domain binding 1
hsa-miR-325	1	0	1	0	1	1	ST13	suppression of tumorigenicity 13 (colon carcinoma) (Hsp70 interacting protein)
hsa-miR-325	1	0	1	0	1	1	WASL	Wiskott-Aldrich syndrome-like
hsa-miR-325	1	0	1	1	1	1	EYA4	eyes absent homolog 4 (Drosophila)
hsa-miR-325	1	0	1	0	1	1	SLC1A2	solute carrier family 1 (glial high affinity glutamate transporter), member 2
hsa-miR-325	0	0	1	0	1	1	TMSB4Y	thymosin beta 4, Y-linked
hsa-miR-325	1	0	1	1	1	1	STK17B	serine/threonine kinase 17b
hsa-miR-325	1	0	1	1	1	1	GDA	guanine deaminase
hsa-miR-325	1	0	1	1	1	1	COX11	COX11 cytochrome c oxidase assembly homolog (yeast)
hsa-miR-325	1	0	1	1	1	1	RAB4A	RAB4A, member RAS oncogene family
hsa-miR-325	1	0	1	0	1	1	SCN2B	sodium channel, voltage-gated, type II, beta subunit
hsa-miR-325	0	0	1	1	1	1	PNPLA4	patatin-like phospholipase domain containing 4
hsa-miR-325	1	0	1	1	1	1	BZRAP1	benzodiazapine receptor (peripheral) associated protein 1
hsa-miR-325	0	0	1	1	1	1	ITGBL1	integrin, beta-like 1 (with EGF-like repeat domains)
hsa-miR-325	1	0	1	1	1	1	MED26	mediator complex subunit 26
hsa-miR-325	1	0	1	0	1	1	ARHGEF6	Rac/Cdc42 guanine nucleotide exchange factor (GEF) 6
hsa-miR-325	0	0	1	1	1	1	CDKN2B	cyclin-dependent kinase inhibitor 2B (p15, inhibits CDK4)
hsa-miR-325	1	0	1	0	1	1	DOCK3	dedicator of cytokinesis 3
hsa-miR-325	0	0	1	1	1	1	NDUFS1	NADH dehydrogenase (ubiquinone) Fe-S protein 1, 75kDa (NADH-coenzyme Q reductase)
hsa-miR-325	1	0	1	1	1	1	CRK	v-crk sarcoma virus CT10 oncogene homolog (avian)
hsa-miR-325	1	0	1	0	1	1	DLX6	distal-less homeobox 6
hsa-miR-325	1	0	1	1	1	1	GPM6A	glycoprotein M6A
hsa-miR-325	1	0	1	1	1	1	H3F3B	H3 histone, family 3B (H3.3B)
hsa-miR-325	1	0	1	0	1	1	CCDC6	coiled-coil domain containing 6
hsa-miR-325	1	0	1	1	1	1	PIGK	phosphatidylinositol glycan anchor biosynthesis, class K
hsa-miR-325	0	0	1	1	1	1	IMPA1	inositol(myo)-1(or 4)-monophosphatase 1
hsa-miR-325	1	0	1	1	1	1	LPP	LIM domain containing preferred translocation partner in lipoma
hsa-miR-325	0	0	1	1	0	0	RTN2	reticulon 2
hsa-miR-325	1	0	1	1	1	1	SYT1	synaptotagmin I
hsa-miR-325	1	0	1	1	1	1	TERF2	telomeric repeat binding factor 2
hsa-miR-325	0	0	1	1	1	1	ACTR3	ARP3 actin-related protein 3 homolog (yeast)
hsa-miR-325	0	0	1	1	1	1	TSPAN3	tetraspanin 3
hsa-miR-325	1	0	1	1	1	1	CTDSP2	CTD (carboxy-terminal domain, RNA polymerase II, polypeptide A) small phosphatase 2
hsa-miR-325	0	0	1	0	1	1	CALCOCO2	calcium binding and coiled-coil domain 2
hsa-miR-325	1	0	1	0	1	1	MAP1B	microtubule-associated protein 1B
hsa-miR-325	0	0	1	1	1	1	TRDN	triadin
hsa-miR-325	0	0	1	1	0	0	NEDD8	neural precursor cell expressed, developmentally down-regulated 8
hsa-miR-325	1	0	1	1	1	1	NEUROD2	neuronal differentiation 2
hsa-miR-325	1	0	1	0	1	1	PPP1R2	protein phosphatase 1, regulatory (inhibitor) subunit 2
hsa-miR-325	0	0	1	1	1	1	PRKCH	protein kinase C, eta
hsa-miR-325	1	0	1	1	1	1	STK4	serine/threonine kinase 4
hsa-miR-325	1	0	1	1	1	1	SMC1A	structural maintenance of chromosomes 1A
hsa-miR-325	1	0	1	1	1	1	SEC23A	Sec23 homolog A (S. cerevisiae)
hsa-miR-325	1	0	1	1	1	1	VAT1	vesicle amine transport protein 1 homolog (T. californica)
hsa-miR-325	1	0	1	1	1	1	PAIP1	poly(A) binding protein interacting protein 1
hsa-miR-325	1	0	1	0	1	1	PTPRE	protein tyrosine phosphatase, receptor type, E
hsa-miR-325	1	0	1	1	1	1	B3GNT2	UDP-GlcNAc:betaGal beta-1,3-N-acetylglucosaminyltransferase 2
hsa-miR-325	0	0	1	1	1	1	CLDN16	claudin 16
hsa-miR-325	1	0	1	1	1	1	MAP3K2	mitogen-activated protein kinase kinase kinase 2
hsa-miR-325	0	0	1	1	1	1	KLRAP1	killer cell lectin-like receptor subfamily A pseudogene 1
hsa-miR-325	0	0	1	1	1	1	FGL2	fibrinogen-like 2
hsa-miR-325	1	0	1	1	1	1	MAN1A2	mannosidase, alpha, class 1A, member 2
hsa-miR-325	1	0	1	1	1	1	SF3A3	splicing factor 3a, subunit 3, 60kDa
hsa-miR-325	0	0	1	1	0	0	HNRNPA0	heterogeneous nuclear ribonucleoprotein A0
hsa-miR-325	1	0	1	1	1	1	RBPMS	RNA binding protein with multiple splicing
hsa-miR-325	1	0	1	1	1	1	RIT1	Ras-like without CAAX 1
hsa-miR-325	1	0	1	1	1	1	SCN1A	sodium channel, voltage-gated, type I, alpha subunit
hsa-miR-325	1	0	1	0	1	1	WASF2	WAS protein family, member 2
hsa-miR-325	1	0	1	1	1	1	ADAMTS5	ADAM metallopeptidase with thrombospondin type 1 motif, 5
hsa-miR-325	1	0	1	1	1	1	ZNF81	zinc finger protein 81
hsa-miR-325	1	0	1	1	1	1	ERLIN2	ER lipid raft associated 2
hsa-miR-325	0	0	1	1	1	1	AKAP10	A kinase (PRKA) anchor protein 10
hsa-miR-325	1	0	1	1	1	1	PALM2-AKAP2	PALM2-AKAP2 readthrough
hsa-miR-325	0	0	1	0	1	1	PNMA2	paraneoplastic Ma antigen 2
hsa-miR-325	0	0	1	0	1	1	PAXIP1	PAX interacting (with transcription-activation domain) protein 1
hsa-miR-325	1	0	1	1	1	1	PHLDA1	pleckstrin homology-like domain, family A, member 1
hsa-miR-325	1	0	1	1	1	1	CASC3	cancer susceptibility candidate 3
hsa-miR-325	0	0	1	1	1	1	FXC1	fracture callus 1 homolog (rat)
hsa-miR-325	1	0	1	1	1	1	RHOQ	ras homolog family member Q
hsa-miR-325	1	0	1	1	1	1	NUFIP1	nuclear fragile X mental retardation protein interacting protein 1
hsa-miR-325	0	0	1	0	1	1	TLL1	tolloid-like 1
hsa-miR-325	0	0	1	1	1	1	UCK2	uridine-cytidine kinase 2
hsa-miR-325	1	0	1	0	1	1	FLRT2	fibronectin leucine rich transmembrane protein 2
hsa-miR-325	0	0	1	1	1	1	DNAJC15	DnaJ (Hsp40) homolog, subfamily C, member 15
hsa-miR-325	0	0	1	1	1	1	TBK1	TANK-binding kinase 1
hsa-miR-325	1	0	1	1	1	1	PPARGC1A	peroxisome proliferator-activated receptor gamma, coactivator 1 alpha
hsa-miR-325	0	0	1	0	1	1	LINC00312	long intergenic non-protein coding RNA 312
hsa-miR-325	1	0	1	1	1	1	SLC25A24	solute carrier family 25 (mitochondrial carrier; phosphate carrier), member 24
hsa-miR-325	1	0	1	1	1	1	RGCC	regulator of cell cycle
hsa-miR-325	0	0	1	1	1	1	GTPBP8	GTP-binding protein 8 (putative)
hsa-miR-325	0	0	1	0	1	1	SCN8A	sodium channel, voltage gated, type VIII, alpha subunit
hsa-miR-325	1	0	1	1	1	1	YME1L1	YME1-like 1 (S. cerevisiae)
hsa-miR-325	1	0	1	1	1	1	MAPRE2	microtubule-associated protein, RP/EB family, member 2
hsa-miR-325	0	0	1	1	1	1	TRAM1	translocation associated membrane protein 1
hsa-miR-325	1	0	1	1	1	1	SLC7A11	solute carrier family 7 (anionic amino acid transporter light chain, xc- system), member 11
hsa-miR-325	1	0	1	0	1	1	RNF11	ring finger protein 11
hsa-miR-325	0	0	1	1	1	1	TCL6	T-cell leukemia/lymphoma 6 (non-protein coding)
hsa-miR-325	1	0	1	1	1	1	OTX1	orthodenticle homeobox 1
hsa-miR-325	1	0	1	0	1	1	KIAA0232	KIAA0232
hsa-miR-325	1	0	1	0	1	1	SERTAD2	SERTA domain containing 2
hsa-miR-325	0	0	1	0	1	1	EPM2AIP1	EPM2A (laforin) interacting protein 1
hsa-miR-325	1	0	1	0	1	1	PJA2	praja ring finger 2, E3 ubiquitin protein ligase
hsa-miR-325	1	0	1	1	1	1	HELZ	helicase with zinc finger
hsa-miR-325	1	0	1	1	1	1	CHSY1	chondroitin sulfate synthase 1
hsa-miR-325	1	0	1	1	1	1	SPAST	spastin
hsa-miR-325	0	0	1	1	0	0	KIFAP3	kinesin-associated protein 3
hsa-miR-325	1	0	1	0	1	1	WDFY3	WD repeat and FYVE domain containing 3
hsa-miR-325	1	0	1	1	1	1	ERP44	endoplasmic reticulum protein 44
hsa-miR-325	1	0	1	1	1	1	PLCB1	phospholipase C, beta 1 (phosphoinositide-specific)
hsa-miR-325	1	0	1	0	1	1	KIAA1024	KIAA1024
hsa-miR-325	1	0	1	0	1	1	ARHGEF12	Rho guanine nucleotide exchange factor (GEF) 12
hsa-miR-325	1	0	1	0	1	1	SRGAP2	SLIT-ROBO Rho GTPase activating protein 2
hsa-miR-325	0	0	1	0	1	1	ZDHHC17	zinc finger, DHHC-type containing 17
hsa-miR-325	0	0	1	1	1	1	ADNP	activity-dependent neuroprotector homeobox
hsa-miR-325	1	0	1	1	1	1	RIMBP2	RIMS binding protein 2
hsa-miR-325	1	0	1	1	1	1	PARM1	prostate androgen-regulated mucin-like protein 1
hsa-miR-325	0	0	1	1	1	1	ZNF10	zinc finger protein 10
hsa-miR-325	0	0	1	1	1	1	POLR1A	polymerase (RNA) I polypeptide A, 194kDa
hsa-miR-325	1	0	1	1	1	1	CNOT6	CCR4-NOT transcription complex, subunit 6
hsa-miR-325	1	0	1	1	1	1	CNRIP1	cannabinoid receptor interacting protein 1
hsa-miR-325	0	0	1	1	1	1	SOSTDC1	sclerostin domain containing 1
hsa-miR-325	0	0	1	1	1	1	MMACHC	methylmalonic aciduria (cobalamin deficiency) cblC type, with homocystinuria
hsa-miR-325	1	0	1	1	1	1	LTN1	listerin E3 ubiquitin protein ligase 1
hsa-miR-325	1	0	1	1	1	1	FGFR1	fibroblast growth factor receptor 1
hsa-miR-325	1	0	1	0	1	1	TRIM33	tripartite motif containing 33
hsa-miR-325	0	0	1	1	1	1	PTPN22	protein tyrosine phosphatase, non-receptor type 22 (lymphoid)
hsa-miR-325	0	0	1	0	1	1	OTUD6B	OTU domain containing 6B
hsa-miR-325	0	0	1	1	1	1	ISOC1	isochorismatase domain containing 1
hsa-miR-325	1	0	1	0	1	1	CNR1	cannabinoid receptor 1 (brain)
hsa-miR-325	0	0	1	1	1	1	NAA20	N(alpha)-acetyltransferase 20, NatB catalytic subunit
hsa-miR-325	0	0	1	1	1	1	RAB10	RAB10, member RAS oncogene family
hsa-miR-325	0	0	1	1	1	1	TRIP4	thyroid hormone receptor interactor 4
hsa-miR-325	1	0	1	1	1	1	AKAP11	A kinase (PRKA) anchor protein 11
hsa-miR-325	1	0	1	0	1	1	SELT	selenoprotein T
hsa-miR-325	1	0	1	1	1	1	RAPGEFL1	Rap guanine nucleotide exchange factor (GEF)-like 1
hsa-miR-325	1	0	1	1	1	1	VTA1	Vps20-associated 1 homolog (S. cerevisiae)
hsa-miR-325	0	0	1	1	0	0	CXorf26	chromosome X open reading frame 26
hsa-miR-325	1	0	1	0	1	1	RAB8B	RAB8B, member RAS oncogene family
hsa-miR-325	1	0	1	0	1	1	KLHL3	kelch-like 3 (Drosophila)
hsa-miR-325	1	0	1	1	1	1	GALNT7	UDP-N-acetyl-alpha-D-galactosamine:polypeptide N-acetylgalactosaminyltransferase 7 (GalNAc-T7)
hsa-miR-325	0	0	1	1	0	0	FNDC8	fibronectin type III domain containing 8
hsa-miR-325	1	0	1	0	1	1	UBE2Q1	ubiquitin-conjugating enzyme E2Q family member 1
hsa-miR-325	1	0	1	1	1	1	TET2	tet methylcytosine dioxygenase 2
hsa-miR-325	1	0	1	1	1	1	TBC1D8B	TBC1 domain family, member 8B (with GRAM domain)
hsa-miR-325	1	0	1	0	1	1	MARCH5	membrane-associated ring finger (C3HC4) 5
hsa-miR-325	0	0	1	1	1	1	SOHLH2	spermatogenesis and oogenesis specific basic helix-loop-helix 2
hsa-miR-325	0	0	1	1	0	0	VPS37C	vacuolar protein sorting 37 homolog C (S. cerevisiae)
hsa-miR-325	1	0	1	1	1	1	ARGLU1	arginine and glutamate rich 1
hsa-miR-325	1	0	1	1	1	1	SOBP	sine oculis binding protein homolog (Drosophila)
hsa-miR-325	0	0	1	1	1	1	THAP1	THAP domain containing, apoptosis associated protein 1
hsa-miR-325	1	0	1	1	1	1	FAM178A	family with sequence similarity 178, member A
hsa-miR-325	1	0	1	1	1	1	TMEM33	transmembrane protein 33
hsa-miR-325	0	0	1	0	1	1	GOLPH3L	golgi phosphoprotein 3-like
hsa-miR-325	1	0	1	1	1	1	TMEM184C	transmembrane protein 184C
hsa-miR-325	1	0	1	1	1	1	BRF2	BRF2, subunit of RNA polymerase III transcription initiation factor, BRF1-like
hsa-miR-325	1	0	1	1	1	1	SPTLC3	serine palmitoyltransferase, long chain base subunit 3
hsa-miR-325	1	0	1	0	1	1	LIN7C	lin-7 homolog C (C. elegans)
hsa-miR-325	1	0	1	1	1	1	RSBN1	round spermatid basic protein 1
hsa-miR-325	1	0	1	1	1	1	RRN3	RRN3 RNA polymerase I transcription factor homolog (S. cerevisiae)
hsa-miR-325	1	0	1	1	1	1	PAG1	phosphoprotein associated with glycosphingolipid microdomains 1
hsa-miR-325	1	0	1	1	1	1	ETNK1	ethanolamine kinase 1
hsa-miR-325	1	0	1	0	1	1	FAM190B	family with sequence similarity 190, member B
hsa-miR-325	0	0	1	1	1	1	GNL3L	guanine nucleotide binding protein-like 3 (nucleolar)-like
hsa-miR-325	0	0	1	1	1	1	RNF20	ring finger protein 20, E3 ubiquitin protein ligase
hsa-miR-325	0	0	1	1	0	0	GKN1	gastrokine 1
hsa-miR-325	1	0	1	1	1	1	FEM1C	fem-1 homolog c (C. elegans)
hsa-miR-325	1	0	1	1	1	1	CCDC47	coiled-coil domain containing 47
hsa-miR-325	1	0	1	0	1	1	SLC17A6	solute carrier family 17 (sodium-dependent inorganic phosphate cotransporter), member 6
hsa-miR-325	0	0	1	1	1	1	CYSLTR2	cysteinyl leukotriene receptor 2
hsa-miR-325	1	0	1	1	1	1	SLC24A3	solute carrier family 24 (sodium/potassium/calcium exchanger), member 3
hsa-miR-325	0	0	1	1	1	1	SHROOM4	shroom family member 4
hsa-miR-325	1	0	1	0	1	1	SYT4	synaptotagmin IV
hsa-miR-325	1	0	1	1	1	1	NCEH1	neutral cholesterol ester hydrolase 1
hsa-miR-325	0	0	1	1	1	1	ARRDC3	arrestin domain containing 3
hsa-miR-325	1	0	1	1	1	1	SIPA1L2	signal-induced proliferation-associated 1 like 2
hsa-miR-325	1	0	1	1	1	1	RANBP10	RAN binding protein 10
hsa-miR-325	0	0	1	1	1	1	BCOR	BCL6 corepressor
hsa-miR-325	1	0	1	0	1	1	TP53INP2	tumor protein p53 inducible nuclear protein 2
hsa-miR-325	0	0	1	1	0	0	ZNF71	zinc finger protein 71
hsa-miR-325	1	0	1	1	1	1	CDH22	cadherin 22, type 2
hsa-miR-325	1	0	1	0	1	1	TSPYL4	TSPY-like 4
hsa-miR-325	0	0	1	1	1	1	DNAJC12	DnaJ (Hsp40) homolog, subfamily C, member 12
hsa-miR-325	0	0	1	0	1	1	CFL2	cofilin 2 (muscle)
hsa-miR-325	1	0	1	1	1	1	ZFAND3	zinc finger, AN1-type domain 3
hsa-miR-325	1	0	1	1	1	1	XPO4	exportin 4
hsa-miR-325	1	0	1	1	1	1	SUDS3	suppressor of defective silencing 3 homolog (S. cerevisiae)
hsa-miR-325	0	0	1	1	1	1	ACBD3	acyl-CoA binding domain containing 3
hsa-miR-325	1	0	1	1	1	1	S100PBP	S100P binding protein
hsa-miR-325	0	0	1	1	1	1	OSBPL11	oxysterol binding protein-like 11
hsa-miR-325	1	0	1	1	1	1	RFX7	regulatory factor X, 7
hsa-miR-325	1	0	1	0	1	1	BCL11B	B-cell CLL/lymphoma 11B (zinc finger protein)
hsa-miR-325	0	0	1	1	1	1	HTR5A	5-hydroxytryptamine (serotonin) receptor 5A, G protein-coupled
hsa-miR-325	1	0	1	1	1	1	HOXD1	homeobox D1
hsa-miR-325	1	0	1	1	1	1	ARSJ	arylsulfatase family, member J
hsa-miR-325	0	0	1	1	1	1	ZDHHC14	zinc finger, DHHC-type containing 14
hsa-miR-325	0	0	1	1	1	1	GAL3ST4	galactose-3-O-sulfotransferase 4
hsa-miR-325	0	0	1	1	1	1	GLT25D1	glycosyltransferase 25 domain containing 1
hsa-miR-325	0	0	1	1	1	1	TTLL7	tubulin tyrosine ligase-like family, member 7
hsa-miR-325	1	0	1	0	1	1	NAA25	N(alpha)-acetyltransferase 25, NatB auxiliary subunit
hsa-miR-325	0	0	1	1	1	1	CCDC170	coiled-coil domain containing 170
hsa-miR-325	1	0	1	1	1	1	NAA50	N(alpha)-acetyltransferase 50, NatE catalytic subunit
hsa-miR-325	1	0	1	0	1	1	EDEM3	ER degradation enhancer, mannosidase alpha-like 3
hsa-miR-325	0	0	1	0	1	1	PDGFD	platelet derived growth factor D
hsa-miR-325	1	0	1	1	1	1	JHDM1D	jumonji C domain containing histone demethylase 1 homolog D (S. cerevisiae)
hsa-miR-325	1	0	1	1	1	1	SGPP1	sphingosine-1-phosphate phosphatase 1
hsa-miR-325	1	0	1	0	1	1	THAP2	THAP domain containing, apoptosis associated protein 2
hsa-miR-325	1	0	1	0	1	1	ITCH	itchy E3 ubiquitin protein ligase
hsa-miR-325	1	0	1	0	1	1	FAM172A	family with sequence similarity 172, member A
hsa-miR-325	1	0	1	0	1	1	SRSF8	serine/arginine-rich splicing factor 8
hsa-miR-325	1	0	1	1	1	1	FBXO30	F-box protein 30
hsa-miR-325	1	0	1	1	1	1	FAM175B	family with sequence similarity 175, member B
hsa-miR-325	1	0	1	1	1	1	ARID5B	AT rich interactive domain 5B (MRF1-like)
hsa-miR-325	1	0	1	0	1	1	FAR1	fatty acyl CoA reductase 1
hsa-miR-325	1	0	1	1	0	0	MAF1	MAF1 homolog (S. cerevisiae)
hsa-miR-325	1	0	1	1	1	1	ZDHHC18	zinc finger, DHHC-type containing 18
hsa-miR-325	0	0	1	1	0	0	NICN1	nicolin 1
hsa-miR-325	1	0	1	1	1	1	JAM3	junctional adhesion molecule 3
hsa-miR-325	1	0	1	0	1	1	ADO	2-aminoethanethiol (cysteamine) dioxygenase
hsa-miR-325	1	0	1	0	1	1	PPP1R15B	protein phosphatase 1, regulatory subunit 15B
hsa-miR-325	1	0	1	0	1	1	C5orf62	chromosome 5 open reading frame 62
hsa-miR-325	1	0	1	1	1	1	PCDH11Y	protocadherin 11 Y-linked
hsa-miR-325	1	0	1	1	1	1	PDGFA	platelet-derived growth factor alpha polypeptide
hsa-miR-325	1	0	1	0	1	1	PURB	purine-rich element binding protein B
hsa-miR-325	0	0	1	1	1	1	COLEC12	collectin sub-family member 12
hsa-miR-325	0	0	1	0	1	1	CNTNAP5	contactin associated protein-like 5
hsa-miR-325	0	0	1	1	1	1	RGS18	regulator of G-protein signaling 18
hsa-miR-325	1	0	1	1	1	1	BMPER	BMP binding endothelial regulator
hsa-miR-325	1	0	1	0	1	1	NUS1	nuclear undecaprenyl pyrophosphate synthase 1 homolog (S. cerevisiae)
hsa-miR-325	1	0	1	1	1	1	DNER	delta/notch-like EGF repeat containing
hsa-miR-325	1	0	1	1	1	1	PPTC7	PTC7 protein phosphatase homolog (S. cerevisiae)
hsa-miR-325	1	0	1	1	1	1	MAPK1IP1L	mitogen-activated protein kinase 1 interacting protein 1-like
hsa-miR-325	0	0	1	1	1	1	CYB5D1	cytochrome b5 domain containing 1
hsa-miR-325	0	0	1	1	0	0	CISH	cytokine inducible SH2-containing protein
hsa-miR-325	0	0	1	0	0	0	B3GNT7	UDP-GlcNAc:betaGal beta-1,3-N-acetylglucosaminyltransferase 7
hsa-miR-325	0	0	1	0	1	1	DDIT4L	DNA-damage-inducible transcript 4-like
hsa-miR-325	0	0	1	1	1	1	APOBEC3F	apolipoprotein B mRNA editing enzyme, catalytic polypeptide-like 3F
hsa-miR-325	1	0	1	1	1	1	FAM110B	family with sequence similarity 110, member B
hsa-miR-325	1	0	1	1	1	1	BOD1L1	biorientation of chromosomes in cell division 1-like 1
hsa-miR-325	1	0	1	1	1	1	POGLUT1	protein O-glucosyltransferase 1
hsa-miR-325	0	0	1	1	1	1	TARSL2	threonyl-tRNA synthetase-like 2
hsa-miR-325	0	0	1	1	1	1	EFCAB13	EF-hand calcium binding domain 13
hsa-miR-325	1	0	1	1	1	1	GRPEL2	GrpE-like 2, mitochondrial (E. coli)
hsa-miR-325	1	0	1	1	1	1	FAM123B	family with sequence similarity 123B
hsa-miR-325	0	0	1	1	1	1	DUSP18	dual specificity phosphatase 18
hsa-miR-325	1	0	1	1	1	1	SLC16A14	solute carrier family 16, member 14 (monocarboxylic acid transporter 14)
hsa-miR-325	1	0	1	1	1	1	PPM1K	protein phosphatase, Mg2+/Mn2+ dependent, 1K
hsa-miR-325	1	0	1	0	1	1	MOSPD2	motile sperm domain containing 2
hsa-miR-325	1	0	1	0	1	1	DCP2	DCP2 decapping enzyme homolog (S. cerevisiae)
hsa-miR-325	1	0	1	0	1	1	FAM116A	family with sequence similarity 116, member A
hsa-miR-325	1	0	1	0	1	1	RWDD4	RWD domain containing 4
hsa-miR-325	1	0	1	1	1	1	PDIK1L	PDLIM1 interacting kinase 1 like
hsa-miR-325	1	0	1	1	1	1	FAS	Fas (TNF receptor superfamily, member 6)
hsa-miR-325	1	0	1	0	1	1	ST6GALNAC3	ST6 (alpha-N-acetyl-neuraminyl-2,3-beta-galactosyl-1,3)-N-acetylgalactosaminide alpha-2,6-sialyltransferase 3
hsa-miR-325	0	0	1	1	1	1	BEND2	BEN domain containing 2
hsa-miR-325	1	0	1	1	1	1	POM121	POM121 transmembrane nucleoporin
hsa-miR-325	0	0	1	1	1	1	CATSPER2	cation channel, sperm associated 2
hsa-miR-325	0	0	1	1	1	1	REXO1L1	REX1, RNA exonuclease 1 homolog (S. cerevisiae)-like 1
hsa-miR-325	1	0	1	1	1	1	MMGT1	membrane magnesium transporter 1
hsa-miR-325	0	0	1	1	1	1	C15orf26	chromosome 15 open reading frame 26
hsa-miR-325	0	0	1	1	1	1	FNDC7	fibronectin type III domain containing 7
hsa-miR-325	0	0	1	1	1	1	UNC5CL	unc-5 homolog C (C. elegans)-like
hsa-miR-325	1	0	1	1	1	1	RNF149	ring finger protein 149
hsa-miR-325	1	0	1	1	1	1	SLC41A1	solute carrier family 41, member 1
hsa-miR-325	1	0	1	1	1	1	STX12	syntaxin 12
hsa-miR-325	1	0	1	1	1	1	TMEM26	transmembrane protein 26
hsa-miR-325	0	0	1	1	1	1	STXBP4	syntaxin binding protein 4
hsa-miR-325	1	0	1	0	1	1	ARL5B	ADP-ribosylation factor-like 5B
hsa-miR-325	0	0	1	1	1	1	LRP5L	low density lipoprotein receptor-related protein 5-like
hsa-miR-325	1	0	1	1	1	1	ADAT2	adenosine deaminase, tRNA-specific 2
hsa-miR-325	1	0	1	1	1	1	ISM2	isthmin 2 homolog (zebrafish)
hsa-miR-325	1	0	1	1	1	1	TMEM229B	transmembrane protein 229B
hsa-miR-325	1	0	1	1	1	1	ZBTB41	zinc finger and BTB domain containing 41
hsa-miR-325	1	0	1	1	1	1	AQP1	aquaporin 1 (Colton blood group)
hsa-miR-325	1	0	1	1	1	1	PAQR9	progestin and adipoQ receptor family member IX
hsa-miR-325	0	0	1	1	1	1	C5orf34	chromosome 5 open reading frame 34
hsa-miR-325	0	0	1	0	1	1	GYPE	glycophorin E (MNS blood group)
hsa-miR-325	0	0	1	1	1	1	ILDR2	immunoglobulin-like domain containing receptor 2
hsa-miR-325	1	0	1	0	1	1	CAPRIN1	cell cycle associated protein 1
hsa-miR-325	1	0	1	1	1	1	RAPH1	Ras association (RalGDS/AF-6) and pleckstrin homology domains 1
hsa-miR-325	1	0	1	1	1	1	E2F7	E2F transcription factor 7
hsa-miR-325	1	0	1	1	1	1	MOG	myelin oligodendrocyte glycoprotein
hsa-miR-325	0	0	1	1	1	1	C4orf50	chromosome 4 open reading frame 50
hsa-miR-325	0	0	1	0	1	1	TMEM215	transmembrane protein 215
hsa-miR-325	0	0	1	0	0	0	CELP	carboxyl ester lipase pseudogene
hsa-miR-325	0	0	1	0	0	0	MIR155HG	MIR155 host gene (non-protein coding)
hsa-miR-325	0	0	1	0	0	0	PPP1R2P3	protein phosphatase 1, regulatory (inhibitor) subunit 2 pseudogene 3
hsa-miR-325	0	0	1	0	0	0	ST13P4	suppression of tumorigenicity 13 (colon carcinoma) (Hsp70 interacting protein) pseudogene 4
hsa-miR-325	0	0	1	0	0	0	ST13P6	suppression of tumorigenicity 13 (colon carcinoma) (Hsp70 interacting protein) pseudogene 6
hsa-miR-325	0	0	1	0	0	0	LOC374443	C-type lectin domain family 2, member D pseudogene
hsa-miR-325	0	0	1	0	0	0	AQP7P1	aquaporin 7 pseudogene 1
hsa-miR-325	0	0	1	0	0	0	SNORA40	small nucleolar RNA, H/ACA box 40
hsa-miR-325	0	0	1	0	0	0	SNORD116-28	small nucleolar RNA, C/D box 116-28
hsa-miR-325	0	0	1	1	0	0	SNRPN	small nuclear ribonucleoprotein polypeptide N
hsa-miR-325	0	0	1	0	0	0	MST1P9	macrophage stimulating 1 (hepatocyte growth factor-like) pseudogene 9
hsa-miR-325	1	0	1	1	1	1	HNRNPA1	heterogeneous nuclear ribonucleoprotein A1
hsa-miR-325	0	0	1	1	0	0	STPG1	sperm-tail PG-rich repeat containing 1
hsa-miR-325	1	0	1	1	0	0	POLDIP2	polymerase (DNA-directed), delta interacting protein 2
hsa-miR-325	0	0	1	1	0	0	LLGL2	lethal giant larvae homolog 2 (Drosophila)
hsa-miR-325	0	0	1	1	0	0	ADAM7	ADAM metallopeptidase domain 7
hsa-miR-325	0	0	1	1	0	0	ALPK1	alpha-kinase 1
hsa-miR-325	0	0	0	1	1	1	C12orf5	chromosome 12 open reading frame 5
hsa-miR-325	0	0	1	1	1	1	PSG5	pregnancy specific beta-1-glycoprotein 5
hsa-miR-325	0	0	0	1	1	1	PSG4	pregnancy specific beta-1-glycoprotein 4
hsa-miR-325	0	0	0	1	0	0	TRIP6	thyroid hormone receptor interactor 6
hsa-miR-325	0	0	1	1	0	0	OAS1	2'-5'-oligoadenylate synthetase 1, 40/46kDa
hsa-miR-325	0	0	1	1	0	0	TPSD1	tryptase delta 1
hsa-miR-325	1	0	1	1	1	1	KDELR3	KDEL (Lys-Asp-Glu-Leu) endoplasmic reticulum protein retention receptor 3
hsa-miR-325	0	0	1	1	1	1	C22orf28	chromosome 22 open reading frame 28
hsa-miR-325	0	0	1	1	0	0	C22orf31	chromosome 22 open reading frame 31
hsa-miR-325	1	0	1	1	1	1	PHF5A	PHD finger protein 5A
hsa-miR-325	0	0	1	1	0	0	AP4S1	adaptor-related protein complex 4, sigma 1 subunit
hsa-miR-325	0	0	0	1	0	0	PROKR2	prokineticin receptor 2
hsa-miR-325	0	0	1	1	1	1	ATP12A	ATPase, H+/K+ transporting, nongastric, alpha polypeptide
hsa-miR-325	1	0	1	1	1	1	DCTN6	dynactin 6
hsa-miR-325	0	0	1	1	1	1	CYP4F3	cytochrome P450, family 4, subfamily F, polypeptide 3
hsa-miR-325	0	0	0	1	1	1	ZIM2	zinc finger, imprinted 2
hsa-miR-325	0	0	1	1	1	1	PEG3	paternally expressed 3
hsa-miR-325	0	0	0	1	0	0	TMEM205	transmembrane protein 205
hsa-miR-325	0	0	0	1	1	1	DNASE2	deoxyribonuclease II, lysosomal
hsa-miR-325	0	0	1	1	0	0	TFR2	transferrin receptor 2
hsa-miR-325	0	0	1	1	0	0	AATF	apoptosis antagonizing transcription factor
hsa-miR-325	1	0	1	1	0	0	SCGB2A2	secretoglobin, family 2A, member 2
hsa-miR-325	0	0	1	1	0	0	IL23A	interleukin 23, alpha subunit p19
hsa-miR-325	0	0	0	1	1	1	RERGL	RERG/RAS-like
hsa-miR-325	1	0	1	1	1	1	SRSF9	serine/arginine-rich splicing factor 9
hsa-miR-325	0	0	0	1	0	0	GABRR2	gamma-aminobutyric acid (GABA) A receptor, rho 2
hsa-miR-325	0	0	1	1	1	1	HLA-DOA	major histocompatibility complex, class II, DO alpha
hsa-miR-325	1	0	1	1	1	1	ISL1	ISL LIM homeobox 1
hsa-miR-325	0	0	0	1	0	0	POU4F3	POU class 4 homeobox 3
hsa-miR-325	0	0	1	1	0	0	HRG	histidine-rich glycoprotein
hsa-miR-325	0	0	1	1	0	0	RBP2	retinol binding protein 2, cellular
hsa-miR-325	0	0	0	1	0	0	NPRL2	nitrogen permease regulator-like 2 (S. cerevisiae)
hsa-miR-325	0	0	0	1	0	0	C3orf14	chromosome 3 open reading frame 14
hsa-miR-325	0	0	1	1	0	0	MDH1	malate dehydrogenase 1, NAD (soluble)
hsa-miR-325	1	0	1	1	1	1	TFPI	tissue factor pathway inhibitor (lipoprotein-associated coagulation inhibitor)
hsa-miR-325	0	0	0	1	0	0	PROC	protein C (inactivator of coagulation factors Va and VIIIa)
hsa-miR-325	0	0	1	1	1	1	ODC1	ornithine decarboxylase 1
hsa-miR-325	0	0	0	1	0	0	ENO1	enolase 1, (alpha)
hsa-miR-325	0	0	0	1	0	0	ACTL8	actin-like 8
hsa-miR-325	0	0	1	1	1	1	C2orf43	chromosome 2 open reading frame 43
hsa-miR-325	0	0	0	1	0	0	SLIRP	SRA stem-loop interacting RNA binding protein
hsa-miR-325	1	0	1	1	1	1	IFIT2	interferon-induced protein with tetratricopeptide repeats 2
hsa-miR-325	0	0	1	1	1	1	PRB1	proline-rich protein BstNI subfamily 1
hsa-miR-325	0	0	1	1	1	1	PRB4	proline-rich protein BstNI subfamily 4
hsa-miR-325	0	0	1	1	0	0	PRB2	proline-rich protein BstNI subfamily 2
hsa-miR-325	0	0	1	1	1	1	TFG	TRK-fused gene
hsa-miR-325	0	0	1	1	0	0	PEX6	peroxisomal biogenesis factor 6
hsa-miR-325	0	0	1	1	0	0	C6orf130	chromosome 6 open reading frame 130
hsa-miR-325	0	0	1	1	0	0	HIST1H3B	histone cluster 1, H3b
hsa-miR-325	0	0	0	1	1	1	TRIM51	tripartite motif-containing 51
hsa-miR-325	1	0	1	1	1	1	SNPH	syntaphilin
hsa-miR-325	0	0	0	1	0	0	C22orf23	chromosome 22 open reading frame 23
hsa-miR-325	0	0	0	1	0	0	DNAJC2	DnaJ (Hsp40) homolog, subfamily C, member 2
hsa-miR-325	0	0	1	1	0	0	ATP6V1F	ATPase, H+ transporting, lysosomal 14kDa, V1 subunit F
hsa-miR-325	1	0	1	1	1	1	DNAJB9	DnaJ (Hsp40) homolog, subfamily B, member 9
hsa-miR-325	0	0	0	1	1	1	TXNDC17	thioredoxin domain containing 17
hsa-miR-325	0	0	1	1	1	1	KIAA0391	KIAA0391
hsa-miR-325	1	0	1	1	1	1	SALL1	sal-like 1 (Drosophila)
hsa-miR-325	0	0	1	1	0	0	NDUFA2	NADH dehydrogenase (ubiquinone) 1 alpha subcomplex, 2, 8kDa
hsa-miR-325	0	0	0	1	1	1	TRMT2A	tRNA methyltransferase 2 homolog A (S. cerevisiae)
hsa-miR-325	0	0	0	1	1	1	ZNF193	zinc finger protein 193
hsa-miR-325	0	0	0	1	1	1	ZKSCAN3	zinc finger with KRAB and SCAN domains 3
hsa-miR-325	0	0	1	1	1	1	MICB	MHC class I polypeptide-related sequence B
hsa-miR-325	0	0	0	1	0	0	KRT75	keratin 75
hsa-miR-325	0	0	0	1	1	1	APOC2	apolipoprotein C-II
hsa-miR-325	0	0	0	1	0	0	PGLS	6-phosphogluconolactonase
hsa-miR-325	0	0	0	1	1	1	ACSBG2	acyl-CoA synthetase bubblegum family member 2
hsa-miR-325	0	0	1	1	0	0	FUT5	fucosyltransferase 5 (alpha (1,3) fucosyltransferase)
hsa-miR-325	0	0	0	1	0	0	BMP15	bone morphogenetic protein 15
hsa-miR-325	0	0	0	1	0	0	GDF15	growth differentiation factor 15
hsa-miR-325	0	0	1	1	0	0	ALKBH6	alkB, alkylation repair homolog 6 (E. coli)
hsa-miR-325	0	0	1	1	0	0	SYNE4	spectrin repeat containing, nuclear envelope family member 4
hsa-miR-325	1	0	1	1	1	1	SLC7A10	solute carrier family 7 (neutral amino acid transporter light chain, asc system), member 10
hsa-miR-325	0	0	1	1	0	0	COX4I1	cytochrome c oxidase subunit IV isoform 1
hsa-miR-325	0	0	1	1	1	1	MRPL35	mitochondrial ribosomal protein L35
hsa-miR-325	1	0	1	1	1	1	RAN	RAN, member RAS oncogene family
hsa-miR-325	0	0	0	1	0	0	RHBG	Rh family, B glycoprotein (gene/pseudogene)
hsa-miR-325	0	0	1	1	0	0	DPH2	DPH2 homolog (S. cerevisiae)
hsa-miR-325	1	0	1	1	1	1	TMTC1	transmembrane and tetratricopeptide repeat containing 1
hsa-miR-325	0	0	1	1	0	0	CCDC59	coiled-coil domain containing 59
hsa-miR-325	0	0	1	1	1	1	LYVE1	lymphatic vessel endothelial hyaluronan receptor 1
hsa-miR-325	0	0	1	1	1	1	FST	follistatin
hsa-miR-325	0	0	0	1	0	0	CARS2	cysteinyl-tRNA synthetase 2, mitochondrial (putative)
hsa-miR-325	0	0	1	1	1	1	OASL	2'-5'-oligoadenylate synthetase-like
hsa-miR-325	0	0	0	1	0	0	RNFT2	ring finger protein, transmembrane 2
hsa-miR-325	0	0	0	1	0	0	CCT7	chaperonin containing TCP1, subunit 7 (eta)
hsa-miR-325	0	0	1	1	1	1	KCNMB4	potassium large conductance calcium-activated channel, subfamily M, beta member 4
hsa-miR-325	0	0	0	1	0	0	ALDH1L2	aldehyde dehydrogenase 1 family, member L2
hsa-miR-325	0	0	0	1	0	0	PSORS1C1	psoriasis susceptibility 1 candidate 1
hsa-miR-325	1	0	1	1	1	1	SLCO5A1	solute carrier organic anion transporter family, member 5A1
hsa-miR-325	0	0	0	1	0	0	TUBGCP4	tubulin, gamma complex associated protein 4
hsa-miR-325	1	0	1	1	1	1	CCBL2	cysteine conjugate-beta lyase 2
hsa-miR-325	0	0	1	1	1	1	DIRC2	disrupted in renal carcinoma 2
hsa-miR-325	0	0	0	1	1	1	TMEM206	transmembrane protein 206
hsa-miR-325	1	0	1	1	1	1	USP14	ubiquitin specific peptidase 14 (tRNA-guanine transglycosylase)
hsa-miR-325	0	0	0	1	1	1	UTP20	UTP20, small subunit (SSU) processome component, homolog (yeast)
hsa-miR-325	0	0	1	1	0	0	ANAPC5	anaphase promoting complex subunit 5
hsa-miR-325	1	0	1	1	1	1	CORO2B	coronin, actin binding protein, 2B
hsa-miR-325	0	0	0	1	0	0	GSDMD	gasdermin D
hsa-miR-325	0	0	1	1	1	1	PRDX1	peroxiredoxin 1
hsa-miR-325	0	0	0	1	1	1	LGALS3BP	lectin, galactoside-binding, soluble, 3 binding protein
hsa-miR-325	0	0	0	1	0	0	UCP1	uncoupling protein 1 (mitochondrial, proton carrier)
hsa-miR-325	0	0	1	1	1	1	EHD2	EH-domain containing 2
hsa-miR-325	1	0	1	1	1	1	LAMC2	laminin, gamma 2
hsa-miR-325	0	0	0	1	1	1	MCM6	minichromosome maintenance complex component 6
hsa-miR-325	0	0	1	1	0	0	NDST4	N-deacetylase/N-sulfotransferase (heparan glucosaminyl) 4
hsa-miR-325	0	0	0	1	0	0	PPAP2A	phosphatidic acid phosphatase type 2A
hsa-miR-325	0	0	0	1	1	1	ASTE1	asteroid homolog 1 (Drosophila)
hsa-miR-325	0	0	1	1	1	1	PAPSS1	3'-phosphoadenosine 5'-phosphosulfate synthase 1
hsa-miR-325	0	0	1	1	1	1	TAX1BP1	Tax1 (human T-cell leukemia virus type I) binding protein 1
hsa-miR-325	1	0	1	1	0	0	B3GAT3	beta-1,3-glucuronyltransferase 3 (glucuronosyltransferase I)
hsa-miR-325	0	0	1	1	1	1	SLC25A13	solute carrier family 25 (aspartate/glutamate carrier), member 13
hsa-miR-325	0	0	1	1	0	0	EIF2B2	eukaryotic translation initiation factor 2B, subunit 2 beta, 39kDa
hsa-miR-325	0	0	1	1	0	0	DHH	desert hedgehog
hsa-miR-325	0	0	0	1	0	0	GCNT3	glucosaminyl (N-acetyl) transferase 3, mucin type
hsa-miR-325	1	0	0	1	0	0	UNC45A	unc-45 homolog A (C. elegans)
hsa-miR-325	0	0	0	1	0	0	SEPT12	septin 12
hsa-miR-325	0	0	0	1	0	0	ADAD2	adenosine deaminase domain containing 2
hsa-miR-325	0	0	0	1	0	0	LRRC46	leucine rich repeat containing 46
hsa-miR-325	0	0	0	1	1	1	ZNF750	zinc finger protein 750
hsa-miR-325	1	0	1	1	1	1	PMAIP1	phorbol-12-myristate-13-acetate-induced protein 1
hsa-miR-325	0	0	1	1	0	0	TM6SF2	transmembrane 6 superfamily member 2
hsa-miR-325	1	0	1	1	0	0	SOD1	superoxide dismutase 1, soluble
hsa-miR-325	0	0	1	1	0	0	RPL13A	ribosomal protein L13a
hsa-miR-325	0	0	0	1	0	0	FAM176B	family with sequence similarity 176, member B
hsa-miR-325	1	0	1	1	1	1	FAM134A	family with sequence similarity 134, member A
hsa-miR-325	0	0	1	1	0	0	PLA1A	phospholipase A1 member A
hsa-miR-325	0	0	1	1	1	1	EIF2A	eukaryotic translation initiation factor 2A, 65kDa
hsa-miR-325	0	0	1	1	1	1	MLIP	muscular LMNA-interacting protein
hsa-miR-325	1	0	1	1	1	1	NACC2	NACC family member 2, BEN and BTB (POZ) domain containing
hsa-miR-325	1	0	0	1	1	1	PPRC1	peroxisome proliferator-activated receptor gamma, coactivator-related 1
hsa-miR-325	0	0	1	1	0	0	PAMR1	peptidase domain containing associated with muscle regeneration 1
hsa-miR-325	0	0	0	1	0	0	C11orf52	chromosome 11 open reading frame 52
hsa-miR-325	0	0	1	1	1	1	MLF1IP	MLF1 interacting protein
hsa-miR-325	0	0	0	1	1	1	GUF1	GUF1 GTPase homolog (S. cerevisiae)
hsa-miR-325	0	0	0	1	1	1	FARSB	phenylalanyl-tRNA synthetase, beta subunit
hsa-miR-325	0	0	0	1	0	0	GRID2	glutamate receptor, ionotropic, delta 2
hsa-miR-325	0	0	0	1	0	0	CWF19L2	CWF19-like 2, cell cycle control (S. pombe)
hsa-miR-325	0	0	0	1	1	1	UGT3A2	UDP glycosyltransferase 3 family, polypeptide A2
hsa-miR-325	0	0	1	1	1	1	RAB3C	RAB3C, member RAS oncogene family
hsa-miR-325	0	0	1	1	1	1	IFLTD1	intermediate filament tail domain containing 1
hsa-miR-325	0	0	0	1	0	0	SPACA7	sperm acrosome associated 7
hsa-miR-325	0	0	1	1	1	1	PGM3	phosphoglucomutase 3
hsa-miR-325	0	0	0	1	1	1	TMPRSS15	transmembrane protease, serine 15
hsa-miR-325	0	0	1	1	1	1	XPC	xeroderma pigmentosum, complementation group C
hsa-miR-325	0	0	1	1	1	1	CCDC146	coiled-coil domain containing 146
hsa-miR-325	0	0	0	1	0	0	GEMIN5	gem (nuclear organelle) associated protein 5
hsa-miR-325	0	0	0	1	1	1	KDM8	lysine (K)-specific demethylase 8
hsa-miR-325	0	0	1	1	1	1	VBP1	von Hippel-Lindau binding protein 1
hsa-miR-325	0	0	0	1	0	0	FUT6	fucosyltransferase 6 (alpha (1,3) fucosyltransferase)
hsa-miR-325	0	0	0	1	0	0	PIK3CB	phosphatidylinositol-4,5-bisphosphate 3-kinase, catalytic subunit beta
hsa-miR-325	0	0	1	1	0	0	GPR162	G protein-coupled receptor 162
hsa-miR-325	0	0	0	1	0	0	LEPREL2	leprecan-like 2
hsa-miR-325	0	0	0	1	0	0	TRMU	tRNA 5-methylaminomethyl-2-thiouridylate methyltransferase
hsa-miR-325	0	0	0	1	1	1	SSU72	SSU72 RNA polymerase II CTD phosphatase homolog (S. cerevisiae)
hsa-miR-325	0	0	1	1	0	0	ANKLE1	ankyrin repeat and LEM domain containing 1
hsa-miR-325	0	0	0	1	0	0	AIRE	autoimmune regulator
hsa-miR-325	0	0	1	1	1	1	ZNF714	zinc finger protein 714
hsa-miR-325	0	0	1	1	0	0	SHKBP1	SH3KBP1 binding protein 1
hsa-miR-325	0	0	0	1	0	0	AMICA1	adhesion molecule, interacts with CXADR antigen 1
hsa-miR-325	0	0	0	1	0	0	SDR9C7	short chain dehydrogenase/reductase family 9C, member 7
hsa-miR-325	0	0	1	1	0	0	GNG3	guanine nucleotide binding protein (G protein), gamma 3
hsa-miR-325	1	0	1	1	1	1	WDR92	WD repeat domain 92
hsa-miR-325	1	0	1	1	1	1	PPP3R1	protein phosphatase 3, regulatory subunit B, alpha
hsa-miR-325	0	0	1	1	0	0	FLAD1	FAD1 flavin adenine dinucleotide synthetase homolog (S. cerevisiae)
hsa-miR-325	1	0	0	1	1	1	EOMES	eomesodermin
hsa-miR-325	0	0	1	1	1	1	CXCL3	chemokine (C-X-C motif) ligand 3
hsa-miR-325	0	0	0	1	0	0	TCF23	transcription factor 23
hsa-miR-325	0	0	1	1	0	0	IFT122	intraflagellar transport 122 homolog (Chlamydomonas)
hsa-miR-325	0	0	0	1	1	1	MFSD8	major facilitator superfamily domain containing 8
hsa-miR-325	1	0	1	1	1	1	T	T, brachyury homolog (mouse)
hsa-miR-325	0	0	1	1	1	1	SAP30L	SAP30-like
hsa-miR-325	0	0	1	1	1	1	KCNV1	potassium channel, subfamily V, member 1
hsa-miR-325	0	0	0	1	0	0	NOS3	nitric oxide synthase 3 (endothelial cell)
hsa-miR-325	0	0	1	1	0	0	WBSCR27	Williams Beuren syndrome chromosome region 27
hsa-miR-325	1	0	1	1	0	0	FIGF	c-fos induced growth factor (vascular endothelial growth factor D)
hsa-miR-325	0	0	1	1	1	1	MRRF	mitochondrial ribosome recycling factor
hsa-miR-325	0	0	1	1	0	0	LRR1	leucine rich repeat protein 1
hsa-miR-325	0	0	1	1	1	1	STOX1	storkhead box 1
hsa-miR-325	0	0	1	1	1	1	SLC39A2	solute carrier family 39 (zinc transporter), member 2
hsa-miR-325	1	0	1	1	0	0	NR1H3	nuclear receptor subfamily 1, group H, member 3
hsa-miR-325	0	0	1	1	0	0	PPP1R14D	protein phosphatase 1, regulatory (inhibitor) subunit 14D
hsa-miR-325	0	0	0	1	0	0	OR2D2	olfactory receptor, family 2, subfamily D, member 2
hsa-miR-325	0	0	1	1	1	1	CDYL2	chromodomain protein, Y-like 2
hsa-miR-325	0	0	1	1	1	1	MYH11	myosin, heavy chain 11, smooth muscle
hsa-miR-325	0	0	0	1	0	0	B4GALNT2	beta-1,4-N-acetyl-galactosaminyl transferase 2
hsa-miR-325	0	0	1	1	0	0	GNGT2	guanine nucleotide binding protein (G protein), gamma transducing activity polypeptide 2
hsa-miR-325	0	0	0	1	0	0	MMP26	matrix metallopeptidase 26
hsa-miR-325	0	0	0	1	1	1	CDT1	chromatin licensing and DNA replication factor 1
hsa-miR-325	0	0	0	1	0	0	PROCA1	protein interacting with cyclin A1
hsa-miR-325	0	0	0	1	1	1	ZNF528	zinc finger protein 528
hsa-miR-325	0	0	0	1	0	0	ZNF578	zinc finger protein 578
hsa-miR-325	0	0	0	1	0	0	LILRA5	leukocyte immunoglobulin-like receptor, subfamily A (with TM domain), member 5
hsa-miR-325	0	0	0	1	0	0	PSCA	prostate stem cell antigen
hsa-miR-325	0	0	0	1	1	1	ZNF443	zinc finger protein 443
hsa-miR-325	1	0	0	1	0	0	ITFG3	integrin alpha FG-GAP repeat containing 3
hsa-miR-325	0	0	1	1	1	1	DNAJC18	DnaJ (Hsp40) homolog, subfamily C, member 18
hsa-miR-325	0	0	0	1	0	0	OR8I2	olfactory receptor, family 8, subfamily I, member 2
hsa-miR-325	0	0	1	1	1	1	RFX3	regulatory factor X, 3 (influences HLA class II expression)
hsa-miR-325	0	0	1	1	1	1	HOXC4	homeobox C4
hsa-miR-325	0	0	0	1	0	0	NFU1	NFU1 iron-sulfur cluster scaffold homolog (S. cerevisiae)
hsa-miR-325	0	0	1	1	0	0	GHRHR	growth hormone releasing hormone receptor
hsa-miR-325	1	0	1	1	1	1	SUV420H1	suppressor of variegation 4-20 homolog 1 (Drosophila)
hsa-miR-325	1	0	1	1	0	0	INO80E	INO80 complex subunit E
hsa-miR-325	0	0	0	1	1	1	VASN	vasorin
hsa-miR-325	0	0	0	1	1	1	NINJ2	ninjurin 2
hsa-miR-325	0	0	1	1	1	1	MUC12	mucin 12, cell surface associated
hsa-miR-325	0	0	1	1	1	1	HDAC3	histone deacetylase 3
hsa-miR-325	0	0	1	1	1	1	ITIH5	inter-alpha-trypsin inhibitor heavy chain family, member 5
hsa-miR-325	0	0	0	1	0	0	OR10H3	olfactory receptor, family 10, subfamily H, member 3
hsa-miR-325	1	0	1	1	0	0	POLR3D	polymerase (RNA) III (DNA directed) polypeptide D, 44kDa
hsa-miR-325	0	0	1	1	0	0	C3orf78	chromosome 3 open reading frame 78
hsa-miR-325	0	0	0	1	0	0	GOT1L1	glutamic-oxaloacetic transaminase 1-like 1
hsa-miR-325	1	0	1	1	1	1	HARS	histidyl-tRNA synthetase
hsa-miR-325	0	0	0	1	0	0	METTL7B	methyltransferase like 7B
hsa-miR-325	0	0	0	1	0	0	RXFP1	relaxin/insulin-like family peptide receptor 1
hsa-miR-325	0	0	1	1	1	1	MRPS12	mitochondrial ribosomal protein S12
hsa-miR-325	0	0	1	1	0	0	TMEM134	transmembrane protein 134
hsa-miR-325	1	0	0	1	1	1	FAM57A	family with sequence similarity 57, member A
hsa-miR-325	0	0	1	1	1	1	WDR52	WD repeat domain 52
hsa-miR-325	0	0	1	1	1	1	SH3YL1	SH3 domain containing, Ysc84-like 1 (S. cerevisiae)
hsa-miR-325	0	0	0	1	0	0	OR10P1	olfactory receptor, family 10, subfamily P, member 1
hsa-miR-325	0	0	0	1	0	0	MAL	mal, T-cell differentiation protein
hsa-miR-325	1	0	1	1	1	1	KCNE3	potassium voltage-gated channel, Isk-related family, member 3
hsa-miR-325	0	0	1	1	1	1	PARP14	poly (ADP-ribose) polymerase family, member 14
hsa-miR-325	1	0	1	1	1	1	CLTB	clathrin, light chain B
hsa-miR-325	0	0	1	1	1	1	CELF1	CUGBP, Elav-like family member 1
hsa-miR-325	0	0	1	1	1	1	REP15	RAB15 effector protein
hsa-miR-325	0	0	0	1	1	1	WFIKKN2	WAP, follistatin/kazal, immunoglobulin, kunitz and netrin domain containing 2
hsa-miR-325	0	0	1	1	1	1	CEP19	centrosomal protein 19kDa
hsa-miR-325	0	0	1	1	0	0	RPS6KB2	ribosomal protein S6 kinase, 70kDa, polypeptide 2
hsa-miR-325	0	0	0	1	1	1	PNPLA1	patatin-like phospholipase domain containing 1
hsa-miR-325	0	0	0	1	0	0	LOC100129726	uncharacterized LOC100129726
hsa-miR-325	0	0	0	1	1	1	C15orf44	chromosome 15 open reading frame 44
hsa-miR-325	0	0	1	1	0	0	FBXL13	F-box and leucine-rich repeat protein 13
hsa-miR-325	0	0	1	1	0	0	ANKRD18A	ankyrin repeat domain 18A
hsa-miR-325	1	0	1	1	1	1	AQP11	aquaporin 11
hsa-miR-325	0	0	0	1	1	1	CHAF1B	chromatin assembly factor 1, subunit B (p60)
hsa-miR-325	0	0	1	1	1	1	CCT6B	chaperonin containing TCP1, subunit 6B (zeta 2)
hsa-miR-325	0	0	0	1	0	0	FARSA	phenylalanyl-tRNA synthetase, alpha subunit
hsa-miR-325	0	0	1	1	0	0	KCNH6	potassium voltage-gated channel, subfamily H (eag-related), member 6
hsa-miR-325	0	0	1	1	1	1	KCND3	potassium voltage-gated channel, Shal-related subfamily, member 3
hsa-miR-325	0	0	0	1	1	1	ASB2	ankyrin repeat and SOCS box containing 2
hsa-miR-325	0	0	0	1	0	0	WRAP53	WD repeat containing, antisense to TP53
hsa-miR-325	0	0	0	1	1	1	ZNF552	zinc finger protein 552
hsa-miR-325	0	0	0	1	0	0	DEF6	differentially expressed in FDCP 6 homolog (mouse)
hsa-miR-325	1	0	1	1	1	1	CCZ1B	CCZ1 vacuolar protein trafficking and biogenesis associated homolog B (S. cerevisiae)
hsa-miR-325	0	0	1	1	0	0	SLC38A5	solute carrier family 38, member 5
hsa-miR-325	1	0	0	1	1	1	TUBB6	tubulin, beta 6 class V
hsa-miR-325	0	0	1	1	1	1	ATG4C	autophagy related 4C, cysteine peptidase
hsa-miR-325	1	0	1	1	1	1	SERF2	small EDRK-rich factor 2
hsa-miR-325	1	0	1	1	1	1	C15orf63	chromosome 15 open reading frame 63
hsa-miR-325	0	0	1	1	1	1	FKRP	fukutin related protein
hsa-miR-325	0	0	0	1	1	1	IL17RA	interleukin 17 receptor A
hsa-miR-325	1	0	1	1	0	0	EPC1	enhancer of polycomb homolog 1 (Drosophila)
hsa-miR-325	1	0	0	1	0	0	ST3GAL1	ST3 beta-galactoside alpha-2,3-sialyltransferase 1
hsa-miR-325	0	0	1	1	1	1	RAB39A	RAB39A, member RAS oncogene family
hsa-miR-325	0	0	1	1	1	1	ARL14	ADP-ribosylation factor-like 14
hsa-miR-325	0	0	1	1	1	1	IRX5	iroquois homeobox 5
hsa-miR-325	0	0	0	1	0	0	SHARPIN	SHANK-associated RH domain interactor
hsa-miR-325	1	0	1	1	0	0	CCDC71	coiled-coil domain containing 71
hsa-miR-325	1	0	0	1	1	1	FAM210A	family with sequence similarity 210, member A
hsa-miR-325	0	0	1	1	0	0	FOXJ1	forkhead box J1
hsa-miR-325	1	0	1	1	1	1	SRRM1	serine/arginine repetitive matrix 1
hsa-miR-325	0	0	1	1	1	1	LGALS8	lectin, galactoside-binding, soluble, 8
hsa-miR-325	0	0	0	1	0	0	ZNF687	zinc finger protein 687
hsa-miR-325	0	0	1	1	0	0	HERC2P3	hect domain and RLD 2 pseudogene 3
hsa-miR-325	0	0	1	1	0	0	SAGE1	sarcoma antigen 1
hsa-miR-325	1	0	1	1	0	0	FOXP2	forkhead box P2
hsa-miR-325	0	0	1	1	1	1	MRPS33	mitochondrial ribosomal protein S33
hsa-miR-325	1	0	1	1	1	1	C14orf28	chromosome 14 open reading frame 28
hsa-miR-325	0	0	1	1	1	1	CTNNAL1	catenin (cadherin-associated protein), alpha-like 1
hsa-miR-325	0	0	1	1	1	1	LACC1	laccase (multicopper oxidoreductase) domain containing 1
hsa-miR-325	0	0	1	1	0	0	BBX	bobby sox homolog (Drosophila)
hsa-miR-325	0	0	1	1	1	1	WFDC9	WAP four-disulfide core domain 9
hsa-miR-325	0	0	1	1	1	1	HOXB2	homeobox B2
hsa-miR-325	0	0	1	1	0	0	MMP12	matrix metallopeptidase 12 (macrophage elastase)
hsa-miR-325	0	0	1	1	1	1	LRRC3B	leucine rich repeat containing 3B
hsa-miR-325	1	0	1	1	1	1	RIT2	Ras-like without CAAX 2
hsa-miR-325	0	0	0	1	0	0	IMPDH2	IMP (inosine 5'-monophosphate) dehydrogenase 2
hsa-miR-325	0	0	0	1	0	0	NDUFAF3	NADH dehydrogenase (ubiquinone) complex I, assembly factor 3
hsa-miR-325	0	0	0	1	0	0	CFD	complement factor D (adipsin)
hsa-miR-325	0	0	1	1	0	0	PLB1	phospholipase B1
hsa-miR-325	0	0	0	1	1	1	DDX53	DEAD (Asp-Glu-Ala-Asp) box polypeptide 53
hsa-miR-325	0	0	0	1	1	1	C16orf79	chromosome 16 open reading frame 79
hsa-miR-325	0	0	0	1	0	0	OR4N4	olfactory receptor, family 4, subfamily N, member 4
hsa-miR-325	1	0	1	1	1	1	C11orf82	chromosome 11 open reading frame 82
hsa-miR-325	0	0	1	1	1	1	PSG2	pregnancy specific beta-1-glycoprotein 2
hsa-miR-325	1	0	1	1	1	1	CREB3L2	cAMP responsive element binding protein 3-like 2
hsa-miR-325	0	0	1	1	1	1	ADAMTSL5	ADAMTS-like 5
hsa-miR-325	0	0	0	1	1	1	NR2C1	nuclear receptor subfamily 2, group C, member 1
hsa-miR-325	0	0	0	1	1	1	WDR5B	WD repeat domain 5B
hsa-miR-325	0	0	1	1	0	0	LOC100131138	uncharacterized LOC100131138
hsa-miR-325	0	0	1	1	1	1	DUT	deoxyuridine triphosphatase
hsa-miR-325	0	0	0	1	0	0	IL28A	interleukin 28A (interferon, lambda 2)
hsa-miR-325	0	0	1	1	0	0	STAC3	SH3 and cysteine rich domain 3
hsa-miR-325	0	0	0	1	1	1	APOL4	apolipoprotein L, 4
hsa-miR-325	0	0	0	1	1	1	TRIM50	tripartite motif containing 50
hsa-miR-325	0	0	1	1	0	0	HIST1H2AJ	histone cluster 1, H2aj
hsa-miR-325	0	0	0	1	1	1	COPB2	coatomer protein complex, subunit beta 2 (beta prime)
hsa-miR-325	0	0	1	1	0	0	FAM212A	family with sequence similarity 212, member A
hsa-miR-325	0	0	1	1	1	1	ATPIF1	ATPase inhibitory factor 1
hsa-miR-325	0	0	1	1	0	0	KRT26	keratin 26
hsa-miR-325	1	0	1	1	0	0	SLC44A2	solute carrier family 44, member 2
hsa-miR-325	0	0	1	1	1	1	UNC119	unc-119 homolog (C. elegans)
hsa-miR-325	0	0	1	1	1	1	BRIX1	BRX1, biogenesis of ribosomes, homolog (S. cerevisiae)
hsa-miR-325	0	0	1	1	0	0	FAM3B	family with sequence similarity 3, member B
hsa-miR-325	0	0	0	1	1	1	GJD3	gap junction protein, delta 3, 31.9kDa
hsa-miR-325	0	0	0	1	0	0	TSPO	translocator protein (18kDa)
hsa-miR-325	1	0	1	1	1	1	DTX3	deltex homolog 3 (Drosophila)
hsa-miR-325	1	0	1	1	1	1	SUPT7L	suppressor of Ty 7 (S. cerevisiae)-like
hsa-miR-325	0	0	0	1	1	1	ZNF420	zinc finger protein 420
hsa-miR-325	0	0	1	1	1	1	RUNDC3B	RUN domain containing 3B
hsa-miR-325	0	0	1	1	0	0	TAF13	TAF13 RNA polymerase II, TATA box binding protein (TBP)-associated factor, 18kDa
hsa-miR-325	0	0	1	1	0	0	DCBLD1	discoidin, CUB and LCCL domain containing 1
hsa-miR-325	1	0	1	1	1	1	MTSS1L	metastasis suppressor 1-like
hsa-miR-325	0	0	0	1	0	0	PTGES2	prostaglandin E synthase 2
hsa-miR-325	0	0	0	1	0	0	NCR3LG1	natural killer cell cytotoxicity receptor 3 ligand 1
hsa-miR-325	1	0	1	1	1	1	TRIM9	tripartite motif containing 9
hsa-miR-325	0	0	1	1	1	1	TMPRSS4	transmembrane protease, serine 4
hsa-miR-325	0	0	1	1	1	1	TRNT1	tRNA nucleotidyl transferase, CCA-adding, 1
hsa-miR-325	0	0	1	1	1	1	ERMP1	endoplasmic reticulum metallopeptidase 1
hsa-miR-325	0	0	1	1	1	1	TTC4	tetratricopeptide repeat domain 4
hsa-miR-325	0	0	1	1	0	0	HEATR8	HEAT repeat containing 8
hsa-miR-325	0	0	0	1	1	1	PDZK1	PDZ domain containing 1
hsa-miR-325	0	0	0	1	1	1	MRAP	melanocortin 2 receptor accessory protein
hsa-miR-325	0	0	1	1	1	1	NDUFA5	NADH dehydrogenase (ubiquinone) 1 alpha subcomplex, 5, 13kDa
hsa-miR-325	1	0	1	1	0	0	PFKM	phosphofructokinase, muscle
hsa-miR-325	1	0	1	1	1	1	PKHD1	polycystic kidney and hepatic disease 1 (autosomal recessive)
hsa-miR-325	0	0	1	1	0	0	C2orf80	chromosome 2 open reading frame 80
hsa-miR-325	0	0	1	1	0	0	CORO1B	coronin, actin binding protein, 1B
hsa-miR-325	0	0	1	1	1	1	TRIM28	tripartite motif containing 28
hsa-miR-325	0	0	1	1	0	0	C7orf59	chromosome 7 open reading frame 59
hsa-miR-325	0	0	0	1	1	1	DCAKD	dephospho-CoA kinase domain containing
hsa-miR-325	0	0	1	1	0	0	FXYD5	FXYD domain containing ion transport regulator 5
hsa-miR-325	0	0	0	1	0	0	ALKBH2	alkB, alkylation repair homolog 2 (E. coli)
hsa-miR-325	0	0	1	1	0	0	SYCE1	synaptonemal complex central element protein 1
hsa-miR-325	0	0	1	1	1	1	APOD	apolipoprotein D
hsa-miR-325	0	0	1	1	1	1	TRIM24	tripartite motif containing 24
hsa-miR-325	1	0	1	1	0	0	SLC35E4	solute carrier family 35, member E4
hsa-miR-325	0	0	1	1	1	1	VIPAS39	VPS33B interacting protein, apical-basolateral polarity regulator, spe-39 homolog
hsa-miR-325	1	0	1	1	1	1	UBAP2L	ubiquitin associated protein 2-like
hsa-miR-325	1	0	1	1	1	1	ASH2L	ash2 (absent, small, or homeotic)-like (Drosophila)
hsa-miR-325	0	0	1	1	0	0	OSGIN1	oxidative stress induced growth inhibitor 1
hsa-miR-325	1	0	1	1	1	1	ABCB9	ATP-binding cassette, sub-family B (MDR/TAP), member 9
hsa-miR-325	1	0	1	1	0	0	TMEM198	transmembrane protein 198
hsa-miR-325	0	0	0	1	0	0	GTF2A1	general transcription factor IIA, 1, 19/37kDa
hsa-miR-325	0	0	1	1	1	1	PUS7L	pseudouridylate synthase 7 homolog (S. cerevisiae)-like
hsa-miR-325	0	0	1	1	1	1	ZNF676	zinc finger protein 676
hsa-miR-325	0	0	0	1	1	1	TRADD	TNFRSF1A-associated via death domain
hsa-miR-325	0	0	1	1	0	0	NISCH	nischarin
hsa-miR-325	0	0	0	1	0	0	DHRS7B	dehydrogenase/reductase (SDR family) member 7B
hsa-miR-325	0	0	1	1	1	1	TRAF6	TNF receptor-associated factor 6, E3 ubiquitin protein ligase
hsa-miR-325	0	0	1	1	1	1	DYX1C1	dyslexia susceptibility 1 candidate 1
hsa-miR-325	0	0	1	1	1	1	CDH26	cadherin 26
hsa-miR-325	1	0	1	1	1	1	FAM184A	family with sequence similarity 184, member A
hsa-miR-325	0	0	0	1	1	1	POLR2K	polymerase (RNA) II (DNA directed) polypeptide K, 7.0kDa
hsa-miR-325	1	0	1	1	1	1	SKP1	S-phase kinase-associated protein 1
hsa-miR-325	0	0	1	1	1	1	GPX4	glutathione peroxidase 4
hsa-miR-325	0	0	0	1	1	1	NDUFV3	NADH dehydrogenase (ubiquinone) flavoprotein 3, 10kDa
hsa-miR-325	0	0	0	1	1	1	KRT74	keratin 74
hsa-miR-325	1	0	1	1	1	1	IGSF11	immunoglobulin superfamily, member 11
hsa-miR-325	1	0	1	1	1	1	ANXA4	annexin A4
hsa-miR-325	1	0	1	1	1	1	C6orf89	chromosome 6 open reading frame 89
hsa-miR-325	0	0	0	1	0	0	CXorf40B	chromosome X open reading frame 40B
hsa-miR-325	0	0	0	1	0	0	MFSD12	major facilitator superfamily domain containing 12
hsa-miR-325	0	0	0	1	0	0	PDE4C	phosphodiesterase 4C, cAMP-specific
hsa-miR-325	0	0	0	1	1	1	SULT1A3	sulfotransferase family, cytosolic, 1A, phenol-preferring, member 3
hsa-miR-325	0	0	0	1	0	0	TRIM17	tripartite motif containing 17
hsa-miR-325	0	0	1	1	1	1	RSL1D1	ribosomal L1 domain containing 1
hsa-miR-325	0	0	1	1	0	0	PC	pyruvate carboxylase
hsa-miR-325	0	0	1	1	1	1	PLGLB1	plasminogen-like B1
hsa-miR-325	0	0	0	1	0	0	ZGPAT	zinc finger, CCCH-type with G patch domain
hsa-miR-325	0	0	1	1	1	1	MED24	mediator complex subunit 24
hsa-miR-325	1	0	0	1	1	1	ZNF614	zinc finger protein 614
hsa-miR-325	0	0	0	1	0	0	ZNF432	zinc finger protein 432
hsa-miR-325	1	0	1	1	1	1	ARIH2	ariadne homolog 2 (Drosophila)
hsa-miR-325	1	0	1	1	1	1	PTPRD	protein tyrosine phosphatase, receptor type, D
hsa-miR-325	0	0	1	1	0	0	PPIE	peptidylprolyl isomerase E (cyclophilin E)
hsa-miR-325	0	0	0	1	0	0	HVCN1	hydrogen voltage-gated channel 1
hsa-miR-325	0	0	1	1	0	0	CRB3	crumbs homolog 3 (Drosophila)
hsa-miR-325	0	0	1	1	1	1	TPCN2	two pore segment channel 2
hsa-miR-325	1	0	0	1	1	1	PTRF	polymerase I and transcript release factor
hsa-miR-325	1	0	1	1	1	1	PEX2	peroxisomal biogenesis factor 2
hsa-miR-325	0	0	0	1	0	0	TTC30B	tetratricopeptide repeat domain 30B
hsa-miR-325	1	0	0	1	1	1	COL9A1	collagen, type IX, alpha 1
hsa-miR-325	0	0	1	1	0	0	COL27A1	collagen, type XXVII, alpha 1
hsa-miR-325	1	0	1	1	1	1	GFPT1	glutamine--fructose-6-phosphate transaminase 1
hsa-miR-325	0	0	0	1	0	0	ANKRD20A8P	ankyrin repeat domain 20 family, member A8, pseudogene
hsa-miR-325	0	0	0	1	0	0	ANKRD20A4	ankyrin repeat domain 20 family, member A4
hsa-miR-325	0	0	0	1	0	0	ANKRD20A20P	ankyrin repeat domain 20 family, member A20, pseudogene
hsa-miR-325	0	0	0	1	0	0	TRIM48	tripartite motif containing 48
hsa-miR-325	0	0	1	1	1	1	SEMA5B	sema domain, seven thrombospondin repeats (type 1 and type 1-like), transmembrane domain (TM) and short cytoplasmic domain, (semaphorin) 5B
hsa-miR-325	0	0	0	1	1	1	ZNF441	zinc finger protein 441
hsa-miR-325	1	0	1	1	1	1	CPNE4	copine IV
hsa-miR-325	0	0	0	1	0	0	ZNF799	zinc finger protein 799
hsa-miR-325	0	0	0	1	1	1	FAM47C	family with sequence similarity 47, member C
hsa-miR-325	0	0	1	1	1	1	ZNF483	zinc finger protein 483
hsa-miR-325	0	0	0	1	0	0	ABCB8	ATP-binding cassette, sub-family B (MDR/TAP), member 8
hsa-miR-325	0	0	1	1	1	1	GGPS1	geranylgeranyl diphosphate synthase 1
hsa-miR-325	0	0	1	1	0	0	CXorf40A	chromosome X open reading frame 40A
hsa-miR-325	0	0	1	1	1	1	PLGLB2	plasminogen-like B2
hsa-miR-325	0	0	1	1	1	1	AKR1B10	aldo-keto reductase family 1, member B10 (aldose reductase)
hsa-miR-325	0	0	0	1	0	0	GRIP1	glutamate receptor interacting protein 1
hsa-miR-325	0	0	0	1	0	0	MLLT4-AS1	MLLT4 antisense RNA 1
hsa-miR-325	0	0	1	1	0	0	SIGLEC6	sialic acid binding Ig-like lectin 6
hsa-miR-325	1	0	1	1	1	1	MYT1	myelin transcription factor 1
hsa-miR-325	0	0	1	1	1	1	MAPK8	mitogen-activated protein kinase 8
hsa-miR-325	0	0	1	1	1	1	ANKRD53	ankyrin repeat domain 53
hsa-miR-325	0	0	0	1	0	0	TSSK6	testis-specific serine kinase 6
hsa-miR-325	0	0	1	1	0	0	ISLR2	immunoglobulin superfamily containing leucine-rich repeat 2
hsa-miR-325	0	0	1	1	1	1	PTPLA	protein tyrosine phosphatase-like (proline instead of catalytic arginine), member A
hsa-miR-325	1	0	1	1	1	1	KIAA0922	KIAA0922
hsa-miR-325	0	0	1	1	1	1	SMC3	structural maintenance of chromosomes 3
hsa-miR-325	0	0	0	1	1	1	ZNF485	zinc finger protein 485
hsa-miR-325	1	0	1	1	1	1	ILF2	interleukin enhancer binding factor 2, 45kDa
hsa-miR-325	1	0	1	1	0	0	PLXNB3	plexin B3
hsa-miR-325	0	0	0	1	1	1	KIAA1279	KIAA1279
hsa-miR-325	0	0	0	1	0	0	SHISA4	shisa homolog 4 (Xenopus laevis)
hsa-miR-325	0	0	1	1	1	1	KMO	kynurenine 3-monooxygenase (kynurenine 3-hydroxylase)
hsa-miR-325	0	0	0	1	1	1	TBCE	tubulin folding cofactor E
hsa-miR-325	0	0	1	1	0	0	HIST3H2A	histone cluster 3, H2a
hsa-miR-325	0	0	1	1	1	1	MARC1	mitochondrial amidoxime reducing component 1
hsa-miR-325	0	0	1	1	1	1	KCTD3	potassium channel tetramerisation domain containing 3
hsa-miR-325	1	0	1	1	0	0	DYNLT1	dynein, light chain, Tctex-type 1
hsa-miR-325	0	0	0	1	0	0	TFB1M	transcription factor B1, mitochondrial
hsa-miR-325	0	0	1	1	1	1	IPCEF1	interaction protein for cytohesin exchange factors 1
hsa-miR-325	0	0	1	1	1	1	IYD	iodotyrosine deiodinase
hsa-miR-325	1	0	1	1	1	1	DENND1B	DENN/MADD domain containing 1B
hsa-miR-325	0	0	0	1	1	1	NCF2	neutrophil cytosolic factor 2
hsa-miR-325	1	0	1	1	1	1	SMG7	smg-7 homolog, nonsense mediated mRNA decay factor (C. elegans)
hsa-miR-325	0	0	1	1	1	1	PAPPA2	pappalysin 2
hsa-miR-325	1	0	1	1	1	1	RC3H1	ring finger and CCCH-type domains 1
hsa-miR-325	0	0	1	1	1	1	GORAB	golgin, RAB6-interacting
hsa-miR-325	0	0	1	1	1	1	C1orf114	chromosome 1 open reading frame 114
hsa-miR-325	0	0	1	1	1	1	C1orf110	chromosome 1 open reading frame 110
hsa-miR-325	0	0	1	1	1	1	CASQ1	calsequestrin 1 (fast-twitch, skeletal muscle)
hsa-miR-325	0	0	1	1	1	1	TRMT11	tRNA methyltransferase 11 homolog (S. cerevisiae)
hsa-miR-325	0	0	1	1	0	0	DCST1	DC-STAMP domain containing 1
hsa-miR-325	0	0	0	1	0	0	CALY	calcyon neuron-specific vesicular protein
hsa-miR-325	0	0	1	1	1	1	RAB13	RAB13, member RAS oncogene family
hsa-miR-325	0	0	1	1	1	1	GLRX3	glutaredoxin 3
hsa-miR-325	0	0	0	1	0	0	LCE1C	late cornified envelope 1C
hsa-miR-325	0	0	1	1	1	1	LHPP	phospholysine phosphohistidine inorganic pyrophosphate phosphatase
hsa-miR-325	0	0	0	1	1	1	CA14	carbonic anhydrase XIV
hsa-miR-325	0	0	0	1	0	0	ACP6	acid phosphatase 6, lysophosphatidic
hsa-miR-325	0	0	0	1	1	1	TDRD1	tudor domain containing 1
hsa-miR-325	0	0	0	1	1	1	MANEA	mannosidase, endo-alpha
hsa-miR-325	0	0	1	1	1	1	PLEKHS1	pleckstrin homology domain containing, family S member 1
hsa-miR-325	0	0	1	1	1	1	HMGCS2	3-hydroxy-3-methylglutaryl-CoA synthase 2 (mitochondrial)
hsa-miR-325	0	0	0	1	1	1	GABRR1	gamma-aminobutyric acid (GABA) A receptor, rho 1
hsa-miR-325	0	0	1	1	0	0	CD58	CD58 molecule
hsa-miR-325	1	0	1	1	1	1	SYT6	synaptotagmin VI
hsa-miR-325	0	0	1	1	0	0	AP4B1	adaptor-related protein complex 4, beta 1 subunit
hsa-miR-325	0	0	1	1	0	0	RTEL1	regulator of telomere elongation helicase 1
hsa-miR-325	0	0	0	1	0	0	TNFRSF6B	tumor necrosis factor receptor superfamily, member 6b, decoy
hsa-miR-325	0	0	1	1	1	1	CUTC	cutC copper transporter homolog (E. coli)
hsa-miR-325	0	0	1	1	1	1	LMBRD1	LMBR1 domain containing 1
hsa-miR-325	0	0	1	1	1	1	MBNL3	muscleblind-like splicing regulator 3
hsa-miR-325	0	0	1	1	0	0	TNNI3K	TNNI3 interacting kinase
hsa-miR-325	0	0	1	1	1	1	FPGT	fucose-1-phosphate guanylyltransferase
hsa-miR-325	1	0	1	1	1	1	IGSF1	immunoglobulin superfamily, member 1
hsa-miR-325	0	0	1	1	1	1	C1orf141	chromosome 1 open reading frame 141
hsa-miR-325	1	0	1	1	0	0	EFHC1	EF-hand domain (C-terminal) containing 1
hsa-miR-325	0	0	1	1	0	0	BSND	Bartter syndrome, infantile, with sensorineural deafness (Barttin)
hsa-miR-325	0	0	1	1	0	0	FAM151A	family with sequence similarity 151, member A
hsa-miR-325	0	0	1	1	0	0	NDUFA1	NADH dehydrogenase (ubiquinone) 1 alpha subcomplex, 1, 7.5kDa
hsa-miR-325	0	0	1	1	1	1	KTI12	KTI12 homolog, chromatin associated (S. cerevisiae)
hsa-miR-325	0	0	0	1	0	0	LCN8	lipocalin 8
hsa-miR-325	0	0	0	1	0	0	FCN1	ficolin (collagen/fibrinogen domain containing) 1
hsa-miR-325	1	0	1	1	1	1	CMPK1	cytidine monophosphate (UMP-CMP) kinase 1, cytosolic
hsa-miR-325	0	0	0	1	1	1	MMRN2	multimerin 2
hsa-miR-325	1	0	0	1	1	1	LRIT1	leucine-rich repeat, immunoglobulin-like and transmembrane domains 1
hsa-miR-325	0	0	1	1	1	1	NUP188	nucleoporin 188kDa
hsa-miR-325	0	0	0	1	0	0	GLRA4	glycine receptor, alpha 4
hsa-miR-325	1	0	1	1	1	1	RIMS3	regulating synaptic membrane exocytosis 3
hsa-miR-325	0	0	0	1	0	0	ZNF642	zinc finger protein 642
hsa-miR-325	1	0	1	1	1	1	KAT6B	K(lysine) acetyltransferase 6B
hsa-miR-325	0	0	1	1	0	0	GNMT	glycine N-methyltransferase
hsa-miR-325	0	0	1	1	0	0	GUCA1A	guanylate cyclase activator 1A (retina)
hsa-miR-325	0	0	0	1	0	0	TSPO2	translocator protein 2
hsa-miR-325	0	0	1	1	1	1	MAGT1	magnesium transporter 1
hsa-miR-325	1	0	1	1	1	1	DENND1A	DENN/MADD domain containing 1A
hsa-miR-325	0	0	0	1	0	0	TMEM39B	transmembrane protein 39B
hsa-miR-325	0	0	0	1	0	0	OR1N2	olfactory receptor, family 1, subfamily N, member 2
hsa-miR-325	0	0	1	1	0	0	MORN5	MORN repeat containing 5
hsa-miR-325	0	0	0	1	0	0	CLPSL1	colipase-like 1
hsa-miR-325	0	0	1	1	0	0	BSPRY	B-box and SPRY domain containing
hsa-miR-325	1	0	1	1	1	1	CXCL12	chemokine (C-X-C motif) ligand 12
hsa-miR-325	0	0	0	1	1	1	RAB41	RAB41, member RAS oncogene family
hsa-miR-325	1	0	1	1	0	0	ZBTB22	zinc finger and BTB domain containing 22
hsa-miR-325	0	0	1	1	1	1	YIPF6	Yip1 domain family, member 6
hsa-miR-325	1	0	1	1	0	0	WNT4	wingless-type MMTV integration site family, member 4
hsa-miR-325	1	0	1	1	1	1	NUP35	nucleoporin 35kDa
hsa-miR-325	1	0	1	1	1	1	HP1BP3	heterochromatin protein 1, binding protein 3
hsa-miR-325	0	0	1	1	1	1	NOTCH4	notch 4
hsa-miR-325	0	0	1	1	0	0	GPSM3	G-protein signaling modulator 3
hsa-miR-325	0	0	1	1	1	1	FAM120AOS	family with sequence similarity 120A opposite strand
hsa-miR-325	0	0	0	1	1	1	SUSD3	sushi domain containing 3
hsa-miR-325	0	0	1	1	1	1	NXPE4	neurexophilin and PC-esterase domain family, member 4
hsa-miR-325	0	0	0	1	0	0	BPIFB3	BPI fold containing family B, member 3
hsa-miR-325	0	0	0	1	0	0	VWA7	von Willebrand factor A domain containing 7
hsa-miR-325	0	0	1	1	0	0	AUH	AU RNA binding protein/enoyl-CoA hydratase
hsa-miR-325	0	0	1	1	0	0	DDAH2	dimethylarginine dimethylaminohydrolase 2
hsa-miR-325	0	0	0	1	0	0	LY6G6D	lymphocyte antigen 6 complex, locus G6D
hsa-miR-325	0	0	0	1	0	0	LY6G6F	lymphocyte antigen 6 complex, locus G6F
hsa-miR-325	0	0	0	1	0	0	PYY3	peptide YY, 3 (pseudogene)
hsa-miR-325	1	0	1	1	1	1	ID1	inhibitor of DNA binding 1, dominant negative helix-loop-helix protein
hsa-miR-325	0	0	0	1	0	0	DEFB121	defensin, beta 121
hsa-miR-325	0	0	1	1	1	1	DHX16	DEAH (Asp-Glu-Ala-His) box polypeptide 16
hsa-miR-325	0	0	1	1	0	0	UGGT2	UDP-glucose glycoprotein glucosyltransferase 2
hsa-miR-325	1	0	1	1	0	0	DNAJC1	DnaJ (Hsp40) homolog, subfamily C, member 1
hsa-miR-325	0	0	1	1	0	0	SRM	spermidine synthase
hsa-miR-325	0	0	1	1	0	0	ARAF	v-raf murine sarcoma 3611 viral oncogene homolog
hsa-miR-325	0	0	0	1	0	0	ZNF311	zinc finger protein 311
hsa-miR-325	0	0	1	1	0	0	PRKACG	protein kinase, cAMP-dependent, catalytic, gamma
hsa-miR-325	1	0	1	1	1	1	CACNB2	calcium channel, voltage-dependent, beta 2 subunit
hsa-miR-325	0	0	1	1	1	1	CBWD3	COBW domain containing 3
hsa-miR-325	0	0	0	1	0	0	CBWD6	COBW domain containing 6
hsa-miR-325	0	0	0	1	0	0	ASB10	ankyrin repeat and SOCS box containing 10
hsa-miR-325	1	0	1	1	1	1	RNF207	ring finger protein 207
hsa-miR-325	0	0	0	1	0	0	GRXCR2	glutaredoxin, cysteine rich 2
hsa-miR-325	0	0	1	1	0	0	FAM221B	family with sequence similarity 221, member B
hsa-miR-325	1	0	1	1	1	1	CKAP2	cytoskeleton associated protein 2
hsa-miR-325	0	0	1	1	1	1	WDR67	WD repeat domain 67
hsa-miR-325	0	0	1	1	0	0	THSD1	thrombospondin, type I, domain containing 1
hsa-miR-325	1	0	0	1	1	1	C19orf54	chromosome 19 open reading frame 54
hsa-miR-325	1	0	1	1	1	1	MRS2	MRS2 magnesium homeostasis factor homolog (S. cerevisiae)
hsa-miR-325	1	0	1	1	1	1	DYNLT3	dynein, light chain, Tctex-type 3
hsa-miR-325	0	0	0	1	0	0	MMP23B	matrix metallopeptidase 23B
hsa-miR-325	0	0	0	1	0	0	LOC100130976	uncharacterized LOC100130976
hsa-miR-325	0	0	0	1	1	1	CXorf21	chromosome X open reading frame 21
hsa-miR-325	0	0	0	1	0	0	PUSL1	pseudouridylate synthase-like 1
hsa-miR-325	0	0	1	1	0	0	UBAP2	ubiquitin associated protein 2
hsa-miR-325	1	0	1	1	1	1	EDN1	endothelin 1
hsa-miR-325	1	0	1	1	1	1	HIVEP1	human immunodeficiency virus type I enhancer binding protein 1
hsa-miR-325	0	0	1	1	1	1	ADTRP	androgen-dependent TFPI-regulating protein
hsa-miR-325	0	0	1	1	0	0	PSTPIP1	proline-serine-threonine phosphatase interacting protein 1
hsa-miR-325	1	0	1	1	1	1	SH3KBP1	SH3-domain kinase binding protein 1
hsa-miR-325	1	0	1	1	1	1	CAMK2D	calcium/calmodulin-dependent protein kinase II delta
hsa-miR-325	1	0	1	1	1	1	PFKFB3	6-phosphofructo-2-kinase/fructose-2,6-biphosphatase 3
hsa-miR-325	1	0	1	1	1	1	F13A1	coagulation factor XIII, A1 polypeptide
hsa-miR-325	1	0	1	1	1	1	RBBP7	retinoblastoma binding protein 7
hsa-miR-325	0	0	1	1	0	0	CA5BP1	carbonic anhydrase VB pseudogene 1
hsa-miR-325	0	0	1	1	1	1	ZNF768	zinc finger protein 768
hsa-miR-325	0	0	1	1	1	1	TUBAL3	tubulin, alpha-like 3
hsa-miR-325	0	0	1	1	1	1	ALOX5AP	arachidonate 5-lipoxygenase-activating protein
hsa-miR-325	0	0	1	1	1	1	ARHGAP6	Rho GTPase activating protein 6
hsa-miR-325	0	0	1	1	1	1	SERF1B	small EDRK-rich factor 1B (centromeric)
hsa-miR-325	1	0	1	1	1	1	RUFY3	RUN and FYVE domain containing 3
hsa-miR-325	0	0	0	1	0	0	CYS1	cystin 1
hsa-miR-325	0	0	1	1	1	1	C1QTNF3	C1q and tumor necrosis factor related protein 3
hsa-miR-325	0	0	1	1	1	1	AMACR	alpha-methylacyl-CoA racemase
hsa-miR-325	0	0	0	1	0	0	DEFB136	defensin, beta 136
hsa-miR-325	1	0	1	1	1	1	CD9	CD9 molecule
hsa-miR-325	0	0	1	1	1	1	RAD51	RAD51 homolog (S. cerevisiae)
hsa-miR-325	1	0	1	1	1	1	DSEL	dermatan sulfate epimerase-like
hsa-miR-325	0	0	1	1	1	1	RBMY1B	RNA binding motif protein, Y-linked, family 1, member B
hsa-miR-325	0	0	1	1	1	1	RBMY1A1	RNA binding motif protein, Y-linked, family 1, member A1
hsa-miR-325	0	0	0	1	0	0	MSLN	mesothelin
hsa-miR-325	0	0	1	1	1	1	GPX1	glutathione peroxidase 1
hsa-miR-325	0	0	1	1	0	0	CCDC158	coiled-coil domain containing 158
hsa-miR-325	0	0	1	1	0	0	LRRIQ3	leucine-rich repeats and IQ motif containing 3
hsa-miR-325	0	0	1	1	0	0	ABCC8	ATP-binding cassette, sub-family C (CFTR/MRP), member 8
hsa-miR-325	0	0	1	1	0	0	NLRP5	NLR family, pyrin domain containing 5
hsa-miR-325	1	0	0	1	1	1	USP44	ubiquitin specific peptidase 44
hsa-miR-325	1	0	1	1	1	1	ACACB	acetyl-CoA carboxylase beta
hsa-miR-325	1	0	1	1	1	1	HDAC2	histone deacetylase 2
hsa-miR-325	0	0	1	1	1	1	MMP13	matrix metallopeptidase 13 (collagenase 3)
hsa-miR-325	1	0	1	0	1	1	PRKCI	protein kinase C, iota
hsa-miR-325	1	0	1	1	1	1	CDKL2	cyclin-dependent kinase-like 2 (CDC2-related kinase)
hsa-miR-325	0	0	0	0	1	1	RNF112	ring finger protein 112
hsa-miR-325	0	0	0	0	1	1	ZNF510	zinc finger protein 510
hsa-miR-325	1	0	1	1	1	1	ZFYVE26	zinc finger, FYVE domain containing 26
hsa-miR-325	0	0	1	1	1	1	THUMPD3	THUMP domain containing 3
hsa-miR-325	1	0	1	1	1	1	MAGOHB	mago-nashi homolog B (Drosophila)
hsa-miR-325	0	0	1	1	1	1	TMEM38B	transmembrane protein 38B
hsa-miR-325	0	0	0	1	1	1	TYW1	tRNA-yW synthesizing protein 1 homolog (S. cerevisiae)
hsa-miR-325	0	0	0	1	1	1	VN1R1	vomeronasal 1 receptor 1
hsa-miR-325	1	0	1	0	1	1	KCTD16	potassium channel tetramerisation domain containing 16
hsa-miR-325	0	0	1	1	1	1	SYT15	synaptotagmin XV
hsa-miR-325	0	0	1	1	1	1	MYOM3	myomesin family, member 3
hsa-miR-325	1	0	1	1	1	1	CCDC149	coiled-coil domain containing 149
hsa-miR-325	0	0	1	1	1	1	ZNF100	zinc finger protein 100
hsa-miR-325	0	0	0	0	1	1	NUS1P1	nuclear undecaprenyl pyrophosphate synthase 1 homolog (S. cerevisiae) pseudogene 1
hsa-miR-325	0	0	1	0	1	1	PPIAL4G	peptidylprolyl isomerase A (cyclophilin A)-like 4G
hsa-miR-325	0	0	0	0	1	1	PPIAL4B	peptidylprolyl isomerase A (cyclophilin A)-like 4B
hsa-miR-325	0	0	0	0	1	1	PPIAL4C	peptidylprolyl isomerase A (cyclophilin A)-like 4C
hsa-miR-325	1	0	1	0	1	1	MAP4K4	mitogen-activated protein kinase kinase kinase kinase 4
hsa-miR-325	0	0	1	1	0	0	ARPC2	actin related protein 2/3 complex, subunit 2, 34kDa
hsa-miR-325	1	0	1	1	1	1	SULT4A1	sulfotransferase family 4A, member 1
hsa-miR-325	0	0	1	1	1	1	NKRF	NFKB repressing factor
hsa-miR-325	1	0	1	1	1	1	SLC8A1	solute carrier family 8 (sodium/calcium exchanger), member 1
hsa-miR-325	1	0	1	1	1	1	SMC6	structural maintenance of chromosomes 6
hsa-miR-325	1	0	1	0	1	1	SEMA6D	sema domain, transmembrane domain (TM), and cytoplasmic domain, (semaphorin) 6D
