# Supplementary material for: Profiling of Selected MicroRNAs in Proliferative Eutopic Endometrium of Women with Ovarian Endometriosis
Source: Biomed Res Int. 2015 Aug 20;2015:760698. doi: 10.1155/2015/760698 (PMC4558423; doi:10.1155/2015/760698)
Supplement: Supplementary file 1 — Table I: The names of miRNAs significantly differentially expressed between eutopic endometrium of patients with endometriosis vs eutopic endometrium of patients without endometriosis. Table II: The associations between miRNA and mRNA, which presents detailed results of the search of six major databases i.e targetscan, tarbase, miranda, mirbase, mirtarget2 and pictar. [file 760698.f1.zip › 760698.f1/Table II/hsa-miR-326.tsv]

miR	targetscan	tarbase	miranda	mirbase	mirtarget2	pictar	GeneSymbol	GeneName
hsa-miR-326	1	0	1	1	0	0	SNX30	sorting nexin family member 30
hsa-miR-326	1	0	1	1	1	1	SEPT4	septin 4
hsa-miR-326	1	0	1	1	1	1	SH3TC2	SH3 domain and tetratricopeptide repeats 2
hsa-miR-326	1	0	1	1	1	1	NCAN	neurocan
hsa-miR-326	1	0	1	1	1	1	ADAM19	ADAM metallopeptidase domain 19
hsa-miR-326	1	0	1	1	1	1	ZSCAN22	zinc finger and SCAN domain containing 22
hsa-miR-326	1	0	1	1	1	1	ST3GAL3	ST3 beta-galactoside alpha-2,3-sialyltransferase 3
hsa-miR-326	1	0	1	1	1	1	OTP	orthopedia homeobox
hsa-miR-326	1	0	1	0	1	1	CLSTN1	calsyntenin 1
hsa-miR-326	1	0	1	1	1	1	RAB3IP	RAB3A interacting protein (rabin3)
hsa-miR-326	1	0	1	1	1	1	XYLT1	xylosyltransferase I
hsa-miR-326	1	1	1	1	0	0	EFNA3	ephrin-A3
hsa-miR-326	1	0	1	1	1	1	CRCP	CGRP receptor component
hsa-miR-326	1	0	1	1	1	1	CTDSP2	CTD (carboxy-terminal domain, RNA polymerase II, polypeptide A) small phosphatase 2
hsa-miR-326	1	0	1	1	1	1	FGD3	FYVE, RhoGEF and PH domain containing 3
hsa-miR-326	1	0	1	1	1	1	CD247	CD247 molecule
hsa-miR-326	1	0	1	0	1	1	CELF2	CUGBP, Elav-like family member 2
hsa-miR-326	1	0	1	0	1	1	VAMP2	vesicle-associated membrane protein 2 (synaptobrevin 2)
hsa-miR-326	1	0	1	1	1	1	DLGAP2	discs, large (Drosophila) homolog-associated protein 2
hsa-miR-326	1	0	1	1	0	0	SEMA3G	sema domain, immunoglobulin domain (Ig), short basic domain, secreted, (semaphorin) 3G
hsa-miR-326	1	0	1	1	1	1	SYT9	synaptotagmin IX
hsa-miR-326	1	0	1	1	1	1	ANK1	ankyrin 1, erythrocytic
hsa-miR-326	1	0	1	1	1	1	KDM5C	lysine (K)-specific demethylase 5C
hsa-miR-326	1	0	1	1	0	0	GPI	glucose-6-phosphate isomerase
hsa-miR-326	1	0	1	1	1	1	RASL10B	RAS-like, family 10, member B
hsa-miR-326	1	0	1	1	1	1	SH3BP4	SH3-domain binding protein 4
hsa-miR-326	1	0	1	1	0	0	DFNB31	deafness, autosomal recessive 31
hsa-miR-326	1	0	1	1	1	1	BSDC1	BSD domain containing 1
hsa-miR-326	1	0	1	0	1	1	CNNM1	cyclin M1
hsa-miR-326	1	0	1	1	1	1	HNRNPA2B1	heterogeneous nuclear ribonucleoprotein A2/B1
hsa-miR-326	1	0	0	1	1	1	SLC5A9	solute carrier family 5 (sodium/glucose cotransporter), member 9
hsa-miR-326	1	0	1	1	1	1	MYO1C	myosin IC
hsa-miR-326	1	0	1	1	1	1	VTI1A	vesicle transport through interaction with t-SNAREs homolog 1A (yeast)
hsa-miR-326	1	0	1	1	1	1	SRPR	signal recognition particle receptor (docking protein)
hsa-miR-326	1	0	1	0	1	1	MTMR9	myotubularin related protein 9
hsa-miR-326	1	0	1	1	1	1	TLN1	talin 1
hsa-miR-326	1	0	1	1	1	1	ST8SIA2	ST8 alpha-N-acetyl-neuraminide alpha-2,8-sialyltransferase 2
hsa-miR-326	1	0	1	1	1	1	NKAIN1	Na+/K+ transporting ATPase interacting 1
hsa-miR-326	1	0	1	1	1	1	EGR3	early growth response 3
hsa-miR-326	1	0	1	1	1	1	ANKS6	ankyrin repeat and sterile alpha motif domain containing 6
hsa-miR-326	1	0	0	0	1	1	STK11	serine/threonine kinase 11
hsa-miR-326	1	0	1	1	1	1	SEC14L1	SEC14-like 1 (S. cerevisiae)
hsa-miR-326	1	0	1	0	1	1	GOLGA7B	golgin A7 family, member B
hsa-miR-326	1	0	1	0	1	1	BTRC	beta-transducin repeat containing E3 ubiquitin protein ligase
hsa-miR-326	1	0	1	1	1	1	LASP1	LIM and SH3 protein 1
hsa-miR-326	1	0	1	1	1	1	RBM47	RNA binding motif protein 47
hsa-miR-326	1	0	1	0	1	1	UNC13A	unc-13 homolog A (C. elegans)
hsa-miR-326	1	0	1	1	0	0	ACRBP	acrosin binding protein
hsa-miR-326	1	0	1	0	1	1	ZNF607	zinc finger protein 607
hsa-miR-326	1	0	0	1	1	1	SLC25A34	solute carrier family 25, member 34
hsa-miR-326	1	0	1	1	1	1	PPP2R5B	protein phosphatase 2, regulatory subunit B', beta
hsa-miR-326	1	0	1	0	1	1	SLC19A2	solute carrier family 19 (thiamine transporter), member 2
hsa-miR-326	1	0	1	1	1	1	EPHB3	EPH receptor B3
hsa-miR-326	1	0	1	0	1	1	RHBDL3	rhomboid, veinlet-like 3 (Drosophila)
hsa-miR-326	1	0	1	1	1	1	ELK1	ELK1, member of ETS oncogene family
hsa-miR-326	1	0	1	0	1	1	RHOBTB2	Rho-related BTB domain containing 2
hsa-miR-326	1	0	1	0	1	1	SYNGAP1	synaptic Ras GTPase activating protein 1
hsa-miR-326	1	0	1	1	1	1	ZBTB44	zinc finger and BTB domain containing 44
hsa-miR-326	1	0	1	1	1	1	ZNF629	zinc finger protein 629
hsa-miR-326	1	0	1	1	1	1	ATP8B2	ATPase, aminophospholipid transporter, class I, type 8B, member 2
hsa-miR-326	1	0	1	1	0	0	AUP1	ancient ubiquitous protein 1
hsa-miR-326	1	0	1	1	1	1	PHF21A	PHD finger protein 21A
hsa-miR-326	1	0	1	1	0	0	YBX2	Y box binding protein 2
hsa-miR-326	1	0	1	0	1	1	SPATS2L	spermatogenesis associated, serine-rich 2-like
hsa-miR-326	1	0	0	1	1	1	HNF4A	hepatocyte nuclear factor 4, alpha
hsa-miR-326	1	0	1	1	1	1	RBFOX2	RNA binding protein, fox-1 homolog (C. elegans) 2
hsa-miR-326	1	0	1	0	1	1	KCMF1	potassium channel modulatory factor 1
hsa-miR-326	1	0	1	1	1	1	SLC2A1	solute carrier family 2 (facilitated glucose transporter), member 1
hsa-miR-326	1	0	1	1	1	1	RCOR1	REST corepressor 1
hsa-miR-326	1	0	1	1	1	1	ABI2	abl-interactor 2
hsa-miR-326	1	0	1	1	1	1	SH2B3	SH2B adaptor protein 3
hsa-miR-326	1	0	1	0	1	1	CPLX2	complexin 2
hsa-miR-326	1	0	1	1	1	1	CBFA2T3	core-binding factor, runt domain, alpha subunit 2; translocated to, 3
hsa-miR-326	1	0	1	1	0	0	KHK	ketohexokinase (fructokinase)
hsa-miR-326	1	0	0	1	1	1	TCHP	trichoplein, keratin filament binding
hsa-miR-326	1	0	1	1	1	1	RIT1	Ras-like without CAAX 1
hsa-miR-326	1	0	1	1	1	1	ASXL1	additional sex combs like 1 (Drosophila)
hsa-miR-326	1	0	1	1	1	1	PABPC1L2B	poly(A) binding protein, cytoplasmic 1-like 2B
hsa-miR-326	1	0	1	1	1	1	SSH2	slingshot homolog 2 (Drosophila)
hsa-miR-326	1	0	0	1	0	0	GGT5	gamma-glutamyltransferase 5
hsa-miR-326	1	0	1	1	1	1	ITGB8	integrin, beta 8
hsa-miR-326	1	0	1	1	1	1	SYS1	SYS1 Golgi-localized integral membrane protein homolog (S. cerevisiae)
hsa-miR-326	1	0	1	1	1	1	FZD5	frizzled family receptor 5
hsa-miR-326	1	0	1	1	1	1	RPS6KA3	ribosomal protein S6 kinase, 90kDa, polypeptide 3
hsa-miR-326	1	0	1	1	1	1	RARG	retinoic acid receptor, gamma
hsa-miR-326	1	0	1	1	1	1	CD40	CD40 molecule, TNF receptor superfamily member 5
hsa-miR-326	1	0	1	1	1	1	EEF2K	eukaryotic elongation factor-2 kinase
hsa-miR-326	1	0	1	1	1	1	COPS7B	COP9 constitutive photomorphogenic homolog subunit 7B (Arabidopsis)
hsa-miR-326	1	0	0	1	1	1	PRR18	proline rich 18
hsa-miR-326	1	0	1	1	0	0	KRT80	keratin 80
hsa-miR-326	1	0	1	1	1	1	PDE1B	phosphodiesterase 1B, calmodulin-dependent
hsa-miR-326	1	0	1	1	0	0	GRIN1	glutamate receptor, ionotropic, N-methyl D-aspartate 1
hsa-miR-326	1	0	1	1	1	1	EML2	echinoderm microtubule associated protein like 2
hsa-miR-326	1	0	1	1	1	1	GGT7	gamma-glutamyltransferase 7
hsa-miR-326	1	0	0	1	1	1	NINJ1	ninjurin 1
hsa-miR-326	1	0	1	1	1	1	SIRPA	signal-regulatory protein alpha
hsa-miR-326	1	0	1	1	1	1	PFKFB4	6-phosphofructo-2-kinase/fructose-2,6-biphosphatase 4
hsa-miR-326	1	0	1	1	1	1	SERBP1	SERPINE1 mRNA binding protein 1
hsa-miR-326	1	0	1	0	0	0	ANKRD52	ankyrin repeat domain 52
hsa-miR-326	1	0	1	1	1	1	CORO2B	coronin, actin binding protein, 2B
hsa-miR-326	1	0	1	1	1	1	ZMIZ1	zinc finger, MIZ-type containing 1
hsa-miR-326	1	0	1	1	0	0	DTNB	dystrobrevin, beta
hsa-miR-326	1	0	1	1	1	1	NAV1	neuron navigator 1
hsa-miR-326	1	0	1	0	1	1	UHRF1BP1	UHRF1 binding protein 1
hsa-miR-326	1	0	1	1	1	1	CASKIN1	CASK interacting protein 1
hsa-miR-326	1	0	1	1	1	1	DNAJB12	DnaJ (Hsp40) homolog, subfamily B, member 12
hsa-miR-326	1	0	1	0	1	1	UBXN10	UBX domain protein 10
hsa-miR-326	1	0	1	0	1	1	GPCPD1	glycerophosphocholine phosphodiesterase GDE1 homolog (S. cerevisiae)
hsa-miR-326	1	0	1	1	1	1	EFNB1	ephrin-B1
hsa-miR-326	1	0	1	1	1	1	MECP2	methyl CpG binding protein 2 (Rett syndrome)
hsa-miR-326	1	0	1	1	1	1	FAF2	Fas associated factor family member 2
hsa-miR-326	1	0	1	1	1	1	CRY2	cryptochrome 2 (photolyase-like)
hsa-miR-326	1	0	1	1	0	0	EHMT2	euchromatic histone-lysine N-methyltransferase 2
hsa-miR-326	1	0	1	1	1	1	PVRL2	poliovirus receptor-related 2 (herpesvirus entry mediator B)
hsa-miR-326	1	0	1	1	1	1	OXSR1	oxidative-stress responsive 1
hsa-miR-326	1	0	1	1	1	1	PTBP1	polypyrimidine tract binding protein 1
hsa-miR-326	1	0	1	1	1	1	SYNPO2L	synaptopodin 2-like
hsa-miR-326	1	0	1	0	1	1	ANKFY1	ankyrin repeat and FYVE domain containing 1
hsa-miR-326	1	0	0	1	0	0	UROC1	urocanate hydratase 1
hsa-miR-326	1	0	1	1	1	1	PALM	paralemmin
hsa-miR-326	1	0	1	1	1	1	EIF4B	eukaryotic translation initiation factor 4B
hsa-miR-326	1	0	1	1	1	1	CBLL1	Cbl proto-oncogene, E3 ubiquitin protein ligase-like 1
hsa-miR-326	1	0	1	0	1	1	CHL1	cell adhesion molecule with homology to L1CAM (close homolog of L1)
hsa-miR-326	1	0	1	1	1	1	NLK	nemo-like kinase
hsa-miR-326	1	0	1	1	1	1	RFWD3	ring finger and WD repeat domain 3
hsa-miR-326	1	0	1	0	1	1	ZZEF1	zinc finger, ZZ-type with EF-hand domain 1
hsa-miR-326	1	0	1	1	1	1	GRPEL2	GrpE-like 2, mitochondrial (E. coli)
hsa-miR-326	1	0	1	1	1	1	FGFR1	fibroblast growth factor receptor 1
hsa-miR-326	1	0	1	1	1	1	FNDC3A	fibronectin type III domain containing 3A
hsa-miR-326	1	0	1	0	1	1	WDFY1	WD repeat and FYVE domain containing 1
hsa-miR-326	1	0	1	1	1	1	FGF18	fibroblast growth factor 18
hsa-miR-326	1	0	1	1	1	1	CSRNP1	cysteine-serine-rich nuclear protein 1
hsa-miR-326	1	0	1	1	1	1	BHLHE40	basic helix-loop-helix family, member e40
hsa-miR-326	1	0	1	1	1	1	GADL1	glutamate decarboxylase-like 1
hsa-miR-326	1	0	1	1	0	0	DGCR6	DiGeorge syndrome critical region gene 6
hsa-miR-326	1	0	1	0	1	1	E2F2	E2F transcription factor 2
hsa-miR-326	1	0	1	1	1	1	CHRM1	cholinergic receptor, muscarinic 1
hsa-miR-326	1	0	1	1	1	1	TMEM127	transmembrane protein 127
hsa-miR-326	1	0	1	1	0	0	PVRL4	poliovirus receptor-related 4
hsa-miR-326	1	0	1	1	1	1	ASTN1	astrotactin 1
hsa-miR-326	1	0	0	1	0	0	LMX1B	LIM homeobox transcription factor 1, beta
hsa-miR-326	1	0	1	1	0	0	NKX2-8	NK2 homeobox 8
hsa-miR-326	1	0	1	1	1	1	TET2	tet methylcytosine dioxygenase 2
hsa-miR-326	1	0	1	1	0	0	TNK2	tyrosine kinase, non-receptor, 2
hsa-miR-326	1	0	1	1	0	0	POLR2J3	polymerase (RNA) II (DNA directed) polypeptide J3
hsa-miR-326	1	0	1	0	1	1	ZNF609	zinc finger protein 609
hsa-miR-326	1	0	1	1	1	1	SLC35A4	solute carrier family 35, member A4
hsa-miR-326	1	0	1	0	1	1	BTBD3	BTB (POZ) domain containing 3
hsa-miR-326	1	0	0	1	1	1	FAIM2	Fas apoptotic inhibitory molecule 2
hsa-miR-326	1	0	1	1	1	1	TSPAN14	tetraspanin 14
hsa-miR-326	1	0	1	1	1	1	KCNIP2	Kv channel interacting protein 2
hsa-miR-326	1	0	1	0	1	1	PARVA	parvin, alpha
hsa-miR-326	1	0	1	1	1	1	ESRRA	estrogen-related receptor alpha
hsa-miR-326	1	0	1	1	1	1	RUNX3	runt-related transcription factor 3
hsa-miR-326	1	0	1	1	1	1	ADAMTS6	ADAM metallopeptidase with thrombospondin type 1 motif, 6
hsa-miR-326	1	0	0	0	1	1	ZNF322	zinc finger protein 322
hsa-miR-326	1	0	1	1	1	1	PDLIM2	PDZ and LIM domain 2 (mystique)
hsa-miR-326	1	0	1	0	1	1	PLXNA1	plexin A1
hsa-miR-326	1	0	1	1	0	0	RPS6KA1	ribosomal protein S6 kinase, 90kDa, polypeptide 1
hsa-miR-326	1	0	1	1	1	1	GPRC5B	G protein-coupled receptor, family C, group 5, member B
hsa-miR-326	1	0	1	0	1	1	SLC5A3	solute carrier family 5 (sodium/myo-inositol cotransporter), member 3
hsa-miR-326	1	0	1	1	0	0	TCAP	titin-cap (telethonin)
hsa-miR-326	1	0	1	1	0	0	RASSF1	Ras association (RalGDS/AF-6) domain family member 1
hsa-miR-326	1	0	1	0	0	0	IGLON5	IgLON family member 5
hsa-miR-326	1	0	1	0	1	1	IGF2BP1	insulin-like growth factor 2 mRNA binding protein 1
hsa-miR-326	1	0	1	0	1	1	NRAS	neuroblastoma RAS viral (v-ras) oncogene homolog
hsa-miR-326	1	0	1	1	0	0	CAPN12	calpain 12
hsa-miR-326	1	0	1	1	1	1	PIP4K2C	phosphatidylinositol-5-phosphate 4-kinase, type II, gamma
hsa-miR-326	1	0	1	1	1	1	CTNS	cystinosin, lysosomal cystine transporter
hsa-miR-326	1	0	1	0	1	1	SCN2B	sodium channel, voltage-gated, type II, beta subunit
hsa-miR-326	1	0	1	0	1	1	PURB	purine-rich element binding protein B
hsa-miR-326	1	0	1	1	0	0	SMCR7	Smith-Magenis syndrome chromosome region, candidate 7
hsa-miR-326	1	0	1	0	1	1	KSR2	kinase suppressor of ras 2
hsa-miR-326	1	0	1	0	1	1	PRSS23	protease, serine, 23
hsa-miR-326	1	0	1	1	1	1	LDOC1	leucine zipper, down-regulated in cancer 1
hsa-miR-326	1	0	0	0	0	0	ABCC1	ATP-binding cassette, sub-family C (CFTR/MRP), member 1
hsa-miR-326	1	0	1	0	1	1	UVRAG	UV radiation resistance associated gene
hsa-miR-326	1	0	1	1	1	1	HNRNPA1	heterogeneous nuclear ribonucleoprotein A1
hsa-miR-326	1	0	1	1	1	1	ZHX3	zinc fingers and homeoboxes 3
hsa-miR-326	1	0	1	0	1	1	DCAF10	DDB1 and CUL4 associated factor 10
hsa-miR-326	1	0	1	0	1	1	FAM127C	family with sequence similarity 127, member C
hsa-miR-326	1	0	1	1	1	1	ARPP21	cAMP-regulated phosphoprotein, 21kDa
hsa-miR-326	1	0	1	1	0	0	KCNC1	potassium voltage-gated channel, Shaw-related subfamily, member 1
hsa-miR-326	1	0	1	0	1	1	KLF3	Kruppel-like factor 3 (basic)
hsa-miR-326	1	0	1	1	1	1	METAP1	methionyl aminopeptidase 1
hsa-miR-326	1	0	1	1	0	0	PSKH1	protein serine kinase H1
hsa-miR-326	1	0	1	1	1	1	PDCD6IP	programmed cell death 6 interacting protein
hsa-miR-326	1	0	1	1	0	0	SEZ6L	seizure related 6 homolog (mouse)-like
hsa-miR-326	1	0	1	1	1	1	PABPC1L2A	poly(A) binding protein, cytoplasmic 1-like 2A
hsa-miR-326	1	0	1	1	1	1	CDC20B	cell division cycle 20 homolog B (S. cerevisiae)
hsa-miR-326	1	0	1	0	1	1	SRGAP3	SLIT-ROBO Rho GTPase activating protein 3
hsa-miR-326	1	0	0	0	0	0	TLE3	transducin-like enhancer of split 3 (E(sp1) homolog, Drosophila)
hsa-miR-326	1	0	1	1	1	1	LRRC20	leucine rich repeat containing 20
hsa-miR-326	1	0	1	0	1	1	LARP1	La ribonucleoprotein domain family, member 1
hsa-miR-326	1	0	1	0	1	1	RNF182	ring finger protein 182
hsa-miR-326	1	0	1	1	1	1	C15orf32	chromosome 15 open reading frame 32
hsa-miR-326	1	0	1	0	0	0	CCDC159	coiled-coil domain containing 159
hsa-miR-326	1	0	1	1	1	1	SLC8A2	solute carrier family 8 (sodium/calcium exchanger), member 2
hsa-miR-326	1	0	1	0	1	1	MAPK4	mitogen-activated protein kinase 4
hsa-miR-326	1	0	1	1	0	0	FBRS	fibrosin
hsa-miR-326	1	0	1	0	1	1	SH3PXD2A	SH3 and PX domains 2A
hsa-miR-326	1	0	1	1	1	1	C14orf1	chromosome 14 open reading frame 1
hsa-miR-326	1	0	1	1	1	1	ELFN2	extracellular leucine-rich repeat and fibronectin type III domain containing 2
hsa-miR-326	1	0	0	1	1	1	PRAF2	PRA1 domain family, member 2
hsa-miR-326	1	0	0	1	0	0	KLF1	Kruppel-like factor 1 (erythroid)
hsa-miR-326	1	0	1	1	1	1	ZCCHC14	zinc finger, CCHC domain containing 14
hsa-miR-326	1	0	0	1	1	1	ALOX15B	arachidonate 15-lipoxygenase, type B
hsa-miR-326	1	0	1	0	0	0	FAM127B	family with sequence similarity 127, member B
hsa-miR-326	1	0	1	0	1	1	KRAS	v-Ki-ras2 Kirsten rat sarcoma viral oncogene homolog
hsa-miR-326	1	0	1	1	1	1	WBP1L	WW domain binding protein 1-like
hsa-miR-326	1	0	0	1	1	1	CLDN8	claudin 8
hsa-miR-326	1	0	1	1	1	1	PPP1R3F	protein phosphatase 1, regulatory subunit 3F
hsa-miR-326	1	0	1	1	1	1	EPB41L1	erythrocyte membrane protein band 4.1-like 1
hsa-miR-326	1	0	1	1	1	1	DRD2	dopamine receptor D2
hsa-miR-326	1	0	1	1	1	1	SLC23A2	solute carrier family 23 (nucleobase transporters), member 2
hsa-miR-326	1	0	1	0	1	1	ALAD	aminolevulinate dehydratase
hsa-miR-326	1	0	1	0	1	1	RIMS4	regulating synaptic membrane exocytosis 4
hsa-miR-326	1	0	1	1	1	1	ITPK1	inositol-tetrakisphosphate 1-kinase
hsa-miR-326	1	0	1	1	1	1	ITGA5	integrin, alpha 5 (fibronectin receptor, alpha polypeptide)
hsa-miR-326	1	0	1	1	1	1	AHCYL2	adenosylhomocysteinase-like 2
hsa-miR-326	1	0	1	1	1	1	PPP1R12B	protein phosphatase 1, regulatory subunit 12B
hsa-miR-326	1	0	1	1	1	1	KLHL14	kelch-like 14 (Drosophila)
hsa-miR-326	1	0	1	0	1	1	CRTAP	cartilage associated protein
hsa-miR-326	1	0	1	1	1	1	GABBR2	gamma-aminobutyric acid (GABA) B receptor, 2
hsa-miR-326	1	0	1	1	1	1	GPD2	glycerol-3-phosphate dehydrogenase 2 (mitochondrial)
hsa-miR-326	1	0	0	1	0	0	PDK2	pyruvate dehydrogenase kinase, isozyme 2
hsa-miR-326	1	0	1	1	1	1	SPRYD3	SPRY domain containing 3
hsa-miR-326	1	0	1	1	1	1	SAMD4B	sterile alpha motif domain containing 4B
hsa-miR-326	1	0	1	1	1	1	ERGIC1	endoplasmic reticulum-golgi intermediate compartment (ERGIC) 1
hsa-miR-326	1	0	1	1	1	1	ZNF3	zinc finger protein 3
hsa-miR-326	1	0	1	1	1	1	NHLRC1	NHL repeat containing 1
hsa-miR-326	1	0	0	1	1	1	ACVRL1	activin A receptor type II-like 1
hsa-miR-326	1	0	1	0	1	1	SOX12	SRY (sex determining region Y)-box 12
hsa-miR-326	1	0	1	1	1	1	SMCR7L	Smith-Magenis syndrome chromosome region, candidate 7-like
hsa-miR-326	1	0	1	1	1	1	KLHL6	kelch-like 6 (Drosophila)
hsa-miR-326	1	0	1	1	1	1	ATP2B2	ATPase, Ca++ transporting, plasma membrane 2
hsa-miR-326	1	0	1	1	1	1	CLCN4	chloride channel, voltage-sensitive 4
hsa-miR-326	1	0	1	1	1	1	NRGN	neurogranin (protein kinase C substrate, RC3)
hsa-miR-326	1	0	1	1	1	1	NXF1	nuclear RNA export factor 1
hsa-miR-326	1	0	1	1	1	1	TOMM34	translocase of outer mitochondrial membrane 34
hsa-miR-326	1	0	1	0	0	0	NTN1	netrin 1
hsa-miR-326	1	0	1	1	1	1	FRAS1	Fraser syndrome 1
hsa-miR-326	1	0	0	1	1	1	ELOF1	elongation factor 1 homolog (S. cerevisiae)
hsa-miR-326	1	0	1	0	1	1	MEST	mesoderm specific transcript homolog (mouse)
hsa-miR-326	1	0	1	1	0	0	CIC	capicua homolog (Drosophila)
hsa-miR-326	1	0	1	1	1	1	FUCA1	fucosidase, alpha-L- 1, tissue
hsa-miR-326	1	0	1	1	1	1	PADI2	peptidyl arginine deiminase, type II
hsa-miR-326	1	0	1	1	1	1	BCL2L2	BCL2-like 2
hsa-miR-326	1	0	1	1	1	1	PAX8	paired box 8
hsa-miR-326	1	0	1	1	1	1	C4orf19	chromosome 4 open reading frame 19
hsa-miR-326	1	0	1	1	1	1	TNC	tenascin C
hsa-miR-326	1	0	1	1	1	1	ORMDL3	ORM1-like 3 (S. cerevisiae)
hsa-miR-326	1	0	1	0	1	1	HEYL	hairy/enhancer-of-split related with YRPW motif-like
hsa-miR-326	1	0	1	0	1	1	SEZ6	seizure related 6 homolog (mouse)
hsa-miR-326	1	0	1	0	1	1	PRICKLE2	prickle homolog 2 (Drosophila)
hsa-miR-326	1	0	1	0	1	1	ARHGEF37	Rho guanine nucleotide exchange factor (GEF) 37
hsa-miR-326	1	0	1	0	1	1	KIAA0513	KIAA0513
hsa-miR-326	1	0	1	1	1	1	DYRK2	dual-specificity tyrosine-(Y)-phosphorylation regulated kinase 2
hsa-miR-326	1	0	1	1	1	1	CDH22	cadherin 22, type 2
hsa-miR-326	1	0	1	0	1	1	RAP2A	RAP2A, member of RAS oncogene family
hsa-miR-326	1	0	1	1	1	1	FGF11	fibroblast growth factor 11
hsa-miR-326	1	0	1	1	1	1	HIC2	hypermethylated in cancer 2
hsa-miR-326	1	0	1	0	1	1	FZD4	frizzled family receptor 4
hsa-miR-326	1	0	1	1	1	1	KCTD15	potassium channel tetramerisation domain containing 15
hsa-miR-326	1	0	0	1	0	0	FAM167B	family with sequence similarity 167, member B
hsa-miR-326	1	0	1	1	1	1	PADI1	peptidyl arginine deiminase, type I
hsa-miR-326	1	0	1	1	0	0	KIF17	kinesin family member 17
hsa-miR-326	1	0	0	0	1	1	H6PD	hexose-6-phosphate dehydrogenase (glucose 1-dehydrogenase)
hsa-miR-326	1	0	1	1	1	1	FBXL16	F-box and leucine-rich repeat protein 16
hsa-miR-326	1	0	1	1	1	1	NPTXR	neuronal pentraxin receptor
hsa-miR-326	1	0	1	1	1	1	DOLPP1	dolichyl pyrophosphate phosphatase 1
hsa-miR-326	1	0	1	1	0	0	FSCN1	fascin homolog 1, actin-bundling protein (Strongylocentrotus purpuratus)
hsa-miR-326	1	0	1	1	1	1	DLG3	discs, large homolog 3 (Drosophila)
hsa-miR-326	1	0	1	1	0	0	PCNX	pecanex homolog (Drosophila)
hsa-miR-326	1	0	1	1	1	1	VPS39	vacuolar protein sorting 39 homolog (S. cerevisiae)
hsa-miR-326	1	0	1	1	0	0	SRCAP	Snf2-related CREBBP activator protein
hsa-miR-326	1	0	1	0	1	1	KIAA0355	KIAA0355
hsa-miR-326	1	0	1	0	1	1	PTPRT	protein tyrosine phosphatase, receptor type, T
hsa-miR-326	0	0	1	1	1	1	C2CD2L	C2CD2-like
hsa-miR-326	0	0	1	1	0	0	PLXNB1	plexin B1
hsa-miR-326	0	0	1	0	1	1	KLHL21	kelch-like 21 (Drosophila)
hsa-miR-326	1	0	1	0	1	1	CEP350	centrosomal protein 350kDa
hsa-miR-326	0	0	1	1	0	0	ZNF862	zinc finger protein 862
hsa-miR-326	1	0	1	1	1	1	GPATCH8	G patch domain containing 8
hsa-miR-326	0	0	1	1	0	0	ATP10B	ATPase, class V, type 10B
hsa-miR-326	1	0	1	1	1	1	DNM3	dynamin 3
hsa-miR-326	1	0	1	1	1	1	CDK12	cyclin-dependent kinase 12
hsa-miR-326	1	0	1	1	1	1	RNMT	RNA (guanine-7-) methyltransferase
hsa-miR-326	1	0	1	1	1	1	CALCR	calcitonin receptor
hsa-miR-326	1	0	1	0	0	0	DTX4	deltex homolog 4 (Drosophila)
hsa-miR-326	1	0	1	1	1	1	BAHD1	bromo adjacent homology domain containing 1
hsa-miR-326	1	0	1	1	1	1	C11orf9	chromosome 11 open reading frame 9
hsa-miR-326	0	0	1	1	1	1	FASTKD2	FAST kinase domains 2
hsa-miR-326	1	0	1	1	0	0	STXBP5L	syntaxin binding protein 5-like
hsa-miR-326	1	0	1	1	0	0	KIAA1045	KIAA1045
hsa-miR-326	0	0	1	1	0	0	RTEL1	regulator of telomere elongation helicase 1
hsa-miR-326	1	0	1	1	1	1	PHF8	PHD finger protein 8
hsa-miR-326	1	0	1	0	1	1	GPR158	G protein-coupled receptor 158
hsa-miR-326	1	0	1	1	0	0	PPM1H	protein phosphatase, Mg2+/Mn2+ dependent, 1H
hsa-miR-326	0	0	1	1	0	0	ZC4H2	zinc finger, C4H2 domain containing
hsa-miR-326	1	0	1	1	1	1	RALGAPB	Ral GTPase activating protein, beta subunit (non-catalytic)
hsa-miR-326	1	0	1	1	0	0	ATAD2B	ATPase family, AAA domain containing 2B
hsa-miR-326	1	0	1	1	1	1	ASAP1	ArfGAP with SH3 domain, ankyrin repeat and PH domain 1
hsa-miR-326	0	0	1	1	1	1	COPS7A	COP9 constitutive photomorphogenic homolog subunit 7A (Arabidopsis)
hsa-miR-326	0	0	1	1	0	0	TNFRSF12A	tumor necrosis factor receptor superfamily, member 12A
hsa-miR-326	1	0	1	1	1	1	PCDH19	protocadherin 19
hsa-miR-326	1	0	1	1	0	0	EBF4	early B-cell factor 4
hsa-miR-326	1	0	1	1	1	1	FAM214B	family with sequence similarity 214, member B
hsa-miR-326	1	0	1	1	0	0	NCKAP5L	NCK-associated protein 5-like
hsa-miR-326	1	0	1	0	1	1	IGDCC4	immunoglobulin superfamily, DCC subclass, member 4
hsa-miR-326	1	0	1	0	0	0	TANC2	tetratricopeptide repeat, ankyrin repeat and coiled-coil containing 2
hsa-miR-326	1	0	1	1	1	1	PTBP2	polypyrimidine tract binding protein 2
hsa-miR-326	1	0	1	1	0	0	TMCO7	transmembrane and coiled-coil domains 7
hsa-miR-326	1	0	1	1	1	1	ITPRIP	inositol 1,4,5-trisphosphate receptor interacting protein
hsa-miR-326	0	0	1	1	1	1	SPEF2	sperm flagellar 2
hsa-miR-326	1	0	1	1	1	1	LCOR	ligand dependent nuclear receptor corepressor
hsa-miR-326	1	0	1	1	1	1	LZTS2	leucine zipper, putative tumor suppressor 2
hsa-miR-326	0	0	1	1	0	0	SPIRE2	spire homolog 2 (Drosophila)
hsa-miR-326	0	0	1	1	1	1	UNC80	unc-80 homolog (C. elegans)
hsa-miR-326	0	0	1	1	1	1	SLC11A2	solute carrier family 11 (proton-coupled divalent metal ion transporters), member 2
hsa-miR-326	1	0	1	1	1	1	NAV2	neuron navigator 2
hsa-miR-326	1	0	1	1	1	1	BCL2L11	BCL2-like 11 (apoptosis facilitator)
hsa-miR-326	1	0	1	0	1	1	KIF5C	kinesin family member 5C
hsa-miR-326	1	0	1	1	1	1	OXR1	oxidation resistance 1
hsa-miR-326	1	0	1	1	0	0	ADC	arginine decarboxylase
hsa-miR-326	0	0	1	0	0	0	NUGGC	nuclear GTPase, germinal center associated
hsa-miR-326	1	0	1	0	0	0	FAT3	FAT tumor suppressor homolog 3 (Drosophila)
hsa-miR-326	1	0	1	0	1	1	RNF43	ring finger protein 43
hsa-miR-326	0	0	1	1	1	1	PDZD3	PDZ domain containing 3
hsa-miR-326	1	0	1	1	1	1	C11orf57	chromosome 11 open reading frame 57
hsa-miR-326	0	0	1	1	0	0	MED12	mediator complex subunit 12
hsa-miR-326	0	0	1	1	0	0	DDB2	damage-specific DNA binding protein 2, 48kDa
hsa-miR-326	0	0	1	1	1	1	MICAL2	microtubule associated monoxygenase, calponin and LIM domain containing 2
hsa-miR-326	0	0	1	1	0	0	SSPO	SCO-spondin homolog (Bos taurus)
hsa-miR-326	1	0	1	1	1	1	KCNMA1	potassium large conductance calcium-activated channel, subfamily M, alpha member 1
hsa-miR-326	1	0	1	1	1	1	FAT2	FAT tumor suppressor homolog 2 (Drosophila)
hsa-miR-326	0	0	1	0	0	0	TIFAB	TRAF-interacting protein with forkhead-associated domain, family member B
hsa-miR-326	0	0	1	1	0	0	MARK2	MAP/microtubule affinity-regulating kinase 2
hsa-miR-326	0	0	1	0	1	1	FLNB	filamin B, beta
hsa-miR-326	0	0	1	0	1	1	ACE2	angiotensin I converting enzyme (peptidyl-dipeptidase A) 2
hsa-miR-326	1	0	1	1	1	1	VLDLR	very low density lipoprotein receptor
hsa-miR-326	1	0	1	1	1	1	SHC1	SHC (Src homology 2 domain containing) transforming protein 1
hsa-miR-326	0	0	1	1	0	0	KCNC3	potassium voltage-gated channel, Shaw-related subfamily, member 3
hsa-miR-326	1	0	1	1	1	1	PML	promyelocytic leukemia
hsa-miR-326	0	0	1	1	1	1	MAZ	MYC-associated zinc finger protein (purine-binding transcription factor)
hsa-miR-326	1	0	1	1	1	1	RLF	rearranged L-myc fusion
hsa-miR-326	1	0	1	1	0	0	CACNB1	calcium channel, voltage-dependent, beta 1 subunit
hsa-miR-326	1	0	1	1	0	0	TSPYL2	TSPY-like 2
hsa-miR-326	1	0	1	0	1	1	DPYSL2	dihydropyrimidinase-like 2
hsa-miR-326	1	0	1	1	1	1	EPHA7	EPH receptor A7
hsa-miR-326	1	0	1	1	1	1	ERF	Ets2 repressor factor
hsa-miR-326	1	0	1	1	0	0	SEMA3B	sema domain, immunoglobulin domain (Ig), short basic domain, secreted, (semaphorin) 3B
hsa-miR-326	1	0	1	1	1	1	SPTB	spectrin, beta, erythrocytic
hsa-miR-326	0	0	1	1	1	1	PPP1R12C	protein phosphatase 1, regulatory subunit 12C
hsa-miR-326	0	0	1	1	0	0	PSMB2	proteasome (prosome, macropain) subunit, beta type, 2
hsa-miR-326	0	0	1	1	0	0	EIF4E2	eukaryotic translation initiation factor 4E family member 2
hsa-miR-326	0	0	1	1	0	0	EIF2B4	eukaryotic translation initiation factor 2B, subunit 4 delta, 67kDa
hsa-miR-326	0	0	1	1	1	1	STAU1	staufen, RNA binding protein, homolog 1 (Drosophila)
hsa-miR-326	1	0	1	1	1	1	EPB41	erythrocyte membrane protein band 4.1 (elliptocytosis 1, RH-linked)
hsa-miR-326	0	0	1	1	1	1	ALDH3B1	aldehyde dehydrogenase 3 family, member B1
hsa-miR-326	0	0	1	1	0	0	SLC22A8	solute carrier family 22 (organic anion transporter), member 8
hsa-miR-326	0	0	1	1	0	0	CDK10	cyclin-dependent kinase 10
hsa-miR-326	1	0	1	1	0	0	PPP2R5D	protein phosphatase 2, regulatory subunit B', delta
hsa-miR-326	0	0	1	1	0	0	MSH5	mutS homolog 5 (E. coli)
hsa-miR-326	0	0	1	1	1	1	PLD1	phospholipase D1, phosphatidylcholine-specific
hsa-miR-326	1	0	1	1	1	1	MEF2D	myocyte enhancer factor 2D
hsa-miR-326	1	0	1	1	1	1	SDHC	succinate dehydrogenase complex, subunit C, integral membrane protein, 15kDa
hsa-miR-326	0	0	1	0	0	0	MIAT	myocardial infarction associated transcript (non-protein coding)
hsa-miR-326	1	0	1	0	1	1	MLL2	myeloid/lymphoid or mixed-lineage leukemia 2
hsa-miR-326	0	0	1	1	0	0	SPTBN2	spectrin, beta, non-erythrocytic 2
hsa-miR-326	1	0	1	1	1	1	PCDH17	protocadherin 17
hsa-miR-326	0	0	1	1	0	0	ITGA7	integrin, alpha 7
hsa-miR-326	0	0	1	1	1	1	UBE4B	ubiquitination factor E4B
hsa-miR-326	1	0	1	1	1	1	MRAS	muscle RAS oncogene homolog
hsa-miR-326	1	0	1	1	1	1	ERLIN1	ER lipid raft associated 1
hsa-miR-326	0	0	1	1	1	1	NOL3	nucleolar protein 3 (apoptosis repressor with CARD domain)
hsa-miR-326	1	0	1	1	1	1	CBFA2T2	core-binding factor, runt domain, alpha subunit 2; translocated to, 2
hsa-miR-326	0	0	1	1	0	0	SLC38A6	solute carrier family 38, member 6
hsa-miR-326	1	0	1	1	1	1	TMEM159	transmembrane protein 159
hsa-miR-326	0	0	1	0	1	1	SERF1A	small EDRK-rich factor 1A (telomeric)
hsa-miR-326	0	0	1	1	1	1	PCF11	PCF11, cleavage and polyadenylation factor subunit, homolog (S. cerevisiae)
hsa-miR-326	0	0	1	1	0	0	CARD10	caspase recruitment domain family, member 10
hsa-miR-326	0	0	1	0	0	0	C3orf79	chromosome 3 open reading frame 79
hsa-miR-326	0	0	1	1	1	1	CAPN10	calpain 10
hsa-miR-326	0	0	1	1	1	1	BBS9	Bardet-Biedl syndrome 9
hsa-miR-326	0	0	1	1	1	1	MSTO1	misato homolog 1 (Drosophila)
hsa-miR-326	1	0	1	0	0	0	PPME1	protein phosphatase methylesterase 1
hsa-miR-326	1	0	1	1	1	1	NF2	neurofibromin 2 (merlin)
hsa-miR-326	0	0	1	1	1	1	DMRT2	doublesex and mab-3 related transcription factor 2
hsa-miR-326	0	0	1	0	1	1	ZDHHC17	zinc finger, DHHC-type containing 17
hsa-miR-326	1	0	1	1	1	1	C16orf70	chromosome 16 open reading frame 70
hsa-miR-326	0	0	1	0	1	1	CLDN2	claudin 2
hsa-miR-326	1	0	1	1	1	1	C3orf18	chromosome 3 open reading frame 18
hsa-miR-326	1	0	1	1	1	1	SYDE1	synapse defective 1, Rho GTPase, homolog 1 (C. elegans)
hsa-miR-326	0	0	1	1	0	0	SH2B1	SH2B adaptor protein 1
hsa-miR-326	0	0	1	1	0	0	HES6	hairy and enhancer of split 6 (Drosophila)
hsa-miR-326	0	0	1	0	1	1	ERBB2IP	erbb2 interacting protein
hsa-miR-326	0	0	1	1	1	1	RASD2	RASD family, member 2
hsa-miR-326	1	0	1	1	1	1	NRP1	neuropilin 1
hsa-miR-326	0	0	1	1	0	0	HYI	hydroxypyruvate isomerase (putative)
hsa-miR-326	0	0	1	0	0	0	LOC645355	uncharacterized LOC645355
hsa-miR-326	1	0	1	1	1	1	TAGLN3	transgelin 3
hsa-miR-326	1	0	1	1	1	1	DCLRE1B	DNA cross-link repair 1B
hsa-miR-326	0	0	1	1	1	1	SEMA6C	sema domain, transmembrane domain (TM), and cytoplasmic domain, (semaphorin) 6C
hsa-miR-326	1	0	1	0	1	1	USP32	ubiquitin specific peptidase 32
hsa-miR-326	1	0	1	1	1	1	DDR1	discoidin domain receptor tyrosine kinase 1
hsa-miR-326	1	0	1	1	1	1	BBC3	BCL2 binding component 3
hsa-miR-326	1	0	1	1	1	1	PBX3	pre-B-cell leukemia homeobox 3
hsa-miR-326	0	0	1	1	0	0	CRHR1	corticotropin releasing hormone receptor 1
hsa-miR-326	0	0	1	1	1	1	SPSB1	splA/ryanodine receptor domain and SOCS box containing 1
hsa-miR-326	0	0	1	1	0	0	ELP2	elongator acetyltransferase complex subunit 2
hsa-miR-326	0	0	1	0	0	0	MYO15B	myosin XVB pseudogene
hsa-miR-326	0	0	1	1	0	0	TTC18	tetratricopeptide repeat domain 18
hsa-miR-326	0	0	1	1	1	1	PPP1R1B	protein phosphatase 1, regulatory (inhibitor) subunit 1B
hsa-miR-326	1	0	1	1	0	0	SEPT8	septin 8
hsa-miR-326	0	0	1	1	0	0	RASGEF1C	RasGEF domain family, member 1C
hsa-miR-326	0	0	1	1	1	1	CDAN1	codanin 1
hsa-miR-326	0	0	1	1	1	1	PTK7	PTK7 protein tyrosine kinase 7
hsa-miR-326	1	0	1	1	1	1	GPR64	G protein-coupled receptor 64
hsa-miR-326	1	0	1	1	1	1	AFF2	AF4/FMR2 family, member 2
hsa-miR-326	1	0	1	1	1	1	FLNC	filamin C, gamma
hsa-miR-326	0	0	1	1	1	1	GNAS	GNAS complex locus
hsa-miR-326	1	0	1	1	1	1	ILF3	interleukin enhancer binding factor 3, 90kDa
hsa-miR-326	0	0	1	1	1	1	RANBP17	RAN binding protein 17
hsa-miR-326	1	0	1	1	1	1	SLAMF6	SLAM family member 6
hsa-miR-326	0	0	1	1	1	1	RNASE7	ribonuclease, RNase A family, 7
hsa-miR-326	1	0	1	1	1	1	PALM2	paralemmin 2
hsa-miR-326	1	0	1	1	1	1	NRXN3	neurexin 3
hsa-miR-326	0	0	1	0	0	0	TOMM6	translocase of outer mitochondrial membrane 6 homolog (yeast)
hsa-miR-326	1	0	1	1	1	1	NAV3	neuron navigator 3
hsa-miR-326	1	0	1	1	1	1	PPP3CB	protein phosphatase 3, catalytic subunit, beta isozyme
hsa-miR-326	0	0	1	1	0	0	KIAA1324	KIAA1324
hsa-miR-326	1	0	1	1	1	1	XIRP1	xin actin-binding repeat containing 1
hsa-miR-326	0	0	1	1	1	1	DEPDC5	DEP domain containing 5
hsa-miR-326	1	0	1	0	1	1	NFAT5	nuclear factor of activated T-cells 5, tonicity-responsive
hsa-miR-326	1	0	1	1	0	0	DUS2L	dihydrouridine synthase 2-like, SMM1 homolog (S. cerevisiae)
hsa-miR-326	0	0	1	1	1	1	PARP16	poly (ADP-ribose) polymerase family, member 16
hsa-miR-326	0	0	1	0	0	0	TUG1	taurine upregulated 1 (non-protein coding)
hsa-miR-326	1	0	1	1	0	0	SENP3	SUMO1/sentrin/SMT3 specific peptidase 3
hsa-miR-326	1	0	1	1	1	1	ZNF691	zinc finger protein 691
hsa-miR-326	0	0	1	1	0	0	AP4B1	adaptor-related protein complex 4, beta 1 subunit
hsa-miR-326	1	0	1	1	1	1	DNMT3B	DNA (cytosine-5-)-methyltransferase 3 beta
hsa-miR-326	1	0	1	1	1	1	EPN2	epsin 2
hsa-miR-326	1	0	1	1	1	1	EIF2C1	eukaryotic translation initiation factor 2C, 1
hsa-miR-326	0	0	1	1	1	1	CXXC5	CXXC finger protein 5
hsa-miR-326	1	0	1	1	1	1	KLHDC8B	kelch domain containing 8B
hsa-miR-326	1	0	1	1	1	1	SMC4	structural maintenance of chromosomes 4
hsa-miR-326	1	0	1	1	1	1	HNRNPUL1	heterogeneous nuclear ribonucleoprotein U-like 1
hsa-miR-326	0	0	1	1	0	0	C17orf53	chromosome 17 open reading frame 53
hsa-miR-326	0	0	1	0	0	0	LOC149134	uncharacterized LOC149134
hsa-miR-326	1	0	1	1	1	1	S100PBP	S100P binding protein
hsa-miR-326	0	0	1	1	0	0	JMJD4	jumonji domain containing 4
hsa-miR-326	1	0	1	1	0	0	FASTK	Fas-activated serine/threonine kinase
hsa-miR-326	1	0	1	1	1	1	MACF1	microtubule-actin crosslinking factor 1
hsa-miR-326	1	0	1	1	1	1	SRP72	signal recognition particle 72kDa
hsa-miR-326	0	0	1	0	0	0	LOC284561	uncharacterized LOC284561
hsa-miR-326	1	0	1	1	1	1	BAZ2A	bromodomain adjacent to zinc finger domain, 2A
hsa-miR-326	1	0	1	1	1	1	ARHGEF15	Rho guanine nucleotide exchange factor (GEF) 15
hsa-miR-326	1	0	1	1	0	0	MEX3A	mex-3 homolog A (C. elegans)
hsa-miR-326	0	0	1	0	0	0	LOC286059	tumor necrosis factor receptor superfamily, member 10d, decoy with truncated death domain pseudogene
hsa-miR-326	1	0	1	1	1	1	ZNF385A	zinc finger protein 385A
hsa-miR-326	1	0	1	0	1	1	ATP2B1	ATPase, Ca++ transporting, plasma membrane 1
hsa-miR-326	0	0	1	0	0	0	RASAL3	RAS protein activator like 3
hsa-miR-326	0	0	1	0	1	1	ATXN1L	ataxin 1-like
hsa-miR-326	0	0	1	1	1	1	CNOT8	CCR4-NOT transcription complex, subunit 8
hsa-miR-326	0	0	1	0	1	1	HEMK1	HemK methyltransferase family member 1
hsa-miR-326	0	0	1	0	0	0	LINC00340	long intergenic non-protein coding RNA 340
hsa-miR-326	0	0	1	1	1	1	ZBBX	zinc finger, B-box domain containing
hsa-miR-326	1	0	1	1	1	1	ITGA9	integrin, alpha 9
hsa-miR-326	0	0	1	1	1	1	GTF2H1	general transcription factor IIH, polypeptide 1, 62kDa
hsa-miR-326	1	0	1	1	1	1	RNF185	ring finger protein 185
hsa-miR-326	0	0	1	0	0	0	A1BG-AS1	A1BG antisense RNA 1
hsa-miR-326	0	0	1	1	0	0	CCDC142	coiled-coil domain containing 142
hsa-miR-326	1	0	1	1	1	1	SEC63	SEC63 homolog (S. cerevisiae)
hsa-miR-326	1	0	1	1	1	1	FAM53C	family with sequence similarity 53, member C
hsa-miR-326	0	0	1	1	1	1	KDM2B	lysine (K)-specific demethylase 2B
hsa-miR-326	0	0	1	1	1	1	CHD1L	chromodomain helicase DNA binding protein 1-like
hsa-miR-326	0	0	1	1	1	1	BBS1	Bardet-Biedl syndrome 1
hsa-miR-326	0	0	1	1	1	1	DCAF4	DDB1 and CUL4 associated factor 4
hsa-miR-326	0	0	1	1	1	1	PAQR4	progestin and adipoQ receptor family member IV
hsa-miR-326	0	0	1	0	0	0	NBLA00301	Nbla00301
hsa-miR-326	1	0	1	0	1	1	ELMOD1	ELMO/CED-12 domain containing 1
hsa-miR-326	0	0	1	1	1	1	RAB37	RAB37, member RAS oncogene family
hsa-miR-326	1	0	1	1	0	0	C15orf27	chromosome 15 open reading frame 27
hsa-miR-326	1	0	1	1	1	1	C7orf43	chromosome 7 open reading frame 43
hsa-miR-326	0	0	1	1	1	1	C8orf46	chromosome 8 open reading frame 46
hsa-miR-326	0	0	1	1	1	1	TOX2	TOX high mobility group box family member 2
hsa-miR-326	0	0	1	0	0	0	LOC154092	uncharacterized LOC154092
hsa-miR-326	0	0	1	1	0	0	USP11	ubiquitin specific peptidase 11
hsa-miR-326	0	0	1	0	0	0	FLJ31104	uncharacterized LOC441072
hsa-miR-326	0	0	1	0	1	1	C17orf108	chromosome 17 open reading frame 108
hsa-miR-326	0	0	1	0	0	0	LOC201617	uncharacterized LOC201617
hsa-miR-326	1	0	1	1	1	1	EXD2	exonuclease 3'-5' domain containing 2
hsa-miR-326	1	0	1	1	0	0	SH2D3C	SH2 domain containing 3C
hsa-miR-326	0	0	1	1	0	0	BEAN1	brain expressed, associated with NEDD4, 1
hsa-miR-326	0	0	1	1	1	1	SEPT5	septin 5
hsa-miR-326	1	0	1	1	1	1	TMEM25	transmembrane protein 25
hsa-miR-326	1	0	1	1	1	1	SHISA5	shisa homolog 5 (Xenopus laevis)
hsa-miR-326	0	0	1	0	0	0	FLJ12825	uncharacterized LOC440101
hsa-miR-326	1	0	1	1	1	1	SCAMP5	secretory carrier membrane protein 5
hsa-miR-326	0	0	1	0	0	0	LOC284600	uncharacterized LOC284600
hsa-miR-326	0	0	1	1	1	1	BRD2	bromodomain containing 2
hsa-miR-326	0	0	1	1	0	0	ZNF185	zinc finger protein 185 (LIM domain)
hsa-miR-326	0	0	1	1	1	1	ZNF606	zinc finger protein 606
hsa-miR-326	0	0	1	0	0	0	LOC255187	hCG1980447
hsa-miR-326	1	0	1	0	1	1	PCGF3	polycomb group ring finger 3
hsa-miR-326	0	0	1	1	0	0	COMMD4	COMM domain containing 4
hsa-miR-326	0	0	1	0	0	0	LOC100125918	uncharacterized LOC100125918
hsa-miR-326	0	0	1	0	0	0	LOC147004	uncharacterized LOC147004
hsa-miR-326	0	0	1	0	1	1	ARHGAP42	Rho GTPase activating protein 42
hsa-miR-326	0	0	1	1	1	1	TAF8	TAF8 RNA polymerase II, TATA box binding protein (TBP)-associated factor, 43kDa
hsa-miR-326	0	0	1	1	0	0	DMRTC2	DMRT-like family C2
hsa-miR-326	1	0	1	0	1	1	PLEKHA1	pleckstrin homology domain containing, family A (phosphoinositide binding specific) member 1
hsa-miR-326	1	0	1	1	0	0	GBA2	glucosidase, beta (bile acid) 2
hsa-miR-326	0	0	1	1	0	0	PORCN	porcupine homolog (Drosophila)
hsa-miR-326	0	0	1	0	0	0	LOC284014	uncharacterized LOC284014
hsa-miR-326	1	0	1	1	1	1	C6orf89	chromosome 6 open reading frame 89
hsa-miR-326	0	0	1	1	0	0	CD37	CD37 molecule
hsa-miR-326	0	0	1	0	0	0	LINC00301	long intergenic non-protein coding RNA 301
hsa-miR-326	1	0	1	1	1	1	AKNA	AT-hook transcription factor
hsa-miR-326	0	0	1	1	0	0	TRIM41	tripartite motif containing 41
hsa-miR-326	0	0	1	1	1	1	ZFAND2B	zinc finger, AN1-type domain 2B
hsa-miR-326	1	0	1	1	1	1	UBAP1	ubiquitin associated protein 1
hsa-miR-326	1	0	1	1	1	1	CLIC5	chloride intracellular channel 5
hsa-miR-326	0	0	1	1	1	1	KDELR1	KDEL (Lys-Asp-Glu-Leu) endoplasmic reticulum protein retention receptor 1
hsa-miR-326	0	0	1	1	0	0	GHDC	GH3 domain containing
hsa-miR-326	0	0	1	1	0	0	PIGO	phosphatidylinositol glycan anchor biosynthesis, class O
hsa-miR-326	0	0	1	1	1	1	MTR	5-methyltetrahydrofolate-homocysteine methyltransferase
hsa-miR-326	0	0	1	0	0	0	LOC727993	uncharacterized LOC727993
hsa-miR-326	0	0	1	0	0	0	LOC643837	uncharacterized LOC643837
hsa-miR-326	1	0	1	1	1	1	ARIH2	ariadne homolog 2 (Drosophila)
hsa-miR-326	1	0	1	1	1	1	EGR2	early growth response 2
hsa-miR-326	0	0	1	1	0	0	CDK15	cyclin-dependent kinase 15
hsa-miR-326	1	0	1	1	1	1	FBXW2	F-box and WD repeat domain containing 2
hsa-miR-326	0	0	1	1	0	0	TRMT44	tRNA methyltransferase 44 homolog (S. cerevisiae)
hsa-miR-326	1	0	1	1	1	1	MAFK	v-maf musculoaponeurotic fibrosarcoma oncogene homolog K (avian)
hsa-miR-326	0	0	1	0	0	0	LOC283887	uncharacterized LOC283887
hsa-miR-326	1	0	1	0	0	0	SH3RF3	SH3 domain containing ring finger 3
hsa-miR-326	0	0	1	1	1	1	C19orf47	chromosome 19 open reading frame 47
hsa-miR-326	0	0	1	1	0	0	WBP1	WW domain binding protein 1
hsa-miR-326	0	0	1	1	1	1	SPOCK1	sparc/osteonectin, cwcv and kazal-like domains proteoglycan (testican) 1
hsa-miR-326	0	0	1	1	1	1	TMEM191C	transmembrane protein 191C
hsa-miR-326	1	0	1	1	1	1	KLC2	kinesin light chain 2
hsa-miR-326	1	0	1	0	1	1	GATAD2B	GATA zinc finger domain containing 2B
hsa-miR-326	0	0	1	1	0	0	IL11RA	interleukin 11 receptor, alpha
hsa-miR-326	0	0	1	1	1	1	RBM25	RNA binding motif protein 25
hsa-miR-326	0	0	1	1	0	0	C9orf24	chromosome 9 open reading frame 24
hsa-miR-326	0	0	1	0	1	1	AGBL4	ATP/GTP binding protein-like 4
hsa-miR-326	1	0	1	1	1	1	TCF4	transcription factor 4
hsa-miR-326	0	0	1	0	0	0	FLJ37798	uncharacterized LOC401264
hsa-miR-326	1	0	1	1	1	1	NDEL1	nudE nuclear distribution E homolog (A. nidulans)-like 1
hsa-miR-326	1	0	1	1	1	1	CUL2	cullin 2
hsa-miR-326	0	0	1	0	0	0	LOC730101	uncharacterized LOC730101
hsa-miR-326	0	0	1	1	1	1	AQP3	aquaporin 3 (Gill blood group)
hsa-miR-326	0	0	1	1	1	1	SIRPB2	signal-regulatory protein beta 2
hsa-miR-326	1	0	1	1	1	1	SPATS2	spermatogenesis associated, serine-rich 2
hsa-miR-326	0	0	1	1	1	1	CDK5RAP1	CDK5 regulatory subunit associated protein 1
hsa-miR-326	1	0	1	1	1	1	LITAF	lipopolysaccharide-induced TNF factor
hsa-miR-326	0	0	1	1	1	1	FBLN1	fibulin 1
hsa-miR-326	1	0	1	1	1	1	ACSL1	acyl-CoA synthetase long-chain family member 1
hsa-miR-326	0	0	1	0	0	0	ZNF815P	zinc finger protein 815, pseudogene
hsa-miR-326	0	0	1	0	0	0	FAM66C	family with sequence similarity 66, member C
hsa-miR-326	0	0	1	0	0	0	C1orf204	chromosome 1 open reading frame 204
hsa-miR-326	0	0	1	0	0	0	ZNF300P1	zinc finger protein 300 pseudogene 1
hsa-miR-326	1	0	1	0	1	1	THRB	thyroid hormone receptor, beta
hsa-miR-326	1	0	1	1	1	1	SYT6	synaptotagmin VI
hsa-miR-326	0	0	1	1	0	0	ECM1	extracellular matrix protein 1
hsa-miR-326	0	0	1	1	0	0	PRKRIP1	PRKR interacting protein 1 (IL11 inducible)
hsa-miR-326	0	0	1	1	0	0	VPS37C	vacuolar protein sorting 37 homolog C (S. cerevisiae)
hsa-miR-326	0	0	1	1	0	0	ACAD10	acyl-CoA dehydrogenase family, member 10
hsa-miR-326	0	0	1	0	0	0	LINC00293	long intergenic non-protein coding RNA 293
hsa-miR-326	0	0	1	1	1	1	CBWD5	COBW domain containing 5
hsa-miR-326	0	0	1	1	0	0	PSAPL1	prosaposin-like 1 (gene/pseudogene)
hsa-miR-326	0	0	1	1	1	1	CKAP2L	cytoskeleton associated protein 2-like
hsa-miR-326	0	0	1	0	0	0	HLA-DQB2	major histocompatibility complex, class II, DQ beta 2
hsa-miR-326	0	0	1	0	0	0	CECR7	cat eye syndrome chromosome region, candidate 7 (non-protein coding)
hsa-miR-326	1	0	1	1	1	1	PIGA	phosphatidylinositol glycan anchor biosynthesis, class A
hsa-miR-326	0	0	1	1	1	1	RP1	retinitis pigmentosa 1 (autosomal dominant)
hsa-miR-326	1	0	1	1	0	0	ENTPD1	ectonucleoside triphosphate diphosphohydrolase 1
hsa-miR-326	0	0	1	1	1	1	ARFGAP2	ADP-ribosylation factor GTPase activating protein 2
hsa-miR-326	1	0	1	1	1	1	THTPA	thiamine triphosphatase
hsa-miR-326	0	0	1	0	0	0	LOC728095	uncharacterized LOC728095
hsa-miR-326	0	0	1	1	1	1	SLFN13	schlafen family member 13
hsa-miR-326	0	0	1	0	1	1	EML5	echinoderm microtubule associated protein like 5
hsa-miR-326	0	0	1	1	1	1	NFKB1	nuclear factor of kappa light polypeptide gene enhancer in B-cells 1
hsa-miR-326	1	0	1	1	0	0	WIZ	widely interspaced zinc finger motifs
hsa-miR-326	1	0	1	1	0	0	CACNB3	calcium channel, voltage-dependent, beta 3 subunit
hsa-miR-326	0	0	1	1	0	0	MARCH10	membrane-associated ring finger (C3HC4) 10, E3 ubiquitin protein ligase
hsa-miR-326	0	0	1	1	0	0	MX2	myxovirus (influenza virus) resistance 2 (mouse)
hsa-miR-326	1	0	1	1	1	1	ZBTB4	zinc finger and BTB domain containing 4
hsa-miR-326	1	0	1	1	1	1	ABHD6	abhydrolase domain containing 6
hsa-miR-326	0	0	1	1	1	1	FRMPD2	FERM and PDZ domain containing 2
hsa-miR-326	0	0	1	0	1	1	PATE4	prostate and testis expressed 4
hsa-miR-326	0	0	1	0	0	0	CLEC4GP1	C-type lectin domain family 4, member G pseudogene 1
hsa-miR-326	1	0	1	1	1	1	PLEKHH1	pleckstrin homology domain containing, family H (with MyTH4 domain) member 1
hsa-miR-326	0	0	1	1	1	1	RGS3	regulator of G-protein signaling 3
hsa-miR-326	0	0	1	1	0	0	TJAP1	tight junction associated protein 1 (peripheral)
hsa-miR-326	0	0	1	0	0	0	LGALS17A	Charcot-Leyden crystal protein pseudogene
hsa-miR-326	0	0	1	0	0	0	TMPRSS11BNL	TMPRSS11B N terminal-like
hsa-miR-326	0	0	1	1	0	0	TTLL12	tubulin tyrosine ligase-like family, member 12
hsa-miR-326	0	0	1	1	0	0	C16orf86	chromosome 16 open reading frame 86
hsa-miR-326	0	0	1	1	0	0	KRT37	keratin 37
hsa-miR-326	1	0	1	0	1	1	WDR82	WD repeat domain 82
hsa-miR-326	1	0	1	1	1	1	FAM219A	family with sequence similarity 219, member A
hsa-miR-326	0	0	1	1	1	1	BTN2A2	butyrophilin, subfamily 2, member A2
hsa-miR-326	0	0	1	0	0	0	DKFZP434H168	uncharacterized LOC26077
hsa-miR-326	0	0	1	1	1	1	SLC9A1	solute carrier family 9, subfamily A (NHE1, cation proton antiporter 1), member 1
hsa-miR-326	1	0	1	1	1	1	NECAB3	N-terminal EF-hand calcium binding protein 3
hsa-miR-326	0	0	1	1	0	0	NPIP	nuclear pore complex interacting protein
hsa-miR-326	1	0	1	0	1	1	TTYH3	tweety homolog 3 (Drosophila)
hsa-miR-326	0	0	1	1	1	1	C2orf91	chromosome 2 open reading frame 91
hsa-miR-326	0	0	1	1	1	1	ATPBD4	ATP binding domain 4
hsa-miR-326	0	0	1	1	0	0	FAM21B	family with sequence similarity 21, member B
hsa-miR-326	0	0	1	1	0	0	LOC100128239	uncharacterized LOC100128239
hsa-miR-326	1	0	1	1	1	1	CCDC149	coiled-coil domain containing 149
hsa-miR-326	1	0	1	1	1	1	DLGAP4	discs, large (Drosophila) homolog-associated protein 4
hsa-miR-326	0	0	1	1	0	0	C20orf141	chromosome 20 open reading frame 141
hsa-miR-326	0	0	1	0	0	0	ADCY10P1	adenylate cyclase 10 (soluble) pseudogene 1
hsa-miR-326	0	0	1	1	0	0	CLDN4	claudin 4
hsa-miR-326	1	0	1	1	0	0	SPEG	SPEG complex locus
hsa-miR-326	0	0	1	1	0	0	HSPG2	heparan sulfate proteoglycan 2
hsa-miR-326	0	0	1	1	0	0	CCDC88B	coiled-coil domain containing 88B
hsa-miR-326	1	0	1	1	1	1	MTOR	mechanistic target of rapamycin (serine/threonine kinase)
hsa-miR-326	1	0	1	1	1	1	C14orf28	chromosome 14 open reading frame 28
hsa-miR-326	1	0	1	1	0	0	MAN1B1	mannosidase, alpha, class 1B, member 1
hsa-miR-326	0	0	1	1	1	1	MOBP	myelin-associated oligodendrocyte basic protein
hsa-miR-326	1	0	1	1	1	1	FMNL3	formin-like 3
hsa-miR-326	1	0	1	0	1	1	N4BP3	NEDD4 binding protein 3
hsa-miR-326	0	0	1	0	0	0	LOC619207	scavenger receptor protein family member
hsa-miR-326	1	0	1	1	1	1	PHF17	PHD finger protein 17
hsa-miR-326	1	0	1	0	1	1	YAF2	YY1 associated factor 2
hsa-miR-326	0	0	1	1	1	1	PIN4	protein (peptidylprolyl cis/trans isomerase) NIMA-interacting, 4 (parvulin)
hsa-miR-326	1	0	1	1	1	1	RNF44	ring finger protein 44
hsa-miR-326	0	0	1	0	0	0	ERVFRD-2	endogenous retrovirus group FRD, member 2
hsa-miR-326	0	0	1	1	0	0	LOC100128682	uncharacterized LOC100128682
hsa-miR-326	0	0	1	0	0	0	FAM205B	transmembrane protein C9orf144B pseudogene
hsa-miR-326	1	0	1	1	1	1	FRYL	FRY-like
hsa-miR-326	0	0	1	1	1	1	ZNF662	zinc finger protein 662
hsa-miR-326	0	0	1	1	0	0	WFIKKN1	WAP, follistatin/kazal, immunoglobulin, kunitz and netrin domain containing 1
hsa-miR-326	1	0	1	0	1	1	CYB561D1	cytochrome b-561 domain containing 1
hsa-miR-326	1	0	1	1	1	1	PHC2	polyhomeotic homolog 2 (Drosophila)
hsa-miR-326	0	0	1	0	0	0	FLJ26245	uncharacterized LOC400533
hsa-miR-326	0	0	1	1	1	1	TBX19	T-box 19
hsa-miR-326	0	0	1	0	0	0	LOC654433	uncharacterized LOC654433
hsa-miR-326	0	0	1	0	0	0	FAM27A	family with sequence similarity 27, member A
hsa-miR-326	0	0	1	0	0	0	LOC390660	FLJ00317 protein
hsa-miR-326	0	0	1	1	1	1	TMC5	transmembrane channel-like 5
hsa-miR-326	0	0	1	0	1	1	RUFY4	RUN and FYVE domain containing 4
hsa-miR-326	0	0	1	0	0	0	LOC100124692	maltase-glucoamylase (alpha-glucosidase) pseudogene
hsa-miR-326	1	0	1	1	1	1	PPP2R5C	protein phosphatase 2, regulatory subunit B', gamma
hsa-miR-326	0	0	1	1	1	1	RNF19B	ring finger protein 19B
hsa-miR-326	1	0	1	0	0	0	ASXL3	additional sex combs like 3 (Drosophila)
hsa-miR-326	0	0	1	1	1	1	ZNF346	zinc finger protein 346
hsa-miR-326	0	0	1	1	1	1	NR4A1	nuclear receptor subfamily 4, group A, member 1
hsa-miR-326	0	0	1	0	0	0	AGAP9	ArfGAP with GTPase domain, ankyrin repeat and PH domain 9
hsa-miR-326	0	0	1	1	0	0	SCNN1A	sodium channel, non-voltage-gated 1 alpha subunit
hsa-miR-326	0	0	1	1	1	1	LRRN4	leucine rich repeat neuronal 4
hsa-miR-326	0	0	1	1	1	1	KAZALD1	Kazal-type serine peptidase inhibitor domain 1
hsa-miR-326	1	0	1	1	1	1	FAM135A	family with sequence similarity 135, member A
hsa-miR-326	1	0	1	1	1	1	UBE2O	ubiquitin-conjugating enzyme E2O
hsa-miR-326	1	0	1	1	0	0	ABLIM3	actin binding LIM protein family, member 3
hsa-miR-326	1	0	1	1	1	1	CAMK2G	calcium/calmodulin-dependent protein kinase II gamma
hsa-miR-326	1	0	1	0	1	1	MAP3K3	mitogen-activated protein kinase kinase kinase 3
hsa-miR-326	0	0	1	1	1	1	TIMMDC1	translocase of inner mitochondrial membrane domain containing 1
hsa-miR-326	1	0	1	1	1	1	ZNF655	zinc finger protein 655
hsa-miR-326	0	0	1	1	0	0	TRIM69	tripartite motif containing 69
hsa-miR-326	1	0	1	0	1	1	TEAD3	TEA domain family member 3
hsa-miR-326	0	0	1	1	0	0	FAAH	fatty acid amide hydrolase
hsa-miR-326	1	0	1	1	1	1	RIF1	RAP1 interacting factor homolog (yeast)
hsa-miR-326	0	0	1	1	0	0	PLK1S1	polo-like kinase 1 substrate 1
hsa-miR-326	0	0	1	0	0	0	POM121L9P	POM121 transmembrane nucleoporin-like 9, pseudogene
hsa-miR-326	0	0	1	1	1	1	ARIH1	ariadne homolog, ubiquitin-conjugating enzyme E2 binding protein, 1 (Drosophila)
hsa-miR-326	0	0	1	0	0	0	KIAA0913	KIAA0913
hsa-miR-326	1	0	1	1	1	1	PREX1	phosphatidylinositol-3,4,5-trisphosphate-dependent Rac exchange factor 1
hsa-miR-326	1	0	1	1	1	1	FAM107B	family with sequence similarity 107, member B
hsa-miR-326	0	0	1	1	0	0	PCIF1	PDX1 C-terminal inhibiting factor 1
hsa-miR-326	0	0	1	1	1	1	STAG3L1	stromal antigen 3-like 1
hsa-miR-326	0	0	1	1	0	0	DOPEY1	dopey family member 1
hsa-miR-326	1	0	1	1	1	1	CTTNBP2NL	CTTNBP2 N-terminal like
hsa-miR-326	1	0	1	1	1	1	NEO1	neogenin 1
hsa-miR-326	1	0	1	0	1	1	GRIN3A	glutamate receptor, ionotropic, N-methyl-D-aspartate 3A
hsa-miR-326	0	0	1	1	1	1	CD276	CD276 molecule
hsa-miR-326	0	0	1	1	1	1	MESP2	mesoderm posterior 2 homolog (mouse)
hsa-miR-326	0	0	1	0	0	0	FAM66D	family with sequence similarity 66, member D
hsa-miR-326	1	0	1	1	1	1	PKNOX2	PBX/knotted 1 homeobox 2
hsa-miR-326	1	0	1	0	1	1	BRPF1	bromodomain and PHD finger containing, 1
hsa-miR-326	0	0	1	1	0	0	KRBA1	KRAB-A domain containing 1
hsa-miR-326	0	0	1	0	1	1	GAB3	GRB2-associated binding protein 3
hsa-miR-326	1	0	1	1	1	1	LYPD3	LY6/PLAUR domain containing 3
hsa-miR-326	1	0	1	1	1	1	FAM126B	family with sequence similarity 126, member B
hsa-miR-326	0	0	1	1	1	1	CENPW	centromere protein W
hsa-miR-326	0	0	1	1	0	0	LETM2	leucine zipper-EF-hand containing transmembrane protein 2
hsa-miR-326	0	0	1	1	1	1	EGFLAM	EGF-like, fibronectin type III and laminin G domains
hsa-miR-326	1	0	1	1	1	1	CHMP7	charged multivesicular body protein 7
hsa-miR-326	1	0	1	1	1	1	NFX1	nuclear transcription factor, X-box binding 1
hsa-miR-326	1	0	1	0	1	1	MPP5	membrane protein, palmitoylated 5 (MAGUK p55 subfamily member 5)
hsa-miR-326	0	0	1	1	1	1	SYTL4	synaptotagmin-like 4
hsa-miR-326	1	0	1	1	0	0	PTAR1	protein prenyltransferase alpha subunit repeat containing 1
hsa-miR-326	0	0	1	0	0	0	FAM225A	family with sequence similarity 225, member A (non-protein coding)
hsa-miR-326	0	0	1	0	1	1	CEP95	centrosomal protein 95kDa
hsa-miR-326	1	0	1	1	1	1	SBF2	SET binding factor 2
hsa-miR-326	0	0	1	0	0	0	C1RL-AS1	C1RL antisense RNA 1
hsa-miR-326	0	0	1	1	0	0	FCRL3	Fc receptor-like 3
hsa-miR-326	0	0	1	0	0	0	LOC286135	uncharacterized LOC286135
hsa-miR-326	1	0	1	1	1	1	GGA3	golgi-associated, gamma adaptin ear containing, ARF binding protein 3
hsa-miR-326	1	0	1	1	1	1	FAM63B	family with sequence similarity 63, member B
hsa-miR-326	1	0	1	1	0	0	KIAA0895L	KIAA0895-like
hsa-miR-326	0	0	1	1	1	1	KLHL29	kelch-like 29 (Drosophila)
hsa-miR-326	0	0	1	1	1	1	LMAN2L	lectin, mannose-binding 2-like
hsa-miR-326	0	0	1	1	1	1	SLAMF7	SLAM family member 7
hsa-miR-326	0	0	1	1	1	1	C5orf45	chromosome 5 open reading frame 45
hsa-miR-326	0	0	1	1	0	0	TMEM134	transmembrane protein 134
hsa-miR-326	0	0	1	0	0	0	GRIK1-AS1	GRIK1 antisense RNA 1
hsa-miR-326	1	0	1	1	1	1	SULF1	sulfatase 1
hsa-miR-326	0	0	1	1	1	1	PINX1	PIN2/TERF1 interacting, telomerase inhibitor 1
hsa-miR-326	0	0	1	1	1	1	IYD	iodotyrosine deiodinase
hsa-miR-326	0	0	1	1	0	0	GLYCTK	glycerate kinase
hsa-miR-326	0	0	1	1	1	1	STAG3L3	stromal antigen 3-like 3
hsa-miR-326	0	0	1	0	0	0	MEG3	maternally expressed 3 (non-protein coding)
hsa-miR-326	1	0	1	1	1	1	GFRA2	GDNF family receptor alpha 2
hsa-miR-326	0	0	1	1	1	1	GCOM1	GRINL1A complex locus 1
hsa-miR-326	1	0	1	1	1	1	TAB3	TGF-beta activated kinase 1/MAP3K7 binding protein 3
hsa-miR-326	0	0	1	0	0	0	FAM138C	family with sequence similarity 138, member C
hsa-miR-326	0	0	1	1	0	0	LRRC28	leucine rich repeat containing 28
hsa-miR-326	0	0	1	1	1	1	SLC22A12	solute carrier family 22 (organic anion/urate transporter), member 12
hsa-miR-326	0	0	1	1	0	0	SIGIRR	single immunoglobulin and toll-interleukin 1 receptor (TIR) domain
hsa-miR-326	0	0	1	1	1	1	GPR114	G protein-coupled receptor 114
hsa-miR-326	0	0	1	0	0	0	LINC00085	long intergenic non-protein coding RNA 85
hsa-miR-326	0	0	1	1	0	0	C16orf48	chromosome 16 open reading frame 48
hsa-miR-326	0	0	1	1	1	1	TNFRSF19	tumor necrosis factor receptor superfamily, member 19
hsa-miR-326	0	0	1	1	0	0	SNRPN	small nuclear ribonucleoprotein polypeptide N
hsa-miR-326	0	0	1	1	1	1	NYAP1	neuronal tyrosine-phosphorylated phosphoinositide-3-kinase adaptor 1
hsa-miR-326	0	0	1	1	1	1	RPTN	repetin
hsa-miR-326	0	0	1	1	1	1	TIMM50	translocase of inner mitochondrial membrane 50 homolog (S. cerevisiae)
hsa-miR-326	1	0	1	1	1	1	VPS45	vacuolar protein sorting 45 homolog (S. cerevisiae)
hsa-miR-326	0	0	1	1	1	1	POTEG	POTE ankyrin domain family, member G
hsa-miR-326	0	0	1	0	0	0	ZNFX1-AS1	ZNFX1 antisense RNA 1
hsa-miR-326	0	0	1	0	1	1	XKR5	XK, Kell blood group complex subunit-related family, member 5
hsa-miR-326	0	0	1	1	1	1	PRPF4	PRP4 pre-mRNA processing factor 4 homolog (yeast)
hsa-miR-326	0	0	1	1	1	1	SMPD1	sphingomyelin phosphodiesterase 1, acid lysosomal
hsa-miR-326	0	0	1	1	1	1	FCRLB	Fc receptor-like B
hsa-miR-326	1	0	1	1	1	1	PLCH1	phospholipase C, eta 1
hsa-miR-326	0	0	1	0	0	0	MAST4	microtubule associated serine/threonine kinase family member 4
hsa-miR-326	0	0	1	1	1	1	CDK20	cyclin-dependent kinase 20
hsa-miR-326	1	0	1	1	1	1	AMOT	angiomotin
hsa-miR-326	0	0	1	1	1	1	B4GALT2	UDP-Gal:betaGlcNAc beta 1,4- galactosyltransferase, polypeptide 2
hsa-miR-326	0	0	1	1	1	1	MRRF	mitochondrial ribosome recycling factor
hsa-miR-326	1	0	1	0	1	1	DPYSL5	dihydropyrimidinase-like 5
hsa-miR-326	0	0	1	1	1	1	TUFT1	tuftelin 1
hsa-miR-326	1	0	1	1	1	1	RIMS3	regulating synaptic membrane exocytosis 3
hsa-miR-326	1	0	1	1	1	1	NONO	non-POU domain containing, octamer-binding
hsa-miR-326	1	0	1	1	1	1	SMO	smoothened, frizzled family receptor
hsa-miR-326	0	0	1	1	0	0	ZNF821	zinc finger protein 821
hsa-miR-326	1	0	1	0	0	0	TGFA	transforming growth factor, alpha
hsa-miR-326	0	0	1	1	1	1	PRMT5	protein arginine methyltransferase 5
hsa-miR-326	0	0	1	0	0	0	LOC93622	Morf4 family associated protein 1-like 1 pseudogene
hsa-miR-326	1	0	1	1	0	0	EIF4A1	eukaryotic translation initiation factor 4A1
hsa-miR-326	0	0	1	0	0	0	DNM1P33	DNM1 pseudogene 33
hsa-miR-326	0	0	1	1	0	0	AGBL5	ATP/GTP binding protein-like 5
hsa-miR-326	0	0	1	1	1	1	ACPP	acid phosphatase, prostate
hsa-miR-326	1	0	1	1	1	1	TRIM39	tripartite motif containing 39
hsa-miR-326	0	0	1	1	0	0	PRR11	proline rich 11
hsa-miR-326	1	0	1	1	0	0	WDR45	WD repeat domain 45
hsa-miR-326	0	0	1	0	0	0	ATXN7L3B	ataxin 7-like 3B
hsa-miR-326	1	0	1	1	1	1	SLC27A4	solute carrier family 27 (fatty acid transporter), member 4
hsa-miR-326	0	0	1	0	0	0	LOC154761	family with sequence similarity 115, member C pseudogene
hsa-miR-326	1	0	1	1	1	1	GRIA2	glutamate receptor, ionotropic, AMPA 2
hsa-miR-326	1	0	1	1	1	1	SZRD1	SUZ RNA binding domain containing 1
hsa-miR-326	1	0	1	1	1	1	SLC46A1	solute carrier family 46 (folate transporter), member 1
hsa-miR-326	0	0	1	1	0	0	MEF2BNB-MEF2B	MEF2BNB-MEF2B readthrough
hsa-miR-326	1	0	1	1	1	1	OTUD5	OTU domain containing 5
hsa-miR-326	1	0	1	1	1	1	ZBTB7B	zinc finger and BTB domain containing 7B
hsa-miR-326	1	0	1	0	1	1	RNF165	ring finger protein 165
hsa-miR-326	1	0	1	0	1	1	FNDC3B	fibronectin type III domain containing 3B
hsa-miR-326	1	0	1	1	1	1	GDA	guanine deaminase
hsa-miR-326	1	0	1	1	1	1	YY1	YY1 transcription factor
hsa-miR-326	1	0	1	1	1	1	PRDM2	PR domain containing 2, with ZNF domain
hsa-miR-326	0	0	1	1	0	0	USP19	ubiquitin specific peptidase 19
hsa-miR-326	0	0	1	1	1	1	TOMM40L	translocase of outer mitochondrial membrane 40 homolog (yeast)-like
hsa-miR-326	0	0	1	1	1	1	C8orf33	chromosome 8 open reading frame 33
hsa-miR-326	0	0	1	1	1	1	UCHL5	ubiquitin carboxyl-terminal hydrolase L5
hsa-miR-326	0	0	1	0	1	1	ZNF37A	zinc finger protein 37A
hsa-miR-326	0	0	1	1	1	1	GLIPR2	GLI pathogenesis-related 2
hsa-miR-326	1	0	1	1	1	1	ARHGEF9	Cdc42 guanine nucleotide exchange factor (GEF) 9
hsa-miR-326	0	0	1	1	1	1	EXOC7	exocyst complex component 7
hsa-miR-326	1	0	1	1	0	0	CSNK1G2	casein kinase 1, gamma 2
hsa-miR-326	1	0	1	1	1	1	MID1IP1	MID1 interacting protein 1
hsa-miR-326	0	0	1	1	1	1	SNX22	sorting nexin 22
hsa-miR-326	0	0	1	0	0	0	ENTPD5	ectonucleoside triphosphate diphosphohydrolase 5
hsa-miR-326	0	0	1	1	1	1	SNX17	sorting nexin 17
hsa-miR-326	1	0	1	1	0	0	TMEM63B	transmembrane protein 63B
hsa-miR-326	0	0	1	0	0	0	C19orf76	chromosome 19 open reading frame 76
hsa-miR-326	0	0	1	1	0	0	SLC22A9	solute carrier family 22 (organic anion transporter), member 9
hsa-miR-326	1	0	1	0	1	1	C14orf101	chromosome 14 open reading frame 101
hsa-miR-326	1	0	1	1	1	1	C16orf45	chromosome 16 open reading frame 45
hsa-miR-326	1	0	1	0	1	1	CDK19	cyclin-dependent kinase 19
hsa-miR-326	0	0	1	1	0	0	KRBA2	KRAB-A domain containing 2
hsa-miR-326	1	0	1	1	1	1	ZNF200	zinc finger protein 200
hsa-miR-326	0	0	1	1	0	0	GLS2	glutaminase 2 (liver, mitochondrial)
hsa-miR-326	1	0	1	1	1	1	NIPA1	non imprinted in Prader-Willi/Angelman syndrome 1
hsa-miR-326	1	0	1	1	1	1	PELI3	pellino E3 ubiquitin protein ligase family member 3
hsa-miR-326	0	0	1	0	0	0	TRAV20	T cell receptor alpha variable 20
hsa-miR-326	0	0	1	1	1	1	VWA3B	von Willebrand factor A domain containing 3B
hsa-miR-326	1	0	1	1	1	1	UHRF2	ubiquitin-like with PHD and ring finger domains 2, E3 ubiquitin protein ligase
hsa-miR-326	1	0	1	1	1	1	HTR2C	5-hydroxytryptamine (serotonin) receptor 2C, G protein-coupled
hsa-miR-326	0	0	1	1	1	1	ASTN2	astrotactin 2
hsa-miR-326	0	0	1	1	0	0	TOMM5	translocase of outer mitochondrial membrane 5 homolog (yeast)
hsa-miR-326	0	0	1	0	0	0	LOC100130950	uncharacterized LOC100130950
hsa-miR-326	0	0	1	1	1	1	LRRC27	leucine rich repeat containing 27
hsa-miR-326	0	0	1	1	0	0	TSPAN16	tetraspanin 16
hsa-miR-326	0	0	1	0	0	0	BCAS3	breast carcinoma amplified sequence 3
hsa-miR-326	1	0	1	1	1	1	ADARB1	adenosine deaminase, RNA-specific, B1
hsa-miR-326	1	0	1	1	1	1	ZNF518A	zinc finger protein 518A
hsa-miR-326	1	0	1	1	0	0	FAM83F	family with sequence similarity 83, member F
hsa-miR-326	0	0	1	0	1	1	FLJ25328	uncharacterized LOC148231
hsa-miR-326	1	0	1	1	1	1	RAB5B	RAB5B, member RAS oncogene family
hsa-miR-326	1	0	1	1	0	0	MRC2	mannose receptor, C type 2
hsa-miR-326	1	0	1	1	1	1	RHOBTB1	Rho-related BTB domain containing 1
hsa-miR-326	0	0	1	1	1	1	IL20RB	interleukin 20 receptor beta
hsa-miR-326	0	0	1	1	0	0	RELA	v-rel reticuloendotheliosis viral oncogene homolog A (avian)
hsa-miR-326	0	0	1	1	1	1	RPTOR	regulatory associated protein of MTOR, complex 1
hsa-miR-326	1	0	1	0	1	1	KIF5A	kinesin family member 5A
hsa-miR-326	0	0	1	1	1	1	HEXA	hexosaminidase A (alpha polypeptide)
hsa-miR-326	0	0	1	1	1	1	ZNF337	zinc finger protein 337
hsa-miR-326	0	0	1	0	0	0	C9orf62	chromosome 9 open reading frame 62
hsa-miR-326	0	0	1	1	0	0	DYNLRB2	dynein, light chain, roadblock-type 2
hsa-miR-326	1	0	1	1	0	0	TBC1D10C	TBC1 domain family, member 10C
hsa-miR-326	0	0	1	1	0	0	PGS1	phosphatidylglycerophosphate synthase 1
hsa-miR-326	0	0	1	1	1	1	TMEM139	transmembrane protein 139
hsa-miR-326	0	0	1	1	1	1	UBE3D	ubiquitin protein ligase E3D
hsa-miR-326	1	0	1	1	0	0	EGLN2	egl nine homolog 2 (C. elegans)
hsa-miR-326	0	0	1	0	0	0	FAM201A	family with sequence similarity 201, member A
hsa-miR-326	0	0	1	0	0	0	LINC00642	long intergenic non-protein coding RNA 642
hsa-miR-326	1	0	1	1	1	1	ELMO2	engulfment and cell motility 2
hsa-miR-326	0	0	1	0	0	0	ANKRD30BP2	ankyrin repeat domain 30B pseudogene 2
hsa-miR-326	0	0	1	0	0	0	CYP4F35P	cytochrome P450, family 4, subfamily F, polypeptide 35, pseudogene
hsa-miR-326	0	0	1	1	1	1	TPPP3	tubulin polymerization-promoting protein family member 3
hsa-miR-326	0	0	1	0	0	0	LOC415056	uncharacterized LOC415056
hsa-miR-326	0	0	1	0	0	0	FLJ36000	uncharacterized FLJ36000
hsa-miR-326	1	0	1	1	1	1	FGFR2	fibroblast growth factor receptor 2
hsa-miR-326	0	0	1	0	0	0	USP32P1	ubiquitin specific peptidase 32 pseudogene 1
hsa-miR-326	0	0	1	0	0	0	LOC401074	uncharacterized LOC401074
hsa-miR-326	0	0	1	1	1	1	ARHGAP25	Rho GTPase activating protein 25
hsa-miR-326	1	0	1	1	1	1	TIMP2	TIMP metallopeptidase inhibitor 2
hsa-miR-326	0	0	1	0	0	0	TOB1-AS1	TOB1 antisense RNA 1
hsa-miR-326	1	0	1	1	1	1	DACH2	dachshund homolog 2 (Drosophila)
hsa-miR-326	1	0	1	0	1	1	PACSIN1	protein kinase C and casein kinase substrate in neurons 1
hsa-miR-326	0	0	1	1	1	1	PRRT3	proline-rich transmembrane protein 3
hsa-miR-326	0	0	1	1	0	0	MTCH1	mitochondrial carrier 1
hsa-miR-326	1	0	1	1	0	0	ZNF292	zinc finger protein 292
hsa-miR-326	0	0	1	1	1	1	FAM71F1	family with sequence similarity 71, member F1
hsa-miR-326	1	0	1	1	1	1	EBF1	early B-cell factor 1
hsa-miR-326	1	0	1	1	1	1	GNG2	guanine nucleotide binding protein (G protein), gamma 2
hsa-miR-326	0	0	1	1	0	0	AQP12B	aquaporin 12B
hsa-miR-326	1	0	1	1	0	0	INPP5J	inositol polyphosphate-5-phosphatase J
hsa-miR-326	1	0	1	0	1	1	DCUN1D4	DCN1, defective in cullin neddylation 1, domain containing 4 (S. cerevisiae)
hsa-miR-326	1	0	1	0	1	1	TNFAIP3	tumor necrosis factor, alpha-induced protein 3
hsa-miR-326	1	0	1	1	1	1	ARID3B	AT rich interactive domain 3B (BRIGHT-like)
hsa-miR-326	0	0	1	1	0	0	C1orf87	chromosome 1 open reading frame 87
hsa-miR-326	0	0	1	1	0	0	PLB1	phospholipase B1
hsa-miR-326	1	0	1	1	1	1	TXNRD1	thioredoxin reductase 1
hsa-miR-326	0	0	1	0	0	0	MORC2-AS1	MORC2 antisense RNA 1
hsa-miR-326	0	0	1	0	0	0	LOC339260	uncharacterized LOC339260
hsa-miR-326	1	0	1	1	1	1	AGAP3	ArfGAP with GTPase domain, ankyrin repeat and PH domain 3
hsa-miR-326	1	0	1	0	1	1	PSD3	pleckstrin and Sec7 domain containing 3
hsa-miR-326	0	0	1	1	1	1	MGC57346	uncharacterized LOC401884
hsa-miR-326	0	0	1	0	0	0	LOC254128	uncharacterized LOC254128
hsa-miR-326	1	0	1	0	1	1	KDM2A	lysine (K)-specific demethylase 2A
hsa-miR-326	1	0	1	1	1	1	UPF3A	UPF3 regulator of nonsense transcripts homolog A (yeast)
hsa-miR-326	0	0	1	1	1	1	ZNF589	zinc finger protein 589
hsa-miR-326	1	0	1	1	0	0	EIF2B5	eukaryotic translation initiation factor 2B, subunit 5 epsilon, 82kDa
hsa-miR-326	0	0	1	1	0	0	NLRC5	NLR family, CARD domain containing 5
hsa-miR-326	1	0	1	1	0	0	CCDC138	coiled-coil domain containing 138
hsa-miR-326	1	0	1	0	1	1	SEMA4G	sema domain, immunoglobulin domain (Ig), transmembrane domain (TM) and short cytoplasmic domain, (semaphorin) 4G
hsa-miR-326	0	0	1	1	1	1	LINC00086	long intergenic non-protein coding RNA 86
hsa-miR-326	0	0	1	1	1	1	RHOT1	ras homolog family member T1
hsa-miR-326	1	0	1	1	1	1	PCGF5	polycomb group ring finger 5
hsa-miR-326	0	0	1	0	1	1	C17orf51	chromosome 17 open reading frame 51
hsa-miR-326	0	0	1	1	1	1	MPP3	membrane protein, palmitoylated 3 (MAGUK p55 subfamily member 3)
hsa-miR-326	0	0	1	1	0	0	C20orf152	chromosome 20 open reading frame 152
hsa-miR-326	0	0	1	1	0	0	GRIN2C	glutamate receptor, ionotropic, N-methyl D-aspartate 2C
hsa-miR-326	1	0	1	1	1	1	DUSP9	dual specificity phosphatase 9
hsa-miR-326	0	0	1	1	0	0	WDR90	WD repeat domain 90
hsa-miR-326	1	0	1	1	0	0	ANKRD13B	ankyrin repeat domain 13B
hsa-miR-326	0	0	1	0	0	0	LMOD2	leiomodin 2 (cardiac)
hsa-miR-326	0	0	1	1	0	0	PRR19	proline rich 19
hsa-miR-326	1	0	1	1	1	1	PDGFRA	platelet-derived growth factor receptor, alpha polypeptide
hsa-miR-326	0	0	1	1	0	0	C8orf31	chromosome 8 open reading frame 31
hsa-miR-326	0	0	1	1	1	1	C1orf109	chromosome 1 open reading frame 109
hsa-miR-326	1	0	1	0	0	0	PRRT4	proline-rich transmembrane protein 4
hsa-miR-326	1	0	1	1	1	1	MYLK	myosin light chain kinase
hsa-miR-326	0	0	1	1	0	0	TSNARE1	t-SNARE domain containing 1
hsa-miR-326	0	0	1	0	0	0	LOC727751	uncharacterized LOC727751
hsa-miR-326	0	0	1	0	0	0	AGSK1	golgin subfamily A member 2-like
hsa-miR-326	0	0	1	0	0	0	LOC727849	golgin A2 pseudogene
hsa-miR-326	0	0	1	1	0	0	FOXH1	forkhead box H1
hsa-miR-326	0	0	1	1	1	1	SH2D1B	SH2 domain containing 1B
hsa-miR-326	0	0	1	1	1	1	METTL15	methyltransferase like 15
hsa-miR-326	1	0	1	1	1	1	FTL	ferritin, light polypeptide
hsa-miR-326	1	0	1	0	1	1	MAGIX	MAGI family member, X-linked
hsa-miR-326	0	0	1	1	1	1	SLAMF1	signaling lymphocytic activation molecule family member 1
hsa-miR-326	0	0	1	1	0	0	CELF3	CUGBP, Elav-like family member 3
hsa-miR-326	1	0	1	1	1	1	MAPKAPK3	mitogen-activated protein kinase-activated protein kinase 3
hsa-miR-326	0	0	1	0	0	0	FLJ12334	uncharacterized LOC400946
hsa-miR-326	0	0	1	1	1	1	TTLL9	tubulin tyrosine ligase-like family, member 9
hsa-miR-326	0	0	1	0	0	0	PTGER4P2	prostaglandin E receptor 4 (subtype EP4) pseudogene 2
hsa-miR-326	1	0	1	1	1	1	TBX2	T-box 2
hsa-miR-326	0	0	1	1	0	0	KCTD19	potassium channel tetramerisation domain containing 19
hsa-miR-326	0	0	1	1	0	0	SLAMF9	SLAM family member 9
hsa-miR-326	1	0	1	0	1	1	HMGB3	high mobility group box 3
hsa-miR-326	0	0	1	0	0	0	JPX	JPX transcript, XIST activator (non-protein coding)
hsa-miR-326	0	0	1	1	1	1	FRMPDP2	FERM and PDZ domain containing 2 pseudogene 2
hsa-miR-326	0	0	1	1	1	1	FRMPD2P1	FERM and PDZ domain containing 2 pseudogene 1
hsa-miR-326	0	0	1	0	0	0	LOC440416	uncharacterized LOC440416
hsa-miR-326	1	0	1	1	0	0	PLEKHG3	pleckstrin homology domain containing, family G (with RhoGef domain) member 3
hsa-miR-326	0	0	1	1	0	0	TRIM73	tripartite motif containing 73
hsa-miR-326	0	0	1	1	0	0	C8orf82	chromosome 8 open reading frame 82
hsa-miR-326	1	0	1	1	1	1	WNT5A	wingless-type MMTV integration site family, member 5A
hsa-miR-326	0	0	1	1	0	0	FAM21A	family with sequence similarity 21, member A
hsa-miR-326	0	0	1	1	0	0	DNHD1	dynein heavy chain domain 1
hsa-miR-326	1	0	1	0	1	1	PIK3R3	phosphoinositide-3-kinase, regulatory subunit 3 (gamma)
hsa-miR-326	0	0	1	0	1	1	TGFB2	transforming growth factor, beta 2
hsa-miR-326	1	0	1	1	1	1	WNT10B	wingless-type MMTV integration site family, member 10B
hsa-miR-326	0	0	1	1	0	0	RPS9	ribosomal protein S9
hsa-miR-326	0	1	1	1	0	0	PKM	pyruvate kinase, muscle
hsa-miR-326	0	0	1	0	0	0	FAM106A	family with sequence similarity 106, member A
hsa-miR-326	0	0	1	0	1	1	GALNT13	UDP-N-acetyl-alpha-D-galactosamine:polypeptide N-acetylgalactosaminyltransferase 13 (GalNAc-T13)
hsa-miR-326	1	0	1	1	1	1	LRRC15	leucine rich repeat containing 15
hsa-miR-326	1	0	1	1	1	1	IL28RA	interleukin 28 receptor, alpha (interferon, lambda receptor)
hsa-miR-326	0	0	1	1	0	0	TMC1	transmembrane channel-like 1
hsa-miR-326	0	0	1	0	0	0	LOC441493	uncharacterized LOC441493
hsa-miR-326	1	0	1	1	1	1	GABRB2	gamma-aminobutyric acid (GABA) A receptor, beta 2
hsa-miR-326	0	0	1	0	1	1	C9orf91	chromosome 9 open reading frame 91
hsa-miR-326	0	0	1	1	1	1	TTN	titin
hsa-miR-326	0	0	1	1	0	0	C9orf153	chromosome 9 open reading frame 153
hsa-miR-326	1	0	1	1	1	1	CERS6	ceramide synthase 6
hsa-miR-326	0	0	1	1	1	1	SMTNL2	smoothelin-like 2
hsa-miR-326	0	0	1	0	0	0	LRRC37A11P	leucine rich repeat containing 37, member A11, pseudogene
hsa-miR-326	0	0	1	1	0	0	PRAMEF10	PRAME family member 10
hsa-miR-326	0	0	1	1	0	0	THBS3	thrombospondin 3
hsa-miR-326	1	0	1	1	0	0	MAPKBP1	mitogen-activated protein kinase binding protein 1
hsa-miR-326	1	0	1	1	1	1	GRIA3	glutamate receptor, ionotropic, AMPA 3
hsa-miR-326	0	0	1	0	0	0	LINC00661	long intergenic non-protein coding RNA 661
hsa-miR-326	0	0	1	1	0	0	RGS12	regulator of G-protein signaling 12
hsa-miR-326	0	0	1	1	0	0	SOCS7	suppressor of cytokine signaling 7
hsa-miR-326	0	0	1	1	0	0	PPAPDC1A	phosphatidic acid phosphatase type 2 domain containing 1A
hsa-miR-326	0	0	1	1	0	0	C10orf68	chromosome 10 open reading frame 68
hsa-miR-326	0	0	1	1	0	0	KIF13A	kinesin family member 13A
hsa-miR-326	0	0	1	1	1	1	SFI1	Sfi1 homolog, spindle assembly associated (yeast)
hsa-miR-326	0	0	1	1	0	0	HSF4	heat shock transcription factor 4
hsa-miR-326	0	0	1	0	0	0	FAM225B	family with sequence similarity 225, member B (non-protein coding)
hsa-miR-326	0	0	1	1	1	1	PRKAR2A	protein kinase, cAMP-dependent, regulatory, type II, alpha
hsa-miR-326	0	0	1	0	0	0	FUT8-AS1	FUT8 antisense RNA 1
hsa-miR-326	0	0	1	1	0	0	NDRG2	NDRG family member 2
hsa-miR-326	0	0	1	0	0	0	LOC100133207	uncharacterized LOC100133207
hsa-miR-326	1	0	1	1	1	1	NUMB	numb homolog (Drosophila)
hsa-miR-326	1	0	1	1	0	0	RGS6	regulator of G-protein signaling 6
hsa-miR-326	0	0	1	1	1	1	IP6K2	inositol hexakisphosphate kinase 2
hsa-miR-326	1	0	1	1	1	1	ATP2B4	ATPase, Ca++ transporting, plasma membrane 4
hsa-miR-326	1	0	1	1	1	1	MIER3	mesoderm induction early response 1, family member 3
hsa-miR-326	0	0	1	0	1	1	GPX8	glutathione peroxidase 8 (putative)
hsa-miR-326	1	0	1	1	1	1	SLC35F1	solute carrier family 35, member F1
hsa-miR-326	1	0	1	1	1	1	SMAD4	SMAD family member 4
hsa-miR-326	1	0	1	0	1	1	GALNT4	UDP-N-acetyl-alpha-D-galactosamine:polypeptide N-acetylgalactosaminyltransferase 4 (GalNAc-T4)
hsa-miR-326	0	0	1	1	1	1	PRR14L	proline rich 14-like
hsa-miR-326	0	0	1	1	1	1	CC2D2A	coiled-coil and C2 domain containing 2A
hsa-miR-326	1	0	1	1	1	1	EPS15	epidermal growth factor receptor pathway substrate 15
hsa-miR-326	1	0	1	1	1	1	RREB1	ras responsive element binding protein 1
hsa-miR-326	0	0	1	1	1	1	ARMCX3	armadillo repeat containing, X-linked 3
hsa-miR-326	1	0	1	0	1	1	VPS36	vacuolar protein sorting 36 homolog (S. cerevisiae)
hsa-miR-326	1	0	1	1	1	1	TSC22D3	TSC22 domain family, member 3
hsa-miR-326	0	0	1	0	1	1	MYO3B	myosin IIIB
hsa-miR-326	0	0	1	0	0	0	OVOS	ovostatin
hsa-miR-326	1	0	1	1	1	1	PPFIA1	protein tyrosine phosphatase, receptor type, f polypeptide (PTPRF), interacting protein (liprin), alpha 1
hsa-miR-326	1	0	1	0	1	1	TBL1XR1	transducin (beta)-like 1 X-linked receptor 1
hsa-miR-326	1	0	1	1	1	1	ARHGDIA	Rho GDP dissociation inhibitor (GDI) alpha
hsa-miR-326	0	0	1	1	1	1	POLR2H	polymerase (RNA) II (DNA directed) polypeptide H
hsa-miR-326	0	0	1	1	0	0	CSH1	chorionic somatomammotropin hormone 1 (placental lactogen)
hsa-miR-326	0	0	1	1	0	0	SREBF2	sterol regulatory element binding transcription factor 2
hsa-miR-326	0	0	1	1	0	0	SNRNP25	small nuclear ribonucleoprotein 25kDa (U11/U12)
hsa-miR-326	1	0	1	1	1	1	SEL1L3	sel-1 suppressor of lin-12-like 3 (C. elegans)
hsa-miR-326	1	0	1	1	1	1	CLU	clusterin
hsa-miR-326	0	0	1	1	1	1	SMYD5	SMYD family member 5
hsa-miR-326	0	0	1	1	0	0	H2AFY2	H2A histone family, member Y2
hsa-miR-326	0	0	1	1	0	0	EMX1	empty spiracles homeobox 1
hsa-miR-326	0	0	1	1	1	1	GTPBP3	GTP binding protein 3 (mitochondrial)
hsa-miR-326	0	0	1	1	1	1	DGCR14	DiGeorge syndrome critical region gene 14
hsa-miR-326	1	0	1	1	1	1	CLDN11	claudin 11
hsa-miR-326	1	0	1	1	1	1	NME4	NME/NM23 nucleoside diphosphate kinase 4
hsa-miR-326	0	0	1	1	1	1	APBB1	amyloid beta (A4) precursor protein-binding, family B, member 1 (Fe65)
hsa-miR-326	0	0	1	1	0	0	ITGB3BP	integrin beta 3 binding protein (beta3-endonexin)
hsa-miR-326	0	0	1	1	1	1	HSPB8	heat shock 22kDa protein 8
hsa-miR-326	0	0	1	1	0	0	NOP56	NOP56 ribonucleoprotein homolog (yeast)
hsa-miR-326	0	0	1	0	0	0	H19	H19, imprinted maternally expressed transcript (non-protein coding)
hsa-miR-326	1	0	1	1	0	0	STX5	syntaxin 5
hsa-miR-326	1	0	1	1	1	1	ADM	adrenomedullin
hsa-miR-326	0	0	1	1	0	0	DNAJB2	DnaJ (Hsp40) homolog, subfamily B, member 2
hsa-miR-326	0	0	1	1	0	0	CGRRF1	cell growth regulator with ring finger domain 1
hsa-miR-326	1	0	1	1	1	1	PLEKHB2	pleckstrin homology domain containing, family B (evectins) member 2
hsa-miR-326	0	0	1	1	0	0	FAM64A	family with sequence similarity 64, member A
hsa-miR-326	0	0	1	1	1	1	GRAP2	GRB2-related adaptor protein 2
hsa-miR-326	0	0	1	1	0	0	KIAA0100	KIAA0100
hsa-miR-326	0	0	1	1	1	1	ANKRD53	ankyrin repeat domain 53
hsa-miR-326	0	0	1	1	1	1	TRIM68	tripartite motif containing 68
hsa-miR-326	0	0	1	1	0	0	PDK3	pyruvate dehydrogenase kinase, isozyme 3
hsa-miR-326	0	0	1	1	0	0	SNRPA	small nuclear ribonucleoprotein polypeptide A
hsa-miR-326	1	0	1	1	1	1	TMEM245	transmembrane protein 245
hsa-miR-326	0	0	1	1	0	0	SAC3D1	SAC3 domain containing 1
hsa-miR-326	0	0	1	0	0	0	FLJ45248	FLJ45248 protein
hsa-miR-326	0	0	1	0	1	1	TMEM155	transmembrane protein 155
hsa-miR-326	0	0	1	1	1	1	MPDU1	mannose-P-dolichol utilization defect 1
hsa-miR-326	0	0	1	1	1	1	KLHDC2	kelch domain containing 2
hsa-miR-326	0	0	1	1	0	0	LILRB4	leukocyte immunoglobulin-like receptor, subfamily B (with TM and ITIM domains), member 4
hsa-miR-326	1	0	1	1	1	1	PPP5C	protein phosphatase 5, catalytic subunit
hsa-miR-326	1	0	1	1	1	1	CUX1	cut-like homeobox 1
hsa-miR-326	1	0	1	1	1	1	DOK4	docking protein 4
hsa-miR-326	0	0	1	0	1	1	SRSF5	serine/arginine-rich splicing factor 5
hsa-miR-326	0	0	1	1	0	0	ELP4	elongator acetyltransferase complex subunit 4
hsa-miR-326	0	0	1	1	0	0	NUP205	nucleoporin 205kDa
hsa-miR-326	0	0	1	0	0	0	PGF	placental growth factor
hsa-miR-326	0	0	1	1	1	1	SERP2	stress-associated endoplasmic reticulum protein family member 2
hsa-miR-326	0	0	1	0	0	0	ZNF720	zinc finger protein 720
hsa-miR-326	0	0	1	1	1	1	PEX19	peroxisomal biogenesis factor 19
hsa-miR-326	1	0	1	1	1	1	EIF4A2	eukaryotic translation initiation factor 4A2
hsa-miR-326	0	0	1	1	0	0	RGS9	regulator of G-protein signaling 9
hsa-miR-326	0	0	1	0	1	1	RPL10	ribosomal protein L10
hsa-miR-326	0	0	1	1	0	0	TMEM120A	transmembrane protein 120A
hsa-miR-326	0	0	1	1	0	0	PHPT1	phosphohistidine phosphatase 1
hsa-miR-326	0	0	1	1	1	1	CD1C	CD1c molecule
hsa-miR-326	0	0	1	1	1	1	ACSF3	acyl-CoA synthetase family member 3
hsa-miR-326	1	0	1	1	1	1	EIF1	eukaryotic translation initiation factor 1
hsa-miR-326	1	0	1	1	1	1	CNBP	CCHC-type zinc finger, nucleic acid binding protein
hsa-miR-326	0	0	1	1	1	1	FUS	fused in sarcoma
hsa-miR-326	0	0	1	1	0	0	AATF	apoptosis antagonizing transcription factor
hsa-miR-326	1	0	1	1	1	1	SNX1	sorting nexin 1
hsa-miR-326	0	0	1	1	0	0	TMEM11	transmembrane protein 11
hsa-miR-326	1	0	1	1	1	1	ARHGEF40	Rho guanine nucleotide exchange factor (GEF) 40
hsa-miR-326	0	0	1	1	0	0	CD79B	CD79b molecule, immunoglobulin-associated beta
hsa-miR-326	1	0	1	1	1	1	RPUSD3	RNA pseudouridylate synthase domain containing 3
hsa-miR-326	0	0	1	1	1	1	FAM18B1	family with sequence similarity 18, member B1
hsa-miR-326	1	0	1	1	1	1	ILK	integrin-linked kinase
hsa-miR-326	0	0	1	1	0	0	CCDC107	coiled-coil domain containing 107
hsa-miR-326	1	0	1	1	1	1	RALY	RNA binding protein, autoantigenic (hnRNP-associated with lethal yellow homolog (mouse))
hsa-miR-326	1	0	1	1	0	0	CCM2	cerebral cavernous malformation 2
hsa-miR-326	0	0	1	1	1	1	RPE	ribulose-5-phosphate-3-epimerase
hsa-miR-326	1	0	1	0	1	1	CD47	CD47 molecule
hsa-miR-326	0	0	1	1	0	0	GPRC5C	G protein-coupled receptor, family C, group 5, member C
hsa-miR-326	0	0	1	0	0	0	LOC100132984	uncharacterized LOC100132984
hsa-miR-326	0	0	1	1	1	1	SUGT1	SGT1, suppressor of G2 allele of SKP1 (S. cerevisiae)
hsa-miR-326	0	0	1	1	1	1	CIRBP	cold inducible RNA binding protein
hsa-miR-326	1	0	1	1	1	1	JUNB	jun B proto-oncogene
hsa-miR-326	0	0	1	1	0	0	UQCRC2	ubiquinol-cytochrome c reductase core protein II
hsa-miR-326	0	0	1	1	0	0	CORO1B	coronin, actin binding protein, 1B
hsa-miR-326	0	0	1	0	0	0	LOC731789	uncharacterized LOC731789
hsa-miR-326	0	0	1	1	0	0	FMN1	formin 1
hsa-miR-326	0	0	1	0	0	0	MUC19	mucin 19, oligomeric
hsa-miR-326	0	0	1	0	1	1	NWD1	NACHT and WD repeat domain containing 1
hsa-miR-326	0	0	1	0	0	0	MIR143HG	MIR143 host gene (non-protein coding)
hsa-miR-326	1	0	1	0	1	1	CNTNAP2	contactin associated protein-like 2
hsa-miR-326	1	0	1	1	1	1	BCL2L1	BCL2-like 1
hsa-miR-326	0	0	1	1	0	0	TENC1	tensin like C1 domain containing phosphatase (tensin 2)
hsa-miR-326	0	0	1	0	0	0	LOC440518	golgin A2 pseudogene
hsa-miR-326	0	0	1	1	1	1	TMEM41B	transmembrane protein 41B
hsa-miR-326	1	0	1	1	1	1	MAN2A2	mannosidase, alpha, class 2A, member 2
hsa-miR-326	0	0	1	1	1	1	PARP14	poly (ADP-ribose) polymerase family, member 14
hsa-miR-326	0	0	1	1	1	1	LTA	lymphotoxin alpha (TNF superfamily, member 1)
hsa-miR-326	0	0	1	1	0	0	FABP6	fatty acid binding protein 6, ileal
hsa-miR-326	0	0	1	1	1	1	PTGS1	prostaglandin-endoperoxide synthase 1 (prostaglandin G/H synthase and cyclooxygenase)
hsa-miR-326	1	0	1	1	1	1	TRIOBP	TRIO and F-actin binding protein
hsa-miR-326	1	0	1	1	1	1	ITSN1	intersectin 1 (SH3 domain protein)
hsa-miR-326	0	0	1	0	0	0	POM121L8P	POM121 transmembrane nucleoporin-like 8 pseudogene
hsa-miR-326	0	0	1	0	0	0	PILRB	paired immunoglobin-like type 2 receptor beta
hsa-miR-326	0	0	1	0	0	0	FAM226A	family with sequence similarity 226, member A (non-protein coding)
hsa-miR-326	1	0	1	1	1	1	SLC4A8	solute carrier family 4, sodium bicarbonate cotransporter, member 8
hsa-miR-326	1	0	1	1	1	1	MLL	myeloid/lymphoid or mixed-lineage leukemia (trithorax homolog, Drosophila)
hsa-miR-326	0	0	1	0	0	0	CELP	carboxyl ester lipase pseudogene
hsa-miR-326	0	0	1	1	1	1	RFC1	replication factor C (activator 1) 1, 145kDa
hsa-miR-326	1	0	1	1	1	1	AFF1	AF4/FMR2 family, member 1
hsa-miR-326	0	0	1	1	0	0	HLA-DQB1	major histocompatibility complex, class II, DQ beta 1
hsa-miR-326	0	0	1	1	0	0	INHBA	inhibin, beta A
hsa-miR-326	1	0	1	0	1	1	BCL2	B-cell CLL/lymphoma 2
hsa-miR-326	0	0	1	1	0	0	COL6A2	collagen, type VI, alpha 2
hsa-miR-326	0	0	1	1	1	1	HLA-G	major histocompatibility complex, class I, G
hsa-miR-326	1	0	1	1	1	1	COL4A3	collagen, type IV, alpha 3 (Goodpasture antigen)
hsa-miR-326	1	0	1	0	1	1	SLC26A2	solute carrier family 26 (sulfate transporter), member 2
hsa-miR-326	0	0	1	1	0	0	EMD	emerin
hsa-miR-326	1	0	1	1	0	0	ENG	endoglin
hsa-miR-326	1	0	1	1	1	1	F13A1	coagulation factor XIII, A1 polypeptide
hsa-miR-326	0	0	1	1	1	1	GLDC	glycine dehydrogenase (decarboxylating)
hsa-miR-326	0	0	1	1	0	0	GP9	glycoprotein IX (platelet)
hsa-miR-326	1	0	1	1	1	1	KCNA1	potassium voltage-gated channel, shaker-related subfamily, member 1 (episodic ataxia with myokymia)
hsa-miR-326	1	0	1	1	1	1	LEP	leptin
hsa-miR-326	1	0	1	0	1	1	SGCB	sarcoglycan, beta (43kDa dystrophin-associated glycoprotein)
hsa-miR-326	1	0	1	1	1	1	MITF	microphthalmia-associated transcription factor
hsa-miR-326	1	0	1	1	1	1	ATXN1	ataxin 1
hsa-miR-326	0	0	1	1	1	1	SRD5A2	steroid-5-alpha-reductase, alpha polypeptide 2 (3-oxo-5 alpha-steroid delta 4-dehydrogenase alpha 2)
hsa-miR-326	0	0	1	1	1	1	CASR	calcium-sensing receptor
hsa-miR-326	0	0	1	1	1	1	L1CAM	L1 cell adhesion molecule
hsa-miR-326	1	0	1	0	1	1	PAFAH1B1	platelet-activating factor acetylhydrolase 1b, regulatory subunit 1 (45kDa)
hsa-miR-326	0	0	1	1	1	1	PLEC	plectin
hsa-miR-326	0	0	1	1	1	1	ALPL	alkaline phosphatase, liver/bone/kidney
hsa-miR-326	0	0	1	1	1	1	CYP11B2	cytochrome P450, family 11, subfamily B, polypeptide 2
hsa-miR-326	1	0	1	1	1	1	MPZ	myelin protein zero
hsa-miR-326	1	0	1	1	1	1	DCX	doublecortin
hsa-miR-326	0	0	1	1	0	0	IL1B	interleukin 1, beta
hsa-miR-326	0	0	1	1	1	1	C7	complement component 7
hsa-miR-326	0	0	1	1	1	1	ALDH1B1	aldehyde dehydrogenase 1 family, member B1
hsa-miR-326	1	0	1	0	1	1	ALDH1A3	aldehyde dehydrogenase 1 family, member A3
hsa-miR-326	0	0	1	1	1	1	EPO	erythropoietin
hsa-miR-326	1	0	1	1	0	0	GRIN2A	glutamate receptor, ionotropic, N-methyl D-aspartate 2A
hsa-miR-326	1	0	1	1	1	1	HTR4	5-hydroxytryptamine (serotonin) receptor 4, G protein-coupled
hsa-miR-326	0	0	1	1	1	1	HTR7	5-hydroxytryptamine (serotonin) receptor 7, adenylate cyclase-coupled
hsa-miR-326	0	0	1	1	1	1	NQO1	NAD(P)H dehydrogenase, quinone 1
hsa-miR-326	1	0	1	1	0	0	PDE3A	phosphodiesterase 3A, cGMP-inhibited
hsa-miR-326	1	0	1	1	1	1	PDE3B	phosphodiesterase 3B, cGMP-inhibited
hsa-miR-326	1	0	1	1	1	1	PTGER4	prostaglandin E receptor 4 (subtype EP4)
hsa-miR-326	0	0	1	1	0	0	PTGIR	prostaglandin I2 (prostacyclin) receptor (IP)
hsa-miR-326	0	0	1	0	1	1	PTGIS	prostaglandin I2 (prostacyclin) synthase
hsa-miR-326	1	0	1	1	1	1	RARA	retinoic acid receptor, alpha
hsa-miR-326	1	0	1	0	1	1	SMAD5	SMAD family member 5
hsa-miR-326	0	0	1	1	0	0	SNCB	synuclein, beta
hsa-miR-326	1	0	1	1	1	1	RORC	RAR-related orphan receptor C
hsa-miR-326	1	0	1	0	1	1	GDF6	growth differentiation factor 6
hsa-miR-326	0	0	1	1	1	1	MED11	mediator complex subunit 11
hsa-miR-326	0	0	1	1	1	1	FLJ45079	FLJ45079 protein
hsa-miR-326	0	0	1	1	0	0	PAMR1	peptidase domain containing associated with muscle regeneration 1
hsa-miR-326	0	0	1	0	0	0	KLK2	kallikrein-related peptidase 2
hsa-miR-326	0	0	1	1	0	0	CBY1	chibby homolog 1 (Drosophila)
hsa-miR-326	1	0	1	1	1	1	KCTD11	potassium channel tetramerisation domain containing 11
hsa-miR-326	0	0	1	1	1	1	C11orf49	chromosome 11 open reading frame 49
hsa-miR-326	0	0	1	1	1	1	DYRK3	dual-specificity tyrosine-(Y)-phosphorylation regulated kinase 3
hsa-miR-326	0	0	1	1	1	1	ALG11	asparagine-linked glycosylation 11, alpha-1,2-mannosyltransferase homolog (yeast)
hsa-miR-326	0	0	1	0	0	0	FIGLA	folliculogenesis specific basic helix-loop-helix
hsa-miR-326	1	0	1	0	1	1	LRRC55	leucine rich repeat containing 55
hsa-miR-326	0	0	1	0	1	1	FLJ46347	uncharacterized LOC389064
hsa-miR-326	1	0	1	0	1	1	YPEL2	yippee-like 2 (Drosophila)
hsa-miR-326	1	0	1	1	0	0	NEURL4	neuralized homolog 4 (Drosophila)
hsa-miR-326	1	0	1	1	1	1	EDA	ectodysplasin A
hsa-miR-326	1	0	1	1	1	1	IGF2BP2	insulin-like growth factor 2 mRNA binding protein 2
hsa-miR-326	0	0	1	0	0	0	LINC00523	long intergenic non-protein coding RNA 523
hsa-miR-326	0	0	1	1	0	0	NTRK1	neurotrophic tyrosine kinase, receptor, type 1
hsa-miR-326	1	0	1	1	1	1	ZDHHC9	zinc finger, DHHC-type containing 9
hsa-miR-326	1	0	1	0	1	1	C18orf25	chromosome 18 open reading frame 25
hsa-miR-326	1	0	1	1	1	1	BCAP29	B-cell receptor-associated protein 29
hsa-miR-326	0	0	1	1	1	1	MXRA7	matrix-remodelling associated 7
hsa-miR-326	1	0	1	1	1	1	LPHN1	latrophilin 1
hsa-miR-326	0	0	1	1	1	1	SPIN3	spindlin family, member 3
hsa-miR-326	1	0	1	0	1	1	ZC3H12B	zinc finger CCCH-type containing 12B
hsa-miR-326	0	0	1	1	1	1	NCMAP	noncompact myelin associated protein
hsa-miR-326	1	0	1	1	1	1	CTNNBIP1	catenin, beta interacting protein 1
hsa-miR-326	0	0	1	1	0	0	SOHLH1	spermatogenesis and oogenesis specific basic helix-loop-helix 1
hsa-miR-326	1	0	1	1	1	1	SORCS1	sortilin-related VPS10 domain containing receptor 1
hsa-miR-326	0	0	1	1	0	0	VSIG8	V-set and immunoglobulin domain containing 8
hsa-miR-326	0	0	1	0	1	1	LINC00268	long intergenic non-protein coding RNA 268
hsa-miR-326	1	0	1	1	1	1	KATNAL1	katanin p60 subunit A-like 1
hsa-miR-326	0	0	1	1	0	0	ETFB	electron-transfer-flavoprotein, beta polypeptide
hsa-miR-326	0	0	1	1	1	1	ME3	malic enzyme 3, NADP(+)-dependent, mitochondrial
hsa-miR-326	1	0	1	1	1	1	NCDN	neurochondrin
hsa-miR-326	1	0	1	1	1	1	RUNX2	runt-related transcription factor 2
hsa-miR-326	0	0	1	1	0	0	SPRR2B	small proline-rich protein 2B
hsa-miR-326	0	0	1	1	1	1	BTBD11	BTB (POZ) domain containing 11
hsa-miR-326	0	0	1	1	0	0	POLR3H	polymerase (RNA) III (DNA directed) polypeptide H (22.9kD)
hsa-miR-326	1	0	1	1	1	1	NTRK2	neurotrophic tyrosine kinase, receptor, type 2
hsa-miR-326	1	0	1	1	1	1	ABCC5	ATP-binding cassette, sub-family C (CFTR/MRP), member 5
hsa-miR-326	1	0	1	1	1	1	SBK1	SH3-binding domain kinase 1
hsa-miR-326	0	0	1	1	1	1	ATF3	activating transcription factor 3
hsa-miR-326	1	0	1	1	1	1	CSNK1G3	casein kinase 1, gamma 3
hsa-miR-326	1	0	1	1	1	1	MASP1	mannan-binding lectin serine peptidase 1 (C4/C2 activating component of Ra-reactive factor)
hsa-miR-326	0	0	1	1	1	1	PHF12	PHD finger protein 12
hsa-miR-326	0	0	1	1	0	0	SCNN1G	sodium channel, non-voltage-gated 1, gamma subunit
hsa-miR-326	0	0	1	0	0	0	FER1L6	fer-1-like 6 (C. elegans)
hsa-miR-326	1	0	1	1	1	1	ELMO1	engulfment and cell motility 1
hsa-miR-326	0	0	1	1	1	1	SIRPG	signal-regulatory protein gamma
hsa-miR-326	1	0	1	0	1	1	GK5	glycerol kinase 5 (putative)
hsa-miR-326	1	0	1	1	1	1	KCNC4	potassium voltage-gated channel, Shaw-related subfamily, member 4
hsa-miR-326	0	0	1	1	0	0	ANGPTL4	angiopoietin-like 4
hsa-miR-326	1	0	1	1	1	1	CHTF8	CTF8, chromosome transmission fidelity factor 8 homolog (S. cerevisiae)
hsa-miR-326	0	0	1	1	1	1	DIO1	deiodinase, iodothyronine, type I
hsa-miR-326	1	0	1	1	1	1	CBLN3	cerebellin 3 precursor
hsa-miR-326	0	0	1	1	1	1	MLH3	mutL homolog 3 (E. coli)
hsa-miR-326	1	0	1	1	1	1	LFNG	LFNG O-fucosylpeptide 3-beta-N-acetylglucosaminyltransferase
hsa-miR-326	0	0	1	1	0	0	AGTRAP	angiotensin II receptor-associated protein
hsa-miR-326	1	0	1	1	1	1	NCALD	neurocalcin delta
hsa-miR-326	1	0	1	1	1	1	PPP4R1	protein phosphatase 4, regulatory subunit 1
hsa-miR-326	0	0	1	1	1	1	MST4	serine/threonine protein kinase MST4
hsa-miR-326	1	0	1	1	1	1	NSL1	NSL1, MIND kinetochore complex component, homolog (S. cerevisiae)
hsa-miR-326	1	0	1	1	1	1	ERBB4	v-erb-a erythroblastic leukemia viral oncogene homolog 4 (avian)
hsa-miR-326	1	0	1	0	1	1	SRGAP2	SLIT-ROBO Rho GTPase activating protein 2
hsa-miR-326	1	0	1	1	1	1	SLA	Src-like-adaptor
hsa-miR-326	1	0	1	1	1	1	UBTF	upstream binding transcription factor, RNA polymerase I
hsa-miR-326	1	0	1	1	1	1	METTL9	methyltransferase like 9
hsa-miR-326	1	0	1	1	1	1	PDE11A	phosphodiesterase 11A
hsa-miR-326	1	0	1	1	1	1	ATG9A	autophagy related 9A
hsa-miR-326	1	0	1	1	1	1	PHF16	PHD finger protein 16
hsa-miR-326	1	0	1	1	1	1	PRR3	proline rich 3
hsa-miR-326	1	0	1	0	1	1	UBXN2B	UBX domain protein 2B
hsa-miR-326	1	0	1	1	1	1	SRSF1	serine/arginine-rich splicing factor 1
hsa-miR-326	1	0	1	1	1	1	UBN1	ubinuclein 1
hsa-miR-326	1	0	1	1	1	1	FAM155A	family with sequence similarity 155, member A
hsa-miR-326	1	0	1	0	1	1	FBXO41	F-box protein 41
hsa-miR-326	1	0	1	1	1	1	SHANK3	SH3 and multiple ankyrin repeat domains 3
hsa-miR-326	0	0	1	1	1	1	IGSF5	immunoglobulin superfamily, member 5
hsa-miR-326	0	0	1	1	0	0	NEURL3	neuralized homolog 3 (Drosophila) pseudogene
hsa-miR-326	1	0	1	1	1	1	DGKG	diacylglycerol kinase, gamma 90kDa
hsa-miR-326	0	0	1	1	0	0	PLOD3	procollagen-lysine, 2-oxoglutarate 5-dioxygenase 3
hsa-miR-326	1	0	1	1	1	1	ASIC1	acid-sensing (proton-gated) ion channel 1
hsa-miR-326	1	0	1	0	1	1	XIAP	X-linked inhibitor of apoptosis
hsa-miR-326	0	0	1	1	1	1	ENTPD3	ectonucleoside triphosphate diphosphohydrolase 3
hsa-miR-326	0	0	1	1	1	1	CCR1	chemokine (C-C motif) receptor 1
hsa-miR-326	1	0	1	1	1	1	CNN1	calponin 1, basic, smooth muscle
hsa-miR-326	0	0	1	1	1	1	DAD1	defender against cell death 1
hsa-miR-326	1	0	1	1	1	1	ELAVL1	ELAV (embryonic lethal, abnormal vision, Drosophila)-like 1 (Hu antigen R)
hsa-miR-326	0	0	1	0	1	1	EMP1	epithelial membrane protein 1
hsa-miR-326	1	0	1	1	1	1	EXTL3	exostoses (multiple)-like 3
hsa-miR-326	0	0	1	1	1	1	B4GALNT1	beta-1,4-N-acetyl-galactosaminyl transferase 1
hsa-miR-326	1	0	1	0	1	1	B4GALT1	UDP-Gal:betaGlcNAc beta 1,4- galactosyltransferase, polypeptide 1
hsa-miR-326	1	0	1	1	1	1	IGFBP4	insulin-like growth factor binding protein 4
hsa-miR-326	1	0	1	1	1	1	AQP4	aquaporin 4
hsa-miR-326	1	0	1	1	1	1	ARF3	ADP-ribosylation factor 3
hsa-miR-326	1	0	1	1	1	1	ARL4D	ADP-ribosylation factor-like 4D
hsa-miR-326	0	0	1	1	1	1	RHOA	ras homolog family member A
hsa-miR-326	1	0	1	0	1	1	ATP1B2	ATPase, Na+/K+ transporting, beta 2 polypeptide
hsa-miR-326	1	0	1	1	1	1	CENPB	centromere protein B, 80kDa
hsa-miR-326	1	0	1	1	1	1	COL4A6	collagen, type IV, alpha 6
hsa-miR-326	1	0	1	1	1	1	DBT	dihydrolipoamide branched chain transacylase E2
hsa-miR-326	1	0	1	1	1	1	DSC3	desmocollin 3
hsa-miR-326	0	0	1	1	0	0	EDN2	endothelin 2
hsa-miR-326	1	0	1	0	1	1	ETV6	ets variant 6
hsa-miR-326	0	0	1	1	1	1	FYN	FYN oncogene related to SRC, FGR, YES
hsa-miR-326	1	0	1	1	1	1	GAB1	GRB2-associated binding protein 1
hsa-miR-326	0	0	1	1	0	0	GPX2	glutathione peroxidase 2 (gastrointestinal)
hsa-miR-326	0	0	1	1	0	0	GPX3	glutathione peroxidase 3 (plasma)
hsa-miR-326	0	0	1	1	1	1	HOXB5	homeobox B5
hsa-miR-326	1	0	1	1	1	1	IL13	interleukin 13
hsa-miR-326	1	0	1	1	1	1	ITGA3	integrin, alpha 3 (antigen CD49C, alpha 3 subunit of VLA-3 receptor)
hsa-miR-326	1	0	1	1	1	1	ITPKB	inositol-trisphosphate 3-kinase B
hsa-miR-326	0	0	1	1	0	0	KRT31	keratin 31
hsa-miR-326	1	0	1	1	1	1	LIF	leukemia inhibitory factor
hsa-miR-326	1	0	1	1	1	1	ADAM11	ADAM metallopeptidase domain 11
hsa-miR-326	1	0	1	1	1	1	MYH9	myosin, heavy chain 9, non-muscle
hsa-miR-326	0	0	1	1	0	0	NDUFA2	NADH dehydrogenase (ubiquinone) 1 alpha subcomplex, 2, 8kDa
hsa-miR-326	0	0	1	1	1	1	NID1	nidogen 1
hsa-miR-326	0	0	1	1	0	0	NTSR1	neurotensin receptor 1 (high affinity)
hsa-miR-326	0	0	1	0	1	1	OAZ2	ornithine decarboxylase antizyme 2
hsa-miR-326	0	0	1	0	1	1	OPHN1	oligophrenin 1
hsa-miR-326	1	0	1	0	1	1	PAPPA	pregnancy-associated plasma protein A, pappalysin 1
hsa-miR-326	0	0	1	1	0	0	PER1	period homolog 1 (Drosophila)
hsa-miR-326	0	0	1	1	0	0	PI3	peptidase inhibitor 3, skin-derived
hsa-miR-326	0	0	1	1	0	0	PPP1R8	protein phosphatase 1, regulatory subunit 8
hsa-miR-326	1	0	1	1	1	1	MAPK1	mitogen-activated protein kinase 1
hsa-miR-326	0	0	1	1	1	1	PTPRM	protein tyrosine phosphatase, receptor type, M
hsa-miR-326	0	0	1	1	0	0	S100A8	S100 calcium binding protein A8
hsa-miR-326	0	0	1	1	0	0	CCL5	chemokine (C-C motif) ligand 5
hsa-miR-326	1	0	1	1	1	1	CCL21	chemokine (C-C motif) ligand 21
hsa-miR-326	1	0	1	0	1	1	ST6GAL1	ST6 beta-galactosamide alpha-2,6-sialyltranferase 1
hsa-miR-326	1	0	1	1	1	1	SMARCD2	SWI/SNF related, matrix associated, actin dependent regulator of chromatin, subfamily d, member 2
hsa-miR-326	0	0	1	1	0	0	SNTA1	syntrophin, alpha 1
hsa-miR-326	1	0	1	0	1	1	STC1	stanniocalcin 1
hsa-miR-326	1	0	1	1	1	1	SUV39H1	suppressor of variegation 3-9 homolog 1 (Drosophila)
hsa-miR-326	1	0	1	0	1	1	TAL1	T-cell acute lymphocytic leukemia 1
hsa-miR-326	1	0	1	1	1	1	TFAP4	transcription factor AP-4 (activating enhancer binding protein 4)
hsa-miR-326	0	0	1	1	1	1	ZNF137P	zinc finger protein 137, pseudogene
hsa-miR-326	1	0	1	1	1	1	CUL5	cullin 5
hsa-miR-326	1	0	1	0	1	1	TNKS	tankyrase, TRF1-interacting ankyrin-related ADP-ribose polymerase
hsa-miR-326	1	0	1	1	1	1	NR5A2	nuclear receptor subfamily 5, group A, member 2
hsa-miR-326	0	0	1	1	0	0	SIGLEC5	sialic acid binding Ig-like lectin 5
hsa-miR-326	0	0	1	1	0	0	MATN4	matrilin 4
hsa-miR-326	1	0	1	0	1	1	SGPL1	sphingosine-1-phosphate lyase 1
hsa-miR-326	0	0	1	1	0	0	AP2S1	adaptor-related protein complex 2, sigma 1 subunit
hsa-miR-326	1	0	1	0	1	1	SLC1A2	solute carrier family 1 (glial high affinity glutamate transporter), member 2
hsa-miR-326	1	0	1	1	1	1	SYT7	synaptotagmin VII
hsa-miR-326	0	0	1	1	1	1	CARTPT	CART prepropeptide
hsa-miR-326	1	0	1	0	1	1	ACVR1B	activin A receptor, type IB
hsa-miR-326	1	0	1	1	1	1	ARL3	ADP-ribosylation factor-like 3
hsa-miR-326	1	0	1	0	1	1	CEBPA	CCAAT/enhancer binding protein (C/EBP), alpha
hsa-miR-326	0	0	1	1	1	1	COL12A1	collagen, type XII, alpha 1
hsa-miR-326	1	0	1	1	1	1	DAG1	dystroglycan 1 (dystrophin-associated glycoprotein 1)
hsa-miR-326	1	0	1	1	1	1	DBN1	drebrin 1
hsa-miR-326	1	0	1	1	1	1	EFNA1	ephrin-A1
hsa-miR-326	1	0	1	1	1	1	EPHB2	EPH receptor B2
hsa-miR-326	1	0	1	1	1	1	FLOT2	flotillin 2
hsa-miR-326	0	0	1	1	1	1	PABPN1	poly(A) binding protein, nuclear 1
hsa-miR-326	1	0	1	0	1	1	USP9Y	ubiquitin specific peptidase 9, Y-linked
hsa-miR-326	0	0	1	0	1	1	CXorf1	chromosome X open reading frame 1
hsa-miR-326	1	0	1	1	1	1	LARGE	like-glycosyltransferase
hsa-miR-326	0	0	1	1	1	1	MTA2	metastasis associated 1 family, member 2
hsa-miR-326	1	0	1	1	1	1	BZRAP1	benzodiazapine receptor (peripheral) associated protein 1
hsa-miR-326	1	0	1	0	1	1	MAPKAPK2	mitogen-activated protein kinase-activated protein kinase 2
hsa-miR-326	0	0	1	0	1	1	ADIPOQ	adiponectin, C1Q and collagen domain containing
hsa-miR-326	1	0	1	1	1	1	KIF23	kinesin family member 23
hsa-miR-326	1	0	1	1	1	1	GABRE	gamma-aminobutyric acid (GABA) A receptor, epsilon
hsa-miR-326	0	0	1	1	1	1	XYLB	xylulokinase homolog (H. influenzae)
hsa-miR-326	1	0	1	1	1	1	APLNR	apelin receptor
hsa-miR-326	1	0	1	1	0	0	BCL3	B-cell CLL/lymphoma 3
hsa-miR-326	1	0	1	0	1	1	E2F1	E2F transcription factor 1
hsa-miR-326	1	0	1	1	1	1	ETS1	v-ets erythroblastosis virus E26 oncogene homolog 1 (avian)
hsa-miR-326	0	0	1	0	1	1	FOSL2	FOS-like antigen 2
hsa-miR-326	1	0	1	1	1	1	PHF2	PHD finger protein 2
hsa-miR-326	0	0	1	1	0	0	PMS2P3	postmeiotic segregation increased 2 pseudogene 3
hsa-miR-326	1	0	1	0	1	1	PRKAB2	protein kinase, AMP-activated, beta 2 non-catalytic subunit
hsa-miR-326	1	0	1	0	1	1	PRKCE	protein kinase C, epsilon
hsa-miR-326	1	0	1	1	0	0	SALL2	sal-like 2 (Drosophila)
hsa-miR-326	1	0	1	0	1	1	CCDC6	coiled-coil domain containing 6
hsa-miR-326	0	0	1	1	1	1	FOSL1	FOS-like antigen 1
hsa-miR-326	0	0	1	1	1	1	MAPK8IP1	mitogen-activated protein kinase 8 interacting protein 1
hsa-miR-326	1	0	1	1	1	1	TLX1	T-cell leukemia homeobox 1
hsa-miR-326	1	0	1	1	1	1	HOXA1	homeobox A1
hsa-miR-326	0	0	1	1	1	1	HSD11B1	hydroxysteroid (11-beta) dehydrogenase 1
hsa-miR-326	0	0	1	1	0	0	RTN2	reticulon 2
hsa-miR-326	0	0	1	1	1	1	PDCD7	programmed cell death 7
hsa-miR-326	1	0	1	1	1	1	GIPC1	GIPC PDZ domain containing family, member 1
hsa-miR-326	0	0	1	1	1	1	MPHOSPH6	M-phase phosphoprotein 6
hsa-miR-326	1	0	1	0	1	1	DCAF7	DDB1 and CUL4 associated factor 7
hsa-miR-326	1	0	1	1	1	1	SRRM1	serine/arginine repetitive matrix 1
hsa-miR-326	1	0	1	0	1	1	SPRY3	sprouty homolog 3 (Drosophila)
hsa-miR-326	0	0	1	1	1	1	DSCR4	Down syndrome critical region gene 4
hsa-miR-326	1	0	1	1	0	0	TRAIP	TRAF interacting protein
hsa-miR-326	1	0	1	0	1	1	SMAD3	SMAD family member 3
hsa-miR-326	1	0	1	1	1	1	MEOX2	mesenchyme homeobox 2
hsa-miR-326	1	0	1	1	1	1	MMP16	matrix metallopeptidase 16 (membrane-inserted)
hsa-miR-326	1	0	1	1	1	1	MTF1	metal-regulatory transcription factor 1
hsa-miR-326	1	0	1	1	0	0	NAB2	NGFI-A binding protein 2 (EGR1 binding protein 2)
hsa-miR-326	0	0	1	1	1	1	LANCL1	LanC lantibiotic synthetase component C-like 1 (bacterial)
hsa-miR-326	0	0	1	1	0	0	CCL26	chemokine (C-C motif) ligand 26
hsa-miR-326	0	0	1	1	1	1	TRDN	triadin
hsa-miR-326	1	0	1	1	0	0	AGFG2	ArfGAP with FG repeats 2
hsa-miR-326	0	0	1	1	1	1	MICU1	mitochondrial calcium uptake 1
hsa-miR-326	1	0	1	1	1	1	DAGLA	diacylglycerol lipase, alpha
hsa-miR-326	0	0	1	1	1	1	CD28	CD28 molecule
hsa-miR-326	0	0	1	1	1	1	CSF2RA	colony stimulating factor 2 receptor, alpha, low-affinity (granulocyte-macrophage)
hsa-miR-326	1	0	1	1	1	1	DNAJB1	DnaJ (Hsp40) homolog, subfamily B, member 1
hsa-miR-326	0	0	1	1	0	0	NEDD8	neural precursor cell expressed, developmentally down-regulated 8
hsa-miR-326	1	0	1	1	1	1	NEUROD2	neuronal differentiation 2
hsa-miR-326	1	0	1	1	1	1	CDK16	cyclin-dependent kinase 16
hsa-miR-326	1	0	1	1	1	1	PRKCD	protein kinase C, delta
hsa-miR-326	0	0	1	1	0	0	CCL19	chemokine (C-C motif) ligand 19
hsa-miR-326	1	0	1	1	1	1	TACC1	transforming, acidic coiled-coil containing protein 1
hsa-miR-326	1	0	1	1	1	1	TSG101	tumor susceptibility gene 101
hsa-miR-326	0	0	1	1	1	1	SLC25A17	solute carrier family 25 (mitochondrial carrier; peroxisomal membrane protein, 34kDa), member 17
hsa-miR-326	0	0	1	1	1	1	TM9SF1	transmembrane 9 superfamily member 1
hsa-miR-326	1	0	1	1	1	1	CTCF	CCCTC-binding factor (zinc finger protein)
hsa-miR-326	1	0	1	1	1	1	MAP3K2	mitogen-activated protein kinase kinase kinase 2
hsa-miR-326	0	0	1	1	1	1	KLRAP1	killer cell lectin-like receptor subfamily A pseudogene 1
hsa-miR-326	1	0	1	1	0	0	FRS3	fibroblast growth factor receptor substrate 3
hsa-miR-326	1	0	1	1	1	1	MMP24	matrix metallopeptidase 24 (membrane-inserted)
hsa-miR-326	0	0	1	1	0	0	UPK2	uroplakin 2
hsa-miR-326	0	0	1	1	0	0	AFG3L2	AFG3 ATPase family gene 3-like 2 (S. cerevisiae)
hsa-miR-326	0	0	1	1	1	1	PKIA	protein kinase (cAMP-dependent, catalytic) inhibitor alpha
hsa-miR-326	0	0	1	1	1	1	ATF7	activating transcription factor 7
hsa-miR-326	0	0	1	1	1	1	HOXA7	homeobox A7
hsa-miR-326	1	0	1	1	0	0	RNF5	ring finger protein 5, E3 ubiquitin protein ligase
hsa-miR-326	1	0	1	0	1	1	WASF2	WAS protein family, member 2
hsa-miR-326	1	0	1	1	1	1	ZNF81	zinc finger protein 81
hsa-miR-326	0	0	1	0	1	1	ZXDB	zinc finger, X-linked, duplicated B
hsa-miR-326	1	0	1	1	1	1	KLF12	Kruppel-like factor 12
hsa-miR-326	0	0	1	0	1	1	PNMA2	paraneoplastic Ma antigen 2
hsa-miR-326	0	0	1	0	0	0	PHB2	prohibitin 2
hsa-miR-326	1	0	1	0	0	0	SYNPO	synaptopodin
hsa-miR-326	0	0	1	1	1	1	KLRK1	killer cell lectin-like receptor subfamily K, member 1
hsa-miR-326	1	0	1	1	1	1	TARDBP	TAR DNA binding protein
hsa-miR-326	0	0	1	1	1	1	FRAT2	frequently rearranged in advanced T-cell lymphomas 2
hsa-miR-326	1	0	1	1	1	1	APPL1	adaptor protein, phosphotyrosine interaction, PH domain and leucine zipper containing 1
hsa-miR-326	0	0	1	1	1	1	COPG2	coatomer protein complex, subunit gamma 2
hsa-miR-326	1	0	1	1	1	1	LAMP5	lysosomal-associated membrane protein family, member 5
hsa-miR-326	1	0	1	0	1	1	FBXL7	F-box and leucine-rich repeat protein 7
hsa-miR-326	0	0	1	0	1	1	PIGN	phosphatidylinositol glycan anchor biosynthesis, class N
hsa-miR-326	1	0	1	1	1	1	PIP5K1C	phosphatidylinositol-4-phosphate 5-kinase, type I, gamma
hsa-miR-326	0	0	1	0	1	1	TLL1	tolloid-like 1
hsa-miR-326	0	0	1	1	1	1	N6AMT1	N-6 adenine-specific DNA methyltransferase 1 (putative)
hsa-miR-326	0	0	1	1	0	0	KCNJ14	potassium inwardly-rectifying channel, subfamily J, member 14
hsa-miR-326	0	0	1	1	1	1	PURG	purine-rich element binding protein G
hsa-miR-326	0	0	1	1	1	1	UQCR10	ubiquinol-cytochrome c reductase, complex III subunit X
hsa-miR-326	1	0	1	1	1	1	AK2	adenylate kinase 2
hsa-miR-326	1	0	1	1	1	1	GAD1	glutamate decarboxylase 1 (brain, 67kDa)
hsa-miR-326	0	0	1	0	1	1	EMR2	egf-like module containing, mucin-like, hormone receptor-like 2
hsa-miR-326	1	0	1	1	1	1	NRG1	neuregulin 1
hsa-miR-326	0	0	1	1	0	0	DHX38	DEAH (Asp-Glu-Ala-His) box polypeptide 38
hsa-miR-326	1	0	1	0	1	1	C16orf72	chromosome 16 open reading frame 72
hsa-miR-326	1	0	1	1	0	0	HOXC11	homeobox C11
hsa-miR-326	0	0	1	1	1	1	CAPN6	calpain 6
hsa-miR-326	1	0	1	1	1	1	SLC7A11	solute carrier family 7 (anionic amino acid transporter light chain, xc- system), member 11
hsa-miR-326	0	0	1	1	1	1	KCNV1	potassium channel, subfamily V, member 1
hsa-miR-326	1	0	1	0	1	1	DIEXF	digestive organ expansion factor homolog (zebrafish)
hsa-miR-326	1	0	1	1	0	0	SND1	staphylococcal nuclease and tudor domain containing 1
hsa-miR-326	0	0	1	1	1	1	LSM1	LSM1 homolog, U6 small nuclear RNA associated (S. cerevisiae)
hsa-miR-326	1	0	1	1	1	1	EHD3	EH-domain containing 3
hsa-miR-326	1	0	1	1	1	1	RALGPS1	Ral GEF with PH domain and SH3 binding motif 1
hsa-miR-326	0	0	1	1	1	1	FAM53B	family with sequence similarity 53, member B
hsa-miR-326	1	0	1	1	1	1	TBKBP1	TBK1 binding protein 1
hsa-miR-326	1	0	1	1	1	1	MLL4	myeloid/lymphoid or mixed-lineage leukemia 4
hsa-miR-326	0	0	1	1	1	1	KIAA0141	KIAA0141
hsa-miR-326	1	0	1	1	1	1	RUSC2	RUN and SH3 domain containing 2
hsa-miR-326	1	0	1	1	1	1	JOSD1	Josephin domain containing 1
hsa-miR-326	1	0	1	1	1	1	PLEKHA6	pleckstrin homology domain containing, family A member 6
hsa-miR-326	1	0	1	1	1	1	RALGAPA1	Ral GTPase activating protein, alpha subunit 1 (catalytic)
hsa-miR-326	1	0	1	1	1	1	RAB21	RAB21, member RAS oncogene family
hsa-miR-326	1	0	1	1	1	1	XPO7	exportin 7
hsa-miR-326	1	0	1	0	1	1	NMNAT2	nicotinamide nucleotide adenylyltransferase 2
hsa-miR-326	1	0	1	1	1	1	PLCB1	phospholipase C, beta 1 (phosphoinositide-specific)
hsa-miR-326	1	0	1	1	1	1	PHF15	PHD finger protein 15
hsa-miR-326	1	0	1	0	1	1	ARHGEF12	Rho guanine nucleotide exchange factor (GEF) 12
hsa-miR-326	1	0	1	1	0	0	SMG5	smg-5 homolog, nonsense mediated mRNA decay factor (C. elegans)
hsa-miR-326	1	0	1	1	1	1	MED13L	mediator complex subunit 13-like
hsa-miR-326	1	0	1	1	1	1	DSTYK	dual serine/threonine and tyrosine protein kinase
hsa-miR-326	1	0	1	1	1	1	PARM1	prostate androgen-regulated mucin-like protein 1
hsa-miR-326	1	0	1	1	1	1	MAGI1	membrane associated guanylate kinase, WW and PDZ domain containing 1
hsa-miR-326	1	0	1	1	1	1	CLIP3	CAP-GLY domain containing linker protein 3
hsa-miR-326	1	0	1	1	0	0	POLDIP2	polymerase (DNA-directed), delta interacting protein 2
hsa-miR-326	0	0	1	1	1	1	TES	testis derived transcript (3 LIM domains)
hsa-miR-326	1	0	1	1	1	1	FAM155B	family with sequence similarity 155, member B
hsa-miR-326	0	0	1	1	1	1	BRPF3	bromodomain and PHD finger containing, 3
hsa-miR-326	1	0	1	1	0	0	COL5A3	collagen, type V, alpha 3
hsa-miR-326	1	0	1	1	1	1	AZIN1	antizyme inhibitor 1
hsa-miR-326	0	0	1	1	1	1	PPIL1	peptidylprolyl isomerase (cyclophilin)-like 1
hsa-miR-326	0	0	1	1	1	1	MRPS16	mitochondrial ribosomal protein S16
hsa-miR-326	0	0	1	1	0	0	CRNN	cornulin
hsa-miR-326	0	0	1	1	1	1	CD244	CD244 molecule, natural killer cell receptor 2B4
hsa-miR-326	1	0	1	1	1	1	PHF20	PHD finger protein 20
hsa-miR-326	1	0	1	0	1	1	CRIM1	cysteine rich transmembrane BMP regulator 1 (chordin-like)
hsa-miR-326	0	0	1	1	0	0	NCKIPSD	NCK interacting protein with SH3 domain
hsa-miR-326	1	0	1	1	1	1	IER5	immediate early response 5
hsa-miR-326	1	0	1	1	1	1	RAB6B	RAB6B, member RAS oncogene family
hsa-miR-326	0	0	1	1	1	1	KDM3B	lysine (K)-specific demethylase 3B
hsa-miR-326	0	0	1	1	1	1	SLC22A17	solute carrier family 22, member 17
hsa-miR-326	1	0	1	0	1	1	SLC25A37	solute carrier family 25 (mitochondrial iron transporter), member 37
hsa-miR-326	1	0	1	1	1	1	MEX3C	mex-3 homolog C (C. elegans)
hsa-miR-326	0	0	1	1	0	0	DLL3	delta-like 3 (Drosophila)
hsa-miR-326	1	0	1	1	1	1	HOXC10	homeobox C10
hsa-miR-326	1	0	1	1	1	1	MDM1	Mdm1 nuclear protein homolog (mouse)
hsa-miR-326	1	0	1	1	1	1	RBM38	RNA binding motif protein 38
hsa-miR-326	1	0	1	0	1	1	EIF2C4	eukaryotic translation initiation factor 2C, 4
hsa-miR-326	0	0	1	1	1	1	MTMR8	myotubularin related protein 8
hsa-miR-326	1	0	1	0	1	1	FAM46C	family with sequence similarity 46, member C
hsa-miR-326	0	0	1	1	1	1	MRPS10	mitochondrial ribosomal protein S10
hsa-miR-326	0	0	1	1	1	1	C1orf106	chromosome 1 open reading frame 106
hsa-miR-326	0	0	1	1	1	1	QRSL1	glutaminyl-tRNA synthase (glutamine-hydrolyzing)-like 1
hsa-miR-326	1	0	1	1	1	1	SPTLC3	serine palmitoyltransferase, long chain base subunit 3
hsa-miR-326	0	0	1	1	1	1	STK32B	serine/threonine kinase 32B
hsa-miR-326	0	0	1	1	1	1	HDAC8	histone deacetylase 8
hsa-miR-326	1	0	1	1	1	1	DLL4	delta-like 4 (Drosophila)
hsa-miR-326	1	0	1	1	1	1	SEPT3	septin 3
hsa-miR-326	1	0	1	1	1	1	EPB41L4B	erythrocyte membrane protein band 4.1 like 4B
hsa-miR-326	0	0	1	1	1	1	RPRM	reprimo, TP53 dependent G2 arrest mediator candidate
hsa-miR-326	0	0	1	0	1	1	ZC3HAV1	zinc finger CCCH-type, antiviral 1
hsa-miR-326	0	0	1	1	0	0	LGALS14	lectin, galactoside-binding, soluble, 14
hsa-miR-326	0	0	1	1	1	1	GRIPAP1	GRIP1 associated protein 1
hsa-miR-326	1	0	1	0	1	1	OTUD7B	OTU domain containing 7B
hsa-miR-326	1	0	1	0	1	1	MNT	MAX binding protein
hsa-miR-326	1	0	1	1	1	1	KIAA1244	KIAA1244
hsa-miR-326	0	0	1	1	1	1	CYSLTR2	cysteinyl leukotriene receptor 2
hsa-miR-326	1	0	1	0	1	1	EIF5A2	eukaryotic translation initiation factor 5A2
hsa-miR-326	1	0	1	1	0	0	JPH2	junctophilin 2
hsa-miR-326	1	0	1	1	1	1	LYRM2	LYR motif containing 2
hsa-miR-326	1	0	1	1	1	1	NRIP3	nuclear receptor interacting protein 3
hsa-miR-326	1	0	1	1	1	1	SLC24A3	solute carrier family 24 (sodium/potassium/calcium exchanger), member 3
hsa-miR-326	1	0	1	1	1	1	ZNF512B	zinc finger protein 512B
hsa-miR-326	0	0	1	1	1	1	SHROOM4	shroom family member 4
hsa-miR-326	1	0	1	0	1	1	SYT4	synaptotagmin IV
hsa-miR-326	1	0	1	1	1	1	RANBP10	RAN binding protein 10
hsa-miR-326	0	0	1	1	1	1	PRX	periaxin
hsa-miR-326	0	0	1	1	1	1	B3GALT1	UDP-Gal:betaGlcNAc beta 1,3-galactosyltransferase, polypeptide 1
hsa-miR-326	0	0	1	1	1	1	GNAO1	guanine nucleotide binding protein (G protein), alpha activating activity polypeptide O
hsa-miR-326	0	0	1	1	0	0	MYL6	myosin, light chain 6, alkali, smooth muscle and non-muscle
hsa-miR-326	1	0	1	1	1	1	NEFH	neurofilament, heavy polypeptide
hsa-miR-326	0	0	1	1	1	1	SLC15A2	solute carrier family 15 (H+/peptide transporter), member 2
hsa-miR-326	1	0	1	1	1	1	MTMR3	myotubularin related protein 3
hsa-miR-326	0	0	1	1	1	1	RNASEL	ribonuclease L (2',5'-oligoisoadenylate synthetase-dependent)
hsa-miR-326	0	0	1	1	0	0	HMHB1	histocompatibility (minor) HB-1
hsa-miR-326	0	0	1	1	1	1	CHST6	carbohydrate (N-acetylglucosamine 6-O) sulfotransferase 6
hsa-miR-326	1	0	1	1	0	0	HLX	H2.0-like homeobox
hsa-miR-326	1	0	1	0	1	1	CSNK1G1	casein kinase 1, gamma 1
hsa-miR-326	0	0	1	1	0	0	ABHD4	abhydrolase domain containing 4
hsa-miR-326	0	0	1	1	1	1	SLC17A9	solute carrier family 17, member 9
hsa-miR-326	1	0	1	1	1	1	GOLPH3	golgi phosphoprotein 3 (coat-protein)
hsa-miR-326	1	0	1	1	1	1	XYLT2	xylosyltransferase II
hsa-miR-326	0	0	1	1	0	0	KIF9	kinesin family member 9
hsa-miR-326	1	0	1	1	1	1	SUDS3	suppressor of defective silencing 3 homolog (S. cerevisiae)
hsa-miR-326	1	0	1	1	1	1	GIGYF1	GRB10 interacting GYF protein 1
hsa-miR-326	1	0	1	0	1	1	ELOVL4	ELOVL fatty acid elongase 4
hsa-miR-326	1	0	1	1	1	1	C16orf58	chromosome 16 open reading frame 58
hsa-miR-326	0	0	1	1	1	1	OSBPL11	oxysterol binding protein-like 11
hsa-miR-326	1	0	1	1	1	1	FNDC4	fibronectin type III domain containing 4
hsa-miR-326	1	0	1	0	1	1	BCL11B	B-cell CLL/lymphoma 11B (zinc finger protein)
hsa-miR-326	1	0	1	1	1	1	REEP1	receptor accessory protein 1
hsa-miR-326	0	0	1	1	1	1	METTL1	methyltransferase like 1
hsa-miR-326	1	0	1	1	1	1	GRAMD3	GRAM domain containing 3
hsa-miR-326	1	0	1	1	1	1	GDAP1L1	ganglioside induced differentiation associated protein 1-like 1
hsa-miR-326	0	0	1	1	0	0	CUEDC2	CUE domain containing 2
hsa-miR-326	1	0	1	0	1	1	NOTCH2	notch 2
hsa-miR-326	1	0	1	1	1	1	PSTPIP2	proline-serine-threonine phosphatase interacting protein 2
hsa-miR-326	0	0	1	1	1	1	CEP70	centrosomal protein 70kDa
hsa-miR-326	1	0	1	1	1	1	HIVEP3	human immunodeficiency virus type I enhancer binding protein 3
hsa-miR-326	0	0	1	1	0	0	EPS8L3	EPS8-like 3
hsa-miR-326	0	0	1	1	0	0	TNFAIP8L2	tumor necrosis factor, alpha-induced protein 8-like 2
hsa-miR-326	0	0	1	1	1	1	AKIRIN1	akirin 1
hsa-miR-326	0	0	1	1	1	1	STEAP4	STEAP family member 4
hsa-miR-326	0	0	1	1	1	1	LRRK1	leucine-rich repeat kinase 1
hsa-miR-326	0	0	1	0	1	1	C1orf115	chromosome 1 open reading frame 115
hsa-miR-326	0	0	1	1	1	1	BTNL8	butyrophilin-like 8
hsa-miR-326	1	0	1	1	0	0	SYNDIG1	synapse differentiation inducing 1
hsa-miR-326	0	0	1	1	1	1	COQ10B	coenzyme Q10 homolog B (S. cerevisiae)
hsa-miR-326	0	0	1	1	1	1	APOL2	apolipoprotein L, 2
hsa-miR-326	1	0	1	1	1	1	TRIM8	tripartite motif containing 8
hsa-miR-326	1	0	1	1	1	1	PPP1R14C	protein phosphatase 1, regulatory (inhibitor) subunit 14C
hsa-miR-326	0	0	1	1	1	1	ARPC5L	actin related protein 2/3 complex, subunit 5-like
hsa-miR-326	1	0	1	1	1	1	RAB1B	RAB1B, member RAS oncogene family
hsa-miR-326	0	0	1	1	0	0	TEX13B	testis expressed 13B
hsa-miR-326	1	0	1	1	0	0	TCF7L1	transcription factor 7-like 1 (T-cell specific, HMG-box)
hsa-miR-326	1	0	1	0	1	1	NRIP2	nuclear receptor interacting protein 2
hsa-miR-326	0	0	1	1	1	1	KCNA7	potassium voltage-gated channel, shaker-related subfamily, member 7
hsa-miR-326	0	0	1	1	0	0	CACNG6	calcium channel, voltage-dependent, gamma subunit 6
hsa-miR-326	0	0	1	1	1	1	TSSK1B	testis-specific serine kinase 1B
hsa-miR-326	0	0	1	1	1	1	FCAMR	Fc receptor, IgA, IgM, high affinity
hsa-miR-326	1	0	1	0	1	1	FAM172A	family with sequence similarity 172, member A
hsa-miR-326	0	0	1	1	1	1	MAGT1	magnesium transporter 1
hsa-miR-326	0	0	1	1	0	0	ATRIP	ATR interacting protein
hsa-miR-326	1	0	1	1	1	1	ARID5B	AT rich interactive domain 5B (MRF1-like)
hsa-miR-326	1	0	1	1	1	1	ANTXR1	anthrax toxin receptor 1
hsa-miR-326	1	0	1	1	1	1	ZDHHC18	zinc finger, DHHC-type containing 18
hsa-miR-326	0	0	1	1	0	0	PCDH1	protocadherin 1
hsa-miR-326	1	0	1	1	1	1	TRIM63	tripartite motif containing 63, E3 ubiquitin protein ligase
hsa-miR-326	1	0	1	1	1	1	PPP1R9B	protein phosphatase 1, regulatory subunit 9B
hsa-miR-326	0	0	1	0	1	1	LMNB2	lamin B2
hsa-miR-326	1	0	1	1	1	1	PHF5A	PHD finger protein 5A
hsa-miR-326	0	0	1	1	1	1	HAVCR2	hepatitis A virus cellular receptor 2
hsa-miR-326	1	0	1	1	0	0	ZC3H10	zinc finger CCCH-type containing 10
hsa-miR-326	1	0	1	0	1	1	UBASH3B	ubiquitin associated and SH3 domain containing B
hsa-miR-326	0	0	1	1	1	1	FBXL20	F-box and leucine-rich repeat protein 20
hsa-miR-326	0	0	1	1	1	1	POLR2J2	polymerase (RNA) II (DNA directed) polypeptide J2
hsa-miR-326	0	0	1	1	0	0	KRT84	keratin 84
hsa-miR-326	0	0	1	1	1	1	SUCNR1	succinate receptor 1
hsa-miR-326	0	0	1	1	1	1	DMRTC1	DMRT-like family C1
hsa-miR-326	1	0	1	1	0	0	DMRTB1	DMRT-like family B with proline-rich C-terminal, 1
hsa-miR-326	1	0	1	0	1	1	ZCCHC3	zinc finger, CCHC domain containing 3
hsa-miR-326	0	0	1	1	1	1	ZIC5	Zic family member 5
hsa-miR-326	1	0	1	1	0	0	CAMK2N2	calcium/calmodulin-dependent protein kinase II inhibitor 2
hsa-miR-326	0	0	1	1	1	1	LHX4	LIM homeobox 4
hsa-miR-326	1	0	1	1	0	0	FCHSD1	FCH and double SH3 domains 1
hsa-miR-326	1	0	1	1	0	0	CCDC120	coiled-coil domain containing 120
hsa-miR-326	1	0	1	1	1	1	LUZP1	leucine zipper protein 1
hsa-miR-326	1	0	1	1	1	1	BRWD1	bromodomain and WD repeat domain containing 1
hsa-miR-326	1	0	1	1	1	1	MAL2	mal, T-cell differentiation protein 2 (gene/pseudogene)
hsa-miR-326	0	0	1	1	1	1	PLEKHG4B	pleckstrin homology domain containing, family G (with RhoGef domain) member 4B
hsa-miR-326	0	0	1	1	0	0	FAM46B	family with sequence similarity 46, member B
hsa-miR-326	0	0	1	1	1	1	PANX3	pannexin 3
hsa-miR-326	0	0	1	1	1	1	WNT7B	wingless-type MMTV integration site family, member 7B
hsa-miR-326	1	0	1	1	1	1	BTN2A1	butyrophilin, subfamily 2, member A1
hsa-miR-326	0	0	1	1	1	1	MAG	myelin associated glycoprotein
hsa-miR-326	1	0	1	1	0	0	ZSWIM1	zinc finger, SWIM-type containing 1
hsa-miR-326	1	0	1	0	1	1	EDARADD	EDAR-associated death domain
hsa-miR-326	0	0	1	1	1	1	TRIM34	tripartite motif containing 34
hsa-miR-326	1	0	1	1	1	1	JDP2	Jun dimerization protein 2
hsa-miR-326	1	0	1	0	1	1	C5orf20	chromosome 5 open reading frame 20
hsa-miR-326	1	0	1	1	0	0	UNC5A	unc-5 homolog A (C. elegans)
hsa-miR-326	0	0	1	1	0	0	CITED4	Cbp/p300-interacting transactivator, with Glu/Asp-rich carboxy-terminal domain, 4
hsa-miR-326	1	0	1	1	0	0	PYGO2	pygopus homolog 2 (Drosophila)
hsa-miR-326	0	0	1	1	1	1	KLF14	Kruppel-like factor 14
hsa-miR-326	1	0	1	1	1	1	CD200R1	CD200 receptor 1
hsa-miR-326	0	0	1	1	1	1	C1orf105	chromosome 1 open reading frame 105
hsa-miR-326	1	0	1	0	1	1	CNOT6L	CCR4-NOT transcription complex, subunit 6-like
hsa-miR-326	0	0	1	1	0	0	C4orf36	chromosome 4 open reading frame 36
hsa-miR-326	0	0	1	1	0	0	LINC00477	long intergenic non-protein coding RNA 477
hsa-miR-326	1	0	1	1	1	1	UBQLNL	ubiquilin-like
hsa-miR-326	0	0	1	1	0	0	CISH	cytokine inducible SH2-containing protein
hsa-miR-326	1	0	1	1	1	1	MOB3C	MOB kinase activator 3C
hsa-miR-326	1	0	1	1	1	1	CADM4	cell adhesion molecule 4
hsa-miR-326	0	0	1	1	1	1	C7orf33	chromosome 7 open reading frame 33
hsa-miR-326	0	0	1	1	1	1	SCARF1	scavenger receptor class F, member 1
hsa-miR-326	0	0	1	1	0	0	TCEB3C	transcription elongation factor B polypeptide 3C (elongin A3)
hsa-miR-326	1	0	1	1	1	1	SEPT6	septin 6
hsa-miR-326	1	0	1	0	1	1	MTPN	myotrophin
hsa-miR-326	1	0	1	1	0	0	GAS2L1	growth arrest-specific 2 like 1
hsa-miR-326	0	0	1	0	1	1	CHKB	choline kinase beta
hsa-miR-326	0	0	1	1	1	1	LONRF1	LON peptidase N-terminal domain and ring finger 1
hsa-miR-326	1	0	1	1	1	1	POGLUT1	protein O-glucosyltransferase 1
hsa-miR-326	0	0	1	1	1	1	ELOVL3	ELOVL fatty acid elongase 3
hsa-miR-326	1	0	1	1	1	1	TBX15	T-box 15
hsa-miR-326	1	0	1	1	1	1	BHLHE22	basic helix-loop-helix family, member e22
hsa-miR-326	0	0	1	1	0	0	C19orf18	chromosome 19 open reading frame 18
hsa-miR-326	1	0	1	1	1	1	ZNF362	zinc finger protein 362
hsa-miR-326	0	0	1	1	1	1	DUSP18	dual specificity phosphatase 18
hsa-miR-326	0	0	1	1	1	1	RALGPS2	Ral GEF with PH domain and SH3 binding motif 2
hsa-miR-326	0	0	1	1	0	0	MUC20	mucin 20, cell surface associated
hsa-miR-326	0	0	1	1	1	1	DNAJC18	DnaJ (Hsp40) homolog, subfamily C, member 18
hsa-miR-326	0	0	1	1	1	1	CNPY4	canopy 4 homolog (zebrafish)
hsa-miR-326	1	0	1	0	1	1	C7orf41	chromosome 7 open reading frame 41
hsa-miR-326	1	0	1	0	1	1	N4BP1	NEDD4 binding protein 1
hsa-miR-326	1	0	1	1	1	1	TCEANC2	transcription elongation factor A (SII) N-terminal and central domain containing 2
hsa-miR-326	1	0	1	1	0	0	TMEM86A	transmembrane protein 86A
hsa-miR-326	1	0	1	0	1	1	ZCCHC24	zinc finger, CCHC domain containing 24
hsa-miR-326	0	0	1	1	1	1	CAMK1D	calcium/calmodulin-dependent protein kinase ID
hsa-miR-326	0	0	1	1	0	0	FAM71A	family with sequence similarity 71, member A
hsa-miR-326	1	0	1	0	1	1	SEMA6D	sema domain, transmembrane domain (TM), and cytoplasmic domain, (semaphorin) 6D
hsa-miR-326	0	0	1	0	1	1	RTP1	receptor (chemosensory) transporter protein 1
hsa-miR-326	1	0	1	1	1	1	POM121	POM121 transmembrane nucleoporin
hsa-miR-326	0	0	1	1	1	1	TAPBP	TAP binding protein (tapasin)
hsa-miR-326	1	0	1	1	1	1	NR4A2	nuclear receptor subfamily 4, group A, member 2
hsa-miR-326	1	0	1	1	1	1	CCDC117	coiled-coil domain containing 117
hsa-miR-326	0	0	1	1	1	1	C17orf78	chromosome 17 open reading frame 78
hsa-miR-326	0	0	1	1	1	1	CD300LB	CD300 molecule-like family member b
hsa-miR-326	0	0	1	0	1	1	C15orf37	chromosome 15 open reading frame 37
hsa-miR-326	0	0	1	1	1	1	C16orf54	chromosome 16 open reading frame 54
hsa-miR-326	0	0	1	1	0	0	IL9R	interleukin 9 receptor
hsa-miR-326	0	0	1	1	1	1	PRNT	prion protein (testis specific)
hsa-miR-326	0	0	1	1	1	1	HSD17B13	hydroxysteroid (17-beta) dehydrogenase 13
hsa-miR-326	0	0	1	1	1	1	GPIHBP1	glycosylphosphatidylinositol anchored high density lipoprotein binding protein 1
hsa-miR-326	0	0	1	1	1	1	STXBP4	syntaxin binding protein 4
hsa-miR-326	0	0	1	0	1	1	GATS	GATS, stromal antigen 3 opposite strand
hsa-miR-326	1	0	1	1	1	1	LRRTM1	leucine rich repeat transmembrane neuronal 1
hsa-miR-326	0	0	1	1	0	0	C1orf64	chromosome 1 open reading frame 64
hsa-miR-326	0	0	1	1	1	1	CMTM8	CKLF-like MARVEL transmembrane domain containing 8
hsa-miR-326	1	0	1	1	1	1	MTERFD2	MTERF domain containing 2
hsa-miR-326	0	0	1	1	0	0	BPIFB4	BPI fold containing family B, member 4
hsa-miR-326	1	0	1	1	1	1	TMEM229B	transmembrane protein 229B
hsa-miR-326	1	0	1	1	0	0	FAM100B	family with sequence similarity 100, member B
hsa-miR-326	0	0	1	1	1	1	C7orf53	chromosome 7 open reading frame 53
hsa-miR-326	0	0	1	1	1	1	C2orf48	chromosome 2 open reading frame 48
hsa-miR-326	0	0	1	1	1	1	FLT4	fms-related tyrosine kinase 4
hsa-miR-326	1	0	1	1	1	1	PHLPP1	PH domain and leucine rich repeat protein phosphatase 1
hsa-miR-326	1	0	1	0	1	1	PTPLB	protein tyrosine phosphatase-like (proline instead of catalytic arginine), member b
hsa-miR-326	1	0	1	0	1	1	NRK	Nik related kinase
hsa-miR-326	0	0	1	1	1	1	FAM174A	family with sequence similarity 174, member A
hsa-miR-326	0	0	1	0	0	0	IGFL1	IGF-like family member 1
hsa-miR-326	0	0	1	1	1	1	LHFPL4	lipoma HMGIC fusion partner-like 4
hsa-miR-326	1	0	1	1	0	0	ENHO	energy homeostasis associated
hsa-miR-326	0	0	1	1	1	1	ZPBP2	zona pellucida binding protein 2
hsa-miR-326	1	0	1	1	1	1	STAC2	SH3 and cysteine rich domain 2
hsa-miR-326	1	0	1	1	1	1	WARS2	tryptophanyl tRNA synthetase 2, mitochondrial
hsa-miR-326	1	0	1	1	0	0	KAZN	kazrin, periplakin interacting protein
hsa-miR-326	1	0	1	1	1	1	ENSA	endosulfine alpha
hsa-miR-326	0	0	1	0	0	0	EFCAB12	EF-hand calcium binding domain 12
hsa-miR-326	0	0	1	1	1	1	TMEM207	transmembrane protein 207
hsa-miR-326	0	0	1	0	1	1	CLEC17A	C-type lectin domain family 17, member A
hsa-miR-326	0	0	1	1	1	1	C4orf50	chromosome 4 open reading frame 50
hsa-miR-326	1	0	1	0	1	1	C17orf102	chromosome 17 open reading frame 102
hsa-miR-326	1	0	1	1	1	1	SAMD12	sterile alpha motif domain containing 12
hsa-miR-326	0	0	1	0	1	1	ASB18	ankyrin repeat and SOCS box containing 18
hsa-miR-326	0	0	1	0	0	0	ESRRAP2	estrogen-related receptor alpha pseudogene 2
hsa-miR-326	0	0	1	0	0	0	PCDHB19P	protocadherin beta 19 pseudogene
hsa-miR-326	0	0	1	0	0	0	HLA-H	major histocompatibility complex, class I, H (pseudogene)
hsa-miR-326	0	0	1	0	0	0	MIR155HG	MIR155 host gene (non-protein coding)
hsa-miR-326	0	0	1	0	0	0	TTTY2	testis-specific transcript, Y-linked 2 (non-protein coding)
hsa-miR-326	0	0	1	0	0	0	TTTY12	testis-specific transcript, Y-linked 12 (non-protein coding)
hsa-miR-326	0	0	1	0	0	0	ST13P4	suppression of tumorigenicity 13 (colon carcinoma) (Hsp70 interacting protein) pseudogene 4
hsa-miR-326	0	0	1	0	0	0	TPI1P2	triosephosphate isomerase 1 pseudogene 2
hsa-miR-326	0	0	1	0	0	0	GOLGA2P3Y	golgin A2 pseudogene 3, Y-linked
hsa-miR-326	0	0	1	0	0	0	NXF4	nuclear RNA export factor 4 pseudogene
hsa-miR-326	0	0	1	0	0	0	SLC25A3P1	solute carrier family 25 (mitochondrial carrier; phosphate carrier), member 3 pseudogene 1
hsa-miR-326	0	0	1	0	0	0	DEFB122	defensin, beta 122 (pseudogene)
hsa-miR-326	0	0	1	0	0	0	ATXN8OS	ATXN8 opposite strand (non-protein coding)
hsa-miR-326	0	0	1	0	0	0	MBL1P	mannose-binding lectin (protein A) 1, pseudogene
hsa-miR-326	0	0	1	0	0	0	AOC4	amine oxidase, copper containing 3 (vascular adhesion protein 1) pseudogene
hsa-miR-326	0	0	1	0	0	0	HOXA11-AS	HOXA11 antisense RNA
hsa-miR-326	0	0	1	0	0	0	AQP7P1	aquaporin 7 pseudogene 1
hsa-miR-326	0	0	1	0	0	0	HERC2P8	hect domain and RLD 2 pseudogene 8
hsa-miR-326	0	0	1	0	0	0	SNX29P2	sorting nexin 29 pseudogene 2
hsa-miR-326	0	0	1	0	0	0	TCAM1P	testicular cell adhesion molecule 1 homolog (mouse), pseudogene
hsa-miR-326	0	0	1	0	0	0	SNORA11	small nucleolar RNA, H/ACA box 11
hsa-miR-326	0	0	1	0	0	0	SNORA26	small nucleolar RNA, H/ACA box 26
hsa-miR-326	0	0	1	0	0	0	SNORA78	small nucleolar RNA, H/ACA box 78
hsa-miR-326	0	0	1	0	0	0	RNF5P1	ring finger protein 5, E3 ubiquitin protein ligase pseudogene 1
hsa-miR-326	0	0	1	1	0	0	GLP1R	glucagon-like peptide 1 receptor
hsa-miR-326	1	0	1	0	1	1	NFIX	nuclear factor I/X (CCAAT-binding transcription factor)
hsa-miR-326	0	0	1	1	1	1	CNGB1	cyclic nucleotide gated channel beta 1
hsa-miR-326	1	0	1	1	1	1	ZNF238	zinc finger protein 238
hsa-miR-326	0	0	1	1	1	1	PEG3	paternally expressed 3
hsa-miR-326	0	0	1	1	0	0	SHBG	sex hormone-binding globulin
hsa-miR-326	1	0	1	1	1	1	IFNAR2	interferon (alpha, beta and omega) receptor 2
hsa-miR-326	0	0	1	1	0	0	BMP1	bone morphogenetic protein 1
hsa-miR-326	1	0	1	1	0	0	PLEKHG6	pleckstrin homology domain containing, family G (with RhoGef domain) member 6
hsa-miR-326	0	0	0	1	0	0	QPCTL	glutaminyl-peptide cyclotransferase-like
hsa-miR-326	0	0	1	1	0	0	RELT	RELT tumor necrosis factor receptor
hsa-miR-326	1	0	1	1	1	1	ZNF275	zinc finger protein 275
hsa-miR-326	0	0	1	1	0	0	FNDC8	fibronectin type III domain containing 8
hsa-miR-326	0	0	1	1	1	1	BCAR1	breast cancer anti-estrogen resistance 1
hsa-miR-326	1	0	1	1	0	0	REXO1	REX1, RNA exonuclease 1 homolog (S. cerevisiae)
hsa-miR-326	0	0	0	1	1	1	RDH8	retinol dehydrogenase 8 (all-trans)
hsa-miR-326	0	0	0	1	1	1	ZNF324	zinc finger protein 324
hsa-miR-326	0	0	0	1	0	0	MRPL28	mitochondrial ribosomal protein L28
hsa-miR-326	0	0	0	1	0	0	GMIP	GEM interacting protein
hsa-miR-326	0	0	1	1	0	0	LTBP4	latent transforming growth factor beta binding protein 4
hsa-miR-326	0	0	1	1	0	0	TGM1	transglutaminase 1 (K polypeptide epidermal type I, protein-glutamine-gamma-glutamyltransferase)
hsa-miR-326	0	0	1	1	1	1	UNC13D	unc-13 homolog D (C. elegans)
hsa-miR-326	1	0	0	1	1	1	CDC34	cell division cycle 34 homolog (S. cerevisiae)
hsa-miR-326	0	0	1	1	1	1	POLR2E	polymerase (RNA) II (DNA directed) polypeptide E, 25kDa
hsa-miR-326	0	0	1	1	1	1	TBC1D10A	TBC1 domain family, member 10A
hsa-miR-326	0	0	0	1	0	0	CRYBB2	crystallin, beta B2
hsa-miR-326	0	0	1	1	0	0	MCM5	minichromosome maintenance complex component 5
hsa-miR-326	0	0	0	1	0	0	PMM1	phosphomannomutase 1
hsa-miR-326	0	0	1	1	1	1	AHSA1	AHA1, activator of heat shock 90kDa protein ATPase homolog 1 (yeast)
hsa-miR-326	0	0	0	1	0	0	CCL17	chemokine (C-C motif) ligand 17
hsa-miR-326	0	0	1	1	0	0	WFDC1	WAP four-disulfide core domain 1
hsa-miR-326	0	0	0	1	0	0	FAM173A	family with sequence similarity 173, member A
hsa-miR-326	0	0	1	1	0	0	STUB1	STIP1 homology and U-box containing protein 1, E3 ubiquitin protein ligase
hsa-miR-326	0	0	1	1	1	1	AQP8	aquaporin 8
hsa-miR-326	1	0	1	1	1	1	HMOX2	heme oxygenase (decycling) 2
hsa-miR-326	1	0	1	1	1	1	APBA2	amyloid beta (A4) precursor protein-binding, family A, member 2
hsa-miR-326	0	0	1	1	0	0	CKM	creatine kinase, muscle
hsa-miR-326	0	0	0	1	0	0	RSPH6A	radial spoke head 6 homolog A (Chlamydomonas)
hsa-miR-326	0	0	0	1	1	1	TGFB1	transforming growth factor, beta 1
hsa-miR-326	0	0	1	1	0	0	LIM2	lens intrinsic membrane protein 2, 19kDa
hsa-miR-326	0	0	1	1	0	0	RPS19	ribosomal protein S19
hsa-miR-326	0	0	0	1	1	1	COMP	cartilage oligomeric matrix protein
hsa-miR-326	0	0	0	1	0	0	FKBP8	FK506 binding protein 8, 38kDa
hsa-miR-326	0	0	1	1	0	0	TFR2	transferrin receptor 2
hsa-miR-326	0	0	0	1	0	0	C8G	complement component 8, gamma polypeptide
hsa-miR-326	1	0	0	1	1	1	WNT3	wingless-type MMTV integration site family, member 3
hsa-miR-326	0	0	0	1	1	1	NAGLU	N-acetylglucosaminidase, alpha
hsa-miR-326	0	0	1	1	1	1	CCDC86	coiled-coil domain containing 86
hsa-miR-326	1	0	1	1	0	0	PRPF19	PRP19/PSO4 pre-mRNA processing factor 19 homolog (S. cerevisiae)
hsa-miR-326	0	0	1	1	0	0	ANAPC15	anaphase promoting complex subunit 15
hsa-miR-326	0	0	0	1	0	0	DAO	D-amino-acid oxidase
hsa-miR-326	0	0	0	1	0	0	OGFOD2	2-oxoglutarate and iron-dependent oxygenase domain containing 2
hsa-miR-326	0	0	0	1	0	0	GAPDH	glyceraldehyde-3-phosphate dehydrogenase
hsa-miR-326	1	0	0	1	0	0	CDX1	caudal type homeobox 1
hsa-miR-326	0	0	0	1	0	0	CYB561D2	cytochrome b-561 domain containing 2
hsa-miR-326	0	0	0	1	0	0	TNNC1	troponin C type 1 (slow)
hsa-miR-326	0	0	0	1	1	1	DOK1	docking protein 1, 62kDa (downstream of tyrosine kinase 1)
hsa-miR-326	0	0	0	1	1	1	WNT6	wingless-type MMTV integration site family, member 6
hsa-miR-326	0	0	0	1	0	0	VAX2	ventral anterior homeobox 2
hsa-miR-326	0	0	0	1	0	0	CTSD	cathepsin D
hsa-miR-326	0	0	1	1	1	1	GJA3	gap junction protein, alpha 3, 46kDa
hsa-miR-326	0	0	0	1	0	0	ACADS	acyl-CoA dehydrogenase, C-2 to C-3 short chain
hsa-miR-326	1	0	1	1	1	1	ATP7B	ATPase, Cu++ transporting, beta polypeptide
hsa-miR-326	0	0	1	1	1	1	CHPF	chondroitin polymerizing factor
hsa-miR-326	0	0	1	1	1	1	CDH26	cadherin 26
hsa-miR-326	0	0	0	1	0	0	IL17C	interleukin 17C
hsa-miR-326	0	0	1	1	1	1	MRPS7	mitochondrial ribosomal protein S7
hsa-miR-326	1	0	0	1	1	1	CLPP	ClpP caseinolytic peptidase, ATP-dependent, proteolytic subunit homolog (E. coli)
hsa-miR-326	0	0	0	1	0	0	TNFSF14	tumor necrosis factor (ligand) superfamily, member 14
hsa-miR-326	0	0	0	1	0	0	GPR42	G protein-coupled receptor 42 (gene/pseudogene)
hsa-miR-326	0	0	0	1	1	1	KRT13	keratin 13
hsa-miR-326	1	0	1	1	0	0	SYNGR3	synaptogyrin 3
hsa-miR-326	1	0	1	1	1	1	RAB40C	RAB40C, member RAS oncogene family
hsa-miR-326	0	0	0	1	0	0	SELO	selenoprotein O
hsa-miR-326	0	0	0	1	0	0	GSTT1	glutathione S-transferase theta 1
hsa-miR-326	0	0	1	1	0	0	CDC42EP1	CDC42 effector protein (Rho GTPase binding) 1
hsa-miR-326	0	0	1	1	0	0	CLN6	ceroid-lipofuscinosis, neuronal 6, late infantile, variant
hsa-miR-326	0	0	0	1	1	1	AP1M2	adaptor-related protein complex 1, mu 2 subunit
hsa-miR-326	1	0	0	1	0	0	PSMB11	proteasome (prosome, macropain) subunit, beta type, 11
hsa-miR-326	0	0	0	1	0	0	PSMG3	proteasome (prosome, macropain) assembly chaperone 3
hsa-miR-326	0	0	0	1	0	0	INF2	inverted formin, FH2 and WH2 domain containing
hsa-miR-326	0	0	0	1	0	0	KLHDC7B	kelch domain containing 7B
hsa-miR-326	0	0	0	1	0	0	TNNI2	troponin I type 2 (skeletal, fast)
hsa-miR-326	1	0	1	1	1	1	MNX1	motor neuron and pancreas homeobox 1
hsa-miR-326	0	0	0	1	0	0	P2RY11	purinergic receptor P2Y, G-protein coupled, 11
hsa-miR-326	0	0	0	1	0	0	PPAN-P2RY11	PPAN-P2RY11 readthrough
hsa-miR-326	0	0	0	1	0	0	PPAN	peter pan homolog (Drosophila)
hsa-miR-326	0	0	1	1	1	1	NR0B2	nuclear receptor subfamily 0, group B, member 2
hsa-miR-326	0	0	1	1	0	0	RAMP1	receptor (G protein-coupled) activity modifying protein 1
hsa-miR-326	0	0	0	1	1	1	SLC52A1	solute carrier family 52, riboflavin transporter, member 1
hsa-miR-326	0	0	1	1	1	1	ERAL1	Era G-protein-like 1 (E. coli)
hsa-miR-326	0	0	0	1	0	0	MYBPH	myosin binding protein H
hsa-miR-326	0	0	1	1	1	1	CCDC134	coiled-coil domain containing 134
hsa-miR-326	0	0	0	1	1	1	DOCK2	dedicator of cytokinesis 2
hsa-miR-326	0	0	1	1	0	0	ACP2	acid phosphatase 2, lysosomal
hsa-miR-326	0	0	0	1	1	1	SDS	serine dehydratase
hsa-miR-326	0	0	1	1	1	1	HRK	harakiri, BCL2 interacting protein (contains only BH3 domain)
hsa-miR-326	1	0	1	1	1	1	PRADC1	protease-associated domain containing 1
hsa-miR-326	0	0	0	1	1	1	DYSF	dysferlin, limb girdle muscular dystrophy 2B (autosomal recessive)
hsa-miR-326	0	0	1	1	0	0	FHOD1	formin homology 2 domain containing 1
hsa-miR-326	1	0	1	1	1	1	DAB2IP	DAB2 interacting protein
hsa-miR-326	0	0	0	1	0	0	CD72	CD72 molecule
hsa-miR-326	0	0	0	1	1	1	ABCG5	ATP-binding cassette, sub-family G (WHITE), member 5
hsa-miR-326	0	0	0	1	1	1	PSMC1	proteasome (prosome, macropain) 26S subunit, ATPase, 1
hsa-miR-326	0	0	0	1	0	0	MOCOS	molybdenum cofactor sulfurase
hsa-miR-326	0	0	0	1	0	0	DSG2	desmoglein 2
hsa-miR-326	0	0	0	1	0	0	C14orf166	chromosome 14 open reading frame 166
hsa-miR-326	0	0	1	1	1	1	ERICH1	glutamate-rich 1
hsa-miR-326	0	0	1	1	0	0	KCNH2	potassium voltage-gated channel, subfamily H (eag-related), member 2
hsa-miR-326	0	0	1	1	1	1	EFTUD2	elongation factor Tu GTP binding domain containing 2
hsa-miR-326	0	0	0	1	1	1	SLC4A1	solute carrier family 4, anion exchanger, member 1 (erythrocyte membrane protein band 3, Diego blood group)
hsa-miR-326	0	0	1	1	0	0	DNAH9	dynein, axonemal, heavy chain 9
hsa-miR-326	0	0	0	1	0	0	CHST8	carbohydrate (N-acetylgalactosamine 4-0) sulfotransferase 8
hsa-miR-326	0	0	0	1	0	0	COPE	coatomer protein complex, subunit epsilon
hsa-miR-326	0	0	0	1	1	1	UQCR11	ubiquinol-cytochrome c reductase, complex III subunit XI
hsa-miR-326	0	0	0	1	1	1	CABIN1	calcineurin binding protein 1
hsa-miR-326	0	0	1	1	0	0	ARVCF	armadillo repeat gene deleted in velocardiofacial syndrome
hsa-miR-326	0	0	1	1	0	0	NOVA2	neuro-oncological ventral antigen 2
hsa-miR-326	0	0	0	1	1	1	TYR	tyrosinase (oculocutaneous albinism IA)
hsa-miR-326	1	0	1	1	1	1	VAMP8	vesicle-associated membrane protein 8 (endobrevin)
hsa-miR-326	0	0	0	1	1	1	POMC	proopiomelanocortin
hsa-miR-326	0	0	0	1	0	0	LYL1	lymphoblastic leukemia derived sequence 1
hsa-miR-326	0	0	1	1	0	0	ZAP70	zeta-chain (TCR) associated protein kinase 70kDa
hsa-miR-326	0	0	1	1	0	0	POR	P450 (cytochrome) oxidoreductase
hsa-miR-326	1	0	1	1	0	0	CDH24	cadherin 24, type 2
hsa-miR-326	0	0	0	1	0	0	CYP11A1	cytochrome P450, family 11, subfamily A, polypeptide 1
hsa-miR-326	0	0	0	1	0	0	RHCG	Rh family, C glycoprotein
hsa-miR-326	0	0	1	1	1	1	ARMC5	armadillo repeat containing 5
hsa-miR-326	0	0	0	1	0	0	ADAD2	adenosine deaminase domain containing 2
hsa-miR-326	0	0	0	1	1	1	RPL3L	ribosomal protein L3-like
hsa-miR-326	0	0	1	1	0	0	GALNS	galactosamine (N-acetyl)-6-sulfate sulfatase
hsa-miR-326	0	0	0	1	0	0	SPG7	spastic paraplegia 7 (pure and complicated autosomal recessive)
hsa-miR-326	0	0	0	1	1	1	NOB1	NIN1/RPN12 binding protein 1 homolog (S. cerevisiae)
hsa-miR-326	1	0	1	1	1	1	IMPA2	inositol(myo)-1(or 4)-monophosphatase 2
hsa-miR-326	0	0	1	1	1	1	FN3KRP	fructosamine 3 kinase related protein
hsa-miR-326	0	0	1	1	0	0	AZI1	5-azacytidine induced 1
hsa-miR-326	0	0	1	1	0	0	NT5C3L	5'-nucleotidase, cytosolic III-like
hsa-miR-326	0	0	1	1	1	1	BCAM	basal cell adhesion molecule (Lutheran blood group)
hsa-miR-326	0	0	1	1	0	0	LMTK3	lemur tyrosine kinase 3
hsa-miR-326	0	0	0	1	0	0	FAM176B	family with sequence similarity 176, member B
hsa-miR-326	0	0	1	1	1	1	SUSD4	sushi domain containing 4
hsa-miR-326	0	0	1	1	0	0	REN	renin
hsa-miR-326	0	0	1	1	0	0	SLC4A3	solute carrier family 4, anion exchanger, member 3
hsa-miR-326	0	0	0	1	1	1	LAT2	linker for activation of T cells family, member 2
hsa-miR-326	0	0	0	1	0	0	DENND2A	DENN/MADD domain containing 2A
hsa-miR-326	0	0	1	1	0	0	DOK2	docking protein 2, 56kDa
hsa-miR-326	0	0	1	1	0	0	SAA4	serum amyloid A4, constitutive
hsa-miR-326	1	0	1	1	1	1	FADS1	fatty acid desaturase 1
hsa-miR-326	0	0	1	1	0	0	FADS3	fatty acid desaturase 3
hsa-miR-326	0	0	0	1	0	0	MYL9	myosin, light chain 9, regulatory
hsa-miR-326	0	0	1	1	0	0	LSM14B	LSM14B, SCD6 homolog B (S. cerevisiae)
hsa-miR-326	1	0	0	1	1	1	DHRS12	dehydrogenase/reductase (SDR family) member 12
hsa-miR-326	0	0	0	1	0	0	TAKR	aldo-keto reductase, truncated
hsa-miR-326	0	0	0	1	0	0	TRIM11	tripartite motif containing 11
hsa-miR-326	0	0	0	1	0	0	C17orf50	chromosome 17 open reading frame 50
hsa-miR-326	1	0	0	1	1	1	RHOC	ras homolog family member C
hsa-miR-326	0	0	1	1	0	0	PDIA4	protein disulfide isomerase family A, member 4
hsa-miR-326	0	0	0	1	0	0	COX6A2	cytochrome c oxidase subunit VIa polypeptide 2
hsa-miR-326	1	0	1	1	1	1	SMAD6	SMAD family member 6
hsa-miR-326	0	0	0	1	0	0	NPM2	nucleophosmin/nucleoplasmin 2
hsa-miR-326	0	0	0	1	1	1	PLA2G4D	phospholipase A2, group IVD (cytosolic)
hsa-miR-326	1	0	1	1	0	0	SHF	Src homology 2 domain containing F
hsa-miR-326	0	0	1	1	0	0	ATP6V0D1	ATPase, H+ transporting, lysosomal 38kDa, V0 subunit d1
hsa-miR-326	0	0	0	1	0	0	CILP2	cartilage intermediate layer protein 2
hsa-miR-326	0	0	0	1	0	0	TFF3	trefoil factor 3 (intestinal)
hsa-miR-326	0	0	0	1	0	0	TFF2	trefoil factor 2
hsa-miR-326	0	0	0	1	0	0	PWP2	PWP2 periodic tryptophan protein homolog (yeast)
hsa-miR-326	1	0	0	1	0	0	NBEAL2	neurobeachin-like 2
hsa-miR-326	0	0	0	1	0	0	MYL3	myosin, light chain 3, alkali; ventricular, skeletal, slow
hsa-miR-326	0	0	1	1	0	0	FGFR4	fibroblast growth factor receptor 4
hsa-miR-326	1	0	1	1	0	0	FAM108A1	family with sequence similarity 108, member A1
hsa-miR-326	1	0	1	1	0	0	CELF5	CUGBP, Elav-like family member 5
hsa-miR-326	0	0	1	1	1	1	CD300LG	CD300 molecule-like family member g
hsa-miR-326	1	0	1	1	1	1	NAGS	N-acetylglutamate synthase
hsa-miR-326	1	0	1	1	0	0	GRASP	GRP1 (general receptor for phosphoinositides 1)-associated scaffold protein
hsa-miR-326	0	0	1	1	0	0	CLPB	ClpB caseinolytic peptidase B homolog (E. coli)
hsa-miR-326	0	0	1	1	0	0	ZFPL1	zinc finger protein-like 1
hsa-miR-326	1	0	1	1	1	1	DHX57	DEAH (Asp-Glu-Ala-Asp/His) box polypeptide 57
hsa-miR-326	0	0	1	1	0	0	IGFN1	immunoglobulin-like and fibronectin type III domain containing 1
hsa-miR-326	0	0	0	1	0	0	UCN	urocortin
hsa-miR-326	0	0	1	1	1	1	TPRA1	transmembrane protein, adipocyte asscociated 1
hsa-miR-326	1	0	1	1	0	0	RPN1	ribophorin I
hsa-miR-326	0	0	0	1	1	1	MFI2	antigen p97 (melanoma associated) identified by monoclonal antibodies 133.2 and 96.5
hsa-miR-326	0	0	1	1	0	0	FAM170A	family with sequence similarity 170, member A
hsa-miR-326	1	0	1	1	1	1	LMTK2	lemur tyrosine kinase 2
hsa-miR-326	0	0	0	1	0	0	PHKG1	phosphorylase kinase, gamma 1 (muscle)
hsa-miR-326	0	0	0	1	0	0	VWA2	von Willebrand factor A domain containing 2
hsa-miR-326	0	0	0	1	0	0	CDH16	cadherin 16, KSP-cadherin
hsa-miR-326	0	0	0	1	0	0	SLC9A5	solute carrier family 9, subfamily A (NHE5, cation proton antiporter 5), member 5
hsa-miR-326	0	0	1	1	0	0	LDHD	lactate dehydrogenase D
hsa-miR-326	0	0	1	1	1	1	VPS11	vacuolar protein sorting 11 homolog (S. cerevisiae)
hsa-miR-326	0	0	0	1	0	0	PCSK4	proprotein convertase subtilisin/kexin type 4
hsa-miR-326	0	0	0	1	0	0	ACER1	alkaline ceramidase 1
hsa-miR-326	0	0	1	1	0	0	CD320	CD320 molecule
hsa-miR-326	0	0	1	1	1	1	SOAT2	sterol O-acyltransferase 2
hsa-miR-326	0	0	0	1	0	0	SPSB3	splA/ryanodine receptor domain and SOCS box containing 3
hsa-miR-326	0	0	1	1	0	0	SRRM2	serine/arginine repetitive matrix 2
hsa-miR-326	0	0	0	1	0	0	LTBP3	latent transforming growth factor beta binding protein 3
hsa-miR-326	0	0	0	1	0	0	NXNL1	nucleoredoxin-like 1
hsa-miR-326	0	0	0	1	0	0	GAA	glucosidase, alpha; acid
hsa-miR-326	0	0	1	1	0	0	HMCN2	hemicentin 2
hsa-miR-326	0	0	0	1	1	1	TRH	thyrotropin-releasing hormone
hsa-miR-326	0	0	0	1	1	1	FAM71B	family with sequence similarity 71, member B
hsa-miR-326	0	0	0	1	0	0	AMDHD2	amidohydrolase domain containing 2
hsa-miR-326	0	0	1	1	1	1	GNB2	guanine nucleotide binding protein (G protein), beta polypeptide 2
hsa-miR-326	1	0	1	1	1	1	CRTC2	CREB regulated transcription coactivator 2
hsa-miR-326	0	0	0	1	0	0	ANKS3	ankyrin repeat and sterile alpha motif domain containing 3
hsa-miR-326	0	0	0	1	0	0	ECEL1	endothelin converting enzyme-like 1
hsa-miR-326	1	0	1	1	0	0	XPO6	exportin 6
hsa-miR-326	0	0	1	1	0	0	GSG1L	GSG1-like
hsa-miR-326	0	0	1	1	0	0	ZNHIT1	zinc finger, HIT-type containing 1
hsa-miR-326	0	0	0	1	0	0	REEP4	receptor accessory protein 4
hsa-miR-326	0	0	1	1	0	0	STRA13	stimulated by retinoic acid 13 homolog (mouse)
hsa-miR-326	1	0	1	1	1	1	GTPBP2	GTP binding protein 2
hsa-miR-326	0	0	1	1	1	1	HTRA3	HtrA serine peptidase 3
hsa-miR-326	0	0	1	1	1	1	C2orf54	chromosome 2 open reading frame 54
hsa-miR-326	0	0	0	1	0	0	GOT1L1	glutamic-oxaloacetic transaminase 1-like 1
hsa-miR-326	1	0	1	1	0	0	RAD9A	RAD9 homolog A (S. pombe)
hsa-miR-326	0	0	0	1	0	0	EFEMP2	EGF containing fibulin-like extracellular matrix protein 2
hsa-miR-326	0	0	0	1	0	0	SNUPN	snurportin 1
hsa-miR-326	0	0	0	1	0	0	ADCK5	aarF domain containing kinase 5
hsa-miR-326	0	0	1	1	0	0	PPP1R14B	protein phosphatase 1, regulatory (inhibitor) subunit 14B
hsa-miR-326	1	0	1	1	1	1	OLR1	oxidized low density lipoprotein (lectin-like) receptor 1
hsa-miR-326	1	0	1	1	0	0	LRFN4	leucine rich repeat and fibronectin type III domain containing 4
hsa-miR-326	1	0	1	1	0	0	NDST2	N-deacetylase/N-sulfotransferase (heparan glucosaminyl) 2
hsa-miR-326	0	0	0	1	0	0	PSMC5	proteasome (prosome, macropain) 26S subunit, ATPase, 5
hsa-miR-326	1	0	1	1	0	0	PHOSPHO1	phosphatase, orphan 1
hsa-miR-326	0	0	1	1	1	1	P2RY2	purinergic receptor P2Y, G-protein coupled, 2
hsa-miR-326	0	0	0	1	0	0	DAK	dihydroxyacetone kinase 2 homolog (S. cerevisiae)
hsa-miR-326	0	0	1	1	1	1	TNK1	tyrosine kinase, non-receptor, 1
hsa-miR-326	0	0	0	1	1	1	USP36	ubiquitin specific peptidase 36
hsa-miR-326	0	0	0	1	0	0	NFE2	nuclear factor (erythroid-derived 2), 45kDa
hsa-miR-326	0	0	1	1	0	0	POLD4	polymerase (DNA-directed), delta 4, accessory subunit
hsa-miR-326	0	0	1	1	0	0	SLC29A1	solute carrier family 29 (nucleoside transporters), member 1
hsa-miR-326	0	0	1	1	0	0	FUZ	fuzzy homolog (Drosophila)
hsa-miR-326	0	0	0	1	0	0	FUT7	fucosyltransferase 7 (alpha (1,3) fucosyltransferase)
hsa-miR-326	0	0	0	1	0	0	FARSA	phenylalanyl-tRNA synthetase, alpha subunit
hsa-miR-326	0	0	0	1	0	0	SLC13A2	solute carrier family 13 (sodium-dependent dicarboxylate transporter), member 2
hsa-miR-326	0	0	1	1	1	1	TMEM132C	transmembrane protein 132C
hsa-miR-326	1	0	1	1	1	1	RAI1	retinoic acid induced 1
hsa-miR-326	0	0	0	1	1	1	MEN1	multiple endocrine neoplasia I
hsa-miR-326	0	0	0	1	0	0	MATK	megakaryocyte-associated tyrosine kinase
hsa-miR-326	0	0	0	1	1	1	ASB2	ankyrin repeat and SOCS box containing 2
hsa-miR-326	1	0	0	1	1	1	WNK4	WNK lysine deficient protein kinase 4
hsa-miR-326	0	0	0	1	0	0	UNCX	UNC homeobox
hsa-miR-326	1	0	1	1	1	1	CALR	calreticulin
hsa-miR-326	0	0	1	1	0	0	STK25	serine/threonine kinase 25
hsa-miR-326	0	0	1	1	1	1	BIN1	bridging integrator 1
hsa-miR-326	0	0	0	1	0	0	INSL3	insulin-like 3 (Leydig cell)
hsa-miR-326	0	0	0	1	1	1	JAK3	Janus kinase 3
hsa-miR-326	0	0	1	1	1	1	HRH3	histamine receptor H3
hsa-miR-326	0	0	0	1	1	1	CPNE1	copine I
hsa-miR-326	0	0	1	1	0	0	SLCO3A1	solute carrier organic anion transporter family, member 3A1
hsa-miR-326	0	0	1	1	0	0	SFTPC	surfactant protein C
hsa-miR-326	0	0	1	1	0	0	INTS3	integrator complex subunit 3
hsa-miR-326	1	0	0	1	1	1	TTC7A	tetratricopeptide repeat domain 7A
hsa-miR-326	0	0	0	1	1	1	OLFML3	olfactomedin-like 3
hsa-miR-326	0	0	1	1	0	0	STXBP2	syntaxin binding protein 2
hsa-miR-326	0	0	0	1	0	0	SLC16A8	solute carrier family 16, member 8 (monocarboxylic acid transporter 3)
hsa-miR-326	0	0	1	1	0	0	PRPF31	PRP31 pre-mRNA processing factor 31 homolog (S. cerevisiae)
hsa-miR-326	0	0	1	1	1	1	CCDC33	coiled-coil domain containing 33
hsa-miR-326	0	0	0	1	0	0	B3GNT8	UDP-GlcNAc:betaGal beta-1,3-N-acetylglucosaminyltransferase 8
hsa-miR-326	0	0	0	1	0	0	TRIM72	tripartite motif containing 72
hsa-miR-326	0	0	0	1	0	0	SSNA1	Sjogren syndrome nuclear autoantigen 1
hsa-miR-326	0	0	1	1	0	0	POLR2A	polymerase (RNA) II (DNA directed) polypeptide A, 220kDa
hsa-miR-326	0	0	0	1	0	0	LRRC61	leucine rich repeat containing 61
hsa-miR-326	0	0	1	1	1	1	BAIAP3	BAI1-associated protein 3
hsa-miR-326	0	0	1	1	0	0	ADCK4	aarF domain containing kinase 4
hsa-miR-326	0	0	0	1	0	0	USHBP1	Usher syndrome 1C binding protein 1
hsa-miR-326	1	0	1	1	0	0	RANBP3	RAN binding protein 3
hsa-miR-326	0	0	1	1	1	1	NUP98	nucleoporin 98kDa
hsa-miR-326	0	0	0	1	0	0	CHMP6	charged multivesicular body protein 6
hsa-miR-326	0	0	0	1	0	0	SLC47A2	solute carrier family 47, member 2
hsa-miR-326	0	0	1	1	0	0	CYP4F8	cytochrome P450, family 4, subfamily F, polypeptide 8
hsa-miR-326	1	0	1	1	1	1	PDXDC1	pyridoxal-dependent decarboxylase domain containing 1
hsa-miR-326	0	0	0	1	0	0	ASCL3	achaete-scute complex homolog 3 (Drosophila)
hsa-miR-326	0	0	1	1	0	0	GHRHR	growth hormone releasing hormone receptor
hsa-miR-326	0	0	0	1	1	1	ITLN1	intelectin 1 (galactofuranose binding)
hsa-miR-326	0	0	0	1	1	1	GSTM4	glutathione S-transferase mu 4
hsa-miR-326	0	0	0	1	0	0	NOC2L	nucleolar complex associated 2 homolog (S. cerevisiae)
hsa-miR-326	1	0	1	1	0	0	IGDCC3	immunoglobulin superfamily, DCC subclass, member 3
hsa-miR-326	0	0	0	1	0	0	HSF1	heat shock transcription factor 1
hsa-miR-326	0	0	0	1	0	0	C19orf71	chromosome 19 open reading frame 71
hsa-miR-326	0	0	0	1	0	0	CLDN5	claudin 5
hsa-miR-326	0	0	0	1	0	0	MRPL54	mitochondrial ribosomal protein L54
hsa-miR-326	0	0	0	1	0	0	SAMD14	sterile alpha motif domain containing 14
hsa-miR-326	0	0	0	1	0	0	IRF7	interferon regulatory factor 7
hsa-miR-326	0	0	1	1	0	0	IGLL1	immunoglobulin lambda-like polypeptide 1
hsa-miR-326	0	0	0	1	0	0	FAM132A	family with sequence similarity 132, member A
hsa-miR-326	0	0	0	1	0	0	TMEM89	transmembrane protein 89
hsa-miR-326	0	0	0	1	0	0	KANK3	KN motif and ankyrin repeat domains 3
hsa-miR-326	0	0	0	1	0	0	SLC25A10	solute carrier family 25 (mitochondrial carrier; dicarboxylate transporter), member 10
hsa-miR-326	0	0	0	1	0	0	SYNDIG1L	synapse differentiation inducing 1-like
hsa-miR-326	0	0	1	1	1	1	MRPL12	mitochondrial ribosomal protein L12
hsa-miR-326	0	0	1	1	0	0	STAC3	SH3 and cysteine rich domain 3
hsa-miR-326	0	0	0	1	0	0	C15orf55	chromosome 15 open reading frame 55
hsa-miR-326	0	0	0	1	0	0	YJEFN3	YjeF N-terminal domain containing 3
hsa-miR-326	0	0	0	1	0	0	C17orf82	chromosome 17 open reading frame 82
hsa-miR-326	0	0	0	1	1	1	VSTM2B	V-set and transmembrane domain containing 2B
hsa-miR-326	0	0	1	1	0	0	ZNF142	zinc finger protein 142
hsa-miR-326	0	0	1	1	1	1	KLK5	kallikrein-related peptidase 5
hsa-miR-326	1	0	1	1	1	1	SFR1	SWI5-dependent recombination repair 1
hsa-miR-326	0	0	1	1	0	0	PDXP	pyridoxal (pyridoxine, vitamin B6) phosphatase
hsa-miR-326	0	0	1	1	0	0	SH3BP1	SH3-domain binding protein 1
hsa-miR-326	0	0	1	1	0	0	SIRT6	sirtuin 6
hsa-miR-326	0	0	0	1	0	0	MAPK15	mitogen-activated protein kinase 15
hsa-miR-326	0	0	0	1	0	0	DUPD1	dual specificity phosphatase and pro isomerase domain containing 1
hsa-miR-326	0	0	1	1	1	1	TMPRSS4	transmembrane protease, serine 4
hsa-miR-326	0	0	0	1	0	0	NOSIP	nitric oxide synthase interacting protein
hsa-miR-326	0	0	0	1	0	0	DUSP15	dual specificity phosphatase 15
hsa-miR-326	0	0	1	1	0	0	NCR3	natural cytotoxicity triggering receptor 3
hsa-miR-326	0	0	1	1	0	0	KCNK7	potassium channel, subfamily K, member 7
hsa-miR-326	0	0	0	1	1	1	PNCK	pregnancy up-regulated non-ubiquitously expressed CaM kinase
hsa-miR-326	0	0	1	1	0	0	MPST	mercaptopyruvate sulfurtransferase
hsa-miR-326	0	0	1	1	0	0	STYXL1	serine/threonine/tyrosine interacting-like 1
hsa-miR-326	0	0	1	1	1	1	LRRC29	leucine rich repeat containing 29
hsa-miR-326	1	0	1	1	1	1	MLLT4	myeloid/lymphoid or mixed-lineage leukemia (trithorax homolog, Drosophila); translocated to, 4
hsa-miR-326	0	0	0	1	0	0	PODXL2	podocalyxin-like 2
hsa-miR-326	0	0	0	1	0	0	ZNF79	zinc finger protein 79
hsa-miR-326	1	0	1	1	1	1	NTRK3	neurotrophic tyrosine kinase, receptor, type 3
hsa-miR-326	0	0	1	1	0	0	CARD14	caspase recruitment domain family, member 14
hsa-miR-326	1	0	1	1	1	1	SLC2A4RG	SLC2A4 regulator
hsa-miR-326	0	0	1	1	0	0	KCNQ1	potassium voltage-gated channel, KQT-like subfamily, member 1
hsa-miR-326	0	0	1	1	0	0	MRPS5	mitochondrial ribosomal protein S5
hsa-miR-326	0	0	0	1	0	0	FCER2	Fc fragment of IgE, low affinity II, receptor for (CD23)
hsa-miR-326	0	0	0	1	0	0	SLC5A11	solute carrier family 5 (sodium/glucose cotransporter), member 11
hsa-miR-326	1	0	1	1	1	1	DOC2A	double C2-like domains, alpha
hsa-miR-326	0	0	0	1	0	0	DDT	D-dopachrome tautomerase
hsa-miR-326	0	0	0	1	0	0	CCL14	chemokine (C-C motif) ligand 14
hsa-miR-326	1	0	1	1	1	1	SLC12A9	solute carrier family 12 (potassium/chloride transporters), member 9
hsa-miR-326	0	0	1	1	1	1	CD209	CD209 molecule
hsa-miR-326	0	0	1	1	0	0	CUL9	cullin 9
hsa-miR-326	1	0	1	1	1	1	HMGA2	high mobility group AT-hook 2
hsa-miR-326	0	0	0	1	0	0	C16orf93	chromosome 16 open reading frame 93
hsa-miR-326	1	0	1	1	1	1	PTPRS	protein tyrosine phosphatase, receptor type, S
hsa-miR-326	0	0	0	1	0	0	CXorf40B	chromosome X open reading frame 40B
hsa-miR-326	0	0	1	1	1	1	CATSPER2	cation channel, sperm associated 2
hsa-miR-326	1	0	1	1	0	0	DNM2	dynamin 2
[truncated: 340 more rows]
