# Supplementary material for: Profiling of Selected MicroRNAs in Proliferative Eutopic Endometrium of Women with Ovarian Endometriosis
Source: Biomed Res Int. 2015 Aug 20;2015:760698. doi: 10.1155/2015/760698 (PMC4558423; doi:10.1155/2015/760698)
Supplement: Supplementary file 1 — Table I: The names of miRNAs significantly differentially expressed between eutopic endometrium of patients with endometriosis vs eutopic endometrium of patients without endometriosis. Table II: The associations between miRNA and mRNA, which presents detailed results of the search of six major databases i.e targetscan, tarbase, miranda, mirbase, mirtarget2 and pictar. [file 760698.f1.zip › 760698.f1/Table II/hsa-miR-330-3p.tsv]

miR	targetscan	tarbase	miranda	mirbase	mirtarget2	pictar	GeneSymbol	GeneName
hsa-miR-330-3p	1	0	1	1	1	1	ZFYVE16	zinc finger, FYVE domain containing 16
hsa-miR-330-3p	1	0	1	1	1	1	CHD9	chromodomain helicase DNA binding protein 9
hsa-miR-330-3p	1	0	1	0	1	1	KIAA0355	KIAA0355
hsa-miR-330-3p	1	0	1	1	1	1	PRUNE2	prune homolog 2 (Drosophila)
hsa-miR-330-3p	0	0	1	1	1	1	HSPH1	heat shock 105kDa/110kDa protein 1
hsa-miR-330-3p	1	0	1	1	1	1	ITM2C	integral membrane protein 2C
hsa-miR-330-3p	1	0	1	1	1	1	ABCC5	ATP-binding cassette, sub-family C (CFTR/MRP), member 5
hsa-miR-330-3p	1	0	1	0	1	1	PTPRT	protein tyrosine phosphatase, receptor type, T
hsa-miR-330-3p	1	0	1	0	1	1	KIAA0408	KIAA0408
hsa-miR-330-3p	1	0	1	0	1	1	VPS13D	vacuolar protein sorting 13 homolog D (S. cerevisiae)
hsa-miR-330-3p	1	0	1	1	0	0	OTUD3	OTU domain containing 3
hsa-miR-330-3p	1	0	1	1	0	0	SUSD5	sushi domain containing 5
hsa-miR-330-3p	1	0	1	1	1	1	NRXN1	neurexin 1
hsa-miR-330-3p	1	0	1	1	0	0	TBC1D12	TBC1 domain family, member 12
hsa-miR-330-3p	1	0	1	1	1	1	HIPK1	homeodomain interacting protein kinase 1
hsa-miR-330-3p	1	0	1	1	1	1	GIGYF2	GRB10 interacting GYF protein 2
hsa-miR-330-3p	1	0	1	1	1	1	TP63	tumor protein p63
hsa-miR-330-3p	1	0	1	1	0	0	ESYT1	extended synaptotagmin-like protein 1
hsa-miR-330-3p	1	0	1	0	1	1	RBM12	RNA binding motif protein 12
hsa-miR-330-3p	1	0	1	1	1	1	LPHN2	latrophilin 2
hsa-miR-330-3p	1	0	1	1	1	1	DNM3	dynamin 3
hsa-miR-330-3p	1	0	1	1	1	1	LMO7	LIM domain 7
hsa-miR-330-3p	0	0	1	1	1	1	MAU2	MAU2 chromatid cohesion factor homolog (C. elegans)
hsa-miR-330-3p	1	0	1	1	1	1	CALCR	calcitonin receptor
hsa-miR-330-3p	1	0	1	1	1	1	RNMT	RNA (guanine-7-) methyltransferase
hsa-miR-330-3p	1	0	1	0	0	0	DTX4	deltex homolog 4 (Drosophila)
hsa-miR-330-3p	1	0	1	1	1	1	CIT	citron (rho-interacting, serine/threonine kinase 21)
hsa-miR-330-3p	1	0	1	1	1	1	C11orf9	chromosome 11 open reading frame 9
hsa-miR-330-3p	1	0	1	1	1	1	NTNG1	netrin G1
hsa-miR-330-3p	0	0	1	1	0	0	MYH15	myosin, heavy chain 15
hsa-miR-330-3p	1	0	1	1	0	0	STXBP5L	syntaxin binding protein 5-like
hsa-miR-330-3p	0	0	1	1	1	1	TTC28	tetratricopeptide repeat domain 28
hsa-miR-330-3p	1	0	1	1	0	0	KIAA1045	KIAA1045
hsa-miR-330-3p	1	0	1	0	1	1	ZNF507	zinc finger protein 507
hsa-miR-330-3p	1	0	1	1	1	1	PLCL2	phospholipase C-like 2
hsa-miR-330-3p	1	0	1	1	1	1	PHF8	PHD finger protein 8
hsa-miR-330-3p	1	0	1	1	1	1	SMARCAD1	SWI/SNF-related, matrix-associated actin-dependent regulator of chromatin, subfamily a, containing DEAD/H box 1
hsa-miR-330-3p	1	0	1	1	1	1	ZMYND8	zinc finger, MYND-type containing 8
hsa-miR-330-3p	1	0	1	0	1	1	ODZ2	odz, odd Oz/ten-m homolog 2 (Drosophila)
hsa-miR-330-3p	1	0	1	1	0	0	PPM1H	protein phosphatase, Mg2+/Mn2+ dependent, 1H
hsa-miR-330-3p	1	0	1	1	1	1	NDRG4	NDRG family member 4
hsa-miR-330-3p	1	0	1	1	0	0	KIAA1210	KIAA1210
hsa-miR-330-3p	1	0	1	1	1	1	RIMKLB	ribosomal modification protein rimK-like family member B
hsa-miR-330-3p	0	0	1	1	1	1	TCF7L2	transcription factor 7-like 2 (T-cell specific, HMG-box)
hsa-miR-330-3p	1	0	1	0	0	0	ODZ4	odz, odd Oz/ten-m homolog 4 (Drosophila)
hsa-miR-330-3p	1	0	1	1	1	1	PCDH19	protocadherin 19
hsa-miR-330-3p	1	0	1	0	1	1	KCTD16	potassium channel tetramerisation domain containing 16
hsa-miR-330-3p	1	0	1	1	1	1	TAOK1	TAO kinase 1
hsa-miR-330-3p	0	0	1	1	1	1	SCAPER	S-phase cyclin A-associated protein in the ER
hsa-miR-330-3p	1	0	1	0	0	0	PITPNM2	phosphatidylinositol transfer protein, membrane-associated 2
hsa-miR-330-3p	1	0	1	1	0	0	KIAA1462	KIAA1462
hsa-miR-330-3p	1	0	1	1	1	1	FRAS1	Fraser syndrome 1
hsa-miR-330-3p	1	0	1	0	1	1	ZNF295	zinc finger protein 295
hsa-miR-330-3p	0	0	1	0	0	0	KRT19P2	keratin 19 pseudogene 2
hsa-miR-330-3p	1	0	1	1	1	1	SLC2A4RG	SLC2A4 regulator
hsa-miR-330-3p	1	0	1	1	0	0	KIAA1549	KIAA1549
hsa-miR-330-3p	1	0	1	1	1	1	PPP6R3	protein phosphatase 6, regulatory subunit 3
hsa-miR-330-3p	0	0	1	0	1	1	ZSWIM6	zinc finger, SWIM-type containing 6
hsa-miR-330-3p	1	0	1	0	1	1	IGDCC4	immunoglobulin superfamily, DCC subclass, member 4
hsa-miR-330-3p	1	0	1	0	0	0	TANC2	tetratricopeptide repeat, ankyrin repeat and coiled-coil containing 2
hsa-miR-330-3p	0	0	1	1	1	1	BHLHB9	basic helix-loop-helix domain containing, class B, 9
hsa-miR-330-3p	1	0	1	1	1	1	DDHD1	DDHD domain containing 1
hsa-miR-330-3p	1	0	1	1	1	1	ITPRIP	inositol 1,4,5-trisphosphate receptor interacting protein
hsa-miR-330-3p	1	0	1	0	1	1	RIMS1	regulating synaptic membrane exocytosis 1
hsa-miR-330-3p	0	0	1	1	1	1	SPOCK3	sparc/osteonectin, cwcv and kazal-like domains proteoglycan (testican) 3
hsa-miR-330-3p	1	0	1	1	1	1	LCOR	ligand dependent nuclear receptor corepressor
hsa-miR-330-3p	0	0	1	1	1	1	UNC80	unc-80 homolog (C. elegans)
hsa-miR-330-3p	1	0	1	1	1	1	AHCTF1	AT hook containing transcription factor 1
hsa-miR-330-3p	1	0	1	1	1	1	AFAP1L2	actin filament associated protein 1-like 2
hsa-miR-330-3p	1	0	1	1	1	1	LSM14A	LSM14A, SCD6 homolog A (S. cerevisiae)
hsa-miR-330-3p	1	0	1	1	1	1	BCL2L11	BCL2-like 11 (apoptosis facilitator)
hsa-miR-330-3p	1	0	1	1	1	1	MAT2B	methionine adenosyltransferase II, beta
hsa-miR-330-3p	1	0	1	1	1	1	OXR1	oxidation resistance 1
hsa-miR-330-3p	1	0	1	1	0	0	ZNF292	zinc finger protein 292
hsa-miR-330-3p	1	0	1	1	1	1	SH3TC2	SH3 domain and tetratricopeptide repeats 2
hsa-miR-330-3p	0	0	1	1	0	0	CIRH1A	cirrhosis, autosomal recessive 1A (cirhin)
hsa-miR-330-3p	1	0	1	0	0	0	FAT3	FAT tumor suppressor homolog 3 (Drosophila)
hsa-miR-330-3p	1	0	1	1	1	1	PRDM16	PR domain containing 16
hsa-miR-330-3p	1	0	1	0	0	0	RNF169	ring finger protein 169
hsa-miR-330-3p	1	0	1	0	0	0	ZBTB34	zinc finger and BTB domain containing 34
hsa-miR-330-3p	1	0	1	1	1	1	ACBD5	acyl-CoA binding domain containing 5
hsa-miR-330-3p	0	0	1	0	1	1	RASSF8	Ras association (RalGDS/AF-6) domain family (N-terminal) member 8
hsa-miR-330-3p	1	0	1	1	1	1	PAM	peptidylglycine alpha-amidating monooxygenase
hsa-miR-330-3p	1	0	1	1	1	1	RFX4	regulatory factor X, 4 (influences HLA class II expression)
hsa-miR-330-3p	1	0	1	1	1	1	C11orf57	chromosome 11 open reading frame 57
hsa-miR-330-3p	0	0	1	1	1	1	ACPP	acid phosphatase, prostate
hsa-miR-330-3p	1	0	1	1	1	1	KCNMA1	potassium large conductance calcium-activated channel, subfamily M, alpha member 1
hsa-miR-330-3p	1	1	1	1	1	1	BACE1	beta-site APP-cleaving enzyme 1
hsa-miR-330-3p	1	0	1	1	1	1	ADARB1	adenosine deaminase, RNA-specific, B1
hsa-miR-330-3p	0	0	1	1	1	1	SYBU	syntabulin (syntaxin-interacting)
hsa-miR-330-3p	0	0	1	1	1	1	ING4	inhibitor of growth family, member 4
hsa-miR-330-3p	1	0	1	1	1	1	DAPK1	death-associated protein kinase 1
hsa-miR-330-3p	1	0	1	0	1	1	PCDHA13	protocadherin alpha 13
hsa-miR-330-3p	1	0	1	1	1	1	PCDHA4	protocadherin alpha 4
hsa-miR-330-3p	1	0	1	1	1	1	RPS6KA3	ribosomal protein S6 kinase, 90kDa, polypeptide 3
hsa-miR-330-3p	1	0	1	1	1	1	MEF2A	myocyte enhancer factor 2A
hsa-miR-330-3p	0	0	1	1	1	1	PTK2	PTK2 protein tyrosine kinase 2
hsa-miR-330-3p	1	0	1	1	1	1	SLC8A1	solute carrier family 8 (sodium/calcium exchanger), member 1
hsa-miR-330-3p	1	0	1	1	1	1	RLF	rearranged L-myc fusion
hsa-miR-330-3p	1	0	1	1	1	1	RPS6KA2	ribosomal protein S6 kinase, 90kDa, polypeptide 2
hsa-miR-330-3p	1	0	1	0	1	1	PLAG1	pleiomorphic adenoma gene 1
hsa-miR-330-3p	1	0	1	0	1	1	SLC6A6	solute carrier family 6 (neurotransmitter transporter, taurine), member 6
hsa-miR-330-3p	1	0	1	1	1	1	FMR1	fragile X mental retardation 1
hsa-miR-330-3p	1	0	1	0	1	1	DPYSL2	dihydropyrimidinase-like 2
hsa-miR-330-3p	1	0	1	0	1	1	ETV1	ets variant 1
hsa-miR-330-3p	1	0	1	1	1	1	TWF1	twinfilin, actin-binding protein, homolog 1 (Drosophila)
hsa-miR-330-3p	1	0	1	1	1	1	PPFIA1	protein tyrosine phosphatase, receptor type, f polypeptide (PTPRF), interacting protein (liprin), alpha 1
hsa-miR-330-3p	1	0	1	0	1	1	CHL1	cell adhesion molecule with homology to L1CAM (close homolog of L1)
hsa-miR-330-3p	0	0	1	1	1	1	DGKE	diacylglycerol kinase, epsilon 64kDa
hsa-miR-330-3p	1	0	1	1	1	1	EPHA5	EPH receptor A5
hsa-miR-330-3p	1	0	1	0	1	1	CDON	Cdon homolog (mouse)
hsa-miR-330-3p	0	0	1	1	1	1	ACO1	aconitase 1, soluble
hsa-miR-330-3p	0	0	1	1	0	0	EIF4E2	eukaryotic translation initiation factor 4E family member 2
hsa-miR-330-3p	1	0	1	1	1	1	PDLIM5	PDZ and LIM domain 5
hsa-miR-330-3p	0	0	1	1	1	1	STAU1	staufen, RNA binding protein, homolog 1 (Drosophila)
hsa-miR-330-3p	1	0	1	1	1	1	HNRNPK	heterogeneous nuclear ribonucleoprotein K
hsa-miR-330-3p	1	0	1	0	1	1	TBL1X	transducin (beta)-like 1X-linked
hsa-miR-330-3p	0	0	1	1	1	1	ALDH3B1	aldehyde dehydrogenase 3 family, member B1
hsa-miR-330-3p	1	0	1	1	1	1	COL24A1	collagen, type XXIV, alpha 1
hsa-miR-330-3p	0	0	1	1	1	1	PTPRA	protein tyrosine phosphatase, receptor type, A
hsa-miR-330-3p	0	0	1	1	1	1	ELOVL5	ELOVL fatty acid elongase 5
hsa-miR-330-3p	1	0	1	0	1	1	ADD3	adducin 3 (gamma)
hsa-miR-330-3p	1	0	1	1	1	1	CRTAM	cytotoxic and regulatory T cell molecule
hsa-miR-330-3p	0	0	1	1	1	1	MYO9A	myosin IXA
hsa-miR-330-3p	1	0	1	1	1	1	TEAD1	TEA domain family member 1 (SV40 transcriptional enhancer factor)
hsa-miR-330-3p	1	0	1	1	0	0	PPP2R5D	protein phosphatase 2, regulatory subunit B', delta
hsa-miR-330-3p	0	0	1	1	0	0	TRIM27	tripartite motif containing 27
hsa-miR-330-3p	1	0	1	0	1	1	PDE7B	phosphodiesterase 7B
hsa-miR-330-3p	1	0	1	1	1	1	APC	adenomatous polyposis coli
hsa-miR-330-3p	1	0	1	1	1	1	PICALM	phosphatidylinositol binding clathrin assembly protein
hsa-miR-330-3p	1	0	1	1	1	1	SDHC	succinate dehydrogenase complex, subunit C, integral membrane protein, 15kDa
hsa-miR-330-3p	0	0	1	0	0	0	LOC646813	DEAH (Asp-Glu-Ala-His) box polypeptide 9 pseudogene
hsa-miR-330-3p	1	0	1	1	1	1	STX16	syntaxin 16
hsa-miR-330-3p	1	0	1	1	1	1	PCDH17	protocadherin 17
hsa-miR-330-3p	1	0	1	1	1	1	TMBIM6	transmembrane BAX inhibitor motif containing 6
hsa-miR-330-3p	0	0	1	1	1	1	SESN1	sestrin 1
hsa-miR-330-3p	1	0	1	0	0	0	MAP3K1	mitogen-activated protein kinase kinase kinase 1, E3 ubiquitin protein ligase
hsa-miR-330-3p	0	0	1	0	0	0	FP588	uncharacterized LOC92973
hsa-miR-330-3p	1	0	1	1	1	1	PCYT1B	phosphate cytidylyltransferase 1, choline, beta
hsa-miR-330-3p	1	0	1	1	1	1	MBNL2	muscleblind-like splicing regulator 2
hsa-miR-330-3p	1	0	1	1	1	1	CTNND1	catenin (cadherin-associated protein), delta 1
hsa-miR-330-3p	1	0	1	1	1	1	ERLIN1	ER lipid raft associated 1
hsa-miR-330-3p	1	0	1	1	1	1	NUDT4	nudix (nucleoside diphosphate linked moiety X)-type motif 4
hsa-miR-330-3p	1	0	1	1	1	1	CBFA2T2	core-binding factor, runt domain, alpha subunit 2; translocated to, 2
hsa-miR-330-3p	1	0	1	1	1	1	VAPB	VAMP (vesicle-associated membrane protein)-associated protein B and C
hsa-miR-330-3p	0	0	1	1	1	1	RER1	RER1 retention in endoplasmic reticulum 1 homolog (S. cerevisiae)
hsa-miR-330-3p	1	0	1	1	1	1	GLS	glutaminase
hsa-miR-330-3p	1	0	1	1	1	1	SLMAP	sarcolemma associated protein
hsa-miR-330-3p	1	0	1	0	1	1	CD164	CD164 molecule, sialomucin
hsa-miR-330-3p	0	0	1	1	0	0	RBM5	RNA binding motif protein 5
hsa-miR-330-3p	0	0	1	1	1	1	IL18BP	interleukin 18 binding protein
hsa-miR-330-3p	1	0	1	1	1	1	EDNRB	endothelin receptor type B
hsa-miR-330-3p	0	0	1	1	1	1	DCAF6	DDB1 and CUL4 associated factor 6
hsa-miR-330-3p	1	0	1	0	1	1	WDR82	WD repeat domain 82
hsa-miR-330-3p	1	0	1	1	1	1	HMG20A	high mobility group 20A
hsa-miR-330-3p	0	0	1	1	0	0	PACSIN3	protein kinase C and casein kinase substrate in neurons 3
hsa-miR-330-3p	1	0	1	1	1	1	C14orf129	chromosome 14 open reading frame 129
hsa-miR-330-3p	0	0	1	1	1	1	CNPPD1	cyclin Pas1/PHO80 domain containing 1
hsa-miR-330-3p	1	0	1	1	1	1	USP15	ubiquitin specific peptidase 15
hsa-miR-330-3p	1	0	1	1	1	1	ANKRD13A	ankyrin repeat domain 13A
hsa-miR-330-3p	1	0	1	1	1	1	C16orf70	chromosome 16 open reading frame 70
hsa-miR-330-3p	1	0	1	1	1	1	TACC2	transforming, acidic coiled-coil containing protein 2
hsa-miR-330-3p	1	0	1	1	1	1	SNPH	syntaphilin
hsa-miR-330-3p	1	0	1	1	0	0	ECE2	endothelin converting enzyme 2
hsa-miR-330-3p	0	0	1	1	1	1	SLC39A8	solute carrier family 39 (zinc transporter), member 8
hsa-miR-330-3p	1	0	1	1	1	1	TSC22D2	TSC22 domain family, member 2
hsa-miR-330-3p	1	0	1	1	1	1	NXT2	nuclear transport factor 2-like export factor 2
hsa-miR-330-3p	0	0	1	1	1	1	CSNK1A1	casein kinase 1, alpha 1
hsa-miR-330-3p	0	0	1	1	1	1	CD28	CD28 molecule
hsa-miR-330-3p	1	0	1	1	1	1	OGT	O-linked N-acetylglucosamine (GlcNAc) transferase
hsa-miR-330-3p	1	0	1	1	0	0	TDRKH	tudor and KH domain containing
hsa-miR-330-3p	1	0	1	1	1	1	RSF1	remodeling and spacing factor 1
hsa-miR-330-3p	0	0	1	0	0	0	URB1	URB1 ribosome biogenesis 1 homolog (S. cerevisiae)
hsa-miR-330-3p	0	0	1	1	1	1	BET1L	blocked early in transport 1 homolog (S. cerevisiae)-like
hsa-miR-330-3p	0	0	1	1	1	1	CELF1	CUGBP, Elav-like family member 1
hsa-miR-330-3p	0	0	1	0	0	0	TIGD7	tigger transposable element derived 7
hsa-miR-330-3p	0	0	1	1	0	0	TRIM41	tripartite motif containing 41
hsa-miR-330-3p	1	0	1	1	1	1	RBM47	RNA binding motif protein 47
hsa-miR-330-3p	1	0	1	0	1	1	TRPS1	trichorhinophalangeal syndrome I
hsa-miR-330-3p	1	0	1	1	1	1	ERGIC1	endoplasmic reticulum-golgi intermediate compartment (ERGIC) 1
hsa-miR-330-3p	1	0	1	1	1	1	PUM2	pumilio homolog 2 (Drosophila)
hsa-miR-330-3p	0	0	1	0	1	1	PRDM6	PR domain containing 6
hsa-miR-330-3p	0	0	1	0	1	1	ERBB2IP	erbb2 interacting protein
hsa-miR-330-3p	0	0	1	1	1	1	TEX12	testis expressed 12
hsa-miR-330-3p	0	0	1	1	1	1	LRTOMT	leucine rich transmembrane and 0-methyltransferase domain containing
hsa-miR-330-3p	1	0	1	1	1	1	DCLRE1B	DNA cross-link repair 1B
hsa-miR-330-3p	0	0	1	0	1	1	KANSL3	KAT8 regulatory NSL complex subunit 3
hsa-miR-330-3p	0	0	1	1	1	1	MED28	mediator complex subunit 28
hsa-miR-330-3p	0	0	1	1	1	1	FCRL1	Fc receptor-like 1
hsa-miR-330-3p	0	0	1	1	1	1	FCRLA	Fc receptor-like A
hsa-miR-330-3p	1	0	1	1	1	1	KCNIP2	Kv channel interacting protein 2
hsa-miR-330-3p	1	0	1	1	1	1	RGS10	regulator of G-protein signaling 10
hsa-miR-330-3p	1	0	1	0	1	1	WIPF2	WAS/WASL interacting protein family, member 2
hsa-miR-330-3p	1	0	1	1	1	1	LARP4	La ribonucleoprotein domain family, member 4
hsa-miR-330-3p	1	0	1	1	1	1	RCAN1	regulator of calcineurin 1
hsa-miR-330-3p	1	0	1	1	1	1	NTRK2	neurotrophic tyrosine kinase, receptor, type 2
hsa-miR-330-3p	0	0	1	1	0	0	CNKSR2	connector enhancer of kinase suppressor of Ras 2
hsa-miR-330-3p	1	0	1	1	0	0	SAMD4A	sterile alpha motif domain containing 4A
hsa-miR-330-3p	0	0	1	1	1	1	PPP1R1B	protein phosphatase 1, regulatory (inhibitor) subunit 1B
hsa-miR-330-3p	1	0	1	1	0	0	SEPT8	septin 8
hsa-miR-330-3p	0	0	1	0	1	1	EPM2A	epilepsy, progressive myoclonus type 2A, Lafora disease (laforin)
hsa-miR-330-3p	1	0	1	1	1	1	HNRNPU	heterogeneous nuclear ribonucleoprotein U (scaffold attachment factor A)
hsa-miR-330-3p	1	0	1	1	0	0	FOXP2	forkhead box P2
hsa-miR-330-3p	1	0	1	1	1	1	WAPAL	wings apart-like homolog (Drosophila)
hsa-miR-330-3p	0	0	1	1	1	1	AMPH	amphiphysin
hsa-miR-330-3p	0	0	1	1	1	1	CARD8	caspase recruitment domain family, member 8
hsa-miR-330-3p	0	0	1	1	1	1	BMP2K	BMP2 inducible kinase
hsa-miR-330-3p	1	0	1	1	1	1	PTBP2	polypyrimidine tract binding protein 2
hsa-miR-330-3p	0	0	1	1	1	1	ANKRD36B	ankyrin repeat domain 36B
hsa-miR-330-3p	1	0	1	1	1	1	AFF2	AF4/FMR2 family, member 2
hsa-miR-330-3p	1	0	1	1	1	1	PLAGL1	pleiomorphic adenoma gene-like 1
hsa-miR-330-3p	1	0	1	0	1	1	DICER1	dicer 1, ribonuclease type III
hsa-miR-330-3p	1	0	1	1	1	1	SUCO	SUN domain containing ossification factor
hsa-miR-330-3p	1	0	1	0	1	1	GRB10	growth factor receptor-bound protein 10
hsa-miR-330-3p	1	0	1	1	1	1	PFKFB3	6-phosphofructo-2-kinase/fructose-2,6-biphosphatase 3
hsa-miR-330-3p	0	0	1	1	1	1	CD1E	CD1e molecule
hsa-miR-330-3p	0	0	1	1	0	0	MCOLN1	mucolipin 1
hsa-miR-330-3p	1	0	1	1	1	1	PALM2	paralemmin 2
hsa-miR-330-3p	1	0	1	1	1	1	NRXN3	neurexin 3
hsa-miR-330-3p	1	0	1	1	1	1	PDE1B	phosphodiesterase 1B, calmodulin-dependent
hsa-miR-330-3p	0	0	1	1	1	1	PDE1A	phosphodiesterase 1A, calmodulin-dependent
hsa-miR-330-3p	1	0	1	1	1	1	NFYA	nuclear transcription factor Y, alpha
hsa-miR-330-3p	1	0	1	1	1	1	ARL4C	ADP-ribosylation factor-like 4C
hsa-miR-330-3p	0	0	1	1	1	1	SLC8A3	solute carrier family 8 (sodium/calcium exchanger), member 3
hsa-miR-330-3p	0	0	1	0	0	0	COL28A1	collagen, type XXVIII, alpha 1
hsa-miR-330-3p	1	0	1	1	1	1	PPP1R9A	protein phosphatase 1, regulatory subunit 9A
hsa-miR-330-3p	1	0	1	1	1	1	AKAP2	A kinase (PRKA) anchor protein 2
hsa-miR-330-3p	1	0	1	1	1	1	SIK2	salt-inducible kinase 2
hsa-miR-330-3p	0	0	1	1	1	1	UBE2Q2	ubiquitin-conjugating enzyme E2Q family member 2
hsa-miR-330-3p	0	0	1	1	1	1	OLFM4	olfactomedin 4
hsa-miR-330-3p	0	0	1	1	1	1	BANK1	B-cell scaffold protein with ankyrin repeats 1
hsa-miR-330-3p	1	0	1	1	1	1	ARHGAP12	Rho GTPase activating protein 12
hsa-miR-330-3p	0	0	1	1	0	0	FAM64A	family with sequence similarity 64, member A
hsa-miR-330-3p	0	0	1	1	1	1	STOX2	storkhead box 2
hsa-miR-330-3p	1	0	1	1	1	1	RIC8B	resistance to inhibitors of cholinesterase 8 homolog B (C. elegans)
hsa-miR-330-3p	0	0	1	1	1	1	ARAP3	ArfGAP with RhoGAP domain, ankyrin repeat and PH domain 3
hsa-miR-330-3p	1	0	1	1	1	1	EIF2C1	eukaryotic translation initiation factor 2C, 1
hsa-miR-330-3p	1	0	1	1	1	1	ARMC8	armadillo repeat containing 8
hsa-miR-330-3p	0	0	1	1	1	1	LRIF1	ligand dependent nuclear receptor interacting factor 1
hsa-miR-330-3p	1	0	1	1	1	1	INSIG2	insulin induced gene 2
hsa-miR-330-3p	1	0	1	1	1	1	C12orf23	chromosome 12 open reading frame 23
hsa-miR-330-3p	0	0	1	1	0	0	UBR4	ubiquitin protein ligase E3 component n-recognin 4
hsa-miR-330-3p	1	0	1	1	1	1	VASH2	vasohibin 2
hsa-miR-330-3p	1	0	1	0	0	0	ZNRF3	zinc and ring finger 3
hsa-miR-330-3p	0	0	1	0	0	0	LOC149134	uncharacterized LOC149134
hsa-miR-330-3p	1	0	1	1	1	1	S100PBP	S100P binding protein
hsa-miR-330-3p	1	0	1	1	0	0	FASTK	Fas-activated serine/threonine kinase
hsa-miR-330-3p	1	0	1	1	1	1	STARD7	StAR-related lipid transfer (START) domain containing 7
hsa-miR-330-3p	0	0	1	1	1	1	LRRN1	leucine rich repeat neuronal 1
hsa-miR-330-3p	1	0	1	1	1	1	MACF1	microtubule-actin crosslinking factor 1
hsa-miR-330-3p	0	0	1	1	1	1	SMYD3	SET and MYND domain containing 3
hsa-miR-330-3p	1	0	1	1	1	1	USP33	ubiquitin specific peptidase 33
hsa-miR-330-3p	1	0	1	1	1	1	RAB11FIP5	RAB11 family interacting protein 5 (class I)
hsa-miR-330-3p	1	0	1	1	1	1	BAZ2A	bromodomain adjacent to zinc finger domain, 2A
hsa-miR-330-3p	1	0	1	1	1	1	DERL1	derlin 1
hsa-miR-330-3p	0	0	1	0	1	1	FLJ14186	uncharacterized LOC401149
hsa-miR-330-3p	0	0	1	1	1	1	METTL7A	methyltransferase like 7A
hsa-miR-330-3p	0	0	1	1	1	1	SIGLEC1	sialic acid binding Ig-like lectin 1, sialoadhesin
hsa-miR-330-3p	1	0	1	0	1	1	ATP2B1	ATPase, Ca++ transporting, plasma membrane 1
hsa-miR-330-3p	1	0	1	1	1	1	ABI3BP	ABI family, member 3 (NESH) binding protein
hsa-miR-330-3p	0	0	1	0	1	1	ATXN1L	ataxin 1-like
hsa-miR-330-3p	1	0	1	1	0	0	FBXO45	F-box protein 45
hsa-miR-330-3p	1	0	1	1	1	1	DENND4C	DENN/MADD domain containing 4C
hsa-miR-330-3p	1	0	1	1	1	1	NAA30	N(alpha)-acetyltransferase 30, NatC catalytic subunit
hsa-miR-330-3p	1	0	1	0	1	1	ZCCHC3	zinc finger, CCHC domain containing 3
hsa-miR-330-3p	0	0	1	1	1	1	MYEOV	myeloma overexpressed (in a subset of t(11;14) positive multiple myelomas)
hsa-miR-330-3p	0	0	1	0	1	1	FLJ22763	uncharacterized LOC401081
hsa-miR-330-3p	1	0	1	1	1	1	DCAF8	DDB1 and CUL4 associated factor 8
hsa-miR-330-3p	0	0	1	0	0	0	NEURL1B	neuralized homolog 1B (Drosophila)
hsa-miR-330-3p	0	0	1	1	1	1	CCDC33	coiled-coil domain containing 33
hsa-miR-330-3p	0	0	1	1	1	1	GTF2H1	general transcription factor IIH, polypeptide 1, 62kDa
hsa-miR-330-3p	0	0	1	1	0	0	CCDC81	coiled-coil domain containing 81
hsa-miR-330-3p	1	0	1	1	1	1	GORASP2	golgi reassembly stacking protein 2, 55kDa
hsa-miR-330-3p	0	0	1	1	1	1	C1orf101	chromosome 1 open reading frame 101
hsa-miR-330-3p	1	0	1	1	1	1	FOXP1	forkhead box P1
hsa-miR-330-3p	0	0	1	1	1	1	KDM2B	lysine (K)-specific demethylase 2B
hsa-miR-330-3p	1	0	1	1	1	1	MARK1	MAP/microtubule affinity-regulating kinase 1
hsa-miR-330-3p	1	0	1	1	1	1	FAM40A	family with sequence similarity 40, member A
hsa-miR-330-3p	1	0	1	1	1	1	GPD2	glycerol-3-phosphate dehydrogenase 2 (mitochondrial)
hsa-miR-330-3p	1	0	1	1	1	1	STRBP	spermatid perinuclear RNA binding protein
hsa-miR-330-3p	0	0	1	1	1	1	IGBP1	immunoglobulin (CD79A) binding protein 1
hsa-miR-330-3p	1	0	1	1	1	1	SLAIN1	SLAIN motif family, member 1
hsa-miR-330-3p	0	0	1	0	0	0	FAM185A	family with sequence similarity 185, member A
hsa-miR-330-3p	0	0	1	1	1	1	C8orf46	chromosome 8 open reading frame 46
hsa-miR-330-3p	1	0	1	1	1	1	PPM1L	protein phosphatase, Mg2+/Mn2+ dependent, 1L
hsa-miR-330-3p	1	0	1	0	1	1	AP1G1	adaptor-related protein complex 1, gamma 1 subunit
hsa-miR-330-3p	0	0	1	1	0	0	C21orf59	chromosome 21 open reading frame 59
hsa-miR-330-3p	0	0	1	0	0	0	FLJ30838	uncharacterized LOC400955
hsa-miR-330-3p	0	0	1	1	1	1	OPTN	optineurin
hsa-miR-330-3p	0	0	1	1	1	1	BCAR3	breast cancer anti-estrogen resistance 3
hsa-miR-330-3p	1	0	1	1	1	1	SULF1	sulfatase 1
hsa-miR-330-3p	0	0	1	0	0	0	LOC219688	uncharacterized LOC219688
hsa-miR-330-3p	1	0	1	0	1	1	RAB1A	RAB1A, member RAS oncogene family
hsa-miR-330-3p	1	0	1	1	1	1	TMTC1	transmembrane and tetratricopeptide repeat containing 1
hsa-miR-330-3p	1	0	1	0	1	1	PTPRE	protein tyrosine phosphatase, receptor type, E
hsa-miR-330-3p	1	0	1	1	1	1	RAI2	retinoic acid induced 2
hsa-miR-330-3p	0	0	1	1	0	0	CHRM3	cholinergic receptor, muscarinic 3
hsa-miR-330-3p	1	0	1	1	1	1	SCAMP5	secretory carrier membrane protein 5
hsa-miR-330-3p	0	0	1	1	1	1	BRD2	bromodomain containing 2
hsa-miR-330-3p	1	0	1	1	1	1	CLCN5	chloride channel, voltage-sensitive 5
hsa-miR-330-3p	0	0	1	1	0	0	NUP93	nucleoporin 93kDa
hsa-miR-330-3p	0	0	1	0	0	0	LOC255187	hCG1980447
hsa-miR-330-3p	0	0	1	0	1	1	SNRNP48	small nuclear ribonucleoprotein 48kDa (U11/U12)
hsa-miR-330-3p	0	0	1	0	1	1	AGBL1	ATP/GTP binding protein-like 1
hsa-miR-330-3p	1	0	1	1	1	1	TPM3	tropomyosin 3
hsa-miR-330-3p	1	0	1	1	1	1	PCMTD1	protein-L-isoaspartate (D-aspartate) O-methyltransferase domain containing 1
hsa-miR-330-3p	0	0	1	0	1	1	ZNF498	zinc finger protein 498
hsa-miR-330-3p	0	0	1	1	1	1	MYBPC1	myosin binding protein C, slow type
hsa-miR-330-3p	0	0	1	1	0	0	FAM156A	family with sequence similarity 156, member A
hsa-miR-330-3p	1	0	1	1	1	1	ANKRD29	ankyrin repeat domain 29
hsa-miR-330-3p	1	0	1	1	1	1	IST1	increased sodium tolerance 1 homolog (yeast)
hsa-miR-330-3p	0	0	1	1	1	1	ZBTB26	zinc finger and BTB domain containing 26
hsa-miR-330-3p	0	0	1	0	0	0	FLJ25363	uncharacterized LOC401082
hsa-miR-330-3p	1	0	1	1	0	0	HS6ST1	heparan sulfate 6-O-sulfotransferase 1
hsa-miR-330-3p	0	0	1	1	0	0	ANKAR	ankyrin and armadillo repeat containing
hsa-miR-330-3p	1	0	1	1	1	1	HLF	hepatic leukemia factor
hsa-miR-330-3p	0	0	1	1	1	1	PDZRN3	PDZ domain containing ring finger 3
hsa-miR-330-3p	1	0	1	1	1	1	SIRT1	sirtuin 1
hsa-miR-330-3p	0	0	1	1	0	0	NISCH	nischarin
hsa-miR-330-3p	1	0	1	1	1	1	KCTD6	potassium channel tetramerisation domain containing 6
hsa-miR-330-3p	1	0	1	1	1	1	FAM73B	family with sequence similarity 73, member B
hsa-miR-330-3p	1	0	1	1	1	1	PIP4K2C	phosphatidylinositol-5-phosphate 4-kinase, type II, gamma
hsa-miR-330-3p	0	0	1	1	0	0	PIGO	phosphatidylinositol glycan anchor biosynthesis, class O
hsa-miR-330-3p	1	0	1	0	0	0	YLPM1	YLP motif containing 1
hsa-miR-330-3p	0	0	1	1	1	1	MAPK10	mitogen-activated protein kinase 10
hsa-miR-330-3p	1	0	1	1	1	1	EGR2	early growth response 2
hsa-miR-330-3p	1	0	1	1	1	1	AMMECR1	Alport syndrome, mental retardation, midface hypoplasia and elliptocytosis chromosomal region gene 1
hsa-miR-330-3p	1	0	1	1	1	1	FBXW2	F-box and WD repeat domain containing 2
hsa-miR-330-3p	1	0	1	1	1	1	TSN	translin
hsa-miR-330-3p	1	0	1	1	1	1	MAFK	v-maf musculoaponeurotic fibrosarcoma oncogene homolog K (avian)
hsa-miR-330-3p	1	0	1	1	1	1	IVNS1ABP	influenza virus NS1A binding protein
hsa-miR-330-3p	0	0	1	0	1	1	SSPN	sarcospan
hsa-miR-330-3p	0	0	1	1	1	1	WT1	Wilms tumor 1
hsa-miR-330-3p	1	0	1	1	1	1	SPTBN1	spectrin, beta, non-erythrocytic 1
hsa-miR-330-3p	0	0	1	0	0	0	CXXC1P1	CXXC finger protein 1 pseudogene 1
hsa-miR-330-3p	0	0	1	0	1	1	PVR	poliovirus receptor
hsa-miR-330-3p	1	0	1	1	1	1	NSG1	neuron specific gene family member 1
hsa-miR-330-3p	0	0	1	0	0	0	ZNF806	zinc finger protein 806
hsa-miR-330-3p	1	0	1	1	1	1	SIAH1	siah E3 ubiquitin protein ligase 1
hsa-miR-330-3p	1	0	1	0	1	1	GATAD2B	GATA zinc finger domain containing 2B
hsa-miR-330-3p	0	0	1	1	1	1	RBM25	RNA binding motif protein 25
hsa-miR-330-3p	0	0	1	0	0	0	LINC00340	long intergenic non-protein coding RNA 340
hsa-miR-330-3p	0	0	1	1	0	0	RASGRF2	Ras protein-specific guanine nucleotide-releasing factor 2
hsa-miR-330-3p	1	0	1	1	1	1	PTPRU	protein tyrosine phosphatase, receptor type, U
hsa-miR-330-3p	1	0	1	1	1	1	KANSL1	KAT8 regulatory NSL complex subunit 1
hsa-miR-330-3p	1	0	1	1	1	1	CPNE8	copine VIII
hsa-miR-330-3p	1	0	1	1	1	1	RASGEF1A	RasGEF domain family, member 1A
hsa-miR-330-3p	1	0	1	0	1	1	SLC39A11	solute carrier family 39 (metal ion transporter), member 11
hsa-miR-330-3p	1	0	1	1	1	1	ANKRD46	ankyrin repeat domain 46
hsa-miR-330-3p	1	0	1	1	1	1	CTNNB1	catenin (cadherin-associated protein), beta 1, 88kDa
hsa-miR-330-3p	1	0	1	0	1	1	UBXN4	UBX domain protein 4
hsa-miR-330-3p	1	0	1	1	1	1	CNEP1R1	CTD nuclear envelope phosphatase 1 regulatory subunit 1
hsa-miR-330-3p	1	0	1	1	1	1	CS	citrate synthase
hsa-miR-330-3p	1	0	1	0	1	1	STC2	stanniocalcin 2
hsa-miR-330-3p	1	0	1	1	1	1	FAM98A	family with sequence similarity 98, member A
hsa-miR-330-3p	1	0	1	1	1	1	GAPVD1	GTPase activating protein and VPS9 domains 1
hsa-miR-330-3p	0	0	1	0	0	0	OTUD1	OTU domain containing 1
hsa-miR-330-3p	0	0	1	1	1	1	XRCC5	X-ray repair complementing defective repair in Chinese hamster cells 5 (double-strand-break rejoining)
hsa-miR-330-3p	1	0	1	1	1	1	LRP8	low density lipoprotein receptor-related protein 8, apolipoprotein e receptor
hsa-miR-330-3p	1	0	1	0	1	1	KIAA1737	KIAA1737
hsa-miR-330-3p	1	0	1	0	1	1	THRB	thyroid hormone receptor, beta
hsa-miR-330-3p	0	0	1	0	0	0	LOC285505	uncharacterized LOC285505
hsa-miR-330-3p	0	0	1	1	1	1	IL17RE	interleukin 17 receptor E
hsa-miR-330-3p	1	0	1	1	1	1	C3orf62	chromosome 3 open reading frame 62
hsa-miR-330-3p	1	0	1	1	1	1	CA12	carbonic anhydrase XII
hsa-miR-330-3p	1	0	1	1	1	1	STIM2	stromal interaction molecule 2
hsa-miR-330-3p	1	0	1	1	1	1	EPB41L1	erythrocyte membrane protein band 4.1-like 1
hsa-miR-330-3p	1	0	1	1	1	1	CDV3	CDV3 homolog (mouse)
hsa-miR-330-3p	0	0	1	1	1	1	EXTL2	exostoses (multiple)-like 2
hsa-miR-330-3p	0	0	1	0	1	1	TNFAIP8	tumor necrosis factor, alpha-induced protein 8
hsa-miR-330-3p	0	0	1	0	0	0	LOC400680	uncharacterized LOC400680
hsa-miR-330-3p	1	0	1	1	1	1	RAB11FIP4	RAB11 family interacting protein 4 (class II)
hsa-miR-330-3p	0	0	1	1	0	0	MFSD5	major facilitator superfamily domain containing 5
hsa-miR-330-3p	0	0	1	1	0	0	AHCY	adenosylhomocysteinase
hsa-miR-330-3p	0	0	1	1	1	1	CBWD5	COBW domain containing 5
hsa-miR-330-3p	0	0	1	1	1	1	LRRC49	leucine rich repeat containing 49
hsa-miR-330-3p	0	0	1	1	1	1	ATP9B	ATPase, class II, type 9B
hsa-miR-330-3p	0	0	1	0	0	0	CECR7	cat eye syndrome chromosome region, candidate 7 (non-protein coding)
hsa-miR-330-3p	1	0	1	1	1	1	GATM	glycine amidinotransferase (L-arginine:glycine amidinotransferase)
hsa-miR-330-3p	0	0	1	1	0	0	DCBLD1	discoidin, CUB and LCCL domain containing 1
hsa-miR-330-3p	1	0	1	1	0	0	ENTPD1	ectonucleoside triphosphate diphosphohydrolase 1
hsa-miR-330-3p	0	0	1	1	1	1	ARFGAP2	ADP-ribosylation factor GTPase activating protein 2
hsa-miR-330-3p	1	0	1	1	1	1	NDFIP2	Nedd4 family interacting protein 2
hsa-miR-330-3p	0	0	1	1	1	1	C1orf114	chromosome 1 open reading frame 114
hsa-miR-330-3p	0	0	1	0	1	1	MYLK4	myosin light chain kinase family, member 4
hsa-miR-330-3p	1	0	1	0	1	1	UNC5D	unc-5 homolog D (C. elegans)
hsa-miR-330-3p	0	0	1	1	1	1	SLFN13	schlafen family member 13
hsa-miR-330-3p	1	0	1	1	1	1	ZMAT3	zinc finger, matrin-type 3
hsa-miR-330-3p	1	0	1	1	1	1	SIK3	SIK family kinase 3
hsa-miR-330-3p	1	0	1	1	0	0	CACNB3	calcium channel, voltage-dependent, beta 3 subunit
hsa-miR-330-3p	0	0	1	1	0	0	MX2	myxovirus (influenza virus) resistance 2 (mouse)
hsa-miR-330-3p	1	0	1	1	1	1	ZNF25	zinc finger protein 25
hsa-miR-330-3p	1	0	1	1	1	1	PXN	paxillin
hsa-miR-330-3p	1	0	1	1	1	1	ZBTB4	zinc finger and BTB domain containing 4
hsa-miR-330-3p	1	0	1	1	1	1	ZNF275	zinc finger protein 275
hsa-miR-330-3p	0	0	1	1	1	1	FRMPD2	FERM and PDZ domain containing 2
hsa-miR-330-3p	0	0	1	0	1	1	PATE4	prostate and testis expressed 4
hsa-miR-330-3p	1	0	1	1	1	1	KALRN	kalirin, RhoGEF kinase
hsa-miR-330-3p	0	0	1	0	1	1	FLJ41200	uncharacterized LOC401492
hsa-miR-330-3p	1	0	1	1	1	1	IKBKAP	inhibitor of kappa light polypeptide gene enhancer in B-cells, kinase complex-associated protein
hsa-miR-330-3p	1	0	1	1	1	1	EGLN3	egl nine homolog 3 (C. elegans)
hsa-miR-330-3p	0	0	1	0	0	0	LGALS17A	Charcot-Leyden crystal protein pseudogene
hsa-miR-330-3p	0	0	1	0	0	0	TMPRSS11BNL	TMPRSS11B N terminal-like
hsa-miR-330-3p	0	0	1	0	0	0	LOC644248	uncharacterized LOC644248
hsa-miR-330-3p	1	0	1	1	0	0	KCNC1	potassium voltage-gated channel, Shaw-related subfamily, member 1
hsa-miR-330-3p	0	0	1	1	0	0	NMI	N-myc (and STAT) interactor
hsa-miR-330-3p	1	0	1	0	1	1	DCUN1D4	DCN1, defective in cullin neddylation 1, domain containing 4 (S. cerevisiae)
hsa-miR-330-3p	1	0	1	1	1	1	VPS54	vacuolar protein sorting 54 homolog (S. cerevisiae)
hsa-miR-330-3p	1	0	1	1	1	1	ABR	active BCR-related
hsa-miR-330-3p	1	0	1	0	1	1	TTYH3	tweety homolog 3 (Drosophila)
hsa-miR-330-3p	1	0	1	1	1	1	FAM122B	family with sequence similarity 122B
hsa-miR-330-3p	1	0	1	1	1	1	KIF21A	kinesin family member 21A
hsa-miR-330-3p	1	0	1	1	1	1	ERBB3	v-erb-b2 erythroblastic leukemia viral oncogene homolog 3 (avian)
hsa-miR-330-3p	1	0	1	1	1	1	XPO1	exportin 1 (CRM1 homolog, yeast)
hsa-miR-330-3p	1	0	1	1	1	1	HARS	histidyl-tRNA synthetase
hsa-miR-330-3p	0	0	1	0	0	0	TMEM232	transmembrane protein 232
hsa-miR-330-3p	1	0	1	1	0	0	RANBP3	RAN binding protein 3
hsa-miR-330-3p	1	0	1	1	1	1	CTGF	connective tissue growth factor
hsa-miR-330-3p	1	0	1	1	1	1	DENND5B	DENN/MADD domain containing 5B
hsa-miR-330-3p	0	0	1	0	0	0	LOC613266	uncharacterized LOC613266
hsa-miR-330-3p	1	0	1	1	1	1	KPNA1	karyopherin alpha 1 (importin alpha 5)
hsa-miR-330-3p	0	0	1	1	1	1	PLOD2	procollagen-lysine, 2-oxoglutarate 5-dioxygenase 2
hsa-miR-330-3p	0	0	1	1	1	1	RBM46	RNA binding motif protein 46
hsa-miR-330-3p	1	0	1	1	1	1	MACROD2	MACRO domain containing 2
hsa-miR-330-3p	1	0	1	1	0	0	UBN2	ubinuclein 2
hsa-miR-330-3p	1	0	1	1	0	0	PCLO	piccolo (presynaptic cytomatrix protein)
hsa-miR-330-3p	1	0	1	1	1	1	CHD5	chromodomain helicase DNA binding protein 5
hsa-miR-330-3p	0	0	1	1	0	0	C20orf141	chromosome 20 open reading frame 141
hsa-miR-330-3p	0	0	1	1	0	0	FSIP2	fibrous sheath interacting protein 2
hsa-miR-330-3p	1	0	1	1	1	1	PIK3R1	phosphoinositide-3-kinase, regulatory subunit 1 (alpha)
hsa-miR-330-3p	1	0	1	1	1	1	SACM1L	SAC1 suppressor of actin mutations 1-like (yeast)
hsa-miR-330-3p	0	0	1	1	0	0	CLDN4	claudin 4
hsa-miR-330-3p	0	0	1	1	1	1	C18orf54	chromosome 18 open reading frame 54
hsa-miR-330-3p	0	0	1	1	1	1	TGM2	transglutaminase 2 (C polypeptide, protein-glutamine-gamma-glutamyltransferase)
hsa-miR-330-3p	1	0	1	1	1	1	DLG2	discs, large homolog 2 (Drosophila)
hsa-miR-330-3p	0	0	1	0	0	0	HNRNPKP3	heterogeneous nuclear ribonucleoprotein K pseudogene 3
hsa-miR-330-3p	0	0	1	1	0	0	TMEM151B	transmembrane protein 151B
hsa-miR-330-3p	1	0	1	1	1	1	LRP2BP	LRP2 binding protein
hsa-miR-330-3p	1	0	1	1	0	0	SNX30	sorting nexin family member 30
hsa-miR-330-3p	0	0	1	1	1	1	KLC4	kinesin light chain 4
hsa-miR-330-3p	1	0	1	1	1	1	MKRN1	makorin ring finger protein 1
hsa-miR-330-3p	1	0	1	1	1	1	TSHZ1	teashirt zinc finger homeobox 1
hsa-miR-330-3p	1	0	1	1	1	1	CLTC	clathrin, heavy chain (Hc)
hsa-miR-330-3p	1	0	1	1	1	1	MFSD6	major facilitator superfamily domain containing 6
hsa-miR-330-3p	0	0	1	1	1	1	RALGAPA2	Ral GTPase activating protein, alpha subunit 2 (catalytic)
hsa-miR-330-3p	1	0	1	1	1	1	PHF17	PHD finger protein 17
hsa-miR-330-3p	1	0	1	1	1	1	KANK4	KN motif and ankyrin repeat domains 4
hsa-miR-330-3p	0	0	1	0	0	0	LOC285812	uncharacterized LOC285812
hsa-miR-330-3p	1	0	1	1	1	1	ENAH	enabled homolog (Drosophila)
hsa-miR-330-3p	1	0	1	0	1	1	FNDC3B	fibronectin type III domain containing 3B
hsa-miR-330-3p	1	0	1	0	1	1	YOD1	YOD1 OTU deubiquinating enzyme 1 homolog (S. cerevisiae)
hsa-miR-330-3p	0	0	1	1	1	1	MCU	mitochondrial calcium uniporter
hsa-miR-330-3p	0	0	1	1	0	0	TMEM136	transmembrane protein 136
hsa-miR-330-3p	0	0	1	1	0	0	TRIM46	tripartite motif containing 46
hsa-miR-330-3p	0	0	1	0	0	0	FAM205B	transmembrane protein C9orf144B pseudogene
hsa-miR-330-3p	1	0	1	0	1	1	PLSCR4	phospholipid scramblase 4
hsa-miR-330-3p	1	0	1	1	1	1	C2CD2	C2 calcium-dependent domain containing 2
hsa-miR-330-3p	1	0	1	0	1	1	USP37	ubiquitin specific peptidase 37
hsa-miR-330-3p	1	0	1	1	0	0	NBEAL1	neurobeachin-like 1
hsa-miR-330-3p	0	0	1	1	1	1	ZNF662	zinc finger protein 662
hsa-miR-330-3p	1	0	1	1	1	1	PHC2	polyhomeotic homolog 2 (Drosophila)
hsa-miR-330-3p	1	0	1	1	1	1	CD200	CD200 molecule
hsa-miR-330-3p	0	0	1	1	1	1	TBX19	T-box 19
hsa-miR-330-3p	1	0	1	1	1	1	ARHGAP24	Rho GTPase activating protein 24
hsa-miR-330-3p	1	0	1	0	1	1	RXRA	retinoid X receptor, alpha
hsa-miR-330-3p	1	0	1	0	1	1	ESRRG	estrogen-related receptor gamma
hsa-miR-330-3p	0	0	1	0	1	1	GALNT13	UDP-N-acetyl-alpha-D-galactosamine:polypeptide N-acetylgalactosaminyltransferase 13 (GalNAc-T13)
hsa-miR-330-3p	0	0	1	1	1	1	SLTM	SAFB-like, transcription modulator
hsa-miR-330-3p	1	0	1	1	1	1	RNF111	ring finger protein 111
hsa-miR-330-3p	1	0	1	0	1	1	STK3	serine/threonine kinase 3
hsa-miR-330-3p	1	0	1	1	1	1	PPP2R5C	protein phosphatase 2, regulatory subunit B', gamma
hsa-miR-330-3p	1	0	1	1	1	1	SMAD7	SMAD family member 7
hsa-miR-330-3p	0	0	1	1	1	1	SYPL2	synaptophysin-like 2
hsa-miR-330-3p	0	0	1	1	0	0	ZNF730	zinc finger protein 730
hsa-miR-330-3p	0	0	1	0	0	0	AGAP9	ArfGAP with GTPase domain, ankyrin repeat and PH domain 9
hsa-miR-330-3p	0	0	1	1	1	1	FANCC	Fanconi anemia, complementation group C
hsa-miR-330-3p	0	0	1	1	0	0	CPT1B	carnitine palmitoyltransferase 1B (muscle)
hsa-miR-330-3p	0	0	1	1	1	1	ARID1A	AT rich interactive domain 1A (SWI-like)
hsa-miR-330-3p	1	0	1	1	1	1	CYYR1	cysteine/tyrosine-rich 1
hsa-miR-330-3p	0	0	1	0	0	0	RRN3P2	RNA polymerase I transcription factor homolog (S. cerevisiae) pseudogene 2
hsa-miR-330-3p	1	0	1	1	1	1	CAMK2G	calcium/calmodulin-dependent protein kinase II gamma
hsa-miR-330-3p	1	0	1	1	1	1	TGFBR3	transforming growth factor, beta receptor III
hsa-miR-330-3p	1	0	1	1	1	1	LUC7L3	LUC7-like 3 (S. cerevisiae)
hsa-miR-330-3p	1	0	1	1	1	1	EDN1	endothelin 1
hsa-miR-330-3p	1	0	1	1	1	1	APBB2	amyloid beta (A4) precursor protein-binding, family B, member 2
hsa-miR-330-3p	0	0	1	1	1	1	PTPN20B	protein tyrosine phosphatase, non-receptor type 20B
hsa-miR-330-3p	0	0	1	1	1	1	PTPN20A	protein tyrosine phosphatase, non-receptor type 20A
hsa-miR-330-3p	1	0	1	1	0	0	PRRC2B	proline-rich coiled-coil 2B
hsa-miR-330-3p	1	0	1	1	1	1	NECAP1	NECAP endocytosis associated 1
hsa-miR-330-3p	0	0	1	1	0	0	NEK7	NIMA (never in mitosis gene a)-related kinase 7
hsa-miR-330-3p	1	0	1	1	1	1	RIF1	RAP1 interacting factor homolog (yeast)
hsa-miR-330-3p	0	0	1	0	0	0	POM121L9P	POM121 transmembrane nucleoporin-like 9, pseudogene
hsa-miR-330-3p	1	0	1	1	1	1	TAB2	TGF-beta activated kinase 1/MAP3K7 binding protein 2
hsa-miR-330-3p	0	0	1	1	1	1	ARIH1	ariadne homolog, ubiquitin-conjugating enzyme E2 binding protein, 1 (Drosophila)
hsa-miR-330-3p	0	0	1	1	1	1	WDR52	WD repeat domain 52
hsa-miR-330-3p	0	0	1	1	1	1	GMEB2	glucocorticoid modulatory element binding protein 2
hsa-miR-330-3p	0	0	1	1	1	1	ZNF280D	zinc finger protein 280D
hsa-miR-330-3p	1	0	1	1	1	1	FAM107B	family with sequence similarity 107, member B
hsa-miR-330-3p	0	0	1	1	1	1	RHOT1	ras homolog family member T1
hsa-miR-330-3p	0	0	1	1	0	0	BAG3	BCL2-associated athanogene 3
hsa-miR-330-3p	1	0	1	1	1	1	KIAA1033	KIAA1033
hsa-miR-330-3p	1	0	1	0	1	1	CEP170	centrosomal protein 170kDa
hsa-miR-330-3p	0	0	1	1	0	0	DOPEY1	dopey family member 1
hsa-miR-330-3p	0	0	1	1	1	1	SLC30A10	solute carrier family 30, member 10
hsa-miR-330-3p	1	0	1	0	1	1	GRIN3A	glutamate receptor, ionotropic, N-methyl-D-aspartate 3A
hsa-miR-330-3p	0	0	1	1	1	1	MESP2	mesoderm posterior 2 homolog (mouse)
hsa-miR-330-3p	1	0	1	1	0	0	FAM108C1	family with sequence similarity 108, member C1
hsa-miR-330-3p	0	0	1	0	0	0	FAM66D	family with sequence similarity 66, member D
hsa-miR-330-3p	1	0	1	1	1	1	MSANTD2	Myb/SANT-like DNA-binding domain containing 2
hsa-miR-330-3p	1	0	1	0	1	1	FAM19A1	family with sequence similarity 19 (chemokine (C-C motif)-like), member A1
hsa-miR-330-3p	0	0	1	1	1	1	COBL	cordon-bleu homolog (mouse)
hsa-miR-330-3p	1	0	1	1	1	1	YTHDF3	YTH domain family, member 3
hsa-miR-330-3p	1	0	1	1	1	1	DENND1B	DENN/MADD domain containing 1B
hsa-miR-330-3p	0	0	1	0	1	1	GAB3	GRB2-associated binding protein 3
hsa-miR-330-3p	1	0	1	1	1	1	PHLDB2	pleckstrin homology-like domain, family B, member 2
hsa-miR-330-3p	1	0	1	1	1	1	FAM126B	family with sequence similarity 126, member B
hsa-miR-330-3p	1	0	1	1	0	0	USP24	ubiquitin specific peptidase 24
hsa-miR-330-3p	0	0	1	1	1	1	MYPN	myopalladin
hsa-miR-330-3p	1	0	1	1	1	1	MLL3	myeloid/lymphoid or mixed-lineage leukemia 3
hsa-miR-330-3p	1	0	1	0	1	1	STYX	serine/threonine/tyrosine interacting protein
hsa-miR-330-3p	0	0	1	1	1	1	SYTL4	synaptotagmin-like 4
hsa-miR-330-3p	0	0	1	1	1	1	YAP1	Yes-associated protein 1
hsa-miR-330-3p	1	0	1	1	0	0	PTAR1	protein prenyltransferase alpha subunit repeat containing 1
hsa-miR-330-3p	1	0	1	1	1	1	TMEM182	transmembrane protein 182
hsa-miR-330-3p	0	0	1	0	0	0	FAM225A	family with sequence similarity 225, member A (non-protein coding)
hsa-miR-330-3p	1	0	1	1	1	1	FBXO3	F-box protein 3
hsa-miR-330-3p	1	0	1	1	1	1	SBF2	SET binding factor 2
hsa-miR-330-3p	0	0	1	1	1	1	AMIGO2	adhesion molecule with Ig-like domain 2
hsa-miR-330-3p	0	0	1	1	1	1	INPP5B	inositol polyphosphate-5-phosphatase, 75kDa
hsa-miR-330-3p	1	0	1	0	1	1	GPCPD1	glycerophosphocholine phosphodiesterase GDE1 homolog (S. cerevisiae)
hsa-miR-330-3p	1	0	1	0	1	1	MEF2C	myocyte enhancer factor 2C
hsa-miR-330-3p	1	0	1	1	1	1	FAM126A	family with sequence similarity 126, member A
hsa-miR-330-3p	0	0	1	1	1	1	NARG2	NMDA receptor regulated 2
hsa-miR-330-3p	1	0	1	1	1	1	CAMK4	calcium/calmodulin-dependent protein kinase IV
hsa-miR-330-3p	0	0	1	1	0	0	TMEM116	transmembrane protein 116
hsa-miR-330-3p	0	0	1	1	1	1	PCDH20	protocadherin 20
hsa-miR-330-3p	1	0	1	1	1	1	ATAT1	alpha tubulin acetyltransferase 1
hsa-miR-330-3p	1	0	1	1	1	1	IL17RD	interleukin 17 receptor D
hsa-miR-330-3p	1	0	1	1	1	1	PRPF38B	PRP38 pre-mRNA processing factor 38 (yeast) domain containing B
hsa-miR-330-3p	0	0	1	1	1	1	SLC35F2	solute carrier family 35, member F2
hsa-miR-330-3p	0	0	1	1	1	1	C8orf34	chromosome 8 open reading frame 34
hsa-miR-330-3p	1	0	1	1	1	1	BOLL	bol, boule-like (Drosophila)
hsa-miR-330-3p	1	0	1	0	1	1	PATL1	protein associated with topoisomerase II homolog 1 (yeast)
hsa-miR-330-3p	1	0	1	1	1	1	SET	SET nuclear oncogene
hsa-miR-330-3p	1	0	1	0	1	1	APOLD1	apolipoprotein L domain containing 1
hsa-miR-330-3p	1	0	1	1	1	1	TSHZ3	teashirt zinc finger homeobox 3
hsa-miR-330-3p	0	0	1	1	1	1	C5orf45	chromosome 5 open reading frame 45
hsa-miR-330-3p	1	0	1	1	1	1	WDR44	WD repeat domain 44
hsa-miR-330-3p	1	0	1	1	1	1	RNF38	ring finger protein 38
hsa-miR-330-3p	1	0	1	1	1	1	IKZF2	IKAROS family zinc finger 2 (Helios)
hsa-miR-330-3p	0	0	1	1	1	1	CCDC62	coiled-coil domain containing 62
hsa-miR-330-3p	0	0	1	1	1	1	KLHL7	kelch-like 7 (Drosophila)
hsa-miR-330-3p	1	0	1	1	1	1	RCAN2	regulator of calcineurin 2
hsa-miR-330-3p	0	0	1	1	1	1	OSR2	odd-skipped related 2 (Drosophila)
hsa-miR-330-3p	0	0	1	1	1	1	GPRASP1	G protein-coupled receptor associated sorting protein 1
hsa-miR-330-3p	1	0	1	0	1	1	BDNF	brain-derived neurotrophic factor
hsa-miR-330-3p	1	0	1	1	1	1	RFFL	ring finger and FYVE-like domain containing E3 ubiquitin protein ligase
hsa-miR-330-3p	0	0	1	0	0	0	CLCN1	chloride channel, voltage-sensitive 1
hsa-miR-330-3p	1	0	1	1	1	1	KIAA0907	KIAA0907
hsa-miR-330-3p	1	0	1	1	1	1	CNRIP1	cannabinoid receptor interacting protein 1
hsa-miR-330-3p	0	0	1	1	1	1	CEP41	centrosomal protein 41kDa
hsa-miR-330-3p	0	0	1	1	1	1	APTX	aprataxin
hsa-miR-330-3p	1	0	1	1	1	1	WDR26	WD repeat domain 26
hsa-miR-330-3p	1	0	1	1	1	1	BCL11A	B-cell CLL/lymphoma 11A (zinc finger protein)
hsa-miR-330-3p	0	0	1	1	1	1	BCOR	BCL6 corepressor
hsa-miR-330-3p	1	0	1	1	1	1	TAB3	TGF-beta activated kinase 1/MAP3K7 binding protein 3
hsa-miR-330-3p	0	0	1	1	1	1	GCOM1	GRINL1A complex locus 1
hsa-miR-330-3p	0	0	1	0	0	0	ZNFX1-AS1	ZNFX1 antisense RNA 1
hsa-miR-330-3p	0	0	1	1	0	0	C16orf48	chromosome 16 open reading frame 48
hsa-miR-330-3p	0	0	1	1	0	0	GFRA3	GDNF family receptor alpha 3
hsa-miR-330-3p	1	0	1	0	1	1	ANKRD28	ankyrin repeat domain 28
hsa-miR-330-3p	0	0	1	1	1	1	RPTN	repetin
hsa-miR-330-3p	1	0	1	1	1	1	ARHGAP20	Rho GTPase activating protein 20
hsa-miR-330-3p	1	0	1	1	1	1	MECP2	methyl CpG binding protein 2 (Rett syndrome)
hsa-miR-330-3p	1	0	1	1	1	1	LAMP2	lysosomal-associated membrane protein 2
hsa-miR-330-3p	0	0	1	1	1	1	SMPD1	sphingomyelin phosphodiesterase 1, acid lysosomal
hsa-miR-330-3p	0	0	1	1	1	1	MSRA	methionine sulfoxide reductase A
hsa-miR-330-3p	1	0	1	1	1	1	PLCH1	phospholipase C, eta 1
hsa-miR-330-3p	1	0	1	1	1	1	EYA2	eyes absent homolog 2 (Drosophila)
hsa-miR-330-3p	0	0	1	1	1	1	RHD	Rh blood group, D antigen
hsa-miR-330-3p	1	0	1	1	1	1	QKI	QKI, KH domain containing, RNA binding
hsa-miR-330-3p	1	0	1	1	1	1	PCDH11X	protocadherin 11 X-linked
hsa-miR-330-3p	1	0	1	1	0	0	TRPC3	transient receptor potential cation channel, subfamily C, member 3
hsa-miR-330-3p	1	0	1	1	1	1	PRKACB	protein kinase, cAMP-dependent, catalytic, beta
hsa-miR-330-3p	1	0	1	1	1	1	TBC1D22B	TBC1 domain family, member 22B
hsa-miR-330-3p	1	0	1	1	1	1	AMOT	angiomotin
hsa-miR-330-3p	1	0	1	1	1	1	NEK6	NIMA (never in mitosis gene a)-related kinase 6
hsa-miR-330-3p	1	0	1	1	1	1	RPRD1A	regulation of nuclear pre-mRNA domain containing 1A
hsa-miR-330-3p	0	0	1	1	1	1	TUBD1	tubulin, delta 1
hsa-miR-330-3p	0	0	1	0	0	0	GBAP1	glucosidase, beta, acid pseudogene 1
hsa-miR-330-3p	1	0	1	0	1	1	FAM46A	family with sequence similarity 46, member A
hsa-miR-330-3p	1	0	1	0	1	1	BAG4	BCL2-associated athanogene 4
hsa-miR-330-3p	1	0	1	1	1	1	ELOVL6	ELOVL fatty acid elongase 6
hsa-miR-330-3p	0	0	1	1	1	1	PAFAH1B2	platelet-activating factor acetylhydrolase 1b, catalytic subunit 2 (30kDa)
hsa-miR-330-3p	1	0	1	1	1	1	AZI2	5-azacytidine induced 2
hsa-miR-330-3p	0	0	1	1	1	1	RAB7L1	RAB7, member RAS oncogene family-like 1
hsa-miR-330-3p	1	0	1	1	1	1	RIMS3	regulating synaptic membrane exocytosis 3
hsa-miR-330-3p	1	0	1	1	0	0	DHDDS	dehydrodolichyl diphosphate synthase
hsa-miR-330-3p	1	0	1	1	1	1	ZNF410	zinc finger protein 410
hsa-miR-330-3p	1	0	1	0	1	1	CGGBP1	CGG triplet repeat binding protein 1
hsa-miR-330-3p	1	0	1	1	1	1	MBNL1	muscleblind-like splicing regulator 1
hsa-miR-330-3p	0	0	1	1	1	1	PDXK	pyridoxal (pyridoxine, vitamin B6) kinase
hsa-miR-330-3p	0	0	1	1	1	1	ZNF589	zinc finger protein 589
hsa-miR-330-3p	1	0	1	1	1	1	U2SURP	U2 snRNP-associated SURP domain containing
hsa-miR-330-3p	0	0	1	1	0	0	RBM14	RNA binding motif protein 14
hsa-miR-330-3p	1	0	1	0	1	1	DDX3X	DEAD (Asp-Glu-Ala-Asp) box polypeptide 3, X-linked
hsa-miR-330-3p	0	0	1	1	0	0	MYLK2	myosin light chain kinase 2
hsa-miR-330-3p	1	0	1	1	1	1	CALM1	calmodulin 1 (phosphorylase kinase, delta)
hsa-miR-330-3p	1	0	1	1	1	1	LMBR1L	limb region 1 homolog (mouse)-like
hsa-miR-330-3p	1	0	1	1	1	1	SHOX2	short stature homeobox 2
hsa-miR-330-3p	0	0	1	1	1	1	TMEM30A	transmembrane protein 30A
hsa-miR-330-3p	0	0	1	0	0	0	ATXN7L3B	ataxin 7-like 3B
hsa-miR-330-3p	0	0	1	1	0	0	PANK2	pantothenate kinase 2
hsa-miR-330-3p	0	0	1	1	0	0	SLC4A2	solute carrier family 4, anion exchanger, member 2 (erythrocyte membrane protein band 3-like 1)
hsa-miR-330-3p	0	0	1	1	1	1	ATXN2L	ataxin 2-like
hsa-miR-330-3p	1	0	1	1	0	0	FA2H	fatty acid 2-hydroxylase
hsa-miR-330-3p	1	0	1	1	1	1	TRIM2	tripartite motif containing 2
hsa-miR-330-3p	1	0	1	0	1	1	RNF165	ring finger protein 165
hsa-miR-330-3p	1	0	1	1	1	1	GDA	guanine deaminase
hsa-miR-330-3p	0	0	1	1	1	1	PCNP	PEST proteolytic signal containing nuclear protein
hsa-miR-330-3p	1	0	1	1	1	1	YY1	YY1 transcription factor
hsa-miR-330-3p	1	0	1	1	1	1	ETF1	eukaryotic translation termination factor 1
hsa-miR-330-3p	0	0	1	0	0	0	LOC201651	arylacetamide deacetylase (esterase) pseudogene
hsa-miR-330-3p	0	0	1	0	1	1	AHI1	Abelson helper integration site 1
hsa-miR-330-3p	1	0	1	1	1	1	PAPOLA	poly(A) polymerase alpha
hsa-miR-330-3p	0	0	1	1	1	1	C8orf33	chromosome 8 open reading frame 33
hsa-miR-330-3p	1	0	1	1	1	1	ZNF512	zinc finger protein 512
hsa-miR-330-3p	0	0	1	0	1	1	ZNF37A	zinc finger protein 37A
hsa-miR-330-3p	0	0	1	1	1	1	KRCC1	lysine-rich coiled-coil 1
hsa-miR-330-3p	1	0	1	1	1	1	PHACTR4	phosphatase and actin regulator 4
hsa-miR-330-3p	0	0	1	1	1	1	CMAS	cytidine monophosphate N-acetylneuraminic acid synthetase
hsa-miR-330-3p	0	0	1	0	0	0	TCP11L2	t-complex 11 (mouse)-like 2
hsa-miR-330-3p	0	0	1	1	1	1	GLIPR2	GLI pathogenesis-related 2
hsa-miR-330-3p	0	0	1	1	1	1	PLA2G4C	phospholipase A2, group IVC (cytosolic, calcium-independent)
hsa-miR-330-3p	1	0	1	1	1	1	ARHGEF9	Cdc42 guanine nucleotide exchange factor (GEF) 9
hsa-miR-330-3p	0	0	1	1	1	1	TMEM40	transmembrane protein 40
hsa-miR-330-3p	0	0	1	0	1	1	ZNF718	zinc finger protein 718
hsa-miR-330-3p	1	0	1	0	1	1	BTF3L4	basic transcription factor 3-like 4
hsa-miR-330-3p	0	0	1	0	1	1	ZNF134	zinc finger protein 134
hsa-miR-330-3p	1	0	1	1	1	1	SPRYD7	SPRY domain containing 7
hsa-miR-330-3p	1	0	1	0	1	1	CDK19	cyclin-dependent kinase 19
hsa-miR-330-3p	0	0	1	1	1	1	SPAG16	sperm associated antigen 16
hsa-miR-330-3p	0	0	1	1	1	1	VWA3B	von Willebrand factor A domain containing 3B
hsa-miR-330-3p	1	0	1	1	1	1	PIGK	phosphatidylinositol glycan anchor biosynthesis, class K
hsa-miR-330-3p	1	0	1	1	1	1	FAM131A	family with sequence similarity 131, member A
hsa-miR-330-3p	1	0	1	1	1	1	SPG20	spastic paraplegia 20 (Troyer syndrome)
hsa-miR-330-3p	0	0	1	0	0	0	C11orf16	chromosome 11 open reading frame 16
hsa-miR-330-3p	1	0	1	1	1	1	RSPO2	R-spondin 2
hsa-miR-330-3p	1	0	1	1	1	1	APPL2	adaptor protein, phosphotyrosine interaction, PH domain and leucine zipper containing 2
hsa-miR-330-3p	1	0	1	1	1	1	PTPRD	protein tyrosine phosphatase, receptor type, D
hsa-miR-330-3p	0	0	1	1	1	1	SELP	selectin P (granule membrane protein 140kDa, antigen CD62)
hsa-miR-330-3p	0	0	1	0	0	0	LOC400891	chromosome 14 open reading frame 166B pseudogene
hsa-miR-330-3p	1	0	1	1	1	1	TMEM127	transmembrane protein 127
hsa-miR-330-3p	0	0	1	0	1	1	KIAA0895	KIAA0895
hsa-miR-330-3p	1	0	1	1	1	1	HTR2C	5-hydroxytryptamine (serotonin) receptor 2C, G protein-coupled
hsa-miR-330-3p	1	0	1	0	0	0	KCNU1	potassium channel, subfamily U, member 1
hsa-miR-330-3p	0	0	1	1	1	1	SLC51A	solute carrier family 51, alpha subunit
hsa-miR-330-3p	0	0	1	1	1	1	TFAM	transcription factor A, mitochondrial
hsa-miR-330-3p	1	0	1	0	1	1	TFEC	transcription factor EC
hsa-miR-330-3p	0	0	1	1	0	0	TSPAN16	tetraspanin 16
hsa-miR-330-3p	1	0	1	1	1	1	TIAL1	TIA1 cytotoxic granule-associated RNA binding protein-like 1
hsa-miR-330-3p	0	0	1	0	1	1	MYO7A	myosin VIIA
hsa-miR-330-3p	0	0	1	1	1	1	CCP110	centriolar coiled coil protein 110kDa
hsa-miR-330-3p	1	0	1	1	1	1	WDR20	WD repeat domain 20
hsa-miR-330-3p	1	0	1	1	1	1	SULT4A1	sulfotransferase family 4A, member 1
hsa-miR-330-3p	1	0	1	1	1	1	ELAVL2	ELAV (embryonic lethal, abnormal vision, Drosophila)-like 2 (Hu antigen B)
hsa-miR-330-3p	0	0	1	1	1	1	AADAT	aminoadipate aminotransferase
hsa-miR-330-3p	1	0	1	1	1	1	MUM1L1	melanoma associated antigen (mutated) 1-like 1
hsa-miR-330-3p	0	0	1	0	0	0	ATP8B5P	ATPase, class I, type 8B, member 5, pseudogene
hsa-miR-330-3p	1	0	1	1	1	1	RCOR3	REST corepressor 3
hsa-miR-330-3p	1	0	1	0	1	1	RNF4	ring finger protein 4
hsa-miR-330-3p	1	0	1	1	1	1	GLUL	glutamate-ammonia ligase
hsa-miR-330-3p	1	0	1	1	1	1	BAIAP2	BAI1-associated protein 2
hsa-miR-330-3p	0	0	1	1	0	0	WASIR2	WASH and IL9R antisense RNA 2
hsa-miR-330-3p	1	0	1	1	1	1	SIRPA	signal-regulatory protein alpha
hsa-miR-330-3p	0	0	1	0	0	0	LINC00238	long intergenic non-protein coding RNA 238
hsa-miR-330-3p	0	0	1	1	1	1	SFI1	Sfi1 homolog, spindle assembly associated (yeast)
hsa-miR-330-3p	1	0	1	1	1	1	PCDHA5	protocadherin alpha 5
hsa-miR-330-3p	0	0	1	1	1	1	ZNF337	zinc finger protein 337
hsa-miR-330-3p	1	0	1	1	1	1	CLK4	CDC-like kinase 4
hsa-miR-330-3p	0	0	1	0	1	1	DKFZP434I0714	uncharacterized protein DKFZP434I0714
hsa-miR-330-3p	1	0	1	0	1	1	DDX3Y	DEAD (Asp-Glu-Ala-Asp) box polypeptide 3, Y-linked
hsa-miR-330-3p	0	0	1	1	1	1	KIF16B	kinesin family member 16B
hsa-miR-330-3p	1	0	1	1	1	1	NKAIN2	Na+/K+ transporting ATPase interacting 2
hsa-miR-330-3p	1	0	1	1	1	1	RAP2C	RAP2C, member of RAS oncogene family
hsa-miR-330-3p	1	0	1	1	1	1	CTDSPL2	CTD (carboxy-terminal domain, RNA polymerase II, polypeptide A) small phosphatase like 2
hsa-miR-330-3p	0	0	1	1	1	1	ARHGAP6	Rho GTPase activating protein 6
hsa-miR-330-3p	1	0	1	1	1	1	IMPACT	Impact homolog (mouse)
hsa-miR-330-3p	1	0	1	1	1	1	PEX5L	peroxisomal biogenesis factor 5-like
hsa-miR-330-3p	0	0	1	0	0	0	FAM201A	family with sequence similarity 201, member A
hsa-miR-330-3p	0	0	1	0	1	1	C9orf57	chromosome 9 open reading frame 57
hsa-miR-330-3p	1	0	1	1	1	1	SMG7	smg-7 homolog, nonsense mediated mRNA decay factor (C. elegans)
hsa-miR-330-3p	1	0	1	1	1	1	SLC35G1	solute carrier family 35, member G1
hsa-miR-330-3p	0	0	1	1	1	1	FAM171B	family with sequence similarity 171, member B
hsa-miR-330-3p	1	0	1	1	1	1	ELMO2	engulfment and cell motility 2
hsa-miR-330-3p	1	0	1	1	1	1	MEIS1	Meis homeobox 1
hsa-miR-330-3p	1	0	1	1	1	1	ACVR1	activin A receptor, type I
hsa-miR-330-3p	1	0	1	1	1	1	BNC2	basonuclin 2
hsa-miR-330-3p	1	0	1	1	1	1	SLC35F3	solute carrier family 35, member F3
hsa-miR-330-3p	1	0	1	1	1	1	DPP10	dipeptidyl-peptidase 10 (non-functional)
hsa-miR-330-3p	1	0	1	0	1	1	ARID2	AT rich interactive domain 2 (ARID, RFX-like)
hsa-miR-330-3p	0	0	1	0	1	1	APOL6	apolipoprotein L, 6
hsa-miR-330-3p	1	0	1	1	1	1	PLS3	plastin 3
hsa-miR-330-3p	1	0	1	1	1	1	FGFR2	fibroblast growth factor receptor 2
hsa-miR-330-3p	0	0	1	1	1	1	CACHD1	cache domain containing 1
hsa-miR-330-3p	1	0	1	1	1	1	PAIP2	poly(A) binding protein interacting protein 2
hsa-miR-330-3p	0	0	1	1	1	1	IQCH	IQ motif containing H
hsa-miR-330-3p	0	0	1	0	0	0	LOC401074	uncharacterized LOC401074
hsa-miR-330-3p	1	0	1	1	1	1	UNK	unkempt homolog (Drosophila)
hsa-miR-330-3p	1	0	1	1	1	1	TIMP2	TIMP metallopeptidase inhibitor 2
hsa-miR-330-3p	0	0	1	1	1	1	FBXL4	F-box and leucine-rich repeat protein 4
hsa-miR-330-3p	1	0	1	1	1	1	FOSB	FBJ murine osteosarcoma viral oncogene homolog B
hsa-miR-330-3p	1	0	1	1	1	1	DACH2	dachshund homolog 2 (Drosophila)
hsa-miR-330-3p	1	0	1	0	1	1	PACSIN1	protein kinase C and casein kinase substrate in neurons 1
hsa-miR-330-3p	1	0	1	1	1	1	INTS6	integrator complex subunit 6
hsa-miR-330-3p	0	0	1	1	0	0	MTCH1	mitochondrial carrier 1
hsa-miR-330-3p	1	0	1	1	1	1	UNC13C	unc-13 homolog C (C. elegans)
hsa-miR-330-3p	0	0	1	0	0	0	A1BG-AS1	A1BG antisense RNA 1
hsa-miR-330-3p	1	0	1	0	1	1	KIAA0430	KIAA0430
hsa-miR-330-3p	1	0	1	1	1	1	ARPP21	cAMP-regulated phosphoprotein, 21kDa
hsa-miR-330-3p	1	0	1	0	1	1	HSPA12A	heat shock 70kDa protein 12A
hsa-miR-330-3p	0	0	1	0	0	0	LOC154822	uncharacterized LOC154822
hsa-miR-330-3p	1	0	1	1	1	1	TNFSF4	tumor necrosis factor (ligand) superfamily, member 4
hsa-miR-330-3p	1	0	1	0	1	1	TNFAIP3	tumor necrosis factor, alpha-induced protein 3
hsa-miR-330-3p	1	0	1	1	1	1	ROCK1	Rho-associated, coiled-coil containing protein kinase 1
hsa-miR-330-3p	0	0	1	1	1	1	ZNF568	zinc finger protein 568
hsa-miR-330-3p	0	0	1	0	0	0	LOC157381	uncharacterized LOC157381
hsa-miR-330-3p	0	0	1	0	1	1	C12orf74	chromosome 12 open reading frame 74
hsa-miR-330-3p	0	0	1	0	0	0	MORF4L2-AS1	MORF4L2 antisense RNA 1
hsa-miR-330-3p	1	0	1	1	1	1	RNF145	ring finger protein 145
hsa-miR-330-3p	0	0	1	1	1	1	MST1	macrophage stimulating 1 (hepatocyte growth factor-like)
hsa-miR-330-3p	1	0	1	0	1	1	PSD3	pleckstrin and Sec7 domain containing 3
hsa-miR-330-3p	1	0	1	1	1	1	MAMDC2	MAM domain containing 2
hsa-miR-330-3p	0	0	1	1	1	1	DOCK8	dedicator of cytokinesis 8
hsa-miR-330-3p	1	0	1	1	1	1	SENP1	SUMO1/sentrin specific peptidase 1
hsa-miR-330-3p	1	0	1	0	0	0	MICAL3	microtubule associated monoxygenase, calponin and LIM domain containing 3
hsa-miR-330-3p	0	0	1	1	0	0	MON1A	MON1 homolog A (yeast)
hsa-miR-330-3p	0	0	1	0	1	1	IL33	interleukin 33
hsa-miR-330-3p	0	0	1	0	0	0	LOC348120	uncharacterized LOC348120
hsa-miR-330-3p	0	0	1	0	0	0	DPY19L2P4	dpy-19-like 2 pseudogene 4 (C. elegans)
hsa-miR-330-3p	1	0	1	1	1	1	KIF2A	kinesin heavy chain member 2A
hsa-miR-330-3p	1	0	1	0	1	1	ZNF800	zinc finger protein 800
hsa-miR-330-3p	1	0	1	1	1	1	SLC39A9	solute carrier family 39 (zinc transporter), member 9
hsa-miR-330-3p	1	0	1	1	0	0	TTC9	tetratricopeptide repeat domain 9
hsa-miR-330-3p	1	0	1	1	1	1	PELI1	pellino E3 ubiquitin protein ligase 1
hsa-miR-330-3p	1	0	1	0	1	1	RNF182	ring finger protein 182
hsa-miR-330-3p	0	0	1	1	0	0	ENTPD8	ectonucleoside triphosphate diphosphohydrolase 8
hsa-miR-330-3p	0	0	1	1	1	1	FBXO38	F-box protein 38
hsa-miR-330-3p	1	0	1	1	1	1	FNDC3A	fibronectin type III domain containing 3A
hsa-miR-330-3p	1	0	1	0	1	1	SEMA4G	sema domain, immunoglobulin domain (Ig), transmembrane domain (TM) and short cytoplasmic domain, (semaphorin) 4G
hsa-miR-330-3p	1	0	1	1	1	1	GATA2	GATA binding protein 2
hsa-miR-330-3p	1	0	1	0	1	1	SMURF2	SMAD specific E3 ubiquitin protein ligase 2
hsa-miR-330-3p	1	0	1	1	1	1	SCN5A	sodium channel, voltage-gated, type V, alpha subunit
hsa-miR-330-3p	0	0	1	1	0	0	GPRASP2	G protein-coupled receptor associated sorting protein 2
hsa-miR-330-3p	1	0	1	1	1	1	ZFP91	zinc finger protein 91 homolog (mouse)
hsa-miR-330-3p	1	0	1	1	1	1	YWHAZ	tyrosine 3-monooxygenase/tryptophan 5-monooxygenase activation protein, zeta polypeptide
hsa-miR-330-3p	1	0	1	0	1	1	HDAC5	histone deacetylase 5
hsa-miR-330-3p	1	0	1	1	1	1	PCGF5	polycomb group ring finger 5
hsa-miR-330-3p	1	0	1	0	1	1	C14orf43	chromosome 14 open reading frame 43
hsa-miR-330-3p	1	0	1	1	1	1	HP1BP3	heterochromatin protein 1, binding protein 3
hsa-miR-330-3p	1	0	1	1	1	1	RCC2	regulator of chromosome condensation 2
hsa-miR-330-3p	0	0	1	1	0	0	TINAG	tubulointerstitial nephritis antigen
hsa-miR-330-3p	0	0	1	1	1	1	MPP3	membrane protein, palmitoylated 3 (MAGUK p55 subfamily member 3)
hsa-miR-330-3p	1	0	1	1	1	1	ZFP161	zinc finger protein 161 homolog (mouse)
hsa-miR-330-3p	0	0	1	1	0	0	C20orf152	chromosome 20 open reading frame 152
hsa-miR-330-3p	0	0	1	1	0	0	RPL7L1	ribosomal protein L7-like 1
hsa-miR-330-3p	0	0	1	1	0	0	WDR90	WD repeat domain 90
hsa-miR-330-3p	1	0	1	1	1	1	ZSCAN29	zinc finger and SCAN domain containing 29
hsa-miR-330-3p	0	0	1	1	1	1	CDH26	cadherin 26
hsa-miR-330-3p	1	0	1	1	0	0	ANKRD13B	ankyrin repeat domain 13B
hsa-miR-330-3p	1	0	1	1	1	1	SCOC	short coiled-coil protein
hsa-miR-330-3p	0	0	1	0	0	0	USP32P1	ubiquitin specific peptidase 32 pseudogene 1
hsa-miR-330-3p	0	0	1	1	1	1	GPATCH2	G patch domain containing 2
hsa-miR-330-3p	0	0	1	1	0	0	DHX30	DEAH (Asp-Glu-Ala-His) box polypeptide 30
hsa-miR-330-3p	0	0	1	1	1	1	C1orf109	chromosome 1 open reading frame 109
hsa-miR-330-3p	1	0	1	1	1	1	ADCY6	adenylate cyclase 6
hsa-miR-330-3p	1	0	1	1	1	1	RAVER2	ribonucleoprotein, PTB-binding 2
hsa-miR-330-3p	1	0	1	1	1	1	RAB2B	RAB2B, member RAS oncogene family
hsa-miR-330-3p	0	0	1	1	1	1	SH2D1B	SH2 domain containing 1B
hsa-miR-330-3p	1	0	1	1	1	1	C18orf1	chromosome 18 open reading frame 1
hsa-miR-330-3p	1	0	1	1	1	1	GRHL1	grainyhead-like 1 (Drosophila)
hsa-miR-330-3p	0	0	1	1	1	1	KCTD18	potassium channel tetramerisation domain containing 18
hsa-miR-330-3p	1	0	1	0	1	1	MAGIX	MAGI family member, X-linked
hsa-miR-330-3p	0	0	1	0	0	0	ZNF66P	zinc finger protein 66, pseudogene
hsa-miR-330-3p	0	0	1	1	0	0	CELF3	CUGBP, Elav-like family member 3
hsa-miR-330-3p	1	0	1	1	1	1	SLC26A7	solute carrier family 26, member 7
hsa-miR-330-3p	1	0	1	1	1	1	SRPK2	SRSF protein kinase 2
hsa-miR-330-3p	0	0	1	0	0	0	PTGER4P2	prostaglandin E receptor 4 (subtype EP4) pseudogene 2
hsa-miR-330-3p	0	0	1	0	0	0	C17orf69	chromosome 17 open reading frame 69
hsa-miR-330-3p	1	0	1	0	1	1	SLC7A2	solute carrier family 7 (cationic amino acid transporter, y+ system), member 2
hsa-miR-330-3p	0	0	1	1	1	1	MSTO1	misato homolog 1 (Drosophila)
hsa-miR-330-3p	0	0	1	1	1	1	TSPAN8	tetraspanin 8
hsa-miR-330-3p	1	0	1	0	1	1	TGFBR1	transforming growth factor, beta receptor 1
hsa-miR-330-3p	1	0	1	1	1	1	USP47	ubiquitin specific peptidase 47
hsa-miR-330-3p	1	0	1	0	1	1	MAP4K3	mitogen-activated protein kinase kinase kinase kinase 3
hsa-miR-330-3p	1	0	1	1	1	1	FARP1	FERM, RhoGEF (ARHGEF) and pleckstrin domain protein 1 (chondrocyte-derived)
hsa-miR-330-3p	0	0	1	1	1	1	CTXN3	cortexin 3
hsa-miR-330-3p	0	0	1	1	1	1	FRMPDP2	FERM and PDZ domain containing 2 pseudogene 2
hsa-miR-330-3p	0	0	1	1	1	1	FRMPD2P1	FERM and PDZ domain containing 2 pseudogene 1
hsa-miR-330-3p	0	0	1	1	0	0	FAM21A	family with sequence similarity 21, member A
hsa-miR-330-3p	1	0	1	0	1	1	DPYSL3	dihydropyrimidinase-like 3
hsa-miR-330-3p	1	0	1	0	1	1	AMMECR1L	AMME chromosomal region gene 1-like
hsa-miR-330-3p	1	0	1	1	1	1	EIF2AK4	eukaryotic translation initiation factor 2 alpha kinase 4
hsa-miR-330-3p	1	0	1	1	1	1	GRAMD4	GRAM domain containing 4
hsa-miR-330-3p	0	0	1	0	0	0	TBC1D25	TBC1 domain family, member 25
hsa-miR-330-3p	0	0	1	1	1	1	HOXD8	homeobox D8
hsa-miR-330-3p	1	0	1	1	1	1	RHOBTB1	Rho-related BTB domain containing 1
hsa-miR-330-3p	0	0	1	1	1	1	LIMS3	LIM and senescent cell antigen-like domains 3
hsa-miR-330-3p	1	0	1	0	1	1	PIK3R3	phosphoinositide-3-kinase, regulatory subunit 3 (gamma)
hsa-miR-330-3p	1	0	1	1	1	1	ELOVL7	ELOVL fatty acid elongase 7
hsa-miR-330-3p	1	0	1	1	1	1	PLXNA2	plexin A2
hsa-miR-330-3p	1	0	1	1	1	1	STK38	serine/threonine kinase 38
hsa-miR-330-3p	1	0	1	1	1	1	ST8SIA2	ST8 alpha-N-acetyl-neuraminide alpha-2,8-sialyltransferase 2
hsa-miR-330-3p	1	0	1	0	1	1	LRRTM4	leucine rich repeat transmembrane neuronal 4
hsa-miR-330-3p	1	0	1	0	1	1	MYBL1	v-myb myeloblastosis viral oncogene homolog (avian)-like 1
hsa-miR-330-3p	0	0	1	1	0	0	FBXO16	F-box protein 16
hsa-miR-330-3p	1	0	1	0	1	1	CPEB2	cytoplasmic polyadenylation element binding protein 2
hsa-miR-330-3p	0	0	1	0	0	0	LSAMP-AS3	LSAMP antisense RNA 3
hsa-miR-330-3p	0	0	1	1	0	0	ANAPC11	anaphase promoting complex subunit 11
hsa-miR-330-3p	0	0	1	0	0	0	LOC150577	uncharacterized LOC150577
hsa-miR-330-3p	1	0	1	1	1	1	PNISR	PNN-interacting serine/arginine-rich protein
hsa-miR-330-3p	0	0	1	1	0	0	C1orf122	chromosome 1 open reading frame 122
hsa-miR-330-3p	1	0	1	1	1	1	SP4	Sp4 transcription factor
hsa-miR-330-3p	1	0	1	0	1	1	KIF5C	kinesin family member 5C
hsa-miR-330-3p	1	0	1	1	1	1	HNRNPR	heterogeneous nuclear ribonucleoprotein R
hsa-miR-330-3p	0	0	1	1	1	1	TTLL5	tubulin tyrosine ligase-like family, member 5
hsa-miR-330-3p	0	0	1	0	0	0	LINC00310	long intergenic non-protein coding RNA 310
hsa-miR-330-3p	0	0	1	0	0	0	MAGEL2	MAGE-like 2
hsa-miR-330-3p	1	0	1	0	1	1	ROBO1	roundabout, axon guidance receptor, homolog 1 (Drosophila)
hsa-miR-330-3p	0	0	1	1	0	0	RNF123	ring finger protein 123
hsa-miR-330-3p	1	0	1	1	1	1	TMEM64	transmembrane protein 64
hsa-miR-330-3p	1	0	1	1	1	1	TRIP12	thyroid hormone receptor interactor 12
hsa-miR-330-3p	1	0	1	1	1	1	PAX3	paired box 3
hsa-miR-330-3p	1	0	1	1	1	1	ST18	suppression of tumorigenicity 18 (breast carcinoma) (zinc finger protein)
hsa-miR-330-3p	1	0	1	1	1	1	GRIA3	glutamate receptor, ionotropic, AMPA 3
hsa-miR-330-3p	1	0	1	1	1	1	OTUD4	OTU domain containing 4
hsa-miR-330-3p	1	0	1	1	1	1	TRAPPC8	trafficking protein particle complex 8
hsa-miR-330-3p	1	0	1	1	1	1	CHIC1	cysteine-rich hydrophobic domain 1
hsa-miR-330-3p	0	0	1	1	1	1	HSF2	heat shock transcription factor 2
hsa-miR-330-3p	1	0	1	1	1	1	MLLT10	myeloid/lymphoid or mixed-lineage leukemia (trithorax homolog, Drosophila); translocated to, 10
hsa-miR-330-3p	1	0	1	1	1	1	C18orf34	chromosome 18 open reading frame 34
hsa-miR-330-3p	1	0	1	1	1	1	KIAA0922	KIAA0922
hsa-miR-330-3p	0	0	1	1	0	0	SYNE3	spectrin repeat containing, nuclear envelope family member 3
hsa-miR-330-3p	0	0	1	0	0	0	LINC00643	long intergenic non-protein coding RNA 643
hsa-miR-330-3p	1	0	1	1	1	1	EIF5	eukaryotic translation initiation factor 5
hsa-miR-330-3p	0	0	1	1	1	1	IP6K2	inositol hexakisphosphate kinase 2
hsa-miR-330-3p	1	0	1	1	1	1	ATP2B4	ATPase, Ca++ transporting, plasma membrane 4
hsa-miR-330-3p	1	0	1	1	1	1	JPH1	junctophilin 1
hsa-miR-330-3p	1	0	1	1	1	1	MIER3	mesoderm induction early response 1, family member 3
hsa-miR-330-3p	1	0	1	1	1	1	TRIM37	tripartite motif containing 37
hsa-miR-330-3p	1	0	1	0	1	1	CCDC88A	coiled-coil domain containing 88A
hsa-miR-330-3p	1	0	1	1	1	1	CCNG1	cyclin G1
hsa-miR-330-3p	0	0	1	1	1	1	STAT2	signal transducer and activator of transcription 2, 113kDa
hsa-miR-330-3p	0	0	1	1	1	1	CRB1	crumbs homolog 1 (Drosophila)
hsa-miR-330-3p	1	0	1	1	1	1	SLC35F1	solute carrier family 35, member F1
hsa-miR-330-3p	1	0	1	1	1	1	SPPL3	signal peptide peptidase like 3
hsa-miR-330-3p	1	0	1	1	1	1	TGOLN2	trans-golgi network protein 2
hsa-miR-330-3p	0	0	1	1	1	1	PSMA2	proteasome (prosome, macropain) subunit, alpha type, 2
hsa-miR-330-3p	1	0	1	1	1	1	RAB30	RAB30, member RAS oncogene family
hsa-miR-330-3p	0	0	1	1	1	1	COL6A3	collagen, type VI, alpha 3
hsa-miR-330-3p	1	0	1	1	1	1	MASP1	mannan-binding lectin serine peptidase 1 (C4/C2 activating component of Ra-reactive factor)
hsa-miR-330-3p	0	0	1	1	1	1	PRR14L	proline rich 14-like
hsa-miR-330-3p	0	0	1	1	1	1	UHRF1BP1L	UHRF1 binding protein 1-like
hsa-miR-330-3p	1	0	1	1	0	0	RBM27	RNA binding motif protein 27
hsa-miR-330-3p	0	0	1	1	1	1	ADH1B	alcohol dehydrogenase 1B (class I), beta polypeptide
hsa-miR-330-3p	0	0	1	0	1	1	THAP6	THAP domain containing 6
hsa-miR-330-3p	1	0	1	1	1	1	STARD13	StAR-related lipid transfer (START) domain containing 13
hsa-miR-330-3p	0	0	1	0	1	1	ANKRD36	ankyrin repeat domain 36
hsa-miR-330-3p	1	0	1	1	1	1	GTDC1	glycosyltransferase-like domain containing 1
hsa-miR-330-3p	0	0	1	1	1	1	HTR2A	5-hydroxytryptamine (serotonin) receptor 2A, G protein-coupled
hsa-miR-330-3p	1	0	1	1	1	1	TC2N	tandem C2 domains, nuclear
hsa-miR-330-3p	0	0	1	1	0	0	PPP2R2B	protein phosphatase 2, regulatory subunit B, beta
hsa-miR-330-3p	0	0	1	0	1	1	B3GALTL	beta 1,3-galactosyltransferase-like
hsa-miR-330-3p	0	0	1	0	0	0	OVOS	ovostatin
hsa-miR-330-3p	0	0	1	1	1	1	TMEM48	transmembrane protein 48
hsa-miR-330-3p	0	0	1	1	1	1	EXT2	exostosin 2
hsa-miR-330-3p	1	0	1	1	1	1	SEMA4D	sema domain, immunoglobulin domain (Ig), transmembrane domain (TM) and short cytoplasmic domain, (semaphorin) 4D
hsa-miR-330-3p	1	0	1	1	1	1	PHF3	PHD finger protein 3
hsa-miR-330-3p	1	0	1	1	1	1	CORIN	corin, serine peptidase
hsa-miR-330-3p	1	0	1	0	1	1	PCGF3	polycomb group ring finger 3
hsa-miR-330-3p	1	0	1	1	1	1	BCLAF1	BCL2-associated transcription factor 1
hsa-miR-330-3p	1	0	1	1	1	1	NAV1	neuron navigator 1
hsa-miR-330-3p	1	0	1	0	1	1	IGF2BP3	insulin-like growth factor 2 mRNA binding protein 3
hsa-miR-330-3p	0	0	1	1	1	1	MPP4	membrane protein, palmitoylated 4 (MAGUK p55 subfamily member 4)
hsa-miR-330-3p	1	0	1	1	1	1	PGAP1	post-GPI attachment to proteins 1
hsa-miR-330-3p	1	0	1	1	1	1	RECK	reversion-inducing-cysteine-rich protein with kazal motifs
hsa-miR-330-3p	1	0	1	1	1	1	TMEM135	transmembrane protein 135
hsa-miR-330-3p	0	0	1	0	0	0	ZNRD1-AS1	ZNRD1 antisense RNA 1
hsa-miR-330-3p	1	0	1	1	1	1	HIF1A	hypoxia inducible factor 1, alpha subunit (basic helix-loop-helix transcription factor)
hsa-miR-330-3p	1	0	1	1	1	1	CALD1	caldesmon 1
hsa-miR-330-3p	1	0	1	0	1	1	TBL1XR1	transducin (beta)-like 1 X-linked receptor 1
hsa-miR-330-3p	0	0	1	1	1	1	USP54	ubiquitin specific peptidase 54
hsa-miR-330-3p	1	0	1	1	1	1	LYST	lysosomal trafficking regulator
hsa-miR-330-3p	1	0	1	1	1	1	SIN3A	SIN3 transcription regulator homolog A (yeast)
hsa-miR-330-3p	0	0	1	0	0	0	LINC00341	long intergenic non-protein coding RNA 341
hsa-miR-330-3p	1	0	1	1	1	1	AP2M1	adaptor-related protein complex 2, mu 1 subunit
hsa-miR-330-3p	0	0	1	1	1	1	HPGD	hydroxyprostaglandin dehydrogenase 15-(NAD)
hsa-miR-330-3p	1	0	1	1	1	1	PCMT1	protein-L-isoaspartate (D-aspartate) O-methyltransferase
hsa-miR-330-3p	0	0	1	0	0	0	DCTN2	dynactin 2 (p50)
hsa-miR-330-3p	0	0	1	1	1	1	GRN	granulin
hsa-miR-330-3p	0	0	1	1	1	1	RIPK2	receptor-interacting serine-threonine kinase 2
hsa-miR-330-3p	0	0	1	1	1	1	PSG2	pregnancy specific beta-1-glycoprotein 2
hsa-miR-330-3p	1	0	1	0	0	0	IGLON5	IgLON family member 5
hsa-miR-330-3p	0	0	1	1	0	0	CDC37	cell division cycle 37 homolog (S. cerevisiae)
hsa-miR-330-3p	0	0	1	1	0	0	GPX3	glutathione peroxidase 3 (plasma)
hsa-miR-330-3p	1	0	1	1	1	1	FUT9	fucosyltransferase 9 (alpha (1,3) fucosyltransferase)
hsa-miR-330-3p	1	0	1	1	1	1	TOM1L1	target of myb1 (chicken)-like 1
hsa-miR-330-3p	1	0	1	1	1	1	TARBP2	TAR (HIV-1) RNA binding protein 2
hsa-miR-330-3p	1	0	1	1	1	1	EIF4B	eukaryotic translation initiation factor 4B
hsa-miR-330-3p	0	0	1	1	0	0	TMEM62	transmembrane protein 62
hsa-miR-330-3p	0	0	1	1	1	1	TPRA1	transmembrane protein, adipocyte asscociated 1
hsa-miR-330-3p	0	0	1	1	0	0	URM1	ubiquitin related modifier 1
hsa-miR-330-3p	0	0	1	1	0	0	TCEAL4	transcription elongation factor A (SII)-like 4
hsa-miR-330-3p	0	0	1	1	1	1	CYTH2	cytohesin 2
hsa-miR-330-3p	0	0	1	1	0	0	FCGRT	Fc fragment of IgG, receptor, transporter, alpha
hsa-miR-330-3p	0	0	1	1	1	1	ADK	adenosine kinase
hsa-miR-330-3p	1	1	1	1	0	0	EFNA3	ephrin-A3
hsa-miR-330-3p	0	0	1	1	1	1	SLC25A4	solute carrier family 25 (mitochondrial carrier; adenine nucleotide translocator), member 4
hsa-miR-330-3p	1	0	1	1	1	1	ACTG1	actin, gamma 1
hsa-miR-330-3p	0	0	1	1	1	1	TASP1	taspase, threonine aspartase, 1
hsa-miR-330-3p	1	0	1	1	1	1	CD9	CD9 molecule
hsa-miR-330-3p	0	0	1	1	1	1	TUBA1A	tubulin, alpha 1a
hsa-miR-330-3p	0	0	1	1	1	1	CD99	CD99 molecule
hsa-miR-330-3p	0	0	1	0	0	0	NBLA00301	Nbla00301
hsa-miR-330-3p	1	0	1	1	1	1	CHTF8	CTF8, chromosome transmission fidelity factor 8 homolog (S. cerevisiae)
hsa-miR-330-3p	0	0	1	1	1	1	MTCP1	mature T-cell proliferation 1
hsa-miR-330-3p	1	0	1	1	1	1	COPS2	COP9 constitutive photomorphogenic homolog subunit 2 (Arabidopsis)
hsa-miR-330-3p	0	0	1	1	1	1	PROCR	protein C receptor, endothelial
hsa-miR-330-3p	0	0	1	1	1	1	SORD	sorbitol dehydrogenase
hsa-miR-330-3p	0	0	1	0	0	0	TRIQK	triple QxxK/R motif containing
hsa-miR-330-3p	0	0	1	0	1	1	EMX2	empty spiracles homeobox 2
hsa-miR-330-3p	1	0	1	1	1	1	TRA2B	transformer 2 beta homolog (Drosophila)
hsa-miR-330-3p	0	0	1	1	1	1	NAPA	N-ethylmaleimide-sensitive factor attachment protein, alpha
hsa-miR-330-3p	0	0	1	0	0	0	LOC654433	uncharacterized LOC654433
hsa-miR-330-3p	0	0	1	1	1	1	STON1	stonin 1
hsa-miR-330-3p	1	0	1	1	1	1	PCTP	phosphatidylcholine transfer protein
hsa-miR-330-3p	1	0	1	1	1	1	TMEM248	transmembrane protein 248
hsa-miR-330-3p	0	0	1	1	0	0	CXorf40A	chromosome X open reading frame 40A
hsa-miR-330-3p	0	0	1	0	1	1	PSG11	pregnancy specific beta-1-glycoprotein 11
hsa-miR-330-3p	0	0	1	1	1	1	EIF3J	eukaryotic translation initiation factor 3, subunit J
hsa-miR-330-3p	0	0	1	1	1	1	POLR2G	polymerase (RNA) II (DNA directed) polypeptide G
hsa-miR-330-3p	1	0	1	1	1	1	TMEM245	transmembrane protein 245
hsa-miR-330-3p	0	0	1	1	0	0	ATRAID	all-trans retinoic acid-induced differentiation factor
hsa-miR-330-3p	1	0	1	1	1	1	WIPF1	WAS/WASL interacting protein family, member 1
hsa-miR-330-3p	0	0	1	0	0	0	LOC150568	uncharacterized LOC150568
hsa-miR-330-3p	0	0	1	1	1	1	BMPR1A	bone morphogenetic protein receptor, type IA
hsa-miR-330-3p	0	0	1	1	1	1	CAPZB	capping protein (actin filament) muscle Z-line, beta
hsa-miR-330-3p	1	0	1	1	1	1	MMP2	matrix metallopeptidase 2 (gelatinase A, 72kDa gelatinase, 72kDa type IV collagenase)
hsa-miR-330-3p	0	0	1	1	1	1	TMEM109	transmembrane protein 109
hsa-miR-330-3p	0	0	1	0	0	0	LOC645513	uncharacterized LOC645513
hsa-miR-330-3p	1	0	1	1	0	0	FAT4	FAT tumor suppressor homolog 4 (Drosophila)
hsa-miR-330-3p	0	0	1	1	0	0	NUP205	nucleoporin 205kDa
hsa-miR-330-3p	1	0	1	1	1	1	ARNTL	aryl hydrocarbon receptor nuclear translocator-like
hsa-miR-330-3p	0	0	1	1	1	1	LDHB	lactate dehydrogenase B
hsa-miR-330-3p	1	0	1	1	1	1	CAMK2A	calcium/calmodulin-dependent protein kinase II alpha
hsa-miR-330-3p	1	0	1	1	1	1	PPP3CB	protein phosphatase 3, catalytic subunit, beta isozyme
hsa-miR-330-3p	0	0	1	0	1	1	VSTM2A	V-set and transmembrane domain containing 2A
hsa-miR-330-3p	1	0	1	1	1	1	YWHAQ	tyrosine 3-monooxygenase/tryptophan 5-monooxygenase activation protein, theta polypeptide
hsa-miR-330-3p	0	0	1	1	0	0	RPL27	ribosomal protein L27
hsa-miR-330-3p	1	0	1	1	1	1	METAP2	methionyl aminopeptidase 2
hsa-miR-330-3p	1	0	1	1	1	1	ARL4A	ADP-ribosylation factor-like 4A
hsa-miR-330-3p	0	0	1	1	1	1	LYSMD4	LysM, putative peptidoglycan-binding, domain containing 4
hsa-miR-330-3p	0	0	1	1	1	1	CD1C	CD1c molecule
hsa-miR-330-3p	1	0	1	1	1	1	PFN2	profilin 2
hsa-miR-330-3p	1	0	1	1	1	1	CNBP	CCHC-type zinc finger, nucleic acid binding protein
hsa-miR-330-3p	0	0	1	1	1	1	PSG5	pregnancy specific beta-1-glycoprotein 5
hsa-miR-330-3p	0	0	1	0	0	0	LOC93622	Morf4 family associated protein 1-like 1 pseudogene
hsa-miR-330-3p	1	0	1	1	0	0	ATP6V1B2	ATPase, H+ transporting, lysosomal 56/58kDa, V1 subunit B2
hsa-miR-330-3p	0	0	1	1	0	0	ZNF511	zinc finger protein 511
hsa-miR-330-3p	0	0	1	1	1	1	FAM18B1	family with sequence similarity 18, member B1
hsa-miR-330-3p	0	0	1	1	1	1	JAM2	junctional adhesion molecule 2
hsa-miR-330-3p	0	0	1	0	0	0	ZNF674-AS1	ZNF674 antisense RNA 1
hsa-miR-330-3p	0	0	1	1	0	0	OXA1L	oxidase (cytochrome c) assembly 1-like
hsa-miR-330-3p	0	0	1	1	1	1	HUS1	HUS1 checkpoint homolog (S. pombe)
hsa-miR-330-3p	1	0	1	1	1	1	TMEM55B	transmembrane protein 55B
hsa-miR-330-3p	1	0	1	1	1	1	UBE2K	ubiquitin-conjugating enzyme E2K
hsa-miR-330-3p	0	0	1	1	1	1	LGI1	leucine-rich, glioma inactivated 1
hsa-miR-330-3p	0	0	1	0	0	0	A2M	alpha-2-macroglobulin
hsa-miR-330-3p	1	0	1	0	1	1	CD47	CD47 molecule
hsa-miR-330-3p	1	0	1	1	1	1	ID2	inhibitor of DNA binding 2, dominant negative helix-loop-helix protein
hsa-miR-330-3p	0	0	1	1	1	1	ZNF346	zinc finger protein 346
hsa-miR-330-3p	1	0	1	1	1	1	PHF20L1	PHD finger protein 20-like 1
hsa-miR-330-3p	0	0	1	1	1	1	OTOR	otoraplin
hsa-miR-330-3p	0	0	1	1	1	1	RNF126	ring finger protein 126
hsa-miR-330-3p	0	0	1	1	1	1	NUDT21	nudix (nucleoside diphosphate linked moiety X)-type motif 21
hsa-miR-330-3p	0	0	1	1	1	1	ZFAND1	zinc finger, AN1-type domain 1
hsa-miR-330-3p	1	0	1	1	1	1	LGALSL	lectin, galactoside-binding-like
hsa-miR-330-3p	1	0	1	1	1	1	TFPI	tissue factor pathway inhibitor (lipoprotein-associated coagulation inhibitor)
hsa-miR-330-3p	1	0	1	1	1	1	RND3	Rho family GTPase 3
hsa-miR-330-3p	1	0	1	0	1	1	NMT1	N-myristoyltransferase 1
hsa-miR-330-3p	0	0	1	0	0	0	MYSM1	Myb-like, SWIRM and MPN domains 1
hsa-miR-330-3p	1	0	1	0	1	1	KIAA0240	KIAA0240
hsa-miR-330-3p	1	0	1	0	1	1	KIAA0664	KIAA0664
hsa-miR-330-3p	0	0	1	0	0	0	LOC731789	uncharacterized LOC731789
hsa-miR-330-3p	0	0	1	1	1	1	BDP1	B double prime 1, subunit of RNA polymerase III transcription initiation factor IIIB
hsa-miR-330-3p	1	0	1	1	1	1	PHACTR2	phosphatase and actin regulator 2
hsa-miR-330-3p	0	0	1	1	1	1	ATG5	autophagy related 5
hsa-miR-330-3p	1	0	1	0	1	1	MEGF10	multiple EGF-like-domains 10
hsa-miR-330-3p	1	0	1	0	1	1	PTP4A1	protein tyrosine phosphatase type IVA, member 1
hsa-miR-330-3p	1	0	1	1	1	1	ANKS6	ankyrin repeat and sterile alpha motif domain containing 6
hsa-miR-330-3p	0	0	1	0	0	0	MUC19	mucin 19, oligomeric
hsa-miR-330-3p	1	0	1	1	1	1	TIPARP	TCDD-inducible poly(ADP-ribose) polymerase
hsa-miR-330-3p	1	0	1	1	1	1	ADD1	adducin 1 (alpha)
hsa-miR-330-3p	1	0	1	1	1	1	ZFHX3	zinc finger homeobox 3
hsa-miR-330-3p	1	0	1	1	1	1	GRM5	glutamate receptor, metabotropic 5
hsa-miR-330-3p	1	0	1	1	1	1	SP2	Sp2 transcription factor
hsa-miR-330-3p	1	0	1	1	1	1	PI15	peptidase inhibitor 15
hsa-miR-330-3p	1	0	1	1	1	1	PRKG1	protein kinase, cGMP-dependent, type I
hsa-miR-330-3p	1	0	1	1	1	1	MAN2A2	mannosidase, alpha, class 2A, member 2
hsa-miR-330-3p	1	0	1	0	1	1	EFR3A	EFR3 homolog A (S. cerevisiae)
hsa-miR-330-3p	1	0	1	1	1	1	UBAP2L	ubiquitin associated protein 2-like
hsa-miR-330-3p	0	0	1	1	1	1	UBXN8	UBX domain protein 8
hsa-miR-330-3p	1	0	1	0	1	1	LONRF2	LON peptidase N-terminal domain and ring finger 2
hsa-miR-330-3p	1	0	1	1	1	1	KCNE3	potassium voltage-gated channel, Isk-related family, member 3
hsa-miR-330-3p	1	0	1	1	1	1	TRIOBP	TRIO and F-actin binding protein
hsa-miR-330-3p	1	0	1	1	1	1	MOSPD1	motile sperm domain containing 1
hsa-miR-330-3p	0	0	1	1	1	1	CCKBR	cholecystokinin B receptor
hsa-miR-330-3p	0	0	1	1	1	1	P2RX7	purinergic receptor P2X, ligand-gated ion channel, 7
hsa-miR-330-3p	0	0	1	0	0	0	CDKN2B-AS1	CDKN2B antisense RNA 1
hsa-miR-330-3p	0	0	1	1	1	1	MARVELD2	MARVEL domain containing 2
hsa-miR-330-3p	1	0	1	1	1	1	CADM3	cell adhesion molecule 3
hsa-miR-330-3p	1	0	1	1	1	1	LGR4	leucine-rich repeat containing G protein-coupled receptor 4
hsa-miR-330-3p	1	0	1	1	1	1	IRF1	interferon regulatory factor 1
hsa-miR-330-3p	0	0	1	1	1	1	CCL20	chemokine (C-C motif) ligand 20
hsa-miR-330-3p	1	0	1	1	1	1	MLL	myeloid/lymphoid or mixed-lineage leukemia (trithorax homolog, Drosophila)
hsa-miR-330-3p	0	0	1	1	1	1	ADPRH	ADP-ribosylarginine hydrolase
hsa-miR-330-3p	1	0	1	1	1	1	ATP2B2	ATPase, Ca++ transporting, plasma membrane 2
hsa-miR-330-3p	1	0	1	1	1	1	AFF1	AF4/FMR2 family, member 1
hsa-miR-330-3p	0	0	1	1	1	1	ELF1	E74-like factor 1 (ets domain transcription factor)
hsa-miR-330-3p	0	0	1	1	1	1	CNGA1	cyclic nucleotide gated channel alpha 1
hsa-miR-330-3p	1	0	1	0	1	1	ACVR2A	activin A receptor, type IIA
hsa-miR-330-3p	0	0	1	1	1	1	CA2	carbonic anhydrase II
hsa-miR-330-3p	1	0	1	1	1	1	COL1A2	collagen, type I, alpha 2
hsa-miR-330-3p	1	0	1	1	1	1	COL4A3	collagen, type IV, alpha 3 (Goodpasture antigen)
hsa-miR-330-3p	1	0	1	1	1	1	COL4A4	collagen, type IV, alpha 4
hsa-miR-330-3p	1	0	1	1	1	1	CYP19A1	cytochrome P450, family 19, subfamily A, polypeptide 1
hsa-miR-330-3p	1	0	1	1	1	1	ESR1	estrogen receptor 1
hsa-miR-330-3p	1	0	1	1	1	1	F13A1	coagulation factor XIII, A1 polypeptide
hsa-miR-330-3p	0	0	1	1	0	0	GBA	glucosidase, beta, acid
hsa-miR-330-3p	0	0	1	0	1	1	GBE1	glucan (1,4-alpha-), branching enzyme 1
hsa-miR-330-3p	1	0	1	1	1	1	GK	glycerol kinase
hsa-miR-330-3p	1	0	1	0	1	1	GLI3	GLI family zinc finger 3
hsa-miR-330-3p	0	0	1	1	1	1	GLDC	glycine dehydrogenase (decarboxylating)
hsa-miR-330-3p	1	0	1	1	1	1	TBX5	T-box 5
hsa-miR-330-3p	1	0	1	1	1	1	KCNA1	potassium voltage-gated channel, shaker-related subfamily, member 1 (episodic ataxia with myokymia)
hsa-miR-330-3p	1	0	1	1	1	1	LAMB3	laminin, beta 3
hsa-miR-330-3p	0	0	1	1	1	1	MAOA	monoamine oxidase A
hsa-miR-330-3p	0	0	1	1	1	1	MTM1	myotubularin 1
hsa-miR-330-3p	1	0	1	1	1	1	OCRL	oculocerebrorenal syndrome of Lowe
hsa-miR-330-3p	1	0	1	1	0	0	PAX2	paired box 2
hsa-miR-330-3p	1	0	1	1	1	1	PMP22	peripheral myelin protein 22
hsa-miR-330-3p	0	0	1	1	1	1	PRNP	prion protein
hsa-miR-330-3p	1	0	1	1	1	1	ATXN1	ataxin 1
hsa-miR-330-3p	0	0	1	1	1	1	TSHR	thyroid stimulating hormone receptor
hsa-miR-330-3p	0	0	1	1	1	1	XDH	xanthine dehydrogenase
hsa-miR-330-3p	1	0	1	0	1	1	COL5A2	collagen, type V, alpha 2
hsa-miR-330-3p	1	0	1	1	1	1	HLCS	holocarboxylase synthetase (biotin-(proprionyl-CoA-carboxylase (ATP-hydrolysing)) ligase)
hsa-miR-330-3p	0	0	1	1	0	0	IAPP	islet amyloid polypeptide
hsa-miR-330-3p	1	0	1	0	1	1	PAFAH1B1	platelet-activating factor acetylhydrolase 1b, regulatory subunit 1 (45kDa)
hsa-miR-330-3p	1	0	1	0	1	1	PCSK1	proprotein convertase subtilisin/kexin type 1
hsa-miR-330-3p	0	0	1	1	0	0	PSEN2	presenilin 2 (Alzheimer disease 4)
hsa-miR-330-3p	0	0	1	1	1	1	UGT1A1	UDP glucuronosyltransferase 1 family, polypeptide A1
hsa-miR-330-3p	1	0	1	1	1	1	ATRX	alpha thalassemia/mental retardation syndrome X-linked
hsa-miR-330-3p	1	0	1	1	1	1	HOXA13	homeobox A13
hsa-miR-330-3p	0	0	1	1	0	0	OTC	ornithine carbamoyltransferase
hsa-miR-330-3p	1	0	1	1	1	1	PLP1	proteolipid protein 1
hsa-miR-330-3p	0	0	1	1	0	0	REN	renin
hsa-miR-330-3p	1	0	1	1	1	1	DCX	doublecortin
hsa-miR-330-3p	1	0	1	1	1	1	CXCL12	chemokine (C-X-C motif) ligand 12
hsa-miR-330-3p	1	0	1	1	1	1	CD44	CD44 molecule (Indian blood group)
hsa-miR-330-3p	0	0	1	0	1	1	ADRA2A	adrenoceptor alpha 2A
hsa-miR-330-3p	0	0	1	1	1	1	AGTR2	angiotensin II receptor, type 2
hsa-miR-330-3p	1	0	1	0	1	1	CACNA1E	calcium channel, voltage-dependent, R type, alpha 1E subunit
hsa-miR-330-3p	0	0	1	1	1	1	CYP7A1	cytochrome P450, family 7, subfamily A, polypeptide 1
hsa-miR-330-3p	1	0	1	1	1	1	DIO2	deiodinase, iodothyronine, type II
hsa-miR-330-3p	1	0	1	1	1	1	DRD1	dopamine receptor D1
hsa-miR-330-3p	0	0	1	1	1	1	GRIN2B	glutamate receptor, ionotropic, N-methyl D-aspartate 2B
hsa-miR-330-3p	1	0	1	1	1	1	GUCY1A2	guanylate cyclase 1, soluble, alpha 2
hsa-miR-330-3p	0	0	1	1	1	1	HTR7	5-hydroxytryptamine (serotonin) receptor 7, adenylate cyclase-coupled
hsa-miR-330-3p	1	0	1	1	1	1	IGF1R	insulin-like growth factor 1 receptor
hsa-miR-330-3p	1	0	1	0	1	1	KITLG	KIT ligand
hsa-miR-330-3p	1	0	1	1	1	1	MME	membrane metallo-endopeptidase
hsa-miR-330-3p	1	0	1	1	1	1	PDE3B	phosphodiesterase 3B, cGMP-inhibited
hsa-miR-330-3p	1	0	1	1	1	1	PTGFR	prostaglandin F receptor (FP)
hsa-miR-330-3p	1	0	1	1	1	1	RARB	retinoic acid receptor, beta
hsa-miR-330-3p	0	0	1	1	1	1	BLOC1S2	biogenesis of lysosomal organelles complex-1, subunit 2
hsa-miR-330-3p	1	0	1	0	1	1	SMAD5	SMAD family member 5
hsa-miR-330-3p	1	0	1	0	1	1	GDF6	growth differentiation factor 6
hsa-miR-330-3p	1	0	1	1	1	1	TPD52L3	tumor protein D52-like 3
hsa-miR-330-3p	1	0	1	0	1	1	CLDN18	claudin 18
hsa-miR-330-3p	1	0	1	1	1	1	GATA3	GATA binding protein 3
hsa-miR-330-3p	1	0	1	1	1	1	ABLIM1	actin binding LIM protein 1
hsa-miR-330-3p	1	0	1	1	1	1	TMEM200B	transmembrane protein 200B
hsa-miR-330-3p	1	0	1	1	1	1	KLHL31	kelch-like 31 (Drosophila)
hsa-miR-330-3p	1	0	1	1	1	1	BICD2	bicaudal D homolog 2 (Drosophila)
hsa-miR-330-3p	1	0	1	0	1	1	BMF	Bcl2 modifying factor
hsa-miR-330-3p	0	0	1	1	1	1	ZCCHC16	zinc finger, CCHC domain containing 16
hsa-miR-330-3p	0	0	1	0	1	1	FLJ16124	FLJ16124 protein
hsa-miR-330-3p	1	0	1	0	1	1	LRRC55	leucine rich repeat containing 55
hsa-miR-330-3p	1	0	1	1	1	1	ACTR2	ARP2 actin-related protein 2 homolog (yeast)
hsa-miR-330-3p	1	0	1	0	1	1	YPEL2	yippee-like 2 (Drosophila)
hsa-miR-330-3p	1	0	1	1	1	1	EDA	ectodysplasin A
hsa-miR-330-3p	0	0	1	1	1	1	RYK	receptor-like tyrosine kinase
hsa-miR-330-3p	1	0	1	0	1	1	IP6K1	inositol hexakisphosphate kinase 1
hsa-miR-330-3p	1	0	1	1	1	1	TAC3	tachykinin 3
hsa-miR-330-3p	0	0	1	1	0	0	TCEAL3	transcription elongation factor A (SII)-like 3
hsa-miR-330-3p	0	0	1	1	1	1	TCEAL6	transcription elongation factor A (SII)-like 6
hsa-miR-330-3p	1	0	1	1	1	1	ATN1	atrophin 1
hsa-miR-330-3p	0	0	1	1	1	1	SCP2	sterol carrier protein 2
hsa-miR-330-3p	1	0	1	1	1	1	NTRK3	neurotrophic tyrosine kinase, receptor, type 3
hsa-miR-330-3p	1	0	1	1	1	1	BRWD1	bromodomain and WD repeat domain containing 1
hsa-miR-330-3p	0	0	1	1	1	1	KLHDC9	kelch domain containing 9
hsa-miR-330-3p	0	0	1	1	1	1	TRIM13	tripartite motif containing 13
hsa-miR-330-3p	0	0	1	1	1	1	FAM154B	family with sequence similarity 154, member B
hsa-miR-330-3p	1	0	1	1	1	1	UMOD	uromodulin
hsa-miR-330-3p	1	0	1	0	1	1	KIAA2022	KIAA2022
hsa-miR-330-3p	1	0	1	1	1	1	NUPL1	nucleoporin like 1
hsa-miR-330-3p	1	0	1	1	1	1	LPHN1	latrophilin 1
hsa-miR-330-3p	0	0	1	1	1	1	FBXO47	F-box protein 47
hsa-miR-330-3p	0	0	1	1	0	0	ARMCX6	armadillo repeat containing, X-linked 6
hsa-miR-330-3p	0	0	1	1	1	1	RXRG	retinoid X receptor, gamma
hsa-miR-330-3p	1	0	1	1	1	1	SHE	Src homology 2 domain containing E
hsa-miR-330-3p	0	0	1	1	1	1	SPIN3	spindlin family, member 3
hsa-miR-330-3p	1	0	1	0	1	1	FAM102B	family with sequence similarity 102, member B
hsa-miR-330-3p	1	0	1	0	1	1	ZC3H12B	zinc finger CCCH-type containing 12B
hsa-miR-330-3p	0	0	1	1	1	1	MUC21	mucin 21, cell surface associated
hsa-miR-330-3p	1	0	1	1	1	1	BCL2L15	BCL2-like 15
hsa-miR-330-3p	1	0	1	1	1	1	FAM171A1	family with sequence similarity 171, member A1
hsa-miR-330-3p	0	0	1	1	1	1	SAMD13	sterile alpha motif domain containing 13
hsa-miR-330-3p	1	0	1	0	1	1	FYTTD1	forty-two-three domain containing 1
hsa-miR-330-3p	0	0	1	1	1	1	DSTN	destrin (actin depolymerizing factor)
hsa-miR-330-3p	1	0	1	1	1	1	PCGF6	polycomb group ring finger 6
hsa-miR-330-3p	1	0	1	1	1	1	CTNNBIP1	catenin, beta interacting protein 1
hsa-miR-330-3p	0	0	1	1	1	1	SEC61G	Sec61 gamma subunit
hsa-miR-330-3p	0	0	1	0	1	1	GNRHR	gonadotropin-releasing hormone receptor
hsa-miR-330-3p	1	0	1	1	1	1	DISC1	disrupted in schizophrenia 1
hsa-miR-330-3p	1	0	1	1	1	1	PABPC1L2A	poly(A) binding protein, cytoplasmic 1-like 2A
hsa-miR-330-3p	0	0	1	1	0	0	TCEAL5	transcription elongation factor A (SII)-like 5
hsa-miR-330-3p	1	0	1	0	1	1	ZKSCAN2	zinc finger with KRAB and SCAN domains 2
hsa-miR-330-3p	1	0	1	1	1	1	SORCS1	sortilin-related VPS10 domain containing receptor 1
hsa-miR-330-3p	0	0	1	1	1	1	FAM53A	family with sequence similarity 53, member A
hsa-miR-330-3p	0	0	1	1	1	1	C2orf68	chromosome 2 open reading frame 68
hsa-miR-330-3p	0	0	1	1	0	0	PTRHD1	peptidyl-tRNA hydrolase domain containing 1
hsa-miR-330-3p	0	0	1	1	1	1	PLIN5	perilipin 5
hsa-miR-330-3p	0	0	1	0	1	1	LINC00268	long intergenic non-protein coding RNA 268
hsa-miR-330-3p	0	0	1	1	0	0	DDR2	discoidin domain receptor tyrosine kinase 2
hsa-miR-330-3p	1	0	1	1	1	1	PHF6	PHD finger protein 6
hsa-miR-330-3p	1	0	1	1	1	1	TMCC1	transmembrane and coiled-coil domain family 1
hsa-miR-330-3p	0	0	1	1	0	0	ALDH18A1	aldehyde dehydrogenase 18 family, member A1
hsa-miR-330-3p	0	0	1	1	1	1	VMAC	vimentin-type intermediate filament associated coiled-coil protein
hsa-miR-330-3p	1	0	1	1	1	1	SH3PXD2B	SH3 and PX domains 2B
hsa-miR-330-3p	1	0	1	1	1	1	DKK3	dickkopf 3 homolog (Xenopus laevis)
hsa-miR-330-3p	1	0	1	1	1	1	SERBP1	SERPINE1 mRNA binding protein 1
hsa-miR-330-3p	0	0	1	1	1	1	NPIPL1	nuclear pore complex interacting protein-like 1
hsa-miR-330-3p	0	0	1	1	1	1	NAE1	NEDD8 activating enzyme E1 subunit 1
hsa-miR-330-3p	0	0	1	1	1	1	HNMT	histamine N-methyltransferase
hsa-miR-330-3p	1	0	1	1	1	1	GPHN	gephyrin
hsa-miR-330-3p	1	0	1	0	1	1	TNRC6B	trinucleotide repeat containing 6B
hsa-miR-330-3p	0	0	1	1	1	1	SC5DL	sterol-C5-desaturase (ERG3 delta-5-desaturase homolog, S. cerevisiae)-like
hsa-miR-330-3p	1	0	1	0	1	1	RAB12	RAB12, member RAS oncogene family
hsa-miR-330-3p	1	0	1	0	1	1	ANO6	anoctamin 6
hsa-miR-330-3p	1	0	1	1	1	1	VEGFA	vascular endothelial growth factor A
hsa-miR-330-3p	1	0	1	1	1	1	FAM108B1	family with sequence similarity 108, member B1
hsa-miR-330-3p	1	0	1	1	1	1	RGS7BP	regulator of G-protein signaling 7 binding protein
hsa-miR-330-3p	1	0	1	1	1	1	SLC10A7	solute carrier family 10 (sodium/bile acid cotransporter family), member 7
hsa-miR-330-3p	1	0	1	1	1	1	RUNX3	runt-related transcription factor 3
hsa-miR-330-3p	1	0	1	1	1	1	YTHDC1	YTH domain containing 1
hsa-miR-330-3p	1	0	1	1	1	1	MAF	v-maf musculoaponeurotic fibrosarcoma oncogene homolog (avian)
hsa-miR-330-3p	1	0	1	1	1	1	CSNK1G3	casein kinase 1, gamma 3
hsa-miR-330-3p	1	0	1	1	1	1	KLF10	Kruppel-like factor 10
hsa-miR-330-3p	1	0	1	1	1	1	UBE2V1	ubiquitin-conjugating enzyme E2 variant 1
hsa-miR-330-3p	1	0	1	1	1	1	RRM1	ribonucleotide reductase M1
hsa-miR-330-3p	1	0	1	1	1	1	ZNF704	zinc finger protein 704
hsa-miR-330-3p	0	0	1	1	1	1	C18orf62	chromosome 18 open reading frame 62
hsa-miR-330-3p	1	0	1	1	1	1	SCD5	stearoyl-CoA desaturase 5
hsa-miR-330-3p	1	0	1	1	1	1	DLX1	distal-less homeobox 1
hsa-miR-330-3p	1	0	1	0	1	1	TTPAL	tocopherol (alpha) transfer protein-like
hsa-miR-330-3p	0	0	1	1	1	1	EFEMP1	EGF containing fibulin-like extracellular matrix protein 1
hsa-miR-330-3p	1	0	1	1	1	1	ELMO1	engulfment and cell motility 1
hsa-miR-330-3p	1	0	1	0	1	1	CCNL2	cyclin L2
hsa-miR-330-3p	1	0	1	0	1	1	USP9X	ubiquitin specific peptidase 9, X-linked
hsa-miR-330-3p	1	0	1	0	1	1	CREBZF	CREB/ATF bZIP transcription factor
hsa-miR-330-3p	0	0	1	1	1	1	MDH1B	malate dehydrogenase 1B, NAD (soluble)
hsa-miR-330-3p	1	0	1	1	1	1	CHN2	chimerin (chimaerin) 2
hsa-miR-330-3p	1	0	1	1	1	1	TCERG1	transcription elongation regulator 1
hsa-miR-330-3p	1	0	1	0	1	1	FAM133B	family with sequence similarity 133, member B
hsa-miR-330-3p	1	0	1	1	1	1	SPTSSB	serine palmitoyltransferase, small subunit B
hsa-miR-330-3p	0	0	1	0	1	1	OPALIN	oligodendrocytic myelin paranodal and inner loop protein
hsa-miR-330-3p	1	0	1	1	1	1	SCN2A	sodium channel, voltage-gated, type II, alpha subunit
hsa-miR-330-3p	0	0	1	0	1	1	SCN3B	sodium channel, voltage-gated, type III, beta subunit
hsa-miR-330-3p	1	0	1	0	1	1	CD83	CD83 molecule
hsa-miR-330-3p	0	0	1	1	1	1	MTHFD2	methylenetetrahydrofolate dehydrogenase (NADP+ dependent) 2, methenyltetrahydrofolate cyclohydrolase
hsa-miR-330-3p	1	0	1	1	1	1	ASB1	ankyrin repeat and SOCS box containing 1
hsa-miR-330-3p	1	0	1	1	1	1	MTMR12	myotubularin related protein 12
hsa-miR-330-3p	1	0	1	1	1	1	FAM63B	family with sequence similarity 63, member B
hsa-miR-330-3p	1	0	1	1	0	0	BCL2L12	BCL2-like 12 (proline rich)
hsa-miR-330-3p	0	0	1	1	0	0	FAM110A	family with sequence similarity 110, member A
hsa-miR-330-3p	1	0	1	1	1	1	GLIS3	GLIS family zinc finger 3
hsa-miR-330-3p	1	0	1	1	1	1	RUFY2	RUN and FYVE domain containing 2
hsa-miR-330-3p	1	0	1	1	1	1	PABPC1L2B	poly(A) binding protein, cytoplasmic 1-like 2B
hsa-miR-330-3p	1	0	1	1	1	1	ZNF706	zinc finger protein 706
hsa-miR-330-3p	1	0	1	1	1	1	FRS2	fibroblast growth factor receptor substrate 2
hsa-miR-330-3p	1	0	1	1	1	1	ERBB4	v-erb-a erythroblastic leukemia viral oncogene homolog 4 (avian)
hsa-miR-330-3p	0	0	1	1	0	0	NGDN	neuroguidin, EIF4E binding protein
hsa-miR-330-3p	1	0	1	0	1	1	SRGAP2	SLIT-ROBO Rho GTPase activating protein 2
hsa-miR-330-3p	1	0	1	0	1	1	SLC12A2	solute carrier family 12 (sodium/potassium/chloride transporters), member 2
hsa-miR-330-3p	0	0	1	1	0	0	UBL5	ubiquitin-like 5
hsa-miR-330-3p	0	0	1	0	1	1	SSTR1	somatostatin receptor 1
hsa-miR-330-3p	0	0	1	0	1	1	TOP2A	topoisomerase (DNA) II alpha 170kDa
hsa-miR-330-3p	1	0	1	1	1	1	MZT1	mitotic spindle organizing protein 1
hsa-miR-330-3p	0	0	1	1	1	1	UGT1A6	UDP glucuronosyltransferase 1 family, polypeptide A6
hsa-miR-330-3p	1	0	1	1	1	1	ZNF436	zinc finger protein 436
hsa-miR-330-3p	1	0	1	1	1	1	PDE11A	phosphodiesterase 11A
hsa-miR-330-3p	1	0	1	1	1	1	ATG9A	autophagy related 9A
hsa-miR-330-3p	1	0	1	1	1	1	RNF214	ring finger protein 214
hsa-miR-330-3p	0	0	1	1	1	1	PPCS	phosphopantothenoylcysteine synthetase
hsa-miR-330-3p	1	0	1	1	1	1	PRR3	proline rich 3
hsa-miR-330-3p	1	0	1	1	1	1	SRSF1	serine/arginine-rich splicing factor 1
hsa-miR-330-3p	0	0	1	1	1	1	DIAPH1	diaphanous homolog 1 (Drosophila)
hsa-miR-330-3p	1	0	1	1	1	1	ITGA6	integrin, alpha 6
hsa-miR-330-3p	1	0	1	1	1	1	OCIAD1	OCIA domain containing 1
hsa-miR-330-3p	1	0	1	1	1	1	CREBBP	CREB binding protein
hsa-miR-330-3p	1	0	1	1	1	1	LDB3	LIM domain binding 3
hsa-miR-330-3p	1	0	1	1	1	1	PACRG	PARK2 co-regulated
hsa-miR-330-3p	1	0	1	0	1	1	FBXO41	F-box protein 41
hsa-miR-330-3p	1	0	1	0	1	1	CCDC85A	coiled-coil domain containing 85A
hsa-miR-330-3p	0	0	1	0	1	1	EPHA6	EPH receptor A6
hsa-miR-330-3p	1	0	1	0	1	1	ODZ3	odz, odd Oz/ten-m homolog 3 (Drosophila)
hsa-miR-330-3p	1	0	1	0	1	1	MEGF9	multiple EGF-like-domains 9
hsa-miR-330-3p	0	0	1	1	1	1	CPN2	carboxypeptidase N, polypeptide 2
hsa-miR-330-3p	1	0	1	1	1	1	UNC119B	unc-119 homolog B (C. elegans)
hsa-miR-330-3p	0	0	1	1	1	1	SNTN	sentan, cilia apical structure protein
hsa-miR-330-3p	1	0	1	1	1	1	MYO1C	myosin IC
hsa-miR-330-3p	1	0	1	1	1	1	REPS2	RALBP1 associated Eps domain containing 2
hsa-miR-330-3p	1	0	1	1	1	1	NXF1	nuclear RNA export factor 1
hsa-miR-330-3p	1	0	1	0	1	1	SCN3A	sodium channel, voltage-gated, type III, alpha subunit
hsa-miR-330-3p	1	0	1	1	0	0	ASIC2	acid-sensing (proton-gated) ion channel 2
hsa-miR-330-3p	1	0	1	1	1	1	ADAM10	ADAM metallopeptidase domain 10
hsa-miR-330-3p	1	0	1	1	1	1	ADCY9	adenylate cyclase 9
hsa-miR-330-3p	1	0	1	0	1	1	XIAP	X-linked inhibitor of apoptosis
hsa-miR-330-3p	1	0	1	0	1	1	BACH1	BTB and CNC homology 1, basic leucine zipper transcription factor 1
hsa-miR-330-3p	0	0	1	0	1	1	BAGE	B melanoma antigen
hsa-miR-330-3p	1	0	1	0	1	1	BMPR2	bone morphogenetic protein receptor, type II (serine/threonine kinase)
hsa-miR-330-3p	1	0	1	0	1	1	KLF9	Kruppel-like factor 9
hsa-miR-330-3p	1	0	1	1	1	1	CAMK2D	calcium/calmodulin-dependent protein kinase II delta
hsa-miR-330-3p	1	0	1	1	1	1	CDH13	cadherin 13, H-cadherin (heart)
hsa-miR-330-3p	1	0	1	0	1	1	CDK6	cyclin-dependent kinase 6
hsa-miR-330-3p	0	0	1	1	1	1	CHI3L1	chitinase 3-like 1 (cartilage glycoprotein-39)
hsa-miR-330-3p	0	0	1	1	1	1	CCR1	chemokine (C-C motif) receptor 1
hsa-miR-330-3p	1	0	1	0	1	1	CPD	carboxypeptidase D
hsa-miR-330-3p	1	0	1	1	1	1	CREBL2	cAMP responsive element binding protein-like 2
hsa-miR-330-3p	0	0	1	1	0	0	DIO3	deiodinase, iodothyronine, type III
hsa-miR-330-3p	1	0	1	1	1	1	DYRK1A	dual-specificity tyrosine-(Y)-phosphorylation regulated kinase 1A
hsa-miR-330-3p	1	0	1	0	1	1	EFNB3	ephrin-B3
hsa-miR-330-3p	1	0	1	0	1	1	EIF2S3	eukaryotic translation initiation factor 2, subunit 3 gamma, 52kDa
hsa-miR-330-3p	1	0	1	1	1	1	ELAVL1	ELAV (embryonic lethal, abnormal vision, Drosophila)-like 1 (Hu antigen R)
hsa-miR-330-3p	0	0	1	0	1	1	EMP1	epithelial membrane protein 1
hsa-miR-330-3p	1	0	1	1	1	1	GPC4	glypican 4
hsa-miR-330-3p	1	0	1	1	1	1	FOXC1	forkhead box C1
hsa-miR-330-3p	0	0	1	0	1	1	FMO2	flavin containing monooxygenase 2 (non-functional)
hsa-miR-330-3p	1	0	1	0	1	1	B4GALT1	UDP-Gal:betaGlcNAc beta 1,4- galactosyltransferase, polypeptide 1
hsa-miR-330-3p	0	0	1	1	1	1	IL13RA1	interleukin 13 receptor, alpha 1
hsa-miR-330-3p	1	0	1	1	1	1	AHNAK	AHNAK nucleoprotein
hsa-miR-330-3p	0	0	1	1	1	1	AOAH	acyloxyacyl hydrolase (neutrophil)
hsa-miR-330-3p	1	0	1	1	1	1	AQP4	aquaporin 4
hsa-miR-330-3p	1	0	1	1	1	1	BTG1	B-cell translocation gene 1, anti-proliferative
hsa-miR-330-3p	0	0	1	1	1	1	CDO1	cysteine dioxygenase, type I
hsa-miR-330-3p	0	0	1	1	1	1	CKS1B	CDC28 protein kinase regulatory subunit 1B
hsa-miR-330-3p	1	0	1	1	1	1	CLCN3	chloride channel, voltage-sensitive 3
hsa-miR-330-3p	1	0	1	0	1	1	COL19A1	collagen, type XIX, alpha 1
hsa-miR-330-3p	1	0	1	1	1	1	SLC31A1	solute carrier family 31 (copper transporters), member 1
hsa-miR-330-3p	0	0	1	1	1	1	SLC31A2	solute carrier family 31 (copper transporters), member 2
hsa-miR-330-3p	1	0	1	1	1	1	DSC3	desmocollin 3
hsa-miR-330-3p	1	0	1	1	1	1	E2F3	E2F transcription factor 3
hsa-miR-330-3p	0	0	1	1	1	1	EGR4	early growth response 4
hsa-miR-330-3p	1	0	1	1	1	1	EIF4E	eukaryotic translation initiation factor 4E
hsa-miR-330-3p	0	0	1	1	1	1	FLI1	Friend leukemia virus integration 1
hsa-miR-330-3p	1	0	1	1	1	1	FMOD	fibromodulin
hsa-miR-330-3p	1	0	1	1	1	1	FRK	fyn-related kinase
hsa-miR-330-3p	1	0	1	0	1	1	FUT4	fucosyltransferase 4 (alpha (1,3) fucosyltransferase, myeloid-specific)
hsa-miR-330-3p	1	0	1	1	1	1	GAB1	GRB2-associated binding protein 1
hsa-miR-330-3p	0	0	1	0	1	1	GCG	glucagon
hsa-miR-330-3p	1	0	1	1	1	1	GLRA2	glycine receptor, alpha 2
hsa-miR-330-3p	0	0	1	0	1	1	GYPA	glycophorin A (MNS blood group)
hsa-miR-330-3p	0	0	1	1	1	1	HLA-DOA	major histocompatibility complex, class II, DO alpha
hsa-miR-330-3p	1	0	1	1	1	1	HOXB3	homeobox B3
hsa-miR-330-3p	1	0	1	1	1	1	ID1	inhibitor of DNA binding 1, dominant negative helix-loop-helix protein
hsa-miR-330-3p	0	0	1	1	0	0	IDH2	isocitrate dehydrogenase 2 (NADP+), mitochondrial
hsa-miR-330-3p	1	0	1	1	1	1	ITGB8	integrin, beta 8
hsa-miR-330-3p	1	0	1	1	1	1	KCNA5	potassium voltage-gated channel, shaker-related subfamily, member 5
hsa-miR-330-3p	1	0	1	1	1	1	KCNA6	potassium voltage-gated channel, shaker-related subfamily, member 6
hsa-miR-330-3p	0	0	1	1	1	1	KCNJ6	potassium inwardly-rectifying channel, subfamily J, member 6
hsa-miR-330-3p	1	0	1	1	1	1	KCNJ10	potassium inwardly-rectifying channel, subfamily J, member 10
hsa-miR-330-3p	0	0	1	1	1	1	KLRC1	killer cell lectin-like receptor subfamily C, member 1
hsa-miR-330-3p	0	0	1	1	1	1	KLRC2	killer cell lectin-like receptor subfamily C, member 2
hsa-miR-330-3p	1	0	1	1	1	1	KPNB1	karyopherin (importin) beta 1
hsa-miR-330-3p	1	0	1	1	1	1	KPNA4	karyopherin alpha 4 (importin alpha 3)
hsa-miR-330-3p	1	0	1	0	1	1	LAMC1	laminin, gamma 1 (formerly LAMB2)
hsa-miR-330-3p	1	0	1	1	1	1	LIFR	leukemia inhibitory factor receptor alpha
hsa-miR-330-3p	1	0	1	1	1	1	LY75	lymphocyte antigen 75
hsa-miR-330-3p	1	0	1	1	1	1	MAX	MYC associated factor X
hsa-miR-330-3p	1	0	1	1	1	1	MYH3	myosin, heavy chain 3, skeletal muscle, embryonic
hsa-miR-330-3p	0	0	1	1	1	1	MYOD1	myogenic differentiation 1
hsa-miR-330-3p	1	0	1	1	1	1	PPP1R12B	protein phosphatase 1, regulatory subunit 12B
hsa-miR-330-3p	1	0	1	1	1	1	NPTX1	neuronal pentraxin I
hsa-miR-330-3p	0	0	1	0	1	1	OAZ2	ornithine decarboxylase antizyme 2
hsa-miR-330-3p	1	0	1	0	1	1	PCDHGC3	protocadherin gamma subfamily C, 3
hsa-miR-330-3p	0	0	1	1	1	1	PCK1	phosphoenolpyruvate carboxykinase 1 (soluble)
hsa-miR-330-3p	1	0	1	0	1	1	PDK1	pyruvate dehydrogenase kinase, isozyme 1
hsa-miR-330-3p	0	0	1	1	1	1	PIM1	pim-1 oncogene
hsa-miR-330-3p	1	0	1	1	1	1	PLAGL2	pleiomorphic adenoma gene-like 2
hsa-miR-330-3p	1	0	1	1	1	1	PPP2CA	protein phosphatase 2, catalytic subunit, alpha isozyme
hsa-miR-330-3p	0	0	1	1	1	1	PRKCB	protein kinase C, beta
hsa-miR-330-3p	0	0	1	1	1	1	MAP2K1	mitogen-activated protein kinase kinase 1
hsa-miR-330-3p	1	0	1	1	1	1	PROX1	prospero homeobox 1
hsa-miR-330-3p	0	0	1	1	1	1	HTRA1	HtrA serine peptidase 1
hsa-miR-330-3p	1	0	1	1	1	1	PTPN4	protein tyrosine phosphatase, non-receptor type 4 (megakaryocyte)
hsa-miR-330-3p	0	0	1	1	1	1	PTPRM	protein tyrosine phosphatase, receptor type, M
hsa-miR-330-3p	1	0	1	1	1	1	PTX3	pentraxin 3, long
hsa-miR-330-3p	1	0	1	0	1	1	RAB6A	RAB6A, member RAS oncogene family
hsa-miR-330-3p	1	0	1	0	1	1	RAP2B	RAP2B, member of RAS oncogene family
hsa-miR-330-3p	1	0	1	1	1	1	RASA1	RAS p21 protein activator (GTPase activating protein) 1
hsa-miR-330-3p	1	0	1	1	1	1	ARID4A	AT rich interactive domain 4A (RBP1-like)
hsa-miR-330-3p	1	0	1	1	1	1	RBL1	retinoblastoma-like 1 (p107)
hsa-miR-330-3p	0	0	1	1	1	1	RFC3	replication factor C (activator 1) 3, 38kDa
hsa-miR-330-3p	0	0	1	1	1	1	RPA1	replication protein A1, 70kDa
hsa-miR-330-3p	1	0	1	0	1	1	SORT1	sortilin 1
hsa-miR-330-3p	1	0	1	1	1	1	SALL1	sal-like 1 (Drosophila)
hsa-miR-330-3p	0	0	1	0	1	1	CXCL5	chemokine (C-X-C motif) ligand 5
hsa-miR-330-3p	1	0	1	1	1	1	SRSF3	serine/arginine-rich splicing factor 3
hsa-miR-330-3p	1	0	1	1	1	1	SH3GL2	SH3-domain GRB2-like 2
hsa-miR-330-3p	1	0	1	1	1	1	SNAI2	snail homolog 2 (Drosophila)
hsa-miR-330-3p	1	0	1	1	1	1	SMARCC1	SWI/SNF related, matrix associated, actin dependent regulator of chromatin, subfamily c, member 1
hsa-miR-330-3p	1	0	1	1	1	1	SMARCD2	SWI/SNF related, matrix associated, actin dependent regulator of chromatin, subfamily d, member 2
hsa-miR-330-3p	1	0	1	1	1	1	SNX2	sorting nexin 2
hsa-miR-330-3p	1	0	1	0	1	1	SOX11	SRY (sex determining region Y)-box 11
hsa-miR-330-3p	0	0	1	1	1	1	SRP9	signal recognition particle 9kDa
hsa-miR-330-3p	0	0	1	1	1	1	TAC1	tachykinin, precursor 1
hsa-miR-330-3p	0	0	1	1	1	1	TAF2	TAF2 RNA polymerase II, TATA box binding protein (TBP)-associated factor, 150kDa
hsa-miR-330-3p	1	0	1	0	1	1	TAL1	T-cell acute lymphocytic leukemia 1
hsa-miR-330-3p	0	0	1	0	1	1	TCEB3	transcription elongation factor B (SIII), polypeptide 3 (110kDa, elongin A)
hsa-miR-330-3p	1	0	1	1	1	1	TDG	thymine-DNA glycosylase
hsa-miR-330-3p	1	0	1	1	1	1	TFAP2B	transcription factor AP-2 beta (activating enhancer binding protein 2 beta)
hsa-miR-330-3p	1	0	1	0	1	1	THBS1	thrombospondin 1
hsa-miR-330-3p	1	0	1	0	1	1	SEC62	SEC62 homolog (S. cerevisiae)
hsa-miR-330-3p	1	0	1	0	1	1	TSPYL1	TSPY-like 1
hsa-miR-330-3p	1	0	1	0	1	1	TUB	tubby homolog (mouse)
hsa-miR-330-3p	1	0	1	0	1	1	VCL	vinculin
hsa-miR-330-3p	1	0	1	0	1	1	YWHAB	tyrosine 3-monooxygenase/tryptophan 5-monooxygenase activation protein, beta polypeptide
hsa-miR-330-3p	1	0	1	1	1	1	YWHAH	tyrosine 3-monooxygenase/tryptophan 5-monooxygenase activation protein, eta polypeptide
hsa-miR-330-3p	0	0	1	0	1	1	ZFY	zinc finger protein, Y-linked
hsa-miR-330-3p	1	0	1	1	1	1	ZIC3	Zic family member 3
hsa-miR-330-3p	1	0	1	1	1	1	FZD5	frizzled family receptor 5
hsa-miR-330-3p	0	0	1	1	1	1	SCG2	secretogranin II
hsa-miR-330-3p	1	0	1	1	1	1	DEK	DEK oncogene
hsa-miR-330-3p	1	0	1	1	1	1	ADAM12	ADAM metallopeptidase domain 12
hsa-miR-330-3p	1	0	1	1	1	1	HMGA2	high mobility group AT-hook 2
hsa-miR-330-3p	1	0	1	1	1	1	NRIP1	nuclear receptor interacting protein 1
hsa-miR-330-3p	1	0	1	1	1	1	FZD7	frizzled family receptor 7
hsa-miR-330-3p	1	0	1	1	1	1	PIP4K2B	phosphatidylinositol-5-phosphate 4-kinase, type II, beta
hsa-miR-330-3p	0	0	1	1	1	1	BFSP2	beaded filament structural protein 2, phakinin
hsa-miR-330-3p	1	0	1	0	1	1	VAPA	VAMP (vesicle-associated membrane protein)-associated protein A, 33kDa
hsa-miR-330-3p	1	0	1	0	1	1	CUL3	cullin 3
hsa-miR-330-3p	0	0	1	1	0	0	SEMA7A	semaphorin 7A, GPI membrane anchor (John Milton Hagen blood group)
hsa-miR-330-3p	0	0	1	1	1	1	RGS5	regulator of G-protein signaling 5
hsa-miR-330-3p	0	0	1	1	1	1	AP3B1	adaptor-related protein complex 3, beta 1 subunit
hsa-miR-330-3p	1	0	1	1	1	1	BHLHE40	basic helix-loop-helix family, member e40
hsa-miR-330-3p	1	0	1	1	1	1	CDC14A	CDC14 cell division cycle 14 homolog A (S. cerevisiae)
hsa-miR-330-3p	1	0	1	1	0	0	TCAP	titin-cap (telethonin)
hsa-miR-330-3p	1	0	1	1	0	0	KHSRP	KH-type splicing regulatory protein
hsa-miR-330-3p	0	0	1	1	1	1	SLC25A12	solute carrier family 25 (aspartate/glutamate carrier), member 12
hsa-miR-330-3p	1	0	1	0	1	1	PCDHGA12	protocadherin gamma subfamily A, 12
hsa-miR-330-3p	1	0	1	0	1	1	PCDHGB4	protocadherin gamma subfamily B, 4
hsa-miR-330-3p	1	0	1	0	1	1	TNKS	tankyrase, TRF1-interacting ankyrin-related ADP-ribose polymerase
hsa-miR-330-3p	1	0	1	0	1	1	IRS2	insulin receptor substrate 2
hsa-miR-330-3p	1	0	1	1	1	1	SRSF9	serine/arginine-rich splicing factor 9
hsa-miR-330-3p	1	0	1	1	1	1	SNAP23	synaptosomal-associated protein, 23kDa
hsa-miR-330-3p	0	0	1	1	1	1	TRIM24	tripartite motif containing 24
hsa-miR-330-3p	1	0	1	1	1	1	NRP2	neuropilin 2
hsa-miR-330-3p	0	0	1	1	0	0	TMEM11	transmembrane protein 11
hsa-miR-330-3p	1	0	1	1	1	1	KAT2B	K(lysine) acetyltransferase 2B
hsa-miR-330-3p	1	0	1	1	1	1	FUBP1	far upstream element (FUSE) binding protein 1
hsa-miR-330-3p	0	0	1	1	1	1	TIMELESS	timeless homolog (Drosophila)
hsa-miR-330-3p	1	0	1	1	1	1	PHOX2B	paired-like homeobox 2b
hsa-miR-330-3p	1	0	1	0	1	1	SKAP2	src kinase associated phosphoprotein 2
hsa-miR-330-3p	1	0	1	0	1	1	ST13	suppression of tumorigenicity 13 (colon carcinoma) (Hsp70 interacting protein)
hsa-miR-330-3p	0	0	1	0	1	1	RHOB	ras homolog family member B
hsa-miR-330-3p	1	0	1	1	1	1	BCL2L2	BCL2-like 2
hsa-miR-330-3p	1	0	1	1	1	1	CDH12	cadherin 12, type 2 (N-cadherin 2)
hsa-miR-330-3p	1	0	1	1	1	1	EFNB2	ephrin-B2
hsa-miR-330-3p	0	0	1	0	1	1	EIF4EBP2	eukaryotic translation initiation factor 4E binding protein 2
hsa-miR-330-3p	0	0	1	1	1	1	SLC1A1	solute carrier family 1 (neuronal/epithelial high affinity glutamate transporter, system Xag), member 1
hsa-miR-330-3p	1	0	1	0	1	1	SLC1A2	solute carrier family 1 (glial high affinity glutamate transporter), member 2
hsa-miR-330-3p	1	0	1	0	1	1	CYTH3	cytohesin 3
hsa-miR-330-3p	1	0	1	0	1	1	MED14	mediator complex subunit 14
hsa-miR-330-3p	0	0	1	1	1	1	SEP15	15 kDa selenoprotein
hsa-miR-330-3p	1	0	1	1	1	1	MED21	mediator complex subunit 21
hsa-miR-330-3p	1	0	1	1	1	1	MED17	mediator complex subunit 17
hsa-miR-330-3p	1	0	1	1	1	1	SLC25A27	solute carrier family 25, member 27
hsa-miR-330-3p	1	0	1	1	1	1	ARL3	ADP-ribosylation factor-like 3
hsa-miR-330-3p	1	0	1	1	1	1	ASTN1	astrotactin 1
hsa-miR-330-3p	1	0	1	1	1	1	BCL9	B-cell CLL/lymphoma 9
hsa-miR-330-3p	1	0	1	1	1	1	DAG1	dystroglycan 1 (dystrophin-associated glycoprotein 1)
hsa-miR-330-3p	0	0	1	1	1	1	DDX10	DEAD (Asp-Glu-Ala-Asp) box polypeptide 10
hsa-miR-330-3p	1	0	1	1	1	1	EPHB2	EPH receptor B2
hsa-miR-330-3p	1	0	1	1	1	1	EPS8	epidermal growth factor receptor pathway substrate 8
hsa-miR-330-3p	1	0	1	0	1	1	ETV5	ets variant 5
hsa-miR-330-3p	1	0	1	1	0	0	FIGF	c-fos induced growth factor (vascular endothelial growth factor D)
hsa-miR-330-3p	1	0	1	1	1	1	FOXD2	forkhead box D2
hsa-miR-330-3p	0	0	1	0	1	1	GALNT3	UDP-N-acetyl-alpha-D-galactosamine:polypeptide N-acetylgalactosaminyltransferase 3 (GalNAc-T3)
hsa-miR-330-3p	0	0	1	1	1	1	FOXA1	forkhead box A1
hsa-miR-330-3p	1	0	1	1	1	1	NAP1L1	nucleosome assembly protein 1-like 1
hsa-miR-330-3p	0	0	1	1	1	1	NFATC3	nuclear factor of activated T-cells, cytoplasmic, calcineurin-dependent 3
hsa-miR-330-3p	0	0	1	0	1	1	POU4F2	POU class 4 homeobox 2
hsa-miR-330-3p	0	0	1	1	1	1	RAB27A	RAB27A, member RAS oncogene family
hsa-miR-330-3p	1	0	1	0	1	1	SCN2B	sodium channel, voltage-gated, type II, beta subunit
hsa-miR-330-3p	0	0	1	1	1	1	PABPN1	poly(A) binding protein, nuclear 1
hsa-miR-330-3p	1	0	1	0	1	1	USP9Y	ubiquitin specific peptidase 9, Y-linked
hsa-miR-330-3p	0	0	1	1	1	1	MGAM	maltase-glucoamylase (alpha-glucosidase)
hsa-miR-330-3p	0	0	1	1	1	1	LATS1	LATS, large tumor suppressor, homolog 1 (Drosophila)
hsa-miR-330-3p	1	0	1	1	1	1	RABEP1	rabaptin, RAB GTPase binding effector protein 1
hsa-miR-330-3p	1	0	1	1	0	0	COX7A2L	cytochrome c oxidase subunit VIIa polypeptide 2 like
hsa-miR-330-3p	1	0	1	1	1	1	DCLK1	doublecortin-like kinase 1
hsa-miR-330-3p	1	0	1	0	1	1	MAPKAPK2	mitogen-activated protein kinase-activated protein kinase 2
hsa-miR-330-3p	1	0	1	1	1	1	STK17A	serine/threonine kinase 17a
hsa-miR-330-3p	1	0	1	1	1	1	B4GALT5	UDP-Gal:betaGlcNAc beta 1,4- galactosyltransferase, polypeptide 5
hsa-miR-330-3p	1	0	1	1	1	1	KIF3B	kinesin family member 3B
hsa-miR-330-3p	0	0	1	1	0	0	SLC22A14	solute carrier family 22, member 14
hsa-miR-330-3p	1	0	1	0	1	1	ARHGEF6	Rac/Cdc42 guanine nucleotide exchange factor (GEF) 6
hsa-miR-330-3p	1	0	1	1	1	1	ONECUT2	one cut homeobox 2
hsa-miR-330-3p	0	0	1	1	1	1	CD8B	CD8b molecule
hsa-miR-330-3p	0	0	1	1	1	1	CDKN2B	cyclin-dependent kinase inhibitor 2B (p15, inhibits CDK4)
hsa-miR-330-3p	0	0	1	0	1	1	DSC2	desmocollin 2
hsa-miR-330-3p	1	0	1	1	1	1	JARID2	jumonji, AT rich interactive domain 2
hsa-miR-330-3p	0	0	1	1	1	1	PRF1	perforin 1 (pore forming protein)
hsa-miR-330-3p	0	0	1	1	1	1	PSMD5	proteasome (prosome, macropain) 26S subunit, non-ATPase, 5
hsa-miR-330-3p	1	0	1	0	1	1	SCD	stearoyl-CoA desaturase (delta-9-desaturase)
hsa-miR-330-3p	1	0	1	0	1	1	SEL1L	sel-1 suppressor of lin-12-like (C. elegans)
hsa-miR-330-3p	1	0	1	1	1	1	SFPQ	splicing factor proline/glutamine-rich
hsa-miR-330-3p	0	0	1	1	1	1	FGFBP1	fibroblast growth factor binding protein 1
hsa-miR-330-3p	1	0	1	1	1	1	BMI1	BMI1 polycomb ring finger oncogene
hsa-miR-330-3p	1	0	1	1	1	1	FOXN3	forkhead box N3
hsa-miR-330-3p	1	0	1	1	1	1	CRKL	v-crk sarcoma virus CT10 oncogene homolog (avian)-like
hsa-miR-330-3p	0	0	1	1	0	0	DLX5	distal-less homeobox 5
hsa-miR-330-3p	1	0	1	0	1	1	DLX6	distal-less homeobox 6
hsa-miR-330-3p	1	0	1	1	1	1	ARID3A	AT rich interactive domain 3A (BRIGHT-like)
hsa-miR-330-3p	1	0	1	0	1	1	E2F1	E2F transcription factor 1
hsa-miR-330-3p	1	0	1	1	1	1	FOXG1	forkhead box G1
hsa-miR-330-3p	1	0	1	1	1	1	GABPB1	GA binding protein transcription factor, beta subunit 1
hsa-miR-330-3p	0	0	1	1	0	0	GNL1	guanine nucleotide binding protein-like 1
hsa-miR-330-3p	1	0	1	1	1	1	GPM6A	glycoprotein M6A
hsa-miR-330-3p	0	0	1	1	1	1	H1F0	H1 histone family, member 0
hsa-miR-330-3p	0	0	1	1	0	0	LIPE	lipase, hormone-sensitive
hsa-miR-330-3p	1	0	1	1	1	1	NCL	nucleolin
hsa-miR-330-3p	1	0	1	0	1	1	PRKAB2	protein kinase, AMP-activated, beta 2 non-catalytic subunit
hsa-miR-330-3p	1	0	1	1	1	1	RALA	v-ral simian leukemia viral oncogene homolog A (ras related)
hsa-miR-330-3p	0	0	1	1	1	1	SKIL	SKI-like oncogene
hsa-miR-330-3p	0	0	1	1	1	1	ST5	suppression of tumorigenicity 5
hsa-miR-330-3p	0	0	1	1	0	0	ARHGEF5	Rho guanine nucleotide exchange factor (GEF) 5
hsa-miR-330-3p	1	0	1	0	1	1	CCDC6	coiled-coil domain containing 6
hsa-miR-330-3p	1	0	1	1	1	1	MED6	mediator complex subunit 6
hsa-miR-330-3p	0	0	1	1	1	1	INSL5	insulin-like 5
hsa-miR-330-3p	1	0	1	0	0	0	FRAT1	frequently rearranged in advanced T-cell lymphomas
hsa-miR-330-3p	0	0	1	1	1	1	DNAJB6	DnaJ (Hsp40) homolog, subfamily B, member 6
hsa-miR-330-3p	1	0	1	1	1	1	ABCA1	ATP-binding cassette, sub-family A (ABC1), member 1
hsa-miR-330-3p	1	0	1	1	1	1	INSIG1	insulin induced gene 1
hsa-miR-330-3p	1	0	1	1	0	0	LOXL1	lysyl oxidase-like 1
hsa-miR-330-3p	1	0	1	1	1	1	MAB21L1	mab-21-like 1 (C. elegans)
hsa-miR-330-3p	0	0	1	0	1	1	POU3F2	POU class 3 homeobox 2
hsa-miR-330-3p	0	0	1	1	1	1	CCL8	chemokine (C-C motif) ligand 8
hsa-miR-330-3p	1	0	1	1	1	1	CTDSP2	CTD (carboxy-terminal domain, RNA polymerase II, polypeptide A) small phosphatase 2
hsa-miR-330-3p	1	0	1	1	1	1	LHFPL2	lipoma HMGIC fusion partner-like 2
hsa-miR-330-3p	0	0	1	0	1	1	CD96	CD96 molecule
hsa-miR-330-3p	1	0	1	0	1	1	DCAF7	DDB1 and CUL4 associated factor 7
hsa-miR-330-3p	1	0	1	0	1	1	SPRY3	sprouty homolog 3 (Drosophila)
hsa-miR-330-3p	0	0	1	1	1	1	ZMPSTE24	zinc metallopeptidase STE24 homolog (S. cerevisiae)
hsa-miR-330-3p	1	0	1	1	1	1	PURA	purine-rich element binding protein A
hsa-miR-330-3p	1	0	1	1	1	1	EFS	embryonal Fyn-associated substrate
hsa-miR-330-3p	1	0	1	1	1	1	MAN1A1	mannosidase, alpha, class 1A, member 1
hsa-miR-330-3p	1	0	1	0	1	1	MAP1B	microtubule-associated protein 1B
hsa-miR-330-3p	1	0	1	1	1	1	MAT2A	methionine adenosyltransferase II, alpha
hsa-miR-330-3p	1	0	1	1	1	1	MEOX2	mesenchyme homeobox 2
hsa-miR-330-3p	1	0	1	1	1	1	MMP16	matrix metallopeptidase 16 (membrane-inserted)
hsa-miR-330-3p	1	0	1	1	1	1	MTF1	metal-regulatory transcription factor 1
hsa-miR-330-3p	1	0	1	1	1	1	LIPG	lipase, endothelial
hsa-miR-330-3p	1	0	1	0	1	1	HDAC4	histone deacetylase 4
hsa-miR-330-3p	0	0	1	1	1	1	KRT1	keratin 1
hsa-miR-330-3p	1	0	1	1	1	1	CAPZA1	capping protein (actin filament) muscle Z-line, alpha 1
hsa-miR-330-3p	0	0	1	1	0	0	NEDD8	neural precursor cell expressed, developmentally down-regulated 8
hsa-miR-330-3p	1	0	1	1	1	1	NEFL	neurofilament, light polypeptide
hsa-miR-330-3p	1	0	1	1	1	1	PDGFRA	platelet-derived growth factor receptor, alpha polypeptide
hsa-miR-330-3p	1	0	1	1	1	1	POU4F1	POU class 4 homeobox 1
hsa-miR-330-3p	1	0	1	0	1	1	PRKAA2	protein kinase, AMP-activated, alpha 2 catalytic subunit
hsa-miR-330-3p	1	0	1	1	1	1	SMC1A	structural maintenance of chromosomes 1A
hsa-miR-330-3p	1	0	1	1	1	1	FBLN5	fibulin 5
hsa-miR-330-3p	0	0	1	1	1	1	C1D	C1D nuclear receptor corepressor
hsa-miR-330-3p	1	0	1	1	1	1	SEC23A	Sec23 homolog A (S. cerevisiae)
hsa-miR-330-3p	1	0	1	1	1	1	VAT1	vesicle amine transport protein 1 homolog (T. californica)
hsa-miR-330-3p	1	0	1	1	1	1	SEMA3C	sema domain, immunoglobulin domain (Ig), short basic domain, secreted, (semaphorin) 3C
hsa-miR-330-3p	1	0	1	0	1	1	APPBP2	amyloid beta precursor protein (cytoplasmic tail) binding protein 2
hsa-miR-330-3p	1	0	1	1	1	1	ANP32B	acidic (leucine-rich) nuclear phosphoprotein 32 family, member B
hsa-miR-330-3p	1	0	1	1	1	1	TRIM3	tripartite motif containing 3
hsa-miR-330-3p	1	0	1	1	1	1	HEXIM1	hexamethylene bis-acetamide inducible 1
hsa-miR-330-3p	1	0	1	0	1	1	GNAI3	guanine nucleotide binding protein (G protein), alpha inhibiting activity polypeptide 3
hsa-miR-330-3p	0	0	1	0	1	1	SLC16A2	solute carrier family 16, member 2 (thyroid hormone transporter)
hsa-miR-330-3p	1	0	1	0	1	1	NCOA2	nuclear receptor coactivator 2
hsa-miR-330-3p	1	0	1	0	1	1	IGF2BP1	insulin-like growth factor 2 mRNA binding protein 1
hsa-miR-330-3p	1	0	1	0	1	1	API5	apoptosis inhibitor 5
hsa-miR-330-3p	1	0	1	1	1	1	MAP3K2	mitogen-activated protein kinase kinase kinase 2
hsa-miR-330-3p	1	0	1	1	1	1	SRSF10	serine/arginine-rich splicing factor 10
hsa-miR-330-3p	1	0	1	1	1	1	ZBTB6	zinc finger and BTB domain containing 6
hsa-miR-330-3p	0	0	1	1	1	1	PPP1R17	protein phosphatase 1, regulatory subunit 17
hsa-miR-330-3p	1	0	1	1	1	1	PGRMC1	progesterone receptor membrane component 1
hsa-miR-330-3p	1	0	1	1	1	1	MAN1A2	mannosidase, alpha, class 1A, member 2
hsa-miR-330-3p	1	0	1	1	1	1	DIAPH2	diaphanous homolog 2 (Drosophila)
hsa-miR-330-3p	1	0	1	1	1	1	HIVEP2	human immunodeficiency virus type I enhancer binding protein 2
hsa-miR-330-3p	0	0	1	1	0	0	DNAJB2	DnaJ (Hsp40) homolog, subfamily B, member 2
hsa-miR-330-3p	1	0	1	1	1	1	SLC20A2	solute carrier family 20 (phosphate transporter), member 2
hsa-miR-330-3p	0	0	1	1	1	1	SSFA2	sperm specific antigen 2
hsa-miR-330-3p	1	0	1	1	1	1	LAPTM5	lysosomal protein transmembrane 5
hsa-miR-330-3p	1	0	1	1	1	1	BTG2	BTG family, member 2
hsa-miR-330-3p	1	0	1	1	1	1	MORF4L1	mortality factor 4 like 1
hsa-miR-330-3p	1	0	1	1	1	1	CBX1	chromobox homolog 1
hsa-miR-330-3p	0	0	1	1	1	1	SERINC3	serine incorporator 3
hsa-miR-330-3p	1	0	1	1	1	1	GLIPR1	GLI pathogenesis-related 1
hsa-miR-330-3p	0	0	1	0	1	1	PSG1	pregnancy specific beta-1-glycoprotein 1
hsa-miR-330-3p	1	0	1	1	1	1	SCN1A	sodium channel, voltage-gated, type I, alpha subunit
hsa-miR-330-3p	1	0	1	0	1	1	SLC5A3	solute carrier family 5 (sodium/myo-inositol cotransporter), member 3
hsa-miR-330-3p	1	0	1	0	1	1	SOX12	SRY (sex determining region Y)-box 12
hsa-miR-330-3p	0	0	1	1	1	1	SPP2	secreted phosphoprotein 2, 24kDa
hsa-miR-330-3p	0	0	1	1	1	1	TAF5	TAF5 RNA polymerase II, TATA box binding protein (TBP)-associated factor, 100kDa
hsa-miR-330-3p	1	0	1	1	1	1	NR4A3	nuclear receptor subfamily 4, group A, member 3
hsa-miR-330-3p	0	0	1	1	1	1	SCGN	secretagogin, EF-hand calcium binding protein
hsa-miR-330-3p	1	0	1	1	1	1	ABHD2	abhydrolase domain containing 2
hsa-miR-330-3p	0	0	1	1	0	0	UBE2C	ubiquitin-conjugating enzyme E2C
hsa-miR-330-3p	1	0	1	1	1	1	ADAMTS5	ADAM metallopeptidase with thrombospondin type 1 motif, 5
hsa-miR-330-3p	1	0	1	1	1	1	SOX21	SRY (sex determining region Y)-box 21
hsa-miR-330-3p	1	0	1	1	1	1	UBL3	ubiquitin-like 3
hsa-miR-330-3p	0	0	1	1	1	1	UGT1A4	UDP glucuronosyltransferase 1 family, polypeptide A4
hsa-miR-330-3p	1	0	1	1	1	1	UTY	ubiquitously transcribed tetratricopeptide repeat gene, Y-linked
hsa-miR-330-3p	0	0	1	0	1	1	ZXDB	zinc finger, X-linked, duplicated B
hsa-miR-330-3p	1	0	1	1	1	1	C14orf1	chromosome 14 open reading frame 1
hsa-miR-330-3p	0	0	1	1	1	1	WIF1	WNT inhibitory factor 1
hsa-miR-330-3p	1	0	1	1	1	1	PALM2-AKAP2	PALM2-AKAP2 readthrough
hsa-miR-330-3p	1	0	1	0	1	1	CHP1	calcineurin-like EF hand protein 1
hsa-miR-330-3p	0	0	1	1	1	1	STXBP3	syntaxin binding protein 3
hsa-miR-330-3p	1	0	1	1	1	1	ZNF236	zinc finger protein 236
hsa-miR-330-3p	1	0	1	1	1	1	MTF2	metal response element binding transcription factor 2
hsa-miR-330-3p	0	0	1	1	0	0	SIX6	SIX homeobox 6
hsa-miR-330-3p	1	0	1	1	1	1	TARDBP	TAR DNA binding protein
hsa-miR-330-3p	1	0	1	1	1	1	ICOS	inducible T-cell co-stimulator
hsa-miR-330-3p	1	0	1	1	1	1	APPL1	adaptor protein, phosphotyrosine interaction, PH domain and leucine zipper containing 1
hsa-miR-330-3p	1	0	1	0	1	1	FZD4	frizzled family receptor 4
hsa-miR-330-3p	1	0	1	1	1	1	RHOQ	ras homolog family member Q
hsa-miR-330-3p	1	0	1	1	1	1	LAMP5	lysosomal-associated membrane protein family, member 5
hsa-miR-330-3p	1	0	1	0	1	1	ACAP2	ArfGAP with coiled-coil, ankyrin repeat and PH domains 2
hsa-miR-330-3p	1	0	1	1	1	1	MAPRE1	microtubule-associated protein, RP/EB family, member 1
hsa-miR-330-3p	1	0	1	1	1	1	DNAJB9	DnaJ (Hsp40) homolog, subfamily B, member 9
hsa-miR-330-3p	1	0	1	1	1	1	MMD	monocyte to macrophage differentiation-associated
hsa-miR-330-3p	1	0	1	1	1	1	NNT	nicotinamide nucleotide transhydrogenase
hsa-miR-330-3p	0	0	1	1	1	1	TTC33	tetratricopeptide repeat domain 33
hsa-miR-330-3p	0	0	1	0	1	1	PITPNC1	phosphatidylinositol transfer protein, cytoplasmic 1
hsa-miR-330-3p	1	0	1	1	1	1	NPTN	neuroplastin
hsa-miR-330-3p	1	0	1	1	1	1	SF3B1	splicing factor 3b, subunit 1, 155kDa
hsa-miR-330-3p	1	0	1	1	1	1	TLL2	tolloid-like 2
hsa-miR-330-3p	1	0	1	1	1	1	TRPC5	transient receptor potential cation channel, subfamily C, member 5
hsa-miR-330-3p	1	0	1	1	1	1	YWHAG	tyrosine 3-monooxygenase/tryptophan 5-monooxygenase activation protein, gamma polypeptide
hsa-miR-330-3p	1	0	1	0	1	1	FLRT2	fibronectin leucine rich transmembrane protein 2
hsa-miR-330-3p	0	0	1	1	1	1	N6AMT1	N-6 adenine-specific DNA methyltransferase 1 (putative)
hsa-miR-330-3p	1	0	1	1	1	1	FLRT3	fibronectin leucine rich transmembrane protein 3
hsa-miR-330-3p	0	0	1	1	1	1	SNX10	sorting nexin 10
hsa-miR-330-3p	0	0	1	1	0	0	KCNJ14	potassium inwardly-rectifying channel, subfamily J, member 14
hsa-miR-330-3p	1	0	1	1	1	1	LRP12	low density lipoprotein receptor-related protein 12
hsa-miR-330-3p	0	0	1	1	1	1	UBQLN1	ubiquilin 1
hsa-miR-330-3p	0	0	1	0	1	1	EMR2	egf-like module containing, mucin-like, hormone receptor-like 2
hsa-miR-330-3p	1	0	1	1	1	1	WDR37	WD repeat domain 37
hsa-miR-330-3p	0	0	1	1	1	1	CCDC113	coiled-coil domain containing 113
hsa-miR-330-3p	0	0	1	0	1	1	ADAMTS3	ADAM metallopeptidase with thrombospondin type 1 motif, 3
hsa-miR-330-3p	0	0	1	1	0	0	RBX1	ring-box 1, E3 ubiquitin protein ligase
hsa-miR-330-3p	1	0	1	0	1	1	ODZ1	odz, odd Oz/ten-m homolog 1 (Drosophila)
hsa-miR-330-3p	1	0	1	1	1	1	YME1L1	YME1-like 1 (S. cerevisiae)
hsa-miR-330-3p	1	0	1	1	1	1	MAPRE2	microtubule-associated protein, RP/EB family, member 2
hsa-miR-330-3p	0	0	1	1	1	1	DNAJC8	DnaJ (Hsp40) homolog, subfamily C, member 8
hsa-miR-330-3p	1	0	1	1	1	1	CBX6	chromobox homolog 6
hsa-miR-330-3p	1	0	1	1	1	1	LEMD3	LEM domain containing 3
hsa-miR-330-3p	0	0	1	0	1	1	EID1	EP300 interacting inhibitor of differentiation 1
hsa-miR-330-3p	1	0	1	1	1	1	MTCH2	mitochondrial carrier 2
hsa-miR-330-3p	0	0	1	1	1	1	ZNF318	zinc finger protein 318
hsa-miR-330-3p	1	0	1	1	1	1	LHX6	LIM homeobox 6
hsa-miR-330-3p	1	0	1	0	1	1	DIEXF	digestive organ expansion factor homolog (zebrafish)
hsa-miR-330-3p	0	0	1	1	1	1	LAMP3	lysosomal-associated membrane protein 3
hsa-miR-330-3p	0	0	1	1	1	1	TCL6	T-cell leukemia/lymphoma 6 (non-protein coding)
hsa-miR-330-3p	1	0	1	1	1	1	AFF4	AF4/FMR2 family, member 4
hsa-miR-330-3p	1	0	1	1	1	1	SERP1	stress-associated endoplasmic reticulum protein 1
hsa-miR-330-3p	1	0	1	1	1	1	PDCD4	programmed cell death 4 (neoplastic transformation inhibitor)
hsa-miR-330-3p	0	0	1	1	1	1	TMOD2	tropomodulin 2 (neuronal)
hsa-miR-330-3p	0	0	1	1	0	0	LMCD1	LIM and cysteine-rich domains 1
hsa-miR-330-3p	1	0	1	1	1	1	SLC40A1	solute carrier family 40 (iron-regulated transporter), member 1
hsa-miR-330-3p	1	0	1	1	1	1	ZNF592	zinc finger protein 592
hsa-miR-330-3p	1	0	1	0	1	1	SH3PXD2A	SH3 and PX domains 2A
hsa-miR-330-3p	1	0	1	0	1	1	EDEM1	ER degradation enhancer, mannosidase alpha-like 1
hsa-miR-330-3p	1	0	1	1	1	1	ULK2	unc-51-like kinase 2 (C. elegans)
hsa-miR-330-3p	0	0	1	1	1	1	SART3	squamous cell carcinoma antigen recognized by T cells 3
hsa-miR-330-3p	0	0	1	1	0	0	SETD1A	SET domain containing 1A
hsa-miR-330-3p	0	0	1	1	1	1	ZNF536	zinc finger protein 536
hsa-miR-330-3p	1	0	1	0	1	1	TOX	thymocyte selection-associated high mobility group box
hsa-miR-330-3p	1	0	1	0	1	1	MLEC	malectin
hsa-miR-330-3p	1	0	1	0	1	1	KIAA0232	KIAA0232
hsa-miR-330-3p	1	0	1	0	1	1	SERTAD2	SERTA domain containing 2
hsa-miR-330-3p	1	0	1	0	1	1	MAML1	mastermind-like 1 (Drosophila)
hsa-miR-330-3p	1	0	1	1	1	1	DAZAP2	DAZ associated protein 2
hsa-miR-330-3p	0	0	1	0	1	1	EPM2AIP1	EPM2A (laforin) interacting protein 1
hsa-miR-330-3p	1	0	1	1	1	1	FCHSD2	FCH and double SH3 domains 2
hsa-miR-330-3p	1	0	1	1	1	1	TBC1D4	TBC1 domain family, member 4
hsa-miR-330-3p	1	0	1	0	1	1	LPPR4	lipid phosphate phosphatase-related protein type 4
hsa-miR-330-3p	1	0	1	1	1	1	NUAK1	NUAK family, SNF1-like kinase, 1
hsa-miR-330-3p	1	0	1	1	1	1	FAM20B	family with sequence similarity 20, member B
hsa-miR-330-3p	1	0	1	0	1	1	ZBTB40	zinc finger and BTB domain containing 40
hsa-miR-330-3p	1	0	1	1	1	1	HELZ	helicase with zinc finger
hsa-miR-330-3p	0	0	1	0	1	1	PPM1E	protein phosphatase, Mg2+/Mn2+ dependent, 1E
hsa-miR-330-3p	1	0	1	1	1	1	CHSY1	chondroitin sulfate synthase 1
hsa-miR-330-3p	1	0	1	0	1	1	WDFY3	WD repeat and FYVE domain containing 3
hsa-miR-330-3p	1	0	1	1	1	1	SPEN	spen homolog, transcriptional regulator (Drosophila)
hsa-miR-330-3p	1	0	1	0	1	1	PDS5B	PDS5, regulator of cohesion maintenance, homolog B (S. cerevisiae)
hsa-miR-330-3p	1	0	1	0	1	1	ZNF609	zinc finger protein 609
hsa-miR-330-3p	1	0	1	1	1	1	TRAK2	trafficking protein, kinesin binding 2
hsa-miR-330-3p	0	0	1	1	1	1	FTSJD2	FtsJ methyltransferase domain containing 2
hsa-miR-330-3p	0	0	1	1	1	1	KDM4C	lysine (K)-specific demethylase 4C
hsa-miR-330-3p	1	0	1	1	1	1	ZNF423	zinc finger protein 423
hsa-miR-330-3p	1	0	1	1	1	1	SMG1	smg-1 homolog, phosphatidylinositol 3-kinase-related kinase (C. elegans)
hsa-miR-330-3p	1	0	1	1	1	1	RTF1	Rtf1, Paf1/RNA polymerase II complex component, homolog (S. cerevisiae)
hsa-miR-330-3p	1	0	1	1	1	1	PRRC2C	proline-rich coiled-coil 2C
hsa-miR-330-3p	1	0	1	1	1	1	PLCB1	phospholipase C, beta 1 (phosphoinositide-specific)
hsa-miR-330-3p	1	0	1	0	1	1	KIAA1024	KIAA1024
hsa-miR-330-3p	1	0	1	1	1	1	CUX2	cut-like homeobox 2
hsa-miR-330-3p	1	0	1	1	1	1	DNAJC13	DnaJ (Hsp40) homolog, subfamily C, member 13
hsa-miR-330-3p	1	0	1	1	1	1	PHF15	PHD finger protein 15
hsa-miR-330-3p	1	0	1	1	1	1	MED13L	mediator complex subunit 13-like
hsa-miR-330-3p	1	0	1	1	1	1	DSTYK	dual serine/threonine and tyrosine protein kinase
hsa-miR-330-3p	0	0	1	1	1	1	ANAPC13	anaphase promoting complex subunit 13
hsa-miR-330-3p	1	0	1	1	1	1	PARM1	prostate androgen-regulated mucin-like protein 1
hsa-miR-330-3p	1	0	1	1	1	1	CNOT6	CCR4-NOT transcription complex, subunit 6
hsa-miR-330-3p	1	0	1	0	1	1	MTMR9	myotubularin related protein 9
hsa-miR-330-3p	1	0	1	1	1	1	ATL3	atlastin GTPase 3
hsa-miR-330-3p	1	0	1	1	1	1	MYRIP	myosin VIIA and Rab interacting protein
hsa-miR-330-3p	0	0	1	1	1	1	SOSTDC1	sclerostin domain containing 1
hsa-miR-330-3p	0	0	1	1	1	1	KBTBD2	kelch repeat and BTB (POZ) domain containing 2
hsa-miR-330-3p	1	0	1	0	1	1	OSBPL3	oxysterol binding protein-like 3
hsa-miR-330-3p	1	0	1	0	1	1	GLCE	glucuronic acid epimerase
hsa-miR-330-3p	1	0	1	1	1	1	LTN1	listerin E3 ubiquitin protein ligase 1
hsa-miR-330-3p	1	0	1	0	1	1	ERC2	ELKS/RAB6-interacting/CAST family member 2
hsa-miR-330-3p	0	0	1	1	0	0	CCZ1	CCZ1 vacuolar protein trafficking and biogenesis associated homolog (S. cerevisiae)
hsa-miR-330-3p	1	0	1	1	1	1	FAM155B	family with sequence similarity 155, member B
hsa-miR-330-3p	1	0	1	0	1	1	RRM2B	ribonucleotide reductase M2 B (TP53 inducible)
hsa-miR-330-3p	1	0	1	1	1	1	PLA2G3	phospholipase A2, group III
hsa-miR-330-3p	1	0	1	1	1	1	MBD2	methyl-CpG binding domain protein 2
hsa-miR-330-3p	1	0	1	1	1	1	FGFR1	fibroblast growth factor receptor 1
hsa-miR-330-3p	1	0	1	1	1	1	AZIN1	antizyme inhibitor 1
hsa-miR-330-3p	1	0	1	1	1	1	ST8SIA3	ST8 alpha-N-acetyl-neuraminide alpha-2,8-sialyltransferase 3
hsa-miR-330-3p	1	0	1	1	1	1	EIF5B	eukaryotic translation initiation factor 5B
hsa-miR-330-3p	1	0	1	0	1	1	TRIM33	tripartite motif containing 33
hsa-miR-330-3p	1	0	1	1	1	1	TXNDC12	thioredoxin domain containing 12 (endoplasmic reticulum)
hsa-miR-330-3p	0	0	1	1	1	1	PELO	pelota homolog (Drosophila)
hsa-miR-330-3p	1	0	1	1	1	1	TAF9B	TAF9B RNA polymerase II, TATA box binding protein (TBP)-associated factor, 31kDa
hsa-miR-330-3p	1	0	1	1	0	0	YBX2	Y box binding protein 2
hsa-miR-330-3p	1	0	1	1	1	1	UBE2J1	ubiquitin-conjugating enzyme E2, J1
hsa-miR-330-3p	0	0	1	1	1	1	APH1A	anterior pharynx defective 1 homolog A (C. elegans)
hsa-miR-330-3p	0	0	1	0	1	1	OTUD6B	OTU domain containing 6B
hsa-miR-330-3p	0	0	1	1	1	1	LACTB2	lactamase, beta 2
hsa-miR-330-3p	1	0	1	1	1	1	SLMO2	slowmo homolog 2 (Drosophila)
hsa-miR-330-3p	1	0	1	0	1	1	CNR1	cannabinoid receptor 1 (brain)
hsa-miR-330-3p	0	0	1	1	1	1	ZFR	zinc finger RNA binding protein
hsa-miR-330-3p	0	0	1	1	1	1	RAB10	RAB10, member RAS oncogene family
hsa-miR-330-3p	0	0	1	1	0	0	TRPC4	transient receptor potential cation channel, subfamily C, member 4
hsa-miR-330-3p	0	0	1	1	0	0	CRNN	cornulin
hsa-miR-330-3p	1	0	1	1	1	1	VGLL3	vestigial like 3 (Drosophila)
hsa-miR-330-3p	1	0	1	1	1	1	NLK	nemo-like kinase
hsa-miR-330-3p	1	0	1	0	1	1	HPCAL4	hippocalcin like 4
hsa-miR-330-3p	0	0	1	1	1	1	FBXO40	F-box protein 40
hsa-miR-330-3p	1	0	1	1	1	1	CMPK1	cytidine monophosphate (UMP-CMP) kinase 1, cytosolic
hsa-miR-330-3p	0	0	1	1	1	1	CD244	CD244 molecule, natural killer cell receptor 2B4
hsa-miR-330-3p	0	0	1	1	0	0	C11orf73	chromosome 11 open reading frame 73
hsa-miR-330-3p	1	0	1	1	1	1	PHF20	PHD finger protein 20
hsa-miR-330-3p	1	0	1	0	1	1	CRIM1	cysteine rich transmembrane BMP regulator 1 (chordin-like)
hsa-miR-330-3p	0	0	1	0	1	1	ERAP1	endoplasmic reticulum aminopeptidase 1
hsa-miR-330-3p	0	0	1	1	1	1	DTL	denticleless E3 ubiquitin protein ligase homolog (Drosophila)
hsa-miR-330-3p	0	0	1	1	0	0	NCKIPSD	NCK interacting protein with SH3 domain
hsa-miR-330-3p	0	0	1	1	0	0	ATP8A2	ATPase, aminophospholipid transporter, class I, type 8A, member 2
hsa-miR-330-3p	1	0	1	0	1	1	RAB8B	RAB8B, member RAS oncogene family
hsa-miR-330-3p	1	0	1	1	1	1	DNAJC27	DnaJ (Hsp40) homolog, subfamily C, member 27
hsa-miR-330-3p	0	0	1	0	1	1	ERGIC2	ERGIC and golgi 2
hsa-miR-330-3p	0	0	1	1	1	1	SLC22A17	solute carrier family 22, member 17
hsa-miR-330-3p	0	0	1	1	0	0	NME8	NME/NM23 family member 8
hsa-miR-330-3p	1	0	1	1	1	1	ZNF644	zinc finger protein 644
hsa-miR-330-3p	1	0	1	0	1	1	FZD3	frizzled family receptor 3
hsa-miR-330-3p	1	0	1	1	1	1	SIX4	SIX homeobox 4
hsa-miR-330-3p	1	0	1	1	1	1	GALNT7	UDP-N-acetyl-alpha-D-galactosamine:polypeptide N-acetylgalactosaminyltransferase 7 (GalNAc-T7)
hsa-miR-330-3p	1	0	1	1	1	1	CPSF2	cleavage and polyadenylation specific factor 2, 100kDa
hsa-miR-330-3p	0	0	1	1	1	1	POLE3	polymerase (DNA directed), epsilon 3, accessory subunit
hsa-miR-330-3p	1	0	1	1	1	1	PLXNA3	plexin A3
hsa-miR-330-3p	0	0	1	1	1	1	NKRF	NFKB repressing factor
hsa-miR-330-3p	1	0	1	1	1	1	GRID1	glutamate receptor, ionotropic, delta 1
hsa-miR-330-3p	1	0	1	0	1	1	UBE2Q1	ubiquitin-conjugating enzyme E2Q family member 1
hsa-miR-330-3p	0	0	1	0	1	1	TRIM44	tripartite motif containing 44
hsa-miR-330-3p	1	0	1	1	1	1	DIRAS2	DIRAS family, GTP-binding RAS-like 2
hsa-miR-330-3p	0	0	1	0	1	1	GIPC2	GIPC PDZ domain containing family, member 2
hsa-miR-330-3p	0	0	1	1	1	1	ARHGEF38	Rho guanine nucleotide exchange factor (GEF) 38
hsa-miR-330-3p	1	0	1	0	1	1	FAM46C	family with sequence similarity 46, member C
hsa-miR-330-3p	0	0	1	1	0	0	CNTLN	centlein, centrosomal protein
hsa-miR-330-3p	1	0	1	1	1	1	ELOVL2	ELOVL fatty acid elongase 2
hsa-miR-330-3p	0	0	1	1	1	1	WHSC1L1	Wolf-Hirschhorn syndrome candidate 1-like 1
hsa-miR-330-3p	1	0	1	1	1	1	IMPAD1	inositol monophosphatase domain containing 1
hsa-miR-330-3p	1	0	1	1	1	1	CDC37L1	cell division cycle 37 homolog (S. cerevisiae)-like 1
hsa-miR-330-3p	1	0	1	1	1	1	FBXO34	F-box protein 34
hsa-miR-330-3p	0	0	1	1	1	1	AIM1L	absent in melanoma 1-like
hsa-miR-330-3p	0	0	1	1	1	1	SCYL2	SCY1-like 2 (S. cerevisiae)
hsa-miR-330-3p	1	0	1	1	1	1	ARGLU1	arginine and glutamate rich 1
hsa-miR-330-3p	1	0	1	1	0	0	EFHC1	EF-hand domain (C-terminal) containing 1
hsa-miR-330-3p	1	0	1	0	1	1	ARMC1	armadillo repeat containing 1
hsa-miR-330-3p	1	0	1	1	1	1	FAM178A	family with sequence similarity 178, member A
hsa-miR-330-3p	1	0	1	1	1	1	RFWD3	ring finger and WD repeat domain 3
hsa-miR-330-3p	1	0	1	0	1	1	MSL2	male-specific lethal 2 homolog (Drosophila)
hsa-miR-330-3p	1	0	1	0	1	1	LGI2	leucine-rich repeat LGI family, member 2
hsa-miR-330-3p	0	0	1	0	1	1	GOLPH3L	golgi phosphoprotein 3-like
hsa-miR-330-3p	1	0	1	1	1	1	TBC1D13	TBC1 domain family, member 13
hsa-miR-330-3p	0	0	1	1	0	0	CCDC87	coiled-coil domain containing 87
hsa-miR-330-3p	1	0	1	0	1	1	PARVA	parvin, alpha
hsa-miR-330-3p	1	0	1	0	1	1	SEPT11	septin 11
hsa-miR-330-3p	1	0	1	1	1	1	ZNF654	zinc finger protein 654
hsa-miR-330-3p	1	0	1	1	1	1	C9orf72	chromosome 9 open reading frame 72
hsa-miR-330-3p	1	0	1	1	1	1	AGPAT5	1-acylglycerol-3-phosphate O-acyltransferase 5 (lysophosphatidic acid acyltransferase, epsilon)
hsa-miR-330-3p	1	0	1	1	1	1	RSBN1	round spermatid basic protein 1
hsa-miR-330-3p	1	0	1	0	1	1	DCP1A	DCP1 decapping enzyme homolog A (S. cerevisiae)
hsa-miR-330-3p	0	0	1	1	1	1	LAPTM4B	lysosomal protein transmembrane 4 beta
hsa-miR-330-3p	1	0	1	0	1	1	FOXJ2	forkhead box J2
hsa-miR-330-3p	1	0	1	1	1	1	EPB41L4B	erythrocyte membrane protein band 4.1 like 4B
hsa-miR-330-3p	0	0	1	0	0	0	FAM45B	family with sequence similarity 45, member A pseudogene
hsa-miR-330-3p	1	0	1	0	1	1	LRP1B	low density lipoprotein receptor-related protein 1B
hsa-miR-330-3p	1	0	1	1	1	1	ETNK1	ethanolamine kinase 1
hsa-miR-330-3p	0	0	1	1	1	1	LENEP	lens epithelial protein
hsa-miR-330-3p	1	0	1	1	1	1	TAP2	transporter 2, ATP-binding cassette, sub-family B (MDR/TAP)
hsa-miR-330-3p	1	0	1	0	1	1	KLHL9	kelch-like 9 (Drosophila)
hsa-miR-330-3p	1	0	1	0	1	1	PCDHAC1	protocadherin alpha subfamily C, 1
hsa-miR-330-3p	1	0	1	0	1	1	PCDHAC2	protocadherin alpha subfamily C, 2
hsa-miR-330-3p	1	0	1	1	1	1	PCDHA1	protocadherin alpha 1
hsa-miR-330-3p	1	0	1	0	1	1	PCDHA10	protocadherin alpha 10
hsa-miR-330-3p	1	0	1	0	1	1	PCDHA11	protocadherin alpha 11
hsa-miR-330-3p	1	0	1	0	1	1	PCDHA12	protocadherin alpha 12
hsa-miR-330-3p	1	0	1	1	1	1	PCDHA2	protocadherin alpha 2
hsa-miR-330-3p	1	0	1	1	1	1	PCDHA3	protocadherin alpha 3
hsa-miR-330-3p	1	0	1	1	1	1	PCDHA6	protocadherin alpha 6
hsa-miR-330-3p	1	0	1	0	1	1	PCDHA7	protocadherin alpha 7
hsa-miR-330-3p	1	0	1	1	1	1	PCDHA8	protocadherin alpha 8
hsa-miR-330-3p	1	0	1	1	1	1	PCDHGA1	protocadherin gamma subfamily A, 1
hsa-miR-330-3p	1	0	1	0	1	1	PCDHGA10	protocadherin gamma subfamily A, 10
hsa-miR-330-3p	1	0	1	0	1	1	PCDHGA11	protocadherin gamma subfamily A, 11
hsa-miR-330-3p	1	0	1	1	1	1	PCDHGA2	protocadherin gamma subfamily A, 2
hsa-miR-330-3p	1	0	1	0	1	1	PCDHGA3	protocadherin gamma subfamily A, 3
hsa-miR-330-3p	1	0	1	0	1	1	PCDHGA4	protocadherin gamma subfamily A, 4
hsa-miR-330-3p	1	0	1	0	1	1	PCDHGA5	protocadherin gamma subfamily A, 5
hsa-miR-330-3p	1	0	1	0	1	1	PCDHGA6	protocadherin gamma subfamily A, 6
hsa-miR-330-3p	1	0	1	0	1	1	PCDHGA7	protocadherin gamma subfamily A, 7
hsa-miR-330-3p	1	0	1	0	1	1	PCDHGA9	protocadherin gamma subfamily A, 9
hsa-miR-330-3p	1	0	1	0	1	1	PCDHGB1	protocadherin gamma subfamily B, 1
hsa-miR-330-3p	1	0	1	0	1	1	PCDHGB2	protocadherin gamma subfamily B, 2
hsa-miR-330-3p	1	0	1	0	1	1	PCDHGB3	protocadherin gamma subfamily B, 3
hsa-miR-330-3p	1	0	1	0	1	1	PCDHGB5	protocadherin gamma subfamily B, 5
hsa-miR-330-3p	1	0	1	0	1	1	PCDHGB6	protocadherin gamma subfamily B, 6
hsa-miR-330-3p	1	0	1	0	1	1	PCDHGB7	protocadherin gamma subfamily B, 7
hsa-miR-330-3p	1	0	1	0	1	1	PCDHGC4	protocadherin gamma subfamily C, 4
hsa-miR-330-3p	1	0	1	0	1	1	PCDHGC5	protocadherin gamma subfamily C, 5
hsa-miR-330-3p	0	0	1	1	1	1	ERRFI1	ERBB receptor feedback inhibitor 1
hsa-miR-330-3p	0	0	1	1	1	1	TERF2IP	telomeric repeat binding factor 2, interacting protein
hsa-miR-330-3p	1	0	1	1	1	1	KCTD5	potassium channel tetramerisation domain containing 5
hsa-miR-330-3p	0	0	1	1	1	1	RIN2	Ras and Rab interactor 2
hsa-miR-330-3p	1	0	1	0	1	1	FAM190B	family with sequence similarity 190, member B
hsa-miR-330-3p	0	0	1	1	1	1	UGT1A10	UDP glucuronosyltransferase 1 family, polypeptide A10
hsa-miR-330-3p	0	0	1	1	1	1	UGT1A8	UDP glucuronosyltransferase 1 family, polypeptide A8
hsa-miR-330-3p	0	0	1	1	1	1	UGT1A7	UDP glucuronosyltransferase 1 family, polypeptide A7
hsa-miR-330-3p	0	0	1	1	1	1	UGT1A5	UDP glucuronosyltransferase 1 family, polypeptide A5
hsa-miR-330-3p	0	0	1	1	1	1	UGT1A3	UDP glucuronosyltransferase 1 family, polypeptide A3
hsa-miR-330-3p	1	0	1	1	0	0	KCNQ5	potassium voltage-gated channel, KQT-like subfamily, member 5
hsa-miR-330-3p	1	0	1	1	1	1	CYP26B1	cytochrome P450, family 26, subfamily B, polypeptide 1
hsa-miR-330-3p	0	0	1	0	1	1	ZC3HAV1	zinc finger CCCH-type, antiviral 1
hsa-miR-330-3p	1	0	1	0	1	1	SLAMF8	SLAM family member 8
hsa-miR-330-3p	0	0	1	1	1	1	TMEM167B	transmembrane protein 167B
hsa-miR-330-3p	1	0	1	0	1	1	PAPOLB	poly(A) polymerase beta (testis specific)
hsa-miR-330-3p	1	0	1	1	1	1	C5orf15	chromosome 5 open reading frame 15
hsa-miR-330-3p	0	0	1	1	1	1	PRTFDC1	phosphoribosyl transferase domain containing 1
hsa-miR-330-3p	1	0	1	1	1	1	PRDM8	PR domain containing 8
hsa-miR-330-3p	0	0	1	1	1	1	CXCR7	chemokine (C-X-C motif) receptor 7
hsa-miR-330-3p	1	0	1	0	1	1	SLC17A6	solute carrier family 17 (sodium-dependent inorganic phosphate cotransporter), member 6
hsa-miR-330-3p	1	0	1	1	1	1	PITHD1	PITH (C-terminal proteasome-interacting domain of thioredoxin-like) domain containing 1
hsa-miR-330-3p	0	0	1	1	1	1	ZNF695	zinc finger protein 695
hsa-miR-330-3p	1	0	1	1	1	1	PCDH9	protocadherin 9
hsa-miR-330-3p	1	0	1	1	1	1	PTGFRN	prostaglandin F2 receptor negative regulator
hsa-miR-330-3p	1	0	1	1	1	1	LYRM2	LYR motif containing 2
hsa-miR-330-3p	0	0	1	0	1	1	TWSG1	twisted gastrulation homolog 1 (Drosophila)
hsa-miR-330-3p	1	0	1	1	0	0	JPH3	junctophilin 3
hsa-miR-330-3p	1	0	1	1	1	1	SLC24A3	solute carrier family 24 (sodium/potassium/calcium exchanger), member 3
hsa-miR-330-3p	0	0	1	0	1	1	ZNF490	zinc finger protein 490
hsa-miR-330-3p	0	0	1	1	1	1	SHROOM4	shroom family member 4
hsa-miR-330-3p	1	0	1	1	1	1	USP31	ubiquitin specific peptidase 31
hsa-miR-330-3p	1	0	1	0	1	1	KLHDC5	kelch domain containing 5
hsa-miR-330-3p	0	0	1	1	1	1	ARRDC3	arrestin domain containing 3
hsa-miR-330-3p	1	0	1	1	1	1	KLHL14	kelch-like 14 (Drosophila)
hsa-miR-330-3p	1	0	1	1	1	1	SIPA1L2	signal-induced proliferation-associated 1 like 2
hsa-miR-330-3p	1	0	1	1	1	1	PCDH10	protocadherin 10
hsa-miR-330-3p	0	0	1	0	1	1	SYT13	synaptotagmin XIII
hsa-miR-330-3p	0	0	1	1	1	1	KLHL1	kelch-like 1 (Drosophila)
hsa-miR-330-3p	1	0	1	0	1	1	GPAM	glycerol-3-phosphate acyltransferase, mitochondrial
hsa-miR-330-3p	0	0	1	1	1	1	GNAO1	guanine nucleotide binding protein (G protein), alpha activating activity polypeptide O
hsa-miR-330-3p	0	0	1	0	1	1	PSG3	pregnancy specific beta-1-glycoprotein 3
hsa-miR-330-3p	0	0	1	1	1	1	UGT1A9	UDP glucuronosyltransferase 1 family, polypeptide A9
hsa-miR-330-3p	1	0	1	0	1	1	RAP2A	RAP2A, member of RAS oncogene family
hsa-miR-330-3p	1	0	1	0	1	1	XK	X-linked Kx blood group (McLeod syndrome)
hsa-miR-330-3p	1	0	1	1	1	1	MTMR3	myotubularin related protein 3
hsa-miR-330-3p	1	0	1	1	1	1	CLDN1	claudin 1
hsa-miR-330-3p	0	0	1	1	0	0	HOXD11	homeobox D11
hsa-miR-330-3p	0	0	1	0	1	1	SLC30A1	solute carrier family 30 (zinc transporter), member 1
hsa-miR-330-3p	0	0	1	0	1	1	MS4A7	membrane-spanning 4-domains, subfamily A, member 7
hsa-miR-330-3p	0	0	1	1	1	1	OSTC	oligosaccharyltransferase complex subunit
hsa-miR-330-3p	1	0	1	1	1	1	NTN4	netrin 4
hsa-miR-330-3p	1	0	1	1	1	1	FAM60A	family with sequence similarity 60, member A
hsa-miR-330-3p	1	0	1	1	1	1	SNX6	sorting nexin 6
hsa-miR-330-3p	1	0	1	1	1	1	TMEM35	transmembrane protein 35
hsa-miR-330-3p	1	0	1	1	1	1	TRIB2	tribbles homolog 2 (Drosophila)
hsa-miR-330-3p	1	0	1	1	1	1	SLC5A7	solute carrier family 5 (choline transporter), member 7
hsa-miR-330-3p	1	0	1	1	1	1	DHX35	DEAH (Asp-Glu-Ala-His) box polypeptide 35
hsa-miR-330-3p	0	0	1	1	1	1	MS4A1	membrane-spanning 4-domains, subfamily A, member 1
hsa-miR-330-3p	1	0	1	1	1	1	SEC24A	SEC24 family, member A (S. cerevisiae)
hsa-miR-330-3p	1	0	1	1	1	1	GPR88	G protein-coupled receptor 88
hsa-miR-330-3p	1	0	1	0	1	1	SLC4A10	solute carrier family 4, sodium bicarbonate transporter, member 10
hsa-miR-330-3p	0	0	1	1	0	0	ABHD4	abhydrolase domain containing 4
hsa-miR-330-3p	0	0	1	1	1	1	ANKRD5	ankyrin repeat domain 5
hsa-miR-330-3p	0	0	1	1	1	1	CLSPN	claspin
hsa-miR-330-3p	1	0	1	1	1	1	SNX16	sorting nexin 16
hsa-miR-330-3p	0	0	1	1	1	1	TCTA	T-cell leukemia translocation altered
hsa-miR-330-3p	1	0	1	1	1	1	ATL2	atlastin GTPase 2
hsa-miR-330-3p	1	0	1	1	1	1	NDRG3	NDRG family member 3
hsa-miR-330-3p	0	0	1	1	1	1	SUSD1	sushi domain containing 1
hsa-miR-330-3p	1	0	1	1	1	1	SUDS3	suppressor of defective silencing 3 homolog (S. cerevisiae)
hsa-miR-330-3p	1	0	1	1	1	1	GIGYF1	GRB10 interacting GYF protein 1
hsa-miR-330-3p	1	0	1	0	1	1	HOXC8	homeobox C8
hsa-miR-330-3p	1	0	1	1	1	1	PRRX1	paired related homeobox 1
hsa-miR-330-3p	0	0	1	1	1	1	ACBD3	acyl-CoA binding domain containing 3
hsa-miR-330-3p	1	0	1	1	1	1	FBXL17	F-box and leucine-rich repeat protein 17
hsa-miR-330-3p	0	0	1	0	1	1	CDCP1	CUB domain containing protein 1
hsa-miR-330-3p	1	0	1	0	1	1	BCL11B	B-cell CLL/lymphoma 11B (zinc finger protein)
hsa-miR-330-3p	1	0	1	1	1	1	REEP1	receptor accessory protein 1
hsa-miR-330-3p	1	0	1	1	1	1	GRAMD3	GRAM domain containing 3
hsa-miR-330-3p	1	0	1	1	1	1	RASL11B	RAS-like, family 11, member B
hsa-miR-330-3p	1	0	1	1	1	1	HOXB8	homeobox B8
hsa-miR-330-3p	1	0	1	1	1	1	KCTD15	potassium channel tetramerisation domain containing 15
hsa-miR-330-3p	1	0	1	1	1	1	IRF2BPL	interferon regulatory factor 2 binding protein-like
hsa-miR-330-3p	1	0	1	1	1	1	LRRC2	leucine rich repeat containing 2
hsa-miR-330-3p	1	0	1	1	1	1	NKAIN1	Na+/K+ transporting ATPase interacting 1
hsa-miR-330-3p	1	0	1	1	1	1	CDC73	cell division cycle 73, Paf1/RNA polymerase II complex component, homolog (S. cerevisiae)
hsa-miR-330-3p	0	0	1	1	1	1	RNF219	ring finger protein 219
hsa-miR-330-3p	0	0	1	1	1	1	C6orf211	chromosome 6 open reading frame 211
hsa-miR-330-3p	0	0	1	1	1	1	NDNF	neuron-derived neurotrophic factor
hsa-miR-330-3p	1	0	1	1	1	1	DHX40	DEAH (Asp-Glu-Ala-His) box polypeptide 40
hsa-miR-330-3p	0	0	1	1	1	1	STEAP4	STEAP family member 4
hsa-miR-330-3p	0	0	1	1	1	1	GALNT12	UDP-N-acetyl-alpha-D-galactosamine:polypeptide N-acetylgalactosaminyltransferase 12 (GalNAc-T12)
hsa-miR-330-3p	0	0	1	0	1	1	C1orf115	chromosome 1 open reading frame 115
hsa-miR-330-3p	1	0	1	0	1	1	ZFHX4	zinc finger homeobox 4
hsa-miR-330-3p	1	0	1	1	1	1	CCDC82	coiled-coil domain containing 82
hsa-miR-330-3p	1	0	1	0	1	1	MOB3B	MOB kinase activator 3B
hsa-miR-330-3p	1	0	1	1	1	1	CLMP	CXADR-like membrane protein
hsa-miR-330-3p	1	0	1	1	0	0	ATAD5	ATPase family, AAA domain containing 5
hsa-miR-330-3p	0	0	1	1	1	1	ZNF767	zinc finger family member 767
hsa-miR-330-3p	1	0	1	1	1	1	CPED1	cadherin-like and PC-esterase domain containing 1
hsa-miR-330-3p	0	0	1	1	1	1	CCDC170	coiled-coil domain containing 170
hsa-miR-330-3p	1	0	1	0	1	1	EDEM3	ER degradation enhancer, mannosidase alpha-like 3
hsa-miR-330-3p	0	0	1	0	1	1	PDGFD	platelet derived growth factor D
hsa-miR-330-3p	1	0	1	1	1	1	TNKS2	tankyrase, TRF1-interacting ankyrin-related ADP-ribose polymerase 2
hsa-miR-330-3p	1	0	1	0	1	1	SETD7	SET domain containing (lysine methyltransferase) 7
hsa-miR-330-3p	1	0	1	1	1	1	PTPRO	protein tyrosine phosphatase, receptor type, O
hsa-miR-330-3p	0	0	1	1	1	1	HMGN5	high mobility group nucleosome binding domain 5
hsa-miR-330-3p	1	0	1	0	1	1	VOPP1	vesicular, overexpressed in cancer, prosurvival protein 1
hsa-miR-330-3p	1	0	1	0	1	1	C1orf21	chromosome 1 open reading frame 21
hsa-miR-330-3p	1	0	1	1	1	1	MAP4	microtubule-associated protein 4
hsa-miR-330-3p	1	0	1	0	1	1	LBH	limb bud and heart development homolog (mouse)
hsa-miR-330-3p	1	0	1	1	1	1	SNX27	sorting nexin family member 27
hsa-miR-330-3p	1	0	1	1	1	1	VMP1	vacuole membrane protein 1
hsa-miR-330-3p	1	0	1	1	1	1	C6orf62	chromosome 6 open reading frame 62
hsa-miR-330-3p	1	0	1	1	1	1	PPP1R14C	protein phosphatase 1, regulatory (inhibitor) subunit 14C
hsa-miR-330-3p	1	0	1	0	1	1	SPRY4	sprouty homolog 4 (Drosophila)
hsa-miR-330-3p	1	0	1	0	1	1	TMEM47	transmembrane protein 47
hsa-miR-330-3p	1	0	1	1	1	1	CRISPLD1	cysteine-rich secretory protein LCCL domain containing 1
hsa-miR-330-3p	1	0	1	0	1	1	SH3BGRL2	SH3 domain binding glutamic acid-rich protein like 2
hsa-miR-330-3p	0	0	1	1	1	1	CRISPLD2	cysteine-rich secretory protein LCCL domain containing 2
hsa-miR-330-3p	1	0	1	0	1	1	ITCH	itchy E3 ubiquitin protein ligase
hsa-miR-330-3p	1	0	1	1	1	1	PCDHA9	protocadherin alpha 9
hsa-miR-330-3p	1	0	1	1	1	1	KLF16	Kruppel-like factor 16
hsa-miR-330-3p	1	0	1	1	1	1	SNX25	sorting nexin 25
hsa-miR-330-3p	1	0	1	0	1	1	PCDHGA8	protocadherin gamma subfamily A, 8
hsa-miR-330-3p	1	0	1	0	1	1	SRSF8	serine/arginine-rich splicing factor 8
hsa-miR-330-3p	0	0	1	1	1	1	MAGT1	magnesium transporter 1
hsa-miR-330-3p	0	0	1	1	0	0	ATRIP	ATR interacting protein
hsa-miR-330-3p	1	0	1	1	1	1	ARID5B	AT rich interactive domain 5B (MRF1-like)
hsa-miR-330-3p	1	0	1	1	1	1	LOXL4	lysyl oxidase-like 4
hsa-miR-330-3p	0	0	1	0	1	1	LDOC1L	leucine zipper, down-regulated in cancer 1-like
hsa-miR-330-3p	0	0	1	0	1	1	TMEM246	transmembrane protein 246
hsa-miR-330-3p	0	0	1	1	0	0	LYZL1	lysozyme-like 1
hsa-miR-330-3p	1	0	1	0	1	1	GLYR1	glyoxylate reductase 1 homolog (Arabidopsis)
hsa-miR-330-3p	0	0	1	1	0	0	CCDC54	coiled-coil domain containing 54
hsa-miR-330-3p	1	0	1	1	1	1	RBBP6	retinoblastoma binding protein 6
hsa-miR-330-3p	1	0	1	0	1	1	INA	internexin neuronal intermediate filament protein, alpha
hsa-miR-330-3p	0	0	1	1	1	1	HAVCR2	hepatitis A virus cellular receptor 2
hsa-miR-330-3p	1	0	1	0	1	1	UBASH3B	ubiquitin associated and SH3 domain containing B
hsa-miR-330-3p	1	0	1	1	1	1	ARHGAP19	Rho GTPase activating protein 19
hsa-miR-330-3p	1	0	1	1	1	1	PCDH11Y	protocadherin 11 Y-linked
hsa-miR-330-3p	1	0	1	0	1	1	EAF1	ELL associated factor 1
hsa-miR-330-3p	1	0	1	0	1	1	PURB	purine-rich element binding protein B
hsa-miR-330-3p	1	0	1	1	1	1	IRX2	iroquois homeobox 2
hsa-miR-330-3p	1	0	1	1	1	1	ADAM19	ADAM metallopeptidase domain 19
hsa-miR-330-3p	0	0	1	1	0	0	BIRC8	baculoviral IAP repeat containing 8
hsa-miR-330-3p	0	0	1	1	1	1	LHX4	LIM homeobox 4
hsa-miR-330-3p	1	0	1	1	1	1	COL4A5	collagen, type IV, alpha 5
hsa-miR-330-3p	1	0	1	1	1	1	SSH2	slingshot homolog 2 (Drosophila)
hsa-miR-330-3p	1	0	1	1	1	1	EPT1	ethanolaminephosphotransferase 1 (CDP-ethanolamine-specific)
hsa-miR-330-3p	1	0	1	1	1	1	CDC42	cell division cycle 42 (GTP binding protein, 25kDa)
hsa-miR-330-3p	1	0	1	1	1	1	MAL2	mal, T-cell differentiation protein 2 (gene/pseudogene)
hsa-miR-330-3p	1	0	1	1	1	1	ESCO1	establishment of cohesion 1 homolog 1 (S. cerevisiae)
hsa-miR-330-3p	1	0	1	1	1	1	TRIM9	tripartite motif containing 9
hsa-miR-330-3p	1	0	1	1	1	1	NAA15	N(alpha)-acetyltransferase 15, NatA auxiliary subunit
hsa-miR-330-3p	1	0	1	0	1	1	ANTXR2	anthrax toxin receptor 2
hsa-miR-330-3p	0	0	1	1	0	0	TCEAL2	transcription elongation factor A (SII)-like 2
hsa-miR-330-3p	1	0	1	1	1	1	NRSN1	neurensin 1
hsa-miR-330-3p	1	0	1	1	1	1	ZNF280B	zinc finger protein 280B
hsa-miR-330-3p	1	0	1	1	1	1	KLHL6	kelch-like 6 (Drosophila)
hsa-miR-330-3p	1	0	1	1	1	1	PRRC1	proline-rich coiled-coil 1
hsa-miR-330-3p	0	0	1	0	1	1	PAQR8	progestin and adipoQ receptor family member VIII
hsa-miR-330-3p	1	0	1	1	1	1	SLC30A7	solute carrier family 30 (zinc transporter), member 7
hsa-miR-330-3p	0	0	1	1	1	1	RAD51B	RAD51 homolog B (S. cerevisiae)
hsa-miR-330-3p	0	0	1	0	1	1	SP140L	SP140 nuclear body protein-like
hsa-miR-330-3p	0	0	1	1	1	1	CASC4	cancer susceptibility candidate 4
hsa-miR-330-3p	1	0	1	1	1	1	GLCCI1	glucocorticoid induced transcript 1
hsa-miR-330-3p	1	0	1	0	1	1	SP1	Sp1 transcription factor
hsa-miR-330-3p	0	0	1	1	1	1	C1orf213	chromosome 1 open reading frame 213
hsa-miR-330-3p	0	0	1	1	1	1	SLC25A46	solute carrier family 25, member 46
hsa-miR-330-3p	1	0	1	0	1	1	FCHO2	FCH domain only 2
hsa-miR-330-3p	1	0	1	1	1	1	CD200R1	CD200 receptor 1
hsa-miR-330-3p	0	0	1	1	1	1	SDR16C5	short chain dehydrogenase/reductase family 16C, member 5
hsa-miR-330-3p	0	0	1	1	1	1	ADAMTS17	ADAM metallopeptidase with thrombospondin type 1 motif, 17
hsa-miR-330-3p	1	0	1	0	1	1	CNOT6L	CCR4-NOT transcription complex, subunit 6-like
hsa-miR-330-3p	0	0	1	1	1	1	C15orf40	chromosome 15 open reading frame 40
hsa-miR-330-3p	1	0	1	1	1	1	FAM91A1	family with sequence similarity 91, member A1
hsa-miR-330-3p	0	0	1	1	1	1	ZFC3H1	zinc finger, C3H1-type containing
hsa-miR-330-3p	0	0	1	1	1	1	NXPE3	neurexophilin and PC-esterase domain family, member 3
hsa-miR-330-3p	0	0	1	1	1	1	TMEM106A	transmembrane protein 106A
hsa-miR-330-3p	0	0	1	1	1	1	DNAJB7	DnaJ (Hsp40) homolog, subfamily B, member 7
hsa-miR-330-3p	1	0	1	1	1	1	FAM84A	family with sequence similarity 84, member A
hsa-miR-330-3p	0	0	1	1	0	0	CSNK1A1L	casein kinase 1, alpha 1-like
hsa-miR-330-3p	1	0	1	1	1	1	VTI1A	vesicle transport through interaction with t-SNAREs homolog 1A (yeast)
hsa-miR-330-3p	1	0	1	1	1	1	MRPL30	mitochondrial ribosomal protein L30
hsa-miR-330-3p	0	0	1	0	1	1	OSTCP1	oligosaccharyltransferase complex subunit pseudogene 1
hsa-miR-330-3p	0	0	1	1	1	1	SLC25A43	solute carrier family 25, member 43
hsa-miR-330-3p	1	0	1	0	1	1	MTPN	myotrophin
hsa-miR-330-3p	0	0	1	1	1	1	MRPL27	mitochondrial ribosomal protein L27
hsa-miR-330-3p	0	0	1	1	0	0	CYB5A	cytochrome b5 type A (microsomal)
hsa-miR-330-3p	1	0	1	1	0	0	GAS2L1	growth arrest-specific 2 like 1
hsa-miR-330-3p	1	0	1	1	1	1	UBTD2	ubiquitin domain containing 2
hsa-miR-330-3p	1	0	1	0	1	1	SYT11	synaptotagmin XI
hsa-miR-330-3p	0	0	1	1	1	1	MRFAP1L1	Morf4 family associated protein 1-like 1
hsa-miR-330-3p	0	0	1	1	1	1	RMI2	RMI2, RecQ mediated genome instability 2, homolog (S. cerevisiae)
hsa-miR-330-3p	0	0	1	1	1	1	KLHDC7A	kelch domain containing 7A
hsa-miR-330-3p	0	0	1	0	1	1	BBS5	Bardet-Biedl syndrome 5
hsa-miR-330-3p	0	0	1	1	1	1	TRAM1L1	translocation associated membrane protein 1-like 1
hsa-miR-330-3p	1	0	1	1	1	1	GRPEL2	GrpE-like 2, mitochondrial (E. coli)
hsa-miR-330-3p	1	0	1	1	1	1	FAM123B	family with sequence similarity 123B
hsa-miR-330-3p	0	0	1	1	1	1	C15orf43	chromosome 15 open reading frame 43
hsa-miR-330-3p	1	0	1	1	1	1	ZNF583	zinc finger protein 583
hsa-miR-330-3p	1	0	1	1	1	1	C7orf60	chromosome 7 open reading frame 60
hsa-miR-330-3p	1	0	1	0	1	1	MOSPD2	motile sperm domain containing 2
hsa-miR-330-3p	0	0	1	1	1	1	FSIP1	fibrous sheath interacting protein 1
hsa-miR-330-3p	1	0	1	1	1	1	CNST	consortin, connexin sorting protein
hsa-miR-330-3p	0	0	1	1	0	0	RNF168	ring finger protein 168, E3 ubiquitin protein ligase
hsa-miR-330-3p	1	0	1	0	1	1	DCP2	DCP2 decapping enzyme homolog (S. cerevisiae)
hsa-miR-330-3p	1	0	1	0	1	1	FAM116A	family with sequence similarity 116, member A
hsa-miR-330-3p	1	0	1	0	1	1	RWDD4	RWD domain containing 4
hsa-miR-330-3p	1	0	1	1	1	1	ATXN7L1	ataxin 7-like 1
hsa-miR-330-3p	0	0	1	1	1	1	CNPY4	canopy 4 homolog (zebrafish)
hsa-miR-330-3p	0	0	1	1	1	1	ASPRV1	aspartic peptidase, retroviral-like 1
hsa-miR-330-3p	1	0	1	0	1	1	C7orf41	chromosome 7 open reading frame 41
hsa-miR-330-3p	1	0	1	1	1	1	UHRF2	ubiquitin-like with PHD and ring finger domains 2, E3 ubiquitin protein ligase
hsa-miR-330-3p	0	0	1	0	1	1	KBTBD6	kelch repeat and BTB (POZ) domain containing 6
hsa-miR-330-3p	1	0	1	0	1	1	ST6GALNAC3	ST6 (alpha-N-acetyl-neuraminyl-2,3-beta-galactosyl-1,3)-N-acetylgalactosaminide alpha-2,6-sialyltransferase 3
hsa-miR-330-3p	1	0	1	1	1	1	APCDD1	adenomatosis polyposis coli down-regulated 1
hsa-miR-330-3p	0	0	1	1	0	0	ODF4	outer dense fiber of sperm tails 4
hsa-miR-330-3p	1	0	1	1	1	1	TCEANC2	transcription elongation factor A (SII) N-terminal and central domain containing 2
hsa-miR-330-3p	1	0	1	1	1	1	AEBP2	AE binding protein 2
hsa-miR-330-3p	0	0	1	1	1	1	COL6A5	collagen, type VI, alpha 5
hsa-miR-330-3p	0	0	1	1	0	0	DEFB123	defensin, beta 123
hsa-miR-330-3p	1	0	1	1	0	0	TMEM86A	transmembrane protein 86A
hsa-miR-330-3p	1	0	1	0	1	1	TAPT1	transmembrane anterior posterior transformation 1
hsa-miR-330-3p	1	0	1	0	1	1	ZCCHC24	zinc finger, CCHC domain containing 24
hsa-miR-330-3p	0	0	1	0	1	1	LNX2	ligand of numb-protein X 2
[truncated: 769 more rows]
