# Supplementary material for: Profiling of Selected MicroRNAs in Proliferative Eutopic Endometrium of Women with Ovarian Endometriosis
Source: Biomed Res Int. 2015 Aug 20;2015:760698. doi: 10.1155/2015/760698 (PMC4558423; doi:10.1155/2015/760698)
Supplement: Supplementary file 1 — Table I: The names of miRNAs significantly differentially expressed between eutopic endometrium of patients with endometriosis vs eutopic endometrium of patients without endometriosis. Table II: The associations between miRNA and mRNA, which presents detailed results of the search of six major databases i.e targetscan, tarbase, miranda, mirbase, mirtarget2 and pictar. [file 760698.f1.zip › 760698.f1/Table II/hsa-miR-331-3p.tsv]

miR	targetscan	tarbase	miranda	mirbase	mirtarget2	pictar	GeneSymbol	GeneName
hsa-miR-331-3p	1	0	1	1	1	1	PLAU	plasminogen activator, urokinase
hsa-miR-331-3p	1	0	1	1	0	0	SRCAP	Snf2-related CREBBP activator protein
hsa-miR-331-3p	1	0	1	1	0	0	RAPGEF2	Rap guanine nucleotide exchange factor (GEF) 2
hsa-miR-331-3p	1	0	1	1	1	1	ABCC5	ATP-binding cassette, sub-family C (CFTR/MRP), member 5
hsa-miR-331-3p	1	0	1	0	1	1	PTPRT	protein tyrosine phosphatase, receptor type, T
hsa-miR-331-3p	1	0	1	0	1	1	KIAA0408	KIAA0408
hsa-miR-331-3p	1	0	1	1	0	0	SEC14L5	SEC14-like 5 (S. cerevisiae)
hsa-miR-331-3p	0	0	1	1	1	1	NEU3	sialidase 3 (membrane sialidase)
hsa-miR-331-3p	1	0	1	1	1	1	IQSEC2	IQ motif and Sec7 domain 2
hsa-miR-331-3p	1	0	1	1	1	1	GPATCH8	G patch domain containing 8
hsa-miR-331-3p	0	0	1	1	1	1	PHLDB1	pleckstrin homology-like domain, family B, member 1
hsa-miR-331-3p	0	0	1	1	0	0	AKAP8L	A kinase (PRKA) anchor protein 8-like
hsa-miR-331-3p	1	0	1	0	1	1	LPHN3	latrophilin 3
hsa-miR-331-3p	1	0	1	1	1	1	AHCYL2	adenosylhomocysteinase-like 2
hsa-miR-331-3p	1	0	1	1	1	1	ARHGEF15	Rho guanine nucleotide exchange factor (GEF) 15
hsa-miR-331-3p	1	0	1	1	1	1	BAHD1	bromo adjacent homology domain containing 1
hsa-miR-331-3p	1	0	1	1	1	1	RGL1	ral guanine nucleotide dissociation stimulator-like 1
hsa-miR-331-3p	1	0	1	1	0	0	KIAA1045	KIAA1045
hsa-miR-331-3p	0	0	1	1	0	0	RTEL1	regulator of telomere elongation helicase 1
hsa-miR-331-3p	1	0	1	1	1	1	PHF8	PHD finger protein 8
hsa-miR-331-3p	1	0	1	1	0	0	PPM1H	protein phosphatase, Mg2+/Mn2+ dependent, 1H
hsa-miR-331-3p	0	0	1	0	0	0	MTA3	metastasis associated 1 family, member 3
hsa-miR-331-3p	1	0	1	1	1	1	STK36	serine/threonine kinase 36
hsa-miR-331-3p	0	0	1	1	0	0	TNFRSF12A	tumor necrosis factor receptor superfamily, member 12A
hsa-miR-331-3p	1	0	1	0	0	0	NYNRIN	NYN domain and retroviral integrase containing
hsa-miR-331-3p	1	0	1	1	1	1	SEMA6A	sema domain, transmembrane domain (TM), and cytoplasmic domain, (semaphorin) 6A
hsa-miR-331-3p	0	0	1	0	0	0	COL20A1	collagen, type XX, alpha 1
hsa-miR-331-3p	0	0	1	1	0	0	DHX37	DEAH (Asp-Glu-Ala-His) box polypeptide 37
hsa-miR-331-3p	1	0	1	1	1	1	FAM214B	family with sequence similarity 214, member B
hsa-miR-331-3p	0	0	1	1	0	0	PQBP1	polyglutamine binding protein 1
hsa-miR-331-3p	1	0	1	1	1	1	DENND1A	DENN/MADD domain containing 1A
hsa-miR-331-3p	1	0	1	1	1	1	IKZF4	IKAROS family zinc finger 4 (Eos)
hsa-miR-331-3p	1	0	1	1	1	1	LZTS2	leucine zipper, putative tumor suppressor 2
hsa-miR-331-3p	1	0	1	0	1	1	JPH4	junctophilin 4
hsa-miR-331-3p	0	0	1	1	0	0	COL27A1	collagen, type XXVII, alpha 1
hsa-miR-331-3p	1	0	1	1	1	1	CSRNP1	cysteine-serine-rich nuclear protein 1
hsa-miR-331-3p	1	0	1	0	1	1	KIF5C	kinesin family member 5C
hsa-miR-331-3p	1	0	1	1	1	1	SH3TC2	SH3 domain and tetratricopeptide repeats 2
hsa-miR-331-3p	1	0	1	0	0	0	RNF169	ring finger protein 169
hsa-miR-331-3p	1	0	1	0	0	0	ZBTB34	zinc finger and BTB domain containing 34
hsa-miR-331-3p	0	0	1	1	0	0	KREMEN2	kringle containing transmembrane protein 2
hsa-miR-331-3p	1	0	1	1	1	1	NRXN2	neurexin 2
hsa-miR-331-3p	0	0	1	0	1	1	ACE2	angiotensin I converting enzyme (peptidyl-dipeptidase A) 2
hsa-miR-331-3p	0	0	1	1	1	1	ING4	inhibitor of growth family, member 4
hsa-miR-331-3p	1	0	1	1	0	0	NDST2	N-deacetylase/N-sulfotransferase (heparan glucosaminyl) 2
hsa-miR-331-3p	0	0	1	1	0	0	KCNC3	potassium voltage-gated channel, Shaw-related subfamily, member 3
hsa-miR-331-3p	1	0	1	1	1	1	PLEKHH3	pleckstrin homology domain containing, family H (with MyTH4 domain) member 3
hsa-miR-331-3p	1	0	1	1	0	0	ELN	elastin
hsa-miR-331-3p	0	0	1	0	0	0	PIDD	p53-induced death domain protein
hsa-miR-331-3p	1	0	1	1	1	1	PML	promyelocytic leukemia
hsa-miR-331-3p	0	0	1	1	1	1	MAZ	MYC-associated zinc finger protein (purine-binding transcription factor)
hsa-miR-331-3p	1	0	1	1	1	1	PHC1	polyhomeotic homolog 1 (Drosophila)
hsa-miR-331-3p	1	0	1	1	1	1	SLC8A1	solute carrier family 8 (sodium/calcium exchanger), member 1
hsa-miR-331-3p	0	0	1	1	1	1	DGKI	diacylglycerol kinase, iota
hsa-miR-331-3p	1	0	1	1	1	1	CACNA1D	calcium channel, voltage-dependent, L type, alpha 1D subunit
hsa-miR-331-3p	1	0	1	1	0	0	CACNB1	calcium channel, voltage-dependent, beta 1 subunit
hsa-miR-331-3p	1	0	1	1	0	0	TSPYL2	TSPY-like 2
hsa-miR-331-3p	0	0	1	1	1	1	DDX39B	DEAD (Asp-Glu-Ala-Asp) box polypeptide 39B
hsa-miR-331-3p	1	0	1	1	1	1	ERF	Ets2 repressor factor
hsa-miR-331-3p	1	0	1	1	1	1	TBX2	T-box 2
hsa-miR-331-3p	1	0	1	1	1	1	MINK1	misshapen-like kinase 1
hsa-miR-331-3p	1	0	1	1	0	0	RGS6	regulator of G-protein signaling 6
hsa-miR-331-3p	0	0	1	1	1	1	ZNF747	zinc finger protein 747
hsa-miR-331-3p	0	0	1	1	0	0	BMP1	bone morphogenetic protein 1
hsa-miR-331-3p	1	0	1	1	1	1	EPHB4	EPH receptor B4
hsa-miR-331-3p	1	0	1	1	1	1	EPB41	erythrocyte membrane protein band 4.1 (elliptocytosis 1, RH-linked)
hsa-miR-331-3p	0	0	1	1	0	0	SLC22A8	solute carrier family 22 (organic anion transporter), member 8
hsa-miR-331-3p	1	0	1	1	0	0	PPP2R5D	protein phosphatase 2, regulatory subunit B', delta
hsa-miR-331-3p	0	0	1	1	0	0	MSH5	mutS homolog 5 (E. coli)
hsa-miR-331-3p	1	0	1	0	1	1	PDE7B	phosphodiesterase 7B
hsa-miR-331-3p	1	0	1	1	1	1	MEF2D	myocyte enhancer factor 2D
hsa-miR-331-3p	1	0	1	1	1	1	PICALM	phosphatidylinositol binding clathrin assembly protein
hsa-miR-331-3p	1	0	1	1	1	1	CSMD2	CUB and Sushi multiple domains 2
hsa-miR-331-3p	0	0	1	0	0	0	MIAT	myocardial infarction associated transcript (non-protein coding)
hsa-miR-331-3p	1	0	1	0	1	1	MLL2	myeloid/lymphoid or mixed-lineage leukemia 2
hsa-miR-331-3p	0	0	1	1	1	1	MFSD11	major facilitator superfamily domain containing 11
hsa-miR-331-3p	0	0	1	1	0	0	ITGA7	integrin, alpha 7
hsa-miR-331-3p	1	0	1	1	0	0	ASPHD1	aspartate beta-hydroxylase domain containing 1
hsa-miR-331-3p	1	0	1	1	0	0	PRRC2A	proline-rich coiled-coil 2A
hsa-miR-331-3p	0	0	1	1	1	1	PCBP4	poly(rC) binding protein 4
hsa-miR-331-3p	1	0	1	0	0	0	PPME1	protein phosphatase methylesterase 1
hsa-miR-331-3p	0	0	1	1	1	1	TMEM176B	transmembrane protein 176B
hsa-miR-331-3p	1	0	1	1	1	1	NF2	neurofibromin 2 (merlin)
hsa-miR-331-3p	0	0	1	1	1	1	ACIN1	apoptotic chromatin condensation inducer 1
hsa-miR-331-3p	0	0	1	1	0	0	CALHM2	calcium homeostasis modulator 2
hsa-miR-331-3p	1	0	1	0	1	1	FAM19A5	family with sequence similarity 19 (chemokine (C-C motif)-like), member A5
hsa-miR-331-3p	0	0	1	1	0	0	ANGPTL4	angiopoietin-like 4
hsa-miR-331-3p	0	0	1	1	1	1	SLC25A14	solute carrier family 25 (mitochondrial carrier, brain), member 14
hsa-miR-331-3p	0	0	1	1	1	1	SLCO2B1	solute carrier organic anion transporter family, member 2B1
hsa-miR-331-3p	0	0	1	1	0	0	STUB1	STIP1 homology and U-box containing protein 1, E3 ubiquitin protein ligase
hsa-miR-331-3p	0	0	1	1	0	0	LGALS12	lectin, galactoside-binding, soluble, 12
hsa-miR-331-3p	0	0	1	1	0	0	SH2B1	SH2B adaptor protein 1
hsa-miR-331-3p	1	0	1	1	1	1	SNTB2	syntrophin, beta 2 (dystrophin-associated protein A1, 59kDa, basic component 2)
hsa-miR-331-3p	0	0	1	1	0	0	NYX	nyctalopin
hsa-miR-331-3p	1	0	1	1	1	1	ABI2	abl-interactor 2
hsa-miR-331-3p	1	0	1	1	1	1	DCLRE1B	DNA cross-link repair 1B
hsa-miR-331-3p	1	0	1	1	0	0	ZBTB37	zinc finger and BTB domain containing 37
hsa-miR-331-3p	1	0	1	1	1	1	SPTBN4	spectrin, beta, non-erythrocytic 4
hsa-miR-331-3p	0	0	1	1	0	0	ZAN	zonadhesin
hsa-miR-331-3p	0	0	1	1	1	1	ITPA	inosine triphosphatase (nucleoside triphosphate pyrophosphatase)
hsa-miR-331-3p	0	0	1	1	1	1	SEMA6C	sema domain, transmembrane domain (TM), and cytoplasmic domain, (semaphorin) 6C
hsa-miR-331-3p	0	0	1	1	0	0	CRHR1	corticotropin releasing hormone receptor 1
hsa-miR-331-3p	0	0	1	0	0	0	MYO15B	myosin XVB pseudogene
hsa-miR-331-3p	1	0	1	1	1	1	ST3GAL3	ST3 beta-galactoside alpha-2,3-sialyltransferase 3
hsa-miR-331-3p	1	0	1	1	1	1	BRSK1	BR serine/threonine kinase 1
hsa-miR-331-3p	1	0	1	1	1	1	BAK1	BCL2-antagonist/killer 1
hsa-miR-331-3p	0	0	1	1	1	1	R3HCC1L	R3H domain and coiled-coil containing 1-like
hsa-miR-331-3p	0	0	1	1	1	1	PTK7	PTK7 protein tyrosine kinase 7
hsa-miR-331-3p	1	0	1	1	1	1	FLNC	filamin C, gamma
hsa-miR-331-3p	0	0	1	1	1	1	GNAS	GNAS complex locus
hsa-miR-331-3p	1	0	1	1	1	1	NRXN3	neurexin 3
hsa-miR-331-3p	1	0	1	1	1	1	PDE1B	phosphodiesterase 1B, calmodulin-dependent
hsa-miR-331-3p	0	0	1	0	0	0	TOMM6	translocase of outer mitochondrial membrane 6 homolog (yeast)
hsa-miR-331-3p	1	0	1	1	1	1	ARL4C	ADP-ribosylation factor-like 4C
hsa-miR-331-3p	0	0	1	1	1	1	TFEB	transcription factor EB
hsa-miR-331-3p	1	0	1	1	0	0	DUS2L	dihydrouridine synthase 2-like, SMM1 homolog (S. cerevisiae)
hsa-miR-331-3p	0	0	1	1	1	1	PARP16	poly (ADP-ribose) polymerase family, member 16
hsa-miR-331-3p	0	0	1	0	0	0	TUG1	taurine upregulated 1 (non-protein coding)
hsa-miR-331-3p	0	0	1	1	1	1	OLFM4	olfactomedin 4
hsa-miR-331-3p	1	0	1	1	1	1	ARGLU1	arginine and glutamate rich 1
hsa-miR-331-3p	0	0	1	1	0	0	AP4B1	adaptor-related protein complex 4, beta 1 subunit
hsa-miR-331-3p	1	0	1	1	1	1	RIC8B	resistance to inhibitors of cholinesterase 8 homolog B (C. elegans)
hsa-miR-331-3p	1	0	1	1	1	1	CADM3	cell adhesion molecule 3
hsa-miR-331-3p	1	0	1	1	1	1	WDTC1	WD and tetratricopeptide repeats 1
hsa-miR-331-3p	0	0	1	1	1	1	CXXC5	CXXC finger protein 5
hsa-miR-331-3p	1	0	1	1	0	0	CCDC120	coiled-coil domain containing 120
hsa-miR-331-3p	1	0	1	1	1	1	ZNF395	zinc finger protein 395
hsa-miR-331-3p	1	0	1	1	1	1	ACER3	alkaline ceramidase 3
hsa-miR-331-3p	1	0	1	1	1	1	KLHDC8B	kelch domain containing 8B
hsa-miR-331-3p	0	0	1	0	0	0	C17orf72	chromosome 17 open reading frame 72
hsa-miR-331-3p	0	0	1	1	0	0	TFR2	transferrin receptor 2
hsa-miR-331-3p	1	0	1	0	1	1	LIN28A	lin-28 homolog A (C. elegans)
hsa-miR-331-3p	0	0	1	0	0	0	DUXAP10	double homeobox A pseudogene 10
hsa-miR-331-3p	1	0	1	0	1	1	DCAF17	DDB1 and CUL4 associated factor 17
hsa-miR-331-3p	1	0	1	1	1	1	BAIAP2	BAI1-associated protein 2
hsa-miR-331-3p	1	0	1	1	1	1	PAX8	paired box 8
hsa-miR-331-3p	1	0	1	1	1	1	MAPK8IP3	mitogen-activated protein kinase 8 interacting protein 3
hsa-miR-331-3p	0	0	1	1	1	1	HDAC7	histone deacetylase 7
hsa-miR-331-3p	0	0	1	0	0	0	IFFO2	intermediate filament family orphan 2
hsa-miR-331-3p	1	0	1	1	1	1	TNRC6A	trinucleotide repeat containing 6A
hsa-miR-331-3p	1	0	1	0	1	1	ZCCHC3	zinc finger, CCHC domain containing 3
hsa-miR-331-3p	0	0	1	1	0	0	DDAH2	dimethylarginine dimethylaminohydrolase 2
hsa-miR-331-3p	0	0	1	1	1	1	MINA	MYC induced nuclear antigen
hsa-miR-331-3p	1	0	1	1	1	1	FAM40A	family with sequence similarity 40, member A
hsa-miR-331-3p	0	0	1	1	1	1	PAQR4	progestin and adipoQ receptor family member IV
hsa-miR-331-3p	0	0	1	1	0	0	IMPDH1	IMP (inosine 5'-monophosphate) dehydrogenase 1
hsa-miR-331-3p	0	0	1	1	1	1	RAB37	RAB37, member RAS oncogene family
hsa-miR-331-3p	0	0	1	0	0	0	LOC254559	uncharacterized LOC254559
hsa-miR-331-3p	0	0	1	1	0	0	FAM153B	family with sequence similarity 153, member B
hsa-miR-331-3p	0	0	1	0	0	0	CHST9-AS1	CHST9 antisense RNA 1
hsa-miR-331-3p	1	0	1	1	1	1	DLGAP4	discs, large (Drosophila) homolog-associated protein 4
hsa-miR-331-3p	0	0	1	1	1	1	ZNF213	zinc finger protein 213
hsa-miR-331-3p	1	0	1	1	0	0	SPEG	SPEG complex locus
hsa-miR-331-3p	1	0	1	1	1	1	MEIS2	Meis homeobox 2
hsa-miR-331-3p	1	0	1	1	0	0	SH2D3C	SH2 domain containing 3C
hsa-miR-331-3p	0	0	1	1	0	0	BEAN1	brain expressed, associated with NEDD4, 1
hsa-miR-331-3p	1	0	1	1	1	1	SCAMP5	secretory carrier membrane protein 5
hsa-miR-331-3p	0	0	1	0	0	0	LOC284600	uncharacterized LOC284600
hsa-miR-331-3p	1	0	1	1	0	0	SRL	sarcalumenin
hsa-miR-331-3p	0	0	1	1	1	1	GNB2	guanine nucleotide binding protein (G protein), beta polypeptide 2
hsa-miR-331-3p	0	0	1	0	0	0	LOC255187	hCG1980447
hsa-miR-331-3p	1	0	1	1	1	1	APLP2	amyloid beta (A4) precursor-like protein 2
hsa-miR-331-3p	0	0	1	1	1	1	COQ10A	coenzyme Q10 homolog A (S. cerevisiae)
hsa-miR-331-3p	1	0	1	1	1	1	MLLT6	myeloid/lymphoid or mixed-lineage leukemia (trithorax homolog, Drosophila); translocated to, 6
hsa-miR-331-3p	0	0	1	1	0	0	COMMD4	COMM domain containing 4
hsa-miR-331-3p	0	0	1	1	1	1	PSME3	proteasome (prosome, macropain) activator subunit 3 (PA28 gamma; Ki)
hsa-miR-331-3p	0	0	1	1	0	0	LOXHD1	lipoxygenase homology domains 1
hsa-miR-331-3p	0	0	1	1	1	1	MS4A14	membrane-spanning 4-domains, subfamily A, member 14
hsa-miR-331-3p	0	0	1	1	1	1	RANBP17	RAN binding protein 17
hsa-miR-331-3p	0	0	1	1	0	0	PORCN	porcupine homolog (Drosophila)
hsa-miR-331-3p	0	0	1	1	0	0	PTOV1	prostate tumor overexpressed 1
hsa-miR-331-3p	0	0	1	0	0	0	FLJ25363	uncharacterized LOC401082
hsa-miR-331-3p	0	0	1	1	0	0	TRIM41	tripartite motif containing 41
hsa-miR-331-3p	0	0	1	1	0	0	PIGO	phosphatidylinositol glycan anchor biosynthesis, class O
hsa-miR-331-3p	1	0	1	1	1	1	FAM73B	family with sequence similarity 73, member B
hsa-miR-331-3p	0	0	1	0	0	0	CAPN13	calpain 13
hsa-miR-331-3p	1	0	1	0	1	1	RNF165	ring finger protein 165
hsa-miR-331-3p	1	0	1	0	1	1	GRAMD1A	GRAM domain containing 1A
hsa-miR-331-3p	1	0	1	1	1	1	SEC61A1	Sec61 alpha 1 subunit (S. cerevisiae)
hsa-miR-331-3p	1	0	1	1	0	0	B3GAT3	beta-1,3-glucuronyltransferase 3 (glucuronosyltransferase I)
hsa-miR-331-3p	0	0	1	1	1	1	CAMKV	CaM kinase-like vesicle-associated
hsa-miR-331-3p	0	0	1	1	0	0	FAM115C	family with sequence similarity 115, member C
hsa-miR-331-3p	0	0	1	0	0	0	LOC643837	uncharacterized LOC643837
hsa-miR-331-3p	0	0	1	1	0	0	ACOT11	acyl-CoA thioesterase 11
hsa-miR-331-3p	0	0	1	0	0	0	LOC440910	uncharacterized LOC440910
hsa-miR-331-3p	1	0	1	1	1	1	FBXW2	F-box and WD repeat domain containing 2
hsa-miR-331-3p	0	0	1	1	1	1	CD34	CD34 molecule
hsa-miR-331-3p	1	0	1	0	1	1	TEF	thyrotrophic embryonic factor
hsa-miR-331-3p	1	0	1	1	1	1	LUC7L2	LUC7-like 2 (S. cerevisiae)
hsa-miR-331-3p	0	0	1	1	1	1	RASGRP2	RAS guanyl releasing protein 2 (calcium and DAG-regulated)
hsa-miR-331-3p	1	0	1	1	1	1	BANP	BTG3 associated nuclear protein
hsa-miR-331-3p	1	0	1	1	1	1	MAP3K12	mitogen-activated protein kinase kinase kinase 12
hsa-miR-331-3p	0	0	1	1	0	0	WBP1	WW domain binding protein 1
hsa-miR-331-3p	0	0	1	1	1	1	TMEM191C	transmembrane protein 191C
hsa-miR-331-3p	0	0	1	0	1	1	AGBL4	ATP/GTP binding protein-like 4
hsa-miR-331-3p	0	0	1	1	1	1	GPT2	glutamic pyruvate transaminase (alanine aminotransferase) 2
hsa-miR-331-3p	0	0	1	1	1	1	CHRM5	cholinergic receptor, muscarinic 5
hsa-miR-331-3p	0	0	1	1	1	1	AQP3	aquaporin 3 (Gill blood group)
hsa-miR-331-3p	1	0	1	1	1	1	KCNIP3	Kv channel interacting protein 3, calsenilin
hsa-miR-331-3p	1	0	1	1	1	1	SPATS2	spermatogenesis associated, serine-rich 2
hsa-miR-331-3p	1	0	1	1	1	1	PEA15	phosphoprotein enriched in astrocytes 15
hsa-miR-331-3p	0	0	1	1	1	1	BAG1	BCL2-associated athanogene
hsa-miR-331-3p	0	0	1	1	0	0	TRIM46	tripartite motif containing 46
hsa-miR-331-3p	0	0	1	0	0	0	ZNF815P	zinc finger protein 815, pseudogene
hsa-miR-331-3p	1	0	1	1	0	0	FBRS	fibrosin
hsa-miR-331-3p	1	0	1	1	0	0	SCAMP2	secretory carrier membrane protein 2
hsa-miR-331-3p	1	0	1	1	1	1	CRTC2	CREB regulated transcription coactivator 2
hsa-miR-331-3p	0	0	1	0	0	0	LINC00340	long intergenic non-protein coding RNA 340
hsa-miR-331-3p	0	0	1	1	1	1	ZNF513	zinc finger protein 513
hsa-miR-331-3p	1	0	1	1	1	1	GATA4	GATA binding protein 4
hsa-miR-331-3p	0	0	1	1	1	1	FGD2	FYVE, RhoGEF and PH domain containing 2
hsa-miR-331-3p	1	0	1	0	1	1	YPEL2	yippee-like 2 (Drosophila)
hsa-miR-331-3p	1	0	1	1	1	1	LCP1	lymphocyte cytosolic protein 1 (L-plastin)
hsa-miR-331-3p	0	0	1	0	0	0	LOC400680	uncharacterized LOC400680
hsa-miR-331-3p	0	0	1	1	1	1	MED20	mediator complex subunit 20
hsa-miR-331-3p	0	0	1	1	1	1	TEX35	testis expressed 35
hsa-miR-331-3p	0	0	1	0	0	0	THAP7-AS1	THAP7 antisense RNA 1
hsa-miR-331-3p	1	0	1	1	1	1	ST7L	suppression of tumorigenicity 7 like
hsa-miR-331-3p	0	0	1	0	0	0	CECR7	cat eye syndrome chromosome region, candidate 7 (non-protein coding)
hsa-miR-331-3p	1	0	1	0	1	1	SQSTM1	sequestosome 1
hsa-miR-331-3p	1	0	1	1	1	1	ZCCHC2	zinc finger, CCHC domain containing 2
hsa-miR-331-3p	0	0	1	0	0	0	LOC100130954	uncharacterized LOC100130954
hsa-miR-331-3p	0	0	1	1	0	0	FBXO16	F-box protein 16
hsa-miR-331-3p	0	0	1	1	1	1	ARFGAP2	ADP-ribosylation factor GTPase activating protein 2
hsa-miR-331-3p	1	0	1	1	1	1	THTPA	thiamine triphosphatase
hsa-miR-331-3p	1	0	1	1	0	0	FBXL19	F-box and leucine-rich repeat protein 19
hsa-miR-331-3p	0	0	1	1	0	0	GDPD5	glycerophosphodiester phosphodiesterase domain containing 5
hsa-miR-331-3p	0	0	1	1	1	1	STRC	stereocilin
hsa-miR-331-3p	0	0	1	1	0	0	KIAA0146	KIAA0146
hsa-miR-331-3p	1	0	1	1	0	0	CACNB3	calcium channel, voltage-dependent, beta 3 subunit
hsa-miR-331-3p	0	0	1	1	0	0	WDR81	WD repeat domain 81
hsa-miR-331-3p	1	0	1	1	1	1	ZNF275	zinc finger protein 275
hsa-miR-331-3p	0	0	1	0	1	1	PATE4	prostate and testis expressed 4
hsa-miR-331-3p	1	0	1	1	1	1	KALRN	kalirin, RhoGEF kinase
hsa-miR-331-3p	0	0	1	0	0	0	C1orf132	chromosome 1 open reading frame 132
hsa-miR-331-3p	0	0	1	1	0	0	TJAP1	tight junction associated protein 1 (peripheral)
hsa-miR-331-3p	0	0	1	0	0	0	LOC650368	asparagine-linked glycosylation 1-like pseudogene
hsa-miR-331-3p	1	0	1	1	1	1	PRDM2	PR domain containing 2, with ZNF domain
hsa-miR-331-3p	0	0	1	1	1	1	SLC9A1	solute carrier family 9, subfamily A (NHE1, cation proton antiporter 1), member 1
hsa-miR-331-3p	1	0	1	1	1	1	GJC1	gap junction protein, gamma 1, 45kDa
hsa-miR-331-3p	0	0	1	1	0	0	SSPO	SCO-spondin homolog (Bos taurus)
hsa-miR-331-3p	0	0	1	1	0	0	PMF1	polyamine-modulated factor 1
hsa-miR-331-3p	1	0	1	1	1	1	CORO2B	coronin, actin binding protein, 2B
hsa-miR-331-3p	0	0	1	1	1	1	C2orf91	chromosome 2 open reading frame 91
hsa-miR-331-3p	1	0	1	0	0	0	ANKRD52	ankyrin repeat domain 52
hsa-miR-331-3p	0	0	1	1	0	0	LOC442075	uncharacterized LOC442075
hsa-miR-331-3p	1	0	1	0	0	0	MSL1	male-specific lethal 1 homolog (Drosophila)
hsa-miR-331-3p	0	0	1	1	0	0	ANKHD1-EIF4EBP3	ANKHD1-EIF4EBP3 readthrough
hsa-miR-331-3p	0	0	1	1	0	0	LOC399829	uncharacterized LOC399829
hsa-miR-331-3p	0	0	1	0	0	0	FAM95B1	family with sequence similarity 95, member B1
hsa-miR-331-3p	0	0	1	1	1	1	RBM46	RNA binding motif protein 46
hsa-miR-331-3p	0	0	1	1	0	0	C20orf141	chromosome 20 open reading frame 141
hsa-miR-331-3p	1	0	1	1	0	0	ATXN7L3	ataxin 7-like 3
hsa-miR-331-3p	0	0	1	0	1	1	LOC388942	uncharacterized LOC388942
hsa-miR-331-3p	0	0	1	1	0	0	HSPG2	heparan sulfate proteoglycan 2
hsa-miR-331-3p	0	0	1	1	1	1	BDH1	3-hydroxybutyrate dehydrogenase, type 1
hsa-miR-331-3p	1	0	1	1	0	0	TNK2	tyrosine kinase, non-receptor, 2
hsa-miR-331-3p	0	0	1	0	0	0	PLEKHD1	pleckstrin homology domain containing, family D (with coiled-coil domains) member 1
hsa-miR-331-3p	1	0	1	1	1	1	DLG2	discs, large homolog 2 (Drosophila)
hsa-miR-331-3p	0	0	1	1	0	0	TMEM151B	transmembrane protein 151B
hsa-miR-331-3p	1	0	1	1	1	1	KDM4B	lysine (K)-specific demethylase 4B
hsa-miR-331-3p	0	0	1	0	0	0	RPL23AP53	ribosomal protein L23a pseudogene 53
hsa-miR-331-3p	0	0	1	1	1	1	KLC4	kinesin light chain 4
hsa-miR-331-3p	1	0	1	0	1	1	N4BP3	NEDD4 binding protein 3
hsa-miR-331-3p	1	0	1	0	0	0	SLC16A3	solute carrier family 16, member 3 (monocarboxylic acid transporter 4)
hsa-miR-331-3p	1	0	1	1	1	1	ENAH	enabled homolog (Drosophila)
hsa-miR-331-3p	0	0	1	1	1	1	PIN4	protein (peptidylprolyl cis/trans isomerase) NIMA-interacting, 4 (parvulin)
hsa-miR-331-3p	0	0	1	0	0	0	ERVFRD-2	endogenous retrovirus group FRD, member 2
hsa-miR-331-3p	1	0	1	1	1	1	PLA2G15	phospholipase A2, group XV
hsa-miR-331-3p	0	0	1	0	0	0	FAM71E2	family with sequence similarity 71, member E2
hsa-miR-331-3p	0	0	1	0	0	0	LINC00514	long intergenic non-protein coding RNA 514
hsa-miR-331-3p	1	0	1	0	1	1	KDM2A	lysine (K)-specific demethylase 2A
hsa-miR-331-3p	0	0	1	1	1	1	MON1B	MON1 homolog B (yeast)
hsa-miR-331-3p	1	0	1	0	0	0	SP7	Sp7 transcription factor
hsa-miR-331-3p	1	0	1	0	1	1	KPNA6	karyopherin alpha 6 (importin alpha 7)
hsa-miR-331-3p	1	0	1	0	1	1	CYB561D1	cytochrome b-561 domain containing 1
hsa-miR-331-3p	0	0	1	1	0	0	HEATR8	HEAT repeat containing 8
hsa-miR-331-3p	0	0	1	0	0	0	LOC390660	FLJ00317 protein
hsa-miR-331-3p	0	0	1	1	0	0	HSH2D	hematopoietic SH2 domain containing
hsa-miR-331-3p	1	0	1	1	1	1	MAP3K14	mitogen-activated protein kinase kinase kinase 14
hsa-miR-331-3p	0	0	1	1	1	1	SYPL2	synaptophysin-like 2
hsa-miR-331-3p	0	0	1	1	1	1	ZNF346	zinc finger protein 346
hsa-miR-331-3p	1	0	1	1	1	1	SYS1	SYS1 Golgi-localized integral membrane protein homolog (S. cerevisiae)
hsa-miR-331-3p	0	0	1	1	1	1	KAZALD1	Kazal-type serine peptidase inhibitor domain 1
hsa-miR-331-3p	0	0	1	1	0	0	GC	group-specific component (vitamin D binding protein)
hsa-miR-331-3p	1	0	1	1	1	1	RPS6KA4	ribosomal protein S6 kinase, 90kDa, polypeptide 4
hsa-miR-331-3p	1	0	1	0	1	1	SEZ6	seizure related 6 homolog (mouse)
hsa-miR-331-3p	0	0	1	1	1	1	NMD3	NMD3 homolog (S. cerevisiae)
hsa-miR-331-3p	1	0	1	1	1	1	PTPN2	protein tyrosine phosphatase, non-receptor type 2
hsa-miR-331-3p	1	0	1	0	1	1	MAP3K3	mitogen-activated protein kinase kinase kinase 3
hsa-miR-331-3p	0	0	1	1	0	0	FAAH	fatty acid amide hydrolase
hsa-miR-331-3p	1	0	1	1	1	1	RIF1	RAP1 interacting factor homolog (yeast)
hsa-miR-331-3p	0	0	1	1	0	0	TBC1D10B	TBC1 domain family, member 10B
hsa-miR-331-3p	0	0	1	0	0	0	TPTE2P6	transmembrane phosphoinositide 3-phosphatase and tensin homolog 2 pseudogene 6
hsa-miR-331-3p	0	0	1	1	0	0	ODF3	outer dense fiber of sperm tails 3
hsa-miR-331-3p	0	0	1	0	0	0	KIAA0913	KIAA0913
hsa-miR-331-3p	1	0	1	1	1	1	PREX1	phosphatidylinositol-3,4,5-trisphosphate-dependent Rac exchange factor 1
hsa-miR-331-3p	0	0	1	1	0	0	PCIF1	PDX1 C-terminal inhibiting factor 1
hsa-miR-331-3p	0	0	1	1	1	1	TAOK2	TAO kinase 2
hsa-miR-331-3p	0	0	1	1	0	0	DDX49	DEAD (Asp-Glu-Ala-Asp) box polypeptide 49
hsa-miR-331-3p	1	0	1	1	1	1	NBEA	neurobeachin
hsa-miR-331-3p	1	0	1	1	1	1	NEO1	neogenin 1
hsa-miR-331-3p	0	0	1	1	1	1	CD276	CD276 molecule
hsa-miR-331-3p	0	0	1	0	0	0	FAM66D	family with sequence similarity 66, member D
hsa-miR-331-3p	1	0	1	1	1	1	PKNOX2	PBX/knotted 1 homeobox 2
hsa-miR-331-3p	1	0	1	0	1	1	BRPF1	bromodomain and PHD finger containing, 1
hsa-miR-331-3p	0	0	1	1	0	0	KRBA1	KRAB-A domain containing 1
hsa-miR-331-3p	1	0	1	1	1	1	LYPD3	LY6/PLAUR domain containing 3
hsa-miR-331-3p	1	0	1	1	1	1	FAM126B	family with sequence similarity 126, member B
hsa-miR-331-3p	0	0	1	1	1	1	EGFLAM	EGF-like, fibronectin type III and laminin G domains
hsa-miR-331-3p	0	0	1	1	1	1	YAP1	Yes-associated protein 1
hsa-miR-331-3p	0	0	1	1	0	0	TMEM91	transmembrane protein 91
hsa-miR-331-3p	0	0	1	0	1	1	FBXO42	F-box protein 42
hsa-miR-331-3p	1	0	1	1	1	1	FAM126A	family with sequence similarity 126, member A
hsa-miR-331-3p	0	0	1	1	0	0	TMEM116	transmembrane protein 116
hsa-miR-331-3p	1	0	1	1	1	1	FAM63B	family with sequence similarity 63, member B
hsa-miR-331-3p	1	0	1	1	1	1	IL17RD	interleukin 17 receptor D
hsa-miR-331-3p	1	0	1	1	1	1	MBD6	methyl-CpG binding domain protein 6
hsa-miR-331-3p	1	0	1	0	1	1	SMURF1	SMAD specific E3 ubiquitin protein ligase 1
hsa-miR-331-3p	0	0	1	1	1	1	PNMAL1	paraneoplastic Ma antigen family-like 1
hsa-miR-331-3p	1	0	1	0	1	1	PATL1	protein associated with topoisomerase II homolog 1 (yeast)
hsa-miR-331-3p	0	0	1	1	1	1	OSR2	odd-skipped related 2 (Drosophila)
hsa-miR-331-3p	1	0	1	1	1	1	GGT7	gamma-glutamyltransferase 7
hsa-miR-331-3p	0	0	1	1	0	0	CMTM1	CKLF-like MARVEL transmembrane domain containing 1
hsa-miR-331-3p	0	0	1	1	1	1	IYD	iodotyrosine deiodinase
hsa-miR-331-3p	0	0	1	0	0	0	MEG3	maternally expressed 3 (non-protein coding)
hsa-miR-331-3p	1	0	1	1	1	1	GFRA2	GDNF family receptor alpha 2
hsa-miR-331-3p	0	0	1	1	0	0	EGFL8	EGF-like-domain, multiple 8
hsa-miR-331-3p	0	0	1	1	1	1	LHFPL1	lipoma HMGIC fusion partner-like 1
hsa-miR-331-3p	0	0	1	1	1	1	IL20	interleukin 20
hsa-miR-331-3p	0	0	1	1	1	1	GPR114	G protein-coupled receptor 114
hsa-miR-331-3p	0	0	1	0	0	0	LINC00085	long intergenic non-protein coding RNA 85
hsa-miR-331-3p	0	0	1	1	1	1	NYAP1	neuronal tyrosine-phosphorylated phosphoinositide-3-kinase adaptor 1
hsa-miR-331-3p	0	0	1	1	1	1	RPTN	repetin
hsa-miR-331-3p	0	0	1	1	1	1	TNFSF15	tumor necrosis factor (ligand) superfamily, member 15
hsa-miR-331-3p	1	0	1	1	0	0	ADAM15	ADAM metallopeptidase domain 15
hsa-miR-331-3p	0	0	1	1	1	1	SMPD1	sphingomyelin phosphodiesterase 1, acid lysosomal
hsa-miR-331-3p	0	0	1	1	1	1	RPAIN	RPA interacting protein
hsa-miR-331-3p	0	0	1	0	0	0	MAST4	microtubule associated serine/threonine kinase family member 4
hsa-miR-331-3p	0	0	1	1	0	0	NBPF8	neuroblastoma breakpoint family, member 8
hsa-miR-331-3p	0	0	1	1	1	1	CDK20	cyclin-dependent kinase 20
hsa-miR-331-3p	1	0	1	1	0	0	PLXNB3	plexin B3
hsa-miR-331-3p	0	0	1	0	0	0	GBAP1	glucosidase, beta, acid pseudogene 1
hsa-miR-331-3p	0	0	1	1	1	1	SLC6A2	solute carrier family 6 (neurotransmitter transporter, noradrenalin), member 2
hsa-miR-331-3p	0	0	1	1	1	1	B4GALT2	UDP-Gal:betaGlcNAc beta 1,4- galactosyltransferase, polypeptide 2
hsa-miR-331-3p	1	0	1	1	1	1	RIMS3	regulating synaptic membrane exocytosis 3
hsa-miR-331-3p	1	0	1	1	1	1	PPP1R11	protein phosphatase 1, regulatory (inhibitor) subunit 11
hsa-miR-331-3p	1	0	1	0	1	1	EIF1AD	eukaryotic translation initiation factor 1A domain containing
hsa-miR-331-3p	0	0	1	1	1	1	PRMT5	protein arginine methyltransferase 5
hsa-miR-331-3p	1	0	1	1	0	0	EIF4A1	eukaryotic translation initiation factor 4A1
hsa-miR-331-3p	1	0	1	1	1	1	U2SURP	U2 snRNP-associated SURP domain containing
hsa-miR-331-3p	0	0	1	0	0	0	GLIS3-AS1	GLIS3 antisense RNA 1
hsa-miR-331-3p	0	0	1	1	1	1	C1orf94	chromosome 1 open reading frame 94
hsa-miR-331-3p	1	0	1	1	1	1	LMBR1L	limb region 1 homolog (mouse)-like
hsa-miR-331-3p	1	0	1	1	1	1	RSU1	Ras suppressor protein 1
hsa-miR-331-3p	0	0	1	1	0	0	PANK2	pantothenate kinase 2
hsa-miR-331-3p	1	0	1	1	1	1	RELL2	RELT-like 2
hsa-miR-331-3p	0	0	1	0	0	0	HIST1H2BN	histone cluster 1, H2bn
hsa-miR-331-3p	1	0	1	1	1	1	KCTD17	potassium channel tetramerisation domain containing 17
hsa-miR-331-3p	1	0	1	1	1	1	B4GALT3	UDP-Gal:betaGlcNAc beta 1,4- galactosyltransferase, polypeptide 3
hsa-miR-331-3p	0	0	1	1	1	1	ATXN2L	ataxin 2-like
hsa-miR-331-3p	0	0	1	0	0	0	LRRC14	leucine rich repeat containing 14
hsa-miR-331-3p	0	0	1	1	1	1	GNL3L	guanine nucleotide binding protein-like 3 (nucleolar)-like
hsa-miR-331-3p	0	0	1	0	1	1	GDE1	glycerophosphodiester phosphodiesterase 1
hsa-miR-331-3p	0	0	1	1	0	0	KLHDC3	kelch domain containing 3
hsa-miR-331-3p	1	0	1	1	1	1	GDAP2	ganglioside induced differentiation associated protein 2
hsa-miR-331-3p	0	0	1	1	0	0	VAV1	vav 1 guanine nucleotide exchange factor
hsa-miR-331-3p	0	0	1	1	1	1	TOMM40L	translocase of outer mitochondrial membrane 40 homolog (yeast)-like
hsa-miR-331-3p	0	0	1	1	0	0	UCK1	uridine-cytidine kinase 1
hsa-miR-331-3p	0	0	1	1	0	0	RBCK1	RanBP-type and C3HC4-type zinc finger containing 1
hsa-miR-331-3p	1	0	1	1	1	1	NRF1	nuclear respiratory factor 1
hsa-miR-331-3p	1	0	1	1	1	1	VTI1A	vesicle transport through interaction with t-SNAREs homolog 1A (yeast)
hsa-miR-331-3p	0	0	1	1	1	1	CSDE1	cold shock domain containing E1, RNA-binding
hsa-miR-331-3p	0	0	1	1	0	0	ZBTB32	zinc finger and BTB domain containing 32
hsa-miR-331-3p	0	0	1	0	1	1	ZNF641	zinc finger protein 641
hsa-miR-331-3p	1	0	1	1	1	1	ARHGEF9	Cdc42 guanine nucleotide exchange factor (GEF) 9
hsa-miR-331-3p	0	0	1	0	0	0	ZNF720	zinc finger protein 720
hsa-miR-331-3p	1	0	1	1	1	1	HMGA2	high mobility group AT-hook 2
hsa-miR-331-3p	0	0	1	1	0	0	HIST2H4A	histone cluster 2, H4a
hsa-miR-331-3p	0	0	1	1	0	0	HIST2H4B	histone cluster 2, H4b
hsa-miR-331-3p	0	0	1	1	1	1	CCBP2	chemokine binding protein 2
hsa-miR-331-3p	0	0	1	1	1	1	SNX17	sorting nexin 17
hsa-miR-331-3p	0	0	1	0	0	0	TMEM208	transmembrane protein 208
hsa-miR-331-3p	0	0	1	1	0	0	DPF1	D4, zinc and double PHD fingers family 1
hsa-miR-331-3p	1	0	1	1	0	0	TMEM63B	transmembrane protein 63B
hsa-miR-331-3p	0	0	1	1	1	1	PDE1C	phosphodiesterase 1C, calmodulin-dependent 70kDa
hsa-miR-331-3p	1	0	1	1	1	1	SPOCK2	sparc/osteonectin, cwcv and kazal-like domains proteoglycan (testican) 2
hsa-miR-331-3p	1	0	1	0	1	1	C14orf101	chromosome 14 open reading frame 101
hsa-miR-331-3p	0	0	1	0	0	0	SNX29P2	sorting nexin 29 pseudogene 2
hsa-miR-331-3p	1	0	1	1	1	1	PELI3	pellino E3 ubiquitin protein ligase family member 3
hsa-miR-331-3p	0	0	1	1	1	1	LRMP	lymphoid-restricted membrane protein
hsa-miR-331-3p	0	0	1	1	1	1	CD48	CD48 molecule
hsa-miR-331-3p	0	0	1	1	0	0	AGBL3	ATP/GTP binding protein-like 3
hsa-miR-331-3p	0	0	1	1	0	0	AHSA2	AHA1, activator of heat shock 90kDa protein ATPase homolog 2 (yeast)
hsa-miR-331-3p	1	0	1	1	1	1	BZRAP1	benzodiazapine receptor (peripheral) associated protein 1
hsa-miR-331-3p	1	0	1	1	1	1	PFAS	phosphoribosylformylglycinamidine synthase
hsa-miR-331-3p	0	0	1	0	1	1	PLEKHM1P	pleckstrin homology domain containing, family M (with RUN domain) member 1 pseudogene
hsa-miR-331-3p	0	0	1	1	1	1	ATF7	activating transcription factor 7
hsa-miR-331-3p	0	0	1	1	1	1	FBXO24	F-box protein 24
hsa-miR-331-3p	1	0	1	1	1	1	CCNG2	cyclin G2
hsa-miR-331-3p	1	0	1	1	1	1	RAB5B	RAB5B, member RAS oncogene family
hsa-miR-331-3p	1	0	1	1	0	0	MRC2	mannose receptor, C type 2
hsa-miR-331-3p	1	0	1	1	1	1	SIRPA	signal-regulatory protein alpha
hsa-miR-331-3p	0	0	1	1	1	1	IL20RB	interleukin 20 receptor beta
hsa-miR-331-3p	1	0	1	0	1	1	KIF5A	kinesin family member 5A
hsa-miR-331-3p	1	0	1	1	1	1	FBXL16	F-box and leucine-rich repeat protein 16
hsa-miR-331-3p	0	0	1	1	1	1	HEXA	hexosaminidase A (alpha polypeptide)
hsa-miR-331-3p	1	0	1	0	1	1	RHOBTB2	Rho-related BTB domain containing 2
hsa-miR-331-3p	0	0	1	1	1	1	KIF16B	kinesin family member 16B
hsa-miR-331-3p	1	0	1	1	1	1	RAP2C	RAP2C, member of RAS oncogene family
hsa-miR-331-3p	0	0	1	1	1	1	TMEM139	transmembrane protein 139
hsa-miR-331-3p	1	0	1	1	1	1	MEIS1	Meis homeobox 1
hsa-miR-331-3p	1	0	1	1	1	1	GAS8	growth arrest-specific 8
hsa-miR-331-3p	0	0	1	0	0	0	CYP4F35P	cytochrome P450, family 4, subfamily F, polypeptide 35, pseudogene
hsa-miR-331-3p	0	0	1	0	1	1	KSR1	kinase suppressor of ras 1
hsa-miR-331-3p	1	0	1	1	1	1	SOX6	SRY (sex determining region Y)-box 6
hsa-miR-331-3p	0	0	1	1	1	1	EFCAB13	EF-hand calcium binding domain 13
hsa-miR-331-3p	1	0	1	0	1	1	MMD2	monocyte to macrophage differentiation-associated 2
hsa-miR-331-3p	1	0	1	1	1	1	WSCD2	WSC domain containing 2
hsa-miR-331-3p	0	0	1	1	0	0	ZAP70	zeta-chain (TCR) associated protein kinase 70kDa
hsa-miR-331-3p	0	0	1	0	0	0	FLJ36000	uncharacterized FLJ36000
hsa-miR-331-3p	0	0	1	0	0	0	USP32P1	ubiquitin specific peptidase 32 pseudogene 1
hsa-miR-331-3p	0	0	1	0	0	0	TOB1-AS1	TOB1 antisense RNA 1
hsa-miR-331-3p	1	0	1	1	0	0	HES7	hairy and enhancer of split 7 (Drosophila)
hsa-miR-331-3p	1	0	1	0	1	1	PACSIN1	protein kinase C and casein kinase substrate in neurons 1
hsa-miR-331-3p	0	0	1	0	0	0	LOC339240	keratin 17 pseudogene
hsa-miR-331-3p	0	0	1	1	1	1	FAM71F1	family with sequence similarity 71, member F1
hsa-miR-331-3p	0	0	1	0	0	0	A1BG-AS1	A1BG antisense RNA 1
hsa-miR-331-3p	0	0	1	1	1	1	SIAE	sialic acid acetylesterase
hsa-miR-331-3p	0	0	1	1	0	0	SCAND1	SCAN domain containing 1
hsa-miR-331-3p	0	0	1	1	1	1	USP2	ubiquitin specific peptidase 2
hsa-miR-331-3p	1	0	1	1	1	1	ARPP21	cAMP-regulated phosphoprotein, 21kDa
hsa-miR-331-3p	1	0	1	1	1	1	GNG2	guanine nucleotide binding protein (G protein), gamma 2
hsa-miR-331-3p	1	0	1	1	0	0	INPP5J	inositol polyphosphate-5-phosphatase J
hsa-miR-331-3p	0	0	1	1	1	1	C8orf34	chromosome 8 open reading frame 34
hsa-miR-331-3p	1	0	1	1	1	1	CTIF	CBP80/20-dependent translation initiation factor
hsa-miR-331-3p	0	0	1	1	0	0	TEX13A	testis expressed 13A
hsa-miR-331-3p	0	0	1	1	0	0	PLB1	phospholipase B1
hsa-miR-331-3p	1	0	1	1	1	1	TXNRD1	thioredoxin reductase 1
hsa-miR-331-3p	0	0	1	0	0	0	LOC401176	uncharacterized LOC401176
hsa-miR-331-3p	0	0	1	0	0	0	LOC339260	uncharacterized LOC339260
hsa-miR-331-3p	0	0	1	0	0	0	DKFZp686O1327	uncharacterized LOC401014
hsa-miR-331-3p	0	0	1	0	0	0	FAM27E3	family with sequence similarity 27, member E3
hsa-miR-331-3p	0	0	1	1	1	1	P2RX6	purinergic receptor P2X, ligand-gated ion channel, 6
hsa-miR-331-3p	1	0	1	1	1	1	TOMM40	translocase of outer mitochondrial membrane 40 homolog (yeast)
hsa-miR-331-3p	0	0	1	1	1	1	ANKDD1A	ankyrin repeat and death domain containing 1A
hsa-miR-331-3p	1	0	1	1	0	0	TTC9	tetratricopeptide repeat domain 9
hsa-miR-331-3p	0	0	1	1	1	1	ZNF589	zinc finger protein 589
hsa-miR-331-3p	0	0	1	1	1	1	RANGAP1	Ran GTPase activating protein 1
hsa-miR-331-3p	0	0	1	0	1	1	ITGA1	integrin, alpha 1
hsa-miR-331-3p	0	0	1	1	0	0	NLRC5	NLR family, CARD domain containing 5
hsa-miR-331-3p	1	0	1	0	1	1	SEMA4G	sema domain, immunoglobulin domain (Ig), transmembrane domain (TM) and short cytoplasmic domain, (semaphorin) 4G
hsa-miR-331-3p	1	0	1	0	1	1	SMURF2	SMAD specific E3 ubiquitin protein ligase 2
hsa-miR-331-3p	0	0	1	1	1	1	LINC00086	long intergenic non-protein coding RNA 86
hsa-miR-331-3p	0	0	1	1	1	1	GRIK5	glutamate receptor, ionotropic, kainate 5
hsa-miR-331-3p	1	0	1	0	1	1	C14orf43	chromosome 14 open reading frame 43
hsa-miR-331-3p	0	0	1	1	0	0	EDC4	enhancer of mRNA decapping 4
hsa-miR-331-3p	0	0	1	1	0	0	TENC1	tensin like C1 domain containing phosphatase (tensin 2)
hsa-miR-331-3p	0	0	1	1	0	0	GRIN2C	glutamate receptor, ionotropic, N-methyl D-aspartate 2C
hsa-miR-331-3p	1	0	1	1	1	1	ZEB2	zinc finger E-box binding homeobox 2
hsa-miR-331-3p	1	0	1	1	1	1	FNDC5	fibronectin type III domain containing 5
hsa-miR-331-3p	1	0	1	1	1	1	ZSCAN29	zinc finger and SCAN domain containing 29
hsa-miR-331-3p	1	0	1	1	0	0	ANKRD13B	ankyrin repeat domain 13B
hsa-miR-331-3p	0	0	1	1	1	1	GPATCH2	G patch domain containing 2
hsa-miR-331-3p	0	0	1	1	0	0	C8orf31	chromosome 8 open reading frame 31
hsa-miR-331-3p	0	0	1	1	1	1	C1orf109	chromosome 1 open reading frame 109
hsa-miR-331-3p	1	0	1	0	0	0	PRRT4	proline-rich transmembrane protein 4
hsa-miR-331-3p	0	0	1	1	0	0	TSNARE1	t-SNARE domain containing 1
hsa-miR-331-3p	1	0	1	1	1	1	C5orf25	chromosome 5 open reading frame 25
hsa-miR-331-3p	0	0	1	1	0	0	ZMYND15	zinc finger, MYND-type containing 15
hsa-miR-331-3p	1	0	1	1	1	1	CCDC149	coiled-coil domain containing 149
hsa-miR-331-3p	0	0	1	1	0	0	TMEM183A	transmembrane protein 183A
hsa-miR-331-3p	1	0	1	0	1	1	MAGIX	MAGI family member, X-linked
hsa-miR-331-3p	1	0	1	1	1	1	MAPKAPK3	mitogen-activated protein kinase-activated protein kinase 3
hsa-miR-331-3p	0	0	1	0	0	0	PTGER4P2	prostaglandin E receptor 4 (subtype EP4) pseudogene 2
hsa-miR-331-3p	0	0	1	0	0	0	SPDYE8P	speedy homolog E8 (Xenopus laevis), pseudogene
hsa-miR-331-3p	0	0	1	1	0	0	SLAMF9	SLAM family member 9
hsa-miR-331-3p	0	0	1	0	0	0	AQP7P2	aquaporin 7 pseudogene 2
hsa-miR-331-3p	0	0	1	1	1	1	SLC11A1	solute carrier family 11 (proton-coupled divalent metal ion transporters), member 1
hsa-miR-331-3p	1	0	1	0	1	1	TGFBR1	transforming growth factor, beta receptor 1
hsa-miR-331-3p	0	0	1	0	0	0	LOC100147773	uncharacterized LOC100147773
hsa-miR-331-3p	1	0	1	1	1	1	RARG	retinoic acid receptor, gamma
hsa-miR-331-3p	0	0	1	1	0	0	C8orf82	chromosome 8 open reading frame 82
hsa-miR-331-3p	0	0	1	0	0	0	ABCC6P1	ATP-binding cassette, sub-family C, member 6 pseudogene 1
hsa-miR-331-3p	1	0	1	0	1	1	AMMECR1L	AMME chromosomal region gene 1-like
hsa-miR-331-3p	0	0	1	0	0	0	C17orf89	chromosome 17 open reading frame 89
hsa-miR-331-3p	0	0	1	0	0	0	LINC00537	long intergenic non-protein coding RNA 537
hsa-miR-331-3p	1	0	1	1	1	1	ZBTB7A	zinc finger and BTB domain containing 7A
hsa-miR-331-3p	1	0	1	1	1	1	ESRRA	estrogen-related receptor alpha
hsa-miR-331-3p	0	1	1	1	0	0	PKM	pyruvate kinase, muscle
hsa-miR-331-3p	1	0	1	1	1	1	GTF2I	general transcription factor IIi
hsa-miR-331-3p	0	0	1	1	1	1	SPDYE2	speedy homolog E2 (Xenopus laevis)
hsa-miR-331-3p	0	0	1	1	1	1	FUT11	fucosyltransferase 11 (alpha (1,3) fucosyltransferase)
hsa-miR-331-3p	1	0	1	1	1	1	IL28RA	interleukin 28 receptor, alpha (interferon, lambda receptor)
hsa-miR-331-3p	0	0	1	0	0	0	LOC441493	uncharacterized LOC441493
hsa-miR-331-3p	1	0	1	1	0	0	KIAA1644	KIAA1644
hsa-miR-331-3p	0	0	1	0	1	1	FLJ25328	uncharacterized LOC148231
hsa-miR-331-3p	0	0	1	0	0	0	FBXL19-AS1	FBXL19 antisense RNA 1 (head to head)
hsa-miR-331-3p	1	0	1	1	1	1	PTPRD	protein tyrosine phosphatase, receptor type, D
hsa-miR-331-3p	0	0	1	0	0	0	POM121L9P	POM121 transmembrane nucleoporin-like 9, pseudogene
hsa-miR-331-3p	0	0	1	1	0	0	RGS9	regulator of G-protein signaling 9
hsa-miR-331-3p	0	0	1	1	1	1	LRCH1	leucine-rich repeats and calponin homology (CH) domain containing 1
hsa-miR-331-3p	0	0	1	0	0	0	LINC00661	long intergenic non-protein coding RNA 661
hsa-miR-331-3p	1	0	1	1	1	1	OSBP2	oxysterol binding protein 2
hsa-miR-331-3p	0	0	1	0	0	0	EEF1DP3	eukaryotic translation elongation factor 1 delta pseudogene 3
hsa-miR-331-3p	0	0	1	0	0	0	KRT8P12	keratin 8 pseudogene 12
hsa-miR-331-3p	1	0	1	1	1	1	ZMYM4	zinc finger, MYM-type 4
hsa-miR-331-3p	0	0	1	0	1	1	C20orf202	chromosome 20 open reading frame 202
hsa-miR-331-3p	1	0	1	1	1	1	MLLT10	myeloid/lymphoid or mixed-lineage leukemia (trithorax homolog, Drosophila); translocated to, 10
hsa-miR-331-3p	0	0	1	1	0	0	HSF4	heat shock transcription factor 4
hsa-miR-331-3p	1	0	1	1	1	1	PHC2	polyhomeotic homolog 2 (Drosophila)
hsa-miR-331-3p	0	0	1	1	1	1	TINF2	TERF1 (TRF1)-interacting nuclear factor 2
hsa-miR-331-3p	1	0	1	1	1	1	CHGA	chromogranin A (parathyroid secretory protein 1)
hsa-miR-331-3p	1	0	1	1	1	1	RAB7A	RAB7A, member RAS oncogene family
hsa-miR-331-3p	1	0	1	0	1	1	NFIX	nuclear factor I/X (CCAAT-binding transcription factor)
hsa-miR-331-3p	0	0	1	1	1	1	STAT2	signal transducer and activator of transcription 2, 113kDa
hsa-miR-331-3p	1	0	1	1	0	0	CCDC30	coiled-coil domain containing 30
hsa-miR-331-3p	0	0	1	0	0	0	TRAF3IP2-AS1	TRAF3IP2 antisense RNA 1
hsa-miR-331-3p	1	0	1	1	1	1	TLN2	talin 2
hsa-miR-331-3p	0	0	1	0	0	0	OVOS	ovostatin
hsa-miR-331-3p	1	0	1	1	1	1	PHF21A	PHD finger protein 21A
hsa-miR-331-3p	1	0	1	1	1	1	PTPN3	protein tyrosine phosphatase, non-receptor type 3
hsa-miR-331-3p	1	0	1	1	1	1	NAV1	neuron navigator 1
hsa-miR-331-3p	1	0	1	1	1	1	ZKSCAN5	zinc finger with KRAB and SCAN domains 5
hsa-miR-331-3p	1	0	1	1	1	1	WLS	wntless homolog (Drosophila)
hsa-miR-331-3p	0	0	1	1	1	1	USP54	ubiquitin specific peptidase 54
hsa-miR-331-3p	1	0	1	1	1	1	CREB3L2	cAMP responsive element binding protein 3-like 2
hsa-miR-331-3p	0	0	1	1	1	1	POLR2H	polymerase (RNA) II (DNA directed) polypeptide H
hsa-miR-331-3p	0	0	1	1	0	0	CSH1	chorionic somatomammotropin hormone 1 (placental lactogen)
hsa-miR-331-3p	0	0	1	1	0	0	SREBF2	sterol regulatory element binding transcription factor 2
hsa-miR-331-3p	0	0	1	1	0	0	PPT2	palmitoyl-protein thioesterase 2
hsa-miR-331-3p	0	0	1	1	1	1	GRN	granulin
hsa-miR-331-3p	1	0	1	1	1	1	CLU	clusterin
hsa-miR-331-3p	0	0	1	1	1	1	CAT	catalase
hsa-miR-331-3p	1	0	1	0	0	0	IGLON5	IgLON family member 5
hsa-miR-331-3p	0	0	1	1	1	1	SMYD5	SMYD family member 5
hsa-miR-331-3p	0	0	1	1	0	0	CDC37	cell division cycle 37 homolog (S. cerevisiae)
hsa-miR-331-3p	0	0	1	1	1	1	TMEM53	transmembrane protein 53
hsa-miR-331-3p	0	0	1	1	1	1	GTPBP3	GTP binding protein 3 (mitochondrial)
hsa-miR-331-3p	0	0	1	1	1	1	TTC27	tetratricopeptide repeat domain 27
hsa-miR-331-3p	1	0	1	1	1	1	EIF4B	eukaryotic translation initiation factor 4B
hsa-miR-331-3p	1	0	1	1	0	0	TSC22D4	TSC22 domain family, member 4
hsa-miR-331-3p	1	0	1	1	1	1	CLDN11	claudin 11
hsa-miR-331-3p	1	0	1	1	0	0	PHGDH	phosphoglycerate dehydrogenase
hsa-miR-331-3p	0	0	1	1	0	0	PPOX	protoporphyrinogen oxidase
hsa-miR-331-3p	0	0	1	1	1	1	DMWD	dystrophia myotonica, WD repeat containing
hsa-miR-331-3p	0	0	1	1	0	0	CYGB	cytoglobin
hsa-miR-331-3p	0	0	1	1	0	0	FCGRT	Fc fragment of IgG, receptor, transporter, alpha
hsa-miR-331-3p	1	0	1	1	1	1	AP3S1	adaptor-related protein complex 3, sigma 1 subunit
hsa-miR-331-3p	1	0	1	1	1	1	DOLPP1	dolichyl pyrophosphate phosphatase 1
hsa-miR-331-3p	1	1	1	1	0	0	EFNA3	ephrin-A3
hsa-miR-331-3p	1	0	1	1	1	1	FGF11	fibroblast growth factor 11
hsa-miR-331-3p	0	0	1	1	0	0	ECH1	enoyl CoA hydratase 1, peroxisomal
hsa-miR-331-3p	0	0	1	1	0	0	STOML2	stomatin (EPB72)-like 2
hsa-miR-331-3p	0	0	1	0	0	0	LOC100009676	uncharacterized LOC100009676
hsa-miR-331-3p	1	0	1	1	1	1	CTDNEP1	CTD nuclear envelope phosphatase 1
hsa-miR-331-3p	1	0	1	1	1	1	SSR1	signal sequence receptor, alpha
hsa-miR-331-3p	1	0	1	1	1	1	ADM	adrenomedullin
hsa-miR-331-3p	0	0	1	1	1	1	CD99	CD99 molecule
hsa-miR-331-3p	0	0	1	1	0	0	DNAJB2	DnaJ (Hsp40) homolog, subfamily B, member 2
hsa-miR-331-3p	0	0	1	1	0	0	MYL6	myosin, light chain 6, alkali, smooth muscle and non-muscle
hsa-miR-331-3p	0	0	1	1	1	1	PLAUR	plasminogen activator, urokinase receptor
hsa-miR-331-3p	1	0	1	1	1	1	EI24	etoposide induced 2.4 mRNA
hsa-miR-331-3p	1	0	1	1	1	1	PLEKHB2	pleckstrin homology domain containing, family B (evectins) member 2
hsa-miR-331-3p	0	0	1	1	0	0	F10	coagulation factor X
hsa-miR-331-3p	0	0	1	1	1	1	GRAP2	GRB2-related adaptor protein 2
hsa-miR-331-3p	1	0	1	0	1	1	RPS6KB1	ribosomal protein S6 kinase, 70kDa, polypeptide 1
hsa-miR-331-3p	0	0	1	1	0	0	KIAA0100	KIAA0100
hsa-miR-331-3p	1	0	1	1	1	1	POU2F2	POU class 2 homeobox 2
hsa-miR-331-3p	1	0	1	1	1	1	ARFIP2	ADP-ribosylation factor interacting protein 2
hsa-miR-331-3p	1	0	1	1	1	1	STK38L	serine/threonine kinase 38 like
hsa-miR-331-3p	1	0	1	0	1	1	PLK3	polo-like kinase 3
hsa-miR-331-3p	0	0	1	1	0	0	C11orf68	chromosome 11 open reading frame 68
hsa-miR-331-3p	0	0	1	0	0	0	FLJ45248	FLJ45248 protein
hsa-miR-331-3p	1	0	1	1	0	0	TBC1D17	TBC1 domain family, member 17
hsa-miR-331-3p	0	0	1	1	0	0	LILRB4	leukocyte immunoglobulin-like receptor, subfamily B (with TM and ITIM domains), member 4
hsa-miR-331-3p	0	0	1	1	0	0	GMPPA	GDP-mannose pyrophosphorylase A
hsa-miR-331-3p	0	0	1	1	0	0	PTGDS	prostaglandin D2 synthase 21kDa (brain)
hsa-miR-331-3p	1	0	1	1	1	1	DOK4	docking protein 4
hsa-miR-331-3p	1	0	1	1	1	1	NRN1	neuritin 1
hsa-miR-331-3p	0	0	1	0	0	0	PGF	placental growth factor
hsa-miR-331-3p	1	0	1	1	1	1	ARNTL	aryl hydrocarbon receptor nuclear translocator-like
hsa-miR-331-3p	1	0	1	1	1	1	BIN3	bridging integrator 3
hsa-miR-331-3p	0	0	1	1	1	1	BTF3	basic transcription factor 3
hsa-miR-331-3p	0	0	1	1	1	1	RPA2	replication protein A2, 32kDa
hsa-miR-331-3p	1	0	1	0	1	1	NLN	neurolysin (metallopeptidase M3 family)
hsa-miR-331-3p	0	0	1	1	1	1	PABPN1	poly(A) binding protein, nuclear 1
hsa-miR-331-3p	0	0	1	0	1	1	RPL10	ribosomal protein L10
hsa-miR-331-3p	0	0	1	1	0	0	GPR153	G protein-coupled receptor 153
hsa-miR-331-3p	1	0	1	1	1	1	TIMP3	TIMP metallopeptidase inhibitor 3
hsa-miR-331-3p	0	0	1	1	1	1	SLC9A3R1	solute carrier family 9, subfamily A (NHE3, cation proton antiporter 3), member 3 regulator 1
hsa-miR-331-3p	0	0	1	1	1	1	UBE2F	ubiquitin-conjugating enzyme E2F (putative)
hsa-miR-331-3p	0	0	1	1	1	1	ACSF3	acyl-CoA synthetase family member 3
hsa-miR-331-3p	0	0	1	1	1	1	IL15	interleukin 15
hsa-miR-331-3p	1	0	1	1	0	0	INO80E	INO80 complex subunit E
hsa-miR-331-3p	1	0	1	0	1	1	GIT2	G protein-coupled receptor kinase interacting ArfGAP 2
hsa-miR-331-3p	0	0	1	1	1	1	EMC4	ER membrane protein complex subunit 4
hsa-miR-331-3p	1	0	1	1	1	1	RALY	RNA binding protein, autoantigenic (hnRNP-associated with lethal yellow homolog (mouse))
hsa-miR-331-3p	0	0	1	1	1	1	ZNF259	zinc finger protein 259
hsa-miR-331-3p	0	0	1	1	0	0	RAMP2	receptor (G protein-coupled) activity modifying protein 2
hsa-miR-331-3p	0	0	1	0	0	0	NUDT18	nudix (nucleoside diphosphate linked moiety X)-type motif 18
hsa-miR-331-3p	0	0	1	0	0	0	PRMT1	protein arginine methyltransferase 1
hsa-miR-331-3p	0	0	1	0	0	0	CHEK2P2	checkpoint kinase 2 pseudogene 2
hsa-miR-331-3p	0	0	1	1	0	0	TESK1	testis-specific kinase 1
hsa-miR-331-3p	0	0	1	0	0	0	LOC100132984	uncharacterized LOC100132984
hsa-miR-331-3p	0	0	1	1	1	1	ZNF75D	zinc finger protein 75D
hsa-miR-331-3p	0	0	1	1	0	0	FCGR2A	Fc fragment of IgG, low affinity IIa, receptor (CD32)
hsa-miR-331-3p	0	0	1	1	1	1	LIMK2	LIM domain kinase 2
hsa-miR-331-3p	1	0	1	1	1	1	JUNB	jun B proto-oncogene
hsa-miR-331-3p	0	0	1	1	0	0	IL11RA	interleukin 11 receptor, alpha
hsa-miR-331-3p	1	0	1	1	0	0	MMP11	matrix metallopeptidase 11 (stromelysin 3)
hsa-miR-331-3p	0	0	1	0	0	0	FAM47E	family with sequence similarity 47, member E
hsa-miR-331-3p	0	0	1	0	1	1	STARD8	StAR-related lipid transfer (START) domain containing 8
hsa-miR-331-3p	1	0	1	1	0	0	GSK3A	glycogen synthase kinase 3 alpha
hsa-miR-331-3p	0	0	1	0	0	0	DNAJC27-AS1	DNAJC27 antisense RNA 1
hsa-miR-331-3p	1	0	1	0	1	1	ZNF652	zinc finger protein 652
hsa-miR-331-3p	1	0	1	1	1	1	BCL2L1	BCL2-like 1
hsa-miR-331-3p	0	0	1	0	0	0	LOC440518	golgin A2 pseudogene
hsa-miR-331-3p	1	0	1	0	1	1	IRF4	interferon regulatory factor 4
hsa-miR-331-3p	0	0	1	1	0	0	HMGXB3	HMG box domain containing 3
hsa-miR-331-3p	1	0	1	0	1	1	CBX7	chromobox homolog 7
hsa-miR-331-3p	0	0	1	1	1	1	LTA	lymphotoxin alpha (TNF superfamily, member 1)
hsa-miR-331-3p	0	0	1	1	0	0	FABP6	fatty acid binding protein 6, ileal
hsa-miR-331-3p	1	0	1	0	1	1	MAP2K7	mitogen-activated protein kinase kinase 7
hsa-miR-331-3p	0	0	1	1	1	1	ITGAX	integrin, alpha X (complement component 3 receptor 4 subunit)
hsa-miR-331-3p	1	0	1	1	1	1	TNFAIP1	tumor necrosis factor, alpha-induced protein 1 (endothelial)
hsa-miR-331-3p	1	0	1	1	1	1	IRF1	interferon regulatory factor 1
hsa-miR-331-3p	1	0	1	1	1	1	SLC4A8	solute carrier family 4, sodium bicarbonate cotransporter, member 8
hsa-miR-331-3p	1	0	1	1	1	1	MAN2A2	mannosidase, alpha, class 2A, member 2
hsa-miR-331-3p	0	0	1	1	0	0	INHBA	inhibin, beta A
hsa-miR-331-3p	0	0	1	1	0	0	APOC1	apolipoprotein C-I
hsa-miR-331-3p	1	0	1	1	1	1	IGF1	insulin-like growth factor 1 (somatomedin C)
hsa-miR-331-3p	1	0	1	1	1	1	ESR1	estrogen receptor 1
hsa-miR-331-3p	0	0	1	1	0	0	GBA	glucosidase, beta, acid
hsa-miR-331-3p	1	0	1	0	1	1	GLI3	GLI family zinc finger 3
hsa-miR-331-3p	0	0	1	1	0	0	GP9	glycoprotein IX (platelet)
hsa-miR-331-3p	1	0	1	1	1	1	LEP	leptin
hsa-miR-331-3p	1	0	1	1	1	1	OCRL	oculocerebrorenal syndrome of Lowe
hsa-miR-331-3p	0	0	1	1	1	1	RS1	retinoschisin 1
hsa-miR-331-3p	1	0	1	1	1	1	BLMH	bleomycin hydrolase
hsa-miR-331-3p	1	0	1	1	0	0	LOR	loricrin
hsa-miR-331-3p	0	0	1	1	0	0	MAT1A	methionine adenosyltransferase I, alpha
hsa-miR-331-3p	1	0	1	1	0	0	NOTCH3	notch 3
hsa-miR-331-3p	0	0	1	1	1	1	CYP11B2	cytochrome P450, family 11, subfamily B, polypeptide 2
hsa-miR-331-3p	1	0	1	1	1	1	TNF	tumor necrosis factor
hsa-miR-331-3p	0	0	1	1	1	1	IGF2	insulin-like growth factor 2 (somatomedin A)
hsa-miR-331-3p	0	0	1	0	0	0	ADRA2C	adrenoceptor alpha 2C
hsa-miR-331-3p	0	0	1	1	1	1	CRAT	carnitine O-acetyltransferase
hsa-miR-331-3p	1	0	1	1	1	1	MME	membrane metallo-endopeptidase
hsa-miR-331-3p	1	0	1	1	1	1	PDE3B	phosphodiesterase 3B, cGMP-inhibited
hsa-miR-331-3p	0	0	1	1	0	0	PTGIR	prostaglandin I2 (prostacyclin) receptor (IP)
hsa-miR-331-3p	0	0	1	0	1	1	PTGIS	prostaglandin I2 (prostacyclin) synthase
hsa-miR-331-3p	1	0	1	1	1	1	RARA	retinoic acid receptor, alpha
hsa-miR-331-3p	0	0	1	1	0	0	SNCB	synuclein, beta
hsa-miR-331-3p	1	0	1	0	1	1	ARHGEF37	Rho guanine nucleotide exchange factor (GEF) 37
hsa-miR-331-3p	0	0	1	1	0	0	PAMR1	peptidase domain containing associated with muscle regeneration 1
hsa-miR-331-3p	0	0	1	0	0	0	KLK2	kallikrein-related peptidase 2
hsa-miR-331-3p	0	0	1	0	0	0	OR8G1	olfactory receptor, family 8, subfamily G, member 1
hsa-miR-331-3p	1	0	1	1	1	1	KCTD11	potassium channel tetramerisation domain containing 11
hsa-miR-331-3p	0	0	1	1	1	1	TWISTNB	TWIST neighbor
hsa-miR-331-3p	0	0	1	1	0	0	C1orf95	chromosome 1 open reading frame 95
hsa-miR-331-3p	0	0	1	1	1	1	C11orf49	chromosome 11 open reading frame 49
hsa-miR-331-3p	1	0	1	0	1	1	BMF	Bcl2 modifying factor
hsa-miR-331-3p	0	0	1	1	1	1	CCDC144NL	coiled-coil domain containing 144 family, N-terminal like
hsa-miR-331-3p	0	0	1	0	0	0	FIGLA	folliculogenesis specific basic helix-loop-helix
hsa-miR-331-3p	0	0	1	1	1	1	CLEC2D	C-type lectin domain family 2, member D
hsa-miR-331-3p	1	0	1	1	1	1	EBF3	early B-cell factor 3
hsa-miR-331-3p	1	0	1	1	1	1	EDA	ectodysplasin A
hsa-miR-331-3p	1	0	1	1	1	1	IGF2BP2	insulin-like growth factor 2 mRNA binding protein 2
hsa-miR-331-3p	1	0	1	1	1	1	SPOP	speckle-type POZ protein
hsa-miR-331-3p	0	0	1	1	0	0	NTRK1	neurotrophic tyrosine kinase, receptor, type 1
hsa-miR-331-3p	1	0	1	0	1	1	CPLX2	complexin 2
hsa-miR-331-3p	1	0	1	1	1	1	ZDHHC9	zinc finger, DHHC-type containing 9
hsa-miR-331-3p	1	0	1	1	1	1	CTDSPL	CTD (carboxy-terminal domain, RNA polymerase II, polypeptide A) small phosphatase-like
hsa-miR-331-3p	1	0	1	1	1	1	BCAP29	B-cell receptor-associated protein 29
hsa-miR-331-3p	1	0	1	0	1	1	KIAA2022	KIAA2022
hsa-miR-331-3p	1	0	1	1	1	1	LPHN1	latrophilin 1
hsa-miR-331-3p	1	0	1	0	1	1	ZC3H12B	zinc finger CCCH-type containing 12B
hsa-miR-331-3p	0	0	1	1	1	1	C1QL3	complement component 1, q subcomponent-like 3
hsa-miR-331-3p	1	0	1	1	1	1	C10orf114	chromosome 10 open reading frame 114
hsa-miR-331-3p	0	0	1	1	1	1	C9orf152	chromosome 9 open reading frame 152
hsa-miR-331-3p	1	0	1	1	1	1	C12orf68	chromosome 12 open reading frame 68
hsa-miR-331-3p	0	0	1	1	1	1	C2orf68	chromosome 2 open reading frame 68
hsa-miR-331-3p	0	0	1	1	0	0	VSIG8	V-set and immunoglobulin domain containing 8
hsa-miR-331-3p	0	0	1	0	0	0	LOC400707	uncharacterized LOC400707
hsa-miR-331-3p	0	0	1	1	1	1	LDLRAD2	low density lipoprotein receptor class A domain containing 2
hsa-miR-331-3p	1	0	1	1	1	1	NCDN	neurochondrin
hsa-miR-331-3p	0	0	1	1	0	0	RTKN	rhotekin
hsa-miR-331-3p	0	0	1	1	1	1	FAM78B	family with sequence similarity 78, member B
hsa-miR-331-3p	1	0	1	1	1	1	VMA21	VMA21 vacuolar H+-ATPase homolog (S. cerevisiae)
hsa-miR-331-3p	0	0	1	1	1	1	RNF215	ring finger protein 215
hsa-miR-331-3p	0	0	1	1	0	0	POLR3H	polymerase (RNA) III (DNA directed) polypeptide H (22.9kD)
hsa-miR-331-3p	0	0	1	0	0	0	ADIG	adipogenin
hsa-miR-331-3p	1	0	1	1	1	1	SERF2	small EDRK-rich factor 2
hsa-miR-331-3p	1	0	1	1	1	1	SBK1	SH3-binding domain kinase 1
hsa-miR-331-3p	1	0	1	0	1	1	BCL7A	B-cell CLL/lymphoma 7A
hsa-miR-331-3p	1	0	1	0	1	1	TNRC6B	trinucleotide repeat containing 6B
hsa-miR-331-3p	1	0	1	1	1	1	SLC6A9	solute carrier family 6 (neurotransmitter transporter, glycine), member 9
hsa-miR-331-3p	1	0	1	0	1	1	C3orf70	chromosome 3 open reading frame 70
hsa-miR-331-3p	1	0	1	1	1	1	VEGFA	vascular endothelial growth factor A
hsa-miR-331-3p	0	0	1	1	1	1	ARRDC2	arrestin domain containing 2
hsa-miR-331-3p	1	0	1	1	1	1	SLC10A7	solute carrier family 10 (sodium/bile acid cotransporter family), member 7
hsa-miR-331-3p	1	0	1	1	1	1	OPN5	opsin 5
hsa-miR-331-3p	1	0	1	1	1	1	UBE2V1	ubiquitin-conjugating enzyme E2 variant 1
hsa-miR-331-3p	1	0	1	1	1	1	MYCL1	v-myc myelocytomatosis viral oncogene homolog 1, lung carcinoma derived (avian)
hsa-miR-331-3p	1	0	1	0	1	1	SRGAP3	SLIT-ROBO Rho GTPase activating protein 3
hsa-miR-331-3p	0	0	1	1	1	1	PHF12	PHD finger protein 12
hsa-miR-331-3p	1	0	1	1	1	1	ZNF704	zinc finger protein 704
hsa-miR-331-3p	0	0	1	1	1	1	ATAD3C	ATPase family, AAA domain containing 3C
hsa-miR-331-3p	1	0	1	1	1	1	KCNC4	potassium voltage-gated channel, Shaw-related subfamily, member 4
hsa-miR-331-3p	0	0	1	1	1	1	C15orf59	chromosome 15 open reading frame 59
hsa-miR-331-3p	1	0	1	1	1	1	CHTF8	CTF8, chromosome transmission fidelity factor 8 homolog (S. cerevisiae)
hsa-miR-331-3p	0	0	1	0	0	0	C19orf55	chromosome 19 open reading frame 55
hsa-miR-331-3p	1	0	1	1	0	0	ANKRD34A	ankyrin repeat domain 34A
hsa-miR-331-3p	1	0	1	0	1	1	CD83	CD83 molecule
hsa-miR-331-3p	0	0	1	1	1	1	METTL21D	methyltransferase like 21D
hsa-miR-331-3p	1	0	1	1	1	1	ERBB4	v-erb-a erythroblastic leukemia viral oncogene homolog 4 (avian)
hsa-miR-331-3p	1	0	1	1	1	1	HS6ST2	heparan sulfate 6-O-sulfotransferase 2
hsa-miR-331-3p	1	0	1	1	1	1	ATG9A	autophagy related 9A
hsa-miR-331-3p	0	0	1	1	0	0	VPS37D	vacuolar protein sorting 37 homolog D (S. cerevisiae)
hsa-miR-331-3p	1	0	1	0	1	1	FAM127C	family with sequence similarity 127, member C
hsa-miR-331-3p	1	0	1	1	1	1	UBN1	ubinuclein 1
hsa-miR-331-3p	0	0	1	1	0	0	PGA3	pepsinogen 3, group I (pepsinogen A)
hsa-miR-331-3p	0	0	1	1	0	0	PGA4	pepsinogen 4, group I (pepsinogen A)
hsa-miR-331-3p	1	0	1	1	1	1	LDB3	LIM domain binding 3
hsa-miR-331-3p	1	0	1	0	1	1	FBXO41	F-box protein 41
hsa-miR-331-3p	1	0	1	1	0	0	DLGAP3	discs, large (Drosophila) homolog-associated protein 3
hsa-miR-331-3p	1	0	1	1	1	1	SHANK3	SH3 and multiple ankyrin repeat domains 3
hsa-miR-331-3p	1	0	1	0	1	1	UNC13A	unc-13 homolog A (C. elegans)
hsa-miR-331-3p	1	0	1	1	1	1	KDM6B	lysine (K)-specific demethylase 6B
hsa-miR-331-3p	1	0	1	0	1	1	THSD7B	thrombospondin, type I, domain containing 7B
hsa-miR-331-3p	0	0	1	1	1	1	LRRC4B	leucine rich repeat containing 4B
hsa-miR-331-3p	1	0	1	0	1	1	MEGF9	multiple EGF-like-domains 9
hsa-miR-331-3p	1	0	1	0	0	0	CCDC159	coiled-coil domain containing 159
hsa-miR-331-3p	0	0	1	1	1	1	TBX18	T-box 18
hsa-miR-331-3p	1	0	1	1	1	1	MGA	MAX gene associated
hsa-miR-331-3p	0	0	1	1	1	1	LILRB1	leukocyte immunoglobulin-like receptor, subfamily B (with TM and ITIM domains), member 1
hsa-miR-331-3p	0	0	1	1	1	1	CLIC2	chloride intracellular channel 2
hsa-miR-331-3p	1	0	1	1	1	1	MAPK14	mitogen-activated protein kinase 14
hsa-miR-331-3p	1	0	1	0	1	1	ELAVL3	ELAV (embryonic lethal, abnormal vision, Drosophila)-like 3 (Hu antigen C)
hsa-miR-331-3p	0	0	1	1	1	1	IL13RA1	interleukin 13 receptor, alpha 1
hsa-miR-331-3p	0	0	1	1	0	0	ACP2	acid phosphatase 2, lysosomal
hsa-miR-331-3p	1	0	1	1	1	1	ARF3	ADP-ribosylation factor 3
hsa-miR-331-3p	0	0	1	1	1	1	ARF5	ADP-ribosylation factor 5
hsa-miR-331-3p	0	0	1	1	0	0	RHOG	ras homolog family member G
hsa-miR-331-3p	1	0	1	1	1	1	CENPB	centromere protein B, 80kDa
hsa-miR-331-3p	0	0	1	1	1	1	DPT	dermatopontin
hsa-miR-331-3p	1	0	1	0	1	1	FOXO1	forkhead box O1
hsa-miR-331-3p	1	0	1	1	0	0	IHH	Indian hedgehog
hsa-miR-331-3p	1	0	1	1	0	0	INHBB	inhibin, beta B
hsa-miR-331-3p	1	0	1	1	1	1	ITGA5	integrin, alpha 5 (fibronectin receptor, alpha polypeptide)
hsa-miR-331-3p	1	0	1	1	0	0	JUP	junction plakoglobin
hsa-miR-331-3p	1	0	1	1	1	1	LIF	leukemia inhibitory factor
hsa-miR-331-3p	1	0	1	1	1	1	LIMK1	LIM domain kinase 1
hsa-miR-331-3p	1	0	1	1	1	1	LRP1	low density lipoprotein receptor-related protein 1
hsa-miR-331-3p	1	0	1	1	1	1	MAFK	v-maf musculoaponeurotic fibrosarcoma oncogene homolog K (avian)
hsa-miR-331-3p	1	0	1	1	1	1	MAX	MYC associated factor X
hsa-miR-331-3p	0	0	1	0	1	1	MFNG	MFNG O-fucosylpeptide 3-beta-N-acetylglucosaminyltransferase
hsa-miR-331-3p	0	0	1	0	1	1	CXCL9	chemokine (C-X-C motif) ligand 9
hsa-miR-331-3p	0	0	1	1	1	1	MMP19	matrix metallopeptidase 19
hsa-miR-331-3p	0	0	1	1	0	0	MYBL2	v-myb myeloblastosis viral oncogene homolog (avian)-like 2
hsa-miR-331-3p	1	0	1	1	1	1	NGFR	nerve growth factor receptor
hsa-miR-331-3p	0	0	1	0	1	1	OAZ2	ornithine decarboxylase antizyme 2
hsa-miR-331-3p	0	0	1	0	1	1	OPHN1	oligophrenin 1
hsa-miR-331-3p	1	0	1	1	1	1	OSBP	oxysterol binding protein
hsa-miR-331-3p	1	0	1	1	1	1	PBX2	pre-B-cell leukemia homeobox 2
hsa-miR-331-3p	1	0	1	0	1	1	PCDHGC3	protocadherin gamma subfamily C, 3
hsa-miR-331-3p	0	0	1	1	1	1	PDE6D	phosphodiesterase 6D, cGMP-specific, rod, delta
hsa-miR-331-3p	0	0	1	1	0	0	PER1	period homolog 1 (Drosophila)
hsa-miR-331-3p	0	0	1	1	1	1	PIM1	pim-1 oncogene
hsa-miR-331-3p	1	0	1	0	1	1	POU3F1	POU class 3 homeobox 1
hsa-miR-331-3p	0	0	1	0	0	0	PSMB10	proteasome (prosome, macropain) subunit, beta type, 10
hsa-miR-331-3p	0	0	1	1	0	0	PSMD2	proteasome (prosome, macropain) 26S subunit, non-ATPase, 2
hsa-miR-331-3p	1	0	1	1	1	1	PVRL1	poliovirus receptor-related 1 (herpesvirus entry mediator C)
hsa-miR-331-3p	0	0	1	1	1	1	RAB3A	RAB3A, member RAS oncogene family
hsa-miR-331-3p	1	0	1	1	0	0	RFX1	regulatory factor X, 1 (influences HLA class II expression)
hsa-miR-331-3p	0	0	1	1	1	1	RING1	ring finger protein 1
hsa-miR-331-3p	0	0	1	1	1	1	MRPL12	mitochondrial ribosomal protein L12
hsa-miR-331-3p	0	0	1	1	1	1	S100A3	S100 calcium binding protein A3
hsa-miR-331-3p	1	0	1	1	1	1	CCL21	chemokine (C-C motif) ligand 21
hsa-miR-331-3p	0	0	1	1	1	1	SDC2	syndecan 2
hsa-miR-331-3p	1	0	1	1	1	1	SH3GL2	SH3-domain GRB2-like 2
hsa-miR-331-3p	1	0	1	0	1	1	SLC6A1	solute carrier family 6 (neurotransmitter transporter, GABA), member 1
hsa-miR-331-3p	1	0	1	1	1	1	SMARCD1	SWI/SNF related, matrix associated, actin dependent regulator of chromatin, subfamily d, member 1
hsa-miR-331-3p	1	0	1	1	1	1	SMARCD2	SWI/SNF related, matrix associated, actin dependent regulator of chromatin, subfamily d, member 2
hsa-miR-331-3p	1	0	1	0	1	1	SOX4	SRY (sex determining region Y)-box 4
hsa-miR-331-3p	1	0	1	0	1	1	SOX11	SRY (sex determining region Y)-box 11
hsa-miR-331-3p	1	0	1	1	1	1	SRF	serum response factor (c-fos serum response element-binding transcription factor)
hsa-miR-331-3p	0	0	1	1	1	1	STIM1	stromal interaction molecule 1
hsa-miR-331-3p	1	0	1	1	1	1	SYN2	synapsin II
hsa-miR-331-3p	1	0	1	1	1	1	TEC	tec protein tyrosine kinase
hsa-miR-331-3p	0	0	1	1	1	1	UBE2I	ubiquitin-conjugating enzyme E2I
hsa-miR-331-3p	0	0	1	1	1	1	ZNF137P	zinc finger protein 137, pseudogene
hsa-miR-331-3p	1	0	1	0	1	1	BSN	bassoon (presynaptic cytomatrix protein)
hsa-miR-331-3p	1	0	1	1	0	0	SLC30A3	solute carrier family 30 (zinc transporter), member 3
hsa-miR-331-3p	1	0	1	1	1	1	KCNAB1	potassium voltage-gated channel, shaker-related subfamily, beta member 1
hsa-miR-331-3p	1	0	1	1	1	1	CILP	cartilage intermediate layer protein, nucleotide pyrophosphohydrolase
hsa-miR-331-3p	0	0	1	1	1	1	RGS5	regulator of G-protein signaling 5
hsa-miR-331-3p	0	0	1	1	0	0	EIF4EBP3	eukaryotic translation initiation factor 4E binding protein 3
hsa-miR-331-3p	1	0	1	0	1	1	PCDHGA12	protocadherin gamma subfamily A, 12
hsa-miR-331-3p	1	0	1	0	1	1	PCDHGB4	protocadherin gamma subfamily B, 4
hsa-miR-331-3p	0	0	1	1	0	0	SOCS1	suppressor of cytokine signaling 1
hsa-miR-331-3p	1	0	1	1	1	1	NRP2	neuropilin 2
hsa-miR-331-3p	1	0	1	1	1	1	KAT2B	K(lysine) acetyltransferase 2B
hsa-miR-331-3p	0	0	1	1	1	1	TIMELESS	timeless homolog (Drosophila)
hsa-miR-331-3p	0	0	1	0	0	0	ARRB1	arrestin, beta 1
hsa-miR-331-3p	1	0	1	0	1	1	E2F2	E2F transcription factor 2
hsa-miR-331-3p	1	0	1	1	1	1	EFNB2	ephrin-B2
hsa-miR-331-3p	1	0	1	0	1	1	EIF2S1	eukaryotic translation initiation factor 2, subunit 1 alpha, 35kDa
hsa-miR-331-3p	0	0	1	1	0	0	DRG1	developmentally regulated GTP binding protein 1
hsa-miR-331-3p	1	0	1	0	1	1	SLC1A2	solute carrier family 1 (glial high affinity glutamate transporter), member 2
hsa-miR-331-3p	1	0	1	1	1	1	SYT7	synaptotagmin VII
hsa-miR-331-3p	0	0	1	1	0	0	CD101	CD101 molecule
hsa-miR-331-3p	1	0	1	0	1	1	GTPBP1	GTP binding protein 1
hsa-miR-331-3p	1	0	1	1	1	1	DAG1	dystroglycan 1 (dystrophin-associated glycoprotein 1)
hsa-miR-331-3p	1	0	1	1	1	1	DBN1	drebrin 1
hsa-miR-331-3p	1	0	1	1	1	1	DTX1	deltex homolog 1 (Drosophila)
hsa-miR-331-3p	1	0	1	1	1	1	DUSP5	dual specificity phosphatase 5
hsa-miR-331-3p	1	0	1	1	1	1	EGR3	early growth response 3
hsa-miR-331-3p	1	0	1	1	1	1	ENSA	endosulfine alpha
hsa-miR-331-3p	1	0	1	1	1	1	FOXD2	forkhead box D2
hsa-miR-331-3p	1	0	1	1	1	1	GOLGA2	golgin A2
hsa-miR-331-3p	0	0	1	1	0	0	PRY	PTPN13-like, Y-linked
hsa-miR-331-3p	1	0	1	1	1	1	SCAF11	SR-related CTD-associated factor 11
hsa-miR-331-3p	1	0	1	1	1	1	LARGE	like-glycosyltransferase
hsa-miR-331-3p	0	0	1	1	1	1	MTA2	metastasis associated 1 family, member 2
hsa-miR-331-3p	0	0	1	1	0	0	BCL7C	B-cell CLL/lymphoma 7C
hsa-miR-331-3p	1	0	1	1	1	1	B4GALT5	UDP-Gal:betaGlcNAc beta 1,4- galactosyltransferase, polypeptide 5
hsa-miR-331-3p	1	0	1	1	1	1	FXR2	fragile X mental retardation, autosomal homolog 2
hsa-miR-331-3p	1	0	1	1	0	0	ADAMTS4	ADAM metallopeptidase with thrombospondin type 1 motif, 4
hsa-miR-331-3p	0	0	1	1	1	1	CLEC2B	C-type lectin domain family 2, member B
hsa-miR-331-3p	0	0	1	1	0	0	HR	hairless homolog (mouse)
hsa-miR-331-3p	0	0	1	0	1	1	CD80	CD80 molecule
hsa-miR-331-3p	1	0	1	0	1	1	E2F1	E2F transcription factor 1
hsa-miR-331-3p	1	0	1	1	0	0	EFNA4	ephrin-A4
hsa-miR-331-3p	0	0	1	1	0	0	GPR20	G protein-coupled receptor 20
hsa-miR-331-3p	0	0	1	1	1	1	GRK5	G protein-coupled receptor kinase 5
hsa-miR-331-3p	1	0	1	1	1	1	HIP1	huntingtin interacting protein 1
hsa-miR-331-3p	1	0	1	1	1	1	PDCL	phosducin-like
hsa-miR-331-3p	1	0	1	1	1	1	PHF2	PHD finger protein 2
hsa-miR-331-3p	1	0	1	0	1	1	PRKAB2	protein kinase, AMP-activated, beta 2 non-catalytic subunit
hsa-miR-331-3p	1	0	1	1	1	1	RALA	v-ral simian leukemia viral oncogene homolog A (ras related)
hsa-miR-331-3p	1	0	1	0	1	1	SRC	v-src sarcoma (Schmidt-Ruppin A-2) viral oncogene homolog (avian)
hsa-miR-331-3p	0	0	1	1	1	1	ST5	suppression of tumorigenicity 5
hsa-miR-331-3p	1	0	1	1	1	1	GABBR2	gamma-aminobutyric acid (GABA) B receptor, 2
hsa-miR-331-3p	1	0	1	1	1	1	AKT3	v-akt murine thymoma viral oncogene homolog 3 (protein kinase B, gamma)
hsa-miR-331-3p	1	0	1	1	1	1	HCN4	hyperpolarization activated cyclic nucleotide-gated potassium channel 4
hsa-miR-331-3p	0	0	1	0	1	1	POU3F2	POU class 3 homeobox 2
hsa-miR-331-3p	0	0	1	1	0	0	RTN2	reticulon 2
hsa-miR-331-3p	1	0	1	1	1	1	TMPRSS2	transmembrane protease, serine 2
hsa-miR-331-3p	1	0	1	1	1	1	ACTR1A	ARP1 actin-related protein 1 homolog A, centractin alpha (yeast)
hsa-miR-331-3p	0	0	1	1	1	1	MPHOSPH6	M-phase phosphoprotein 6
hsa-miR-331-3p	1	0	1	1	1	1	FOXO4	forkhead box O4
hsa-miR-331-3p	1	0	1	1	1	1	MTF1	metal-regulatory transcription factor 1
hsa-miR-331-3p	0	0	1	1	0	0	LAMC3	laminin, gamma 3
hsa-miR-331-3p	1	0	1	1	1	1	IRF9	interferon regulatory factor 9
hsa-miR-331-3p	1	0	1	0	1	1	SCML2	sex comb on midleg-like 2 (Drosophila)
hsa-miR-331-3p	1	0	1	1	1	1	DAGLA	diacylglycerol lipase, alpha
hsa-miR-331-3p	1	0	1	1	1	1	DYNC1LI2	dynein, cytoplasmic 1, light intermediate chain 2
hsa-miR-331-3p	1	0	1	1	1	1	DNAJB1	DnaJ (Hsp40) homolog, subfamily B, member 1
hsa-miR-331-3p	1	0	1	1	1	1	NEUROD2	neuronal differentiation 2
hsa-miR-331-3p	1	0	1	1	1	1	CDK16	cyclin-dependent kinase 16
hsa-miR-331-3p	1	0	1	0	1	1	PITPNA	phosphatidylinositol transfer protein, alpha
hsa-miR-331-3p	1	0	1	0	1	1	IGF2BP1	insulin-like growth factor 2 mRNA binding protein 1
hsa-miR-331-3p	0	0	1	1	1	1	CD226	CD226 molecule
hsa-miR-331-3p	0	0	1	1	1	1	PPP1R17	protein phosphatase 1, regulatory subunit 17
hsa-miR-331-3p	1	0	1	1	1	1	MAN1A2	mannosidase, alpha, class 1A, member 2
hsa-miR-331-3p	1	0	1	1	0	0	PSKH1	protein serine kinase H1
hsa-miR-331-3p	1	0	1	0	1	1	SYNGAP1	synaptic Ras GTPase activating protein 1
hsa-miR-331-3p	0	0	1	1	0	0	PIM2	pim-2 oncogene
hsa-miR-331-3p	1	0	1	0	1	1	SLC2A3	solute carrier family 2 (facilitated glucose transporter), member 3
hsa-miR-331-3p	1	0	1	1	1	1	NR4A3	nuclear receptor subfamily 4, group A, member 3
hsa-miR-331-3p	1	0	1	0	1	1	WASF2	WAS protein family, member 2
hsa-miR-331-3p	1	0	1	1	1	1	SSR3	signal sequence receptor, gamma (translocon-associated protein gamma)
hsa-miR-331-3p	1	0	1	1	1	1	VCP	valosin containing protein
hsa-miR-331-3p	1	0	1	1	1	1	ABCF2	ATP-binding cassette, sub-family F (GCN20), member 2
hsa-miR-331-3p	1	0	1	0	1	1	CHP1	calcineurin-like EF hand protein 1
hsa-miR-331-3p	1	0	1	1	1	1	KLF12	Kruppel-like factor 12
hsa-miR-331-3p	0	0	1	0	0	0	PHB2	prohibitin 2
hsa-miR-331-3p	1	0	1	1	1	1	CASC3	cancer susceptibility candidate 3
hsa-miR-331-3p	0	0	1	1	1	1	KLRK1	killer cell lectin-like receptor subfamily K, member 1
hsa-miR-331-3p	1	0	1	1	1	1	PADI2	peptidyl arginine deiminase, type II
hsa-miR-331-3p	1	0	1	1	1	1	TARDBP	TAR DNA binding protein
hsa-miR-331-3p	0	0	1	1	1	1	FRAT2	frequently rearranged in advanced T-cell lymphomas 2
hsa-miR-331-3p	1	0	1	1	1	1	ICOS	inducible T-cell co-stimulator
hsa-miR-331-3p	0	0	1	1	1	1	LMOD1	leiomodin 1 (smooth muscle)
hsa-miR-331-3p	1	0	1	0	1	1	FZD4	frizzled family receptor 4
hsa-miR-331-3p	1	0	1	1	1	1	KCNE1L	KCNE1-like
hsa-miR-331-3p	0	0	1	0	1	1	PLA2G2D	phospholipase A2, group IID
hsa-miR-331-3p	0	0	1	1	1	1	TIMM13	translocase of inner mitochondrial membrane 13 homolog (yeast)
hsa-miR-331-3p	1	0	1	1	1	1	YWHAG	tyrosine 3-monooxygenase/tryptophan 5-monooxygenase activation protein, gamma polypeptide
hsa-miR-331-3p	0	0	1	1	0	0	C2orf27A	chromosome 2 open reading frame 27A
hsa-miR-331-3p	0	0	1	1	0	0	KCNJ14	potassium inwardly-rectifying channel, subfamily J, member 14
hsa-miR-331-3p	1	0	1	1	1	1	GAD1	glutamate decarboxylase 1 (brain, 67kDa)
hsa-miR-331-3p	1	0	1	1	1	1	SCN11A	sodium channel, voltage-gated, type XI, alpha subunit
hsa-miR-331-3p	0	0	1	0	1	1	AP2A1	adaptor-related protein complex 2, alpha 1 subunit
hsa-miR-331-3p	0	0	1	1	0	0	PGA5	pepsinogen 5, group I (pepsinogen A)
hsa-miR-331-3p	1	0	1	1	1	1	AFF4	AF4/FMR2 family, member 4
hsa-miR-331-3p	0	0	1	1	1	1	HOXC4	homeobox C4
hsa-miR-331-3p	1	0	1	0	1	1	SH3PXD2A	SH3 and PX domains 2A
hsa-miR-331-3p	0	0	1	1	0	0	SLC25A44	solute carrier family 25, member 44
hsa-miR-331-3p	1	0	1	1	1	1	TBKBP1	TBK1 binding protein 1
hsa-miR-331-3p	1	0	1	0	1	1	MLEC	malectin
hsa-miR-331-3p	1	0	1	0	1	1	SERTAD2	SERTA domain containing 2
hsa-miR-331-3p	0	0	1	0	0	0	CUL7	cullin 7
hsa-miR-331-3p	1	0	1	1	1	1	ARHGEF11	Rho guanine nucleotide exchange factor (GEF) 11
hsa-miR-331-3p	0	0	1	1	0	0	PCNXL2	pecanex-like 2 (Drosophila)
hsa-miR-331-3p	1	0	1	1	1	1	ZBTB39	zinc finger and BTB domain containing 39
hsa-miR-331-3p	1	0	1	1	1	1	NUAK1	NUAK family, SNF1-like kinase, 1
hsa-miR-331-3p	1	0	1	1	1	1	SV2A	synaptic vesicle glycoprotein 2A
hsa-miR-331-3p	1	0	1	0	1	1	WDFY3	WD repeat and FYVE domain containing 3
hsa-miR-331-3p	1	0	1	1	1	1	PHLPP2	PH domain and leucine rich repeat protein phosphatase 2
hsa-miR-331-3p	1	0	1	1	1	1	XPO7	exportin 7
hsa-miR-331-3p	1	0	1	0	1	1	NMNAT2	nicotinamide nucleotide adenylyltransferase 2
hsa-miR-331-3p	1	0	1	0	1	1	ZNF609	zinc finger protein 609
hsa-miR-331-3p	1	0	1	1	0	0	KIAA0556	KIAA0556
hsa-miR-331-3p	1	0	1	1	1	1	PHF15	PHD finger protein 15
hsa-miR-331-3p	1	0	1	0	1	1	KHNYN	KH and NYN domain containing
hsa-miR-331-3p	0	0	1	1	1	1	ANGEL1	angel homolog 1 (Drosophila)
hsa-miR-331-3p	1	0	1	0	1	1	SRGAP2	SLIT-ROBO Rho GTPase activating protein 2
hsa-miR-331-3p	1	0	1	1	0	0	SMG5	smg-5 homolog, nonsense mediated mRNA decay factor (C. elegans)
hsa-miR-331-3p	1	0	1	1	1	1	DSTYK	dual serine/threonine and tyrosine protein kinase
hsa-miR-331-3p	1	0	1	1	1	1	MYRIP	myosin VIIA and Rab interacting protein
hsa-miR-331-3p	0	0	1	1	0	0	TSKU	tsukushi small leucine rich proteoglycan homolog (Xenopus laevis)
hsa-miR-331-3p	1	0	1	1	1	1	CLIP3	CAP-GLY domain containing linker protein 3
hsa-miR-331-3p	1	0	1	0	1	1	PPP1R16B	protein phosphatase 1, regulatory subunit 16B
hsa-miR-331-3p	1	0	1	1	0	0	POLDIP2	polymerase (DNA-directed), delta interacting protein 2
hsa-miR-331-3p	1	0	1	1	1	1	PHF19	PHD finger protein 19
hsa-miR-331-3p	1	0	1	1	1	1	FAM155B	family with sequence similarity 155, member B
hsa-miR-331-3p	0	0	1	1	1	1	BRPF3	bromodomain and PHD finger containing, 3
hsa-miR-331-3p	0	0	1	1	0	0	DESI1	desumoylating isopeptidase 1
hsa-miR-331-3p	1	0	1	1	1	1	PLA2G3	phospholipase A2, group III
hsa-miR-331-3p	1	0	1	0	1	1	CNR1	cannabinoid receptor 1 (brain)
hsa-miR-331-3p	1	0	1	1	1	1	VGLL3	vestigial like 3 (Drosophila)
hsa-miR-331-3p	1	0	1	1	1	1	AKAP11	A kinase (PRKA) anchor protein 11
hsa-miR-331-3p	0	0	1	1	1	1	FBXO40	F-box protein 40
hsa-miR-331-3p	0	0	1	1	0	0	SRRM2	serine/arginine repetitive matrix 2
hsa-miR-331-3p	1	0	1	1	1	1	RAPGEFL1	Rap guanine nucleotide exchange factor (GEF)-like 1
hsa-miR-331-3p	0	0	1	1	1	1	CD244	CD244 molecule, natural killer cell receptor 2B4
hsa-miR-331-3p	0	0	1	0	1	1	IGF2-AS	IGF2 antisense RNA
hsa-miR-331-3p	1	0	1	0	1	1	CRIM1	cysteine rich transmembrane BMP regulator 1 (chordin-like)
hsa-miR-331-3p	0	0	1	1	0	0	PCDH12	protocadherin 12
hsa-miR-331-3p	1	0	1	1	1	1	GALNT7	UDP-N-acetyl-alpha-D-galactosamine:polypeptide N-acetylgalactosaminyltransferase 7 (GalNAc-T7)
hsa-miR-331-3p	0	0	1	1	1	1	PRKAG3	protein kinase, AMP-activated, gamma 3 non-catalytic subunit
hsa-miR-331-3p	1	0	1	1	1	1	CPSF2	cleavage and polyadenylation specific factor 2, 100kDa
hsa-miR-331-3p	1	0	1	1	1	1	INO80	INO80 homolog (S. cerevisiae)
hsa-miR-331-3p	1	0	1	1	0	0	C17orf59	chromosome 17 open reading frame 59
hsa-miR-331-3p	0	0	1	1	0	0	NDE1	nudE nuclear distribution E homolog 1 (A. nidulans)
hsa-miR-331-3p	0	0	1	0	1	1	OTUB1	OTU domain, ubiquitin aldehyde binding 1
hsa-miR-331-3p	0	0	1	1	1	1	WDR55	WD repeat domain 55
hsa-miR-331-3p	1	0	1	0	1	1	FAM46C	family with sequence similarity 46, member C
hsa-miR-331-3p	1	0	1	1	1	1	HIF1AN	hypoxia inducible factor 1, alpha subunit inhibitor
hsa-miR-331-3p	1	0	1	1	0	0	LAMTOR1	late endosomal/lysosomal adaptor, MAPK and MTOR activator 1
hsa-miR-331-3p	1	0	1	0	1	1	NPLOC4	nuclear protein localization 4 homolog (S. cerevisiae)
hsa-miR-331-3p	0	0	1	0	1	1	MREG	melanoregulin
hsa-miR-331-3p	1	0	1	1	1	1	IFT57	intraflagellar transport 57 homolog (Chlamydomonas)
hsa-miR-331-3p	1	0	1	1	1	1	BCL11A	B-cell CLL/lymphoma 11A (zinc finger protein)
hsa-miR-331-3p	0	0	1	1	1	1	OSBPL1A	oxysterol binding protein-like 1A
hsa-miR-331-3p	0	0	1	0	1	1	WDR60	WD repeat domain 60
hsa-miR-331-3p	1	0	1	1	1	1	FAM178A	family with sequence similarity 178, member A
hsa-miR-331-3p	0	0	1	1	1	1	TMLHE	trimethyllysine hydroxylase, epsilon
hsa-miR-331-3p	1	0	1	1	1	1	ASH1L	ash1 (absent, small, or homeotic)-like (Drosophila)
hsa-miR-331-3p	1	0	1	1	1	1	AJAP1	adherens junctions associated protein 1
hsa-miR-331-3p	1	0	1	1	1	1	PCDHGA1	protocadherin gamma subfamily A, 1
hsa-miR-331-3p	1	0	1	0	1	1	PCDHGA10	protocadherin gamma subfamily A, 10
hsa-miR-331-3p	1	0	1	0	1	1	PCDHGA11	protocadherin gamma subfamily A, 11
hsa-miR-331-3p	1	0	1	1	1	1	PCDHGA2	protocadherin gamma subfamily A, 2
hsa-miR-331-3p	1	0	1	0	1	1	PCDHGA3	protocadherin gamma subfamily A, 3
hsa-miR-331-3p	1	0	1	0	1	1	PCDHGA4	protocadherin gamma subfamily A, 4
hsa-miR-331-3p	1	0	1	0	1	1	PCDHGA5	protocadherin gamma subfamily A, 5
hsa-miR-331-3p	1	0	1	0	1	1	PCDHGA6	protocadherin gamma subfamily A, 6
hsa-miR-331-3p	1	0	1	0	1	1	PCDHGA7	protocadherin gamma subfamily A, 7
hsa-miR-331-3p	1	0	1	0	1	1	PCDHGA9	protocadherin gamma subfamily A, 9
hsa-miR-331-3p	1	0	1	0	1	1	PCDHGB1	protocadherin gamma subfamily B, 1
hsa-miR-331-3p	1	0	1	0	1	1	PCDHGB2	protocadherin gamma subfamily B, 2
hsa-miR-331-3p	1	0	1	0	1	1	PCDHGB3	protocadherin gamma subfamily B, 3
hsa-miR-331-3p	1	0	1	0	1	1	PCDHGB5	protocadherin gamma subfamily B, 5
hsa-miR-331-3p	1	0	1	0	1	1	PCDHGB6	protocadherin gamma subfamily B, 6
hsa-miR-331-3p	1	0	1	0	1	1	PCDHGB7	protocadherin gamma subfamily B, 7
hsa-miR-331-3p	1	0	1	0	1	1	PCDHGC4	protocadherin gamma subfamily C, 4
hsa-miR-331-3p	1	0	1	0	1	1	PCDHGC5	protocadherin gamma subfamily C, 5
hsa-miR-331-3p	0	0	1	1	0	0	SH3BP1	SH3-domain binding protein 1
hsa-miR-331-3p	1	0	1	0	1	1	UBFD1	ubiquitin family domain containing 1
hsa-miR-331-3p	0	0	1	1	1	1	KLHL4	kelch-like 4 (Drosophila)
hsa-miR-331-3p	1	0	1	0	1	1	OTUD7B	OTU domain containing 7B
hsa-miR-331-3p	1	0	1	1	1	1	PRDM8	PR domain containing 8
hsa-miR-331-3p	1	0	1	1	0	0	SLC17A7	solute carrier family 17 (sodium-dependent inorganic phosphate cotransporter), member 7
hsa-miR-331-3p	1	0	1	1	1	1	PITHD1	PITH (C-terminal proteasome-interacting domain of thioredoxin-like) domain containing 1
hsa-miR-331-3p	0	0	1	1	1	1	PDSS2	prenyl (decaprenyl) diphosphate synthase, subunit 2
hsa-miR-331-3p	1	0	1	0	1	1	EIF5A2	eukaryotic translation initiation factor 5A2
hsa-miR-331-3p	1	0	1	1	0	0	JPH2	junctophilin 2
hsa-miR-331-3p	1	0	1	1	1	1	EPHA8	EPH receptor A8
hsa-miR-331-3p	1	0	1	1	1	1	NRIP3	nuclear receptor interacting protein 3
hsa-miR-331-3p	0	0	1	1	1	1	S100A14	S100 calcium binding protein A14
hsa-miR-331-3p	1	0	1	1	1	1	CASKIN1	CASK interacting protein 1
hsa-miR-331-3p	1	0	1	1	1	1	RANBP10	RAN binding protein 10
hsa-miR-331-3p	1	0	1	0	1	1	GPAM	glycerol-3-phosphate acyltransferase, mitochondrial
hsa-miR-331-3p	0	0	1	1	1	1	PRX	periaxin
hsa-miR-331-3p	0	0	1	1	1	1	TLX3	T-cell leukemia homeobox 3
hsa-miR-331-3p	1	0	1	1	1	1	MTMR3	myotubularin related protein 3
hsa-miR-331-3p	1	0	1	1	1	1	GRHL3	grainyhead-like 3 (Drosophila)
hsa-miR-331-3p	1	0	1	1	1	1	FAM60A	family with sequence similarity 60, member A
hsa-miR-331-3p	0	0	1	1	1	1	VPS11	vacuolar protein sorting 11 homolog (S. cerevisiae)
hsa-miR-331-3p	1	0	1	0	0	0	ALX4	ALX homeobox 4
hsa-miR-331-3p	1	0	1	1	1	1	ZFAND3	zinc finger, AN1-type domain 3
hsa-miR-331-3p	0	0	1	1	1	1	ANKRD5	ankyrin repeat domain 5
hsa-miR-331-3p	1	0	1	1	1	1	CLSTN2	calsyntenin 2
hsa-miR-331-3p	1	0	1	1	1	1	XYLT2	xylosyltransferase II
hsa-miR-331-3p	1	0	1	1	1	1	ABCG4	ATP-binding cassette, sub-family G (WHITE), member 4
hsa-miR-331-3p	0	0	1	1	1	1	TCTA	T-cell leukemia translocation altered
hsa-miR-331-3p	0	0	1	1	1	1	HS1BP3	HCLS1 binding protein 3
hsa-miR-331-3p	1	0	1	1	1	1	GIGYF1	GRB10 interacting GYF protein 1
hsa-miR-331-3p	1	0	1	1	1	1	C6orf106	chromosome 6 open reading frame 106
hsa-miR-331-3p	0	0	1	1	1	1	IQCH	IQ motif containing H
hsa-miR-331-3p	1	0	1	1	1	1	FNDC4	fibronectin type III domain containing 4
hsa-miR-331-3p	0	0	1	1	0	0	DHRS11	dehydrogenase/reductase (SDR family) member 11
hsa-miR-331-3p	0	0	1	1	0	0	EPS8L3	EPS8-like 3
hsa-miR-331-3p	1	0	1	1	1	1	MUL1	mitochondrial E3 ubiquitin protein ligase 1
hsa-miR-331-3p	0	0	1	1	1	1	RNF219	ring finger protein 219
hsa-miR-331-3p	0	0	1	1	1	1	AKIRIN1	akirin 1
hsa-miR-331-3p	0	0	1	1	1	1	LRRK1	leucine-rich repeat kinase 1
hsa-miR-331-3p	1	0	1	1	1	1	PIP4K2C	phosphatidylinositol-5-phosphate 4-kinase, type II, gamma
hsa-miR-331-3p	0	0	1	1	0	0	RNF122	ring finger protein 122
hsa-miR-331-3p	0	0	1	1	1	1	TREML2	triggering receptor expressed on myeloid cells-like 2
hsa-miR-331-3p	0	0	1	1	1	1	CCDC134	coiled-coil domain containing 134
hsa-miR-331-3p	0	0	1	1	1	1	BTNL8	butyrophilin-like 8
hsa-miR-331-3p	1	0	1	1	0	0	CNTD2	cyclin N-terminal domain containing 2
hsa-miR-331-3p	0	0	1	1	1	1	ZNF767	zinc finger family member 767
hsa-miR-331-3p	0	0	1	1	0	0	BAIAP2L2	BAI1-associated protein 2-like 2
hsa-miR-331-3p	0	0	1	1	0	0	CENPT	centromere protein T
hsa-miR-331-3p	1	0	1	0	1	1	SRCIN1	SRC kinase signaling inhibitor 1
hsa-miR-331-3p	1	0	1	1	1	1	JHDM1D	jumonji C domain containing histone demethylase 1 homolog D (S. cerevisiae)
hsa-miR-331-3p	1	0	1	0	1	1	SETD7	SET domain containing (lysine methyltransferase) 7
hsa-miR-331-3p	1	0	1	1	1	1	HOXA3	homeobox A3
hsa-miR-331-3p	0	0	1	1	1	1	BCL2L14	BCL2-like 14 (apoptosis facilitator)
hsa-miR-331-3p	1	0	1	0	1	1	C1orf21	chromosome 1 open reading frame 21
hsa-miR-331-3p	1	0	1	0	1	1	LBH	limb bud and heart development homolog (mouse)
hsa-miR-331-3p	1	0	1	1	1	1	RAB1B	RAB1B, member RAS oncogene family
hsa-miR-331-3p	0	0	1	1	0	0	TEX13B	testis expressed 13B
hsa-miR-331-3p	0	0	1	1	1	1	FCRL5	Fc receptor-like 5
hsa-miR-331-3p	0	0	1	1	1	1	INHBE	inhibin, beta E
hsa-miR-331-3p	0	0	1	1	1	1	KCNA7	potassium voltage-gated channel, shaker-related subfamily, member 7
hsa-miR-331-3p	0	0	1	0	1	1	ENAM	enamelin
hsa-miR-331-3p	0	0	1	1	0	0	CACNG6	calcium channel, voltage-dependent, gamma subunit 6
hsa-miR-331-3p	0	0	1	1	0	0	KRTAP17-1	keratin associated protein 17-1
hsa-miR-331-3p	1	0	1	0	1	1	PCDHGA8	protocadherin gamma subfamily A, 8
hsa-miR-331-3p	1	0	1	1	1	1	DSEL	dermatan sulfate epimerase-like
hsa-miR-331-3p	1	0	1	1	1	1	ANTXR1	anthrax toxin receptor 1
hsa-miR-331-3p	1	0	1	0	1	1	PSD2	pleckstrin and Sec7 domain containing 2
hsa-miR-331-3p	1	0	1	1	1	1	CAMKK1	calcium/calmodulin-dependent protein kinase kinase 1, alpha
hsa-miR-331-3p	1	0	1	1	1	1	DNAJC14	DnaJ (Hsp40) homolog, subfamily C, member 14
hsa-miR-331-3p	0	0	1	1	0	0	ZNF414	zinc finger protein 414
hsa-miR-331-3p	0	0	1	1	1	1	C5orf4	chromosome 5 open reading frame 4
hsa-miR-331-3p	1	0	1	1	1	1	TRIM63	tripartite motif containing 63, E3 ubiquitin protein ligase
hsa-miR-331-3p	1	0	1	1	0	0	ZC3H10	zinc finger CCCH-type containing 10
hsa-miR-331-3p	1	0	1	1	0	0	ATOH8	atonal homolog 8 (Drosophila)
hsa-miR-331-3p	0	0	1	1	1	1	FBXL20	F-box and leucine-rich repeat protein 20
hsa-miR-331-3p	0	0	1	1	0	0	PNMA6A	paraneoplastic Ma antigen family member 6A
hsa-miR-331-3p	1	0	1	1	1	1	MAP6	microtubule-associated protein 6
hsa-miR-331-3p	1	0	1	1	0	0	DMRTB1	DMRT-like family B with proline-rich C-terminal, 1
hsa-miR-331-3p	0	0	1	1	1	1	ZIC5	Zic family member 5
hsa-miR-331-3p	1	0	1	1	0	0	CAMK2N2	calcium/calmodulin-dependent protein kinase II inhibitor 2
hsa-miR-331-3p	1	0	1	1	1	1	EPT1	ethanolaminephosphotransferase 1 (CDP-ethanolamine-specific)
hsa-miR-331-3p	1	0	1	1	1	1	STX1B	syntaxin 1B
hsa-miR-331-3p	1	0	1	1	1	1	XKR4	XK, Kell blood group complex subunit-related family, member 4
hsa-miR-331-3p	1	0	1	1	1	1	ELFN2	extracellular leucine-rich repeat and fibronectin type III domain containing 2
hsa-miR-331-3p	0	0	1	1	1	1	IP6K3	inositol hexakisphosphate kinase 3
hsa-miR-331-3p	1	0	1	1	0	0	BRD4	bromodomain containing 4
hsa-miR-331-3p	0	0	1	1	0	0	WFDC3	WAP four-disulfide core domain 3
hsa-miR-331-3p	1	0	1	1	1	1	COL11A2	collagen, type XI, alpha 2
hsa-miR-331-3p	1	0	1	1	0	0	ADAMTS14	ADAM metallopeptidase with thrombospondin type 1 motif, 14
hsa-miR-331-3p	0	0	1	1	1	1	CHST14	carbohydrate (N-acetylgalactosamine 4-0) sulfotransferase 14
hsa-miR-331-3p	0	0	1	0	1	1	CNTNAP5	contactin associated protein-like 5
hsa-miR-331-3p	0	0	1	0	1	1	PAQR8	progestin and adipoQ receptor family member VIII
hsa-miR-331-3p	1	0	1	1	0	0	UNC5A	unc-5 homolog A (C. elegans)
hsa-miR-331-3p	0	0	1	0	1	1	SYNPO2	synaptopodin 2
hsa-miR-331-3p	1	0	1	1	0	0	PYGO2	pygopus homolog 2 (Drosophila)
hsa-miR-331-3p	1	0	1	1	0	0	PKDCC	protein kinase domain containing, cytoplasmic homolog (mouse)
hsa-miR-331-3p	1	0	1	1	1	1	MARS2	methionyl-tRNA synthetase 2, mitochondrial
hsa-miR-331-3p	0	0	1	1	0	0	C12orf57	chromosome 12 open reading frame 57
hsa-miR-331-3p	0	0	1	1	1	1	RAB3C	RAB3C, member RAS oncogene family
hsa-miR-331-3p	0	0	1	1	0	0	PPP1R14B	protein phosphatase 1, regulatory (inhibitor) subunit 14B
hsa-miR-331-3p	0	0	1	1	0	0	FAM3D	family with sequence similarity 3, member D
hsa-miR-331-3p	0	0	1	1	1	1	SLFN5	schlafen family member 5
hsa-miR-331-3p	1	0	1	1	1	1	YPEL4	yippee-like 4 (Drosophila)
hsa-miR-331-3p	0	0	1	1	0	0	CISH	cytokine inducible SH2-containing protein
hsa-miR-331-3p	1	0	1	0	1	1	ZBTB47	zinc finger and BTB domain containing 47
hsa-miR-331-3p	1	0	1	0	1	1	DIRAS1	DIRAS family, GTP-binding RAS-like 1
hsa-miR-331-3p	0	0	1	1	1	1	FAM100A	family with sequence similarity 100, member A
hsa-miR-331-3p	0	0	1	1	0	0	NKX2-3	NK2 homeobox 3
hsa-miR-331-3p	1	0	1	1	1	1	CADM4	cell adhesion molecule 4
hsa-miR-331-3p	0	0	1	1	0	0	TCEB3C	transcription elongation factor B polypeptide 3C (elongin A3)
hsa-miR-331-3p	1	0	1	1	1	1	ABTB2	ankyrin repeat and BTB (POZ) domain containing 2
hsa-miR-331-3p	0	0	1	1	1	1	GLIS1	GLIS family zinc finger 1
hsa-miR-331-3p	1	0	1	1	1	1	FAM123B	family with sequence similarity 123B
hsa-miR-331-3p	1	0	1	1	1	1	ZNF362	zinc finger protein 362
hsa-miR-331-3p	1	0	1	0	1	1	TMEM154	transmembrane protein 154
hsa-miR-331-3p	1	0	1	1	1	1	HEPACAM	hepatic and glial cell adhesion molecule
hsa-miR-331-3p	1	0	1	1	1	1	TCEANC2	transcription elongation factor A (SII) N-terminal and central domain containing 2
hsa-miR-331-3p	0	0	1	0	0	0	FLJ32955	uncharacterized protein FLJ32955
hsa-miR-331-3p	0	0	1	0	1	1	LIX1	Lix1 homolog (chicken)
hsa-miR-331-3p	1	0	1	1	1	1	TMEM151A	transmembrane protein 151A
hsa-miR-331-3p	0	0	1	1	0	0	SCARF2	scavenger receptor class F, member 2
hsa-miR-331-3p	0	0	1	1	1	1	TBC1D21	TBC1 domain family, member 21
hsa-miR-331-3p	1	0	1	0	1	1	ZCCHC24	zinc finger, CCHC domain containing 24
hsa-miR-331-3p	1	0	1	0	1	1	MDGA1	MAM domain containing glycosylphosphatidylinositol anchor 1
hsa-miR-331-3p	0	0	1	1	1	1	CAMK1D	calcium/calmodulin-dependent protein kinase ID
hsa-miR-331-3p	1	0	1	1	1	1	CREBRF	CREB3 regulatory factor
hsa-miR-331-3p	1	0	1	1	0	0	LPCAT4	lysophosphatidylcholine acyltransferase 4
hsa-miR-331-3p	1	0	1	1	1	1	POM121	POM121 transmembrane nucleoporin
hsa-miR-331-3p	0	0	1	1	1	1	CATSPER2	cation channel, sperm associated 2
hsa-miR-331-3p	0	0	1	1	1	1	TAPBP	TAP binding protein (tapasin)
hsa-miR-331-3p	1	0	1	1	1	1	PIP5KL1	phosphatidylinositol-4-phosphate 5-kinase-like 1
hsa-miR-331-3p	0	0	1	1	1	1	CDRT4	CMT1A duplicated region transcript 4
hsa-miR-331-3p	1	0	1	0	1	1	FAM84B	family with sequence similarity 84, member B
hsa-miR-331-3p	1	0	1	1	1	1	SCN4B	sodium channel, voltage-gated, type IV, beta subunit
hsa-miR-331-3p	0	0	1	1	1	1	SPDYE1	speedy homolog E1 (Xenopus laevis)
hsa-miR-331-3p	0	0	1	1	1	1	GIMAP8	GTPase, IMAP family member 8
hsa-miR-331-3p	1	0	1	1	1	1	RAB3IP	RAB3A interacting protein (rabin3)
hsa-miR-331-3p	0	0	1	1	0	0	C17orf74	chromosome 17 open reading frame 74
hsa-miR-331-3p	0	0	1	1	1	1	KRTAP8-1	keratin associated protein 8-1
hsa-miR-331-3p	0	0	1	1	1	1	C16orf54	chromosome 16 open reading frame 54
hsa-miR-331-3p	0	0	1	1	0	0	FAM151A	family with sequence similarity 151, member A
hsa-miR-331-3p	0	0	1	0	1	1	PSME1	proteasome (prosome, macropain) activator subunit 1 (PA28 alpha)
hsa-miR-331-3p	1	0	1	1	1	1	LRRTM3	leucine rich repeat transmembrane neuronal 3
hsa-miR-331-3p	1	0	1	1	1	1	FAM134C	family with sequence similarity 134, member C
hsa-miR-331-3p	0	0	1	1	0	0	PAQR7	progestin and adipoQ receptor family member VII
hsa-miR-331-3p	0	0	1	1	1	1	ZNF831	zinc finger protein 831
hsa-miR-331-3p	0	0	1	0	1	1	HCG27	HLA complex group 27 (non-protein coding)
hsa-miR-331-3p	0	0	1	1	1	1	USP12	ubiquitin specific peptidase 12
hsa-miR-331-3p	1	0	1	1	1	1	ADAT2	adenosine deaminase, tRNA-specific 2
hsa-miR-331-3p	1	0	1	1	1	1	TMEM229B	transmembrane protein 229B
hsa-miR-331-3p	1	0	1	1	1	1	BCL9L	B-cell CLL/lymphoma 9-like
hsa-miR-331-3p	1	0	1	1	0	0	FAM100B	family with sequence similarity 100, member B
hsa-miR-331-3p	1	0	1	1	1	1	NIN	ninein (GSK3B interacting protein)
hsa-miR-331-3p	1	0	1	0	1	1	RIMS4	regulating synaptic membrane exocytosis 4
hsa-miR-331-3p	1	0	1	1	1	1	AQP1	aquaporin 1 (Colton blood group)
hsa-miR-331-3p	0	0	1	1	1	1	LHFPL4	lipoma HMGIC fusion partner-like 4
hsa-miR-331-3p	1	0	1	0	1	1	ZC3H6	zinc finger CCCH-type containing 6
hsa-miR-331-3p	1	0	1	1	1	1	PTGER3	prostaglandin E receptor 3 (subtype EP3)
hsa-miR-331-3p	0	0	1	0	1	1	WASH3P	WAS protein family homolog 3 pseudogene
hsa-miR-331-3p	0	0	1	0	1	1	SOGA1	suppressor of glucose, autophagy associated 1
hsa-miR-331-3p	1	0	1	1	1	1	TMEM189-UBE2V1	TMEM189-UBE2V1 readthrough
hsa-miR-331-3p	0	0	1	1	0	0	C9orf50	chromosome 9 open reading frame 50
hsa-miR-331-3p	1	0	1	1	0	0	KAZN	kazrin, periplakin interacting protein
hsa-miR-331-3p	1	0	1	1	1	1	METTL21B	methyltransferase like 21B
hsa-miR-331-3p	0	0	1	0	0	0	EFCAB12	EF-hand calcium binding domain 12
hsa-miR-331-3p	0	0	1	1	1	1	C10orf129	chromosome 10 open reading frame 129
hsa-miR-331-3p	1	0	1	1	1	1	FAM43B	family with sequence similarity 43, member B
hsa-miR-331-3p	0	0	1	0	1	1	CLEC17A	C-type lectin domain family 17, member A
hsa-miR-331-3p	0	0	1	0	1	1	C1orf229	chromosome 1 open reading frame 229
hsa-miR-331-3p	1	0	1	1	1	1	TEX19	testis expressed 19
hsa-miR-331-3p	0	0	1	1	1	1	DEFB132	defensin, beta 132
hsa-miR-331-3p	0	0	1	1	0	0	C2orf27B	chromosome 2 open reading frame 27B
hsa-miR-331-3p	0	0	1	0	0	0	ESRRAP2	estrogen-related receptor alpha pseudogene 2
hsa-miR-331-3p	0	0	1	0	0	0	CELP	carboxyl ester lipase pseudogene
hsa-miR-331-3p	0	0	1	0	0	0	LYPLA2P1	lysophospholipase II pseudogene 1
hsa-miR-331-3p	0	0	1	0	0	0	ANXA2P3	annexin A2 pseudogene 3
hsa-miR-331-3p	0	0	1	0	0	0	TTTY6	testis-specific transcript, Y-linked 6 (non-protein coding)
hsa-miR-331-3p	0	0	1	0	0	0	TTTY2	testis-specific transcript, Y-linked 2 (non-protein coding)
hsa-miR-331-3p	0	0	1	0	0	0	DKFZP586I1420	uncharacterized protein DKFZp586I1420
hsa-miR-331-3p	0	0	1	0	0	0	TPI1P2	triosephosphate isomerase 1 pseudogene 2
hsa-miR-331-3p	0	0	1	0	0	0	GOLGA2P3Y	golgin A2 pseudogene 3, Y-linked
hsa-miR-331-3p	0	0	1	0	0	0	GTF2IP1	general transcription factor IIi, pseudogene 1
hsa-miR-331-3p	0	0	1	0	0	0	NXF4	nuclear RNA export factor 4 pseudogene
hsa-miR-331-3p	0	0	1	0	0	0	FMO6P	flavin containing monooxygenase 6 pseudogene
hsa-miR-331-3p	0	0	1	0	0	0	MBL1P	mannose-binding lectin (protein A) 1, pseudogene
hsa-miR-331-3p	0	0	1	0	0	0	DUSP5P	dual specificity phosphatase 5 pseudogene
hsa-miR-331-3p	0	0	1	0	0	0	PTPRVP	protein tyrosine phosphatase, receptor type, V, pseudogene
hsa-miR-331-3p	0	0	1	0	0	0	SCARNA17	small Cajal body-specific RNA 17
hsa-miR-331-3p	0	0	1	0	0	0	LILRP2	leukocyte immunoglobulin-like receptor pseudogene 2
hsa-miR-331-3p	0	0	1	0	0	0	GBP1P1	guanylate binding protein 1, interferon-inducible pseudogene 1
hsa-miR-331-3p	0	0	1	0	0	0	AFG3L1P	AFG3 ATPase family gene 3-like 1 (S. cerevisiae), pseudogene
hsa-miR-331-3p	0	0	1	0	0	0	LOC729603	calcium binding protein P22 pseudogene
hsa-miR-331-3p	0	0	1	0	0	0	SNORD116-28	small nucleolar RNA, C/D box 116-28
hsa-miR-331-3p	0	0	1	1	0	0	SNRPN	small nuclear ribonucleoprotein polypeptide N
hsa-miR-331-3p	1	0	1	1	0	0	TNXB	tenascin XB
hsa-miR-331-3p	1	0	1	1	1	1	ATF6B	activating transcription factor 6 beta
hsa-miR-331-3p	0	0	1	0	0	0	PLGLA	plasminogen-like A
hsa-miR-331-3p	0	0	1	1	0	0	MUC1	mucin 1, cell surface associated
hsa-miR-331-3p	0	0	1	1	1	1	CD6	CD6 molecule
hsa-miR-331-3p	1	0	1	1	1	1	HNRNPA1	heterogeneous nuclear ribonucleoprotein A1
hsa-miR-331-3p	0	0	1	1	1	1	CACNG3	calcium channel, voltage-dependent, gamma subunit 3
hsa-miR-331-3p	0	0	0	1	0	0	PRR5-ARHGAP8	PRR5-ARHGAP8 readthrough
hsa-miR-331-3p	0	0	1	1	0	0	PRR5	proline rich 5 (renal)
hsa-miR-331-3p	0	0	1	1	0	0	ARHGAP8	Rho GTPase activating protein 8
hsa-miR-331-3p	0	0	1	1	1	1	RPUSD1	RNA pseudouridylate synthase domain containing 1
hsa-miR-331-3p	1	0	1	1	1	1	OSBPL7	oxysterol binding protein-like 7
hsa-miR-331-3p	0	0	0	1	0	0	LRRC23	leucine rich repeat containing 23
hsa-miR-331-3p	1	0	1	1	1	1	PPP5C	protein phosphatase 5, catalytic subunit
hsa-miR-331-3p	0	0	0	1	0	0	DNASE1L1	deoxyribonuclease I-like 1
hsa-miR-331-3p	0	0	0	1	0	0	SCTR	secretin receptor
hsa-miR-331-3p	0	0	0	1	0	0	BEST2	bestrophin 2
hsa-miR-331-3p	0	0	0	1	0	0	ADCK2	aarF domain containing kinase 2
hsa-miR-331-3p	0	0	1	1	0	0	KCNQ1	potassium voltage-gated channel, KQT-like subfamily, member 1
hsa-miR-331-3p	0	0	0	1	0	0	PSMC4	proteasome (prosome, macropain) 26S subunit, ATPase, 4
hsa-miR-331-3p	0	0	1	1	1	1	BCAR1	breast cancer anti-estrogen resistance 1
hsa-miR-331-3p	1	0	1	1	1	1	PPP2R5B	protein phosphatase 2, regulatory subunit B', beta
hsa-miR-331-3p	0	0	1	1	0	0	LLGL2	lethal giant larvae homolog 2 (Drosophila)
hsa-miR-331-3p	0	0	1	1	0	0	LTBP4	latent transforming growth factor beta binding protein 4
hsa-miR-331-3p	0	0	1	1	1	1	TMEM101	transmembrane protein 101
hsa-miR-331-3p	0	0	1	1	1	1	SLC22A17	solute carrier family 22, member 17
hsa-miR-331-3p	0	0	1	1	0	0	TGM1	transglutaminase 1 (K polypeptide epidermal type I, protein-glutamine-gamma-glutamyltransferase)
hsa-miR-331-3p	0	0	0	1	0	0	ATP5D	ATP synthase, H+ transporting, mitochondrial F1 complex, delta subunit
hsa-miR-331-3p	0	0	0	1	0	0	IGFALS	insulin-like growth factor binding protein, acid labile subunit
hsa-miR-331-3p	1	0	0	1	1	1	CDC34	cell division cycle 34 homolog (S. cerevisiae)
hsa-miR-331-3p	0	0	0	1	0	0	SLC25A1	solute carrier family 25 (mitochondrial carrier; citrate transporter), member 1
hsa-miR-331-3p	0	0	0	1	0	0	LMF2	lipase maturation factor 2
hsa-miR-331-3p	0	0	1	1	0	0	TXN2	thioredoxin 2
hsa-miR-331-3p	0	0	1	1	0	0	AP4S1	adaptor-related protein complex 4, sigma 1 subunit
hsa-miR-331-3p	1	0	1	1	0	0	PYGB	phosphorylase, glycogen; brain
hsa-miR-331-3p	0	0	0	1	0	0	SRMS	src-related kinase lacking C-terminal regulatory tyrosine and N-terminal myristylation sites
hsa-miR-331-3p	0	0	1	1	1	1	LBP	lipopolysaccharide binding protein
hsa-miR-331-3p	0	0	0	1	0	0	CCL17	chemokine (C-C motif) ligand 17
hsa-miR-331-3p	1	0	0	1	1	1	MMP15	matrix metallopeptidase 15 (membrane-inserted)
hsa-miR-331-3p	0	0	1	1	0	0	ARHGDIG	Rho GDP dissociation inhibitor (GDI) gamma
hsa-miR-331-3p	0	0	0	1	0	0	FAM173A	family with sequence similarity 173, member A
hsa-miR-331-3p	0	0	1	1	0	0	CNOT3	CCR4-NOT transcription complex, subunit 3
hsa-miR-331-3p	0	0	0	1	0	0	EXOSC5	exosome component 5
hsa-miR-331-3p	0	0	1	1	0	0	RPS19	ribosomal protein S19
hsa-miR-331-3p	0	0	1	1	0	0	HAS1	hyaluronan synthase 1
hsa-miR-331-3p	0	0	1	1	0	0	WDR83OS	WD repeat domain 83 opposite strand
hsa-miR-331-3p	0	0	0	1	0	0	GAPDHS	glyceraldehyde-3-phosphate dehydrogenase, spermatogenic
hsa-miR-331-3p	0	0	0	1	0	0	FKBP8	FK506 binding protein 8, 38kDa
hsa-miR-331-3p	0	0	0	1	0	0	RBP3	retinol binding protein 3, interstitial
hsa-miR-331-3p	1	0	1	1	0	0	RUNDC3A	RUN domain containing 3A
hsa-miR-331-3p	0	0	1	1	0	0	PIGL	phosphatidylinositol glycan anchor biosynthesis, class L
hsa-miR-331-3p	0	0	1	1	1	1	KRT32	keratin 32
hsa-miR-331-3p	0	0	0	1	1	1	KAT2A	K(lysine) acetyltransferase 2A
hsa-miR-331-3p	0	0	1	1	1	1	IL2	interleukin 2
hsa-miR-331-3p	0	0	1	1	0	0	MVK	mevalonate kinase
hsa-miR-331-3p	0	0	1	1	0	0	ITFG2	integrin alpha FG-GAP repeat containing 2
hsa-miR-331-3p	0	0	0	1	0	0	CYB561D2	cytochrome b-561 domain containing 2
hsa-miR-331-3p	1	0	0	1	0	0	ABTB1	ankyrin repeat and BTB (POZ) domain containing 1
hsa-miR-331-3p	1	0	1	1	1	1	MAPRE3	microtubule-associated protein, RP/EB family, member 3
hsa-miR-331-3p	0	0	0	1	1	1	DOK1	docking protein 1, 62kDa (downstream of tyrosine kinase 1)
hsa-miR-331-3p	0	0	0	1	1	1	WNT6	wingless-type MMTV integration site family, member 6
hsa-miR-331-3p	0	0	0	1	0	0	CTSD	cathepsin D
hsa-miR-331-3p	0	0	1	1	1	1	ACYP1	acylphosphatase 1, erythrocyte (common) type
hsa-miR-331-3p	1	0	1	1	1	1	GPR68	G protein-coupled receptor 68
hsa-miR-331-3p	0	0	0	1	0	0	C10orf95	chromosome 10 open reading frame 95
hsa-miR-331-3p	0	0	1	1	0	0	WDR83	WD repeat domain 83
hsa-miR-331-3p	0	0	1	1	1	1	CCDC70	coiled-coil domain containing 70
hsa-miR-331-3p	0	0	1	1	0	0	SLC17A1	solute carrier family 17 (sodium phosphate), member 1
hsa-miR-331-3p	0	0	1	1	1	1	SH3TC1	SH3 domain and tetratricopeptide repeats 1
hsa-miR-331-3p	0	0	1	1	1	1	MRPS7	mitochondrial ribosomal protein S7
hsa-miR-331-3p	0	0	0	1	0	0	TNFSF14	tumor necrosis factor (ligand) superfamily, member 14
hsa-miR-331-3p	1	0	1	1	0	0	NCLN	nicalin
hsa-miR-331-3p	0	0	0	1	0	0	SLURP1	secreted LY6/PLAUR domain containing 1
hsa-miR-331-3p	1	0	0	1	1	1	WNK4	WNK lysine deficient protein kinase 4
hsa-miR-331-3p	0	0	1	1	0	0	ZNF777	zinc finger protein 777
hsa-miR-331-3p	0	0	1	1	1	1	ZNF598	zinc finger protein 598
hsa-miR-331-3p	0	0	1	1	0	0	EMC6	ER membrane protein complex subunit 6
hsa-miR-331-3p	1	0	1	1	1	1	IVD	isovaleryl-CoA dehydrogenase
hsa-miR-331-3p	1	0	0	1	0	0	PSMB11	proteasome (prosome, macropain) subunit, beta type, 11
hsa-miR-331-3p	1	0	1	1	1	1	KLF16	Kruppel-like factor 16
hsa-miR-331-3p	0	0	0	1	1	1	DOHH	deoxyhypusine hydroxylase/monooxygenase
hsa-miR-331-3p	0	0	1	1	0	0	PAM16	presequence translocase-associated motor 16 homolog (S. cerevisiae)
hsa-miR-331-3p	0	0	1	1	1	1	CORO7	coronin 7
hsa-miR-331-3p	0	0	1	1	0	0	CERS4	ceramide synthase 4
hsa-miR-331-3p	0	0	1	1	0	0	ALOX12	arachidonate 12-lipoxygenase
hsa-miR-331-3p	0	0	0	1	1	1	TRMT2A	tRNA methyltransferase 2 homolog A (S. cerevisiae)
hsa-miR-331-3p	1	0	0	1	1	1	ELOF1	elongation factor 1 homolog (S. cerevisiae)
hsa-miR-331-3p	0	0	0	1	0	0	INF2	inverted formin, FH2 and WH2 domain containing
hsa-miR-331-3p	0	0	0	1	1	1	BST2	bone marrow stromal cell antigen 2
hsa-miR-331-3p	0	0	0	1	1	1	ZNF764	zinc finger protein 764
hsa-miR-331-3p	0	0	1	1	0	0	SAG	S-antigen; retina and pineal gland (arrestin)
hsa-miR-331-3p	1	0	1	1	1	1	MNX1	motor neuron and pancreas homeobox 1
hsa-miR-331-3p	1	0	1	1	0	0	MAP3K10	mitogen-activated protein kinase kinase kinase 10
hsa-miR-331-3p	0	0	0	1	0	0	CCL25	chemokine (C-C motif) ligand 25
hsa-miR-331-3p	0	0	1	1	1	1	FSHB	follicle stimulating hormone, beta polypeptide
hsa-miR-331-3p	0	0	0	1	0	0	FBXW9	F-box and WD repeat domain containing 9
hsa-miR-331-3p	0	0	0	1	1	1	GAS2L2	growth arrest-specific 2 like 2
hsa-miR-331-3p	1	0	1	1	0	0	EEFSEC	eukaryotic elongation factor, selenocysteine-tRNA-specific
hsa-miR-331-3p	0	0	0	1	1	1	SLC52A1	solute carrier family 52, riboflavin transporter, member 1
hsa-miR-331-3p	0	0	1	1	1	1	NES	nestin
hsa-miR-331-3p	1	0	0	1	0	0	HAPLN2	hyaluronan and proteoglycan link protein 2
hsa-miR-331-3p	0	0	0	1	0	0	CHIT1	chitinase 1 (chitotriosidase)
hsa-miR-331-3p	1	0	1	1	1	1	AMPD3	adenosine monophosphate deaminase 3
hsa-miR-331-3p	0	0	1	1	0	0	DDB2	damage-specific DNA binding protein 2, 48kDa
hsa-miR-331-3p	0	0	0	1	0	0	DHX34	DEAH (Asp-Glu-Ala-His) box polypeptide 34
hsa-miR-331-3p	0	0	1	1	1	1	KIAA1009	KIAA1009
hsa-miR-331-3p	1	0	1	1	0	0	GYPC	glycophorin C (Gerbich blood group)
hsa-miR-331-3p	0	0	1	1	0	0	KIF12	kinesin family member 12
hsa-miR-331-3p	0	0	1	1	0	0	POU5F1	POU class 5 homeobox 1
hsa-miR-331-3p	0	0	1	1	0	0	CLPS	colipase, pancreatic
hsa-miR-331-3p	0	0	1	1	0	0	NOX5	NADPH oxidase, EF-hand calcium binding domain 5
hsa-miR-331-3p	0	0	1	1	0	0	PLCE1	phospholipase C, epsilon 1
hsa-miR-331-3p	1	0	1	1	1	1	RAI1	retinoic acid induced 1
hsa-miR-331-3p	1	0	1	1	1	1	ZNF282	zinc finger protein 282
hsa-miR-331-3p	0	0	0	1	0	0	POLD1	polymerase (DNA directed), delta 1, catalytic subunit
hsa-miR-331-3p	0	0	0	1	0	0	GSDMD	gasdermin D
hsa-miR-331-3p	0	0	0	1	0	0	CHST8	carbohydrate (N-acetylgalactosamine 4-0) sulfotransferase 8
hsa-miR-331-3p	0	0	0	1	0	0	HCK	hemopoietic cell kinase
hsa-miR-331-3p	0	0	0	1	0	0	CCDC124	coiled-coil domain containing 124
hsa-miR-331-3p	0	0	1	1	1	1	MAU2	MAU2 chromatid cohesion factor homolog (C. elegans)
hsa-miR-331-3p	0	0	0	1	1	1	BPI	bactericidal/permeability-increasing protein
hsa-miR-331-3p	0	0	0	1	0	0	C19orf10	chromosome 19 open reading frame 10
hsa-miR-331-3p	1	0	1	1	1	1	ZMYND8	zinc finger, MYND-type containing 8
hsa-miR-331-3p	0	0	1	1	1	1	SMG6	smg-6 homolog, nonsense mediated mRNA decay factor (C. elegans)
hsa-miR-331-3p	0	0	1	1	0	0	ARVCF	armadillo repeat gene deleted in velocardiofacial syndrome
hsa-miR-331-3p	0	0	0	1	1	1	SGOL1	shugoshin-like 1 (S. pombe)
hsa-miR-331-3p	0	0	0	1	1	1	NOL10	nucleolar protein 10
hsa-miR-331-3p	0	0	1	1	0	0	IFT46	intraflagellar transport 46 homolog (Chlamydomonas)
hsa-miR-331-3p	0	0	0	1	0	0	TREH	trehalase (brush-border membrane glycoprotein)
hsa-miR-331-3p	0	0	1	1	0	0	UPK2	uroplakin 2
hsa-miR-331-3p	0	0	0	1	1	1	FARP2	FERM, RhoGEF and pleckstrin domain protein 2
hsa-miR-331-3p	0	0	0	1	0	0	GZMM	granzyme M (lymphocyte met-ase 1)
hsa-miR-331-3p	0	0	0	1	0	0	KLKB1	kallikrein B, plasma (Fletcher factor) 1
hsa-miR-331-3p	0	0	1	1	1	1	F11	coagulation factor XI
hsa-miR-331-3p	0	0	0	1	0	0	LYL1	lymphoblastic leukemia derived sequence 1
hsa-miR-331-3p	0	0	0	1	0	0	SIL1	SIL1 homolog, endoplasmic reticulum chaperone (S. cerevisiae)
hsa-miR-331-3p	1	0	1	1	1	1	APBA1	amyloid beta (A4) precursor protein-binding, family A, member 1
hsa-miR-331-3p	0	0	1	1	0	0	INTS9	integrator complex subunit 9
hsa-miR-331-3p	1	0	1	1	1	1	SLC2A4RG	SLC2A4 regulator
hsa-miR-331-3p	0	0	1	1	0	0	FBXO7	F-box protein 7
hsa-miR-331-3p	0	0	1	1	0	0	TAPBPL	TAP binding protein-like
hsa-miR-331-3p	0	0	1	1	0	0	C12orf52	chromosome 12 open reading frame 52
hsa-miR-331-3p	1	0	1	1	1	1	CHFR	checkpoint with forkhead and ring finger domains, E3 ubiquitin protein ligase
hsa-miR-331-3p	0	0	1	1	0	0	DHH	desert hedgehog
hsa-miR-331-3p	1	0	1	1	0	0	CDH24	cadherin 24, type 2
hsa-miR-331-3p	0	0	1	1	0	0	REM2	RAS (RAD and GEM)-like GTP binding 2
hsa-miR-331-3p	0	0	0	1	0	0	CYP11A1	cytochrome P450, family 11, subfamily A, polypeptide 1
hsa-miR-331-3p	0	0	0	1	0	0	RHCG	Rh family, C glycoprotein
hsa-miR-331-3p	0	0	1	1	1	1	IRF8	interferon regulatory factor 8
hsa-miR-331-3p	0	0	0	1	0	0	LRRC46	leucine rich repeat containing 46
hsa-miR-331-3p	0	0	0	1	1	1	TRIM65	tripartite motif containing 65
hsa-miR-331-3p	0	0	0	1	0	0	SECTM1	secreted and transmembrane 1
hsa-miR-331-3p	0	0	1	1	0	0	AZI1	5-azacytidine induced 1
hsa-miR-331-3p	0	0	0	1	1	1	ERBB2	v-erb-b2 erythroblastic leukemia viral oncogene homolog 2, neuro/glioblastoma derived oncogene homolog (avian)
hsa-miR-331-3p	0	0	0	1	0	0	BCKDHA	branched chain keto acid dehydrogenase E1, alpha polypeptide
hsa-miR-331-3p	0	0	0	1	0	0	CBLC	Cbl proto-oncogene, E3 ubiquitin protein ligase C
hsa-miR-331-3p	1	0	1	1	0	0	ADAMTS10	ADAM metallopeptidase with thrombospondin type 1 motif, 10
hsa-miR-331-3p	0	0	0	1	0	0	ZNF787	zinc finger protein 787
hsa-miR-331-3p	0	0	1	1	1	1	FBN3	fibrillin 3
hsa-miR-331-3p	0	0	1	1	0	0	KLHDC4	kelch domain containing 4
hsa-miR-331-3p	0	0	1	1	0	0	RPL13A	ribosomal protein L13a
hsa-miR-331-3p	0	0	0	1	0	0	SLC2A7	solute carrier family 2 (facilitated glucose transporter), member 7
hsa-miR-331-3p	1	0	1	1	1	1	ZNF697	zinc finger protein 697
hsa-miR-331-3p	0	0	1	1	1	1	GON4L	gon-4-like (C. elegans)
hsa-miR-331-3p	0	0	1	1	1	1	MALL	mal, T-cell differentiation protein-like
hsa-miR-331-3p	0	0	0	1	0	0	FAHD2B	fumarylacetoacetate hydrolase domain containing 2B
hsa-miR-331-3p	0	0	0	1	0	0	ADAMTS2	ADAM metallopeptidase with thrombospondin type 1 motif, 2
hsa-miR-331-3p	0	0	0	1	1	1	CDCA5	cell division cycle associated 5
hsa-miR-331-3p	0	0	1	1	0	0	FUOM	fucose mutarotase
hsa-miR-331-3p	1	0	0	1	1	1	CAPN5	calpain 5
hsa-miR-331-3p	1	0	1	1	1	1	ABCB9	ATP-binding cassette, sub-family B (MDR/TAP), member 9
hsa-miR-331-3p	0	0	1	1	1	1	SLC25A4	solute carrier family 25 (mitochondrial carrier; adenine nucleotide translocator), member 4
hsa-miR-331-3p	0	0	1	1	1	1	UNC80	unc-80 homolog (C. elegans)
hsa-miR-331-3p	1	0	1	1	1	1	ADAMTS18	ADAM metallopeptidase with thrombospondin type 1 motif, 18
hsa-miR-331-3p	0	0	1	1	1	1	MARVELD2	MARVEL domain containing 2
hsa-miR-331-3p	0	0	1	1	0	0	PLCH2	phospholipase C, eta 2
hsa-miR-331-3p	1	0	1	1	1	1	WIPI2	WD repeat domain, phosphoinositide interacting 2
hsa-miR-331-3p	0	0	1	1	1	1	C2orf62	chromosome 2 open reading frame 62
hsa-miR-331-3p	0	0	0	1	0	0	TMEM141	transmembrane protein 141
hsa-miR-331-3p	0	0	0	1	0	0	KIAA1984	KIAA1984
hsa-miR-331-3p	0	0	1	1	0	0	PKD2L2	polycystic kidney disease 2-like 2
hsa-miR-331-3p	1	0	1	1	1	1	ALDH4A1	aldehyde dehydrogenase 4 family, member A1
hsa-miR-331-3p	0	0	1	1	0	0	TNFRSF13C	tumor necrosis factor receptor superfamily, member 13C
hsa-miR-331-3p	0	0	0	1	1	1	AP1M1	adaptor-related protein complex 1, mu 1 subunit
hsa-miR-331-3p	0	0	0	1	0	0	CILP2	cartilage intermediate layer protein 2
hsa-miR-331-3p	0	0	0	1	0	0	PWP2	PWP2 periodic tryptophan protein homolog (yeast)
hsa-miR-331-3p	0	0	1	1	0	0	CXCR5	chemokine (C-X-C motif) receptor 5
hsa-miR-331-3p	1	0	0	1	0	0	NBEAL2	neurobeachin-like 2
hsa-miR-331-3p	1	0	0	1	0	0	CPSF4	cleavage and polyadenylation specific factor 4, 30kDa
hsa-miR-331-3p	0	0	0	1	0	0	PTGER1	prostaglandin E receptor 1 (subtype EP1), 42kDa
hsa-miR-331-3p	1	0	1	1	0	0	FAM108A1	family with sequence similarity 108, member A1
hsa-miR-331-3p	0	0	0	1	0	0	LRWD1	leucine-rich repeats and WD repeat domain containing 1
hsa-miR-331-3p	0	0	1	1	1	1	CD300LG	CD300 molecule-like family member g
hsa-miR-331-3p	0	0	0	1	0	0	AQP5	aquaporin 5
hsa-miR-331-3p	1	0	1	1	0	0	GRASP	GRP1 (general receptor for phosphoinositides 1)-associated scaffold protein
hsa-miR-331-3p	0	0	1	1	0	0	KRT83	keratin 83
hsa-miR-331-3p	1	0	1	1	1	1	BCL6B	B-cell CLL/lymphoma 6, member B
hsa-miR-331-3p	0	0	1	1	0	0	POLR3K	polymerase (RNA) III (DNA directed) polypeptide K, 12.3 kDa
hsa-miR-331-3p	1	0	0	1	1	1	MAP4K2	mitogen-activated protein kinase kinase kinase kinase 2
hsa-miR-331-3p	0	0	1	1	1	1	C1orf74	chromosome 1 open reading frame 74
hsa-miR-331-3p	0	0	0	1	1	1	FAM228A	family with sequence similarity 228, member A
hsa-miR-331-3p	0	0	0	1	0	0	ALPPL2	alkaline phosphatase, placental-like 2
hsa-miR-331-3p	1	0	1	1	0	0	RPN1	ribophorin I
hsa-miR-331-3p	0	0	1	1	0	0	LEPRE1	leucine proline-enriched proteoglycan (leprecan) 1
hsa-miR-331-3p	0	0	1	1	1	1	ANKHD1	ankyrin repeat and KH domain containing 1
hsa-miR-331-3p	1	0	1	1	1	1	EN2	engrailed homeobox 2
hsa-miR-331-3p	0	0	1	1	1	1	RPP25L	ribonuclease P/MRP 25kDa subunit-like
hsa-miR-331-3p	0	0	1	1	0	0	RNF183	ring finger protein 183
hsa-miR-331-3p	1	0	1	1	1	1	EHMT1	euchromatic histone-lysine N-methyltransferase 1
hsa-miR-331-3p	0	0	1	1	1	1	TTLL5	tubulin tyrosine ligase-like family, member 5
hsa-miR-331-3p	0	0	1	1	1	1	AMBRA1	autophagy/beclin-1 regulator 1
hsa-miR-331-3p	0	0	1	1	0	0	PACSIN3	protein kinase C and casein kinase substrate in neurons 3
hsa-miR-331-3p	0	0	1	1	0	0	RAPSN	receptor-associated protein of the synapse
hsa-miR-331-3p	0	0	0	1	0	0	ADAMTS15	ADAM metallopeptidase with thrombospondin type 1 motif, 15
hsa-miR-331-3p	0	0	0	1	0	0	TBATA	thymus, brain and testes associated
hsa-miR-331-3p	0	0	0	1	0	0	COQ4	coenzyme Q4 homolog (S. cerevisiae)
hsa-miR-331-3p	1	0	1	1	1	1	SLC27A4	solute carrier family 27 (fatty acid transporter), member 4
hsa-miR-331-3p	1	0	0	1	0	0	PGAP3	post-GPI attachment to proteins 3
hsa-miR-331-3p	0	0	0	1	0	0	PCSK4	proprotein convertase subtilisin/kexin type 4
hsa-miR-331-3p	0	0	0	1	0	0	JSRP1	junctional sarcoplasmic reticulum protein 1
hsa-miR-331-3p	0	0	0	1	0	0	ZNF524	zinc finger protein 524
hsa-miR-331-3p	0	0	1	1	0	0	KLK1	kallikrein 1
hsa-miR-331-3p	0	0	1	1	0	0	CD320	CD320 molecule
hsa-miR-331-3p	1	0	0	1	1	1	RCOR2	REST corepressor 2
hsa-miR-331-3p	0	0	1	1	0	0	NUDT8	nudix (nucleoside diphosphate linked moiety X)-type motif 8
hsa-miR-331-3p	0	0	0	1	0	0	TK1	thymidine kinase 1, soluble
hsa-miR-331-3p	0	0	0	1	0	0	LTBP3	latent transforming growth factor beta binding protein 3
hsa-miR-331-3p	0	0	1	1	1	1	SCARA5	scavenger receptor class A, member 5 (putative)
hsa-miR-331-3p	0	0	1	1	0	0	CD14	CD14 molecule
hsa-miR-331-3p	0	0	0	1	0	0	C1QTNF4	C1q and tumor necrosis factor related protein 4
hsa-miR-331-3p	0	0	0	1	0	0	AMDHD2	amidohydrolase domain containing 2
hsa-miR-331-3p	1	0	0	1	0	0	TRABD	TraB domain containing
hsa-miR-331-3p	1	0	0	1	1	1	SSH1	slingshot homolog 1 (Drosophila)
hsa-miR-331-3p	0	0	1	1	0	0	LST1	leukocyte specific transcript 1
hsa-miR-331-3p	0	0	0	1	1	1	CDKN2A	cyclin-dependent kinase inhibitor 2A
hsa-miR-331-3p	0	0	0	1	0	0	NFRKB	nuclear factor related to kappaB binding protein
hsa-miR-331-3p	0	0	1	1	0	0	PEX6	peroxisomal biogenesis factor 6
hsa-miR-331-3p	0	0	1	1	0	0	GSG1L	GSG1-like
hsa-miR-331-3p	0	0	1	1	1	1	MUC12	mucin 12, cell surface associated
hsa-miR-331-3p	1	0	1	1	1	1	GRM5	glutamate receptor, metabotropic 5
hsa-miR-331-3p	0	0	1	1	0	0	TWF2	twinfilin, actin-binding protein, homolog 2 (Drosophila)
hsa-miR-331-3p	0	0	0	1	0	0	TLR9	toll-like receptor 9
hsa-miR-331-3p	1	0	1	1	1	1	CSDC2	cold shock domain containing C2, RNA binding
hsa-miR-331-3p	0	0	0	1	0	0	REEP4	receptor accessory protein 4
hsa-miR-331-3p	0	0	1	1	0	0	RNF181	ring finger protein 181
hsa-miR-331-3p	0	0	1	1	1	1	TMEM37	transmembrane protein 37
hsa-miR-331-3p	0	0	0	1	1	1	LRRC45	leucine rich repeat containing 45
hsa-miR-331-3p	1	0	0	1	1	1	SLC1A5	solute carrier family 1 (neutral amino acid transporter), member 5
hsa-miR-331-3p	0	0	1	1	1	1	RAC3	ras-related C3 botulinum toxin substrate 3 (rho family, small GTP binding protein Rac3)
hsa-miR-331-3p	0	0	1	1	1	1	HTRA3	HtrA serine peptidase 3
hsa-miR-331-3p	0	0	1	1	0	0	CNTNAP4	contactin associated protein-like 4
hsa-miR-331-3p	0	0	0	1	0	0	EFEMP2	EGF containing fibulin-like extracellular matrix protein 2
hsa-miR-331-3p	0	0	0	1	0	0	SNX32	sorting nexin 32
hsa-miR-331-3p	0	0	0	1	0	0	CLDN15	claudin 15
hsa-miR-331-3p	1	0	1	1	1	1	PDLIM2	PDZ and LIM domain 2 (mystique)
hsa-miR-331-3p	0	0	1	1	1	1	CSPG4	chondroitin sulfate proteoglycan 4
hsa-miR-331-3p	0	0	0	1	0	0	ATAD3B	ATPase family, AAA domain containing 3B
hsa-miR-331-3p	1	0	0	1	0	0	AP1G2	adaptor-related protein complex 1, gamma 2 subunit
hsa-miR-331-3p	0	0	0	1	0	0	PHYHD1	phytanoyl-CoA dioxygenase domain containing 1
hsa-miR-331-3p	0	0	0	1	0	0	MRPL38	mitochondrial ribosomal protein L38
hsa-miR-331-3p	0	0	0	1	0	0	OR1S1	olfactory receptor, family 1, subfamily S, member 1
hsa-miR-331-3p	1	0	0	1	1	1	ELF3	E74-like factor 3 (ets domain transcription factor, epithelial-specific )
hsa-miR-331-3p	1	0	0	1	1	1	FADS6	fatty acid desaturase domain family, member 6
hsa-miR-331-3p	1	0	1	1	1	1	VANGL1	vang-like 1 (van gogh, Drosophila)
hsa-miR-331-3p	0	0	1	1	0	0	SPNS1	spinster homolog 1 (Drosophila)
hsa-miR-331-3p	0	0	0	1	0	0	TTC9B	tetratricopeptide repeat domain 9B
hsa-miR-331-3p	0	0	0	1	0	0	PFKL	phosphofructokinase, liver
hsa-miR-331-3p	1	0	0	1	0	0	FBXL18	F-box and leucine-rich repeat protein 18
hsa-miR-331-3p	0	0	1	1	0	0	RPS6KB2	ribosomal protein S6 kinase, 70kDa, polypeptide 2
hsa-miR-331-3p	0	0	0	1	0	0	PARP10	poly (ADP-ribose) polymerase family, member 10
hsa-miR-331-3p	0	0	1	1	0	0	SLC6A13	solute carrier family 6 (neurotransmitter transporter, GABA), member 13
hsa-miR-331-3p	1	0	1	1	1	1	EMID2	EMI domain containing 2
hsa-miR-331-3p	0	0	1	1	0	0	TBC1D26	TBC1 domain family, member 26
hsa-miR-331-3p	0	0	1	1	1	1	ESRP1	epithelial splicing regulatory protein 1
hsa-miR-331-3p	0	0	0	1	0	0	STAP2	signal transducing adaptor family member 2
hsa-miR-331-3p	0	0	1	1	0	0	ARL6IP4	ADP-ribosylation-like factor 6 interacting protein 4
hsa-miR-331-3p	0	0	1	1	0	0	FAM89B	family with sequence similarity 89, member B
hsa-miR-331-3p	0	0	0	1	0	0	DEF6	differentially expressed in FDCP 6 homolog (mouse)
hsa-miR-331-3p	0	0	1	1	1	1	BIN1	bridging integrator 1
hsa-miR-331-3p	0	0	1	1	0	0	TMEM11	transmembrane protein 11
hsa-miR-331-3p	1	0	1	1	1	1	CC2D1A	coiled-coil and C2 domain containing 1A
hsa-miR-331-3p	1	0	1	1	1	1	SLC24A4	solute carrier family 24 (sodium/potassium/calcium exchanger), member 4
hsa-miR-331-3p	0	0	1	1	0	0	DNASE1L3	deoxyribonuclease I-like 3
hsa-miR-331-3p	0	0	1	1	0	0	SFTPC	surfactant protein C
hsa-miR-331-3p	0	0	1	1	0	0	DCTPP1	dCTP pyrophosphatase 1
hsa-miR-331-3p	0	0	0	1	1	1	IL17RA	interleukin 17 receptor A
hsa-miR-331-3p	0	0	0	1	0	0	LRRC37A3	leucine rich repeat containing 37, member A3
hsa-miR-331-3p	0	0	0	1	1	1	ABO	ABO blood group (transferase A, alpha 1-3-N-acetylgalactosaminyltransferase; transferase B, alpha 1-3-galactosyltransferase)
hsa-miR-331-3p	0	0	0	1	0	0	ANKRD30B	ankyrin repeat domain 30B
hsa-miR-331-3p	0	0	0	1	0	0	DUS3L	dihydrouridine synthase 3-like (S. cerevisiae)
hsa-miR-331-3p	0	0	0	1	0	0	SHARPIN	SHANK-associated RH domain interactor
hsa-miR-331-3p	0	0	0	1	0	0	HIST1H3G	histone cluster 1, H3g
hsa-miR-331-3p	0	0	1	1	1	1	CCDC33	coiled-coil domain containing 33
hsa-miR-331-3p	0	0	0	1	1	1	FKBP10	FK506 binding protein 10, 65 kDa
hsa-miR-331-3p	0	0	0	1	0	0	B3GNT8	UDP-GlcNAc:betaGal beta-1,3-N-acetylglucosaminyltransferase 8
hsa-miR-331-3p	0	0	1	1	0	0	CD151	CD151 molecule (Raph blood group)
hsa-miR-331-3p	0	0	0	1	0	0	TRIM72	tripartite motif containing 72
hsa-miR-331-3p	0	0	0	1	0	0	SSNA1	Sjogren syndrome nuclear autoantigen 1
hsa-miR-331-3p	1	0	1	1	1	1	WDR20	WD repeat domain 20
hsa-miR-331-3p	1	0	1	1	1	1	WNT11	wingless-type MMTV integration site family, member 11
hsa-miR-331-3p	0	0	1	1	0	0	ZNF335	zinc finger protein 335
hsa-miR-331-3p	0	0	1	1	0	0	KLK4	kallikrein-related peptidase 4
hsa-miR-331-3p	0	0	0	1	0	0	ZNF687	zinc finger protein 687
hsa-miR-331-3p	1	0	1	1	0	0	ECE2	endothelin converting enzyme 2
hsa-miR-331-3p	1	0	1	1	1	1	DDR1	discoidin domain receptor tyrosine kinase 1
hsa-miR-331-3p	1	0	1	1	0	0	RANBP3	RAN binding protein 3
hsa-miR-331-3p	0	0	0	1	0	0	CHMP6	charged multivesicular body protein 6
hsa-miR-331-3p	1	0	0	1	1	1	PLEKHJ1	pleckstrin homology domain containing, family J member 1
hsa-miR-331-3p	1	0	1	1	1	1	PPP6R1	protein phosphatase 6, regulatory subunit 1
hsa-miR-331-3p	0	0	0	1	1	1	FLII	flightless I homolog (Drosophila)
hsa-miR-331-3p	0	0	0	1	0	0	NOC2L	nucleolar complex associated 2 homolog (S. cerevisiae)
hsa-miR-331-3p	0	0	0	1	0	0	OXCT2	3-oxoacid CoA transferase 2
hsa-miR-331-3p	0	0	0	1	0	0	SERHL2	serine hydrolase-like 2
hsa-miR-331-3p	0	0	1	1	0	0	GAS6	growth arrest-specific 6
hsa-miR-331-3p	1	0	1	1	0	0	IGDCC3	immunoglobulin superfamily, DCC subclass, member 3
hsa-miR-331-3p	0	0	0	1	1	1	CNOT10	CCR4-NOT transcription complex, subunit 10
hsa-miR-331-3p	0	0	1	1	0	0	HGS	hepatocyte growth factor-regulated tyrosine kinase substrate
hsa-miR-331-3p	0	0	0	1	0	0	C19orf71	chromosome 19 open reading frame 71
hsa-miR-331-3p	0	0	0	1	0	0	GDPGP1	GDP-D-glucose phosphorylase 1
hsa-miR-331-3p	0	0	0	1	1	1	C14orf80	chromosome 14 open reading frame 80
hsa-miR-331-3p	0	0	1	1	1	1	UQCR10	ubiquinol-cytochrome c reductase, complex III subunit X
hsa-miR-331-3p	0	0	1	1	0	0	RXFP3	relaxin/insulin-like family peptide receptor 3
hsa-miR-331-3p	0	0	0	1	0	0	MRPL54	mitochondrial ribosomal protein L54
hsa-miR-331-3p	0	0	1	1	0	0	IGLL1	immunoglobulin lambda-like polypeptide 1
hsa-miR-331-3p	0	0	0	1	0	0	FAM132A	family with sequence similarity 132, member A
hsa-miR-331-3p	0	0	1	1	0	0	USP51	ubiquitin specific peptidase 51
hsa-miR-331-3p	0	0	0	1	0	0	PDE6G	phosphodiesterase 6G, cGMP-specific, rod, gamma
hsa-miR-331-3p	0	0	1	1	1	1	P4HA3	prolyl 4-hydroxylase, alpha polypeptide III
hsa-miR-331-3p	0	0	0	1	0	0	SYNDIG1L	synapse differentiation inducing 1-like
hsa-miR-331-3p	1	0	1	1	1	1	KCNJ12	potassium inwardly-rectifying channel, subfamily J, member 12
hsa-miR-331-3p	0	0	0	1	1	1	TBX1	T-box 1
hsa-miR-331-3p	0	0	1	1	0	0	STAC3	SH3 and cysteine rich domain 3
hsa-miR-331-3p	0	0	1	1	1	1	TPRN	taperin
hsa-miR-331-3p	0	0	0	1	0	0	H1FX	H1 histone family, member X
hsa-miR-331-3p	0	0	0	1	1	1	NME9	NME/NM23 family member 9
hsa-miR-331-3p	0	0	1	1	1	1	LZTS1	leucine zipper, putative tumor suppressor 1
hsa-miR-331-3p	0	0	0	1	0	0	DEFB128	defensin, beta 128
hsa-miR-331-3p	0	0	0	1	0	0	C17orf82	chromosome 17 open reading frame 82
hsa-miR-331-3p	0	0	1	1	1	1	SELV	selenoprotein V
hsa-miR-331-3p	1	0	1	1	1	1	SPTB	spectrin, beta, erythrocytic
hsa-miR-331-3p	0	0	0	1	0	0	VWCE	von Willebrand factor C and EGF domains
hsa-miR-331-3p	1	0	1	1	0	0	NCKAP5L	NCK-associated protein 5-like
hsa-miR-331-3p	0	0	1	1	1	1	TOR2A	torsin family 2, member A
hsa-miR-331-3p	0	0	1	1	1	1	IFRD2	interferon-related developmental regulator 2
hsa-miR-331-3p	0	0	1	1	0	0	TBC1D22A	TBC1 domain family, member 22A
hsa-miR-331-3p	0	0	1	1	0	0	AVPR2	arginine vasopressin receptor 2
hsa-miR-331-3p	0	0	1	1	0	0	SIRT6	sirtuin 6
hsa-miR-331-3p	0	0	0	1	0	0	TSPO	translocator protein (18kDa)
hsa-miR-331-3p	0	0	1	1	0	0	CRYM-AS1	CRYM antisense RNA 1
hsa-miR-331-3p	0	0	0	1	0	0	PPP1R32	protein phosphatase 1, regulatory subunit 32
hsa-miR-331-3p	0	0	1	1	0	0	TMEM120A	transmembrane protein 120A
hsa-miR-331-3p	1	0	0	1	0	0	CRTC1	CREB regulated transcription coactivator 1
hsa-miR-331-3p	0	0	0	1	0	0	CATSPER4	cation channel, sperm associated 4
hsa-miR-331-3p	0	0	0	1	0	0	NCR3LG1	natural killer cell cytotoxicity receptor 3 ligand 1
hsa-miR-331-3p	0	0	0	1	0	0	TFPT	TCF3 (E2A) fusion partner (in childhood Leukemia)
hsa-miR-331-3p	0	0	0	1	0	0	DUSP15	dual specificity phosphatase 15
hsa-miR-331-3p	1	0	1	1	1	1	SMC1A	structural maintenance of chromosomes 1A
hsa-miR-331-3p	0	0	0	1	0	0	ZBP1	Z-DNA binding protein 1
hsa-miR-331-3p	0	0	0	1	1	1	PNCK	pregnancy up-regulated non-ubiquitously expressed CaM kinase
hsa-miR-331-3p	0	0	0	1	0	0	SAMD11	sterile alpha motif domain containing 11
hsa-miR-331-3p	0	0	1	1	1	1	ANAPC1	anaphase promoting complex subunit 1
hsa-miR-331-3p	0	0	0	1	0	0	TMEM221	transmembrane protein 221
hsa-miR-331-3p	0	0	0	1	0	0	WDR86	WD repeat domain 86
hsa-miR-331-3p	0	0	0	1	0	0	ASTL	astacin-like metallo-endopeptidase (M12 family)
hsa-miR-331-3p	0	0	0	1	0	0	C12orf63	chromosome 12 open reading frame 63
hsa-miR-331-3p	1	0	1	1	0	0	ST3GAL2	ST3 beta-galactoside alpha-2,3-sialyltransferase 2
hsa-miR-331-3p	0	0	0	1	1	1	TM7SF3	transmembrane 7 superfamily member 3
hsa-miR-331-3p	0	0	0	1	0	0	QRFP	pyroglutamylated RFamide peptide
hsa-miR-331-3p	0	0	0	1	1	1	CORO6	coronin 6
hsa-miR-331-3p	0	0	0	1	0	0	C19orf57	chromosome 19 open reading frame 57
hsa-miR-331-3p	0	0	0	1	0	0	SLC5A11	solute carrier family 5 (sodium/glucose cotransporter), member 11
hsa-miR-331-3p	1	0	1	1	1	1	AKT1	v-akt murine thymoma viral oncogene homolog 1
hsa-miR-331-3p	0	0	1	1	1	1	POFUT2	protein O-fucosyltransferase 2
hsa-miR-331-3p	0	0	1	1	1	1	COG3	component of oligomeric golgi complex 3
hsa-miR-331-3p	0	0	0	1	0	0	RHBDL1	rhomboid, veinlet-like 1 (Drosophila)
hsa-miR-331-3p	0	0	1	1	1	1	CAPN10	calpain 10
hsa-miR-331-3p	0	0	0	1	0	0	ACAP3	ArfGAP with coiled-coil, ankyrin repeat and PH domains 3
hsa-miR-331-3p	1	0	1	1	1	1	SLC12A9	solute carrier family 12 (potassium/chloride transporters), member 9
hsa-miR-331-3p	1	0	1	1	1	1	THRAP3	thyroid hormone receptor associated protein 3
hsa-miR-331-3p	0	0	1	1	0	0	NDUFA4L2	NADH dehydrogenase (ubiquinone) 1 alpha subcomplex, 4-like 2
hsa-miR-331-3p	0	0	1	1	1	1	FMO1	flavin containing monooxygenase 1
hsa-miR-331-3p	0	0	0	1	0	0	C16orf93	chromosome 16 open reading frame 93
hsa-miR-331-3p	1	0	1	1	1	1	PTPRS	protein tyrosine phosphatase, receptor type, S
hsa-miR-331-3p	1	0	1	1	1	1	LINGO1	leucine rich repeat and Ig domain containing 1
hsa-miR-331-3p	1	0	1	1	1	1	COL5A1	collagen, type V, alpha 1
hsa-miR-331-3p	0	0	0	1	0	0	SHROOM1	shroom family member 1
hsa-miR-331-3p	0	0	0	1	1	1	TBCD	tubulin folding cofactor D
hsa-miR-331-3p	0	0	1	1	1	1	TPRA1	transmembrane protein, adipocyte asscociated 1
hsa-miR-331-3p	0	0	1	1	1	1	RSL1D1	ribosomal L1 domain containing 1
hsa-miR-331-3p	0	0	1	1	0	0	PC	pyruvate carboxylase
hsa-miR-331-3p	0	0	0	1	1	1	OPRL1	opiate receptor-like 1
hsa-miR-331-3p	0	0	1	1	1	1	MEGF6	multiple EGF-like-domains 6
hsa-miR-331-3p	0	0	1	1	0	0	PDXP	pyridoxal (pyridoxine, vitamin B6) phosphatase
hsa-miR-331-3p	0	0	0	1	0	0	FAM163B	family with sequence similarity 163, member B
hsa-miR-331-3p	0	0	1	1	1	1	PICK1	protein interacting with PRKCA 1
hsa-miR-331-3p	0	0	1	1	1	1	PLEC	plectin
hsa-miR-331-3p	0	0	0	1	0	0	CDC37P1	cell division cycle 37 homolog (S. cerevisiae) pseudogene 1
hsa-miR-331-3p	0	0	1	1	1	1	CCR3	chemokine (C-C motif) receptor 3
hsa-miR-331-3p	0	0	0	1	0	0	ARID5A	AT rich interactive domain 5A (MRF1-like)
hsa-miR-331-3p	0	0	0	1	1	1	TMEM79	transmembrane protein 79
hsa-miR-331-3p	0	0	1	1	0	0	ASIC4	acid-sensing (proton-gated) ion channel family member 4
hsa-miR-331-3p	0	0	1	1	0	0	ZCWPW1	zinc finger, CW type with PWWP domain 1
hsa-miR-331-3p	0	0	1	1	0	0	THNSL2	threonine synthase-like 2 (S. cerevisiae)
hsa-miR-331-3p	0	0	1	1	0	0	FANCG	Fanconi anemia, complementation group G
hsa-miR-331-3p	1	0	0	1	0	0	TRPV6	transient receptor potential cation channel, subfamily V, member 6
hsa-miR-331-3p	0	0	0	1	0	0	TMC3	transmembrane channel-like 3
hsa-miR-331-3p	1	0	1	1	1	1	NUMA1	nuclear mitotic apparatus protein 1
hsa-miR-331-3p	0	0	0	1	1	1	KCNQ2	potassium voltage-gated channel, KQT-like subfamily, member 2
hsa-miR-331-3p	0	0	1	1	1	1	SLC17A2	solute carrier family 17 (sodium phosphate), member 2
hsa-miR-331-3p	0	0	1	1	0	0	ABHD14A	abhydrolase domain containing 14A
hsa-miR-331-3p	0	0	1	1	1	1	HPS1	Hermansky-Pudlak syndrome 1
hsa-miR-331-3p	0	0	1	1	0	0	TXNRD2	thioredoxin reductase 2
hsa-miR-331-3p	0	0	1	1	1	1	SELM	selenoprotein M
hsa-miR-331-3p	1	0	1	1	1	1	NPL	N-acetylneuraminate pyruvate lyase (dihydrodipicolinate synthase)
hsa-miR-331-3p	0	0	1	1	0	0	USF1	upstream transcription factor 1
hsa-miR-331-3p	0	0	1	1	0	0	CCDC19	coiled-coil domain containing 19
hsa-miR-331-3p	0	0	0	1	0	0	INSRR	insulin receptor-related receptor
hsa-miR-331-3p	0	0	0	1	0	0	CRABP2	cellular retinoic acid binding protein 2
hsa-miR-331-3p	0	0	0	1	0	0	BGLAP	bone gamma-carboxyglutamate (gla) protein
hsa-miR-331-3p	0	0	0	1	1	1	ZNF684	zinc finger protein 684
hsa-miR-331-3p	0	0	0	1	0	0	PRAP1	proline-rich acidic protein 1
hsa-miR-331-3p	0	0	0	1	0	0	TTC40	tetratricopeptide repeat domain 40
hsa-miR-331-3p	0	0	0	1	0	0	NKX6-2	NK6 homeobox 2
hsa-miR-331-3p	1	0	1	1	1	1	INPP5A	inositol polyphosphate-5-phosphatase, 40kDa
hsa-miR-331-3p	0	0	1	1	0	0	CREB3L4	cAMP responsive element binding protein 3-like 4
hsa-miR-331-3p	0	0	0	1	0	0	S100A7L2	S100 calcium binding protein A7-like 2
hsa-miR-331-3p	0	0	0	1	0	0	S100A9	S100 calcium binding protein A9
hsa-miR-331-3p	0	0	0	1	0	0	UROS	uroporphyrinogen III synthase
hsa-miR-331-3p	0	0	1	1	0	0	LINGO4	leucine rich repeat and Ig domain containing 4
hsa-miR-331-3p	0	0	1	1	1	1	LHPP	phospholysine phosphohistidine inorganic pyrophosphate phosphatase
hsa-miR-331-3p	0	0	0	1	0	0	FAM108A2	Abhydrolase domain-containing protein FAM108A2
hsa-miR-331-3p	0	0	0	1	1	1	TDRD1	tudor domain containing 1
hsa-miR-331-3p	0	0	0	1	0	0	NPBWR2	neuropeptides B/W receptor 2
hsa-miR-331-3p	1	0	1	1	1	1	LCA5	Leber congenital amaurosis 5
hsa-miR-331-3p	1	0	1	1	1	1	CNNM2	cyclin M2
hsa-miR-331-3p	1	0	1	1	0	0	POLL	polymerase (DNA directed), lambda
hsa-miR-331-3p	0	0	1	1	0	0	FATE1	fetal and adult testis expressed 1
hsa-miR-331-3p	0	0	1	1	0	0	CPN1	carboxypeptidase N, polypeptide 1
hsa-miR-331-3p	0	0	1	1	0	0	SLC25A28	solute carrier family 25 (mitochondrial iron transporter), member 28
hsa-miR-331-3p	0	0	0	1	1	1	C20orf85	chromosome 20 open reading frame 85
hsa-miR-331-3p	0	0	0	1	1	1	CDCP2	CUB domain containing protein 2
hsa-miR-331-3p	0	0	0	1	1	1	PDE6C	phosphodiesterase 6C, cGMP-specific, cone, alpha prime
hsa-miR-331-3p	1	0	1	1	1	1	ABCA2	ATP-binding cassette, sub-family A (ABC1), member 2
hsa-miR-331-3p	0	0	0	1	0	0	LCN8	lipocalin 8
hsa-miR-331-3p	0	0	0	1	0	0	FAM69B	family with sequence similarity 69, member B
hsa-miR-331-3p	0	0	1	1	0	0	MRPS2	mitochondrial ribosomal protein S2
hsa-miR-331-3p	0	0	0	1	0	0	CEL	carboxyl ester lipase (bile salt-stimulated lipase)
hsa-miR-331-3p	1	0	1	1	1	1	KCNMA1	potassium large conductance calcium-activated channel, subfamily M, alpha member 1
hsa-miR-331-3p	1	0	1	1	0	0	LRRC73	leucine rich repeat containing 73
hsa-miR-331-3p	1	0	1	1	1	1	CTSA	cathepsin A
hsa-miR-331-3p	0	0	1	1	1	1	TIE1	tyrosine kinase with immunoglobulin-like and EGF-like domains 1
hsa-miR-331-3p	1	0	1	1	1	1	SNX21	sorting nexin family member 21
hsa-miR-331-3p	0	0	1	1	1	1	ZMYND12	zinc finger, MYND-type containing 12
hsa-miR-331-3p	0	0	1	1	1	1	NUP188	nucleoporin 188kDa
hsa-miR-331-3p	0	0	1	1	1	1	PKIG	protein kinase (cAMP-dependent, catalytic) inhibitor gamma
hsa-miR-331-3p	1	0	1	1	1	1	GDAP1L1	ganglioside induced differentiation associated protein 1-like 1
hsa-miR-331-3p	0	0	0	1	0	0	LCN2	lipocalin 2
hsa-miR-331-3p	0	0	1	1	0	0	TREML1	triggering receptor expressed on myeloid cells-like 1
hsa-miR-331-3p	0	0	0	1	0	0	TSPO2	translocator protein 2
hsa-miR-331-3p	0	0	1	1	0	0	FPGS	folylpolyglutamate synthase
hsa-miR-331-3p	0	0	0	1	0	0	GPR35	G protein-coupled receptor 35
hsa-miR-331-3p	0	0	1	1	1	1	FTSJD2	FtsJ methyltransferase domain containing 2
hsa-miR-331-3p	0	0	1	1	1	1	HPCA	hippocalcin
hsa-miR-331-3p	1	0	0	1	0	0	LMX1B	LIM homeobox transcription factor 1, beta
hsa-miR-331-3p	1	0	0	1	1	1	TMEM234	transmembrane protein 234
hsa-miR-331-3p	0	0	1	1	0	0	PI16	peptidase inhibitor 16
hsa-miR-331-3p	0	0	1	1	0	0	SPDEF	SAM pointed domain containing ets transcription factor
hsa-miR-331-3p	0	0	1	1	0	0	SYTL1	synaptotagmin-like 1
hsa-miR-331-3p	0	0	1	1	0	0	GPN2	GPN-loop GTPase 2
hsa-miR-331-3p	0	0	0	1	1	1	SLC30A2	solute carrier family 30 (zinc transporter), member 2
hsa-miR-331-3p	0	0	1	1	1	1	PTGR1	prostaglandin reductase 1
hsa-miR-331-3p	0	0	1	1	0	0	GDPD2	glycerophosphodiester phosphodiesterase domain containing 2
hsa-miR-331-3p	1	0	1	1	1	1	SRSF10	serine/arginine-rich splicing factor 10
hsa-miR-331-3p	0	0	0	1	1	1	B3GALT4	UDP-Gal:betaGlcNAc beta 1,3-galactosyltransferase, polypeptide 4
hsa-miR-331-3p	0	0	1	1	0	0	CELA3A	chymotrypsin-like elastase family, member 3A
hsa-miR-331-3p	0	0	1	1	0	0	CELA3B	chymotrypsin-like elastase family, member 3B
hsa-miR-331-3p	0	0	1	1	0	0	VSIG4	V-set and immunoglobulin domain containing 4
hsa-miR-331-3p	0	0	1	1	0	0	GALK1	galactokinase 1
hsa-miR-331-3p	0	0	0	1	1	1	EMC1	ER membrane protein complex subunit 1
hsa-miR-331-3p	0	0	1	1	1	1	ZNF341	zinc finger protein 341
hsa-miR-331-3p	0	0	1	1	1	1	ZBTB12	zinc finger and BTB domain containing 12
hsa-miR-331-3p	1	0	1	1	1	1	ID1	inhibitor of DNA binding 1, dominant negative helix-loop-helix protein
hsa-miR-331-3p	0	0	0	1	0	0	CCHCR1	coiled-coil alpha-helical rod protein 1
hsa-miR-331-3p	0	0	0	1	1	1	RABL2A	RAB, member of RAS oncogene family-like 2A
hsa-miR-331-3p	0	0	1	1	0	0	NPPA	natriuretic peptide A
hsa-miR-331-3p	0	0	1	1	0	0	GNL1	guanine nucleotide binding protein-like 1
hsa-miR-331-3p	0	0	1	1	0	0	MAD2L2	MAD2 mitotic arrest deficient-like 2 (yeast)
hsa-miR-331-3p	0	0	0	1	1	1	TRIM15	tripartite motif containing 15
hsa-miR-331-3p	1	0	1	1	1	1	RILPL1	Rab interacting lysosomal protein-like 1
hsa-miR-331-3p	1	0	0	1	1	1	ABCC4	ATP-binding cassette, sub-family C (CFTR/MRP), member 4
hsa-miR-331-3p	0	0	0	1	0	0	C1orf127	chromosome 1 open reading frame 127
hsa-miR-331-3p	0	0	0	1	1	1	TMEM252	transmembrane protein 252
hsa-miR-331-3p	0	0	1	1	1	1	SLC22A12	solute carrier family 22 (organic anion/urate transporter), member 12
hsa-miR-331-3p	0	0	0	1	1	1	PYCRL	pyrroline-5-carboxylate reductase-like
hsa-miR-331-3p	0	0	0	1	0	0	SLC25A51	solute carrier family 25, member 51
hsa-miR-331-3p	0	0	1	1	0	0	SLC22A6	solute carrier family 22 (organic anion transporter), member 6
hsa-miR-331-3p	1	0	1	1	1	1	CASK	calcium/calmodulin-dependent serine protein kinase (MAGUK family)
hsa-miR-331-3p	1	0	1	1	1	1	ANKRD11	ankyrin repeat domain 11
hsa-miR-331-3p	0	0	0	1	0	0	APRT	adenine phosphoribosyltransferase
hsa-miR-331-3p	0	0	1	1	0	0	ARHGEF16	Rho guanine nucleotide exchange factor (GEF) 16
hsa-miR-331-3p	0	0	0	1	0	0	C9orf131	chromosome 9 open reading frame 131
hsa-miR-331-3p	1	0	1	1	1	1	DNAJB5	DnaJ (Hsp40) homolog, subfamily B, member 5
hsa-miR-331-3p	0	0	0	1	0	0	TMEM88B	transmembrane protein 88B
hsa-miR-331-3p	0	0	1	1	0	0	NUDT2	nudix (nucleoside diphosphate linked moiety X)-type motif 2
hsa-miR-331-3p	0	0	0	1	0	0	TNFRSF4	tumor necrosis factor receptor superfamily, member 4
hsa-miR-331-3p	0	0	0	1	0	0	C1orf159	chromosome 1 open reading frame 159
hsa-miR-331-3p	0	0	0	1	0	0	NT5M	5',3'-nucleotidase, mitochondrial
hsa-miR-331-3p	1	0	0	1	1	1	PDHA1	pyruvate dehydrogenase (lipoamide) alpha 1
hsa-miR-331-3p	0	0	0	1	0	0	KRTAP12-3	keratin associated protein 12-3
hsa-miR-331-3p	0	0	0	1	1	1	KRTAP10-10	keratin associated protein 10-10
hsa-miR-331-3p	0	0	0	1	0	0	KRTAP10-11	keratin associated protein 10-11
hsa-miR-331-3p	0	0	0	1	1	1	GGT6	gamma-glutamyltransferase 6
hsa-miR-331-3p	0	0	1	1	0	0	NPSR1	neuropeptide S receptor 1
hsa-miR-331-3p	0	0	0	1	1	1	LSP1	lymphocyte-specific protein 1
hsa-miR-331-3p	0	0	1	1	1	1	SERPINF2	serpin peptidase inhibitor, clade F (alpha-2 antiplasmin, pigment epithelium derived factor), member 2
hsa-miR-331-3p	0	0	0	1	0	0	DNASE1L2	deoxyribonuclease I-like 2
hsa-miR-331-3p	0	0	0	1	0	0	JMJD7-PLA2G4B	JMJD7-PLA2G4B readthrough
hsa-miR-331-3p	0	0	0	1	0	0	LOC100131089	uncharacterized LOC100131089
hsa-miR-331-3p	0	0	0	1	0	0	IGLL3P	immunoglobulin lambda-like polypeptide 3, pseudogene
hsa-miR-331-3p	1	0	1	1	1	1	WHSC1	Wolf-Hirschhorn syndrome candidate 1
hsa-miR-331-3p	0	0	0	1	0	0	SLC7A4	solute carrier family 7 (orphan transporter), member 4
hsa-miR-331-3p	0	0	1	1	0	0	SNRNP25	small nuclear ribonucleoprotein 25kDa (U11/U12)
hsa-miR-331-3p	0	0	1	1	1	1	DUOX2	dual oxidase 2
hsa-miR-331-3p	0	0	0	1	0	0	RAB42	RAB42, member RAS oncogene family
hsa-miR-331-3p	1	0	1	1	1	1	NIPAL3	NIPA-like domain containing 3
hsa-miR-331-3p	0	0	0	1	0	0	GAA	glucosidase, alpha; acid
hsa-miR-331-3p	0	0	1	1	0	0	COL23A1	collagen, type XXIII, alpha 1
hsa-miR-331-3p	0	0	0	1	0	0	PRR22	proline rich 22
hsa-miR-331-3p	0	0	1	1	1	1	VHL	von Hippel-Lindau tumor suppressor, E3 ubiquitin protein ligase
hsa-miR-331-3p	1	0	1	1	1	1	DRD1	dopamine receptor D1
hsa-miR-331-3p	0	0	1	1	1	1	RPL13	ribosomal protein L13
hsa-miR-331-3p	0	0	1	1	1	1	FAM109B	family with sequence similarity 109, member B
hsa-miR-331-3p	1	0	0	1	1	1	SLC5A9	solute carrier family 5 (sodium/glucose cotransporter), member 9
hsa-miR-331-3p	0	0	1	1	1	1	SLC13A3	solute carrier family 13 (sodium-dependent dicarboxylate transporter), member 3
hsa-miR-331-3p	1	0	1	0	1	1	FIGNL2	fidgetin-like 2
hsa-miR-331-3p	1	0	1	0	1	1	HDAC5	histone deacetylase 5
hsa-miR-331-3p	1	0	1	1	1	1	CYLD	cylindromatosis (turban tumor syndrome)
hsa-miR-331-3p	1	0	1	1	1	1	ZNF436	zinc finger protein 436
hsa-miR-331-3p	1	0	1	0	1	1	UBXN2B	UBX domain protein 2B
hsa-miR-331-3p	1	0	1	1	1	1	HDAC2	histone deacetylase 2
hsa-miR-331-3p	1	0	1	1	1	1	MAFG	v-maf musculoaponeurotic fibrosarcoma oncogene homolog G (avian)
hsa-miR-331-3p	1	0	1	0	1	1	PRKCA	protein kinase C, alpha
hsa-miR-331-3p	0	0	1	1	1	1	SDC4	syndecan 4
hsa-miR-331-3p	1	0	1	1	1	1	SLC1A4	solute carrier family 1 (glutamate/neutral amino acid transporter), member 4
hsa-miR-331-3p	0	0	1	1	1	1	STX7	syntaxin 7
hsa-miR-331-3p	1	0	1	0	1	1	GAS7	growth arrest-specific 7
hsa-miR-331-3p	1	0	1	1	1	1	MYO1E	myosin IE
hsa-miR-331-3p	0	0	1	1	1	1	COG5	component of oligomeric golgi complex 5
hsa-miR-331-3p	1	0	1	1	1	1	UBL3	ubiquitin-like 3
hsa-miR-331-3p	1	0	1	1	1	1	CA5B	carbonic anhydrase VB, mitochondrial
hsa-miR-331-3p	0	0	1	0	1	1	CDC42EP4	CDC42 effector protein (Rho GTPase binding) 4
hsa-miR-331-3p	0	0	1	1	1	1	ANKRD6	ankyrin repeat domain 6
hsa-miR-331-3p	1	0	1	1	1	1	CEP164	centrosomal protein 164kDa
hsa-miR-331-3p	0	0	1	1	1	1	ICOSLG	inducible T-cell co-stimulator ligand
hsa-miR-331-3p	1	0	1	1	1	1	CAMK2A	calcium/calmodulin-dependent protein kinase II alpha
hsa-miR-331-3p	0	0	1	0	1	1	ZNF44	zinc finger protein 44
hsa-miR-331-3p	0	0	1	1	1	1	DHTKD1	dehydrogenase E1 and transketolase domain containing 1
hsa-miR-331-3p	0	0	1	1	1	1	AQP9	aquaporin 9
hsa-miR-331-3p	0	0	1	1	1	1	SH2D4A	SH2 domain containing 4A
hsa-miR-331-3p	1	0	1	0	1	1	OTUB2	OTU domain, ubiquitin aldehyde binding 2
hsa-miR-331-3p	1	0	0	0	1	1	C19orf42	chromosome 19 open reading frame 42
hsa-miR-331-3p	0	0	0	1	1	1	MCPH1	microcephalin 1
hsa-miR-331-3p	0	0	1	1	1	1	THSD4	thrombospondin, type I, domain containing 4
hsa-miR-331-3p	0	0	1	1	1	1	SPSB1	splA/ryanodine receptor domain and SOCS box containing 1
hsa-miR-331-3p	1	0	1	0	1	1	TTYH3	tweety homolog 3 (Drosophila)
hsa-miR-331-3p	1	0	1	1	1	1	POLDIP3	polymerase (DNA-directed), delta interacting protein 3
hsa-miR-331-3p	1	0	1	1	1	1	ING5	inhibitor of growth family, member 5
hsa-miR-331-3p	0	0	0	0	1	1	TSPAN18	tetraspanin 18
hsa-miR-331-3p	0	0	1	1	1	1	ZNF721	zinc finger protein 721
hsa-miR-331-3p	1	0	1	1	1	1	CCDC43	coiled-coil domain containing 43
hsa-miR-331-3p	0	0	1	1	1	1	ZFP3	zinc finger protein 3 homolog (mouse)
hsa-miR-331-3p	0	0	1	1	1	1	FBLN7	fibulin 7
hsa-miR-331-3p	0	0	0	1	1	1	P2RY8	purinergic receptor P2Y, G-protein coupled, 8
hsa-miR-331-3p	1	0	1	1	1	1	C15orf52	chromosome 15 open reading frame 52
hsa-miR-331-3p	0	0	0	0	1	1	LOC730338	uncharacterized LOC730338
