# Supplementary material for: Profiling of Selected MicroRNAs in Proliferative Eutopic Endometrium of Women with Ovarian Endometriosis
Source: Biomed Res Int. 2015 Aug 20;2015:760698. doi: 10.1155/2015/760698 (PMC4558423; doi:10.1155/2015/760698)
Supplement: Supplementary file 1 — Table I: The names of miRNAs significantly differentially expressed between eutopic endometrium of patients with endometriosis vs eutopic endometrium of patients without endometriosis. Table II: The associations between miRNA and mRNA, which presents detailed results of the search of six major databases i.e targetscan, tarbase, miranda, mirbase, mirtarget2 and pictar. [file 760698.f1.zip › 760698.f1/Table II/hsa-miR-331-5p.tsv]

miR	targetscan	tarbase	miranda	mirbase	mirtarget2	pictar	GeneSymbol	GeneName
hsa-miR-331-5p	1	0	1	1	1	1	PRUNE2	prune homolog 2 (Drosophila)
hsa-miR-331-5p	1	0	1	1	1	1	ABCC5	ATP-binding cassette, sub-family C (CFTR/MRP), member 5
hsa-miR-331-5p	1	0	1	0	1	1	KIAA0408	KIAA0408
hsa-miR-331-5p	1	0	1	0	1	1	NEDD4L	neural precursor cell expressed, developmentally down-regulated 4-like, E3 ubiquitin protein ligase
hsa-miR-331-5p	0	0	1	1	1	1	RABGAP1L	RAB GTPase activating protein 1-like
hsa-miR-331-5p	1	0	1	1	0	0	TBC1D12	TBC1 domain family, member 12
hsa-miR-331-5p	1	0	1	0	1	1	MFAP3L	microfibrillar-associated protein 3-like
hsa-miR-331-5p	1	0	1	1	1	1	DNM3	dynamin 3
hsa-miR-331-5p	1	0	1	1	1	1	CPEB3	cytoplasmic polyadenylation element binding protein 3
hsa-miR-331-5p	1	0	1	1	1	1	CIT	citron (rho-interacting, serine/threonine kinase 21)
hsa-miR-331-5p	0	0	1	1	1	1	TBC1D30	TBC1 domain family, member 30
hsa-miR-331-5p	1	0	1	1	1	1	RPGRIP1L	RPGRIP1-like
hsa-miR-331-5p	1	0	1	1	1	1	MKL2	MKL/myocardin-like 2
hsa-miR-331-5p	1	0	1	1	1	1	USP28	ubiquitin specific peptidase 28
hsa-miR-331-5p	0	0	1	1	1	1	PBLD	phenazine biosynthesis-like protein domain containing
hsa-miR-331-5p	1	0	1	1	1	1	IKZF4	IKAROS family zinc finger 4 (Eos)
hsa-miR-331-5p	1	0	1	1	1	1	LCOR	ligand dependent nuclear receptor corepressor
hsa-miR-331-5p	1	0	1	1	0	0	ZNF292	zinc finger protein 292
hsa-miR-331-5p	1	0	1	1	1	1	SH3TC2	SH3 domain and tetratricopeptide repeats 2
hsa-miR-331-5p	0	0	1	0	1	1	RASSF8	Ras association (RalGDS/AF-6) domain family (N-terminal) member 8
hsa-miR-331-5p	0	0	1	1	1	1	IL7	interleukin 7
hsa-miR-331-5p	1	0	1	1	1	1	PAN3	PAN3 poly(A) specific ribonuclease subunit homolog (S. cerevisiae)
hsa-miR-331-5p	1	1	1	1	1	1	BACE1	beta-site APP-cleaving enzyme 1
hsa-miR-331-5p	0	0	1	1	1	1	CAST	calpastatin
hsa-miR-331-5p	1	0	1	1	1	1	CCNF	cyclin F
hsa-miR-331-5p	1	0	1	0	1	1	PCDHA13	protocadherin alpha 13
hsa-miR-331-5p	1	0	1	1	1	1	PCDHA4	protocadherin alpha 4
hsa-miR-331-5p	0	0	1	1	0	0	TNNI3K	TNNI3 interacting kinase
hsa-miR-331-5p	0	0	1	1	0	0	SMARCC2	SWI/SNF related, matrix associated, actin dependent regulator of chromatin, subfamily c, member 2
hsa-miR-331-5p	1	0	1	1	1	1	PCCB	propionyl CoA carboxylase, beta polypeptide
hsa-miR-331-5p	0	0	1	1	1	1	MAZ	MYC-associated zinc finger protein (purine-binding transcription factor)
hsa-miR-331-5p	1	0	1	1	1	1	DTNA	dystrobrevin, alpha
hsa-miR-331-5p	1	0	1	1	1	1	EIF4G3	eukaryotic translation initiation factor 4 gamma, 3
hsa-miR-331-5p	1	0	1	0	1	1	PLAG1	pleiomorphic adenoma gene 1
hsa-miR-331-5p	1	0	1	1	1	1	TWF1	twinfilin, actin-binding protein, homolog 1 (Drosophila)
hsa-miR-331-5p	0	0	1	1	0	0	HTATSF1	HIV-1 Tat specific factor 1
hsa-miR-331-5p	1	0	1	1	1	1	EPHA5	EPH receptor A5
hsa-miR-331-5p	1	0	1	1	1	1	MYO5A	myosin VA (heavy chain 12, myoxin)
hsa-miR-331-5p	1	0	1	1	1	1	IPO8	importin 8
hsa-miR-331-5p	1	0	1	1	1	1	COL24A1	collagen, type XXIV, alpha 1
hsa-miR-331-5p	1	0	1	1	0	0	GRIN2A	glutamate receptor, ionotropic, N-methyl D-aspartate 2A
hsa-miR-331-5p	1	0	1	1	0	0	ARRB2	arrestin, beta 2
hsa-miR-331-5p	0	0	1	1	1	1	ELOVL5	ELOVL fatty acid elongase 5
hsa-miR-331-5p	1	0	1	1	1	1	ZFX	zinc finger protein, X-linked
hsa-miR-331-5p	1	0	1	0	1	1	FYB	FYN binding protein
hsa-miR-331-5p	1	0	1	1	1	1	DLGAP2	discs, large (Drosophila) homolog-associated protein 2
hsa-miR-331-5p	1	0	1	0	1	1	MLL2	myeloid/lymphoid or mixed-lineage leukemia 2
hsa-miR-331-5p	1	0	1	1	1	1	PCDH17	protocadherin 17
hsa-miR-331-5p	0	0	1	0	0	0	ZNRD1-AS1	ZNRD1 antisense RNA 1
hsa-miR-331-5p	1	0	1	1	1	1	MYT1L	myelin transcription factor 1-like
hsa-miR-331-5p	1	0	1	0	1	1	CELF2	CUGBP, Elav-like family member 2
hsa-miR-331-5p	0	0	1	0	1	1	C9orf91	chromosome 9 open reading frame 91
hsa-miR-331-5p	0	0	1	1	1	1	NAT6	N-acetyltransferase 6 (GCN5-related)
hsa-miR-331-5p	1	0	1	1	1	1	CTNND1	catenin (cadherin-associated protein), delta 1
hsa-miR-331-5p	0	0	1	1	1	1	SC5DL	sterol-C5-desaturase (ERG3 delta-5-desaturase homolog, S. cerevisiae)-like
hsa-miR-331-5p	0	0	1	1	1	1	PLEKHB1	pleckstrin homology domain containing, family B (evectins) member 1
hsa-miR-331-5p	0	0	1	1	1	1	GUCA1C	guanylate cyclase activator 1C
hsa-miR-331-5p	1	0	1	1	1	1	KAT6B	K(lysine) acetyltransferase 6B
hsa-miR-331-5p	1	0	1	0	1	1	CDK14	cyclin-dependent kinase 14
hsa-miR-331-5p	0	0	1	1	1	1	DHX16	DEAH (Asp-Glu-Ala-His) box polypeptide 16
hsa-miR-331-5p	1	0	1	1	1	1	CAB39	calcium binding protein 39
hsa-miR-331-5p	0	0	1	0	1	1	CLEC5A	C-type lectin domain family 5, member A
hsa-miR-331-5p	1	0	1	1	1	1	HTRA2	HtrA serine peptidase 2
hsa-miR-331-5p	1	0	1	1	1	1	HMG20A	high mobility group 20A
hsa-miR-331-5p	1	0	1	0	1	1	SLC34A2	solute carrier family 34 (sodium phosphate), member 2
hsa-miR-331-5p	1	0	1	1	0	0	TDRKH	tudor and KH domain containing
hsa-miR-331-5p	0	0	1	1	0	0	C3orf24	chromosome 3 open reading frame 24
hsa-miR-331-5p	0	0	1	1	1	1	NKX3-1	NK3 homeobox 1
hsa-miR-331-5p	0	0	1	0	1	1	ERBB2IP	erbb2 interacting protein
hsa-miR-331-5p	1	0	1	1	0	0	ZBTB37	zinc finger and BTB domain containing 37
hsa-miR-331-5p	1	0	1	1	1	1	BIVM	basic, immunoglobulin-like variable motif containing
hsa-miR-331-5p	0	0	1	1	1	1	MFSD1	major facilitator superfamily domain containing 1
hsa-miR-331-5p	1	0	1	1	1	1	LARP4	La ribonucleoprotein domain family, member 4
hsa-miR-331-5p	0	0	1	0	0	0	NBPF10	neuroblastoma breakpoint family, member 10
hsa-miR-331-5p	1	0	1	1	1	1	MAGI1	membrane associated guanylate kinase, WW and PDZ domain containing 1
hsa-miR-331-5p	0	0	1	0	0	0	MYO15B	myosin XVB pseudogene
hsa-miR-331-5p	1	0	1	1	0	0	FOXP2	forkhead box P2
hsa-miR-331-5p	1	0	1	0	1	1	PPP1R12A	protein phosphatase 1, regulatory subunit 12A
hsa-miR-331-5p	0	0	1	1	0	0	CLDN19	claudin 19
hsa-miR-331-5p	1	0	1	1	1	1	AFF2	AF4/FMR2 family, member 2
hsa-miR-331-5p	0	0	1	0	0	0	ADAM5	ADAM metallopeptidase domain 5, pseudogene
hsa-miR-331-5p	1	0	1	1	1	1	RAB3IP	RAB3A interacting protein (rabin3)
hsa-miR-331-5p	1	0	1	1	1	1	ARL4C	ADP-ribosylation factor-like 4C
hsa-miR-331-5p	1	0	1	1	1	1	PPP1R9A	protein phosphatase 1, regulatory subunit 9A
hsa-miR-331-5p	0	0	1	1	0	0	ASAP3	ArfGAP with SH3 domain, ankyrin repeat and PH domain 3
hsa-miR-331-5p	1	0	1	1	1	1	ENOX2	ecto-NOX disulfide-thiol exchanger 2
hsa-miR-331-5p	1	0	1	1	1	1	ZC3H7A	zinc finger CCCH-type containing 7A
hsa-miR-331-5p	0	0	1	1	1	1	RNF220	ring finger protein 220
hsa-miR-331-5p	1	0	1	0	1	1	CLIC4	chloride intracellular channel 4
hsa-miR-331-5p	1	0	1	1	0	0	SMUG1	single-strand-selective monofunctional uracil-DNA glycosylase 1
hsa-miR-331-5p	1	0	1	1	1	1	KLHDC8B	kelch domain containing 8B
hsa-miR-331-5p	0	0	1	1	0	0	ANAPC7	anaphase promoting complex subunit 7
hsa-miR-331-5p	0	0	1	1	0	0	UBR4	ubiquitin protein ligase E3 component n-recognin 4
hsa-miR-331-5p	1	0	1	1	1	1	MON2	MON2 homolog (S. cerevisiae)
hsa-miR-331-5p	1	0	1	1	1	1	S100PBP	S100P binding protein
hsa-miR-331-5p	0	0	1	1	1	1	VPRBP	Vpr (HIV-1) binding protein
hsa-miR-331-5p	0	0	1	1	0	0	BUB1	budding uninhibited by benzimidazoles 1 homolog (yeast)
hsa-miR-331-5p	0	0	1	0	0	0	LOC284561	uncharacterized LOC284561
hsa-miR-331-5p	1	0	1	1	1	1	DERL1	derlin 1
hsa-miR-331-5p	0	0	1	1	1	1	IPP	intracisternal A particle-promoted polypeptide
hsa-miR-331-5p	0	0	1	0	1	1	HEMK1	HemK methyltransferase family member 1
hsa-miR-331-5p	0	0	1	0	1	1	FLJ22447	uncharacterized LOC400221
hsa-miR-331-5p	1	0	1	1	0	0	SLAIN2	SLAIN motif family, member 2
hsa-miR-331-5p	1	0	1	1	1	1	DCAF8	DDB1 and CUL4 associated factor 8
hsa-miR-331-5p	1	0	1	0	1	1	TOX3	TOX high mobility group box family member 3
hsa-miR-331-5p	0	0	1	0	0	0	LOC729852	uncharacterized LOC729852
hsa-miR-331-5p	0	0	1	0	0	0	JAKMIP2-AS1	JAKMIP2 antisense RNA 1
hsa-miR-331-5p	0	0	1	1	0	0	FAM153B	family with sequence similarity 153, member B
hsa-miR-331-5p	0	0	1	0	0	0	CASC2	cancer susceptibility candidate 2 (non-protein coding)
hsa-miR-331-5p	0	0	1	1	0	0	ABHD16A	abhydrolase domain containing 16A
hsa-miR-331-5p	1	0	1	1	0	0	MEPCE	methylphosphate capping enzyme
hsa-miR-331-5p	1	0	1	1	1	1	RAI2	retinoic acid induced 2
hsa-miR-331-5p	1	0	1	1	1	1	SCAMP5	secretory carrier membrane protein 5
hsa-miR-331-5p	0	0	1	1	1	1	BRD2	bromodomain containing 2
hsa-miR-331-5p	1	0	1	1	1	1	CLCN5	chloride channel, voltage-sensitive 5
hsa-miR-331-5p	0	0	1	1	1	1	DST	dystonin
hsa-miR-331-5p	0	0	1	0	1	1	THAP6	THAP domain containing 6
hsa-miR-331-5p	1	0	1	1	1	1	MGAT1	mannosyl (alpha-1,3-)-glycoprotein beta-1,2-N-acetylglucosaminyltransferase
hsa-miR-331-5p	0	0	1	0	0	0	INTS4L1	integrator complex subunit 4-like 1
hsa-miR-331-5p	1	0	1	1	1	1	ANKRD29	ankyrin repeat domain 29
hsa-miR-331-5p	1	0	1	1	1	1	IST1	increased sodium tolerance 1 homolog (yeast)
hsa-miR-331-5p	0	0	1	1	0	0	ANKAR	ankyrin and armadillo repeat containing
hsa-miR-331-5p	0	0	1	1	1	1	PKIB	protein kinase (cAMP-dependent, catalytic) inhibitor beta
hsa-miR-331-5p	1	0	1	1	1	1	CNOT4	CCR4-NOT transcription complex, subunit 4
hsa-miR-331-5p	1	0	1	1	1	1	SIRT1	sirtuin 1
hsa-miR-331-5p	1	0	1	1	0	0	APBB3	amyloid beta (A4) precursor protein-binding, family B, member 3
hsa-miR-331-5p	0	0	1	1	0	0	PIGO	phosphatidylinositol glycan anchor biosynthesis, class O
hsa-miR-331-5p	1	0	1	1	1	1	BOC	Boc homolog (mouse)
hsa-miR-331-5p	0	0	1	0	1	1	TMSB15B	thymosin beta 15B
hsa-miR-331-5p	0	0	1	0	0	0	SEC14L2	SEC14-like 2 (S. cerevisiae)
hsa-miR-331-5p	1	0	1	1	1	1	SUPT16H	suppressor of Ty 16 homolog (S. cerevisiae)
hsa-miR-331-5p	1	0	1	1	1	1	LUC7L2	LUC7-like 2 (S. cerevisiae)
hsa-miR-331-5p	1	0	1	1	1	1	SPTBN1	spectrin, beta, non-erythrocytic 1
hsa-miR-331-5p	1	0	1	1	1	1	MCMBP	minichromosome maintenance complex binding protein
hsa-miR-331-5p	0	0	1	0	1	1	KANSL2	KAT8 regulatory NSL complex subunit 2
hsa-miR-331-5p	0	0	1	0	0	0	LINC00340	long intergenic non-protein coding RNA 340
hsa-miR-331-5p	0	0	1	1	0	0	CES4A	carboxylesterase 4A
hsa-miR-331-5p	0	0	1	1	1	1	C9orf47	chromosome 9 open reading frame 47
hsa-miR-331-5p	0	0	1	1	0	0	PPOX	protoporphyrinogen oxidase
hsa-miR-331-5p	0	0	1	1	1	1	SPAG16	sperm associated antigen 16
hsa-miR-331-5p	1	0	1	1	1	1	FAM222B	family with sequence similarity 222, member B
hsa-miR-331-5p	1	0	1	1	1	1	SPATS2	spermatogenesis associated, serine-rich 2
hsa-miR-331-5p	1	0	1	1	1	1	ALCAM	activated leukocyte cell adhesion molecule
hsa-miR-331-5p	0	0	1	1	1	1	AIMP1	aminoacyl tRNA synthetase complex-interacting multifunctional protein 1
hsa-miR-331-5p	1	0	1	0	1	1	KBTBD8	kelch repeat and BTB (POZ) domain containing 8
hsa-miR-331-5p	1	0	1	1	1	1	CDV3	CDV3 homolog (mouse)
hsa-miR-331-5p	0	0	1	0	0	0	LOC400680	uncharacterized LOC400680
hsa-miR-331-5p	0	0	1	0	0	0	LINC00293	long intergenic non-protein coding RNA 293
hsa-miR-331-5p	1	0	1	1	1	1	NSUN4	NOP2/Sun domain family, member 4
hsa-miR-331-5p	1	0	1	1	1	1	GOLGA8B	golgin A8 family, member B
hsa-miR-331-5p	0	0	1	1	0	0	AHCY	adenosylhomocysteinase
hsa-miR-331-5p	0	0	1	1	0	0	PSAPL1	prosaposin-like 1 (gene/pseudogene)
hsa-miR-331-5p	0	0	1	0	1	1	TNFAIP8	tumor necrosis factor, alpha-induced protein 8
hsa-miR-331-5p	0	0	1	1	1	1	POLR1D	polymerase (RNA) I polypeptide D, 16kDa
hsa-miR-331-5p	0	0	1	1	1	1	CPXCR1	CPX chromosome region, candidate 1
hsa-miR-331-5p	0	0	1	0	0	0	LOC338579	ankyrin repeat domain-containing protein 30B pseudogene
hsa-miR-331-5p	0	0	1	1	1	1	WDR64	WD repeat domain 64
hsa-miR-331-5p	0	0	1	1	1	1	RNF103	ring finger protein 103
hsa-miR-331-5p	0	0	1	1	0	0	SSPO	SCO-spondin homolog (Bos taurus)
hsa-miR-331-5p	0	0	1	0	0	0	MORN2	MORN repeat containing 2
hsa-miR-331-5p	0	0	1	1	1	1	CC2D2B	coiled-coil and C2 domain containing 2B
hsa-miR-331-5p	0	0	1	0	0	0	LGALS17A	Charcot-Leyden crystal protein pseudogene
hsa-miR-331-5p	0	0	1	1	1	1	ANKRD44	ankyrin repeat domain 44
hsa-miR-331-5p	1	0	1	1	1	1	SMAP1	small ArfGAP 1
hsa-miR-331-5p	1	0	1	1	1	1	ERBB3	v-erb-b2 erythroblastic leukemia viral oncogene homolog 3 (avian)
hsa-miR-331-5p	1	0	1	1	1	1	UBA2	ubiquitin-like modifier activating enzyme 2
hsa-miR-331-5p	1	0	1	0	1	1	CNTN2	contactin 2 (axonal)
hsa-miR-331-5p	0	0	1	1	1	1	C2orf91	chromosome 2 open reading frame 91
hsa-miR-331-5p	0	0	1	1	1	1	C3orf67	chromosome 3 open reading frame 67
hsa-miR-331-5p	0	0	1	0	0	0	TMEM232	transmembrane protein 232
hsa-miR-331-5p	0	0	1	0	1	1	PRELID2	PRELI domain containing 2
hsa-miR-331-5p	1	0	1	1	1	1	SH3BP5L	SH3-binding domain protein 5-like
hsa-miR-331-5p	0	0	1	0	0	0	FAM95B1	family with sequence similarity 95, member B1
hsa-miR-331-5p	0	0	1	1	1	1	EPPIN	epididymal peptidase inhibitor
hsa-miR-331-5p	0	0	1	0	1	1	LOC388942	uncharacterized LOC388942
hsa-miR-331-5p	1	0	1	0	1	1	GPR180	G protein-coupled receptor 180
hsa-miR-331-5p	1	0	1	1	0	0	SNX30	sorting nexin family member 30
hsa-miR-331-5p	1	0	1	1	1	1	CTNNA2	catenin (cadherin-associated protein), alpha 2
hsa-miR-331-5p	1	0	1	1	1	1	CXorf23	chromosome X open reading frame 23
hsa-miR-331-5p	1	0	1	0	1	1	FNDC3B	fibronectin type III domain containing 3B
hsa-miR-331-5p	1	0	1	1	1	1	AHRR	aryl-hydrocarbon receptor repressor
hsa-miR-331-5p	1	0	1	1	1	1	FRYL	FRY-like
hsa-miR-331-5p	1	0	1	1	1	1	SH3D19	SH3 domain containing 19
hsa-miR-331-5p	0	0	1	0	0	0	EMBP1	embigin pseudogene 1
hsa-miR-331-5p	1	0	1	1	1	1	ADAMTS19	ADAM metallopeptidase with thrombospondin type 1 motif, 19
hsa-miR-331-5p	1	0	1	1	0	0	ELN	elastin
hsa-miR-331-5p	0	0	1	1	1	1	TMEM202	transmembrane protein 202
hsa-miR-331-5p	0	0	1	0	0	0	LOC100124692	maltase-glucoamylase (alpha-glucosidase) pseudogene
hsa-miR-331-5p	1	0	1	1	1	1	LRRK2	leucine-rich repeat kinase 2
hsa-miR-331-5p	0	0	1	0	0	0	AGAP9	ArfGAP with GTPase domain, ankyrin repeat and PH domain 9
hsa-miR-331-5p	1	0	1	0	1	1	TMEM106B	transmembrane protein 106B
hsa-miR-331-5p	1	0	1	1	1	1	CYYR1	cysteine/tyrosine-rich 1
hsa-miR-331-5p	0	0	1	1	1	1	C5orf28	chromosome 5 open reading frame 28
hsa-miR-331-5p	1	0	1	1	1	1	MEAF6	MYST/Esa1-associated factor 6
hsa-miR-331-5p	1	0	1	0	1	1	MAP3K3	mitogen-activated protein kinase kinase kinase 3
hsa-miR-331-5p	1	0	1	1	1	1	PHTF2	putative homeodomain transcription factor 2
hsa-miR-331-5p	1	0	1	1	1	1	UPK1B	uroplakin 1B
hsa-miR-331-5p	1	0	1	1	1	1	AHCYL1	adenosylhomocysteinase-like 1
hsa-miR-331-5p	0	0	1	1	1	1	PTPN20B	protein tyrosine phosphatase, non-receptor type 20B
hsa-miR-331-5p	0	0	1	1	1	1	PTPN20A	protein tyrosine phosphatase, non-receptor type 20A
hsa-miR-331-5p	1	0	1	1	0	0	PRRC2B	proline-rich coiled-coil 2B
hsa-miR-331-5p	1	0	1	1	1	1	TAB2	TGF-beta activated kinase 1/MAP3K7 binding protein 2
hsa-miR-331-5p	0	0	1	1	0	0	TBC1D10B	TBC1 domain family, member 10B
hsa-miR-331-5p	0	0	1	0	0	0	POM121L8P	POM121 transmembrane nucleoporin-like 8 pseudogene
hsa-miR-331-5p	1	0	1	1	1	1	GOLGA8A	golgin A8 family, member A
hsa-miR-331-5p	1	0	1	1	1	1	ECT2	epithelial cell transforming sequence 2 oncogene
hsa-miR-331-5p	1	0	1	1	1	1	NBEA	neurobeachin
hsa-miR-331-5p	1	0	1	1	1	1	KIAA1033	KIAA1033
hsa-miR-331-5p	1	0	1	1	1	1	TFE3	transcription factor binding to IGHM enhancer 3
hsa-miR-331-5p	0	0	1	1	1	1	FILIP1	filamin A interacting protein 1
hsa-miR-331-5p	0	0	1	1	1	1	MYPN	myopalladin
hsa-miR-331-5p	1	0	1	0	1	1	GPAM	glycerol-3-phosphate acyltransferase, mitochondrial
hsa-miR-331-5p	1	0	1	0	1	1	MEF2C	myocyte enhancer factor 2C
hsa-miR-331-5p	0	0	1	1	1	1	NARG2	NMDA receptor regulated 2
hsa-miR-331-5p	1	0	1	1	1	1	CAMK4	calcium/calmodulin-dependent protein kinase IV
hsa-miR-331-5p	1	0	1	1	1	1	MARCH7	membrane-associated ring finger (C3HC4) 7, E3 ubiquitin protein ligase
hsa-miR-331-5p	0	0	1	1	1	1	TDRD9	tudor domain containing 9
hsa-miR-331-5p	1	0	1	1	1	1	MBD6	methyl-CpG binding domain protein 6
hsa-miR-331-5p	1	0	1	1	1	1	RICTOR	RPTOR independent companion of MTOR, complex 2
hsa-miR-331-5p	0	0	1	0	1	1	SYNPO2	synaptopodin 2
hsa-miR-331-5p	1	0	1	0	1	1	PHYHIPL	phytanoyl-CoA 2-hydroxylase interacting protein-like
hsa-miR-331-5p	0	0	1	0	0	0	KGFLP1	fibroblast growth factor 7 pseudogene
hsa-miR-331-5p	1	0	1	1	1	1	LUZP2	leucine zipper protein 2
hsa-miR-331-5p	0	0	1	1	1	1	APTX	aprataxin
hsa-miR-331-5p	1	0	1	1	1	1	CAMTA1	calmodulin binding transcription activator 1
hsa-miR-331-5p	0	0	1	1	1	1	GCOM1	GRINL1A complex locus 1
hsa-miR-331-5p	1	0	1	1	1	1	LRRTM3	leucine rich repeat transmembrane neuronal 3
hsa-miR-331-5p	0	0	1	1	0	0	VSIG4	V-set and immunoglobulin domain containing 4
hsa-miR-331-5p	0	0	1	1	0	0	GLIPR1L1	GLI pathogenesis-related 1 like 1
hsa-miR-331-5p	0	0	1	1	1	1	PLD5	phospholipase D family, member 5
hsa-miR-331-5p	1	0	1	1	1	1	HMGA2	high mobility group AT-hook 2
hsa-miR-331-5p	1	0	1	1	1	1	PFKFB4	6-phosphofructo-2-kinase/fructose-2,6-biphosphatase 4
hsa-miR-331-5p	1	0	1	1	1	1	QKI	QKI, KH domain containing, RNA binding
hsa-miR-331-5p	0	0	1	1	0	0	NBPF8	neuroblastoma breakpoint family, member 8
hsa-miR-331-5p	0	0	1	1	1	1	IL23R	interleukin 23 receptor
hsa-miR-331-5p	1	0	1	0	1	1	RASGRP1	RAS guanyl releasing protein 1 (calcium and DAG-regulated)
hsa-miR-331-5p	0	0	1	0	1	1	MIS12	MIS12, MIND kinetochore complex component, homolog (S. pombe)
hsa-miR-331-5p	0	0	1	1	0	0	DGUOK	deoxyguanosine kinase
hsa-miR-331-5p	0	0	1	1	1	1	ENOPH1	enolase-phosphatase 1
hsa-miR-331-5p	1	0	1	1	1	1	MYCN	v-myc myelocytomatosis viral related oncogene, neuroblastoma derived (avian)
hsa-miR-331-5p	0	0	1	1	0	0	ZNF576	zinc finger protein 576
hsa-miR-331-5p	1	0	1	1	1	1	ZNF410	zinc finger protein 410
hsa-miR-331-5p	1	0	1	1	0	0	POLR3D	polymerase (RNA) III (DNA directed) polypeptide D, 44kDa
hsa-miR-331-5p	1	0	1	0	0	0	TGFA	transforming growth factor, alpha
hsa-miR-331-5p	0	0	1	1	1	1	TMEM30A	transmembrane protein 30A
hsa-miR-331-5p	1	0	1	1	1	1	SZRD1	SUZ RNA binding domain containing 1
hsa-miR-331-5p	1	0	1	1	1	1	TRIM2	tripartite motif containing 2
hsa-miR-331-5p	0	0	1	1	1	1	HDHD2	haloacid dehalogenase-like hydrolase domain containing 2
hsa-miR-331-5p	0	0	1	1	1	1	RNF170	ring finger protein 170
hsa-miR-331-5p	0	0	1	1	0	0	PTPMT1	protein tyrosine phosphatase, mitochondrial 1
hsa-miR-331-5p	0	0	1	0	1	1	AHI1	Abelson helper integration site 1
hsa-miR-331-5p	0	0	1	1	1	1	C8orf33	chromosome 8 open reading frame 33
hsa-miR-331-5p	0	0	1	0	1	1	ZNF37A	zinc finger protein 37A
hsa-miR-331-5p	1	0	1	0	1	1	NR1D2	nuclear receptor subfamily 1, group D, member 2
hsa-miR-331-5p	0	0	1	1	0	0	DPY30	dpy-30 homolog (C. elegans)
hsa-miR-331-5p	1	0	1	0	1	1	CYBRD1	cytochrome b reductase 1
hsa-miR-331-5p	0	0	1	1	1	1	RDH11	retinol dehydrogenase 11 (all-trans/9-cis/11-cis)
hsa-miR-331-5p	0	0	1	0	0	0	FAM200B	family with sequence similarity 200, member B
hsa-miR-331-5p	0	0	1	1	1	1	SRP19	signal recognition particle 19kDa
hsa-miR-331-5p	0	0	1	1	1	1	PTCD2	pentatricopeptide repeat domain 2
hsa-miR-331-5p	0	0	1	0	1	1	CD99P1	CD99 molecule pseudogene 1
hsa-miR-331-5p	1	0	1	1	1	1	TAT	tyrosine aminotransferase
hsa-miR-331-5p	1	0	1	1	1	1	C11orf30	chromosome 11 open reading frame 30
hsa-miR-331-5p	0	0	1	1	0	0	SLC22A9	solute carrier family 22 (organic anion transporter), member 9
hsa-miR-331-5p	0	0	1	0	0	0	AZGP1P1	alpha-2-glycoprotein 1, zinc-binding pseudogene 1
hsa-miR-331-5p	0	0	1	1	1	1	ABCA8	ATP-binding cassette, sub-family A (ABC1), member 8
hsa-miR-331-5p	1	0	1	0	1	1	CDK19	cyclin-dependent kinase 19
hsa-miR-331-5p	0	0	1	1	1	1	CD48	CD48 molecule
hsa-miR-331-5p	0	0	1	1	1	1	TMEM117	transmembrane protein 117
hsa-miR-331-5p	0	0	1	1	1	1	PIP5K1B	phosphatidylinositol-4-phosphate 5-kinase, type I, beta
hsa-miR-331-5p	0	0	1	1	1	1	RBBP8	retinoblastoma binding protein 8
hsa-miR-331-5p	0	0	1	1	0	0	AGBL3	ATP/GTP binding protein-like 3
hsa-miR-331-5p	1	0	1	1	1	1	ADARB1	adenosine deaminase, RNA-specific, B1
hsa-miR-331-5p	1	0	1	1	1	1	MUM1L1	melanoma associated antigen (mutated) 1-like 1
hsa-miR-331-5p	1	0	1	1	1	1	PITPNB	phosphatidylinositol transfer protein, beta
hsa-miR-331-5p	0	0	1	0	0	0	WDFY3-AS2	WDFY3 antisense RNA 2
hsa-miR-331-5p	1	0	1	1	1	1	PCDHA5	protocadherin alpha 5
hsa-miR-331-5p	0	0	1	1	1	1	HEXA	hexosaminidase A (alpha polypeptide)
hsa-miR-331-5p	0	0	1	1	1	1	KIF16B	kinesin family member 16B
hsa-miR-331-5p	0	0	1	0	1	1	GPR155	G protein-coupled receptor 155
hsa-miR-331-5p	1	0	1	1	1	1	RAP2C	RAP2C, member of RAS oncogene family
hsa-miR-331-5p	0	0	1	0	0	0	C12orf77	chromosome 12 open reading frame 77
hsa-miR-331-5p	0	0	1	0	1	1	C9orf57	chromosome 9 open reading frame 57
hsa-miR-331-5p	0	0	1	1	1	1	FAM171B	family with sequence similarity 171, member B
hsa-miR-331-5p	1	0	1	1	1	1	ELMO2	engulfment and cell motility 2
hsa-miR-331-5p	0	0	1	1	1	1	EFCAB13	EF-hand calcium binding domain 13
hsa-miR-331-5p	0	0	1	1	1	1	C14orf118	chromosome 14 open reading frame 118
hsa-miR-331-5p	1	0	1	1	1	1	FGFR2	fibroblast growth factor receptor 2
hsa-miR-331-5p	0	0	1	0	0	0	LOC339622	uncharacterized LOC339622
hsa-miR-331-5p	1	0	1	0	1	1	PCSK2	proprotein convertase subtilisin/kexin type 2
hsa-miR-331-5p	0	0	1	1	1	1	SIAE	sialic acid acetylesterase
hsa-miR-331-5p	0	0	1	0	1	1	FAM13B	family with sequence similarity 13, member B
hsa-miR-331-5p	1	0	1	1	1	1	ARPP21	cAMP-regulated phosphoprotein, 21kDa
hsa-miR-331-5p	1	0	1	0	1	1	HSPA12A	heat shock 70kDa protein 12A
hsa-miR-331-5p	0	0	1	1	1	1	CARD8	caspase recruitment domain family, member 8
hsa-miR-331-5p	0	0	1	1	1	1	NSUN7	NOP2/Sun domain family, member 7
hsa-miR-331-5p	0	0	1	0	0	0	LOC283914	uncharacterized LOC283914
hsa-miR-331-5p	1	0	1	0	1	1	LYPD6	LY6/PLAUR domain containing 6
hsa-miR-331-5p	0	0	1	0	0	0	LOC348120	uncharacterized LOC348120
hsa-miR-331-5p	0	0	1	0	0	0	WASH2P	WAS protein family homolog 2 pseudogene
hsa-miR-331-5p	1	0	1	1	1	1	PELI1	pellino E3 ubiquitin protein ligase 1
hsa-miR-331-5p	1	0	1	0	1	1	ARHGAP5	Rho GTPase activating protein 5
hsa-miR-331-5p	0	0	1	1	0	0	SLC38A6	solute carrier family 38, member 6
hsa-miR-331-5p	1	0	1	1	0	0	KCNQ5	potassium voltage-gated channel, KQT-like subfamily, member 5
hsa-miR-331-5p	1	0	1	1	1	1	FNDC3A	fibronectin type III domain containing 3A
hsa-miR-331-5p	1	0	1	0	1	1	SEMA4G	sema domain, immunoglobulin domain (Ig), transmembrane domain (TM) and short cytoplasmic domain, (semaphorin) 4G
hsa-miR-331-5p	0	0	1	1	0	0	HYAL3	hyaluronoglucosaminidase 3
hsa-miR-331-5p	1	0	1	1	1	1	PCGF5	polycomb group ring finger 5
hsa-miR-331-5p	1	0	1	1	1	1	BZW2	basic leucine zipper and W2 domains 2
hsa-miR-331-5p	0	0	1	1	1	1	COG2	component of oligomeric golgi complex 2
hsa-miR-331-5p	1	0	1	1	1	1	OLFML2A	olfactomedin-like 2A
hsa-miR-331-5p	1	0	1	1	1	1	CCAR1	cell division cycle and apoptosis regulator 1
hsa-miR-331-5p	0	0	1	1	0	0	IFT88	intraflagellar transport 88 homolog (Chlamydomonas)
hsa-miR-331-5p	0	0	1	1	0	0	LRRIQ3	leucine-rich repeats and IQ motif containing 3
hsa-miR-331-5p	0	0	1	0	1	1	ASAP2	ArfGAP with SH3 domain, ankyrin repeat and PH domain 2
hsa-miR-331-5p	1	0	1	1	0	0	OSMR	oncostatin M receptor
hsa-miR-331-5p	0	0	1	1	0	0	DHX30	DEAH (Asp-Glu-Ala-His) box polypeptide 30
hsa-miR-331-5p	0	0	1	1	1	1	CAMLG	calcium modulating ligand
hsa-miR-331-5p	1	0	1	0	0	0	PRRT4	proline-rich transmembrane protein 4
hsa-miR-331-5p	1	0	1	1	1	1	MYLK	myosin light chain kinase
hsa-miR-331-5p	1	0	1	1	1	1	ADCY6	adenylate cyclase 6
hsa-miR-331-5p	1	0	1	1	1	1	IL15RA	interleukin 15 receptor, alpha
hsa-miR-331-5p	1	0	1	0	1	1	EML4	echinoderm microtubule associated protein like 4
hsa-miR-331-5p	0	0	1	1	1	1	SLAMF1	signaling lymphocytic activation molecule family member 1
hsa-miR-331-5p	0	0	1	0	0	0	PTGER4P2	prostaglandin E receptor 4 (subtype EP4) pseudogene 2
hsa-miR-331-5p	0	0	1	0	0	0	SPDYE8P	speedy homolog E8 (Xenopus laevis), pseudogene
hsa-miR-331-5p	1	0	1	0	1	1	SLC7A2	solute carrier family 7 (cationic amino acid transporter, y+ system), member 2
hsa-miR-331-5p	0	0	1	1	0	0	CYP4F30P	cytochrome P450, family 4, subfamily F, polypeptide 30, pseudogene
hsa-miR-331-5p	0	0	1	1	1	1	MSTO1	misato homolog 1 (Drosophila)
hsa-miR-331-5p	1	0	1	0	1	1	HMGB3	high mobility group box 3
hsa-miR-331-5p	1	0	1	0	1	1	TMEM194A	transmembrane protein 194A
hsa-miR-331-5p	1	0	1	1	1	1	PARP8	poly (ADP-ribose) polymerase family, member 8
hsa-miR-331-5p	0	0	1	1	0	0	EDDM3A	epididymal protein 3A
hsa-miR-331-5p	0	0	1	1	1	1	PARPBP	PARP1 binding protein
hsa-miR-331-5p	1	0	1	1	1	1	SLC36A2	solute carrier family 36 (proton/amino acid symporter), member 2
hsa-miR-331-5p	1	0	1	1	1	1	HNRNPA1	heterogeneous nuclear ribonucleoprotein A1
hsa-miR-331-5p	1	0	1	1	1	1	ARFIP1	ADP-ribosylation factor interacting protein 1
hsa-miR-331-5p	1	0	1	1	0	0	KIAA1644	KIAA1644
hsa-miR-331-5p	0	0	1	0	1	1	FLJ25328	uncharacterized LOC148231
hsa-miR-331-5p	1	0	1	1	1	1	GABRB2	gamma-aminobutyric acid (GABA) A receptor, beta 2
hsa-miR-331-5p	1	0	1	1	1	1	PNISR	PNN-interacting serine/arginine-rich protein
hsa-miR-331-5p	0	0	1	1	1	1	TTN	titin
hsa-miR-331-5p	1	0	1	0	1	1	BTBD3	BTB (POZ) domain containing 3
hsa-miR-331-5p	1	0	1	1	1	1	SHANK2	SH3 and multiple ankyrin repeat domains 2
hsa-miR-331-5p	1	0	1	1	1	1	OTUD4	OTU domain containing 4
hsa-miR-331-5p	1	0	1	1	1	1	TRAPPC8	trafficking protein particle complex 8
hsa-miR-331-5p	1	0	1	1	1	1	MACROD2	MACRO domain containing 2
hsa-miR-331-5p	0	0	1	1	0	0	HSF4	heat shock transcription factor 4
hsa-miR-331-5p	0	0	1	0	0	0	FAM225B	family with sequence similarity 225, member B (non-protein coding)
hsa-miR-331-5p	1	0	1	1	1	1	EXD2	exonuclease 3'-5' domain containing 2
hsa-miR-331-5p	0	0	1	1	1	1	TINF2	TERF1 (TRF1)-interacting nuclear factor 2
hsa-miR-331-5p	1	0	1	1	1	1	SASH1	SAM and SH3 domain containing 1
hsa-miR-331-5p	1	0	1	1	1	1	MIER3	mesoderm induction early response 1, family member 3
hsa-miR-331-5p	0	0	1	0	0	0	RGPD4	RANBP2-like and GRIP domain containing 4
hsa-miR-331-5p	1	0	1	0	1	1	MTX3	metaxin 3
hsa-miR-331-5p	1	0	1	1	1	1	RORB	RAR-related orphan receptor B
hsa-miR-331-5p	0	0	1	0	0	0	LINC00240	long intergenic non-protein coding RNA 240
hsa-miR-331-5p	1	0	1	1	1	1	STARD13	StAR-related lipid transfer (START) domain containing 13
hsa-miR-331-5p	1	0	1	1	1	1	DDAH1	dimethylarginine dimethylaminohydrolase 1
hsa-miR-331-5p	1	0	1	1	1	1	NAV1	neuron navigator 1
hsa-miR-331-5p	1	0	1	0	1	1	IGF2BP3	insulin-like growth factor 2 mRNA binding protein 3
hsa-miR-331-5p	1	0	1	1	1	1	C5orf24	chromosome 5 open reading frame 24
hsa-miR-331-5p	0	0	1	1	1	1	ABCD3	ATP-binding cassette, sub-family D (ALD), member 3
hsa-miR-331-5p	1	0	1	0	1	1	TBL1XR1	transducin (beta)-like 1 X-linked receptor 1
hsa-miR-331-5p	1	0	1	1	1	1	LYST	lysosomal trafficking regulator
hsa-miR-331-5p	1	0	1	1	1	1	BSDC1	BSD domain containing 1
hsa-miR-331-5p	0	0	1	0	0	0	LINC00341	long intergenic non-protein coding RNA 341
hsa-miR-331-5p	0	0	1	1	1	1	CHEK1	checkpoint kinase 1
hsa-miR-331-5p	0	0	1	1	1	1	TMEM53	transmembrane protein 53
hsa-miR-331-5p	0	0	1	1	0	0	STAMBP	STAM binding protein
hsa-miR-331-5p	1	0	1	1	1	1	FGF11	fibroblast growth factor 11
hsa-miR-331-5p	1	0	1	1	0	0	CRELD1	cysteine-rich with EGF-like domains 1
hsa-miR-331-5p	0	0	1	1	1	1	CHCHD4	coiled-coil-helix-coiled-coil-helix domain containing 4
hsa-miR-331-5p	1	0	1	1	1	1	CAAP1	caspase activity and apoptosis inhibitor 1
hsa-miR-331-5p	1	0	1	1	1	1	SSR1	signal sequence receptor, alpha
hsa-miR-331-5p	1	0	1	1	1	1	CHTF8	CTF8, chromosome transmission fidelity factor 8 homolog (S. cerevisiae)
hsa-miR-331-5p	1	0	1	1	1	1	WDYHV1	WDYHV motif containing 1
hsa-miR-331-5p	0	0	1	0	1	1	WASH3P	WAS protein family homolog 3 pseudogene
hsa-miR-331-5p	1	0	1	1	1	1	NUP160	nucleoporin 160kDa
hsa-miR-331-5p	1	0	1	1	1	1	STK38L	serine/threonine kinase 38 like
hsa-miR-331-5p	0	0	1	1	0	0	C11orf73	chromosome 11 open reading frame 73
hsa-miR-331-5p	0	0	1	1	1	1	EIF3J	eukaryotic translation initiation factor 3, subunit J
hsa-miR-331-5p	0	0	1	1	1	1	POLR2G	polymerase (RNA) II (DNA directed) polypeptide G
hsa-miR-331-5p	1	0	1	1	1	1	MGST3	microsomal glutathione S-transferase 3
hsa-miR-331-5p	0	0	1	1	0	0	RNASEH2B	ribonuclease H2, subunit B
hsa-miR-331-5p	0	0	1	1	1	1	CAPZB	capping protein (actin filament) muscle Z-line, beta
hsa-miR-331-5p	0	0	1	0	0	0	LOC645513	uncharacterized LOC645513
hsa-miR-331-5p	1	0	1	1	1	1	FUBP3	far upstream element (FUSE) binding protein 3
hsa-miR-331-5p	1	0	1	1	1	1	METAP2	methionyl aminopeptidase 2
hsa-miR-331-5p	1	0	1	1	1	1	ARL4A	ADP-ribosylation factor-like 4A
hsa-miR-331-5p	0	0	1	1	1	1	CD1C	CD1c molecule
hsa-miR-331-5p	0	0	1	1	1	1	EMC4	ER membrane protein complex subunit 4
hsa-miR-331-5p	0	0	1	1	1	1	PTGES	prostaglandin E synthase
hsa-miR-331-5p	1	0	1	1	1	1	SRSF2	serine/arginine-rich splicing factor 2
hsa-miR-331-5p	0	0	1	1	0	0	CTSW	cathepsin W
hsa-miR-331-5p	1	0	1	1	1	1	TMBIM6	transmembrane BAX inhibitor motif containing 6
hsa-miR-331-5p	0	0	1	0	0	0	LOC100132984	uncharacterized LOC100132984
hsa-miR-331-5p	1	0	1	1	1	1	SLC37A3	solute carrier family 37 (glycerol-3-phosphate transporter), member 3
hsa-miR-331-5p	0	0	1	1	0	0	IL11RA	interleukin 11 receptor, alpha
hsa-miR-331-5p	1	0	1	1	1	1	SERF2	small EDRK-rich factor 2
hsa-miR-331-5p	0	0	1	0	0	0	LOC731789	uncharacterized LOC731789
hsa-miR-331-5p	1	0	1	1	1	1	SLC39A10	solute carrier family 39 (zinc transporter), member 10
hsa-miR-331-5p	1	0	1	1	1	1	ZFHX3	zinc finger homeobox 3
hsa-miR-331-5p	1	0	1	0	1	1	KLHDC10	kelch domain containing 10
hsa-miR-331-5p	1	0	1	0	1	1	RBBP5	retinoblastoma binding protein 5
hsa-miR-331-5p	1	0	1	0	1	1	DCBLD2	discoidin, CUB and LCCL domain containing 2
hsa-miR-331-5p	0	0	1	1	1	1	PROS1	protein S (alpha)
hsa-miR-331-5p	1	0	1	1	1	1	LGR4	leucine-rich repeat containing G protein-coupled receptor 4
hsa-miR-331-5p	0	0	1	1	1	1	KLRG1	killer cell lectin-like receptor subfamily G, member 1
hsa-miR-331-5p	1	0	1	1	1	1	ATP2B2	ATPase, Ca++ transporting, plasma membrane 2
hsa-miR-331-5p	1	0	1	1	1	1	AFF1	AF4/FMR2 family, member 1
hsa-miR-331-5p	1	0	1	1	1	1	CCNG2	cyclin G2
hsa-miR-331-5p	1	0	1	0	1	1	ACVR2A	activin A receptor, type IIA
hsa-miR-331-5p	0	0	1	1	1	1	ATP7A	ATPase, Cu++ transporting, alpha polypeptide
hsa-miR-331-5p	1	0	1	1	1	1	COL4A3	collagen, type IV, alpha 3 (Goodpasture antigen)
hsa-miR-331-5p	1	0	1	1	1	1	CPOX	coproporphyrinogen oxidase
hsa-miR-331-5p	0	0	1	1	0	0	FSHR	follicle stimulating hormone receptor
hsa-miR-331-5p	1	0	1	1	1	1	FUT1	fucosyltransferase 1 (galactoside 2-alpha-L-fucosyltransferase, H blood group)
hsa-miR-331-5p	1	0	1	1	1	1	GJA1	gap junction protein, alpha 1, 43kDa
hsa-miR-331-5p	0	0	1	1	1	1	MAOA	monoamine oxidase A
hsa-miR-331-5p	0	0	1	1	1	1	PAH	phenylalanine hydroxylase
hsa-miR-331-5p	1	0	1	1	1	1	ATXN1	ataxin 1
hsa-miR-331-5p	1	0	1	1	1	1	IL1A	interleukin 1, alpha
hsa-miR-331-5p	1	0	1	0	1	1	ABAT	4-aminobutyrate aminotransferase
hsa-miR-331-5p	1	0	1	0	1	1	ADRB1	adrenoceptor beta 1
hsa-miR-331-5p	1	0	1	1	1	1	GRM1	glutamate receptor, metabotropic 1
hsa-miR-331-5p	1	0	1	1	1	1	IGF1R	insulin-like growth factor 1 receptor
hsa-miR-331-5p	1	0	1	0	1	1	KCNJ2	potassium inwardly-rectifying channel, subfamily J, member 2
hsa-miR-331-5p	1	0	1	0	1	1	SPOPL	speckle-type POZ protein-like
hsa-miR-331-5p	1	0	1	0	1	1	ARHGEF37	Rho guanine nucleotide exchange factor (GEF) 37
hsa-miR-331-5p	1	0	1	0	1	1	PLEKHA1	pleckstrin homology domain containing, family A (phosphoinositide binding specific) member 1
hsa-miR-331-5p	0	0	1	0	0	0	KLK2	kallikrein-related peptidase 2
hsa-miR-331-5p	0	0	1	1	1	1	TRIM6-TRIM34	TRIM6-TRIM34 readthrough
hsa-miR-331-5p	0	0	1	1	1	1	TRIM34	tripartite motif containing 34
hsa-miR-331-5p	1	0	1	0	1	1	BMF	Bcl2 modifying factor
hsa-miR-331-5p	0	0	1	1	1	1	ZCCHC16	zinc finger, CCHC domain containing 16
hsa-miR-331-5p	0	0	1	0	1	1	FLJ16124	FLJ16124 protein
hsa-miR-331-5p	1	0	1	0	1	1	LRRC55	leucine rich repeat containing 55
hsa-miR-331-5p	1	0	1	1	1	1	EBF3	early B-cell factor 3
hsa-miR-331-5p	0	0	1	1	1	1	RYK	receptor-like tyrosine kinase
hsa-miR-331-5p	1	0	1	1	1	1	BRWD1	bromodomain and WD repeat domain containing 1
hsa-miR-331-5p	0	0	1	1	1	1	TRIM13	tripartite motif containing 13
hsa-miR-331-5p	0	0	1	1	0	0	F8A3	coagulation factor VIII-associated 3
hsa-miR-331-5p	1	0	1	0	1	1	C18orf25	chromosome 18 open reading frame 25
hsa-miR-331-5p	1	0	1	1	1	1	FNIP1	folliculin interacting protein 1
hsa-miR-331-5p	0	0	1	1	1	1	GCSAM	germinal center-associated, signaling and motility
hsa-miR-331-5p	0	0	1	1	1	1	C12orf29	chromosome 12 open reading frame 29
hsa-miR-331-5p	1	0	1	0	1	1	FYTTD1	forty-two-three domain containing 1
hsa-miR-331-5p	1	0	1	0	1	1	CREB5	cAMP responsive element binding protein 5
hsa-miR-331-5p	1	0	1	1	1	1	SORCS1	sortilin-related VPS10 domain containing receptor 1
hsa-miR-331-5p	0	0	1	1	1	1	C2orf68	chromosome 2 open reading frame 68
hsa-miR-331-5p	1	0	1	1	1	1	RUNX2	runt-related transcription factor 2
hsa-miR-331-5p	1	0	1	0	1	1	TFEC	transcription factor EC
hsa-miR-331-5p	0	0	1	1	1	1	POLR2M	polymerase (RNA) II (DNA directed) polypeptide M
hsa-miR-331-5p	1	0	1	0	1	1	RGAG4	retrotransposon gag domain containing 4
hsa-miR-331-5p	1	0	1	1	1	1	TPD52	tumor protein D52
hsa-miR-331-5p	1	0	1	1	1	1	SLC35F1	solute carrier family 35, member F1
hsa-miR-331-5p	1	0	1	1	1	1	OPN5	opsin 5
hsa-miR-331-5p	1	0	1	1	1	1	SRSF7	serine/arginine-rich splicing factor 7
hsa-miR-331-5p	1	0	1	1	1	1	CSNK1G3	casein kinase 1, gamma 3
hsa-miR-331-5p	1	0	1	1	1	1	TFAP2A	transcription factor AP-2 alpha (activating enhancer binding protein 2 alpha)
hsa-miR-331-5p	1	0	1	0	1	1	SRGAP3	SLIT-ROBO Rho GTPase activating protein 3
hsa-miR-331-5p	1	0	1	1	1	1	ZNF704	zinc finger protein 704
hsa-miR-331-5p	1	0	1	1	1	1	ACPL2	acid phosphatase-like 2
hsa-miR-331-5p	1	0	1	1	1	1	KIAA0317	KIAA0317
hsa-miR-331-5p	1	0	1	0	1	1	CREBZF	CREB/ATF bZIP transcription factor
hsa-miR-331-5p	0	0	1	1	1	1	MDH1B	malate dehydrogenase 1B, NAD (soluble)
hsa-miR-331-5p	1	0	1	1	1	1	RUFY2	RUN and FYVE domain containing 2
hsa-miR-331-5p	1	0	1	1	1	1	SLC9A6	solute carrier family 9, subfamily A (NHE6, cation proton antiporter 6), member 6
hsa-miR-331-5p	1	0	1	1	1	1	KDM5A	lysine (K)-specific demethylase 5A
hsa-miR-331-5p	1	0	1	1	1	1	PVRL2	poliovirus receptor-related 2 (herpesvirus entry mediator B)
hsa-miR-331-5p	1	0	1	1	1	1	FAM155A	family with sequence similarity 155, member A
hsa-miR-331-5p	1	0	1	1	1	1	MGA	MAX gene associated
hsa-miR-331-5p	0	0	1	1	1	1	G6PC2	glucose-6-phosphatase, catalytic, 2
hsa-miR-331-5p	1	0	1	1	1	1	ASIC1	acid-sensing (proton-gated) ion channel 1
hsa-miR-331-5p	0	0	1	1	1	1	ADSS	adenylosuccinate synthase
hsa-miR-331-5p	0	0	1	1	1	1	CLIC2	chloride intracellular channel 2
hsa-miR-331-5p	1	0	1	1	1	1	ELAVL1	ELAV (embryonic lethal, abnormal vision, Drosophila)-like 1 (Hu antigen R)
hsa-miR-331-5p	0	0	1	0	1	1	FMO2	flavin containing monooxygenase 2 (non-functional)
hsa-miR-331-5p	0	0	1	1	1	1	IL13RA1	interleukin 13 receptor, alpha 1
hsa-miR-331-5p	1	0	1	1	1	1	IRAK2	interleukin-1 receptor-associated kinase 2
hsa-miR-331-5p	1	0	1	1	1	1	ATP6V1A	ATPase, H+ transporting, lysosomal 70kDa, V1 subunit A
hsa-miR-331-5p	1	0	1	1	1	1	BTG1	B-cell translocation gene 1, anti-proliferative
hsa-miR-331-5p	0	0	1	1	1	1	CD1D	CD1d molecule
hsa-miR-331-5p	1	0	1	1	1	1	CDC25A	cell division cycle 25 homolog A (S. pombe)
hsa-miR-331-5p	1	0	1	1	1	1	CDH5	cadherin 5, type 2 (vascular endothelium)
hsa-miR-331-5p	1	0	1	0	1	1	COL19A1	collagen, type XIX, alpha 1
hsa-miR-331-5p	0	0	1	1	1	1	GADD45A	growth arrest and DNA-damage-inducible, alpha
hsa-miR-331-5p	1	0	1	1	1	1	DPP4	dipeptidyl-peptidase 4
hsa-miR-331-5p	1	0	1	1	1	1	FGF7	fibroblast growth factor 7
hsa-miR-331-5p	0	0	1	0	1	1	GYPA	glycophorin A (MNS blood group)
hsa-miR-331-5p	1	0	1	1	1	1	INSM1	insulinoma-associated 1
hsa-miR-331-5p	0	0	1	0	1	1	ITGAV	integrin, alpha V
hsa-miR-331-5p	1	0	1	1	1	1	ITGB8	integrin, beta 8
hsa-miR-331-5p	1	0	1	1	1	1	KCNA6	potassium voltage-gated channel, shaker-related subfamily, member 6
hsa-miR-331-5p	1	0	1	1	1	1	KPNA3	karyopherin alpha 3 (importin alpha 4)
hsa-miR-331-5p	1	0	1	0	1	1	LAMC1	laminin, gamma 1 (formerly LAMB2)
hsa-miR-331-5p	1	0	1	1	1	1	LIFR	leukemia inhibitory factor receptor alpha
hsa-miR-331-5p	1	0	1	1	1	1	MSN	moesin
hsa-miR-331-5p	1	0	1	1	1	1	NEUROD1	neuronal differentiation 1
hsa-miR-331-5p	0	0	1	1	1	1	NOV	nephroblastoma overexpressed
hsa-miR-331-5p	0	0	1	0	1	1	OPHN1	oligophrenin 1
hsa-miR-331-5p	0	0	1	1	1	1	PAFAH1B2	platelet-activating factor acetylhydrolase 1b, catalytic subunit 2 (30kDa)
hsa-miR-331-5p	1	0	1	1	1	1	PLAGL2	pleiomorphic adenoma gene-like 2
hsa-miR-331-5p	0	0	1	1	0	0	PPBP	pro-platelet basic protein (chemokine (C-X-C motif) ligand 7)
hsa-miR-331-5p	0	0	1	1	1	1	PPP1R3A	protein phosphatase 1, regulatory subunit 3A
hsa-miR-331-5p	1	0	1	1	1	1	PTPRJ	protein tyrosine phosphatase, receptor type, J
hsa-miR-331-5p	1	0	1	1	1	1	CCL21	chemokine (C-C motif) ligand 21
hsa-miR-331-5p	1	0	1	1	1	1	SRSF3	serine/arginine-rich splicing factor 3
hsa-miR-331-5p	1	0	1	0	1	1	SOX11	SRY (sex determining region Y)-box 11
hsa-miR-331-5p	0	0	1	1	1	1	SRP54	signal recognition particle 54kDa
hsa-miR-331-5p	1	0	1	0	1	1	STC1	stanniocalcin 1
hsa-miR-331-5p	0	0	1	1	1	1	STIM1	stromal interaction molecule 1
hsa-miR-331-5p	1	0	1	0	1	1	RPS6KB1	ribosomal protein S6 kinase, 70kDa, polypeptide 1
hsa-miR-331-5p	1	0	1	1	1	1	TEC	tec protein tyrosine kinase
hsa-miR-331-5p	1	0	1	1	1	1	TFAP2B	transcription factor AP-2 beta (activating enhancer binding protein 2 beta)
hsa-miR-331-5p	1	0	1	1	1	1	TIAM1	T-cell lymphoma invasion and metastasis 1
hsa-miR-331-5p	1	0	1	1	1	1	TSPAN6	tetraspanin 6
hsa-miR-331-5p	1	0	1	0	1	1	YWHAB	tyrosine 3-monooxygenase/tryptophan 5-monooxygenase activation protein, beta polypeptide
hsa-miR-331-5p	1	0	1	1	1	1	ZIC3	Zic family member 3
hsa-miR-331-5p	1	0	1	1	1	1	CUL5	cullin 5
hsa-miR-331-5p	1	0	1	0	1	1	TNKS	tankyrase, TRF1-interacting ankyrin-related ADP-ribose polymerase
hsa-miR-331-5p	1	0	1	1	1	1	ADAM9	ADAM metallopeptidase domain 9
hsa-miR-331-5p	1	0	1	0	1	1	ST13	suppression of tumorigenicity 13 (colon carcinoma) (Hsp70 interacting protein)
hsa-miR-331-5p	1	0	1	0	1	1	WASL	Wiskott-Aldrich syndrome-like
hsa-miR-331-5p	0	0	1	1	1	1	MPZL1	myelin protein zero-like 1
hsa-miR-331-5p	0	0	1	1	0	0	NPR2	natriuretic peptide receptor B/guanylate cyclase B (atrionatriuretic peptide receptor B)
hsa-miR-331-5p	1	0	1	1	1	1	PPP2CB	protein phosphatase 2, catalytic subunit, beta isozyme
hsa-miR-331-5p	1	0	1	0	1	1	SLC1A2	solute carrier family 1 (glial high affinity glutamate transporter), member 2
hsa-miR-331-5p	0	0	1	1	1	1	COL12A1	collagen, type XII, alpha 1
hsa-miR-331-5p	1	0	1	1	1	1	DUSP1	dual specificity phosphatase 1
hsa-miR-331-5p	1	0	1	1	1	1	EPHA4	EPH receptor A4
hsa-miR-331-5p	1	0	1	1	1	1	EPS8	epidermal growth factor receptor pathway substrate 8
hsa-miR-331-5p	1	0	1	0	1	1	USP9Y	ubiquitin specific peptidase 9, Y-linked
hsa-miR-331-5p	1	0	1	1	1	1	XPR1	xenotropic and polytropic retrovirus receptor 1
hsa-miR-331-5p	1	0	1	1	1	1	RPS6KA5	ribosomal protein S6 kinase, 90kDa, polypeptide 5
hsa-miR-331-5p	0	0	1	1	0	0	ASIC3	acid-sensing (proton-gated) ion channel 3
hsa-miR-331-5p	0	0	1	0	1	1	ADIPOQ	adiponectin, C1Q and collagen domain containing
hsa-miR-331-5p	1	0	1	1	1	1	KIF3B	kinesin family member 3B
hsa-miR-331-5p	0	0	1	1	1	1	CYP7B1	cytochrome P450, family 7, subfamily B, polypeptide 1
hsa-miR-331-5p	1	0	1	1	1	1	ONECUT2	one cut homeobox 2
hsa-miR-331-5p	1	0	1	1	1	1	KIF23	kinesin family member 23
hsa-miR-331-5p	1	0	1	0	1	1	DOCK3	dedicator of cytokinesis 3
hsa-miR-331-5p	1	0	1	1	1	1	GABRE	gamma-aminobutyric acid (GABA) A receptor, epsilon
hsa-miR-331-5p	1	0	1	0	1	1	KRAS	v-Ki-ras2 Kirsten rat sarcoma viral oncogene homolog
hsa-miR-331-5p	1	0	1	1	1	1	RELN	reelin
hsa-miR-331-5p	0	0	1	1	1	1	PSMD5	proteasome (prosome, macropain) 26S subunit, non-ATPase, 5
hsa-miR-331-5p	0	0	1	1	1	1	RGPD5	RANBP2-like and GRIP domain containing 5
hsa-miR-331-5p	1	0	1	0	1	1	SEL1L	sel-1 suppressor of lin-12-like (C. elegans)
hsa-miR-331-5p	0	0	1	1	1	1	AKAP17A	A kinase (PRKA) anchor protein 17A
hsa-miR-331-5p	0	0	1	1	0	0	HR	hairless homolog (mouse)
hsa-miR-331-5p	1	0	1	1	1	1	DCC	deleted in colorectal carcinoma
hsa-miR-331-5p	1	0	1	1	1	1	FOXG1	forkhead box G1
hsa-miR-331-5p	1	0	1	1	1	1	HAS2	hyaluronan synthase 2
hsa-miR-331-5p	1	0	1	0	1	1	PRKAB2	protein kinase, AMP-activated, beta 2 non-catalytic subunit
hsa-miR-331-5p	0	0	1	1	1	1	CXCL11	chemokine (C-X-C motif) ligand 11
hsa-miR-331-5p	1	0	1	1	1	1	MED6	mediator complex subunit 6
hsa-miR-331-5p	1	0	1	1	1	1	TOM1L1	target of myb1 (chicken)-like 1
hsa-miR-331-5p	1	0	1	1	1	1	ABCA1	ATP-binding cassette, sub-family A (ABC1), member 1
hsa-miR-331-5p	1	0	1	1	1	1	LPP	LIM domain containing preferred translocation partner in lipoma
hsa-miR-331-5p	1	0	1	1	1	1	RGS4	regulator of G-protein signaling 4
hsa-miR-331-5p	1	0	1	1	1	1	ST8SIA4	ST8 alpha-N-acetyl-neuraminide alpha-2,8-sialyltransferase 4
hsa-miR-331-5p	0	0	1	1	1	1	RNF41	ring finger protein 41
hsa-miR-331-5p	1	0	1	0	1	1	SPRY3	sprouty homolog 3 (Drosophila)
hsa-miR-331-5p	0	0	1	0	1	1	HCAR3	hydroxycarboxylic acid receptor 3
hsa-miR-331-5p	0	0	1	1	1	1	TRDN	triadin
hsa-miR-331-5p	0	0	1	1	0	0	LGALS4	lectin, galactoside-binding, soluble, 4
hsa-miR-331-5p	1	0	1	1	1	1	ENPP1	ectonucleotide pyrophosphatase/phosphodiesterase 1
hsa-miR-331-5p	1	0	1	1	1	1	RANBP2	RAN binding protein 2
hsa-miR-331-5p	1	0	1	1	1	1	BASP1	brain abundant, membrane attached signal protein 1
hsa-miR-331-5p	0	0	1	1	0	0	RBM14	RNA binding motif protein 14
hsa-miR-331-5p	0	0	1	1	1	1	CAP2	CAP, adenylate cyclase-associated protein, 2 (yeast)
hsa-miR-331-5p	1	0	1	1	1	1	NEBL	nebulette
hsa-miR-331-5p	1	0	1	1	1	1	CDC42EP3	CDC42 effector protein (Rho GTPase binding) 3
hsa-miR-331-5p	1	0	1	0	1	1	IGF2BP1	insulin-like growth factor 2 mRNA binding protein 1
hsa-miR-331-5p	1	0	1	1	1	1	MAP3K2	mitogen-activated protein kinase kinase kinase 2
hsa-miR-331-5p	1	0	1	1	1	1	PGRMC1	progesterone receptor membrane component 1
hsa-miR-331-5p	0	0	1	1	1	1	LYVE1	lymphatic vessel endothelial hyaluronan receptor 1
hsa-miR-331-5p	1	0	1	1	1	1	DIAPH2	diaphanous homolog 2 (Drosophila)
hsa-miR-331-5p	0	0	1	1	1	1	SYPL1	synaptophysin-like 1
hsa-miR-331-5p	0	0	1	1	1	1	ASCC3	activating signal cointegrator 1 complex subunit 3
hsa-miR-331-5p	1	0	1	1	1	1	B3GNT1	UDP-GlcNAc:betaGal beta-1,3-N-acetylglucosaminyltransferase 1
hsa-miR-331-5p	1	0	1	1	1	1	CD86	CD86 molecule
hsa-miR-331-5p	1	0	1	1	1	1	PRRX1	paired related homeobox 1
hsa-miR-331-5p	1	0	1	1	1	1	RIT1	Ras-like without CAAX 1
hsa-miR-331-5p	1	0	1	0	1	1	SLC2A3	solute carrier family 2 (facilitated glucose transporter), member 3
hsa-miR-331-5p	1	0	1	1	1	1	UBL3	ubiquitin-like 3
hsa-miR-331-5p	0	0	1	1	1	1	USH2A	Usher syndrome 2A (autosomal recessive, mild)
hsa-miR-331-5p	1	0	1	0	1	1	CHP1	calcineurin-like EF hand protein 1
hsa-miR-331-5p	1	0	1	0	1	1	FZD4	frizzled family receptor 4
hsa-miR-331-5p	1	0	1	1	1	1	RHOQ	ras homolog family member Q
hsa-miR-331-5p	1	0	1	1	1	1	HEY2	hairy/enhancer-of-split related with YRPW motif 2
hsa-miR-331-5p	1	0	1	1	1	1	HS2ST1	heparan sulfate 2-O-sulfotransferase 1
hsa-miR-331-5p	0	0	1	1	1	1	IL36RN	interleukin 36 receptor antagonist
hsa-miR-331-5p	1	0	1	1	1	1	KCND2	potassium voltage-gated channel, Shal-related subfamily, member 2
hsa-miR-331-5p	0	0	1	0	1	1	PITPNC1	phosphatidylinositol transfer protein, cytoplasmic 1
hsa-miR-331-5p	1	0	1	1	1	1	TRPC5	transient receptor potential cation channel, subfamily C, member 5
hsa-miR-331-5p	1	0	1	1	1	1	SLC25A24	solute carrier family 25 (mitochondrial carrier; phosphate carrier), member 24
hsa-miR-331-5p	1	0	1	1	1	1	LAMP2	lysosomal-associated membrane protein 2
hsa-miR-331-5p	0	0	1	1	1	1	SNX24	sorting nexin 24
hsa-miR-331-5p	0	0	1	1	1	1	GTPBP8	GTP-binding protein 8 (putative)
hsa-miR-331-5p	0	0	1	1	1	1	TRAM1	translocation associated membrane protein 1
hsa-miR-331-5p	1	0	1	1	1	1	SLC7A11	solute carrier family 7 (anionic amino acid transporter light chain, xc- system), member 11
hsa-miR-331-5p	0	0	1	1	1	1	ZNF318	zinc finger protein 318
hsa-miR-331-5p	1	0	1	1	1	1	GCC2	GRIP and coiled-coil domain containing 2
hsa-miR-331-5p	1	0	1	0	1	1	EDEM1	ER degradation enhancer, mannosidase alpha-like 1
hsa-miR-331-5p	0	0	1	1	1	1	AQR	aquarius homolog (mouse)
hsa-miR-331-5p	1	0	1	0	1	1	MLEC	malectin
hsa-miR-331-5p	1	0	1	1	1	1	JAKMIP2	janus kinase and microtubule interacting protein 2
hsa-miR-331-5p	1	0	1	1	1	1	RUSC2	RUN and SH3 domain containing 2
hsa-miR-331-5p	1	0	1	1	1	1	FCHSD2	FCH and double SH3 domains 2
hsa-miR-331-5p	1	0	1	1	1	1	ARHGAP44	Rho GTPase activating protein 44
hsa-miR-331-5p	1	0	1	0	1	1	WDFY3	WD repeat and FYVE domain containing 3
hsa-miR-331-5p	1	0	1	1	1	1	RAB21	RAB21, member RAS oncogene family
hsa-miR-331-5p	1	0	1	1	1	1	TRAK2	trafficking protein, kinesin binding 2
hsa-miR-331-5p	1	0	1	1	1	1	ERP44	endoplasmic reticulum protein 44
hsa-miR-331-5p	0	0	1	1	1	1	NBPF14	neuroblastoma breakpoint family, member 14
hsa-miR-331-5p	1	0	1	1	1	1	MOB4	MOB family member 4, phocein
hsa-miR-331-5p	0	0	1	1	1	1	ZNF10	zinc finger protein 10
hsa-miR-331-5p	0	0	1	1	0	0	DPCD	deleted in primary ciliary dyskinesia homolog (mouse)
hsa-miR-331-5p	1	0	1	1	1	1	NSL1	NSL1, MIND kinetochore complex component, homolog (S. cerevisiae)
hsa-miR-331-5p	1	0	1	1	1	1	KIAA1429	KIAA1429
hsa-miR-331-5p	1	0	1	1	1	1	CHD5	chromodomain helicase DNA binding protein 5
hsa-miR-331-5p	1	0	1	1	1	1	LTN1	listerin E3 ubiquitin protein ligase 1
hsa-miR-331-5p	1	0	1	1	1	1	HOOK1	hook homolog 1 (Drosophila)
hsa-miR-331-5p	1	0	1	0	1	1	TRIM33	tripartite motif containing 33
hsa-miR-331-5p	1	0	1	1	1	1	TAF9B	TAF9B RNA polymerase II, TATA box binding protein (TBP)-associated factor, 31kDa
hsa-miR-331-5p	0	0	1	1	1	1	PPIL1	peptidylprolyl isomerase (cyclophilin)-like 1
hsa-miR-331-5p	0	0	1	1	1	1	MRPS33	mitochondrial ribosomal protein S33
hsa-miR-331-5p	0	0	1	1	1	1	EMCN	endomucin
hsa-miR-331-5p	0	0	1	1	1	1	HSD17B11	hydroxysteroid (17-beta) dehydrogenase 11
hsa-miR-331-5p	1	0	1	0	1	1	HPCAL4	hippocalcin like 4
hsa-miR-331-5p	1	0	1	1	1	1	RNF138	ring finger protein 138, E3 ubiquitin protein ligase
hsa-miR-331-5p	0	0	1	1	1	1	CD244	CD244 molecule, natural killer cell receptor 2B4
hsa-miR-331-5p	1	0	1	1	1	1	PHF20	PHD finger protein 20
hsa-miR-331-5p	1	0	1	1	1	1	WAC	WW domain containing adaptor with coiled-coil
hsa-miR-331-5p	0	0	1	1	1	1	SHC3	SHC (Src homology 2 domain containing) transforming protein 3
hsa-miR-331-5p	1	0	1	1	1	1	GALNT7	UDP-N-acetyl-alpha-D-galactosamine:polypeptide N-acetylgalactosaminyltransferase 7 (GalNAc-T7)
hsa-miR-331-5p	1	0	1	1	0	0	DUOX1	dual oxidase 1
hsa-miR-331-5p	1	0	1	1	1	1	DIRAS2	DIRAS family, GTP-binding RAS-like 2
hsa-miR-331-5p	1	0	1	1	1	1	MBTD1	mbt domain containing 1
hsa-miR-331-5p	0	0	1	1	1	1	MTMR8	myotubularin related protein 8
hsa-miR-331-5p	1	0	1	1	1	1	LPPR1	lipid phosphate phosphatase-related protein type 1
hsa-miR-331-5p	1	0	1	0	1	1	CHD7	chromodomain helicase DNA binding protein 7
hsa-miR-331-5p	1	0	1	1	1	1	RNF125	ring finger protein 125, E3 ubiquitin protein ligase
hsa-miR-331-5p	0	0	1	1	1	1	C1orf27	chromosome 1 open reading frame 27
hsa-miR-331-5p	1	0	1	1	1	1	C9orf40	chromosome 9 open reading frame 40
hsa-miR-331-5p	1	0	1	0	1	1	CCDC88A	coiled-coil domain containing 88A
hsa-miR-331-5p	0	0	1	1	1	1	TMEM38B	transmembrane protein 38B
hsa-miR-331-5p	1	0	1	1	1	1	RFWD3	ring finger and WD repeat domain 3
hsa-miR-331-5p	1	0	1	1	1	1	UBA6	ubiquitin-like modifier activating enzyme 6
hsa-miR-331-5p	0	0	1	1	1	1	ADI1	acireductone dioxygenase 1
hsa-miR-331-5p	1	0	1	1	1	1	AGPAT5	1-acylglycerol-3-phosphate O-acyltransferase 5 (lysophosphatidic acid acyltransferase, epsilon)
hsa-miR-331-5p	0	0	1	1	1	1	STYK1	serine/threonine/tyrosine kinase 1
hsa-miR-331-5p	0	0	1	0	0	0	KDM3A	lysine (K)-specific demethylase 3A
hsa-miR-331-5p	1	0	1	1	1	1	ETNK1	ethanolamine kinase 1
hsa-miR-331-5p	1	0	1	0	1	1	PCDHAC1	protocadherin alpha subfamily C, 1
hsa-miR-331-5p	1	0	1	0	1	1	PCDHAC2	protocadherin alpha subfamily C, 2
hsa-miR-331-5p	1	0	1	1	1	1	PCDHA1	protocadherin alpha 1
hsa-miR-331-5p	1	0	1	0	1	1	PCDHA10	protocadherin alpha 10
hsa-miR-331-5p	1	0	1	0	1	1	PCDHA11	protocadherin alpha 11
hsa-miR-331-5p	1	0	1	0	1	1	PCDHA12	protocadherin alpha 12
hsa-miR-331-5p	1	0	1	1	1	1	PCDHA2	protocadherin alpha 2
hsa-miR-331-5p	1	0	1	1	1	1	PCDHA3	protocadherin alpha 3
hsa-miR-331-5p	1	0	1	1	1	1	PCDHA6	protocadherin alpha 6
hsa-miR-331-5p	1	0	1	0	1	1	PCDHA7	protocadherin alpha 7
hsa-miR-331-5p	1	0	1	1	1	1	PCDHA8	protocadherin alpha 8
hsa-miR-331-5p	1	0	1	0	1	1	FAM190B	family with sequence similarity 190, member B
hsa-miR-331-5p	1	0	1	0	1	1	CCDC93	coiled-coil domain containing 93
hsa-miR-331-5p	1	0	1	1	1	1	PLEKHA3	pleckstrin homology domain containing, family A (phosphoinositide binding specific) member 3
hsa-miR-331-5p	1	0	1	0	1	1	CNGB3	cyclic nucleotide gated channel beta 3
hsa-miR-331-5p	0	0	1	1	1	1	UBQLN4	ubiquilin 4
hsa-miR-331-5p	1	0	1	1	1	1	WRNIP1	Werner helicase interacting protein 1
hsa-miR-331-5p	0	0	1	1	1	1	TMEM167B	transmembrane protein 167B
hsa-miR-331-5p	1	0	1	0	1	1	PAPOLB	poly(A) polymerase beta (testis specific)
hsa-miR-331-5p	1	0	1	1	1	1	NMUR2	neuromedin U receptor 2
hsa-miR-331-5p	0	0	1	1	1	1	CMC2	COX assembly mitochondrial protein 2 homolog (S. cerevisiae)
hsa-miR-331-5p	0	0	1	1	1	1	HRASLS	HRAS-like suppressor
hsa-miR-331-5p	1	0	1	1	1	1	PCDH9	protocadherin 9
hsa-miR-331-5p	0	0	1	1	1	1	PLXDC1	plexin domain containing 1
hsa-miR-331-5p	1	0	1	1	0	0	THAP11	THAP domain containing 11
hsa-miR-331-5p	1	0	1	1	1	1	NRIP3	nuclear receptor interacting protein 3
hsa-miR-331-5p	1	0	1	1	1	1	RAB22A	RAB22A, member RAS oncogene family
hsa-miR-331-5p	1	0	1	0	1	1	SYT4	synaptotagmin IV
hsa-miR-331-5p	1	0	1	1	1	1	PCDH10	protocadherin 10
hsa-miR-331-5p	1	0	1	1	1	1	CNTN3	contactin 3 (plasmacytoma associated)
hsa-miR-331-5p	0	0	1	1	1	1	BCOR	BCL6 corepressor
hsa-miR-331-5p	1	0	1	1	1	1	HCN1	hyperpolarization activated cyclic nucleotide-gated potassium channel 1
hsa-miR-331-5p	0	0	1	1	1	1	RNASEL	ribonuclease L (2',5'-oligoisoadenylate synthetase-dependent)
hsa-miR-331-5p	1	0	1	1	1	1	KCNK10	potassium channel, subfamily K, member 10
hsa-miR-331-5p	1	0	1	1	1	1	RPRD1B	regulation of nuclear pre-mRNA domain containing 1B
hsa-miR-331-5p	1	0	1	1	1	1	DHX35	DEAH (Asp-Glu-Ala-His) box polypeptide 35
hsa-miR-331-5p	0	0	1	1	1	1	TCTA	T-cell leukemia translocation altered
hsa-miR-331-5p	1	0	1	1	1	1	SUDS3	suppressor of defective silencing 3 homolog (S. cerevisiae)
hsa-miR-331-5p	1	0	1	1	1	1	GIGYF1	GRB10 interacting GYF protein 1
hsa-miR-331-5p	1	0	1	0	1	1	ELOVL4	ELOVL fatty acid elongase 4
hsa-miR-331-5p	0	0	1	0	1	1	NAIP	NLR family, apoptosis inhibitory protein
hsa-miR-331-5p	1	0	1	1	1	1	REEP1	receptor accessory protein 1
hsa-miR-331-5p	1	0	1	1	1	1	SOWAHC	sosondowah ankyrin repeat domain family member C
hsa-miR-331-5p	1	0	1	1	0	0	UBE2Z	ubiquitin-conjugating enzyme E2Z
hsa-miR-331-5p	0	0	1	1	0	0	IRX3	iroquois homeobox 3
hsa-miR-331-5p	0	0	1	1	1	1	AKIRIN1	akirin 1
hsa-miR-331-5p	0	0	1	0	1	1	ZYG11B	zyg-11 homolog B (C. elegans)
hsa-miR-331-5p	0	0	1	1	1	1	WDR78	WD repeat domain 78
hsa-miR-331-5p	1	0	1	1	1	1	CLMP	CXADR-like membrane protein
hsa-miR-331-5p	1	0	1	1	1	1	PIP4K2C	phosphatidylinositol-5-phosphate 4-kinase, type II, gamma
hsa-miR-331-5p	1	0	1	1	1	1	CPED1	cadherin-like and PC-esterase domain containing 1
hsa-miR-331-5p	0	0	1	1	1	1	DOCK5	dedicator of cytokinesis 5
hsa-miR-331-5p	1	0	1	0	1	1	VCPIP1	valosin containing protein (p97)/p47 complex interacting protein 1
hsa-miR-331-5p	1	0	1	1	1	1	NAA50	N(alpha)-acetyltransferase 50, NatE catalytic subunit
hsa-miR-331-5p	1	0	1	1	1	1	TRIB1	tribbles homolog 1 (Drosophila)
hsa-miR-331-5p	0	0	1	0	1	1	PDGFD	platelet derived growth factor D
hsa-miR-331-5p	1	0	1	0	1	1	SETD7	SET domain containing (lysine methyltransferase) 7
hsa-miR-331-5p	0	0	1	1	1	1	BCL2L14	BCL2-like 14 (apoptosis facilitator)
hsa-miR-331-5p	1	0	1	1	1	1	SGPP1	sphingosine-1-phosphate phosphatase 1
hsa-miR-331-5p	1	0	1	1	1	1	MAP4	microtubule-associated protein 4
hsa-miR-331-5p	0	0	1	1	1	1	TEX15	testis expressed 15
hsa-miR-331-5p	1	0	1	1	1	1	GABARAPL1	GABA(A) receptor-associated protein like 1
hsa-miR-331-5p	1	0	1	1	1	1	FAM103A1	family with sequence similarity 103, member A1
hsa-miR-331-5p	1	0	1	0	1	1	SH3BGRL2	SH3 domain binding glutamic acid-rich protein like 2
hsa-miR-331-5p	1	0	1	1	1	1	PCDHA9	protocadherin alpha 9
hsa-miR-331-5p	1	0	1	1	1	1	FBXO30	F-box protein 30
hsa-miR-331-5p	1	0	1	1	1	1	DSEL	dermatan sulfate epimerase-like
hsa-miR-331-5p	1	0	1	1	1	1	ARID5B	AT rich interactive domain 5B (MRF1-like)
hsa-miR-331-5p	1	0	1	0	1	1	FAR1	fatty acyl CoA reductase 1
hsa-miR-331-5p	1	0	1	1	1	1	SLITRK6	SLIT and NTRK-like family, member 6
hsa-miR-331-5p	1	0	1	1	0	0	MAF1	MAF1 homolog (S. cerevisiae)
hsa-miR-331-5p	0	0	1	1	1	1	MNF1	mitochondrial nucleoid factor 1
hsa-miR-331-5p	1	0	1	1	1	1	BRMS1L	breast cancer metastasis-suppressor 1-like
hsa-miR-331-5p	1	0	1	0	1	1	INA	internexin neuronal intermediate filament protein, alpha
hsa-miR-331-5p	1	0	1	1	1	1	ABHD13	abhydrolase domain containing 13
hsa-miR-331-5p	1	0	1	1	1	1	ARHGAP19	Rho GTPase activating protein 19
hsa-miR-331-5p	1	0	1	1	1	1	PDGFA	platelet-derived growth factor alpha polypeptide
hsa-miR-331-5p	0	0	1	1	1	1	ZIC5	Zic family member 5
hsa-miR-331-5p	1	0	1	0	1	1	FGF5	fibroblast growth factor 5
hsa-miR-331-5p	1	0	1	1	1	1	TP53INP1	tumor protein p53 inducible nuclear protein 1
hsa-miR-331-5p	1	0	1	1	1	1	TPD52L3	tumor protein D52-like 3
hsa-miR-331-5p	1	0	1	1	1	1	SLC2A13	solute carrier family 2 (facilitated glucose transporter), member 13
hsa-miR-331-5p	1	0	1	1	1	1	MAL2	mal, T-cell differentiation protein 2 (gene/pseudogene)
hsa-miR-331-5p	1	0	1	1	1	1	NAA15	N(alpha)-acetyltransferase 15, NatA auxiliary subunit
hsa-miR-331-5p	1	0	1	0	1	1	ANTXR2	anthrax toxin receptor 2
hsa-miR-331-5p	0	0	1	1	0	0	WNT8A	wingless-type MMTV integration site family, member 8A
hsa-miR-331-5p	0	0	1	1	1	1	CBLN4	cerebellin 4 precursor
hsa-miR-331-5p	0	0	1	1	1	1	PABPC5	poly(A) binding protein, cytoplasmic 5
hsa-miR-331-5p	1	0	1	1	1	1	ZAK	sterile alpha motif and leucine zipper containing kinase AZK
hsa-miR-331-5p	1	0	1	1	1	1	GNPDA2	glucosamine-6-phosphate deaminase 2
hsa-miR-331-5p	0	0	1	1	1	1	MRAP2	melanocortin 2 receptor accessory protein 2
hsa-miR-331-5p	0	0	1	1	1	1	C1orf213	chromosome 1 open reading frame 213
hsa-miR-331-5p	1	0	1	0	1	1	FCHO2	FCH domain only 2
hsa-miR-331-5p	1	0	1	1	1	1	MSI2	musashi homolog 2 (Drosophila)
hsa-miR-331-5p	0	0	1	0	1	1	SLC17A8	solute carrier family 17 (sodium-dependent inorganic phosphate cotransporter), member 8
hsa-miR-331-5p	0	0	1	1	1	1	GTSF1	gametocyte specific factor 1
hsa-miR-331-5p	1	0	1	1	1	1	SAMD8	sterile alpha motif domain containing 8
hsa-miR-331-5p	0	0	1	1	1	1	RANBP3L	RAN binding protein 3-like
hsa-miR-331-5p	0	0	1	0	1	1	UBLCP1	ubiquitin-like domain containing CTD phosphatase 1
hsa-miR-331-5p	1	0	1	1	1	1	UBQLNL	ubiquilin-like
hsa-miR-331-5p	0	0	1	1	0	0	SENP8	SUMO/sentrin specific peptidase family member 8
hsa-miR-331-5p	0	0	1	1	1	1	APOBEC3F	apolipoprotein B mRNA editing enzyme, catalytic polypeptide-like 3F
hsa-miR-331-5p	0	0	1	1	0	0	KLK12	kallikrein-related peptidase 12
hsa-miR-331-5p	1	0	1	1	1	1	UBTD2	ubiquitin domain containing 2
hsa-miR-331-5p	1	0	1	1	1	1	POGLUT1	protein O-glucosyltransferase 1
hsa-miR-331-5p	0	0	1	1	1	1	SNX31	sorting nexin 31
hsa-miR-331-5p	1	0	1	0	1	1	FAM116A	family with sequence similarity 116, member A
hsa-miR-331-5p	0	0	1	1	1	1	DNAJC18	DnaJ (Hsp40) homolog, subfamily C, member 18
hsa-miR-331-5p	1	0	1	0	1	1	ZBTB9	zinc finger and BTB domain containing 9
hsa-miR-331-5p	0	0	1	1	0	0	ZDHHC20	zinc finger, DHHC-type containing 20
hsa-miR-331-5p	1	0	1	1	0	0	TMEM86A	transmembrane protein 86A
hsa-miR-331-5p	0	0	1	1	1	1	REXO1L1	REX1, RNA exonuclease 1 homolog (S. cerevisiae)-like 1
hsa-miR-331-5p	1	0	1	1	1	1	MMGT1	membrane magnesium transporter 1
hsa-miR-331-5p	1	0	1	0	1	1	PGM2L1	phosphoglucomutase 2-like 1
hsa-miR-331-5p	0	0	1	1	1	1	ZCCHC12	zinc finger, CCHC domain containing 12
hsa-miR-331-5p	1	0	1	1	1	1	SYT9	synaptotagmin IX
hsa-miR-331-5p	0	0	1	1	1	1	CHSY3	chondroitin sulfate synthase 3
hsa-miR-331-5p	0	0	1	1	1	1	MRPL43	mitochondrial ribosomal protein L43
hsa-miR-331-5p	1	0	1	1	1	1	STX12	syntaxin 12
hsa-miR-331-5p	0	0	1	0	1	1	ITGA1	integrin, alpha 1
hsa-miR-331-5p	1	0	1	1	1	1	NF2	neurofibromin 2 (merlin)
hsa-miR-331-5p	0	0	1	1	0	0	NUDT8	nudix (nucleoside diphosphate linked moiety X)-type motif 8
hsa-miR-331-5p	1	0	1	1	1	1	TMEM229B	transmembrane protein 229B
hsa-miR-331-5p	0	0	1	0	1	1	NBPF11	neuroblastoma breakpoint family, member 11
hsa-miR-331-5p	1	0	1	1	1	1	ARRDC4	arrestin domain containing 4
hsa-miR-331-5p	1	0	1	1	1	1	TMEM65	transmembrane protein 65
hsa-miR-331-5p	1	0	1	1	1	1	E2F6	E2F transcription factor 6
hsa-miR-331-5p	1	0	1	0	1	1	ZC3H6	zinc finger CCCH-type containing 6
hsa-miR-331-5p	1	0	1	1	1	1	PTGER3	prostaglandin E receptor 3 (subtype EP3)
hsa-miR-331-5p	0	0	1	1	1	1	COL25A1	collagen, type XXV, alpha 1
hsa-miR-331-5p	1	0	1	0	1	1	LHFPL3	lipoma HMGIC fusion partner-like 3
hsa-miR-331-5p	0	0	1	1	1	1	ILDR2	immunoglobulin-like domain containing receptor 2
hsa-miR-331-5p	1	0	1	0	1	1	CAPRIN1	cell cycle associated protein 1
hsa-miR-331-5p	0	0	1	1	1	1	SPINK6	serine peptidase inhibitor, Kazal type 6
hsa-miR-331-5p	0	0	1	1	1	1	ZNF474	zinc finger protein 474
hsa-miR-331-5p	0	0	1	1	0	0	TMPRSS11F	transmembrane protease, serine 11F
hsa-miR-331-5p	0	0	1	0	0	0	ST13P4	suppression of tumorigenicity 13 (colon carcinoma) (Hsp70 interacting protein) pseudogene 4
hsa-miR-331-5p	0	0	1	0	0	0	ST13P6	suppression of tumorigenicity 13 (colon carcinoma) (Hsp70 interacting protein) pseudogene 6
hsa-miR-331-5p	0	0	1	0	0	0	TRIM78P	tripartite motif containing 78, pseudogene
hsa-miR-331-5p	0	0	1	0	0	0	PER4	period homolog 3 (Drosophila) pseudogene
hsa-miR-331-5p	0	0	1	0	0	0	NEAT1	nuclear paraspeckle assembly transcript 1 (non-protein coding)
hsa-miR-331-5p	0	0	1	0	0	0	HAS2-AS1	HAS2 antisense RNA 1
hsa-miR-331-5p	0	0	1	0	0	0	CLEC4GP1	C-type lectin domain family 4, member G pseudogene 1
hsa-miR-331-5p	0	0	1	0	0	0	HNRNPA1P10	heterogeneous nuclear ribonucleoprotein A1 pseudogene 10
hsa-miR-331-5p	0	0	1	0	0	0	SNORA30	small nucleolar RNA, H/ACA box 30
hsa-miR-331-5p	0	0	1	0	0	0	NBR2	neighbor of BRCA1 gene 2 (non-protein coding)
hsa-miR-331-5p	0	0	1	0	0	0	HSP90B3P	heat shock protein 90kDa beta (Grp94), member 3, pseudogene
hsa-miR-331-5p	0	0	1	0	0	0	MST1P9	macrophage stimulating 1 (hepatocyte growth factor-like) pseudogene 9
hsa-miR-331-5p	0	0	1	1	0	0	MUC1	mucin 1, cell surface associated
hsa-miR-331-5p	1	0	0	1	0	0	PDK2	pyruvate dehydrogenase kinase, isozyme 2
hsa-miR-331-5p	0	0	1	1	1	1	SS18L2	synovial sarcoma translocation gene on chromosome 18-like 2
hsa-miR-331-5p	1	0	1	1	1	1	PSD	pleckstrin and Sec7 domain containing
hsa-miR-331-5p	0	0	1	1	0	0	VDAC3	voltage-dependent anion channel 3
hsa-miR-331-5p	0	0	1	1	1	1	PIGQ	phosphatidylinositol glycan anchor biosynthesis, class Q
hsa-miR-331-5p	0	0	1	1	0	0	DNAH2	dynein, axonemal, heavy chain 2
hsa-miR-331-5p	0	0	1	1	1	1	BCAR1	breast cancer anti-estrogen resistance 1
hsa-miR-331-5p	0	0	1	1	0	0	BPIFB2	BPI fold containing family B, member 2
hsa-miR-331-5p	0	0	1	1	0	0	ADAM7	ADAM metallopeptidase domain 7
hsa-miR-331-5p	1	0	1	1	1	1	CLIC5	chloride intracellular channel 5
hsa-miR-331-5p	1	0	1	1	0	0	ITGB4	integrin, beta 4
hsa-miR-331-5p	0	0	0	1	0	0	FLT3LG	fms-related tyrosine kinase 3 ligand
hsa-miR-331-5p	0	0	0	1	0	0	LGALS2	lectin, galactoside-binding, soluble, 2
hsa-miR-331-5p	0	0	1	1	0	0	TXN2	thioredoxin 2
hsa-miR-331-5p	1	0	1	1	1	1	EFS	embryonal Fyn-associated substrate
hsa-miR-331-5p	0	0	1	1	0	0	CPNE6	copine VI (neuronal)
hsa-miR-331-5p	0	0	1	1	1	1	LBP	lipopolysaccharide binding protein
hsa-miR-331-5p	0	0	1	1	1	1	STMN2	stathmin-like 2
hsa-miR-331-5p	1	0	1	1	0	0	PNPLA6	patatin-like phospholipase domain containing 6
hsa-miR-331-5p	0	0	1	1	1	1	PLAUR	plasminogen activator, urokinase receptor
hsa-miR-331-5p	0	0	1	1	0	0	CEACAM3	carcinoembryonic antigen-related cell adhesion molecule 3
hsa-miR-331-5p	0	0	1	1	0	0	RABAC1	Rab acceptor 1 (prenylated)
hsa-miR-331-5p	0	0	1	1	0	0	HAS1	hyaluronan synthase 1
hsa-miR-331-5p	0	0	1	1	1	1	GCDH	glutaryl-CoA dehydrogenase
hsa-miR-331-5p	0	0	1	1	0	0	TFR2	transferrin receptor 2
hsa-miR-331-5p	0	0	0	1	0	0	C8G	complement component 8, gamma polypeptide
hsa-miR-331-5p	1	0	0	1	0	0	ACTA2	actin, alpha 2, smooth muscle, aorta
hsa-miR-331-5p	0	0	1	1	1	1	KRT32	keratin 32
hsa-miR-331-5p	1	0	1	1	1	1	MYH3	myosin, heavy chain 3, skeletal muscle, embryonic
hsa-miR-331-5p	0	0	1	1	1	1	LDHA	lactate dehydrogenase A
hsa-miR-331-5p	0	0	1	1	1	1	CHPT1	choline phosphotransferase 1
hsa-miR-331-5p	0	0	1	1	0	0	COX7A2	cytochrome c oxidase subunit VIIa polypeptide 2 (liver)
hsa-miR-331-5p	0	0	0	1	1	1	CRBN	cereblon
hsa-miR-331-5p	0	0	1	1	0	0	HRG	histidine-rich glycoprotein
hsa-miR-331-5p	0	0	1	1	0	0	RBP2	retinol binding protein 2, cellular
hsa-miR-331-5p	0	0	0	1	1	1	DOK1	docking protein 1, 62kDa (downstream of tyrosine kinase 1)
hsa-miR-331-5p	0	0	1	1	0	0	NDUFB3	NADH dehydrogenase (ubiquinone) 1 beta subcomplex, 3, 12kDa
hsa-miR-331-5p	0	0	1	1	1	1	PTGR1	prostaglandin reductase 1
hsa-miR-331-5p	1	0	1	1	1	1	TEX14	testis expressed 14
hsa-miR-331-5p	0	0	1	1	0	0	ADORA3	adenosine A3 receptor
hsa-miR-331-5p	0	0	1	1	1	1	SRGN	serglycin
hsa-miR-331-5p	0	0	0	1	0	0	ZNF442	zinc finger protein 442
hsa-miR-331-5p	0	0	0	1	1	1	TTC21B	tetratricopeptide repeat domain 21B
hsa-miR-331-5p	0	0	0	1	0	0	BATF3	basic leucine zipper transcription factor, ATF-like 3
hsa-miR-331-5p	0	0	1	1	0	0	RRP36	ribosomal RNA processing 36 homolog (S. cerevisiae)
hsa-miR-331-5p	0	0	0	1	1	1	APOBEC2	apolipoprotein B mRNA editing enzyme, catalytic polypeptide-like 2
hsa-miR-331-5p	0	0	0	1	0	0	KATNAL2	katanin p60 subunit A-like 2
hsa-miR-331-5p	1	0	1	1	1	1	EML2	echinoderm microtubule associated protein like 2
hsa-miR-331-5p	0	0	0	1	0	0	IGFLR1	IGF-like family receptor 1
hsa-miR-331-5p	0	0	1	1	0	0	ARL2	ADP-ribosylation factor-like 2
hsa-miR-331-5p	0	0	1	1	1	1	SBDS	Shwachman-Bodian-Diamond syndrome
hsa-miR-331-5p	0	0	1	1	1	1	OMG	oligodendrocyte myelin glycoprotein
hsa-miR-331-5p	0	0	0	1	0	0	TAS2R4	taste receptor, type 2, member 4
hsa-miR-331-5p	0	0	0	1	1	1	RFPL2	ret finger protein-like 2
hsa-miR-331-5p	0	0	1	1	1	1	APOBEC3A	apolipoprotein B mRNA editing enzyme, catalytic polypeptide-like 3A
hsa-miR-331-5p	0	0	1	1	0	0	SIRT2	sirtuin 2
hsa-miR-331-5p	0	0	1	1	1	1	MYOD1	myogenic differentiation 1
hsa-miR-331-5p	0	0	0	1	0	0	LILRA2	leukocyte immunoglobulin-like receptor, subfamily A (with TM domain), member 2
hsa-miR-331-5p	0	0	1	1	1	1	CCDC132	coiled-coil domain containing 132
hsa-miR-331-5p	0	0	1	1	0	0	NXPE1	neurexophilin and PC-esterase domain family, member 1
hsa-miR-331-5p	0	0	1	1	0	0	TMCO6	transmembrane and coiled-coil domains 6
hsa-miR-331-5p	0	0	0	1	0	0	KRT6C	keratin 6C
hsa-miR-331-5p	0	0	1	1	0	0	HRC	histidine rich calcium binding protein
hsa-miR-331-5p	0	0	0	1	0	0	C20orf151	chromosome 20 open reading frame 151
hsa-miR-331-5p	1	0	0	1	1	1	YIPF2	Yip1 domain family, member 2
hsa-miR-331-5p	1	0	0	1	1	1	AKAP12	A kinase (PRKA) anchor protein 12
hsa-miR-331-5p	0	0	1	1	0	0	HIGD1B	HIG1 hypoxia inducible domain family, member 1B
hsa-miR-331-5p	0	0	1	1	0	0	COX4I1	cytochrome c oxidase subunit IV isoform 1
hsa-miR-331-5p	0	0	0	1	0	0	USP29	ubiquitin specific peptidase 29
hsa-miR-331-5p	1	0	1	1	0	0	DCAF15	DDB1 and CUL4 associated factor 15
hsa-miR-331-5p	0	0	0	1	1	1	BCAN	brevican
hsa-miR-331-5p	0	0	1	1	1	1	PABPC1L	poly(A) binding protein, cytoplasmic 1-like
hsa-miR-331-5p	0	0	1	1	1	1	SERINC3	serine incorporator 3
hsa-miR-331-5p	0	0	0	1	1	1	PRAM1	PML-RARA regulated adaptor molecule 1
hsa-miR-331-5p	0	0	1	1	1	1	MED10	mediator complex subunit 10
hsa-miR-331-5p	0	0	1	1	1	1	CCNB1	cyclin B1
hsa-miR-331-5p	0	0	1	1	1	1	NARS	asparaginyl-tRNA synthetase
hsa-miR-331-5p	0	0	1	1	1	1	DSG3	desmoglein 3
hsa-miR-331-5p	1	0	1	1	1	1	SEMA6A	sema domain, transmembrane domain (TM), and cytoplasmic domain, (semaphorin) 6A
hsa-miR-331-5p	0	0	0	1	1	1	ASB4	ankyrin repeat and SOCS box containing 4
hsa-miR-331-5p	0	0	0	1	1	1	AVIL	advillin
hsa-miR-331-5p	0	0	0	1	1	1	TSPAN31	tetraspanin 31
hsa-miR-331-5p	0	0	1	1	0	0	FHOD1	formin homology 2 domain containing 1
hsa-miR-331-5p	0	0	0	1	1	1	CCDC102A	coiled-coil domain containing 102A
hsa-miR-331-5p	0	0	0	1	1	1	SP110	SP110 nuclear body protein
hsa-miR-331-5p	1	0	1	1	1	1	RALGAPA1	Ral GTPase activating protein, alpha subunit 1 (catalytic)
hsa-miR-331-5p	0	0	0	1	0	0	CAPN11	calpain 11
hsa-miR-331-5p	0	0	1	1	0	0	PSORS1C2	psoriasis susceptibility 1 candidate 2
hsa-miR-331-5p	0	0	1	1	0	0	CARD17	caspase recruitment domain family, member 17
hsa-miR-331-5p	0	0	1	1	1	1	CASP1	caspase 1, apoptosis-related cysteine peptidase
hsa-miR-331-5p	0	0	1	1	1	1	CHRNA1	cholinergic receptor, nicotinic, alpha 1 (muscle)
hsa-miR-331-5p	0	0	1	1	1	1	SNCAIP	synuclein, alpha interacting protein
hsa-miR-331-5p	0	0	0	1	0	0	TRPV4	transient receptor potential cation channel, subfamily V, member 4
hsa-miR-331-5p	1	0	0	1	1	1	ATF1	activating transcription factor 1
hsa-miR-331-5p	0	0	0	1	0	0	PSMB1	proteasome (prosome, macropain) subunit, beta type, 1
hsa-miR-331-5p	1	0	1	1	1	1	YY1	YY1 transcription factor
hsa-miR-331-5p	0	0	1	1	1	1	DHX8	DEAH (Asp-Glu-Ala-His) box polypeptide 8
hsa-miR-331-5p	0	0	0	1	0	0	CHST8	carbohydrate (N-acetylgalactosamine 4-0) sulfotransferase 8
hsa-miR-331-5p	0	0	1	1	0	0	TYROBP	TYRO protein tyrosine kinase binding protein
hsa-miR-331-5p	0	0	0	1	0	0	UCP1	uncoupling protein 1 (mitochondrial, proton carrier)
hsa-miR-331-5p	1	0	1	1	1	1	MAPK3	mitogen-activated protein kinase 3
hsa-miR-331-5p	1	0	1	1	1	1	NFX1	nuclear transcription factor, X-box binding 1
hsa-miR-331-5p	1	0	0	1	1	1	DDX18	DEAD (Asp-Glu-Ala-Asp) box polypeptide 18
hsa-miR-331-5p	0	0	0	1	1	1	TYR	tyrosinase (oculocutaneous albinism IA)
hsa-miR-331-5p	0	0	1	1	1	1	POLD3	polymerase (DNA-directed), delta 3, accessory subunit
hsa-miR-331-5p	1	0	1	1	0	0	KIAA1211	KIAA1211
hsa-miR-331-5p	0	0	1	1	1	1	NOP58	NOP58 ribonucleoprotein homolog (yeast)
hsa-miR-331-5p	0	0	0	1	0	0	HERC5	HECT and RLD domain containing E3 ubiquitin protein ligase 5
hsa-miR-331-5p	0	0	0	1	0	0	THOC3	THO complex 3
hsa-miR-331-5p	0	0	1	1	1	1	ADH4	alcohol dehydrogenase 4 (class II), pi polypeptide
hsa-miR-331-5p	0	0	1	1	1	1	ABCB1	ATP-binding cassette, sub-family B (MDR/TAP), member 1
hsa-miR-331-5p	0	0	1	1	0	0	SERGEF	secretion regulating guanine nucleotide exchange factor
hsa-miR-331-5p	0	0	0	1	1	1	CCDC65	coiled-coil domain containing 65
hsa-miR-331-5p	0	0	1	1	0	0	DHH	desert hedgehog
hsa-miR-331-5p	0	0	0	1	0	0	ETFA	electron-transfer-flavoprotein, alpha polypeptide
hsa-miR-331-5p	0	0	1	1	0	0	CYP1A1	cytochrome P450, family 1, subfamily A, polypeptide 1
hsa-miR-331-5p	0	0	0	1	0	0	SECTM1	secreted and transmembrane 1
hsa-miR-331-5p	0	0	0	1	0	0	PNMT	phenylethanolamine N-methyltransferase
hsa-miR-331-5p	0	0	0	1	1	1	LILRA6	leukocyte immunoglobulin-like receptor, subfamily A (with TM domain), member 6
hsa-miR-331-5p	0	0	0	1	0	0	RCN3	reticulocalbin 3, EF-hand calcium binding domain
hsa-miR-331-5p	0	0	1	1	0	0	ITGB3BP	integrin beta 3 binding protein (beta3-endonexin)
hsa-miR-331-5p	0	0	1	1	1	1	WNT9A	wingless-type MMTV integration site family, member 9A
hsa-miR-331-5p	0	0	1	1	0	0	RTKN	rhotekin
hsa-miR-331-5p	0	0	0	1	0	0	ANKMY1	ankyrin repeat and MYND domain containing 1
hsa-miR-331-5p	0	0	1	1	1	1	SEC22C	SEC22 vesicle trafficking protein homolog C (S. cerevisiae)
hsa-miR-331-5p	0	0	1	1	0	0	PLA1A	phospholipase A1 member A
hsa-miR-331-5p	0	0	0	1	0	0	KAAG1	kidney associated antigen 1
hsa-miR-331-5p	1	0	1	1	1	1	SLC2A12	solute carrier family 2 (facilitated glucose transporter), member 12
hsa-miR-331-5p	1	0	0	1	1	1	CAPN5	calpain 5
hsa-miR-331-5p	1	0	0	1	1	1	HMBS	hydroxymethylbilane synthase
hsa-miR-331-5p	0	0	1	1	1	1	TAOK2	TAO kinase 2
hsa-miR-331-5p	1	0	0	1	1	1	DHRS12	dehydrogenase/reductase (SDR family) member 12
hsa-miR-331-5p	0	0	1	1	1	1	CD226	CD226 molecule
hsa-miR-331-5p	0	0	0	1	1	1	LDHAL6A	lactate dehydrogenase A-like 6A
hsa-miR-331-5p	0	0	1	1	0	0	HAUS1	HAUS augmin-like complex, subunit 1
hsa-miR-331-5p	0	0	1	1	0	0	KCNK13	potassium channel, subfamily K, member 13
hsa-miR-331-5p	0	0	0	1	1	1	TUBGCP5	tubulin, gamma complex associated protein 5
hsa-miR-331-5p	0	0	0	1	1	1	SERPINB4	serpin peptidase inhibitor, clade B (ovalbumin), member 4
hsa-miR-331-5p	1	0	1	1	1	1	GTF2E1	general transcription factor IIE, polypeptide 1, alpha 56kDa
hsa-miR-331-5p	0	0	0	1	1	1	UCHL1	ubiquitin carboxyl-terminal esterase L1 (ubiquitin thiolesterase)
hsa-miR-331-5p	0	0	1	1	1	1	AKR1B1	aldo-keto reductase family 1, member B1 (aldose reductase)
hsa-miR-331-5p	0	0	0	1	0	0	NAA11	N(alpha)-acetyltransferase 11, NatA catalytic subunit
hsa-miR-331-5p	1	0	0	1	1	1	TSPAN33	tetraspanin 33
hsa-miR-331-5p	0	0	0	1	1	1	ACSM3	acyl-CoA synthetase medium-chain family member 3
hsa-miR-331-5p	0	0	0	1	0	0	NPM2	nucleophosmin/nucleoplasmin 2
hsa-miR-331-5p	0	0	1	1	0	0	C21orf59	chromosome 21 open reading frame 59
hsa-miR-331-5p	1	0	1	1	1	1	PPP1R12B	protein phosphatase 1, regulatory subunit 12B
hsa-miR-331-5p	0	0	0	1	0	0	PPP1R16A	protein phosphatase 1, regulatory subunit 16A
hsa-miR-331-5p	0	0	1	1	0	0	THAP8	THAP domain containing 8
hsa-miR-331-5p	0	0	1	1	0	0	CCDC42	coiled-coil domain containing 42
hsa-miR-331-5p	0	0	1	1	0	0	SSRP1	structure specific recognition protein 1
hsa-miR-331-5p	0	0	1	1	1	1	C1orf74	chromosome 1 open reading frame 74
hsa-miR-331-5p	0	0	0	1	0	0	TRIM17	tripartite motif containing 17
hsa-miR-331-5p	1	0	1	1	1	1	FZD5	frizzled family receptor 5
hsa-miR-331-5p	0	0	0	1	0	0	ALPPL2	alkaline phosphatase, placental-like 2
hsa-miR-331-5p	0	0	1	1	1	1	SERPINI1	serpin peptidase inhibitor, clade I (neuroserpin), member 1
hsa-miR-331-5p	0	0	1	1	1	1	SAP30L	SAP30-like
hsa-miR-331-5p	1	0	1	1	1	1	KIAA1324L	KIAA1324-like
hsa-miR-331-5p	0	0	1	1	0	0	KIAA0146	KIAA0146
hsa-miR-331-5p	0	0	1	1	1	1	SLC7A13	solute carrier family 7 (anionic amino acid transporter), member 13
hsa-miR-331-5p	0	0	0	1	0	0	GBX1	gastrulation brain homeobox 1
hsa-miR-331-5p	0	0	1	1	1	1	MSMB	microseminoprotein, beta-
hsa-miR-331-5p	0	0	1	1	1	1	DEPDC4	DEP domain containing 4
hsa-miR-331-5p	0	0	1	1	1	1	APBB1	amyloid beta (A4) precursor protein-binding, family B, member 1 (Fe65)
hsa-miR-331-5p	0	0	1	1	1	1	FAM96A	family with sequence similarity 96, member A
hsa-miR-331-5p	0	0	1	1	0	0	PEX11A	peroxisomal biogenesis factor 11 alpha
hsa-miR-331-5p	0	0	1	1	0	0	PLK1	polo-like kinase 1
hsa-miR-331-5p	0	0	1	1	1	1	MS4A8B	membrane-spanning 4-domains, subfamily A, member 8B
hsa-miR-331-5p	0	0	0	1	0	0	DNAAF3	dynein, axonemal, assembly factor 3
hsa-miR-331-5p	1	0	0	1	1	1	KIF5B	kinesin family member 5B
hsa-miR-331-5p	1	0	1	1	1	1	BPNT1	3'(2'), 5'-bisphosphate nucleotidase 1
hsa-miR-331-5p	0	0	0	1	1	1	FAM71B	family with sequence similarity 71, member B
hsa-miR-331-5p	1	0	1	1	1	1	PCBP1	poly(rC) binding protein 1
hsa-miR-331-5p	0	0	0	1	0	0	KCNJ4	potassium inwardly-rectifying channel, subfamily J, member 4
hsa-miR-331-5p	0	0	1	1	0	0	PRY	PTPN13-like, Y-linked
hsa-miR-331-5p	0	0	1	1	0	0	LST1	leukocyte specific transcript 1
hsa-miR-331-5p	0	0	1	1	0	0	SYCE1	synaptonemal complex central element protein 1
hsa-miR-331-5p	0	0	1	1	0	0	TSPY3	testis specific protein, Y-linked 3
hsa-miR-331-5p	0	0	1	1	0	0	KCTD19	potassium channel tetramerisation domain containing 19
hsa-miR-331-5p	0	0	1	1	0	0	SLC6A19	solute carrier family 6 (neutral amino acid transporter), member 19
hsa-miR-331-5p	0	0	0	1	0	0	NFRKB	nuclear factor related to kappaB binding protein
hsa-miR-331-5p	0	0	0	1	0	0	SLFN12	schlafen family member 12
hsa-miR-331-5p	0	0	0	1	1	1	ZNF434	zinc finger protein 434
hsa-miR-331-5p	0	0	0	1	1	1	NINJ2	ninjurin 2
hsa-miR-331-5p	0	0	1	1	1	1	YEATS2	YEATS domain containing 2
hsa-miR-331-5p	1	0	1	1	0	0	HTR1E	5-hydroxytryptamine (serotonin) receptor 1E, G protein-coupled
hsa-miR-331-5p	1	0	1	1	0	0	TET3	tet methylcytosine dioxygenase 3
hsa-miR-331-5p	1	0	1	1	1	1	ONECUT1	one cut homeobox 1
hsa-miR-331-5p	0	0	1	1	0	0	SOX14	SRY (sex determining region Y)-box 14
hsa-miR-331-5p	1	0	0	1	0	0	TMEM192	transmembrane protein 192
hsa-miR-331-5p	0	0	1	1	1	1	MPLKIP	M-phase specific PLK1 interacting protein
hsa-miR-331-5p	0	0	1	1	0	0	SPRR1A	small proline-rich protein 1A
hsa-miR-331-5p	0	0	0	1	1	1	LDHAL6B	lactate dehydrogenase A-like 6B
hsa-miR-331-5p	0	0	0	1	0	0	THOP1	thimet oligopeptidase 1
hsa-miR-331-5p	0	0	1	1	0	0	WFDC5	WAP four-disulfide core domain 5
hsa-miR-331-5p	0	0	0	1	0	0	EFEMP2	EGF containing fibulin-like extracellular matrix protein 2
hsa-miR-331-5p	0	0	1	1	0	0	MUS81	MUS81 endonuclease homolog (S. cerevisiae)
hsa-miR-331-5p	1	0	1	1	1	1	PDLIM2	PDZ and LIM domain 2 (mystique)
hsa-miR-331-5p	0	0	1	1	1	1	EPG5	ectopic P-granules autophagy protein 5 homolog (C. elegans)
hsa-miR-331-5p	0	0	0	1	0	0	SNUPN	snurportin 1
hsa-miR-331-5p	0	0	1	1	0	0	DENND4A	DENN/MADD domain containing 4A
hsa-miR-331-5p	0	0	0	1	0	0	CEP290	centrosomal protein 290kDa
hsa-miR-331-5p	0	0	0	1	1	1	UGT2B15	UDP glucuronosyltransferase 2 family, polypeptide B15
hsa-miR-331-5p	1	0	1	1	0	0	PPARGC1B	peroxisome proliferator-activated receptor gamma, coactivator 1 beta
hsa-miR-331-5p	0	0	0	1	0	0	PPM1J	protein phosphatase, Mg2+/Mn2+ dependent, 1J
hsa-miR-331-5p	0	0	1	1	0	0	PPP1R14B	protein phosphatase 1, regulatory (inhibitor) subunit 14B
hsa-miR-331-5p	0	0	1	1	1	1	CHST2	carbohydrate (N-acetylglucosamine-6-O) sulfotransferase 2
hsa-miR-331-5p	0	0	1	1	1	1	CD36	CD36 molecule (thrombospondin receptor)
hsa-miR-331-5p	0	0	1	1	1	1	TRMT10C	tRNA methyltransferase 10 homolog C (S. cerevisiae)
hsa-miR-331-5p	0	0	1	1	0	0	CFLAR	CASP8 and FADD-like apoptosis regulator
hsa-miR-331-5p	0	0	1	1	1	1	PARP14	poly (ADP-ribose) polymerase family, member 14
hsa-miR-331-5p	1	0	1	1	1	1	TBC1D8B	TBC1 domain family, member 8B (with GRAM domain)
hsa-miR-331-5p	1	0	1	1	1	1	ANKRD10	ankyrin repeat domain 10
hsa-miR-331-5p	0	0	1	1	0	0	UBQLN3	ubiquilin 3
hsa-miR-331-5p	0	0	0	1	1	1	IL1RL1	interleukin 1 receptor-like 1
hsa-miR-331-5p	0	0	0	1	0	0	CST6	cystatin E/M
hsa-miR-331-5p	0	0	1	1	0	0	SLC6A13	solute carrier family 6 (neurotransmitter transporter, GABA), member 13
hsa-miR-331-5p	1	0	1	1	0	0	GPR89A	G protein-coupled receptor 89A
hsa-miR-331-5p	0	0	1	1	1	1	CKS2	CDC28 protein kinase regulatory subunit 2
hsa-miR-331-5p	0	0	1	1	1	1	ESRP1	epithelial splicing regulatory protein 1
hsa-miR-331-5p	1	0	1	1	1	1	HTR4	5-hydroxytryptamine (serotonin) receptor 4, G protein-coupled
hsa-miR-331-5p	0	0	1	1	1	1	NSUN3	NOP2/Sun domain family, member 3
hsa-miR-331-5p	0	0	0	1	0	0	OR4A16	olfactory receptor, family 4, subfamily A, member 16
hsa-miR-331-5p	0	0	1	1	1	1	DBF4B	DBF4 homolog B (S. cerevisiae)
hsa-miR-331-5p	0	0	1	1	1	1	GCSH	glycine cleavage system protein H (aminomethyl carrier)
hsa-miR-331-5p	1	0	1	1	1	1	WDR6	WD repeat domain 6
hsa-miR-331-5p	1	0	1	1	0	0	PDIA5	protein disulfide isomerase family A, member 5
hsa-miR-331-5p	0	0	1	1	1	1	CCDC89	coiled-coil domain containing 89
hsa-miR-331-5p	1	0	1	1	1	1	CCZ1B	CCZ1 vacuolar protein trafficking and biogenesis associated homolog B (S. cerevisiae)
hsa-miR-331-5p	0	0	0	1	0	0	ZNF554	zinc finger protein 554
hsa-miR-331-5p	1	0	1	1	0	0	ZNF527	zinc finger protein 527
hsa-miR-331-5p	1	0	1	1	1	1	C15orf63	chromosome 15 open reading frame 63
hsa-miR-331-5p	1	0	1	1	1	1	CC2D1A	coiled-coil and C2 domain containing 1A
hsa-miR-331-5p	1	0	1	1	1	1	IFNAR2	interferon (alpha, beta and omega) receptor 2
hsa-miR-331-5p	0	0	1	1	1	1	PEX7	peroxisomal biogenesis factor 7
hsa-miR-331-5p	1	0	0	1	0	0	MPDZ	multiple PDZ domain protein
hsa-miR-331-5p	0	0	1	1	1	1	ELL3	elongation factor RNA polymerase II-like 3
hsa-miR-331-5p	1	0	1	1	1	1	B4GALT3	UDP-Gal:betaGlcNAc beta 1,4- galactosyltransferase, polypeptide 3
hsa-miR-331-5p	0	0	0	1	0	0	DOCK6	dedicator of cytokinesis 6
hsa-miR-331-5p	1	0	1	1	1	1	SLC4A8	solute carrier family 4, sodium bicarbonate cotransporter, member 8
hsa-miR-331-5p	0	0	0	1	0	0	OR6S1	olfactory receptor, family 6, subfamily S, member 1
hsa-miR-331-5p	0	0	1	1	1	1	ARL14	ADP-ribosylation factor-like 14
hsa-miR-331-5p	0	0	1	1	1	1	HCCS	holocytochrome c synthase
hsa-miR-331-5p	0	0	1	1	1	1	TGIF2LY	TGFB-induced factor homeobox 2-like, Y-linked
hsa-miR-331-5p	0	0	0	1	0	0	GJD4	gap junction protein, delta 4, 40.1kDa
hsa-miR-331-5p	0	0	0	1	0	0	OR51S1	olfactory receptor, family 51, subfamily S, member 1
hsa-miR-331-5p	0	0	1	1	1	1	XPNPEP1	X-prolyl aminopeptidase (aminopeptidase P) 1, soluble
hsa-miR-331-5p	0	0	1	1	0	0	B4GALNT3	beta-1,4-N-acetyl-galactosaminyl transferase 3
hsa-miR-331-5p	0	0	1	1	1	1	KDELC2	KDEL (Lys-Asp-Glu-Leu) containing 2
hsa-miR-331-5p	0	0	1	1	1	1	TMEM45A	transmembrane protein 45A
hsa-miR-331-5p	0	0	1	1	1	1	SAMD3	sterile alpha motif domain containing 3
hsa-miR-331-5p	1	0	1	1	0	0	ECE2	endothelin converting enzyme 2
hsa-miR-331-5p	0	0	1	1	0	0	MRVI1-AS1	MRVI1 antisense RNA 1
hsa-miR-331-5p	0	0	1	1	0	0	VPS37D	vacuolar protein sorting 37 homolog D (S. cerevisiae)
hsa-miR-331-5p	0	0	1	1	1	1	MAGEB18	melanoma antigen family B, 18
hsa-miR-331-5p	0	0	0	1	0	0	GSG2	germ cell associated 2 (haspin)
hsa-miR-331-5p	0	0	1	1	0	0	CCZ1	CCZ1 vacuolar protein trafficking and biogenesis associated homolog (S. cerevisiae)
hsa-miR-331-5p	1	0	1	1	1	1	ZNF562	zinc finger protein 562
hsa-miR-331-5p	0	0	1	1	0	0	MMP12	matrix metallopeptidase 12 (macrophage elastase)
hsa-miR-331-5p	1	0	1	1	1	1	CDK13	cyclin-dependent kinase 13
hsa-miR-331-5p	1	0	0	1	1	1	PLEKHJ1	pleckstrin homology domain containing, family J member 1
hsa-miR-331-5p	0	0	1	1	1	1	ADGB	androglobin
hsa-miR-331-5p	0	0	1	1	1	1	CETN1	centrin, EF-hand protein, 1
hsa-miR-331-5p	1	0	1	1	0	0	EXOSC3	exosome component 3
hsa-miR-331-5p	0	0	1	1	0	0	PLB1	phospholipase B1
hsa-miR-331-5p	1	0	1	1	0	0	KCNH7	potassium voltage-gated channel, subfamily H (eag-related), member 7
hsa-miR-331-5p	0	0	1	1	1	1	FMNL1	formin-like 1
hsa-miR-331-5p	0	0	1	1	0	0	LRRC33	leucine rich repeat containing 33
hsa-miR-331-5p	0	0	1	1	1	1	KCNJ15	potassium inwardly-rectifying channel, subfamily J, member 15
hsa-miR-331-5p	0	0	0	1	0	0	DEFB108B	defensin, beta 108B
hsa-miR-331-5p	0	0	1	1	1	1	CAPS2	calcyphosine 2
hsa-miR-331-5p	0	0	0	1	0	0	OR4N4	olfactory receptor, family 4, subfamily N, member 4
hsa-miR-331-5p	0	0	0	1	0	0	HCAR2	hydroxycarboxylic acid receptor 2
hsa-miR-331-5p	0	0	0	1	0	0	SPPL2C	signal peptide peptidase like 2C
hsa-miR-331-5p	1	0	1	1	1	1	SETD3	SET domain containing 3
hsa-miR-331-5p	0	0	1	1	1	1	MARCKSL1	MARCKS-like 1
hsa-miR-331-5p	0	0	0	1	0	0	ADAT3	adenosine deaminase, tRNA-specific 3
hsa-miR-331-5p	0	0	0	1	1	1	C6orf58	chromosome 6 open reading frame 58
hsa-miR-331-5p	0	0	1	1	0	0	WBSCR16	Williams-Beuren syndrome chromosome region 16
hsa-miR-331-5p	0	0	0	1	1	1	SLC52A2	solute carrier family 52, riboflavin transporter, member 2
hsa-miR-331-5p	0	0	1	1	0	0	IDH2	isocitrate dehydrogenase 2 (NADP+), mitochondrial
hsa-miR-331-5p	1	0	1	1	1	1	KPNA2	karyopherin alpha 2 (RAG cohort 1, importin alpha 1)
hsa-miR-331-5p	0	0	0	1	1	1	WDR5B	WD repeat domain 5B
hsa-miR-331-5p	0	0	1	1	0	0	SGK223	homolog of rat pragma of Rnd2
hsa-miR-331-5p	0	0	1	1	1	1	BEST3	bestrophin 3
hsa-miR-331-5p	1	0	1	1	1	1	DPP6	dipeptidyl-peptidase 6
hsa-miR-331-5p	0	0	1	1	0	0	EPGN	epithelial mitogen homolog (mouse)
hsa-miR-331-5p	1	0	0	1	0	0	RGS19	regulator of G-protein signaling 19
hsa-miR-331-5p	0	0	1	1	0	0	STAC3	SH3 and cysteine rich domain 3
hsa-miR-331-5p	0	0	0	1	1	1	NR2C1	nuclear receptor subfamily 2, group C, member 1
hsa-miR-331-5p	0	0	1	1	1	1	C18orf21	chromosome 18 open reading frame 21
hsa-miR-331-5p	0	0	1	1	1	1	APOBEC3B	apolipoprotein B mRNA editing enzyme, catalytic polypeptide-like 3B
hsa-miR-331-5p	0	0	0	1	1	1	ANGPTL5	angiopoietin-like 5
hsa-miR-331-5p	0	0	0	1	1	1	USP16	ubiquitin specific peptidase 16
hsa-miR-331-5p	0	0	1	1	1	1	C2orf76	chromosome 2 open reading frame 76
hsa-miR-331-5p	0	0	1	1	1	1	NAA20	N(alpha)-acetyltransferase 20, NatB catalytic subunit
hsa-miR-331-5p	0	0	0	1	0	0	OR6N1	olfactory receptor, family 6, subfamily N, member 1
hsa-miR-331-5p	0	0	0	1	1	1	INTU	inturned planar cell polarity effector homolog (Drosophila)
hsa-miR-331-5p	0	0	0	1	0	0	VWCE	von Willebrand factor C and EGF domains
hsa-miR-331-5p	0	0	1	1	1	1	PSPC1	paraspeckle component 1
hsa-miR-331-5p	0	0	1	1	1	1	TOR2A	torsin family 2, member A
hsa-miR-331-5p	0	0	1	1	1	1	FGG	fibrinogen gamma chain
hsa-miR-331-5p	0	0	1	1	0	0	RGN	regucalcin (senescence marker protein-30)
hsa-miR-331-5p	0	0	1	1	1	1	SPAG17	sperm associated antigen 17
hsa-miR-331-5p	0	0	1	1	1	1	LRRFIP2	leucine rich repeat (in FLII) interacting protein 2
hsa-miR-331-5p	0	0	1	1	0	0	MKS1	Meckel syndrome, type 1
hsa-miR-331-5p	0	0	1	1	0	0	TBC1D22A	TBC1 domain family, member 22A
hsa-miR-331-5p	0	0	1	1	0	0	WFDC3	WAP four-disulfide core domain 3
hsa-miR-331-5p	0	0	1	1	1	1	RAD9B	RAD9 homolog B (S. pombe)
hsa-miR-331-5p	1	0	1	1	1	1	CAPN3	calpain 3, (p94)
hsa-miR-331-5p	1	0	1	1	1	1	GALNTL1	UDP-N-acetyl-alpha-D-galactosamine:polypeptide N-acetylgalactosaminyltransferase-like 1
hsa-miR-331-5p	0	0	0	1	0	0	FAM82A2	family with sequence similarity 82, member A2
hsa-miR-331-5p	0	0	0	1	0	0	OR13H1	olfactory receptor, family 13, subfamily H, member 1
hsa-miR-331-5p	0	0	1	1	1	1	ATP5G2	ATP synthase, H+ transporting, mitochondrial Fo complex, subunit C2 (subunit 9)
hsa-miR-331-5p	0	0	0	1	0	0	NANOS3	nanos homolog 3 (Drosophila)
hsa-miR-331-5p	1	0	1	1	1	1	HIF3A	hypoxia inducible factor 3, alpha subunit
hsa-miR-331-5p	0	0	1	1	1	1	SLC26A3	solute carrier family 26, member 3
hsa-miR-331-5p	1	0	1	1	1	1	C20orf26	chromosome 20 open reading frame 26
hsa-miR-331-5p	0	0	0	1	1	1	SOX18	SRY (sex determining region Y)-box 18
hsa-miR-331-5p	1	0	1	1	1	1	ATRN	attractin
hsa-miR-331-5p	0	0	1	1	1	1	SLC5A12	solute carrier family 5 (sodium/glucose cotransporter), member 12
hsa-miR-331-5p	0	0	0	1	1	1	SERPINB3	serpin peptidase inhibitor, clade B (ovalbumin), member 3
hsa-miR-331-5p	0	0	1	1	1	1	CLUAP1	clusterin associated protein 1
hsa-miR-331-5p	1	0	1	1	1	1	SYN2	synapsin II
hsa-miR-331-5p	0	0	1	1	1	1	TSHR	thyroid stimulating hormone receptor
hsa-miR-331-5p	0	0	1	1	1	1	CCDC125	coiled-coil domain containing 125
hsa-miR-331-5p	1	0	1	1	1	1	GOLGA2	golgin A2
hsa-miR-331-5p	0	0	1	1	0	0	RGL3	ral guanine nucleotide dissociation stimulator-like 3
hsa-miR-331-5p	1	0	1	1	0	0	LRRC16B	leucine rich repeat containing 16B
hsa-miR-331-5p	1	0	1	1	1	1	YTHDF1	YTH domain family, member 1
hsa-miR-331-5p	0	0	0	1	1	1	TM7SF3	transmembrane 7 superfamily member 3
hsa-miR-331-5p	0	0	1	1	0	0	DAP3	death associated protein 3
hsa-miR-331-5p	0	0	0	1	0	0	OR6C75	olfactory receptor, family 6, subfamily C, member 75
hsa-miR-331-5p	0	0	1	1	1	1	VIPAS39	VPS33B interacting protein, apical-basolateral polarity regulator, spe-39 homolog
hsa-miR-331-5p	0	0	0	1	1	1	MCPH1	microcephalin 1
hsa-miR-331-5p	1	0	1	1	1	1	HMGN3	high mobility group nucleosomal binding domain 3
hsa-miR-331-5p	1	0	1	1	1	1	LARP6	La ribonucleoprotein domain family, member 6
hsa-miR-331-5p	0	0	0	1	0	0	FAM47A	family with sequence similarity 47, member A
hsa-miR-331-5p	0	0	1	1	0	0	CLPTM1	cleft lip and palate associated transmembrane protein 1
hsa-miR-331-5p	0	0	1	1	1	1	SMAD9	SMAD family member 9
hsa-miR-331-5p	0	0	1	1	0	0	C9orf9	chromosome 9 open reading frame 9
hsa-miR-331-5p	1	0	1	1	1	1	TNC	tenascin C
hsa-miR-331-5p	0	0	1	1	1	1	TRAF3	TNF receptor-associated factor 3
hsa-miR-331-5p	0	0	0	1	0	0	ACAP3	ArfGAP with coiled-coil, ankyrin repeat and PH domains 3
hsa-miR-331-5p	1	0	1	1	1	1	HYOU1	hypoxia up-regulated 1
hsa-miR-331-5p	0	0	1	1	0	0	C10orf11	chromosome 10 open reading frame 11
hsa-miR-331-5p	0	0	1	1	1	1	RFPL1	ret finger protein-like 1
hsa-miR-331-5p	0	0	1	1	1	1	ELP5	elongator acetyltransferase complex subunit 5
hsa-miR-331-5p	1	0	1	1	1	1	MAK	male germ cell-associated kinase
hsa-miR-331-5p	0	0	0	1	1	1	GNL3	guanine nucleotide binding protein-like 3 (nucleolar)
hsa-miR-331-5p	0	0	0	1	0	0	ANKRD18B	ankyrin repeat domain 18B
hsa-miR-331-5p	0	0	1	1	1	1	CYB5D1	cytochrome b5 domain containing 1
hsa-miR-331-5p	0	0	1	1	1	1	FMO1	flavin containing monooxygenase 1
hsa-miR-331-5p	0	0	0	1	0	0	OR5H2	olfactory receptor, family 5, subfamily H, member 2
hsa-miR-331-5p	0	0	0	1	1	1	TBCD	tubulin folding cofactor D
hsa-miR-331-5p	0	0	0	1	0	0	SPNS3	spinster homolog 3 (Drosophila)
hsa-miR-331-5p	0	0	1	1	1	1	TPRA1	transmembrane protein, adipocyte asscociated 1
hsa-miR-331-5p	0	0	1	1	0	0	CCDC114	coiled-coil domain containing 114
hsa-miR-331-5p	1	0	1	1	1	1	TMEM135	transmembrane protein 135
hsa-miR-331-5p	0	0	0	1	0	0	ZNF625	zinc finger protein 625
hsa-miR-331-5p	0	0	0	1	1	1	GTF3C1	general transcription factor IIIC, polypeptide 1, alpha 220kDa
hsa-miR-331-5p	0	0	1	1	1	1	SDAD1	SDA1 domain containing 1
hsa-miR-331-5p	0	0	1	1	1	1	GALNT6	UDP-N-acetyl-alpha-D-galactosamine:polypeptide N-acetylgalactosaminyltransferase 6 (GalNAc-T6)
hsa-miR-331-5p	0	0	0	1	0	0	LSS	lanosterol synthase (2,3-oxidosqualene-lanosterol cyclase)
hsa-miR-331-5p	1	0	1	1	1	1	UBE3A	ubiquitin protein ligase E3A
hsa-miR-331-5p	1	0	1	1	0	0	ABLIM3	actin binding LIM protein family, member 3
hsa-miR-331-5p	0	0	1	1	1	1	SLC39A8	solute carrier family 39 (zinc transporter), member 8
hsa-miR-331-5p	1	0	1	1	1	1	PTBP1	polypyrimidine tract binding protein 1
hsa-miR-331-5p	0	0	1	1	0	0	TXNDC11	thioredoxin domain containing 11
hsa-miR-331-5p	0	0	1	1	1	1	PSRC1	proline/serine-rich coiled-coil 1
hsa-miR-331-5p	0	0	1	1	0	0	MYBPHL	myosin binding protein H-like
hsa-miR-331-5p	1	0	0	1	1	1	COL9A1	collagen, type IX, alpha 1
hsa-miR-331-5p	1	0	1	1	1	1	TRPM3	transient receptor potential cation channel, subfamily M, member 3
hsa-miR-331-5p	0	0	0	1	1	1	FAM47C	family with sequence similarity 47, member C
hsa-miR-331-5p	0	0	0	1	1	1	ARSD	arylsulfatase D
hsa-miR-331-5p	0	0	0	1	0	0	LRRC8B	leucine rich repeat containing 8 family, member B
hsa-miR-331-5p	1	0	0	1	0	0	RABEP2	rabaptin, RAB GTPase binding effector protein 2
hsa-miR-331-5p	0	0	0	1	1	1	SUSD2	sushi domain containing 2
hsa-miR-331-5p	1	0	1	1	1	1	MAMLD1	mastermind-like domain containing 1
hsa-miR-331-5p	0	0	1	1	0	0	EDC4	enhancer of mRNA decapping 4
hsa-miR-331-5p	0	0	0	1	0	0	OFCC1	orofacial cleft 1 candidate 1
hsa-miR-331-5p	0	0	1	1	1	1	PCBP2	poly(rC) binding protein 2
hsa-miR-331-5p	0	0	0	1	1	1	INPP5D	inositol polyphosphate-5-phosphatase, 145kDa
hsa-miR-331-5p	0	0	0	1	0	0	OR2M2	olfactory receptor, family 2, subfamily M, member 2
hsa-miR-331-5p	0	0	0	1	0	0	CLN3	ceroid-lipofuscinosis, neuronal 3
hsa-miR-331-5p	0	0	0	1	0	0	DISP1	dispatched homolog 1 (Drosophila)
hsa-miR-331-5p	0	0	1	1	0	0	AXDND1	axonemal dynein light chain domain containing 1
hsa-miR-331-5p	0	0	1	1	0	0	SLC41A3	solute carrier family 41, member 3
hsa-miR-331-5p	1	0	1	1	0	0	PCED1A	PC-esterase domain containing 1A
hsa-miR-331-5p	0	0	0	1	1	1	ZNF627	zinc finger protein 627
hsa-miR-331-5p	0	0	0	1	0	0	DNASE2B	deoxyribonuclease II beta
hsa-miR-331-5p	0	0	1	1	0	0	FAM19A3	family with sequence similarity 19 (chemokine (C-C motif)-like), member A3
hsa-miR-331-5p	0	0	1	1	1	1	CDY1	chromodomain protein, Y-linked, 1
hsa-miR-331-5p	0	0	1	1	0	0	EPS8L3	EPS8-like 3
hsa-miR-331-5p	0	0	0	1	1	1	KIAA1279	KIAA1279
hsa-miR-331-5p	0	0	1	1	1	1	C1orf101	chromosome 1 open reading frame 101
hsa-miR-331-5p	0	0	0	1	1	1	TBCE	tubulin folding cofactor E
hsa-miR-331-5p	1	0	1	1	1	1	LEFTY2	left-right determination factor 2
hsa-miR-331-5p	0	0	1	1	1	1	MAP3K4	mitogen-activated protein kinase kinase kinase 4
hsa-miR-331-5p	0	0	1	1	1	1	IL20	interleukin 20
hsa-miR-331-5p	0	0	0	1	1	1	ULBP2	UL16 binding protein 2
hsa-miR-331-5p	0	0	1	1	1	1	CFHR3	complement factor H-related 3
hsa-miR-331-5p	0	0	1	1	1	1	PLA2G4A	phospholipase A2, group IVA (cytosolic, calcium-dependent)
hsa-miR-331-5p	1	0	1	1	1	1	NPL	N-acetylneuraminate pyruvate lyase (dihydrodipicolinate synthase)
hsa-miR-331-5p	0	0	1	1	1	1	FUCA2	fucosidase, alpha-L- 2, plasma
hsa-miR-331-5p	1	0	1	1	0	0	REPS1	RALBP1 associated Eps domain containing 1
hsa-miR-331-5p	1	0	1	1	1	1	OLIG3	oligodendrocyte transcription factor 3
hsa-miR-331-5p	0	0	1	1	1	1	UCK2	uridine-cytidine kinase 2
hsa-miR-331-5p	0	0	1	1	0	0	DDR2	discoidin domain receptor tyrosine kinase 2
hsa-miR-331-5p	0	0	1	1	1	1	FCGR2B	Fc fragment of IgG, low affinity IIb, receptor (CD32)
hsa-miR-331-5p	0	0	1	1	0	0	FCGR2A	Fc fragment of IgG, low affinity IIa, receptor (CD32)
hsa-miR-331-5p	0	0	1	1	0	0	SLAMF9	SLAM family member 9
hsa-miR-331-5p	0	0	0	1	0	0	OR6K3	olfactory receptor, family 6, subfamily K, member 3
hsa-miR-331-5p	0	0	1	1	1	1	FCRL5	Fc receptor-like 5
hsa-miR-331-5p	0	0	1	1	0	0	CCT3	chaperonin containing TCP1, subunit 3 (gamma)
hsa-miR-331-5p	1	0	1	1	1	1	SSR2	signal sequence receptor, beta (translocon-associated protein beta)
hsa-miR-331-5p	0	0	0	1	1	1	SMPDL3A	sphingomyelin phosphodiesterase, acid-like 3A
hsa-miR-331-5p	0	0	1	1	0	0	ZUFSP	zinc finger with UFM1-specific peptidase domain
hsa-miR-331-5p	0	0	1	1	0	0	FANK1	fibronectin type III and ankyrin repeat domains 1
hsa-miR-331-5p	0	0	1	1	0	0	S100A8	S100 calcium binding protein A8
hsa-miR-331-5p	0	0	1	1	1	1	SMCP	sperm mitochondria-associated cysteine-rich protein
hsa-miR-331-5p	0	0	0	1	0	0	UROS	uroporphyrinogen III synthase
hsa-miR-331-5p	0	0	0	1	1	1	AKD1	adenylate kinase domain containing 1
hsa-miR-331-5p	0	0	1	1	0	0	MRPS21	mitochondrial ribosomal protein S21
hsa-miR-331-5p	0	0	1	1	0	0	C1orf51	chromosome 1 open reading frame 51
hsa-miR-331-5p	0	0	1	1	1	1	PREP	prolyl endopeptidase
hsa-miR-331-5p	0	0	0	1	1	1	CA14	carbonic anhydrase XIV
hsa-miR-331-5p	0	0	0	1	1	1	TDRD1	tudor domain containing 1
hsa-miR-331-5p	0	0	1	1	1	1	RBM8A	RNA binding motif protein 8A
hsa-miR-331-5p	0	0	1	1	1	1	POLR3GL	polymerase (RNA) III (DNA directed) polypeptide G (32kD)-like
hsa-miR-331-5p	0	0	0	1	0	0	NRAP	nebulin-related anchoring protein
hsa-miR-331-5p	0	0	1	1	0	0	RWDD2A	RWD domain containing 2A
hsa-miR-331-5p	0	0	0	1	0	0	NPBWR2	neuropeptides B/W receptor 2
hsa-miR-331-5p	0	0	1	1	0	0	AMIGO1	adhesion molecule with Ig-like domain 1
hsa-miR-331-5p	1	0	1	1	1	1	SUFU	suppressor of fused homolog (Drosophila)
hsa-miR-331-5p	1	0	0	1	0	0	TMEM180	transmembrane protein 180
hsa-miR-331-5p	0	0	1	1	1	1	IRAK1BP1	interleukin-1 receptor-associated kinase 1 binding protein 1
hsa-miR-331-5p	0	0	1	1	0	0	FRRS1	ferric-chelate reductase 1
hsa-miR-331-5p	1	0	1	1	1	1	FAM178A	family with sequence similarity 178, member A
hsa-miR-331-5p	0	0	1	1	0	0	PRRG3	proline rich Gla (G-carboxyglutamic acid) 3 (transmembrane)
hsa-miR-331-5p	0	0	1	1	0	0	CPN1	carboxypeptidase N, polypeptide 1
hsa-miR-331-5p	0	0	1	1	1	1	COX15	COX15 homolog, cytochrome c oxidase assembly protein (yeast)
hsa-miR-331-5p	0	0	1	1	1	1	LMBRD1	LMBR1 domain containing 1
hsa-miR-331-5p	0	0	1	1	1	1	FPGT	fucose-1-phosphate guanylyltransferase
hsa-miR-331-5p	0	0	0	1	1	1	EFCAB7	EF-hand calcium binding domain 7
hsa-miR-331-5p	0	0	1	1	1	1	C1orf177	chromosome 1 open reading frame 177
hsa-miR-331-5p	0	0	1	1	0	0	HSPB11	heat shock protein family B (small), member 11
hsa-miR-331-5p	0	0	0	1	0	0	ECHDC2	enoyl CoA hydratase domain containing 2
hsa-miR-331-5p	1	0	1	1	1	1	LONRF3	LON peptidase N-terminal domain and ring finger 3
hsa-miR-331-5p	1	0	1	1	1	1	NCOA3	nuclear receptor coactivator 3
hsa-miR-331-5p	0	0	1	1	1	1	MED22	mediator complex subunit 22
hsa-miR-331-5p	0	0	0	1	0	0	GBGT1	globoside alpha-1,3-N-acetylgalactosaminyltransferase 1
hsa-miR-331-5p	0	0	0	1	0	0	GTF3C4	general transcription factor IIIC, polypeptide 4, 90kDa
hsa-miR-331-5p	0	0	0	1	1	1	DDX31	DEAD (Asp-Glu-Ala-Asp) box polypeptide 31
hsa-miR-331-5p	0	0	1	1	1	1	POLR3A	polymerase (RNA) III (DNA directed) polypeptide A, 155kDa
hsa-miR-331-5p	1	0	1	1	1	1	KCNMA1	potassium large conductance calcium-activated channel, subfamily M, alpha member 1
hsa-miR-331-5p	1	0	1	1	0	0	ELOVL1	ELOVL fatty acid elongase 1
hsa-miR-331-5p	0	0	0	1	1	1	MPL	myeloproliferative leukemia virus oncogene
hsa-miR-331-5p	1	0	1	1	1	1	SNX21	sorting nexin family member 21
hsa-miR-331-5p	0	0	1	1	1	1	SLC22A7	solute carrier family 22 (organic anion transporter), member 7
hsa-miR-331-5p	0	0	0	1	1	1	CTPS1	CTP synthase 1
hsa-miR-331-5p	0	0	0	1	0	0	RPL36A	ribosomal protein L36a
hsa-miR-331-5p	0	0	1	1	0	0	TREML1	triggering receptor expressed on myeloid cells-like 1
hsa-miR-331-5p	0	0	1	1	1	1	HDAC8	histone deacetylase 8
hsa-miR-331-5p	1	0	1	1	1	1	COL16A1	collagen, type XVI, alpha 1
hsa-miR-331-5p	0	0	1	1	1	1	TTLL11	tubulin tyrosine ligase-like family, member 11
hsa-miR-331-5p	0	0	0	1	1	1	LHFPL5	lipoma HMGIC fusion partner-like 5
hsa-miR-331-5p	0	0	0	1	0	0	EYA3	eyes absent homolog 3 (Drosophila)
hsa-miR-331-5p	0	0	0	1	0	0	SMPDL3B	sphingomyelin phosphodiesterase, acid-like 3B
hsa-miR-331-5p	1	0	1	1	0	0	DHDDS	dehydrodolichyl diphosphate synthase
hsa-miR-331-5p	1	0	1	1	1	1	SRSF10	serine/arginine-rich splicing factor 10
hsa-miR-331-5p	1	0	1	1	0	0	SVEP1	sushi, von Willebrand factor type A, EGF and pentraxin domain containing 1
hsa-miR-331-5p	1	0	1	1	1	1	FUCA1	fucosidase, alpha-L- 1, tissue
hsa-miR-331-5p	1	0	1	1	1	1	PHF1	PHD finger protein 1
hsa-miR-331-5p	0	0	1	1	0	0	P2RY4	pyrimidinergic receptor P2Y, G-protein coupled, 4
hsa-miR-331-5p	0	0	1	1	0	0	FRRS1L	ferric-chelate reductase 1-like
hsa-miR-331-5p	1	0	1	1	0	0	WNT4	wingless-type MMTV integration site family, member 4
hsa-miR-331-5p	0	0	0	1	0	0	HLA-DMA	major histocompatibility complex, class II, DM alpha
hsa-miR-331-5p	0	0	1	1	0	0	MSANTD3	Myb/SANT-like DNA-binding domain containing 3
hsa-miR-331-5p	1	0	1	1	1	1	TMEFF1	transmembrane protein with EGF-like and two follistatin-like domains 1
hsa-miR-331-5p	1	0	1	1	1	1	HP1BP3	heterochromatin protein 1, binding protein 3
hsa-miR-331-5p	1	0	1	1	0	0	CCDC153	coiled-coil domain containing 153
hsa-miR-331-5p	1	0	0	1	1	1	DCUN1D2	DCN1, defective in cullin neddylation 1, domain containing 2 (S. cerevisiae)
hsa-miR-331-5p	1	0	1	1	0	0	EHMT2	euchromatic histone-lysine N-methyltransferase 2
hsa-miR-331-5p	0	0	0	1	0	0	FAM131C	family with sequence similarity 131, member C
hsa-miR-331-5p	1	0	1	1	1	1	C20orf112	chromosome 20 open reading frame 112
hsa-miR-331-5p	0	0	0	1	0	0	TMEM82	transmembrane protein 82
hsa-miR-331-5p	0	0	1	1	0	0	CSNK2B	casein kinase 2, beta polypeptide
hsa-miR-331-5p	0	0	0	1	1	1	LY6G5B	lymphocyte antigen 6 complex, locus G5B
hsa-miR-331-5p	0	0	1	1	1	1	NAA35	N(alpha)-acetyltransferase 35, NatC auxiliary subunit
hsa-miR-331-5p	1	0	1	1	1	1	HNRNPK	heterogeneous nuclear ribonucleoprotein K
hsa-miR-331-5p	0	0	1	1	0	0	PQBP1	polyglutamine binding protein 1
hsa-miR-331-5p	0	0	0	1	1	1	TRIM15	tripartite motif containing 15
hsa-miR-331-5p	1	0	1	1	1	1	VSX1	visual system homeobox 1
hsa-miR-331-5p	1	0	1	1	1	1	RILPL1	Rab interacting lysosomal protein-like 1
hsa-miR-331-5p	0	0	1	1	0	0	YIF1A	Yip1 interacting factor homolog A (S. cerevisiae)
hsa-miR-331-5p	0	0	1	1	1	1	DUSP18	dual specificity phosphatase 18
hsa-miR-331-5p	0	0	0	1	1	1	NMNAT1	nicotinamide nucleotide adenylyltransferase 1
hsa-miR-331-5p	0	0	0	1	1	1	VIPR2	vasoactive intestinal peptide receptor 2
hsa-miR-331-5p	0	0	0	1	1	1	GRHPR	glyoxylate reductase/hydroxypyruvate reductase
hsa-miR-331-5p	0	0	1	1	1	1	HES2	hairy and enhancer of split 2 (Drosophila)
hsa-miR-331-5p	0	0	1	1	1	1	MYC	v-myc myelocytomatosis viral oncogene homolog (avian)
hsa-miR-331-5p	0	0	1	1	1	1	ZNF767	zinc finger family member 767
hsa-miR-331-5p	0	0	1	1	0	0	KCNAB2	potassium voltage-gated channel, shaker-related subfamily, beta member 2
hsa-miR-331-5p	0	0	1	1	1	1	UTP14C	UTP14, U3 small nucleolar ribonucleoprotein, homolog C (yeast)
hsa-miR-331-5p	0	0	0	1	0	0	RPP38	ribonuclease P/MRP 38kDa subunit
hsa-miR-331-5p	0	0	0	1	1	1	OLAH	oleoyl-ACP hydrolase
hsa-miR-331-5p	1	0	1	1	1	1	ARHGEF39	Rho guanine nucleotide exchange factor (GEF) 39
hsa-miR-331-5p	1	0	1	1	1	1	AFF4	AF4/FMR2 family, member 4
hsa-miR-331-5p	0	0	0	1	0	0	UCMA	upper zone of growth plate and cartilage matrix associated
hsa-miR-331-5p	0	0	0	1	0	0	GALT	galactose-1-phosphate uridylyltransferase
hsa-miR-331-5p	0	0	1	1	0	0	WDR62	WD repeat domain 62
hsa-miR-331-5p	1	0	1	1	1	1	ZNF827	zinc finger protein 827
hsa-miR-331-5p	0	0	0	1	0	0	OR6C1	olfactory receptor, family 6, subfamily C, member 1
hsa-miR-331-5p	1	0	0	1	1	1	PDHA1	pyruvate dehydrogenase (lipoamide) alpha 1
hsa-miR-331-5p	0	0	1	1	1	1	SOAT2	sterol O-acyltransferase 2
hsa-miR-331-5p	0	0	1	1	0	0	C9orf11	chromosome 9 open reading frame 11
hsa-miR-331-5p	0	0	0	1	0	0	IFNA4	interferon, alpha 4
hsa-miR-331-5p	0	0	0	1	1	1	HBB	hemoglobin, beta
hsa-miR-331-5p	0	0	1	1	0	0	HBD	hemoglobin, delta
hsa-miR-331-5p	0	0	0	1	0	0	ASB11	ankyrin repeat and SOCS box containing 11
hsa-miR-331-5p	1	0	0	1	1	1	PRDM15	PR domain containing 15
hsa-miR-331-5p	0	0	1	1	1	1	ALOX5AP	arachidonate 5-lipoxygenase-activating protein
hsa-miR-331-5p	0	0	1	1	0	0	FREM1	FRAS1 related extracellular matrix 1
hsa-miR-331-5p	0	0	0	1	1	1	ASGR1	asialoglycoprotein receptor 1
hsa-miR-331-5p	1	0	1	1	1	1	PFKP	phosphofructokinase, platelet
hsa-miR-331-5p	0	0	1	1	1	1	KDM4C	lysine (K)-specific demethylase 4C
hsa-miR-331-5p	0	0	1	1	0	0	APOBEC3G	apolipoprotein B mRNA editing enzyme, catalytic polypeptide-like 3G
hsa-miR-331-5p	0	0	1	1	1	1	SPATA6L	spermatogenesis associated 6-like
hsa-miR-331-5p	0	0	1	1	0	0	RNF17	ring finger protein 17
hsa-miR-331-5p	1	0	1	1	1	1	TRA2B	transformer 2 beta homolog (Drosophila)
hsa-miR-331-5p	0	0	0	1	0	0	DEFB135	defensin, beta 135
hsa-miR-331-5p	0	0	1	1	1	1	ZMYM5	zinc finger, MYM-type 5
hsa-miR-331-5p	1	0	1	1	1	1	MME	membrane metallo-endopeptidase
hsa-miR-331-5p	1	0	1	1	1	1	VGLL3	vestigial like 3 (Drosophila)
hsa-miR-331-5p	0	0	0	1	0	0	VILL	villin-like
hsa-miR-331-5p	0	0	0	1	0	0	UFSP1	UFM1-specific peptidase 1 (non-functional)
hsa-miR-331-5p	0	0	1	1	1	1	DUOX2	dual oxidase 2
hsa-miR-331-5p	1	0	1	1	1	1	CNEP1R1	CTD nuclear envelope phosphatase 1 regulatory subunit 1
hsa-miR-331-5p	0	0	1	1	0	0	C7orf63	chromosome 7 open reading frame 63
hsa-miR-331-5p	0	0	0	1	0	0	ESYT3	extended synaptotagmin-like protein 3
hsa-miR-331-5p	0	0	0	1	1	1	ASB14	ankyrin repeat and SOCS box containing 14
hsa-miR-331-5p	0	0	0	1	0	0	TAS2R50	taste receptor, type 2, member 50
hsa-miR-331-5p	1	0	1	1	1	1	GK	glycerol kinase
hsa-miR-331-5p	1	0	1	0	1	1	SMAD2	SMAD family member 2
hsa-miR-331-5p	0	0	1	1	1	1	TRIM6	tripartite motif containing 6
hsa-miR-331-5p	1	0	1	1	1	1	TULP4	tubby like protein 4
hsa-miR-331-5p	0	0	1	1	1	1	CCDC73	coiled-coil domain containing 73
hsa-miR-331-5p	1	0	1	1	1	1	ZNF655	zinc finger protein 655
hsa-miR-331-5p	0	0	1	1	1	1	TECRL	trans-2,3-enoyl-CoA reductase-like
hsa-miR-331-5p	1	0	0	1	1	1	ZNF260	zinc finger protein 260
hsa-miR-331-5p	0	0	1	1	1	1	ZNF833P	zinc finger protein 833, pseudogene
hsa-miR-331-5p	0	0	1	1	1	1	C12orf40	chromosome 12 open reading frame 40
hsa-miR-331-5p	1	0	1	1	1	1	RRM2	ribonucleotide reductase M2
hsa-miR-331-5p	0	0	1	0	1	1	TYW5	tRNA-yW synthesizing protein 5
hsa-miR-331-5p	1	0	1	1	1	1	QSER1	glutamine and serine rich 1
hsa-miR-331-5p	1	0	0	1	1	1	FAM177A1	family with sequence similarity 177, member A1
hsa-miR-331-5p	0	0	1	1	1	1	FKTN	fukutin
hsa-miR-331-5p	0	0	1	1	1	1	SHISA3	shisa homolog 3 (Xenopus laevis)
hsa-miR-331-5p	0	0	1	1	1	1	SNTN	sentan, cilia apical structure protein
hsa-miR-331-5p	1	0	0	1	1	1	ADCY7	adenylate cyclase 7
hsa-miR-331-5p	0	0	1	1	1	1	ECM2	extracellular matrix protein 2, female organ and adipocyte specific
hsa-miR-331-5p	1	0	1	1	1	1	AQP4	aquaporin 4
hsa-miR-331-5p	1	0	1	1	1	1	CREM	cAMP responsive element modulator
hsa-miR-331-5p	0	0	0	1	1	1	FHIT	fragile histidine triad
hsa-miR-331-5p	1	0	1	1	1	1	ITGA2	integrin, alpha 2 (CD49B, alpha 2 subunit of VLA-2 receptor)
hsa-miR-331-5p	1	0	1	1	1	1	TDG	thymine-DNA glycosylase
hsa-miR-331-5p	0	0	0	1	1	1	ZNF91	zinc finger protein 91
hsa-miR-331-5p	1	0	1	1	1	1	PPFIA1	protein tyrosine phosphatase, receptor type, f polypeptide (PTPRF), interacting protein (liprin), alpha 1
hsa-miR-331-5p	1	0	1	1	1	1	SYNJ1	synaptojanin 1
hsa-miR-331-5p	1	0	1	1	1	1	FGF12	fibroblast growth factor 12
hsa-miR-331-5p	0	0	1	0	1	1	SLC1A3	solute carrier family 1 (glial high affinity glutamate transporter), member 3
hsa-miR-331-5p	0	0	0	1	1	1	ZNF235	zinc finger protein 235
hsa-miR-331-5p	1	0	1	1	1	1	NAP1L1	nucleosome assembly protein 1-like 1
hsa-miR-331-5p	0	0	1	1	1	1	MGAM	maltase-glucoamylase (alpha-glucosidase)
hsa-miR-331-5p	0	0	1	1	1	1	DDX21	DEAD (Asp-Glu-Ala-Asp) box helicase 21
hsa-miR-331-5p	0	0	1	1	1	1	ABCD2	ATP-binding cassette, sub-family D (ALD), member 2
hsa-miR-331-5p	1	0	1	1	1	1	FUT9	fucosyltransferase 9 (alpha (1,3) fucosyltransferase)
hsa-miR-331-5p	1	0	1	1	1	1	SNTB2	syntrophin, beta 2 (dystrophin-associated protein A1, 59kDa, basic component 2)
hsa-miR-331-5p	0	0	1	0	1	1	PSG1	pregnancy specific beta-1-glycoprotein 1
hsa-miR-331-5p	0	0	1	1	1	1	DMC1	DMC1 dosage suppressor of mck1 homolog, meiosis-specific homologous recombination (yeast)
hsa-miR-331-5p	0	0	1	1	1	1	ABCB10	ATP-binding cassette, sub-family B (MDR/TAP), member 10
hsa-miR-331-5p	0	0	0	1	1	1	NUP62	nucleoporin 62kDa
hsa-miR-331-5p	0	0	0	1	1	1	SERPINB13	serpin peptidase inhibitor, clade B (ovalbumin), member 13
hsa-miR-331-5p	0	0	1	1	1	1	IFIT5	interferon-induced protein with tetratricopeptide repeats 5
hsa-miR-331-5p	1	0	1	0	1	1	TRHDE	thyrotropin-releasing hormone degrading enzyme
hsa-miR-331-5p	1	0	1	0	1	1	LIMD1	LIM domains containing 1
hsa-miR-331-5p	1	0	1	1	1	1	SECISBP2L	SECIS binding protein 2-like
hsa-miR-331-5p	0	0	1	1	1	1	LCMT2	leucine carboxyl methyltransferase 2
hsa-miR-331-5p	1	0	1	0	1	1	ZNF507	zinc finger protein 507
hsa-miR-331-5p	0	0	1	1	1	1	RAB23	RAB23, member RAS oncogene family
hsa-miR-331-5p	0	0	1	1	1	1	TRAT1	T cell receptor associated transmembrane adaptor 1
hsa-miR-331-5p	0	0	1	1	1	1	C1RL	complement component 1, r subcomponent-like
hsa-miR-331-5p	1	0	1	1	1	1	ST7L	suppression of tumorigenicity 7 like
hsa-miR-331-5p	1	0	1	0	1	1	G2E3	G2/M-phase specific E3 ubiquitin protein ligase
hsa-miR-331-5p	0	0	1	1	1	1	OSBPL1A	oxysterol binding protein-like 1A
hsa-miR-331-5p	0	0	1	1	1	1	ERRFI1	ERBB receptor feedback inhibitor 1
hsa-miR-331-5p	0	0	1	0	1	1	MRPL50	mitochondrial ribosomal protein L50
hsa-miR-331-5p	0	0	1	1	1	1	GNL3L	guanine nucleotide binding protein-like 3 (nucleolar)-like
hsa-miR-331-5p	0	0	1	1	1	1	TRMT13	tRNA methyltransferase 13 homolog (S. cerevisiae)
hsa-miR-331-5p	1	0	1	1	1	1	CELF4	CUGBP, Elav-like family member 4
hsa-miR-331-5p	0	0	1	1	1	1	COG6	component of oligomeric golgi complex 6
hsa-miR-331-5p	0	0	1	1	1	1	FAM204A	family with sequence similarity 204, member A
hsa-miR-331-5p	0	0	1	1	1	1	C5orf54	chromosome 5 open reading frame 54
hsa-miR-331-5p	0	0	0	1	1	1	TMEM106C	transmembrane protein 106C
hsa-miR-331-5p	1	0	1	1	1	1	GNPTAB	N-acetylglucosamine-1-phosphate transferase, alpha and beta subunits
hsa-miR-331-5p	0	0	0	1	1	1	TMEM43	transmembrane protein 43
hsa-miR-331-5p	0	0	0	1	1	1	THAP9	THAP domain containing 9
hsa-miR-331-5p	0	0	1	1	1	1	FAM124B	family with sequence similarity 124B
hsa-miR-331-5p	0	0	1	0	1	1	TM4SF20	transmembrane 4 L six family member 20
hsa-miR-331-5p	0	0	0	1	1	1	TRIM45	tripartite motif containing 45
hsa-miR-331-5p	1	0	1	0	1	1	NUDT12	nudix (nucleoside diphosphate linked moiety X)-type motif 12
hsa-miR-331-5p	0	0	0	1	1	1	PCBD2	pterin-4 alpha-carbinolamine dehydratase/dimerization cofactor of hepatocyte nuclear factor 1 alpha (TCF1) 2
hsa-miR-331-5p	0	0	1	0	1	1	CBR4	carbonyl reductase 4
hsa-miR-331-5p	0	0	0	1	1	1	ZCRB1	zinc finger CCHC-type and RNA binding motif 1
hsa-miR-331-5p	0	0	1	0	1	1	C9orf123	chromosome 9 open reading frame 123
hsa-miR-331-5p	0	0	1	1	1	1	BCCIP	BRCA2 and CDKN1A interacting protein
hsa-miR-331-5p	0	0	1	1	1	1	SLC4A5	solute carrier family 4, sodium bicarbonate cotransporter, member 5
hsa-miR-331-5p	0	0	1	0	1	1	SLCO1A2	solute carrier organic anion transporter family, member 1A2
hsa-miR-331-5p	1	0	1	1	1	1	ICA1L	islet cell autoantigen 1,69kDa-like
hsa-miR-331-5p	0	0	1	1	1	1	TLR4	toll-like receptor 4
hsa-miR-331-5p	0	0	0	0	1	1	ZNF480	zinc finger protein 480
hsa-miR-331-5p	1	0	1	1	1	1	CCSAP	centriole, cilia and spindle-associated protein
hsa-miR-331-5p	1	0	1	1	1	1	CTSC	cathepsin C
hsa-miR-331-5p	0	0	1	0	1	1	KBTBD3	kelch repeat and BTB (POZ) domain containing 3
hsa-miR-331-5p	1	0	1	1	1	1	ZNF664	zinc finger protein 664
hsa-miR-331-5p	1	0	1	1	1	1	TIPRL	TIP41, TOR signaling pathway regulator-like (S. cerevisiae)
hsa-miR-331-5p	0	0	0	0	1	1	FAM26E	family with sequence similarity 26, member E
hsa-miR-331-5p	1	0	1	1	1	1	ANAPC16	anaphase promoting complex subunit 16
hsa-miR-331-5p	0	0	1	1	1	1	C1orf88	chromosome 1 open reading frame 88
hsa-miR-331-5p	0	0	1	1	1	1	MFSD4	major facilitator superfamily domain containing 4
hsa-miR-331-5p	0	0	1	1	1	1	LYRM7	Lyrm7 homolog (mouse)
hsa-miR-331-5p	1	0	1	0	1	1	LOC90462	zinc finger protein 605-like
hsa-miR-331-5p	1	0	1	0	1	1	LIN54	lin-54 homolog (C. elegans)
hsa-miR-331-5p	1	0	1	0	1	1	NAALADL2	N-acetylated alpha-linked acidic dipeptidase-like 2
hsa-miR-331-5p	0	0	0	1	1	1	FREM3	FRAS1 related extracellular matrix 3
hsa-miR-331-5p	0	0	0	0	1	1	GOLGA6D	golgin A6 family, member D
hsa-miR-331-5p	0	0	0	0	1	1	LOC643037	uncharacterized LOC643037
hsa-miR-331-5p	0	0	1	0	1	1	PPIAL4G	peptidylprolyl isomerase A (cyclophilin A)-like 4G
hsa-miR-331-5p	0	0	0	0	1	1	PPIAL4B	peptidylprolyl isomerase A (cyclophilin A)-like 4B
hsa-miR-331-5p	0	0	0	0	1	1	PPIAL4C	peptidylprolyl isomerase A (cyclophilin A)-like 4C
hsa-miR-331-5p	0	0	0	0	1	1	LOC645752	golgin A6 family, member A pseudogene
hsa-miR-331-5p	0	0	0	0	1	1	C5orf63	chromosome 5 open reading frame 63
