# Supplementary material for: Profiling of Selected MicroRNAs in Proliferative Eutopic Endometrium of Women with Ovarian Endometriosis
Source: Biomed Res Int. 2015 Aug 20;2015:760698. doi: 10.1155/2015/760698 (PMC4558423; doi:10.1155/2015/760698)
Supplement: Supplementary file 1 — Table I: The names of miRNAs significantly differentially expressed between eutopic endometrium of patients with endometriosis vs eutopic endometrium of patients without endometriosis. Table II: The associations between miRNA and mRNA, which presents detailed results of the search of six major databases i.e targetscan, tarbase, miranda, mirbase, mirtarget2 and pictar. [file 760698.f1.zip › 760698.f1/Table II/hsa-miR-338-3p.tsv]

miR	targetscan	tarbase	miranda	mirbase	mirtarget2	pictar	GeneSymbol	GeneName
hsa-miR-338-3p	1	0	1	1	1	1	ATXN7L1	ataxin 7-like 1
hsa-miR-338-3p	1	0	1	1	1	1	CPEB3	cytoplasmic polyadenylation element binding protein 3
hsa-miR-338-3p	1	0	1	1	1	1	FBXW7	F-box and WD repeat domain containing 7, E3 ubiquitin protein ligase
hsa-miR-338-3p	1	0	1	0	1	1	CHL1	cell adhesion molecule with homology to L1CAM (close homolog of L1)
hsa-miR-338-3p	1	0	1	1	0	0	SNX18	sorting nexin 18
hsa-miR-338-3p	1	0	1	1	1	1	RUNX2	runt-related transcription factor 2
hsa-miR-338-3p	1	0	1	1	1	1	DAB2IP	DAB2 interacting protein
hsa-miR-338-3p	1	0	1	0	1	1	MLL2	myeloid/lymphoid or mixed-lineage leukemia 2
hsa-miR-338-3p	1	0	1	1	1	1	NNT	nicotinamide nucleotide transhydrogenase
hsa-miR-338-3p	1	0	1	0	1	1	SP6	Sp6 transcription factor
hsa-miR-338-3p	1	0	1	1	1	1	ZBTB39	zinc finger and BTB domain containing 39
hsa-miR-338-3p	1	0	1	1	1	1	AZI2	5-azacytidine induced 2
hsa-miR-338-3p	1	0	1	1	1	1	RRM1	ribonucleotide reductase M1
hsa-miR-338-3p	1	0	1	1	1	1	PI4K2B	phosphatidylinositol 4-kinase type 2 beta
hsa-miR-338-3p	1	0	1	1	1	1	LRRC7	leucine rich repeat containing 7
hsa-miR-338-3p	1	0	1	1	1	1	FGF9	fibroblast growth factor 9 (glia-activating factor)
hsa-miR-338-3p	1	0	0	1	1	1	WNK4	WNK lysine deficient protein kinase 4
hsa-miR-338-3p	1	0	1	1	1	1	ARMC8	armadillo repeat containing 8
hsa-miR-338-3p	1	0	1	1	1	1	ARGLU1	arginine and glutamate rich 1
hsa-miR-338-3p	1	0	0	1	0	0	TBC1D8	TBC1 domain family, member 8 (with GRAM domain)
hsa-miR-338-3p	1	0	1	1	1	1	NONO	non-POU domain containing, octamer-binding
hsa-miR-338-3p	1	0	1	0	1	1	NHS	Nance-Horan syndrome (congenital cataracts and dental anomalies)
hsa-miR-338-3p	1	0	1	1	1	1	FOPNL	FGFR1OP N-terminal like
hsa-miR-338-3p	1	0	1	0	1	1	IRS2	insulin receptor substrate 2
hsa-miR-338-3p	1	0	1	0	0	0	TANC2	tetratricopeptide repeat, ankyrin repeat and coiled-coil containing 2
hsa-miR-338-3p	1	0	1	1	1	1	MTUS1	microtubule associated tumor suppressor 1
hsa-miR-338-3p	1	0	1	1	1	1	ATG9A	autophagy related 9A
hsa-miR-338-3p	1	0	1	1	1	1	ARHGEF10L	Rho guanine nucleotide exchange factor (GEF) 10-like
hsa-miR-338-3p	1	0	1	1	1	1	CAMK2A	calcium/calmodulin-dependent protein kinase II alpha
hsa-miR-338-3p	1	0	1	1	1	1	NDFIP1	Nedd4 family interacting protein 1
hsa-miR-338-3p	1	0	1	1	1	1	ARHGAP32	Rho GTPase activating protein 32
hsa-miR-338-3p	1	0	0	1	1	1	ADAM17	ADAM metallopeptidase domain 17
hsa-miR-338-3p	1	0	1	1	1	1	PTCH1	patched 1
hsa-miR-338-3p	1	0	1	1	0	0	CNTD2	cyclin N-terminal domain containing 2
hsa-miR-338-3p	1	0	1	0	1	1	PKNOX1	PBX/knotted 1 homeobox 1
hsa-miR-338-3p	1	0	1	0	1	1	TFEC	transcription factor EC
hsa-miR-338-3p	1	0	1	1	0	0	KIAA1549L	KIAA1549-like
hsa-miR-338-3p	1	0	1	1	1	1	TIMP2	TIMP metallopeptidase inhibitor 2
hsa-miR-338-3p	1	0	1	1	1	1	MSN	moesin
hsa-miR-338-3p	1	0	1	1	1	1	LGALSL	lectin, galactoside-binding-like
hsa-miR-338-3p	1	0	1	1	1	1	NRP1	neuropilin 1
hsa-miR-338-3p	1	0	1	1	1	1	PDIK1L	PDLIM1 interacting kinase 1 like
hsa-miR-338-3p	1	0	1	1	1	1	ESYT2	extended synaptotagmin-like protein 2
hsa-miR-338-3p	1	0	1	1	1	1	TANC1	tetratricopeptide repeat, ankyrin repeat and coiled-coil containing 1
hsa-miR-338-3p	1	0	1	1	1	1	SLC35F5	solute carrier family 35, member F5
hsa-miR-338-3p	1	0	1	1	1	1	DLG2	discs, large homolog 2 (Drosophila)
hsa-miR-338-3p	1	0	1	1	1	1	TERF2	telomeric repeat binding factor 2
hsa-miR-338-3p	1	0	1	1	1	1	NOVA1	neuro-oncological ventral antigen 1
hsa-miR-338-3p	1	0	1	1	1	1	FAM168A	family with sequence similarity 168, member A
hsa-miR-338-3p	1	0	1	1	1	1	BAMBI	BMP and activin membrane-bound inhibitor homolog (Xenopus laevis)
hsa-miR-338-3p	1	0	1	1	0	0	DES	desmin
hsa-miR-338-3p	1	0	1	1	1	1	HMOX2	heme oxygenase (decycling) 2
hsa-miR-338-3p	1	0	1	1	1	1	PVALB	parvalbumin
hsa-miR-338-3p	1	0	1	0	1	1	TSPYL4	TSPY-like 4
hsa-miR-338-3p	1	0	0	0	0	0	AAK1	AP2 associated kinase 1
hsa-miR-338-3p	1	0	1	1	0	0	GRIN1	glutamate receptor, ionotropic, N-methyl D-aspartate 1
hsa-miR-338-3p	1	0	1	1	1	1	RAB14	RAB14, member RAS oncogene family
hsa-miR-338-3p	1	0	1	1	1	1	FBXO30	F-box protein 30
hsa-miR-338-3p	1	0	1	1	1	1	PPP1R1A	protein phosphatase 1, regulatory (inhibitor) subunit 1A
hsa-miR-338-3p	1	0	1	1	1	1	SEMA6A	sema domain, transmembrane domain (TM), and cytoplasmic domain, (semaphorin) 6A
hsa-miR-338-3p	1	0	1	1	1	1	SLC35G1	solute carrier family 35, member G1
hsa-miR-338-3p	1	0	1	1	1	1	GNG12	guanine nucleotide binding protein (G protein), gamma 12
hsa-miR-338-3p	1	0	1	0	1	1	DGKB	diacylglycerol kinase, beta 90kDa
hsa-miR-338-3p	1	0	1	1	1	1	PANK1	pantothenate kinase 1
hsa-miR-338-3p	1	0	1	1	1	1	DCAF12	DDB1 and CUL4 associated factor 12
hsa-miR-338-3p	1	0	1	0	1	1	VAMP2	vesicle-associated membrane protein 2 (synaptobrevin 2)
hsa-miR-338-3p	1	0	1	1	1	1	CNOT6	CCR4-NOT transcription complex, subunit 6
hsa-miR-338-3p	1	0	1	1	1	1	C10orf54	chromosome 10 open reading frame 54
hsa-miR-338-3p	1	0	1	1	0	0	CHTOP	chromatin target of PRMT1
hsa-miR-338-3p	1	0	1	1	0	0	PYGB	phosphorylase, glycogen; brain
hsa-miR-338-3p	1	0	1	1	1	1	MECOM	MDS1 and EVI1 complex locus
hsa-miR-338-3p	1	0	1	1	1	1	CELSR2	cadherin, EGF LAG seven-pass G-type receptor 2 (flamingo homolog, Drosophila)
hsa-miR-338-3p	1	0	1	0	1	1	RBBP5	retinoblastoma binding protein 5
hsa-miR-338-3p	1	0	1	1	1	1	TGOLN2	trans-golgi network protein 2
hsa-miR-338-3p	1	0	1	0	1	1	MSL2	male-specific lethal 2 homolog (Drosophila)
hsa-miR-338-3p	1	0	1	0	1	1	ZDHHC21	zinc finger, DHHC-type containing 21
hsa-miR-338-3p	1	0	1	0	1	1	NUFIP2	nuclear fragile X mental retardation protein interacting protein 2
hsa-miR-338-3p	1	0	1	1	1	1	TIA1	TIA1 cytotoxic granule-associated RNA binding protein
hsa-miR-338-3p	1	0	1	1	0	0	PLXNB3	plexin B3
hsa-miR-338-3p	1	0	1	0	1	1	ZFHX4	zinc finger homeobox 4
hsa-miR-338-3p	1	0	1	0	0	0	FAM69A	family with sequence similarity 69, member A
hsa-miR-338-3p	1	0	1	1	1	1	PHF20L1	PHD finger protein 20-like 1
hsa-miR-338-3p	1	0	1	1	1	1	CHSY1	chondroitin sulfate synthase 1
hsa-miR-338-3p	1	0	1	1	1	1	PAPD5	PAP associated domain containing 5
hsa-miR-338-3p	1	0	1	1	1	1	RBMS3	RNA binding motif, single stranded interacting protein 3
hsa-miR-338-3p	1	0	1	1	1	1	ZNF238	zinc finger protein 238
hsa-miR-338-3p	1	0	1	1	1	1	SYN2	synapsin II
hsa-miR-338-3p	1	0	1	0	1	1	RNF114	ring finger protein 114
hsa-miR-338-3p	1	0	1	1	1	1	KDR	kinase insert domain receptor (a type III receptor tyrosine kinase)
hsa-miR-338-3p	1	0	1	0	1	1	ATP10D	ATPase, class V, type 10D
hsa-miR-338-3p	1	0	1	1	1	1	DCUN1D3	DCN1, defective in cullin neddylation 1, domain containing 3 (S. cerevisiae)
hsa-miR-338-3p	1	0	1	1	1	1	MYT1L	myelin transcription factor 1-like
hsa-miR-338-3p	1	0	1	0	0	0	NTN1	netrin 1
hsa-miR-338-3p	1	0	1	1	1	1	HHAT	hedgehog acyltransferase
hsa-miR-338-3p	1	0	1	1	1	1	SF3A3	splicing factor 3a, subunit 3, 60kDa
hsa-miR-338-3p	1	0	1	1	0	0	WNK1	WNK lysine deficient protein kinase 1
hsa-miR-338-3p	1	0	1	0	1	1	OSBPL3	oxysterol binding protein-like 3
hsa-miR-338-3p	1	0	1	1	1	1	PPP1CB	protein phosphatase 1, catalytic subunit, beta isozyme
hsa-miR-338-3p	1	0	1	0	1	1	TRIM33	tripartite motif containing 33
hsa-miR-338-3p	1	0	1	1	0	0	KCNC1	potassium voltage-gated channel, Shaw-related subfamily, member 1
hsa-miR-338-3p	1	0	1	1	1	1	ZBTB10	zinc finger and BTB domain containing 10
hsa-miR-338-3p	1	0	1	1	1	1	IGF1	insulin-like growth factor 1 (somatomedin C)
hsa-miR-338-3p	1	0	1	1	1	1	NTPCR	nucleoside-triphosphatase, cancer-related
hsa-miR-338-3p	1	0	1	0	1	1	ARL5A	ADP-ribosylation factor-like 5A
hsa-miR-338-3p	1	0	1	0	1	1	UBE2G1	ubiquitin-conjugating enzyme E2G 1
hsa-miR-338-3p	1	0	1	1	1	1	ZDHHC18	zinc finger, DHHC-type containing 18
hsa-miR-338-3p	1	0	1	1	1	1	B4GALT7	xylosylprotein beta 1,4-galactosyltransferase, polypeptide 7
hsa-miR-338-3p	1	0	1	1	1	1	GPR124	G protein-coupled receptor 124
hsa-miR-338-3p	1	0	1	1	1	1	LRRC59	leucine rich repeat containing 59
hsa-miR-338-3p	1	0	1	1	1	1	SNAP29	synaptosomal-associated protein, 29kDa
hsa-miR-338-3p	1	0	1	1	1	1	SALL1	sal-like 1 (Drosophila)
hsa-miR-338-3p	1	0	1	1	1	1	SRSF2	serine/arginine-rich splicing factor 2
hsa-miR-338-3p	1	0	1	1	1	1	ACTR2	ARP2 actin-related protein 2 homolog (yeast)
hsa-miR-338-3p	1	0	1	1	1	1	RIC8B	resistance to inhibitors of cholinesterase 8 homolog B (C. elegans)
hsa-miR-338-3p	1	0	1	1	1	1	RCSD1	RCSD domain containing 1
hsa-miR-338-3p	1	0	1	0	1	1	TSPYL1	TSPY-like 1
hsa-miR-338-3p	1	0	1	1	1	1	ARHGEF9	Cdc42 guanine nucleotide exchange factor (GEF) 9
hsa-miR-338-3p	1	0	1	1	1	1	EIF4E3	eukaryotic translation initiation factor 4E family member 3
hsa-miR-338-3p	1	0	1	1	1	1	GTPBP2	GTP binding protein 2
hsa-miR-338-3p	1	0	1	1	1	1	RAPH1	Ras association (RalGDS/AF-6) and pleckstrin homology domains 1
hsa-miR-338-3p	1	0	1	1	1	1	ZFAND3	zinc finger, AN1-type domain 3
hsa-miR-338-3p	1	0	1	1	1	1	FBXO33	F-box protein 33
hsa-miR-338-3p	1	0	1	1	1	1	CADM2	cell adhesion molecule 2
hsa-miR-338-3p	1	0	1	1	1	1	PRRC2C	proline-rich coiled-coil 2C
hsa-miR-338-3p	1	0	1	1	1	1	MACROD2	MACRO domain containing 2
hsa-miR-338-3p	1	0	1	0	1	1	SOX4	SRY (sex determining region Y)-box 4
hsa-miR-338-3p	1	0	1	1	1	1	PLA2G3	phospholipase A2, group III
hsa-miR-338-3p	1	0	1	1	1	1	YRDC	yrdC domain containing (E. coli)
hsa-miR-338-3p	1	0	1	1	1	1	WAPAL	wings apart-like homolog (Drosophila)
hsa-miR-338-3p	1	0	1	1	1	1	RUSC2	RUN and SH3 domain containing 2
hsa-miR-338-3p	1	0	1	1	1	1	CAMTA1	calmodulin binding transcription activator 1
hsa-miR-338-3p	1	0	1	0	1	1	SRGAP3	SLIT-ROBO Rho GTPase activating protein 3
hsa-miR-338-3p	1	0	1	1	1	1	MNX1	motor neuron and pancreas homeobox 1
hsa-miR-338-3p	1	0	1	1	1	1	SULT4A1	sulfotransferase family 4A, member 1
hsa-miR-338-3p	1	0	1	1	1	1	MAF	v-maf musculoaponeurotic fibrosarcoma oncogene homolog (avian)
hsa-miR-338-3p	1	0	1	1	1	1	ZBTB7B	zinc finger and BTB domain containing 7B
hsa-miR-338-3p	1	0	1	1	1	1	HN1	hematological and neurological expressed 1
hsa-miR-338-3p	1	0	1	1	1	1	BCL2L15	BCL2-like 15
hsa-miR-338-3p	1	0	1	1	1	1	N4BP2L1	NEDD4 binding protein 2-like 1
hsa-miR-338-3p	1	0	1	0	1	1	AMOTL2	angiomotin like 2
hsa-miR-338-3p	1	0	1	0	1	1	UBE2Q1	ubiquitin-conjugating enzyme E2Q family member 1
hsa-miR-338-3p	1	0	1	1	1	1	SLC30A7	solute carrier family 30 (zinc transporter), member 7
hsa-miR-338-3p	1	0	1	1	1	1	TMEM229B	transmembrane protein 229B
hsa-miR-338-3p	1	0	1	1	1	1	PIP5KL1	phosphatidylinositol-4-phosphate 5-kinase-like 1
hsa-miR-338-3p	1	0	1	1	1	1	LUC7L2	LUC7-like 2 (S. cerevisiae)
hsa-miR-338-3p	1	0	1	1	1	1	ETS1	v-ets erythroblastosis virus E26 oncogene homolog 1 (avian)
hsa-miR-338-3p	1	0	1	0	1	1	C18orf25	chromosome 18 open reading frame 25
hsa-miR-338-3p	1	0	1	1	0	0	SNX30	sorting nexin family member 30
hsa-miR-338-3p	1	0	0	0	1	1	KRT77	keratin 77
hsa-miR-338-3p	1	0	1	1	1	1	PPP4R1	protein phosphatase 4, regulatory subunit 1
hsa-miR-338-3p	1	0	1	0	1	1	IPO9	importin 9
hsa-miR-338-3p	1	0	1	1	1	1	ADAMTS18	ADAM metallopeptidase with thrombospondin type 1 motif, 18
hsa-miR-338-3p	1	0	1	0	1	1	HSPA12A	heat shock 70kDa protein 12A
hsa-miR-338-3p	1	0	1	1	0	0	ABL2	v-abl Abelson murine leukemia viral oncogene homolog 2
hsa-miR-338-3p	1	0	1	1	1	1	AGPAT5	1-acylglycerol-3-phosphate O-acyltransferase 5 (lysophosphatidic acid acyltransferase, epsilon)
hsa-miR-338-3p	1	0	1	0	1	1	RNF144A	ring finger protein 144A
hsa-miR-338-3p	1	0	1	0	1	1	CPLX2	complexin 2
hsa-miR-338-3p	1	0	1	0	1	1	SS18L1	synovial sarcoma translocation gene on chromosome 18-like 1
hsa-miR-338-3p	1	0	1	1	1	1	FGD1	FYVE, RhoGEF and PH domain containing 1
hsa-miR-338-3p	1	0	1	1	1	1	VAPB	VAMP (vesicle-associated membrane protein)-associated protein B and C
hsa-miR-338-3p	1	0	1	1	1	1	LARP4	La ribonucleoprotein domain family, member 4
hsa-miR-338-3p	1	0	1	1	1	1	MAFB	v-maf musculoaponeurotic fibrosarcoma oncogene homolog B (avian)
hsa-miR-338-3p	1	0	1	1	0	0	USP7	ubiquitin specific peptidase 7 (herpes virus-associated)
hsa-miR-338-3p	1	0	0	1	1	1	AKAP12	A kinase (PRKA) anchor protein 12
hsa-miR-338-3p	1	0	1	1	0	0	LRCH4	leucine-rich repeats and calponin homology (CH) domain containing 4
hsa-miR-338-3p	1	0	1	1	1	1	KCNMA1	potassium large conductance calcium-activated channel, subfamily M, alpha member 1
hsa-miR-338-3p	1	0	1	1	1	1	UPK1B	uroplakin 1B
hsa-miR-338-3p	1	0	1	0	1	1	SRSF8	serine/arginine-rich splicing factor 8
hsa-miR-338-3p	1	0	1	0	1	1	ZNF607	zinc finger protein 607
hsa-miR-338-3p	1	0	1	1	1	1	CBFB	core-binding factor, beta subunit
hsa-miR-338-3p	1	0	1	1	0	0	PEAK1	NKF3 kinase family member
hsa-miR-338-3p	1	0	1	1	1	1	CAMK2G	calcium/calmodulin-dependent protein kinase II gamma
hsa-miR-338-3p	1	0	1	0	1	1	LMO3	LIM domain only 3 (rhombotin-like 2)
hsa-miR-338-3p	1	0	1	1	0	0	PLD3	phospholipase D family, member 3
hsa-miR-338-3p	1	0	1	1	1	1	CSDA	cold shock domain protein A
hsa-miR-338-3p	1	0	1	0	1	1	C6orf222	chromosome 6 open reading frame 222
hsa-miR-338-3p	1	0	1	1	1	1	TNFRSF1B	tumor necrosis factor receptor superfamily, member 1B
hsa-miR-338-3p	1	0	1	1	1	1	KIAA1199	KIAA1199
hsa-miR-338-3p	1	0	1	0	1	1	PAPPA	pregnancy-associated plasma protein A, pappalysin 1
hsa-miR-338-3p	1	0	1	1	1	1	HELZ	helicase with zinc finger
hsa-miR-338-3p	1	0	1	1	1	1	FGFR2	fibroblast growth factor receptor 2
hsa-miR-338-3p	1	0	1	1	1	1	TEX19	testis expressed 19
hsa-miR-338-3p	1	0	1	1	1	1	FKBP1A	FK506 binding protein 1A, 12kDa
hsa-miR-338-3p	1	0	1	0	1	1	UBFD1	ubiquitin family domain containing 1
hsa-miR-338-3p	1	0	1	1	1	1	CDV3	CDV3 homolog (mouse)
hsa-miR-338-3p	1	0	0	1	1	1	PRDM15	PR domain containing 15
hsa-miR-338-3p	1	0	1	1	1	1	ADAMTS6	ADAM metallopeptidase with thrombospondin type 1 motif, 6
hsa-miR-338-3p	1	0	1	1	0	0	TET3	tet methylcytosine dioxygenase 3
hsa-miR-338-3p	1	0	1	1	1	1	TSPYL5	TSPY-like 5
hsa-miR-338-3p	1	0	1	1	0	0	ATXN7L3	ataxin 7-like 3
hsa-miR-338-3p	1	0	1	0	1	1	TNRC6B	trinucleotide repeat containing 6B
hsa-miR-338-3p	1	0	1	1	1	1	PPP1R3F	protein phosphatase 1, regulatory subunit 3F
hsa-miR-338-3p	1	0	1	1	1	1	RGS7BP	regulator of G-protein signaling 7 binding protein
hsa-miR-338-3p	1	0	1	1	1	1	HOXA3	homeobox A3
hsa-miR-338-3p	1	0	1	1	1	1	NOL4	nucleolar protein 4
hsa-miR-338-3p	1	0	1	1	1	1	ARPC1B	actin related protein 2/3 complex, subunit 1B, 41kDa
hsa-miR-338-3p	1	0	1	1	0	0	DUOX1	dual oxidase 1
hsa-miR-338-3p	1	0	1	0	1	1	SH3PXD2A	SH3 and PX domains 2A
hsa-miR-338-3p	1	0	1	1	0	0	SRCAP	Snf2-related CREBBP activator protein
hsa-miR-338-3p	1	0	1	1	1	1	PRUNE2	prune homolog 2 (Drosophila)
hsa-miR-338-3p	1	0	1	0	1	1	PTPRT	protein tyrosine phosphatase, receptor type, T
hsa-miR-338-3p	0	0	1	1	1	1	PEG3	paternally expressed 3
hsa-miR-338-3p	0	0	1	1	1	1	PDE4DIP	phosphodiesterase 4D interacting protein
hsa-miR-338-3p	0	0	1	1	0	0	RAP1GAP	RAP1 GTPase activating protein
hsa-miR-338-3p	1	0	1	1	0	0	DENND4B	DENN/MADD domain containing 4B
hsa-miR-338-3p	1	0	1	0	1	1	CEP350	centrosomal protein 350kDa
hsa-miR-338-3p	1	0	1	1	1	1	TP63	tumor protein p63
hsa-miR-338-3p	1	0	1	0	1	1	RBM12	RNA binding motif protein 12
hsa-miR-338-3p	1	0	1	0	1	1	LPHN3	latrophilin 3
hsa-miR-338-3p	0	0	1	0	1	1	RASGRP3	RAS guanyl releasing protein 3 (calcium and DAG-regulated)
hsa-miR-338-3p	1	0	1	1	1	1	CDK12	cyclin-dependent kinase 12
hsa-miR-338-3p	1	0	1	1	1	1	SEMA4F	sema domain, immunoglobulin domain (Ig), transmembrane domain (TM) and short cytoplasmic domain, (semaphorin) 4F
hsa-miR-338-3p	0	0	1	1	1	1	MAN2B2	mannosidase, alpha, class 2B, member 2
hsa-miR-338-3p	1	0	1	0	0	0	DTX4	deltex homolog 4 (Drosophila)
hsa-miR-338-3p	1	0	1	1	1	1	BAHD1	bromo adjacent homology domain containing 1
hsa-miR-338-3p	1	0	1	1	1	1	NLGN4Y	neuroligin 4, Y-linked
hsa-miR-338-3p	0	0	1	0	0	0	THSD7A	thrombospondin, type I, domain containing 7A
hsa-miR-338-3p	1	0	1	1	1	1	NTNG1	netrin G1
hsa-miR-338-3p	1	0	1	1	0	0	FRMD4B	FERM domain containing 4B
hsa-miR-338-3p	1	0	1	1	1	1	NLGN1	neuroligin 1
hsa-miR-338-3p	1	0	1	1	1	1	ZMYND8	zinc finger, MYND-type containing 8
hsa-miR-338-3p	0	0	1	1	0	0	ZC4H2	zinc finger, C4H2 domain containing
hsa-miR-338-3p	1	0	1	1	1	1	NDRG4	NDRG family member 4
hsa-miR-338-3p	1	0	1	1	0	0	KIAA1210	KIAA1210
hsa-miR-338-3p	0	0	1	0	0	0	MTA3	metastasis associated 1 family, member 3
hsa-miR-338-3p	0	0	1	1	1	1	FILIP1	filamin A interacting protein 1
hsa-miR-338-3p	1	0	1	1	1	1	PCDH19	protocadherin 19
hsa-miR-338-3p	1	0	1	1	1	1	FAM135A	family with sequence similarity 135, member A
hsa-miR-338-3p	1	1	1	1	1	1	NFIA	nuclear factor I/A
hsa-miR-338-3p	1	0	1	0	1	1	SEMA6D	sema domain, transmembrane domain (TM), and cytoplasmic domain, (semaphorin) 6D
hsa-miR-338-3p	1	0	1	1	1	1	FRAS1	Fraser syndrome 1
hsa-miR-338-3p	0	0	1	0	1	1	ARHGAP23	Rho GTPase activating protein 23
hsa-miR-338-3p	1	0	1	1	1	1	KIAA1522	KIAA1522
hsa-miR-338-3p	1	0	1	1	1	1	INADL	InaD-like (Drosophila)
hsa-miR-338-3p	0	0	1	0	1	1	ZSWIM6	zinc finger, SWIM-type containing 6
hsa-miR-338-3p	1	0	1	0	1	1	IGDCC4	immunoglobulin superfamily, DCC subclass, member 4
hsa-miR-338-3p	1	0	1	1	1	1	ZNF532	zinc finger protein 532
hsa-miR-338-3p	0	0	1	0	1	1	SETD5	SET domain containing 5
hsa-miR-338-3p	1	0	1	0	1	1	RIMS1	regulating synaptic membrane exocytosis 1
hsa-miR-338-3p	1	0	1	1	0	0	ADC	arginine decarboxylase
hsa-miR-338-3p	1	0	1	1	1	1	SH3TC2	SH3 domain and tetratricopeptide repeats 2
hsa-miR-338-3p	0	0	1	1	0	0	SLC22A10	solute carrier family 22, member 10
hsa-miR-338-3p	1	0	1	0	0	0	FAT3	FAT tumor suppressor homolog 3 (Drosophila)
hsa-miR-338-3p	1	0	1	1	1	1	CDC20B	cell division cycle 20 homolog B (S. cerevisiae)
hsa-miR-338-3p	1	0	1	0	0	0	ZBTB34	zinc finger and BTB domain containing 34
hsa-miR-338-3p	0	0	1	1	1	1	NELL1	NEL-like 1 (chicken)
hsa-miR-338-3p	0	0	1	1	1	1	BCO2	beta-carotene oxygenase 2
hsa-miR-338-3p	1	0	1	1	1	1	PAN3	PAN3 poly(A) specific ribonuclease subunit homolog (S. cerevisiae)
hsa-miR-338-3p	0	0	1	1	0	0	PTPRF	protein tyrosine phosphatase, receptor type, F
hsa-miR-338-3p	0	0	1	1	1	1	ING4	inhibitor of growth family, member 4
hsa-miR-338-3p	1	0	1	0	1	1	LRBA	LPS-responsive vesicle trafficking, beach and anchor containing
hsa-miR-338-3p	1	0	1	1	1	1	BACH2	BTB and CNC homology 1, basic leucine zipper transcription factor 2
hsa-miR-338-3p	1	0	1	1	1	1	PML	promyelocytic leukemia
hsa-miR-338-3p	0	0	1	0	1	1	DCAF11	DDB1 and CUL4 associated factor 11
hsa-miR-338-3p	1	0	1	1	1	1	SLC8A1	solute carrier family 8 (sodium/calcium exchanger), member 1
hsa-miR-338-3p	0	0	1	1	0	0	CASP9	caspase 9, apoptosis-related cysteine peptidase
hsa-miR-338-3p	1	0	1	1	1	1	PRKACB	protein kinase, cAMP-dependent, catalytic, beta
hsa-miR-338-3p	1	0	1	0	1	1	ETV1	ets variant 1
hsa-miR-338-3p	1	0	1	1	1	1	DMTF1	cyclin D binding myb-like transcription factor 1
hsa-miR-338-3p	1	0	1	1	1	1	ABI1	abl-interactor 1
hsa-miR-338-3p	1	0	1	1	1	1	TBX2	T-box 2
hsa-miR-338-3p	1	0	1	1	1	1	AEBP2	AE binding protein 2
hsa-miR-338-3p	0	0	1	1	0	0	DNMT1	DNA (cytosine-5-)-methyltransferase 1
hsa-miR-338-3p	1	0	1	0	1	1	AKAP13	A kinase (PRKA) anchor protein 13
hsa-miR-338-3p	0	0	1	1	1	1	ACO1	aconitase 1, soluble
hsa-miR-338-3p	1	0	1	1	1	1	LIMA1	LIM domain and actin binding 1
hsa-miR-338-3p	0	0	1	1	0	0	EIF2B4	eukaryotic translation initiation factor 2B, subunit 4 delta, 67kDa
hsa-miR-338-3p	0	0	1	1	0	0	ITGA2B	integrin, alpha 2b (platelet glycoprotein IIb of IIb/IIIa complex, antigen CD41)
hsa-miR-338-3p	1	0	1	1	1	1	HNRNPK	heterogeneous nuclear ribonucleoprotein K
hsa-miR-338-3p	0	0	1	1	0	0	HLA-DMB	major histocompatibility complex, class II, DM beta
hsa-miR-338-3p	0	0	1	1	0	0	CFLAR	CASP8 and FADD-like apoptosis regulator
hsa-miR-338-3p	1	0	1	1	1	1	ARHGEF3	Rho guanine nucleotide exchange factor (GEF) 3
hsa-miR-338-3p	0	0	1	1	1	1	KIF3A	kinesin family member 3A
hsa-miR-338-3p	1	0	1	1	0	0	PPP2R5D	protein phosphatase 2, regulatory subunit B', delta
hsa-miR-338-3p	0	0	1	1	0	0	TRIM27	tripartite motif containing 27
hsa-miR-338-3p	0	0	1	0	0	0	TRPC2	transient receptor potential cation channel, subfamily C, member 2, pseudogene
hsa-miR-338-3p	0	0	1	0	0	0	MIAT	myocardial infarction associated transcript (non-protein coding)
hsa-miR-338-3p	1	0	1	1	1	1	SLC4A4	solute carrier family 4, sodium bicarbonate cotransporter, member 4
hsa-miR-338-3p	0	0	1	0	1	1	ZMYM2	zinc finger, MYM-type 2
hsa-miR-338-3p	0	0	1	1	1	1	PPEF2	protein phosphatase, EF-hand calcium binding domain 2
hsa-miR-338-3p	1	0	1	1	1	1	PCDH17	protocadherin 17
hsa-miR-338-3p	0	0	1	0	0	0	ZNRD1-AS1	ZNRD1 antisense RNA 1
hsa-miR-338-3p	1	0	1	0	1	1	CELF2	CUGBP, Elav-like family member 2
hsa-miR-338-3p	0	0	1	1	0	0	BMX	BMX non-receptor tyrosine kinase
hsa-miR-338-3p	0	0	1	1	1	1	ZMYM6	zinc finger, MYM-type 6
hsa-miR-338-3p	1	0	1	1	1	1	MBNL2	muscleblind-like splicing regulator 2
hsa-miR-338-3p	0	0	1	1	1	1	ZNF33A	zinc finger protein 33A
hsa-miR-338-3p	1	0	1	1	1	1	ERLIN1	ER lipid raft associated 1
hsa-miR-338-3p	1	0	1	1	1	1	PDE4A	phosphodiesterase 4A, cAMP-specific
hsa-miR-338-3p	0	0	1	1	0	0	CARD10	caspase recruitment domain family, member 10
hsa-miR-338-3p	0	0	1	1	1	1	RGS7	regulator of G-protein signaling 7
hsa-miR-338-3p	1	0	1	1	1	1	SLMAP	sarcolemma associated protein
hsa-miR-338-3p	0	0	1	1	1	1	MSTO1	misato homolog 1 (Drosophila)
hsa-miR-338-3p	1	0	1	1	1	1	NF2	neurofibromin 2 (merlin)
hsa-miR-338-3p	0	0	1	1	1	1	DMRT2	doublesex and mab-3 related transcription factor 2
hsa-miR-338-3p	1	0	1	1	1	1	HNRNPH3	heterogeneous nuclear ribonucleoprotein H3 (2H9)
hsa-miR-338-3p	1	0	1	1	1	1	MYNN	myoneurin
hsa-miR-338-3p	1	0	1	1	1	1	C14orf129	chromosome 14 open reading frame 129
hsa-miR-338-3p	1	0	1	1	1	1	USP15	ubiquitin specific peptidase 15
hsa-miR-338-3p	1	0	1	1	1	1	C3orf18	chromosome 3 open reading frame 18
hsa-miR-338-3p	1	0	1	0	1	1	TAPT1	transmembrane anterior posterior transformation 1
hsa-miR-338-3p	0	0	1	0	0	0	BPESC1	blepharophimosis, epicanthus inversus and ptosis, candidate 1 (non-protein coding)
hsa-miR-338-3p	1	0	1	1	1	1	TSC22D2	TSC22 domain family, member 2
hsa-miR-338-3p	0	0	1	1	1	1	SLCO2B1	solute carrier organic anion transporter family, member 2B1
hsa-miR-338-3p	1	0	1	1	1	1	KCNMB2	potassium large conductance calcium-activated channel, subfamily M, beta member 2
hsa-miR-338-3p	0	0	1	1	1	1	SLC30A5	solute carrier family 30 (zinc transporter), member 5
hsa-miR-338-3p	0	0	1	1	1	1	CSNK1A1	casein kinase 1, alpha 1
hsa-miR-338-3p	1	0	1	1	1	1	C21orf91	chromosome 21 open reading frame 91
hsa-miR-338-3p	1	0	1	1	1	1	SH3GLB1	SH3-domain GRB2-like endophilin B1
hsa-miR-338-3p	1	0	1	0	1	1	TRPS1	trichorhinophalangeal syndrome I
hsa-miR-338-3p	1	0	1	1	1	1	PUM2	pumilio homolog 2 (Drosophila)
hsa-miR-338-3p	1	0	1	1	1	1	PCDH11Y	protocadherin 11 Y-linked
hsa-miR-338-3p	0	0	1	1	1	1	RASD2	RASD family, member 2
hsa-miR-338-3p	1	0	1	1	1	1	KLHL12	kelch-like 12 (Drosophila)
hsa-miR-338-3p	1	0	1	1	1	1	CALU	calumenin
hsa-miR-338-3p	0	0	1	1	0	0	TRO	trophinin
hsa-miR-338-3p	0	0	1	1	1	1	PARK2	parkinson protein 2, E3 ubiquitin protein ligase (parkin)
hsa-miR-338-3p	0	0	1	0	1	1	MYO3B	myosin IIIB
hsa-miR-338-3p	0	0	1	1	0	0	SNRPN	small nuclear ribonucleoprotein polypeptide N
hsa-miR-338-3p	0	0	1	1	0	0	ELP2	elongator acetyltransferase complex subunit 2
hsa-miR-338-3p	0	0	1	0	0	0	MYO15B	myosin XVB pseudogene
hsa-miR-338-3p	1	0	1	1	1	1	ST3GAL3	ST3 beta-galactoside alpha-2,3-sialyltransferase 3
hsa-miR-338-3p	1	0	1	1	1	1	STX16	syntaxin 16
hsa-miR-338-3p	0	0	1	0	0	0	RMST	rhabdomyosarcoma 2 associated transcript (non-protein coding)
hsa-miR-338-3p	0	0	1	1	1	1	C10orf90	chromosome 10 open reading frame 90
hsa-miR-338-3p	1	0	1	1	0	0	SEPT8	septin 8
hsa-miR-338-3p	1	0	1	1	0	0	FOXP2	forkhead box P2
hsa-miR-338-3p	1	0	1	1	1	1	HNRNPU	heterogeneous nuclear ribonucleoprotein U (scaffold attachment factor A)
hsa-miR-338-3p	1	0	1	1	1	1	ASB8	ankyrin repeat and SOCS box containing 8
hsa-miR-338-3p	1	0	1	1	1	1	AKIP1	A kinase (PRKA) interacting protein 1
hsa-miR-338-3p	0	0	1	1	1	1	PTK7	PTK7 protein tyrosine kinase 7
hsa-miR-338-3p	1	0	1	1	1	1	AFF2	AF4/FMR2 family, member 2
hsa-miR-338-3p	1	0	1	0	1	1	MED14	mediator complex subunit 14
hsa-miR-338-3p	1	0	1	1	1	1	SH2B3	SH2B adaptor protein 3
hsa-miR-338-3p	1	0	1	1	0	0	ENTPD1	ectonucleoside triphosphate diphosphohydrolase 1
hsa-miR-338-3p	0	0	1	1	1	1	GNAS	GNAS complex locus
hsa-miR-338-3p	0	0	1	1	1	1	SPRR3	small proline-rich protein 3
hsa-miR-338-3p	1	0	1	1	1	1	CACNA2D2	calcium channel, voltage-dependent, alpha 2/delta subunit 2
hsa-miR-338-3p	0	0	1	0	0	0	CACNA2D3	calcium channel, voltage-dependent, alpha 2/delta subunit 3
hsa-miR-338-3p	1	0	1	1	1	1	VAMP7	vesicle-associated membrane protein 7
hsa-miR-338-3p	1	0	1	1	1	1	PALM2	paralemmin 2
hsa-miR-338-3p	1	0	1	1	1	1	NRXN3	neurexin 3
hsa-miR-338-3p	0	0	1	1	0	0	MBD1	methyl-CpG binding domain protein 1
hsa-miR-338-3p	1	0	1	1	1	1	ARL4C	ADP-ribosylation factor-like 4C
hsa-miR-338-3p	0	0	1	1	1	1	ESRP1	epithelial splicing regulatory protein 1
hsa-miR-338-3p	0	0	1	1	0	0	ASAP3	ArfGAP with SH3 domain, ankyrin repeat and PH domain 3
hsa-miR-338-3p	1	0	1	0	1	1	NFAT5	nuclear factor of activated T-cells 5, tonicity-responsive
hsa-miR-338-3p	1	0	1	1	1	1	ARHGAP12	Rho GTPase activating protein 12
hsa-miR-338-3p	1	0	1	1	1	1	ZC3H7A	zinc finger CCCH-type containing 7A
hsa-miR-338-3p	0	0	1	1	0	0	ZCWPW1	zinc finger, CW type with PWWP domain 1
hsa-miR-338-3p	0	0	1	1	0	0	AP4B1	adaptor-related protein complex 4, beta 1 subunit
hsa-miR-338-3p	0	0	1	0	1	1	EBF2	early B-cell factor 2
hsa-miR-338-3p	0	0	1	1	1	1	RSRC2	arginine/serine-rich coiled-coil 2
hsa-miR-338-3p	1	0	1	0	1	1	SPATS2L	spermatogenesis associated, serine-rich 2-like
hsa-miR-338-3p	1	0	1	1	1	1	KLHDC8B	kelch domain containing 8B
hsa-miR-338-3p	1	0	1	1	1	1	HNRNPUL1	heterogeneous nuclear ribonucleoprotein U-like 1
hsa-miR-338-3p	0	0	1	1	0	0	C17orf53	chromosome 17 open reading frame 53
hsa-miR-338-3p	0	0	1	1	0	0	ADCK4	aarF domain containing kinase 4
hsa-miR-338-3p	0	0	1	1	1	1	AMACR	alpha-methylacyl-CoA racemase
hsa-miR-338-3p	0	0	1	1	1	1	SPATA5L1	spermatogenesis associated 5-like 1
hsa-miR-338-3p	1	0	1	1	1	1	STARD7	StAR-related lipid transfer (START) domain containing 7
hsa-miR-338-3p	0	0	1	1	1	1	LRRN1	leucine rich repeat neuronal 1
hsa-miR-338-3p	1	0	1	0	1	1	UBP1	upstream binding protein 1 (LBP-1a)
hsa-miR-338-3p	1	0	1	1	1	1	CC2D1A	coiled-coil and C2 domain containing 1A
hsa-miR-338-3p	0	0	1	0	0	0	LOC284561	uncharacterized LOC284561
hsa-miR-338-3p	1	0	1	1	1	1	ARHGEF15	Rho guanine nucleotide exchange factor (GEF) 15
hsa-miR-338-3p	0	0	1	0	1	1	FLJ14186	uncharacterized LOC401149
hsa-miR-338-3p	1	0	1	1	1	1	COPS7B	COP9 constitutive photomorphogenic homolog subunit 7B (Arabidopsis)
hsa-miR-338-3p	1	0	1	1	1	1	FAM131A	family with sequence similarity 131, member A
hsa-miR-338-3p	0	0	1	1	1	1	UNC13D	unc-13 homolog D (C. elegans)
hsa-miR-338-3p	0	0	1	1	1	1	SIGLEC1	sialic acid binding Ig-like lectin 1, sialoadhesin
hsa-miR-338-3p	1	0	1	0	1	1	ATP2B1	ATPase, Ca++ transporting, plasma membrane 1
hsa-miR-338-3p	1	0	1	1	1	1	ABI3BP	ABI family, member 3 (NESH) binding protein
hsa-miR-338-3p	1	0	1	1	1	1	YPEL5	yippee-like 5 (Drosophila)
hsa-miR-338-3p	1	0	1	0	1	1	ZCCHC3	zinc finger, CCHC domain containing 3
hsa-miR-338-3p	0	0	1	1	0	0	STPG1	sperm-tail PG-rich repeat containing 1
hsa-miR-338-3p	0	0	1	0	1	1	HEMK1	HemK methyltransferase family member 1
hsa-miR-338-3p	0	0	1	1	1	1	GTF2H1	general transcription factor IIH, polypeptide 1, 62kDa
hsa-miR-338-3p	1	0	1	1	1	1	FOXP1	forkhead box P1
hsa-miR-338-3p	0	0	1	0	1	1	TWSG1	twisted gastrulation homolog 1 (Drosophila)
hsa-miR-338-3p	1	0	1	1	1	1	SLC38A1	solute carrier family 38, member 1
hsa-miR-338-3p	0	0	1	0	0	0	LOC254559	uncharacterized LOC254559
hsa-miR-338-3p	0	0	1	1	1	1	C8orf46	chromosome 8 open reading frame 46
hsa-miR-338-3p	1	0	1	1	1	1	MBD5	methyl-CpG binding domain protein 5
hsa-miR-338-3p	1	0	1	0	1	1	AP1G1	adaptor-related protein complex 1, gamma 1 subunit
hsa-miR-338-3p	0	0	1	1	1	1	FANCI	Fanconi anemia, complementation group I
hsa-miR-338-3p	1	0	1	1	1	1	TPM1	tropomyosin 1 (alpha)
hsa-miR-338-3p	0	0	1	1	0	0	SLC26A8	solute carrier family 26, member 8
hsa-miR-338-3p	0	0	1	1	0	0	C21orf59	chromosome 21 open reading frame 59
hsa-miR-338-3p	1	0	1	1	0	0	SPEG	SPEG complex locus
hsa-miR-338-3p	1	0	1	1	1	1	FRMD6	FERM domain containing 6
hsa-miR-338-3p	0	0	1	0	0	0	LOC219688	uncharacterized LOC219688
hsa-miR-338-3p	1	0	1	0	1	1	RAB1A	RAB1A, member RAS oncogene family
hsa-miR-338-3p	0	0	1	1	1	1	CLHC1	clathrin heavy chain linker domain containing 1
hsa-miR-338-3p	0	0	1	0	1	1	FAM70A	family with sequence similarity 70, member A
hsa-miR-338-3p	0	0	1	0	0	0	LOC441204	uncharacterized LOC441204
hsa-miR-338-3p	0	0	1	1	1	1	BRD2	bromodomain containing 2
hsa-miR-338-3p	0	0	1	1	0	0	BTN2A3P	butyrophilin, subfamily 2, member A3, pseudogene
hsa-miR-338-3p	0	0	1	1	0	0	MLF1	myeloid leukemia factor 1
hsa-miR-338-3p	0	0	1	1	1	1	COQ10A	coenzyme Q10 homolog A (S. cerevisiae)
hsa-miR-338-3p	1	0	1	0	1	1	PLEKHA1	pleckstrin homology domain containing, family A (phosphoinositide binding specific) member 1
hsa-miR-338-3p	0	0	1	1	1	1	RANBP17	RAN binding protein 17
hsa-miR-338-3p	0	0	1	1	1	1	SEC61A2	Sec61 alpha 2 subunit (S. cerevisiae)
hsa-miR-338-3p	0	0	1	1	0	0	PRSS54	protease, serine, 54
hsa-miR-338-3p	0	0	1	1	1	1	ZBTB26	zinc finger and BTB domain containing 26
hsa-miR-338-3p	1	0	1	1	1	1	C6orf89	chromosome 6 open reading frame 89
hsa-miR-338-3p	1	0	1	1	1	1	FAM102A	family with sequence similarity 102, member A
hsa-miR-338-3p	1	0	1	1	1	1	FAM73B	family with sequence similarity 73, member B
hsa-miR-338-3p	1	0	1	0	1	1	CLASP1	cytoplasmic linker associated protein 1
hsa-miR-338-3p	0	0	1	0	1	1	CDHR3	cadherin-related family member 3
hsa-miR-338-3p	0	0	1	1	1	1	SLC52A3	solute carrier family 52, riboflavin transporter, member 3
hsa-miR-338-3p	0	0	1	0	1	1	CADM1	cell adhesion molecule 1
hsa-miR-338-3p	1	0	1	1	1	1	TTC13	tetratricopeptide repeat domain 13
hsa-miR-338-3p	0	0	1	1	0	0	PIGO	phosphatidylinositol glycan anchor biosynthesis, class O
hsa-miR-338-3p	0	0	1	1	1	1	MTR	5-methyltetrahydrofolate-homocysteine methyltransferase
hsa-miR-338-3p	1	0	1	1	1	1	STXBP5	syntaxin binding protein 5 (tomosyn)
hsa-miR-338-3p	1	0	1	1	1	1	TLK1	tousled-like kinase 1
hsa-miR-338-3p	0	0	1	1	0	0	CTNNBL1	catenin, beta like 1
hsa-miR-338-3p	1	0	1	1	1	1	ARIH2	ariadne homolog 2 (Drosophila)
hsa-miR-338-3p	1	0	1	1	1	1	FRY	furry homolog (Drosophila)
hsa-miR-338-3p	1	0	1	1	1	1	RBMX	RNA binding motif protein, X-linked
hsa-miR-338-3p	0	0	1	1	0	0	CDK15	cyclin-dependent kinase 15
hsa-miR-338-3p	1	0	1	1	1	1	FBXW2	F-box and WD repeat domain containing 2
hsa-miR-338-3p	0	0	1	1	1	1	CD34	CD34 molecule
hsa-miR-338-3p	1	0	1	1	1	1	GNG2	guanine nucleotide binding protein (G protein), gamma 2
hsa-miR-338-3p	0	0	1	1	1	1	WT1	Wilms tumor 1
hsa-miR-338-3p	0	0	1	1	1	1	SPOCK1	sparc/osteonectin, cwcv and kazal-like domains proteoglycan (testican) 1
hsa-miR-338-3p	0	0	1	0	0	0	PART1	prostate androgen-regulated transcript 1 (non-protein coding)
hsa-miR-338-3p	0	0	1	0	0	0	ZNF806	zinc finger protein 806
hsa-miR-338-3p	0	0	1	0	1	1	ATP6V0E2	ATPase, H+ transporting V0 subunit e2
hsa-miR-338-3p	0	0	1	0	0	0	LINC00486	long intergenic non-protein coding RNA 486
hsa-miR-338-3p	1	0	1	1	1	1	ATXN10	ataxin 10
hsa-miR-338-3p	1	0	1	0	1	1	FAM129A	family with sequence similarity 129, member A
hsa-miR-338-3p	0	0	1	0	1	1	HDAC9	histone deacetylase 9
hsa-miR-338-3p	0	0	1	0	0	0	PSMG4	proteasome (prosome, macropain) assembly chaperone 4
hsa-miR-338-3p	0	0	1	1	1	1	SUSD4	sushi domain containing 4
hsa-miR-338-3p	0	0	1	0	0	0	ZNF815P	zinc finger protein 815, pseudogene
hsa-miR-338-3p	0	0	1	0	0	0	C1orf204	chromosome 1 open reading frame 204
hsa-miR-338-3p	1	0	1	1	1	1	CA12	carbonic anhydrase XII
hsa-miR-338-3p	1	0	1	1	1	1	EPB41L1	erythrocyte membrane protein band 4.1-like 1
hsa-miR-338-3p	0	0	1	0	1	1	FLJ39639	uncharacterized protein FLJ39639
hsa-miR-338-3p	0	0	1	0	0	0	LOC400680	uncharacterized LOC400680
hsa-miR-338-3p	0	0	1	1	0	0	ACAD10	acyl-CoA dehydrogenase family, member 10
hsa-miR-338-3p	1	0	1	0	1	1	AGFG1	ArfGAP with FG repeats 1
hsa-miR-338-3p	0	0	1	1	0	0	MEI1	meiosis inhibitor 1
hsa-miR-338-3p	0	0	1	1	1	1	PRSS16	protease, serine, 16 (thymus)
hsa-miR-338-3p	1	0	1	1	1	1	UGDH	UDP-glucose 6-dehydrogenase
hsa-miR-338-3p	0	0	1	1	0	0	CORO1A	coronin, actin binding protein, 1A
hsa-miR-338-3p	0	0	1	1	0	0	LUC7L	LUC7-like (S. cerevisiae)
hsa-miR-338-3p	1	0	1	1	1	1	LZTS2	leucine zipper, putative tumor suppressor 2
hsa-miR-338-3p	1	0	1	1	1	1	ZCCHC2	zinc finger, CCHC domain containing 2
hsa-miR-338-3p	0	0	1	1	1	1	RP1	retinitis pigmentosa 1 (autosomal dominant)
hsa-miR-338-3p	0	0	1	1	0	0	DCBLD1	discoidin, CUB and LCCL domain containing 1
hsa-miR-338-3p	0	0	1	1	1	1	SYTL4	synaptotagmin-like 4
hsa-miR-338-3p	0	0	1	1	1	1	ARFGAP2	ADP-ribosylation factor GTPase activating protein 2
hsa-miR-338-3p	0	0	1	0	0	0	GTF2IP1	general transcription factor IIi, pseudogene 1
hsa-miR-338-3p	1	0	1	0	1	1	UNC5D	unc-5 homolog D (C. elegans)
hsa-miR-338-3p	0	0	1	1	0	0	ZACN	zinc activated ligand-gated ion channel
hsa-miR-338-3p	0	0	1	1	1	1	SLFN13	schlafen family member 13
hsa-miR-338-3p	1	0	1	1	1	1	LMX1A	LIM homeobox transcription factor 1, alpha
hsa-miR-338-3p	0	0	1	1	1	1	STRC	stereocilin
hsa-miR-338-3p	0	0	1	1	1	1	GGA1	golgi-associated, gamma adaptin ear containing, ARF binding protein 1
hsa-miR-338-3p	0	0	1	1	0	0	PROKR1	prokineticin receptor 1
hsa-miR-338-3p	0	0	1	1	0	0	MARS	methionyl-tRNA synthetase
hsa-miR-338-3p	0	0	1	1	0	0	ZNF335	zinc finger protein 335
hsa-miR-338-3p	1	0	1	1	1	1	ZBTB4	zinc finger and BTB domain containing 4
hsa-miR-338-3p	0	0	1	1	0	0	SLC26A10	solute carrier family 26, member 10
hsa-miR-338-3p	0	0	1	1	0	0	SSPO	SCO-spondin homolog (Bos taurus)
hsa-miR-338-3p	1	0	1	1	1	1	MDGA2	MAM domain containing glycosylphosphatidylinositol anchor 2
hsa-miR-338-3p	1	0	1	1	1	1	SBF2	SET binding factor 2
hsa-miR-338-3p	0	0	1	0	0	0	SATB2-AS1	SATB2 antisense RNA 1
hsa-miR-338-3p	0	0	1	0	0	0	LOC650368	asparagine-linked glycosylation 1-like pseudogene
hsa-miR-338-3p	1	0	1	1	1	1	PHKB	phosphorylase kinase, beta
hsa-miR-338-3p	1	0	1	1	1	1	EPAS1	endothelial PAS domain protein 1
hsa-miR-338-3p	0	0	1	1	1	1	ANKRD44	ankyrin repeat domain 44
hsa-miR-338-3p	0	0	1	1	0	0	PTK6	PTK6 protein tyrosine kinase 6
hsa-miR-338-3p	0	0	1	0	0	0	DKFZP434H168	uncharacterized LOC26077
hsa-miR-338-3p	0	0	1	1	0	0	NMI	N-myc (and STAT) interactor
hsa-miR-338-3p	0	0	1	1	0	0	NPIP	nuclear pore complex interacting protein
hsa-miR-338-3p	1	0	1	1	1	1	FAM122B	family with sequence similarity 122B
hsa-miR-338-3p	1	0	1	1	1	1	CORO2B	coronin, actin binding protein, 2B
hsa-miR-338-3p	0	0	1	1	1	1	ATPBD4	ATP binding domain 4
hsa-miR-338-3p	0	0	1	0	0	0	C3orf72	chromosome 3 open reading frame 72
hsa-miR-338-3p	0	0	1	1	1	1	MKX	mohawk homeobox
hsa-miR-338-3p	0	0	1	1	1	1	DENND5A	DENN/MADD domain containing 5A
hsa-miR-338-3p	0	0	1	1	0	0	LOC442075	uncharacterized LOC442075
hsa-miR-338-3p	0	0	1	0	0	0	FAM95B1	family with sequence similarity 95, member B1
hsa-miR-338-3p	0	0	1	0	0	0	FER1L5	fer-1-like 5 (C. elegans)
hsa-miR-338-3p	0	0	1	1	0	0	C20orf141	chromosome 20 open reading frame 141
hsa-miR-338-3p	0	0	1	1	1	1	MORF4L2	mortality factor 4 like 2
hsa-miR-338-3p	0	0	1	0	0	0	RPL23AP53	ribosomal protein L23a pseudogene 53
hsa-miR-338-3p	1	0	1	1	1	1	TSHZ1	teashirt zinc finger homeobox 1
hsa-miR-338-3p	0	0	1	1	0	0	FAM54B	family with sequence similarity 54, member B
hsa-miR-338-3p	1	0	1	0	1	1	N4BP3	NEDD4 binding protein 3
hsa-miR-338-3p	1	0	1	1	1	1	UBE3C	ubiquitin protein ligase E3C
hsa-miR-338-3p	1	0	1	1	1	1	HYOU1	hypoxia up-regulated 1
hsa-miR-338-3p	1	0	1	1	1	1	PHF17	PHD finger protein 17
hsa-miR-338-3p	0	0	1	0	1	1	NPHP4	nephronophthisis 4
hsa-miR-338-3p	1	0	1	1	1	1	LSM14A	LSM14A, SCD6 homolog A (S. cerevisiae)
hsa-miR-338-3p	1	0	1	1	1	1	ENAH	enabled homolog (Drosophila)
hsa-miR-338-3p	1	0	1	1	0	0	PPP1CA	protein phosphatase 1, catalytic subunit, alpha isozyme
hsa-miR-338-3p	1	0	1	1	1	1	NFYC	nuclear transcription factor Y, gamma
hsa-miR-338-3p	0	0	1	1	0	0	IQUB	IQ motif and ubiquitin domain containing
hsa-miR-338-3p	1	0	1	1	1	1	PLA2G15	phospholipase A2, group XV
hsa-miR-338-3p	1	0	1	0	1	1	YOD1	YOD1 OTU deubiquinating enzyme 1 homolog (S. cerevisiae)
hsa-miR-338-3p	0	0	1	1	1	1	MCU	mitochondrial calcium uniporter
hsa-miR-338-3p	0	0	1	0	0	0	LRRC9	leucine rich repeat containing 9
hsa-miR-338-3p	0	0	1	1	0	0	TMEM136	transmembrane protein 136
hsa-miR-338-3p	0	0	1	0	0	0	FAM205B	transmembrane protein C9orf144B pseudogene
hsa-miR-338-3p	1	0	1	1	0	0	C15orf39	chromosome 15 open reading frame 39
hsa-miR-338-3p	0	0	1	0	0	0	FLJ46361	deleted in malignant brain tumors 1 pseudogene
hsa-miR-338-3p	1	0	1	0	1	1	NBR1	neighbor of BRCA1 gene 1
hsa-miR-338-3p	0	0	1	1	0	0	SMTN	smoothelin
hsa-miR-338-3p	1	0	1	1	1	1	PUS7	pseudouridylate synthase 7 homolog (S. cerevisiae)
hsa-miR-338-3p	0	0	1	0	0	0	LOC100129940	uncharacterized LOC100129940
hsa-miR-338-3p	1	0	1	1	1	1	UPF1	UPF1 regulator of nonsense transcripts homolog (yeast)
hsa-miR-338-3p	1	0	1	0	1	1	CYB561D1	cytochrome b-561 domain containing 1
hsa-miR-338-3p	0	0	1	1	0	0	HEATR8	HEAT repeat containing 8
hsa-miR-338-3p	1	0	1	1	1	1	GPD1	glycerol-3-phosphate dehydrogenase 1 (soluble)
hsa-miR-338-3p	0	0	1	1	0	0	ZNF730	zinc finger protein 730
hsa-miR-338-3p	0	0	1	1	0	0	C3orf20	chromosome 3 open reading frame 20
hsa-miR-338-3p	1	0	1	1	1	1	LRRK2	leucine-rich repeat kinase 2
hsa-miR-338-3p	1	0	1	1	1	1	MAP2K4	mitogen-activated protein kinase kinase 4
hsa-miR-338-3p	1	0	1	1	1	1	SYS1	SYS1 Golgi-localized integral membrane protein homolog (S. cerevisiae)
hsa-miR-338-3p	1	0	1	1	1	1	CTSA	cathepsin A
hsa-miR-338-3p	1	0	1	1	1	1	TAP2	transporter 2, ATP-binding cassette, sub-family B (MDR/TAP)
hsa-miR-338-3p	1	0	1	1	1	1	CYFIP2	cytoplasmic FMR1 interacting protein 2
hsa-miR-338-3p	1	0	1	1	1	1	TBC1D15	TBC1 domain family, member 15
hsa-miR-338-3p	1	0	1	1	1	1	UBE2O	ubiquitin-conjugating enzyme E2O
hsa-miR-338-3p	0	0	1	0	0	0	RRN3P2	RNA polymerase I transcription factor homolog (S. cerevisiae) pseudogene 2
hsa-miR-338-3p	0	0	1	1	0	0	PCSK5	proprotein convertase subtilisin/kexin type 5
hsa-miR-338-3p	1	0	1	0	1	1	MAP3K3	mitogen-activated protein kinase kinase kinase 3
hsa-miR-338-3p	1	0	1	1	1	1	WDR20	WD repeat domain 20
hsa-miR-338-3p	1	0	1	1	1	1	BIN2	bridging integrator 2
hsa-miR-338-3p	0	0	1	1	0	0	TRIM69	tripartite motif containing 69
hsa-miR-338-3p	1	0	1	1	1	1	RIF1	RAP1 interacting factor homolog (yeast)
hsa-miR-338-3p	1	0	1	1	1	1	TAB2	TGF-beta activated kinase 1/MAP3K7 binding protein 2
hsa-miR-338-3p	0	0	1	1	0	0	FAM153B	family with sequence similarity 153, member B
hsa-miR-338-3p	1	0	1	1	1	1	ARPP21	cAMP-regulated phosphoprotein, 21kDa
hsa-miR-338-3p	0	0	1	0	0	0	KIAA0913	KIAA0913
hsa-miR-338-3p	0	0	1	1	1	1	ZNF280D	zinc finger protein 280D
hsa-miR-338-3p	1	0	1	0	1	1	DNAJC5	DnaJ (Hsp40) homolog, subfamily C, member 5
hsa-miR-338-3p	0	0	1	0	0	0	TPTE2P6	transmembrane phosphoinositide 3-phosphatase and tensin homolog 2 pseudogene 6
hsa-miR-338-3p	0	0	1	1	1	1	STAG3L1	stromal antigen 3-like 1
hsa-miR-338-3p	0	0	1	1	0	0	DNAI2	dynein, axonemal, intermediate chain 2
hsa-miR-338-3p	0	0	1	0	0	0	LRRC37BP1	leucine rich repeat containing 37B pseudogene 1
hsa-miR-338-3p	1	0	1	0	1	1	GRIN3A	glutamate receptor, ionotropic, N-methyl-D-aspartate 3A
hsa-miR-338-3p	0	0	1	0	0	0	RPL23AP82	ribosomal protein L23a pseudogene 82
hsa-miR-338-3p	0	0	1	0	0	0	FAM66D	family with sequence similarity 66, member D
hsa-miR-338-3p	0	0	1	1	0	0	HDAC10	histone deacetylase 10
hsa-miR-338-3p	0	0	1	1	1	1	COBL	cordon-bleu homolog (mouse)
hsa-miR-338-3p	1	0	1	0	0	0	SYNPO	synaptopodin
hsa-miR-338-3p	1	0	1	1	1	1	MIER1	mesoderm induction early response 1 homolog (Xenopus laevis)
hsa-miR-338-3p	1	0	1	1	1	1	FAM126B	family with sequence similarity 126, member B
hsa-miR-338-3p	1	0	1	1	0	0	USP24	ubiquitin specific peptidase 24
hsa-miR-338-3p	1	0	1	1	1	1	MLL3	myeloid/lymphoid or mixed-lineage leukemia 3
hsa-miR-338-3p	0	0	1	1	1	1	C10orf57	chromosome 10 open reading frame 57
hsa-miR-338-3p	0	0	1	1	1	1	YAP1	Yes-associated protein 1
hsa-miR-338-3p	0	0	1	1	1	1	U2AF1	U2 small nuclear RNA auxiliary factor 1
hsa-miR-338-3p	1	0	1	1	1	1	EHMT1	euchromatic histone-lysine N-methyltransferase 1
hsa-miR-338-3p	0	0	1	1	1	1	INPP5B	inositol polyphosphate-5-phosphatase, 75kDa
hsa-miR-338-3p	1	0	1	0	1	1	SLC25A37	solute carrier family 25 (mitochondrial iron transporter), member 37
hsa-miR-338-3p	1	0	1	0	1	1	MEF2C	myocyte enhancer factor 2C
hsa-miR-338-3p	0	0	1	0	0	0	LOC286135	uncharacterized LOC286135
hsa-miR-338-3p	1	0	1	0	1	1	CLINT1	clathrin interactor 1
hsa-miR-338-3p	0	0	1	0	0	0	EPHA1-AS1	EPHA1 antisense RNA 1
hsa-miR-338-3p	1	0	1	1	1	1	FAM63B	family with sequence similarity 63, member B
hsa-miR-338-3p	0	0	1	0	0	0	ADCY10P1	adenylate cyclase 10 (soluble) pseudogene 1
hsa-miR-338-3p	1	0	1	1	1	1	IL17RD	interleukin 17 receptor D
hsa-miR-338-3p	1	0	1	0	0	0	NPEPL1	aminopeptidase-like 1
hsa-miR-338-3p	1	0	1	0	1	1	JAZF1	JAZF zinc finger 1
hsa-miR-338-3p	0	0	1	1	1	1	C8orf34	chromosome 8 open reading frame 34
hsa-miR-338-3p	1	0	1	1	1	1	SET	SET nuclear oncogene
hsa-miR-338-3p	1	0	1	0	1	1	PHYHIPL	phytanoyl-CoA 2-hydroxylase interacting protein-like
hsa-miR-338-3p	0	0	1	1	1	1	AMOTL1	angiomotin like 1
hsa-miR-338-3p	0	0	1	0	0	0	PMCHL1	pro-melanin-concentrating hormone-like 1, pseudogene
hsa-miR-338-3p	0	0	1	0	0	0	PMCHL2	pro-melanin-concentrating hormone-like 2, pseudogene
hsa-miR-338-3p	0	0	1	1	1	1	CRB1	crumbs homolog 1 (Drosophila)
hsa-miR-338-3p	1	0	1	1	1	1	MIPOL1	mirror-image polydactyly 1
hsa-miR-338-3p	0	0	1	0	0	0	LINC00308	long intergenic non-protein coding RNA 308
hsa-miR-338-3p	0	0	1	0	0	0	GRIK1-AS1	GRIK1 antisense RNA 1
hsa-miR-338-3p	0	0	1	0	0	0	KGFLP1	fibroblast growth factor 7 pseudogene
hsa-miR-338-3p	1	0	1	1	1	1	RFFL	ring finger and FYVE-like domain containing E3 ubiquitin protein ligase
hsa-miR-338-3p	1	0	1	1	1	1	KIAA0907	KIAA0907
hsa-miR-338-3p	1	0	1	1	1	1	WDR26	WD repeat domain 26
hsa-miR-338-3p	0	0	1	1	0	0	NIF3L1	NIF3 NGG1 interacting factor 3-like 1 (S. cerevisiae)
hsa-miR-338-3p	0	0	1	1	1	1	IYD	iodotyrosine deiodinase
hsa-miR-338-3p	0	0	1	1	1	1	GCOM1	GRINL1A complex locus 1
hsa-miR-338-3p	0	0	1	1	1	1	IL20	interleukin 20
hsa-miR-338-3p	1	0	1	1	1	1	SUFU	suppressor of fused homolog (Drosophila)
hsa-miR-338-3p	0	0	1	0	0	0	CACNA1B	calcium channel, voltage-dependent, N type, alpha 1B subunit
hsa-miR-338-3p	1	0	1	1	1	1	FAM120A	family with sequence similarity 120A
hsa-miR-338-3p	0	0	1	1	1	1	AICDA	activation-induced cytidine deaminase
hsa-miR-338-3p	1	0	1	1	1	1	MECP2	methyl CpG binding protein 2 (Rett syndrome)
hsa-miR-338-3p	0	0	1	1	0	0	PAOX	polyamine oxidase (exo-N4-amino)
hsa-miR-338-3p	0	0	1	1	1	1	NR1I3	nuclear receptor subfamily 1, group I, member 3
hsa-miR-338-3p	0	0	1	0	1	1	RAB18	RAB18, member RAS oncogene family
hsa-miR-338-3p	0	0	1	1	1	1	IDNK	idnK, gluconokinase homolog (E. coli)
hsa-miR-338-3p	0	0	1	1	1	1	KANK2	KN motif and ankyrin repeat domains 2
hsa-miR-338-3p	0	0	1	1	1	1	KLK7	kallikrein-related peptidase 7
hsa-miR-338-3p	0	0	1	1	0	0	USP27X	ubiquitin specific peptidase 27, X-linked
hsa-miR-338-3p	0	0	1	1	0	0	PDE9A	phosphodiesterase 9A
hsa-miR-338-3p	1	0	1	1	1	1	PFKFB4	6-phosphofructo-2-kinase/fructose-2,6-biphosphatase 4
hsa-miR-338-3p	1	0	1	1	0	0	TAF4B	TAF4b RNA polymerase II, TATA box binding protein (TBP)-associated factor, 105kDa
hsa-miR-338-3p	0	0	1	1	1	1	LY86	lymphocyte antigen 86
hsa-miR-338-3p	0	0	1	1	1	1	IL23R	interleukin 23 receptor
hsa-miR-338-3p	1	0	1	1	1	1	AMOT	angiomotin
hsa-miR-338-3p	0	0	1	1	1	1	TMOD1	tropomodulin 1
hsa-miR-338-3p	1	0	1	1	1	1	RIMS3	regulating synaptic membrane exocytosis 3
hsa-miR-338-3p	1	0	1	1	1	1	SMO	smoothened, frizzled family receptor
hsa-miR-338-3p	0	0	1	1	1	1	METTL17	methyltransferase like 17
hsa-miR-338-3p	1	0	1	1	1	1	POU2F2	POU class 2 homeobox 2
hsa-miR-338-3p	1	0	1	1	1	1	U2SURP	U2 snRNP-associated SURP domain containing
hsa-miR-338-3p	1	0	1	0	1	1	VAMP4	vesicle-associated membrane protein 4
hsa-miR-338-3p	0	0	1	1	1	1	MLIP	muscular LMNA-interacting protein
hsa-miR-338-3p	0	0	1	0	0	0	ATXN7L3B	ataxin 7-like 3B
hsa-miR-338-3p	1	0	1	1	0	0	MARCH9	membrane-associated ring finger (C3HC4) 9
hsa-miR-338-3p	1	0	1	1	1	1	SLC27A4	solute carrier family 27 (fatty acid transporter), member 4
hsa-miR-338-3p	1	0	1	1	1	1	B4GALT3	UDP-Gal:betaGlcNAc beta 1,4- galactosyltransferase, polypeptide 3
hsa-miR-338-3p	1	0	1	1	1	1	GRIA2	glutamate receptor, ionotropic, AMPA 2
hsa-miR-338-3p	0	0	1	0	0	0	GRAMD1B	GRAM domain containing 1B
hsa-miR-338-3p	1	0	1	0	1	1	MTMR2	myotubularin related protein 2
hsa-miR-338-3p	1	0	1	1	0	0	CAPN12	calpain 12
hsa-miR-338-3p	0	0	1	0	0	0	MGC21881	uncharacterized locus MGC21881
hsa-miR-338-3p	0	0	1	0	1	1	ZNF37A	zinc finger protein 37A
hsa-miR-338-3p	1	0	1	1	1	1	NUMBL	numb homolog (Drosophila)-like
hsa-miR-338-3p	0	0	1	1	1	1	MBIP	MAP3K12 binding inhibitory protein 1
hsa-miR-338-3p	0	0	1	1	0	0	ZDHHC6	zinc finger, DHHC-type containing 6
hsa-miR-338-3p	0	0	1	1	0	0	ZBTB32	zinc finger and BTB domain containing 32
hsa-miR-338-3p	0	0	1	0	0	0	ZNF720	zinc finger protein 720
hsa-miR-338-3p	1	0	1	1	1	1	SUZ12	suppressor of zeste 12 homolog (Drosophila)
hsa-miR-338-3p	0	0	1	1	1	1	EIF2B3	eukaryotic translation initiation factor 2B, subunit 3 gamma, 58kDa
hsa-miR-338-3p	0	0	1	0	1	1	TMSB15B	thymosin beta 15B
hsa-miR-338-3p	0	0	1	0	1	1	ZNF718	zinc finger protein 718
hsa-miR-338-3p	1	0	1	0	1	1	BTF3L4	basic transcription factor 3-like 4
hsa-miR-338-3p	1	0	1	1	1	1	TM9SF4	transmembrane 9 superfamily protein member 4
hsa-miR-338-3p	1	0	1	1	1	1	SCML4	sex comb on midleg-like 4 (Drosophila)
hsa-miR-338-3p	0	0	1	0	0	0	NBR2	neighbor of BRCA1 gene 2 (non-protein coding)
hsa-miR-338-3p	0	0	1	1	1	1	COMMD7	COMM domain containing 7
hsa-miR-338-3p	0	0	1	1	0	0	SLC22A9	solute carrier family 22 (organic anion transporter), member 9
hsa-miR-338-3p	1	0	1	1	1	1	SPRYD7	SPRY domain containing 7
hsa-miR-338-3p	0	0	1	1	1	1	PDE1C	phosphodiesterase 1C, calmodulin-dependent 70kDa
hsa-miR-338-3p	1	0	1	1	1	1	BEND6	BEN domain containing 6
hsa-miR-338-3p	1	0	1	1	1	1	SPOCK2	sparc/osteonectin, cwcv and kazal-like domains proteoglycan (testican) 2
hsa-miR-338-3p	1	0	1	0	1	1	CDK19	cyclin-dependent kinase 19
hsa-miR-338-3p	0	0	1	0	0	0	SNX29P2	sorting nexin 29 pseudogene 2
hsa-miR-338-3p	0	0	1	0	0	0	FLJ35390	uncharacterized LOC255031
hsa-miR-338-3p	1	0	1	1	1	1	PELI3	pellino E3 ubiquitin protein ligase family member 3
hsa-miR-338-3p	1	0	1	1	0	0	NCLN	nicalin
hsa-miR-338-3p	1	0	1	1	1	1	ZDHHC5	zinc finger, DHHC-type containing 5
hsa-miR-338-3p	0	0	1	1	1	1	MAP2	microtubule-associated protein 2
hsa-miR-338-3p	0	0	1	1	1	1	ZNF589	zinc finger protein 589
hsa-miR-338-3p	1	0	1	0	0	0	KCNU1	potassium channel, subfamily U, member 1
hsa-miR-338-3p	1	0	1	0	1	1	NCAM1	neural cell adhesion molecule 1
hsa-miR-338-3p	0	0	1	1	1	1	KIAA1755	KIAA1755
hsa-miR-338-3p	1	0	1	1	1	1	SYT9	synaptotagmin IX
hsa-miR-338-3p	1	0	1	0	1	1	SV2B	synaptic vesicle glycoprotein 2B
hsa-miR-338-3p	1	0	1	1	1	1	TIAL1	TIA1 cytotoxic granule-associated RNA binding protein-like 1
hsa-miR-338-3p	1	0	1	1	1	1	EYA4	eyes absent homolog 4 (Drosophila)
hsa-miR-338-3p	0	0	1	1	1	1	ZNF100	zinc finger protein 100
hsa-miR-338-3p	1	0	1	1	1	1	SPATS2	spermatogenesis associated, serine-rich 2
hsa-miR-338-3p	0	0	1	0	0	0	LOC643648	uncharacterized LOC643648
hsa-miR-338-3p	0	0	1	1	1	1	SNAP47	synaptosomal-associated protein, 47kDa
hsa-miR-338-3p	0	0	1	1	1	1	C5orf22	chromosome 5 open reading frame 22
hsa-miR-338-3p	1	0	1	1	1	1	SORL1	sortilin-related receptor, L(DLR class) A repeats containing
hsa-miR-338-3p	0	0	1	1	1	1	SFI1	Sfi1 homolog, spindle assembly associated (yeast)
hsa-miR-338-3p	1	0	1	1	1	1	HMGCR	3-hydroxy-3-methylglutaryl-CoA reductase
hsa-miR-338-3p	0	0	1	1	0	0	TNMD	tenomodulin
hsa-miR-338-3p	0	0	1	1	1	1	HEXA	hexosaminidase A (alpha polypeptide)
hsa-miR-338-3p	1	0	1	0	1	1	DDX3Y	DEAD (Asp-Glu-Ala-Asp) box polypeptide 3, Y-linked
hsa-miR-338-3p	0	0	1	1	0	0	CCDC158	coiled-coil domain containing 158
hsa-miR-338-3p	0	0	1	1	1	1	CLCNKA	chloride channel, voltage-sensitive Ka
hsa-miR-338-3p	1	0	1	1	1	1	RAP2C	RAP2C, member of RAS oncogene family
hsa-miR-338-3p	1	0	1	1	1	1	ZEB2	zinc finger E-box binding homeobox 2
hsa-miR-338-3p	0	0	1	1	1	1	ARHGAP6	Rho GTPase activating protein 6
hsa-miR-338-3p	0	0	1	0	0	0	LOC339862	uncharacterized LOC339862
hsa-miR-338-3p	1	0	1	1	1	1	SLC38A9	solute carrier family 38, member 9
hsa-miR-338-3p	0	0	1	0	0	0	LOC654433	uncharacterized LOC654433
hsa-miR-338-3p	1	0	1	1	1	1	ACVR1	activin A receptor, type I
hsa-miR-338-3p	0	0	1	0	0	0	CYP4F35P	cytochrome P450, family 4, subfamily F, polypeptide 35, pseudogene
hsa-miR-338-3p	0	0	1	0	0	0	LOC286184	uncharacterized LOC286184
hsa-miR-338-3p	1	0	1	0	1	1	ARID2	AT rich interactive domain 2 (ARID, RFX-like)
hsa-miR-338-3p	0	0	1	1	0	0	COX4I1	cytochrome c oxidase subunit IV isoform 1
hsa-miR-338-3p	1	0	1	0	1	1	FBXO22	F-box protein 22
hsa-miR-338-3p	0	0	1	1	0	0	CCDC152	coiled-coil domain containing 152
hsa-miR-338-3p	0	0	1	0	0	0	FLJ36000	uncharacterized FLJ36000
hsa-miR-338-3p	1	0	1	0	1	1	GPR107	G protein-coupled receptor 107
hsa-miR-338-3p	1	0	1	1	1	1	BPTF	bromodomain PHD finger transcription factor
hsa-miR-338-3p	1	0	1	1	1	1	BVES	blood vessel epicardial substance
hsa-miR-338-3p	1	0	1	1	0	0	ZNF292	zinc finger protein 292
hsa-miR-338-3p	0	0	1	1	1	1	SIAE	sialic acid acetylesterase
hsa-miR-338-3p	0	0	1	0	1	1	METTL12	methyltransferase like 12
hsa-miR-338-3p	0	0	1	1	1	1	CARD8	caspase recruitment domain family, member 8
hsa-miR-338-3p	0	0	1	1	0	0	C1orf87	chromosome 1 open reading frame 87
hsa-miR-338-3p	0	0	1	1	1	1	SH3GL3	SH3-domain GRB2-like 3
hsa-miR-338-3p	1	0	1	1	1	1	ADD1	adducin 1 (alpha)
hsa-miR-338-3p	0	0	1	0	0	0	LOC338579	ankyrin repeat domain-containing protein 30B pseudogene
hsa-miR-338-3p	0	0	1	0	0	0	LOC157381	uncharacterized LOC157381
hsa-miR-338-3p	0	0	1	0	0	0	MORF4L2-AS1	MORF4L2 antisense RNA 1
hsa-miR-338-3p	0	0	1	0	0	0	DKFZp686O1327	uncharacterized LOC401014
hsa-miR-338-3p	0	0	1	1	1	1	TMEM200A	transmembrane protein 200A
hsa-miR-338-3p	0	0	1	1	0	0	BMP1	bone morphogenetic protein 1
hsa-miR-338-3p	1	0	1	0	1	1	PSD3	pleckstrin and Sec7 domain containing 3
hsa-miR-338-3p	0	0	1	1	1	1	MGC57346	uncharacterized LOC401884
hsa-miR-338-3p	0	0	1	1	0	0	NIT1	nitrilase 1
hsa-miR-338-3p	1	0	1	0	0	0	MICAL3	microtubule associated monoxygenase, calponin and LIM domain containing 3
hsa-miR-338-3p	1	0	1	0	1	1	KDM2A	lysine (K)-specific demethylase 2A
hsa-miR-338-3p	1	0	1	1	1	1	BRD1	bromodomain containing 1
hsa-miR-338-3p	1	0	1	0	1	1	ARHGAP5	Rho GTPase activating protein 5
hsa-miR-338-3p	0	0	1	0	1	1	ITGA1	integrin, alpha 1
hsa-miR-338-3p	1	0	1	1	1	1	WASF3	WAS protein family, member 3
hsa-miR-338-3p	1	0	1	0	1	1	FAM131B	family with sequence similarity 131, member B
hsa-miR-338-3p	1	0	1	0	1	1	SEMA4G	sema domain, immunoglobulin domain (Ig), transmembrane domain (TM) and short cytoplasmic domain, (semaphorin) 4G
hsa-miR-338-3p	0	0	1	1	1	1	HLA-DQA1	major histocompatibility complex, class II, DQ alpha 1
hsa-miR-338-3p	0	0	1	0	1	1	C17orf51	chromosome 17 open reading frame 51
hsa-miR-338-3p	0	0	1	0	1	1	SLC1A3	solute carrier family 1 (glial high affinity glutamate transporter), member 3
hsa-miR-338-3p	1	0	1	1	0	0	DALRD3	DALR anticodon binding domain containing 3
hsa-miR-338-3p	0	0	1	0	1	1	GUCY1B3	guanylate cyclase 1, soluble, beta 3
hsa-miR-338-3p	0	0	1	1	0	0	TM6SF1	transmembrane 6 superfamily member 1
hsa-miR-338-3p	0	0	1	1	0	0	C8orf31	chromosome 8 open reading frame 31
hsa-miR-338-3p	0	0	1	1	0	0	DHX30	DEAH (Asp-Glu-Ala-His) box polypeptide 30
hsa-miR-338-3p	1	0	1	1	1	1	GRIK2	glutamate receptor, ionotropic, kainate 2
hsa-miR-338-3p	0	0	1	0	0	0	SCAND2	SCAN domain containing 2 pseudogene
hsa-miR-338-3p	1	0	1	1	1	1	ADCY6	adenylate cyclase 6
hsa-miR-338-3p	0	0	1	1	1	1	ATP2A2	ATPase, Ca++ transporting, cardiac muscle, slow twitch 2
hsa-miR-338-3p	1	0	1	1	1	1	NRSN1	neurensin 1
hsa-miR-338-3p	1	0	1	1	1	1	CCDC149	coiled-coil domain containing 149
hsa-miR-338-3p	1	0	1	0	1	1	MAGIX	MAGI family member, X-linked
hsa-miR-338-3p	0	0	1	0	0	0	PCP4L1	Purkinje cell protein 4 like 1
hsa-miR-338-3p	1	0	1	1	1	1	PDCD6IP	programmed cell death 6 interacting protein
hsa-miR-338-3p	1	0	1	1	1	1	SLC26A7	solute carrier family 26, member 7
hsa-miR-338-3p	0	0	1	1	1	1	AQPEP	laeverin
hsa-miR-338-3p	0	0	1	0	0	0	PTGER4P2	prostaglandin E receptor 4 (subtype EP4) pseudogene 2
hsa-miR-338-3p	0	0	1	1	0	0	CYP4F30P	cytochrome P450, family 4, subfamily F, polypeptide 30, pseudogene
hsa-miR-338-3p	1	0	1	1	1	1	SCAF8	SR-related CTD-associated factor 8
hsa-miR-338-3p	1	0	1	0	1	1	MAP4K3	mitogen-activated protein kinase kinase kinase kinase 3
hsa-miR-338-3p	1	0	1	0	1	1	TMEM194A	transmembrane protein 194A
hsa-miR-338-3p	0	0	1	0	0	0	JPX	JPX transcript, XIST activator (non-protein coding)
hsa-miR-338-3p	1	0	1	1	1	1	KDELR2	KDEL (Lys-Asp-Glu-Leu) endoplasmic reticulum protein retention receptor 2
hsa-miR-338-3p	1	0	1	1	1	1	WNT5A	wingless-type MMTV integration site family, member 5A
hsa-miR-338-3p	0	0	1	0	0	0	ABCC6P1	ATP-binding cassette, sub-family C, member 6 pseudogene 1
hsa-miR-338-3p	1	0	1	0	1	1	AMMECR1L	AMME chromosomal region gene 1-like
hsa-miR-338-3p	0	0	1	0	0	0	LINC00537	long intergenic non-protein coding RNA 537
hsa-miR-338-3p	0	0	1	0	0	0	TBC1D25	TBC1 domain family, member 25
hsa-miR-338-3p	0	0	1	0	0	0	LOC554249	uncharacterized LOC554249
hsa-miR-338-3p	0	0	1	1	1	1	MAPK13	mitogen-activated protein kinase 13
hsa-miR-338-3p	0	0	1	0	1	1	LOC389043	uncharacterized LOC389043
hsa-miR-338-3p	1	0	1	1	1	1	ZMYND11	zinc finger, MYND-type containing 11
hsa-miR-338-3p	0	0	1	1	1	1	LIMS3	LIM and senescent cell antigen-like domains 3
hsa-miR-338-3p	1	0	1	1	1	1	STK38	serine/threonine kinase 38
hsa-miR-338-3p	1	0	1	1	1	1	WNT10B	wingless-type MMTV integration site family, member 10B
hsa-miR-338-3p	1	0	1	0	1	1	LRRTM4	leucine rich repeat transmembrane neuronal 4
hsa-miR-338-3p	0	0	1	1	1	1	XG	Xg blood group
hsa-miR-338-3p	0	0	1	1	0	0	MTMR11	myotubularin related protein 11
hsa-miR-338-3p	0	0	1	1	1	1	ZNF365	zinc finger protein 365
hsa-miR-338-3p	0	0	1	1	0	0	RGL4	ral guanine nucleotide dissociation stimulator-like 4
hsa-miR-338-3p	1	0	1	0	1	1	MYBL1	v-myb myeloblastosis viral oncogene homolog (avian)-like 1
hsa-miR-338-3p	1	0	1	1	1	1	IL28RA	interleukin 28 receptor, alpha (interferon, lambda receptor)
hsa-miR-338-3p	0	0	1	1	0	0	TMC1	transmembrane channel-like 1
hsa-miR-338-3p	1	0	1	1	0	0	KIAA1644	KIAA1644
hsa-miR-338-3p	0	0	1	0	1	1	FLJ25328	uncharacterized LOC148231
hsa-miR-338-3p	0	0	1	1	1	1	CCDC126	coiled-coil domain containing 126
hsa-miR-338-3p	0	0	1	1	1	1	SPHKAP	SPHK1 interactor, AKAP domain containing
hsa-miR-338-3p	1	0	1	1	1	1	GABRB2	gamma-aminobutyric acid (GABA) A receptor, beta 2
hsa-miR-338-3p	1	0	1	1	1	1	ZNF763	zinc finger protein 763
hsa-miR-338-3p	0	0	1	0	0	0	FAM71F2	family with sequence similarity 71, member F2
hsa-miR-338-3p	1	0	1	1	1	1	FAM135B	family with sequence similarity 135, member B
hsa-miR-338-3p	0	0	1	1	1	1	TTN	titin
hsa-miR-338-3p	1	0	1	1	1	1	SP4	Sp4 transcription factor
hsa-miR-338-3p	1	0	1	1	1	1	TET2	tet methylcytosine dioxygenase 2
hsa-miR-338-3p	1	0	1	1	1	1	UBE4A	ubiquitination factor E4A
hsa-miR-338-3p	1	0	1	1	1	1	SLK	STE20-like kinase
hsa-miR-338-3p	0	0	1	0	0	0	LINC00310	long intergenic non-protein coding RNA 310
hsa-miR-338-3p	0	0	1	1	0	0	RNF123	ring finger protein 123
hsa-miR-338-3p	1	0	1	1	1	1	TMEM132B	transmembrane protein 132B
hsa-miR-338-3p	1	0	1	1	1	1	ST18	suppression of tumorigenicity 18 (breast carcinoma) (zinc finger protein)
hsa-miR-338-3p	0	0	1	1	1	1	C14orf105	chromosome 14 open reading frame 105
hsa-miR-338-3p	1	0	1	1	1	1	OTUD4	OTU domain containing 4
hsa-miR-338-3p	0	0	1	1	0	0	WDR90	WD repeat domain 90
hsa-miR-338-3p	0	0	1	0	0	0	KRT8P12	keratin 8 pseudogene 12
hsa-miR-338-3p	0	0	1	0	1	1	GOLGA8G	golgin A8 family, member G
hsa-miR-338-3p	1	0	1	1	1	1	ANK2	ankyrin 2, neuronal
hsa-miR-338-3p	0	0	1	1	1	1	KANSL1L	KAT8 regulatory NSL complex subunit 1-like
hsa-miR-338-3p	0	0	1	0	0	0	FAM225B	family with sequence similarity 225, member B (non-protein coding)
hsa-miR-338-3p	0	0	1	0	0	0	LILRP2	leukocyte immunoglobulin-like receptor pseudogene 2
hsa-miR-338-3p	1	0	1	1	1	1	FNDC3A	fibronectin type III domain containing 3A
hsa-miR-338-3p	1	0	1	1	0	0	NRL	neural retina leucine zipper
hsa-miR-338-3p	0	0	1	1	0	0	NDRG2	NDRG family member 2
hsa-miR-338-3p	0	0	1	1	1	1	NCBP2	nuclear cap binding protein subunit 2, 20kDa
hsa-miR-338-3p	0	0	1	1	1	1	IP6K2	inositol hexakisphosphate kinase 2
hsa-miR-338-3p	1	0	1	1	0	0	KRT80	keratin 80
hsa-miR-338-3p	1	0	1	1	1	1	ATP2B4	ATPase, Ca++ transporting, plasma membrane 4
hsa-miR-338-3p	1	0	1	0	1	1	MTX3	metaxin 3
hsa-miR-338-3p	0	0	1	1	1	1	STAT2	signal transducer and activator of transcription 2, 113kDa
hsa-miR-338-3p	1	0	1	0	1	1	CLASP2	cytoplasmic linker associated protein 2
hsa-miR-338-3p	1	0	1	1	1	1	C12orf4	chromosome 12 open reading frame 4
hsa-miR-338-3p	1	0	1	1	1	1	RAB30	RAB30, member RAS oncogene family
hsa-miR-338-3p	0	0	1	0	0	0	EML6	echinoderm microtubule associated protein like 6
hsa-miR-338-3p	1	0	1	1	1	1	MYCBP2	MYC binding protein 2, E3 ubiquitin protein ligase
hsa-miR-338-3p	0	0	1	1	1	1	IPCEF1	interaction protein for cytohesin exchange factors 1
hsa-miR-338-3p	1	0	1	1	1	1	HMGB1	high mobility group box 1
hsa-miR-338-3p	0	0	1	1	1	1	PRR14L	proline rich 14-like
hsa-miR-338-3p	1	0	1	1	1	1	PRDM2	PR domain containing 2, with ZNF domain
hsa-miR-338-3p	0	0	1	1	1	1	CP	ceruloplasmin (ferroxidase)
hsa-miR-338-3p	0	0	1	1	1	1	ADH1B	alcohol dehydrogenase 1B (class I), beta polypeptide
hsa-miR-338-3p	1	0	1	1	1	1	CASP3	caspase 3, apoptosis-related cysteine peptidase
hsa-miR-338-3p	1	0	1	0	1	1	EML4	echinoderm microtubule associated protein like 4
hsa-miR-338-3p	0	0	1	0	1	1	ANKRD36	ankyrin repeat domain 36
hsa-miR-338-3p	0	0	1	1	1	1	ARMCX3	armadillo repeat containing, X-linked 3
hsa-miR-338-3p	1	0	1	1	1	1	TC2N	tandem C2 domains, nuclear
hsa-miR-338-3p	0	0	1	0	1	1	B3GALTL	beta 1,3-galactosyltransferase-like
hsa-miR-338-3p	1	0	1	1	1	1	DCAF5	DDB1 and CUL4 associated factor 5
hsa-miR-338-3p	1	0	1	1	1	1	LCA5	Leber congenital amaurosis 5
hsa-miR-338-3p	1	0	1	0	1	1	PCGF3	polycomb group ring finger 3
hsa-miR-338-3p	1	0	1	1	1	1	NFIB	nuclear factor I/B
hsa-miR-338-3p	1	0	1	1	1	1	HIF1A	hypoxia inducible factor 1, alpha subunit (basic helix-loop-helix transcription factor)
hsa-miR-338-3p	1	0	1	0	1	1	TTL	tubulin tyrosine ligase
hsa-miR-338-3p	0	0	1	1	0	0	RPS24	ribosomal protein S24
hsa-miR-338-3p	0	0	1	1	1	1	SMYD5	SMYD family member 5
hsa-miR-338-3p	1	0	1	1	1	1	ARF1	ADP-ribosylation factor 1
hsa-miR-338-3p	1	0	1	1	1	1	GPBP1	GC-rich promoter binding protein 1
hsa-miR-338-3p	0	0	1	1	1	1	CKB	creatine kinase, brain
hsa-miR-338-3p	0	0	1	1	1	1	TMEM53	transmembrane protein 53
hsa-miR-338-3p	0	0	1	1	1	1	TBC1D10A	TBC1 domain family, member 10A
hsa-miR-338-3p	0	0	1	1	1	1	GTPBP3	GTP binding protein 3 (mitochondrial)
hsa-miR-338-3p	1	0	1	1	1	1	FUT9	fucosyltransferase 9 (alpha (1,3) fucosyltransferase)
hsa-miR-338-3p	1	0	1	1	0	0	CGREF1	cell growth regulator with EF-hand domain 1
hsa-miR-338-3p	0	0	1	1	0	0	APOA1BP	apolipoprotein A-I binding protein
hsa-miR-338-3p	1	0	1	1	1	1	TARBP2	TAR (HIV-1) RNA binding protein 2
hsa-miR-338-3p	1	0	1	1	1	1	EIF4B	eukaryotic translation initiation factor 4B
hsa-miR-338-3p	1	0	1	1	1	1	CLDN11	claudin 11
hsa-miR-338-3p	0	0	1	1	1	1	CYTH2	cytohesin 2
hsa-miR-338-3p	0	0	1	1	0	0	FCHO1	FCH domain only 1
hsa-miR-338-3p	0	0	1	1	0	0	MIF4GD	MIF4G domain containing
hsa-miR-338-3p	0	0	1	0	1	1	BLM	Bloom syndrome, RecQ helicase-like
hsa-miR-338-3p	0	0	1	0	0	0	ZBED3-AS1	ZBED3 antisense RNA 1
hsa-miR-338-3p	0	0	1	1	1	1	CHCHD4	coiled-coil-helix-coiled-coil-helix domain containing 4
hsa-miR-338-3p	0	0	1	1	0	0	NGDN	neuroguidin, EIF4E binding protein
hsa-miR-338-3p	0	0	1	1	0	0	DNAJB2	DnaJ (Hsp40) homolog, subfamily B, member 2
hsa-miR-338-3p	0	0	1	1	0	0	METTL23	methyltransferase like 23
hsa-miR-338-3p	1	0	1	1	1	1	NTM	neurotrimin
hsa-miR-338-3p	0	0	1	1	0	0	NDUFV1	NADH dehydrogenase (ubiquinone) flavoprotein 1, 51kDa
hsa-miR-338-3p	0	0	1	1	0	0	F10	coagulation factor X
hsa-miR-338-3p	0	0	1	1	1	1	C1orf123	chromosome 1 open reading frame 123
hsa-miR-338-3p	1	0	1	1	0	0	PNPLA6	patatin-like phospholipase domain containing 6
hsa-miR-338-3p	1	0	1	1	1	1	TFDP1	transcription factor Dp-1
hsa-miR-338-3p	0	0	1	1	0	0	MUS81	MUS81 endonuclease homolog (S. cerevisiae)
hsa-miR-338-3p	0	0	1	1	1	1	STON1	stonin 1
hsa-miR-338-3p	0	0	1	0	0	0	LOC729678	uncharacterized LOC729678
hsa-miR-338-3p	0	0	1	1	0	0	STK19	serine/threonine kinase 19
hsa-miR-338-3p	1	0	1	0	1	1	KIAA0494	KIAA0494
hsa-miR-338-3p	0	0	1	1	1	1	EIF3J	eukaryotic translation initiation factor 3, subunit J
hsa-miR-338-3p	0	0	1	1	1	1	POLR2G	polymerase (RNA) II (DNA directed) polypeptide G
hsa-miR-338-3p	0	0	1	1	0	0	C11orf68	chromosome 11 open reading frame 68
hsa-miR-338-3p	1	0	1	1	1	1	TMEM66	transmembrane protein 66
hsa-miR-338-3p	1	0	1	1	1	1	OSBPL9	oxysterol binding protein-like 9
hsa-miR-338-3p	1	0	1	1	1	1	DOK4	docking protein 4
hsa-miR-338-3p	1	0	1	1	1	1	CUL4A	cullin 4A
hsa-miR-338-3p	0	0	1	1	0	0	C1orf122	chromosome 1 open reading frame 122
hsa-miR-338-3p	1	0	1	1	1	1	TAGLN2	transgelin 2
hsa-miR-338-3p	1	0	1	1	1	1	ARNTL	aryl hydrocarbon receptor nuclear translocator-like
hsa-miR-338-3p	0	0	1	1	1	1	COMMD3	COMM domain containing 3
hsa-miR-338-3p	1	0	1	1	1	1	FOS	FBJ murine osteosarcoma viral oncogene homolog
hsa-miR-338-3p	0	0	1	1	0	0	PLB1	phospholipase B1
hsa-miR-338-3p	0	0	1	1	0	0	RGS9	regulator of G-protein signaling 9
hsa-miR-338-3p	1	0	1	1	1	1	ARL4A	ADP-ribosylation factor-like 4A
hsa-miR-338-3p	0	0	1	1	1	1	NOLC1	nucleolar and coiled-body phosphoprotein 1
hsa-miR-338-3p	0	0	1	1	0	0	FAM57B	family with sequence similarity 57, member B
hsa-miR-338-3p	1	0	1	1	1	1	ATAT1	alpha tubulin acetyltransferase 1
hsa-miR-338-3p	1	0	1	1	1	1	ANAPC16	anaphase promoting complex subunit 16
hsa-miR-338-3p	1	0	1	1	1	1	CNBP	CCHC-type zinc finger, nucleic acid binding protein
hsa-miR-338-3p	1	0	1	1	1	1	ZNF207	zinc finger protein 207
hsa-miR-338-3p	0	0	1	1	1	1	SLCO4A1	solute carrier organic anion transporter family, member 4A1
hsa-miR-338-3p	1	0	1	1	1	1	RALY	RNA binding protein, autoantigenic (hnRNP-associated with lethal yellow homolog (mouse))
hsa-miR-338-3p	0	0	1	1	1	1	NCAPH	non-SMC condensin I complex, subunit H
hsa-miR-338-3p	0	0	1	1	1	1	TBRG1	transforming growth factor beta regulator 1
hsa-miR-338-3p	1	0	1	1	0	0	CCM2	cerebral cavernous malformation 2
hsa-miR-338-3p	1	0	1	1	1	1	RUNX1	runt-related transcription factor 1
hsa-miR-338-3p	1	0	1	1	1	1	YWHAE	tyrosine 3-monooxygenase/tryptophan 5-monooxygenase activation protein, epsilon polypeptide
hsa-miR-338-3p	1	0	1	1	1	1	ID2	inhibitor of DNA binding 2, dominant negative helix-loop-helix protein
hsa-miR-338-3p	1	0	1	1	1	1	TIPRL	TIP41, TOR signaling pathway regulator-like (S. cerevisiae)
hsa-miR-338-3p	0	0	1	0	0	0	LOC100132984	uncharacterized LOC100132984
hsa-miR-338-3p	0	0	1	1	0	0	FES	feline sarcoma oncogene
hsa-miR-338-3p	0	0	1	1	1	1	SUGT1	SGT1, suppressor of G2 allele of SKP1 (S. cerevisiae)
hsa-miR-338-3p	0	0	1	1	1	1	COPS4	COP9 constitutive photomorphogenic homolog subunit 4 (Arabidopsis)
hsa-miR-338-3p	0	0	1	1	1	1	TOP3B	topoisomerase (DNA) III beta
hsa-miR-338-3p	0	0	1	1	0	0	IL11RA	interleukin 11 receptor, alpha
hsa-miR-338-3p	1	0	1	1	1	1	SERF2	small EDRK-rich factor 2
hsa-miR-338-3p	0	0	1	0	0	0	FAM47E	family with sequence similarity 47, member E
hsa-miR-338-3p	0	0	1	0	0	0	LOC731789	uncharacterized LOC731789
hsa-miR-338-3p	1	0	1	1	1	1	PTPRG	protein tyrosine phosphatase, receptor type, G
hsa-miR-338-3p	0	0	1	1	1	1	BDP1	B double prime 1, subunit of RNA polymerase III transcription initiation factor IIIB
hsa-miR-338-3p	0	0	1	1	1	1	ISX	intestine-specific homeobox
hsa-miR-338-3p	0	0	1	0	0	0	LINC00661	long intergenic non-protein coding RNA 661
hsa-miR-338-3p	1	0	1	0	1	1	XRN1	5'-3' exoribonuclease 1
hsa-miR-338-3p	0	0	1	1	1	1	ARMCX1	armadillo repeat containing, X-linked 1
hsa-miR-338-3p	1	0	1	1	1	1	SNRK	SNF related kinase
hsa-miR-338-3p	1	0	1	1	0	0	POMGNT1	protein O-linked mannose beta1,2-N-acetylglucosaminyltransferase
hsa-miR-338-3p	0	0	1	0	1	1	ZNF28	zinc finger protein 28
hsa-miR-338-3p	0	0	1	0	1	1	SYNPR	synaptoporin
hsa-miR-338-3p	0	0	1	0	0	0	ZNFX1-AS1	ZNFX1 antisense RNA 1
hsa-miR-338-3p	0	0	1	1	1	1	SLC39A14	solute carrier family 39 (zinc transporter), member 14
hsa-miR-338-3p	0	0	1	1	1	1	PTGS1	prostaglandin-endoperoxide synthase 1 (prostaglandin G/H synthase and cyclooxygenase)
hsa-miR-338-3p	0	0	1	1	0	0	SPATA20	spermatogenesis associated 20
hsa-miR-338-3p	1	0	1	1	0	0	LGSN	lengsin, lens protein with glutamine synthetase domain
hsa-miR-338-3p	0	0	1	0	0	0	POM121L8P	POM121 transmembrane nucleoporin-like 8 pseudogene
hsa-miR-338-3p	0	0	1	0	0	0	LOC728377	Rho guanine nucleotide exchange factor (GEF) 5 pseudogene
hsa-miR-338-3p	1	0	1	0	1	1	DAPP1	dual adaptor of phosphotyrosine and 3-phosphoinositides
hsa-miR-338-3p	1	0	1	1	1	1	SLC4A8	solute carrier family 4, sodium bicarbonate cotransporter, member 8
hsa-miR-338-3p	0	0	1	0	0	0	GPR144	G protein-coupled receptor 144
hsa-miR-338-3p	1	0	1	1	1	1	ATP2B2	ATPase, Ca++ transporting, plasma membrane 2
hsa-miR-338-3p	0	0	1	1	1	1	RFC1	replication factor C (activator 1) 1, 145kDa
hsa-miR-338-3p	1	0	1	1	1	1	AFF1	AF4/FMR2 family, member 1
hsa-miR-338-3p	1	0	1	1	1	1	PLAU	plasminogen activator, urokinase
hsa-miR-338-3p	1	0	1	1	1	1	ZNF76	zinc finger protein 76
hsa-miR-338-3p	1	0	1	0	1	1	ACVR2A	activin A receptor, type IIA
hsa-miR-338-3p	1	0	1	1	1	1	AGL	amylo-alpha-1, 6-glucosidase, 4-alpha-glucanotransferase
hsa-miR-338-3p	0	0	1	1	1	1	F8	coagulation factor VIII, procoagulant component
hsa-miR-338-3p	1	0	1	1	1	1	FBN1	fibrillin 1
hsa-miR-338-3p	0	0	1	0	1	1	MS4A2	membrane-spanning 4-domains, subfamily A, member 2
hsa-miR-338-3p	1	0	1	1	1	1	GJA1	gap junction protein, alpha 1, 43kDa
hsa-miR-338-3p	1	0	1	0	1	1	ITGB3	integrin, beta 3 (platelet glycoprotein IIIa, antigen CD61)
hsa-miR-338-3p	1	0	1	0	1	1	KIT	v-kit Hardy-Zuckerman 4 feline sarcoma viral oncogene homolog
hsa-miR-338-3p	1	0	1	0	1	1	SGCB	sarcoglycan, beta (43kDa dystrophin-associated glycoprotein)
hsa-miR-338-3p	0	0	1	0	1	1	MYO7A	myosin VIIA
hsa-miR-338-3p	0	0	1	1	1	1	NDP	Norrie disease (pseudoglioma)
hsa-miR-338-3p	0	0	1	1	1	1	PEX7	peroxisomal biogenesis factor 7
hsa-miR-338-3p	1	0	1	0	1	1	PTEN	phosphatase and tensin homolog
hsa-miR-338-3p	0	0	1	1	1	1	SLC25A20	solute carrier family 25 (carnitine/acylcarnitine translocase), member 20
hsa-miR-338-3p	1	0	1	0	1	1	CYBB	cytochrome b-245, beta polypeptide
hsa-miR-338-3p	1	0	1	0	1	1	PAFAH1B1	platelet-activating factor acetylhydrolase 1b, regulatory subunit 1 (45kDa)
hsa-miR-338-3p	1	0	1	0	1	1	RAG1	recombination activating gene 1
hsa-miR-338-3p	1	0	1	1	1	1	KCNJ11	potassium inwardly-rectifying channel, subfamily J, member 11
hsa-miR-338-3p	0	0	1	1	1	1	RHO	rhodopsin
hsa-miR-338-3p	1	0	1	1	1	1	DCX	doublecortin
hsa-miR-338-3p	0	0	1	1	1	1	HGF	hepatocyte growth factor (hepapoietin A; scatter factor)
hsa-miR-338-3p	0	0	1	1	1	1	SOD2	superoxide dismutase 2, mitochondrial
hsa-miR-338-3p	0	0	1	1	0	0	BLVRA	biliverdin reductase A
hsa-miR-338-3p	1	0	1	1	1	1	CACNB4	calcium channel, voltage-dependent, beta 4 subunit
hsa-miR-338-3p	1	0	1	1	1	1	DIO2	deiodinase, iodothyronine, type II
hsa-miR-338-3p	0	0	1	1	1	1	EPO	erythropoietin
hsa-miR-338-3p	1	0	1	1	1	1	GABRG2	gamma-aminobutyric acid (GABA) A receptor, gamma 2
hsa-miR-338-3p	0	0	1	1	1	1	GAD2	glutamate decarboxylase 2 (pancreatic islets and brain, 65kDa)
hsa-miR-338-3p	1	0	1	1	1	1	MME	membrane metallo-endopeptidase
hsa-miR-338-3p	1	0	1	1	1	1	PTGFR	prostaglandin F receptor (FP)
hsa-miR-338-3p	0	0	1	1	0	0	PTGIR	prostaglandin I2 (prostacyclin) receptor (IP)
hsa-miR-338-3p	0	0	1	0	1	1	PTGIS	prostaglandin I2 (prostacyclin) synthase
hsa-miR-338-3p	0	0	1	1	1	1	BLOC1S2	biogenesis of lysosomal organelles complex-1, subunit 2
hsa-miR-338-3p	1	0	1	0	1	1	SMAD5	SMAD family member 5
hsa-miR-338-3p	0	0	1	1	1	1	C16orf87	chromosome 16 open reading frame 87
hsa-miR-338-3p	0	0	1	1	1	1	CC2D2B	coiled-coil and C2 domain containing 2B
hsa-miR-338-3p	1	0	1	1	1	1	ATP1B1	ATPase, Na+/K+ transporting, beta 1 polypeptide
hsa-miR-338-3p	0	0	1	1	0	0	ATP5G1	ATP synthase, H+ transporting, mitochondrial Fo complex, subunit C1 (subunit 9)
hsa-miR-338-3p	1	0	1	1	1	1	LCLAT1	lysocardiolipin acyltransferase 1
hsa-miR-338-3p	0	0	1	1	1	1	EPSTI1	epithelial stromal interaction 1 (breast)
hsa-miR-338-3p	0	0	1	0	0	0	OR8G1	olfactory receptor, family 8, subfamily G, member 1
hsa-miR-338-3p	1	0	1	1	1	1	HMGXB4	HMG box domain containing 4
hsa-miR-338-3p	0	0	1	1	0	0	PMS2P3	postmeiotic segregation increased 2 pseudogene 3
hsa-miR-338-3p	1	0	1	0	1	1	BMF	Bcl2 modifying factor
hsa-miR-338-3p	0	0	1	1	1	1	C1orf168	chromosome 1 open reading frame 168
hsa-miR-338-3p	0	0	1	1	1	1	CCDC144NL	coiled-coil domain containing 144 family, N-terminal like
hsa-miR-338-3p	0	0	1	0	1	1	FLJ16124	FLJ16124 protein
hsa-miR-338-3p	0	0	1	1	1	1	HMGN2P46	high mobility group nucleosomal binding domain 2 pseudogene 46
hsa-miR-338-3p	1	0	1	1	1	1	AK4	adenylate kinase 4
hsa-miR-338-3p	1	0	1	0	1	1	IP6K1	inositol hexakisphosphate kinase 1
hsa-miR-338-3p	0	0	1	1	1	1	FAM154B	family with sequence similarity 154, member B
hsa-miR-338-3p	1	0	1	1	1	1	CTDSPL	CTD (carboxy-terminal domain, RNA polymerase II, polypeptide A) small phosphatase-like
hsa-miR-338-3p	0	0	1	1	1	1	CXCR4	chemokine (C-X-C motif) receptor 4
hsa-miR-338-3p	1	0	1	1	1	1	FNIP1	folliculin interacting protein 1
hsa-miR-338-3p	1	0	1	1	1	1	LUZP2	leucine zipper protein 2
hsa-miR-338-3p	1	0	1	0	1	1	ERMN	ermin, ERM-like protein
hsa-miR-338-3p	1	0	1	1	1	1	SHE	Src homology 2 domain containing E
hsa-miR-338-3p	0	0	1	1	1	1	MUC21	mucin 21, cell surface associated
hsa-miR-338-3p	0	0	1	1	1	1	NCMAP	noncompact myelin associated protein
hsa-miR-338-3p	0	0	1	1	0	0	SOHLH1	spermatogenesis and oogenesis specific basic helix-loop-helix 1
hsa-miR-338-3p	0	0	1	0	1	1	GOLGA8E	golgin A8 family, member E
hsa-miR-338-3p	1	0	1	1	1	1	FOXP4	forkhead box P4
hsa-miR-338-3p	1	0	1	0	1	1	ZKSCAN2	zinc finger with KRAB and SCAN domains 2
hsa-miR-338-3p	0	0	1	1	1	1	CCNC	cyclin C
hsa-miR-338-3p	0	0	1	1	1	1	PAGE5	P antigen family, member 5 (prostate associated)
hsa-miR-338-3p	0	0	1	1	1	1	C2orf68	chromosome 2 open reading frame 68
hsa-miR-338-3p	0	0	1	0	1	1	LINC00268	long intergenic non-protein coding RNA 268
hsa-miR-338-3p	0	0	1	0	0	0	LOC441956	uncharacterized LOC441956
hsa-miR-338-3p	1	0	1	1	1	1	KATNAL1	katanin p60 subunit A-like 1
hsa-miR-338-3p	1	0	1	1	1	1	CA7	carbonic anhydrase VII
hsa-miR-338-3p	0	0	1	1	1	1	KIAA2026	KIAA2026
hsa-miR-338-3p	1	0	1	1	1	1	VMA21	VMA21 vacuolar H+-ATPase homolog (S. cerevisiae)
hsa-miR-338-3p	1	0	1	1	1	1	NTRK2	neurotrophic tyrosine kinase, receptor, type 2
hsa-miR-338-3p	0	0	1	1	0	0	RPS19	ribosomal protein S19
hsa-miR-338-3p	1	0	1	1	1	1	IQCB1	IQ motif containing B1
hsa-miR-338-3p	0	0	1	1	1	1	LRRC66	leucine rich repeat containing 66
hsa-miR-338-3p	1	0	1	1	1	1	TPD52	tumor protein D52
hsa-miR-338-3p	1	0	1	1	1	1	FAM108B1	family with sequence similarity 108, member B1
hsa-miR-338-3p	1	0	1	1	1	1	CTNS	cystinosin, lysosomal cystine transporter
hsa-miR-338-3p	0	0	1	1	1	1	TP53BP2	tumor protein p53 binding protein, 2
hsa-miR-338-3p	0	0	1	1	1	1	LYPD5	LY6/PLAUR domain containing 5
hsa-miR-338-3p	1	0	1	1	1	1	CSNK1G3	casein kinase 1, gamma 3
hsa-miR-338-3p	1	0	1	1	1	1	UBE2V1	ubiquitin-conjugating enzyme E2 variant 1
hsa-miR-338-3p	1	0	1	1	1	1	MAGI1	membrane associated guanylate kinase, WW and PDZ domain containing 1
hsa-miR-338-3p	1	0	1	1	1	1	AMD1	adenosylmethionine decarboxylase 1
hsa-miR-338-3p	1	0	1	1	1	1	MYCL1	v-myc myelocytomatosis viral oncogene homolog 1, lung carcinoma derived (avian)
hsa-miR-338-3p	1	0	1	1	1	1	PPM1B	protein phosphatase, Mg2+/Mn2+ dependent, 1B
hsa-miR-338-3p	0	0	1	1	0	0	SSX4B	synovial sarcoma, X breakpoint 4B
hsa-miR-338-3p	0	0	1	1	1	1	KCNIP1	Kv channel interacting protein 1
hsa-miR-338-3p	0	0	1	1	0	0	C17orf47	chromosome 17 open reading frame 47
hsa-miR-338-3p	0	0	1	0	1	1	FER1L6-AS1	FER1L6 antisense RNA 1
hsa-miR-338-3p	0	0	1	1	1	1	HEPACAM2	HEPACAM family member 2
hsa-miR-338-3p	1	0	1	1	1	1	AP1S3	adaptor-related protein complex 1, sigma 3 subunit
hsa-miR-338-3p	1	0	1	0	1	1	CCNL2	cyclin L2
hsa-miR-338-3p	1	0	1	0	1	1	USP9X	ubiquitin specific peptidase 9, X-linked
hsa-miR-338-3p	1	0	1	0	1	1	CREBZF	CREB/ATF bZIP transcription factor
hsa-miR-338-3p	0	0	1	1	0	0	ANGPTL4	angiopoietin-like 4
hsa-miR-338-3p	1	0	1	1	1	1	CBLN3	cerebellin 3 precursor
hsa-miR-338-3p	1	0	1	1	1	1	C3orf65	chromosome 3 open reading frame 65
hsa-miR-338-3p	1	0	1	1	1	1	MLLT4	myeloid/lymphoid or mixed-lineage leukemia (trithorax homolog, Drosophila); translocated to, 4
hsa-miR-338-3p	1	0	1	1	1	1	SPTSSB	serine palmitoyltransferase, small subunit B
hsa-miR-338-3p	0	0	1	0	1	1	SPINK13	serine peptidase inhibitor, Kazal type 13 (putative)
hsa-miR-338-3p	0	0	1	1	1	1	SPOCK3	sparc/osteonectin, cwcv and kazal-like domains proteoglycan (testican) 3
hsa-miR-338-3p	1	0	1	1	1	1	NCALD	neurocalcin delta
hsa-miR-338-3p	0	0	1	1	1	1	C6orf162	chromosome 6 open reading frame 162
hsa-miR-338-3p	1	0	1	1	1	1	FRS2	fibroblast growth factor receptor substrate 2
hsa-miR-338-3p	0	0	1	1	1	1	TTC14	tetratricopeptide repeat domain 14
hsa-miR-338-3p	1	0	1	1	1	1	KDM5A	lysine (K)-specific demethylase 5A
hsa-miR-338-3p	0	0	1	1	1	1	SEC24B	SEC24 family, member B (S. cerevisiae)
hsa-miR-338-3p	1	0	1	1	1	1	TPM3	tropomyosin 3
hsa-miR-338-3p	1	0	1	1	1	1	NET1	neuroepithelial cell transforming 1
hsa-miR-338-3p	0	0	1	0	1	1	SSTR1	somatostatin receptor 1
hsa-miR-338-3p	1	0	1	1	1	1	SREK1	splicing regulatory glutamine/lysine-rich protein 1
hsa-miR-338-3p	1	0	1	1	1	1	IRF2BP2	interferon regulatory factor 2 binding protein 2
hsa-miR-338-3p	1	0	1	1	1	1	ALG9	asparagine-linked glycosylation 9, alpha-1,2-mannosyltransferase homolog (S. cerevisiae)
hsa-miR-338-3p	1	0	1	1	1	1	CUL4B	cullin 4B
hsa-miR-338-3p	1	0	1	1	1	1	VAV3	vav 3 guanine nucleotide exchange factor
hsa-miR-338-3p	1	0	1	1	1	1	ZNF697	zinc finger protein 697
hsa-miR-338-3p	1	0	1	1	1	1	REPS2	RALBP1 associated Eps domain containing 2
hsa-miR-338-3p	0	0	1	1	1	1	G6PC2	glucose-6-phosphatase, catalytic, 2
hsa-miR-338-3p	0	0	1	1	1	1	CRISP1	cysteine-rich secretory protein 1
hsa-miR-338-3p	1	0	1	0	1	1	XIAP	X-linked inhibitor of apoptosis
hsa-miR-338-3p	1	0	1	0	1	1	BACH1	BTB and CNC homology 1, basic leucine zipper transcription factor 1
hsa-miR-338-3p	1	0	1	1	1	1	PRDM1	PR domain containing 1, with ZNF domain
hsa-miR-338-3p	1	0	1	0	1	1	BMPR2	bone morphogenetic protein receptor, type II (serine/threonine kinase)
hsa-miR-338-3p	0	0	1	1	1	1	CCNT2	cyclin T2
hsa-miR-338-3p	1	0	1	0	1	1	CDK6	cyclin-dependent kinase 6
hsa-miR-338-3p	0	0	1	1	1	1	CLIC2	chloride intracellular channel 2
hsa-miR-338-3p	1	0	1	0	1	1	CPD	carboxypeptidase D
hsa-miR-338-3p	1	0	1	1	1	1	DTNA	dystrobrevin, alpha
hsa-miR-338-3p	1	0	1	1	1	1	DYRK1A	dual-specificity tyrosine-(Y)-phosphorylation regulated kinase 1A
hsa-miR-338-3p	1	0	1	1	1	1	CELSR3	cadherin, EGF LAG seven-pass G-type receptor 3 (flamingo homolog, Drosophila)
hsa-miR-338-3p	0	0	1	0	1	1	ELF5	E74-like factor 5 (ets domain transcription factor)
hsa-miR-338-3p	0	0	1	0	1	1	EMP1	epithelial membrane protein 1
hsa-miR-338-3p	1	0	1	1	1	1	EREG	epiregulin
hsa-miR-338-3p	1	0	1	0	1	1	GCNT2	glucosaminyl (N-acetyl) transferase 2, I-branching enzyme (I blood group)
hsa-miR-338-3p	1	0	1	1	1	1	GTF2B	general transcription factor IIB
hsa-miR-338-3p	1	0	1	1	1	1	NDST1	N-deacetylase/N-sulfotransferase (heparan glucosaminyl) 1
hsa-miR-338-3p	1	0	1	1	1	1	IFIT2	interferon-induced protein with tetratricopeptide repeats 2
hsa-miR-338-3p	0	0	1	1	0	0	ACP2	acid phosphatase 2, lysosomal
hsa-miR-338-3p	1	0	1	1	1	1	ADD2	adducin 2 (beta)
hsa-miR-338-3p	1	0	1	1	1	1	AHNAK	AHNAK nucleoprotein
hsa-miR-338-3p	0	0	1	1	0	0	BMP6	bone morphogenetic protein 6
hsa-miR-338-3p	1	0	1	1	1	1	KLF5	Kruppel-like factor 5 (intestinal)
hsa-miR-338-3p	1	0	1	1	1	1	CDC25A	cell division cycle 25 homolog A (S. pombe)
hsa-miR-338-3p	1	0	1	1	1	1	CLCN3	chloride channel, voltage-sensitive 3
hsa-miR-338-3p	0	0	1	1	0	0	CNTFR	ciliary neurotrophic factor receptor
hsa-miR-338-3p	0	0	1	1	1	1	CTSE	cathepsin E
hsa-miR-338-3p	1	0	1	1	1	1	DSC3	desmocollin 3
hsa-miR-338-3p	1	0	1	1	1	1	EPB49	erythrocyte membrane protein band 4.9 (dematin)
hsa-miR-338-3p	0	0	1	0	1	1	FGF2	fibroblast growth factor 2 (basic)
hsa-miR-338-3p	1	0	1	1	1	1	FGF7	fibroblast growth factor 7
hsa-miR-338-3p	0	0	1	1	1	1	GZMK	granzyme K (granzyme 3; tryptase II)
hsa-miR-338-3p	0	0	1	1	1	1	HOXA4	homeobox A4
hsa-miR-338-3p	1	0	1	1	0	0	HSPE1	heat shock 10kDa protein 1 (chaperonin 10)
hsa-miR-338-3p	1	0	1	1	1	1	ITGA3	integrin, alpha 3 (antigen CD49C, alpha 3 subunit of VLA-3 receptor)
hsa-miR-338-3p	1	0	1	1	1	1	ITGA5	integrin, alpha 5 (fibronectin receptor, alpha polypeptide)
hsa-miR-338-3p	1	0	1	1	1	1	ITGA9	integrin, alpha 9
hsa-miR-338-3p	0	0	1	1	0	0	EIF6	eukaryotic translation initiation factor 6
hsa-miR-338-3p	1	0	1	1	1	1	KCNJ10	potassium inwardly-rectifying channel, subfamily J, member 10
hsa-miR-338-3p	1	0	1	0	1	1	LAMC1	laminin, gamma 1 (formerly LAMB2)
hsa-miR-338-3p	1	0	1	1	1	1	LIF	leukemia inhibitory factor
hsa-miR-338-3p	1	0	1	0	1	1	MXD1	MAX dimerization protein 1
hsa-miR-338-3p	1	0	1	1	1	1	ADAM11	ADAM metallopeptidase domain 11
hsa-miR-338-3p	0	0	1	0	1	1	CXCL9	chemokine (C-X-C motif) ligand 9
hsa-miR-338-3p	0	0	1	1	1	1	MTRR	5-methyltetrahydrofolate-homocysteine methyltransferase reductase
hsa-miR-338-3p	0	0	1	1	1	1	CEACAM6	carcinoembryonic antigen-related cell adhesion molecule 6 (non-specific cross reacting antigen)
hsa-miR-338-3p	1	0	1	1	1	1	NEUROD1	neuronal differentiation 1
hsa-miR-338-3p	1	0	1	1	1	1	NPAS2	neuronal PAS domain protein 2
hsa-miR-338-3p	1	0	1	1	1	1	NPAT	nuclear protein, ataxia-telangiectasia locus
hsa-miR-338-3p	0	0	1	0	1	1	OPHN1	oligophrenin 1
hsa-miR-338-3p	1	0	1	1	1	1	FURIN	furin (paired basic amino acid cleaving enzyme)
hsa-miR-338-3p	1	0	1	1	1	1	PAWR	PRKC, apoptosis, WT1, regulator
hsa-miR-338-3p	1	0	1	1	1	1	PBX2	pre-B-cell leukemia homeobox 2
hsa-miR-338-3p	0	0	1	1	0	0	PER1	period homolog 1 (Drosophila)
hsa-miR-338-3p	0	0	1	1	1	1	PITX1	paired-like homeodomain 1
hsa-miR-338-3p	1	0	1	1	1	1	PLAGL2	pleiomorphic adenoma gene-like 2
hsa-miR-338-3p	1	0	1	0	0	0	PPP1R10	protein phosphatase 1, regulatory subunit 10
hsa-miR-338-3p	1	0	1	1	1	1	PPP2CA	protein phosphatase 2, catalytic subunit, alpha isozyme
hsa-miR-338-3p	0	0	1	1	0	0	PSMC6	proteasome (prosome, macropain) 26S subunit, ATPase, 6
hsa-miR-338-3p	0	0	1	1	0	0	RBMS2	RNA binding motif, single stranded interacting protein 2
hsa-miR-338-3p	0	0	1	1	0	0	RDBP	RD RNA binding protein
hsa-miR-338-3p	0	0	1	1	0	0	S100A5	S100 calcium binding protein A5
hsa-miR-338-3p	1	0	1	1	1	1	CCL21	chemokine (C-C motif) ligand 21
hsa-miR-338-3p	0	0	1	1	1	1	SDC2	syndecan 2
hsa-miR-338-3p	0	0	1	1	1	1	SDC4	syndecan 4
hsa-miR-338-3p	0	0	1	1	1	1	SH3BGRL	SH3 domain binding glutamic acid-rich protein like
hsa-miR-338-3p	1	0	1	1	1	1	SH3GL2	SH3-domain GRB2-like 2
hsa-miR-338-3p	1	0	1	0	1	1	ST6GAL1	ST6 beta-galactosamide alpha-2,6-sialyltranferase 1
hsa-miR-338-3p	1	0	1	1	1	1	ST8SIA1	ST8 alpha-N-acetyl-neuraminide alpha-2,8-sialyltransferase 1
hsa-miR-338-3p	1	0	1	0	1	1	SLC6A6	solute carrier family 6 (neurotransmitter transporter, taurine), member 6
hsa-miR-338-3p	1	0	1	1	0	0	SLN	sarcolipin
hsa-miR-338-3p	1	0	1	1	1	1	SNX2	sorting nexin 2
hsa-miR-338-3p	1	0	1	0	1	1	TAL1	T-cell acute lymphocytic leukemia 1
hsa-miR-338-3p	1	0	1	1	1	1	TFAP2C	transcription factor AP-2 gamma (activating enhancer binding protein 2 gamma)
hsa-miR-338-3p	1	0	1	1	1	1	LEFTY2	left-right determination factor 2
hsa-miR-338-3p	1	0	1	0	1	1	THBS1	thrombospondin 1
hsa-miR-338-3p	1	0	1	0	1	1	SEC62	SEC62 homolog (S. cerevisiae)
hsa-miR-338-3p	1	0	1	1	1	1	NR2E1	nuclear receptor subfamily 2, group E, member 1
hsa-miR-338-3p	0	0	1	1	1	1	TPR	translocated promoter region, nuclear basket protein
hsa-miR-338-3p	1	0	1	0	1	1	YWHAB	tyrosine 3-monooxygenase/tryptophan 5-monooxygenase activation protein, beta polypeptide
hsa-miR-338-3p	0	0	1	1	1	1	ZNF141	zinc finger protein 141
hsa-miR-338-3p	1	0	1	1	1	1	KCNAB1	potassium voltage-gated channel, shaker-related subfamily, beta member 1
hsa-miR-338-3p	0	0	1	1	1	1	STAM	signal transducing adaptor molecule (SH3 domain and ITAM motif) 1
hsa-miR-338-3p	1	0	1	1	1	1	ADAM12	ADAM metallopeptidase domain 12
hsa-miR-338-3p	1	0	1	1	1	1	CUL5	cullin 5
hsa-miR-338-3p	1	0	1	1	1	1	HMGA2	high mobility group AT-hook 2
hsa-miR-338-3p	0	0	1	1	1	1	PIP5K1A	phosphatidylinositol-4-phosphate 5-kinase, type I, alpha
hsa-miR-338-3p	1	0	1	1	1	1	DYRK2	dual-specificity tyrosine-(Y)-phosphorylation regulated kinase 2
hsa-miR-338-3p	1	0	1	1	1	1	CILP	cartilage intermediate layer protein, nucleotide pyrophosphohydrolase
hsa-miR-338-3p	0	0	1	1	1	1	PEX3	peroxisomal biogenesis factor 3
hsa-miR-338-3p	0	0	1	1	1	1	DDO	D-aspartate oxidase
hsa-miR-338-3p	0	0	1	1	1	1	CHST1	carbohydrate (keratan sulfate Gal-6) sulfotransferase 1
hsa-miR-338-3p	1	0	1	1	1	1	TNFSF11	tumor necrosis factor (ligand) superfamily, member 11
hsa-miR-338-3p	0	0	1	1	1	1	UNC5C	unc-5 homolog C (C. elegans)
hsa-miR-338-3p	0	0	1	1	1	1	CRADD	CASP2 and RIPK1 domain containing adaptor with death domain
hsa-miR-338-3p	1	0	1	1	1	1	NRP2	neuropilin 2
hsa-miR-338-3p	0	0	1	0	1	1	AP1S2	adaptor-related protein complex 1, sigma 2 subunit
hsa-miR-338-3p	0	0	1	1	1	1	UBA3	ubiquitin-like modifier activating enzyme 3
hsa-miR-338-3p	1	0	1	1	1	1	BTAF1	BTAF1 RNA polymerase II, B-TFIID transcription factor-associated, 170kDa (Mot1 homolog, S. cerevisiae)
hsa-miR-338-3p	1	0	1	1	1	1	BCL2L2	BCL2-like 2
hsa-miR-338-3p	0	0	1	1	1	1	TIMM8A	translocase of inner mitochondrial membrane 8 homolog A (yeast)
hsa-miR-338-3p	1	0	1	1	1	1	FGF13	fibroblast growth factor 13
hsa-miR-338-3p	1	0	1	1	1	1	HNF4G	hepatocyte nuclear factor 4, gamma
hsa-miR-338-3p	1	0	1	0	1	1	IREB2	iron-responsive element binding protein 2
hsa-miR-338-3p	1	0	1	1	1	1	SEMA3F	sema domain, immunoglobulin domain (Ig), short basic domain, secreted, (semaphorin) 3F
hsa-miR-338-3p	0	0	1	0	1	1	TMSB4Y	thymosin beta 4, Y-linked
hsa-miR-338-3p	0	0	1	1	0	0	BAG3	BCL2-associated athanogene 3
hsa-miR-338-3p	1	0	1	1	1	1	GDA	guanine deaminase
hsa-miR-338-3p	1	0	1	1	1	1	BCL9	B-cell CLL/lymphoma 9
hsa-miR-338-3p	0	0	1	1	1	1	CDH1	cadherin 1, type 1, E-cadherin (epithelial)
hsa-miR-338-3p	1	0	1	1	1	1	DAG1	dystroglycan 1 (dystrophin-associated glycoprotein 1)
hsa-miR-338-3p	1	0	1	1	1	1	EGR3	early growth response 3
hsa-miR-338-3p	1	0	1	0	1	1	FGF5	fibroblast growth factor 5
hsa-miR-338-3p	0	0	1	1	1	1	GPC5	glypican 5
hsa-miR-338-3p	1	0	1	0	1	1	GALNT2	UDP-N-acetyl-alpha-D-galactosamine:polypeptide N-acetylgalactosaminyltransferase 2 (GalNAc-T2)
hsa-miR-338-3p	0	0	1	1	1	1	FOXA1	forkhead box A1
hsa-miR-338-3p	1	0	1	1	1	1	BAP1	BRCA1 associated protein-1 (ubiquitin carboxy-terminal hydrolase)
hsa-miR-338-3p	1	0	1	1	1	1	RAB11A	RAB11A, member RAS oncogene family
hsa-miR-338-3p	1	0	1	1	1	1	SCAF11	SR-related CTD-associated factor 11
hsa-miR-338-3p	1	0	1	0	1	1	VAMP3	vesicle-associated membrane protein 3 (cellubrevin)
hsa-miR-338-3p	0	0	1	0	1	1	ADIPOQ	adiponectin, C1Q and collagen domain containing
hsa-miR-338-3p	1	0	1	1	1	1	KIF3B	kinesin family member 3B
hsa-miR-338-3p	1	0	1	1	1	1	NRXN1	neurexin 1
hsa-miR-338-3p	0	0	1	1	0	0	SLC22A14	solute carrier family 22, member 14
hsa-miR-338-3p	0	0	1	1	0	0	EIF4E2	eukaryotic translation initiation factor 4E family member 2
hsa-miR-338-3p	1	0	1	0	1	1	ROCK2	Rho-associated, coiled-coil containing protein kinase 2
hsa-miR-338-3p	1	0	1	1	1	1	ONECUT2	one cut homeobox 2
hsa-miR-338-3p	0	0	1	1	1	1	CD8B	CD8b molecule
hsa-miR-338-3p	1	0	1	1	1	1	GABRE	gamma-aminobutyric acid (GABA) A receptor, epsilon
hsa-miR-338-3p	0	0	1	1	1	1	GDF10	growth differentiation factor 10
hsa-miR-338-3p	0	0	1	1	1	1	JAK2	Janus kinase 2
hsa-miR-338-3p	1	0	1	0	1	1	SCD	stearoyl-CoA desaturase (delta-9-desaturase)
hsa-miR-338-3p	1	0	1	1	1	1	WDR1	WD repeat domain 1
hsa-miR-338-3p	0	0	1	1	0	0	ASCL2	achaete-scute complex homolog 2 (Drosophila)
hsa-miR-338-3p	1	0	1	0	1	1	CALM3	calmodulin 3 (phosphorylase kinase, delta)
hsa-miR-338-3p	1	0	1	1	1	1	GABPB1	GA binding protein transcription factor, beta subunit 1
hsa-miR-338-3p	1	0	1	1	1	1	GPR3	G protein-coupled receptor 3
hsa-miR-338-3p	0	0	1	1	1	1	PDIA3	protein disulfide isomerase family A, member 3
hsa-miR-338-3p	1	0	1	1	1	1	HAS2	hyaluronan synthase 2
hsa-miR-338-3p	0	0	1	1	0	0	NCKAP1L	NCK-associated protein 1-like
hsa-miR-338-3p	1	0	1	0	1	1	CCDC6	coiled-coil domain containing 6
hsa-miR-338-3p	0	0	1	1	1	1	CER1	cerberus 1, cysteine knot superfamily, homolog (Xenopus laevis)
hsa-miR-338-3p	0	0	1	1	1	1	DNAJB6	DnaJ (Hsp40) homolog, subfamily B, member 6
hsa-miR-338-3p	1	0	1	1	1	1	LAMC2	laminin, gamma 2
hsa-miR-338-3p	1	0	1	1	1	1	MAB21L1	mab-21-like 1 (C. elegans)
hsa-miR-338-3p	1	0	1	1	1	1	UST	uronyl-2-sulfotransferase
hsa-miR-338-3p	0	0	1	1	1	1	TSPAN3	tetraspanin 3
hsa-miR-338-3p	1	0	1	0	1	1	CLEC3A	C-type lectin domain family 3, member A
hsa-miR-338-3p	1	0	1	0	1	1	SPRY3	sprouty homolog 3 (Drosophila)
hsa-miR-338-3p	1	0	1	1	1	1	FOXO4	forkhead box O4
hsa-miR-338-3p	1	0	1	1	1	1	MMP16	matrix metallopeptidase 16 (membrane-inserted)
hsa-miR-338-3p	1	0	1	1	1	1	MTF1	metal-regulatory transcription factor 1
hsa-miR-338-3p	0	0	1	1	1	1	MANF	mesencephalic astrocyte-derived neurotrophic factor
hsa-miR-338-3p	1	0	1	1	1	1	LIPG	lipase, endothelial
hsa-miR-338-3p	0	0	1	0	1	1	OAS3	2'-5'-oligoadenylate synthetase 3, 100kDa
hsa-miR-338-3p	1	0	1	1	1	1	PCBP1	poly(rC) binding protein 1
hsa-miR-338-3p	0	0	1	0	0	0	PTPN13	protein tyrosine phosphatase, non-receptor type 13 (APO-1/CD95 (Fas)-associated phosphatase)
hsa-miR-338-3p	1	0	1	1	1	1	TACC1	transforming, acidic coiled-coil containing protein 1
hsa-miR-338-3p	1	0	1	1	1	1	SMC1A	structural maintenance of chromosomes 1A
hsa-miR-338-3p	0	0	1	1	1	1	PGRMC2	progesterone receptor membrane component 2
hsa-miR-338-3p	0	0	1	1	1	1	SLC30A9	solute carrier family 30 (zinc transporter), member 9
hsa-miR-338-3p	1	0	1	0	1	1	ARFGEF2	ADP-ribosylation factor guanine nucleotide-exchange factor 2 (brefeldin A-inhibited)
hsa-miR-338-3p	1	0	1	1	1	1	HEXIM1	hexamethylene bis-acetamide inducible 1
hsa-miR-338-3p	0	0	1	0	1	1	SLC16A2	solute carrier family 16, member 2 (thyroid hormone transporter)
hsa-miR-338-3p	0	0	1	1	1	1	POLD3	polymerase (DNA-directed), delta 3, accessory subunit
hsa-miR-338-3p	1	0	1	1	1	1	KDM5B	lysine (K)-specific demethylase 5B
hsa-miR-338-3p	0	0	1	1	0	0	VAMP5	vesicle-associated membrane protein 5 (myobrevin)
hsa-miR-338-3p	0	0	1	1	1	1	PPP1R17	protein phosphatase 1, regulatory subunit 17
hsa-miR-338-3p	1	0	1	1	1	1	DIAPH2	diaphanous homolog 2 (Drosophila)
hsa-miR-338-3p	1	0	1	1	0	0	PSKH1	protein serine kinase H1
hsa-miR-338-3p	1	0	1	1	1	1	BTG2	BTG family, member 2
hsa-miR-338-3p	1	0	1	1	1	1	MORF4L1	mortality factor 4 like 1
hsa-miR-338-3p	0	0	1	1	1	1	TMED10	transmembrane emp24-like trafficking protein 10 (yeast)
hsa-miR-338-3p	1	0	1	1	1	1	GLIPR1	GLI pathogenesis-related 1
hsa-miR-338-3p	1	0	1	1	1	1	RP2	retinitis pigmentosa 2 (X-linked recessive)
hsa-miR-338-3p	1	0	1	1	1	1	SCN1A	sodium channel, voltage-gated, type I, alpha subunit
hsa-miR-338-3p	1	0	1	0	1	1	SLC2A3	solute carrier family 2 (facilitated glucose transporter), member 3
hsa-miR-338-3p	0	0	1	1	1	1	C10orf10	chromosome 10 open reading frame 10
hsa-miR-338-3p	1	0	1	1	1	1	PTPN21	protein tyrosine phosphatase, non-receptor type 21
hsa-miR-338-3p	0	0	1	1	0	0	USF1	upstream transcription factor 1
hsa-miR-338-3p	1	0	1	1	1	1	VEZF1	vascular endothelial zinc finger 1
hsa-miR-338-3p	1	0	1	1	1	1	ERLIN2	ER lipid raft associated 2
hsa-miR-338-3p	1	0	1	1	1	1	KLF12	Kruppel-like factor 12
hsa-miR-338-3p	0	0	1	0	1	1	AP4E1	adaptor-related protein complex 4, epsilon 1 subunit
hsa-miR-338-3p	1	0	1	1	1	1	ELL2	elongation factor, RNA polymerase II, 2
hsa-miR-338-3p	1	0	1	1	1	1	ICOS	inducible T-cell co-stimulator
hsa-miR-338-3p	0	0	1	1	1	1	COPG2	coatomer protein complex, subunit gamma 2
hsa-miR-338-3p	0	0	1	1	1	1	EHF	ets homologous factor
hsa-miR-338-3p	1	0	1	1	1	1	LAMP5	lysosomal-associated membrane protein family, member 5
hsa-miR-338-3p	0	0	1	1	1	1	IL36RN	interleukin 36 receptor antagonist
hsa-miR-338-3p	1	0	1	1	1	1	KCND2	potassium voltage-gated channel, Shal-related subfamily, member 2
hsa-miR-338-3p	1	0	1	0	1	1	G3BP2	GTPase activating protein (SH3 domain) binding protein 2
hsa-miR-338-3p	1	0	1	0	1	1	FBXL7	F-box and leucine-rich repeat protein 7
hsa-miR-338-3p	1	0	1	1	1	1	MAPRE1	microtubule-associated protein, RP/EB family, member 1
hsa-miR-338-3p	1	0	1	1	1	1	NUFIP1	nuclear fragile X mental retardation protein interacting protein 1
hsa-miR-338-3p	0	0	1	1	1	1	TTC33	tetratricopeptide repeat domain 33
hsa-miR-338-3p	0	0	1	0	1	1	TLL1	tolloid-like 1
hsa-miR-338-3p	1	0	1	1	1	1	TLL2	tolloid-like 2
hsa-miR-338-3p	1	0	1	1	1	1	TRPC5	transient receptor potential cation channel, subfamily C, member 5
hsa-miR-338-3p	1	0	1	0	1	1	FLRT2	fibronectin leucine rich transmembrane protein 2
hsa-miR-338-3p	0	0	1	1	1	1	N6AMT1	N-6 adenine-specific DNA methyltransferase 1 (putative)
hsa-miR-338-3p	1	0	1	0	1	1	TRHDE	thyrotropin-releasing hormone degrading enzyme
hsa-miR-338-3p	0	0	1	0	1	1	EMR2	egf-like module containing, mucin-like, hormone receptor-like 2
hsa-miR-338-3p	1	0	1	1	0	0	DEXI	Dexi homolog (mouse)
hsa-miR-338-3p	1	0	1	1	1	1	KLF15	Kruppel-like factor 15
hsa-miR-338-3p	0	0	1	0	1	1	ADAMTS3	ADAM metallopeptidase with thrombospondin type 1 motif, 3
hsa-miR-338-3p	1	0	1	1	1	1	LEMD3	LEM domain containing 3
hsa-miR-338-3p	1	0	1	1	1	1	CORO1C	coronin, actin binding protein, 1C
hsa-miR-338-3p	1	0	1	1	1	1	SLC7A11	solute carrier family 7 (anionic amino acid transporter light chain, xc- system), member 11
hsa-miR-338-3p	0	0	1	0	1	1	EID1	EP300 interacting inhibitor of differentiation 1
hsa-miR-338-3p	0	0	1	1	1	1	APOL3	apolipoprotein L, 3
hsa-miR-338-3p	1	0	1	0	1	1	DIEXF	digestive organ expansion factor homolog (zebrafish)
hsa-miR-338-3p	1	0	1	1	0	0	RBMXL2	RNA binding motif protein, X-linked-like 2
hsa-miR-338-3p	1	0	1	1	1	1	RND1	Rho family GTPase 1
hsa-miR-338-3p	0	0	1	1	1	1	GOLIM4	golgi integral membrane protein 4
hsa-miR-338-3p	0	0	1	1	1	1	ARFGAP3	ADP-ribosylation factor GTPase activating protein 3
hsa-miR-338-3p	0	0	1	1	1	1	FAM53B	family with sequence similarity 53, member B
hsa-miR-338-3p	1	0	1	1	1	1	KDM4A	lysine (K)-specific demethylase 4A
hsa-miR-338-3p	1	0	1	0	1	1	SERTAD2	SERTA domain containing 2
hsa-miR-338-3p	1	0	1	1	1	1	LRIG2	leucine-rich repeats and immunoglobulin-like domains 2
hsa-miR-338-3p	1	0	1	0	1	1	LPPR4	lipid phosphate phosphatase-related protein type 4
hsa-miR-338-3p	1	0	1	1	1	1	NUAK1	NUAK family, SNF1-like kinase, 1
hsa-miR-338-3p	1	0	1	1	1	1	SV2A	synaptic vesicle glycoprotein 2A
hsa-miR-338-3p	1	0	1	1	1	1	ZBTB5	zinc finger and BTB domain containing 5
hsa-miR-338-3p	1	0	1	1	1	1	MFN2	mitofusin 2
hsa-miR-338-3p	0	0	1	1	1	1	ADNP2	ADNP homeobox 2
hsa-miR-338-3p	1	0	1	0	1	1	ICK	intestinal cell (MAK-like) kinase
hsa-miR-338-3p	1	0	1	1	1	1	SPAST	spastin
hsa-miR-338-3p	1	0	1	0	1	1	ZNF609	zinc finger protein 609
hsa-miR-338-3p	1	0	1	1	1	1	TBC1D9	TBC1 domain family, member 9 (with GRAM domain)
hsa-miR-338-3p	1	0	1	1	1	1	RTF1	Rtf1, Paf1/RNA polymerase II complex component, homolog (S. cerevisiae)
hsa-miR-338-3p	1	0	1	1	1	1	TRIM9	tripartite motif containing 9
hsa-miR-338-3p	1	0	1	1	1	1	SIK2	salt-inducible kinase 2
hsa-miR-338-3p	1	0	1	1	1	1	PLCB1	phospholipase C, beta 1 (phosphoinositide-specific)
hsa-miR-338-3p	1	0	1	1	1	1	CUX2	cut-like homeobox 2
hsa-miR-338-3p	1	0	1	1	1	1	DSTYK	dual serine/threonine and tyrosine protein kinase
hsa-miR-338-3p	1	0	1	1	1	1	MOB4	MOB family member 4, phocein
hsa-miR-338-3p	1	0	1	1	1	1	RNF19A	ring finger protein 19A, E3 ubiquitin protein ligase
hsa-miR-338-3p	1	0	1	1	1	1	CCDC28A	coiled-coil domain containing 28A
hsa-miR-338-3p	1	0	1	1	1	1	MYRIP	myosin VIIA and Rab interacting protein
hsa-miR-338-3p	1	0	1	1	1	1	LTN1	listerin E3 ubiquitin protein ligase 1
hsa-miR-338-3p	1	0	1	0	1	1	PPP1R16B	protein phosphatase 1, regulatory subunit 16B
hsa-miR-338-3p	1	0	1	0	1	1	ERC2	ELKS/RAB6-interacting/CAST family member 2
hsa-miR-338-3p	1	0	1	1	0	0	POLDIP2	polymerase (DNA-directed), delta interacting protein 2
hsa-miR-338-3p	1	0	1	1	1	1	ABCA12	ATP-binding cassette, sub-family A (ABC1), member 12
hsa-miR-338-3p	1	0	1	1	0	0	SENP3	SUMO1/sentrin/SMT3 specific peptidase 3
hsa-miR-338-3p	0	0	1	1	0	0	ZNF117	zinc finger protein 117
hsa-miR-338-3p	1	0	1	1	1	1	ST8SIA3	ST8 alpha-N-acetyl-neuraminide alpha-2,8-sialyltransferase 3
hsa-miR-338-3p	0	0	1	1	1	1	HMP19	HMP19 protein
hsa-miR-338-3p	0	0	1	1	1	1	MRPS23	mitochondrial ribosomal protein S23
hsa-miR-338-3p	1	0	1	0	1	1	CNR1	cannabinoid receptor 1 (brain)
hsa-miR-338-3p	0	0	1	1	1	1	IMPG2	interphotoreceptor matrix proteoglycan 2
hsa-miR-338-3p	0	0	1	1	1	1	RSL24D1	ribosomal L24 domain containing 1
hsa-miR-338-3p	1	0	1	1	1	1	CMPK1	cytidine monophosphate (UMP-CMP) kinase 1, cytosolic
hsa-miR-338-3p	1	0	1	1	1	1	ZDHHC2	zinc finger, DHHC-type containing 2
hsa-miR-338-3p	0	0	1	1	1	1	CD244	CD244 molecule, natural killer cell receptor 2B4
hsa-miR-338-3p	1	0	1	0	1	1	CRIM1	cysteine rich transmembrane BMP regulator 1 (chordin-like)
hsa-miR-338-3p	0	0	1	0	1	1	ERAP1	endoplasmic reticulum aminopeptidase 1
hsa-miR-338-3p	0	0	1	1	1	1	COX16	COX16 cytochrome c oxidase assembly homolog (S. cerevisiae)
hsa-miR-338-3p	1	0	1	0	1	1	TMEM216	transmembrane protein 216
hsa-miR-338-3p	1	0	1	0	1	1	RAB8B	RAB8B, member RAS oncogene family
hsa-miR-338-3p	0	0	1	0	1	1	GPR83	G protein-coupled receptor 83
hsa-miR-338-3p	0	0	1	1	1	1	TIMMDC1	translocase of inner mitochondrial membrane domain containing 1
hsa-miR-338-3p	0	0	1	1	1	1	SMN2	survival of motor neuron 2, centromeric
hsa-miR-338-3p	1	0	1	0	1	1	FZD3	frizzled family receptor 3
hsa-miR-338-3p	0	0	1	1	1	1	POLE3	polymerase (DNA directed), epsilon 3, accessory subunit
hsa-miR-338-3p	1	0	1	0	1	1	ZRANB1	zinc finger, RAN-binding domain containing 1
hsa-miR-338-3p	0	0	1	0	1	1	VEZT	vezatin, adherens junctions transmembrane protein
hsa-miR-338-3p	1	0	1	0	1	1	EIF2C4	eukaryotic translation initiation factor 2C, 4
hsa-miR-338-3p	1	0	1	1	1	1	ZNF280C	zinc finger protein 280C
hsa-miR-338-3p	0	0	1	1	0	0	NUP62CL	nucleoporin 62kDa C-terminal like
hsa-miR-338-3p	1	0	1	1	1	1	ALKBH5	alkB, alkylation repair homolog 5 (E. coli)
hsa-miR-338-3p	1	0	1	0	1	1	CMTM6	CKLF-like MARVEL transmembrane domain containing 6
hsa-miR-338-3p	1	0	1	1	1	1	IMPAD1	inositol monophosphatase domain containing 1
hsa-miR-338-3p	1	0	1	0	1	1	MARCH5	membrane-associated ring finger (C3HC4) 5
hsa-miR-338-3p	0	0	1	1	1	1	C2orf42	chromosome 2 open reading frame 42
hsa-miR-338-3p	0	0	1	1	1	1	ACSM5	acyl-CoA synthetase medium-chain family member 5
hsa-miR-338-3p	1	0	1	1	1	1	HIF1AN	hypoxia inducible factor 1, alpha subunit inhibitor
hsa-miR-338-3p	0	0	1	1	1	1	SCYL2	SCY1-like 2 (S. cerevisiae)
hsa-miR-338-3p	1	0	1	1	1	1	C9orf40	chromosome 9 open reading frame 40
hsa-miR-338-3p	1	0	1	1	1	1	ATG2B	autophagy related 2B
hsa-miR-338-3p	1	0	1	1	1	1	FIGN	fidgetin
hsa-miR-338-3p	1	0	1	0	1	1	ARMC1	armadillo repeat containing 1
hsa-miR-338-3p	0	0	1	1	1	1	TSR1	TSR1, 20S rRNA accumulation, homolog (S. cerevisiae)
hsa-miR-338-3p	1	0	1	1	1	1	RPRD1A	regulation of nuclear pre-mRNA domain containing 1A
hsa-miR-338-3p	1	0	1	0	1	1	ARL8B	ADP-ribosylation factor-like 8B
hsa-miR-338-3p	1	0	1	1	1	1	KIAA1598	KIAA1598
hsa-miR-338-3p	1	0	1	1	1	1	RSBN1	round spermatid basic protein 1
hsa-miR-338-3p	1	0	1	1	1	1	DRAM1	DNA-damage regulated autophagy modulator 1
hsa-miR-338-3p	1	0	1	0	1	1	FOXJ2	forkhead box J2
hsa-miR-338-3p	0	0	1	1	1	1	ZC3H15	zinc finger CCCH-type containing 15
hsa-miR-338-3p	0	0	1	1	1	1	DHTKD1	dehydrogenase E1 and transketolase domain containing 1
hsa-miR-338-3p	1	0	1	0	1	1	TMEM55A	transmembrane protein 55A
hsa-miR-338-3p	0	0	1	1	1	1	RIN2	Ras and Rab interactor 2
hsa-miR-338-3p	0	0	1	1	1	1	GNL3L	guanine nucleotide binding protein-like 3 (nucleolar)-like
hsa-miR-338-3p	1	0	1	0	1	1	CNGB3	cyclic nucleotide gated channel beta 3
hsa-miR-338-3p	1	0	1	1	1	1	SEPT3	septin 3
hsa-miR-338-3p	1	0	1	1	1	1	CCBL2	cysteine conjugate-beta lyase 2
hsa-miR-338-3p	1	0	1	1	1	1	CYP26B1	cytochrome P450, family 26, subfamily B, polypeptide 1
hsa-miR-338-3p	1	0	1	1	1	1	C8orf4	chromosome 8 open reading frame 4
hsa-miR-338-3p	0	0	1	1	1	1	GRIPAP1	GRIP1 associated protein 1
hsa-miR-338-3p	0	0	1	1	1	1	TMEM167B	transmembrane protein 167B
hsa-miR-338-3p	1	0	1	1	1	1	ANKRD50	ankyrin repeat domain 50
hsa-miR-338-3p	1	0	1	0	1	1	SLC17A6	solute carrier family 17 (sodium-dependent inorganic phosphate cotransporter), member 6
hsa-miR-338-3p	1	0	1	0	1	1	EIF5A2	eukaryotic translation initiation factor 5A2
hsa-miR-338-3p	0	0	1	1	0	0	CHRNA10	cholinergic receptor, nicotinic, alpha 10 (neuronal)
hsa-miR-338-3p	1	0	1	1	0	0	JPH2	junctophilin 2
hsa-miR-338-3p	1	0	1	1	1	1	ASPHD2	aspartate beta-hydroxylase domain containing 2
hsa-miR-338-3p	1	0	1	0	1	1	DCUN1D1	DCN1, defective in cullin neddylation 1, domain containing 1 (S. cerevisiae)
hsa-miR-338-3p	0	0	1	1	1	1	SHROOM4	shroom family member 4
hsa-miR-338-3p	1	0	1	1	1	1	MIB1	mindbomb E3 ubiquitin protein ligase 1
hsa-miR-338-3p	1	0	1	0	1	1	ALPK3	alpha-kinase 3
hsa-miR-338-3p	1	0	1	1	1	1	NLGN2	neuroligin 2
hsa-miR-338-3p	0	0	1	1	1	1	ARRDC3	arrestin domain containing 3
hsa-miR-338-3p	0	0	1	0	1	1	TRMT5	tRNA methyltransferase 5 homolog (S. cerevisiae)
hsa-miR-338-3p	1	0	1	1	1	1	HOMEZ	homeobox and leucine zipper encoding
hsa-miR-338-3p	1	0	1	1	1	1	WDR48	WD repeat domain 48
hsa-miR-338-3p	1	0	1	1	1	1	ZFP14	zinc finger protein 14 homolog (mouse)
hsa-miR-338-3p	1	0	1	1	1	1	NIN	ninein (GSK3B interacting protein)
hsa-miR-338-3p	1	0	1	1	1	1	FAM160B1	family with sequence similarity 160, member B1
hsa-miR-338-3p	0	0	1	1	1	1	PRX	periaxin
hsa-miR-338-3p	1	0	1	1	1	1	SNTB1	syntrophin, beta 1 (dystrophin-associated protein A1, 59kDa, basic component 1)
hsa-miR-338-3p	0	0	1	1	0	0	MAGEA5	melanoma antigen family A, 5
hsa-miR-338-3p	1	0	1	1	1	1	HCN1	hyperpolarization activated cyclic nucleotide-gated potassium channel 1
hsa-miR-338-3p	0	0	1	1	1	1	MRPS12	mitochondrial ribosomal protein S12
hsa-miR-338-3p	0	0	1	1	1	1	RNASEL	ribonuclease L (2',5'-oligoisoadenylate synthetase-dependent)
hsa-miR-338-3p	0	0	1	0	1	1	SLC30A1	solute carrier family 30 (zinc transporter), member 1
hsa-miR-338-3p	1	0	1	0	1	1	TP53INP2	tumor protein p53 inducible nuclear protein 2
hsa-miR-338-3p	0	0	1	1	1	1	SELK	selenoprotein K
hsa-miR-338-3p	1	0	1	1	1	1	FAM60A	family with sequence similarity 60, member A
hsa-miR-338-3p	1	0	1	1	1	1	SNX6	sorting nexin 6
hsa-miR-338-3p	1	0	1	1	1	1	PELI2	pellino E3 ubiquitin protein ligase family member 2
hsa-miR-338-3p	0	0	1	1	1	1	CHST6	carbohydrate (N-acetylglucosamine 6-O) sulfotransferase 6
hsa-miR-338-3p	1	0	1	1	1	1	SENP2	SUMO1/sentrin/SMT3 specific peptidase 2
hsa-miR-338-3p	1	0	1	1	1	1	TGIF2	TGFB-induced factor homeobox 2
hsa-miR-338-3p	1	0	1	1	1	1	SEC24A	SEC24 family, member A (S. cerevisiae)
hsa-miR-338-3p	0	0	1	1	0	0	TMSB15A	thymosin beta 15a
hsa-miR-338-3p	1	0	1	0	1	1	GAN	gigaxonin
hsa-miR-338-3p	1	0	1	0	1	1	CSNK1G1	casein kinase 1, gamma 1
hsa-miR-338-3p	0	0	1	1	0	0	KCNK13	potassium channel, subfamily K, member 13
hsa-miR-338-3p	1	0	1	1	1	1	SNX16	sorting nexin 16
hsa-miR-338-3p	1	0	1	1	1	1	ABCG4	ATP-binding cassette, sub-family G (WHITE), member 4
hsa-miR-338-3p	0	0	1	1	0	0	KIF9	kinesin family member 9
hsa-miR-338-3p	0	0	1	1	1	1	GLIPR2	GLI pathogenesis-related 2
hsa-miR-338-3p	1	0	1	1	1	1	ATL2	atlastin GTPase 2
hsa-miR-338-3p	1	0	1	1	1	1	XPO4	exportin 4
hsa-miR-338-3p	0	0	1	1	1	1	HS1BP3	HCLS1 binding protein 3
hsa-miR-338-3p	1	0	1	0	1	1	GREM2	gremlin 2
hsa-miR-338-3p	0	0	1	1	1	1	SUSD1	sushi domain containing 1
hsa-miR-338-3p	1	0	1	1	1	1	PRRX1	paired related homeobox 1
hsa-miR-338-3p	0	0	1	1	1	1	ACBD3	acyl-CoA binding domain containing 3
hsa-miR-338-3p	1	0	1	1	1	1	FAM59A	family with sequence similarity 59, member A
hsa-miR-338-3p	0	0	1	1	1	1	SFXN1	sideroflexin 1
hsa-miR-338-3p	0	0	1	0	1	1	NAIP	NLR family, apoptosis inhibitory protein
hsa-miR-338-3p	1	0	1	1	1	1	GID4	GID complex subunit 4, VID24 homolog (S. cerevisiae)
hsa-miR-338-3p	1	0	1	0	1	1	NOTCH2	notch 2
hsa-miR-338-3p	1	0	1	1	1	1	GCC1	GRIP and coiled-coil domain containing 1
hsa-miR-338-3p	0	0	1	1	0	0	RNF122	ring finger protein 122
hsa-miR-338-3p	0	0	1	1	1	1	PREX2	phosphatidylinositol-3,4,5-trisphosphate-dependent Rac exchange factor 2
hsa-miR-338-3p	0	0	1	1	1	1	ZNF767	zinc finger family member 767
hsa-miR-338-3p	0	0	1	1	0	0	TMEM156	transmembrane protein 156
hsa-miR-338-3p	1	0	1	1	1	1	JHDM1D	jumonji C domain containing histone demethylase 1 homolog D (S. cerevisiae)
hsa-miR-338-3p	1	0	1	1	1	1	RAI1	retinoic acid induced 1
hsa-miR-338-3p	1	0	1	1	1	1	PTPRO	protein tyrosine phosphatase, receptor type, O
hsa-miR-338-3p	1	0	1	1	1	1	C6orf62	chromosome 6 open reading frame 62
hsa-miR-338-3p	0	0	1	0	1	1	PHACTR1	phosphatase and actin regulator 1
hsa-miR-338-3p	0	0	1	1	1	1	FCRL4	Fc receptor-like 4
hsa-miR-338-3p	1	0	1	0	1	1	TMEM47	transmembrane protein 47
hsa-miR-338-3p	0	0	1	1	1	1	FRMD8	FERM domain containing 8
hsa-miR-338-3p	0	0	1	1	0	0	KRTAP17-1	keratin associated protein 17-1
hsa-miR-338-3p	0	0	1	1	1	1	RNASEH2C	ribonuclease H2, subunit C
hsa-miR-338-3p	1	0	1	1	1	1	ANTXR1	anthrax toxin receptor 1
hsa-miR-338-3p	1	0	1	1	1	1	ZNRF1	zinc and ring finger 1, E3 ubiquitin protein ligase
hsa-miR-338-3p	0	0	1	1	1	1	VPS25	vacuolar protein sorting 25 homolog (S. cerevisiae)
hsa-miR-338-3p	0	0	1	1	1	1	C5orf4	chromosome 5 open reading frame 4
hsa-miR-338-3p	1	0	1	1	1	1	PCDH7	protocadherin 7
hsa-miR-338-3p	1	0	1	1	1	1	HIATL1	hippocampus abundant transcript-like 1
hsa-miR-338-3p	0	0	1	1	0	0	LCE3D	late cornified envelope 3D
hsa-miR-338-3p	1	0	1	1	1	1	RSPO3	R-spondin 3
hsa-miR-338-3p	1	0	1	1	1	1	ARHGEF39	Rho guanine nucleotide exchange factor (GEF) 39
hsa-miR-338-3p	0	0	1	1	1	1	FAM136A	family with sequence similarity 136, member A
hsa-miR-338-3p	0	0	1	1	1	1	ATG4C	autophagy related 4C, cysteine peptidase
hsa-miR-338-3p	1	0	1	0	1	1	UBASH3B	ubiquitin associated and SH3 domain containing B
hsa-miR-338-3p	0	0	1	0	1	1	PIGY	phosphatidylinositol glycan anchor biosynthesis, class Y
hsa-miR-338-3p	1	0	1	0	1	1	C5orf62	chromosome 5 open reading frame 62
hsa-miR-338-3p	0	0	1	1	1	1	POLR2J2	polymerase (RNA) II (DNA directed) polypeptide J2
hsa-miR-338-3p	1	0	1	1	1	1	PCDH11X	protocadherin 11 X-linked
hsa-miR-338-3p	0	0	1	1	1	1	ARHGEF4	Rho guanine nucleotide exchange factor (GEF) 4
hsa-miR-338-3p	0	0	1	1	1	1	DMRTC1	DMRT-like family C1
hsa-miR-338-3p	1	0	1	1	1	1	HIAT1	hippocampus abundant transcript 1
hsa-miR-338-3p	1	0	1	1	0	0	WNT3A	wingless-type MMTV integration site family, member 3A
hsa-miR-338-3p	0	0	1	1	1	1	ABCC12	ATP-binding cassette, sub-family C (CFTR/MRP), member 12
hsa-miR-338-3p	1	0	1	1	1	1	COL4A5	collagen, type IV, alpha 5
hsa-miR-338-3p	1	0	1	1	1	1	EPT1	ethanolaminephosphotransferase 1 (CDP-ethanolamine-specific)
hsa-miR-338-3p	1	0	1	1	1	1	TPD52L3	tumor protein D52-like 3
hsa-miR-338-3p	0	0	1	1	1	1	PLEKHG4B	pleckstrin homology domain containing, family G (with RhoGef domain) member 4B
hsa-miR-338-3p	1	0	1	0	1	1	TMEM123	transmembrane protein 123
hsa-miR-338-3p	0	0	1	1	0	0	APOA5	apolipoprotein A-V
hsa-miR-338-3p	0	0	1	1	1	1	RAD51C	RAD51 homolog C (S. cerevisiae)
hsa-miR-338-3p	0	0	1	1	1	1	CLEC4D	C-type lectin domain family 4, member D
hsa-miR-338-3p	1	0	1	1	1	1	SLC44A1	solute carrier family 44, member 1
hsa-miR-338-3p	0	0	1	1	1	1	C20orf118	chromosome 20 open reading frame 118
hsa-miR-338-3p	1	0	1	1	0	0	ADAMTS14	ADAM metallopeptidase with thrombospondin type 1 motif, 14
hsa-miR-338-3p	1	0	1	1	1	1	KLHL6	kelch-like 6 (Drosophila)
hsa-miR-338-3p	0	0	1	1	1	1	KCNG3	potassium voltage-gated channel, subfamily G, member 3
hsa-miR-338-3p	1	0	1	1	0	0	UNC5A	unc-5 homolog A (C. elegans)
hsa-miR-338-3p	0	0	1	0	1	1	AMZ1	archaelysin family metallopeptidase 1
hsa-miR-338-3p	0	0	1	1	1	1	ZNF431	zinc finger protein 431
hsa-miR-338-3p	1	0	1	1	1	1	ADAMTS19	ADAM metallopeptidase with thrombospondin type 1 motif, 19
hsa-miR-338-3p	1	0	1	1	1	1	MARS2	methionyl-tRNA synthetase 2, mitochondrial
hsa-miR-338-3p	1	0	1	1	1	1	ICA1L	islet cell autoantigen 1,69kDa-like
hsa-miR-338-3p	0	0	1	1	1	1	FAM122C	family with sequence similarity 122C
hsa-miR-338-3p	0	0	1	1	1	1	MS4A6E	membrane-spanning 4-domains, subfamily A, member 6E
hsa-miR-338-3p	1	0	1	1	1	1	PPTC7	PTC7 protein phosphatase homolog (S. cerevisiae)
hsa-miR-338-3p	0	0	1	1	0	0	CDC26	cell division cycle 26 homolog (S. cerevisiae)
hsa-miR-338-3p	1	0	1	1	1	1	ATRN	attractin
hsa-miR-338-3p	0	0	1	1	1	1	C15orf40	chromosome 15 open reading frame 40
hsa-miR-338-3p	1	0	1	1	1	1	KCNH8	potassium voltage-gated channel, subfamily H (eag-related), member 8
hsa-miR-338-3p	0	0	1	1	1	1	SPICE1	spindle and centriole associated protein 1
hsa-miR-338-3p	1	0	1	0	1	1	CENPBD1	CENPB DNA-binding domains containing 1
hsa-miR-338-3p	0	0	1	1	0	0	SFT2D1	SFT2 domain containing 1
hsa-miR-338-3p	1	0	1	0	1	1	DIRAS1	DIRAS family, GTP-binding RAS-like 1
hsa-miR-338-3p	0	0	1	1	1	1	DNAJB7	DnaJ (Hsp40) homolog, subfamily B, member 7
hsa-miR-338-3p	0	0	1	0	1	1	DDIT4L	DNA-damage-inducible transcript 4-like
hsa-miR-338-3p	0	0	1	1	1	1	SCARF1	scavenger receptor class F, member 1
hsa-miR-338-3p	0	0	1	1	0	0	IL27	interleukin 27
hsa-miR-338-3p	1	0	1	1	1	1	SEPT6	septin 6
hsa-miR-338-3p	0	0	1	1	0	0	TEX34	testis expressed 34
hsa-miR-338-3p	1	0	1	1	1	1	C1orf216	chromosome 1 open reading frame 216
hsa-miR-338-3p	0	0	1	0	1	1	BBS5	Bardet-Biedl syndrome 5
hsa-miR-338-3p	0	0	1	1	1	1	ZNF572	zinc finger protein 572
hsa-miR-338-3p	1	0	1	1	1	1	BHLHE22	basic helix-loop-helix family, member e22
hsa-miR-338-3p	1	0	1	1	1	1	FAM123B	family with sequence similarity 123B
hsa-miR-338-3p	0	0	1	0	1	1	KBTBD3	kelch repeat and BTB (POZ) domain containing 3
hsa-miR-338-3p	1	0	1	1	1	1	ZSCAN29	zinc finger and SCAN domain containing 29
hsa-miR-338-3p	0	0	1	1	1	1	CNIH3	cornichon homolog 3 (Drosophila)
hsa-miR-338-3p	1	0	1	0	1	1	MOSPD2	motile sperm domain containing 2
hsa-miR-338-3p	1	0	1	1	1	1	CNST	consortin, connexin sorting protein
hsa-miR-338-3p	1	0	1	0	1	1	DCP2	DCP2 decapping enzyme homolog (S. cerevisiae)
hsa-miR-338-3p	1	0	1	1	1	1	TCTEX1D1	Tctex1 domain containing 1
hsa-miR-338-3p	1	0	1	0	1	1	RWDD4	RWD domain containing 4
hsa-miR-338-3p	1	0	1	1	1	1	ZCCHC5	zinc finger, CCHC domain containing 5
hsa-miR-338-3p	1	0	1	1	1	1	SENP5	SUMO1/sentrin specific peptidase 5
hsa-miR-338-3p	1	0	1	1	1	1	C15orf32	chromosome 15 open reading frame 32
hsa-miR-338-3p	0	0	1	0	1	1	TMEM92	transmembrane protein 92
hsa-miR-338-3p	1	0	1	1	1	1	FBXL16	F-box and leucine-rich repeat protein 16
hsa-miR-338-3p	1	0	1	1	0	0	SVEP1	sushi, von Willebrand factor type A, EGF and pentraxin domain containing 1
hsa-miR-338-3p	0	0	1	1	1	1	C11orf31	chromosome 11 open reading frame 31
hsa-miR-338-3p	1	0	1	1	1	1	RAB39B	RAB39B, member RAS oncogene family
hsa-miR-338-3p	1	0	1	1	1	1	CAMKK1	calcium/calmodulin-dependent protein kinase kinase 1, alpha
hsa-miR-338-3p	1	0	1	1	1	1	IL16	interleukin 16
hsa-miR-338-3p	0	0	1	1	1	1	REXO1L1	REX1, RNA exonuclease 1 homolog (S. cerevisiae)-like 1
hsa-miR-338-3p	1	0	1	1	1	1	SMG7	smg-7 homolog, nonsense mediated mRNA decay factor (C. elegans)
hsa-miR-338-3p	0	0	1	1	1	1	TPH2	tryptophan hydroxylase 2
hsa-miR-338-3p	0	0	1	1	0	0	SSX6	synovial sarcoma, X breakpoint 6 (pseudogene)
hsa-miR-338-3p	0	0	1	1	0	0	DEFB119	defensin, beta 119
hsa-miR-338-3p	0	0	1	1	0	0	CCDC105	coiled-coil domain containing 105
hsa-miR-338-3p	1	0	1	1	1	1	LSM11	LSM11, U7 small nuclear RNA associated
hsa-miR-338-3p	1	0	1	1	1	1	FAM117B	family with sequence similarity 117, member B
hsa-miR-338-3p	0	0	1	1	1	1	C15orf26	chromosome 15 open reading frame 26
hsa-miR-338-3p	1	0	1	0	1	1	C3orf58	chromosome 3 open reading frame 58
hsa-miR-338-3p	0	0	1	1	0	0	TMEM145	transmembrane protein 145
hsa-miR-338-3p	1	0	1	1	1	1	RABL3	RAB, member of RAS oncogene family-like 3
hsa-miR-338-3p	1	0	1	0	1	1	TMEM167A	transmembrane protein 167A
hsa-miR-338-3p	0	0	1	1	1	1	FRMD3	FERM domain containing 3
hsa-miR-338-3p	1	0	1	1	1	1	EXOC8	exocyst complex component 8
hsa-miR-338-3p	1	0	1	1	1	1	ZADH2	zinc binding alcohol dehydrogenase domain containing 2
hsa-miR-338-3p	0	0	1	1	0	0	TAS1R1	taste receptor, type 1, member 1
hsa-miR-338-3p	1	0	1	1	1	1	PRIMA1	proline rich membrane anchor 1
hsa-miR-338-3p	1	0	1	1	1	1	FAM134C	family with sequence similarity 134, member C
hsa-miR-338-3p	0	0	1	1	1	1	LCE3E	late cornified envelope 3E
hsa-miR-338-3p	1	0	1	1	1	1	MARCH3	membrane-associated ring finger (C3HC4) 3, E3 ubiquitin protein ligase
hsa-miR-338-3p	0	0	1	1	1	1	ZNF831	zinc finger protein 831
hsa-miR-338-3p	0	0	1	0	1	1	ZNF445	zinc finger protein 445
hsa-miR-338-3p	0	0	1	1	1	1	MED22	mediator complex subunit 22
hsa-miR-338-3p	0	0	1	1	0	0	ANKRD37	ankyrin repeat domain 37
hsa-miR-338-3p	1	0	1	1	1	1	ZSCAN22	zinc finger and SCAN domain containing 22
hsa-miR-338-3p	0	0	1	1	0	0	BPIFB4	BPI fold containing family B, member 4
hsa-miR-338-3p	0	0	1	0	1	1	VSTM2A	V-set and transmembrane domain containing 2A
hsa-miR-338-3p	1	0	1	0	1	1	C12orf36	chromosome 12 open reading frame 36
hsa-miR-338-3p	0	0	1	1	1	1	SKA2	spindle and kinetochore associated complex subunit 2
hsa-miR-338-3p	1	0	1	1	1	1	SP8	Sp8 transcription factor
hsa-miR-338-3p	0	0	1	1	1	1	TMEM37	transmembrane protein 37
hsa-miR-338-3p	1	0	1	1	1	1	DND1	dead end homolog 1 (zebrafish)
hsa-miR-338-3p	0	0	1	0	1	1	CLDN23	claudin 23
hsa-miR-338-3p	1	0	1	1	1	1	SPTY2D1	SPT2, Suppressor of Ty, domain containing 1 (S. cerevisiae)
hsa-miR-338-3p	1	0	1	1	1	1	RALGAPA1	Ral GTPase activating protein, alpha subunit 1 (catalytic)
hsa-miR-338-3p	0	0	1	1	0	0	ZNF30	zinc finger protein 30
hsa-miR-338-3p	0	0	1	1	0	0	C7orf55	chromosome 7 open reading frame 55
hsa-miR-338-3p	1	0	1	0	1	1	PTPLB	protein tyrosine phosphatase-like (proline instead of catalytic arginine), member b
hsa-miR-338-3p	0	0	1	1	1	1	FAM174A	family with sequence similarity 174, member A
hsa-miR-338-3p	0	0	1	1	1	1	LHFPL4	lipoma HMGIC fusion partner-like 4
hsa-miR-338-3p	1	0	1	0	1	1	ZC3H6	zinc finger CCCH-type containing 6
hsa-miR-338-3p	1	0	1	1	1	1	PTGER3	prostaglandin E receptor 3 (subtype EP3)
hsa-miR-338-3p	1	0	1	0	1	1	PRICKLE2	prickle homolog 2 (Drosophila)
hsa-miR-338-3p	1	0	1	0	1	1	DLEU7	deleted in lymphocytic leukemia, 7
hsa-miR-338-3p	1	0	1	0	1	1	LHFPL3	lipoma HMGIC fusion partner-like 3
hsa-miR-338-3p	1	0	1	1	1	1	NSUN4	NOP2/Sun domain family, member 4
hsa-miR-338-3p	0	0	1	0	1	1	WASH3P	WAS protein family homolog 3 pseudogene
hsa-miR-338-3p	0	0	1	1	1	1	COL18A1-AS1	COL18A1 antisense RNA 1
hsa-miR-338-3p	1	0	1	1	1	1	TMEM189-UBE2V1	TMEM189-UBE2V1 readthrough
hsa-miR-338-3p	0	0	1	1	1	1	SERTM1	serine-rich and transmembrane domain containing 1
hsa-miR-338-3p	1	0	1	1	1	1	METTL21B	methyltransferase like 21B
hsa-miR-338-3p	1	0	1	1	1	1	ATRNL1	attractin-like 1
hsa-miR-338-3p	0	0	1	1	1	1	ZNF474	zinc finger protein 474
hsa-miR-338-3p	1	0	1	1	1	1	SKIDA1	SKI/DACH domain containing 1
hsa-miR-338-3p	1	0	1	1	1	1	ADAMTSL3	ADAMTS-like 3
hsa-miR-338-3p	0	0	1	0	1	1	FSD1L	fibronectin type III and SPRY domain containing 1-like
hsa-miR-338-3p	0	0	1	1	1	1	PRKCB	protein kinase C, beta
hsa-miR-338-3p	0	0	1	1	1	1	PATE2	prostate and testis expressed 2
hsa-miR-338-3p	0	0	1	0	0	0	PPIAP29	peptidylprolyl isomerase A (cyclophilin A) pseudogene 29
hsa-miR-338-3p	0	0	1	0	0	0	PCDHB17	protocadherin beta 17 pseudogene
hsa-miR-338-3p	0	0	1	0	0	0	PCDHB19P	protocadherin beta 19 pseudogene
hsa-miR-338-3p	0	0	1	0	0	0	SNORD108	small nucleolar RNA, C/D box 108
hsa-miR-338-3p	0	0	1	0	0	0	PAR5	Prader-Willi/Angelman syndrome-5
hsa-miR-338-3p	0	0	1	0	0	0	ANXA2P3	annexin A2 pseudogene 3
hsa-miR-338-3p	0	0	1	0	0	0	TTTY2	testis-specific transcript, Y-linked 2 (non-protein coding)
hsa-miR-338-3p	0	0	1	0	0	0	TTTY1	testis-specific transcript, Y-linked 1 (non-protein coding)
hsa-miR-338-3p	0	0	1	0	0	0	TTTY15	testis-specific transcript, Y-linked 15 (non-protein coding)
hsa-miR-338-3p	0	0	1	0	0	0	DKFZP586I1420	uncharacterized protein DKFZp586I1420
hsa-miR-338-3p	0	0	1	0	0	0	GOLGA2P3Y	golgin A2 pseudogene 3, Y-linked
hsa-miR-338-3p	0	0	1	0	0	0	RBMXP3	RNA binding motif protein, X-linked pseudogene 3
hsa-miR-338-3p	0	0	1	0	0	0	NXF4	nuclear RNA export factor 4 pseudogene
hsa-miR-338-3p	0	0	1	0	0	0	PDIA3P	protein disulfide isomerase family A, member 3 pseudogene
hsa-miR-338-3p	0	0	1	0	0	0	TOP1P1	topoisomerase (DNA) I pseudogene 1
hsa-miR-338-3p	0	0	1	0	0	0	HYALP1	hyaluronoglucosaminidase pseudogene 1
hsa-miR-338-3p	0	0	1	0	0	0	SNORD56	small nucleolar RNA, C/D box 56
hsa-miR-338-3p	0	0	1	0	0	0	SNORD52	small nucleolar RNA, C/D box 52
hsa-miR-338-3p	0	0	1	0	0	0	AKIRIN2-AS1	AKIRIN2 antisense RNA 1
hsa-miR-338-3p	0	0	1	0	0	0	AOC4	amine oxidase, copper containing 3 (vascular adhesion protein 1) pseudogene
hsa-miR-338-3p	0	0	1	0	0	0	HOXA11-AS	HOXA11 antisense RNA
hsa-miR-338-3p	0	0	1	0	0	0	LOC256880	uncharacterized LOC256880
hsa-miR-338-3p	0	0	1	0	0	0	LOC374443	C-type lectin domain family 2, member D pseudogene
hsa-miR-338-3p	0	0	1	0	0	0	AQP7P1	aquaporin 7 pseudogene 1
hsa-miR-338-3p	0	0	1	0	0	0	MALAT1	metastasis associated lung adenocarcinoma transcript 1 (non-protein coding)
hsa-miR-338-3p	0	0	1	0	0	0	SNORA60	small nucleolar RNA, H/ACA box 60
hsa-miR-338-3p	0	0	1	0	0	0	SNORA53	small nucleolar RNA, H/ACA box 53
hsa-miR-338-3p	0	0	1	0	0	0	HSP90B3P	heat shock protein 90kDa beta (Grp94), member 3, pseudogene
hsa-miR-338-3p	0	0	1	0	0	0	SNORD114-4	small nucleolar RNA, C/D box 114-4
hsa-miR-338-3p	0	0	1	0	0	0	SNORD115-7	small nucleolar RNA, C/D box 115-7
hsa-miR-338-3p	0	0	1	0	0	0	SNORD115-19	small nucleolar RNA, C/D box 115-19
hsa-miR-338-3p	0	0	1	0	0	0	SNORD115-26	small nucleolar RNA, C/D box 115-26
hsa-miR-338-3p	1	0	1	1	1	1	AKAP1	A kinase (PRKA) anchor protein 1
hsa-miR-338-3p	1	0	1	1	1	1	TRIO	trio Rho guanine nucleotide exchange factor
hsa-miR-338-3p	0	0	1	0	0	0	PLGLA	plasminogen-like A
hsa-miR-338-3p	0	0	1	1	0	0	MUC1	mucin 1, cell surface associated
hsa-miR-338-3p	0	0	1	1	0	0	GPR17	G protein-coupled receptor 17
hsa-miR-338-3p	0	0	1	1	1	1	FUCA2	fucosidase, alpha-L- 2, plasma
hsa-miR-338-3p	1	0	1	1	0	0	GPRC5A	G protein-coupled receptor, family C, group 5, member A
hsa-miR-338-3p	0	0	0	1	1	1	MS4A12	membrane-spanning 4-domains, subfamily A, member 12
hsa-miR-338-3p	0	0	0	1	1	1	FTSJ1	FtsJ RNA methyltransferase homolog 1 (E. coli)
hsa-miR-338-3p	0	0	1	1	0	0	TTC17	tetratricopeptide repeat domain 17
hsa-miR-338-3p	0	0	1	1	1	1	STYK1	serine/threonine/tyrosine kinase 1
hsa-miR-338-3p	0	0	0	1	0	0	TMEM161A	transmembrane protein 161A
hsa-miR-338-3p	0	0	0	1	0	0	METTL22	methyltransferase like 22
hsa-miR-338-3p	0	0	1	1	1	1	IL4R	interleukin 4 receptor
hsa-miR-338-3p	0	0	0	1	1	1	FAP	fibroblast activation protein, alpha
hsa-miR-338-3p	1	0	1	1	1	1	LYRM2	LYR motif containing 2
hsa-miR-338-3p	0	0	0	1	1	1	SLC24A6	solute carrier family 24 (sodium/lithium/calcium exchanger), member 6
hsa-miR-338-3p	0	0	0	1	0	0	GMIP	GEM interacting protein
hsa-miR-338-3p	0	0	1	1	1	1	ABCC6	ATP-binding cassette, sub-family C (CFTR/MRP), member 6
hsa-miR-338-3p	0	0	1	1	0	0	PSMD8	proteasome (prosome, macropain) 26S subunit, non-ATPase, 8
hsa-miR-338-3p	0	0	0	1	0	0	IGFALS	insulin-like growth factor binding protein, acid labile subunit
hsa-miR-338-3p	1	0	1	1	0	0	MMP11	matrix metallopeptidase 11 (stromelysin 3)
hsa-miR-338-3p	1	0	1	1	1	1	PIK3IP1	phosphoinositide-3-kinase interacting protein 1
hsa-miR-338-3p	0	0	1	1	0	0	NHP2L1	NHP2 non-histone chromosome protein 2-like 1 (S. cerevisiae)
hsa-miR-338-3p	0	0	1	1	0	0	NIPSNAP1	nipsnap homolog 1 (C. elegans)
hsa-miR-338-3p	0	0	1	1	0	0	RBX1	ring-box 1, E3 ubiquitin protein ligase
hsa-miR-338-3p	0	0	0	1	0	0	PMM1	phosphomannomutase 1
hsa-miR-338-3p	1	0	0	1	1	1	SALL4	sal-like 4 (Drosophila)
hsa-miR-338-3p	0	0	1	1	0	0	TRIB3	tribbles homolog 3 (Drosophila)
hsa-miR-338-3p	0	0	1	1	0	0	TAF9	TAF9 RNA polymerase II, TATA box binding protein (TBP)-associated factor, 32kDa
hsa-miR-338-3p	0	0	1	1	1	1	DECR2	2,4-dienoyl CoA reductase 2, peroxisomal
hsa-miR-338-3p	0	0	1	1	0	0	STUB1	STIP1 homology and U-box containing protein 1, E3 ubiquitin protein ligase
hsa-miR-338-3p	0	0	1	1	0	0	CRYM	crystallin, mu
hsa-miR-338-3p	1	0	0	1	1	1	C16orf88	chromosome 16 open reading frame 88
hsa-miR-338-3p	0	0	0	1	1	1	PEX11G	peroxisomal biogenesis factor 11 gamma
hsa-miR-338-3p	0	0	1	1	1	1	GCDH	glutaryl-CoA dehydrogenase
hsa-miR-338-3p	0	0	0	1	0	0	INSL3	insulin-like 3 (Leydig cell)
hsa-miR-338-3p	0	0	0	1	1	1	JAK3	Janus kinase 3
hsa-miR-338-3p	0	0	0	1	1	1	MRPL32	mitochondrial ribosomal protein L32
hsa-miR-338-3p	0	0	1	1	1	1	COA1	cytochrome C oxidase assembly factor 1 homolog (S. cerevisiae)
hsa-miR-338-3p	0	0	0	1	1	1	AEBP1	AE binding protein 1
hsa-miR-338-3p	0	0	1	1	1	1	P2RX5	purinergic receptor P2X, ligand-gated ion channel, 5
hsa-miR-338-3p	0	0	1	1	1	1	SHPK	sedoheptulokinase
hsa-miR-338-3p	0	0	1	1	1	1	LDHA	lactate dehydrogenase A
hsa-miR-338-3p	0	0	1	1	0	0	CYP27B1	cytochrome P450, family 27, subfamily B, polypeptide 1
hsa-miR-338-3p	0	0	1	1	1	1	CMAS	cytidine monophosphate N-acetylneuraminic acid synthetase
hsa-miR-338-3p	0	0	0	1	0	0	CYB561D2	cytochrome b-561 domain containing 2
hsa-miR-338-3p	0	0	1	1	1	1	NEK4	NIMA (never in mitosis gene a)-related kinase 4
hsa-miR-338-3p	0	0	1	1	0	0	IGFBP2	insulin-like growth factor binding protein 2, 36kDa
hsa-miR-338-3p	0	0	0	1	1	1	PASK	PAS domain containing serine/threonine kinase
hsa-miR-338-3p	1	0	0	1	0	0	PQLC2	PQ loop repeat containing 2
hsa-miR-338-3p	1	0	1	1	1	1	ADPRHL2	ADP-ribosylhydrolase like 2
hsa-miR-338-3p	1	0	1	1	0	0	TNP1	transition protein 1 (during histone to protamine replacement)
hsa-miR-338-3p	0	0	1	1	1	1	RARRES1	retinoic acid receptor responder (tazarotene induced) 1
hsa-miR-338-3p	1	0	1	1	1	1	TSHZ3	teashirt zinc finger homeobox 3
hsa-miR-338-3p	0	0	0	1	0	0	GJA8	gap junction protein, alpha 8, 50kDa
hsa-miR-338-3p	0	0	1	1	1	1	CCDC70	coiled-coil domain containing 70
hsa-miR-338-3p	0	0	0	1	1	1	TNFAIP6	tumor necrosis factor, alpha-induced protein 6
hsa-miR-338-3p	0	0	1	1	0	0	WFDC3	WAP four-disulfide core domain 3
hsa-miR-338-3p	0	0	0	1	1	1	BBS2	Bardet-Biedl syndrome 2
hsa-miR-338-3p	1	0	1	1	1	1	SPHK2	sphingosine kinase 2
hsa-miR-338-3p	1	0	0	1	1	1	TNFSF9	tumor necrosis factor (ligand) superfamily, member 9
hsa-miR-338-3p	0	0	1	1	0	0	PLK1S1	polo-like kinase 1 substrate 1
hsa-miR-338-3p	0	0	0	1	0	0	GPR42	G protein-coupled receptor 42 (gene/pseudogene)
hsa-miR-338-3p	0	0	1	1	1	1	ZNF598	zinc finger protein 598
hsa-miR-338-3p	0	0	1	1	0	0	SIRT2	sirtuin 2
hsa-miR-338-3p	0	0	0	1	1	1	ARHGAP22	Rho GTPase activating protein 22
hsa-miR-338-3p	0	0	1	1	1	1	MMP28	matrix metallopeptidase 28
hsa-miR-338-3p	0	0	1	1	0	0	KLK12	kallikrein-related peptidase 12
hsa-miR-338-3p	0	0	0	1	0	0	LILRA2	leukocyte immunoglobulin-like receptor, subfamily A (with TM domain), member 2
hsa-miR-338-3p	0	0	0	1	0	0	CFHR4	complement factor H-related 4
hsa-miR-338-3p	1	0	1	1	1	1	TSG101	tumor susceptibility gene 101
hsa-miR-338-3p	0	0	0	1	0	0	GALNT8	UDP-N-acetyl-alpha-D-galactosamine:polypeptide N-acetylgalactosaminyltransferase 8 (GalNAc-T8)
hsa-miR-338-3p	0	0	0	1	1	1	LSM4	LSM4 homolog, U6 small nuclear RNA associated (S. cerevisiae)
hsa-miR-338-3p	0	0	0	1	1	1	HIP1R	huntingtin interacting protein 1 related
hsa-miR-338-3p	0	0	1	1	1	1	ZNF331	zinc finger protein 331
hsa-miR-338-3p	0	0	0	1	0	0	ZNF132	zinc finger protein 132
hsa-miR-338-3p	0	0	1	1	0	0	NXT1	NTF2-like export factor 1
hsa-miR-338-3p	0	0	0	1	0	0	MYBPH	myosin binding protein H
hsa-miR-338-3p	0	0	1	1	1	1	CCDC134	coiled-coil domain containing 134
hsa-miR-338-3p	1	0	0	1	0	0	PI4KA	phosphatidylinositol 4-kinase, catalytic, alpha
hsa-miR-338-3p	1	0	1	1	1	1	MRO	maestro
hsa-miR-338-3p	1	0	1	1	1	1	IER3IP1	immediate early response 3 interacting protein 1
hsa-miR-338-3p	0	0	1	1	1	1	IL5RA	interleukin 5 receptor, alpha
hsa-miR-338-3p	0	0	1	1	0	0	DDB2	damage-specific DNA binding protein 2, 48kDa
hsa-miR-338-3p	0	0	1	1	0	0	MTNR1B	melatonin receptor 1B
hsa-miR-338-3p	0	0	0	1	1	1	ESPL1	extra spindle pole bodies homolog 1 (S. cerevisiae)
hsa-miR-338-3p	0	0	0	1	1	1	MFSD9	major facilitator superfamily domain containing 9
hsa-miR-338-3p	0	0	1	1	0	0	TBRG4	transforming growth factor beta regulator 4
hsa-miR-338-3p	0	0	0	1	1	1	TACO1	translational activator of mitochondrially encoded cytochrome c oxidase I
hsa-miR-338-3p	0	0	0	1	0	0	IL36A	interleukin 36, alpha
hsa-miR-338-3p	0	0	0	1	1	1	PGBD1	piggyBac transposable element derived 1
hsa-miR-338-3p	0	0	1	1	1	1	SIX3	SIX homeobox 3
hsa-miR-338-3p	1	0	0	1	1	1	CENPO	centromere protein O
hsa-miR-338-3p	0	0	1	1	1	1	HS3ST2	heparan sulfate (glucosamine) 3-O-sulfotransferase 2
hsa-miR-338-3p	0	0	0	1	1	1	PPP2R3C	protein phosphatase 2, regulatory subunit B'', gamma
hsa-miR-338-3p	0	0	0	1	1	1	PALB2	partner and localizer of BRCA2
hsa-miR-338-3p	0	0	0	1	1	1	UTP20	UTP20, small subunit (SSU) processome component, homolog (yeast)
hsa-miR-338-3p	0	0	1	1	0	0	PDGFRB	platelet-derived growth factor receptor, beta polypeptide
hsa-miR-338-3p	0	0	0	1	0	0	MCM4	minichromosome maintenance complex component 4
hsa-miR-338-3p	0	0	0	1	1	1	METTL2B	methyltransferase like 2B
hsa-miR-338-3p	0	0	0	1	0	0	ATP4A	ATPase, H+/K+ exchanging, alpha polypeptide
hsa-miR-338-3p	1	0	1	1	1	1	CDH20	cadherin 20, type 2
hsa-miR-338-3p	0	0	0	1	0	0	XRCC1	X-ray repair complementing defective repair in Chinese hamster cells 1
hsa-miR-338-3p	0	0	0	1	0	0	C19orf10	chromosome 19 open reading frame 10
hsa-miR-338-3p	0	0	1	1	1	1	NLRP2	NLR family, pyrin domain containing 2
hsa-miR-338-3p	0	0	1	1	0	0	LTK	leukocyte receptor tyrosine kinase
hsa-miR-338-3p	0	0	1	1	1	1	SLC9A1	solute carrier family 9, subfamily A (NHE1, cation proton antiporter 1), member 1
hsa-miR-338-3p	0	0	0	1	1	1	PET112	PET112 homolog (yeast)
hsa-miR-338-3p	0	0	0	1	0	0	TREH	trehalase (brush-border membrane glycoprotein)
hsa-miR-338-3p	0	0	1	1	1	1	CAPZB	capping protein (actin filament) muscle Z-line, beta
hsa-miR-338-3p	1	0	0	1	0	0	ECE1	endothelin converting enzyme 1
hsa-miR-338-3p	0	0	1	1	0	0	CAD	carbamoyl-phosphate synthetase 2, aspartate transcarbamylase, and dihydroorotase
hsa-miR-338-3p	0	0	0	1	0	0	TMEM175	transmembrane protein 175
hsa-miR-338-3p	0	0	0	1	0	0	IQCG	IQ motif containing G
hsa-miR-338-3p	0	0	0	1	1	1	SLC25A16	solute carrier family 25 (mitochondrial carrier; Graves disease autoantigen), member 16
hsa-miR-338-3p	0	0	0	1	1	1	WDR89	WD repeat domain 89
hsa-miR-338-3p	0	0	1	1	1	1	BBS4	Bardet-Biedl syndrome 4
hsa-miR-338-3p	0	0	1	1	1	1	ITGAX	integrin, alpha X (complement component 3 receptor 4 subunit)
hsa-miR-338-3p	1	0	1	1	1	1	CBX8	chromobox homolog 8
hsa-miR-338-3p	1	0	0	1	0	0	SF3B4	splicing factor 3b, subunit 4, 49kDa
hsa-miR-338-3p	0	0	0	1	0	0	EPHX1	epoxide hydrolase 1, microsomal (xenobiotic)
hsa-miR-338-3p	0	0	1	1	0	0	FTH1	ferritin, heavy polypeptide 1
hsa-miR-338-3p	0	0	0	1	0	0	NKD2	naked cuticle homolog 2 (Drosophila)
hsa-miR-338-3p	1	0	1	1	1	1	RREB1	ras responsive element binding protein 1
hsa-miR-338-3p	0	0	0	1	1	1	HIGD2A	HIG1 hypoxia inducible domain family, member 2A
hsa-miR-338-3p	0	0	1	1	1	1	GGCT	gamma-glutamylcyclotransferase
hsa-miR-338-3p	0	0	0	1	0	0	GPR174	G protein-coupled receptor 174
hsa-miR-338-3p	1	0	1	1	1	1	MFHAS1	malignant fibrous histiocytoma amplified sequence 1
hsa-miR-338-3p	0	0	1	1	0	0	OLFM1	olfactomedin 1
hsa-miR-338-3p	0	0	0	1	0	0	PNPLA7	patatin-like phospholipase domain containing 7
hsa-miR-338-3p	1	0	1	1	1	1	ZNF215	zinc finger protein 215
hsa-miR-338-3p	0	0	0	1	1	1	APIP	APAF1 interacting protein
hsa-miR-338-3p	0	0	1	1	1	1	INCENP	inner centromere protein antigens 135/155kDa
hsa-miR-338-3p	1	0	1	1	1	1	TMEM218	transmembrane protein 218
hsa-miR-338-3p	0	0	1	1	0	0	NUBP1	nucleotide binding protein 1
hsa-miR-338-3p	1	0	1	1	1	1	KCTD15	potassium channel tetramerisation domain containing 15
hsa-miR-338-3p	0	0	0	1	0	0	SLC7A7	solute carrier family 7 (amino acid transporter light chain, y+L system), member 7
hsa-miR-338-3p	0	0	0	1	1	1	NAT2	N-acetyltransferase 2 (arylamine N-acetyltransferase)
hsa-miR-338-3p	1	0	0	1	1	1	WHAMM	WAS protein homolog associated with actin, golgi membranes and microtubules
hsa-miR-338-3p	0	0	1	1	1	1	ERCC6L2	excision repair cross-complementing rodent repair deficiency, complementation group 6-like 2
hsa-miR-338-3p	0	0	1	1	1	1	ZFAND2B	zinc finger, AN1-type domain 2B
hsa-miR-338-3p	0	0	0	1	0	0	CBR3	carbonyl reductase 3
hsa-miR-338-3p	0	0	0	1	0	0	FTCD	formiminotransferase cyclodeaminase
hsa-miR-338-3p	0	0	1	1	1	1	ZNF714	zinc finger protein 714
hsa-miR-338-3p	0	0	1	1	0	0	NCR1	natural cytotoxicity triggering receptor 1
hsa-miR-338-3p	0	0	1	1	1	1	FCRL2	Fc receptor-like 2
hsa-miR-338-3p	0	0	0	1	0	0	CCDC116	coiled-coil domain containing 116
hsa-miR-338-3p	0	0	1	1	1	1	FBXO17	F-box protein 17
hsa-miR-338-3p	0	0	0	1	1	1	FDXR	ferredoxin reductase
hsa-miR-338-3p	1	0	1	1	1	1	NXF1	nuclear RNA export factor 1
hsa-miR-338-3p	0	0	0	1	0	0	CCDC27	coiled-coil domain containing 27
hsa-miR-338-3p	0	0	1	1	1	1	IWS1	IWS1 homolog (S. cerevisiae)
hsa-miR-338-3p	0	0	0	1	1	1	TMEM79	transmembrane protein 79
hsa-miR-338-3p	0	0	0	1	0	0	GLB1L	galactosidase, beta 1-like
hsa-miR-338-3p	0	0	0	1	1	1	CLRN1	clarin 1
hsa-miR-338-3p	1	0	1	1	1	1	ZDHHC3	zinc finger, DHHC-type containing 3
hsa-miR-338-3p	0	0	0	1	0	0	ITGB5	integrin, beta 5
hsa-miR-338-3p	0	0	1	1	0	0	RPL39L	ribosomal protein L39-like
hsa-miR-338-3p	0	0	0	1	1	1	PRSS12	protease, serine, 12 (neurotrypsin, motopsin)
hsa-miR-338-3p	1	0	1	1	1	1	XKR6	XK, Kell blood group complex subunit-related family, member 6
hsa-miR-338-3p	0	0	0	1	1	1	DEFA4	defensin, alpha 4, corticostatin
hsa-miR-338-3p	0	0	0	1	0	0	GPR101	G protein-coupled receptor 101
hsa-miR-338-3p	0	0	0	1	0	0	SERPINA4	serpin peptidase inhibitor, clade A (alpha-1 antiproteinase, antitrypsin), member 4
hsa-miR-338-3p	0	0	0	1	1	1	C14orf159	chromosome 14 open reading frame 159
hsa-miR-338-3p	0	0	0	1	0	0	IFI27L1	interferon, alpha-inducible protein 27-like 1
hsa-miR-338-3p	0	0	1	1	1	1	MSS51	MSS51 mitochondrial translational activator homolog (S. cerevisiae)
hsa-miR-338-3p	1	0	1	1	0	0	PPIB	peptidylprolyl isomerase B (cyclophilin B)
hsa-miR-338-3p	0	0	1	1	0	0	LDHD	lactate dehydrogenase D
hsa-miR-338-3p	0	0	0	1	0	0	COQ4	coenzyme Q4 homolog (S. cerevisiae)
hsa-miR-338-3p	0	0	0	1	0	0	PIEZO1	piezo-type mechanosensitive ion channel component 1
hsa-miR-338-3p	0	0	0	1	0	0	ZNF524	zinc finger protein 524
hsa-miR-338-3p	0	0	0	1	1	1	ZNF526	zinc finger protein 526
hsa-miR-338-3p	0	0	0	1	0	0	LILRA5	leukocyte immunoglobulin-like receptor, subfamily A (with TM domain), member 5
hsa-miR-338-3p	0	0	0	1	1	1	SPINT2	serine peptidase inhibitor, Kunitz type, 2
hsa-miR-338-3p	0	0	1	1	0	0	IGFBP6	insulin-like growth factor binding protein 6
hsa-miR-338-3p	0	0	1	1	0	0	PRDX2	peroxiredoxin 2
hsa-miR-338-3p	0	0	1	1	1	1	SCARA5	scavenger receptor class A, member 5 (putative)
hsa-miR-338-3p	0	0	1	1	0	0	AHSP	alpha hemoglobin stabilizing protein
hsa-miR-338-3p	0	0	0	1	0	0	OR10J1	olfactory receptor, family 10, subfamily J, member 1
hsa-miR-338-3p	0	0	1	1	0	0	KCNK9	potassium channel, subfamily K, member 9
hsa-miR-338-3p	0	0	1	1	0	0	TMEM51	transmembrane protein 51
hsa-miR-338-3p	1	0	1	1	0	0	ENHO	energy homeostasis associated
hsa-miR-338-3p	0	0	0	1	0	0	EXOSC10	exosome component 10
hsa-miR-338-3p	0	0	1	1	1	1	INSL5	insulin-like 5
hsa-miR-338-3p	1	0	1	1	1	1	SH3D19	SH3 domain containing 19
hsa-miR-338-3p	1	0	1	1	1	1	ZFX	zinc finger protein, X-linked
hsa-miR-338-3p	0	0	0	1	0	0	HSFY2	heat shock transcription factor, Y linked 2
hsa-miR-338-3p	0	0	0	1	0	0	SLFN12	schlafen family member 12
hsa-miR-338-3p	0	0	0	1	1	1	NINJ2	ninjurin 2
hsa-miR-338-3p	1	0	1	1	1	1	MAPK1IP1L	mitogen-activated protein kinase 1 interacting protein 1-like
hsa-miR-338-3p	0	0	1	1	1	1	SMOX	spermine oxidase
hsa-miR-338-3p	0	0	1	1	0	0	ISG20	interferon stimulated exonuclease gene 20kDa
hsa-miR-338-3p	1	0	1	1	1	1	SOGA2	SOGA family member 2
hsa-miR-338-3p	0	0	0	1	1	1	AVEN	apoptosis, caspase activation inhibitor
hsa-miR-338-3p	0	0	0	1	0	0	METTL7B	methyltransferase like 7B
hsa-miR-338-3p	1	0	1	1	1	1	AIFM2	apoptosis-inducing factor, mitochondrion-associated, 2
hsa-miR-338-3p	0	0	1	1	0	0	CRYGS	crystallin, gamma S
hsa-miR-338-3p	0	0	0	1	0	0	C1orf100	chromosome 1 open reading frame 100
hsa-miR-338-3p	0	0	1	1	0	0	PLG	plasminogen
hsa-miR-338-3p	0	0	0	1	0	0	SNUPN	snurportin 1
hsa-miR-338-3p	1	0	1	1	1	1	ADRBK1	adrenergic, beta, receptor kinase 1
hsa-miR-338-3p	0	0	0	1	0	0	EVX2	even-skipped homeobox 2
hsa-miR-338-3p	0	0	1	1	1	1	MLKL	mixed lineage kinase domain-like
hsa-miR-338-3p	0	0	1	1	1	1	ZNF483	zinc finger protein 483
hsa-miR-338-3p	0	0	0	1	1	1	LOC729317	voltage-dependent anion channel 2 pseudogene
hsa-miR-338-3p	0	0	0	1	1	1	ZG16	zymogen granule protein 16 homolog (rat)
hsa-miR-338-3p	1	0	0	1	1	1	ELF3	E74-like factor 3 (ets domain transcription factor, epithelial-specific )
hsa-miR-338-3p	0	0	0	1	1	1	PRLR	prolactin receptor
hsa-miR-338-3p	0	0	1	1	1	1	CYP7B1	cytochrome P450, family 7, subfamily B, polypeptide 1
hsa-miR-338-3p	1	0	1	1	1	1	SPON1	spondin 1, extracellular matrix protein
hsa-miR-338-3p	1	0	1	1	1	1	GPD2	glycerol-3-phosphate dehydrogenase 2 (mitochondrial)
hsa-miR-338-3p	1	0	1	1	0	0	MEPCE	methylphosphate capping enzyme
hsa-miR-338-3p	1	0	1	1	1	1	TNS1	tensin 1
hsa-miR-338-3p	1	0	1	1	1	1	LDB3	LIM domain binding 3
hsa-miR-338-3p	0	0	1	1	1	1	P2RY2	purinergic receptor P2Y, G-protein coupled, 2
hsa-miR-338-3p	0	0	1	1	1	1	PLAC8	placenta-specific 8
hsa-miR-338-3p	0	0	0	1	1	1	LSP1	lymphocyte-specific protein 1
hsa-miR-338-3p	0	0	1	1	1	1	TNK1	tyrosine kinase, non-receptor, 1
hsa-miR-338-3p	0	0	0	1	0	0	ZNF408	zinc finger protein 408
hsa-miR-338-3p	0	0	0	1	0	0	MOS	v-mos Moloney murine sarcoma viral oncogene homolog
hsa-miR-338-3p	0	0	0	1	0	0	ATHL1	ATH1, acid trehalase-like 1 (yeast)
hsa-miR-338-3p	0	0	0	1	0	0	OR8K3	olfactory receptor, family 8, subfamily K, member 3
hsa-miR-338-3p	0	0	0	1	0	0	LOC100129726	uncharacterized LOC100129726
hsa-miR-338-3p	0	0	0	1	0	0	PUF60	poly-U binding splicing factor 60KDa
hsa-miR-338-3p	0	0	1	1	1	1	RMND5B	required for meiotic nuclear division 5 homolog B (S. cerevisiae)
hsa-miR-338-3p	0	0	0	1	1	1	CHAF1B	chromatin assembly factor 1, subunit B (p60)
hsa-miR-338-3p	1	0	1	1	0	0	RELL1	RELT-like 1
hsa-miR-338-3p	0	0	1	1	0	0	KCNMB3	potassium large conductance calcium-activated channel, subfamily M beta member 3
hsa-miR-338-3p	0	0	0	1	1	1	LILRB2	leukocyte immunoglobulin-like receptor, subfamily B (with TM and ITIM domains), member 2
hsa-miR-338-3p	0	0	1	1	1	1	IMP3	IMP3, U3 small nucleolar ribonucleoprotein, homolog (yeast)
hsa-miR-338-3p	0	0	1	1	0	0	C1QB	complement component 1, q subcomponent, B chain
hsa-miR-338-3p	0	0	1	1	1	1	MPP4	membrane protein, palmitoylated 4 (MAGUK p55 subfamily member 4)
hsa-miR-338-3p	0	0	1	1	1	1	KCND3	potassium voltage-gated channel, Shal-related subfamily, member 3
hsa-miR-338-3p	0	0	1	1	0	0	BCAT2	branched chain amino-acid transaminase 2, mitochondrial
hsa-miR-338-3p	0	0	1	1	1	1	LPA	lipoprotein, Lp(a)
hsa-miR-338-3p	0	0	0	1	0	0	ZFAND2A	zinc finger, AN1-type domain 2A
hsa-miR-338-3p	0	0	1	1	0	0	SNAPC5	small nuclear RNA activating complex, polypeptide 5, 19kDa
hsa-miR-338-3p	0	0	1	1	0	0	EFCAB11	EF-hand calcium binding domain 11
hsa-miR-338-3p	0	0	0	1	0	0	PYCR2	pyrroline-5-carboxylate reductase family, member 2
hsa-miR-338-3p	0	0	1	1	0	0	CCDC101	coiled-coil domain containing 101
hsa-miR-338-3p	0	0	0	1	1	1	ZNF559	zinc finger protein 559
hsa-miR-338-3p	0	0	1	1	1	1	RAB23	RAB23, member RAS oncogene family
hsa-miR-338-3p	0	0	0	1	1	1	GRHPR	glyoxylate reductase/hydroxypyruvate reductase
hsa-miR-338-3p	0	0	1	1	1	1	SEPHS2	selenophosphate synthetase 2
hsa-miR-338-3p	1	0	1	1	1	1	DIP2A	DIP2 disco-interacting protein 2 homolog A (Drosophila)
hsa-miR-338-3p	0	0	0	1	0	0	OR13D1	olfactory receptor, family 13, subfamily D, member 1
hsa-miR-338-3p	1	0	1	1	1	1	SH3BGRL3	SH3 domain binding glutamic acid-rich protein like 3
hsa-miR-338-3p	0	0	1	1	0	0	TMX2	thioredoxin-related transmembrane protein 2
hsa-miR-338-3p	0	0	0	1	0	0	SGPP2	sphingosine-1-phosphate phosphatase 2
hsa-miR-338-3p	0	0	0	1	1	1	FOLR2	folate receptor 2 (fetal)
hsa-miR-338-3p	0	0	1	1	1	1	WDR33	WD repeat domain 33
hsa-miR-338-3p	1	0	1	1	0	0	SMCR7	Smith-Magenis syndrome chromosome region, candidate 7
hsa-miR-338-3p	0	0	1	1	1	1	PRMT5	protein arginine methyltransferase 5
hsa-miR-338-3p	0	0	0	1	0	0	CRIPAK	cysteine-rich PAK1 inhibitor
hsa-miR-338-3p	1	0	1	1	1	1	CUL1	cullin 1
hsa-miR-338-3p	1	0	1	1	1	1	CEP57	centrosomal protein 57kDa
hsa-miR-338-3p	0	0	0	1	1	1	DMRTA1	DMRT-like family A1
hsa-miR-338-3p	0	0	1	1	1	1	PRNT	prion protein (testis specific)
hsa-miR-338-3p	1	0	1	1	1	1	EYA2	eyes absent homolog 2 (Drosophila)
hsa-miR-338-3p	0	0	0	1	0	0	SERHL2	serine hydrolase-like 2
hsa-miR-338-3p	0	0	1	1	0	0	GPKOW	G patch domain and KOW motifs
hsa-miR-338-3p	0	0	1	1	1	1	XRCC5	X-ray repair complementing defective repair in Chinese hamster cells 5 (double-strand-break rejoining)
hsa-miR-338-3p	0	0	0	1	0	0	OR8B8	olfactory receptor, family 8, subfamily B, member 8
hsa-miR-338-3p	0	0	1	1	0	0	ZNF71	zinc finger protein 71
hsa-miR-338-3p	0	0	1	1	1	1	GLUD2	glutamate dehydrogenase 2
hsa-miR-338-3p	0	0	0	1	0	0	TMEM75	transmembrane protein 75
hsa-miR-338-3p	0	0	1	1	1	1	COL7A1	collagen, type VII, alpha 1
hsa-miR-338-3p	0	0	0	1	1	1	APOL4	apolipoprotein L, 4
hsa-miR-338-3p	0	0	0	1	0	0	TNFRSF18	tumor necrosis factor receptor superfamily, member 18
hsa-miR-338-3p	0	0	1	1	0	0	GKN2	gastrokine 2
hsa-miR-338-3p	0	0	0	1	1	1	RAX2	retina and anterior neural fold homeobox 2
hsa-miR-338-3p	0	0	0	1	0	0	OR52A1	olfactory receptor, family 52, subfamily A, member 1
hsa-miR-338-3p	0	0	0	1	0	0	ADAT3	adenosine deaminase, tRNA-specific 3
hsa-miR-338-3p	0	0	1	1	1	1	WBP2NL	WBP2 N-terminal like
hsa-miR-338-3p	0	0	1	1	0	0	HIST1H2AK	histone cluster 1, H2ak
hsa-miR-338-3p	0	0	0	1	0	0	C21orf56	chromosome 21 open reading frame 56
hsa-miR-338-3p	0	0	1	1	1	1	MINA	MYC induced nuclear antigen
hsa-miR-338-3p	0	0	0	1	0	0	CDCA2	cell division cycle associated 2
hsa-miR-338-3p	0	0	0	1	0	0	TLCD2	TLC domain containing 2
hsa-miR-338-3p	1	0	1	1	1	1	NTF3	neurotrophin 3
hsa-miR-338-3p	0	0	1	1	0	0	EWSR1	Ewing sarcoma breakpoint region 1
hsa-miR-338-3p	0	0	1	1	1	1	AKR1C2	aldo-keto reductase family 1, member C2 (dihydrodiol dehydrogenase 2; bile acid binding protein; 3-alpha hydroxysteroid dehydrogenase, type III)
hsa-miR-338-3p	0	0	0	1	0	0	ALG12	asparagine-linked glycosylation 12, alpha-1,6-mannosyltransferase homolog (S. cerevisiae)
hsa-miR-338-3p	1	0	0	1	0	0	DGAT1	diacylglycerol O-acyltransferase 1
hsa-miR-338-3p	1	0	1	1	1	1	TMED9	transmembrane emp24 protein transport domain containing 9
hsa-miR-338-3p	0	0	1	1	0	0	WDR53	WD repeat domain 53
hsa-miR-338-3p	0	0	0	1	0	0	MRPL40	mitochondrial ribosomal protein L40
hsa-miR-338-3p	0	0	0	1	0	0	AHNAK2	AHNAK nucleoprotein 2
hsa-miR-338-3p	0	0	0	1	1	1	S1PR5	sphingosine-1-phosphate receptor 5
hsa-miR-338-3p	0	0	1	1	0	0	TMEM179B	transmembrane protein 179B
hsa-miR-338-3p	1	0	1	1	1	1	CREM	cAMP responsive element modulator
hsa-miR-338-3p	0	0	1	1	0	0	LENG9	leukocyte receptor cluster (LRC) member 9
hsa-miR-338-3p	0	0	1	1	0	0	DMRTC1B	DMRT-like family C1B
hsa-miR-338-3p	0	0	0	1	0	0	KRTAP19-3	keratin associated protein 19-3
hsa-miR-338-3p	0	0	1	1	1	1	ACAD9	acyl-CoA dehydrogenase family, member 9
hsa-miR-338-3p	0	0	1	1	0	0	CA5BP1	carbonic anhydrase VB pseudogene 1
hsa-miR-338-3p	0	0	1	1	0	0	RLTPR	RGD motif, leucine rich repeats, tropomodulin domain and proline-rich containing
hsa-miR-338-3p	1	0	1	1	1	1	PDXDC1	pyridoxal-dependent decarboxylase domain containing 1
hsa-miR-338-3p	0	0	0	1	0	0	JMJD7-PLA2G4B	JMJD7-PLA2G4B readthrough
hsa-miR-338-3p	1	0	1	1	1	1	AGAP3	ArfGAP with GTPase domain, ankyrin repeat and PH domain 3
hsa-miR-338-3p	0	0	0	1	0	0	OR5D14	olfactory receptor, family 5, subfamily D, member 14
hsa-miR-338-3p	0	0	1	1	0	0	TESK1	testis-specific kinase 1
hsa-miR-338-3p	0	0	0	1	0	0	SCAI	suppressor of cancer cell invasion
hsa-miR-338-3p	0	0	0	1	0	0	CECR5	cat eye syndrome chromosome region, candidate 5
hsa-miR-338-3p	1	0	1	1	1	1	SNCA	synuclein, alpha (non A4 component of amyloid precursor)
hsa-miR-338-3p	0	0	0	1	1	1	SLMO1	slowmo homolog 1 (Drosophila)
hsa-miR-338-3p	0	0	1	1	1	1	PCBP4	poly(rC) binding protein 4
hsa-miR-338-3p	1	0	1	1	1	1	SUPT7L	suppressor of Ty 7 (S. cerevisiae)-like
hsa-miR-338-3p	1	0	1	1	1	1	C15orf63	chromosome 15 open reading frame 63
hsa-miR-338-3p	1	0	1	1	0	0	ZBTB49	zinc finger and BTB domain containing 49
hsa-miR-338-3p	1	0	1	1	1	1	HNRNPF	heterogeneous nuclear ribonucleoprotein F
hsa-miR-338-3p	0	0	0	1	0	0	FBLL1	fibrillarin-like 1
hsa-miR-338-3p	0	0	1	1	1	1	SNRPE	small nuclear ribonucleoprotein polypeptide E
hsa-miR-338-3p	0	0	0	1	1	1	NPY5R	neuropeptide Y receptor Y5
hsa-miR-338-3p	0	0	0	1	0	0	ZFP92	zinc finger protein 92 homolog (mouse)
hsa-miR-338-3p	0	0	1	1	0	0	RGS12	regulator of G-protein signaling 12
hsa-miR-338-3p	0	0	0	1	0	0	CATSPER4	cation channel, sperm associated 4
hsa-miR-338-3p	0	0	1	1	1	1	GAL3ST1	galactose-3-O-sulfotransferase 1
hsa-miR-338-3p	0	0	1	1	0	0	HAVCR1	hepatitis A virus cellular receptor 1
hsa-miR-338-3p	0	0	0	1	1	1	ZNF595	zinc finger protein 595
hsa-miR-338-3p	0	0	0	1	1	1	MRAP	melanocortin 2 receptor accessory protein
hsa-miR-338-3p	0	0	0	1	1	1	SDCBP2	syndecan binding protein (syntenin) 2
hsa-miR-338-3p	1	0	1	1	1	1	SPAM1	sperm adhesion molecule 1 (PH-20 hyaluronidase, zona pellucida binding)
hsa-miR-338-3p	0	0	1	1	1	1	UTS2D	urotensin 2 domain containing
hsa-miR-338-3p	0	0	1	1	1	1	SLC2A14	solute carrier family 2 (facilitated glucose transporter), member 14
hsa-miR-338-3p	0	0	1	1	0	0	HIST1H4D	histone cluster 1, H4d
hsa-miR-338-3p	0	0	1	1	1	1	SLC5A12	solute carrier family 5 (sodium/glucose cotransporter), member 12
hsa-miR-338-3p	0	0	1	1	1	1	C15orf43	chromosome 15 open reading frame 43
hsa-miR-338-3p	0	0	0	1	1	1	PLEKHG5	pleckstrin homology domain containing, family G (with RhoGef domain) member 5
hsa-miR-338-3p	0	0	0	1	0	0	EXD3	exonuclease 3'-5' domain containing 3
hsa-miR-338-3p	1	0	1	1	1	1	PKHD1	polycystic kidney and hepatic disease 1 (autosomal recessive)
hsa-miR-338-3p	0	0	0	1	0	0	CXorf27	chromosome X open reading frame 27
hsa-miR-338-3p	0	0	1	1	1	1	MCOLN3	mucolipin 3
hsa-miR-338-3p	0	0	0	1	0	0	TMEM221	transmembrane protein 221
hsa-miR-338-3p	1	0	1	1	1	1	PVRL1	poliovirus receptor-related 1 (herpesvirus entry mediator C)
hsa-miR-338-3p	0	0	1	1	1	1	LCTL	lactase-like
hsa-miR-338-3p	0	0	0	1	0	0	FUT6	fucosyltransferase 6 (alpha (1,3) fucosyltransferase)
hsa-miR-338-3p	0	0	1	1	1	1	LRRC29	leucine rich repeat containing 29
hsa-miR-338-3p	0	0	1	1	1	1	BID	BH3 interacting domain death agonist
hsa-miR-338-3p	1	0	1	1	1	1	SLC20A2	solute carrier family 20 (phosphate transporter), member 2
hsa-miR-338-3p	0	0	0	1	1	1	ASCL4	achaete-scute complex homolog 4 (Drosophila)
hsa-miR-338-3p	0	0	0	1	0	0	TMEM120B	transmembrane protein 120B
hsa-miR-338-3p	0	0	0	1	1	1	PROZ	protein Z, vitamin K-dependent plasma glycoprotein
hsa-miR-338-3p	0	0	1	1	0	0	FXYD5	FXYD domain containing ion transport regulator 5
hsa-miR-338-3p	1	0	1	1	0	0	ST3GAL2	ST3 beta-galactoside alpha-2,3-sialyltransferase 2
hsa-miR-338-3p	0	0	0	1	1	1	PSG4	pregnancy specific beta-1-glycoprotein 4
hsa-miR-338-3p	0	0	1	1	1	1	PSG5	pregnancy specific beta-1-glycoprotein 5
hsa-miR-338-3p	0	0	1	1	0	0	DAP3	death associated protein 3
hsa-miR-338-3p	0	0	1	1	0	0	SCNN1B	sodium channel, non-voltage-gated 1, beta subunit
hsa-miR-338-3p	0	0	0	1	0	0	QRFP	pyroglutamylated RFamide peptide
hsa-miR-338-3p	1	0	1	1	1	1	ATG13	autophagy related 13
hsa-miR-338-3p	0	0	1	1	1	1	GBP5	guanylate binding protein 5
hsa-miR-338-3p	0	0	1	1	0	0	FAM159A	family with sequence similarity 159, member A
hsa-miR-338-3p	1	0	1	1	1	1	MKL2	MKL/myocardin-like 2
hsa-miR-338-3p	0	0	0	1	1	1	FAM111B	family with sequence similarity 111, member B
hsa-miR-338-3p	0	0	0	1	0	0	CYP3A5	cytochrome P450, family 3, subfamily A, polypeptide 5
hsa-miR-338-3p	0	0	1	1	0	0	SAPCD1	suppressor APC domain containing 1
hsa-miR-338-3p	0	0	1	1	0	0	RPS10	ribosomal protein S10
hsa-miR-338-3p	0	0	1	1	0	0	ANAPC11	anaphase promoting complex subunit 11
hsa-miR-338-3p	0	0	1	1	1	1	ZNF676	zinc finger protein 676
hsa-miR-338-3p	0	0	1	1	0	0	CLPTM1	cleft lip and palate associated transmembrane protein 1
hsa-miR-338-3p	0	0	0	1	1	1	CRHR2	corticotropin releasing hormone receptor 2
hsa-miR-338-3p	0	0	0	1	0	0	ARHGAP4	Rho GTPase activating protein 4
hsa-miR-338-3p	0	0	0	1	1	1	SLC43A3	solute carrier family 43, member 3
hsa-miR-338-3p	0	0	0	1	0	0	CCDC37	coiled-coil domain containing 37
hsa-miR-338-3p	0	0	0	1	0	0	THYN1	thymocyte nuclear protein 1
hsa-miR-338-3p	0	0	0	1	1	1	COL17A1	collagen, type XVII, alpha 1
hsa-miR-338-3p	0	0	1	1	1	1	NUP214	nucleoporin 214kDa
hsa-miR-338-3p	0	0	1	1	1	1	TAP1	transporter 1, ATP-binding cassette, sub-family B (MDR/TAP)
hsa-miR-338-3p	0	0	1	1	1	1	TMEM207	transmembrane protein 207
hsa-miR-338-3p	1	0	1	1	1	1	APCDD1	adenomatosis polyposis coli down-regulated 1
hsa-miR-338-3p	0	0	1	1	1	1	ITGB1BP1	integrin beta 1 binding protein 1
hsa-miR-338-3p	0	0	1	1	1	1	ZNF493	zinc finger protein 493
hsa-miR-338-3p	1	0	0	1	0	0	CARD11	caspase recruitment domain family, member 11
hsa-miR-338-3p	1	0	1	1	1	1	TRRAP	transformation/transcription domain-associated protein
hsa-miR-338-3p	1	0	1	1	1	1	FBXL3	F-box and leucine-rich repeat protein 3
hsa-miR-338-3p	0	0	1	1	1	1	CHCHD8	coiled-coil-helix-coiled-coil-helix domain containing 8
hsa-miR-338-3p	0	0	0	1	1	1	ZNF658B	zinc finger protein 658B, pseudogene
hsa-miR-338-3p	0	0	0	1	0	0	LIPC	lipase, hepatic
hsa-miR-338-3p	0	0	1	1	1	1	GALNT6	UDP-N-acetyl-alpha-D-galactosamine:polypeptide N-acetylgalactosaminyltransferase 6 (GalNAc-T6)
hsa-miR-338-3p	0	0	0	1	0	0	LSS	lanosterol synthase (2,3-oxidosqualene-lanosterol cyclase)
hsa-miR-338-3p	0	0	1	1	1	1	TMEM67	transmembrane protein 67
hsa-miR-338-3p	0	0	1	1	1	1	TPCN2	two pore segment channel 2
hsa-miR-338-3p	1	0	1	1	1	1	DDX26B	DEAD/H (Asp-Glu-Ala-Asp/His) box polypeptide 26B
hsa-miR-338-3p	0	0	0	1	0	0	HHIPL1	HHIP-like 1
hsa-miR-338-3p	0	0	1	1	1	1	MAP1LC3C	microtubule-associated protein 1 light chain 3 gamma
hsa-miR-338-3p	0	0	0	1	1	1	GJA9	gap junction protein, alpha 9, 59kDa
hsa-miR-338-3p	1	0	1	1	1	1	MYH9	myosin, heavy chain 9, non-muscle
hsa-miR-338-3p	1	0	1	1	1	1	EPHA2	EPH receptor A2
hsa-miR-338-3p	0	0	1	1	1	1	APOL2	apolipoprotein L, 2
hsa-miR-338-3p	1	0	1	1	1	1	DEM1	defects in morphology 1 homolog (S. cerevisiae)
hsa-miR-338-3p	0	0	1	1	1	1	CNDP1	carnosine dipeptidase 1 (metallopeptidase M20 family)
hsa-miR-338-3p	0	0	1	1	0	0	SFTA2	surfactant associated 2
hsa-miR-338-3p	0	0	1	1	1	1	SLC2A10	solute carrier family 2 (facilitated glucose transporter), member 10
hsa-miR-338-3p	0	0	1	1	1	1	XRCC2	X-ray repair complementing defective repair in Chinese hamster cells 2
hsa-miR-338-3p	1	0	1	1	1	1	LFNG	LFNG O-fucosylpeptide 3-beta-N-acetylglucosaminyltransferase
hsa-miR-338-3p	0	0	0	1	0	0	ST6GAL2	ST6 beta-galactosamide alpha-2,6-sialyltranferase 2
hsa-miR-338-3p	0	0	0	1	0	0	TEAD4	TEA domain family member 4
hsa-miR-338-3p	0	0	1	1	0	0	ZNF630	zinc finger protein 630
hsa-miR-338-3p	0	0	1	1	1	1	ZNF182	zinc finger protein 182
hsa-miR-338-3p	0	0	1	1	0	0	BRMS1	breast cancer metastasis suppressor 1
hsa-miR-338-3p	1	0	1	1	0	0	BRD4	bromodomain containing 4
hsa-miR-338-3p	1	0	1	1	1	1	ZNF436	zinc finger protein 436
hsa-miR-338-3p	0	0	0	1	1	1	UAP1L1	UDP-N-acteylglucosamine pyrophosphorylase 1-like 1
hsa-miR-338-3p	0	0	0	1	0	0	ARTN	artemin
hsa-miR-338-3p	0	0	0	1	1	1	PKD1L2	polycystic kidney disease 1-like 2
hsa-miR-338-3p	0	0	1	1	0	0	CPT1B	carnitine palmitoyltransferase 1B (muscle)
hsa-miR-338-3p	0	0	0	1	1	1	RGS22	regulator of G-protein signaling 22
hsa-miR-338-3p	0	0	0	1	1	1	MTHFSD	methenyltetrahydrofolate synthetase domain containing
hsa-miR-338-3p	0	0	0	1	0	0	HAO2	hydroxyacid oxidase 2 (long chain)
hsa-miR-338-3p	1	0	1	1	0	0	KAZN	kazrin, periplakin interacting protein
hsa-miR-338-3p	0	0	0	1	1	1	SLC26A11	solute carrier family 26, member 11
hsa-miR-338-3p	0	0	0	1	0	0	DUSP27	dual specificity phosphatase 27 (putative)
hsa-miR-338-3p	1	0	1	1	1	1	ZFP2	zinc finger protein 2 homolog (mouse)
hsa-miR-338-3p	0	0	0	1	0	0	ZNF643	zinc finger protein 643
hsa-miR-338-3p	0	0	1	1	0	0	MYH7	myosin, heavy chain 7, cardiac muscle, beta
hsa-miR-338-3p	0	0	1	1	1	1	GPRASP1	G protein-coupled receptor associated sorting protein 1
hsa-miR-338-3p	0	0	1	1	0	0	TXNRD2	thioredoxin reductase 2
hsa-miR-338-3p	0	0	1	1	0	0	NXF5	nuclear RNA export factor 5
hsa-miR-338-3p	0	0	0	1	1	1	TIFA	TRAF-interacting protein with forkhead-associated domain
[truncated: 218 more rows]
