# Supplementary material for: Profiling of Selected MicroRNAs in Proliferative Eutopic Endometrium of Women with Ovarian Endometriosis
Source: Biomed Res Int. 2015 Aug 20;2015:760698. doi: 10.1155/2015/760698 (PMC4558423; doi:10.1155/2015/760698)
Supplement: Supplementary file 1 — Table I: The names of miRNAs significantly differentially expressed between eutopic endometrium of patients with endometriosis vs eutopic endometrium of patients without endometriosis. Table II: The associations between miRNA and mRNA, which presents detailed results of the search of six major databases i.e targetscan, tarbase, miranda, mirbase, mirtarget2 and pictar. [file 760698.f1.zip › 760698.f1/Table II/hsa-miR-338-5p.tsv]

miR	targetscan	tarbase	miranda	mirbase	mirtarget2	pictar	GeneSymbol	GeneName
hsa-miR-338-5p	0	0	1	1	1	1	VRK2	vaccinia related kinase 2
hsa-miR-338-5p	1	0	1	1	1	1	ZFYVE16	zinc finger, FYVE domain containing 16
hsa-miR-338-5p	1	0	1	1	0	0	SRCAP	Snf2-related CREBBP activator protein
hsa-miR-338-5p	1	0	1	0	1	1	KIAA0355	KIAA0355
hsa-miR-338-5p	0	0	1	1	1	1	PPIP5K1	diphosphoinositol pentakisphosphate kinase 1
hsa-miR-338-5p	1	0	1	1	1	1	DAAM2	dishevelled associated activator of morphogenesis 2
hsa-miR-338-5p	0	0	1	1	1	1	HSPH1	heat shock 105kDa/110kDa protein 1
hsa-miR-338-5p	1	0	1	0	1	1	KIAA0408	KIAA0408
hsa-miR-338-5p	1	0	1	1	1	1	NUPL1	nucleoporin like 1
hsa-miR-338-5p	1	0	1	0	1	1	MTSS1	metastasis suppressor 1
hsa-miR-338-5p	1	0	1	1	1	1	AUTS2	autism susceptibility candidate 2
hsa-miR-338-5p	1	0	1	1	1	1	CDC42BPA	CDC42 binding protein kinase alpha (DMPK-like)
hsa-miR-338-5p	1	0	1	0	1	1	CEP350	centrosomal protein 350kDa
hsa-miR-338-5p	0	0	1	1	1	1	NEU3	sialidase 3 (membrane sialidase)
hsa-miR-338-5p	0	0	1	1	1	1	SPAG9	sperm associated antigen 9
hsa-miR-338-5p	1	0	1	1	0	0	SUSD5	sushi domain containing 5
hsa-miR-338-5p	1	0	1	1	1	1	SLC4A7	solute carrier family 4, sodium bicarbonate cotransporter, member 7
hsa-miR-338-5p	1	0	1	1	1	1	HIPK1	homeodomain interacting protein kinase 1
hsa-miR-338-5p	1	0	1	0	1	1	SNX13	sorting nexin 13
hsa-miR-338-5p	1	0	1	0	1	1	DOCK4	dedicator of cytokinesis 4
hsa-miR-338-5p	1	0	1	0	1	1	LPHN3	latrophilin 3
hsa-miR-338-5p	1	0	1	1	1	1	LPHN2	latrophilin 2
hsa-miR-338-5p	1	0	1	1	1	1	DNM3	dynamin 3
hsa-miR-338-5p	0	0	1	1	1	1	WDR47	WD repeat domain 47
hsa-miR-338-5p	1	0	1	1	1	1	CPEB3	cytoplasmic polyadenylation element binding protein 3
hsa-miR-338-5p	1	0	1	1	1	1	CIT	citron (rho-interacting, serine/threonine kinase 21)
hsa-miR-338-5p	1	0	1	1	1	1	RGL1	ral guanine nucleotide dissociation stimulator-like 1
hsa-miR-338-5p	1	0	1	1	1	1	NTNG1	netrin G1
hsa-miR-338-5p	0	0	1	1	1	1	TBC1D30	TBC1 domain family, member 30
hsa-miR-338-5p	1	0	1	1	1	1	PALLD	palladin, cytoskeletal associated protein
hsa-miR-338-5p	1	0	1	1	0	0	FRMD4B	FERM domain containing 4B
hsa-miR-338-5p	1	0	1	1	1	1	FOXJ3	forkhead box J3
hsa-miR-338-5p	1	0	1	1	1	1	FAM208A	family with sequence similarity 208, member A
hsa-miR-338-5p	1	0	1	1	1	1	SMARCAD1	SWI/SNF-related, matrix-associated actin-dependent regulator of chromatin, subfamily a, containing DEAD/H box 1
hsa-miR-338-5p	1	0	1	0	1	1	GPR158	G protein-coupled receptor 158
hsa-miR-338-5p	1	0	1	0	1	1	SRGAP3	SLIT-ROBO Rho GTPase activating protein 3
hsa-miR-338-5p	0	0	1	1	0	0	ODF2L	outer dense fiber of sperm tails 2-like
hsa-miR-338-5p	1	0	1	1	1	1	RIMKLB	ribosomal modification protein rimK-like family member B
hsa-miR-338-5p	1	0	1	1	1	1	MKL2	MKL/myocardin-like 2
hsa-miR-338-5p	1	0	1	1	1	1	ASAP1	ArfGAP with SH3 domain, ankyrin repeat and PH domain 1
hsa-miR-338-5p	0	0	1	1	1	1	FILIP1	filamin A interacting protein 1
hsa-miR-338-5p	1	0	1	1	1	1	PCDH19	protocadherin 19
hsa-miR-338-5p	1	0	1	0	1	1	KCTD16	potassium channel tetramerisation domain containing 16
hsa-miR-338-5p	1	0	1	1	1	1	HACE1	HECT domain and ankyrin repeat containing E3 ubiquitin protein ligase 1
hsa-miR-338-5p	1	0	1	1	1	1	ATP2C1	ATPase, Ca++ transporting, type 2C, member 1
hsa-miR-338-5p	1	0	1	1	1	1	LRRC7	leucine rich repeat containing 7
hsa-miR-338-5p	1	0	1	1	1	1	FAM135A	family with sequence similarity 135, member A
hsa-miR-338-5p	0	0	1	1	1	1	SCAPER	S-phase cyclin A-associated protein in the ER
hsa-miR-338-5p	1	0	1	1	1	1	BAZ2B	bromodomain adjacent to zinc finger domain, 2B
hsa-miR-338-5p	0	0	1	0	0	0	NYAP2	neuronal tyrosine-phosphorylated phosphoinositide-3-kinase adaptor 2
hsa-miR-338-5p	1	0	1	1	1	1	USP28	ubiquitin specific peptidase 28
hsa-miR-338-5p	1	0	1	0	1	1	ZNF295	zinc finger protein 295
hsa-miR-338-5p	0	0	1	0	1	1	CDC42EP4	CDC42 effector protein (Rho GTPase binding) 4
hsa-miR-338-5p	1	0	1	0	1	1	LMO3	LIM domain only 3 (rhombotin-like 2)
hsa-miR-338-5p	1	0	1	1	1	1	PPP6R3	protein phosphatase 6, regulatory subunit 3
hsa-miR-338-5p	0	0	1	1	1	1	CEP192	centrosomal protein 192kDa
hsa-miR-338-5p	1	0	1	1	1	1	DENND1A	DENN/MADD domain containing 1A
hsa-miR-338-5p	1	0	1	0	0	0	TANC2	tetratricopeptide repeat, ankyrin repeat and coiled-coil containing 2
hsa-miR-338-5p	0	0	1	1	1	1	LRRCC1	leucine rich repeat and coiled-coil centrosomal protein 1
hsa-miR-338-5p	0	0	1	1	0	0	SLC22A16	solute carrier family 22 (organic cation/carnitine transporter), member 16
hsa-miR-338-5p	1	0	1	1	1	1	IKZF4	IKAROS family zinc finger 4 (Eos)
hsa-miR-338-5p	1	0	1	1	0	0	DOT1L	DOT1-like, histone H3 methyltransferase (S. cerevisiae)
hsa-miR-338-5p	0	0	1	1	1	1	UNC80	unc-80 homolog (C. elegans)
hsa-miR-338-5p	0	0	1	1	1	1	SLC11A2	solute carrier family 11 (proton-coupled divalent metal ion transporters), member 2
hsa-miR-338-5p	0	0	1	1	0	0	SEC16B	SEC16 homolog B (S. cerevisiae)
hsa-miR-338-5p	1	0	1	1	1	1	LSM14A	LSM14A, SCD6 homolog A (S. cerevisiae)
hsa-miR-338-5p	1	0	1	1	1	1	BCL2L11	BCL2-like 11 (apoptosis facilitator)
hsa-miR-338-5p	1	0	1	1	1	1	OXR1	oxidation resistance 1
hsa-miR-338-5p	1	0	1	1	1	1	SH3TC2	SH3 domain and tetratricopeptide repeats 2
hsa-miR-338-5p	1	0	1	1	1	1	CSGALNACT1	chondroitin sulfate N-acetylgalactosaminyltransferase 1
hsa-miR-338-5p	1	0	1	0	0	0	RNF169	ring finger protein 169
hsa-miR-338-5p	0	0	1	0	1	1	RASSF8	Ras association (RalGDS/AF-6) domain family (N-terminal) member 8
hsa-miR-338-5p	1	0	1	1	1	1	UBR3	ubiquitin protein ligase E3 component n-recognin 3 (putative)
hsa-miR-338-5p	1	0	1	0	0	0	ZC3H12C	zinc finger CCCH-type containing 12C
hsa-miR-338-5p	0	0	1	1	1	1	IL7	interleukin 7
hsa-miR-338-5p	1	0	1	1	1	1	PAN3	PAN3 poly(A) specific ribonuclease subunit homolog (S. cerevisiae)
hsa-miR-338-5p	0	0	1	1	1	1	MICAL2	microtubule associated monoxygenase, calponin and LIM domain containing 2
hsa-miR-338-5p	1	0	1	0	1	1	LIN54	lin-54 homolog (C. elegans)
hsa-miR-338-5p	1	0	1	1	1	1	SCN5A	sodium channel, voltage-gated, type V, alpha subunit
hsa-miR-338-5p	1	1	1	1	1	1	BACE1	beta-site APP-cleaving enzyme 1
hsa-miR-338-5p	1	0	1	1	1	1	UBE3A	ubiquitin protein ligase E3A
hsa-miR-338-5p	0	0	1	1	0	0	HFM1	HFM1, ATP-dependent DNA helicase homolog (S. cerevisiae)
hsa-miR-338-5p	1	0	1	1	1	1	LTBP1	latent transforming growth factor beta binding protein 1
hsa-miR-338-5p	1	0	1	0	1	1	LRBA	LPS-responsive vesicle trafficking, beach and anchor containing
hsa-miR-338-5p	1	0	1	0	1	1	PCDHA13	protocadherin alpha 13
hsa-miR-338-5p	1	0	1	1	1	1	PCDHA4	protocadherin alpha 4
hsa-miR-338-5p	0	0	1	0	1	1	ATF6	activating transcription factor 6
hsa-miR-338-5p	1	0	1	1	1	1	RPS6KA3	ribosomal protein S6 kinase, 90kDa, polypeptide 3
hsa-miR-338-5p	1	0	1	1	1	1	CLIP4	CAP-GLY domain containing linker protein family, member 4
hsa-miR-338-5p	1	0	1	1	1	1	SYNCRIP	synaptotagmin binding, cytoplasmic RNA interacting protein
hsa-miR-338-5p	1	0	1	1	1	1	RLF	rearranged L-myc fusion
hsa-miR-338-5p	1	0	1	1	1	1	DTNA	dystrobrevin, alpha
hsa-miR-338-5p	1	0	1	0	1	1	PLAG1	pleiomorphic adenoma gene 1
hsa-miR-338-5p	1	0	1	1	1	1	PRKACB	protein kinase, cAMP-dependent, catalytic, beta
hsa-miR-338-5p	1	0	1	1	1	1	EPHA7	EPH receptor A7
hsa-miR-338-5p	1	0	1	0	1	1	CHL1	cell adhesion molecule with homology to L1CAM (close homolog of L1)
hsa-miR-338-5p	1	0	1	1	1	1	EPHA5	EPH receptor A5
hsa-miR-338-5p	1	0	1	1	1	1	SATB2	SATB homeobox 2
hsa-miR-338-5p	1	0	1	1	1	1	AEBP2	AE binding protein 2
hsa-miR-338-5p	1	0	1	0	1	1	CDON	Cdon homolog (mouse)
hsa-miR-338-5p	1	0	1	1	1	1	MYO5A	myosin VA (heavy chain 12, myoxin)
hsa-miR-338-5p	1	0	1	1	1	1	LIMA1	LIM domain and actin binding 1
hsa-miR-338-5p	0	0	1	1	0	0	BMP1	bone morphogenetic protein 1
hsa-miR-338-5p	1	0	1	1	1	1	ARHGEF3	Rho guanine nucleotide exchange factor (GEF) 3
hsa-miR-338-5p	1	0	1	1	1	1	SATB1	SATB homeobox 1
hsa-miR-338-5p	1	0	1	1	1	1	HMGA2	high mobility group AT-hook 2
hsa-miR-338-5p	1	0	1	1	1	1	TEAD1	TEA domain family member 1 (SV40 transcriptional enhancer factor)
hsa-miR-338-5p	1	0	1	1	1	1	NCOA3	nuclear receptor coactivator 3
hsa-miR-338-5p	0	0	1	1	0	0	MSH5	mutS homolog 5 (E. coli)
hsa-miR-338-5p	1	0	1	1	1	1	ZFX	zinc finger protein, X-linked
hsa-miR-338-5p	0	0	1	1	1	1	PLD1	phospholipase D1, phosphatidylcholine-specific
hsa-miR-338-5p	1	0	1	0	1	1	CAV1	caveolin 1, caveolae protein, 22kDa
hsa-miR-338-5p	1	0	1	0	1	1	PDE7B	phosphodiesterase 7B
hsa-miR-338-5p	1	0	1	1	1	1	MEF2D	myocyte enhancer factor 2D
hsa-miR-338-5p	1	0	1	1	1	1	PICALM	phosphatidylinositol binding clathrin assembly protein
hsa-miR-338-5p	1	0	1	1	1	1	DLGAP2	discs, large (Drosophila) homolog-associated protein 2
hsa-miR-338-5p	1	0	1	1	1	1	PCDH17	protocadherin 17
hsa-miR-338-5p	1	0	1	1	1	1	MYT1L	myelin transcription factor 1-like
hsa-miR-338-5p	0	0	1	1	0	0	BMX	BMX non-receptor tyrosine kinase
hsa-miR-338-5p	1	0	1	1	1	1	LDB2	LIM domain binding 2
hsa-miR-338-5p	0	0	1	1	1	1	CREB3L1	cAMP responsive element binding protein 3-like 1
hsa-miR-338-5p	0	0	1	1	1	1	SLIT2	slit homolog 2 (Drosophila)
hsa-miR-338-5p	1	0	1	1	1	1	MBNL2	muscleblind-like splicing regulator 2
hsa-miR-338-5p	0	0	1	1	1	1	ZNF33A	zinc finger protein 33A
hsa-miR-338-5p	1	0	1	1	1	1	NUDT4	nudix (nucleoside diphosphate linked moiety X)-type motif 4
hsa-miR-338-5p	1	0	1	1	1	1	TMEM159	transmembrane protein 159
hsa-miR-338-5p	1	0	1	1	1	1	MTF2	metal response element binding transcription factor 2
hsa-miR-338-5p	1	0	1	1	1	1	TP63	tumor protein p63
hsa-miR-338-5p	0	0	1	1	1	1	LYPLA1	lysophospholipase I
hsa-miR-338-5p	0	0	1	1	1	1	PCF11	PCF11, cleavage and polyadenylation factor subunit, homolog (S. cerevisiae)
hsa-miR-338-5p	0	0	1	1	1	1	FHL1	four and a half LIM domains 1
hsa-miR-338-5p	1	0	1	1	1	1	ARIH2	ariadne homolog 2 (Drosophila)
hsa-miR-338-5p	0	0	1	1	1	1	SH2D1A	SH2 domain containing 1A
hsa-miR-338-5p	1	0	1	1	1	1	SLMAP	sarcolemma associated protein
hsa-miR-338-5p	0	0	1	1	1	1	THOC7	THO complex 7 homolog (Drosophila)
hsa-miR-338-5p	0	0	1	1	1	1	TMEM176B	transmembrane protein 176B
hsa-miR-338-5p	1	0	1	1	1	1	TAOK3	TAO kinase 3
hsa-miR-338-5p	1	0	1	1	1	1	AASDHPPT	aminoadipate-semialdehyde dehydrogenase-phosphopantetheinyl transferase
hsa-miR-338-5p	1	0	1	1	1	1	SCHIP1	schwannomin interacting protein 1
hsa-miR-338-5p	1	0	1	1	1	1	MYNN	myoneurin
hsa-miR-338-5p	0	0	1	0	1	1	PDP1	pyruvate dehyrogenase phosphatase catalytic subunit 1
hsa-miR-338-5p	1	0	1	1	1	1	USP25	ubiquitin specific peptidase 25
hsa-miR-338-5p	1	0	1	0	1	1	AMOTL2	angiomotin like 2
hsa-miR-338-5p	0	0	1	0	1	1	CLDN2	claudin 2
hsa-miR-338-5p	0	0	1	1	1	1	SLC39A8	solute carrier family 39 (zinc transporter), member 8
hsa-miR-338-5p	1	0	1	1	1	1	SENP7	SUMO1/sentrin specific peptidase 7
hsa-miR-338-5p	1	0	1	1	1	1	KCNMB2	potassium large conductance calcium-activated channel, subfamily M, beta member 2
hsa-miR-338-5p	1	0	1	1	1	1	SUFU	suppressor of fused homolog (Drosophila)
hsa-miR-338-5p	1	0	1	1	1	1	OGT	O-linked N-acetylglucosamine (GlcNAc) transferase
hsa-miR-338-5p	0	0	1	1	1	1	CHST12	carbohydrate (chondroitin 4) sulfotransferase 12
hsa-miR-338-5p	1	0	1	1	1	1	SNTB2	syntrophin, beta 2 (dystrophin-associated protein A1, 59kDa, basic component 2)
hsa-miR-338-5p	0	0	1	0	0	0	TIGD7	tigger transposable element derived 7
hsa-miR-338-5p	1	0	1	1	1	1	SH3GLB1	SH3-domain GRB2-like endophilin B1
hsa-miR-338-5p	1	0	1	1	1	1	DYRK4	dual-specificity tyrosine-(Y)-phosphorylation regulated kinase 4
hsa-miR-338-5p	1	0	1	0	1	1	TRPS1	trichorhinophalangeal syndrome I
hsa-miR-338-5p	0	0	1	1	1	1	C21orf7	chromosome 21 open reading frame 7
hsa-miR-338-5p	0	0	1	1	1	1	ZNF331	zinc finger protein 331
hsa-miR-338-5p	1	0	1	1	1	1	PUM2	pumilio homolog 2 (Drosophila)
hsa-miR-338-5p	0	0	1	0	1	1	PRDM6	PR domain containing 6
hsa-miR-338-5p	1	0	1	1	1	1	VPS39	vacuolar protein sorting 39 homolog (S. cerevisiae)
hsa-miR-338-5p	0	0	1	0	0	0	LOC645355	uncharacterized LOC645355
hsa-miR-338-5p	0	0	1	1	1	1	FCRL1	Fc receptor-like 1
hsa-miR-338-5p	0	0	1	1	1	1	FCRLA	Fc receptor-like A
hsa-miR-338-5p	1	0	1	1	1	1	CHST9	carbohydrate (N-acetylgalactosamine 4-0) sulfotransferase 9
hsa-miR-338-5p	1	0	1	1	1	1	CALU	calumenin
hsa-miR-338-5p	1	0	1	1	1	1	ATAD1	ATPase family, AAA domain containing 1
hsa-miR-338-5p	0	0	1	1	1	1	WDR59	WD repeat domain 59
hsa-miR-338-5p	1	0	1	1	1	1	CALCOCO1	calcium binding and coiled-coil domain 1
hsa-miR-338-5p	1	0	1	1	1	1	SON	SON DNA binding protein
hsa-miR-338-5p	0	0	1	0	1	1	MYO3B	myosin IIIB
hsa-miR-338-5p	0	0	1	1	0	0	SNRPN	small nuclear ribonucleoprotein polypeptide N
hsa-miR-338-5p	1	0	1	1	1	1	MAGI1	membrane associated guanylate kinase, WW and PDZ domain containing 1
hsa-miR-338-5p	0	0	1	0	0	0	ANKRD30BP2	ankyrin repeat domain 30B pseudogene 2
hsa-miR-338-5p	0	0	1	0	0	0	RMST	rhabdomyosarcoma 2 associated transcript (non-protein coding)
hsa-miR-338-5p	1	0	1	1	1	1	RBFOX1	RNA binding protein, fox-1 homolog (C. elegans) 1
hsa-miR-338-5p	1	0	1	1	0	0	FOXP2	forkhead box P2
hsa-miR-338-5p	0	0	1	1	1	1	SAMD9L	sterile alpha motif domain containing 9-like
hsa-miR-338-5p	1	0	1	1	1	1	F3	coagulation factor III (thromboplastin, tissue factor)
hsa-miR-338-5p	0	0	1	1	0	0	SYCP3	synaptonemal complex protein 3
hsa-miR-338-5p	0	0	1	1	1	1	RBM11	RNA binding motif protein 11
hsa-miR-338-5p	0	0	1	1	1	1	CHODL	chondrolectin
hsa-miR-338-5p	0	0	1	1	1	1	R3HCC1L	R3H domain and coiled-coil containing 1-like
hsa-miR-338-5p	0	0	1	1	1	1	BMP2K	BMP2 inducible kinase
hsa-miR-338-5p	1	0	1	0	1	1	IL1RAP	interleukin 1 receptor accessory protein
hsa-miR-338-5p	1	0	1	1	1	1	AFF2	AF4/FMR2 family, member 2
hsa-miR-338-5p	0	0	1	0	0	0	ADAM5	ADAM metallopeptidase domain 5, pseudogene
hsa-miR-338-5p	0	0	1	1	1	1	CLDND1	claudin domain containing 1
hsa-miR-338-5p	1	0	1	0	1	1	GRB10	growth factor receptor-bound protein 10
hsa-miR-338-5p	0	0	1	1	1	1	CD1E	CD1e molecule
hsa-miR-338-5p	1	0	1	1	1	1	VAMP7	vesicle-associated membrane protein 7
hsa-miR-338-5p	1	0	1	1	1	1	PALM2	paralemmin 2
hsa-miR-338-5p	0	0	1	1	1	1	PPARG	peroxisome proliferator-activated receptor gamma
hsa-miR-338-5p	1	0	1	1	1	1	PPP1R9A	protein phosphatase 1, regulatory subunit 9A
hsa-miR-338-5p	0	0	1	1	1	1	ESRP1	epithelial splicing regulatory protein 1
hsa-miR-338-5p	1	0	1	1	1	1	AKAP2	A kinase (PRKA) anchor protein 2
hsa-miR-338-5p	1	0	1	0	1	1	NFAT5	nuclear factor of activated T-cells 5, tonicity-responsive
hsa-miR-338-5p	0	0	1	1	1	1	UBE2Q2	ubiquitin-conjugating enzyme E2Q family member 2
hsa-miR-338-5p	0	0	1	0	0	0	TUG1	taurine upregulated 1 (non-protein coding)
hsa-miR-338-5p	0	0	1	1	1	1	PARPBP	PARP1 binding protein
hsa-miR-338-5p	0	0	1	1	1	1	STOX2	storkhead box 2
hsa-miR-338-5p	1	0	1	0	1	1	CLIC4	chloride intracellular channel 4
hsa-miR-338-5p	1	0	1	1	1	1	PTBP3	polypyrimidine tract binding protein 3
hsa-miR-338-5p	1	0	1	1	1	1	SLC38A2	solute carrier family 38, member 2
hsa-miR-338-5p	1	0	1	1	1	1	MBD5	methyl-CpG binding domain protein 5
hsa-miR-338-5p	0	0	1	1	0	0	PARP2	poly (ADP-ribose) polymerase 2
hsa-miR-338-5p	0	0	1	1	1	1	PRPF39	PRP39 pre-mRNA processing factor 39 homolog (S. cerevisiae)
hsa-miR-338-5p	1	0	1	1	1	1	MYEF2	myelin expression factor 2
hsa-miR-338-5p	1	0	1	1	1	1	ACER3	alkaline ceramidase 3
hsa-miR-338-5p	0	0	1	1	1	1	TCP11L1	t-complex 11 (mouse)-like 1
hsa-miR-338-5p	0	0	1	1	1	1	ANKRD6	ankyrin repeat domain 6
hsa-miR-338-5p	1	0	1	1	1	1	INSIG2	insulin induced gene 2
hsa-miR-338-5p	0	0	1	1	1	1	SNCAIP	synuclein, alpha interacting protein
hsa-miR-338-5p	0	0	1	1	0	0	UBR4	ubiquitin protein ligase E3 component n-recognin 4
hsa-miR-338-5p	1	0	1	1	1	1	MON2	MON2 homolog (S. cerevisiae)
hsa-miR-338-5p	0	0	1	1	0	0	TRMT2B	tRNA methyltransferase 2 homolog B (S. cerevisiae)
hsa-miR-338-5p	1	0	1	0	0	0	ZNRF3	zinc and ring finger 3
hsa-miR-338-5p	0	0	1	0	0	0	DUXAP10	double homeobox A pseudogene 10
hsa-miR-338-5p	1	0	1	1	1	1	MACF1	microtubule-actin crosslinking factor 1
hsa-miR-338-5p	1	0	1	1	1	1	PHF20L1	PHD finger protein 20-like 1
hsa-miR-338-5p	1	0	1	1	1	1	POMT2	protein-O-mannosyltransferase 2
hsa-miR-338-5p	1	0	1	1	1	1	DERL1	derlin 1
hsa-miR-338-5p	0	0	1	0	0	0	LOC286059	tumor necrosis factor receptor superfamily, member 10d, decoy with truncated death domain pseudogene
hsa-miR-338-5p	1	0	1	1	1	1	DYRK2	dual-specificity tyrosine-(Y)-phosphorylation regulated kinase 2
hsa-miR-338-5p	1	0	1	0	1	1	ATP2B1	ATPase, Ca++ transporting, plasma membrane 1
hsa-miR-338-5p	1	0	1	1	1	1	ABI3BP	ABI family, member 3 (NESH) binding protein
hsa-miR-338-5p	0	0	1	0	1	1	ATXN1L	ataxin 1-like
hsa-miR-338-5p	0	0	1	1	1	1	CNOT8	CCR4-NOT transcription complex, subunit 8
hsa-miR-338-5p	1	0	1	1	1	1	NAA30	N(alpha)-acetyltransferase 30, NatC catalytic subunit
hsa-miR-338-5p	1	0	1	1	0	0	MAGI3	membrane associated guanylate kinase, WW and PDZ domain containing 3
hsa-miR-338-5p	0	0	1	1	1	1	KDM2B	lysine (K)-specific demethylase 2B
hsa-miR-338-5p	1	0	1	1	1	1	MARK1	MAP/microtubule affinity-regulating kinase 1
hsa-miR-338-5p	1	0	1	0	1	1	ATP10D	ATPase, class V, type 10D
hsa-miR-338-5p	1	0	1	1	1	1	KCTD15	potassium channel tetramerisation domain containing 15
hsa-miR-338-5p	0	0	1	1	1	1	IGBP1	immunoglobulin (CD79A) binding protein 1
hsa-miR-338-5p	1	0	1	0	1	1	ELMOD1	ELMO/CED-12 domain containing 1
hsa-miR-338-5p	0	0	1	1	0	0	FGGY	FGGY carbohydrate kinase domain containing
hsa-miR-338-5p	1	0	1	1	1	1	TPPP	tubulin polymerization promoting protein
hsa-miR-338-5p	0	0	1	0	0	0	LOC283508	uncharacterized LOC283508
hsa-miR-338-5p	1	0	1	0	1	1	AP1G1	adaptor-related protein complex 1, gamma 1 subunit
hsa-miR-338-5p	1	0	1	0	1	1	RAB1A	RAB1A, member RAS oncogene family
hsa-miR-338-5p	1	0	1	1	1	1	TMTC1	transmembrane and tetratricopeptide repeat containing 1
hsa-miR-338-5p	1	0	1	0	1	1	RNF165	ring finger protein 165
hsa-miR-338-5p	0	0	1	0	0	0	JPX	JPX transcript, XIST activator (non-protein coding)
hsa-miR-338-5p	0	0	1	0	0	0	LOC654433	uncharacterized LOC654433
hsa-miR-338-5p	0	0	1	0	1	1	FAM70A	family with sequence similarity 70, member A
hsa-miR-338-5p	1	0	1	1	1	1	CLCN5	chloride channel, voltage-sensitive 5
hsa-miR-338-5p	1	0	1	1	1	1	PUM1	pumilio homolog 1 (Drosophila)
hsa-miR-338-5p	1	0	1	1	1	1	APLP2	amyloid beta (A4) precursor-like protein 2
hsa-miR-338-5p	1	0	1	1	1	1	MPP7	membrane protein, palmitoylated 7 (MAGUK p55 subfamily member 7)
hsa-miR-338-5p	0	0	1	1	0	0	NXF2	nuclear RNA export factor 2
hsa-miR-338-5p	0	0	1	1	1	1	RANBP17	RAN binding protein 17
hsa-miR-338-5p	0	0	1	1	0	0	AXDND1	axonemal dynein light chain domain containing 1
hsa-miR-338-5p	0	0	1	0	1	1	CHURC1	churchill domain containing 1
hsa-miR-338-5p	1	0	1	1	1	1	ANKRD49	ankyrin repeat domain 49
hsa-miR-338-5p	1	0	1	1	1	1	IST1	increased sodium tolerance 1 homolog (yeast)
hsa-miR-338-5p	1	0	1	1	1	1	HLF	hepatic leukemia factor
hsa-miR-338-5p	1	0	1	1	1	1	SIRT1	sirtuin 1
hsa-miR-338-5p	0	0	1	1	1	1	GSG1	germ cell associated 1
hsa-miR-338-5p	1	0	1	1	1	1	BOC	Boc homolog (mouse)
hsa-miR-338-5p	0	0	1	1	1	1	PIK3C3	phosphatidylinositol 3-kinase, catalytic subunit type 3
hsa-miR-338-5p	1	0	1	1	1	1	WDR20	WD repeat domain 20
hsa-miR-338-5p	1	0	1	1	1	1	TLK1	tousled-like kinase 1
hsa-miR-338-5p	0	0	1	1	0	0	ACOT11	acyl-CoA thioesterase 11
hsa-miR-338-5p	1	0	1	1	1	1	AMMECR1	Alport syndrome, mental retardation, midface hypoplasia and elliptocytosis chromosomal region gene 1
hsa-miR-338-5p	1	0	1	1	1	1	SUPT16H	suppressor of Ty 16 homolog (S. cerevisiae)
hsa-miR-338-5p	1	0	1	1	1	1	CTTN	cortactin
hsa-miR-338-5p	1	0	1	1	1	1	FBXW2	F-box and WD repeat domain containing 2
hsa-miR-338-5p	1	0	1	1	1	1	TSN	translin
hsa-miR-338-5p	1	0	1	1	1	1	ZNF286A	zinc finger protein 286A
hsa-miR-338-5p	1	0	1	1	1	1	GNG2	guanine nucleotide binding protein (G protein), gamma 2
hsa-miR-338-5p	1	0	1	1	1	1	GPD2	glycerol-3-phosphate dehydrogenase 2 (mitochondrial)
hsa-miR-338-5p	1	0	1	1	0	0	TOE1	target of EGR1, member 1 (nuclear)
hsa-miR-338-5p	0	0	1	1	1	1	PRKRA	protein kinase, interferon-inducible double stranded RNA dependent activator
hsa-miR-338-5p	0	0	1	0	0	0	CXXC1P1	CXXC finger protein 1 pseudogene 1
hsa-miR-338-5p	0	0	1	1	1	1	ACTR8	ARP8 actin-related protein 8 homolog (yeast)
hsa-miR-338-5p	1	0	1	1	1	1	RNF121	ring finger protein 121
hsa-miR-338-5p	1	0	1	0	1	1	ARL6IP6	ADP-ribosylation-like factor 6 interacting protein 6
hsa-miR-338-5p	1	0	1	0	1	1	NCOA7	nuclear receptor coactivator 7
hsa-miR-338-5p	0	0	1	0	0	0	LINC00340	long intergenic non-protein coding RNA 340
hsa-miR-338-5p	1	0	1	1	1	1	GALNTL2	UDP-N-acetyl-alpha-D-galactosamine:polypeptide N-acetylgalactosaminyltransferase-like 2
hsa-miR-338-5p	0	0	1	1	1	1	HOGA1	4-hydroxy-2-oxoglutarate aldolase 1
hsa-miR-338-5p	1	0	1	1	1	1	CPNE8	copine VIII
hsa-miR-338-5p	1	0	1	1	1	1	GLT25D2	glycosyltransferase 25 domain containing 2
hsa-miR-338-5p	1	0	1	1	1	1	RASGEF1A	RasGEF domain family, member 1A
hsa-miR-338-5p	0	0	1	1	0	0	HPN	hepsin
hsa-miR-338-5p	1	0	1	1	1	1	CUL2	cullin 2
hsa-miR-338-5p	1	0	1	1	1	1	EPHB1	EPH receptor B1
hsa-miR-338-5p	1	0	1	1	1	1	ATXN10	ataxin 10
hsa-miR-338-5p	1	0	1	0	1	1	UVRAG	UV radiation resistance associated gene
hsa-miR-338-5p	0	0	1	0	0	0	LOC730101	uncharacterized LOC730101
hsa-miR-338-5p	0	0	1	1	1	1	LTBR	lymphotoxin beta receptor (TNFR superfamily, member 3)
hsa-miR-338-5p	0	0	1	0	0	0	LOC100129620	uncharacterized LOC100129620
hsa-miR-338-5p	1	0	1	1	1	1	ANKRD10	ankyrin repeat domain 10
hsa-miR-338-5p	0	0	1	0	1	1	HDAC9	histone deacetylase 9
hsa-miR-338-5p	1	0	1	1	1	1	ZC3H11A	zinc finger CCCH-type containing 11A
hsa-miR-338-5p	0	0	1	1	1	1	AIMP1	aminoacyl tRNA synthetase complex-interacting multifunctional protein 1
hsa-miR-338-5p	0	0	1	1	1	1	FBLN1	fibulin 1
hsa-miR-338-5p	0	0	1	0	1	1	FLJ39080	uncharacterized LOC441355
hsa-miR-338-5p	0	0	1	0	0	0	C1orf204	chromosome 1 open reading frame 204
hsa-miR-338-5p	1	0	1	0	1	1	THRB	thyroid hormone receptor, beta
hsa-miR-338-5p	0	0	1	1	1	1	ARMCX5	armadillo repeat containing, X-linked 5
hsa-miR-338-5p	1	0	1	1	1	1	SYT6	synaptotagmin VI
hsa-miR-338-5p	1	0	1	1	1	1	ETS2	v-ets erythroblastosis virus E26 oncogene homolog 2 (avian)
hsa-miR-338-5p	1	0	1	1	1	1	STIM2	stromal interaction molecule 2
hsa-miR-338-5p	1	0	1	1	1	1	CDV3	CDV3 homolog (mouse)
hsa-miR-338-5p	0	0	1	0	0	0	LOC400680	uncharacterized LOC400680
hsa-miR-338-5p	0	0	1	0	0	0	LINC00293	long intergenic non-protein coding RNA 293
hsa-miR-338-5p	0	0	1	1	1	1	CBWD5	COBW domain containing 5
hsa-miR-338-5p	1	0	1	1	1	1	ST7L	suppression of tumorigenicity 7 like
hsa-miR-338-5p	1	0	1	1	1	1	PIGA	phosphatidylinositol glycan anchor biosynthesis, class A
hsa-miR-338-5p	0	0	1	1	1	1	C10orf32	chromosome 10 open reading frame 32
hsa-miR-338-5p	1	0	1	1	1	1	LARP1B	La ribonucleoprotein domain family, member 1B
hsa-miR-338-5p	0	0	1	1	1	1	TRPM7	transient receptor potential cation channel, subfamily M, member 7
hsa-miR-338-5p	0	0	1	1	0	0	MAGED2	melanoma antigen family D, 2
hsa-miR-338-5p	0	0	1	1	0	0	CT45A4	cancer/testis antigen family 45, member A4
hsa-miR-338-5p	1	0	1	1	1	1	GLUD1	glutamate dehydrogenase 1
hsa-miR-338-5p	1	0	1	1	1	1	ACSL6	acyl-CoA synthetase long-chain family member 6
hsa-miR-338-5p	1	0	1	1	1	1	DDX42	DEAD (Asp-Glu-Ala-Asp) box polypeptide 42
hsa-miR-338-5p	0	0	1	1	1	1	SLFN13	schlafen family member 13
hsa-miR-338-5p	1	0	1	1	1	1	HBP1	HMG-box transcription factor 1
hsa-miR-338-5p	1	0	1	1	1	1	LMX1A	LIM homeobox transcription factor 1, alpha
hsa-miR-338-5p	1	0	1	1	1	1	SIK3	SIK family kinase 3
hsa-miR-338-5p	1	0	1	1	1	1	BCL6B	B-cell CLL/lymphoma 6, member B
hsa-miR-338-5p	1	0	1	1	1	1	PPP1R21	protein phosphatase 1, regulatory subunit 21
hsa-miR-338-5p	1	0	1	1	1	1	ZBTB4	zinc finger and BTB domain containing 4
hsa-miR-338-5p	1	0	1	1	0	0	KCNC1	potassium voltage-gated channel, Shaw-related subfamily, member 1
hsa-miR-338-5p	0	0	1	0	1	1	FLJ41200	uncharacterized LOC401492
hsa-miR-338-5p	1	0	1	1	1	1	TPRG1	tumor protein p63 regulated 1
hsa-miR-338-5p	0	0	1	1	1	1	FAM19A2	family with sequence similarity 19 (chemokine (C-C motif)-like), member A2
hsa-miR-338-5p	1	0	1	1	1	1	EPAS1	endothelial PAS domain protein 1
hsa-miR-338-5p	1	0	1	1	1	1	FAM219A	family with sequence similarity 219, member A
hsa-miR-338-5p	1	0	1	1	1	1	PRDM2	PR domain containing 2, with ZNF domain
hsa-miR-338-5p	1	0	1	1	1	1	GJC1	gap junction protein, gamma 1, 45kDa
hsa-miR-338-5p	0	0	1	1	1	1	QDPR	quinoid dihydropteridine reductase
hsa-miR-338-5p	1	0	1	0	1	1	RHBDL3	rhomboid, veinlet-like 3 (Drosophila)
hsa-miR-338-5p	0	0	1	1	1	1	IDS	iduronate 2-sulfatase
hsa-miR-338-5p	1	0	1	1	1	1	KIF21A	kinesin family member 21A
hsa-miR-338-5p	1	0	1	1	1	1	UBA2	ubiquitin-like modifier activating enzyme 2
hsa-miR-338-5p	1	0	1	1	1	1	SGIP1	SH3-domain GRB2-like (endophilin) interacting protein 1
hsa-miR-338-5p	1	0	1	1	1	1	SEPHS1	selenophosphate synthetase 1
hsa-miR-338-5p	1	0	1	1	1	1	CTGF	connective tissue growth factor
hsa-miR-338-5p	0	0	1	0	1	1	RASGRP3	RAS guanyl releasing protein 3 (calcium and DAG-regulated)
hsa-miR-338-5p	1	0	1	0	0	0	MSL1	male-specific lethal 1 homolog (Drosophila)
hsa-miR-338-5p	0	0	1	1	1	1	RBM46	RNA binding motif protein 46
hsa-miR-338-5p	1	0	1	1	1	1	KALRN	kalirin, RhoGEF kinase
hsa-miR-338-5p	1	0	1	1	1	1	FAM122B	family with sequence similarity 122B
hsa-miR-338-5p	0	0	1	1	0	0	FSIP2	fibrous sheath interacting protein 2
hsa-miR-338-5p	1	0	1	1	1	1	IL16	interleukin 16
hsa-miR-338-5p	1	0	1	1	1	1	SIKE1	suppressor of IKBKE 1
hsa-miR-338-5p	1	0	1	1	1	1	PIK3R1	phosphoinositide-3-kinase, regulatory subunit 1 (alpha)
hsa-miR-338-5p	0	0	1	1	1	1	BDH1	3-hydroxybutyrate dehydrogenase, type 1
hsa-miR-338-5p	1	0	1	1	1	1	MTOR	mechanistic target of rapamycin (serine/threonine kinase)
hsa-miR-338-5p	1	0	1	1	1	1	KDM4B	lysine (K)-specific demethylase 4B
hsa-miR-338-5p	0	0	1	1	0	0	HS3ST5	heparan sulfate (glucosamine) 3-O-sulfotransferase 5
hsa-miR-338-5p	1	0	1	1	1	1	CLIP1	CAP-GLY domain containing linker protein 1
hsa-miR-338-5p	1	0	1	1	1	1	EIF4E3	eukaryotic translation initiation factor 4E family member 3
hsa-miR-338-5p	0	0	1	0	0	0	RPL23AP53	ribosomal protein L23a pseudogene 53
hsa-miR-338-5p	1	0	1	1	1	1	TSHZ1	teashirt zinc finger homeobox 1
hsa-miR-338-5p	1	0	1	1	1	1	CLTC	clathrin, heavy chain (Hc)
hsa-miR-338-5p	0	0	1	1	1	1	DOCK9	dedicator of cytokinesis 9
hsa-miR-338-5p	1	0	1	0	1	1	YAF2	YY1 associated factor 2
hsa-miR-338-5p	1	0	1	1	1	1	ENAH	enabled homolog (Drosophila)
hsa-miR-338-5p	1	0	1	1	1	1	EYA1	eyes absent homolog 1 (Drosophila)
hsa-miR-338-5p	0	0	1	1	1	1	MCU	mitochondrial calcium uniporter
hsa-miR-338-5p	0	0	1	0	0	0	LRRC9	leucine rich repeat containing 9
hsa-miR-338-5p	1	0	1	1	1	1	BCAT1	branched chain amino-acid transaminase 1, cytosolic
hsa-miR-338-5p	0	0	1	0	0	0	LOC100129940	uncharacterized LOC100129940
hsa-miR-338-5p	1	0	1	0	1	1	CYB561D1	cytochrome b-561 domain containing 1
hsa-miR-338-5p	1	0	1	1	1	1	CD200	CD200 molecule
hsa-miR-338-5p	0	0	1	1	1	1	ENPP2	ectonucleotide pyrophosphatase/phosphodiesterase 2
hsa-miR-338-5p	1	0	1	0	1	1	IRF4	interferon regulatory factor 4
hsa-miR-338-5p	1	0	1	0	1	1	ESRRG	estrogen-related receptor gamma
hsa-miR-338-5p	0	0	1	0	1	1	GALNT13	UDP-N-acetyl-alpha-D-galactosamine:polypeptide N-acetylgalactosaminyltransferase 13 (GalNAc-T13)
hsa-miR-338-5p	1	0	1	1	1	1	RNF111	ring finger protein 111
hsa-miR-338-5p	1	0	1	0	1	1	FMNL2	formin-like 2
hsa-miR-338-5p	0	0	1	1	0	0	CYP4X1	cytochrome P450, family 4, subfamily X, polypeptide 1
hsa-miR-338-5p	1	0	1	0	1	1	STK3	serine/threonine kinase 3
hsa-miR-338-5p	1	0	1	1	1	1	PPP2R5C	protein phosphatase 2, regulatory subunit B', gamma
hsa-miR-338-5p	1	0	1	0	0	0	ASXL3	additional sex combs like 3 (Drosophila)
hsa-miR-338-5p	1	0	1	1	1	1	MAP2K4	mitogen-activated protein kinase kinase 4
hsa-miR-338-5p	1	0	1	1	1	1	SYS1	SYS1 Golgi-localized integral membrane protein homolog (S. cerevisiae)
hsa-miR-338-5p	0	0	1	1	1	1	XRN2	5'-3' exoribonuclease 2
hsa-miR-338-5p	1	0	1	1	1	1	GATA6	GATA binding protein 6
hsa-miR-338-5p	1	0	1	1	1	1	TRPM6	transient receptor potential cation channel, subfamily M, member 6
hsa-miR-338-5p	1	0	1	1	1	1	TOM1L1	target of myb1 (chicken)-like 1
hsa-miR-338-5p	1	0	1	1	1	1	MEAF6	MYST/Esa1-associated factor 6
hsa-miR-338-5p	1	0	1	1	1	1	COBLL1	COBL-like 1
hsa-miR-338-5p	1	0	1	1	1	1	SETX	senataxin
hsa-miR-338-5p	1	0	1	1	1	1	APBB2	amyloid beta (A4) precursor protein-binding, family B, member 2
hsa-miR-338-5p	1	0	1	1	1	1	NECAP1	NECAP endocytosis associated 1
hsa-miR-338-5p	0	0	1	1	0	0	NEK7	NIMA (never in mitosis gene a)-related kinase 7
hsa-miR-338-5p	0	0	1	1	1	1	BCL2A1	BCL2-related protein A1
hsa-miR-338-5p	0	0	1	1	0	0	PLK1S1	polo-like kinase 1 substrate 1
hsa-miR-338-5p	1	0	1	1	1	1	ARF6	ADP-ribosylation factor 6
hsa-miR-338-5p	0	0	1	1	1	1	ARIH1	ariadne homolog, ubiquitin-conjugating enzyme E2 binding protein, 1 (Drosophila)
hsa-miR-338-5p	0	0	1	1	1	1	MTPAP	mitochondrial poly(A) polymerase
hsa-miR-338-5p	0	0	1	1	1	1	ZNF280D	zinc finger protein 280D
hsa-miR-338-5p	0	0	1	0	0	0	JAKMIP3	Janus kinase and microtubule interacting protein 3
hsa-miR-338-5p	1	0	1	1	1	1	NBEA	neurobeachin
hsa-miR-338-5p	1	0	1	0	1	1	CEP170	centrosomal protein 170kDa
hsa-miR-338-5p	1	0	1	1	1	1	TFE3	transcription factor binding to IGHM enhancer 3
hsa-miR-338-5p	1	0	1	0	1	1	GRIN3A	glutamate receptor, ionotropic, N-methyl-D-aspartate 3A
hsa-miR-338-5p	0	0	1	1	1	1	IDH3A	isocitrate dehydrogenase 3 (NAD+) alpha
hsa-miR-338-5p	1	0	1	0	0	0	BAHCC1	BAH domain and coiled-coil containing 1
hsa-miR-338-5p	1	0	1	0	1	1	ZNF507	zinc finger protein 507
hsa-miR-338-5p	1	0	1	1	1	1	YTHDF3	YTH domain family, member 3
hsa-miR-338-5p	1	0	1	1	1	1	TMEFF1	transmembrane protein with EGF-like and two follistatin-like domains 1
hsa-miR-338-5p	0	0	1	0	0	0	ZNF720	zinc finger protein 720
hsa-miR-338-5p	1	0	1	1	0	0	USP24	ubiquitin specific peptidase 24
hsa-miR-338-5p	1	0	1	1	1	1	MLL3	myeloid/lymphoid or mixed-lineage leukemia 3
hsa-miR-338-5p	1	0	1	0	1	1	MPP5	membrane protein, palmitoylated 5 (MAGUK p55 subfamily member 5)
hsa-miR-338-5p	1	0	1	1	1	1	RNF180	ring finger protein 180
hsa-miR-338-5p	0	0	1	1	1	1	YAP1	Yes-associated protein 1
hsa-miR-338-5p	1	0	1	1	1	1	TMEM182	transmembrane protein 182
hsa-miR-338-5p	1	0	1	1	1	1	FBXO3	F-box protein 3
hsa-miR-338-5p	1	0	1	0	1	1	MEF2C	myocyte enhancer factor 2C
hsa-miR-338-5p	1	0	1	1	1	1	FAM126A	family with sequence similarity 126, member A
hsa-miR-338-5p	0	0	1	1	0	0	DENND4A	DENN/MADD domain containing 4A
hsa-miR-338-5p	1	0	1	1	1	1	BPTF	bromodomain PHD finger transcription factor
hsa-miR-338-5p	1	0	1	1	0	0	KIAA1109	KIAA1109
hsa-miR-338-5p	1	0	1	1	1	1	UHRF2	ubiquitin-like with PHD and ring finger domains 2, E3 ubiquitin protein ligase
hsa-miR-338-5p	0	0	1	0	0	0	LOC286135	uncharacterized LOC286135
hsa-miR-338-5p	1	0	1	0	1	1	CLINT1	clathrin interactor 1
hsa-miR-338-5p	0	0	1	0	0	0	EPHA1-AS1	EPHA1 antisense RNA 1
hsa-miR-338-5p	1	0	1	1	1	1	NRP1	neuropilin 1
hsa-miR-338-5p	1	0	1	1	1	1	ANP32E	acidic (leucine-rich) nuclear phosphoprotein 32 family, member E
hsa-miR-338-5p	0	0	1	1	1	1	PCDH20	protocadherin 20
hsa-miR-338-5p	0	0	1	1	1	1	CAND1	cullin-associated and neddylation-dissociated 1
hsa-miR-338-5p	1	0	1	1	1	1	IL17RD	interleukin 17 receptor D
hsa-miR-338-5p	1	0	1	1	1	1	PRPF38B	PRP38 pre-mRNA processing factor 38 (yeast) domain containing B
hsa-miR-338-5p	0	0	1	1	1	1	SLC35F2	solute carrier family 35, member F2
hsa-miR-338-5p	1	0	1	1	1	1	ANKRD12	ankyrin repeat domain 12
hsa-miR-338-5p	1	0	1	1	1	1	CAPRIN2	caprin family member 2
hsa-miR-338-5p	1	0	1	0	1	1	JAZF1	JAZF zinc finger 1
hsa-miR-338-5p	0	0	1	1	1	1	TEX2	testis expressed 2
hsa-miR-338-5p	1	0	1	1	1	1	CADM2	cell adhesion molecule 2
hsa-miR-338-5p	1	0	1	1	1	1	RICTOR	RPTOR independent companion of MTOR, complex 2
hsa-miR-338-5p	1	0	1	0	1	1	COX18	COX18 cytochrome c oxidase assembly homolog (S. cerevisiae)
hsa-miR-338-5p	0	0	1	1	1	1	LMAN2L	lectin, mannose-binding 2-like
hsa-miR-338-5p	1	0	1	0	1	1	PATL1	protein associated with topoisomerase II homolog 1 (yeast)
hsa-miR-338-5p	0	0	1	1	1	1	SLAMF7	SLAM family member 7
hsa-miR-338-5p	0	0	1	0	1	1	USO1	USO1 vesicle docking protein homolog (yeast)
hsa-miR-338-5p	0	0	1	1	1	1	AMOTL1	angiomotin like 1
hsa-miR-338-5p	1	0	1	1	1	1	IKZF2	IKAROS family zinc finger 2 (Helios)
hsa-miR-338-5p	0	0	1	1	1	1	RUNDC3B	RUN domain containing 3B
hsa-miR-338-5p	0	0	1	1	1	1	OSR2	odd-skipped related 2 (Drosophila)
hsa-miR-338-5p	1	0	1	1	1	1	MIPOL1	mirror-image polydactyly 1
hsa-miR-338-5p	0	0	1	0	0	0	LOC374443	C-type lectin domain family 2, member D pseudogene
hsa-miR-338-5p	1	0	1	1	1	1	ANGPT1	angiopoietin 1
hsa-miR-338-5p	1	0	1	1	1	1	PIH1D3	PIH1 domain containing 3
hsa-miR-338-5p	1	0	1	1	0	0	DSG4	desmoglein 4
hsa-miR-338-5p	1	0	1	1	1	1	BCL11A	B-cell CLL/lymphoma 11A (zinc finger protein)
hsa-miR-338-5p	1	0	1	1	1	1	PNRC1	proline-rich nuclear receptor coactivator 1
hsa-miR-338-5p	1	0	1	1	1	1	GFRA2	GDNF family receptor alpha 2
hsa-miR-338-5p	1	0	1	1	1	1	TAB3	TGF-beta activated kinase 1/MAP3K7 binding protein 3
hsa-miR-338-5p	0	0	1	1	1	1	GCOM1	GRINL1A complex locus 1
hsa-miR-338-5p	0	0	1	1	1	1	BRDT	bromodomain, testis-specific
hsa-miR-338-5p	0	0	1	1	1	1	MFAP5	microfibrillar associated protein 5
hsa-miR-338-5p	1	0	1	1	1	1	CAMTA1	calmodulin binding transcription activator 1
hsa-miR-338-5p	0	0	1	0	1	1	ANKS1B	ankyrin repeat and sterile alpha motif domain containing 1B
hsa-miR-338-5p	1	0	1	1	1	1	SP3	Sp3 transcription factor
hsa-miR-338-5p	1	0	1	0	1	1	CHRM2	cholinergic receptor, muscarinic 2
hsa-miR-338-5p	0	0	1	1	1	1	POTEG	POTE ankyrin domain family, member G
hsa-miR-338-5p	1	0	1	1	1	1	ARHGAP20	Rho GTPase activating protein 20
hsa-miR-338-5p	1	0	1	1	1	1	MECP2	methyl CpG binding protein 2 (Rett syndrome)
hsa-miR-338-5p	0	0	1	1	1	1	DIO1	deiodinase, iodothyronine, type I
hsa-miR-338-5p	0	0	1	0	1	1	RAB18	RAB18, member RAS oncogene family
hsa-miR-338-5p	0	0	1	1	1	1	HORMAD1	HORMA domain containing 1
hsa-miR-338-5p	0	0	1	1	1	1	C9orf78	chromosome 9 open reading frame 78
hsa-miR-338-5p	0	0	1	1	1	1	KANK2	KN motif and ankyrin repeat domains 2
hsa-miR-338-5p	0	0	1	1	1	1	IL24	interleukin 24
hsa-miR-338-5p	1	0	1	1	1	1	BHLHE41	basic helix-loop-helix family, member e41
hsa-miR-338-5p	0	0	1	1	1	1	ILDR1	immunoglobulin-like domain containing receptor 1
hsa-miR-338-5p	1	0	1	1	1	1	QKI	QKI, KH domain containing, RNA binding
hsa-miR-338-5p	1	0	1	1	1	1	PCDH11X	protocadherin 11 X-linked
hsa-miR-338-5p	0	0	1	1	1	1	IYD	iodotyrosine deiodinase
hsa-miR-338-5p	0	0	1	1	1	1	TUBD1	tubulin, delta 1
hsa-miR-338-5p	1	0	1	0	1	1	FAM46A	family with sequence similarity 46, member A
hsa-miR-338-5p	0	0	1	1	1	1	PAFAH1B2	platelet-activating factor acetylhydrolase 1b, catalytic subunit 2 (30kDa)
hsa-miR-338-5p	1	0	1	1	1	1	MYCN	v-myc myelocytomatosis viral related oncogene, neuroblastoma derived (avian)
hsa-miR-338-5p	1	0	1	1	1	1	NONO	non-POU domain containing, octamer-binding
hsa-miR-338-5p	1	0	1	0	1	1	DCAF10	DDB1 and CUL4 associated factor 10
hsa-miR-338-5p	1	0	1	1	1	1	SPRY2	sprouty homolog 2 (Drosophila)
hsa-miR-338-5p	1	0	1	1	1	1	MBNL1	muscleblind-like splicing regulator 1
hsa-miR-338-5p	0	0	1	1	1	1	CENPK	centromere protein K
hsa-miR-338-5p	0	0	1	0	0	0	MGC13053	uncharacterized MGC13053
hsa-miR-338-5p	1	0	1	1	1	1	U2SURP	U2 snRNP-associated SURP domain containing
hsa-miR-338-5p	1	0	1	0	1	1	FAXC	failed axon connections homolog (Drosophila)
hsa-miR-338-5p	1	0	1	1	1	1	CALM1	calmodulin 1 (phosphorylase kinase, delta)
hsa-miR-338-5p	0	0	1	1	0	0	FPGS	folylpolyglutamate synthase
hsa-miR-338-5p	1	0	1	0	1	1	TMEM39A	transmembrane protein 39A
hsa-miR-338-5p	1	0	1	1	1	1	GRIA2	glutamate receptor, ionotropic, AMPA 2
hsa-miR-338-5p	1	0	1	1	1	1	ZFAND5	zinc finger, AN1-type domain 5
hsa-miR-338-5p	1	0	1	0	1	1	CNP	2',3'-cyclic nucleotide 3' phosphodiesterase
hsa-miR-338-5p	0	0	1	1	1	1	GNL3L	guanine nucleotide binding protein-like 3 (nucleolar)-like
hsa-miR-338-5p	1	0	1	1	1	1	BTG3	BTG family, member 3
hsa-miR-338-5p	0	0	1	0	1	1	OAS3	2'-5'-oligoadenylate synthetase 3, 100kDa
hsa-miR-338-5p	1	0	1	1	1	1	ZBTB7B	zinc finger and BTB domain containing 7B
hsa-miR-338-5p	0	0	1	1	0	0	KLHDC3	kelch domain containing 3
hsa-miR-338-5p	1	0	1	1	1	1	GDAP2	ganglioside induced differentiation associated protein 2
hsa-miR-338-5p	0	0	1	1	1	1	RNF170	ring finger protein 170
hsa-miR-338-5p	1	0	1	1	1	1	ETF1	eukaryotic translation termination factor 1
hsa-miR-338-5p	1	0	1	1	1	1	ZNF512	zinc finger protein 512
hsa-miR-338-5p	1	0	1	0	1	1	NR1D2	nuclear receptor subfamily 1, group D, member 2
hsa-miR-338-5p	1	0	1	1	1	1	ASH2L	ash2 (absent, small, or homeotic)-like (Drosophila)
hsa-miR-338-5p	0	0	1	1	1	1	CMAS	cytidine monophosphate N-acetylneuraminic acid synthetase
hsa-miR-338-5p	1	0	1	1	1	1	FAM199X	family with sequence similarity 199, X-linked
hsa-miR-338-5p	1	0	1	0	1	1	ZNF24	zinc finger protein 24
hsa-miR-338-5p	1	0	1	1	1	1	ELF4	E74-like factor 4 (ets domain transcription factor)
hsa-miR-338-5p	0	0	1	1	1	1	RDH11	retinol dehydrogenase 11 (all-trans/9-cis/11-cis)
hsa-miR-338-5p	1	0	1	1	1	1	ZNF131	zinc finger protein 131
hsa-miR-338-5p	1	0	1	1	1	1	WWC2	WW and C2 domain containing 2
hsa-miR-338-5p	0	0	1	0	0	0	FAM200B	family with sequence similarity 200, member B
hsa-miR-338-5p	0	0	1	1	1	1	C1orf109	chromosome 1 open reading frame 109
hsa-miR-338-5p	1	0	1	1	1	1	KIAA1217	KIAA1217
hsa-miR-338-5p	0	0	1	0	0	0	WDFY3-AS2	WDFY3 antisense RNA 2
hsa-miR-338-5p	0	0	1	0	1	1	CD99P1	CD99 molecule pseudogene 1
hsa-miR-338-5p	1	0	1	1	1	1	FAM222A	family with sequence similarity 222, member A
hsa-miR-338-5p	0	0	1	0	1	1	ZNF718	zinc finger protein 718
hsa-miR-338-5p	0	0	1	1	1	1	SRGN	serglycin
hsa-miR-338-5p	0	0	1	1	0	0	CCDC171	coiled-coil domain containing 171
hsa-miR-338-5p	1	0	1	1	1	1	CNTN4	contactin 4
hsa-miR-338-5p	1	0	1	1	1	1	B3GNT5	UDP-GlcNAc:betaGal beta-1,3-N-acetylglucosaminyltransferase 5
hsa-miR-338-5p	0	0	1	1	1	1	C14orf105	chromosome 14 open reading frame 105
hsa-miR-338-5p	0	0	1	1	1	1	C1orf101	chromosome 1 open reading frame 101
hsa-miR-338-5p	0	0	1	0	1	1	KIAA0895	KIAA0895
hsa-miR-338-5p	1	0	1	1	1	1	HTR2C	5-hydroxytryptamine (serotonin) receptor 2C, G protein-coupled
hsa-miR-338-5p	1	0	1	0	0	0	KCNU1	potassium channel, subfamily U, member 1
hsa-miR-338-5p	1	0	1	1	1	1	TIAL1	TIA1 cytotoxic granule-associated RNA binding protein-like 1
hsa-miR-338-5p	0	0	1	0	1	1	MYO7A	myosin VIIA
hsa-miR-338-5p	1	0	1	1	1	1	GABRA1	gamma-aminobutyric acid (GABA) A receptor, alpha 1
hsa-miR-338-5p	0	0	1	1	1	1	SLC22A2	solute carrier family 22 (organic cation transporter), member 2
hsa-miR-338-5p	0	0	1	1	1	1	IQCH	IQ motif containing H
hsa-miR-338-5p	1	0	1	1	1	1	PLS1	plastin 1
hsa-miR-338-5p	1	0	1	1	1	1	MUM1L1	melanoma associated antigen (mutated) 1-like 1
hsa-miR-338-5p	1	0	1	1	1	1	RCOR3	REST corepressor 3
hsa-miR-338-5p	1	0	1	1	1	1	ZNF521	zinc finger protein 521
hsa-miR-338-5p	1	0	1	1	1	1	CRKL	v-crk sarcoma virus CT10 oncogene homolog (avian)-like
hsa-miR-338-5p	1	0	1	1	1	1	HMGCR	3-hydroxy-3-methylglutaryl-CoA reductase
hsa-miR-338-5p	1	0	1	1	1	1	PCDHA5	protocadherin alpha 5
hsa-miR-338-5p	1	0	1	1	1	1	PAK4	p21 protein (Cdc42/Rac)-activated kinase 4
hsa-miR-338-5p	0	0	1	0	0	0	FAM66C	family with sequence similarity 66, member C
hsa-miR-338-5p	0	0	1	0	1	1	DKFZP434I0714	uncharacterized protein DKFZP434I0714
hsa-miR-338-5p	1	0	1	0	1	1	DDX3Y	DEAD (Asp-Glu-Ala-Asp) box polypeptide 3, Y-linked
hsa-miR-338-5p	1	0	1	1	1	1	RAP2C	RAP2C, member of RAS oncogene family
hsa-miR-338-5p	1	0	1	1	0	0	GRASP	GRP1 (general receptor for phosphoinositides 1)-associated scaffold protein
hsa-miR-338-5p	0	0	1	0	1	1	FAM72A	family with sequence similarity 72, member A
hsa-miR-338-5p	1	0	1	1	1	1	CTDSPL2	CTD (carboxy-terminal domain, RNA polymerase II, polypeptide A) small phosphatase like 2
hsa-miR-338-5p	0	0	1	1	1	1	SEC24D	SEC24 family, member D (S. cerevisiae)
hsa-miR-338-5p	0	0	1	1	0	0	SNTG2	syntrophin, gamma 2
hsa-miR-338-5p	0	0	1	0	0	0	LOC339862	uncharacterized LOC339862
hsa-miR-338-5p	0	0	1	1	0	0	VPS8	vacuolar protein sorting 8 homolog (S. cerevisiae)
hsa-miR-338-5p	1	0	1	1	1	1	IMPACT	Impact homolog (mouse)
hsa-miR-338-5p	0	0	1	0	0	0	FAM201A	family with sequence similarity 201, member A
hsa-miR-338-5p	1	0	1	1	1	1	SLC38A9	solute carrier family 38, member 9
hsa-miR-338-5p	1	0	1	1	1	1	SLC35G1	solute carrier family 35, member G1
hsa-miR-338-5p	1	0	1	1	1	1	MACROD2	MACRO domain containing 2
hsa-miR-338-5p	1	0	1	1	1	1	HECTD2	HECT domain containing E3 ubiquitin protein ligase 2
hsa-miR-338-5p	0	0	1	1	1	1	TADA1	transcriptional adaptor 1
hsa-miR-338-5p	1	0	1	1	1	1	MEIS1	Meis homeobox 1
hsa-miR-338-5p	1	0	1	0	1	1	CLDN12	claudin 12
hsa-miR-338-5p	1	0	1	0	1	1	NEGR1	neuronal growth regulator 1
hsa-miR-338-5p	1	0	1	0	1	1	CPEB4	cytoplasmic polyadenylation element binding protein 4
hsa-miR-338-5p	0	0	1	0	0	0	CYP4F35P	cytochrome P450, family 4, subfamily F, polypeptide 35, pseudogene
hsa-miR-338-5p	1	0	1	1	1	1	FAM135B	family with sequence similarity 135, member B
hsa-miR-338-5p	1	0	1	1	1	1	SOX6	SRY (sex determining region Y)-box 6
hsa-miR-338-5p	1	0	1	1	1	1	DPP10	dipeptidyl-peptidase 10 (non-functional)
hsa-miR-338-5p	0	0	1	1	1	1	TTC39B	tetratricopeptide repeat domain 39B
hsa-miR-338-5p	0	0	1	1	0	0	CCDC152	coiled-coil domain containing 152
hsa-miR-338-5p	0	0	1	0	0	0	FLJ36000	uncharacterized FLJ36000
hsa-miR-338-5p	1	0	1	1	1	1	FGFR2	fibroblast growth factor receptor 2
hsa-miR-338-5p	1	0	1	1	1	1	PAIP2	poly(A) binding protein interacting protein 2
hsa-miR-338-5p	1	0	1	1	1	1	DACH2	dachshund homolog 2 (Drosophila)
hsa-miR-338-5p	0	0	1	0	0	0	MIR17HG	miR-17-92 cluster host gene (non-protein coding)
hsa-miR-338-5p	1	0	1	1	1	1	UNC13C	unc-13 homolog C (C. elegans)
hsa-miR-338-5p	1	0	1	0	1	1	HSPA12A	heat shock 70kDa protein 12A
hsa-miR-338-5p	0	0	1	0	1	1	PDGFC	platelet derived growth factor C
hsa-miR-338-5p	1	0	1	1	1	1	CLOCK	clock homolog (mouse)
hsa-miR-338-5p	0	0	1	1	1	1	ZNF568	zinc finger protein 568
hsa-miR-338-5p	0	0	1	1	1	1	MTHFD2L	methylenetetrahydrofolate dehydrogenase (NADP+ dependent) 2-like
hsa-miR-338-5p	0	0	1	1	1	1	C4orf32	chromosome 4 open reading frame 32
hsa-miR-338-5p	0	0	1	1	0	0	C1orf87	chromosome 1 open reading frame 87
hsa-miR-338-5p	0	0	1	1	1	1	NSUN7	NOP2/Sun domain family, member 7
hsa-miR-338-5p	0	0	1	0	0	0	LOC157381	uncharacterized LOC157381
hsa-miR-338-5p	0	0	1	0	0	0	LINC00347	long intergenic non-protein coding RNA 347
hsa-miR-338-5p	0	0	1	0	0	0	SLC8A1-AS1	SLC8A1 antisense RNA 1
hsa-miR-338-5p	0	0	1	0	0	0	DKFZp686O1327	uncharacterized LOC401014
hsa-miR-338-5p	1	0	1	0	1	1	PSD3	pleckstrin and Sec7 domain containing 3
hsa-miR-338-5p	0	0	1	1	1	1	MGC57346	uncharacterized LOC401884
hsa-miR-338-5p	0	0	1	0	0	0	LOC283914	uncharacterized LOC283914
hsa-miR-338-5p	1	0	1	1	1	1	SENP1	SUMO1/sentrin specific peptidase 1
hsa-miR-338-5p	0	0	1	1	0	0	FAM72B	family with sequence similarity 72, member B
hsa-miR-338-5p	0	0	1	0	0	0	LOC339529	uncharacterized LOC339529
hsa-miR-338-5p	1	0	1	0	1	1	LYPD6	LY6/PLAUR domain containing 6
hsa-miR-338-5p	1	0	1	1	1	1	BRD1	bromodomain containing 1
hsa-miR-338-5p	1	0	1	1	0	0	TTC9	tetratricopeptide repeat domain 9
hsa-miR-338-5p	1	0	1	1	1	1	PELI1	pellino E3 ubiquitin protein ligase 1
hsa-miR-338-5p	1	0	1	0	1	1	ARHGAP5	Rho GTPase activating protein 5
hsa-miR-338-5p	0	0	1	0	1	1	ITGA1	integrin, alpha 1
hsa-miR-338-5p	1	0	1	0	1	1	NUDT10	nudix (nucleoside diphosphate linked moiety X)-type motif 10
hsa-miR-338-5p	1	0	1	1	1	1	GATA2	GATA binding protein 2
hsa-miR-338-5p	0	0	1	1	1	1	HLA-DQA1	major histocompatibility complex, class II, DQ alpha 1
hsa-miR-338-5p	1	0	1	1	1	1	PCGF5	polycomb group ring finger 5
hsa-miR-338-5p	1	0	1	1	1	1	PRRG1	proline rich Gla (G-carboxyglutamic acid) 1
hsa-miR-338-5p	1	0	1	1	1	1	GTDC1	glycosyltransferase-like domain containing 1
hsa-miR-338-5p	0	0	1	1	1	1	B4GALT4	UDP-Gal:betaGlcNAc beta 1,4- galactosyltransferase, polypeptide 4
hsa-miR-338-5p	1	0	1	1	1	1	CLK4	CDC-like kinase 4
hsa-miR-338-5p	0	0	1	0	1	1	ASAP2	ArfGAP with SH3 domain, ankyrin repeat and PH domain 2
hsa-miR-338-5p	0	0	1	1	1	1	GPATCH2	G patch domain containing 2
hsa-miR-338-5p	1	0	1	1	1	1	RANBP9	RAN binding protein 9
hsa-miR-338-5p	1	0	1	1	1	1	NIPBL	Nipped-B homolog (Drosophila)
hsa-miR-338-5p	0	0	1	0	0	0	GNN	Grp94 neighboring nucleotidase pseudogene
hsa-miR-338-5p	0	0	1	0	0	0	LOC158435	uncharacterized LOC158435
hsa-miR-338-5p	1	0	1	1	1	1	STXBP5	syntaxin binding protein 5 (tomosyn)
hsa-miR-338-5p	0	0	1	1	1	1	ATP2A2	ATPase, Ca++ transporting, cardiac muscle, slow twitch 2
hsa-miR-338-5p	1	0	1	1	1	1	AP3M1	adaptor-related protein complex 3, mu 1 subunit
hsa-miR-338-5p	1	0	1	1	1	1	FAM129B	family with sequence similarity 129, member B
hsa-miR-338-5p	0	0	1	0	0	0	ZNF66P	zinc finger protein 66, pseudogene
hsa-miR-338-5p	0	0	1	0	0	0	LINC00442	long intergenic non-protein coding RNA 442
hsa-miR-338-5p	0	0	1	0	0	0	PABPC1P2	poly(A) binding protein, cytoplasmic 1 pseudogene 2
hsa-miR-338-5p	1	0	1	1	1	1	SLC26A7	solute carrier family 26, member 7
hsa-miR-338-5p	1	0	1	1	1	1	PHACTR4	phosphatase and actin regulator 4
hsa-miR-338-5p	0	0	1	1	0	0	CYP4F30P	cytochrome P450, family 4, subfamily F, polypeptide 30, pseudogene
hsa-miR-338-5p	1	0	1	1	1	1	TBX2	T-box 2
hsa-miR-338-5p	1	0	1	1	1	1	ANLN	anillin, actin binding protein
hsa-miR-338-5p	1	0	1	1	1	1	AHR	aryl hydrocarbon receptor
hsa-miR-338-5p	1	0	1	0	1	1	HMGB3	high mobility group box 3
hsa-miR-338-5p	1	0	1	0	1	1	TGFBR1	transforming growth factor, beta receptor 1
hsa-miR-338-5p	1	0	1	0	1	1	MAP4K3	mitogen-activated protein kinase kinase kinase kinase 3
hsa-miR-338-5p	1	0	1	1	1	1	OPCML	opioid binding protein/cell adhesion molecule-like
hsa-miR-338-5p	1	0	1	0	1	1	DPYSL3	dihydropyrimidinase-like 3
hsa-miR-338-5p	1	0	1	0	1	1	AMMECR1L	AMME chromosomal region gene 1-like
hsa-miR-338-5p	1	0	1	1	1	1	NOTCH2NL	notch 2 N-terminal like
hsa-miR-338-5p	1	0	1	1	1	1	ACVR2B	activin A receptor, type IIB
hsa-miR-338-5p	1	0	1	1	1	1	SYNJ1	synaptojanin 1
hsa-miR-338-5p	0	0	1	1	1	1	C10orf118	chromosome 10 open reading frame 118
hsa-miR-338-5p	0	0	1	1	1	1	XG	Xg blood group
hsa-miR-338-5p	0	0	1	1	1	1	ZNF365	zinc finger protein 365
hsa-miR-338-5p	1	0	1	0	1	1	MYBL1	v-myb myeloblastosis viral oncogene homolog (avian)-like 1
hsa-miR-338-5p	1	0	1	0	1	1	CPEB2	cytoplasmic polyadenylation element binding protein 2
hsa-miR-338-5p	1	0	1	1	0	0	KIAA1644	KIAA1644
hsa-miR-338-5p	0	0	1	1	1	1	CCDC126	coiled-coil domain containing 126
hsa-miR-338-5p	1	0	1	1	1	1	GABRB2	gamma-aminobutyric acid (GABA) A receptor, beta 2
hsa-miR-338-5p	1	0	1	1	1	1	PTPRD	protein tyrosine phosphatase, receptor type, D
hsa-miR-338-5p	1	0	1	1	1	1	PNISR	PNN-interacting serine/arginine-rich protein
hsa-miR-338-5p	0	0	1	1	0	0	C9orf153	chromosome 9 open reading frame 153
hsa-miR-338-5p	0	0	1	1	0	0	ITGB1BP2	integrin beta 1 binding protein (melusin) 2
hsa-miR-338-5p	1	0	1	0	1	1	DNAJC6	DnaJ (Hsp40) homolog, subfamily C, member 6
hsa-miR-338-5p	0	0	1	1	1	1	STAU2	staufen, RNA binding protein, homolog 2 (Drosophila)
hsa-miR-338-5p	1	0	1	1	1	1	TET2	tet methylcytosine dioxygenase 2
hsa-miR-338-5p	1	0	1	1	1	1	MARCH6	membrane-associated ring finger (C3HC4) 6, E3 ubiquitin protein ligase
hsa-miR-338-5p	1	0	1	1	1	1	SLK	STE20-like kinase
hsa-miR-338-5p	0	0	1	1	1	1	FSHB	follicle stimulating hormone, beta polypeptide
hsa-miR-338-5p	1	0	1	1	1	1	TMEM64	transmembrane protein 64
hsa-miR-338-5p	1	0	1	1	1	1	SHANK2	SH3 and multiple ankyrin repeat domains 2
hsa-miR-338-5p	1	0	1	0	1	1	PRDM10	PR domain containing 10
hsa-miR-338-5p	0	0	1	0	0	0	LINC00486	long intergenic non-protein coding RNA 486
hsa-miR-338-5p	0	0	1	0	0	0	LGALS17A	Charcot-Leyden crystal protein pseudogene
hsa-miR-338-5p	1	0	1	0	1	1	CAMSAP2	calmodulin regulated spectrin-associated protein family, member 2
hsa-miR-338-5p	0	0	1	1	0	0	SAFB	scaffold attachment factor B
hsa-miR-338-5p	1	0	1	1	1	1	JMJD1C	jumonji domain containing 1C
hsa-miR-338-5p	1	0	1	1	1	1	ZEB2	zinc finger E-box binding homeobox 2
hsa-miR-338-5p	1	0	1	1	1	1	ZMYM4	zinc finger, MYM-type 4
hsa-miR-338-5p	1	0	1	1	1	1	FNDC3A	fibronectin type III domain containing 3A
hsa-miR-338-5p	0	0	1	1	1	1	HAUS4	HAUS augmin-like complex, subunit 4
hsa-miR-338-5p	0	0	1	0	0	0	LINC00643	long intergenic non-protein coding RNA 643
hsa-miR-338-5p	1	0	1	1	1	1	SASH1	SAM and SH3 domain containing 1
hsa-miR-338-5p	0	0	1	0	0	0	DKFZp686D0853	uncharacterized LOC401613
hsa-miR-338-5p	1	0	1	1	1	1	MIER3	mesoderm induction early response 1, family member 3
hsa-miR-338-5p	1	0	1	1	1	1	SGCD	sarcoglycan, delta (35kDa dystrophin-associated glycoprotein)
hsa-miR-338-5p	1	0	1	1	1	1	TRIM37	tripartite motif containing 37
hsa-miR-338-5p	0	0	1	1	1	1	STAT2	signal transducer and activator of transcription 2, 113kDa
hsa-miR-338-5p	1	0	1	0	1	1	CLASP2	cytoplasmic linker associated protein 2
hsa-miR-338-5p	0	0	1	1	1	1	CRB1	crumbs homolog 1 (Drosophila)
hsa-miR-338-5p	1	0	1	1	1	1	SPPL3	signal peptide peptidase like 3
hsa-miR-338-5p	1	0	1	1	1	1	C7orf31	chromosome 7 open reading frame 31
hsa-miR-338-5p	0	0	1	1	1	1	GTF3C2	general transcription factor IIIC, polypeptide 2, beta 110kDa
hsa-miR-338-5p	1	0	1	1	1	1	SMAD4	SMAD family member 4
hsa-miR-338-5p	0	0	1	1	1	1	IPCEF1	interaction protein for cytohesin exchange factors 1
hsa-miR-338-5p	1	0	1	1	0	0	RBM27	RNA binding motif protein 27
hsa-miR-338-5p	0	0	1	1	1	1	FAM9C	family with sequence similarity 9, member C
hsa-miR-338-5p	0	0	1	0	0	0	LINC00240	long intergenic non-protein coding RNA 240
hsa-miR-338-5p	0	0	1	1	1	1	NIPSNAP3B	nipsnap homolog 3B (C. elegans)
hsa-miR-338-5p	1	0	1	1	1	1	TLN2	talin 2
hsa-miR-338-5p	1	0	1	1	1	1	FOXP1	forkhead box P1
hsa-miR-338-5p	0	0	1	1	1	1	ARMCX3	armadillo repeat containing, X-linked 3
hsa-miR-338-5p	1	0	1	1	1	1	TC2N	tandem C2 domains, nuclear
hsa-miR-338-5p	1	0	1	1	1	1	GDI2	GDP dissociation inhibitor 2
hsa-miR-338-5p	1	0	1	1	1	1	ATP6V1C1	ATPase, H+ transporting, lysosomal 42kDa, V1 subunit C1
hsa-miR-338-5p	1	0	1	1	1	1	ZNF711	zinc finger protein 711
hsa-miR-338-5p	0	0	1	1	1	1	CCNT2	cyclin T2
hsa-miR-338-5p	1	0	1	1	1	1	BCLAF1	BCL2-associated transcription factor 1
hsa-miR-338-5p	1	0	1	0	1	1	KLHL24	kelch-like 24 (Drosophila)
hsa-miR-338-5p	0	0	1	1	1	1	MPP4	membrane protein, palmitoylated 4 (MAGUK p55 subfamily member 4)
hsa-miR-338-5p	1	0	1	1	1	1	PTER	phosphotriesterase related
hsa-miR-338-5p	1	0	1	1	1	1	PGAP1	post-GPI attachment to proteins 1
hsa-miR-338-5p	1	0	1	1	1	1	HIF1A	hypoxia inducible factor 1, alpha subunit (basic helix-loop-helix transcription factor)
hsa-miR-338-5p	1	0	1	1	1	1	CALD1	caldesmon 1
hsa-miR-338-5p	1	0	1	1	1	1	EOGT	EGF domain-specific O-linked N-acetylglucosamine (GlcNAc) transferase
hsa-miR-338-5p	1	0	1	0	1	1	TBL1XR1	transducin (beta)-like 1 X-linked receptor 1
hsa-miR-338-5p	1	0	1	1	1	1	SGK3	serum/glucocorticoid regulated kinase family, member 3
hsa-miR-338-5p	1	0	1	1	1	1	CREB3L2	cAMP responsive element binding protein 3-like 2
hsa-miR-338-5p	0	0	1	1	0	0	HNRNPAB	heterogeneous nuclear ribonucleoprotein A/B
hsa-miR-338-5p	1	0	1	1	1	1	AP2M1	adaptor-related protein complex 2, mu 1 subunit
hsa-miR-338-5p	0	0	1	1	1	1	HPGD	hydroxyprostaglandin dehydrogenase 15-(NAD)
hsa-miR-338-5p	1	0	1	1	1	1	ARHGDIA	Rho GDP dissociation inhibitor (GDI) alpha
hsa-miR-338-5p	1	0	1	1	1	1	SEL1L3	sel-1 suppressor of lin-12-like 3 (C. elegans)
hsa-miR-338-5p	1	0	1	1	0	0	SMARCA2	SWI/SNF related, matrix associated, actin dependent regulator of chromatin, subfamily a, member 2
hsa-miR-338-5p	1	0	1	1	1	1	RNF10	ring finger protein 10
hsa-miR-338-5p	1	0	1	1	1	1	FUT9	fucosyltransferase 9 (alpha (1,3) fucosyltransferase)
hsa-miR-338-5p	1	0	1	1	1	1	FAM192A	family with sequence similarity 192, member A
hsa-miR-338-5p	0	0	1	0	0	0	AKR1A1	aldo-keto reductase family 1, member A1 (aldehyde reductase)
hsa-miR-338-5p	0	0	1	1	0	0	NDUFS2	NADH dehydrogenase (ubiquinone) Fe-S protein 2, 49kDa (NADH-coenzyme Q reductase)
hsa-miR-338-5p	0	0	1	1	0	0	RBM28	RNA binding motif protein 28
hsa-miR-338-5p	0	0	1	1	0	0	ITGB3BP	integrin beta 3 binding protein (beta3-endonexin)
hsa-miR-338-5p	0	0	1	1	1	1	CIRBP	cold inducible RNA binding protein
hsa-miR-338-5p	1	0	1	1	1	1	RAP1A	RAP1A, member of RAS oncogene family
hsa-miR-338-5p	0	0	1	1	1	1	PTGES3	prostaglandin E synthase 3 (cytosolic)
hsa-miR-338-5p	0	0	1	1	1	1	CCDC132	coiled-coil domain containing 132
hsa-miR-338-5p	1	0	1	0	1	1	BNIP3L	BCL2/adenovirus E1B 19kDa interacting protein 3-like
hsa-miR-338-5p	1	0	1	1	0	0	LOXL1	lysyl oxidase-like 1
hsa-miR-338-5p	0	0	1	1	1	1	KIAA0141	KIAA0141
hsa-miR-338-5p	1	0	1	1	1	1	CD9	CD9 molecule
hsa-miR-338-5p	0	0	1	0	0	0	MYCT1	myc target 1
hsa-miR-338-5p	1	0	1	1	1	1	ADM	adrenomedullin
hsa-miR-338-5p	0	0	1	1	1	1	BLZF1	basic leucine zipper nuclear factor 1
hsa-miR-338-5p	0	0	1	1	1	1	MRPS36	mitochondrial ribosomal protein S36
hsa-miR-338-5p	0	0	1	1	1	1	PLAUR	plasminogen activator, urokinase receptor
hsa-miR-338-5p	1	0	1	1	1	1	DAZAP1	DAZ associated protein 1
hsa-miR-338-5p	1	0	1	1	1	1	TRA2B	transformer 2 beta homolog (Drosophila)
hsa-miR-338-5p	0	0	1	1	1	1	HMGB2	high mobility group box 2
hsa-miR-338-5p	0	0	1	1	1	1	ACTR3B	ARP3 actin-related protein 3 homolog B (yeast)
hsa-miR-338-5p	0	0	1	1	1	1	STON1	stonin 1
hsa-miR-338-5p	0	0	1	1	1	1	XBP1	X-box binding protein 1
hsa-miR-338-5p	1	0	1	1	1	1	NAP1L1	nucleosome assembly protein 1-like 1
hsa-miR-338-5p	1	0	1	1	1	1	STK38L	serine/threonine kinase 38 like
hsa-miR-338-5p	1	0	1	1	1	1	MTCH2	mitochondrial carrier 2
hsa-miR-338-5p	1	0	1	1	1	1	WIPF1	WAS/WASL interacting protein family, member 1
hsa-miR-338-5p	0	0	1	0	0	0	LOC150568	uncharacterized LOC150568
hsa-miR-338-5p	0	0	1	1	1	1	BEX2	brain expressed X-linked 2
hsa-miR-338-5p	0	0	1	0	1	1	TMEM155	transmembrane protein 155
hsa-miR-338-5p	1	0	1	1	1	1	TMEM66	transmembrane protein 66
hsa-miR-338-5p	0	0	1	1	0	0	MAST1	microtubule associated serine/threonine kinase 1
hsa-miR-338-5p	0	0	1	1	1	1	COG3	component of oligomeric golgi complex 3
hsa-miR-338-5p	0	0	1	1	0	0	NOX5	NADPH oxidase, EF-hand calcium binding domain 5
hsa-miR-338-5p	1	0	1	1	1	1	ARNTL	aryl hydrocarbon receptor nuclear translocator-like
hsa-miR-338-5p	1	0	1	1	1	1	RBBP7	retinoblastoma binding protein 7
hsa-miR-338-5p	1	0	1	1	1	1	BAALC	brain and acute leukemia, cytoplasmic
hsa-miR-338-5p	1	0	1	1	1	1	PFN2	profilin 2
hsa-miR-338-5p	1	0	1	1	1	1	NFYB	nuclear transcription factor Y, beta
hsa-miR-338-5p	0	0	1	1	1	1	RCN2	reticulocalbin 2, EF-hand calcium binding domain
hsa-miR-338-5p	1	0	1	1	0	0	ATP6V1B2	ATPase, H+ transporting, lysosomal 56/58kDa, V1 subunit B2
hsa-miR-338-5p	0	0	1	1	1	1	HOXC9	homeobox C9
hsa-miR-338-5p	0	0	1	1	1	1	ZNF333	zinc finger protein 333
hsa-miR-338-5p	1	0	1	1	1	1	ARMC8	armadillo repeat containing 8
hsa-miR-338-5p	0	0	1	1	1	1	FAM18B1	family with sequence similarity 18, member B1
hsa-miR-338-5p	0	0	1	1	0	0	CCNDBP1	cyclin D-type binding-protein 1
hsa-miR-338-5p	0	0	1	1	1	1	SAMD3	sterile alpha motif domain containing 3
hsa-miR-338-5p	1	0	1	1	1	1	RBFOX2	RNA binding protein, fox-1 homolog (C. elegans) 2
hsa-miR-338-5p	1	0	1	0	1	1	MAP1B	microtubule-associated protein 1B
hsa-miR-338-5p	1	0	1	1	1	1	RBPJ	recombination signal binding protein for immunoglobulin kappa J region
hsa-miR-338-5p	0	0	1	0	0	0	FAM92A1	family with sequence similarity 92, member A1
hsa-miR-338-5p	1	0	1	1	1	1	RUNX1	runt-related transcription factor 1
hsa-miR-338-5p	0	0	1	1	1	1	ZNF346	zinc finger protein 346
hsa-miR-338-5p	0	0	1	1	1	1	MRFAP1L1	Morf4 family associated protein 1-like 1
hsa-miR-338-5p	1	0	1	1	0	0	FOXO3	forkhead box O3
hsa-miR-338-5p	0	0	1	1	1	1	PTMA	prothymosin, alpha
hsa-miR-338-5p	0	0	1	1	1	1	BEX4	brain expressed, X-linked 4
hsa-miR-338-5p	0	0	1	0	1	1	TSPAN7	tetraspanin 7
hsa-miR-338-5p	1	0	1	1	1	1	RND3	Rho family GTPase 3
hsa-miR-338-5p	1	0	1	1	1	1	TARBP2	TAR (HIV-1) RNA binding protein 2
hsa-miR-338-5p	1	0	1	0	1	1	KIAA0240	KIAA0240
hsa-miR-338-5p	0	0	1	0	0	0	FAM47E	family with sequence similarity 47, member E
hsa-miR-338-5p	1	0	1	1	1	1	STAG2	stromal antigen 2
hsa-miR-338-5p	0	0	1	1	1	1	CCP110	centriolar coiled coil protein 110kDa
hsa-miR-338-5p	0	0	1	1	1	1	UPRT	uracil phosphoribosyltransferase (FUR1) homolog (S. cerevisiae)
hsa-miR-338-5p	1	0	1	0	1	1	OSBPL8	oxysterol binding protein-like 8
hsa-miR-338-5p	1	0	1	0	1	1	MCFD2	multiple coagulation factor deficiency 2
hsa-miR-338-5p	1	0	1	1	1	1	SNRK	SNF related kinase
hsa-miR-338-5p	1	0	1	0	1	1	CNTNAP2	contactin associated protein-like 2
hsa-miR-338-5p	1	0	1	1	1	1	NAPEPLD	N-acyl phosphatidylethanolamine phospholipase D
hsa-miR-338-5p	1	0	1	1	1	1	SP2	Sp2 transcription factor
hsa-miR-338-5p	0	0	1	1	1	1	SLC39A14	solute carrier family 39 (zinc transporter), member 14
hsa-miR-338-5p	1	0	1	1	1	1	PI15	peptidase inhibitor 15
hsa-miR-338-5p	1	0	1	1	1	1	PRKG1	protein kinase, cGMP-dependent, type I
hsa-miR-338-5p	1	0	1	1	1	1	TTC3	tetratricopeptide repeat domain 3
hsa-miR-338-5p	1	0	1	1	1	1	RB1CC1	RB1-inducible coiled-coil 1
hsa-miR-338-5p	1	0	1	1	1	1	TMEFF2	transmembrane protein with EGF-like and two follistatin-like domains 2
hsa-miR-338-5p	0	0	1	1	1	1	PTGS1	prostaglandin-endoperoxide synthase 1 (prostaglandin G/H synthase and cyclooxygenase)
hsa-miR-338-5p	0	0	1	1	1	1	CD274	CD274 molecule
hsa-miR-338-5p	1	0	1	1	0	0	DPY19L1	dpy-19-like 1 (C. elegans)
hsa-miR-338-5p	0	0	1	1	1	1	C1orf27	chromosome 1 open reading frame 27
hsa-miR-338-5p	0	0	1	1	1	1	TNFSF10	tumor necrosis factor (ligand) superfamily, member 10
hsa-miR-338-5p	1	0	1	0	1	1	RBBP5	retinoblastoma binding protein 5
hsa-miR-338-5p	1	0	1	0	1	1	DCBLD2	discoidin, CUB and LCCL domain containing 2
hsa-miR-338-5p	0	0	1	1	1	1	CCL20	chemokine (C-C motif) ligand 20
hsa-miR-338-5p	1	0	1	0	1	1	EPDR1	ependymin related protein 1 (zebrafish)
hsa-miR-338-5p	1	0	1	0	1	1	STAT3	signal transducer and activator of transcription 3 (acute-phase response factor)
hsa-miR-338-5p	0	0	1	1	0	0	INHBA	inhibin, beta A
hsa-miR-338-5p	1	0	1	0	1	1	BCL2	B-cell CLL/lymphoma 2
hsa-miR-338-5p	1	0	1	0	1	1	YES1	v-yes-1 Yamaguchi sarcoma viral oncogene homolog 1
hsa-miR-338-5p	0	0	1	1	1	1	GAD2	glutamate decarboxylase 2 (pancreatic islets and brain, 65kDa)
hsa-miR-338-5p	1	0	1	0	1	1	ACVR2A	activin A receptor, type IIA
hsa-miR-338-5p	1	0	1	1	1	1	AGL	amylo-alpha-1, 6-glucosidase, 4-alpha-glucanotransferase
hsa-miR-338-5p	0	0	1	1	1	1	ATP7A	ATPase, Cu++ transporting, alpha polypeptide
hsa-miR-338-5p	0	0	1	1	1	1	CA2	carbonic anhydrase II
hsa-miR-338-5p	0	0	1	1	1	1	ERCC8	excision repair cross-complementing rodent repair deficiency, complementation group 8
hsa-miR-338-5p	1	0	1	1	1	1	COL4A3	collagen, type IV, alpha 3 (Goodpasture antigen)
hsa-miR-338-5p	1	0	1	1	1	1	COL5A1	collagen, type V, alpha 1
hsa-miR-338-5p	1	0	1	1	1	1	CPOX	coproporphyrinogen oxidase
hsa-miR-338-5p	1	0	1	1	1	1	DMD	dystrophin
hsa-miR-338-5p	1	0	1	1	1	1	ESR1	estrogen receptor 1
hsa-miR-338-5p	0	0	1	1	1	1	FABP2	fatty acid binding protein 2, intestinal
hsa-miR-338-5p	1	0	1	0	1	1	G6PC	glucose-6-phosphatase, catalytic subunit
hsa-miR-338-5p	1	0	1	0	1	1	GHR	growth hormone receptor
hsa-miR-338-5p	1	0	1	1	1	1	GK	glycerol kinase
hsa-miR-338-5p	1	0	1	1	1	1	HK2	hexokinase 2
hsa-miR-338-5p	0	0	1	1	1	1	HPRT1	hypoxanthine phosphoribosyltransferase 1
hsa-miR-338-5p	1	0	1	1	1	1	INSR	insulin receptor
hsa-miR-338-5p	0	0	1	0	1	1	KAL1	Kallmann syndrome 1 sequence
hsa-miR-338-5p	1	0	1	0	1	1	SGCB	sarcoglycan, beta (43kDa dystrophin-associated glycoprotein)
hsa-miR-338-5p	1	0	1	1	1	1	MET	met proto-oncogene (hepatocyte growth factor receptor)
hsa-miR-338-5p	1	0	1	1	1	1	NF1	neurofibromin 1
hsa-miR-338-5p	1	0	1	1	1	1	OCRL	oculocerebrorenal syndrome of Lowe
hsa-miR-338-5p	1	0	1	0	1	1	PKD2	polycystic kidney disease 2 (autosomal dominant)
hsa-miR-338-5p	1	0	1	0	1	1	PTEN	phosphatase and tensin homolog
hsa-miR-338-5p	1	0	1	1	1	1	PTH	parathyroid hormone
hsa-miR-338-5p	0	0	1	1	1	1	RPGR	retinitis pigmentosa GTPase regulator
hsa-miR-338-5p	1	0	1	1	1	1	ATXN1	ataxin 1
hsa-miR-338-5p	0	0	1	1	1	1	SLC5A1	solute carrier family 5 (sodium/glucose cotransporter), member 1
hsa-miR-338-5p	1	0	1	1	1	1	TIMP3	TIMP metallopeptidase inhibitor 3
hsa-miR-338-5p	1	0	1	0	1	1	TSC1	tuberous sclerosis 1
hsa-miR-338-5p	1	0	1	1	1	1	CHM	choroideremia (Rab escort protein 1)
hsa-miR-338-5p	1	0	1	0	1	1	PAFAH1B1	platelet-activating factor acetylhydrolase 1b, regulatory subunit 1 (45kDa)
hsa-miR-338-5p	0	0	1	0	1	1	SLC10A2	solute carrier family 10 (sodium/bile acid cotransporter family), member 2
hsa-miR-338-5p	1	0	1	1	1	1	AQP2	aquaporin 2 (collecting duct)
hsa-miR-338-5p	1	0	1	1	1	1	ATRX	alpha thalassemia/mental retardation syndrome X-linked
hsa-miR-338-5p	0	0	1	1	1	1	IL6	interleukin 6 (interferon, beta 2)
hsa-miR-338-5p	1	0	1	1	1	1	CXCL12	chemokine (C-X-C motif) ligand 12
hsa-miR-338-5p	0	0	1	1	1	1	IFNG	interferon, gamma
hsa-miR-338-5p	0	0	1	0	1	1	IFNAR1	interferon (alpha, beta and omega) receptor 1
hsa-miR-338-5p	1	0	1	1	1	1	FASLG	Fas ligand (TNF superfamily, member 6)
hsa-miR-338-5p	0	0	1	0	1	1	ADRA2A	adrenoceptor alpha 2A
hsa-miR-338-5p	1	0	1	1	1	1	DIO2	deiodinase, iodothyronine, type II
hsa-miR-338-5p	1	0	1	0	1	1	GABRA4	gamma-aminobutyric acid (GABA) A receptor, alpha 4
hsa-miR-338-5p	1	0	1	1	1	1	GABRB3	gamma-aminobutyric acid (GABA) A receptor, beta 3
hsa-miR-338-5p	1	0	1	1	1	1	GABRG2	gamma-aminobutyric acid (GABA) A receptor, gamma 2
hsa-miR-338-5p	1	0	1	1	1	1	GAD1	glutamate decarboxylase 1 (brain, 67kDa)
hsa-miR-338-5p	0	0	1	1	1	1	GLRB	glycine receptor, beta
hsa-miR-338-5p	1	0	1	1	1	1	GRIA4	glutamate receptor, ionotropic, AMPA 4
hsa-miR-338-5p	1	0	1	1	1	1	GRM7	glutamate receptor, metabotropic 7
hsa-miR-338-5p	0	0	1	1	1	1	HTR7	5-hydroxytryptamine (serotonin) receptor 7, adenylate cyclase-coupled
hsa-miR-338-5p	1	0	1	0	1	1	KCNJ2	potassium inwardly-rectifying channel, subfamily J, member 2
hsa-miR-338-5p	0	0	1	1	1	1	ABCB1	ATP-binding cassette, sub-family B (MDR/TAP), member 1
hsa-miR-338-5p	1	0	1	1	1	1	PTGDR	prostaglandin D2 receptor (DP)
hsa-miR-338-5p	1	0	1	1	1	1	PTGER2	prostaglandin E receptor 2 (subtype EP2), 53kDa
hsa-miR-338-5p	0	0	1	1	1	1	PTGS2	prostaglandin-endoperoxide synthase 2 (prostaglandin G/H synthase and cyclooxygenase)
hsa-miR-338-5p	1	0	1	0	1	1	SMAD5	SMAD family member 5
hsa-miR-338-5p	1	0	1	1	1	1	UGP2	UDP-glucose pyrophosphorylase 2
hsa-miR-338-5p	0	0	1	1	1	1	GALK2	galactokinase 2
hsa-miR-338-5p	1	0	1	1	1	1	C14orf37	chromosome 14 open reading frame 37
hsa-miR-338-5p	1	0	1	1	0	0	UBASH3A	ubiquitin associated and SH3 domain containing A
hsa-miR-338-5p	1	0	1	1	1	1	FAM13C	family with sequence similarity 13, member C
hsa-miR-338-5p	1	0	1	1	1	1	GATA3	GATA binding protein 3
hsa-miR-338-5p	1	0	1	0	1	1	SMAD2	SMAD family member 2
hsa-miR-338-5p	1	0	1	1	1	1	BICD2	bicaudal D homolog 2 (Drosophila)
hsa-miR-338-5p	0	0	1	1	0	0	C7orf61	chromosome 7 open reading frame 61
hsa-miR-338-5p	1	0	1	1	1	1	NCK2	NCK adaptor protein 2
hsa-miR-338-5p	1	0	1	1	1	1	EBF3	early B-cell factor 3
hsa-miR-338-5p	1	0	1	1	1	1	PLCXD3	phosphatidylinositol-specific phospholipase C, X domain containing 3
hsa-miR-338-5p	1	0	1	1	1	1	NFKBIZ	nuclear factor of kappa light polypeptide gene enhancer in B-cells inhibitor, zeta
hsa-miR-338-5p	1	0	1	1	1	1	ADAM9	ADAM metallopeptidase domain 9
hsa-miR-338-5p	0	0	1	0	1	1	SUMO2	SMT3 suppressor of mif two 3 homolog 2 (S. cerevisiae)
hsa-miR-338-5p	1	0	1	1	1	1	TCEAL1	transcription elongation factor A (SII)-like 1
hsa-miR-338-5p	1	0	1	1	1	1	L3MBTL3	l(3)mbt-like 3 (Drosophila)
hsa-miR-338-5p	1	0	1	1	1	1	SPOP	speckle-type POZ protein
hsa-miR-338-5p	1	0	1	1	1	1	TULP4	tubby like protein 4
hsa-miR-338-5p	0	0	1	1	0	0	CT45A5	cancer/testis antigen family 45, member A5
hsa-miR-338-5p	1	0	1	0	1	1	SS18	synovial sarcoma translocation, chromosome 18
hsa-miR-338-5p	0	0	1	1	1	1	UACA	uveal autoantigen with coiled-coil domains and ankyrin repeats
hsa-miR-338-5p	1	0	1	1	1	1	CNOT4	CCR4-NOT transcription complex, subunit 4
hsa-miR-338-5p	0	0	1	1	0	0	SLC41A3	solute carrier family 41, member 3
hsa-miR-338-5p	1	0	1	0	1	1	KIAA2022	KIAA2022
hsa-miR-338-5p	0	0	1	1	1	1	CXCR4	chemokine (C-X-C motif) receptor 4
hsa-miR-338-5p	0	0	1	1	1	1	MXI1	MAX interactor 1
hsa-miR-338-5p	1	0	1	1	1	1	EML1	echinoderm microtubule associated protein like 1
hsa-miR-338-5p	0	0	1	1	1	1	GCSAM	germinal center-associated, signaling and motility
hsa-miR-338-5p	1	0	1	1	1	1	CUL4A	cullin 4A
hsa-miR-338-5p	0	0	1	1	1	1	ZCCHC11	zinc finger, CCHC domain containing 11
hsa-miR-338-5p	1	0	1	1	1	1	LUZP2	leucine zipper protein 2
hsa-miR-338-5p	0	0	1	1	1	1	IRAK1BP1	interleukin-1 receptor-associated kinase 1 binding protein 1
hsa-miR-338-5p	1	0	1	1	1	1	SHE	Src homology 2 domain containing E
hsa-miR-338-5p	0	0	1	1	1	1	SPIN3	spindlin family, member 3
hsa-miR-338-5p	1	0	1	0	1	1	FAM102B	family with sequence similarity 102, member B
hsa-miR-338-5p	1	0	1	0	1	1	MTX3	metaxin 3
hsa-miR-338-5p	1	0	1	1	1	1	ATP11C	ATPase, class VI, type 11C
hsa-miR-338-5p	1	0	1	0	1	1	FYTTD1	forty-two-three domain containing 1
hsa-miR-338-5p	1	0	1	0	1	1	CREB5	cAMP responsive element binding protein 5
hsa-miR-338-5p	1	0	1	1	1	1	SLC25A53	solute carrier family 25, member 53
hsa-miR-338-5p	1	0	1	0	1	1	RGMB	RGM domain family, member B
hsa-miR-338-5p	1	0	1	0	1	1	ZKSCAN2	zinc finger with KRAB and SCAN domains 2
hsa-miR-338-5p	0	0	1	1	1	1	CCNC	cyclin C
hsa-miR-338-5p	0	0	1	1	1	1	PAGE5	P antigen family, member 5 (prostate associated)
hsa-miR-338-5p	1	0	1	1	1	1	H3F3C	H3 histone, family 3C
hsa-miR-338-5p	0	0	1	1	0	0	SPRR2G	small proline-rich protein 2G
hsa-miR-338-5p	1	0	1	1	1	1	RUNX2	runt-related transcription factor 2
hsa-miR-338-5p	1	0	1	0	1	1	GOPC	golgi-associated PDZ and coiled-coil motif containing
hsa-miR-338-5p	0	0	1	1	0	0	CT45A1	cancer/testis antigen family 45, member A1
hsa-miR-338-5p	0	0	1	1	0	0	CT45A6	cancer/testis antigen family 45, member A6
hsa-miR-338-5p	0	0	1	1	1	1	RAB28	RAB28, member RAS oncogene family
hsa-miR-338-5p	1	0	1	1	1	1	VMA21	VMA21 vacuolar H+-ATPase homolog (S. cerevisiae)
hsa-miR-338-5p	0	0	1	1	1	1	ACTBL2	actin, beta-like 2
hsa-miR-338-5p	0	0	1	1	1	1	VPS13A	vacuolar protein sorting 13 homolog A (S. cerevisiae)
hsa-miR-338-5p	1	0	1	0	1	1	BRCC3	BRCA1/BRCA2-containing complex, subunit 3
hsa-miR-338-5p	0	0	1	1	1	1	POLR2M	polymerase (RNA) II (DNA directed) polypeptide M
hsa-miR-338-5p	0	0	1	1	1	1	MURC	muscle-related coiled-coil protein
hsa-miR-338-5p	1	0	1	0	1	1	TNRC6B	trinucleotide repeat containing 6B
hsa-miR-338-5p	0	0	1	1	1	1	WASF1	WAS protein family, member 1
hsa-miR-338-5p	1	0	1	0	1	1	CELF2	CUGBP, Elav-like family member 2
hsa-miR-338-5p	1	0	1	1	1	1	TPD52	tumor protein D52
hsa-miR-338-5p	1	0	1	0	1	1	C3orf70	chromosome 3 open reading frame 70
hsa-miR-338-5p	1	0	1	1	1	1	SLC35F1	solute carrier family 35, member F1
hsa-miR-338-5p	0	0	1	1	1	1	SOWAHB	sosondowah ankyrin repeat domain family member B
hsa-miR-338-5p	0	0	1	1	1	1	CIB4	calcium and integrin binding family member 4
hsa-miR-338-5p	1	0	1	1	1	1	KIAA0101	KIAA0101
hsa-miR-338-5p	0	0	1	1	1	1	TRMT11	tRNA methyltransferase 11 homolog (S. cerevisiae)
hsa-miR-338-5p	1	0	1	1	1	1	TFAP2A	transcription factor AP-2 alpha (activating enhancer binding protein 2 alpha)
hsa-miR-338-5p	1	0	1	1	1	1	KLF10	Kruppel-like factor 10
hsa-miR-338-5p	0	0	1	1	1	1	SLC35A2	solute carrier family 35 (UDP-galactose transporter), member A2
hsa-miR-338-5p	1	0	1	1	1	1	MYCL1	v-myc myelocytomatosis viral oncogene homolog 1, lung carcinoma derived (avian)
hsa-miR-338-5p	0	0	1	1	1	1	KCNIP1	Kv channel interacting protein 1
hsa-miR-338-5p	0	0	1	1	1	1	CEP112	centrosomal protein 112kDa
hsa-miR-338-5p	0	0	1	1	1	1	C18orf62	chromosome 18 open reading frame 62
hsa-miR-338-5p	1	0	1	1	1	1	PDE4B	phosphodiesterase 4B, cAMP-specific
hsa-miR-338-5p	0	0	1	1	1	1	CTLA4	cytotoxic T-lymphocyte-associated protein 4
hsa-miR-338-5p	0	0	1	1	1	1	EFEMP1	EGF containing fibulin-like extracellular matrix protein 1
hsa-miR-338-5p	1	0	1	0	1	1	GK5	glycerol kinase 5 (putative)
hsa-miR-338-5p	0	0	1	0	1	1	C15orf56	chromosome 15 open reading frame 56
hsa-miR-338-5p	1	0	1	1	1	1	CHN2	chimerin (chimaerin) 2
hsa-miR-338-5p	1	0	1	1	1	1	MLLT4	myeloid/lymphoid or mixed-lineage leukemia (trithorax homolog, Drosophila); translocated to, 4
hsa-miR-338-5p	1	0	1	0	1	1	CEP44	centrosomal protein 44kDa
hsa-miR-338-5p	1	0	1	1	1	1	LFNG	LFNG O-fucosylpeptide 3-beta-N-acetylglucosaminyltransferase
hsa-miR-338-5p	0	0	1	1	1	1	MCHR2	melanin-concentrating hormone receptor 2
hsa-miR-338-5p	1	0	1	1	1	1	ASB1	ankyrin repeat and SOCS box containing 1
hsa-miR-338-5p	1	0	1	1	1	1	MTMR12	myotubularin related protein 12
hsa-miR-338-5p	0	0	1	1	1	1	ATF3	activating transcription factor 3
hsa-miR-338-5p	1	0	1	1	1	1	CRCP	CGRP receptor component
hsa-miR-338-5p	0	0	1	0	1	1	STEAP2	STEAP family member 2, metalloreductase
hsa-miR-338-5p	1	0	1	1	1	1	PPP4R1	protein phosphatase 4, regulatory subunit 1
hsa-miR-338-5p	1	0	1	1	1	1	HMGCLL1	3-hydroxymethyl-3-methylglutaryl-CoA lyase-like 1
hsa-miR-338-5p	0	0	1	1	1	1	MST4	serine/threonine protein kinase MST4
hsa-miR-338-5p	1	0	1	1	1	1	C2orf88	chromosome 2 open reading frame 88
hsa-miR-338-5p	1	0	1	1	1	1	NSL1	NSL1, MIND kinetochore complex component, homolog (S. cerevisiae)
hsa-miR-338-5p	1	0	1	1	1	1	FRS2	fibroblast growth factor receptor substrate 2
hsa-miR-338-5p	1	0	1	1	1	1	TPM3	tropomyosin 3
hsa-miR-338-5p	1	0	1	0	1	1	TMEM237	transmembrane protein 237
hsa-miR-338-5p	0	0	1	1	0	0	TYMS	thymidylate synthetase
hsa-miR-338-5p	1	0	1	1	1	1	MZT1	mitotic spindle organizing protein 1
hsa-miR-338-5p	1	0	1	1	1	1	QSER1	glutamine and serine rich 1
hsa-miR-338-5p	1	0	1	1	1	1	METTL9	methyltransferase like 9
hsa-miR-338-5p	1	0	1	1	1	1	CDC14B	CDC14 cell division cycle 14 homolog B (S. cerevisiae)
hsa-miR-338-5p	1	0	1	1	1	1	ZNF436	zinc finger protein 436
hsa-miR-338-5p	1	0	1	1	1	1	SRSF1	serine/arginine-rich splicing factor 1
hsa-miR-338-5p	1	0	1	1	1	1	HNRNPUL2	heterogeneous nuclear ribonucleoprotein U-like 2
hsa-miR-338-5p	0	0	1	1	1	1	XIRP2	xin actin-binding repeat containing 2
hsa-miR-338-5p	1	0	1	1	1	1	ITGA6	integrin, alpha 6
hsa-miR-338-5p	1	0	1	1	1	1	OCIAD1	OCIA domain containing 1
hsa-miR-338-5p	1	0	1	1	1	1	CREBBP	CREB binding protein
hsa-miR-338-5p	1	0	1	1	1	1	VAV3	vav 3 guanine nucleotide exchange factor
hsa-miR-338-5p	1	0	1	1	1	1	UNK	unkempt homolog (Drosophila)
hsa-miR-338-5p	1	0	1	0	1	1	THSD7B	thrombospondin, type I, domain containing 7B
hsa-miR-338-5p	1	0	1	0	1	1	CCDC85A	coiled-coil domain containing 85A
hsa-miR-338-5p	0	0	1	1	1	1	HSF5	heat shock transcription factor family member 5
hsa-miR-338-5p	1	0	1	0	1	1	ODZ3	odz, odd Oz/ten-m homolog 3 (Drosophila)
hsa-miR-338-5p	1	0	1	1	1	1	MBOAT1	membrane bound O-acyltransferase domain containing 1
hsa-miR-338-5p	0	0	1	1	1	1	TBX18	T-box 18
hsa-miR-338-5p	0	0	1	0	1	1	WIPF3	WAS/WASL interacting protein family, member 3
hsa-miR-338-5p	1	0	1	1	1	1	DGKG	diacylglycerol kinase, gamma 90kDa
hsa-miR-338-5p	1	0	1	1	1	1	ADCYAP1	adenylate cyclase activating polypeptide 1 (pituitary)
hsa-miR-338-5p	1	0	1	1	1	1	SLC25A5	solute carrier family 25 (mitochondrial carrier; adenine nucleotide translocator), member 5
hsa-miR-338-5p	1	0	1	0	1	1	XIAP	X-linked inhibitor of apoptosis
hsa-miR-338-5p	1	0	1	1	1	1	BMP2	bone morphogenetic protein 2
hsa-miR-338-5p	1	0	1	0	1	1	BMPR2	bone morphogenetic protein receptor, type II (serine/threonine kinase)
hsa-miR-338-5p	0	0	1	1	1	1	ENTPD3	ectonucleoside triphosphate diphosphohydrolase 3
hsa-miR-338-5p	1	0	1	1	1	1	CDH13	cadherin 13, H-cadherin (heart)
hsa-miR-338-5p	1	0	1	1	1	1	CHD1	chromodomain helicase DNA binding protein 1
hsa-miR-338-5p	1	0	1	0	1	1	CPD	carboxypeptidase D
hsa-miR-338-5p	1	0	1	1	1	1	MAPK14	mitogen-activated protein kinase 14
hsa-miR-338-5p	0	0	1	1	1	1	DARS	aspartyl-tRNA synthetase
hsa-miR-338-5p	1	0	1	1	1	1	DYRK1A	dual-specificity tyrosine-(Y)-phosphorylation regulated kinase 1A
hsa-miR-338-5p	1	0	1	1	1	1	EN2	engrailed homeobox 2
hsa-miR-338-5p	1	0	1	1	1	1	EP300	E1A binding protein p300
hsa-miR-338-5p	1	0	1	1	1	1	EREG	epiregulin
hsa-miR-338-5p	1	0	1	1	1	1	EXTL3	exostoses (multiple)-like 3
hsa-miR-338-5p	0	0	1	1	1	1	FABP4	fatty acid binding protein 4, adipocyte
hsa-miR-338-5p	0	0	1	0	1	1	FMO2	flavin containing monooxygenase 2 (non-functional)
hsa-miR-338-5p	0	0	1	1	1	1	FRZB	frizzled-related protein
hsa-miR-338-5p	1	0	1	0	1	1	GCNT2	glucosaminyl (N-acetyl) transferase 2, I-branching enzyme (I blood group)
hsa-miR-338-5p	1	0	1	1	1	1	ID4	inhibitor of DNA binding 4, dominant negative helix-loop-helix protein
hsa-miR-338-5p	0	0	1	1	1	1	IL13RA1	interleukin 13 receptor, alpha 1
hsa-miR-338-5p	0	0	1	1	1	1	CXCL10	chemokine (C-X-C motif) ligand 10
hsa-miR-338-5p	1	0	1	0	1	1	MPPED2	metallophosphoesterase domain containing 2
hsa-miR-338-5p	0	0	1	1	1	1	ARF4	ADP-ribosylation factor 4
hsa-miR-338-5p	1	0	1	0	1	1	ARNT	aryl hydrocarbon receptor nuclear translocator
hsa-miR-338-5p	1	0	1	1	1	1	BCL6	B-cell CLL/lymphoma 6
hsa-miR-338-5p	1	0	1	1	1	1	BNC1	basonuclin 1
hsa-miR-338-5p	1	0	1	1	1	1	KLF5	Kruppel-like factor 5 (intestinal)
hsa-miR-338-5p	1	0	1	1	1	1	CALM2	calmodulin 2 (phosphorylase kinase, delta)
hsa-miR-338-5p	1	0	1	1	1	1	CBFB	core-binding factor, beta subunit
hsa-miR-338-5p	1	0	1	1	1	1	CDC25A	cell division cycle 25 homolog A (S. pombe)
hsa-miR-338-5p	1	0	1	1	1	1	COL4A1	collagen, type IV, alpha 1
hsa-miR-338-5p	0	0	1	1	0	0	CSNK2A2	casein kinase 2, alpha prime polypeptide
hsa-miR-338-5p	1	0	1	1	1	1	DBT	dihydrolipoamide branched chain transacylase E2
hsa-miR-338-5p	0	0	1	1	1	1	DLAT	dihydrolipoamide S-acetyltransferase
hsa-miR-338-5p	1	0	1	1	1	1	DR1	down-regulator of transcription 1, TBP-binding (negative cofactor 2)
hsa-miR-338-5p	1	0	1	1	1	1	DSC3	desmocollin 3
hsa-miR-338-5p	1	0	1	1	0	0	E2F4	E2F transcription factor 4, p107/p130-binding
hsa-miR-338-5p	1	0	1	1	1	1	EGR1	early growth response 1
hsa-miR-338-5p	1	0	1	1	1	1	FBN2	fibrillin 2
hsa-miR-338-5p	0	0	1	0	1	1	FGF2	fibroblast growth factor 2 (basic)
hsa-miR-338-5p	1	0	1	0	1	1	FUT4	fucosyltransferase 4 (alpha (1,3) fucosyltransferase, myeloid-specific)
hsa-miR-338-5p	1	0	1	0	1	1	GNAI1	guanine nucleotide binding protein (G protein), alpha inhibiting activity polypeptide 1
hsa-miR-338-5p	0	0	1	0	1	1	GYPA	glycophorin A (MNS blood group)
hsa-miR-338-5p	1	0	1	1	1	1	HIVEP1	human immunodeficiency virus type I enhancer binding protein 1
hsa-miR-338-5p	1	0	1	1	1	1	ID1	inhibitor of DNA binding 1, dominant negative helix-loop-helix protein
hsa-miR-338-5p	1	0	1	1	1	1	JAK1	Janus kinase 1
hsa-miR-338-5p	1	0	1	1	1	1	KCNJ3	potassium inwardly-rectifying channel, subfamily J, member 3
hsa-miR-338-5p	1	0	1	1	1	1	KPNA3	karyopherin alpha 3 (importin alpha 4)
hsa-miR-338-5p	1	0	1	1	1	1	LRP1	low density lipoprotein receptor-related protein 1
hsa-miR-338-5p	0	0	1	1	1	1	TACSTD2	tumor-associated calcium signal transducer 2
hsa-miR-338-5p	1	0	1	1	1	1	MN1	meningioma (disrupted in balanced translocation) 1
hsa-miR-338-5p	0	0	1	1	1	1	MSH3	mutS homolog 3 (E. coli)
hsa-miR-338-5p	1	0	1	1	1	1	MSR1	macrophage scavenger receptor 1
hsa-miR-338-5p	0	0	1	1	1	1	MTRR	5-methyltetrahydrofolate-homocysteine methyltransferase reductase
hsa-miR-338-5p	0	0	1	1	1	1	NID1	nidogen 1
hsa-miR-338-5p	1	0	1	1	1	1	NKX2-2	NK2 homeobox 2
hsa-miR-338-5p	1	0	1	1	1	1	NPAT	nuclear protein, ataxia-telangiectasia locus
hsa-miR-338-5p	1	0	1	1	1	1	NPTX1	neuronal pentraxin I
hsa-miR-338-5p	1	0	1	0	1	1	NRAS	neuroblastoma RAS viral (v-ras) oncogene homolog
hsa-miR-338-5p	1	0	1	1	1	1	NTF3	neurotrophin 3
hsa-miR-338-5p	1	0	1	1	1	1	PCSK6	proprotein convertase subtilisin/kexin type 6
hsa-miR-338-5p	1	0	1	0	1	1	PAPPA	pregnancy-associated plasma protein A, pappalysin 1
hsa-miR-338-5p	0	0	1	1	1	1	PCK1	phosphoenolpyruvate carboxykinase 1 (soluble)
hsa-miR-338-5p	0	0	1	1	1	1	PCNA	proliferating cell nuclear antigen
hsa-miR-338-5p	1	0	1	0	1	1	CDK17	cyclin-dependent kinase 17
hsa-miR-338-5p	0	0	1	1	1	1	PFDN4	prefoldin subunit 4
hsa-miR-338-5p	1	0	1	1	1	1	PLAGL2	pleiomorphic adenoma gene-like 2
hsa-miR-338-5p	0	0	1	1	0	0	PLCG2	phospholipase C, gamma 2 (phosphatidylinositol-specific)
hsa-miR-338-5p	0	0	1	0	1	1	PLN	phospholamban
hsa-miR-338-5p	1	0	1	1	1	1	PPP1CB	protein phosphatase 1, catalytic subunit, beta isozyme
hsa-miR-338-5p	1	0	1	1	1	1	PPP2CA	protein phosphatase 2, catalytic subunit, alpha isozyme
hsa-miR-338-5p	1	0	1	1	1	1	PPP2R3A	protein phosphatase 2, regulatory subunit B'', alpha
hsa-miR-338-5p	0	0	1	1	1	1	PRKCB	protein kinase C, beta
hsa-miR-338-5p	1	0	1	1	0	0	PSMD7	proteasome (prosome, macropain) 26S subunit, non-ATPase, 7
hsa-miR-338-5p	1	0	1	1	1	1	PTPN1	protein tyrosine phosphatase, non-receptor type 1
hsa-miR-338-5p	1	0	1	1	1	1	PTPN2	protein tyrosine phosphatase, non-receptor type 2
hsa-miR-338-5p	1	0	1	1	1	1	PTPN9	protein tyrosine phosphatase, non-receptor type 9
hsa-miR-338-5p	0	0	1	1	1	1	PTPRM	protein tyrosine phosphatase, receptor type, M
hsa-miR-338-5p	1	0	1	1	1	1	PTPRO	protein tyrosine phosphatase, receptor type, O
hsa-miR-338-5p	1	0	1	1	1	1	ARID4A	AT rich interactive domain 4A (RBP1-like)
hsa-miR-338-5p	0	0	1	1	1	1	RING1	ring finger protein 1
hsa-miR-338-5p	1	0	1	0	1	1	SCN9A	sodium channel, voltage-gated, type IX, alpha subunit
hsa-miR-338-5p	1	0	1	1	1	1	SH3GL2	SH3-domain GRB2-like 2
hsa-miR-338-5p	1	0	1	0	1	1	SLC6A1	solute carrier family 6 (neurotransmitter transporter, GABA), member 1
hsa-miR-338-5p	1	0	1	1	1	1	SNX2	sorting nexin 2
hsa-miR-338-5p	1	0	1	0	1	1	SOX11	SRY (sex determining region Y)-box 11
hsa-miR-338-5p	1	0	1	1	1	1	SPTBN1	spectrin, beta, non-erythrocytic 1
hsa-miR-338-5p	0	0	1	1	1	1	SRY	sex determining region Y
hsa-miR-338-5p	0	0	1	1	1	1	STRN	striatin, calmodulin binding protein
hsa-miR-338-5p	0	0	1	1	1	1	TAC1	tachykinin, precursor 1
hsa-miR-338-5p	0	0	1	1	1	1	TAF2	TAF2 RNA polymerase II, TATA box binding protein (TBP)-associated factor, 150kDa
hsa-miR-338-5p	1	0	1	1	1	1	TAF4	TAF4 RNA polymerase II, TATA box binding protein (TBP)-associated factor, 135kDa
hsa-miR-338-5p	0	0	1	0	1	1	TDGF1	teratocarcinoma-derived growth factor 1
hsa-miR-338-5p	1	0	1	1	1	1	TEC	tec protein tyrosine kinase
hsa-miR-338-5p	1	0	1	1	1	1	TFAP2B	transcription factor AP-2 beta (activating enhancer binding protein 2 beta)
hsa-miR-338-5p	1	0	1	1	1	1	TGFB3	transforming growth factor, beta 3
hsa-miR-338-5p	1	0	1	1	1	1	TRAPPC10	trafficking protein particle complex 10
hsa-miR-338-5p	0	0	1	1	1	1	TPP2	tripeptidyl peptidase II
hsa-miR-338-5p	0	0	1	1	1	1	TRAF3	TNF receptor-associated factor 3
hsa-miR-338-5p	0	0	1	1	1	1	TTK	TTK protein kinase
hsa-miR-338-5p	1	0	1	0	1	1	UBE2L3	ubiquitin-conjugating enzyme E2L 3
hsa-miR-338-5p	1	0	1	1	1	1	UBE2N	ubiquitin-conjugating enzyme E2N
hsa-miR-338-5p	0	0	1	1	1	1	UBE2V2	ubiquitin-conjugating enzyme E2 variant 2
hsa-miR-338-5p	1	0	1	1	1	1	YY1	YY1 transcription factor
hsa-miR-338-5p	1	0	1	0	1	1	YWHAB	tyrosine 3-monooxygenase/tryptophan 5-monooxygenase activation protein, beta polypeptide
hsa-miR-338-5p	0	0	1	0	1	1	ZFY	zinc finger protein, Y-linked
hsa-miR-338-5p	1	0	1	0	1	1	BSN	bassoon (presynaptic cytomatrix protein)
hsa-miR-338-5p	1	0	1	1	1	1	FZD5	frizzled family receptor 5
hsa-miR-338-5p	1	0	1	1	1	1	CUL5	cullin 5
hsa-miR-338-5p	1	0	1	1	1	1	NRIP1	nuclear receptor interacting protein 1
hsa-miR-338-5p	1	0	1	1	1	1	FZD7	frizzled family receptor 7
hsa-miR-338-5p	1	0	1	1	1	1	PIP4K2B	phosphatidylinositol-5-phosphate 4-kinase, type II, beta
hsa-miR-338-5p	1	0	1	1	1	1	EEA1	early endosome antigen 1
hsa-miR-338-5p	1	0	1	1	1	1	KLF11	Kruppel-like factor 11
hsa-miR-338-5p	0	0	1	1	1	1	FAM193A	family with sequence similarity 193, member A
hsa-miR-338-5p	0	0	1	1	1	1	SLC25A12	solute carrier family 25 (aspartate/glutamate carrier), member 12
hsa-miR-338-5p	0	0	1	1	1	1	SNX4	sorting nexin 4
hsa-miR-338-5p	1	0	1	1	1	1	URI1	URI1, prefoldin-like chaperone
hsa-miR-338-5p	1	0	1	1	1	1	NR5A2	nuclear receptor subfamily 5, group A, member 2
hsa-miR-338-5p	0	0	1	1	0	0	DLK1	delta-like 1 homolog (Drosophila)
hsa-miR-338-5p	0	0	1	1	1	1	FPGT	fucose-1-phosphate guanylyltransferase
hsa-miR-338-5p	0	0	1	1	1	1	CREG1	cellular repressor of E1A-stimulated genes 1
hsa-miR-338-5p	1	0	1	1	1	1	NRP2	neuropilin 2
hsa-miR-338-5p	1	0	1	1	1	1	KAT2B	K(lysine) acetyltransferase 2B
hsa-miR-338-5p	1	0	1	0	1	1	CDK5R1	cyclin-dependent kinase 5, regulatory subunit 1 (p35)
hsa-miR-338-5p	1	0	1	1	1	1	ALDH1A2	aldehyde dehydrogenase 1 family, member A2
hsa-miR-338-5p	0	0	1	1	1	1	PRPF4B	PRP4 pre-mRNA processing factor 4 homolog B (yeast)
hsa-miR-338-5p	1	0	1	0	1	1	WASL	Wiskott-Aldrich syndrome-like
hsa-miR-338-5p	1	0	1	0	1	1	SEMA5A	sema domain, seven thrombospondin repeats (type 1 and type 1-like), transmembrane domain (TM) and short cytoplasmic domain, (semaphorin) 5A
hsa-miR-338-5p	0	0	1	1	1	1	UBA3	ubiquitin-like modifier activating enzyme 3
hsa-miR-338-5p	1	0	1	1	1	1	BTAF1	BTAF1 RNA polymerase II, B-TFIID transcription factor-associated, 170kDa (Mot1 homolog, S. cerevisiae)
hsa-miR-338-5p	1	0	1	1	1	1	CDH12	cadherin 12, type 2 (N-cadherin 2)
hsa-miR-338-5p	1	0	1	0	1	1	DGKB	diacylglycerol kinase, beta 90kDa
hsa-miR-338-5p	1	0	1	1	1	1	EYA4	eyes absent homolog 4 (Drosophila)
hsa-miR-338-5p	1	0	1	1	1	1	FGF12	fibroblast growth factor 12
hsa-miR-338-5p	1	0	1	1	1	1	FGF13	fibroblast growth factor 13
hsa-miR-338-5p	1	0	1	1	1	1	GMFB	glia maturation factor, beta
hsa-miR-338-5p	0	0	1	0	1	1	OAZ1	ornithine decarboxylase antizyme 1
hsa-miR-338-5p	1	0	1	1	1	1	RAB5A	RAB5A, member RAS oncogene family
hsa-miR-338-5p	1	0	1	0	1	1	SLC1A2	solute carrier family 1 (glial high affinity glutamate transporter), member 2
hsa-miR-338-5p	1	0	1	1	1	1	STK17B	serine/threonine kinase 17b
hsa-miR-338-5p	1	0	1	0	1	1	MED14	mediator complex subunit 14
hsa-miR-338-5p	0	0	1	1	1	1	HOMER1	homer homolog 1 (Drosophila)
hsa-miR-338-5p	1	0	1	1	1	1	GDA	guanine deaminase
hsa-miR-338-5p	1	0	1	1	1	1	BCL9	B-cell CLL/lymphoma 9
hsa-miR-338-5p	1	0	1	1	1	1	CREB1	cAMP responsive element binding protein 1
hsa-miR-338-5p	1	0	1	1	1	1	DDX5	DEAD (Asp-Glu-Ala-Asp) box helicase 5
hsa-miR-338-5p	1	0	1	1	1	1	DUSP2	dual specificity phosphatase 2
hsa-miR-338-5p	1	0	1	1	1	1	EGR3	early growth response 3
hsa-miR-338-5p	1	0	1	0	1	1	ACSL4	acyl-CoA synthetase long-chain family member 4
hsa-miR-338-5p	1	0	1	0	1	1	FOXD1	forkhead box D1
hsa-miR-338-5p	1	0	1	1	1	1	FUT8	fucosyltransferase 8 (alpha (1,6) fucosyltransferase)
hsa-miR-338-5p	0	0	1	1	1	1	GCSH	glycine cleavage system protein H (aminomethyl carrier)
hsa-miR-338-5p	1	0	1	1	1	1	GOLGA2	golgin A2
hsa-miR-338-5p	0	0	1	1	1	1	FOXA1	forkhead box A1
hsa-miR-338-5p	1	0	1	1	1	1	LRP2	low density lipoprotein receptor-related protein 2
hsa-miR-338-5p	1	0	1	1	0	0	ROR2	receptor tyrosine kinase-like orphan receptor 2
hsa-miR-338-5p	0	0	1	0	0	0	XKRY	XK, Kell blood group complex subunit-related, Y-linked
hsa-miR-338-5p	1	0	1	1	1	1	SCAF11	SR-related CTD-associated factor 11
hsa-miR-338-5p	1	0	1	1	1	1	LARGE	like-glycosyltransferase
hsa-miR-338-5p	0	0	1	1	1	1	MMP20	matrix metallopeptidase 20
hsa-miR-338-5p	1	0	1	1	1	1	B4GALT6	UDP-Gal:betaGlcNAc beta 1,4- galactosyltransferase, polypeptide 6
hsa-miR-338-5p	1	0	1	1	1	1	B4GALT5	UDP-Gal:betaGlcNAc beta 1,4- galactosyltransferase, polypeptide 5
hsa-miR-338-5p	1	0	1	0	1	1	VAMP3	vesicle-associated membrane protein 3 (cellubrevin)
hsa-miR-338-5p	1	0	1	1	1	1	NRXN3	neurexin 3
hsa-miR-338-5p	1	0	1	0	1	1	ARHGEF6	Rac/Cdc42 guanine nucleotide exchange factor (GEF) 6
hsa-miR-338-5p	1	0	1	1	1	1	AKAP7	A kinase (PRKA) anchor protein 7
hsa-miR-338-5p	1	0	1	1	1	1	ONECUT2	one cut homeobox 2
hsa-miR-338-5p	0	0	1	1	1	1	ITM2A	integral membrane protein 2A
hsa-miR-338-5p	1	0	1	1	1	1	CXCL14	chemokine (C-X-C motif) ligand 14
hsa-miR-338-5p	0	0	1	1	1	1	CDH6	cadherin 6, type 2, K-cadherin (fetal kidney)
hsa-miR-338-5p	1	0	1	0	1	1	DOCK3	dedicator of cytokinesis 3
hsa-miR-338-5p	0	0	1	1	1	1	JAK2	Janus kinase 2
hsa-miR-338-5p	1	0	1	0	1	1	KRAS	v-Ki-ras2 Kirsten rat sarcoma viral oncogene homolog
hsa-miR-338-5p	1	0	1	1	1	1	RELN	reelin
hsa-miR-338-5p	1	0	1	0	1	1	SEL1L	sel-1 suppressor of lin-12-like (C. elegans)
hsa-miR-338-5p	0	0	1	1	1	1	SIM1	single-minded homolog 1 (Drosophila)
hsa-miR-338-5p	1	0	1	1	0	0	ZMYM3	zinc finger, MYM-type 3
hsa-miR-338-5p	1	0	1	1	1	1	SLC23A2	solute carrier family 23 (nucleobase transporters), member 2
hsa-miR-338-5p	1	0	1	1	1	1	MED13	mediator complex subunit 13
hsa-miR-338-5p	1	0	1	1	1	1	BMI1	BMI1 polycomb ring finger oncogene
hsa-miR-338-5p	1	0	1	0	1	1	CALM3	calmodulin 3 (phosphorylase kinase, delta)
hsa-miR-338-5p	1	0	1	0	1	1	DLX6	distal-less homeobox 6
hsa-miR-338-5p	1	0	1	1	1	1	ETS1	v-ets erythroblastosis virus E26 oncogene homolog 1 (avian)
hsa-miR-338-5p	1	0	1	1	1	1	GABPB1	GA binding protein transcription factor, beta subunit 1
hsa-miR-338-5p	1	0	1	1	1	1	GAS2	growth arrest-specific 2
hsa-miR-338-5p	0	0	1	1	1	1	MSTN	myostatin
hsa-miR-338-5p	1	0	1	1	1	1	GFRA1	GDNF family receptor alpha 1
hsa-miR-338-5p	0	0	1	1	1	1	LPAR4	lysophosphatidic acid receptor 4
hsa-miR-338-5p	1	0	1	1	1	1	H3F3B	H3 histone, family 3B (H3.3B)
hsa-miR-338-5p	1	0	1	1	1	1	NEFM	neurofilament, medium polypeptide
hsa-miR-338-5p	1	0	1	1	0	0	NNAT	neuronatin
hsa-miR-338-5p	0	0	1	1	1	1	SEPP1	selenoprotein P, plasma, 1
hsa-miR-338-5p	1	0	1	0	1	1	SRC	v-src sarcoma (Schmidt-Ruppin A-2) viral oncogene homolog (avian)
hsa-miR-338-5p	1	0	1	1	1	1	VEGFC	vascular endothelial growth factor C
hsa-miR-338-5p	1	0	1	0	1	1	CCDC6	coiled-coil domain containing 6
hsa-miR-338-5p	1	0	1	1	1	1	MAFB	v-maf musculoaponeurotic fibrosarcoma oncogene homolog B (avian)
hsa-miR-338-5p	0	0	1	1	1	1	INSL5	insulin-like 5
hsa-miR-338-5p	1	0	1	1	1	1	PIGK	phosphatidylinositol glycan anchor biosynthesis, class K
hsa-miR-338-5p	1	0	1	1	1	1	MNX1	motor neuron and pancreas homeobox 1
hsa-miR-338-5p	1	0	1	1	1	1	IRS1	insulin receptor substrate 1
hsa-miR-338-5p	1	0	1	1	1	1	MAB21L1	mab-21-like 1 (C. elegans)
hsa-miR-338-5p	0	0	1	0	1	1	POU3F2	POU class 3 homeobox 2
hsa-miR-338-5p	1	0	1	1	1	1	RGS4	regulator of G-protein signaling 4
hsa-miR-338-5p	1	0	1	1	1	1	RHEB	Ras homolog enriched in brain
hsa-miR-338-5p	1	0	1	1	1	1	DLL1	delta-like 1 (Drosophila)
hsa-miR-338-5p	0	0	1	1	1	1	SRSF4	serine/arginine-rich splicing factor 4
hsa-miR-338-5p	1	0	1	1	1	1	SYT1	synaptotagmin I
hsa-miR-338-5p	1	0	1	1	1	1	UST	uronyl-2-sulfotransferase
hsa-miR-338-5p	0	0	1	1	1	1	TOB1	transducer of ERBB2, 1
hsa-miR-338-5p	0	0	1	1	1	1	RNF41	ring finger protein 41
hsa-miR-338-5p	0	0	1	1	1	1	MPHOSPH10	M-phase phosphoprotein 10 (U3 small nucleolar ribonucleoprotein)
hsa-miR-338-5p	1	0	1	1	1	1	PURA	purine-rich element binding protein A
hsa-miR-338-5p	1	0	1	1	1	1	BET1	blocked early in transport 1 homolog (S. cerevisiae)
hsa-miR-338-5p	0	0	1	1	1	1	EIF1B	eukaryotic translation initiation factor 1B
hsa-miR-338-5p	0	0	1	1	1	1	SF3A1	splicing factor 3a, subunit 1, 120kDa
hsa-miR-338-5p	1	0	1	1	1	1	MEOX2	mesenchyme homeobox 2
hsa-miR-338-5p	1	0	1	1	1	1	MMP16	matrix metallopeptidase 16 (membrane-inserted)
hsa-miR-338-5p	1	0	1	1	1	1	MTF1	metal-regulatory transcription factor 1
hsa-miR-338-5p	1	0	1	0	1	1	NAB1	NGFI-A binding protein 1 (EGR1 binding protein 1)
hsa-miR-338-5p	0	0	1	1	1	1	SOX1	SRY (sex determining region Y)-box 1
hsa-miR-338-5p	1	0	1	0	1	1	HDAC4	histone deacetylase 4
hsa-miR-338-5p	0	0	1	1	0	0	RRAGB	Ras-related GTP binding B
hsa-miR-338-5p	1	0	1	0	1	1	SCML2	sex comb on midleg-like 2 (Drosophila)
hsa-miR-338-5p	1	0	1	1	1	1	SPON1	spondin 1, extracellular matrix protein
hsa-miR-338-5p	1	0	1	1	1	1	DAGLA	diacylglycerol lipase, alpha
hsa-miR-338-5p	1	0	1	1	1	1	TMEM50B	transmembrane protein 50B
hsa-miR-338-5p	1	0	1	1	1	1	CAPZA2	capping protein (actin filament) muscle Z-line, alpha 2
hsa-miR-338-5p	1	0	1	1	1	1	NCK1	NCK adaptor protein 1
hsa-miR-338-5p	0	0	1	1	1	1	NKX3-1	NK3 homeobox 1
hsa-miR-338-5p	1	0	1	1	1	1	NSF	N-ethylmaleimide-sensitive factor
hsa-miR-338-5p	0	0	1	1	1	1	PA2G4	proliferation-associated 2G4, 38kDa
hsa-miR-338-5p	1	0	1	1	1	1	CDK16	cyclin-dependent kinase 16
hsa-miR-338-5p	1	0	1	1	1	1	PDGFRA	platelet-derived growth factor receptor, alpha polypeptide
hsa-miR-338-5p	0	0	1	1	1	1	PPP2R5A	protein phosphatase 2, regulatory subunit B', alpha
hsa-miR-338-5p	1	0	1	1	1	1	PKN2	protein kinase N2
hsa-miR-338-5p	1	0	1	1	1	1	RAD21	RAD21 homolog (S. pombe)
hsa-miR-338-5p	1	0	1	1	1	1	CCL7	chemokine (C-C motif) ligand 7
hsa-miR-338-5p	0	0	1	1	1	1	TNFAIP2	tumor necrosis factor, alpha-induced protein 2
hsa-miR-338-5p	1	0	1	1	1	1	BASP1	brain abundant, membrane attached signal protein 1
hsa-miR-338-5p	1	0	1	1	1	1	TIMM17A	translocase of inner mitochondrial membrane 17 homolog A (yeast)
hsa-miR-338-5p	0	0	1	1	1	1	CAP2	CAP, adenylate cyclase-associated protein, 2 (yeast)
hsa-miR-338-5p	1	0	1	1	1	1	NEBL	nebulette
hsa-miR-338-5p	1	0	1	1	1	1	CDC42EP3	CDC42 effector protein (Rho GTPase binding) 3
hsa-miR-338-5p	1	0	1	1	1	1	DYNLT3	dynein, light chain, Tctex-type 3
hsa-miR-338-5p	1	0	1	0	1	1	NCOA2	nuclear receptor coactivator 2
hsa-miR-338-5p	1	0	1	0	1	1	API5	apoptosis inhibitor 5
hsa-miR-338-5p	1	0	1	1	1	1	KDM5B	lysine (K)-specific demethylase 5B
hsa-miR-338-5p	0	0	1	1	1	1	PPP1R17	protein phosphatase 1, regulatory subunit 17
hsa-miR-338-5p	0	0	1	1	1	1	FGL2	fibrinogen-like 2
hsa-miR-338-5p	0	0	1	0	1	1	SUB1	SUB1 homolog (S. cerevisiae)
hsa-miR-338-5p	1	0	1	1	1	1	SPIN1	spindlin 1
hsa-miR-338-5p	1	0	1	1	1	1	DIAPH2	diaphanous homolog 2 (Drosophila)
hsa-miR-338-5p	0	0	1	1	1	1	SYPL1	synaptophysin-like 1
hsa-miR-338-5p	1	0	1	1	1	1	CBX1	chromobox homolog 1
hsa-miR-338-5p	1	0	1	1	1	1	FERMT2	fermitin family member 2
hsa-miR-338-5p	0	0	1	1	1	1	HOXA7	homeobox A7
hsa-miR-338-5p	1	0	1	1	1	1	SKP1	S-phase kinase-associated protein 1
hsa-miR-338-5p	1	0	1	0	1	1	SLC5A3	solute carrier family 5 (sodium/myo-inositol cotransporter), member 3
hsa-miR-338-5p	1	0	1	1	1	1	NR4A3	nuclear receptor subfamily 4, group A, member 3
hsa-miR-338-5p	1	0	1	1	1	1	UBL3	ubiquitin-like 3
hsa-miR-338-5p	1	0	1	1	1	1	UTRN	utrophin
hsa-miR-338-5p	1	0	1	1	1	1	ZIC2	Zic family member 2
hsa-miR-338-5p	1	0	1	1	1	1	VEZF1	vascular endothelial zinc finger 1
hsa-miR-338-5p	0	0	1	0	1	1	ZXDB	zinc finger, X-linked, duplicated B
hsa-miR-338-5p	1	0	1	1	1	1	TESK2	testis-specific kinase 2
hsa-miR-338-5p	0	0	1	1	1	1	WIF1	WNT inhibitory factor 1
hsa-miR-338-5p	1	0	1	1	1	1	PALM2-AKAP2	PALM2-AKAP2 readthrough
hsa-miR-338-5p	0	0	1	1	1	1	SLC6A14	solute carrier family 6 (amino acid transporter), member 14
hsa-miR-338-5p	1	0	1	1	1	1	KLF12	Kruppel-like factor 12
hsa-miR-338-5p	1	0	1	1	1	1	CBX3	chromobox homolog 3
hsa-miR-338-5p	1	0	1	1	1	1	ZNF236	zinc finger protein 236
hsa-miR-338-5p	0	0	1	0	1	1	AP4E1	adaptor-related protein complex 4, epsilon 1 subunit
hsa-miR-338-5p	0	0	1	1	1	1	MMRN1	multimerin 1
hsa-miR-338-5p	1	0	1	1	1	1	TARDBP	TAR DNA binding protein
hsa-miR-338-5p	1	0	1	0	1	1	ZFPM2	zinc finger protein, multitype 2
hsa-miR-338-5p	1	0	1	0	1	1	CASP8AP2	caspase 8 associated protein 2
hsa-miR-338-5p	0	0	1	1	1	1	EHF	ets homologous factor
hsa-miR-338-5p	1	0	1	1	1	1	MGAT4A	mannosyl (alpha-1,3-)-glycoprotein beta-1,4-N-acetylglucosaminyltransferase, isozyme A
hsa-miR-338-5p	1	0	1	1	1	1	MGEA5	meningioma expressed antigen 5 (hyaluronidase)
hsa-miR-338-5p	0	0	1	1	1	1	SEPHS2	selenophosphate synthetase 2
hsa-miR-338-5p	1	0	1	1	1	1	HS2ST1	heparan sulfate 2-O-sulfotransferase 1
hsa-miR-338-5p	1	0	1	1	1	1	KCND2	potassium voltage-gated channel, Shal-related subfamily, member 2
hsa-miR-338-5p	1	0	1	0	1	1	ACAP2	ArfGAP with coiled-coil, ankyrin repeat and PH domains 2
hsa-miR-338-5p	1	0	1	0	1	1	RAPGEF5	Rap guanine nucleotide exchange factor (GEF) 5
hsa-miR-338-5p	1	0	1	1	1	1	MMD	monocyte to macrophage differentiation-associated
hsa-miR-338-5p	1	0	1	1	1	1	PITPNB	phosphatidylinositol transfer protein, beta
hsa-miR-338-5p	1	0	1	1	1	1	RANBP6	RAN binding protein 6
hsa-miR-338-5p	0	0	1	0	1	1	TLL1	tolloid-like 1
hsa-miR-338-5p	1	0	1	1	1	1	TLL2	tolloid-like 2
hsa-miR-338-5p	1	0	1	1	1	1	YWHAG	tyrosine 3-monooxygenase/tryptophan 5-monooxygenase activation protein, gamma polypeptide
hsa-miR-338-5p	0	0	1	1	1	1	CD24	CD24 molecule
hsa-miR-338-5p	1	0	1	0	1	1	FLRT2	fibronectin leucine rich transmembrane protein 2
hsa-miR-338-5p	0	0	1	1	1	1	N6AMT1	N-6 adenine-specific DNA methyltransferase 1 (putative)
hsa-miR-338-5p	0	0	1	1	1	1	TBK1	TANK-binding kinase 1
hsa-miR-338-5p	1	0	1	1	1	1	PPARGC1A	peroxisome proliferator-activated receptor gamma, coactivator 1 alpha
hsa-miR-338-5p	0	0	1	1	1	1	PURG	purine-rich element binding protein G
hsa-miR-338-5p	1	0	1	0	1	1	TRHDE	thyrotropin-releasing hormone degrading enzyme
hsa-miR-338-5p	1	0	1	1	1	1	NCKAP1	NCK-associated protein 1
hsa-miR-338-5p	1	0	1	1	1	1	LRP12	low density lipoprotein receptor-related protein 12
hsa-miR-338-5p	0	0	1	1	1	1	UBQLN1	ubiquilin 1
hsa-miR-338-5p	1	0	1	1	1	1	ASF1A	ASF1 anti-silencing function 1 homolog A (S. cerevisiae)
hsa-miR-338-5p	1	0	1	1	1	1	RGCC	regulator of cell cycle
hsa-miR-338-5p	0	0	1	1	0	0	MCTS1	malignant T cell amplified sequence 1
hsa-miR-338-5p	1	0	1	1	1	1	ZNF770	zinc finger protein 770
hsa-miR-338-5p	1	0	1	0	1	1	C16orf72	chromosome 16 open reading frame 72
hsa-miR-338-5p	1	0	1	1	1	1	ZBTB44	zinc finger and BTB domain containing 44
hsa-miR-338-5p	0	0	1	0	1	1	ADAMTS3	ADAM metallopeptidase with thrombospondin type 1 motif, 3
hsa-miR-338-5p	0	0	1	1	0	0	RBX1	ring-box 1, E3 ubiquitin protein ligase
hsa-miR-338-5p	1	0	1	0	1	1	ODZ1	odz, odd Oz/ten-m homolog 1 (Drosophila)
hsa-miR-338-5p	1	0	1	1	1	1	MAPRE2	microtubule-associated protein, RP/EB family, member 2
hsa-miR-338-5p	0	0	1	1	1	1	TRAM1	translocation associated membrane protein 1
hsa-miR-338-5p	0	0	1	0	1	1	EID1	EP300 interacting inhibitor of differentiation 1
hsa-miR-338-5p	0	0	1	1	1	1	ANKRD1	ankyrin repeat domain 1 (cardiac muscle)
hsa-miR-338-5p	0	0	1	1	1	1	TSPAN13	tetraspanin 13
hsa-miR-338-5p	1	0	1	1	1	1	AFF4	AF4/FMR2 family, member 4
hsa-miR-338-5p	1	0	1	1	1	1	SERP1	stress-associated endoplasmic reticulum protein 1
hsa-miR-338-5p	0	0	1	1	1	1	MCAT	malonyl CoA:ACP acyltransferase (mitochondrial)
hsa-miR-338-5p	1	0	1	1	1	1	CNOT2	CCR4-NOT transcription complex, subunit 2
hsa-miR-338-5p	0	0	1	1	1	1	TMOD2	tropomodulin 2 (neuronal)
hsa-miR-338-5p	0	0	1	1	1	1	ARFGAP3	ADP-ribosylation factor GTPase activating protein 3
hsa-miR-338-5p	1	0	1	1	1	1	ERO1L	ERO1-like (S. cerevisiae)
hsa-miR-338-5p	1	0	1	1	1	1	SLC40A1	solute carrier family 40 (iron-regulated transporter), member 1
hsa-miR-338-5p	1	0	1	1	1	1	HERC3	HECT and RLD domain containing E3 ubiquitin protein ligase 3
hsa-miR-338-5p	1	0	1	0	1	1	ATP11B	ATPase, class VI, type 11B
hsa-miR-338-5p	0	0	1	1	1	1	HOXC4	homeobox C4
hsa-miR-338-5p	0	0	1	1	1	1	PHF14	PHD finger protein 14
hsa-miR-338-5p	0	0	1	1	1	1	ZNF536	zinc finger protein 536
hsa-miR-338-5p	1	0	1	1	1	1	MLL4	myeloid/lymphoid or mixed-lineage leukemia 4
hsa-miR-338-5p	0	0	1	1	1	1	FRMPD4	FERM and PDZ domain containing 4
hsa-miR-338-5p	1	0	1	0	1	1	MLEC	malectin
hsa-miR-338-5p	1	0	1	1	1	1	SPCS2	signal peptidase complex subunit 2 homolog (S. cerevisiae)
hsa-miR-338-5p	1	0	1	0	1	1	SERTAD2	SERTA domain containing 2
hsa-miR-338-5p	1	0	1	1	1	1	DAZAP2	DAZ associated protein 2
hsa-miR-338-5p	1	0	1	0	1	1	KIAA0494	KIAA0494
hsa-miR-338-5p	1	0	1	1	1	1	JAKMIP2	janus kinase and microtubule interacting protein 2
hsa-miR-338-5p	1	0	1	0	1	1	PJA2	praja ring finger 2, E3 ubiquitin protein ligase
hsa-miR-338-5p	1	0	1	1	1	1	ZBTB39	zinc finger and BTB domain containing 39
hsa-miR-338-5p	1	0	1	0	1	1	LPPR4	lipid phosphate phosphatase-related protein type 4
hsa-miR-338-5p	0	0	1	1	1	1	KIAA0196	KIAA0196
hsa-miR-338-5p	1	0	1	1	1	1	ZBTB5	zinc finger and BTB domain containing 5
hsa-miR-338-5p	1	0	1	1	1	1	RNF44	ring finger protein 44
hsa-miR-338-5p	0	0	1	0	1	1	PPM1E	protein phosphatase, Mg2+/Mn2+ dependent, 1E
hsa-miR-338-5p	1	0	1	1	1	1	R3HDM2	R3H domain containing 2
hsa-miR-338-5p	1	0	1	1	1	1	SPAST	spastin
hsa-miR-338-5p	1	0	1	0	1	1	WDFY3	WD repeat and FYVE domain containing 3
hsa-miR-338-5p	1	0	1	1	1	1	USP33	ubiquitin specific peptidase 33
hsa-miR-338-5p	0	0	1	1	0	0	DOPEY1	dopey family member 1
hsa-miR-338-5p	1	0	1	0	1	1	ZNF609	zinc finger protein 609
hsa-miR-338-5p	1	0	1	0	1	1	PEG10	paternally expressed 10
hsa-miR-338-5p	1	0	1	1	1	1	SMG1	smg-1 homolog, phosphatidylinositol 3-kinase-related kinase (C. elegans)
hsa-miR-338-5p	1	0	1	0	1	1	ZZEF1	zinc finger, ZZ-type with EF-hand domain 1
hsa-miR-338-5p	1	0	1	1	1	1	RTF1	Rtf1, Paf1/RNA polymerase II complex component, homolog (S. cerevisiae)
hsa-miR-338-5p	1	0	1	1	1	1	RCOR1	REST corepressor 1
hsa-miR-338-5p	0	0	1	1	1	1	FBXO28	F-box protein 28
hsa-miR-338-5p	1	0	1	1	1	1	PLCB1	phospholipase C, beta 1 (phosphoinositide-specific)
hsa-miR-338-5p	1	0	1	1	1	1	PDS5A	PDS5, regulator of cohesion maintenance, homolog A (S. cerevisiae)
hsa-miR-338-5p	1	0	1	0	1	1	KIAA1024	KIAA1024
hsa-miR-338-5p	1	0	1	1	1	1	ARAP2	ArfGAP with RhoGAP domain, ankyrin repeat and PH domain 2
hsa-miR-338-5p	1	0	1	0	1	1	SRGAP2	SLIT-ROBO Rho GTPase activating protein 2
hsa-miR-338-5p	0	0	1	0	1	1	ZDHHC17	zinc finger, DHHC-type containing 17
hsa-miR-338-5p	1	0	1	1	1	1	MORC3	MORC family CW-type zinc finger 3
hsa-miR-338-5p	0	0	1	1	1	1	ANAPC13	anaphase promoting complex subunit 13
hsa-miR-338-5p	1	0	1	1	1	1	PARM1	prostate androgen-regulated mucin-like protein 1
hsa-miR-338-5p	1	0	1	1	1	1	CCDC28A	coiled-coil domain containing 28A
hsa-miR-338-5p	0	0	1	0	1	1	TMEM158	transmembrane protein 158 (gene/pseudogene)
hsa-miR-338-5p	1	0	1	1	1	1	CNOT6	CCR4-NOT transcription complex, subunit 6
hsa-miR-338-5p	1	0	1	0	1	1	MTMR9	myotubularin related protein 9
hsa-miR-338-5p	1	0	1	1	1	1	CNRIP1	cannabinoid receptor interacting protein 1
hsa-miR-338-5p	0	0	1	1	0	0	TSKU	tsukushi small leucine rich proteoglycan homolog (Xenopus laevis)
hsa-miR-338-5p	1	0	1	1	1	1	TOR1AIP1	torsin A interacting protein 1
hsa-miR-338-5p	1	0	1	0	1	1	WWC3	WWC family member 3
hsa-miR-338-5p	1	0	1	1	1	1	AZIN1	antizyme inhibitor 1
hsa-miR-338-5p	1	0	1	1	1	1	ST8SIA3	ST8 alpha-N-acetyl-neuraminide alpha-2,8-sialyltransferase 3
hsa-miR-338-5p	1	0	1	1	1	1	HOOK1	hook homolog 1 (Drosophila)
hsa-miR-338-5p	1	0	1	1	1	1	CDC40	cell division cycle 40 homolog (S. cerevisiae)
hsa-miR-338-5p	1	0	1	0	1	1	TRIM33	tripartite motif containing 33
hsa-miR-338-5p	1	0	1	1	1	1	TXNDC12	thioredoxin domain containing 12 (endoplasmic reticulum)
hsa-miR-338-5p	0	0	1	1	1	1	PELO	pelota homolog (Drosophila)
hsa-miR-338-5p	0	0	1	1	1	1	GAL	galanin prepropeptide
hsa-miR-338-5p	0	0	1	1	1	1	HMP19	HMP19 protein
hsa-miR-338-5p	1	0	1	0	1	1	KLF13	Kruppel-like factor 13
hsa-miR-338-5p	1	0	1	1	1	1	UBE2J1	ubiquitin-conjugating enzyme E2, J1
hsa-miR-338-5p	0	0	1	1	1	1	ISOC1	isochorismatase domain containing 1
hsa-miR-338-5p	1	0	1	1	1	1	GOLT1B	golgi transport 1B
hsa-miR-338-5p	0	0	1	1	1	1	HDGFRP3	hepatoma-derived growth factor, related protein 3
hsa-miR-338-5p	1	0	1	0	1	1	CNR1	cannabinoid receptor 1 (brain)
hsa-miR-338-5p	1	0	1	1	1	1	NSFL1C	NSFL1 (p97) cofactor (p47)
hsa-miR-338-5p	0	0	1	1	1	1	COMMD10	COMM domain containing 10
hsa-miR-338-5p	0	0	1	1	1	1	ACSL5	acyl-CoA synthetase long-chain family member 5
hsa-miR-338-5p	1	0	1	1	1	1	RNF138	ring finger protein 138, E3 ubiquitin protein ligase
hsa-miR-338-5p	1	0	1	1	1	1	TOB2	transducer of ERBB2, 2
hsa-miR-338-5p	0	0	1	1	1	1	CDH9	cadherin 9, type 2 (T1-cadherin)
hsa-miR-338-5p	1	0	1	1	1	1	RAB14	RAB14, member RAS oncogene family
hsa-miR-338-5p	1	0	1	1	1	1	ARID4B	AT rich interactive domain 4B (RBP1-like)
hsa-miR-338-5p	1	0	1	0	1	1	RNF141	ring finger protein 141
hsa-miR-338-5p	1	0	1	1	1	1	PHF20	PHD finger protein 20
hsa-miR-338-5p	1	0	1	0	1	1	CRIM1	cysteine rich transmembrane BMP regulator 1 (chordin-like)
hsa-miR-338-5p	1	0	1	1	1	1	C20orf111	chromosome 20 open reading frame 111
hsa-miR-338-5p	0	0	1	0	1	1	ERGIC2	ERGIC and golgi 2
hsa-miR-338-5p	1	0	1	1	1	1	RAB6B	RAB6B, member RAS oncogene family
hsa-miR-338-5p	1	0	1	1	1	1	UFM1	ubiquitin-fold modifier 1
hsa-miR-338-5p	1	0	1	1	1	1	GALNT7	UDP-N-acetyl-alpha-D-galactosamine:polypeptide N-acetylgalactosaminyltransferase 7 (GalNAc-T7)
hsa-miR-338-5p	1	0	1	1	1	1	CPSF2	cleavage and polyadenylation specific factor 2, 100kDa
hsa-miR-338-5p	0	0	1	1	1	1	NKRF	NFKB repressing factor
hsa-miR-338-5p	0	0	1	0	1	1	TRIM44	tripartite motif containing 44
hsa-miR-338-5p	0	0	1	0	1	1	VEZT	vezatin, adherens junctions transmembrane protein
hsa-miR-338-5p	0	0	1	1	1	1	MTMR8	myotubularin related protein 8
hsa-miR-338-5p	1	0	1	0	1	1	DCAF16	DDB1 and CUL4 associated factor 16
hsa-miR-338-5p	1	0	1	0	1	1	CMTM6	CKLF-like MARVEL transmembrane domain containing 6
hsa-miR-338-5p	1	0	1	1	0	0	OSGEP	O-sialoglycoprotein endopeptidase
hsa-miR-338-5p	1	0	1	0	1	1	MARCH5	membrane-associated ring finger (C3HC4) 5
hsa-miR-338-5p	1	0	1	1	1	1	FBXO34	F-box protein 34
hsa-miR-338-5p	1	0	1	1	1	1	ZNHIT6	zinc finger, HIT-type containing 6
hsa-miR-338-5p	0	0	1	1	1	1	IWS1	IWS1 homolog (S. cerevisiae)
hsa-miR-338-5p	1	0	1	1	1	1	C9orf40	chromosome 9 open reading frame 40
hsa-miR-338-5p	1	0	1	1	1	1	WDYHV1	WDYHV motif containing 1
hsa-miR-338-5p	1	0	1	1	1	1	ATG2B	autophagy related 2B
hsa-miR-338-5p	0	0	1	0	1	1	WDR60	WD repeat domain 60
hsa-miR-338-5p	0	0	1	1	1	1	TMEM38B	transmembrane protein 38B
hsa-miR-338-5p	1	0	1	1	1	1	FAM178A	family with sequence similarity 178, member A
hsa-miR-338-5p	0	0	1	1	0	0	CEP55	centrosomal protein 55kDa
hsa-miR-338-5p	0	0	1	1	0	0	SMG8	smg-8 homolog, nonsense mediated mRNA decay factor (C. elegans)
hsa-miR-338-5p	1	0	1	1	1	1	RPRD1A	regulation of nuclear pre-mRNA domain containing 1A
hsa-miR-338-5p	0	0	1	1	1	1	TMLHE	trimethyllysine hydroxylase, epsilon
hsa-miR-338-5p	1	0	1	1	1	1	UBA6	ubiquitin-like modifier activating enzyme 6
hsa-miR-338-5p	0	0	1	1	1	1	SLC47A1	solute carrier family 47, member 1
hsa-miR-338-5p	1	0	1	1	1	1	TBC1D19	TBC1 domain family, member 19
hsa-miR-338-5p	1	0	1	1	1	1	PI4K2B	phosphatidylinositol 4-kinase type 2 beta
hsa-miR-338-5p	1	0	1	1	1	1	C9orf72	chromosome 9 open reading frame 72
hsa-miR-338-5p	1	0	1	1	1	1	RSBN1	round spermatid basic protein 1
hsa-miR-338-5p	1	0	1	1	1	1	SLC39A9	solute carrier family 39 (zinc transporter), member 9
hsa-miR-338-5p	0	0	1	1	1	1	HEMGN	hemogen
hsa-miR-338-5p	1	0	1	1	1	1	PAG1	phosphoprotein associated with glycosphingolipid microdomains 1
hsa-miR-338-5p	0	0	1	1	1	1	BEX1	brain expressed, X-linked 1
hsa-miR-338-5p	1	0	1	1	1	1	SLC16A10	solute carrier family 16, member 10 (aromatic amino acid transporter)
hsa-miR-338-5p	1	0	1	0	1	1	PCDHAC1	protocadherin alpha subfamily C, 1
hsa-miR-338-5p	1	0	1	0	1	1	PCDHAC2	protocadherin alpha subfamily C, 2
hsa-miR-338-5p	1	0	1	1	1	1	PCDHA1	protocadherin alpha 1
hsa-miR-338-5p	1	0	1	0	1	1	PCDHA10	protocadherin alpha 10
hsa-miR-338-5p	1	0	1	0	1	1	PCDHA11	protocadherin alpha 11
hsa-miR-338-5p	1	0	1	0	1	1	PCDHA12	protocadherin alpha 12
hsa-miR-338-5p	1	0	1	1	1	1	PCDHA2	protocadherin alpha 2
hsa-miR-338-5p	1	0	1	1	1	1	PCDHA3	protocadherin alpha 3
hsa-miR-338-5p	1	0	1	1	1	1	PCDHA6	protocadherin alpha 6
hsa-miR-338-5p	1	0	1	0	1	1	PCDHA7	protocadherin alpha 7
hsa-miR-338-5p	1	0	1	1	1	1	PCDHA8	protocadherin alpha 8
hsa-miR-338-5p	0	0	1	1	1	1	ERRFI1	ERBB receptor feedback inhibitor 1
hsa-miR-338-5p	1	0	1	1	1	1	HOXA10	homeobox A10
hsa-miR-338-5p	1	0	1	0	1	1	CCNJ	cyclin J
hsa-miR-338-5p	0	0	1	0	1	1	ARL15	ADP-ribosylation factor-like 15
hsa-miR-338-5p	1	0	1	1	1	1	PLEKHA3	pleckstrin homology domain containing, family A (phosphoinositide binding specific) member 3
hsa-miR-338-5p	1	0	1	1	1	1	GTPBP2	GTP binding protein 2
hsa-miR-338-5p	1	0	1	1	1	1	HOXA5	homeobox A5
hsa-miR-338-5p	1	0	1	1	1	1	EPB41L4B	erythrocyte membrane protein band 4.1 like 4B
hsa-miR-338-5p	1	0	1	1	1	1	C1GALT1	core 1 synthase, glycoprotein-N-acetylgalactosamine 3-beta-galactosyltransferase, 1
hsa-miR-338-5p	1	0	1	1	1	1	FEM1C	fem-1 homolog c (C. elegans)
hsa-miR-338-5p	1	0	1	1	1	1	CNNM4	cyclin M4
hsa-miR-338-5p	1	0	1	1	1	1	C5orf15	chromosome 5 open reading frame 15
hsa-miR-338-5p	1	0	1	1	1	1	C1orf63	chromosome 1 open reading frame 63
hsa-miR-338-5p	0	0	1	1	1	1	PAPPA2	pappalysin 2
hsa-miR-338-5p	1	0	1	0	1	1	SLC17A6	solute carrier family 17 (sodium-dependent inorganic phosphate cotransporter), member 6
hsa-miR-338-5p	1	0	1	0	1	1	EIF5A2	eukaryotic translation initiation factor 5A2
hsa-miR-338-5p	1	0	1	1	1	1	PCDH9	protocadherin 9
hsa-miR-338-5p	1	0	1	1	1	1	OSM	oncostatin M
hsa-miR-338-5p	1	0	1	1	1	1	RAB22A	RAB22A, member RAS oncogene family
hsa-miR-338-5p	0	0	1	1	0	0	AMIGO1	adhesion molecule with Ig-like domain 1
hsa-miR-338-5p	0	0	1	1	1	1	SHROOM4	shroom family member 4
hsa-miR-338-5p	1	0	1	1	1	1	ZNF608	zinc finger protein 608
hsa-miR-338-5p	1	0	1	0	1	1	NUFIP2	nuclear fragile X mental retardation protein interacting protein 2
hsa-miR-338-5p	1	0	1	1	1	1	NLGN2	neuroligin 2
hsa-miR-338-5p	1	0	1	1	1	1	SEMA6A	sema domain, transmembrane domain (TM), and cytoplasmic domain, (semaphorin) 6A
hsa-miR-338-5p	1	0	1	1	1	1	KLHL14	kelch-like 14 (Drosophila)
hsa-miR-338-5p	1	0	1	1	1	1	ARHGAP21	Rho GTPase activating protein 21
hsa-miR-338-5p	1	0	1	0	1	1	CRAMP1L	Crm, cramped-like (Drosophila)
hsa-miR-338-5p	1	0	1	1	1	1	KIAA1467	KIAA1467
hsa-miR-338-5p	1	0	1	1	1	1	TSHZ3	teashirt zinc finger homeobox 3
hsa-miR-338-5p	1	0	1	0	1	1	GPAM	glycerol-3-phosphate acyltransferase, mitochondrial
hsa-miR-338-5p	1	0	1	1	1	1	VAT1L	vesicle amine transport protein 1 homolog (T. californica)-like
hsa-miR-338-5p	0	0	1	1	1	1	KIAA1586	KIAA1586
hsa-miR-338-5p	1	0	1	1	1	1	SNTB1	syntrophin, beta 1 (dystrophin-associated protein A1, 59kDa, basic component 1)
hsa-miR-338-5p	1	0	1	1	1	1	HCN1	hyperpolarization activated cyclic nucleotide-gated potassium channel 1
hsa-miR-338-5p	1	0	1	0	1	1	XK	X-linked Kx blood group (McLeod syndrome)
hsa-miR-338-5p	1	0	1	1	1	1	CLDN1	claudin 1
hsa-miR-338-5p	1	0	1	1	1	1	SNX6	sorting nexin 6
hsa-miR-338-5p	0	0	1	1	1	1	NR1D1	nuclear receptor subfamily 1, group D, member 1
hsa-miR-338-5p	1	0	1	1	1	1	BACH2	BTB and CNC homology 1, basic leucine zipper transcription factor 2
hsa-miR-338-5p	1	0	1	1	1	1	SLC5A7	solute carrier family 5 (choline transporter), member 7
hsa-miR-338-5p	1	0	1	1	1	1	NAP1L2	nucleosome assembly protein 1-like 2
hsa-miR-338-5p	1	0	1	1	1	1	SEC24A	SEC24 family, member A (S. cerevisiae)
hsa-miR-338-5p	1	0	1	0	1	1	GAN	gigaxonin
hsa-miR-338-5p	1	0	1	0	1	1	CSNK1G1	casein kinase 1, gamma 1
hsa-miR-338-5p	1	0	1	1	1	1	EGLN1	egl nine homolog 1 (C. elegans)
hsa-miR-338-5p	1	0	1	1	1	1	LRRC4	leucine rich repeat containing 4
hsa-miR-338-5p	0	0	1	1	1	1	RTP4	receptor (chemosensory) transporter protein 4
hsa-miR-338-5p	0	0	1	1	1	1	RAB38	RAB38, member RAS oncogene family
hsa-miR-338-5p	1	0	1	0	1	1	GREM2	gremlin 2
hsa-miR-338-5p	1	0	1	1	0	0	CDH24	cadherin 24, type 2
hsa-miR-338-5p	1	0	1	1	1	1	TMEM168	transmembrane protein 168
hsa-miR-338-5p	1	0	1	0	1	1	MRPS25	mitochondrial ribosomal protein S25
hsa-miR-338-5p	1	0	1	1	1	1	PRRX1	paired related homeobox 1
hsa-miR-338-5p	1	0	1	1	1	1	NEUROD6	neuronal differentiation 6
hsa-miR-338-5p	1	0	1	0	1	1	USP46	ubiquitin specific peptidase 46
hsa-miR-338-5p	1	0	1	1	1	1	RFX7	regulatory factor X, 7
hsa-miR-338-5p	1	0	1	0	1	1	BCL11B	B-cell CLL/lymphoma 11B (zinc finger protein)
hsa-miR-338-5p	1	0	1	1	1	1	C1orf116	chromosome 1 open reading frame 116
hsa-miR-338-5p	1	0	1	1	1	1	C10orf76	chromosome 10 open reading frame 76
hsa-miR-338-5p	0	0	1	1	1	1	RNF219	ring finger protein 219
hsa-miR-338-5p	0	0	1	0	1	1	EFCAB1	EF-hand calcium binding domain 1
hsa-miR-338-5p	1	0	1	1	1	1	DHX40	DEAH (Asp-Glu-Ala-His) box polypeptide 40
hsa-miR-338-5p	0	0	1	1	1	1	STEAP4	STEAP family member 4
hsa-miR-338-5p	0	0	1	1	1	1	SHCBP1	SHC SH2-domain binding protein 1
hsa-miR-338-5p	1	0	1	0	1	1	MOB3B	MOB kinase activator 3B
hsa-miR-338-5p	0	0	1	0	1	1	TM4SF20	transmembrane 4 L six family member 20
hsa-miR-338-5p	0	0	1	1	1	1	UBA5	ubiquitin-like modifier activating enzyme 5
hsa-miR-338-5p	1	0	1	1	1	1	GRHL2	grainyhead-like 2 (Drosophila)
hsa-miR-338-5p	0	0	1	1	0	0	TMEM156	transmembrane protein 156
hsa-miR-338-5p	0	0	1	1	1	1	GFM1	G elongation factor, mitochondrial 1
hsa-miR-338-5p	1	0	1	1	1	1	KLHL18	kelch-like 18 (Drosophila)
hsa-miR-338-5p	0	0	1	1	1	1	GPR110	G protein-coupled receptor 110
hsa-miR-338-5p	1	0	1	0	1	1	VCPIP1	valosin containing protein (p97)/p47 complex interacting protein 1
hsa-miR-338-5p	1	0	1	1	1	1	HKDC1	hexokinase domain containing 1
hsa-miR-338-5p	1	0	1	1	1	1	FBXO11	F-box protein 11
hsa-miR-338-5p	1	0	1	1	1	1	NAA50	N(alpha)-acetyltransferase 50, NatE catalytic subunit
hsa-miR-338-5p	1	0	1	0	1	1	EDEM3	ER degradation enhancer, mannosidase alpha-like 3
hsa-miR-338-5p	1	0	1	0	1	1	SRCIN1	SRC kinase signaling inhibitor 1
hsa-miR-338-5p	1	0	1	1	1	1	TMX1	thioredoxin-related transmembrane protein 1
hsa-miR-338-5p	0	0	1	1	1	1	HMGN5	high mobility group nucleosome binding domain 5
hsa-miR-338-5p	1	0	1	0	1	1	C1orf21	chromosome 1 open reading frame 21
hsa-miR-338-5p	1	0	1	0	1	1	SPRY4	sprouty homolog 4 (Drosophila)
hsa-miR-338-5p	0	0	1	1	1	1	KIF18A	kinesin family member 18A
hsa-miR-338-5p	1	0	1	0	1	1	TMEM47	transmembrane protein 47
hsa-miR-338-5p	1	0	1	0	1	1	SH3BGRL2	SH3 domain binding glutamic acid-rich protein like 2
hsa-miR-338-5p	0	0	1	1	1	1	CRISPLD2	cysteine-rich secretory protein LCCL domain containing 2
hsa-miR-338-5p	1	0	1	0	1	1	ITCH	itchy E3 ubiquitin protein ligase
hsa-miR-338-5p	1	0	1	1	1	1	PCDHA9	protocadherin alpha 9
hsa-miR-338-5p	1	0	1	1	1	1	SNX25	sorting nexin 25
hsa-miR-338-5p	1	0	1	1	1	1	DSEL	dermatan sulfate epimerase-like
hsa-miR-338-5p	1	0	1	0	1	1	ATP11A	ATPase, class VI, type 11A
hsa-miR-338-5p	1	0	1	1	1	1	ARID5B	AT rich interactive domain 5B (MRF1-like)
hsa-miR-338-5p	0	0	1	1	1	1	ATP13A4	ATPase type 13A4
hsa-miR-338-5p	1	0	1	1	1	1	ZDHHC18	zinc finger, DHHC-type containing 18
hsa-miR-338-5p	1	0	1	1	1	1	ING5	inhibitor of growth family, member 5
hsa-miR-338-5p	1	0	1	1	1	1	SYVN1	synovial apoptosis inhibitor 1, synoviolin
hsa-miR-338-5p	1	0	1	1	1	1	PHF6	PHD finger protein 6
hsa-miR-338-5p	1	0	1	1	1	1	PARD6B	par-6 partitioning defective 6 homolog beta (C. elegans)
hsa-miR-338-5p	1	0	1	0	1	1	GLYR1	glyoxylate reductase 1 homolog (Arabidopsis)
hsa-miR-338-5p	1	0	1	1	1	1	RBBP6	retinoblastoma binding protein 6
hsa-miR-338-5p	1	0	1	1	1	1	JAM3	junctional adhesion molecule 3
hsa-miR-338-5p	0	0	1	1	1	1	ALG10	asparagine-linked glycosylation 10, alpha-1,2-glucosyltransferase homolog (S. pombe)
hsa-miR-338-5p	1	0	1	0	1	1	LACTB	lactamase, beta
hsa-miR-338-5p	1	0	1	1	1	1	PCDH11Y	protocadherin 11 Y-linked
hsa-miR-338-5p	1	0	1	1	1	1	CASP2	caspase 2, apoptosis-related cysteine peptidase
hsa-miR-338-5p	1	0	1	1	1	1	PDGFA	platelet-derived growth factor alpha polypeptide
hsa-miR-338-5p	1	0	1	1	1	1	HIAT1	hippocampus abundant transcript 1
hsa-miR-338-5p	1	0	1	1	1	1	C5orf30	chromosome 5 open reading frame 30
hsa-miR-338-5p	1	0	1	0	1	1	PURB	purine-rich element binding protein B
hsa-miR-338-5p	1	0	1	1	1	1	COL4A5	collagen, type IV, alpha 5
hsa-miR-338-5p	1	0	1	1	1	1	SSH2	slingshot homolog 2 (Drosophila)
hsa-miR-338-5p	0	0	1	1	1	1	FBXO4	F-box protein 4
hsa-miR-338-5p	1	0	1	1	1	1	EPT1	ethanolaminephosphotransferase 1 (CDP-ethanolamine-specific)
hsa-miR-338-5p	0	0	1	1	1	1	ARHGAP18	Rho GTPase activating protein 18
hsa-miR-338-5p	1	0	1	1	1	1	BRWD1	bromodomain and WD repeat domain containing 1
hsa-miR-338-5p	0	0	1	1	1	1	ZNF830	zinc finger protein 830
hsa-miR-338-5p	1	0	1	1	1	1	RCSD1	RCSD domain containing 1
hsa-miR-338-5p	1	0	1	1	1	1	SLC2A13	solute carrier family 2 (facilitated glucose transporter), member 13
hsa-miR-338-5p	1	0	1	1	1	1	MAL2	mal, T-cell differentiation protein 2 (gene/pseudogene)
hsa-miR-338-5p	1	0	1	1	1	1	SLITRK1	SLIT and NTRK-like family, member 1
hsa-miR-338-5p	0	0	1	1	1	1	IL22RA2	interleukin 22 receptor, alpha 2
hsa-miR-338-5p	1	0	1	1	1	1	TRIM9	tripartite motif containing 9
hsa-miR-338-5p	0	0	1	1	1	1	PRDM7	PR domain containing 7
hsa-miR-338-5p	0	0	1	0	1	1	ZNF518B	zinc finger protein 518B
hsa-miR-338-5p	1	0	1	1	1	1	SRSF10	serine/arginine-rich splicing factor 10
hsa-miR-338-5p	1	0	1	1	1	1	KLHL6	kelch-like 6 (Drosophila)
hsa-miR-338-5p	1	0	1	1	1	1	PRRC1	proline-rich coiled-coil 1
hsa-miR-338-5p	0	0	1	1	1	1	WFDC8	WAP four-disulfide core domain 8
hsa-miR-338-5p	1	0	1	1	1	1	ZAK	sterile alpha motif and leucine zipper containing kinase AZK
hsa-miR-338-5p	0	0	1	1	1	1	PKD1L1	polycystic kidney disease 1 like 1
hsa-miR-338-5p	0	0	1	1	1	1	CASC4	cancer susceptibility candidate 4
hsa-miR-338-5p	1	0	1	1	1	1	GLCCI1	glucocorticoid induced transcript 1
hsa-miR-338-5p	1	0	1	0	1	1	FCHO2	FCH domain only 2
hsa-miR-338-5p	1	0	1	1	1	1	MBOAT2	membrane bound O-acyltransferase domain containing 2
hsa-miR-338-5p	0	0	1	1	1	1	ADAMTS17	ADAM metallopeptidase with thrombospondin type 1 motif, 17
hsa-miR-338-5p	1	0	1	1	1	1	DNER	delta/notch-like EGF repeat containing
hsa-miR-338-5p	0	0	1	1	1	1	KCNC2	potassium voltage-gated channel, Shaw-related subfamily, member 2
hsa-miR-338-5p	1	0	1	1	1	1	RPIA	ribose 5-phosphate isomerase A
hsa-miR-338-5p	1	0	1	0	1	1	CNOT6L	CCR4-NOT transcription complex, subunit 6-like
hsa-miR-338-5p	1	0	1	1	1	1	SAMD8	sterile alpha motif domain containing 8
hsa-miR-338-5p	1	0	1	1	1	1	FAM91A1	family with sequence similarity 91, member A1
hsa-miR-338-5p	0	0	1	1	1	1	RIBC1	RIB43A domain with coiled-coils 1
hsa-miR-338-5p	0	0	1	0	1	1	UBLCP1	ubiquitin-like domain containing CTD phosphatase 1
hsa-miR-338-5p	1	0	1	1	1	1	FAM84A	family with sequence similarity 84, member A
hsa-miR-338-5p	1	0	1	1	1	1	CCSAP	centriole, cilia and spindle-associated protein
hsa-miR-338-5p	1	0	1	1	1	1	ZNF396	zinc finger protein 396
hsa-miR-338-5p	1	0	1	1	1	1	SEPT6	septin 6
hsa-miR-338-5p	1	0	1	1	1	1	ABTB2	ankyrin repeat and BTB (POZ) domain containing 2
hsa-miR-338-5p	1	0	1	0	1	1	MTPN	myotrophin
hsa-miR-338-5p	1	0	1	1	1	1	SGMS1	sphingomyelin synthase 1
hsa-miR-338-5p	0	0	1	1	1	1	CDYL2	chromodomain protein, Y-like 2
hsa-miR-338-5p	1	0	1	1	1	1	C1orf216	chromosome 1 open reading frame 216
hsa-miR-338-5p	0	0	1	0	1	1	AFAP1L1	actin filament associated protein 1-like 1
hsa-miR-338-5p	1	0	1	1	1	1	GRPEL2	GrpE-like 2, mitochondrial (E. coli)
hsa-miR-338-5p	1	0	1	1	1	1	FAM123B	family with sequence similarity 123B
hsa-miR-338-5p	1	0	1	0	1	1	ARID2	AT rich interactive domain 2 (ARID, RFX-like)
hsa-miR-338-5p	1	0	1	1	1	1	TCTEX1D1	Tctex1 domain containing 1
hsa-miR-338-5p	1	0	1	1	1	1	HOXA9	homeobox A9
hsa-miR-338-5p	1	0	1	1	1	1	NXPH1	neurexophilin 1
hsa-miR-338-5p	0	0	1	1	1	1	TCTEX1D2	Tctex1 domain containing 2
hsa-miR-338-5p	1	0	1	1	1	1	PDIK1L	PDLIM1 interacting kinase 1 like
hsa-miR-338-5p	0	0	1	0	1	1	KBTBD6	kelch repeat and BTB (POZ) domain containing 6
hsa-miR-338-5p	1	0	1	1	1	1	PXT1	peroxisomal, testis specific 1
hsa-miR-338-5p	0	0	1	1	1	1	CCDC140	coiled-coil domain containing 140
hsa-miR-338-5p	0	0	1	1	1	1	LACC1	laccase (multicopper oxidoreductase) domain containing 1
hsa-miR-338-5p	0	0	1	0	1	1	LIX1	Lix1 homolog (chicken)
hsa-miR-338-5p	1	0	1	1	1	1	MAMDC2	MAM domain containing 2
hsa-miR-338-5p	1	0	1	0	1	1	ZCCHC24	zinc finger, CCHC domain containing 24
hsa-miR-338-5p	1	0	1	1	1	1	HS6ST3	heparan sulfate 6-O-sulfotransferase 3
hsa-miR-338-5p	0	0	1	1	1	1	CAMK1D	calcium/calmodulin-dependent protein kinase ID
hsa-miR-338-5p	1	0	1	1	1	1	CREBRF	CREB3 regulatory factor
hsa-miR-338-5p	1	0	1	0	1	1	SEMA6D	sema domain, transmembrane domain (TM), and cytoplasmic domain, (semaphorin) 6D
hsa-miR-338-5p	1	0	1	1	1	1	ZNF367	zinc finger protein 367
hsa-miR-338-5p	1	0	1	1	1	1	CSF1	colony stimulating factor 1 (macrophage)
hsa-miR-338-5p	0	0	1	1	1	1	REXO1L1	REX1, RNA exonuclease 1 homolog (S. cerevisiae)-like 1
hsa-miR-338-5p	1	0	1	1	1	1	MOB1B	MOB kinase activator 1B
hsa-miR-338-5p	1	0	1	1	1	1	MMGT1	membrane magnesium transporter 1
hsa-miR-338-5p	1	0	1	1	1	1	DCUN1D3	DCN1, defective in cullin neddylation 1, domain containing 3 (S. cerevisiae)
hsa-miR-338-5p	1	0	1	1	1	1	CNTD1	cyclin N-terminal domain containing 1
hsa-miR-338-5p	1	0	1	1	1	1	FAM117B	family with sequence similarity 117, member B
hsa-miR-338-5p	0	0	1	1	1	1	FNDC7	fibronectin type III domain containing 7
hsa-miR-338-5p	1	0	1	0	1	1	C3orf58	chromosome 3 open reading frame 58
hsa-miR-338-5p	1	0	1	0	1	1	PGM2L1	phosphoglucomutase 2-like 1
hsa-miR-338-5p	1	0	1	1	1	1	XKR6	XK, Kell blood group complex subunit-related family, member 6
hsa-miR-338-5p	0	0	1	1	1	1	NSMCE2	non-SMC element 2, MMS21 homolog (S. cerevisiae)
hsa-miR-338-5p	0	0	1	1	1	1	FAM133A	family with sequence similarity 133, member A
hsa-miR-338-5p	0	0	1	1	1	1	AQPEP	laeverin
hsa-miR-338-5p	1	0	1	0	1	1	SREK1IP1	SREK1-interacting protein 1
hsa-miR-338-5p	0	0	1	1	1	1	CCDC75	coiled-coil domain containing 75
hsa-miR-338-5p	1	0	1	1	1	1	SYT9	synaptotagmin IX
hsa-miR-338-5p	1	0	1	1	1	1	STX12	syntaxin 12
hsa-miR-338-5p	0	0	1	1	1	1	RASSF6	Ras association (RalGDS/AF-6) domain family member 6
hsa-miR-338-5p	1	0	1	1	1	1	PPM1B	protein phosphatase, Mg2+/Mn2+ dependent, 1B
hsa-miR-338-5p	1	0	1	1	1	1	LRRTM3	leucine rich repeat transmembrane neuronal 3
hsa-miR-338-5p	0	0	1	1	1	1	ZNF831	zinc finger protein 831
hsa-miR-338-5p	1	0	1	1	1	1	NOTUM	notum pectinacetylesterase homolog (Drosophila)
hsa-miR-338-5p	0	0	1	1	1	1	C4orf26	chromosome 4 open reading frame 26
hsa-miR-338-5p	0	0	1	1	1	1	STXBP4	syntaxin binding protein 4
hsa-miR-338-5p	1	0	1	0	1	1	ZDHHC21	zinc finger, DHHC-type containing 21
hsa-miR-338-5p	0	0	1	1	1	1	CMTM4	CKLF-like MARVEL transmembrane domain containing 4
hsa-miR-338-5p	0	0	1	1	1	1	NPAS4	neuronal PAS domain protein 4
hsa-miR-338-5p	0	0	1	0	1	1	ZNF445	zinc finger protein 445
hsa-miR-338-5p	0	0	1	0	1	1	KRT28	keratin 28
hsa-miR-338-5p	0	0	1	1	1	1	RFC3	replication factor C (activator 1) 3, 38kDa
hsa-miR-338-5p	0	0	1	1	0	0	DCDC1	doublecortin domain containing 1
hsa-miR-338-5p	1	0	1	1	1	1	GDPD1	glycerophosphodiester phosphodiesterase domain containing 1
hsa-miR-338-5p	0	0	1	1	1	1	THEM5	thioesterase superfamily member 5
hsa-miR-338-5p	1	0	1	1	1	1	SP8	Sp8 transcription factor
hsa-miR-338-5p	1	0	1	0	1	1	RNF144B	ring finger protein 144B
hsa-miR-338-5p	1	0	1	0	1	1	WDR72	WD repeat domain 72
hsa-miR-338-5p	0	0	1	1	1	1	ARL13B	ADP-ribosylation factor-like 13B
hsa-miR-338-5p	0	0	1	1	1	1	ZNF326	zinc finger protein 326
hsa-miR-338-5p	1	0	1	0	1	1	HNRNPA3	heterogeneous nuclear ribonucleoprotein A3
hsa-miR-338-5p	1	0	1	1	1	1	TMEM65	transmembrane protein 65
hsa-miR-338-5p	1	0	1	1	1	1	RALGAPA1	Ral GTPase activating protein, alpha subunit 1 (catalytic)
hsa-miR-338-5p	1	0	1	1	1	1	C1orf52	chromosome 1 open reading frame 52
hsa-miR-338-5p	1	0	1	1	1	1	GPRIN3	GPRIN family member 3
hsa-miR-338-5p	1	0	1	0	1	1	FAM73A	family with sequence similarity 73, member A
hsa-miR-338-5p	0	0	1	1	1	1	C5orf34	chromosome 5 open reading frame 34
hsa-miR-338-5p	1	0	1	1	1	1	PTGER3	prostaglandin E receptor 3 (subtype EP3)
hsa-miR-338-5p	1	0	1	0	1	1	DLEU7	deleted in lymphocytic leukemia, 7
hsa-miR-338-5p	1	0	1	1	1	1	VAX1	ventral anterior homeobox 1
hsa-miR-338-5p	0	0	1	1	1	1	SHC4	SHC (Src homology 2 domain containing) family, member 4
hsa-miR-338-5p	1	0	1	0	1	1	MBLAC2	metallo-beta-lactamase domain containing 2
hsa-miR-338-5p	1	0	1	1	1	1	ATRNL1	attractin-like 1
hsa-miR-338-5p	0	0	1	1	1	1	C10orf129	chromosome 10 open reading frame 129
hsa-miR-338-5p	0	0	1	1	0	0	KIAA1211L	KIAA1211-like
hsa-miR-338-5p	0	0	1	1	1	1	C4orf50	chromosome 4 open reading frame 50
hsa-miR-338-5p	0	0	1	1	0	0	TMPRSS11F	transmembrane protease, serine 11F
hsa-miR-338-5p	1	0	1	1	1	1	SAMD12	sterile alpha motif domain containing 12
hsa-miR-338-5p	0	0	1	0	1	1	FSD1L	fibronectin type III and SPRY domain containing 1-like
hsa-miR-338-5p	0	0	1	0	0	0	PPIAP29	peptidylprolyl isomerase A (cyclophilin A) pseudogene 29
hsa-miR-338-5p	0	0	1	0	0	0	TTTY6	testis-specific transcript, Y-linked 6 (non-protein coding)
hsa-miR-338-5p	0	0	1	0	0	0	NACAP1	nascent-polypeptide-associated complex alpha polypeptide pseudogene 1
hsa-miR-338-5p	0	0	1	0	0	0	TPI1P2	triosephosphate isomerase 1 pseudogene 2
hsa-miR-338-5p	0	0	1	0	0	0	SUMO1P1	SUMO1 pseudogene 1
hsa-miR-338-5p	0	0	1	0	0	0	NUDT4P1	nudix (nucleoside diphosphate linked moiety X)-type motif 4 pseudogene 1
hsa-miR-338-5p	0	0	1	0	0	0	TDGF1P3	teratocarcinoma-derived growth factor 1 pseudogene 3
hsa-miR-338-5p	0	0	1	0	0	0	HNRNPA3P1	heterogeneous nuclear ribonucleoprotein A3 pseudogene 1
hsa-miR-338-5p	0	0	1	0	0	0	NUDT9P1	nudix (nucleoside diphosphate linked moiety X)-type motif 9 pseudogene 1
hsa-miR-338-5p	0	0	1	0	0	0	SEPHS1P1	selenophosphate synthetase 1 pseudogene 1
hsa-miR-338-5p	0	0	1	0	0	0	HCG26	HLA complex group 26 (non-protein coding)
hsa-miR-338-5p	0	0	1	0	0	0	AQP7P1	aquaporin 7 pseudogene 1
hsa-miR-338-5p	0	0	1	0	0	0	RNASEH2CP1	ribonuclease H2, subunit C pseudogene 1
hsa-miR-338-5p	0	0	1	0	0	0	EIF3IP1	eukaryotic translation initiation factor 3, subunit I pseudogene 1
hsa-miR-338-5p	0	0	1	0	0	0	SNORD92	small nucleolar RNA, C/D box 92
hsa-miR-338-5p	0	0	1	0	0	0	HSP90B3P	heat shock protein 90kDa beta (Grp94), member 3, pseudogene
hsa-miR-338-5p	0	0	1	0	0	0	SNORD115-3	small nucleolar RNA, C/D box 115-3
hsa-miR-338-5p	0	0	1	0	0	0	SNORD115-4	small nucleolar RNA, C/D box 115-4
hsa-miR-338-5p	0	0	1	0	0	0	SNORD115-5	small nucleolar RNA, C/D box 115-5
hsa-miR-338-5p	0	0	1	0	0	0	SNORD115-6	small nucleolar RNA, C/D box 115-6
hsa-miR-338-5p	0	0	1	0	0	0	SNORD115-7	small nucleolar RNA, C/D box 115-7
hsa-miR-338-5p	0	0	1	0	0	0	SNORD115-10	small nucleolar RNA, C/D box 115-10
hsa-miR-338-5p	0	0	1	0	0	0	SNORD115-12	small nucleolar RNA, C/D box 115-12
hsa-miR-338-5p	0	0	1	0	0	0	SNORD115-14	small nucleolar RNA, C/D box 115-14
hsa-miR-338-5p	0	0	1	0	0	0	SNORD115-19	small nucleolar RNA, C/D box 115-19
hsa-miR-338-5p	0	0	1	0	0	0	SNORD115-21	small nucleolar RNA, C/D box 115-21
hsa-miR-338-5p	0	0	1	0	0	0	SNORD115-22	small nucleolar RNA, C/D box 115-22
hsa-miR-338-5p	0	0	1	0	0	0	SNORD115-23	small nucleolar RNA, C/D box 115-23
hsa-miR-338-5p	0	0	1	0	0	0	PAR4	Prader-Willi/Angelman region gene 4
hsa-miR-338-5p	0	0	1	0	0	0	SNORD115-25	small nucleolar RNA, C/D box 115-25
hsa-miR-338-5p	0	0	1	0	0	0	SNORD115-26	small nucleolar RNA, C/D box 115-26
hsa-miR-338-5p	0	0	1	0	0	0	SNORD115-30	small nucleolar RNA, C/D box 115-30
hsa-miR-338-5p	0	0	1	0	0	0	SNORD115-31	small nucleolar RNA, C/D box 115-31
hsa-miR-338-5p	0	0	1	0	0	0	SNORD115-33	small nucleolar RNA, C/D box 115-33
hsa-miR-338-5p	0	0	1	0	0	0	SNORD115-37	small nucleolar RNA, C/D box 115-37
hsa-miR-338-5p	0	0	1	0	0	0	SNORD115-39	small nucleolar RNA, C/D box 115-39
hsa-miR-338-5p	0	0	1	0	0	0	SNORD115-42	small nucleolar RNA, C/D box 115-42
hsa-miR-338-5p	0	0	1	0	0	0	SNORD115-43	small nucleolar RNA, C/D box 115-43
hsa-miR-338-5p	0	0	1	0	0	0	SNORD115-44	small nucleolar RNA, C/D box 115-44
hsa-miR-338-5p	1	0	1	1	0	0	TNXB	tenascin XB
hsa-miR-338-5p	1	0	1	1	1	1	ATF6B	activating transcription factor 6 beta
hsa-miR-338-5p	0	0	1	0	0	0	PLGLA	plasminogen-like A
hsa-miR-338-5p	0	0	1	1	0	0	TTC17	tetratricopeptide repeat domain 17
hsa-miR-338-5p	0	0	1	1	1	1	TNIP3	TNFAIP3 interacting protein 3
hsa-miR-338-5p	0	0	0	1	1	1	KRT20	keratin 20
hsa-miR-338-5p	0	0	1	1	1	1	HEATR6	HEAT repeat containing 6
hsa-miR-338-5p	0	0	0	1	1	1	FAP	fibroblast activation protein, alpha
hsa-miR-338-5p	0	0	1	1	0	0	SIRT4	sirtuin 4
hsa-miR-338-5p	0	0	0	1	0	0	FLT3LG	fms-related tyrosine kinase 3 ligand
hsa-miR-338-5p	0	0	0	1	0	0	MIOX	myo-inositol oxygenase
hsa-miR-338-5p	0	0	1	1	0	0	FKBP3	FK506 binding protein 3, 25kDa
hsa-miR-338-5p	0	0	1	1	1	1	METTL21D	methyltransferase like 21D
hsa-miR-338-5p	1	0	1	1	1	1	ZFYVE21	zinc finger, FYVE domain containing 21
hsa-miR-338-5p	0	0	1	1	1	1	PNN	pinin, desmosome associated protein
hsa-miR-338-5p	0	0	1	1	1	1	ATP1B4	ATPase, Na+/K+ transporting, beta 4 polypeptide
hsa-miR-338-5p	0	0	1	1	0	0	GPR50	G protein-coupled receptor 50
hsa-miR-338-5p	0	0	1	1	1	1	ORC6	origin recognition complex, subunit 6
hsa-miR-338-5p	0	0	0	1	1	1	DHODH	dihydroorotate dehydrogenase (quinone)
hsa-miR-338-5p	0	0	1	1	0	0	WFDC1	WAP four-disulfide core domain 1
hsa-miR-338-5p	1	0	1	1	1	1	CBLL1	Cbl proto-oncogene, E3 ubiquitin protein ligase-like 1
hsa-miR-338-5p	0	0	0	1	0	0	MYL10	myosin, light chain 10, regulatory
hsa-miR-338-5p	0	0	0	1	1	1	MRPL32	mitochondrial ribosomal protein L32
hsa-miR-338-5p	0	0	1	1	1	1	PLGRKT	plasminogen receptor, C-terminal lysine transmembrane protein
hsa-miR-338-5p	0	0	1	1	0	0	KRT37	keratin 37
hsa-miR-338-5p	1	0	1	1	1	1	CCL1	chemokine (C-C motif) ligand 1
hsa-miR-338-5p	1	0	1	1	1	1	HSPA8	heat shock 70kDa protein 8
hsa-miR-338-5p	0	0	1	1	1	1	BIRC2	baculoviral IAP repeat containing 2
hsa-miR-338-5p	0	0	0	1	0	0	MYF6	myogenic factor 6 (herculin)
hsa-miR-338-5p	0	0	0	1	0	0	SPSB2	splA/ryanodine receptor domain and SOCS box containing 2
hsa-miR-338-5p	1	0	1	1	1	1	FAM65B	family with sequence similarity 65, member B
hsa-miR-338-5p	0	0	1	1	0	0	B3GAT2	beta-1,3-glucuronyltransferase 2 (glucuronosyltransferase S)
hsa-miR-338-5p	1	0	0	1	1	1	KIF20A	kinesin family member 20A
hsa-miR-338-5p	0	0	1	1	1	1	CPS1	carbamoyl-phosphate synthase 1, mitochondrial
hsa-miR-338-5p	1	0	1	1	0	0	TMSB10	thymosin beta 10
hsa-miR-338-5p	0	0	1	1	1	1	MSH2	mutS homolog 2, colon cancer, nonpolyposis type 1 (E. coli)
hsa-miR-338-5p	0	0	1	1	0	0	PRAMEF10	PRAME family member 10
hsa-miR-338-5p	0	0	1	1	0	0	HSD3B1	hydroxy-delta-5-steroid dehydrogenase, 3 beta- and steroid delta-isomerase 1
hsa-miR-338-5p	0	0	1	1	0	0	COLEC11	collectin sub-family member 11
hsa-miR-338-5p	0	0	1	1	1	1	DDX55	DEAD (Asp-Glu-Ala-Asp) box polypeptide 55
hsa-miR-338-5p	0	0	1	1	0	0	LIPF	lipase, gastric
hsa-miR-338-5p	1	0	1	1	1	1	DUSP1	dual specificity phosphatase 1
hsa-miR-338-5p	0	0	0	1	0	0	TAS2R9	taste receptor, type 2, member 9
hsa-miR-338-5p	0	0	1	1	1	1	EBPL	emopamil binding protein-like
hsa-miR-338-5p	0	0	0	1	1	1	TNFAIP6	tumor necrosis factor, alpha-induced protein 6
hsa-miR-338-5p	0	0	1	1	0	0	HIST1H4G	histone cluster 1, H4g
hsa-miR-338-5p	0	0	0	1	0	0	KATNAL2	katanin p60 subunit A-like 2
hsa-miR-338-5p	0	0	1	1	0	0	MAGEC2	melanoma antigen family C, 2
hsa-miR-338-5p	0	0	1	1	1	1	KLF2	Kruppel-like factor 2 (lung)
hsa-miR-338-5p	0	0	1	1	1	1	HN1L	hematological and neurological expressed 1-like
hsa-miR-338-5p	0	0	0	1	0	0	TICAM1	toll-like receptor adaptor molecule 1
hsa-miR-338-5p	0	0	1	1	1	1	GNG11	guanine nucleotide binding protein (G protein), gamma 11
hsa-miR-338-5p	0	0	0	1	1	1	MTX2	metaxin 2
hsa-miR-338-5p	1	0	1	1	1	1	IVD	isovaleryl-CoA dehydrogenase
hsa-miR-338-5p	0	0	0	1	0	0	ART1	ADP-ribosyltransferase 1
hsa-miR-338-5p	0	0	0	1	0	0	CFHR4	complement factor H-related 4
hsa-miR-338-5p	1	0	1	1	1	1	ESYT2	extended synaptotagmin-like protein 2
hsa-miR-338-5p	0	0	1	1	0	0	NXPE1	neurexophilin and PC-esterase domain family, member 1
hsa-miR-338-5p	1	0	0	1	0	0	SAFB2	scaffold attachment factor B2
hsa-miR-338-5p	0	0	1	1	1	1	MRPL34	mitochondrial ribosomal protein L34
hsa-miR-338-5p	0	0	0	1	0	0	RSPH3	radial spoke 3 homolog (Chlamydomonas)
hsa-miR-338-5p	0	0	0	1	0	0	GINS2	GINS complex subunit 2 (Psf2 homolog)
hsa-miR-338-5p	1	0	1	1	1	1	NDFIP1	Nedd4 family interacting protein 1
hsa-miR-338-5p	0	0	1	1	1	1	CRP	C-reactive protein, pentraxin-related
hsa-miR-338-5p	0	0	1	1	0	0	ZSWIM3	zinc finger, SWIM-type containing 3
hsa-miR-338-5p	0	0	0	1	1	1	DMGDH	dimethylglycine dehydrogenase
hsa-miR-338-5p	0	0	1	1	1	1	AP3B1	adaptor-related protein complex 3, beta 1 subunit
hsa-miR-338-5p	0	0	1	1	0	0	CCNA1	cyclin A1
hsa-miR-338-5p	0	0	0	1	1	1	ANKRD32	ankyrin repeat domain 32
hsa-miR-338-5p	0	0	1	1	0	0	FKBP11	FK506 binding protein 11, 19 kDa
hsa-miR-338-5p	0	0	1	1	1	1	RBMX2	RNA binding motif protein, X-linked 2
hsa-miR-338-5p	1	0	0	1	1	1	CEP135	centrosomal protein 135kDa
hsa-miR-338-5p	1	0	0	1	1	1	USP30	ubiquitin specific peptidase 30
hsa-miR-338-5p	0	0	0	1	1	1	PNPLA8	patatin-like phospholipase domain containing 8
hsa-miR-338-5p	0	0	1	1	1	1	RDH5	retinol dehydrogenase 5 (11-cis/9-cis)
hsa-miR-338-5p	0	0	1	1	0	0	TM6SF1	transmembrane 6 superfamily member 1
hsa-miR-338-5p	0	0	1	1	1	1	MRPS18B	mitochondrial ribosomal protein S18B
hsa-miR-338-5p	0	0	1	1	1	1	ASUN	asunder, spermatogenesis regulator homolog (Drosphila)
hsa-miR-338-5p	0	0	0	1	1	1	JKAMP	JNK1/MAPK8-associated membrane protein
hsa-miR-338-5p	0	0	1	1	1	1	SCPEP1	serine carboxypeptidase 1
hsa-miR-338-5p	0	0	1	1	1	1	DNAJA3	DnaJ (Hsp40) homolog, subfamily A, member 3
hsa-miR-338-5p	1	0	0	1	0	0	INPP4B	inositol polyphosphate-4-phosphatase, type II, 105kDa
hsa-miR-338-5p	0	0	1	1	1	1	NLRP2	NLR family, pyrin domain containing 2
hsa-miR-338-5p	0	0	1	1	1	1	TAF1B	TATA box binding protein (TBP)-associated factor, RNA polymerase I, B, 63kDa
hsa-miR-338-5p	0	0	0	1	1	1	SGOL1	shugoshin-like 1 (S. pombe)
hsa-miR-338-5p	1	0	1	1	1	1	EIF2AK4	eukaryotic translation initiation factor 2 alpha kinase 4
hsa-miR-338-5p	1	0	1	1	1	1	VAMP8	vesicle-associated membrane protein 8 (endobrevin)
hsa-miR-338-5p	0	0	0	1	0	0	TECTA	tectorin alpha
hsa-miR-338-5p	0	0	1	1	0	0	NMU	neuromedin U
hsa-miR-338-5p	0	0	1	1	1	1	HRASLS	HRAS-like suppressor
hsa-miR-338-5p	1	0	1	1	1	1	MAP3K13	mitogen-activated protein kinase kinase kinase 13
hsa-miR-338-5p	0	0	1	1	1	1	CCDC99	coiled-coil domain containing 99
hsa-miR-338-5p	0	0	1	1	1	1	ADAM2	ADAM metallopeptidase domain 2
hsa-miR-338-5p	0	0	0	1	1	1	WBSCR22	Williams Beuren syndrome chromosome region 22
hsa-miR-338-5p	1	0	1	1	1	1	RUFY2	RUN and FYVE domain containing 2
hsa-miR-338-5p	0	0	0	1	0	0	ARNTL2	aryl hydrocarbon receptor nuclear translocator-like 2
hsa-miR-338-5p	0	0	1	1	0	0	NDUFA9	NADH dehydrogenase (ubiquinone) 1 alpha subcomplex, 9, 39kDa
hsa-miR-338-5p	0	0	1	1	0	0	NEDD1	neural precursor cell expressed, developmentally down-regulated 1
hsa-miR-338-5p	0	0	1	1	1	1	TINF2	TERF1 (TRF1)-interacting nuclear factor 2
hsa-miR-338-5p	0	0	1	1	1	1	AK7	adenylate kinase 7
hsa-miR-338-5p	0	0	1	1	1	1	FAM181A	family with sequence similarity 181, member A
hsa-miR-338-5p	1	0	1	1	1	1	ZSCAN29	zinc finger and SCAN domain containing 29
hsa-miR-338-5p	1	0	1	1	1	1	BNIP2	BCL2/adenovirus E1B 19kDa interacting protein 2
hsa-miR-338-5p	0	0	1	1	1	1	WDR93	WD repeat domain 93
hsa-miR-338-5p	0	0	1	1	0	0	COPS3	COP9 constitutive photomorphogenic homolog subunit 3 (Arabidopsis)
hsa-miR-338-5p	0	0	1	1	1	1	PHF12	PHD finger protein 12
hsa-miR-338-5p	0	0	1	1	0	0	EPN3	epsin 3
hsa-miR-338-5p	1	0	1	1	1	1	SGSM2	small G protein signaling modulator 2
hsa-miR-338-5p	0	0	1	1	0	0	CCDC40	coiled-coil domain containing 40
hsa-miR-338-5p	0	0	0	1	0	0	FBXO15	F-box protein 15
hsa-miR-338-5p	0	0	0	1	1	1	TXNL4A	thioredoxin-like 4A
hsa-miR-338-5p	0	0	1	1	0	0	KLHDC4	kelch domain containing 4
hsa-miR-338-5p	1	0	1	1	1	1	HMCN1	hemicentin 1
hsa-miR-338-5p	0	0	1	1	0	0	FTH1	ferritin, heavy polypeptide 1
hsa-miR-338-5p	0	0	1	1	1	1	ZNF300	zinc finger protein 300
hsa-miR-338-5p	1	0	1	1	1	1	RREB1	ras responsive element binding protein 1
hsa-miR-338-5p	0	0	1	1	1	1	C6orf170	chromosome 6 open reading frame 170
hsa-miR-338-5p	1	0	1	1	1	1	SLC18B1	solute carrier family 18, subfamily B, member 1
hsa-miR-338-5p	1	0	0	1	1	1	EGFR	epidermal growth factor receptor
hsa-miR-338-5p	1	0	0	1	1	1	IGFBP1	insulin-like growth factor binding protein 1
hsa-miR-338-5p	0	0	1	1	1	1	CPXCR1	CPX chromosome region, candidate 1
hsa-miR-338-5p	0	0	0	1	0	0	GPR119	G protein-coupled receptor 119
hsa-miR-338-5p	1	0	1	1	1	1	GOLGA7	golgin A7
hsa-miR-338-5p	0	0	0	1	0	0	PSKH2	protein serine kinase H2
hsa-miR-338-5p	1	0	1	1	1	1	CCDC82	coiled-coil domain containing 82
hsa-miR-338-5p	0	0	0	1	0	0	C11orf52	chromosome 11 open reading frame 52
hsa-miR-338-5p	0	0	0	1	0	0	OR5M9	olfactory receptor, family 5, subfamily M, member 9
hsa-miR-338-5p	0	0	1	1	1	1	MIA2	melanoma inhibitory activity 2
hsa-miR-338-5p	0	0	1	1	1	1	NGLY1	N-glycanase 1
hsa-miR-338-5p	0	0	1	1	1	1	C4orf33	chromosome 4 open reading frame 33
hsa-miR-338-5p	1	0	0	1	1	1	NCAPD3	non-SMC condensin II complex, subunit D3
hsa-miR-338-5p	0	0	0	1	1	1	TDO2	tryptophan 2,3-dioxygenase
hsa-miR-338-5p	0	0	0	1	0	0	GRID2	glutamate receptor, ionotropic, delta 2
hsa-miR-338-5p	0	0	1	1	1	1	ARL14EP	ADP-ribosylation factor-like 14 effector protein
hsa-miR-338-5p	1	0	0	1	0	0	POC5	POC5 centriolar protein homolog (Chlamydomonas)
hsa-miR-338-5p	0	0	0	1	0	0	CWF19L2	CWF19-like 2, cell cycle control (S. pombe)
hsa-miR-338-5p	1	0	0	1	1	1	ZNF547	zinc finger protein 547
hsa-miR-338-5p	0	0	1	1	1	1	CCDC50	coiled-coil domain containing 50
hsa-miR-338-5p	0	0	0	1	1	1	CAPSL	calcyphosine-like
hsa-miR-338-5p	0	0	0	1	0	0	LIPM	lipase, family member M
hsa-miR-338-5p	1	0	1	1	1	1	SCOC	short coiled-coil protein
hsa-miR-338-5p	0	0	1	1	1	1	PLA2R1	phospholipase A2 receptor 1, 180kDa
hsa-miR-338-5p	0	0	1	1	0	0	FEZF2	FEZ family zinc finger 2
hsa-miR-338-5p	1	0	1	1	1	1	ATP8B1	ATPase, aminophospholipid transporter, class I, type 8B, member 1
hsa-miR-338-5p	0	0	1	1	1	1	DGKE	diacylglycerol kinase, epsilon 64kDa
hsa-miR-338-5p	0	0	1	1	0	0	ABCA6	ATP-binding cassette, sub-family A (ABC1), member 6
hsa-miR-338-5p	0	0	1	1	1	1	TSEN2	tRNA splicing endonuclease 2 homolog (S. cerevisiae)
hsa-miR-338-5p	0	0	0	1	0	0	RBM45	RNA binding motif protein 45
hsa-miR-338-5p	0	0	1	1	1	1	PPIL3	peptidylprolyl isomerase (cyclophilin)-like 3
hsa-miR-338-5p	0	0	0	1	1	1	NAT2	N-acetyltransferase 2 (arylamine N-acetyltransferase)
hsa-miR-338-5p	0	0	1	1	0	0	CCT8	chaperonin containing TCP1, subunit 8 (theta)
hsa-miR-338-5p	0	0	1	1	1	1	BUB1B	budding uninhibited by benzimidazoles 1 homolog beta (yeast)
hsa-miR-338-5p	0	0	0	1	0	0	TSPY8	testis specific protein, Y-linked 8
hsa-miR-338-5p	0	0	0	1	1	1	LYZL4	lysozyme-like 4
hsa-miR-338-5p	0	0	0	1	1	1	SSU72	SSU72 RNA polymerase II CTD phosphatase homolog (S. cerevisiae)
hsa-miR-338-5p	0	0	1	1	0	0	CPAMD8	C3 and PZP-like, alpha-2-macroglobulin domain containing 8
hsa-miR-338-5p	0	0	0	1	0	0	GPSM1	G-protein signaling modulator 1
hsa-miR-338-5p	0	0	0	1	0	0	SYCE2	synaptonemal complex central element protein 2
hsa-miR-338-5p	0	0	1	1	1	1	C2orf47	chromosome 2 open reading frame 47
hsa-miR-338-5p	1	0	1	1	1	1	MERTK	c-mer proto-oncogene tyrosine kinase
hsa-miR-338-5p	1	0	1	1	1	1	CCDC141	coiled-coil domain containing 141
hsa-miR-338-5p	0	0	1	1	1	1	TRAT1	T cell receptor associated transmembrane adaptor 1
hsa-miR-338-5p	0	0	0	1	0	0	HESX1	HESX homeobox 1
hsa-miR-338-5p	0	0	1	1	1	1	PCOLCE2	procollagen C-endopeptidase enhancer 2
hsa-miR-338-5p	1	0	1	1	0	0	RPN1	ribophorin I
hsa-miR-338-5p	0	0	0	1	1	1	MFI2	antigen p97 (melanoma associated) identified by monoclonal antibodies 133.2 and 96.5
hsa-miR-338-5p	0	0	1	1	1	1	BDH2	3-hydroxybutyrate dehydrogenase, type 2
hsa-miR-338-5p	0	0	0	1	1	1	MFSD8	major facilitator superfamily domain containing 8
hsa-miR-338-5p	0	0	0	1	1	1	LSM6	LSM6 homolog, U6 small nuclear RNA associated (S. cerevisiae)
hsa-miR-338-5p	0	0	0	1	0	0	ANKRD33B	ankyrin repeat domain 33B
hsa-miR-338-5p	0	0	1	1	1	1	SLC30A5	solute carrier family 30 (zinc transporter), member 5
hsa-miR-338-5p	0	0	0	1	1	1	USP49	ubiquitin specific peptidase 49
hsa-miR-338-5p	1	0	0	1	1	1	CTHRC1	collagen triple helix repeat containing 1
hsa-miR-338-5p	0	0	1	1	0	0	DCSTAMP	dendrocyte expressed seven transmembrane protein
hsa-miR-338-5p	0	0	1	1	1	1	CPA6	carboxypeptidase A6
hsa-miR-338-5p	0	0	0	1	1	1	ZNF488	zinc finger protein 488
hsa-miR-338-5p	0	0	0	1	1	1	C14orf159	chromosome 14 open reading frame 159
hsa-miR-338-5p	1	0	1	1	1	1	PHKB	phosphorylase kinase, beta
hsa-miR-338-5p	0	0	1	1	0	0	CRABP1	cellular retinoic acid binding protein 1
hsa-miR-338-5p	0	0	1	1	0	0	CLEC4E	C-type lectin domain family 4, member E
hsa-miR-338-5p	1	0	0	1	1	1	HSBP1	heat shock factor binding protein 1
hsa-miR-338-5p	0	0	0	1	0	0	MC4R	melanocortin 4 receptor
hsa-miR-338-5p	0	0	1	1	0	0	SCG5	secretogranin V (7B2 protein)
hsa-miR-338-5p	0	0	1	1	1	1	GCN1L1	GCN1 general control of amino-acid synthesis 1-like 1 (yeast)
hsa-miR-338-5p	0	0	0	1	1	1	ZNF443	zinc finger protein 443
hsa-miR-338-5p	0	0	0	1	0	0	ICT1	immature colon carcinoma transcript 1
hsa-miR-338-5p	0	0	1	1	1	1	POLR2G	polymerase (RNA) II (DNA directed) polypeptide G
hsa-miR-338-5p	0	0	0	1	0	0	OR5B2	olfactory receptor, family 5, subfamily B, member 2
hsa-miR-338-5p	0	0	0	1	0	0	OR5T3	olfactory receptor, family 5, subfamily T, member 3
hsa-miR-338-5p	0	0	0	1	1	1	GPR37	G protein-coupled receptor 37 (endothelin receptor type B-like)
hsa-miR-338-5p	1	0	1	1	1	1	MYO1B	myosin IB
hsa-miR-338-5p	0	0	1	1	1	1	GPR22	G protein-coupled receptor 22
hsa-miR-338-5p	0	0	0	1	0	0	TIGD1	tigger transposable element derived 1
hsa-miR-338-5p	0	0	0	1	0	0	SLFN12	schlafen family member 12
hsa-miR-338-5p	1	0	1	1	1	1	USP47	ubiquitin specific peptidase 47
hsa-miR-338-5p	1	0	1	1	1	1	IBTK	inhibitor of Bruton agammaglobulinemia tyrosine kinase
hsa-miR-338-5p	0	0	0	1	1	1	CDY1B	chromodomain protein, Y-linked, 1B
hsa-miR-338-5p	0	0	0	1	1	1	ZNF57	zinc finger protein 57
hsa-miR-338-5p	0	0	1	1	1	1	MPLKIP	M-phase specific PLK1 interacting protein
hsa-miR-338-5p	0	0	1	1	1	1	CMTM8	CKLF-like MARVEL transmembrane domain containing 8
hsa-miR-338-5p	0	0	1	1	1	1	RAPGEF6	Rap guanine nucleotide exchange factor (GEF) 6
hsa-miR-338-5p	1	0	1	1	1	1	FNIP1	folliculin interacting protein 1
hsa-miR-338-5p	0	0	0	1	0	0	CLDN15	claudin 15
hsa-miR-338-5p	1	0	1	1	1	1	PHC3	polyhomeotic homolog 3 (Drosophila)
hsa-miR-338-5p	0	0	0	1	0	0	OR5B3	olfactory receptor, family 5, subfamily B, member 3
hsa-miR-338-5p	1	0	1	1	1	1	RCE1	RCE1 homolog, prenyl protein protease (S. cerevisiae)
hsa-miR-338-5p	0	0	1	1	0	0	C3orf77	chromosome 3 open reading frame 77
hsa-miR-338-5p	0	0	0	1	0	0	STON1-GTF2A1L	STON1-GTF2A1L readthrough
hsa-miR-338-5p	0	0	1	1	1	1	HYDIN	HYDIN, axonemal central pair apparatus protein
hsa-miR-338-5p	0	0	0	1	1	1	ATP6V0A4	ATPase, H+ transporting, lysosomal V0 subunit a4
hsa-miR-338-5p	0	0	1	1	0	0	MRPL48	mitochondrial ribosomal protein L48
hsa-miR-338-5p	0	0	1	1	0	0	UGT8	UDP glycosyltransferase 8
hsa-miR-338-5p	1	0	1	1	1	1	TNS1	tensin 1
hsa-miR-338-5p	0	0	1	1	1	1	ABCC12	ATP-binding cassette, sub-family C (CFTR/MRP), member 12
hsa-miR-338-5p	0	0	1	1	1	1	LSM1	LSM1 homolog, U6 small nuclear RNA associated (S. cerevisiae)
hsa-miR-338-5p	0	0	0	1	1	1	FAM21D	family with sequence similarity 21, member D
hsa-miR-338-5p	0	0	1	1	0	0	UQCRH	ubiquinol-cytochrome c reductase hinge protein
hsa-miR-338-5p	0	0	1	1	1	1	BTC	betacellulin
hsa-miR-338-5p	0	0	0	1	1	1	USP36	ubiquitin specific peptidase 36
hsa-miR-338-5p	0	0	1	1	1	1	FOSL1	FOS-like antigen 1
hsa-miR-338-5p	0	0	1	1	1	1	PIP5K1B	phosphatidylinositol-4-phosphate 5-kinase, type I, beta
hsa-miR-338-5p	0	0	1	1	0	0	MLF1	myeloid leukemia factor 1
hsa-miR-338-5p	1	0	1	1	1	1	ATG9B	autophagy related 9B
hsa-miR-338-5p	1	0	1	1	1	1	TRIP10	thyroid hormone receptor interactor 10
hsa-miR-338-5p	0	0	0	1	1	1	SPAG6	sperm associated antigen 6
hsa-miR-338-5p	0	0	0	1	1	1	TAF7	TAF7 RNA polymerase II, TATA box binding protein (TBP)-associated factor, 55kDa
hsa-miR-338-5p	0	0	1	1	1	1	RPA2	replication protein A2, 32kDa
hsa-miR-338-5p	0	0	1	1	1	1	MRPS23	mitochondrial ribosomal protein S23
hsa-miR-338-5p	0	0	1	1	1	1	TMPRSS7	transmembrane protease, serine 7
hsa-miR-338-5p	0	0	1	1	1	1	IMP3	IMP3, U3 small nucleolar ribonucleoprotein, homolog (yeast)
hsa-miR-338-5p	0	0	1	1	1	1	SYTL2	synaptotagmin-like 2
hsa-miR-338-5p	0	0	1	1	1	1	CCDC89	coiled-coil domain containing 89
hsa-miR-338-5p	1	0	1	1	1	1	DLC1	deleted in liver cancer 1
hsa-miR-338-5p	0	0	0	1	0	0	OR52N2	olfactory receptor, family 52, subfamily N, member 2
hsa-miR-338-5p	0	0	0	1	1	1	DLGAP1-AS1	DLGAP1 antisense RNA 1
hsa-miR-338-5p	1	0	0	1	1	1	PLEKHA5	pleckstrin homology domain containing, family A member 5
hsa-miR-338-5p	1	0	1	1	1	1	MAB21L2	mab-21-like 2 (C. elegans)
hsa-miR-338-5p	0	0	0	1	0	0	ZNF154	zinc finger protein 154
hsa-miR-338-5p	0	0	0	1	1	1	GRHPR	glyoxylate reductase/hydroxypyruvate reductase
hsa-miR-338-5p	0	0	1	1	1	1	C8orf47	chromosome 8 open reading frame 47
hsa-miR-338-5p	0	0	1	1	1	1	SLC6A15	solute carrier family 6 (neutral amino acid transporter), member 15
hsa-miR-338-5p	0	0	1	1	1	1	ALG2	asparagine-linked glycosylation 2, alpha-1,3-mannosyltransferase homolog (S. cerevisiae)
hsa-miR-338-5p	0	0	0	1	0	0	KLK11	kallikrein-related peptidase 11
hsa-miR-338-5p	0	0	1	1	1	1	RABGGTB	Rab geranylgeranyltransferase, beta subunit
hsa-miR-338-5p	0	0	0	1	0	0	FGF8	fibroblast growth factor 8 (androgen-induced)
hsa-miR-338-5p	0	0	1	1	1	1	CLK1	CDC-like kinase 1
hsa-miR-338-5p	0	0	1	1	1	1	C18orf26	chromosome 18 open reading frame 26
hsa-miR-338-5p	0	0	1	1	0	0	THAP4	THAP domain containing 4
hsa-miR-338-5p	1	0	1	1	1	1	NCL	nucleolin
hsa-miR-338-5p	0	0	1	1	1	1	C19orf12	chromosome 19 open reading frame 12
hsa-miR-338-5p	1	0	1	1	1	1	SAV1	salvador homolog 1 (Drosophila)
hsa-miR-338-5p	0	0	1	1	0	0	MRVI1-AS1	MRVI1 antisense RNA 1
hsa-miR-338-5p	0	0	0	1	0	0	NEU4	sialidase 4
hsa-miR-338-5p	1	0	1	1	1	1	RNF185	ring finger protein 185
hsa-miR-338-5p	0	0	1	1	1	1	PRNT	prion protein (testis specific)
hsa-miR-338-5p	1	0	1	1	1	1	TNKS1BP1	tankyrase 1 binding protein 1, 182kDa
hsa-miR-338-5p	0	0	0	1	1	1	ZNF274	zinc finger protein 274
hsa-miR-338-5p	0	0	0	1	1	1	NR2E3	nuclear receptor subfamily 2, group E, member 3
hsa-miR-338-5p	1	0	0	1	1	1	MMS19	MMS19 nucleotide excision repair homolog (S. cerevisiae)
hsa-miR-338-5p	0	0	1	1	0	0	FAM208B	family with sequence similarity 208, member B
hsa-miR-338-5p	0	0	1	1	1	1	ATF7	activating transcription factor 7
hsa-miR-338-5p	0	0	0	1	0	0	NLRP10	NLR family, pyrin domain containing 10
hsa-miR-338-5p	0	0	1	1	0	0	PCP4	Purkinje cell protein 4
hsa-miR-338-5p	0	0	0	1	0	0	OR52A1	olfactory receptor, family 52, subfamily A, member 1
hsa-miR-338-5p	1	0	1	1	1	1	C11orf82	chromosome 11 open reading frame 82
hsa-miR-338-5p	0	0	0	1	0	0	OR56A3	olfactory receptor, family 56, subfamily A, member 3
hsa-miR-338-5p	0	0	0	1	0	0	CLDN24	claudin 24
hsa-miR-338-5p	0	0	0	1	1	1	FREM3	FRAS1 related extracellular matrix 3
hsa-miR-338-5p	1	0	1	1	1	1	ZDHHC23	zinc finger, DHHC-type containing 23
hsa-miR-338-5p	0	0	0	1	0	0	OR2T10	olfactory receptor, family 2, subfamily T, member 10
hsa-miR-338-5p	0	0	0	1	1	1	DDX59	DEAD (Asp-Glu-Ala-Asp) box polypeptide 59
hsa-miR-338-5p	0	0	0	1	1	1	GLRX5	glutaredoxin 5
hsa-miR-338-5p	0	0	1	1	0	0	SLC22A10	solute carrier family 22, member 10
hsa-miR-338-5p	0	0	1	1	1	1	CRADD	CASP2 and RIPK1 domain containing adaptor with death domain
hsa-miR-338-5p	0	0	0	1	0	0	FAM200A	family with sequence similarity 200, member A
hsa-miR-338-5p	0	0	0	1	1	1	MAGEA11	melanoma antigen family A, 11
hsa-miR-338-5p	0	0	0	1	0	0	ZNF804B	zinc finger protein 804B
hsa-miR-338-5p	0	0	1	1	1	1	IGIP	IgA-inducing protein homolog (Bos taurus)
hsa-miR-338-5p	0	0	1	1	0	0	TMEM179B	transmembrane protein 179B
hsa-miR-338-5p	0	0	0	1	0	0	TUBB2A	tubulin, beta 2A class IIa
hsa-miR-338-5p	0	0	0	1	0	0	C15orf55	chromosome 15 open reading frame 55
hsa-miR-338-5p	1	0	1	1	1	1	CREM	cAMP responsive element modulator
hsa-miR-338-5p	0	0	1	1	1	1	PION	pigeon homolog (Drosophila)
hsa-miR-338-5p	0	0	0	1	1	1	USP16	ubiquitin specific peptidase 16
hsa-miR-338-5p	0	0	1	1	0	0	TXNRD2	thioredoxin reductase 2
hsa-miR-338-5p	0	0	1	1	1	1	INO80C	INO80 complex subunit C
hsa-miR-338-5p	0	0	0	1	0	0	KRTAP20-1	keratin associated protein 20-1
hsa-miR-338-5p	0	0	1	1	1	1	CCK	cholecystokinin
hsa-miR-338-5p	0	0	0	1	0	0	HPDL	4-hydroxyphenylpyruvate dioxygenase-like
hsa-miR-338-5p	0	0	0	1	0	0	JMJD7-PLA2G4B	JMJD7-PLA2G4B readthrough
hsa-miR-338-5p	0	0	1	1	0	0	ANKRD37	ankyrin repeat domain 37
hsa-miR-338-5p	0	0	0	1	1	1	INTU	inturned planar cell polarity effector homolog (Drosophila)
hsa-miR-338-5p	0	0	1	1	0	0	HTR3E	5-hydroxytryptamine (serotonin) receptor 3E, ionotropic
hsa-miR-338-5p	0	0	1	1	0	0	ADAM7	ADAM metallopeptidase domain 7
hsa-miR-338-5p	1	0	1	1	1	1	UBE2E2	ubiquitin-conjugating enzyme E2E 2
hsa-miR-338-5p	0	0	1	1	0	0	NME1	NME/NM23 nucleoside diphosphate kinase 1
hsa-miR-338-5p	0	0	0	1	0	0	NME1-NME2	NME1-NME2 readthrough
hsa-miR-338-5p	0	0	0	1	0	0	NME2	NME/NM23 nucleoside diphosphate kinase 2
hsa-miR-338-5p	0	0	1	1	1	1	NLRP3	NLR family, pyrin domain containing 3
hsa-miR-338-5p	0	0	1	1	1	1	FAM21C	family with sequence similarity 21, member C
hsa-miR-338-5p	0	0	1	1	0	0	WFDC6	WAP four-disulfide core domain 6
[truncated: 433 more rows]
