# Supplementary material for: Profiling of Selected MicroRNAs in Proliferative Eutopic Endometrium of Women with Ovarian Endometriosis
Source: Biomed Res Int. 2015 Aug 20;2015:760698. doi: 10.1155/2015/760698 (PMC4558423; doi:10.1155/2015/760698)
Supplement: Supplementary file 1 — Table I: The names of miRNAs significantly differentially expressed between eutopic endometrium of patients with endometriosis vs eutopic endometrium of patients without endometriosis. Table II: The associations between miRNA and mRNA, which presents detailed results of the search of six major databases i.e targetscan, tarbase, miranda, mirbase, mirtarget2 and pictar. [file 760698.f1.zip › 760698.f1/Table II/hsa-miR-339-3p.tsv]

miR	targetscan	tarbase	miranda	mirbase	mirtarget2	pictar	GeneSymbol	GeneName
hsa-miR-339-3p	1	0	1	0	1	1	PTPRT	protein tyrosine phosphatase, receptor type, T
hsa-miR-339-3p	0	0	1	1	0	0	PLCH2	phospholipase C, eta 2
hsa-miR-339-3p	1	0	1	1	1	1	PCDH19	protocadherin 19
hsa-miR-339-3p	1	0	1	1	1	1	UNC79	unc-79 homolog (C. elegans)
hsa-miR-339-3p	1	0	1	1	1	1	ITPRIP	inositol 1,4,5-trisphosphate receptor interacting protein
hsa-miR-339-3p	1	0	1	1	1	1	LZTS2	leucine zipper, putative tumor suppressor 2
hsa-miR-339-3p	0	0	1	1	0	0	COL27A1	collagen, type XXVII, alpha 1
hsa-miR-339-3p	1	0	1	1	1	1	PRDM16	PR domain containing 16
hsa-miR-339-3p	1	1	1	1	1	1	BACE1	beta-site APP-cleaving enzyme 1
hsa-miR-339-3p	1	0	1	1	1	1	VLDLR	very low density lipoprotein receptor
hsa-miR-339-3p	1	0	1	1	1	1	BACH2	BTB and CNC homology 1, basic leucine zipper transcription factor 2
hsa-miR-339-3p	0	0	1	1	0	0	KCNC3	potassium voltage-gated channel, Shaw-related subfamily, member 3
hsa-miR-339-3p	1	0	1	1	1	1	PLEKHH3	pleckstrin homology domain containing, family H (with MyTH4 domain) member 3
hsa-miR-339-3p	1	0	1	0	1	1	SLC6A6	solute carrier family 6 (neurotransmitter transporter, taurine), member 6
hsa-miR-339-3p	1	0	1	1	1	1	PPFIA1	protein tyrosine phosphatase, receptor type, f polypeptide (PTPRF), interacting protein (liprin), alpha 1
hsa-miR-339-3p	1	0	1	0	1	1	CHL1	cell adhesion molecule with homology to L1CAM (close homolog of L1)
hsa-miR-339-3p	1	0	1	1	0	0	RGS6	regulator of G-protein signaling 6
hsa-miR-339-3p	0	0	1	1	1	1	ZNF747	zinc finger protein 747
hsa-miR-339-3p	1	0	1	1	1	1	COL24A1	collagen, type XXIV, alpha 1
hsa-miR-339-3p	1	0	1	1	1	1	CTNND1	catenin (cadherin-associated protein), delta 1
hsa-miR-339-3p	0	0	1	1	1	1	NOL3	nucleolar protein 3 (apoptosis repressor with CARD domain)
hsa-miR-339-3p	0	0	1	1	1	1	PLEKHB1	pleckstrin homology domain containing, family B (evectins) member 1
hsa-miR-339-3p	0	0	1	1	1	1	SH2D1A	SH2 domain containing 1A
hsa-miR-339-3p	0	0	1	1	0	0	CALHM2	calcium homeostasis modulator 2
hsa-miR-339-3p	1	0	1	1	1	1	USP25	ubiquitin specific peptidase 25
hsa-miR-339-3p	0	0	1	1	1	1	RBM8A	RNA binding motif protein 8A
hsa-miR-339-3p	0	0	1	1	0	0	DAB1	disabled homolog 1 (Drosophila)
hsa-miR-339-3p	0	0	1	1	1	1	MED28	mediator complex subunit 28
hsa-miR-339-3p	1	0	1	1	1	1	BBC3	BCL2 binding component 3
hsa-miR-339-3p	0	0	1	1	0	0	SPNS1	spinster homolog 1 (Drosophila)
hsa-miR-339-3p	0	0	1	1	0	0	SNRPN	small nuclear ribonucleoprotein polypeptide N
hsa-miR-339-3p	1	0	1	1	0	0	POLR2J3	polymerase (RNA) II (DNA directed) polypeptide J3
hsa-miR-339-3p	1	0	1	1	1	1	WAPAL	wings apart-like homolog (Drosophila)
hsa-miR-339-3p	1	0	1	1	1	1	CACNA2D2	calcium channel, voltage-dependent, alpha 2/delta subunit 2
hsa-miR-339-3p	1	0	1	1	1	1	ILF3	interleukin enhancer binding factor 3, 90kDa
hsa-miR-339-3p	0	0	1	1	1	1	TFEB	transcription factor EB
hsa-miR-339-3p	1	0	1	1	1	1	SYNM	synemin, intermediate filament protein
hsa-miR-339-3p	0	0	1	0	0	0	TUG1	taurine upregulated 1 (non-protein coding)
hsa-miR-339-3p	1	0	1	1	1	1	C15orf63	chromosome 15 open reading frame 63
hsa-miR-339-3p	1	0	1	1	1	1	WDTC1	WD and tetratricopeptide repeats 1
hsa-miR-339-3p	0	0	1	1	1	1	ARMC5	armadillo repeat containing 5
hsa-miR-339-3p	0	0	1	1	1	1	SPATA5L1	spermatogenesis associated 5-like 1
hsa-miR-339-3p	1	0	1	1	0	0	MEX3A	mex-3 homolog A (C. elegans)
hsa-miR-339-3p	0	0	1	0	1	1	FLJ14186	uncharacterized LOC401149
hsa-miR-339-3p	0	0	1	0	0	0	IFFO2	intermediate filament family orphan 2
hsa-miR-339-3p	1	0	1	1	0	0	PRMT8	protein arginine methyltransferase 8
hsa-miR-339-3p	0	0	1	0	0	0	JAKMIP2-AS1	JAKMIP2 antisense RNA 1
hsa-miR-339-3p	0	0	1	1	0	0	ZNF252P	zinc finger protein 252, pseudogene
hsa-miR-339-3p	1	0	1	1	1	1	KCTD15	potassium channel tetramerisation domain containing 15
hsa-miR-339-3p	0	0	1	1	1	1	PAQR4	progestin and adipoQ receptor family member IV
hsa-miR-339-3p	1	0	1	0	1	1	PTPRE	protein tyrosine phosphatase, receptor type, E
hsa-miR-339-3p	0	0	1	1	1	1	PTCD2	pentatricopeptide repeat domain 2
hsa-miR-339-3p	1	0	1	0	1	1	PCGF3	polycomb group ring finger 3
hsa-miR-339-3p	0	0	1	1	0	0	TRIM41	tripartite motif containing 41
hsa-miR-339-3p	0	0	1	1	0	0	MRPL46	mitochondrial ribosomal protein L46
hsa-miR-339-3p	0	0	1	1	0	0	NISCH	nischarin
hsa-miR-339-3p	0	0	1	1	0	0	PIGO	phosphatidylinositol glycan anchor biosynthesis, class O
hsa-miR-339-3p	0	0	1	0	0	0	LOC727993	uncharacterized LOC727993
hsa-miR-339-3p	0	0	1	1	0	0	CTNNBL1	catenin, beta like 1
hsa-miR-339-3p	1	0	1	1	1	1	RRBP1	ribosome binding protein 1 homolog 180kDa (dog)
hsa-miR-339-3p	1	0	1	1	1	1	RAB11FIP4	RAB11 family interacting protein 4 (class II)
hsa-miR-339-3p	0	0	1	0	0	0	CECR7	cat eye syndrome chromosome region, candidate 7 (non-protein coding)
hsa-miR-339-3p	0	0	1	1	1	1	VIPAS39	VPS33B interacting protein, apical-basolateral polarity regulator, spe-39 homolog
hsa-miR-339-3p	0	0	1	1	1	1	ARFGAP2	ADP-ribosylation factor GTPase activating protein 2
hsa-miR-339-3p	0	0	1	1	0	0	ZACN	zinc activated ligand-gated ion channel
hsa-miR-339-3p	1	0	1	1	1	1	HBP1	HMG-box transcription factor 1
hsa-miR-339-3p	1	0	1	1	1	1	LMX1A	LIM homeobox transcription factor 1, alpha
hsa-miR-339-3p	0	0	1	1	0	0	KIAA0146	KIAA0146
hsa-miR-339-3p	1	0	1	1	1	1	AGAP2	ArfGAP with GTPase domain, ankyrin repeat and PH domain 2
hsa-miR-339-3p	1	0	1	1	1	1	ZNF275	zinc finger protein 275
hsa-miR-339-3p	0	0	1	1	1	1	FAM19A2	family with sequence similarity 19 (chemokine (C-C motif)-like), member A2
hsa-miR-339-3p	0	0	1	0	0	0	DKFZP434H168	uncharacterized LOC26077
hsa-miR-339-3p	0	0	1	0	1	1	LOC389641	uncharacterized LOC389641
hsa-miR-339-3p	0	0	1	1	0	0	TMEM151B	transmembrane protein 151B
hsa-miR-339-3p	1	0	1	1	1	1	FMNL3	formin-like 3
hsa-miR-339-3p	0	0	1	0	0	0	LOC619207	scavenger receptor protein family member
hsa-miR-339-3p	0	0	1	0	0	0	FAM205B	transmembrane protein C9orf144B pseudogene
hsa-miR-339-3p	0	0	1	1	0	0	FAM159A	family with sequence similarity 159, member A
hsa-miR-339-3p	1	0	1	0	1	1	KDM2A	lysine (K)-specific demethylase 2A
hsa-miR-339-3p	0	0	1	1	0	0	INTS1	integrator complex subunit 1
hsa-miR-339-3p	1	0	1	1	1	1	BCAT1	branched chain amino-acid transaminase 1, cytosolic
hsa-miR-339-3p	0	0	1	1	0	0	WFIKKN1	WAP, follistatin/kazal, immunoglobulin, kunitz and netrin domain containing 1
hsa-miR-339-3p	0	0	1	1	1	1	LYPD1	LY6/PLAUR domain containing 1
hsa-miR-339-3p	0	0	1	0	0	0	LOC654433	uncharacterized LOC654433
hsa-miR-339-3p	1	0	1	0	1	1	TEAD3	TEA domain family member 3
hsa-miR-339-3p	0	0	1	0	0	0	POM121L9P	POM121 transmembrane nucleoporin-like 9, pseudogene
hsa-miR-339-3p	1	0	1	1	1	1	SMAP2	small ArfGAP2
hsa-miR-339-3p	0	0	1	1	1	1	STAG3L1	stromal antigen 3-like 1
hsa-miR-339-3p	0	0	1	1	1	1	TAOK2	TAO kinase 2
hsa-miR-339-3p	0	0	1	1	1	1	ARFGAP1	ADP-ribosylation factor GTPase activating protein 1
hsa-miR-339-3p	1	0	1	1	1	1	CTTNBP2NL	CTTNBP2 N-terminal like
hsa-miR-339-3p	1	0	1	1	1	1	FAM63B	family with sequence similarity 63, member B
hsa-miR-339-3p	1	0	1	0	0	0	NPEPL1	aminopeptidase-like 1
hsa-miR-339-3p	1	0	1	1	1	1	IKZF2	IKAROS family zinc finger 2 (Helios)
hsa-miR-339-3p	0	0	1	1	0	0	FAM176C	family with sequence similarity 176, member C
hsa-miR-339-3p	0	0	1	0	0	0	KGFLP1	fibroblast growth factor 7 pseudogene
hsa-miR-339-3p	0	0	1	1	0	0	GLYCTK	glycerate kinase
hsa-miR-339-3p	1	0	1	1	1	1	TMCC2	transmembrane and coiled-coil domain family 2
hsa-miR-339-3p	0	0	1	1	0	0	DHRS4	dehydrogenase/reductase (SDR family) member 4
hsa-miR-339-3p	0	0	1	1	0	0	C15orf61	chromosome 15 open reading frame 61
hsa-miR-339-3p	1	0	1	1	0	0	FAM108A1	family with sequence similarity 108, member A1
hsa-miR-339-3p	1	0	1	1	1	1	RPRD1A	regulation of nuclear pre-mRNA domain containing 1A
hsa-miR-339-3p	0	0	1	0	0	0	DNM1P33	DNM1 pseudogene 33
hsa-miR-339-3p	0	0	1	1	0	0	AGBL5	ATP/GTP binding protein-like 5
hsa-miR-339-3p	1	0	1	1	1	1	KCNMA1	potassium large conductance calcium-activated channel, subfamily M, alpha member 1
hsa-miR-339-3p	1	0	1	0	1	1	RNF165	ring finger protein 165
hsa-miR-339-3p	0	0	1	1	0	0	PTPMT1	protein tyrosine phosphatase, mitochondrial 1
hsa-miR-339-3p	0	0	1	1	0	0	BEST1	bestrophin 1
hsa-miR-339-3p	1	0	1	1	0	0	AKT1S1	AKT1 substrate 1 (proline-rich)
hsa-miR-339-3p	0	0	1	1	1	1	CMAS	cytidine monophosphate N-acetylneuraminic acid synthetase
hsa-miR-339-3p	0	0	1	0	0	0	LOC441528	uncharacterized LOC441528
hsa-miR-339-3p	1	0	1	1	1	1	FAM222A	family with sequence similarity 222, member A
hsa-miR-339-3p	0	0	1	1	1	1	LRRK1	leucine-rich repeat kinase 1
hsa-miR-339-3p	1	0	1	0	1	1	C14orf101	chromosome 14 open reading frame 101
hsa-miR-339-3p	0	0	1	0	0	0	FLJ35390	uncharacterized LOC255031
hsa-miR-339-3p	0	0	1	0	0	0	LOC728485	uncharacterized LOC728485
hsa-miR-339-3p	0	0	1	1	1	1	TLR4	toll-like receptor 4
hsa-miR-339-3p	1	0	1	0	1	1	TFEC	transcription factor EC
hsa-miR-339-3p	1	0	1	0	1	1	SV2B	synaptic vesicle glycoprotein 2B
hsa-miR-339-3p	1	0	1	1	1	1	ZNF282	zinc finger protein 282
hsa-miR-339-3p	0	0	1	1	0	0	RAB4B	RAB4B, member RAS oncogene family
hsa-miR-339-3p	0	0	1	0	0	0	LINC00494	long intergenic non-protein coding RNA 494
hsa-miR-339-3p	1	0	1	1	1	1	ZEB2	zinc finger E-box binding homeobox 2
hsa-miR-339-3p	1	0	1	1	1	1	CTDSPL2	CTD (carboxy-terminal domain, RNA polymerase II, polypeptide A) small phosphatase like 2
hsa-miR-339-3p	0	0	1	0	0	0	HOXA-AS2	HOXA cluster antisense RNA 2
hsa-miR-339-3p	0	0	1	1	1	1	PLGRKT	plasminogen receptor, C-terminal lysine transmembrane protein
hsa-miR-339-3p	0	0	1	0	0	0	MEG3	maternally expressed 3 (non-protein coding)
hsa-miR-339-3p	0	0	1	0	0	0	LOC284889	uncharacterized LOC284889
hsa-miR-339-3p	1	0	1	1	1	1	FAM135B	family with sequence similarity 135, member B
hsa-miR-339-3p	0	0	1	1	0	0	PRMT2	protein arginine methyltransferase 2
hsa-miR-339-3p	0	0	1	0	0	0	LOC401074	uncharacterized LOC401074
hsa-miR-339-3p	0	0	1	1	1	1	SLC14A1	solute carrier family 14 (urea transporter), member 1 (Kidd blood group)
hsa-miR-339-3p	1	0	1	1	1	1	FOSB	FBJ murine osteosarcoma viral oncogene homolog B
hsa-miR-339-3p	0	0	1	1	0	0	SCAND1	SCAN domain containing 1
hsa-miR-339-3p	0	0	1	0	0	0	LRRC37BP1	leucine rich repeat containing 37B pseudogene 1
hsa-miR-339-3p	0	0	1	1	1	1	MST1	macrophage stimulating 1 (hepatocyte growth factor-like)
hsa-miR-339-3p	1	0	1	1	1	1	MAMDC2	MAM domain containing 2
hsa-miR-339-3p	0	0	1	1	0	0	FAM165B	family with sequence similarity 165, member B
hsa-miR-339-3p	0	0	1	1	0	0	NIT1	nitrilase 1
hsa-miR-339-3p	1	0	1	1	1	1	PTPRG	protein tyrosine phosphatase, receptor type, G
hsa-miR-339-3p	0	0	1	1	0	0	NLRC5	NLR family, CARD domain containing 5
hsa-miR-339-3p	0	0	1	1	1	1	HLA-DQA1	major histocompatibility complex, class II, DQ alpha 1
hsa-miR-339-3p	0	0	1	1	0	0	CUEDC1	CUE domain containing 1
hsa-miR-339-3p	0	0	1	1	0	0	GRIN2C	glutamate receptor, ionotropic, N-methyl D-aspartate 2C
hsa-miR-339-3p	0	0	1	1	0	0	C8orf31	chromosome 8 open reading frame 31
hsa-miR-339-3p	0	0	1	1	1	1	METTL15	methyltransferase like 15
hsa-miR-339-3p	1	0	1	0	1	1	MAGIX	MAGI family member, X-linked
hsa-miR-339-3p	0	0	1	1	0	0	GPRC5C	G protein-coupled receptor, family C, group 5, member C
hsa-miR-339-3p	0	0	1	1	0	0	KLK15	kallikrein-related peptidase 15
hsa-miR-339-3p	0	0	1	1	1	1	SLC11A1	solute carrier family 11 (proton-coupled divalent metal ion transporters), member 1
hsa-miR-339-3p	0	0	1	0	0	0	LINC00537	long intergenic non-protein coding RNA 537
hsa-miR-339-3p	1	0	1	1	1	1	STK38	serine/threonine kinase 38
hsa-miR-339-3p	0	0	1	0	0	0	FBXL19-AS1	FBXL19 antisense RNA 1 (head to head)
hsa-miR-339-3p	0	0	1	1	0	0	ZNF276	zinc finger protein 276
hsa-miR-339-3p	0	0	1	0	0	0	CCT6P1	chaperonin containing TCP1, subunit 6 (zeta) pseudogene 1
hsa-miR-339-3p	0	0	1	1	0	0	SOCS7	suppressor of cytokine signaling 7
hsa-miR-339-3p	0	0	1	1	0	0	HOXD12	homeobox D12
hsa-miR-339-3p	0	0	1	1	0	0	CCDC79	coiled-coil domain containing 79
hsa-miR-339-3p	0	0	1	0	0	0	FLJ38723	uncharacterized FLJ38723
hsa-miR-339-3p	1	0	1	1	1	1	DLST	dihydrolipoamide S-succinyltransferase (E2 component of 2-oxo-glutarate complex)
hsa-miR-339-3p	0	0	1	1	1	1	IP6K2	inositol hexakisphosphate kinase 2
hsa-miR-339-3p	1	0	1	1	1	1	RAB7A	RAB7A, member RAS oncogene family
hsa-miR-339-3p	1	0	1	0	1	1	MTX3	metaxin 3
hsa-miR-339-3p	1	0	1	1	1	1	SLC39A13	solute carrier family 39 (zinc transporter), member 13
hsa-miR-339-3p	0	0	1	0	0	0	LOC286299	uncharacterized LOC286299
hsa-miR-339-3p	0	0	1	0	0	0	ZNRD1-AS1	ZNRD1 antisense RNA 1
hsa-miR-339-3p	0	0	1	1	0	0	PITRM1	pitrilysin metallopeptidase 1
hsa-miR-339-3p	0	0	1	1	0	0	CRIP2	cysteine-rich protein 2
hsa-miR-339-3p	0	0	1	1	1	1	HEXA	hexosaminidase A (alpha polypeptide)
hsa-miR-339-3p	1	0	1	1	1	1	NME4	NME/NM23 nucleoside diphosphate kinase 4
hsa-miR-339-3p	0	0	1	1	1	1	CCS	copper chaperone for superoxide dismutase
hsa-miR-339-3p	1	0	1	1	1	1	PCGF2	polycomb group ring finger 2
hsa-miR-339-3p	0	0	1	1	1	1	DGCR14	DiGeorge syndrome critical region gene 14
hsa-miR-339-3p	0	0	1	0	0	0	LOC400768	uncharacterized LOC400768
hsa-miR-339-3p	1	0	1	1	1	1	LETMD1	LETM1 domain containing 1
hsa-miR-339-3p	0	0	1	1	0	0	SRM	spermidine synthase
hsa-miR-339-3p	0	0	1	1	0	0	CD81	CD81 molecule
hsa-miR-339-3p	0	0	1	1	1	1	INCENP	inner centromere protein antigens 135/155kDa
hsa-miR-339-3p	1	0	1	0	1	1	PTPLAD1	protein tyrosine phosphatase-like A domain containing 1
hsa-miR-339-3p	1	0	1	1	0	0	CCM2	cerebral cavernous malformation 2
hsa-miR-339-3p	0	0	1	1	0	0	IKBKG	inhibitor of kappa light polypeptide gene enhancer in B-cells, kinase gamma
hsa-miR-339-3p	0	0	1	0	0	0	TMEM208	transmembrane protein 208
hsa-miR-339-3p	0	0	1	1	1	1	MS4A6A	membrane-spanning 4-domains, subfamily A, member 6A
hsa-miR-339-3p	0	0	1	1	1	1	CAPZB	capping protein (actin filament) muscle Z-line, beta
hsa-miR-339-3p	0	0	1	1	0	0	GMPPA	GDP-mannose pyrophosphorylase A
hsa-miR-339-3p	1	0	1	1	1	1	CUL4A	cullin 4A
hsa-miR-339-3p	1	0	1	1	1	1	ARNTL	aryl hydrocarbon receptor nuclear translocator-like
hsa-miR-339-3p	0	0	1	1	0	0	RGS9	regulator of G-protein signaling 9
hsa-miR-339-3p	1	0	1	1	1	1	TIMP3	TIMP metallopeptidase inhibitor 3
hsa-miR-339-3p	0	0	1	1	1	1	LYSMD4	LysM, putative peptidoglycan-binding, domain containing 4
hsa-miR-339-3p	0	0	1	1	0	0	AHSG	alpha-2-HS-glycoprotein
hsa-miR-339-3p	0	0	1	1	1	1	HOXC9	homeobox C9
hsa-miR-339-3p	0	0	1	1	0	0	TUSC3	tumor suppressor candidate 3
hsa-miR-339-3p	1	0	1	1	1	1	RNF2	ring finger protein 2
hsa-miR-339-3p	0	0	1	0	1	1	ARMC10	armadillo repeat containing 10
hsa-miR-339-3p	0	0	1	0	0	0	NUDT18	nudix (nucleoside diphosphate linked moiety X)-type motif 18
hsa-miR-339-3p	0	0	1	1	1	1	ZNF346	zinc finger protein 346
hsa-miR-339-3p	0	0	1	1	0	0	ARVCF	armadillo repeat gene deleted in velocardiofacial syndrome
hsa-miR-339-3p	1	0	1	0	1	1	BTRC	beta-transducin repeat containing E3 ubiquitin protein ligase
hsa-miR-339-3p	1	0	1	0	1	1	CBX7	chromobox homolog 7
hsa-miR-339-3p	0	0	1	0	0	0	GPR144	G protein-coupled receptor 144
hsa-miR-339-3p	1	0	1	1	1	1	COL1A1	collagen, type I, alpha 1
hsa-miR-339-3p	1	0	1	0	1	1	GLI3	GLI family zinc finger 3
hsa-miR-339-3p	0	0	1	0	0	0	FUT2	fucosyltransferase 2 (secretor status included)
hsa-miR-339-3p	0	0	1	1	1	1	IGF2	insulin-like growth factor 2 (somatomedin A)
hsa-miR-339-3p	0	0	1	0	0	0	C10orf55	chromosome 10 open reading frame 55
hsa-miR-339-3p	1	0	1	1	1	1	NRARP	NOTCH-regulated ankyrin repeat protein
hsa-miR-339-3p	1	0	1	0	1	1	IP6K1	inositol hexakisphosphate kinase 1
hsa-miR-339-3p	0	0	1	1	0	0	TCEAL3	transcription elongation factor A (SII)-like 3
hsa-miR-339-3p	1	0	1	1	1	1	ATN1	atrophin 1
hsa-miR-339-3p	1	0	1	1	1	1	SLC25A53	solute carrier family 25, member 53
hsa-miR-339-3p	1	0	1	0	1	1	ZKSCAN2	zinc finger with KRAB and SCAN domains 2
hsa-miR-339-3p	0	0	1	0	0	0	LOC400707	uncharacterized LOC400707
hsa-miR-339-3p	1	0	1	0	1	1	BRCC3	BRCA1/BRCA2-containing complex, subunit 3
hsa-miR-339-3p	0	0	1	1	1	1	C18orf62	chromosome 18 open reading frame 62
hsa-miR-339-3p	1	0	1	1	1	1	CRCP	CGRP receptor component
hsa-miR-339-3p	1	0	1	0	1	1	SRGAP2	SLIT-ROBO Rho GTPase activating protein 2
hsa-miR-339-3p	0	0	1	1	1	1	FAM22G	family with sequence similarity 22, member G
hsa-miR-339-3p	1	0	1	1	1	1	HS6ST2	heparan sulfate 6-O-sulfotransferase 2
hsa-miR-339-3p	1	0	1	1	1	1	ADCY9	adenylate cyclase 9
hsa-miR-339-3p	1	0	1	0	1	1	CDK6	cyclin-dependent kinase 6
hsa-miR-339-3p	0	0	1	1	0	0	CLPTM1	cleft lip and palate associated transmembrane protein 1
hsa-miR-339-3p	1	0	1	1	1	1	CTNND2	catenin (cadherin-associated protein), delta 2
hsa-miR-339-3p	0	0	1	0	0	0	BAI1	brain-specific angiogenesis inhibitor 1
hsa-miR-339-3p	0	0	1	1	1	1	CD1D	CD1d molecule
hsa-miR-339-3p	1	0	1	1	1	1	CDC25A	cell division cycle 25 homolog A (S. pombe)
hsa-miR-339-3p	0	0	1	1	0	0	MYBL2	v-myb myeloblastosis viral oncogene homolog (avian)-like 2
hsa-miR-339-3p	0	0	1	1	1	1	MYOD1	myogenic differentiation 1
hsa-miR-339-3p	1	0	1	1	1	1	NPTX1	neuronal pentraxin I
hsa-miR-339-3p	0	0	1	1	1	1	SEPT5	septin 5
hsa-miR-339-3p	1	0	1	1	1	1	SMARCC1	SWI/SNF related, matrix associated, actin dependent regulator of chromatin, subfamily c, member 1
hsa-miR-339-3p	1	0	1	1	1	1	SMARCD1	SWI/SNF related, matrix associated, actin dependent regulator of chromatin, subfamily d, member 1
hsa-miR-339-3p	1	0	1	0	1	1	VCL	vinculin
hsa-miR-339-3p	1	0	1	1	1	1	ADAM12	ADAM metallopeptidase domain 12
hsa-miR-339-3p	0	0	1	1	1	1	HIST2H2BE	histone cluster 2, H2be
hsa-miR-339-3p	0	0	1	1	0	0	TNFRSF25	tumor necrosis factor receptor superfamily, member 25
hsa-miR-339-3p	0	0	1	1	0	0	MATN4	matrilin 4
hsa-miR-339-3p	1	0	1	1	1	1	RAB5A	RAB5A, member RAS oncogene family
hsa-miR-339-3p	0	0	1	0	1	1	POU4F2	POU class 4 homeobox 2
hsa-miR-339-3p	1	0	1	0	1	1	SCN2B	sodium channel, voltage-gated, type II, beta subunit
hsa-miR-339-3p	1	0	1	1	1	1	RAB11A	RAB11A, member RAS oncogene family
hsa-miR-339-3p	1	0	1	0	1	1	ROCK2	Rho-associated, coiled-coil containing protein kinase 2
hsa-miR-339-3p	1	0	1	1	1	1	FXR2	fragile X mental retardation, autosomal homolog 2
hsa-miR-339-3p	0	0	1	1	1	1	ITM2A	integral membrane protein 2A
hsa-miR-339-3p	1	0	1	1	1	1	GABRE	gamma-aminobutyric acid (GABA) A receptor, epsilon
hsa-miR-339-3p	0	0	1	1	0	0	HR	hairless homolog (mouse)
hsa-miR-339-3p	1	0	1	1	1	1	HIP1	huntingtin interacting protein 1
hsa-miR-339-3p	1	0	1	1	0	0	NNAT	neuronatin
hsa-miR-339-3p	1	0	1	0	1	1	PRKAB2	protein kinase, AMP-activated, beta 2 non-catalytic subunit
hsa-miR-339-3p	1	0	1	0	1	1	SPRY3	sprouty homolog 3 (Drosophila)
hsa-miR-339-3p	0	0	1	1	0	0	KATNB1	katanin p80 (WD repeat containing) subunit B 1
hsa-miR-339-3p	1	0	1	1	1	1	MTF1	metal-regulatory transcription factor 1
hsa-miR-339-3p	1	0	1	1	1	1	NEUROD2	neuronal differentiation 2
hsa-miR-339-3p	0	0	1	1	0	0	PNOC	prepronociceptin
hsa-miR-339-3p	0	0	1	1	1	1	NPC2	Niemann-Pick disease, type C2
hsa-miR-339-3p	1	0	1	1	1	1	BTG2	BTG family, member 2
hsa-miR-339-3p	1	0	1	1	1	1	KDELR2	KDEL (Lys-Asp-Glu-Leu) endoplasmic reticulum protein retention receptor 2
hsa-miR-339-3p	0	0	1	1	0	0	PIM2	pim-2 oncogene
hsa-miR-339-3p	0	0	1	0	1	1	AP4E1	adaptor-related protein complex 4, epsilon 1 subunit
hsa-miR-339-3p	0	0	1	1	0	0	LTB	lymphotoxin beta (TNF superfamily, member 3)
hsa-miR-339-3p	1	0	1	1	1	1	CLCF1	cardiotrophin-like cytokine factor 1
hsa-miR-339-3p	1	0	1	1	1	1	LHX6	LIM homeobox 6
hsa-miR-339-3p	1	0	1	1	1	1	ZNF592	zinc finger protein 592
hsa-miR-339-3p	0	0	1	1	0	0	SLC25A44	solute carrier family 25, member 44
hsa-miR-339-3p	1	0	1	0	1	1	PDAP1	PDGFA associated protein 1
hsa-miR-339-3p	0	0	1	0	1	1	PPM1E	protein phosphatase, Mg2+/Mn2+ dependent, 1E
hsa-miR-339-3p	1	0	1	1	1	1	PLEKHA6	pleckstrin homology domain containing, family A member 6
hsa-miR-339-3p	1	0	1	1	1	1	ZNF423	zinc finger protein 423
hsa-miR-339-3p	1	0	1	1	1	1	PNKD	paroxysmal nonkinesigenic dyskinesia
hsa-miR-339-3p	0	0	1	1	1	1	USP18	ubiquitin specific peptidase 18
hsa-miR-339-3p	1	0	1	0	1	1	KLHL3	kelch-like 3 (Drosophila)
hsa-miR-339-3p	1	0	1	1	1	1	SIX4	SIX homeobox 4
hsa-miR-339-3p	1	0	1	1	1	1	DIRAS2	DIRAS family, GTP-binding RAS-like 2
hsa-miR-339-3p	0	0	1	1	0	0	NDE1	nudE nuclear distribution E homolog 1 (A. nidulans)
hsa-miR-339-3p	0	0	1	1	0	0	CLN6	ceroid-lipofuscinosis, neuronal 6, late infantile, variant
hsa-miR-339-3p	0	0	1	1	1	1	NECAP2	NECAP endocytosis associated 2
hsa-miR-339-3p	1	0	1	1	1	1	CYP26B1	cytochrome P450, family 26, subfamily B, polypeptide 1
hsa-miR-339-3p	1	0	1	1	1	1	PTGFRN	prostaglandin F2 receptor negative regulator
hsa-miR-339-3p	1	0	1	1	1	1	RNF150	ring finger protein 150
hsa-miR-339-3p	1	0	1	1	1	1	NLGN2	neuroligin 2
hsa-miR-339-3p	1	0	1	0	1	1	LRCH2	leucine-rich repeats and calponin homology (CH) domain containing 2
hsa-miR-339-3p	1	0	1	1	1	1	PELI2	pellino E3 ubiquitin protein ligase family member 2
hsa-miR-339-3p	1	0	1	0	1	1	MCL1	myeloid cell leukemia sequence 1 (BCL2-related)
hsa-miR-339-3p	1	0	1	1	1	1	NEUROG2	neurogenin 2
hsa-miR-339-3p	1	0	1	1	1	1	AHNAK	AHNAK nucleoprotein
hsa-miR-339-3p	0	0	1	0	1	1	C1orf115	chromosome 1 open reading frame 115
hsa-miR-339-3p	0	0	1	1	1	1	SNX22	sorting nexin 22
hsa-miR-339-3p	1	0	1	1	1	1	KLHL18	kelch-like 18 (Drosophila)
hsa-miR-339-3p	1	0	1	1	1	1	TRIM8	tripartite motif containing 8
hsa-miR-339-3p	0	0	1	1	0	0	NICN1	nicolin 1
hsa-miR-339-3p	0	0	1	0	1	1	MAK16	MAK16 homolog (S. cerevisiae)
hsa-miR-339-3p	0	0	1	1	0	0	ACCS	1-aminocyclopropane-1-carboxylate synthase homolog (Arabidopsis)(non-functional)
hsa-miR-339-3p	1	0	1	1	0	0	DMRTB1	DMRT-like family B with proline-rich C-terminal, 1
hsa-miR-339-3p	1	0	1	0	1	1	SCRT2	scratch homolog 2, zinc finger protein (Drosophila)
hsa-miR-339-3p	1	0	1	1	1	1	C20orf112	chromosome 20 open reading frame 112
hsa-miR-339-3p	1	0	1	1	0	0	ADAMTS14	ADAM metallopeptidase with thrombospondin type 1 motif, 14
hsa-miR-339-3p	1	0	1	0	1	1	SOCS4	suppressor of cytokine signaling 4
hsa-miR-339-3p	1	0	1	1	1	1	ARX	aristaless related homeobox
hsa-miR-339-3p	0	0	1	1	1	1	TRMT10B	tRNA methyltransferase 10 homolog B (S. cerevisiae)
hsa-miR-339-3p	1	0	1	1	1	1	ANKRD23	ankyrin repeat domain 23
hsa-miR-339-3p	1	0	1	0	1	1	CENPBD1	CENPB DNA-binding domains containing 1
hsa-miR-339-3p	0	0	1	1	0	0	PRKCDBP	protein kinase C, delta binding protein
hsa-miR-339-3p	0	0	1	1	0	0	C1orf158	chromosome 1 open reading frame 158
hsa-miR-339-3p	0	0	1	0	1	1	BBS5	Bardet-Biedl syndrome 5
hsa-miR-339-3p	1	0	1	1	1	1	FGFBP3	fibroblast growth factor binding protein 3
hsa-miR-339-3p	1	0	1	0	1	1	TMEM154	transmembrane protein 154
hsa-miR-339-3p	1	0	1	1	1	1	TCEANC2	transcription elongation factor A (SII) N-terminal and central domain containing 2
hsa-miR-339-3p	0	0	1	1	1	1	NFATC3	nuclear factor of activated T-cells, cytoplasmic, calcineurin-dependent 3
hsa-miR-339-3p	1	0	1	1	1	1	ARL10	ADP-ribosylation factor-like 10
hsa-miR-339-3p	1	0	1	1	1	1	PRIMA1	proline rich membrane anchor 1
hsa-miR-339-3p	0	0	1	1	1	1	TUBB	tubulin, beta class I
hsa-miR-339-3p	0	0	1	1	1	1	C1QTNF9	C1q and tumor necrosis factor related protein 9
hsa-miR-339-3p	1	0	1	1	1	1	CREM	cAMP responsive element modulator
hsa-miR-339-3p	1	0	1	1	1	1	E2F6	E2F transcription factor 6
hsa-miR-339-3p	0	0	1	1	0	0	LRRN4CL	LRRN4 C-terminal like
hsa-miR-339-3p	0	0	1	1	0	0	IER5L	immediate early response 5-like
hsa-miR-339-3p	0	0	1	0	0	0	PCDHB17	protocadherin beta 17 pseudogene
hsa-miR-339-3p	0	0	1	0	0	0	PCDHB19P	protocadherin beta 19 pseudogene
hsa-miR-339-3p	0	0	1	0	0	0	TTTY2	testis-specific transcript, Y-linked 2 (non-protein coding)
hsa-miR-339-3p	0	0	1	0	0	0	FTH1P8	ferritin, heavy polypeptide 1 pseudogene 8
hsa-miR-339-3p	0	0	1	0	0	0	MSX2P1	msh homeobox 2 pseudogene 1
hsa-miR-339-3p	0	0	1	0	0	0	DGCR5	DiGeorge syndrome critical region gene 5 (non-protein coding)
hsa-miR-339-3p	0	0	1	0	0	0	HOXA11-AS	HOXA11 antisense RNA
hsa-miR-339-3p	0	0	1	0	0	0	HAS2-AS1	HAS2 antisense RNA 1
hsa-miR-339-3p	0	0	1	0	0	0	SCARNA2	small Cajal body-specific RNA 2
hsa-miR-339-3p	0	0	1	0	0	0	SNORD115-26	small nucleolar RNA, C/D box 115-26
hsa-miR-339-3p	1	0	1	1	1	1	AKAP1	A kinase (PRKA) anchor protein 1
hsa-miR-339-3p	1	0	1	1	1	1	SNRNP70	small nuclear ribonucleoprotein 70kDa (U1)
hsa-miR-339-3p	0	0	1	1	1	1	CD6	CD6 molecule
hsa-miR-339-3p	0	0	1	1	0	0	TMEM132A	transmembrane protein 132A
hsa-miR-339-3p	1	0	1	1	1	1	DVL2	dishevelled, dsh homolog 2 (Drosophila)
hsa-miR-339-3p	0	0	1	1	0	0	RHBDD2	rhomboid domain containing 2
hsa-miR-339-3p	0	0	1	1	0	0	TSR3	TSR3, 20S rRNA accumulation, homolog (S. cerevisiae)
hsa-miR-339-3p	0	0	1	1	1	1	ARHGAP33	Rho GTPase activating protein 33
hsa-miR-339-3p	1	0	1	1	1	1	XYLT2	xylosyltransferase II
hsa-miR-339-3p	0	0	1	1	0	0	EDC4	enhancer of mRNA decapping 4
hsa-miR-339-3p	0	0	0	1	0	0	BEST2	bestrophin 2
hsa-miR-339-3p	0	0	1	1	1	1	GRN	granulin
hsa-miR-339-3p	0	0	0	1	0	0	GSC2	goosecoid homeobox 2
hsa-miR-339-3p	0	0	0	1	0	0	TMEM161A	transmembrane protein 161A
hsa-miR-339-3p	0	0	0	1	0	0	PRLH	prolactin releasing hormone
hsa-miR-339-3p	0	0	0	1	0	0	NMRK2	nicotinamide riboside kinase 2
hsa-miR-339-3p	0	0	1	1	1	1	IL4R	interleukin 4 receptor
hsa-miR-339-3p	0	0	0	1	0	0	DRD4	dopamine receptor D4
hsa-miR-339-3p	0	0	1	1	0	0	MAP2K5	mitogen-activated protein kinase kinase 5
hsa-miR-339-3p	1	0	1	1	1	1	CLIC5	chloride intracellular channel 5
hsa-miR-339-3p	1	0	1	1	1	1	AQP2	aquaporin 2 (collecting duct)
hsa-miR-339-3p	1	0	1	1	0	0	KHSRP	KH-type splicing regulatory protein
hsa-miR-339-3p	0	0	1	1	0	0	REM1	RAS (RAD and GEM)-like GTP-binding 1
hsa-miR-339-3p	0	0	0	1	1	1	SLC24A6	solute carrier family 24 (sodium/lithium/calcium exchanger), member 6
hsa-miR-339-3p	1	0	1	1	0	0	MAPK12	mitogen-activated protein kinase 12
hsa-miR-339-3p	0	0	0	1	0	0	LGALS2	lectin, galactoside-binding, soluble, 2
hsa-miR-339-3p	0	0	0	1	0	0	POLR2F	polymerase (RNA) II (DNA directed) polypeptide F
hsa-miR-339-3p	0	0	1	1	1	1	PNPLA5	patatin-like phospholipase domain containing 5
hsa-miR-339-3p	0	0	1	1	0	0	C14orf166B	chromosome 14 open reading frame 166B
hsa-miR-339-3p	0	0	0	1	0	0	RIN3	Ras and Rab interactor 3
hsa-miR-339-3p	0	0	1	1	1	1	PROCR	protein C receptor, endothelial
hsa-miR-339-3p	0	0	1	1	0	0	CST4	cystatin S
hsa-miR-339-3p	1	0	1	1	1	1	C16orf70	chromosome 16 open reading frame 70
hsa-miR-339-3p	0	0	0	1	0	0	CCL17	chemokine (C-C motif) ligand 17
hsa-miR-339-3p	0	0	0	1	1	1	NME3	NME/NM23 nucleoside diphosphate kinase 3
hsa-miR-339-3p	0	0	1	1	1	1	CMC2	COX assembly mitochondrial protein 2 homolog (S. cerevisiae)
hsa-miR-339-3p	0	0	1	1	1	1	DECR2	2,4-dienoyl CoA reductase 2, peroxisomal
hsa-miR-339-3p	0	0	0	1	0	0	PAF1	Paf1, RNA polymerase II associated factor, homolog (S. cerevisiae)
hsa-miR-339-3p	0	0	0	1	1	1	PEX11G	peroxisomal biogenesis factor 11 gamma
hsa-miR-339-3p	1	0	1	1	0	0	DOT1L	DOT1-like, histone H3 methyltransferase (S. cerevisiae)
hsa-miR-339-3p	0	0	0	1	0	0	SF3A2	splicing factor 3a, subunit 2, 66kDa
hsa-miR-339-3p	0	0	0	1	0	0	POLR2I	polymerase (RNA) II (DNA directed) polypeptide I, 14.5kDa
hsa-miR-339-3p	0	0	0	1	0	0	ZNF574	zinc finger protein 574
hsa-miR-339-3p	0	0	0	1	0	0	SNX8	sorting nexin 8
hsa-miR-339-3p	0	0	1	1	1	1	GDF10	growth differentiation factor 10
hsa-miR-339-3p	1	0	1	1	0	0	RUNDC3A	RUN domain containing 3A
hsa-miR-339-3p	1	0	0	1	1	1	WNT3	wingless-type MMTV integration site family, member 3
hsa-miR-339-3p	0	0	1	1	0	0	GALK1	galactokinase 1
hsa-miR-339-3p	1	0	1	1	0	0	HOXB6	homeobox B6
hsa-miR-339-3p	0	0	1	1	1	1	NFKB1	nuclear factor of kappa light polypeptide gene enhancer in B-cells 1
hsa-miR-339-3p	0	0	1	1	1	1	GAR1	GAR1 ribonucleoprotein homolog (yeast)
hsa-miR-339-3p	0	0	0	1	0	0	DDX11	DEAD/H (Asp-Glu-Ala-Asp/His) box helicase 11
hsa-miR-339-3p	0	0	1	1	1	1	ARPC3	actin related protein 2/3 complex, subunit 3, 21kDa
hsa-miR-339-3p	0	0	1	1	1	1	LTBR	lymphotoxin beta receptor (TNFR superfamily, member 3)
hsa-miR-339-3p	0	0	0	1	1	1	GNB3	guanine nucleotide binding protein (G protein), beta polypeptide 3
hsa-miR-339-3p	0	0	0	1	0	0	SPSB2	splA/ryanodine receptor domain and SOCS box containing 2
hsa-miR-339-3p	1	0	1	1	1	1	SRSF9	serine/arginine-rich splicing factor 9
hsa-miR-339-3p	1	0	1	1	1	1	SOBP	sine oculis binding protein homolog (Drosophila)
hsa-miR-339-3p	1	0	1	1	0	0	INO80D	INO80 complex subunit D
hsa-miR-339-3p	1	0	1	1	1	1	TTC31	tetratricopeptide repeat domain 31
hsa-miR-339-3p	0	0	1	1	0	0	IGFBP2	insulin-like growth factor binding protein 2, 36kDa
hsa-miR-339-3p	0	0	0	1	1	1	WNT6	wingless-type MMTV integration site family, member 6
hsa-miR-339-3p	0	0	0	1	0	0	AZU1	azurocidin 1
hsa-miR-339-3p	0	0	1	1	1	1	ATP6V0B	ATPase, H+ transporting, lysosomal 21kDa, V0 subunit b
hsa-miR-339-3p	0	0	0	1	0	0	APOA1	apolipoprotein A-I
hsa-miR-339-3p	0	0	1	1	0	0	GSC	goosecoid homeobox
hsa-miR-339-3p	0	0	1	1	1	1	CCDC77	coiled-coil domain containing 77
hsa-miR-339-3p	0	0	1	1	0	0	STX10	syntaxin 10
hsa-miR-339-3p	1	0	0	1	0	0	CD97	CD97 molecule
hsa-miR-339-3p	1	0	1	1	1	1	ATP7B	ATPase, Cu++ transporting, beta polypeptide
hsa-miR-339-3p	1	0	1	1	0	0	SMUG1	single-strand-selective monofunctional uracil-DNA glycosylase 1
hsa-miR-339-3p	0	0	0	1	0	0	B9D2	B9 protein domain 2
hsa-miR-339-3p	0	0	0	1	0	0	TNFSF14	tumor necrosis factor (ligand) superfamily, member 14
hsa-miR-339-3p	0	0	0	1	0	0	SYMPK	symplekin
hsa-miR-339-3p	0	0	0	1	0	0	SLURP1	secreted LY6/PLAUR domain containing 1
hsa-miR-339-3p	0	0	0	1	0	0	KRT35	keratin 35
hsa-miR-339-3p	0	0	0	1	1	1	KRT9	keratin 9
hsa-miR-339-3p	0	0	1	1	1	1	RRAS	related RAS viral (r-ras) oncogene homolog
hsa-miR-339-3p	0	0	1	1	0	0	DDX49	DEAD (Asp-Glu-Ala-Asp) box polypeptide 49
hsa-miR-339-3p	0	0	1	1	0	0	CTAG2	cancer/testis antigen 2
hsa-miR-339-3p	1	0	1	1	1	1	SULT4A1	sulfotransferase family 4A, member 1
hsa-miR-339-3p	0	0	1	1	0	0	ATP6V1F	ATPase, H+ transporting, lysosomal 14kDa, V1 subunit F
hsa-miR-339-3p	0	0	1	1	0	0	SIRT2	sirtuin 2
hsa-miR-339-3p	1	0	1	1	0	0	HOXD9	homeobox D9
hsa-miR-339-3p	0	0	0	1	1	1	ARHGAP22	Rho GTPase activating protein 22
hsa-miR-339-3p	0	0	0	1	0	0	ISLR	immunoglobulin superfamily containing leucine-rich repeat
hsa-miR-339-3p	0	0	1	1	0	0	NDUFA2	NADH dehydrogenase (ubiquinone) 1 alpha subcomplex, 2, 8kDa
hsa-miR-339-3p	0	0	0	1	0	0	KRT75	keratin 75
hsa-miR-339-3p	1	0	0	1	0	0	GADD45G	growth arrest and DNA-damage-inducible, gamma
hsa-miR-339-3p	1	0	0	1	0	0	SAFB2	scaffold attachment factor B2
hsa-miR-339-3p	0	0	1	1	1	1	MRPL34	mitochondrial ribosomal protein L34
hsa-miR-339-3p	0	0	0	1	1	1	ACSBG2	acyl-CoA synthetase bubblegum family member 2
hsa-miR-339-3p	0	0	1	1	1	1	EPO	erythropoietin
hsa-miR-339-3p	1	0	1	1	1	1	MNX1	motor neuron and pancreas homeobox 1
hsa-miR-339-3p	0	0	1	1	0	0	ADRM1	adhesion regulating molecule 1
hsa-miR-339-3p	1	0	1	1	0	0	ANGPTL6	angiopoietin-like 6
hsa-miR-339-3p	1	0	1	1	1	1	DUSP9	dual specificity phosphatase 9
hsa-miR-339-3p	1	0	1	1	1	1	SLC7A10	solute carrier family 7 (neutral amino acid transporter light chain, asc system), member 10
hsa-miR-339-3p	0	0	0	1	1	1	ZNF233	zinc finger protein 233
hsa-miR-339-3p	0	0	1	1	1	1	IGJ	immunoglobulin J polypeptide, linker protein for immunoglobulin alpha and mu polypeptides
hsa-miR-339-3p	0	0	1	1	1	1	TRIM47	tripartite motif containing 47
hsa-miR-339-3p	1	0	1	1	1	1	KDM6B	lysine (K)-specific demethylase 6B
hsa-miR-339-3p	0	0	1	1	0	0	IGHMBP2	immunoglobulin mu binding protein 2
hsa-miR-339-3p	0	0	0	1	1	1	BTBD2	BTB (POZ) domain containing 2
hsa-miR-339-3p	0	0	1	1	0	0	HSPBP1	HSPA (heat shock 70kDa) binding protein, cytoplasmic cochaperone 1
hsa-miR-339-3p	1	0	1	1	0	0	CSNK1G2	casein kinase 1, gamma 2
hsa-miR-339-3p	0	0	0	1	1	1	RARRES3	retinoic acid receptor responder (tazarotene induced) 3
hsa-miR-339-3p	0	0	1	1	0	0	SLC2A11	solute carrier family 2 (facilitated glucose transporter), member 11
hsa-miR-339-3p	0	0	1	1	1	1	DUSP26	dual specificity phosphatase 26 (putative)
hsa-miR-339-3p	0	0	1	1	1	1	IL5RA	interleukin 5 receptor, alpha
hsa-miR-339-3p	0	0	1	1	0	0	CD101	CD101 molecule
hsa-miR-339-3p	0	0	1	1	0	0	SAA2	serum amyloid A2
hsa-miR-339-3p	1	0	1	1	1	1	CABLES1	Cdk5 and Abl enzyme substrate 1
hsa-miR-339-3p	1	0	1	1	1	1	NREP	neuronal regeneration related protein homolog (rat)
hsa-miR-339-3p	1	0	1	1	1	1	TRAFD1	TRAF-type zinc finger domain containing 1
hsa-miR-339-3p	1	0	1	1	0	0	LMO2	LIM domain only 2 (rhombotin-like 1)
hsa-miR-339-3p	0	0	0	1	1	1	TSPAN31	tetraspanin 31
hsa-miR-339-3p	0	0	1	1	1	1	EGR4	early growth response 4
hsa-miR-339-3p	0	0	0	1	0	0	FBXL8	F-box and leucine-rich repeat protein 8
hsa-miR-339-3p	0	0	1	1	1	1	PIGC	phosphatidylinositol glycan anchor biosynthesis, class C
hsa-miR-339-3p	1	0	1	1	1	1	DRAM1	DNA-damage regulated autophagy modulator 1
hsa-miR-339-3p	0	0	0	1	1	1	TACO1	translational activator of mitochondrially encoded cytochrome c oxidase I
hsa-miR-339-3p	1	0	1	1	1	1	KIAA0368	KIAA0368
hsa-miR-339-3p	0	0	0	1	0	0	GMPR	guanosine monophosphate reductase
hsa-miR-339-3p	0	0	1	1	1	1	TUBB2B	tubulin, beta 2B class IIb
hsa-miR-339-3p	0	0	1	1	0	0	ITPKA	inositol-trisphosphate 3-kinase A
hsa-miR-339-3p	0	0	1	1	1	1	PAK6	p21 protein (Cdc42/Rac)-activated kinase 6
hsa-miR-339-3p	0	0	0	1	0	0	GCHFR	GTP cyclohydrolase I feedback regulator
hsa-miR-339-3p	1	0	1	1	0	0	CGREF1	cell growth regulator with EF-hand domain 1
hsa-miR-339-3p	0	0	1	1	0	0	ENOX1	ecto-NOX disulfide-thiol exchanger 1
hsa-miR-339-3p	1	0	1	1	1	1	NOL4	nucleolar protein 4
hsa-miR-339-3p	1	0	1	1	1	1	RIMBP2	RIMS binding protein 2
hsa-miR-339-3p	1	0	0	1	1	1	SCARB1	scavenger receptor class B, member 1
hsa-miR-339-3p	0	0	0	1	0	0	TRPV4	transient receptor potential cation channel, subfamily V, member 4
hsa-miR-339-3p	0	0	1	1	0	0	KCNH2	potassium voltage-gated channel, subfamily H (eag-related), member 2
hsa-miR-339-3p	1	0	1	1	1	1	TRIM37	tripartite motif containing 37
hsa-miR-339-3p	0	0	0	1	0	0	TELO2	TEL2, telomere maintenance 2, homolog (S. cerevisiae)
hsa-miR-339-3p	1	0	1	1	0	0	ZC3H3	zinc finger CCCH-type containing 3
hsa-miR-339-3p	0	0	0	1	1	1	CECR1	cat eye syndrome chromosome region, candidate 1
hsa-miR-339-3p	0	0	0	1	0	0	CHST8	carbohydrate (N-acetylgalactosamine 4-0) sulfotransferase 8
hsa-miR-339-3p	0	0	1	1	1	1	MAG	myelin associated glycoprotein
hsa-miR-339-3p	0	0	1	1	0	0	HPN	hepsin
hsa-miR-339-3p	0	0	0	1	0	0	OVOL3	ovo-like 3 (Drosophila)
hsa-miR-339-3p	1	0	1	1	1	1	CDH20	cadherin 20, type 2
hsa-miR-339-3p	0	0	1	1	0	0	PAFAH1B3	platelet-activating factor acetylhydrolase 1b, catalytic subunit 3 (29kDa)
hsa-miR-339-3p	0	0	1	1	1	1	CNPY4	canopy 4 homolog (zebrafish)
hsa-miR-339-3p	0	0	0	1	1	1	NUCB1	nucleobindin 1
hsa-miR-339-3p	0	0	1	1	1	1	GIPR	gastric inhibitory polypeptide receptor
hsa-miR-339-3p	1	0	1	1	0	0	SLC10A3	solute carrier family 10 (sodium/bile acid cotransporter family), member 3
hsa-miR-339-3p	1	0	1	1	0	0	HIPK2	homeodomain interacting protein kinase 2
hsa-miR-339-3p	1	0	1	1	1	1	PALD1	phosphatase domain containing, paladin 1
hsa-miR-339-3p	1	0	1	1	1	1	ARID3A	AT rich interactive domain 3A (BRIGHT-like)
hsa-miR-339-3p	0	0	1	1	1	1	SDF4	stromal cell derived factor 4
hsa-miR-339-3p	0	0	1	1	1	1	DVL1	dishevelled, dsh homolog 1 (Drosophila)
hsa-miR-339-3p	0	0	1	1	0	0	PRDM11	PR domain containing 11
hsa-miR-339-3p	0	0	0	1	0	0	TECTA	tectorin alpha
hsa-miR-339-3p	0	0	0	1	0	0	GPR108	G protein-coupled receptor 108
hsa-miR-339-3p	0	0	1	1	1	1	SUMO1	SMT3 suppressor of mif two 3 homolog 1 (S. cerevisiae)
hsa-miR-339-3p	1	0	1	1	1	1	WDR1	WD repeat domain 1
hsa-miR-339-3p	0	0	1	1	1	1	HOOK2	hook homolog 2 (Drosophila)
hsa-miR-339-3p	0	0	1	1	1	1	NPR3	natriuretic peptide receptor C/guanylate cyclase C (atrionatriuretic peptide receptor C)
hsa-miR-339-3p	1	0	1	1	0	0	RBM27	RNA binding motif protein 27
hsa-miR-339-3p	0	0	0	1	1	1	POLA2	polymerase (DNA directed), alpha 2, accessory subunit
hsa-miR-339-3p	0	0	1	1	0	0	KIF9	kinesin family member 9
hsa-miR-339-3p	0	0	1	1	0	0	EXOSC7	exosome component 7
hsa-miR-339-3p	1	0	1	1	1	1	DBC1	deleted in bladder cancer 1
hsa-miR-339-3p	0	0	1	1	1	1	MYO3A	myosin IIIA
hsa-miR-339-3p	1	0	1	1	1	1	GID8	GID complex subunit 8 homolog (S. cerevisiae)
hsa-miR-339-3p	1	0	1	1	1	1	CHFR	checkpoint with forkhead and ring finger domains, E3 ubiquitin protein ligase
hsa-miR-339-3p	0	0	0	1	0	0	DIABLO	diablo, IAP-binding mitochondrial protein
hsa-miR-339-3p	1	0	1	1	0	0	CDH24	cadherin 24, type 2
hsa-miR-339-3p	0	0	1	1	1	1	FAM181A	family with sequence similarity 181, member A
hsa-miR-339-3p	0	0	1	1	0	0	PIF1	PIF1 5'-to-3' DNA helicase homolog (S. cerevisiae)
hsa-miR-339-3p	1	0	0	1	0	0	PMM2	phosphomannomutase 2
hsa-miR-339-3p	0	0	0	1	1	1	C17orf64	chromosome 17 open reading frame 64
hsa-miR-339-3p	0	0	0	1	0	0	PIK3R5	phosphoinositide-3-kinase, regulatory subunit 5
hsa-miR-339-3p	0	0	0	1	0	0	ECSIT	ECSIT homolog (Drosophila)
hsa-miR-339-3p	0	0	0	1	0	0	SLC2A7	solute carrier family 2 (facilitated glucose transporter), member 7
hsa-miR-339-3p	0	0	0	1	0	0	FAM176B	family with sequence similarity 176, member B
hsa-miR-339-3p	1	0	1	1	1	1	OSR1	odd-skipped related 1 (Drosophila)
hsa-miR-339-3p	0	0	1	1	0	0	SLC4A3	solute carrier family 4, anion exchanger, member 3
hsa-miR-339-3p	0	0	1	1	1	1	UCN2	urocortin 2
hsa-miR-339-3p	1	0	1	1	1	1	GPR6	G protein-coupled receptor 6
hsa-miR-339-3p	0	0	0	1	0	0	FERD3L	Fer3-like (Drosophila)
hsa-miR-339-3p	0	0	0	1	0	0	FRMPD3	FERM and PDZ domain containing 3
hsa-miR-339-3p	0	0	1	1	1	1	RPP30	ribonuclease P/MRP 30kDa subunit
hsa-miR-339-3p	0	0	1	1	0	0	SAA4	serum amyloid A4, constitutive
hsa-miR-339-3p	1	0	1	1	1	1	ZNF215	zinc finger protein 215
hsa-miR-339-3p	1	0	0	1	1	1	CAPN5	calpain 5
hsa-miR-339-3p	0	0	0	1	0	0	C11orf52	chromosome 11 open reading frame 52
hsa-miR-339-3p	1	0	1	1	0	0	LAMTOR1	late endosomal/lysosomal adaptor, MAPK and MTOR activator 1
hsa-miR-339-3p	1	0	1	1	1	1	NINL	ninein-like
hsa-miR-339-3p	1	0	1	1	0	0	BSCL2	Berardinelli-Seip congenital lipodystrophy 2 (seipin)
hsa-miR-339-3p	1	0	0	1	0	0	ROBO3	roundabout, axon guidance receptor, homolog 3 (Drosophila)
hsa-miR-339-3p	0	0	1	1	0	0	PIGT	phosphatidylinositol glycan anchor biosynthesis, class T
hsa-miR-339-3p	0	0	1	1	0	0	TBX6	T-box 6
hsa-miR-339-3p	1	0	1	1	0	0	PPP4C	protein phosphatase 4, catalytic subunit
hsa-miR-339-3p	0	0	0	1	0	0	TRIM48	tripartite motif containing 48
hsa-miR-339-3p	1	0	1	1	1	1	ANK3	ankyrin 3, node of Ranvier (ankyrin G)
hsa-miR-339-3p	0	0	0	1	1	1	TMEM18	transmembrane protein 18
hsa-miR-339-3p	1	0	1	1	1	1	SETBP1	SET binding protein 1
hsa-miR-339-3p	0	0	1	1	0	0	NUBP1	nucleotide binding protein 1
hsa-miR-339-3p	0	0	0	1	1	1	ABCC3	ATP-binding cassette, sub-family C (CFTR/MRP), member 3
hsa-miR-339-3p	0	0	1	1	1	1	SLC28A1	solute carrier family 28 (sodium-coupled nucleoside transporter), member 1
hsa-miR-339-3p	1	0	0	1	0	0	ANKRD9	ankyrin repeat domain 9
hsa-miR-339-3p	1	0	1	1	1	1	ZNF689	zinc finger protein 689
hsa-miR-339-3p	0	0	0	1	0	0	COX6A2	cytochrome c oxidase subunit VIa polypeptide 2
hsa-miR-339-3p	1	0	1	1	1	1	DUSP2	dual specificity phosphatase 2
hsa-miR-339-3p	1	0	1	1	1	1	PPP1R12B	protein phosphatase 1, regulatory subunit 12B
hsa-miR-339-3p	1	0	1	1	1	1	CTBP1	C-terminal binding protein 1
hsa-miR-339-3p	0	0	0	1	1	1	SSU72	SSU72 RNA polymerase II CTD phosphatase homolog (S. cerevisiae)
hsa-miR-339-3p	0	0	0	1	0	0	FAM207A	family with sequence similarity 207, member A
hsa-miR-339-3p	0	0	0	1	1	1	PHLDB3	pleckstrin homology-like domain, family B, member 3
hsa-miR-339-3p	0	0	1	1	0	0	NLRX1	NLR family member X1
hsa-miR-339-3p	0	0	1	1	0	0	FGFR4	fibroblast growth factor receptor 4
hsa-miR-339-3p	0	0	1	1	0	0	LTC4S	leukotriene C4 synthase
hsa-miR-339-3p	0	0	0	1	0	0	CCDC116	coiled-coil domain containing 116
hsa-miR-339-3p	0	0	1	1	0	0	THAP8	THAP domain containing 8
hsa-miR-339-3p	0	0	1	1	1	1	DUSP14	dual specificity phosphatase 14
hsa-miR-339-3p	1	0	1	1	1	1	NAGS	N-acetylglutamate synthase
hsa-miR-339-3p	1	0	1	1	0	0	GRASP	GRP1 (general receptor for phosphoinositides 1)-associated scaffold protein
hsa-miR-339-3p	0	0	1	1	1	1	MED11	mediator complex subunit 11
hsa-miR-339-3p	1	0	1	1	1	1	CCNF	cyclin F
hsa-miR-339-3p	0	0	0	1	0	0	TAF6L	TAF6-like RNA polymerase II, p300/CBP-associated factor (PCAF)-associated factor, 65kDa
hsa-miR-339-3p	0	0	1	1	0	0	FAM151A	family with sequence similarity 151, member A
hsa-miR-339-3p	0	0	1	1	0	0	DCST2	DC-STAMP domain containing 2
hsa-miR-339-3p	0	0	1	1	1	1	PTPRN	protein tyrosine phosphatase, receptor type, N
hsa-miR-339-3p	0	0	0	1	0	0	HDAC11	histone deacetylase 11
hsa-miR-339-3p	0	0	1	1	0	0	DCLK3	doublecortin-like kinase 3
hsa-miR-339-3p	1	0	1	1	1	1	BAP1	BRCA1 associated protein-1 (ubiquitin carboxy-terminal hydrolase)
hsa-miR-339-3p	0	0	1	1	0	0	TREX1	three prime repair exonuclease 1
hsa-miR-339-3p	0	0	1	1	0	0	APEH	N-acylaminoacyl-peptide hydrolase
hsa-miR-339-3p	0	0	0	1	1	1	RP9	retinitis pigmentosa 9 (autosomal dominant)
hsa-miR-339-3p	0	0	1	1	1	1	SPAG11B	sperm associated antigen 11B
hsa-miR-339-3p	0	0	1	1	1	1	TMUB1	transmembrane and ubiquitin-like domain containing 1
hsa-miR-339-3p	0	0	0	1	0	0	ALDH7A1	aldehyde dehydrogenase 7 family, member A1
hsa-miR-339-3p	0	0	1	1	1	1	RPP25L	ribonuclease P/MRP 25kDa subunit-like
hsa-miR-339-3p	1	0	1	1	1	1	WDFY2	WD repeat and FYVE domain containing 2
hsa-miR-339-3p	1	0	1	1	1	1	KIAA1191	KIAA1191
hsa-miR-339-3p	1	0	1	1	1	1	DUSP16	dual specificity phosphatase 16
hsa-miR-339-3p	1	0	1	1	1	1	EHMT1	euchromatic histone-lysine N-methyltransferase 1
hsa-miR-339-3p	0	0	0	1	1	1	CRTAC1	cartilage acidic protein 1
hsa-miR-339-3p	0	0	1	1	0	0	PPP1R14D	protein phosphatase 1, regulatory (inhibitor) subunit 14D
hsa-miR-339-3p	0	0	0	1	0	0	TRMT61A	tRNA methyltransferase 61 homolog A (S. cerevisiae)
hsa-miR-339-3p	0	0	1	1	1	1	SALL3	sal-like 3 (Drosophila)
hsa-miR-339-3p	0	0	1	1	0	0	CENPV	centromere protein V
hsa-miR-339-3p	0	0	1	1	0	0	RRAD	Ras-related associated with diabetes
hsa-miR-339-3p	0	0	0	1	0	0	C16orf92	chromosome 16 open reading frame 92
hsa-miR-339-3p	0	0	1	1	0	0	IRGQ	immunity-related GTPase family, Q
hsa-miR-339-3p	1	0	1	1	0	0	JPH3	junctophilin 3
hsa-miR-339-3p	0	0	0	1	0	0	PROCA1	protein interacting with cyclin A1
hsa-miR-339-3p	1	0	1	1	0	0	RAB34	RAB34, member RAS oncogene family
hsa-miR-339-3p	0	0	0	1	0	0	TP53I13	tumor protein p53 inducible protein 13
hsa-miR-339-3p	0	0	0	1	0	0	CYP2A6	cytochrome P450, family 2, subfamily A, polypeptide 6
hsa-miR-339-3p	0	0	0	1	0	0	CYP2A7	cytochrome P450, family 2, subfamily A, polypeptide 7
hsa-miR-339-3p	0	0	1	1	1	1	GRIK5	glutamate receptor, ionotropic, kainate 5
hsa-miR-339-3p	0	0	1	1	0	0	TRAPPC9	trafficking protein particle complex 9
hsa-miR-339-3p	0	0	0	1	0	0	DAPK3	death-associated protein kinase 3
hsa-miR-339-3p	0	0	0	1	1	1	MYH14	myosin, heavy chain 14, non-muscle
hsa-miR-339-3p	0	0	1	1	0	0	IGFBP6	insulin-like growth factor binding protein 6
hsa-miR-339-3p	0	0	1	1	1	1	MPDU1	mannose-P-dolichol utilization defect 1
hsa-miR-339-3p	1	0	0	1	0	0	ITFG3	integrin alpha FG-GAP repeat containing 3
hsa-miR-339-3p	0	0	0	1	0	0	LTBP3	latent transforming growth factor beta binding protein 3
hsa-miR-339-3p	0	0	0	1	0	0	NXNL1	nucleoredoxin-like 1
hsa-miR-339-3p	0	0	1	1	1	1	MPHOSPH9	M-phase phosphoprotein 9
hsa-miR-339-3p	0	0	0	1	0	0	OR6Y1	olfactory receptor, family 6, subfamily Y, member 1
hsa-miR-339-3p	0	0	0	1	0	0	AURKC	aurora kinase C
hsa-miR-339-3p	1	0	1	1	1	1	UBTF	upstream binding transcription factor, RNA polymerase I
hsa-miR-339-3p	0	0	1	1	1	1	COL22A1	collagen, type XXII, alpha 1
hsa-miR-339-3p	0	0	1	1	1	1	MXD3	MAX dimerization protein 3
hsa-miR-339-3p	0	0	1	1	0	0	VAV1	vav 1 guanine nucleotide exchange factor
hsa-miR-339-3p	1	0	1	1	1	1	TTBK1	tau tubulin kinase 1
hsa-miR-339-3p	0	0	0	1	0	0	ADCYAP1R1	adenylate cyclase activating polypeptide 1 (pituitary) receptor type I
hsa-miR-339-3p	0	0	1	1	1	1	FRMD3	FERM domain containing 3
hsa-miR-339-3p	0	0	1	1	1	1	SEC61A2	Sec61 alpha 2 subunit (S. cerevisiae)
hsa-miR-339-3p	1	0	1	1	0	0	INO80E	INO80 complex subunit E
hsa-miR-339-3p	0	0	0	1	0	0	CST1	cystatin SN
hsa-miR-339-3p	0	0	1	1	1	1	PPIH	peptidylprolyl isomerase H (cyclophilin H)
hsa-miR-339-3p	1	0	1	1	0	0	C15orf27	chromosome 15 open reading frame 27
hsa-miR-339-3p	0	0	1	1	1	1	FRMPD2	FERM and PDZ domain containing 2
hsa-miR-339-3p	0	0	0	1	0	0	DEGS2	delta(4)-desaturase, sphingolipid 2
hsa-miR-339-3p	0	0	1	1	0	0	TBC1D10B	TBC1 domain family, member 10B
hsa-miR-339-3p	1	0	1	1	0	0	TET3	tet methylcytosine dioxygenase 3
hsa-miR-339-3p	1	0	1	1	1	1	TRIM56	tripartite motif containing 56
hsa-miR-339-3p	0	0	0	1	1	1	LRRC8E	leucine rich repeat containing 8 family, member E
hsa-miR-339-3p	1	0	0	1	1	1	SLC1A5	solute carrier family 1 (neutral amino acid transporter), member 5
hsa-miR-339-3p	0	0	0	1	1	1	ABHD15	abhydrolase domain containing 15
hsa-miR-339-3p	0	0	0	1	0	0	BOP1	block of proliferation 1
hsa-miR-339-3p	0	0	1	1	1	1	CCDC8	coiled-coil domain containing 8
hsa-miR-339-3p	0	0	0	1	1	1	CCDC110	coiled-coil domain containing 110
hsa-miR-339-3p	0	0	1	1	0	0	FAM195A	family with sequence similarity 195, member A
hsa-miR-339-3p	0	0	1	1	1	1	MRPS12	mitochondrial ribosomal protein S12
hsa-miR-339-3p	0	0	0	1	1	1	PTDSS2	phosphatidylserine synthase 2
hsa-miR-339-3p	1	0	1	1	0	0	BRSK2	BR serine/threonine kinase 2
hsa-miR-339-3p	0	0	1	1	0	0	RELA	v-rel reticuloendotheliosis viral oncogene homolog A (avian)
hsa-miR-339-3p	1	0	0	1	0	0	AP1G2	adaptor-related protein complex 1, gamma 2 subunit
hsa-miR-339-3p	1	0	1	1	0	0	ASPHD1	aspartate beta-hydroxylase domain containing 1
hsa-miR-339-3p	0	0	0	1	0	0	ZNF519	zinc finger protein 519
hsa-miR-339-3p	1	0	1	1	0	0	LRFN4	leucine rich repeat and fibronectin type III domain containing 4
hsa-miR-339-3p	0	0	1	1	0	0	CARD14	caspase recruitment domain family, member 14
hsa-miR-339-3p	1	0	1	1	1	1	RIC3	resistance to inhibitors of cholinesterase 3 homolog (C. elegans)
hsa-miR-339-3p	0	0	0	1	1	1	ATP6V0A4	ATPase, H+ transporting, lysosomal V0 subunit a4
hsa-miR-339-3p	1	0	0	1	1	1	ELF3	E74-like factor 3 (ets domain transcription factor, epithelial-specific )
hsa-miR-339-3p	0	0	1	1	0	0	CCDC13	coiled-coil domain containing 13
hsa-miR-339-3p	1	0	1	1	1	1	CLTB	clathrin, light chain B
hsa-miR-339-3p	1	0	1	1	1	1	CASP2	caspase 2, apoptosis-related cysteine peptidase
hsa-miR-339-3p	1	0	1	1	0	0	PHOSPHO1	phosphatase, orphan 1
hsa-miR-339-3p	0	0	0	1	1	1	TERT	telomerase reverse transcriptase
hsa-miR-339-3p	0	0	1	1	0	0	DNAI2	dynein, axonemal, intermediate chain 2
hsa-miR-339-3p	0	0	1	1	1	1	CARHSP1	calcium regulated heat stable protein 1, 24kDa
hsa-miR-339-3p	0	0	0	1	0	0	SLC19A1	solute carrier family 19 (folate transporter), member 1
hsa-miR-339-3p	0	0	1	1	0	0	AGAP8	ArfGAP with GTPase domain, ankyrin repeat and PH domain 8
hsa-miR-339-3p	0	0	0	1	0	0	CMKLR1	chemokine-like receptor 1
hsa-miR-339-3p	0	0	1	1	1	1	MSL3	male-specific lethal 3 homolog (Drosophila)
hsa-miR-339-3p	0	0	0	1	0	0	PFKL	phosphofructokinase, liver
hsa-miR-339-3p	1	0	1	1	0	0	SPEG	SPEG complex locus
hsa-miR-339-3p	1	0	1	1	0	0	TBC1D10C	TBC1 domain family, member 10C
hsa-miR-339-3p	1	0	1	1	0	0	HOXC5	homeobox C5
hsa-miR-339-3p	1	0	0	1	0	0	FBXL18	F-box and leucine-rich repeat protein 18
hsa-miR-339-3p	0	0	0	1	0	0	TNFRSF10C	tumor necrosis factor receptor superfamily, member 10c, decoy without an intracellular domain
hsa-miR-339-3p	0	0	0	1	0	0	PARP10	poly (ADP-ribose) polymerase family, member 10
hsa-miR-339-3p	0	0	1	1	0	0	GAK	cyclin G associated kinase
hsa-miR-339-3p	1	0	1	1	0	0	PPP2R2D	protein phosphatase 2, regulatory subunit B, delta
hsa-miR-339-3p	0	0	1	1	1	1	ST8SIA5	ST8 alpha-N-acetyl-neuraminide alpha-2,8-sialyltransferase 5
hsa-miR-339-3p	0	0	1	1	0	0	PRSS50	protease, serine, 50
hsa-miR-339-3p	0	0	1	1	0	0	FZD2	frizzled family receptor 2
hsa-miR-339-3p	1	0	1	1	1	1	DTNA	dystrobrevin, alpha
hsa-miR-339-3p	1	0	1	1	1	1	CNOT4	CCR4-NOT transcription complex, subunit 4
hsa-miR-339-3p	0	0	0	1	0	0	RRP12	ribosomal RNA processing 12 homolog (S. cerevisiae)
hsa-miR-339-3p	0	0	0	1	0	0	GPS2	G protein pathway suppressor 2
hsa-miR-339-3p	0	0	0	1	1	1	ASB2	ankyrin repeat and SOCS box containing 2
hsa-miR-339-3p	0	0	0	1	0	0	LOC100129540	uncharacterized LOC100129540
hsa-miR-339-3p	0	0	1	1	1	1	BIN1	bridging integrator 1
hsa-miR-339-3p	0	0	0	1	0	0	FAM125A	family with sequence similarity 125, member A
hsa-miR-339-3p	0	0	0	1	0	0	INSL3	insulin-like 3 (Leydig cell)
hsa-miR-339-3p	0	0	0	1	1	1	JAK3	Janus kinase 3
hsa-miR-339-3p	0	0	1	1	1	1	GLYATL1	glycine-N-acyltransferase-like 1
hsa-miR-339-3p	0	0	0	1	0	0	MAMDC4	MAM domain containing 4
hsa-miR-339-3p	0	0	0	1	0	0	PGAM5	phosphoglycerate mutase family member 5
hsa-miR-339-3p	0	0	1	1	0	0	HOPX	HOP homeobox
hsa-miR-339-3p	1	0	1	1	0	0	HES7	hairy and enhancer of split 7 (Drosophila)
hsa-miR-339-3p	0	0	0	1	0	0	TNFRSF6B	tumor necrosis factor receptor superfamily, member 6b, decoy
hsa-miR-339-3p	0	0	1	1	0	0	RTEL1	regulator of telomere elongation helicase 1
hsa-miR-339-3p	0	0	1	1	0	0	DGKZ	diacylglycerol kinase, zeta
hsa-miR-339-3p	0	0	1	1	1	1	C5orf46	chromosome 5 open reading frame 46
hsa-miR-339-3p	1	0	1	1	1	1	SYNGR1	synaptogyrin 1
hsa-miR-339-3p	0	0	0	1	0	0	CYC1	cytochrome c-1
hsa-miR-339-3p	1	0	1	1	1	1	RALGPS1	Ral GEF with PH domain and SH3 binding motif 1
hsa-miR-339-3p	0	0	0	1	1	1	ETV4	ets variant 4
hsa-miR-339-3p	0	0	1	1	1	1	USP54	ubiquitin specific peptidase 54
hsa-miR-339-3p	1	0	1	1	1	1	SLC25A22	solute carrier family 25 (mitochondrial carrier: glutamate), member 22
hsa-miR-339-3p	0	0	0	1	0	0	AMIGO3	adhesion molecule with Ig-like domain 3
hsa-miR-339-3p	0	0	1	1	1	1	ARHGEF25	Rho guanine nucleotide exchange factor (GEF) 25
hsa-miR-339-3p	0	0	1	1	0	0	SLC26A10	solute carrier family 26, member 10
hsa-miR-339-3p	0	0	0	1	0	0	SLC16A8	solute carrier family 16, member 8 (monocarboxylic acid transporter 3)
hsa-miR-339-3p	1	0	1	1	0	0	IGSF9B	immunoglobulin superfamily, member 9B
hsa-miR-339-3p	1	0	1	1	1	1	BAIAP2	BAI1-associated protein 2
hsa-miR-339-3p	0	0	0	1	0	0	LINC00476	long intergenic non-protein coding RNA 476
hsa-miR-339-3p	0	0	1	1	0	0	VARS2	valyl-tRNA synthetase 2, mitochondrial (putative)
hsa-miR-339-3p	0	0	1	1	0	0	CD151	CD151 molecule (Raph blood group)
hsa-miR-339-3p	0	0	1	1	0	0	RUVBL1	RuvB-like 1 (E. coli)
hsa-miR-339-3p	0	0	1	1	1	1	BRD9	bromodomain containing 9
hsa-miR-339-3p	0	0	0	1	0	0	LRRC23	leucine rich repeat containing 23
hsa-miR-339-3p	0	0	0	1	0	0	ANAPC2	anaphase promoting complex subunit 2
hsa-miR-339-3p	0	0	1	1	0	0	NLRP12	NLR family, pyrin domain containing 12
hsa-miR-339-3p	0	0	1	1	1	1	SH3GL3	SH3-domain GRB2-like 3
hsa-miR-339-3p	1	0	1	1	0	0	ECE2	endothelin converting enzyme 2
hsa-miR-339-3p	0	0	0	1	0	0	CRIPAK	cysteine-rich PAK1 inhibitor
hsa-miR-339-3p	0	0	0	1	0	0	SPAG11A	sperm associated antigen 11A
hsa-miR-339-3p	1	0	0	1	1	1	PLEKHJ1	pleckstrin homology domain containing, family J member 1
hsa-miR-339-3p	0	0	0	1	1	1	CYP4F11	cytochrome P450, family 4, subfamily F, polypeptide 11
hsa-miR-339-3p	0	0	1	1	0	0	KLHDC3	kelch domain containing 3
hsa-miR-339-3p	0	0	1	1	1	1	RBBP8	retinoblastoma binding protein 8
hsa-miR-339-3p	1	0	1	1	0	0	FAM100B	family with sequence similarity 100, member B
hsa-miR-339-3p	0	0	1	1	1	1	FFAR3	free fatty acid receptor 3
hsa-miR-339-3p	0	0	0	1	1	1	KCNK12	potassium channel, subfamily K, member 12
hsa-miR-339-3p	1	0	1	1	0	0	IGDCC3	immunoglobulin superfamily, DCC subclass, member 3
hsa-miR-339-3p	0	0	0	1	1	1	ENPP7	ectonucleotide pyrophosphatase/phosphodiesterase 7
hsa-miR-339-3p	1	0	1	1	1	1	PTPN21	protein tyrosine phosphatase, non-receptor type 21
hsa-miR-339-3p	0	0	0	1	1	1	C1S	complement component 1, s subcomponent
hsa-miR-339-3p	0	0	1	1	1	1	HNMT	histamine N-methyltransferase
hsa-miR-339-3p	1	0	1	1	0	0	PTP4A3	protein tyrosine phosphatase type IVA, member 3
hsa-miR-339-3p	0	0	1	1	1	1	LRRC16A	leucine rich repeat containing 16A
hsa-miR-339-3p	1	0	1	1	0	0	FAM43A	family with sequence similarity 43, member A
hsa-miR-339-3p	0	0	1	1	0	0	DTWD1	DTW domain containing 1
hsa-miR-339-3p	0	0	0	1	1	1	C14orf80	chromosome 14 open reading frame 80
hsa-miR-339-3p	0	0	0	1	0	0	CLDN5	claudin 5
hsa-miR-339-3p	0	0	1	1	1	1	PPP1R27	protein phosphatase 1, regulatory subunit 27
hsa-miR-339-3p	1	0	1	1	1	1	BACE2	beta-site APP-cleaving enzyme 2
hsa-miR-339-3p	0	0	0	1	0	0	A3GALT2P	alpha 1,3-galactosyltransferase 2, pseudogene
hsa-miR-339-3p	1	0	1	1	1	1	PRKCD	protein kinase C, delta
hsa-miR-339-3p	0	0	1	1	0	0	SLC5A2	solute carrier family 5 (sodium/glucose cotransporter), member 2
hsa-miR-339-3p	1	0	1	1	1	1	PRRC1	proline-rich coiled-coil 1
hsa-miR-339-3p	0	0	0	1	0	0	NOC4L	nucleolar complex associated 4 homolog (S. cerevisiae)
hsa-miR-339-3p	0	0	0	1	0	0	RTL1	retrotransposon-like 1
hsa-miR-339-3p	1	0	1	1	1	1	FBXW4	F-box and WD repeat domain containing 4
hsa-miR-339-3p	0	0	0	1	0	0	SYNDIG1L	synapse differentiation inducing 1-like
hsa-miR-339-3p	1	0	1	1	1	1	KCNJ12	potassium inwardly-rectifying channel, subfamily J, member 12
hsa-miR-339-3p	0	0	1	1	0	0	SOCS1	suppressor of cytokine signaling 1
hsa-miR-339-3p	0	0	1	1	0	0	SIGIRR	single immunoglobulin and toll-interleukin 1 receptor (TIR) domain
hsa-miR-339-3p	0	0	0	1	1	1	ANO9	anoctamin 9
hsa-miR-339-3p	0	0	0	1	0	0	ACAA1	acetyl-CoA acyltransferase 1
hsa-miR-339-3p	0	0	0	1	0	0	TUBB2A	tubulin, beta 2A class IIa
hsa-miR-339-3p	0	0	0	1	0	0	TH	tyrosine hydroxylase
hsa-miR-339-3p	0	0	1	1	0	0	ACTL7A	actin-like 7A
hsa-miR-339-3p	0	0	0	1	0	0	C5orf38	chromosome 5 open reading frame 38
hsa-miR-339-3p	0	0	1	1	1	1	HTR3D	5-hydroxytryptamine (serotonin) receptor 3D, ionotropic
hsa-miR-339-3p	0	0	1	1	1	1	RALGAPA2	Ral GTPase activating protein, alpha subunit 2 (catalytic)
hsa-miR-339-3p	1	0	1	1	1	1	ANKRD13A	ankyrin repeat domain 13A
hsa-miR-339-3p	0	0	1	1	0	0	HTR3E	5-hydroxytryptamine (serotonin) receptor 3E, ionotropic
hsa-miR-339-3p	1	0	1	1	0	0	SLC44A2	solute carrier family 44, member 2
hsa-miR-339-3p	0	0	1	1	1	1	SLC6A16	solute carrier family 6, member 16
hsa-miR-339-3p	1	0	1	1	1	1	OVOL1	ovo-like 1(Drosophila)
hsa-miR-339-3p	0	0	1	1	1	1	TOR2A	torsin family 2, member A
hsa-miR-339-3p	1	0	1	1	1	1	GGT7	gamma-glutamyltransferase 7
hsa-miR-339-3p	0	0	1	1	0	0	ZFYVE19	zinc finger, FYVE domain containing 19
hsa-miR-339-3p	0	0	1	1	0	0	ARHGAP10	Rho GTPase activating protein 10
hsa-miR-339-3p	1	0	0	1	1	1	IFFO1	intermediate filament family orphan 1
hsa-miR-339-3p	0	0	1	1	0	0	RGS12	regulator of G-protein signaling 12
hsa-miR-339-3p	0	0	1	1	0	0	PDXP	pyridoxal (pyridoxine, vitamin B6) phosphatase
hsa-miR-339-3p	0	0	1	1	0	0	SH3BP1	SH3-domain binding protein 1
hsa-miR-339-3p	1	0	0	1	0	0	CIDEC	cell death-inducing DFFA-like effector c
hsa-miR-339-3p	0	0	0	1	1	1	PCID2	PCI domain containing 2
hsa-miR-339-3p	1	0	1	1	1	1	ACACB	acetyl-CoA carboxylase beta
hsa-miR-339-3p	0	0	0	1	0	0	GJB5	gap junction protein, beta 5, 31.1kDa
hsa-miR-339-3p	1	0	1	1	1	1	ATP9A	ATPase, class II, type 9A
hsa-miR-339-3p	0	0	0	1	0	0	TFPT	TCF3 (E2A) fusion partner (in childhood Leukemia)
hsa-miR-339-3p	0	0	0	1	0	0	CMTM5	CKLF-like MARVEL transmembrane domain containing 5
hsa-miR-339-3p	0	0	1	1	0	0	HAVCR1	hepatitis A virus cellular receptor 1
hsa-miR-339-3p	0	0	0	1	0	0	SFN	stratifin
hsa-miR-339-3p	0	0	0	1	0	0	FCRL6	Fc receptor-like 6
hsa-miR-339-3p	0	0	1	1	0	0	ACOT8	acyl-CoA thioesterase 8
hsa-miR-339-3p	0	0	1	1	0	0	DMKN	dermokine
hsa-miR-339-3p	0	0	0	1	0	0	NAALADL1	N-acetylated alpha-linked acidic dipeptidase-like 1
hsa-miR-339-3p	0	0	1	1	0	0	KCNK7	potassium channel, subfamily K, member 7
hsa-miR-339-3p	0	0	1	1	1	1	TMEM201	transmembrane protein 201
hsa-miR-339-3p	0	0	1	1	0	0	CYB5A	cytochrome b5 type A (microsomal)
hsa-miR-339-3p	0	0	1	1	1	1	PLD1	phospholipase D1, phosphatidylcholine-specific
hsa-miR-339-3p	1	0	0	1	1	1	MGAT3	mannosyl (beta-1,4-)-glycoprotein beta-1,4-N-acetylglucosaminyltransferase
hsa-miR-339-3p	1	0	1	1	1	1	FAM222B	family with sequence similarity 222, member B
hsa-miR-339-3p	0	0	0	1	0	0	NOXA1	NADPH oxidase activator 1
hsa-miR-339-3p	0	0	1	1	1	1	LBX2	ladybird homeobox 2
hsa-miR-339-3p	1	0	1	1	1	1	ABCA1	ATP-binding cassette, sub-family A (ABC1), member 1
hsa-miR-339-3p	0	0	0	1	1	1	FHIT	fragile histidine triad
hsa-miR-339-3p	1	0	1	1	1	1	C1orf173	chromosome 1 open reading frame 173
hsa-miR-339-3p	0	0	0	1	1	1	ASCL4	achaete-scute complex homolog 4 (Drosophila)
hsa-miR-339-3p	0	0	0	1	0	0	PODXL2	podocalyxin-like 2
hsa-miR-339-3p	0	0	1	1	0	0	D2HGDH	D-2-hydroxyglutarate dehydrogenase
hsa-miR-339-3p	1	0	1	1	1	1	ZNF207	zinc finger protein 207
hsa-miR-339-3p	1	0	1	1	1	1	RBM38	RNA binding motif protein 38
hsa-miR-339-3p	0	0	1	1	0	0	LY6H	lymphocyte antigen 6 complex, locus H
hsa-miR-339-3p	0	0	0	1	1	1	PROZ	protein Z, vitamin K-dependent plasma glycoprotein
hsa-miR-339-3p	0	0	1	1	0	0	SCNN1B	sodium channel, non-voltage-gated 1, beta subunit
hsa-miR-339-3p	0	0	1	1	1	1	STAU2	staufen, RNA binding protein, homolog 2 (Drosophila)
hsa-miR-339-3p	0	0	1	1	1	1	ILDR1	immunoglobulin-like domain containing receptor 1
hsa-miR-339-3p	0	0	0	1	0	0	RASSF7	Ras association (RalGDS/AF-6) domain family (N-terminal) member 7
hsa-miR-339-3p	0	0	0	1	1	1	DUSP22	dual specificity phosphatase 22
hsa-miR-339-3p	1	0	0	1	0	0	TSPAN4	tetraspanin 4
hsa-miR-339-3p	0	0	0	1	1	1	CRHR2	corticotropin releasing hormone receptor 2
hsa-miR-339-3p	0	0	1	1	1	1	KLC1	kinesin light chain 1
hsa-miR-339-3p	0	0	1	1	0	0	P2RY6	pyrimidinergic receptor P2Y, G-protein coupled, 6
hsa-miR-339-3p	0	0	1	1	1	1	PDE1A	phosphodiesterase 1A, calmodulin-dependent
hsa-miR-339-3p	0	0	0	1	0	0	CCDC37	coiled-coil domain containing 37
hsa-miR-339-3p	1	0	1	1	1	1	RAI1	retinoic acid induced 1
hsa-miR-339-3p	1	0	1	1	1	1	DMPK	dystrophia myotonica-protein kinase
hsa-miR-339-3p	0	0	0	1	0	0	ZNF774	zinc finger protein 774
hsa-miR-339-3p	0	0	0	1	0	0	ATG7	autophagy related 7
hsa-miR-339-3p	1	0	1	1	0	0	ADAMTSL2	ADAMTS-like 2
hsa-miR-339-3p	0	0	0	1	0	0	ZBTB45	zinc finger and BTB domain containing 45
hsa-miR-339-3p	0	0	0	1	1	1	SULT1A3	sulfotransferase family, cytosolic, 1A, phenol-preferring, member 3
hsa-miR-339-3p	0	0	0	1	0	0	CRYBA4	crystallin, beta A4
hsa-miR-339-3p	0	0	1	1	1	1	FMO1	flavin containing monooxygenase 1
hsa-miR-339-3p	0	0	0	1	0	0	INCA1	inhibitor of CDK, cyclin A1 interacting protein 1
hsa-miR-339-3p	1	0	1	1	1	1	ABHD2	abhydrolase domain containing 2
hsa-miR-339-3p	0	0	0	1	1	1	ITGB2	integrin, beta 2 (complement component 3 receptor 3 and 4 subunit)
hsa-miR-339-3p	0	0	0	1	0	0	CGB8	chorionic gonadotropin, beta polypeptide 8
hsa-miR-339-3p	0	0	0	1	0	0	C2CD4A	C2 calcium-dependent domain containing 4A
hsa-miR-339-3p	0	0	1	1	0	0	DPF1	D4, zinc and double PHD fingers family 1
hsa-miR-339-3p	0	0	1	1	0	0	AGAP4	ArfGAP with GTPase domain, ankyrin repeat and PH domain 4
hsa-miR-339-3p	0	0	1	1	0	0	CEP250	centrosomal protein 250kDa
hsa-miR-339-3p	1	0	1	1	0	0	PLD3	phospholipase D family, member 3
hsa-miR-339-3p	0	0	0	1	0	0	SAA1	serum amyloid A1
hsa-miR-339-3p	0	0	1	1	0	0	TSGA13	testis specific, 13
hsa-miR-339-3p	1	0	1	1	1	1	C19orf6	chromosome 19 open reading frame 6
hsa-miR-339-3p	0	0	1	1	1	1	CCDC69	coiled-coil domain containing 69
hsa-miR-339-3p	0	0	0	1	0	0	POTEE	POTE ankyrin domain family, member E
hsa-miR-339-3p	0	0	1	1	1	1	PICK1	protein interacting with PRKCA 1
hsa-miR-339-3p	0	0	1	1	1	1	PSRC1	proline/serine-rich coiled-coil 1
hsa-miR-339-3p	0	0	1	1	0	0	MYBPHL	myosin binding protein H-like
hsa-miR-339-3p	0	0	1	1	0	0	DOK3	docking protein 3
hsa-miR-339-3p	0	0	0	1	0	0	ZNF628	zinc finger protein 628
hsa-miR-339-3p	1	0	1	1	1	1	ACHE	acetylcholinesterase
hsa-miR-339-3p	0	0	0	1	0	0	POTEF	POTE ankyrin domain family, member F
hsa-miR-339-3p	0	0	0	1	0	0	C1QTNF5	C1q and tumor necrosis factor related protein 5
hsa-miR-339-3p	0	0	0	1	0	0	ARID5A	AT rich interactive domain 5A (MRF1-like)
hsa-miR-339-3p	0	0	0	1	0	0	ZBP1	Z-DNA binding protein 1
hsa-miR-339-3p	0	0	1	1	0	0	TRMT1	tRNA methyltransferase 1 homolog (S. cerevisiae)
hsa-miR-339-3p	0	0	1	1	1	1	THSD4	thrombospondin, type I, domain containing 4
hsa-miR-339-3p	0	0	1	1	0	0	NAT9	N-acetyltransferase 9 (GCN5-related, putative)
hsa-miR-339-3p	0	0	1	1	1	1	COPS5	COP9 constitutive photomorphogenic homolog subunit 5 (Arabidopsis)
hsa-miR-339-3p	1	0	1	1	0	0	MANEAL	mannosidase, endo-alpha-like
hsa-miR-339-3p	1	0	1	1	1	1	PCSK6	proprotein convertase subtilisin/kexin type 6
hsa-miR-339-3p	0	0	0	1	0	0	DUX4L3	double homeobox 4 like 3
hsa-miR-339-3p	0	0	0	1	0	0	TAB3-AS1	TAB3 antisense RNA 1
hsa-miR-339-3p	0	0	1	1	0	0	FAM3D	family with sequence similarity 3, member D
hsa-miR-339-3p	0	0	1	1	0	0	LPAR2	lysophosphatidic acid receptor 2
hsa-miR-339-3p	0	0	1	1	0	0	FANCG	Fanconi anemia, complementation group G
hsa-miR-339-3p	1	0	1	1	1	1	VCP	valosin containing protein
hsa-miR-339-3p	0	0	1	1	1	1	DNM1	dynamin 1
hsa-miR-339-3p	0	0	1	1	0	0	SH2B1	SH2B adaptor protein 1
hsa-miR-339-3p	0	0	1	1	1	1	TMEM139	transmembrane protein 139
hsa-miR-339-3p	0	0	1	1	0	0	CGB2	chorionic gonadotropin, beta polypeptide 2
hsa-miR-339-3p	0	0	1	1	0	0	ARAP1	ArfGAP with RhoGAP domain, ankyrin repeat and PH domain 1
hsa-miR-339-3p	1	0	0	1	0	0	TRPV6	transient receptor potential cation channel, subfamily V, member 6
hsa-miR-339-3p	1	0	1	1	1	1	LFNG	LFNG O-fucosylpeptide 3-beta-N-acetylglucosaminyltransferase
hsa-miR-339-3p	1	0	1	1	1	1	NUMA1	nuclear mitotic apparatus protein 1
hsa-miR-339-3p	0	0	0	1	0	0	KIAA1683	KIAA1683
hsa-miR-339-3p	1	0	1	1	0	0	EFNA4	ephrin-A4
hsa-miR-339-3p	1	0	1	1	1	1	TMEM25	transmembrane protein 25
hsa-miR-339-3p	1	0	0	1	0	0	TSTA3	tissue specific transplantation antigen P35B
hsa-miR-339-3p	1	0	1	1	1	1	LPHN2	latrophilin 2
hsa-miR-339-3p	0	0	0	1	1	1	SULT1A4	sulfotransferase family, cytosolic, 1A, phenol-preferring, member 4
hsa-miR-339-3p	0	0	0	1	0	0	MMP17	matrix metallopeptidase 17 (membrane-inserted)
hsa-miR-339-3p	0	0	1	1	0	0	NTNG2	netrin G2
hsa-miR-339-3p	1	0	1	1	1	1	GRAMD4	GRAM domain containing 4
hsa-miR-339-3p	0	0	0	1	0	0	HAO2	hydroxyacid oxidase 2 (long chain)
hsa-miR-339-3p	0	0	1	1	1	1	ABHD14B	abhydrolase domain containing 14B
hsa-miR-339-3p	1	0	1	1	1	1	RUSC2	RUN and SH3 domain containing 2
hsa-miR-339-3p	1	0	1	1	1	1	CD300LF	CD300 molecule-like family member f
hsa-miR-339-3p	0	0	1	1	1	1	PTPLA	protein tyrosine phosphatase-like (proline instead of catalytic arginine), member A
hsa-miR-339-3p	0	0	0	1	1	1	ZNF438	zinc finger protein 438
hsa-miR-339-3p	0	0	0	1	0	0	IFT140	intraflagellar transport 140 homolog (Chlamydomonas)
hsa-miR-339-3p	0	0	1	1	0	0	UBL7	ubiquitin-like 7 (bone marrow stromal cell-derived)
hsa-miR-339-3p	0	0	1	1	1	1	HPS1	Hermansky-Pudlak syndrome 1
hsa-miR-339-3p	0	0	1	1	0	0	ZNF511	zinc finger protein 511
hsa-miR-339-3p	1	0	1	1	1	1	ULK2	unc-51-like kinase 2 (C. elegans)
hsa-miR-339-3p	1	0	0	1	1	1	SBNO2	strawberry notch homolog 2 (Drosophila)
hsa-miR-339-3p	0	0	0	1	0	0	TEX28	testis expressed 28
hsa-miR-339-3p	1	0	1	1	1	1	SH3BP5L	SH3-binding domain protein 5-like
hsa-miR-339-3p	1	0	0	1	1	1	TRIM67	tripartite motif containing 67
hsa-miR-339-3p	0	0	0	1	1	1	OBSCN	obscurin, cytoskeletal calmodulin and titin-interacting RhoGEF
hsa-miR-339-3p	0	0	0	1	0	0	GUK1	guanylate kinase 1
hsa-miR-339-3p	1	0	1	1	0	0	WNT3A	wingless-type MMTV integration site family, member 3A
hsa-miR-339-3p	0	0	1	1	0	0	PSEN2	presenilin 2 (Alzheimer disease 4)
hsa-miR-339-3p	0	0	1	1	1	1	ATF3	activating transcription factor 3
hsa-miR-339-3p	0	0	1	1	1	1	MFSD4	major facilitator superfamily domain containing 4
hsa-miR-339-3p	0	0	0	1	0	0	LEMD1	LEM domain containing 1
hsa-miR-339-3p	0	0	1	1	0	0	LRRN2	leucine rich repeat neuronal 2
hsa-miR-339-3p	0	0	0	1	0	0	PHLDA3	pleckstrin homology-like domain, family A, member 3
hsa-miR-339-3p	1	0	1	1	1	1	NR5A2	nuclear receptor subfamily 5, group A, member 2
hsa-miR-339-3p	1	0	1	1	1	1	ADAT2	adenosine deaminase, tRNA-specific 2
hsa-miR-339-3p	0	0	0	1	1	1	GPA33	glycoprotein A33 (transmembrane)
hsa-miR-339-3p	1	0	1	1	1	1	ARHGAP30	Rho GTPase activating protein 30
hsa-miR-339-3p	0	0	1	1	0	0	SLAMF9	SLAM family member 9
hsa-miR-339-3p	0	0	0	1	0	0	INSRR	insulin receptor-related receptor
hsa-miR-339-3p	1	0	1	1	1	1	HDGF	hepatoma-derived growth factor
hsa-miR-339-3p	0	0	1	1	0	0	PMF1	polyamine-modulated factor 1
hsa-miR-339-3p	0	0	0	1	0	0	BGLAP	bone gamma-carboxyglutamate (gla) protein
hsa-miR-339-3p	0	0	0	1	0	0	TTC40	tetratricopeptide repeat domain 40
hsa-miR-339-3p	1	0	1	1	1	1	INPP5A	inositol polyphosphate-5-phosphatase, 40kDa
hsa-miR-339-3p	0	0	1	1	0	0	FANK1	fibronectin type III and ankyrin repeat domains 1
hsa-miR-339-3p	0	0	1	1	1	1	S100A3	S100 calcium binding protein A3
hsa-miR-339-3p	0	0	0	1	0	0	S100A4	S100 calcium binding protein A4
hsa-miR-339-3p	1	0	1	1	1	1	CRCT1	cysteine-rich C-terminal 1
hsa-miR-339-3p	0	0	1	1	0	0	PPAPDC1A	phosphatidic acid phosphatase type 2 domain containing 1A
hsa-miR-339-3p	0	0	1	1	1	1	PLEKHS1	pleckstrin homology domain containing, family S member 1
hsa-miR-339-3p	0	0	1	1	0	0	CD58	CD58 molecule
hsa-miR-339-3p	1	0	1	1	1	1	PHTF1	putative homeodomain transcription factor 1
hsa-miR-339-3p	0	0	0	1	0	0	FLNA	filamin A, alpha
hsa-miR-339-3p	0	0	0	1	0	0	ABHD16B	abhydrolase domain containing 16B
hsa-miR-339-3p	0	0	0	1	1	1	PNCK	pregnancy up-regulated non-ubiquitously expressed CaM kinase
hsa-miR-339-3p	0	0	0	1	0	0	PPDPF	pancreatic progenitor cell differentiation and proliferation factor homolog (zebrafish)
hsa-miR-339-3p	0	0	0	1	0	0	HAUS7	HAUS augmin-like complex, subunit 7
hsa-miR-339-3p	1	0	0	1	1	1	NKAIN4	Na+/K+ transporting ATPase interacting 4
hsa-miR-339-3p	0	0	0	1	0	0	OGFR	opioid growth factor receptor
hsa-miR-339-3p	0	0	0	1	0	0	CXorf66	chromosome X open reading frame 66
hsa-miR-339-3p	0	0	1	1	0	0	RPS21	ribosomal protein S21
hsa-miR-339-3p	0	0	1	1	1	1	KIAA1586	KIAA1586
hsa-miR-339-3p	0	0	0	1	1	1	TTC22	tetratricopeptide repeat domain 22
hsa-miR-339-3p	0	0	0	1	1	1	CDCP2	CUB domain containing protein 2
hsa-miR-339-3p	0	0	0	1	0	0	ECHDC2	enoyl CoA hydratase domain containing 2
hsa-miR-339-3p	1	0	1	1	0	0	GRIN1	glutamate receptor, ionotropic, N-methyl D-aspartate 1
hsa-miR-339-3p	1	0	1	1	1	1	LONRF3	LON peptidase N-terminal domain and ring finger 3
hsa-miR-339-3p	0	0	0	1	0	0	EDF1	endothelial differentiation-related factor 1
hsa-miR-339-3p	0	0	0	1	0	0	LCN8	lipocalin 8
hsa-miR-339-3p	0	0	1	1	0	0	CARD9	caspase recruitment domain family, member 9
hsa-miR-339-3p	0	0	0	1	1	1	REXO4	REX4, RNA exonuclease 4 homolog (S. cerevisiae)
hsa-miR-339-3p	0	0	1	1	0	0	MAD2L1BP	MAD2L1 binding protein
hsa-miR-339-3p	1	0	1	1	1	1	CDH22	cadherin 22, type 2
hsa-miR-339-3p	0	0	0	1	0	0	LOC100128028	uncharacterized LOC100128028
hsa-miR-339-3p	0	0	0	1	0	0	NTMT1	N-terminal Xaa-Pro-Lys N-methyltransferase 1
hsa-miR-339-3p	0	0	1	1	1	1	SLC22A7	solute carrier family 22 (organic anion transporter), member 7
hsa-miR-339-3p	0	0	0	1	0	0	KCNQ4	potassium voltage-gated channel, KQT-like subfamily, member 4
hsa-miR-339-3p	0	0	0	1	1	1	ZDHHC12	zinc finger, DHHC-type containing 12
hsa-miR-339-3p	0	0	0	1	0	0	TP53TG5	TP53 target 5
hsa-miR-339-3p	0	0	1	1	0	0	RBPJL	recombination signal binding protein for immunoglobulin kappa J region-like
hsa-miR-339-3p	1	0	1	1	1	1	CAMK2G	calcium/calmodulin-dependent protein kinase II gamma
hsa-miR-339-3p	0	0	0	1	1	1	WFDC12	WAP four-disulfide core domain 12
hsa-miR-339-3p	0	0	1	1	0	0	URM1	ubiquitin related modifier 1
hsa-miR-339-3p	0	0	0	1	1	1	ADA	adenosine deaminase
hsa-miR-339-3p	0	0	1	1	0	0	SWI5	SWI5 recombination repair homolog (yeast)
hsa-miR-339-3p	0	0	1	1	0	0	CIZ1	CDKN1A interacting zinc finger protein 1
hsa-miR-339-3p	0	0	1	1	0	0	C9orf16	chromosome 9 open reading frame 16
hsa-miR-339-3p	0	0	1	1	0	0	CSF3R	colony stimulating factor 3 receptor (granulocyte)
hsa-miR-339-3p	1	0	1	1	1	1	TRAPPC3	trafficking protein particle complex 3
hsa-miR-339-3p	0	0	1	1	1	1	TFAP2E	transcription factor AP-2 epsilon (activating enhancer binding protein 2 epsilon)
hsa-miR-339-3p	0	0	1	1	1	1	SLC2A8	solute carrier family 2 (facilitated glucose transporter), member 8
hsa-miR-339-3p	1	0	1	1	0	0	CCDC167	coiled-coil domain containing 167
hsa-miR-339-3p	1	0	1	1	0	0	ADC	arginine decarboxylase
hsa-miR-339-3p	1	0	0	1	1	1	TMEM234	transmembrane protein 234
hsa-miR-339-3p	1	0	1	1	1	1	COPS7B	COP9 constitutive photomorphogenic homolog subunit 7B (Arabidopsis)
hsa-miR-339-3p	0	0	0	1	0	0	SERINC2	serine incorporator 2
hsa-miR-339-3p	0	0	1	1	1	1	MAPK13	mitogen-activated protein kinase 13
hsa-miR-339-3p	1	0	0	1	1	1	CNTRL	centriolin
hsa-miR-339-3p	0	0	1	1	0	0	SPDEF	SAM pointed domain containing ets transcription factor
hsa-miR-339-3p	0	0	1	1	0	0	AGAP6	ArfGAP with GTPase domain, ankyrin repeat and PH domain 6
hsa-miR-339-3p	0	0	1	1	0	0	MED12	mediator complex subunit 12
hsa-miR-339-3p	0	0	1	1	0	0	CNKSR1	connector enhancer of kinase suppressor of Ras 1
hsa-miR-339-3p	1	0	1	1	1	1	CXCL12	chemokine (C-X-C motif) ligand 12
hsa-miR-339-3p	0	0	0	1	0	0	ARR3	arrestin 3, retinal (X-arrestin)
hsa-miR-339-3p	1	0	1	1	1	1	EPHB2	EPH receptor B2
hsa-miR-339-3p	0	0	0	1	0	0	C1QA	complement component 1, q subcomponent, A chain
hsa-miR-339-3p	0	0	1	1	0	0	CELA3A	chymotrypsin-like elastase family, member 3A
hsa-miR-339-3p	0	0	1	1	0	0	CELA3B	chymotrypsin-like elastase family, member 3B
hsa-miR-339-3p	1	0	1	1	1	1	COL11A2	collagen, type XI, alpha 2
hsa-miR-339-3p	0	0	1	1	0	0	VSIG4	V-set and immunoglobulin domain containing 4
hsa-miR-339-3p	0	0	0	1	0	0	ASIP	agouti signaling protein
hsa-miR-339-3p	0	0	1	1	1	1	H2AFX	H2A histone family, member X
hsa-miR-339-3p	1	0	1	1	1	1	ATF6B	activating transcription factor 6 beta
hsa-miR-339-3p	1	0	1	1	1	1	KIAA0195	KIAA0195
hsa-miR-339-3p	0	0	0	1	0	0	FAM70B	family with sequence similarity 70, member B
hsa-miR-339-3p	0	0	0	1	0	0	KIF19	kinesin family member 19
hsa-miR-339-3p	0	0	0	1	0	0	GPR142	G protein-coupled receptor 142
hsa-miR-339-3p	0	0	0	1	1	1	MFAP2	microfibrillar-associated protein 2
hsa-miR-339-3p	0	0	1	1	0	0	CROCC	ciliary rootlet coiled-coil, rootletin
hsa-miR-339-3p	0	0	0	1	0	0	VWA7	von Willebrand factor A domain containing 7
hsa-miR-339-3p	0	0	1	1	1	1	CLCNKA	chloride channel, voltage-sensitive Ka
hsa-miR-339-3p	1	0	1	1	1	1	SECISBP2	SECIS binding protein 2
hsa-miR-339-3p	0	0	1	1	0	0	FOXS1	forkhead box S1
hsa-miR-339-3p	0	0	1	1	1	1	KDELC1	KDEL (Lys-Asp-Glu-Leu) containing 1
hsa-miR-339-3p	1	0	1	1	1	1	GOLM1	golgi membrane protein 1
hsa-miR-339-3p	0	0	1	1	0	0	NCR3	natural cytotoxicity triggering receptor 3
hsa-miR-339-3p	1	0	1	1	1	1	ID1	inhibitor of DNA binding 1, dominant negative helix-loop-helix protein
hsa-miR-339-3p	1	0	1	1	1	1	HNRNPK	heterogeneous nuclear ribonucleoprotein K
hsa-miR-339-3p	0	0	0	1	1	1	GPR183	G protein-coupled receptor 183
hsa-miR-339-3p	0	0	1	1	0	0	KRTAP5-11	keratin associated protein 5-11
hsa-miR-339-3p	0	0	1	1	0	0	KRTAP5-10	keratin associated protein 5-10
hsa-miR-339-3p	1	0	1	1	1	1	CTTN	cortactin
hsa-miR-339-3p	0	0	1	1	0	0	KIAA2013	KIAA2013
hsa-miR-339-3p	0	0	1	1	0	0	MAD2L2	MAD2 mitotic arrest deficient-like 2 (yeast)
hsa-miR-339-3p	0	0	1	1	1	1	GATA1	GATA binding protein 1 (globin transcription factor 1)
hsa-miR-339-3p	0	0	0	1	1	1	BTNL9	butyrophilin-like 9
hsa-miR-339-3p	0	0	0	1	0	0	HLA-F	major histocompatibility complex, class I, F
hsa-miR-339-3p	0	0	0	1	0	0	POLD1	polymerase (DNA directed), delta 1, catalytic subunit
hsa-miR-339-3p	0	0	1	1	1	1	GFAP	glial fibrillary acidic protein
hsa-miR-339-3p	1	0	1	1	1	1	C10orf114	chromosome 10 open reading frame 114
hsa-miR-339-3p	1	0	1	1	1	1	NKX2-2	NK2 homeobox 2
hsa-miR-339-3p	0	0	0	1	0	0	CGB7	chorionic gonadotropin, beta polypeptide 7
hsa-miR-339-3p	1	0	1	1	1	1	C20orf26	chromosome 20 open reading frame 26
hsa-miR-339-3p	0	0	1	1	1	1	RASGRP2	RAS guanyl releasing protein 2 (calcium and DAG-regulated)
hsa-miR-339-3p	1	0	1	1	1	1	KLF12	Kruppel-like factor 12
hsa-miR-339-3p	1	0	1	1	1	1	HIF3A	hypoxia inducible factor 3, alpha subunit
hsa-miR-339-3p	0	0	1	1	0	0	HES3	hairy and enhancer of split 3 (Drosophila)
hsa-miR-339-3p	0	0	1	1	0	0	ASIC3	acid-sensing (proton-gated) ion channel 3
hsa-miR-339-3p	1	0	1	1	1	1	PCDHA1	protocadherin alpha 1
hsa-miR-339-3p	0	0	0	1	0	0	PANK4	pantothenate kinase 4
hsa-miR-339-3p	0	0	1	1	0	0	C1orf86	chromosome 1 open reading frame 86
hsa-miR-339-3p	0	0	1	1	0	0	GABRD	gamma-aminobutyric acid (GABA) A receptor, delta
hsa-miR-339-3p	0	0	0	1	0	0	DUX4L2	double homeobox 4 like 2
hsa-miR-339-3p	0	0	0	1	0	0	DUX4L6	double homeobox 4 like 6
hsa-miR-339-3p	0	0	1	1	1	1	CAMK1D	calcium/calmodulin-dependent protein kinase ID
hsa-miR-339-3p	0	0	1	1	1	1	IL1RAPL1	interleukin 1 receptor accessory protein-like 1
hsa-miR-339-3p	0	0	0	1	0	0	ECHDC3	enoyl CoA hydratase domain containing 3
hsa-miR-339-3p	0	0	1	1	0	0	TBC1D7	TBC1 domain family, member 7
hsa-miR-339-3p	0	0	0	1	0	0	NT5M	5',3'-nucleotidase, mitochondrial
hsa-miR-339-3p	1	0	1	1	0	0	TRPC3	transient receptor potential cation channel, subfamily C, member 3
hsa-miR-339-3p	1	0	1	1	1	1	PFKFB3	6-phosphofructo-2-kinase/fructose-2,6-biphosphatase 3
hsa-miR-339-3p	0	0	1	1	0	0	FBXO18	F-box protein, helicase, 18
hsa-miR-339-3p	0	0	0	1	0	0	GPR150	G protein-coupled receptor 150
hsa-miR-339-3p	0	0	1	1	0	0	APH1B	anterior pharynx defective 1 homolog B (C. elegans)
hsa-miR-339-3p	0	0	1	1	1	1	BPHL	biphenyl hydrolase-like (serine hydrolase)
hsa-miR-339-3p	0	0	0	1	0	0	C2CD4B	C2 calcium-dependent domain containing 4B
hsa-miR-339-3p	0	0	1	1	0	0	CPXM1	carboxypeptidase X (M14 family), member 1
hsa-miR-339-3p	0	0	0	1	1	1	ASGR1	asialoglycoprotein receptor 1
hsa-miR-339-3p	0	0	1	1	0	0	CEP152	centrosomal protein 152kDa
hsa-miR-339-3p	0	0	0	1	1	1	DDC	dopa decarboxylase (aromatic L-amino acid decarboxylase)
hsa-miR-339-3p	0	0	1	1	1	1	FKBP1B	FK506 binding protein 1B, 12.6 kDa
hsa-miR-339-3p	0	0	0	1	0	0	LOC729162	uncharacterized LOC729162
hsa-miR-339-3p	1	0	1	1	1	1	PDLIM2	PDZ and LIM domain 2 (mystique)
hsa-miR-339-3p	0	0	0	1	1	1	ADARB2	adenosine deaminase, RNA-specific, B2
hsa-miR-339-3p	0	0	1	1	1	1	SLCO1B3	solute carrier organic anion transporter family, member 1B3
hsa-miR-339-3p	0	0	1	1	1	1	SIRPD	signal-regulatory protein delta
hsa-miR-339-3p	0	0	0	1	0	0	LOC100131094	uncharacterized LOC100131094
hsa-miR-339-3p	0	0	0	1	0	0	ANGPT4	angiopoietin 4
hsa-miR-339-3p	0	0	1	1	1	1	SLC52A3	solute carrier family 52, riboflavin transporter, member 3
hsa-miR-339-3p	0	0	1	1	0	0	FBXO7	F-box protein 7
hsa-miR-339-3p	1	0	1	1	1	1	SLC43A2	solute carrier family 43, member 2
hsa-miR-339-3p	0	0	1	1	1	1	TOLLIP	toll interacting protein
hsa-miR-339-3p	0	0	0	1	0	0	LOC100128770	uncharacterized LOC100128770
hsa-miR-339-3p	0	0	0	1	0	0	C20orf96	chromosome 20 open reading frame 96
hsa-miR-339-3p	0	0	0	1	0	0	RP1L1	retinitis pigmentosa 1-like 1
hsa-miR-339-3p	0	0	1	1	0	0	C21orf59	chromosome 21 open reading frame 59
hsa-miR-339-3p	0	0	0	1	0	0	FAM90A7P	putative protein FAM90A7
hsa-miR-339-3p	0	0	1	1	1	1	GNAI2	guanine nucleotide binding protein (G protein), alpha inhibiting activity polypeptide 2
hsa-miR-339-3p	0	0	0	1	1	1	MRPL2	mitochondrial ribosomal protein L2
hsa-miR-339-3p	0	0	0	1	0	0	ASPDH	aspartate dehydrogenase domain containing
hsa-miR-339-3p	0	0	0	1	0	0	PLEKHM3	pleckstrin homology domain containing, family M, member 3
hsa-miR-339-3p	0	0	1	1	0	0	FANCA	Fanconi anemia, complementation group A
hsa-miR-339-3p	1	0	1	1	1	1	PTCH1	patched 1
hsa-miR-339-3p	0	0	0	1	1	1	ANKRD20A5P	ankyrin repeat domain 20 family, member A5, pseudogene
