# Supplementary material for: Profiling of Selected MicroRNAs in Proliferative Eutopic Endometrium of Women with Ovarian Endometriosis
Source: Biomed Res Int. 2015 Aug 20;2015:760698. doi: 10.1155/2015/760698 (PMC4558423; doi:10.1155/2015/760698)
Supplement: Supplementary file 1 — Table I: The names of miRNAs significantly differentially expressed between eutopic endometrium of patients with endometriosis vs eutopic endometrium of patients without endometriosis. Table II: The associations between miRNA and mRNA, which presents detailed results of the search of six major databases i.e targetscan, tarbase, miranda, mirbase, mirtarget2 and pictar. [file 760698.f1.zip › 760698.f1/Table II/hsa-miR-342-3p.tsv]

miR	targetscan	tarbase	miranda	mirbase	mirtarget2	pictar	GeneSymbol	GeneName
hsa-miR-342-3p	1	0	1	1	1	1	ZHX3	zinc fingers and homeoboxes 3
hsa-miR-342-3p	1	0	1	1	1	1	TTBK2	tau tubulin kinase 2
hsa-miR-342-3p	1	0	1	0	0	0	TANC2	tetratricopeptide repeat, ankyrin repeat and coiled-coil containing 2
hsa-miR-342-3p	1	0	1	1	1	1	EP300	E1A binding protein p300
hsa-miR-342-3p	1	0	1	1	1	1	SYNPO2L	synaptopodin 2-like
hsa-miR-342-3p	1	0	1	1	1	1	BCL2L1	BCL2-like 1
hsa-miR-342-3p	1	0	1	1	1	1	IPO5	importin 5
hsa-miR-342-3p	1	0	0	1	1	1	MSI1	musashi homolog 1 (Drosophila)
hsa-miR-342-3p	1	0	1	1	0	0	PRRC2B	proline-rich coiled-coil 2B
hsa-miR-342-3p	1	0	1	1	1	1	FUT8	fucosyltransferase 8 (alpha (1,6) fucosyltransferase)
hsa-miR-342-3p	1	0	1	1	1	1	FBXO33	F-box protein 33
hsa-miR-342-3p	1	0	1	1	1	1	GID8	GID complex subunit 8 homolog (S. cerevisiae)
hsa-miR-342-3p	1	0	1	1	1	1	HIP1	huntingtin interacting protein 1
hsa-miR-342-3p	1	0	1	1	1	1	COL1A2	collagen, type I, alpha 2
hsa-miR-342-3p	1	0	1	1	1	1	ARID1B	AT rich interactive domain 1B (SWI1-like)
hsa-miR-342-3p	1	0	1	0	1	1	PCGF3	polycomb group ring finger 3
hsa-miR-342-3p	1	0	1	1	0	0	PKDCC	protein kinase domain containing, cytoplasmic homolog (mouse)
hsa-miR-342-3p	1	0	1	0	1	1	GOSR1	golgi SNAP receptor complex member 1
hsa-miR-342-3p	1	0	1	1	1	1	LRRC4	leucine rich repeat containing 4
hsa-miR-342-3p	1	0	1	1	1	1	MSI2	musashi homolog 2 (Drosophila)
hsa-miR-342-3p	1	0	1	1	1	1	SV2A	synaptic vesicle glycoprotein 2A
hsa-miR-342-3p	1	0	1	1	1	1	NEO1	neogenin 1
hsa-miR-342-3p	1	0	1	1	1	1	BIRC6	baculoviral IAP repeat containing 6
hsa-miR-342-3p	1	0	1	1	1	1	RMND5A	required for meiotic nuclear division 5 homolog A (S. cerevisiae)
hsa-miR-342-3p	1	0	1	1	1	1	LRRC15	leucine rich repeat containing 15
hsa-miR-342-3p	1	0	1	1	1	1	ST7L	suppression of tumorigenicity 7 like
hsa-miR-342-3p	1	0	1	1	1	1	ANK2	ankyrin 2, neuronal
hsa-miR-342-3p	1	0	1	1	1	1	FLNC	filamin C, gamma
hsa-miR-342-3p	1	0	1	1	1	1	SMC1A	structural maintenance of chromosomes 1A
hsa-miR-342-3p	1	0	1	1	1	1	LMX1A	LIM homeobox transcription factor 1, alpha
hsa-miR-342-3p	1	0	1	0	1	1	FHDC1	FH2 domain containing 1
hsa-miR-342-3p	1	0	1	1	1	1	RREB1	ras responsive element binding protein 1
hsa-miR-342-3p	1	0	1	1	0	0	NAPRT1	nicotinate phosphoribosyltransferase domain containing 1
hsa-miR-342-3p	1	0	1	1	0	0	SDC1	syndecan 1
hsa-miR-342-3p	1	0	1	1	1	1	FAM222B	family with sequence similarity 222, member B
hsa-miR-342-3p	1	0	1	0	1	1	STK40	serine/threonine kinase 40
hsa-miR-342-3p	1	0	1	1	1	1	PHF20	PHD finger protein 20
hsa-miR-342-3p	1	0	1	1	1	1	AAMP	angio-associated, migratory cell protein
hsa-miR-342-3p	1	0	1	1	1	1	KIAA1033	KIAA1033
hsa-miR-342-3p	1	0	1	1	1	1	CUX2	cut-like homeobox 2
hsa-miR-342-3p	1	0	1	1	1	1	RAD23B	RAD23 homolog B (S. cerevisiae)
hsa-miR-342-3p	1	0	1	1	0	0	MEX3A	mex-3 homolog A (C. elegans)
hsa-miR-342-3p	1	0	0	0	1	1	PTPRN2	protein tyrosine phosphatase, receptor type, N polypeptide 2
hsa-miR-342-3p	1	0	1	1	1	1	C20orf111	chromosome 20 open reading frame 111
hsa-miR-342-3p	1	0	1	1	1	1	EDA	ectodysplasin A
hsa-miR-342-3p	1	0	1	1	1	1	CAMK2N1	calcium/calmodulin-dependent protein kinase II inhibitor 1
hsa-miR-342-3p	1	0	1	1	1	1	SEPT3	septin 3
hsa-miR-342-3p	1	0	1	1	1	1	SSR1	signal sequence receptor, alpha
hsa-miR-342-3p	1	0	1	1	1	1	LRP8	low density lipoprotein receptor-related protein 8, apolipoprotein e receptor
hsa-miR-342-3p	1	0	1	1	1	1	CYP26B1	cytochrome P450, family 26, subfamily B, polypeptide 1
hsa-miR-342-3p	1	0	1	1	1	1	FAM222A	family with sequence similarity 222, member A
hsa-miR-342-3p	1	0	1	1	1	1	ZEB1	zinc finger E-box binding homeobox 1
hsa-miR-342-3p	1	0	1	0	1	1	MLL2	myeloid/lymphoid or mixed-lineage leukemia 2
hsa-miR-342-3p	1	0	1	1	1	1	MTDH	metadherin
hsa-miR-342-3p	1	0	1	1	1	1	RPRD1A	regulation of nuclear pre-mRNA domain containing 1A
hsa-miR-342-3p	1	0	1	1	0	0	DGCR2	DiGeorge syndrome critical region gene 2
hsa-miR-342-3p	1	0	1	0	1	1	CDK6	cyclin-dependent kinase 6
hsa-miR-342-3p	1	0	1	1	1	1	LAMC2	laminin, gamma 2
hsa-miR-342-3p	1	0	1	0	0	0	ZNRF3	zinc and ring finger 3
hsa-miR-342-3p	1	0	1	1	1	1	SHE	Src homology 2 domain containing E
hsa-miR-342-3p	1	0	1	1	1	1	PPFIA4	protein tyrosine phosphatase, receptor type, f polypeptide (PTPRF), interacting protein (liprin), alpha 4
hsa-miR-342-3p	1	0	1	1	1	1	SPOCK2	sparc/osteonectin, cwcv and kazal-like domains proteoglycan (testican) 2
hsa-miR-342-3p	1	0	1	0	1	1	SEPT11	septin 11
hsa-miR-342-3p	1	0	1	1	1	1	ZZZ3	zinc finger, ZZ-type containing 3
hsa-miR-342-3p	1	0	1	1	1	1	ZBTB4	zinc finger and BTB domain containing 4
hsa-miR-342-3p	1	0	1	1	1	1	HOXB3	homeobox B3
hsa-miR-342-3p	1	0	1	0	1	1	UBASH3B	ubiquitin associated and SH3 domain containing B
hsa-miR-342-3p	1	0	1	1	1	1	NBEA	neurobeachin
hsa-miR-342-3p	1	0	1	1	1	1	CDC42BPB	CDC42 binding protein kinase beta (DMPK-like)
hsa-miR-342-3p	1	0	1	1	1	1	OLFML2A	olfactomedin-like 2A
hsa-miR-342-3p	1	0	1	0	1	1	UBE2L3	ubiquitin-conjugating enzyme E2L 3
hsa-miR-342-3p	1	0	1	1	1	1	ELAVL2	ELAV (embryonic lethal, abnormal vision, Drosophila)-like 2 (Hu antigen B)
hsa-miR-342-3p	1	0	1	0	1	1	KCMF1	potassium channel modulatory factor 1
hsa-miR-342-3p	1	0	1	0	1	1	CACNA1C	calcium channel, voltage-dependent, L type, alpha 1C subunit
hsa-miR-342-3p	1	0	1	1	1	1	GDA	guanine deaminase
hsa-miR-342-3p	1	0	1	1	0	0	UQCC	ubiquinol-cytochrome c reductase complex chaperone
hsa-miR-342-3p	1	0	1	1	1	1	SEMA6A	sema domain, transmembrane domain (TM), and cytoplasmic domain, (semaphorin) 6A
hsa-miR-342-3p	1	0	1	1	1	1	CELF6	CUGBP, Elav-like family member 6
hsa-miR-342-3p	1	0	1	1	1	1	AP2M1	adaptor-related protein complex 2, mu 1 subunit
hsa-miR-342-3p	1	0	1	0	1	1	BSN	bassoon (presynaptic cytomatrix protein)
hsa-miR-342-3p	1	0	1	1	1	1	EDC3	enhancer of mRNA decapping 3 homolog (S. cerevisiae)
hsa-miR-342-3p	1	0	1	0	1	1	ZNF652	zinc finger protein 652
hsa-miR-342-3p	1	0	1	1	1	1	BHLHE41	basic helix-loop-helix family, member e41
hsa-miR-342-3p	1	0	1	1	1	1	AGPAT4	1-acylglycerol-3-phosphate O-acyltransferase 4 (lysophosphatidic acid acyltransferase, delta)
hsa-miR-342-3p	1	0	1	1	1	1	SH2D4B	SH2 domain containing 4B
hsa-miR-342-3p	1	0	1	1	1	1	MINK1	misshapen-like kinase 1
hsa-miR-342-3p	1	0	1	1	1	1	NKX2-2	NK2 homeobox 2
hsa-miR-342-3p	1	0	1	1	1	1	MLLT6	myeloid/lymphoid or mixed-lineage leukemia (trithorax homolog, Drosophila); translocated to, 6
hsa-miR-342-3p	1	0	1	1	1	1	FAM192A	family with sequence similarity 192, member A
hsa-miR-342-3p	1	0	1	1	1	1	KCNJ11	potassium inwardly-rectifying channel, subfamily J, member 11
hsa-miR-342-3p	1	0	1	0	0	0	ANKRD52	ankyrin repeat domain 52
hsa-miR-342-3p	1	0	1	0	1	1	CEBPG	CCAAT/enhancer binding protein (C/EBP), gamma
hsa-miR-342-3p	1	0	1	0	1	1	AGFG1	ArfGAP with FG repeats 1
hsa-miR-342-3p	1	0	1	1	0	0	GXYLT1	glucoside xylosyltransferase 1
hsa-miR-342-3p	1	0	1	1	1	1	GPR64	G protein-coupled receptor 64
hsa-miR-342-3p	1	0	0	0	1	1	YPEL1	yippee-like 1 (Drosophila)
hsa-miR-342-3p	1	0	1	0	1	1	TMTC2	transmembrane and tetratricopeptide repeat containing 2
hsa-miR-342-3p	1	0	0	1	1	1	PTRF	polymerase I and transcript release factor
hsa-miR-342-3p	1	0	1	1	1	1	NR2C2	nuclear receptor subfamily 2, group C, member 2
hsa-miR-342-3p	1	0	1	1	1	1	LARP4	La ribonucleoprotein domain family, member 4
hsa-miR-342-3p	1	0	1	1	1	1	LRRC57	leucine rich repeat containing 57
hsa-miR-342-3p	1	0	1	1	0	0	NOMO3	NODAL modulator 3
hsa-miR-342-3p	1	0	1	1	1	1	ACVR2B	activin A receptor, type IIB
hsa-miR-342-3p	1	0	1	0	1	1	ZFHX4	zinc finger homeobox 4
hsa-miR-342-3p	1	0	1	1	1	1	SRSF3	serine/arginine-rich splicing factor 3
hsa-miR-342-3p	1	0	1	0	1	1	SLC5A3	solute carrier family 5 (sodium/myo-inositol cotransporter), member 3
hsa-miR-342-3p	1	0	1	1	1	1	WBP1L	WW domain binding protein 1-like
hsa-miR-342-3p	1	0	1	0	1	1	BEND4	BEN domain containing 4
hsa-miR-342-3p	1	0	1	1	1	1	SOX6	SRY (sex determining region Y)-box 6
hsa-miR-342-3p	1	0	1	1	1	1	PTGER4	prostaglandin E receptor 4 (subtype EP4)
hsa-miR-342-3p	1	0	1	0	1	1	PDE4D	phosphodiesterase 4D, cAMP-specific
hsa-miR-342-3p	1	0	1	0	1	1	PLEKHH2	pleckstrin homology domain containing, family H (with MyTH4 domain) member 2
hsa-miR-342-3p	1	0	0	0	1	1	C22orf29	chromosome 22 open reading frame 29
hsa-miR-342-3p	1	0	1	0	1	1	BMPR2	bone morphogenetic protein receptor, type II (serine/threonine kinase)
hsa-miR-342-3p	1	0	1	1	1	1	RICTOR	RPTOR independent companion of MTOR, complex 2
hsa-miR-342-3p	1	0	1	0	1	1	NCOA7	nuclear receptor coactivator 7
hsa-miR-342-3p	1	0	1	1	1	1	ANKRD49	ankyrin repeat domain 49
hsa-miR-342-3p	1	0	1	1	1	1	ITGB8	integrin, beta 8
hsa-miR-342-3p	1	0	1	0	1	1	CPEB4	cytoplasmic polyadenylation element binding protein 4
hsa-miR-342-3p	1	0	1	1	1	1	GOLM1	golgi membrane protein 1
hsa-miR-342-3p	1	0	1	1	1	1	IKZF2	IKAROS family zinc finger 2 (Helios)
hsa-miR-342-3p	1	0	1	1	1	1	OTUD4	OTU domain containing 4
hsa-miR-342-3p	1	0	1	1	1	1	C12orf68	chromosome 12 open reading frame 68
hsa-miR-342-3p	1	0	1	1	1	1	ATXN7	ataxin 7
hsa-miR-342-3p	1	0	1	0	1	1	CD83	CD83 molecule
hsa-miR-342-3p	1	0	1	1	1	1	DACH1	dachshund homolog 1 (Drosophila)
hsa-miR-342-3p	1	0	1	1	1	1	MLL	myeloid/lymphoid or mixed-lineage leukemia (trithorax homolog, Drosophila)
hsa-miR-342-3p	1	0	1	1	1	1	MATN1	matrilin 1, cartilage matrix protein
hsa-miR-342-3p	1	0	1	1	1	1	ANKRD17	ankyrin repeat domain 17
hsa-miR-342-3p	1	0	1	1	1	1	TIAM1	T-cell lymphoma invasion and metastasis 1
hsa-miR-342-3p	1	0	1	1	1	1	NRF1	nuclear respiratory factor 1
hsa-miR-342-3p	1	0	1	1	0	0	ITPRIPL2	inositol 1,4,5-trisphosphate receptor interacting protein-like 2
hsa-miR-342-3p	1	0	1	1	1	1	EPN2	epsin 2
hsa-miR-342-3p	1	0	1	1	0	0	INO80D	INO80 complex subunit D
hsa-miR-342-3p	1	0	1	1	1	1	ID4	inhibitor of DNA binding 4, dominant negative helix-loop-helix protein
hsa-miR-342-3p	1	0	1	0	1	1	RAB6A	RAB6A, member RAS oncogene family
hsa-miR-342-3p	1	0	1	1	1	1	CASP2	caspase 2, apoptosis-related cysteine peptidase
hsa-miR-342-3p	1	0	1	1	1	1	MRFAP1	Morf4 family associated protein 1
hsa-miR-342-3p	1	0	1	1	1	1	PFN2	profilin 2
hsa-miR-342-3p	1	0	0	0	1	1	ZNF322	zinc finger protein 322
hsa-miR-342-3p	1	0	1	1	1	1	KDM6B	lysine (K)-specific demethylase 6B
hsa-miR-342-3p	1	0	1	1	1	1	BTN2A1	butyrophilin, subfamily 2, member A1
hsa-miR-342-3p	1	0	1	0	1	1	PGM2L1	phosphoglucomutase 2-like 1
hsa-miR-342-3p	1	0	1	1	1	1	ETAA1	Ewing tumor-associated antigen 1
hsa-miR-342-3p	1	0	1	1	1	1	ZAK	sterile alpha motif and leucine zipper containing kinase AZK
hsa-miR-342-3p	1	0	1	1	0	0	GRIN2D	glutamate receptor, ionotropic, N-methyl D-aspartate 2D
hsa-miR-342-3p	1	0	1	0	0	0	GPHB5	glycoprotein hormone beta 5
hsa-miR-342-3p	1	0	1	1	1	1	MMAB	methylmalonic aciduria (cobalamin deficiency) cblB type
hsa-miR-342-3p	1	0	1	1	1	1	CA12	carbonic anhydrase XII
hsa-miR-342-3p	1	0	1	1	1	1	ZIC4	Zic family member 4
hsa-miR-342-3p	1	0	0	1	0	0	MYLK3	myosin light chain kinase 3
hsa-miR-342-3p	1	0	1	1	1	1	SP8	Sp8 transcription factor
hsa-miR-342-3p	1	0	1	1	1	1	CDC42	cell division cycle 42 (GTP binding protein, 25kDa)
hsa-miR-342-3p	1	0	0	1	1	1	MMS19	MMS19 nucleotide excision repair homolog (S. cerevisiae)
hsa-miR-342-3p	1	0	1	0	1	1	DDX3X	DEAD (Asp-Glu-Ala-Asp) box polypeptide 3, X-linked
hsa-miR-342-3p	1	0	1	1	1	1	DCX	doublecortin
hsa-miR-342-3p	1	0	1	1	1	1	FRMD4A	FERM domain containing 4A
hsa-miR-342-3p	1	0	1	1	1	1	EEA1	early endosome antigen 1
hsa-miR-342-3p	1	0	1	1	1	1	PDGFRA	platelet-derived growth factor receptor, alpha polypeptide
hsa-miR-342-3p	1	0	0	1	1	1	DDX25	DEAD (Asp-Glu-Ala-Asp) box helicase 25
hsa-miR-342-3p	1	0	1	0	1	1	POU3F1	POU class 3 homeobox 1
hsa-miR-342-3p	1	0	1	1	1	1	GOSR2	golgi SNAP receptor complex member 2
hsa-miR-342-3p	1	0	1	1	0	0	RPS6KA1	ribosomal protein S6 kinase, 90kDa, polypeptide 1
hsa-miR-342-3p	1	0	1	0	1	1	MAGIX	MAGI family member, X-linked
hsa-miR-342-3p	1	0	1	1	1	1	BTBD7	BTB (POZ) domain containing 7
hsa-miR-342-3p	1	0	1	1	1	1	ATAT1	alpha tubulin acetyltransferase 1
hsa-miR-342-3p	1	0	1	1	1	1	ZBTB5	zinc finger and BTB domain containing 5
hsa-miR-342-3p	1	0	1	1	1	1	TCF15	transcription factor 15 (basic helix-loop-helix)
hsa-miR-342-3p	1	0	1	1	1	1	UPF1	UPF1 regulator of nonsense transcripts homolog (yeast)
hsa-miR-342-3p	1	0	1	0	1	1	KIAA0355	KIAA0355
hsa-miR-342-3p	1	0	1	1	1	1	PRUNE2	prune homolog 2 (Drosophila)
hsa-miR-342-3p	1	0	1	1	1	1	ABCC5	ATP-binding cassette, sub-family C (CFTR/MRP), member 5
hsa-miR-342-3p	1	0	1	0	1	1	PTPRT	protein tyrosine phosphatase, receptor type, T
hsa-miR-342-3p	0	0	1	1	1	1	C2CD2L	C2CD2-like
hsa-miR-342-3p	1	0	1	1	1	1	NUPL1	nucleoporin like 1
hsa-miR-342-3p	0	0	1	1	1	1	NEU3	sialidase 3 (membrane sialidase)
hsa-miR-342-3p	0	0	1	1	1	1	SPAG9	sperm associated antigen 9
hsa-miR-342-3p	0	0	1	1	0	0	ZNF862	zinc finger protein 862
hsa-miR-342-3p	1	0	1	0	1	1	MAGI2	membrane associated guanylate kinase, WW and PDZ domain containing 2
hsa-miR-342-3p	1	0	1	1	1	1	DNM3	dynamin 3
hsa-miR-342-3p	1	0	1	0	0	0	DTX4	deltex homolog 4 (Drosophila)
hsa-miR-342-3p	1	0	1	1	1	1	CIT	citron (rho-interacting, serine/threonine kinase 21)
hsa-miR-342-3p	1	0	1	1	1	1	C11orf9	chromosome 11 open reading frame 9
hsa-miR-342-3p	0	0	1	1	1	1	TBC1D30	TBC1 domain family, member 30
hsa-miR-342-3p	1	0	1	0	1	1	ZNF507	zinc finger protein 507
hsa-miR-342-3p	1	0	1	1	1	1	SMARCAD1	SWI/SNF-related, matrix-associated actin-dependent regulator of chromatin, subfamily a, containing DEAD/H box 1
hsa-miR-342-3p	0	0	1	0	0	0	MTA3	metastasis associated 1 family, member 3
hsa-miR-342-3p	1	0	1	0	1	1	INTS2	integrator complex subunit 2
hsa-miR-342-3p	1	0	1	0	0	0	PITPNM2	phosphatidylinositol transfer protein, membrane-associated 2
hsa-miR-342-3p	1	0	1	1	0	0	KIAA1462	KIAA1462
hsa-miR-342-3p	0	0	1	1	1	1	BHLHB9	basic helix-loop-helix domain containing, class B, 9
hsa-miR-342-3p	0	0	1	0	1	1	SETD5	SET domain containing 5
hsa-miR-342-3p	1	0	1	0	0	0	CDH23	cadherin-related 23
hsa-miR-342-3p	1	0	1	1	1	1	BCL2L11	BCL2-like 11 (apoptosis facilitator)
hsa-miR-342-3p	1	0	1	1	0	0	ZNF292	zinc finger protein 292
hsa-miR-342-3p	0	0	1	1	1	1	KIAA1967	KIAA1967
hsa-miR-342-3p	1	0	1	1	1	1	SH3TC2	SH3 domain and tetratricopeptide repeats 2
hsa-miR-342-3p	0	0	1	1	0	0	CIRH1A	cirrhosis, autosomal recessive 1A (cirhin)
hsa-miR-342-3p	1	0	1	1	1	1	PRDM16	PR domain containing 16
hsa-miR-342-3p	1	0	1	1	1	1	PAM	peptidylglycine alpha-amidating monooxygenase
hsa-miR-342-3p	1	0	1	0	0	0	ZC3H12C	zinc finger CCCH-type containing 12C
hsa-miR-342-3p	0	0	1	1	0	0	SSPO	SCO-spondin homolog (Bos taurus)
hsa-miR-342-3p	1	0	1	1	1	1	KCNMA1	potassium large conductance calcium-activated channel, subfamily M, alpha member 1
hsa-miR-342-3p	1	0	1	1	1	1	HIF3A	hypoxia inducible factor 3, alpha subunit
hsa-miR-342-3p	1	0	1	1	1	1	FAT2	FAT tumor suppressor homolog 2 (Drosophila)
hsa-miR-342-3p	1	0	1	1	1	1	CCNF	cyclin F
hsa-miR-342-3p	0	0	1	1	0	0	KCNC3	potassium voltage-gated channel, Shaw-related subfamily, member 3
hsa-miR-342-3p	1	0	1	1	1	1	RPS6KA3	ribosomal protein S6 kinase, 90kDa, polypeptide 3
hsa-miR-342-3p	0	0	1	1	0	0	STON2	stonin 2
hsa-miR-342-3p	1	0	1	1	1	1	MEF2A	myocyte enhancer factor 2A
hsa-miR-342-3p	1	0	1	0	1	1	PLAG1	pleiomorphic adenoma gene 1
hsa-miR-342-3p	1	0	1	0	1	1	CDON	Cdon homolog (mouse)
hsa-miR-342-3p	0	0	1	1	0	0	DNMT1	DNA (cytosine-5-)-methyltransferase 1
hsa-miR-342-3p	0	0	1	1	0	0	ITGA2B	integrin, alpha 2b (platelet glycoprotein IIb of IIb/IIIa complex, antigen CD41)
hsa-miR-342-3p	0	0	1	1	0	0	HLA-DMB	major histocompatibility complex, class II, DM beta
hsa-miR-342-3p	0	0	1	1	0	0	MCM5	minichromosome maintenance complex component 5
hsa-miR-342-3p	1	0	1	1	1	1	SLC6A8	solute carrier family 6 (neurotransmitter transporter, creatine), member 8
hsa-miR-342-3p	1	0	1	1	1	1	CRTAM	cytotoxic and regulatory T cell molecule
hsa-miR-342-3p	1	0	1	1	1	1	TEAD1	TEA domain family member 1 (SV40 transcriptional enhancer factor)
hsa-miR-342-3p	1	0	1	1	1	1	ZFX	zinc finger protein, X-linked
hsa-miR-342-3p	1	0	1	0	1	1	CAV1	caveolin 1, caveolae protein, 22kDa
hsa-miR-342-3p	1	0	1	0	1	1	PDE7B	phosphodiesterase 7B
hsa-miR-342-3p	1	0	1	1	1	1	MEF2D	myocyte enhancer factor 2D
hsa-miR-342-3p	0	0	1	1	1	1	HDAC3	histone deacetylase 3
hsa-miR-342-3p	1	0	1	1	1	1	DLGAP2	discs, large (Drosophila) homolog-associated protein 2
hsa-miR-342-3p	0	0	1	1	1	1	MFSD11	major facilitator superfamily domain containing 11
hsa-miR-342-3p	1	0	1	1	1	1	PCDH17	protocadherin 17
hsa-miR-342-3p	1	0	1	1	1	1	MYT1L	myelin transcription factor 1-like
hsa-miR-342-3p	1	0	1	0	0	0	MAP3K1	mitogen-activated protein kinase kinase kinase 1, E3 ubiquitin protein ligase
hsa-miR-342-3p	0	0	1	1	1	1	SLC11A2	solute carrier family 11 (proton-coupled divalent metal ion transporters), member 2
hsa-miR-342-3p	0	0	1	1	1	1	CD84	CD84 molecule
hsa-miR-342-3p	1	0	1	1	1	1	CTNND1	catenin (cadherin-associated protein), delta 1
hsa-miR-342-3p	1	0	1	1	1	1	ERLIN1	ER lipid raft associated 1
hsa-miR-342-3p	1	0	1	1	1	1	TP63	tumor protein p63
hsa-miR-342-3p	0	0	1	1	1	1	SSBP2	single-stranded DNA binding protein 2
hsa-miR-342-3p	0	0	1	1	1	1	SH2D1A	SH2 domain containing 1A
hsa-miR-342-3p	1	0	1	1	0	0	RASSF1	Ras association (RalGDS/AF-6) domain family member 1
hsa-miR-342-3p	0	0	1	1	1	1	IL18BP	interleukin 18 binding protein
hsa-miR-342-3p	0	0	1	0	1	1	SLC38A4	solute carrier family 38, member 4
hsa-miR-342-3p	0	0	1	1	1	1	SLCO2B1	solute carrier organic anion transporter family, member 2B1
hsa-miR-342-3p	1	0	1	1	1	1	NXT2	nuclear transport factor 2-like export factor 2
hsa-miR-342-3p	1	0	1	1	0	0	TDRKH	tudor and KH domain containing
hsa-miR-342-3p	1	0	1	1	1	1	DESI2	desumoylating isopeptidase 2
hsa-miR-342-3p	0	0	1	1	1	1	C21orf7	chromosome 21 open reading frame 7
hsa-miR-342-3p	0	0	1	1	1	1	ZNF331	zinc finger protein 331
hsa-miR-342-3p	1	0	1	1	1	1	LETMD1	LETM1 domain containing 1
hsa-miR-342-3p	0	0	1	1	0	0	SLC4A9	solute carrier family 4, sodium bicarbonate cotransporter, member 9
hsa-miR-342-3p	0	0	1	1	0	0	ZAN	zonadhesin
hsa-miR-342-3p	0	0	1	1	0	0	SNRPN	small nuclear ribonucleoprotein polypeptide N
hsa-miR-342-3p	0	0	1	1	0	0	CNKSR2	connector enhancer of kinase suppressor of Ras 2
hsa-miR-342-3p	1	0	1	1	0	0	SAMD4A	sterile alpha motif domain containing 4A
hsa-miR-342-3p	1	0	1	1	0	0	SEPT8	septin 8
hsa-miR-342-3p	1	0	1	1	0	0	FOXP2	forkhead box P2
hsa-miR-342-3p	0	0	1	1	1	1	AMPH	amphiphysin
hsa-miR-342-3p	1	0	1	1	1	1	NRXN3	neurexin 3
hsa-miR-342-3p	0	0	1	1	1	1	PDE1A	phosphodiesterase 1A, calmodulin-dependent
hsa-miR-342-3p	1	0	1	1	1	1	HNRNPF	heterogeneous nuclear ribonucleoprotein F
hsa-miR-342-3p	0	0	1	1	1	1	STOX2	storkhead box 2
hsa-miR-342-3p	1	0	1	0	1	1	VPS13D	vacuolar protein sorting 13 homolog D (S. cerevisiae)
hsa-miR-342-3p	1	0	1	1	1	1	PTBP3	polypyrimidine tract binding protein 3
hsa-miR-342-3p	1	0	1	1	1	1	ARMC8	armadillo repeat containing 8
hsa-miR-342-3p	0	0	1	1	1	1	CXXC5	CXXC finger protein 5
hsa-miR-342-3p	0	0	1	1	1	1	STAU2	staufen, RNA binding protein, homolog 2 (Drosophila)
hsa-miR-342-3p	0	0	1	1	0	0	JMJD4	jumonji domain containing 4
hsa-miR-342-3p	0	0	1	1	1	1	HDAC7	histone deacetylase 7
hsa-miR-342-3p	0	0	1	0	1	1	ATXN1L	ataxin 1-like
hsa-miR-342-3p	1	0	1	1	1	1	TNRC6A	trinucleotide repeat containing 6A
hsa-miR-342-3p	0	0	1	0	0	0	LOC729852	uncharacterized LOC729852
hsa-miR-342-3p	1	0	1	1	1	1	FOXP1	forkhead box P1
hsa-miR-342-3p	1	0	1	1	1	1	FAM53C	family with sequence similarity 53, member C
hsa-miR-342-3p	0	0	1	1	1	1	KDM2B	lysine (K)-specific demethylase 2B
hsa-miR-342-3p	1	0	1	1	1	1	SLC38A1	solute carrier family 38, member 1
hsa-miR-342-3p	1	0	1	1	1	1	ZNF462	zinc finger protein 462
hsa-miR-342-3p	0	0	1	1	1	1	SNAP47	synaptosomal-associated protein, 47kDa
hsa-miR-342-3p	0	0	1	1	1	1	FAM107A	family with sequence similarity 107, member A
hsa-miR-342-3p	1	0	1	1	1	1	SGK1	serum/glucocorticoid regulated kinase 1
hsa-miR-342-3p	0	0	1	0	1	1	HDX	highly divergent homeobox
hsa-miR-342-3p	0	0	1	1	1	1	OPTN	optineurin
hsa-miR-342-3p	0	0	1	0	0	0	LOC401242	uncharacterized LOC401242
hsa-miR-342-3p	1	0	1	1	1	1	SFXN2	sideroflexin 2
hsa-miR-342-3p	0	0	1	1	1	1	SLCO1B3	solute carrier organic anion transporter family, member 1B3
hsa-miR-342-3p	1	0	1	1	1	1	DIXDC1	DIX domain containing 1
hsa-miR-342-3p	1	0	1	1	0	0	MEPCE	methylphosphate capping enzyme
hsa-miR-342-3p	1	0	1	0	1	1	RNF165	ring finger protein 165
hsa-miR-342-3p	1	0	1	0	1	1	PTPRE	protein tyrosine phosphatase, receptor type, E
hsa-miR-342-3p	0	0	1	1	0	0	BEAN1	brain expressed, associated with NEDD4, 1
hsa-miR-342-3p	1	0	1	1	1	1	PPP1R3F	protein phosphatase 1, regulatory subunit 3F
hsa-miR-342-3p	1	0	1	1	1	1	TMEM25	transmembrane protein 25
hsa-miR-342-3p	1	0	1	1	1	1	SCAMP5	secretory carrier membrane protein 5
hsa-miR-342-3p	0	0	1	1	1	1	PSME3	proteasome (prosome, macropain) activator subunit 3 (PA28 gamma; Ki)
hsa-miR-342-3p	0	0	1	0	0	0	LOC100125918	uncharacterized LOC100125918
hsa-miR-342-3p	0	0	1	1	0	0	DMRTC2	DMRT-like family C2
hsa-miR-342-3p	1	0	1	0	1	1	NCAM1	neural cell adhesion molecule 1
hsa-miR-342-3p	0	0	1	1	0	0	PTOV1	prostate tumor overexpressed 1
hsa-miR-342-3p	1	0	1	1	1	1	IST1	increased sodium tolerance 1 homolog (yeast)
hsa-miR-342-3p	1	0	1	1	1	1	HLF	hepatic leukemia factor
hsa-miR-342-3p	0	0	1	0	0	0	CAPN13	calpain 13
hsa-miR-342-3p	0	0	1	0	0	0	SDHAP2	succinate dehydrogenase complex, subunit A, flavoprotein pseudogene 2
hsa-miR-342-3p	1	0	1	1	1	1	SIRT1	sirtuin 1
hsa-miR-342-3p	1	0	1	0	1	1	GRAMD1A	GRAM domain containing 1A
hsa-miR-342-3p	0	0	1	1	1	1	ITGBL1	integrin, beta-like 1 (with EGF-like repeat domains)
hsa-miR-342-3p	1	0	1	1	1	1	UXS1	UDP-glucuronate decarboxylase 1
hsa-miR-342-3p	0	0	1	1	1	1	CAMKV	CaM kinase-like vesicle-associated
hsa-miR-342-3p	0	0	1	0	1	1	CADM1	cell adhesion molecule 1
hsa-miR-342-3p	1	0	1	1	1	1	PIP4K2C	phosphatidylinositol-5-phosphate 4-kinase, type II, gamma
hsa-miR-342-3p	0	0	1	1	0	0	PIGO	phosphatidylinositol glycan anchor biosynthesis, class O
hsa-miR-342-3p	1	0	1	1	1	1	CYP46A1	cytochrome P450, family 46, subfamily A, polypeptide 1
hsa-miR-342-3p	0	0	1	1	1	1	STBD1	starch binding domain 1
hsa-miR-342-3p	0	0	1	0	0	0	LOC643837	uncharacterized LOC643837
hsa-miR-342-3p	1	0	1	1	1	1	AMMECR1	Alport syndrome, mental retardation, midface hypoplasia and elliptocytosis chromosomal region gene 1
hsa-miR-342-3p	1	0	1	1	1	1	FBXW2	F-box and WD repeat domain containing 2
hsa-miR-342-3p	1	0	1	1	1	1	TSN	translin
hsa-miR-342-3p	1	0	1	1	1	1	MAFK	v-maf musculoaponeurotic fibrosarcoma oncogene homolog K (avian)
hsa-miR-342-3p	1	0	1	1	1	1	GPD2	glycerol-3-phosphate dehydrogenase 2 (mitochondrial)
hsa-miR-342-3p	1	0	1	1	0	0	TOE1	target of EGR1, member 1 (nuclear)
hsa-miR-342-3p	1	0	1	1	0	0	PRMT8	protein arginine methyltransferase 8
hsa-miR-342-3p	1	0	1	0	1	1	SYT2	synaptotagmin II
hsa-miR-342-3p	0	0	1	1	0	0	LEKR1	leucine, glutamate and lysine rich 1
hsa-miR-342-3p	0	0	1	1	1	1	CORO7	coronin 7
hsa-miR-342-3p	0	0	1	0	0	0	ZNF806	zinc finger protein 806
hsa-miR-342-3p	1	0	1	1	1	1	GLT25D2	glycosyltransferase 25 domain containing 2
hsa-miR-342-3p	1	0	1	1	1	1	NDEL1	nudE nuclear distribution E homolog (A. nidulans)-like 1
hsa-miR-342-3p	1	0	1	1	1	1	CUL2	cullin 2
hsa-miR-342-3p	0	0	1	1	1	1	AQP3	aquaporin 3 (Gill blood group)
hsa-miR-342-3p	0	0	1	1	1	1	GPR115	G protein-coupled receptor 115
hsa-miR-342-3p	0	0	1	0	0	0	LOC284577	uncharacterized LOC284577
hsa-miR-342-3p	1	0	1	0	1	1	STC2	stanniocalcin 2
hsa-miR-342-3p	1	0	1	1	1	1	FAM98A	family with sequence similarity 98, member A
hsa-miR-342-3p	1	0	1	1	1	1	SLITRK2	SLIT and NTRK-like family, member 2
hsa-miR-342-3p	0	0	1	0	0	0	ZNF815P	zinc finger protein 815, pseudogene
hsa-miR-342-3p	1	0	1	0	1	1	KIAA1737	KIAA1737
hsa-miR-342-3p	1	0	1	1	1	1	SYT6	synaptotagmin VI
hsa-miR-342-3p	1	0	1	1	1	1	ETS2	v-ets erythroblastosis virus E26 oncogene homolog 2 (avian)
hsa-miR-342-3p	1	0	1	1	1	1	STIM2	stromal interaction molecule 2
hsa-miR-342-3p	0	0	1	0	1	1	FLJ39639	uncharacterized protein FLJ39639
hsa-miR-342-3p	0	0	1	0	0	0	CCDC150	coiled-coil domain containing 150
hsa-miR-342-3p	0	0	1	1	1	1	TEX35	testis expressed 35
hsa-miR-342-3p	0	0	1	1	1	1	RBM4	RNA binding motif protein 4
hsa-miR-342-3p	0	0	1	1	0	0	CORO1A	coronin, actin binding protein, 1A
hsa-miR-342-3p	1	0	1	1	1	1	LZTS2	leucine zipper, putative tumor suppressor 2
hsa-miR-342-3p	1	0	1	1	1	1	CHD6	chromodomain helicase DNA binding protein 6
hsa-miR-342-3p	0	0	1	1	1	1	ARFGAP2	ADP-ribosylation factor GTPase activating protein 2
hsa-miR-342-3p	0	0	1	0	0	0	LOC338579	ankyrin repeat domain-containing protein 30B pseudogene
hsa-miR-342-3p	1	0	1	1	0	0	FBXL19	F-box and leucine-rich repeat protein 19
hsa-miR-342-3p	0	0	1	1	0	0	PRICKLE1	prickle homolog 1 (Drosophila)
hsa-miR-342-3p	0	0	1	0	0	0	C1orf132	chromosome 1 open reading frame 132
hsa-miR-342-3p	1	0	1	1	1	1	IKBKAP	inhibitor of kappa light polypeptide gene enhancer in B-cells, kinase complex-associated protein
hsa-miR-342-3p	0	0	1	1	1	1	BAI2	brain-specific angiogenesis inhibitor 2
hsa-miR-342-3p	0	0	1	1	0	0	TJAP1	tight junction associated protein 1 (peripheral)
hsa-miR-342-3p	1	0	1	0	1	1	KCNK2	potassium channel, subfamily K, member 2
hsa-miR-342-3p	0	0	1	1	1	1	PRRT1	proline-rich transmembrane protein 1
hsa-miR-342-3p	0	0	1	0	0	0	LGALS17A	Charcot-Leyden crystal protein pseudogene
hsa-miR-342-3p	0	0	1	0	0	0	LOC650368	asparagine-linked glycosylation 1-like pseudogene
hsa-miR-342-3p	0	0	1	1	0	0	LIX1L	Lix1 homolog (mouse)-like
hsa-miR-342-3p	0	0	1	1	0	0	KRT37	keratin 37
hsa-miR-342-3p	1	0	1	0	1	1	WDR82	WD repeat domain 82
hsa-miR-342-3p	0	0	1	1	1	1	BTN2A2	butyrophilin, subfamily 2, member A2
hsa-miR-342-3p	0	0	1	0	0	0	DKFZP434H168	uncharacterized LOC26077
hsa-miR-342-3p	1	0	1	1	1	1	PRDM2	PR domain containing 2, with ZNF domain
hsa-miR-342-3p	0	0	1	1	0	0	C20orf27	chromosome 20 open reading frame 27
hsa-miR-342-3p	1	0	1	0	1	1	DCUN1D4	DCN1, defective in cullin neddylation 1, domain containing 4 (S. cerevisiae)
hsa-miR-342-3p	1	0	1	1	1	1	FAM122B	family with sequence similarity 122B
hsa-miR-342-3p	0	0	1	1	1	1	C2orf91	chromosome 2 open reading frame 91
hsa-miR-342-3p	0	0	1	0	0	0	FAM95B1	family with sequence similarity 95, member B1
hsa-miR-342-3p	0	0	1	1	1	1	MYOM3	myomesin family, member 3
hsa-miR-342-3p	0	0	1	1	0	0	C20orf141	chromosome 20 open reading frame 141
hsa-miR-342-3p	1	0	1	1	1	1	IBTK	inhibitor of Bruton agammaglobulinemia tyrosine kinase
hsa-miR-342-3p	1	0	1	1	1	1	ODF2	outer dense fiber of sperm tails 2
hsa-miR-342-3p	0	0	1	1	0	0	TMEM151B	transmembrane protein 151B
hsa-miR-342-3p	1	0	1	1	1	1	MKRN1	makorin ring finger protein 1
hsa-miR-342-3p	0	0	1	1	1	1	PIN4	protein (peptidylprolyl cis/trans isomerase) NIMA-interacting, 4 (parvulin)
hsa-miR-342-3p	0	0	1	1	0	0	NCF1	neutrophil cytosolic factor 1
hsa-miR-342-3p	0	0	1	1	1	1	SLC35F2	solute carrier family 35, member F2
hsa-miR-342-3p	0	0	1	1	0	0	TRIM46	tripartite motif containing 46
hsa-miR-342-3p	0	0	1	1	0	0	MIB2	mindbomb E3 ubiquitin protein ligase 2
hsa-miR-342-3p	0	0	1	0	0	0	EP400NL	EP400 N-terminal like
hsa-miR-342-3p	1	0	1	1	0	0	MAN1B1	mannosidase, alpha, class 1B, member 1
hsa-miR-342-3p	1	0	1	0	1	1	KDM2A	lysine (K)-specific demethylase 2A
hsa-miR-342-3p	1	0	1	1	1	1	FRYL	FRY-like
hsa-miR-342-3p	1	0	1	1	1	1	PHC2	polyhomeotic homolog 2 (Drosophila)
hsa-miR-342-3p	0	0	1	1	0	0	IQCF2	IQ motif containing F2
hsa-miR-342-3p	1	0	1	1	1	1	DPY19L3	dpy-19-like 3 (C. elegans)
hsa-miR-342-3p	0	0	1	1	1	1	NLRP11	NLR family, pyrin domain containing 11
hsa-miR-342-3p	0	0	1	1	1	1	TMEM202	transmembrane protein 202
hsa-miR-342-3p	0	0	1	0	0	0	LOC390660	FLJ00317 protein
hsa-miR-342-3p	0	0	1	1	1	1	ZNF346	zinc finger protein 346
hsa-miR-342-3p	0	0	1	1	0	0	ZNF730	zinc finger protein 730
hsa-miR-342-3p	0	0	1	1	0	0	DTHD1	death domain containing 1
hsa-miR-342-3p	1	0	1	0	1	1	ZNF607	zinc finger protein 607
hsa-miR-342-3p	1	0	1	1	1	1	SYS1	SYS1 Golgi-localized integral membrane protein homolog (S. cerevisiae)
hsa-miR-342-3p	0	0	1	1	1	1	RGS3	regulator of G-protein signaling 3
hsa-miR-342-3p	1	0	1	0	1	1	TMEM106B	transmembrane protein 106B
hsa-miR-342-3p	1	0	1	1	1	1	ACTN1	actinin, alpha 1
hsa-miR-342-3p	1	0	1	1	1	1	PHTF2	putative homeodomain transcription factor 2
hsa-miR-342-3p	1	0	1	1	1	1	NCOA1	nuclear receptor coactivator 1
hsa-miR-342-3p	1	0	1	1	1	1	NPAS3	neuronal PAS domain protein 3
hsa-miR-342-3p	0	0	1	1	0	0	FAM149A	family with sequence similarity 149, member A
hsa-miR-342-3p	1	0	1	1	1	1	RIF1	RAP1 interacting factor homolog (yeast)
hsa-miR-342-3p	0	0	1	1	1	1	TFDP2	transcription factor Dp-2 (E2F dimerization partner 2)
hsa-miR-342-3p	0	0	1	0	0	0	POM121L9P	POM121 transmembrane nucleoporin-like 9, pseudogene
hsa-miR-342-3p	0	0	1	0	0	0	POM121L8P	POM121 transmembrane nucleoporin-like 8 pseudogene
hsa-miR-342-3p	1	0	1	1	1	1	SMAP2	small ArfGAP2
hsa-miR-342-3p	0	0	1	1	0	0	H2AFJ	H2A histone family, member J
hsa-miR-342-3p	1	0	1	1	1	1	SLC30A8	solute carrier family 30 (zinc transporter), member 8
hsa-miR-342-3p	1	0	1	1	1	1	DENND1B	DENN/MADD domain containing 1B
hsa-miR-342-3p	1	0	1	1	1	1	TMEFF1	transmembrane protein with EGF-like and two follistatin-like domains 1
hsa-miR-342-3p	0	0	1	1	0	0	KRBA1	KRAB-A domain containing 1
hsa-miR-342-3p	1	0	1	1	1	1	MIER1	mesoderm induction early response 1 homolog (Xenopus laevis)
hsa-miR-342-3p	0	0	1	0	1	1	GAB3	GRB2-associated binding protein 3
hsa-miR-342-3p	0	0	1	1	0	0	THADA	thyroid adenoma associated
hsa-miR-342-3p	1	0	1	1	1	1	LYPD3	LY6/PLAUR domain containing 3
hsa-miR-342-3p	0	0	1	1	1	1	BEND7	BEN domain containing 7
hsa-miR-342-3p	1	0	1	1	1	1	FAM126B	family with sequence similarity 126, member B
hsa-miR-342-3p	0	0	1	1	1	1	SRSF11	serine/arginine-rich splicing factor 11
hsa-miR-342-3p	1	0	1	1	1	1	PRRC1	proline-rich coiled-coil 1
hsa-miR-342-3p	0	0	1	1	1	1	INPP5B	inositol polyphosphate-5-phosphatase, 75kDa
hsa-miR-342-3p	1	0	1	1	1	1	NRP1	neuropilin 1
hsa-miR-342-3p	0	0	1	0	0	0	ADCY10P1	adenylate cyclase 10 (soluble) pseudogene 1
hsa-miR-342-3p	0	0	1	1	1	1	PCDH20	protocadherin 20
hsa-miR-342-3p	1	0	1	0	0	0	NPEPL1	aminopeptidase-like 1
hsa-miR-342-3p	1	0	1	0	0	0	XPNPEP3	X-prolyl aminopeptidase (aminopeptidase P) 3, putative
hsa-miR-342-3p	1	0	1	1	1	1	FAM76B	family with sequence similarity 76, member B
hsa-miR-342-3p	0	0	1	1	1	1	AMOTL1	angiomotin like 1
hsa-miR-342-3p	1	0	1	1	1	1	RNF38	ring finger protein 38
hsa-miR-342-3p	0	0	1	1	0	0	TMEM134	transmembrane protein 134
hsa-miR-342-3p	0	0	1	1	0	0	CRB3	crumbs homolog 3 (Drosophila)
hsa-miR-342-3p	1	0	1	1	1	1	KIAA0907	KIAA0907
hsa-miR-342-3p	0	0	1	1	1	1	SYNJ2	synaptojanin 2
hsa-miR-342-3p	0	0	1	1	1	1	CEP41	centrosomal protein 41kDa
hsa-miR-342-3p	0	0	1	1	1	1	DNAJB14	DnaJ (Hsp40) homolog, subfamily B, member 14
hsa-miR-342-3p	1	0	1	1	1	1	NRG1	neuregulin 1
hsa-miR-342-3p	1	0	1	1	1	1	WDR26	WD repeat domain 26
hsa-miR-342-3p	0	0	1	1	0	0	DNAH1	dynein, axonemal, heavy chain 1
hsa-miR-342-3p	1	0	1	1	1	1	TAB3	TGF-beta activated kinase 1/MAP3K7 binding protein 3
hsa-miR-342-3p	0	0	1	1	1	1	ATF7IP	activating transcription factor 7 interacting protein
hsa-miR-342-3p	0	0	1	0	0	0	LINC00085	long intergenic non-protein coding RNA 85
hsa-miR-342-3p	1	0	1	1	1	1	P4HA2	prolyl 4-hydroxylase, alpha polypeptide II
hsa-miR-342-3p	1	0	1	0	1	1	NHS	Nance-Horan syndrome (congenital cataracts and dental anomalies)
hsa-miR-342-3p	0	0	1	0	1	1	XKR5	XK, Kell blood group complex subunit-related family, member 5
hsa-miR-342-3p	0	0	1	1	0	0	PAOX	polyamine oxidase (exo-N4-amino)
hsa-miR-342-3p	0	0	1	0	1	1	RAB18	RAB18, member RAS oncogene family
hsa-miR-342-3p	0	0	1	1	0	0	CLSTN3	calsyntenin 3
hsa-miR-342-3p	1	0	1	1	0	0	DGAT2	diacylglycerol O-acyltransferase 2
hsa-miR-342-3p	1	0	1	1	1	1	TBC1D22B	TBC1 domain family, member 22B
hsa-miR-342-3p	1	0	1	1	1	1	NEK6	NIMA (never in mitosis gene a)-related kinase 6
hsa-miR-342-3p	1	0	1	0	1	1	FAM46A	family with sequence similarity 46, member A
hsa-miR-342-3p	0	0	1	1	0	0	DGUOK	deoxyguanosine kinase
hsa-miR-342-3p	0	0	1	1	1	1	CHEK1	checkpoint kinase 1
hsa-miR-342-3p	0	0	1	1	1	1	ZNF589	zinc finger protein 589
hsa-miR-342-3p	1	0	1	1	1	1	COL2A1	collagen, type II, alpha 1
hsa-miR-342-3p	0	0	1	1	0	0	ALKBH6	alkB, alkylation repair homolog 6 (E. coli)
hsa-miR-342-3p	0	0	1	1	0	0	MYLK2	myosin light chain kinase 2
hsa-miR-342-3p	0	0	1	1	1	1	ATXN2L	ataxin 2-like
hsa-miR-342-3p	1	0	1	1	1	1	GRIA2	glutamate receptor, ionotropic, AMPA 2
hsa-miR-342-3p	0	0	1	1	0	0	MEF2BNB-MEF2B	MEF2BNB-MEF2B readthrough
hsa-miR-342-3p	0	0	1	1	1	1	H2AFY	H2A histone family, member Y
hsa-miR-342-3p	0	0	1	1	0	0	USP19	ubiquitin specific peptidase 19
hsa-miR-342-3p	0	0	1	1	1	1	C8orf33	chromosome 8 open reading frame 33
hsa-miR-342-3p	0	0	1	0	0	0	KLHL15	kelch-like 15 (Drosophila)
hsa-miR-342-3p	1	0	1	1	1	1	ZBTB38	zinc finger and BTB domain containing 38
hsa-miR-342-3p	1	0	1	0	1	1	NR1D2	nuclear receptor subfamily 1, group D, member 2
hsa-miR-342-3p	1	0	1	0	1	1	ZNF24	zinc finger protein 24
hsa-miR-342-3p	0	0	1	0	0	0	LOC100144602	uncharacterized LOC100144602
hsa-miR-342-3p	1	0	1	1	1	1	ARHGEF9	Cdc42 guanine nucleotide exchange factor (GEF) 9
hsa-miR-342-3p	0	0	1	0	0	0	ZNF720	zinc finger protein 720
hsa-miR-342-3p	0	0	1	1	1	1	PTCD2	pentatricopeptide repeat domain 2
hsa-miR-342-3p	0	0	1	1	1	1	PRMT3	protein arginine methyltransferase 3
hsa-miR-342-3p	0	0	1	1	1	1	C10orf88	chromosome 10 open reading frame 88
hsa-miR-342-3p	0	0	1	1	1	1	CDC42SE2	CDC42 small effector 2
hsa-miR-342-3p	0	0	1	1	1	1	UCHL5	ubiquitin carboxyl-terminal hydrolase L5
hsa-miR-342-3p	0	0	1	1	1	1	HYAL1	hyaluronoglucosaminidase 1
hsa-miR-342-3p	1	0	1	1	1	1	CRKL	v-crk sarcoma virus CT10 oncogene homolog (avian)-like
hsa-miR-342-3p	0	0	1	1	0	0	SPERT	spermatid associated
hsa-miR-342-3p	1	0	1	1	1	1	RSPO2	R-spondin 2
hsa-miR-342-3p	0	0	1	1	0	0	PLSCR3	phospholipid scramblase 3
hsa-miR-342-3p	1	0	1	1	1	1	HTR2C	5-hydroxytryptamine (serotonin) receptor 2C, G protein-coupled
hsa-miR-342-3p	0	0	1	1	0	0	CPT1C	carnitine palmitoyltransferase 1C
hsa-miR-342-3p	0	0	1	1	1	1	PIK3AP1	phosphoinositide-3-kinase adaptor protein 1
hsa-miR-342-3p	1	0	1	0	1	1	SV2B	synaptic vesicle glycoprotein 2B
hsa-miR-342-3p	1	0	1	1	1	1	TAF15	TAF15 RNA polymerase II, TATA box binding protein (TBP)-associated factor, 68kDa
hsa-miR-342-3p	1	0	1	1	1	1	WDR20	WD repeat domain 20
hsa-miR-342-3p	0	0	1	1	0	0	TTC12	tetratricopeptide repeat domain 12
hsa-miR-342-3p	1	0	1	1	1	1	SPATS2	spermatogenesis associated, serine-rich 2
hsa-miR-342-3p	1	0	1	1	1	1	BAIAP2	BAI1-associated protein 2
hsa-miR-342-3p	0	0	1	1	1	1	CEPT1	choline/ethanolamine phosphotransferase 1
hsa-miR-342-3p	1	0	1	1	1	1	SECISBP2L	SECIS binding protein 2-like
hsa-miR-342-3p	0	0	1	0	0	0	LINC00238	long intergenic non-protein coding RNA 238
hsa-miR-342-3p	0	0	1	0	0	0	LOC415056	uncharacterized LOC415056
hsa-miR-342-3p	1	0	1	1	1	1	RIC8B	resistance to inhibitors of cholinesterase 8 homolog B (C. elegans)
hsa-miR-342-3p	1	0	1	1	1	1	CUL1	cullin 1
hsa-miR-342-3p	0	0	1	1	1	1	ZNF337	zinc finger protein 337
hsa-miR-342-3p	1	0	1	0	1	1	DDX3Y	DEAD (Asp-Glu-Ala-Asp) box polypeptide 3, Y-linked
hsa-miR-342-3p	0	0	1	1	0	0	HCRTR1	hypocretin (orexin) receptor 1
hsa-miR-342-3p	1	0	1	1	1	1	ZEB2	zinc finger E-box binding homeobox 2
hsa-miR-342-3p	0	0	1	0	0	0	FAM201A	family with sequence similarity 201, member A
hsa-miR-342-3p	1	0	1	1	1	1	MACROD2	MACRO domain containing 2
hsa-miR-342-3p	1	0	1	1	1	1	MEIS1	Meis homeobox 1
hsa-miR-342-3p	1	0	1	0	1	1	NEGR1	neuronal growth regulator 1
hsa-miR-342-3p	1	0	1	1	1	1	CEP128	centrosomal protein 128kDa
hsa-miR-342-3p	0	0	1	1	1	1	EFCAB13	EF-hand calcium binding domain 13
hsa-miR-342-3p	0	0	1	0	0	0	CRYBB2P1	crystallin, beta B2 pseudogene 1
hsa-miR-342-3p	1	0	1	1	1	1	CMIP	c-Maf inducing protein
hsa-miR-342-3p	1	0	1	1	1	1	PSD	pleckstrin and Sec7 domain containing
hsa-miR-342-3p	0	0	1	0	0	0	LINC00326	long intergenic non-protein coding RNA 326
hsa-miR-342-3p	0	0	1	0	1	1	LINC00634	long intergenic non-protein coding RNA 634
hsa-miR-342-3p	1	0	1	1	1	1	FOSB	FBJ murine osteosarcoma viral oncogene homolog B
hsa-miR-342-3p	1	0	1	1	1	1	DACH2	dachshund homolog 2 (Drosophila)
hsa-miR-342-3p	0	0	1	0	0	0	A1BG-AS1	A1BG antisense RNA 1
hsa-miR-342-3p	0	0	1	0	0	0	LOC154822	uncharacterized LOC154822
hsa-miR-342-3p	1	0	1	1	1	1	TNFSF4	tumor necrosis factor (ligand) superfamily, member 4
hsa-miR-342-3p	1	0	1	1	1	1	CLOCK	clock homolog (mouse)
hsa-miR-342-3p	0	0	1	0	0	0	SOX2-OT	SOX2 overlapping transcript (non-protein coding)
hsa-miR-342-3p	0	0	1	0	0	0	LOC401176	uncharacterized LOC401176
hsa-miR-342-3p	0	0	1	0	0	0	MORF4L2-AS1	MORF4L2 antisense RNA 1
hsa-miR-342-3p	1	0	1	1	1	1	RNF145	ring finger protein 145
hsa-miR-342-3p	0	0	1	1	1	1	NUDT13	nudix (nucleoside diphosphate linked moiety X)-type motif 13
hsa-miR-342-3p	1	0	1	0	0	0	MICAL3	microtubule associated monoxygenase, calponin and LIM domain containing 3
hsa-miR-342-3p	0	0	1	0	0	0	LOC348120	uncharacterized LOC348120
hsa-miR-342-3p	0	0	1	1	0	0	MT3	metallothionein 3
hsa-miR-342-3p	0	0	1	1	0	0	NISCH	nischarin
hsa-miR-342-3p	1	0	1	1	1	1	PCGF5	polycomb group ring finger 5
hsa-miR-342-3p	1	0	1	1	1	1	CRCP	CGRP receptor component
hsa-miR-342-3p	0	0	1	1	1	1	ATP6V0B	ATPase, H+ transporting, lysosomal 21kDa, V0 subunit b
hsa-miR-342-3p	1	0	1	1	1	1	RCC2	regulator of chromosome condensation 2
hsa-miR-342-3p	0	0	1	1	0	0	TENC1	tensin like C1 domain containing phosphatase (tensin 2)
hsa-miR-342-3p	1	0	1	1	1	1	ATP8B4	ATPase, class I, type 8B, member 4
hsa-miR-342-3p	1	0	1	1	1	1	PRRG1	proline rich Gla (G-carboxyglutamic acid) 1
hsa-miR-342-3p	0	0	1	1	1	1	ZNF333	zinc finger protein 333
hsa-miR-342-3p	0	0	1	0	0	0	LOC158435	uncharacterized LOC158435
hsa-miR-342-3p	0	0	1	0	0	0	ZNF66P	zinc finger protein 66, pseudogene
hsa-miR-342-3p	1	0	1	1	0	0	TMEM198	transmembrane protein 198
hsa-miR-342-3p	0	0	1	0	0	0	PTGER4P2	prostaglandin E receptor 4 (subtype EP4) pseudogene 2
hsa-miR-342-3p	1	0	1	1	1	1	ANLN	anillin, actin binding protein
hsa-miR-342-3p	0	0	1	0	0	0	ULK4P1	unc-51-like kinase 4 (C. elegans) pseudogene 1
hsa-miR-342-3p	0	0	1	0	0	0	JPX	JPX transcript, XIST activator (non-protein coding)
hsa-miR-342-3p	1	0	1	1	1	1	RARG	retinoic acid receptor, gamma
hsa-miR-342-3p	0	0	1	0	1	1	SH3RF2	SH3 domain containing ring finger 2
hsa-miR-342-3p	1	0	1	1	1	1	OPCML	opioid binding protein/cell adhesion molecule-like
hsa-miR-342-3p	1	0	1	1	1	1	NTRK2	neurotrophic tyrosine kinase, receptor, type 2
hsa-miR-342-3p	1	0	1	0	1	1	AMMECR1L	AMME chromosomal region gene 1-like
hsa-miR-342-3p	0	0	1	0	0	0	LINC00537	long intergenic non-protein coding RNA 537
hsa-miR-342-3p	1	0	1	1	1	1	ARHGAP44	Rho GTPase activating protein 44
hsa-miR-342-3p	1	0	1	1	1	1	STK38	serine/threonine kinase 38
hsa-miR-342-3p	1	0	1	1	1	1	ST8SIA2	ST8 alpha-N-acetyl-neuraminide alpha-2,8-sialyltransferase 2
hsa-miR-342-3p	1	0	1	1	1	1	WNT10B	wingless-type MMTV integration site family, member 10B
hsa-miR-342-3p	1	0	1	1	1	1	ASXL1	additional sex combs like 1 (Drosophila)
hsa-miR-342-3p	0	0	1	1	0	0	ZNF541	zinc finger protein 541
hsa-miR-342-3p	0	0	1	0	0	0	LBX2-AS1	LBX2 antisense RNA 1
hsa-miR-342-3p	0	0	1	1	0	0	RIPPLY1	ripply1 homolog (zebrafish)
hsa-miR-342-3p	0	0	1	1	0	0	ZNF276	zinc finger protein 276
hsa-miR-342-3p	1	0	1	0	1	1	RBM23	RNA binding motif protein 23
hsa-miR-342-3p	0	0	1	1	1	1	RASAL2	RAS protein activator like 2
hsa-miR-342-3p	1	0	1	1	1	1	TRIP12	thyroid hormone receptor interactor 12
hsa-miR-342-3p	0	0	1	1	0	0	C14orf178	chromosome 14 open reading frame 178
hsa-miR-342-3p	1	0	1	1	1	1	PAX3	paired box 3
hsa-miR-342-3p	1	0	1	0	1	1	PRDM10	PR domain containing 10
hsa-miR-342-3p	0	0	1	0	0	0	EEF1DP3	eukaryotic translation elongation factor 1 delta pseudogene 3
hsa-miR-342-3p	0	0	1	0	0	0	KRT8P12	keratin 8 pseudogene 12
hsa-miR-342-3p	1	0	1	0	1	1	LHFPL3	lipoma HMGIC fusion partner-like 3
hsa-miR-342-3p	0	0	1	0	0	0	FLJ39632	uncharacterized LOC642477
hsa-miR-342-3p	1	0	1	1	1	1	ERMAP	erythroblast membrane-associated protein (Scianna blood group)
hsa-miR-342-3p	0	0	1	1	1	1	IP6K2	inositol hexakisphosphate kinase 2
hsa-miR-342-3p	1	0	1	1	1	1	RBL2	retinoblastoma-like 2 (p130)
hsa-miR-342-3p	1	0	1	1	1	1	SGCD	sarcoglycan, delta (35kDa dystrophin-associated glycoprotein)
hsa-miR-342-3p	1	0	1	1	1	1	NIPAL3	NIPA-like domain containing 3
hsa-miR-342-3p	1	0	1	1	1	1	ETS1	v-ets erythroblastosis virus E26 oncogene homolog 1 (avian)
hsa-miR-342-3p	0	0	1	1	1	1	THSD4	thrombospondin, type I, domain containing 4
hsa-miR-342-3p	0	0	1	1	0	0	ITIH4	inter-alpha-trypsin inhibitor heavy chain family, member 4
hsa-miR-342-3p	0	0	1	1	1	1	ADH1B	alcohol dehydrogenase 1B (class I), beta polypeptide
hsa-miR-342-3p	0	0	1	1	1	1	FAM9C	family with sequence similarity 9, member C
hsa-miR-342-3p	0	0	1	1	0	0	ANKRD33	ankyrin repeat domain 33
hsa-miR-342-3p	0	0	1	1	1	1	ARMCX3	armadillo repeat containing, X-linked 3
hsa-miR-342-3p	0	0	1	0	0	0	OVOS	ovostatin
hsa-miR-342-3p	1	0	1	1	1	1	PDXDC1	pyridoxal-dependent decarboxylase domain containing 1
hsa-miR-342-3p	1	0	1	1	1	1	DDAH1	dimethylarginine dimethylaminohydrolase 1
hsa-miR-342-3p	0	0	1	1	1	1	CCNT2	cyclin T2
hsa-miR-342-3p	1	0	1	1	1	1	NFIB	nuclear factor I/B
hsa-miR-342-3p	1	0	1	1	1	1	C5orf24	chromosome 5 open reading frame 24
hsa-miR-342-3p	1	0	1	1	1	1	PTER	phosphotriesterase related
hsa-miR-342-3p	0	0	1	1	1	1	RBM20	RNA binding motif protein 20
hsa-miR-342-3p	1	0	1	1	1	1	PGAP1	post-GPI attachment to proteins 1
hsa-miR-342-3p	0	0	1	0	0	0	ZNRD1-AS1	ZNRD1 antisense RNA 1
hsa-miR-342-3p	0	0	1	1	1	1	SSFA2	sperm specific antigen 2
hsa-miR-342-3p	1	0	1	1	1	1	FAM208A	family with sequence similarity 208, member A
hsa-miR-342-3p	1	0	1	1	1	1	CREB3L2	cAMP responsive element binding protein 3-like 2
hsa-miR-342-3p	1	0	1	0	1	1	RNF144A	ring finger protein 144A
hsa-miR-342-3p	0	0	1	1	1	1	DUSP26	dual specificity phosphatase 26 (putative)
hsa-miR-342-3p	1	0	1	0	0	0	IGLON5	IgLON family member 5
hsa-miR-342-3p	0	0	1	0	0	0	LOC401127	WD repeat domain 5 pseudogene
hsa-miR-342-3p	1	0	1	1	1	1	ARF1	ADP-ribosylation factor 1
hsa-miR-342-3p	0	0	1	1	1	1	TBC1D10A	TBC1 domain family, member 10A
hsa-miR-342-3p	0	0	1	1	1	1	GTPBP3	GTP binding protein 3 (mitochondrial)
hsa-miR-342-3p	0	0	1	0	0	0	RPS16P10	ribosomal protein S16 pseudogene 10
hsa-miR-342-3p	0	0	1	1	1	1	UPRT	uracil phosphoribosyltransferase (FUR1) homolog (S. cerevisiae)
hsa-miR-342-3p	1	0	1	1	1	1	TARBP2	TAR (HIV-1) RNA binding protein 2
hsa-miR-342-3p	1	0	1	1	1	1	POU2F3	POU class 2 homeobox 3
hsa-miR-342-3p	1	0	1	1	1	1	EIF4B	eukaryotic translation initiation factor 4B
hsa-miR-342-3p	0	0	1	1	1	1	APH1A	anterior pharynx defective 1 homolog A (C. elegans)
hsa-miR-342-3p	0	0	1	1	1	1	NR2C2AP	nuclear receptor 2C2-associated protein
hsa-miR-342-3p	0	0	1	1	1	1	IER3	immediate early response 3
hsa-miR-342-3p	1	0	1	1	1	1	C8orf58	chromosome 8 open reading frame 58
hsa-miR-342-3p	0	0	1	1	1	1	COPS8	COP9 constitutive photomorphogenic homolog subunit 8 (Arabidopsis)
hsa-miR-342-3p	0	0	1	0	0	0	SPATA17	spermatogenesis associated 17
hsa-miR-342-3p	0	0	1	0	0	0	H19	H19, imprinted maternally expressed transcript (non-protein coding)
hsa-miR-342-3p	1	0	1	1	1	1	RASL12	RAS-like, family 12
hsa-miR-342-3p	0	0	1	1	1	1	TASP1	taspase, threonine aspartase, 1
hsa-miR-342-3p	0	0	1	1	1	1	TCEA2	transcription elongation factor A (SII), 2
hsa-miR-342-3p	0	0	1	1	1	1	MRPS36	mitochondrial ribosomal protein S36
hsa-miR-342-3p	0	0	1	0	1	1	CD99P1	CD99 molecule pseudogene 1
hsa-miR-342-3p	1	0	1	1	1	1	GALE	UDP-galactose-4-epimerase
hsa-miR-342-3p	0	0	1	1	0	0	CGRRF1	cell growth regulator with ring finger domain 1
hsa-miR-342-3p	1	0	1	1	1	1	NTM	neurotrimin
hsa-miR-342-3p	1	0	1	1	1	1	UPF3A	UPF3 regulator of nonsense transcripts homolog A (yeast)
hsa-miR-342-3p	1	0	1	1	1	1	FBXO9	F-box protein 9
hsa-miR-342-3p	0	0	1	1	0	0	IKBKG	inhibitor of kappa light polypeptide gene enhancer in B-cells, kinase gamma
hsa-miR-342-3p	1	0	1	0	1	1	RPS6KB1	ribosomal protein S6 kinase, 70kDa, polypeptide 1
hsa-miR-342-3p	0	0	1	1	0	0	SNRPA	small nuclear ribonucleoprotein polypeptide A
hsa-miR-342-3p	0	0	1	1	1	1	TOX4	TOX high mobility group box family member 4
hsa-miR-342-3p	1	0	1	1	1	1	SSBP3	single stranded DNA binding protein 3
hsa-miR-342-3p	1	0	1	1	1	1	DKK3	dickkopf 3 homolog (Xenopus laevis)
hsa-miR-342-3p	0	0	1	1	0	0	CD7	CD7 molecule
hsa-miR-342-3p	0	0	1	1	1	1	VPS16	vacuolar protein sorting 16 homolog (S. cerevisiae)
hsa-miR-342-3p	0	0	1	0	0	0	LOC677759	uncharacterized LOC677759
hsa-miR-342-3p	1	0	1	1	1	1	DOK4	docking protein 4
hsa-miR-342-3p	0	0	1	1	1	1	CPZ	carboxypeptidase Z
hsa-miR-342-3p	0	0	1	1	0	0	NARF	nuclear prelamin A recognition factor
hsa-miR-342-3p	0	0	1	1	1	1	FKBP1B	FK506 binding protein 1B, 12.6 kDa
hsa-miR-342-3p	0	0	1	1	0	0	FXYD1	FXYD domain containing ion transport regulator 1
hsa-miR-342-3p	0	0	1	0	0	0	ZNF674-AS1	ZNF674 antisense RNA 1
hsa-miR-342-3p	1	0	1	0	1	1	RUNX1T1	runt-related transcription factor 1; translocated to, 1 (cyclin D-related)
hsa-miR-342-3p	1	0	1	1	1	1	UBE2K	ubiquitin-conjugating enzyme E2K
hsa-miR-342-3p	0	0	1	1	1	1	ZNF259	zinc finger protein 259
hsa-miR-342-3p	0	0	1	0	0	0	CHEK2P2	checkpoint kinase 2 pseudogene 2
hsa-miR-342-3p	0	0	1	1	1	1	ZNF397	zinc finger protein 397
hsa-miR-342-3p	1	0	1	1	0	0	CGREF1	cell growth regulator with EF-hand domain 1
hsa-miR-342-3p	0	0	1	1	1	1	CDKAL1	CDK5 regulatory subunit associated protein 1-like 1
hsa-miR-342-3p	0	0	1	1	1	1	PTMA	prothymosin, alpha
hsa-miR-342-3p	1	0	1	1	1	1	SLC35A1	solute carrier family 35 (CMP-sialic acid transporter), member A1
hsa-miR-342-3p	0	0	1	0	0	0	FAM47E	family with sequence similarity 47, member E
hsa-miR-342-3p	0	0	1	1	1	1	BDP1	B double prime 1, subunit of RNA polymerase III transcription initiation factor IIIB
hsa-miR-342-3p	0	0	1	1	1	1	CCP110	centriolar coiled coil protein 110kDa
hsa-miR-342-3p	1	0	1	1	1	1	PHACTR2	phosphatase and actin regulator 2
hsa-miR-342-3p	1	0	1	1	1	1	NKTR	natural killer-tumor recognition sequence
hsa-miR-342-3p	1	0	1	0	1	1	SLC7A6	solute carrier family 7 (amino acid transporter light chain, y+L system), member 6
hsa-miR-342-3p	1	0	1	0	1	1	OSBPL8	oxysterol binding protein-like 8
hsa-miR-342-3p	1	0	1	1	1	1	SLC39A10	solute carrier family 39 (zinc transporter), member 10
hsa-miR-342-3p	1	0	1	1	1	1	SLC30A7	solute carrier family 30 (zinc transporter), member 7
hsa-miR-342-3p	1	0	1	1	1	1	PHF21B	PHD finger protein 21B
hsa-miR-342-3p	1	0	1	1	1	1	UBAP2L	ubiquitin associated protein 2-like
hsa-miR-342-3p	1	0	1	1	1	1	SEC14L1	SEC14-like 1 (S. cerevisiae)
hsa-miR-342-3p	1	0	1	0	1	1	LONRF2	LON peptidase N-terminal domain and ring finger 2
hsa-miR-342-3p	1	0	1	1	1	1	RSPO1	R-spondin 1
hsa-miR-342-3p	0	0	1	0	0	0	ANKRD30BP2	ankyrin repeat domain 30B pseudogene 2
hsa-miR-342-3p	0	0	1	0	0	0	PILRB	paired immunoglobin-like type 2 receptor beta
hsa-miR-342-3p	1	0	1	1	1	1	BNC2	basonuclin 2
hsa-miR-342-3p	0	0	1	1	1	1	PROS1	protein S (alpha)
hsa-miR-342-3p	1	0	1	1	1	1	LGR4	leucine-rich repeat containing G protein-coupled receptor 4
hsa-miR-342-3p	1	0	1	1	1	1	IRF1	interferon regulatory factor 1
hsa-miR-342-3p	0	0	1	0	0	0	CTSL1P2	cathepsin L1 pseudogene 2
hsa-miR-342-3p	0	0	1	1	0	0	INPPL1	inositol polyphosphate phosphatase-like 1
hsa-miR-342-3p	1	0	1	0	0	0	YLPM1	YLP motif containing 1
hsa-miR-342-3p	0	0	1	1	0	0	INHBA	inhibin, beta A
hsa-miR-342-3p	1	0	1	0	1	1	BCL2	B-cell CLL/lymphoma 2
hsa-miR-342-3p	0	0	1	1	0	0	GBA	glucosidase, beta, acid
hsa-miR-342-3p	0	0	1	1	1	1	GLDC	glycine dehydrogenase (decarboxylating)
hsa-miR-342-3p	1	0	1	1	1	1	TBX5	T-box 5
hsa-miR-342-3p	1	0	1	0	1	1	ITGB3	integrin, beta 3 (platelet glycoprotein IIIa, antigen CD61)
hsa-miR-342-3p	1	0	1	1	1	1	KCNA1	potassium voltage-gated channel, shaker-related subfamily, member 1 (episodic ataxia with myokymia)
hsa-miR-342-3p	0	0	1	1	1	1	LPL	lipoprotein lipase
hsa-miR-342-3p	1	0	1	1	1	1	PTCH1	patched 1
hsa-miR-342-3p	1	0	1	1	0	0	PAX2	paired box 2
hsa-miR-342-3p	1	0	1	1	1	1	TIMP3	TIMP metallopeptidase inhibitor 3
hsa-miR-342-3p	1	0	1	0	1	1	PAFAH1B1	platelet-activating factor acetylhydrolase 1b, regulatory subunit 1 (45kDa)
hsa-miR-342-3p	0	0	1	1	0	0	IL3	interleukin 3 (colony-stimulating factor, multiple)
hsa-miR-342-3p	1	0	1	1	1	1	FASLG	Fas ligand (TNF superfamily, member 6)
hsa-miR-342-3p	1	0	1	0	1	1	ADRB1	adrenoceptor beta 1
hsa-miR-342-3p	1	0	1	1	1	1	GABRB3	gamma-aminobutyric acid (GABA) A receptor, beta 3
hsa-miR-342-3p	1	0	1	1	1	1	HTR4	5-hydroxytryptamine (serotonin) receptor 4, G protein-coupled
hsa-miR-342-3p	1	0	1	1	1	1	PPP3R1	protein phosphatase 3, regulatory subunit B, alpha
hsa-miR-342-3p	1	0	1	1	1	1	RORC	RAR-related orphan receptor C
hsa-miR-342-3p	1	0	1	1	0	0	AWAT2	acyl-CoA wax alcohol acyltransferase 2
hsa-miR-342-3p	1	0	1	1	1	1	KCTD11	potassium channel tetramerisation domain containing 11
hsa-miR-342-3p	1	0	1	1	1	1	ABLIM1	actin binding LIM protein 1
hsa-miR-342-3p	1	0	1	0	1	1	BMF	Bcl2 modifying factor
hsa-miR-342-3p	1	0	1	0	1	1	LIN28B	lin-28 homolog B (C. elegans)
hsa-miR-342-3p	0	0	1	0	1	1	ZNF705A	zinc finger protein 705A
hsa-miR-342-3p	0	0	1	1	1	1	MTHFD2L	methylenetetrahydrofolate dehydrogenase (NADP+ dependent) 2-like
hsa-miR-342-3p	0	0	1	1	1	1	SP140	SP140 nuclear body protein
hsa-miR-342-3p	1	0	1	1	0	0	MAGED1	melanoma antigen family D, 1
hsa-miR-342-3p	1	0	1	1	1	1	ZDHHC9	zinc finger, DHHC-type containing 9
hsa-miR-342-3p	1	0	1	0	1	1	C18orf25	chromosome 18 open reading frame 25
hsa-miR-342-3p	1	0	1	1	1	1	CTDSPL	CTD (carboxy-terminal domain, RNA polymerase II, polypeptide A) small phosphatase-like
hsa-miR-342-3p	1	0	1	1	1	1	BCAP29	B-cell receptor-associated protein 29
hsa-miR-342-3p	1	0	1	1	1	1	RBM33	RNA binding motif protein 33
hsa-miR-342-3p	1	0	1	0	1	1	KIAA2022	KIAA2022
hsa-miR-342-3p	0	0	1	1	1	1	MXI1	MAX interactor 1
hsa-miR-342-3p	1	0	1	1	1	1	CUL4A	cullin 4A
hsa-miR-342-3p	1	0	1	1	1	1	FAM168B	family with sequence similarity 168, member B
hsa-miR-342-3p	0	0	1	1	0	0	HES5	hairy and enhancer of split 5 (Drosophila)
hsa-miR-342-3p	1	0	1	1	0	0	RPL21P44	ribosomal protein L21 pseudogene 44
hsa-miR-342-3p	0	0	1	1	1	1	MS4A13	membrane-spanning 4-domains, subfamily A, member 13
hsa-miR-342-3p	0	0	1	1	1	1	SEC61G	Sec61 gamma subunit
hsa-miR-342-3p	0	0	1	1	0	0	VSIG8	V-set and immunoglobulin domain containing 8
hsa-miR-342-3p	0	0	1	1	1	1	LDLRAD2	low density lipoprotein receptor class A domain containing 2
hsa-miR-342-3p	1	0	1	1	1	1	KATNAL1	katanin p60 subunit A-like 1
hsa-miR-342-3p	0	0	1	1	1	1	ME3	malic enzyme 3, NADP(+)-dependent, mitochondrial
hsa-miR-342-3p	1	0	1	1	1	1	MSMO1	methylsterol monooxygenase 1
hsa-miR-342-3p	1	0	1	1	1	1	SERBP1	SERPINE1 mRNA binding protein 1
hsa-miR-342-3p	1	0	1	0	1	1	CELF2	CUGBP, Elav-like family member 2
hsa-miR-342-3p	1	0	1	1	1	1	AFF3	AF4/FMR2 family, member 3
hsa-miR-342-3p	1	0	1	0	1	1	CLLU1	chronic lymphocytic leukemia up-regulated 1
hsa-miR-342-3p	1	0	1	0	1	1	C3orf70	chromosome 3 open reading frame 70
hsa-miR-342-3p	1	0	1	1	1	1	VEGFA	vascular endothelial growth factor A
hsa-miR-342-3p	1	0	1	0	1	1	MSRB3	methionine sulfoxide reductase B3
hsa-miR-342-3p	1	0	1	1	1	1	MAF	v-maf musculoaponeurotic fibrosarcoma oncogene homolog (avian)
hsa-miR-342-3p	0	0	1	1	1	1	SLC35A2	solute carrier family 35 (UDP-galactose transporter), member A2
hsa-miR-342-3p	0	0	1	1	0	0	NGRN	neugrin, neurite outgrowth associated
hsa-miR-342-3p	1	0	1	0	1	1	SRGAP3	SLIT-ROBO Rho GTPase activating protein 3
hsa-miR-342-3p	1	0	1	1	1	1	SCD5	stearoyl-CoA desaturase 5
hsa-miR-342-3p	1	0	1	1	1	1	KCNC4	potassium voltage-gated channel, Shaw-related subfamily, member 4
hsa-miR-342-3p	0	0	1	1	1	1	MAP9	microtubule-associated protein 9
hsa-miR-342-3p	0	0	1	0	1	1	ZNF705D	zinc finger protein 705D
hsa-miR-342-3p	0	0	1	0	1	1	OPALIN	oligodendrocytic myelin paranodal and inner loop protein
hsa-miR-342-3p	0	0	1	0	1	1	SPINK13	serine peptidase inhibitor, Kazal type 13 (putative)
hsa-miR-342-3p	1	0	1	1	1	1	FAM63B	family with sequence similarity 63, member B
hsa-miR-342-3p	1	0	1	1	1	1	SLC9A6	solute carrier family 9, subfamily A (NHE6, cation proton antiporter 6), member 6
hsa-miR-342-3p	1	0	1	1	1	1	FRS2	fibroblast growth factor receptor substrate 2
hsa-miR-342-3p	0	0	1	1	1	1	TMEM8B	transmembrane protein 8B
hsa-miR-342-3p	1	0	1	1	1	1	ERBB4	v-erb-a erythroblastic leukemia viral oncogene homolog 4 (avian)
hsa-miR-342-3p	1	0	1	0	1	1	TMEM237	transmembrane protein 237
hsa-miR-342-3p	0	0	1	1	1	1	SLC6A4	solute carrier family 6 (neurotransmitter transporter, serotonin), member 4
hsa-miR-342-3p	1	0	1	1	1	1	PDE11A	phosphodiesterase 11A
hsa-miR-342-3p	0	0	1	0	1	1	WTH3DI	RAB6C-like
hsa-miR-342-3p	1	0	1	1	1	1	LDB3	LIM domain binding 3
hsa-miR-342-3p	0	0	1	1	1	1	HSF5	heat shock transcription factor family member 5
hsa-miR-342-3p	1	0	1	1	1	1	ZNF697	zinc finger protein 697
hsa-miR-342-3p	0	0	1	1	1	1	TBX18	T-box 18
hsa-miR-342-3p	1	0	1	1	1	1	CAMK2D	calcium/calmodulin-dependent protein kinase II delta
hsa-miR-342-3p	1	0	1	1	1	1	MAPK14	mitogen-activated protein kinase 14
hsa-miR-342-3p	1	0	1	1	1	1	CTNND2	catenin (cadherin-associated protein), delta 2
hsa-miR-342-3p	0	0	1	1	1	1	DSCAM	Down syndrome cell adhesion molecule
hsa-miR-342-3p	1	0	1	1	1	1	DUSP4	dual specificity phosphatase 4
hsa-miR-342-3p	0	0	1	1	1	1	IL13RA1	interleukin 13 receptor, alpha 1
hsa-miR-342-3p	1	0	1	1	1	1	AQP4	aquaporin 4
hsa-miR-342-3p	1	0	1	1	1	1	ARF3	ADP-ribosylation factor 3
hsa-miR-342-3p	1	0	1	1	1	1	BNC1	basonuclin 1
hsa-miR-342-3p	0	0	1	1	0	0	CDKN2D	cyclin-dependent kinase inhibitor 2D (p19, inhibits CDK4)
hsa-miR-342-3p	0	0	1	1	1	1	CEACAM8	carcinoembryonic antigen-related cell adhesion molecule 8
hsa-miR-342-3p	1	0	1	1	1	1	COL4A6	collagen, type IV, alpha 6
hsa-miR-342-3p	1	0	1	1	1	1	MASP1	mannan-binding lectin serine peptidase 1 (C4/C2 activating component of Ra-reactive factor)
hsa-miR-342-3p	1	0	1	1	1	1	DR1	down-regulator of transcription 1, TBP-binding (negative cofactor 2)
hsa-miR-342-3p	1	0	1	1	1	1	DUSP6	dual specificity phosphatase 6
hsa-miR-342-3p	1	0	1	1	1	1	E2F3	E2F transcription factor 3
hsa-miR-342-3p	1	0	1	1	1	1	EGR1	early growth response 1
hsa-miR-342-3p	1	0	1	1	1	1	EIF4E	eukaryotic translation initiation factor 4E
hsa-miR-342-3p	0	0	1	1	1	1	GNAQ	guanine nucleotide binding protein (G protein), q polypeptide
hsa-miR-342-3p	1	0	1	1	1	1	KPNB1	karyopherin (importin) beta 1
hsa-miR-342-3p	1	0	1	0	1	1	LAMC1	laminin, gamma 1 (formerly LAMB2)
hsa-miR-342-3p	0	0	1	1	1	1	MAGEB2	melanoma antigen family B, 2
hsa-miR-342-3p	0	0	1	1	1	1	MMP1	matrix metallopeptidase 1 (interstitial collagenase)
hsa-miR-342-3p	0	0	1	1	1	1	MSH3	mutS homolog 3 (E. coli)
hsa-miR-342-3p	0	0	1	1	1	1	MTAP	methylthioadenosine phosphorylase
hsa-miR-342-3p	1	0	1	1	1	1	NDN	necdin homolog (mouse)
hsa-miR-342-3p	1	0	1	1	1	1	NPTX1	neuronal pentraxin I
hsa-miR-342-3p	0	0	1	0	1	1	OPHN1	oligophrenin 1
hsa-miR-342-3p	0	0	1	1	1	1	P2RY2	purinergic receptor P2Y, G-protein coupled, 2
hsa-miR-342-3p	1	0	1	0	1	1	PAK2	p21 protein (Cdc42/Rac)-activated kinase 2
hsa-miR-342-3p	0	0	1	1	0	0	REG3A	regenerating islet-derived 3 alpha
hsa-miR-342-3p	1	0	1	0	1	1	PAPPA	pregnancy-associated plasma protein A, pappalysin 1
hsa-miR-342-3p	1	0	1	1	1	1	PCDH7	protocadherin 7
hsa-miR-342-3p	1	0	1	0	1	1	MAPK4	mitogen-activated protein kinase 4
hsa-miR-342-3p	1	0	1	1	1	1	PRPS1	phosphoribosyl pyrophosphate synthetase 1
hsa-miR-342-3p	1	0	1	0	1	1	RAP2B	RAP2B, member of RAS oncogene family
hsa-miR-342-3p	1	0	1	1	1	1	RASA1	RAS p21 protein activator (GTPase activating protein) 1
hsa-miR-342-3p	1	0	1	1	0	0	RPN1	ribophorin I
hsa-miR-342-3p	1	0	1	0	1	1	SORT1	sortilin 1
hsa-miR-342-3p	0	0	1	0	1	1	CXCL5	chemokine (C-X-C motif) ligand 5
hsa-miR-342-3p	1	0	1	0	1	1	ST6GAL1	ST6 beta-galactosamide alpha-2,6-sialyltranferase 1
hsa-miR-342-3p	1	0	1	1	1	1	SMARCC1	SWI/SNF related, matrix associated, actin dependent regulator of chromatin, subfamily c, member 1
hsa-miR-342-3p	1	0	1	1	1	1	SRF	serum response factor (c-fos serum response element-binding transcription factor)
hsa-miR-342-3p	0	0	1	1	1	1	TAPBP	TAP binding protein (tapasin)
hsa-miR-342-3p	1	0	1	1	1	1	TDG	thymine-DNA glycosylase
hsa-miR-342-3p	1	0	1	0	1	1	UBE2D2	ubiquitin-conjugating enzyme E2D 2
hsa-miR-342-3p	1	0	1	1	1	1	UBE2D3	ubiquitin-conjugating enzyme E2D 3
hsa-miR-342-3p	1	0	1	1	1	1	FZD5	frizzled family receptor 5
hsa-miR-342-3p	1	0	1	1	1	1	NRIP1	nuclear receptor interacting protein 1
hsa-miR-342-3p	0	0	1	1	1	1	AGPS	alkylglycerone phosphate synthase
hsa-miR-342-3p	1	0	1	1	1	1	TNFSF11	tumor necrosis factor (ligand) superfamily, member 11
hsa-miR-342-3p	1	0	1	0	1	1	TNKS	tankyrase, TRF1-interacting ankyrin-related ADP-ribose polymerase
hsa-miR-342-3p	0	0	1	0	0	0	MYH13	myosin, heavy chain 13, skeletal muscle
hsa-miR-342-3p	1	0	1	1	1	1	ADAM9	ADAM metallopeptidase domain 9
hsa-miR-342-3p	1	0	1	1	1	1	KAT2B	K(lysine) acetyltransferase 2B
hsa-miR-342-3p	0	0	1	1	1	1	RNF8	ring finger protein 8, E3 ubiquitin protein ligase
hsa-miR-342-3p	1	0	1	1	1	1	BCL2L2	BCL2-like 2
hsa-miR-342-3p	0	0	1	1	0	0	AP2S1	adaptor-related protein complex 2, sigma 1 subunit
hsa-miR-342-3p	1	0	1	0	1	1	DGKB	diacylglycerol kinase, beta 90kDa
hsa-miR-342-3p	1	0	1	1	1	1	EFNB2	ephrin-B2
hsa-miR-342-3p	1	0	1	1	1	1	FGF12	fibroblast growth factor 12
hsa-miR-342-3p	1	0	1	0	1	1	SLC1A2	solute carrier family 1 (glial high affinity glutamate transporter), member 2
hsa-miR-342-3p	0	0	1	1	1	1	CARTPT	CART prepropeptide
hsa-miR-342-3p	1	0	1	0	1	1	ACVR1B	activin A receptor, type IB
hsa-miR-342-3p	0	0	1	1	1	1	COL12A1	collagen, type XII, alpha 1
hsa-miR-342-3p	1	0	1	1	1	1	ATF6B	activating transcription factor 6 beta
hsa-miR-342-3p	1	0	1	1	1	1	EGR3	early growth response 3
hsa-miR-342-3p	1	0	1	1	1	1	EPHB3	EPH receptor B3
hsa-miR-342-3p	1	0	1	0	1	1	ETV5	ets variant 5
hsa-miR-342-3p	1	0	1	0	1	1	ACSL4	acyl-CoA synthetase long-chain family member 4
hsa-miR-342-3p	1	0	1	1	0	0	HOXC6	homeobox C6
hsa-miR-342-3p	1	0	1	1	1	1	FOXK2	forkhead box K2
hsa-miR-342-3p	0	0	1	1	1	1	NFATC3	nuclear factor of activated T-cells, cytoplasmic, calcineurin-dependent 3
hsa-miR-342-3p	1	0	1	1	1	1	RAB11A	RAB11A, member RAS oncogene family
hsa-miR-342-3p	1	0	1	1	1	1	B4GALT5	UDP-Gal:betaGlcNAc beta 1,4- galactosyltransferase, polypeptide 5
hsa-miR-342-3p	0	0	1	0	1	1	ADIPOQ	adiponectin, C1Q and collagen domain containing
hsa-miR-342-3p	1	0	1	1	1	1	KIF3B	kinesin family member 3B
hsa-miR-342-3p	0	0	1	1	1	1	TJP2	tight junction protein 2
hsa-miR-342-3p	1	0	1	1	1	1	ONECUT2	one cut homeobox 2
hsa-miR-342-3p	0	0	1	1	0	0	PDIA4	protein disulfide isomerase family A, member 4
hsa-miR-342-3p	0	0	1	0	1	1	DSC2	desmocollin 2
hsa-miR-342-3p	1	0	1	1	1	1	GABRE	gamma-aminobutyric acid (GABA) A receptor, epsilon
hsa-miR-342-3p	1	0	1	1	0	0	MMP14	matrix metallopeptidase 14 (membrane-inserted)
hsa-miR-342-3p	1	0	1	1	1	1	TLE1	transducin-like enhancer of split 1 (E(sp1) homolog, Drosophila)
hsa-miR-342-3p	1	0	1	1	0	0	ADAMTS4	ADAM metallopeptidase with thrombospondin type 1 motif, 4
hsa-miR-342-3p	1	0	1	0	1	1	NUP153	nucleoporin 153kDa
hsa-miR-342-3p	1	0	1	0	1	1	DLX6	distal-less homeobox 6
hsa-miR-342-3p	1	0	1	0	1	1	E2F1	E2F transcription factor 1
hsa-miR-342-3p	0	0	1	0	1	1	FOSL2	FOS-like antigen 2
hsa-miR-342-3p	0	0	1	1	1	1	LPAR4	lysophosphatidic acid receptor 4
hsa-miR-342-3p	1	0	1	1	1	1	PIGK	phosphatidylinositol glycan anchor biosynthesis, class K
hsa-miR-342-3p	1	0	1	1	1	1	SCARB2	scavenger receptor class B, member 2
hsa-miR-342-3p	1	0	1	1	1	1	HOXA1	homeobox A1
hsa-miR-342-3p	1	0	1	1	1	1	INSIG1	insulin induced gene 1
hsa-miR-342-3p	1	0	1	1	1	1	NHLH1	nescient helix loop helix 1
hsa-miR-342-3p	1	0	1	1	1	1	NHLH2	nescient helix loop helix 2
hsa-miR-342-3p	1	0	1	1	1	1	RGS4	regulator of G-protein signaling 4
hsa-miR-342-3p	1	0	1	1	1	1	ABCF2	ATP-binding cassette, sub-family F (GCN20), member 2
hsa-miR-342-3p	0	0	1	1	0	0	COX17	COX17 cytochrome c oxidase assembly homolog (S. cerevisiae)
hsa-miR-342-3p	0	0	1	1	1	1	TSPAN3	tetraspanin 3
hsa-miR-342-3p	1	0	1	0	1	1	TSPAN2	tetraspanin 2
hsa-miR-342-3p	1	0	1	1	1	1	ACTR1A	ARP1 actin-related protein 1 homolog A, centractin alpha (yeast)
hsa-miR-342-3p	1	0	1	0	1	1	SPRY3	sprouty homolog 3 (Drosophila)
hsa-miR-342-3p	1	0	1	1	1	1	MEOX2	mesenchyme homeobox 2
hsa-miR-342-3p	1	0	1	1	0	0	NAB2	NGFI-A binding protein 2 (EGR1 binding protein 2)
hsa-miR-342-3p	1	0	1	1	1	1	LASP1	LIM and SH3 protein 1
hsa-miR-342-3p	1	0	1	1	1	1	NR4A2	nuclear receptor subfamily 4, group A, member 2
hsa-miR-342-3p	1	0	1	1	1	1	CDK16	cyclin-dependent kinase 16
hsa-miR-342-3p	1	0	1	1	1	1	PRKCD	protein kinase C, delta
hsa-miR-342-3p	0	0	1	1	0	0	CCL19	chemokine (C-C motif) ligand 19
hsa-miR-342-3p	1	0	1	1	1	1	TACC1	transforming, acidic coiled-coil containing protein 1
hsa-miR-342-3p	0	0	1	1	1	1	TYRO3	TYRO3 protein tyrosine kinase
hsa-miR-342-3p	1	0	1	1	1	1	NPEPPS	aminopeptidase puromycin sensitive
hsa-miR-342-3p	0	0	1	1	1	1	PGRMC2	progesterone receptor membrane component 2
hsa-miR-342-3p	0	0	1	1	1	1	SLC30A9	solute carrier family 30 (zinc transporter), member 9
hsa-miR-342-3p	1	0	1	0	1	1	MXD4	MAX dimerization protein 4
hsa-miR-342-3p	1	0	1	1	1	1	MAP3K2	mitogen-activated protein kinase kinase kinase 2
hsa-miR-342-3p	1	0	1	1	1	1	SPIN1	spindlin 1
hsa-miR-342-3p	1	0	1	1	1	1	KAT6A	K(lysine) acetyltransferase 6A
hsa-miR-342-3p	1	0	1	0	1	1	SYNGAP1	synaptic Ras GTPase activating protein 1
hsa-miR-342-3p	0	0	1	1	1	1	TMED10	transmembrane emp24-like trafficking protein 10 (yeast)
hsa-miR-342-3p	1	0	1	1	1	1	RAC1	ras-related C3 botulinum toxin substrate 1 (rho family, small GTP binding protein Rac1)
hsa-miR-342-3p	1	0	1	1	1	1	NR4A3	nuclear receptor subfamily 4, group A, member 3
hsa-miR-342-3p	1	0	1	1	1	1	ADAMTS5	ADAM metallopeptidase with thrombospondin type 1 motif, 5
hsa-miR-342-3p	1	0	1	1	1	1	SOX21	SRY (sex determining region Y)-box 21
hsa-miR-342-3p	1	0	1	1	1	1	TMF1	TATA element modulatory factor 1
hsa-miR-342-3p	1	0	1	1	1	1	ZNF81	zinc finger protein 81
hsa-miR-342-3p	1	0	1	1	1	1	ERLIN2	ER lipid raft associated 2
hsa-miR-342-3p	0	0	1	1	0	0	NXPH3	neurexophilin 3
hsa-miR-342-3p	0	0	1	1	1	1	XPOT	exportin, tRNA (nuclear export receptor for tRNAs)
hsa-miR-342-3p	1	0	1	1	1	1	KLF12	Kruppel-like factor 12
hsa-miR-342-3p	0	0	1	0	1	1	PNMA2	paraneoplastic Ma antigen 2
hsa-miR-342-3p	1	0	1	1	1	1	TUSC2	tumor suppressor candidate 2
hsa-miR-342-3p	1	0	1	1	1	1	CBX3	chromobox homolog 3
hsa-miR-342-3p	1	0	1	1	0	0	GRIN1	glutamate receptor, ionotropic, N-methyl D-aspartate 1
hsa-miR-342-3p	1	0	1	1	1	1	PHLDA1	pleckstrin homology-like domain, family A, member 1
hsa-miR-342-3p	0	0	1	1	1	1	TMED3	transmembrane emp24 protein transport domain containing 3
hsa-miR-342-3p	0	0	1	1	1	1	ATF5	activating transcription factor 5
hsa-miR-342-3p	1	0	1	1	1	1	ICOS	inducible T-cell co-stimulator
hsa-miR-342-3p	1	0	1	0	1	1	CD2AP	CD2-associated protein
hsa-miR-342-3p	0	0	1	1	1	1	LMOD1	leiomodin 1 (smooth muscle)
hsa-miR-342-3p	0	0	1	1	1	1	FOXI1	forkhead box I1
hsa-miR-342-3p	1	0	1	0	1	1	FZD4	frizzled family receptor 4
hsa-miR-342-3p	0	0	1	1	1	1	HARS2	histidyl-tRNA synthetase 2, mitochondrial
hsa-miR-342-3p	0	0	1	1	1	1	RAB3GAP1	RAB3 GTPase activating protein subunit 1 (catalytic)
hsa-miR-342-3p	1	0	1	1	1	1	LAMP5	lysosomal-associated membrane protein family, member 5
hsa-miR-342-3p	1	0	1	0	1	1	PXDN	peroxidasin homolog (Drosophila)
hsa-miR-342-3p	1	0	1	0	1	1	MYCBP	c-myc binding protein
hsa-miR-342-3p	1	0	1	1	1	1	PITPNB	phosphatidylinositol transfer protein, beta
hsa-miR-342-3p	0	0	1	0	1	1	TLL1	tolloid-like 1
hsa-miR-342-3p	1	0	1	1	1	1	TLL2	tolloid-like 2
hsa-miR-342-3p	0	0	1	1	1	1	UBQLN1	ubiquilin 1
hsa-miR-342-3p	1	0	1	1	1	1	SOCS5	suppressor of cytokine signaling 5
hsa-miR-342-3p	1	0	1	1	1	1	WDR37	WD repeat domain 37
hsa-miR-342-3p	1	0	1	0	1	1	VAMP2	vesicle-associated membrane protein 2 (synaptobrevin 2)
hsa-miR-342-3p	0	0	1	1	1	1	UBL4A	ubiquitin-like 4A
hsa-miR-342-3p	0	0	1	1	0	0	NOMO1	NODAL modulator 1
hsa-miR-342-3p	1	0	1	1	1	1	LEMD3	LEM domain containing 3
hsa-miR-342-3p	0	0	1	1	1	1	DAPK2	death-associated protein kinase 2
hsa-miR-342-3p	1	0	1	1	1	1	AFF4	AF4/FMR2 family, member 4
hsa-miR-342-3p	1	0	1	0	1	1	HUNK	hormonally up-regulated Neu-associated kinase
hsa-miR-342-3p	0	0	1	1	1	1	PSME4	proteasome (prosome, macropain) activator subunit 4
hsa-miR-342-3p	1	0	1	1	1	1	ZNF592	zinc finger protein 592
hsa-miR-342-3p	1	0	1	1	1	1	RALGPS1	Ral GEF with PH domain and SH3 binding motif 1
hsa-miR-342-3p	0	0	1	1	1	1	FAM53B	family with sequence similarity 53, member B
hsa-miR-342-3p	0	0	1	0	1	1	DHCR24	24-dehydrocholesterol reductase
hsa-miR-342-3p	0	0	1	0	1	1	EPM2AIP1	EPM2A (laforin) interacting protein 1
hsa-miR-342-3p	1	0	1	0	1	1	LPPR4	lipid phosphate phosphatase-related protein type 4
hsa-miR-342-3p	0	0	1	1	1	1	ENPP4	ectonucleotide pyrophosphatase/phosphodiesterase 4 (putative)
hsa-miR-342-3p	0	0	1	1	0	0	KIFAP3	kinesin-associated protein 3
hsa-miR-342-3p	0	0	1	1	1	1	MYO16	myosin XVI
hsa-miR-342-3p	1	0	1	1	1	1	PHLPP2	PH domain and leucine rich repeat protein phosphatase 2
hsa-miR-342-3p	1	0	1	1	1	1	XPO7	exportin 7
hsa-miR-342-3p	1	0	1	0	1	1	NMNAT2	nicotinamide nucleotide adenylyltransferase 2
hsa-miR-342-3p	1	0	1	1	1	1	TAB2	TGF-beta activated kinase 1/MAP3K7 binding protein 2
hsa-miR-342-3p	0	0	1	1	1	1	POFUT2	protein O-fucosyltransferase 2
hsa-miR-342-3p	1	0	1	1	1	1	PHF15	PHD finger protein 15
hsa-miR-342-3p	1	0	1	0	1	1	ARHGEF12	Rho guanine nucleotide exchange factor (GEF) 12
hsa-miR-342-3p	1	0	1	0	1	1	SRGAP2	SLIT-ROBO Rho GTPase activating protein 2
hsa-miR-342-3p	1	0	1	1	1	1	MED13L	mediator complex subunit 13-like
hsa-miR-342-3p	0	0	1	1	1	1	LEPROTL1	leptin receptor overlapping transcript-like 1
hsa-miR-342-3p	1	0	1	1	1	1	RIMBP2	RIMS binding protein 2
hsa-miR-342-3p	1	0	1	0	1	1	KCTD2	potassium channel tetramerisation domain containing 2
hsa-miR-342-3p	1	0	1	1	1	1	MOB4	MOB family member 4, phocein
hsa-miR-342-3p	1	0	1	1	1	1	DCAF12	DDB1 and CUL4 associated factor 12
hsa-miR-342-3p	1	0	1	1	1	1	LTN1	listerin E3 ubiquitin protein ligase 1
hsa-miR-342-3p	0	0	1	1	1	1	HERC4	HECT and RLD domain containing E3 ubiquitin protein ligase 4
hsa-miR-342-3p	1	0	1	1	1	1	FAM155B	family with sequence similarity 155, member B
hsa-miR-342-3p	0	0	1	1	1	1	PCF11	PCF11, cleavage and polyadenylation factor subunit, homolog (S. cerevisiae)
hsa-miR-342-3p	1	0	1	1	1	1	HOOK1	hook homolog 1 (Drosophila)
hsa-miR-342-3p	1	0	1	0	1	1	TRIM33	tripartite motif containing 33
hsa-miR-342-3p	0	0	1	1	1	1	MRPS16	mitochondrial ribosomal protein S16
hsa-miR-342-3p	1	0	1	0	1	1	CNR1	cannabinoid receptor 1 (brain)
hsa-miR-342-3p	0	0	1	1	1	1	ZFR	zinc finger RNA binding protein
hsa-miR-342-3p	0	0	1	1	0	0	PKD2L1	polycystic kidney disease 2-like 1
hsa-miR-342-3p	1	0	1	1	1	1	SUFU	suppressor of fused homolog (Drosophila)
hsa-miR-342-3p	0	0	1	1	1	1	CYB5R1	cytochrome b5 reductase 1
hsa-miR-342-3p	1	0	1	1	1	1	RAB14	RAB14, member RAS oncogene family
hsa-miR-342-3p	1	0	1	1	0	0	CPA4	carboxypeptidase A4
hsa-miR-342-3p	1	0	1	0	1	1	CRIM1	cysteine rich transmembrane BMP regulator 1 (chordin-like)
hsa-miR-342-3p	1	0	1	1	1	1	RAB6B	RAB6B, member RAS oncogene family
hsa-miR-342-3p	0	0	1	1	1	1	TIMMDC1	translocase of inner mitochondrial membrane domain containing 1
hsa-miR-342-3p	1	0	1	1	1	1	MEX3C	mex-3 homolog C (C. elegans)
hsa-miR-342-3p	1	0	1	0	1	1	KLHL3	kelch-like 3 (Drosophila)
hsa-miR-342-3p	1	0	1	1	1	1	SIX4	SIX homeobox 4
hsa-miR-342-3p	0	0	1	1	1	1	POLE3	polymerase (DNA directed), epsilon 3, accessory subunit
hsa-miR-342-3p	0	0	1	1	0	0	UBQLN3	ubiquilin 3
hsa-miR-342-3p	1	0	1	1	1	1	GRID1	glutamate receptor, ionotropic, delta 1
hsa-miR-342-3p	1	0	1	1	1	1	INO80	INO80 homolog (S. cerevisiae)
hsa-miR-342-3p	1	0	1	1	1	1	CNNM2	cyclin M2
hsa-miR-342-3p	1	0	1	0	1	1	FAM46C	family with sequence similarity 46, member C
hsa-miR-342-3p	0	0	1	1	1	1	NCAPG2	non-SMC condensin II complex, subunit G2
hsa-miR-342-3p	1	0	1	1	1	1	UBE2R2	ubiquitin-conjugating enzyme E2R 2
hsa-miR-342-3p	1	0	1	1	1	1	HIF1AN	hypoxia inducible factor 1, alpha subunit inhibitor
hsa-miR-342-3p	0	0	1	1	1	1	FKBP14	FK506 binding protein 14, 22 kDa
hsa-miR-342-3p	0	0	1	1	1	1	WIPI1	WD repeat domain, phosphoinositide interacting 1
hsa-miR-342-3p	0	0	1	1	1	1	KDM4D	lysine (K)-specific demethylase 4D
hsa-miR-342-3p	0	0	1	1	1	1	NUDT11	nudix (nucleoside diphosphate linked moiety X)-type motif 11
hsa-miR-342-3p	0	0	1	0	1	1	GOLPH3L	golgi phosphoprotein 3-like
hsa-miR-342-3p	1	0	1	1	1	1	C20orf20	chromosome 20 open reading frame 20
hsa-miR-342-3p	1	0	1	0	1	1	LIN7C	lin-7 homolog C (C. elegans)
hsa-miR-342-3p	1	0	1	1	1	1	RSBN1	round spermatid basic protein 1
hsa-miR-342-3p	1	0	1	1	1	1	DRAM1	DNA-damage regulated autophagy modulator 1
hsa-miR-342-3p	1	0	1	1	1	1	PAG1	phosphoprotein associated with glycosphingolipid microdomains 1
hsa-miR-342-3p	1	0	1	1	1	1	NRP2	neuropilin 2
hsa-miR-342-3p	0	0	1	1	1	1	NPAP1	nuclear pore associated protein 1
hsa-miR-342-3p	0	0	1	1	1	1	TERF2IP	telomeric repeat binding factor 2, interacting protein
hsa-miR-342-3p	1	0	1	0	1	1	CCNJ	cyclin J
hsa-miR-342-3p	1	0	1	1	1	1	MDM1	Mdm1 nuclear protein homolog (mouse)
hsa-miR-342-3p	0	0	1	1	1	1	TMEM167B	transmembrane protein 167B
hsa-miR-342-3p	1	0	1	1	1	1	CCDC47	coiled-coil domain containing 47
hsa-miR-342-3p	1	0	1	1	1	1	PITHD1	PITH (C-terminal proteasome-interacting domain of thioredoxin-like) domain containing 1
hsa-miR-342-3p	0	0	1	1	1	1	PNPLA2	patatin-like phospholipase domain containing 2
hsa-miR-342-3p	0	0	1	1	1	1	CYSLTR2	cysteinyl leukotriene receptor 2
hsa-miR-342-3p	1	0	1	1	1	1	LYRM2	LYR motif containing 2
hsa-miR-342-3p	0	0	1	1	1	1	TCL6	T-cell leukemia/lymphoma 6 (non-protein coding)
hsa-miR-342-3p	0	0	1	1	1	1	TMEM27	transmembrane protein 27
hsa-miR-342-3p	1	0	1	0	1	1	KCNS2	potassium voltage-gated channel, delayed-rectifier, subfamily S, member 2
hsa-miR-342-3p	1	0	1	1	1	1	USP31	ubiquitin specific peptidase 31
hsa-miR-342-3p	1	0	1	0	1	1	SYT4	synaptotagmin IV
hsa-miR-342-3p	1	0	1	1	1	1	NLGN2	neuroligin 2
hsa-miR-342-3p	0	0	1	1	1	1	ARRDC3	arrestin domain containing 3
hsa-miR-342-3p	1	0	1	1	1	1	ARHGAP21	Rho GTPase activating protein 21
hsa-miR-342-3p	0	0	1	0	1	1	SYT13	synaptotagmin XIII
hsa-miR-342-3p	0	0	1	1	0	0	MYL6	myosin, light chain 6, alkali, smooth muscle and non-muscle
hsa-miR-342-3p	1	0	1	0	1	1	RAP2A	RAP2A, member of RAS oncogene family
hsa-miR-342-3p	1	0	1	1	1	1	MTMR3	myotubularin related protein 3
hsa-miR-342-3p	1	0	1	1	1	1	CLDN1	claudin 1
hsa-miR-342-3p	1	0	1	1	1	1	C6orf47	chromosome 6 open reading frame 47
hsa-miR-342-3p	0	0	1	0	1	1	MS4A7	membrane-spanning 4-domains, subfamily A, member 7
hsa-miR-342-3p	1	0	1	1	1	1	RPRD1B	regulation of nuclear pre-mRNA domain containing 1B
hsa-miR-342-3p	1	0	1	1	1	1	NTN4	netrin 4
hsa-miR-342-3p	1	0	1	1	1	1	ZFYVE1	zinc finger, FYVE domain containing 1
hsa-miR-342-3p	1	0	1	1	1	1	TMEM35	transmembrane protein 35
hsa-miR-342-3p	1	0	1	1	1	1	OTX2	orthodenticle homeobox 2
hsa-miR-342-3p	0	0	1	0	1	1	CFL2	cofilin 2 (muscle)
hsa-miR-342-3p	1	0	1	1	1	1	FOXM1	forkhead box M1
hsa-miR-342-3p	0	0	1	1	1	1	GLIPR2	GLI pathogenesis-related 2
hsa-miR-342-3p	0	0	1	1	1	1	NSD1	nuclear receptor binding SET domain protein 1
hsa-miR-342-3p	1	0	1	0	1	1	GREM2	gremlin 2
hsa-miR-342-3p	1	0	1	1	1	1	S100PBP	S100P binding protein
hsa-miR-342-3p	1	0	1	1	1	1	C6orf106	chromosome 6 open reading frame 106
hsa-miR-342-3p	0	0	1	1	1	1	METTL4	methyltransferase like 4
hsa-miR-342-3p	1	0	1	1	1	1	REEP1	receptor accessory protein 1
hsa-miR-342-3p	1	0	1	1	1	1	RASL11B	RAS-like, family 11, member B
hsa-miR-342-3p	1	0	1	1	1	1	HOXB8	homeobox B8
hsa-miR-342-3p	1	0	1	1	1	1	NEUROG2	neurogenin 2
hsa-miR-342-3p	0	0	1	1	0	0	DDX50	DEAD (Asp-Glu-Ala-Asp) box polypeptide 50
hsa-miR-342-3p	0	0	1	1	1	1	WDR77	WD repeat domain 77
hsa-miR-342-3p	0	0	1	1	0	0	ZBED2	zinc finger, BED-type containing 2
hsa-miR-342-3p	0	0	1	1	1	1	AKIRIN1	akirin 1
hsa-miR-342-3p	0	0	1	1	1	1	LRRK1	leucine-rich repeat kinase 1
hsa-miR-342-3p	0	0	1	1	0	0	CENPT	centromere protein T
hsa-miR-342-3p	1	0	1	1	1	1	CYB5B	cytochrome b5 type B (outer mitochondrial membrane)
hsa-miR-342-3p	1	0	1	1	1	1	TMX1	thioredoxin-related transmembrane protein 1
hsa-miR-342-3p	1	0	1	0	1	1	VOPP1	vesicular, overexpressed in cancer, prosurvival protein 1
hsa-miR-342-3p	0	0	1	1	1	1	CDADC1	cytidine and dCMP deaminase domain containing 1
hsa-miR-342-3p	1	0	1	1	0	0	PVRL4	poliovirus receptor-related 4
hsa-miR-342-3p	1	0	1	0	1	1	SPRY4	sprouty homolog 4 (Drosophila)
hsa-miR-342-3p	0	0	1	0	1	1	RAB6C	RAB6C, member RAS oncogene family
hsa-miR-342-3p	1	0	1	1	1	1	DSEL	dermatan sulfate epimerase-like
hsa-miR-342-3p	0	0	1	1	1	1	RNASEH2C	ribonuclease H2, subunit C
hsa-miR-342-3p	1	0	1	1	1	1	ARID5B	AT rich interactive domain 5B (MRF1-like)
hsa-miR-342-3p	0	0	1	1	0	0	C19orf44	chromosome 19 open reading frame 44
hsa-miR-342-3p	1	0	1	1	1	1	SETD3	SET domain containing 3
hsa-miR-342-3p	1	0	1	1	1	1	ZNRF1	zinc and ring finger 1, E3 ubiquitin protein ligase
hsa-miR-342-3p	1	0	1	0	1	1	PSD2	pleckstrin and Sec7 domain containing 2
hsa-miR-342-3p	1	0	1	1	1	1	BRMS1L	breast cancer metastasis-suppressor 1-like
hsa-miR-342-3p	1	0	1	1	1	1	HOOK3	hook homolog 3 (Drosophila)
hsa-miR-342-3p	1	0	1	0	1	1	INA	internexin neuronal intermediate filament protein, alpha
hsa-miR-342-3p	0	0	1	1	0	0	PPAPDC3	phosphatidic acid phosphatase type 2 domain containing 3
hsa-miR-342-3p	1	0	1	1	0	0	ORAI1	ORAI calcium release-activated calcium modulator 1
hsa-miR-342-3p	1	0	1	1	1	1	ARHGEF39	Rho guanine nucleotide exchange factor (GEF) 39
hsa-miR-342-3p	1	0	1	1	1	1	RAB2B	RAB2B, member RAS oncogene family
hsa-miR-342-3p	1	0	1	1	1	1	CGNL1	cingulin-like 1
hsa-miR-342-3p	1	0	1	1	1	1	ARHGAP19	Rho GTPase activating protein 19
hsa-miR-342-3p	0	0	1	1	1	1	POLR2J2	polymerase (RNA) II (DNA directed) polypeptide J2
hsa-miR-342-3p	1	0	1	1	1	1	PCDH10	protocadherin 10
hsa-miR-342-3p	0	0	1	1	1	1	DMRTC1	DMRT-like family C1
hsa-miR-342-3p	1	0	1	0	1	1	EAF1	ELL associated factor 1
hsa-miR-342-3p	0	0	1	1	0	0	BPIFB1	BPI fold containing family B, member 1
hsa-miR-342-3p	1	0	1	0	1	1	PURB	purine-rich element binding protein B
hsa-miR-342-3p	1	0	1	1	1	1	FOXQ1	forkhead box Q1
hsa-miR-342-3p	1	0	1	1	1	1	RASL10B	RAS-like, family 10, member B
hsa-miR-342-3p	0	0	1	1	0	0	RWDD2A	RWD domain containing 2A
hsa-miR-342-3p	0	0	1	1	1	1	FBXO4	F-box protein 4
hsa-miR-342-3p	1	0	1	1	1	1	EPT1	ethanolaminephosphotransferase 1 (CDP-ethanolamine-specific)
hsa-miR-342-3p	1	0	1	0	0	0	ANKRD40	ankyrin repeat domain 40
hsa-miR-342-3p	1	0	1	1	1	1	STX1B	syntaxin 1B
hsa-miR-342-3p	1	0	1	1	1	1	MAL2	mal, T-cell differentiation protein 2 (gene/pseudogene)
hsa-miR-342-3p	1	0	1	1	1	1	ELFN2	extracellular leucine-rich repeat and fibronectin type III domain containing 2
hsa-miR-342-3p	0	0	1	1	1	1	SCAND3	SCAN domain containing 3
hsa-miR-342-3p	0	0	1	1	1	1	PRDM7	PR domain containing 7
hsa-miR-342-3p	0	0	1	0	1	1	SLC36A1	solute carrier family 36 (proton/amino acid symporter), member 1
hsa-miR-342-3p	0	0	1	1	1	1	ATP6V1G3	ATPase, H+ transporting, lysosomal 13kDa, V1 subunit G3
hsa-miR-342-3p	1	0	1	1	0	0	UNC5A	unc-5 homolog A (C. elegans)
hsa-miR-342-3p	1	0	1	1	1	1	DCN	decorin
hsa-miR-342-3p	0	0	1	1	1	1	RFX3	regulatory factor X, 3 (influences HLA class II expression)
hsa-miR-342-3p	0	0	1	1	1	1	PATE1	prostate and testis expressed 1
hsa-miR-342-3p	1	0	1	1	1	1	PCSK6	proprotein convertase subtilisin/kexin type 6
hsa-miR-342-3p	0	0	1	0	1	1	SP140L	SP140 nuclear body protein-like
hsa-miR-342-3p	0	0	1	1	0	0	KIF12	kinesin family member 12
hsa-miR-342-3p	1	0	1	1	1	1	WDR92	WD repeat domain 92
hsa-miR-342-3p	1	0	1	0	1	1	NUS1	nuclear undecaprenyl pyrophosphate synthase 1 homolog (S. cerevisiae)
hsa-miR-342-3p	1	0	1	0	1	1	SP1	Sp1 transcription factor
hsa-miR-342-3p	1	0	1	1	1	1	TRIOBP	TRIO and F-actin binding protein
hsa-miR-342-3p	1	0	1	1	1	1	PKHD1	polycystic kidney and hepatic disease 1 (autosomal recessive)
hsa-miR-342-3p	0	0	1	1	0	0	SGCZ	sarcoglycan, zeta
hsa-miR-342-3p	1	0	1	1	0	0	LIPH	lipase, member H
hsa-miR-342-3p	1	0	1	1	1	1	KCNH8	potassium voltage-gated channel, subfamily H (eag-related), member 8
hsa-miR-342-3p	0	0	1	1	0	0	RNASE11	ribonuclease, RNase A family, 11 (non-active)
hsa-miR-342-3p	0	0	1	1	1	1	FAM100A	family with sequence similarity 100, member A
hsa-miR-342-3p	1	0	1	0	1	1	MTPN	myotrophin
hsa-miR-342-3p	0	0	1	1	1	1	TCEAL7	transcription elongation factor A (SII)-like 7
hsa-miR-342-3p	1	0	1	1	1	1	POGLUT1	protein O-glucosyltransferase 1
hsa-miR-342-3p	1	0	1	1	1	1	C1orf216	chromosome 1 open reading frame 216
hsa-miR-342-3p	1	0	1	1	1	1	FAM123B	family with sequence similarity 123B
hsa-miR-342-3p	1	0	1	1	1	1	ZNF583	zinc finger protein 583
hsa-miR-342-3p	1	0	1	0	1	1	DCP2	DCP2 decapping enzyme homolog (S. cerevisiae)
hsa-miR-342-3p	0	0	1	1	1	1	METTL15	methyltransferase like 15
hsa-miR-342-3p	0	0	1	1	1	1	CCER1	coiled-coil glutamate-rich protein 1
hsa-miR-342-3p	1	0	1	0	1	1	RWDD4	RWD domain containing 4
hsa-miR-342-3p	1	0	1	1	1	1	ATXN7L1	ataxin 7-like 1
hsa-miR-342-3p	1	0	1	1	0	0	TMEM86A	transmembrane protein 86A
hsa-miR-342-3p	1	0	1	1	1	1	FNDC5	fibronectin type III domain containing 5
hsa-miR-342-3p	1	0	1	1	1	1	NAP1L5	nucleosome assembly protein 1-like 5
hsa-miR-342-3p	0	0	1	1	1	1	POFUT1	protein O-fucosyltransferase 1
hsa-miR-342-3p	0	0	1	0	1	1	TUSC5	tumor suppressor candidate 5
hsa-miR-342-3p	1	0	1	1	1	1	MOB1B	MOB kinase activator 1B
hsa-miR-342-3p	1	0	1	1	1	1	MMGT1	membrane magnesium transporter 1
hsa-miR-342-3p	0	0	1	1	0	0	NOMO2	NODAL modulator 2
hsa-miR-342-3p	0	0	1	1	1	1	ZCCHC12	zinc finger, CCHC domain containing 12
hsa-miR-342-3p	1	0	1	1	1	1	PRIMA1	proline rich membrane anchor 1
hsa-miR-342-3p	1	0	1	1	1	1	TMEM26	transmembrane protein 26
hsa-miR-342-3p	1	0	1	0	1	1	ARL5B	ADP-ribosylation factor-like 5B
hsa-miR-342-3p	1	0	1	1	1	1	ERAS	ES cell expressed Ras
hsa-miR-342-3p	0	0	1	1	0	0	CENPV	centromere protein V
hsa-miR-342-3p	1	0	1	1	1	1	RPS6KA5	ribosomal protein S6 kinase, 90kDa, polypeptide 5
hsa-miR-342-3p	1	0	1	0	1	1	C12orf36	chromosome 12 open reading frame 36
hsa-miR-342-3p	1	0	1	0	1	1	RNF144B	ring finger protein 144B
hsa-miR-342-3p	1	0	1	0	1	1	ZC3H6	zinc finger CCCH-type containing 6
hsa-miR-342-3p	1	0	1	0	0	0	RAB15	RAB15, member RAS oncogene family
hsa-miR-342-3p	1	0	1	1	1	1	PTGER3	prostaglandin E receptor 3 (subtype EP3)
hsa-miR-342-3p	1	0	1	0	1	1	PRICKLE2	prickle homolog 2 (Drosophila)
hsa-miR-342-3p	1	0	1	0	1	1	DLEU7	deleted in lymphocytic leukemia, 7
hsa-miR-342-3p	1	0	1	1	1	1	STAC2	SH3 and cysteine rich domain 2
hsa-miR-342-3p	0	0	1	1	1	1	ILDR2	immunoglobulin-like domain containing receptor 2
hsa-miR-342-3p	1	0	1	1	1	1	RAPH1	Ras association (RalGDS/AF-6) and pleckstrin homology domains 1
hsa-miR-342-3p	0	0	1	1	1	1	APOBEC4	apolipoprotein B mRNA editing enzyme, catalytic polypeptide-like 4 (putative)
hsa-miR-342-3p	1	0	1	1	1	1	ENSA	endosulfine alpha
hsa-miR-342-3p	1	0	1	1	1	1	SKIDA1	SKI/DACH domain containing 1
hsa-miR-342-3p	1	0	1	1	1	1	TNFAIP8L3	tumor necrosis factor, alpha-induced protein 8-like 3
hsa-miR-342-3p	0	0	1	1	1	1	FAM177B	family with sequence similarity 177, member B
hsa-miR-342-3p	0	0	1	0	1	1	TMEM215	transmembrane protein 215
hsa-miR-342-3p	0	0	1	1	0	0	TTTY8	testis-specific transcript, Y-linked 8 (non-protein coding)
hsa-miR-342-3p	0	0	1	0	0	0	TTTY2	testis-specific transcript, Y-linked 2 (non-protein coding)
hsa-miR-342-3p	0	0	1	0	0	0	TTTY15	testis-specific transcript, Y-linked 15 (non-protein coding)
hsa-miR-342-3p	0	0	1	0	0	0	TTTY4B	testis-specific transcript, Y-linked 4B (non-protein coding)
hsa-miR-342-3p	0	0	1	0	0	0	COX6B1P1	cytochrome c oxidase subunit VIb polypeptide 1 (ubiquitous) pseudogene 1
hsa-miR-342-3p	0	0	1	0	0	0	H3F3AP4	H3 histone, family 3A, pseudogene 4
hsa-miR-342-3p	0	0	1	0	0	0	DGCR5	DiGeorge syndrome critical region gene 5 (non-protein coding)
hsa-miR-342-3p	0	0	1	0	0	0	TREML5P	triggering receptor expressed on myeloid cells-like 5, pseudogene
hsa-miR-342-3p	0	0	1	0	0	0	NEAT1	nuclear paraspeckle assembly transcript 1 (non-protein coding)
hsa-miR-342-3p	0	0	1	0	0	0	TMED10P1	transmembrane emp24-like trafficking protein 10 (yeast) pseudogene 1
hsa-miR-342-3p	0	0	1	0	0	0	TPTE2P6	transmembrane phosphoinositide 3-phosphatase and tensin homolog 2 pseudogene 6
hsa-miR-342-3p	0	0	1	0	0	0	MALAT1	metastasis associated lung adenocarcinoma transcript 1 (non-protein coding)
hsa-miR-342-3p	0	0	1	0	0	0	RNASEH2CP1	ribonuclease H2, subunit C pseudogene 1
hsa-miR-342-3p	0	0	1	0	0	0	SIGLEC16	sialic acid binding Ig-like lectin 16 (gene/pseudogene)
hsa-miR-342-3p	0	0	1	0	0	0	TCAM1P	testicular cell adhesion molecule 1 homolog (mouse), pseudogene
hsa-miR-342-3p	0	0	1	0	0	0	NUDT16P1	nudix (nucleoside diphosphate linked moiety X)-type motif 16 pseudogene 1
hsa-miR-342-3p	0	0	1	0	0	0	SCARNA16	small Cajal body-specific RNA 16
hsa-miR-342-3p	0	0	1	0	0	0	SNORD114-11	small nucleolar RNA, C/D box 114-11
hsa-miR-342-3p	0	0	1	0	0	0	SNORD116-28	small nucleolar RNA, C/D box 116-28
hsa-miR-342-3p	0	0	1	0	0	0	GAGE3	G antigen 3
hsa-miR-342-3p	1	0	1	1	1	1	ZNF238	zinc finger protein 238
hsa-miR-342-3p	1	0	1	1	1	1	TRIO	trio Rho guanine nucleotide exchange factor
hsa-miR-342-3p	0	0	1	0	0	0	MUC5AC	mucin 5AC, oligomeric mucus/gel-forming
hsa-miR-342-3p	0	0	0	1	0	0	PRR5-ARHGAP8	PRR5-ARHGAP8 readthrough
hsa-miR-342-3p	0	0	1	1	0	0	PRR5	proline rich 5 (renal)
hsa-miR-342-3p	0	0	1	1	0	0	ARHGAP8	Rho GTPase activating protein 8
hsa-miR-342-3p	1	0	1	1	1	1	OSBPL7	oxysterol binding protein-like 7
hsa-miR-342-3p	0	0	1	1	1	1	PIGQ	phosphatidylinositol glycan anchor biosynthesis, class Q
hsa-miR-342-3p	0	0	1	1	1	1	GRN	granulin
hsa-miR-342-3p	0	0	0	1	0	0	THAP3	THAP domain containing, apoptosis associated protein 3
hsa-miR-342-3p	0	0	0	1	0	0	RFC2	replication factor C (activator 1) 2, 40kDa
hsa-miR-342-3p	0	0	0	1	0	0	FAM50A	family with sequence similarity 50, member A
hsa-miR-342-3p	1	0	1	1	1	1	PANX2	pannexin 2
hsa-miR-342-3p	0	0	1	1	1	1	BCAR1	breast cancer anti-estrogen resistance 1
hsa-miR-342-3p	0	0	1	1	0	0	TRPV1	transient receptor potential cation channel, subfamily V, member 1
hsa-miR-342-3p	0	0	1	1	0	0	FAR2	fatty acyl CoA reductase 2
hsa-miR-342-3p	1	0	1	1	1	1	FAM135A	family with sequence similarity 135, member A
hsa-miR-342-3p	0	0	0	1	0	0	IGSF9	immunoglobulin superfamily, member 9
hsa-miR-342-3p	1	0	1	1	1	1	TRMT6	tRNA methyltransferase 6 homolog (S. cerevisiae)
hsa-miR-342-3p	0	0	1	1	0	0	MARCH2	membrane-associated ring finger (C3HC4) 2, E3 ubiquitin protein ligase
hsa-miR-342-3p	1	0	1	1	1	1	DNAL4	dynein, axonemal, light chain 4
hsa-miR-342-3p	0	0	1	1	0	0	TTLL12	tubulin tyrosine ligase-like family, member 12
hsa-miR-342-3p	0	0	0	1	0	0	PMM1	phosphomannomutase 1
hsa-miR-342-3p	0	0	1	1	1	1	ZFP64	zinc finger protein 64 homolog (mouse)
hsa-miR-342-3p	0	0	1	1	1	1	ZNF263	zinc finger protein 263
hsa-miR-342-3p	1	0	1	1	0	0	RUVBL2	RuvB-like 2 (E. coli)
hsa-miR-342-3p	0	0	0	1	1	1	ZIM2	zinc finger, imprinted 2
hsa-miR-342-3p	0	0	1	1	1	1	PEG3	paternally expressed 3
hsa-miR-342-3p	0	0	1	1	0	0	RPS19	ribosomal protein S19
hsa-miR-342-3p	0	0	1	1	0	0	HAS1	hyaluronan synthase 1
hsa-miR-342-3p	0	0	1	1	0	0	DBP	D site of albumin promoter (albumin D-box) binding protein
hsa-miR-342-3p	0	0	0	1	1	1	MRPL32	mitochondrial ribosomal protein L32
hsa-miR-342-3p	0	0	0	1	1	1	KAT2A	K(lysine) acetyltransferase 2A
hsa-miR-342-3p	0	0	0	1	1	1	NAGLU	N-acetylglucosaminidase, alpha
hsa-miR-342-3p	0	0	1	1	0	0	AFP	alpha-fetoprotein
hsa-miR-342-3p	0	0	0	1	1	1	UNC93B1	unc-93 homolog B1 (C. elegans)
hsa-miR-342-3p	0	0	1	1	1	1	CCDC86	coiled-coil domain containing 86
hsa-miR-342-3p	1	0	0	1	1	1	KCTD10	potassium channel tetramerisation domain containing 10
hsa-miR-342-3p	0	0	1	1	1	1	ARHGDIB	Rho GDP dissociation inhibitor (GDI) beta
hsa-miR-342-3p	0	0	1	1	1	1	FANCE	Fanconi anemia, complementation group E
hsa-miR-342-3p	0	0	1	1	1	1	GPR63	G protein-coupled receptor 63
hsa-miR-342-3p	0	0	1	1	1	1	BYSL	bystin-like
hsa-miR-342-3p	0	0	1	1	1	1	UMPS	uridine monophosphate synthetase
hsa-miR-342-3p	0	0	0	1	1	1	DOK1	docking protein 1, 62kDa (downstream of tyrosine kinase 1)
hsa-miR-342-3p	0	0	0	1	1	1	IL1RL1	interleukin 1 receptor-like 1
hsa-miR-342-3p	0	0	0	1	0	0	OSCP1	organic solute carrier partner 1
hsa-miR-342-3p	0	0	1	1	1	1	FBXO24	F-box protein 24
hsa-miR-342-3p	0	0	1	1	1	1	MRPS7	mitochondrial ribosomal protein S7
hsa-miR-342-3p	0	0	0	1	0	0	S1PR4	sphingosine-1-phosphate receptor 4
hsa-miR-342-3p	1	0	1	1	0	0	KDM1A	lysine (K)-specific demethylase 1A
hsa-miR-342-3p	0	0	0	1	0	0	VPREB3	pre-B lymphocyte 3
hsa-miR-342-3p	0	0	0	1	1	1	AP1M2	adaptor-related protein complex 1, mu 2 subunit
hsa-miR-342-3p	0	0	1	1	0	0	DHRS2	dehydrogenase/reductase (SDR family) member 2
hsa-miR-342-3p	0	0	1	1	1	1	TRPC4AP	transient receptor potential cation channel, subfamily C, member 4 associated protein
hsa-miR-342-3p	0	0	0	1	0	0	GAMT	guanidinoacetate N-methyltransferase
hsa-miR-342-3p	0	0	0	1	0	0	PSMG3	proteasome (prosome, macropain) assembly chaperone 3
hsa-miR-342-3p	0	0	0	1	1	1	BST2	bone marrow stromal cell antigen 2
hsa-miR-342-3p	1	0	1	1	1	1	MNX1	motor neuron and pancreas homeobox 1
hsa-miR-342-3p	0	0	1	1	0	0	SYNE4	spectrin repeat containing, nuclear envelope family member 4
hsa-miR-342-3p	0	0	1	1	0	0	PKDREJ	polycystic kidney disease (polycystin) and REJ homolog (sperm receptor for egg jelly homolog, sea urchin)
hsa-miR-342-3p	0	0	0	1	1	1	PRDM9	PR domain containing 9
hsa-miR-342-3p	0	0	1	1	1	1	HRSP12	heat-responsive protein 12
hsa-miR-342-3p	1	0	0	1	0	0	PI4KA	phosphatidylinositol 4-kinase, catalytic, alpha
hsa-miR-342-3p	0	0	0	1	1	1	C14orf159	chromosome 14 open reading frame 159
hsa-miR-342-3p	0	0	0	1	1	1	SDS	serine dehydratase
hsa-miR-342-3p	0	0	0	1	1	1	ASB4	ankyrin repeat and SOCS box containing 4
hsa-miR-342-3p	1	0	1	1	1	1	PHF21A	PHD finger protein 21A
hsa-miR-342-3p	0	0	1	1	0	0	GDF11	growth differentiation factor 11
hsa-miR-342-3p	0	0	1	1	1	1	ARHGEF25	Rho guanine nucleotide exchange factor (GEF) 25
hsa-miR-342-3p	0	0	1	1	0	0	SLC26A10	solute carrier family 26, member 10
hsa-miR-342-3p	0	0	0	1	1	1	MRPL44	mitochondrial ribosomal protein L44
hsa-miR-342-3p	0	0	1	1	0	0	GPR45	G protein-coupled receptor 45
hsa-miR-342-3p	1	0	1	1	1	1	NEK3	NIMA (never in mitosis gene a)-related kinase 3
hsa-miR-342-3p	0	0	1	1	1	1	RCBTB1	regulator of chromosome condensation (RCC1) and BTB (POZ) domain containing protein 1
hsa-miR-342-3p	0	0	1	1	0	0	TM6SF1	transmembrane 6 superfamily member 1
hsa-miR-342-3p	0	0	0	1	1	1	BRIP1	BRCA1 interacting protein C-terminal helicase 1
hsa-miR-342-3p	0	0	1	1	1	1	NDUFB5	NADH dehydrogenase (ubiquinone) 1 beta subcomplex, 5, 16kDa
hsa-miR-342-3p	0	0	1	1	1	1	CTSL2	cathepsin L2
hsa-miR-342-3p	0	0	0	1	0	0	C6orf15	chromosome 6 open reading frame 15
hsa-miR-342-3p	0	0	0	1	1	1	BCL2L10	BCL2-like 10 (apoptosis facilitator)
hsa-miR-342-3p	0	0	1	1	0	0	IRAK3	interleukin-1 receptor-associated kinase 3
hsa-miR-342-3p	0	0	1	1	0	0	SNW1	SNW domain containing 1
hsa-miR-342-3p	0	0	0	1	1	1	UTP20	UTP20, small subunit (SSU) processome component, homolog (yeast)
hsa-miR-342-3p	0	0	1	1	1	1	RBM19	RNA binding motif protein 19
hsa-miR-342-3p	0	0	1	1	1	1	CSNK1A1	casein kinase 1, alpha 1
hsa-miR-342-3p	0	0	1	1	1	1	PRPF40B	PRP40 pre-mRNA processing factor 40 homolog B (S. cerevisiae)
hsa-miR-342-3p	0	0	0	1	0	0	MYOM2	myomesin (M-protein) 2, 165kDa
hsa-miR-342-3p	0	0	0	1	1	1	SLC4A1	solute carrier family 4, anion exchanger, member 1 (erythrocyte membrane protein band 3, Diego blood group)
hsa-miR-342-3p	0	0	0	1	0	0	RPL8	ribosomal protein L8
hsa-miR-342-3p	0	0	0	1	0	0	CHST8	carbohydrate (N-acetylgalactosamine 4-0) sulfotransferase 8
hsa-miR-342-3p	0	0	0	1	0	0	MOV10L1	Mov10l1, Moloney leukemia virus 10-like 1, homolog (mouse)
hsa-miR-342-3p	0	0	1	1	0	0	PAFAH1B3	platelet-activating factor acetylhydrolase 1b, catalytic subunit 3 (29kDa)
hsa-miR-342-3p	0	0	0	1	1	1	MAP2K2	mitogen-activated protein kinase kinase 2
hsa-miR-342-3p	0	0	1	1	1	1	ZNF330	zinc finger protein 330
hsa-miR-342-3p	1	0	0	1	0	0	CNN2	calponin 2
hsa-miR-342-3p	0	0	1	1	0	0	ARVCF	armadillo repeat gene deleted in velocardiofacial syndrome
hsa-miR-342-3p	0	0	1	1	0	0	NOVA2	neuro-oncological ventral antigen 2
hsa-miR-342-3p	0	0	0	1	0	0	LIG1	ligase I, DNA, ATP-dependent
hsa-miR-342-3p	0	0	0	1	0	0	CCDC61	coiled-coil domain containing 61
hsa-miR-342-3p	0	0	0	1	1	1	DCPS	decapping enzyme, scavenger
hsa-miR-342-3p	1	0	1	1	0	0	OSBPL5	oxysterol binding protein-like 5
hsa-miR-342-3p	0	0	0	1	1	1	GTF3C3	general transcription factor IIIC, polypeptide 3, 102kDa
hsa-miR-342-3p	0	0	1	1	1	1	DGKD	diacylglycerol kinase, delta 130kDa
hsa-miR-342-3p	0	0	0	1	1	1	SLC25A23	solute carrier family 25 (mitochondrial carrier; phosphate carrier), member 23
hsa-miR-342-3p	0	0	0	1	1	1	SRD5A3	steroid 5 alpha-reductase 3
hsa-miR-342-3p	0	0	1	1	1	1	FGFRL1	fibroblast growth factor receptor-like 1
hsa-miR-342-3p	0	0	1	1	0	0	MCM2	minichromosome maintenance complex component 2
hsa-miR-342-3p	0	0	0	1	1	1	POLA2	polymerase (DNA directed), alpha 2, accessory subunit
hsa-miR-342-3p	0	0	0	1	0	0	SCAP	SREBF chaperone
hsa-miR-342-3p	0	0	1	1	0	0	ABCB4	ATP-binding cassette, sub-family B (MDR/TAP), member 4
hsa-miR-342-3p	1	0	1	1	0	0	KIAA1644	KIAA1644
hsa-miR-342-3p	1	0	0	1	1	1	ACVRL1	activin A receptor type II-like 1
hsa-miR-342-3p	0	0	1	1	0	0	NABP2	nucleic acid binding protein 2
hsa-miR-342-3p	0	0	0	1	0	0	GCNT3	glucosaminyl (N-acetyl) transferase 3, mucin type
hsa-miR-342-3p	0	0	1	1	1	1	RLBP1	retinaldehyde binding protein 1
hsa-miR-342-3p	0	0	1	1	1	1	SEC11A	SEC11 homolog A (S. cerevisiae)
hsa-miR-342-3p	0	0	0	1	1	1	RPL3L	ribosomal protein L3-like
hsa-miR-342-3p	0	0	1	1	0	0	NDUFB10	NADH dehydrogenase (ubiquinone) 1 beta subcomplex, 10, 22kDa
hsa-miR-342-3p	1	0	1	1	1	1	CBX8	chromobox homolog 8
hsa-miR-342-3p	1	0	1	1	1	1	CBX2	chromobox homolog 2
hsa-miR-342-3p	0	0	0	1	1	1	TXNL4A	thioredoxin-like 4A
hsa-miR-342-3p	0	0	0	1	1	1	FEM1A	fem-1 homolog a (C. elegans)
hsa-miR-342-3p	0	0	0	1	0	0	IL19	interleukin 19
hsa-miR-342-3p	0	0	1	1	1	1	SLC6A3	solute carrier family 6 (neurotransmitter transporter, dopamine), member 3
hsa-miR-342-3p	0	0	1	1	0	0	WRAP73	WD repeat containing, antisense to TP73
hsa-miR-342-3p	0	0	0	1	0	0	KIAA1751	KIAA1751
hsa-miR-342-3p	0	0	0	1	0	0	ABCG8	ATP-binding cassette, sub-family G (WHITE), member 8
hsa-miR-342-3p	0	0	0	1	1	1	METTL21A	methyltransferase like 21A
hsa-miR-342-3p	0	0	1	1	1	1	PTH2R	parathyroid hormone 2 receptor
hsa-miR-342-3p	0	0	0	1	0	0	ANKMY1	ankyrin repeat and MYND domain containing 1
hsa-miR-342-3p	0	0	1	1	1	1	MARCH4	membrane-associated ring finger (C3HC4) 4, E3 ubiquitin protein ligase
hsa-miR-342-3p	0	0	1	1	1	1	UCN2	urocortin 2
hsa-miR-342-3p	1	0	1	1	1	1	GPR6	G protein-coupled receptor 6
hsa-miR-342-3p	0	0	1	1	0	0	TTTY7	testis-specific transcript, Y-linked 7 (non-protein coding)
hsa-miR-342-3p	0	0	1	1	0	0	TBX6	T-box 6
hsa-miR-342-3p	0	0	1	1	0	0	CWC15	CWC15 spliceosome-associated protein homolog (S. cerevisiae)
hsa-miR-342-3p	0	0	1	1	1	1	PTS	6-pyruvoyltetrahydropterin synthase
hsa-miR-342-3p	1	0	1	1	1	1	FREM2	FRAS1 related extracellular matrix protein 2
hsa-miR-342-3p	1	0	1	1	1	1	NUBPL	nucleotide binding protein-like
hsa-miR-342-3p	0	0	0	1	1	1	FARSB	phenylalanyl-tRNA synthetase, beta subunit
hsa-miR-342-3p	0	0	1	1	1	1	CAST	calpastatin
hsa-miR-342-3p	0	0	0	1	0	0	OR4D2	olfactory receptor, family 4, subfamily D, member 2
hsa-miR-342-3p	1	0	1	1	0	0	JPH3	junctophilin 3
hsa-miR-342-3p	0	0	0	1	1	1	UCHL1	ubiquitin carboxyl-terminal esterase L1 (ubiquitin thiolesterase)
hsa-miR-342-3p	0	0	0	1	0	0	RAET1L	retinoic acid early transcript 1L
hsa-miR-342-3p	0	0	0	1	0	0	MAGEA8	melanoma antigen family A, 8
hsa-miR-342-3p	1	0	0	1	1	1	WHAMM	WAS protein homolog associated with actin, golgi membranes and microtubules
hsa-miR-342-3p	0	0	1	1	0	0	LCA5L	Leber congenital amaurosis 5-like
hsa-miR-342-3p	0	0	1	1	1	1	SVOPL	SVOP-like
hsa-miR-342-3p	1	0	1	1	1	1	PPP1R9A	protein phosphatase 1, regulatory subunit 9A
hsa-miR-342-3p	0	0	0	1	0	0	CHRNB3	cholinergic receptor, nicotinic, beta 3 (neuronal)
hsa-miR-342-3p	0	0	0	1	0	0	CILP2	cartilage intermediate layer protein 2
hsa-miR-342-3p	0	0	1	1	0	0	NCR1	natural cytotoxicity triggering receptor 1
hsa-miR-342-3p	0	0	1	1	1	1	CD3G	CD3g molecule, gamma (CD3-TCR complex)
hsa-miR-342-3p	0	0	0	1	0	0	PAQR6	progestin and adipoQ receptor family member VI
hsa-miR-342-3p	0	0	1	1	0	0	AZGP1	alpha-2-glycoprotein 1, zinc-binding
hsa-miR-342-3p	1	0	1	1	0	0	HK3	hexokinase 3 (white cell)
hsa-miR-342-3p	0	0	0	1	1	1	FDXR	ferredoxin reductase
hsa-miR-342-3p	0	0	1	1	0	0	POLR3K	polymerase (RNA) III (DNA directed) polypeptide K, 12.3 kDa
hsa-miR-342-3p	1	0	1	1	1	1	KCNIP3	Kv channel interacting protein 3, calsenilin
hsa-miR-342-3p	0	0	0	1	0	0	NPPC	natriuretic peptide C
hsa-miR-342-3p	1	0	0	1	1	1	MRPS18C	mitochondrial ribosomal protein S18C
hsa-miR-342-3p	0	0	1	1	1	1	PTPRN	protein tyrosine phosphatase, receptor type, N
hsa-miR-342-3p	0	0	1	1	0	0	CCDC51	coiled-coil domain containing 51
hsa-miR-342-3p	0	0	1	1	0	0	MON1A	MON1 homolog A (yeast)
hsa-miR-342-3p	0	0	1	1	1	1	HMGB2	high mobility group box 2
hsa-miR-342-3p	0	0	1	1	1	1	TMEM200A	transmembrane protein 200A
hsa-miR-342-3p	0	0	1	1	0	0	RNF183	ring finger protein 183
hsa-miR-342-3p	1	0	1	1	1	1	WDFY2	WD repeat and FYVE domain containing 2
hsa-miR-342-3p	1	0	1	1	0	0	PPP1R36	protein phosphatase 1, regulatory subunit 36
hsa-miR-342-3p	0	0	1	1	0	0	SLC6A5	solute carrier family 6 (neurotransmitter transporter, glycine), member 5
hsa-miR-342-3p	0	0	1	1	1	1	GPR176	G protein-coupled receptor 176
hsa-miR-342-3p	1	0	1	1	1	1	UEVLD	UEV and lactate/malate dehyrogenase domains
hsa-miR-342-3p	0	0	1	1	0	0	MESP1	mesoderm posterior 1 homolog (mouse)
hsa-miR-342-3p	0	0	0	1	0	0	GPR182	G protein-coupled receptor 182
hsa-miR-342-3p	0	0	0	1	0	0	B4GALNT2	beta-1,4-N-acetyl-galactosaminyl transferase 2
hsa-miR-342-3p	0	0	1	1	0	0	GNGT2	guanine nucleotide binding protein (G protein), gamma transducing activity polypeptide 2
hsa-miR-342-3p	0	0	1	1	1	1	LENG8	leukocyte receptor cluster (LRC) member 8
hsa-miR-342-3p	0	0	0	1	1	1	SPINT2	serine peptidase inhibitor, Kunitz type, 2
hsa-miR-342-3p	0	0	1	1	1	1	ZFP28	zinc finger protein 28 homolog (mouse)
hsa-miR-342-3p	0	0	1	1	0	0	VPS37C	vacuolar protein sorting 37 homolog C (S. cerevisiae)
hsa-miR-342-3p	0	0	0	1	0	0	ULK4	unc-51-like kinase 4 (C. elegans)
hsa-miR-342-3p	1	0	1	1	0	0	SNX15	sorting nexin 15
hsa-miR-342-3p	0	0	1	1	0	0	IRF2BP1	interferon regulatory factor 2 binding protein 1
hsa-miR-342-3p	1	0	1	1	1	1	ZC3H14	zinc finger CCCH-type containing 14
hsa-miR-342-3p	0	0	0	1	1	1	C17orf65	chromosome 17 open reading frame 65
hsa-miR-342-3p	0	0	1	1	1	1	MXD3	MAX dimerization protein 3
hsa-miR-342-3p	0	0	0	1	0	0	GLOD5	glyoxalase domain containing 5
hsa-miR-342-3p	1	0	1	1	1	1	MARK3	MAP/microtubule affinity-regulating kinase 3
hsa-miR-342-3p	0	0	1	1	0	0	PROKR1	prokineticin receptor 1
hsa-miR-342-3p	1	0	1	1	1	1	GPRIN1	G protein regulated inducer of neurite outgrowth 1
hsa-miR-342-3p	0	0	0	1	0	0	C11orf24	chromosome 11 open reading frame 24
hsa-miR-342-3p	0	0	1	1	0	0	SLC6A19	solute carrier family 6 (neutral amino acid transporter), member 19
hsa-miR-342-3p	1	0	1	1	1	1	RRM2	ribonucleotide reductase M2
hsa-miR-342-3p	0	0	0	1	0	0	PTCRA	pre T-cell antigen receptor alpha
hsa-miR-342-3p	0	0	0	1	0	0	OR1B1	olfactory receptor, family 1, subfamily B, member 1
hsa-miR-342-3p	0	0	0	1	1	1	TACR3	tachykinin receptor 3
hsa-miR-342-3p	1	0	0	1	1	1	PWWP2B	PWWP domain containing 2B
hsa-miR-342-3p	0	0	0	1	0	0	BOLA2B	bolA homolog 2B (E. coli)
hsa-miR-342-3p	1	0	1	1	0	0	SEMA4C	sema domain, immunoglobulin domain (Ig), transmembrane domain (TM) and short cytoplasmic domain, (semaphorin) 4C
hsa-miR-342-3p	0	0	1	1	0	0	ISG20	interferon stimulated exonuclease gene 20kDa
hsa-miR-342-3p	0	0	1	1	0	0	STRA13	stimulated by retinoic acid 13 homolog (mouse)
hsa-miR-342-3p	0	0	1	1	0	0	ZNF584	zinc finger protein 584
hsa-miR-342-3p	0	0	0	1	0	0	ZNF324B	zinc finger protein 324B
hsa-miR-342-3p	1	0	1	1	1	1	CHRM1	cholinergic receptor, muscarinic 1
hsa-miR-342-3p	0	0	1	1	0	0	TSNARE1	t-SNARE domain containing 1
hsa-miR-342-3p	0	0	1	1	1	1	GLB1	galactosidase, beta 1
hsa-miR-342-3p	0	0	0	1	1	1	ZIK1	zinc finger protein interacting with K protein 1 homolog (mouse)
hsa-miR-342-3p	1	0	1	1	0	0	ACOT12	acyl-CoA thioesterase 12
hsa-miR-342-3p	0	0	1	1	1	1	ATP9B	ATPase, class II, type 9B
hsa-miR-342-3p	0	0	1	1	1	1	PPID	peptidylprolyl isomerase D
hsa-miR-342-3p	0	0	0	1	1	1	PTDSS2	phosphatidylserine synthase 2
hsa-miR-342-3p	0	0	0	1	0	0	KRTAP5-8	keratin associated protein 5-8
hsa-miR-342-3p	0	0	1	1	0	0	KRTAP5-7	keratin associated protein 5-7
hsa-miR-342-3p	0	0	1	1	0	0	NUP93	nucleoporin 93kDa
hsa-miR-342-3p	0	0	1	1	1	1	PDZRN3	PDZ domain containing ring finger 3
hsa-miR-342-3p	0	0	1	1	1	1	BTK	Bruton agammaglobulinemia tyrosine kinase
hsa-miR-342-3p	0	0	1	1	0	0	RFWD2	ring finger and WD repeat domain 2, E3 ubiquitin protein ligase
hsa-miR-342-3p	0	0	1	1	1	1	APITD1	apoptosis-inducing, TAF9-like domain 1
hsa-miR-342-3p	0	0	1	1	1	1	CORT	cortistatin
hsa-miR-342-3p	0	0	1	1	1	1	CD3EAP	CD3e molecule, epsilon associated protein
hsa-miR-342-3p	1	0	1	1	0	0	ATG4D	autophagy related 4D, cysteine peptidase
hsa-miR-342-3p	0	0	1	1	0	0	UCP2	uncoupling protein 2 (mitochondrial, proton carrier)
hsa-miR-342-3p	1	0	1	1	1	1	FAM131A	family with sequence similarity 131, member A
hsa-miR-342-3p	0	0	1	1	1	1	CARHSP1	calcium regulated heat stable protein 1, 24kDa
hsa-miR-342-3p	1	0	1	1	1	1	COQ2	coenzyme Q2 homolog, prenyltransferase (yeast)
hsa-miR-342-3p	1	0	1	1	1	1	AKNA	AT-hook transcription factor
hsa-miR-342-3p	0	0	0	1	0	0	CMKLR1	chemokine-like receptor 1
hsa-miR-342-3p	0	0	1	1	0	0	RPS6KB2	ribosomal protein S6 kinase, 70kDa, polypeptide 2
hsa-miR-342-3p	0	0	0	1	0	0	ZNF585B	zinc finger protein 585B
hsa-miR-342-3p	0	0	0	1	0	0	PARP10	poly (ADP-ribose) polymerase family, member 10
hsa-miR-342-3p	0	0	0	1	1	1	SLC15A1	solute carrier family 15 (oligopeptide transporter), member 1
hsa-miR-342-3p	1	0	1	1	1	1	EBF1	early B-cell factor 1
hsa-miR-342-3p	1	0	1	1	1	1	ZDHHC7	zinc finger, DHHC-type containing 7
hsa-miR-342-3p	0	0	0	1	0	0	PRODH	proline dehydrogenase (oxidase) 1
hsa-miR-342-3p	0	0	0	1	0	0	RPL27A	ribosomal protein L27a
hsa-miR-342-3p	1	0	1	1	1	1	LUZP1	leucine zipper protein 1
hsa-miR-342-3p	0	0	0	1	1	1	DNAJC28	DnaJ (Hsp40) homolog, subfamily C, member 28
hsa-miR-342-3p	0	0	1	1	0	0	TMEM54	transmembrane protein 54
hsa-miR-342-3p	0	0	1	1	1	1	EXD1	exonuclease 3'-5' domain containing 1
hsa-miR-342-3p	0	0	1	1	0	0	ANAPC4	anaphase promoting complex subunit 4
hsa-miR-342-3p	0	0	1	1	1	1	KRTAP3-2	keratin associated protein 3-2
hsa-miR-342-3p	0	0	1	1	0	0	MARS	methionyl-tRNA synthetase
hsa-miR-342-3p	0	0	1	1	0	0	WDR90	WD repeat domain 90
hsa-miR-342-3p	0	0	0	1	0	0	WRAP53	WD repeat containing, antisense to TP53
hsa-miR-342-3p	1	0	1	1	1	1	ZNF518A	zinc finger protein 518A
hsa-miR-342-3p	0	0	1	1	0	0	PANK2	pantothenate kinase 2
hsa-miR-342-3p	1	0	1	1	1	1	SHMT1	serine hydroxymethyltransferase 1 (soluble)
hsa-miR-342-3p	1	0	1	1	1	1	TRIT1	tRNA isopentenyltransferase 1
hsa-miR-342-3p	0	0	1	1	0	0	STOML1	stomatin (EPB72)-like 1
hsa-miR-342-3p	0	0	1	1	0	0	SETDB2	SET domain, bifurcated 2
hsa-miR-342-3p	0	0	1	1	0	0	IL11RA	interleukin 11 receptor, alpha
hsa-miR-342-3p	0	0	1	1	1	1	MRPL43	mitochondrial ribosomal protein L43
hsa-miR-342-3p	0	0	1	1	1	1	FKRP	fukutin related protein
hsa-miR-342-3p	0	0	1	1	0	0	ZBTB48	zinc finger and BTB domain containing 48
hsa-miR-342-3p	1	0	1	1	1	1	IL15RA	interleukin 15 receptor, alpha
hsa-miR-342-3p	0	0	1	1	0	0	PVRL3	poliovirus receptor-related 3
hsa-miR-342-3p	0	0	0	1	1	1	C16orf53	chromosome 16 open reading frame 53
hsa-miR-342-3p	0	0	0	1	0	0	WBSCR28	Williams-Beuren syndrome chromosome region 28
hsa-miR-342-3p	0	0	1	1	0	0	MUC20	mucin 20, cell surface associated
hsa-miR-342-3p	0	0	1	1	1	1	TAF8	TAF8 RNA polymerase II, TATA box binding protein (TBP)-associated factor, 43kDa
hsa-miR-342-3p	0	0	1	1	1	1	IL12RB1	interleukin 12 receptor, beta 1
hsa-miR-342-3p	0	0	1	1	1	1	COX5A	cytochrome c oxidase subunit Va
hsa-miR-342-3p	0	0	0	1	0	0	OR1E1	olfactory receptor, family 1, subfamily E, member 1
hsa-miR-342-3p	0	0	1	1	0	0	RUVBL1	RuvB-like 1 (E. coli)
hsa-miR-342-3p	0	0	0	1	0	0	SPEM1	spermatid maturation 1
hsa-miR-342-3p	0	0	1	1	1	1	PRX	periaxin
hsa-miR-342-3p	0	0	0	1	0	0	WFDC11	WAP four-disulfide core domain 11
hsa-miR-342-3p	0	0	1	1	1	1	FAM153C	family with sequence similarity 153, member C, pseudogene
hsa-miR-342-3p	0	0	1	1	0	0	PRPF3	PRP3 pre-mRNA processing factor 3 homolog (S. cerevisiae)
hsa-miR-342-3p	0	0	1	1	1	1	YARS2	tyrosyl-tRNA synthetase 2, mitochondrial
hsa-miR-342-3p	1	0	1	1	1	1	ZNF580	zinc finger protein 580
hsa-miR-342-3p	1	0	1	1	1	1	PGR	progesterone receptor
hsa-miR-342-3p	0	0	0	1	1	1	P2RY13	purinergic receptor P2Y, G-protein coupled, 13
hsa-miR-342-3p	0	0	0	1	1	1	CABP4	calcium binding protein 4
hsa-miR-342-3p	1	0	1	1	1	1	TOR1AIP1	torsin A interacting protein 1
hsa-miR-342-3p	0	0	0	1	1	1	GSTM4	glutathione S-transferase mu 4
hsa-miR-342-3p	0	0	1	1	1	1	PTPLA	protein tyrosine phosphatase-like (proline instead of catalytic arginine), member A
hsa-miR-342-3p	0	0	0	1	1	1	FLII	flightless I homolog (Drosophila)
hsa-miR-342-3p	0	0	1	1	1	1	ADI1	acireductone dioxygenase 1
hsa-miR-342-3p	1	0	0	1	0	0	KRT81	keratin 81
hsa-miR-342-3p	1	0	1	1	1	1	KREMEN1	kringle containing transmembrane protein 1
hsa-miR-342-3p	0	0	0	1	0	0	ZNF610	zinc finger protein 610
hsa-miR-342-3p	0	0	1	1	0	0	SPRR4	small proline-rich protein 4
hsa-miR-342-3p	0	0	1	1	1	1	DSCR4	Down syndrome critical region gene 4
hsa-miR-342-3p	0	0	1	1	1	1	RNF135	ring finger protein 135
hsa-miR-342-3p	0	0	0	1	1	1	PIGW	phosphatidylinositol glycan anchor biosynthesis, class W
hsa-miR-342-3p	0	0	0	1	1	1	NOP10	NOP10 ribonucleoprotein homolog (yeast)
hsa-miR-342-3p	0	0	1	1	0	0	CRIP2	cysteine-rich protein 2
hsa-miR-342-3p	0	0	0	1	0	0	USP17L3	ubiquitin specific peptidase 17-like 3
hsa-miR-342-3p	0	0	1	1	0	0	AQP12B	aquaporin 12B
hsa-miR-342-3p	0	0	0	1	0	0	ZNF775	zinc finger protein 775
hsa-miR-342-3p	0	0	1	1	0	0	IRX3	iroquois homeobox 3
hsa-miR-342-3p	0	0	1	1	0	0	PYCR1	pyrroline-5-carboxylate reductase 1
hsa-miR-342-3p	0	0	1	1	1	1	MOB2	MOB kinase activator 2
hsa-miR-342-3p	0	0	0	1	1	1	TMEM121	transmembrane protein 121
hsa-miR-342-3p	0	0	1	1	1	1	CMTM4	CKLF-like MARVEL transmembrane domain containing 4
hsa-miR-342-3p	0	0	1	1	1	1	ARHGAP27	Rho GTPase activating protein 27
hsa-miR-342-3p	0	0	0	1	1	1	SNX20	sorting nexin 20
hsa-miR-342-3p	0	0	0	1	0	0	CCR4	chemokine (C-C motif) receptor 4
hsa-miR-342-3p	0	0	0	1	0	0	BOLA2	bolA homolog 2 (E. coli)
hsa-miR-342-3p	0	0	0	1	1	1	GLRX5	glutaredoxin 5
hsa-miR-342-3p	0	0	0	1	0	0	PRAMEF11	PRAME family member 11
hsa-miR-342-3p	1	0	1	1	1	1	CDC20B	cell division cycle 20 homolog B (S. cerevisiae)
hsa-miR-342-3p	0	0	0	1	1	1	SETD4	SET domain containing 4
hsa-miR-342-3p	0	0	1	1	1	1	METTL7A	methyltransferase like 7A
hsa-miR-342-3p	0	0	0	1	0	0	PRAMEF1	PRAME family member 1
hsa-miR-342-3p	1	0	1	1	1	1	TMED9	transmembrane emp24 protein transport domain containing 9
hsa-miR-342-3p	0	0	1	1	1	1	TM2D3	TM2 domain containing 3
hsa-miR-342-3p	0	0	0	1	0	0	TSSC4	tumor suppressing subtransferable candidate 4
hsa-miR-342-3p	0	0	1	1	0	0	EFNA5	ephrin-A5
hsa-miR-342-3p	1	0	1	1	1	1	SELE	selectin E
hsa-miR-342-3p	1	0	1	1	1	1	PALLD	palladin, cytoskeletal associated protein
hsa-miR-342-3p	0	0	0	1	0	0	USP17L2	ubiquitin specific peptidase 17-like 2
hsa-miR-342-3p	0	0	1	1	0	0	DMRTC1B	DMRT-like family C1B
hsa-miR-342-3p	0	0	1	1	1	1	WHSC2	Wolf-Hirschhorn syndrome candidate 2
hsa-miR-342-3p	0	0	1	1	1	1	LGMN	legumain
hsa-miR-342-3p	0	0	0	1	0	0	OR10H1	olfactory receptor, family 10, subfamily H, member 1
hsa-miR-342-3p	0	0	0	1	0	0	WDR25	WD repeat domain 25
hsa-miR-342-3p	0	0	0	1	0	0	TBX10	T-box 10
hsa-miR-342-3p	0	0	1	1	0	0	SAMD7	sterile alpha motif domain containing 7
hsa-miR-342-3p	1	0	1	1	1	1	SEC23B	Sec23 homolog B (S. cerevisiae)
hsa-miR-342-3p	0	0	0	1	0	0	ZNF444	zinc finger protein 444
hsa-miR-342-3p	1	0	1	1	1	1	CTBP2	C-terminal binding protein 2
hsa-miR-342-3p	0	0	0	1	0	0	LRRC71	leucine rich repeat containing 71
hsa-miR-342-3p	1	0	1	1	1	1	DTX3	deltex homolog 3 (Drosophila)
hsa-miR-342-3p	0	0	0	1	0	0	AQP12A	aquaporin 12A
hsa-miR-342-3p	1	0	1	1	1	1	SCHIP1	schwannomin interacting protein 1
hsa-miR-342-3p	0	0	0	1	0	0	KPTN	kaptin (actin binding protein)
hsa-miR-342-3p	0	0	1	1	0	0	SNTG1	syntrophin, gamma 1
hsa-miR-342-3p	1	0	1	1	0	0	CHST4	carbohydrate (N-acetylglucosamine 6-O) sulfotransferase 4
hsa-miR-342-3p	1	0	0	1	1	1	C19orf54	chromosome 19 open reading frame 54
hsa-miR-342-3p	0	0	0	1	1	1	ZNF595	zinc finger protein 595
hsa-miR-342-3p	1	0	1	1	1	1	ANP32B	acidic (leucine-rich) nuclear phosphoprotein 32 family, member B
hsa-miR-342-3p	0	0	0	1	0	0	GFI1B	growth factor independent 1B transcription repressor
hsa-miR-342-3p	0	0	1	1	0	0	ANXA8L2	annexin A8-like 2
hsa-miR-342-3p	0	0	0	1	0	0	ALG1L	asparagine-linked glycosylation 1-like
hsa-miR-342-3p	0	0	0	1	1	1	PNCK	pregnancy up-regulated non-ubiquitously expressed CaM kinase
hsa-miR-342-3p	0	0	1	1	1	1	CPLX3	complexin 3
hsa-miR-342-3p	0	0	0	1	1	1	SYCP2L	synaptonemal complex protein 2-like
hsa-miR-342-3p	0	0	0	1	0	0	BLOC1S3	biogenesis of lysosomal organelles complex-1, subunit 3
hsa-miR-342-3p	0	0	1	1	1	1	ESR2	estrogen receptor 2 (ER beta)
hsa-miR-342-3p	0	0	0	1	0	0	THYN1	thymocyte nuclear protein 1
hsa-miR-342-3p	0	0	0	1	0	0	TMEM179	transmembrane protein 179
hsa-miR-342-3p	0	0	0	1	1	1	SUMF2	sulfatase modifying factor 2
hsa-miR-342-3p	0	0	0	1	0	0	OR14I1	olfactory receptor, family 14, subfamily I, member 1
hsa-miR-342-3p	0	0	0	1	1	1	HHIPL2	HHIP-like 2
hsa-miR-342-3p	0	0	0	1	1	1	ZNF177	zinc finger protein 177
hsa-miR-342-3p	0	0	1	1	1	1	GGA1	golgi-associated, gamma adaptin ear containing, ARF binding protein 1
hsa-miR-342-3p	1	0	1	1	1	1	ASH2L	ash2 (absent, small, or homeotic)-like (Drosophila)
hsa-miR-342-3p	0	0	0	1	1	1	FAM69C	family with sequence similarity 69, member C
hsa-miR-342-3p	0	0	0	1	1	1	OR7D2	olfactory receptor, family 7, subfamily D, member 2
hsa-miR-342-3p	1	0	1	1	1	1	STARD13	StAR-related lipid transfer (START) domain containing 13
hsa-miR-342-3p	0	0	0	1	1	1	DTNBP1	dystrobrevin binding protein 1
hsa-miR-342-3p	0	0	0	1	0	0	MRPL20	mitochondrial ribosomal protein L20
hsa-miR-342-3p	0	0	0	1	0	0	CPSF4L	cleavage and polyadenylation specific factor 4-like
hsa-miR-342-3p	0	0	0	1	0	0	PRAMEF14	PRAME family member 14
hsa-miR-342-3p	1	0	0	1	0	0	TSPAN4	tetraspanin 4
hsa-miR-342-3p	0	0	0	1	0	0	RPL35	ribosomal protein L35
hsa-miR-342-3p	1	0	0	1	0	0	SMPD4	sphingomyelin phosphodiesterase 4, neutral membrane (neutral sphingomyelinase-3)
hsa-miR-342-3p	0	0	1	1	0	0	MPI	mannose phosphate isomerase
hsa-miR-342-3p	0	0	0	1	0	0	RHBDL1	rhomboid, veinlet-like 1 (Drosophila)
hsa-miR-342-3p	1	0	1	1	1	1	MKLN1	muskelin 1, intracellular mediator containing kelch motifs
hsa-miR-342-3p	0	0	1	1	0	0	RBCK1	RanBP-type and C3HC4-type zinc finger containing 1
hsa-miR-342-3p	0	0	1	1	0	0	ETFB	electron-transfer-flavoprotein, beta polypeptide
hsa-miR-342-3p	0	0	0	1	0	0	HRCT1	histidine rich carboxyl terminus 1
hsa-miR-342-3p	0	0	0	1	0	0	PCDHB11	protocadherin beta 11
hsa-miR-342-3p	0	0	0	1	1	1	ALDH9A1	aldehyde dehydrogenase 9 family, member A1
hsa-miR-342-3p	1	0	1	1	1	1	KCTD6	potassium channel tetramerisation domain containing 6
hsa-miR-342-3p	0	0	0	1	0	0	CXorf40B	chromosome X open reading frame 40B
hsa-miR-342-3p	0	0	1	1	0	0	CCDC114	coiled-coil domain containing 114
hsa-miR-342-3p	1	0	1	1	1	1	TMEM135	transmembrane protein 135
hsa-miR-342-3p	0	0	0	1	0	0	HIST1H4L	histone cluster 1, H4l
hsa-miR-342-3p	1	0	1	1	1	1	TMED7	transmembrane emp24 protein transport domain containing 7
hsa-miR-342-3p	0	0	0	1	1	1	TICAM2	toll-like receptor adaptor molecule 2
hsa-miR-342-3p	0	0	0	1	0	0	LSS	lanosterol synthase (2,3-oxidosqualene-lanosterol cyclase)
hsa-miR-342-3p	0	0	0	1	1	1	PITPNM1	phosphatidylinositol transfer protein, membrane-associated 1
hsa-miR-342-3p	0	0	0	1	1	1	MYOM1	myomesin 1, 185kDa
hsa-miR-342-3p	0	0	1	1	1	1	MEGF6	multiple EGF-like-domains 6
hsa-miR-342-3p	0	0	1	1	0	0	HEATR7A	HEAT repeat containing 7A
hsa-miR-342-3p	0	0	0	1	0	0	C5orf48	chromosome 5 open reading frame 48
hsa-miR-342-3p	0	0	1	1	1	1	SLA2	Src-like-adaptor 2
hsa-miR-342-3p	0	0	1	1	0	0	ANXA8	annexin A8
hsa-miR-342-3p	0	0	1	1	0	0	NAT9	N-acetyltransferase 9 (GCN5-related, putative)
hsa-miR-342-3p	1	0	1	1	0	0	C17orf59	chromosome 17 open reading frame 59
hsa-miR-342-3p	0	0	0	1	1	1	PLOD1	procollagen-lysine, 2-oxoglutarate 5-dioxygenase 1
hsa-miR-342-3p	0	0	0	1	0	0	ANXA8L1	annexin A8-like 1
hsa-miR-342-3p	1	0	1	1	1	1	TNKS1BP1	tankyrase 1 binding protein 1, 182kDa
hsa-miR-342-3p	0	0	1	1	1	1	RAD52	RAD52 homolog (S. cerevisiae)
hsa-miR-342-3p	0	0	1	1	0	0	PLXNB1	plexin B1
hsa-miR-342-3p	0	0	1	1	1	1	PRAME	preferentially expressed antigen in melanoma
hsa-miR-342-3p	0	0	1	1	1	1	MYOF	myoferlin
hsa-miR-342-3p	1	0	0	1	0	0	TRPV6	transient receptor potential cation channel, subfamily V, member 6
hsa-miR-342-3p	0	0	0	1	0	0	ZNF416	zinc finger protein 416
hsa-miR-342-3p	0	0	1	1	0	0	TRAF2	TNF receptor-associated factor 2
hsa-miR-342-3p	0	0	1	1	1	1	TPK1	thiamin pyrophosphokinase 1
hsa-miR-342-3p	0	0	0	1	1	1	SPN	sialophorin
hsa-miR-342-3p	0	0	1	1	1	1	PRKAR1B	protein kinase, cAMP-dependent, regulatory, type I, beta
hsa-miR-342-3p	0	0	1	1	1	1	HLA-G	major histocompatibility complex, class I, G
hsa-miR-342-3p	0	0	0	1	0	0	OR2T8	olfactory receptor, family 2, subfamily T, member 8
hsa-miR-342-3p	0	0	0	1	0	0	CLPSL2	colipase-like 2
hsa-miR-342-3p	0	0	1	1	1	1	FBXL22	F-box and leucine-rich repeat protein 22
hsa-miR-342-3p	0	0	0	1	1	1	RDH16	retinol dehydrogenase 16 (all-trans)
hsa-miR-342-3p	0	0	0	1	0	0	OR10A3	olfactory receptor, family 10, subfamily A, member 3
hsa-miR-342-3p	0	0	0	1	1	1	ZNF438	zinc finger protein 438
hsa-miR-342-3p	0	0	1	1	1	1	HPS1	Hermansky-Pudlak syndrome 1
hsa-miR-342-3p	1	0	1	1	1	1	PNP	purine nucleoside phosphorylase
hsa-miR-342-3p	0	0	0	1	1	1	ABCA4	ATP-binding cassette, sub-family A (ABC1), member 4
hsa-miR-342-3p	0	0	0	1	1	1	C16orf59	chromosome 16 open reading frame 59
hsa-miR-342-3p	0	0	1	1	1	1	NOS1AP	nitric oxide synthase 1 (neuronal) adaptor protein
hsa-miR-342-3p	0	0	0	1	1	1	FAN1	FANCD2/FANCI-associated nuclease 1
hsa-miR-342-3p	0	0	0	1	0	0	OR2L2	olfactory receptor, family 2, subfamily L, member 2
hsa-miR-342-3p	0	0	1	1	1	1	HEATR1	HEAT repeat containing 1
hsa-miR-342-3p	0	0	1	1	0	0	FAM89A	family with sequence similarity 89, member A
hsa-miR-342-3p	0	0	1	1	1	1	COG2	component of oligomeric golgi complex 2
hsa-miR-342-3p	0	0	0	1	1	1	OBSCN	obscurin, cytoskeletal calmodulin and titin-interacting RhoGEF
hsa-miR-342-3p	0	0	0	1	0	0	GUK1	guanylate kinase 1
hsa-miR-342-3p	0	0	1	1	1	1	LYPLAL1	lysophospholipase-like 1
hsa-miR-342-3p	1	0	1	1	1	1	RPS6KC1	ribosomal protein S6 kinase, 52kDa, polypeptide 1
hsa-miR-342-3p	0	0	1	1	1	1	CD55	CD55 molecule, decay accelerating factor for complement (Cromer blood group)
hsa-miR-342-3p	0	0	1	1	1	1	IL24	interleukin 24
hsa-miR-342-3p	0	0	0	1	1	1	GPR37L1	G protein-coupled receptor 37 like 1
hsa-miR-342-3p	0	0	0	1	0	0	RAET1G	retinoic acid early transcript 1G
hsa-miR-342-3p	0	0	1	1	1	1	BLZF1	basic leucine zipper nuclear factor 1
hsa-miR-342-3p	0	0	0	1	0	0	RPS12	ribosomal protein S12
hsa-miR-342-3p	1	0	1	1	1	1	SLC18B1	solute carrier family 18, subfamily B, member 1
hsa-miR-342-3p	0	0	0	1	0	0	FCER1G	Fc fragment of IgE, high affinity I, receptor for; gamma polypeptide
hsa-miR-342-3p	0	0	1	1	1	1	KCNJ9	potassium inwardly-rectifying channel, subfamily J, member 9
hsa-miR-342-3p	0	0	1	1	0	0	PMF1	polyamine-modulated factor 1
hsa-miR-342-3p	0	0	0	1	0	0	BGLAP	bone gamma-carboxyglutamate (gla) protein
hsa-miR-342-3p	0	0	1	1	1	1	UBQLN4	ubiquilin 4
hsa-miR-342-3p	0	0	1	1	0	0	LOC399829	uncharacterized LOC399829
hsa-miR-342-3p	0	0	1	1	0	0	CREB3L4	cAMP responsive element binding protein 3-like 4
hsa-miR-342-3p	0	0	0	1	0	0	LAMA4	laminin, alpha 4
hsa-miR-342-3p	0	0	1	1	1	1	THEM5	thioesterase superfamily member 5
hsa-miR-342-3p	1	0	1	1	1	1	SNX27	sorting nexin family member 27
hsa-miR-342-3p	1	0	1	1	1	1	CPXM2	carboxypeptidase X (M14 family), member 2
hsa-miR-342-3p	0	0	0	1	1	1	BNIPL	BCL2/adenovirus E1B 19kD interacting protein like
hsa-miR-342-3p	0	0	1	1	0	0	NSMCE4A	non-SMC element 4 homolog A (S. cerevisiae)
hsa-miR-342-3p	0	0	1	1	1	1	MMS22L	MMS22-like, DNA repair protein
hsa-miR-342-3p	0	0	0	1	1	1	CD2	CD2 molecule
hsa-miR-342-3p	1	0	1	1	1	1	KCNA2	potassium voltage-gated channel, shaker-related subfamily, member 2
hsa-miR-342-3p	0	0	0	1	0	0	GSTM2	glutathione S-transferase mu 2 (muscle)
hsa-miR-342-3p	0	0	0	1	0	0	ABHD16B	abhydrolase domain containing 16B
hsa-miR-342-3p	0	0	1	1	0	0	NAA10	N(alpha)-acetyltransferase 10, NatA catalytic subunit
hsa-miR-342-3p	0	0	1	1	1	1	NPM3	nucleophosmin/nucleoplasmin 3
hsa-miR-342-3p	0	0	0	1	1	1	KCNQ2	potassium voltage-gated channel, KQT-like subfamily, member 2
hsa-miR-342-3p	0	0	0	1	1	1	ABCC2	ATP-binding cassette, sub-family C (CFTR/MRP), member 2
hsa-miR-342-3p	0	0	0	1	0	0	C6orf57	chromosome 6 open reading frame 57
hsa-miR-342-3p	1	0	1	1	1	1	FUBP1	far upstream element (FUSE) binding protein 1
hsa-miR-342-3p	0	0	1	1	1	1	ELOVL5	ELOVL fatty acid elongase 5
hsa-miR-342-3p	0	0	1	1	1	1	GSTA4	glutathione S-transferase alpha 4
hsa-miR-342-3p	0	0	1	1	0	0	BSND	Bartter syndrome, infantile, with sensorineural deafness (Barttin)
hsa-miR-342-3p	0	0	0	1	0	0	FAM209A	family with sequence similarity 209, member A
hsa-miR-342-3p	0	0	1	1	1	1	LRRC42	leucine rich repeat containing 42
hsa-miR-342-3p	1	0	1	1	1	1	EHMT1	euchromatic histone-lysine N-methyltransferase 1
hsa-miR-342-3p	0	0	0	1	0	0	C9orf116	chromosome 9 open reading frame 116
hsa-miR-342-3p	0	0	0	1	0	0	RSPH9	radial spoke head 9 homolog (Chlamydomonas)
hsa-miR-342-3p	0	0	0	1	1	1	DDX31	DEAD (Asp-Glu-Ala-Asp) box polypeptide 31
hsa-miR-342-3p	0	0	0	1	0	0	PTCH2	patched 2
hsa-miR-342-3p	0	0	1	1	1	1	RNF220	ring finger protein 220
hsa-miR-342-3p	0	0	1	1	1	1	POLR3A	polymerase (RNA) III (DNA directed) polypeptide A, 155kDa
hsa-miR-342-3p	0	0	0	1	0	0	NTMT1	N-terminal Xaa-Pro-Lys N-methyltransferase 1
hsa-miR-342-3p	0	0	0	1	0	0	TNNC2	troponin C type 2 (fast)
hsa-miR-342-3p	0	0	0	1	1	1	ZNF684	zinc finger protein 684
hsa-miR-342-3p	1	0	1	1	1	1	PLAU	plasminogen activator, urokinase
hsa-miR-342-3p	0	0	1	1	0	0	TOMM7	translocase of outer mitochondrial membrane 7 homolog (yeast)
hsa-miR-342-3p	1	0	0	1	1	1	HNF4A	hepatocyte nuclear factor 4, alpha
hsa-miR-342-3p	0	0	1	1	1	1	DNAJC9	DnaJ (Hsp40) homolog, subfamily C, member 9
hsa-miR-342-3p	1	0	1	1	0	0	FHL3	four and a half LIM domains 3
hsa-miR-342-3p	1	0	1	1	1	1	MEAF6	MYST/Esa1-associated factor 6
hsa-miR-342-3p	0	0	1	1	0	0	C10orf35	chromosome 10 open reading frame 35
hsa-miR-342-3p	0	0	1	1	0	0	C9orf117	chromosome 9 open reading frame 117
hsa-miR-342-3p	1	0	1	1	0	0	ANGPTL2	angiopoietin-like 2
hsa-miR-342-3p	1	0	1	1	1	1	NR6A1	nuclear receptor subfamily 6, group A, member 1
hsa-miR-342-3p	0	0	1	1	1	1	MRRF	mitochondrial ribosome recycling factor
hsa-miR-342-3p	0	0	1	1	1	1	TTLL11	tubulin tyrosine ligase-like family, member 11
hsa-miR-342-3p	0	0	0	1	1	1	LHFPL5	lipoma HMGIC fusion partner-like 5
hsa-miR-342-3p	1	0	1	1	0	0	ZMYM3	zinc finger, MYM-type 3
hsa-miR-342-3p	1	0	1	1	0	0	CD164L2	CD164 sialomucin-like 2
hsa-miR-342-3p	0	0	1	1	0	0	OGDHL	oxoglutarate dehydrogenase-like
hsa-miR-342-3p	1	0	1	1	1	1	ZDHHC18	zinc finger, DHHC-type containing 18
hsa-miR-342-3p	1	0	1	1	0	0	DHDDS	dehydrodolichyl diphosphate synthase
hsa-miR-342-3p	0	0	0	1	0	0	SPAG4	sperm associated antigen 4
hsa-miR-342-3p	0	0	1	1	0	0	UGCG	UDP-glucose ceramide glucosyltransferase
hsa-miR-342-3p	0	0	1	1	1	1	ZNF483	zinc finger protein 483
hsa-miR-342-3p	0	0	0	1	0	0	ARR3	arrestin 3, retinal (X-arrestin)
hsa-miR-342-3p	1	0	1	1	1	1	HEPACAM	hepatic and glial cell adhesion molecule
hsa-miR-342-3p	0	0	1	1	0	0	CCDC7	coiled-coil domain containing 7
hsa-miR-342-3p	0	0	1	1	0	0	C10orf68	chromosome 10 open reading frame 68
hsa-miR-342-3p	1	0	1	1	1	1	NCBP1	nuclear cap binding protein subunit 1, 80kDa
hsa-miR-342-3p	0	0	0	1	0	0	CD300LD	CD300 molecule-like family member d
hsa-miR-342-3p	1	0	1	1	1	1	PADI2	peptidyl arginine deiminase, type II
hsa-miR-342-3p	1	0	1	1	1	1	SZRD1	SUZ RNA binding domain containing 1
hsa-miR-342-3p	0	0	1	1	1	1	C6orf48	chromosome 6 open reading frame 48
hsa-miR-342-3p	0	0	1	1	1	1	KDELC2	KDEL (Lys-Asp-Glu-Leu) containing 2
hsa-miR-342-3p	0	0	0	1	0	0	CLCNKB	chloride channel, voltage-sensitive Kb
hsa-miR-342-3p	0	0	1	1	1	1	CLCNKA	chloride channel, voltage-sensitive Ka
hsa-miR-342-3p	0	0	1	1	1	1	ING1	inhibitor of growth family, member 1
hsa-miR-342-3p	0	0	0	1	0	0	PRAMEF13	PRAME family member 13
hsa-miR-342-3p	0	0	0	1	0	0	HLA-F	major histocompatibility complex, class I, F
hsa-miR-342-3p	0	0	1	1	1	1	CNGA3	cyclic nucleotide gated channel alpha 3
hsa-miR-342-3p	0	0	1	1	1	1	C9orf85	chromosome 9 open reading frame 85
hsa-miR-342-3p	0	0	1	1	0	0	ARAF	v-raf murine sarcoma 3611 viral oncogene homolog
hsa-miR-342-3p	0	0	0	1	0	0	ZNF157	zinc finger protein 157
hsa-miR-342-3p	1	0	1	1	1	1	CTNNBIP1	catenin, beta interacting protein 1
hsa-miR-342-3p	0	0	0	1	0	0	CBWD6	COBW domain containing 6
hsa-miR-342-3p	0	0	1	1	1	1	DTD1	D-tyrosyl-tRNA deacylase 1 homolog (S. cerevisiae)
hsa-miR-342-3p	0	0	1	1	1	1	RASGRP2	RAS guanyl releasing protein 2 (calcium and DAG-regulated)
hsa-miR-342-3p	0	0	0	1	1	1	ST8SIA6	ST8 alpha-N-acetyl-neuraminide alpha-2,8-sialyltransferase 6
hsa-miR-342-3p	1	0	1	1	1	1	PCDHGA1	protocadherin gamma subfamily A, 1
hsa-miR-342-3p	0	0	1	1	1	1	EBPL	emopamil binding protein-like
hsa-miR-342-3p	1	0	0	1	0	0	REEP2	receptor accessory protein 2
hsa-miR-342-3p	0	0	1	1	1	1	CAMKMT	calmodulin-lysine N-methyltransferase
hsa-miR-342-3p	0	0	1	1	1	1	MED4	mediator complex subunit 4
hsa-miR-342-3p	0	0	0	1	1	1	UQCRQ	ubiquinol-cytochrome c reductase, complex III subunit VII, 9.5kDa
hsa-miR-342-3p	0	0	1	1	0	0	C20orf196	chromosome 20 open reading frame 196
hsa-miR-342-3p	1	0	1	1	1	1	SLC30A6	solute carrier family 30 (zinc transporter), member 6
hsa-miR-342-3p	0	0	0	1	0	0	PLEKHN1	pleckstrin homology domain containing, family N member 1
hsa-miR-342-3p	1	0	1	1	1	1	ASPH	aspartate beta-hydroxylase
hsa-miR-342-3p	1	0	1	1	1	1	TRIM36	tripartite motif containing 36
hsa-miR-342-3p	0	0	1	1	0	0	SLC4A11	solute carrier family 4, sodium borate transporter, member 11
hsa-miR-342-3p	0	0	0	1	0	0	LOC100131831	uncharacterized LOC100131831
hsa-miR-342-3p	0	0	1	1	1	1	HSPH1	heat shock 105kDa/110kDa protein 1
hsa-miR-342-3p	1	0	1	1	1	1	ADRA1A	adrenoceptor alpha 1A
hsa-miR-342-3p	0	0	1	1	1	1	AKR1C2	aldo-keto reductase family 1, member C2 (dihydrodiol dehydrogenase 2; bile acid binding protein; 3-alpha hydroxysteroid dehydrogenase, type III)
hsa-miR-342-3p	1	0	1	1	1	1	SLC7A1	solute carrier family 7 (cationic amino acid transporter, y+ system), member 1
hsa-miR-342-3p	0	0	1	1	1	1	IL4R	interleukin 4 receptor
hsa-miR-342-3p	0	0	0	1	0	0	GPR143	G protein-coupled receptor 143
hsa-miR-342-3p	1	0	1	1	1	1	RBBP6	retinoblastoma binding protein 6
hsa-miR-342-3p	0	0	1	1	1	1	ENTHD1	ENTH domain containing 1
hsa-miR-342-3p	1	0	0	1	0	0	CENPJ	centromere protein J
hsa-miR-342-3p	0	0	1	1	0	0	RNF17	ring finger protein 17
hsa-miR-342-3p	0	0	0	1	0	0	KCNV2	potassium channel, subfamily V, member 2
hsa-miR-342-3p	0	0	0	1	0	0	DEFB134	defensin, beta 134
hsa-miR-342-3p	0	0	0	1	0	0	LOC728419	ubiquitin carboxyl-terminal hydrolase 17-like
hsa-miR-342-3p	0	0	0	1	0	0	LOC728379	ubiquitin carboxyl-terminal hydrolase 17-like
hsa-miR-342-3p	0	0	1	1	0	0	SIGIRR	single immunoglobulin and toll-interleukin 1 receptor (TIR) domain
hsa-miR-342-3p	1	1	1	1	1	1	LATS2	LATS, large tumor suppressor, homolog 2 (Drosophila)
hsa-miR-342-3p	0	0	0	1	0	0	USP17L4	ubiquitin specific peptidase 17-like 4
hsa-miR-342-3p	0	0	1	1	0	0	TPSD1	tryptase delta 1
hsa-miR-342-3p	1	0	1	1	1	1	WHSC1	Wolf-Hirschhorn syndrome candidate 1
hsa-miR-342-3p	0	0	1	1	1	1	MST1	macrophage stimulating 1 (hepatocyte growth factor-like)
hsa-miR-342-3p	0	0	1	1	1	1	CSPP1	centrosome and spindle pole associated protein 1
hsa-miR-342-3p	0	0	1	1	1	1	CASC1	cancer susceptibility candidate 1
hsa-miR-342-3p	0	0	1	1	1	1	SMTNL2	smoothelin-like 2
hsa-miR-342-3p	0	0	0	1	0	0	FAM101A	family with sequence similarity 101, member A
hsa-miR-342-3p	0	0	1	1	1	1	TARP	TCR gamma alternate reading frame protein
hsa-miR-342-3p	0	0	0	1	1	1	ADORA2A	adenosine A2a receptor
hsa-miR-342-3p	1	0	1	0	1	1	KIAA0930	KIAA0930
hsa-miR-342-3p	1	0	1	0	1	1	ZNF793	zinc finger protein 793
hsa-miR-342-3p	0	0	1	1	1	1	VMAC	vimentin-type intermediate filament associated coiled-coil protein
hsa-miR-342-3p	0	0	1	1	1	1	DCAF4L1	DDB1 and CUL4 associated factor 4-like 1
hsa-miR-342-3p	1	0	1	0	1	1	ARL5A	ADP-ribosylation factor-like 5A
hsa-miR-342-3p	1	0	1	1	1	1	NSG1	neuron specific gene family member 1
hsa-miR-342-3p	1	0	1	0	1	1	TRAPPC6B	trafficking protein particle complex 6B
hsa-miR-342-3p	1	0	1	0	1	1	BMP7	bone morphogenetic protein 7
hsa-miR-342-3p	1	0	1	1	1	1	MSR1	macrophage scavenger receptor 1
hsa-miR-342-3p	0	0	1	1	1	1	PTPRC	protein tyrosine phosphatase, receptor type, C
hsa-miR-342-3p	1	0	1	0	1	1	RXRA	retinoid X receptor, alpha
hsa-miR-342-3p	0	0	1	1	1	1	WNT9A	wingless-type MMTV integration site family, member 9A
hsa-miR-342-3p	1	0	1	0	1	1	EIF2S1	eukaryotic translation initiation factor 2, subunit 1 alpha, 35kDa
hsa-miR-342-3p	1	0	1	1	1	1	CASP3	caspase 3, apoptosis-related cysteine peptidase
hsa-miR-342-3p	0	0	1	1	1	1	GCM2	glial cells missing homolog 2 (Drosophila)
hsa-miR-342-3p	1	0	1	1	1	1	POLR2D	polymerase (RNA) II (DNA directed) polypeptide D
hsa-miR-342-3p	0	0	1	1	1	1	ABCD4	ATP-binding cassette, sub-family D (ALD), member 4
hsa-miR-342-3p	0	0	0	1	1	1	FXYD3	FXYD domain containing ion transport regulator 3
hsa-miR-342-3p	0	0	1	1	1	1	ZNF230	zinc finger protein 230
hsa-miR-342-3p	0	0	1	1	1	1	TRIM38	tripartite motif containing 38
hsa-miR-342-3p	1	0	1	1	1	1	AGR2	anterior gradient 2 homolog (Xenopus laevis)
hsa-miR-342-3p	1	0	1	1	1	1	SNTB2	syntrophin, beta 2 (dystrophin-associated protein A1, 59kDa, basic component 2)
hsa-miR-342-3p	1	0	1	1	1	1	BRD3	bromodomain containing 3
hsa-miR-342-3p	1	0	1	1	1	1	TRAM2	translocation associated membrane protein 2
hsa-miR-342-3p	1	0	1	0	1	1	KPNA6	karyopherin alpha 6 (importin alpha 7)
hsa-miR-342-3p	1	0	1	1	1	1	STAT5B	signal transducer and activator of transcription 5B
hsa-miR-342-3p	1	0	1	0	1	1	LIMD1	LIM domains containing 1
hsa-miR-342-3p	1	0	1	1	1	1	MTCH2	mitochondrial carrier 2
hsa-miR-342-3p	1	0	1	0	1	1	ERC1	ELKS/RAB6-interacting/CAST family member 1
hsa-miR-342-3p	0	0	1	1	1	1	SUSD4	sushi domain containing 4
hsa-miR-342-3p	0	0	0	0	1	1	CLN8	ceroid-lipofuscinosis, neuronal 8 (epilepsy, progressive with mental retardation)
hsa-miR-342-3p	1	0	1	1	1	1	CELF4	CUGBP, Elav-like family member 4
hsa-miR-342-3p	0	0	1	1	1	1	RNASEL	ribonuclease L (2',5'-oligoisoadenylate synthetase-dependent)
hsa-miR-342-3p	1	0	1	1	1	1	NAPB	N-ethylmaleimide-sensitive factor attachment protein, beta
hsa-miR-342-3p	0	0	1	1	1	1	SAMSN1	SAM domain, SH3 domain and nuclear localization signals 1
hsa-miR-342-3p	1	0	1	1	1	1	TTC31	tetratricopeptide repeat domain 31
hsa-miR-342-3p	1	0	1	1	1	1	ZNF329	zinc finger protein 329
hsa-miR-342-3p	0	0	1	1	1	1	ERMP1	endoplasmic reticulum metallopeptidase 1
hsa-miR-342-3p	1	0	1	0	1	1	SRCIN1	SRC kinase signaling inhibitor 1
hsa-miR-342-3p	1	0	1	1	1	1	TRIM56	tripartite motif containing 56
hsa-miR-342-3p	0	0	1	1	1	1	L3MBTL2	l(3)mbt-like 2 (Drosophila)
hsa-miR-342-3p	0	0	1	1	1	1	ASB5	ankyrin repeat and SOCS box containing 5
hsa-miR-342-3p	0	0	0	1	1	1	ZNF501	zinc finger protein 501
hsa-miR-342-3p	0	0	0	1	1	1	DHRSX	dehydrogenase/reductase (SDR family) X-linked
hsa-miR-342-3p	1	0	1	1	1	1	CCSAP	centriole, cilia and spindle-associated protein
hsa-miR-342-3p	0	0	0	1	1	1	ANKS4B	ankyrin repeat and sterile alpha motif domain containing 4B
hsa-miR-342-3p	0	0	1	1	1	1	LACC1	laccase (multicopper oxidoreductase) domain containing 1
hsa-miR-342-3p	0	0	1	1	1	1	POC1B	POC1 centriolar protein homolog B (Chlamydomonas)
hsa-miR-342-3p	1	0	1	0	1	1	C5orf51	chromosome 5 open reading frame 51
hsa-miR-342-3p	0	0	1	1	1	1	S100A7A	S100 calcium binding protein A7A
hsa-miR-342-3p	1	0	1	0	1	1	LOC90462	zinc finger protein 605-like
hsa-miR-342-3p	0	0	1	0	1	1	SIAH3	siah E3 ubiquitin protein ligase family member 3
hsa-miR-342-3p	0	0	0	0	1	1	ZNF322P1	zinc finger protein 322 pseudogene 1
hsa-miR-342-3p	0	0	1	1	1	1	PATE2	prostate and testis expressed 2
hsa-miR-342-3p	0	0	0	0	1	1	LOC728730	uncharacterized LOC728730
hsa-miR-342-3p	0	0	1	0	1	1	LOC285556	uncharacterized LOC285556
hsa-miR-342-3p	0	0	0	1	1	1	CXorf69	chromosome X open reading frame 69
hsa-miR-342-3p	0	0	0	0	1	1	RPS16P5	ribosomal protein S16 pseudogene 5
