# Supplementary material for: Profiling of Selected MicroRNAs in Proliferative Eutopic Endometrium of Women with Ovarian Endometriosis
Source: Biomed Res Int. 2015 Aug 20;2015:760698. doi: 10.1155/2015/760698 (PMC4558423; doi:10.1155/2015/760698)
Supplement: Supplementary file 1 — Table I: The names of miRNAs significantly differentially expressed between eutopic endometrium of patients with endometriosis vs eutopic endometrium of patients without endometriosis. Table II: The associations between miRNA and mRNA, which presents detailed results of the search of six major databases i.e targetscan, tarbase, miranda, mirbase, mirtarget2 and pictar. [file 760698.f1.zip › 760698.f1/Table II/hsa-miR-346.tsv]

miR	targetscan	tarbase	miranda	mirbase	mirtarget2	pictar	GeneSymbol	GeneName
hsa-miR-346	1	0	1	1	1	1	CALN1	calneuron 1
hsa-miR-346	1	0	1	1	0	0	RIMS2	regulating synaptic membrane exocytosis 2
hsa-miR-346	1	0	1	1	1	1	ZNF664	zinc finger protein 664
hsa-miR-346	1	0	1	0	1	1	FSTL4	follistatin-like 4
hsa-miR-346	1	0	1	1	1	1	ARSB	arylsulfatase B
hsa-miR-346	1	0	1	1	1	1	RIMKLA	ribosomal modification protein rimK-like family member A
hsa-miR-346	1	0	1	1	1	1	CNOT2	CCR4-NOT transcription complex, subunit 2
hsa-miR-346	1	0	1	1	1	1	KIF1B	kinesin family member 1B
hsa-miR-346	1	0	1	1	1	1	SPRYD7	SPRY domain containing 7
hsa-miR-346	1	0	1	1	1	1	GID8	GID complex subunit 8 homolog (S. cerevisiae)
hsa-miR-346	1	0	1	0	1	1	SPRY3	sprouty homolog 3 (Drosophila)
hsa-miR-346	1	0	1	0	0	0	SP7	Sp7 transcription factor
hsa-miR-346	1	0	1	0	1	1	SMAD3	SMAD family member 3
hsa-miR-346	1	0	1	1	1	1	CCNL1	cyclin L1
hsa-miR-346	1	0	1	1	1	1	ATG2B	autophagy related 2B
hsa-miR-346	1	0	1	1	1	1	PPP1R9B	protein phosphatase 1, regulatory subunit 9B
hsa-miR-346	1	0	1	1	1	1	LIF	leukemia inhibitory factor
hsa-miR-346	1	0	1	0	1	1	ZIC1	Zic family member 1
hsa-miR-346	1	0	1	0	0	0	ANKRD52	ankyrin repeat domain 52
hsa-miR-346	1	0	1	0	1	1	MMD2	monocyte to macrophage differentiation-associated 2
hsa-miR-346	1	0	1	1	1	1	NFIB	nuclear factor I/B
hsa-miR-346	1	0	1	1	1	1	KCNC4	potassium voltage-gated channel, Shaw-related subfamily, member 4
hsa-miR-346	1	0	1	1	1	1	PDZD4	PDZ domain containing 4
hsa-miR-346	1	0	1	1	1	1	SCML4	sex comb on midleg-like 4 (Drosophila)
hsa-miR-346	1	0	1	1	1	1	KLHL18	kelch-like 18 (Drosophila)
hsa-miR-346	1	0	1	0	1	1	ETV6	ets variant 6
hsa-miR-346	1	0	1	0	1	1	PIK3R3	phosphoinositide-3-kinase, regulatory subunit 3 (gamma)
hsa-miR-346	1	0	1	1	1	1	SMAD4	SMAD family member 4
hsa-miR-346	1	0	1	1	1	1	RBFOX2	RNA binding protein, fox-1 homolog (C. elegans) 2
hsa-miR-346	1	0	1	1	1	1	AJAP1	adherens junctions associated protein 1
hsa-miR-346	1	0	1	1	1	1	CADM3	cell adhesion molecule 3
hsa-miR-346	1	0	1	1	1	1	TEAD1	TEA domain family member 1 (SV40 transcriptional enhancer factor)
hsa-miR-346	1	0	1	1	1	1	PPIL6	peptidylprolyl isomerase (cyclophilin)-like 6
hsa-miR-346	1	0	1	1	1	1	IL20RA	interleukin 20 receptor, alpha
hsa-miR-346	1	0	0	1	1	1	CPSF7	cleavage and polyadenylation specific factor 7, 59kDa
hsa-miR-346	1	0	1	0	1	1	TP53INP2	tumor protein p53 inducible nuclear protein 2
hsa-miR-346	1	0	1	1	1	1	ARHGEF15	Rho guanine nucleotide exchange factor (GEF) 15
hsa-miR-346	1	0	1	0	1	1	PRICKLE2	prickle homolog 2 (Drosophila)
hsa-miR-346	1	0	1	0	1	1	ZNF609	zinc finger protein 609
hsa-miR-346	1	0	1	1	1	1	ZNF362	zinc finger protein 362
hsa-miR-346	1	0	1	0	1	1	RAPGEF1	Rap guanine nucleotide exchange factor (GEF) 1
hsa-miR-346	1	0	1	1	1	1	MYO5A	myosin VA (heavy chain 12, myoxin)
hsa-miR-346	1	0	1	1	1	1	KDM4A	lysine (K)-specific demethylase 4A
hsa-miR-346	1	0	1	1	1	1	CSNK1D	casein kinase 1, delta
hsa-miR-346	1	0	1	1	1	1	ASB6	ankyrin repeat and SOCS box containing 6
hsa-miR-346	1	0	1	0	1	1	KCMF1	potassium channel modulatory factor 1
hsa-miR-346	1	0	1	1	0	0	GPR173	G protein-coupled receptor 173
hsa-miR-346	1	0	1	1	1	1	SFRP4	secreted frizzled-related protein 4
hsa-miR-346	1	0	1	1	1	1	IER5	immediate early response 5
hsa-miR-346	1	0	1	1	1	1	KLF4	Kruppel-like factor 4 (gut)
hsa-miR-346	1	0	1	1	1	1	NXPH1	neurexophilin 1
hsa-miR-346	1	0	1	0	1	1	PPP1R16B	protein phosphatase 1, regulatory subunit 16B
hsa-miR-346	1	0	1	1	1	1	FGF7	fibroblast growth factor 7
hsa-miR-346	1	0	1	1	1	1	BCL6	B-cell CLL/lymphoma 6
hsa-miR-346	1	0	1	1	1	1	EPB41L1	erythrocyte membrane protein band 4.1-like 1
hsa-miR-346	1	0	1	1	1	1	MBNL1	muscleblind-like splicing regulator 1
hsa-miR-346	1	0	1	1	1	1	COL2A1	collagen, type II, alpha 1
hsa-miR-346	1	0	1	1	1	1	PAFAH2	platelet-activating factor acetylhydrolase 2, 40kDa
hsa-miR-346	1	0	1	1	0	0	ENTPD1	ectonucleoside triphosphate diphosphohydrolase 1
hsa-miR-346	1	0	1	1	0	0	PTPN5	protein tyrosine phosphatase, non-receptor type 5 (striatum-enriched)
hsa-miR-346	1	0	1	1	1	1	ACVR2B	activin A receptor, type IIB
hsa-miR-346	1	0	1	0	1	1	IGF2BP1	insulin-like growth factor 2 mRNA binding protein 1
hsa-miR-346	1	0	1	1	1	1	MTMR3	myotubularin related protein 3
hsa-miR-346	1	0	1	1	1	1	CA7	carbonic anhydrase VII
hsa-miR-346	1	0	1	1	1	1	BNC2	basonuclin 2
hsa-miR-346	1	0	1	1	1	1	LIMD2	LIM domain containing 2
hsa-miR-346	1	0	1	1	1	1	IGF1R	insulin-like growth factor 1 receptor
hsa-miR-346	1	0	1	0	1	1	KIF5C	kinesin family member 5C
hsa-miR-346	1	0	1	1	1	1	SAMD12	sterile alpha motif domain containing 12
hsa-miR-346	1	0	1	1	1	1	SORCS3	sortilin-related VPS10 domain containing receptor 3
hsa-miR-346	1	0	1	1	1	1	LRP6	low density lipoprotein receptor-related protein 6
hsa-miR-346	1	0	1	1	1	1	ABCG4	ATP-binding cassette, sub-family G (WHITE), member 4
hsa-miR-346	1	0	1	1	1	1	RDX	radixin
hsa-miR-346	1	0	1	0	1	1	NMT1	N-myristoyltransferase 1
hsa-miR-346	1	0	1	1	1	1	FAM131A	family with sequence similarity 131, member A
hsa-miR-346	1	0	0	1	1	1	UHRF1	ubiquitin-like with PHD and ring finger domains 1
hsa-miR-346	1	0	1	0	1	1	MLL2	myeloid/lymphoid or mixed-lineage leukemia 2
hsa-miR-346	1	0	1	1	1	1	MAP6	microtubule-associated protein 6
hsa-miR-346	1	0	1	1	0	0	CARNS1	carnosine synthase 1
hsa-miR-346	1	0	1	1	1	1	TRAF4	TNF receptor-associated factor 4
hsa-miR-346	1	0	1	1	1	1	NLGN2	neuroligin 2
hsa-miR-346	1	0	1	0	1	1	NFAM1	NFAT activating protein with ITAM motif 1
hsa-miR-346	1	0	1	1	0	0	PRRC2B	proline-rich coiled-coil 2B
hsa-miR-346	1	0	1	1	1	1	SZRD1	SUZ RNA binding domain containing 1
hsa-miR-346	1	0	1	1	1	1	MEMO1	mediator of cell motility 1
hsa-miR-346	1	0	1	1	1	1	FAM155B	family with sequence similarity 155, member B
hsa-miR-346	1	0	1	0	1	1	CNNM1	cyclin M1
hsa-miR-346	1	0	1	1	0	0	HES7	hairy and enhancer of split 7 (Drosophila)
hsa-miR-346	1	0	1	0	1	1	PTPRT	protein tyrosine phosphatase, receptor type, T
hsa-miR-346	1	0	1	1	1	1	SGSM2	small G protein signaling modulator 2
hsa-miR-346	0	0	1	1	0	0	RAP1GAP	RAP1 GTPase activating protein
hsa-miR-346	0	0	1	1	0	0	ZNF862	zinc finger protein 862
hsa-miR-346	1	0	1	0	0	0	MICAL3	microtubule associated monoxygenase, calponin and LIM domain containing 3
hsa-miR-346	1	0	1	1	1	1	CDK12	cyclin-dependent kinase 12
hsa-miR-346	0	0	1	1	1	1	MAN2B2	mannosidase, alpha, class 2B, member 2
hsa-miR-346	1	0	1	1	1	1	CIT	citron (rho-interacting, serine/threonine kinase 21)
hsa-miR-346	1	0	1	1	1	1	C11orf9	chromosome 11 open reading frame 9
hsa-miR-346	1	0	1	1	1	1	RGL1	ral guanine nucleotide dissociation stimulator-like 1
hsa-miR-346	1	0	1	1	0	0	FRMD4B	FERM domain containing 4B
hsa-miR-346	1	0	1	1	0	0	IGSF9B	immunoglobulin superfamily, member 9B
hsa-miR-346	1	0	1	1	0	0	KIAA1045	KIAA1045
hsa-miR-346	0	0	1	1	1	1	SETD1B	SET domain containing 1B
hsa-miR-346	0	0	1	1	1	1	SEMA4A	sema domain, immunoglobulin domain (Ig), transmembrane domain (TM) and short cytoplasmic domain, (semaphorin) 4A
hsa-miR-346	0	0	1	1	0	0	ZC4H2	zinc finger, C4H2 domain containing
hsa-miR-346	1	0	1	1	1	1	ATXN7L1	ataxin 7-like 1
hsa-miR-346	1	0	1	0	0	0	HEG1	HEG homolog 1 (zebrafish)
hsa-miR-346	0	0	1	0	0	0	MTA3	metastasis associated 1 family, member 3
hsa-miR-346	0	0	1	1	0	0	TNFRSF12A	tumor necrosis factor receptor superfamily, member 12A
hsa-miR-346	1	0	1	1	1	1	SEMA6A	sema domain, transmembrane domain (TM), and cytoplasmic domain, (semaphorin) 6A
hsa-miR-346	1	0	1	1	1	1	FRAS1	Fraser syndrome 1
hsa-miR-346	0	0	1	0	0	0	KRT19P2	keratin 19 pseudogene 2
hsa-miR-346	1	0	1	1	1	1	FUT8	fucosyltransferase 8 (alpha (1,6) fucosyltransferase)
hsa-miR-346	0	0	1	0	0	0	TTC28-AS1	TTC28 antisense RNA 1
hsa-miR-346	0	0	1	0	0	0	LOC440792	proline dehydrogenase (oxidase) 1 pseudogene
hsa-miR-346	1	0	1	1	0	0	ARHGAP39	Rho GTPase activating protein 39
hsa-miR-346	0	0	1	0	1	1	SETD5	SET domain containing 5
hsa-miR-346	0	0	1	1	0	0	NTNG2	netrin G2
hsa-miR-346	0	0	1	1	0	0	COL27A1	collagen, type XXVII, alpha 1
hsa-miR-346	1	0	1	1	0	0	ADC	arginine decarboxylase
hsa-miR-346	1	0	1	1	1	1	SH3TC2	SH3 domain and tetratricopeptide repeats 2
hsa-miR-346	0	0	1	1	0	0	SLC22A10	solute carrier family 22, member 10
hsa-miR-346	1	0	1	0	1	1	RNF43	ring finger protein 43
hsa-miR-346	0	0	1	1	0	0	KREMEN2	kringle containing transmembrane protein 2
hsa-miR-346	0	0	1	0	1	1	RASSF8	Ras association (RalGDS/AF-6) domain family (N-terminal) member 8
hsa-miR-346	1	0	1	0	0	0	ZC3H12C	zinc finger CCCH-type containing 12C
hsa-miR-346	0	0	1	1	0	0	SSPO	SCO-spondin homolog (Bos taurus)
hsa-miR-346	0	0	1	1	0	0	ERAP2	endoplasmic reticulum aminopeptidase 2
hsa-miR-346	0	0	1	1	1	1	ING4	inhibitor of growth family, member 4
hsa-miR-346	1	0	1	1	1	1	LTBP1	latent transforming growth factor beta binding protein 1
hsa-miR-346	0	0	1	1	0	0	CPT1C	carnitine palmitoyltransferase 1C
hsa-miR-346	1	0	1	1	0	0	ELN	elastin
hsa-miR-346	1	0	1	1	1	1	MEF2A	myocyte enhancer factor 2A
hsa-miR-346	1	0	1	1	1	1	PCCB	propionyl CoA carboxylase, beta polypeptide
hsa-miR-346	1	0	1	0	1	1	CACNA1C	calcium channel, voltage-dependent, L type, alpha 1C subunit
hsa-miR-346	0	0	1	1	1	1	MAZ	MYC-associated zinc finger protein (purine-binding transcription factor)
hsa-miR-346	1	0	1	1	1	1	PHC1	polyhomeotic homolog 1 (Drosophila)
hsa-miR-346	1	0	1	0	1	1	PLAG1	pleiomorphic adenoma gene 1
hsa-miR-346	1	0	1	0	1	1	MPPED2	metallophosphoesterase domain containing 2
hsa-miR-346	1	0	1	1	1	1	ERF	Ets2 repressor factor
hsa-miR-346	1	0	1	1	0	0	SEMA3B	sema domain, immunoglobulin domain (Ig), short basic domain, secreted, (semaphorin) 3B
hsa-miR-346	0	0	1	1	0	0	IFT27	intraflagellar transport 27 homolog (Chlamydomonas)
hsa-miR-346	0	0	1	1	0	0	BMP1	bone morphogenetic protein 1
hsa-miR-346	0	0	1	1	0	0	CFLAR	CASP8 and FADD-like apoptosis regulator
hsa-miR-346	0	0	1	1	0	0	SLC22A8	solute carrier family 22 (organic anion transporter), member 8
hsa-miR-346	1	0	1	1	0	0	GRIN2A	glutamate receptor, ionotropic, N-methyl D-aspartate 2A
hsa-miR-346	0	0	1	1	0	0	CDK10	cyclin-dependent kinase 10
hsa-miR-346	1	0	1	1	0	0	PPP2R5D	protein phosphatase 2, regulatory subunit B', delta
hsa-miR-346	0	0	1	1	0	0	TRIM27	tripartite motif containing 27
hsa-miR-346	1	0	1	1	1	1	PHLDB2	pleckstrin homology-like domain, family B, member 2
hsa-miR-346	0	0	1	1	1	1	PLD1	phospholipase D1, phosphatidylcholine-specific
hsa-miR-346	1	0	1	0	1	1	CAV1	caveolin 1, caveolae protein, 22kDa
hsa-miR-346	1	0	1	1	1	1	MEF2D	myocyte enhancer factor 2D
hsa-miR-346	0	0	1	0	0	0	MIAT	myocardial infarction associated transcript (non-protein coding)
hsa-miR-346	1	0	1	0	1	1	DDX3X	DEAD (Asp-Glu-Ala-Asp) box polypeptide 3, X-linked
hsa-miR-346	1	0	1	1	1	1	ADARB1	adenosine deaminase, RNA-specific, B1
hsa-miR-346	1	0	1	1	1	1	CBFA2T2	core-binding factor, runt domain, alpha subunit 2; translocated to, 2
hsa-miR-346	0	0	1	0	0	0	ALOX12P2	arachidonate 12-lipoxygenase pseudogene 2
hsa-miR-346	0	0	1	1	0	0	SPTBN2	spectrin, beta, non-erythrocytic 2
hsa-miR-346	1	0	1	1	1	1	MRAS	muscle RAS oncogene homolog
hsa-miR-346	1	0	1	1	1	1	PFKFB3	6-phosphofructo-2-kinase/fructose-2,6-biphosphatase 3
hsa-miR-346	1	0	1	1	1	1	MBNL2	muscleblind-like splicing regulator 2
hsa-miR-346	0	0	1	1	1	1	CAPN10	calpain 10
hsa-miR-346	0	0	1	1	1	1	PCBP4	poly(rC) binding protein 4
hsa-miR-346	1	0	1	1	0	0	RASSF1	Ras association (RalGDS/AF-6) domain family member 1
hsa-miR-346	0	0	1	1	1	1	GUCA1C	guanylate cyclase activator 1C
hsa-miR-346	0	0	1	1	1	1	IL18BP	interleukin 18 binding protein
hsa-miR-346	0	0	1	1	1	1	MSTO1	misato homolog 1 (Drosophila)
hsa-miR-346	1	0	1	1	1	1	EDNRB	endothelin receptor type B
hsa-miR-346	1	0	1	0	1	1	CDK14	cyclin-dependent kinase 14
hsa-miR-346	0	0	1	1	0	0	ADAMTS7	ADAM metallopeptidase with thrombospondin type 1 motif, 7
hsa-miR-346	1	0	1	1	1	1	C3orf18	chromosome 3 open reading frame 18
hsa-miR-346	0	0	1	0	1	1	SLC38A4	solute carrier family 38, member 4
hsa-miR-346	1	0	1	0	1	1	KLHL3	kelch-like 3 (Drosophila)
hsa-miR-346	1	0	1	1	1	1	SYDE1	synapse defective 1, Rho GTPase, homolog 1 (C. elegans)
hsa-miR-346	0	0	1	1	1	1	CD28	CD28 molecule
hsa-miR-346	1	0	1	1	1	1	STRN3	striatin, calmodulin binding protein 3
hsa-miR-346	0	0	1	0	0	0	TIGD7	tigger transposable element derived 7
hsa-miR-346	1	0	1	1	1	1	KCNIP2	Kv channel interacting protein 2
hsa-miR-346	1	0	1	1	1	1	CALCOCO1	calcium binding and coiled-coil domain 1
hsa-miR-346	0	0	1	0	0	0	NBPF10	neuroblastoma breakpoint family, member 10
hsa-miR-346	0	0	1	0	0	0	CLRN1-AS1	CLRN1 antisense RNA 1
hsa-miR-346	0	0	1	1	1	1	ORMDL1	ORM1-like 1 (S. cerevisiae)
hsa-miR-346	1	0	1	1	0	0	FOXP2	forkhead box P2
hsa-miR-346	1	0	1	1	1	1	BAK1	BCL2-antagonist/killer 1
hsa-miR-346	0	0	1	1	1	1	R3HCC1L	R3H domain and coiled-coil containing 1-like
hsa-miR-346	0	0	1	1	1	1	PTK7	PTK7 protein tyrosine kinase 7
hsa-miR-346	1	0	1	1	1	1	GPR64	G protein-coupled receptor 64
hsa-miR-346	1	0	1	1	1	1	AFF2	AF4/FMR2 family, member 2
hsa-miR-346	0	0	1	0	0	0	SNHG4	small nucleolar RNA host gene 4 (non-protein coding)
hsa-miR-346	1	0	1	1	0	0	SEZ6L2	seizure related 6 homolog (mouse)-like 2
hsa-miR-346	1	0	1	1	1	1	NRXN3	neurexin 3
hsa-miR-346	1	0	1	1	1	1	EMID2	EMI domain containing 2
hsa-miR-346	0	0	1	0	0	0	TOMM6	translocase of outer mitochondrial membrane 6 homolog (yeast)
hsa-miR-346	0	0	1	1	1	1	ZNF248	zinc finger protein 248
hsa-miR-346	0	0	1	1	0	0	MBD1	methyl-CpG binding domain protein 1
hsa-miR-346	0	0	1	1	1	1	DEPDC5	DEP domain containing 5
hsa-miR-346	1	0	1	1	1	1	PPP1R9A	protein phosphatase 1, regulatory subunit 9A
hsa-miR-346	1	0	1	1	0	0	TRPM4	transient receptor potential cation channel, subfamily M, member 4
hsa-miR-346	0	0	1	1	1	1	PARPBP	PARP1 binding protein
hsa-miR-346	0	0	1	1	0	0	LOC100128398	uncharacterized LOC100128398
hsa-miR-346	0	0	1	0	0	0	RNF31	ring finger protein 31
hsa-miR-346	1	0	1	1	0	0	SMUG1	single-strand-selective monofunctional uracil-DNA glycosylase 1
hsa-miR-346	1	0	1	1	1	1	MYEF2	myelin expression factor 2
hsa-miR-346	0	0	1	1	0	0	CARD14	caspase recruitment domain family, member 14
hsa-miR-346	1	0	1	1	1	1	KLHDC8B	kelch domain containing 8B
hsa-miR-346	1	0	1	1	1	1	MYO9B	myosin IXB
hsa-miR-346	0	0	1	1	1	1	SNCAIP	synuclein, alpha interacting protein
hsa-miR-346	0	0	1	1	0	0	KIRREL	kin of IRRE like (Drosophila)
hsa-miR-346	0	0	1	1	1	1	INPP5B	inositol polyphosphate-5-phosphatase, 75kDa
hsa-miR-346	0	0	1	1	1	1	SPATA5L1	spermatogenesis associated 5-like 1
hsa-miR-346	0	0	1	0	0	0	MIRLET7BHG	MIRLET7B host gene (non-protein coding)
hsa-miR-346	1	0	1	1	0	0	CCDC136	coiled-coil domain containing 136
hsa-miR-346	0	0	1	1	1	1	SMYD3	SET and MYND domain containing 3
hsa-miR-346	0	0	1	1	1	1	CLEC4M	C-type lectin domain family 4, member M
hsa-miR-346	0	0	1	1	0	0	EIF4ENIF1	eukaryotic translation initiation factor 4E nuclear import factor 1
hsa-miR-346	0	0	1	0	0	0	KIAA1671	KIAA1671
hsa-miR-346	0	0	1	1	1	1	C12orf65	chromosome 12 open reading frame 65
hsa-miR-346	0	0	1	0	1	1	HEMK1	HemK methyltransferase family member 1
hsa-miR-346	0	0	1	0	1	1	FLJ22763	uncharacterized LOC401081
hsa-miR-346	1	0	1	1	1	1	DCAF8	DDB1 and CUL4 associated factor 8
hsa-miR-346	1	0	1	1	1	1	EML2	echinoderm microtubule associated protein like 2
hsa-miR-346	1	0	1	1	1	1	ITGA9	integrin, alpha 9
hsa-miR-346	1	0	1	0	1	1	TOX3	TOX high mobility group box family member 3
hsa-miR-346	0	0	1	1	1	1	HDC	histidine decarboxylase
hsa-miR-346	1	0	1	1	1	1	FAM53C	family with sequence similarity 53, member C
hsa-miR-346	1	0	1	1	1	1	GPD2	glycerol-3-phosphate dehydrogenase 2 (mitochondrial)
hsa-miR-346	1	0	1	1	1	1	KCTD15	potassium channel tetramerisation domain containing 15
hsa-miR-346	0	0	1	1	1	1	PAQR4	progestin and adipoQ receptor family member IV
hsa-miR-346	0	0	1	0	0	0	KIAA0664L3	KIAA0664-like 3
hsa-miR-346	0	0	1	1	1	1	MTRF1	mitochondrial translational release factor 1
hsa-miR-346	1	0	1	1	1	1	AGAP3	ArfGAP with GTPase domain, ankyrin repeat and PH domain 3
hsa-miR-346	0	0	1	0	0	0	FLJ30838	uncharacterized LOC400955
hsa-miR-346	0	0	1	0	0	0	LOC219688	uncharacterized LOC219688
hsa-miR-346	0	0	1	0	0	0	FLJ31104	uncharacterized LOC441072
hsa-miR-346	1	0	1	1	1	1	SFXN2	sideroflexin 2
hsa-miR-346	0	0	1	1	1	1	FLYWCH1	FLYWCH-type zinc finger 1
hsa-miR-346	1	0	1	1	0	0	SH2D3C	SH2 domain containing 3C
hsa-miR-346	1	0	1	1	1	1	LMNA	lamin A/C
hsa-miR-346	0	0	1	0	0	0	RMST	rhabdomyosarcoma 2 associated transcript (non-protein coding)
hsa-miR-346	0	0	1	1	1	1	SEPT5	septin 5
hsa-miR-346	0	0	1	1	0	0	ZNF185	zinc finger protein 185 (LIM domain)
hsa-miR-346	0	0	1	0	0	0	BAIAP2-AS1	BAIAP2 antisense RNA 1
hsa-miR-346	0	0	1	0	0	0	ERVV-1	endogenous retrovirus group V, member 1
hsa-miR-346	0	0	1	0	1	1	THAP6	THAP domain containing 6
hsa-miR-346	0	0	1	1	0	0	RELT	RELT tumor necrosis factor receptor
hsa-miR-346	0	0	1	1	0	0	COMMD4	COMM domain containing 4
hsa-miR-346	0	0	1	0	0	0	TUBA3FP	tubulin, alpha 3f, pseudogene
hsa-miR-346	0	0	1	0	0	0	FLJ32742	uncharacterized locus FLJ32742
hsa-miR-346	0	0	1	1	0	0	NXF2	nuclear RNA export factor 2
hsa-miR-346	0	0	1	1	1	1	MS4A14	membrane-spanning 4-domains, subfamily A, member 14
hsa-miR-346	1	0	1	1	1	1	IST1	increased sodium tolerance 1 homolog (yeast)
hsa-miR-346	0	0	1	1	1	1	ZBTB26	zinc finger and BTB domain containing 26
hsa-miR-346	1	0	1	1	1	1	AKNA	AT-hook transcription factor
hsa-miR-346	0	0	1	1	0	0	TRIM41	tripartite motif containing 41
hsa-miR-346	1	0	1	1	1	1	FAM102A	family with sequence similarity 102, member A
hsa-miR-346	1	0	1	1	1	1	PEAR1	platelet endothelial aggregation receptor 1
hsa-miR-346	1	0	1	1	1	1	FAM73B	family with sequence similarity 73, member B
hsa-miR-346	1	0	1	1	1	1	ARID1B	AT rich interactive domain 1B (SWI1-like)
hsa-miR-346	1	0	1	1	1	1	KCTD6	potassium channel tetramerisation domain containing 6
hsa-miR-346	0	0	1	0	1	1	CADM1	cell adhesion molecule 1
hsa-miR-346	0	0	1	1	0	0	PIGO	phosphatidylinositol glycan anchor biosynthesis, class O
hsa-miR-346	0	0	1	0	0	0	LOC643837	uncharacterized LOC643837
hsa-miR-346	0	0	1	0	0	0	FLJ34208	uncharacterized LOC401106
hsa-miR-346	0	0	1	0	0	0	LOC440910	uncharacterized LOC440910
hsa-miR-346	1	0	1	1	1	1	FBXW2	F-box and WD repeat domain containing 2
hsa-miR-346	0	0	1	1	0	0	MSANTD3	Myb/SANT-like DNA-binding domain containing 3
hsa-miR-346	0	0	1	1	1	1	AP5S1	adaptor-related protein complex 5, sigma 1 subunit
hsa-miR-346	1	0	1	1	0	0	PRMT8	protein arginine methyltransferase 8
hsa-miR-346	0	0	1	1	1	1	SLC16A1	solute carrier family 16, member 1 (monocarboxylic acid transporter 1)
hsa-miR-346	0	0	1	0	0	0	CXXC1P1	CXXC finger protein 1 pseudogene 1
hsa-miR-346	1	0	1	1	1	1	RCN1	reticulocalbin 1, EF-hand calcium binding domain
hsa-miR-346	1	0	1	1	1	1	KCND1	potassium voltage-gated channel, Shal-related subfamily, member 1
hsa-miR-346	1	0	1	1	1	1	RNF121	ring finger protein 121
hsa-miR-346	0	0	1	0	0	0	PART1	prostate androgen-regulated transcript 1 (non-protein coding)
hsa-miR-346	0	0	1	1	0	0	IL11RA	interleukin 11 receptor, alpha
hsa-miR-346	1	0	1	0	1	1	NCOA7	nuclear receptor coactivator 7
hsa-miR-346	0	0	1	0	0	0	LINC00340	long intergenic non-protein coding RNA 340
hsa-miR-346	1	0	1	1	1	1	LPPR2	lipid phosphate phosphatase-related protein type 2
hsa-miR-346	1	0	1	1	1	1	NDEL1	nudE nuclear distribution E homolog (A. nidulans)-like 1
hsa-miR-346	1	0	1	0	1	1	UVRAG	UV radiation resistance associated gene
hsa-miR-346	0	0	1	1	1	1	LTBR	lymphotoxin beta receptor (TNFR superfamily, member 3)
hsa-miR-346	0	0	1	0	0	0	LOC100129620	uncharacterized LOC100129620
hsa-miR-346	1	0	1	1	1	1	PEA15	phosphoprotein enriched in astrocytes 15
hsa-miR-346	0	0	1	1	0	0	MAP7D1	MAP7 domain containing 1
hsa-miR-346	0	0	1	1	1	1	FBLN1	fibulin 1
hsa-miR-346	1	0	1	1	1	1	EPB41L4A	erythrocyte membrane protein band 4.1 like 4A
hsa-miR-346	1	0	1	1	1	1	AMT	aminomethyltransferase
hsa-miR-346	1	0	1	1	1	1	FAM98A	family with sequence similarity 98, member A
hsa-miR-346	0	0	1	0	0	0	ZNF815P	zinc finger protein 815, pseudogene
hsa-miR-346	1	0	1	0	1	1	THRB	thyroid hormone receptor, beta
hsa-miR-346	0	0	1	0	0	0	CCDC150	coiled-coil domain containing 150
hsa-miR-346	0	0	1	1	0	0	CHCHD5	coiled-coil-helix-coiled-coil-helix domain containing 5
hsa-miR-346	0	0	1	1	1	1	TEX35	testis expressed 35
hsa-miR-346	0	0	1	1	0	0	AHCY	adenosylhomocysteinase
hsa-miR-346	0	0	1	1	1	1	CBWD5	COBW domain containing 5
hsa-miR-346	1	0	1	1	1	1	IGSF11	immunoglobulin superfamily, member 11
hsa-miR-346	1	0	1	1	1	1	HOOK1	hook homolog 1 (Drosophila)
hsa-miR-346	0	0	1	1	0	0	TAPBPL	TAP binding protein-like
hsa-miR-346	0	0	1	0	0	0	CECR7	cat eye syndrome chromosome region, candidate 7 (non-protein coding)
hsa-miR-346	0	0	1	1	1	1	RGS14	regulator of G-protein signaling 14
hsa-miR-346	0	0	1	1	0	0	DCBLD1	discoidin, CUB and LCCL domain containing 1
hsa-miR-346	0	0	1	0	0	0	LOC100130954	uncharacterized LOC100130954
hsa-miR-346	0	0	1	1	1	1	GRPEL1	GrpE-like 1, mitochondrial (E. coli)
hsa-miR-346	1	0	1	1	0	0	FBXL19	F-box and leucine-rich repeat protein 19
hsa-miR-346	0	0	1	0	1	1	MYLK4	myosin light chain kinase family, member 4
hsa-miR-346	0	0	1	1	0	0	ZACN	zinc activated ligand-gated ion channel
hsa-miR-346	1	0	1	1	1	1	HBP1	HMG-box transcription factor 1
hsa-miR-346	1	0	1	1	1	1	BCL6B	B-cell CLL/lymphoma 6, member B
hsa-miR-346	0	0	1	1	0	0	ZNF335	zinc finger protein 335
hsa-miR-346	1	0	1	1	1	1	ZBTB4	zinc finger and BTB domain containing 4
hsa-miR-346	0	0	1	1	0	0	ARHGAP10	Rho GTPase activating protein 10
hsa-miR-346	1	0	1	1	1	1	EGLN3	egl nine homolog 3 (C. elegans)
hsa-miR-346	0	0	1	1	1	1	PCBP2	poly(rC) binding protein 2
hsa-miR-346	0	0	1	1	0	0	CENPM	centromere protein M
hsa-miR-346	0	0	1	0	0	0	LGALS17A	Charcot-Leyden crystal protein pseudogene
hsa-miR-346	0	0	1	1	0	0	C16orf86	chromosome 16 open reading frame 86
hsa-miR-346	0	0	1	1	0	0	KRT37	keratin 37
hsa-miR-346	1	0	1	1	1	1	EPAS1	endothelial PAS domain protein 1
hsa-miR-346	1	0	1	0	1	1	WDR82	WD repeat domain 82
hsa-miR-346	0	0	1	1	1	1	BTN2A2	butyrophilin, subfamily 2, member A2
hsa-miR-346	0	0	1	0	0	0	LOC285043	uncharacterized LOC285043
hsa-miR-346	1	0	1	1	1	1	MBTD1	mbt domain containing 1
hsa-miR-346	0	0	1	0	0	0	DKFZP434H168	uncharacterized LOC26077
hsa-miR-346	0	0	1	1	0	0	NPIP	nuclear pore complex interacting protein
hsa-miR-346	1	0	1	0	1	1	TTYH3	tweety homolog 3 (Drosophila)
hsa-miR-346	1	0	1	1	1	1	CORO2B	coronin, actin binding protein, 2B
hsa-miR-346	1	0	1	1	1	1	CELF6	CUGBP, Elav-like family member 6
hsa-miR-346	0	0	1	1	0	0	PPP1R18	protein phosphatase 1, regulatory subunit 18
hsa-miR-346	1	0	1	1	0	0	OSBPL5	oxysterol binding protein-like 5
hsa-miR-346	0	0	1	1	0	0	LOC100128239	uncharacterized LOC100128239
hsa-miR-346	1	0	1	1	1	1	DLGAP4	discs, large (Drosophila) homolog-associated protein 4
hsa-miR-346	0	0	1	1	1	1	C11orf45	chromosome 11 open reading frame 45
hsa-miR-346	0	0	1	0	0	0	FAM95B1	family with sequence similarity 95, member B1
hsa-miR-346	0	0	1	1	1	1	EPPIN	epididymal peptidase inhibitor
hsa-miR-346	1	0	1	1	0	0	ATXN7L3	ataxin 7-like 3
hsa-miR-346	0	0	1	1	1	1	RBM39	RNA binding motif protein 39
hsa-miR-346	0	0	1	1	0	0	CLDN4	claudin 4
hsa-miR-346	1	0	1	1	1	1	C15orf52	chromosome 15 open reading frame 52
hsa-miR-346	1	0	1	1	1	1	ATP1A2	ATPase, Na+/K+ transporting, alpha 2 polypeptide
hsa-miR-346	1	0	1	1	0	0	TNK2	tyrosine kinase, non-receptor, 2
hsa-miR-346	0	0	1	0	0	0	PLEKHD1	pleckstrin homology domain containing, family D (with coiled-coil domains) member 1
hsa-miR-346	1	0	1	1	1	1	DLG2	discs, large homolog 2 (Drosophila)
hsa-miR-346	1	0	1	1	1	1	MKRN1	makorin ring finger protein 1
hsa-miR-346	0	0	1	0	0	0	LOC100127955	uncharacterized LOC100127955
hsa-miR-346	0	0	1	0	0	0	LOC619207	scavenger receptor protein family member
hsa-miR-346	1	0	1	1	1	1	KANK4	KN motif and ankyrin repeat domains 4
hsa-miR-346	1	0	1	0	1	1	SP6	Sp6 transcription factor
hsa-miR-346	0	0	1	1	0	0	NCF1	neutrophil cytosolic factor 1
hsa-miR-346	1	0	1	1	1	1	NSUN4	NOP2/Sun domain family, member 4
hsa-miR-346	0	0	1	0	0	0	FLJ46361	deleted in malignant brain tumors 1 pseudogene
hsa-miR-346	1	0	1	1	1	1	FRYL	FRY-like
hsa-miR-346	1	0	1	0	1	1	NBR1	neighbor of BRCA1 gene 1
hsa-miR-346	0	0	1	0	0	0	LOC100129940	uncharacterized LOC100129940
hsa-miR-346	1	0	1	1	1	1	UPF1	UPF1 regulator of nonsense transcripts homolog (yeast)
hsa-miR-346	1	0	1	0	1	1	CYB561D1	cytochrome b-561 domain containing 1
hsa-miR-346	1	0	1	1	1	1	PHC2	polyhomeotic homolog 2 (Drosophila)
hsa-miR-346	0	0	1	1	1	1	MRPL49	mitochondrial ribosomal protein L49
hsa-miR-346	0	0	1	1	1	1	LYPD1	LY6/PLAUR domain containing 1
hsa-miR-346	0	0	1	1	0	0	TMEM91	transmembrane protein 91
hsa-miR-346	0	0	1	0	1	1	RUFY4	RUN and FYVE domain containing 4
hsa-miR-346	0	0	1	1	1	1	NOTCH4	notch 4
hsa-miR-346	1	0	1	1	1	1	MAP3K14	mitogen-activated protein kinase kinase kinase 14
hsa-miR-346	0	0	1	0	0	0	AGAP9	ArfGAP with GTPase domain, ankyrin repeat and PH domain 9
hsa-miR-346	0	0	1	1	0	0	SCNN1A	sodium channel, non-voltage-gated 1 alpha subunit
hsa-miR-346	1	0	1	1	1	1	BIN2	bridging integrator 2
hsa-miR-346	0	0	1	1	1	1	PRSS16	protease, serine, 16 (thymus)
hsa-miR-346	1	0	1	1	1	1	AHCYL1	adenosylhomocysteinase-like 1
hsa-miR-346	1	0	1	1	1	1	RIF1	RAP1 interacting factor homolog (yeast)
hsa-miR-346	0	0	1	1	1	1	ENGASE	endo-beta-N-acetylglucosaminidase
hsa-miR-346	0	0	1	0	0	0	POM121L9P	POM121 transmembrane nucleoporin-like 9, pseudogene
hsa-miR-346	1	0	1	1	1	1	TAB2	TGF-beta activated kinase 1/MAP3K7 binding protein 2
hsa-miR-346	0	0	1	0	0	0	POM121L8P	POM121 transmembrane nucleoporin-like 8 pseudogene
hsa-miR-346	1	0	1	0	1	1	DCDC2	doublecortin domain containing 2
hsa-miR-346	1	0	1	1	1	1	SMAP2	small ArfGAP2
hsa-miR-346	0	0	1	1	0	0	ODF3	outer dense fiber of sperm tails 3
hsa-miR-346	0	0	1	0	0	0	DNAJC5B	DnaJ (Hsp40) homolog, subfamily C, member 5 beta
hsa-miR-346	1	0	1	1	1	1	PKNOX2	PBX/knotted 1 homeobox 2
hsa-miR-346	0	0	1	0	0	0	ZNF720	zinc finger protein 720
hsa-miR-346	1	0	1	0	1	1	HNRNPA3	heterogeneous nuclear ribonucleoprotein A3
hsa-miR-346	0	0	1	1	1	1	MYPN	myopalladin
hsa-miR-346	0	0	1	1	1	1	C10orf57	chromosome 10 open reading frame 57
hsa-miR-346	0	0	1	1	1	1	YAP1	Yes-associated protein 1
hsa-miR-346	0	0	1	0	0	0	FAM225A	family with sequence similarity 225, member A (non-protein coding)
hsa-miR-346	0	0	1	1	0	0	LGI4	leucine-rich repeat LGI family, member 4
hsa-miR-346	1	0	1	1	1	1	SOX6	SRY (sex determining region Y)-box 6
hsa-miR-346	0	0	1	0	1	1	PLEKHM1P	pleckstrin homology domain containing, family M (with RUN domain) member 1 pseudogene
hsa-miR-346	0	0	1	1	0	0	YIF1B	Yip1 interacting factor homolog B (S. cerevisiae)
hsa-miR-346	0	0	1	0	0	0	EPHA1-AS1	EPHA1 antisense RNA 1
hsa-miR-346	1	0	1	1	1	1	NRP1	neuropilin 1
hsa-miR-346	0	0	1	1	1	1	CAND1	cullin-associated and neddylation-dissociated 1
hsa-miR-346	1	0	1	1	1	1	PRPF38B	PRP38 pre-mRNA processing factor 38 (yeast) domain containing B
hsa-miR-346	1	0	1	0	0	0	NPEPL1	aminopeptidase-like 1
hsa-miR-346	1	0	1	1	1	1	ANKRD12	ankyrin repeat domain 12
hsa-miR-346	1	0	1	1	1	1	MBD6	methyl-CpG binding domain protein 6
hsa-miR-346	1	0	1	0	1	1	KIF21B	kinesin family member 21B
hsa-miR-346	0	0	1	1	1	1	MTMR14	myotubularin related protein 14
hsa-miR-346	1	0	1	1	1	1	DUSP16	dual specificity phosphatase 16
hsa-miR-346	0	0	1	1	0	0	TP73	tumor protein p73
hsa-miR-346	0	0	1	1	1	1	CRB1	crumbs homolog 1 (Drosophila)
hsa-miR-346	0	0	1	0	0	0	KGFLP1	fibroblast growth factor 7 pseudogene
hsa-miR-346	0	0	1	0	0	0	TDH	L-threonine dehydrogenase
hsa-miR-346	1	0	1	1	1	1	PBRM1	polybromo 1
hsa-miR-346	1	0	1	1	1	1	GFRA2	GDNF family receptor alpha 2
hsa-miR-346	1	0	1	1	1	1	TAB3	TGF-beta activated kinase 1/MAP3K7 binding protein 3
hsa-miR-346	0	0	1	1	1	1	MFAP5	microfibrillar associated protein 5
hsa-miR-346	0	0	1	1	0	0	PIGU	phosphatidylinositol glycan anchor biosynthesis, class U
hsa-miR-346	0	0	1	1	1	1	GCOM1	GRINL1A complex locus 1
hsa-miR-346	0	0	1	1	1	1	LINGO2	leucine rich repeat and Ig domain containing 2
hsa-miR-346	0	0	1	1	0	0	VSIG4	V-set and immunoglobulin domain containing 4
hsa-miR-346	0	0	1	1	1	1	GPR114	G protein-coupled receptor 114
hsa-miR-346	0	0	1	1	1	1	PAQR5	progestin and adipoQ receptor family member V
hsa-miR-346	1	0	1	1	1	1	FAM120A	family with sequence similarity 120A
hsa-miR-346	0	0	1	1	0	0	SH2D6	SH2 domain containing 6
hsa-miR-346	1	0	1	1	1	1	MECP2	methyl CpG binding protein 2 (Rett syndrome)
hsa-miR-346	0	0	1	1	0	0	PAOX	polyamine oxidase (exo-N4-amino)
hsa-miR-346	0	0	1	1	1	1	RPAIN	RPA interacting protein
hsa-miR-346	0	0	1	1	0	0	C15orf61	chromosome 15 open reading frame 61
hsa-miR-346	0	0	1	1	1	1	RHD	Rh blood group, D antigen
hsa-miR-346	0	0	1	0	0	0	PTPRVP	protein tyrosine phosphatase, receptor type, V, pseudogene
hsa-miR-346	0	0	1	1	0	0	NBPF8	neuroblastoma breakpoint family, member 8
hsa-miR-346	0	0	1	1	1	1	IYD	iodotyrosine deiodinase
hsa-miR-346	1	0	1	1	1	1	AMOT	angiomotin
hsa-miR-346	0	0	1	1	1	1	TUFT1	tuftelin 1
hsa-miR-346	1	0	1	1	1	1	RIMS3	regulating synaptic membrane exocytosis 3
hsa-miR-346	0	0	1	1	1	1	FTO	fat mass and obesity associated
hsa-miR-346	1	0	1	0	0	0	TGFA	transforming growth factor, alpha
hsa-miR-346	0	0	1	0	0	0	LOC93622	Morf4 family associated protein 1-like 1 pseudogene
hsa-miR-346	1	0	1	1	1	1	PTMS	parathymosin
hsa-miR-346	0	0	1	1	0	0	MYLK2	myosin light chain kinase 2
hsa-miR-346	0	0	1	1	1	1	TMEM30A	transmembrane protein 30A
hsa-miR-346	0	0	1	0	0	0	LOC400043	uncharacterized LOC400043
hsa-miR-346	1	0	1	1	0	0	MARCH9	membrane-associated ring finger (C3HC4) 9
hsa-miR-346	1	0	1	1	0	0	BSCL2	Berardinelli-Seip congenital lipodystrophy 2 (seipin)
hsa-miR-346	1	0	1	1	0	0	SIGMAR1	sigma non-opioid intracellular receptor 1
hsa-miR-346	0	0	1	1	1	1	GTPBP8	GTP-binding protein 8 (putative)
hsa-miR-346	0	0	1	0	0	0	LOC154761	family with sequence similarity 115, member C pseudogene
hsa-miR-346	0	0	1	1	1	1	ATXN2L	ataxin 2-like
hsa-miR-346	0	0	1	0	0	0	LRRC14	leucine rich repeat containing 14
hsa-miR-346	1	0	1	1	1	1	OTUD5	OTU domain containing 5
hsa-miR-346	1	0	1	1	1	1	ZBTB7B	zinc finger and BTB domain containing 7B
hsa-miR-346	0	0	1	1	1	1	NUP98	nucleoporin 98kDa
hsa-miR-346	0	0	1	1	1	1	KLF7	Kruppel-like factor 7 (ubiquitous)
hsa-miR-346	1	0	1	1	1	1	DPH1	DPH1 homolog (S. cerevisiae)
hsa-miR-346	0	0	1	1	0	0	VAV1	vav 1 guanine nucleotide exchange factor
hsa-miR-346	1	0	1	1	0	0	CAPN12	calpain 12
hsa-miR-346	0	0	1	1	0	0	PTPMT1	protein tyrosine phosphatase, mitochondrial 1
hsa-miR-346	1	0	1	1	1	1	SLC25A36	solute carrier family 25 (pyrimidine nucleotide carrier ), member 36
hsa-miR-346	1	0	1	1	1	1	PRDM2	PR domain containing 2, with ZNF domain
hsa-miR-346	0	0	1	1	1	1	TOMM40L	translocase of outer mitochondrial membrane 40 homolog (yeast)-like
hsa-miR-346	0	0	1	0	1	1	ZNF37A	zinc finger protein 37A
hsa-miR-346	1	0	1	1	1	1	SREK1	splicing regulatory glutamine/lysine-rich protein 1
hsa-miR-346	0	0	1	1	0	0	ZBTB32	zinc finger and BTB domain containing 32
hsa-miR-346	1	0	1	1	1	1	HMGA2	high mobility group AT-hook 2
hsa-miR-346	0	0	1	1	1	1	TMEM40	transmembrane protein 40
hsa-miR-346	0	0	1	0	0	0	FAM92A1P2	family with sequence similarity 92, member A3
hsa-miR-346	0	0	1	1	1	1	TRAPPC11	trafficking protein particle complex 11
hsa-miR-346	0	0	1	1	0	0	PRRG2	proline rich Gla (G-carboxyglutamic acid) 2
hsa-miR-346	1	0	1	1	1	1	TMEM127	transmembrane protein 127
hsa-miR-346	0	0	1	1	1	1	PIP5K1B	phosphatidylinositol-4-phosphate 5-kinase, type I, beta
hsa-miR-346	1	0	1	1	1	1	ZNF518A	zinc finger protein 518A
hsa-miR-346	0	0	1	0	0	0	ATP8B5P	ATPase, class I, type 8B, member 5, pseudogene
hsa-miR-346	1	0	1	1	1	1	BZRAP1	benzodiazapine receptor (peripheral) associated protein 1
hsa-miR-346	1	0	1	1	1	1	SPATS2	spermatogenesis associated, serine-rich 2
hsa-miR-346	1	0	1	1	1	1	CCNG2	cyclin G2
hsa-miR-346	1	0	1	1	0	0	MRC2	mannose receptor, C type 2
hsa-miR-346	1	0	1	1	1	1	RHOBTB1	Rho-related BTB domain containing 1
hsa-miR-346	0	0	1	1	0	0	IGFN1	immunoglobulin-like and fibronectin type III domain containing 1
hsa-miR-346	0	0	1	0	0	0	MGC45922	uncharacterized LOC284365
hsa-miR-346	1	0	1	1	0	0	DGCR6	DiGeorge syndrome critical region gene 6
hsa-miR-346	1	0	1	1	0	0	CHST4	carbohydrate (N-acetylglucosamine 6-O) sulfotransferase 4
hsa-miR-346	0	0	1	1	1	1	SNAPC3	small nuclear RNA activating complex, polypeptide 3, 50kDa
hsa-miR-346	1	0	1	1	1	1	ZNF618	zinc finger protein 618
hsa-miR-346	1	0	1	1	0	0	EGLN2	egl nine homolog 2 (C. elegans)
hsa-miR-346	0	0	1	0	0	0	SPATA3	spermatogenesis associated 3
hsa-miR-346	1	0	1	1	1	1	MEIS1	Meis homeobox 1
hsa-miR-346	0	0	1	0	0	0	LOC652276	potassium channel tetramerisation domain containing 5 pseudogene
hsa-miR-346	1	0	1	1	1	1	ACVR1	activin A receptor, type I
hsa-miR-346	1	0	1	0	1	1	CLDN12	claudin 12
hsa-miR-346	0	0	1	0	0	0	SRGAP2C	SLIT-ROBO Rho GTPase activating protein 2C
hsa-miR-346	0	0	1	0	0	0	LOC284889	uncharacterized LOC284889
hsa-miR-346	0	0	1	0	0	0	LOC286184	uncharacterized LOC286184
hsa-miR-346	0	0	1	1	1	1	MTHFD2L	methylenetetrahydrofolate dehydrogenase (NADP+ dependent) 2-like
hsa-miR-346	0	0	1	0	0	0	INHBA-AS1	INHBA antisense RNA 1
hsa-miR-346	1	0	1	1	1	1	SF1	splicing factor 1
hsa-miR-346	0	0	1	1	1	1	NUDT13	nudix (nucleoside diphosphate linked moiety X)-type motif 13
hsa-miR-346	0	0	1	1	0	0	HSPA14	heat shock 70kDa protein 14
hsa-miR-346	0	0	1	0	0	0	LOC100134868	uncharacterized LOC100134868
hsa-miR-346	1	0	1	1	1	1	TIMP2	TIMP metallopeptidase inhibitor 2
hsa-miR-346	1	0	1	1	1	1	FOSB	FBJ murine osteosarcoma viral oncogene homolog B
hsa-miR-346	1	0	1	1	1	1	DACH2	dachshund homolog 2 (Drosophila)
hsa-miR-346	0	0	1	1	0	0	MTCH1	mitochondrial carrier 1
hsa-miR-346	0	0	1	0	0	0	SLC7A11-AS1	SLC7A11 antisense RNA 1
hsa-miR-346	1	0	1	1	1	1	CTIF	CBP80/20-dependent translation initiation factor
hsa-miR-346	0	0	1	0	0	0	MORF4L2-AS1	MORF4L2 antisense RNA 1
hsa-miR-346	0	0	1	1	1	1	MST1	macrophage stimulating 1 (hepatocyte growth factor-like)
hsa-miR-346	1	0	1	1	1	1	MAMDC2	MAM domain containing 2
hsa-miR-346	0	0	1	1	1	1	MGC57346	uncharacterized LOC401884
hsa-miR-346	1	0	1	1	1	1	PPP2R5B	protein phosphatase 2, regulatory subunit B', beta
hsa-miR-346	0	0	1	1	1	1	EBP	emopamil binding protein (sterol isomerase)
hsa-miR-346	0	0	1	0	0	0	CLEC4GP1	C-type lectin domain family 4, member G pseudogene 1
hsa-miR-346	1	0	1	1	0	0	TTC9	tetratricopeptide repeat domain 9
hsa-miR-346	0	0	1	0	0	0	SEPT7L	septin 7-like
hsa-miR-346	1	0	1	0	1	1	SEMA4G	sema domain, immunoglobulin domain (Ig), transmembrane domain (TM) and short cytoplasmic domain, (semaphorin) 4G
hsa-miR-346	1	0	1	1	1	1	PCGF5	polycomb group ring finger 5
hsa-miR-346	0	0	1	0	0	0	AQP7P1	aquaporin 7 pseudogene 1
hsa-miR-346	0	0	1	0	1	1	C17orf51	chromosome 17 open reading frame 51
hsa-miR-346	0	0	1	1	0	0	ABHD1	abhydrolase domain containing 1
hsa-miR-346	1	0	1	1	1	1	ATP8B4	ATPase, class I, type 8B, member 4
hsa-miR-346	0	0	1	1	0	0	BCL7C	B-cell CLL/lymphoma 7C
hsa-miR-346	0	0	1	1	0	0	RPS9	ribosomal protein S9
hsa-miR-346	0	0	1	1	0	0	WDR90	WD repeat domain 90
hsa-miR-346	1	0	1	1	1	1	PDGFRA	platelet-derived growth factor receptor, alpha polypeptide
hsa-miR-346	0	0	1	0	0	0	USP32P1	ubiquitin specific peptidase 32 pseudogene 1
hsa-miR-346	0	0	1	1	1	1	GPATCH2	G patch domain containing 2
hsa-miR-346	0	0	1	0	0	0	FLJ35390	uncharacterized LOC255031
hsa-miR-346	1	0	1	1	1	1	ASXL1	additional sex combs like 1 (Drosophila)
hsa-miR-346	0	0	1	1	1	1	ZNF189	zinc finger protein 189
hsa-miR-346	1	0	1	1	1	1	NRSN1	neurensin 1
hsa-miR-346	0	0	1	1	1	1	TTLL9	tubulin tyrosine ligase-like family, member 9
hsa-miR-346	1	0	1	0	1	1	TMEM194A	transmembrane protein 194A
hsa-miR-346	0	0	1	0	0	0	JPX	JPX transcript, XIST activator (non-protein coding)
hsa-miR-346	0	0	1	1	1	1	TNFSF12	tumor necrosis factor (ligand) superfamily, member 12
hsa-miR-346	1	0	1	1	1	1	RARG	retinoic acid receptor, gamma
hsa-miR-346	0	0	1	0	0	0	LOC642846	DEAD/H (Asp-Glu-Ala-Asp/His) box polypeptide 11-like
hsa-miR-346	1	0	1	1	1	1	GRAMD4	GRAM domain containing 4
hsa-miR-346	0	0	1	0	0	0	TBC1D25	TBC1 domain family, member 25
hsa-miR-346	1	0	1	1	1	1	FMNL3	formin-like 3
hsa-miR-346	1	0	1	1	1	1	ESRRA	estrogen-related receptor alpha
hsa-miR-346	0	0	1	1	1	1	LIMS3	LIM and senescent cell antigen-like domains 3
hsa-miR-346	1	0	1	1	1	1	GBF1	golgi brefeldin A resistant guanine nucleotide exchange factor 1
hsa-miR-346	0	0	1	0	1	1	TGFB2	transforming growth factor, beta 2
hsa-miR-346	1	0	1	1	1	1	WNT10B	wingless-type MMTV integration site family, member 10B
hsa-miR-346	0	0	1	0	0	0	ABCA11P	ATP-binding cassette, sub-family A (ABC1), member 11, pseudogene
hsa-miR-346	0	0	1	0	0	0	FAM106A	family with sequence similarity 106, member A
hsa-miR-346	0	0	1	0	0	0	TP53TG3B	TP53 target 3B
hsa-miR-346	0	0	1	0	1	1	TP53TG3	TP53 target 3
hsa-miR-346	0	0	1	1	1	1	ZNF365	zinc finger protein 365
hsa-miR-346	1	0	1	1	1	1	SLC36A2	solute carrier family 36 (proton/amino acid symporter), member 2
hsa-miR-346	0	0	1	0	0	0	GUSBP9	glucuronidase, beta pseudogene 9
hsa-miR-346	0	0	1	1	0	0	SFTPC	surfactant protein C
hsa-miR-346	0	0	1	0	0	0	FAM71F2	family with sequence similarity 71, member F2
hsa-miR-346	0	0	1	1	1	1	PCNP	PEST proteolytic signal containing nuclear protein
hsa-miR-346	0	0	1	1	0	0	C1orf122	chromosome 1 open reading frame 122
hsa-miR-346	0	0	1	1	1	1	IL4R	interleukin 4 receptor
hsa-miR-346	0	0	1	1	1	1	UNC13B	unc-13 homolog B (C. elegans)
hsa-miR-346	0	0	1	1	0	0	PRAMEF10	PRAME family member 10
hsa-miR-346	0	0	1	1	0	0	PAEP	progestagen-associated endometrial protein
hsa-miR-346	1	0	1	1	1	1	TNS1	tensin 1
hsa-miR-346	1	0	1	1	1	1	GRIA3	glutamate receptor, ionotropic, AMPA 3
hsa-miR-346	0	0	1	0	0	0	FAM225B	family with sequence similarity 225, member B (non-protein coding)
hsa-miR-346	0	0	1	0	0	0	SMA4	glucuronidase, beta pseudogene
hsa-miR-346	1	0	1	1	1	1	EXD2	exonuclease 3'-5' domain containing 2
hsa-miR-346	0	0	1	1	1	1	NCBP2	nuclear cap binding protein subunit 2, 20kDa
hsa-miR-346	1	0	1	1	1	1	MKLN1	muskelin 1, intracellular mediator containing kelch motifs
hsa-miR-346	1	0	1	1	1	1	SASH1	SAM and SH3 domain containing 1
hsa-miR-346	0	0	1	1	1	1	STAT2	signal transducer and activator of transcription 2, 113kDa
hsa-miR-346	1	0	1	1	1	1	MLLT10	myeloid/lymphoid or mixed-lineage leukemia (trithorax homolog, Drosophila); translocated to, 10
hsa-miR-346	1	0	1	1	1	1	TGOLN2	trans-golgi network protein 2
hsa-miR-346	0	0	1	1	0	0	CDK5RAP2	CDK5 regulatory subunit associated protein 2
hsa-miR-346	1	0	1	1	1	1	C12orf4	chromosome 12 open reading frame 4
hsa-miR-346	0	0	1	1	1	1	PRR14L	proline rich 14-like
hsa-miR-346	0	0	1	0	0	0	SMG1P1	smg-1 homolog, phosphatidylinositol 3-kinase-related kinase pseudogene 1
hsa-miR-346	1	0	1	1	1	1	S100PBP	S100P binding protein
hsa-miR-346	1	0	1	0	1	1	PCGF3	polycomb group ring finger 3
hsa-miR-346	1	0	1	1	1	1	PGAP1	post-GPI attachment to proteins 1
hsa-miR-346	0	0	1	1	1	1	KIAA1328	KIAA1328
hsa-miR-346	0	0	1	0	1	1	GINS3	GINS complex subunit 3 (Psf3 homolog)
hsa-miR-346	0	0	1	1	0	0	CRIP2	cysteine-rich protein 2
hsa-miR-346	0	0	1	1	1	1	PSG2	pregnancy specific beta-1-glycoprotein 2
hsa-miR-346	1	0	1	1	1	1	ARF1	ADP-ribosylation factor 1
hsa-miR-346	0	0	1	1	1	1	TBC1D10A	TBC1 domain family, member 10A
hsa-miR-346	0	0	1	1	1	1	GTPBP3	GTP binding protein 3 (mitochondrial)
hsa-miR-346	0	0	1	1	1	1	UPRT	uracil phosphoribosyltransferase (FUR1) homolog (S. cerevisiae)
hsa-miR-346	0	0	1	1	1	1	DGCR14	DiGeorge syndrome critical region gene 14
hsa-miR-346	0	0	1	0	0	0	LOC400768	uncharacterized LOC400768
hsa-miR-346	0	0	1	1	0	0	TMEM62	transmembrane protein 62
hsa-miR-346	0	0	1	1	0	0	URM1	ubiquitin related modifier 1
hsa-miR-346	1	0	1	1	0	0	TSC22D4	TSC22 domain family, member 4
hsa-miR-346	0	0	1	0	0	0	ABCB5	ATP-binding cassette, sub-family B (MDR/TAP), member 5
hsa-miR-346	0	0	1	1	0	0	PPOX	protoporphyrinogen oxidase
hsa-miR-346	0	0	1	1	0	0	CYGB	cytoglobin
hsa-miR-346	0	0	1	1	0	0	SRM	spermidine synthase
hsa-miR-346	1	0	1	1	1	1	DOLPP1	dolichyl pyrophosphate phosphatase 1
hsa-miR-346	1	1	1	1	0	0	EFNA3	ephrin-A3
hsa-miR-346	0	0	1	1	1	1	ERLEC1	endoplasmic reticulum lectin 1
hsa-miR-346	0	0	1	0	0	0	LOC100009676	uncharacterized LOC100009676
hsa-miR-346	0	0	1	1	0	0	TFCP2	transcription factor CP2
hsa-miR-346	0	0	1	0	0	0	FAM86JP	family with sequence similarity 86, member A pseudogene
hsa-miR-346	1	0	1	1	1	1	NTM	neurotrimin
hsa-miR-346	1	0	1	1	1	1	PLEKHB2	pleckstrin homology domain containing, family B (evectins) member 2
hsa-miR-346	1	0	1	1	1	1	POU2F2	POU class 2 homeobox 2
hsa-miR-346	1	0	1	1	1	1	PCTP	phosphatidylcholine transfer protein
hsa-miR-346	0	0	1	1	1	1	TRIM68	tripartite motif containing 68
hsa-miR-346	0	0	1	0	0	0	TMEM208	transmembrane protein 208
hsa-miR-346	0	0	1	1	1	1	EIF3J	eukaryotic translation initiation factor 3, subunit J
hsa-miR-346	0	0	1	1	1	1	TOX4	TOX high mobility group box family member 4
hsa-miR-346	0	0	1	0	0	0	MEG3	maternally expressed 3 (non-protein coding)
hsa-miR-346	0	0	1	0	0	0	FLJ45248	FLJ45248 protein
hsa-miR-346	1	0	1	0	1	1	IP6K1	inositol hexakisphosphate kinase 1
hsa-miR-346	0	0	1	1	1	1	CD3E	CD3e molecule, epsilon (CD3-TCR complex)
hsa-miR-346	1	0	1	1	1	1	ARNTL	aryl hydrocarbon receptor nuclear translocator-like
hsa-miR-346	0	0	1	1	1	1	PEX19	peroxisomal biogenesis factor 19
hsa-miR-346	1	0	1	1	1	1	HN1	hematological and neurological expressed 1
hsa-miR-346	1	0	1	1	1	1	TIMP3	TIMP metallopeptidase inhibitor 3
hsa-miR-346	0	0	1	1	1	1	RFT1	RFT1 homolog (S. cerevisiae)
hsa-miR-346	0	0	1	1	1	1	SLC9A3R1	solute carrier family 9, subfamily A (NHE3, cation proton antiporter 3), member 3 regulator 1
hsa-miR-346	0	0	1	1	1	1	LYSMD4	LysM, putative peptidoglycan-binding, domain containing 4
hsa-miR-346	1	0	1	1	1	1	BAALC	brain and acute leukemia, cytoplasmic
hsa-miR-346	0	0	1	1	1	1	PSG5	pregnancy specific beta-1-glycoprotein 5
hsa-miR-346	0	0	1	1	0	0	C9orf114	chromosome 9 open reading frame 114
hsa-miR-346	0	0	1	1	0	0	AATF	apoptosis antagonizing transcription factor
hsa-miR-346	1	0	1	1	0	0	CRELD1	cysteine-rich with EGF-like domains 1
hsa-miR-346	0	0	1	1	0	0	TUSC3	tumor suppressor candidate 3
hsa-miR-346	0	0	1	1	1	1	RPL14	ribosomal protein L14
hsa-miR-346	1	0	1	1	1	1	RALY	RNA binding protein, autoantigenic (hnRNP-associated with lethal yellow homolog (mouse))
hsa-miR-346	0	0	1	1	0	0	RPS6KB2	ribosomal protein S6 kinase, 70kDa, polypeptide 2
hsa-miR-346	0	0	1	1	1	1	ZNF346	zinc finger protein 346
hsa-miR-346	0	0	1	1	0	0	ARVCF	armadillo repeat gene deleted in velocardiofacial syndrome
hsa-miR-346	0	0	1	1	0	0	TESK1	testis-specific kinase 1
hsa-miR-346	0	0	1	0	0	0	LOC100132984	uncharacterized LOC100132984
hsa-miR-346	0	0	1	1	0	0	POLB	polymerase (DNA directed), beta
hsa-miR-346	0	0	1	1	0	0	TTYH1	tweety homolog 1 (Drosophila)
hsa-miR-346	0	0	1	1	1	1	R3HDM4	R3H domain containing 4
hsa-miR-346	1	0	1	1	1	1	MAN1C1	mannosidase, alpha, class 1C, member 1
hsa-miR-346	1	0	1	1	1	1	ANKS6	ankyrin repeat and sterile alpha motif domain containing 6
hsa-miR-346	0	0	1	1	1	1	CIRBP	cold inducible RNA binding protein
hsa-miR-346	0	0	1	1	0	0	ISG20	interferon stimulated exonuclease gene 20kDa
hsa-miR-346	0	0	1	1	0	0	INO80B	INO80 complex subunit B
hsa-miR-346	0	0	1	1	1	1	VPS16	vacuolar protein sorting 16 homolog (S. cerevisiae)
hsa-miR-346	1	0	1	0	1	1	KIAA0664	KIAA0664
hsa-miR-346	0	0	1	0	0	0	LOC731789	uncharacterized LOC731789
hsa-miR-346	0	0	1	0	0	0	LINC00661	long intergenic non-protein coding RNA 661
hsa-miR-346	1	0	1	0	1	1	XRN1	5'-3' exoribonuclease 1
hsa-miR-346	1	0	1	1	1	1	MAPK8IP3	mitogen-activated protein kinase 8 interacting protein 3
hsa-miR-346	0	0	1	0	0	0	MIR143HG	MIR143 host gene (non-protein coding)
hsa-miR-346	0	0	1	1	0	0	TENC1	tensin like C1 domain containing phosphatase (tensin 2)
hsa-miR-346	0	0	1	0	0	0	LOC440518	golgin A2 pseudogene
hsa-miR-346	1	0	1	1	1	1	MAN2A2	mannosidase, alpha, class 2A, member 2
hsa-miR-346	1	0	1	1	1	1	SEC14L1	SEC14-like 1 (S. cerevisiae)
hsa-miR-346	0	0	1	1	1	1	PARP14	poly (ADP-ribose) polymerase family, member 14
hsa-miR-346	1	0	1	1	1	1	TRIOBP	TRIO and F-actin binding protein
hsa-miR-346	0	0	1	1	0	0	FAM58A	family with sequence similarity 58, member A
hsa-miR-346	0	0	1	1	1	1	OXNAD1	oxidoreductase NAD-binding domain containing 1
hsa-miR-346	0	0	1	0	0	0	PILRB	paired immunoglobin-like type 2 receptor beta
hsa-miR-346	1	0	1	1	1	1	GRM1	glutamate receptor, metabotropic 1
hsa-miR-346	0	0	1	1	0	0	GGT2	gamma-glutamyltransferase 2
hsa-miR-346	1	0	1	1	1	1	PML	promyelocytic leukemia
hsa-miR-346	1	0	1	1	1	1	DMD	dystrophin
hsa-miR-346	0	0	1	0	1	1	MS4A2	membrane-spanning 4-domains, subfamily A, member 2
hsa-miR-346	1	0	1	1	1	1	FUT1	fucosyltransferase 1 (galactoside 2-alpha-L-fucosyltransferase, H blood group)
hsa-miR-346	1	0	1	1	0	0	PAX2	paired box 2
hsa-miR-346	0	0	1	1	1	1	SLC5A1	solute carrier family 5 (sodium/glucose cotransporter), member 1
hsa-miR-346	0	0	1	1	1	1	SRD5A2	steroid-5-alpha-reductase, alpha polypeptide 2 (3-oxo-5 alpha-steroid delta 4-dehydrogenase alpha 2)
hsa-miR-346	0	0	1	0	1	1	SLC10A2	solute carrier family 10 (sodium/bile acid cotransporter family), member 2
hsa-miR-346	1	0	1	1	1	1	AQP2	aquaporin 2 (collecting duct)
hsa-miR-346	0	0	1	0	1	1	ADRA2A	adrenoceptor alpha 2A
hsa-miR-346	1	0	1	0	1	1	ADRA2B	adrenoceptor alpha 2B
hsa-miR-346	1	0	1	0	1	1	ALDH1A3	aldehyde dehydrogenase 1 family, member A3
hsa-miR-346	1	0	1	0	1	1	CACNA1E	calcium channel, voltage-dependent, R type, alpha 1E subunit
hsa-miR-346	0	0	1	1	1	1	GABRA5	gamma-aminobutyric acid (GABA) A receptor, alpha 5
hsa-miR-346	1	0	1	1	1	1	GABRG2	gamma-aminobutyric acid (GABA) A receptor, gamma 2
hsa-miR-346	1	0	1	1	1	1	GRM7	glutamate receptor, metabotropic 7
hsa-miR-346	1	0	1	1	1	1	PTGFR	prostaglandin F receptor (FP)
hsa-miR-346	0	0	1	0	1	1	PTGIS	prostaglandin I2 (prostacyclin) synthase
hsa-miR-346	0	0	1	0	1	1	DNAJB3	DnaJ (Hsp40) homolog, subfamily B, member 3
hsa-miR-346	1	0	1	1	1	1	TPD52L3	tumor protein D52-like 3
hsa-miR-346	0	0	1	0	0	0	KLK2	kallikrein-related peptidase 2
hsa-miR-346	1	0	1	0	1	1	CACNA1I	calcium channel, voltage-dependent, T type, alpha 1I subunit
hsa-miR-346	1	0	1	1	1	1	KLHL31	kelch-like 31 (Drosophila)
hsa-miR-346	1	0	1	0	1	1	BMF	Bcl2 modifying factor
hsa-miR-346	0	0	1	1	1	1	CCDC144NL	coiled-coil domain containing 144 family, N-terminal like
hsa-miR-346	0	0	1	1	1	1	AGMO	alkylglycerol monooxygenase
hsa-miR-346	0	0	1	0	1	1	ZNF705A	zinc finger protein 705A
hsa-miR-346	1	0	1	1	1	1	EDA	ectodysplasin A
hsa-miR-346	1	0	1	1	0	0	SDC1	syndecan 1
hsa-miR-346	1	0	1	0	1	1	GOSR1	golgi SNAP receptor complex member 1
hsa-miR-346	1	0	1	1	1	1	BRWD1	bromodomain and WD repeat domain containing 1
hsa-miR-346	1	0	1	1	1	1	EI24	etoposide induced 2.4 mRNA
hsa-miR-346	0	0	1	1	1	1	TRIM13	tripartite motif containing 13
hsa-miR-346	1	0	1	1	1	1	CTDSPL	CTD (carboxy-terminal domain, RNA polymerase II, polypeptide A) small phosphatase-like
hsa-miR-346	0	0	1	1	1	1	MXRA7	matrix-remodelling associated 7
hsa-miR-346	0	0	1	1	1	1	SPIN3	spindlin family, member 3
hsa-miR-346	1	0	1	0	1	1	ZKSCAN2	zinc finger with KRAB and SCAN domains 2
hsa-miR-346	0	0	1	1	1	1	LDLRAD2	low density lipoprotein receptor class A domain containing 2
hsa-miR-346	1	0	1	1	1	1	NCDN	neurochondrin
hsa-miR-346	0	0	1	1	0	0	RTKN	rhotekin
hsa-miR-346	1	0	1	1	1	1	DKK3	dickkopf 3 homolog (Xenopus laevis)
hsa-miR-346	0	0	1	1	1	1	NPIPL1	nuclear pore complex interacting protein-like 1
hsa-miR-346	1	0	1	1	1	1	IQCB1	IQ motif containing B1
hsa-miR-346	1	0	1	1	1	1	ABCC5	ATP-binding cassette, sub-family C (CFTR/MRP), member 5
hsa-miR-346	0	0	1	1	0	0	S100A13	S100 calcium binding protein A13
hsa-miR-346	1	0	1	0	1	1	BCL7A	B-cell CLL/lymphoma 7A
hsa-miR-346	1	0	1	0	1	1	TNRC6B	trinucleotide repeat containing 6B
hsa-miR-346	0	0	1	1	1	1	ARRDC2	arrestin domain containing 2
hsa-miR-346	1	0	1	1	1	1	MAF	v-maf musculoaponeurotic fibrosarcoma oncogene homolog (avian)
hsa-miR-346	0	0	1	1	1	1	MMP28	matrix metallopeptidase 28
hsa-miR-346	1	0	1	0	1	1	SRGAP3	SLIT-ROBO Rho GTPase activating protein 3
hsa-miR-346	0	0	1	1	1	1	PHF12	PHD finger protein 12
hsa-miR-346	0	0	1	1	1	1	KCNIP1	Kv channel interacting protein 1
hsa-miR-346	0	0	1	1	1	1	FAM134B	family with sequence similarity 134, member B
hsa-miR-346	0	0	1	1	1	1	CTLA4	cytotoxic T-lymphocyte-associated protein 4
hsa-miR-346	0	0	1	0	0	0	RUSC1-AS1	RUSC1 antisense RNA 1
hsa-miR-346	0	0	1	0	1	1	ZNF705D	zinc finger protein 705D
hsa-miR-346	0	0	1	1	1	1	GPX4	glutathione peroxidase 4
hsa-miR-346	1	0	1	1	1	1	SCN2A	sodium channel, voltage-gated, type II, alpha subunit
hsa-miR-346	1	0	1	0	1	1	CD83	CD83 molecule
hsa-miR-346	0	0	1	1	0	0	FAM110A	family with sequence similarity 110, member A
hsa-miR-346	1	0	1	1	1	1	PPP4R1	protein phosphatase 4, regulatory subunit 1
hsa-miR-346	0	0	1	1	1	1	NUPR1	nuclear protein, transcriptional regulator, 1
hsa-miR-346	1	0	1	1	1	1	NSL1	NSL1, MIND kinetochore complex component, homolog (S. cerevisiae)
hsa-miR-346	1	0	1	1	1	1	ATG9A	autophagy related 9A
hsa-miR-346	1	0	1	1	1	1	NCOR2	nuclear receptor corepressor 2
hsa-miR-346	0	0	1	1	1	1	ZNF586	zinc finger protein 586
hsa-miR-346	0	0	1	1	0	0	VPS37D	vacuolar protein sorting 37 homolog D (S. cerevisiae)
hsa-miR-346	0	0	1	1	1	1	VCAM1	vascular cell adhesion molecule 1
hsa-miR-346	1	0	1	1	1	1	DACT1	dapper, antagonist of beta-catenin, homolog 1 (Xenopus laevis)
hsa-miR-346	1	0	1	1	1	1	UNK	unkempt homolog (Drosophila)
hsa-miR-346	1	0	1	1	1	1	SHANK3	SH3 and multiple ankyrin repeat domains 3
hsa-miR-346	0	0	1	1	1	1	HSF5	heat shock transcription factor family member 5
hsa-miR-346	1	0	1	1	1	1	DGKG	diacylglycerol kinase, gamma 90kDa
hsa-miR-346	1	0	1	1	1	1	REPS2	RALBP1 associated Eps domain containing 2
hsa-miR-346	1	0	1	0	1	1	KLF9	Kruppel-like factor 9
hsa-miR-346	0	0	1	1	0	0	CLPTM1	cleft lip and palate associated transmembrane protein 1
hsa-miR-346	1	0	1	1	1	1	MAPK14	mitogen-activated protein kinase 14
hsa-miR-346	1	0	1	1	1	1	CELSR2	cadherin, EGF LAG seven-pass G-type receptor 2 (flamingo homolog, Drosophila)
hsa-miR-346	0	0	1	1	1	1	FRZB	frizzled-related protein
hsa-miR-346	0	0	1	1	0	0	APEH	N-acylaminoacyl-peptide hydrolase
hsa-miR-346	0	0	1	1	1	1	ARF4	ADP-ribosylation factor 4
hsa-miR-346	1	0	1	1	1	1	CDC25A	cell division cycle 25 homolog A (S. pombe)
hsa-miR-346	1	0	1	1	1	1	CENPB	centromere protein B, 80kDa
hsa-miR-346	0	0	1	1	1	1	CEACAM8	carcinoembryonic antigen-related cell adhesion molecule 8
hsa-miR-346	1	0	1	1	1	1	COL4A1	collagen, type IV, alpha 1
hsa-miR-346	1	0	1	1	1	1	MASP1	mannan-binding lectin serine peptidase 1 (C4/C2 activating component of Ra-reactive factor)
hsa-miR-346	1	0	1	1	1	1	DLST	dihydrolipoamide S-succinyltransferase (E2 component of 2-oxo-glutarate complex)
hsa-miR-346	1	0	1	1	1	1	EPB49	erythrocyte membrane protein band 4.9 (dematin)
hsa-miR-346	0	0	1	1	1	1	GFAP	glial fibrillary acidic protein
hsa-miR-346	0	0	1	1	0	0	GPX3	glutathione peroxidase 3 (plasma)
hsa-miR-346	0	0	1	1	1	1	HMGCS1	3-hydroxy-3-methylglutaryl-CoA synthase 1 (soluble)
hsa-miR-346	1	0	1	1	0	0	IHH	Indian hedgehog
hsa-miR-346	0	0	1	1	0	0	EIF6	eukaryotic translation initiation factor 6
hsa-miR-346	1	0	1	1	1	1	JUN	jun proto-oncogene
hsa-miR-346	1	0	1	1	1	1	KCNA3	potassium voltage-gated channel, shaker-related subfamily, member 3
hsa-miR-346	1	0	1	1	1	1	KCNJ10	potassium inwardly-rectifying channel, subfamily J, member 10
hsa-miR-346	1	0	1	1	1	1	LRP1	low density lipoprotein receptor-related protein 1
hsa-miR-346	0	0	1	0	1	1	MFNG	MFNG O-fucosylpeptide 3-beta-N-acetylglucosaminyltransferase
hsa-miR-346	1	0	1	1	1	1	MSN	moesin
hsa-miR-346	0	0	1	1	0	0	MYBL2	v-myb myeloblastosis viral oncogene homolog (avian)-like 2
hsa-miR-346	1	0	1	1	1	1	MYH9	myosin, heavy chain 9, non-muscle
hsa-miR-346	0	0	1	1	1	1	CEACAM6	carcinoembryonic antigen-related cell adhesion molecule 6 (non-specific cross reacting antigen)
hsa-miR-346	0	0	1	0	1	1	OAZ2	ornithine decarboxylase antizyme 2
hsa-miR-346	1	0	1	1	0	0	PDGFB	platelet-derived growth factor beta polypeptide
hsa-miR-346	0	0	1	0	1	1	PSMD3	proteasome (prosome, macropain) 26S subunit, non-ATPase, 3
hsa-miR-346	0	0	1	1	0	0	RBP1	retinol binding protein 1, cellular
hsa-miR-346	1	0	1	1	0	0	RFX1	regulatory factor X, 1 (influences HLA class II expression)
hsa-miR-346	1	0	1	1	1	1	SHB	Src homology 2 domain containing adaptor protein B
hsa-miR-346	1	0	1	0	1	1	ST6GAL1	ST6 beta-galactosamide alpha-2,6-sialyltranferase 1
hsa-miR-346	0	0	1	1	1	1	SLAMF1	signaling lymphocytic activation molecule family member 1
hsa-miR-346	1	0	1	1	1	1	SRF	serum response factor (c-fos serum response element-binding transcription factor)
hsa-miR-346	0	0	1	1	1	1	STAT5A	signal transducer and activator of transcription 5A
hsa-miR-346	1	0	1	1	1	1	ADAM12	ADAM metallopeptidase domain 12
hsa-miR-346	1	0	1	0	1	1	SNN	stannin
hsa-miR-346	1	0	1	1	1	1	FZD7	frizzled family receptor 7
hsa-miR-346	0	0	1	1	1	1	PIP5K1A	phosphatidylinositol-4-phosphate 5-kinase, type I, alpha
hsa-miR-346	0	0	1	1	0	0	CAMK1	calcium/calmodulin-dependent protein kinase I
hsa-miR-346	1	0	1	1	1	1	BARX2	BARX homeobox 2
hsa-miR-346	0	0	1	1	0	0	PEX11A	peroxisomal biogenesis factor 11 alpha
hsa-miR-346	0	0	1	1	0	0	TMEM11	transmembrane protein 11
hsa-miR-346	1	0	1	1	0	0	GPRC5A	G protein-coupled receptor, family C, group 5, member A
hsa-miR-346	0	0	1	1	0	0	AP2S1	adaptor-related protein complex 2, sigma 1 subunit
hsa-miR-346	1	0	1	1	1	1	EFNB2	ephrin-B2
hsa-miR-346	1	0	1	1	0	0	EIF4EBP1	eukaryotic translation initiation factor 4E binding protein 1
hsa-miR-346	1	0	1	0	1	1	CYTH3	cytohesin 3
hsa-miR-346	1	0	1	0	1	1	GTPBP1	GTP binding protein 1
hsa-miR-346	1	0	1	1	1	1	ARL3	ADP-ribosylation factor-like 3
hsa-miR-346	0	0	1	1	0	0	CPT1B	carnitine palmitoyltransferase 1B (muscle)
hsa-miR-346	0	0	1	1	1	1	CSK	c-src tyrosine kinase
hsa-miR-346	1	0	1	1	1	1	EFNA1	ephrin-A1
hsa-miR-346	1	0	1	1	1	1	EFNB1	ephrin-B1
hsa-miR-346	1	0	1	1	1	1	EGR3	early growth response 3
hsa-miR-346	1	0	1	1	1	1	EPHB3	EPH receptor B3
hsa-miR-346	1	0	1	1	1	1	ERG	v-ets erythroblastosis virus E26 oncogene homolog (avian)
hsa-miR-346	0	0	1	1	1	1	NFATC3	nuclear factor of activated T-cells, cytoplasmic, calcineurin-dependent 3
hsa-miR-346	0	0	1	1	1	1	CCL16	chemokine (C-C motif) ligand 16
hsa-miR-346	0	0	1	1	0	0	SFSWAP	splicing factor, suppressor of white-apricot homolog (Drosophila)
hsa-miR-346	1	0	1	1	1	1	WNT11	wingless-type MMTV integration site family, member 11
hsa-miR-346	0	0	1	1	0	0	DYRK1B	dual-specificity tyrosine-(Y)-phosphorylation regulated kinase 1B
hsa-miR-346	1	0	1	1	1	1	ZFYVE9	zinc finger, FYVE domain containing 9
hsa-miR-346	1	0	1	0	0	0	NTN1	netrin 1
hsa-miR-346	1	0	1	1	1	1	ONECUT2	one cut homeobox 2
hsa-miR-346	1	0	1	1	1	1	JARID2	jumonji, AT rich interactive domain 2
hsa-miR-346	1	0	1	1	1	1	KCNJ8	potassium inwardly-rectifying channel, subfamily J, member 8
hsa-miR-346	1	0	1	0	1	1	KRAS	v-Ki-ras2 Kirsten rat sarcoma viral oncogene homolog
hsa-miR-346	1	0	1	1	1	1	OXSR1	oxidative-stress responsive 1
hsa-miR-346	1	0	1	1	1	1	ACTC1	actin, alpha, cardiac muscle 1
hsa-miR-346	1	0	1	1	1	1	APLNR	apelin receptor
hsa-miR-346	1	0	1	1	0	0	BCL3	B-cell CLL/lymphoma 3
hsa-miR-346	1	0	1	1	1	1	ARID3A	AT rich interactive domain 3A (BRIGHT-like)
hsa-miR-346	1	0	1	1	1	1	NR2F6	nuclear receptor subfamily 2, group F, member 6
hsa-miR-346	1	0	1	1	1	1	GABPB1	GA binding protein transcription factor, beta subunit 1
hsa-miR-346	0	0	1	1	0	0	NCKAP1L	NCK-associated protein 1-like
hsa-miR-346	1	0	1	0	1	1	PRKAB2	protein kinase, AMP-activated, beta 2 non-catalytic subunit
hsa-miR-346	0	0	1	1	1	1	MALL	mal, T-cell differentiation protein-like
hsa-miR-346	1	0	1	1	1	1	RND2	Rho family GTPase 2
hsa-miR-346	0	0	1	1	1	1	FAIM3	Fas apoptotic inhibitory molecule 3
hsa-miR-346	1	0	1	1	1	1	RGS4	regulator of G-protein signaling 4
hsa-miR-346	1	0	1	1	1	1	ACTR1A	ARP1 actin-related protein 1 homolog A, centractin alpha (yeast)
hsa-miR-346	1	0	1	0	1	1	DCAF7	DDB1 and CUL4 associated factor 7
hsa-miR-346	1	0	1	1	1	1	BET1	blocked early in transport 1 homolog (S. cerevisiae)
hsa-miR-346	1	0	1	1	0	0	TRAIP	TRAF interacting protein
hsa-miR-346	1	0	1	1	1	1	MTF1	metal-regulatory transcription factor 1
hsa-miR-346	1	0	1	1	1	1	SNAI1	snail homolog 1 (Drosophila)
hsa-miR-346	1	0	1	1	1	1	DAGLA	diacylglycerol lipase, alpha
hsa-miR-346	0	0	1	1	1	1	CSF2RA	colony stimulating factor 2 receptor, alpha, low-affinity (granulocyte-macrophage)
hsa-miR-346	1	0	1	1	1	1	DYNC1LI2	dynein, cytoplasmic 1, light intermediate chain 2
hsa-miR-346	0	0	1	1	1	1	NKX3-1	NK3 homeobox 1
hsa-miR-346	1	0	1	1	1	1	NR4A2	nuclear receptor subfamily 4, group A, member 2
hsa-miR-346	1	0	1	0	1	1	PITPNA	phosphatidylinositol transfer protein, alpha
hsa-miR-346	1	0	1	1	1	1	POU4F1	POU class 4 homeobox 1
hsa-miR-346	1	0	1	1	1	1	STK4	serine/threonine kinase 4
hsa-miR-346	1	0	1	1	1	1	ZER1	zer-1 homolog (C. elegans)
hsa-miR-346	0	0	1	0	0	0	RELB	v-rel reticuloendotheliosis viral oncogene homolog B
hsa-miR-346	1	0	1	1	1	1	CTCF	CCCTC-binding factor (zinc finger protein)
hsa-miR-346	1	0	1	1	1	1	SRSF10	serine/arginine-rich splicing factor 10
hsa-miR-346	1	0	1	1	1	1	MMP24	matrix metallopeptidase 24 (membrane-inserted)
hsa-miR-346	0	0	1	1	1	1	JTB	jumping translocation breakpoint
hsa-miR-346	0	0	1	1	0	0	DNAJB2	DnaJ (Hsp40) homolog, subfamily B, member 2
hsa-miR-346	1	0	1	1	1	1	BTG2	BTG family, member 2
hsa-miR-346	1	0	1	1	1	1	ZBTB33	zinc finger and BTB domain containing 33
hsa-miR-346	1	0	1	1	1	1	SF3A3	splicing factor 3a, subunit 3, 60kDa
hsa-miR-346	0	0	1	1	1	1	PKIA	protein kinase (cAMP-dependent, catalytic) inhibitor alpha
hsa-miR-346	1	0	1	0	1	1	WASF2	WAS protein family, member 2
hsa-miR-346	1	0	1	0	1	1	PAPD7	PAP associated domain containing 7
hsa-miR-346	1	0	1	1	1	1	ABHD2	abhydrolase domain containing 2
hsa-miR-346	1	0	1	1	1	1	TESK2	testis-specific kinase 2
hsa-miR-346	1	0	1	1	1	1	TUSC2	tumor suppressor candidate 2
hsa-miR-346	0	0	1	1	1	1	LMOD1	leiomodin 1 (smooth muscle)
hsa-miR-346	1	0	1	0	1	1	EIF2C2	eukaryotic translation initiation factor 2C, 2
hsa-miR-346	0	0	1	1	1	1	SNX10	sorting nexin 10
hsa-miR-346	0	0	1	1	0	0	ZDHHC8	zinc finger, DHHC-type containing 8
hsa-miR-346	0	0	1	1	1	1	LRP10	low density lipoprotein receptor-related protein 10
hsa-miR-346	0	0	1	1	1	1	MAGEH1	melanoma antigen family H, 1
hsa-miR-346	1	0	1	0	1	1	ODZ1	odz, odd Oz/ten-m homolog 1 (Drosophila)
hsa-miR-346	1	0	1	1	1	1	LHX6	LIM homeobox 6
hsa-miR-346	1	0	1	0	1	1	DIEXF	digestive organ expansion factor homolog (zebrafish)
hsa-miR-346	1	0	1	1	0	0	SND1	staphylococcal nuclease and tudor domain containing 1
hsa-miR-346	1	0	1	1	1	1	CDR2L	cerebellar degeneration-related protein 2-like
hsa-miR-346	1	0	1	1	1	1	ZNF592	zinc finger protein 592
hsa-miR-346	1	0	1	0	1	1	SH3PXD2A	SH3 and PX domains 2A
hsa-miR-346	1	0	1	1	1	1	RALGPS1	Ral GEF with PH domain and SH3 binding motif 1
hsa-miR-346	1	0	1	1	1	1	LRIG2	leucine-rich repeats and immunoglobulin-like domains 2
hsa-miR-346	0	0	1	0	1	1	PPM1E	protein phosphatase, Mg2+/Mn2+ dependent, 1E
hsa-miR-346	1	0	1	0	1	1	WDFY3	WD repeat and FYVE domain containing 3
hsa-miR-346	1	0	1	1	1	1	PHLPP2	PH domain and leucine rich repeat protein phosphatase 2
hsa-miR-346	1	0	1	0	1	1	LARP1	La ribonucleoprotein domain family, member 1
hsa-miR-346	1	0	1	0	1	1	SRGAP2	SLIT-ROBO Rho GTPase activating protein 2
hsa-miR-346	1	0	1	1	1	1	RIMBP2	RIMS binding protein 2
hsa-miR-346	1	0	1	1	1	1	PARM1	prostate androgen-regulated mucin-like protein 1
hsa-miR-346	1	0	1	1	0	0	SENP3	SUMO1/sentrin/SMT3 specific peptidase 3
hsa-miR-346	0	0	1	1	0	0	GP6	glycoprotein VI (platelet)
hsa-miR-346	0	0	1	1	0	0	FAM203A	family with sequence similarity 203, member A
hsa-miR-346	1	0	1	1	1	1	C20orf111	chromosome 20 open reading frame 111
hsa-miR-346	1	0	1	0	1	1	NT5DC3	5'-nucleotidase domain containing 3
hsa-miR-346	1	0	1	1	1	1	SIX4	SIX homeobox 4
hsa-miR-346	0	0	1	1	1	1	POLE3	polymerase (DNA directed), epsilon 3, accessory subunit
hsa-miR-346	1	0	1	1	1	1	INO80	INO80 homolog (S. cerevisiae)
hsa-miR-346	0	0	1	1	0	0	CNTLN	centlein, centrosomal protein
hsa-miR-346	1	0	1	1	1	1	TBC1D8B	TBC1 domain family, member 8B (with GRAM domain)
hsa-miR-346	1	0	1	1	1	1	LPPR1	lipid phosphate phosphatase-related protein type 1
hsa-miR-346	1	0	1	1	1	1	RNF125	ring finger protein 125, E3 ubiquitin protein ligase
hsa-miR-346	0	0	1	1	1	1	SDHAF2	succinate dehydrogenase complex assembly factor 2
hsa-miR-346	0	0	1	0	0	0	C19orf73	chromosome 19 open reading frame 73
hsa-miR-346	1	0	1	1	1	1	FAM178A	family with sequence similarity 178, member A
hsa-miR-346	1	0	1	1	1	1	RPRD1A	regulation of nuclear pre-mRNA domain containing 1A
hsa-miR-346	1	0	1	0	1	1	LGI2	leucine-rich repeat LGI family, member 2
hsa-miR-346	1	0	1	1	1	1	BRF2	BRF2, subunit of RNA polymerase III transcription initiation factor, BRF1-like
hsa-miR-346	0	0	1	1	1	1	GNL3L	guanine nucleotide binding protein-like 3 (nucleolar)-like
hsa-miR-346	1	0	1	0	1	1	CNGB3	cyclic nucleotide gated channel beta 3
hsa-miR-346	1	0	1	0	1	1	UBFD1	ubiquitin family domain containing 1
hsa-miR-346	0	0	1	1	1	1	RPRM	reprimo, TP53 dependent G2 arrest mediator candidate
hsa-miR-346	0	0	1	1	1	1	BDH2	3-hydroxybutyrate dehydrogenase, type 2
hsa-miR-346	0	0	1	1	1	1	RALGAPA2	Ral GTPase activating protein, alpha subunit 2 (catalytic)
hsa-miR-346	0	0	1	1	1	1	HRASLS	HRAS-like suppressor
hsa-miR-346	1	0	1	1	1	1	JPH1	junctophilin 1
hsa-miR-346	0	0	1	1	1	1	KIAA1161	KIAA1161
hsa-miR-346	0	0	1	1	1	1	ARRDC3	arrestin domain containing 3
hsa-miR-346	1	0	1	1	1	1	RANBP10	RAN binding protein 10
hsa-miR-346	0	0	1	1	1	1	KLHL1	kelch-like 1 (Drosophila)
hsa-miR-346	0	0	1	1	1	1	BCOR	BCL6 corepressor
hsa-miR-346	1	0	1	1	1	1	RET	ret proto-oncogene
hsa-miR-346	0	0	1	0	1	1	PSG3	pregnancy specific beta-1-glycoprotein 3
hsa-miR-346	1	0	1	1	1	1	NMB	neuromedin B
hsa-miR-346	0	0	1	1	0	0	SPINK2	serine peptidase inhibitor, Kazal type 2 (acrosin-trypsin inhibitor)
hsa-miR-346	0	0	1	1	1	1	CHST6	carbohydrate (N-acetylglucosamine 6-O) sulfotransferase 6
hsa-miR-346	1	0	1	1	1	1	TGIF2	TGFB-induced factor homeobox 2
hsa-miR-346	0	0	1	1	0	0	MIIP	migration and invasion inhibitory protein
hsa-miR-346	1	0	1	0	1	1	CSNK1G1	casein kinase 1, gamma 1
hsa-miR-346	0	0	1	1	1	1	FAM204A	family with sequence similarity 204, member A
hsa-miR-346	1	0	1	1	1	1	CLSTN2	calsyntenin 2
hsa-miR-346	1	0	1	1	1	1	LRRC4	leucine rich repeat containing 4
hsa-miR-346	0	0	1	1	1	1	RAB38	RAB38, member RAS oncogene family
hsa-miR-346	0	0	1	1	1	1	GLIPR2	GLI pathogenesis-related 2
hsa-miR-346	0	0	1	1	0	0	LEPRE1	leucine proline-enriched proteoglycan (leprecan) 1
hsa-miR-346	1	0	1	1	1	1	C1orf116	chromosome 1 open reading frame 116
hsa-miR-346	1	0	1	1	0	0	LRFN4	leucine rich repeat and fibronectin type III domain containing 4
hsa-miR-346	0	0	1	0	1	1	TRPM8	transient receptor potential cation channel, subfamily M, member 8
hsa-miR-346	1	0	1	1	1	1	HOXD1	homeobox D1
hsa-miR-346	0	0	1	0	1	1	C1orf115	chromosome 1 open reading frame 115
hsa-miR-346	1	0	1	0	1	1	MOB3B	MOB kinase activator 3B
hsa-miR-346	1	0	1	0	1	1	MAGIX	MAGI family member, X-linked
hsa-miR-346	1	0	1	0	1	1	SETD7	SET domain containing (lysine methyltransferase) 7
hsa-miR-346	1	0	1	1	1	1	NRBF2	nuclear receptor binding factor 2
hsa-miR-346	0	0	1	1	1	1	SLC2A10	solute carrier family 2 (facilitated glucose transporter), member 10
hsa-miR-346	1	0	1	1	1	1	PDRG1	p53 and DNA-damage regulated 1
hsa-miR-346	1	0	1	0	1	1	SPRY4	sprouty homolog 4 (Drosophila)
hsa-miR-346	1	0	1	1	1	1	MARK4	MAP/microtubule affinity-regulating kinase 4
hsa-miR-346	0	0	1	1	1	1	COG3	component of oligomeric golgi complex 3
hsa-miR-346	0	0	1	1	0	0	SLC4A11	solute carrier family 4, sodium borate transporter, member 11
hsa-miR-346	1	0	1	1	1	1	OTP	orthopedia homeobox
hsa-miR-346	1	0	1	1	1	1	ZNRF1	zinc and ring finger 1, E3 ubiquitin protein ligase
hsa-miR-346	1	0	1	1	0	0	TRAF7	TNF receptor-associated factor 7, E3 ubiquitin protein ligase
hsa-miR-346	1	0	1	1	1	1	POLDIP3	polymerase (DNA-directed), delta interacting protein 3
hsa-miR-346	0	0	1	1	1	1	ZNF333	zinc finger protein 333
hsa-miR-346	0	0	1	1	1	1	MAP1LC3A	microtubule-associated protein 1 light chain 3 alpha
hsa-miR-346	1	0	1	1	0	0	ATOH8	atonal homolog 8 (Drosophila)
hsa-miR-346	0	0	1	1	1	1	MICALCL	MICAL C-terminal like
hsa-miR-346	1	0	1	0	1	1	C5orf62	chromosome 5 open reading frame 62
hsa-miR-346	1	0	1	1	1	1	CASP2	caspase 2, apoptosis-related cysteine peptidase
hsa-miR-346	0	0	1	1	0	0	MUC13	mucin 13, cell surface associated
hsa-miR-346	1	0	1	1	1	1	FGD3	FYVE, RhoGEF and PH domain containing 3
hsa-miR-346	1	0	1	0	1	1	PURB	purine-rich element binding protein B
hsa-miR-346	1	0	1	1	0	0	CAMK2N2	calcium/calmodulin-dependent protein kinase II inhibitor 2
hsa-miR-346	1	0	1	1	0	0	FCHSD1	FCH and double SH3 domains 1
hsa-miR-346	1	0	1	1	1	1	STX1B	syntaxin 1B
hsa-miR-346	0	0	1	1	0	0	SIGLEC11	sialic acid binding Ig-like lectin 11
hsa-miR-346	0	0	1	1	0	0	PGLYRP2	peptidoglycan recognition protein 2
hsa-miR-346	1	0	1	1	1	1	ELFN2	extracellular leucine-rich repeat and fibronectin type III domain containing 2
hsa-miR-346	1	0	1	1	1	1	MED12L	mediator complex subunit 12-like
hsa-miR-346	1	0	1	1	1	1	PFN2	profilin 2
hsa-miR-346	1	0	1	1	1	1	NAA15	N(alpha)-acetyltransferase 15, NatA auxiliary subunit
hsa-miR-346	1	0	1	1	0	0	BRD4	bromodomain containing 4
hsa-miR-346	0	0	1	1	0	0	WNT8A	wingless-type MMTV integration site family, member 8A
hsa-miR-346	1	0	1	1	1	1	SEPT4	septin 4
hsa-miR-346	1	0	1	1	0	0	ADAMTS14	ADAM metallopeptidase with thrombospondin type 1 motif, 14
hsa-miR-346	0	0	1	0	1	1	PAQR8	progestin and adipoQ receptor family member VIII
hsa-miR-346	1	0	1	1	0	0	PYGO2	pygopus homolog 2 (Drosophila)
hsa-miR-346	1	0	1	1	1	1	PANK1	pantothenate kinase 1
hsa-miR-346	0	0	1	1	0	0	CCDC101	coiled-coil domain containing 101
hsa-miR-346	0	0	1	1	1	1	KLF14	Kruppel-like factor 14
hsa-miR-346	0	0	1	1	1	1	BAX	BCL2-associated X protein
hsa-miR-346	0	0	1	1	1	1	ADAMTS17	ADAM metallopeptidase with thrombospondin type 1 motif, 17
hsa-miR-346	1	0	1	1	0	0	GNAT1	guanine nucleotide binding protein (G protein), alpha transducing activity polypeptide 1
hsa-miR-346	1	0	1	1	1	1	FAM76B	family with sequence similarity 76, member B
hsa-miR-346	1	0	1	1	0	0	SMCR8	Smith-Magenis syndrome chromosome region, candidate 8
hsa-miR-346	0	0	1	1	1	1	ZFC3H1	zinc finger, C3H1-type containing
hsa-miR-346	1	0	1	1	1	1	CCSAP	centriole, cilia and spindle-associated protein
hsa-miR-346	1	0	1	0	1	1	MTPN	myotrophin
hsa-miR-346	0	0	1	1	1	1	DEFB106A	defensin, beta 106A
hsa-miR-346	1	0	1	1	1	1	LSM12	LSM12 homolog (S. cerevisiae)
hsa-miR-346	0	0	1	1	1	1	KBTBD5	kelch repeat and BTB (POZ) domain containing 5
hsa-miR-346	1	0	1	1	1	1	FAM123B	family with sequence similarity 123B
hsa-miR-346	1	0	1	1	1	1	ZSCAN29	zinc finger and SCAN domain containing 29
hsa-miR-346	0	0	1	1	1	1	DAND5	DAN domain family, member 5
hsa-miR-346	1	0	1	1	1	1	HOXA9	homeobox A9
hsa-miR-346	1	0	1	0	1	1	ST6GALNAC3	ST6 (alpha-N-acetyl-neuraminyl-2,3-beta-galactosyl-1,3)-N-acetylgalactosaminide alpha-2,6-sialyltransferase 3
hsa-miR-346	0	0	1	0	1	1	TMEM92	transmembrane protein 92
hsa-miR-346	0	0	1	1	1	1	SLC22A7	solute carrier family 22 (organic anion transporter), member 7
hsa-miR-346	1	0	1	1	1	1	CREBRF	CREB3 regulatory factor
hsa-miR-346	1	0	1	1	1	1	FNDC5	fibronectin type III domain containing 5
hsa-miR-346	1	0	1	1	1	1	PHF13	PHD finger protein 13
hsa-miR-346	0	0	1	1	1	1	REXO1L1	REX1, RNA exonuclease 1 homolog (S. cerevisiae)-like 1
hsa-miR-346	1	0	1	1	1	1	IL28RA	interleukin 28 receptor, alpha (interferon, lambda receptor)
hsa-miR-346	1	0	1	1	1	1	SMG7	smg-7 homolog, nonsense mediated mRNA decay factor (C. elegans)
hsa-miR-346	0	0	1	1	1	1	CYP4F22	cytochrome P450, family 4, subfamily F, polypeptide 22
hsa-miR-346	0	0	1	1	0	0	CLEC4F	C-type lectin domain family 4, member F
hsa-miR-346	0	0	1	1	0	0	EFCAB4A	EF-hand calcium binding domain 4A
hsa-miR-346	1	0	1	1	1	1	IGSF22	immunoglobulin superfamily, member 22
hsa-miR-346	1	0	1	0	1	1	KSR2	kinase suppressor of ras 2
hsa-miR-346	0	0	1	1	1	1	CDRT4	CMT1A duplicated region transcript 4
hsa-miR-346	0	0	1	0	1	1	KRT18P55	keratin 18 pseudogene 55
hsa-miR-346	0	0	1	0	1	1	NBPF15	neuroblastoma breakpoint family, member 15
hsa-miR-346	0	0	1	0	1	1	C5orf64	chromosome 5 open reading frame 64
hsa-miR-346	0	0	1	1	0	0	SEC14L4	SEC14-like 4 (S. cerevisiae)
hsa-miR-346	0	0	1	1	0	0	LYG2	lysozyme G-like 2
hsa-miR-346	1	0	1	1	1	1	PPAP2B	phosphatidic acid phosphatase type 2B
hsa-miR-346	0	0	1	1	1	1	LYNX1	Ly6/neurotoxin 1
hsa-miR-346	1	0	1	1	1	1	DCAF12L1	DDB1 and CUL4 associated factor 12-like 1
hsa-miR-346	0	0	1	1	1	1	NPAS4	neuronal PAS domain protein 4
hsa-miR-346	1	0	1	1	1	1	NIN	ninein (GSK3B interacting protein)
hsa-miR-346	0	0	1	0	1	1	NBPF11	neuroblastoma breakpoint family, member 11
hsa-miR-346	1	0	1	1	1	1	PHLPP1	PH domain and leucine rich repeat protein phosphatase 1
hsa-miR-346	1	0	1	1	1	1	ADAMTS6	ADAM metallopeptidase with thrombospondin type 1 motif, 6
hsa-miR-346	0	0	1	1	1	1	LHFPL4	lipoma HMGIC fusion partner-like 4
hsa-miR-346	1	0	1	0	1	1	ZC3H6	zinc finger CCCH-type containing 6
hsa-miR-346	1	0	1	1	1	1	NHLRC1	NHL repeat containing 1
hsa-miR-346	1	0	1	0	0	0	RAB15	RAB15, member RAS oncogene family
hsa-miR-346	1	0	1	1	1	1	PTGER3	prostaglandin E receptor 3 (subtype EP3)
hsa-miR-346	0	0	1	1	1	1	UBE3D	ubiquitin protein ligase E3D
hsa-miR-346	0	0	1	1	1	1	COL18A1-AS1	COL18A1 antisense RNA 1
hsa-miR-346	0	0	1	1	1	1	SLC25A35	solute carrier family 25, member 35
hsa-miR-346	0	0	1	1	0	0	IER5L	immediate early response 5-like
hsa-miR-346	0	0	1	1	0	0	PPIE	peptidylprolyl isomerase E (cyclophilin E)
hsa-miR-346	1	0	1	1	1	1	IGSF1	immunoglobulin superfamily, member 1
hsa-miR-346	0	0	1	1	0	0	SFTA2	surfactant associated 2
hsa-miR-346	1	0	1	0	1	1	NCKAP5	NCK-associated protein 5
hsa-miR-346	0	0	1	0	0	0	AATK-AS1	AATK antisense RNA 1
hsa-miR-346	1	0	1	0	1	1	C17orf102	chromosome 17 open reading frame 102
hsa-miR-346	0	0	1	0	1	1	C1orf220	chromosome 1 open reading frame 220
hsa-miR-346	0	0	1	1	1	1	FAM177B	family with sequence similarity 177, member B
hsa-miR-346	0	0	1	0	1	1	TMEM215	transmembrane protein 215
hsa-miR-346	0	0	1	0	0	0	ESRRAP2	estrogen-related receptor alpha pseudogene 2
hsa-miR-346	0	0	1	0	0	0	TTTY15	testis-specific transcript, Y-linked 15 (non-protein coding)
hsa-miR-346	0	0	1	0	0	0	CYCSP52	cytochrome c, somatic pseudogene 52
hsa-miR-346	0	0	1	0	0	0	CYCSP55	cytochrome c, somatic pseudogene 55
hsa-miR-346	0	0	1	0	0	0	PPP1R2P3	protein phosphatase 1, regulatory (inhibitor) subunit 2 pseudogene 3
hsa-miR-346	0	0	1	0	0	0	NXF4	nuclear RNA export factor 4 pseudogene
hsa-miR-346	0	0	1	0	0	0	AOC4	amine oxidase, copper containing 3 (vascular adhesion protein 1) pseudogene
hsa-miR-346	0	0	1	0	0	0	HTR7P1	5-hydroxytryptamine (serotonin) receptor 7 pseudogene 1
hsa-miR-346	0	0	1	0	0	0	SNORA56	small nucleolar RNA, H/ACA box 56
hsa-miR-346	0	0	1	0	0	0	LILRP2	leukocyte immunoglobulin-like receptor pseudogene 2
hsa-miR-346	0	0	1	0	0	0	NBR2	neighbor of BRCA1 gene 2 (non-protein coding)
hsa-miR-346	0	0	1	0	0	0	ANP32AP1	acidic (leucine-rich) nuclear phosphoprotein 32 family, member A pseudogene 1
hsa-miR-346	0	0	1	0	0	0	CDRT15P1	CMT1A duplicated region transcript 15 pseudogene 1
hsa-miR-346	0	0	1	1	0	0	GLP1R	glucagon-like peptide 1 receptor
hsa-miR-346	0	0	1	1	0	0	TBL3	transducin (beta)-like 3
hsa-miR-346	1	0	1	1	1	1	TRIO	trio Rho guanine nucleotide exchange factor
hsa-miR-346	0	0	1	1	0	0	MUC1	mucin 1, cell surface associated
hsa-miR-346	1	0	1	1	1	1	HNRNPA1	heterogeneous nuclear ribonucleoprotein A1
hsa-miR-346	1	0	1	1	1	1	IFNAR2	interferon (alpha, beta and omega) receptor 2
hsa-miR-346	0	0	0	1	0	0	LRRC23	leucine rich repeat containing 23
hsa-miR-346	0	0	1	1	0	0	CHPF2	chondroitin polymerizing factor 2
hsa-miR-346	0	0	1	1	0	0	RTN4R	reticulon 4 receptor
hsa-miR-346	0	0	0	1	0	0	RFC2	replication factor C (activator 1) 2, 40kDa
hsa-miR-346	0	0	1	1	1	1	CREB3L3	cAMP responsive element binding protein 3-like 3
hsa-miR-346	0	0	0	1	0	0	RAPGEF3	Rap guanine nucleotide exchange factor (GEF) 3
hsa-miR-346	0	0	0	1	0	0	ASNS	asparagine synthetase (glutamine-hydrolyzing)
hsa-miR-346	0	0	1	1	0	0	CPB2	carboxypeptidase B2 (plasma)
hsa-miR-346	0	0	0	1	0	0	TMEM38A	transmembrane protein 38A
hsa-miR-346	0	0	0	1	0	0	MRPL28	mitochondrial ribosomal protein L28
hsa-miR-346	1	0	1	1	1	1	PPP1R13B	protein phosphatase 1, regulatory subunit 13B
hsa-miR-346	0	0	1	1	0	0	UQCRC1	ubiquinol-cytochrome c reductase core protein I
hsa-miR-346	0	0	0	1	0	0	TEKT2	tektin 2 (testicular)
hsa-miR-346	1	0	1	1	1	1	OSM	oncostatin M
hsa-miR-346	0	0	0	1	0	0	LGALS2	lectin, galactoside-binding, soluble, 2
hsa-miR-346	1	0	1	1	1	1	ASPHD2	aspartate beta-hydroxylase domain containing 2
hsa-miR-346	1	0	1	1	1	1	SUN2	Sad1 and UNC84 domain containing 2
hsa-miR-346	0	0	0	1	1	1	RHBDD3	rhomboid domain containing 3
hsa-miR-346	0	0	1	1	1	1	CABP7	calcium binding protein 7
hsa-miR-346	0	0	1	1	0	0	C14orf166B	chromosome 14 open reading frame 166B
hsa-miR-346	0	0	1	1	0	0	CHMP4B	charged multivesicular body protein 4B
hsa-miR-346	0	0	0	1	0	0	GLA	galactosidase, alpha
hsa-miR-346	0	0	0	1	1	1	PLLP	plasmolipin
hsa-miR-346	0	0	0	1	1	1	DHODH	dihydroorotate dehydrogenase (quinone)
hsa-miR-346	0	0	1	1	0	0	COG4	component of oligomeric golgi complex 4
hsa-miR-346	0	0	0	1	0	0	DKK4	dickkopf homolog 4 (Xenopus laevis)
hsa-miR-346	0	0	0	1	0	0	MAN2B1	mannosidase, alpha, class 2B, member 1
hsa-miR-346	0	0	1	1	0	0	TULP2	tubby like protein 2
hsa-miR-346	1	0	1	1	0	0	RUVBL2	RuvB-like 2 (E. coli)
hsa-miR-346	0	0	1	1	0	0	PPP1R37	protein phosphatase 1, regulatory subunit 37
hsa-miR-346	0	0	1	1	0	0	SLC1A6	solute carrier family 1 (high affinity aspartate/glutamate transporter), member 6
hsa-miR-346	1	0	1	1	0	0	FSD1	fibronectin type III and SPRY domain containing 1
hsa-miR-346	0	0	0	1	0	0	TMEM205	transmembrane protein 205
hsa-miR-346	0	0	0	1	0	0	RBP3	retinol binding protein 3, interstitial
hsa-miR-346	0	0	1	1	1	1	P2RX5	purinergic receptor P2X, ligand-gated ion channel, 5
hsa-miR-346	0	0	1	1	0	0	ZNHIT3	zinc finger, HIT-type containing 3
hsa-miR-346	1	0	0	1	1	1	WNT3	wingless-type MMTV integration site family, member 3
hsa-miR-346	0	0	1	1	0	0	CACNG1	calcium channel, voltage-dependent, gamma subunit 1
hsa-miR-346	0	0	0	1	0	0	MRPL23	mitochondrial ribosomal protein L23
hsa-miR-346	0	0	0	1	0	0	SLC6A7	solute carrier family 6 (neurotransmitter transporter, L-proline), member 7
hsa-miR-346	0	0	1	1	0	0	PCDH12	protocadherin 12
hsa-miR-346	0	0	1	1	0	0	WBP1	WW domain binding protein 1
hsa-miR-346	0	0	0	1	0	0	ENO1	enolase 1, (alpha)
hsa-miR-346	1	0	1	1	1	1	DUSP4	dual specificity phosphatase 4
hsa-miR-346	0	0	1	1	1	1	CDH26	cadherin 26
hsa-miR-346	0	0	0	1	1	1	PSG9	pregnancy specific beta-1-glycoprotein 9
hsa-miR-346	0	0	0	1	1	1	AARS2	alanyl-tRNA synthetase 2, mitochondrial (putative)
hsa-miR-346	0	0	0	1	0	0	EMC3	ER membrane protein complex subunit 3
hsa-miR-346	0	0	0	1	0	0	NT5C	5', 3'-nucleotidase, cytosolic
hsa-miR-346	0	0	1	1	0	0	FNTB	farnesyltransferase, CAAX box, beta
hsa-miR-346	0	0	0	1	1	1	KRT9	keratin 9
hsa-miR-346	0	0	1	1	1	1	SLC35A2	solute carrier family 35 (UDP-galactose transporter), member A2
hsa-miR-346	0	0	0	1	0	0	TUBB7P	tubulin, beta 7, pseudogene
hsa-miR-346	1	0	1	1	0	0	LRFN1	leucine rich repeat and fibronectin type III domain containing 1
hsa-miR-346	0	0	0	1	0	0	NCF4	neutrophil cytosolic factor 4, 40kDa
hsa-miR-346	0	0	0	1	1	1	GDF2	growth differentiation factor 2
hsa-miR-346	0	0	0	1	1	1	LILRA3	leukocyte immunoglobulin-like receptor, subfamily A (without TM domain), member 3
hsa-miR-346	0	0	0	1	1	1	USP40	ubiquitin specific peptidase 40
hsa-miR-346	1	0	0	1	0	0	GADD45G	growth arrest and DNA-damage-inducible, gamma
hsa-miR-346	0	0	0	1	0	0	INF2	inverted formin, FH2 and WH2 domain containing
hsa-miR-346	1	0	0	1	0	0	SAFB2	scaffold attachment factor B2
hsa-miR-346	1	0	1	1	1	1	ACTN4	actinin, alpha 4
hsa-miR-346	0	0	0	1	0	0	TMEM160	transmembrane protein 160
hsa-miR-346	0	0	0	1	0	0	FAM22F	family with sequence similarity 22, member F
hsa-miR-346	0	0	1	1	0	0	ATP6V1E1	ATPase, H+ transporting, lysosomal 31kDa, V1 subunit E1
hsa-miR-346	0	0	1	1	1	1	PSMC3IP	PSMC3 interacting protein
hsa-miR-346	0	0	1	1	1	1	NR0B2	nuclear receptor subfamily 0, group B, member 2
hsa-miR-346	1	0	1	1	1	1	DNAJB1	DnaJ (Hsp40) homolog, subfamily B, member 1
hsa-miR-346	1	0	1	1	0	0	EEFSEC	eukaryotic elongation factor, selenocysteine-tRNA-specific
hsa-miR-346	0	0	1	1	1	1	NES	nestin
hsa-miR-346	0	0	1	1	0	0	MTNR1B	melatonin receptor 1B
hsa-miR-346	1	0	1	1	1	1	AHNAK	AHNAK nucleoprotein
hsa-miR-346	1	0	1	1	1	1	ADAMTS8	ADAM metallopeptidase with thrombospondin type 1 motif, 8
hsa-miR-346	0	0	1	1	0	0	KRT84	keratin 84
hsa-miR-346	1	0	0	1	0	0	KCNH3	potassium voltage-gated channel, subfamily H (eag-related), member 3
hsa-miR-346	0	0	0	1	1	1	DYSF	dysferlin, limb girdle muscular dystrophy 2B (autosomal recessive)
hsa-miR-346	0	0	0	1	1	1	MRPS9	mitochondrial ribosomal protein S9
hsa-miR-346	1	0	1	1	1	1	CIB2	calcium and integrin binding family member 2
hsa-miR-346	1	0	1	1	0	0	HAUS2	HAUS augmin-like complex, subunit 2
hsa-miR-346	0	0	1	1	0	0	PLCB2	phospholipase C, beta 2
hsa-miR-346	0	0	1	1	1	1	SIX3	SIX homeobox 3
hsa-miR-346	0	0	1	1	1	1	UTP6	UTP6, small subunit (SSU) processome component, homolog (yeast)
hsa-miR-346	0	0	0	1	0	0	MYOM2	myomesin (M-protein) 2, 165kDa
hsa-miR-346	0	0	1	1	0	0	RGS9	regulator of G-protein signaling 9
hsa-miR-346	0	0	0	1	0	0	CHST8	carbohydrate (N-acetylgalactosamine 4-0) sulfotransferase 8
hsa-miR-346	0	0	1	1	1	1	PRDX1	peroxiredoxin 1
hsa-miR-346	0	0	1	1	1	1	GIPR	gastric inhibitory polypeptide receptor
hsa-miR-346	1	0	1	1	1	1	MED26	mediator complex subunit 26
hsa-miR-346	0	0	1	1	1	1	DVL1	dishevelled, dsh homolog 1 (Drosophila)
hsa-miR-346	0	0	1	1	0	0	LTK	leukocyte receptor tyrosine kinase
hsa-miR-346	0	0	1	1	1	1	FGFRL1	fibroblast growth factor receptor-like 1
hsa-miR-346	0	0	0	1	0	0	TMEM175	transmembrane protein 175
hsa-miR-346	0	0	0	1	0	0	AMBP	alpha-1-microglobulin/bikunin precursor
hsa-miR-346	0	0	1	1	0	0	C12orf52	chromosome 12 open reading frame 52
hsa-miR-346	0	0	1	1	1	1	WDR93	WD repeat domain 93
hsa-miR-346	0	0	0	1	1	1	MARVELD3	MARVEL domain containing 3
hsa-miR-346	0	0	1	1	1	1	NOL3	nucleolar protein 3 (apoptosis repressor with CARD domain)
hsa-miR-346	0	0	0	1	1	1	RPL3L	ribosomal protein L3-like
hsa-miR-346	1	0	1	1	1	1	ARHGDIA	Rho GDP dissociation inhibitor (GDI) alpha
hsa-miR-346	0	0	0	1	1	1	NFIC	nuclear factor I/C (CCAAT-binding transcription factor)
hsa-miR-346	0	0	0	1	0	0	MED16	mediator complex subunit 16
hsa-miR-346	0	0	0	1	0	0	ARMC6	armadillo repeat containing 6
hsa-miR-346	0	0	0	1	0	0	CACNG8	calcium channel, voltage-dependent, gamma subunit 8
hsa-miR-346	1	0	1	1	1	1	MOB3C	MOB kinase activator 3C
hsa-miR-346	0	0	1	1	0	0	WDPCP	WD repeat containing planar cell polarity effector
hsa-miR-346	0	0	0	1	0	0	FAHD2B	fumarylacetoacetate hydrolase domain containing 2B
hsa-miR-346	0	0	1	1	1	1	CDKN2AIPNL	CDKN2A interacting protein N-terminal like
hsa-miR-346	1	0	1	1	1	1	FADS1	fatty acid desaturase 1
hsa-miR-346	0	0	1	1	0	0	FADS3	fatty acid desaturase 3
hsa-miR-346	1	0	1	1	1	1	CD40	CD40 molecule, TNF receptor superfamily member 5
hsa-miR-346	0	0	1	1	0	0	SLC22A9	solute carrier family 22 (organic anion transporter), member 9
hsa-miR-346	0	0	0	1	1	1	ZNF773	zinc finger protein 773
hsa-miR-346	0	0	1	1	1	1	DSPP	dentin sialophosphoprotein
hsa-miR-346	0	0	0	1	0	0	NMRAL1	NmrA-like family domain containing 1
hsa-miR-346	0	0	0	1	1	1	CD8A	CD8a molecule
hsa-miR-346	0	0	0	1	0	0	MCOLN2	mucolipin 2
hsa-miR-346	1	0	1	1	1	1	PIEZO2	piezo-type mechanosensitive ion channel component 2
hsa-miR-346	0	0	1	1	0	0	TRIM74	tripartite motif containing 74
hsa-miR-346	0	0	1	1	0	0	PDIA4	protein disulfide isomerase family A, member 4
hsa-miR-346	0	0	0	1	0	0	FAM161B	family with sequence similarity 161, member B
hsa-miR-346	0	0	0	1	1	1	NAAA	N-acylethanolamine acid amidase
hsa-miR-346	0	0	0	1	1	1	FANCD2	Fanconi anemia, complementation group D2
hsa-miR-346	0	0	0	1	0	0	IL34	interleukin 34
hsa-miR-346	0	0	0	1	0	0	PSMG3	proteasome (prosome, macropain) assembly chaperone 3
hsa-miR-346	0	0	1	1	1	1	RAB28	RAB28, member RAS oncogene family
hsa-miR-346	0	0	0	1	0	0	CDH15	cadherin 15, type 1, M-cadherin (myotubule)
hsa-miR-346	0	0	0	1	0	0	CHRNB3	cholinergic receptor, nicotinic, beta 3 (neuronal)
hsa-miR-346	0	0	1	1	0	0	WNT9B	wingless-type MMTV integration site family, member 9B
hsa-miR-346	0	0	0	1	0	0	OGFR	opioid growth factor receptor
hsa-miR-346	0	0	0	1	1	1	NLRP8	NLR family, pyrin domain containing 8
hsa-miR-346	0	0	0	1	0	0	TONSL	tonsoku-like, DNA repair protein
hsa-miR-346	0	0	1	1	0	0	YDJC	YdjC homolog (bacterial)
hsa-miR-346	0	0	0	1	0	0	SDR9C7	short chain dehydrogenase/reductase family 9C, member 7
hsa-miR-346	0	0	0	1	0	0	AQP5	aquaporin 5
hsa-miR-346	0	0	0	1	1	1	NHLRC4	NHL repeat containing 4
hsa-miR-346	0	0	0	1	0	0	HAAO	3-hydroxyanthranilate 3,4-dioxygenase
hsa-miR-346	0	0	0	1	0	0	KCNF1	potassium voltage-gated channel, subfamily F, member 1
hsa-miR-346	0	0	0	1	0	0	GLB1L	galactosidase, beta 1-like
hsa-miR-346	0	0	0	1	0	0	UCN	urocortin
hsa-miR-346	1	0	1	1	1	1	KLF15	Kruppel-like factor 15
hsa-miR-346	0	0	1	1	0	0	TMEM41A	transmembrane protein 41A
hsa-miR-346	0	0	1	1	1	1	SLC51A	solute carrier family 51, alpha subunit
hsa-miR-346	0	0	0	1	0	0	SPATA19	spermatogenesis associated 19
hsa-miR-346	0	0	1	1	1	1	CPLX4	complexin 4
hsa-miR-346	0	0	1	1	0	0	RRAD	Ras-related associated with diabetes
hsa-miR-346	1	0	1	1	1	1	GPRC5B	G protein-coupled receptor, family C, group 5, member B
hsa-miR-346	0	0	0	1	1	1	ZNF91	zinc finger protein 91
hsa-miR-346	0	0	0	1	0	0	ZNF668	zinc finger protein 668
hsa-miR-346	0	0	0	1	0	0	TRAPPC2L	trafficking protein particle complex 2-like
hsa-miR-346	0	0	0	1	0	0	DNAAF3	dynein, axonemal, assembly factor 3
hsa-miR-346	0	0	1	1	1	1	TSR1	TSR1, 20S rRNA accumulation, homolog (S. cerevisiae)
hsa-miR-346	0	0	0	1	0	0	PRR25	proline rich 25
hsa-miR-346	0	0	1	1	0	0	PDILT	protein disulfide isomerase-like, testis expressed
hsa-miR-346	0	0	1	1	0	0	HMCN2	hemicentin 2
hsa-miR-346	0	0	0	1	1	1	TRH	thyrotropin-releasing hormone
hsa-miR-346	0	0	1	1	1	1	MXD3	MAX dimerization protein 3
hsa-miR-346	0	0	1	1	1	1	C15orf40	chromosome 15 open reading frame 40
hsa-miR-346	0	0	0	1	0	0	ANKS3	ankyrin repeat and sterile alpha motif domain containing 3
hsa-miR-346	1	0	1	1	1	1	IL13	interleukin 13
hsa-miR-346	0	0	0	1	0	0	ECEL1	endothelin converting enzyme-like 1
hsa-miR-346	0	0	0	1	1	1	GUSB	glucuronidase, beta
hsa-miR-346	0	0	1	1	1	1	HDAC3	histone deacetylase 3
hsa-miR-346	0	0	1	1	1	1	ITIH5	inter-alpha-trypsin inhibitor heavy chain family, member 5
hsa-miR-346	0	0	0	1	1	1	PTAFR	platelet-activating factor receptor
hsa-miR-346	0	0	1	1	1	1	FAM22G	family with sequence similarity 22, member G
hsa-miR-346	1	0	1	1	0	0	MYO1F	myosin IF
hsa-miR-346	0	0	1	1	0	0	HOXD4	homeobox D4
hsa-miR-346	0	0	0	1	0	0	HSFX2	heat shock transcription factor family, X linked 2
hsa-miR-346	1	0	1	1	0	0	ADRA1B	adrenoceptor alpha 1B
hsa-miR-346	0	0	1	1	1	1	COG8	component of oligomeric golgi complex 8
hsa-miR-346	0	0	1	1	0	0	HEXIM2	hexamethylene bis-acetamide inducible 2
hsa-miR-346	0	0	0	1	0	0	THOP1	thimet oligopeptidase 1
hsa-miR-346	0	0	1	1	0	0	WFDC5	WAP four-disulfide core domain 5
hsa-miR-346	0	0	0	1	0	0	EFEMP2	EGF containing fibulin-like extracellular matrix protein 2
hsa-miR-346	0	0	0	1	1	1	ZNF471	zinc finger protein 471
hsa-miR-346	1	0	1	1	1	1	SSH3	slingshot homolog 3 (Drosophila)
hsa-miR-346	0	0	0	1	0	0	ATAD3B	ATPase family, AAA domain containing 3B
hsa-miR-346	0	0	0	1	0	0	XCR1	chemokine (C motif) receptor 1
hsa-miR-346	0	0	1	1	0	0	EEF2	eukaryotic translation elongation factor 2
hsa-miR-346	1	0	1	1	0	0	TCAP	titin-cap (telethonin)
hsa-miR-346	1	0	1	1	1	1	SLC39A1	solute carrier family 39 (zinc transporter), member 1
hsa-miR-346	0	0	1	1	0	0	RFNG	RFNG O-fucosylpeptide 3-beta-N-acetylglucosaminyltransferase
hsa-miR-346	0	0	1	1	0	0	MRPL11	mitochondrial ribosomal protein L11
hsa-miR-346	0	0	1	1	1	1	CARHSP1	calcium regulated heat stable protein 1, 24kDa
hsa-miR-346	0	0	1	1	1	1	ABCC12	ATP-binding cassette, sub-family C (CFTR/MRP), member 12
hsa-miR-346	1	0	1	1	1	1	KIAA1033	KIAA1033
hsa-miR-346	0	0	0	1	0	0	OR4D11	olfactory receptor, family 4, subfamily D, member 11
hsa-miR-346	0	0	1	1	0	0	STX4	syntaxin 4
hsa-miR-346	0	0	0	1	0	0	FUT7	fucosyltransferase 7 (alpha (1,3) fucosyltransferase)
hsa-miR-346	0	0	1	1	0	0	KCNH6	potassium voltage-gated channel, subfamily H (eag-related), member 6
hsa-miR-346	0	0	0	1	0	0	SULT1A1	sulfotransferase family, cytosolic, 1A, phenol-preferring, member 1
hsa-miR-346	0	0	1	1	1	1	PINX1	PIN2/TERF1 interacting, telomerase inhibitor 1
hsa-miR-346	1	0	1	1	1	1	RHOT2	ras homolog family member T2
hsa-miR-346	0	0	1	1	0	0	YSK4	YSK4 Sps1/Ste20-related kinase homolog (S. cerevisiae)
hsa-miR-346	1	0	1	1	0	0	NEURL4	neuralized homolog 4 (Drosophila)
hsa-miR-346	1	0	1	1	1	1	AKAP11	A kinase (PRKA) anchor protein 11
hsa-miR-346	1	0	1	1	1	1	PRIMA1	proline rich membrane anchor 1
hsa-miR-346	1	0	1	1	1	1	INADL	InaD-like (Drosophila)
hsa-miR-346	0	0	1	1	0	0	DNAJC7	DnaJ (Hsp40) homolog, subfamily C, member 7
hsa-miR-346	0	0	0	1	0	0	ARMCX4	armadillo repeat containing, X-linked 4
hsa-miR-346	0	0	0	1	0	0	TRPT1	tRNA phosphotransferase 1
hsa-miR-346	0	0	0	1	0	0	S1PR2	sphingosine-1-phosphate receptor 2
hsa-miR-346	0	0	0	1	0	0	SLC5A10	solute carrier family 5 (sodium/glucose cotransporter), member 10
hsa-miR-346	0	0	1	1	1	1	CD276	CD276 molecule
hsa-miR-346	0	0	0	1	0	0	CTXN1	cortexin 1
hsa-miR-346	0	0	1	1	1	1	RNF170	ring finger protein 170
hsa-miR-346	0	0	1	1	1	1	SHISA3	shisa homolog 3 (Xenopus laevis)
hsa-miR-346	1	0	1	1	1	1	GORASP1	golgi reassembly stacking protein 1, 65kDa
hsa-miR-346	0	0	0	1	0	0	LRRC37A3	leucine rich repeat containing 37, member A3
hsa-miR-346	0	0	0	1	1	1	OLFML3	olfactomedin-like 3
hsa-miR-346	0	0	0	1	1	1	VN1R1	vomeronasal 1 receptor 1
hsa-miR-346	0	0	0	1	1	1	NUDC	nuclear distribution C homolog (A. nidulans)
hsa-miR-346	0	0	0	1	0	0	RNF151	ring finger protein 151
hsa-miR-346	0	0	1	1	1	1	PINK1	PTEN induced putative kinase 1
hsa-miR-346	0	0	0	1	0	0	FAM3A	family with sequence similarity 3, member A
hsa-miR-346	1	0	0	1	1	1	GPR4	G protein-coupled receptor 4
hsa-miR-346	0	0	1	1	0	0	TRIM73	tripartite motif containing 73
hsa-miR-346	0	0	1	1	1	1	SERPINF2	serpin peptidase inhibitor, clade F (alpha-2 antiplasmin, pigment epithelium derived factor), member 2
hsa-miR-346	0	0	1	1	0	0	NLRP12	NLR family, pyrin domain containing 12
hsa-miR-346	0	0	0	1	0	0	CYP4F12	cytochrome P450, family 4, subfamily F, polypeptide 12
hsa-miR-346	0	0	1	1	1	1	FAM193A	family with sequence similarity 193, member A
hsa-miR-346	0	0	1	1	0	0	UBAC2	UBA domain containing 2
hsa-miR-346	0	0	0	1	0	0	GYLTL1B	glycosyltransferase-like 1B
hsa-miR-346	0	0	0	1	1	1	C14orf177	chromosome 14 open reading frame 177
hsa-miR-346	0	0	0	1	0	0	NEU4	sialidase 4
hsa-miR-346	1	0	0	1	1	1	IQCE	IQ motif containing E
hsa-miR-346	0	0	1	1	1	1	ARHGEF4	Rho guanine nucleotide exchange factor (GEF) 4
hsa-miR-346	1	0	1	1	1	1	BRSK1	BR serine/threonine kinase 1
hsa-miR-346	1	0	1	1	1	1	CARM1	coactivator-associated arginine methyltransferase 1
hsa-miR-346	1	0	0	1	0	0	GGT5	gamma-glutamyltransferase 5
hsa-miR-346	0	0	0	1	0	0	SERHL2	serine hydrolase-like 2
hsa-miR-346	0	0	0	1	0	0	RAB11B	RAB11B, member RAS oncogene family
hsa-miR-346	0	0	1	1	1	1	COL7A1	collagen, type VII, alpha 1
hsa-miR-346	0	0	0	1	1	1	C3orf35	chromosome 3 open reading frame 35
hsa-miR-346	0	0	1	1	1	1	ATF7	activating transcription factor 7
hsa-miR-346	0	0	0	1	0	0	DEFB108B	defensin, beta 108B
hsa-miR-346	0	0	1	1	0	0	NXPH3	neurexophilin 3
hsa-miR-346	1	0	1	1	1	1	SHMT2	serine hydroxymethyltransferase 2 (mitochondrial)
hsa-miR-346	0	0	0	1	0	0	OR52A1	olfactory receptor, family 52, subfamily A, member 1
hsa-miR-346	0	0	0	1	0	0	C19orf71	chromosome 19 open reading frame 71
hsa-miR-346	1	0	1	1	1	1	SHMT1	serine hydroxymethyltransferase 1 (soluble)
hsa-miR-346	0	0	0	1	0	0	GGTLC3	gamma-glutamyltransferase light chain 3
hsa-miR-346	0	0	0	1	1	1	TMEM121	transmembrane protein 121
hsa-miR-346	0	0	1	1	0	0	CLK3	CDC-like kinase 3
hsa-miR-346	0	0	1	1	1	1	MYOM3	myomesin family, member 3
hsa-miR-346	1	0	1	1	0	0	INPP5J	inositol polyphosphate-5-phosphatase J
hsa-miR-346	0	0	0	1	0	0	PCYT2	phosphate cytidylyltransferase 2, ethanolamine
hsa-miR-346	0	0	0	1	0	0	CCR10	chemokine (C-C motif) receptor 10
hsa-miR-346	0	0	0	1	0	0	FAM200A	family with sequence similarity 200, member A
hsa-miR-346	1	0	1	1	0	0	TSEN54	tRNA splicing endonuclease 54 homolog (S. cerevisiae)
hsa-miR-346	0	0	1	1	1	1	AIFM3	apoptosis-inducing factor, mitochondrion-associated, 3
hsa-miR-346	1	0	0	1	0	0	EMID1	EMI domain containing 1
hsa-miR-346	0	0	0	1	0	0	FGF3	fibroblast growth factor 3
hsa-miR-346	1	0	1	1	0	0	MEGF8	multiple EGF-like-domains 8
hsa-miR-346	0	0	0	1	1	1	PDCD1	programmed cell death 1
hsa-miR-346	0	0	1	1	0	0	PFDN5	prefoldin subunit 5
hsa-miR-346	0	0	0	1	0	0	TAC4	tachykinin 4 (hemokinin)
hsa-miR-346	0	0	1	1	0	0	KIF9	kinesin family member 9
hsa-miR-346	0	0	0	1	1	1	TESC	tescalcin
hsa-miR-346	0	0	0	1	0	0	DEFB106B	defensin, beta 106B
hsa-miR-346	1	0	1	1	1	1	SPTB	spectrin, beta, erythrocytic
hsa-miR-346	0	0	0	1	0	0	SULT1A2	sulfotransferase family, cytosolic, 1A, phenol-preferring, member 2
hsa-miR-346	0	0	0	1	0	0	ZNF671	zinc finger protein 671
hsa-miR-346	0	0	1	1	1	1	IFRD2	interferon-related developmental regulator 2
hsa-miR-346	0	0	1	1	0	0	NME1	NME/NM23 nucleoside diphosphate kinase 1
hsa-miR-346	0	0	0	1	0	0	NME1-NME2	NME1-NME2 readthrough
hsa-miR-346	0	0	0	1	0	0	NME2	NME/NM23 nucleoside diphosphate kinase 2
hsa-miR-346	0	0	1	1	0	0	MRPL37	mitochondrial ribosomal protein L37
hsa-miR-346	0	0	1	1	0	0	HYAL3	hyaluronoglucosaminidase 3
hsa-miR-346	1	0	1	1	1	1	TMPRSS13	transmembrane protease, serine 13
hsa-miR-346	1	0	1	1	1	1	ATG4B	autophagy related 4B, cysteine peptidase
hsa-miR-346	0	0	0	1	0	0	ZNF394	zinc finger protein 394
hsa-miR-346	0	0	0	1	1	1	OTUD6A	OTU domain containing 6A
hsa-miR-346	0	0	1	1	0	0	MOCS2	molybdenum cofactor synthesis 2
hsa-miR-346	0	0	0	1	1	1	C11orf95	chromosome 11 open reading frame 95
hsa-miR-346	0	0	0	1	0	0	GJB5	gap junction protein, beta 5, 31.1kDa
hsa-miR-346	0	0	0	1	0	0	SCNN1D	sodium channel, non-voltage-gated 1, delta subunit
hsa-miR-346	1	0	0	1	0	0	CRTC1	CREB regulated transcription coactivator 1
hsa-miR-346	0	0	0	1	0	0	PTGES2	prostaglandin E synthase 2
hsa-miR-346	0	0	1	1	1	1	SIGLEC10	sialic acid binding Ig-like lectin 10
hsa-miR-346	0	0	0	1	1	1	VWA1	von Willebrand factor A domain containing 1
hsa-miR-346	0	0	1	1	1	1	ETV7	ets variant 7
hsa-miR-346	0	0	0	1	1	1	PNCK	pregnancy up-regulated non-ubiquitously expressed CaM kinase
hsa-miR-346	0	0	0	1	0	0	EXD3	exonuclease 3'-5' domain containing 3
hsa-miR-346	0	0	1	1	0	0	IL4I1	interleukin 4 induced 1
hsa-miR-346	0	0	0	1	0	0	WDR86	WD repeat domain 86
hsa-miR-346	0	0	0	1	0	0	IGFL3	IGF-like family member 3
hsa-miR-346	0	0	1	1	1	1	ABLIM2	actin binding LIM protein family, member 2
hsa-miR-346	1	0	1	1	1	1	C1orf173	chromosome 1 open reading frame 173
hsa-miR-346	0	0	1	1	1	1	SMPD1	sphingomyelin phosphodiesterase 1, acid lysosomal
hsa-miR-346	0	0	1	1	1	1	C9orf171	chromosome 9 open reading frame 171
hsa-miR-346	0	0	1	1	1	1	SZT2	seizure threshold 2 homolog (mouse)
hsa-miR-346	0	0	0	1	0	0	ZNF669	zinc finger protein 669
hsa-miR-346	0	0	1	1	1	1	ATP7A	ATPase, Cu++ transporting, alpha polypeptide
hsa-miR-346	1	0	0	1	1	1	COL9A3	collagen, type IX, alpha 3
hsa-miR-346	0	0	0	1	0	0	RNF222	ring finger protein 222
hsa-miR-346	0	0	1	1	1	1	ICOSLG	inducible T-cell co-stimulator ligand
hsa-miR-346	0	0	0	1	0	0	SDSL	serine dehydratase-like
hsa-miR-346	0	0	0	1	1	1	F7	coagulation factor VII (serum prothrombin conversion accelerator)
hsa-miR-346	0	0	0	1	0	0	DHRS7B	dehydrogenase/reductase (SDR family) member 7B
hsa-miR-346	0	0	1	1	1	1	POFUT2	protein O-fucosyltransferase 2
hsa-miR-346	0	0	0	1	0	0	CCDC37	coiled-coil domain containing 37
hsa-miR-346	0	0	1	1	1	1	RFPL1	ret finger protein-like 1
hsa-miR-346	0	0	0	1	0	0	EXOC3L1	exocyst complex component 3-like 1
hsa-miR-346	0	0	1	1	1	1	ELP5	elongator acetyltransferase complex subunit 5
hsa-miR-346	0	0	0	1	0	0	ZNF324B	zinc finger protein 324B
hsa-miR-346	0	0	1	1	0	0	ZNF584	zinc finger protein 584
hsa-miR-346	0	0	1	1	0	0	GLYCTK	glycerate kinase
hsa-miR-346	1	0	1	1	1	1	TXNRD1	thioredoxin reductase 1
hsa-miR-346	1	0	1	1	1	1	CTNNA1	catenin (cadherin-associated protein), alpha 1, 102kDa
hsa-miR-346	1	0	1	1	1	1	APP	amyloid beta (A4) precursor protein
hsa-miR-346	1	0	1	1	1	1	LINGO1	leucine rich repeat and Ig domain containing 1
hsa-miR-346	0	0	0	1	0	0	MFSD12	major facilitator superfamily domain containing 12
hsa-miR-346	0	0	0	1	0	0	LEPREL4	leprecan-like 4
hsa-miR-346	1	0	0	1	0	0	CARD11	caspase recruitment domain family, member 11
hsa-miR-346	0	0	1	1	1	1	MTAP	methylthioadenosine phosphorylase
hsa-miR-346	0	0	0	1	1	1	MYOM1	myomesin 1, 185kDa
hsa-miR-346	1	0	1	1	0	0	PLD3	phospholipase D family, member 3
hsa-miR-346	0	0	1	1	0	0	SLITRK4	SLIT and NTRK-like family, member 4
hsa-miR-346	0	0	1	1	0	0	DOK3	docking protein 3
hsa-miR-346	0	0	0	1	0	0	OR11G2	olfactory receptor, family 11, subfamily G, member 2
hsa-miR-346	0	0	0	1	0	0	DNAJC22	DnaJ (Hsp40) homolog, subfamily C, member 22
hsa-miR-346	0	0	0	1	0	0	HIST4H4	histone cluster 4, H4
hsa-miR-346	0	0	1	1	0	0	SERPINH1	serpin peptidase inhibitor, clade H (heat shock protein 47), member 1, (collagen binding protein 1)
hsa-miR-346	0	0	1	1	1	1	EXOG	endo/exonuclease (5'-3'), endonuclease G-like
hsa-miR-346	0	0	0	1	0	0	BCKDHA	branched chain keto acid dehydrogenase E1, alpha polypeptide
hsa-miR-346	0	0	1	1	1	1	ATP5S	ATP synthase, H+ transporting, mitochondrial Fo complex, subunit s (factor B)
hsa-miR-346	1	0	1	1	1	1	ENTPD4	ectonucleoside triphosphate diphosphohydrolase 4
hsa-miR-346	1	0	1	1	1	1	TRIM3	tripartite motif containing 3
hsa-miR-346	1	0	1	1	1	1	FAM219A	family with sequence similarity 219, member A
hsa-miR-346	0	0	1	1	0	0	NPSR1	neuropeptide S receptor 1
hsa-miR-346	0	0	1	1	0	0	HKR1	HKR1, GLI-Kruppel zinc finger family member
hsa-miR-346	1	0	0	1	0	0	TSTA3	tissue specific transplantation antigen P35B
hsa-miR-346	0	0	0	1	0	0	ABP1	amiloride binding protein 1 (amine oxidase (copper-containing))
hsa-miR-346	1	0	1	1	0	0	ZNF219	zinc finger protein 219
hsa-miR-346	0	0	0	1	0	0	C11orf80	chromosome 11 open reading frame 80
hsa-miR-346	1	0	1	1	1	1	CD247	CD247 molecule
hsa-miR-346	1	0	0	1	1	1	SBNO2	strawberry notch homolog 2 (Drosophila)
hsa-miR-346	1	0	1	1	0	0	DFNB31	deafness, autosomal recessive 31
hsa-miR-346	1	0	1	1	1	1	SH3BP5L	SH3-binding domain protein 5-like
hsa-miR-346	0	0	0	1	1	1	B3GALNT2	beta-1,3-N-acetylgalactosaminyltransferase 2
hsa-miR-346	0	0	1	1	0	0	C1orf95	chromosome 1 open reading frame 95
hsa-miR-346	0	0	1	1	1	1	INTS7	integrator complex subunit 7
hsa-miR-346	0	0	0	1	1	1	RMND1	required for meiotic nuclear division 1 homolog (S. cerevisiae)
hsa-miR-346	1	0	1	1	1	1	TROVE2	TROVE domain family, member 2
hsa-miR-346	0	0	0	1	1	1	LTV1	LTV1 homolog (S. cerevisiae)
hsa-miR-346	1	0	1	1	1	1	ECT2L	epithelial cell transforming sequence 2 oncogene-like
hsa-miR-346	0	0	1	1	1	1	DPT	dermatopontin
hsa-miR-346	0	0	1	1	1	1	ATP1A4	ATPase, Na+/K+ transporting, alpha 4 polypeptide
hsa-miR-346	0	0	0	1	0	0	RHBG	Rh family, B glycoprotein (gene/pseudogene)
hsa-miR-346	0	0	1	1	1	1	ECHDC1	enoyl CoA hydratase domain containing 1
hsa-miR-346	0	0	0	1	0	0	YY1AP1	YY1 associated protein 1
hsa-miR-346	0	0	1	1	0	0	DAP3	death associated protein 3
hsa-miR-346	0	0	1	1	0	0	PMVK	phosphomevalonate kinase
hsa-miR-346	0	0	0	1	0	0	PRAP1	proline-rich acidic protein 1
hsa-miR-346	1	0	0	1	1	1	PWWP2B	PWWP domain containing 2B
hsa-miR-346	1	0	1	1	0	0	CHTOP	chromatin target of PRMT1
hsa-miR-346	0	0	1	1	0	0	HIST2H3C	histone cluster 2, H3c
hsa-miR-346	0	0	0	1	0	0	HIST1H3H	histone cluster 1, H3h
hsa-miR-346	1	0	1	1	1	1	FAM160B1	family with sequence similarity 160, member B1
hsa-miR-346	0	0	1	1	0	0	GSTO1	glutathione S-transferase omega 1
hsa-miR-346	0	0	1	1	0	0	EPS8L3	EPS8-like 3
hsa-miR-346	0	0	0	1	0	0	GSTM2	glutathione S-transferase mu 2 (muscle)
hsa-miR-346	0	0	0	1	0	0	UCKL1-AS1	UCKL1 antisense RNA 1
hsa-miR-346	0	0	0	1	0	0	TNFRSF6B	tumor necrosis factor receptor superfamily, member 6b, decoy
hsa-miR-346	0	0	1	1	0	0	RTEL1	regulator of telomere elongation helicase 1
hsa-miR-346	0	0	1	1	1	1	L1CAM	L1 cell adhesion molecule
hsa-miR-346	0	0	0	1	0	0	HAUS7	HAUS augmin-like complex, subunit 7
hsa-miR-346	0	0	1	1	0	0	TINAG	tubulointerstitial nephritis antigen
hsa-miR-346	1	0	1	1	1	1	SSBP3	single stranded DNA binding protein 3
hsa-miR-346	1	0	1	1	1	1	NELF	nasal embryonic LHRH factor
hsa-miR-346	0	0	0	1	0	0	NPDC1	neural proliferation, differentiation and control, 1
hsa-miR-346	0	0	0	1	0	0	INPP5E	inositol polyphosphate-5-phosphatase, 72 kDa
hsa-miR-346	0	0	0	1	0	0	C9orf116	chromosome 9 open reading frame 116
hsa-miR-346	0	0	0	1	0	0	LCN1P2	lipocalin 1 pseudogene 2
hsa-miR-346	0	0	0	1	1	1	EXOSC2	exosome component 2
hsa-miR-346	0	0	0	1	0	0	PRRX2	paired related homeobox 2
hsa-miR-346	1	0	1	1	1	1	SNX21	sorting nexin family member 21
hsa-miR-346	0	0	1	1	1	1	CNPY3	canopy 3 homolog (zebrafish)
hsa-miR-346	0	0	1	1	1	1	TRUB2	TruB pseudouridine (psi) synthase homolog 2 (E. coli)
hsa-miR-346	1	0	1	1	1	1	GDAP1L1	ganglioside induced differentiation associated protein 1-like 1
hsa-miR-346	0	0	0	1	1	1	USP49	ubiquitin specific peptidase 49
hsa-miR-346	1	0	0	1	0	0	LMX1B	LIM homeobox transcription factor 1, beta
hsa-miR-346	0	0	1	1	0	0	EIF3I	eukaryotic translation initiation factor 3, subunit I
hsa-miR-346	1	0	1	1	0	0	CCDC28B	coiled-coil domain containing 28B
hsa-miR-346	0	0	1	1	0	0	PI16	peptidase inhibitor 16
hsa-miR-346	0	0	0	1	0	0	OR5C1	olfactory receptor, family 5, subfamily C, member 1
hsa-miR-346	0	0	1	1	0	0	GJB1	gap junction protein, beta 1, 32kDa
hsa-miR-346	0	0	1	1	0	0	OGDHL	oxoglutarate dehydrogenase-like
hsa-miR-346	0	0	1	1	0	0	P2RY4	pyrimidinergic receptor P2Y, G-protein coupled, 4
hsa-miR-346	1	0	0	1	0	0	PSMB8	proteasome (prosome, macropain) subunit, beta type, 8 (large multifunctional peptidase 7)
hsa-miR-346	0	0	1	1	0	0	DNAH17	dynein, axonemal, heavy chain 17
hsa-miR-346	0	0	1	1	1	1	PRRT1	proline-rich transmembrane protein 1
hsa-miR-346	0	0	1	1	1	1	ZNF341	zinc finger protein 341
hsa-miR-346	1	1	1	1	1	1	MAP3K8	mitogen-activated protein kinase kinase kinase 8
hsa-miR-346	0	0	1	1	0	0	SLC44A4	solute carrier family 44, member 4
hsa-miR-346	0	0	0	1	0	0	TMEM82	transmembrane protein 82
hsa-miR-346	0	0	1	1	0	0	DDAH2	dimethylarginine dimethylaminohydrolase 2
hsa-miR-346	1	0	0	1	0	0	PLEKHM2	pleckstrin homology domain containing, family M (with RUN domain) member 2
hsa-miR-346	0	0	1	1	0	0	DGKK	diacylglycerol kinase, kappa
hsa-miR-346	1	0	1	1	0	0	MCCD1	mitochondrial coiled-coil domain 1
hsa-miR-346	0	0	1	1	1	1	MYO3A	myosin IIIA
hsa-miR-346	0	0	1	1	0	0	NPPA	natriuretic peptide A
hsa-miR-346	0	0	0	1	0	0	LOC100130238	uncharacterized LOC100130238
hsa-miR-346	0	0	1	1	0	0	HDAC6	histone deacetylase 6
hsa-miR-346	0	0	0	1	0	0	FBXO6	F-box protein 6
hsa-miR-346	0	0	1	1	0	0	FBXO2	F-box protein 2
hsa-miR-346	0	0	0	1	0	0	C1orf127	chromosome 1 open reading frame 127
hsa-miR-346	0	0	1	1	1	1	THBD	thrombomodulin
hsa-miR-346	0	0	0	1	0	0	SPDYC	speedy homolog C (Xenopus laevis)
hsa-miR-346	1	0	1	1	1	1	CTNNBIP1	catenin, beta interacting protein 1
hsa-miR-346	0	0	0	1	1	1	PYCRL	pyrroline-5-carboxylate reductase-like
hsa-miR-346	0	0	0	1	0	0	FAM74A3	family with sequence similarity 74, member A3
hsa-miR-346	0	0	1	1	1	1	HES2	hairy and enhancer of split 2 (Drosophila)
hsa-miR-346	1	0	0	1	0	0	ARHGEF1	Rho guanine nucleotide exchange factor (GEF) 1
hsa-miR-346	0	0	0	1	0	0	AARD	alanine and arginine rich domain containing protein
hsa-miR-346	1	0	1	1	1	1	PRDM16	PR domain containing 16
hsa-miR-346	1	0	1	1	1	1	MID1IP1	MID1 interacting protein 1
hsa-miR-346	0	0	0	1	0	0	LIG3	ligase III, DNA, ATP-dependent
hsa-miR-346	0	0	0	1	0	0	SPI1	spleen focus forming virus (SFFV) proviral integration oncogene spi1
hsa-miR-346	0	0	0	1	0	0	KIAA1751	KIAA1751
hsa-miR-346	0	0	1	1	1	1	C11orf49	chromosome 11 open reading frame 49
hsa-miR-346	0	0	0	1	0	0	OXER1	oxoeicosanoid (OXE) receptor 1
hsa-miR-346	0	0	1	1	0	0	DGKZ	diacylglycerol kinase, zeta
hsa-miR-346	0	0	0	1	1	1	SSU72	SSU72 RNA polymerase II CTD phosphatase homolog (S. cerevisiae)
hsa-miR-346	0	0	0	1	0	0	GALT	galactose-1-phosphate uridylyltransferase
hsa-miR-346	0	0	0	1	0	0	TNFRSF4	tumor necrosis factor receptor superfamily, member 4
hsa-miR-346	0	0	0	1	0	0	DNAJC2	DnaJ (Hsp40) homolog, subfamily C, member 2
hsa-miR-346	1	0	1	1	1	1	NFX1	nuclear transcription factor, X-box binding 1
hsa-miR-346	0	0	0	1	1	1	PAK1IP1	PAK1 interacting protein 1
hsa-miR-346	0	0	0	1	0	0	KIFC3	kinesin family member C3
hsa-miR-346	0	0	0	1	0	0	TECPR1	tectonin beta-propeller repeat containing 1
hsa-miR-346	0	0	1	1	1	1	ITPA	inosine triphosphatase (nucleoside triphosphate pyrophosphatase)
hsa-miR-346	0	0	0	1	0	0	HBG2	hemoglobin, gamma G
hsa-miR-346	0	0	1	1	1	1	ZNF768	zinc finger protein 768
hsa-miR-346	0	0	1	1	0	0	SHBG	sex hormone-binding globulin
hsa-miR-346	0	0	0	1	1	1	NAP1L4	nucleosome assembly protein 1-like 4
hsa-miR-346	1	0	1	1	0	0	EBF4	early B-cell factor 4
hsa-miR-346	0	0	0	1	1	1	POMC	proopiomelanocortin
hsa-miR-346	1	0	1	1	1	1	RUFY3	RUN and FYVE domain containing 3
hsa-miR-346	0	0	0	1	1	1	PDX1	pancreatic and duodenal homeobox 1
hsa-miR-346	0	0	0	1	1	1	ZBED1	zinc finger, BED-type containing 1
hsa-miR-346	0	0	0	1	0	0	GP2	glycoprotein 2 (zymogen granule membrane)
hsa-miR-346	0	0	0	1	1	1	GGT6	gamma-glutamyltransferase 6
hsa-miR-346	0	0	1	1	0	0	CATSPERD	catsper channel auxiliary subunit delta
hsa-miR-346	1	0	1	1	1	1	HOXA10	homeobox A10
hsa-miR-346	1	0	1	1	1	1	CDC37L1	cell division cycle 37 homolog (S. cerevisiae)-like 1
hsa-miR-346	1	0	1	1	1	1	SLC43A2	solute carrier family 43, member 2
hsa-miR-346	0	0	0	1	0	0	ZNF205	zinc finger protein 205
hsa-miR-346	0	0	0	1	0	0	CLCN7	chloride channel, voltage-sensitive 7
hsa-miR-346	0	0	0	1	1	1	METTL6	methyltransferase like 6
hsa-miR-346	1	0	1	1	1	1	RPUSD3	RNA pseudouridylate synthase domain containing 3
hsa-miR-346	1	0	1	1	1	1	ADAMTSL1	ADAMTS-like 1
hsa-miR-346	0	0	1	1	1	1	DIAPH1	diaphanous homolog 1 (Drosophila)
hsa-miR-346	1	0	1	0	1	1	SGCB	sarcoglycan, beta (43kDa dystrophin-associated glycoprotein)
hsa-miR-346	0	0	1	0	1	1	PGK1	phosphoglycerate kinase 1
hsa-miR-346	1	0	1	1	1	1	ITGA4	integrin, alpha 4 (antigen CD49D, alpha 4 subunit of VLA-4 receptor)
hsa-miR-346	0	0	1	0	1	1	ZDHHC13	zinc finger, DHHC-type containing 13
hsa-miR-346	1	0	1	0	1	1	LIN28B	lin-28 homolog B (C. elegans)
hsa-miR-346	0	0	1	0	1	1	SPDYE3	speedy homolog E3 (Xenopus laevis)
hsa-miR-346	1	0	1	1	1	1	TULP4	tubby like protein 4
hsa-miR-346	1	0	1	1	1	1	RBM33	RNA binding motif protein 33
hsa-miR-346	0	0	0	0	1	1	IBA57	IBA57, iron-sulfur cluster assembly homolog (S. cerevisiae)
hsa-miR-346	0	0	0	1	1	1	ZIK1	zinc finger protein interacting with K protein 1 homolog (mouse)
hsa-miR-346	0	0	1	1	1	1	OAS2	2'-5'-oligoadenylate synthetase 2, 69/71kDa
hsa-miR-346	0	0	1	1	1	1	FAM220A	family with sequence similarity 220, member A
hsa-miR-346	0	0	1	0	1	1	CAV2	caveolin 2
hsa-miR-346	1	0	1	0	1	1	BMP8B	bone morphogenetic protein 8b
hsa-miR-346	1	0	1	1	1	1	PDPK1	3-phosphoinositide dependent protein kinase-1
hsa-miR-346	0	0	1	0	1	1	GCFC2	GC-rich sequence DNA-binding factor 2
hsa-miR-346	0	0	0	1	1	1	ZNF177	zinc finger protein 177
hsa-miR-346	0	0	1	1	1	1	EXTL1	exostoses (multiple)-like 1
hsa-miR-346	0	0	1	1	1	1	NAALAD2	N-acetylated alpha-linked acidic dipeptidase 2
hsa-miR-346	0	0	0	1	1	1	FARSB	phenylalanyl-tRNA synthetase, beta subunit
hsa-miR-346	1	0	1	1	1	1	SHANK2	SH3 and multiple ankyrin repeat domains 2
hsa-miR-346	1	0	1	0	1	1	MYCBP	c-myc binding protein
hsa-miR-346	1	0	1	1	1	1	MKL2	MKL/myocardin-like 2
hsa-miR-346	1	0	1	1	1	1	PTPN18	protein tyrosine phosphatase, non-receptor type 18 (brain-derived)
hsa-miR-346	0	0	0	1	1	1	HSPB7	heat shock 27kDa protein family, member 7 (cardiovascular)
hsa-miR-346	0	0	0	1	1	1	NPHS2	nephrosis 2, idiopathic, steroid-resistant (podocin)
hsa-miR-346	0	0	1	1	1	1	FAM53B	family with sequence similarity 53, member B
hsa-miR-346	1	0	1	1	1	1	HECW1	HECT, C2 and WW domain containing E3 ubiquitin protein ligase 1
hsa-miR-346	0	0	1	1	1	1	ZNF337	zinc finger protein 337
hsa-miR-346	1	0	1	1	1	1	ST8SIA3	ST8 alpha-N-acetyl-neuraminide alpha-2,8-sialyltransferase 3
hsa-miR-346	1	0	1	1	1	1	TXNDC12	thioredoxin domain containing 12 (endoplasmic reticulum)
hsa-miR-346	1	0	1	1	1	1	YTHDF1	YTH domain family, member 1
hsa-miR-346	0	0	1	1	1	1	AP5M1	adaptor-related protein complex 5, mu 1 subunit
hsa-miR-346	1	0	1	1	1	1	KCTD5	potassium channel tetramerisation domain containing 5
hsa-miR-346	1	0	1	0	1	1	PLSCR4	phospholipid scramblase 4
hsa-miR-346	0	0	0	1	1	1	REXO4	REX4, RNA exonuclease 4 homolog (S. cerevisiae)
hsa-miR-346	1	0	1	1	1	1	NIPAL3	NIPA-like domain containing 3
hsa-miR-346	1	0	1	1	1	1	TMEM9B	TMEM9 domain family, member B
hsa-miR-346	0	0	0	1	1	1	METTL14	methyltransferase like 14
hsa-miR-346	0	0	1	1	1	1	C5orf28	chromosome 5 open reading frame 28
hsa-miR-346	0	0	1	1	1	1	CERK	ceramide kinase
hsa-miR-346	0	0	0	1	1	1	PROK1	prokineticin 1
hsa-miR-346	1	0	0	1	1	1	SLC46A2	solute carrier family 46, member 2
hsa-miR-346	0	0	1	0	1	1	CCDC97	coiled-coil domain containing 97
hsa-miR-346	0	0	1	1	1	1	IP6K3	inositol hexakisphosphate kinase 3
hsa-miR-346	0	0	1	1	1	1	LOH12CR1	loss of heterozygosity, 12, chromosomal region 1
hsa-miR-346	1	0	1	1	1	1	LPIN1	lipin 1
hsa-miR-346	0	0	0	1	1	1	PYDC1	PYD (pyrin domain) containing 1
hsa-miR-346	1	0	1	1	1	1	SLC24A4	solute carrier family 24 (sodium/potassium/calcium exchanger), member 4
hsa-miR-346	0	0	1	1	1	1	POFUT1	protein O-fucosyltransferase 1
hsa-miR-346	1	0	1	0	1	1	GABRG1	gamma-aminobutyric acid (GABA) A receptor, gamma 1
hsa-miR-346	1	0	1	0	1	1	RGMB	RGM domain family, member B
hsa-miR-346	0	0	0	1	1	1	FAM83C	family with sequence similarity 83, member C
hsa-miR-346	1	0	1	1	1	1	MTERFD2	MTERF domain containing 2
hsa-miR-346	1	0	1	1	1	1	FAM101B	family with sequence similarity 101, member B
hsa-miR-346	0	0	1	1	1	1	ZNF326	zinc finger protein 326
hsa-miR-346	1	0	0	1	1	1	ZNF615	zinc finger protein 615
hsa-miR-346	0	0	1	1	1	1	ZFP64	zinc finger protein 64 homolog (mouse)
hsa-miR-346	0	0	1	1	1	1	C8orf86	chromosome 8 open reading frame 86
hsa-miR-346	0	0	0	1	1	1	TRIM49B	tripartite motif containing 49B
hsa-miR-346	0	0	1	0	1	1	PCBP1-AS1	PCBP1 antisense RNA 1
hsa-miR-346	1	0	1	0	0	0	HK1	hexokinase 1
hsa-miR-346	0	0	1	1	1	1	LTBP2	latent transforming growth factor beta binding protein 2
hsa-miR-346	1	0	1	1	1	1	ADAM10	ADAM metallopeptidase domain 10
hsa-miR-346	1	0	1	0	1	1	AP1G1	adaptor-related protein complex 1, gamma 1 subunit
hsa-miR-346	1	0	1	1	1	1	DYRK1A	dual-specificity tyrosine-(Y)-phosphorylation regulated kinase 1A
hsa-miR-346	1	0	1	1	1	1	NDST1	N-deacetylase/N-sulfotransferase (heparan glucosaminyl) 1
hsa-miR-346	0	0	1	1	0	0	CSNK2A2	casein kinase 2, alpha prime polypeptide
hsa-miR-346	1	0	1	1	1	1	ID1	inhibitor of DNA binding 1, dominant negative helix-loop-helix protein
hsa-miR-346	1	0	1	1	1	1	KPNA4	karyopherin alpha 4 (importin alpha 3)
hsa-miR-346	1	0	1	1	1	1	SLC25A27	solute carrier family 25, member 27
hsa-miR-346	0	0	1	1	0	0	ROR1	receptor tyrosine kinase-like orphan receptor 1
hsa-miR-346	1	0	1	1	1	1	NTRK2	neurotrophic tyrosine kinase, receptor, type 2
hsa-miR-346	1	0	1	0	1	1	SOX12	SRY (sex determining region Y)-box 12
hsa-miR-346	1	0	1	1	1	1	ZNF12	zinc finger protein 12
hsa-miR-346	1	0	1	1	1	1	SNPH	syntaphilin
hsa-miR-346	1	0	1	1	1	1	HIC2	hypermethylated in cancer 2
hsa-miR-346	1	0	1	1	1	1	MXRA5	matrix-remodelling associated 5
hsa-miR-346	1	0	1	1	1	1	SLITRK5	SLIT and NTRK-like family, member 5
hsa-miR-346	1	0	1	1	1	1	DCTN4	dynactin 4 (p62)
hsa-miR-346	1	0	1	1	1	1	CC2D1A	coiled-coil and C2 domain containing 1A
hsa-miR-346	1	0	1	1	1	1	LRRC1	leucine rich repeat containing 1
hsa-miR-346	0	0	1	1	1	1	ING3	inhibitor of growth family, member 3
hsa-miR-346	0	0	1	1	1	1	SELK	selenoprotein K
hsa-miR-346	0	0	1	1	1	1	VPS11	vacuolar protein sorting 11 homolog (S. cerevisiae)
hsa-miR-346	1	0	1	1	1	1	NEUROG2	neurogenin 2
hsa-miR-346	1	0	1	0	1	1	NAA60	N(alpha)-acetyltransferase 60, NatF catalytic subunit
hsa-miR-346	1	0	1	0	1	1	CPEB4	cytoplasmic polyadenylation element binding protein 4
hsa-miR-346	0	0	1	1	1	1	C7orf29	chromosome 7 open reading frame 29
hsa-miR-346	0	0	0	1	0	0	SYT8	synaptotagmin VIII
hsa-miR-346	1	0	1	1	1	1	TEX261	testis expressed 261
hsa-miR-346	0	0	0	1	0	0	SNX32	sorting nexin 32
hsa-miR-346	0	0	1	1	1	1	ATP2A2	ATPase, Ca++ transporting, cardiac muscle, slow twitch 2
hsa-miR-346	1	0	1	0	1	1	ZNF800	zinc finger protein 800
hsa-miR-346	1	0	1	1	1	1	LRRTM1	leucine rich repeat transmembrane neuronal 1
hsa-miR-346	1	0	1	1	1	1	QKI	QKI, KH domain containing, RNA binding
