# Supplementary material for: Profiling of Selected MicroRNAs in Proliferative Eutopic Endometrium of Women with Ovarian Endometriosis
Source: Biomed Res Int. 2015 Aug 20;2015:760698. doi: 10.1155/2015/760698 (PMC4558423; doi:10.1155/2015/760698)
Supplement: Supplementary file 1 — Table I: The names of miRNAs significantly differentially expressed between eutopic endometrium of patients with endometriosis vs eutopic endometrium of patients without endometriosis. Table II: The associations between miRNA and mRNA, which presents detailed results of the search of six major databases i.e targetscan, tarbase, miranda, mirbase, mirtarget2 and pictar. [file 760698.f1.zip › 760698.f1/Table II/hsa-miR-361-3p.tsv]

miR	targetscan	tarbase	miranda	mirbase	mirtarget2	pictar	GeneSymbol	GeneName
hsa-miR-361-3p	1	0	1	1	1	1	PLAU	plasminogen activator, urokinase
hsa-miR-361-3p	1	0	1	1	1	1	CHD9	chromodomain helicase DNA binding protein 9
hsa-miR-361-3p	1	0	1	1	0	0	SRCAP	Snf2-related CREBBP activator protein
hsa-miR-361-3p	1	0	1	1	0	0	HUWE1	HECT, UBA and WWE domain containing 1, E3 ubiquitin protein ligase
hsa-miR-361-3p	1	0	1	0	0	0	TRANK1	tetratricopeptide repeat and ankyrin repeat containing 1
hsa-miR-361-3p	1	0	1	0	1	1	KIAA0355	KIAA0355
hsa-miR-361-3p	0	0	1	1	1	1	BAI2	brain-specific angiogenesis inhibitor 2
hsa-miR-361-3p	1	0	1	0	1	1	PTPRT	protein tyrosine phosphatase, receptor type, T
hsa-miR-361-3p	1	0	1	1	1	1	SGSM2	small G protein signaling modulator 2
hsa-miR-361-3p	1	0	1	0	1	1	MTSS1	metastasis suppressor 1
hsa-miR-361-3p	1	0	1	1	0	0	OTUD3	OTU domain containing 3
hsa-miR-361-3p	0	0	1	0	1	1	KLHL21	kelch-like 21 (Drosophila)
hsa-miR-361-3p	1	0	1	1	0	0	DENND4B	DENN/MADD domain containing 4B
hsa-miR-361-3p	0	0	1	1	1	1	SPAG9	sperm associated antigen 9
hsa-miR-361-3p	1	0	1	1	1	1	IQSEC2	IQ motif and Sec7 domain 2
hsa-miR-361-3p	0	0	1	1	0	0	ZNF862	zinc finger protein 862
hsa-miR-361-3p	1	0	1	1	1	1	GPATCH8	G patch domain containing 8
hsa-miR-361-3p	1	0	1	1	1	1	HIPK1	homeodomain interacting protein kinase 1
hsa-miR-361-3p	0	0	1	1	0	0	ARHGEF2	Rho/Rac guanine nucleotide exchange factor (GEF) 2
hsa-miR-361-3p	1	0	1	1	1	1	DNM3	dynamin 3
hsa-miR-361-3p	1	0	1	1	1	1	WWC1	WW and C2 domain containing 1
hsa-miR-361-3p	1	0	1	1	1	1	SEMA4F	sema domain, immunoglobulin domain (Ig), transmembrane domain (TM) and short cytoplasmic domain, (semaphorin) 4F
hsa-miR-361-3p	1	0	1	0	0	0	DTX4	deltex homolog 4 (Drosophila)
hsa-miR-361-3p	1	0	1	1	1	1	C11orf9	chromosome 11 open reading frame 9
hsa-miR-361-3p	0	0	1	1	1	1	TBC1D30	TBC1 domain family, member 30
hsa-miR-361-3p	1	0	1	1	1	1	FOXJ3	forkhead box J3
hsa-miR-361-3p	1	0	1	1	0	0	KIAA1045	KIAA1045
hsa-miR-361-3p	1	0	1	1	1	1	NLGN1	neuroligin 1
hsa-miR-361-3p	0	0	1	1	0	0	RTEL1	regulator of telomere elongation helicase 1
hsa-miR-361-3p	1	0	1	1	1	1	PHF8	PHD finger protein 8
hsa-miR-361-3p	1	0	1	0	1	1	ODZ2	odz, odd Oz/ten-m homolog 2 (Drosophila)
hsa-miR-361-3p	1	0	1	0	1	1	SRGAP3	SLIT-ROBO Rho GTPase activating protein 3
hsa-miR-361-3p	1	0	1	1	0	0	KIAA1210	KIAA1210
hsa-miR-361-3p	1	0	1	1	1	1	ATXN7L1	ataxin 7-like 1
hsa-miR-361-3p	1	0	1	1	1	1	RIMKLB	ribosomal modification protein rimK-like family member B
hsa-miR-361-3p	1	0	1	1	0	0	ATAD2B	ATPase family, AAA domain containing 2B
hsa-miR-361-3p	0	0	1	1	0	0	TNFRSF12A	tumor necrosis factor receptor superfamily, member 12A
hsa-miR-361-3p	1	0	1	0	0	0	NYNRIN	NYN domain and retroviral integrase containing
hsa-miR-361-3p	1	0	1	0	1	1	KCTD16	potassium channel tetramerisation domain containing 16
hsa-miR-361-3p	1	0	1	1	1	1	UPF2	UPF2 regulator of nonsense transcripts homolog (yeast)
hsa-miR-361-3p	1	0	1	1	1	1	FAM135A	family with sequence similarity 135, member A
hsa-miR-361-3p	0	0	1	0	1	1	KIAA1468	KIAA1468
hsa-miR-361-3p	0	0	1	1	1	1	NLGN3	neuroligin 3
hsa-miR-361-3p	1	0	1	1	1	1	KIAA1522	KIAA1522
hsa-miR-361-3p	1	0	1	1	1	1	FAM214B	family with sequence similarity 214, member B
hsa-miR-361-3p	1	0	1	1	0	0	NCKAP5L	NCK-associated protein 5-like
hsa-miR-361-3p	1	0	1	1	1	1	DENND1A	DENN/MADD domain containing 1A
hsa-miR-361-3p	1	0	1	1	1	1	MOV10	Mov10, Moloney leukemia virus 10, homolog (mouse)
hsa-miR-361-3p	1	0	1	0	0	0	TANC2	tetratricopeptide repeat, ankyrin repeat and coiled-coil containing 2
hsa-miR-361-3p	1	0	1	1	1	1	PTBP2	polypyrimidine tract binding protein 2
hsa-miR-361-3p	0	0	1	0	0	0	LOC440792	proline dehydrogenase (oxidase) 1 pseudogene
hsa-miR-361-3p	1	0	1	1	0	0	ARHGAP39	Rho GTPase activating protein 39
hsa-miR-361-3p	0	0	1	1	1	1	AMBRA1	autophagy/beclin-1 regulator 1
hsa-miR-361-3p	0	0	1	0	1	1	SETD5	SET domain containing 5
hsa-miR-361-3p	0	0	1	1	0	0	PFDN5	prefoldin subunit 5
hsa-miR-361-3p	1	0	1	1	1	1	IKZF4	IKAROS family zinc finger 4 (Eos)
hsa-miR-361-3p	0	0	1	1	0	0	COL27A1	collagen, type XXVII, alpha 1
hsa-miR-361-3p	1	0	1	1	1	1	LSM14A	LSM14A, SCD6 homolog A (S. cerevisiae)
hsa-miR-361-3p	1	0	1	1	1	1	BCL2L11	BCL2-like 11 (apoptosis facilitator)
hsa-miR-361-3p	0	0	1	0	0	0	NBLA00301	Nbla00301
hsa-miR-361-3p	1	0	1	1	0	0	ADC	arginine decarboxylase
hsa-miR-361-3p	0	0	1	1	1	1	KIAA1967	KIAA1967
hsa-miR-361-3p	1	0	1	1	1	1	SH3TC2	SH3 domain and tetratricopeptide repeats 2
hsa-miR-361-3p	0	0	1	1	0	0	CIRH1A	cirrhosis, autosomal recessive 1A (cirhin)
hsa-miR-361-3p	1	0	1	0	0	0	FAT3	FAT tumor suppressor homolog 3 (Drosophila)
hsa-miR-361-3p	1	0	1	0	1	1	RNF43	ring finger protein 43
hsa-miR-361-3p	1	0	1	0	0	0	RNF169	ring finger protein 169
hsa-miR-361-3p	1	0	1	0	0	0	ZBTB34	zinc finger and BTB domain containing 34
hsa-miR-361-3p	0	0	1	1	0	0	KREMEN2	kringle containing transmembrane protein 2
hsa-miR-361-3p	0	0	1	0	1	1	RASSF8	Ras association (RalGDS/AF-6) domain family (N-terminal) member 8
hsa-miR-361-3p	0	0	1	1	0	0	FAM22D	family with sequence similarity 22, member D
hsa-miR-361-3p	1	0	1	0	0	0	ZC3H12C	zinc finger CCCH-type containing 12C
hsa-miR-361-3p	0	0	1	1	0	0	SSPO	SCO-spondin homolog (Bos taurus)
hsa-miR-361-3p	1	0	1	1	1	1	KCNMA1	potassium large conductance calcium-activated channel, subfamily M, alpha member 1
hsa-miR-361-3p	1	0	1	0	1	1	BEND4	BEN domain containing 4
hsa-miR-361-3p	1	1	1	1	1	1	BACE1	beta-site APP-cleaving enzyme 1
hsa-miR-361-3p	1	0	1	1	1	1	NRXN2	neurexin 2
hsa-miR-361-3p	1	0	1	1	1	1	ADARB1	adenosine deaminase, RNA-specific, B1
hsa-miR-361-3p	1	0	1	1	1	1	BACH2	BTB and CNC homology 1, basic leucine zipper transcription factor 2
hsa-miR-361-3p	1	0	1	0	1	1	PCDHA13	protocadherin alpha 13
hsa-miR-361-3p	1	0	1	1	1	1	PCDHA4	protocadherin alpha 4
hsa-miR-361-3p	1	0	1	1	0	0	ELN	elastin
hsa-miR-361-3p	0	0	1	0	0	0	PIDD	p53-induced death domain protein
hsa-miR-361-3p	1	0	1	1	1	1	PML	promyelocytic leukemia
hsa-miR-361-3p	1	0	1	1	1	1	NFYC	nuclear transcription factor Y, gamma
hsa-miR-361-3p	0	0	1	1	1	1	MAZ	MYC-associated zinc finger protein (purine-binding transcription factor)
hsa-miR-361-3p	0	0	1	0	1	1	DCAF11	DDB1 and CUL4 associated factor 11
hsa-miR-361-3p	1	0	1	1	1	1	SLC8A1	solute carrier family 8 (sodium/calcium exchanger), member 1
hsa-miR-361-3p	1	0	1	1	1	1	RLF	rearranged L-myc fusion
hsa-miR-361-3p	1	0	1	1	1	1	DTNA	dystrobrevin, alpha
hsa-miR-361-3p	1	0	1	0	1	1	MPPED2	metallophosphoesterase domain containing 2
hsa-miR-361-3p	1	0	1	0	1	1	SLC6A6	solute carrier family 6 (neurotransmitter transporter, taurine), member 6
hsa-miR-361-3p	1	0	1	1	0	0	CACNB1	calcium channel, voltage-dependent, beta 1 subunit
hsa-miR-361-3p	1	0	1	1	0	0	TSPYL2	TSPY-like 2
hsa-miR-361-3p	0	0	1	0	0	0	SUPT5H	suppressor of Ty 5 homolog (S. cerevisiae)
hsa-miR-361-3p	1	0	1	1	1	1	ABI1	abl-interactor 1
hsa-miR-361-3p	1	0	1	1	1	1	ERF	Ets2 repressor factor
hsa-miR-361-3p	1	0	1	1	1	1	MTA1	metastasis associated 1
hsa-miR-361-3p	1	0	1	1	1	1	NEO1	neogenin 1
hsa-miR-361-3p	0	0	1	1	1	1	RYR1	ryanodine receptor 1 (skeletal)
hsa-miR-361-3p	1	0	1	1	1	1	MINK1	misshapen-like kinase 1
hsa-miR-361-3p	0	0	1	1	0	0	PSMB2	proteasome (prosome, macropain) subunit, beta type, 2
hsa-miR-361-3p	1	0	1	1	1	1	LIMA1	LIM domain and actin binding 1
hsa-miR-361-3p	1	0	1	1	1	1	GIT1	G protein-coupled receptor kinase interacting ArfGAP 1
hsa-miR-361-3p	0	0	1	1	1	1	ZNF747	zinc finger protein 747
hsa-miR-361-3p	0	0	1	1	0	0	ITGA2B	integrin, alpha 2b (platelet glycoprotein IIb of IIb/IIIa complex, antigen CD41)
hsa-miR-361-3p	1	0	1	1	1	1	HNRNPK	heterogeneous nuclear ribonucleoprotein K
hsa-miR-361-3p	0	0	1	1	0	0	HLA-DMB	major histocompatibility complex, class II, DM beta
hsa-miR-361-3p	0	0	1	1	0	0	BMP1	bone morphogenetic protein 1
hsa-miR-361-3p	0	0	1	1	0	0	CFLAR	CASP8 and FADD-like apoptosis regulator
hsa-miR-361-3p	1	0	1	1	1	1	IPO8	importin 8
hsa-miR-361-3p	1	0	1	0	1	1	TBL1X	transducin (beta)-like 1X-linked
hsa-miR-361-3p	1	0	1	1	1	1	ARHGEF3	Rho guanine nucleotide exchange factor (GEF) 3
hsa-miR-361-3p	1	0	1	1	1	1	CRTAM	cytotoxic and regulatory T cell molecule
hsa-miR-361-3p	1	0	1	1	1	1	HMGA2	high mobility group AT-hook 2
hsa-miR-361-3p	1	0	1	1	0	0	PPP2R5D	protein phosphatase 2, regulatory subunit B', delta
hsa-miR-361-3p	1	0	1	1	1	1	ZFX	zinc finger protein, X-linked
hsa-miR-361-3p	1	0	1	1	1	1	ANPEP	alanyl (membrane) aminopeptidase
hsa-miR-361-3p	1	0	1	1	1	1	MEF2D	myocyte enhancer factor 2D
hsa-miR-361-3p	0	0	1	1	1	1	EIF4G1	eukaryotic translation initiation factor 4 gamma, 1
hsa-miR-361-3p	1	0	1	1	1	1	PICALM	phosphatidylinositol binding clathrin assembly protein
hsa-miR-361-3p	0	0	1	0	0	0	MIAT	myocardial infarction associated transcript (non-protein coding)
hsa-miR-361-3p	1	0	1	1	1	1	STX16	syntaxin 16
hsa-miR-361-3p	1	0	1	0	1	1	MLL2	myeloid/lymphoid or mixed-lineage leukemia 2
hsa-miR-361-3p	0	0	1	1	1	1	MFSD11	major facilitator superfamily domain containing 11
hsa-miR-361-3p	0	0	1	1	1	1	CD3EAP	CD3e molecule, epsilon associated protein
hsa-miR-361-3p	1	0	1	1	1	1	YME1L1	YME1-like 1 (S. cerevisiae)
hsa-miR-361-3p	0	0	1	1	0	0	SPTBN2	spectrin, beta, non-erythrocytic 2
hsa-miR-361-3p	0	0	1	1	0	0	ITGA7	integrin, alpha 7
hsa-miR-361-3p	1	0	1	1	1	1	MYT1L	myelin transcription factor 1-like
hsa-miR-361-3p	1	0	1	0	1	1	CELF2	CUGBP, Elav-like family member 2
hsa-miR-361-3p	0	0	1	1	1	1	NAT6	N-acetyltransferase 6 (GCN5-related)
hsa-miR-361-3p	0	0	1	1	1	1	CYP4F3	cytochrome P450, family 4, subfamily F, polypeptide 3
hsa-miR-361-3p	1	0	1	1	1	1	ERLIN1	ER lipid raft associated 1
hsa-miR-361-3p	0	0	1	1	0	0	SLC38A6	solute carrier family 38, member 6
hsa-miR-361-3p	1	0	1	1	0	0	ASPHD1	aspartate beta-hydroxylase domain containing 1
hsa-miR-361-3p	1	0	1	1	1	1	WHSC1	Wolf-Hirschhorn syndrome candidate 1
hsa-miR-361-3p	0	0	1	1	1	1	PCF11	PCF11, cleavage and polyadenylation factor subunit, homolog (S. cerevisiae)
hsa-miR-361-3p	0	0	1	0	0	0	ZNF880	zinc finger protein 880
hsa-miR-361-3p	0	0	1	1	1	1	PCBP4	poly(rC) binding protein 4
hsa-miR-361-3p	1	0	1	1	1	1	GLS	glutaminase
hsa-miR-361-3p	1	0	1	1	1	1	SLMAP	sarcolemma associated protein
hsa-miR-361-3p	1	0	1	1	0	0	RASSF1	Ras association (RalGDS/AF-6) domain family member 1
hsa-miR-361-3p	1	0	1	0	1	1	FAM19A5	family with sequence similarity 19 (chemokine (C-C motif)-like), member A5
hsa-miR-361-3p	0	0	1	0	1	1	CLEC5A	C-type lectin domain family 5, member A
hsa-miR-361-3p	1	0	1	1	1	1	HMG20A	high mobility group 20A
hsa-miR-361-3p	1	0	1	1	0	0	ZCCHC4	zinc finger, CCHC domain containing 4
hsa-miR-361-3p	1	0	1	1	1	1	USP25	ubiquitin specific peptidase 25
hsa-miR-361-3p	1	0	1	1	1	1	C16orf70	chromosome 16 open reading frame 70
hsa-miR-361-3p	1	0	1	1	1	1	C3orf18	chromosome 3 open reading frame 18
hsa-miR-361-3p	1	0	1	1	1	1	SYDE1	synapse defective 1, Rho GTPase, homolog 1 (C. elegans)
hsa-miR-361-3p	0	0	1	1	0	0	MVK	mevalonate kinase
hsa-miR-361-3p	1	0	1	1	0	0	POLL	polymerase (DNA directed), lambda
hsa-miR-361-3p	1	0	1	1	1	1	OGT	O-linked N-acetylglucosamine (GlcNAc) transferase
hsa-miR-361-3p	0	0	1	1	0	0	SH2B1	SH2B adaptor protein 1
hsa-miR-361-3p	0	0	1	1	1	1	CELF1	CUGBP, Elav-like family member 1
hsa-miR-361-3p	0	0	1	1	0	0	TRIM41	tripartite motif containing 41
hsa-miR-361-3p	0	0	1	1	1	1	CTDSP1	CTD (carboxy-terminal domain, RNA polymerase II, polypeptide A) small phosphatase 1
hsa-miR-361-3p	1	0	1	1	1	1	RBM47	RNA binding motif protein 47
hsa-miR-361-3p	0	0	1	1	0	0	CSAG2	CSAG family, member 2
hsa-miR-361-3p	0	0	1	0	0	0	CSAG3	CSAG family, member 3
hsa-miR-361-3p	0	0	1	1	1	1	C21orf7	chromosome 21 open reading frame 7
hsa-miR-361-3p	0	0	1	1	0	0	KCNK6	potassium channel, subfamily K, member 6
hsa-miR-361-3p	1	0	1	1	1	1	CALN1	calneuron 1
hsa-miR-361-3p	1	0	1	1	0	0	EPC1	enhancer of polycomb homolog 1 (Drosophila)
hsa-miR-361-3p	1	0	1	1	1	1	TMUB2	transmembrane and ubiquitin-like domain containing 2
hsa-miR-361-3p	1	0	1	1	1	1	DCLRE1B	DNA cross-link repair 1B
hsa-miR-361-3p	0	0	1	0	0	0	HMG20B	high mobility group 20B
hsa-miR-361-3p	1	0	1	1	1	1	SPTBN4	spectrin, beta, non-erythrocytic 4
hsa-miR-361-3p	1	0	1	1	1	1	CPEB1	cytoplasmic polyadenylation element binding protein 1
hsa-miR-361-3p	0	0	1	1	1	1	FCRL5	Fc receptor-like 5
hsa-miR-361-3p	0	0	1	1	1	1	SLC6A15	solute carrier family 6 (neutral amino acid transporter), member 15
hsa-miR-361-3p	1	0	1	1	1	1	BBC3	BCL2 binding component 3
hsa-miR-361-3p	1	0	1	1	1	1	KCNIP2	Kv channel interacting protein 2
hsa-miR-361-3p	1	0	1	1	1	1	NF2	neurofibromin 2 (merlin)
hsa-miR-361-3p	1	0	1	0	1	1	WIPF2	WAS/WASL interacting protein family, member 2
hsa-miR-361-3p	0	0	1	0	0	0	C17orf109	chromosome 17 open reading frame 109
hsa-miR-361-3p	1	0	1	1	1	1	CALCOCO1	calcium binding and coiled-coil domain 1
hsa-miR-361-3p	0	0	1	1	1	1	PLEKHA8	pleckstrin homology domain containing, family A (phosphoinositide binding specific) member 8
hsa-miR-361-3p	0	0	1	1	1	1	CASP8	caspase 8, apoptosis-related cysteine peptidase
hsa-miR-361-3p	0	0	1	0	1	1	MYO3B	myosin IIIB
hsa-miR-361-3p	0	0	1	1	0	0	SNRPN	small nuclear ribonucleoprotein polypeptide N
hsa-miR-361-3p	0	0	1	0	0	0	MYO15B	myosin XVB pseudogene
hsa-miR-361-3p	1	0	1	1	0	0	FOXP2	forkhead box P2
hsa-miR-361-3p	1	0	1	1	1	1	BRSK1	BR serine/threonine kinase 1
hsa-miR-361-3p	1	0	1	0	1	1	IL1RAP	interleukin 1 receptor accessory protein
hsa-miR-361-3p	1	0	1	1	1	1	AFF2	AF4/FMR2 family, member 2
hsa-miR-361-3p	0	0	1	1	1	1	GNAS	GNAS complex locus
hsa-miR-361-3p	1	0	1	0	1	1	GRB10	growth factor receptor-bound protein 10
hsa-miR-361-3p	1	0	1	1	1	1	PALM2	paralemmin 2
hsa-miR-361-3p	1	0	1	1	1	1	NRXN3	neurexin 3
hsa-miR-361-3p	1	0	1	1	1	1	PDE1B	phosphodiesterase 1B, calmodulin-dependent
hsa-miR-361-3p	1	0	1	1	1	1	EMID2	EMI domain containing 2
hsa-miR-361-3p	0	0	1	0	0	0	TOMM6	translocase of outer mitochondrial membrane 6 homolog (yeast)
hsa-miR-361-3p	0	0	1	1	0	0	MBD1	methyl-CpG binding domain protein 1
hsa-miR-361-3p	1	0	1	1	1	1	ARL4C	ADP-ribosylation factor-like 4C
hsa-miR-361-3p	0	0	1	1	1	1	TFEB	transcription factor EB
hsa-miR-361-3p	0	0	1	1	0	0	IL4I1	interleukin 4 induced 1
hsa-miR-361-3p	1	0	1	1	0	0	TRPM4	transient receptor potential cation channel, subfamily M, member 4
hsa-miR-361-3p	0	0	1	1	0	0	VSIG2	V-set and immunoglobulin domain containing 2
hsa-miR-361-3p	0	0	1	0	0	0	TUG1	taurine upregulated 1 (non-protein coding)
hsa-miR-361-3p	1	0	1	1	1	1	MEIS2	Meis homeobox 2
hsa-miR-361-3p	1	0	1	1	1	1	HNRNPF	heterogeneous nuclear ribonucleoprotein F
hsa-miR-361-3p	1	0	1	1	1	1	EIF2C1	eukaryotic translation initiation factor 2C, 1
hsa-miR-361-3p	1	0	1	1	0	0	SMUG1	single-strand-selective monofunctional uracil-DNA glycosylase 1
hsa-miR-361-3p	0	0	1	1	1	1	SNRNP200	small nuclear ribonucleoprotein 200kDa (U5)
hsa-miR-361-3p	0	0	1	1	1	1	AMACR	alpha-methylacyl-CoA racemase
hsa-miR-361-3p	1	0	1	0	0	0	ZNRF3	zinc and ring finger 3
hsa-miR-361-3p	0	0	1	0	0	0	SOX2-OT	SOX2 overlapping transcript (non-protein coding)
hsa-miR-361-3p	1	0	1	1	1	1	WDTC1	WD and tetratricopeptide repeats 1
hsa-miR-361-3p	0	0	1	1	1	1	ARMC5	armadillo repeat containing 5
hsa-miR-361-3p	1	0	1	1	0	0	FASTK	Fas-activated serine/threonine kinase
hsa-miR-361-3p	1	0	1	1	1	1	SMEK2	SMEK homolog 2, suppressor of mek1 (Dictyostelium)
hsa-miR-361-3p	0	0	1	0	0	0	LINC00475	long intergenic non-protein coding RNA 475
hsa-miR-361-3p	1	0	1	1	1	1	POMT2	protein-O-mannosyltransferase 2
hsa-miR-361-3p	0	0	1	0	0	0	LOC284561	uncharacterized LOC284561
hsa-miR-361-3p	1	0	1	1	1	1	DERL1	derlin 1
hsa-miR-361-3p	1	0	1	1	1	1	ARHGEF15	Rho guanine nucleotide exchange factor (GEF) 15
hsa-miR-361-3p	1	0	1	1	0	0	ST6GALNAC6	ST6 (alpha-N-acetyl-neuraminyl-2,3-beta-galactosyl-1,3)-N-acetylgalactosaminide alpha-2,6-sialyltransferase 6
hsa-miR-361-3p	1	0	1	1	1	1	CEP85	centrosomal protein 85kDa
hsa-miR-361-3p	1	0	1	1	1	1	FAM131A	family with sequence similarity 131, member A
hsa-miR-361-3p	1	0	1	1	1	1	ZNF385A	zinc finger protein 385A
hsa-miR-361-3p	1	0	1	1	1	1	SCAF1	SR-related CTD-associated factor 1
hsa-miR-361-3p	0	0	1	1	1	1	SIGLEC1	sialic acid binding Ig-like lectin 1, sialoadhesin
hsa-miR-361-3p	0	0	1	0	0	0	IFFO2	intermediate filament family orphan 2
hsa-miR-361-3p	1	0	1	0	1	1	STK40	serine/threonine kinase 40
hsa-miR-361-3p	0	0	1	1	1	1	MUC12	mucin 12, cell surface associated
hsa-miR-361-3p	1	0	1	1	1	1	GBF1	golgi brefeldin A resistant guanine nucleotide exchange factor 1
hsa-miR-361-3p	0	0	1	0	1	1	ATXN1L	ataxin 1-like
hsa-miR-361-3p	1	0	1	1	0	0	FBXO45	F-box protein 45
hsa-miR-361-3p	1	0	1	0	1	1	ZCCHC3	zinc finger, CCHC domain containing 3
hsa-miR-361-3p	0	0	1	0	1	1	HEMK1	HemK methyltransferase family member 1
hsa-miR-361-3p	0	0	1	0	1	1	FLJ22447	uncharacterized LOC400221
hsa-miR-361-3p	1	0	1	0	0	0	DTX2	deltex homolog 2 (Drosophila)
hsa-miR-361-3p	1	0	1	1	1	1	DCAF8	DDB1 and CUL4 associated factor 8
hsa-miR-361-3p	1	0	1	1	1	1	RNF185	ring finger protein 185
hsa-miR-361-3p	1	0	1	1	1	1	LRP4	low density lipoprotein receptor-related protein 4
hsa-miR-361-3p	1	0	1	1	1	1	GORASP2	golgi reassembly stacking protein 2, 55kDa
hsa-miR-361-3p	1	0	1	1	1	1	FOXP1	forkhead box P1
hsa-miR-361-3p	1	0	1	1	1	1	FAM53C	family with sequence similarity 53, member C
hsa-miR-361-3p	1	0	1	1	1	1	TMEM2	transmembrane protein 2
hsa-miR-361-3p	0	0	1	1	0	0	CYP21A2	cytochrome P450, family 21, subfamily A, polypeptide 2
hsa-miR-361-3p	0	0	1	0	0	0	FAM185A	family with sequence similarity 185, member A
hsa-miR-361-3p	0	0	1	1	0	0	ADRM1	adhesion regulating molecule 1
hsa-miR-361-3p	0	0	1	1	1	1	PRR5L	proline rich 5 like
hsa-miR-361-3p	0	0	1	0	0	0	CHST9-AS1	CHST9 antisense RNA 1
hsa-miR-361-3p	1	0	1	0	1	1	AP1G1	adaptor-related protein complex 1, gamma 1 subunit
hsa-miR-361-3p	1	0	1	1	1	1	FRMD6	FERM domain containing 6
hsa-miR-361-3p	1	0	1	1	0	0	AUP1	ancient ubiquitous protein 1
hsa-miR-361-3p	0	0	1	0	0	0	LOC157273	uncharacterized LOC157273
hsa-miR-361-3p	1	0	1	0	0	0	PWWP2A	PWWP domain containing 2A
hsa-miR-361-3p	1	0	1	1	0	0	MEPCE	methylphosphate capping enzyme
hsa-miR-361-3p	1	0	1	1	1	1	ZNF664	zinc finger protein 664
hsa-miR-361-3p	1	0	1	1	1	1	LMNA	lamin A/C
hsa-miR-361-3p	1	0	1	1	1	1	PPP1R3F	protein phosphatase 1, regulatory subunit 3F
hsa-miR-361-3p	0	0	1	1	0	0	CHPF2	chondroitin polymerizing factor 2
hsa-miR-361-3p	1	0	1	1	1	1	SCAMP5	secretory carrier membrane protein 5
hsa-miR-361-3p	1	0	1	1	1	1	PHF15	PHD finger protein 15
hsa-miR-361-3p	0	0	1	0	0	0	LOC441204	uncharacterized LOC441204
hsa-miR-361-3p	1	0	1	1	1	1	CLCN5	chloride channel, voltage-sensitive 5
hsa-miR-361-3p	1	0	1	0	1	1	RABGEF1	RAB guanine nucleotide exchange factor (GEF) 1
hsa-miR-361-3p	0	0	1	0	0	0	LOC157381	uncharacterized LOC157381
hsa-miR-361-3p	0	0	1	1	1	1	C14orf79	chromosome 14 open reading frame 79
hsa-miR-361-3p	1	0	1	1	1	1	MAP3K11	mitogen-activated protein kinase kinase kinase 11
hsa-miR-361-3p	1	0	1	1	0	0	ZBTB37	zinc finger and BTB domain containing 37
hsa-miR-361-3p	0	0	1	0	0	0	IQCF3	IQ motif containing F3
hsa-miR-361-3p	1	0	1	0	1	1	NCAM1	neural cell adhesion molecule 1
hsa-miR-361-3p	0	0	1	1	0	0	KRT86	keratin 86
hsa-miR-361-3p	0	0	1	0	0	0	LOC284014	uncharacterized LOC284014
hsa-miR-361-3p	0	0	1	0	0	0	LINC00637	long intergenic non-protein coding RNA 637
hsa-miR-361-3p	0	0	1	1	0	0	PRSS54	protease, serine, 54
hsa-miR-361-3p	1	0	1	1	1	1	C6orf89	chromosome 6 open reading frame 89
hsa-miR-361-3p	0	0	1	0	1	1	CCDC68	coiled-coil domain containing 68
hsa-miR-361-3p	1	0	1	1	1	1	AKNA	AT-hook transcription factor
hsa-miR-361-3p	1	0	1	1	1	1	FAM102A	family with sequence similarity 102, member A
hsa-miR-361-3p	1	0	1	1	1	1	FAM73B	family with sequence similarity 73, member B
hsa-miR-361-3p	1	0	1	1	1	1	HLF	hepatic leukemia factor
hsa-miR-361-3p	1	0	1	1	1	1	PRRT2	proline-rich transmembrane protein 2
hsa-miR-361-3p	0	0	1	1	1	1	GALNT6	UDP-N-acetyl-alpha-D-galactosamine:polypeptide N-acetylgalactosaminyltransferase 6 (GalNAc-T6)
hsa-miR-361-3p	1	0	1	1	1	1	UBAP1	ubiquitin associated protein 1
hsa-miR-361-3p	0	0	1	1	0	0	SHKBP1	SH3KBP1 binding protein 1
hsa-miR-361-3p	1	0	1	1	0	0	B3GAT3	beta-1,3-glucuronyltransferase 3 (glucuronosyltransferase I)
hsa-miR-361-3p	1	0	1	1	1	1	PIP4K2C	phosphatidylinositol-5-phosphate 4-kinase, type II, gamma
hsa-miR-361-3p	0	0	1	1	0	0	PIGO	phosphatidylinositol glycan anchor biosynthesis, class O
hsa-miR-361-3p	1	0	1	1	1	1	BOC	Boc homolog (mouse)
hsa-miR-361-3p	0	0	1	1	0	0	PPP2R1A	protein phosphatase 2, regulatory subunit A, alpha
hsa-miR-361-3p	0	0	1	1	0	0	CTNNBL1	catenin, beta like 1
hsa-miR-361-3p	0	0	1	0	0	0	SEC14L2	SEC14-like 2 (S. cerevisiae)
hsa-miR-361-3p	0	0	1	0	0	0	LOC440910	uncharacterized LOC440910
hsa-miR-361-3p	1	0	1	1	1	1	FBXW2	F-box and WD repeat domain containing 2
hsa-miR-361-3p	1	0	1	1	1	1	TSN	translin
hsa-miR-361-3p	0	0	1	1	1	1	NRBP1	nuclear receptor binding protein 1
hsa-miR-361-3p	0	0	1	1	1	1	RASGRP2	RAS guanyl releasing protein 2 (calcium and DAG-regulated)
hsa-miR-361-3p	0	0	1	0	0	0	LOC283887	uncharacterized LOC283887
hsa-miR-361-3p	1	0	1	1	1	1	SPTBN1	spectrin, beta, non-erythrocytic 1
hsa-miR-361-3p	0	0	1	1	1	1	CYP11B1	cytochrome P450, family 11, subfamily B, polypeptide 1
hsa-miR-361-3p	1	0	1	0	1	1	SYNGAP1	synaptic Ras GTPase activating protein 1
hsa-miR-361-3p	0	0	1	1	0	0	NDUFA4L2	NADH dehydrogenase (ubiquinone) 1 alpha subcomplex, 4-like 2
hsa-miR-361-3p	0	0	1	1	0	0	WBP1	WW domain binding protein 1
hsa-miR-361-3p	1	0	1	1	1	1	RCN1	reticulocalbin 1, EF-hand calcium binding domain
hsa-miR-361-3p	0	0	1	1	0	0	CYHR1	cysteine/histidine-rich 1
hsa-miR-361-3p	1	0	1	0	1	1	GATAD2B	GATA zinc finger domain containing 2B
hsa-miR-361-3p	0	0	1	1	1	1	RBM25	RNA binding motif protein 25
hsa-miR-361-3p	0	0	1	0	0	0	LINC00340	long intergenic non-protein coding RNA 340
hsa-miR-361-3p	0	0	1	1	0	0	CES4A	carboxylesterase 4A
hsa-miR-361-3p	1	0	1	1	1	1	PTPRU	protein tyrosine phosphatase, receptor type, U
hsa-miR-361-3p	1	0	1	1	1	1	GLT25D2	glycosyltransferase 25 domain containing 2
hsa-miR-361-3p	1	0	1	1	1	1	TMEM100	transmembrane protein 100
hsa-miR-361-3p	0	0	1	1	1	1	MOBP	myelin-associated oligodendrocyte basic protein
hsa-miR-361-3p	0	0	1	1	1	1	GPR115	G protein-coupled receptor 115
hsa-miR-361-3p	0	0	1	1	1	1	FUT11	fucosyltransferase 11 (alpha (1,3) fucosyltransferase)
hsa-miR-361-3p	0	0	1	1	1	1	SIRPB2	signal-regulatory protein beta 2
hsa-miR-361-3p	1	0	1	1	0	0	IGDCC3	immunoglobulin superfamily, DCC subclass, member 3
hsa-miR-361-3p	1	0	1	1	1	1	ZC3H11A	zinc finger CCCH-type containing 11A
hsa-miR-361-3p	1	0	1	0	1	1	STC2	stanniocalcin 2
hsa-miR-361-3p	0	0	1	1	0	0	MAP7D1	MAP7 domain containing 1
hsa-miR-361-3p	0	0	1	1	1	1	BAG1	BCL2-associated athanogene
hsa-miR-361-3p	0	0	1	1	1	1	LRRC29	leucine rich repeat containing 29
hsa-miR-361-3p	0	0	1	1	1	1	GNAI2	guanine nucleotide binding protein (G protein), alpha inhibiting activity polypeptide 2
hsa-miR-361-3p	1	0	1	1	0	0	FBRS	fibrosin
hsa-miR-361-3p	1	0	1	1	1	1	CRTC2	CREB regulated transcription coactivator 2
hsa-miR-361-3p	1	0	1	1	1	1	LRP8	low density lipoprotein receptor-related protein 8, apolipoprotein e receptor
hsa-miR-361-3p	0	0	1	0	0	0	ZNF300P1	zinc finger protein 300 pseudogene 1
hsa-miR-361-3p	1	0	1	0	1	1	THRB	thyroid hormone receptor, beta
hsa-miR-361-3p	0	0	1	1	1	1	POLR3F	polymerase (RNA) III (DNA directed) polypeptide F, 39 kDa
hsa-miR-361-3p	0	0	1	1	1	1	ZNF513	zinc finger protein 513
hsa-miR-361-3p	1	0	1	1	1	1	KL	klotho
hsa-miR-361-3p	0	0	1	0	0	0	DNAJB8-AS1	DNAJB8 antisense RNA 1
hsa-miR-361-3p	0	0	1	0	0	0	LOC100128560	uncharacterized LOC100128560
hsa-miR-361-3p	0	0	1	0	0	0	LOC284385	uncharacterized LOC284385
hsa-miR-361-3p	1	0	1	1	0	0	CFL1	cofilin 1 (non-muscle)
hsa-miR-361-3p	0	0	1	1	0	0	PSAPL1	prosaposin-like 1 (gene/pseudogene)
hsa-miR-361-3p	0	0	1	1	1	1	ATP9B	ATPase, class II, type 9B
hsa-miR-361-3p	0	0	1	1	0	0	TOM1	target of myb1 (chicken)
hsa-miR-361-3p	0	0	1	1	0	0	CORO1A	coronin, actin binding protein, 1A
hsa-miR-361-3p	0	0	1	0	0	0	CECR7	cat eye syndrome chromosome region, candidate 7 (non-protein coding)
hsa-miR-361-3p	0	0	1	1	1	1	ARFGAP2	ADP-ribosylation factor GTPase activating protein 2
hsa-miR-361-3p	1	0	1	1	1	1	SLC39A13	solute carrier family 39 (zinc transporter), member 13
hsa-miR-361-3p	0	0	1	0	0	0	LOC728095	uncharacterized LOC728095
hsa-miR-361-3p	1	0	1	1	0	0	FBXL19	F-box and leucine-rich repeat protein 19
hsa-miR-361-3p	0	0	1	0	1	1	MYLK4	myosin light chain kinase family, member 4
hsa-miR-361-3p	1	0	1	1	1	1	ZMAT3	zinc finger, matrin-type 3
hsa-miR-361-3p	0	0	1	1	1	1	ZNF182	zinc finger protein 182
hsa-miR-361-3p	0	0	1	1	1	1	GGA1	golgi-associated, gamma adaptin ear containing, ARF binding protein 1
hsa-miR-361-3p	1	0	1	1	0	0	CACNB3	calcium channel, voltage-dependent, beta 3 subunit
hsa-miR-361-3p	0	0	1	1	0	0	PROKR1	prokineticin receptor 1
hsa-miR-361-3p	1	0	1	1	1	1	ZBTB4	zinc finger and BTB domain containing 4
hsa-miR-361-3p	0	0	1	1	0	0	ARHGAP10	Rho GTPase activating protein 10
hsa-miR-361-3p	0	0	1	1	1	1	FRMPD2	FERM and PDZ domain containing 2
hsa-miR-361-3p	0	0	1	0	1	1	PATE4	prostate and testis expressed 4
hsa-miR-361-3p	0	0	1	0	0	0	C1orf132	chromosome 1 open reading frame 132
hsa-miR-361-3p	1	0	1	1	1	1	PDZD4	PDZ domain containing 4
hsa-miR-361-3p	1	0	1	1	1	1	PLEKHH1	pleckstrin homology domain containing, family H (with MyTH4 domain) member 1
hsa-miR-361-3p	0	0	1	1	0	0	C16orf86	chromosome 16 open reading frame 86
hsa-miR-361-3p	0	0	1	1	0	0	KRT37	keratin 37
hsa-miR-361-3p	1	0	1	1	1	1	FAM219A	family with sequence similarity 219, member A
hsa-miR-361-3p	0	0	1	0	0	0	DKFZP434H168	uncharacterized LOC26077
hsa-miR-361-3p	0	0	1	1	1	1	SLC9A1	solute carrier family 9, subfamily A (NHE1, cation proton antiporter 1), member 1
hsa-miR-361-3p	1	0	1	1	0	0	KCNC1	potassium voltage-gated channel, Shaw-related subfamily, member 1
hsa-miR-361-3p	0	0	1	1	0	0	NMI	N-myc (and STAT) interactor
hsa-miR-361-3p	0	0	1	1	0	0	NPIP	nuclear pore complex interacting protein
hsa-miR-361-3p	1	0	1	0	1	1	RHBDL3	rhomboid, veinlet-like 3 (Drosophila)
hsa-miR-361-3p	1	0	1	0	1	1	TTYH3	tweety homolog 3 (Drosophila)
hsa-miR-361-3p	0	0	1	1	1	1	LRTM2	leucine-rich repeats and transmembrane domains 2
hsa-miR-361-3p	1	0	1	1	1	1	XPO1	exportin 1 (CRM1 homolog, yeast)
hsa-miR-361-3p	0	0	1	1	0	0	PPP1R18	protein phosphatase 1, regulatory subunit 18
hsa-miR-361-3p	0	0	1	1	1	1	C2orf91	chromosome 2 open reading frame 91
hsa-miR-361-3p	1	0	1	1	1	1	C11orf30	chromosome 11 open reading frame 30
hsa-miR-361-3p	1	0	1	1	1	1	PIAS3	protein inhibitor of activated STAT, 3
hsa-miR-361-3p	0	0	1	1	1	1	CTPS2	CTP synthase 2
hsa-miR-361-3p	1	0	1	0	0	0	ANKRD52	ankyrin repeat domain 52
hsa-miR-361-3p	0	0	1	0	0	0	LOC613266	uncharacterized LOC613266
hsa-miR-361-3p	0	0	1	0	0	0	FAM75D4	family with sequence similarity 75, member D4
hsa-miR-361-3p	0	0	1	0	0	0	FAM95B1	family with sequence similarity 95, member B1
hsa-miR-361-3p	0	0	1	1	0	0	RPRD2	regulation of nuclear pre-mRNA domain containing 2
hsa-miR-361-3p	1	0	1	1	1	1	TP53INP1	tumor protein p53 inducible nuclear protein 1
hsa-miR-361-3p	1	0	1	1	1	1	MACROD2	MACRO domain containing 2
hsa-miR-361-3p	1	0	1	1	0	0	UBN2	ubinuclein 2
hsa-miR-361-3p	0	0	1	1	0	0	C20orf141	chromosome 20 open reading frame 141
hsa-miR-361-3p	1	0	1	1	0	0	ATXN7L3	ataxin 7-like 3
hsa-miR-361-3p	0	0	1	1	1	1	PLEKHS1	pleckstrin homology domain containing, family S member 1
hsa-miR-361-3p	1	0	1	1	1	1	SACM1L	SAC1 suppressor of actin mutations 1-like (yeast)
hsa-miR-361-3p	0	0	1	1	0	0	SPATS1	spermatogenesis associated, serine-rich 1
hsa-miR-361-3p	0	0	1	1	0	0	CCDC88B	coiled-coil domain containing 88B
hsa-miR-361-3p	0	0	1	0	0	0	PLEKHD1	pleckstrin homology domain containing, family D (with coiled-coil domains) member 1
hsa-miR-361-3p	1	0	1	1	1	1	DLG2	discs, large homolog 2 (Drosophila)
hsa-miR-361-3p	1	0	1	1	0	0	LRRC73	leucine rich repeat containing 73
hsa-miR-361-3p	0	0	1	1	0	0	TMEM151B	transmembrane protein 151B
hsa-miR-361-3p	0	0	1	1	1	1	SZT2	seizure threshold 2 homolog (mouse)
hsa-miR-361-3p	1	0	1	1	1	1	MFSD6	major facilitator superfamily domain containing 6
hsa-miR-361-3p	0	0	1	1	1	1	DOCK9	dedicator of cytokinesis 9
hsa-miR-361-3p	1	0	1	0	1	1	N4BP3	NEDD4 binding protein 3
hsa-miR-361-3p	1	0	1	1	1	1	CTNNA2	catenin (cadherin-associated protein), alpha 2
hsa-miR-361-3p	0	0	1	1	1	1	RALGAPA2	Ral GTPase activating protein, alpha subunit 2 (catalytic)
hsa-miR-361-3p	0	0	1	1	1	1	ARHGAP33	Rho GTPase activating protein 33
hsa-miR-361-3p	1	0	1	1	1	1	UBE3C	ubiquitin protein ligase E3C
hsa-miR-361-3p	1	0	1	1	0	0	SLC30A3	solute carrier family 30 (zinc transporter), member 3
hsa-miR-361-3p	1	0	1	0	1	1	KIAA0182	KIAA0182
hsa-miR-361-3p	0	0	1	1	1	1	PIN4	protein (peptidylprolyl cis/trans isomerase) NIMA-interacting, 4 (parvulin)
hsa-miR-361-3p	1	0	1	1	0	0	PPP1CA	protein phosphatase 1, catalytic subunit, alpha isozyme
hsa-miR-361-3p	0	0	1	1	0	0	GRINA	glutamate receptor, ionotropic, N-methyl D-aspartate-associated protein 1 (glutamate binding)
hsa-miR-361-3p	1	0	1	0	1	1	SP6	Sp6 transcription factor
hsa-miR-361-3p	1	0	1	1	1	1	PLA2G15	phospholipase A2, group XV
hsa-miR-361-3p	0	0	1	1	0	0	BPIFB1	BPI fold containing family B, member 1
hsa-miR-361-3p	0	0	1	1	1	1	MCU	mitochondrial calcium uniporter
hsa-miR-361-3p	0	0	1	1	0	0	TRIM46	tripartite motif containing 46
hsa-miR-361-3p	1	0	1	1	0	0	SMCR7	Smith-Magenis syndrome chromosome region, candidate 7
hsa-miR-361-3p	0	0	1	1	1	1	RAB13	RAB13, member RAS oncogene family
hsa-miR-361-3p	0	0	1	0	0	0	EMBP1	embigin pseudogene 1
hsa-miR-361-3p	1	0	1	1	1	1	ADAMTSL1	ADAMTS-like 1
hsa-miR-361-3p	1	0	1	1	1	1	ADAMTS19	ADAM metallopeptidase with thrombospondin type 1 motif, 19
hsa-miR-361-3p	0	0	1	1	0	0	WFIKKN1	WAP, follistatin/kazal, immunoglobulin, kunitz and netrin domain containing 1
hsa-miR-361-3p	1	0	1	0	1	1	CYB561D1	cytochrome b-561 domain containing 1
hsa-miR-361-3p	1	0	1	1	1	1	RBM24	RNA binding motif protein 24
hsa-miR-361-3p	0	0	1	1	0	0	EXOSC7	exosome component 7
hsa-miR-361-3p	0	0	1	0	0	0	LOC654433	uncharacterized LOC654433
hsa-miR-361-3p	0	0	1	0	1	1	KIF1A	kinesin family member 1A
hsa-miR-361-3p	0	0	1	1	1	1	TMEM202	transmembrane protein 202
hsa-miR-361-3p	0	0	1	0	1	1	GALNT13	UDP-N-acetyl-alpha-D-galactosamine:polypeptide N-acetylgalactosaminyltransferase 13 (GalNAc-T13)
hsa-miR-361-3p	0	0	1	0	1	1	RUFY4	RUN and FYVE domain containing 4
hsa-miR-361-3p	0	0	1	0	0	0	LOC100124692	maltase-glucoamylase (alpha-glucosidase) pseudogene
hsa-miR-361-3p	1	0	1	1	1	1	PPP2R5C	protein phosphatase 2, regulatory subunit B', gamma
hsa-miR-361-3p	0	0	1	1	0	0	C9orf96	chromosome 9 open reading frame 96
hsa-miR-361-3p	0	0	1	1	0	0	ZSCAN18	zinc finger and SCAN domain containing 18
hsa-miR-361-3p	0	0	1	1	1	1	LRRN4	leucine rich repeat neuronal 4
hsa-miR-361-3p	0	0	1	1	1	1	CRISP3	cysteine-rich secretory protein 3
hsa-miR-361-3p	1	0	1	1	1	1	RPS6KA4	ribosomal protein S6 kinase, 90kDa, polypeptide 4
hsa-miR-361-3p	0	0	1	1	1	1	CD48	CD48 molecule
hsa-miR-361-3p	0	0	1	1	0	0	PCSK5	proprotein convertase subtilisin/kexin type 5
hsa-miR-361-3p	1	0	1	1	1	1	TGFBR3	transforming growth factor, beta receptor III
hsa-miR-361-3p	0	0	1	1	1	1	RNF135	ring finger protein 135
hsa-miR-361-3p	1	0	1	1	1	1	NCOA1	nuclear receptor coactivator 1
hsa-miR-361-3p	1	0	1	0	1	1	TEAD3	TEA domain family member 3
hsa-miR-361-3p	0	0	1	1	0	0	CPNE6	copine VI (neuronal)
hsa-miR-361-3p	1	0	1	1	1	1	RIF1	RAP1 interacting factor homolog (yeast)
hsa-miR-361-3p	0	0	1	1	1	1	TTLL3	tubulin tyrosine ligase-like family, member 3
hsa-miR-361-3p	1	0	1	1	0	0	MAN1B1	mannosidase, alpha, class 1B, member 1
hsa-miR-361-3p	0	0	1	0	0	0	POM121L9P	POM121 transmembrane nucleoporin-like 9, pseudogene
hsa-miR-361-3p	0	0	1	0	0	0	POM121L8P	POM121 transmembrane nucleoporin-like 8 pseudogene
hsa-miR-361-3p	1	0	1	1	1	1	ARF6	ADP-ribosylation factor 6
hsa-miR-361-3p	0	0	1	1	1	1	ARIH1	ariadne homolog, ubiquitin-conjugating enzyme E2 binding protein, 1 (Drosophila)
hsa-miR-361-3p	0	0	1	1	0	0	MSH5	mutS homolog 5 (E. coli)
hsa-miR-361-3p	0	0	1	1	0	0	SAPCD1	suppressor APC domain containing 1
hsa-miR-361-3p	1	0	1	1	1	1	MLLT6	myeloid/lymphoid or mixed-lineage leukemia (trithorax homolog, Drosophila); translocated to, 6
hsa-miR-361-3p	0	0	1	0	0	0	KIAA0913	KIAA0913
hsa-miR-361-3p	0	0	1	1	1	1	STAG3L1	stromal antigen 3-like 1
hsa-miR-361-3p	0	0	1	1	1	1	TAOK2	TAO kinase 2
hsa-miR-361-3p	0	0	1	1	1	1	AQP6	aquaporin 6, kidney specific
hsa-miR-361-3p	1	0	1	1	1	1	TFE3	transcription factor binding to IGHM enhancer 3
hsa-miR-361-3p	1	0	1	1	1	1	CTTNBP2NL	CTTNBP2 N-terminal like
hsa-miR-361-3p	1	0	1	1	1	1	RNF10	ring finger protein 10
hsa-miR-361-3p	0	0	1	0	0	0	FAM66D	family with sequence similarity 66, member D
hsa-miR-361-3p	1	0	1	0	1	1	BRPF1	bromodomain and PHD finger containing, 1
hsa-miR-361-3p	1	0	1	0	0	0	SYNPO	synaptopodin
hsa-miR-361-3p	0	0	1	0	0	0	ZNF720	zinc finger protein 720
hsa-miR-361-3p	1	0	1	1	1	1	CHMP7	charged multivesicular body protein 7
hsa-miR-361-3p	0	0	1	1	1	1	YAP1	Yes-associated protein 1
hsa-miR-361-3p	1	0	1	1	1	1	NABP1	nucleic acid binding protein 1
hsa-miR-361-3p	0	0	1	1	1	1	BRD2	bromodomain containing 2
hsa-miR-361-3p	0	0	1	1	1	1	AMIGO2	adhesion molecule with Ig-like domain 2
hsa-miR-361-3p	0	0	1	1	0	0	TMEM44	transmembrane protein 44
hsa-miR-361-3p	1	0	1	0	1	1	GPCPD1	glycerophosphocholine phosphodiesterase GDE1 homolog (S. cerevisiae)
hsa-miR-361-3p	0	0	1	1	0	0	TMEM91	transmembrane protein 91
hsa-miR-361-3p	0	0	1	0	1	1	FBXO42	F-box protein 42
hsa-miR-361-3p	1	0	1	1	1	1	CEP164	centrosomal protein 164kDa
hsa-miR-361-3p	0	0	1	1	0	0	LRRN2	leucine rich repeat neuronal 2
hsa-miR-361-3p	1	0	1	1	1	1	FAM63B	family with sequence similarity 63, member B
hsa-miR-361-3p	0	0	1	0	0	0	ADCY10P1	adenylate cyclase 10 (soluble) pseudogene 1
hsa-miR-361-3p	1	0	1	0	0	0	NPEPL1	aminopeptidase-like 1
hsa-miR-361-3p	1	0	1	1	0	0	KIAA0895L	KIAA0895-like
hsa-miR-361-3p	1	0	1	1	1	1	MBD6	methyl-CpG binding domain protein 6
hsa-miR-361-3p	1	0	1	0	1	1	JAZF1	JAZF zinc finger 1
hsa-miR-361-3p	1	0	1	1	1	1	MSANTD4	Myb/SANT-like DNA-binding domain containing 4 with coiled-coils
hsa-miR-361-3p	1	0	1	0	1	1	PATL1	protein associated with topoisomerase II homolog 1 (yeast)
hsa-miR-361-3p	1	0	1	1	1	1	PPP3CA	protein phosphatase 3, catalytic subunit, alpha isozyme
hsa-miR-361-3p	1	0	1	1	1	1	WDR44	WD repeat domain 44
hsa-miR-361-3p	1	0	1	1	1	1	GAL3ST3	galactose-3-O-sulfotransferase 3
hsa-miR-361-3p	0	0	1	1	1	1	KLHL7	kelch-like 7 (Drosophila)
hsa-miR-361-3p	1	0	1	1	1	1	CLIC5	chloride intracellular channel 5
hsa-miR-361-3p	0	0	1	1	1	1	OSR2	odd-skipped related 2 (Drosophila)
hsa-miR-361-3p	1	0	1	1	1	1	DUSP16	dual specificity phosphatase 16
hsa-miR-361-3p	0	0	1	1	0	0	FAM176C	family with sequence similarity 176, member C
hsa-miR-361-3p	0	0	1	1	1	1	CRB1	crumbs homolog 1 (Drosophila)
hsa-miR-361-3p	1	0	1	1	1	1	MGLL	monoglyceride lipase
hsa-miR-361-3p	0	0	1	1	0	0	DNAH1	dynein, axonemal, heavy chain 1
hsa-miR-361-3p	1	0	1	1	1	1	PBRM1	polybromo 1
hsa-miR-361-3p	1	0	1	1	1	1	GFRA2	GDNF family receptor alpha 2
hsa-miR-361-3p	0	0	1	1	1	1	GPR114	G protein-coupled receptor 114
hsa-miR-361-3p	0	0	1	1	0	0	ART5	ADP-ribosyltransferase 5
hsa-miR-361-3p	0	0	1	0	0	0	LINC00085	long intergenic non-protein coding RNA 85
hsa-miR-361-3p	0	0	1	1	1	1	PTGR2	prostaglandin reductase 2
hsa-miR-361-3p	1	0	1	0	1	1	NHS	Nance-Horan syndrome (congenital cataracts and dental anomalies)
hsa-miR-361-3p	0	0	1	1	1	1	POTEG	POTE ankyrin domain family, member G
hsa-miR-361-3p	1	0	1	1	1	1	MECP2	methyl CpG binding protein 2 (Rett syndrome)
hsa-miR-361-3p	0	0	1	1	0	0	PAOX	polyamine oxidase (exo-N4-amino)
hsa-miR-361-3p	1	0	1	1	0	0	ADAM15	ADAM metallopeptidase domain 15
hsa-miR-361-3p	0	0	1	1	1	1	KLK7	kallikrein-related peptidase 7
hsa-miR-361-3p	1	0	1	1	1	1	PLCH1	phospholipase C, eta 1
hsa-miR-361-3p	0	0	1	0	0	0	LOC100128076	protein tyrosine phosphatase pseudogene
hsa-miR-361-3p	0	0	1	1	1	1	DLEC1	deleted in lung and esophageal cancer 1
hsa-miR-361-3p	1	0	1	1	0	0	TAF4B	TAF4b RNA polymerase II, TATA box binding protein (TBP)-associated factor, 105kDa
hsa-miR-361-3p	1	0	1	1	1	1	AMOT	angiomotin
hsa-miR-361-3p	0	0	1	1	0	0	DHCR7	7-dehydrocholesterol reductase
hsa-miR-361-3p	0	0	1	1	1	1	SLC6A2	solute carrier family 6 (neurotransmitter transporter, noradrenalin), member 2
hsa-miR-361-3p	0	0	1	1	1	1	FAM115A	family with sequence similarity 115, member A
hsa-miR-361-3p	0	0	1	1	1	1	PTDSS1	phosphatidylserine synthase 1
hsa-miR-361-3p	0	0	1	1	1	1	WDR55	WD repeat domain 55
hsa-miR-361-3p	0	0	1	1	1	1	RAB7L1	RAB7, member RAS oncogene family-like 1
hsa-miR-361-3p	0	0	1	1	1	1	TUFT1	tuftelin 1
hsa-miR-361-3p	1	0	1	1	1	1	NUMA1	nuclear mitotic apparatus protein 1
hsa-miR-361-3p	0	0	1	1	0	0	RUSC1	RUN and SH3 domain containing 1
hsa-miR-361-3p	0	0	1	1	1	1	ZNF589	zinc finger protein 589
hsa-miR-361-3p	1	0	1	1	0	0	EIF4A1	eukaryotic translation initiation factor 4A1
hsa-miR-361-3p	1	0	1	0	1	1	CAV1	caveolin 1, caveolae protein, 22kDa
hsa-miR-361-3p	0	0	1	1	0	0	LOC100132167	uncharacterized LOC100132167
hsa-miR-361-3p	0	0	1	1	1	1	SGK2	serum/glucocorticoid regulated kinase 2
hsa-miR-361-3p	1	0	1	0	1	1	VAMP4	vesicle-associated membrane protein 4
hsa-miR-361-3p	0	0	1	1	0	0	NDUFB10	NADH dehydrogenase (ubiquinone) 1 beta subcomplex, 10, 22kDa
hsa-miR-361-3p	1	0	1	1	1	1	LMBR1L	limb region 1 homolog (mouse)-like
hsa-miR-361-3p	0	0	1	1	1	1	ICA1	islet cell autoantigen 1, 69kDa
hsa-miR-361-3p	0	0	1	1	1	1	TMEM30A	transmembrane protein 30A
hsa-miR-361-3p	1	0	1	1	0	0	WDR45	WD repeat domain 45
hsa-miR-361-3p	0	0	1	0	0	0	ATXN7L3B	ataxin 7-like 3B
hsa-miR-361-3p	1	0	1	1	1	1	NXN	nucleoredoxin
hsa-miR-361-3p	0	0	1	0	0	0	LOC400043	uncharacterized LOC400043
hsa-miR-361-3p	0	0	1	1	0	0	PANK2	pantothenate kinase 2
hsa-miR-361-3p	1	0	1	1	1	1	RELL2	RELT-like 2
hsa-miR-361-3p	1	0	1	1	1	1	KCTD17	potassium channel tetramerisation domain containing 17
hsa-miR-361-3p	0	0	1	1	1	1	ZNF587	zinc finger protein 587
hsa-miR-361-3p	0	0	1	1	0	0	HDAC6	histone deacetylase 6
hsa-miR-361-3p	1	0	1	1	0	0	JUP	junction plakoglobin
hsa-miR-361-3p	0	0	1	1	1	1	KLHL29	kelch-like 29 (Drosophila)
hsa-miR-361-3p	0	0	1	1	1	1	DLX4	distal-less homeobox 4
hsa-miR-361-3p	0	0	1	0	0	0	KLHL15	kelch-like 15 (Drosophila)
hsa-miR-361-3p	1	0	1	1	1	1	ZNF512	zinc finger protein 512
hsa-miR-361-3p	0	0	1	0	1	1	ZNF37A	zinc finger protein 37A
hsa-miR-361-3p	0	0	1	1	1	1	CEP70	centrosomal protein 70kDa
hsa-miR-361-3p	1	0	1	1	1	1	NUMBL	numb homolog (Drosophila)-like
hsa-miR-361-3p	1	0	1	1	1	1	FAM199X	family with sequence similarity 199, X-linked
hsa-miR-361-3p	0	0	1	1	1	1	CSDE1	cold shock domain containing E1, RNA-binding
hsa-miR-361-3p	0	0	1	1	0	0	ZBTB32	zinc finger and BTB domain containing 32
hsa-miR-361-3p	0	0	1	0	0	0	TCP11L2	t-complex 11 (mouse)-like 2
hsa-miR-361-3p	0	0	1	0	1	1	LOC646736	uncharacterized LOC646736
hsa-miR-361-3p	0	0	1	1	0	0	LRRC36	leucine rich repeat containing 36
hsa-miR-361-3p	1	0	1	1	1	1	SLC25A22	solute carrier family 25 (mitochondrial carrier: glutamate), member 22
hsa-miR-361-3p	1	0	1	1	1	1	TMEM182	transmembrane protein 182
hsa-miR-361-3p	0	0	1	1	0	0	C6orf130	chromosome 6 open reading frame 130
hsa-miR-361-3p	1	0	1	1	0	0	TMEM63B	transmembrane protein 63B
hsa-miR-361-3p	1	0	1	1	0	0	TET3	tet methylcytosine dioxygenase 3
hsa-miR-361-3p	0	0	1	1	0	0	SLC22A9	solute carrier family 22 (organic anion transporter), member 9
hsa-miR-361-3p	0	0	1	1	1	1	PDE1C	phosphodiesterase 1C, calmodulin-dependent 70kDa
hsa-miR-361-3p	1	0	1	1	1	1	SPOCK2	sparc/osteonectin, cwcv and kazal-like domains proteoglycan (testican) 2
hsa-miR-361-3p	0	0	1	1	0	0	FAM89B	family with sequence similarity 89, member B
hsa-miR-361-3p	1	0	1	0	1	1	CDK19	cyclin-dependent kinase 19
hsa-miR-361-3p	0	0	1	1	0	0	MEI1	meiosis inhibitor 1
hsa-miR-361-3p	1	0	1	1	1	1	PELI3	pellino E3 ubiquitin protein ligase family member 3
hsa-miR-361-3p	0	0	1	1	1	1	HYAL1	hyaluronoglucosaminidase 1
hsa-miR-361-3p	0	0	1	1	0	0	TBX6	T-box 6
hsa-miR-361-3p	1	0	1	1	1	1	ZDHHC5	zinc finger, DHHC-type containing 5
hsa-miR-361-3p	1	0	1	1	1	1	ADAM9	ADAM metallopeptidase domain 9
hsa-miR-361-3p	1	0	1	1	1	1	U2SURP	U2 snRNP-associated SURP domain containing
hsa-miR-361-3p	0	0	1	1	1	1	ANKZF1	ankyrin repeat and zinc finger domain containing 1
hsa-miR-361-3p	0	0	1	1	0	0	SYT3	synaptotagmin III
hsa-miR-361-3p	0	0	1	0	1	1	PAPOLG	poly(A) polymerase gamma
hsa-miR-361-3p	0	0	1	1	1	1	ASTN2	astrotactin 2
hsa-miR-361-3p	0	0	1	1	0	0	GEMIN6	gem (nuclear organelle) associated protein 6
hsa-miR-361-3p	1	0	1	1	1	1	SYT9	synaptotagmin IX
hsa-miR-361-3p	1	0	1	0	1	1	PSMF1	proteasome (prosome, macropain) inhibitor subunit 1 (PI31)
hsa-miR-361-3p	0	0	1	0	0	0	ZNF503-AS2	ZNF503 antisense RNA 2
hsa-miR-361-3p	0	0	1	0	0	0	BCAS3	breast carcinoma amplified sequence 3
hsa-miR-361-3p	1	0	1	0	1	1	SV2B	synaptic vesicle glycoprotein 2B
hsa-miR-361-3p	1	0	1	1	1	1	EYA4	eyes absent homolog 4 (Drosophila)
hsa-miR-361-3p	1	0	1	1	1	1	TAF15	TAF15 RNA polymerase II, TATA box binding protein (TBP)-associated factor, 68kDa
hsa-miR-361-3p	0	0	1	0	1	1	FLJ25328	uncharacterized LOC148231
hsa-miR-361-3p	0	0	1	0	0	0	CFL1P1	cofilin 1 (non-muscle) pseudogene 1
hsa-miR-361-3p	0	0	1	1	1	1	C7orf53	chromosome 7 open reading frame 53
hsa-miR-361-3p	1	0	1	1	1	1	TTC39C	tetratricopeptide repeat domain 39C
hsa-miR-361-3p	1	0	1	1	1	1	RAB5B	RAB5B, member RAS oncogene family
hsa-miR-361-3p	1	0	1	1	0	0	MRC2	mannose receptor, C type 2
hsa-miR-361-3p	0	0	1	1	0	0	WASIR2	WASH and IL9R antisense RNA 2
hsa-miR-361-3p	1	0	1	1	1	1	SECISBP2L	SECIS binding protein 2-like
hsa-miR-361-3p	1	0	1	1	1	1	SIRPA	signal-regulatory protein alpha
hsa-miR-361-3p	0	0	1	1	0	0	IGFN1	immunoglobulin-like and fibronectin type III domain containing 1
hsa-miR-361-3p	0	0	1	1	1	1	IL20RB	interleukin 20 receptor beta
hsa-miR-361-3p	1	0	1	1	1	1	PCDHA5	protocadherin alpha 5
hsa-miR-361-3p	1	0	1	1	0	0	GPR137	G protein-coupled receptor 137
hsa-miR-361-3p	0	0	1	1	1	1	EDA2R	ectodysplasin A2 receptor
hsa-miR-361-3p	0	0	1	0	0	0	LOC643529	hCG2024094
hsa-miR-361-3p	0	0	1	1	1	1	APBB1IP	amyloid beta (A4) precursor protein-binding, family B, member 1 interacting protein
hsa-miR-361-3p	1	0	1	1	0	0	INO80E	INO80 complex subunit E
hsa-miR-361-3p	0	0	1	0	1	1	FAM72A	family with sequence similarity 72, member A
hsa-miR-361-3p	1	0	1	1	1	1	ZEB2	zinc finger E-box binding homeobox 2
hsa-miR-361-3p	0	0	1	0	0	0	LOC339862	uncharacterized LOC339862
hsa-miR-361-3p	0	0	1	0	0	0	SPATA3	spermatogenesis associated 3
hsa-miR-361-3p	1	0	1	1	1	1	ELMO2	engulfment and cell motility 2
hsa-miR-361-3p	1	0	1	1	1	1	MEIS1	Meis homeobox 1
hsa-miR-361-3p	1	0	1	0	1	1	NEGR1	neuronal growth regulator 1
hsa-miR-361-3p	1	0	1	1	0	0	RASGEF1B	RasGEF domain family, member 1B
hsa-miR-361-3p	0	0	1	0	0	0	LOC284889	uncharacterized LOC284889
hsa-miR-361-3p	0	0	1	1	1	1	ZNF138	zinc finger protein 138
hsa-miR-361-3p	1	0	1	0	0	0	RAVER1	ribonucleoprotein, PTB-binding 1
hsa-miR-361-3p	1	0	1	1	1	1	SLC35F3	solute carrier family 35, member F3
hsa-miR-361-3p	1	0	1	1	1	1	SF1	splicing factor 1
hsa-miR-361-3p	1	0	1	1	0	0	CHD4	chromodomain helicase DNA binding protein 4
hsa-miR-361-3p	0	0	1	1	1	1	C1orf177	chromosome 1 open reading frame 177
hsa-miR-361-3p	0	0	1	0	0	0	FLJ36000	uncharacterized FLJ36000
hsa-miR-361-3p	1	0	1	0	0	0	MSL1	male-specific lethal 1 homolog (Drosophila)
hsa-miR-361-3p	0	0	1	0	0	0	LOC401074	uncharacterized LOC401074
hsa-miR-361-3p	0	0	1	0	0	0	TOB1-AS1	TOB1 antisense RNA 1
hsa-miR-361-3p	0	0	1	0	0	0	LOC221122	uncharacterized LOC221122
hsa-miR-361-3p	0	0	1	0	1	1	LINC00634	long intergenic non-protein coding RNA 634
hsa-miR-361-3p	1	0	1	1	1	1	FOSB	FBJ murine osteosarcoma viral oncogene homolog B
hsa-miR-361-3p	0	0	1	0	1	1	SRSF5	serine/arginine-rich splicing factor 5
hsa-miR-361-3p	1	0	1	1	1	1	DACH2	dachshund homolog 2 (Drosophila)
hsa-miR-361-3p	0	0	1	0	0	0	SNHG11	small nucleolar RNA host gene 11 (non-protein coding)
hsa-miR-361-3p	1	0	1	1	1	1	IL16	interleukin 16
hsa-miR-361-3p	0	0	1	1	1	1	FAM71F1	family with sequence similarity 71, member F1
hsa-miR-361-3p	0	0	1	0	0	0	A1BG-AS1	A1BG antisense RNA 1
hsa-miR-361-3p	1	0	1	1	0	0	RGL2	ral guanine nucleotide dissociation stimulator-like 2
hsa-miR-361-3p	0	0	1	0	0	0	SLC7A11-AS1	SLC7A11 antisense RNA 1
hsa-miR-361-3p	1	0	1	0	1	1	KIAA0430	KIAA0430
hsa-miR-361-3p	0	0	1	0	1	1	FAM13B	family with sequence similarity 13, member B
hsa-miR-361-3p	0	0	1	0	1	1	METTL12	methyltransferase like 12
hsa-miR-361-3p	1	0	1	1	1	1	GNG2	guanine nucleotide binding protein (G protein), gamma 2
hsa-miR-361-3p	0	0	1	1	0	0	AQP12B	aquaporin 12B
hsa-miR-361-3p	1	0	1	1	1	1	TNFSF4	tumor necrosis factor (ligand) superfamily, member 4
hsa-miR-361-3p	1	0	1	1	1	1	DOC2A	double C2-like domains, alpha
hsa-miR-361-3p	1	0	1	1	1	1	ARID3B	AT rich interactive domain 3B (BRIGHT-like)
hsa-miR-361-3p	1	0	1	1	1	1	ROCK1	Rho-associated, coiled-coil containing protein kinase 1
hsa-miR-361-3p	0	0	1	1	0	0	ZNF839	zinc finger protein 839
hsa-miR-361-3p	0	0	1	1	1	1	SH3GL3	SH3-domain GRB2-like 3
hsa-miR-361-3p	0	0	1	0	0	0	LINC00347	long intergenic non-protein coding RNA 347
hsa-miR-361-3p	0	0	1	0	1	1	C12orf74	chromosome 12 open reading frame 74
hsa-miR-361-3p	0	0	1	0	0	0	DKFZp686O1327	uncharacterized LOC401014
hsa-miR-361-3p	0	0	1	0	0	0	LOC100130015	5-hydroxyisourate hydrolase pseudogene
hsa-miR-361-3p	1	0	1	1	1	1	AGAP3	ArfGAP with GTPase domain, ankyrin repeat and PH domain 3
hsa-miR-361-3p	1	0	1	1	1	1	PPP2R5B	protein phosphatase 2, regulatory subunit B', beta
hsa-miR-361-3p	1	0	1	1	1	1	SENP1	SUMO1/sentrin specific peptidase 1
hsa-miR-361-3p	0	0	1	1	0	0	NIT1	nitrilase 1
hsa-miR-361-3p	1	0	1	1	1	1	DIP2A	DIP2 disco-interacting protein 2 homolog A (Drosophila)
hsa-miR-361-3p	0	0	1	1	0	0	FAM72B	family with sequence similarity 72, member B
hsa-miR-361-3p	0	0	1	1	0	0	FOXJ1	forkhead box J1
hsa-miR-361-3p	0	0	1	1	1	1	P2RX6	purinergic receptor P2X, ligand-gated ion channel, 6
hsa-miR-361-3p	1	0	1	1	0	0	CELF5	CUGBP, Elav-like family member 5
hsa-miR-361-3p	1	0	1	0	1	1	ARHGAP5	Rho GTPase activating protein 5
hsa-miR-361-3p	0	0	1	1	0	0	ENTPD8	ectonucleoside triphosphate diphosphohydrolase 8
hsa-miR-361-3p	0	0	1	1	1	1	NCMAP	noncompact myelin associated protein
hsa-miR-361-3p	0	0	1	1	0	0	NLRC5	NLR family, CARD domain containing 5
hsa-miR-361-3p	1	0	1	0	1	1	SEMA4G	sema domain, immunoglobulin domain (Ig), transmembrane domain (TM) and short cytoplasmic domain, (semaphorin) 4G
hsa-miR-361-3p	0	0	1	1	1	1	LINC00086	long intergenic non-protein coding RNA 86
hsa-miR-361-3p	0	0	1	1	0	0	HYAL3	hyaluronoglucosaminidase 3
hsa-miR-361-3p	0	0	1	1	1	1	HLA-DQA1	major histocompatibility complex, class II, DQ alpha 1
hsa-miR-361-3p	1	0	1	1	1	1	SCUBE3	signal peptide, CUB domain, EGF-like 3
hsa-miR-361-3p	0	0	1	0	0	0	AQP7P1	aquaporin 7 pseudogene 1
hsa-miR-361-3p	0	0	1	1	0	0	LY6H	lymphocyte antigen 6 complex, locus H
hsa-miR-361-3p	1	0	1	1	0	0	ATG2A	autophagy related 2A
hsa-miR-361-3p	0	0	1	0	1	1	C17orf51	chromosome 17 open reading frame 51
hsa-miR-361-3p	1	0	1	1	1	1	KDM5C	lysine (K)-specific demethylase 5C
hsa-miR-361-3p	0	0	1	1	0	0	ABHD1	abhydrolase domain containing 1
hsa-miR-361-3p	1	0	1	1	1	1	NCOA5	nuclear receptor coactivator 5
hsa-miR-361-3p	0	0	1	1	0	0	CUEDC1	CUE domain containing 1
hsa-miR-361-3p	0	0	1	1	1	1	HOGA1	4-hydroxy-2-oxoglutarate aldolase 1
hsa-miR-361-3p	0	0	1	0	0	0	LOC388436	uncharacterized LOC388436
hsa-miR-361-3p	1	0	1	1	1	1	SOX5	SRY (sex determining region Y)-box 5
hsa-miR-361-3p	0	0	1	0	0	0	CISD3	CDGSH iron sulfur domain 3
hsa-miR-361-3p	1	0	1	0	1	1	C7orf41	chromosome 7 open reading frame 41
hsa-miR-361-3p	1	0	1	1	0	0	ANKRD13B	ankyrin repeat domain 13B
hsa-miR-361-3p	0	0	1	1	0	0	PRR19	proline rich 19
hsa-miR-361-3p	0	0	1	1	1	1	GPATCH2	G patch domain containing 2
hsa-miR-361-3p	0	0	1	0	0	0	LOC387647	patched domain containing 3 pseudogene
hsa-miR-361-3p	0	0	1	1	0	0	C8orf31	chromosome 8 open reading frame 31
hsa-miR-361-3p	0	0	1	1	0	0	CERS4	ceramide synthase 4
hsa-miR-361-3p	0	0	1	1	1	1	C10orf129	chromosome 10 open reading frame 129
hsa-miR-361-3p	0	0	1	0	0	0	LOC158435	uncharacterized LOC158435
hsa-miR-361-3p	0	0	1	1	1	1	ZNF189	zinc finger protein 189
hsa-miR-361-3p	1	0	1	1	1	1	LMO4	LIM domain only 4
hsa-miR-361-3p	0	0	1	1	1	1	SLAMF1	signaling lymphocytic activation molecule family member 1
hsa-miR-361-3p	0	0	1	1	1	1	COG5	component of oligomeric golgi complex 5
hsa-miR-361-3p	1	0	1	1	1	1	LINGO1	leucine rich repeat and Ig domain containing 1
hsa-miR-361-3p	0	0	1	0	0	0	PTGER4P2	prostaglandin E receptor 4 (subtype EP4) pseudogene 2
hsa-miR-361-3p	1	0	1	1	1	1	SOCS2	suppressor of cytokine signaling 2
hsa-miR-361-3p	1	0	1	1	1	1	TBX2	T-box 2
hsa-miR-361-3p	1	0	1	1	1	1	ANLN	anillin, actin binding protein
hsa-miR-361-3p	0	0	1	1	1	1	MSTO1	misato homolog 1 (Drosophila)
hsa-miR-361-3p	1	0	1	1	1	1	DDR1	discoidin domain receptor tyrosine kinase 1
hsa-miR-361-3p	0	0	1	0	0	0	AQP7P2	aquaporin 7 pseudogene 2
hsa-miR-361-3p	1	0	1	1	1	1	USP47	ubiquitin specific peptidase 47
hsa-miR-361-3p	0	0	1	0	0	0	JPX	JPX transcript, XIST activator (non-protein coding)
hsa-miR-361-3p	0	0	1	1	1	1	FRMPDP2	FERM and PDZ domain containing 2 pseudogene 2
hsa-miR-361-3p	0	0	1	1	1	1	FRMPD2P1	FERM and PDZ domain containing 2 pseudogene 1
hsa-miR-361-3p	0	0	1	1	0	0	C8orf82	chromosome 8 open reading frame 82
hsa-miR-361-3p	0	0	1	1	0	0	DNHD1	dynein heavy chain domain 1
hsa-miR-361-3p	0	0	1	1	1	1	ABCG2	ATP-binding cassette, sub-family G (WHITE), member 2
hsa-miR-361-3p	1	0	1	0	1	1	PIK3R3	phosphoinositide-3-kinase, regulatory subunit 3 (gamma)
hsa-miR-361-3p	1	0	1	1	1	1	PLXNA2	plexin A2
hsa-miR-361-3p	1	0	1	1	1	1	STK38	serine/threonine kinase 38
hsa-miR-361-3p	0	0	1	1	0	0	DNASE1	deoxyribonuclease I
hsa-miR-361-3p	1	0	1	1	1	1	ST8SIA2	ST8 alpha-N-acetyl-neuraminide alpha-2,8-sialyltransferase 2
hsa-miR-361-3p	1	0	1	1	1	1	ACVR2B	activin A receptor, type IIB
hsa-miR-361-3p	1	0	1	1	0	0	PLD3	phospholipase D family, member 3
hsa-miR-361-3p	0	0	1	1	1	1	XG	Xg blood group
hsa-miR-361-3p	1	0	1	1	1	1	LRRC15	leucine rich repeat containing 15
hsa-miR-361-3p	0	0	1	0	0	0	CCDC163P	coiled-coil domain containing 163, pseudogene
hsa-miR-361-3p	1	0	1	1	1	1	ARFIP1	ADP-ribosylation factor interacting protein 1
hsa-miR-361-3p	0	0	1	1	0	0	PLA2G16	phospholipase A2, group XVI
hsa-miR-361-3p	0	0	1	1	0	0	TMC1	transmembrane channel-like 1
hsa-miR-361-3p	0	0	1	0	0	0	LOC441493	uncharacterized LOC441493
hsa-miR-361-3p	1	0	1	1	0	0	KIAA1644	KIAA1644
hsa-miR-361-3p	0	0	1	0	0	0	GUSBP9	glucuronidase, beta pseudogene 9
hsa-miR-361-3p	1	0	1	1	1	1	FAM135B	family with sequence similarity 135, member B
hsa-miR-361-3p	0	0	1	0	1	1	C9orf91	chromosome 9 open reading frame 91
hsa-miR-361-3p	0	0	1	1	0	0	FMN1	formin 1
hsa-miR-361-3p	1	0	1	0	1	1	DNAJC6	DnaJ (Hsp40) homolog, subfamily C, member 6
hsa-miR-361-3p	1	0	1	0	1	1	BTBD3	BTB (POZ) domain containing 3
hsa-miR-361-3p	0	0	1	1	1	1	ZNF514	zinc finger protein 514
hsa-miR-361-3p	0	0	1	1	0	0	RELA	v-rel reticuloendotheliosis viral oncogene homolog A (avian)
hsa-miR-361-3p	0	0	1	1	0	0	PRAMEF10	PRAME family member 10
hsa-miR-361-3p	0	0	1	1	0	0	PAEP	progestagen-associated endometrial protein
hsa-miR-361-3p	0	0	1	1	0	0	RNF123	ring finger protein 123
hsa-miR-361-3p	0	0	1	1	0	0	AQP7	aquaporin 7
hsa-miR-361-3p	1	0	1	1	1	1	FKBP1A	FK506 binding protein 1A, 12kDa
hsa-miR-361-3p	0	0	1	0	0	0	CCT6P1	chaperonin containing TCP1, subunit 6 (zeta) pseudogene 1
hsa-miR-361-3p	0	0	1	0	1	1	GOLGA8G	golgin A8 family, member G
hsa-miR-361-3p	1	0	1	0	1	1	CAMSAP2	calmodulin regulated spectrin-associated protein family, member 2
hsa-miR-361-3p	1	0	1	1	1	1	MLLT10	myeloid/lymphoid or mixed-lineage leukemia (trithorax homolog, Drosophila); translocated to, 10
hsa-miR-361-3p	0	0	1	0	0	0	FAM225B	family with sequence similarity 225, member B (non-protein coding)
hsa-miR-361-3p	1	0	1	0	1	1	NFAT5	nuclear factor of activated T-cells 5, tonicity-responsive
hsa-miR-361-3p	0	0	1	0	0	0	SMA4	glucuronidase, beta pseudogene
hsa-miR-361-3p	0	0	1	0	0	0	FUT8-AS1	FUT8 antisense RNA 1
hsa-miR-361-3p	0	0	1	1	1	1	TCL6	T-cell leukemia/lymphoma 6 (non-protein coding)
hsa-miR-361-3p	0	0	1	1	1	1	TINF2	TERF1 (TRF1)-interacting nuclear factor 2
hsa-miR-361-3p	0	0	1	1	0	0	NDRG2	NDRG family member 2
hsa-miR-361-3p	0	0	1	0	0	0	FLJ39632	uncharacterized LOC642477
hsa-miR-361-3p	0	0	1	1	1	1	NCBP2	nuclear cap binding protein subunit 2, 20kDa
hsa-miR-361-3p	0	0	1	1	1	1	RAD17	RAD17 homolog (S. pombe)
hsa-miR-361-3p	0	0	1	1	0	0	C2	complement component 2
hsa-miR-361-3p	0	0	1	1	1	1	IP6K2	inositol hexakisphosphate kinase 2
hsa-miR-361-3p	0	0	1	1	1	1	STAT2	signal transducer and activator of transcription 2, 113kDa
hsa-miR-361-3p	1	0	1	1	1	1	ETS1	v-ets erythroblastosis virus E26 oncogene homolog 1 (avian)
hsa-miR-361-3p	1	0	1	1	1	1	SPPL3	signal peptide peptidase like 3
hsa-miR-361-3p	1	0	1	1	1	1	NFASC	neurofascin
hsa-miR-361-3p	1	0	1	1	1	1	RAB30	RAB30, member RAS oncogene family
hsa-miR-361-3p	0	0	1	1	1	1	GTF3C2	general transcription factor IIIC, polypeptide 2, beta 110kDa
hsa-miR-361-3p	0	0	1	1	1	1	GRM6	glutamate receptor, metabotropic 6
hsa-miR-361-3p	1	0	1	1	1	1	MASP1	mannan-binding lectin serine peptidase 1 (C4/C2 activating component of Ra-reactive factor)
hsa-miR-361-3p	1	0	1	1	0	0	RBM27	RNA binding motif protein 27
hsa-miR-361-3p	0	0	1	1	0	0	SNAPC2	small nuclear RNA activating complex, polypeptide 2, 45kDa
hsa-miR-361-3p	1	0	1	1	0	0	CECR2	cat eye syndrome chromosome region, candidate 2
hsa-miR-361-3p	0	0	1	1	1	1	ADH1B	alcohol dehydrogenase 1B (class I), beta polypeptide
hsa-miR-361-3p	0	0	1	1	0	0	PRKCQ	protein kinase C, theta
hsa-miR-361-3p	1	0	1	1	1	1	TSC22D3	TSC22 domain family, member 3
hsa-miR-361-3p	1	0	1	1	1	1	DCAF5	DDB1 and CUL4 associated factor 5
hsa-miR-361-3p	1	0	1	0	1	1	PCGF3	polycomb group ring finger 3
hsa-miR-361-3p	1	0	1	1	1	1	NFIB	nuclear factor I/B
hsa-miR-361-3p	0	0	1	1	0	0	DGKZ	diacylglycerol kinase, zeta
hsa-miR-361-3p	1	0	1	1	1	1	NAV1	neuron navigator 1
hsa-miR-361-3p	1	0	1	1	1	1	BZRAP1	benzodiazapine receptor (peripheral) associated protein 1
hsa-miR-361-3p	0	0	1	1	1	1	SSFA2	sperm specific antigen 2
hsa-miR-361-3p	1	0	1	1	1	1	LYST	lysosomal trafficking regulator
hsa-miR-361-3p	1	0	1	1	1	1	DLG5	discs, large homolog 5 (Drosophila)
hsa-miR-361-3p	1	0	1	1	1	1	CREB3L2	cAMP responsive element binding protein 3-like 2
hsa-miR-361-3p	1	0	1	0	1	1	TTL	tubulin tyrosine ligase
hsa-miR-361-3p	1	0	1	1	1	1	BSDC1	BSD domain containing 1
hsa-miR-361-3p	0	0	1	1	1	1	HPGD	hydroxyprostaglandin dehydrogenase 15-(NAD)
hsa-miR-361-3p	0	0	1	0	0	0	DCTN2	dynactin 2 (p50)
hsa-miR-361-3p	0	0	1	1	0	0	PPT2	palmitoyl-protein thioesterase 2
hsa-miR-361-3p	0	0	1	1	1	1	SLC25A11	solute carrier family 25 (mitochondrial carrier; oxoglutarate carrier), member 11
hsa-miR-361-3p	1	0	1	1	1	1	ENTPD6	ectonucleoside triphosphate diphosphohydrolase 6 (putative)
hsa-miR-361-3p	0	0	1	1	1	1	CHEK1	checkpoint kinase 1
hsa-miR-361-3p	1	0	1	0	0	0	IGLON5	IgLON family member 5
hsa-miR-361-3p	0	0	1	1	1	1	DNM1	dynamin 1
hsa-miR-361-3p	0	0	1	1	0	0	H2AFY2	H2A histone family, member Y2
hsa-miR-361-3p	1	0	1	1	0	0	RAB24	RAB24, member RAS oncogene family
hsa-miR-361-3p	0	0	1	1	0	0	CDC37	cell division cycle 37 homolog (S. cerevisiae)
hsa-miR-361-3p	0	0	1	1	1	1	TBC1D10A	TBC1 domain family, member 10A
hsa-miR-361-3p	1	0	1	1	1	1	VIM	vimentin
hsa-miR-361-3p	0	0	1	1	0	0	APOA1BP	apolipoprotein A-I binding protein
hsa-miR-361-3p	1	0	1	1	1	1	TARBP2	TAR (HIV-1) RNA binding protein 2
hsa-miR-361-3p	0	0	1	1	0	0	URM1	ubiquitin related modifier 1
hsa-miR-361-3p	1	0	1	1	1	1	PTH1R	parathyroid hormone 1 receptor
hsa-miR-361-3p	0	0	1	1	1	1	COPS8	COP9 constitutive photomorphogenic homolog subunit 8 (Arabidopsis)
hsa-miR-361-3p	1	0	1	1	1	1	SLC35D2	solute carrier family 35, member D2
hsa-miR-361-3p	0	0	1	1	0	0	SIRT6	sirtuin 6
hsa-miR-361-3p	0	0	1	1	1	1	PISD	phosphatidylserine decarboxylase
hsa-miR-361-3p	0	0	1	1	0	0	FCGRT	Fc fragment of IgG, receptor, transporter, alpha
hsa-miR-361-3p	1	0	1	1	1	1	DOLPP1	dolichyl pyrophosphate phosphatase 1
hsa-miR-361-3p	1	1	1	1	0	0	EFNA3	ephrin-A3
hsa-miR-361-3p	0	0	1	0	1	1	BLM	Bloom syndrome, RecQ helicase-like
hsa-miR-361-3p	1	0	1	1	1	1	SIX5	SIX homeobox 5
hsa-miR-361-3p	1	0	1	1	0	0	CRELD1	cysteine-rich with EGF-like domains 1
hsa-miR-361-3p	1	0	1	1	0	0	ELOVL1	ELOVL fatty acid elongase 1
hsa-miR-361-3p	0	0	1	1	1	1	TASP1	taspase, threonine aspartase, 1
hsa-miR-361-3p	1	0	1	1	0	0	STX5	syntaxin 5
hsa-miR-361-3p	1	0	1	1	1	1	ADM	adrenomedullin
hsa-miR-361-3p	0	0	1	1	0	0	DNAJB2	DnaJ (Hsp40) homolog, subfamily B, member 2
hsa-miR-361-3p	1	0	1	1	1	1	CHTF8	CTF8, chromosome transmission fidelity factor 8 homolog (S. cerevisiae)
hsa-miR-361-3p	0	0	1	1	1	1	MTCP1	mature T-cell proliferation 1
hsa-miR-361-3p	0	0	1	0	1	1	CD99P1	CD99 molecule pseudogene 1
hsa-miR-361-3p	1	0	1	1	1	1	NTM	neurotrimin
hsa-miR-361-3p	0	0	1	1	0	0	F10	coagulation factor X
hsa-miR-361-3p	0	0	1	1	0	0	IKBKG	inhibitor of kappa light polypeptide gene enhancer in B-cells, kinase gamma
hsa-miR-361-3p	1	0	1	0	1	1	RPS6KB1	ribosomal protein S6 kinase, 70kDa, polypeptide 1
hsa-miR-361-3p	1	0	1	1	1	1	POU2F2	POU class 2 homeobox 2
hsa-miR-361-3p	1	0	1	1	1	1	PCTP	phosphatidylcholine transfer protein
hsa-miR-361-3p	1	0	1	1	1	1	LYPLA2	lysophospholipase II
hsa-miR-361-3p	1	0	1	1	1	1	NUP160	nucleoporin 160kDa
hsa-miR-361-3p	0	0	1	0	0	0	LOC150568	uncharacterized LOC150568
hsa-miR-361-3p	0	0	1	1	0	0	C11orf68	chromosome 11 open reading frame 68
hsa-miR-361-3p	0	0	1	0	0	0	MEG3	maternally expressed 3 (non-protein coding)
hsa-miR-361-3p	0	0	1	1	1	1	NFATC4	nuclear factor of activated T-cells, cytoplasmic, calcineurin-dependent 4
hsa-miR-361-3p	0	0	1	1	0	0	CD7	CD7 molecule
hsa-miR-361-3p	0	0	1	1	1	1	CAPZB	capping protein (actin filament) muscle Z-line, beta
hsa-miR-361-3p	0	0	1	0	0	0	ARRDC1	arrestin domain containing 1
hsa-miR-361-3p	1	0	1	1	1	1	PEX2	peroxisomal biogenesis factor 2
hsa-miR-361-3p	1	0	1	1	1	1	PPP5C	protein phosphatase 5, catalytic subunit
hsa-miR-361-3p	0	0	1	1	0	0	PTGDS	prostaglandin D2 synthase 21kDa (brain)
hsa-miR-361-3p	1	0	1	1	1	1	DOK4	docking protein 4
hsa-miR-361-3p	0	0	1	1	1	1	CD3E	CD3e molecule, epsilon (CD3-TCR complex)
hsa-miR-361-3p	0	0	1	0	0	0	LOC100130353	hippocampus abundant transcript-like 1 pseudogene
hsa-miR-361-3p	1	0	1	1	1	1	TAGLN2	transgelin 2
hsa-miR-361-3p	1	0	1	1	1	1	EIF4A2	eukaryotic translation initiation factor 4A2
hsa-miR-361-3p	0	0	1	1	1	1	BTF3	basic transcription factor 3
hsa-miR-361-3p	0	0	1	1	1	1	WIBG	within bgcn homolog (Drosophila)
hsa-miR-361-3p	1	0	1	1	1	1	TIMP3	TIMP metallopeptidase inhibitor 3
hsa-miR-361-3p	0	0	1	1	1	1	LYSMD4	LysM, putative peptidoglycan-binding, domain containing 4
hsa-miR-361-3p	0	0	1	1	1	1	LDHA	lactate dehydrogenase A
hsa-miR-361-3p	1	0	1	1	1	1	PSAP	prosaposin
hsa-miR-361-3p	1	0	1	1	0	0	ATP6V1B2	ATPase, H+ transporting, lysosomal 56/58kDa, V1 subunit B2
hsa-miR-361-3p	0	0	1	1	0	0	FXYD1	FXYD domain containing ion transport regulator 1
hsa-miR-361-3p	1	0	1	1	1	1	ARMC8	armadillo repeat containing 8
hsa-miR-361-3p	0	0	1	1	0	0	CD79B	CD79b molecule, immunoglobulin-associated beta
hsa-miR-361-3p	1	0	1	1	1	1	PDCL	phosducin-like
hsa-miR-361-3p	1	0	1	1	0	0	LMAN2	lectin, mannose-binding 2
hsa-miR-361-3p	1	0	1	1	1	1	RBFOX2	RNA binding protein, fox-1 homolog (C. elegans) 2
hsa-miR-361-3p	1	0	1	1	1	1	ILK	integrin-linked kinase
hsa-miR-361-3p	1	0	1	1	1	1	HMGN2	high mobility group nucleosomal binding domain 2
hsa-miR-361-3p	0	0	1	1	0	0	BCKDK	branched chain ketoacid dehydrogenase kinase
hsa-miR-361-3p	1	0	1	1	1	1	TMEM55B	transmembrane protein 55B
hsa-miR-361-3p	1	0	1	0	1	1	CD47	CD47 molecule
hsa-miR-361-3p	0	0	1	1	1	1	ZNF346	zinc finger protein 346
hsa-miR-361-3p	0	0	1	1	0	0	TMEM222	transmembrane protein 222
hsa-miR-361-3p	0	0	1	1	0	0	TESK1	testis-specific kinase 1
hsa-miR-361-3p	0	0	1	0	0	0	LOC100132984	uncharacterized LOC100132984
hsa-miR-361-3p	1	0	1	1	0	0	RAD9A	RAD9 homolog A (S. pombe)
hsa-miR-361-3p	0	0	1	1	0	0	TTYH1	tweety homolog 1 (Drosophila)
hsa-miR-361-3p	0	0	1	1	1	1	NUDT21	nudix (nucleoside diphosphate linked moiety X)-type motif 21
hsa-miR-361-3p	1	0	1	1	1	1	MED1	mediator complex subunit 1
hsa-miR-361-3p	1	0	1	1	1	1	CALR	calreticulin
hsa-miR-361-3p	0	0	1	0	0	0	PRMT1	protein arginine methyltransferase 1
hsa-miR-361-3p	0	0	1	1	1	1	COMMD3	COMM domain containing 3
hsa-miR-361-3p	0	0	1	1	0	0	CD2BP2	CD2 (cytoplasmic tail) binding protein 2
hsa-miR-361-3p	1	0	1	1	1	1	LGALSL	lectin, galactoside-binding-like
hsa-miR-361-3p	0	0	1	1	0	0	INO80B	INO80 complex subunit B
hsa-miR-361-3p	1	0	1	1	1	1	SERF2	small EDRK-rich factor 2
hsa-miR-361-3p	1	0	1	0	1	1	KIAA0664	KIAA0664
hsa-miR-361-3p	0	0	1	0	0	0	LOC731789	uncharacterized LOC731789
hsa-miR-361-3p	1	0	1	0	1	1	BTRC	beta-transducin repeat containing E3 ubiquitin protein ligase
hsa-miR-361-3p	0	0	1	1	1	1	SYNE2	spectrin repeat containing, nuclear envelope 2
hsa-miR-361-3p	1	0	1	1	1	1	PHACTR2	phosphatase and actin regulator 2
hsa-miR-361-3p	0	0	1	0	0	0	LINC00661	long intergenic non-protein coding RNA 661
hsa-miR-361-3p	0	0	1	0	0	0	MUC19	mucin 19, oligomeric
hsa-miR-361-3p	0	0	1	1	1	1	SLC25A26	solute carrier family 25 (S-adenosylmethionine carrier), member 26
hsa-miR-361-3p	0	0	1	0	0	0	MIR143HG	MIR143 host gene (non-protein coding)
hsa-miR-361-3p	1	0	1	0	1	1	CNTNAP2	contactin associated protein-like 2
hsa-miR-361-3p	1	0	1	1	1	1	BCL2L1	BCL2-like 1
hsa-miR-361-3p	0	0	1	0	0	0	LOC440518	golgin A2 pseudogene
hsa-miR-361-3p	1	0	1	1	1	1	MAN2A2	mannosidase, alpha, class 2A, member 2
hsa-miR-361-3p	1	0	1	1	1	1	UBAP2L	ubiquitin associated protein 2-like
hsa-miR-361-3p	1	0	1	0	1	1	KLHDC10	kelch domain containing 10
hsa-miR-361-3p	1	0	1	1	1	1	PHYHIP	phytanoyl-CoA 2-hydroxylase interacting protein
hsa-miR-361-3p	1	0	1	0	1	1	CBX7	chromobox homolog 7
hsa-miR-361-3p	0	0	1	1	1	1	LTA	lymphotoxin alpha (TNF superfamily, member 1)
hsa-miR-361-3p	1	0	1	1	1	1	ATP2B3	ATPase, Ca++ transporting, plasma membrane 3
hsa-miR-361-3p	1	0	1	1	1	1	TRIOBP	TRIO and F-actin binding protein
hsa-miR-361-3p	0	0	1	1	0	0	SPATA20	spermatogenesis associated 20
hsa-miR-361-3p	0	0	1	0	0	0	LOC728377	Rho guanine nucleotide exchange factor (GEF) 5 pseudogene
hsa-miR-361-3p	1	0	1	1	1	1	TNFAIP1	tumor necrosis factor, alpha-induced protein 1 (endothelial)
hsa-miR-361-3p	0	0	1	1	1	1	CCL20	chemokine (C-C motif) ligand 20
hsa-miR-361-3p	1	0	1	1	1	1	SLC4A8	solute carrier family 4, sodium bicarbonate cotransporter, member 8
hsa-miR-361-3p	0	0	1	0	0	0	C1orf81	chromosome 1 open reading frame 81
hsa-miR-361-3p	0	0	1	1	1	1	MORC4	MORC family CW-type zinc finger 4
hsa-miR-361-3p	0	0	1	1	1	1	ADPRH	ADP-ribosylarginine hydrolase
hsa-miR-361-3p	0	0	1	1	1	1	PCYT1A	phosphate cytidylyltransferase 1, choline, alpha
hsa-miR-361-3p	1	0	1	1	1	1	ELK1	ELK1, member of ETS oncogene family
hsa-miR-361-3p	0	0	1	0	0	0	PVT1	Pvt1 oncogene (non-protein coding)
hsa-miR-361-3p	0	0	1	1	1	1	PRKACA	protein kinase, cAMP-dependent, catalytic, alpha
hsa-miR-361-3p	0	0	1	1	1	1	ELF1	E74-like factor 1 (ets domain transcription factor)
hsa-miR-361-3p	1	0	1	1	1	1	COL1A1	collagen, type I, alpha 1
hsa-miR-361-3p	1	0	1	1	1	1	COL4A3	collagen, type IV, alpha 3 (Goodpasture antigen)
hsa-miR-361-3p	0	0	1	1	1	1	COL7A1	collagen, type VII, alpha 1
hsa-miR-361-3p	1	0	1	1	1	1	CYP19A1	cytochrome P450, family 19, subfamily A, polypeptide 1
hsa-miR-361-3p	1	0	1	1	1	1	F13A1	coagulation factor XIII, A1 polypeptide
hsa-miR-361-3p	0	0	1	1	0	0	FANCA	Fanconi anemia, complementation group A
hsa-miR-361-3p	1	0	1	0	1	1	GCH1	GTP cyclohydrolase 1
hsa-miR-361-3p	1	0	1	1	1	1	GJA1	gap junction protein, alpha 1, 43kDa
hsa-miR-361-3p	1	0	1	0	1	1	GLI3	GLI family zinc finger 3
hsa-miR-361-3p	1	0	1	0	1	1	ITGB3	integrin, beta 3 (platelet glycoprotein IIIa, antigen CD61)
hsa-miR-361-3p	1	0	1	1	1	1	KCNA1	potassium voltage-gated channel, shaker-related subfamily, member 1 (episodic ataxia with myokymia)
hsa-miR-361-3p	0	0	1	1	0	0	KCNQ1	potassium voltage-gated channel, KQT-like subfamily, member 1
hsa-miR-361-3p	1	0	1	1	1	1	MITF	microphthalmia-associated transcription factor
hsa-miR-361-3p	1	0	1	1	0	0	PAX2	paired box 2
hsa-miR-361-3p	0	0	1	1	0	0	PHKG2	phosphorylase kinase, gamma 2 (testis)
hsa-miR-361-3p	1	0	1	1	1	1	ATXN1	ataxin 1
hsa-miR-361-3p	0	0	1	1	0	0	TGM1	transglutaminase 1 (K polypeptide epidermal type I, protein-glutamine-gamma-glutamyltransferase)
hsa-miR-361-3p	1	0	1	1	1	1	CHM	choroideremia (Rab escort protein 1)
hsa-miR-361-3p	1	0	1	0	1	1	CYBB	cytochrome b-245, beta polypeptide
hsa-miR-361-3p	0	0	1	1	1	1	GM2A	GM2 ganglioside activator
hsa-miR-361-3p	1	0	1	1	1	1	HLCS	holocarboxylase synthetase (biotin-(proprionyl-CoA-carboxylase (ATP-hydrolysing)) ligase)
hsa-miR-361-3p	1	0	1	1	1	1	SELE	selectin E
hsa-miR-361-3p	1	0	1	1	1	1	AQP2	aquaporin 2 (collecting duct)
hsa-miR-361-3p	0	0	1	1	1	1	CYP11B2	cytochrome P450, family 11, subfamily B, polypeptide 2
hsa-miR-361-3p	1	0	1	1	1	1	DCX	doublecortin
hsa-miR-361-3p	1	0	1	1	1	1	IL10	interleukin 10
hsa-miR-361-3p	1	0	1	1	1	1	TNF	tumor necrosis factor
hsa-miR-361-3p	0	0	1	1	1	1	IGF2	insulin-like growth factor 2 (somatomedin A)
hsa-miR-361-3p	0	0	1	1	1	1	BDKRB2	bradykinin receptor B2
hsa-miR-361-3p	0	0	1	0	1	1	IFNAR1	interferon (alpha, beta and omega) receptor 1
hsa-miR-361-3p	0	0	1	1	1	1	IL11	interleukin 11
hsa-miR-361-3p	1	0	1	1	0	0	ADRA1B	adrenoceptor alpha 1B
hsa-miR-361-3p	1	0	1	0	1	1	CACNA1E	calcium channel, voltage-dependent, R type, alpha 1E subunit
hsa-miR-361-3p	1	0	1	1	1	1	CACNB4	calcium channel, voltage-dependent, beta 4 subunit
hsa-miR-361-3p	1	0	1	1	1	1	DIO2	deiodinase, iodothyronine, type II
hsa-miR-361-3p	0	0	1	1	1	1	GRIN2B	glutamate receptor, ionotropic, N-methyl D-aspartate 2B
hsa-miR-361-3p	1	0	1	1	1	1	HTR4	5-hydroxytryptamine (serotonin) receptor 4, G protein-coupled
hsa-miR-361-3p	0	0	1	1	1	1	MAOB	monoamine oxidase B
hsa-miR-361-3p	1	0	1	1	1	1	PTGER2	prostaglandin E receptor 2 (subtype EP2), 53kDa
hsa-miR-361-3p	1	0	1	1	1	1	PTGFR	prostaglandin F receptor (FP)
hsa-miR-361-3p	1	0	1	1	1	1	RARA	retinoic acid receptor, alpha
hsa-miR-361-3p	1	0	1	0	1	1	SMAD5	SMAD family member 5
hsa-miR-361-3p	1	0	1	1	0	0	SLC35E4	solute carrier family 35, member E4
hsa-miR-361-3p	1	0	1	1	1	1	RORC	RAR-related orphan receptor C
hsa-miR-361-3p	0	0	1	0	0	0	KLK2	kallikrein-related peptidase 2
hsa-miR-361-3p	1	0	1	1	1	1	WNK3	WNK lysine deficient protein kinase 3
hsa-miR-361-3p	1	0	1	0	1	1	SMAD2	SMAD family member 2
hsa-miR-361-3p	0	0	1	1	0	0	C1orf95	chromosome 1 open reading frame 95
hsa-miR-361-3p	1	0	1	1	1	1	HMGXB4	HMG box domain containing 4
hsa-miR-361-3p	1	0	1	1	1	1	TMEM200B	transmembrane protein 200B
hsa-miR-361-3p	1	0	1	1	1	1	RBMS3	RNA binding motif, single stranded interacting protein 3
hsa-miR-361-3p	1	0	1	0	1	1	BMF	Bcl2 modifying factor
hsa-miR-361-3p	0	0	1	1	1	1	CCDC144NL	coiled-coil domain containing 144 family, N-terminal like
hsa-miR-361-3p	0	0	1	1	1	1	ZCCHC16	zinc finger, CCHC domain containing 16
hsa-miR-361-3p	0	0	1	1	0	0	C7orf61	chromosome 7 open reading frame 61
hsa-miR-361-3p	0	0	1	1	1	1	PRR13	proline rich 13
hsa-miR-361-3p	1	0	1	1	1	1	EDA	ectodysplasin A
hsa-miR-361-3p	1	0	1	1	0	0	RPS6KA1	ribosomal protein S6 kinase, 90kDa, polypeptide 1
hsa-miR-361-3p	1	0	1	0	1	1	GOSR1	golgi SNAP receptor complex member 1
hsa-miR-361-3p	0	0	1	1	1	1	SCP2	sterol carrier protein 2
hsa-miR-361-3p	1	0	1	1	1	1	L3MBTL3	l(3)mbt-like 3 (Drosophila)
hsa-miR-361-3p	1	0	1	1	1	1	IGSF3	immunoglobulin superfamily, member 3
hsa-miR-361-3p	0	0	1	1	1	1	KLHDC9	kelch domain containing 9
hsa-miR-361-3p	0	0	1	1	1	1	TRIM13	tripartite motif containing 13
hsa-miR-361-3p	0	0	1	1	0	0	F8A3	coagulation factor VIII-associated 3
hsa-miR-361-3p	0	0	1	0	1	1	C3orf56	chromosome 3 open reading frame 56
hsa-miR-361-3p	0	0	1	1	0	0	IRGQ	immunity-related GTPase family, Q
hsa-miR-361-3p	1	0	1	0	1	1	CPLX2	complexin 2
hsa-miR-361-3p	1	0	1	1	1	1	ZDHHC9	zinc finger, DHHC-type containing 9
hsa-miR-361-3p	1	0	1	1	1	1	CNOT4	CCR4-NOT transcription complex, subunit 4
hsa-miR-361-3p	1	0	1	0	1	1	C18orf25	chromosome 18 open reading frame 25
hsa-miR-361-3p	1	0	1	1	1	1	LPHN1	latrophilin 1
hsa-miR-361-3p	0	0	1	1	0	0	CCT3	chaperonin containing TCP1, subunit 3 (gamma)
hsa-miR-361-3p	1	0	1	0	1	1	ERMN	ermin, ERM-like protein
hsa-miR-361-3p	0	0	1	1	1	1	SPIN3	spindlin family, member 3
hsa-miR-361-3p	1	0	1	0	1	1	CREB5	cAMP responsive element binding protein 5
hsa-miR-361-3p	0	0	1	0	1	1	GOLGA8E	golgin A8 family, member E
hsa-miR-361-3p	1	0	1	1	1	1	FOXP4	forkhead box P4
hsa-miR-361-3p	0	0	1	0	1	1	U2AF2	U2 small nuclear RNA auxiliary factor 2
hsa-miR-361-3p	1	0	1	0	1	1	RGMB	RGM domain family, member B
hsa-miR-361-3p	0	0	1	1	1	1	C9orf152	chromosome 9 open reading frame 152
hsa-miR-361-3p	0	0	1	0	1	1	LINC00268	long intergenic non-protein coding RNA 268
hsa-miR-361-3p	1	0	1	1	1	1	CA7	carbonic anhydrase VII
hsa-miR-361-3p	1	0	1	1	1	1	RUNX2	runt-related transcription factor 2
hsa-miR-361-3p	0	0	1	1	0	0	RTKN	rhotekin
hsa-miR-361-3p	1	0	1	1	1	1	PHF6	PHD finger protein 6
hsa-miR-361-3p	1	0	1	1	1	1	PFKFB2	6-phosphofructo-2-kinase/fructose-2,6-biphosphatase 2
hsa-miR-361-3p	1	0	1	0	1	1	BCL7A	B-cell CLL/lymphoma 7A
hsa-miR-361-3p	1	0	1	0	1	1	TNRC6B	trinucleotide repeat containing 6B
hsa-miR-361-3p	1	0	1	1	1	1	SLC6A9	solute carrier family 6 (neurotransmitter transporter, glycine), member 9
hsa-miR-361-3p	0	0	1	1	0	0	KPRP	keratinocyte proline-rich protein
hsa-miR-361-3p	1	0	1	0	1	1	ANO6	anoctamin 6
hsa-miR-361-3p	0	0	1	1	1	1	ARRDC2	arrestin domain containing 2
hsa-miR-361-3p	0	0	1	1	0	0	KLK3	kallikrein-related peptidase 3
hsa-miR-361-3p	1	0	1	0	1	1	SAMD5	sterile alpha motif domain containing 5
hsa-miR-361-3p	1	0	1	0	1	1	CYB5RL	cytochrome b5 reductase-like
hsa-miR-361-3p	1	0	1	1	1	1	NEK10	NIMA (never in mitosis gene a)- related kinase 10
hsa-miR-361-3p	0	0	1	1	1	1	VSTM4	V-set and transmembrane domain containing 4
hsa-miR-361-3p	1	0	1	1	1	1	TFAP2A	transcription factor AP-2 alpha (activating enhancer binding protein 2 alpha)
hsa-miR-361-3p	1	0	1	1	1	1	UBE2V1	ubiquitin-conjugating enzyme E2 variant 1
hsa-miR-361-3p	0	0	1	1	1	1	SLC35A2	solute carrier family 35 (UDP-galactose transporter), member A2
hsa-miR-361-3p	1	0	1	1	1	1	AMD1	adenosylmethionine decarboxylase 1
hsa-miR-361-3p	1	0	1	1	1	1	MYCL1	v-myc myelocytomatosis viral oncogene homolog 1, lung carcinoma derived (avian)
hsa-miR-361-3p	1	0	1	1	1	1	SCN1B	sodium channel, voltage-gated, type I, beta subunit
hsa-miR-361-3p	1	0	1	1	1	1	PDE4B	phosphodiesterase 4B, cAMP-specific
hsa-miR-361-3p	0	0	1	1	1	1	CTLA4	cytotoxic T-lymphocyte-associated protein 4
hsa-miR-361-3p	1	0	1	1	1	1	DLX1	distal-less homeobox 1
hsa-miR-361-3p	0	0	1	0	1	1	RGS21	regulator of G-protein signaling 21
hsa-miR-361-3p	1	0	1	1	1	1	KIAA0317	KIAA0317
hsa-miR-361-3p	0	0	1	0	0	0	RUSC1-AS1	RUSC1 antisense RNA 1
hsa-miR-361-3p	1	0	1	0	1	1	CCNL2	cyclin L2
hsa-miR-361-3p	1	0	1	1	1	1	CDC42	cell division cycle 42 (GTP binding protein, 25kDa)
hsa-miR-361-3p	1	0	1	1	1	1	ZNF384	zinc finger protein 384
hsa-miR-361-3p	1	0	1	1	1	1	SPTSSB	serine palmitoyltransferase, small subunit B
hsa-miR-361-3p	1	0	1	1	1	1	MTMR12	myotubularin related protein 12
hsa-miR-361-3p	1	0	1	1	1	1	SLC2A4	solute carrier family 2 (facilitated glucose transporter), member 4
hsa-miR-361-3p	0	0	1	1	0	0	FAM110A	family with sequence similarity 110, member A
hsa-miR-361-3p	1	0	1	1	1	1	AJAP1	adherens junctions associated protein 1
hsa-miR-361-3p	1	0	1	1	1	1	ZNF706	zinc finger protein 706
hsa-miR-361-3p	0	0	1	1	1	1	TTC14	tetratricopeptide repeat domain 14
hsa-miR-361-3p	1	0	1	1	1	1	KDM5A	lysine (K)-specific demethylase 5A
hsa-miR-361-3p	1	0	1	0	1	1	SRGAP2	SLIT-ROBO Rho GTPase activating protein 2
hsa-miR-361-3p	0	0	1	1	1	1	FAM22G	family with sequence similarity 22, member G
hsa-miR-361-3p	0	0	1	1	1	1	RCC1	regulator of chromosome condensation 1
hsa-miR-361-3p	0	0	1	0	1	1	SSTR1	somatostatin receptor 1
hsa-miR-361-3p	1	0	1	0	1	1	SLC7A6	solute carrier family 7 (amino acid transporter light chain, y+L system), member 6
hsa-miR-361-3p	1	0	1	1	1	1	NCOR2	nuclear receptor corepressor 2
hsa-miR-361-3p	0	0	1	1	1	1	KLK5	kallikrein-related peptidase 5
hsa-miR-361-3p	0	0	1	1	0	0	VPS37D	vacuolar protein sorting 37 homolog D (S. cerevisiae)
hsa-miR-361-3p	1	0	1	1	1	1	SRSF1	serine/arginine-rich splicing factor 1
hsa-miR-361-3p	0	0	1	1	0	0	FAM127A	family with sequence similarity 127, member A
hsa-miR-361-3p	1	0	1	0	0	0	FAM127B	family with sequence similarity 127, member B
hsa-miR-361-3p	1	0	1	0	1	1	FAM127C	family with sequence similarity 127, member C
hsa-miR-361-3p	1	0	1	1	1	1	HNRNPUL2	heterogeneous nuclear ribonucleoprotein U-like 2
hsa-miR-361-3p	1	0	1	1	1	1	VAV3	vav 3 guanine nucleotide exchange factor
hsa-miR-361-3p	1	0	1	1	1	1	PACRG	PARK2 co-regulated
hsa-miR-361-3p	1	0	1	1	1	1	FAM155A	family with sequence similarity 155, member A
hsa-miR-361-3p	1	0	1	0	1	1	FBXO41	F-box protein 41
hsa-miR-361-3p	1	0	1	0	1	1	UNC13A	unc-13 homolog A (C. elegans)
hsa-miR-361-3p	1	0	1	0	1	1	MEGF9	multiple EGF-like-domains 9
hsa-miR-361-3p	1	0	1	1	1	1	MYO1C	myosin IC
hsa-miR-361-3p	0	0	1	1	1	1	C15orf57	chromosome 15 open reading frame 57
hsa-miR-361-3p	1	0	1	1	1	1	NXF1	nuclear RNA export factor 1
hsa-miR-361-3p	0	0	1	1	1	1	CASQ1	calsequestrin 1 (fast-twitch, skeletal muscle)
hsa-miR-361-3p	0	0	1	1	1	1	ENTPD3	ectonucleoside triphosphate diphosphohydrolase 3
hsa-miR-361-3p	1	0	1	1	1	1	CDK9	cyclin-dependent kinase 9
hsa-miR-361-3p	1	0	1	1	1	1	CHKA	choline kinase alpha
hsa-miR-361-3p	1	0	1	1	1	1	CREBL2	cAMP responsive element binding protein-like 2
hsa-miR-361-3p	1	0	1	0	0	0	DLG4	discs, large homolog 4 (Drosophila)
hsa-miR-361-3p	1	0	1	1	1	1	DUSP4	dual specificity phosphatase 4
hsa-miR-361-3p	1	0	1	0	1	1	EFNB3	ephrin-B3
hsa-miR-361-3p	1	0	1	1	1	1	CELSR3	cadherin, EGF LAG seven-pass G-type receptor 3 (flamingo homolog, Drosophila)
hsa-miR-361-3p	1	0	1	1	1	1	CELSR2	cadherin, EGF LAG seven-pass G-type receptor 2 (flamingo homolog, Drosophila)
hsa-miR-361-3p	0	0	1	0	1	1	EMP1	epithelial membrane protein 1
hsa-miR-361-3p	1	0	1	1	1	1	EP300	E1A binding protein p300
hsa-miR-361-3p	1	0	1	1	1	1	GPC4	glypican 4
hsa-miR-361-3p	1	0	1	1	1	1	FOXC1	forkhead box C1
hsa-miR-361-3p	1	0	1	1	0	0	GDI1	GDP dissociation inhibitor 1
hsa-miR-361-3p	1	0	1	0	1	1	B4GALT1	UDP-Gal:betaGlcNAc beta 1,4- galactosyltransferase, polypeptide 1
hsa-miR-361-3p	0	0	1	1	0	0	HSPB2	heat shock 27kDa protein 2
hsa-miR-361-3p	1	0	1	1	1	1	NDST1	N-deacetylase/N-sulfotransferase (heparan glucosaminyl) 1
hsa-miR-361-3p	1	0	1	1	1	1	AHNAK	AHNAK nucleoprotein
hsa-miR-361-3p	0	0	1	1	1	1	AOAH	acyloxyacyl hydrolase (neutrophil)
hsa-miR-361-3p	1	0	1	1	1	1	ARF3	ADP-ribosylation factor 3
hsa-miR-361-3p	1	0	1	0	1	1	ARNT	aryl hydrocarbon receptor nuclear translocator
hsa-miR-361-3p	1	0	1	0	1	1	ATP1B2	ATPase, Na+/K+ transporting, beta 2 polypeptide
hsa-miR-361-3p	1	0	1	1	1	1	BCL6	B-cell CLL/lymphoma 6
hsa-miR-361-3p	1	0	1	1	1	1	BTG1	B-cell translocation gene 1, anti-proliferative
hsa-miR-361-3p	0	0	1	1	1	1	BTN1A1	butyrophilin, subfamily 1, member A1
hsa-miR-361-3p	0	0	1	1	1	1	CALB2	calbindin 2
hsa-miR-361-3p	0	0	1	1	0	0	CNTFR	ciliary neurotrophic factor receptor
hsa-miR-361-3p	0	0	1	1	0	0	CPA1	carboxypeptidase A1 (pancreatic)
hsa-miR-361-3p	0	0	1	1	1	1	DLAT	dihydrolipoamide S-acetyltransferase
hsa-miR-361-3p	1	0	1	1	1	1	DR1	down-regulator of transcription 1, TBP-binding (negative cofactor 2)
hsa-miR-361-3p	1	0	1	1	1	1	EGR1	early growth response 1
hsa-miR-361-3p	1	0	1	1	1	1	EPB49	erythrocyte membrane protein band 4.9 (dematin)
hsa-miR-361-3p	1	0	1	1	1	1	FGF9	fibroblast growth factor 9 (glia-activating factor)
hsa-miR-361-3p	1	0	1	1	1	1	FKBP4	FK506 binding protein 4, 59kDa
hsa-miR-361-3p	0	0	1	1	1	1	GFAP	glial fibrillary acidic protein
hsa-miR-361-3p	0	0	1	0	1	1	GCLM	glutamate-cysteine ligase, modifier subunit
hsa-miR-361-3p	1	0	1	1	0	0	GYPC	glycophorin C (Gerbich blood group)
hsa-miR-361-3p	0	0	1	1	0	0	IGFBP6	insulin-like growth factor binding protein 6
hsa-miR-361-3p	1	0	1	1	0	0	IHH	Indian hedgehog
hsa-miR-361-3p	1	0	1	1	1	1	IL13	interleukin 13
hsa-miR-361-3p	1	0	1	1	1	1	ITGA5	integrin, alpha 5 (fibronectin receptor, alpha polypeptide)
hsa-miR-361-3p	1	0	1	1	1	1	ITPR2	inositol 1,4,5-trisphosphate receptor, type 2
hsa-miR-361-3p	1	0	1	1	1	1	KCNJ10	potassium inwardly-rectifying channel, subfamily J, member 10
hsa-miR-361-3p	1	0	1	1	0	0	KCNN3	potassium intermediate/small conductance calcium-activated channel, subfamily N, member 3
hsa-miR-361-3p	0	0	1	1	0	0	KRT31	keratin 31
hsa-miR-361-3p	1	0	1	0	1	1	MXD1	MAX dimerization protein 1
hsa-miR-361-3p	0	0	1	1	1	1	MAG	myelin associated glycoprotein
hsa-miR-361-3p	1	0	1	1	1	1	MSN	moesin
hsa-miR-361-3p	0	0	1	1	1	1	MTAP	methylthioadenosine phosphorylase
hsa-miR-361-3p	0	0	1	1	0	0	MYOG	myogenin (myogenic factor 4)
hsa-miR-361-3p	1	0	1	1	1	1	NGFR	nerve growth factor receptor
hsa-miR-361-3p	1	0	1	1	1	1	NPAS2	neuronal PAS domain protein 2
hsa-miR-361-3p	0	0	1	0	1	1	OPHN1	oligophrenin 1
hsa-miR-361-3p	1	0	1	1	1	1	OSBP	oxysterol binding protein
hsa-miR-361-3p	1	0	1	1	1	1	PBX2	pre-B-cell leukemia homeobox 2
hsa-miR-361-3p	1	0	1	1	0	0	PDGFB	platelet-derived growth factor beta polypeptide
hsa-miR-361-3p	1	0	1	1	1	1	PHF1	PHD finger protein 1
hsa-miR-361-3p	1	0	1	1	1	1	PLAGL2	pleiomorphic adenoma gene-like 2
hsa-miR-361-3p	0	0	1	1	1	1	SEPT5	septin 5
hsa-miR-361-3p	0	0	1	1	0	0	PPP1R8	protein phosphatase 1, regulatory subunit 8
hsa-miR-361-3p	1	0	1	0	0	0	PPP1R10	protein phosphatase 1, regulatory subunit 10
hsa-miR-361-3p	0	0	1	1	1	1	PRKCB	protein kinase C, beta
hsa-miR-361-3p	1	0	1	0	1	1	MAPK4	mitogen-activated protein kinase 4
hsa-miR-361-3p	0	0	1	1	0	0	PSMD2	proteasome (prosome, macropain) 26S subunit, non-ATPase, 2
hsa-miR-361-3p	0	0	1	0	1	1	PSMD3	proteasome (prosome, macropain) 26S subunit, non-ATPase, 3
hsa-miR-361-3p	0	0	1	1	0	0	PSMD11	proteasome (prosome, macropain) 26S subunit, non-ATPase, 11
hsa-miR-361-3p	1	0	1	1	1	1	PTPN11	protein tyrosine phosphatase, non-receptor type 11
hsa-miR-361-3p	1	0	1	1	1	1	PVRL1	poliovirus receptor-related 1 (herpesvirus entry mediator C)
hsa-miR-361-3p	1	0	1	0	1	1	RAP2B	RAP2B, member of RAS oncogene family
hsa-miR-361-3p	0	0	1	1	0	0	RBMS2	RNA binding motif, single stranded interacting protein 2
hsa-miR-361-3p	0	0	1	1	1	1	SDC2	syndecan 2
hsa-miR-361-3p	1	0	1	0	1	1	ST6GAL1	ST6 beta-galactosamide alpha-2,6-sialyltranferase 1
hsa-miR-361-3p	1	0	1	1	1	1	SNAI2	snail homolog 2 (Drosophila)
hsa-miR-361-3p	1	0	1	1	1	1	SMARCC1	SWI/SNF related, matrix associated, actin dependent regulator of chromatin, subfamily c, member 1
hsa-miR-361-3p	1	0	1	1	1	1	SMARCD2	SWI/SNF related, matrix associated, actin dependent regulator of chromatin, subfamily d, member 2
hsa-miR-361-3p	1	0	1	1	1	1	SOX2	SRY (sex determining region Y)-box 2
hsa-miR-361-3p	1	0	1	0	1	1	SOX4	SRY (sex determining region Y)-box 4
hsa-miR-361-3p	1	0	1	0	1	1	SOX11	SRY (sex determining region Y)-box 11
hsa-miR-361-3p	0	0	1	1	1	1	SPIB	Spi-B transcription factor (Spi-1/PU.1 related)
hsa-miR-361-3p	1	0	1	1	1	1	SRF	serum response factor (c-fos serum response element-binding transcription factor)
hsa-miR-361-3p	1	0	1	1	1	1	SYN2	synapsin II
hsa-miR-361-3p	1	0	1	1	1	1	TAF4	TAF4 RNA polymerase II, TATA box binding protein (TBP)-associated factor, 135kDa
hsa-miR-361-3p	1	0	1	1	1	1	TFAP4	transcription factor AP-4 (activating enhancer binding protein 4)
hsa-miR-361-3p	1	0	1	1	1	1	NR2E1	nuclear receptor subfamily 2, group E, member 1
hsa-miR-361-3p	1	0	1	1	1	1	TOP1	topoisomerase (DNA) I
hsa-miR-361-3p	0	0	1	1	1	1	TRAF3	TNF receptor-associated factor 3
hsa-miR-361-3p	0	0	1	1	1	1	UBE2I	ubiquitin-conjugating enzyme E2I
hsa-miR-361-3p	1	0	1	1	1	1	CUL5	cullin 5
hsa-miR-361-3p	1	0	1	1	1	1	ZNF282	zinc finger protein 282
hsa-miR-361-3p	0	0	1	1	1	1	KMO	kynurenine 3-monooxygenase (kynurenine 3-hydroxylase)
hsa-miR-361-3p	0	0	1	1	0	0	SIGLEC5	sialic acid binding Ig-like lectin 5
hsa-miR-361-3p	0	0	1	1	1	1	LDB1	LIM domain binding 1
hsa-miR-361-3p	0	0	1	1	0	0	CDK5R2	cyclin-dependent kinase 5, regulatory subunit 2 (p39)
hsa-miR-361-3p	1	0	1	1	1	1	BTAF1	BTAF1 RNA polymerase II, B-TFIID transcription factor-associated, 170kDa (Mot1 homolog, S. cerevisiae)
hsa-miR-361-3p	1	0	1	1	1	1	BCL2L2	BCL2-like 2
hsa-miR-361-3p	1	0	1	0	1	1	PLK3	polo-like kinase 3
hsa-miR-361-3p	0	0	1	1	0	0	CRYBB3	crystallin, beta B3
hsa-miR-361-3p	1	0	1	1	1	1	EFNB2	ephrin-B2
hsa-miR-361-3p	1	0	1	1	0	0	EIF4EBP1	eukaryotic translation initiation factor 4E binding protein 1
hsa-miR-361-3p	1	0	1	1	1	1	FGF12	fibroblast growth factor 12
hsa-miR-361-3p	1	0	1	0	1	1	SLC1A2	solute carrier family 1 (glial high affinity glutamate transporter), member 2
hsa-miR-361-3p	0	0	1	1	1	1	SNRPD3	small nuclear ribonucleoprotein D3 polypeptide 18kDa
hsa-miR-361-3p	1	0	1	1	1	1	SYT7	synaptotagmin VII
hsa-miR-361-3p	1	0	1	1	1	1	GDA	guanine deaminase
hsa-miR-361-3p	1	0	1	1	1	1	ARL3	ADP-ribosylation factor-like 3
hsa-miR-361-3p	1	0	1	1	1	1	DAG1	dystroglycan 1 (dystrophin-associated glycoprotein 1)
hsa-miR-361-3p	1	0	1	1	1	1	DVL2	dishevelled, dsh homolog 2 (Drosophila)
hsa-miR-361-3p	1	0	1	1	1	1	EGR3	early growth response 3
hsa-miR-361-3p	1	0	1	1	1	1	ENSA	endosulfine alpha
hsa-miR-361-3p	1	0	1	1	1	1	EPHB3	EPH receptor B3
hsa-miR-361-3p	1	0	1	1	0	0	ERH	enhancer of rudimentary homolog (Drosophila)
hsa-miR-361-3p	1	0	1	1	1	1	ACSL3	acyl-CoA synthetase long-chain family member 3
hsa-miR-361-3p	1	0	1	1	1	1	FLOT2	flotillin 2
hsa-miR-361-3p	1	0	1	1	0	0	HOXC6	homeobox C6
hsa-miR-361-3p	1	0	1	1	1	1	MLLT3	myeloid/lymphoid or mixed-lineage leukemia (trithorax homolog, Drosophila); translocated to, 3
hsa-miR-361-3p	1	0	1	1	1	1	RAB5C	RAB5C, member RAS oncogene family
hsa-miR-361-3p	0	0	1	1	0	0	C21orf33	chromosome 21 open reading frame 33
hsa-miR-361-3p	0	0	1	1	0	0	PRY	PTPN13-like, Y-linked
hsa-miR-361-3p	0	0	1	1	0	0	DYRK1B	dual-specificity tyrosine-(Y)-phosphorylation regulated kinase 1B
hsa-miR-361-3p	1	0	1	1	1	1	LARGE	like-glycosyltransferase
hsa-miR-361-3p	1	0	1	0	1	1	VAMP3	vesicle-associated membrane protein 3 (cellubrevin)
hsa-miR-361-3p	1	0	1	1	1	1	KIF3B	kinesin family member 3B
hsa-miR-361-3p	0	0	1	1	0	0	SLC22A14	solute carrier family 22, member 14
hsa-miR-361-3p	0	0	1	1	1	1	IL27RA	interleukin 27 receptor, alpha
hsa-miR-361-3p	1	0	1	1	1	1	ONECUT2	one cut homeobox 2
hsa-miR-361-3p	1	0	1	1	0	0	CHST10	carbohydrate sulfotransferase 10
hsa-miR-361-3p	0	0	1	1	1	1	CLCA3P	chloride channel accessory 3, pseudogene
hsa-miR-361-3p	1	0	1	1	1	1	SEC24C	SEC24 family, member C (S. cerevisiae)
hsa-miR-361-3p	0	0	1	1	0	0	NR5A1	nuclear receptor subfamily 5, group A, member 1
hsa-miR-361-3p	0	0	1	1	1	1	KCNJ9	potassium inwardly-rectifying channel, subfamily J, member 9
hsa-miR-361-3p	1	0	1	1	0	0	MMP14	matrix metallopeptidase 14 (membrane-inserted)
hsa-miR-361-3p	0	0	1	1	0	0	PFN1	profilin 1
hsa-miR-361-3p	1	0	1	1	0	0	PIP4K2A	phosphatidylinositol-5-phosphate 4-kinase, type II, alpha
hsa-miR-361-3p	1	0	1	1	1	1	APLNR	apelin receptor
hsa-miR-361-3p	1	0	1	1	1	1	CBL	Cbl proto-oncogene, E3 ubiquitin protein ligase
hsa-miR-361-3p	1	0	1	1	1	1	DLX3	distal-less homeobox 3
hsa-miR-361-3p	1	0	1	0	1	1	E2F1	E2F transcription factor 1
hsa-miR-361-3p	0	0	1	0	1	1	FOSL2	FOS-like antigen 2
hsa-miR-361-3p	0	0	1	1	0	0	GLI1	GLI family zinc finger 1
hsa-miR-361-3p	0	0	1	1	0	0	GNL1	guanine nucleotide binding protein-like 1
hsa-miR-361-3p	1	0	1	1	1	1	GPR3	G protein-coupled receptor 3
hsa-miR-361-3p	1	0	1	1	1	1	H3F3B	H3 histone, family 3B (H3.3B)
hsa-miR-361-3p	1	0	1	0	1	1	SRC	v-src sarcoma (Schmidt-Ruppin A-2) viral oncogene homolog (avian)
hsa-miR-361-3p	1	0	1	1	1	1	WNT1	wingless-type MMTV integration site family, member 1
hsa-miR-361-3p	0	0	1	1	1	1	MALL	mal, T-cell differentiation protein-like
hsa-miR-361-3p	1	0	1	1	1	1	RND2	Rho family GTPase 2
hsa-miR-361-3p	1	0	1	1	1	1	GABBR2	gamma-aminobutyric acid (GABA) B receptor, 2
hsa-miR-361-3p	1	0	1	1	1	1	AKT3	v-akt murine thymoma viral oncogene homolog 3 (protein kinase B, gamma)
hsa-miR-361-3p	1	0	1	0	0	0	FRAT1	frequently rearranged in advanced T-cell lymphomas
hsa-miR-361-3p	1	0	1	1	1	1	GTF2E1	general transcription factor IIE, polypeptide 1, alpha 56kDa
hsa-miR-361-3p	1	0	1	1	1	1	HOXA1	homeobox A1
hsa-miR-361-3p	0	0	1	0	1	1	LCP2	lymphocyte cytosolic protein 2 (SH2 domain containing leukocyte protein of 76kDa)
hsa-miR-361-3p	0	0	1	0	1	1	POU3F2	POU class 3 homeobox 2
hsa-miR-361-3p	0	0	1	1	1	1	SSX1	synovial sarcoma, X breakpoint 1
hsa-miR-361-3p	0	0	1	1	0	0	TAF13	TAF13 RNA polymerase II, TATA box binding protein (TBP)-associated factor, 18kDa
hsa-miR-361-3p	1	0	1	1	1	1	MMP16	matrix metallopeptidase 16 (membrane-inserted)
hsa-miR-361-3p	1	0	1	1	1	1	MTF1	metal-regulatory transcription factor 1
hsa-miR-361-3p	1	0	1	1	0	0	NAB2	NGFI-A binding protein 2 (EGR1 binding protein 2)
hsa-miR-361-3p	1	0	1	1	1	1	SNAI1	snail homolog 1 (Drosophila)
hsa-miR-361-3p	1	0	1	1	1	1	LIPG	lipase, endothelial
hsa-miR-361-3p	1	0	1	1	1	1	CDC42BPB	CDC42 binding protein kinase beta (DMPK-like)
hsa-miR-361-3p	1	0	1	0	1	1	HDAC4	histone deacetylase 4
hsa-miR-361-3p	1	0	1	1	1	1	HS3ST4	heparan sulfate (glucosamine) 3-O-sulfotransferase 4
hsa-miR-361-3p	0	0	1	1	1	1	TRDN	triadin
hsa-miR-361-3p	1	0	1	1	1	1	IRF9	interferon regulatory factor 9
hsa-miR-361-3p	1	0	1	1	1	1	DAGLA	diacylglycerol lipase, alpha
hsa-miR-361-3p	0	0	1	1	1	1	CD28	CD28 molecule
hsa-miR-361-3p	1	0	1	1	1	1	NFATC1	nuclear factor of activated T-cells, cytoplasmic, calcineurin-dependent 1
hsa-miR-361-3p	0	0	1	1	1	1	PA2G4	proliferation-associated 2G4, 38kDa
hsa-miR-361-3p	1	0	1	1	1	1	CDK16	cyclin-dependent kinase 16
hsa-miR-361-3p	0	0	1	1	0	0	PNOC	prepronociceptin
hsa-miR-361-3p	1	0	1	1	1	1	PRKAB1	protein kinase, AMP-activated, beta 1 non-catalytic subunit
hsa-miR-361-3p	0	0	1	1	0	0	CCL19	chemokine (C-C motif) ligand 19
hsa-miR-361-3p	1	0	1	1	1	1	ITSN2	intersectin 2
hsa-miR-361-3p	0	0	1	1	0	0	ANP32A	acidic (leucine-rich) nuclear phosphoprotein 32 family, member A
hsa-miR-361-3p	0	0	1	1	1	1	SLC30A9	solute carrier family 30 (zinc transporter), member 9
hsa-miR-361-3p	1	0	1	1	1	1	ZNF238	zinc finger protein 238
hsa-miR-361-3p	0	0	1	0	0	0	CREB3	cAMP responsive element binding protein 3
hsa-miR-361-3p	1	0	1	0	1	1	APPBP2	amyloid beta precursor protein (cytoplasmic tail) binding protein 2
hsa-miR-361-3p	0	0	1	1	0	0	DRAP1	DR1-associated protein 1 (negative cofactor 2 alpha)
hsa-miR-361-3p	1	0	1	1	1	1	SLC2A1	solute carrier family 2 (facilitated glucose transporter), member 1
hsa-miR-361-3p	0	0	1	0	1	1	SLC16A2	solute carrier family 16, member 2 (thyroid hormone transporter)
hsa-miR-361-3p	1	0	1	0	1	1	NCOA2	nuclear receptor coactivator 2
hsa-miR-361-3p	1	0	1	0	1	1	IGF2BP1	insulin-like growth factor 2 mRNA binding protein 1
hsa-miR-361-3p	1	0	1	1	1	1	ZBTB6	zinc finger and BTB domain containing 6
hsa-miR-361-3p	0	0	1	1	1	1	PPP1R17	protein phosphatase 1, regulatory subunit 17
hsa-miR-361-3p	1	0	1	1	1	1	MMP24	matrix metallopeptidase 24 (membrane-inserted)
hsa-miR-361-3p	1	0	1	1	1	1	MAN1A2	mannosidase, alpha, class 1A, member 2
hsa-miR-361-3p	1	0	1	1	0	0	PSKH1	protein serine kinase H1
hsa-miR-361-3p	0	0	1	1	1	1	SURF6	surfeit 6
hsa-miR-361-3p	1	0	1	1	1	1	BTG2	BTG family, member 2
hsa-miR-361-3p	0	0	1	1	1	1	IFRD2	interferon-related developmental regulator 2
hsa-miR-361-3p	0	0	1	1	0	0	HNRNPA0	heterogeneous nuclear ribonucleoprotein A0
hsa-miR-361-3p	1	0	1	1	0	0	CCDC85B	coiled-coil domain containing 85B
hsa-miR-361-3p	0	0	1	1	1	1	ATF7	activating transcription factor 7
hsa-miR-361-3p	1	0	1	1	1	1	RAB35	RAB35, member RAS oncogene family
hsa-miR-361-3p	0	0	1	1	0	0	PIM2	pim-2 oncogene
hsa-miR-361-3p	1	0	1	1	1	1	CD86	CD86 molecule
hsa-miR-361-3p	1	0	1	0	1	1	SLC5A3	solute carrier family 5 (sodium/myo-inositol cotransporter), member 3
hsa-miR-361-3p	1	0	1	0	1	1	WASF2	WAS protein family, member 2
hsa-miR-361-3p	0	0	1	1	1	1	TMEM115	transmembrane protein 115
hsa-miR-361-3p	1	0	1	1	1	1	ESM1	endothelial cell-specific molecule 1
hsa-miR-361-3p	0	0	1	1	0	0	CDC42EP1	CDC42 effector protein (Rho GTPase binding) 1
hsa-miR-361-3p	1	0	1	1	1	1	VCP	valosin containing protein
hsa-miR-361-3p	0	0	1	1	1	1	WIF1	WNT inhibitory factor 1
hsa-miR-361-3p	1	0	1	1	1	1	KLF12	Kruppel-like factor 12
hsa-miR-361-3p	1	0	1	1	1	1	TUSC2	tumor suppressor candidate 2
hsa-miR-361-3p	0	0	1	0	1	1	AP4E1	adaptor-related protein complex 4, epsilon 1 subunit
hsa-miR-361-3p	0	0	1	0	1	1	PAXIP1	PAX interacting (with transcription-activation domain) protein 1
hsa-miR-361-3p	0	0	1	1	1	1	KLRK1	killer cell lectin-like receptor subfamily K, member 1
hsa-miR-361-3p	1	0	1	1	1	1	TARDBP	TAR DNA binding protein
hsa-miR-361-3p	1	0	1	0	1	1	ZFPM2	zinc finger protein, multitype 2
hsa-miR-361-3p	1	0	1	1	1	1	APPL1	adaptor protein, phosphotyrosine interaction, PH domain and leucine zipper containing 1
hsa-miR-361-3p	1	0	1	1	1	1	FBXL2	F-box and leucine-rich repeat protein 2
hsa-miR-361-3p	1	0	1	0	1	1	FZD4	frizzled family receptor 4
hsa-miR-361-3p	1	0	1	1	1	1	RHOQ	ras homolog family member Q
hsa-miR-361-3p	1	0	1	0	1	1	MYO10	myosin X
hsa-miR-361-3p	1	0	1	1	0	0	TIMM10	translocase of inner mitochondrial membrane 10 homolog (yeast)
hsa-miR-361-3p	1	0	1	0	1	1	FLRT2	fibronectin leucine rich transmembrane protein 2
hsa-miR-361-3p	0	0	1	1	1	1	N6AMT1	N-6 adenine-specific DNA methyltransferase 1 (putative)
hsa-miR-361-3p	1	0	1	1	1	1	PPARGC1A	peroxisome proliferator-activated receptor gamma, coactivator 1 alpha
hsa-miR-361-3p	0	0	1	1	0	0	GMPPB	GDP-mannose pyrophosphorylase B
hsa-miR-361-3p	0	0	1	1	1	1	CYTH4	cytohesin 4
hsa-miR-361-3p	1	0	1	1	1	1	LRP12	low density lipoprotein receptor-related protein 12
hsa-miR-361-3p	0	0	1	0	0	0	PILRB	paired immunoglobin-like type 2 receptor beta
hsa-miR-361-3p	0	0	1	0	1	1	EMR2	egf-like module containing, mucin-like, hormone receptor-like 2
hsa-miR-361-3p	0	0	1	1	1	1	MRPL42	mitochondrial ribosomal protein L42
hsa-miR-361-3p	0	0	1	1	1	1	MAGEH1	melanoma antigen family H, 1
hsa-miR-361-3p	0	0	1	1	1	1	ORMDL2	ORM1-like 2 (S. cerevisiae)
hsa-miR-361-3p	0	0	1	0	1	1	AP2A1	adaptor-related protein complex 2, alpha 1 subunit
hsa-miR-361-3p	0	0	1	1	1	1	DSPP	dentin sialophosphoprotein
hsa-miR-361-3p	0	0	1	1	1	1	TM4SF1	transmembrane 4 L six family member 1
hsa-miR-361-3p	1	0	1	0	1	1	VAMP2	vesicle-associated membrane protein 2 (synaptobrevin 2)
hsa-miR-361-3p	0	0	1	1	0	0	OLFM1	olfactomedin 1
hsa-miR-361-3p	0	0	1	1	1	1	CAPN6	calpain 6
hsa-miR-361-3p	1	0	1	1	0	0	BRD4	bromodomain containing 4
hsa-miR-361-3p	1	0	1	1	1	1	PATZ1	POZ (BTB) and AT hook containing zinc finger 1
hsa-miR-361-3p	1	0	1	1	1	1	RND1	Rho family GTPase 1
hsa-miR-361-3p	0	0	1	1	0	0	UBE2S	ubiquitin-conjugating enzyme E2S
hsa-miR-361-3p	1	0	1	1	0	0	PRPF19	PRP19/PSO4 pre-mRNA processing factor 19 homolog (S. cerevisiae)
hsa-miR-361-3p	1	0	1	1	1	1	CDR2L	cerebellar degeneration-related protein 2-like
hsa-miR-361-3p	0	0	1	1	1	1	HOXC4	homeobox C4
hsa-miR-361-3p	0	0	1	1	0	0	S100A6	S100 calcium binding protein A6
hsa-miR-361-3p	0	0	1	1	1	1	FAM53B	family with sequence similarity 53, member B
hsa-miR-361-3p	1	0	1	1	1	1	KDM4A	lysine (K)-specific demethylase 4A
hsa-miR-361-3p	0	0	1	1	0	0	ZNF646	zinc finger protein 646
hsa-miR-361-3p	0	0	1	1	0	0	SETD1A	SET domain containing 1A
hsa-miR-361-3p	1	0	1	1	1	1	TBKBP1	TBK1 binding protein 1
hsa-miR-361-3p	1	0	1	1	1	1	MLL4	myeloid/lymphoid or mixed-lineage leukemia 4
hsa-miR-361-3p	0	0	1	1	1	1	FRMPD4	FERM and PDZ domain containing 4
hsa-miR-361-3p	1	0	1	0	1	1	SERTAD2	SERTA domain containing 2
hsa-miR-361-3p	1	0	1	0	1	1	MAML1	mastermind-like 1 (Drosophila)
hsa-miR-361-3p	1	0	1	0	1	1	TOMM20	translocase of outer mitochondrial membrane 20 homolog (yeast)
hsa-miR-361-3p	0	0	1	0	1	1	EPM2AIP1	EPM2A (laforin) interacting protein 1
hsa-miR-361-3p	1	0	1	1	1	1	RUSC2	RUN and SH3 domain containing 2
hsa-miR-361-3p	1	0	1	1	1	1	NUAK1	NUAK family, SNF1-like kinase, 1
hsa-miR-361-3p	1	0	1	1	1	1	SV2A	synaptic vesicle glycoprotein 2A
hsa-miR-361-3p	1	0	1	0	1	1	PDAP1	PDGFA associated protein 1
hsa-miR-361-3p	0	0	1	0	1	1	PPM1E	protein phosphatase, Mg2+/Mn2+ dependent, 1E
hsa-miR-361-3p	0	0	1	0	1	1	VASH1	vasohibin 1
hsa-miR-361-3p	1	0	1	1	1	1	PLEKHA6	pleckstrin homology domain containing, family A member 6
hsa-miR-361-3p	1	0	1	1	1	1	XPO7	exportin 7
hsa-miR-361-3p	1	0	1	0	1	1	PDS5B	PDS5, regulator of cohesion maintenance, homolog B (S. cerevisiae)
hsa-miR-361-3p	1	0	1	0	1	1	ZNF609	zinc finger protein 609
hsa-miR-361-3p	1	0	1	0	1	1	GGA2	golgi-associated, gamma adaptin ear containing, ARF binding protein 2
hsa-miR-361-3p	1	0	1	1	1	1	HECW1	HECT, C2 and WW domain containing E3 ubiquitin protein ligase 1
hsa-miR-361-3p	1	0	1	1	1	1	SMG1	smg-1 homolog, phosphatidylinositol 3-kinase-related kinase (C. elegans)
hsa-miR-361-3p	1	0	1	1	0	0	CIC	capicua homolog (Drosophila)
hsa-miR-361-3p	1	0	1	1	1	1	GPD1L	glycerol-3-phosphate dehydrogenase 1-like
hsa-miR-361-3p	1	0	1	0	1	1	LARP1	La ribonucleoprotein domain family, member 1
hsa-miR-361-3p	1	0	1	1	1	1	PARM1	prostate androgen-regulated mucin-like protein 1
hsa-miR-361-3p	1	0	1	1	1	1	MYRIP	myosin VIIA and Rab interacting protein
hsa-miR-361-3p	1	0	1	1	1	1	CLIP3	CAP-GLY domain containing linker protein 3
hsa-miR-361-3p	1	0	1	1	1	1	CHD5	chromodomain helicase DNA binding protein 5
hsa-miR-361-3p	1	0	1	0	1	1	PPP1R16B	protein phosphatase 1, regulatory subunit 16B
hsa-miR-361-3p	1	0	1	1	0	0	LDLRAP1	low density lipoprotein receptor adaptor protein 1
hsa-miR-361-3p	1	0	1	1	1	1	ABCA12	ATP-binding cassette, sub-family A (ABC1), member 12
hsa-miR-361-3p	1	0	1	1	0	0	SENP3	SUMO1/sentrin/SMT3 specific peptidase 3
hsa-miR-361-3p	1	0	1	1	1	1	FAM155B	family with sequence similarity 155, member B
hsa-miR-361-3p	1	0	1	1	1	1	FGFR1	fibroblast growth factor receptor 1
hsa-miR-361-3p	1	0	1	1	1	1	AZIN1	antizyme inhibitor 1
hsa-miR-361-3p	1	0	1	0	1	1	TRIM33	tripartite motif containing 33
hsa-miR-361-3p	1	0	1	1	1	1	PHF20L1	PHD finger protein 20-like 1
hsa-miR-361-3p	1	0	1	1	1	1	RRP15	ribosomal RNA processing 15 homolog (S. cerevisiae)
hsa-miR-361-3p	1	0	1	1	1	1	SNX9	sorting nexin 9
hsa-miR-361-3p	1	0	1	1	1	1	NLK	nemo-like kinase
hsa-miR-361-3p	0	0	1	1	1	1	IMPG2	interphotoreceptor matrix proteoglycan 2
hsa-miR-361-3p	0	0	1	1	0	0	SRRM2	serine/arginine repetitive matrix 2
hsa-miR-361-3p	1	0	1	1	1	1	RAPGEFL1	Rap guanine nucleotide exchange factor (GEF)-like 1
hsa-miR-361-3p	1	0	1	0	1	1	RNF141	ring finger protein 141
hsa-miR-361-3p	0	0	1	1	1	1	TCEB3B	transcription elongation factor B polypeptide 3B (elongin A2)
hsa-miR-361-3p	1	0	1	0	1	1	KLF3	Kruppel-like factor 3 (basic)
hsa-miR-361-3p	0	0	1	1	1	1	CEND1	cell cycle exit and neuronal differentiation 1
hsa-miR-361-3p	1	0	1	1	1	1	RAB6B	RAB6B, member RAS oncogene family
hsa-miR-361-3p	0	0	1	1	0	0	PCDH12	protocadherin 12
hsa-miR-361-3p	0	0	1	1	0	0	DLL3	delta-like 3 (Drosophila)
hsa-miR-361-3p	0	0	1	1	1	1	USP18	ubiquitin specific peptidase 18
hsa-miR-361-3p	0	0	1	1	0	0	UBQLN3	ubiquilin 3
hsa-miR-361-3p	1	0	1	1	1	1	INO80	INO80 homolog (S. cerevisiae)
hsa-miR-361-3p	0	0	1	1	1	1	SMG6	smg-6 homolog, nonsense mediated mRNA decay factor (C. elegans)
hsa-miR-361-3p	0	0	1	0	1	1	TRIM44	tripartite motif containing 44
hsa-miR-361-3p	1	0	1	1	1	1	HAUS6	HAUS augmin-like complex, subunit 6
hsa-miR-361-3p	1	0	1	1	1	1	ZNF280C	zinc finger protein 280C
hsa-miR-361-3p	1	0	1	0	1	1	FAM46C	family with sequence similarity 46, member C
hsa-miR-361-3p	1	0	1	1	1	1	ALKBH5	alkB, alkylation repair homolog 5 (E. coli)
hsa-miR-361-3p	0	0	1	1	1	1	WHSC1L1	Wolf-Hirschhorn syndrome candidate 1-like 1
hsa-miR-361-3p	1	0	1	1	1	1	UBE2R2	ubiquitin-conjugating enzyme E2R 2
hsa-miR-361-3p	1	0	1	1	1	1	FAM120C	family with sequence similarity 120C
hsa-miR-361-3p	0	0	1	1	1	1	ACSM5	acyl-CoA synthetase medium-chain family member 5
hsa-miR-361-3p	1	0	1	1	1	1	IFT57	intraflagellar transport 57 homolog (Chlamydomonas)
hsa-miR-361-3p	1	0	1	1	1	1	LRRC20	leucine rich repeat containing 20
hsa-miR-361-3p	0	0	1	1	1	1	PNMAL1	paraneoplastic Ma antigen family-like 1
hsa-miR-361-3p	1	0	1	1	1	1	EPB41L4B	erythrocyte membrane protein band 4.1 like 4B
hsa-miR-361-3p	0	0	1	1	1	1	BDP1	B double prime 1, subunit of RNA polymerase III transcription initiation factor IIIB
hsa-miR-361-3p	1	0	1	1	1	1	ASH1L	ash1 (absent, small, or homeotic)-like (Drosophila)
hsa-miR-361-3p	1	0	1	1	1	1	LRRC59	leucine rich repeat containing 59
hsa-miR-361-3p	1	0	1	0	1	1	PCDHAC1	protocadherin alpha subfamily C, 1
hsa-miR-361-3p	1	0	1	0	1	1	PCDHAC2	protocadherin alpha subfamily C, 2
hsa-miR-361-3p	1	0	1	1	1	1	PCDHA1	protocadherin alpha 1
hsa-miR-361-3p	1	0	1	0	1	1	PCDHA10	protocadherin alpha 10
hsa-miR-361-3p	1	0	1	0	1	1	PCDHA11	protocadherin alpha 11
hsa-miR-361-3p	1	0	1	0	1	1	PCDHA12	protocadherin alpha 12
hsa-miR-361-3p	1	0	1	1	1	1	PCDHA2	protocadherin alpha 2
hsa-miR-361-3p	1	0	1	1	1	1	PCDHA3	protocadherin alpha 3
hsa-miR-361-3p	1	0	1	1	1	1	PCDHA6	protocadherin alpha 6
hsa-miR-361-3p	1	0	1	0	1	1	PCDHA7	protocadherin alpha 7
hsa-miR-361-3p	1	0	1	1	1	1	PCDHA8	protocadherin alpha 8
hsa-miR-361-3p	1	0	1	1	1	1	HOXA10	homeobox A10
hsa-miR-361-3p	1	0	1	0	1	1	TMX3	thioredoxin-related transmembrane protein 3
hsa-miR-361-3p	0	0	1	1	1	1	GNL3L	guanine nucleotide binding protein-like 3 (nucleolar)-like
hsa-miR-361-3p	1	0	1	1	1	1	SERTAD4	SERTA domain containing 4
hsa-miR-361-3p	1	0	1	1	1	1	MDM1	Mdm1 nuclear protein homolog (mouse)
hsa-miR-361-3p	0	0	1	1	1	1	TMEM167B	transmembrane protein 167B
hsa-miR-361-3p	0	0	1	1	1	1	MEPE	matrix extracellular phosphoglycoprotein
hsa-miR-361-3p	1	0	1	0	1	1	OTUD7B	OTU domain containing 7B
hsa-miR-361-3p	1	0	1	1	0	0	SLC17A7	solute carrier family 17 (sodium-dependent inorganic phosphate cotransporter), member 7
hsa-miR-361-3p	1	0	1	0	1	1	MNT	MAX binding protein
hsa-miR-361-3p	1	0	1	1	1	1	EPHA8	EPH receptor A8
hsa-miR-361-3p	0	0	1	1	0	0	AMIGO1	adhesion molecule with Ig-like domain 1
hsa-miR-361-3p	0	0	1	1	1	1	SHROOM4	shroom family member 4
hsa-miR-361-3p	1	0	1	0	1	1	ALPK3	alpha-kinase 3
hsa-miR-361-3p	1	0	1	1	1	1	NLGN2	neuroligin 2
hsa-miR-361-3p	0	0	1	0	1	1	TRMT5	tRNA methyltransferase 5 homolog (S. cerevisiae)
hsa-miR-361-3p	1	0	1	1	1	1	ARHGAP21	Rho GTPase activating protein 21
hsa-miR-361-3p	1	0	1	1	1	1	HOMEZ	homeobox and leucine zipper encoding
hsa-miR-361-3p	1	0	1	1	1	1	RANBP10	RAN binding protein 10
hsa-miR-361-3p	1	0	1	0	1	1	RNF213	ring finger protein 213
hsa-miR-361-3p	1	0	1	0	1	1	GPAM	glycerol-3-phosphate acyltransferase, mitochondrial
hsa-miR-361-3p	1	0	1	1	1	1	VAT1L	vesicle amine transport protein 1 homolog (T. californica)-like
hsa-miR-361-3p	1	0	1	1	1	1	FAM160B1	family with sequence similarity 160, member B1
hsa-miR-361-3p	0	0	1	1	1	1	PRX	periaxin
hsa-miR-361-3p	0	0	1	1	1	1	PPM1A	protein phosphatase, Mg2+/Mn2+ dependent, 1A
hsa-miR-361-3p	0	0	1	1	1	1	TLX3	T-cell leukemia homeobox 3
hsa-miR-361-3p	1	0	1	1	1	1	CLDN1	claudin 1
hsa-miR-361-3p	0	0	1	1	1	1	MRPS12	mitochondrial ribosomal protein S12
hsa-miR-361-3p	0	0	1	1	1	1	RNASEL	ribonuclease L (2',5'-oligoisoadenylate synthetase-dependent)
hsa-miR-361-3p	0	0	1	1	0	0	TRAF2	TNF receptor-associated factor 2
hsa-miR-361-3p	0	0	1	1	0	0	TRIB3	tribbles homolog 3 (Drosophila)
hsa-miR-361-3p	1	0	1	0	1	1	TP53INP2	tumor protein p53 inducible nuclear protein 2
hsa-miR-361-3p	0	0	1	1	1	1	CHST6	carbohydrate (N-acetylglucosamine 6-O) sulfotransferase 6
hsa-miR-361-3p	1	0	1	1	1	1	SENP2	SUMO1/sentrin/SMT3 specific peptidase 2
hsa-miR-361-3p	1	0	1	1	1	1	TMEM35	transmembrane protein 35
hsa-miR-361-3p	1	0	1	1	1	1	CLCN6	chloride channel, voltage-sensitive 6
hsa-miR-361-3p	0	0	1	1	0	0	MIIP	migration and invasion inhibitory protein
hsa-miR-361-3p	1	0	1	1	1	1	ZFAND3	zinc finger, AN1-type domain 3
hsa-miR-361-3p	1	0	1	0	1	1	CSNK1G1	casein kinase 1, gamma 1
hsa-miR-361-3p	0	0	1	1	1	1	SLC17A9	solute carrier family 17, member 9
hsa-miR-361-3p	1	0	1	1	1	1	ABCG4	ATP-binding cassette, sub-family G (WHITE), member 4
hsa-miR-361-3p	0	0	1	1	1	1	TCTA	T-cell leukemia translocation altered
hsa-miR-361-3p	1	0	1	1	1	1	HIF3A	hypoxia inducible factor 3, alpha subunit
hsa-miR-361-3p	0	0	1	1	1	1	SUSD1	sushi domain containing 1
hsa-miR-361-3p	1	0	1	1	1	1	GIGYF1	GRB10 interacting GYF protein 1
hsa-miR-361-3p	0	0	1	0	1	1	EBF2	early B-cell factor 2
hsa-miR-361-3p	1	0	1	1	1	1	PRRX1	paired related homeobox 1
hsa-miR-361-3p	1	0	1	1	1	1	LPPR2	lipid phosphate phosphatase-related protein type 2
hsa-miR-361-3p	1	0	1	1	1	1	S100PBP	S100P binding protein
hsa-miR-361-3p	1	0	1	0	1	1	BCL11B	B-cell CLL/lymphoma 11B (zinc finger protein)
hsa-miR-361-3p	1	0	1	1	0	0	UBE2Z	ubiquitin-conjugating enzyme E2Z
hsa-miR-361-3p	1	0	1	1	1	1	FAM134A	family with sequence similarity 134, member A
hsa-miR-361-3p	1	0	1	1	1	1	LRRC2	leucine rich repeat containing 2
hsa-miR-361-3p	1	0	1	1	1	1	CDC73	cell division cycle 73, Paf1/RNA polymerase II complex component, homolog (S. cerevisiae)
hsa-miR-361-3p	1	0	1	1	1	1	C10orf76	chromosome 10 open reading frame 76
hsa-miR-361-3p	1	0	1	0	1	1	PLEKHF2	pleckstrin homology domain containing, family F (with FYVE domain) member 2
hsa-miR-361-3p	0	0	1	1	1	1	GLT25D1	glycosyltransferase 25 domain containing 1
hsa-miR-361-3p	1	0	1	0	1	1	LIN28A	lin-28 homolog A (C. elegans)
hsa-miR-361-3p	0	0	1	0	1	1	C1orf115	chromosome 1 open reading frame 115
hsa-miR-361-3p	0	0	1	1	1	1	ZNF767	zinc finger family member 767
hsa-miR-361-3p	1	0	1	1	1	1	KLHL18	kelch-like 18 (Drosophila)
hsa-miR-361-3p	0	0	1	1	0	0	BAIAP2L2	BAI1-associated protein 2-like 2
hsa-miR-361-3p	1	0	1	1	1	1	PROSER1	proline and serine rich 1
hsa-miR-361-3p	0	0	1	1	0	0	WNT10A	wingless-type MMTV integration site family, member 10A
hsa-miR-361-3p	1	0	1	0	1	1	SRCIN1	SRC kinase signaling inhibitor 1
hsa-miR-361-3p	1	0	1	1	1	1	CYB5B	cytochrome b5 type B (outer mitochondrial membrane)
hsa-miR-361-3p	1	0	1	1	1	1	JHDM1D	jumonji C domain containing histone demethylase 1 homolog D (S. cerevisiae)
hsa-miR-361-3p	1	0	1	0	1	1	C1orf21	chromosome 1 open reading frame 21
hsa-miR-361-3p	0	0	1	1	1	1	APOL2	apolipoprotein L, 2
hsa-miR-361-3p	1	0	1	0	1	1	LBH	limb bud and heart development homolog (mouse)
hsa-miR-361-3p	1	0	1	1	0	0	PVRL4	poliovirus receptor-related 4
hsa-miR-361-3p	1	0	1	0	1	1	SPRY4	sprouty homolog 4 (Drosophila)
hsa-miR-361-3p	0	0	1	1	1	1	ARPC5L	actin related protein 2/3 complex, subunit 5-like
hsa-miR-361-3p	1	0	1	1	1	1	GABARAPL1	GABA(A) receptor-associated protein like 1
hsa-miR-361-3p	1	0	1	0	1	1	TMEM47	transmembrane protein 47
hsa-miR-361-3p	1	0	1	1	1	1	PCDHA9	protocadherin alpha 9
hsa-miR-361-3p	0	0	1	1	1	1	KCNA7	potassium voltage-gated channel, shaker-related subfamily, member 7
hsa-miR-361-3p	0	0	1	1	1	1	FRMD8	FERM domain containing 8
hsa-miR-361-3p	1	0	1	0	1	1	SRSF8	serine/arginine-rich splicing factor 8
hsa-miR-361-3p	1	0	1	1	1	1	FAM175B	family with sequence similarity 175, member B
hsa-miR-361-3p	1	0	1	1	1	1	ZNRF1	zinc and ring finger 1, E3 ubiquitin protein ligase
hsa-miR-361-3p	0	0	1	0	1	1	LDOC1L	leucine zipper, down-regulated in cancer 1-like
hsa-miR-361-3p	1	0	1	1	1	1	CAMKK1	calcium/calmodulin-dependent protein kinase kinase 1, alpha
hsa-miR-361-3p	1	0	1	1	1	1	PRADC1	protease-associated domain containing 1
hsa-miR-361-3p	0	0	1	1	1	1	C5orf4	chromosome 5 open reading frame 4
hsa-miR-361-3p	0	0	1	1	0	0	PCDH1	protocadherin 1
hsa-miR-361-3p	1	0	1	1	1	1	PARD6B	par-6 partitioning defective 6 homolog beta (C. elegans)
hsa-miR-361-3p	0	0	1	1	1	1	HCAR1	hydroxycarboxylic acid receptor 1
hsa-miR-361-3p	1	0	1	0	1	1	GLYR1	glyoxylate reductase 1 homolog (Arabidopsis)
hsa-miR-361-3p	1	0	1	1	1	1	PPP1R9B	protein phosphatase 1, regulatory subunit 9B
hsa-miR-361-3p	1	0	1	0	1	1	UBASH3B	ubiquitin associated and SH3 domain containing B
hsa-miR-361-3p	0	0	1	1	1	1	COX14	COX14 cytochrome c oxidase assembly homolog (S. cerevisiae)
hsa-miR-361-3p	1	0	1	0	1	1	C5orf62	chromosome 5 open reading frame 62
hsa-miR-361-3p	1	0	1	1	0	0	DMRTB1	DMRT-like family B with proline-rich C-terminal, 1
hsa-miR-361-3p	0	0	1	1	1	1	ZIC5	Zic family member 5
hsa-miR-361-3p	1	0	1	1	1	1	C5orf30	chromosome 5 open reading frame 30
hsa-miR-361-3p	1	0	1	0	1	1	PURB	purine-rich element binding protein B
hsa-miR-361-3p	1	0	1	1	1	1	ADAM19	ADAM metallopeptidase domain 19
hsa-miR-361-3p	1	0	1	1	1	1	RASL10B	RAS-like, family 10, member B
hsa-miR-361-3p	1	0	1	1	0	0	FCHSD1	FCH and double SH3 domains 1
hsa-miR-361-3p	1	0	1	1	1	1	EPT1	ethanolaminephosphotransferase 1 (CDP-ethanolamine-specific)
hsa-miR-361-3p	0	0	1	0	0	0	CEACAM21	carcinoembryonic antigen-related cell adhesion molecule 21
hsa-miR-361-3p	1	0	1	1	0	0	CCDC120	coiled-coil domain containing 120
hsa-miR-361-3p	0	0	1	1	1	1	NACC1	nucleus accumbens associated 1, BEN and BTB (POZ) domain containing
hsa-miR-361-3p	0	0	1	1	1	1	PLEKHG4B	pleckstrin homology domain containing, family G (with RhoGef domain) member 4B
hsa-miR-361-3p	1	0	1	0	0	0	SMYD4	SET and MYND domain containing 4
hsa-miR-361-3p	0	0	1	1	1	1	IL22RA2	interleukin 22 receptor, alpha 2
hsa-miR-361-3p	1	0	1	1	1	1	TRIM9	tripartite motif containing 9
hsa-miR-361-3p	1	0	1	0	1	1	ANTXR2	anthrax toxin receptor 2
hsa-miR-361-3p	1	0	1	1	1	1	SEPT4	septin 4
hsa-miR-361-3p	0	0	1	1	0	0	WFDC3	WAP four-disulfide core domain 3
hsa-miR-361-3p	1	0	1	1	1	1	COL11A2	collagen, type XI, alpha 2
hsa-miR-361-3p	1	0	1	1	1	1	SPSB4	splA/ryanodine receptor domain and SOCS box containing 4
hsa-miR-361-3p	1	0	1	1	1	1	KLHL6	kelch-like 6 (Drosophila)
hsa-miR-361-3p	0	0	1	0	1	1	PAQR8	progestin and adipoQ receptor family member VIII
hsa-miR-361-3p	0	0	1	1	1	1	RAD51B	RAD51 homolog B (S. cerevisiae)
hsa-miR-361-3p	1	0	1	1	1	1	SLC26A7	solute carrier family 26, member 7
hsa-miR-361-3p	0	0	1	1	1	1	PATE1	prostate and testis expressed 1
hsa-miR-361-3p	0	0	1	0	0	0	AP5B1	adaptor-related protein complex 5, beta 1 subunit
hsa-miR-361-3p	1	0	1	1	0	0	PKDCC	protein kinase domain containing, cytoplasmic homolog (mouse)
hsa-miR-361-3p	1	0	1	1	1	1	MTSS1L	metastasis suppressor 1-like
hsa-miR-361-3p	0	0	1	1	0	0	KIF12	kinesin family member 12
hsa-miR-361-3p	0	0	1	1	1	1	C1orf212	chromosome 1 open reading frame 212
hsa-miR-361-3p	0	0	1	1	0	0	KLK15	kallikrein-related peptidase 15
hsa-miR-361-3p	0	0	1	1	1	1	KLF14	Kruppel-like factor 14
hsa-miR-361-3p	1	0	1	1	1	1	MBOAT2	membrane bound O-acyltransferase domain containing 2
hsa-miR-361-3p	1	0	1	1	1	1	LGI3	leucine-rich repeat LGI family, member 3
hsa-miR-361-3p	1	0	1	1	0	0	GNAT1	guanine nucleotide binding protein (G protein), alpha transducing activity polypeptide 1
hsa-miR-361-3p	0	0	1	1	0	0	KLK8	kallikrein-related peptidase 8
hsa-miR-361-3p	1	0	1	1	1	1	RPIA	ribose 5-phosphate isomerase A
hsa-miR-361-3p	0	0	1	1	1	1	HIPK4	homeodomain interacting protein kinase 4
hsa-miR-361-3p	1	0	1	1	1	1	YPEL4	yippee-like 4 (Drosophila)
hsa-miR-361-3p	0	0	1	1	1	1	DACT3	dapper, antagonist of beta-catenin, homolog 3 (Xenopus laevis)
hsa-miR-361-3p	1	0	1	1	1	1	FAM84A	family with sequence similarity 84, member A
hsa-miR-361-3p	0	0	1	1	0	0	FANK1	fibronectin type III and ankyrin repeat domains 1
hsa-miR-361-3p	0	0	1	1	0	0	EVI5L	ecotropic viral integration site 5-like
hsa-miR-361-3p	0	0	1	1	1	1	FAM100A	family with sequence similarity 100, member A
hsa-miR-361-3p	1	0	1	1	1	1	CADM4	cell adhesion molecule 4
hsa-miR-361-3p	0	0	1	1	1	1	SCARF1	scavenger receptor class F, member 1
hsa-miR-361-3p	0	0	1	1	0	0	TCEB3C	transcription elongation factor B polypeptide 3C (elongin A3)
hsa-miR-361-3p	1	0	1	0	1	1	MTPN	myotrophin
hsa-miR-361-3p	0	0	1	1	0	0	KLK12	kallikrein-related peptidase 12
hsa-miR-361-3p	1	0	1	1	1	1	TPM3	tropomyosin 3
hsa-miR-361-3p	0	0	1	1	1	1	ATP1A3	ATPase, Na+/K+ transporting, alpha 3 polypeptide
hsa-miR-361-3p	1	0	1	0	1	1	UBXN10	UBX domain protein 10
hsa-miR-361-3p	1	0	1	1	1	1	FAM123B	family with sequence similarity 123B
hsa-miR-361-3p	0	0	1	1	1	1	C15orf43	chromosome 15 open reading frame 43
hsa-miR-361-3p	1	0	1	1	1	1	ZNF362	zinc finger protein 362
hsa-miR-361-3p	0	0	1	1	1	1	CNIH3	cornichon homolog 3 (Drosophila)
hsa-miR-361-3p	0	0	1	1	1	1	ENTHD1	ENTH domain containing 1
hsa-miR-361-3p	1	0	1	1	0	0	ZNF579	zinc finger protein 579
hsa-miR-361-3p	0	0	1	1	1	1	DAND5	DAN domain family, member 5
hsa-miR-361-3p	1	0	1	0	1	1	TMEM154	transmembrane protein 154
hsa-miR-361-3p	0	0	1	1	1	1	DNAJC18	DnaJ (Hsp40) homolog, subfamily C, member 18
hsa-miR-361-3p	0	0	1	1	0	0	MS4A15	membrane-spanning 4-domains, subfamily A, member 15
hsa-miR-361-3p	0	0	1	1	0	0	DOK6	docking protein 6
hsa-miR-361-3p	0	0	1	1	0	0	GPC2	glypican 2
hsa-miR-361-3p	1	0	1	1	1	1	C3orf45	chromosome 3 open reading frame 45
hsa-miR-361-3p	0	0	1	0	1	1	TMEM92	transmembrane protein 92
hsa-miR-361-3p	1	0	1	1	1	1	FBXL16	F-box and leucine-rich repeat protein 16
hsa-miR-361-3p	1	0	1	1	1	1	HS6ST3	heparan sulfate 6-O-sulfotransferase 3
hsa-miR-361-3p	1	0	1	1	0	0	FAM43A	family with sequence similarity 43, member A
hsa-miR-361-3p	1	0	1	1	1	1	FNDC5	fibronectin type III domain containing 5
hsa-miR-361-3p	1	0	1	1	1	1	POM121	POM121 transmembrane nucleoporin
hsa-miR-361-3p	0	0	1	1	1	1	TAPBP	TAP binding protein (tapasin)
hsa-miR-361-3p	0	0	1	0	1	1	TUSC5	tumor suppressor candidate 5
hsa-miR-361-3p	1	0	1	1	1	1	IL28RA	interleukin 28 receptor, alpha (interferon, lambda receptor)
hsa-miR-361-3p	1	0	1	1	1	1	TTBK2	tau tubulin kinase 2
hsa-miR-361-3p	0	0	1	1	0	0	PRSS36	protease, serine, 36
hsa-miR-361-3p	1	0	1	1	1	1	FAM117B	family with sequence similarity 117, member B
hsa-miR-361-3p	0	0	1	1	1	1	C15orf26	chromosome 15 open reading frame 26
hsa-miR-361-3p	0	0	1	1	0	0	CLEC4F	C-type lectin domain family 4, member F
hsa-miR-361-3p	1	0	1	0	1	1	KSR2	kinase suppressor of ras 2
hsa-miR-361-3p	1	0	1	1	1	1	SLC9A9	solute carrier family 9, subfamily A (NHE9, cation proton antiporter 9), member 9
hsa-miR-361-3p	1	0	1	1	1	1	ATG9B	autophagy related 9B
hsa-miR-361-3p	0	0	1	1	0	0	FAAH2	fatty acid amide hydrolase 2
hsa-miR-361-3p	0	0	1	1	1	1	CLEC14A	C-type lectin domain family 14, member A
hsa-miR-361-3p	1	0	1	1	1	1	PDLIM2	PDZ and LIM domain 2 (mystique)
hsa-miR-361-3p	1	0	1	1	1	1	FAM134C	family with sequence similarity 134, member C
hsa-miR-361-3p	0	0	1	1	1	1	GPIHBP1	glycosylphosphatidylinositol anchored high density lipoprotein binding protein 1
hsa-miR-361-3p	0	0	1	1	0	0	PAQR7	progestin and adipoQ receptor family member VII
hsa-miR-361-3p	1	0	1	1	1	1	BCL6B	B-cell CLL/lymphoma 6, member B
hsa-miR-361-3p	1	0	1	1	1	1	ZSCAN22	zinc finger and SCAN domain containing 22
hsa-miR-361-3p	0	0	1	1	1	1	USP12	ubiquitin specific peptidase 12
hsa-miR-361-3p	0	0	1	0	1	1	VSTM2A	V-set and transmembrane domain containing 2A
hsa-miR-361-3p	1	0	1	1	0	0	FAM100B	family with sequence similarity 100, member B
hsa-miR-361-3p	0	0	1	1	1	1	C15orf38	chromosome 15 open reading frame 38
hsa-miR-361-3p	0	0	1	1	0	0	UPK3B	uroplakin 3B
hsa-miR-361-3p	1	0	1	0	1	1	RIMS4	regulating synaptic membrane exocytosis 4
hsa-miR-361-3p	1	0	1	0	1	1	SRRM4	serine/arginine repetitive matrix 4
hsa-miR-361-3p	1	0	1	1	1	1	ADAMTS6	ADAM metallopeptidase with thrombospondin type 1 motif, 6
hsa-miR-361-3p	0	0	1	1	0	0	TMEM173	transmembrane protein 173
hsa-miR-361-3p	1	0	1	1	1	1	RAB43	RAB43, member RAS oncogene family
hsa-miR-361-3p	0	0	1	1	1	1	LHFPL4	lipoma HMGIC fusion partner-like 4
hsa-miR-361-3p	1	0	1	1	0	0	ENHO	energy homeostasis associated
hsa-miR-361-3p	0	0	1	0	1	1	WASH3P	WAS protein family homolog 3 pseudogene
hsa-miR-361-3p	0	0	1	0	1	1	SOGA1	suppressor of glucose, autophagy associated 1
hsa-miR-361-3p	1	0	1	1	1	1	TMEM189-UBE2V1	TMEM189-UBE2V1 readthrough
hsa-miR-361-3p	0	0	1	1	0	0	FOXD4L4	forkhead box D4-like 4
hsa-miR-361-3p	1	0	1	1	1	1	THRA	thyroid hormone receptor, alpha
hsa-miR-361-3p	0	0	1	1	1	1	SLC25A35	solute carrier family 25, member 35
hsa-miR-361-3p	0	0	1	1	1	1	ZRANB2	zinc finger, RAN-binding domain containing 2
hsa-miR-361-3p	0	0	1	1	0	0	LRRN4CL	LRRN4 C-terminal like
hsa-miR-361-3p	0	0	1	1	0	0	IER5L	immediate early response 5-like
hsa-miR-361-3p	1	0	1	1	1	1	METTL21B	methyltransferase like 21B
hsa-miR-361-3p	1	0	1	1	1	1	TMEM132E	transmembrane protein 132E
hsa-miR-361-3p	1	0	1	0	1	1	NCKAP5	NCK-associated protein 5
hsa-miR-361-3p	0	0	1	0	1	1	CLEC17A	C-type lectin domain family 17, member A
hsa-miR-361-3p	0	0	1	1	1	1	C8orf86	chromosome 8 open reading frame 86
hsa-miR-361-3p	0	0	1	1	1	1	FLJ45983	uncharacterized LOC399717
hsa-miR-361-3p	1	0	1	1	1	1	FOXI2	forkhead box I2
hsa-miR-361-3p	0	0	1	0	1	1	FAM174B	family with sequence similarity 174, member B
hsa-miR-361-3p	0	0	1	0	1	1	C1orf220	chromosome 1 open reading frame 220
hsa-miR-361-3p	0	0	1	0	0	0	ESRRAP2	estrogen-related receptor alpha pseudogene 2
hsa-miR-361-3p	0	0	1	0	0	0	CELP	carboxyl ester lipase pseudogene
hsa-miR-361-3p	0	0	1	0	0	0	TOP1P2	topoisomerase (DNA) I pseudogene 2
hsa-miR-361-3p	0	0	1	0	0	0	LYPLA2P1	lysophospholipase II pseudogene 1
hsa-miR-361-3p	0	0	1	0	0	0	TTTY21	testis-specific transcript, Y-linked 21 (non-protein coding)
hsa-miR-361-3p	0	0	1	0	0	0	TTTY15	testis-specific transcript, Y-linked 15 (non-protein coding)
hsa-miR-361-3p	0	0	1	0	0	0	CYCSP52	cytochrome c, somatic pseudogene 52
hsa-miR-361-3p	0	0	1	0	0	0	PPP1R2P3	protein phosphatase 1, regulatory (inhibitor) subunit 2 pseudogene 3
hsa-miR-361-3p	0	0	1	0	0	0	ST13P4	suppression of tumorigenicity 13 (colon carcinoma) (Hsp70 interacting protein) pseudogene 4
hsa-miR-361-3p	0	0	1	0	0	0	TPI1P2	triosephosphate isomerase 1 pseudogene 2
hsa-miR-361-3p	0	0	1	0	0	0	FTH1P2	ferritin, heavy polypeptide 1 pseudogene 2
hsa-miR-361-3p	0	0	1	0	0	0	NPY6R	neuropeptide Y receptor Y6 (pseudogene)
hsa-miR-361-3p	0	0	1	0	0	0	AKIRIN2-AS1	AKIRIN2 antisense RNA 1
hsa-miR-361-3p	0	0	1	0	0	0	TRIM78P	tripartite motif containing 78, pseudogene
hsa-miR-361-3p	0	0	1	0	0	0	HOXA11-AS	HOXA11 antisense RNA
hsa-miR-361-3p	0	0	1	0	0	0	MALAT1	metastasis associated lung adenocarcinoma transcript 1 (non-protein coding)
hsa-miR-361-3p	0	0	1	0	0	0	RNASEH2CP1	ribonuclease H2, subunit C pseudogene 1
hsa-miR-361-3p	0	0	1	0	0	0	SIGLEC16	sialic acid binding Ig-like lectin 16 (gene/pseudogene)
hsa-miR-361-3p	0	0	1	0	0	0	LOC401010	nucleolar complex associated 2 homolog (S. cerevisiae) pseudogene
hsa-miR-361-3p	0	0	1	0	0	0	HERC2P8	hect domain and RLD 2 pseudogene 8
hsa-miR-361-3p	0	0	1	0	0	0	HAS2-AS1	HAS2 antisense RNA 1
hsa-miR-361-3p	0	0	1	0	0	0	SNX29P2	sorting nexin 29 pseudogene 2
hsa-miR-361-3p	0	0	1	0	0	0	SCARNA21	small Cajal body-specific RNA 21
hsa-miR-361-3p	0	0	1	0	0	0	SCARNA17	small Cajal body-specific RNA 17
hsa-miR-361-3p	0	0	1	0	0	0	PYY2	peptide YY, 2 (pseudogene)
hsa-miR-361-3p	0	0	1	0	0	0	HSP90B3P	heat shock protein 90kDa beta (Grp94), member 3, pseudogene
hsa-miR-361-3p	0	0	1	0	0	0	SNORD115-26	small nucleolar RNA, C/D box 115-26
hsa-miR-361-3p	0	0	1	1	0	0	TBL3	transducin (beta)-like 3
hsa-miR-361-3p	1	0	1	0	1	1	NFIX	nuclear factor I/X (CCAAT-binding transcription factor)
hsa-miR-361-3p	1	0	1	1	1	1	TRIO	trio Rho guanine nucleotide exchange factor
hsa-miR-361-3p	1	0	1	1	0	0	TNXB	tenascin XB
hsa-miR-361-3p	1	0	1	1	1	1	ATF6B	activating transcription factor 6 beta
hsa-miR-361-3p	0	0	1	0	0	0	PLGLA	plasminogen-like A
hsa-miR-361-3p	0	0	1	1	0	0	EPX	eosinophil peroxidase
hsa-miR-361-3p	1	0	1	1	1	1	IFNAR2	interferon (alpha, beta and omega) receptor 2
hsa-miR-361-3p	1	0	1	1	1	1	HS3ST1	heparan sulfate (glucosamine) 3-O-sulfotransferase 1
hsa-miR-361-3p	0	0	0	1	0	0	CRLF1	cytokine receptor-like factor 1
hsa-miR-361-3p	0	0	1	1	1	1	KLRAP1	killer cell lectin-like receptor subfamily A pseudogene 1
hsa-miR-361-3p	1	0	1	1	0	0	SLC45A4	solute carrier family 45, member 4
hsa-miR-361-3p	0	0	0	1	1	1	MYOC	myocilin, trabecular meshwork inducible glucocorticoid response
hsa-miR-361-3p	0	0	0	1	0	0	THAP3	THAP domain containing, apoptosis associated protein 3
hsa-miR-361-3p	0	0	0	1	1	1	NFE2L3	nuclear factor (erythroid-derived 2)-like 3
hsa-miR-361-3p	0	0	1	1	1	1	YIPF1	Yip1 domain family, member 1
hsa-miR-361-3p	1	0	1	1	1	1	PRSS22	protease, serine, 22
hsa-miR-361-3p	0	0	1	1	0	0	MEF2BNB-MEF2B	MEF2BNB-MEF2B readthrough
hsa-miR-361-3p	0	0	0	1	1	1	C12orf5	chromosome 12 open reading frame 5
hsa-miR-361-3p	0	0	0	1	0	0	ZNF8	zinc finger protein 8
hsa-miR-361-3p	1	0	1	1	0	0	ITGB4	integrin, beta 4
hsa-miR-361-3p	0	0	0	1	0	0	SULT2B1	sulfotransferase family, cytosolic, 2B, member 1
hsa-miR-361-3p	0	0	1	1	0	0	REM1	RAS (RAD and GEM)-like GTP-binding 1
hsa-miR-361-3p	0	0	0	1	0	0	CEBPE	CCAAT/enhancer binding protein (C/EBP), epsilon
hsa-miR-361-3p	0	0	0	1	1	1	ADH1A	alcohol dehydrogenase 1A (class I), alpha polypeptide
hsa-miR-361-3p	0	0	1	1	0	0	TECR	trans-2,3-enoyl-CoA reductase
hsa-miR-361-3p	0	0	1	1	1	1	POLR2E	polymerase (RNA) II (DNA directed) polypeptide E, 25kDa
hsa-miR-361-3p	0	0	0	1	0	0	POLRMT	polymerase (RNA) mitochondrial (DNA directed)
hsa-miR-361-3p	0	0	0	1	0	0	GGTLC2	gamma-glutamyltransferase light chain 2
hsa-miR-361-3p	0	0	0	1	0	0	RTDR1	rhabdoid tumor deletion region gene 1
hsa-miR-361-3p	0	0	0	1	0	0	MIOX	myo-inositol oxygenase
hsa-miR-361-3p	0	0	1	1	0	0	ARHGDIG	Rho GDP dissociation inhibitor (GDI) gamma
hsa-miR-361-3p	1	0	0	1	1	1	EHD4	EH-domain containing 4
hsa-miR-361-3p	0	0	1	1	0	0	CNOT3	CCR4-NOT transcription complex, subunit 3
hsa-miR-361-3p	0	0	0	1	0	0	EXOSC5	exosome component 5
hsa-miR-361-3p	0	0	1	1	0	0	CKM	creatine kinase, muscle
hsa-miR-361-3p	1	0	1	1	0	0	FSD1	fibronectin type III and SPRY domain containing 1
hsa-miR-361-3p	0	0	0	1	0	0	CACTIN	cactin, spliceosome C complex subunit
hsa-miR-361-3p	0	0	0	1	0	0	PLIN3	perilipin 3
hsa-miR-361-3p	0	0	0	1	0	0	CD79A	CD79a molecule, immunoglobulin-associated alpha
hsa-miR-361-3p	0	0	1	1	0	0	WDR83OS	WD repeat domain 83 opposite strand
hsa-miR-361-3p	0	0	1	1	1	1	GCDH	glutaryl-CoA dehydrogenase
hsa-miR-361-3p	0	0	0	1	0	0	FKBP8	FK506 binding protein 8, 38kDa
hsa-miR-361-3p	0	0	0	1	0	0	HOXA6	homeobox A6
hsa-miR-361-3p	1	0	1	1	1	1	PEX12	peroxisomal biogenesis factor 12
hsa-miR-361-3p	0	0	0	1	1	1	NAGLU	N-acetylglucosaminidase, alpha
hsa-miR-361-3p	0	0	1	1	0	0	CACNG1	calcium channel, voltage-dependent, gamma subunit 1
hsa-miR-361-3p	0	0	0	1	1	1	CD82	CD82 molecule
hsa-miR-361-3p	1	0	0	1	0	0	ABTB1	ankyrin repeat and BTB (POZ) domain containing 1
hsa-miR-361-3p	0	0	0	1	0	0	TNNC1	troponin C type 1 (slow)
hsa-miR-361-3p	0	0	0	1	1	1	WNT6	wingless-type MMTV integration site family, member 6
hsa-miR-361-3p	0	0	0	1	0	0	PRAMEF4	PRAME family member 4
hsa-miR-361-3p	0	0	1	1	0	0	COLEC11	collectin sub-family member 11
hsa-miR-361-3p	0	0	1	1	0	0	GSC	goosecoid homeobox
hsa-miR-361-3p	0	0	0	1	0	0	ADCK1	aarF domain containing kinase 1
hsa-miR-361-3p	0	0	0	1	0	0	ACADS	acyl-CoA dehydrogenase, C-2 to C-3 short chain
hsa-miR-361-3p	0	0	1	1	0	0	STX10	syntaxin 10
hsa-miR-361-3p	0	0	1	1	1	1	CHPF	chondroitin polymerizing factor
hsa-miR-361-3p	0	0	0	1	0	0	ACTR5	ARP5 actin-related protein 5 homolog (yeast)
hsa-miR-361-3p	0	0	0	1	0	0	PEPD	peptidase D
hsa-miR-361-3p	1	0	1	1	1	1	SNPH	syntaphilin
hsa-miR-361-3p	0	0	1	1	0	0	DDX49	DEAD (Asp-Glu-Ala-Asp) box polypeptide 49
hsa-miR-361-3p	1	0	1	1	0	0	PLEKHG3	pleckstrin homology domain containing, family G (with RhoGef domain) member 3
hsa-miR-361-3p	0	0	1	1	0	0	STYXL1	serine/threonine/tyrosine interacting-like 1
hsa-miR-361-3p	0	0	0	1	0	0	SELO	selenoprotein O
hsa-miR-361-3p	0	0	0	1	0	0	DGCR6L	DiGeorge syndrome critical region gene 6-like
hsa-miR-361-3p	0	0	1	1	0	0	GGT1	gamma-glutamyltransferase 1
hsa-miR-361-3p	0	0	0	1	0	0	APOL5	apolipoprotein L, 5
hsa-miR-361-3p	1	0	1	1	1	1	IVD	isovaleryl-CoA dehydrogenase
hsa-miR-361-3p	0	0	0	1	0	0	ART1	ADP-ribosyltransferase 1
hsa-miR-361-3p	1	0	0	1	1	1	SBNO2	strawberry notch homolog 2 (Drosophila)
hsa-miR-361-3p	0	0	0	1	1	1	DOHH	deoxyhypusine hydroxylase/monooxygenase
hsa-miR-361-3p	1	0	0	1	0	0	SAFB2	scaffold attachment factor B2
hsa-miR-361-3p	0	0	1	1	0	0	CACNG6	calcium channel, voltage-dependent, gamma subunit 6
hsa-miR-361-3p	0	0	0	1	0	0	FAM22F	family with sequence similarity 22, member F
hsa-miR-361-3p	0	0	0	1	0	0	ULBP3	UL16 binding protein 3
hsa-miR-361-3p	0	0	1	1	0	0	FAM153B	family with sequence similarity 153, member B
hsa-miR-361-3p	0	0	1	1	1	1	PSMC3IP	PSMC3 interacting protein
hsa-miR-361-3p	0	0	1	1	1	1	CHD1L	chromodomain helicase DNA binding protein 1-like
hsa-miR-361-3p	0	0	1	1	0	0	IGHMBP2	immunoglobulin mu binding protein 2
hsa-miR-361-3p	1	0	1	1	1	1	C20orf111	chromosome 20 open reading frame 111
hsa-miR-361-3p	0	0	0	1	0	0	CHIT1	chitinase 1 (chitotriosidase)
hsa-miR-361-3p	0	0	1	1	0	0	MTNR1B	melatonin receptor 1B
hsa-miR-361-3p	0	0	1	1	1	1	CD63	CD63 molecule
hsa-miR-361-3p	0	0	1	1	0	0	GDF11	growth differentiation factor 11
hsa-miR-361-3p	1	0	1	1	0	0	NKX2-8	NK2 homeobox 8
hsa-miR-361-3p	0	0	1	1	1	1	TEX2	testis expressed 2
hsa-miR-361-3p	0	0	0	1	0	0	ORM1	orosomucoid 1
hsa-miR-361-3p	0	0	0	1	1	1	TLR2	toll-like receptor 2
hsa-miR-361-3p	0	0	0	1	1	1	PSMC1	proteasome (prosome, macropain) 26S subunit, ATPase, 1
hsa-miR-361-3p	0	0	1	1	0	0	B9D1	B9 protein domain 1
hsa-miR-361-3p	0	0	0	1	0	0	DPEP1	dipeptidase 1 (renal)
hsa-miR-361-3p	0	0	0	1	0	0	GPR133	G protein-coupled receptor 133
hsa-miR-361-3p	0	0	1	1	0	0	RGS9	regulator of G-protein signaling 9
hsa-miR-361-3p	1	0	1	1	0	0	ZC3H3	zinc finger CCCH-type containing 3
hsa-miR-361-3p	0	0	0	1	0	0	COPE	coatomer protein complex, subunit epsilon
hsa-miR-361-3p	0	0	0	1	0	0	TJP3	tight junction protein 3
hsa-miR-361-3p	0	0	0	1	0	0	PIAS4	protein inhibitor of activated STAT, 4
hsa-miR-361-3p	1	0	1	1	1	1	MAPK3	mitogen-activated protein kinase 3
hsa-miR-361-3p	0	0	0	1	1	1	NUCB1	nucleobindin 1
hsa-miR-361-3p	0	0	1	1	1	1	GIPR	gastric inhibitory polypeptide receptor
hsa-miR-361-3p	0	0	1	1	0	0	ASB3	ankyrin repeat and SOCS box containing 3
hsa-miR-361-3p	0	0	1	1	1	1	SEC22C	SEC22 vesicle trafficking protein homolog C (S. cerevisiae)
hsa-miR-361-3p	0	0	0	1	1	1	RAB17	RAB17, member RAS oncogene family
hsa-miR-361-3p	0	0	0	1	0	0	KLKB1	kallikrein B, plasma (Fletcher factor) 1
hsa-miR-361-3p	0	0	0	1	1	1	POMC	proopiomelanocortin
hsa-miR-361-3p	1	0	0	1	0	0	KLF1	Kruppel-like factor 1 (erythroid)
hsa-miR-361-3p	0	0	0	1	0	0	TRPV5	transient receptor potential cation channel, subfamily V, member 5
hsa-miR-361-3p	1	0	0	1	1	1	WNT2	wingless-type MMTV integration site family member 2
hsa-miR-361-3p	0	0	0	1	0	0	SCAP	SREBF chaperone
hsa-miR-361-3p	0	0	1	1	0	0	MCCC1	methylcrotonoyl-CoA carboxylase 1 (alpha)
hsa-miR-361-3p	1	0	1	1	1	1	ALDH8A1	aldehyde dehydrogenase 8 family, member A1
hsa-miR-361-3p	0	0	0	1	0	0	ACAT1	acetyl-CoA acetyltransferase 1
hsa-miR-361-3p	0	0	0	1	0	0	ADAP1	ArfGAP with dual PH domains 1
hsa-miR-361-3p	0	0	1	1	0	0	ITIH4	inter-alpha-trypsin inhibitor heavy chain family, member 4
hsa-miR-361-3p	0	0	1	1	1	1	RDH12	retinol dehydrogenase 12 (all-trans/9-cis/11-cis)
hsa-miR-361-3p	1	0	1	1	1	1	IGF1R	insulin-like growth factor 1 receptor
hsa-miR-361-3p	0	0	1	1	1	1	WDR93	WD repeat domain 93
hsa-miR-361-3p	0	0	0	1	0	0	ADAD2	adenosine deaminase domain containing 2
hsa-miR-361-3p	0	0	0	1	1	1	CPNE7	copine VII
hsa-miR-361-3p	1	0	1	1	0	0	ADAMTS10	ADAM metallopeptidase with thrombospondin type 1 motif, 10
hsa-miR-361-3p	0	0	1	1	1	1	CAPN10	calpain 10
hsa-miR-361-3p	0	0	1	1	1	1	EPN1	epsin 1
hsa-miR-361-3p	0	0	0	1	1	1	METTL21A	methyltransferase like 21A
hsa-miR-361-3p	0	0	0	1	0	0	CPO	carboxypeptidase O
hsa-miR-361-3p	0	0	1	1	0	0	SLC4A3	solute carrier family 4, anion exchanger, member 3
hsa-miR-361-3p	0	0	1	1	0	0	ALDH1L1	aldehyde dehydrogenase 1 family, member L1
hsa-miR-361-3p	0	0	1	1	1	1	MANF	mesencephalic astrocyte-derived neurotrophic factor
hsa-miR-361-3p	0	0	0	1	0	0	SLC10A6	solute carrier family 10 (sodium/bile acid cotransporter family), member 6
hsa-miR-361-3p	1	0	1	1	1	1	FGF18	fibroblast growth factor 18
hsa-miR-361-3p	0	0	0	1	0	0	FRMPD3	FERM and PDZ domain containing 3
hsa-miR-361-3p	0	0	1	1	0	0	PRDM14	PR domain containing 14
hsa-miR-361-3p	0	0	1	1	0	0	FUOM	fucose mutarotase
hsa-miR-361-3p	1	0	1	1	1	1	FADS1	fatty acid desaturase 1
hsa-miR-361-3p	0	0	1	1	0	0	FADS3	fatty acid desaturase 3
hsa-miR-361-3p	0	0	0	1	0	0	ROM1	retinal outer segment membrane protein 1
hsa-miR-361-3p	0	0	1	1	0	0	WDR74	WD repeat domain 74
hsa-miR-361-3p	1	0	1	1	1	1	NINL	ninein-like
hsa-miR-361-3p	1	0	1	1	0	0	BSCL2	Berardinelli-Seip congenital lipodystrophy 2 (seipin)
hsa-miR-361-3p	0	0	1	1	1	1	TAGLN	transgelin
hsa-miR-361-3p	0	0	0	1	1	1	OCSTAMP	osteoclast stimulatory transmembrane protein
hsa-miR-361-3p	0	0	0	1	0	0	PLBD2	phospholipase B domain containing 2
hsa-miR-361-3p	1	0	0	1	1	1	ZFP36L2	zinc finger protein 36, C3H type-like 2
hsa-miR-361-3p	1	0	1	1	1	1	FAM105B	family with sequence similarity 105, member B
hsa-miR-361-3p	0	0	1	1	0	0	TRMT44	tRNA methyltransferase 44 homolog (S. cerevisiae)
hsa-miR-361-3p	0	0	0	1	1	1	KDM8	lysine (K)-specific demethylase 8
hsa-miR-361-3p	1	0	1	1	0	0	DTNB	dystrobrevin, beta
hsa-miR-361-3p	0	0	0	1	0	0	PIK3CB	phosphatidylinositol-4,5-bisphosphate 3-kinase, catalytic subunit beta
hsa-miR-361-3p	0	0	0	1	0	0	CDH15	cadherin 15, type 1, M-cadherin (myotubule)
hsa-miR-361-3p	0	0	1	1	0	0	SLC45A1	solute carrier family 45, member 1
hsa-miR-361-3p	0	0	0	1	0	0	TMEM141	transmembrane protein 141
hsa-miR-361-3p	0	0	0	1	0	0	KIAA1984	KIAA1984
hsa-miR-361-3p	0	0	1	1	0	0	ATP6V0D1	ATPase, H+ transporting, lysosomal 38kDa, V0 subunit d1
hsa-miR-361-3p	0	0	1	1	0	0	PTGIR	prostaglandin I2 (prostacyclin) receptor (IP)
hsa-miR-361-3p	0	0	0	1	1	1	IQCC	IQ motif containing C
hsa-miR-361-3p	0	0	1	1	1	1	S100B	S100 calcium binding protein B
hsa-miR-361-3p	0	0	0	1	0	0	PPP1R16A	protein phosphatase 1, regulatory subunit 16A
hsa-miR-361-3p	0	0	0	1	0	0	COX7A1	cytochrome c oxidase subunit VIIa polypeptide 1 (muscle)
hsa-miR-361-3p	0	0	0	1	0	0	CCL15	chemokine (C-C motif) ligand 15
hsa-miR-361-3p	0	0	1	1	1	1	ZNF653	zinc finger protein 653
hsa-miR-361-3p	0	0	1	1	1	1	FCRLA	Fc receptor-like A
hsa-miR-361-3p	0	0	1	1	0	0	TRIM54	tripartite motif containing 54
hsa-miR-361-3p	0	0	1	1	0	0	TKT	transketolase
hsa-miR-361-3p	0	0	1	1	1	1	SPZ1	spermatogenic leucine zipper 1
hsa-miR-361-3p	0	0	0	1	0	0	AMN	amnionless homolog (mouse)
hsa-miR-361-3p	1	0	1	1	1	1	LARP6	La ribonucleoprotein domain family, member 6
hsa-miR-361-3p	0	0	0	1	1	1	PCBD1	pterin-4 alpha-carbinolamine dehydratase/dimerization cofactor of hepatocyte nuclear factor 1 alpha
hsa-miR-361-3p	0	0	0	1	0	0	PCSK4	proprotein convertase subtilisin/kexin type 4
hsa-miR-361-3p	0	0	0	1	1	1	CDT1	chromatin licensing and DNA replication factor 1
hsa-miR-361-3p	0	0	0	1	0	0	CYP2A6	cytochrome P450, family 2, subfamily A, polypeptide 6
hsa-miR-361-3p	0	0	0	1	0	0	LILRA5	leukocyte immunoglobulin-like receptor, subfamily A (with TM domain), member 5
hsa-miR-361-3p	1	0	1	1	1	1	TMEM99	transmembrane protein 99
hsa-miR-361-3p	0	0	0	1	0	0	ECI1	enoyl-CoA delta isomerase 1
hsa-miR-361-3p	0	0	1	1	1	1	SCARA5	scavenger receptor class A, member 5 (putative)
hsa-miR-361-3p	0	0	0	1	1	1	RBKS	ribokinase
hsa-miR-361-3p	0	0	0	1	1	1	PYDC1	PYD (pyrin domain) containing 1
hsa-miR-361-3p	0	0	0	1	0	0	KCNJ4	potassium inwardly-rectifying channel, subfamily J, member 4
hsa-miR-361-3p	1	0	1	1	0	0	BCORL1	BCL6 corepressor-like 1
hsa-miR-361-3p	0	0	1	1	1	1	C15orf40	chromosome 15 open reading frame 40
hsa-miR-361-3p	0	0	0	1	0	0	ANKS3	ankyrin repeat and sterile alpha motif domain containing 3
hsa-miR-361-3p	0	0	0	1	1	1	CST5	cystatin D
hsa-miR-361-3p	0	0	0	1	1	1	PTAFR	platelet-activating factor receptor
hsa-miR-361-3p	0	0	0	1	0	0	OR1M1	olfactory receptor, family 1, subfamily M, member 1
hsa-miR-361-3p	1	0	1	1	1	1	DUS1L	dihydrouridine synthase 1-like (S. cerevisiae)
hsa-miR-361-3p	1	0	0	1	1	1	SLC1A5	solute carrier family 1 (neutral amino acid transporter), member 5
hsa-miR-361-3p	0	0	0	1	0	0	TMEM223	transmembrane protein 223
hsa-miR-361-3p	1	0	1	1	1	1	KIAA1217	KIAA1217
hsa-miR-361-3p	0	0	0	1	1	1	C3AR1	complement component 3a receptor 1
hsa-miR-361-3p	1	0	0	1	0	0	AP1G2	adaptor-related protein complex 1, gamma 2 subunit
hsa-miR-361-3p	0	0	0	1	1	1	ZNF596	zinc finger protein 596
hsa-miR-361-3p	0	0	0	1	0	0	ADCK5	aarF domain containing kinase 5
hsa-miR-361-3p	1	0	1	1	1	1	DAB2IP	DAB2 interacting protein
hsa-miR-361-3p	0	0	1	1	0	0	LGI4	leucine-rich repeat LGI family, member 4
hsa-miR-361-3p	0	0	0	1	0	0	METTL18	methyltransferase like 18
hsa-miR-361-3p	0	0	1	1	0	0	UGT8	UDP glycosyltransferase 8
hsa-miR-361-3p	1	0	1	1	0	0	CSRP2	cysteine and glycine-rich protein 2
hsa-miR-361-3p	0	0	1	1	0	0	RIN1	Ras and Rab interactor 1
hsa-miR-361-3p	0	0	1	1	0	0	CD248	CD248 molecule, endosialin
hsa-miR-361-3p	0	0	0	1	0	0	OR52W1	olfactory receptor, family 52, subfamily W, member 1
hsa-miR-361-3p	0	0	1	1	0	0	RPS6KB2	ribosomal protein S6 kinase, 70kDa, polypeptide 2
hsa-miR-361-3p	0	0	1	1	0	0	STX4	syntaxin 4
hsa-miR-361-3p	1	0	1	1	1	1	RHOT2	ras homolog family member T2
hsa-miR-361-3p	1	0	1	1	1	1	EDC3	enhancer of mRNA decapping 3 homolog (S. cerevisiae)
hsa-miR-361-3p	1	0	0	1	0	0	ARHGEF1	Rho guanine nucleotide exchange factor (GEF) 1
hsa-miR-361-3p	0	0	0	1	0	0	UNCX	UNC homeobox
hsa-miR-361-3p	0	0	0	1	0	0	PXMP2	peroxisomal membrane protein 2, 22kDa
hsa-miR-361-3p	0	0	1	1	1	1	MRPS24	mitochondrial ribosomal protein S24
hsa-miR-361-3p	0	0	0	1	0	0	PGAM5	phosphoglycerate mutase family member 5
hsa-miR-361-3p	0	0	1	1	0	0	RHBDD2	rhomboid domain containing 2
hsa-miR-361-3p	0	0	0	1	1	1	ETV4	ets variant 4
hsa-miR-361-3p	1	0	1	1	1	1	MYO9B	myosin IXB
hsa-miR-361-3p	0	0	0	1	0	0	FGF8	fibroblast growth factor 8 (androgen-induced)
hsa-miR-361-3p	0	0	0	1	0	0	GPS1	G protein pathway suppressor 1
hsa-miR-361-3p	0	0	1	1	0	0	VWF	von Willebrand factor
hsa-miR-361-3p	0	0	1	1	1	1	ATG16L2	autophagy related 16-like 2 (S. cerevisiae)
hsa-miR-361-3p	0	0	0	1	0	0	TIGD5	tigger transposable element derived 5
hsa-miR-361-3p	0	0	0	1	0	0	TRIM72	tripartite motif containing 72
hsa-miR-361-3p	1	0	1	1	1	1	IFT20	intraflagellar transport 20 homolog (Chlamydomonas)
hsa-miR-361-3p	0	0	1	1	0	0	PNKP	polynucleotide kinase 3'-phosphatase
hsa-miR-361-3p	0	0	0	1	0	0	UFSP1	UFM1-specific peptidase 1 (non-functional)
hsa-miR-361-3p	0	0	1	1	0	0	ZNF335	zinc finger protein 335
hsa-miR-361-3p	0	0	1	1	0	0	COG4	component of oligomeric golgi complex 4
hsa-miR-361-3p	0	0	1	1	1	1	SLC34A1	solute carrier family 34 (sodium phosphate), member 1
hsa-miR-361-3p	0	0	0	1	0	0	USHBP1	Usher syndrome 1C binding protein 1
hsa-miR-361-3p	0	0	1	1	1	1	FAM153C	family with sequence similarity 153, member C, pseudogene
hsa-miR-361-3p	0	0	0	1	1	1	FBXW5	F-box and WD repeat domain containing 5
hsa-miR-361-3p	0	0	1	1	1	1	KLHDC7A	kelch domain containing 7A
hsa-miR-361-3p	1	0	1	1	0	0	PACS2	phosphofurin acidic cluster sorting protein 2
hsa-miR-361-3p	0	0	0	1	0	0	FAM75E1	family with sequence similarity 75, member E1
hsa-miR-361-3p	0	0	0	1	0	0	NOC2L	nucleolar complex associated 2 homolog (S. cerevisiae)
hsa-miR-361-3p	1	0	0	1	0	0	GGT5	gamma-glutamyltransferase 5
hsa-miR-361-3p	1	0	1	1	1	1	EYA2	eyes absent homolog 2 (Drosophila)
hsa-miR-361-3p	0	0	1	1	0	0	GAS6	growth arrest-specific 6
hsa-miR-361-3p	0	0	0	1	0	0	HEXDC	hexosaminidase (glycosyl hydrolase family 20, catalytic domain) containing
hsa-miR-361-3p	1	0	1	1	1	1	MYT1	myelin transcription factor 1
hsa-miR-361-3p	0	0	0	1	0	0	C19orf68	chromosome 19 open reading frame 68
hsa-miR-361-3p	0	0	0	1	0	0	CLEC4G	C-type lectin domain family 4, member G
hsa-miR-361-3p	0	0	0	1	0	0	GALR2	galanin receptor 2
hsa-miR-361-3p	0	0	1	1	0	0	GP1BA	glycoprotein Ib (platelet), alpha polypeptide
hsa-miR-361-3p	1	0	1	1	1	1	SETD3	SET domain containing 3
hsa-miR-361-3p	0	0	1	1	0	0	MRPL37	mitochondrial ribosomal protein L37
hsa-miR-361-3p	0	0	0	1	0	0	B4GALNT4	beta-1,4-N-acetyl-galactosaminyl transferase 4
hsa-miR-361-3p	0	0	0	1	0	0	PRAMEF15	PRAME family member 15
hsa-miR-361-3p	0	0	1	1	0	0	THADA	thyroid adenoma associated
hsa-miR-361-3p	0	0	1	1	1	1	CD300C	CD300c molecule
hsa-miR-361-3p	0	0	0	1	1	1	SNX20	sorting nexin 20
hsa-miR-361-3p	1	0	1	1	0	0	DGCR6	DiGeorge syndrome critical region gene 6
hsa-miR-361-3p	1	0	1	1	1	1	DND1	dead end homolog 1 (zebrafish)
hsa-miR-361-3p	1	0	1	1	1	1	KCNJ12	potassium inwardly-rectifying channel, subfamily J, member 12
hsa-miR-361-3p	0	0	1	1	1	1	MGAT4C	mannosyl (alpha-1,3-)-glycoprotein beta-1,4-N-acetylglucosaminyltransferase, isozyme C (putative)
hsa-miR-361-3p	0	0	0	1	1	1	FTSJ2	FtsJ RNA methyltransferase homolog 2 (E. coli)
hsa-miR-361-3p	0	0	0	1	0	0	PRHOXNB	parahox cluster neighbor
hsa-miR-361-3p	0	0	1	1	1	1	UQCR10	ubiquinol-cytochrome c reductase, complex III subunit X
hsa-miR-361-3p	1	0	1	1	1	1	SLIT3	slit homolog 3 (Drosophila)
hsa-miR-361-3p	0	0	1	1	0	0	GPR97	G protein-coupled receptor 97
hsa-miR-361-3p	0	0	1	1	0	0	GABRQ	gamma-aminobutyric acid (GABA) A receptor, theta
hsa-miR-361-3p	0	0	1	1	0	0	EGFL8	EGF-like-domain, multiple 8
hsa-miR-361-3p	0	0	0	1	0	0	POLR3C	polymerase (RNA) III (DNA directed) polypeptide C (62kD)
hsa-miR-361-3p	0	0	1	1	0	0	ZACN	zinc activated ligand-gated ion channel
hsa-miR-361-3p	0	0	1	1	0	0	HBD	hemoglobin, delta
hsa-miR-361-3p	0	0	0	1	1	1	HBB	hemoglobin, beta
hsa-miR-361-3p	0	0	0	1	0	0	TBX10	T-box 10
hsa-miR-361-3p	1	0	1	1	1	1	SPTB	spectrin, beta, erythrocytic
hsa-miR-361-3p	0	0	0	1	0	0	RASSF3	Ras association (RalGDS/AF-6) domain family member 3
hsa-miR-361-3p	0	0	1	1	0	0	RGS12	regulator of G-protein signaling 12
hsa-miR-361-3p	0	0	0	1	0	0	LRRC71	leucine rich repeat containing 71
hsa-miR-361-3p	1	0	1	1	0	0	ZBTB49	zinc finger and BTB domain containing 49
hsa-miR-361-3p	0	0	0	1	1	1	IL21R	interleukin 21 receptor
hsa-miR-361-3p	1	0	1	1	1	1	ISCU	iron-sulfur cluster scaffold homolog (E. coli)
hsa-miR-361-3p	0	0	0	1	0	0	HELT	helt bHLH transcription factor
hsa-miR-361-3p	0	0	0	1	0	0	SFN	stratifin
hsa-miR-361-3p	0	0	0	1	0	0	DUSP15	dual specificity phosphatase 15
hsa-miR-361-3p	0	0	1	1	1	1	PRDX6	peroxiredoxin 6
hsa-miR-361-3p	1	0	1	1	1	1	H3F3C	H3 histone, family 3C
hsa-miR-361-3p	0	0	1	1	1	1	BRAT1	BRCA1-associated ATM activator 1
hsa-miR-361-3p	0	0	1	1	1	1	RASEF	RAS and EF-hand domain containing
hsa-miR-361-3p	0	0	0	1	1	1	PNCK	pregnancy up-regulated non-ubiquitously expressed CaM kinase
hsa-miR-361-3p	0	0	1	1	1	1	ICAM4	intercellular adhesion molecule 4 (Landsteiner-Wiener blood group)
hsa-miR-361-3p	0	0	0	1	0	0	BLOC1S3	biogenesis of lysosomal organelles complex-1, subunit 3
hsa-miR-361-3p	1	0	1	1	0	0	KAT5	K(lysine) acetyltransferase 5
hsa-miR-361-3p	0	0	1	1	0	0	TEX264	testis expressed 264
hsa-miR-361-3p	0	0	0	1	0	0	TMEM179	transmembrane protein 179
hsa-miR-361-3p	1	0	1	1	0	0	LRRC16B	leucine rich repeat containing 16B
hsa-miR-361-3p	1	0	1	1	0	0	ST3GAL2	ST3 beta-galactoside alpha-2,3-sialyltransferase 2
hsa-miR-361-3p	1	0	1	1	1	1	ASH2L	ash2 (absent, small, or homeotic)-like (Drosophila)
hsa-miR-361-3p	0	0	0	1	0	0	TAF3	TAF3 RNA polymerase II, TATA box binding protein (TBP)-associated factor, 140kDa
hsa-miR-361-3p	0	0	1	1	0	0	DHRS2	dehydrogenase/reductase (SDR family) member 2
hsa-miR-361-3p	0	0	1	1	0	0	ANAPC11	anaphase promoting complex subunit 11
hsa-miR-361-3p	0	0	0	1	1	1	TRADD	TNFRSF1A-associated via death domain
hsa-miR-361-3p	1	0	1	1	1	1	TJP1	tight junction protein 1
hsa-miR-361-3p	0	0	1	1	1	1	GMPR2	guanosine monophosphate reductase 2
hsa-miR-361-3p	0	0	0	1	1	1	ALDH3B2	aldehyde dehydrogenase 3 family, member B2
hsa-miR-361-3p	1	0	1	1	1	1	ELFN2	extracellular leucine-rich repeat and fibronectin type III domain containing 2
hsa-miR-361-3p	1	0	1	1	1	1	ARHGEF10	Rho guanine nucleotide exchange factor (GEF) 10
hsa-miR-361-3p	1	0	1	1	1	1	ATP2B2	ATPase, Ca++ transporting, plasma membrane 2
hsa-miR-361-3p	0	0	1	1	1	1	KCTD14	potassium channel tetramerisation domain containing 14
hsa-miR-361-3p	0	0	1	1	0	0	ETFB	electron-transfer-flavoprotein, beta polypeptide
hsa-miR-361-3p	0	0	1	1	0	0	C10orf11	chromosome 10 open reading frame 11
hsa-miR-361-3p	0	0	1	1	0	0	ANAPC7	anaphase promoting complex subunit 7
hsa-miR-361-3p	0	0	1	1	1	1	MED23	mediator complex subunit 23
hsa-miR-361-3p	0	0	1	1	0	0	HIST1H4J	histone cluster 1, H4j
hsa-miR-361-3p	0	0	0	1	1	1	NEIL1	nei endonuclease VIII-like 1 (E. coli)
hsa-miR-361-3p	0	0	0	1	1	1	ITGB2	integrin, beta 2 (complement component 3 receptor 3 and 4 subunit)
hsa-miR-361-3p	0	0	0	1	0	0	MFSD12	major facilitator superfamily domain containing 12
hsa-miR-361-3p	1	0	0	1	0	0	CARD11	caspase recruitment domain family, member 11
hsa-miR-361-3p	1	0	1	1	0	0	DNM2	dynamin 2
hsa-miR-361-3p	0	0	1	1	0	0	PC	pyruvate carboxylase
hsa-miR-361-3p	0	0	0	1	0	0	NUDT1	nudix (nucleoside diphosphate linked moiety X)-type motif 1
hsa-miR-361-3p	0	0	0	1	0	0	FAM163B	family with sequence similarity 163, member B
hsa-miR-361-3p	1	0	0	1	1	1	PTRF	polymerase I and transcript release factor
hsa-miR-361-3p	0	0	0	1	1	1	PRAMEF8	PRAME family member 8
hsa-miR-361-3p	0	0	1	1	1	1	SLA2	Src-like-adaptor 2
hsa-miR-361-3p	1	0	1	1	1	1	EHMT1	euchromatic histone-lysine N-methyltransferase 1
hsa-miR-361-3p	1	0	0	1	0	0	RABEP2	rabaptin, RAB GTPase binding effector protein 2
hsa-miR-361-3p	1	0	1	1	1	1	GATAD2A	GATA zinc finger domain containing 2A
hsa-miR-361-3p	0	0	0	1	0	0	ABCB8	ATP-binding cassette, sub-family B (MDR/TAP), member 8
hsa-miR-361-3p	0	0	0	1	0	0	TPGS1	tubulin polyglutamylase complex subunit 1
hsa-miR-361-3p	1	0	0	1	0	0	TRPV6	transient receptor potential cation channel, subfamily V, member 6
hsa-miR-361-3p	0	0	0	1	1	1	TBX1	T-box 1
hsa-miR-361-3p	0	0	1	1	1	1	LRP10	low density lipoprotein receptor-related protein 10
hsa-miR-361-3p	1	0	1	1	0	0	EFNA4	ephrin-A4
hsa-miR-361-3p	0	0	1	1	0	0	BRMS1	breast cancer metastasis suppressor 1
hsa-miR-361-3p	0	0	1	1	1	1	ATP2A3	ATPase, Ca++ transporting, ubiquitous
hsa-miR-361-3p	0	0	0	1	0	0	CD300A	CD300a molecule
hsa-miR-361-3p	0	0	0	1	1	1	RDH14	retinol dehydrogenase 14 (all-trans/9-cis/11-cis)
hsa-miR-361-3p	1	0	0	1	1	1	NT5C1B	5'-nucleotidase, cytosolic IB
hsa-miR-361-3p	0	0	0	1	0	0	MMP17	matrix metallopeptidase 17 (membrane-inserted)
hsa-miR-361-3p	0	0	0	1	0	0	TNNT3	troponin T type 3 (skeletal, fast)
hsa-miR-361-3p	0	0	1	1	0	0	NTNG2	netrin G2
hsa-miR-361-3p	1	0	1	1	1	1	PUM2	pumilio homolog 2 (Drosophila)
hsa-miR-361-3p	0	0	0	1	0	0	PRAMEF7	PRAME family member 7
hsa-miR-361-3p	1	0	1	1	1	1	TBX3	T-box 3
hsa-miR-361-3p	0	0	1	1	0	0	SREBF2	sterol regulatory element binding transcription factor 2
hsa-miR-361-3p	0	0	1	1	1	1	PTPLA	protein tyrosine phosphatase-like (proline instead of catalytic arginine), member A
hsa-miR-361-3p	0	0	0	1	1	1	ASB12	ankyrin repeat and SOCS box containing 12
hsa-miR-361-3p	0	0	1	1	1	1	APOL3	apolipoprotein L, 3
hsa-miR-361-3p	0	0	0	1	1	1	KRTAP5-9	keratin associated protein 5-9
hsa-miR-361-3p	0	0	0	1	1	1	BNIPL	BCL2/adenovirus E1B 19kD interacting protein like
hsa-miR-361-3p	0	0	0	1	0	0	PYCR2	pyrroline-5-carboxylate reductase family, member 2
hsa-miR-361-3p	1	0	1	1	1	1	RPS6KA2	ribosomal protein S6 kinase, 90kDa, polypeptide 2
hsa-miR-361-3p	0	0	0	1	0	0	TFB1M	transcription factor B1, mitochondrial
hsa-miR-361-3p	0	0	1	1	1	1	AIG1	androgen-induced 1
hsa-miR-361-3p	1	0	1	1	1	1	CTGF	connective tissue growth factor
hsa-miR-361-3p	0	0	0	1	0	0	INSRR	insulin receptor-related receptor
hsa-miR-361-3p	0	0	0	1	0	0	CRABP2	cellular retinoic acid binding protein 2
hsa-miR-361-3p	0	0	0	1	0	0	CALY	calcyon neuron-specific vesicular protein
hsa-miR-361-3p	0	0	1	1	0	0	LOC399829	uncharacterized LOC399829
hsa-miR-361-3p	0	0	1	1	0	0	S100A16	S100 calcium binding protein A16
hsa-miR-361-3p	0	0	0	1	0	0	UROS	uroporphyrinogen III synthase
hsa-miR-361-3p	0	0	1	1	1	1	FAM204A	family with sequence similarity 204, member A
hsa-miR-361-3p	0	0	1	1	1	1	POLR3GL	polymerase (RNA) III (DNA directed) polypeptide G (32kD)-like
hsa-miR-361-3p	0	0	0	1	0	0	GSTM2	glutathione S-transferase mu 2 (muscle)
hsa-miR-361-3p	0	0	0	1	0	0	ABHD16B	abhydrolase domain containing 16B
hsa-miR-361-3p	0	0	1	1	0	0	PITX3	paired-like homeodomain 3
hsa-miR-361-3p	0	0	1	1	1	1	RTCA	RNA 3'-terminal phosphate cyclase
hsa-miR-361-3p	0	0	1	1	0	0	PRRG3	proline rich Gla (G-carboxyglutamic acid) 3 (transmembrane)
hsa-miR-361-3p	0	0	1	1	0	0	FAM151A	family with sequence similarity 151, member A
hsa-miR-361-3p	0	0	0	1	0	0	EDF1	endothelial differentiation-related factor 1
hsa-miR-361-3p	0	0	1	1	0	0	PHPT1	phosphohistidine phosphatase 1
hsa-miR-361-3p	0	0	0	1	1	1	TSPAN1	tetraspanin 1
hsa-miR-361-3p	0	0	0	1	0	0	PLAC9	placenta-specific 9
hsa-miR-361-3p	0	0	0	1	0	0	CCDC24	coiled-coil domain containing 24
hsa-miR-361-3p	0	0	0	1	0	0	IPO13	importin 13
hsa-miR-361-3p	1	0	1	1	1	1	CTSA	cathepsin A
hsa-miR-361-3p	0	0	1	1	0	0	ABCC10	ATP-binding cassette, sub-family C (CFTR/MRP), member 10
hsa-miR-361-3p	0	0	1	1	1	1	PPIH	peptidylprolyl isomerase H (cyclophilin H)
hsa-miR-361-3p	0	0	1	1	1	1	SLC22A7	solute carrier family 22 (organic anion transporter), member 7
hsa-miR-361-3p	0	0	0	1	1	1	WFDC12	WAP four-disulfide core domain 12
hsa-miR-361-3p	0	0	1	1	0	0	GNMT	glycine N-methyltransferase
hsa-miR-361-3p	0	0	1	1	0	0	TREML1	triggering receptor expressed on myeloid cells-like 1
hsa-miR-361-3p	0	0	1	1	1	1	TFAP2E	transcription factor AP-2 epsilon (activating enhancer binding protein 2 epsilon)
hsa-miR-361-3p	0	0	0	1	1	1	FARP2	FERM, RhoGEF and pleckstrin domain protein 2
hsa-miR-361-3p	0	0	0	1	0	0	LRSAM1	leucine rich repeat and sterile alpha motif containing 1
hsa-miR-361-3p	1	0	1	1	0	0	CCDC167	coiled-coil domain containing 167
hsa-miR-361-3p	1	0	1	1	1	1	RALGPS1	Ral GEF with PH domain and SH3 binding motif 1
hsa-miR-361-3p	1	0	0	1	0	0	LMX1B	LIM homeobox transcription factor 1, beta
hsa-miR-361-3p	0	0	1	1	0	0	MORN5	MORN repeat containing 5
hsa-miR-361-3p	0	0	1	1	1	1	ZNF365	zinc finger protein 365
hsa-miR-361-3p	1	0	1	1	0	0	DFNB31	deafness, autosomal recessive 31
hsa-miR-361-3p	0	0	1	1	0	0	SYTL1	synaptotagmin-like 1
hsa-miR-361-3p	0	0	0	1	0	0	ORM2	orosomucoid 2
hsa-miR-361-3p	1	0	1	1	1	1	ZNF618	zinc finger protein 618
hsa-miR-361-3p	0	0	0	1	0	0	CD52	CD52 molecule
hsa-miR-361-3p	0	0	0	1	1	1	FAM83C	family with sequence similarity 83, member C
hsa-miR-361-3p	1	0	1	1	1	1	FUCA1	fucosidase, alpha-L- 1, tissue
hsa-miR-361-3p	0	0	1	1	0	0	WDR46	WD repeat domain 46
hsa-miR-361-3p	0	0	0	1	0	0	LOC729305	uncharacterized LOC729305
hsa-miR-361-3p	0	0	1	1	0	0	RAP1GAP	RAP1 GTPase activating protein
hsa-miR-361-3p	0	0	0	1	0	0	HLA-DMA	major histocompatibility complex, class II, DM alpha
hsa-miR-361-3p	0	0	0	1	0	0	FKBPL	FK506 binding protein like
hsa-miR-361-3p	0	0	0	1	0	0	FAM70B	family with sequence similarity 70, member B
hsa-miR-361-3p	0	0	0	1	0	0	SKIV2L	superkiller viralicidic activity 2-like (S. cerevisiae)
hsa-miR-361-3p	1	0	1	1	1	1	SCN1A	sodium channel, voltage-gated, type I, alpha subunit
hsa-miR-361-3p	1	0	1	1	1	1	PADI2	peptidyl arginine deiminase, type II
hsa-miR-361-3p	1	0	1	1	0	0	EHMT2	euchromatic histone-lysine N-methyltransferase 2
hsa-miR-361-3p	0	0	0	1	1	1	MFAP2	microfibrillar-associated protein 2
hsa-miR-361-3p	0	0	1	1	1	1	PECAM1	platelet/endothelial cell adhesion molecule 1
hsa-miR-361-3p	0	0	1	1	1	1	RAB3GAP1	RAB3 GTPase activating protein subunit 1 (catalytic)
hsa-miR-361-3p	0	0	1	1	0	0	FOXS1	forkhead box S1
hsa-miR-361-3p	0	0	1	1	0	0	DGKK	diacylglycerol kinase, kappa
hsa-miR-361-3p	0	0	1	1	0	0	PRAMEF9	PRAME family member 9
[truncated: 110 more rows]
