# Supplementary material for: Profiling of Selected MicroRNAs in Proliferative Eutopic Endometrium of Women with Ovarian Endometriosis
Source: Biomed Res Int. 2015 Aug 20;2015:760698. doi: 10.1155/2015/760698 (PMC4558423; doi:10.1155/2015/760698)
Supplement: Supplementary file 1 — Table I: The names of miRNAs significantly differentially expressed between eutopic endometrium of patients with endometriosis vs eutopic endometrium of patients without endometriosis. Table II: The associations between miRNA and mRNA, which presents detailed results of the search of six major databases i.e targetscan, tarbase, miranda, mirbase, mirtarget2 and pictar. [file 760698.f1.zip › 760698.f1/Table II/hsa-miR-362-3p.tsv]

miR	targetscan	tarbase	miranda	mirbase	mirtarget2	pictar	GeneSymbol	GeneName
hsa-miR-362-3p	1	0	1	1	1	1	GRB2	growth factor receptor-bound protein 2
hsa-miR-362-3p	1	0	1	1	1	1	PEA15	phosphoprotein enriched in astrocytes 15
hsa-miR-362-3p	1	0	1	1	1	1	GRIK2	glutamate receptor, ionotropic, kainate 2
hsa-miR-362-3p	1	0	1	1	0	0	NOG	noggin
hsa-miR-362-3p	1	0	1	1	1	1	CHD5	chromodomain helicase DNA binding protein 5
hsa-miR-362-3p	1	0	1	1	1	1	DCX	doublecortin
hsa-miR-362-3p	1	0	1	1	1	1	SSR1	signal sequence receptor, alpha
hsa-miR-362-3p	1	0	1	1	1	1	H3F3B	H3 histone, family 3B (H3.3B)
hsa-miR-362-3p	1	0	1	1	1	1	KCNMA1	potassium large conductance calcium-activated channel, subfamily M, alpha member 1
hsa-miR-362-3p	1	0	1	1	1	1	FOXN3	forkhead box N3
hsa-miR-362-3p	1	0	1	1	1	1	RAI1	retinoic acid induced 1
hsa-miR-362-3p	1	0	1	1	1	1	ZBTB39	zinc finger and BTB domain containing 39
hsa-miR-362-3p	1	0	1	1	0	0	FBXO45	F-box protein 45
hsa-miR-362-3p	1	0	1	1	1	1	CNTN3	contactin 3 (plasmacytoma associated)
hsa-miR-362-3p	1	0	1	0	1	1	LRAT	lecithin retinol acyltransferase (phosphatidylcholine--retinol O-acyltransferase)
hsa-miR-362-3p	1	0	1	0	1	1	PCGF3	polycomb group ring finger 3
hsa-miR-362-3p	1	0	1	1	1	1	PTPRJ	protein tyrosine phosphatase, receptor type, J
hsa-miR-362-3p	1	0	1	1	1	1	WAPAL	wings apart-like homolog (Drosophila)
hsa-miR-362-3p	1	0	1	1	1	1	WNT1	wingless-type MMTV integration site family, member 1
hsa-miR-362-3p	1	0	1	0	1	1	FAXC	failed axon connections homolog (Drosophila)
hsa-miR-362-3p	1	0	1	0	1	1	SLC6A6	solute carrier family 6 (neurotransmitter transporter, taurine), member 6
hsa-miR-362-3p	1	0	1	1	1	1	FXR2	fragile X mental retardation, autosomal homolog 2
hsa-miR-362-3p	1	0	1	1	0	0	ERH	enhancer of rudimentary homolog (Drosophila)
hsa-miR-362-3p	1	0	1	1	1	1	TNFAIP8L3	tumor necrosis factor, alpha-induced protein 8-like 3
hsa-miR-362-3p	1	0	1	1	1	1	SMARCAD1	SWI/SNF-related, matrix-associated actin-dependent regulator of chromatin, subfamily a, containing DEAD/H box 1
hsa-miR-362-3p	1	0	0	1	1	1	LLGL1	lethal giant larvae homolog 1 (Drosophila)
hsa-miR-362-3p	1	0	1	1	1	1	PRUNE2	prune homolog 2 (Drosophila)
hsa-miR-362-3p	1	0	1	0	1	1	RGMB	RGM domain family, member B
hsa-miR-362-3p	1	0	1	0	1	1	NHS	Nance-Horan syndrome (congenital cataracts and dental anomalies)
hsa-miR-362-3p	1	0	1	1	1	1	BCLAF1	BCL2-associated transcription factor 1
hsa-miR-362-3p	1	0	1	1	1	1	KLF12	Kruppel-like factor 12
hsa-miR-362-3p	1	0	0	1	1	1	SOX17	SRY (sex determining region Y)-box 17
hsa-miR-362-3p	1	0	1	1	1	1	PCDHA5	protocadherin alpha 5
hsa-miR-362-3p	1	0	1	0	1	1	DPYSL3	dihydropyrimidinase-like 3
hsa-miR-362-3p	1	0	1	0	1	1	LHFPL3	lipoma HMGIC fusion partner-like 3
hsa-miR-362-3p	1	0	1	1	1	1	PAPD5	PAP associated domain containing 5
hsa-miR-362-3p	1	0	1	1	1	1	KDELR2	KDEL (Lys-Asp-Glu-Leu) endoplasmic reticulum protein retention receptor 2
hsa-miR-362-3p	1	0	1	1	1	1	IKZF2	IKAROS family zinc finger 2 (Helios)
hsa-miR-362-3p	1	0	1	0	1	1	DPYSL2	dihydropyrimidinase-like 2
hsa-miR-362-3p	1	0	1	1	1	1	NCOA1	nuclear receptor coactivator 1
hsa-miR-362-3p	1	0	1	1	1	1	GABRB2	gamma-aminobutyric acid (GABA) A receptor, beta 2
hsa-miR-362-3p	1	0	1	0	1	1	VAPA	VAMP (vesicle-associated membrane protein)-associated protein A, 33kDa
hsa-miR-362-3p	1	0	1	0	1	1	CNOT6L	CCR4-NOT transcription complex, subunit 6-like
hsa-miR-362-3p	1	0	1	1	1	1	KCTD11	potassium channel tetramerisation domain containing 11
hsa-miR-362-3p	1	0	1	1	1	1	DUSP10	dual specificity phosphatase 10
hsa-miR-362-3p	1	0	1	1	0	0	PAX2	paired box 2
hsa-miR-362-3p	1	0	1	1	1	1	MCAM	melanoma cell adhesion molecule
hsa-miR-362-3p	1	0	1	1	1	1	RAB6B	RAB6B, member RAS oncogene family
hsa-miR-362-3p	1	0	1	1	1	1	RASSF2	Ras association (RalGDS/AF-6) domain family member 2
hsa-miR-362-3p	1	0	1	1	1	1	ANKRD17	ankyrin repeat domain 17
hsa-miR-362-3p	1	0	1	1	1	1	PLCXD3	phosphatidylinositol-specific phospholipase C, X domain containing 3
hsa-miR-362-3p	1	0	1	1	1	1	PCDH11X	protocadherin 11 X-linked
hsa-miR-362-3p	1	0	1	0	1	1	PCDHA7	protocadherin alpha 7
hsa-miR-362-3p	1	0	1	1	0	0	ADAMTS4	ADAM metallopeptidase with thrombospondin type 1 motif, 4
hsa-miR-362-3p	1	0	1	1	1	1	SPCS2	signal peptidase complex subunit 2 homolog (S. cerevisiae)
hsa-miR-362-3p	1	0	1	0	1	1	LIN28A	lin-28 homolog A (C. elegans)
hsa-miR-362-3p	1	0	1	1	1	1	ERI3	ERI1 exoribonuclease family member 3
hsa-miR-362-3p	1	0	1	1	1	1	IPO5	importin 5
hsa-miR-362-3p	1	0	1	1	1	1	ZC3H7B	zinc finger CCCH-type containing 7B
hsa-miR-362-3p	1	0	1	1	1	1	ADCY9	adenylate cyclase 9
hsa-miR-362-3p	1	0	1	1	1	1	SHB	Src homology 2 domain containing adaptor protein B
hsa-miR-362-3p	1	0	1	1	1	1	FAM219A	family with sequence similarity 219, member A
hsa-miR-362-3p	1	0	1	1	1	1	FAM178A	family with sequence similarity 178, member A
hsa-miR-362-3p	1	0	1	1	0	0	PTAR1	protein prenyltransferase alpha subunit repeat containing 1
hsa-miR-362-3p	1	0	1	0	1	1	GAS7	growth arrest-specific 7
hsa-miR-362-3p	1	0	1	0	1	1	PCSK2	proprotein convertase subtilisin/kexin type 2
hsa-miR-362-3p	1	0	1	1	1	1	ZNF655	zinc finger protein 655
hsa-miR-362-3p	1	0	1	0	1	1	TP53INP2	tumor protein p53 inducible nuclear protein 2
hsa-miR-362-3p	1	0	1	0	1	1	MEGF10	multiple EGF-like-domains 10
hsa-miR-362-3p	1	0	1	0	1	1	SP1	Sp1 transcription factor
hsa-miR-362-3p	1	0	1	0	1	1	PCDHA11	protocadherin alpha 11
hsa-miR-362-3p	1	0	1	1	1	1	TOB2	transducer of ERBB2, 2
hsa-miR-362-3p	1	0	1	1	1	1	PCDHA1	protocadherin alpha 1
hsa-miR-362-3p	1	0	1	0	0	0	BAHCC1	BAH domain and coiled-coil containing 1
hsa-miR-362-3p	1	0	0	1	0	0	PRR12	proline rich 12
hsa-miR-362-3p	1	0	1	1	1	1	SLC8A1	solute carrier family 8 (sodium/calcium exchanger), member 1
hsa-miR-362-3p	1	0	1	1	1	1	NAA15	N(alpha)-acetyltransferase 15, NatA auxiliary subunit
hsa-miR-362-3p	1	0	1	1	1	1	ABCA12	ATP-binding cassette, sub-family A (ABC1), member 12
hsa-miR-362-3p	1	0	1	1	1	1	PCDHA2	protocadherin alpha 2
hsa-miR-362-3p	1	0	1	1	1	1	OPCML	opioid binding protein/cell adhesion molecule-like
hsa-miR-362-3p	1	0	0	1	1	1	ARL8A	ADP-ribosylation factor-like 8A
hsa-miR-362-3p	1	0	1	1	1	1	CTNND1	catenin (cadherin-associated protein), delta 1
hsa-miR-362-3p	1	0	1	0	1	1	MLL2	myeloid/lymphoid or mixed-lineage leukemia 2
hsa-miR-362-3p	1	0	1	0	1	1	SYNGAP1	synaptic Ras GTPase activating protein 1
hsa-miR-362-3p	1	0	1	0	1	1	NPNT	nephronectin
hsa-miR-362-3p	1	0	1	0	1	1	KHNYN	KH and NYN domain containing
hsa-miR-362-3p	1	0	1	1	1	1	DENND5B	DENN/MADD domain containing 5B
hsa-miR-362-3p	1	0	1	0	1	1	LBH	limb bud and heart development homolog (mouse)
hsa-miR-362-3p	1	0	1	0	1	1	BMF	Bcl2 modifying factor
hsa-miR-362-3p	1	0	1	1	1	1	DLGAP4	discs, large (Drosophila) homolog-associated protein 4
hsa-miR-362-3p	1	0	1	1	1	1	AKAP1	A kinase (PRKA) anchor protein 1
hsa-miR-362-3p	1	0	1	1	1	1	ZNF238	zinc finger protein 238
hsa-miR-362-3p	1	0	1	1	1	1	LHX9	LIM homeobox 9
hsa-miR-362-3p	1	0	1	1	1	1	KDM5C	lysine (K)-specific demethylase 5C
hsa-miR-362-3p	1	0	1	1	0	0	TCF7L1	transcription factor 7-like 1 (T-cell specific, HMG-box)
hsa-miR-362-3p	1	0	1	0	1	1	KCMF1	potassium channel modulatory factor 1
hsa-miR-362-3p	1	0	1	1	1	1	ATXN1	ataxin 1
hsa-miR-362-3p	1	0	1	0	1	1	N4BP3	NEDD4 binding protein 3
hsa-miR-362-3p	1	0	1	1	1	1	RNF214	ring finger protein 214
hsa-miR-362-3p	1	0	1	0	1	1	PDE5A	phosphodiesterase 5A, cGMP-specific
hsa-miR-362-3p	1	0	1	1	1	1	CRMP1	collapsin response mediator protein 1
hsa-miR-362-3p	1	0	1	0	1	1	SRGAP3	SLIT-ROBO Rho GTPase activating protein 3
hsa-miR-362-3p	1	0	1	0	1	1	ERC2	ELKS/RAB6-interacting/CAST family member 2
hsa-miR-362-3p	1	0	1	1	1	1	FBN1	fibrillin 1
hsa-miR-362-3p	1	0	1	1	1	1	USF2	upstream transcription factor 2, c-fos interacting
hsa-miR-362-3p	1	0	1	1	1	1	BLCAP	bladder cancer associated protein
hsa-miR-362-3p	1	0	1	1	1	1	PCDHA8	protocadherin alpha 8
hsa-miR-362-3p	1	0	1	1	1	1	MON2	MON2 homolog (S. cerevisiae)
hsa-miR-362-3p	1	0	1	0	1	1	BCL7A	B-cell CLL/lymphoma 7A
hsa-miR-362-3p	1	0	1	1	1	1	ONECUT2	one cut homeobox 2
hsa-miR-362-3p	1	0	1	1	1	1	VAMP7	vesicle-associated membrane protein 7
hsa-miR-362-3p	1	0	1	0	1	1	OLA1	Obg-like ATPase 1
hsa-miR-362-3p	1	0	1	1	1	1	LMX1A	LIM homeobox transcription factor 1, alpha
hsa-miR-362-3p	1	0	1	1	1	1	PCDHA6	protocadherin alpha 6
hsa-miR-362-3p	1	0	1	1	1	1	FAM120A	family with sequence similarity 120A
hsa-miR-362-3p	1	0	1	0	1	1	WIPF2	WAS/WASL interacting protein family, member 2
hsa-miR-362-3p	1	0	1	0	1	1	TNRC6B	trinucleotide repeat containing 6B
hsa-miR-362-3p	1	0	1	1	1	1	AKAP2	A kinase (PRKA) anchor protein 2
hsa-miR-362-3p	1	0	1	1	1	1	PHF21A	PHD finger protein 21A
hsa-miR-362-3p	1	0	1	1	0	0	MTUS2	microtubule associated tumor suppressor candidate 2
hsa-miR-362-3p	1	0	1	1	1	1	C1orf216	chromosome 1 open reading frame 216
hsa-miR-362-3p	1	0	1	0	1	1	ZCCHC24	zinc finger, CCHC domain containing 24
hsa-miR-362-3p	1	0	1	1	1	1	RBM33	RNA binding motif protein 33
hsa-miR-362-3p	1	0	1	1	1	1	NUMBL	numb homolog (Drosophila)-like
hsa-miR-362-3p	1	0	1	1	1	1	MCF2L	MCF.2 cell line derived transforming sequence-like
hsa-miR-362-3p	1	0	1	1	1	1	DCUN1D3	DCN1, defective in cullin neddylation 1, domain containing 3 (S. cerevisiae)
hsa-miR-362-3p	1	0	1	1	1	1	TOR3A	torsin family 3, member A
hsa-miR-362-3p	1	0	1	1	0	0	CPA4	carboxypeptidase A4
hsa-miR-362-3p	1	0	1	1	1	1	CLTB	clathrin, light chain B
hsa-miR-362-3p	1	0	1	1	1	1	ASXL1	additional sex combs like 1 (Drosophila)
hsa-miR-362-3p	1	0	1	1	1	1	MRAS	muscle RAS oncogene homolog
hsa-miR-362-3p	1	0	1	1	1	1	CBX1	chromobox homolog 1
hsa-miR-362-3p	1	0	1	1	1	1	ARL4A	ADP-ribosylation factor-like 4A
hsa-miR-362-3p	1	0	0	1	1	1	SUGP2	SURP and G patch domain containing 2
hsa-miR-362-3p	1	0	1	1	1	1	SOCS6	suppressor of cytokine signaling 6
hsa-miR-362-3p	1	0	1	0	1	1	RNF165	ring finger protein 165
hsa-miR-362-3p	1	0	1	0	1	1	BMPR2	bone morphogenetic protein receptor, type II (serine/threonine kinase)
hsa-miR-362-3p	1	0	1	1	1	1	PSIP1	PC4 and SFRS1 interacting protein 1
hsa-miR-362-3p	1	0	1	0	1	1	PCDHA13	protocadherin alpha 13
hsa-miR-362-3p	1	0	1	1	1	1	PTPN1	protein tyrosine phosphatase, non-receptor type 1
hsa-miR-362-3p	1	0	1	0	1	1	PCDHAC2	protocadherin alpha subfamily C, 2
hsa-miR-362-3p	1	0	1	1	1	1	PCDHA3	protocadherin alpha 3
hsa-miR-362-3p	1	0	1	1	1	1	GIGYF1	GRB10 interacting GYF protein 1
hsa-miR-362-3p	1	0	1	1	1	1	NR2C2	nuclear receptor subfamily 2, group C, member 2
hsa-miR-362-3p	1	0	1	0	1	1	RAB1A	RAB1A, member RAS oncogene family
hsa-miR-362-3p	1	0	1	0	1	1	PCDHA10	protocadherin alpha 10
hsa-miR-362-3p	1	0	1	1	1	1	KRIT1	KRIT1, ankyrin repeat containing
hsa-miR-362-3p	1	0	1	1	1	1	AGAP3	ArfGAP with GTPase domain, ankyrin repeat and PH domain 3
hsa-miR-362-3p	1	0	1	1	1	1	SERBP1	SERPINE1 mRNA binding protein 1
hsa-miR-362-3p	1	0	1	1	0	0	INO80D	INO80 complex subunit D
hsa-miR-362-3p	1	0	1	1	0	0	LMO2	LIM domain only 2 (rhombotin-like 1)
hsa-miR-362-3p	1	0	1	1	1	1	RBPMS	RNA binding protein with multiple splicing
hsa-miR-362-3p	1	0	1	0	0	0	FAT3	FAT tumor suppressor homolog 3 (Drosophila)
hsa-miR-362-3p	1	0	1	0	1	1	PMEPA1	prostate transmembrane protein, androgen induced 1
hsa-miR-362-3p	1	0	1	1	1	1	NAV3	neuron navigator 3
hsa-miR-362-3p	1	0	1	1	1	1	RIMBP2	RIMS binding protein 2
hsa-miR-362-3p	1	0	1	1	1	1	MAPRE1	microtubule-associated protein, RP/EB family, member 1
hsa-miR-362-3p	1	0	1	1	1	1	PTBP2	polypyrimidine tract binding protein 2
hsa-miR-362-3p	1	0	1	1	1	1	ATP6V1C1	ATPase, H+ transporting, lysosomal 42kDa, V1 subunit C1
hsa-miR-362-3p	1	0	1	1	1	1	PHB	prohibitin
hsa-miR-362-3p	1	0	1	0	1	1	CEP350	centrosomal protein 350kDa
hsa-miR-362-3p	1	0	1	0	1	1	TRIM33	tripartite motif containing 33
hsa-miR-362-3p	1	0	1	1	1	1	RNF139	ring finger protein 139
hsa-miR-362-3p	1	0	1	1	1	1	PALM2-AKAP2	PALM2-AKAP2 readthrough
hsa-miR-362-3p	1	0	1	1	1	1	C16orf45	chromosome 16 open reading frame 45
hsa-miR-362-3p	1	0	1	1	1	1	PCDHA4	protocadherin alpha 4
hsa-miR-362-3p	1	0	1	0	1	1	RGAG4	retrotransposon gag domain containing 4
hsa-miR-362-3p	1	0	1	0	1	1	PCDHA12	protocadherin alpha 12
hsa-miR-362-3p	1	0	1	1	1	1	PPFIA4	protein tyrosine phosphatase, receptor type, f polypeptide (PTPRF), interacting protein (liprin), alpha 4
hsa-miR-362-3p	1	0	1	1	1	1	TMEM245	transmembrane protein 245
hsa-miR-362-3p	1	0	1	1	1	1	SPEN	spen homolog, transcriptional regulator (Drosophila)
hsa-miR-362-3p	1	0	1	0	1	1	SLC26A2	solute carrier family 26 (sulfate transporter), member 2
hsa-miR-362-3p	1	0	1	1	1	1	PGAP1	post-GPI attachment to proteins 1
hsa-miR-362-3p	1	0	1	0	1	1	THRB	thyroid hormone receptor, beta
hsa-miR-362-3p	1	0	1	1	1	1	PRR7	proline rich 7 (synaptic)
hsa-miR-362-3p	1	0	1	0	1	1	SLC5A3	solute carrier family 5 (sodium/myo-inositol cotransporter), member 3
hsa-miR-362-3p	1	0	1	0	1	1	KCNS2	potassium voltage-gated channel, delayed-rectifier, subfamily S, member 2
hsa-miR-362-3p	1	0	1	1	1	1	C16orf70	chromosome 16 open reading frame 70
hsa-miR-362-3p	1	0	1	1	1	1	TARDBP	TAR DNA binding protein
hsa-miR-362-3p	1	0	1	0	1	1	SMAD2	SMAD family member 2
hsa-miR-362-3p	1	0	1	0	1	1	VSX2	visual system homeobox 2
hsa-miR-362-3p	1	0	1	0	1	1	FBXO41	F-box protein 41
hsa-miR-362-3p	1	0	1	1	1	1	IRF2BPL	interferon regulatory factor 2 binding protein-like
hsa-miR-362-3p	1	0	1	0	1	1	PRKCA	protein kinase C, alpha
hsa-miR-362-3p	1	0	1	1	1	1	SSX2IP	synovial sarcoma, X breakpoint 2 interacting protein
hsa-miR-362-3p	1	0	1	1	1	1	RABGAP1	RAB GTPase activating protein 1
hsa-miR-362-3p	1	0	1	0	1	1	ZFHX4	zinc finger homeobox 4
hsa-miR-362-3p	1	0	1	1	1	1	PTPN9	protein tyrosine phosphatase, non-receptor type 9
hsa-miR-362-3p	1	0	1	0	1	1	PAPPA	pregnancy-associated plasma protein A, pappalysin 1
hsa-miR-362-3p	1	0	1	0	1	1	PDE4D	phosphodiesterase 4D, cAMP-specific
hsa-miR-362-3p	1	0	1	0	1	1	MED14	mediator complex subunit 14
hsa-miR-362-3p	1	0	1	0	1	1	BCL11B	B-cell CLL/lymphoma 11B (zinc finger protein)
hsa-miR-362-3p	1	0	1	1	1	1	ZER1	zer-1 homolog (C. elegans)
hsa-miR-362-3p	1	0	1	1	1	1	HOXA3	homeobox A3
hsa-miR-362-3p	1	0	1	0	1	1	PCDHAC1	protocadherin alpha subfamily C, 1
hsa-miR-362-3p	1	0	0	1	1	1	MGAT3	mannosyl (beta-1,4-)-glycoprotein beta-1,4-N-acetylglucosaminyltransferase
hsa-miR-362-3p	1	0	1	1	1	1	SLC23A2	solute carrier family 23 (nucleobase transporters), member 2
hsa-miR-362-3p	1	0	1	0	1	1	CCDC85A	coiled-coil domain containing 85A
hsa-miR-362-3p	1	0	1	1	0	0	ZC3H10	zinc finger CCCH-type containing 10
hsa-miR-362-3p	1	0	1	1	0	0	INHBB	inhibin, beta B
hsa-miR-362-3p	1	0	1	1	1	1	SPRED2	sprouty-related, EVH1 domain containing 2
hsa-miR-362-3p	1	0	1	1	1	1	UNC45B	unc-45 homolog B (C. elegans)
hsa-miR-362-3p	1	0	1	1	1	1	ZDHHC5	zinc finger, DHHC-type containing 5
hsa-miR-362-3p	1	0	1	1	1	1	UNK	unkempt homolog (Drosophila)
hsa-miR-362-3p	1	0	1	0	1	1	ADRA2B	adrenoceptor alpha 2B
hsa-miR-362-3p	1	0	1	1	1	1	CASZ1	castor zinc finger 1
hsa-miR-362-3p	1	0	1	1	1	1	TCEAL8	transcription elongation factor A (SII)-like 8
hsa-miR-362-3p	1	0	1	1	1	1	FOXI2	forkhead box I2
hsa-miR-362-3p	1	0	1	1	0	0	STAG3L4	stromal antigen 3-like 4
hsa-miR-362-3p	1	0	1	1	1	1	DYRK2	dual-specificity tyrosine-(Y)-phosphorylation regulated kinase 2
hsa-miR-362-3p	1	0	1	1	1	1	TMEM185A	transmembrane protein 185A
hsa-miR-362-3p	1	0	1	1	1	1	MTSS1L	metastasis suppressor 1-like
hsa-miR-362-3p	1	0	1	1	1	1	CUL2	cullin 2
hsa-miR-362-3p	1	0	0	0	1	1	RNF216	ring finger protein 216
hsa-miR-362-3p	1	0	1	1	1	1	PTCH1	patched 1
hsa-miR-362-3p	1	0	1	1	1	1	PPP2R2C	protein phosphatase 2, regulatory subunit B, gamma
hsa-miR-362-3p	1	0	1	1	1	1	APBA2	amyloid beta (A4) precursor protein-binding, family A, member 2
hsa-miR-362-3p	1	0	1	1	1	1	TRIM55	tripartite motif containing 55
hsa-miR-362-3p	1	0	0	1	1	1	WNT3	wingless-type MMTV integration site family, member 3
hsa-miR-362-3p	1	0	1	1	1	1	ZFX	zinc finger protein, X-linked
hsa-miR-362-3p	1	0	1	1	1	1	ZZZ3	zinc finger, ZZ-type containing 3
hsa-miR-362-3p	1	0	1	1	1	1	SLC39A10	solute carrier family 39 (zinc transporter), member 10
hsa-miR-362-3p	1	0	1	1	1	1	ABCC5	ATP-binding cassette, sub-family C (CFTR/MRP), member 5
hsa-miR-362-3p	1	0	1	0	1	1	PTPRT	protein tyrosine phosphatase, receptor type, T
hsa-miR-362-3p	1	0	1	0	1	1	KIAA0408	KIAA0408
hsa-miR-362-3p	1	0	1	1	1	1	NRXN1	neurexin 1
hsa-miR-362-3p	1	0	1	1	1	1	HIPK1	homeodomain interacting protein kinase 1
hsa-miR-362-3p	1	0	1	0	1	1	RBM12	RNA binding motif protein 12
hsa-miR-362-3p	1	0	1	1	1	1	DNM3	dynamin 3
hsa-miR-362-3p	0	0	1	1	1	1	MAU2	MAU2 chromatid cohesion factor homolog (C. elegans)
hsa-miR-362-3p	1	0	1	1	1	1	ARHGEF15	Rho guanine nucleotide exchange factor (GEF) 15
hsa-miR-362-3p	1	0	1	1	0	0	KIAA1045	KIAA1045
hsa-miR-362-3p	0	0	1	1	0	0	RTEL1	regulator of telomere elongation helicase 1
hsa-miR-362-3p	1	0	1	1	0	0	ATAD2B	ATPase family, AAA domain containing 2B
hsa-miR-362-3p	0	0	1	1	1	1	COPS7A	COP9 constitutive photomorphogenic homolog subunit 7A (Arabidopsis)
hsa-miR-362-3p	1	0	1	0	0	0	ODZ4	odz, odd Oz/ten-m homolog 4 (Drosophila)
hsa-miR-362-3p	1	0	1	1	1	1	HACE1	HECT domain and ankyrin repeat containing E3 ubiquitin protein ligase 1
hsa-miR-362-3p	1	0	1	0	0	0	CDH23	cadherin-related 23
hsa-miR-362-3p	1	0	1	1	1	1	NPAS3	neuronal PAS domain protein 3
hsa-miR-362-3p	0	0	1	1	1	1	UNC80	unc-80 homolog (C. elegans)
hsa-miR-362-3p	0	0	1	0	0	0	MYSM1	Myb-like, SWIRM and MPN domains 1
hsa-miR-362-3p	1	0	1	1	0	0	ADC	arginine decarboxylase
hsa-miR-362-3p	0	0	1	1	0	0	CIRH1A	cirrhosis, autosomal recessive 1A (cirhin)
hsa-miR-362-3p	1	0	1	1	1	1	CSGALNACT1	chondroitin sulfate N-acetylgalactosaminyltransferase 1
hsa-miR-362-3p	1	0	1	1	1	1	PAM	peptidylglycine alpha-amidating monooxygenase
hsa-miR-362-3p	1	0	1	1	1	1	UBR3	ubiquitin protein ligase E3 component n-recognin 3 (putative)
hsa-miR-362-3p	1	0	1	1	1	1	C11orf57	chromosome 11 open reading frame 57
hsa-miR-362-3p	0	0	1	1	0	0	SSPO	SCO-spondin homolog (Bos taurus)
hsa-miR-362-3p	0	0	1	1	0	0	PTPRF	protein tyrosine phosphatase, receptor type, F
hsa-miR-362-3p	0	0	1	0	1	1	ITPR1	inositol 1,4,5-trisphosphate receptor, type 1
hsa-miR-362-3p	1	0	1	1	1	1	DAPK1	death-associated protein kinase 1
hsa-miR-362-3p	1	0	1	1	1	1	BACH2	BTB and CNC homology 1, basic leucine zipper transcription factor 2
hsa-miR-362-3p	1	0	1	1	1	1	PLEKHH3	pleckstrin homology domain containing, family H (with MyTH4 domain) member 3
hsa-miR-362-3p	1	0	1	1	1	1	MEF2A	myocyte enhancer factor 2A
hsa-miR-362-3p	1	0	1	1	1	1	PCCB	propionyl CoA carboxylase, beta polypeptide
hsa-miR-362-3p	1	0	1	1	1	1	PML	promyelocytic leukemia
hsa-miR-362-3p	1	0	1	1	1	1	DTNA	dystrobrevin, alpha
hsa-miR-362-3p	1	0	1	1	1	1	PRKACB	protein kinase, cAMP-dependent, catalytic, beta
hsa-miR-362-3p	0	0	1	0	1	1	NPY1R	neuropeptide Y receptor Y1
hsa-miR-362-3p	0	0	1	1	1	1	DGKE	diacylglycerol kinase, epsilon 64kDa
hsa-miR-362-3p	0	0	1	1	0	0	IFT27	intraflagellar transport 27 homolog (Chlamydomonas)
hsa-miR-362-3p	0	0	1	1	0	0	IGFBP2	insulin-like growth factor binding protein 2, 36kDa
hsa-miR-362-3p	0	0	1	1	0	0	EIF4E2	eukaryotic translation initiation factor 4E family member 2
hsa-miR-362-3p	0	0	1	1	0	0	CFLAR	CASP8 and FADD-like apoptosis regulator
hsa-miR-362-3p	1	0	1	1	1	1	EPB41	erythrocyte membrane protein band 4.1 (elliptocytosis 1, RH-linked)
hsa-miR-362-3p	1	0	1	1	0	0	GRIN2A	glutamate receptor, ionotropic, N-methyl D-aspartate 2A
hsa-miR-362-3p	1	0	1	1	1	1	PHLDB2	pleckstrin homology-like domain, family B, member 2
hsa-miR-362-3p	0	0	1	1	1	1	EIF4G1	eukaryotic translation initiation factor 4 gamma, 1
hsa-miR-362-3p	0	0	1	1	0	0	SPTBN2	spectrin, beta, non-erythrocytic 2
hsa-miR-362-3p	1	0	1	1	1	1	TMBIM6	transmembrane BAX inhibitor motif containing 6
hsa-miR-362-3p	1	0	1	1	1	1	SOCS2	suppressor of cytokine signaling 2
hsa-miR-362-3p	1	0	1	0	0	0	MAP3K1	mitogen-activated protein kinase kinase kinase 1, E3 ubiquitin protein ligase
hsa-miR-362-3p	1	0	1	1	0	0	PAK1	p21 protein (Cdc42/Rac)-activated kinase 1
hsa-miR-362-3p	0	0	1	1	1	1	SH2D1A	SH2 domain containing 1A
hsa-miR-362-3p	1	0	1	1	1	1	KAT6B	K(lysine) acetyltransferase 6B
hsa-miR-362-3p	1	0	1	0	1	1	WDR82	WD repeat domain 82
hsa-miR-362-3p	1	0	1	1	1	1	ANKRD13A	ankyrin repeat domain 13A
hsa-miR-362-3p	1	0	1	0	1	1	KLHL3	kelch-like 3 (Drosophila)
hsa-miR-362-3p	0	0	1	1	0	0	NCOA6	nuclear receptor coactivator 6
hsa-miR-362-3p	0	0	1	1	1	1	BAX	BCL2-associated X protein
hsa-miR-362-3p	0	0	1	0	0	0	TIGD7	tigger transposable element derived 7
hsa-miR-362-3p	0	0	1	1	0	0	NYX	nyctalopin
hsa-miR-362-3p	1	0	1	1	1	1	ERGIC1	endoplasmic reticulum-golgi intermediate compartment (ERGIC) 1
hsa-miR-362-3p	0	0	1	0	1	1	KANSL3	KAT8 regulatory NSL complex subunit 3
hsa-miR-362-3p	1	0	1	1	1	1	ATAD1	ATPase family, AAA domain containing 1
hsa-miR-362-3p	1	0	1	1	1	1	RGS10	regulator of G-protein signaling 10
hsa-miR-362-3p	0	0	1	1	0	0	SNRPN	small nuclear ribonucleoprotein polypeptide N
hsa-miR-362-3p	1	0	1	1	1	1	NTRK2	neurotrophic tyrosine kinase, receptor, type 2
hsa-miR-362-3p	1	0	1	1	0	0	FOXP2	forkhead box P2
hsa-miR-362-3p	0	0	1	1	0	0	CLDN19	claudin 19
hsa-miR-362-3p	1	0	1	0	1	1	IL1RAP	interleukin 1 receptor accessory protein
hsa-miR-362-3p	0	0	1	1	1	1	CLDND1	claudin domain containing 1
hsa-miR-362-3p	0	0	1	0	1	1	COL13A1	collagen, type XIII, alpha 1
hsa-miR-362-3p	1	0	1	1	1	1	PALM2	paralemmin 2
hsa-miR-362-3p	1	0	1	1	1	1	PNISR	PNN-interacting serine/arginine-rich protein
hsa-miR-362-3p	1	0	1	1	1	1	ARL4C	ADP-ribosylation factor-like 4C
hsa-miR-362-3p	1	0	1	1	1	1	MYB	v-myb myeloblastosis viral oncogene homolog (avian)
hsa-miR-362-3p	0	0	1	1	1	1	PARP16	poly (ADP-ribose) polymerase family, member 16
hsa-miR-362-3p	0	0	1	1	0	0	EIF3C	eukaryotic translation initiation factor 3, subunit C
hsa-miR-362-3p	1	0	1	1	1	1	NIP7	nuclear import 7 homolog (S. cerevisiae)
hsa-miR-362-3p	1	0	1	1	1	1	CADM3	cell adhesion molecule 3
hsa-miR-362-3p	1	0	1	1	1	1	PTBP3	polypyrimidine tract binding protein 3
hsa-miR-362-3p	0	0	1	1	0	0	MLST8	MTOR associated protein, LST8 homolog (S. cerevisiae)
hsa-miR-362-3p	0	0	1	1	0	0	UBR4	ubiquitin protein ligase E3 component n-recognin 4
hsa-miR-362-3p	1	0	1	1	1	1	STARD7	StAR-related lipid transfer (START) domain containing 7
hsa-miR-362-3p	0	0	1	1	0	0	BUB1	budding uninhibited by benzimidazoles 1 homolog (yeast)
hsa-miR-362-3p	0	0	1	0	0	0	LOC284561	uncharacterized LOC284561
hsa-miR-362-3p	1	0	1	1	1	1	COPS7B	COP9 constitutive photomorphogenic homolog subunit 7B (Arabidopsis)
hsa-miR-362-3p	1	0	1	0	1	1	CADPS2	Ca++-dependent secretion activator 2
hsa-miR-362-3p	0	0	1	1	0	0	NUDT7	nudix (nucleoside diphosphate linked moiety X)-type motif 7
hsa-miR-362-3p	1	0	1	1	1	1	RNF185	ring finger protein 185
hsa-miR-362-3p	0	0	1	1	1	1	MINA	MYC induced nuclear antigen
hsa-miR-362-3p	0	0	1	1	1	1	SPRTN	SprT-like N-terminal domain
hsa-miR-362-3p	1	0	1	1	1	1	SEC63	SEC63 homolog (S. cerevisiae)
hsa-miR-362-3p	1	0	1	1	1	1	FAM53C	family with sequence similarity 53, member C
hsa-miR-362-3p	0	0	1	1	1	1	NETO2	neuropilin (NRP) and tolloid (TLL)-like 2
hsa-miR-362-3p	0	0	1	1	1	1	FAM107A	family with sequence similarity 107, member A
hsa-miR-362-3p	1	0	1	1	1	1	FRMD6	FERM domain containing 6
hsa-miR-362-3p	0	0	1	0	0	0	LOC201617	uncharacterized LOC201617
hsa-miR-362-3p	0	0	1	0	0	0	JPX	JPX transcript, XIST activator (non-protein coding)
hsa-miR-362-3p	1	0	1	1	1	1	SCAMP5	secretory carrier membrane protein 5
hsa-miR-362-3p	1	0	1	1	0	0	SRL	sarcalumenin
hsa-miR-362-3p	1	0	1	1	1	1	SORBS2	sorbin and SH3 domain containing 2
hsa-miR-362-3p	0	0	1	1	0	0	RGL3	ral guanine nucleotide dissociation stimulator-like 3
hsa-miR-362-3p	0	0	1	1	1	1	PSME3	proteasome (prosome, macropain) activator subunit 3 (PA28 gamma; Ki)
hsa-miR-362-3p	0	0	1	0	1	1	ARHGAP42	Rho GTPase activating protein 42
hsa-miR-362-3p	0	0	1	1	0	0	NXF2	nuclear RNA export factor 2
hsa-miR-362-3p	0	0	1	1	0	0	TRIM41	tripartite motif containing 41
hsa-miR-362-3p	0	0	1	0	1	1	CDHR3	cadherin-related family member 3
hsa-miR-362-3p	1	0	1	0	1	1	TPBG	trophoblast glycoprotein
hsa-miR-362-3p	0	0	1	1	1	1	CAMKV	CaM kinase-like vesicle-associated
hsa-miR-362-3p	1	0	1	0	1	1	SLC25A37	solute carrier family 25 (mitochondrial iron transporter), member 37
hsa-miR-362-3p	0	0	1	0	1	1	CADM1	cell adhesion molecule 1
hsa-miR-362-3p	1	0	1	1	1	1	PIP4K2C	phosphatidylinositol-5-phosphate 4-kinase, type II, gamma
hsa-miR-362-3p	1	0	1	1	1	1	STXBP5	syntaxin binding protein 5 (tomosyn)
hsa-miR-362-3p	0	0	1	1	1	1	CCDC102B	coiled-coil domain containing 102B
hsa-miR-362-3p	1	0	1	1	1	1	ARIH2	ariadne homolog 2 (Drosophila)
hsa-miR-362-3p	1	0	1	0	1	1	TEF	thyrotrophic embryonic factor
hsa-miR-362-3p	1	0	1	0	1	1	RNF114	ring finger protein 114
hsa-miR-362-3p	1	0	1	1	1	1	MAFK	v-maf musculoaponeurotic fibrosarcoma oncogene homolog K (avian)
hsa-miR-362-3p	1	0	1	1	1	1	RRBP1	ribosome binding protein 1 homolog 180kDa (dog)
hsa-miR-362-3p	1	0	1	1	1	1	TIAM1	T-cell lymphoma invasion and metastasis 1
hsa-miR-362-3p	1	0	1	1	0	0	PRMT8	protein arginine methyltransferase 8
hsa-miR-362-3p	0	0	1	1	1	1	TGFBI	transforming growth factor, beta-induced, 68kDa
hsa-miR-362-3p	1	0	1	1	1	1	SIAH1	siah E3 ubiquitin protein ligase 1
hsa-miR-362-3p	0	0	1	1	1	1	TM2D3	TM2 domain containing 3
hsa-miR-362-3p	0	0	1	1	1	1	WBSCR17	Williams-Beuren syndrome chromosome region 17
hsa-miR-362-3p	0	0	1	1	1	1	MYO6	myosin VI
hsa-miR-362-3p	0	0	1	1	1	1	AQP3	aquaporin 3 (Gill blood group)
hsa-miR-362-3p	1	0	1	0	1	1	UBXN4	UBX domain protein 4
hsa-miR-362-3p	0	0	1	0	0	0	LOC284577	uncharacterized LOC284577
hsa-miR-362-3p	0	0	1	1	1	1	VDAC1	voltage-dependent anion channel 1
hsa-miR-362-3p	0	0	1	1	1	1	RPE	ribulose-5-phosphate-3-epimerase
hsa-miR-362-3p	0	0	1	0	0	0	ZNF815P	zinc finger protein 815, pseudogene
hsa-miR-362-3p	1	0	1	0	1	1	KBTBD8	kelch repeat and BTB (POZ) domain containing 8
hsa-miR-362-3p	1	0	1	1	1	1	EPB41L1	erythrocyte membrane protein band 4.1-like 1
hsa-miR-362-3p	1	0	1	1	1	1	CDV3	CDV3 homolog (mouse)
hsa-miR-362-3p	1	0	1	1	1	1	POU2F3	POU class 2 homeobox 3
hsa-miR-362-3p	0	0	1	1	1	1	TEX35	testis expressed 35
hsa-miR-362-3p	0	0	1	0	0	0	LOC285626	uncharacterized LOC285626
hsa-miR-362-3p	0	0	1	1	1	1	CBWD5	COBW domain containing 5
hsa-miR-362-3p	0	0	1	1	0	0	PSAPL1	prosaposin-like 1 (gene/pseudogene)
hsa-miR-362-3p	0	0	1	0	0	0	HLA-DQB2	major histocompatibility complex, class II, DQ beta 2
hsa-miR-362-3p	1	0	1	1	1	1	PIGA	phosphatidylinositol glycan anchor biosynthesis, class A
hsa-miR-362-3p	0	0	1	1	1	1	ARFGAP2	ADP-ribosylation factor GTPase activating protein 2
hsa-miR-362-3p	1	0	1	1	1	1	LARP1B	La ribonucleoprotein domain family, member 1B
hsa-miR-362-3p	0	0	1	1	0	0	ALDOA	aldolase A, fructose-bisphosphate
hsa-miR-362-3p	0	0	1	1	0	0	GDPD5	glycerophosphodiester phosphodiesterase domain containing 5
hsa-miR-362-3p	0	0	1	1	1	1	SLFN13	schlafen family member 13
hsa-miR-362-3p	0	0	1	1	1	1	GGA1	golgi-associated, gamma adaptin ear containing, ARF binding protein 1
hsa-miR-362-3p	0	0	1	0	0	0	CLEC4GP1	C-type lectin domain family 4, member G pseudogene 1
hsa-miR-362-3p	1	0	1	1	0	0	KCNC1	potassium voltage-gated channel, Shaw-related subfamily, member 1
hsa-miR-362-3p	0	0	1	0	0	0	LOC100133029	sirtuin 5 pseudogene
hsa-miR-362-3p	0	0	1	0	0	0	DKFZP434H168	uncharacterized LOC26077
hsa-miR-362-3p	0	0	1	1	0	0	C20orf27	chromosome 20 open reading frame 27
hsa-miR-362-3p	1	0	1	1	1	1	CELF6	CUGBP, Elav-like family member 6
hsa-miR-362-3p	0	0	1	0	0	0	TMEM232	transmembrane protein 232
hsa-miR-362-3p	1	0	1	1	0	0	GXYLT1	glucoside xylosyltransferase 1
hsa-miR-362-3p	0	0	1	1	0	0	FAM21B	family with sequence similarity 21, member B
hsa-miR-362-3p	0	0	1	1	1	1	MKX	mohawk homeobox
hsa-miR-362-3p	1	0	1	0	0	0	MSL1	male-specific lethal 1 homolog (Drosophila)
hsa-miR-362-3p	1	0	1	1	1	1	TP53INP1	tumor protein p53 inducible nuclear protein 1
hsa-miR-362-3p	1	0	1	1	1	1	FAM122B	family with sequence similarity 122B
hsa-miR-362-3p	0	0	1	1	1	1	EPPIN	epididymal peptidase inhibitor
hsa-miR-362-3p	0	0	1	1	0	0	C20orf141	chromosome 20 open reading frame 141
hsa-miR-362-3p	0	0	1	1	1	1	RBM39	RNA binding motif protein 39
hsa-miR-362-3p	0	0	1	1	0	0	TMEM151B	transmembrane protein 151B
hsa-miR-362-3p	1	0	1	1	0	0	SNX30	sorting nexin family member 30
hsa-miR-362-3p	1	0	1	1	1	1	MKRN1	makorin ring finger protein 1
hsa-miR-362-3p	1	0	1	1	0	0	SLC30A3	solute carrier family 30 (zinc transporter), member 3
hsa-miR-362-3p	0	0	1	1	1	1	PIN4	protein (peptidylprolyl cis/trans isomerase) NIMA-interacting, 4 (parvulin)
hsa-miR-362-3p	0	0	1	1	1	1	MCU	mitochondrial calcium uniporter
hsa-miR-362-3p	1	0	1	1	1	1	FRYL	FRY-like
hsa-miR-362-3p	1	0	1	1	1	1	DPY19L3	dpy-19-like 3 (C. elegans)
hsa-miR-362-3p	0	0	1	1	1	1	G3BP1	GTPase activating protein (SH3 domain) binding protein 1
hsa-miR-362-3p	1	0	1	0	1	1	IRF4	interferon regulatory factor 4
hsa-miR-362-3p	1	0	1	0	1	1	ESRRG	estrogen-related receptor gamma
hsa-miR-362-3p	0	0	1	1	1	1	RNF19B	ring finger protein 19B
hsa-miR-362-3p	0	0	1	0	0	0	AGAP9	ArfGAP with GTPase domain, ankyrin repeat and PH domain 9
hsa-miR-362-3p	1	0	1	1	1	1	SYS1	SYS1 Golgi-localized integral membrane protein homolog (S. cerevisiae)
hsa-miR-362-3p	0	0	1	0	1	1	PEX5	peroxisomal biogenesis factor 5
hsa-miR-362-3p	1	0	1	1	1	1	EIF4G3	eukaryotic translation initiation factor 4 gamma, 3
hsa-miR-362-3p	1	0	1	0	1	1	MAP3K3	mitogen-activated protein kinase kinase kinase 3
hsa-miR-362-3p	1	0	1	1	1	1	PHTF2	putative homeodomain transcription factor 2
hsa-miR-362-3p	0	0	1	1	1	1	PUS7L	pseudouridylate synthase 7 homolog (S. cerevisiae)-like
hsa-miR-362-3p	0	0	1	0	1	1	NEK1	NIMA (never in mitosis gene a)-related kinase 1
hsa-miR-362-3p	0	0	1	1	0	0	CPNE6	copine VI (neuronal)
hsa-miR-362-3p	0	0	1	1	0	0	PLK1S1	polo-like kinase 1 substrate 1
hsa-miR-362-3p	0	0	1	1	1	1	ARIH1	ariadne homolog, ubiquitin-conjugating enzyme E2 binding protein, 1 (Drosophila)
hsa-miR-362-3p	0	0	1	0	0	0	KIAA0913	KIAA0913
hsa-miR-362-3p	1	0	1	0	1	1	DNAJC5	DnaJ (Hsp40) homolog, subfamily C, member 5
hsa-miR-362-3p	0	0	1	0	0	0	JAKMIP3	Janus kinase and microtubule interacting protein 3
hsa-miR-362-3p	0	0	1	0	0	0	FAM66D	family with sequence similarity 66, member D
hsa-miR-362-3p	0	0	1	1	1	1	COBL	cordon-bleu homolog (mouse)
hsa-miR-362-3p	0	0	1	1	1	1	FILIP1	filamin A interacting protein 1
hsa-miR-362-3p	1	0	1	1	1	1	FAM126B	family with sequence similarity 126, member B
hsa-miR-362-3p	1	0	1	0	1	1	HNRNPA3	heterogeneous nuclear ribonucleoprotein A3
hsa-miR-362-3p	0	0	1	1	1	1	EGFLAM	EGF-like, fibronectin type III and laminin G domains
hsa-miR-362-3p	1	0	1	1	1	1	CHMP7	charged multivesicular body protein 7
hsa-miR-362-3p	1	0	1	1	0	0	USP24	ubiquitin specific peptidase 24
hsa-miR-362-3p	0	0	1	1	1	1	VWA3B	von Willebrand factor A domain containing 3B
hsa-miR-362-3p	0	0	1	0	1	1	MYD88	myeloid differentiation primary response gene (88)
hsa-miR-362-3p	0	0	1	1	1	1	INPP5B	inositol polyphosphate-5-phosphatase, 75kDa
hsa-miR-362-3p	0	0	1	0	1	1	PAPD4	PAP associated domain containing 4
hsa-miR-362-3p	1	0	1	0	1	1	MEF2C	myocyte enhancer factor 2C
hsa-miR-362-3p	1	0	1	1	1	1	FAM126A	family with sequence similarity 126, member A
hsa-miR-362-3p	0	0	1	0	0	0	EPHA1-AS1	EPHA1 antisense RNA 1
hsa-miR-362-3p	0	0	1	1	1	1	PNMAL1	paraneoplastic Ma antigen family-like 1
hsa-miR-362-3p	1	0	1	0	1	1	NR3C1	nuclear receptor subfamily 3, group C, member 1 (glucocorticoid receptor)
hsa-miR-362-3p	1	0	1	1	1	1	FAM76B	family with sequence similarity 76, member B
hsa-miR-362-3p	1	0	1	0	1	1	PHYHIPL	phytanoyl-CoA 2-hydroxylase interacting protein-like
hsa-miR-362-3p	1	0	1	1	1	1	RNF38	ring finger protein 38
hsa-miR-362-3p	0	0	1	0	1	1	STEAP2	STEAP family member 2, metalloreductase
hsa-miR-362-3p	0	0	1	1	1	1	CEP41	centrosomal protein 41kDa
hsa-miR-362-3p	1	0	1	1	1	1	WDR26	WD repeat domain 26
hsa-miR-362-3p	0	0	1	1	0	0	DNAH1	dynein, axonemal, heavy chain 1
hsa-miR-362-3p	0	0	1	1	0	0	ZYG11A	zyg-11 homolog A (C. elegans)
hsa-miR-362-3p	0	0	1	1	1	1	ATF7IP	activating transcription factor 7 interacting protein
hsa-miR-362-3p	1	0	1	1	1	1	CAMTA1	calmodulin binding transcription activator 1
hsa-miR-362-3p	1	0	1	1	0	0	USP7	ubiquitin specific peptidase 7 (herpes virus-associated)
hsa-miR-362-3p	0	0	1	1	1	1	POTEG	POTE ankyrin domain family, member G
hsa-miR-362-3p	0	0	1	0	1	1	XKR5	XK, Kell blood group complex subunit-related family, member 5
hsa-miR-362-3p	1	0	1	1	0	0	ADAM15	ADAM metallopeptidase domain 15
hsa-miR-362-3p	1	0	1	1	1	1	CHRDL1	chordin-like 1
hsa-miR-362-3p	0	0	1	1	0	0	FAM170A	family with sequence similarity 170, member A
hsa-miR-362-3p	1	0	1	1	1	1	MCHR1	melanin-concentrating hormone receptor 1
hsa-miR-362-3p	0	0	1	1	0	0	DGUOK	deoxyguanosine kinase
hsa-miR-362-3p	0	0	1	1	1	1	PTDSS1	phosphatidylserine synthase 1
hsa-miR-362-3p	1	0	1	1	0	0	NCLN	nicalin
hsa-miR-362-3p	1	0	1	1	0	0	DHDDS	dehydrodolichyl diphosphate synthase
hsa-miR-362-3p	1	0	1	0	1	1	DDX3X	DEAD (Asp-Glu-Ala-Asp) box polypeptide 3, X-linked
hsa-miR-362-3p	1	0	1	1	1	1	SHOX2	short stature homeobox 2
hsa-miR-362-3p	0	0	1	1	1	1	TMEM30A	transmembrane protein 30A
hsa-miR-362-3p	1	0	1	1	0	0	JUP	junction plakoglobin
hsa-miR-362-3p	1	0	1	0	1	1	FNDC3B	fibronectin type III domain containing 3B
hsa-miR-362-3p	0	0	1	1	1	1	C8orf33	chromosome 8 open reading frame 33
hsa-miR-362-3p	1	0	1	1	1	1	TMEM9B	TMEM9 domain family, member B
hsa-miR-362-3p	0	0	1	1	1	1	KRCC1	lysine-rich coiled-coil 1
hsa-miR-362-3p	1	0	1	1	1	1	FAM176A	family with sequence similarity 176, member A
hsa-miR-362-3p	1	0	1	1	1	1	FAM199X	family with sequence similarity 199, X-linked
hsa-miR-362-3p	1	0	1	1	1	1	ELF4	E74-like factor 4 (ets domain transcription factor)
hsa-miR-362-3p	0	0	1	0	0	0	LOC100144602	uncharacterized LOC100144602
hsa-miR-362-3p	1	0	1	1	1	1	SCAF11	SR-related CTD-associated factor 11
hsa-miR-362-3p	1	0	1	1	1	1	HMGA2	high mobility group AT-hook 2
hsa-miR-362-3p	1	0	1	0	1	1	CDK19	cyclin-dependent kinase 19
hsa-miR-362-3p	0	0	1	1	1	1	MAP2	microtubule-associated protein 2
hsa-miR-362-3p	1	0	1	1	1	1	ADAM9	ADAM metallopeptidase domain 9
hsa-miR-362-3p	1	0	1	1	1	1	SENP6	SUMO1/sentrin specific peptidase 6
hsa-miR-362-3p	0	0	1	1	1	1	SEMA3D	sema domain, immunoglobulin domain (Ig), short basic domain, secreted, (semaphorin) 3D
hsa-miR-362-3p	0	0	1	1	1	1	CD48	CD48 molecule
hsa-miR-362-3p	0	0	1	0	0	0	C20orf62	chromosome 20 open reading frame 62
hsa-miR-362-3p	0	0	1	1	1	1	TARP	TCR gamma alternate reading frame protein
hsa-miR-362-3p	1	0	1	1	1	1	TAF15	TAF15 RNA polymerase II, TATA box binding protein (TBP)-associated factor, 68kDa
hsa-miR-362-3p	1	0	1	1	1	1	ELAVL2	ELAV (embryonic lethal, abnormal vision, Drosophila)-like 2 (Hu antigen B)
hsa-miR-362-3p	0	0	1	0	0	0	LOC643648	uncharacterized LOC643648
hsa-miR-362-3p	0	0	1	1	1	1	ZNF337	zinc finger protein 337
hsa-miR-362-3p	1	0	1	0	1	1	DDX3Y	DEAD (Asp-Glu-Ala-Asp) box polypeptide 3, Y-linked
hsa-miR-362-3p	0	0	1	0	0	0	BOD1L2	biorientation of chromosomes in cell division 1-like 2
hsa-miR-362-3p	1	0	1	1	1	1	THRA	thyroid hormone receptor, alpha
hsa-miR-362-3p	1	0	1	0	1	1	ATP11A	ATPase, class VI, type 11A
hsa-miR-362-3p	0	0	1	1	1	1	CBLN2	cerebellin 2 precursor
hsa-miR-362-3p	1	0	1	1	1	1	ZNF618	zinc finger protein 618
hsa-miR-362-3p	0	0	1	0	0	0	FAM201A	family with sequence similarity 201, member A
hsa-miR-362-3p	1	0	1	1	1	1	ELMO2	engulfment and cell motility 2
hsa-miR-362-3p	1	0	1	0	1	1	CPEB4	cytoplasmic polyadenylation element binding protein 4
hsa-miR-362-3p	0	0	1	0	0	0	CYP4F35P	cytochrome P450, family 4, subfamily F, polypeptide 35, pseudogene
hsa-miR-362-3p	0	0	1	0	0	0	LOC286184	uncharacterized LOC286184
hsa-miR-362-3p	1	0	1	1	1	1	DAAM1	dishevelled associated activator of morphogenesis 1
hsa-miR-362-3p	0	0	1	0	0	0	FLJ36000	uncharacterized FLJ36000
hsa-miR-362-3p	0	0	1	0	0	0	DLGAP1-AS3	DLGAP1 antisense RNA 3
hsa-miR-362-3p	0	0	1	0	1	1	LINC00634	long intergenic non-protein coding RNA 634
hsa-miR-362-3p	1	0	1	1	0	0	KDM1A	lysine (K)-specific demethylase 1A
hsa-miR-362-3p	0	0	1	1	1	1	SCLT1	sodium channel and clathrin linker 1
hsa-miR-362-3p	0	0	1	1	1	1	ZFP90	zinc finger protein 90 homolog (mouse)
hsa-miR-362-3p	0	0	1	1	1	1	CARD8	caspase recruitment domain family, member 8
hsa-miR-362-3p	0	0	1	1	1	1	FAM90A1	family with sequence similarity 90, member A1
hsa-miR-362-3p	0	0	1	0	1	1	C12orf74	chromosome 12 open reading frame 74
hsa-miR-362-3p	1	0	1	0	0	0	MICAL3	microtubule associated monoxygenase, calponin and LIM domain containing 3
hsa-miR-362-3p	0	0	1	0	0	0	INHBA-AS1	INHBA antisense RNA 1
hsa-miR-362-3p	0	0	1	0	0	0	LOC348120	uncharacterized LOC348120
hsa-miR-362-3p	1	0	1	1	1	1	BRD1	bromodomain containing 1
hsa-miR-362-3p	1	0	1	1	1	1	RTKN2	rhotekin 2
hsa-miR-362-3p	0	0	1	0	1	1	ITGA1	integrin, alpha 1
hsa-miR-362-3p	0	0	1	0	0	0	AURKAPS1	aurora kinase A pseudogene 1
hsa-miR-362-3p	0	0	1	0	0	0	BMS1P6	BMS1 pseudogene 6
hsa-miR-362-3p	1	0	1	1	1	1	ZFP91	zinc finger protein 91 homolog (mouse)
hsa-miR-362-3p	1	0	1	1	1	1	PCGF5	polycomb group ring finger 5
hsa-miR-362-3p	0	0	1	1	0	0	TENC1	tensin like C1 domain containing phosphatase (tensin 2)
hsa-miR-362-3p	0	0	1	0	0	0	LOC388436	uncharacterized LOC388436
hsa-miR-362-3p	1	0	1	1	1	1	PRRG1	proline rich Gla (G-carboxyglutamic acid) 1
hsa-miR-362-3p	0	0	1	1	0	0	AGAP11	ankyrin repeat and GTPase domain Arf GTPase activating protein 11
hsa-miR-362-3p	1	0	1	0	0	0	PRRT4	proline-rich transmembrane protein 4
hsa-miR-362-3p	0	0	1	1	1	1	PIM3	pim-3 oncogene
hsa-miR-362-3p	0	0	1	1	1	1	ZNF33B	zinc finger protein 33B
hsa-miR-362-3p	1	0	1	1	1	1	IARS	isoleucyl-tRNA synthetase
hsa-miR-362-3p	0	0	1	0	0	0	DPY19L2P1	dpy-19-like 2 pseudogene 1 (C. elegans)
hsa-miR-362-3p	0	0	1	0	0	0	ZNF66P	zinc finger protein 66, pseudogene
hsa-miR-362-3p	1	0	1	1	1	1	SLC26A7	solute carrier family 26, member 7
hsa-miR-362-3p	0	0	1	1	0	0	RELA	v-rel reticuloendotheliosis viral oncogene homolog A (avian)
hsa-miR-362-3p	1	0	1	0	1	1	HMGB3	high mobility group box 3
hsa-miR-362-3p	0	0	1	0	0	0	TRGV9	T cell receptor gamma variable 9
hsa-miR-362-3p	1	0	1	1	1	1	RARG	retinoic acid receptor, gamma
hsa-miR-362-3p	0	0	1	1	0	0	FAM21A	family with sequence similarity 21, member A
hsa-miR-362-3p	0	0	1	0	0	0	FAM106A	family with sequence similarity 106, member A
hsa-miR-362-3p	1	0	1	0	1	1	VANGL2	vang-like 2 (van gogh, Drosophila)
hsa-miR-362-3p	0	0	1	1	0	0	TMC1	transmembrane channel-like 1
hsa-miR-362-3p	0	0	1	1	0	0	ANAPC11	anaphase promoting complex subunit 11
hsa-miR-362-3p	0	0	1	1	1	1	SPHKAP	SPHK1 interactor, AKAP domain containing
hsa-miR-362-3p	0	0	1	1	0	0	SFTPC	surfactant protein C
hsa-miR-362-3p	0	0	1	1	0	0	RIPPLY1	ripply1 homolog (zebrafish)
hsa-miR-362-3p	0	0	1	1	0	0	SLC17A4	solute carrier family 17 (sodium phosphate), member 4
hsa-miR-362-3p	1	0	1	1	1	1	SP4	Sp4 transcription factor
hsa-miR-362-3p	1	0	1	0	1	1	BTBD3	BTB (POZ) domain containing 3
hsa-miR-362-3p	1	0	1	1	1	1	SLK	STE20-like kinase
hsa-miR-362-3p	1	0	1	1	1	1	PAX3	paired box 3
hsa-miR-362-3p	1	0	1	0	1	1	CAMSAP2	calmodulin regulated spectrin-associated protein family, member 2
hsa-miR-362-3p	0	0	1	0	1	1	RBM44	RNA binding motif protein 44
hsa-miR-362-3p	0	0	1	1	1	1	RNF14	ring finger protein 14
hsa-miR-362-3p	1	0	1	1	1	1	ZMYM4	zinc finger, MYM-type 4
hsa-miR-362-3p	0	0	1	0	0	0	IGSF23	immunoglobulin superfamily, member 23
hsa-miR-362-3p	1	0	1	1	1	1	MLLT10	myeloid/lymphoid or mixed-lineage leukemia (trithorax homolog, Drosophila); translocated to, 10
hsa-miR-362-3p	0	0	1	1	0	0	DZANK1	double zinc ribbon and ankyrin repeat domains 1
hsa-miR-362-3p	0	0	1	0	0	0	FAM225B	family with sequence similarity 225, member B (non-protein coding)
hsa-miR-362-3p	1	0	1	1	1	1	PCM1	pericentriolar material 1
hsa-miR-362-3p	1	0	1	1	1	1	ERMAP	erythroblast membrane-associated protein (Scianna blood group)
hsa-miR-362-3p	1	0	1	1	1	1	RBL2	retinoblastoma-like 2 (p130)
hsa-miR-362-3p	1	0	1	0	1	1	MTX3	metaxin 3
hsa-miR-362-3p	1	0	1	1	1	1	ETS1	v-ets erythroblastosis virus E26 oncogene homolog 1 (avian)
hsa-miR-362-3p	0	0	1	1	1	1	COL6A3	collagen, type VI, alpha 3
hsa-miR-362-3p	1	0	1	1	1	1	KLHL2	kelch-like 2, Mayven (Drosophila)
hsa-miR-362-3p	1	0	1	1	1	1	DCAF5	DDB1 and CUL4 associated factor 5
hsa-miR-362-3p	1	0	1	1	1	1	CSMD3	CUB and Sushi multiple domains 3
hsa-miR-362-3p	1	0	1	1	1	1	CORIN	corin, serine peptidase
hsa-miR-362-3p	0	0	1	0	0	0	LOC286299	uncharacterized LOC286299
hsa-miR-362-3p	1	0	1	1	1	1	RECK	reversion-inducing-cysteine-rich protein with kazal motifs
hsa-miR-362-3p	0	0	1	1	1	1	C4orf40	chromosome 4 open reading frame 40
hsa-miR-362-3p	0	0	1	0	1	1	CD59	CD59 molecule, complement regulatory protein
hsa-miR-362-3p	0	0	1	1	0	0	CRIP2	cysteine-rich protein 2
hsa-miR-362-3p	0	0	1	1	0	0	PPT2	palmitoyl-protein thioesterase 2
hsa-miR-362-3p	1	0	1	1	1	1	CLU	clusterin
hsa-miR-362-3p	1	0	1	0	0	0	IGLON5	IgLON family member 5
hsa-miR-362-3p	1	0	1	1	1	1	GPBP1	GC-rich promoter binding protein 1
hsa-miR-362-3p	0	0	1	0	0	0	RPS16P10	ribosomal protein S16 pseudogene 10
hsa-miR-362-3p	0	0	1	1	0	0	TMEM62	transmembrane protein 62
hsa-miR-362-3p	0	0	1	1	1	1	ATP1B3	ATPase, Na+/K+ transporting, beta 3 polypeptide
hsa-miR-362-3p	0	0	1	1	0	0	DNAJB2	DnaJ (Hsp40) homolog, subfamily B, member 2
hsa-miR-362-3p	0	0	1	1	1	1	MRPS36	mitochondrial ribosomal protein S36
hsa-miR-362-3p	0	0	1	1	1	1	PROCR	protein C receptor, endothelial
hsa-miR-362-3p	0	0	1	1	1	1	GRAP2	GRB2-related adaptor protein 2
hsa-miR-362-3p	0	0	1	1	1	1	PGAP2	post-GPI attachment to proteins 2
hsa-miR-362-3p	0	0	1	1	0	0	B9D1	B9 protein domain 1
hsa-miR-362-3p	0	0	1	1	1	1	PSMA1	proteasome (prosome, macropain) subunit, alpha type, 1
hsa-miR-362-3p	1	0	1	1	1	1	SSBP3	single stranded DNA binding protein 3
hsa-miR-362-3p	0	0	1	0	1	1	TMEM155	transmembrane protein 155
hsa-miR-362-3p	0	0	1	1	1	1	CAPZB	capping protein (actin filament) muscle Z-line, beta
hsa-miR-362-3p	0	0	1	1	1	1	PDLIM1	PDZ and LIM domain 1
hsa-miR-362-3p	0	0	1	0	0	0	LOC677759	uncharacterized LOC677759
hsa-miR-362-3p	1	0	1	1	1	1	BIN3	bridging integrator 3
hsa-miR-362-3p	0	0	1	0	0	0	LOC100132352	FSHD region gene 1 pseudogene
hsa-miR-362-3p	0	0	1	1	1	1	ACSF3	acyl-CoA synthetase family member 3
hsa-miR-362-3p	0	0	1	1	0	0	C9orf114	chromosome 9 open reading frame 114
hsa-miR-362-3p	0	0	1	1	1	1	SLCO4A1	solute carrier organic anion transporter family, member 4A1
hsa-miR-362-3p	0	0	1	1	1	1	ZNF333	zinc finger protein 333
hsa-miR-362-3p	0	0	1	1	0	0	CD79B	CD79b molecule, immunoglobulin-associated beta
hsa-miR-362-3p	1	0	1	1	1	1	UBE2K	ubiquitin-conjugating enzyme E2K
hsa-miR-362-3p	0	0	1	1	1	1	ARHGEF25	Rho guanine nucleotide exchange factor (GEF) 25
hsa-miR-362-3p	1	0	1	1	1	1	MYT1	myelin transcription factor 1
hsa-miR-362-3p	1	0	1	1	1	1	SLC37A3	solute carrier family 37 (glycerol-3-phosphate transporter), member 3
hsa-miR-362-3p	1	0	1	1	1	1	SLC35A1	solute carrier family 35 (CMP-sialic acid transporter), member A1
hsa-miR-362-3p	1	0	1	1	1	1	PHACTR2	phosphatase and actin regulator 2
hsa-miR-362-3p	1	0	1	0	1	1	CNTNAP2	contactin associated protein-like 2
hsa-miR-362-3p	1	0	1	1	1	1	MAN2A2	mannosidase, alpha, class 2A, member 2
hsa-miR-362-3p	0	0	1	1	1	1	LTA	lymphotoxin alpha (TNF superfamily, member 1)
hsa-miR-362-3p	1	0	1	1	1	1	RSPO1	R-spondin 1
hsa-miR-362-3p	0	0	1	1	1	1	PTGS1	prostaglandin-endoperoxide synthase 1 (prostaglandin G/H synthase and cyclooxygenase)
hsa-miR-362-3p	0	0	1	1	1	1	P2RX7	purinergic receptor P2X, ligand-gated ion channel, 7
hsa-miR-362-3p	1	0	1	1	1	1	GLIS3	GLIS family zinc finger 3
hsa-miR-362-3p	1	0	1	0	1	1	MAP2K7	mitogen-activated protein kinase kinase 7
hsa-miR-362-3p	1	0	1	1	1	1	BNC2	basonuclin 2
hsa-miR-362-3p	0	0	1	1	0	0	CEACAM3	carcinoembryonic antigen-related cell adhesion molecule 3
hsa-miR-362-3p	1	0	1	1	1	1	MLL	myeloid/lymphoid or mixed-lineage leukemia (trithorax homolog, Drosophila)
hsa-miR-362-3p	0	0	1	1	1	1	ATP7A	ATPase, Cu++ transporting, alpha polypeptide
hsa-miR-362-3p	1	0	1	1	1	1	F13A1	coagulation factor XIII, A1 polypeptide
hsa-miR-362-3p	1	0	1	1	1	1	GALC	galactosylceramidase
hsa-miR-362-3p	1	0	1	1	1	1	MET	met proto-oncogene (hepatocyte growth factor receptor)
hsa-miR-362-3p	0	0	1	1	1	1	NDP	Norrie disease (pseudoglioma)
hsa-miR-362-3p	1	0	1	1	1	1	TIMP3	TIMP metallopeptidase inhibitor 3
hsa-miR-362-3p	0	0	1	1	1	1	GM2A	GM2 ganglioside activator
hsa-miR-362-3p	0	0	1	0	1	1	GNRHR	gonadotropin-releasing hormone receptor
hsa-miR-362-3p	1	0	1	0	1	1	PAFAH1B1	platelet-activating factor acetylhydrolase 1b, regulatory subunit 1 (45kDa)
hsa-miR-362-3p	1	0	1	1	1	1	ATRX	alpha thalassemia/mental retardation syndrome X-linked
hsa-miR-362-3p	0	0	1	1	1	1	CYP11B2	cytochrome P450, family 11, subfamily B, polypeptide 2
hsa-miR-362-3p	1	0	1	1	1	1	PLP1	proteolipid protein 1
hsa-miR-362-3p	0	0	1	1	1	1	IGF2	insulin-like growth factor 2 (somatomedin A)
hsa-miR-362-3p	1	0	1	1	1	1	FASLG	Fas ligand (TNF superfamily, member 6)
hsa-miR-362-3p	1	0	1	0	1	1	CACNA1E	calcium channel, voltage-dependent, R type, alpha 1E subunit
hsa-miR-362-3p	0	0	1	1	1	1	EPO	erythropoietin
hsa-miR-362-3p	0	0	1	1	1	1	GAD2	glutamate decarboxylase 2 (pancreatic islets and brain, 65kDa)
hsa-miR-362-3p	1	0	1	1	1	1	IGF1R	insulin-like growth factor 1 receptor
hsa-miR-362-3p	0	0	1	1	1	1	MAOB	monoamine oxidase B
hsa-miR-362-3p	1	0	1	1	1	1	MME	membrane metallo-endopeptidase
hsa-miR-362-3p	1	0	1	1	1	1	PTGDR	prostaglandin D2 receptor (DP)
hsa-miR-362-3p	0	0	1	1	0	0	ATP5G1	ATP synthase, H+ transporting, mitochondrial Fo complex, subunit C1 (subunit 9)
hsa-miR-362-3p	1	0	1	1	1	1	ABLIM1	actin binding LIM protein 1
hsa-miR-362-3p	1	0	1	1	1	1	RREB1	ras responsive element binding protein 1
hsa-miR-362-3p	0	0	1	1	1	1	CCDC144NL	coiled-coil domain containing 144 family, N-terminal like
hsa-miR-362-3p	0	0	1	1	1	1	ZCCHC16	zinc finger, CCHC domain containing 16
hsa-miR-362-3p	1	0	1	1	1	1	AK4	adenylate kinase 4
hsa-miR-362-3p	1	0	1	1	1	1	NFKBIZ	nuclear factor of kappa light polypeptide gene enhancer in B-cells inhibitor, zeta
hsa-miR-362-3p	1	0	1	0	1	1	IP6K1	inositol hexakisphosphate kinase 1
hsa-miR-362-3p	0	0	1	1	1	1	MAPKAP1	mitogen-activated protein kinase associated protein 1
hsa-miR-362-3p	0	0	1	1	1	1	CR2	complement component (3d/Epstein Barr virus) receptor 2
hsa-miR-362-3p	0	0	1	1	1	1	SCP2	sterol carrier protein 2
hsa-miR-362-3p	0	0	1	0	1	1	C3orf56	chromosome 3 open reading frame 56
hsa-miR-362-3p	0	0	1	1	1	1	FAM154B	family with sequence similarity 154, member B
hsa-miR-362-3p	1	0	1	1	1	1	FNIP1	folliculin interacting protein 1
hsa-miR-362-3p	0	0	1	1	1	1	HRNR	hornerin
hsa-miR-362-3p	1	0	1	0	1	1	ZC3H12B	zinc finger CCCH-type containing 12B
hsa-miR-362-3p	1	0	1	0	1	1	CREB5	cAMP responsive element binding protein 5
hsa-miR-362-3p	1	0	1	0	1	1	ZKSCAN2	zinc finger with KRAB and SCAN domains 2
hsa-miR-362-3p	1	0	1	1	1	1	DKK3	dickkopf 3 homolog (Xenopus laevis)
hsa-miR-362-3p	1	0	1	0	1	1	TFEC	transcription factor EC
hsa-miR-362-3p	0	0	1	0	1	1	TM2D2	TM2 domain containing 2
hsa-miR-362-3p	1	0	1	0	1	1	CELF2	CUGBP, Elav-like family member 2
hsa-miR-362-3p	1	0	1	0	1	1	ADAR	adenosine deaminase, RNA-specific
hsa-miR-362-3p	1	0	1	0	1	1	RAB12	RAB12, member RAS oncogene family
hsa-miR-362-3p	0	0	1	1	1	1	PGAM4	phosphoglycerate mutase family member 4
hsa-miR-362-3p	1	0	1	0	1	1	MSRB3	methionine sulfoxide reductase B3
hsa-miR-362-3p	1	0	1	1	1	1	CSNK1G3	casein kinase 1, gamma 3
hsa-miR-362-3p	0	0	1	1	1	1	SLC35A2	solute carrier family 35 (UDP-galactose transporter), member A2
hsa-miR-362-3p	1	0	1	0	1	1	RYR2	ryanodine receptor 2 (cardiac)
hsa-miR-362-3p	1	0	1	1	1	1	AGAP1	ArfGAP with GTPase domain, ankyrin repeat and PH domain 1
hsa-miR-362-3p	1	1	1	1	1	1	TRIM71	tripartite motif containing 71, E3 ubiquitin protein ligase
hsa-miR-362-3p	1	0	1	0	1	1	USP9X	ubiquitin specific peptidase 9, X-linked
hsa-miR-362-3p	1	0	1	1	1	1	CHTF8	CTF8, chromosome transmission fidelity factor 8 homolog (S. cerevisiae)
hsa-miR-362-3p	1	0	1	1	1	1	CDC42	cell division cycle 42 (GTP binding protein, 25kDa)
hsa-miR-362-3p	1	0	1	1	1	1	TCERG1	transcription elongation regulator 1
hsa-miR-362-3p	1	0	1	1	1	1	FAM3C	family with sequence similarity 3, member C
hsa-miR-362-3p	1	0	1	1	1	1	PALM	paralemmin
hsa-miR-362-3p	0	0	1	1	1	1	MTHFD2	methylenetetrahydrofolate dehydrogenase (NADP+ dependent) 2, methenyltetrahydrofolate cyclohydrolase
hsa-miR-362-3p	1	0	1	1	1	1	ZBTB8A	zinc finger and BTB domain containing 8A
hsa-miR-362-3p	0	0	1	1	1	1	ZXDC	ZXD family zinc finger C
hsa-miR-362-3p	0	0	1	1	1	1	NUPR1	nuclear protein, transcriptional regulator, 1
hsa-miR-362-3p	1	0	1	1	1	1	GLRA3	glycine receptor, alpha 3
hsa-miR-362-3p	0	0	1	1	1	1	SMC2	structural maintenance of chromosomes 2
hsa-miR-362-3p	0	0	1	1	1	1	TMEM8B	transmembrane protein 8B
hsa-miR-362-3p	1	0	1	1	1	1	ERBB4	v-erb-a erythroblastic leukemia viral oncogene homolog 4 (avian)
hsa-miR-362-3p	1	0	1	1	1	1	TPM3	tropomyosin 3
hsa-miR-362-3p	1	0	1	0	1	1	TMEM237	transmembrane protein 237
hsa-miR-362-3p	1	0	1	1	1	1	METTL9	methyltransferase like 9
hsa-miR-362-3p	1	0	1	1	1	1	HS6ST2	heparan sulfate 6-O-sulfotransferase 2
hsa-miR-362-3p	1	0	1	1	1	1	IRF2BP2	interferon regulatory factor 2 binding protein 2
hsa-miR-362-3p	1	0	1	1	1	1	LDB3	LIM domain binding 3
hsa-miR-362-3p	1	0	1	0	1	1	THSD7B	thrombospondin, type I, domain containing 7B
hsa-miR-362-3p	1	0	1	0	1	1	MEGF9	multiple EGF-like-domains 9
hsa-miR-362-3p	0	0	1	1	1	1	G6PC2	glucose-6-phosphatase, catalytic, 2
hsa-miR-362-3p	0	0	1	1	0	0	AFP	alpha-fetoprotein
hsa-miR-362-3p	1	0	1	1	1	1	CDH13	cadherin 13, H-cadherin (heart)
hsa-miR-362-3p	0	0	1	1	0	0	DNAH9	dynein, axonemal, heavy chain 9
hsa-miR-362-3p	1	0	1	1	1	1	EN2	engrailed homeobox 2
hsa-miR-362-3p	1	0	1	1	1	1	EXTL3	exostoses (multiple)-like 3
hsa-miR-362-3p	1	0	1	0	1	1	B4GALT1	UDP-Gal:betaGlcNAc beta 1,4- galactosyltransferase, polypeptide 1
hsa-miR-362-3p	1	0	1	1	1	1	AHNAK	AHNAK nucleoprotein
hsa-miR-362-3p	1	0	1	1	1	1	ARF3	ADP-ribosylation factor 3
hsa-miR-362-3p	1	0	1	1	1	1	ARL4D	ADP-ribosylation factor-like 4D
hsa-miR-362-3p	1	0	1	1	1	1	ATP6V1A	ATPase, H+ transporting, lysosomal 70kDa, V1 subunit A
hsa-miR-362-3p	1	0	1	1	1	1	CD69	CD69 molecule
hsa-miR-362-3p	0	0	1	1	0	0	CDKN2D	cyclin-dependent kinase inhibitor 2D (p19, inhibits CDK4)
hsa-miR-362-3p	0	0	1	1	1	1	CEACAM8	carcinoembryonic antigen-related cell adhesion molecule 8
hsa-miR-362-3p	1	0	1	1	1	1	CLCN4	chloride channel, voltage-sensitive 4
hsa-miR-362-3p	1	0	1	0	1	1	COL19A1	collagen, type XIX, alpha 1
hsa-miR-362-3p	1	0	1	0	1	1	ETV6	ets variant 6
hsa-miR-362-3p	1	0	1	1	1	1	FGF4	fibroblast growth factor 4
hsa-miR-362-3p	1	0	1	1	1	1	GLRA2	glycine receptor, alpha 2
hsa-miR-362-3p	1	0	1	1	1	1	GOLGA1	golgin A1
hsa-miR-362-3p	1	0	1	1	1	1	HIVEP1	human immunodeficiency virus type I enhancer binding protein 1
hsa-miR-362-3p	0	0	1	1	1	1	HLA-DOA	major histocompatibility complex, class II, DO alpha
hsa-miR-362-3p	0	0	1	1	1	1	HOXA4	homeobox A4
hsa-miR-362-3p	0	0	1	1	1	1	IRF8	interferon regulatory factor 8
hsa-miR-362-3p	1	0	1	1	1	1	ITPR2	inositol 1,4,5-trisphosphate receptor, type 2
hsa-miR-362-3p	1	0	1	1	1	1	KPNB1	karyopherin (importin) beta 1
hsa-miR-362-3p	0	0	1	1	1	1	TACSTD2	tumor-associated calcium signal transducer 2
hsa-miR-362-3p	0	0	1	1	1	1	MSMB	microseminoprotein, beta-
hsa-miR-362-3p	0	0	1	1	1	1	MYOD1	myogenic differentiation 1
hsa-miR-362-3p	0	0	1	1	1	1	CEACAM6	carcinoembryonic antigen-related cell adhesion molecule 6 (non-specific cross reacting antigen)
hsa-miR-362-3p	0	0	1	1	0	0	NOVA2	neuro-oncological ventral antigen 2
hsa-miR-362-3p	1	0	1	1	1	1	PGAM1	phosphoglycerate mutase 1 (brain)
hsa-miR-362-3p	0	0	1	1	1	1	PIM1	pim-1 oncogene
hsa-miR-362-3p	1	0	1	1	1	1	PLAGL2	pleiomorphic adenoma gene-like 2
hsa-miR-362-3p	1	0	1	1	1	1	PPP2R1B	protein phosphatase 2, regulatory subunit A, beta
hsa-miR-362-3p	1	0	1	1	1	1	PRKD1	protein kinase D1
hsa-miR-362-3p	1	0	1	0	1	1	MAPK4	mitogen-activated protein kinase 4
hsa-miR-362-3p	0	0	1	1	0	0	PSMD11	proteasome (prosome, macropain) 26S subunit, non-ATPase, 11
hsa-miR-362-3p	1	0	1	0	1	1	RAB6A	RAB6A, member RAS oncogene family
hsa-miR-362-3p	0	0	1	1	1	1	CXCL6	chemokine (C-X-C motif) ligand 6 (granulocyte chemotactic protein 2)
hsa-miR-362-3p	1	0	1	1	1	1	SRF	serum response factor (c-fos serum response element-binding transcription factor)
hsa-miR-362-3p	1	0	1	0	1	1	RPS6KB1	ribosomal protein S6 kinase, 70kDa, polypeptide 1
hsa-miR-362-3p	0	0	1	1	1	1	TAF2	TAF2 RNA polymerase II, TATA box binding protein (TBP)-associated factor, 150kDa
hsa-miR-362-3p	1	0	1	0	1	1	TAL1	T-cell acute lymphocytic leukemia 1
hsa-miR-362-3p	0	0	1	1	1	1	TPR	translocated promoter region, nuclear basket protein
hsa-miR-362-3p	1	0	1	0	1	1	UBE2D2	ubiquitin-conjugating enzyme E2D 2
hsa-miR-362-3p	0	0	1	0	1	1	ZFY	zinc finger protein, Y-linked
hsa-miR-362-3p	0	0	1	1	1	1	ZNF137P	zinc finger protein 137, pseudogene
hsa-miR-362-3p	1	0	1	1	1	1	NRIP1	nuclear receptor interacting protein 1
hsa-miR-362-3p	0	0	1	1	1	1	STX7	syntaxin 7
hsa-miR-362-3p	0	0	1	1	1	1	CHST1	carbohydrate (keratan sulfate Gal-6) sulfotransferase 1
hsa-miR-362-3p	0	0	1	1	1	1	PRPF18	PRP18 pre-mRNA processing factor 18 homolog (S. cerevisiae)
hsa-miR-362-3p	1	0	1	1	1	1	TNFSF11	tumor necrosis factor (ligand) superfamily, member 11
hsa-miR-362-3p	1	0	1	0	1	1	TNKS	tankyrase, TRF1-interacting ankyrin-related ADP-ribose polymerase
hsa-miR-362-3p	1	0	1	1	1	1	NRP2	neuropilin 2
hsa-miR-362-3p	1	0	1	1	1	1	ALDH1A2	aldehyde dehydrogenase 1 family, member A2
hsa-miR-362-3p	0	0	1	1	1	1	PRPF4B	PRP4 pre-mRNA processing factor 4 homolog B (yeast)
hsa-miR-362-3p	1	0	1	0	1	1	WASL	Wiskott-Aldrich syndrome-like
hsa-miR-362-3p	1	0	1	1	1	1	FGF12	fibroblast growth factor 12
hsa-miR-362-3p	1	0	1	0	1	1	SLC1A2	solute carrier family 1 (glial high affinity glutamate transporter), member 2
hsa-miR-362-3p	1	0	1	1	1	1	GDA	guanine deaminase
hsa-miR-362-3p	1	0	1	1	1	1	ARL3	ADP-ribosylation factor-like 3
hsa-miR-362-3p	1	0	1	1	1	1	BCL9	B-cell CLL/lymphoma 9
hsa-miR-362-3p	1	0	1	1	1	1	DUSP1	dual specificity phosphatase 1
hsa-miR-362-3p	1	0	1	1	1	1	DUSP2	dual specificity phosphatase 2
hsa-miR-362-3p	1	0	1	1	1	1	TCF15	transcription factor 15 (basic helix-loop-helix)
hsa-miR-362-3p	1	0	1	1	1	1	RABEP1	rabaptin, RAB GTPase binding effector protein 1
hsa-miR-362-3p	1	0	1	0	1	1	MAPKAPK2	mitogen-activated protein kinase-activated protein kinase 2
hsa-miR-362-3p	1	0	1	1	1	1	B4GALT6	UDP-Gal:betaGlcNAc beta 1,4- galactosyltransferase, polypeptide 6
hsa-miR-362-3p	1	0	1	1	1	1	B4GALT5	UDP-Gal:betaGlcNAc beta 1,4- galactosyltransferase, polypeptide 5
hsa-miR-362-3p	1	0	1	0	1	1	ARHGEF6	Rac/Cdc42 guanine nucleotide exchange factor (GEF) 6
hsa-miR-362-3p	1	0	1	1	1	1	AKAP7	A kinase (PRKA) anchor protein 7
hsa-miR-362-3p	1	0	1	1	1	1	VPS4B	vacuolar protein sorting 4 homolog B (S. cerevisiae)
hsa-miR-362-3p	1	0	1	1	1	1	CXCL14	chemokine (C-X-C motif) ligand 14
hsa-miR-362-3p	0	0	1	1	1	1	CDH6	cadherin 6, type 2, K-cadherin (fetal kidney)
hsa-miR-362-3p	0	0	1	1	1	1	NDUFA5	NADH dehydrogenase (ubiquinone) 1 alpha subcomplex, 5, 13kDa
hsa-miR-362-3p	1	0	1	1	1	1	SIAH2	siah E3 ubiquitin protein ligase 2
hsa-miR-362-3p	1	0	1	1	1	1	MED13	mediator complex subunit 13
hsa-miR-362-3p	0	0	1	1	1	1	ABCD2	ATP-binding cassette, sub-family D (ALD), member 2
hsa-miR-362-3p	1	0	1	1	1	1	BMI1	BMI1 polycomb ring finger oncogene
hsa-miR-362-3p	1	0	1	1	1	1	CRK	v-crk sarcoma virus CT10 oncogene homolog (avian)
hsa-miR-362-3p	1	0	1	0	1	1	E2F1	E2F transcription factor 1
hsa-miR-362-3p	0	0	1	0	1	1	EPHA3	EPH receptor A3
hsa-miR-362-3p	1	0	1	1	1	1	HSPA5	heat shock 70kDa protein 5 (glucose-regulated protein, 78kDa)
hsa-miR-362-3p	1	0	1	1	1	1	MYCL1	v-myc myelocytomatosis viral oncogene homolog 1, lung carcinoma derived (avian)
hsa-miR-362-3p	1	0	1	1	1	1	PHF2	PHD finger protein 2
hsa-miR-362-3p	1	0	1	0	1	1	PRKAB2	protein kinase, AMP-activated, beta 2 non-catalytic subunit
hsa-miR-362-3p	1	0	1	0	1	1	PRKCE	protein kinase C, epsilon
hsa-miR-362-3p	1	0	1	1	1	1	RALA	v-ral simian leukemia viral oncogene homolog A (ras related)
hsa-miR-362-3p	1	0	1	1	1	1	AKT3	v-akt murine thymoma viral oncogene homolog 3 (protein kinase B, gamma)
hsa-miR-362-3p	0	0	1	1	1	1	ING1	inhibitor of growth family, member 1
hsa-miR-362-3p	1	0	1	1	1	1	NHLH1	nescient helix loop helix 1
hsa-miR-362-3p	0	0	1	1	1	1	SRSF4	serine/arginine-rich splicing factor 4
hsa-miR-362-3p	1	0	1	1	1	1	SYT1	synaptotagmin I
hsa-miR-362-3p	0	0	1	1	1	1	PDCD7	programmed cell death 7
hsa-miR-362-3p	1	0	1	1	1	1	ACTR1A	ARP1 actin-related protein 1 homolog A, centractin alpha (yeast)
hsa-miR-362-3p	1	0	1	1	1	1	NAMPT	nicotinamide phosphoribosyltransferase
hsa-miR-362-3p	0	0	1	1	1	1	RNF41	ring finger protein 41
hsa-miR-362-3p	0	0	1	0	1	1	CALCOCO2	calcium binding and coiled-coil domain 2
hsa-miR-362-3p	1	0	1	1	1	1	GOLGA3	golgin A3
hsa-miR-362-3p	0	0	1	1	1	1	MFAP3	microfibrillar-associated protein 3
hsa-miR-362-3p	1	0	1	1	1	1	MTF1	metal-regulatory transcription factor 1
hsa-miR-362-3p	1	0	1	1	1	1	DAGLA	diacylglycerol lipase, alpha
hsa-miR-362-3p	1	0	1	1	1	1	PDGFRA	platelet-derived growth factor receptor, alpha polypeptide
hsa-miR-362-3p	1	0	1	1	1	1	PRKAA1	protein kinase, AMP-activated, alpha 1 catalytic subunit
hsa-miR-362-3p	1	0	1	1	1	1	RANBP2	RAN binding protein 2
hsa-miR-362-3p	0	0	1	1	0	0	CCL19	chemokine (C-C motif) ligand 19
hsa-miR-362-3p	0	0	1	1	1	1	ZNF230	zinc finger protein 230
hsa-miR-362-3p	1	0	1	0	1	1	IGF2BP1	insulin-like growth factor 2 mRNA binding protein 1
hsa-miR-362-3p	1	0	1	0	1	1	MAP4K5	mitogen-activated protein kinase kinase kinase kinase 5
hsa-miR-362-3p	0	0	1	1	1	1	CLDN16	claudin 16
hsa-miR-362-3p	1	0	1	1	1	1	MAP3K2	mitogen-activated protein kinase kinase kinase 2
hsa-miR-362-3p	0	0	1	1	0	0	KIF1C	kinesin family member 1C
hsa-miR-362-3p	1	0	1	1	1	1	SRSF10	serine/arginine-rich splicing factor 10
hsa-miR-362-3p	0	0	1	1	1	1	NUDT3	nudix (nucleoside diphosphate linked moiety X)-type motif 3
hsa-miR-362-3p	0	0	1	1	1	1	GLO1	glyoxalase I
hsa-miR-362-3p	1	0	1	1	1	1	SLC20A2	solute carrier family 20 (phosphate transporter), member 2
hsa-miR-362-3p	1	0	1	0	1	1	TCEA1	transcription elongation factor A (SII), 1
hsa-miR-362-3p	1	0	1	1	1	1	RAC1	ras-related C3 botulinum toxin substrate 1 (rho family, small GTP binding protein Rac1)
hsa-miR-362-3p	0	0	1	1	1	1	RLN1	relaxin 1
hsa-miR-362-3p	1	0	1	1	1	1	ADAMTS1	ADAM metallopeptidase with thrombospondin type 1 motif, 1
hsa-miR-362-3p	0	0	1	1	0	0	USF1	upstream transcription factor 1
hsa-miR-362-3p	1	0	1	1	1	1	VEZF1	vascular endothelial zinc finger 1
hsa-miR-362-3p	1	0	1	1	1	1	ERLIN2	ER lipid raft associated 2
hsa-miR-362-3p	1	0	1	1	1	1	ZNF236	zinc finger protein 236
hsa-miR-362-3p	1	0	1	1	1	1	CASC3	cancer susceptibility candidate 3
hsa-miR-362-3p	1	0	1	1	0	0	ANGPTL2	angiopoietin-like 2
hsa-miR-362-3p	0	0	1	1	1	1	N6AMT1	N-6 adenine-specific DNA methyltransferase 1 (putative)
hsa-miR-362-3p	1	0	1	1	1	1	CLCF1	cardiotrophin-like cytokine factor 1
hsa-miR-362-3p	1	0	1	1	1	1	PPARGC1A	peroxisome proliferator-activated receptor gamma, coactivator 1 alpha
hsa-miR-362-3p	0	0	1	1	0	0	TBX21	T-box 21
hsa-miR-362-3p	1	0	1	1	1	1	PADI1	peptidyl arginine deiminase, type I
hsa-miR-362-3p	1	0	1	1	1	1	SERTAD3	SERTA domain containing 3
hsa-miR-362-3p	1	0	1	1	1	1	TMEM2	transmembrane protein 2
hsa-miR-362-3p	0	0	1	0	1	1	EMR2	egf-like module containing, mucin-like, hormone receptor-like 2
hsa-miR-362-3p	1	0	1	1	1	1	NRG1	neuregulin 1
hsa-miR-362-3p	1	0	1	0	1	1	OSTM1	osteopetrosis associated transmembrane protein 1
hsa-miR-362-3p	0	0	1	1	1	1	CCDC113	coiled-coil domain containing 113
hsa-miR-362-3p	1	0	1	0	1	1	VAMP2	vesicle-associated membrane protein 2 (synaptobrevin 2)
hsa-miR-362-3p	1	0	1	1	1	1	RNF7	ring finger protein 7
hsa-miR-362-3p	1	0	1	1	1	1	CNOT2	CCR4-NOT transcription complex, subunit 2
hsa-miR-362-3p	1	0	1	1	1	1	VSX1	visual system homeobox 1
hsa-miR-362-3p	0	0	1	1	1	1	DZIP3	DAZ interacting protein 3, zinc finger
hsa-miR-362-3p	1	0	1	1	1	1	KDM4A	lysine (K)-specific demethylase 4A
hsa-miR-362-3p	1	0	1	1	1	1	ULK2	unc-51-like kinase 2 (C. elegans)
hsa-miR-362-3p	1	0	1	0	1	1	MLEC	malectin
hsa-miR-362-3p	1	0	1	1	1	1	KIAA0247	KIAA0247
hsa-miR-362-3p	1	0	1	0	1	1	KIAA0232	KIAA0232
hsa-miR-362-3p	1	0	1	0	1	1	SERTAD2	SERTA domain containing 2
hsa-miR-362-3p	1	0	1	0	1	1	MAML1	mastermind-like 1 (Drosophila)
hsa-miR-362-3p	0	0	1	0	1	1	DHCR24	24-dehydrocholesterol reductase
hsa-miR-362-3p	1	0	1	1	1	1	NUAK1	NUAK family, SNF1-like kinase, 1
hsa-miR-362-3p	1	0	1	0	1	1	SV2B	synaptic vesicle glycoprotein 2B
hsa-miR-362-3p	0	0	1	1	1	1	ENPP4	ectonucleotide pyrophosphatase/phosphodiesterase 4 (putative)
hsa-miR-362-3p	1	0	1	1	1	1	DIP2C	DIP2 disco-interacting protein 2 homolog C (Drosophila)
hsa-miR-362-3p	1	0	1	0	1	1	WDFY3	WD repeat and FYVE domain containing 3
hsa-miR-362-3p	1	0	1	0	1	1	SNX13	sorting nexin 13
hsa-miR-362-3p	1	0	1	1	1	1	RTF1	Rtf1, Paf1/RNA polymerase II complex component, homolog (S. cerevisiae)
hsa-miR-362-3p	1	0	1	0	1	1	LARP4B	La ribonucleoprotein domain family, member 4B
hsa-miR-362-3p	1	0	1	0	1	1	KIAA1024	KIAA1024
hsa-miR-362-3p	1	0	1	1	1	1	MED13L	mediator complex subunit 13-like
hsa-miR-362-3p	1	0	1	1	1	1	CCDC28A	coiled-coil domain containing 28A
hsa-miR-362-3p	1	0	1	1	1	1	CNOT6	CCR4-NOT transcription complex, subunit 6
hsa-miR-362-3p	0	0	1	1	1	1	KBTBD2	kelch repeat and BTB (POZ) domain containing 2
hsa-miR-362-3p	1	0	1	0	1	1	PPP1R16B	protein phosphatase 1, regulatory subunit 16B
hsa-miR-362-3p	0	0	1	1	1	1	CCDC69	coiled-coil domain containing 69
hsa-miR-362-3p	1	0	1	1	1	1	AZIN1	antizyme inhibitor 1
hsa-miR-362-3p	0	0	1	1	1	1	HMP19	HMP19 protein
hsa-miR-362-3p	0	0	1	1	1	1	ZFR	zinc finger RNA binding protein
hsa-miR-362-3p	0	0	1	1	1	1	RBM19	RNA binding motif protein 19
hsa-miR-362-3p	1	0	1	1	1	1	SNX9	sorting nexin 9
hsa-miR-362-3p	1	0	1	1	1	1	NLK	nemo-like kinase
hsa-miR-362-3p	1	0	1	1	1	1	AKAP11	A kinase (PRKA) anchor protein 11
hsa-miR-362-3p	1	0	1	0	1	1	SELT	selenoprotein T
hsa-miR-362-3p	1	0	1	1	1	1	RAB14	RAB14, member RAS oncogene family
hsa-miR-362-3p	0	0	1	1	0	0	DLL3	delta-like 3 (Drosophila)
hsa-miR-362-3p	1	0	1	1	1	1	HOXC10	homeobox C10
hsa-miR-362-3p	0	0	1	0	1	1	APLN	apelin
hsa-miR-362-3p	1	0	1	1	1	1	SIX4	SIX homeobox 4
hsa-miR-362-3p	1	0	1	1	1	1	ARID1B	AT rich interactive domain 1B (SWI1-like)
hsa-miR-362-3p	1	0	1	1	1	1	ALKBH5	alkB, alkylation repair homolog 5 (E. coli)
hsa-miR-362-3p	1	0	1	0	1	1	CHD7	chromodomain helicase DNA binding protein 7
hsa-miR-362-3p	0	0	1	1	1	1	SOHLH2	spermatogenesis and oogenesis specific basic helix-loop-helix 2
hsa-miR-362-3p	0	0	1	1	1	1	C1orf27	chromosome 1 open reading frame 27
hsa-miR-362-3p	0	0	1	1	1	1	TMEM70	transmembrane protein 70
hsa-miR-362-3p	1	0	1	1	1	1	CDCA4	cell division cycle associated 4
hsa-miR-362-3p	1	0	1	1	1	1	ARGLU1	arginine and glutamate rich 1
hsa-miR-362-3p	1	0	1	1	1	1	RIC8B	resistance to inhibitors of cholinesterase 8 homolog B (C. elegans)
hsa-miR-362-3p	0	0	1	0	1	1	TMEM57	transmembrane protein 57
hsa-miR-362-3p	1	0	1	1	1	1	LRRC1	leucine rich repeat containing 1
hsa-miR-362-3p	1	0	1	1	1	1	C9orf72	chromosome 9 open reading frame 72
hsa-miR-362-3p	1	0	1	1	1	1	KIAA1598	KIAA1598
hsa-miR-362-3p	1	0	1	1	1	1	AGPAT5	1-acylglycerol-3-phosphate O-acyltransferase 5 (lysophosphatidic acid acyltransferase, epsilon)
hsa-miR-362-3p	0	0	1	1	0	0	C17orf79	chromosome 17 open reading frame 79
hsa-miR-362-3p	1	0	1	0	1	1	FOXJ2	forkhead box J2
hsa-miR-362-3p	1	0	1	1	1	1	CTTNBP2NL	CTTNBP2 N-terminal like
hsa-miR-362-3p	1	0	1	0	1	1	CCNJ	cyclin J
hsa-miR-362-3p	1	0	1	1	1	1	PLEKHA3	pleckstrin homology domain containing, family A (phosphoinositide binding specific) member 3
hsa-miR-362-3p	0	0	1	1	1	1	KLHL4	kelch-like 4 (Drosophila)
hsa-miR-362-3p	1	0	1	1	1	1	LRRC8A	leucine rich repeat containing 8 family, member A
hsa-miR-362-3p	0	0	1	1	1	1	GRIPAP1	GRIP1 associated protein 1
hsa-miR-362-3p	1	0	1	1	0	0	SEMA3G	sema domain, immunoglobulin domain (Ig), short basic domain, secreted, (semaphorin) 3G
hsa-miR-362-3p	1	0	1	1	1	1	ASPH	aspartate beta-hydroxylase
hsa-miR-362-3p	0	0	1	1	1	1	PAPPA2	pappalysin 2
hsa-miR-362-3p	0	0	1	1	0	0	ENTPD7	ectonucleoside triphosphate diphosphohydrolase 7
hsa-miR-362-3p	1	0	1	1	1	1	JPH1	junctophilin 1
hsa-miR-362-3p	0	0	1	0	1	1	SERINC1	serine incorporator 1
hsa-miR-362-3p	1	0	1	0	1	1	NUFIP2	nuclear fragile X mental retardation protein interacting protein 2
hsa-miR-362-3p	1	0	1	0	1	1	SYT4	synaptotagmin IV
hsa-miR-362-3p	1	0	1	1	1	1	NLGN2	neuroligin 2
hsa-miR-362-3p	1	0	1	1	1	1	SEMA6A	sema domain, transmembrane domain (TM), and cytoplasmic domain, (semaphorin) 6A
hsa-miR-362-3p	1	0	1	1	1	1	ARHGAP21	Rho GTPase activating protein 21
hsa-miR-362-3p	1	0	1	1	1	1	RANBP10	RAN binding protein 10
hsa-miR-362-3p	1	0	1	0	1	1	SH3RF1	SH3 domain containing ring finger 1
hsa-miR-362-3p	1	0	1	1	1	1	MTMR3	myotubularin related protein 3
hsa-miR-362-3p	1	0	1	1	1	1	KCNK10	potassium channel, subfamily K, member 10
hsa-miR-362-3p	1	0	1	1	1	1	NTN4	netrin 4
hsa-miR-362-3p	1	0	1	1	1	1	PELI2	pellino E3 ubiquitin protein ligase family member 2
hsa-miR-362-3p	1	0	1	1	1	1	ZFYVE1	zinc finger, FYVE domain containing 1
hsa-miR-362-3p	0	0	1	1	1	1	PRDM13	PR domain containing 13
hsa-miR-362-3p	1	0	1	1	1	1	TMEM35	transmembrane protein 35
hsa-miR-362-3p	0	0	1	1	1	1	PGM5	phosphoglucomutase 5
hsa-miR-362-3p	1	0	1	0	1	1	GAN	gigaxonin
hsa-miR-362-3p	0	0	1	1	1	1	ASCC3	activating signal cointegrator 1 complex subunit 3
hsa-miR-362-3p	1	0	1	1	1	1	C6orf106	chromosome 6 open reading frame 106
hsa-miR-362-3p	1	0	1	1	1	1	YTHDC2	YTH domain containing 2
hsa-miR-362-3p	0	0	1	0	1	1	CDCP1	CUB domain containing protein 1
hsa-miR-362-3p	0	0	1	0	1	1	KXD1	KxDL motif containing 1
hsa-miR-362-3p	1	0	1	1	1	1	C10orf76	chromosome 10 open reading frame 76
hsa-miR-362-3p	1	0	1	1	1	1	PPP1R3B	protein phosphatase 1, regulatory subunit 3B
hsa-miR-362-3p	1	0	1	0	1	1	PLEKHF2	pleckstrin homology domain containing, family F (with FYVE domain) member 2
hsa-miR-362-3p	1	0	1	1	1	1	DLC1	deleted in liver cancer 1
hsa-miR-362-3p	1	0	1	1	1	1	EIF2C3	eukaryotic translation initiation factor 2C, 3
hsa-miR-362-3p	1	0	1	0	1	1	MAGIX	MAGI family member, X-linked
hsa-miR-362-3p	1	0	1	1	1	1	NAA50	N(alpha)-acetyltransferase 50, NatE catalytic subunit
hsa-miR-362-3p	0	0	1	1	1	1	MED28	mediator complex subunit 28
hsa-miR-362-3p	1	0	1	0	1	1	SETD7	SET domain containing (lysine methyltransferase) 7
hsa-miR-362-3p	1	0	1	1	1	1	NRBF2	nuclear receptor binding factor 2
hsa-miR-362-3p	0	0	1	1	1	1	BCL2L14	BCL2-like 14 (apoptosis facilitator)
hsa-miR-362-3p	1	0	1	0	1	1	VOPP1	vesicular, overexpressed in cancer, prosurvival protein 1
hsa-miR-362-3p	1	0	1	0	1	1	CSRNP2	cysteine-serine-rich nuclear protein 2
hsa-miR-362-3p	1	0	1	1	1	1	PDRG1	p53 and DNA-damage regulated 1
hsa-miR-362-3p	1	0	1	1	0	0	PVRL4	poliovirus receptor-related 4
hsa-miR-362-3p	1	0	1	1	1	1	SNX27	sorting nexin family member 27
hsa-miR-362-3p	1	0	1	1	1	1	GABARAPL1	GABA(A) receptor-associated protein like 1
hsa-miR-362-3p	1	0	1	1	1	1	HSDL1	hydroxysteroid dehydrogenase like 1
hsa-miR-362-3p	1	0	1	1	1	1	PCDHA9	protocadherin alpha 9
hsa-miR-362-3p	1	0	1	0	1	1	SRSF8	serine/arginine-rich splicing factor 8
hsa-miR-362-3p	0	0	1	1	1	1	MAGT1	magnesium transporter 1
hsa-miR-362-3p	1	0	1	1	1	1	DSEL	dermatan sulfate epimerase-like
hsa-miR-362-3p	1	0	1	1	1	1	ARID5B	AT rich interactive domain 5B (MRF1-like)
hsa-miR-362-3p	1	0	1	1	1	1	ZNRF1	zinc and ring finger 1, E3 ubiquitin protein ligase
hsa-miR-362-3p	0	0	1	1	1	1	HAVCR2	hepatitis A virus cellular receptor 2
hsa-miR-362-3p	1	0	1	1	1	1	ARHGEF39	Rho guanine nucleotide exchange factor (GEF) 39
hsa-miR-362-3p	1	0	1	0	1	1	EAF1	ELL associated factor 1
hsa-miR-362-3p	0	0	1	1	1	1	CABS1	calcium-binding protein, spermatid-specific 1
hsa-miR-362-3p	0	0	1	1	1	1	ZIC5	Zic family member 5
hsa-miR-362-3p	1	0	1	0	1	1	PURB	purine-rich element binding protein B
hsa-miR-362-3p	0	0	1	1	1	1	LHX4	LIM homeobox 4
hsa-miR-362-3p	1	0	1	1	1	1	TANC1	tetratricopeptide repeat, ankyrin repeat and coiled-coil containing 1
hsa-miR-362-3p	1	0	1	1	1	1	EPT1	ethanolaminephosphotransferase 1 (CDP-ethanolamine-specific)
hsa-miR-362-3p	1	0	1	1	1	1	BRWD1	bromodomain and WD repeat domain containing 1
hsa-miR-362-3p	1	0	1	1	1	1	STX1B	syntaxin 1B
hsa-miR-362-3p	1	0	1	1	1	1	MAL2	mal, T-cell differentiation protein 2 (gene/pseudogene)
hsa-miR-362-3p	1	0	1	0	1	1	FAM129A	family with sequence similarity 129, member A
hsa-miR-362-3p	0	0	1	1	0	0	APOA5	apolipoprotein A-V
hsa-miR-362-3p	0	0	1	0	1	1	ZNF518B	zinc finger protein 518B
hsa-miR-362-3p	1	0	1	1	0	0	BRD4	bromodomain containing 4
hsa-miR-362-3p	0	0	1	1	1	1	CLEC4D	C-type lectin domain family 4, member D
hsa-miR-362-3p	0	0	1	1	0	0	WFDC3	WAP four-disulfide core domain 3
hsa-miR-362-3p	1	0	1	0	1	1	EDARADD	EDAR-associated death domain
hsa-miR-362-3p	1	0	1	1	1	1	KLHL6	kelch-like 6 (Drosophila)
hsa-miR-362-3p	0	0	1	1	1	1	ATP6V1G3	ATPase, H+ transporting, lysosomal 13kDa, V1 subunit G3
hsa-miR-362-3p	1	0	1	1	1	1	GLCCI1	glucocorticoid induced transcript 1
hsa-miR-362-3p	1	0	1	0	1	1	NUS1	nuclear undecaprenyl pyrophosphate synthase 1 homolog (S. cerevisiae)
hsa-miR-362-3p	1	0	1	1	1	1	KCNH8	potassium voltage-gated channel, subfamily H (eag-related), member 8
hsa-miR-362-3p	1	0	1	1	1	1	ZMAT2	zinc finger, matrin-type 2
hsa-miR-362-3p	0	0	1	1	0	0	CDC42EP5	CDC42 effector protein (Rho GTPase binding) 5
hsa-miR-362-3p	0	0	1	1	1	1	DNAJB7	DnaJ (Hsp40) homolog, subfamily B, member 7
hsa-miR-362-3p	0	0	1	1	0	0	C10orf35	chromosome 10 open reading frame 35
hsa-miR-362-3p	1	0	1	0	1	1	MTPN	myotrophin
hsa-miR-362-3p	0	0	1	1	0	0	KLK12	kallikrein-related peptidase 12
hsa-miR-362-3p	1	0	1	1	1	1	LSM12	LSM12 homolog (S. cerevisiae)
hsa-miR-362-3p	1	0	1	1	1	1	TBX15	T-box 15
hsa-miR-362-3p	1	0	1	1	1	1	FAM123B	family with sequence similarity 123B
hsa-miR-362-3p	0	0	1	1	0	0	MS4A15	membrane-spanning 4-domains, subfamily A, member 15
hsa-miR-362-3p	1	0	1	1	1	1	HEPACAM	hepatic and glial cell adhesion molecule
hsa-miR-362-3p	0	0	1	1	1	1	CNPY4	canopy 4 homolog (zebrafish)
hsa-miR-362-3p	0	0	1	1	0	0	IGLL1	immunoglobulin lambda-like polypeptide 1
hsa-miR-362-3p	1	0	1	0	1	1	ST6GALNAC3	ST6 (alpha-N-acetyl-neuraminyl-2,3-beta-galactosyl-1,3)-N-acetylgalactosaminide alpha-2,6-sialyltransferase 3
hsa-miR-362-3p	1	0	1	1	1	1	C3orf45	chromosome 3 open reading frame 45
hsa-miR-362-3p	1	0	1	0	1	1	ENPP6	ectonucleotide pyrophosphatase/phosphodiesterase 6
hsa-miR-362-3p	1	0	1	1	0	0	TMEM86A	transmembrane protein 86A
hsa-miR-362-3p	0	0	1	0	1	1	LNX2	ligand of numb-protein X 2
hsa-miR-362-3p	1	0	1	1	1	1	HS6ST3	heparan sulfate 6-O-sulfotransferase 3
hsa-miR-362-3p	0	0	1	1	1	1	CAMK1D	calcium/calmodulin-dependent protein kinase ID
hsa-miR-362-3p	1	0	1	1	1	1	TTBK2	tau tubulin kinase 2
hsa-miR-362-3p	1	0	1	1	1	1	CNKSR3	CNKSR family member 3
hsa-miR-362-3p	0	0	1	1	1	1	FNDC7	fibronectin type III domain containing 7
hsa-miR-362-3p	0	0	1	1	0	0	CLEC4F	C-type lectin domain family 4, member F
hsa-miR-362-3p	1	0	1	1	1	1	UBR1	ubiquitin protein ligase E3 component n-recognin 1
hsa-miR-362-3p	1	0	1	0	1	1	CCDC71L	coiled-coil domain containing 71-like
hsa-miR-362-3p	0	0	1	1	1	1	NLRP9	NLR family, pyrin domain containing 9
hsa-miR-362-3p	1	0	1	1	1	1	TMEM26	transmembrane protein 26
hsa-miR-362-3p	0	0	1	1	0	0	C2orf53	chromosome 2 open reading frame 53
hsa-miR-362-3p	1	0	1	0	1	1	ARL5B	ADP-ribosylation factor-like 5B
hsa-miR-362-3p	0	0	1	0	1	1	ZNF445	zinc finger protein 445
hsa-miR-362-3p	1	0	1	1	1	1	TCF20	transcription factor 20 (AR1)
hsa-miR-362-3p	0	0	1	1	1	1	SYT15	synaptotagmin XV
hsa-miR-362-3p	1	0	1	1	1	1	NF2	neurofibromin 2 (merlin)
hsa-miR-362-3p	1	0	1	0	1	1	PTPLB	protein tyrosine phosphatase-like (proline instead of catalytic arginine), member b
hsa-miR-362-3p	0	0	1	1	1	1	APOOL	apolipoprotein O-like
hsa-miR-362-3p	0	0	1	1	1	1	FOXR2	forkhead box R2
hsa-miR-362-3p	0	0	1	1	1	1	FAM174A	family with sequence similarity 174, member A
hsa-miR-362-3p	1	0	1	0	1	1	ZC3H6	zinc finger CCCH-type containing 6
hsa-miR-362-3p	1	0	1	0	1	1	PRICKLE2	prickle homolog 2 (Drosophila)
hsa-miR-362-3p	1	0	1	0	1	1	SS18L1	synovial sarcoma translocation gene on chromosome 18-like 1
hsa-miR-362-3p	1	0	1	1	1	1	CXCL12	chemokine (C-X-C motif) ligand 12
hsa-miR-362-3p	0	0	1	1	1	1	GPX1	glutathione peroxidase 1
hsa-miR-362-3p	1	0	1	1	1	1	FBXO33	F-box protein 33
hsa-miR-362-3p	1	0	1	1	1	1	FAM43B	family with sequence similarity 43, member B
hsa-miR-362-3p	1	0	1	1	1	1	GADL1	glutamate decarboxylase-like 1
hsa-miR-362-3p	1	0	1	1	1	1	SKIDA1	SKI/DACH domain containing 1
hsa-miR-362-3p	0	0	1	0	1	1	FSD1L	fibronectin type III and SPRY domain containing 1-like
hsa-miR-362-3p	0	0	1	0	0	0	RAB9BP1	RAB9B, member RAS oncogene family pseudogene 1
hsa-miR-362-3p	0	0	1	0	0	0	TOP1P2	topoisomerase (DNA) I pseudogene 2
hsa-miR-362-3p	0	0	1	0	0	0	LOC339240	keratin 17 pseudogene
hsa-miR-362-3p	0	0	1	1	0	0	TTTY8	testis-specific transcript, Y-linked 8 (non-protein coding)
hsa-miR-362-3p	0	0	1	0	0	0	TTTY17B	testis-specific transcript, Y-linked 17B (non-protein coding)
hsa-miR-362-3p	0	0	1	0	0	0	NXF4	nuclear RNA export factor 4 pseudogene
hsa-miR-362-3p	0	0	1	0	0	0	SCARNA9	small Cajal body-specific RNA 9
hsa-miR-362-3p	0	0	1	0	0	0	SNORD96A	small nucleolar RNA, C/D box 96A
hsa-miR-362-3p	0	0	1	0	0	0	TOP1P1	topoisomerase (DNA) I pseudogene 1
hsa-miR-362-3p	0	0	1	0	0	0	HTR7P1	5-hydroxytryptamine (serotonin) receptor 7 pseudogene 1
hsa-miR-362-3p	0	0	1	0	0	0	LOC256880	uncharacterized LOC256880
hsa-miR-362-3p	0	0	1	0	0	0	TPTE2P6	transmembrane phosphoinositide 3-phosphatase and tensin homolog 2 pseudogene 6
hsa-miR-362-3p	0	0	1	0	0	0	AQP7P1	aquaporin 7 pseudogene 1
hsa-miR-362-3p	0	0	1	0	0	0	RNASEH2CP1	ribonuclease H2, subunit C pseudogene 1
hsa-miR-362-3p	0	0	1	0	0	0	SNX29P2	sorting nexin 29 pseudogene 2
hsa-miR-362-3p	0	0	1	0	0	0	SNORD114-11	small nucleolar RNA, C/D box 114-11
hsa-miR-362-3p	0	0	1	0	0	0	SNORD116-28	small nucleolar RNA, C/D box 116-28
hsa-miR-362-3p	0	0	0	1	0	0	RPS20	ribosomal protein S20
hsa-miR-362-3p	1	0	1	1	1	1	B4GALT7	xylosylprotein beta 1,4-galactosyltransferase, polypeptide 7
hsa-miR-362-3p	0	0	1	1	1	1	NSMAF	neutral sphingomyelinase (N-SMase) activation associated factor
hsa-miR-362-3p	0	0	1	1	0	0	RTN4R	reticulon 4 receptor
hsa-miR-362-3p	0	0	1	1	0	0	CTDP1	CTD (carboxy-terminal domain, RNA polymerase II, polypeptide A) phosphatase, subunit 1
hsa-miR-362-3p	0	0	1	1	1	1	BCAR1	breast cancer anti-estrogen resistance 1
hsa-miR-362-3p	0	0	1	1	1	1	FSTL3	follistatin-like 3 (secreted glycoprotein)
hsa-miR-362-3p	1	0	1	1	1	1	EPHA8	EPH receptor A8
hsa-miR-362-3p	1	0	1	1	1	1	TNS1	tensin 1
hsa-miR-362-3p	1	0	1	1	1	1	TRAM2	translocation associated membrane protein 2
hsa-miR-362-3p	0	0	1	1	1	1	RBM41	RNA binding motif protein 41
hsa-miR-362-3p	0	0	1	1	1	1	SPG21	spastic paraplegia 21 (autosomal recessive, Mast syndrome)
hsa-miR-362-3p	0	0	1	1	0	0	GLG1	golgi glycoprotein 1
hsa-miR-362-3p	1	0	1	1	1	1	DLD	dihydrolipoamide dehydrogenase
hsa-miR-362-3p	0	0	0	1	0	0	AAAS	achalasia, adrenocortical insufficiency, alacrimia
hsa-miR-362-3p	0	0	0	1	0	0	TMED1	transmembrane emp24 protein transport domain containing 1
hsa-miR-362-3p	0	0	1	1	0	0	SEC14L3	SEC14-like 3 (S. cerevisiae)
hsa-miR-362-3p	0	0	0	1	0	0	LGALS2	lectin, galactoside-binding, soluble, 2
hsa-miR-362-3p	0	0	0	1	0	0	MIOX	myo-inositol oxygenase
hsa-miR-362-3p	0	0	1	1	0	0	MCM5	minichromosome maintenance complex component 5
hsa-miR-362-3p	1	0	1	1	1	1	PHF5A	PHD finger protein 5A
hsa-miR-362-3p	1	0	1	1	0	0	CDH24	cadherin 24, type 2
hsa-miR-362-3p	0	0	1	1	1	1	GSS	glutathione synthetase
hsa-miR-362-3p	0	0	0	1	0	0	PROKR2	prokineticin receptor 2
hsa-miR-362-3p	0	0	1	1	0	0	GPR50	G protein-coupled receptor 50
hsa-miR-362-3p	0	0	0	1	0	0	MLNR	motilin receptor
hsa-miR-362-3p	0	0	0	1	1	1	NTHL1	nth endonuclease III-like 1 (E. coli)
hsa-miR-362-3p	0	0	1	1	0	0	STUB1	STIP1 homology and U-box containing protein 1, E3 ubiquitin protein ligase
hsa-miR-362-3p	0	0	1	1	1	1	SLC6A2	solute carrier family 6 (neurotransmitter transporter, noradrenalin), member 2
hsa-miR-362-3p	1	0	1	1	1	1	BRF2	BRF2, subunit of RNA polymerase III transcription initiation factor, BRF1-like
hsa-miR-362-3p	1	0	1	1	1	1	SNRNP70	small nuclear ribonucleoprotein 70kDa (U1)
hsa-miR-362-3p	0	0	1	1	0	0	LIM2	lens intrinsic membrane protein 2, 19kDa
hsa-miR-362-3p	1	0	1	1	1	1	RAB3D	RAB3D, member RAS oncogene family
hsa-miR-362-3p	0	0	0	1	0	0	CCL24	chemokine (C-C motif) ligand 24
hsa-miR-362-3p	0	0	1	1	0	0	TADA2A	transcriptional adaptor 2A
hsa-miR-362-3p	0	0	0	1	0	0	NUP88	nucleoporin 88kDa
hsa-miR-362-3p	0	0	0	1	1	1	CD82	CD82 molecule
hsa-miR-362-3p	0	0	0	1	0	0	LTF	lactotransferrin
hsa-miR-362-3p	0	0	1	1	0	0	MLH1	mutL homolog 1, colon cancer, nonpolyposis type 2 (E. coli)
hsa-miR-362-3p	1	0	1	1	0	0	GNAT1	guanine nucleotide binding protein (G protein), alpha transducing activity polypeptide 1
hsa-miR-362-3p	0	0	1	1	0	0	MDH1	malate dehydrogenase 1, NAD (soluble)
hsa-miR-362-3p	0	0	0	1	0	0	PRAMEF4	PRAME family member 4
hsa-miR-362-3p	0	0	1	1	1	1	SPP1	secreted phosphoprotein 1
hsa-miR-362-3p	0	0	1	1	0	0	TNFSF18	tumor necrosis factor (ligand) superfamily, member 18
hsa-miR-362-3p	0	0	1	1	1	1	TNFSF10	tumor necrosis factor (ligand) superfamily, member 10
hsa-miR-362-3p	0	0	1	1	0	0	NPY	neuropeptide Y
hsa-miR-362-3p	0	0	0	1	0	0	RAMP3	receptor (G protein-coupled) activity modifying protein 3
hsa-miR-362-3p	0	0	1	1	1	1	DYNLL1	dynein, light chain, LC8-type 1
hsa-miR-362-3p	0	0	1	1	0	0	SNRPA	small nuclear ribonucleoprotein polypeptide A
hsa-miR-362-3p	0	0	1	1	1	1	RAB38	RAB38, member RAS oncogene family
hsa-miR-362-3p	1	0	1	1	1	1	HIF3A	hypoxia inducible factor 3, alpha subunit
hsa-miR-362-3p	0	0	1	1	0	0	HIST1H1D	histone cluster 1, H1d
hsa-miR-362-3p	0	0	0	1	1	1	APOBEC2	apolipoprotein B mRNA editing enzyme, catalytic polypeptide-like 2
hsa-miR-362-3p	0	0	0	1	0	0	IGFLR1	IGF-like family receptor 1
hsa-miR-362-3p	0	0	1	1	0	0	HCST	hematopoietic cell signal transducer
hsa-miR-362-3p	0	0	1	1	1	1	ZNF10	zinc finger protein 10
hsa-miR-362-3p	0	0	1	1	1	1	MON1B	MON1 homolog B (yeast)
hsa-miR-362-3p	1	0	1	1	1	1	AAMP	angio-associated, migratory cell protein
hsa-miR-362-3p	0	0	1	1	0	0	CLN6	ceroid-lipofuscinosis, neuronal 6, late infantile, variant
hsa-miR-362-3p	0	0	0	1	1	1	DOHH	deoxyhypusine hydroxylase/monooxygenase
hsa-miR-362-3p	0	0	1	1	1	1	CNGB1	cyclic nucleotide gated channel beta 1
hsa-miR-362-3p	0	0	0	1	1	1	ZKSCAN3	zinc finger with KRAB and SCAN domains 3
hsa-miR-362-3p	1	0	1	1	1	1	SLC7A10	solute carrier family 7 (neutral amino acid transporter light chain, asc system), member 10
hsa-miR-362-3p	0	0	1	1	0	0	BPIFB1	BPI fold containing family B, member 1
hsa-miR-362-3p	0	0	0	1	1	1	PRDM9	PR domain containing 9
hsa-miR-362-3p	0	0	1	1	0	0	FAM153B	family with sequence similarity 153, member B
hsa-miR-362-3p	0	0	1	1	1	1	RHPN2	rhophilin, Rho GTPase binding protein 2
hsa-miR-362-3p	1	0	0	1	1	1	ZSWIM4	zinc finger, SWIM-type containing 4
hsa-miR-362-3p	0	0	0	1	0	0	GUCY2D	guanylate cyclase 2D, membrane (retina-specific)
hsa-miR-362-3p	0	0	1	1	1	1	RFXAP	regulatory factor X-associated protein
hsa-miR-362-3p	1	0	0	1	0	0	PI4KA	phosphatidylinositol 4-kinase, catalytic, alpha
hsa-miR-362-3p	1	0	1	1	0	0	ATP13A3	ATPase type 13A3
hsa-miR-362-3p	1	0	1	1	1	1	CABLES1	Cdk5 and Abl enzyme substrate 1
hsa-miR-362-3p	0	0	1	1	0	0	GPR77	G protein-coupled receptor 77
hsa-miR-362-3p	1	0	1	1	1	1	CCNJL	cyclin J-like
hsa-miR-362-3p	1	0	0	1	1	1	USP30	ubiquitin specific peptidase 30
hsa-miR-362-3p	1	0	1	1	0	0	CCDC64	coiled-coil domain containing 64
hsa-miR-362-3p	1	0	1	1	1	1	DTX1	deltex homolog 1 (Drosophila)
hsa-miR-362-3p	0	0	1	1	1	1	PION	pigeon homolog (Drosophila)
hsa-miR-362-3p	0	0	1	1	1	1	AKIRIN2	akirin 2
hsa-miR-362-3p	0	0	1	1	0	0	GPR45	G protein-coupled receptor 45
hsa-miR-362-3p	0	0	0	1	0	0	ALDH1L2	aldehyde dehydrogenase 1 family, member L2
hsa-miR-362-3p	1	0	1	1	1	1	PRKRIR	protein-kinase, interferon-inducible double stranded RNA dependent inhibitor, repressor of (P58 repressor)
hsa-miR-362-3p	0	0	1	1	1	1	CCDC90B	coiled-coil domain containing 90B
hsa-miR-362-3p	0	0	0	1	0	0	HTR3B	5-hydroxytryptamine (serotonin) receptor 3B, ionotropic
hsa-miR-362-3p	0	0	0	1	0	0	RPLP1	ribosomal protein, large, P1
hsa-miR-362-3p	0	0	1	1	1	1	TOPBP1	topoisomerase (DNA) II binding protein 1
hsa-miR-362-3p	0	0	0	1	0	0	NUP133	nucleoporin 133kDa
hsa-miR-362-3p	0	0	1	1	1	1	SPECC1	sperm antigen with calponin homology and coiled-coil domains 1
hsa-miR-362-3p	0	0	1	1	1	1	AP5M1	adaptor-related protein complex 5, mu 1 subunit
hsa-miR-362-3p	1	0	1	1	1	1	NOL4	nucleolar protein 4
hsa-miR-362-3p	1	0	1	1	1	1	CDRT1	CMT1A duplicated region transcript 1
hsa-miR-362-3p	0	0	0	1	1	1	TRIM16	tripartite motif containing 16
hsa-miR-362-3p	0	0	1	1	1	1	ALDH2	aldehyde dehydrogenase 2 family (mitochondrial)
hsa-miR-362-3p	1	0	1	1	0	0	TMCO7	transmembrane and coiled-coil domains 7
hsa-miR-362-3p	0	0	1	1	1	1	CYSTM1	cysteine-rich transmembrane module containing 1
hsa-miR-362-3p	0	0	1	1	1	1	THSD4	thrombospondin, type I, domain containing 4
hsa-miR-362-3p	0	0	1	1	1	1	TTC23	tetratricopeptide repeat domain 23
hsa-miR-362-3p	0	0	0	1	0	0	LMF1	lipase maturation factor 1
hsa-miR-362-3p	0	0	0	1	0	0	TELO2	TEL2, telomere maintenance 2, homolog (S. cerevisiae)
hsa-miR-362-3p	0	0	1	1	0	0	CNTLN	centlein, centrosomal protein
hsa-miR-362-3p	0	0	0	1	1	1	MLYCD	malonyl-CoA decarboxylase
hsa-miR-362-3p	0	0	0	1	1	1	METTL2B	methyltransferase like 2B
hsa-miR-362-3p	1	0	1	1	1	1	AJUBA	ajuba LIM protein
hsa-miR-362-3p	0	0	0	1	0	0	MOV10L1	Mov10l1, Moloney leukemia virus 10-like 1, homolog (mouse)
hsa-miR-362-3p	0	0	0	1	1	1	BPI	bactericidal/permeability-increasing protein
hsa-miR-362-3p	0	0	0	1	0	0	LIG1	ligase I, DNA, ATP-dependent
hsa-miR-362-3p	0	0	0	1	0	0	CCDC61	coiled-coil domain containing 61
hsa-miR-362-3p	0	0	1	1	1	1	TFAP2E	transcription factor AP-2 epsilon (activating enhancer binding protein 2 epsilon)
hsa-miR-362-3p	0	0	0	1	1	1	TP53AIP1	tumor protein p53 regulated apoptosis inducing protein 1
hsa-miR-362-3p	0	0	0	1	1	1	MCM6	minichromosome maintenance complex component 6
hsa-miR-362-3p	0	0	0	1	0	0	IL18RAP	interleukin 18 receptor accessory protein
hsa-miR-362-3p	0	0	1	1	0	0	NDST4	N-deacetylase/N-sulfotransferase (heparan glucosaminyl) 4
hsa-miR-362-3p	0	0	0	1	0	0	NSUN2	NOP2/Sun RNA methyltransferase family, member 2
hsa-miR-362-3p	0	0	1	1	0	0	RPL26L1	ribosomal protein L26-like 1
hsa-miR-362-3p	0	0	1	1	0	0	POR	P450 (cytochrome) oxidoreductase
hsa-miR-362-3p	1	0	1	1	1	1	APBA1	amyloid beta (A4) precursor protein-binding, family A, member 1
hsa-miR-362-3p	0	0	1	1	1	1	GPR116	G protein-coupled receptor 116
hsa-miR-362-3p	1	0	0	1	1	1	WNT2	wingless-type MMTV integration site family member 2
hsa-miR-362-3p	0	0	1	1	0	0	MARK2	MAP/microtubule affinity-regulating kinase 2
hsa-miR-362-3p	0	0	1	1	1	1	TRDN	triadin
hsa-miR-362-3p	1	0	0	1	1	1	ACVRL1	activin A receptor type II-like 1
hsa-miR-362-3p	0	0	0	1	1	1	FANCM	Fanconi anemia, complementation group M
hsa-miR-362-3p	0	0	1	1	0	0	PIF1	PIF1 5'-to-3' DNA helicase homolog (S. cerevisiae)
hsa-miR-362-3p	1	0	1	1	1	1	FAM59A	family with sequence similarity 59, member A
hsa-miR-362-3p	1	0	1	1	1	1	NPC1	Niemann-Pick disease, type C1
hsa-miR-362-3p	1	0	1	1	1	1	CBX8	chromobox homolog 8
hsa-miR-362-3p	0	0	0	1	0	0	LRRC56	leucine rich repeat containing 56
hsa-miR-362-3p	0	0	0	1	0	0	ZNF581	zinc finger protein 581
hsa-miR-362-3p	0	0	1	1	1	1	SLC47A1	solute carrier family 47, member 1
hsa-miR-362-3p	0	0	1	1	1	1	CYP4B1	cytochrome P450, family 4, subfamily B, polypeptide 1
hsa-miR-362-3p	0	0	0	1	0	0	ADAMTSL4	ADAMTS-like 4
hsa-miR-362-3p	0	0	0	1	0	0	ANXA9	annexin A9
hsa-miR-362-3p	0	0	1	1	0	0	CREB3L4	cAMP responsive element binding protein 3-like 4
hsa-miR-362-3p	0	0	0	1	1	1	ACP1	acid phosphatase 1, soluble
hsa-miR-362-3p	0	0	0	1	0	0	RQCD1	RCD1 required for cell differentiation1 homolog (S. pombe)
hsa-miR-362-3p	0	0	1	1	0	0	PNLDC1	poly(A)-specific ribonuclease (PARN)-like domain containing 1
hsa-miR-362-3p	0	0	1	1	1	1	SYTL4	synaptotagmin-like 4
hsa-miR-362-3p	0	0	0	1	0	0	GPR119	G protein-coupled receptor 119
hsa-miR-362-3p	1	0	1	1	1	1	GLUD1	glutamate dehydrogenase 1
hsa-miR-362-3p	0	0	1	1	0	0	SSRP1	structure specific recognition protein 1
hsa-miR-362-3p	0	0	0	1	0	0	OVOL2	ovo-like 2 (Drosophila)
hsa-miR-362-3p	0	0	1	1	1	1	INCENP	inner centromere protein antigens 135/155kDa
hsa-miR-362-3p	1	0	1	1	0	0	TMEM219	transmembrane protein 219
hsa-miR-362-3p	0	0	0	1	0	0	MMP10	matrix metallopeptidase 10 (stromelysin 2)
hsa-miR-362-3p	0	0	0	1	0	0	TRIM48	tripartite motif containing 48
hsa-miR-362-3p	0	0	1	1	1	1	MIA2	melanoma inhibitory activity 2
hsa-miR-362-3p	0	0	0	1	1	1	C11orf53	chromosome 11 open reading frame 53
hsa-miR-362-3p	1	0	1	1	1	1	NUBPL	nucleotide binding protein-like
hsa-miR-362-3p	0	0	1	1	1	1	ATG10	autophagy related 10
hsa-miR-362-3p	1	0	1	1	1	1	ZNF304	zinc finger protein 304
hsa-miR-362-3p	1	0	1	1	1	1	GMCL1	germ cell-less, spermatogenesis associated 1
hsa-miR-362-3p	0	0	1	1	0	0	BMP6	bone morphogenetic protein 6
hsa-miR-362-3p	0	0	0	1	1	1	TUBGCP5	tubulin, gamma complex associated protein 5
hsa-miR-362-3p	0	0	0	1	0	0	C16orf74	chromosome 16 open reading frame 74
hsa-miR-362-3p	0	0	0	1	0	0	TRIM11	tripartite motif containing 11
hsa-miR-362-3p	1	0	1	1	1	1	NCAM2	neural cell adhesion molecule 2
hsa-miR-362-3p	0	0	0	1	1	1	LRGUK	leucine-rich repeats and guanylate kinase domain containing
hsa-miR-362-3p	0	0	1	1	0	0	SLC26A10	solute carrier family 26, member 10
hsa-miR-362-3p	0	0	0	1	1	1	NAAA	N-acylethanolamine acid amidase
hsa-miR-362-3p	0	0	0	1	0	0	NAA11	N(alpha)-acetyltransferase 11, NatA catalytic subunit
hsa-miR-362-3p	0	0	1	1	1	1	TATDN2	TatD DNase domain containing 2
hsa-miR-362-3p	0	0	1	1	1	1	KCNJ6	potassium inwardly-rectifying channel, subfamily J, member 6
hsa-miR-362-3p	0	0	1	1	1	1	SVOPL	SVOP-like
hsa-miR-362-3p	0	0	0	1	1	1	COQ5	coenzyme Q5 homolog, methyltransferase (S. cerevisiae)
hsa-miR-362-3p	0	0	0	1	1	1	WDR66	WD repeat domain 66
hsa-miR-362-3p	1	0	1	1	1	1	PPP1R9A	protein phosphatase 1, regulatory subunit 9A
hsa-miR-362-3p	0	0	1	1	1	1	ZFAND2B	zinc finger, AN1-type domain 2B
hsa-miR-362-3p	0	0	0	1	0	0	TMEM141	transmembrane protein 141
hsa-miR-362-3p	0	0	0	1	0	0	KIAA1984	KIAA1984
hsa-miR-362-3p	1	0	1	1	1	1	ALDH4A1	aldehyde dehydrogenase 4 family, member A1
hsa-miR-362-3p	0	0	0	1	0	0	CLDND2	claudin domain containing 2
hsa-miR-362-3p	0	0	0	1	1	1	ZNF20	zinc finger protein 20
hsa-miR-362-3p	0	0	0	1	1	1	ANO10	anoctamin 10
hsa-miR-362-3p	1	0	1	1	0	0	IER2	immediate early response 2
hsa-miR-362-3p	0	0	1	1	0	0	ASB16	ankyrin repeat and SOCS box containing 16
hsa-miR-362-3p	0	0	0	1	0	0	WDR63	WD repeat domain 63
hsa-miR-362-3p	0	0	1	1	0	0	HELQ	helicase, POLQ-like
hsa-miR-362-3p	0	0	0	1	1	1	TMEM79	transmembrane protein 79
hsa-miR-362-3p	0	0	0	1	0	0	FEV	FEV (ETS oncogene family)
hsa-miR-362-3p	1	0	1	1	1	1	ABI2	abl-interactor 2
hsa-miR-362-3p	1	0	1	1	1	1	PTPRG	protein tyrosine phosphatase, receptor type, G
hsa-miR-362-3p	0	0	0	1	0	0	RTP3	receptor (chemosensory) transporter protein 3
hsa-miR-362-3p	0	0	1	1	1	1	UVSSA	UV-stimulated scaffold protein A
hsa-miR-362-3p	0	0	1	1	1	1	ZNF589	zinc finger protein 589
hsa-miR-362-3p	0	0	1	1	0	0	MON1A	MON1 homolog A (yeast)
hsa-miR-362-3p	0	0	0	1	0	0	ADAD1	adenosine deaminase domain containing 1 (testis-specific)
hsa-miR-362-3p	0	0	0	1	1	1	WDR41	WD repeat domain 41
hsa-miR-362-3p	0	0	1	1	0	0	IL3	interleukin 3 (colony-stimulating factor, multiple)
hsa-miR-362-3p	0	0	1	1	1	1	MED30	mediator complex subunit 30
hsa-miR-362-3p	0	0	1	1	1	1	SPAG11B	sperm associated antigen 11B
hsa-miR-362-3p	0	0	1	1	0	0	WNK2	WNK lysine deficient protein kinase 2
hsa-miR-362-3p	0	0	0	1	1	1	ZNF488	zinc finger protein 488
hsa-miR-362-3p	0	0	0	1	0	0	HPS6	Hermansky-Pudlak syndrome 6
hsa-miR-362-3p	0	0	1	1	0	0	CCT2	chaperonin containing TCP1, subunit 2 (beta)
hsa-miR-362-3p	0	0	0	1	0	0	ANKRD20A20P	ankyrin repeat domain 20 family, member A20, pseudogene
hsa-miR-362-3p	0	0	0	1	0	0	ANKRD20A8P	ankyrin repeat domain 20 family, member A8, pseudogene
hsa-miR-362-3p	0	0	0	1	0	0	ANKRD20A4	ankyrin repeat domain 20 family, member A4
hsa-miR-362-3p	0	0	1	1	1	1	GCN1L1	GCN1 general control of amino-acid synthesis 1-like 1 (yeast)
hsa-miR-362-3p	0	0	1	1	1	1	ZNF428	zinc finger protein 428
hsa-miR-362-3p	0	0	0	1	1	1	CYB5D2	cytochrome b5 domain containing 2
hsa-miR-362-3p	1	0	0	1	0	0	ITFG3	integrin alpha FG-GAP repeat containing 3
hsa-miR-362-3p	0	0	1	1	1	1	OGG1	8-oxoguanine DNA glycosylase
hsa-miR-362-3p	1	0	1	1	0	0	LMAN2	lectin, mannose-binding 2
hsa-miR-362-3p	1	0	1	1	1	1	PDS5A	PDS5, regulator of cohesion maintenance, homolog A (S. cerevisiae)
hsa-miR-362-3p	1	0	1	1	1	1	MARK3	MAP/microtubule affinity-regulating kinase 3
hsa-miR-362-3p	1	0	1	1	1	1	GPRIN1	G protein regulated inducer of neurite outgrowth 1
hsa-miR-362-3p	1	0	1	1	1	1	ORMDL3	ORM1-like 3 (S. cerevisiae)
hsa-miR-362-3p	0	0	1	1	0	0	GHRHR	growth hormone releasing hormone receptor
hsa-miR-362-3p	0	0	0	1	0	0	OR5AU1	olfactory receptor, family 5, subfamily AU, member 1
hsa-miR-362-3p	0	0	1	1	0	0	FSHR	follicle stimulating hormone receptor
hsa-miR-362-3p	1	0	1	1	0	0	XPO6	exportin 6
hsa-miR-362-3p	0	0	0	1	0	0	OR1B1	olfactory receptor, family 1, subfamily B, member 1
hsa-miR-362-3p	0	0	0	1	0	0	TUBB3	tubulin, beta 3 class III
hsa-miR-362-3p	1	0	1	1	1	1	KLF11	Kruppel-like factor 11
hsa-miR-362-3p	1	0	1	1	0	0	QARS	glutaminyl-tRNA synthetase
hsa-miR-362-3p	0	0	1	1	1	1	CCDC91	coiled-coil domain containing 91
hsa-miR-362-3p	0	0	0	1	0	0	REEP4	receptor accessory protein 4
hsa-miR-362-3p	0	0	1	1	1	1	C2orf68	chromosome 2 open reading frame 68
hsa-miR-362-3p	1	0	1	1	1	1	CEP120	centrosomal protein 120kDa
hsa-miR-362-3p	0	0	1	1	1	1	PRL	prolactin
hsa-miR-362-3p	0	0	1	1	1	1	ROBO4	roundabout, axon guidance receptor, homolog 4 (Drosophila)
hsa-miR-362-3p	0	0	0	1	1	1	ZNF672	zinc finger protein 672
hsa-miR-362-3p	1	0	1	1	1	1	SUPT3H	suppressor of Ty 3 homolog (S. cerevisiae)
hsa-miR-362-3p	0	0	0	1	0	0	MYEOV2	myeloma overexpressed 2
hsa-miR-362-3p	1	0	1	1	1	1	PDCD6IP	programmed cell death 6 interacting protein
hsa-miR-362-3p	0	0	0	1	0	0	TMEM223	transmembrane protein 223
hsa-miR-362-3p	0	0	0	1	0	0	OR10V1	olfactory receptor, family 10, subfamily V, member 1
hsa-miR-362-3p	0	0	1	1	1	1	JAGN1	jagunal homolog 1 (Drosophila)
hsa-miR-362-3p	0	0	0	1	0	0	RPL4	ribosomal protein L4
hsa-miR-362-3p	0	0	0	1	1	1	AOC3	amine oxidase, copper containing 3 (vascular adhesion protein 1)
hsa-miR-362-3p	0	0	0	1	0	0	ATAD3B	ATPase family, AAA domain containing 3B
hsa-miR-362-3p	0	0	1	1	1	1	BTK	Bruton agammaglobulinemia tyrosine kinase
hsa-miR-362-3p	0	0	1	1	1	1	MYEOV	myeloma overexpressed (in a subset of t(11;14) positive multiple myelomas)
hsa-miR-362-3p	0	0	1	1	1	1	APITD1	apoptosis-inducing, TAF9-like domain 1
hsa-miR-362-3p	0	0	1	1	1	1	CORT	cortistatin
hsa-miR-362-3p	0	0	0	1	0	0	OR5B3	olfactory receptor, family 5, subfamily B, member 3
hsa-miR-362-3p	0	0	1	1	0	0	CARD14	caspase recruitment domain family, member 14
hsa-miR-362-3p	1	0	1	1	1	1	GLE1	GLE1 RNA export mediator homolog (yeast)
hsa-miR-362-3p	0	0	1	1	0	0	SPERT	spermatid associated
hsa-miR-362-3p	0	0	0	1	0	0	DAK	dihydroxyacetone kinase 2 homolog (S. cerevisiae)
hsa-miR-362-3p	1	0	1	1	1	1	ATG4B	autophagy related 4B, cysteine peptidase
hsa-miR-362-3p	0	0	0	1	1	1	FAM21D	family with sequence similarity 21, member D
hsa-miR-362-3p	0	0	0	1	1	1	HSPB7	heat shock 27kDa protein family, member 7 (cardiovascular)
hsa-miR-362-3p	0	0	0	1	0	0	NFE2	nuclear factor (erythroid-derived 2), 45kDa
hsa-miR-362-3p	0	0	0	1	0	0	NAGPA	N-acetylglucosamine-1-phosphodiester alpha-N-acetylglucosaminidase
hsa-miR-362-3p	0	0	1	1	1	1	SART1	squamous cell carcinoma antigen recognized by T cells
hsa-miR-362-3p	0	0	1	1	0	0	RPS6KB2	ribosomal protein S6 kinase, 70kDa, polypeptide 2
hsa-miR-362-3p	1	0	1	1	1	1	CSNK1D	casein kinase 1, delta
hsa-miR-362-3p	0	0	1	1	1	1	LOH12CR1	loss of heterozygosity, 12, chromosomal region 1
hsa-miR-362-3p	0	0	1	1	1	1	AMFR	autocrine motility factor receptor, E3 ubiquitin protein ligase
hsa-miR-362-3p	0	0	0	1	0	0	FARSA	phenylalanyl-tRNA synthetase, alpha subunit
hsa-miR-362-3p	0	0	1	1	1	1	SCIMP	SLP adaptor and CSK interacting membrane protein
hsa-miR-362-3p	0	0	0	1	0	0	LOC100132418	Uncharacterized PRO1102-like protein LOC100132418
hsa-miR-362-3p	0	0	1	1	0	0	SLC41A3	solute carrier family 41, member 3
hsa-miR-362-3p	0	0	0	1	1	1	TDRD6	tudor domain containing 6
hsa-miR-362-3p	0	0	0	1	0	0	AURKB	aurora kinase B
hsa-miR-362-3p	1	0	1	1	1	1	ANO1	anoctamin 1, calcium activated chloride channel
hsa-miR-362-3p	0	0	0	1	0	0	OR52N2	olfactory receptor, family 52, subfamily N, member 2
hsa-miR-362-3p	0	0	1	1	0	0	IL11RA	interleukin 11 receptor, alpha
hsa-miR-362-3p	0	0	0	1	1	1	GRHPR	glyoxylate reductase/hydroxypyruvate reductase
hsa-miR-362-3p	1	0	1	1	1	1	FIBIN	fin bud initiation factor homolog (zebrafish)
hsa-miR-362-3p	0	0	1	1	1	1	ABLIM2	actin binding LIM protein family, member 2
hsa-miR-362-3p	0	0	1	1	1	1	ZDHHC22	zinc finger, DHHC-type containing 22
hsa-miR-362-3p	1	0	1	1	1	1	IL17RD	interleukin 17 receptor D
hsa-miR-362-3p	0	0	1	1	1	1	GALNT11	UDP-N-acetyl-alpha-D-galactosamine:polypeptide N-acetylgalactosaminyltransferase 11 (GalNAc-T11)
hsa-miR-362-3p	0	0	1	1	0	0	THAP4	THAP domain containing 4
hsa-miR-362-3p	0	0	0	1	1	1	HSD17B6	hydroxysteroid (17-beta) dehydrogenase 6 homolog (mouse)
hsa-miR-362-3p	1	0	1	1	1	1	WDR20	WD repeat domain 20
hsa-miR-362-3p	0	0	1	1	0	0	RUVBL1	RuvB-like 1 (E. coli)
hsa-miR-362-3p	1	0	1	1	0	0	SMCR7	Smith-Magenis syndrome chromosome region, candidate 7
hsa-miR-362-3p	1	0	0	1	1	1	GPR4	G protein-coupled receptor 4
hsa-miR-362-3p	1	0	1	1	1	1	LRRC57	leucine rich repeat containing 57
hsa-miR-362-3p	0	0	1	1	1	1	BRD9	bromodomain containing 9
hsa-miR-362-3p	0	0	1	1	1	1	SLC34A1	solute carrier family 34 (sodium phosphate), member 1
hsa-miR-362-3p	0	0	1	1	1	1	FAM153C	family with sequence similarity 153, member C, pseudogene
hsa-miR-362-3p	1	0	1	1	1	1	FAM210B	family with sequence similarity 210, member B
hsa-miR-362-3p	0	0	1	1	1	1	LRIF1	ligand dependent nuclear receptor interacting factor 1
hsa-miR-362-3p	0	0	0	1	0	0	FER1L4	fer-1-like 4 (C. elegans) pseudogene
hsa-miR-362-3p	0	0	0	1	0	0	LOC100130557	uncharacterized LOC100130557
hsa-miR-362-3p	1	0	1	1	1	1	TOR1AIP1	torsin A interacting protein 1
hsa-miR-362-3p	0	0	0	1	1	1	EID2B	EP300 interacting inhibitor of differentiation 2B
hsa-miR-362-3p	0	0	1	1	1	1	ZSCAN20	zinc finger and SCAN domain containing 20
hsa-miR-362-3p	1	0	0	1	1	1	ABCC9	ATP-binding cassette, sub-family C (CFTR/MRP), member 9
hsa-miR-362-3p	0	0	1	1	1	1	HARBI1	harbinger transposase derived 1
hsa-miR-362-3p	0	0	0	1	0	0	NDUFAF3	NADH dehydrogenase (ubiquinone) complex I, assembly factor 3
hsa-miR-362-3p	0	0	0	1	1	1	NR2E3	nuclear receptor subfamily 2, group E, member 3
hsa-miR-362-3p	1	0	0	1	1	1	MMS19	MMS19 nucleotide excision repair homolog (S. cerevisiae)
hsa-miR-362-3p	1	0	1	1	1	1	PTPN2	protein tyrosine phosphatase, non-receptor type 2
hsa-miR-362-3p	0	0	1	1	0	0	GPR97	G protein-coupled receptor 97
hsa-miR-362-3p	0	0	1	1	1	1	GRIK1	glutamate receptor, ionotropic, kainate 1
hsa-miR-362-3p	0	0	1	1	1	1	SMYD3	SET and MYND domain containing 3
hsa-miR-362-3p	0	0	1	1	1	1	GLUD2	glutamate dehydrogenase 2
hsa-miR-362-3p	0	0	1	1	1	1	FMNL1	formin-like 1
hsa-miR-362-3p	0	0	0	1	0	0	ARSI	arylsulfatase family, member I
hsa-miR-362-3p	0	0	0	1	0	0	OR4F6	olfactory receptor, family 4, subfamily F, member 6
hsa-miR-362-3p	0	0	0	1	0	0	TOP1MT	topoisomerase (DNA) I, mitochondrial
hsa-miR-362-3p	0	0	1	1	1	1	HNMT	histamine N-methyltransferase
hsa-miR-362-3p	0	0	1	1	1	1	KRTAP8-1	keratin associated protein 8-1
hsa-miR-362-3p	0	0	0	1	0	0	ZNF775	zinc finger protein 775
hsa-miR-362-3p	1	0	1	1	0	0	ORAI1	ORAI calcium release-activated calcium modulator 1
hsa-miR-362-3p	0	0	0	1	0	0	PRAMEF15	PRAME family member 15
hsa-miR-362-3p	0	0	1	1	0	0	TMEM44	transmembrane protein 44
hsa-miR-362-3p	1	0	0	1	0	0	MAPK11	mitogen-activated protein kinase 11
hsa-miR-362-3p	1	0	0	1	1	1	IKZF1	IKAROS family zinc finger 1 (Ikaros)
hsa-miR-362-3p	0	0	0	1	1	1	SNAI3	snail homolog 3 (Drosophila)
hsa-miR-362-3p	0	0	0	1	1	1	FTSJ2	FtsJ RNA methyltransferase homolog 2 (E. coli)
hsa-miR-362-3p	0	0	0	1	0	0	ZNF484	zinc finger protein 484
hsa-miR-362-3p	0	0	0	1	0	0	TMEM186	transmembrane protein 186
hsa-miR-362-3p	0	0	1	1	0	0	FAM212A	family with sequence similarity 212, member A
hsa-miR-362-3p	0	0	0	1	0	0	C22orf26	chromosome 22 open reading frame 26
hsa-miR-362-3p	0	0	1	1	0	0	C11orf74	chromosome 11 open reading frame 74
hsa-miR-362-3p	0	0	1	1	0	0	TRIM7	tripartite motif containing 7
hsa-miR-362-3p	0	0	1	1	0	0	KRTAP10-4	keratin associated protein 10-4
hsa-miR-362-3p	0	0	1	1	0	0	TBC1D7	TBC1 domain family, member 7
hsa-miR-362-3p	1	0	1	1	1	1	GRIA3	glutamate receptor, ionotropic, AMPA 3
hsa-miR-362-3p	0	0	0	1	0	0	TBX10	T-box 10
hsa-miR-362-3p	0	0	1	1	1	1	FAM22G	family with sequence similarity 22, member G
hsa-miR-362-3p	0	0	0	1	0	0	VWCE	von Willebrand factor C and EGF domains
hsa-miR-362-3p	1	0	0	1	1	1	ZNF354A	zinc finger protein 354A
hsa-miR-362-3p	0	0	0	1	0	0	ZNF671	zinc finger protein 671
hsa-miR-362-3p	0	0	1	1	1	1	LYNX1	Ly6/neurotoxin 1
hsa-miR-362-3p	0	0	1	1	1	1	FAM21C	family with sequence similarity 21, member C
hsa-miR-362-3p	1	0	1	1	1	1	PACRG	PARK2 co-regulated
hsa-miR-362-3p	1	0	1	1	0	0	C10orf137	chromosome 10 open reading frame 137
hsa-miR-362-3p	0	0	1	1	1	1	AIF1	allograft inflammatory factor 1
hsa-miR-362-3p	1	0	1	1	1	1	SPRYD4	SPRY domain containing 4
hsa-miR-362-3p	0	0	0	1	1	1	ZIM2	zinc finger, imprinted 2
hsa-miR-362-3p	0	0	1	1	1	1	PEG3	paternally expressed 3
hsa-miR-362-3p	0	0	1	1	1	1	FIBP	fibroblast growth factor (acidic) intracellular binding protein
hsa-miR-362-3p	0	0	0	1	0	0	OR2AG2	olfactory receptor, family 2, subfamily AG, member 2
hsa-miR-362-3p	0	0	1	1	0	0	CRYM-AS1	CRYM antisense RNA 1
hsa-miR-362-3p	1	0	1	1	1	1	DFFB	DNA fragmentation factor, 40kDa, beta polypeptide (caspase-activated DNase)
hsa-miR-362-3p	0	0	1	1	1	1	TTC4	tetratricopeptide repeat domain 4
hsa-miR-362-3p	0	0	1	1	0	0	HEATR8	HEAT repeat containing 8
hsa-miR-362-3p	1	0	1	1	1	1	NDUFA4	NADH dehydrogenase (ubiquinone) 1 alpha subcomplex, 4, 9kDa
hsa-miR-362-3p	1	0	1	1	1	1	PRDM8	PR domain containing 8
hsa-miR-362-3p	0	0	1	1	1	1	MIOS	missing oocyte, meiosis regulator, homolog (Drosophila)
hsa-miR-362-3p	0	0	0	1	1	1	CCDC169	coiled-coil domain containing 169
hsa-miR-362-3p	1	0	1	1	1	1	H3F3C	H3 histone, family 3C
hsa-miR-362-3p	0	0	1	1	0	0	HIST1H4D	histone cluster 1, H4d
hsa-miR-362-3p	0	0	0	1	0	0	EXD3	exonuclease 3'-5' domain containing 3
hsa-miR-362-3p	1	0	1	1	1	1	ACER2	alkaline ceramidase 2
hsa-miR-362-3p	0	0	1	1	1	1	ZDHHC14	zinc finger, DHHC-type containing 14
hsa-miR-362-3p	0	0	0	1	0	0	THYN1	thymocyte nuclear protein 1
hsa-miR-362-3p	1	0	1	1	1	1	TMEM189-UBE2V1	TMEM189-UBE2V1 readthrough
hsa-miR-362-3p	1	0	1	1	1	1	UBE2V1	ubiquitin-conjugating enzyme E2 variant 1
hsa-miR-362-3p	0	0	1	1	1	1	TMEM189	transmembrane protein 189
hsa-miR-362-3p	0	0	1	1	1	1	GNA14	guanine nucleotide binding protein (G protein), alpha 14
hsa-miR-362-3p	0	0	1	1	0	0	MPRIP	myosin phosphatase Rho interacting protein
hsa-miR-362-3p	1	0	1	1	1	1	SBK1	SH3-binding domain kinase 1
hsa-miR-362-3p	0	0	1	1	1	1	CAST	calpastatin
hsa-miR-362-3p	1	0	1	1	1	1	SAT1	spermidine/spermine N1-acetyltransferase 1
hsa-miR-362-3p	0	0	0	1	0	0	QRFP	pyroglutamylated RFamide peptide
hsa-miR-362-3p	0	0	1	1	1	1	UBE4B	ubiquitination factor E4B
hsa-miR-362-3p	1	0	1	1	1	1	CASKIN1	CASK interacting protein 1
hsa-miR-362-3p	0	0	1	1	0	0	SLC12A7	solute carrier family 12 (potassium/chloride transporters), member 7
hsa-miR-362-3p	1	0	0	1	1	1	COL9A3	collagen, type IX, alpha 3
hsa-miR-362-3p	0	0	1	1	1	1	LRRC27	leucine rich repeat containing 27
hsa-miR-362-3p	0	0	0	1	1	1	OR7D2	olfactory receptor, family 7, subfamily D, member 2
hsa-miR-362-3p	0	0	0	1	0	0	GTDC2	glycosyltransferase-like domain containing 2
hsa-miR-362-3p	0	0	0	1	0	0	FAM166A	family with sequence similarity 166, member A
hsa-miR-362-3p	0	0	0	1	0	0	OR2T27	olfactory receptor, family 2, subfamily T, member 27
hsa-miR-362-3p	0	0	1	1	0	0	PRICKLE1	prickle homolog 1 (Drosophila)
hsa-miR-362-3p	0	0	0	1	0	0	RPL36	ribosomal protein L36
hsa-miR-362-3p	0	0	0	1	1	1	ABCG1	ATP-binding cassette, sub-family G (WHITE), member 1
hsa-miR-362-3p	1	0	1	1	1	1	IQCB1	IQ motif containing B1
hsa-miR-362-3p	1	0	1	1	1	1	CACNA1D	calcium channel, voltage-dependent, L type, alpha 1D subunit
hsa-miR-362-3p	1	0	1	1	1	1	DOC2A	double C2-like domains, alpha
hsa-miR-362-3p	1	0	1	1	0	0	HINFP	histone H4 transcription factor
hsa-miR-362-3p	1	0	1	1	1	1	UPF3A	UPF3 regulator of nonsense transcripts homolog A (yeast)
hsa-miR-362-3p	0	0	1	1	0	0	PTTG1	pituitary tumor-transforming 1
hsa-miR-362-3p	0	0	1	1	1	1	ARPC5L	actin related protein 2/3 complex, subunit 5-like
hsa-miR-362-3p	0	0	0	1	1	1	COL17A1	collagen, type XVII, alpha 1
hsa-miR-362-3p	0	0	1	1	0	0	DNHD1	dynein heavy chain domain 1
hsa-miR-362-3p	0	0	1	1	0	0	DDRGK1	DDRGK domain containing 1
hsa-miR-362-3p	0	0	1	1	1	1	XKR9	XK, Kell blood group complex subunit-related family, member 9
hsa-miR-362-3p	0	0	1	1	0	0	MLXIPL	MLX interacting protein-like
hsa-miR-362-3p	0	0	0	1	0	0	CRYBA4	crystallin, beta A4
hsa-miR-362-3p	1	0	1	1	1	1	TWIST1	twist homolog 1 (Drosophila)
hsa-miR-362-3p	1	0	1	1	1	1	BOC	Boc homolog (mouse)
hsa-miR-362-3p	1	0	0	1	0	0	CARD11	caspase recruitment domain family, member 11
hsa-miR-362-3p	0	0	0	1	0	0	OR52B4	olfactory receptor, family 52, subfamily B, member 4
hsa-miR-362-3p	0	0	0	1	0	0	TRIM17	tripartite motif containing 17
hsa-miR-362-3p	1	0	0	1	1	1	MKL1	megakaryoblastic leukemia (translocation) 1
hsa-miR-362-3p	0	0	1	1	1	1	CHCHD8	coiled-coil-helix-coiled-coil-helix domain containing 8
hsa-miR-362-3p	1	0	1	1	1	1	LAMB3	laminin, beta 3
hsa-miR-362-3p	0	0	1	1	1	1	CDAN1	codanin 1
hsa-miR-362-3p	0	0	1	1	1	1	RANGAP1	Ran GTPase activating protein 1
hsa-miR-362-3p	1	0	1	1	1	1	ADD2	adducin 2 (beta)
hsa-miR-362-3p	0	0	1	1	1	1	PEX14	peroxisomal biogenesis factor 14
hsa-miR-362-3p	0	0	1	1	0	0	CRB3	crumbs homolog 3 (Drosophila)
hsa-miR-362-3p	0	0	1	1	1	1	TPCN2	two pore segment channel 2
hsa-miR-362-3p	0	0	1	1	1	1	APBB1IP	amyloid beta (A4) precursor protein-binding, family B, member 1 interacting protein
hsa-miR-362-3p	0	0	0	1	0	0	OR51D1	olfactory receptor, family 51, subfamily D, member 1
hsa-miR-362-3p	0	0	0	1	1	1	DCLRE1C	DNA cross-link repair 1C
hsa-miR-362-3p	0	0	0	1	0	0	HMX3	H6 family homeobox 3
hsa-miR-362-3p	1	0	1	1	1	1	BRD3	bromodomain containing 3
hsa-miR-362-3p	1	0	0	1	1	1	C14orf102	chromosome 14 open reading frame 102
hsa-miR-362-3p	0	0	1	1	0	0	PLA2G4F	phospholipase A2, group IVF
hsa-miR-362-3p	0	0	0	1	0	0	ANKLE2	ankyrin repeat and LEM domain containing 2
hsa-miR-362-3p	0	0	0	1	0	0	DDX47	DEAD (Asp-Glu-Ala-Asp) box polypeptide 47
hsa-miR-362-3p	1	0	1	1	1	1	EPHB4	EPH receptor B4
hsa-miR-362-3p	0	0	1	1	1	1	STAT4	signal transducer and activator of transcription 4
hsa-miR-362-3p	0	0	1	1	0	0	SCGB1D4	secretoglobin, family 1D, member 4
hsa-miR-362-3p	0	0	1	1	0	0	NSMCE1	non-SMC element 1 homolog (S. cerevisiae)
hsa-miR-362-3p	0	0	1	1	0	0	TMEM126B	transmembrane protein 126B
hsa-miR-362-3p	0	0	0	1	1	1	AASS	aminoadipate-semialdehyde synthase
hsa-miR-362-3p	0	0	1	1	1	1	GGPS1	geranylgeranyl diphosphate synthase 1
hsa-miR-362-3p	1	0	1	1	1	1	TRPM6	transient receptor potential cation channel, subfamily M, member 6
hsa-miR-362-3p	0	0	1	1	1	1	ME3	malic enzyme 3, NADP(+)-dependent, mitochondrial
hsa-miR-362-3p	0	0	1	1	0	0	NIF3L1	NIF3 NGG1 interacting factor 3-like 1 (S. cerevisiae)
hsa-miR-362-3p	0	0	1	1	1	1	RXRG	retinoid X receptor, gamma
hsa-miR-362-3p	0	0	1	1	1	1	GTPBP4	GTP binding protein 4
hsa-miR-362-3p	0	0	1	1	0	0	AARSD1	alanyl-tRNA synthetase domain containing 1
hsa-miR-362-3p	0	0	1	1	1	1	CDC16	cell division cycle 16 homolog (S. cerevisiae)
hsa-miR-362-3p	0	0	0	1	0	0	CLPSL2	colipase-like 2
hsa-miR-362-3p	0	0	1	1	1	1	GSTM3	glutathione S-transferase mu 3 (brain)
hsa-miR-362-3p	0	0	0	1	1	1	SLC26A11	solute carrier family 26, member 11
hsa-miR-362-3p	0	0	0	1	1	1	ZNF438	zinc finger protein 438
hsa-miR-362-3p	0	0	0	1	1	1	FAM109A	family with sequence similarity 109, member A
hsa-miR-362-3p	0	0	0	1	0	0	KRT19	keratin 19
hsa-miR-362-3p	0	0	0	1	0	0	ZNF358	zinc finger protein 358
hsa-miR-362-3p	0	0	0	1	0	0	SLC25A47	solute carrier family 25, member 47
hsa-miR-362-3p	0	0	0	1	1	1	FAM63A	family with sequence similarity 63, member A
hsa-miR-362-3p	1	0	1	1	1	1	ENSA	endosulfine alpha
hsa-miR-362-3p	0	0	1	1	1	1	C1orf101	chromosome 1 open reading frame 101
hsa-miR-362-3p	0	0	0	1	1	1	ADCK3	aarF domain containing kinase 3
hsa-miR-362-3p	0	0	1	1	0	0	C1orf95	chromosome 1 open reading frame 95
hsa-miR-362-3p	0	0	1	1	1	1	DYRK3	dual-specificity tyrosine-(Y)-phosphorylation regulated kinase 3
hsa-miR-362-3p	1	0	0	1	1	1	SOX13	SRY (sex determining region Y)-box 13
hsa-miR-362-3p	0	0	0	1	1	1	RMND1	required for meiotic nuclear division 1 homolog (S. cerevisiae)
hsa-miR-362-3p	1	0	1	1	1	1	NR5A2	nuclear receptor subfamily 5, group A, member 2
hsa-miR-362-3p	1	0	1	1	1	1	PCMT1	protein-L-isoaspartate (D-aspartate) O-methyltransferase
hsa-miR-362-3p	0	0	0	1	1	1	QSOX1	quiescin Q6 sulfhydryl oxidase 1
hsa-miR-362-3p	0	0	0	1	1	1	MRPS14	mitochondrial ribosomal protein S14
hsa-miR-362-3p	0	0	1	1	0	0	PMF1	polyamine-modulated factor 1
hsa-miR-362-3p	0	0	0	1	0	0	BGLAP	bone gamma-carboxyglutamate (gla) protein
hsa-miR-362-3p	1	0	1	1	1	1	HCN3	hyperpolarization activated cyclic nucleotide-gated potassium channel 3
hsa-miR-362-3p	0	0	1	1	0	0	CLVS2	clavesin 2
hsa-miR-362-3p	0	0	0	1	0	0	STK32C	serine/threonine kinase 32C
hsa-miR-362-3p	0	0	1	1	0	0	TUBE1	tubulin, epsilon 1
hsa-miR-362-3p	1	0	1	1	0	0	CHTOP	chromatin target of PRMT1
hsa-miR-362-3p	0	0	1	1	1	1	BUB3	budding uninhibited by benzimidazoles 3 homolog (yeast)
hsa-miR-362-3p	1	0	1	1	1	1	EPHA7	EPH receptor A7
hsa-miR-362-3p	0	0	1	1	0	0	NEURL	neuralized homolog (Drosophila)
hsa-miR-362-3p	0	0	1	1	0	0	MYBPHL	myosin binding protein H-like
hsa-miR-362-3p	0	0	1	1	1	1	PSRC1	proline/serine-rich coiled-coil 1
hsa-miR-362-3p	0	0	1	1	1	1	ELOVL3	ELOVL fatty acid elongase 3
hsa-miR-362-3p	0	0	1	1	0	0	NAA10	N(alpha)-acetyltransferase 10, NatA catalytic subunit
hsa-miR-362-3p	0	0	1	1	1	1	RTCA	RNA 3'-terminal phosphate cyclase
hsa-miR-362-3p	0	0	0	1	1	1	PNCK	pregnancy up-regulated non-ubiquitously expressed CaM kinase
hsa-miR-362-3p	1	0	1	1	1	1	DUSP9	dual specificity phosphatase 9
hsa-miR-362-3p	0	0	0	1	0	0	PPDPF	pancreatic progenitor cell differentiation and proliferation factor homolog (zebrafish)
hsa-miR-362-3p	0	0	1	1	0	0	CPN1	carboxypeptidase N, polypeptide 1
hsa-miR-362-3p	0	0	1	1	1	1	GNAS	GNAS complex locus
hsa-miR-362-3p	0	0	0	1	0	0	DEFB110	defensin, beta 110 locus
hsa-miR-362-3p	0	0	1	1	1	1	PARS2	prolyl-tRNA synthetase 2, mitochondrial (putative)
hsa-miR-362-3p	0	0	0	1	0	0	MAGOH	mago-nashi homolog, proliferation-associated (Drosophila)
hsa-miR-362-3p	0	0	1	1	0	0	BCAS4	breast carcinoma amplified sequence 4
hsa-miR-362-3p	0	0	0	1	0	0	LCN8	lipocalin 8
hsa-miR-362-3p	0	0	0	1	0	0	FAM69B	family with sequence similarity 69, member B
hsa-miR-362-3p	0	0	1	1	0	0	BEND5	BEN domain containing 5
hsa-miR-362-3p	0	0	0	1	1	1	TSPAN1	tetraspanin 1
hsa-miR-362-3p	0	0	1	1	1	1	TIE1	tyrosine kinase with immunoglobulin-like and EGF-like domains 1
hsa-miR-362-3p	0	0	1	1	0	0	CCDC23	coiled-coil domain containing 23
hsa-miR-362-3p	0	0	1	1	1	1	PPCS	phosphopantothenoylcysteine synthetase
hsa-miR-362-3p	0	0	0	1	0	0	ENDOG	endonuclease G
hsa-miR-362-3p	0	0	1	1	0	0	TRERF1	transcriptional regulating factor 1
hsa-miR-362-3p	0	0	1	1	1	1	SRPX2	sushi-repeat containing protein, X-linked 2
hsa-miR-362-3p	0	0	0	1	0	0	GNL2	guanine nucleotide binding protein-like 2 (nucleolar)
hsa-miR-362-3p	0	0	1	1	1	1	TGM2	transglutaminase 2 (C polypeptide, protein-glutamine-gamma-glutamyltransferase)
hsa-miR-362-3p	0	0	0	1	0	0	BMP2KL	BMP2 inducible kinase-like
hsa-miR-362-3p	1	0	1	1	1	1	NEK6	NIMA (never in mitosis gene a)-related kinase 6
hsa-miR-362-3p	0	0	1	1	1	1	FBXO36	F-box protein 36
hsa-miR-362-3p	0	0	1	1	1	1	WDR69	WD repeat domain 69
hsa-miR-362-3p	1	0	1	1	1	1	REEP3	receptor accessory protein 3
hsa-miR-362-3p	1	0	0	1	1	1	CNTRL	centriolin
hsa-miR-362-3p	1	0	1	1	0	0	CD164L2	CD164 sialomucin-like 2
hsa-miR-362-3p	0	0	1	1	0	0	IL2RG	interleukin 2 receptor, gamma
hsa-miR-362-3p	0	0	1	1	0	0	GDPD2	glycerophosphodiester phosphodiesterase domain containing 2
hsa-miR-362-3p	0	0	0	1	0	0	HLA-DMA	major histocompatibility complex, class II, DM alpha
hsa-miR-362-3p	0	0	0	1	1	1	PSMB9	proteasome (prosome, macropain) subunit, beta type, 9 (large multifunctional peptidase 2)
hsa-miR-362-3p	1	0	1	1	1	1	MGAT5B	mannosyl (alpha-1,6-)-glycoprotein beta-1,6-N-acetyl-glucosaminyltransferase, isozyme B
hsa-miR-362-3p	0	0	0	1	0	0	TMEM225	transmembrane protein 225
hsa-miR-362-3p	0	0	1	1	0	0	EGFL8	EGF-like-domain, multiple 8
hsa-miR-362-3p	0	0	0	1	1	1	EMC1	ER membrane protein complex subunit 1
hsa-miR-362-3p	0	0	0	1	0	0	BTBD17	BTB (POZ) domain containing 17
hsa-miR-362-3p	1	0	1	1	1	1	C20orf112	chromosome 20 open reading frame 112
hsa-miR-362-3p	0	0	0	1	1	1	NXNL2	nucleoredoxin-like 2
hsa-miR-362-3p	1	0	1	1	1	1	GDPD1	glycerophosphodiester phosphodiesterase domain containing 1
hsa-miR-362-3p	0	0	1	1	0	0	PRAMEF9	PRAME family member 9
hsa-miR-362-3p	1	0	1	1	1	1	PPP1R3F	protein phosphatase 1, regulatory subunit 3F
hsa-miR-362-3p	0	0	1	1	1	1	NALCN	sodium leak channel, non-selective
hsa-miR-362-3p	0	0	0	1	0	0	PSORS1C3	psoriasis susceptibility 1 candidate 3 (non-protein coding)
hsa-miR-362-3p	1	0	1	1	0	0	DGAT2	diacylglycerol O-acyltransferase 2
hsa-miR-362-3p	0	0	0	1	1	1	C9orf64	chromosome 9 open reading frame 64
hsa-miR-362-3p	0	0	1	1	1	1	IER3	immediate early response 3
hsa-miR-362-3p	0	0	0	1	0	0	NME1-NME2	NME1-NME2 readthrough
hsa-miR-362-3p	0	0	1	1	0	0	NME1	NME/NM23 nucleoside diphosphate kinase 1
hsa-miR-362-3p	0	0	0	1	0	0	NME2	NME/NM23 nucleoside diphosphate kinase 2
hsa-miR-362-3p	0	0	1	1	1	1	FRMD3	FERM domain containing 3
hsa-miR-362-3p	1	0	1	1	1	1	TLE4	transducin-like enhancer of split 4 (E(sp1) homolog, Drosophila)
hsa-miR-362-3p	0	0	1	1	1	1	GATA1	GATA binding protein 1 (globin transcription factor 1)
hsa-miR-362-3p	0	0	1	1	0	0	UGGT2	UDP-glucose glycoprotein glucosyltransferase 2
hsa-miR-362-3p	0	0	1	1	1	1	ALDH1A1	aldehyde dehydrogenase 1 family, member A1
hsa-miR-362-3p	0	0	0	1	0	0	ZNF157	zinc finger protein 157
hsa-miR-362-3p	0	0	1	1	1	1	TJP2	tight junction protein 2
hsa-miR-362-3p	0	0	0	1	1	1	TMEM252	transmembrane protein 252
hsa-miR-362-3p	0	0	0	1	0	0	CBWD6	COBW domain containing 6
hsa-miR-362-3p	0	0	1	1	1	1	SNX5	sorting nexin 5
hsa-miR-362-3p	0	0	1	1	0	0	SLC3A2	solute carrier family 3 (activators of dibasic and neutral amino acid transport), member 2
hsa-miR-362-3p	1	0	1	1	1	1	DIAPH3	diaphanous homolog 3 (Drosophila)
hsa-miR-362-3p	0	0	1	1	1	1	SCGN	secretagogin, EF-hand calcium binding protein
hsa-miR-362-3p	0	0	0	1	0	0	GRXCR2	glutaredoxin, cysteine rich 2
hsa-miR-362-3p	0	0	0	1	0	0	ZNF425	zinc finger protein 425
hsa-miR-362-3p	0	0	1	1	1	1	UTP14C	UTP14, U3 small nucleolar ribonucleoprotein, homolog C (yeast)
hsa-miR-362-3p	1	0	1	1	1	1	AJAP1	adherens junctions associated protein 1
hsa-miR-362-3p	0	0	0	1	1	1	LRRC47	leucine rich repeat containing 47
hsa-miR-362-3p	0	0	1	1	1	1	EBPL	emopamil binding protein-like
hsa-miR-362-3p	0	0	1	1	1	1	CDADC1	cytidine and dCMP deaminase domain containing 1
hsa-miR-362-3p	0	0	0	1	0	0	OR5D16	olfactory receptor, family 5, subfamily D, member 16
hsa-miR-362-3p	0	0	0	1	0	0	CDK11B	cyclin-dependent kinase 11B
hsa-miR-362-3p	1	0	1	1	1	1	PLCB1	phospholipase C, beta 1 (phosphoinositide-specific)
hsa-miR-362-3p	0	0	0	1	1	1	CXorf21	chromosome X open reading frame 21
hsa-miR-362-3p	0	0	0	1	0	0	C11orf91	chromosome 11 open reading frame 91
hsa-miR-362-3p	0	0	1	1	1	1	NFATC3	nuclear factor of activated T-cells, cytoplasmic, calcineurin-dependent 3
hsa-miR-362-3p	0	0	1	1	0	0	AQP7	aquaporin 7
hsa-miR-362-3p	1	0	0	1	1	1	PDHA1	pyruvate dehydrogenase (lipoamide) alpha 1
hsa-miR-362-3p	0	0	1	1	1	1	SOAT2	sterol O-acyltransferase 2
hsa-miR-362-3p	0	0	0	1	0	0	OR52E6	olfactory receptor, family 52, subfamily E, member 6
hsa-miR-362-3p	0	0	1	1	0	0	LETM2	leucine zipper-EF-hand containing transmembrane protein 2
hsa-miR-362-3p	0	0	1	1	0	0	SLC4A11	solute carrier family 4, sodium borate transporter, member 11
hsa-miR-362-3p	0	0	1	1	0	0	EXOC3L4	exocyst complex component 3-like 4
hsa-miR-362-3p	0	0	0	1	0	0	MRPS26	mitochondrial ribosomal protein S26
hsa-miR-362-3p	0	0	1	1	0	0	RPS6	ribosomal protein S6
hsa-miR-362-3p	0	0	1	1	0	0	CARS	cysteinyl-tRNA synthetase
hsa-miR-362-3p	1	0	1	1	1	1	DNAJC27	DnaJ (Hsp40) homolog, subfamily C, member 27
hsa-miR-362-3p	0	0	0	1	0	0	EIF3CL	eukaryotic translation initiation factor 3, subunit C-like
hsa-miR-362-3p	0	0	1	1	1	1	ALB	albumin
hsa-miR-362-3p	1	0	0	1	1	1	NT5C1B	5'-nucleotidase, cytosolic IB
hsa-miR-362-3p	0	0	0	1	1	1	RDH14	retinol dehydrogenase 14 (all-trans/9-cis/11-cis)
hsa-miR-362-3p	1	0	1	1	1	1	ITSN1	intersectin 1 (SH3 domain protein)
hsa-miR-362-3p	0	0	1	1	1	1	KDM4C	lysine (K)-specific demethylase 4C
hsa-miR-362-3p	1	0	1	1	1	1	SMARCD1	SWI/SNF related, matrix associated, actin dependent regulator of chromatin, subfamily d, member 1
hsa-miR-362-3p	0	0	0	1	0	0	LOC728419	ubiquitin carboxyl-terminal hydrolase 17-like
hsa-miR-362-3p	0	0	0	1	0	0	LOC728379	ubiquitin carboxyl-terminal hydrolase 17-like
hsa-miR-362-3p	0	0	0	1	0	0	USP17L4	ubiquitin specific peptidase 17-like 4
hsa-miR-362-3p	0	0	0	1	0	0	NKD2	naked cuticle homolog 2 (Drosophila)
hsa-miR-362-3p	0	0	1	1	0	0	OTUD7A	OTU domain containing 7A
hsa-miR-362-3p	1	0	1	1	1	1	SPIRE1	spire homolog 1 (Drosophila)
hsa-miR-362-3p	0	0	1	1	0	0	FAM83G	family with sequence similarity 83, member G
hsa-miR-362-3p	0	0	1	1	0	0	TMEM72	transmembrane protein 72
hsa-miR-362-3p	0	0	1	1	0	0	NLRP5	NLR family, pyrin domain containing 5
hsa-miR-362-3p	1	0	1	0	1	1	SCN4A	sodium channel, voltage-gated, type IV, alpha subunit
hsa-miR-362-3p	0	0	1	1	1	1	RHO	rhodopsin
hsa-miR-362-3p	1	0	1	0	1	1	RAB11FIP1	RAB11 family interacting protein 1 (class I)
hsa-miR-362-3p	1	0	0	0	1	1	PLEKHG7	pleckstrin homology domain containing, family G (with RhoGef domain) member 7
hsa-miR-362-3p	1	0	1	0	1	1	CPLX2	complexin 2
hsa-miR-362-3p	0	0	0	1	1	1	INPP5D	inositol polyphosphate-5-phosphatase, 145kDa
hsa-miR-362-3p	1	0	0	1	1	1	CCNI2	cyclin I family, member 2
hsa-miR-362-3p	1	0	1	0	1	1	SGSM1	small G protein signaling modulator 1
hsa-miR-362-3p	0	0	0	1	1	1	ZNF682	zinc finger protein 682
hsa-miR-362-3p	1	0	0	1	1	1	FAM177A1	family with sequence similarity 177, member A1
hsa-miR-362-3p	1	0	1	1	1	1	EIF4B	eukaryotic translation initiation factor 4B
hsa-miR-362-3p	0	0	0	1	1	1	KCNS1	potassium voltage-gated channel, delayed-rectifier, subfamily S, member 1
hsa-miR-362-3p	1	0	1	0	1	1	PRKCI	protein kinase C, iota
hsa-miR-362-3p	1	0	1	0	1	1	RAP2B	RAP2B, member of RAS oncogene family
hsa-miR-362-3p	1	0	1	0	1	1	STC2	stanniocalcin 2
hsa-miR-362-3p	1	0	1	0	1	1	BTRC	beta-transducin repeat containing E3 ubiquitin protein ligase
hsa-miR-362-3p	1	0	1	1	1	1	UST	uronyl-2-sulfotransferase
hsa-miR-362-3p	0	0	0	1	1	1	AKAP8	A kinase (PRKA) anchor protein 8
hsa-miR-362-3p	0	0	1	1	1	1	SMNDC1	survival motor neuron domain containing 1
hsa-miR-362-3p	1	0	1	1	1	1	MAPT	microtubule-associated protein tau
hsa-miR-362-3p	0	0	1	0	1	1	OAS3	2'-5'-oligoadenylate synthetase 3, 100kDa
hsa-miR-362-3p	1	0	1	0	1	1	CHL1	cell adhesion molecule with homology to L1CAM (close homolog of L1)
hsa-miR-362-3p	0	0	0	1	1	1	MALT1	mucosa associated lymphoid tissue lymphoma translocation gene 1
hsa-miR-362-3p	0	0	1	1	1	1	AP3M2	adaptor-related protein complex 3, mu 2 subunit
hsa-miR-362-3p	1	0	1	1	1	1	TPPP	tubulin polymerization promoting protein
hsa-miR-362-3p	1	0	1	0	1	1	NUP50	nucleoporin 50kDa
hsa-miR-362-3p	1	0	1	1	1	1	GNA12	guanine nucleotide binding protein (G protein) alpha 12
hsa-miR-362-3p	0	0	1	1	1	1	ZNF346	zinc finger protein 346
hsa-miR-362-3p	1	0	1	0	1	1	ACAP2	ArfGAP with coiled-coil, ankyrin repeat and PH domains 2
hsa-miR-362-3p	1	0	1	1	1	1	TNFRSF21	tumor necrosis factor receptor superfamily, member 21
hsa-miR-362-3p	0	0	1	0	1	1	ZBTB24	zinc finger and BTB domain containing 24
hsa-miR-362-3p	0	0	0	0	1	1	MESDC2	mesoderm development candidate 2
hsa-miR-362-3p	1	0	1	1	1	1	STK36	serine/threonine kinase 36
hsa-miR-362-3p	1	0	1	1	1	1	CTDSPL2	CTD (carboxy-terminal domain, RNA polymerase II, polypeptide A) small phosphatase like 2
hsa-miR-362-3p	1	0	1	1	1	1	GLTP	glycolipid transfer protein
hsa-miR-362-3p	1	0	1	1	1	1	TMED9	transmembrane emp24 protein transport domain containing 9
hsa-miR-362-3p	0	0	1	1	1	1	ZCCHC10	zinc finger, CCHC domain containing 10
hsa-miR-362-3p	0	0	1	1	1	1	RFK	riboflavin kinase
hsa-miR-362-3p	1	0	1	1	1	1	FTSJD1	FtsJ methyltransferase domain containing 1
hsa-miR-362-3p	1	0	1	1	1	1	SVOP	SV2 related protein homolog (rat)
hsa-miR-362-3p	0	0	0	1	1	1	WDR5B	WD repeat domain 5B
hsa-miR-362-3p	0	0	0	1	1	1	C2orf83	chromosome 2 open reading frame 83
hsa-miR-362-3p	1	0	1	0	1	1	OTUD7B	OTU domain containing 7B
hsa-miR-362-3p	0	0	0	1	1	1	C12orf5	chromosome 12 open reading frame 5
hsa-miR-362-3p	0	0	1	1	1	1	EPG5	ectopic P-granules autophagy protein 5 homolog (C. elegans)
hsa-miR-362-3p	0	0	1	1	1	1	SLC22A23	solute carrier family 22, member 23
hsa-miR-362-3p	0	0	1	1	1	1	GJA3	gap junction protein, alpha 3, 46kDa
hsa-miR-362-3p	0	0	1	1	1	1	ZNF667	zinc finger protein 667
hsa-miR-362-3p	1	0	1	1	1	1	C1orf116	chromosome 1 open reading frame 116
hsa-miR-362-3p	0	0	1	1	1	1	SH3D21	SH3 domain containing 21
hsa-miR-362-3p	0	0	0	1	1	1	DCAKD	dephospho-CoA kinase domain containing
hsa-miR-362-3p	0	0	0	1	1	1	USP36	ubiquitin specific peptidase 36
hsa-miR-362-3p	1	0	0	1	1	1	PDCD1LG2	programmed cell death 1 ligand 2
hsa-miR-362-3p	1	0	1	1	1	1	PCDH11Y	protocadherin 11 Y-linked
hsa-miR-362-3p	1	0	1	1	1	1	SYN2	synapsin II
hsa-miR-362-3p	1	0	1	1	1	1	FAM105B	family with sequence similarity 105, member B
hsa-miR-362-3p	0	0	1	1	1	1	ALKBH8	alkB, alkylation repair homolog 8 (E. coli)
hsa-miR-362-3p	0	0	1	0	1	1	SNRNP48	small nuclear ribonucleoprotein 48kDa (U11/U12)
hsa-miR-362-3p	0	0	1	1	1	1	MAP7D2	MAP7 domain containing 2
hsa-miR-362-3p	1	0	1	0	1	1	MDGA1	MAM domain containing glycosylphosphatidylinositol anchor 1
hsa-miR-362-3p	0	0	1	1	1	1	POC1B	POC1 centriolar protein homolog B (Chlamydomonas)
hsa-miR-362-3p	1	0	1	0	1	1	KSR2	kinase suppressor of ras 2
hsa-miR-362-3p	0	0	1	1	1	1	IL6ST	interleukin 6 signal transducer (gp130, oncostatin M receptor)
hsa-miR-362-3p	0	0	0	1	1	1	MACC1	metastasis associated in colon cancer 1
hsa-miR-362-3p	1	0	1	0	1	1	LOC90462	zinc finger protein 605-like
hsa-miR-362-3p	1	0	1	0	1	1	LYSMD3	LysM, putative peptidoglycan-binding, domain containing 3
hsa-miR-362-3p	1	0	0	1	1	1	LANCL3	LanC lantibiotic synthetase component C-like 3 (bacterial)
hsa-miR-362-3p	1	0	1	0	1	1	SP6	Sp6 transcription factor
hsa-miR-362-3p	0	0	1	1	1	1	IYD	iodotyrosine deiodinase
hsa-miR-362-3p	0	0	0	0	1	1	LOC729086	vesicular, overexpressed in cancer, prosurvival protein 1 pseudogene
hsa-miR-362-3p	0	0	1	0	1	1	C2orf72	chromosome 2 open reading frame 72
hsa-miR-362-3p	0	0	0	0	1	1	AK4P3	adenylate kinase 4 pseudogene 3
hsa-miR-362-3p	0	0	0	0	1	1	LOC729020	rcRPE
hsa-miR-362-3p	0	0	1	1	1	1	LRRC38	leucine rich repeat containing 38
hsa-miR-362-3p	0	0	0	0	1	1	RBBP4P1	retinoblastoma binding protein 4 pseudogene 1
hsa-miR-362-3p	0	0	0	1	1	1	H2BFM	H2B histone family, member M
