# Supplementary material for: Profiling of Selected MicroRNAs in Proliferative Eutopic Endometrium of Women with Ovarian Endometriosis
Source: Biomed Res Int. 2015 Aug 20;2015:760698. doi: 10.1155/2015/760698 (PMC4558423; doi:10.1155/2015/760698)
Supplement: Supplementary file 1 — Table I: The names of miRNAs significantly differentially expressed between eutopic endometrium of patients with endometriosis vs eutopic endometrium of patients without endometriosis. Table II: The associations between miRNA and mRNA, which presents detailed results of the search of six major databases i.e targetscan, tarbase, miranda, mirbase, mirtarget2 and pictar. [file 760698.f1.zip › 760698.f1/Table II/hsa-miR-362-5p.tsv]

miR	targetscan	tarbase	miranda	mirbase	mirtarget2	pictar	GeneSymbol	GeneName
hsa-miR-362-5p	1	0	1	1	1	1	PLAU	plasminogen activator, urokinase
hsa-miR-362-5p	1	0	1	1	1	1	ZFYVE16	zinc finger, FYVE domain containing 16
hsa-miR-362-5p	0	0	1	1	1	1	PPIP5K1	diphosphoinositol pentakisphosphate kinase 1
hsa-miR-362-5p	0	0	1	1	1	1	HSPH1	heat shock 105kDa/110kDa protein 1
hsa-miR-362-5p	1	0	1	0	1	1	PTPRT	protein tyrosine phosphatase, receptor type, T
hsa-miR-362-5p	0	0	1	1	1	1	NEU3	sialidase 3 (membrane sialidase)
hsa-miR-362-5p	1	0	1	1	0	0	SUSD5	sushi domain containing 5
hsa-miR-362-5p	0	0	1	1	0	0	ZNF862	zinc finger protein 862
hsa-miR-362-5p	0	0	1	1	0	0	PAN2	PAN2 poly(A) specific ribonuclease subunit homolog (S. cerevisiae)
hsa-miR-362-5p	1	0	1	1	0	0	ESYT1	extended synaptotagmin-like protein 1
hsa-miR-362-5p	1	0	1	0	1	1	RBM12	RNA binding motif protein 12
hsa-miR-362-5p	1	0	1	1	1	1	AHCYL2	adenosylhomocysteinase-like 2
hsa-miR-362-5p	1	0	1	1	1	1	SEMA4F	sema domain, immunoglobulin domain (Ig), transmembrane domain (TM) and short cytoplasmic domain, (semaphorin) 4F
hsa-miR-362-5p	1	0	1	0	0	0	DTX4	deltex homolog 4 (Drosophila)
hsa-miR-362-5p	0	0	1	1	1	1	ANKRD6	ankyrin repeat domain 6
hsa-miR-362-5p	1	0	1	1	1	1	RGL1	ral guanine nucleotide dissociation stimulator-like 1
hsa-miR-362-5p	1	0	1	1	1	1	NTNG1	netrin G1
hsa-miR-362-5p	1	0	1	1	0	0	KIAA1045	KIAA1045
hsa-miR-362-5p	1	0	1	0	1	1	ZNF507	zinc finger protein 507
hsa-miR-362-5p	1	0	1	1	0	0	PPM1H	protein phosphatase, Mg2+/Mn2+ dependent, 1H
hsa-miR-362-5p	1	0	1	1	1	1	RALGAPB	Ral GTPase activating protein, beta subunit (non-catalytic)
hsa-miR-362-5p	1	0	1	1	1	1	ASAP1	ArfGAP with SH3 domain, ankyrin repeat and PH domain 1
hsa-miR-362-5p	1	0	1	0	1	1	ANKFY1	ankyrin repeat and FYVE domain containing 1
hsa-miR-362-5p	0	0	1	0	0	0	MTA3	metastasis associated 1 family, member 3
hsa-miR-362-5p	1	0	1	0	0	0	NYNRIN	NYN domain and retroviral integrase containing
hsa-miR-362-5p	1	0	1	1	1	1	PCDH19	protocadherin 19
hsa-miR-362-5p	1	0	1	1	1	1	LRRC7	leucine rich repeat containing 7
hsa-miR-362-5p	0	0	1	0	1	1	ARHGAP23	Rho GTPase activating protein 23
hsa-miR-362-5p	0	0	1	0	1	1	ZSWIM6	zinc finger, SWIM-type containing 6
hsa-miR-362-5p	1	0	1	1	0	0	TMCO7	transmembrane and coiled-coil domains 7
hsa-miR-362-5p	0	0	1	0	1	1	SETD5	SET domain containing 5
hsa-miR-362-5p	0	0	1	1	0	0	PFDN5	prefoldin subunit 5
hsa-miR-362-5p	1	0	1	1	1	1	CSRNP1	cysteine-serine-rich nuclear protein 1
hsa-miR-362-5p	1	0	1	1	1	1	HNRPDL	heterogeneous nuclear ribonucleoprotein D-like
hsa-miR-362-5p	0	0	1	1	0	0	ERCC1	excision repair cross-complementing rodent repair deficiency, complementation group 1 (includes overlapping antisense sequence)
hsa-miR-362-5p	1	0	1	1	1	1	BCL2L11	BCL2-like 11 (apoptosis facilitator)
hsa-miR-362-5p	1	0	1	1	1	1	POGZ	pogo transposable element with ZNF domain
hsa-miR-362-5p	1	0	1	1	1	1	TET2	tet methylcytosine dioxygenase 2
hsa-miR-362-5p	1	0	1	1	1	1	SH3TC2	SH3 domain and tetratricopeptide repeats 2
hsa-miR-362-5p	1	0	1	0	0	0	FAT3	FAT tumor suppressor homolog 3 (Drosophila)
hsa-miR-362-5p	1	0	1	0	1	1	RNF43	ring finger protein 43
hsa-miR-362-5p	0	0	1	1	1	1	PDZD3	PDZ domain containing 3
hsa-miR-362-5p	1	0	1	1	1	1	RFX4	regulatory factor X, 4 (influences HLA class II expression)
hsa-miR-362-5p	1	0	1	1	1	1	KCNMA1	potassium large conductance calcium-activated channel, subfamily M, alpha member 1
hsa-miR-362-5p	1	0	1	1	1	1	FAT2	FAT tumor suppressor homolog 2 (Drosophila)
hsa-miR-362-5p	1	1	1	1	1	1	BACE1	beta-site APP-cleaving enzyme 1
hsa-miR-362-5p	0	0	1	0	1	1	ACE2	angiotensin I converting enzyme (peptidyl-dipeptidase A) 2
hsa-miR-362-5p	1	0	1	0	1	1	CCDC88A	coiled-coil domain containing 88A
hsa-miR-362-5p	1	0	1	1	1	1	VLDLR	very low density lipoprotein receptor
hsa-miR-362-5p	1	0	1	0	1	1	PCDHA13	protocadherin alpha 13
hsa-miR-362-5p	1	0	1	1	1	1	PCDHA4	protocadherin alpha 4
hsa-miR-362-5p	1	0	1	1	1	1	PML	promyelocytic leukemia
hsa-miR-362-5p	1	0	1	0	1	1	PLAG1	pleiomorphic adenoma gene 1
hsa-miR-362-5p	1	0	1	1	0	0	TSPYL2	TSPY-like 2
hsa-miR-362-5p	1	0	1	1	1	1	REV3L	REV3-like, polymerase (DNA directed), zeta, catalytic subunit
hsa-miR-362-5p	1	0	1	1	1	1	EPHA5	EPH receptor A5
hsa-miR-362-5p	1	0	1	1	1	1	SATB2	SATB homeobox 2
hsa-miR-362-5p	1	0	1	0	1	1	CDON	Cdon homolog (mouse)
hsa-miR-362-5p	0	0	1	1	0	0	IFT27	intraflagellar transport 27 homolog (Chlamydomonas)
hsa-miR-362-5p	0	0	1	1	1	1	PPP1R12C	protein phosphatase 1, regulatory subunit 12C
hsa-miR-362-5p	0	0	1	1	0	0	PSMB2	proteasome (prosome, macropain) subunit, beta type, 2
hsa-miR-362-5p	0	0	1	1	1	1	ACO1	aconitase 1, soluble
hsa-miR-362-5p	0	0	1	1	0	0	BMP1	bone morphogenetic protein 1
hsa-miR-362-5p	1	0	1	1	1	1	ARHGEF3	Rho guanine nucleotide exchange factor (GEF) 3
hsa-miR-362-5p	1	0	1	1	1	1	SATB1	SATB homeobox 1
hsa-miR-362-5p	1	0	1	1	1	1	HMGA2	high mobility group AT-hook 2
hsa-miR-362-5p	0	0	1	1	0	0	TRIM27	tripartite motif containing 27
hsa-miR-362-5p	1	0	1	1	1	1	ZFX	zinc finger protein, X-linked
hsa-miR-362-5p	1	0	1	0	1	1	CAV1	caveolin 1, caveolae protein, 22kDa
hsa-miR-362-5p	1	0	1	0	1	1	PDE7B	phosphodiesterase 7B
hsa-miR-362-5p	1	0	1	0	1	1	DDX3X	DEAD (Asp-Glu-Ala-Asp) box polypeptide 3, X-linked
hsa-miR-362-5p	0	0	1	1	1	1	BRCA1	breast cancer 1, early onset
hsa-miR-362-5p	0	0	1	1	1	1	HDAC3	histone deacetylase 3
hsa-miR-362-5p	1	0	1	1	1	1	PCDH17	protocadherin 17
hsa-miR-362-5p	0	0	1	0	0	0	ZNRD1-AS1	ZNRD1 antisense RNA 1
hsa-miR-362-5p	1	0	1	0	0	0	MAP3K1	mitogen-activated protein kinase kinase kinase 1, E3 ubiquitin protein ligase
hsa-miR-362-5p	1	0	1	1	1	1	MRAS	muscle RAS oncogene homolog
hsa-miR-362-5p	0	0	1	1	1	1	MICAL2	microtubule associated monoxygenase, calponin and LIM domain containing 2
hsa-miR-362-5p	1	0	1	1	1	1	CSE1L	CSE1 chromosome segregation 1-like (yeast)
hsa-miR-362-5p	1	0	1	1	1	1	SHOC2	soc-2 suppressor of clear homolog (C. elegans)
hsa-miR-362-5p	0	0	1	1	1	1	ZNF33A	zinc finger protein 33A
hsa-miR-362-5p	1	0	1	1	1	1	USP3	ubiquitin specific peptidase 3
hsa-miR-362-5p	0	0	1	1	1	1	ACIN1	apoptotic chromatin condensation inducer 1
hsa-miR-362-5p	0	0	1	1	0	0	CALHM2	calcium homeostasis modulator 2
hsa-miR-362-5p	1	0	1	1	1	1	TAOK3	TAO kinase 3
hsa-miR-362-5p	1	0	1	1	1	1	USP15	ubiquitin specific peptidase 15
hsa-miR-362-5p	0	0	1	1	1	1	SAP30L	SAP30-like
hsa-miR-362-5p	0	0	1	1	1	1	FGFR1OP2	FGFR1 oncogene partner 2
hsa-miR-362-5p	0	0	1	0	1	1	CLDN2	claudin 2
hsa-miR-362-5p	0	0	1	0	1	1	SLC38A4	solute carrier family 38, member 4
hsa-miR-362-5p	0	0	1	1	0	0	NCOA6	nuclear receptor coactivator 6
hsa-miR-362-5p	1	0	1	1	1	1	STRN3	striatin, calmodulin binding protein 3
hsa-miR-362-5p	0	0	1	1	1	1	NKX3-1	NK3 homeobox 1
hsa-miR-362-5p	1	0	1	1	0	0	LMO2	LIM domain only 2 (rhombotin-like 1)
hsa-miR-362-5p	1	0	1	0	1	1	PARP11	poly (ADP-ribose) polymerase family, member 11
hsa-miR-362-5p	1	0	1	0	1	1	TRPS1	trichorhinophalangeal syndrome I
hsa-miR-362-5p	0	0	1	1	1	1	RANGRF	RAN guanine nucleotide release factor
hsa-miR-362-5p	0	0	1	1	0	0	BCAT2	branched chain amino-acid transaminase 2, mitochondrial
hsa-miR-362-5p	0	0	1	1	0	0	TCP11	t-complex 11 homolog (mouse)
hsa-miR-362-5p	0	0	1	0	0	0	LOC645355	uncharacterized LOC645355
hsa-miR-362-5p	1	0	1	1	1	1	KLHL12	kelch-like 12 (Drosophila)
hsa-miR-362-5p	1	0	1	1	1	1	DCLRE1B	DNA cross-link repair 1B
hsa-miR-362-5p	1	0	1	1	1	1	CPEB1	cytoplasmic polyadenylation element binding protein 1
hsa-miR-362-5p	0	0	1	1	0	0	TTTY7	testis-specific transcript, Y-linked 7 (non-protein coding)
hsa-miR-362-5p	1	0	1	1	1	1	CALU	calumenin
hsa-miR-362-5p	1	0	1	0	1	1	USP32	ubiquitin specific peptidase 32
hsa-miR-362-5p	1	0	1	0	1	1	WIPF2	WAS/WASL interacting protein family, member 2
hsa-miR-362-5p	1	0	1	1	1	1	CALCOCO1	calcium binding and coiled-coil domain 1
hsa-miR-362-5p	0	0	1	0	1	1	MYO3B	myosin IIIB
hsa-miR-362-5p	0	0	1	1	1	1	RAPGEF6	Rap guanine nucleotide exchange factor (GEF) 6
hsa-miR-362-5p	1	0	1	1	1	1	STX16	syntaxin 16
hsa-miR-362-5p	1	0	1	1	0	0	XRRA1	X-ray radiation resistance associated 1
hsa-miR-362-5p	1	0	1	1	0	0	TET3	tet methylcytosine dioxygenase 3
hsa-miR-362-5p	1	0	1	1	1	1	IQCK	IQ motif containing K
hsa-miR-362-5p	0	0	1	1	1	1	CHODL	chondrolectin
hsa-miR-362-5p	0	0	1	1	1	1	PTK7	PTK7 protein tyrosine kinase 7
hsa-miR-362-5p	1	0	1	1	1	1	VPS37A	vacuolar protein sorting 37 homolog A (S. cerevisiae)
hsa-miR-362-5p	0	0	1	1	0	0	NCR2	natural cytotoxicity triggering receptor 2
hsa-miR-362-5p	0	0	1	1	1	1	GNAS	GNAS complex locus
hsa-miR-362-5p	0	0	1	1	1	1	RANBP17	RAN binding protein 17
hsa-miR-362-5p	0	0	1	1	1	1	DMRTC1	DMRT-like family C1
hsa-miR-362-5p	0	0	1	1	0	0	DMRTC1B	DMRT-like family C1B
hsa-miR-362-5p	0	0	1	1	0	0	MCOLN1	mucolipin 1
hsa-miR-362-5p	1	0	1	1	1	1	RAB3IP	RAB3A interacting protein (rabin3)
hsa-miR-362-5p	1	0	1	1	1	1	NRXN3	neurexin 3
hsa-miR-362-5p	1	0	1	1	1	1	PDE1B	phosphodiesterase 1B, calmodulin-dependent
hsa-miR-362-5p	1	0	1	1	1	1	NAV3	neuron navigator 3
hsa-miR-362-5p	0	0	1	1	1	1	TAF1	TAF1 RNA polymerase II, TATA box binding protein (TBP)-associated factor, 250kDa
hsa-miR-362-5p	1	0	1	1	1	1	VAMP7	vesicle-associated membrane protein 7
hsa-miR-362-5p	1	0	1	1	1	1	SYT14	synaptotagmin XIV
hsa-miR-362-5p	1	0	1	1	1	1	PPP1R9A	protein phosphatase 1, regulatory subunit 9A
hsa-miR-362-5p	0	0	1	1	1	1	DBR1	debranching enzyme homolog 1 (S. cerevisiae)
hsa-miR-362-5p	1	0	1	1	1	1	AKAP2	A kinase (PRKA) anchor protein 2
hsa-miR-362-5p	1	0	1	0	1	1	NFAT5	nuclear factor of activated T-cells 5, tonicity-responsive
hsa-miR-362-5p	0	0	1	1	1	1	UBE2Q2	ubiquitin-conjugating enzyme E2Q family member 2
hsa-miR-362-5p	0	0	1	0	0	0	TUG1	taurine upregulated 1 (non-protein coding)
hsa-miR-362-5p	0	0	1	0	1	1	HHLA2	HERV-H LTR-associating 2
hsa-miR-362-5p	1	0	1	1	1	1	NIP7	nuclear import 7 homolog (S. cerevisiae)
hsa-miR-362-5p	1	0	1	0	1	1	CLIC4	chloride intracellular channel 4
hsa-miR-362-5p	1	0	1	1	1	1	ACER3	alkaline ceramidase 3
hsa-miR-362-5p	0	0	1	1	0	0	UGGT2	UDP-glucose glycoprotein glucosyltransferase 2
hsa-miR-362-5p	1	0	1	1	0	0	YPEL3	yippee-like 3 (Drosophila)
hsa-miR-362-5p	1	0	1	1	1	1	VASH2	vasohibin 2
hsa-miR-362-5p	0	0	1	1	0	0	KIRREL	kin of IRRE like (Drosophila)
hsa-miR-362-5p	0	0	1	0	0	0	SOX2-OT	SOX2 overlapping transcript (non-protein coding)
hsa-miR-362-5p	1	0	1	1	1	1	S100PBP	S100P binding protein
hsa-miR-362-5p	0	0	1	1	0	0	JMJD4	jumonji domain containing 4
hsa-miR-362-5p	1	0	1	1	1	1	WDTC1	WD and tetratricopeptide repeats 1
hsa-miR-362-5p	0	0	1	1	1	1	ARMC5	armadillo repeat containing 5
hsa-miR-362-5p	0	0	1	1	0	0	POLR3E	polymerase (RNA) III (DNA directed) polypeptide E (80kD)
hsa-miR-362-5p	0	0	1	0	1	1	ARHGAP42	Rho GTPase activating protein 42
hsa-miR-362-5p	0	0	1	0	0	0	LOC284561	uncharacterized LOC284561
hsa-miR-362-5p	1	0	1	1	1	1	DERL1	derlin 1
hsa-miR-362-5p	0	0	1	0	1	1	ZNF766	zinc finger protein 766
hsa-miR-362-5p	1	0	1	1	1	1	ZNF385A	zinc finger protein 385A
hsa-miR-362-5p	1	0	1	1	1	1	SLC35A3	solute carrier family 35 (UDP-N-acetylglucosamine (UDP-GlcNAc) transporter), member A3
hsa-miR-362-5p	0	0	1	1	0	0	PLEKHG2	pleckstrin homology domain containing, family G (with RhoGef domain) member 2
hsa-miR-362-5p	1	0	1	1	1	1	DCAF8	DDB1 and CUL4 associated factor 8
hsa-miR-362-5p	1	0	1	1	1	1	TAF7L	TAF7-like RNA polymerase II, TATA box binding protein (TBP)-associated factor, 50kDa
hsa-miR-362-5p	1	0	1	1	1	1	ITGA9	integrin, alpha 9
hsa-miR-362-5p	1	0	1	1	1	1	FBXL12	F-box and leucine-rich repeat protein 12
hsa-miR-362-5p	1	0	1	1	1	1	RNF185	ring finger protein 185
hsa-miR-362-5p	1	0	1	1	1	1	FOXP1	forkhead box P1
hsa-miR-362-5p	0	0	1	1	1	1	SPRTN	SprT-like N-terminal domain
hsa-miR-362-5p	0	0	1	1	1	1	KDM2B	lysine (K)-specific demethylase 2B
hsa-miR-362-5p	0	0	1	1	1	1	BBS1	Bardet-Biedl syndrome 1
hsa-miR-362-5p	0	0	1	1	1	1	DTL	denticleless E3 ubiquitin protein ligase homolog (Drosophila)
hsa-miR-362-5p	1	0	1	1	1	1	SLC38A1	solute carrier family 38, member 1
hsa-miR-362-5p	1	0	1	1	1	1	C7orf43	chromosome 7 open reading frame 43
hsa-miR-362-5p	0	0	1	0	0	0	LOC254559	uncharacterized LOC254559
hsa-miR-362-5p	1	0	1	0	1	1	AP1G1	adaptor-related protein complex 1, gamma 1 subunit
hsa-miR-362-5p	1	0	1	1	1	1	DLGAP4	discs, large (Drosophila) homolog-associated protein 4
hsa-miR-362-5p	0	0	1	0	0	0	CASC2	cancer susceptibility candidate 2 (non-protein coding)
hsa-miR-362-5p	0	0	1	0	0	0	FLJ31104	uncharacterized LOC441072
hsa-miR-362-5p	1	0	1	0	1	1	PTPRE	protein tyrosine phosphatase, receptor type, E
hsa-miR-362-5p	0	0	1	0	0	0	RMST	rhabdomyosarcoma 2 associated transcript (non-protein coding)
hsa-miR-362-5p	1	0	1	1	1	1	SCAMP5	secretory carrier membrane protein 5
hsa-miR-362-5p	0	0	1	0	0	0	LOC284600	uncharacterized LOC284600
hsa-miR-362-5p	1	0	1	1	1	1	CLCN5	chloride channel, voltage-sensitive 5
hsa-miR-362-5p	1	0	1	1	1	1	SORBS2	sorbin and SH3 domain containing 2
hsa-miR-362-5p	1	0	1	1	1	1	FOPNL	FGFR1OP N-terminal like
hsa-miR-362-5p	0	0	1	1	1	1	XAF1	XIAP associated factor 1
hsa-miR-362-5p	1	0	1	1	1	1	ZBTB10	zinc finger and BTB domain containing 10
hsa-miR-362-5p	1	0	1	1	0	0	SLC29A2	solute carrier family 29 (nucleoside transporters), member 2
hsa-miR-362-5p	1	0	1	1	1	1	TLE4	transducin-like enhancer of split 4 (E(sp1) homolog, Drosophila)
hsa-miR-362-5p	0	0	1	1	1	1	SEC61A2	Sec61 alpha 2 subunit (S. cerevisiae)
hsa-miR-362-5p	0	0	1	0	1	1	CHURC1	churchill domain containing 1
hsa-miR-362-5p	1	0	1	1	1	1	ANKRD49	ankyrin repeat domain 49
hsa-miR-362-5p	0	0	1	1	0	0	PRSS54	protease, serine, 54
hsa-miR-362-5p	0	0	1	1	0	0	ANKAR	ankyrin and armadillo repeat containing
hsa-miR-362-5p	0	0	1	0	1	1	UHMK1	U2AF homology motif (UHM) kinase 1
hsa-miR-362-5p	0	0	1	1	0	0	MRPL46	mitochondrial ribosomal protein L46
hsa-miR-362-5p	1	0	1	1	1	1	HLF	hepatic leukemia factor
hsa-miR-362-5p	1	0	1	1	1	1	BLCAP	bladder cancer associated protein
hsa-miR-362-5p	1	0	1	1	1	1	UXS1	UDP-glucuronate decarboxylase 1
hsa-miR-362-5p	1	0	1	1	1	1	PIP4K2C	phosphatidylinositol-5-phosphate 4-kinase, type II, gamma
hsa-miR-362-5p	1	0	1	1	1	1	DPH1	DPH1 homolog (S. cerevisiae)
hsa-miR-362-5p	0	0	1	1	1	1	STBD1	starch binding domain 1
hsa-miR-362-5p	0	0	1	0	1	1	TMSB15B	thymosin beta 15B
hsa-miR-362-5p	1	0	1	1	1	1	CBFA2T3	core-binding factor, runt domain, alpha subunit 2; translocated to, 3
hsa-miR-362-5p	0	0	1	1	1	1	CCDC102B	coiled-coil domain containing 102B
hsa-miR-362-5p	0	0	1	1	0	0	ACOT11	acyl-CoA thioesterase 11
hsa-miR-362-5p	1	0	1	1	1	1	SYN2	synapsin II
hsa-miR-362-5p	0	0	1	0	1	1	PIANP	PILR alpha associated neural protein
hsa-miR-362-5p	0	0	1	0	1	1	TBX5-AS1	TBX5 antisense RNA 1
hsa-miR-362-5p	1	0	1	1	1	1	FBXW2	F-box and WD repeat domain containing 2
hsa-miR-362-5p	0	0	1	1	0	0	ADH6	alcohol dehydrogenase 6 (class V)
hsa-miR-362-5p	1	0	1	1	1	1	GPD2	glycerol-3-phosphate dehydrogenase 2 (mitochondrial)
hsa-miR-362-5p	1	0	1	1	1	1	DEM1	defects in morphology 1 homolog (S. cerevisiae)
hsa-miR-362-5p	1	0	1	1	1	1	LRRC57	leucine rich repeat containing 57
hsa-miR-362-5p	0	0	1	1	0	0	WBP1	WW domain binding protein 1
hsa-miR-362-5p	0	0	1	0	0	0	PART1	prostate androgen-regulated transcript 1 (non-protein coding)
hsa-miR-362-5p	0	0	1	0	1	1	RALYL	RALY RNA binding protein-like
hsa-miR-362-5p	0	0	1	1	1	1	WDR67	WD repeat domain 67
hsa-miR-362-5p	1	0	1	0	1	1	GATAD2B	GATA zinc finger domain containing 2B
hsa-miR-362-5p	0	0	1	0	1	1	AGBL4	ATP/GTP binding protein-like 4
hsa-miR-362-5p	1	0	1	1	1	1	NMT2	N-myristoyltransferase 2
hsa-miR-362-5p	1	0	1	1	1	1	RASGEF1A	RasGEF domain family, member 1A
hsa-miR-362-5p	0	0	1	1	1	1	MOBP	myelin-associated oligodendrocyte basic protein
hsa-miR-362-5p	0	0	1	0	0	0	LINC00486	long intergenic non-protein coding RNA 486
hsa-miR-362-5p	1	0	1	0	1	1	SLC39A11	solute carrier family 39 (metal ion transporter), member 11
hsa-miR-362-5p	0	0	1	1	1	1	MYO6	myosin VI
hsa-miR-362-5p	1	0	1	0	1	1	UVRAG	UV radiation resistance associated gene
hsa-miR-362-5p	1	0	1	1	1	1	PEA15	phosphoprotein enriched in astrocytes 15
hsa-miR-362-5p	0	0	1	0	0	0	CCDC150	coiled-coil domain containing 150
hsa-miR-362-5p	0	0	1	1	1	1	KIAA1755	KIAA1755
hsa-miR-362-5p	1	0	1	1	1	1	FADS1	fatty acid desaturase 1
hsa-miR-362-5p	0	0	1	1	1	1	GNAI2	guanine nucleotide binding protein (G protein), alpha inhibiting activity polypeptide 2
hsa-miR-362-5p	0	0	1	0	0	0	FAM66C	family with sequence similarity 66, member C
hsa-miR-362-5p	1	0	1	0	1	1	KIAA1737	KIAA1737
hsa-miR-362-5p	1	0	1	0	1	1	THRB	thyroid hormone receptor, beta
hsa-miR-362-5p	0	0	1	0	1	1	FLJ39639	uncharacterized protein FLJ39639
hsa-miR-362-5p	0	0	1	1	0	0	CHCHD5	coiled-coil-helix-coiled-coil-helix domain containing 5
hsa-miR-362-5p	0	0	1	0	0	0	LOC400680	uncharacterized LOC400680
hsa-miR-362-5p	0	0	1	1	0	0	CORO1A	coronin, actin binding protein, 1A
hsa-miR-362-5p	0	0	1	0	0	0	CECR7	cat eye syndrome chromosome region, candidate 7 (non-protein coding)
hsa-miR-362-5p	1	0	1	1	1	1	LARP1B	La ribonucleoprotein domain family, member 1B
hsa-miR-362-5p	1	0	1	1	0	0	FBXL19	F-box and leucine-rich repeat protein 19
hsa-miR-362-5p	0	0	1	0	0	0	GTF2IP1	general transcription factor IIi, pseudogene 1
hsa-miR-362-5p	1	0	1	0	1	1	UNC5D	unc-5 homolog D (C. elegans)
hsa-miR-362-5p	0	0	1	1	0	0	KIAA0146	KIAA0146
hsa-miR-362-5p	1	0	1	1	1	1	BCL6B	B-cell CLL/lymphoma 6, member B
hsa-miR-362-5p	0	0	1	0	0	0	C1orf132	chromosome 1 open reading frame 132
hsa-miR-362-5p	0	0	1	0	1	1	FLJ41200	uncharacterized LOC401492
hsa-miR-362-5p	0	0	1	0	0	0	MORN2	MORN repeat containing 2
hsa-miR-362-5p	0	0	1	0	0	0	LGALS17A	Charcot-Leyden crystal protein pseudogene
hsa-miR-362-5p	0	0	1	0	0	0	TMPRSS11BNL	TMPRSS11B N terminal-like
hsa-miR-362-5p	0	0	1	1	1	1	FAM19A2	family with sequence similarity 19 (chemokine (C-C motif)-like), member A2
hsa-miR-362-5p	0	0	1	0	0	0	LOC285043	uncharacterized LOC285043
hsa-miR-362-5p	1	0	1	1	1	1	METTL8	methyltransferase like 8
hsa-miR-362-5p	1	0	1	1	1	1	ADIPOR1	adiponectin receptor 1
hsa-miR-362-5p	1	0	1	1	1	1	FAM122B	family with sequence similarity 122B
hsa-miR-362-5p	1	0	1	1	1	1	CORO2B	coronin, actin binding protein, 2B
hsa-miR-362-5p	1	0	1	0	1	1	CNTN2	contactin 2 (axonal)
hsa-miR-362-5p	1	0	1	1	1	1	ATXN7	ataxin 7
hsa-miR-362-5p	0	0	1	1	0	0	LOC100128239	uncharacterized LOC100128239
hsa-miR-362-5p	0	0	1	0	0	0	C3orf72	chromosome 3 open reading frame 72
hsa-miR-362-5p	1	0	1	0	0	0	MSL1	male-specific lethal 1 homolog (Drosophila)
hsa-miR-362-5p	0	0	1	1	0	0	ANKHD1-EIF4EBP3	ANKHD1-EIF4EBP3 readthrough
hsa-miR-362-5p	0	0	1	0	0	0	FAM75D4	family with sequence similarity 75, member D4
hsa-miR-362-5p	0	0	1	1	0	0	RPRD2	regulation of nuclear pre-mRNA domain containing 2
hsa-miR-362-5p	0	0	1	1	1	1	RBM46	RNA binding motif protein 46
hsa-miR-362-5p	1	0	1	1	1	1	WWC2	WW and C2 domain containing 2
hsa-miR-362-5p	0	0	1	1	0	0	FSIP2	fibrous sheath interacting protein 2
hsa-miR-362-5p	0	0	1	1	1	1	RBM39	RNA binding motif protein 39
hsa-miR-362-5p	0	0	1	1	1	1	C2orf65	chromosome 2 open reading frame 65
hsa-miR-362-5p	1	0	1	1	1	1	SACM1L	SAC1 suppressor of actin mutations 1-like (yeast)
hsa-miR-362-5p	1	0	1	1	0	0	SPEG	SPEG complex locus
hsa-miR-362-5p	0	0	1	1	1	1	C18orf54	chromosome 18 open reading frame 54
hsa-miR-362-5p	0	0	1	1	1	1	BDH1	3-hydroxybutyrate dehydrogenase, type 1
hsa-miR-362-5p	1	0	1	1	1	1	DMXL1	Dmx-like 1
hsa-miR-362-5p	1	0	1	1	1	1	PHTF1	putative homeodomain transcription factor 1
hsa-miR-362-5p	1	0	1	0	1	1	GPR180	G protein-coupled receptor 180
hsa-miR-362-5p	0	0	1	1	0	0	TMEM151B	transmembrane protein 151B
hsa-miR-362-5p	0	0	1	0	0	0	LOC619207	scavenger receptor protein family member
hsa-miR-362-5p	0	0	1	0	0	0	GRAMD1B	GRAM domain containing 1B
hsa-miR-362-5p	1	0	1	1	1	1	R3HDM1	R3H domain containing 1
hsa-miR-362-5p	1	0	1	1	1	1	GNA12	guanine nucleotide binding protein (G protein) alpha 12
hsa-miR-362-5p	0	0	1	1	1	1	WDR69	WD repeat domain 69
hsa-miR-362-5p	1	0	1	1	1	1	PLA2G15	phospholipase A2, group XV
hsa-miR-362-5p	1	0	1	0	1	1	CAPRIN1	cell cycle associated protein 1
hsa-miR-362-5p	1	0	1	0	1	1	YOD1	YOD1 OTU deubiquinating enzyme 1 homolog (S. cerevisiae)
hsa-miR-362-5p	1	0	1	1	1	1	SLC12A6	solute carrier family 12 (potassium/chloride transporters), member 6
hsa-miR-362-5p	0	0	1	1	0	0	TRIM46	tripartite motif containing 46
hsa-miR-362-5p	0	0	1	0	0	0	FAM205B	transmembrane protein C9orf144B pseudogene
hsa-miR-362-5p	0	0	1	0	0	0	EP400NL	EP400 N-terminal like
hsa-miR-362-5p	1	0	1	1	1	1	KALRN	kalirin, RhoGEF kinase
hsa-miR-362-5p	1	0	1	1	1	1	KCTD12	potassium channel tetramerisation domain containing 12
hsa-miR-362-5p	0	0	1	1	1	1	MON1B	MON1 homolog B (yeast)
hsa-miR-362-5p	1	0	1	1	1	1	AIF1L	allograft inflammatory factor 1-like
hsa-miR-362-5p	1	0	1	1	1	1	BCAT1	branched chain amino-acid transaminase 1, cytosolic
hsa-miR-362-5p	1	0	1	1	1	1	SDCBP	syndecan binding protein (syntenin)
hsa-miR-362-5p	0	0	1	1	1	1	TPK1	thiamin pyrophosphokinase 1
hsa-miR-362-5p	0	0	1	1	1	1	SHROOM3	shroom family member 3
hsa-miR-362-5p	0	0	1	0	0	0	EMBP1	embigin pseudogene 1
hsa-miR-362-5p	0	0	1	1	0	0	WFIKKN1	WAP, follistatin/kazal, immunoglobulin, kunitz and netrin domain containing 1
hsa-miR-362-5p	1	0	1	0	1	1	CYB561D1	cytochrome b-561 domain containing 1
hsa-miR-362-5p	0	0	1	0	0	0	AFG3L1P	AFG3 ATPase family gene 3-like 1 (S. cerevisiae), pseudogene
hsa-miR-362-5p	0	0	1	0	0	0	FLJ26245	uncharacterized LOC400533
hsa-miR-362-5p	1	0	1	1	1	1	CEP97	centrosomal protein 97kDa
hsa-miR-362-5p	1	0	1	1	1	1	GPD1	glycerol-3-phosphate dehydrogenase 1 (soluble)
hsa-miR-362-5p	0	0	1	1	1	1	TMEM202	transmembrane protein 202
hsa-miR-362-5p	0	0	1	0	0	0	LOC494141	mitochondrial carrier triple repeat 1 pseudogene
hsa-miR-362-5p	0	0	1	0	1	1	GALNT13	UDP-N-acetyl-alpha-D-galactosamine:polypeptide N-acetylgalactosaminyltransferase 13 (GalNAc-T13)
hsa-miR-362-5p	0	0	1	0	0	0	LOC100133315	transient receptor potential cation channel, subfamily C, member 2-like
hsa-miR-362-5p	0	0	1	1	0	0	DNASE1L3	deoxyribonuclease I-like 3
hsa-miR-362-5p	1	0	1	0	1	1	STK3	serine/threonine kinase 3
hsa-miR-362-5p	0	0	1	1	1	1	ZNF346	zinc finger protein 346
hsa-miR-362-5p	1	0	1	1	1	1	MAP2K4	mitogen-activated protein kinase kinase 4
hsa-miR-362-5p	0	0	1	0	0	0	AGAP9	ArfGAP with GTPase domain, ankyrin repeat and PH domain 9
hsa-miR-362-5p	0	0	1	1	1	1	RGS3	regulator of G-protein signaling 3
hsa-miR-362-5p	0	0	1	1	1	1	CEACAM5	carcinoembryonic antigen-related cell adhesion molecule 5
hsa-miR-362-5p	0	0	1	1	0	0	PCSK5	proprotein convertase subtilisin/kexin type 5
hsa-miR-362-5p	1	0	1	1	1	1	ZNF655	zinc finger protein 655
hsa-miR-362-5p	1	0	1	1	1	1	LUC7L3	LUC7-like 3 (S. cerevisiae)
hsa-miR-362-5p	0	0	1	1	1	1	RNF135	ring finger protein 135
hsa-miR-362-5p	0	0	1	1	0	0	TRIM69	tripartite motif containing 69
hsa-miR-362-5p	0	0	1	1	1	1	RABGAP1L	RAB GTPase activating protein 1-like
hsa-miR-362-5p	1	0	1	1	1	1	AHCYL1	adenosylhomocysteinase-like 1
hsa-miR-362-5p	0	0	1	0	1	1	NEK1	NIMA (never in mitosis gene a)-related kinase 1
hsa-miR-362-5p	0	0	1	0	0	0	POM121L9P	POM121 transmembrane nucleoporin-like 9, pseudogene
hsa-miR-362-5p	1	0	1	1	1	1	ARF6	ADP-ribosylation factor 6
hsa-miR-362-5p	0	0	1	1	0	0	MSH5	mutS homolog 5 (E. coli)
hsa-miR-362-5p	0	0	1	1	0	0	SAPCD1	suppressor APC domain containing 1
hsa-miR-362-5p	1	0	1	0	1	1	DCDC2	doublecortin domain containing 2
hsa-miR-362-5p	1	0	1	1	1	1	PREX1	phosphatidylinositol-3,4,5-trisphosphate-dependent Rac exchange factor 1
hsa-miR-362-5p	0	0	1	1	1	1	ZNF280D	zinc finger protein 280D
hsa-miR-362-5p	0	0	1	1	1	1	TAOK2	TAO kinase 2
hsa-miR-362-5p	1	0	1	0	1	1	GPR85	G protein-coupled receptor 85
hsa-miR-362-5p	0	0	1	1	1	1	ING3	inhibitor of growth family, member 3
hsa-miR-362-5p	0	0	1	1	1	1	COBL	cordon-bleu homolog (mouse)
hsa-miR-362-5p	1	0	1	1	1	1	YTHDF3	YTH domain family, member 3
hsa-miR-362-5p	0	0	1	1	1	1	ZCCHC6	zinc finger, CCHC domain containing 6
hsa-miR-362-5p	0	0	1	0	0	0	ZNF720	zinc finger protein 720
hsa-miR-362-5p	1	0	1	0	1	1	HNRNPA3	heterogeneous nuclear ribonucleoprotein A3
hsa-miR-362-5p	1	0	1	0	1	1	GPAM	glycerol-3-phosphate acyltransferase, mitochondrial
hsa-miR-362-5p	0	0	1	1	0	0	HEATR8	HEAT repeat containing 8
hsa-miR-362-5p	1	0	1	0	1	1	MPP5	membrane protein, palmitoylated 5 (MAGUK p55 subfamily member 5)
hsa-miR-362-5p	0	0	1	1	1	1	SYTL4	synaptotagmin-like 4
hsa-miR-362-5p	0	0	1	1	1	1	YAP1	Yes-associated protein 1
hsa-miR-362-5p	0	0	1	1	1	1	U2AF1	U2 small nuclear RNA auxiliary factor 1
hsa-miR-362-5p	0	0	1	0	0	0	FAM225A	family with sequence similarity 225, member A (non-protein coding)
hsa-miR-362-5p	1	0	1	1	1	1	FBXO3	F-box protein 3
hsa-miR-362-5p	1	0	1	0	1	1	SLC25A37	solute carrier family 25 (mitochondrial iron transporter), member 37
hsa-miR-362-5p	1	0	1	1	1	1	FAM126A	family with sequence similarity 126, member A
hsa-miR-362-5p	0	0	1	0	0	0	LOC286135	uncharacterized LOC286135
hsa-miR-362-5p	0	0	1	0	0	0	EPHA1-AS1	EPHA1 antisense RNA 1
hsa-miR-362-5p	0	0	1	1	1	1	SOAT1	sterol O-acyltransferase 1
hsa-miR-362-5p	0	0	1	0	0	0	ADCY10P1	adenylate cyclase 10 (soluble) pseudogene 1
hsa-miR-362-5p	1	0	1	1	1	1	MARCH7	membrane-associated ring finger (C3HC4) 7, E3 ubiquitin protein ligase
hsa-miR-362-5p	0	0	1	1	1	1	PCDH20	protocadherin 20
hsa-miR-362-5p	1	0	1	1	1	1	IL17RD	interleukin 17 receptor D
hsa-miR-362-5p	1	0	1	0	0	0	NPEPL1	aminopeptidase-like 1
hsa-miR-362-5p	1	0	1	1	1	1	DIS3L2	DIS3 mitotic control homolog (S. cerevisiae)-like 2
hsa-miR-362-5p	1	0	1	1	1	1	MBD6	methyl-CpG binding domain protein 6
hsa-miR-362-5p	1	0	1	1	1	1	BOLL	bol, boule-like (Drosophila)
hsa-miR-362-5p	0	0	1	0	1	1	SYNPO2	synaptopodin 2
hsa-miR-362-5p	1	0	1	1	0	0	LRRC58	leucine rich repeat containing 58
hsa-miR-362-5p	0	0	1	1	0	0	TMEM134	transmembrane protein 134
hsa-miR-362-5p	1	0	1	1	1	1	CLIC5	chloride intracellular channel 5
hsa-miR-362-5p	1	0	1	1	1	1	MIPOL1	mirror-image polydactyly 1
hsa-miR-362-5p	0	0	1	1	0	0	CRB3	crumbs homolog 3 (Drosophila)
hsa-miR-362-5p	1	0	1	1	1	1	LUZP2	leucine zipper protein 2
hsa-miR-362-5p	1	0	1	1	1	1	WDR26	WD repeat domain 26
hsa-miR-362-5p	1	0	1	1	1	1	BCL11A	B-cell CLL/lymphoma 11A (zinc finger protein)
hsa-miR-362-5p	1	0	1	1	1	1	TPP1	tripeptidyl peptidase I
hsa-miR-362-5p	1	0	1	1	1	1	PBRM1	polybromo 1
hsa-miR-362-5p	0	0	1	1	0	0	GLYCTK	glycerate kinase
hsa-miR-362-5p	1	0	1	1	1	1	GFRA2	GDNF family receptor alpha 2
hsa-miR-362-5p	0	0	1	1	1	1	LHFPL1	lipoma HMGIC fusion partner-like 1
hsa-miR-362-5p	0	0	1	1	1	1	GPR114	G protein-coupled receptor 114
hsa-miR-362-5p	0	0	1	1	1	1	PIGG	phosphatidylinositol glycan anchor biosynthesis, class G
hsa-miR-362-5p	0	0	1	1	1	1	NYAP1	neuronal tyrosine-phosphorylated phosphoinositide-3-kinase adaptor 1
hsa-miR-362-5p	0	0	1	1	1	1	RPTN	repetin
hsa-miR-362-5p	0	0	1	0	0	0	ZNFX1-AS1	ZNFX1 antisense RNA 1
hsa-miR-362-5p	0	0	1	1	0	0	SH2D6	SH2 domain containing 6
hsa-miR-362-5p	0	0	1	1	0	0	ASB16	ankyrin repeat and SOCS box containing 16
hsa-miR-362-5p	1	0	1	1	1	1	MOG	myelin oligodendrocyte glycoprotein
hsa-miR-362-5p	0	0	1	1	1	1	SMPD1	sphingomyelin phosphodiesterase 1, acid lysosomal
hsa-miR-362-5p	1	0	1	1	1	1	PLCH1	phospholipase C, eta 1
hsa-miR-362-5p	1	0	1	1	1	1	PFKFB4	6-phosphofructo-2-kinase/fructose-2,6-biphosphatase 4
hsa-miR-362-5p	1	0	1	1	1	1	PCDH11X	protocadherin 11 X-linked
hsa-miR-362-5p	0	0	1	1	1	1	CDK20	cyclin-dependent kinase 20
hsa-miR-362-5p	0	0	1	1	1	1	IL23R	interleukin 23 receptor
hsa-miR-362-5p	1	0	1	1	1	1	RPRD1A	regulation of nuclear pre-mRNA domain containing 1A
hsa-miR-362-5p	1	0	1	1	1	1	NOL4	nucleolar protein 4
hsa-miR-362-5p	1	0	1	0	1	1	FAM46A	family with sequence similarity 46, member A
hsa-miR-362-5p	0	0	1	1	0	0	DDX49	DEAD (Asp-Glu-Ala-Asp) box polypeptide 49
hsa-miR-362-5p	0	0	1	1	1	1	WDR55	WD repeat domain 55
hsa-miR-362-5p	0	0	1	1	0	0	WRAP73	WD repeat containing, antisense to TP73
hsa-miR-362-5p	1	0	1	1	1	1	HOXC13	homeobox C13
hsa-miR-362-5p	0	0	1	1	1	1	MRRF	mitochondrial ribosome recycling factor
hsa-miR-362-5p	1	0	1	1	1	1	TSPAN14	tetraspanin 14
hsa-miR-362-5p	1	0	1	0	0	0	VGLL4	vestigial like 4 (Drosophila)
hsa-miR-362-5p	1	0	1	1	1	1	RIMS3	regulating synaptic membrane exocytosis 3
hsa-miR-362-5p	0	0	1	0	1	1	HAUS3	HAUS augmin-like complex, subunit 3
hsa-miR-362-5p	1	0	1	1	0	0	POLR3D	polymerase (RNA) III (DNA directed) polypeptide D, 44kDa
hsa-miR-362-5p	0	0	1	1	1	1	CENPK	centromere protein K
hsa-miR-362-5p	0	0	1	1	1	1	RBM19	RNA binding motif protein 19
hsa-miR-362-5p	1	0	1	0	1	1	VAMP4	vesicle-associated membrane protein 4
hsa-miR-362-5p	0	0	1	1	0	0	RBM14	RNA binding motif protein 14
hsa-miR-362-5p	1	0	1	1	0	0	RUVBL2	RuvB-like 2 (E. coli)
hsa-miR-362-5p	0	0	1	0	0	0	ATXN7L3B	ataxin 7-like 3B
hsa-miR-362-5p	1	0	1	1	1	1	AGK	acylglycerol kinase
hsa-miR-362-5p	1	0	1	1	0	0	SIGMAR1	sigma non-opioid intracellular receptor 1
hsa-miR-362-5p	0	0	1	1	1	1	ATG12	autophagy related 12
hsa-miR-362-5p	0	0	1	1	0	0	ELP4	elongator acetyltransferase complex subunit 4
hsa-miR-362-5p	1	0	1	1	1	1	IDH1	isocitrate dehydrogenase 1 (NADP+), soluble
hsa-miR-362-5p	1	0	1	1	1	1	CAP1	CAP, adenylate cyclase-associated protein 1 (yeast)
hsa-miR-362-5p	0	0	1	1	1	1	KEAP1	kelch-like ECH-associated protein 1
hsa-miR-362-5p	1	0	1	1	1	1	ETF1	eukaryotic translation termination factor 1
hsa-miR-362-5p	1	0	1	1	1	1	PRDM2	PR domain containing 2, with ZNF domain
hsa-miR-362-5p	0	0	1	1	1	1	C8orf33	chromosome 8 open reading frame 33
hsa-miR-362-5p	0	0	1	1	1	1	GIN1	gypsy retrotransposon integrase 1
hsa-miR-362-5p	0	0	1	0	0	0	KLHL15	kelch-like 15 (Drosophila)
hsa-miR-362-5p	1	0	1	1	1	1	ZBTB38	zinc finger and BTB domain containing 38
hsa-miR-362-5p	0	0	1	0	0	0	NUDT16P1	nudix (nucleoside diphosphate linked moiety X)-type motif 16 pseudogene 1
hsa-miR-362-5p	1	0	1	1	1	1	ASH2L	ash2 (absent, small, or homeotic)-like (Drosophila)
hsa-miR-362-5p	1	0	1	1	1	1	ELF4	E74-like factor 4 (ets domain transcription factor)
hsa-miR-362-5p	0	0	1	0	0	0	FAM200B	family with sequence similarity 200, member B
hsa-miR-362-5p	1	0	1	1	1	1	ARHGEF9	Cdc42 guanine nucleotide exchange factor (GEF) 9
hsa-miR-362-5p	1	0	1	1	1	1	SUZ12	suppressor of zeste 12 homolog (Drosophila)
hsa-miR-362-5p	0	0	1	0	0	0	WDFY3-AS2	WDFY3 antisense RNA 2
hsa-miR-362-5p	0	0	1	1	1	1	TMEM40	transmembrane protein 40
hsa-miR-362-5p	0	0	1	0	1	1	ZNF718	zinc finger protein 718
hsa-miR-362-5p	1	0	1	0	1	1	BTF3L4	basic transcription factor 3-like 4
hsa-miR-362-5p	0	0	1	0	1	1	ERICH1-AS1	ERICH1 antisense RNA 1
hsa-miR-362-5p	0	0	1	1	0	0	SLC22A9	solute carrier family 22 (organic anion transporter), member 9
hsa-miR-362-5p	1	0	1	1	1	1	SPOCK2	sparc/osteonectin, cwcv and kazal-like domains proteoglycan (testican) 2
hsa-miR-362-5p	1	0	1	0	1	1	CDK19	cyclin-dependent kinase 19
hsa-miR-362-5p	0	0	1	0	0	0	SNX29P2	sorting nexin 29 pseudogene 2
hsa-miR-362-5p	0	0	1	1	1	1	TLR4	toll-like receptor 4
hsa-miR-362-5p	1	0	1	1	1	1	NIPA1	non imprinted in Prader-Willi/Angelman syndrome 1
hsa-miR-362-5p	0	0	1	1	1	1	VWA3B	von Willebrand factor A domain containing 3B
hsa-miR-362-5p	1	0	1	1	1	1	CNTN4	contactin 4
hsa-miR-362-5p	0	0	1	0	0	0	ZBED3-AS1	ZBED3 antisense RNA 1
hsa-miR-362-5p	1	0	1	1	1	1	RSPO2	R-spondin 2
hsa-miR-362-5p	1	0	1	1	1	1	B3GNT5	UDP-GlcNAc:betaGal beta-1,3-N-acetylglucosaminyltransferase 5
hsa-miR-362-5p	0	0	1	1	1	1	ZNF589	zinc finger protein 589
hsa-miR-362-5p	0	0	1	1	1	1	ANKZF1	ankyrin repeat and zinc finger domain containing 1
hsa-miR-362-5p	1	0	1	1	1	1	ACACB	acetyl-CoA carboxylase beta
hsa-miR-362-5p	0	0	1	0	1	1	KIAA0895	KIAA0895
hsa-miR-362-5p	1	0	1	1	1	1	GIGYF2	GRB10 interacting GYF protein 2
hsa-miR-362-5p	0	0	1	1	1	1	CCP110	centriolar coiled coil protein 110kDa
hsa-miR-362-5p	0	0	1	0	0	0	C20orf62	chromosome 20 open reading frame 62
hsa-miR-362-5p	0	0	1	1	0	0	AGBL3	ATP/GTP binding protein-like 3
hsa-miR-362-5p	1	0	1	1	1	1	ZNF518A	zinc finger protein 518A
hsa-miR-362-5p	0	0	1	0	0	0	ATP8B5P	ATPase, class I, type 8B, member 5, pseudogene
hsa-miR-362-5p	1	0	1	1	1	1	BZRAP1	benzodiazapine receptor (peripheral) associated protein 1
hsa-miR-362-5p	1	0	1	1	1	1	PHTF2	putative homeodomain transcription factor 2
hsa-miR-362-5p	1	0	1	1	1	1	TBC1D1	TBC1 (tre-2/USP6, BUB2, cdc16) domain family, member 1
hsa-miR-362-5p	0	0	1	0	0	0	FAM86JP	family with sequence similarity 86, member A pseudogene
hsa-miR-362-5p	0	0	1	1	1	1	C5orf22	chromosome 5 open reading frame 22
hsa-miR-362-5p	1	0	1	1	1	1	SECISBP2L	SECIS binding protein 2-like
hsa-miR-362-5p	1	0	1	1	1	1	CEP76	centrosomal protein 76kDa
hsa-miR-362-5p	0	0	1	0	0	0	LINC00238	long intergenic non-protein coding RNA 238
hsa-miR-362-5p	1	0	1	1	1	1	PCDHA5	protocadherin alpha 5
hsa-miR-362-5p	0	0	1	1	0	0	ADAP2	ArfGAP with dual PH domains 2
hsa-miR-362-5p	0	0	1	1	0	0	STPG1	sperm-tail PG-rich repeat containing 1
hsa-miR-362-5p	0	0	1	1	1	1	SNAPC3	small nuclear RNA activating complex, polypeptide 3, 50kDa
hsa-miR-362-5p	0	0	1	1	1	1	DUSP28	dual specificity phosphatase 28
hsa-miR-362-5p	1	0	1	1	1	1	MACROD2	MACRO domain containing 2
hsa-miR-362-5p	1	0	1	1	1	1	HECTD2	HECT domain containing E3 ubiquitin protein ligase 2
hsa-miR-362-5p	0	0	1	0	0	0	LOC654433	uncharacterized LOC654433
hsa-miR-362-5p	1	0	1	0	1	1	CLDN12	claudin 12
hsa-miR-362-5p	1	0	1	0	1	1	NEGR1	neuronal growth regulator 1
hsa-miR-362-5p	1	0	1	1	0	0	RASGEF1B	RasGEF domain family, member 1B
hsa-miR-362-5p	1	0	1	0	1	1	CPEB4	cytoplasmic polyadenylation element binding protein 4
hsa-miR-362-5p	0	0	1	0	0	0	PATL2	protein associated with topoisomerase II homolog 2 (yeast)
hsa-miR-362-5p	1	0	1	1	1	1	BNC2	basonuclin 2
hsa-miR-362-5p	1	0	1	0	1	1	RAG1	recombination activating gene 1
hsa-miR-362-5p	0	0	1	0	0	0	LOC286184	uncharacterized LOC286184
hsa-miR-362-5p	1	0	1	1	1	1	SOX6	SRY (sex determining region Y)-box 6
hsa-miR-362-5p	1	0	1	1	1	1	UBXN2A	UBX domain protein 2A
hsa-miR-362-5p	0	0	1	1	0	0	COX4I1	cytochrome c oxidase subunit IV isoform 1
hsa-miR-362-5p	0	0	1	0	0	0	USP32P1	ubiquitin specific peptidase 32 pseudogene 1
hsa-miR-362-5p	0	0	1	0	0	0	LINC00326	long intergenic non-protein coding RNA 326
hsa-miR-362-5p	1	0	1	0	1	1	LPHN3	latrophilin 3
hsa-miR-362-5p	0	0	1	0	0	0	LOC401074	uncharacterized LOC401074
hsa-miR-362-5p	1	0	1	0	1	1	GPR107	G protein-coupled receptor 107
hsa-miR-362-5p	0	0	1	1	1	1	FBXL4	F-box and leucine-rich repeat protein 4
hsa-miR-362-5p	1	0	1	1	1	1	DPP8	dipeptidyl-peptidase 8
hsa-miR-362-5p	0	0	1	0	1	1	SRSF5	serine/arginine-rich splicing factor 5
hsa-miR-362-5p	1	0	1	1	1	1	DACH2	dachshund homolog 2 (Drosophila)
hsa-miR-362-5p	0	0	1	1	1	1	TMEM45A	transmembrane protein 45A
hsa-miR-362-5p	1	0	1	1	1	1	FBXO8	F-box protein 8
hsa-miR-362-5p	1	0	1	1	1	1	BVES	blood vessel epicardial substance
hsa-miR-362-5p	0	0	1	0	1	1	TSLP	thymic stromal lymphopoietin
hsa-miR-362-5p	0	0	1	0	0	0	LOC339240	keratin 17 pseudogene
hsa-miR-362-5p	0	0	1	0	0	0	LOC154822	uncharacterized LOC154822
hsa-miR-362-5p	0	0	1	1	1	1	BCO2	beta-carotene oxygenase 2
hsa-miR-362-5p	0	0	1	1	1	1	C4orf32	chromosome 4 open reading frame 32
hsa-miR-362-5p	0	0	1	0	0	0	OR7E47P	olfactory receptor, family 7, subfamily E, member 47 pseudogene
hsa-miR-362-5p	0	0	1	0	0	0	C10orf108	chromosome 10 open reading frame 108
hsa-miR-362-5p	0	0	1	0	0	0	LOC643837	uncharacterized LOC643837
hsa-miR-362-5p	0	0	1	1	1	1	STARD4	StAR-related lipid transfer (START) domain containing 4
hsa-miR-362-5p	0	0	1	0	0	0	LOC340094	uncharacterized LOC340094
hsa-miR-362-5p	0	0	1	0	0	0	LOC338579	ankyrin repeat domain-containing protein 30B pseudogene
hsa-miR-362-5p	0	0	1	0	0	0	DKFZp686O1327	uncharacterized LOC401014
hsa-miR-362-5p	1	0	1	1	1	1	RNF145	ring finger protein 145
hsa-miR-362-5p	1	0	1	1	1	1	MAMDC2	MAM domain containing 2
hsa-miR-362-5p	0	0	1	0	0	0	LOC283914	uncharacterized LOC283914
hsa-miR-362-5p	1	0	1	1	1	1	SUPT7L	suppressor of Ty 7 (S. cerevisiae)-like
hsa-miR-362-5p	1	0	1	0	1	1	LYPD6	LY6/PLAUR domain containing 6
hsa-miR-362-5p	0	0	1	0	1	1	IL33	interleukin 33
hsa-miR-362-5p	0	0	1	1	1	1	ANKDD1A	ankyrin repeat and death domain containing 1A
hsa-miR-362-5p	1	0	1	1	1	1	PELI1	pellino E3 ubiquitin protein ligase 1
hsa-miR-362-5p	1	0	1	0	1	1	NUDT10	nudix (nucleoside diphosphate linked moiety X)-type motif 10
hsa-miR-362-5p	1	0	1	1	1	1	FNDC3A	fibronectin type III domain containing 3A
hsa-miR-362-5p	0	0	1	1	0	0	CCDC107	coiled-coil domain containing 107
hsa-miR-362-5p	1	0	1	1	0	0	STX17	syntaxin 17
hsa-miR-362-5p	0	0	1	1	1	1	HLA-DQA1	major histocompatibility complex, class II, DQ alpha 1
hsa-miR-362-5p	1	0	1	1	1	1	PCGF5	polycomb group ring finger 5
hsa-miR-362-5p	0	0	1	0	0	0	LINC00265	long intergenic non-protein coding RNA 265
hsa-miR-362-5p	0	0	1	1	0	0	TINAG	tubulointerstitial nephritis antigen
hsa-miR-362-5p	1	0	1	1	1	1	ZEB2	zinc finger E-box binding homeobox 2
hsa-miR-362-5p	1	0	1	1	1	1	PRRG1	proline rich Gla (G-carboxyglutamic acid) 1
hsa-miR-362-5p	0	0	1	1	1	1	CLEC2D	C-type lectin domain family 2, member D
hsa-miR-362-5p	1	0	1	1	1	1	NIPBL	Nipped-B homolog (Drosophila)
hsa-miR-362-5p	1	0	1	1	1	1	MGAT5B	mannosyl (alpha-1,6-)-glycoprotein beta-1,6-N-acetyl-glucosaminyltransferase, isozyme B
hsa-miR-362-5p	1	0	1	0	0	0	PRRT4	proline-rich transmembrane protein 4
hsa-miR-362-5p	0	0	1	1	1	1	ZNF333	zinc finger protein 333
hsa-miR-362-5p	0	0	1	1	1	1	ZNF189	zinc finger protein 189
hsa-miR-362-5p	1	0	1	1	1	1	CUX1	cut-like homeobox 1
hsa-miR-362-5p	1	0	1	1	1	1	GRHL1	grainyhead-like 1 (Drosophila)
hsa-miR-362-5p	0	0	1	1	1	1	SLAMF1	signaling lymphocytic activation molecule family member 1
hsa-miR-362-5p	1	0	1	1	0	0	SNX18	sorting nexin 18
hsa-miR-362-5p	1	0	1	1	1	1	PDCD6IP	programmed cell death 6 interacting protein
hsa-miR-362-5p	0	0	1	0	0	0	PTGER4P2	prostaglandin E receptor 4 (subtype EP4) pseudogene 2
hsa-miR-362-5p	1	0	1	1	1	1	SOCS2	suppressor of cytokine signaling 2
hsa-miR-362-5p	1	0	1	1	1	1	AHR	aryl hydrocarbon receptor
hsa-miR-362-5p	0	0	1	1	0	0	SLAMF9	SLAM family member 9
hsa-miR-362-5p	1	0	1	0	1	1	TGFBR1	transforming growth factor, beta receptor 1
hsa-miR-362-5p	1	0	1	1	1	1	USP47	ubiquitin specific peptidase 47
hsa-miR-362-5p	0	0	1	0	0	0	JPX	JPX transcript, XIST activator (non-protein coding)
hsa-miR-362-5p	0	0	1	1	1	1	ABHD14B	abhydrolase domain containing 14B
hsa-miR-362-5p	0	0	1	0	0	0	LOC727849	golgin A2 pseudogene
hsa-miR-362-5p	0	0	1	0	0	0	LOC727751	uncharacterized LOC727751
hsa-miR-362-5p	0	0	1	0	0	0	AGSK1	golgin subfamily A member 2-like
hsa-miR-362-5p	1	0	1	1	1	1	OPCML	opioid binding protein/cell adhesion molecule-like
hsa-miR-362-5p	1	0	1	0	1	1	AMMECR1L	AMME chromosomal region gene 1-like
hsa-miR-362-5p	0	0	1	0	0	0	LINC00537	long intergenic non-protein coding RNA 537
hsa-miR-362-5p	1	0	1	1	1	1	GBF1	golgi brefeldin A resistant guanine nucleotide exchange factor 1
hsa-miR-362-5p	1	0	1	1	1	1	ACVR2B	activin A receptor, type IIB
hsa-miR-362-5p	1	0	1	0	1	1	LRRTM4	leucine rich repeat transmembrane neuronal 4
hsa-miR-362-5p	0	0	1	1	1	1	ZNF365	zinc finger protein 365
hsa-miR-362-5p	1	0	1	0	1	1	VANGL2	vang-like 2 (van gogh, Drosophila)
hsa-miR-362-5p	0	0	1	0	0	0	LSAMP-AS3	LSAMP antisense RNA 3
hsa-miR-362-5p	1	0	1	1	1	1	SLC35G1	solute carrier family 35, member G1
hsa-miR-362-5p	1	0	1	1	1	1	NR2F2	nuclear receptor subfamily 2, group F, member 2
hsa-miR-362-5p	1	0	1	1	1	1	PTPRD	protein tyrosine phosphatase, receptor type, D
hsa-miR-362-5p	1	0	1	1	1	1	PNISR	PNN-interacting serine/arginine-rich protein
hsa-miR-362-5p	1	0	1	1	1	1	TCF3	transcription factor 3 (E2A immunoglobulin enhancer binding factors E12/E47)
hsa-miR-362-5p	0	0	1	0	0	0	INTS4L1	integrator complex subunit 4-like 1
hsa-miR-362-5p	0	0	1	0	0	0	LRRC37A11P	leucine rich repeat containing 37, member A11, pseudogene
hsa-miR-362-5p	0	0	1	1	0	0	PRAMEF10	PRAME family member 10
hsa-miR-362-5p	1	0	1	1	1	1	TRIP12	thyroid hormone receptor interactor 12
hsa-miR-362-5p	1	0	1	1	1	1	ST18	suppression of tumorigenicity 18 (breast carcinoma) (zinc finger protein)
hsa-miR-362-5p	1	0	1	1	1	1	GRIA3	glutamate receptor, ionotropic, AMPA 3
hsa-miR-362-5p	1	0	1	1	1	1	ANK2	ankyrin 2, neuronal
hsa-miR-362-5p	0	0	1	1	1	1	RNF14	ring finger protein 14
hsa-miR-362-5p	1	0	1	1	1	1	MEGF11	multiple EGF-like-domains 11
hsa-miR-362-5p	0	0	1	1	1	1	UCHL5	ubiquitin carboxyl-terminal hydrolase L5
hsa-miR-362-5p	0	0	1	0	0	0	MEG3	maternally expressed 3 (non-protein coding)
hsa-miR-362-5p	1	0	1	1	1	1	NUMB	numb homolog (Drosophila)
hsa-miR-362-5p	1	0	1	0	1	1	NFIX	nuclear factor I/X (CCAAT-binding transcription factor)
hsa-miR-362-5p	1	0	1	1	1	1	MIER3	mesoderm induction early response 1, family member 3
hsa-miR-362-5p	1	0	1	1	1	1	CCNG1	cyclin G1
hsa-miR-362-5p	0	0	1	1	1	1	STAT2	signal transducer and activator of transcription 2, 113kDa
hsa-miR-362-5p	1	0	1	1	1	1	ETS1	v-ets erythroblastosis virus E26 oncogene homolog 1 (avian)
hsa-miR-362-5p	1	0	1	1	1	1	TJP1	tight junction protein 1
hsa-miR-362-5p	0	0	1	1	1	1	IPCEF1	interaction protein for cytohesin exchange factors 1
hsa-miR-362-5p	0	0	1	1	1	1	PRR14L	proline rich 14-like
hsa-miR-362-5p	1	0	1	1	0	0	RBM27	RNA binding motif protein 27
hsa-miR-362-5p	1	0	1	1	1	1	EPS15	epidermal growth factor receptor pathway substrate 15
hsa-miR-362-5p	1	0	1	1	1	1	USP6	ubiquitin specific peptidase 6 (Tre-2 oncogene)
hsa-miR-362-5p	1	0	1	1	1	1	GABPA	GA binding protein transcription factor, alpha subunit 60kDa
hsa-miR-362-5p	1	0	1	1	1	1	CASP7	caspase 7, apoptosis-related cysteine peptidase
hsa-miR-362-5p	1	0	1	1	1	1	NEDD9	neural precursor cell expressed, developmentally down-regulated 9
hsa-miR-362-5p	1	0	1	1	1	1	DDAH1	dimethylarginine dimethylaminohydrolase 1
hsa-miR-362-5p	0	0	1	0	1	1	TYW5	tRNA-yW synthesizing protein 5
hsa-miR-362-5p	0	0	1	1	1	1	DOCK5	dedicator of cytokinesis 5
hsa-miR-362-5p	1	0	1	1	1	1	NFIB	nuclear factor I/B
hsa-miR-362-5p	1	0	1	1	1	1	SOGA2	SOGA family member 2
hsa-miR-362-5p	1	0	1	1	1	1	NAV1	neuron navigator 1
hsa-miR-362-5p	0	0	1	0	0	0	LOC286299	uncharacterized LOC286299
hsa-miR-362-5p	0	0	1	1	1	1	DAZL	deleted in azoospermia-like
hsa-miR-362-5p	0	0	1	1	1	1	ABCD3	ATP-binding cassette, sub-family D (ALD), member 3
hsa-miR-362-5p	1	0	1	1	1	1	HIC2	hypermethylated in cancer 2
hsa-miR-362-5p	0	0	1	1	1	1	PLA2G4C	phospholipase A2, group IVC (cytosolic, calcium-independent)
hsa-miR-362-5p	0	0	1	0	1	1	GINS3	GINS complex subunit 3 (Psf3 homolog)
hsa-miR-362-5p	0	0	1	1	1	1	HPGD	hydroxyprostaglandin dehydrogenase 15-(NAD)
hsa-miR-362-5p	1	0	1	0	1	1	STX6	syntaxin 6
hsa-miR-362-5p	0	0	1	1	1	1	DUSP26	dual specificity phosphatase 26 (putative)
hsa-miR-362-5p	0	0	1	1	1	1	DNM1	dynamin 1
hsa-miR-362-5p	1	0	1	1	1	1	ARF1	ADP-ribosylation factor 1
hsa-miR-362-5p	1	0	1	1	1	1	GPBP1	GC-rich promoter binding protein 1
hsa-miR-362-5p	0	0	1	1	0	0	GPX3	glutathione peroxidase 3 (plasma)
hsa-miR-362-5p	1	0	1	1	1	1	TARBP2	TAR (HIV-1) RNA binding protein 2
hsa-miR-362-5p	1	0	1	1	1	1	HNRNPC	heterogeneous nuclear ribonucleoprotein C (C1/C2)
hsa-miR-362-5p	0	0	1	1	1	1	SRP9	signal recognition particle 9kDa
hsa-miR-362-5p	0	0	1	1	0	0	CYGB	cytoglobin
hsa-miR-362-5p	0	0	1	1	1	1	SMAGP	small cell adhesion glycoprotein
hsa-miR-362-5p	1	1	1	1	0	0	EFNA3	ephrin-A3
hsa-miR-362-5p	0	0	1	1	1	1	APH1A	anterior pharynx defective 1 homolog A (C. elegans)
hsa-miR-362-5p	1	0	1	1	0	0	ELOVL1	ELOVL fatty acid elongase 1
hsa-miR-362-5p	0	0	1	1	1	1	MRPS36	mitochondrial ribosomal protein S36
hsa-miR-362-5p	0	0	1	1	1	1	BID	BH3 interacting domain death agonist
hsa-miR-362-5p	1	0	1	1	1	1	CHTF8	CTF8, chromosome transmission fidelity factor 8 homolog (S. cerevisiae)
hsa-miR-362-5p	0	0	1	0	0	0	LOC440900	uncharacterized LOC440900
hsa-miR-362-5p	1	0	1	1	1	1	MDK	midkine (neurite growth-promoting factor 2)
hsa-miR-362-5p	0	0	1	1	0	0	RAD54B	RAD54 homolog B (S. cerevisiae)
hsa-miR-362-5p	1	0	1	1	1	1	DRAM2	DNA-damage regulated autophagy modulator 2
hsa-miR-362-5p	1	0	1	1	1	1	COPZ1	coatomer protein complex, subunit zeta 1
hsa-miR-362-5p	0	0	1	1	1	1	CCDC91	coiled-coil domain containing 91
hsa-miR-362-5p	0	0	1	1	0	0	FAM64A	family with sequence similarity 64, member A
hsa-miR-362-5p	0	0	1	1	0	0	NARF	nuclear prelamin A recognition factor
hsa-miR-362-5p	0	0	1	1	1	1	GRAP2	GRB2-related adaptor protein 2
hsa-miR-362-5p	0	0	1	1	0	0	HBG1	hemoglobin, gamma A
hsa-miR-362-5p	0	0	1	1	0	0	MUS81	MUS81 endonuclease homolog (S. cerevisiae)
hsa-miR-362-5p	1	0	1	1	0	0	RNF24	ring finger protein 24
hsa-miR-362-5p	0	0	1	1	0	0	B9D1	B9 protein domain 1
hsa-miR-362-5p	0	0	1	1	0	0	C20orf43	chromosome 20 open reading frame 43
hsa-miR-362-5p	1	0	1	1	1	1	TMEM245	transmembrane protein 245
hsa-miR-362-5p	1	0	1	1	1	1	DKK3	dickkopf 3 homolog (Xenopus laevis)
hsa-miR-362-5p	0	0	1	1	1	1	TRIM38	tripartite motif containing 38
hsa-miR-362-5p	0	0	1	1	1	1	VPS16	vacuolar protein sorting 16 homolog (S. cerevisiae)
hsa-miR-362-5p	1	0	1	1	1	1	KCNIP4	Kv channel interacting protein 4
hsa-miR-362-5p	1	0	1	1	1	1	DOK4	docking protein 4
hsa-miR-362-5p	0	0	1	1	0	0	CCDC22	coiled-coil domain containing 22
hsa-miR-362-5p	0	0	1	1	1	1	SAP130	Sin3A-associated protein, 130kDa
hsa-miR-362-5p	1	0	1	1	1	1	ARNTL	aryl hydrocarbon receptor nuclear translocator-like
hsa-miR-362-5p	0	0	1	1	1	1	PEX19	peroxisomal biogenesis factor 19
hsa-miR-362-5p	0	0	1	1	0	0	WDR43	WD repeat domain 43
hsa-miR-362-5p	1	0	1	0	1	1	C15orf41	chromosome 15 open reading frame 41
hsa-miR-362-5p	1	0	1	1	1	1	ARL4A	ADP-ribosylation factor-like 4A
hsa-miR-362-5p	1	0	1	1	1	1	ATAT1	alpha tubulin acetyltransferase 1
hsa-miR-362-5p	0	0	1	1	1	1	CD1C	CD1c molecule
hsa-miR-362-5p	1	0	1	1	1	1	BAALC	brain and acute leukemia, cytoplasmic
hsa-miR-362-5p	1	0	1	1	1	1	F11R	F11 receptor
hsa-miR-362-5p	1	0	1	1	1	1	ARHGEF40	Rho guanine nucleotide exchange factor (GEF) 40
hsa-miR-362-5p	1	0	1	1	1	1	RNF2	ring finger protein 2
hsa-miR-362-5p	1	0	1	1	0	0	ZCCHC4	zinc finger, CCHC domain containing 4
hsa-miR-362-5p	1	0	1	1	1	1	TAGLN2	transgelin 2
hsa-miR-362-5p	1	0	1	1	0	0	STAG3L4	stromal antigen 3-like 4
hsa-miR-362-5p	1	0	1	1	1	1	TRAPPC3	trafficking protein particle complex 3
hsa-miR-362-5p	1	0	1	0	1	1	EIF2S2	eukaryotic translation initiation factor 2, subunit 2 beta, 38kDa
hsa-miR-362-5p	1	0	1	0	1	1	SLC2A3	solute carrier family 2 (facilitated glucose transporter), member 3
hsa-miR-362-5p	1	0	1	1	1	1	RUNX1	runt-related transcription factor 1
hsa-miR-362-5p	0	0	1	1	1	1	GATSL3	GATS protein-like 3
hsa-miR-362-5p	0	0	1	0	0	0	LOC100132984	uncharacterized LOC100132984
hsa-miR-362-5p	0	0	1	1	1	1	ARHGEF25	Rho guanine nucleotide exchange factor (GEF) 25
hsa-miR-362-5p	0	0	1	1	1	1	RFESD	Rieske (Fe-S) domain containing
hsa-miR-362-5p	0	0	1	1	1	1	NUDT21	nudix (nucleoside diphosphate linked moiety X)-type motif 21
hsa-miR-362-5p	1	0	1	1	1	1	JUNB	jun B proto-oncogene
hsa-miR-362-5p	0	0	1	1	1	1	ZFAND2B	zinc finger, AN1-type domain 2B
hsa-miR-362-5p	0	0	1	1	1	1	C10orf2	chromosome 10 open reading frame 2
hsa-miR-362-5p	1	0	1	1	1	1	RND3	Rho family GTPase 3
hsa-miR-362-5p	0	0	1	0	0	0	MYSM1	Myb-like, SWIRM and MPN domains 1
hsa-miR-362-5p	1	0	1	1	0	0	SMCHD1	structural maintenance of chromosomes flexible hinge domain containing 1
hsa-miR-362-5p	1	0	1	0	1	1	BTRC	beta-transducin repeat containing E3 ubiquitin protein ligase
hsa-miR-362-5p	0	0	1	0	1	1	STARD8	StAR-related lipid transfer (START) domain containing 8
hsa-miR-362-5p	1	0	1	0	1	1	CNTNAP2	contactin associated protein-like 2
hsa-miR-362-5p	1	0	1	1	1	1	SLC16A12	solute carrier family 16, member 12 (monocarboxylic acid transporter 12)
hsa-miR-362-5p	0	0	1	0	0	0	LOC440518	golgin A2 pseudogene
hsa-miR-362-5p	0	0	1	1	0	0	GSTT2	glutathione S-transferase theta 2
hsa-miR-362-5p	1	0	1	1	1	1	ZFHX3	zinc finger homeobox 3
hsa-miR-362-5p	1	0	1	1	1	1	MAN2A2	mannosidase, alpha, class 2A, member 2
hsa-miR-362-5p	0	0	1	1	1	1	UBXN8	UBX domain protein 8
hsa-miR-362-5p	1	0	1	0	1	1	LONRF2	LON peptidase N-terminal domain and ring finger 2
hsa-miR-362-5p	1	0	1	1	1	1	MOSPD1	motile sperm domain containing 1
hsa-miR-362-5p	0	0	1	1	1	1	C1orf27	chromosome 1 open reading frame 27
hsa-miR-362-5p	0	0	1	1	1	1	MARVELD2	MARVEL domain containing 2
hsa-miR-362-5p	1	0	1	1	1	1	CDC27	cell division cycle 27 homolog (S. cerevisiae)
hsa-miR-362-5p	1	0	1	0	1	1	EPDR1	ependymin related protein 1 (zebrafish)
hsa-miR-362-5p	0	0	1	1	1	1	ALDH3B1	aldehyde dehydrogenase 3 family, member B1
hsa-miR-362-5p	0	0	1	1	1	1	AKAP17A	A kinase (PRKA) anchor protein 17A
hsa-miR-362-5p	1	0	1	0	1	1	BCL2	B-cell CLL/lymphoma 2
hsa-miR-362-5p	0	0	1	1	1	1	NPR3	natriuretic peptide receptor C/guanylate cyclase C (atrionatriuretic peptide receptor C)
hsa-miR-362-5p	0	0	1	1	1	1	HLA-G	major histocompatibility complex, class I, G
hsa-miR-362-5p	1	0	1	0	1	1	ACVR2A	activin A receptor, type IIA
hsa-miR-362-5p	1	0	1	1	1	1	FAS	Fas (TNF receptor superfamily, member 6)
hsa-miR-362-5p	0	0	1	1	1	1	ATP7A	ATPase, Cu++ transporting, alpha polypeptide
hsa-miR-362-5p	1	0	1	1	1	1	CPOX	coproporphyrinogen oxidase
hsa-miR-362-5p	1	0	1	0	1	1	SLC26A2	solute carrier family 26 (sulfate transporter), member 2
hsa-miR-362-5p	0	0	1	0	1	1	TOR1A	torsin family 1, member A (torsin A)
hsa-miR-362-5p	1	0	1	1	1	1	ESR1	estrogen receptor 1
hsa-miR-362-5p	1	0	1	1	1	1	F13A1	coagulation factor XIII, A1 polypeptide
hsa-miR-362-5p	0	0	1	0	1	1	MS4A2	membrane-spanning 4-domains, subfamily A, member 2
hsa-miR-362-5p	1	0	1	1	1	1	ITGA6	integrin, alpha 6
hsa-miR-362-5p	1	0	1	1	1	1	KCNA1	potassium voltage-gated channel, shaker-related subfamily, member 1 (episodic ataxia with myokymia)
hsa-miR-362-5p	0	0	1	1	1	1	LPL	lipoprotein lipase
hsa-miR-362-5p	0	0	1	1	0	0	KCNH2	potassium voltage-gated channel, subfamily H (eag-related), member 2
hsa-miR-362-5p	1	0	1	1	1	1	MET	met proto-oncogene (hepatocyte growth factor receptor)
hsa-miR-362-5p	1	0	1	0	1	1	PKD2	polycystic kidney disease 2 (autosomal dominant)
hsa-miR-362-5p	1	0	1	1	1	1	ATXN1	ataxin 1
hsa-miR-362-5p	0	0	1	1	1	1	WAS	Wiskott-Aldrich syndrome
hsa-miR-362-5p	0	0	1	1	0	0	IL2RA	interleukin 2 receptor, alpha
hsa-miR-362-5p	0	0	1	1	1	1	CYP11B2	cytochrome P450, family 11, subfamily B, polypeptide 2
hsa-miR-362-5p	1	0	1	1	1	1	PLP1	proteolipid protein 1
hsa-miR-362-5p	0	0	1	1	1	1	C7	complement component 7
hsa-miR-362-5p	0	0	1	0	1	1	ADRA2A	adrenoceptor alpha 2A
hsa-miR-362-5p	0	0	1	1	1	1	CYP51A1	cytochrome P450, family 51, subfamily A, polypeptide 1
hsa-miR-362-5p	0	0	1	1	1	1	EPO	erythropoietin
hsa-miR-362-5p	1	0	1	1	1	1	GRM7	glutamate receptor, metabotropic 7
hsa-miR-362-5p	1	0	1	0	1	1	KCNJ2	potassium inwardly-rectifying channel, subfamily J, member 2
hsa-miR-362-5p	1	0	1	1	0	0	PDE3A	phosphodiesterase 3A, cGMP-inhibited
hsa-miR-362-5p	1	0	1	1	1	1	PTGDR	prostaglandin D2 receptor (DP)
hsa-miR-362-5p	1	0	1	1	1	1	PTGFR	prostaglandin F receptor (FP)
hsa-miR-362-5p	0	0	1	1	1	1	C16orf87	chromosome 16 open reading frame 87
hsa-miR-362-5p	1	0	1	0	1	1	SPOPL	speckle-type POZ protein-like
hsa-miR-362-5p	1	0	1	0	1	1	ARHGEF37	Rho guanine nucleotide exchange factor (GEF) 37
hsa-miR-362-5p	0	0	1	0	0	0	KLK2	kallikrein-related peptidase 2
hsa-miR-362-5p	1	0	1	1	1	1	LCLAT1	lysocardiolipin acyltransferase 1
hsa-miR-362-5p	1	0	1	1	1	1	C1orf173	chromosome 1 open reading frame 173
hsa-miR-362-5p	0	0	1	1	1	1	TWISTNB	TWIST neighbor
hsa-miR-362-5p	0	0	1	1	1	1	TRIM6-TRIM34	TRIM6-TRIM34 readthrough
hsa-miR-362-5p	0	0	1	1	1	1	TRIM34	tripartite motif containing 34
hsa-miR-362-5p	1	0	1	0	1	1	BMF	Bcl2 modifying factor
hsa-miR-362-5p	1	0	1	0	1	1	LRRC55	leucine rich repeat containing 55
hsa-miR-362-5p	1	0	1	1	1	1	ACTR2	ARP2 actin-related protein 2 homolog (yeast)
hsa-miR-362-5p	1	0	1	0	1	1	YPEL2	yippee-like 2 (Drosophila)
hsa-miR-362-5p	1	0	1	1	1	1	PLCXD3	phosphatidylinositol-specific phospholipase C, X domain containing 3
hsa-miR-362-5p	1	0	1	0	1	1	CPM	carboxypeptidase M
hsa-miR-362-5p	1	0	1	1	1	1	EDA	ectodysplasin A
hsa-miR-362-5p	0	0	1	1	1	1	SUMO1	SMT3 suppressor of mif two 3 homolog 1 (S. cerevisiae)
hsa-miR-362-5p	1	0	1	1	1	1	NTRK3	neurotrophic tyrosine kinase, receptor, type 3
hsa-miR-362-5p	0	0	1	1	1	1	FAM154B	family with sequence similarity 154, member B
hsa-miR-362-5p	1	0	1	1	1	1	RBM33	RNA binding motif protein 33
hsa-miR-362-5p	0	0	1	1	1	1	MXRA7	matrix-remodelling associated 7
hsa-miR-362-5p	1	0	1	0	1	1	KIAA2022	KIAA2022
hsa-miR-362-5p	1	0	1	1	1	1	FNIP1	folliculin interacting protein 1
hsa-miR-362-5p	0	0	1	1	1	1	ZCCHC11	zinc finger, CCHC domain containing 11
hsa-miR-362-5p	1	0	1	0	1	1	RCHY1	ring finger and CHY zinc finger domain containing 1, E3 ubiquitin protein ligase
hsa-miR-362-5p	1	0	1	0	1	1	ZC3H12B	zinc finger CCCH-type containing 12B
hsa-miR-362-5p	0	0	1	1	1	1	C1QL3	complement component 1, q subcomponent-like 3
hsa-miR-362-5p	0	0	1	1	1	1	NCMAP	noncompact myelin associated protein
hsa-miR-362-5p	1	0	1	0	1	1	FYTTD1	forty-two-three domain containing 1
hsa-miR-362-5p	1	0	1	0	1	1	BACH1	BTB and CNC homology 1, basic leucine zipper transcription factor 1
hsa-miR-362-5p	0	0	1	1	1	1	ZMAT1	zinc finger, matrin-type 1
hsa-miR-362-5p	1	0	1	0	1	1	CREB5	cAMP responsive element binding protein 5
hsa-miR-362-5p	1	0	1	1	1	1	SLC25A53	solute carrier family 25, member 53
hsa-miR-362-5p	1	0	1	1	1	1	DISC1	disrupted in schizophrenia 1
hsa-miR-362-5p	1	0	1	0	1	1	ZKSCAN2	zinc finger with KRAB and SCAN domains 2
hsa-miR-362-5p	1	0	1	1	1	1	SORCS1	sortilin-related VPS10 domain containing receptor 1
hsa-miR-362-5p	1	0	1	1	1	1	H3F3C	H3 histone, family 3C
hsa-miR-362-5p	0	0	1	1	1	1	DCAF8L1	DDB1 and CUL4 associated factor 8-like 1
hsa-miR-362-5p	1	0	1	1	1	1	VMA21	VMA21 vacuolar H+-ATPase homolog (S. cerevisiae)
hsa-miR-362-5p	0	0	1	1	1	1	ACTBL2	actin, beta-like 2
hsa-miR-362-5p	1	0	1	0	1	1	BRCC3	BRCA1/BRCA2-containing complex, subunit 3
hsa-miR-362-5p	1	0	1	1	1	1	SERBP1	SERPINE1 mRNA binding protein 1
hsa-miR-362-5p	0	0	1	1	1	1	LRRC66	leucine rich repeat containing 66
hsa-miR-362-5p	0	0	1	1	1	1	SC5DL	sterol-C5-desaturase (ERG3 delta-5-desaturase homolog, S. cerevisiae)-like
hsa-miR-362-5p	0	0	1	1	0	0	BRMS1	breast cancer metastasis suppressor 1
hsa-miR-362-5p	1	0	1	0	1	1	ANO6	anoctamin 6
hsa-miR-362-5p	1	0	1	1	1	1	RGS7BP	regulator of G-protein signaling 7 binding protein
hsa-miR-362-5p	1	0	1	0	1	1	MSRB3	methionine sulfoxide reductase B3
hsa-miR-362-5p	1	0	1	1	1	1	NEK10	NIMA (never in mitosis gene a)- related kinase 10
hsa-miR-362-5p	1	0	1	1	1	1	CSNK1G3	casein kinase 1, gamma 3
hsa-miR-362-5p	1	0	1	1	1	1	UBE2V1	ubiquitin-conjugating enzyme E2 variant 1
hsa-miR-362-5p	1	0	1	1	1	1	PPM1B	protein phosphatase, Mg2+/Mn2+ dependent, 1B
hsa-miR-362-5p	0	0	1	1	1	1	C6orf225	chromosome 6 open reading frame 225
hsa-miR-362-5p	0	0	1	1	1	1	CTLA4	cytotoxic T-lymphocyte-associated protein 4
hsa-miR-362-5p	0	0	1	1	1	1	ATAD3C	ATPase family, AAA domain containing 3C
hsa-miR-362-5p	0	0	1	1	1	1	HEPACAM2	HEPACAM family member 2
hsa-miR-362-5p	1	0	1	1	1	1	KIAA0317	KIAA0317
hsa-miR-362-5p	1	0	1	0	1	1	GK5	glycerol kinase 5 (putative)
hsa-miR-362-5p	1	0	1	1	1	1	KREMEN1	kringle containing transmembrane protein 1
hsa-miR-362-5p	1	0	1	0	1	1	CREBZF	CREB/ATF bZIP transcription factor
hsa-miR-362-5p	0	0	1	1	0	0	ANGPTL4	angiopoietin-like 4
hsa-miR-362-5p	0	0	1	0	0	0	C19orf55	chromosome 19 open reading frame 55
hsa-miR-362-5p	1	0	1	1	1	1	FAM3C	family with sequence similarity 3, member C
hsa-miR-362-5p	0	0	1	1	1	1	SPOCK3	sparc/osteonectin, cwcv and kazal-like domains proteoglycan (testican) 3
hsa-miR-362-5p	1	0	1	1	1	1	PRKAG2	protein kinase, AMP-activated, gamma 2 non-catalytic subunit
hsa-miR-362-5p	0	0	1	0	1	1	ABCE1	ATP-binding cassette, sub-family E (OABP), member 1
hsa-miR-362-5p	1	0	1	1	1	1	CYLD	cylindromatosis (turban tumor syndrome)
hsa-miR-362-5p	1	0	1	1	1	1	PPP4R1	protein phosphatase 4, regulatory subunit 1
hsa-miR-362-5p	0	0	1	1	1	1	MST4	serine/threonine protein kinase MST4
hsa-miR-362-5p	1	0	1	1	1	1	DIAPH3	diaphanous homolog 3 (Drosophila)
hsa-miR-362-5p	1	0	1	1	1	1	ERBB4	v-erb-a erythroblastic leukemia viral oncogene homolog 4 (avian)
hsa-miR-362-5p	0	0	1	1	1	1	TTC14	tetratricopeptide repeat domain 14
hsa-miR-362-5p	0	0	1	1	1	1	TRAK1	trafficking protein, kinesin binding 1
hsa-miR-362-5p	1	0	1	1	1	1	PVRL2	poliovirus receptor-related 2 (herpesvirus entry mediator B)
hsa-miR-362-5p	1	0	1	0	1	1	SLC12A2	solute carrier family 12 (sodium/potassium/chloride transporters), member 2
hsa-miR-362-5p	0	0	1	1	0	0	DBNDD2	dysbindin (dystrobrevin binding protein 1) domain containing 2
hsa-miR-362-5p	1	0	1	1	1	1	ZNF436	zinc finger protein 436
hsa-miR-362-5p	1	0	1	1	1	1	SREK1	splicing regulatory glutamine/lysine-rich protein 1
hsa-miR-362-5p	1	0	1	1	1	1	GRIA4	glutamate receptor, ionotropic, AMPA 4
hsa-miR-362-5p	1	0	1	1	1	1	SRSF1	serine/arginine-rich splicing factor 1
hsa-miR-362-5p	1	0	1	1	1	1	UBN1	ubinuclein 1
hsa-miR-362-5p	0	0	1	1	1	1	TAX1BP1	Tax1 (human T-cell leukemia virus type I) binding protein 1
hsa-miR-362-5p	0	0	1	1	0	0	CT47A1	cancer/testis antigen family 47, member A1
hsa-miR-362-5p	1	0	1	0	1	1	THSD7B	thrombospondin, type I, domain containing 7B
hsa-miR-362-5p	0	0	1	1	0	0	SLC35F4	solute carrier family 35, member F4
hsa-miR-362-5p	1	0	1	0	1	1	MEGF9	multiple EGF-like-domains 9
hsa-miR-362-5p	0	0	1	1	0	0	OVOS2	ovostatin 2
hsa-miR-362-5p	1	0	1	1	1	1	MGA	MAX gene associated
hsa-miR-362-5p	1	0	1	1	1	1	MYO1C	myosin IC
hsa-miR-362-5p	0	0	1	1	1	1	C15orf57	chromosome 15 open reading frame 57
hsa-miR-362-5p	0	0	1	1	0	0	GSTT2B	glutathione S-transferase theta 2B (gene/pseudogene)
hsa-miR-362-5p	1	0	1	1	1	1	REPS2	RALBP1 associated Eps domain containing 2
hsa-miR-362-5p	1	0	1	1	1	1	NXF1	nuclear RNA export factor 1
hsa-miR-362-5p	1	0	1	0	1	1	SCN3A	sodium channel, voltage-gated, type III, alpha subunit
hsa-miR-362-5p	0	0	1	1	1	1	G6PC2	glucose-6-phosphatase, catalytic, 2
hsa-miR-362-5p	0	0	1	1	1	1	AMELY	amelogenin, Y-linked
hsa-miR-362-5p	1	0	1	0	1	1	XIAP	X-linked inhibitor of apoptosis
hsa-miR-362-5p	0	0	1	1	1	1	CCNT2	cyclin T2
hsa-miR-362-5p	1	0	1	0	1	1	CDK6	cyclin-dependent kinase 6
hsa-miR-362-5p	1	0	1	1	1	1	EREG	epiregulin
hsa-miR-362-5p	1	0	1	0	1	1	B4GALT1	UDP-Gal:betaGlcNAc beta 1,4- galactosyltransferase, polypeptide 1
hsa-miR-362-5p	0	0	1	1	0	0	HCRTR2	hypocretin (orexin) receptor 2
hsa-miR-362-5p	0	0	1	1	1	1	CXCL10	chemokine (C-X-C motif) ligand 10
hsa-miR-362-5p	0	0	1	1	0	0	ACP2	acid phosphatase 2, lysosomal
hsa-miR-362-5p	1	0	1	1	1	1	AQP4	aquaporin 4
hsa-miR-362-5p	0	0	1	1	1	1	BTN1A1	butyrophilin, subfamily 1, member A1
hsa-miR-362-5p	1	0	1	1	1	1	CDC25A	cell division cycle 25 homolog A (S. pombe)
hsa-miR-362-5p	1	0	1	1	1	1	CDK2	cyclin-dependent kinase 2
hsa-miR-362-5p	1	0	1	1	1	1	CENPB	centromere protein B, 80kDa
hsa-miR-362-5p	0	0	1	1	1	1	CKS1B	CDC28 protein kinase regulatory subunit 1B
hsa-miR-362-5p	0	0	1	1	0	0	CLC	Charcot-Leyden crystal protein
hsa-miR-362-5p	1	0	1	1	1	1	MASP1	mannan-binding lectin serine peptidase 1 (C4/C2 activating component of Ra-reactive factor)
hsa-miR-362-5p	0	0	1	1	1	1	GADD45A	growth arrest and DNA-damage-inducible, alpha
hsa-miR-362-5p	1	0	1	1	1	1	DSC3	desmocollin 3
hsa-miR-362-5p	0	0	1	1	1	1	DSG1	desmoglein 1
hsa-miR-362-5p	1	0	1	0	1	1	ETV6	ets variant 6
hsa-miR-362-5p	0	0	1	1	0	0	FCER1A	Fc fragment of IgE, high affinity I, receptor for; alpha polypeptide
hsa-miR-362-5p	0	0	1	1	0	0	FKBP3	FK506 binding protein 3, 25kDa
hsa-miR-362-5p	0	0	1	1	1	1	GFAP	glial fibrillary acidic protein
hsa-miR-362-5p	1	0	1	1	1	1	GOLGA1	golgin A1
hsa-miR-362-5p	1	0	1	1	1	1	IL13	interleukin 13
hsa-miR-362-5p	1	0	1	0	1	1	IRF2	interferon regulatory factor 2
hsa-miR-362-5p	1	0	1	1	1	1	ISL1	ISL LIM homeobox 1
hsa-miR-362-5p	1	0	1	1	1	1	ITGA5	integrin, alpha 5 (fibronectin receptor, alpha polypeptide)
hsa-miR-362-5p	1	0	1	1	1	1	ITGB8	integrin, beta 8
hsa-miR-362-5p	1	0	1	1	1	1	KCNJ10	potassium inwardly-rectifying channel, subfamily J, member 10
hsa-miR-362-5p	0	0	1	1	0	0	KRT31	keratin 31
hsa-miR-362-5p	0	0	1	1	0	0	LALBA	lactalbumin, alpha-
hsa-miR-362-5p	1	0	1	0	1	1	MXD1	MAX dimerization protein 1
hsa-miR-362-5p	1	0	1	1	1	1	MAP1A	microtubule-associated protein 1A
hsa-miR-362-5p	1	0	1	1	1	1	ADAM11	ADAM metallopeptidase domain 11
hsa-miR-362-5p	0	0	1	0	1	1	CXCL9	chemokine (C-X-C motif) ligand 9
hsa-miR-362-5p	0	0	1	1	1	1	MRC1	mannose receptor, C type 1
hsa-miR-362-5p	0	0	1	1	1	1	MTAP	methylthioadenosine phosphorylase
hsa-miR-362-5p	1	0	1	1	1	1	NPTX1	neuronal pentraxin I
hsa-miR-362-5p	1	0	1	1	1	1	ORC5	origin recognition complex, subunit 5
hsa-miR-362-5p	1	0	1	1	1	1	OSBP	oxysterol binding protein
hsa-miR-362-5p	0	0	1	1	1	1	PIK3C2B	phosphatidylinositol-4-phosphate 3-kinase, catalytic subunit type 2 beta
hsa-miR-362-5p	1	0	1	1	1	1	PLAGL2	pleiomorphic adenoma gene-like 2
hsa-miR-362-5p	1	0	1	1	1	1	PPP2R3A	protein phosphatase 2, regulatory subunit B'', alpha
hsa-miR-362-5p	1	0	1	0	1	1	PRKCA	protein kinase C, alpha
hsa-miR-362-5p	0	0	1	1	0	0	PRPSAP1	phosphoribosyl pyrophosphate synthetase-associated protein 1
hsa-miR-362-5p	1	0	1	1	1	1	PTPN9	protein tyrosine phosphatase, non-receptor type 9
hsa-miR-362-5p	1	0	1	1	1	1	PTPN11	protein tyrosine phosphatase, non-receptor type 11
hsa-miR-362-5p	0	0	1	1	0	0	RBP1	retinol binding protein 1, cellular
hsa-miR-362-5p	0	0	1	1	1	1	SDC2	syndecan 2
hsa-miR-362-5p	1	0	1	0	1	1	ST6GAL1	ST6 beta-galactosamide alpha-2,6-sialyltranferase 1
hsa-miR-362-5p	1	0	1	0	1	1	SLC6A1	solute carrier family 6 (neurotransmitter transporter, GABA), member 1
hsa-miR-362-5p	1	0	1	1	1	1	SRF	serum response factor (c-fos serum response element-binding transcription factor)
hsa-miR-362-5p	0	0	1	1	1	1	SSBP1	single-stranded DNA binding protein 1, mitochondrial
hsa-miR-362-5p	0	0	1	1	0	0	SSRP1	structure specific recognition protein 1
hsa-miR-362-5p	1	0	1	1	1	1	STAC	SH3 and cysteine rich domain
hsa-miR-362-5p	0	0	1	1	1	1	STIM1	stromal interaction molecule 1
hsa-miR-362-5p	1	0	1	0	1	1	RPS6KB1	ribosomal protein S6 kinase, 70kDa, polypeptide 1
hsa-miR-362-5p	0	0	1	1	1	1	TPR	translocated promoter region, nuclear basket protein
hsa-miR-362-5p	1	0	1	1	1	1	UBE2B	ubiquitin-conjugating enzyme E2B
hsa-miR-362-5p	1	0	1	1	1	1	NRIP1	nuclear receptor interacting protein 1
hsa-miR-362-5p	1	0	1	0	1	1	CNTNAP1	contactin associated protein 1
hsa-miR-362-5p	1	0	1	1	0	0	TCAP	titin-cap (telethonin)
hsa-miR-362-5p	0	0	1	1	0	0	EIF4EBP3	eukaryotic translation initiation factor 4E binding protein 3
hsa-miR-362-5p	0	0	1	1	1	1	EIF3A	eukaryotic translation initiation factor 3, subunit A
hsa-miR-362-5p	0	0	1	1	1	1	TNFSF12	tumor necrosis factor (ligand) superfamily, member 12
hsa-miR-362-5p	0	0	1	1	0	0	ADAM23	ADAM metallopeptidase domain 23
hsa-miR-362-5p	1	0	1	1	1	1	PEX11B	peroxisomal biogenesis factor 11 beta
hsa-miR-362-5p	1	0	1	1	1	1	NRP2	neuropilin 2
hsa-miR-362-5p	1	0	1	1	1	1	ALDH1A2	aldehyde dehydrogenase 1 family, member A2
hsa-miR-362-5p	1	0	1	1	1	1	CDKL2	cyclin-dependent kinase-like 2 (CDC2-related kinase)
hsa-miR-362-5p	0	0	1	1	0	0	CRYBB3	crystallin, beta B3
hsa-miR-362-5p	1	0	1	0	1	1	E2F2	E2F transcription factor 2
hsa-miR-362-5p	0	0	1	0	1	1	EIF4EBP2	eukaryotic translation initiation factor 4E binding protein 2
hsa-miR-362-5p	1	0	1	1	1	1	HNF4G	hepatocyte nuclear factor 4, gamma
hsa-miR-362-5p	1	0	1	0	1	1	SLC1A2	solute carrier family 1 (glial high affinity glutamate transporter), member 2
hsa-miR-362-5p	1	0	1	1	1	1	MFHAS1	malignant fibrous histiocytoma amplified sequence 1
hsa-miR-362-5p	1	0	1	0	1	1	MED14	mediator complex subunit 14
hsa-miR-362-5p	0	0	1	1	1	1	COX5A	cytochrome c oxidase subunit Va
hsa-miR-362-5p	0	0	1	1	0	0	PIGL	phosphatidylinositol glycan anchor biosynthesis, class L
hsa-miR-362-5p	0	0	1	1	1	1	CETN3	centrin, EF-hand protein, 3
hsa-miR-362-5p	1	0	1	1	1	1	DACH1	dachshund homolog 1 (Drosophila)
hsa-miR-362-5p	1	0	1	1	1	1	DUSP1	dual specificity phosphatase 1
hsa-miR-362-5p	1	0	1	1	1	1	EPHB3	EPH receptor B3
hsa-miR-362-5p	0	0	1	1	1	1	NFATC3	nuclear factor of activated T-cells, cytoplasmic, calcineurin-dependent 3
hsa-miR-362-5p	0	0	1	1	1	1	TRAF6	TNF receptor-associated factor 6, E3 ubiquitin protein ligase
hsa-miR-362-5p	1	0	1	1	0	0	PIAS2	protein inhibitor of activated STAT, 2
hsa-miR-362-5p	0	0	1	1	0	0	MAP3K6	mitogen-activated protein kinase kinase kinase 6
hsa-miR-362-5p	1	0	1	1	1	1	LARGE	like-glycosyltransferase
hsa-miR-362-5p	1	0	1	1	1	1	B4GALT6	UDP-Gal:betaGlcNAc beta 1,4- galactosyltransferase, polypeptide 6
hsa-miR-362-5p	1	0	1	0	1	1	ROCK2	Rho-associated, coiled-coil containing protein kinase 2
hsa-miR-362-5p	1	0	1	0	1	1	DOCK3	dedicator of cytokinesis 3
hsa-miR-362-5p	0	0	1	0	1	1	DSC2	desmocollin 2
hsa-miR-362-5p	0	0	1	1	1	1	JAK2	Janus kinase 2
hsa-miR-362-5p	1	0	1	0	1	1	SEL1L	sel-1 suppressor of lin-12-like (C. elegans)
hsa-miR-362-5p	0	0	1	1	1	1	SIM1	single-minded homolog 1 (Drosophila)
hsa-miR-362-5p	0	0	1	1	1	1	ABCD2	ATP-binding cassette, sub-family D (ALD), member 2
hsa-miR-362-5p	1	0	1	1	1	1	CBL	Cbl proto-oncogene, E3 ubiquitin protein ligase
hsa-miR-362-5p	1	0	1	1	1	1	DLX3	distal-less homeobox 3
hsa-miR-362-5p	1	0	1	1	1	1	HAS3	hyaluronan synthase 3
hsa-miR-362-5p	1	0	1	1	1	1	RAB8A	RAB8A, member RAS oncogene family
hsa-miR-362-5p	1	0	1	0	1	1	PRKAB2	protein kinase, AMP-activated, beta 2 non-catalytic subunit
hsa-miR-362-5p	1	0	1	0	1	1	PRKCE	protein kinase C, epsilon
hsa-miR-362-5p	1	0	1	1	1	1	RALA	v-ral simian leukemia viral oncogene homolog A (ras related)
hsa-miR-362-5p	1	0	1	0	1	1	CCDC6	coiled-coil domain containing 6
hsa-miR-362-5p	0	0	1	1	1	1	FAIM3	Fas apoptotic inhibitory molecule 3
hsa-miR-362-5p	1	0	1	1	0	0	ZBTB22	zinc finger and BTB domain containing 22
hsa-miR-362-5p	1	0	1	1	1	1	AKT3	v-akt murine thymoma viral oncogene homolog 3 (protein kinase B, gamma)
hsa-miR-362-5p	1	0	1	1	1	1	INSIG1	insulin induced gene 1
hsa-miR-362-5p	1	0	1	1	1	1	LAMC2	laminin, gamma 2
hsa-miR-362-5p	1	0	1	1	1	1	LPP	LIM domain containing preferred translocation partner in lipoma
hsa-miR-362-5p	1	0	1	1	1	1	NHLH2	nescient helix loop helix 2
hsa-miR-362-5p	0	0	1	1	0	0	NR2F1	nuclear receptor subfamily 2, group F, member 1
hsa-miR-362-5p	0	0	1	1	1	1	ARPC3	actin related protein 2/3 complex, subunit 3, 21kDa
hsa-miR-362-5p	1	0	1	0	1	1	SPRY3	sprouty homolog 3 (Drosophila)
hsa-miR-362-5p	0	0	1	1	1	1	BCAS2	breast carcinoma amplified sequence 2
hsa-miR-362-5p	0	0	1	1	1	1	SF3A1	splicing factor 3a, subunit 1, 120kDa
hsa-miR-362-5p	0	0	1	1	1	1	MFAP3	microfibrillar-associated protein 3
hsa-miR-362-5p	1	0	1	1	1	1	MMP16	matrix metallopeptidase 16 (membrane-inserted)
hsa-miR-362-5p	1	0	1	1	1	1	MTF1	metal-regulatory transcription factor 1
hsa-miR-362-5p	1	0	1	0	1	1	NAB1	NGFI-A binding protein 1 (EGR1 binding protein 1)
hsa-miR-362-5p	0	0	1	1	0	0	PPYR1	pancreatic polypeptide receptor 1
hsa-miR-362-5p	1	0	1	1	1	1	SNAI1	snail homolog 1 (Drosophila)
hsa-miR-362-5p	1	0	1	1	0	0	ALKBH1	alkB, alkylation repair homolog 1 (E. coli)
hsa-miR-362-5p	1	0	1	1	1	1	LIPG	lipase, endothelial
hsa-miR-362-5p	0	0	1	1	1	1	TRDN	triadin
hsa-miR-362-5p	1	0	1	1	1	1	SEMA3A	sema domain, immunoglobulin domain (Ig), short basic domain, secreted, (semaphorin) 3A
hsa-miR-362-5p	1	0	1	1	1	1	DAGLA	diacylglycerol lipase, alpha
hsa-miR-362-5p	1	0	1	1	1	1	CAPZA1	capping protein (actin filament) muscle Z-line, alpha 1
hsa-miR-362-5p	1	0	1	1	1	1	DNAJB1	DnaJ (Hsp40) homolog, subfamily B, member 1
hsa-miR-362-5p	1	0	1	1	1	1	NEFL	neurofilament, light polypeptide
hsa-miR-362-5p	0	0	1	1	1	1	PLCD1	phospholipase C, delta 1
hsa-miR-362-5p	0	0	1	1	1	1	PRKG2	protein kinase, cGMP-dependent, type II
hsa-miR-362-5p	1	0	1	1	1	1	NPEPPS	aminopeptidase puromycin sensitive
hsa-miR-362-5p	1	0	1	1	1	1	TIMM17A	translocase of inner mitochondrial membrane 17 homolog A (yeast)
hsa-miR-362-5p	1	0	1	0	1	1	APPBP2	amyloid beta precursor protein (cytoplasmic tail) binding protein 2
hsa-miR-362-5p	1	0	1	1	1	1	NEBL	nebulette
hsa-miR-362-5p	1	0	1	1	1	1	TRIM3	tripartite motif containing 3
hsa-miR-362-5p	1	0	1	1	1	1	HEXIM1	hexamethylene bis-acetamide inducible 1
hsa-miR-362-5p	1	0	1	1	1	1	DYNLT3	dynein, light chain, Tctex-type 3
hsa-miR-362-5p	0	0	1	1	1	1	CLCA2	chloride channel accessory 2
hsa-miR-362-5p	1	0	1	0	1	1	IGF2BP1	insulin-like growth factor 2 mRNA binding protein 1
hsa-miR-362-5p	1	0	1	1	1	1	CTCF	CCCTC-binding factor (zinc finger protein)
hsa-miR-362-5p	1	0	1	1	1	1	SRSF10	serine/arginine-rich splicing factor 10
hsa-miR-362-5p	1	0	1	1	1	1	MMP24	matrix metallopeptidase 24 (membrane-inserted)
hsa-miR-362-5p	1	0	1	1	1	1	MAN1A2	mannosidase, alpha, class 1A, member 2
hsa-miR-362-5p	0	0	1	1	1	1	GLO1	glyoxalase I
hsa-miR-362-5p	1	0	1	1	1	1	BTG2	BTG family, member 2
hsa-miR-362-5p	0	0	1	1	1	1	IFRD2	interferon-related developmental regulator 2
hsa-miR-362-5p	1	0	1	1	1	1	KAT6A	K(lysine) acetyltransferase 6A
hsa-miR-362-5p	0	0	1	1	1	1	SERINC3	serine incorporator 3
hsa-miR-362-5p	0	0	1	1	0	0	SF3B2	splicing factor 3b, subunit 2, 145kDa
hsa-miR-362-5p	0	0	1	1	0	0	PIM2	pim-2 oncogene
hsa-miR-362-5p	0	0	1	1	1	1	CEACAM7	carcinoembryonic antigen-related cell adhesion molecule 7
hsa-miR-362-5p	0	0	1	1	1	1	HOXD3	homeobox D3
hsa-miR-362-5p	1	0	1	1	1	1	PRRX1	paired related homeobox 1
hsa-miR-362-5p	1	0	1	1	1	1	SYN1	synapsin I
hsa-miR-362-5p	0	0	1	1	1	1	TMEM115	transmembrane protein 115
hsa-miR-362-5p	1	0	1	1	1	1	ADAMTS5	ADAM metallopeptidase with thrombospondin type 1 motif, 5
hsa-miR-362-5p	0	0	1	1	1	1	CALB2	calbindin 2
hsa-miR-362-5p	1	0	1	1	1	1	VEZF1	vascular endothelial zinc finger 1
hsa-miR-362-5p	0	0	1	0	1	1	ZXDB	zinc finger, X-linked, duplicated B
hsa-miR-362-5p	1	0	1	1	1	1	PALM2-AKAP2	PALM2-AKAP2 readthrough
hsa-miR-362-5p	0	0	1	1	1	1	GPR176	G protein-coupled receptor 176
hsa-miR-362-5p	0	0	1	1	1	1	SLC6A14	solute carrier family 6 (amino acid transporter), member 14
hsa-miR-362-5p	1	0	1	1	1	1	KLF12	Kruppel-like factor 12
hsa-miR-362-5p	1	0	1	1	1	1	ZNF236	zinc finger protein 236
hsa-miR-362-5p	1	0	1	1	1	1	CASC3	cancer susceptibility candidate 3
hsa-miR-362-5p	0	0	1	1	1	1	MIP	major intrinsic protein of lens fiber
hsa-miR-362-5p	0	0	1	1	1	1	CHIC2	cysteine-rich hydrophobic domain 2
hsa-miR-362-5p	1	0	1	0	1	1	CASP8AP2	caspase 8 associated protein 2
hsa-miR-362-5p	1	0	1	0	1	1	CD2AP	CD2-associated protein
hsa-miR-362-5p	1	0	1	0	1	1	FZD4	frizzled family receptor 4
hsa-miR-362-5p	1	0	1	1	1	1	MGAT4A	mannosyl (alpha-1,3-)-glycoprotein beta-1,4-N-acetylglucosaminyltransferase, isozyme A
hsa-miR-362-5p	1	0	1	1	1	1	RYBP	RING1 and YY1 binding protein
hsa-miR-362-5p	1	0	1	1	1	1	DKK1	dickkopf 1 homolog (Xenopus laevis)
hsa-miR-362-5p	0	0	1	1	1	1	IL36RN	interleukin 36 receptor antagonist
hsa-miR-362-5p	1	0	1	0	1	1	GAB2	GRB2-associated binding protein 2
hsa-miR-362-5p	1	0	1	0	1	1	BLOC1S6	biogenesis of lysosomal organelles complex-1, subunit 6, pallidin
hsa-miR-362-5p	0	0	1	0	1	1	PITPNC1	phosphatidylinositol transfer protein, cytoplasmic 1
hsa-miR-362-5p	1	0	1	0	1	1	FLRT2	fibronectin leucine rich transmembrane protein 2
hsa-miR-362-5p	0	0	1	1	1	1	N6AMT1	N-6 adenine-specific DNA methyltransferase 1 (putative)
hsa-miR-362-5p	1	0	1	0	1	1	VPS4A	vacuolar protein sorting 4 homolog A (S. cerevisiae)
hsa-miR-362-5p	1	0	1	1	0	0	SNX15	sorting nexin 15
hsa-miR-362-5p	0	0	1	1	0	0	C2orf27A	chromosome 2 open reading frame 27A
hsa-miR-362-5p	0	0	1	1	0	0	KCNJ14	potassium inwardly-rectifying channel, subfamily J, member 14
hsa-miR-362-5p	1	0	1	1	1	1	PADI1	peptidyl arginine deiminase, type I
hsa-miR-362-5p	0	0	1	0	0	0	PILRB	paired immunoglobin-like type 2 receptor beta
hsa-miR-362-5p	1	0	1	1	1	1	GAD1	glutamate decarboxylase 1 (brain, 67kDa)
hsa-miR-362-5p	0	0	1	0	1	1	EMR2	egf-like module containing, mucin-like, hormone receptor-like 2
hsa-miR-362-5p	1	0	1	0	1	1	OSTM1	osteopetrosis associated transmembrane protein 1
hsa-miR-362-5p	1	0	1	0	1	1	C16orf72	chromosome 16 open reading frame 72
hsa-miR-362-5p	0	0	1	1	0	0	HSD17B8	hydroxysteroid (17-beta) dehydrogenase 8
hsa-miR-362-5p	0	0	1	1	0	0	NOMO1	NODAL modulator 1
hsa-miR-362-5p	0	0	1	1	1	1	TAF5L	TAF5-like RNA polymerase II, p300/CBP-associated factor (PCAF)-associated factor, 65kDa
hsa-miR-362-5p	0	0	1	0	0	0	SND1-IT1	SND1 intronic transcript 1 (non-protein coding)
hsa-miR-362-5p	1	0	1	1	1	1	ZBTB11	zinc finger and BTB domain containing 11
hsa-miR-362-5p	1	0	1	1	1	1	AFF4	AF4/FMR2 family, member 4
hsa-miR-362-5p	1	0	1	1	1	1	PDCD4	programmed cell death 4 (neoplastic transformation inhibitor)
hsa-miR-362-5p	1	0	1	1	1	1	KLHL20	kelch-like 20 (Drosophila)
hsa-miR-362-5p	1	0	1	0	1	1	SH3PXD2A	SH3 and PX domains 2A
hsa-miR-362-5p	1	0	1	1	1	1	RALGPS1	Ral GEF with PH domain and SH3 binding motif 1
hsa-miR-362-5p	1	0	1	0	1	1	BZW1	basic leucine zipper and W2 domains 1
hsa-miR-362-5p	1	0	1	0	1	1	EDEM1	ER degradation enhancer, mannosidase alpha-like 1
hsa-miR-362-5p	1	0	1	0	1	1	MLEC	malectin
hsa-miR-362-5p	1	0	1	0	1	1	KIAA0513	KIAA0513
hsa-miR-362-5p	1	0	1	0	1	1	KIAA0232	KIAA0232
hsa-miR-362-5p	1	0	1	0	1	1	SERTAD2	SERTA domain containing 2
hsa-miR-362-5p	1	0	1	1	1	1	DAZAP2	DAZ associated protein 2
hsa-miR-362-5p	0	0	1	0	1	1	EPM2AIP1	EPM2A (laforin) interacting protein 1
hsa-miR-362-5p	1	0	1	1	1	1	LRIG2	leucine-rich repeats and immunoglobulin-like domains 2
hsa-miR-362-5p	1	0	1	1	1	1	FCHSD2	FCH and double SH3 domains 2
hsa-miR-362-5p	0	0	1	1	1	1	TOX4	TOX high mobility group box family member 4
hsa-miR-362-5p	1	0	1	1	1	1	SV2A	synaptic vesicle glycoprotein 2A
hsa-miR-362-5p	0	0	1	0	1	1	PPM1E	protein phosphatase, Mg2+/Mn2+ dependent, 1E
hsa-miR-362-5p	1	0	1	1	1	1	CHSY1	chondroitin sulfate synthase 1
hsa-miR-362-5p	1	0	1	1	1	1	PLEKHA6	pleckstrin homology domain containing, family A member 6
hsa-miR-362-5p	1	0	1	1	1	1	DIP2C	DIP2 disco-interacting protein 2 homolog C (Drosophila)
hsa-miR-362-5p	1	0	1	1	1	1	SORCS3	sortilin-related VPS10 domain containing receptor 3
hsa-miR-362-5p	1	0	1	1	1	1	SPEN	spen homolog, transcriptional regulator (Drosophila)
hsa-miR-362-5p	1	0	1	1	1	1	USP33	ubiquitin specific peptidase 33
hsa-miR-362-5p	1	0	1	1	1	1	TRAK2	trafficking protein, kinesin binding 2
hsa-miR-362-5p	1	0	1	0	1	1	PEG10	paternally expressed 10
hsa-miR-362-5p	1	0	1	1	1	1	SIPA1L3	signal-induced proliferation-associated 1 like 3
hsa-miR-362-5p	1	0	1	1	1	1	DDN	dendrin
hsa-miR-362-5p	1	0	1	1	1	1	SMG1	smg-1 homolog, phosphatidylinositol 3-kinase-related kinase (C. elegans)
hsa-miR-362-5p	1	0	1	1	1	1	ZCCHC14	zinc finger, CCHC domain containing 14
hsa-miR-362-5p	1	0	1	0	1	1	LARP4B	La ribonucleoprotein domain family, member 4B
hsa-miR-362-5p	0	0	1	1	1	1	FBXO28	F-box protein 28
hsa-miR-362-5p	1	0	1	1	1	1	PLCB1	phospholipase C, beta 1 (phosphoinositide-specific)
hsa-miR-362-5p	1	0	1	1	1	1	WDR7	WD repeat domain 7
hsa-miR-362-5p	1	0	1	1	1	1	PHF15	PHD finger protein 15
hsa-miR-362-5p	1	0	1	0	1	1	ARHGEF12	Rho guanine nucleotide exchange factor (GEF) 12
hsa-miR-362-5p	1	0	1	1	0	0	SMG5	smg-5 homolog, nonsense mediated mRNA decay factor (C. elegans)
hsa-miR-362-5p	1	0	1	1	1	1	MED13L	mediator complex subunit 13-like
hsa-miR-362-5p	1	0	1	1	1	1	ZFYVE26	zinc finger, FYVE domain containing 26
hsa-miR-362-5p	1	0	1	1	1	1	MORC3	MORC family CW-type zinc finger 3
hsa-miR-362-5p	1	0	1	1	1	1	DSTYK	dual serine/threonine and tyrosine protein kinase
hsa-miR-362-5p	1	0	1	1	1	1	MOB4	MOB family member 4, phocein
hsa-miR-362-5p	1	0	1	1	1	1	PARM1	prostate androgen-regulated mucin-like protein 1
hsa-miR-362-5p	1	0	1	1	1	1	SETBP1	SET binding protein 1
hsa-miR-362-5p	0	0	1	1	1	1	CCDC69	coiled-coil domain containing 69
hsa-miR-362-5p	1	0	1	1	1	1	AZIN1	antizyme inhibitor 1
hsa-miR-362-5p	1	0	1	1	1	1	TXNDC12	thioredoxin domain containing 12 (endoplasmic reticulum)
hsa-miR-362-5p	0	0	1	1	1	1	MRPS16	mitochondrial ribosomal protein S16
hsa-miR-362-5p	0	0	1	1	1	1	HDGFRP3	hepatoma-derived growth factor, related protein 3
hsa-miR-362-5p	1	0	1	0	1	1	HPCAL4	hippocalcin like 4
hsa-miR-362-5p	0	0	1	1	1	1	DNAJB11	DnaJ (Hsp40) homolog, subfamily B, member 11
hsa-miR-362-5p	1	0	1	1	1	1	CMPK1	cytidine monophosphate (UMP-CMP) kinase 1, cytosolic
hsa-miR-362-5p	1	0	1	1	1	1	RAPGEFL1	Rap guanine nucleotide exchange factor (GEF)-like 1
hsa-miR-362-5p	0	0	1	1	1	1	ADAM22	ADAM metallopeptidase domain 22
hsa-miR-362-5p	1	0	1	0	1	1	RNF141	ring finger protein 141
hsa-miR-362-5p	1	0	1	1	1	1	PHF20	PHD finger protein 20
hsa-miR-362-5p	1	0	1	1	1	1	VTA1	Vps20-associated 1 homolog (S. cerevisiae)
hsa-miR-362-5p	0	0	1	1	1	1	MRPL27	mitochondrial ribosomal protein L27
hsa-miR-362-5p	0	0	1	1	1	1	AMBN	ameloblastin (enamel matrix protein)
hsa-miR-362-5p	1	0	1	1	1	1	RAB6B	RAB6B, member RAS oncogene family
hsa-miR-362-5p	0	0	1	1	0	0	IL23A	interleukin 23, alpha subunit p19
hsa-miR-362-5p	1	0	1	1	1	1	ZNF644	zinc finger protein 644
hsa-miR-362-5p	1	0	1	1	1	1	WAC	WW domain containing adaptor with coiled-coil
hsa-miR-362-5p	0	0	1	1	1	1	HYDIN	HYDIN, axonemal central pair apparatus protein
hsa-miR-362-5p	0	0	1	1	1	1	SMG6	smg-6 homolog, nonsense mediated mRNA decay factor (C. elegans)
hsa-miR-362-5p	0	0	1	1	1	1	CHRNA9	cholinergic receptor, nicotinic, alpha 9 (neuronal)
hsa-miR-362-5p	1	0	1	1	1	1	DNAJB12	DnaJ (Hsp40) homolog, subfamily B, member 12
hsa-miR-362-5p	1	0	1	1	1	1	GDAP2	ganglioside induced differentiation associated protein 2
hsa-miR-362-5p	0	0	1	0	1	1	THUMPD1	THUMP domain containing 1
hsa-miR-362-5p	1	0	1	1	1	1	TBC1D8B	TBC1 domain family, member 8B (with GRAM domain)
hsa-miR-362-5p	1	0	1	0	1	1	CMTM6	CKLF-like MARVEL transmembrane domain containing 6
hsa-miR-362-5p	1	0	1	1	1	1	SLC48A1	solute carrier family 48 (heme transporter), member 1
hsa-miR-362-5p	1	0	1	1	1	1	C9orf40	chromosome 9 open reading frame 40
hsa-miR-362-5p	1	0	1	1	1	1	ARGLU1	arginine and glutamate rich 1
hsa-miR-362-5p	1	0	1	1	1	1	SOBP	sine oculis binding protein homolog (Drosophila)
hsa-miR-362-5p	1	0	1	0	1	1	ARMC1	armadillo repeat containing 1
hsa-miR-362-5p	1	0	1	1	1	1	FAM178A	family with sequence similarity 178, member A
hsa-miR-362-5p	0	0	1	1	0	0	CEP55	centrosomal protein 55kDa
hsa-miR-362-5p	0	0	1	1	1	1	TRIM62	tripartite motif containing 62
hsa-miR-362-5p	1	0	1	0	1	1	SEPT11	septin 11
hsa-miR-362-5p	1	0	1	1	1	1	SPTLC3	serine palmitoyltransferase, long chain base subunit 3
hsa-miR-362-5p	1	0	1	0	1	1	LIN7C	lin-7 homolog C (C. elegans)
hsa-miR-362-5p	1	0	1	1	1	1	RSBN1	round spermatid basic protein 1
hsa-miR-362-5p	1	0	1	0	1	1	FOXJ2	forkhead box J2
hsa-miR-362-5p	1	0	1	1	1	1	EPB41L4B	erythrocyte membrane protein band 4.1 like 4B
hsa-miR-362-5p	0	0	1	1	1	1	ALG13	asparagine-linked glycosylation 13 homolog (S. cerevisiae)
hsa-miR-362-5p	0	0	1	1	1	1	LENEP	lens epithelial protein
hsa-miR-362-5p	1	0	1	1	1	1	KIAA1199	KIAA1199
hsa-miR-362-5p	1	0	1	0	1	1	PCDHAC1	protocadherin alpha subfamily C, 1
hsa-miR-362-5p	1	0	1	0	1	1	PCDHAC2	protocadherin alpha subfamily C, 2
hsa-miR-362-5p	1	0	1	1	1	1	PCDHA1	protocadherin alpha 1
hsa-miR-362-5p	1	0	1	0	1	1	PCDHA10	protocadherin alpha 10
hsa-miR-362-5p	1	0	1	0	1	1	PCDHA11	protocadherin alpha 11
hsa-miR-362-5p	1	0	1	0	1	1	PCDHA12	protocadherin alpha 12
hsa-miR-362-5p	1	0	1	1	1	1	PCDHA2	protocadherin alpha 2
hsa-miR-362-5p	1	0	1	1	1	1	PCDHA3	protocadherin alpha 3
hsa-miR-362-5p	1	0	1	1	1	1	PCDHA6	protocadherin alpha 6
hsa-miR-362-5p	1	0	1	0	1	1	PCDHA7	protocadherin alpha 7
hsa-miR-362-5p	1	0	1	1	1	1	PCDHA8	protocadherin alpha 8
hsa-miR-362-5p	1	0	1	1	0	0	GPR173	G protein-coupled receptor 173
hsa-miR-362-5p	1	0	1	1	1	1	SASH3	SAM and SH3 domain containing 3
hsa-miR-362-5p	1	0	1	1	1	1	DENND1B	DENN/MADD domain containing 1B
hsa-miR-362-5p	1	0	1	1	1	1	DDIT4	DNA-damage-inducible transcript 4
hsa-miR-362-5p	0	0	1	1	1	1	HES2	hairy and enhancer of split 2 (Drosophila)
hsa-miR-362-5p	1	0	1	0	1	1	UBFD1	ubiquitin family domain containing 1
hsa-miR-362-5p	1	0	1	1	1	1	CCBL2	cysteine conjugate-beta lyase 2
hsa-miR-362-5p	0	0	1	0	1	1	ZC3HAV1	zinc finger CCCH-type, antiviral 1
hsa-miR-362-5p	1	0	1	1	1	1	C8orf4	chromosome 8 open reading frame 4
hsa-miR-362-5p	0	0	1	1	0	0	NDUFA4L2	NADH dehydrogenase (ubiquinone) 1 alpha subcomplex, 4-like 2
hsa-miR-362-5p	1	0	1	1	1	1	FEM1C	fem-1 homolog c (C. elegans)
hsa-miR-362-5p	1	0	1	1	1	1	C5orf15	chromosome 5 open reading frame 15
hsa-miR-362-5p	1	0	1	1	0	0	SLC17A7	solute carrier family 17 (sodium-dependent inorganic phosphate cotransporter), member 7
hsa-miR-362-5p	1	0	1	1	1	1	KIAA1244	KIAA1244
hsa-miR-362-5p	0	0	1	1	1	1	CYSLTR2	cysteinyl leukotriene receptor 2
hsa-miR-362-5p	0	0	1	1	0	0	CHRNA10	cholinergic receptor, nicotinic, alpha 10 (neuronal)
hsa-miR-362-5p	1	0	1	0	1	1	KCNS2	potassium voltage-gated channel, delayed-rectifier, subfamily S, member 2
hsa-miR-362-5p	1	0	1	0	1	1	FAM40B	family with sequence similarity 40, member B
hsa-miR-362-5p	0	0	1	1	1	1	SHROOM4	shroom family member 4
hsa-miR-362-5p	1	0	1	1	1	1	USP31	ubiquitin specific peptidase 31
hsa-miR-362-5p	1	0	1	1	1	1	MIB1	mindbomb E3 ubiquitin protein ligase 1
hsa-miR-362-5p	1	0	1	0	1	1	ALPK3	alpha-kinase 3
hsa-miR-362-5p	1	0	1	1	1	1	HOMEZ	homeobox and leucine zipper encoding
hsa-miR-362-5p	0	0	1	1	1	1	KLHL1	kelch-like 1 (Drosophila)
hsa-miR-362-5p	1	0	1	0	1	1	SH3RF1	SH3 domain containing ring finger 1
hsa-miR-362-5p	1	0	1	1	1	1	CNTN3	contactin 3 (plasmacytoma associated)
hsa-miR-362-5p	0	0	1	1	1	1	PRX	periaxin
hsa-miR-362-5p	0	0	1	1	1	1	B3GALT1	UDP-Gal:betaGlcNAc beta 1,3-galactosyltransferase, polypeptide 1
hsa-miR-362-5p	1	0	1	1	1	1	NEFH	neurofilament, heavy polypeptide
hsa-miR-362-5p	1	0	1	0	1	1	NMT1	N-myristoyltransferase 1
hsa-miR-362-5p	1	0	1	0	1	1	TP53INP2	tumor protein p53 inducible nuclear protein 2
hsa-miR-362-5p	1	0	1	1	1	1	TMEM35	transmembrane protein 35
hsa-miR-362-5p	1	0	1	1	1	1	CLCN6	chloride channel, voltage-sensitive 6
hsa-miR-362-5p	1	0	1	1	1	1	BACH2	BTB and CNC homology 1, basic leucine zipper transcription factor 2
hsa-miR-362-5p	1	0	1	0	1	1	MCL1	myeloid cell leukemia sequence 1 (BCL2-related)
hsa-miR-362-5p	1	0	1	1	1	1	GPR88	G protein-coupled receptor 88
hsa-miR-362-5p	1	0	1	1	1	1	XYLT1	xylosyltransferase I
hsa-miR-362-5p	1	0	1	1	1	1	ABCG4	ATP-binding cassette, sub-family G (WHITE), member 4
hsa-miR-362-5p	1	0	1	0	1	1	DNMT3A	DNA (cytosine-5-)-methyltransferase 3 alpha
hsa-miR-362-5p	1	0	1	1	1	1	ALDH8A1	aldehyde dehydrogenase 8 family, member A1
hsa-miR-362-5p	0	0	1	0	1	1	EBF2	early B-cell factor 2
hsa-miR-362-5p	1	0	1	0	1	1	ELOVL4	ELOVL fatty acid elongase 4
hsa-miR-362-5p	0	0	1	1	1	1	METTL1	methyltransferase like 1
hsa-miR-362-5p	0	0	1	1	0	0	CUEDC2	CUE domain containing 2
hsa-miR-362-5p	1	0	1	1	1	1	GID4	GID complex subunit 4, VID24 homolog (S. cerevisiae)
hsa-miR-362-5p	0	0	1	1	1	1	CEP70	centrosomal protein 70kDa
hsa-miR-362-5p	0	0	1	1	0	0	EPS8L3	EPS8-like 3
hsa-miR-362-5p	1	0	1	1	1	1	CDC73	cell division cycle 73, Paf1/RNA polymerase II complex component, homolog (S. cerevisiae)
hsa-miR-362-5p	1	0	1	1	1	1	CCNJL	cyclin J-like
hsa-miR-362-5p	0	0	1	1	1	1	LRRK1	leucine-rich repeat kinase 1
hsa-miR-362-5p	0	0	1	1	1	1	GLT25D1	glycosyltransferase 25 domain containing 1
hsa-miR-362-5p	0	0	1	1	1	1	BBS10	Bardet-Biedl syndrome 10
hsa-miR-362-5p	1	0	1	1	1	1	KLHL18	kelch-like 18 (Drosophila)
hsa-miR-362-5p	0	0	1	1	0	0	CTC1	CTS telomere maintenance complex component 1
hsa-miR-362-5p	1	0	1	1	1	1	HKDC1	hexokinase domain containing 1
hsa-miR-362-5p	1	0	1	0	1	1	EDEM3	ER degradation enhancer, mannosidase alpha-like 3
hsa-miR-362-5p	1	0	1	1	1	1	CYB5B	cytochrome b5 type B (outer mitochondrial membrane)
hsa-miR-362-5p	1	0	1	1	1	1	HOXA3	homeobox A3
hsa-miR-362-5p	0	0	1	1	1	1	FCRL2	Fc receptor-like 2
hsa-miR-362-5p	1	0	1	1	1	1	TUBB1	tubulin, beta 1 class VI
hsa-miR-362-5p	1	0	1	1	1	1	SYNC	syncoilin, intermediate filament protein
hsa-miR-362-5p	1	0	1	0	1	1	CSRNP2	cysteine-serine-rich nuclear protein 2
hsa-miR-362-5p	1	0	1	1	1	1	PPP1R14C	protein phosphatase 1, regulatory (inhibitor) subunit 14C
hsa-miR-362-5p	1	0	1	0	1	1	SPRY4	sprouty homolog 4 (Drosophila)
hsa-miR-362-5p	0	0	1	1	1	1	FCRL5	Fc receptor-like 5
hsa-miR-362-5p	1	0	1	0	1	1	TMEM47	transmembrane protein 47
hsa-miR-362-5p	1	0	1	1	1	1	PCDHA9	protocadherin alpha 9
hsa-miR-362-5p	0	0	1	1	0	0	ELMOD3	ELMO/CED-12 domain containing 3
hsa-miR-362-5p	1	0	1	0	1	1	FAR1	fatty acyl CoA reductase 1
hsa-miR-362-5p	1	0	1	1	1	1	SLITRK6	SLIT and NTRK-like family, member 6
hsa-miR-362-5p	1	0	1	1	1	1	ZNRF1	zinc and ring finger 1, E3 ubiquitin protein ligase
hsa-miR-362-5p	1	0	1	1	1	1	POLDIP3	polymerase (DNA-directed), delta interacting protein 3
hsa-miR-362-5p	1	0	1	1	1	1	ING5	inhibitor of growth family, member 5
hsa-miR-362-5p	1	0	1	1	1	1	DNAJC14	DnaJ (Hsp40) homolog, subfamily C, member 14
hsa-miR-362-5p	1	0	1	1	1	1	USP38	ubiquitin specific peptidase 38
hsa-miR-362-5p	1	0	1	1	1	1	HIATL1	hippocampus abundant transcript-like 1
hsa-miR-362-5p	1	0	1	1	1	1	JAM3	junctional adhesion molecule 3
hsa-miR-362-5p	1	0	1	0	1	1	PPP1R15B	protein phosphatase 1, regulatory subunit 15B
hsa-miR-362-5p	1	0	1	1	1	1	PCDH11Y	protocadherin 11 Y-linked
hsa-miR-362-5p	0	0	1	1	0	0	RRP36	ribosomal RNA processing 36 homolog (S. cerevisiae)
hsa-miR-362-5p	1	0	1	0	1	1	SCRT2	scratch homolog 2, zinc finger protein (Drosophila)
hsa-miR-362-5p	0	0	1	1	1	1	KRTAP3-3	keratin associated protein 3-3
hsa-miR-362-5p	1	0	1	0	1	1	PURB	purine-rich element binding protein B
hsa-miR-362-5p	0	0	1	1	1	1	LHX4	LIM homeobox 4
hsa-miR-362-5p	1	0	1	1	1	1	COL4A5	collagen, type IV, alpha 5
hsa-miR-362-5p	0	0	1	1	1	1	CTTNBP2	cortactin binding protein 2
hsa-miR-362-5p	1	0	1	1	0	0	FCHSD1	FCH and double SH3 domains 1
hsa-miR-362-5p	1	0	1	1	1	1	SYS1	SYS1 Golgi-localized integral membrane protein homolog (S. cerevisiae)
hsa-miR-362-5p	1	0	1	0	0	0	ANKRD40	ankyrin repeat domain 40
hsa-miR-362-5p	0	0	1	1	1	1	NALCN	sodium leak channel, non-selective
hsa-miR-362-5p	0	0	1	1	1	1	PLEKHG4B	pleckstrin homology domain containing, family G (with RhoGef domain) member 4B
hsa-miR-362-5p	1	0	1	0	1	1	TMEM123	transmembrane protein 123
hsa-miR-362-5p	0	0	1	1	0	0	FAM46B	family with sequence similarity 46, member B
hsa-miR-362-5p	1	0	1	1	1	1	TRIM9	tripartite motif containing 9
hsa-miR-362-5p	0	0	1	1	1	1	CBLN4	cerebellin 4 precursor
hsa-miR-362-5p	1	0	1	1	0	0	ADAMTS14	ADAM metallopeptidase with thrombospondin type 1 motif, 14
hsa-miR-362-5p	1	0	1	0	1	1	STK35	serine/threonine kinase 35
hsa-miR-362-5p	1	0	1	1	1	1	DYRK1A	dual-specificity tyrosine-(Y)-phosphorylation regulated kinase 1A
hsa-miR-362-5p	1	0	1	1	1	1	KLHL6	kelch-like 6 (Drosophila)
hsa-miR-362-5p	0	0	1	1	1	1	CHST14	carbohydrate (N-acetylgalactosamine 4-0) sulfotransferase 14
hsa-miR-362-5p	0	0	1	0	1	1	PAQR8	progestin and adipoQ receptor family member VIII
hsa-miR-362-5p	1	0	1	1	1	1	SPTSSA	serine palmitoyltransferase, small subunit A
hsa-miR-362-5p	1	0	1	1	1	1	GLCCI1	glucocorticoid induced transcript 1
hsa-miR-362-5p	1	0	1	0	1	1	SP1	Sp1 transcription factor
hsa-miR-362-5p	0	0	1	0	1	1	PRELID2	PRELI domain containing 2
hsa-miR-362-5p	0	0	1	1	1	1	TAF8	TAF8 RNA polymerase II, TATA box binding protein (TBP)-associated factor, 43kDa
hsa-miR-362-5p	0	0	1	1	1	1	KLF14	Kruppel-like factor 14
hsa-miR-362-5p	0	0	1	1	1	1	MTFMT	mitochondrial methionyl-tRNA formyltransferase
hsa-miR-362-5p	1	0	1	1	1	1	ATRN	attractin
hsa-miR-362-5p	1	0	1	1	1	1	TEX261	testis expressed 261
hsa-miR-362-5p	1	0	1	1	1	1	TMEM182	transmembrane protein 182
hsa-miR-362-5p	0	0	1	1	1	1	PXDNL	peroxidasin homolog (Drosophila)-like
hsa-miR-362-5p	1	0	1	1	1	1	SAMD8	sterile alpha motif domain containing 8
hsa-miR-362-5p	0	0	1	1	1	1	PUS10	pseudouridylate synthase 10
hsa-miR-362-5p	1	0	1	1	1	1	FAM91A1	family with sequence similarity 91, member A1
hsa-miR-362-5p	1	0	1	1	1	1	CADM4	cell adhesion molecule 4
hsa-miR-362-5p	0	0	1	1	1	1	APOBEC3F	apolipoprotein B mRNA editing enzyme, catalytic polypeptide-like 3F
hsa-miR-362-5p	0	0	1	1	0	0	TCEB3C	transcription elongation factor B polypeptide 3C (elongin A3)
hsa-miR-362-5p	0	0	1	1	1	1	TIGD2	tigger transposable element derived 2
hsa-miR-362-5p	0	0	1	1	0	0	KLK12	kallikrein-related peptidase 12
hsa-miR-362-5p	0	0	1	1	0	0	RPUSD2	RNA pseudouridylate synthase domain containing 2
hsa-miR-362-5p	0	0	1	1	1	1	ZNF561	zinc finger protein 561
hsa-miR-362-5p	0	0	1	1	1	1	ERP27	endoplasmic reticulum protein 27
hsa-miR-362-5p	1	0	1	1	1	1	MUM1L1	melanoma associated antigen (mutated) 1-like 1
hsa-miR-362-5p	1	0	1	1	1	1	ZSCAN29	zinc finger and SCAN domain containing 29
hsa-miR-362-5p	0	0	1	1	1	1	SLC35G3	solute carrier family 35, member G3
hsa-miR-362-5p	1	0	1	0	1	1	FAM116A	family with sequence similarity 116, member A
hsa-miR-362-5p	0	0	1	1	0	0	AKNAD1	AKNA domain containing 1
hsa-miR-362-5p	1	0	1	0	1	1	TMEM196	transmembrane protein 196
hsa-miR-362-5p	1	0	1	1	1	1	PDIK1L	PDLIM1 interacting kinase 1 like
hsa-miR-362-5p	1	0	1	1	1	1	WTAP	Wilms tumor 1 associated protein
hsa-miR-362-5p	1	0	1	1	1	1	EED	embryonic ectoderm development
hsa-miR-362-5p	1	0	1	0	1	1	ST6GALNAC3	ST6 (alpha-N-acetyl-neuraminyl-2,3-beta-galactosyl-1,3)-N-acetylgalactosaminide alpha-2,6-sialyltransferase 3
hsa-miR-362-5p	0	0	1	0	1	1	LIX1	Lix1 homolog (chicken)
hsa-miR-362-5p	0	0	1	1	1	1	DEFB125	defensin, beta 125
hsa-miR-362-5p	1	0	1	1	0	0	TMEM86A	transmembrane protein 86A
hsa-miR-362-5p	1	0	1	0	1	1	MDGA1	MAM domain containing glycosylphosphatidylinositol anchor 1
hsa-miR-362-5p	1	0	1	1	1	1	FNDC5	fibronectin type III domain containing 5
hsa-miR-362-5p	1	0	1	1	1	1	CACUL1	CDK2-associated, cullin domain 1
hsa-miR-362-5p	0	0	1	1	1	1	SIAE	sialic acid acetylesterase
hsa-miR-362-5p	0	0	1	1	1	1	CDY1	chromodomain protein, Y-linked, 1
hsa-miR-362-5p	0	0	1	1	1	1	PSMD10	proteasome (prosome, macropain) 26S subunit, non-ATPase, 10
hsa-miR-362-5p	0	0	1	1	1	1	ZFP91-CNTF	ZFP91-CNTF readthrough (non-protein coding)
hsa-miR-362-5p	1	0	1	1	1	1	RC3H1	ring finger and CCCH-type domains 1
hsa-miR-362-5p	1	0	1	1	1	1	IL28RA	interleukin 28 receptor, alpha (interferon, lambda receptor)
hsa-miR-362-5p	0	0	1	1	0	0	SLITRK4	SLIT and NTRK-like family, member 4
hsa-miR-362-5p	1	0	1	1	1	1	DCUN1D3	DCN1, defective in cullin neddylation 1, domain containing 3 (S. cerevisiae)
hsa-miR-362-5p	1	0	1	1	1	1	CCDC117	coiled-coil domain containing 117
hsa-miR-362-5p	1	0	1	1	1	1	FAM117B	family with sequence similarity 117, member B
hsa-miR-362-5p	0	0	1	1	0	0	CT47A11	cancer/testis antigen family 47, member A11
hsa-miR-362-5p	1	0	1	1	1	1	SLC9A9	solute carrier family 9, subfamily A (NHE9, cation proton antiporter 9), member 9
hsa-miR-362-5p	0	0	1	0	1	1	C5orf64	chromosome 5 open reading frame 64
hsa-miR-362-5p	1	0	1	0	1	1	TMEM167A	transmembrane protein 167A
hsa-miR-362-5p	0	0	1	1	0	0	TCTE3	t-complex-associated-testis-expressed 3
hsa-miR-362-5p	1	0	1	1	1	1	OLIG3	oligodendrocyte transcription factor 3
hsa-miR-362-5p	1	0	1	0	1	1	CCDC71L	coiled-coil domain containing 71-like
hsa-miR-362-5p	0	0	1	1	1	1	MRPL43	mitochondrial ribosomal protein L43
hsa-miR-362-5p	1	0	1	1	1	1	PKHD1L1	polycystic kidney and hepatic disease 1 (autosomal recessive)-like 1
hsa-miR-362-5p	0	0	1	1	0	0	CCDC36	coiled-coil domain containing 36
hsa-miR-362-5p	0	0	1	1	1	1	ZNF831	zinc finger protein 831
hsa-miR-362-5p	1	0	1	1	1	1	TMEM26	transmembrane protein 26
hsa-miR-362-5p	0	0	1	0	0	0	MRPL21	mitochondrial ribosomal protein L21
hsa-miR-362-5p	0	0	1	1	1	1	CCDC67	coiled-coil domain containing 67
hsa-miR-362-5p	1	0	1	1	1	1	QSOX2	quiescin Q6 sulfhydryl oxidase 2
hsa-miR-362-5p	1	0	1	0	1	1	EFHA2	EF-hand domain family, member A2
hsa-miR-362-5p	0	0	1	1	1	1	ZSWIM2	zinc finger, SWIM-type containing 2
hsa-miR-362-5p	1	0	1	1	1	1	TMEM229B	transmembrane protein 229B
hsa-miR-362-5p	0	0	1	0	0	0	C1orf126	chromosome 1 open reading frame 126
hsa-miR-362-5p	0	0	1	0	1	1	VSTM2A	V-set and transmembrane domain containing 2A
hsa-miR-362-5p	1	0	1	0	1	1	C12orf36	chromosome 12 open reading frame 36
hsa-miR-362-5p	1	0	1	1	1	1	SUMF1	sulfatase modifying factor 1
hsa-miR-362-5p	1	0	1	0	1	1	RIMS4	regulating synaptic membrane exocytosis 4
hsa-miR-362-5p	0	0	1	1	1	1	ZNF326	zinc finger protein 326
hsa-miR-362-5p	1	0	1	1	1	1	ARRDC4	arrestin domain containing 4
hsa-miR-362-5p	1	0	1	1	1	1	KIF1B	kinesin family member 1B
hsa-miR-362-5p	1	0	1	1	1	1	RALGAPA1	Ral GTPase activating protein, alpha subunit 1 (catalytic)
hsa-miR-362-5p	1	0	1	0	1	1	LYSMD3	LysM, putative peptidoglycan-binding, domain containing 3
hsa-miR-362-5p	1	0	1	0	1	1	NRK	Nik related kinase
hsa-miR-362-5p	1	0	1	1	1	1	RAB43	RAB43, member RAS oncogene family
hsa-miR-362-5p	1	0	1	1	0	0	ENHO	energy homeostasis associated
hsa-miR-362-5p	1	0	1	0	1	1	ZC3H6	zinc finger CCCH-type containing 6
hsa-miR-362-5p	1	0	1	0	1	1	PRICKLE2	prickle homolog 2 (Drosophila)
hsa-miR-362-5p	0	0	1	1	1	1	PTHLH	parathyroid hormone-like hormone
hsa-miR-362-5p	0	0	1	1	0	0	LENG9	leukocyte receptor cluster (LRC) member 9
hsa-miR-362-5p	1	0	1	1	1	1	NSUN4	NOP2/Sun domain family, member 4
hsa-miR-362-5p	1	0	1	1	1	1	TMEM189-UBE2V1	TMEM189-UBE2V1 readthrough
hsa-miR-362-5p	1	0	1	1	1	1	GLYAT	glycine-N-acyltransferase
hsa-miR-362-5p	1	0	1	0	1	1	LURAP1L	leucine rich adaptor protein 1-like
hsa-miR-362-5p	0	0	1	1	1	1	APOBEC4	apolipoprotein B mRNA editing enzyme, catalytic polypeptide-like 4 (putative)
hsa-miR-362-5p	0	0	1	0	1	1	NPSR1-AS1	NPSR1 antisense RNA 1
hsa-miR-362-5p	1	0	1	1	1	1	ATRNL1	attractin-like 1
hsa-miR-362-5p	1	0	1	1	1	1	TMEM132E	transmembrane protein 132E
hsa-miR-362-5p	0	0	1	0	0	0	C16orf47	chromosome 16 open reading frame 47
hsa-miR-362-5p	0	0	1	1	1	1	DFFA	DNA fragmentation factor, 45kDa, alpha polypeptide
hsa-miR-362-5p	0	0	1	1	0	0	C2orf27B	chromosome 2 open reading frame 27B
hsa-miR-362-5p	0	0	1	0	0	0	SNORD107	small nucleolar RNA, C/D box 107
hsa-miR-362-5p	0	0	1	1	0	0	SNRPN	small nuclear ribonucleoprotein polypeptide N
hsa-miR-362-5p	0	0	1	0	0	0	TTTY1	testis-specific transcript, Y-linked 1 (non-protein coding)
hsa-miR-362-5p	0	0	1	0	0	0	TTTY22	testis-specific transcript, Y-linked 22 (non-protein coding)
hsa-miR-362-5p	0	0	1	0	0	0	TTTY15	testis-specific transcript, Y-linked 15 (non-protein coding)
hsa-miR-362-5p	0	0	1	0	0	0	TTTY12	testis-specific transcript, Y-linked 12 (non-protein coding)
hsa-miR-362-5p	0	0	1	0	0	0	TPI1P2	triosephosphate isomerase 1 pseudogene 2
hsa-miR-362-5p	0	0	1	0	0	0	NXF4	nuclear RNA export factor 4 pseudogene
hsa-miR-362-5p	0	0	1	0	0	0	SNORA33	small nucleolar RNA, H/ACA box 33
hsa-miR-362-5p	0	0	1	0	0	0	SNORD96A	small nucleolar RNA, C/D box 96A
hsa-miR-362-5p	0	0	1	0	0	0	TDGF1P3	teratocarcinoma-derived growth factor 1 pseudogene 3
hsa-miR-362-5p	0	0	1	0	0	0	TOP1P1	topoisomerase (DNA) I pseudogene 1
hsa-miR-362-5p	0	0	1	0	0	0	GABPAP	GA binding protein transcription factor, alpha subunit pseudogene
hsa-miR-362-5p	0	0	1	0	0	0	HNRNPA3P1	heterogeneous nuclear ribonucleoprotein A3 pseudogene 1
hsa-miR-362-5p	0	0	1	0	0	0	AKIRIN2-AS1	AKIRIN2 antisense RNA 1
hsa-miR-362-5p	0	0	1	0	0	0	AOC4	amine oxidase, copper containing 3 (vascular adhesion protein 1) pseudogene
hsa-miR-362-5p	0	0	1	0	0	0	TRIM78P	tripartite motif containing 78, pseudogene
hsa-miR-362-5p	0	0	1	0	0	0	RPL29P2	ribosomal protein L29 pseudogene 2
hsa-miR-362-5p	0	0	1	0	0	0	NUDT9P1	nudix (nucleoside diphosphate linked moiety X)-type motif 9 pseudogene 1
hsa-miR-362-5p	0	0	1	0	0	0	RNASEH2CP1	ribonuclease H2, subunit C pseudogene 1
hsa-miR-362-5p	0	0	1	0	0	0	SIGLEC16	sialic acid binding Ig-like lectin 16 (gene/pseudogene)
hsa-miR-362-5p	0	0	1	0	0	0	HAS2-AS1	HAS2 antisense RNA 1
hsa-miR-362-5p	0	0	1	0	0	0	TUBA4B	tubulin, alpha 4b (pseudogene)
hsa-miR-362-5p	0	0	1	0	0	0	PYY2	peptide YY, 2 (pseudogene)
hsa-miR-362-5p	0	0	1	0	0	0	SNORD93	small nucleolar RNA, C/D box 93
hsa-miR-362-5p	0	0	1	0	0	0	NBR2	neighbor of BRCA1 gene 2 (non-protein coding)
hsa-miR-362-5p	0	0	1	0	0	0	LOC284441	actin-related protein 2 pseudogene
hsa-miR-362-5p	0	0	1	0	0	0	HSP90B3P	heat shock protein 90kDa beta (Grp94), member 3, pseudogene
hsa-miR-362-5p	0	0	1	0	0	0	HSP90AB2P	heat shock protein 90kDa alpha (cytosolic), class B member 2, pseudogene
hsa-miR-362-5p	0	0	1	0	0	0	GBP1P1	guanylate binding protein 1, interferon-inducible pseudogene 1
hsa-miR-362-5p	0	0	1	0	0	0	SNORD114-4	small nucleolar RNA, C/D box 114-4
hsa-miR-362-5p	0	0	1	0	0	0	GMCL1P1	germ cell-less, spermatogenesis associated 1 pseudogene 1
hsa-miR-362-5p	0	0	1	0	0	0	SNORD116-28	small nucleolar RNA, C/D box 116-28
hsa-miR-362-5p	0	0	1	1	0	0	TCP10	t-complex 10 homolog (mouse)
hsa-miR-362-5p	1	0	1	1	1	1	MYB	v-myb myeloblastosis viral oncogene homolog (avian)
hsa-miR-362-5p	0	0	1	1	0	0	MUC1	mucin 1, cell surface associated
hsa-miR-362-5p	1	0	1	1	1	1	IGF1	insulin-like growth factor 1 (somatomedin C)
hsa-miR-362-5p	0	0	1	1	0	0	USH1C	Usher syndrome 1C (autosomal recessive, severe)
hsa-miR-362-5p	0	0	0	1	0	0	KRT33A	keratin 33A
hsa-miR-362-5p	0	0	1	1	1	1	GRIPAP1	GRIP1 associated protein 1
hsa-miR-362-5p	1	0	1	1	1	1	CAMKK1	calcium/calmodulin-dependent protein kinase kinase 1, alpha
hsa-miR-362-5p	0	0	0	1	0	0	TMEM161A	transmembrane protein 161A
hsa-miR-362-5p	0	0	0	1	1	1	RDH8	retinol dehydrogenase 8 (all-trans)
hsa-miR-362-5p	0	0	0	1	0	0	DRD4	dopamine receptor D4
hsa-miR-362-5p	0	0	0	1	0	0	TSPAN32	tetraspanin 32
hsa-miR-362-5p	0	0	1	1	1	1	HEATR6	HEAT repeat containing 6
hsa-miR-362-5p	0	0	1	1	0	0	ACTR6	ARP6 actin-related protein 6 homolog (yeast)
hsa-miR-362-5p	0	0	0	1	0	0	IGSF9	immunoglobulin superfamily, member 9
hsa-miR-362-5p	0	0	0	1	0	0	MRPL28	mitochondrial ribosomal protein L28
hsa-miR-362-5p	1	0	1	1	1	1	C20orf112	chromosome 20 open reading frame 112
hsa-miR-362-5p	0	0	0	1	0	0	GMIP	GEM interacting protein
hsa-miR-362-5p	0	0	1	1	1	1	APOH	apolipoprotein H (beta-2-glycoprotein I)
hsa-miR-362-5p	0	0	1	1	0	0	UPK3A	uroplakin 3A
hsa-miR-362-5p	0	0	0	1	0	0	BDKRB1	bradykinin receptor B1
hsa-miR-362-5p	0	0	1	1	1	1	ZFP64	zinc finger protein 64 homolog (mouse)
hsa-miR-362-5p	0	0	1	1	0	0	MYBL2	v-myb myeloblastosis viral oncogene homolog (avian)-like 2
hsa-miR-362-5p	0	0	0	1	0	0	CTSZ	cathepsin Z
hsa-miR-362-5p	1	0	1	1	1	1	POLR2C	polymerase (RNA) II (DNA directed) polypeptide C, 33kDa
hsa-miR-362-5p	0	0	0	1	0	0	TGM5	transglutaminase 5
hsa-miR-362-5p	1	0	1	1	1	1	BRF2	BRF2, subunit of RNA polymerase III transcription initiation factor, BRF1-like
hsa-miR-362-5p	0	0	0	1	0	0	EXOSC5	exosome component 5
hsa-miR-362-5p	0	0	0	1	0	0	PAF1	Paf1, RNA polymerase II associated factor, homolog (S. cerevisiae)
hsa-miR-362-5p	1	0	1	1	1	1	SNRNP70	small nuclear ribonucleoprotein 70kDa (U1)
hsa-miR-362-5p	0	0	0	1	0	0	RSPH6A	radial spoke head 6 homolog A (Chlamydomonas)
hsa-miR-362-5p	0	0	0	1	0	0	C19orf53	chromosome 19 open reading frame 53
hsa-miR-362-5p	1	0	1	1	0	0	CNTD2	cyclin N-terminal domain containing 2
hsa-miR-362-5p	0	0	1	1	0	0	HAS1	hyaluronan synthase 1
hsa-miR-362-5p	0	0	0	1	0	0	EPOR	erythropoietin receptor
hsa-miR-362-5p	1	0	1	1	1	1	MLL4	myeloid/lymphoid or mixed-lineage leukemia 4
hsa-miR-362-5p	0	0	0	1	0	0	FKBP8	FK506 binding protein 8, 38kDa
hsa-miR-362-5p	0	0	1	1	1	1	NPVF	neuropeptide VF precursor
hsa-miR-362-5p	0	0	1	1	1	1	HOXA2	homeobox A2
hsa-miR-362-5p	0	0	0	1	0	0	EVX1	even-skipped homeobox 1
hsa-miR-362-5p	0	0	0	1	0	0	CYP3A5	cytochrome P450, family 3, subfamily A, polypeptide 5
hsa-miR-362-5p	0	0	1	1	0	0	URGCP	upregulator of cell proliferation
hsa-miR-362-5p	0	0	0	1	0	0	ZNF688	zinc finger protein 688
hsa-miR-362-5p	0	0	0	1	1	1	ZNF785	zinc finger protein 785
hsa-miR-362-5p	0	0	1	1	1	1	TAX1BP3	Tax1 (human T-cell leukemia virus type I) binding protein 3
hsa-miR-362-5p	0	0	1	1	0	0	KRT37	keratin 37
hsa-miR-362-5p	0	0	1	1	1	1	CCL13	chemokine (C-C motif) ligand 13
hsa-miR-362-5p	0	0	1	1	1	1	LAP3	leucine aminopeptidase 3
hsa-miR-362-5p	0	0	0	1	1	1	CD82	CD82 molecule
hsa-miR-362-5p	0	0	1	1	1	1	PUS3	pseudouridylate synthase 3
hsa-miR-362-5p	0	0	1	1	1	1	BIRC2	baculoviral IAP repeat containing 2
hsa-miR-362-5p	0	0	1	1	0	0	GLI1	GLI family zinc finger 1
hsa-miR-362-5p	0	0	0	1	1	1	CDCA3	cell division cycle associated 3
hsa-miR-362-5p	0	0	0	1	0	0	GATC	glutamyl-tRNA(Gln) amidotransferase, subunit C homolog (bacterial)
hsa-miR-362-5p	0	0	1	1	1	1	C6orf118	chromosome 6 open reading frame 118
hsa-miR-362-5p	0	0	1	1	1	1	AGXT2	alanine--glyoxylate aminotransferase 2
hsa-miR-362-5p	0	0	0	1	0	0	ACY1	aminoacylase 1
hsa-miR-362-5p	0	0	1	1	1	1	PRKAG3	protein kinase, AMP-activated, gamma 3 non-catalytic subunit
hsa-miR-362-5p	0	0	1	1	0	0	MASP2	mannan-binding lectin serine peptidase 2
hsa-miR-362-5p	0	0	0	1	0	0	OSCP1	organic solute carrier partner 1
hsa-miR-362-5p	0	0	0	1	0	0	ATIC	5-aminoimidazole-4-carboxamide ribonucleotide formyltransferase/IMP cyclohydrolase
hsa-miR-362-5p	0	0	1	1	0	0	PDZD7	PDZ domain containing 7
hsa-miR-362-5p	0	0	0	1	1	1	TTLL2	tubulin tyrosine ligase-like family, member 2
hsa-miR-362-5p	0	0	0	1	1	1	ZNF415	zinc finger protein 415
hsa-miR-362-5p	0	0	0	1	0	0	ARHGAP40	Rho GTPase activating protein 40
hsa-miR-362-5p	0	0	1	1	1	1	ATP5S	ATP synthase, H+ transporting, mitochondrial Fo complex, subunit s (factor B)
hsa-miR-362-5p	0	0	1	1	1	1	MRPS7	mitochondrial ribosomal protein S7
hsa-miR-362-5p	1	0	0	1	1	1	CLPP	ClpP caseinolytic peptidase, ATP-dependent, proteolytic subunit homolog (E. coli)
hsa-miR-362-5p	0	0	1	1	1	1	NDUFB2	NADH dehydrogenase (ubiquinone) 1 beta subcomplex, 2, 8kDa
hsa-miR-362-5p	0	0	0	1	0	0	GALR3	galanin receptor 3
hsa-miR-362-5p	0	0	0	1	0	0	DNAJC2	DnaJ (Hsp40) homolog, subfamily C, member 2
hsa-miR-362-5p	1	0	1	1	1	1	IVD	isovaleryl-CoA dehydrogenase
hsa-miR-362-5p	0	0	0	1	0	0	CMA1	chymase 1, mast cell
hsa-miR-362-5p	0	0	1	1	0	0	NEDD8	neural precursor cell expressed, developmentally down-regulated 8
hsa-miR-362-5p	0	0	1	1	0	0	NXPE1	neurexophilin and PC-esterase domain family, member 1
hsa-miR-362-5p	0	0	1	1	1	1	DEFB118	defensin, beta 118
hsa-miR-362-5p	0	0	0	1	0	0	FBXW9	F-box and WD repeat domain containing 9
hsa-miR-362-5p	0	0	0	1	0	0	GUCY2D	guanylate cyclase 2D, membrane (retina-specific)
hsa-miR-362-5p	0	0	1	1	0	0	BRD8	bromodomain containing 8
hsa-miR-362-5p	0	0	1	1	0	0	NXT1	NTF2-like export factor 1
hsa-miR-362-5p	0	0	1	1	1	1	CHI3L1	chitinase 3-like 1 (cartilage glycoprotein-39)
hsa-miR-362-5p	0	0	1	1	1	1	ADAM20	ADAM metallopeptidase domain 20
hsa-miR-362-5p	0	0	1	1	0	0	MTNR1B	melatonin receptor 1B
hsa-miR-362-5p	0	0	0	1	0	0	RNFT2	ring finger protein, transmembrane 2
hsa-miR-362-5p	0	0	0	1	1	1	KRT82	keratin 82
hsa-miR-362-5p	0	0	1	1	1	1	KCNMB4	potassium large conductance calcium-activated channel, subfamily M, beta member 4
hsa-miR-362-5p	0	0	0	1	0	0	FBXL8	F-box and leucine-rich repeat protein 8
hsa-miR-362-5p	1	0	0	1	1	1	TGFBRAP1	transforming growth factor, beta receptor associated protein 1
hsa-miR-362-5p	0	0	0	1	0	0	HTR3B	5-hydroxytryptamine (serotonin) receptor 3B, ionotropic
hsa-miR-362-5p	0	0	1	1	1	1	MMP7	matrix metallopeptidase 7 (matrilysin, uterine)
hsa-miR-362-5p	1	0	1	1	0	0	CGREF1	cell growth regulator with EF-hand domain 1
hsa-miR-362-5p	0	0	0	1	1	1	ABCG5	ATP-binding cassette, sub-family G (WHITE), member 5
hsa-miR-362-5p	0	0	1	1	0	0	PPWD1	peptidylprolyl isomerase domain and WD repeat containing 1
hsa-miR-362-5p	0	0	0	1	1	1	C4orf27	chromosome 4 open reading frame 27
hsa-miR-362-5p	0	0	1	1	0	0	ESRRB	estrogen-related receptor beta
hsa-miR-362-5p	1	0	1	1	1	1	HERC2	HECT and RLD domain containing E3 ubiquitin protein ligase 2
hsa-miR-362-5p	0	0	1	1	1	1	BFAR	bifunctional apoptosis regulator
hsa-miR-362-5p	0	0	1	1	1	1	ANKHD1	ankyrin repeat and KH domain containing 1
hsa-miR-362-5p	0	0	1	1	1	1	PRPF40B	PRP40 pre-mRNA processing factor 40 homolog B (S. cerevisiae)
hsa-miR-362-5p	1	0	0	1	1	1	ATF1	activating transcription factor 1
hsa-miR-362-5p	0	0	0	1	1	1	SLC4A1	solute carrier family 4, anion exchanger, member 1 (erythrocyte membrane protein band 3, Diego blood group)
hsa-miR-362-5p	0	0	1	1	0	0	NLRC5	NLR family, CARD domain containing 5
hsa-miR-362-5p	0	0	1	1	0	0	HPN	hepsin
hsa-miR-362-5p	1	0	1	1	1	1	AJUBA	ajuba LIM protein
hsa-miR-362-5p	0	0	1	1	0	0	PAFAH1B3	platelet-activating factor acetylhydrolase 1b, catalytic subunit 3 (29kDa)
hsa-miR-362-5p	0	0	0	1	0	0	UCP1	uncoupling protein 1 (mitochondrial, proton carrier)
hsa-miR-362-5p	0	0	1	1	1	1	GLTSCR1	glioma tumor suppressor candidate region gene 1
hsa-miR-362-5p	0	0	0	1	0	0	C11orf67	chromosome 11 open reading frame 67
hsa-miR-362-5p	0	0	1	1	1	1	NLRP2	NLR family, pyrin domain containing 2
hsa-miR-362-5p	0	0	1	1	0	0	TBXAS1	thromboxane A synthase 1 (platelet)
hsa-miR-362-5p	1	0	1	1	1	1	C10orf54	chromosome 10 open reading frame 54
hsa-miR-362-5p	0	0	1	1	1	1	IL7	interleukin 7
hsa-miR-362-5p	0	0	1	1	0	0	POPDC2	popeye domain containing 2
hsa-miR-362-5p	0	0	0	1	0	0	LYL1	lymphoblastic leukemia derived sequence 1
hsa-miR-362-5p	0	0	0	1	1	1	OLFM2	olfactomedin 2
hsa-miR-362-5p	1	0	1	1	1	1	MAP3K13	mitogen-activated protein kinase kinase kinase 13
hsa-miR-362-5p	0	0	1	1	0	0	RASGRF2	Ras protein-specific guanine nucleotide-releasing factor 2
hsa-miR-362-5p	0	0	1	1	1	1	ARHGEF38	Rho guanine nucleotide exchange factor (GEF) 38
hsa-miR-362-5p	0	0	1	1	1	1	PAPSS1	3'-phosphoadenosine 5'-phosphosulfate synthase 1
hsa-miR-362-5p	0	0	1	1	0	0	FAM188B	family with sequence similarity 188, member B
hsa-miR-362-5p	0	0	1	1	0	0	OBSL1	obscurin-like 1
hsa-miR-362-5p	0	0	0	1	1	1	WBSCR22	Williams Beuren syndrome chromosome region 22
hsa-miR-362-5p	0	0	1	1	0	0	SERGEF	secretion regulating guanine nucleotide exchange factor
hsa-miR-362-5p	0	0	1	1	0	0	B4GALNT3	beta-1,4-N-acetyl-galactosaminyl transferase 3
hsa-miR-362-5p	0	0	1	1	0	0	GPR84	G protein-coupled receptor 84
hsa-miR-362-5p	0	0	0	1	1	1	RNF113B	ring finger protein 113B
hsa-miR-362-5p	0	0	1	1	0	0	GPR65	G protein-coupled receptor 65
hsa-miR-362-5p	0	0	1	1	1	1	HDC	histidine decarboxylase
hsa-miR-362-5p	0	0	1	1	1	1	ADAMTS17	ADAM metallopeptidase with thrombospondin type 1 motif, 17
hsa-miR-362-5p	1	0	0	1	0	0	PMM2	phosphomannomutase 2
hsa-miR-362-5p	0	0	0	1	0	0	CDRT15	CMT1A duplicated region transcript 15
hsa-miR-362-5p	1	0	1	1	1	1	ADCYAP1	adenylate cyclase activating polypeptide 1 (pituitary)
hsa-miR-362-5p	0	0	1	1	1	1	ELAC1	elaC homolog 1 (E. coli)
hsa-miR-362-5p	0	0	1	1	0	0	NT5C3L	5'-nucleotidase, cytosolic III-like
hsa-miR-362-5p	0	0	0	1	0	0	SAMD1	sterile alpha motif domain containing 1
hsa-miR-362-5p	0	0	0	1	0	0	CALR3	calreticulin 3
hsa-miR-362-5p	0	0	0	1	0	0	IL19	interleukin 19
hsa-miR-362-5p	0	0	1	1	1	1	BCAM	basal cell adhesion molecule (Lutheran blood group)
hsa-miR-362-5p	0	0	0	1	1	1	PROK1	prokineticin 1
hsa-miR-362-5p	0	0	0	1	0	0	ANXA9	annexin A9
hsa-miR-362-5p	0	0	0	1	0	0	SLC27A3	solute carrier family 27 (fatty acid transporter), member 3
hsa-miR-362-5p	0	0	1	1	0	0	CREB3L4	cAMP responsive element binding protein 3-like 4
hsa-miR-362-5p	0	0	1	1	0	0	RPS27A	ribosomal protein S27a
hsa-miR-362-5p	0	0	1	1	0	0	SLC4A3	solute carrier family 4, anion exchanger, member 3
hsa-miR-362-5p	0	0	0	1	0	0	FAM198A	family with sequence similarity 198, member A
hsa-miR-362-5p	0	0	1	1	0	0	DNAH1	dynein, axonemal, heavy chain 1
hsa-miR-362-5p	0	0	1	1	1	1	CABS1	calcium-binding protein, spermatid-specific 1
hsa-miR-362-5p	1	0	1	1	1	1	FGF18	fibroblast growth factor 18
hsa-miR-362-5p	0	0	1	1	1	1	FARS2	phenylalanyl-tRNA synthetase 2, mitochondrial
hsa-miR-362-5p	0	0	1	1	1	1	GGCT	gamma-glutamylcyclotransferase
hsa-miR-362-5p	0	0	0	1	1	1	LAT2	linker for activation of T cells family, member 2
hsa-miR-362-5p	0	0	0	1	1	1	EPHA1	EPH receptor A1
hsa-miR-362-5p	0	0	1	1	1	1	ADHFE1	alcohol dehydrogenase, iron containing, 1
hsa-miR-362-5p	1	0	0	1	1	1	HMBS	hydroxymethylbilane synthase
hsa-miR-362-5p	0	0	0	1	0	0	GRIK4	glutamate receptor, ionotropic, kainate 4
hsa-miR-362-5p	0	0	1	1	1	1	TMEM138	transmembrane protein 138
hsa-miR-362-5p	0	0	0	1	0	0	ROM1	retinal outer segment membrane protein 1
hsa-miR-362-5p	0	0	0	1	0	0	FERMT3	fermitin family member 3
hsa-miR-362-5p	0	0	1	1	0	0	TM7SF2	transmembrane 7 superfamily member 2
hsa-miR-362-5p	1	0	0	1	0	0	ZNF385D	zinc finger protein 385D
hsa-miR-362-5p	0	0	1	1	0	0	KCNK13	potassium channel, subfamily K, member 13
hsa-miR-362-5p	1	0	0	1	0	0	POC5	POC5 centriolar protein homolog (Chlamydomonas)
hsa-miR-362-5p	0	0	1	1	1	1	ATP6V0D2	ATPase, H+ transporting, lysosomal 38kDa, V0 subunit d2
hsa-miR-362-5p	0	0	1	1	0	0	TRIM74	tripartite motif containing 74
hsa-miR-362-5p	0	0	0	1	0	0	RBM45	RNA binding motif protein 45
hsa-miR-362-5p	0	0	0	1	1	1	KDM8	lysine (K)-specific demethylase 8
hsa-miR-362-5p	0	0	0	1	1	1	NAT2	N-acetyltransferase 2 (arylamine N-acetyltransferase)
hsa-miR-362-5p	0	0	1	1	0	0	SLC26A10	solute carrier family 26, member 10
hsa-miR-362-5p	1	0	1	1	1	1	C8orf37	chromosome 8 open reading frame 37
hsa-miR-362-5p	1	0	1	1	0	0	TYSND1	trypsin domain containing 1
hsa-miR-362-5p	0	0	1	1	0	0	FRRS1	ferric-chelate reductase 1
hsa-miR-362-5p	0	0	1	1	1	1	DGKI	diacylglycerol kinase, iota
hsa-miR-362-5p	0	0	1	1	0	0	MMEL1	membrane metallo-endopeptidase-like 1
hsa-miR-362-5p	1	0	1	1	1	1	DUSP2	dual specificity phosphatase 2
hsa-miR-362-5p	0	0	1	1	1	1	C2orf29	chromosome 2 open reading frame 29
hsa-miR-362-5p	0	0	1	1	0	0	AGPAT6	1-acylglycerol-3-phosphate O-acyltransferase 6 (lysophosphatidic acid acyltransferase, zeta)
hsa-miR-362-5p	0	0	0	1	0	0	HTR6	5-hydroxytryptamine (serotonin) receptor 6, G protein-coupled
hsa-miR-362-5p	0	0	1	1	0	0	ARAF	v-raf murine sarcoma 3611 viral oncogene homolog
hsa-miR-362-5p	1	0	1	1	1	1	ALDH4A1	aldehyde dehydrogenase 4 family, member A1
hsa-miR-362-5p	0	0	1	1	1	1	TPPP3	tubulin polymerization-promoting protein family member 3
hsa-miR-362-5p	0	0	1	1	0	0	ATP6V0D1	ATPase, H+ transporting, lysosomal 38kDa, V0 subunit d1
hsa-miR-362-5p	0	0	1	1	0	0	NLRX1	NLR family member X1
hsa-miR-362-5p	1	0	0	1	0	0	NBEAL2	neurobeachin-like 2
hsa-miR-362-5p	0	0	1	1	0	0	ABCF3	ATP-binding cassette, sub-family F (GCN20), member 3
hsa-miR-362-5p	0	0	1	1	0	0	THAP8	THAP domain containing 8
hsa-miR-362-5p	0	0	1	1	1	1	IKZF3	IKAROS family zinc finger 3 (Aiolos)
hsa-miR-362-5p	0	0	1	1	1	1	CCDC78	coiled-coil domain containing 78
hsa-miR-362-5p	0	0	1	1	0	0	PHF7	PHD finger protein 7
hsa-miR-362-5p	0	0	0	1	0	0	ALPPL2	alkaline phosphatase, placental-like 2
hsa-miR-362-5p	0	0	1	1	1	1	SERPINI1	serpin peptidase inhibitor, clade I (neuroserpin), member 1
hsa-miR-362-5p	0	0	0	1	1	1	CLRN1	clarin 1
hsa-miR-362-5p	0	0	0	1	0	0	POC1A	POC1 centriolar protein homolog A (Chlamydomonas)
hsa-miR-362-5p	0	0	0	1	0	0	ADAD1	adenosine deaminase domain containing 1 (testis-specific)
hsa-miR-362-5p	0	0	0	1	1	1	WDR41	WD repeat domain 41
hsa-miR-362-5p	0	0	1	1	0	0	IL3	interleukin 3 (colony-stimulating factor, multiple)
hsa-miR-362-5p	1	0	1	1	1	1	LMTK2	lemur tyrosine kinase 2
hsa-miR-362-5p	0	0	0	1	0	0	NOS3	nitric oxide synthase 3 (endothelial cell)
hsa-miR-362-5p	0	0	1	1	0	0	RNF183	ring finger protein 183
hsa-miR-362-5p	0	0	1	1	1	1	RPUSD4	RNA pseudouridylate synthase domain containing 4
hsa-miR-362-5p	0	0	0	1	0	0	SERPINA4	serpin peptidase inhibitor, clade A (alpha-1 antiproteinase, antitrypsin), member 4
hsa-miR-362-5p	0	0	0	1	0	0	ADAMTS15	ADAM metallopeptidase with thrombospondin type 1 motif, 15
hsa-miR-362-5p	0	0	0	1	1	1	AVPR1A	arginine vasopressin receptor 1A
hsa-miR-362-5p	0	0	0	1	0	0	TBATA	thymus, brain and testes associated
hsa-miR-362-5p	1	0	1	1	1	1	TMEM100	transmembrane protein 100
hsa-miR-362-5p	0	0	1	1	1	1	TMED3	transmembrane emp24 protein transport domain containing 3
hsa-miR-362-5p	0	0	0	1	0	0	MC4R	melanocortin 4 receptor
hsa-miR-362-5p	0	0	1	1	1	1	STAT6	signal transducer and activator of transcription 6, interleukin-4 induced
hsa-miR-362-5p	0	0	1	1	0	0	CKMT1A	creatine kinase, mitochondrial 1A
hsa-miR-362-5p	0	0	1	1	1	1	TRIM68	tripartite motif containing 68
hsa-miR-362-5p	0	0	0	1	0	0	PCSK4	proprotein convertase subtilisin/kexin type 4
hsa-miR-362-5p	0	0	0	1	0	0	TMIGD2	transmembrane and immunoglobulin domain containing 2
hsa-miR-362-5p	0	0	1	1	0	0	CGB1	chorionic gonadotropin, beta polypeptide 1
hsa-miR-362-5p	0	0	1	1	0	0	CGB2	chorionic gonadotropin, beta polypeptide 2
hsa-miR-362-5p	0	0	1	1	0	0	CDK2AP2	cyclin-dependent kinase 2 associated protein 2
hsa-miR-362-5p	0	0	0	1	0	0	ECI1	enoyl-CoA delta isomerase 1
hsa-miR-362-5p	0	0	0	1	0	0	LTBP3	latent transforming growth factor beta binding protein 3
hsa-miR-362-5p	0	0	0	1	0	0	OR6F1	olfactory receptor, family 6, subfamily F, member 1
hsa-miR-362-5p	0	0	0	1	0	0	OR8U1	olfactory receptor, family 8, subfamily U, member 1
hsa-miR-362-5p	0	0	0	1	1	1	TRH	thyrotropin-releasing hormone
hsa-miR-362-5p	0	0	0	1	1	1	PYDC1	PYD (pyrin domain) containing 1
hsa-miR-362-5p	0	0	0	1	0	0	OR5AR1	olfactory receptor, family 5, subfamily AR, member 1
hsa-miR-362-5p	0	0	0	1	0	0	OR5T3	olfactory receptor, family 5, subfamily T, member 3
hsa-miR-362-5p	0	0	0	1	0	0	KCNJ4	potassium inwardly-rectifying channel, subfamily J, member 4
hsa-miR-362-5p	0	0	0	1	0	0	NFU1	NFU1 iron-sulfur cluster scaffold homolog (S. cerevisiae)
hsa-miR-362-5p	1	0	1	1	1	1	ADORA2B	adenosine A2b receptor
hsa-miR-362-5p	0	0	0	1	0	0	NFRKB	nuclear factor related to kappaB binding protein
hsa-miR-362-5p	0	0	1	1	0	0	RPL7L1	ribosomal protein L7-like 1
hsa-miR-362-5p	0	0	0	1	0	0	C14orf183	chromosome 14 open reading frame 183
hsa-miR-362-5p	0	0	0	1	1	1	PTAFR	platelet-activating factor receptor
hsa-miR-362-5p	0	0	0	1	0	0	SIGLEC7	sialic acid binding Ig-like lectin 7
hsa-miR-362-5p	0	0	0	1	1	1	TBL2	transducin (beta)-like 2
hsa-miR-362-5p	0	0	0	1	0	0	CENPN	centromere protein N
hsa-miR-362-5p	0	0	1	1	1	1	LSM3	LSM3 homolog, U6 small nuclear RNA associated (S. cerevisiae)
hsa-miR-362-5p	0	0	1	1	1	1	ANKRD27	ankyrin repeat domain 27 (VPS9 domain)
hsa-miR-362-5p	0	0	1	1	1	1	HSPBAP1	HSPB (heat shock 27kDa) associated protein 1
hsa-miR-362-5p	0	0	0	1	1	1	PPIC	peptidylprolyl isomerase C (cyclophilin C)
hsa-miR-362-5p	0	0	1	1	1	1	C5orf34	chromosome 5 open reading frame 34
hsa-miR-362-5p	1	0	0	1	1	1	SLC1A5	solute carrier family 1 (neutral amino acid transporter), member 5
hsa-miR-362-5p	0	0	1	1	0	0	HEXIM2	hexamethylene bis-acetamide inducible 2
hsa-miR-362-5p	0	0	0	1	1	1	ZIK1	zinc finger protein interacting with K protein 1 homolog (mouse)
hsa-miR-362-5p	1	0	1	1	1	1	HARS	histidyl-tRNA synthetase
hsa-miR-362-5p	0	0	0	1	0	0	EFEMP2	EGF containing fibulin-like extracellular matrix protein 2
hsa-miR-362-5p	0	0	1	1	0	0	RFWD2	ring finger and WD repeat domain 2, E3 ubiquitin protein ligase
hsa-miR-362-5p	0	0	0	1	1	1	UGT2B15	UDP glucuronosyltransferase 2 family, polypeptide B15
hsa-miR-362-5p	0	0	1	1	1	1	ZNF483	zinc finger protein 483
hsa-miR-362-5p	0	0	1	1	0	0	PPP1R14B	protein phosphatase 1, regulatory (inhibitor) subunit 14B
hsa-miR-362-5p	0	0	1	1	1	1	B4GALT2	UDP-Gal:betaGlcNAc beta 1,4- galactosyltransferase, polypeptide 2
hsa-miR-362-5p	0	0	0	1	1	1	KRT2	keratin 2
hsa-miR-362-5p	1	0	1	1	1	1	CHD2	chromodomain helicase DNA binding protein 2
hsa-miR-362-5p	0	0	1	1	0	0	PSMD2	proteasome (prosome, macropain) 26S subunit, non-ATPase, 2
hsa-miR-362-5p	1	0	1	1	1	1	CTDSP2	CTD (carboxy-terminal domain, RNA polymerase II, polypeptide A) small phosphatase 2
hsa-miR-362-5p	0	0	1	1	1	1	PARP14	poly (ADP-ribose) polymerase family, member 14
hsa-miR-362-5p	0	0	1	1	0	0	ZDHHC24	zinc finger, DHHC-type containing 24
hsa-miR-362-5p	0	0	1	1	0	0	MRPS22	mitochondrial ribosomal protein S22
hsa-miR-362-5p	0	0	0	1	1	1	TMEM52	transmembrane protein 52
hsa-miR-362-5p	1	0	1	1	1	1	B3GNT1	UDP-GlcNAc:betaGal beta-1,3-N-acetylglucosaminyltransferase 1
hsa-miR-362-5p	0	0	1	1	0	0	TEAD2	TEA domain family member 2
hsa-miR-362-5p	0	0	1	1	0	0	RIN1	Ras and Rab interactor 1
hsa-miR-362-5p	1	0	1	1	1	1	COQ2	coenzyme Q2 homolog, prenyltransferase (yeast)
hsa-miR-362-5p	0	0	1	1	1	1	PLAC8	placenta-specific 8
hsa-miR-362-5p	0	0	0	1	0	0	CMKLR1	chemokine-like receptor 1
hsa-miR-362-5p	0	0	0	1	0	0	OR5R1	olfactory receptor, family 5, subfamily R, member 1
hsa-miR-362-5p	0	0	0	1	0	0	TNFRSF10C	tumor necrosis factor receptor superfamily, member 10c, decoy without an intracellular domain
hsa-miR-362-5p	0	0	1	1	1	1	RNF166	ring finger protein 166
hsa-miR-362-5p	0	0	0	1	1	1	ZNF135	zinc finger protein 135
hsa-miR-362-5p	0	0	1	1	0	0	C2CD3	C2 calcium-dependent domain containing 3
hsa-miR-362-5p	0	0	0	1	0	0	CSNK1G2-AS1	CSNK1G2 antisense RNA 1
hsa-miR-362-5p	0	0	1	1	1	1	AMFR	autocrine motility factor receptor, E3 ubiquitin protein ligase
hsa-miR-362-5p	1	0	0	1	1	1	RECQL	RecQ protein-like (DNA helicase Q1-like)
hsa-miR-362-5p	1	0	1	1	1	1	CCDC43	coiled-coil domain containing 43
hsa-miR-362-5p	0	0	0	1	0	0	METAP1D	methionyl aminopeptidase type 1D (mitochondrial)
hsa-miR-362-5p	0	0	1	1	1	1	LPA	lipoprotein, Lp(a)
hsa-miR-362-5p	0	0	0	1	0	0	DEF6	differentially expressed in FDCP 6 homolog (mouse)
hsa-miR-362-5p	0	0	0	1	0	0	OR52N2	olfactory receptor, family 52, subfamily N, member 2
hsa-miR-362-5p	0	0	0	1	0	0	OR2T35	olfactory receptor, family 2, subfamily T, member 35
hsa-miR-362-5p	1	0	1	1	0	0	ZNF527	zinc finger protein 527
hsa-miR-362-5p	1	0	1	1	1	1	ARHGAP24	Rho GTPase activating protein 24
hsa-miR-362-5p	0	0	1	1	0	0	SLCO3A1	solute carrier organic anion transporter family, member 3A1
hsa-miR-362-5p	0	0	1	1	0	0	AVL9	AVL9 homolog (S. cerevisiase)
hsa-miR-362-5p	0	0	1	1	0	0	NADSYN1	NAD synthetase 1
hsa-miR-362-5p	0	0	1	1	1	1	PCK1	phosphoenolpyruvate carboxykinase 1 (soluble)
hsa-miR-362-5p	0	0	1	1	0	0	TMCO5A	transmembrane and coiled-coil domains 5A
hsa-miR-362-5p	1	0	1	1	1	1	PRR15	proline rich 15
hsa-miR-362-5p	0	0	0	1	0	0	OR2G3	olfactory receptor, family 2, subfamily G, member 3
hsa-miR-362-5p	0	0	0	1	0	0	METRNL	meteorin, glial cell differentiation regulator-like
hsa-miR-362-5p	0	0	0	1	1	1	CCDC65	coiled-coil domain containing 65
hsa-miR-362-5p	1	0	1	1	0	0	SYNGR3	synaptogyrin 3
hsa-miR-362-5p	0	0	1	1	0	0	TSPY2	testis specific protein, Y-linked 2
hsa-miR-362-5p	0	0	0	1	0	0	OR6S1	olfactory receptor, family 6, subfamily S, member 1
hsa-miR-362-5p	1	0	1	1	1	1	UEVLD	UEV and lactate/malate dehyrogenase domains
hsa-miR-362-5p	0	0	0	1	0	0	SLC25A41	solute carrier family 25, member 41
hsa-miR-362-5p	0	0	1	1	0	0	THAP4	THAP domain containing 4
hsa-miR-362-5p	0	0	0	1	0	0	DEFB112	defensin, beta 112
hsa-miR-362-5p	0	0	0	1	0	0	RPRML	reprimo-like
hsa-miR-362-5p	0	0	0	1	0	0	INPP1	inositol polyphosphate-1-phosphatase
hsa-miR-362-5p	0	0	0	1	1	1	ZYX	zyxin
hsa-miR-362-5p	1	0	1	1	0	0	SMCR7	Smith-Magenis syndrome chromosome region, candidate 7
hsa-miR-362-5p	0	0	1	1	0	0	TYMS	thymidylate synthetase
hsa-miR-362-5p	0	0	1	1	0	0	TCOF1	Treacher Collins-Franceschetti syndrome 1
hsa-miR-362-5p	0	0	1	1	0	0	TRIM73	tripartite motif containing 73
hsa-miR-362-5p	1	0	1	1	1	1	ST8SIA3	ST8 alpha-N-acetyl-neuraminide alpha-2,8-sialyltransferase 3
hsa-miR-362-5p	0	0	1	1	0	0	KLK4	kallikrein-related peptidase 4
hsa-miR-362-5p	0	0	0	1	0	0	H1FOO	H1 histone family, member O, oocyte-specific
hsa-miR-362-5p	0	0	0	1	0	0	ACTL9	actin-like 9
hsa-miR-362-5p	0	0	1	1	0	0	MRVI1-AS1	MRVI1 antisense RNA 1
hsa-miR-362-5p	0	0	1	1	1	1	TSC22D1	TSC22 domain family, member 1
hsa-miR-362-5p	0	0	1	1	1	1	KLHDC7A	kelch domain containing 7A
hsa-miR-362-5p	1	0	0	1	0	0	ZNF784	zinc finger protein 784
hsa-miR-362-5p	0	0	0	1	0	0	SLC47A2	solute carrier family 47, member 2
hsa-miR-362-5p	1	0	1	1	1	1	CLGN	calmegin
hsa-miR-362-5p	0	0	1	1	1	1	RMI1	RMI1, RecQ mediated genome instability 1, homolog (S. cerevisiae)
hsa-miR-362-5p	1	0	1	1	1	1	TOR1AIP1	torsin A interacting protein 1
hsa-miR-362-5p	0	0	0	1	1	1	ITLN1	intelectin 1 (galactofuranose binding)
hsa-miR-362-5p	0	0	0	1	1	1	ZNF274	zinc finger protein 274
hsa-miR-362-5p	1	0	1	1	1	1	BRSK1	BR serine/threonine kinase 1
hsa-miR-362-5p	0	0	0	1	0	0	NDUFAF3	NADH dehydrogenase (ubiquinone) complex I, assembly factor 3
hsa-miR-362-5p	0	0	0	1	1	1	FLII	flightless I homolog (Drosophila)
hsa-miR-362-5p	0	0	0	1	1	1	BTBD6	BTB (POZ) domain containing 6
hsa-miR-362-5p	0	0	1	1	0	0	GPR97	G protein-coupled receptor 97
hsa-miR-362-5p	0	0	0	1	0	0	SERHL2	serine hydrolase-like 2
hsa-miR-362-5p	0	0	0	1	1	1	NRBP2	nuclear receptor binding protein 2
hsa-miR-362-5p	0	0	1	1	1	1	FMNL1	formin-like 1
hsa-miR-362-5p	0	0	1	1	0	0	PHKG2	phosphorylase kinase, gamma 2 (testis)
hsa-miR-362-5p	0	0	0	1	0	0	OR2V2	olfactory receptor, family 2, subfamily V, member 2
hsa-miR-362-5p	0	0	0	1	0	0	SLC9A7	solute carrier family 9, subfamily A (NHE7, cation proton antiporter 7), member 7
hsa-miR-362-5p	0	0	0	1	0	0	RNASE10	ribonuclease, RNase A family, 10 (non-active)
hsa-miR-362-5p	1	0	0	1	1	1	SSTR3	somatostatin receptor 3
hsa-miR-362-5p	0	0	1	1	0	0	PRSS55	protease, serine, 55
hsa-miR-362-5p	0	0	0	1	0	0	SH2D7	SH2 domain containing 7
hsa-miR-362-5p	0	0	0	1	1	1	CNOT10	CCR4-NOT transcription complex, subunit 10
hsa-miR-362-5p	0	0	0	1	1	1	C1S	complement component 1, s subcomponent
hsa-miR-362-5p	0	0	1	1	1	1	OLFML1	olfactomedin-like 1
hsa-miR-362-5p	0	0	1	1	1	1	HNMT	histamine N-methyltransferase
hsa-miR-362-5p	0	0	0	1	0	0	ADAT3	adenosine deaminase, tRNA-specific 3
hsa-miR-362-5p	0	0	1	1	1	1	KRTAP8-1	keratin associated protein 8-1
hsa-miR-362-5p	0	0	0	1	0	0	ZNF775	zinc finger protein 775
hsa-miR-362-5p	0	0	0	1	1	1	C14orf80	chromosome 14 open reading frame 80
hsa-miR-362-5p	0	0	0	1	1	1	TMEM121	transmembrane protein 121
hsa-miR-362-5p	0	0	0	1	0	0	NSUN5P1	NOP2/Sun domain family, member 5 pseudogene 1
hsa-miR-362-5p	1	0	1	1	1	1	GJC1	gap junction protein, gamma 1, 45kDa
hsa-miR-362-5p	0	0	1	1	0	0	USP51	ubiquitin specific peptidase 51
hsa-miR-362-5p	1	0	1	1	1	1	MTA1	metastasis associated 1
hsa-miR-362-5p	0	0	1	1	1	1	TAB1	TGF-beta activated kinase 1/MAP3K7 binding protein 1
hsa-miR-362-5p	0	0	1	1	0	0	BGN	biglycan
hsa-miR-362-5p	0	0	0	1	0	0	OR4F15	olfactory receptor, family 4, subfamily F, member 15
hsa-miR-362-5p	1	0	0	1	0	0	DGAT1	diacylglycerol O-acyltransferase 1
hsa-miR-362-5p	0	0	1	1	0	0	GPR19	G protein-coupled receptor 19
hsa-miR-362-5p	0	0	1	1	1	1	VSTM4	V-set and transmembrane domain containing 4
hsa-miR-362-5p	0	0	0	1	1	1	TRIM50	tripartite motif containing 50
hsa-miR-362-5p	1	0	1	1	0	0	TSEN54	tRNA splicing endonuclease 54 homolog (S. cerevisiae)
hsa-miR-362-5p	0	0	0	1	0	0	LCE3C	late cornified envelope 3C
hsa-miR-362-5p	0	0	1	1	0	0	C1QL4	complement component 1, q subcomponent-like 4
hsa-miR-362-5p	0	0	0	1	0	0	OR10T2	olfactory receptor, family 10, subfamily T, member 2
hsa-miR-362-5p	1	0	1	1	1	1	BTLA	B and T lymphocyte associated
hsa-miR-362-5p	0	0	1	1	1	1	KLC1	kinesin light chain 1
hsa-miR-362-5p	0	0	0	1	1	1	HSP90AA1	heat shock protein 90kDa alpha (cytosolic), class A member 1
hsa-miR-362-5p	0	0	1	1	0	0	LRCH3	leucine-rich repeats and calponin homology (CH) domain containing 3
hsa-miR-362-5p	0	0	0	1	1	1	PKD1L3	polycystic kidney disease 1-like 3
hsa-miR-362-5p	0	0	0	1	0	0	FAM183A	family with sequence similarity 183, member A
hsa-miR-362-5p	0	0	0	1	0	0	WDR25	WD repeat domain 25
hsa-miR-362-5p	0	0	0	1	0	0	TBX10	T-box 10
hsa-miR-362-5p	0	0	1	1	0	0	TRABD2A	TraB domain containing 2A
hsa-miR-362-5p	0	0	0	1	0	0	VWCE	von Willebrand factor C and EGF domains
hsa-miR-362-5p	0	0	1	1	1	1	PSPC1	paraspeckle component 1
hsa-miR-362-5p	0	0	0	1	0	0	ZNF446	zinc finger protein 446
hsa-miR-362-5p	1	0	1	1	1	1	ILF3	interleukin enhancer binding factor 3, 90kDa
hsa-miR-362-5p	0	0	1	1	0	0	ZNF142	zinc finger protein 142
hsa-miR-362-5p	0	0	1	1	0	0	RGN	regucalcin (senescence marker protein-30)
hsa-miR-362-5p	1	0	1	1	1	1	TFE3	transcription factor binding to IGHM enhancer 3
hsa-miR-362-5p	0	0	1	1	1	1	IL17RE	interleukin 17 receptor E
hsa-miR-362-5p	1	0	0	1	1	1	NPHP3	nephronophthisis 3 (adolescent)
hsa-miR-362-5p	0	0	1	1	1	1	ACAD11	acyl-CoA dehydrogenase family, member 11
hsa-miR-362-5p	1	0	1	1	1	1	MYH9	myosin, heavy chain 9, non-muscle
hsa-miR-362-5p	0	0	0	1	1	1	NR1I2	nuclear receptor subfamily 1, group I, member 2
hsa-miR-362-5p	0	0	1	1	1	1	FAM78B	family with sequence similarity 78, member B
hsa-miR-362-5p	0	0	1	1	1	1	FIBP	fibroblast growth factor (acidic) intracellular binding protein
hsa-miR-362-5p	0	0	0	1	0	0	HIST1H1T	histone cluster 1, H1t
hsa-miR-362-5p	0	0	1	1	1	1	FAIM	Fas apoptotic inhibitory molecule
hsa-miR-362-5p	0	0	1	1	1	1	HPS1	Hermansky-Pudlak syndrome 1
hsa-miR-362-5p	0	0	0	1	1	1	NPY5R	neuropeptide Y receptor Y5
hsa-miR-362-5p	0	0	1	1	1	1	TBCCD1	TBCC domain containing 1
hsa-miR-362-5p	0	0	0	1	0	0	PTGES2	prostaglandin E synthase 2
hsa-miR-362-5p	0	0	1	1	1	1	ERMP1	endoplasmic reticulum metallopeptidase 1
hsa-miR-362-5p	0	0	1	1	0	0	FERMT1	fermitin family member 1
hsa-miR-362-5p	0	0	0	1	0	0	DNAJB13	DnaJ (Hsp40) homolog, subfamily B, member 13
hsa-miR-362-5p	0	0	0	1	1	1	NCCRP1	non-specific cytotoxic cell receptor protein 1 homolog (zebrafish)
hsa-miR-362-5p	0	0	0	1	1	1	FPR2	formyl peptide receptor 2
hsa-miR-362-5p	0	0	1	1	0	0	SPAG8	sperm associated antigen 8
hsa-miR-362-5p	0	0	1	1	0	0	ARHGAP9	Rho GTPase activating protein 9
hsa-miR-362-5p	0	0	1	1	1	1	UTS2D	urotensin 2 domain containing
hsa-miR-362-5p	0	0	0	1	1	1	CRYZ	crystallin, zeta (quinone reductase)
hsa-miR-362-5p	0	0	0	1	0	0	TPH1	tryptophan hydroxylase 1
hsa-miR-362-5p	0	0	0	1	0	0	SERPINA6	serpin peptidase inhibitor, clade A (alpha-1 antiproteinase, antitrypsin), member 6
hsa-miR-362-5p	0	0	0	1	0	0	EARS2	glutamyl-tRNA synthetase 2, mitochondrial (putative)
hsa-miR-362-5p	0	0	1	1	1	1	TMEM189	transmembrane protein 189
hsa-miR-362-5p	0	0	1	1	1	1	GNA14	guanine nucleotide binding protein (G protein), alpha 14
hsa-miR-362-5p	0	0	1	1	0	0	TRIM29	tripartite motif containing 29
hsa-miR-362-5p	0	0	1	1	1	1	CNTNAP3B	contactin associated protein-like 3B
hsa-miR-362-5p	0	0	1	1	0	0	SLC24A2	solute carrier family 24 (sodium/potassium/calcium exchanger), member 2
hsa-miR-362-5p	1	0	1	1	0	0	CECR2	cat eye syndrome chromosome region, candidate 2
hsa-miR-362-5p	0	0	1	1	1	1	TMEM230	transmembrane protein 230
hsa-miR-362-5p	0	0	0	1	1	1	DCAKD	dephospho-CoA kinase domain containing
hsa-miR-362-5p	0	0	0	1	0	0	FAM22B	family with sequence similarity 22, member B
hsa-miR-362-5p	0	0	1	1	0	0	NDE1	nudE nuclear distribution E homolog 1 (A. nidulans)
hsa-miR-362-5p	0	0	0	1	0	0	OR2T2	olfactory receptor, family 2, subfamily T, member 2
hsa-miR-362-5p	0	0	0	1	1	1	TM7SF3	transmembrane 7 superfamily member 3
hsa-miR-362-5p	1	0	1	1	1	1	ATG13	autophagy related 13
hsa-miR-362-5p	0	0	0	1	1	1	FAM111B	family with sequence similarity 111, member B
hsa-miR-362-5p	0	0	1	1	0	0	RBPJL	recombination signal binding protein for immunoglobulin kappa J region-like
hsa-miR-362-5p	0	0	1	1	0	0	LIPI	lipase, member I
hsa-miR-362-5p	0	0	0	1	0	0	HSFY2	heat shock transcription factor, Y linked 2
hsa-miR-362-5p	0	0	0	1	0	0	OR2T27	olfactory receptor, family 2, subfamily T, member 27
hsa-miR-362-5p	0	0	1	1	1	1	FAM221A	family with sequence similarity 221, member A
hsa-miR-362-5p	0	0	0	1	0	0	ACTG2	actin, gamma 2, smooth muscle, enteric
hsa-miR-362-5p	0	0	0	1	0	0	C19orf48	chromosome 19 open reading frame 48
hsa-miR-362-5p	0	0	0	1	1	1	CPNE1	copine I
hsa-miR-362-5p	0	0	0	1	1	1	NDUFB6	NADH dehydrogenase (ubiquinone) 1 beta subcomplex, 6, 17kDa
hsa-miR-362-5p	1	0	1	1	0	0	HINFP	histone H4 transcription factor
hsa-miR-362-5p	0	0	1	1	1	1	SLC37A1	solute carrier family 37 (glycerol-3-phosphate transporter), member 1
hsa-miR-362-5p	0	0	0	1	1	1	SLC43A3	solute carrier family 43, member 3
hsa-miR-362-5p	0	0	0	1	1	1	KRT74	keratin 74
hsa-miR-362-5p	0	0	1	1	0	0	MLXIPL	MLX interacting protein-like
hsa-miR-362-5p	1	0	1	1	1	1	TSTD2	thiosulfate sulfurtransferase (rhodanese)-like domain containing 2
hsa-miR-362-5p	0	0	0	1	0	0	MYL4	myosin, light chain 4, alkali; atrial, embryonic
hsa-miR-362-5p	0	0	0	1	1	1	ARSG	arylsulfatase G
hsa-miR-362-5p	1	0	1	1	1	1	COL5A1	collagen, type V, alpha 1
hsa-miR-362-5p	0	0	0	1	0	0	MFSD12	major facilitator superfamily domain containing 12
hsa-miR-362-5p	0	0	0	1	0	0	WDR88	WD repeat domain 88
hsa-miR-362-5p	0	0	0	1	1	1	GTF2IRD2B	GTF2I repeat domain containing 2B
hsa-miR-362-5p	1	0	1	1	1	1	SH3BP2	SH3-domain binding protein 2
hsa-miR-362-5p	0	0	1	1	0	0	ZAN	zonadhesin
hsa-miR-362-5p	0	0	0	1	1	1	FAM180B	family with sequence similarity 180, member B
hsa-miR-362-5p	0	0	0	1	0	0	FAM163B	family with sequence similarity 163, member B
hsa-miR-362-5p	1	0	0	1	1	1	COL9A1	collagen, type IX, alpha 1
hsa-miR-362-5p	0	0	1	1	1	1	C15orf38	chromosome 15 open reading frame 38
hsa-miR-362-5p	0	0	0	1	0	0	ZBP1	Z-DNA binding protein 1
hsa-miR-362-5p	0	0	1	1	1	1	PTMA	prothymosin, alpha
hsa-miR-362-5p	0	0	1	1	1	1	MAP2K6	mitogen-activated protein kinase kinase 6
hsa-miR-362-5p	0	0	1	1	1	1	PIK3CG	phosphatidylinositol-4,5-bisphosphate 3-kinase, catalytic subunit gamma
hsa-miR-362-5p	0	0	0	1	0	0	SLFNL1	schlafen-like 1
hsa-miR-362-5p	0	0	0	1	0	0	EFTUD1	elongation factor Tu GTP binding domain containing 1
hsa-miR-362-5p	1	0	1	1	1	1	CEP85L	centrosomal protein 85kDa-like
hsa-miR-362-5p	0	0	1	1	1	1	CNPPD1	cyclin Pas1/PHO80 domain containing 1
hsa-miR-362-5p	0	0	0	1	0	0	MMP17	matrix metallopeptidase 17 (membrane-inserted)
hsa-miR-362-5p	0	0	1	1	0	0	CPT1B	carnitine palmitoyltransferase 1B (muscle)
hsa-miR-362-5p	0	0	1	1	1	1	GTF2IRD2	GTF2I repeat domain containing 2
hsa-miR-362-5p	1	0	1	1	1	1	CD300LF	CD300 molecule-like family member f
hsa-miR-362-5p	0	0	1	1	1	1	TAF11	TAF11 RNA polymerase II, TATA box binding protein (TBP)-associated factor, 28kDa
hsa-miR-362-5p	1	0	0	1	1	1	DCLRE1A	DNA cross-link repair 1A
hsa-miR-362-5p	0	0	0	1	0	0	KRT19	keratin 19
hsa-miR-362-5p	0	0	0	1	0	0	TEX28	testis expressed 28
hsa-miR-362-5p	1	0	1	1	0	0	PLXNB3	plexin B3
hsa-miR-362-5p	0	0	1	1	1	1	SCCPDH	saccharopine dehydrogenase (putative)
hsa-miR-362-5p	0	0	1	1	1	1	C1orf101	chromosome 1 open reading frame 101
hsa-miR-362-5p	0	0	1	1	1	1	PLD5	phospholipase D family, member 5
hsa-miR-362-5p	0	0	1	1	1	1	KMO	kynurenine 3-monooxygenase (kynurenine 3-hydroxylase)
hsa-miR-362-5p	1	0	1	1	1	1	GPR137B	G protein-coupled receptor 137B
hsa-miR-362-5p	1	0	1	1	1	1	DLL1	delta-like 1 (Drosophila)
hsa-miR-362-5p	0	0	0	1	0	0	GPR31	G protein-coupled receptor 31
hsa-miR-362-5p	1	0	1	1	1	1	MPC1	mitochondrial pyruvate carrier 1
hsa-miR-362-5p	0	0	1	1	1	1	LPAL2	lipoprotein, Lp(a)-like 2, pseudogene
hsa-miR-362-5p	0	0	0	1	1	1	NENF	neudesin neurotrophic factor
hsa-miR-362-5p	0	0	1	1	1	1	DYRK3	dual-specificity tyrosine-(Y)-phosphorylation regulated kinase 3
hsa-miR-362-5p	1	0	1	1	0	0	ETNK2	ethanolamine kinase 2
hsa-miR-362-5p	0	0	0	1	1	1	NCF2	neutrophil cytosolic factor 2
hsa-miR-362-5p	1	0	1	1	0	0	ZBTB37	zinc finger and BTB domain containing 37
hsa-miR-362-5p	1	0	1	1	1	1	DNM3	dynamin 3
hsa-miR-362-5p	0	0	0	1	0	0	FMO4	flavin containing monooxygenase 4
hsa-miR-362-5p	0	0	1	1	1	1	BLZF1	basic leucine zipper nuclear factor 1
hsa-miR-362-5p	0	0	1	1	1	1	UFC1	ubiquitin-fold modifier conjugating enzyme 1
hsa-miR-362-5p	0	0	1	1	1	1	CRP	C-reactive protein, pentraxin-related
hsa-miR-362-5p	0	0	1	1	0	0	PYHIN1	pyrin and HIN domain family, member 1
hsa-miR-362-5p	1	0	1	1	1	1	NKAIN2	Na+/K+ transporting ATPase interacting 2
hsa-miR-362-5p	0	0	1	1	0	0	DCST1	DC-STAMP domain containing 1
hsa-miR-362-5p	0	0	1	1	0	0	CLVS2	clavesin 2
hsa-miR-362-5p	0	0	1	1	1	1	C1orf43	chromosome 1 open reading frame 43
hsa-miR-362-5p	0	0	0	1	0	0	STK32C	serine/threonine kinase 32C
hsa-miR-362-5p	1	0	1	1	0	0	TCERG1L	transcription elongation regulator 1-like
hsa-miR-362-5p	0	0	0	1	0	0	UROS	uroporphyrinogen III synthase
hsa-miR-362-5p	0	0	1	1	1	1	LCE3E	late cornified envelope 3E
hsa-miR-362-5p	1	0	0	1	1	1	LACE1	lactation elevated 1
hsa-miR-362-5p	0	0	1	1	1	1	GRK5	G protein-coupled receptor kinase 5
hsa-miR-362-5p	1	0	0	1	0	0	PLEKHO1	pleckstrin homology domain containing, family O member 1
hsa-miR-362-5p	1	0	1	1	1	1	USP45	ubiquitin specific peptidase 45
hsa-miR-362-5p	0	0	1	1	1	1	MMS22L	MMS22-like, DNA repair protein
hsa-miR-362-5p	0	0	0	1	1	1	UFL1	UFM1-specific ligase 1
hsa-miR-362-5p	0	0	0	1	1	1	WDR3	WD repeat domain 3
hsa-miR-362-5p	0	0	1	1	1	1	CGA	glycoprotein hormones, alpha polypeptide
hsa-miR-362-5p	1	0	1	1	1	1	ST7L	suppression of tumorigenicity 7 like
hsa-miR-362-5p	1	0	1	1	1	1	FAM40A	family with sequence similarity 40, member A
hsa-miR-362-5p	0	0	0	1	0	0	C1orf194	chromosome 1 open reading frame 194
hsa-miR-362-5p	0	0	1	1	0	0	NAA10	N(alpha)-acetyltransferase 10, NatA catalytic subunit
hsa-miR-362-5p	0	0	1	1	0	0	DPCD	deleted in primary ciliary dyskinesia homolog (mouse)
hsa-miR-362-5p	1	0	1	1	1	1	ARHGAP29	Rho GTPase activating protein 29
hsa-miR-362-5p	1	0	1	1	0	0	PAX2	paired box 2
hsa-miR-362-5p	0	0	1	1	0	0	CPN1	carboxypeptidase N, polypeptide 1
hsa-miR-362-5p	0	0	1	1	0	0	HPSE2	heparanase 2
hsa-miR-362-5p	1	0	1	1	1	1	SSX2IP	synovial sarcoma, X breakpoint 2 interacting protein
hsa-miR-362-5p	1	0	0	1	0	0	GNG5	guanine nucleotide binding protein (G protein), gamma 5
hsa-miR-362-5p	1	0	1	1	1	1	FUBP1	far upstream element (FUSE) binding protein 1
hsa-miR-362-5p	0	0	1	1	1	1	ELOVL5	ELOVL fatty acid elongase 5
hsa-miR-362-5p	0	0	1	1	1	1	C1orf141	chromosome 1 open reading frame 141
hsa-miR-362-5p	1	0	1	1	1	1	SGIP1	SH3-domain GRB2-like (endophilin) interacting protein 1
hsa-miR-362-5p	0	0	0	1	0	0	CT47A2	cancer/testis antigen family 47, member A2
hsa-miR-362-5p	0	0	0	1	0	0	CT47A3	cancer/testis antigen family 47, member A3
hsa-miR-362-5p	0	0	0	1	0	0	CT47A4	cancer/testis antigen family 47, member A4
hsa-miR-362-5p	0	0	0	1	0	0	CT47A5	cancer/testis antigen family 47, member A5
hsa-miR-362-5p	0	0	0	1	0	0	CT47A8	cancer/testis antigen family 47, member A8
hsa-miR-362-5p	0	0	0	1	0	0	CT47A10	cancer/testis antigen family 47, member A10
hsa-miR-362-5p	0	0	0	1	0	0	C9orf37	chromosome 9 open reading frame 37
hsa-miR-362-5p	0	0	0	1	0	0	ECHDC2	enoyl CoA hydratase domain containing 2
hsa-miR-362-5p	0	0	1	1	0	0	PTGDS	prostaglandin D2 synthase 21kDa (brain)
hsa-miR-362-5p	0	0	0	1	0	0	INPP5E	inositol polyphosphate-5-phosphatase, 72 kDa
hsa-miR-362-5p	0	0	1	1	0	0	BEND5	BEN domain containing 5
hsa-miR-362-5p	0	0	1	1	0	0	SPATA6	spermatogenesis associated 6
hsa-miR-362-5p	1	0	1	1	1	1	AMOT	angiomotin
hsa-miR-362-5p	0	0	1	1	1	1	EIF2B3	eukaryotic translation initiation factor 2B, subunit 3 gamma, 58kDa
hsa-miR-362-5p	0	0	1	1	1	1	FAM22G	family with sequence similarity 22, member G
hsa-miR-362-5p	0	0	1	1	0	0	YIPF3	Yip1 domain family, member 3
hsa-miR-362-5p	0	0	1	1	1	1	RBM41	RNA binding motif protein 41
hsa-miR-362-5p	0	0	1	1	1	1	PPIH	peptidylprolyl isomerase H (cyclophilin H)
hsa-miR-362-5p	0	0	1	1	1	1	ZMYND12	zinc finger, MYND-type containing 12
hsa-miR-362-5p	0	0	0	1	1	1	ZDHHC12	zinc finger, DHHC-type containing 12
hsa-miR-362-5p	1	0	1	1	1	1	GLE1	GLE1 RNA export mediator homolog (yeast)
hsa-miR-362-5p	0	0	1	1	0	0	GNMT	glycine N-methyltransferase
hsa-miR-362-5p	0	0	1	1	0	0	URM1	ubiquitin related modifier 1
hsa-miR-362-5p	0	0	0	1	1	1	PABPC4	poly(A) binding protein, cytoplasmic 4 (inducible form)
hsa-miR-362-5p	1	0	1	1	1	1	GDAP1L1	ganglioside induced differentiation associated protein 1-like 1
hsa-miR-362-5p	1	0	0	1	0	0	DPM2	dolichyl-phosphate mannosyltransferase polypeptide 2, regulatory subunit
hsa-miR-362-5p	1	0	1	1	1	1	CHD6	chromodomain helicase DNA binding protein 6
hsa-miR-362-5p	0	0	1	1	1	1	PPA1	pyrophosphatase (inorganic) 1
hsa-miR-362-5p	0	0	0	1	1	1	FARP2	FERM, RhoGEF and pleckstrin domain protein 2
hsa-miR-362-5p	0	0	1	1	1	1	MAGT1	magnesium transporter 1
hsa-miR-362-5p	1	0	1	1	1	1	CSMD2	CUB and Sushi multiple domains 2
hsa-miR-362-5p	1	0	1	1	0	0	CCDC167	coiled-coil domain containing 167
hsa-miR-362-5p	1	0	1	1	1	1	HDAC1	histone deacetylase 1
hsa-miR-362-5p	0	0	1	1	0	0	RPS4X	ribosomal protein S4, X-linked
hsa-miR-362-5p	0	0	0	1	0	0	ATOH7	atonal homolog 7 (Drosophila)
hsa-miR-362-5p	1	0	1	1	1	1	ANK3	ankyrin 3, node of Ranvier (ankyrin G)
hsa-miR-362-5p	0	0	0	1	1	1	FGR	Gardner-Rasheed feline sarcoma viral (v-fgr) oncogene homolog
hsa-miR-362-5p	0	0	1	1	1	1	DEC1	deleted in esophageal cancer 1
hsa-miR-362-5p	0	0	0	1	0	0	FXYD4	FXYD domain containing ion transport regulator 4
hsa-miR-362-5p	0	0	1	1	0	0	P2RY4	pyrimidinergic receptor P2Y, G-protein coupled, 4
hsa-miR-362-5p	0	0	0	1	0	0	HLA-DMA	major histocompatibility complex, class II, DM alpha
hsa-miR-362-5p	1	0	0	1	0	0	PSMB8	proteasome (prosome, macropain) subunit, beta type, 8 (large multifunctional peptidase 7)
hsa-miR-362-5p	0	0	1	1	1	1	TBC1D2	TBC1 domain family, member 2
hsa-miR-362-5p	0	0	1	1	0	0	GALK1	galactokinase 1
hsa-miR-362-5p	0	0	1	1	0	0	FBP2	fructose-1,6-bisphosphatase 2
hsa-miR-362-5p	1	0	1	1	1	1	TFDP1	transcription factor Dp-1
hsa-miR-362-5p	1	0	1	1	1	1	KDM5C	lysine (K)-specific demethylase 5C
hsa-miR-362-5p	1	0	0	1	1	1	DCUN1D2	DCN1, defective in cullin neddylation 1, domain containing 2 (S. cerevisiae)
hsa-miR-362-5p	0	0	0	1	0	0	ARHGEF19	Rho guanine nucleotide exchange factor (GEF) 19
hsa-miR-362-5p	0	0	0	1	0	0	LOC100130657	uncharacterized LOC100130657
hsa-miR-362-5p	0	0	0	1	0	0	ZBTB17	zinc finger and BTB domain containing 17
hsa-miR-362-5p	0	0	1	1	1	1	MYO16	myosin XVI
hsa-miR-362-5p	0	0	1	1	0	0	FOXS1	forkhead box S1
hsa-miR-362-5p	0	0	1	1	1	1	PAGE4	P antigen family, member 4 (prostate associated)
hsa-miR-362-5p	0	0	1	1	1	1	PAAF1	proteasomal ATPase-associated factor 1
hsa-miR-362-5p	1	0	0	1	0	0	NRM	nurim (nuclear envelope membrane protein)
hsa-miR-362-5p	0	0	1	1	1	1	GATA1	GATA binding protein 1 (globin transcription factor 1)
hsa-miR-362-5p	0	0	0	1	1	1	ANGPTL7	angiopoietin-like 7
hsa-miR-362-5p	0	0	0	1	1	1	BTNL9	butyrophilin-like 9
hsa-miR-362-5p	1	0	1	1	1	1	RILPL1	Rab interacting lysosomal protein-like 1
hsa-miR-362-5p	1	0	1	1	1	1	MLLT10	myeloid/lymphoid or mixed-lineage leukemia (trithorax homolog, Drosophila); translocated to, 10
hsa-miR-362-5p	0	0	1	1	1	1	TJP2	tight junction protein 2
hsa-miR-362-5p	1	0	1	1	1	1	C20orf26	chromosome 20 open reading frame 26
hsa-miR-362-5p	0	0	0	1	1	1	NSUN6	NOP2/Sun domain family, member 6
hsa-miR-362-5p	1	0	1	1	1	1	CYFIP2	cytoplasmic FMR1 interacting protein 2
hsa-miR-362-5p	0	0	1	1	1	1	CNTNAP3	contactin associated protein-like 3
hsa-miR-362-5p	0	0	0	1	1	1	KRTAP9-3	keratin associated protein 9-3
hsa-miR-362-5p	1	0	1	1	1	1	MZT1	mitotic spindle organizing protein 1
hsa-miR-362-5p	0	0	0	1	0	0	CUBN	cubilin (intrinsic factor-cobalamin receptor)
hsa-miR-362-5p	0	0	1	1	1	1	TMEM8B	transmembrane protein 8B
hsa-miR-362-5p	1	0	1	1	1	1	CKAP2	cytoskeleton associated protein 2
hsa-miR-362-5p	0	0	1	1	1	1	SLC41A2	solute carrier family 41, member 2
hsa-miR-362-5p	0	0	1	1	0	0	KCNAB2	potassium voltage-gated channel, shaker-related subfamily, beta member 2
hsa-miR-362-5p	1	0	1	1	1	1	AJAP1	adherens junctions associated protein 1
hsa-miR-362-5p	0	0	0	1	0	0	APRT	adenine phosphoribosyltransferase
hsa-miR-362-5p	0	0	1	1	1	1	ANKRD5	ankyrin repeat domain 5
hsa-miR-362-5p	1	0	1	1	1	1	PRDM16	PR domain containing 16
hsa-miR-362-5p	1	0	0	1	1	1	LANCL3	LanC lantibiotic synthetase component C-like 3 (bacterial)
hsa-miR-362-5p	0	0	0	1	0	0	PHYH	phytanoyl-CoA 2-hydroxylase
hsa-miR-362-5p	0	0	0	1	0	0	TBC1D29	TBC1 domain family, member 29
hsa-miR-362-5p	0	0	0	1	0	0	DKFZp779M0652	uncharacterized DKFZp779M0652
hsa-miR-362-5p	1	0	1	1	1	1	DHX57	DEAH (Asp-Glu-Ala-Asp/His) box polypeptide 57
hsa-miR-362-5p	0	0	1	1	1	1	LRRN4	leucine rich repeat neuronal 4
hsa-miR-362-5p	0	0	1	1	1	1	PRR5L	proline rich 5 like
hsa-miR-362-5p	0	0	1	1	0	0	NUDT2	nudix (nucleoside diphosphate linked moiety X)-type motif 2
hsa-miR-362-5p	0	0	1	1	0	0	PDK3	pyruvate dehydrogenase kinase, isozyme 3
hsa-miR-362-5p	0	0	1	1	1	1	PDE7A	phosphodiesterase 7A
hsa-miR-362-5p	1	0	1	1	1	1	ASPH	aspartate beta-hydroxylase
hsa-miR-362-5p	0	0	1	1	1	1	GCM2	glial cells missing homolog 2 (Drosophila)
hsa-miR-362-5p	0	0	1	1	1	1	TMEM14B	transmembrane protein 14B
hsa-miR-362-5p	0	0	0	1	0	0	HBG2	hemoglobin, gamma G
hsa-miR-362-5p	0	0	0	1	1	1	HBB	hemoglobin, beta
hsa-miR-362-5p	0	0	1	1	0	0	HBD	hemoglobin, delta
hsa-miR-362-5p	0	0	0	1	1	1	ASGR1	asialoglycoprotein receptor 1
hsa-miR-362-5p	0	0	0	1	1	1	TTC38	tetratricopeptide repeat domain 38
hsa-miR-362-5p	0	0	0	1	1	1	EXOC1	exocyst complex component 1
hsa-miR-362-5p	0	0	0	1	0	0	GPR12	G protein-coupled receptor 12
hsa-miR-362-5p	1	0	1	1	1	1	GREB1	growth regulation by estrogen in breast cancer 1
hsa-miR-362-5p	0	0	1	1	1	1	SLCO1C1	solute carrier organic anion transporter family, member 1C1
hsa-miR-362-5p	0	0	1	1	0	0	FAM22D	family with sequence similarity 22, member D
hsa-miR-362-5p	0	0	0	1	0	0	FAM22A	family with sequence similarity 22, member A
hsa-miR-362-5p	0	0	0	1	0	0	C16orf96	chromosome 16 open reading frame 96
hsa-miR-362-5p	0	0	0	1	1	1	RBMY1J	RNA binding motif protein, Y-linked, family 1, member J
hsa-miR-362-5p	0	0	0	1	1	1	RBMY1E	RNA binding motif protein, Y-linked, family 1, member E
hsa-miR-362-5p	0	0	0	1	1	1	RBMY1D	RNA binding motif protein, Y-linked, family 1, member D
hsa-miR-362-5p	0	0	1	1	0	0	OTUD7A	OTU domain containing 7A
hsa-miR-362-5p	1	0	1	1	1	1	NKTR	natural killer-tumor recognition sequence
hsa-miR-362-5p	0	0	0	1	0	0	SEC13	SEC13 homolog (S. cerevisiae)
hsa-miR-362-5p	0	0	1	1	1	1	FLG2	filaggrin family member 2
hsa-miR-362-5p	0	0	1	1	1	1	MS4A1	membrane-spanning 4-domains, subfamily A, member 1
hsa-miR-362-5p	0	0	0	1	1	1	ERVFRD-1	endogenous retrovirus group FRD, member 1
hsa-miR-362-5p	1	0	0	1	1	1	ACVRL1	activin A receptor type II-like 1
hsa-miR-362-5p	0	0	1	0	1	1	CYP1B1	cytochrome P450, family 1, subfamily B, polypeptide 1
hsa-miR-362-5p	1	0	1	1	1	1	DMD	dystrophin
hsa-miR-362-5p	1	0	1	1	1	1	CFTR	cystic fibrosis transmembrane conductance regulator (ATP-binding cassette sub-family C, member 7)
hsa-miR-362-5p	0	0	1	1	1	1	RFXAP	regulatory factor X-associated protein
hsa-miR-362-5p	0	0	1	1	1	1	SLC11A2	solute carrier family 11 (proton-coupled divalent metal ion transporters), member 2
hsa-miR-362-5p	0	0	0	0	1	1	ADH5	alcohol dehydrogenase 5 (class III), chi polypeptide
hsa-miR-362-5p	1	0	1	1	1	1	ATP2B4	ATPase, Ca++ transporting, plasma membrane 4
hsa-miR-362-5p	1	0	1	0	1	1	PPARA	peroxisome proliferator-activated receptor alpha
hsa-miR-362-5p	0	0	1	1	1	1	C9orf47	chromosome 9 open reading frame 47
hsa-miR-362-5p	0	0	1	1	1	1	TRIM6	tripartite motif containing 6
hsa-miR-362-5p	1	0	1	1	1	1	TMEM220	transmembrane protein 220
hsa-miR-362-5p	0	0	1	1	1	1	DAZ4	deleted in azoospermia 4
hsa-miR-362-5p	0	0	1	1	1	1	DAZ2	deleted in azoospermia 2
hsa-miR-362-5p	0	0	1	0	1	1	ZNF765	zinc finger protein 765
hsa-miR-362-5p	1	0	1	0	1	1	TMEM237	transmembrane protein 237
hsa-miR-362-5p	1	0	1	1	1	1	HDAC2	histone deacetylase 2
hsa-miR-362-5p	1	0	1	1	1	1	LCP1	lymphocyte cytosolic protein 1 (L-plastin)
hsa-miR-362-5p	0	0	1	1	1	1	PSMA2	proteasome (prosome, macropain) subunit, alpha type, 2
hsa-miR-362-5p	0	0	1	1	1	1	DAZ1	deleted in azoospermia 1
hsa-miR-362-5p	1	0	1	1	1	1	PRKRIR	protein-kinase, interferon-inducible double stranded RNA dependent inhibitor, repressor of (P58 repressor)
hsa-miR-362-5p	1	0	1	0	1	1	SPTLC2	serine palmitoyltransferase, long chain base subunit 2
hsa-miR-362-5p	0	0	1	1	1	1	TRIM25	tripartite motif containing 25
hsa-miR-362-5p	1	1	1	1	1	1	MAP3K8	mitogen-activated protein kinase kinase kinase 8
hsa-miR-362-5p	1	0	1	1	1	1	MERTK	c-mer proto-oncogene tyrosine kinase
hsa-miR-362-5p	0	0	0	1	1	1	TXNL4A	thioredoxin-like 4A
hsa-miR-362-5p	0	0	0	1	1	1	MALT1	mucosa associated lymphoid tissue lymphoma translocation gene 1
hsa-miR-362-5p	0	0	0	1	1	1	UGT2A1	UDP glucuronosyltransferase 2 family, polypeptide A1, complex locus
hsa-miR-362-5p	0	0	1	0	1	1	TLL1	tolloid-like 1
hsa-miR-362-5p	0	0	1	0	1	1	OGN	osteoglycin
hsa-miR-362-5p	0	0	1	1	1	1	DDX58	DEAD (Asp-Glu-Ala-Asp) box polypeptide 58
hsa-miR-362-5p	0	0	1	1	1	1	OSBPL2	oxysterol binding protein-like 2
hsa-miR-362-5p	1	0	1	1	1	1	PIKFYVE	phosphoinositide kinase, FYVE finger containing
hsa-miR-362-5p	1	0	1	1	1	1	NFASC	neurofascin
hsa-miR-362-5p	1	0	1	0	1	1	MTMR9	myotubularin related protein 9
hsa-miR-362-5p	0	0	0	1	1	1	FAM82B	family with sequence similarity 82, member B
hsa-miR-362-5p	1	0	1	1	1	1	VGLL3	vestigial like 3 (Drosophila)
hsa-miR-362-5p	0	0	0	1	1	1	GPN3	GPN-loop GTPase 3
hsa-miR-362-5p	1	0	1	1	1	1	SMCR7L	Smith-Magenis syndrome chromosome region, candidate 7-like
hsa-miR-362-5p	1	0	0	1	1	1	ABCC9	ATP-binding cassette, sub-family C (CFTR/MRP), member 9
hsa-miR-362-5p	0	0	1	0	1	1	DAZ3	deleted in azoospermia 3
hsa-miR-362-5p	1	0	1	1	1	1	RAB22A	RAB22A, member RAS oncogene family
hsa-miR-362-5p	0	0	1	1	1	1	TMCC3	transmembrane and coiled-coil domain family 3
hsa-miR-362-5p	1	0	1	1	1	1	HCN3	hyperpolarization activated cyclic nucleotide-gated potassium channel 3
hsa-miR-362-5p	1	0	1	1	1	1	CLDN1	claudin 1
hsa-miR-362-5p	1	0	0	1	1	1	RBAK	RB-associated KRAB zinc finger
hsa-miR-362-5p	0	0	1	1	1	1	C2orf43	chromosome 2 open reading frame 43
hsa-miR-362-5p	1	0	1	1	1	1	SNX16	sorting nexin 16
hsa-miR-362-5p	1	0	1	1	1	1	FYCO1	FYVE and coiled-coil domain containing 1
hsa-miR-362-5p	1	0	1	1	1	1	HMCN1	hemicentin 1
hsa-miR-362-5p	0	0	1	0	1	1	GPR98	G protein-coupled receptor 98
hsa-miR-362-5p	0	0	1	0	1	1	LDOC1L	leucine zipper, down-regulated in cancer 1-like
hsa-miR-362-5p	1	0	1	1	1	1	FAM104A	family with sequence similarity 104, member A
hsa-miR-362-5p	0	0	1	0	1	1	TP53RK	TP53 regulating kinase
hsa-miR-362-5p	0	0	1	1	1	1	SPICE1	spindle and centriole associated protein 1
hsa-miR-362-5p	0	0	0	1	1	1	PDCD2	programmed cell death 2
[truncated: 10 more rows]
