# Supplementary material for: Profiling of Selected MicroRNAs in Proliferative Eutopic Endometrium of Women with Ovarian Endometriosis
Source: Biomed Res Int. 2015 Aug 20;2015:760698. doi: 10.1155/2015/760698 (PMC4558423; doi:10.1155/2015/760698)
Supplement: Supplementary file 1 — Table I: The names of miRNAs significantly differentially expressed between eutopic endometrium of patients with endometriosis vs eutopic endometrium of patients without endometriosis. Table II: The associations between miRNA and mRNA, which presents detailed results of the search of six major databases i.e targetscan, tarbase, miranda, mirbase, mirtarget2 and pictar. [file 760698.f1.zip › 760698.f1/Table II/hsa-miR-369-5p.tsv]

miR	targetscan	tarbase	miranda	mirbase	mirtarget2	pictar	GeneSymbol	GeneName
hsa-miR-369-5p	0	0	1	1	1	1	HSPH1	heat shock 105kDa/110kDa protein 1
hsa-miR-369-5p	1	0	1	1	1	1	PPIP5K2	diphosphoinositol pentakisphosphate kinase 2
hsa-miR-369-5p	0	0	1	1	0	0	ODF2L	outer dense fiber of sperm tails 2-like
hsa-miR-369-5p	0	0	1	1	0	0	CFLAR	CASP8 and FADD-like apoptosis regulator
hsa-miR-369-5p	1	0	1	1	1	1	PICALM	phosphatidylinositol binding clathrin assembly protein
hsa-miR-369-5p	0	0	1	1	1	1	RGS7	regulator of G-protein signaling 7
hsa-miR-369-5p	0	0	1	1	1	1	FAM114A2	family with sequence similarity 114, member A2
hsa-miR-369-5p	1	0	1	1	1	1	SPTBN4	spectrin, beta, non-erythrocytic 4
hsa-miR-369-5p	1	0	1	1	1	1	NTRK2	neurotrophic tyrosine kinase, receptor, type 2
hsa-miR-369-5p	1	0	1	1	1	1	DPP9	dipeptidyl-peptidase 9
hsa-miR-369-5p	0	0	1	1	1	1	ANKRD36B	ankyrin repeat domain 36B
hsa-miR-369-5p	0	0	1	1	1	1	GNAS	GNAS complex locus
hsa-miR-369-5p	1	0	1	1	1	1	NFYA	nuclear transcription factor Y, alpha
hsa-miR-369-5p	1	0	1	1	1	1	SMEK2	SMEK homolog 2, suppressor of mek1 (Dictyostelium)
hsa-miR-369-5p	1	0	1	1	1	1	MACF1	microtubule-actin crosslinking factor 1
hsa-miR-369-5p	0	0	1	0	1	1	ATXN1L	ataxin 1-like
hsa-miR-369-5p	0	0	1	0	0	0	LOC283508	uncharacterized LOC283508
hsa-miR-369-5p	1	0	1	1	1	1	DHX15	DEAH (Asp-Glu-Ala-His) box polypeptide 15
hsa-miR-369-5p	1	0	1	0	1	1	PTPRE	protein tyrosine phosphatase, receptor type, E
hsa-miR-369-5p	0	0	1	0	0	0	LOC654433	uncharacterized LOC654433
hsa-miR-369-5p	0	0	1	1	0	0	KRT86	keratin 86
hsa-miR-369-5p	0	0	1	0	0	0	FLJ25363	uncharacterized LOC401082
hsa-miR-369-5p	0	0	1	0	1	1	TMSB15B	thymosin beta 15B
hsa-miR-369-5p	0	0	1	1	1	1	HNRNPH1	heterogeneous nuclear ribonucleoprotein H1 (H)
hsa-miR-369-5p	0	0	1	0	1	1	RALYL	RALY RNA binding protein-like
hsa-miR-369-5p	0	0	1	0	1	1	NBPF3	neuroblastoma breakpoint family, member 3
hsa-miR-369-5p	1	0	1	1	1	1	SYT6	synaptotagmin VI
hsa-miR-369-5p	1	0	1	1	1	1	C17orf85	chromosome 17 open reading frame 85
hsa-miR-369-5p	1	0	1	1	1	1	CTGF	connective tissue growth factor
hsa-miR-369-5p	1	0	1	1	1	1	MYO1D	myosin ID
hsa-miR-369-5p	0	0	1	1	0	0	C1orf86	chromosome 1 open reading frame 86
hsa-miR-369-5p	0	0	1	0	0	0	LRRC9	leucine rich repeat containing 9
hsa-miR-369-5p	0	0	1	1	0	0	C17orf107	chromosome 17 open reading frame 107
hsa-miR-369-5p	1	0	1	1	1	1	BCAT1	branched chain amino-acid transaminase 1, cytosolic
hsa-miR-369-5p	0	0	1	0	0	0	FLJ26245	uncharacterized LOC400533
hsa-miR-369-5p	1	0	1	1	1	1	RNF111	ring finger protein 111
hsa-miR-369-5p	1	0	1	1	1	1	TAB2	TGF-beta activated kinase 1/MAP3K7 binding protein 2
hsa-miR-369-5p	0	0	1	1	1	1	HNRPLL	heterogeneous nuclear ribonucleoprotein L-like
hsa-miR-369-5p	1	0	1	0	1	1	MEF2C	myocyte enhancer factor 2C
hsa-miR-369-5p	1	0	1	1	1	1	SYNCRIP	synaptotagmin binding, cytoplasmic RNA interacting protein
hsa-miR-369-5p	1	0	1	1	0	0	ADAM15	ADAM metallopeptidase domain 15
hsa-miR-369-5p	1	0	1	1	1	1	QKI	QKI, KH domain containing, RNA binding
hsa-miR-369-5p	1	0	1	0	1	1	FAM46A	family with sequence similarity 46, member A
hsa-miR-369-5p	1	0	1	1	1	1	PRDM2	PR domain containing 2, with ZNF domain
hsa-miR-369-5p	0	0	1	1	1	1	MAP2	microtubule-associated protein 2
hsa-miR-369-5p	0	0	1	1	1	1	CKMT2	creatine kinase, mitochondrial 2 (sarcomeric)
hsa-miR-369-5p	1	0	1	1	1	1	TBC1D1	TBC1 (tre-2/USP6, BUB2, cdc16) domain family, member 1
hsa-miR-369-5p	0	0	1	1	1	1	FAM171B	family with sequence similarity 171, member B
hsa-miR-369-5p	0	0	1	0	0	0	LOC401074	uncharacterized LOC401074
hsa-miR-369-5p	0	0	1	1	1	1	NSUN7	NOP2/Sun domain family, member 7
hsa-miR-369-5p	0	0	1	1	1	1	MYO3A	myosin IIIA
hsa-miR-369-5p	0	0	1	1	0	0	AGAP11	ankyrin repeat and GTPase domain Arf GTPase activating protein 11
hsa-miR-369-5p	1	0	1	0	1	1	MAGIX	MAGI family member, X-linked
hsa-miR-369-5p	1	0	1	0	1	1	TGFBR1	transforming growth factor, beta receptor 1
hsa-miR-369-5p	1	0	1	1	1	1	OPCML	opioid binding protein/cell adhesion molecule-like
hsa-miR-369-5p	0	0	1	0	0	0	AGAP9	ArfGAP with GTPase domain, ankyrin repeat and PH domain 9
hsa-miR-369-5p	0	0	1	0	0	0	LSAMP-AS3	LSAMP antisense RNA 3
hsa-miR-369-5p	0	0	1	0	0	0	FBXL19-AS1	FBXL19 antisense RNA 1 (head to head)
hsa-miR-369-5p	1	0	1	1	1	1	UBE4A	ubiquitination factor E4A
hsa-miR-369-5p	1	0	1	1	1	1	PAX3	paired box 3
hsa-miR-369-5p	1	0	1	1	1	1	ZEB2	zinc finger E-box binding homeobox 2
hsa-miR-369-5p	0	0	1	0	0	0	LINC00643	long intergenic non-protein coding RNA 643
hsa-miR-369-5p	1	0	1	1	1	1	MASP1	mannan-binding lectin serine peptidase 1 (C4/C2 activating component of Ra-reactive factor)
hsa-miR-369-5p	0	0	1	1	1	1	PRR14L	proline rich 14-like
hsa-miR-369-5p	1	0	1	1	1	1	ATP7B	ATPase, Cu++ transporting, beta polypeptide
hsa-miR-369-5p	1	0	1	1	1	1	NFIB	nuclear factor I/B
hsa-miR-369-5p	1	0	1	0	1	1	KLHL24	kelch-like 24 (Drosophila)
hsa-miR-369-5p	1	0	1	1	1	1	ASB6	ankyrin repeat and SOCS box containing 6
hsa-miR-369-5p	1	0	1	1	1	1	FUT9	fucosyltransferase 9 (alpha (1,3) fucosyltransferase)
hsa-miR-369-5p	0	0	1	0	0	0	SBDSP1	Shwachman-Bodian-Diamond syndrome pseudogene 1
hsa-miR-369-5p	0	0	1	0	0	0	TRIQK	triple QxxK/R motif containing
hsa-miR-369-5p	1	0	1	1	1	1	STK38L	serine/threonine kinase 38 like
hsa-miR-369-5p	1	0	1	1	1	1	ATAT1	alpha tubulin acetyltransferase 1
hsa-miR-369-5p	0	0	1	1	1	1	NCAPH	non-SMC condensin I complex, subunit H
hsa-miR-369-5p	0	0	1	1	1	1	UPRT	uracil phosphoribosyltransferase (FUR1) homolog (S. cerevisiae)
hsa-miR-369-5p	0	0	1	1	1	1	ATF2	activating transcription factor 2
hsa-miR-369-5p	1	0	1	0	1	1	GLI3	GLI family zinc finger 3
hsa-miR-369-5p	1	0	1	1	1	1	LEP	leptin
hsa-miR-369-5p	0	0	1	1	1	1	LPL	lipoprotein lipase
hsa-miR-369-5p	0	0	1	0	1	1	SLC10A2	solute carrier family 10 (sodium/bile acid cotransporter family), member 2
hsa-miR-369-5p	1	0	1	1	1	1	GRIA4	glutamate receptor, ionotropic, AMPA 4
hsa-miR-369-5p	1	0	1	1	1	1	PTGFR	prostaglandin F receptor (FP)
hsa-miR-369-5p	0	0	1	1	1	1	C4orf3	chromosome 4 open reading frame 3
hsa-miR-369-5p	1	0	1	1	1	1	PLCXD3	phosphatidylinositol-specific phospholipase C, X domain containing 3
hsa-miR-369-5p	1	0	1	0	1	1	ZKSCAN2	zinc finger with KRAB and SCAN domains 2
hsa-miR-369-5p	1	0	1	0	1	1	CELF2	CUGBP, Elav-like family member 2
hsa-miR-369-5p	1	0	1	0	1	1	NPNT	nephronectin
hsa-miR-369-5p	0	0	1	1	1	1	MCHR2	melanin-concentrating hormone receptor 2
hsa-miR-369-5p	1	0	1	0	1	1	CD83	CD83 molecule
hsa-miR-369-5p	1	0	1	1	1	1	ZNF706	zinc finger protein 706
hsa-miR-369-5p	0	0	1	1	1	1	FAM22G	family with sequence similarity 22, member G
hsa-miR-369-5p	1	0	1	1	1	1	ZNF697	zinc finger protein 697
hsa-miR-369-5p	0	0	1	1	1	1	CLIC2	chloride intracellular channel 2
hsa-miR-369-5p	1	0	1	1	1	1	ID4	inhibitor of DNA binding 4, dominant negative helix-loop-helix protein
hsa-miR-369-5p	1	0	1	1	1	1	FRK	fyn-related kinase
hsa-miR-369-5p	0	0	1	1	1	1	RGS2	regulator of G-protein signaling 2, 24kDa
hsa-miR-369-5p	1	0	1	1	1	1	SMARCD1	SWI/SNF related, matrix associated, actin dependent regulator of chromatin, subfamily d, member 1
hsa-miR-369-5p	0	0	1	1	1	1	UBE2D1	ubiquitin-conjugating enzyme E2D 1
hsa-miR-369-5p	0	0	1	1	1	1	DDO	D-aspartate oxidase
hsa-miR-369-5p	1	0	1	1	1	1	HNF4G	hepatocyte nuclear factor 4, gamma
hsa-miR-369-5p	1	0	1	1	1	1	ERG	v-ets erythroblastosis virus E26 oncogene homolog (avian)
hsa-miR-369-5p	0	0	1	1	1	1	DIRAS3	DIRAS family, GTP-binding RAS-like 3
hsa-miR-369-5p	1	0	1	1	1	1	ONECUT2	one cut homeobox 2
hsa-miR-369-5p	1	0	1	0	1	1	CALM3	calmodulin 3 (phosphorylase kinase, delta)
hsa-miR-369-5p	1	0	1	1	1	1	ETS1	v-ets erythroblastosis virus E26 oncogene homolog 1 (avian)
hsa-miR-369-5p	1	0	1	0	1	1	CCDC6	coiled-coil domain containing 6
hsa-miR-369-5p	1	0	1	1	1	1	IRS1	insulin receptor substrate 1
hsa-miR-369-5p	0	0	1	1	1	1	HS3ST2	heparan sulfate (glucosamine) 3-O-sulfotransferase 2
hsa-miR-369-5p	0	0	1	1	0	0	NDC80	NDC80 kinetochore complex component homolog (S. cerevisiae)
hsa-miR-369-5p	0	0	1	1	0	0	CCT2	chaperonin containing TCP1, subunit 2 (beta)
hsa-miR-369-5p	1	0	1	1	1	1	MAN1A2	mannosidase, alpha, class 1A, member 2
hsa-miR-369-5p	1	0	1	1	1	1	HIVEP2	human immunodeficiency virus type I enhancer binding protein 2
hsa-miR-369-5p	1	0	1	1	1	1	NR4A3	nuclear receptor subfamily 4, group A, member 3
hsa-miR-369-5p	0	0	1	1	1	1	EHF	ets homologous factor
hsa-miR-369-5p	1	0	1	0	1	1	FZD4	frizzled family receptor 4
hsa-miR-369-5p	1	0	1	0	1	1	RAPGEF5	Rap guanine nucleotide exchange factor (GEF) 5
hsa-miR-369-5p	1	0	1	1	1	1	TSPAN12	tetraspanin 12
hsa-miR-369-5p	1	0	1	0	1	1	MLEC	malectin
hsa-miR-369-5p	1	0	1	0	1	1	PJA2	praja ring finger 2, E3 ubiquitin protein ligase
hsa-miR-369-5p	1	0	1	0	1	1	LPPR4	lipid phosphate phosphatase-related protein type 4
hsa-miR-369-5p	1	0	1	1	1	1	SPAST	spastin
hsa-miR-369-5p	1	0	1	1	0	0	CIC	capicua homolog (Drosophila)
hsa-miR-369-5p	1	0	1	1	1	1	PLCB1	phospholipase C, beta 1 (phosphoinositide-specific)
hsa-miR-369-5p	1	0	1	1	1	1	MORC3	MORC family CW-type zinc finger 3
hsa-miR-369-5p	1	0	1	0	1	1	EIF2C4	eukaryotic translation initiation factor 2C, 4
hsa-miR-369-5p	0	0	1	1	1	1	CRLS1	cardiolipin synthase 1
hsa-miR-369-5p	1	0	1	1	1	1	VAT1L	vesicle amine transport protein 1 homolog (T. californica)-like
hsa-miR-369-5p	1	0	1	1	1	1	SUDS3	suppressor of defective silencing 3 homolog (S. cerevisiae)
hsa-miR-369-5p	1	0	1	1	1	1	ZC3H12A	zinc finger CCCH-type containing 12A
hsa-miR-369-5p	0	0	1	1	1	1	ISCA1	iron-sulfur cluster assembly 1 homolog (S. cerevisiae)
hsa-miR-369-5p	0	0	1	1	1	1	RNASEH2C	ribonuclease H2, subunit C
hsa-miR-369-5p	1	0	1	1	1	1	MEX3B	mex-3 homolog B (C. elegans)
hsa-miR-369-5p	1	0	1	0	1	1	PURB	purine-rich element binding protein B
hsa-miR-369-5p	1	0	1	0	1	1	STK35	serine/threonine kinase 35
hsa-miR-369-5p	1	0	1	1	1	1	KLHL6	kelch-like 6 (Drosophila)
hsa-miR-369-5p	1	0	1	1	1	1	GLCCI1	glucocorticoid induced transcript 1
hsa-miR-369-5p	1	0	1	1	1	1	MBNL2	muscleblind-like splicing regulator 2
hsa-miR-369-5p	0	0	1	0	1	1	HORMAD2	HORMA domain containing 2
hsa-miR-369-5p	1	0	1	0	1	1	ST6GALNAC3	ST6 (alpha-N-acetyl-neuraminyl-2,3-beta-galactosyl-1,3)-N-acetylgalactosaminide alpha-2,6-sialyltransferase 3
hsa-miR-369-5p	1	0	1	1	1	1	CCDC117	coiled-coil domain containing 117
hsa-miR-369-5p	1	0	1	0	1	1	FAM84B	family with sequence similarity 84, member B
hsa-miR-369-5p	1	0	1	1	0	0	TCERG1L	transcription elongation regulator 1-like
hsa-miR-369-5p	1	0	1	1	1	1	ANKRD42	ankyrin repeat domain 42
hsa-miR-369-5p	1	0	1	1	1	1	ZBTB41	zinc finger and BTB domain containing 41
hsa-miR-369-5p	0	0	1	1	1	1	COL25A1	collagen, type XXV, alpha 1
hsa-miR-369-5p	0	0	1	0	0	0	RNY5	RNA, Ro-associated Y5
hsa-miR-369-5p	0	0	1	0	0	0	NACAP1	nascent-polypeptide-associated complex alpha polypeptide pseudogene 1
hsa-miR-369-5p	1	0	1	1	1	1	PAM	peptidylglycine alpha-amidating monooxygenase
hsa-miR-369-5p	0	0	1	1	0	0	TMEM132A	transmembrane protein 132A
hsa-miR-369-5p	0	0	1	1	1	1	CYP4F3	cytochrome P450, family 4, subfamily F, polypeptide 3
hsa-miR-369-5p	0	0	1	1	0	0	C20orf43	chromosome 20 open reading frame 43
hsa-miR-369-5p	1	0	1	1	0	0	SLC45A4	solute carrier family 45, member 4
hsa-miR-369-5p	0	0	1	1	1	1	TNIP3	TNFAIP3 interacting protein 3
hsa-miR-369-5p	1	0	1	1	1	1	QSER1	glutamine and serine rich 1
hsa-miR-369-5p	0	0	0	1	1	1	MBD3	methyl-CpG binding domain protein 3
hsa-miR-369-5p	0	0	1	1	1	1	TRIP13	thyroid hormone receptor interactor 13
hsa-miR-369-5p	1	0	1	1	0	0	TMEM131	transmembrane protein 131
hsa-miR-369-5p	0	0	0	1	1	1	PSG6	pregnancy specific beta-1-glycoprotein 6
hsa-miR-369-5p	1	0	1	1	1	1	SLC25A3	solute carrier family 25 (mitochondrial carrier; phosphate carrier), member 3
hsa-miR-369-5p	0	0	0	1	1	1	PCDHB4	protocadherin beta 4
hsa-miR-369-5p	1	0	1	1	1	1	SNAP91	synaptosomal-associated protein, 91kDa homolog (mouse)
hsa-miR-369-5p	1	0	1	1	1	1	LAMP2	lysosomal-associated membrane protein 2
hsa-miR-369-5p	0	0	0	1	0	0	SULT2B1	sulfotransferase family, cytosolic, 2B, member 1
hsa-miR-369-5p	0	0	1	1	1	1	RBM41	RNA binding motif protein 41
hsa-miR-369-5p	0	0	0	1	0	0	OR1I1	olfactory receptor, family 1, subfamily I, member 1
hsa-miR-369-5p	0	0	0	1	1	1	GADD45B	growth arrest and DNA-damage-inducible, beta
hsa-miR-369-5p	0	0	1	1	0	0	CRYBB3	crystallin, beta B3
hsa-miR-369-5p	1	0	1	1	1	1	KDELR3	KDEL (Lys-Asp-Glu-Leu) endoplasmic reticulum protein retention receptor 3
hsa-miR-369-5p	0	0	1	1	0	0	HDAC10	histone deacetylase 10
hsa-miR-369-5p	0	0	1	1	0	0	SAMD15	sterile alpha motif domain containing 15
hsa-miR-369-5p	1	0	1	1	0	0	ALKBH1	alkB, alkylation repair homolog 1 (E. coli)
hsa-miR-369-5p	0	0	1	1	0	0	CHMP4A	charged multivesicular body protein 4A
hsa-miR-369-5p	0	0	1	1	1	1	PABPC1L	poly(A) binding protein, cytoplasmic 1-like
hsa-miR-369-5p	0	0	1	1	1	1	MYL12A	myosin, light chain 12A, regulatory, non-sarcomeric
hsa-miR-369-5p	0	0	1	1	1	1	SLC25A14	solute carrier family 25 (mitochondrial carrier, brain), member 14
hsa-miR-369-5p	1	0	1	1	1	1	RP2	retinitis pigmentosa 2 (X-linked recessive)
hsa-miR-369-5p	0	0	0	1	0	0	MLNR	motilin receptor
hsa-miR-369-5p	1	0	0	1	1	1	SGCG	sarcoglycan, gamma (35kDa dystrophin-associated glycoprotein)
hsa-miR-369-5p	0	0	0	1	0	0	ACSM1	acyl-CoA synthetase medium-chain family member 1
hsa-miR-369-5p	0	0	0	1	0	0	ZP2	zona pellucida glycoprotein 2 (sperm receptor)
hsa-miR-369-5p	0	0	1	1	1	1	MTFMT	mitochondrial methionyl-tRNA formyltransferase
hsa-miR-369-5p	0	0	1	1	1	1	OIP5	Opa interacting protein 5
hsa-miR-369-5p	1	0	1	1	1	1	PPP2CB	protein phosphatase 2, catalytic subunit, beta isozyme
hsa-miR-369-5p	1	0	1	1	1	1	NEFM	neurofilament, medium polypeptide
hsa-miR-369-5p	0	0	1	1	0	0	PPP1R37	protein phosphatase 1, regulatory subunit 37
hsa-miR-369-5p	0	0	1	1	0	0	RNASEH2A	ribonuclease H2, subunit A
hsa-miR-369-5p	1	0	1	1	0	0	GSK3A	glycogen synthase kinase 3 alpha
hsa-miR-369-5p	0	0	1	1	1	1	NPVF	neuropeptide VF precursor
hsa-miR-369-5p	0	0	1	1	0	0	TFR2	transferrin receptor 2
hsa-miR-369-5p	1	0	1	1	1	1	LSM5	LSM5 homolog, U6 small nuclear RNA associated (S. cerevisiae)
hsa-miR-369-5p	0	0	1	1	1	1	PSMA2	proteasome (prosome, macropain) subunit, alpha type, 2
hsa-miR-369-5p	0	0	1	1	1	1	RLN1	relaxin 1
hsa-miR-369-5p	1	0	1	1	1	1	SETX	senataxin
hsa-miR-369-5p	0	0	1	1	0	0	ZNHIT3	zinc finger, HIT-type containing 3
hsa-miR-369-5p	0	0	1	1	1	1	PF4V1	platelet factor 4 variant 1
hsa-miR-369-5p	1	0	1	1	1	1	KLHL2	kelch-like 2, Mayven (Drosophila)
hsa-miR-369-5p	1	0	1	1	0	0	RPS13	ribosomal protein S13
hsa-miR-369-5p	1	0	1	1	0	0	ACRBP	acrosin binding protein
hsa-miR-369-5p	0	0	0	1	0	0	TPI1	triosephosphate isomerase 1
hsa-miR-369-5p	0	0	1	1	1	1	HLA-DOA	major histocompatibility complex, class II, DO alpha
hsa-miR-369-5p	0	0	0	1	1	1	PCDHB5	protocadherin beta 5
hsa-miR-369-5p	1	0	1	1	1	1	PPP2CA	protein phosphatase 2, catalytic subunit, alpha isozyme
hsa-miR-369-5p	0	0	0	1	1	1	AADAC	arylacetamide deacetylase
hsa-miR-369-5p	0	0	0	1	0	0	AZU1	azurocidin 1
hsa-miR-369-5p	1	0	1	1	1	1	SLC8A2	solute carrier family 8 (sodium/calcium exchanger), member 2
hsa-miR-369-5p	1	0	0	1	1	1	GLRX	glutaredoxin (thioltransferase)
hsa-miR-369-5p	1	0	0	1	1	1	PIGZ	phosphatidylinositol glycan anchor biosynthesis, class Z
hsa-miR-369-5p	0	0	0	1	1	1	GPR75	G protein-coupled receptor 75
hsa-miR-369-5p	1	0	1	1	1	1	HOXB8	homeobox B8
hsa-miR-369-5p	1	0	1	1	1	1	DUSP1	dual specificity phosphatase 1
hsa-miR-369-5p	0	0	1	1	0	0	PPP3CC	protein phosphatase 3, catalytic subunit, gamma isozyme
hsa-miR-369-5p	1	0	1	1	1	1	LUC7L3	LUC7-like 3 (S. cerevisiae)
hsa-miR-369-5p	1	0	1	1	1	1	COIL	coilin
hsa-miR-369-5p	1	0	1	1	1	1	TBX4	T-box 4
hsa-miR-369-5p	1	0	1	1	1	1	KCNJ8	potassium inwardly-rectifying channel, subfamily J, member 8
hsa-miR-369-5p	0	0	1	1	0	0	GHRHR	growth hormone releasing hormone receptor
hsa-miR-369-5p	0	0	1	1	0	0	LIPE	lipase, hormone-sensitive
hsa-miR-369-5p	0	0	1	1	0	0	HIST1H2BJ	histone cluster 1, H2bj
hsa-miR-369-5p	0	0	1	1	1	1	ATP5S	ATP synthase, H+ transporting, mitochondrial Fo complex, subunit s (factor B)
hsa-miR-369-5p	0	0	1	1	0	0	MYH2	myosin, heavy chain 2, skeletal muscle, adult
hsa-miR-369-5p	0	0	1	1	0	0	PLK1S1	polo-like kinase 1 substrate 1
hsa-miR-369-5p	0	0	1	1	0	0	FLRT1	fibronectin leucine rich transmembrane protein 1
hsa-miR-369-5p	0	0	0	1	0	0	TUBA4A	tubulin, alpha 4a
hsa-miR-369-5p	1	0	1	1	0	0	SDF2L1	stromal cell-derived factor 2-like 1
hsa-miR-369-5p	1	0	1	1	0	0	HOXD9	homeobox D9
hsa-miR-369-5p	0	0	1	1	1	1	MBD4	methyl-CpG binding domain protein 4
hsa-miR-369-5p	0	0	1	1	1	1	NUP37	nucleoporin 37kDa
hsa-miR-369-5p	0	0	1	1	1	1	KRT12	keratin 12
hsa-miR-369-5p	0	0	0	1	1	1	ZKSCAN3	zinc finger with KRAB and SCAN domains 3
hsa-miR-369-5p	0	0	1	1	1	1	KRT1	keratin 1
hsa-miR-369-5p	1	0	1	1	1	1	DPF2	D4, zinc and double PHD fingers family 2
hsa-miR-369-5p	0	0	0	1	0	0	KLHDC7B	kelch domain containing 7B
hsa-miR-369-5p	0	0	1	1	0	0	SAG	S-antigen; retina and pineal gland (arrestin)
hsa-miR-369-5p	0	0	1	1	0	0	GMFG	glia maturation factor, gamma
hsa-miR-369-5p	1	0	1	1	0	0	ANGPTL6	angiopoietin-like 6
hsa-miR-369-5p	0	0	1	1	1	1	NOL11	nucleolar protein 11
hsa-miR-369-5p	0	0	0	1	1	1	TMEM204	transmembrane protein 204
hsa-miR-369-5p	0	0	1	1	1	1	IMMT	inner membrane protein, mitochondrial
hsa-miR-369-5p	1	0	1	1	1	1	INADL	InaD-like (Drosophila)
hsa-miR-369-5p	0	0	1	1	1	1	RTTN	rotatin
hsa-miR-369-5p	0	0	1	1	1	1	FABP4	fatty acid binding protein 4, adipocyte
hsa-miR-369-5p	0	0	0	1	1	1	C14orf159	chromosome 14 open reading frame 159
hsa-miR-369-5p	0	0	1	1	0	0	EMC7	ER membrane protein complex subunit 7
hsa-miR-369-5p	0	0	0	1	0	0	C12orf39	chromosome 12 open reading frame 39
hsa-miR-369-5p	0	0	1	1	0	0	SPOCD1	SPOC domain containing 1
hsa-miR-369-5p	0	0	0	1	0	0	FAM189A2	family with sequence similarity 189, member A2
hsa-miR-369-5p	0	0	1	1	1	1	PION	pigeon homolog (Drosophila)
hsa-miR-369-5p	0	0	1	1	0	0	HILPDA	hypoxia inducible lipid droplet-associated
hsa-miR-369-5p	0	0	1	1	0	0	TROAP	trophinin associated protein (tastin)
hsa-miR-369-5p	0	0	1	1	1	1	DOCK10	dedicator of cytokinesis 10
hsa-miR-369-5p	0	0	1	1	1	1	RTP4	receptor (chemosensory) transporter protein 4
hsa-miR-369-5p	0	0	0	1	1	1	FGFBP2	fibroblast growth factor binding protein 2
hsa-miR-369-5p	0	0	1	1	1	1	DDX60	DEAD (Asp-Glu-Ala-Asp) box polypeptide 60
hsa-miR-369-5p	1	0	1	1	1	1	SORL1	sortilin-related receptor, L(DLR class) A repeats containing
hsa-miR-369-5p	0	0	1	1	1	1	MMP7	matrix metallopeptidase 7 (matrilysin, uterine)
hsa-miR-369-5p	0	0	0	1	0	0	RPLP1	ribosomal protein, large, P1
hsa-miR-369-5p	0	0	1	1	1	1	LRRC49	leucine rich repeat containing 49
hsa-miR-369-5p	0	0	1	1	1	1	EXOC6	exocyst complex component 6
hsa-miR-369-5p	0	0	1	1	1	1	GUCA1C	guanylate cyclase activator 1C
hsa-miR-369-5p	0	0	1	1	1	1	SNCAIP	synuclein, alpha interacting protein
hsa-miR-369-5p	0	0	1	1	0	0	ENOX1	ecto-NOX disulfide-thiol exchanger 1
hsa-miR-369-5p	0	0	0	1	1	1	PALB2	partner and localizer of BRCA2
hsa-miR-369-5p	1	0	1	1	1	1	ARL1	ADP-ribosylation factor-like 1
hsa-miR-369-5p	0	0	1	1	1	1	UTP6	UTP6, small subunit (SSU) processome component, homolog (yeast)
hsa-miR-369-5p	1	0	1	1	1	1	BLMH	bleomycin hydrolase
hsa-miR-369-5p	0	0	1	1	0	0	AARS	alanyl-tRNA synthetase
hsa-miR-369-5p	0	0	1	1	1	1	TRIP4	thyroid hormone receptor interactor 4
hsa-miR-369-5p	0	0	0	1	0	0	MYOM2	myomesin (M-protein) 2, 165kDa
hsa-miR-369-5p	0	0	0	1	1	1	CDH19	cadherin 19, type 2
hsa-miR-369-5p	0	0	1	1	1	1	DNAJB6	DnaJ (Hsp40) homolog, subfamily B, member 6
hsa-miR-369-5p	0	0	0	1	0	0	PSMB1	proteasome (prosome, macropain) subunit, beta type, 1
hsa-miR-369-5p	0	0	1	1	0	0	ZNF839	zinc finger protein 839
hsa-miR-369-5p	0	0	1	1	1	1	EFTUD2	elongation factor Tu GTP binding domain containing 2
hsa-miR-369-5p	0	0	0	1	1	1	ATP2C2	ATPase, Ca++ transporting, type 2C, member 2
hsa-miR-369-5p	0	0	1	1	0	0	NLRC5	NLR family, CARD domain containing 5
hsa-miR-369-5p	0	0	1	1	0	0	ZBTB32	zinc finger and BTB domain containing 32
hsa-miR-369-5p	0	0	1	1	1	1	KIF18A	kinesin family member 18A
hsa-miR-369-5p	0	0	1	1	0	0	PACSIN2	protein kinase C and casein kinase substrate in neurons 2
hsa-miR-369-5p	0	0	1	1	0	0	NOVA2	neuro-oncological ventral antigen 2
hsa-miR-369-5p	1	0	1	1	1	1	NOX4	NADPH oxidase 4
hsa-miR-369-5p	0	0	1	1	0	0	TCF25	transcription factor 25 (basic helix-loop-helix)
hsa-miR-369-5p	0	0	1	1	1	1	COMMD9	COMM domain containing 9
hsa-miR-369-5p	0	0	1	1	1	1	PNO1	partner of NOB1 homolog (S. cerevisiae)
hsa-miR-369-5p	1	0	1	1	1	1	TTBK2	tau tubulin kinase 2
hsa-miR-369-5p	1	0	1	1	1	1	IKZF2	IKAROS family zinc finger 2 (Helios)
hsa-miR-369-5p	0	0	1	1	0	0	POPDC2	popeye domain containing 2
hsa-miR-369-5p	0	0	1	1	1	1	ZNF638	zinc finger protein 638
hsa-miR-369-5p	1	0	1	1	1	1	CDH10	cadherin 10, type 2 (T2-cadherin)
hsa-miR-369-5p	0	0	1	1	1	1	IL11	interleukin 11
hsa-miR-369-5p	1	0	1	1	1	1	ASB1	ankyrin repeat and SOCS box containing 1
hsa-miR-369-5p	1	0	1	1	1	1	SNX25	sorting nexin 25
hsa-miR-369-5p	0	0	0	1	1	1	OLFM2	olfactomedin 2
hsa-miR-369-5p	0	0	1	1	1	1	ZFR	zinc finger RNA binding protein
hsa-miR-369-5p	0	0	0	1	1	1	EGF	epidermal growth factor
hsa-miR-369-5p	0	0	1	1	0	0	OBSL1	obscurin-like 1
hsa-miR-369-5p	0	0	1	1	1	1	POT1	protection of telomeres 1 homolog (S. pombe)
hsa-miR-369-5p	0	0	1	1	1	1	TAX1BP1	Tax1 (human T-cell leukemia virus type I) binding protein 1
hsa-miR-369-5p	1	0	1	1	1	1	ANLN	anillin, actin binding protein
hsa-miR-369-5p	0	0	0	1	0	0	ACAT1	acetyl-CoA acetyltransferase 1
hsa-miR-369-5p	1	0	1	1	0	0	KCNC1	potassium voltage-gated channel, Shaw-related subfamily, member 1
hsa-miR-369-5p	0	0	1	1	0	0	EIF2B2	eukaryotic translation initiation factor 2B, subunit 2 beta, 39kDa
hsa-miR-369-5p	0	0	1	1	0	0	PDE6H	phosphodiesterase 6H, cGMP-specific, cone, gamma
hsa-miR-369-5p	0	0	1	1	0	0	SYCP3	synaptonemal complex protein 3
hsa-miR-369-5p	0	0	1	1	0	0	C12orf52	chromosome 12 open reading frame 52
hsa-miR-369-5p	1	0	1	1	1	1	LMBR1L	limb region 1 homolog (mouse)-like
hsa-miR-369-5p	0	0	1	1	1	1	METTL21C	methyltransferase like 21C
hsa-miR-369-5p	0	0	0	1	1	1	FANCM	Fanconi anemia, complementation group M
hsa-miR-369-5p	0	0	1	1	0	0	SLC38A6	solute carrier family 38, member 6
hsa-miR-369-5p	0	0	1	1	1	1	RDH12	retinol dehydrogenase 12 (all-trans/9-cis/11-cis)
hsa-miR-369-5p	0	0	0	1	0	0	GCNT3	glucosaminyl (N-acetyl) transferase 3, mucin type
hsa-miR-369-5p	1	0	1	1	1	1	PML	promyelocytic leukemia
hsa-miR-369-5p	0	0	1	1	0	0	DPEP3	dipeptidase 3
hsa-miR-369-5p	0	0	0	1	1	1	MYO19	myosin XIX
hsa-miR-369-5p	0	0	1	1	0	0	SPACA3	sperm acrosome associated 3
hsa-miR-369-5p	1	0	1	1	1	1	NPC1	Niemann-Pick disease, type C1
hsa-miR-369-5p	0	0	0	1	0	0	PPAP2C	phosphatidic acid phosphatase type 2C
hsa-miR-369-5p	0	0	0	1	1	1	ZNF223	zinc finger protein 223
hsa-miR-369-5p	0	0	0	1	0	0	SLC2A7	solute carrier family 2 (facilitated glucose transporter), member 7
hsa-miR-369-5p	0	0	1	1	0	0	EIF2D	eukaryotic translation initiation factor 2D
hsa-miR-369-5p	1	0	1	1	1	1	ETAA1	Ewing tumor-associated antigen 1
hsa-miR-369-5p	0	0	1	1	1	1	DQX1	DEAQ box RNA-dependent ATPase 1
hsa-miR-369-5p	0	0	1	1	0	0	TAMM41	TAM41, mitochondrial translocator assembly and maintenance protein, homolog (S. cerevisiae)
hsa-miR-369-5p	0	0	1	1	0	0	SLC22A14	solute carrier family 22, member 14
hsa-miR-369-5p	1	0	1	1	1	1	GOLGA4	golgin A4
hsa-miR-369-5p	1	0	1	1	1	1	RNF7	ring finger protein 7
hsa-miR-369-5p	1	0	1	1	1	1	TBCK	TBC1 domain containing kinase
hsa-miR-369-5p	1	0	1	1	1	1	AP1AR	adaptor-related protein complex 1 associated regulatory protein
hsa-miR-369-5p	0	0	1	1	1	1	ZNF300	zinc finger protein 300
hsa-miR-369-5p	1	0	1	1	1	1	ZMAT2	zinc finger, matrin-type 2
hsa-miR-369-5p	1	0	1	1	1	1	HMGN3	high mobility group nucleosomal binding domain 3
hsa-miR-369-5p	0	0	1	1	0	0	AGBL3	ATP/GTP binding protein-like 3
hsa-miR-369-5p	1	0	1	1	1	1	GOLGA7	golgin A7
hsa-miR-369-5p	1	0	1	1	0	0	SIGMAR1	sigma non-opioid intracellular receptor 1
hsa-miR-369-5p	0	0	1	1	1	1	BCCIP	BRCA2 and CDKN1A interacting protein
hsa-miR-369-5p	0	0	1	1	1	1	INCENP	inner centromere protein antigens 135/155kDa
hsa-miR-369-5p	0	0	1	1	1	1	CHEK1	checkpoint kinase 1
hsa-miR-369-5p	0	0	1	1	1	1	MIA2	melanoma inhibitory activity 2
hsa-miR-369-5p	0	0	1	1	1	1	SCLT1	sodium channel and clathrin linker 1
hsa-miR-369-5p	0	0	1	1	1	1	QDPR	quinoid dihydropteridine reductase
hsa-miR-369-5p	0	0	0	1	0	0	TAKR	aldo-keto reductase, truncated
hsa-miR-369-5p	0	0	0	1	1	1	ZNF551	zinc finger protein 551
hsa-miR-369-5p	0	0	0	1	0	0	LIPM	lipase, family member M
hsa-miR-369-5p	1	0	1	1	1	1	ADAMTS18	ADAM metallopeptidase with thrombospondin type 1 motif, 18
hsa-miR-369-5p	1	0	1	1	1	1	GPR125	G protein-coupled receptor 125
hsa-miR-369-5p	0	0	1	1	1	1	CPB1	carboxypeptidase B1 (tissue)
hsa-miR-369-5p	0	0	0	1	1	1	TUBGCP5	tubulin, gamma complex associated protein 5
hsa-miR-369-5p	0	0	1	1	0	0	CFDP1	craniofacial development protein 1
hsa-miR-369-5p	1	0	1	1	1	1	MAX	MYC associated factor X
hsa-miR-369-5p	0	0	1	1	0	0	ABCA6	ATP-binding cassette, sub-family A (ABC1), member 6
hsa-miR-369-5p	0	0	0	1	1	1	LONP2	lon peptidase 2, peroxisomal
hsa-miR-369-5p	0	0	0	1	0	0	GEMIN5	gem (nuclear organelle) associated protein 5
hsa-miR-369-5p	0	0	0	1	0	0	RBM45	RNA binding motif protein 45
hsa-miR-369-5p	0	0	0	1	1	1	ALS2CR12	amyotrophic lateral sclerosis 2 (juvenile) chromosome region, candidate 12
hsa-miR-369-5p	0	0	1	1	1	1	WDR67	WD repeat domain 67
hsa-miR-369-5p	0	0	1	1	0	0	NOMO1	NODAL modulator 1
hsa-miR-369-5p	0	0	0	1	0	0	CCNB2	cyclin B2
hsa-miR-369-5p	1	0	1	1	1	1	APPL1	adaptor protein, phosphotyrosine interaction, PH domain and leucine zipper containing 1
hsa-miR-369-5p	0	0	1	1	1	1	HIST1H2BD	histone cluster 1, H2bd
hsa-miR-369-5p	0	0	0	1	1	1	ACSM3	acyl-CoA synthetase medium-chain family member 3
hsa-miR-369-5p	1	0	1	1	1	1	GCFC1	GC-rich sequence DNA-binding factor 1
hsa-miR-369-5p	0	0	0	1	1	1	HOXB13	homeobox B13
hsa-miR-369-5p	0	0	0	1	0	0	RSPH1	radial spoke head 1 homolog (Chlamydomonas)
hsa-miR-369-5p	0	0	0	1	1	1	ZNF772	zinc finger protein 772
hsa-miR-369-5p	0	0	0	1	1	1	ZNF585A	zinc finger protein 585A
hsa-miR-369-5p	0	0	0	1	1	1	MEIOB	meiosis specific with OB domains
hsa-miR-369-5p	0	0	0	1	1	1	GBP7	guanylate binding protein 7
hsa-miR-369-5p	0	0	1	1	0	0	HFM1	HFM1, ATP-dependent DNA helicase homolog (S. cerevisiae)
hsa-miR-369-5p	0	0	1	1	1	1	PEX13	peroxisomal biogenesis factor 13
hsa-miR-369-5p	1	0	1	1	1	1	WDR92	WD repeat domain 92
hsa-miR-369-5p	1	0	1	1	1	1	PPP3R1	protein phosphatase 3, regulatory subunit B, alpha
hsa-miR-369-5p	1	0	1	1	1	1	EN1	engrailed homeobox 1
hsa-miR-369-5p	0	0	1	1	1	1	SLC9A4	solute carrier family 9, subfamily A (NHE4, cation proton antiporter 4), member 4
hsa-miR-369-5p	1	0	1	1	1	1	GABRB1	gamma-aminobutyric acid (GABA) A receptor, beta 1
hsa-miR-369-5p	1	0	1	1	1	1	HNRPDL	heterogeneous nuclear ribonucleoprotein D-like
hsa-miR-369-5p	1	0	1	1	1	1	AZI2	5-azacytidine induced 2
hsa-miR-369-5p	0	0	1	1	1	1	SPICE1	spindle and centriole associated protein 1
hsa-miR-369-5p	1	0	1	1	1	1	CCNL1	cyclin L1
hsa-miR-369-5p	0	0	1	1	0	0	PPBP	pro-platelet basic protein (chemokine (C-X-C motif) ligand 7)
hsa-miR-369-5p	0	0	0	1	0	0	RTP3	receptor (chemosensory) transporter protein 3
hsa-miR-369-5p	0	0	1	1	1	1	ZNF589	zinc finger protein 589
hsa-miR-369-5p	0	0	1	1	0	0	CCDC36	coiled-coil domain containing 36
hsa-miR-369-5p	0	0	1	1	1	1	HSPA4L	heat shock 70kDa protein 4-like
hsa-miR-369-5p	0	0	1	1	1	1	ZNF474	zinc finger protein 474
hsa-miR-369-5p	0	0	1	1	0	0	HIST1H2AA	histone cluster 1, H2aa
hsa-miR-369-5p	0	0	1	1	1	1	MED30	mediator complex subunit 30
hsa-miR-369-5p	1	0	1	1	1	1	OSGIN2	oxidative stress induced growth inhibitor family member 2
hsa-miR-369-5p	0	0	1	1	1	1	MRRF	mitochondrial ribosome recycling factor
hsa-miR-369-5p	1	0	1	1	1	1	LRFN5	leucine rich repeat and fibronectin type III domain containing 5
hsa-miR-369-5p	0	0	1	1	1	1	VSTM4	V-set and transmembrane domain containing 4
hsa-miR-369-5p	0	0	0	1	1	1	FRMD7	FERM domain containing 7
hsa-miR-369-5p	1	0	1	1	1	1	COPS2	COP9 constitutive photomorphogenic homolog subunit 2 (Arabidopsis)
hsa-miR-369-5p	1	0	1	1	1	1	FRS2	fibroblast growth factor receptor substrate 2
hsa-miR-369-5p	0	0	1	1	1	1	GALR1	galanin receptor 1
hsa-miR-369-5p	1	0	1	1	1	1	KIAA0101	KIAA0101
hsa-miR-369-5p	0	0	1	1	0	0	MESP1	mesoderm posterior 1 homolog (mouse)
hsa-miR-369-5p	0	0	1	1	1	1	MRPL16	mitochondrial ribosomal protein L16
hsa-miR-369-5p	0	0	1	1	1	1	MS4A6E	membrane-spanning 4-domains, subfamily A, member 6E
hsa-miR-369-5p	0	0	1	1	1	1	ENGASE	endo-beta-N-acetylglucosaminidase
hsa-miR-369-5p	0	0	0	1	1	1	ENTHD2	ENTH domain containing 2
hsa-miR-369-5p	0	0	0	1	0	0	GNG8	guanine nucleotide binding protein (G protein), gamma 8
hsa-miR-369-5p	0	0	1	1	0	0	SMG8	smg-8 homolog, nonsense mediated mRNA decay factor (C. elegans)
hsa-miR-369-5p	0	0	0	1	0	0	TRAPPC2L	trafficking protein particle complex 2-like
hsa-miR-369-5p	0	0	1	1	0	0	ANKRD33	ankyrin repeat domain 33
hsa-miR-369-5p	0	0	1	1	0	0	TTYH1	tweety homolog 1 (Drosophila)
hsa-miR-369-5p	0	0	0	1	0	0	OR5A2	olfactory receptor, family 5, subfamily A, member 2
hsa-miR-369-5p	0	0	1	1	1	1	GTF2IRD2	GTF2I repeat domain containing 2
hsa-miR-369-5p	0	0	1	1	1	1	ZNF804A	zinc finger protein 804A
hsa-miR-369-5p	0	0	1	1	1	1	ITGB1	integrin, beta 1 (fibronectin receptor, beta polypeptide, antigen CD29 includes MDF2, MSK12)
hsa-miR-369-5p	0	0	1	1	0	0	FNTA	farnesyltransferase, CAAX box, alpha
hsa-miR-369-5p	1	0	1	1	1	1	ZBTB46	zinc finger and BTB domain containing 46
hsa-miR-369-5p	0	0	1	1	1	1	COL22A1	collagen, type XXII, alpha 1
hsa-miR-369-5p	0	0	1	1	1	1	MMADHC	methylmalonic aciduria (cobalamin deficiency) cblD type, with homocystinuria
hsa-miR-369-5p	0	0	0	1	0	0	GPR25	G protein-coupled receptor 25
hsa-miR-369-5p	0	0	1	1	1	1	DSCAM	Down syndrome cell adhesion molecule
hsa-miR-369-5p	1	0	1	1	1	1	COL3A1	collagen, type III, alpha 1
hsa-miR-369-5p	0	0	0	1	0	0	SLFN12	schlafen family member 12
hsa-miR-369-5p	0	0	0	1	0	0	OR4K15	olfactory receptor, family 4, subfamily K, member 15
hsa-miR-369-5p	0	0	0	1	1	1	NMUR1	neuromedin U receptor 1
hsa-miR-369-5p	0	0	1	1	1	1	TM4SF1	transmembrane 4 L six family member 1
hsa-miR-369-5p	0	0	1	1	1	1	SCG2	secretogranin II
hsa-miR-369-5p	1	0	1	1	1	1	GPHN	gephyrin
hsa-miR-369-5p	0	0	1	1	1	1	LSM3	LSM3 homolog, U6 small nuclear RNA associated (S. cerevisiae)
hsa-miR-369-5p	0	0	1	1	1	1	MUC17	mucin 17, cell surface associated
hsa-miR-369-5p	0	0	0	1	1	1	MRPL13	mitochondrial ribosomal protein L13
hsa-miR-369-5p	0	0	1	1	1	1	CDY1	chromodomain protein, Y-linked, 1
hsa-miR-369-5p	0	0	1	1	1	1	MPLKIP	M-phase specific PLK1 interacting protein
hsa-miR-369-5p	1	0	1	1	1	1	AXIN2	axin 2
hsa-miR-369-5p	0	0	1	1	1	1	USH2A	Usher syndrome 2A (autosomal recessive, mild)
hsa-miR-369-5p	0	0	1	1	1	1	HTRA3	HtrA serine peptidase 3
hsa-miR-369-5p	1	0	1	1	0	0	NKIRAS2	NFKB inhibitor interacting Ras-like 2
hsa-miR-369-5p	0	0	1	1	0	0	MUS81	MUS81 endonuclease homolog (S. cerevisiae)
hsa-miR-369-5p	0	0	1	1	1	1	GEMIN2	gem (nuclear organelle) associated protein 2
hsa-miR-369-5p	1	0	1	1	1	1	PDLIM2	PDZ and LIM domain 2 (mystique)
hsa-miR-369-5p	0	0	1	1	1	1	EPG5	ectopic P-granules autophagy protein 5 homolog (C. elegans)
hsa-miR-369-5p	0	0	1	1	0	0	DUSP13	dual specificity phosphatase 13
hsa-miR-369-5p	0	0	0	1	1	1	LGR6	leucine-rich repeat containing G protein-coupled receptor 6
hsa-miR-369-5p	0	0	1	1	0	0	TRMT112	tRNA methyltransferase 11-2 homolog (S. cerevisiae)
hsa-miR-369-5p	1	0	1	1	1	1	GPBP1	GC-rich promoter binding protein 1
hsa-miR-369-5p	0	0	1	1	0	0	GRB7	growth factor receptor-bound protein 7
hsa-miR-369-5p	0	0	0	1	0	0	GLRXP3	glutaredoxin (thioltransferase) pseudogene 3
hsa-miR-369-5p	0	0	1	1	1	1	KLF7	Kruppel-like factor 7 (ubiquitous)
hsa-miR-369-5p	0	0	0	1	1	1	EPS8L1	EPS8-like 1
hsa-miR-369-5p	0	0	1	1	0	0	PSMD2	proteasome (prosome, macropain) 26S subunit, non-ATPase, 2
hsa-miR-369-5p	0	0	0	1	0	0	ATP8B3	ATPase, aminophospholipid transporter, class I, type 8B, member 3
hsa-miR-369-5p	0	0	1	1	1	1	PPA2	pyrophosphatase (inorganic) 2
hsa-miR-369-5p	0	0	1	1	1	1	PIGG	phosphatidylinositol glycan anchor biosynthesis, class G
hsa-miR-369-5p	0	0	1	1	1	1	CCDC14	coiled-coil domain containing 14
hsa-miR-369-5p	0	0	1	1	0	0	ANKHD1-EIF4EBP3	ANKHD1-EIF4EBP3 readthrough
hsa-miR-369-5p	0	0	1	1	0	0	EIF4EBP3	eukaryotic translation initiation factor 4E binding protein 3
hsa-miR-369-5p	0	0	1	1	1	1	ANKHD1	ankyrin repeat and KH domain containing 1
hsa-miR-369-5p	0	0	1	1	1	1	CELF1	CUGBP, Elav-like family member 1
hsa-miR-369-5p	0	0	1	1	0	0	ZNF283	zinc finger protein 283
hsa-miR-369-5p	0	0	1	1	0	0	AGAP8	ArfGAP with GTPase domain, ankyrin repeat and PH domain 8
hsa-miR-369-5p	1	0	1	1	1	1	RBFOX1	RNA binding protein, fox-1 homolog (C. elegans) 1
hsa-miR-369-5p	0	0	1	1	1	1	FAM71D	family with sequence similarity 71, member D
hsa-miR-369-5p	0	0	1	1	0	0	RPS14	ribosomal protein S14
hsa-miR-369-5p	0	0	0	1	0	0	MCTP1	multiple C2 domains, transmembrane 1
hsa-miR-369-5p	0	0	0	1	0	0	PFKL	phosphofructokinase, liver
hsa-miR-369-5p	0	0	1	1	0	0	POLD4	polymerase (DNA-directed), delta 4, accessory subunit
hsa-miR-369-5p	1	0	1	1	0	0	CGREF1	cell growth regulator with EF-hand domain 1
hsa-miR-369-5p	0	0	1	1	1	1	PFN4	profilin family, member 4
hsa-miR-369-5p	0	0	1	1	1	1	KLF8	Kruppel-like factor 8
hsa-miR-369-5p	0	0	1	1	1	1	MRPS23	mitochondrial ribosomal protein S23
hsa-miR-369-5p	0	0	1	1	1	1	PNMAL1	paraneoplastic Ma antigen family-like 1
hsa-miR-369-5p	1	0	1	1	0	0	DALRD3	DALR anticodon binding domain containing 3
hsa-miR-369-5p	0	0	0	1	0	0	RPL27A	ribosomal protein L27a
hsa-miR-369-5p	0	0	0	1	0	0	OR4C15	olfactory receptor, family 4, subfamily C, member 15
hsa-miR-369-5p	0	0	1	1	1	1	PENK	proenkephalin
hsa-miR-369-5p	0	0	1	1	0	0	HNRNPA0	heterogeneous nuclear ribonucleoprotein A0
hsa-miR-369-5p	1	0	1	1	1	1	RHOT2	ras homolog family member T2
hsa-miR-369-5p	0	0	0	1	0	0	OR11H4	olfactory receptor, family 11, subfamily H, member 4
hsa-miR-369-5p	0	0	1	1	1	1	CALML4	calmodulin-like 4
hsa-miR-369-5p	1	0	1	1	1	1	CCNG2	cyclin G2
hsa-miR-369-5p	1	0	1	1	1	1	CLU	clusterin
hsa-miR-369-5p	0	0	0	1	0	0	DEF6	differentially expressed in FDCP 6 homolog (mouse)
hsa-miR-369-5p	0	0	1	1	1	1	PUS10	pseudouridylate synthase 10
hsa-miR-369-5p	0	0	1	1	1	1	C5orf46	chromosome 5 open reading frame 46
hsa-miR-369-5p	0	0	1	1	1	1	HDDC2	HD domain containing 2
hsa-miR-369-5p	0	0	1	1	1	1	GRM6	glutamate receptor, metabotropic 6
hsa-miR-369-5p	0	0	1	1	1	1	KLHL11	kelch-like 11 (Drosophila)
hsa-miR-369-5p	0	0	0	1	1	1	DIS3L	DIS3 mitotic control homolog (S. cerevisiae)-like
hsa-miR-369-5p	0	0	0	1	0	0	OR6B3	olfactory receptor, family 6, subfamily B, member 3
hsa-miR-369-5p	0	0	1	1	1	1	ZNF169	zinc finger protein 169
hsa-miR-369-5p	1	0	1	1	1	1	LPHN2	latrophilin 2
hsa-miR-369-5p	0	0	1	1	0	0	RPP40	ribonuclease P/MRP 40kDa subunit
hsa-miR-369-5p	0	0	1	1	1	1	USP54	ubiquitin specific peptidase 54
hsa-miR-369-5p	1	0	0	1	1	1	ZFP82	zinc finger protein 82 homolog (mouse)
hsa-miR-369-5p	0	0	0	1	0	0	OR2G2	olfactory receptor, family 2, subfamily G, member 2
hsa-miR-369-5p	0	0	0	1	0	0	SLC16A8	solute carrier family 16, member 8 (monocarboxylic acid transporter 3)
hsa-miR-369-5p	0	0	1	1	1	1	EFCAB5	EF-hand calcium binding domain 5
hsa-miR-369-5p	1	0	1	1	1	1	DYRK1A	dual-specificity tyrosine-(Y)-phosphorylation regulated kinase 1A
hsa-miR-369-5p	1	0	1	1	0	0	SENP3	SUMO1/sentrin/SMT3 specific peptidase 3
hsa-miR-369-5p	0	0	0	1	0	0	OR8D4	olfactory receptor, family 8, subfamily D, member 4
hsa-miR-369-5p	0	0	0	1	1	1	PLD6	phospholipase D family, member 6
hsa-miR-369-5p	0	0	1	1	0	0	VARS2	valyl-tRNA synthetase 2, mitochondrial (putative)
hsa-miR-369-5p	1	0	1	1	0	0	ATAD5	ATPase family, AAA domain containing 5
hsa-miR-369-5p	0	0	0	1	1	1	TPRX1	tetra-peptide repeat homeobox 1
hsa-miR-369-5p	0	0	1	1	1	1	DDX10	DEAD (Asp-Glu-Ala-Asp) box polypeptide 10
hsa-miR-369-5p	0	0	1	1	0	0	DUOXA2	dual oxidase maturation factor 2
hsa-miR-369-5p	0	0	1	1	0	0	TYMS	thymidylate synthetase
hsa-miR-369-5p	0	0	1	1	1	1	PIPOX	pipecolic acid oxidase
hsa-miR-369-5p	0	0	0	1	0	0	B3GNT4	UDP-GlcNAc:betaGal beta-1,3-N-acetylglucosaminyltransferase 4
hsa-miR-369-5p	0	0	1	1	1	1	ARFRP1	ADP-ribosylation factor related protein 1
hsa-miR-369-5p	0	0	1	1	1	1	CALCB	calcitonin-related polypeptide beta
hsa-miR-369-5p	0	0	1	1	1	1	TCP11L1	t-complex 11 (mouse)-like 1
hsa-miR-369-5p	0	0	1	1	1	1	SCAPER	S-phase cyclin A-associated protein in the ER
hsa-miR-369-5p	0	0	1	1	1	1	LRIF1	ligand dependent nuclear receptor interacting factor 1
hsa-miR-369-5p	0	0	0	1	1	1	C21orf2	chromosome 21 open reading frame 2
hsa-miR-369-5p	0	0	1	1	1	1	MARVELD2	MARVEL domain containing 2
hsa-miR-369-5p	1	0	1	1	0	0	UBC	ubiquitin C
hsa-miR-369-5p	0	0	1	1	1	1	ZNF639	zinc finger protein 639
hsa-miR-369-5p	0	0	1	1	1	1	SLC36A4	solute carrier family 36 (proton/amino acid symporter), member 4
hsa-miR-369-5p	0	0	1	1	0	0	COX6B2	cytochrome c oxidase subunit VIb polypeptide 2 (testis)
hsa-miR-369-5p	0	0	1	1	0	0	CES4A	carboxylesterase 4A
hsa-miR-369-5p	0	0	1	1	1	1	CETN1	centrin, EF-hand protein, 1
hsa-miR-369-5p	1	0	1	1	1	1	JMJD1C	jumonji domain containing 1C
hsa-miR-369-5p	0	0	0	1	0	0	CFD	complement factor D (adipsin)
hsa-miR-369-5p	1	0	1	1	1	1	WT1-AS	WT1 antisense RNA
hsa-miR-369-5p	0	0	0	1	1	1	CRELD2	cysteine-rich with EGF-like domains 2
hsa-miR-369-5p	0	0	1	1	1	1	CCDC34	coiled-coil domain containing 34
hsa-miR-369-5p	1	0	1	1	1	1	COA5	cytochrome C oxidase assembly factor 5
hsa-miR-369-5p	0	0	0	1	0	0	C19orf68	chromosome 19 open reading frame 68
hsa-miR-369-5p	1	0	1	1	1	1	SEPT9	septin 9
hsa-miR-369-5p	0	0	0	1	0	0	POTEKP	POTE ankyrin domain family, member K, pseudogene
hsa-miR-369-5p	0	0	0	1	1	1	TRIM61	tripartite motif containing 61
hsa-miR-369-5p	0	0	1	1	1	1	LRRC16A	leucine rich repeat containing 16A
hsa-miR-369-5p	0	0	1	1	1	1	WBP2NL	WBP2 N-terminal like
hsa-miR-369-5p	0	0	1	1	0	0	IRX3	iroquois homeobox 3
hsa-miR-369-5p	1	0	1	1	1	1	TPM3	tropomyosin 3
hsa-miR-369-5p	1	0	1	1	1	1	PRKCD	protein kinase C, delta
hsa-miR-369-5p	0	0	1	1	0	0	NOMO2	NODAL modulator 2
hsa-miR-369-5p	0	0	0	1	0	0	PDE6G	phosphodiesterase 6G, cGMP-specific, rod, gamma
hsa-miR-369-5p	1	0	1	1	1	1	CSTF2T	cleavage stimulation factor, 3' pre-RNA, subunit 2, 64kDa, tau variant
hsa-miR-369-5p	0	0	0	1	0	0	HIST2H3D	histone cluster 2, H3d
hsa-miR-369-5p	0	0	1	1	0	0	EIF3C	eukaryotic translation initiation factor 3, subunit C
hsa-miR-369-5p	0	0	1	1	0	0	ACTB	actin, beta
hsa-miR-369-5p	0	0	1	1	1	1	WT1	Wilms tumor 1
hsa-miR-369-5p	0	0	1	1	1	1	IFNE	interferon, epsilon
hsa-miR-369-5p	0	0	0	1	0	0	PRHOXNB	parahox cluster neighbor
hsa-miR-369-5p	1	0	1	1	1	1	CCDC28A	coiled-coil domain containing 28A
hsa-miR-369-5p	1	0	1	1	0	0	NOG	noggin
hsa-miR-369-5p	0	0	0	1	0	0	ZNF804B	zinc finger protein 804B
hsa-miR-369-5p	0	0	0	1	0	0	TUBB2A	tubulin, beta 2A class IIa
hsa-miR-369-5p	0	0	1	1	1	1	COBL	cordon-bleu homolog (mouse)
hsa-miR-369-5p	0	0	0	1	0	0	C15orf55	chromosome 15 open reading frame 55
hsa-miR-369-5p	0	0	1	1	1	1	ZNF568	zinc finger protein 568
hsa-miR-369-5p	1	0	1	1	1	1	ZSCAN2	zinc finger and SCAN domain containing 2
hsa-miR-369-5p	0	0	1	1	1	1	GABRA5	gamma-aminobutyric acid (GABA) A receptor, alpha 5
hsa-miR-369-5p	1	0	1	1	1	1	TCF20	transcription factor 20 (AR1)
hsa-miR-369-5p	1	0	1	1	1	1	NPAS2	neuronal PAS domain protein 2
hsa-miR-369-5p	0	0	1	1	1	1	ATP5C1	ATP synthase, H+ transporting, mitochondrial F1 complex, gamma polypeptide 1
hsa-miR-369-5p	0	0	1	1	1	1	SLC6A16	solute carrier family 6, member 16
hsa-miR-369-5p	1	0	1	1	1	1	BOLL	bol, boule-like (Drosophila)
hsa-miR-369-5p	0	0	1	1	0	0	ZNF142	zinc finger protein 142
hsa-miR-369-5p	0	0	0	1	1	1	CYP3A4	cytochrome P450, family 3, subfamily A, polypeptide 4
hsa-miR-369-5p	0	0	1	1	0	0	ZFYVE19	zinc finger, FYVE domain containing 19
hsa-miR-369-5p	0	0	0	1	0	0	KLC3	kinesin light chain 3
hsa-miR-369-5p	1	0	1	1	1	1	BCL2L13	BCL2-like 13 (apoptosis facilitator)
hsa-miR-369-5p	1	0	1	1	0	0	C10orf137	chromosome 10 open reading frame 137
hsa-miR-369-5p	0	0	0	1	1	1	ZNF420	zinc finger protein 420
hsa-miR-369-5p	0	0	1	1	1	1	RAB28	RAB28, member RAS oncogene family
hsa-miR-369-5p	0	0	1	1	0	0	SLPI	secretory leukocyte peptidase inhibitor
hsa-miR-369-5p	0	0	1	1	1	1	SLC28A1	solute carrier family 28 (sodium-coupled nucleoside transporter), member 1
hsa-miR-369-5p	0	0	0	1	0	0	DUSP21	dual specificity phosphatase 21
hsa-miR-369-5p	0	0	1	1	1	1	ATP1A1	ATPase, Na+/K+ transporting, alpha 1 polypeptide
hsa-miR-369-5p	1	0	1	1	1	1	PHKA1	phosphorylase kinase, alpha 1 (muscle)
hsa-miR-369-5p	1	0	1	1	1	1	AQP4	aquaporin 4
hsa-miR-369-5p	0	0	1	1	1	1	ZCCHC13	zinc finger, CCHC domain containing 13
hsa-miR-369-5p	0	0	1	1	1	1	GPT2	glutamic pyruvate transaminase (alanine aminotransferase) 2
hsa-miR-369-5p	1	0	1	1	1	1	C20orf26	chromosome 20 open reading frame 26
hsa-miR-369-5p	1	0	1	1	1	1	H3F3C	H3 histone, family 3C
hsa-miR-369-5p	0	0	1	1	1	1	BRAT1	BRCA1-associated ATM activator 1
hsa-miR-369-5p	1	0	1	1	1	1	RRP1B	ribosomal RNA processing 1 homolog B (S. cerevisiae)
hsa-miR-369-5p	0	0	1	1	1	1	H1F0	H1 histone family, member 0
hsa-miR-369-5p	0	0	0	1	0	0	RASSF10	Ras association (RalGDS/AF-6) domain family (N-terminal) member 10
hsa-miR-369-5p	0	0	1	1	0	0	ART3	ADP-ribosyltransferase 3
hsa-miR-369-5p	0	0	0	1	1	1	TRIM60	tripartite motif containing 60
hsa-miR-369-5p	1	0	0	1	1	1	MGAT3	mannosyl (beta-1,4-)-glycoprotein beta-1,4-N-acetylglucosaminyltransferase
hsa-miR-369-5p	1	0	1	1	1	1	VAPB	VAMP (vesicle-associated membrane protein)-associated protein B and C
hsa-miR-369-5p	0	0	0	1	0	0	SERPINA12	serpin peptidase inhibitor, clade A (alpha-1 antiproteinase, antitrypsin), member 12
hsa-miR-369-5p	1	0	1	1	1	1	JARID2	jumonji, AT rich interactive domain 2
hsa-miR-369-5p	0	0	1	1	0	0	C7orf59	chromosome 7 open reading frame 59
hsa-miR-369-5p	0	0	0	1	0	0	SRRT	serrate RNA effector molecule homolog (Arabidopsis)
hsa-miR-369-5p	1	0	1	1	0	0	CECR2	cat eye syndrome chromosome region, candidate 2
hsa-miR-369-5p	0	0	0	1	1	1	DCAKD	dephospho-CoA kinase domain containing
hsa-miR-369-5p	0	0	1	1	1	1	IKBIP	IKBKB interacting protein
hsa-miR-369-5p	1	0	1	1	1	1	JAK1	Janus kinase 1
hsa-miR-369-5p	0	0	1	1	0	0	AGAP4	ArfGAP with GTPase domain, ankyrin repeat and PH domain 4
hsa-miR-369-5p	1	0	0	1	1	1	SNED1	sushi, nidogen and EGF-like domains 1
hsa-miR-369-5p	1	0	1	1	1	1	WDR20	WD repeat domain 20
hsa-miR-369-5p	1	0	1	1	0	0	LRRC16B	leucine rich repeat containing 16B
hsa-miR-369-5p	0	0	0	1	0	0	CLRN2	clarin 2
hsa-miR-369-5p	0	0	0	1	1	1	DFNA5	deafness, autosomal dominant 5
hsa-miR-369-5p	0	0	1	1	1	1	MAGEH1	melanoma antigen family H, 1
hsa-miR-369-5p	0	0	1	1	1	1	C9orf171	chromosome 9 open reading frame 171
hsa-miR-369-5p	0	0	1	1	0	0	SIGLEC6	sialic acid binding Ig-like lectin 6
hsa-miR-369-5p	0	0	0	1	0	0	ZBP1	Z-DNA binding protein 1
hsa-miR-369-5p	1	0	1	1	0	0	FOXO3	forkhead box O3
hsa-miR-369-5p	1	0	1	1	0	0	FAM150B	family with sequence similarity 150, member B
hsa-miR-369-5p	0	0	1	1	1	1	RAB23	RAB23, member RAS oncogene family
hsa-miR-369-5p	0	0	1	1	0	0	NKX2-3	NK2 homeobox 3
hsa-miR-369-5p	0	0	1	1	1	1	ZNF833P	zinc finger protein 833, pseudogene
hsa-miR-369-5p	0	0	1	1	1	1	TGIF1	TGFB-induced factor homeobox 1
hsa-miR-369-5p	1	0	1	1	1	1	CNNM2	cyclin M2
hsa-miR-369-5p	0	0	0	1	0	0	PPL	periplakin
hsa-miR-369-5p	0	0	1	1	0	0	SLC28A2	solute carrier family 28 (sodium-coupled nucleoside transporter), member 2
hsa-miR-369-5p	0	0	1	1	0	0	RBM5	RNA binding motif protein 5
hsa-miR-369-5p	1	0	1	1	1	1	UBE3C	ubiquitin protein ligase E3C
hsa-miR-369-5p	1	0	1	1	1	1	VPS39	vacuolar protein sorting 39 homolog (S. cerevisiae)
hsa-miR-369-5p	0	0	0	1	0	0	IRF7	interferon regulatory factor 7
hsa-miR-369-5p	0	0	1	1	0	0	C20orf152	chromosome 20 open reading frame 152
hsa-miR-369-5p	0	0	1	1	1	1	PQLC1	PQ loop repeat containing 1
hsa-miR-369-5p	0	0	1	1	1	1	TEX9	testis expressed 9
hsa-miR-369-5p	0	0	0	1	1	1	POLR2K	polymerase (RNA) II (DNA directed) polypeptide K, 7.0kDa
hsa-miR-369-5p	0	0	0	1	0	0	PRAMEF19	PRAME family member 19
hsa-miR-369-5p	0	0	1	1	1	1	PLA2G4C	phospholipase A2, group IVC (cytosolic, calcium-independent)
hsa-miR-369-5p	0	0	1	1	1	1	COPS8	COP9 constitutive photomorphogenic homolog subunit 8 (Arabidopsis)
hsa-miR-369-5p	0	0	1	1	1	1	GIN1	gypsy retrotransposon integrase 1
hsa-miR-369-5p	1	0	1	1	0	0	SRGAP1	SLIT-ROBO Rho GTPase activating protein 1
hsa-miR-369-5p	0	0	1	1	1	1	ZNF160	zinc finger protein 160
hsa-miR-369-5p	0	0	0	1	1	1	ARSG	arylsulfatase G
hsa-miR-369-5p	0	0	1	1	0	0	PRMT2	protein arginine methyltransferase 2
hsa-miR-369-5p	0	0	1	1	1	1	TTC39B	tetratricopeptide repeat domain 39B
hsa-miR-369-5p	0	0	0	1	0	0	OR11L1	olfactory receptor, family 11, subfamily L, member 1
hsa-miR-369-5p	1	0	1	1	1	1	PHLPP2	PH domain and leucine rich repeat protein phosphatase 2
hsa-miR-369-5p	0	0	1	1	1	1	PXDNL	peroxidasin homolog (Drosophila)-like
hsa-miR-369-5p	1	0	1	1	1	1	ARIH2	ariadne homolog 2 (Drosophila)
hsa-miR-369-5p	1	0	1	1	0	0	DTNB	dystrobrevin, beta
hsa-miR-369-5p	0	0	0	1	1	1	LIG4	ligase IV, DNA, ATP-dependent
hsa-miR-369-5p	1	0	1	1	1	1	IGF2R	insulin-like growth factor 2 receptor
hsa-miR-369-5p	1	0	1	1	1	1	ZFP161	zinc finger protein 161 homolog (mouse)
hsa-miR-369-5p	0	0	0	1	0	0	RIMBP3B	RIMS binding protein 3B
hsa-miR-369-5p	0	0	1	1	1	1	TCL6	T-cell leukemia/lymphoma 6 (non-protein coding)
hsa-miR-369-5p	1	0	0	1	1	1	SDCCAG3	serologically defined colon cancer antigen 3
hsa-miR-369-5p	1	0	1	1	1	1	UPF2	UPF2 regulator of nonsense transcripts homolog (yeast)
hsa-miR-369-5p	0	0	1	1	1	1	KBTBD4	kelch repeat and BTB (POZ) domain containing 4
hsa-miR-369-5p	0	0	1	1	1	1	SGOL2	shugoshin-like 2 (S. pombe)
hsa-miR-369-5p	0	0	1	1	1	1	SPSB1	splA/ryanodine receptor domain and SOCS box containing 1
hsa-miR-369-5p	0	0	1	1	1	1	MTPAP	mitochondrial poly(A) polymerase
hsa-miR-369-5p	1	0	1	1	1	1	PAK4	p21 protein (Cdc42/Rac)-activated kinase 4
hsa-miR-369-5p	1	0	1	1	1	1	FUT8	fucosyltransferase 8 (alpha (1,6) fucosyltransferase)
hsa-miR-369-5p	1	0	1	1	1	1	PCSK6	proprotein convertase subtilisin/kexin type 6
hsa-miR-369-5p	1	0	1	1	1	1	DEM1	defects in morphology 1 homolog (S. cerevisiae)
hsa-miR-369-5p	0	0	0	1	1	1	TMA16	translation machinery associated 16 homolog (S. cerevisiae)
hsa-miR-369-5p	0	0	0	1	1	1	MANEA	mannosidase, endo-alpha
hsa-miR-369-5p	0	0	1	1	1	1	CCL20	chemokine (C-C motif) ligand 20
hsa-miR-369-5p	0	0	1	1	1	1	CNDP1	carnosine dipeptidase 1 (metallopeptidase M20 family)
hsa-miR-369-5p	0	0	1	1	0	0	BCL7C	B-cell CLL/lymphoma 7C
hsa-miR-369-5p	0	0	1	1	0	0	C9orf169	chromosome 9 open reading frame 169
hsa-miR-369-5p	1	0	1	1	1	1	SPTSSB	serine palmitoyltransferase, small subunit B
hsa-miR-369-5p	0	0	1	1	0	0	SH2B1	SH2B adaptor protein 1
hsa-miR-369-5p	0	0	1	1	0	0	HIST1H3J	histone cluster 1, H3j
hsa-miR-369-5p	0	0	0	1	0	0	OR1N1	olfactory receptor, family 1, subfamily N, member 1
hsa-miR-369-5p	0	0	0	1	0	0	EFTUD1	elongation factor Tu GTP binding domain containing 1
hsa-miR-369-5p	0	0	1	1	0	0	DNMT1	DNA (cytosine-5-)-methyltransferase 1
hsa-miR-369-5p	0	0	1	1	1	1	GTF3C2	general transcription factor IIIC, polypeptide 2, beta 110kDa
hsa-miR-369-5p	1	0	1	1	0	0	EFNA4	ephrin-A4
hsa-miR-369-5p	0	0	1	1	0	0	SPINK5	serine peptidase inhibitor, Kazal type 5
hsa-miR-369-5p	0	0	1	1	1	1	C17orf104	chromosome 17 open reading frame 104
hsa-miR-369-5p	0	0	1	1	0	0	FAM48A	family with sequence similarity 48, member A
hsa-miR-369-5p	1	0	1	1	1	1	CUX1	cut-like homeobox 1
hsa-miR-369-5p	1	0	1	1	1	1	NMB	neuromedin B
hsa-miR-369-5p	1	0	1	1	1	1	SNTB2	syntrophin, beta 2 (dystrophin-associated protein A1, 59kDa, basic component 2)
hsa-miR-369-5p	0	0	1	1	0	0	ISLR2	immunoglobulin superfamily containing leucine-rich repeat 2
hsa-miR-369-5p	1	0	1	1	1	1	NCKAP1	NCK-associated protein 1
hsa-miR-369-5p	0	0	1	1	0	0	RNF208	ring finger protein 208
hsa-miR-369-5p	1	0	1	1	1	1	KIAA0922	KIAA0922
hsa-miR-369-5p	0	0	1	1	1	1	PJA1	praja ring finger 1, E3 ubiquitin protein ligase
hsa-miR-369-5p	0	0	0	1	0	0	SNRNP35	small nuclear ribonucleoprotein 35kDa (U11/U12)
hsa-miR-369-5p	1	0	1	1	1	1	SGMS1	sphingomyelin synthase 1
hsa-miR-369-5p	0	0	1	1	1	1	OSTC	oligosaccharyltransferase complex subunit
hsa-miR-369-5p	1	0	1	1	1	1	ZFYVE9	zinc finger, FYVE domain containing 9
hsa-miR-369-5p	1	0	1	1	1	1	SOWAHA	sosondowah ankyrin repeat domain family member A
hsa-miR-369-5p	0	0	0	1	1	1	MAGEB3	melanoma antigen family B, 3
hsa-miR-369-5p	0	0	1	1	1	1	GRM3	glutamate receptor, metabotropic 3
hsa-miR-369-5p	1	0	1	1	1	1	CELF4	CUGBP, Elav-like family member 4
hsa-miR-369-5p	0	0	1	1	0	0	CNIH4	cornichon homolog 4 (Drosophila)
hsa-miR-369-5p	1	0	1	1	1	1	RCOR3	REST corepressor 3
hsa-miR-369-5p	1	0	1	1	0	0	DYNLT1	dynein, light chain, Tctex-type 1
hsa-miR-369-5p	1	0	1	1	1	1	TULP4	tubby like protein 4
hsa-miR-369-5p	0	0	0	1	0	0	TFB1M	transcription factor B1, mitochondrial
hsa-miR-369-5p	0	0	1	1	0	0	TMEM183A	transmembrane protein 183A
hsa-miR-369-5p	0	0	1	1	1	1	PLA2G4A	phospholipase A2, group IVA (cytosolic, calcium-dependent)
hsa-miR-369-5p	1	0	1	1	1	1	SASH1	SAM and SH3 domain containing 1
hsa-miR-369-5p	0	0	1	1	0	0	MR1	major histocompatibility complex, class I-related
hsa-miR-369-5p	1	0	1	1	1	1	ADAT2	adenosine deaminase, tRNA-specific 2
hsa-miR-369-5p	0	0	1	1	1	1	AIG1	androgen-induced 1
hsa-miR-369-5p	1	0	1	1	1	1	TXLNB	taxilin beta
hsa-miR-369-5p	0	0	1	1	1	1	HEBP2	heme binding protein 2
hsa-miR-369-5p	0	0	1	1	0	0	KIFAP3	kinesin-associated protein 3
hsa-miR-369-5p	1	0	1	1	1	1	CD247	CD247 molecule
hsa-miR-369-5p	0	0	1	1	1	1	MAEL	maelstrom homolog (Drosophila)
hsa-miR-369-5p	1	0	1	1	1	1	MGST3	microsomal glutathione S-transferase 3
hsa-miR-369-5p	0	0	1	1	1	1	C1orf110	chromosome 1 open reading frame 110
hsa-miR-369-5p	0	0	0	1	0	0	C1orf111	chromosome 1 open reading frame 111
hsa-miR-369-5p	0	0	1	1	1	1	FCRLB	Fc receptor-like B
hsa-miR-369-5p	0	0	0	1	0	0	FCER1G	Fc fragment of IgE, high affinity I, receptor for; gamma polypeptide
hsa-miR-369-5p	1	0	1	1	1	1	TAGLN2	transgelin 2
hsa-miR-369-5p	0	0	1	1	0	0	DUSP23	dual specificity phosphatase 23
hsa-miR-369-5p	0	0	1	1	0	0	CCT3	chaperonin containing TCP1, subunit 3 (gamma)
hsa-miR-369-5p	0	0	1	1	1	1	C1orf85	chromosome 1 open reading frame 85
hsa-miR-369-5p	0	0	1	1	1	1	LENEP	lens epithelial protein
hsa-miR-369-5p	0	0	0	1	1	1	FABP7	fatty acid binding protein 7, brain
hsa-miR-369-5p	0	0	0	1	1	1	BNIP3	BCL2/adenovirus E1B 19kDa interacting protein 3
hsa-miR-369-5p	0	0	0	1	0	0	UROS	uroporphyrinogen III synthase
hsa-miR-369-5p	0	0	1	1	1	1	HTRA1	HtrA serine peptidase 1
hsa-miR-369-5p	1	0	1	1	1	1	GRIK2	glutamate receptor, ionotropic, kainate 2
hsa-miR-369-5p	0	0	0	1	0	0	HIST1H3H	histone cluster 1, H3h
hsa-miR-369-5p	0	0	1	1	0	0	FAM72B	family with sequence similarity 72, member B
hsa-miR-369-5p	0	0	0	1	1	1	WDR3	WD repeat domain 3
hsa-miR-369-5p	0	0	0	1	1	1	C6orf165	chromosome 6 open reading frame 165
hsa-miR-369-5p	0	0	0	1	1	1	DDX20	DEAD (Asp-Glu-Ala-Asp) box polypeptide 20
hsa-miR-369-5p	0	0	0	1	0	0	TNFRSF6B	tumor necrosis factor receptor superfamily, member 6b, decoy
hsa-miR-369-5p	0	0	1	1	0	0	RTEL1	regulator of telomere elongation helicase 1
hsa-miR-369-5p	0	0	1	1	1	1	BCAR3	breast cancer anti-estrogen resistance 3
hsa-miR-369-5p	0	0	1	1	0	0	EPHX4	epoxide hydrolase 4
hsa-miR-369-5p	0	0	0	1	0	0	CXorf40B	chromosome X open reading frame 40B
hsa-miR-369-5p	0	0	0	1	0	0	RPF1	ribosome production factor 1 homolog (S. cerevisiae)
hsa-miR-369-5p	0	0	0	1	0	0	MAP7D3	MAP7 domain containing 3
hsa-miR-369-5p	1	0	1	1	1	1	FUBP1	far upstream element (FUSE) binding protein 1
hsa-miR-369-5p	0	0	0	1	0	0	SLC44A5	solute carrier family 44, member 5
hsa-miR-369-5p	1	0	1	1	1	1	KLHL31	kelch-like 31 (Drosophila)
hsa-miR-369-5p	0	0	1	1	1	1	C1orf141	chromosome 1 open reading frame 141
hsa-miR-369-5p	0	0	1	1	0	0	L1TD1	LINE-1 type transposase domain containing 1
hsa-miR-369-5p	0	0	1	1	1	1	DNTT	deoxynucleotidyltransferase, terminal
hsa-miR-369-5p	0	0	0	1	0	0	C8B	complement component 8, beta polypeptide
hsa-miR-369-5p	1	0	1	1	1	1	CUL4B	cullin 4B
hsa-miR-369-5p	0	0	1	1	0	0	NFATC2	nuclear factor of activated T-cells, cytoplasmic, calcineurin-dependent 2
hsa-miR-369-5p	1	0	1	1	0	0	MAN1B1	mannosidase, alpha, class 1B, member 1
hsa-miR-369-5p	1	0	1	1	1	1	LONRF3	LON peptidase N-terminal domain and ring finger 3
hsa-miR-369-5p	0	0	0	1	1	1	MMRN2	multimerin 2
hsa-miR-369-5p	0	0	0	1	0	0	GBGT1	globoside alpha-1,3-N-acetylgalactosaminyltransferase 1
hsa-miR-369-5p	0	0	1	1	0	0	MAD2L1BP	MAD2L1 binding protein
hsa-miR-369-5p	0	0	0	1	0	0	PLAC9	placenta-specific 9
hsa-miR-369-5p	0	0	0	1	0	0	CCDC24	coiled-coil domain containing 24
hsa-miR-369-5p	1	0	1	1	1	1	PIH1D3	PIH1 domain containing 3
hsa-miR-369-5p	0	0	1	1	0	0	DOLK	dolichol kinase
hsa-miR-369-5p	1	0	1	1	1	1	CAP1	CAP, adenylate cyclase-associated protein 1 (yeast)
hsa-miR-369-5p	1	0	1	1	1	1	MTF1	metal-regulatory transcription factor 1
hsa-miR-369-5p	1	0	1	1	1	1	FAM102A	family with sequence similarity 102, member A
hsa-miR-369-5p	0	0	1	1	1	1	L3MBTL1	l(3)mbt-like 1 (Drosophila)
hsa-miR-369-5p	0	0	0	1	0	0	TDRG1	testis development related 1 (non-protein coding)
hsa-miR-369-5p	0	0	0	1	0	0	KCNK16	potassium channel, subfamily K, member 16
hsa-miR-369-5p	1	0	1	1	1	1	AIFM2	apoptosis-inducing factor, mitochondrion-associated, 2
hsa-miR-369-5p	0	0	1	1	0	0	CXorf26	chromosome X open reading frame 26
hsa-miR-369-5p	0	0	1	1	0	0	GARNL3	GTPase activating Rap/RanGAP domain-like 3
hsa-miR-369-5p	0	0	0	1	1	1	TTI1	TELO2 interacting protein 1
hsa-miR-369-5p	0	0	1	1	0	0	DDX50	DEAD (Asp-Glu-Ala-Asp) box polypeptide 50
hsa-miR-369-5p	0	0	1	1	0	0	NR5A1	nuclear receptor subfamily 5, group A, member 1
hsa-miR-369-5p	0	0	0	1	0	0	ATOH7	atonal homolog 7 (Drosophila)
hsa-miR-369-5p	0	0	1	1	1	1	HERC4	HECT and RLD domain containing E3 ubiquitin protein ligase 4
hsa-miR-369-5p	0	0	1	1	1	1	MAPK13	mitogen-activated protein kinase 13
hsa-miR-369-5p	1	0	1	1	1	1	ZNF76	zinc finger protein 76
hsa-miR-369-5p	0	0	1	1	1	1	RBM39	RNA binding motif protein 39
hsa-miR-369-5p	0	0	1	1	0	0	AGAP6	ArfGAP with GTPase domain, ankyrin repeat and PH domain 6
hsa-miR-369-5p	0	0	1	1	1	1	SLC9A1	solute carrier family 9, subfamily A (NHE1, cation proton antiporter 1), member 1
hsa-miR-369-5p	0	0	0	1	1	1	KIAA1958	KIAA1958
hsa-miR-369-5p	1	0	1	1	1	1	ZFAND4	zinc finger, AN1-type domain 4
hsa-miR-369-5p	1	0	1	1	1	1	RAPH1	Ras association (RalGDS/AF-6) and pleckstrin homology domains 1
hsa-miR-369-5p	1	0	1	1	1	1	LYPLA2	lysophospholipase II
hsa-miR-369-5p	1	0	1	1	1	1	NTM	neurotrimin
hsa-miR-369-5p	1	0	1	1	1	1	NRP1	neuropilin 1
hsa-miR-369-5p	0	0	1	1	0	0	FAAH2	fatty acid amide hydrolase 2
hsa-miR-369-5p	0	0	1	1	0	0	CCDC7	coiled-coil domain containing 7
hsa-miR-369-5p	0	0	1	1	0	0	C10orf68	chromosome 10 open reading frame 68
hsa-miR-369-5p	0	0	0	1	1	1	C9orf156	chromosome 9 open reading frame 156
hsa-miR-369-5p	0	0	1	1	1	1	PRRT1	proline-rich transmembrane protein 1
hsa-miR-369-5p	1	0	1	1	1	1	TSTD2	thiosulfate sulfurtransferase (rhodanese)-like domain containing 2
hsa-miR-369-5p	1	0	1	1	1	1	SCN1A	sodium channel, voltage-gated, type I, alpha subunit
hsa-miR-369-5p	0	0	1	1	1	1	ING1	inhibitor of growth family, member 1
hsa-miR-369-5p	0	0	1	1	1	1	MYO16	myosin XVI
hsa-miR-369-5p	1	0	1	1	1	1	SPIN1	spindlin 1
hsa-miR-369-5p	0	0	1	1	1	1	TEX30	testis expressed 30
hsa-miR-369-5p	1	0	1	1	1	1	GDPD1	glycerophosphodiester phosphodiesterase domain containing 1
hsa-miR-369-5p	0	0	1	1	1	1	LTA	lymphotoxin alpha (TNF superfamily, member 1)
hsa-miR-369-5p	1	0	1	1	1	1	KIAA1217	KIAA1217
hsa-miR-369-5p	0	0	1	1	1	1	CPT1A	carnitine palmitoyltransferase 1A (liver)
hsa-miR-369-5p	0	0	1	1	0	0	HDAC6	histone deacetylase 6
hsa-miR-369-5p	0	0	1	1	0	0	MAD2L2	MAD2 mitotic arrest deficient-like 2 (yeast)
hsa-miR-369-5p	0	0	1	1	0	0	UGGT2	UDP-glucose glycoprotein glucosyltransferase 2
hsa-miR-369-5p	0	0	1	1	0	0	PCSK5	proprotein convertase subtilisin/kexin type 5
hsa-miR-369-5p	1	0	0	1	0	0	TBC1D8	TBC1 domain family, member 8 (with GRAM domain)
hsa-miR-369-5p	1	0	1	1	1	1	SOX21	SRY (sex determining region Y)-box 21
hsa-miR-369-5p	1	0	1	1	0	0	DNAJC1	DnaJ (Hsp40) homolog, subfamily C, member 1
hsa-miR-369-5p	1	0	1	1	1	1	MLLT10	myeloid/lymphoid or mixed-lineage leukemia (trithorax homolog, Drosophila); translocated to, 10
hsa-miR-369-5p	1	0	1	1	1	1	NEBL	nebulette
hsa-miR-369-5p	0	0	1	1	1	1	XRN2	5'-3' exoribonuclease 2
hsa-miR-369-5p	0	0	1	1	0	0	C9orf135	chromosome 9 open reading frame 135
hsa-miR-369-5p	0	0	0	1	1	1	NMNAT1	nicotinamide nucleotide adenylyltransferase 1
hsa-miR-369-5p	0	0	1	1	1	1	FXN	frataxin
hsa-miR-369-5p	0	0	1	1	1	1	ATXN2	ataxin 2
hsa-miR-369-5p	0	0	1	1	0	0	GPR20	G protein-coupled receptor 20
hsa-miR-369-5p	0	0	1	1	1	1	LECT1	leukocyte cell derived chemotaxin 1
hsa-miR-369-5p	1	0	1	1	1	1	FAM65B	family with sequence similarity 65, member B
hsa-miR-369-5p	1	0	1	1	0	0	GBA2	glucosidase, beta (bile acid) 2
hsa-miR-369-5p	0	0	0	1	0	0	LOC100132272	uncharacterized LOC100132272
hsa-miR-369-5p	1	0	1	1	1	1	NMT2	N-myristoyltransferase 2
hsa-miR-369-5p	1	0	1	1	1	1	AJAP1	adherens junctions associated protein 1
hsa-miR-369-5p	0	0	0	1	1	1	GPLD1	glycosylphosphatidylinositol specific phospholipase D1
hsa-miR-369-5p	0	0	1	1	1	1	FAM213B	family with sequence similarity 213, member B
hsa-miR-369-5p	0	0	0	1	0	0	OR4A47	olfactory receptor, family 4, subfamily A, member 47
hsa-miR-369-5p	0	0	1	1	0	0	CDNF	cerebral dopamine neurotrophic factor
hsa-miR-369-5p	1	0	1	1	1	1	NRSN1	neurensin 1
hsa-miR-369-5p	0	0	1	1	0	0	KIAA0226L	KIAA0226-like
hsa-miR-369-5p	0	0	0	1	0	0	LRRC63	leucine rich repeat containing 63
hsa-miR-369-5p	0	0	0	1	0	0	GALT	galactose-1-phosphate uridylyltransferase
hsa-miR-369-5p	1	0	1	1	1	1	SRSF7	serine/arginine-rich splicing factor 7
hsa-miR-369-5p	0	0	0	1	0	0	SDHAF1	succinate dehydrogenase complex assembly factor 1
hsa-miR-369-5p	0	0	1	1	0	0	ZNF584	zinc finger protein 584
hsa-miR-369-5p	0	0	0	1	0	0	ZNF324B	zinc finger protein 324B
hsa-miR-369-5p	0	0	1	1	1	1	MAP9	microtubule-associated protein 9
hsa-miR-369-5p	0	0	0	1	1	1	SIRT5	sirtuin 5
hsa-miR-369-5p	0	0	0	1	0	0	DNAJC2	DnaJ (Hsp40) homolog, subfamily C, member 2
hsa-miR-369-5p	0	0	1	1	1	1	POLR2J2	polymerase (RNA) II (DNA directed) polypeptide J2
hsa-miR-369-5p	1	0	1	1	0	0	POLR2J3	polymerase (RNA) II (DNA directed) polypeptide J3
hsa-miR-369-5p	1	0	1	1	1	1	SLC25A15	solute carrier family 25 (mitochondrial carrier; ornithine transporter) member 15
hsa-miR-369-5p	0	0	0	1	1	1	PAK1IP1	PAK1 interacting protein 1
hsa-miR-369-5p	1	0	1	1	1	1	CAMK2D	calcium/calmodulin-dependent protein kinase II delta
hsa-miR-369-5p	1	0	0	1	1	1	PDHA1	pyruvate dehydrogenase (lipoamide) alpha 1
hsa-miR-369-5p	0	0	1	1	0	0	SGCE	sarcoglycan, epsilon
hsa-miR-369-5p	0	0	1	1	0	0	C9orf11	chromosome 9 open reading frame 11
hsa-miR-369-5p	0	0	1	1	0	0	SLC4A11	solute carrier family 4, sodium borate transporter, member 11
hsa-miR-369-5p	0	0	1	1	1	1	RFC3	replication factor C (activator 1) 3, 38kDa
hsa-miR-369-5p	0	0	1	1	1	1	PLAA	phospholipase A2-activating protein
hsa-miR-369-5p	0	0	1	1	0	0	C6orf201	chromosome 6 open reading frame 201
hsa-miR-369-5p	0	0	1	1	0	0	FOCAD	focadhesin
hsa-miR-369-5p	0	0	1	1	1	1	FAM50B	family with sequence similarity 50, member B
hsa-miR-369-5p	0	0	1	1	1	1	U2AF1	U2 small nuclear RNA auxiliary factor 1
hsa-miR-369-5p	0	0	0	1	0	0	EMILIN1	elastin microfibril interfacer 1
hsa-miR-369-5p	0	0	0	1	0	0	LOC100132159	uncharacterized LOC100132159
hsa-miR-369-5p	0	0	0	1	0	0	CALML5	calmodulin-like 5
hsa-miR-369-5p	0	0	1	1	1	1	TUBAL3	tubulin, alpha-like 3
hsa-miR-369-5p	0	0	1	1	0	0	UMODL1	uromodulin-like 1
hsa-miR-369-5p	0	0	1	1	1	1	FAM154A	family with sequence similarity 154, member A
hsa-miR-369-5p	0	0	1	1	1	1	MSL3	male-specific lethal 3 homolog (Drosophila)
hsa-miR-369-5p	0	0	1	1	0	0	TAF9	TAF9 RNA polymerase II, TATA box binding protein (TBP)-associated factor, 32kDa
hsa-miR-369-5p	0	0	0	1	0	0	AREGB	amphiregulin B
hsa-miR-369-5p	0	0	0	1	0	0	EIF3CL	eukaryotic translation initiation factor 3, subunit C-like
hsa-miR-369-5p	0	0	1	1	0	0	MUC16	mucin 16, cell surface associated
hsa-miR-369-5p	1	0	1	1	1	1	MXRA5	matrix-remodelling associated 5
hsa-miR-369-5p	0	0	1	1	1	1	CD99	CD99 molecule
hsa-miR-369-5p	0	0	1	1	0	0	DPF3	D4, zinc and double PHD fingers, family 3
hsa-miR-369-5p	0	0	1	1	1	1	CSF2RA	colony stimulating factor 2 receptor, alpha, low-affinity (granulocyte-macrophage)
hsa-miR-369-5p	0	0	1	1	0	0	EIF3L	eukaryotic translation initiation factor 3, subunit L
hsa-miR-369-5p	0	0	0	1	0	0	KCNV2	potassium channel, subfamily V, member 2
hsa-miR-369-5p	0	0	0	1	1	1	BPY2C	basic charge, Y-linked, 2C
hsa-miR-369-5p	1	0	1	1	1	1	FGF9	fibroblast growth factor 9 (glia-activating factor)
hsa-miR-369-5p	0	0	0	1	0	0	PSMD13	proteasome (prosome, macropain) 26S subunit, non-ATPase, 13
hsa-miR-369-5p	0	0	0	1	0	0	CYTL1	cytokine-like 1
hsa-miR-369-5p	0	0	1	1	1	1	CRYL1	crystallin, lambda 1
hsa-miR-369-5p	0	0	1	1	1	1	CD24	CD24 molecule
hsa-miR-369-5p	0	0	1	1	1	1	C18orf54	chromosome 18 open reading frame 54
hsa-miR-369-5p	0	0	0	1	1	1	TMEM191B	transmembrane protein 191B
hsa-miR-369-5p	0	0	0	1	0	0	TMEM42	transmembrane protein 42
hsa-miR-369-5p	0	0	0	1	1	1	METTL6	methyltransferase like 6
hsa-miR-369-5p	0	0	0	1	0	0	C3orf19	chromosome 3 open reading frame 19
hsa-miR-369-5p	0	0	0	1	0	0	SEC13	SEC13 homolog (S. cerevisiae)
hsa-miR-369-5p	1	0	1	1	1	1	MKLN1	muskelin 1, intracellular mediator containing kelch motifs
hsa-miR-369-5p	0	0	1	1	1	1	GPX1	glutathione peroxidase 1
hsa-miR-369-5p	1	0	1	1	0	0	SLAIN2	SLAIN motif family, member 2
hsa-miR-369-5p	0	0	1	1	0	0	LRRIQ3	leucine-rich repeats and IQ motif containing 3
hsa-miR-369-5p	0	0	0	1	1	1	VPS53	vacuolar protein sorting 53 homolog (S. cerevisiae)
hsa-miR-369-5p	0	0	0	1	0	0	PLEKHM3	pleckstrin homology domain containing, family M, member 3
hsa-miR-369-5p	1	0	1	1	1	1	GRM7	glutamate receptor, metabotropic 7
hsa-miR-369-5p	0	0	0	1	1	1	RPH3A	rabphilin 3A homolog (mouse)
hsa-miR-369-5p	1	0	1	1	1	1	ALCAM	activated leukocyte cell adhesion molecule
hsa-miR-369-5p	0	0	1	1	0	0	SNRPN	small nuclear ribonucleoprotein polypeptide N
hsa-miR-369-5p	0	0	0	1	1	1	ABCG1	ATP-binding cassette, sub-family G (WHITE), member 1
hsa-miR-369-5p	0	0	0	1	1	1	LILRA6	leukocyte immunoglobulin-like receptor, subfamily A (with TM domain), member 6
hsa-miR-369-5p	1	0	1	1	1	1	JUN	jun proto-oncogene
