# Supplementary material for: Profiling of Selected MicroRNAs in Proliferative Eutopic Endometrium of Women with Ovarian Endometriosis
Source: Biomed Res Int. 2015 Aug 20;2015:760698. doi: 10.1155/2015/760698 (PMC4558423; doi:10.1155/2015/760698)
Supplement: Supplementary file 1 — Table I: The names of miRNAs significantly differentially expressed between eutopic endometrium of patients with endometriosis vs eutopic endometrium of patients without endometriosis. Table II: The associations between miRNA and mRNA, which presents detailed results of the search of six major databases i.e targetscan, tarbase, miranda, mirbase, mirtarget2 and pictar. [file 760698.f1.zip › 760698.f1/Table II/hsa-miR-370.tsv]

miR	targetscan	tarbase	miranda	mirbase	mirtarget2	pictar	GeneSymbol	GeneName
hsa-miR-370	1	0	1	1	1	1	SSH2	slingshot homolog 2 (Drosophila)
hsa-miR-370	1	0	1	0	1	1	PRDM10	PR domain containing 10
hsa-miR-370	1	0	1	1	1	1	C6orf106	chromosome 6 open reading frame 106
hsa-miR-370	1	0	1	1	0	0	DES	desmin
hsa-miR-370	1	0	1	0	1	1	C14orf43	chromosome 14 open reading frame 43
hsa-miR-370	1	0	1	1	0	0	ANGPTL6	angiopoietin-like 6
hsa-miR-370	1	0	1	1	1	1	DUSP3	dual specificity phosphatase 3
hsa-miR-370	1	0	0	1	1	1	ACBD7	acyl-CoA binding domain containing 7
hsa-miR-370	1	0	1	0	0	0	ANKRD52	ankyrin repeat domain 52
hsa-miR-370	1	0	1	1	1	1	IPPK	inositol 1,3,4,5,6-pentakisphosphate 2-kinase
hsa-miR-370	1	0	0	1	1	1	CYP2U1	cytochrome P450, family 2, subfamily U, polypeptide 1
hsa-miR-370	1	0	1	1	1	1	DHX35	DEAH (Asp-Glu-Ala-His) box polypeptide 35
hsa-miR-370	1	0	1	1	1	1	HPS5	Hermansky-Pudlak syndrome 5
hsa-miR-370	1	0	1	1	1	1	SPTY2D1	SPT2, Suppressor of Ty, domain containing 1 (S. cerevisiae)
hsa-miR-370	1	0	1	1	1	1	IVD	isovaleryl-CoA dehydrogenase
hsa-miR-370	1	0	1	1	0	0	PPP2R5D	protein phosphatase 2, regulatory subunit B', delta
hsa-miR-370	1	0	1	1	1	1	SPTSSB	serine palmitoyltransferase, small subunit B
hsa-miR-370	1	0	1	1	1	1	KCTD21	potassium channel tetramerisation domain containing 21
hsa-miR-370	1	0	1	0	1	1	KITLG	KIT ligand
hsa-miR-370	1	0	1	1	0	0	TRAIP	TRAF interacting protein
hsa-miR-370	1	0	1	1	1	1	VANGL1	vang-like 1 (van gogh, Drosophila)
hsa-miR-370	1	0	1	1	1	1	TM9SF4	transmembrane 9 superfamily protein member 4
hsa-miR-370	1	0	1	1	1	1	EN2	engrailed homeobox 2
hsa-miR-370	1	0	1	1	0	0	CCDC64	coiled-coil domain containing 64
hsa-miR-370	1	0	1	1	0	0	C15orf27	chromosome 15 open reading frame 27
hsa-miR-370	1	0	1	1	1	1	SH3BP2	SH3-domain binding protein 2
hsa-miR-370	1	0	0	1	0	0	AP1G2	adaptor-related protein complex 1, gamma 2 subunit
hsa-miR-370	1	0	0	0	0	0	RASGRP4	RAS guanyl releasing protein 4
hsa-miR-370	1	0	0	1	1	1	PTRF	polymerase I and transcript release factor
hsa-miR-370	1	0	1	1	0	0	UBXN7	UBX domain protein 7
hsa-miR-370	1	0	1	1	1	1	GAP43	growth associated protein 43
hsa-miR-370	1	0	1	0	1	1	CLASP2	cytoplasmic linker associated protein 2
hsa-miR-370	1	0	1	1	1	1	NF1	neurofibromin 1
hsa-miR-370	1	0	1	1	1	1	INO80	INO80 homolog (S. cerevisiae)
hsa-miR-370	1	0	1	1	1	1	TRIT1	tRNA isopentenyltransferase 1
hsa-miR-370	1	0	1	1	0	0	DMRTB1	DMRT-like family B with proline-rich C-terminal, 1
hsa-miR-370	1	0	1	1	0	0	PRRC2B	proline-rich coiled-coil 2B
hsa-miR-370	1	0	1	1	1	1	ZNF704	zinc finger protein 704
hsa-miR-370	1	0	1	1	1	1	ASIC1	acid-sensing (proton-gated) ion channel 1
hsa-miR-370	1	0	1	1	1	1	RAVER2	ribonucleoprotein, PTB-binding 2
hsa-miR-370	1	0	1	1	1	1	IL25	interleukin 25
hsa-miR-370	1	0	1	0	1	1	ARCN1	archain 1
hsa-miR-370	1	0	1	1	1	1	KIAA2018	KIAA2018
hsa-miR-370	1	0	1	1	1	1	NFASC	neurofascin
hsa-miR-370	1	0	1	1	1	1	KLF12	Kruppel-like factor 12
hsa-miR-370	1	1	1	1	1	1	CDKN1A	cyclin-dependent kinase inhibitor 1A (p21, Cip1)
hsa-miR-370	1	0	0	1	0	0	ATPAF2	ATP synthase mitochondrial F1 complex assembly factor 2
hsa-miR-370	1	0	1	1	1	1	ATG9B	autophagy related 9B
hsa-miR-370	1	0	1	0	0	0	SYNPO	synaptopodin
hsa-miR-370	1	0	1	1	1	1	ZFAND5	zinc finger, AN1-type domain 5
hsa-miR-370	1	0	1	1	1	1	CNIH2	cornichon homolog 2 (Drosophila)
hsa-miR-370	1	0	1	1	1	1	ODF2	outer dense fiber of sperm tails 2
hsa-miR-370	1	0	1	1	0	0	CFL1	cofilin 1 (non-muscle)
hsa-miR-370	1	0	1	1	0	0	TMCO7	transmembrane and coiled-coil domains 7
hsa-miR-370	1	0	1	0	1	1	UBE2L3	ubiquitin-conjugating enzyme E2L 3
hsa-miR-370	1	0	1	1	1	1	CASK	calcium/calmodulin-dependent serine protein kinase (MAGUK family)
hsa-miR-370	1	0	1	1	1	1	KCNJ11	potassium inwardly-rectifying channel, subfamily J, member 11
hsa-miR-370	1	0	1	0	1	1	NUFIP2	nuclear fragile X mental retardation protein interacting protein 2
hsa-miR-370	1	0	1	1	1	1	SERTAD4	SERTA domain containing 4
hsa-miR-370	1	0	1	1	1	1	DSEL	dermatan sulfate epimerase-like
hsa-miR-370	1	0	1	1	1	1	PLCXD3	phosphatidylinositol-specific phospholipase C, X domain containing 3
hsa-miR-370	1	0	1	0	1	1	EFNB3	ephrin-B3
hsa-miR-370	1	0	1	0	1	1	LOC90462	zinc finger protein 605-like
hsa-miR-370	1	0	1	1	1	1	PCDH11X	protocadherin 11 X-linked
hsa-miR-370	1	0	0	1	1	1	VSTM2L	V-set and transmembrane domain containing 2 like
hsa-miR-370	1	0	1	1	1	1	TGFBR2	transforming growth factor, beta receptor II (70/80kDa)
hsa-miR-370	1	0	1	1	1	1	DND1	dead end homolog 1 (zebrafish)
hsa-miR-370	1	0	1	1	0	0	GYPC	glycophorin C (Gerbich blood group)
hsa-miR-370	1	0	1	0	1	1	TMEM154	transmembrane protein 154
hsa-miR-370	1	0	1	1	1	1	SCN5A	sodium channel, voltage-gated, type V, alpha subunit
hsa-miR-370	1	0	1	1	1	1	CBFA2T2	core-binding factor, runt domain, alpha subunit 2; translocated to, 2
hsa-miR-370	1	0	1	1	1	1	TRAF4	TNF receptor-associated factor 4
hsa-miR-370	1	0	1	1	1	1	DSTYK	dual serine/threonine and tyrosine protein kinase
hsa-miR-370	1	0	1	1	1	1	CHRNA7	cholinergic receptor, nicotinic, alpha 7 (neuronal)
hsa-miR-370	1	0	1	0	1	1	KLF3	Kruppel-like factor 3 (basic)
hsa-miR-370	1	0	1	1	1	1	PCDH11Y	protocadherin 11 Y-linked
hsa-miR-370	1	0	1	1	1	1	ZNF148	zinc finger protein 148
hsa-miR-370	1	0	1	1	1	1	NCDN	neurochondrin
hsa-miR-370	1	0	1	1	0	0	FBRS	fibrosin
hsa-miR-370	1	0	1	1	1	1	TMEM127	transmembrane protein 127
hsa-miR-370	1	0	1	0	1	1	SORT1	sortilin 1
hsa-miR-370	1	0	1	1	1	1	RAP2C	RAP2C, member of RAS oncogene family
hsa-miR-370	1	0	1	1	1	1	KLHL18	kelch-like 18 (Drosophila)
hsa-miR-370	1	0	1	1	1	1	IGFBP4	insulin-like growth factor binding protein 4
hsa-miR-370	1	0	1	1	1	1	SLC4A4	solute carrier family 4, sodium bicarbonate cotransporter, member 4
hsa-miR-370	1	0	1	1	1	1	EFNA1	ephrin-A1
hsa-miR-370	1	0	1	0	1	1	CDC42SE1	CDC42 small effector 1
hsa-miR-370	1	0	1	1	1	1	CIT	citron (rho-interacting, serine/threonine kinase 21)
hsa-miR-370	1	0	1	1	1	1	ATP9A	ATPase, class II, type 9A
hsa-miR-370	1	0	1	1	1	1	OPA3	optic atrophy 3 (autosomal recessive, with chorea and spastic paraplegia)
hsa-miR-370	1	0	0	1	0	0	SOS1	son of sevenless homolog 1 (Drosophila)
hsa-miR-370	1	0	1	0	1	1	VPS13D	vacuolar protein sorting 13 homolog D (S. cerevisiae)
hsa-miR-370	1	0	1	1	1	1	SLAMF6	SLAM family member 6
hsa-miR-370	1	0	0	1	1	1	DNAJC11	DnaJ (Hsp40) homolog, subfamily C, member 11
hsa-miR-370	1	0	1	1	1	1	C17orf103	chromosome 17 open reading frame 103
hsa-miR-370	1	0	1	1	1	1	EML1	echinoderm microtubule associated protein like 1
hsa-miR-370	1	0	1	1	1	1	FBLN5	fibulin 5
hsa-miR-370	1	0	1	1	1	1	POMT2	protein-O-mannosyltransferase 2
hsa-miR-370	1	0	1	0	1	1	BDNF	brain-derived neurotrophic factor
hsa-miR-370	1	0	1	1	1	1	GPR62	G protein-coupled receptor 62
hsa-miR-370	1	0	1	1	1	1	BAZ2A	bromodomain adjacent to zinc finger domain, 2A
hsa-miR-370	1	0	1	0	1	1	BMF	Bcl2 modifying factor
hsa-miR-370	1	0	1	1	0	0	ATXN7L3	ataxin 7-like 3
hsa-miR-370	1	0	1	0	1	1	GAB2	GRB2-associated binding protein 2
hsa-miR-370	1	0	1	1	1	1	SNX27	sorting nexin family member 27
hsa-miR-370	1	0	1	1	1	1	IKZF4	IKAROS family zinc finger 4 (Eos)
hsa-miR-370	1	0	1	1	1	1	ARF3	ADP-ribosylation factor 3
hsa-miR-370	1	0	1	1	1	1	NLGN2	neuroligin 2
hsa-miR-370	1	0	1	1	0	0	ESYT1	extended synaptotagmin-like protein 1
hsa-miR-370	1	0	1	1	1	1	ZMYND11	zinc finger, MYND-type containing 11
hsa-miR-370	1	0	1	1	1	1	HTR4	5-hydroxytryptamine (serotonin) receptor 4, G protein-coupled
hsa-miR-370	1	0	1	1	1	1	CTSS	cathepsin S
hsa-miR-370	1	0	1	1	1	1	SPRYD3	SPRY domain containing 3
hsa-miR-370	1	0	1	1	1	1	FOXM1	forkhead box M1
hsa-miR-370	1	0	1	1	1	1	FRK	fyn-related kinase
hsa-miR-370	1	0	1	1	1	1	ADAM19	ADAM metallopeptidase domain 19
hsa-miR-370	1	0	0	0	1	1	DNAH11	dynein, axonemal, heavy chain 11
hsa-miR-370	1	0	1	1	1	1	ERF	Ets2 repressor factor
hsa-miR-370	1	0	1	0	1	1	BMP8B	bone morphogenetic protein 8b
hsa-miR-370	1	0	1	0	1	1	LIN28A	lin-28 homolog A (C. elegans)
hsa-miR-370	1	0	1	1	1	1	ORC5	origin recognition complex, subunit 5
hsa-miR-370	1	0	1	1	1	1	AQP4	aquaporin 4
hsa-miR-370	1	0	1	1	1	1	UBTF	upstream binding transcription factor, RNA polymerase I
hsa-miR-370	1	0	1	1	0	0	TMEM86A	transmembrane protein 86A
hsa-miR-370	1	0	1	1	1	1	SYNGR1	synaptogyrin 1
hsa-miR-370	1	0	1	1	1	1	SMARCD1	SWI/SNF related, matrix associated, actin dependent regulator of chromatin, subfamily d, member 1
hsa-miR-370	1	0	0	1	1	1	OR11A1	olfactory receptor, family 11, subfamily A, member 1
hsa-miR-370	1	0	1	1	1	1	RALY	RNA binding protein, autoantigenic (hnRNP-associated with lethal yellow homolog (mouse))
hsa-miR-370	1	0	1	0	1	1	CCNJ	cyclin J
hsa-miR-370	1	0	1	1	0	0	LAYN	layilin
hsa-miR-370	1	0	1	1	1	1	SMO	smoothened, frizzled family receptor
hsa-miR-370	1	0	1	0	1	1	PSD2	pleckstrin and Sec7 domain containing 2
hsa-miR-370	1	0	1	1	1	1	NSUN4	NOP2/Sun domain family, member 4
hsa-miR-370	1	0	1	1	1	1	UPF1	UPF1 regulator of nonsense transcripts homolog (yeast)
hsa-miR-370	1	0	1	1	1	1	FGF11	fibroblast growth factor 11
hsa-miR-370	1	0	1	1	1	1	TRIOBP	TRIO and F-actin binding protein
hsa-miR-370	1	0	1	1	1	1	LPHN2	latrophilin 2
hsa-miR-370	1	0	1	1	1	1	C3orf65	chromosome 3 open reading frame 65
hsa-miR-370	1	0	1	1	1	1	SIDT2	SID1 transmembrane family, member 2
hsa-miR-370	1	0	1	0	1	1	ANKH	ankylosis, progressive homolog (mouse)
hsa-miR-370	1	0	1	0	1	1	RGAG4	retrotransposon gag domain containing 4
hsa-miR-370	1	0	1	1	1	1	CCL21	chemokine (C-C motif) ligand 21
hsa-miR-370	1	0	1	0	1	1	DDX3X	DEAD (Asp-Glu-Ala-Asp) box polypeptide 3, X-linked
hsa-miR-370	1	0	1	1	1	1	SYT14	synaptotagmin XIV
hsa-miR-370	1	0	1	1	1	1	NAA15	N(alpha)-acetyltransferase 15, NatA auxiliary subunit
hsa-miR-370	1	0	1	1	1	1	ZDHHC5	zinc finger, DHHC-type containing 5
hsa-miR-370	1	0	1	1	1	1	UBE2R2	ubiquitin-conjugating enzyme E2R 2
hsa-miR-370	1	0	1	1	1	1	BACH2	BTB and CNC homology 1, basic leucine zipper transcription factor 2
hsa-miR-370	1	0	1	1	1	1	CHD2	chromodomain helicase DNA binding protein 2
hsa-miR-370	1	0	1	1	1	1	SENP5	SUMO1/sentrin specific peptidase 5
hsa-miR-370	1	0	1	0	1	1	MAML1	mastermind-like 1 (Drosophila)
hsa-miR-370	1	0	1	1	1	1	CLU	clusterin
hsa-miR-370	1	0	1	1	1	1	STX1B	syntaxin 1B
hsa-miR-370	1	0	1	0	1	1	MTSS1	metastasis suppressor 1
hsa-miR-370	1	0	1	0	1	1	HSPA12A	heat shock 70kDa protein 12A
hsa-miR-370	1	0	1	1	1	1	USP47	ubiquitin specific peptidase 47
hsa-miR-370	1	0	1	1	1	1	QKI	QKI, KH domain containing, RNA binding
hsa-miR-370	1	0	1	1	1	1	ACVR2B	activin A receptor, type IIB
hsa-miR-370	1	0	1	1	0	0	KY	kyphoscoliosis peptidase
hsa-miR-370	1	0	1	1	0	0	CD164L2	CD164 sialomucin-like 2
hsa-miR-370	1	0	1	1	1	1	WNT10B	wingless-type MMTV integration site family, member 10B
hsa-miR-370	1	0	1	0	1	1	DDX3Y	DEAD (Asp-Glu-Ala-Asp) box polypeptide 3, Y-linked
hsa-miR-370	1	0	1	0	1	1	SMURF1	SMAD specific E3 ubiquitin protein ligase 1
hsa-miR-370	1	0	1	1	0	0	KIFC2	kinesin family member C2
hsa-miR-370	1	0	1	1	1	1	KCTD15	potassium channel tetramerisation domain containing 15
hsa-miR-370	1	0	1	1	1	1	ABCG4	ATP-binding cassette, sub-family G (WHITE), member 4
hsa-miR-370	1	0	1	0	1	1	ZCCHC24	zinc finger, CCHC domain containing 24
hsa-miR-370	1	0	1	1	1	1	NAA40	N(alpha)-acetyltransferase 40, NatD catalytic subunit, homolog (S. cerevisiae)
hsa-miR-370	1	0	1	0	1	1	WDR82	WD repeat domain 82
hsa-miR-370	1	0	1	1	1	1	ZC3H7B	zinc finger CCCH-type containing 7B
hsa-miR-370	1	0	1	1	1	1	RSPO1	R-spondin 1
hsa-miR-370	1	0	1	1	1	1	PRRX1	paired related homeobox 1
hsa-miR-370	1	0	1	1	1	1	RAP1GDS1	RAP1, GTP-GDP dissociation stimulator 1
hsa-miR-370	1	0	1	0	1	1	HDAC4	histone deacetylase 4
hsa-miR-370	1	0	1	1	1	1	KAT6A	K(lysine) acetyltransferase 6A
hsa-miR-370	1	0	1	1	1	1	ZC2HC1C	zinc finger, C2HC-type containing 1C
hsa-miR-370	1	0	1	1	1	1	FOXP4	forkhead box P4
hsa-miR-370	1	0	1	0	1	1	MLEC	malectin
hsa-miR-370	1	0	1	1	1	1	MKLN1	muskelin 1, intracellular mediator containing kelch motifs
hsa-miR-370	1	0	1	1	1	1	FOSB	FBJ murine osteosarcoma viral oncogene homolog B
hsa-miR-370	1	0	1	1	1	1	ATRN	attractin
hsa-miR-370	1	0	1	1	1	1	HNRNPA1	heterogeneous nuclear ribonucleoprotein A1
hsa-miR-370	1	0	1	1	1	1	DNMT3B	DNA (cytosine-5-)-methyltransferase 3 beta
hsa-miR-370	1	0	1	0	1	1	MLL2	myeloid/lymphoid or mixed-lineage leukemia 2
hsa-miR-370	1	0	1	1	1	1	IRS1	insulin receptor substrate 1
hsa-miR-370	1	0	1	1	0	0	ENG	endoglin
hsa-miR-370	1	0	1	1	0	0	ZNF219	zinc finger protein 219
hsa-miR-370	1	0	1	1	1	1	SHE	Src homology 2 domain containing E
hsa-miR-370	1	0	1	1	1	1	KCNE1L	KCNE1-like
hsa-miR-370	1	0	1	0	1	1	ATP11A	ATPase, class VI, type 11A
hsa-miR-370	1	0	1	0	1	1	HNRNPA3	heterogeneous nuclear ribonucleoprotein A3
hsa-miR-370	1	0	1	0	1	1	ST6GAL1	ST6 beta-galactosamide alpha-2,6-sialyltranferase 1
hsa-miR-370	1	0	1	1	1	1	EHD3	EH-domain containing 3
hsa-miR-370	1	0	1	1	1	1	MARCKS	myristoylated alanine-rich protein kinase C substrate
hsa-miR-370	1	0	1	1	1	1	WDTC1	WD and tetratricopeptide repeats 1
hsa-miR-370	1	0	1	1	1	1	DCLRE1B	DNA cross-link repair 1B
hsa-miR-370	1	0	1	0	1	1	SH3BGRL2	SH3 domain binding glutamic acid-rich protein like 2
hsa-miR-370	1	0	1	1	1	1	PCDH10	protocadherin 10
hsa-miR-370	1	0	1	1	1	1	CCNK	cyclin K
hsa-miR-370	1	0	1	1	1	1	RGS7BP	regulator of G-protein signaling 7 binding protein
hsa-miR-370	1	0	1	1	0	0	CCDC136	coiled-coil domain containing 136
hsa-miR-370	1	0	1	1	1	1	FAM102A	family with sequence similarity 102, member A
hsa-miR-370	1	0	1	1	1	1	PLEKHA6	pleckstrin homology domain containing, family A member 6
hsa-miR-370	1	0	1	1	1	1	NF2	neurofibromin 2 (merlin)
hsa-miR-370	1	0	1	0	1	1	SRSF6	serine/arginine-rich splicing factor 6
hsa-miR-370	1	0	1	1	0	0	FOXO3	forkhead box O3
hsa-miR-370	1	0	1	1	1	1	BAALC	brain and acute leukemia, cytoplasmic
hsa-miR-370	1	0	1	1	1	1	NCOA5	nuclear receptor coactivator 5
hsa-miR-370	1	0	1	1	1	1	AFF1	AF4/FMR2 family, member 1
hsa-miR-370	1	0	1	1	1	1	RUNX1	runt-related transcription factor 1
hsa-miR-370	1	0	1	1	1	1	SLC46A1	solute carrier family 46 (folate transporter), member 1
hsa-miR-370	1	0	1	1	1	1	TRIM55	tripartite motif containing 55
hsa-miR-370	1	0	1	0	1	1	USP37	ubiquitin specific peptidase 37
hsa-miR-370	1	0	1	1	1	1	C3orf62	chromosome 3 open reading frame 62
hsa-miR-370	1	0	1	1	1	1	RFX7	regulatory factor X, 7
hsa-miR-370	1	0	1	1	1	1	TAP2	transporter 2, ATP-binding cassette, sub-family B (MDR/TAP)
hsa-miR-370	1	0	1	0	1	1	C2orf18	chromosome 2 open reading frame 18
hsa-miR-370	1	0	0	1	1	1	FAM219B	family with sequence similarity 219, member B
hsa-miR-370	1	0	1	1	1	1	GABBR2	gamma-aminobutyric acid (GABA) B receptor, 2
hsa-miR-370	1	0	1	1	0	0	CCDC85B	coiled-coil domain containing 85B
hsa-miR-370	1	0	1	0	1	1	KIAA0355	KIAA0355
hsa-miR-370	1	0	0	0	1	1	MED29	mediator complex subunit 29
hsa-miR-370	1	0	1	1	1	1	FGF7	fibroblast growth factor 7
hsa-miR-370	1	0	1	1	1	1	BAP1	BRCA1 associated protein-1 (ubiquitin carboxy-terminal hydrolase)
hsa-miR-370	1	0	1	1	1	1	C10orf114	chromosome 10 open reading frame 114
hsa-miR-370	1	0	1	0	1	1	FOXO1	forkhead box O1
hsa-miR-370	1	0	1	0	1	1	SOX12	SRY (sex determining region Y)-box 12
hsa-miR-370	1	0	1	1	1	1	CD9	CD9 molecule
hsa-miR-370	1	0	1	1	1	1	EPT1	ethanolaminephosphotransferase 1 (CDP-ethanolamine-specific)
hsa-miR-370	1	0	1	1	1	1	EIF5	eukaryotic translation initiation factor 5
hsa-miR-370	1	0	0	0	0	0	AAK1	AP2 associated kinase 1
hsa-miR-370	1	0	1	1	1	1	MRO	maestro
hsa-miR-370	1	0	1	1	1	1	DNAJB1	DnaJ (Hsp40) homolog, subfamily B, member 1
hsa-miR-370	1	0	1	1	1	1	SLC16A12	solute carrier family 16, member 12 (monocarboxylic acid transporter 12)
hsa-miR-370	1	0	1	1	1	1	TXNDC12	thioredoxin domain containing 12 (endoplasmic reticulum)
hsa-miR-370	1	0	1	0	1	1	CYB5RL	cytochrome b5 reductase-like
hsa-miR-370	1	0	1	0	1	1	IGF2BP1	insulin-like growth factor 2 mRNA binding protein 1
hsa-miR-370	1	0	1	0	1	1	MAP2K7	mitogen-activated protein kinase kinase 7
hsa-miR-370	1	0	1	1	1	1	UCP3	uncoupling protein 3 (mitochondrial, proton carrier)
hsa-miR-370	1	1	1	1	1	1	MAP3K8	mitogen-activated protein kinase kinase kinase 8
hsa-miR-370	0	0	1	1	1	1	MKNK1	MAP kinase interacting serine/threonine kinase 1
hsa-miR-370	1	0	1	1	0	0	SRCAP	Snf2-related CREBBP activator protein
hsa-miR-370	1	0	1	0	1	1	PTPRT	protein tyrosine phosphatase, receptor type, T
hsa-miR-370	1	0	1	1	1	1	SGSM2	small G protein signaling modulator 2
hsa-miR-370	0	0	1	1	0	0	PLXNB1	plexin B1
hsa-miR-370	1	0	1	1	1	1	NUPL1	nucleoporin like 1
hsa-miR-370	0	0	1	1	0	0	PLCH2	phospholipase C, eta 2
hsa-miR-370	0	0	1	1	1	1	PDE4DIP	phosphodiesterase 4D interacting protein
hsa-miR-370	0	0	1	1	1	1	PAX4	paired box 4
hsa-miR-370	0	0	1	1	0	0	ZNF862	zinc finger protein 862
hsa-miR-370	0	0	1	1	0	0	ARHGEF2	Rho/Rac guanine nucleotide exchange factor (GEF) 2
hsa-miR-370	1	0	1	0	1	1	DOCK4	dedicator of cytokinesis 4
hsa-miR-370	0	0	1	1	1	1	MAN2B2	mannosidase, alpha, class 2B, member 2
hsa-miR-370	1	0	1	0	0	0	DTX4	deltex homolog 4 (Drosophila)
hsa-miR-370	1	0	1	1	1	1	BAHD1	bromo adjacent homology domain containing 1
hsa-miR-370	1	0	1	1	1	1	C11orf9	chromosome 11 open reading frame 9
hsa-miR-370	1	0	1	1	1	1	FOXJ3	forkhead box J3
hsa-miR-370	1	0	1	1	0	0	KIAA1045	KIAA1045
hsa-miR-370	0	0	1	1	0	0	RTEL1	regulator of telomere elongation helicase 1
hsa-miR-370	1	0	1	1	1	1	PRRC2C	proline-rich coiled-coil 2C
hsa-miR-370	1	0	1	0	1	1	ODZ2	odz, odd Oz/ten-m homolog 2 (Drosophila)
hsa-miR-370	1	0	1	1	0	0	ATAD2B	ATPase family, AAA domain containing 2B
hsa-miR-370	1	0	1	0	1	1	ANKFY1	ankyrin repeat and FYVE domain containing 1
hsa-miR-370	0	0	1	0	0	0	MTA3	metastasis associated 1 family, member 3
hsa-miR-370	1	0	1	1	1	1	STK36	serine/threonine kinase 36
hsa-miR-370	1	0	1	0	0	0	ODZ4	odz, odd Oz/ten-m homolog 4 (Drosophila)
hsa-miR-370	1	0	1	1	1	1	PCDH19	protocadherin 19
hsa-miR-370	1	0	1	1	1	1	TAOK1	TAO kinase 1
hsa-miR-370	1	0	1	1	1	1	SEMA6A	sema domain, transmembrane domain (TM), and cytoplasmic domain, (semaphorin) 6A
hsa-miR-370	1	0	1	1	1	1	UPF2	UPF2 regulator of nonsense transcripts homolog (yeast)
hsa-miR-370	1	0	1	0	0	0	PITPNM2	phosphatidylinositol transfer protein, membrane-associated 2
hsa-miR-370	0	0	1	0	0	0	COL20A1	collagen, type XX, alpha 1
hsa-miR-370	0	0	1	1	0	0	PQBP1	polyglutamine binding protein 1
hsa-miR-370	1	0	1	0	0	0	TANC2	tetratricopeptide repeat, ankyrin repeat and coiled-coil containing 2
hsa-miR-370	0	0	1	0	0	0	TTC28-AS1	TTC28 antisense RNA 1
hsa-miR-370	0	0	1	0	0	0	LOC440792	proline dehydrogenase (oxidase) 1 pseudogene
hsa-miR-370	0	0	1	1	1	1	BHLHB9	basic helix-loop-helix domain containing, class B, 9
hsa-miR-370	0	0	1	1	1	1	SPEF2	sperm flagellar 2
hsa-miR-370	1	0	1	1	1	1	MAT2B	methionine adenosyltransferase II, beta
hsa-miR-370	1	0	1	1	1	1	OXR1	oxidation resistance 1
hsa-miR-370	1	0	1	1	0	0	ZNF292	zinc finger protein 292
hsa-miR-370	1	0	1	1	0	0	ADC	arginine decarboxylase
hsa-miR-370	1	0	1	1	1	1	SH3TC2	SH3 domain and tetratricopeptide repeats 2
hsa-miR-370	1	0	1	0	0	0	RNF169	ring finger protein 169
hsa-miR-370	1	0	1	0	0	0	ZBTB34	zinc finger and BTB domain containing 34
hsa-miR-370	0	0	1	1	0	0	FAM22D	family with sequence similarity 22, member D
hsa-miR-370	1	0	1	1	1	1	TRPM3	transient receptor potential cation channel, subfamily M, member 3
hsa-miR-370	0	0	1	1	0	0	DDB2	damage-specific DNA binding protein 2, 48kDa
hsa-miR-370	0	0	1	1	0	0	SSPO	SCO-spondin homolog (Bos taurus)
hsa-miR-370	0	0	1	1	0	0	ERAP2	endoplasmic reticulum aminopeptidase 2
hsa-miR-370	1	0	1	1	1	1	NRXN2	neurexin 2
hsa-miR-370	1	0	1	1	1	1	ADARB1	adenosine deaminase, RNA-specific, B1
hsa-miR-370	1	0	1	1	1	1	VLDLR	very low density lipoprotein receptor
hsa-miR-370	0	0	1	0	1	1	ATR	ataxia telangiectasia and Rad3 related
hsa-miR-370	0	0	1	0	1	1	ATF6	activating transcription factor 6
hsa-miR-370	1	0	1	1	1	1	PML	promyelocytic leukemia
hsa-miR-370	0	0	1	1	1	1	MAZ	MYC-associated zinc finger protein (purine-binding transcription factor)
hsa-miR-370	1	0	1	1	1	1	DTNA	dystrobrevin, alpha
hsa-miR-370	1	0	1	1	1	1	RASSF5	Ras association (RalGDS/AF-6) domain family member 5
hsa-miR-370	1	0	1	0	1	1	MPPED2	metallophosphoesterase domain containing 2
hsa-miR-370	1	0	1	0	1	1	SLC6A6	solute carrier family 6 (neurotransmitter transporter, taurine), member 6
hsa-miR-370	0	0	1	1	1	1	DDX39B	DEAD (Asp-Glu-Ala-Asp) box polypeptide 39B
hsa-miR-370	1	0	1	1	1	1	ARFGEF1	ADP-ribosylation factor guanine nucleotide-exchange factor 1 (brefeldin A-inhibited)
hsa-miR-370	1	0	1	1	0	0	RGS6	regulator of G-protein signaling 6
hsa-miR-370	0	0	1	1	0	0	IGFBP2	insulin-like growth factor binding protein 2, 36kDa
hsa-miR-370	0	0	1	1	0	0	EIF2B4	eukaryotic translation initiation factor 2B, subunit 4 delta, 67kDa
hsa-miR-370	0	0	1	1	0	0	HLA-DMB	major histocompatibility complex, class II, DM beta
hsa-miR-370	0	0	1	1	0	0	BMP1	bone morphogenetic protein 1
hsa-miR-370	0	0	1	1	0	0	CFLAR	CASP8 and FADD-like apoptosis regulator
hsa-miR-370	1	0	1	1	1	1	MLLT10	myeloid/lymphoid or mixed-lineage leukemia (trithorax homolog, Drosophila); translocated to, 10
hsa-miR-370	1	0	1	0	1	1	ADD3	adducin 3 (gamma)
hsa-miR-370	1	0	1	1	0	0	KAT5	K(lysine) acetyltransferase 5
hsa-miR-370	1	0	1	1	1	1	TLE1	transducin-like enhancer of split 1 (E(sp1) homolog, Drosophila)
hsa-miR-370	0	0	1	1	1	1	DDX10	DEAD (Asp-Glu-Ala-Asp) box polypeptide 10
hsa-miR-370	0	0	1	1	0	0	TRIM27	tripartite motif containing 27
hsa-miR-370	0	0	1	1	1	1	SGSH	N-sulfoglucosamine sulfohydrolase
hsa-miR-370	0	0	1	0	0	0	TRPC2	transient receptor potential cation channel, subfamily C, member 2, pseudogene
hsa-miR-370	0	0	1	0	0	0	MIAT	myocardial infarction associated transcript (non-protein coding)
hsa-miR-370	0	0	1	1	1	1	CD3EAP	CD3e molecule, epsilon associated protein
hsa-miR-370	1	0	1	0	1	1	CELF2	CUGBP, Elav-like family member 2
hsa-miR-370	1	0	1	1	1	1	SOCS2	suppressor of cytokine signaling 2
hsa-miR-370	1	0	1	1	1	1	MBNL2	muscleblind-like splicing regulator 2
hsa-miR-370	0	0	1	1	1	1	PCBP4	poly(rC) binding protein 4
hsa-miR-370	0	0	1	1	1	1	SH2D1A	SH2 domain containing 1A
hsa-miR-370	1	0	1	1	0	0	RASSF1	Ras association (RalGDS/AF-6) domain family member 1
hsa-miR-370	0	0	1	1	1	1	IL18BP	interleukin 18 binding protein
hsa-miR-370	0	0	1	0	0	0	RPH3AL	rabphilin 3A-like (without C2 domains)
hsa-miR-370	0	0	1	1	1	1	HEPH	hephaestin
hsa-miR-370	0	0	1	0	1	1	PDP1	pyruvate dehyrogenase phosphatase catalytic subunit 1
hsa-miR-370	0	0	1	1	1	1	NBPF14	neuroblastoma breakpoint family, member 14
hsa-miR-370	1	0	1	1	1	1	TLK2	tousled-like kinase 2
hsa-miR-370	1	0	1	1	1	1	C16orf70	chromosome 16 open reading frame 70
hsa-miR-370	1	0	1	1	1	1	SNPH	syntaphilin
hsa-miR-370	1	0	1	1	1	1	C3orf18	chromosome 3 open reading frame 18
hsa-miR-370	1	0	1	1	1	1	TSC22D2	TSC22 domain family, member 2
hsa-miR-370	1	0	1	0	1	1	KLHL3	kelch-like 3 (Drosophila)
hsa-miR-370	1	0	1	1	1	1	OGT	O-linked N-acetylglucosamine (GlcNAc) transferase
hsa-miR-370	1	0	1	1	1	1	RSF1	remodeling and spacing factor 1
hsa-miR-370	0	0	1	1	1	1	RBM8A	RNA binding motif protein 8A
hsa-miR-370	1	0	1	1	1	1	CALD1	caldesmon 1
hsa-miR-370	0	0	1	1	0	0	NYX	nyctalopin
hsa-miR-370	0	0	1	1	0	0	HES6	hairy and enhancer of split 6 (Drosophila)
hsa-miR-370	1	0	1	1	1	1	ABI2	abl-interactor 2
hsa-miR-370	1	0	1	0	1	1	TRPS1	trichorhinophalangeal syndrome I
hsa-miR-370	0	0	1	0	1	1	PRDM6	PR domain containing 6
hsa-miR-370	1	0	1	1	1	1	TMUB2	transmembrane and ubiquitin-like domain containing 2
hsa-miR-370	0	0	1	0	0	0	LOC645355	uncharacterized LOC645355
hsa-miR-370	1	0	1	1	1	1	MGEA5	meningioma expressed antigen 5 (hyaluronidase)
hsa-miR-370	1	0	1	1	0	0	ZBTB37	zinc finger and BTB domain containing 37
hsa-miR-370	1	0	1	1	1	1	VEGFA	vascular endothelial growth factor A
hsa-miR-370	1	0	1	0	1	1	GLYR1	glyoxylate reductase 1 homolog (Arabidopsis)
hsa-miR-370	1	0	1	1	1	1	AIFM2	apoptosis-inducing factor, mitochondrion-associated, 2
hsa-miR-370	1	0	1	1	1	1	CALCOCO1	calcium binding and coiled-coil domain 1
hsa-miR-370	0	0	1	0	0	0	NBPF10	neuroblastoma breakpoint family, member 10
hsa-miR-370	0	0	1	1	0	0	SNRPN	small nuclear ribonucleoprotein polypeptide N
hsa-miR-370	1	0	1	1	1	1	MAGI1	membrane associated guanylate kinase, WW and PDZ domain containing 1
hsa-miR-370	1	0	1	1	1	1	NTRK2	neurotrophic tyrosine kinase, receptor, type 2
hsa-miR-370	0	0	1	0	0	0	MYO15B	myosin XVB pseudogene
hsa-miR-370	0	0	1	0	1	1	NBPF15	neuroblastoma breakpoint family, member 15
hsa-miR-370	1	0	1	1	1	1	ST3GAL3	ST3 beta-galactoside alpha-2,3-sialyltransferase 3
hsa-miR-370	1	0	1	1	1	1	STX16	syntaxin 16
hsa-miR-370	0	0	1	0	0	0	RMST	rhabdomyosarcoma 2 associated transcript (non-protein coding)
hsa-miR-370	0	0	1	1	1	1	PPP1R1B	protein phosphatase 1, regulatory (inhibitor) subunit 1B
hsa-miR-370	1	0	1	1	0	0	XRRA1	X-ray radiation resistance associated 1
hsa-miR-370	1	0	1	1	0	0	SEPT8	septin 8
hsa-miR-370	0	0	1	1	1	1	PSRC1	proline/serine-rich coiled-coil 1
hsa-miR-370	1	0	1	1	1	1	RBFOX1	RNA binding protein, fox-1 homolog (C. elegans) 1
hsa-miR-370	0	0	1	1	0	0	RASGEF1C	RasGEF domain family, member 1C
hsa-miR-370	1	0	1	1	0	0	FOXP2	forkhead box P2
hsa-miR-370	1	0	1	0	1	1	PPP1R12A	protein phosphatase 1, regulatory subunit 12A
hsa-miR-370	1	0	1	1	0	0	ST3GAL4	ST3 beta-galactoside alpha-2,3-sialyltransferase 4
hsa-miR-370	1	0	1	0	1	1	IL1RAP	interleukin 1 receptor accessory protein
hsa-miR-370	1	0	1	1	1	1	AFF2	AF4/FMR2 family, member 2
hsa-miR-370	0	0	1	1	1	1	KCNJ13	potassium inwardly-rectifying channel, subfamily J, member 13
hsa-miR-370	1	0	1	1	1	1	FLNC	filamin C, gamma
hsa-miR-370	1	0	1	1	1	1	UBAP2L	ubiquitin associated protein 2-like
hsa-miR-370	0	0	1	1	1	1	TCFL5	transcription factor-like 5 (basic helix-loop-helix)
hsa-miR-370	1	0	1	0	1	1	GRB10	growth factor receptor-bound protein 10
hsa-miR-370	1	0	1	1	1	1	ILF3	interleukin enhancer binding factor 3, 90kDa
hsa-miR-370	0	0	1	0	0	0	CD177	CD177 molecule
hsa-miR-370	1	0	1	1	1	1	RAB3IP	RAB3A interacting protein (rabin3)
hsa-miR-370	0	0	1	0	0	0	LY6G6E	lymphocyte antigen 6 complex, locus G6E (pseudogene)
hsa-miR-370	1	0	1	1	1	1	NRXN3	neurexin 3
hsa-miR-370	1	0	1	1	1	1	EMID2	EMI domain containing 2
hsa-miR-370	1	0	1	1	1	1	NFYA	nuclear transcription factor Y, alpha
hsa-miR-370	1	0	1	1	1	1	NAV3	neuron navigator 3
hsa-miR-370	0	0	1	1	0	0	IL4I1	interleukin 4 induced 1
hsa-miR-370	0	0	1	0	0	0	COL28A1	collagen, type XXVIII, alpha 1
hsa-miR-370	0	0	1	1	1	1	ESRP1	epithelial splicing regulatory protein 1
hsa-miR-370	1	0	1	0	1	1	NFAT5	nuclear factor of activated T-cells 5, tonicity-responsive
hsa-miR-370	1	0	1	1	1	1	ENOX2	ecto-NOX disulfide-thiol exchanger 2
hsa-miR-370	0	0	1	0	0	0	TUG1	taurine upregulated 1 (non-protein coding)
hsa-miR-370	0	0	1	1	1	1	RNF220	ring finger protein 220
hsa-miR-370	1	0	1	1	1	1	CADM3	cell adhesion molecule 3
hsa-miR-370	0	0	1	1	1	1	CXXC5	CXXC finger protein 5
hsa-miR-370	0	0	1	1	1	1	LRIF1	ligand dependent nuclear receptor interacting factor 1
hsa-miR-370	0	0	1	1	0	0	TRPV2	transient receptor potential cation channel, subfamily V, member 2
hsa-miR-370	0	0	1	0	0	0	LINC00284	long intergenic non-protein coding RNA 284
hsa-miR-370	1	0	1	1	1	1	HNRNPUL1	heterogeneous nuclear ribonucleoprotein U-like 1
hsa-miR-370	0	0	1	1	0	0	C17orf53	chromosome 17 open reading frame 53
hsa-miR-370	0	0	1	1	0	0	UBR4	ubiquitin protein ligase E3 component n-recognin 4
hsa-miR-370	0	0	1	1	0	0	CCDC51	coiled-coil domain containing 51
hsa-miR-370	0	0	1	1	0	0	TRMT2B	tRNA methyltransferase 2 homolog B (S. cerevisiae)
hsa-miR-370	0	0	1	1	0	0	JMJD4	jumonji domain containing 4
hsa-miR-370	0	0	1	1	1	1	ARMC5	armadillo repeat containing 5
hsa-miR-370	0	0	1	0	0	0	LOC284561	uncharacterized LOC284561
hsa-miR-370	0	0	1	1	0	0	RAD54L2	RAD54-like 2 (S. cerevisiae)
hsa-miR-370	1	0	1	1	1	1	DERL1	derlin 1
hsa-miR-370	0	0	1	1	0	0	OBSL1	obscurin-like 1
hsa-miR-370	1	0	1	1	1	1	PAX8	paired box 8
hsa-miR-370	0	0	1	1	1	1	AMFR	autocrine motility factor receptor, E3 ubiquitin protein ligase
hsa-miR-370	1	0	1	1	1	1	COPS7B	COP9 constitutive photomorphogenic homolog subunit 7B (Arabidopsis)
hsa-miR-370	0	0	1	0	0	0	LINC00085	long intergenic non-protein coding RNA 85
hsa-miR-370	1	0	1	1	1	1	FAM131A	family with sequence similarity 131, member A
hsa-miR-370	0	0	1	1	1	1	SIGLEC1	sialic acid binding Ig-like lectin 1, sialoadhesin
hsa-miR-370	0	0	1	1	0	0	SPON2	spondin 2, extracellular matrix protein
hsa-miR-370	0	0	1	0	1	1	ATXN1L	ataxin 1-like
hsa-miR-370	1	0	1	1	1	1	YPEL5	yippee-like 5 (Drosophila)
hsa-miR-370	0	0	1	0	1	1	HEMK1	HemK methyltransferase family member 1
hsa-miR-370	0	0	1	1	1	1	HSPBAP1	HSPB (heat shock 27kDa) associated protein 1
hsa-miR-370	1	0	1	1	0	0	POMGNT1	protein O-linked mannose beta1,2-N-acetylglucosaminyltransferase
hsa-miR-370	1	0	1	1	1	1	DCAF8	DDB1 and CUL4 associated factor 8
hsa-miR-370	1	0	1	1	1	1	LRP4	low density lipoprotein receptor-related protein 4
hsa-miR-370	0	0	1	0	0	0	A1BG-AS1	A1BG antisense RNA 1
hsa-miR-370	0	0	1	1	0	0	CCDC142	coiled-coil domain containing 142
hsa-miR-370	0	0	1	1	1	1	KDM2B	lysine (K)-specific demethylase 2B
hsa-miR-370	1	0	1	1	1	1	GPD2	glycerol-3-phosphate dehydrogenase 2 (mitochondrial)
hsa-miR-370	0	0	1	0	0	0	LOC254559	uncharacterized LOC254559
hsa-miR-370	0	0	1	1	1	1	PRR5L	proline rich 5 like
hsa-miR-370	0	0	1	0	0	0	FLJ30838	uncharacterized LOC400955
hsa-miR-370	0	0	1	0	0	0	LOC401242	uncharacterized LOC401242
hsa-miR-370	0	0	1	1	1	1	CCND3	cyclin D3
hsa-miR-370	0	0	1	1	1	1	GLYATL1	glycine-N-acyltransferase-like 1
hsa-miR-370	1	0	1	0	1	1	PTPRE	protein tyrosine phosphatase, receptor type, E
hsa-miR-370	0	0	1	1	0	0	BEAN1	brain expressed, associated with NEDD4, 1
hsa-miR-370	1	0	1	1	1	1	LMNA	lamin A/C
hsa-miR-370	0	0	1	1	1	1	PDE1C	phosphodiesterase 1C, calmodulin-dependent 70kDa
hsa-miR-370	0	0	1	1	1	1	SEPT5	septin 5
hsa-miR-370	1	0	1	1	1	1	SHISA5	shisa homolog 5 (Xenopus laevis)
hsa-miR-370	0	0	1	0	1	1	FAM70A	family with sequence similarity 70, member A
hsa-miR-370	0	0	1	0	0	0	LOC284600	uncharacterized LOC284600
hsa-miR-370	0	0	1	1	0	0	ZNF185	zinc finger protein 185 (LIM domain)
hsa-miR-370	0	0	1	1	1	1	PTCD2	pentatricopeptide repeat domain 2
hsa-miR-370	0	0	1	0	0	0	ERVV-1	endogenous retrovirus group V, member 1
hsa-miR-370	0	0	1	0	0	0	LOC255187	hCG1980447
hsa-miR-370	1	0	1	0	1	1	RABGEF1	RAB guanine nucleotide exchange factor (GEF) 1
hsa-miR-370	0	0	1	1	1	1	FAM213B	family with sequence similarity 213, member B
hsa-miR-370	0	0	1	1	0	0	RELT	RELT tumor necrosis factor receptor
hsa-miR-370	0	0	1	1	0	0	COMMD4	COMM domain containing 4
hsa-miR-370	0	0	1	1	1	1	C14orf79	chromosome 14 open reading frame 79
hsa-miR-370	0	0	1	1	1	1	SEC61A2	Sec61 alpha 2 subunit (S. cerevisiae)
hsa-miR-370	0	0	1	0	0	0	UBE2QL1	ubiquitin-conjugating enzyme E2Q family-like 1
hsa-miR-370	0	0	1	1	0	0	PTOV1	prostate tumor overexpressed 1
hsa-miR-370	0	0	1	1	1	1	A2ML1	alpha-2-macroglobulin-like 1
hsa-miR-370	0	0	1	1	0	0	CD37	CD37 molecule
hsa-miR-370	0	0	1	1	0	0	TRIM41	tripartite motif containing 41
hsa-miR-370	0	0	1	1	0	0	PIGO	phosphatidylinositol glycan anchor biosynthesis, class O
hsa-miR-370	1	0	1	1	1	1	PEAR1	platelet endothelial aggregation receptor 1
hsa-miR-370	1	0	1	1	1	1	PHF15	PHD finger protein 15
hsa-miR-370	1	0	1	1	1	1	BLCAP	bladder cancer associated protein
hsa-miR-370	1	0	1	1	1	1	NOTCH2NL	notch 2 N-terminal like
hsa-miR-370	1	0	1	0	1	1	SLC25A37	solute carrier family 25 (mitochondrial iron transporter), member 37
hsa-miR-370	0	0	1	1	0	0	ATP6AP1	ATPase, H+ transporting, lysosomal accessory protein 1
hsa-miR-370	0	0	1	1	1	1	MTR	5-methyltetrahydrofolate-homocysteine methyltransferase
hsa-miR-370	0	0	1	0	0	0	LOC152225	uncharacterized LOC152225
hsa-miR-370	0	0	1	1	0	0	ACOT11	acyl-CoA thioesterase 11
hsa-miR-370	0	0	1	1	0	0	CTNNBL1	catenin, beta like 1
hsa-miR-370	1	0	1	1	1	1	SYN2	synapsin II
hsa-miR-370	0	0	1	0	0	0	SEC14L2	SEC14-like 2 (S. cerevisiae)
hsa-miR-370	0	0	1	0	0	0	LOC440910	uncharacterized LOC440910
hsa-miR-370	1	0	1	0	1	1	TEF	thyrotrophic embryonic factor
hsa-miR-370	1	0	1	1	1	1	GNG2	guanine nucleotide binding protein (G protein), gamma 2
hsa-miR-370	0	0	1	1	0	0	APLP1	amyloid beta (A4) precursor-like protein 1
hsa-miR-370	1	0	1	1	1	1	MAFK	v-maf musculoaponeurotic fibrosarcoma oncogene homolog K (avian)
hsa-miR-370	0	0	1	1	0	0	CDC25B	cell division cycle 25 homolog B (S. pombe)
hsa-miR-370	1	0	1	1	0	0	TOE1	target of EGR1, member 1 (nuclear)
hsa-miR-370	0	0	1	1	0	0	AXDND1	axonemal dynein light chain domain containing 1
hsa-miR-370	0	0	1	1	1	1	CYP11B1	cytochrome P450, family 11, subfamily B, polypeptide 1
hsa-miR-370	0	0	1	0	0	0	CXXC1P1	CXXC finger protein 1 pseudogene 1
hsa-miR-370	0	0	1	1	0	0	NDUFA4L2	NADH dehydrogenase (ubiquinone) 1 alpha subcomplex, 4-like 2
hsa-miR-370	0	0	1	1	0	0	WBP1	WW domain binding protein 1
hsa-miR-370	0	0	1	1	1	1	SLC9A3R1	solute carrier family 9, subfamily A (NHE3, cation proton antiporter 3), member 3 regulator 1
hsa-miR-370	0	0	1	1	1	1	SPOCK1	sparc/osteonectin, cwcv and kazal-like domains proteoglycan (testican) 1
hsa-miR-370	0	0	1	1	0	0	CYHR1	cysteine/histidine-rich 1
hsa-miR-370	1	0	1	1	1	1	KLC2	kinesin light chain 2
hsa-miR-370	0	0	1	1	1	1	NMD3	NMD3 homolog (S. cerevisiae)
hsa-miR-370	1	0	1	1	1	1	GALNTL2	UDP-N-acetyl-alpha-D-galactosamine:polypeptide N-acetylgalactosaminyltransferase-like 2
hsa-miR-370	0	0	1	0	1	1	AGBL4	ATP/GTP binding protein-like 4
hsa-miR-370	1	0	1	1	1	1	LPPR2	lipid phosphate phosphatase-related protein type 2
hsa-miR-370	0	0	1	1	1	1	GPT2	glutamic pyruvate transaminase (alanine aminotransferase) 2
hsa-miR-370	0	0	1	1	0	0	TMEM108	transmembrane protein 108
hsa-miR-370	0	0	1	1	1	1	CHRM5	cholinergic receptor, muscarinic 5
hsa-miR-370	0	0	1	1	1	1	AQP3	aquaporin 3 (Gill blood group)
hsa-miR-370	0	0	1	1	1	1	SIRPB2	signal-regulatory protein beta 2
hsa-miR-370	1	0	1	1	1	1	KCNIP3	Kv channel interacting protein 3, calsenilin
hsa-miR-370	1	0	1	1	1	1	SPATS2	spermatogenesis associated, serine-rich 2
hsa-miR-370	1	0	1	0	1	1	STC2	stanniocalcin 2
hsa-miR-370	1	0	1	1	1	1	PEA15	phosphoprotein enriched in astrocytes 15
hsa-miR-370	1	0	1	1	1	1	EPB41L4A	erythrocyte membrane protein band 4.1 like 4A
hsa-miR-370	0	0	1	0	0	0	LOC100133029	sirtuin 5 pseudogene
hsa-miR-370	0	0	1	0	0	0	CCDC150	coiled-coil domain containing 150
hsa-miR-370	0	0	1	0	0	0	ZNF815P	zinc finger protein 815, pseudogene
hsa-miR-370	0	0	1	0	0	0	FAM66C	family with sequence similarity 66, member C
hsa-miR-370	1	0	1	1	0	0	SCAMP2	secretory carrier membrane protein 2
hsa-miR-370	0	0	1	0	0	0	ZNF300P1	zinc finger protein 300 pseudogene 1
hsa-miR-370	0	0	1	1	1	1	EPHX2	epoxide hydrolase 2, cytoplasmic
hsa-miR-370	1	0	1	1	1	1	CA12	carbonic anhydrase XII
hsa-miR-370	1	0	1	1	1	1	EPB41L1	erythrocyte membrane protein band 4.1-like 1
hsa-miR-370	0	0	1	1	1	1	FGD2	FYVE, RhoGEF and PH domain containing 2
hsa-miR-370	0	0	1	0	0	0	LOC400680	uncharacterized LOC400680
hsa-miR-370	0	0	1	0	0	0	KIRREL3-AS3	KIRREL3 antisense RNA 3
hsa-miR-370	0	0	1	1	1	1	ADGB	androglobin
hsa-miR-370	0	0	1	1	1	1	RBM4	RNA binding motif protein 4
hsa-miR-370	0	0	1	1	0	0	PSAPL1	prosaposin-like 1 (gene/pseudogene)
hsa-miR-370	0	0	1	0	0	0	THAP7-AS1	THAP7 antisense RNA 1
hsa-miR-370	0	0	1	1	0	0	MEI1	meiosis inhibitor 1
hsa-miR-370	0	0	1	1	0	0	CORO1A	coronin, actin binding protein, 1A
hsa-miR-370	1	0	1	1	1	1	LZTS2	leucine zipper, putative tumor suppressor 2
hsa-miR-370	1	0	1	1	1	1	PIGA	phosphatidylinositol glycan anchor biosynthesis, class A
hsa-miR-370	0	0	1	1	1	1	RP1	retinitis pigmentosa 1 (autosomal dominant)
hsa-miR-370	0	0	1	1	0	0	DCBLD1	discoidin, CUB and LCCL domain containing 1
hsa-miR-370	1	0	1	1	1	1	THTPA	thiamine triphosphatase
hsa-miR-370	0	0	1	0	0	0	LOC338579	ankyrin repeat domain-containing protein 30B pseudogene
hsa-miR-370	1	0	1	1	0	0	DGCR6	DiGeorge syndrome critical region gene 6
hsa-miR-370	0	0	1	1	1	1	VWA3B	von Willebrand factor A domain containing 3B
hsa-miR-370	1	0	1	1	1	1	TRAFD1	TRAF-type zinc finger domain containing 1
hsa-miR-370	1	0	1	1	1	1	LMX1A	LIM homeobox transcription factor 1, alpha
hsa-miR-370	0	0	1	1	0	0	KIAA0146	KIAA0146
hsa-miR-370	1	0	1	1	0	0	WIZ	widely interspaced zinc finger motifs
hsa-miR-370	1	0	1	1	0	0	CACNB3	calcium channel, voltage-dependent, beta 3 subunit
hsa-miR-370	0	0	1	1	0	0	MARS	methionyl-tRNA synthetase
hsa-miR-370	0	0	1	1	1	1	GFI1	growth factor independent 1 transcription repressor
hsa-miR-370	0	0	1	1	1	1	FRMD5	FERM domain containing 5
hsa-miR-370	0	0	1	0	0	0	C1orf132	chromosome 1 open reading frame 132
hsa-miR-370	1	0	1	1	1	1	EGLN3	egl nine homolog 3 (C. elegans)
hsa-miR-370	0	0	1	1	1	1	PRRT1	proline-rich transmembrane protein 1
hsa-miR-370	0	0	1	1	1	1	SLC9A1	solute carrier family 9, subfamily A (NHE1, cation proton antiporter 1), member 1
hsa-miR-370	0	0	1	0	1	1	LOC389641	uncharacterized LOC389641
hsa-miR-370	0	0	1	1	0	0	NPIP	nuclear pore complex interacting protein
hsa-miR-370	1	0	1	1	1	1	CORO2B	coronin, actin binding protein, 2B
hsa-miR-370	0	0	1	1	1	1	C2orf91	chromosome 2 open reading frame 91
hsa-miR-370	0	0	1	1	1	1	KANSL1L	KAT8 regulatory NSL complex subunit 1-like
hsa-miR-370	1	0	1	1	1	1	C17orf85	chromosome 17 open reading frame 85
hsa-miR-370	1	0	1	1	1	1	METAP2	methionyl aminopeptidase 2
hsa-miR-370	0	0	1	1	1	1	DENND5A	DENN/MADD domain containing 5A
hsa-miR-370	0	0	1	0	1	1	RASGRP3	RAS guanyl releasing protein 3 (calcium and DAG-regulated)
hsa-miR-370	0	0	1	0	0	0	FAM75D4	family with sequence similarity 75, member D4
hsa-miR-370	0	0	1	0	0	0	FAM95B1	family with sequence similarity 95, member B1
hsa-miR-370	0	0	1	1	1	1	RBM46	RNA binding motif protein 46
hsa-miR-370	1	0	1	1	0	0	UBN2	ubinuclein 2
hsa-miR-370	0	0	1	1	1	1	EPPIN	epididymal peptidase inhibitor
hsa-miR-370	0	0	1	1	0	0	FSIP2	fibrous sheath interacting protein 2
hsa-miR-370	1	0	1	1	1	1	PTPRB	protein tyrosine phosphatase, receptor type, B
hsa-miR-370	0	0	1	1	1	1	BDH1	3-hydroxybutyrate dehydrogenase, type 1
hsa-miR-370	0	0	1	1	0	0	CCDC88B	coiled-coil domain containing 88B
hsa-miR-370	1	0	1	0	1	1	CLEC16A	C-type lectin domain family 16, member A
hsa-miR-370	1	0	1	1	1	1	DLG2	discs, large homolog 2 (Drosophila)
hsa-miR-370	1	0	1	1	1	1	CLIP1	CAP-GLY domain containing linker protein 1
hsa-miR-370	0	0	1	1	1	1	KLC4	kinesin light chain 4
hsa-miR-370	0	0	1	1	0	0	FAM54B	family with sequence similarity 54, member B
hsa-miR-370	1	0	1	0	1	1	ADIPOR2	adiponectin receptor 2
hsa-miR-370	1	0	1	1	0	0	PEAK1	NKF3 kinase family member
hsa-miR-370	1	0	1	1	1	1	RNF44	ring finger protein 44
hsa-miR-370	0	0	1	1	0	0	IQUB	IQ motif and ubiquitin domain containing
hsa-miR-370	1	0	1	1	1	1	PLA2G15	phospholipase A2, group XV
hsa-miR-370	1	0	1	0	1	1	CAPRIN1	cell cycle associated protein 1
hsa-miR-370	0	0	1	0	0	0	FAM71E2	family with sequence similarity 71, member E2
hsa-miR-370	1	0	1	1	1	1	SLC12A6	solute carrier family 12 (potassium/chloride transporters), member 6
hsa-miR-370	0	0	1	1	0	0	TRIM46	tripartite motif containing 46
hsa-miR-370	0	0	1	0	0	0	FAM205B	transmembrane protein C9orf144B pseudogene
hsa-miR-370	0	0	1	0	0	0	EP400NL	EP400 N-terminal like
hsa-miR-370	0	0	1	0	0	0	AFG3L1P	AFG3 ATPase family gene 3-like 1 (S. cerevisiae), pseudogene
hsa-miR-370	0	0	1	0	0	0	LOC100129940	uncharacterized LOC100129940
hsa-miR-370	1	0	1	1	1	1	ADAMTSL1	ADAMTS-like 1
hsa-miR-370	0	0	1	1	0	0	GSG1L	GSG1-like
hsa-miR-370	0	0	1	1	0	0	WFIKKN1	WAP, follistatin/kazal, immunoglobulin, kunitz and netrin domain containing 1
hsa-miR-370	1	0	1	0	1	1	CYB561D1	cytochrome b-561 domain containing 1
hsa-miR-370	0	0	1	0	0	0	FLJ26245	uncharacterized LOC400533
hsa-miR-370	1	0	1	1	1	1	RBM24	RNA binding motif protein 24
hsa-miR-370	0	0	1	1	0	0	HEATR8	HEAT repeat containing 8
hsa-miR-370	1	0	1	1	1	1	GPD1	glycerol-3-phosphate dehydrogenase 1 (soluble)
hsa-miR-370	0	0	1	0	0	0	LOC654433	uncharacterized LOC654433
hsa-miR-370	0	0	1	0	1	1	KIF1A	kinesin family member 1A
hsa-miR-370	0	0	1	1	1	1	TMC5	transmembrane channel-like 5
hsa-miR-370	0	0	1	0	1	1	RUFY4	RUN and FYVE domain containing 4
hsa-miR-370	0	0	1	0	0	0	AGAP9	ArfGAP with GTPase domain, ankyrin repeat and PH domain 9
hsa-miR-370	1	0	1	1	1	1	SYS1	SYS1 Golgi-localized integral membrane protein homolog (S. cerevisiae)
hsa-miR-370	0	0	1	1	1	1	AKTIP	AKT interacting protein
hsa-miR-370	1	0	1	1	1	1	RBBP4	retinoblastoma binding protein 4
hsa-miR-370	1	0	1	1	1	1	CYFIP2	cytoplasmic FMR1 interacting protein 2
hsa-miR-370	1	0	1	0	1	1	SEZ6	seizure related 6 homolog (mouse)
hsa-miR-370	1	0	1	1	1	1	CAMK2G	calcium/calmodulin-dependent protein kinase II gamma
hsa-miR-370	1	0	1	1	1	1	ZNF655	zinc finger protein 655
hsa-miR-370	1	0	1	1	1	1	AHCYL1	adenosylhomocysteinase-like 1
hsa-miR-370	0	0	1	0	0	0	PART1	prostate androgen-regulated transcript 1 (non-protein coding)
hsa-miR-370	0	0	1	0	0	0	POM121L9P	POM121 transmembrane nucleoporin-like 9, pseudogene
hsa-miR-370	0	0	1	0	0	0	POM121L8P	POM121 transmembrane nucleoporin-like 8 pseudogene
hsa-miR-370	0	0	1	1	1	1	ARIH1	ariadne homolog, ubiquitin-conjugating enzyme E2 binding protein, 1 (Drosophila)
hsa-miR-370	0	0	1	1	0	0	MSH5	mutS homolog 5 (E. coli)
hsa-miR-370	0	0	1	1	0	0	SAPCD1	suppressor APC domain containing 1
hsa-miR-370	0	0	1	0	0	0	KIAA0913	KIAA0913
hsa-miR-370	0	0	1	1	1	1	MIOS	missing oocyte, meiosis regulator, homolog (Drosophila)
hsa-miR-370	1	0	1	0	1	1	DNAJC5	DnaJ (Hsp40) homolog, subfamily C, member 5
hsa-miR-370	0	0	1	1	1	1	STAG3L1	stromal antigen 3-like 1
hsa-miR-370	1	0	1	0	1	1	GRIN3A	glutamate receptor, ionotropic, N-methyl-D-aspartate 3A
hsa-miR-370	0	0	1	1	1	1	CD276	CD276 molecule
hsa-miR-370	0	0	1	0	0	0	FAM66D	family with sequence similarity 66, member D
hsa-miR-370	0	0	1	1	1	1	ING3	inhibitor of growth family, member 3
hsa-miR-370	0	0	1	1	1	1	COBL	cordon-bleu homolog (mouse)
hsa-miR-370	1	0	1	1	1	1	SLC30A8	solute carrier family 30 (zinc transporter), member 8
hsa-miR-370	0	0	1	1	0	0	KRBA1	KRAB-A domain containing 1
hsa-miR-370	0	0	1	1	1	1	ZFP41	zinc finger protein 41 homolog (mouse)
hsa-miR-370	0	0	1	1	1	1	EGFLAM	EGF-like, fibronectin type III and laminin G domains
hsa-miR-370	0	0	1	1	1	1	SRSF11	serine/arginine-rich splicing factor 11
hsa-miR-370	1	0	1	1	1	1	NFX1	nuclear transcription factor, X-box binding 1
hsa-miR-370	1	0	1	1	0	0	USP24	ubiquitin specific peptidase 24
hsa-miR-370	1	0	1	1	1	1	MLL3	myeloid/lymphoid or mixed-lineage leukemia 3
hsa-miR-370	1	0	1	1	1	1	RNF180	ring finger protein 180
hsa-miR-370	0	0	1	1	1	1	NUP214	nucleoporin 214kDa
hsa-miR-370	0	0	1	0	0	0	FAM225A	family with sequence similarity 225, member A (non-protein coding)
hsa-miR-370	0	0	1	1	0	0	TMEM44	transmembrane protein 44
hsa-miR-370	0	0	1	1	1	1	INPP5B	inositol polyphosphate-5-phosphatase, 75kDa
hsa-miR-370	0	0	1	1	1	1	CCDC132	coiled-coil domain containing 132
hsa-miR-370	0	0	1	0	0	0	EPHA1-AS1	EPHA1 antisense RNA 1
hsa-miR-370	1	0	1	1	1	1	ATAT1	alpha tubulin acetyltransferase 1
hsa-miR-370	1	0	1	1	1	1	IL17RD	interleukin 17 receptor D
hsa-miR-370	1	0	1	1	1	1	CAPRIN2	caprin family member 2
hsa-miR-370	1	0	1	0	1	1	JAZF1	JAZF zinc finger 1
hsa-miR-370	1	0	1	1	1	1	ZNF207	zinc finger protein 207
hsa-miR-370	1	0	1	1	1	1	FAM76B	family with sequence similarity 76, member B
hsa-miR-370	0	0	1	1	1	1	TMEM130	transmembrane protein 130
hsa-miR-370	1	0	1	1	1	1	RNF38	ring finger protein 38
hsa-miR-370	0	0	1	0	0	0	TRBJ2-2	T cell receptor beta joining 2-2
hsa-miR-370	1	0	1	1	1	1	CLIC5	chloride intracellular channel 5
hsa-miR-370	0	0	1	1	0	0	GPC2	glypican 2
hsa-miR-370	1	0	1	1	1	1	LUZP2	leucine zipper protein 2
hsa-miR-370	0	0	1	1	0	0	CMTM1	CKLF-like MARVEL transmembrane domain containing 1
hsa-miR-370	0	0	1	1	1	1	KLC1	kinesin light chain 1
hsa-miR-370	1	0	1	0	1	1	NEDD4L	neural precursor cell expressed, developmentally down-regulated 4-like, E3 ubiquitin protein ligase
hsa-miR-370	0	0	1	1	0	0	PIGU	phosphatidylinositol glycan anchor biosynthesis, class U
hsa-miR-370	0	0	1	0	1	1	ANKS1B	ankyrin repeat and sterile alpha motif domain containing 1B
hsa-miR-370	1	0	1	1	1	1	TMCC2	transmembrane and coiled-coil domain family 2
hsa-miR-370	0	0	1	1	0	0	ART5	ADP-ribosyltransferase 5
hsa-miR-370	0	0	1	1	1	1	TIMM50	translocase of inner mitochondrial membrane 50 homolog (S. cerevisiae)
hsa-miR-370	1	0	1	0	1	1	NHS	Nance-Horan syndrome (congenital cataracts and dental anomalies)
hsa-miR-370	1	0	1	1	1	1	ARHGAP20	Rho GTPase activating protein 20
hsa-miR-370	0	0	1	0	1	1	XKR5	XK, Kell blood group complex subunit-related family, member 5
hsa-miR-370	1	0	1	1	1	1	MECP2	methyl CpG binding protein 2 (Rett syndrome)
hsa-miR-370	0	0	1	1	0	0	ASB16	ankyrin repeat and SOCS box containing 16
hsa-miR-370	1	0	1	1	0	0	ADAM15	ADAM metallopeptidase domain 15
hsa-miR-370	0	0	1	1	0	0	DHRS4	dehydrogenase/reductase (SDR family) member 4
hsa-miR-370	0	0	1	1	1	1	IL24	interleukin 24
hsa-miR-370	1	0	1	1	1	1	RTN3	reticulon 3
hsa-miR-370	0	0	1	0	0	0	LOC100128076	protein tyrosine phosphatase pseudogene
hsa-miR-370	1	0	1	1	1	1	SAT1	spermidine/spermine N1-acetyltransferase 1
hsa-miR-370	0	0	1	1	0	0	NBPF8	neuroblastoma breakpoint family, member 8
hsa-miR-370	0	0	1	1	1	1	CDK20	cyclin-dependent kinase 20
hsa-miR-370	1	0	1	1	1	1	TBC1D22B	TBC1 domain family, member 22B
hsa-miR-370	0	0	1	1	0	0	CXorf26	chromosome X open reading frame 26
hsa-miR-370	1	0	1	1	1	1	AMOT	angiomotin
hsa-miR-370	0	0	1	1	1	1	ZCCHC17	zinc finger, CCHC domain containing 17
hsa-miR-370	1	0	1	0	1	1	BAG4	BCL2-associated athanogene 4
hsa-miR-370	1	0	1	1	1	1	PDLIM3	PDZ and LIM domain 3
hsa-miR-370	0	0	1	1	1	1	WDR55	WD repeat domain 55
hsa-miR-370	1	0	1	1	1	1	RIMS3	regulating synaptic membrane exocytosis 3
hsa-miR-370	1	0	1	1	1	1	NUMA1	nuclear mitotic apparatus protein 1
hsa-miR-370	1	0	1	1	0	0	POLR3D	polymerase (RNA) III (DNA directed) polypeptide D, 44kDa
hsa-miR-370	1	0	1	1	0	0	SERPINE1	serpin peptidase inhibitor, clade E (nexin, plasminogen activator inhibitor type 1), member 1
hsa-miR-370	0	0	1	0	0	0	LINC00467	long intergenic non-protein coding RNA 467
hsa-miR-370	1	0	1	1	1	1	POU2F2	POU class 2 homeobox 2
hsa-miR-370	0	0	1	0	0	0	MGC13053	uncharacterized MGC13053
hsa-miR-370	1	0	1	1	0	0	EIF4A1	eukaryotic translation initiation factor 4A1
hsa-miR-370	0	0	1	0	0	0	DNM1P33	DNM1 pseudogene 33
hsa-miR-370	0	0	1	1	0	0	FAM195A	family with sequence similarity 195, member A
hsa-miR-370	0	0	1	0	0	0	GLIS3-AS1	GLIS3 antisense RNA 1
hsa-miR-370	1	0	1	1	0	0	SAP30BP	SAP30 binding protein
hsa-miR-370	0	0	1	1	0	0	MYLK2	myosin light chain kinase 2
hsa-miR-370	0	0	1	0	0	0	FBXO46	F-box protein 46
hsa-miR-370	0	0	1	1	1	1	ICA1	islet cell autoantigen 1, 69kDa
hsa-miR-370	1	0	1	1	1	1	PLEKHO2	pleckstrin homology domain containing, family O member 2
hsa-miR-370	1	0	1	1	1	1	HMGA1	high mobility group AT-hook 1
hsa-miR-370	1	0	1	1	0	0	WDR45	WD repeat domain 45
hsa-miR-370	0	0	1	0	0	0	ATXN7L3B	ataxin 7-like 3B
hsa-miR-370	0	0	1	1	0	0	PANK2	pantothenate kinase 2
hsa-miR-370	0	0	1	1	1	1	ATXN2L	ataxin 2-like
hsa-miR-370	1	0	1	0	1	1	CNP	2',3'-cyclic nucleotide 3' phosphodiesterase
hsa-miR-370	0	0	1	1	0	0	TCN2	transcobalamin II
hsa-miR-370	0	0	1	1	1	1	ZNF587	zinc finger protein 587
hsa-miR-370	0	0	1	0	0	0	LRRC14	leucine rich repeat containing 14
hsa-miR-370	0	0	1	0	0	0	GRAMD1B	GRAM domain containing 1B
hsa-miR-370	1	0	1	0	1	1	FNDC3B	fibronectin type III domain containing 3B
hsa-miR-370	0	0	1	1	0	0	KLHDC3	kelch domain containing 3
hsa-miR-370	1	0	1	1	1	1	DPH1	DPH1 homolog (S. cerevisiae)
hsa-miR-370	0	0	1	1	1	1	DEDD2	death effector domain containing 2
hsa-miR-370	0	0	1	1	1	1	RNF170	ring finger protein 170
hsa-miR-370	1	0	1	1	1	1	ETF1	eukaryotic translation termination factor 1
hsa-miR-370	1	0	1	1	1	1	PRDM2	PR domain containing 2, with ZNF domain
hsa-miR-370	1	0	1	1	0	0	FHL3	four and a half LIM domains 3
hsa-miR-370	1	0	1	1	0	0	LRFN1	leucine rich repeat and fibronectin type III domain containing 1
hsa-miR-370	0	0	1	1	1	1	TOMM40L	translocase of outer mitochondrial membrane 40 homolog (yeast)-like
hsa-miR-370	0	0	1	0	0	0	MGC21881	uncharacterized locus MGC21881
hsa-miR-370	0	0	1	0	1	1	ZNF37A	zinc finger protein 37A
hsa-miR-370	1	0	1	1	1	1	CSDA	cold shock domain protein A
hsa-miR-370	1	0	1	1	1	1	FAM176A	family with sequence similarity 176, member A
hsa-miR-370	0	0	1	1	1	1	CASP8	caspase 8, apoptosis-related cysteine peptidase
hsa-miR-370	0	0	1	1	0	0	ZBTB32	zinc finger and BTB domain containing 32
hsa-miR-370	1	0	1	1	1	1	SCAF11	SR-related CTD-associated factor 11
hsa-miR-370	0	0	1	1	1	1	GLIPR2	GLI pathogenesis-related 2
hsa-miR-370	0	0	1	1	1	1	EXOC7	exocyst complex component 7
hsa-miR-370	0	0	1	1	1	1	PRMT3	protein arginine methyltransferase 3
hsa-miR-370	0	0	1	1	0	0	PTPMT1	protein tyrosine phosphatase, mitochondrial 1
hsa-miR-370	0	0	1	1	1	1	LRRK1	leucine-rich repeat kinase 1
hsa-miR-370	0	0	1	1	1	1	TMEM40	transmembrane protein 40
hsa-miR-370	0	0	1	0	1	1	ZNF718	zinc finger protein 718
hsa-miR-370	1	0	1	0	1	1	BTF3L4	basic transcription factor 3-like 4
hsa-miR-370	0	0	1	0	0	0	DKFZP434K028	uncharacterized LOC26070
hsa-miR-370	0	0	1	1	0	0	NTN5	netrin 5
hsa-miR-370	0	0	1	1	1	1	FMNL1	formin-like 1
hsa-miR-370	0	0	1	0	0	0	NBR2	neighbor of BRCA1 gene 2 (non-protein coding)
hsa-miR-370	0	0	1	0	0	0	AZGP1P1	alpha-2-glycoprotein 1, zinc-binding pseudogene 1
hsa-miR-370	0	0	1	1	1	1	FBXO36	F-box protein 36
hsa-miR-370	1	0	1	1	1	1	SPOCK2	sparc/osteonectin, cwcv and kazal-like domains proteoglycan (testican) 2
hsa-miR-370	1	0	1	0	1	1	CDK19	cyclin-dependent kinase 19
hsa-miR-370	0	0	1	1	1	1	SPAG16	sperm associated antigen 16
hsa-miR-370	0	0	1	1	0	0	CCDC114	coiled-coil domain containing 114
hsa-miR-370	0	0	1	1	1	1	C14orf105	chromosome 14 open reading frame 105
hsa-miR-370	1	0	1	1	1	1	SMYD2	SET and MYND domain containing 2
hsa-miR-370	1	0	1	1	0	0	PPIL2	peptidylprolyl isomerase (cyclophilin)-like 2
hsa-miR-370	0	0	1	1	0	0	CPT1C	carnitine palmitoyltransferase 1C
hsa-miR-370	0	0	1	1	1	1	LRMP	lymphoid-restricted membrane protein
hsa-miR-370	0	0	1	1	0	0	C7orf57	chromosome 7 open reading frame 57
hsa-miR-370	0	0	1	0	1	1	FLJ25328	uncharacterized LOC148231
hsa-miR-370	1	0	1	1	1	1	BZRAP1	benzodiazapine receptor (peripheral) associated protein 1
hsa-miR-370	1	0	1	1	1	1	ZNF282	zinc finger protein 282
hsa-miR-370	1	0	1	1	1	1	PMAIP1	phorbol-12-myristate-13-acetate-induced protein 1
hsa-miR-370	0	0	1	0	0	0	FAM86JP	family with sequence similarity 86, member A pseudogene
hsa-miR-370	1	0	1	1	1	1	RHOBTB1	Rho-related BTB domain containing 1
hsa-miR-370	0	0	1	1	0	0	WASIR2	WASH and IL9R antisense RNA 2
hsa-miR-370	1	0	1	1	1	1	SECISBP2L	SECIS binding protein 2-like
hsa-miR-370	0	0	1	0	0	0	MGC45922	uncharacterized LOC284365
hsa-miR-370	0	0	1	0	0	0	HILS1	histone linker H1 domain, spermatid-specific 1, pseudogene
hsa-miR-370	0	0	1	0	0	0	LINC00238	long intergenic non-protein coding RNA 238
hsa-miR-370	1	0	1	0	1	1	KIF5A	kinesin family member 5A
hsa-miR-370	0	0	1	1	1	1	HEXA	hexosaminidase A (alpha polypeptide)
hsa-miR-370	0	0	1	0	0	0	LINC00452	long intergenic non-protein coding RNA 452
hsa-miR-370	1	0	1	1	1	1	ABCA1	ATP-binding cassette, sub-family A (ABC1), member 1
hsa-miR-370	0	0	1	1	1	1	EDA2R	ectodysplasin A2 receptor
hsa-miR-370	1	0	1	1	1	1	NKAIN2	Na+/K+ transporting ATPase interacting 2
hsa-miR-370	1	0	1	1	1	1	THRA	thyroid hormone receptor, alpha
hsa-miR-370	0	0	1	1	1	1	PIK3CG	phosphatidylinositol-4,5-bisphosphate 3-kinase, catalytic subunit gamma
hsa-miR-370	0	0	1	1	0	0	HCRTR1	hypocretin (orexin) receptor 1
hsa-miR-370	1	0	1	1	1	1	CTDSPL2	CTD (carboxy-terminal domain, RNA polymerase II, polypeptide A) small phosphatase like 2
hsa-miR-370	0	0	1	0	0	0	LOC339862	uncharacterized LOC339862
hsa-miR-370	0	0	1	1	0	0	B3GNTL1	UDP-GlcNAc:betaGal beta-1,3-N-acetylglucosaminyltransferase-like 1
hsa-miR-370	0	0	1	1	1	1	UBE3D	ubiquitin protein ligase E3D
hsa-miR-370	0	0	1	1	1	1	DUSP28	dual specificity phosphatase 28
hsa-miR-370	0	0	1	0	0	0	FAM201A	family with sequence similarity 201, member A
hsa-miR-370	0	0	1	0	0	0	SPATA3	spermatogenesis associated 3
hsa-miR-370	1	0	1	1	1	1	HECTD2	HECT domain containing E3 ubiquitin protein ligase 2
hsa-miR-370	0	0	1	1	1	1	TADA1	transcriptional adaptor 1
hsa-miR-370	0	0	1	0	0	0	ANKRD30BP2	ankyrin repeat domain 30B pseudogene 2
hsa-miR-370	1	0	1	1	1	1	MEIS1	Meis homeobox 1
hsa-miR-370	0	0	1	0	0	0	LOC652276	potassium channel tetramerisation domain containing 5 pseudogene
hsa-miR-370	1	0	1	0	1	1	NEGR1	neuronal growth regulator 1
hsa-miR-370	1	0	1	1	0	0	RASGEF1B	RasGEF domain family, member 1B
hsa-miR-370	0	0	1	0	0	0	LOC284889	uncharacterized LOC284889
hsa-miR-370	1	0	1	1	1	1	WDR48	WD repeat domain 48
hsa-miR-370	0	0	1	1	0	0	FNTA	farnesyltransferase, CAAX box, alpha
hsa-miR-370	1	0	1	1	1	1	CTBP2	C-terminal binding protein 2
hsa-miR-370	1	0	1	1	1	1	UBXN2A	UBX domain protein 2A
hsa-miR-370	1	0	1	1	1	1	C4orf19	chromosome 4 open reading frame 19
hsa-miR-370	0	0	1	1	0	0	DHX32	DEAH (Asp-Glu-Ala-His) box polypeptide 32
hsa-miR-370	0	0	1	0	0	0	INHBA-AS1	INHBA antisense RNA 1
hsa-miR-370	1	0	1	1	1	1	GALNT1	UDP-N-acetyl-alpha-D-galactosamine:polypeptide N-acetylgalactosaminyltransferase 1 (GalNAc-T1)
hsa-miR-370	0	0	1	0	0	0	LOC100134868	uncharacterized LOC100134868
hsa-miR-370	0	0	1	1	0	0	CLSTN3	calsyntenin 3
hsa-miR-370	0	0	1	0	0	0	FLJ36000	uncharacterized FLJ36000
hsa-miR-370	1	0	1	1	1	1	ULK2	unc-51-like kinase 2 (C. elegans)
hsa-miR-370	0	0	1	1	1	1	FAM21C	family with sequence similarity 21, member C
hsa-miR-370	0	0	1	0	1	1	LINC00634	long intergenic non-protein coding RNA 634
hsa-miR-370	1	0	1	1	1	1	IL16	interleukin 16
hsa-miR-370	1	0	1	1	1	1	INTS6	integrator complex subunit 6
hsa-miR-370	0	0	1	1	1	1	MDFIC	MyoD family inhibitor domain containing
hsa-miR-370	0	0	1	0	0	0	SLC7A11-AS1	SLC7A11 antisense RNA 1
hsa-miR-370	1	0	1	1	1	1	ARPP21	cAMP-regulated phosphoprotein, 21kDa
hsa-miR-370	1	0	1	1	1	1	PRRG1	proline rich Gla (G-carboxyglutamic acid) 1
hsa-miR-370	1	0	1	1	1	1	DOC2A	double C2-like domains, alpha
hsa-miR-370	1	0	1	1	1	1	ARID3B	AT rich interactive domain 3B (BRIGHT-like)
hsa-miR-370	1	0	1	1	1	1	CLOCK	clock homolog (mouse)
hsa-miR-370	1	0	1	1	1	1	CTIF	CBP80/20-dependent translation initiation factor
hsa-miR-370	0	0	1	0	0	0	LRRC37BP1	leucine rich repeat containing 37B pseudogene 1
hsa-miR-370	0	0	1	1	0	0	ZNF839	zinc finger protein 839
hsa-miR-370	0	0	1	0	0	0	LOC339166	uncharacterized LOC339166
hsa-miR-370	0	0	1	0	0	0	DKFZp686O1327	uncharacterized LOC401014
hsa-miR-370	1	0	1	1	0	0	WNK1	WNK lysine deficient protein kinase 1
hsa-miR-370	1	0	1	1	1	1	RNF145	ring finger protein 145
hsa-miR-370	1	0	1	0	1	1	PSD3	pleckstrin and Sec7 domain containing 3
hsa-miR-370	1	0	1	1	1	1	MAMDC2	MAM domain containing 2
hsa-miR-370	1	0	1	1	1	1	SENP1	SUMO1/sentrin specific peptidase 1
hsa-miR-370	0	0	1	1	0	0	FAM165B	family with sequence similarity 165, member B
hsa-miR-370	0	0	1	1	0	0	NIT1	nitrilase 1
hsa-miR-370	1	0	1	1	0	0	SFXN5	sideroflexin 5
hsa-miR-370	0	0	1	0	0	0	CRYBB2P1	crystallin, beta B2 pseudogene 1
hsa-miR-370	0	0	1	0	0	0	LOC348120	uncharacterized LOC348120
hsa-miR-370	0	0	1	0	0	0	DPY19L2P4	dpy-19-like 2 pseudogene 4 (C. elegans)
hsa-miR-370	1	0	1	0	1	1	KDM2A	lysine (K)-specific demethylase 2A
hsa-miR-370	1	0	1	1	0	0	NCSTN	nicastrin
hsa-miR-370	1	0	1	1	0	0	TTC9	tetratricopeptide repeat domain 9
hsa-miR-370	1	0	1	1	1	1	RTKN2	rhotekin 2
hsa-miR-370	0	0	1	0	0	0	WASH2P	WAS protein family homolog 2 pseudogene
hsa-miR-370	0	0	1	0	0	0	LOC283038	uncharacterized LOC283038
hsa-miR-370	1	0	1	0	1	1	ARHGAP5	Rho GTPase activating protein 5
hsa-miR-370	0	0	1	0	1	1	ITGA1	integrin, alpha 1
hsa-miR-370	0	0	1	1	1	1	NCMAP	noncompact myelin associated protein
hsa-miR-370	1	0	1	1	1	1	MBNL1	muscleblind-like splicing regulator 1
hsa-miR-370	0	0	1	1	0	0	SRP14	signal recognition particle 14kDa (homologous Alu RNA binding protein)
hsa-miR-370	1	0	1	0	1	1	SEMA4G	sema domain, immunoglobulin domain (Ig), transmembrane domain (TM) and short cytoplasmic domain, (semaphorin) 4G
hsa-miR-370	1	0	1	1	1	1	ZFP91	zinc finger protein 91 homolog (mouse)
hsa-miR-370	1	0	1	1	1	1	LIMD2	LIM domain containing 2
hsa-miR-370	0	0	1	1	1	1	RAB3IL1	RAB3A interacting protein (rabin3)-like 1
hsa-miR-370	1	0	1	1	1	1	SCUBE3	signal peptide, CUB domain, EGF-like 3
hsa-miR-370	1	0	1	1	1	1	CRCP	CGRP receptor component
hsa-miR-370	0	0	1	0	0	0	LINC00265	long intergenic non-protein coding RNA 265
hsa-miR-370	0	0	1	1	0	0	TENC1	tensin like C1 domain containing phosphatase (tensin 2)
hsa-miR-370	0	0	1	0	0	0	HGSNAT	heparan-alpha-glucosaminide N-acetyltransferase
hsa-miR-370	0	0	1	1	1	1	ZNF254	zinc finger protein 254
hsa-miR-370	0	0	1	1	1	1	C17orf97	chromosome 17 open reading frame 97
hsa-miR-370	1	0	1	1	1	1	KLHL28	kelch-like 28 (Drosophila)
hsa-miR-370	0	0	1	0	0	0	LOC388436	uncharacterized LOC388436
hsa-miR-370	0	0	1	1	1	1	ZNF365	zinc finger protein 365
hsa-miR-370	1	0	1	1	1	1	INPP5A	inositol polyphosphate-5-phosphatase, 40kDa
hsa-miR-370	0	0	1	1	1	1	CDH26	cadherin 26
hsa-miR-370	1	0	1	0	0	0	MICAL3	microtubule associated monoxygenase, calponin and LIM domain containing 3
hsa-miR-370	0	0	1	0	0	0	FLJ35390	uncharacterized LOC255031
hsa-miR-370	1	0	1	1	1	1	UEVLD	UEV and lactate/malate dehyrogenase domains
hsa-miR-370	1	0	1	1	1	1	ADCY6	adenylate cyclase 6
hsa-miR-370	0	0	1	1	1	1	ZNF33B	zinc finger protein 33B
hsa-miR-370	0	0	1	1	0	0	SPNS2	spinster homolog 2 (Drosophila)
hsa-miR-370	0	0	1	1	0	0	TSNARE1	t-SNARE domain containing 1
hsa-miR-370	0	0	1	0	0	0	KANSL1-AS1	KANSL1 antisense RNA 1
hsa-miR-370	1	0	1	1	1	1	C18orf1	chromosome 18 open reading frame 1
hsa-miR-370	1	0	1	1	1	1	AP3M1	adaptor-related protein complex 3, mu 1 subunit
hsa-miR-370	1	0	1	1	1	1	FAM129B	family with sequence similarity 129, member B
hsa-miR-370	0	0	1	0	0	0	PABPC1P2	poly(A) binding protein, cytoplasmic 1 pseudogene 2
hsa-miR-370	1	0	1	1	1	1	PHACTR4	phosphatase and actin regulator 4
hsa-miR-370	1	0	1	1	1	1	BAZ2B	bromodomain adjacent to zinc finger domain, 2B
hsa-miR-370	0	0	1	0	0	0	CHADL	chondroadherin-like
hsa-miR-370	0	0	1	0	0	0	FOXN3-AS2	FOXN3 antisense RNA 2
hsa-miR-370	0	0	1	1	1	1	MSTO1	misato homolog 1 (Drosophila)
hsa-miR-370	0	0	1	0	0	0	ZRANB2-AS1	ZRANB2 antisense RNA 1
hsa-miR-370	0	0	1	0	0	0	ULK4P1	unc-51-like kinase 4 (C. elegans) pseudogene 1
hsa-miR-370	0	0	1	1	1	1	SLC11A1	solute carrier family 11 (proton-coupled divalent metal ion transporters), member 1
hsa-miR-370	1	0	1	1	1	1	FARP1	FERM, RhoGEF (ARHGEF) and pleckstrin domain protein 1 (chondrocyte-derived)
hsa-miR-370	0	0	1	0	0	0	JPX	JPX transcript, XIST activator (non-protein coding)
hsa-miR-370	0	0	1	0	0	0	ULK4P3	unc-51-like kinase 4 (C. elegans) pseudogene 3
hsa-miR-370	0	0	1	0	0	0	LOC440416	uncharacterized LOC440416
hsa-miR-370	0	0	1	0	0	0	LOC283070	uncharacterized LOC283070
hsa-miR-370	0	0	1	1	0	0	TRIM73	tripartite motif containing 73
hsa-miR-370	0	0	1	0	1	1	TNFRSF8	tumor necrosis factor receptor superfamily, member 8
hsa-miR-370	0	0	1	0	1	1	SH3RF2	SH3 domain containing ring finger 2
hsa-miR-370	0	0	1	1	0	0	D2HGDH	D-2-hydroxyglutarate dehydrogenase
hsa-miR-370	1	0	1	0	1	1	AMMECR1L	AMME chromosomal region gene 1-like
hsa-miR-370	0	0	1	0	0	0	LINC00537	long intergenic non-protein coding RNA 537
hsa-miR-370	0	0	1	1	0	0	C16orf86	chromosome 16 open reading frame 86
hsa-miR-370	0	0	1	1	0	0	HERC2P3	hect domain and RLD 2 pseudogene 3
hsa-miR-370	1	0	1	0	1	1	PIK3R3	phosphoinositide-3-kinase, regulatory subunit 3 (gamma)
hsa-miR-370	0	0	1	1	0	0	DNASE1	deoxyribonuclease I
hsa-miR-370	1	0	1	1	1	1	ST8SIA2	ST8 alpha-N-acetyl-neuraminide alpha-2,8-sialyltransferase 2
hsa-miR-370	1	0	1	1	1	1	SYNJ1	synaptojanin 1
hsa-miR-370	0	0	1	1	1	1	TMEM52B	transmembrane protein 52B
hsa-miR-370	1	0	1	1	1	1	LRRC15	leucine rich repeat containing 15
hsa-miR-370	1	0	1	1	1	1	IL28RA	interleukin 28 receptor, alpha (interferon, lambda receptor)
hsa-miR-370	0	0	1	1	0	0	ADAMTS13	ADAM metallopeptidase with thrombospondin type 1 motif, 13
hsa-miR-370	1	0	1	0	1	1	VANGL2	vang-like 2 (van gogh, Drosophila)
hsa-miR-370	0	0	1	1	1	1	TTLL9	tubulin tyrosine ligase-like family, member 9
hsa-miR-370	0	0	1	0	0	0	FAM71F2	family with sequence similarity 71, member F2
hsa-miR-370	0	0	1	0	0	0	FBXL19-AS1	FBXL19 antisense RNA 1 (head to head)
hsa-miR-370	0	0	1	1	0	0	ZNF276	zinc finger protein 276
hsa-miR-370	1	0	1	1	1	1	SUV420H1	suppressor of variegation 4-20 homolog 1 (Drosophila)
hsa-miR-370	0	0	1	1	0	0	LEPRE1	leucine proline-enriched proteoglycan (leprecan) 1
hsa-miR-370	0	0	1	1	0	0	ITGB1BP2	integrin beta 1 binding protein (melusin) 2
hsa-miR-370	1	0	1	0	1	1	KIF5C	kinesin family member 5C
hsa-miR-370	0	0	1	0	0	0	LRRC37A11P	leucine rich repeat containing 37, member A11, pseudogene
hsa-miR-370	1	0	1	1	1	1	NR3C2	nuclear receptor subfamily 3, group C, member 2
hsa-miR-370	0	0	1	1	0	0	PRAMEF10	PRAME family member 10
hsa-miR-370	0	0	1	1	0	0	RNF123	ring finger protein 123
hsa-miR-370	0	0	1	1	1	1	LRCH1	leucine-rich repeats and calponin homology (CH) domain containing 1
hsa-miR-370	0	0	1	1	0	0	C20orf152	chromosome 20 open reading frame 152
hsa-miR-370	1	0	1	1	1	1	FKBP1A	FK506 binding protein 1A, 12kDa
hsa-miR-370	0	0	1	0	0	0	LINC00486	long intergenic non-protein coding RNA 486
hsa-miR-370	0	0	1	1	0	0	PLCXD2	phosphatidylinositol-specific phospholipase C, X domain containing 2
hsa-miR-370	0	0	1	0	0	0	EEF1DP3	eukaryotic translation elongation factor 1 delta pseudogene 3
hsa-miR-370	1	0	1	1	1	1	ANK2	ankyrin 2, neuronal
hsa-miR-370	0	0	1	0	1	1	C20orf202	chromosome 20 open reading frame 202
hsa-miR-370	0	0	1	0	0	0	FAM225B	family with sequence similarity 225, member B (non-protein coding)
hsa-miR-370	1	0	1	1	1	1	PHC2	polyhomeotic homolog 2 (Drosophila)
hsa-miR-370	1	0	1	0	1	1	FAM196A	family with sequence similarity 196, member A
hsa-miR-370	1	0	1	1	1	1	NIPAL2	NIPA-like domain containing 2
hsa-miR-370	0	0	1	1	1	1	PRKAR2A	protein kinase, cAMP-dependent, regulatory, type II, alpha
hsa-miR-370	0	0	1	0	0	0	FLJ39632	uncharacterized LOC642477
hsa-miR-370	0	0	1	1	1	1	IP6K2	inositol hexakisphosphate kinase 2
hsa-miR-370	1	0	1	1	0	0	KRT80	keratin 80
hsa-miR-370	0	0	1	1	1	1	C10orf57	chromosome 10 open reading frame 57
hsa-miR-370	1	0	1	1	1	1	TRIM37	tripartite motif containing 37
hsa-miR-370	1	0	1	1	1	1	SUN2	Sad1 and UNC84 domain containing 2
hsa-miR-370	1	0	1	1	1	1	SPPL3	signal peptide peptidase like 3
hsa-miR-370	0	0	1	1	1	1	THSD4	thrombospondin, type I, domain containing 4
hsa-miR-370	0	0	1	1	1	1	PRR14L	proline rich 14-like
hsa-miR-370	1	0	1	1	0	0	RBM27	RNA binding motif protein 27
hsa-miR-370	1	0	1	0	1	1	C14orf101	chromosome 14 open reading frame 101
hsa-miR-370	0	0	1	1	1	1	B4GALT4	UDP-Gal:betaGlcNAc beta 1,4- galactosyltransferase, polypeptide 4
hsa-miR-370	1	0	1	1	0	0	KIAA0226	KIAA0226
hsa-miR-370	1	0	1	1	1	1	FOXP1	forkhead box P1
hsa-miR-370	0	0	1	1	0	0	ANKRD33	ankyrin repeat domain 33
hsa-miR-370	1	0	1	0	1	1	EML4	echinoderm microtubule associated protein like 4
hsa-miR-370	1	0	1	1	1	1	DCAF5	DDB1 and CUL4 associated factor 5
hsa-miR-370	0	0	1	0	0	0	LINC00338	long intergenic non-protein coding RNA 338
hsa-miR-370	1	0	1	1	1	1	NFIB	nuclear factor I/B
hsa-miR-370	1	0	1	1	1	1	NAV1	neuron navigator 1
hsa-miR-370	1	0	1	1	1	1	RDX	radixin
hsa-miR-370	1	0	1	1	1	1	RECK	reversion-inducing-cysteine-rich protein with kazal motifs
hsa-miR-370	1	0	1	0	1	1	TBL1XR1	transducin (beta)-like 1 X-linked receptor 1
hsa-miR-370	1	0	1	1	1	1	CREB3L2	cAMP responsive element binding protein 3-like 2
hsa-miR-370	1	0	1	0	1	1	TTL	tubulin tyrosine ligase
hsa-miR-370	1	0	1	1	1	1	HIC2	hypermethylated in cancer 2
hsa-miR-370	1	0	1	1	1	1	BSDC1	BSD domain containing 1
hsa-miR-370	1	0	1	1	1	1	MDK	midkine (neurite growth-promoting factor 2)
hsa-miR-370	0	0	1	1	0	0	PYCR1	pyrroline-5-carboxylate reductase 1
hsa-miR-370	1	0	1	1	1	1	ARHGDIA	Rho GDP dissociation inhibitor (GDI) alpha
hsa-miR-370	0	0	1	1	1	1	POLR2H	polymerase (RNA) II (DNA directed) polypeptide H
hsa-miR-370	1	0	1	0	1	1	RNF144A	ring finger protein 144A
hsa-miR-370	1	0	1	1	0	0	RAB24	RAB24, member RAS oncogene family
hsa-miR-370	0	0	1	1	1	1	TMEM53	transmembrane protein 53
hsa-miR-370	1	0	1	1	1	1	VIM	vimentin
hsa-miR-370	1	0	1	1	1	1	TOM1L1	target of myb1 (chicken)-like 1
hsa-miR-370	0	0	1	1	0	0	SARS	seryl-tRNA synthetase
hsa-miR-370	1	0	1	1	1	1	PCGF2	polycomb group ring finger 2
hsa-miR-370	1	0	1	1	1	1	TARBP2	TAR (HIV-1) RNA binding protein 2
hsa-miR-370	1	0	1	1	1	1	POU2F3	POU class 2 homeobox 3
hsa-miR-370	0	0	1	1	0	0	TMEM62	transmembrane protein 62
hsa-miR-370	0	0	1	1	0	0	URM1	ubiquitin related modifier 1
hsa-miR-370	0	0	1	1	0	0	RBM28	RNA binding motif protein 28
hsa-miR-370	0	0	1	1	0	0	F2	coagulation factor II (thrombin)
hsa-miR-370	1	0	1	1	0	0	TSC22D4	TSC22 domain family, member 4
hsa-miR-370	0	0	1	1	1	1	SEC22C	SEC22 vesicle trafficking protein homolog C (S. cerevisiae)
hsa-miR-370	1	0	1	1	1	1	SLC35D2	solute carrier family 35, member D2
hsa-miR-370	0	0	1	1	1	1	APBB1	amyloid beta (A4) precursor protein-binding, family B, member 1 (Fe65)
hsa-miR-370	0	0	1	1	0	0	FCGRT	Fc fragment of IgG, receptor, transporter, alpha
hsa-miR-370	1	0	1	1	1	1	HAPLN1	hyaluronan and proteoglycan link protein 1
hsa-miR-370	0	0	1	1	0	0	WDR18	WD repeat domain 18
hsa-miR-370	0	0	1	0	0	0	H19	H19, imprinted maternally expressed transcript (non-protein coding)
hsa-miR-370	0	0	1	1	1	1	TCEA2	transcription elongation factor A (SII), 2
hsa-miR-370	0	0	1	1	1	1	SAE1	SUMO1 activating enzyme subunit 1
hsa-miR-370	1	0	1	1	1	1	ADM	adrenomedullin
hsa-miR-370	0	0	1	1	1	1	CD99	CD99 molecule
hsa-miR-370	0	0	1	1	1	1	MRPS36	mitochondrial ribosomal protein S36
hsa-miR-370	0	0	1	1	1	1	ASCC2	activating signal cointegrator 1 complex subunit 2
hsa-miR-370	0	0	1	1	1	1	IFNGR2	interferon gamma receptor 2 (interferon gamma transducer 1)
hsa-miR-370	1	0	1	1	1	1	COPZ1	coatomer protein complex, subunit zeta 1
hsa-miR-370	0	0	1	1	1	1	GRAP2	GRB2-related adaptor protein 2
hsa-miR-370	0	0	1	1	0	0	MUS81	MUS81 endonuclease homolog (S. cerevisiae)
hsa-miR-370	0	0	1	1	1	1	STON1	stonin 1
hsa-miR-370	0	0	1	1	1	1	TRIM68	tripartite motif containing 68
hsa-miR-370	0	0	1	0	1	1	WASH3P	WAS protein family homolog 3 pseudogene
hsa-miR-370	0	0	1	1	0	0	STK19	serine/threonine kinase 19
hsa-miR-370	1	0	1	1	1	1	LYPLA2	lysophospholipase II
hsa-miR-370	0	0	1	0	1	1	MMAA	methylmalonic aciduria (cobalamin deficiency) cblA type
hsa-miR-370	0	0	1	1	1	1	EIF3J	eukaryotic translation initiation factor 3, subunit J
hsa-miR-370	0	0	1	1	1	1	BEX2	brain expressed X-linked 2
hsa-miR-370	0	0	1	1	1	1	VPS16	vacuolar protein sorting 16 homolog (S. cerevisiae)
hsa-miR-370	0	0	1	1	1	1	MPDU1	mannose-P-dolichol utilization defect 1
hsa-miR-370	0	0	1	1	1	1	NARS	asparaginyl-tRNA synthetase
hsa-miR-370	0	0	1	1	1	1	HPS1	Hermansky-Pudlak syndrome 1
hsa-miR-370	1	0	1	1	1	1	PPP5C	protein phosphatase 5, catalytic subunit
hsa-miR-370	0	0	1	1	1	1	TMEM109	transmembrane protein 109
hsa-miR-370	1	0	1	1	1	1	CUX1	cut-like homeobox 1
hsa-miR-370	0	0	1	1	0	0	PTGDS	prostaglandin D2 synthase 21kDa (brain)
hsa-miR-370	0	0	1	1	0	0	C1orf122	chromosome 1 open reading frame 122
hsa-miR-370	0	0	1	1	0	0	SCRN2	secernin 2
hsa-miR-370	1	0	1	1	1	1	BIN3	bridging integrator 3
hsa-miR-370	0	0	1	1	1	1	SMNDC1	survival motor neuron domain containing 1
hsa-miR-370	1	0	1	1	1	1	TIMP3	TIMP metallopeptidase inhibitor 3
hsa-miR-370	0	0	1	1	0	0	STUB1	STIP1 homology and U-box containing protein 1, E3 ubiquitin protein ligase
hsa-miR-370	1	0	1	1	1	1	GOLGA7	golgin A7
hsa-miR-370	0	0	1	1	1	1	FUS	fused in sarcoma
hsa-miR-370	0	0	1	1	0	0	FXYD1	FXYD domain containing ion transport regulator 1
hsa-miR-370	0	0	1	1	0	0	TUSC3	tumor suppressor candidate 3
hsa-miR-370	1	0	1	1	0	0	LMAN2	lectin, mannose-binding 2
hsa-miR-370	0	0	1	0	0	0	LOC100130954	uncharacterized LOC100130954
hsa-miR-370	1	0	1	1	1	1	ILK	integrin-linked kinase
hsa-miR-370	1	0	1	0	1	1	GIT2	G protein-coupled receptor kinase interacting ArfGAP 2
hsa-miR-370	0	0	1	1	0	0	CCDC107	coiled-coil domain containing 107
hsa-miR-370	0	0	1	1	1	1	EMC4	ER membrane protein complex subunit 4
hsa-miR-370	0	0	1	1	1	1	NCAPH	non-SMC condensin I complex, subunit H
hsa-miR-370	0	0	1	1	0	0	PC	pyruvate carboxylase
hsa-miR-370	1	0	1	1	1	1	RBPJ	recombination signal binding protein for immunoglobulin kappa J region
hsa-miR-370	1	0	1	1	1	1	TRAPPC3	trafficking protein particle complex 3
hsa-miR-370	0	0	1	1	0	0	TUBG2	tubulin, gamma 2
hsa-miR-370	1	0	1	1	1	1	TIPRL	TIP41, TOR signaling pathway regulator-like (S. cerevisiae)
hsa-miR-370	0	0	1	1	0	0	FES	feline sarcoma oncogene
hsa-miR-370	0	0	1	1	1	1	SUGT1	SGT1, suppressor of G2 allele of SKP1 (S. cerevisiae)
hsa-miR-370	0	0	1	1	0	0	NFKBIL1	nuclear factor of kappa light polypeptide gene enhancer in B-cells inhibitor-like 1
hsa-miR-370	0	0	1	1	1	1	FAM118B	family with sequence similarity 118, member B
hsa-miR-370	1	0	1	0	1	1	DNMT3A	DNA (cytosine-5-)-methyltransferase 3 alpha
hsa-miR-370	1	0	1	1	1	1	SLC37A3	solute carrier family 37 (glycerol-3-phosphate transporter), member 3
hsa-miR-370	1	0	1	1	1	1	PTPRG	protein tyrosine phosphatase, receptor type, G
hsa-miR-370	0	0	1	1	1	1	SYNE2	spectrin repeat containing, nuclear envelope 2
hsa-miR-370	0	0	1	0	0	0	LINC00661	long intergenic non-protein coding RNA 661
hsa-miR-370	0	0	1	0	0	0	MUC19	mucin 19, oligomeric
hsa-miR-370	1	0	1	0	1	1	XRN1	5'-3' exoribonuclease 1
hsa-miR-370	1	0	1	0	1	1	MCFD2	multiple coagulation factor deficiency 2
hsa-miR-370	1	0	1	1	1	1	BNC2	basonuclin 2
hsa-miR-370	1	0	1	1	1	1	METAP1	methionyl aminopeptidase 1
hsa-miR-370	1	0	1	1	1	1	MAN2A2	mannosidase, alpha, class 2A, member 2
hsa-miR-370	0	0	1	1	0	0	HMGXB3	HMG box domain containing 3
hsa-miR-370	0	0	1	0	0	0	61E3.4	nuclear pore complex interacting protein-like
hsa-miR-370	0	0	1	1	1	1	LTA	lymphotoxin alpha (TNF superfamily, member 1)
hsa-miR-370	0	0	1	1	0	0	PXK	PX domain containing serine/threonine kinase
hsa-miR-370	0	0	1	1	0	0	SPATA20	spermatogenesis associated 20
hsa-miR-370	0	0	1	1	0	0	NBPF9	neuroblastoma breakpoint family, member 9
hsa-miR-370	1	0	1	1	1	1	BCL2L11	BCL2-like 11 (apoptosis facilitator)
hsa-miR-370	0	0	1	0	0	0	FAM226A	family with sequence similarity 226, member A (non-protein coding)
hsa-miR-370	1	0	1	0	1	1	DAPP1	dual adaptor of phosphotyrosine and 3-phosphoinositides
hsa-miR-370	0	0	1	1	1	1	AKAP17A	A kinase (PRKA) anchor protein 17A
hsa-miR-370	1	0	1	1	1	1	MLL	myeloid/lymphoid or mixed-lineage leukemia (trithorax homolog, Drosophila)
hsa-miR-370	0	0	1	1	1	1	VDAC2	voltage-dependent anion channel 2
hsa-miR-370	0	0	1	0	1	1	OPRK1	opioid receptor, kappa 1
hsa-miR-370	1	0	1	0	0	0	YLPM1	YLP motif containing 1
hsa-miR-370	1	0	1	1	1	1	RALBP1	ralA binding protein 1
hsa-miR-370	1	0	1	1	1	1	CCNG2	cyclin G2
hsa-miR-370	1	0	1	1	1	1	GRM1	glutamate receptor, metabotropic 1
hsa-miR-370	0	0	1	1	0	0	COL6A2	collagen, type VI, alpha 2
hsa-miR-370	1	0	1	1	0	0	ADRB3	adrenoceptor beta 3
hsa-miR-370	1	0	1	1	1	1	COL4A4	collagen, type IV, alpha 4
hsa-miR-370	1	0	1	0	1	1	EXT1	exostosin 1
hsa-miR-370	1	0	1	1	1	1	F13A1	coagulation factor XIII, A1 polypeptide
hsa-miR-370	0	0	1	1	1	1	FABP2	fatty acid binding protein 2, intestinal
hsa-miR-370	0	0	1	1	0	0	FANCA	Fanconi anemia, complementation group A
hsa-miR-370	0	0	1	1	0	0	GBA	glucosidase, beta, acid
hsa-miR-370	0	0	1	1	1	1	GSS	glutathione synthetase
hsa-miR-370	1	0	1	1	1	1	LEP	leptin
hsa-miR-370	1	0	1	1	1	1	OCRL	oculocerebrorenal syndrome of Lowe
hsa-miR-370	0	0	1	1	1	1	PKP1	plakophilin 1 (ectodermal dysplasia/skin fragility syndrome)
hsa-miR-370	1	0	1	1	1	1	ATXN1	ataxin 1
hsa-miR-370	1	0	1	0	1	1	SCN4A	sodium channel, voltage-gated, type IV, alpha subunit
hsa-miR-370	0	0	1	1	1	1	SRD5A2	steroid-5-alpha-reductase, alpha polypeptide 2 (3-oxo-5 alpha-steroid delta 4-dehydrogenase alpha 2)
hsa-miR-370	1	0	1	0	1	1	TSC1	tuberous sclerosis 1
hsa-miR-370	1	0	1	0	1	1	CYBB	cytochrome b-245, beta polypeptide
hsa-miR-370	0	0	1	1	0	0	KRT5	keratin 5
hsa-miR-370	1	0	1	0	1	1	PAFAH1B1	platelet-activating factor acetylhydrolase 1b, regulatory subunit 1 (45kDa)
hsa-miR-370	1	0	1	1	1	1	RFX5	regulatory factor X, 5 (influences HLA class II expression)
hsa-miR-370	1	0	1	1	1	1	AQP2	aquaporin 2 (collecting duct)
hsa-miR-370	0	0	1	1	1	1	CYP11B2	cytochrome P450, family 11, subfamily B, polypeptide 2
hsa-miR-370	1	0	1	1	1	1	DCX	doublecortin
hsa-miR-370	1	0	1	0	1	1	IL6R	interleukin 6 receptor
hsa-miR-370	0	0	1	1	1	1	FCGR3B	Fc fragment of IgG, low affinity IIIb, receptor (CD16b)
hsa-miR-370	0	0	1	0	1	1	CCR5	chemokine (C-C motif) receptor 5 (gene/pseudogene)
hsa-miR-370	0	0	1	1	1	1	C7	complement component 7
hsa-miR-370	1	0	1	1	1	1	CHRM1	cholinergic receptor, muscarinic 1
hsa-miR-370	1	0	1	1	0	0	GRIK3	glutamate receptor, ionotropic, kainate 3
hsa-miR-370	0	0	1	1	1	1	HTR7	5-hydroxytryptamine (serotonin) receptor 7, adenylate cyclase-coupled
hsa-miR-370	1	0	1	1	1	1	IGF1R	insulin-like growth factor 1 receptor
hsa-miR-370	0	0	1	1	0	0	PTGIR	prostaglandin I2 (prostacyclin) receptor (IP)
hsa-miR-370	1	0	1	1	0	0	SLC35E4	solute carrier family 35, member E4
hsa-miR-370	1	0	1	1	1	1	RORC	RAR-related orphan receptor C
hsa-miR-370	1	0	1	0	1	1	ARHGEF37	Rho guanine nucleotide exchange factor (GEF) 37
hsa-miR-370	0	0	1	0	0	0	C10orf55	chromosome 10 open reading frame 55
hsa-miR-370	1	0	1	1	1	1	LCLAT1	lysocardiolipin acyltransferase 1
hsa-miR-370	0	0	1	1	0	0	C1orf95	chromosome 1 open reading frame 95
hsa-miR-370	1	0	1	1	1	1	BICD2	bicaudal D homolog 2 (Drosophila)
hsa-miR-370	0	0	1	1	1	1	ALG11	asparagine-linked glycosylation 11, alpha-1,2-mannosyltransferase homolog (yeast)
hsa-miR-370	0	0	1	1	1	1	DBX2	developing brain homeobox 2
hsa-miR-370	1	0	1	0	1	1	LRRC55	leucine rich repeat containing 55
hsa-miR-370	0	0	1	0	1	1	FLJ46347	uncharacterized LOC389064
hsa-miR-370	0	0	1	1	1	1	PRR13	proline rich 13
hsa-miR-370	0	0	1	1	0	0	MARCH2	membrane-associated ring finger (C3HC4) 2, E3 ubiquitin protein ligase
hsa-miR-370	1	0	1	1	1	1	EDA	ectodysplasin A
hsa-miR-370	1	0	1	0	1	1	IP6K1	inositol hexakisphosphate kinase 1
hsa-miR-370	0	0	1	1	1	1	APOBEC3F	apolipoprotein B mRNA editing enzyme, catalytic polypeptide-like 3F
hsa-miR-370	1	0	1	0	1	1	GOSR1	golgi SNAP receptor complex member 1
hsa-miR-370	1	0	1	1	1	1	ATN1	atrophin 1
hsa-miR-370	0	0	1	1	0	0	DUSP13	dual specificity phosphatase 13
hsa-miR-370	0	0	1	0	1	1	C3orf56	chromosome 3 open reading frame 56
hsa-miR-370	0	0	1	1	1	1	FAM154B	family with sequence similarity 154, member B
hsa-miR-370	1	0	1	0	1	1	C18orf25	chromosome 18 open reading frame 25
hsa-miR-370	1	0	1	1	1	1	CTDSPL	CTD (carboxy-terminal domain, RNA polymerase II, polypeptide A) small phosphatase-like
hsa-miR-370	1	0	1	1	1	1	RBM33	RNA binding motif protein 33
hsa-miR-370	0	0	1	1	1	1	PIWIL3	piwi-like 3 (Drosophila)
hsa-miR-370	0	0	1	1	1	1	GCSAM	germinal center-associated, signaling and motility
hsa-miR-370	0	0	1	1	1	1	PIK3R6	phosphoinositide-3-kinase, regulatory subunit 6
hsa-miR-370	0	0	1	1	1	1	SPIN3	spindlin family, member 3
hsa-miR-370	1	0	1	0	1	1	FYTTD1	forty-two-three domain containing 1
hsa-miR-370	0	0	1	1	1	1	SLC9A4	solute carrier family 9, subfamily A (NHE4, cation proton antiporter 4), member 4
hsa-miR-370	0	0	1	1	0	0	RGR	retinal G protein coupled receptor
hsa-miR-370	1	0	1	0	1	1	ZKSCAN2	zinc finger with KRAB and SCAN domains 2
hsa-miR-370	1	0	1	1	1	1	SORCS1	sortilin-related VPS10 domain containing receptor 1
hsa-miR-370	0	0	1	1	0	0	EPGN	epithelial mitogen homolog (mouse)
hsa-miR-370	0	0	1	1	0	0	VSIG8	V-set and immunoglobulin domain containing 8
hsa-miR-370	0	0	1	0	0	0	LOC400707	uncharacterized LOC400707
hsa-miR-370	0	0	1	0	1	1	LINC00268	long intergenic non-protein coding RNA 268
hsa-miR-370	0	0	1	0	0	0	LOC441956	uncharacterized LOC441956
hsa-miR-370	1	0	1	1	1	1	KATNAL1	katanin p60 subunit A-like 1
hsa-miR-370	1	0	1	1	1	1	CA7	carbonic anhydrase VII
hsa-miR-370	1	0	1	1	1	1	TMCC1	transmembrane and coiled-coil domain family 1
hsa-miR-370	0	0	1	1	0	0	ALDH18A1	aldehyde dehydrogenase 18 family, member A1
hsa-miR-370	0	0	1	1	0	0	POLR3H	polymerase (RNA) III (DNA directed) polypeptide H (22.9kD)
hsa-miR-370	1	0	1	1	1	1	GPHN	gephyrin
hsa-miR-370	1	0	1	1	1	1	CANX	calnexin
hsa-miR-370	1	0	1	0	1	1	TNRC6B	trinucleotide repeat containing 6B
hsa-miR-370	1	0	1	1	1	1	AFF3	AF4/FMR2 family, member 3
hsa-miR-370	0	0	1	1	1	1	ARRDC2	arrestin domain containing 2
hsa-miR-370	0	0	1	1	1	1	ATF3	activating transcription factor 3
hsa-miR-370	0	0	1	1	1	1	SPDYE2	speedy homolog E2 (Xenopus laevis)
hsa-miR-370	1	0	1	0	1	1	MSRB3	methionine sulfoxide reductase B3
hsa-miR-370	1	0	1	1	1	1	CSNK1G3	casein kinase 1, gamma 3
hsa-miR-370	1	0	1	1	1	1	UBE2V1	ubiquitin-conjugating enzyme E2 variant 1
hsa-miR-370	0	0	1	1	1	1	SLC35A2	solute carrier family 35 (UDP-galactose transporter), member A2
hsa-miR-370	1	0	1	0	1	1	MINOS1	mitochondrial inner membrane organizing system 1
hsa-miR-370	0	0	1	1	0	0	SULT6B1	sulfotransferase family, cytosolic, 6B, member 1
hsa-miR-370	1	0	1	1	1	1	MYCL1	v-myc myelocytomatosis viral oncogene homolog 1, lung carcinoma derived (avian)
hsa-miR-370	1	0	1	1	1	1	GALNTL6	UDP-N-acetyl-alpha-D-galactosamine:polypeptide N-acetylgalactosaminyltransferase-like 6
hsa-miR-370	0	0	1	1	1	1	CEP112	centrosomal protein 112kDa
hsa-miR-370	1	0	1	1	1	1	SCD5	stearoyl-CoA desaturase 5
hsa-miR-370	0	0	1	1	1	1	CTLA4	cytotoxic T-lymphocyte-associated protein 4
hsa-miR-370	1	0	1	1	1	1	KREMEN1	kringle containing transmembrane protein 1
hsa-miR-370	1	0	1	1	1	1	CHTF8	CTF8, chromosome transmission fidelity factor 8 homolog (S. cerevisiae)
hsa-miR-370	1	0	1	1	1	1	CBLN3	cerebellin 3 precursor
hsa-miR-370	1	0	1	1	1	1	ZNF384	zinc finger protein 384
hsa-miR-370	0	0	1	1	1	1	MLH3	mutL homolog 3 (E. coli)
hsa-miR-370	1	0	1	0	1	1	CD83	CD83 molecule
hsa-miR-370	1	0	1	0	1	1	DCUN1D4	DCN1, defective in cullin neddylation 1, domain containing 4 (S. cerevisiae)
hsa-miR-370	1	0	1	1	1	1	NCALD	neurocalcin delta
hsa-miR-370	1	0	1	1	1	1	HEY1	hairy/enhancer-of-split related with YRPW motif 1
hsa-miR-370	0	0	1	1	0	0	INS-IGF2	INS-IGF2 readthrough
hsa-miR-370	0	0	1	1	1	1	GEMIN8	gem (nuclear organelle) associated protein 8
hsa-miR-370	1	0	1	1	1	1	FRS2	fibroblast growth factor receptor substrate 2
hsa-miR-370	0	0	1	1	1	1	TMEM8B	transmembrane protein 8B
hsa-miR-370	1	0	1	1	1	1	ERBB4	v-erb-a erythroblastic leukemia viral oncogene homolog 4 (avian)
hsa-miR-370	0	0	1	1	1	1	MSANTD1	Myb/SANT-like DNA-binding domain containing 1
hsa-miR-370	1	0	1	1	1	1	PVRL2	poliovirus receptor-related 2 (herpesvirus entry mediator B)
hsa-miR-370	1	0	1	0	1	1	SRGAP2	SLIT-ROBO Rho GTPase activating protein 2
hsa-miR-370	1	0	1	1	1	1	TPM3	tropomyosin 3
hsa-miR-370	0	0	1	1	1	1	FAM22G	family with sequence similarity 22, member G
hsa-miR-370	1	0	1	0	1	1	NCAM1	neural cell adhesion molecule 1
hsa-miR-370	1	0	1	1	1	1	SRSF1	serine/arginine-rich splicing factor 1
hsa-miR-370	1	0	1	0	1	1	FAM127C	family with sequence similarity 127, member C
hsa-miR-370	1	0	1	1	1	1	HNRNPUL2	heterogeneous nuclear ribonucleoprotein U-like 2
hsa-miR-370	1	0	1	1	1	1	LDB3	LIM domain binding 3
hsa-miR-370	1	0	1	0	1	1	FBXO41	F-box protein 41
hsa-miR-370	1	0	1	1	1	1	UNK	unkempt homolog (Drosophila)
hsa-miR-370	1	0	1	1	1	1	SHANK3	SH3 and multiple ankyrin repeat domains 3
hsa-miR-370	1	0	1	1	1	1	DGKG	diacylglycerol kinase, gamma 90kDa
hsa-miR-370	1	0	1	1	1	1	MYO1C	myosin IC
hsa-miR-370	0	0	1	1	1	1	C15orf57	chromosome 15 open reading frame 57
hsa-miR-370	1	0	1	1	1	1	REPS2	RALBP1 associated Eps domain containing 2
hsa-miR-370	1	0	1	1	1	1	NXF1	nuclear RNA export factor 1
hsa-miR-370	0	0	1	1	0	0	NUDT2	nudix (nucleoside diphosphate linked moiety X)-type motif 2
hsa-miR-370	1	0	1	1	1	1	BMP2	bone morphogenetic protein 2
hsa-miR-370	1	0	1	0	1	1	BMPR2	bone morphogenetic protein receptor, type II (serine/threonine kinase)
hsa-miR-370	0	0	1	1	1	1	CLIC2	chloride intracellular channel 2
hsa-miR-370	1	0	1	0	0	0	DLG4	discs, large homolog 4 (Drosophila)
hsa-miR-370	0	0	1	0	1	1	ELF5	E74-like factor 5 (ets domain transcription factor)
hsa-miR-370	1	0	1	1	1	1	EXTL3	exostoses (multiple)-like 3
hsa-miR-370	0	0	1	1	1	1	IL13RA1	interleukin 13 receptor, alpha 1
hsa-miR-370	1	0	1	1	1	1	IRAK2	interleukin-1 receptor-associated kinase 2
hsa-miR-370	0	0	1	1	0	0	AARS	alanyl-tRNA synthetase
hsa-miR-370	1	0	1	1	1	1	BAAT	bile acid CoA: amino acid N-acyltransferase (glycine N-choloyltransferase)
hsa-miR-370	1	0	1	1	1	1	COL4A1	collagen, type IV, alpha 1
hsa-miR-370	1	0	1	1	1	1	COL15A1	collagen, type XV, alpha 1
hsa-miR-370	0	0	1	1	0	0	CPA3	carboxypeptidase A3 (mast cell)
hsa-miR-370	1	0	1	0	0	0	DRP2	dystrophin related protein 2
hsa-miR-370	1	0	1	1	1	1	HBEGF	heparin-binding EGF-like growth factor
hsa-miR-370	1	0	1	0	1	1	FUT4	fucosyltransferase 4 (alpha (1,3) fucosyltransferase, myeloid-specific)
hsa-miR-370	0	0	1	1	1	1	FYN	FYN oncogene related to SRC, FGR, YES
hsa-miR-370	0	0	1	1	1	1	IL6ST	interleukin 6 signal transducer (gp130, oncostatin M receptor)
hsa-miR-370	1	0	1	1	1	1	ITGA3	integrin, alpha 3 (antigen CD49C, alpha 3 subunit of VLA-3 receptor)
hsa-miR-370	1	0	1	1	1	1	KCNA5	potassium voltage-gated channel, shaker-related subfamily, member 5
hsa-miR-370	0	0	1	1	0	0	KCNK3	potassium channel, subfamily K, member 3
hsa-miR-370	1	0	1	1	1	1	KDR	kinase insert domain receptor (a type III receptor tyrosine kinase)
hsa-miR-370	0	0	1	1	0	0	LAMB2	laminin, beta 2 (laminin S)
hsa-miR-370	1	0	1	1	1	1	LIF	leukemia inhibitory factor
hsa-miR-370	1	0	1	1	1	1	LIMK1	LIM domain kinase 1
hsa-miR-370	1	0	1	0	1	1	MXD1	MAX dimerization protein 1
hsa-miR-370	0	0	1	1	1	1	CD46	CD46 molecule, complement regulatory protein
hsa-miR-370	1	0	1	1	1	1	NGFR	nerve growth factor receptor
hsa-miR-370	0	0	1	0	1	1	OAZ2	ornithine decarboxylase antizyme 2
hsa-miR-370	0	0	1	1	1	1	PIM1	pim-1 oncogene
hsa-miR-370	1	0	1	1	1	1	PLAGL2	pleiomorphic adenoma gene-like 2
hsa-miR-370	0	0	1	1	1	1	PPP1R3A	protein phosphatase 1, regulatory subunit 3A
hsa-miR-370	0	0	1	1	0	0	MAPK7	mitogen-activated protein kinase 7
hsa-miR-370	0	0	1	0	1	1	PSMD3	proteasome (prosome, macropain) 26S subunit, non-ATPase, 3
hsa-miR-370	1	0	1	1	1	1	PVRL1	poliovirus receptor-related 1 (herpesvirus entry mediator C)
hsa-miR-370	0	0	1	1	1	1	RAF1	v-raf-1 murine leukemia viral oncogene homolog 1
hsa-miR-370	1	0	1	1	1	1	ARID4A	AT rich interactive domain 4A (RBP1-like)
hsa-miR-370	0	0	1	1	0	0	RBP1	retinol binding protein 1, cellular
hsa-miR-370	1	0	1	1	1	1	RGS16	regulator of G-protein signaling 16
hsa-miR-370	1	0	1	1	1	1	SKI	v-ski sarcoma viral oncogene homolog (avian)
hsa-miR-370	0	0	1	1	0	0	SLPI	secretory leukocyte peptidase inhibitor
hsa-miR-370	1	0	1	1	1	1	STAC	SH3 and cysteine rich domain
hsa-miR-370	1	0	1	0	1	1	TAL1	T-cell acute lymphocytic leukemia 1
hsa-miR-370	1	0	1	1	1	1	TIAM1	T-cell lymphoma invasion and metastasis 1
hsa-miR-370	0	0	1	1	0	0	TIMP1	TIMP metallopeptidase inhibitor 1
hsa-miR-370	1	0	1	0	1	1	VCL	vinculin
hsa-miR-370	0	0	1	1	1	1	ZNF137P	zinc finger protein 137, pseudogene
hsa-miR-370	1	0	1	0	1	1	BSN	bassoon (presynaptic cytomatrix protein)
hsa-miR-370	1	0	1	1	1	1	CUL5	cullin 5
hsa-miR-370	0	0	1	1	1	1	USP5	ubiquitin specific peptidase 5 (isopeptidase T)
hsa-miR-370	1	0	1	1	1	1	HMGA2	high mobility group AT-hook 2
hsa-miR-370	0	0	1	1	1	1	STX7	syntaxin 7
hsa-miR-370	0	0	1	1	1	1	RGS5	regulator of G-protein signaling 5
hsa-miR-370	1	0	1	0	1	1	CNTNAP1	contactin associated protein 1
hsa-miR-370	0	0	1	1	1	1	KMO	kynurenine 3-monooxygenase (kynurenine 3-hydroxylase)
hsa-miR-370	0	0	1	1	1	1	FAM193A	family with sequence similarity 193, member A
hsa-miR-370	1	0	1	1	1	1	B3GALT2	UDP-Gal:betaGlcNAc beta 1,3-galactosyltransferase, polypeptide 2
hsa-miR-370	0	0	1	1	1	1	TRIM24	tripartite motif containing 24
hsa-miR-370	1	0	1	1	1	1	NRP2	neuropilin 2
hsa-miR-370	1	0	1	1	1	1	KALRN	kalirin, RhoGEF kinase
hsa-miR-370	0	0	1	1	1	1	RNF8	ring finger protein 8, E3 ubiquitin protein ligase
hsa-miR-370	0	0	1	1	0	0	AP2S1	adaptor-related protein complex 2, sigma 1 subunit
hsa-miR-370	1	0	1	1	1	1	EFNB2	ephrin-B2
hsa-miR-370	0	0	1	1	0	0	FGF14	fibroblast growth factor 14
hsa-miR-370	1	0	1	0	1	1	SLC1A2	solute carrier family 1 (glial high affinity glutamate transporter), member 2
hsa-miR-370	0	0	1	1	0	0	EBAG9	estrogen receptor binding site associated, antigen, 9
hsa-miR-370	0	0	1	0	1	1	CYTIP	cytohesin 1 interacting protein
hsa-miR-370	1	0	1	0	1	1	ACVR1B	activin A receptor, type IB
hsa-miR-370	1	0	1	1	1	1	ARL3	ADP-ribosylation factor-like 3
hsa-miR-370	0	0	1	1	1	1	BST1	bone marrow stromal cell antigen 1
hsa-miR-370	0	0	1	1	1	1	COPA	coatomer protein complex, subunit alpha
hsa-miR-370	0	0	1	1	0	0	CPT1B	carnitine palmitoyltransferase 1B (muscle)
hsa-miR-370	1	0	1	1	1	1	EPHB3	EPH receptor B3
hsa-miR-370	1	0	1	1	1	1	FOXD2	forkhead box D2
hsa-miR-370	1	0	1	1	1	1	ONECUT1	one cut homeobox 1
hsa-miR-370	0	0	1	1	1	1	NFATC3	nuclear factor of activated T-cells, cytoplasmic, calcineurin-dependent 3
hsa-miR-370	0	0	1	1	1	1	RAB27A	RAB27A, member RAS oncogene family
hsa-miR-370	1	0	1	0	1	1	WNT7A	wingless-type MMTV integration site family, member 7A
hsa-miR-370	1	0	1	1	1	1	RAB7A	RAB7A, member RAS oncogene family
hsa-miR-370	1	0	1	1	1	1	RAB11A	RAB11A, member RAS oncogene family
hsa-miR-370	1	0	1	1	1	1	MTMR4	myotubularin related protein 4
hsa-miR-370	0	0	1	0	1	1	CXorf1	chromosome X open reading frame 1
hsa-miR-370	1	0	1	0	1	1	VAMP3	vesicle-associated membrane protein 3 (cellubrevin)
hsa-miR-370	1	0	1	1	1	1	KIF3B	kinesin family member 3B
hsa-miR-370	1	0	1	1	1	1	SEC24C	SEC24 family, member C (S. cerevisiae)
hsa-miR-370	0	0	1	1	1	1	MTL5	metallothionein-like 5, testis-specific (tesmin)
hsa-miR-370	0	0	1	1	1	1	DHX8	DEAH (Asp-Glu-Ala-His) box polypeptide 8
hsa-miR-370	1	0	1	1	1	1	GABRE	gamma-aminobutyric acid (GABA) A receptor, epsilon
hsa-miR-370	0	0	1	1	1	1	GDF10	growth differentiation factor 10
hsa-miR-370	1	0	1	1	0	0	MMP14	matrix metallopeptidase 14 (membrane-inserted)
hsa-miR-370	0	0	1	1	0	0	RAPSN	receptor-associated protein of the synapse
hsa-miR-370	0	0	1	1	0	0	HR	hairless homolog (mouse)
hsa-miR-370	1	0	1	1	1	1	APLNR	apelin receptor
hsa-miR-370	1	0	1	1	1	1	BMI1	BMI1 polycomb ring finger oncogene
hsa-miR-370	1	0	1	1	1	1	CRK	v-crk sarcoma virus CT10 oncogene homolog (avian)
hsa-miR-370	1	0	1	1	1	1	DLX3	distal-less homeobox 3
hsa-miR-370	1	0	1	1	1	1	ARID3A	AT rich interactive domain 3A (BRIGHT-like)
hsa-miR-370	0	0	1	0	1	1	FOSL2	FOS-like antigen 2
hsa-miR-370	1	0	1	1	1	1	GEM	GTP binding protein overexpressed in skeletal muscle
hsa-miR-370	0	0	1	1	0	0	GPR20	G protein-coupled receptor 20
hsa-miR-370	1	0	1	1	1	1	HAS3	hyaluronan synthase 3
hsa-miR-370	1	0	1	1	0	0	NNAT	neuronatin
hsa-miR-370	0	0	1	1	1	1	FOSL1	FOS-like antigen 1
hsa-miR-370	1	0	1	1	1	1	HCN4	hyperpolarization activated cyclic nucleotide-gated potassium channel 4
hsa-miR-370	1	0	1	1	1	1	PIGK	phosphatidylinositol glycan anchor biosynthesis, class K
hsa-miR-370	1	0	1	1	1	1	GTF2E1	general transcription factor IIE, polypeptide 1, alpha 56kDa
hsa-miR-370	0	0	1	1	0	0	SNURF	SNRPN upstream reading frame
hsa-miR-370	1	0	1	1	1	1	UST	uronyl-2-sulfotransferase
hsa-miR-370	1	0	1	1	1	1	CTDSP2	CTD (carboxy-terminal domain, RNA polymerase II, polypeptide A) small phosphatase 2
hsa-miR-370	1	0	1	1	1	1	ACTR1A	ARP1 actin-related protein 1 homolog A, centractin alpha (yeast)
hsa-miR-370	0	0	1	1	1	1	RNF41	ring finger protein 41
hsa-miR-370	0	0	1	1	1	1	MPHOSPH6	M-phase phosphoprotein 6
hsa-miR-370	0	0	1	1	1	1	DSCR4	Down syndrome critical region gene 4
hsa-miR-370	1	0	1	1	1	1	FOXO4	forkhead box O4
hsa-miR-370	1	0	1	1	0	0	NAB2	NGFI-A binding protein 2 (EGR1 binding protein 2)
hsa-miR-370	0	0	1	1	0	0	PPYR1	pancreatic polypeptide receptor 1
hsa-miR-370	1	0	1	0	1	1	SPATA2	spermatogenesis associated 2
hsa-miR-370	1	0	1	1	1	1	CDK16	cyclin-dependent kinase 16
hsa-miR-370	0	0	1	1	1	1	PIK3CA	phosphatidylinositol-4,5-bisphosphate 3-kinase, catalytic subunit alpha
hsa-miR-370	1	0	1	1	1	1	SMC1A	structural maintenance of chromosomes 1A
hsa-miR-370	0	0	1	1	0	0	RBM14	RNA binding motif protein 14
hsa-miR-370	1	0	1	1	1	1	ZER1	zer-1 homolog (C. elegans)
hsa-miR-370	0	0	1	0	0	0	CREB3	cAMP responsive element binding protein 3
hsa-miR-370	1	0	1	1	1	1	CDRT1	CMT1A duplicated region transcript 1
hsa-miR-370	0	0	1	1	1	1	HBXIP	hepatitis B virus x interacting protein
hsa-miR-370	1	0	1	0	1	1	MXD4	MAX dimerization protein 4
hsa-miR-370	1	0	1	1	1	1	TXNIP	thioredoxin interacting protein
hsa-miR-370	1	0	1	1	1	1	SLC2A1	solute carrier family 2 (facilitated glucose transporter), member 1
hsa-miR-370	0	0	1	0	1	1	SLC16A2	solute carrier family 16, member 2 (thyroid hormone transporter)
hsa-miR-370	0	0	1	1	1	1	CLCA2	chloride channel accessory 2
hsa-miR-370	0	0	1	1	1	1	YKT6	YKT6 v-SNARE homolog (S. cerevisiae)
hsa-miR-370	1	0	1	1	1	1	MMP24	matrix metallopeptidase 24 (membrane-inserted)
hsa-miR-370	1	0	1	1	0	0	PSKH1	protein serine kinase H1
hsa-miR-370	0	0	1	1	1	1	CLP1	CLP1, cleavage and polyadenylation factor I subunit, homolog (S. cerevisiae)
hsa-miR-370	1	0	1	1	1	1	NR4A3	nuclear receptor subfamily 4, group A, member 3
hsa-miR-370	1	0	1	1	1	1	ADAMTS1	ADAM metallopeptidase with thrombospondin type 1 motif, 1
hsa-miR-370	1	0	1	0	1	1	WASF2	WAS protein family, member 2
hsa-miR-370	1	0	1	0	1	1	PAPD7	PAP associated domain containing 7
hsa-miR-370	1	0	1	1	1	1	ABHD2	abhydrolase domain containing 2
hsa-miR-370	1	0	1	1	1	1	KAT7	K(lysine) acetyltransferase 7
hsa-miR-370	1	0	1	1	1	1	UBL3	ubiquitin-like 3
hsa-miR-370	0	0	1	1	1	1	HRH3	histamine receptor H3
hsa-miR-370	1	0	1	1	1	1	TUSC2	tumor suppressor candidate 2
hsa-miR-370	0	0	1	1	1	1	C3orf27	chromosome 3 open reading frame 27
hsa-miR-370	0	0	1	1	1	1	LMOD1	leiomodin 1 (smooth muscle)
hsa-miR-370	1	0	1	0	1	1	FZD4	frizzled family receptor 4
hsa-miR-370	0	0	1	1	0	0	GNG3	guanine nucleotide binding protein (G protein), gamma 3
hsa-miR-370	1	0	1	1	1	1	KCNH4	potassium voltage-gated channel, subfamily H (eag-related), member 4
hsa-miR-370	1	0	1	0	1	1	PXDN	peroxidasin homolog (Drosophila)
hsa-miR-370	1	0	1	1	1	1	MAPRE1	microtubule-associated protein, RP/EB family, member 1
hsa-miR-370	1	0	1	1	1	1	PADI1	peptidyl arginine deiminase, type I
hsa-miR-370	0	0	1	1	1	1	UQCR10	ubiquinol-cytochrome c reductase, complex III subunit X
hsa-miR-370	1	0	1	1	1	1	NRG1	neuregulin 1
hsa-miR-370	0	0	1	1	0	0	DHX38	DEAH (Asp-Glu-Ala-His) box polypeptide 38
hsa-miR-370	0	0	1	1	1	1	ORMDL2	ORM1-like 2 (S. cerevisiae)
hsa-miR-370	1	0	1	1	1	1	MAPRE2	microtubule-associated protein, RP/EB family, member 2
hsa-miR-370	0	0	1	1	0	0	ADAMTS7	ADAM metallopeptidase with thrombospondin type 1 motif, 7
hsa-miR-370	1	0	1	1	0	0	BRD4	bromodomain containing 4
hsa-miR-370	0	0	1	1	1	1	C22orf28	chromosome 22 open reading frame 28
hsa-miR-370	0	0	1	1	1	1	OPN3	opsin 3
hsa-miR-370	0	0	1	1	1	1	APOL3	apolipoprotein L, 3
hsa-miR-370	1	0	1	0	1	1	CNTN5	contactin 5
hsa-miR-370	1	0	1	1	1	1	SERP1	stress-associated endoplasmic reticulum protein 1
hsa-miR-370	0	0	1	1	0	0	SIT1	signaling threshold regulating transmembrane adaptor 1
hsa-miR-370	1	0	1	1	1	1	KLHL20	kelch-like 20 (Drosophila)
hsa-miR-370	0	0	1	1	1	1	MCAT	malonyl CoA:ACP acyltransferase (mitochondrial)
hsa-miR-370	1	0	1	1	1	1	OTX1	orthodenticle homeobox 1
hsa-miR-370	1	0	1	1	1	1	ZNF592	zinc finger protein 592
hsa-miR-370	1	0	1	0	1	1	SH3PXD2A	SH3 and PX domains 2A
hsa-miR-370	1	0	1	1	1	1	RALGPS1	Ral GEF with PH domain and SH3 binding motif 1
hsa-miR-370	1	0	1	1	1	1	KDM4A	lysine (K)-specific demethylase 4A
hsa-miR-370	1	0	1	0	1	1	KIAA0232	KIAA0232
hsa-miR-370	1	0	1	0	1	1	SERTAD2	SERTA domain containing 2
hsa-miR-370	1	0	1	0	1	1	TOMM20	translocase of outer mitochondrial membrane 20 homolog (yeast)
hsa-miR-370	0	0	1	1	1	1	KIAA0141	KIAA0141
hsa-miR-370	1	0	1	1	0	0	ARHGEF17	Rho guanine nucleotide exchange factor (GEF) 17
hsa-miR-370	1	0	1	0	1	1	TRIL	TLR4 interactor with leucine-rich repeats
hsa-miR-370	1	0	1	1	1	1	ZBTB39	zinc finger and BTB domain containing 39
hsa-miR-370	1	0	1	1	1	1	TBC1D4	TBC1 domain family, member 4
hsa-miR-370	1	0	1	0	1	1	LPPR4	lipid phosphate phosphatase-related protein type 4
hsa-miR-370	1	0	1	1	1	1	JOSD1	Josephin domain containing 1
hsa-miR-370	1	0	1	1	1	1	PHLPP2	PH domain and leucine rich repeat protein phosphatase 2
hsa-miR-370	1	0	1	0	1	1	PDS5B	PDS5, regulator of cohesion maintenance, homolog B (S. cerevisiae)
hsa-miR-370	1	0	1	0	1	1	ZNF609	zinc finger protein 609
hsa-miR-370	0	0	1	1	0	0	AVL9	AVL9 homolog (S. cerevisiase)
hsa-miR-370	0	0	1	1	1	1	KDM4C	lysine (K)-specific demethylase 4C
hsa-miR-370	1	0	1	1	1	1	SIPA1L3	signal-induced proliferation-associated 1 like 3
hsa-miR-370	1	0	1	1	1	1	RTF1	Rtf1, Paf1/RNA polymerase II complex component, homolog (S. cerevisiae)
hsa-miR-370	0	0	1	1	1	1	ANGEL1	angel homolog 1 (Drosophila)
hsa-miR-370	1	0	1	1	1	1	MED13L	mediator complex subunit 13-like
hsa-miR-370	1	0	1	1	1	1	PARM1	prostate androgen-regulated mucin-like protein 1
hsa-miR-370	1	0	1	1	1	1	CNOT6	CCR4-NOT transcription complex, subunit 6
hsa-miR-370	0	0	1	1	1	1	CCDC69	coiled-coil domain containing 69
hsa-miR-370	1	0	1	1	1	1	PHF19	PHD finger protein 19
hsa-miR-370	0	0	1	1	1	1	C10orf12	chromosome 10 open reading frame 12
hsa-miR-370	1	0	1	1	1	1	FAM155B	family with sequence similarity 155, member B
hsa-miR-370	1	0	1	0	1	1	RRM2B	ribonucleotide reductase M2 B (TP53 inducible)
hsa-miR-370	1	0	1	0	1	1	TRIM33	tripartite motif containing 33
hsa-miR-370	1	0	1	1	1	1	AKAP11	A kinase (PRKA) anchor protein 11
hsa-miR-370	1	0	1	0	1	1	HPCAL4	hippocalcin like 4
hsa-miR-370	1	0	1	1	1	1	TOB2	transducer of ERBB2, 2
hsa-miR-370	0	0	1	1	1	1	FBXO40	F-box protein 40
hsa-miR-370	0	0	1	1	0	0	SRRM2	serine/arginine repetitive matrix 2
hsa-miR-370	1	0	1	1	1	1	RAPGEFL1	Rap guanine nucleotide exchange factor (GEF)-like 1
hsa-miR-370	1	0	1	1	0	0	CPA4	carboxypeptidase A4
hsa-miR-370	1	0	1	1	1	1	ARID4B	AT rich interactive domain 4B (RBP1-like)
hsa-miR-370	1	0	1	1	1	1	PHF20	PHD finger protein 20
hsa-miR-370	1	0	1	0	1	1	CRIM1	cysteine rich transmembrane BMP regulator 1 (chordin-like)
hsa-miR-370	0	0	1	1	0	0	FAM203A	family with sequence similarity 203, member A
hsa-miR-370	1	0	1	1	1	1	RAB6B	RAB6B, member RAS oncogene family
hsa-miR-370	1	0	1	1	1	1	PLXNA3	plexin A3
hsa-miR-370	0	0	1	0	1	1	TRIM44	tripartite motif containing 44
hsa-miR-370	1	0	1	0	1	1	EIF2C4	eukaryotic translation initiation factor 2C, 4
hsa-miR-370	0	0	1	1	1	1	LRRC16A	leucine rich repeat containing 16A
hsa-miR-370	1	0	1	1	1	1	ZNF280C	zinc finger protein 280C
hsa-miR-370	0	0	1	1	1	1	MTMR8	myotubularin related protein 8
hsa-miR-370	1	0	1	1	1	1	GDAP2	ganglioside induced differentiation associated protein 2
hsa-miR-370	1	0	1	1	1	1	ZNF3	zinc finger protein 3
hsa-miR-370	0	0	1	1	1	1	SOHLH2	spermatogenesis and oogenesis specific basic helix-loop-helix 2
hsa-miR-370	0	0	1	1	1	1	SDHAF2	succinate dehydrogenase complex assembly factor 2
hsa-miR-370	0	0	1	1	1	1	TMEM38B	transmembrane protein 38B
hsa-miR-370	1	0	1	0	1	1	LGI2	leucine-rich repeat LGI family, member 2
hsa-miR-370	1	0	1	1	1	1	TBC1D13	TBC1 domain family, member 13
hsa-miR-370	1	0	1	1	1	1	LRRC20	leucine rich repeat containing 20
hsa-miR-370	0	0	1	1	1	1	TRIM62	tripartite motif containing 62
hsa-miR-370	1	0	1	0	1	1	SEPT11	septin 11
hsa-miR-370	1	0	1	1	1	1	TMEM143	transmembrane protein 143
hsa-miR-370	0	0	1	1	1	1	TMEM144	transmembrane protein 144
hsa-miR-370	0	0	1	1	0	0	GABRQ	gamma-aminobutyric acid (GABA) A receptor, theta
hsa-miR-370	0	0	1	1	0	0	H2AFY2	H2A histone family, member Y2
hsa-miR-370	0	0	1	1	1	1	ELAC1	elaC homolog 1 (E. coli)
hsa-miR-370	1	0	1	1	0	0	HOXB6	homeobox B6
hsa-miR-370	0	0	1	1	0	0	SH3BP1	SH3-domain binding protein 1
hsa-miR-370	1	0	1	1	1	1	CRCT1	cysteine-rich C-terminal 1
hsa-miR-370	1	0	1	1	1	1	SEPT3	septin 3
hsa-miR-370	1	0	1	0	1	1	UBFD1	ubiquitin family domain containing 1
hsa-miR-370	0	0	1	0	1	1	ZC3HAV1	zinc finger CCCH-type, antiviral 1
hsa-miR-370	1	0	1	0	1	1	KCMF1	potassium channel modulatory factor 1
hsa-miR-370	1	0	1	0	1	1	SLAMF8	SLAM family member 8
hsa-miR-370	1	0	1	1	1	1	MDM1	Mdm1 nuclear protein homolog (mouse)
hsa-miR-370	1	0	1	1	1	1	C8orf4	chromosome 8 open reading frame 4
hsa-miR-370	1	0	1	1	1	1	CNNM4	cyclin M4
hsa-miR-370	0	0	1	1	1	1	PRTFDC1	phosphoribosyl transferase domain containing 1
hsa-miR-370	1	0	1	1	1	1	KIAA1244	KIAA1244
hsa-miR-370	0	0	1	1	1	1	RALGAPA2	Ral GTPase activating protein, alpha subunit 2 (catalytic)
hsa-miR-370	1	0	1	0	1	1	EIF5A2	eukaryotic translation initiation factor 5A2
hsa-miR-370	1	0	1	1	1	1	OSM	oncostatin M
hsa-miR-370	1	0	1	0	1	1	ADCY2	adenylate cyclase 2 (brain)
hsa-miR-370	0	0	1	0	1	1	ZNF490	zinc finger protein 490
hsa-miR-370	0	0	1	1	1	1	SHROOM4	shroom family member 4
hsa-miR-370	1	0	1	1	1	1	DLG3	discs, large homolog 3 (Drosophila)
hsa-miR-370	1	0	1	1	0	0	CASKIN2	CASK interacting protein 2
hsa-miR-370	1	0	1	1	1	1	RGAG1	retrotransposon gag domain containing 1
hsa-miR-370	1	0	1	0	1	1	ALPK3	alpha-kinase 3
hsa-miR-370	1	0	1	1	1	1	SIPA1L2	signal-induced proliferation-associated 1 like 2
hsa-miR-370	0	0	1	1	1	1	ZFP28	zinc finger protein 28 homolog (mouse)
hsa-miR-370	1	0	1	1	1	1	RANBP10	RAN binding protein 10
hsa-miR-370	0	0	1	1	1	1	PRX	periaxin
hsa-miR-370	0	0	1	1	1	1	B3GALT1	UDP-Gal:betaGlcNAc beta 1,3-galactosyltransferase, polypeptide 1
hsa-miR-370	0	0	1	1	0	0	CTAG2	cancer/testis antigen 2
hsa-miR-370	1	0	1	1	1	1	ZNFX1	zinc finger, NFX1-type containing 1
hsa-miR-370	1	0	1	0	1	1	TP53INP2	tumor protein p53 inducible nuclear protein 2
hsa-miR-370	0	0	1	1	1	1	CHST6	carbohydrate (N-acetylglucosamine 6-O) sulfotransferase 6
hsa-miR-370	1	0	1	1	1	1	TRIB2	tribbles homolog 2 (Drosophila)
hsa-miR-370	0	0	1	1	1	1	GABBR1	gamma-aminobutyric acid (GABA) B receptor, 1
hsa-miR-370	1	0	1	0	0	0	ALX4	ALX homeobox 4
hsa-miR-370	0	0	1	1	1	1	PGM5	phosphoglucomutase 5
hsa-miR-370	1	0	1	0	1	1	CSNK1G1	casein kinase 1, gamma 1
hsa-miR-370	1	0	1	1	1	1	XYLT1	xylosyltransferase I
hsa-miR-370	1	0	1	1	1	1	XYLT2	xylosyltransferase II
hsa-miR-370	0	0	1	1	1	1	HS1BP3	HCLS1 binding protein 3
hsa-miR-370	1	0	1	1	1	1	GIGYF1	GRB10 interacting GYF protein 1
hsa-miR-370	1	0	1	1	1	1	C16orf58	chromosome 16 open reading frame 58
hsa-miR-370	1	0	1	1	1	1	FAM160B2	family with sequence similarity 160, member B2
hsa-miR-370	1	0	1	1	1	1	RMND5A	required for meiotic nuclear division 5 homolog A (S. cerevisiae)
hsa-miR-370	0	0	1	0	1	1	KXD1	KxDL motif containing 1
hsa-miR-370	0	0	1	1	0	0	DCTPP1	dCTP pyrophosphatase 1
hsa-miR-370	1	0	1	1	1	1	PSTPIP2	proline-serine-threonine phosphatase interacting protein 2
hsa-miR-370	1	0	1	1	1	1	C10orf76	chromosome 10 open reading frame 76
hsa-miR-370	1	0	1	1	1	1	USB1	U6 snRNA biogenesis 1
hsa-miR-370	1	0	1	0	1	1	ZFHX4	zinc finger homeobox 4
hsa-miR-370	0	0	1	1	1	1	ZNF767	zinc finger family member 767
hsa-miR-370	1	0	1	1	0	0	UBTD1	ubiquitin domain containing 1
hsa-miR-370	1	0	1	0	1	1	VCPIP1	valosin containing protein (p97)/p47 complex interacting protein 1
hsa-miR-370	0	0	1	1	0	0	CENPT	centromere protein T
hsa-miR-370	0	0	1	1	0	0	BPIFB2	BPI fold containing family B, member 2
hsa-miR-370	1	0	1	1	1	1	CYB5B	cytochrome b5 type B (outer mitochondrial membrane)
hsa-miR-370	1	0	1	0	1	1	TET1	tet methylcytosine dioxygenase 1
hsa-miR-370	1	0	1	1	1	1	JHDM1D	jumonji C domain containing histone demethylase 1 homolog D (S. cerevisiae)
hsa-miR-370	1	0	1	1	1	1	TRIM8	tripartite motif containing 8
hsa-miR-370	1	0	1	0	1	1	SPRY4	sprouty homolog 4 (Drosophila)
hsa-miR-370	1	0	1	0	1	1	TMEM47	transmembrane protein 47
hsa-miR-370	0	0	1	1	1	1	INHBE	inhibin, beta E
hsa-miR-370	0	0	1	1	1	1	KCNA7	potassium voltage-gated channel, shaker-related subfamily, member 7
hsa-miR-370	0	0	1	1	1	1	FRMD8	FERM domain containing 8
hsa-miR-370	0	0	1	1	1	1	TSSK1B	testis-specific serine kinase 1B
hsa-miR-370	1	0	1	1	1	1	PATZ1	POZ (BTB) and AT hook containing zinc finger 1
hsa-miR-370	1	0	1	0	1	1	SRSF8	serine/arginine-rich splicing factor 8
hsa-miR-370	0	0	1	1	0	0	ATRIP	ATR interacting protein
hsa-miR-370	1	0	1	1	1	1	ANTXR1	anthrax toxin receptor 1
hsa-miR-370	1	0	1	1	1	1	LOXL4	lysyl oxidase-like 4
hsa-miR-370	1	0	1	1	1	1	ZNRF1	zinc and ring finger 1, E3 ubiquitin protein ligase
hsa-miR-370	1	0	1	1	0	0	MAF1	MAF1 homolog (S. cerevisiae)
hsa-miR-370	0	0	1	0	1	1	LDOC1L	leucine zipper, down-regulated in cancer 1-like
hsa-miR-370	1	0	1	1	1	1	ARHGEF39	Rho guanine nucleotide exchange factor (GEF) 39
hsa-miR-370	0	0	1	1	1	1	FAM136A	family with sequence similarity 136, member A
hsa-miR-370	0	0	1	0	1	1	PIGY	phosphatidylinositol glycan anchor biosynthesis, class Y
hsa-miR-370	1	0	1	0	1	1	C5orf62	chromosome 5 open reading frame 62
hsa-miR-370	0	0	1	1	1	1	ARHGEF4	Rho guanine nucleotide exchange factor (GEF) 4
hsa-miR-370	0	0	1	0	1	1	TSLP	thymic stromal lymphopoietin
hsa-miR-370	1	0	1	0	1	1	EAF1	ELL associated factor 1
hsa-miR-370	1	0	1	1	1	1	FGD3	FYVE, RhoGEF and PH domain containing 3
hsa-miR-370	1	0	1	0	1	1	SCRT2	scratch homolog 2, zinc finger protein (Drosophila)
hsa-miR-370	1	0	1	0	1	1	FGF5	fibroblast growth factor 5
hsa-miR-370	1	0	1	1	0	0	CAMK2N2	calcium/calmodulin-dependent protein kinase II inhibitor 2
hsa-miR-370	1	0	1	1	1	1	ADRA1A	adrenoceptor alpha 1A
hsa-miR-370	1	0	1	1	1	1	C19orf6	chromosome 19 open reading frame 6
hsa-miR-370	0	0	1	1	0	0	GZMH	granzyme H (cathepsin G-like 2, protein h-CCPX)
hsa-miR-370	0	0	1	0	1	1	C9orf123	chromosome 9 open reading frame 123
hsa-miR-370	1	0	1	1	0	0	FCHSD1	FCH and double SH3 domains 1
hsa-miR-370	1	0	1	1	0	0	DISP2	dispatched homolog 2 (Drosophila)
hsa-miR-370	1	0	1	1	1	1	LUZP1	leucine zipper protein 1
hsa-miR-370	0	0	1	1	0	0	CTDP1	CTD (carboxy-terminal domain, RNA polymerase II, polypeptide A) phosphatase, subunit 1
hsa-miR-370	0	0	1	0	1	1	CCDC97	coiled-coil domain containing 97
hsa-miR-370	1	0	1	0	0	0	ANKRD40	ankyrin repeat domain 40
hsa-miR-370	0	0	1	1	0	0	PGLYRP2	peptidoglycan recognition protein 2
hsa-miR-370	1	0	1	1	1	1	XKR4	XK, Kell blood group complex subunit-related family, member 4
hsa-miR-370	0	0	1	1	1	1	PLEKHG4B	pleckstrin homology domain containing, family G (with RhoGef domain) member 4B
hsa-miR-370	0	0	1	1	0	0	FAM46B	family with sequence similarity 46, member B
hsa-miR-370	0	0	1	1	0	0	RBP7	retinol binding protein 7, cellular
hsa-miR-370	0	0	1	1	1	1	PRDM7	PR domain containing 7
hsa-miR-370	1	0	1	1	1	1	SEPT4	septin 4
hsa-miR-370	0	0	1	1	1	1	SELM	selenoprotein M
hsa-miR-370	0	0	1	1	1	1	SLC32A1	solute carrier family 32 (GABA vesicular transporter), member 1
hsa-miR-370	0	0	1	1	1	1	CTCFL	CCCTC-binding factor (zinc finger protein)-like
hsa-miR-370	0	0	1	1	1	1	PABPC5	poly(A) binding protein, cytoplasmic 5
hsa-miR-370	1	0	1	0	1	1	STK35	serine/threonine kinase 35
hsa-miR-370	1	0	1	1	1	1	KLHL6	kelch-like 6 (Drosophila)
hsa-miR-370	0	0	1	1	1	1	CHST14	carbohydrate (N-acetylgalactosamine 4-0) sulfotransferase 14
hsa-miR-370	0	0	1	1	1	1	KCNG3	potassium voltage-gated channel, subfamily G, member 3
hsa-miR-370	1	0	1	1	1	1	WHSC1	Wolf-Hirschhorn syndrome candidate 1
hsa-miR-370	0	0	1	0	1	1	AMZ1	archaelysin family metallopeptidase 1
hsa-miR-370	1	0	1	1	1	1	BMPER	BMP binding endothelial regulator
hsa-miR-370	0	0	1	1	1	1	RAD51B	RAD51 homolog B (S. cerevisiae)
hsa-miR-370	0	0	1	1	0	0	C6orf25	chromosome 6 open reading frame 25
hsa-miR-370	1	0	1	1	0	0	PKDCC	protein kinase domain containing, cytoplasmic homolog (mouse)
hsa-miR-370	0	0	1	1	0	0	KIF12	kinesin family member 12
hsa-miR-370	0	0	1	1	1	1	TPCN2	two pore segment channel 2
hsa-miR-370	0	0	1	1	0	0	SGCZ	sarcoglycan, zeta
hsa-miR-370	1	0	1	1	0	0	GNAT1	guanine nucleotide binding protein (G protein), alpha transducing activity polypeptide 1
hsa-miR-370	1	0	1	0	1	1	DIRAS1	DIRAS family, GTP-binding RAS-like 1
hsa-miR-370	1	0	1	0	1	1	MTPN	myotrophin
hsa-miR-370	1	0	1	1	0	0	GAS2L1	growth arrest-specific 2 like 1
hsa-miR-370	1	0	1	1	1	1	POGLUT1	protein O-glucosyltransferase 1
hsa-miR-370	1	0	1	1	1	1	FAM123B	family with sequence similarity 123B
hsa-miR-370	1	0	1	1	1	1	ZSCAN29	zinc finger and SCAN domain containing 29
hsa-miR-370	1	0	1	1	1	1	ZNF362	zinc finger protein 362
hsa-miR-370	1	0	1	0	1	1	ARID2	AT rich interactive domain 2 (ARID, RFX-like)
hsa-miR-370	0	0	1	1	1	1	C6orf170	chromosome 6 open reading frame 170
hsa-miR-370	1	0	1	1	1	1	PDIK1L	PDLIM1 interacting kinase 1 like
hsa-miR-370	1	0	1	0	1	1	ST6GALNAC3	ST6 (alpha-N-acetyl-neuraminyl-2,3-beta-galactosyl-1,3)-N-acetylgalactosaminide alpha-2,6-sialyltransferase 3
hsa-miR-370	0	0	1	1	1	1	TMEM74	transmembrane protein 74
hsa-miR-370	0	0	1	1	1	1	SLC22A7	solute carrier family 22 (organic anion transporter), member 7
hsa-miR-370	0	0	1	1	0	0	SCARF2	scavenger receptor class F, member 2
hsa-miR-370	0	0	1	1	1	1	MED19	mediator complex subunit 19
hsa-miR-370	1	0	1	1	1	1	CACUL1	CDK2-associated, cullin domain 1
hsa-miR-370	0	0	1	1	1	1	ZFP91-CNTF	ZFP91-CNTF readthrough (non-protein coding)
hsa-miR-370	0	0	1	1	1	1	REXO1L1	REX1, RNA exonuclease 1 homolog (S. cerevisiae)-like 1
hsa-miR-370	0	0	1	0	1	1	TUSC5	tumor suppressor candidate 5
hsa-miR-370	1	0	1	1	1	1	SMG7	smg-7 homolog, nonsense mediated mRNA decay factor (C. elegans)
hsa-miR-370	1	0	1	1	1	1	CCDC117	coiled-coil domain containing 117
hsa-miR-370	1	0	1	1	1	1	VKORC1L1	vitamin K epoxide reductase complex, subunit 1-like 1
hsa-miR-370	0	0	1	1	1	1	FNDC7	fibronectin type III domain containing 7
hsa-miR-370	0	0	1	1	1	1	C17orf78	chromosome 17 open reading frame 78
hsa-miR-370	1	0	1	1	1	1	XKR6	XK, Kell blood group complex subunit-related family, member 6
hsa-miR-370	0	0	1	1	1	1	SCARA5	scavenger receptor class A, member 5 (putative)
hsa-miR-370	0	0	1	1	0	0	SPACA3	sperm acrosome associated 3
hsa-miR-370	0	0	1	1	0	0	KRTCAP3	keratinocyte associated protein 3
hsa-miR-370	0	0	1	1	1	1	ZDHHC22	zinc finger, DHHC-type containing 22
hsa-miR-370	0	0	1	1	0	0	SEC14L4	SEC14-like 4 (S. cerevisiae)
hsa-miR-370	0	0	1	1	0	0	C17orf74	chromosome 17 open reading frame 74
hsa-miR-370	1	0	1	1	0	0	JPH2	junctophilin 2
hsa-miR-370	0	0	1	1	0	0	IL9R	interleukin 9 receptor
hsa-miR-370	0	0	1	1	1	1	NLRP9	NLR family, pyrin domain containing 9
hsa-miR-370	1	0	1	1	1	1	INADL	InaD-like (Drosophila)
hsa-miR-370	1	0	1	1	1	1	STX12	syntaxin 12
hsa-miR-370	0	0	1	1	0	0	TAS1R1	taste receptor, type 1, member 1
hsa-miR-370	1	0	1	1	1	1	PPM1B	protein phosphatase, Mg2+/Mn2+ dependent, 1B
hsa-miR-370	0	0	1	0	1	1	GATS	GATS, stromal antigen 3 opposite strand
hsa-miR-370	1	0	1	1	1	1	AKT3	v-akt murine thymoma viral oncogene homolog 3 (protein kinase B, gamma)
hsa-miR-370	0	0	1	0	1	1	HCG27	HLA complex group 27 (non-protein coding)
hsa-miR-370	1	0	1	1	1	1	ZSCAN22	zinc finger and SCAN domain containing 22
hsa-miR-370	0	0	1	1	0	0	BPIFB4	BPI fold containing family B, member 4
hsa-miR-370	1	0	1	1	1	1	TMEM229B	transmembrane protein 229B
hsa-miR-370	0	0	1	1	1	1	C1QL2	complement component 1, q subcomponent-like 2
hsa-miR-370	1	0	1	1	1	1	BCL9L	B-cell CLL/lymphoma 9-like
hsa-miR-370	0	0	1	1	1	1	THEM5	thioesterase superfamily member 5
hsa-miR-370	1	0	1	0	1	1	RNF144B	ring finger protein 144B
hsa-miR-370	1	0	1	0	1	1	RIMS4	regulating synaptic membrane exocytosis 4
hsa-miR-370	1	0	1	1	1	1	RNF7	ring finger protein 7
hsa-miR-370	1	0	1	1	1	1	ARRDC4	arrestin domain containing 4
hsa-miR-370	1	0	1	1	1	1	RBPMS2	RNA binding protein with multiple splicing 2
hsa-miR-370	1	0	1	1	1	1	ASB7	ankyrin repeat and SOCS box containing 7
hsa-miR-370	1	0	1	1	1	1	E2F6	E2F transcription factor 6
hsa-miR-370	0	0	1	1	1	1	EMB	embigin
hsa-miR-370	1	0	1	0	1	1	FAM73A	family with sequence similarity 73, member A
hsa-miR-370	1	0	1	1	1	1	CXCL12	chemokine (C-X-C motif) ligand 12
hsa-miR-370	0	0	1	1	1	1	COL18A1-AS1	COL18A1 antisense RNA 1
hsa-miR-370	1	0	1	1	1	1	TMEM189-UBE2V1	TMEM189-UBE2V1 readthrough
hsa-miR-370	0	0	1	1	0	0	FOXD4L4	forkhead box D4-like 4
hsa-miR-370	0	0	1	1	1	1	ARHGAP27	Rho GTPase activating protein 27
hsa-miR-370	0	0	1	1	1	1	ILDR2	immunoglobulin-like domain containing receptor 2
hsa-miR-370	1	0	1	1	1	1	GLYAT	glycine-N-acyltransferase
hsa-miR-370	0	0	1	1	1	1	ELP5	elongator acetyltransferase complex subunit 5
hsa-miR-370	0	0	1	1	0	0	C19orf70	chromosome 19 open reading frame 70
hsa-miR-370	1	0	1	1	1	1	METTL21B	methyltransferase like 21B
hsa-miR-370	0	0	1	1	1	1	SCIMP	SLP adaptor and CSK interacting membrane protein
hsa-miR-370	1	0	1	1	1	1	FAM43B	family with sequence similarity 43, member B
hsa-miR-370	0	0	1	1	0	0	KRT39	keratin 39
hsa-miR-370	1	0	1	0	1	1	STAT3	signal transducer and activator of transcription 3 (acute-phase response factor)
hsa-miR-370	0	0	1	0	0	0	RAB9BP1	RAB9B, member RAS oncogene family pseudogene 1
hsa-miR-370	0	0	1	0	0	0	CELP	carboxyl ester lipase pseudogene
hsa-miR-370	0	0	1	0	0	0	LYPLA2P1	lysophospholipase II pseudogene 1
hsa-miR-370	0	0	1	0	0	0	ANXA2P3	annexin A2 pseudogene 3
hsa-miR-370	0	0	1	0	0	0	MIR155HG	MIR155 host gene (non-protein coding)
hsa-miR-370	0	0	1	0	0	0	TTTY15	testis-specific transcript, Y-linked 15 (non-protein coding)
hsa-miR-370	0	0	1	0	0	0	SUMO1P1	SUMO1 pseudogene 1
hsa-miR-370	0	0	1	0	0	0	GOLGA2P3Y	golgin A2 pseudogene 3, Y-linked
hsa-miR-370	0	0	1	0	0	0	LOC606724	coronin, actin binding protein, 1A pseudogene
hsa-miR-370	0	0	1	0	0	0	DEFB122	defensin, beta 122 (pseudogene)
hsa-miR-370	0	0	1	0	0	0	MBL1P	mannose-binding lectin (protein A) 1, pseudogene
hsa-miR-370	0	0	1	0	0	0	HNRNPA3P1	heterogeneous nuclear ribonucleoprotein A3 pseudogene 1
hsa-miR-370	0	0	1	0	0	0	HTR7P1	5-hydroxytryptamine (serotonin) receptor 7 pseudogene 1
hsa-miR-370	0	0	1	0	0	0	TPTE2P6	transmembrane phosphoinositide 3-phosphatase and tensin homolog 2 pseudogene 6
hsa-miR-370	0	0	1	0	0	0	MALAT1	metastasis associated lung adenocarcinoma transcript 1 (non-protein coding)
hsa-miR-370	0	0	1	0	0	0	DUSP5P	dual specificity phosphatase 5 pseudogene
hsa-miR-370	0	0	1	0	0	0	SNX29P2	sorting nexin 29 pseudogene 2
hsa-miR-370	0	0	1	0	0	0	HNRNPA1P16	heterogeneous nuclear ribonucleoprotein A1 pseudogene 16
hsa-miR-370	0	0	1	0	0	0	SNORA40	small nucleolar RNA, H/ACA box 40
hsa-miR-370	0	0	1	0	0	0	PYY2	peptide YY, 2 (pseudogene)
hsa-miR-370	0	0	1	0	0	0	GBP1P1	guanylate binding protein 1, interferon-inducible pseudogene 1
hsa-miR-370	0	0	1	0	0	0	CDRT15P1	CMT1A duplicated region transcript 15 pseudogene 1
hsa-miR-370	0	0	1	0	0	0	LOC728643	heterogeneous nuclear ribonucleoprotein A1 pseudogene
hsa-miR-370	0	0	1	0	0	0	SNORD116-4	small nucleolar RNA, C/D box 116-4
hsa-miR-370	1	0	1	1	1	1	TRIO	trio Rho guanine nucleotide exchange factor
hsa-miR-370	0	0	1	1	0	0	VEGFB	vascular endothelial growth factor B
hsa-miR-370	1	0	1	1	1	1	ESR1	estrogen receptor 1
hsa-miR-370	0	0	1	1	1	1	PEG3	paternally expressed 3
hsa-miR-370	0	0	1	1	1	1	CD6	CD6 molecule
hsa-miR-370	0	0	1	0	0	0	MUC5AC	mucin 5AC, oligomeric mucus/gel-forming
hsa-miR-370	0	0	0	1	0	0	CRLF1	cytokine receptor-like factor 1
hsa-miR-370	0	0	1	1	1	1	PIGQ	phosphatidylinositol glycan anchor biosynthesis, class Q
hsa-miR-370	0	0	1	1	0	0	EDC4	enhancer of mRNA decapping 4
hsa-miR-370	0	0	0	1	0	0	GSC2	goosecoid homeobox 2
hsa-miR-370	0	0	0	1	1	1	KRT13	keratin 13
hsa-miR-370	0	0	1	1	0	0	MAP2K5	mitogen-activated protein kinase kinase 5
hsa-miR-370	0	0	0	1	0	0	MRPL28	mitochondrial ribosomal protein L28
hsa-miR-370	0	0	0	1	1	1	GADD45B	growth arrest and DNA-damage-inducible, beta
hsa-miR-370	0	0	0	1	0	0	HMGB1P10	high mobility group box 1 pseudogene 10
hsa-miR-370	0	0	0	1	0	0	POLR2F	polymerase (RNA) II (DNA directed) polypeptide F
hsa-miR-370	0	0	0	1	0	0	MIOX	myo-inositol oxygenase
hsa-miR-370	0	0	1	1	1	1	IL2RB	interleukin 2 receptor, beta
hsa-miR-370	0	0	1	1	0	0	CST4	cystatin S
hsa-miR-370	0	0	0	1	1	1	H2BFWT	H2B histone family, member W, testis-specific
hsa-miR-370	0	0	0	1	0	0	ACP5	acid phosphatase 5, tartrate resistant
hsa-miR-370	1	0	0	1	1	1	DHRS12	dehydrogenase/reductase (SDR family) member 12
hsa-miR-370	0	0	1	1	0	0	MT4	metallothionein 4
hsa-miR-370	1	0	1	1	1	1	ARL2BP	ADP-ribosylation factor-like 2 binding protein
hsa-miR-370	0	0	1	1	1	1	CSK	c-src tyrosine kinase
hsa-miR-370	0	0	1	1	1	1	FGL1	fibrinogen-like 1
hsa-miR-370	0	0	1	1	0	0	HNRNPL	heterogeneous nuclear ribonucleoprotein L
hsa-miR-370	1	0	1	1	0	0	FSD1	fibronectin type III and SPRY domain containing 1
hsa-miR-370	0	0	1	1	1	1	ATP5SL	ATP5S-like
hsa-miR-370	0	0	0	1	0	0	CD79A	CD79a molecule, immunoglobulin-associated alpha
hsa-miR-370	0	0	0	1	0	0	FKBP8	FK506 binding protein 8, 38kDa
hsa-miR-370	0	0	1	1	1	1	CEP41	centrosomal protein 41kDa
hsa-miR-370	0	0	1	1	0	0	AATF	apoptosis antagonizing transcription factor
hsa-miR-370	1	0	1	1	1	1	WFS1	Wolfram syndrome 1 (wolframin)
hsa-miR-370	1	0	1	1	0	0	PRPF19	PRP19/PSO4 pre-mRNA processing factor 19 homolog (S. cerevisiae)
hsa-miR-370	0	0	0	1	0	0	MRPL23	mitochondrial ribosomal protein L23
hsa-miR-370	0	0	0	1	0	0	MYF6	myogenic factor 6 (herculin)
hsa-miR-370	1	0	1	1	0	0	PPM1H	protein phosphatase, Mg2+/Mn2+ dependent, 1H
hsa-miR-370	0	0	1	1	0	0	ITFG2	integrin alpha FG-GAP repeat containing 2
hsa-miR-370	1	0	1	1	1	1	SRSF9	serine/arginine-rich splicing factor 9
hsa-miR-370	0	0	1	1	1	1	FANCE	Fanconi anemia, complementation group E
hsa-miR-370	0	0	1	1	0	0	INO80B	INO80 complex subunit B
hsa-miR-370	0	0	0	1	0	0	RPS15	ribosomal protein S15
hsa-miR-370	1	0	1	1	1	1	ADPRHL2	ADP-ribosylhydrolase like 2
hsa-miR-370	1	0	1	1	0	0	TNP1	transition protein 1 (during histone to protamine replacement)
hsa-miR-370	0	0	1	1	1	1	RARRES1	retinoic acid receptor responder (tazarotene induced) 1
hsa-miR-370	0	0	0	1	0	0	C2orf40	chromosome 2 open reading frame 40
hsa-miR-370	1	0	1	1	1	1	TWIST1	twist homolog 1 (Drosophila)
hsa-miR-370	0	0	1	1	1	1	UNC5CL	unc-5 homolog C (C. elegans)-like
hsa-miR-370	0	0	0	1	1	1	ARMC7	armadillo repeat containing 7
hsa-miR-370	1	0	1	1	1	1	C20orf26	chromosome 20 open reading frame 26
hsa-miR-370	0	0	1	1	0	0	LRFN3	leucine rich repeat and fibronectin type III domain containing 3
hsa-miR-370	1	0	1	1	0	0	ABHD8	abhydrolase domain containing 8
hsa-miR-370	0	0	0	1	1	1	MPV17L2	MPV17 mitochondrial membrane protein-like 2
hsa-miR-370	0	0	1	1	0	0	ZNF777	zinc finger protein 777
hsa-miR-370	0	0	0	1	1	1	CYP4F11	cytochrome P450, family 4, subfamily F, polypeptide 11
hsa-miR-370	0	0	1	1	0	0	CHAC1	ChaC, cation transport regulator homolog 1 (E. coli)
hsa-miR-370	0	0	1	1	1	1	SOX15	SRY (sex determining region Y)-box 15
hsa-miR-370	1	0	0	1	0	0	PSMB11	proteasome (prosome, macropain) subunit, beta type, 11
hsa-miR-370	1	0	1	1	1	1	MKNK2	MAP kinase interacting serine/threonine kinase 2
hsa-miR-370	0	0	1	1	1	1	CNGB1	cyclic nucleotide gated channel beta 1
hsa-miR-370	0	0	0	1	0	0	SLX1A	SLX1 structure-specific endonuclease subunit homolog A (S. cerevisiae)
hsa-miR-370	0	0	0	1	0	0	TYMP	thymidine phosphorylase
hsa-miR-370	0	0	1	1	0	0	TMCO6	transmembrane and coiled-coil domains 6
hsa-miR-370	0	0	0	1	0	0	ZSCAN10	zinc finger and SCAN domain containing 10
hsa-miR-370	0	0	0	1	1	1	ACSBG2	acyl-CoA synthetase bubblegum family member 2
hsa-miR-370	0	0	0	1	0	0	SCO2	SCO cytochrome oxidase deficient homolog 2 (yeast)
hsa-miR-370	0	0	0	1	0	0	TUBGCP2	tubulin, gamma complex associated protein 2
hsa-miR-370	1	0	1	1	1	1	MNX1	motor neuron and pancreas homeobox 1
hsa-miR-370	0	0	0	1	0	0	C20orf151	chromosome 20 open reading frame 151
hsa-miR-370	1	0	1	1	1	1	PRDM12	PR domain containing 12
hsa-miR-370	0	0	0	1	0	0	NPAS1	neuronal PAS domain protein 1
hsa-miR-370	0	0	1	1	0	0	POLN	polymerase (DNA directed) nu
hsa-miR-370	0	0	0	1	0	0	CCL25	chemokine (C-C motif) ligand 25
hsa-miR-370	0	0	0	1	0	0	GINS2	GINS complex subunit 2 (Psf2 homolog)
hsa-miR-370	0	0	1	1	0	0	FAM153B	family with sequence similarity 153, member B
hsa-miR-370	0	0	1	1	0	0	C3orf20	chromosome 3 open reading frame 20
hsa-miR-370	1	0	1	1	1	1	NUP210	nucleoporin 210kDa
hsa-miR-370	0	0	0	1	0	0	FTH1P19	ferritin, heavy polypeptide 1 pseudogene 19
hsa-miR-370	0	0	0	1	1	1	C1QTNF6	C1q and tumor necrosis factor related protein 6
hsa-miR-370	1	0	1	1	1	1	TMTC1	transmembrane and tetratricopeptide repeat containing 1
hsa-miR-370	0	0	0	1	1	1	VRTN	vertebrae development homolog (pig)
hsa-miR-370	0	0	0	1	1	1	DYSF	dysferlin, limb girdle muscular dystrophy 2B (autosomal recessive)
hsa-miR-370	0	0	1	1	0	0	GPR45	G protein-coupled receptor 45
hsa-miR-370	0	0	0	1	0	0	CHAD	chondroadherin
hsa-miR-370	0	0	0	1	1	1	TACO1	translational activator of mitochondrially encoded cytochrome c oxidase I
hsa-miR-370	0	0	1	1	0	0	BLK	B lymphoid tyrosine kinase
hsa-miR-370	0	0	0	1	0	0	CAPN11	calpain 11
hsa-miR-370	0	0	1	1	0	0	SFSWAP	splicing factor, suppressor of white-apricot homolog (Drosophila)
hsa-miR-370	0	0	0	1	0	0	IL17B	interleukin 17B
hsa-miR-370	1	0	1	1	1	1	CYP46A1	cytochrome P450, family 46, subfamily A, polypeptide 1
hsa-miR-370	0	0	1	1	1	1	FLT4	fms-related tyrosine kinase 4
hsa-miR-370	0	0	1	1	0	0	SGCA	sarcoglycan, alpha (50kDa dystrophin-associated glycoprotein)
hsa-miR-370	0	0	1	1	1	1	RHBDF1	rhomboid 5 homolog 1 (Drosophila)
hsa-miR-370	0	0	0	1	0	0	IL12RB2	interleukin 12 receptor, beta 2
hsa-miR-370	0	0	1	1	0	0	ITGA2B	integrin, alpha 2b (platelet glycoprotein IIb of IIb/IIIa complex, antigen CD41)
hsa-miR-370	0	0	0	1	0	0	GSDMD	gasdermin D
hsa-miR-370	0	0	0	1	0	0	CHST8	carbohydrate (N-acetylgalactosamine 4-0) sulfotransferase 8
hsa-miR-370	0	0	0	1	0	0	ATP4A	ATPase, H+/K+ exchanging, alpha polypeptide
hsa-miR-370	0	0	1	1	0	0	EFCAB6	EF-hand calcium binding domain 6
hsa-miR-370	1	0	1	1	1	1	SEC14L1	SEC14-like 1 (S. cerevisiae)
hsa-miR-370	0	0	1	1	1	1	MID2	midline 2
hsa-miR-370	1	0	1	1	0	0	DGCR2	DiGeorge syndrome critical region gene 2
hsa-miR-370	0	0	1	1	0	0	UFD1L	ubiquitin fusion degradation 1 like (yeast)
hsa-miR-370	1	0	0	1	0	0	MED15	mediator complex subunit 15
hsa-miR-370	0	0	0	1	0	0	CCDC61	coiled-coil domain containing 61
hsa-miR-370	1	0	1	1	1	1	VAMP8	vesicle-associated membrane protein 8 (endobrevin)
hsa-miR-370	1	0	0	1	0	0	ECE1	endothelin converting enzyme 1
hsa-miR-370	1	0	1	1	0	0	CHST10	carbohydrate sulfotransferase 10
hsa-miR-370	1	0	1	1	1	1	WNT5A	wingless-type MMTV integration site family, member 5A
hsa-miR-370	1	0	0	1	0	0	KLF1	Kruppel-like factor 1 (erythroid)
hsa-miR-370	0	0	0	1	1	1	POLA2	polymerase (DNA directed), alpha 2, accessory subunit
hsa-miR-370	0	0	0	1	0	0	CLCN2	chloride channel, voltage-sensitive 2
hsa-miR-370	0	0	1	1	0	0	STMN4	stathmin-like 4
hsa-miR-370	0	0	1	1	1	1	MYO3A	myosin IIIA
hsa-miR-370	0	0	1	1	1	1	PISD	phosphatidylserine decarboxylase
hsa-miR-370	0	0	0	1	0	0	C12orf10	chromosome 12 open reading frame 10
hsa-miR-370	0	0	0	1	0	0	CYP11A1	cytochrome P450, family 11, subfamily A, polypeptide 1
hsa-miR-370	1	0	1	1	1	1	CRTC3	CREB regulated transcription coactivator 3
hsa-miR-370	0	0	1	1	1	1	TIMM44	translocase of inner mitochondrial membrane 44 homolog (yeast)
hsa-miR-370	0	0	1	1	0	0	KLHDC4	kelch domain containing 4
hsa-miR-370	0	0	0	1	0	0	KIAA1751	KIAA1751
hsa-miR-370	0	0	0	1	0	0	ADAMTSL4	ADAMTS-like 4
hsa-miR-370	0	0	0	1	0	0	PKLR	pyruvate kinase, liver and RBC
hsa-miR-370	0	0	0	1	0	0	ANO7	anoctamin 7
hsa-miR-370	1	0	0	1	1	1	CHST7	carbohydrate (N-acetylglucosamine 6-O) sulfotransferase 7
hsa-miR-370	0	0	1	1	0	0	FAM58A	family with sequence similarity 58, member A
hsa-miR-370	0	0	0	1	0	0	GSDMC	gasdermin C
hsa-miR-370	1	0	1	1	1	1	CEP164	centrosomal protein 164kDa
hsa-miR-370	0	0	1	1	1	1	GRIN2B	glutamate receptor, ionotropic, N-methyl D-aspartate 2B
hsa-miR-370	0	0	1	1	1	1	G6PC2	glucose-6-phosphatase, catalytic, 2
hsa-miR-370	1	0	0	1	1	1	LPCAT1	lysophosphatidylcholine acyltransferase 1
hsa-miR-370	0	0	1	1	1	1	NSMCE2	non-SMC element 2, MMS21 homolog (S. cerevisiae)
hsa-miR-370	0	0	0	1	0	0	IL34	interleukin 34
hsa-miR-370	0	0	0	1	0	0	PSMG3	proteasome (prosome, macropain) assembly chaperone 3
hsa-miR-370	0	0	0	1	0	0	TMEM141	transmembrane protein 141
hsa-miR-370	0	0	0	1	0	0	KIAA1984	KIAA1984
hsa-miR-370	0	0	1	1	1	1	SNF8	SNF8, ESCRT-II complex subunit, homolog (S. cerevisiae)
hsa-miR-370	0	0	1	1	0	0	TNFRSF13C	tumor necrosis factor receptor superfamily, member 13C
hsa-miR-370	0	0	0	1	1	1	AP1M1	adaptor-related protein complex 1, mu 1 subunit
hsa-miR-370	1	0	1	1	1	1	NR2F6	nuclear receptor subfamily 2, group F, member 6
hsa-miR-370	0	0	0	1	0	0	FAM207A	family with sequence similarity 207, member A
hsa-miR-370	0	0	0	1	0	0	FTCD	formiminotransferase cyclodeaminase
hsa-miR-370	0	0	1	1	1	1	HIPK4	homeodomain interacting protein kinase 4
hsa-miR-370	1	0	1	1	1	1	ZBTB7B	zinc finger and BTB domain containing 7B
hsa-miR-370	1	0	0	1	0	0	NBEAL2	neurobeachin-like 2
hsa-miR-370	0	0	1	1	0	0	FGFR4	fibroblast growth factor receptor 4
hsa-miR-370	0	0	0	1	0	0	CCDC130	coiled-coil domain containing 130
hsa-miR-370	0	0	1	1	0	0	FOXH1	forkhead box H1
hsa-miR-370	0	0	0	1	1	1	FDXR	ferredoxin reductase
hsa-miR-370	0	0	1	1	1	1	CD300LG	CD300 molecule-like family member g
hsa-miR-370	1	0	1	1	0	0	GRASP	GRP1 (general receptor for phosphoinositides 1)-associated scaffold protein
hsa-miR-370	0	0	1	1	1	1	MED11	mediator complex subunit 11
hsa-miR-370	0	0	0	1	0	0	CCDC27	coiled-coil domain containing 27
hsa-miR-370	0	0	0	1	0	0	CCKAR	cholecystokinin A receptor
hsa-miR-370	0	0	0	1	0	0	FEV	FEV (ETS oncogene family)
hsa-miR-370	0	0	0	1	0	0	HDAC11	histone deacetylase 11
hsa-miR-370	0	0	1	1	1	1	TPRA1	transmembrane protein, adipocyte asscociated 1
hsa-miR-370	0	0	0	1	0	0	LRPAP1	low density lipoprotein receptor-related protein associated protein 1
hsa-miR-370	0	0	1	1	0	0	MON1A	MON1 homolog A (yeast)
hsa-miR-370	0	0	0	1	1	1	SBSPON	somatomedin B and thrombospondin, type 1 domain containing
hsa-miR-370	0	0	0	1	1	1	ZNF488	zinc finger protein 488
hsa-miR-370	0	0	0	1	0	0	SNAPC4	small nuclear RNA activating complex, polypeptide 4, 190kDa
hsa-miR-370	0	0	1	1	1	1	ZMYND19	zinc finger, MYND-type containing 19
hsa-miR-370	0	0	0	1	1	1	CRTAC1	cartilage acidic protein 1
hsa-miR-370	0	0	0	1	0	0	SERPINA4	serpin peptidase inhibitor, clade A (alpha-1 antiproteinase, antitrypsin), member 4
hsa-miR-370	0	0	0	1	0	0	SPATA19	spermatogenesis associated 19
hsa-miR-370	0	0	0	1	0	0	CDH16	cadherin 16, KSP-cadherin
hsa-miR-370	1	0	1	1	1	1	ANPEP	alanyl (membrane) aminopeptidase
hsa-miR-370	0	0	0	1	0	0	MVD	mevalonate (diphospho) decarboxylase
hsa-miR-370	0	0	0	1	0	0	PSCA	prostate stem cell antigen
hsa-miR-370	0	0	1	1	0	0	CDK2AP2	cyclin-dependent kinase 2 associated protein 2
hsa-miR-370	0	0	1	1	0	0	GHDC	GH3 domain containing
hsa-miR-370	1	0	0	1	0	0	ITFG3	integrin alpha FG-GAP repeat containing 3
hsa-miR-370	0	0	1	1	0	0	BEST1	bestrophin 1
hsa-miR-370	0	0	0	1	0	0	C20orf201	chromosome 20 open reading frame 201
hsa-miR-370	0	0	0	1	1	1	PDHB	pyruvate dehydrogenase (lipoamide) beta
hsa-miR-370	1	0	1	1	1	1	TSEN34	tRNA splicing endonuclease 34 homolog (S. cerevisiae)
hsa-miR-370	0	0	1	1	0	0	PROKR1	prokineticin receptor 1
hsa-miR-370	1	0	1	1	1	1	TTBK1	tau tubulin kinase 1
hsa-miR-370	0	0	0	1	1	1	CST5	cystatin D
hsa-miR-370	0	0	1	1	0	0	CST2	cystatin SA
hsa-miR-370	0	0	0	1	0	0	CST1	cystatin SN
hsa-miR-370	0	0	0	1	1	1	GUSB	glucuronidase, beta
hsa-miR-370	0	0	1	1	1	1	SMR3B	submaxillary gland androgen regulated protein 3B
hsa-miR-370	0	0	1	1	1	1	YEATS2	YEATS domain containing 2
hsa-miR-370	0	0	0	1	0	0	DTYMK	deoxythymidylate kinase (thymidylate kinase)
hsa-miR-370	0	0	0	1	1	1	PPIC	peptidylprolyl isomerase C (cyclophilin C)
hsa-miR-370	0	0	0	1	0	0	ASPSCR1	alveolar soft part sarcoma chromosome region, candidate 1
hsa-miR-370	0	0	1	1	1	1	HTRA3	HtrA serine peptidase 3
hsa-miR-370	1	0	1	1	0	0	CARNS1	carnosine synthase 1
hsa-miR-370	0	0	1	1	1	1	DLEC1	deleted in lung and esophageal cancer 1
hsa-miR-370	1	0	1	1	0	0	BRSK2	BR serine/threonine kinase 2
hsa-miR-370	1	0	1	1	1	1	CASP3	caspase 3, apoptosis-related cysteine peptidase
hsa-miR-370	0	0	1	1	1	1	EPG5	ectopic P-granules autophagy protein 5 homolog (C. elegans)
hsa-miR-370	0	0	0	1	0	0	ATAD3B	ATPase family, AAA domain containing 3B
hsa-miR-370	0	0	1	1	0	0	MXRA8	matrix-remodelling associated 8
hsa-miR-370	1	0	1	1	0	0	ATG4D	autophagy related 4D, cysteine peptidase
hsa-miR-370	0	0	0	1	1	1	LOC729317	voltage-dependent anion channel 2 pseudogene
hsa-miR-370	0	0	1	1	0	0	PSMD2	proteasome (prosome, macropain) 26S subunit, non-ATPase, 2
hsa-miR-370	0	0	1	1	0	0	CCDC13	coiled-coil domain containing 13
hsa-miR-370	0	0	1	1	0	0	MRPL48	mitochondrial ribosomal protein L48
hsa-miR-370	0	0	0	1	1	1	TMEM52	transmembrane protein 52
hsa-miR-370	1	0	1	1	1	1	ISCU	iron-sulfur cluster scaffold homolog (E. coli)
hsa-miR-370	1	0	0	1	0	0	CTU2	cytosolic thiouridylase subunit 2 homolog (S. pombe)
hsa-miR-370	0	0	0	1	0	0	PFKL	phosphofructokinase, liver
hsa-miR-370	1	0	1	1	0	0	SPEG	SPEG complex locus
hsa-miR-370	0	0	1	1	0	0	POLD4	polymerase (DNA-directed), delta 4, accessory subunit
hsa-miR-370	0	0	0	1	1	1	MRPL45	mitochondrial ribosomal protein L45
hsa-miR-370	0	0	1	1	0	0	RPS6KB2	ribosomal protein S6 kinase, 70kDa, polypeptide 2
hsa-miR-370	0	0	1	1	0	0	CD7	CD7 molecule
hsa-miR-370	1	0	0	1	1	1	AURKA	aurora kinase A
hsa-miR-370	0	0	1	1	1	1	MGAM	maltase-glucoamylase (alpha-glucosidase)
hsa-miR-370	0	0	0	1	1	1	HMHA1	histocompatibility (minor) HA-1
hsa-miR-370	1	0	1	1	0	0	ATOX1	ATX1 antioxidant protein 1 homolog (yeast)
hsa-miR-370	0	0	1	1	1	1	RMND5B	required for meiotic nuclear division 5 homolog B (S. cerevisiae)
hsa-miR-370	0	0	1	1	0	0	TUFM	Tu translation elongation factor, mitochondrial
hsa-miR-370	0	0	0	1	0	0	FAM20C	family with sequence similarity 20, member C
hsa-miR-370	0	0	1	1	0	0	STX4	syntaxin 4
hsa-miR-370	0	0	0	1	0	0	MATK	megakaryocyte-associated tyrosine kinase
hsa-miR-370	0	0	0	1	0	0	SPATA9	spermatogenesis associated 9
hsa-miR-370	0	0	1	1	0	0	LCN15	lipocalin 15
hsa-miR-370	0	0	1	1	0	0	SLC12A4	solute carrier family 12 (potassium/chloride transporters), member 4
hsa-miR-370	0	0	1	1	1	1	HYDIN	HYDIN, axonemal central pair apparatus protein
hsa-miR-370	0	0	0	1	0	0	ZFAND2A	zinc finger, AN1-type domain 2A
hsa-miR-370	1	0	1	1	1	1	CABP1	calcium binding protein 1
hsa-miR-370	0	0	0	1	0	0	VCX2	variable charge, X-linked 2
hsa-miR-370	0	0	0	1	0	0	LOC100128310	uncharacterized LOC100128310
hsa-miR-370	0	0	0	1	0	0	C3orf22	chromosome 3 open reading frame 22
hsa-miR-370	1	0	1	1	1	1	ANKRD23	ankyrin repeat domain 23
hsa-miR-370	0	0	0	1	1	1	EPS8L2	EPS8-like 2
hsa-miR-370	0	0	1	1	0	0	FAM211B	family with sequence similarity 211, member B
hsa-miR-370	0	0	1	1	1	1	GRM6	glutamate receptor, metabotropic 6
hsa-miR-370	1	0	0	1	1	1	TTC7A	tetratricopeptide repeat domain 7A
hsa-miR-370	0	0	1	1	1	1	GALNT11	UDP-N-acetyl-alpha-D-galactosamine:polypeptide N-acetylgalactosaminyltransferase 11 (GalNAc-T11)
hsa-miR-370	1	0	1	1	1	1	PACS1	phosphofurin acidic cluster sorting protein 1
hsa-miR-370	0	0	1	1	0	0	PRPF31	PRP31 pre-mRNA processing factor 31 homolog (S. cerevisiae)
hsa-miR-370	1	0	1	1	0	0	KIF17	kinesin family member 17
hsa-miR-370	1	0	1	1	1	1	ULK1	unc-51-like kinase 1 (C. elegans)
hsa-miR-370	0	0	1	1	0	0	EFCAB4A	EF-hand calcium binding domain 4A
hsa-miR-370	0	0	1	1	0	0	CD151	CD151 molecule (Raph blood group)
hsa-miR-370	0	0	0	1	0	0	HECW1-IT1	HECW1 intronic transcript 1 (non-protein coding)
hsa-miR-370	0	0	1	1	1	1	RTBDN	retbindin
hsa-miR-370	0	0	1	1	1	1	USP39	ubiquitin specific peptidase 39
hsa-miR-370	0	0	1	1	1	1	SNRNP200	small nuclear ribonucleoprotein 200kDa (U5)
hsa-miR-370	1	0	1	1	1	1	IRF9	interferon regulatory factor 9
hsa-miR-370	0	0	1	1	1	1	FAM153C	family with sequence similarity 153, member C, pseudogene
hsa-miR-370	0	0	1	1	0	0	MRVI1-AS1	MRVI1 antisense RNA 1
hsa-miR-370	1	0	1	1	1	1	DIS3L2	DIS3 mitotic control homolog (S. cerevisiae)-like 2
hsa-miR-370	1	0	0	1	1	1	IQCE	IQ motif containing E
hsa-miR-370	0	0	0	1	0	0	C3orf80	chromosome 3 open reading frame 80
hsa-miR-370	0	0	1	1	0	0	TMEM150B	transmembrane protein 150B
hsa-miR-370	1	0	1	1	1	1	PPP6R1	protein phosphatase 6, regulatory subunit 1
hsa-miR-370	0	0	0	1	1	1	BRF1	BRF1 homolog, subunit of RNA polymerase III transcription initiation factor IIIB (S. cerevisiae)
hsa-miR-370	0	0	0	1	1	1	BTBD6	BTB (POZ) domain containing 6
hsa-miR-370	1	0	1	1	1	1	ARF1	ADP-ribosylation factor 1
hsa-miR-370	1	0	1	1	0	0	FAM100B	family with sequence similarity 100, member B
hsa-miR-370	0	0	1	1	0	0	PLB1	phospholipase B1
hsa-miR-370	0	0	1	1	1	1	FFAR3	free fatty acid receptor 3
hsa-miR-370	0	0	1	1	1	1	FAM178B	family with sequence similarity 178, member B
hsa-miR-370	1	0	1	1	1	1	PROSC	proline synthetase co-transcribed homolog (bacterial)
hsa-miR-370	0	0	0	1	0	0	LRRC14B	leucine rich repeat containing 14B
hsa-miR-370	0	0	0	1	0	0	C19orf68	chromosome 19 open reading frame 68
hsa-miR-370	0	0	0	1	0	0	TBC1D29	TBC1 domain family, member 29
hsa-miR-370	0	0	1	1	1	1	TPO	thyroid peroxidase
hsa-miR-370	1	0	1	1	0	0	PTP4A3	protein tyrosine phosphatase type IVA, member 3
hsa-miR-370	0	0	1	1	1	1	PDLIM1	PDZ and LIM domain 1
hsa-miR-370	0	0	0	1	0	0	ADAT3	adenosine deaminase, tRNA-specific 3
hsa-miR-370	1	0	1	1	0	0	RIMS2	regulating synaptic membrane exocytosis 2
hsa-miR-370	0	0	1	1	0	0	SLX1B	SLX1 structure-specific endonuclease subunit homolog B (S. cerevisiae)
hsa-miR-370	0	0	0	1	0	0	DDX41	DEAD (Asp-Glu-Ala-Asp) box polypeptide 41
hsa-miR-370	1	0	1	1	1	1	NOTUM	notum pectinacetylesterase homolog (Drosophila)
hsa-miR-370	0	0	1	1	0	0	PAPL	iron/zinc purple acid phosphatase-like protein
hsa-miR-370	0	0	0	1	0	0	PCYT2	phosphate cytidylyltransferase 2, ethanolamine
hsa-miR-370	0	0	0	1	0	0	SLC25A10	solute carrier family 25 (mitochondrial carrier; dicarboxylate transporter), member 10
hsa-miR-370	0	0	0	1	0	0	SYNDIG1L	synapse differentiation inducing 1-like
hsa-miR-370	0	0	0	1	1	1	C14orf180	chromosome 14 open reading frame 180
hsa-miR-370	0	0	0	1	1	1	SNAI3	snail homolog 3 (Drosophila)
hsa-miR-370	1	0	0	1	0	0	RGS19	regulator of G-protein signaling 19
hsa-miR-370	1	0	0	1	0	0	DGAT1	diacylglycerol O-acyltransferase 1
hsa-miR-370	0	0	1	1	0	0	TRIML1	tripartite motif family-like 1
hsa-miR-370	0	0	1	1	1	1	TMPRSS11B	transmembrane protease, serine 11B
hsa-miR-370	0	0	1	1	1	1	CMTM3	CKLF-like MARVEL transmembrane domain containing 3
hsa-miR-370	0	0	0	1	0	0	TREML3P	triggering receptor expressed on myeloid cells-like 3, pseudogene
hsa-miR-370	0	0	0	1	0	0	TSSC4	tumor suppressing subtransferable candidate 4
hsa-miR-370	0	0	1	1	0	0	UBA7	ubiquitin-like modifier activating enzyme 7
hsa-miR-370	1	0	1	1	0	0	TNK2	tyrosine kinase, non-receptor, 2
hsa-miR-370	1	0	1	1	1	1	ZSCAN2	zinc finger and SCAN domain containing 2
hsa-miR-370	0	0	1	1	0	0	KRTAP19-5	keratin associated protein 19-5
hsa-miR-370	0	0	0	1	1	1	PDCD1	programmed cell death 1
hsa-miR-370	0	0	0	1	0	0	TAC4	tachykinin 4 (hemokinin)
hsa-miR-370	0	0	0	1	0	0	KRTAP10-5	keratin associated protein 10-5
hsa-miR-370	0	0	0	1	0	0	KRTAP10-6	keratin associated protein 10-6
hsa-miR-370	0	0	1	1	1	1	KIR3DX1	killer cell immunoglobulin-like receptor, three domains, X1
hsa-miR-370	0	0	0	1	0	0	TBX10	T-box 10
hsa-miR-370	0	0	1	1	0	0	GPAT2	glycerol-3-phosphate acyltransferase 2, mitochondrial
hsa-miR-370	0	0	1	1	1	1	LYNX1	Ly6/neurotoxin 1
hsa-miR-370	0	0	1	1	1	1	IFRD2	interferon-related developmental regulator 2
hsa-miR-370	0	0	1	1	1	1	ZXDC	ZXD family zinc finger C
hsa-miR-370	1	0	1	1	1	1	HLCS	holocarboxylase synthetase (biotin-(proprionyl-CoA-carboxylase (ATP-hydrolysing)) ligase)
hsa-miR-370	0	0	0	1	0	0	CECR5	cat eye syndrome chromosome region, candidate 5
hsa-miR-370	1	0	1	1	1	1	PACRG	PARK2 co-regulated
hsa-miR-370	0	0	0	1	0	0	TSPO	translocator protein (18kDa)
hsa-miR-370	1	0	1	1	0	0	ZBTB49	zinc finger and BTB domain containing 49
hsa-miR-370	1	0	1	1	1	1	CSMD2	CUB and Sushi multiple domains 2
hsa-miR-370	0	0	0	1	0	0	DUPD1	dual specificity phosphatase and pro isomerase domain containing 1
hsa-miR-370	0	0	0	1	0	0	SCNN1D	sodium channel, non-voltage-gated 1, delta subunit
hsa-miR-370	1	0	1	1	1	1	LRP1	low density lipoprotein receptor-related protein 1
hsa-miR-370	0	0	0	1	0	0	KRTAP10-12	keratin associated protein 10-12
hsa-miR-370	0	0	1	1	0	0	NRN1L	neuritin 1-like
hsa-miR-370	0	0	1	1	1	1	OASL	2'-5'-oligoadenylate synthetase-like
hsa-miR-370	0	0	0	1	0	0	TAS1R3	taste receptor, type 1, member 3
hsa-miR-370	1	0	1	1	1	1	EYA1	eyes absent homolog 1 (Drosophila)
hsa-miR-370	0	0	1	1	1	1	PRKAR1B	protein kinase, cAMP-dependent, regulatory, type I, beta
hsa-miR-370	0	0	0	1	0	0	LCN6	lipocalin 6
hsa-miR-370	0	0	0	1	1	1	TREML4	triggering receptor expressed on myeloid cells-like 4
hsa-miR-370	0	0	1	1	1	1	LRRC29	leucine rich repeat containing 29
hsa-miR-370	0	0	1	1	1	1	ABLIM2	actin binding LIM protein family, member 2
hsa-miR-370	0	0	1	1	0	0	SLC24A2	solute carrier family 24 (sodium/potassium/calcium exchanger), member 2
hsa-miR-370	0	0	0	1	0	0	JMJD7-PLA2G4B	JMJD7-PLA2G4B readthrough
hsa-miR-370	0	0	0	1	1	1	COL18A1	collagen, type XVIII, alpha 1
hsa-miR-370	0	0	0	1	1	1	CIDEA	cell death-inducing DFFA-like effector a
hsa-miR-370	0	0	1	1	1	1	SUSD4	sushi domain containing 4
hsa-miR-370	0	0	1	1	1	1	C9orf171	chromosome 9 open reading frame 171
hsa-miR-370	1	0	1	1	1	1	ATG13	autophagy related 13
hsa-miR-370	0	0	1	1	0	0	FAM159A	family with sequence similarity 159, member A
hsa-miR-370	0	0	1	1	1	1	TP53BP2	tumor protein p53 binding protein, 2
hsa-miR-370	0	0	0	1	0	0	NKAPL	NFKB activating protein-like
hsa-miR-370	0	0	0	1	1	1	ZNF136	zinc finger protein 136
hsa-miR-370	0	0	1	1	1	1	LRRC27	leucine rich repeat containing 27
hsa-miR-370	0	0	1	1	0	0	ASS1	argininosuccinate synthase 1
hsa-miR-370	0	0	0	1	0	0	CPSF4L	cleavage and polyadenylation specific factor 4-like
hsa-miR-370	1	0	1	1	1	1	GIPC1	GIPC PDZ domain containing family, member 1
hsa-miR-370	0	0	0	1	0	0	C19orf48	chromosome 19 open reading frame 48
hsa-miR-370	0	0	1	1	0	0	UBE2J2	ubiquitin-conjugating enzyme E2, J2
hsa-miR-370	0	0	0	1	1	1	CRHR2	corticotropin releasing hormone receptor 2
hsa-miR-370	0	0	0	1	1	1	POP1	processing of precursor 1, ribonuclease P/MRP subunit (S. cerevisiae)
hsa-miR-370	0	0	1	1	1	1	C1orf43	chromosome 1 open reading frame 43
hsa-miR-370	0	0	0	1	1	1	DGCR8	DiGeorge syndrome critical region gene 8
hsa-miR-370	0	0	0	1	0	0	NOXO1	NADPH oxidase organizer 1
hsa-miR-370	1	0	1	1	0	0	CKAP5	cytoskeleton associated protein 5
hsa-miR-370	0	0	1	1	0	0	MLXIPL	MLX interacting protein-like
hsa-miR-370	1	0	0	1	1	1	LIPA	lipase A, lysosomal acid, cholesterol esterase
hsa-miR-370	0	0	0	1	0	0	C16orf93	chromosome 16 open reading frame 93
hsa-miR-370	0	0	1	1	0	0	DNAJC4	DnaJ (Hsp40) homolog, subfamily C, member 4
hsa-miR-370	1	0	1	1	1	1	DRD2	dopamine receptor D2
hsa-miR-370	0	0	0	1	0	0	MFSD12	major facilitator superfamily domain containing 12
hsa-miR-370	0	0	0	1	1	1	SULT1A3	sulfotransferase family, cytosolic, 1A, phenol-preferring, member 3
hsa-miR-370	0	0	1	1	1	1	UBE2I	ubiquitin-conjugating enzyme E2I
hsa-miR-370	0	0	0	1	0	0	WDR88	WD repeat domain 88
hsa-miR-370	0	0	0	1	1	1	GTF3C1	general transcription factor IIIC, polypeptide 1, alpha 220kDa
hsa-miR-370	1	0	1	1	0	0	DTNB	dystrobrevin, beta
hsa-miR-370	0	0	1	1	0	0	GUCA2A	guanylate cyclase activator 2A (guanylin)
hsa-miR-370	0	0	0	1	0	0	OGFR	opioid growth factor receptor
hsa-miR-370	0	0	1	1	0	0	RAET1E	retinoic acid early transcript 1E
hsa-miR-370	0	0	1	1	0	0	DOK3	docking protein 3
hsa-miR-370	0	0	0	1	0	0	SMARCAL1	SWI/SNF related, matrix associated, actin dependent regulator of chromatin, subfamily a-like 1
hsa-miR-370	0	0	0	1	0	0	C7orf50	chromosome 7 open reading frame 50
hsa-miR-370	1	0	1	1	1	1	HOMEZ	homeobox and leucine zipper encoding
hsa-miR-370	0	0	0	1	0	0	LCA10	lung carcinoma-associated protein 10
hsa-miR-370	0	0	1	1	0	0	ASIC4	acid-sensing (proton-gated) ion channel family member 4
hsa-miR-370	0	0	1	1	0	0	ATL1	atlastin GTPase 1
hsa-miR-370	0	0	0	1	0	0	PADI6	peptidyl arginine deiminase, type VI
hsa-miR-370	0	0	0	1	0	0	DUX4L3	double homeobox 4 like 3
hsa-miR-370	0	0	0	1	0	0	PFN3	profilin 3
hsa-miR-370	0	0	1	1	0	0	TRAPPC4	trafficking protein particle complex 4
hsa-miR-370	0	0	1	1	0	0	SFTA2	surfactant associated 2
hsa-miR-370	0	0	1	1	1	1	PRICKLE4	prickle homolog 4 (Drosophila)
hsa-miR-370	0	0	0	1	0	0	TPGS1	tubulin polyglutamylase complex subunit 1
hsa-miR-370	0	0	1	1	0	0	AGBL5	ATP/GTP binding protein-like 5
hsa-miR-370	0	0	1	1	0	0	NPSR1	neuropeptide S receptor 1
hsa-miR-370	1	0	1	1	1	1	TOR1B	torsin family 1, member B (torsin B)
hsa-miR-370	0	0	0	1	0	0	CLN3	ceroid-lipofuscinosis, neuronal 3
hsa-miR-370	1	0	0	1	0	0	TSTA3	tissue specific transplantation antigen P35B
hsa-miR-370	0	0	0	1	1	1	RDH14	retinol dehydrogenase 14 (all-trans/9-cis/11-cis)
hsa-miR-370	1	0	0	1	1	1	NT5C1B	5'-nucleotidase, cytosolic IB
hsa-miR-370	0	0	0	1	1	1	CLEC4C	C-type lectin domain family 4, member C
hsa-miR-370	0	0	0	1	0	0	SYTL3	synaptotagmin-like 3
hsa-miR-370	1	0	1	1	1	1	TPPP	tubulin polymerization promoting protein
hsa-miR-370	0	0	1	1	0	0	NTNG2	netrin G2
hsa-miR-370	0	0	0	1	0	0	PARVB	parvin, beta
hsa-miR-370	0	0	1	1	1	1	C5orf45	chromosome 5 open reading frame 45
hsa-miR-370	0	0	0	1	0	0	KRTAP12-3	keratin associated protein 12-3
hsa-miR-370	0	0	0	1	0	0	KRTAP10-11	keratin associated protein 10-11
hsa-miR-370	0	0	0	1	1	1	KRTAP10-10	keratin associated protein 10-10
hsa-miR-370	0	0	0	1	1	1	CYB561	cytochrome b-561
hsa-miR-370	0	0	1	1	0	0	ELMO3	engulfment and cell motility 3
hsa-miR-370	0	0	1	1	1	1	MEPE	matrix extracellular phosphoglycoprotein
hsa-miR-370	1	0	1	1	1	1	CD300LF	CD300 molecule-like family member f
hsa-miR-370	0	0	0	1	0	0	SLC25A47	solute carrier family 25, member 47
hsa-miR-370	1	0	1	1	0	0	PLXNB3	plexin B3
hsa-miR-370	0	0	1	1	0	0	CSAG1	chondrosarcoma associated gene 1
hsa-miR-370	0	0	1	1	1	1	KCNK1	potassium channel, subfamily K, member 1
hsa-miR-370	0	0	1	1	1	1	COG2	component of oligomeric golgi complex 2
hsa-miR-370	0	0	0	1	1	1	DACT2	dapper, antagonist of beta-catenin, homolog 2 (Xenopus laevis)
hsa-miR-370	0	0	0	1	0	0	TMEM63A	transmembrane protein 63A
hsa-miR-370	0	0	0	1	1	1	PTPN14	protein tyrosine phosphatase, non-receptor type 14
hsa-miR-370	0	0	1	1	1	1	FCAMR	Fc receptor, IgA, IgM, high affinity
[truncated: 201 more rows]
