# Supplementary material for: Profiling of Selected MicroRNAs in Proliferative Eutopic Endometrium of Women with Ovarian Endometriosis
Source: Biomed Res Int. 2015 Aug 20;2015:760698. doi: 10.1155/2015/760698 (PMC4558423; doi:10.1155/2015/760698)
Supplement: Supplementary file 1 — Table I: The names of miRNAs significantly differentially expressed between eutopic endometrium of patients with endometriosis vs eutopic endometrium of patients without endometriosis. Table II: The associations between miRNA and mRNA, which presents detailed results of the search of six major databases i.e targetscan, tarbase, miranda, mirbase, mirtarget2 and pictar. [file 760698.f1.zip › 760698.f1/Table II/hsa-miR-383.tsv]

miR	targetscan	tarbase	miranda	mirbase	mirtarget2	pictar	GeneSymbol	GeneName
hsa-miR-383	1	0	1	1	1	1	MAL2	mal, T-cell differentiation protein 2 (gene/pseudogene)
hsa-miR-383	1	0	1	1	1	1	FAM43B	family with sequence similarity 43, member B
hsa-miR-383	1	0	1	0	0	0	FAT3	FAT tumor suppressor homolog 3 (Drosophila)
hsa-miR-383	1	0	1	0	1	1	LIN28A	lin-28 homolog A (C. elegans)
hsa-miR-383	1	0	1	1	0	0	PCNX	pecanex homolog (Drosophila)
hsa-miR-383	1	0	1	1	1	1	NSL1	NSL1, MIND kinetochore complex component, homolog (S. cerevisiae)
hsa-miR-383	1	0	1	0	1	1	WIPF2	WAS/WASL interacting protein family, member 2
hsa-miR-383	1	0	1	1	1	1	RASL10B	RAS-like, family 10, member B
hsa-miR-383	1	0	1	1	1	1	RBBP9	retinoblastoma binding protein 9
hsa-miR-383	1	0	1	1	1	1	STK17A	serine/threonine kinase 17a
hsa-miR-383	1	0	1	0	1	1	ZNF507	zinc finger protein 507
hsa-miR-383	1	0	1	1	1	1	EIF4B	eukaryotic translation initiation factor 4B
hsa-miR-383	1	0	1	1	1	1	UBL3	ubiquitin-like 3
hsa-miR-383	1	0	1	1	0	0	NNAT	neuronatin
hsa-miR-383	1	0	1	1	1	1	C10orf76	chromosome 10 open reading frame 76
hsa-miR-383	1	0	1	0	0	0	SP7	Sp7 transcription factor
hsa-miR-383	1	0	1	1	1	1	STRN3	striatin, calmodulin binding protein 3
hsa-miR-383	1	0	1	1	1	1	ANKRD13C	ankyrin repeat domain 13C
hsa-miR-383	1	0	1	0	0	0	DTX4	deltex homolog 4 (Drosophila)
hsa-miR-383	1	0	1	1	1	1	TBC1D22B	TBC1 domain family, member 22B
hsa-miR-383	1	0	1	1	1	1	UBE2R2	ubiquitin-conjugating enzyme E2R 2
hsa-miR-383	1	0	1	1	1	1	DCLK1	doublecortin-like kinase 1
hsa-miR-383	1	0	1	1	1	1	PRR3	proline rich 3
hsa-miR-383	1	0	1	0	1	1	ACVR1B	activin A receptor, type IB
hsa-miR-383	1	0	1	1	1	1	SORCS1	sortilin-related VPS10 domain containing receptor 1
hsa-miR-383	1	0	1	1	1	1	TAOK3	TAO kinase 3
hsa-miR-383	1	0	1	1	1	1	TBCK	TBC1 domain containing kinase
hsa-miR-383	1	0	1	1	1	1	PRDX3	peroxiredoxin 3
hsa-miR-383	1	0	1	0	1	1	C14orf101	chromosome 14 open reading frame 101
hsa-miR-383	1	0	1	1	0	0	RAPGEF2	Rap guanine nucleotide exchange factor (GEF) 2
hsa-miR-383	1	0	1	1	1	1	HNRNPA1	heterogeneous nuclear ribonucleoprotein A1
hsa-miR-383	1	0	1	0	1	1	TRPS1	trichorhinophalangeal syndrome I
hsa-miR-383	1	0	1	1	1	1	RBM3	RNA binding motif (RNP1, RRM) protein 3
hsa-miR-383	1	0	1	1	1	1	PRKAG1	protein kinase, AMP-activated, gamma 1 non-catalytic subunit
hsa-miR-383	1	0	1	1	1	1	ELAVL2	ELAV (embryonic lethal, abnormal vision, Drosophila)-like 2 (Hu antigen B)
hsa-miR-383	1	0	1	1	1	1	GLIS3	GLIS family zinc finger 3
hsa-miR-383	1	0	1	0	1	1	ARHGEF12	Rho guanine nucleotide exchange factor (GEF) 12
hsa-miR-383	1	0	1	0	0	0	FRAT1	frequently rearranged in advanced T-cell lymphomas
hsa-miR-383	1	0	1	1	1	1	NCKAP1	NCK-associated protein 1
hsa-miR-383	1	0	1	0	1	1	AGFG1	ArfGAP with FG repeats 1
hsa-miR-383	1	0	1	0	1	1	CCND2	cyclin D2
hsa-miR-383	1	0	1	0	1	1	KIF5C	kinesin family member 5C
hsa-miR-383	1	0	1	1	1	1	PHF21A	PHD finger protein 21A
hsa-miR-383	1	0	1	0	1	1	NUP153	nucleoporin 153kDa
hsa-miR-383	1	0	1	1	1	1	TMEM26	transmembrane protein 26
hsa-miR-383	1	0	1	0	1	1	CDK19	cyclin-dependent kinase 19
hsa-miR-383	1	0	1	1	1	1	GSTCD	glutathione S-transferase, C-terminal domain containing
hsa-miR-383	1	0	1	0	1	1	CALCRL	calcitonin receptor-like
hsa-miR-383	1	0	1	1	1	1	PPIL6	peptidylprolyl isomerase (cyclophilin)-like 6
hsa-miR-383	1	0	1	1	1	1	PPP1R9A	protein phosphatase 1, regulatory subunit 9A
hsa-miR-383	1	0	1	1	1	1	ATXN7L1	ataxin 7-like 1
hsa-miR-383	1	0	1	1	1	1	OPRM1	opioid receptor, mu 1
hsa-miR-383	1	0	1	0	1	1	SLC1A2	solute carrier family 1 (glial high affinity glutamate transporter), member 2
hsa-miR-383	1	0	1	1	1	1	CORO1C	coronin, actin binding protein, 1C
hsa-miR-383	1	0	1	1	1	1	C8orf37	chromosome 8 open reading frame 37
hsa-miR-383	1	0	1	1	1	1	ST8SIA4	ST8 alpha-N-acetyl-neuraminide alpha-2,8-sialyltransferase 4
hsa-miR-383	1	0	0	1	1	1	RBMS1	RNA binding motif, single stranded interacting protein 1
hsa-miR-383	1	0	1	1	1	1	COA5	cytochrome C oxidase assembly factor 5
hsa-miR-383	1	0	1	1	1	1	SOCS3	suppressor of cytokine signaling 3
hsa-miR-383	1	0	1	1	1	1	RMND5A	required for meiotic nuclear division 5 homolog A (S. cerevisiae)
hsa-miR-383	1	0	1	1	1	1	FGF7	fibroblast growth factor 7
hsa-miR-383	1	0	1	0	1	1	PTPRE	protein tyrosine phosphatase, receptor type, E
hsa-miR-383	1	0	1	0	1	1	CLEC3A	C-type lectin domain family 3, member A
hsa-miR-383	1	0	1	0	1	1	NFAT5	nuclear factor of activated T-cells 5, tonicity-responsive
hsa-miR-383	1	0	1	0	1	1	MSL2	male-specific lethal 2 homolog (Drosophila)
hsa-miR-383	1	0	1	1	1	1	FOS	FBJ murine osteosarcoma viral oncogene homolog
hsa-miR-383	1	0	1	1	1	1	SLC35A3	solute carrier family 35 (UDP-N-acetylglucosamine (UDP-GlcNAc) transporter), member A3
hsa-miR-383	1	0	1	1	1	1	EPN2	epsin 2
hsa-miR-383	1	0	1	1	1	1	SLC24A3	solute carrier family 24 (sodium/potassium/calcium exchanger), member 3
hsa-miR-383	1	0	1	1	1	1	VEGFA	vascular endothelial growth factor A
hsa-miR-383	1	0	1	1	1	1	SLA	Src-like-adaptor
hsa-miR-383	1	0	0	1	0	0	GADD45G	growth arrest and DNA-damage-inducible, gamma
hsa-miR-383	1	0	1	0	1	1	YOD1	YOD1 OTU deubiquinating enzyme 1 homolog (S. cerevisiae)
hsa-miR-383	1	0	1	1	1	1	SHMT2	serine hydroxymethyltransferase 2 (mitochondrial)
hsa-miR-383	1	0	1	1	1	1	AP3M1	adaptor-related protein complex 3, mu 1 subunit
hsa-miR-383	1	0	1	0	1	1	ZKSCAN2	zinc finger with KRAB and SCAN domains 2
hsa-miR-383	1	0	1	1	1	1	EPAS1	endothelial PAS domain protein 1
hsa-miR-383	1	0	1	0	1	1	FAM172A	family with sequence similarity 172, member A
hsa-miR-383	1	0	0	1	1	1	MLANA	melan-A
hsa-miR-383	1	0	1	1	1	1	PAPD5	PAP associated domain containing 5
hsa-miR-383	1	0	1	0	1	1	ARID2	AT rich interactive domain 2 (ARID, RFX-like)
hsa-miR-383	1	0	1	1	1	1	GTDC1	glycosyltransferase-like domain containing 1
hsa-miR-383	1	0	1	0	1	1	SOX11	SRY (sex determining region Y)-box 11
hsa-miR-383	1	0	0	1	0	0	ROBO3	roundabout, axon guidance receptor, homolog 3 (Drosophila)
hsa-miR-383	1	0	1	1	1	1	KATNAL1	katanin p60 subunit A-like 1
hsa-miR-383	1	0	1	1	1	1	IRF1	interferon regulatory factor 1
hsa-miR-383	1	0	1	1	1	1	MMP24	matrix metallopeptidase 24 (membrane-inserted)
hsa-miR-383	1	0	1	1	1	1	PANK1	pantothenate kinase 1
hsa-miR-383	1	0	1	1	1	1	MGA	MAX gene associated
hsa-miR-383	1	0	1	1	1	1	MOSPD1	motile sperm domain containing 1
hsa-miR-383	1	0	0	0	0	0	SLC12A1	solute carrier family 12 (sodium/potassium/chloride transporters), member 1
hsa-miR-383	1	0	1	0	1	1	BLOC1S6	biogenesis of lysosomal organelles complex-1, subunit 6, pallidin
hsa-miR-383	1	0	1	1	1	1	SAMD4B	sterile alpha motif domain containing 4B
hsa-miR-383	1	0	1	0	1	1	KLHDC10	kelch domain containing 10
hsa-miR-383	1	0	1	1	1	1	ERBB4	v-erb-a erythroblastic leukemia viral oncogene homolog 4 (avian)
hsa-miR-383	1	0	1	1	1	1	UGGT1	UDP-glucose glycoprotein glucosyltransferase 1
hsa-miR-383	1	0	1	1	1	1	HS6ST3	heparan sulfate 6-O-sulfotransferase 3
hsa-miR-383	1	0	1	0	1	1	BRCC3	BRCA1/BRCA2-containing complex, subunit 3
hsa-miR-383	1	0	1	1	1	1	CDV3	CDV3 homolog (mouse)
hsa-miR-383	1	0	1	1	1	1	CNTD1	cyclin N-terminal domain containing 1
hsa-miR-383	1	0	1	1	1	1	CHD2	chromodomain helicase DNA binding protein 2
hsa-miR-383	1	0	1	1	1	1	FOXN3	forkhead box N3
hsa-miR-383	1	0	1	1	1	1	FRYL	FRY-like
hsa-miR-383	1	0	1	1	1	1	RBFOX2	RNA binding protein, fox-1 homolog (C. elegans) 2
hsa-miR-383	1	0	1	1	1	1	SPATS2	spermatogenesis associated, serine-rich 2
hsa-miR-383	0	0	1	0	0	0	NOP14-AS1	NOP14 antisense RNA 1
hsa-miR-383	1	0	1	1	1	1	PRUNE2	prune homolog 2 (Drosophila)
hsa-miR-383	1	0	1	0	1	1	PTPRT	protein tyrosine phosphatase, receptor type, T
hsa-miR-383	1	0	1	0	1	1	KIAA0408	KIAA0408
hsa-miR-383	1	0	1	1	0	0	SEC14L5	SEC14-like 5 (S. cerevisiae)
hsa-miR-383	1	0	1	0	1	1	MFAP3L	microfibrillar-associated protein 3-like
hsa-miR-383	1	0	1	1	1	1	HIPK1	homeodomain interacting protein kinase 1
hsa-miR-383	1	0	1	1	1	1	ANKRD17	ankyrin repeat domain 17
hsa-miR-383	1	0	1	1	0	0	RIMS2	regulating synaptic membrane exocytosis 2
hsa-miR-383	1	0	1	0	1	1	RBM12	RNA binding motif protein 12
hsa-miR-383	1	0	1	0	1	1	LPHN3	latrophilin 3
hsa-miR-383	1	0	1	0	1	1	ATG14	autophagy related 14
hsa-miR-383	1	0	1	1	1	1	UBR5	ubiquitin protein ligase E3 component n-recognin 5
hsa-miR-383	0	0	1	1	1	1	FASTKD2	FAST kinase domains 2
hsa-miR-383	1	0	1	1	1	1	NTNG1	netrin G1
hsa-miR-383	1	0	1	1	1	1	RPGRIP1L	RPGRIP1-like
hsa-miR-383	1	0	1	1	0	0	KIAA1045	KIAA1045
hsa-miR-383	1	0	1	1	1	1	NLGN1	neuroligin 1
hsa-miR-383	0	0	1	1	1	1	SEMA4A	sema domain, immunoglobulin domain (Ig), transmembrane domain (TM) and short cytoplasmic domain, (semaphorin) 4A
hsa-miR-383	1	0	1	0	1	1	ODZ2	odz, odd Oz/ten-m homolog 2 (Drosophila)
hsa-miR-383	0	0	1	1	0	0	ODF2L	outer dense fiber of sperm tails 2-like
hsa-miR-383	1	0	1	1	1	1	RIMKLB	ribosomal modification protein rimK-like family member B
hsa-miR-383	1	0	1	1	1	1	ASAP1	ArfGAP with SH3 domain, ankyrin repeat and PH domain 1
hsa-miR-383	0	0	1	0	0	0	MTA3	metastasis associated 1 family, member 3
hsa-miR-383	1	0	1	1	1	1	PCDH19	protocadherin 19
hsa-miR-383	1	0	1	1	1	1	FRAS1	Fraser syndrome 1
hsa-miR-383	1	0	1	1	0	0	ZSWIM5	zinc finger, SWIM-type containing 5
hsa-miR-383	0	0	1	1	1	1	AMBRA1	autophagy/beclin-1 regulator 1
hsa-miR-383	1	0	1	1	0	0	ZNF527	zinc finger protein 527
hsa-miR-383	1	0	1	0	1	1	JPH4	junctophilin 4
hsa-miR-383	0	0	1	1	1	1	SLC11A2	solute carrier family 11 (proton-coupled divalent metal ion transporters), member 2
hsa-miR-383	1	0	1	1	1	1	BCL2L11	BCL2-like 11 (apoptosis facilitator)
hsa-miR-383	1	0	1	1	1	1	SH3TC2	SH3 domain and tetratricopeptide repeats 2
hsa-miR-383	0	0	1	1	0	0	CIRH1A	cirrhosis, autosomal recessive 1A (cirhin)
hsa-miR-383	0	0	1	0	1	1	RASSF8	Ras association (RalGDS/AF-6) domain family (N-terminal) member 8
hsa-miR-383	0	0	1	1	1	1	BCO2	beta-carotene oxygenase 2
hsa-miR-383	1	0	1	1	1	1	PAN3	PAN3 poly(A) specific ribonuclease subunit homolog (S. cerevisiae)
hsa-miR-383	1	0	1	0	1	1	LIN54	lin-54 homolog (C. elegans)
hsa-miR-383	1	0	1	1	1	1	SEC14L1	SEC14-like 1 (S. cerevisiae)
hsa-miR-383	1	0	1	1	1	1	VLDLR	very low density lipoprotein receptor
hsa-miR-383	1	0	1	1	1	1	COL11A1	collagen, type XI, alpha 1
hsa-miR-383	1	0	1	1	0	0	ELN	elastin
hsa-miR-383	1	0	1	1	1	1	CLIP4	CAP-GLY domain containing linker protein family, member 4
hsa-miR-383	1	0	1	0	1	1	SLC6A6	solute carrier family 6 (neurotransmitter transporter, taurine), member 6
hsa-miR-383	1	0	1	1	0	0	CACNB1	calcium channel, voltage-dependent, beta 1 subunit
hsa-miR-383	1	0	1	1	1	1	PRKACB	protein kinase, cAMP-dependent, catalytic, beta
hsa-miR-383	1	0	1	1	1	1	DMTF1	cyclin D binding myb-like transcription factor 1
hsa-miR-383	1	0	1	1	1	1	SATB2	SATB homeobox 2
hsa-miR-383	1	0	1	1	1	1	PDLIM5	PDZ and LIM domain 5
hsa-miR-383	0	0	1	1	0	0	MBD1	methyl-CpG binding domain protein 1
hsa-miR-383	0	0	1	1	1	1	ELOVL5	ELOVL fatty acid elongase 5
hsa-miR-383	0	0	1	1	0	0	TRIM27	tripartite motif containing 27
hsa-miR-383	0	0	1	1	1	1	PLD1	phospholipase D1, phosphatidylcholine-specific
hsa-miR-383	1	0	1	1	1	1	MEF2D	myocyte enhancer factor 2D
hsa-miR-383	0	0	1	0	0	0	MIAT	myocardial infarction associated transcript (non-protein coding)
hsa-miR-383	0	0	1	0	1	1	PARG	poly (ADP-ribose) glycohydrolase
hsa-miR-383	1	0	1	1	1	1	SLC4A4	solute carrier family 4, sodium bicarbonate cotransporter, member 4
hsa-miR-383	0	0	1	1	1	1	MFSD11	major facilitator superfamily domain containing 11
hsa-miR-383	1	0	1	1	1	1	PCDH17	protocadherin 17
hsa-miR-383	1	0	1	0	1	1	CELF2	CUGBP, Elav-like family member 2
hsa-miR-383	0	0	1	1	1	1	CD84	CD84 molecule
hsa-miR-383	1	0	1	1	1	1	MBNL2	muscleblind-like splicing regulator 2
hsa-miR-383	1	0	1	1	1	1	CTNND1	catenin (cadherin-associated protein), delta 1
hsa-miR-383	0	0	1	1	0	0	MRPS22	mitochondrial ribosomal protein S22
hsa-miR-383	1	0	1	1	1	1	CBFA2T2	core-binding factor, runt domain, alpha subunit 2; translocated to, 2
hsa-miR-383	1	0	1	1	1	1	GLS	glutaminase
hsa-miR-383	1	0	1	0	1	1	CD164	CD164 molecule, sialomucin
hsa-miR-383	1	0	1	1	1	1	LRRFIP1	leucine rich repeat (in FLII) interacting protein 1
hsa-miR-383	1	0	1	1	1	1	HNRNPH3	heterogeneous nuclear ribonucleoprotein H3 (2H9)
hsa-miR-383	1	0	1	1	1	1	SORBS1	sorbin and SH3 domain containing 1
hsa-miR-383	1	0	1	1	1	1	HTRA2	HtrA serine peptidase 2
hsa-miR-383	1	0	1	0	0	0	PRPF40A	PRP40 pre-mRNA processing factor 40 homolog A (S. cerevisiae)
hsa-miR-383	1	0	1	1	1	1	ZNF202	zinc finger protein 202
hsa-miR-383	1	0	1	1	1	1	AGPAT3	1-acylglycerol-3-phosphate O-acyltransferase 3
hsa-miR-383	0	0	1	1	1	1	FAM114A2	family with sequence similarity 114, member A2
hsa-miR-383	1	0	1	1	1	1	HBS1L	HBS1-like (S. cerevisiae)
hsa-miR-383	0	0	1	1	1	1	CDC16	cell division cycle 16 homolog (S. cerevisiae)
hsa-miR-383	0	0	1	0	1	1	CLDN2	claudin 2
hsa-miR-383	1	0	1	1	1	1	DAB2	disabled homolog 2, mitogen-responsive phosphoprotein (Drosophila)
hsa-miR-383	1	0	1	1	1	1	TSC22D2	TSC22 domain family, member 2
hsa-miR-383	0	0	1	0	0	0	ARL17A	ADP-ribosylation factor-like 17A
hsa-miR-383	0	0	1	1	1	1	SAMSN1	SAM domain, SH3 domain and nuclear localization signals 1
hsa-miR-383	1	0	1	1	1	1	OGT	O-linked N-acetylglucosamine (GlcNAc) transferase
hsa-miR-383	0	0	1	1	1	1	DOCK10	dedicator of cytokinesis 10
hsa-miR-383	0	0	1	1	0	0	ELMOD3	ELMO/CED-12 domain containing 3
hsa-miR-383	0	0	1	1	1	1	GOLGA6A	golgin A6 family, member A
hsa-miR-383	0	0	1	1	0	0	KCNK6	potassium channel, subfamily K, member 6
hsa-miR-383	1	0	1	1	1	1	TAGLN3	transgelin 3
hsa-miR-383	0	0	1	1	1	1	PARP9	poly (ADP-ribose) polymerase family, member 9
hsa-miR-383	0	0	1	0	1	1	KANSL3	KAT8 regulatory NSL complex subunit 3
hsa-miR-383	1	0	1	1	1	1	FBXO31	F-box protein 31
hsa-miR-383	0	0	1	1	0	0	TTTY7	testis-specific transcript, Y-linked 7 (non-protein coding)
hsa-miR-383	0	0	1	1	0	0	ZAN	zonadhesin
hsa-miR-383	0	0	1	1	1	1	RERG	RAS-like, estrogen-regulated, growth inhibitor
hsa-miR-383	1	0	1	0	1	1	USP32	ubiquitin specific peptidase 32
hsa-miR-383	1	0	1	1	1	1	CALCOCO1	calcium binding and coiled-coil domain 1
hsa-miR-383	0	0	1	1	1	1	CASP8	caspase 8, apoptosis-related cysteine peptidase
hsa-miR-383	0	0	1	0	1	1	MYO3B	myosin IIIB
hsa-miR-383	0	0	1	1	1	1	WBP2NL	WBP2 N-terminal like
hsa-miR-383	0	0	1	1	1	1	ORMDL1	ORM1-like 1 (S. cerevisiae)
hsa-miR-383	0	0	1	1	0	0	SNRPN	small nuclear ribonucleoprotein polypeptide N
hsa-miR-383	0	0	1	1	1	1	SPSB1	splA/ryanodine receptor domain and SOCS box containing 1
hsa-miR-383	0	0	1	0	0	0	MYO15B	myosin XVB pseudogene
hsa-miR-383	1	0	1	1	1	1	ST3GAL3	ST3 beta-galactoside alpha-2,3-sialyltransferase 3
hsa-miR-383	1	0	1	1	0	0	XRRA1	X-ray radiation resistance associated 1
hsa-miR-383	0	0	1	0	1	1	EPM2A	epilepsy, progressive myoclonus type 2A, Lafora disease (laforin)
hsa-miR-383	0	0	1	1	1	1	CSPG5	chondroitin sulfate proteoglycan 5 (neuroglycan C)
hsa-miR-383	1	0	1	0	1	1	IL1RAP	interleukin 1 receptor accessory protein
hsa-miR-383	1	0	1	1	1	1	GPR64	G protein-coupled receptor 64
hsa-miR-383	1	0	1	1	1	1	AFF2	AF4/FMR2 family, member 2
hsa-miR-383	0	0	1	1	1	1	MTHFR	methylenetetrahydrofolate reductase (NAD(P)H)
hsa-miR-383	1	0	1	1	1	1	ILF3	interleukin enhancer binding factor 3, 90kDa
hsa-miR-383	0	0	1	1	1	1	CD28	CD28 molecule
hsa-miR-383	0	0	1	0	0	0	CD177	CD177 molecule
hsa-miR-383	1	0	1	1	1	1	SLAMF6	SLAM family member 6
hsa-miR-383	1	0	1	1	1	1	PDE1B	phosphodiesterase 1B, calmodulin-dependent
hsa-miR-383	1	0	1	1	1	1	NAV3	neuron navigator 3
hsa-miR-383	1	0	1	1	1	1	SYT14	synaptotagmin XIV
hsa-miR-383	0	0	1	0	0	0	COL28A1	collagen, type XXVIII, alpha 1
hsa-miR-383	0	0	1	1	1	1	PARP16	poly (ADP-ribose) polymerase family, member 16
hsa-miR-383	0	0	1	0	1	1	EBF2	early B-cell factor 2
hsa-miR-383	0	0	1	0	0	0	MCM3AP-AS1	MCM3AP antisense RNA 1
hsa-miR-383	0	0	1	1	1	1	STOX2	storkhead box 2
hsa-miR-383	1	0	1	1	1	1	EIF2C1	eukaryotic translation initiation factor 2C, 1
hsa-miR-383	0	0	1	1	0	0	PARP2	poly (ADP-ribose) polymerase 2
hsa-miR-383	0	0	1	1	1	1	PRPF39	PRP39 pre-mRNA processing factor 39 homolog (S. cerevisiae)
hsa-miR-383	1	0	1	1	1	1	ZNF395	zinc finger protein 395
hsa-miR-383	0	0	1	1	1	1	STAU2	staufen, RNA binding protein, homolog 2 (Drosophila)
hsa-miR-383	1	0	1	1	1	1	C12orf23	chromosome 12 open reading frame 23
hsa-miR-383	1	0	1	1	0	0	UQCC	ubiquinol-cytochrome c reductase complex chaperone
hsa-miR-383	0	0	1	0	0	0	DUXAP10	double homeobox A pseudogene 10
hsa-miR-383	1	0	1	1	1	1	SMEK2	SMEK homolog 2, suppressor of mek1 (Dictyostelium)
hsa-miR-383	1	0	1	0	1	1	DCAF17	DDB1 and CUL4 associated factor 17
hsa-miR-383	1	0	1	0	1	1	UBP1	upstream binding protein 1 (LBP-1a)
hsa-miR-383	1	0	1	1	1	1	PHF20L1	PHD finger protein 20-like 1
hsa-miR-383	0	0	1	0	0	0	LOC284561	uncharacterized LOC284561
hsa-miR-383	1	0	1	1	1	1	DERL1	derlin 1
hsa-miR-383	0	0	1	1	1	1	IPP	intracisternal A particle-promoted polypeptide
hsa-miR-383	0	0	1	1	0	0	KLHDC4	kelch domain containing 4
hsa-miR-383	0	0	1	0	1	1	ATXN1L	ataxin 1-like
hsa-miR-383	0	0	1	1	0	0	FERMT1	fermitin family member 1
hsa-miR-383	0	0	1	1	0	0	STPG1	sperm-tail PG-rich repeat containing 1
hsa-miR-383	0	0	1	1	1	1	MYEOV	myeloma overexpressed (in a subset of t(11;14) positive multiple myelomas)
hsa-miR-383	0	0	1	0	1	1	FLJ22763	uncharacterized LOC401081
hsa-miR-383	1	0	1	1	1	1	ITGA9	integrin, alpha 9
hsa-miR-383	0	0	1	1	1	1	SPRTN	SprT-like N-terminal domain
hsa-miR-383	1	0	1	1	1	1	SEC63	SEC63 homolog (S. cerevisiae)
hsa-miR-383	1	0	1	1	1	1	NFASC	neurofascin
hsa-miR-383	0	0	1	1	0	0	TMEM107	transmembrane protein 107
hsa-miR-383	1	0	1	1	1	1	MBD5	methyl-CpG binding domain protein 5
hsa-miR-383	1	0	1	1	1	1	TPM1	tropomyosin 1 (alpha)
hsa-miR-383	1	0	1	1	1	1	FRMD6	FERM domain containing 6
hsa-miR-383	1	0	1	1	1	1	HERPUD2	HERPUD family member 2
hsa-miR-383	1	0	1	1	1	1	DHX15	DEAH (Asp-Glu-Ala-His) box polypeptide 15
hsa-miR-383	1	0	1	1	1	1	DIXDC1	DIX domain containing 1
hsa-miR-383	1	0	1	0	1	1	RAB1A	RAB1A, member RAS oncogene family
hsa-miR-383	0	0	1	1	1	1	SDK1	sidekick cell adhesion molecule 1
hsa-miR-383	1	0	1	1	1	1	EXD2	exonuclease 3'-5' domain containing 2
hsa-miR-383	0	0	1	1	1	1	ANKRD36B	ankyrin repeat domain 36B
hsa-miR-383	0	0	1	0	0	0	LOC255187	hCG1980447
hsa-miR-383	0	0	1	1	0	0	SLC39A4	solute carrier family 39 (zinc transporter), member 4
hsa-miR-383	0	0	1	1	0	0	MLF1	myeloid leukemia factor 1
hsa-miR-383	1	0	1	1	1	1	PCMTD1	protein-L-isoaspartate (D-aspartate) O-methyltransferase domain containing 1
hsa-miR-383	0	0	1	1	0	0	NXF2	nuclear RNA export factor 2
hsa-miR-383	0	0	1	0	0	0	LOC100128505	uncharacterized LOC100128505
hsa-miR-383	1	0	1	0	1	1	NCAM1	neural cell adhesion molecule 1
hsa-miR-383	0	0	1	0	1	1	CCDC68	coiled-coil domain containing 68
hsa-miR-383	1	0	1	1	1	1	BLCAP	bladder cancer associated protein
hsa-miR-383	1	0	1	1	1	1	CNOT4	CCR4-NOT transcription complex, subunit 4
hsa-miR-383	1	0	1	1	1	1	NOTCH2NL	notch 2 N-terminal like
hsa-miR-383	0	0	1	1	1	1	CAMKV	CaM kinase-like vesicle-associated
hsa-miR-383	1	0	1	1	1	1	KCTD6	potassium channel tetramerisation domain containing 6
hsa-miR-383	0	0	1	1	1	1	ANKDD1A	ankyrin repeat and death domain containing 1A
hsa-miR-383	1	0	1	1	1	1	PIP4K2C	phosphatidylinositol-5-phosphate 4-kinase, type II, gamma
hsa-miR-383	0	0	1	1	0	0	CTNNBL1	catenin, beta like 1
hsa-miR-383	1	0	1	1	1	1	ARIH2	ariadne homolog 2 (Drosophila)
hsa-miR-383	0	0	1	1	1	1	KBTBD4	kelch repeat and BTB (POZ) domain containing 4
hsa-miR-383	1	0	1	1	1	1	SUPT16H	suppressor of Ty 16 homolog (S. cerevisiae)
hsa-miR-383	0	0	1	0	1	1	TBX5-AS1	TBX5 antisense RNA 1
hsa-miR-383	1	0	1	1	1	1	CTTN	cortactin
hsa-miR-383	1	0	1	1	1	1	FBXW2	F-box and WD repeat domain containing 2
hsa-miR-383	0	0	1	1	1	1	CD34	CD34 molecule
hsa-miR-383	1	0	1	1	1	1	TSN	translin
hsa-miR-383	0	0	1	1	0	0	APOBEC3G	apolipoprotein B mRNA editing enzyme, catalytic polypeptide-like 3G
hsa-miR-383	0	0	1	1	0	0	ADH6	alcohol dehydrogenase 6 (class V)
hsa-miR-383	0	0	1	1	0	0	C6orf163	chromosome 6 open reading frame 163
hsa-miR-383	0	0	1	1	0	0	HSD17B4	hydroxysteroid (17-beta) dehydrogenase 4
hsa-miR-383	0	0	1	1	0	0	WBP1	WW domain binding protein 1
hsa-miR-383	1	0	1	1	1	1	KCND1	potassium voltage-gated channel, Shal-related subfamily, member 1
hsa-miR-383	0	0	1	1	1	1	ACTR8	ARP8 actin-related protein 8 homolog (yeast)
hsa-miR-383	0	0	1	0	1	1	KANSL2	KAT8 regulatory NSL complex subunit 2
hsa-miR-383	0	0	1	1	1	1	SPEF2	sperm flagellar 2
hsa-miR-383	0	0	1	0	0	0	ZNF806	zinc finger protein 806
hsa-miR-383	0	0	1	1	1	1	RBM25	RNA binding motif protein 25
hsa-miR-383	0	0	1	0	0	0	FLJ37505	uncharacterized LOC400087
hsa-miR-383	0	0	1	0	1	1	AGBL4	ATP/GTP binding protein-like 4
hsa-miR-383	0	0	1	1	1	1	TMEM170A	transmembrane protein 170A
hsa-miR-383	0	0	1	1	0	0	DPAGT1	dolichyl-phosphate (UDP-N-acetylglucosamine) N-acetylglucosaminephosphotransferase 1 (GlcNAc-1-P transferase)
hsa-miR-383	1	0	1	1	1	1	KLF4	Kruppel-like factor 4 (gut)
hsa-miR-383	1	0	1	1	1	1	NDEL1	nudE nuclear distribution E homolog (A. nidulans)-like 1
hsa-miR-383	0	0	1	1	1	1	MYO6	myosin VI
hsa-miR-383	0	0	1	1	1	1	EXOC4	exocyst complex component 4
hsa-miR-383	0	0	1	0	0	0	LOC100129858	uncharacterized LOC100129858
hsa-miR-383	0	0	1	0	1	1	HDAC9	histone deacetylase 9
hsa-miR-383	1	0	1	1	1	1	CS	citrate synthase
hsa-miR-383	1	0	1	0	1	1	STC2	stanniocalcin 2
hsa-miR-383	1	0	1	1	1	1	B4GALT7	xylosylprotein beta 1,4-galactosyltransferase, polypeptide 7
hsa-miR-383	0	0	1	0	0	0	CCDC150	coiled-coil domain containing 150
hsa-miR-383	0	0	1	1	1	1	SUSD4	sushi domain containing 4
hsa-miR-383	0	0	1	1	1	1	ZNF673	zinc finger family member 673
hsa-miR-383	1	0	1	0	1	1	THRB	thyroid hormone receptor, beta
hsa-miR-383	1	0	1	0	1	1	KBTBD8	kelch repeat and BTB (POZ) domain containing 8
hsa-miR-383	1	0	1	1	1	1	CA12	carbonic anhydrase XII
hsa-miR-383	0	0	1	1	0	0	CHCHD5	coiled-coil-helix-coiled-coil-helix domain containing 5
hsa-miR-383	1	0	1	1	1	1	RPL22	ribosomal protein L22
hsa-miR-383	0	0	1	1	1	1	PPFIBP2	PTPRF interacting protein, binding protein 2 (liprin beta 2)
hsa-miR-383	0	0	1	0	0	0	LINC00293	long intergenic non-protein coding RNA 293
hsa-miR-383	1	0	1	0	1	1	PRKAR1A	protein kinase, cAMP-dependent, regulatory, type I, alpha
hsa-miR-383	0	0	1	1	1	1	RBM4	RNA binding motif protein 4
hsa-miR-383	1	0	1	1	0	0	CFL1	cofilin 1 (non-muscle)
hsa-miR-383	0	0	1	0	0	0	THAP7-AS1	THAP7 antisense RNA 1
hsa-miR-383	0	0	1	1	0	0	MEI1	meiosis inhibitor 1
hsa-miR-383	0	0	1	0	0	0	HLA-DQB2	major histocompatibility complex, class II, DQ beta 2
hsa-miR-383	1	0	1	1	1	1	PIGA	phosphatidylinositol glycan anchor biosynthesis, class A
hsa-miR-383	0	0	1	1	0	0	FBXO16	F-box protein 16
hsa-miR-383	1	0	1	1	1	1	ACSL6	acyl-CoA synthetase long-chain family member 6
hsa-miR-383	0	0	1	1	1	1	SLFN13	schlafen family member 13
hsa-miR-383	1	0	1	1	1	1	CRMP1	collapsin response mediator protein 1
hsa-miR-383	1	0	1	1	1	1	ZMAT3	zinc finger, matrin-type 3
hsa-miR-383	1	0	1	1	1	1	LMX1A	LIM homeobox transcription factor 1, alpha
hsa-miR-383	1	0	1	1	1	1	SIK3	SIK family kinase 3
hsa-miR-383	1	0	1	1	1	1	RPS6KC1	ribosomal protein S6 kinase, 52kDa, polypeptide 1
hsa-miR-383	0	0	1	1	0	0	GPR113	G protein-coupled receptor 113
hsa-miR-383	0	0	1	0	1	1	PATE4	prostate and testis expressed 4
hsa-miR-383	0	0	1	1	1	1	SLC13A3	solute carrier family 13 (sodium-dependent dicarboxylate transporter), member 3
hsa-miR-383	1	0	1	0	1	1	KCNK2	potassium channel, subfamily K, member 2
hsa-miR-383	0	0	1	1	1	1	PRRT1	proline-rich transmembrane protein 1
hsa-miR-383	1	0	1	1	1	1	METTL8	methyltransferase like 8
hsa-miR-383	0	0	1	0	0	0	DKFZP434H168	uncharacterized LOC26077
hsa-miR-383	0	0	1	1	1	1	PKP4	plakophilin 4
hsa-miR-383	1	0	1	1	1	1	VPS54	vacuolar protein sorting 54 homolog (S. cerevisiae)
hsa-miR-383	0	0	1	1	0	0	SSPO	SCO-spondin homolog (Bos taurus)
hsa-miR-383	0	0	1	1	1	1	IDS	iduronate 2-sulfatase
hsa-miR-383	1	0	1	1	1	1	KIF21A	kinesin family member 21A
hsa-miR-383	1	0	1	1	1	1	CELF6	CUGBP, Elav-like family member 6
hsa-miR-383	1	0	1	1	1	1	PIAS3	protein inhibitor of activated STAT, 3
hsa-miR-383	1	0	1	1	1	1	CTGF	connective tissue growth factor
hsa-miR-383	0	0	1	1	0	0	CUL9	cullin 9
hsa-miR-383	1	0	1	0	0	0	ANKRD52	ankyrin repeat domain 52
hsa-miR-383	1	0	1	1	1	1	SACS	spastic ataxia of Charlevoix-Saguenay (sacsin)
hsa-miR-383	1	0	1	1	0	0	UBN2	ubinuclein 2
hsa-miR-383	1	0	1	1	1	1	FAM122B	family with sequence similarity 122B
hsa-miR-383	0	0	1	1	0	0	C20orf141	chromosome 20 open reading frame 141
hsa-miR-383	0	0	1	1	0	0	FSIP2	fibrous sheath interacting protein 2
hsa-miR-383	1	0	1	1	1	1	SIKE1	suppressor of IKBKE 1
hsa-miR-383	1	0	1	1	1	1	PIK3R1	phosphoinositide-3-kinase, regulatory subunit 1 (alpha)
hsa-miR-383	1	0	1	1	1	1	DLG2	discs, large homolog 2 (Drosophila)
hsa-miR-383	1	0	1	1	1	1	IBTK	inhibitor of Bruton agammaglobulinemia tyrosine kinase
hsa-miR-383	0	0	1	1	1	1	SPICE1	spindle and centriole associated protein 1
hsa-miR-383	1	0	1	1	1	1	CLIP1	CAP-GLY domain containing linker protein 1
hsa-miR-383	1	0	1	1	1	1	EIF4E3	eukaryotic translation initiation factor 4E family member 3
hsa-miR-383	0	0	1	0	0	0	RPL23AP53	ribosomal protein L23a pseudogene 53
hsa-miR-383	1	0	1	1	1	1	MFSD6	major facilitator superfamily domain containing 6
hsa-miR-383	1	0	1	0	1	1	ADIPOR2	adiponectin receptor 2
hsa-miR-383	1	0	1	1	1	1	PHF17	PHD finger protein 17
hsa-miR-383	0	0	1	0	0	0	GRAMD1B	GRAM domain containing 1B
hsa-miR-383	1	0	1	0	1	1	FNDC3B	fibronectin type III domain containing 3B
hsa-miR-383	0	0	1	1	0	0	AADACL3	arylacetamide deacetylase-like 3
hsa-miR-383	0	0	1	1	0	0	BPIFB1	BPI fold containing family B, member 1
hsa-miR-383	1	0	1	1	1	1	KCTD12	potassium channel tetramerisation domain containing 12
hsa-miR-383	1	0	1	1	1	1	SDCBP	syndecan binding protein (syntenin)
hsa-miR-383	0	0	1	1	1	1	ZNF662	zinc finger protein 662
hsa-miR-383	0	0	1	0	0	0	EMBP1	embigin pseudogene 1
hsa-miR-383	1	0	1	1	1	1	DPY19L3	dpy-19-like 3 (C. elegans)
hsa-miR-383	0	0	1	1	1	1	TBX19	T-box 19
hsa-miR-383	1	0	1	1	1	1	CEP97	centrosomal protein 97kDa
hsa-miR-383	0	0	1	1	1	1	G3BP1	GTPase activating protein (SH3 domain) binding protein 1
hsa-miR-383	0	0	1	0	0	0	LOC494141	mitochondrial carrier triple repeat 1 pseudogene
hsa-miR-383	0	0	1	0	1	1	GALNT13	UDP-N-acetyl-alpha-D-galactosamine:polypeptide N-acetylgalactosaminyltransferase 13 (GalNAc-T13)
hsa-miR-383	1	0	1	0	1	1	FMNL2	formin-like 2
hsa-miR-383	1	0	1	1	1	1	RABGAP1	RAB GTPase activating protein 1
hsa-miR-383	0	0	1	1	1	1	SYPL2	synaptophysin-like 2
hsa-miR-383	1	0	1	1	1	1	MAP2K4	mitogen-activated protein kinase kinase 4
hsa-miR-383	0	0	1	1	1	1	XRN2	5'-3' exoribonuclease 2
hsa-miR-383	1	0	1	1	1	1	TRPM6	transient receptor potential cation channel, subfamily M, member 6
hsa-miR-383	1	0	1	1	1	1	MEAF6	MYST/Esa1-associated factor 6
hsa-miR-383	1	0	1	1	1	1	COBLL1	COBL-like 1
hsa-miR-383	1	0	1	1	1	1	PHTF2	putative homeodomain transcription factor 2
hsa-miR-383	1	0	1	1	1	1	UPK1B	uroplakin 1B
hsa-miR-383	0	0	1	1	1	1	PSMG2	proteasome (prosome, macropain) assembly chaperone 2
hsa-miR-383	0	0	1	1	0	0	HSPB11	heat shock protein family B (small), member 11
hsa-miR-383	1	0	1	1	1	1	EDN1	endothelin 1
hsa-miR-383	1	0	1	1	1	1	DUSP3	dual specificity phosphatase 3
hsa-miR-383	0	0	1	1	0	0	NEK7	NIMA (never in mitosis gene a)-related kinase 7
hsa-miR-383	0	0	1	1	1	1	TTLL3	tubulin tyrosine ligase-like family, member 3
hsa-miR-383	1	0	1	1	1	1	ARF6	ADP-ribosylation factor 6
hsa-miR-383	0	0	1	1	1	1	ARIH1	ariadne homolog, ubiquitin-conjugating enzyme E2 binding protein, 1 (Drosophila)
hsa-miR-383	0	0	1	0	0	0	TPTE2P6	transmembrane phosphoinositide 3-phosphatase and tensin homolog 2 pseudogene 6
hsa-miR-383	1	0	1	1	1	1	TFE3	transcription factor binding to IGHM enhancer 3
hsa-miR-383	1	0	1	1	1	1	PKNOX2	PBX/knotted 1 homeobox 2
hsa-miR-383	1	0	1	0	1	1	BRPF1	bromodomain and PHD finger containing, 1
hsa-miR-383	1	0	1	0	1	1	FAM19A1	family with sequence similarity 19 (chemokine (C-C motif)-like), member A1
hsa-miR-383	0	0	1	1	1	1	TRAK1	trafficking protein, kinesin binding 1
hsa-miR-383	1	0	1	1	1	1	SLC30A8	solute carrier family 30 (zinc transporter), member 8
hsa-miR-383	1	0	1	1	1	1	YTHDF3	YTH domain family, member 3
hsa-miR-383	1	0	1	1	1	1	DENND1B	DENN/MADD domain containing 1B
hsa-miR-383	1	0	1	1	1	1	MAP4	microtubule-associated protein 4
hsa-miR-383	0	0	1	1	1	1	FILIP1	filamin A interacting protein 1
hsa-miR-383	0	0	1	1	1	1	BEND7	BEN domain containing 7
hsa-miR-383	1	0	1	1	1	1	FAM126B	family with sequence similarity 126, member B
hsa-miR-383	0	0	1	1	1	1	RAD51AP1	RAD51 associated protein 1
hsa-miR-383	0	0	1	1	1	1	SRSF11	serine/arginine-rich splicing factor 11
hsa-miR-383	1	0	1	0	0	0	YLPM1	YLP motif containing 1
hsa-miR-383	1	0	1	1	0	0	USP24	ubiquitin specific peptidase 24
hsa-miR-383	0	0	1	1	1	1	C10orf57	chromosome 10 open reading frame 57
hsa-miR-383	1	0	1	1	1	1	NABP1	nucleic acid binding protein 1
hsa-miR-383	1	0	1	1	1	1	TMEM182	transmembrane protein 182
hsa-miR-383	1	0	1	0	1	1	MEF2C	myocyte enhancer factor 2C
hsa-miR-383	0	0	1	1	0	0	FCRL3	Fc receptor-like 3
hsa-miR-383	0	0	1	0	0	0	LOC286135	uncharacterized LOC286135
hsa-miR-383	0	0	1	1	0	0	PPIE	peptidylprolyl isomerase E (cyclophilin E)
hsa-miR-383	0	0	1	0	0	0	EPHA1-AS1	EPHA1 antisense RNA 1
hsa-miR-383	1	0	1	1	1	1	MARCH7	membrane-associated ring finger (C3HC4) 7, E3 ubiquitin protein ligase
hsa-miR-383	1	0	1	1	1	1	ATAT1	alpha tubulin acetyltransferase 1
hsa-miR-383	1	0	1	1	1	1	IL17RD	interleukin 17 receptor D
hsa-miR-383	0	0	1	1	1	1	TDRD9	tudor domain containing 9
hsa-miR-383	1	0	1	1	1	1	PRPF38B	PRP38 pre-mRNA processing factor 38 (yeast) domain containing B
hsa-miR-383	1	0	1	1	1	1	DIS3L2	DIS3 mitotic control homolog (S. cerevisiae)-like 2
hsa-miR-383	1	0	1	1	1	1	CAPRIN2	caprin family member 2
hsa-miR-383	1	0	1	1	1	1	RBM26	RNA binding motif protein 26
hsa-miR-383	1	0	1	1	1	1	FAM76B	family with sequence similarity 76, member B
hsa-miR-383	1	0	1	1	1	1	FBXL5	F-box and leucine-rich repeat protein 5
hsa-miR-383	1	0	1	1	1	1	IKZF2	IKAROS family zinc finger 2 (Helios)
hsa-miR-383	0	0	1	1	1	1	ALS2CR8	amyotrophic lateral sclerosis 2 (juvenile) chromosome region, candidate 8
hsa-miR-383	0	0	1	1	1	1	GPRASP1	G protein-coupled receptor associated sorting protein 1
hsa-miR-383	1	0	1	0	1	1	BDNF	brain-derived neurotrophic factor
hsa-miR-383	0	0	1	1	1	1	SHPRH	SNF2 histone linker PHD RING helicase, E3 ubiquitin protein ligase
hsa-miR-383	0	0	1	1	1	1	DNAJB14	DnaJ (Hsp40) homolog, subfamily B, member 14
hsa-miR-383	1	0	1	1	0	0	DSG4	desmoglein 4
hsa-miR-383	1	0	1	1	1	1	BCL11A	B-cell CLL/lymphoma 11A (zinc finger protein)
hsa-miR-383	0	0	1	1	1	1	GCOM1	GRINL1A complex locus 1
hsa-miR-383	1	0	1	0	1	1	DLEU7	deleted in lymphocytic leukemia, 7
hsa-miR-383	0	0	1	1	1	1	PIGG	phosphatidylinositol glycan anchor biosynthesis, class G
hsa-miR-383	0	0	1	1	0	0	RAET1E	retinoic acid early transcript 1E
hsa-miR-383	1	0	1	0	1	1	ANKRD28	ankyrin repeat domain 28
hsa-miR-383	0	0	1	1	1	1	AICDA	activation-induced cytidine deaminase
hsa-miR-383	1	0	1	1	1	1	MECP2	methyl CpG binding protein 2 (Rett syndrome)
hsa-miR-383	1	0	1	1	1	1	RBM24	RNA binding motif protein 24
hsa-miR-383	0	0	1	1	1	1	IL24	interleukin 24
hsa-miR-383	1	0	1	1	1	1	RTN3	reticulon 3
hsa-miR-383	1	0	1	1	1	1	MYB	v-myb myeloblastosis viral oncogene homolog (avian)
hsa-miR-383	0	0	1	0	1	1	KCNE1	potassium voltage-gated channel, Isk-related family, member 1
hsa-miR-383	1	0	1	1	1	1	PCDH11X	protocadherin 11 X-linked
hsa-miR-383	0	0	1	1	0	0	CXorf26	chromosome X open reading frame 26
hsa-miR-383	0	0	1	1	1	1	IYD	iodotyrosine deiodinase
hsa-miR-383	1	0	1	1	1	1	AMOT	angiomotin
hsa-miR-383	1	0	1	1	1	1	NOL4	nucleolar protein 4
hsa-miR-383	0	0	1	1	1	1	SLC6A2	solute carrier family 6 (neurotransmitter transporter, noradrenalin), member 2
hsa-miR-383	0	0	1	1	0	0	ANXA5	annexin A5
hsa-miR-383	0	0	1	1	1	1	PAFAH1B2	platelet-activating factor acetylhydrolase 1b, catalytic subunit 2 (30kDa)
hsa-miR-383	0	0	1	1	1	1	ATG3	autophagy related 3
hsa-miR-383	1	0	1	1	1	1	NRGN	neurogranin (protein kinase C substrate, RC3)
hsa-miR-383	1	0	1	1	1	1	TSPAN14	tetraspanin 14
hsa-miR-383	1	0	1	1	1	1	RIMS3	regulating synaptic membrane exocytosis 3
hsa-miR-383	1	0	1	0	1	1	DCAF10	DDB1 and CUL4 associated factor 10
hsa-miR-383	1	0	1	1	1	1	ZNF410	zinc finger protein 410
hsa-miR-383	1	0	1	1	1	1	TSEN34	tRNA splicing endonuclease 34 homolog (S. cerevisiae)
hsa-miR-383	1	0	1	0	1	1	CGGBP1	CGG triplet repeat binding protein 1
hsa-miR-383	0	0	1	1	1	1	LRRIQ1	leucine-rich repeats and IQ motif containing 1
hsa-miR-383	0	0	1	0	0	0	MGC13053	uncharacterized MGC13053
hsa-miR-383	0	0	1	1	1	1	KIRREL2	kin of IRRE like 2 (Drosophila)
hsa-miR-383	1	0	1	0	1	1	DDX3X	DEAD (Asp-Glu-Ala-Asp) box polypeptide 3, X-linked
hsa-miR-383	1	0	1	1	1	1	CALM1	calmodulin 1 (phosphorylase kinase, delta)
hsa-miR-383	0	0	1	1	0	0	PRR11	proline rich 11
hsa-miR-383	1	0	1	1	1	1	RSU1	Ras suppressor protein 1
hsa-miR-383	1	0	1	1	1	1	B4GALT3	UDP-Gal:betaGlcNAc beta 1,4- galactosyltransferase, polypeptide 3
hsa-miR-383	1	0	1	1	1	1	GRIA2	glutamate receptor, ionotropic, AMPA 2
hsa-miR-383	1	0	1	1	1	1	ZFAND5	zinc finger, AN1-type domain 5
hsa-miR-383	1	0	1	1	1	1	GDAP2	ganglioside induced differentiation associated protein 2
hsa-miR-383	0	0	1	1	0	0	HAVCR1	hepatitis A virus cellular receptor 1
hsa-miR-383	0	0	1	1	1	1	DEDD2	death effector domain containing 2
hsa-miR-383	0	0	1	0	1	1	AHI1	Abelson helper integration site 1
hsa-miR-383	1	0	1	1	1	1	PAPOLA	poly(A) polymerase alpha
hsa-miR-383	1	0	1	1	1	1	ZBTB38	zinc finger and BTB domain containing 38
hsa-miR-383	0	0	1	0	1	1	ZNF37A	zinc finger protein 37A
hsa-miR-383	0	0	1	1	1	1	FAM122C	family with sequence similarity 122C
hsa-miR-383	1	0	1	1	0	0	UBR7	ubiquitin protein ligase E3 component n-recognin 7 (putative)
hsa-miR-383	0	0	1	1	0	0	C1orf51	chromosome 1 open reading frame 51
hsa-miR-383	0	0	1	1	0	0	ZBTB32	zinc finger and BTB domain containing 32
hsa-miR-383	0	0	1	1	1	1	RDH11	retinol dehydrogenase 11 (all-trans/9-cis/11-cis)
hsa-miR-383	1	0	1	1	1	1	SUZ12	suppressor of zeste 12 homolog (Drosophila)
hsa-miR-383	0	0	1	0	1	1	TMSB15B	thymosin beta 15B
hsa-miR-383	1	0	1	1	1	1	C11orf30	chromosome 11 open reading frame 30
hsa-miR-383	0	0	1	0	0	0	FAM92A1P2	family with sequence similarity 92, member A3
hsa-miR-383	1	0	1	1	0	0	ACOXL	acyl-CoA oxidase-like
hsa-miR-383	0	0	1	1	0	0	SLC22A9	solute carrier family 22 (organic anion transporter), member 9
hsa-miR-383	0	0	1	1	1	1	CDC42SE2	CDC42 small effector 2
hsa-miR-383	0	0	1	0	0	0	SNX29P2	sorting nexin 29 pseudogene 2
hsa-miR-383	1	0	1	1	1	1	NIPA1	non imprinted in Prader-Willi/Angelman syndrome 1
hsa-miR-383	0	0	1	1	1	1	VWA3B	von Willebrand factor A domain containing 3B
hsa-miR-383	1	0	1	1	1	1	SPG20	spastic paraplegia 20 (Troyer syndrome)
hsa-miR-383	0	0	1	1	1	1	CCPG1	cell cycle progression 1
hsa-miR-383	1	0	1	1	1	1	RSPO2	R-spondin 2
hsa-miR-383	1	0	1	1	1	1	U2SURP	U2 snRNP-associated SURP domain containing
hsa-miR-383	1	0	1	1	1	1	ACACB	acetyl-CoA carboxylase beta
hsa-miR-383	1	0	1	1	1	1	TMEM127	transmembrane protein 127
hsa-miR-383	1	0	1	1	1	1	HTR2C	5-hydroxytryptamine (serotonin) receptor 2C, G protein-coupled
hsa-miR-383	0	0	1	0	0	0	LOC100130950	uncharacterized LOC100130950
hsa-miR-383	0	0	1	1	0	0	GEMIN6	gem (nuclear organelle) associated protein 6
hsa-miR-383	1	0	1	0	1	1	TFEC	transcription factor EC
hsa-miR-383	1	0	1	0	1	1	SV2B	synaptic vesicle glycoprotein 2B
hsa-miR-383	0	0	1	1	0	0	TMEM251	transmembrane protein 251
hsa-miR-383	1	0	1	0	1	1	GPR107	G protein-coupled receptor 107
hsa-miR-383	0	0	1	1	1	1	TMEM117	transmembrane protein 117
hsa-miR-383	0	0	1	1	1	1	RBBP8	retinoblastoma binding protein 8
hsa-miR-383	0	0	1	0	0	0	ATP8B5P	ATPase, class I, type 8B, member 5, pseudogene
hsa-miR-383	0	0	1	0	0	0	CFL1P1	cofilin 1 (non-muscle) pseudogene 1
hsa-miR-383	0	0	1	0	0	0	LOC387647	patched domain containing 3 pseudogene
hsa-miR-383	1	0	1	0	1	1	RNF4	ring finger protein 4
hsa-miR-383	1	0	1	1	1	1	FGF1	fibroblast growth factor 1 (acidic)
hsa-miR-383	1	0	1	1	1	1	RAB5B	RAB5B, member RAS oncogene family
hsa-miR-383	1	0	1	1	1	1	SECISBP2L	SECIS binding protein 2-like
hsa-miR-383	1	0	1	1	1	1	PLEKHA7	pleckstrin homology domain containing, family A member 7
hsa-miR-383	1	0	1	1	1	1	ATF7IP2	activating transcription factor 7 interacting protein 2
hsa-miR-383	0	0	1	0	0	0	LOC415056	uncharacterized LOC415056
hsa-miR-383	0	0	1	0	0	0	FAM66C	family with sequence similarity 66, member C
hsa-miR-383	1	0	1	1	1	1	FAM120A	family with sequence similarity 120A
hsa-miR-383	1	0	1	0	1	1	PDE12	phosphodiesterase 12
hsa-miR-383	0	0	1	1	1	1	KIF16B	kinesin family member 16B
hsa-miR-383	1	0	1	1	1	1	RAP2C	RAP2C, member of RAS oncogene family
hsa-miR-383	0	0	1	1	1	1	SEC24D	SEC24 family, member D (S. cerevisiae)
hsa-miR-383	0	0	1	1	0	0	VPS8	vacuolar protein sorting 8 homolog (S. cerevisiae)
hsa-miR-383	1	0	1	1	1	1	ZNF618	zinc finger protein 618
hsa-miR-383	0	0	1	1	1	1	ATP1A4	ATPase, Na+/K+ transporting, alpha 4 polypeptide
hsa-miR-383	1	0	1	1	1	1	IMPACT	Impact homolog (mouse)
hsa-miR-383	0	0	1	1	1	1	DUSP28	dual specificity phosphatase 28
hsa-miR-383	0	0	1	1	0	0	FAM3B	family with sequence similarity 3, member B
hsa-miR-383	1	0	1	1	1	1	ELMO2	engulfment and cell motility 2
hsa-miR-383	1	0	1	1	1	1	HECTD2	HECT domain containing E3 ubiquitin protein ligase 2
hsa-miR-383	1	0	1	0	1	1	CLDN12	claudin 12
hsa-miR-383	1	0	1	0	1	1	CPEB4	cytoplasmic polyadenylation element binding protein 4
hsa-miR-383	1	0	1	1	1	1	FAM135B	family with sequence similarity 135, member B
hsa-miR-383	0	0	1	0	0	0	LOC286184	uncharacterized LOC286184
hsa-miR-383	1	0	1	0	0	0	RAVER1	ribonucleoprotein, PTB-binding 1
hsa-miR-383	1	0	1	1	1	1	SOX6	SRY (sex determining region Y)-box 6
hsa-miR-383	1	0	1	1	1	1	C4orf19	chromosome 4 open reading frame 19
hsa-miR-383	1	0	1	1	1	1	GALNT1	UDP-N-acetyl-alpha-D-galactosamine:polypeptide N-acetylgalactosaminyltransferase 1 (GalNAc-T1)
hsa-miR-383	0	0	1	1	1	1	SNF8	SNF8, ESCRT-II complex subunit, homolog (S. cerevisiae)
hsa-miR-383	0	0	1	1	0	0	H2AFZ	H2A histone family, member Z
hsa-miR-383	1	0	1	1	1	1	MARCKS	myristoylated alanine-rich protein kinase C substrate
hsa-miR-383	1	0	1	1	1	1	DACH2	dachshund homolog 2 (Drosophila)
hsa-miR-383	1	0	1	1	1	1	FBXO8	F-box protein 8
hsa-miR-383	1	0	1	1	1	1	BVES	blood vessel epicardial substance
hsa-miR-383	0	0	1	1	0	0	MTCH1	mitochondrial carrier 1
hsa-miR-383	0	0	1	1	1	1	FAM71F1	family with sequence similarity 71, member F1
hsa-miR-383	0	0	1	1	1	1	SIAE	sialic acid acetylesterase
hsa-miR-383	1	0	1	1	0	0	RGL2	ral guanine nucleotide dissociation stimulator-like 2
hsa-miR-383	0	0	1	1	1	1	VPS35	vacuolar protein sorting 35 homolog (S. cerevisiae)
hsa-miR-383	1	0	1	1	1	1	ARPP21	cAMP-regulated phosphoprotein, 21kDa
hsa-miR-383	1	0	1	1	1	1	FAM123A	family with sequence similarity 123A
hsa-miR-383	1	0	1	0	1	1	HSPA12A	heat shock 70kDa protein 12A
hsa-miR-383	0	0	1	1	1	1	NSUN7	NOP2/Sun domain family, member 7
hsa-miR-383	0	0	1	0	0	0	LOC643837	uncharacterized LOC643837
hsa-miR-383	0	0	1	0	0	0	LINC00347	long intergenic non-protein coding RNA 347
hsa-miR-383	0	0	1	0	0	0	LOC339260	uncharacterized LOC339260
hsa-miR-383	0	0	1	1	1	1	PINX1	PIN2/TERF1 interacting, telomerase inhibitor 1
hsa-miR-383	1	0	1	1	1	1	RNF145	ring finger protein 145
hsa-miR-383	0	0	1	1	0	0	LILRA1	leukocyte immunoglobulin-like receptor, subfamily A (with TM domain), member 1
hsa-miR-383	0	0	1	0	1	1	IL33	interleukin 33
hsa-miR-383	0	0	1	0	1	1	LOC338758	uncharacterized LOC338758
hsa-miR-383	0	0	1	0	1	1	LOC401021	uncharacterized LOC401021
hsa-miR-383	1	0	1	1	0	0	TTC9	tetratricopeptide repeat domain 9
hsa-miR-383	0	0	1	1	1	1	ZNF589	zinc finger protein 589
hsa-miR-383	0	0	1	0	1	1	ITGA1	integrin, alpha 1
hsa-miR-383	1	0	1	1	1	1	ANKRD46	ankyrin repeat domain 46
hsa-miR-383	0	0	1	1	1	1	NCMAP	noncompact myelin associated protein
hsa-miR-383	0	0	1	0	0	0	IDI2-AS1	IDI2 antisense RNA 1
hsa-miR-383	1	0	1	0	1	1	NUDT10	nudix (nucleoside diphosphate linked moiety X)-type motif 10
hsa-miR-383	1	0	1	1	1	1	FNDC3A	fibronectin type III domain containing 3A
hsa-miR-383	1	0	1	0	1	1	SEMA4G	sema domain, immunoglobulin domain (Ig), transmembrane domain (TM) and short cytoplasmic domain, (semaphorin) 4G
hsa-miR-383	0	0	1	1	0	0	TRABD2A	TraB domain containing 2A
hsa-miR-383	1	0	1	1	1	1	LIMD2	LIM domain containing 2
hsa-miR-383	1	0	1	1	1	1	PCGF5	polycomb group ring finger 5
hsa-miR-383	1	0	1	1	1	1	BZW2	basic leucine zipper and W2 domains 2
hsa-miR-383	1	0	1	1	1	1	SCUBE3	signal peptide, CUB domain, EGF-like 3
hsa-miR-383	1	0	1	0	1	1	C14orf43	chromosome 14 open reading frame 43
hsa-miR-383	0	0	1	1	1	1	MCOLN3	mucolipin 3
hsa-miR-383	1	0	1	1	1	1	SOX5	SRY (sex determining region Y)-box 5
hsa-miR-383	1	0	1	1	1	1	ZEB2	zinc finger E-box binding homeobox 2
hsa-miR-383	0	0	1	1	1	1	B4GALT4	UDP-Gal:betaGlcNAc beta 1,4- galactosyltransferase, polypeptide 4
hsa-miR-383	0	0	1	0	0	0	TEX36	testis expressed 36
hsa-miR-383	0	0	1	1	1	1	GPATCH2	G patch domain containing 2
hsa-miR-383	1	0	1	0	0	0	PRRT4	proline-rich transmembrane protein 4
hsa-miR-383	0	0	1	1	0	0	ADORA3	adenosine A3 receptor
hsa-miR-383	0	0	1	1	1	1	SCLT1	sodium channel and clathrin linker 1
hsa-miR-383	0	0	1	1	0	0	SLC38A6	solute carrier family 38, member 6
hsa-miR-383	1	0	1	1	1	1	ADCY6	adenylate cyclase 6
hsa-miR-383	1	0	1	1	1	1	GANAB	glucosidase, alpha; neutral AB
hsa-miR-383	0	0	1	1	0	0	PLAC1	placenta-specific 1
hsa-miR-383	1	0	1	1	1	1	CCDC149	coiled-coil domain containing 149
hsa-miR-383	0	0	1	1	1	1	SLAMF1	signaling lymphocytic activation molecule family member 1
hsa-miR-383	1	0	1	1	1	1	SULF1	sulfatase 1
hsa-miR-383	0	0	1	0	0	0	C17orf69	chromosome 17 open reading frame 69
hsa-miR-383	1	0	1	1	1	1	SOCS2	suppressor of cytokine signaling 2
hsa-miR-383	1	0	1	1	1	1	MED27	mediator complex subunit 27
hsa-miR-383	1	0	1	0	1	1	TGFBR1	transforming growth factor, beta receptor 1
hsa-miR-383	0	0	1	0	0	0	JPX	JPX transcript, XIST activator (non-protein coding)
hsa-miR-383	0	0	1	0	0	0	SDHAP2	succinate dehydrogenase complex, subunit A, flavoprotein pseudogene 2
hsa-miR-383	0	0	1	1	0	0	EBNA1BP2	EBNA1 binding protein 2
hsa-miR-383	1	0	1	1	1	1	OPCML	opioid binding protein/cell adhesion molecule-like
hsa-miR-383	0	0	1	0	0	0	ATP5L2	ATP synthase, H+ transporting, mitochondrial Fo complex, subunit G2
hsa-miR-383	0	0	1	1	1	1	SPRR2A	small proline-rich protein 2A
hsa-miR-383	0	0	1	0	1	1	TGFB2	transforming growth factor, beta 2
hsa-miR-383	0	0	1	1	0	0	RPS9	ribosomal protein S9
hsa-miR-383	0	0	1	1	1	1	XG	Xg blood group
hsa-miR-383	0	0	1	1	0	0	TMC1	transmembrane channel-like 1
hsa-miR-383	0	0	1	1	1	1	SPHKAP	SPHK1 interactor, AKAP domain containing
hsa-miR-383	0	0	1	0	0	0	LOC150577	uncharacterized LOC150577
hsa-miR-383	1	0	1	0	1	1	BTBD3	BTB (POZ) domain containing 3
hsa-miR-383	0	0	1	1	1	1	RASAL2	RAS protein activator like 2
hsa-miR-383	0	0	1	1	0	0	ASB3	ankyrin repeat and SOCS box containing 3
hsa-miR-383	1	0	1	1	1	1	SLK	STE20-like kinase
hsa-miR-383	0	0	1	1	0	0	RNF123	ring finger protein 123
hsa-miR-383	0	0	1	1	1	1	FSHB	follicle stimulating hormone, beta polypeptide
hsa-miR-383	1	0	1	1	1	1	SLMAP	sarcolemma associated protein
hsa-miR-383	1	0	1	1	1	1	MERTK	c-mer proto-oncogene tyrosine kinase
hsa-miR-383	0	0	1	0	0	0	LOC286094	uncharacterized LOC286094
hsa-miR-383	0	0	1	0	1	1	NWD1	NACHT and WD repeat domain containing 1
hsa-miR-383	1	0	1	1	1	1	OTUD4	OTU domain containing 4
hsa-miR-383	0	0	1	1	0	0	RGSL1	regulator of G-protein signaling like 1
hsa-miR-383	1	0	1	0	1	1	LRCH2	leucine-rich repeats and calponin homology (CH) domain containing 2
hsa-miR-383	0	0	1	1	1	1	RNF14	ring finger protein 14
hsa-miR-383	1	0	1	1	1	1	TRAPPC8	trafficking protein particle complex 8
hsa-miR-383	0	0	1	1	1	1	GLB1L3	galactosidase, beta 1-like 3
hsa-miR-383	1	0	1	1	1	1	CADPS	Ca++-dependent secretion activator
hsa-miR-383	1	0	1	1	1	1	TMEM218	transmembrane protein 218
hsa-miR-383	1	0	1	1	1	1	PCM1	pericentriolar material 1
hsa-miR-383	0	0	1	1	1	1	PRKAR2A	protein kinase, cAMP-dependent, regulatory, type II, alpha
hsa-miR-383	0	0	1	1	1	1	CNIH	cornichon homolog (Drosophila)
hsa-miR-383	0	0	1	0	0	0	FLJ39632	uncharacterized LOC642477
hsa-miR-383	0	0	1	0	0	0	DKFZp686D0853	uncharacterized LOC401613
hsa-miR-383	1	0	1	1	1	1	RAB7A	RAB7A, member RAS oncogene family
hsa-miR-383	0	0	1	1	0	0	EYS	eyes shut homolog (Drosophila)
hsa-miR-383	0	0	1	1	1	1	DSG3	desmoglein 3
hsa-miR-383	1	0	1	1	1	1	ST7L	suppression of tumorigenicity 7 like
hsa-miR-383	0	0	1	1	1	1	CRB1	crumbs homolog 1 (Drosophila)
hsa-miR-383	1	0	1	1	1	1	C7orf31	chromosome 7 open reading frame 31
hsa-miR-383	0	0	1	1	1	1	MAP2K6	mitogen-activated protein kinase kinase 6
hsa-miR-383	1	0	1	0	1	1	GALNT4	UDP-N-acetyl-alpha-D-galactosamine:polypeptide N-acetylgalactosaminyltransferase 4 (GalNAc-T4)
hsa-miR-383	0	0	1	1	1	1	MLIP	muscular LMNA-interacting protein
hsa-miR-383	0	0	1	0	1	1	TYW5	tRNA-yW synthesizing protein 5
hsa-miR-383	0	0	1	0	1	1	ANKRD36	ankyrin repeat domain 36
hsa-miR-383	1	0	1	1	1	1	CYB5B	cytochrome b5 type B (outer mitochondrial membrane)
hsa-miR-383	0	0	1	1	1	1	CCNT2	cyclin T2
hsa-miR-383	1	0	1	1	1	1	PTPN3	protein tyrosine phosphatase, non-receptor type 3
hsa-miR-383	0	0	1	0	0	0	LINC00338	long intergenic non-protein coding RNA 338
hsa-miR-383	1	0	1	1	1	1	NFIB	nuclear factor I/B
hsa-miR-383	1	0	1	1	1	1	RECK	reversion-inducing-cysteine-rich protein with kazal motifs
hsa-miR-383	1	0	1	0	1	1	TBL1XR1	transducin (beta)-like 1 X-linked receptor 1
hsa-miR-383	0	0	1	1	0	0	CNIH4	cornichon homolog 4 (Drosophila)
hsa-miR-383	0	0	1	0	1	1	GINS3	GINS complex subunit 3 (Psf3 homolog)
hsa-miR-383	0	0	1	1	1	1	HPGD	hydroxyprostaglandin dehydrogenase 15-(NAD)
hsa-miR-383	0	0	1	1	0	0	STMN4	stathmin-like 4
hsa-miR-383	1	0	1	1	1	1	CLU	clusterin
hsa-miR-383	1	0	1	0	1	1	STX6	syntaxin 6
hsa-miR-383	1	0	1	1	0	0	RAB24	RAB24, member RAS oncogene family
hsa-miR-383	1	0	1	1	1	1	VIM	vimentin
hsa-miR-383	0	0	1	1	1	1	UPRT	uracil phosphoribosyltransferase (FUR1) homolog (S. cerevisiae)
hsa-miR-383	0	0	1	1	0	0	TBC1D22A	TBC1 domain family, member 22A
hsa-miR-383	1	0	1	1	1	1	LETMD1	LETM1 domain containing 1
hsa-miR-383	1	0	1	1	1	1	DOLPP1	dolichyl pyrophosphate phosphatase 1
hsa-miR-383	0	0	1	1	1	1	CIRBP	cold inducible RNA binding protein
hsa-miR-383	1	0	1	0	1	1	BNIP3L	BCL2/adenovirus E1B 19kDa interacting protein 3-like
hsa-miR-383	0	0	1	1	1	1	TUBA1A	tubulin, alpha 1a
hsa-miR-383	1	0	1	1	1	1	SSR1	signal sequence receptor, alpha
hsa-miR-383	1	0	1	1	0	0	CCM2	cerebral cavernous malformation 2
hsa-miR-383	0	0	1	1	1	1	MTCP1	mature T-cell proliferation 1
hsa-miR-383	0	0	1	0	1	1	CD99P1	CD99 molecule pseudogene 1
hsa-miR-383	1	0	1	1	1	1	COPS2	COP9 constitutive photomorphogenic homolog subunit 2 (Arabidopsis)
hsa-miR-383	1	0	1	1	1	1	TMED5	transmembrane emp24 protein transport domain containing 5
hsa-miR-383	1	0	1	1	1	1	HMGN1	high mobility group nucleosome binding domain 1
hsa-miR-383	0	0	1	0	1	1	EMX2	empty spiracles homeobox 2
hsa-miR-383	0	0	1	1	1	1	GGPS1	geranylgeranyl diphosphate synthase 1
hsa-miR-383	0	0	1	0	0	0	HMGN1P37	high mobility group nucleosome binding domain 1 pseudogene 37
hsa-miR-383	0	0	1	1	0	0	KIAA0100	KIAA0100
hsa-miR-383	0	0	1	1	0	0	MUS81	MUS81 endonuclease homolog (S. cerevisiae)
hsa-miR-383	0	0	1	1	1	1	STON1	stonin 1
hsa-miR-383	0	0	1	1	1	1	TRIM68	tripartite motif containing 68
hsa-miR-383	0	0	1	1	0	0	B9D1	B9 protein domain 1
hsa-miR-383	0	0	1	1	0	0	PDK3	pyruvate dehydrogenase kinase, isozyme 3
hsa-miR-383	0	0	1	0	1	1	MMAA	methylmalonic aciduria (cobalamin deficiency) cblA type
hsa-miR-383	0	0	1	0	0	0	C12orf75	chromosome 12 open reading frame 75
hsa-miR-383	0	0	1	1	1	1	EIF3J	eukaryotic translation initiation factor 3, subunit J
hsa-miR-383	0	0	1	1	1	1	TOX4	TOX high mobility group box family member 4
hsa-miR-383	1	0	1	1	1	1	TMEM66	transmembrane protein 66
hsa-miR-383	1	0	1	1	1	1	NRN1	neuritin 1
hsa-miR-383	0	0	1	0	1	1	SRSF5	serine/arginine-rich splicing factor 5
hsa-miR-383	1	0	1	1	1	1	TAGLN2	transgelin 2
hsa-miR-383	1	0	1	1	1	1	EIF4A2	eukaryotic translation initiation factor 4A2
hsa-miR-383	0	0	1	1	1	1	LDHB	lactate dehydrogenase B
hsa-miR-383	0	0	1	0	1	1	VSTM2A	V-set and transmembrane domain containing 2A
hsa-miR-383	1	0	1	1	1	1	PFN2	profilin 2
hsa-miR-383	0	0	1	1	0	0	EIF3I	eukaryotic translation initiation factor 3, subunit I
hsa-miR-383	0	0	1	1	0	0	AATF	apoptosis antagonizing transcription factor
hsa-miR-383	0	0	1	1	1	1	CXADR	coxsackie virus and adenovirus receptor
hsa-miR-383	0	0	1	0	1	1	MAPKAPK5	mitogen-activated protein kinase-activated protein kinase 5
hsa-miR-383	0	0	1	1	1	1	STRAP	serine/threonine kinase receptor associated protein
hsa-miR-383	0	0	1	1	1	1	FAM18B1	family with sequence similarity 18, member B1
hsa-miR-383	0	0	1	1	0	0	CCNDBP1	cyclin D-type binding-protein 1
hsa-miR-383	1	0	1	1	1	1	HMGN2	high mobility group nucleosomal binding domain 2
hsa-miR-383	0	0	1	1	1	1	HUS1	HUS1 checkpoint homolog (S. pombe)
hsa-miR-383	1	0	1	1	1	1	SRSF2	serine/arginine-rich splicing factor 2
hsa-miR-383	0	0	1	1	1	1	LGI1	leucine-rich, glioma inactivated 1
hsa-miR-383	0	0	1	0	0	0	A2M	alpha-2-macroglobulin
hsa-miR-383	1	0	1	0	1	1	CD47	CD47 molecule
hsa-miR-383	0	0	1	1	1	1	CDKAL1	CDK5 regulatory subunit associated protein 1-like 1
hsa-miR-383	1	0	1	1	1	1	ATP5G3	ATP synthase, H+ transporting, mitochondrial Fo complex, subunit C3 (subunit 9)
hsa-miR-383	0	0	1	0	1	1	SEPT7	septin 7
hsa-miR-383	0	0	1	1	1	1	ZNF75D	zinc finger protein 75D
hsa-miR-383	0	0	1	1	1	1	ANXA7	annexin A7
hsa-miR-383	1	0	1	1	1	1	JUNB	jun B proto-oncogene
hsa-miR-383	1	0	1	0	1	1	DNMT3A	DNA (cytosine-5-)-methyltransferase 3 alpha
hsa-miR-383	1	0	1	0	1	1	NMT1	N-myristoyltransferase 1
hsa-miR-383	0	0	1	1	0	0	DUSP11	dual specificity phosphatase 11 (RNA/RNP complex 1-interacting)
hsa-miR-383	0	0	1	0	0	0	FAM47E	family with sequence similarity 47, member E
hsa-miR-383	0	0	1	1	1	1	MRPL42	mitochondrial ribosomal protein L42
hsa-miR-383	1	0	1	1	1	1	PHACTR2	phosphatase and actin regulator 2
hsa-miR-383	0	0	1	0	0	0	LINC00661	long intergenic non-protein coding RNA 661
hsa-miR-383	1	0	1	0	1	1	MEGF10	multiple EGF-like-domains 10
hsa-miR-383	0	0	1	1	1	1	SLC25A26	solute carrier family 25 (S-adenosylmethionine carrier), member 26
hsa-miR-383	1	0	1	1	1	1	ZFHX3	zinc finger homeobox 3
hsa-miR-383	0	0	1	1	1	1	TMEM41B	transmembrane protein 41B
hsa-miR-383	1	0	1	1	1	1	PRKG1	protein kinase, cGMP-dependent, type I
hsa-miR-383	1	0	1	1	1	1	NKX2-1	NK2 homeobox 1
hsa-miR-383	1	0	1	1	1	1	RB1CC1	RB1-inducible coiled-coil 1
hsa-miR-383	1	0	1	1	1	1	FAM168A	family with sequence similarity 168, member A
hsa-miR-383	0	0	1	1	1	1	FCAR	Fc fragment of IgA, receptor for
hsa-miR-383	0	0	1	0	0	0	ANKRD30BP2	ankyrin repeat domain 30B pseudogene 2
hsa-miR-383	0	0	1	1	1	1	PTGS1	prostaglandin-endoperoxide synthase 1 (prostaglandin G/H synthase and cyclooxygenase)
hsa-miR-383	0	0	1	1	1	1	CD274	CD274 molecule
hsa-miR-383	1	0	1	1	1	1	QKI	QKI, KH domain containing, RNA binding
hsa-miR-383	0	0	1	0	0	0	POM121L8P	POM121 transmembrane nucleoporin-like 8 pseudogene
hsa-miR-383	0	0	1	1	1	1	DHX36	DEAH (Asp-Glu-Ala-His) box polypeptide 36
hsa-miR-383	1	0	1	0	1	1	DAPP1	dual adaptor of phosphotyrosine and 3-phosphoinositides
hsa-miR-383	1	0	1	0	1	1	DCBLD2	discoidin, CUB and LCCL domain containing 2
hsa-miR-383	1	0	1	1	1	1	LGR4	leucine-rich repeat containing G protein-coupled receptor 4
hsa-miR-383	0	0	1	1	1	1	ADPRH	ADP-ribosylarginine hydrolase
hsa-miR-383	1	0	1	0	1	1	BCL2	B-cell CLL/lymphoma 2
hsa-miR-383	0	0	1	1	1	1	CD55	CD55 molecule, decay accelerating factor for complement (Cromer blood group)
hsa-miR-383	1	0	1	1	1	1	IGF1	insulin-like growth factor 1 (somatomedin C)
hsa-miR-383	0	0	1	1	1	1	AGA	aspartylglucosaminidase
hsa-miR-383	1	0	1	1	1	1	AGL	amylo-alpha-1, 6-glucosidase, 4-alpha-glucanotransferase
hsa-miR-383	1	0	1	1	1	1	ARSB	arylsulfatase B
hsa-miR-383	1	0	1	1	1	1	COL4A3	collagen, type IV, alpha 3 (Goodpasture antigen)
hsa-miR-383	1	0	1	1	1	1	F13A1	coagulation factor XIII, A1 polypeptide
hsa-miR-383	1	0	1	1	1	1	INSR	insulin receptor
hsa-miR-383	1	0	1	1	1	1	MET	met proto-oncogene (hepatocyte growth factor receptor)
hsa-miR-383	1	0	1	1	1	1	OCRL	oculocerebrorenal syndrome of Lowe
hsa-miR-383	1	0	1	1	1	1	PMP22	peripheral myelin protein 22
hsa-miR-383	0	0	1	1	1	1	LTBP2	latent transforming growth factor beta binding protein 2
hsa-miR-383	1	0	1	0	1	1	PAFAH1B1	platelet-activating factor acetylhydrolase 1b, regulatory subunit 1 (45kDa)
hsa-miR-383	1	0	1	1	0	0	NOTCH3	notch 3
hsa-miR-383	0	0	1	1	1	1	OXCT1	3-oxoacid CoA transferase 1
hsa-miR-383	1	0	1	1	1	1	HOXA13	homeobox A13
hsa-miR-383	1	0	1	1	1	1	PLP1	proteolipid protein 1
hsa-miR-383	0	0	1	1	0	0	IL1B	interleukin 1, beta
hsa-miR-383	0	0	1	1	1	1	IL6	interleukin 6 (interferon, beta 2)
hsa-miR-383	1	0	1	1	1	1	CD44	CD44 molecule (Indian blood group)
hsa-miR-383	0	0	1	1	1	1	GSR	glutathione reductase
hsa-miR-383	0	0	1	1	1	1	ADH4	alcohol dehydrogenase 4 (class II), pi polypeptide
hsa-miR-383	1	0	1	0	1	1	ADRB1	adrenoceptor beta 1
hsa-miR-383	1	0	1	0	1	1	ALDH1A3	aldehyde dehydrogenase 1 family, member A3
hsa-miR-383	1	0	1	0	1	1	CACNA1E	calcium channel, voltage-dependent, R type, alpha 1E subunit
hsa-miR-383	1	0	1	1	1	1	DIO2	deiodinase, iodothyronine, type II
hsa-miR-383	0	0	1	1	0	0	FOLR1	folate receptor 1 (adult)
hsa-miR-383	1	0	1	1	1	1	GABRB3	gamma-aminobutyric acid (GABA) A receptor, beta 3
hsa-miR-383	1	0	1	1	1	1	GRM1	glutamate receptor, metabotropic 1
hsa-miR-383	1	0	1	1	1	1	HTR4	5-hydroxytryptamine (serotonin) receptor 4, G protein-coupled
hsa-miR-383	0	0	1	1	1	1	IL12A	interleukin 12A (natural killer cell stimulatory factor 1, cytotoxic lymphocyte maturation factor 1, p35)
hsa-miR-383	1	0	1	0	1	1	KCNJ2	potassium inwardly-rectifying channel, subfamily J, member 2
hsa-miR-383	0	0	1	1	0	0	MGP	matrix Gla protein
hsa-miR-383	0	0	1	1	1	1	P4HA1	prolyl 4-hydroxylase, alpha polypeptide I
hsa-miR-383	1	0	1	1	1	1	PDE3B	phosphodiesterase 3B, cGMP-inhibited
hsa-miR-383	1	0	1	1	1	1	PPP3R1	protein phosphatase 3, regulatory subunit B, alpha
hsa-miR-383	1	0	1	1	1	1	PTGFR	prostaglandin F receptor (FP)
hsa-miR-383	0	0	1	1	0	0	PTGIR	prostaglandin I2 (prostacyclin) receptor (IP)
hsa-miR-383	1	0	1	1	1	1	MTUS1	microtubule associated tumor suppressor 1
hsa-miR-383	1	0	1	1	1	1	FAM13C	family with sequence similarity 13, member C
hsa-miR-383	0	0	1	1	0	0	PAMR1	peptidase domain containing associated with muscle regeneration 1
hsa-miR-383	1	0	1	1	0	0	AWAT2	acyl-CoA wax alcohol acyltransferase 2
hsa-miR-383	1	0	1	1	1	1	LCLAT1	lysocardiolipin acyltransferase 1
hsa-miR-383	1	0	1	1	1	1	EVI2A	ecotropic viral integration site 2A
hsa-miR-383	1	0	1	0	1	1	ZNF740	zinc finger protein 740
hsa-miR-383	0	0	1	0	1	1	FLJ16124	FLJ16124 protein
hsa-miR-383	0	0	1	1	1	1	HMGN2P46	high mobility group nucleosomal binding domain 2 pseudogene 46
hsa-miR-383	1	0	1	1	1	1	EBF3	early B-cell factor 3
hsa-miR-383	1	0	1	1	1	1	PLCXD3	phosphatidylinositol-specific phospholipase C, X domain containing 3
hsa-miR-383	1	0	1	1	1	1	NFKBIZ	nuclear factor of kappa light polypeptide gene enhancer in B-cells inhibitor, zeta
hsa-miR-383	0	0	1	1	1	1	MAPKAP1	mitogen-activated protein kinase associated protein 1
hsa-miR-383	1	0	1	1	1	1	TCEAL8	transcription elongation factor A (SII)-like 8
hsa-miR-383	1	0	1	1	1	1	L3MBTL3	l(3)mbt-like 3 (Drosophila)
hsa-miR-383	0	0	1	0	0	0	RWDD1	RWD domain containing 1
hsa-miR-383	1	0	1	1	1	1	ZDHHC9	zinc finger, DHHC-type containing 9
hsa-miR-383	0	0	1	1	1	1	GCSAM	germinal center-associated, signaling and motility
hsa-miR-383	0	0	1	1	1	1	SLC35D3	solute carrier family 35, member D3
hsa-miR-383	1	0	1	0	1	1	PM20D2	peptidase M20 domain containing 2
hsa-miR-383	0	0	1	0	1	1	LPPR5	lipid phosphate phosphatase-related protein type 5
hsa-miR-383	1	0	1	0	1	1	ZC3H12B	zinc finger CCCH-type containing 12B
hsa-miR-383	1	0	1	1	1	1	C10orf114	chromosome 10 open reading frame 114
hsa-miR-383	1	0	1	0	1	1	FYTTD1	forty-two-three domain containing 1
hsa-miR-383	1	0	1	0	1	1	CREB5	cAMP responsive element binding protein 5
hsa-miR-383	0	0	1	1	1	1	RNASE13	ribonuclease, RNase A family, 13 (non-active)
hsa-miR-383	1	0	1	1	1	1	PABPC1L2A	poly(A) binding protein, cytoplasmic 1-like 2A
hsa-miR-383	0	0	1	1	1	1	BEX5	brain expressed, X-linked 5
hsa-miR-383	0	0	1	1	1	1	C9orf152	chromosome 9 open reading frame 152
hsa-miR-383	0	0	1	0	1	1	LINC00268	long intergenic non-protein coding RNA 268
hsa-miR-383	0	0	1	0	0	0	SPRR2F	small proline-rich protein 2F
hsa-miR-383	0	0	1	1	0	0	SPRR2B	small proline-rich protein 2B
hsa-miR-383	0	0	1	1	1	1	POLR2M	polymerase (RNA) II (DNA directed) polypeptide M
hsa-miR-383	0	0	1	1	1	1	FANCB	Fanconi anemia, complementation group B
hsa-miR-383	1	0	1	1	1	1	ABCC5	ATP-binding cassette, sub-family C (CFTR/MRP), member 5
hsa-miR-383	1	0	1	0	1	1	GCH1	GTP cyclohydrolase 1
hsa-miR-383	1	0	1	1	1	1	GPHN	gephyrin
hsa-miR-383	0	0	1	1	1	1	SOD2	superoxide dismutase 2, mitochondrial
hsa-miR-383	1	0	1	1	1	1	KALRN	kalirin, RhoGEF kinase
hsa-miR-383	0	0	1	1	1	1	WASF1	WAS protein family, member 1
hsa-miR-383	0	0	1	1	1	1	SC5DL	sterol-C5-desaturase (ERG3 delta-5-desaturase homolog, S. cerevisiae)-like
hsa-miR-383	1	0	1	1	1	1	AFF3	AF4/FMR2 family, member 3
hsa-miR-383	1	0	1	1	1	1	TPD52	tumor protein D52
hsa-miR-383	1	0	1	0	1	1	C3orf70	chromosome 3 open reading frame 70
hsa-miR-383	1	0	1	1	1	1	RGS7BP	regulator of G-protein signaling 7 binding protein
hsa-miR-383	1	0	1	1	1	1	TFAP2A	transcription factor AP-2 alpha (activating enhancer binding protein 2 alpha)
hsa-miR-383	0	0	1	1	1	1	HNRNPH2	heterogeneous nuclear ribonucleoprotein H2 (H')
hsa-miR-383	1	0	1	1	1	1	TMEM98	transmembrane protein 98
hsa-miR-383	1	0	1	1	0	0	MTUS2	microtubule associated tumor suppressor candidate 2
hsa-miR-383	0	0	1	1	1	1	FAM134B	family with sequence similarity 134, member B
hsa-miR-383	1	0	1	1	1	1	PDE4B	phosphodiesterase 4B, cAMP-specific
hsa-miR-383	1	0	1	1	1	1	NPM1	nucleophosmin (nucleolar phosphoprotein B23, numatrin)
hsa-miR-383	1	0	1	0	1	1	CDC42SE1	CDC42 small effector 1
hsa-miR-383	0	0	1	0	0	0	CEACAM16	carcinoembryonic antigen-related cell adhesion molecule 16
hsa-miR-383	0	0	1	1	1	1	SKA1	spindle and kinetochore associated complex subunit 1
hsa-miR-383	1	0	1	0	1	1	GK5	glycerol kinase 5 (putative)
hsa-miR-383	1	0	1	0	1	1	CREBZF	CREB/ATF bZIP transcription factor
hsa-miR-383	1	0	1	1	1	1	SCN2A	sodium channel, voltage-gated, type II, alpha subunit
hsa-miR-383	1	0	1	0	1	1	DCUN1D4	DCN1, defective in cullin neddylation 1, domain containing 4 (S. cerevisiae)
hsa-miR-383	0	0	1	1	1	1	MTHFD2	methylenetetrahydrofolate dehydrogenase (NADP+ dependent) 2, methenyltetrahydrofolate cyclohydrolase
hsa-miR-383	0	0	1	1	1	1	MST4	serine/threonine protein kinase MST4
hsa-miR-383	1	0	1	1	1	1	PABPC1L2B	poly(A) binding protein, cytoplasmic 1-like 2B
hsa-miR-383	1	0	1	1	1	1	DIAPH3	diaphanous homolog 3 (Drosophila)
hsa-miR-383	1	0	1	1	1	1	FRS2	fibroblast growth factor receptor substrate 2
hsa-miR-383	0	0	1	1	1	1	TMEM8B	transmembrane protein 8B
hsa-miR-383	0	0	1	1	1	1	TTC14	tetratricopeptide repeat domain 14
hsa-miR-383	1	0	1	1	1	1	PVRL2	poliovirus receptor-related 2 (herpesvirus entry mediator B)
hsa-miR-383	0	0	1	1	1	1	SLC6A4	solute carrier family 6 (neurotransmitter transporter, serotonin), member 4
hsa-miR-383	0	0	1	1	0	0	SST	somatostatin
hsa-miR-383	0	0	1	0	1	1	TOP2A	topoisomerase (DNA) II alpha 170kDa
hsa-miR-383	1	0	1	1	1	1	QSER1	glutamine and serine rich 1
hsa-miR-383	1	0	1	1	1	1	HS6ST2	heparan sulfate 6-O-sulfotransferase 2
hsa-miR-383	1	0	1	1	1	1	IRF2BP2	interferon regulatory factor 2 binding protein 2
hsa-miR-383	1	0	1	0	1	1	FAM127C	family with sequence similarity 127, member C
hsa-miR-383	1	0	1	1	1	1	DACT1	dapper, antagonist of beta-catenin, homolog 1 (Xenopus laevis)
hsa-miR-383	1	0	1	1	1	1	HAP1	huntingtin-associated protein 1
hsa-miR-383	1	0	1	1	1	1	FAM155A	family with sequence similarity 155, member A
hsa-miR-383	0	0	1	1	1	1	HSF5	heat shock transcription factor family member 5
hsa-miR-383	0	0	1	0	1	1	EPHA6	EPH receptor A6
hsa-miR-383	0	0	1	0	1	1	TMEM150C	transmembrane protein 150C
hsa-miR-383	0	0	1	0	0	0	C16orf90	chromosome 16 open reading frame 90
hsa-miR-383	0	0	1	1	1	1	ADSS	adenylosuccinate synthase
hsa-miR-383	1	0	1	0	1	1	XIAP	X-linked inhibitor of apoptosis
hsa-miR-383	1	0	1	0	1	1	KLF9	Kruppel-like factor 9
hsa-miR-383	1	0	1	1	1	1	CAMK2D	calcium/calmodulin-dependent protein kinase II delta
hsa-miR-383	1	0	1	1	1	1	CASP10	caspase 10, apoptosis-related cysteine peptidase
hsa-miR-383	1	0	1	0	1	1	CDK6	cyclin-dependent kinase 6
hsa-miR-383	1	0	1	1	1	1	CDS1	CDP-diacylglycerol synthase (phosphatidate cytidylyltransferase) 1
hsa-miR-383	0	0	1	1	1	1	CLIC2	chloride intracellular channel 2
hsa-miR-383	1	0	1	1	1	1	EIF1AX	eukaryotic translation initiation factor 1A, X-linked
hsa-miR-383	1	0	1	0	1	1	EIF2S3	eukaryotic translation initiation factor 2, subunit 3 gamma, 52kDa
hsa-miR-383	0	0	1	0	1	1	EMP1	epithelial membrane protein 1
hsa-miR-383	1	0	1	0	1	1	B4GALT1	UDP-Gal:betaGlcNAc beta 1,4- galactosyltransferase, polypeptide 1
hsa-miR-383	1	0	1	1	1	1	BAAT	bile acid CoA: amino acid N-acyltransferase (glycine N-choloyltransferase)
hsa-miR-383	0	0	1	1	0	0	C9	complement component 9
hsa-miR-383	0	0	1	1	1	1	CDR2	cerebellar degeneration-related protein 2, 62kDa
hsa-miR-383	0	0	1	1	0	0	CLPS	colipase, pancreatic
hsa-miR-383	1	0	1	1	1	1	COL15A1	collagen, type XV, alpha 1
hsa-miR-383	0	0	1	1	1	1	DSG1	desmoglein 1
hsa-miR-383	0	0	1	1	1	1	EDNRA	endothelin receptor type A
hsa-miR-383	0	0	1	1	0	0	EIF5A	eukaryotic translation initiation factor 5A
hsa-miR-383	1	0	1	0	1	1	ETV6	ets variant 6
hsa-miR-383	1	0	1	1	1	1	FGF9	fibroblast growth factor 9 (glia-activating factor)
hsa-miR-383	1	0	1	0	1	1	FUT4	fucosyltransferase 4 (alpha (1,3) fucosyltransferase, myeloid-specific)
hsa-miR-383	1	0	1	1	1	1	GOLGA1	golgin A1
hsa-miR-383	0	0	1	0	1	1	GYPA	glycophorin A (MNS blood group)
hsa-miR-383	0	0	1	1	1	1	HLA-DOA	major histocompatibility complex, class II, DO alpha
hsa-miR-383	0	0	1	1	1	1	HMGCS1	3-hydroxy-3-methylglutaryl-CoA synthase 1 (soluble)
hsa-miR-383	0	0	1	1	1	1	FOXN2	forkhead box N2
hsa-miR-383	0	0	1	1	0	0	ID3	inhibitor of DNA binding 3, dominant negative helix-loop-helix protein
hsa-miR-383	0	0	1	1	1	1	IL12B	interleukin 12B (natural killer cell stimulatory factor 2, cytotoxic lymphocyte maturation factor 2, p40)
hsa-miR-383	1	0	1	1	1	1	INSM1	insulinoma-associated 1
hsa-miR-383	0	0	1	0	1	1	ITGAV	integrin, alpha V
hsa-miR-383	1	0	1	1	1	1	ITGB8	integrin, beta 8
hsa-miR-383	1	0	1	1	1	1	KCNA6	potassium voltage-gated channel, shaker-related subfamily, member 6
hsa-miR-383	1	0	1	1	1	1	KCNJ10	potassium inwardly-rectifying channel, subfamily J, member 10
hsa-miR-383	1	0	1	1	1	1	IPO5	importin 5
hsa-miR-383	1	0	1	0	1	1	LAMC1	laminin, gamma 1 (formerly LAMB2)
hsa-miR-383	1	0	1	1	1	1	LAMP2	lysosomal-associated membrane protein 2
hsa-miR-383	1	0	1	1	1	1	LIFR	leukemia inhibitory factor receptor alpha
hsa-miR-383	1	0	1	1	1	1	MAX	MYC associated factor X
hsa-miR-383	0	0	1	1	0	0	MNAT1	menage a trois homolog 1, cyclin H assembly factor (Xenopus laevis)
hsa-miR-383	1	0	1	1	1	1	MSN	moesin
hsa-miR-383	0	0	1	1	0	0	MYOG	myogenin (myogenic factor 4)
hsa-miR-383	1	0	1	1	1	1	NEUROD1	neuronal differentiation 1
hsa-miR-383	1	0	1	1	1	1	NPAT	nuclear protein, ataxia-telangiectasia locus
hsa-miR-383	0	0	1	1	0	0	NPPB	natriuretic peptide B
hsa-miR-383	1	0	1	1	1	1	NPTX2	neuronal pentraxin II
hsa-miR-383	1	0	1	0	1	1	PAPPA	pregnancy-associated plasma protein A, pappalysin 1
hsa-miR-383	1	0	1	1	1	1	PBX2	pre-B-cell leukemia homeobox 2
hsa-miR-383	0	0	1	1	1	1	PF4V1	platelet factor 4 variant 1
hsa-miR-383	0	0	1	1	0	0	PI3	peptidase inhibitor 3, skin-derived
hsa-miR-383	1	0	1	1	1	1	PLAGL2	pleiomorphic adenoma gene-like 2
hsa-miR-383	0	0	1	1	0	0	PPP1R8	protein phosphatase 1, regulatory subunit 8
hsa-miR-383	1	0	1	0	0	0	PPP1R10	protein phosphatase 1, regulatory subunit 10
hsa-miR-383	1	0	1	0	1	1	PRKCA	protein kinase C, alpha
hsa-miR-383	0	0	1	1	1	1	PRKCB	protein kinase C, beta
hsa-miR-383	1	0	1	0	1	1	MAPK4	mitogen-activated protein kinase 4
hsa-miR-383	1	0	1	1	1	1	RAD23B	RAD23 homolog B (S. cerevisiae)
hsa-miR-383	1	0	1	0	1	1	SCN9A	sodium channel, voltage-gated, type IX, alpha subunit
hsa-miR-383	1	0	1	1	1	1	SLC7A1	solute carrier family 7 (cationic amino acid transporter, y+ system), member 1
hsa-miR-383	1	0	1	0	1	1	RPS6KB1	ribosomal protein S6 kinase, 70kDa, polypeptide 1
hsa-miR-383	0	0	1	1	1	1	SULT2A1	sulfotransferase family, cytosolic, 2A, dehydroepiandrosterone (DHEA)-preferring, member 1
hsa-miR-383	0	0	1	1	1	1	TERF1	telomeric repeat binding factor (NIMA-interacting) 1
hsa-miR-383	1	0	1	0	1	1	SEC62	SEC62 homolog (S. cerevisiae)
hsa-miR-383	1	0	1	1	1	1	TRAPPC10	trafficking protein particle complex 10
hsa-miR-383	0	0	1	1	1	1	UBE2D1	ubiquitin-conjugating enzyme E2D 1
hsa-miR-383	1	0	1	1	1	1	UBE2N	ubiquitin-conjugating enzyme E2N
hsa-miR-383	0	0	1	1	1	1	ZNF137P	zinc finger protein 137, pseudogene
hsa-miR-383	1	0	1	1	1	1	ADAM12	ADAM metallopeptidase domain 12
hsa-miR-383	0	0	1	1	1	1	PIP5K1A	phosphatidylinositol-4-phosphate 5-kinase, type I, alpha
hsa-miR-383	0	0	1	1	0	0	SEMA7A	semaphorin 7A, GPI membrane anchor (John Milton Hagen blood group)
hsa-miR-383	0	0	1	1	1	1	DGKD	diacylglycerol kinase, delta 130kDa
hsa-miR-383	0	0	1	1	1	1	CHST1	carbohydrate (keratan sulfate Gal-6) sulfotransferase 1
hsa-miR-383	0	0	1	1	1	1	KMO	kynurenine 3-monooxygenase (kynurenine 3-hydroxylase)
hsa-miR-383	1	0	1	1	1	1	EXO1	exonuclease 1
hsa-miR-383	0	0	1	1	1	1	TNFSF13	tumor necrosis factor (ligand) superfamily, member 13
hsa-miR-383	1	0	1	1	1	1	NR5A2	nuclear receptor subfamily 5, group A, member 2
hsa-miR-383	1	0	1	1	1	1	PEX11B	peroxisomal biogenesis factor 11 beta
hsa-miR-383	1	0	1	0	1	1	SGPL1	sphingosine-1-phosphate lyase 1
hsa-miR-383	0	0	1	1	1	1	MPZL1	myelin protein zero-like 1
hsa-miR-383	0	0	1	1	1	1	RNF8	ring finger protein 8, E3 ubiquitin protein ligase
hsa-miR-383	1	0	1	1	1	1	MAP7	microtubule-associated protein 7
hsa-miR-383	0	0	1	0	1	1	RHOB	ras homolog family member B
hsa-miR-383	1	0	1	1	1	1	CDH12	cadherin 12, type 2 (N-cadherin 2)
hsa-miR-383	0	0	1	1	1	1	TIMM8A	translocase of inner mitochondrial membrane 8 homolog A (yeast)
hsa-miR-383	0	0	1	1	1	1	LBP	lipopolysaccharide binding protein
hsa-miR-383	0	0	1	1	0	0	SLC28A2	solute carrier family 28 (sodium-coupled nucleoside transporter), member 2
hsa-miR-383	1	0	1	0	1	1	AKAP6	A kinase (PRKA) anchor protein 6
hsa-miR-383	1	0	1	1	1	1	ARL3	ADP-ribosylation factor-like 3
hsa-miR-383	0	0	1	1	1	1	COL12A1	collagen, type XII, alpha 1
hsa-miR-383	1	0	1	1	1	1	EPHA4	EPH receptor A4
hsa-miR-383	1	0	1	1	0	0	FIGF	c-fos induced growth factor (vascular endothelial growth factor D)
hsa-miR-383	1	0	1	1	1	1	FUT8	fucosyltransferase 8 (alpha (1,6) fucosyltransferase)
hsa-miR-383	0	0	1	1	1	1	TRPC6	transient receptor potential cation channel, subfamily C, member 6
hsa-miR-383	1	0	1	0	1	1	WNT7A	wingless-type MMTV integration site family, member 7A
hsa-miR-383	0	0	1	0	1	1	CXorf1	chromosome X open reading frame 1
hsa-miR-383	1	0	1	1	1	1	XPR1	xenotropic and polytropic retrovirus receptor 1
hsa-miR-383	1	0	1	1	1	1	LARGE	like-glycosyltransferase
hsa-miR-383	1	0	1	1	1	1	B4GALT6	UDP-Gal:betaGlcNAc beta 1,4- galactosyltransferase, polypeptide 6
hsa-miR-383	1	0	1	0	1	1	VAMP3	vesicle-associated membrane protein 3 (cellubrevin)
hsa-miR-383	1	0	1	1	1	1	KIF3B	kinesin family member 3B
hsa-miR-383	1	0	1	0	1	1	ARHGEF6	Rac/Cdc42 guanine nucleotide exchange factor (GEF) 6
hsa-miR-383	1	0	1	1	1	1	ONECUT2	one cut homeobox 2
hsa-miR-383	1	0	1	1	1	1	FXR2	fragile X mental retardation, autosomal homolog 2
hsa-miR-383	0	0	1	1	1	1	CALB1	calbindin 1, 28kDa
hsa-miR-383	0	0	1	1	0	0	IDE	insulin-degrading enzyme
hsa-miR-383	1	0	1	1	1	1	RELN	reelin
hsa-miR-383	1	0	1	0	1	1	SCD	stearoyl-CoA desaturase (delta-9-desaturase)
hsa-miR-383	0	0	1	1	1	1	XYLB	xylulokinase homolog (H. influenzae)
hsa-miR-383	1	0	1	1	1	1	GFPT2	glutamine-fructose-6-phosphate transaminase 2
hsa-miR-383	1	0	1	1	1	1	MED13	mediator complex subunit 13
hsa-miR-383	1	0	1	0	1	1	NR1D2	nuclear receptor subfamily 1, group D, member 2
hsa-miR-383	1	0	1	1	1	1	APLNR	apelin receptor
hsa-miR-383	1	0	1	1	1	1	CRK	v-crk sarcoma virus CT10 oncogene homolog (avian)
hsa-miR-383	1	0	1	0	1	1	RAPGEF1	Rap guanine nucleotide exchange factor (GEF) 1
hsa-miR-383	1	0	1	1	1	1	RAB8A	RAB8A, member RAS oncogene family
hsa-miR-383	1	0	1	1	1	1	PHF2	PHD finger protein 2
hsa-miR-383	0	0	1	1	1	1	PPP1R3C	protein phosphatase 1, regulatory subunit 3C
hsa-miR-383	1	0	1	1	1	1	ROCK1	Rho-associated, coiled-coil containing protein kinase 1
hsa-miR-383	1	0	1	1	1	1	AKT3	v-akt murine thymoma viral oncogene homolog 3 (protein kinase B, gamma)
hsa-miR-383	0	0	1	1	1	1	LMAN1	lectin, mannose-binding, 1
hsa-miR-383	1	0	1	1	1	1	LPP	LIM domain containing preferred translocation partner in lipoma
hsa-miR-383	0	0	1	1	0	0	TAF13	TAF13 RNA polymerase II, TATA box binding protein (TBP)-associated factor, 18kDa
hsa-miR-383	0	0	1	1	1	1	SLC35A2	solute carrier family 35 (UDP-galactose transporter), member A2
hsa-miR-383	1	0	1	1	1	1	EVI5	ecotropic viral integration site 5
hsa-miR-383	0	0	1	1	1	1	ACTR3	ARP3 actin-related protein 3 homolog (yeast)
hsa-miR-383	0	0	1	1	1	1	CEBPZ	CCAAT/enhancer binding protein (C/EBP), zeta
hsa-miR-383	1	0	1	0	1	1	SPRY3	sprouty homolog 3 (Drosophila)
hsa-miR-383	0	0	1	1	1	1	DSCR4	Down syndrome critical region gene 4
hsa-miR-383	0	0	1	1	1	1	CD5L	CD5 molecule-like
hsa-miR-383	1	0	1	1	1	1	MMP16	matrix metallopeptidase 16 (membrane-inserted)
hsa-miR-383	1	0	1	1	1	1	ENDOU	endonuclease, polyU-specific
hsa-miR-383	1	0	1	0	1	1	HDAC4	histone deacetylase 4
hsa-miR-383	0	0	1	1	1	1	LANCL1	LanC lantibiotic synthetase component C-like 1 (bacterial)
hsa-miR-383	1	0	1	1	1	1	DYNC1LI2	dynein, cytoplasmic 1, light intermediate chain 2
hsa-miR-383	1	0	1	1	1	1	DNAJB1	DnaJ (Hsp40) homolog, subfamily B, member 1
hsa-miR-383	0	0	1	1	1	1	NKX3-1	NK3 homeobox 1
hsa-miR-383	0	0	1	1	1	1	NTF4	neurotrophin 4
hsa-miR-383	1	0	1	1	1	1	ORC2	origin recognition complex, subunit 2
hsa-miR-383	1	0	1	1	1	1	PFKFB2	6-phosphofructo-2-kinase/fructose-2,6-biphosphatase 2
hsa-miR-383	1	0	1	1	1	1	SMC1A	structural maintenance of chromosomes 1A
hsa-miR-383	1	0	1	1	1	1	NEBL	nebulette
hsa-miR-383	0	0	1	1	0	0	UBD	ubiquitin D
hsa-miR-383	0	0	1	1	1	1	TM9SF1	transmembrane 9 superfamily member 1
hsa-miR-383	1	0	1	1	1	1	SLC2A1	solute carrier family 2 (facilitated glucose transporter), member 1
hsa-miR-383	0	0	1	1	1	1	FARS2	phenylalanyl-tRNA synthetase 2, mitochondrial
hsa-miR-383	0	0	1	1	0	0	VAMP5	vesicle-associated membrane protein 5 (myobrevin)
hsa-miR-383	1	0	1	1	1	1	MAN1A2	mannosidase, alpha, class 1A, member 2
hsa-miR-383	1	0	1	1	1	1	DIAPH2	diaphanous homolog 2 (Drosophila)
hsa-miR-383	0	0	1	1	0	0	DNAJB2	DnaJ (Hsp40) homolog, subfamily B, member 2
hsa-miR-383	1	0	1	1	1	1	SLC20A2	solute carrier family 20 (phosphate transporter), member 2
hsa-miR-383	0	0	1	1	0	0	TALDO1	transaldolase 1
hsa-miR-383	1	0	1	1	1	1	BTG2	BTG family, member 2
hsa-miR-383	1	0	1	1	1	1	ZBTB33	zinc finger and BTB domain containing 33
hsa-miR-383	0	0	1	1	1	1	PKIA	protein kinase (cAMP-dependent, catalytic) inhibitor alpha
hsa-miR-383	1	0	1	1	1	1	PRRX1	paired related homeobox 1
hsa-miR-383	1	0	1	1	1	1	RAC1	ras-related C3 botulinum toxin substrate 1 (rho family, small GTP binding protein Rac1)
hsa-miR-383	0	0	1	1	1	1	NPM3	nucleophosmin/nucleoplasmin 3
hsa-miR-383	1	0	1	1	1	1	ABHD2	abhydrolase domain containing 2
hsa-miR-383	1	0	1	1	1	1	KAT7	K(lysine) acetyltransferase 7
hsa-miR-383	1	0	1	1	1	1	UTRN	utrophin
hsa-miR-383	0	0	1	0	0	0	ZXDA	zinc finger, X-linked, duplicated A
hsa-miR-383	0	0	1	0	1	1	ZXDB	zinc finger, X-linked, duplicated B
hsa-miR-383	1	0	1	0	1	1	PRSS23	protease, serine, 23
hsa-miR-383	1	0	1	1	1	1	C14orf1	chromosome 14 open reading frame 1
hsa-miR-383	0	0	1	1	1	1	AKAP10	A kinase (PRKA) anchor protein 10
hsa-miR-383	1	0	1	1	1	1	RNF139	ring finger protein 139
hsa-miR-383	1	0	1	1	1	1	CA5B	carbonic anhydrase VB, mitochondrial
hsa-miR-383	1	0	1	1	1	1	KLF12	Kruppel-like factor 12
hsa-miR-383	0	0	1	1	1	1	OIP5	Opa interacting protein 5
hsa-miR-383	1	0	1	1	1	1	PHLDA1	pleckstrin homology-like domain, family A, member 1
hsa-miR-383	1	0	1	0	1	1	CASP8AP2	caspase 8 associated protein 2
hsa-miR-383	1	0	1	1	1	1	FBXL2	F-box and leucine-rich repeat protein 2
hsa-miR-383	0	0	1	1	1	1	RRAS2	related RAS viral (r-ras) oncogene homolog 2
hsa-miR-383	1	0	1	1	1	1	HS2ST1	heparan sulfate 2-O-sulfotransferase 1
hsa-miR-383	1	0	1	0	1	1	G3BP2	GTPase activating protein (SH3 domain) binding protein 2
hsa-miR-383	1	0	1	0	1	1	FBXL7	F-box and leucine-rich repeat protein 7
hsa-miR-383	1	0	1	1	1	1	MMD	monocyte to macrophage differentiation-associated
hsa-miR-383	1	0	1	0	1	1	MYCBP	c-myc binding protein
hsa-miR-383	1	0	1	1	1	1	TSPAN12	tetraspanin 12
hsa-miR-383	1	0	1	1	1	1	PITPNB	phosphatidylinositol transfer protein, beta
hsa-miR-383	0	0	1	0	1	1	PITPNC1	phosphatidylinositol transfer protein, cytoplasmic 1
hsa-miR-383	0	0	1	0	1	1	TLL1	tolloid-like 1
hsa-miR-383	1	0	1	1	1	1	PPARGC1A	peroxisome proliferator-activated receptor gamma, coactivator 1 alpha
hsa-miR-383	0	0	1	1	1	1	ABT1	activator of basal transcription 1
hsa-miR-383	1	0	1	1	1	1	C11orf58	chromosome 11 open reading frame 58
hsa-miR-383	0	0	1	1	1	1	DNAJC8	DnaJ (Hsp40) homolog, subfamily C, member 8
hsa-miR-383	1	0	1	1	1	1	PATZ1	POZ (BTB) and AT hook containing zinc finger 1
hsa-miR-383	1	0	1	1	1	1	SLC7A11	solute carrier family 7 (anionic amino acid transporter light chain, xc- system), member 11
hsa-miR-383	1	0	1	0	1	1	RNF11	ring finger protein 11
hsa-miR-383	1	0	1	1	1	1	SERP1	stress-associated endoplasmic reticulum protein 1
hsa-miR-383	1	0	1	1	1	1	GRHL1	grainyhead-like 1 (Drosophila)
hsa-miR-383	1	0	1	1	1	1	OTX1	orthodenticle homeobox 1
hsa-miR-383	1	0	1	1	1	1	ZNF592	zinc finger protein 592
hsa-miR-383	0	0	1	0	1	1	CTR9	Ctr9, Paf1/RNA polymerase II complex component, homolog (S. cerevisiae)
hsa-miR-383	1	0	1	1	1	1	RALGPS1	Ral GEF with PH domain and SH3 binding motif 1
hsa-miR-383	1	0	1	0	1	1	MLEC	malectin
hsa-miR-383	1	0	1	1	1	1	DAZAP2	DAZ associated protein 2
hsa-miR-383	1	0	1	0	1	1	TOMM20	translocase of outer mitochondrial membrane 20 homolog (yeast)
hsa-miR-383	1	0	1	0	1	1	SCRN1	secernin 1
hsa-miR-383	0	0	1	1	1	1	KIAA0141	KIAA0141
hsa-miR-383	0	0	1	1	1	1	LCMT2	leucine carboxyl methyltransferase 2
hsa-miR-383	1	0	1	0	1	1	PJA2	praja ring finger 2, E3 ubiquitin protein ligase
hsa-miR-383	1	0	1	0	1	1	LPPR4	lipid phosphate phosphatase-related protein type 4
hsa-miR-383	1	0	1	1	1	1	NUAK1	NUAK family, SNF1-like kinase, 1
hsa-miR-383	1	0	1	1	1	1	SV2A	synaptic vesicle glycoprotein 2A
hsa-miR-383	1	0	1	1	1	1	ZBTB5	zinc finger and BTB domain containing 5
hsa-miR-383	1	0	1	0	1	1	RAB11FIP2	RAB11 family interacting protein 2 (class I)
hsa-miR-383	1	0	1	0	1	1	ICK	intestinal cell (MAK-like) kinase
hsa-miR-383	1	0	1	1	1	1	SPAST	spastin
hsa-miR-383	1	0	1	1	1	1	RUFY3	RUN and FYVE domain containing 3
hsa-miR-383	1	0	1	1	1	1	FBXO21	F-box protein 21
hsa-miR-383	1	0	1	0	1	1	NMNAT2	nicotinamide nucleotide adenylyltransferase 2
hsa-miR-383	1	0	1	0	1	1	ZNF609	zinc finger protein 609
hsa-miR-383	1	0	1	1	1	1	TRAK2	trafficking protein, kinesin binding 2
hsa-miR-383	1	0	1	0	1	1	PEG10	paternally expressed 10
hsa-miR-383	1	0	1	1	1	1	SMG1	smg-1 homolog, phosphatidylinositol 3-kinase-related kinase (C. elegans)
hsa-miR-383	1	0	1	1	1	1	TBC1D9	TBC1 domain family, member 9 (with GRAM domain)
hsa-miR-383	1	0	1	1	1	1	RTF1	Rtf1, Paf1/RNA polymerase II complex component, homolog (S. cerevisiae)
hsa-miR-383	1	0	1	1	1	1	RCOR1	REST corepressor 1
hsa-miR-383	0	0	1	1	1	1	ARL6IP1	ADP-ribosylation factor-like 6 interacting protein 1
hsa-miR-383	1	0	1	1	1	1	PLCB1	phospholipase C, beta 1 (phosphoinositide-specific)
hsa-miR-383	1	0	1	1	1	1	PDS5A	PDS5, regulator of cohesion maintenance, homolog A (S. cerevisiae)
hsa-miR-383	1	0	1	0	1	1	KIAA1024	KIAA1024
hsa-miR-383	1	0	1	0	1	1	KHNYN	KH and NYN domain containing
hsa-miR-383	1	0	1	1	1	1	CNRIP1	cannabinoid receptor interacting protein 1
hsa-miR-383	1	0	1	0	1	1	GLCE	glucuronic acid epimerase
hsa-miR-383	1	0	1	1	1	1	LRRTM2	leucine rich repeat transmembrane neuronal 2
hsa-miR-383	1	0	1	1	1	1	LTN1	listerin E3 ubiquitin protein ligase 1
hsa-miR-383	1	0	1	0	1	1	PPP1R16B	protein phosphatase 1, regulatory subunit 16B
hsa-miR-383	1	0	1	0	1	1	ERC2	ELKS/RAB6-interacting/CAST family member 2
hsa-miR-383	0	0	1	1	1	1	HERC4	HECT and RLD domain containing E3 ubiquitin protein ligase 4
hsa-miR-383	1	0	1	1	0	0	SENP3	SUMO1/sentrin/SMT3 specific peptidase 3
hsa-miR-383	1	0	1	1	1	1	PLA2G3	phospholipase A2, group III
hsa-miR-383	1	0	1	1	1	1	CDC40	cell division cycle 40 homolog (S. cerevisiae)
hsa-miR-383	1	0	1	1	1	1	TAF9B	TAF9B RNA polymerase II, TATA box binding protein (TBP)-associated factor, 31kDa
hsa-miR-383	1	0	1	1	1	1	UBE2J1	ubiquitin-conjugating enzyme E2, J1
hsa-miR-383	0	0	1	1	1	1	ISOC1	isochorismatase domain containing 1
hsa-miR-383	1	0	1	0	1	1	CNR1	cannabinoid receptor 1 (brain)
hsa-miR-383	1	0	1	1	1	1	NLK	nemo-like kinase
hsa-miR-383	0	0	1	0	1	1	FAM8A1	family with sequence similarity 8, member A1
hsa-miR-383	1	0	1	1	1	1	RAB14	RAB14, member RAS oncogene family
hsa-miR-383	1	0	1	1	1	1	PHF20	PHD finger protein 20
hsa-miR-383	1	0	1	0	1	1	CRIM1	cysteine rich transmembrane BMP regulator 1 (chordin-like)
hsa-miR-383	0	0	1	1	1	1	SPAG11B	sperm associated antigen 11B
hsa-miR-383	1	0	1	1	1	1	DNAJC27	DnaJ (Hsp40) homolog, subfamily C, member 27
hsa-miR-383	1	0	1	1	1	1	GCNT4	glucosaminyl (N-acetyl) transferase 4, core 2
hsa-miR-383	0	0	1	1	1	1	POLE3	polymerase (DNA directed), epsilon 3, accessory subunit
hsa-miR-383	1	0	1	1	1	1	GRID1	glutamate receptor, ionotropic, delta 1
hsa-miR-383	0	0	1	0	1	1	TRIM44	tripartite motif containing 44
hsa-miR-383	1	0	1	1	1	1	HAUS6	HAUS augmin-like complex, subunit 6
hsa-miR-383	0	0	1	1	1	1	ERCC6L	excision repair cross-complementing rodent repair deficiency, complementation group 6-like
hsa-miR-383	1	0	1	0	1	1	DCAF16	DDB1 and CUL4 associated factor 16
hsa-miR-383	0	0	1	1	0	0	LYAR	Ly1 antibody reactive homolog (mouse)
hsa-miR-383	1	0	1	1	1	1	FAM120C	family with sequence similarity 120C
hsa-miR-383	0	0	1	0	1	1	MREG	melanoregulin
hsa-miR-383	1	0	1	1	1	1	ARGLU1	arginine and glutamate rich 1
hsa-miR-383	1	0	1	0	1	1	ARL8B	ADP-ribosylation factor-like 8B
hsa-miR-383	1	0	1	1	1	1	SPTLC3	serine palmitoyltransferase, long chain base subunit 3
hsa-miR-383	0	0	1	1	1	1	TMEM144	transmembrane protein 144
hsa-miR-383	1	0	1	1	1	1	RSBN1	round spermatid basic protein 1
hsa-miR-383	1	0	1	1	1	1	ACER3	alkaline ceramidase 3
hsa-miR-383	0	0	1	1	1	1	STK32B	serine/threonine kinase 32B
hsa-miR-383	1	0	1	1	1	1	EPB41L4B	erythrocyte membrane protein band 4.1 like 4B
hsa-miR-383	0	0	1	1	1	1	CISD1	CDGSH iron sulfur domain 1
hsa-miR-383	1	0	1	1	1	1	SLC16A10	solute carrier family 16, member 10 (aromatic amino acid transporter)
hsa-miR-383	1	0	1	1	1	1	CTTNBP2NL	CTTNBP2 N-terminal like
hsa-miR-383	1	0	1	0	1	1	ELMOD1	ELMO/CED-12 domain containing 1
hsa-miR-383	0	0	1	1	1	1	TERF2IP	telomeric repeat binding factor 2, interacting protein
hsa-miR-383	1	0	1	1	1	1	KCTD5	potassium channel tetramerisation domain containing 5
hsa-miR-383	1	0	1	1	1	1	POLE4	polymerase (DNA-directed), epsilon 4, accessory subunit
hsa-miR-383	0	0	1	0	1	1	ZC3HAV1	zinc finger CCCH-type, antiviral 1
hsa-miR-383	0	0	1	1	1	1	UBQLN4	ubiquilin 4
hsa-miR-383	1	0	1	0	1	1	OTUD7B	OTU domain containing 7B
hsa-miR-383	1	0	1	1	1	1	KIAA1244	KIAA1244
hsa-miR-383	0	0	1	1	1	1	RALGAPA2	Ral GTPase activating protein, alpha subunit 2 (catalytic)
hsa-miR-383	0	0	1	1	1	1	ZNF695	zinc finger protein 695
hsa-miR-383	1	0	1	1	1	1	PTGFRN	prostaglandin F2 receptor negative regulator
hsa-miR-383	1	0	1	1	1	1	RAB22A	RAB22A, member RAS oncogene family
hsa-miR-383	1	0	1	0	1	1	KCNS2	potassium voltage-gated channel, delayed-rectifier, subfamily S, member 2
hsa-miR-383	1	0	1	1	1	1	USP31	ubiquitin specific peptidase 31
hsa-miR-383	1	0	1	1	1	1	MIB1	mindbomb E3 ubiquitin protein ligase 1
hsa-miR-383	1	0	1	0	1	1	SYT4	synaptotagmin IV
hsa-miR-383	1	0	1	1	1	1	NCEH1	neutral cholesterol ester hydrolase 1
hsa-miR-383	1	0	1	1	1	1	NLGN2	neuroligin 2
hsa-miR-383	1	0	1	1	1	1	SEMA6A	sema domain, transmembrane domain (TM), and cytoplasmic domain, (semaphorin) 6A
hsa-miR-383	1	0	1	1	1	1	KLHL14	kelch-like 14 (Drosophila)
hsa-miR-383	1	0	1	1	1	1	CNTN3	contactin 3 (plasmacytoma associated)
hsa-miR-383	1	0	1	1	1	1	KCNJ12	potassium inwardly-rectifying channel, subfamily J, member 12
hsa-miR-383	1	0	1	0	1	1	RAP2A	RAP2A, member of RAS oncogene family
hsa-miR-383	1	0	1	1	0	0	SLC5A6	solute carrier family 5 (sodium-dependent vitamin transporter), member 6
hsa-miR-383	1	0	1	0	1	1	TMX4	thioredoxin-related transmembrane protein 4
hsa-miR-383	0	0	1	0	1	1	MS4A7	membrane-spanning 4-domains, subfamily A, member 7
hsa-miR-383	1	0	1	1	1	1	CDH22	cadherin 22, type 2
hsa-miR-383	0	0	1	1	1	1	CHST6	carbohydrate (N-acetylglucosamine 6-O) sulfotransferase 6
hsa-miR-383	0	0	1	1	1	1	HRH4	histamine receptor H4
hsa-miR-383	1	0	1	1	1	1	TRIB2	tribbles homolog 2 (Drosophila)
hsa-miR-383	1	0	1	1	1	1	OTX2	orthodenticle homeobox 2
hsa-miR-383	0	0	1	0	1	1	CFL2	cofilin 2 (muscle)
hsa-miR-383	1	0	1	1	1	1	ATP2B3	ATPase, Ca++ transporting, plasma membrane 3
hsa-miR-383	1	0	1	1	1	1	MRPL17	mitochondrial ribosomal protein L17
hsa-miR-383	0	0	1	1	1	1	ASCC3	activating signal cointegrator 1 complex subunit 3
hsa-miR-383	1	0	1	1	1	1	CLSTN2	calsyntenin 2
hsa-miR-383	1	0	1	1	1	1	ABCG4	ATP-binding cassette, sub-family G (WHITE), member 4
hsa-miR-383	1	0	1	1	1	1	XPO4	exportin 4
hsa-miR-383	1	0	1	1	1	1	HIF3A	hypoxia inducible factor 3, alpha subunit
hsa-miR-383	1	0	1	1	1	1	TMEM168	transmembrane protein 168
hsa-miR-383	1	0	1	0	1	1	ELOVL4	ELOVL fatty acid elongase 4
hsa-miR-383	1	0	1	1	1	1	DEPTOR	DEP domain containing MTOR-interacting protein
hsa-miR-383	0	0	1	1	1	1	METTL4	methyltransferase like 4
hsa-miR-383	1	0	1	1	1	1	NEUROG2	neurogenin 2
hsa-miR-383	1	0	1	1	1	1	GCC1	GRIP and coiled-coil domain containing 1
hsa-miR-383	1	0	1	1	1	1	CDC73	cell division cycle 73, Paf1/RNA polymerase II complex component, homolog (S. cerevisiae)
hsa-miR-383	1	0	1	1	1	1	ARSJ	arylsulfatase family, member J
hsa-miR-383	0	0	1	1	1	1	AKIRIN1	akirin 1
hsa-miR-383	1	0	1	1	1	1	PPP1R3B	protein phosphatase 1, regulatory subunit 3B
hsa-miR-383	0	0	1	0	1	1	ZYG11B	zyg-11 homolog B (C. elegans)
hsa-miR-383	0	0	1	1	1	1	SNIP1	Smad nuclear interacting protein 1
hsa-miR-383	1	0	1	0	1	1	MOB3B	MOB kinase activator 3B
hsa-miR-383	1	0	1	1	1	1	EIF2C3	eukaryotic translation initiation factor 2C, 3
hsa-miR-383	1	0	1	1	1	1	L2HGDH	L-2-hydroxyglutarate dehydrogenase
hsa-miR-383	0	0	1	1	1	1	ZNF767	zinc finger family member 767
hsa-miR-383	0	0	1	1	1	1	DOCK5	dedicator of cytokinesis 5
hsa-miR-383	1	0	1	0	1	1	NAA25	N(alpha)-acetyltransferase 25, NatB auxiliary subunit
hsa-miR-383	1	0	1	1	1	1	KLHL18	kelch-like 18 (Drosophila)
hsa-miR-383	1	0	1	0	1	1	EDEM3	ER degradation enhancer, mannosidase alpha-like 3
hsa-miR-383	0	0	1	0	1	1	PDGFD	platelet derived growth factor D
hsa-miR-383	1	0	1	0	1	1	SETD7	SET domain containing (lysine methyltransferase) 7
hsa-miR-383	1	0	1	1	1	1	SGPP1	sphingosine-1-phosphate phosphatase 1
hsa-miR-383	1	0	1	0	1	1	CSRNP2	cysteine-serine-rich nuclear protein 2
hsa-miR-383	1	0	1	1	1	1	OR2H1	olfactory receptor, family 2, subfamily H, member 1
hsa-miR-383	1	0	1	1	1	1	SNX27	sorting nexin family member 27
hsa-miR-383	0	0	1	1	1	1	COG3	component of oligomeric golgi complex 3
hsa-miR-383	0	0	1	1	0	0	GRWD1	glutamate-rich WD repeat containing 1
hsa-miR-383	0	0	1	0	1	1	KRTAP1-5	keratin associated protein 1-5
hsa-miR-383	1	0	1	0	1	1	SRSF8	serine/arginine-rich splicing factor 8
hsa-miR-383	0	0	1	1	0	0	ATRIP	ATR interacting protein
hsa-miR-383	1	0	1	1	1	1	ARID5B	AT rich interactive domain 5B (MRF1-like)
hsa-miR-383	1	0	1	1	0	0	MAF1	MAF1 homolog (S. cerevisiae)
hsa-miR-383	0	0	1	1	1	1	EFCAB2	EF-hand calcium binding domain 2
hsa-miR-383	0	0	1	0	1	1	MIEN1	migration and invasion enhancer 1
hsa-miR-383	0	0	1	1	1	1	CYSTM1	cysteine-rich transmembrane module containing 1
hsa-miR-383	0	0	1	1	1	1	CHAMP1	chromosome alignment maintaining phosphoprotein 1
hsa-miR-383	1	0	1	0	1	1	INA	internexin neuronal intermediate filament protein, alpha
hsa-miR-383	1	0	1	1	1	1	SPRYD3	SPRY domain containing 3
hsa-miR-383	1	0	1	0	1	1	UBASH3B	ubiquitin associated and SH3 domain containing B
hsa-miR-383	1	0	1	1	1	1	ARHGAP19	Rho GTPase activating protein 19
hsa-miR-383	1	0	1	1	1	1	PCDH11Y	protocadherin 11 Y-linked
hsa-miR-383	1	0	1	1	0	0	DMRTB1	DMRT-like family B with proline-rich C-terminal, 1
hsa-miR-383	1	0	1	0	1	1	ZCCHC3	zinc finger, CCHC domain containing 3
hsa-miR-383	1	0	1	0	1	1	PURB	purine-rich element binding protein B
hsa-miR-383	1	0	1	1	1	1	EPT1	ethanolaminephosphotransferase 1 (CDP-ethanolamine-specific)
hsa-miR-383	1	0	1	1	1	1	CDC42	cell division cycle 42 (GTP binding protein, 25kDa)
hsa-miR-383	1	0	1	1	1	1	VPS26B	vacuolar protein sorting 26 homolog B (S. pombe)
hsa-miR-383	0	0	1	1	1	1	LENG8	leukocyte receptor cluster (LRC) member 8
hsa-miR-383	0	0	1	1	1	1	ABCA10	ATP-binding cassette, sub-family A (ABC1), member 10
hsa-miR-383	1	0	1	1	1	1	C20orf112	chromosome 20 open reading frame 112
hsa-miR-383	1	0	1	1	1	1	KCNE4	potassium voltage-gated channel, Isk-related family, member 4
hsa-miR-383	1	0	1	1	1	1	COL11A2	collagen, type XI, alpha 2
hsa-miR-383	0	0	1	1	1	1	COLEC12	collectin sub-family member 12
hsa-miR-383	0	0	1	1	1	1	CHST14	carbohydrate (N-acetylgalactosamine 4-0) sulfotransferase 14
hsa-miR-383	0	0	1	1	0	0	RXFP2	relaxin/insulin-like family peptide receptor 2
hsa-miR-383	1	0	1	1	1	1	ADAMTS19	ADAM metallopeptidase with thrombospondin type 1 motif, 19
hsa-miR-383	1	0	1	1	1	1	GLCCI1	glucocorticoid induced transcript 1
hsa-miR-383	1	0	1	0	1	1	SP1	Sp1 transcription factor
hsa-miR-383	1	0	1	1	1	1	CD200R1	CD200 receptor 1
hsa-miR-383	0	0	1	0	1	1	SLC17A8	solute carrier family 17 (sodium-dependent inorganic phosphate cotransporter), member 8
hsa-miR-383	1	0	1	1	1	1	ATRN	attractin
hsa-miR-383	1	0	1	0	1	1	CNOT6L	CCR4-NOT transcription complex, subunit 6-like
hsa-miR-383	1	0	1	1	1	1	TEX261	testis expressed 261
hsa-miR-383	0	0	1	1	0	0	DHRS13	dehydrogenase/reductase (SDR family) member 13
hsa-miR-383	1	0	1	1	1	1	FAM91A1	family with sequence similarity 91, member A1
hsa-miR-383	0	0	1	0	1	1	PIGM	phosphatidylinositol glycan anchor biosynthesis, class M
hsa-miR-383	1	0	1	1	1	1	SLC2A12	solute carrier family 2 (facilitated glucose transporter), member 12
hsa-miR-383	0	0	1	0	1	1	DDIT4L	DNA-damage-inducible transcript 4-like
hsa-miR-383	0	0	1	1	1	1	APOBEC3F	apolipoprotein B mRNA editing enzyme, catalytic polypeptide-like 3F
hsa-miR-383	0	0	1	1	0	0	IL11RA	interleukin 11 receptor, alpha
hsa-miR-383	0	0	1	1	1	1	WFDC9	WAP four-disulfide core domain 9
hsa-miR-383	0	0	1	1	1	1	MRPL27	mitochondrial ribosomal protein L27
hsa-miR-383	1	0	1	0	1	1	SYT11	synaptotagmin XI
hsa-miR-383	0	0	1	1	1	1	ERP27	endoplasmic reticulum protein 27
hsa-miR-383	1	0	1	1	1	1	LSM12	LSM12 homolog (S. cerevisiae)
hsa-miR-383	1	0	1	0	1	1	UBXN10	UBX domain protein 10
hsa-miR-383	0	0	1	0	1	1	AFAP1L1	actin filament associated protein 1-like 1
hsa-miR-383	1	0	1	1	1	1	FAM123B	family with sequence similarity 123B
hsa-miR-383	0	0	1	1	1	1	RDH12	retinol dehydrogenase 12 (all-trans/9-cis/11-cis)
hsa-miR-383	1	0	1	1	1	1	FAM81A	family with sequence similarity 81, member A
hsa-miR-383	1	0	1	1	1	1	PPM1K	protein phosphatase, Mg2+/Mn2+ dependent, 1K
hsa-miR-383	1	0	1	0	1	1	MOSPD2	motile sperm domain containing 2
hsa-miR-383	0	0	1	1	1	1	C12orf50	chromosome 12 open reading frame 50
hsa-miR-383	1	0	1	1	1	1	CNST	consortin, connexin sorting protein
hsa-miR-383	1	0	1	0	1	1	TMEM154	transmembrane protein 154
hsa-miR-383	1	0	1	0	1	1	RWDD4	RWD domain containing 4
hsa-miR-383	0	0	1	1	1	1	GAPT	GRB2-binding adaptor protein, transmembrane
hsa-miR-383	1	0	1	1	1	1	ZCCHC5	zinc finger, CCHC domain containing 5
hsa-miR-383	1	0	1	1	1	1	NXPH1	neurexophilin 1
hsa-miR-383	1	0	1	1	1	1	FAS	Fas (TNF receptor superfamily, member 6)
hsa-miR-383	0	0	1	0	0	0	FLJ32955	uncharacterized protein FLJ32955
hsa-miR-383	0	0	1	1	1	1	MED19	mediator complex subunit 19
hsa-miR-383	1	0	1	1	1	1	LCORL	ligand dependent nuclear receptor corepressor-like
hsa-miR-383	1	0	1	1	1	1	ELMOD2	ELMO/CED-12 domain containing 2
hsa-miR-383	1	0	1	1	1	1	FNDC5	fibronectin type III domain containing 5
hsa-miR-383	0	0	1	1	1	1	CREG2	cellular repressor of E1A-stimulated genes 2
hsa-miR-383	0	0	1	1	1	1	GPR110	G protein-coupled receptor 110
hsa-miR-383	0	0	1	1	1	1	SERHL	serine hydrolase-like
hsa-miR-383	1	0	1	1	1	1	RC3H1	ring finger and CCCH-type domains 1
hsa-miR-383	0	0	1	1	1	1	TNFSF12-TNFSF13	TNFSF12-TNFSF13 readthrough
hsa-miR-383	1	0	1	1	1	1	FAM117B	family with sequence similarity 117, member B
hsa-miR-383	1	0	1	0	1	1	C3orf58	chromosome 3 open reading frame 58
hsa-miR-383	1	0	1	0	1	1	PGM2L1	phosphoglucomutase 2-like 1
hsa-miR-383	1	0	1	1	1	1	RNF149	ring finger protein 149
hsa-miR-383	1	0	1	1	1	1	SLC9A9	solute carrier family 9, subfamily A (NHE9, cation proton antiporter 9), member 9
hsa-miR-383	1	0	1	1	1	1	RABL3	RAB, member of RAS oncogene family-like 3
hsa-miR-383	1	0	1	0	1	1	TMEM167A	transmembrane protein 167A
hsa-miR-383	1	0	1	1	1	1	SYT9	synaptotagmin IX
hsa-miR-383	0	0	1	1	1	1	C16orf54	chromosome 16 open reading frame 54
hsa-miR-383	1	0	1	1	1	1	ZADH2	zinc binding alcohol dehydrogenase domain containing 2
hsa-miR-383	0	0	1	1	0	0	CHMP4B	charged multivesicular body protein 4B
hsa-miR-383	1	0	1	1	1	1	PPM1B	protein phosphatase, Mg2+/Mn2+ dependent, 1B
hsa-miR-383	1	0	1	1	1	1	LRRTM3	leucine rich repeat transmembrane neuronal 3
hsa-miR-383	0	0	1	1	1	1	ZNF831	zinc finger protein 831
hsa-miR-383	1	0	1	1	1	1	MB21D2	Mab-21 domain containing 2
hsa-miR-383	0	0	1	1	0	0	C7orf34	chromosome 7 open reading frame 34
hsa-miR-383	1	0	1	1	1	1	FAM216B	family with sequence similarity 216, member B
hsa-miR-383	0	0	1	1	1	1	SKA2	spindle and kinetochore associated complex subunit 2
hsa-miR-383	0	0	1	1	0	0	GPX6	glutathione peroxidase 6 (olfactory)
hsa-miR-383	1	0	1	1	1	1	RD3	retinal degeneration 3
hsa-miR-383	1	0	1	1	1	1	ADAMTS6	ADAM metallopeptidase with thrombospondin type 1 motif, 6
hsa-miR-383	1	0	1	1	1	1	ASB7	ankyrin repeat and SOCS box containing 7
hsa-miR-383	1	0	1	0	1	1	PTPLB	protein tyrosine phosphatase-like (proline instead of catalytic arginine), member b
hsa-miR-383	0	0	1	1	1	1	EMB	embigin
hsa-miR-383	0	0	1	1	1	1	FAM174A	family with sequence similarity 174, member A
hsa-miR-383	0	0	1	1	0	0	DGAT2L6	diacylglycerol O-acyltransferase 2-like 6
hsa-miR-383	1	0	1	1	0	0	HDDC3	HD domain containing 3
hsa-miR-383	0	0	1	1	1	1	LHFPL4	lipoma HMGIC fusion partner-like 4
hsa-miR-383	1	0	1	0	1	1	ZC3H6	zinc finger CCCH-type containing 6
hsa-miR-383	1	0	1	1	1	1	PTGER3	prostaglandin E receptor 3 (subtype EP3)
hsa-miR-383	0	0	1	0	1	1	SIAH3	siah E3 ubiquitin protein ligase family member 3
hsa-miR-383	1	0	1	1	1	1	NSUN4	NOP2/Sun domain family, member 4
hsa-miR-383	0	0	1	1	1	1	H2AFV	H2A histone family, member V
hsa-miR-383	0	0	1	1	1	1	SLC25A35	solute carrier family 25, member 35
hsa-miR-383	1	0	1	1	0	0	KAZN	kazrin, periplakin interacting protein
hsa-miR-383	0	0	1	1	1	1	SHC4	SHC (Src homology 2 domain containing) family, member 4
hsa-miR-383	0	0	1	1	1	1	ZRANB2	zinc finger, RAN-binding domain containing 2
hsa-miR-383	1	0	1	1	1	1	E2F7	E2F transcription factor 7
hsa-miR-383	1	0	1	1	1	1	PPAPDC2	phosphatidic acid phosphatase type 2 domain containing 2
hsa-miR-383	1	0	1	1	1	1	IGSF1	immunoglobulin superfamily, member 1
hsa-miR-383	1	0	1	1	1	1	ENSA	endosulfine alpha
hsa-miR-383	0	0	1	1	1	1	SEPT14	septin 14
hsa-miR-383	0	0	1	0	0	0	C16orf47	chromosome 16 open reading frame 47
hsa-miR-383	0	0	1	1	1	1	FAM177B	family with sequence similarity 177, member B
hsa-miR-383	1	0	1	1	1	1	ADAMTSL3	ADAMTS-like 3
hsa-miR-383	1	0	1	1	1	1	C11orf87	chromosome 11 open reading frame 87
hsa-miR-383	0	0	1	0	1	1	TMEM215	transmembrane protein 215
hsa-miR-383	0	0	1	0	0	0	TTTY2	testis-specific transcript, Y-linked 2 (non-protein coding)
hsa-miR-383	0	0	1	0	0	0	ST13P4	suppression of tumorigenicity 13 (colon carcinoma) (Hsp70 interacting protein) pseudogene 4
hsa-miR-383	0	0	1	0	0	0	ST13P6	suppression of tumorigenicity 13 (colon carcinoma) (Hsp70 interacting protein) pseudogene 6
hsa-miR-383	0	0	1	0	0	0	NXF4	nuclear RNA export factor 4 pseudogene
hsa-miR-383	0	0	1	0	0	0	SNORA33	small nucleolar RNA, H/ACA box 33
hsa-miR-383	0	0	1	0	0	0	SNORA4	small nucleolar RNA, H/ACA box 4
hsa-miR-383	0	0	1	0	0	0	TRIM78P	tripartite motif containing 78, pseudogene
hsa-miR-383	0	0	1	0	0	0	TPTE2P3	transmembrane phosphoinositide 3-phosphatase and tensin homolog 2 pseudogene 3
hsa-miR-383	0	0	1	0	0	0	LOC374443	C-type lectin domain family 2, member D pseudogene
hsa-miR-383	0	0	1	0	0	0	RNF126P1	ring finger protein 126 pseudogene 1
hsa-miR-383	0	0	1	0	0	0	MALAT1	metastasis associated lung adenocarcinoma transcript 1 (non-protein coding)
hsa-miR-383	0	0	1	0	0	0	SIGLEC16	sialic acid binding Ig-like lectin 16 (gene/pseudogene)
hsa-miR-383	0	0	1	0	0	0	HNRNPA1P16	heterogeneous nuclear ribonucleoprotein A1 pseudogene 16
hsa-miR-383	0	0	1	0	0	0	HNRNPA1P10	heterogeneous nuclear ribonucleoprotein A1 pseudogene 10
hsa-miR-383	0	0	1	0	0	0	SCARNA2	small Cajal body-specific RNA 2
hsa-miR-383	0	0	1	0	0	0	SNORD19	small nucleolar RNA, C/D box 19
hsa-miR-383	0	0	1	0	0	0	SNORD111	small nucleolar RNA, C/D box 111
hsa-miR-383	0	0	1	0	0	0	HSP90B3P	heat shock protein 90kDa beta (Grp94), member 3, pseudogene
hsa-miR-383	0	0	1	0	0	0	USP32P1	ubiquitin specific peptidase 32 pseudogene 1
hsa-miR-383	0	0	1	0	0	0	GMCL1P1	germ cell-less, spermatogenesis associated 1 pseudogene 1
hsa-miR-383	0	0	1	0	0	0	LOC729603	calcium binding protein P22 pseudogene
hsa-miR-383	1	0	1	1	1	1	CBLB	Cbl proto-oncogene, E3 ubiquitin protein ligase B
hsa-miR-383	0	0	1	1	1	1	BBS9	Bardet-Biedl syndrome 9
hsa-miR-383	1	0	1	1	1	1	IFNAR2	interferon (alpha, beta and omega) receptor 2
hsa-miR-383	1	0	1	1	1	1	CFTR	cystic fibrosis transmembrane conductance regulator (ATP-binding cassette sub-family C, member 7)
hsa-miR-383	0	0	1	1	1	1	ARHGAP33	Rho GTPase activating protein 33
hsa-miR-383	1	0	1	1	0	0	YBX2	Y box binding protein 2
hsa-miR-383	0	0	0	1	1	1	MGST1	microsomal glutathione S-transferase 1
hsa-miR-383	0	0	1	1	1	1	KLRAP1	killer cell lectin-like receptor subfamily A pseudogene 1
hsa-miR-383	0	0	0	1	0	0	RFC2	replication factor C (activator 1) 2, 40kDa
hsa-miR-383	0	0	1	1	1	1	AQR	aquarius homolog (mouse)
hsa-miR-383	0	0	0	1	0	0	KLK14	kallikrein-related peptidase 14
hsa-miR-383	0	0	1	1	1	1	TRIP13	thyroid hormone receptor interactor 13
hsa-miR-383	0	0	1	1	1	1	SPP2	secreted phosphoprotein 2, 24kDa
hsa-miR-383	0	0	1	1	0	0	ALPK1	alpha-kinase 1
hsa-miR-383	0	0	1	1	1	1	NR1H4	nuclear receptor subfamily 1, group H, member 4
hsa-miR-383	0	0	1	1	0	0	PPP1R15A	protein phosphatase 1, regulatory subunit 15A
hsa-miR-383	1	0	1	1	1	1	MLF2	myeloid leukemia factor 2
hsa-miR-383	1	0	1	1	0	0	YPEL3	yippee-like 3 (Drosophila)
hsa-miR-383	0	0	1	1	0	0	DHPS	deoxyhypusine synthase
hsa-miR-383	0	0	0	1	0	0	CATSPERG	catsper channel auxiliary subunit gamma
hsa-miR-383	0	0	1	1	1	1	AMELY	amelogenin, Y-linked
hsa-miR-383	1	0	1	1	0	0	MAPK12	mitogen-activated protein kinase 12
hsa-miR-383	1	0	1	1	1	1	MAPK1	mitogen-activated protein kinase 1
hsa-miR-383	0	0	1	1	0	0	NIPSNAP1	nipsnap homolog 1 (C. elegans)
hsa-miR-383	0	0	0	1	1	1	ADSL	adenylosuccinate lyase
hsa-miR-383	0	0	1	1	0	0	UPK3A	uroplakin 3A
hsa-miR-383	1	0	0	1	1	1	NID2	nidogen 2 (osteonidogen)
hsa-miR-383	0	0	1	1	1	1	PRMT5	protein arginine methyltransferase 5
hsa-miR-383	1	0	1	1	0	0	ALKBH1	alkB, alkylation repair homolog 1 (E. coli)
hsa-miR-383	1	0	1	1	1	1	CHGA	chromogranin A (parathyroid secretory protein 1)
hsa-miR-383	0	0	1	1	1	1	CSTF1	cleavage stimulation factor, 3' pre-RNA, subunit 1, 50kDa
hsa-miR-383	0	0	1	1	1	1	PIN4	protein (peptidylprolyl cis/trans isomerase) NIMA-interacting, 4 (parvulin)
hsa-miR-383	1	0	0	1	1	1	EHD4	EH-domain containing 4
hsa-miR-383	1	0	1	1	1	1	DCTN6	dynactin 6
hsa-miR-383	0	0	1	1	1	1	AES	amino-terminal enhancer of split
hsa-miR-383	0	0	0	1	1	1	SGTA	small glutamine-rich tetratricopeptide repeat (TPR)-containing, alpha
hsa-miR-383	0	0	0	1	1	1	GTPBP10	GTP-binding protein 10 (putative)
hsa-miR-383	0	0	0	1	1	1	KAT2A	K(lysine) acetyltransferase 2A
hsa-miR-383	0	0	1	1	1	1	NFKB1	nuclear factor of kappa light polypeptide gene enhancer in B-cells 1
hsa-miR-383	0	0	1	1	1	1	LDHA	lactate dehydrogenase A
hsa-miR-383	1	0	1	1	0	0	PRPF19	PRP19/PSO4 pre-mRNA processing factor 19 homolog (S. cerevisiae)
hsa-miR-383	1	0	1	1	1	1	MYF5	myogenic factor 5
hsa-miR-383	0	0	1	1	1	1	ARHGDIB	Rho GDP dissociation inhibitor (GDI) beta
hsa-miR-383	0	0	1	1	1	1	RHAG	Rh-associated glycoprotein
hsa-miR-383	0	0	1	1	0	0	MLH1	mutL homolog 1, colon cancer, nonpolyposis type 2 (E. coli)
hsa-miR-383	0	0	0	1	0	0	SPCS1	signal peptidase complex subunit 1 homolog (S. cerevisiae)
hsa-miR-383	0	0	1	1	0	0	INO80B	INO80 complex subunit B
hsa-miR-383	0	0	0	1	1	1	OPRD1	opioid receptor, delta 1
hsa-miR-383	0	0	0	1	0	0	C2orf40	chromosome 2 open reading frame 40
hsa-miR-383	1	0	1	1	0	0	CCDC92	coiled-coil domain containing 92
hsa-miR-383	0	0	0	1	1	1	PCDHB12	protocadherin beta 12
hsa-miR-383	0	0	1	1	0	0	TCEAL3	transcription elongation factor A (SII)-like 3
hsa-miR-383	0	0	0	1	0	0	ACTR5	ARP5 actin-related protein 5 homolog (yeast)
hsa-miR-383	0	0	0	1	0	0	PEPD	peptidase D
hsa-miR-383	0	0	1	1	1	1	CEACAM8	carcinoembryonic antigen-related cell adhesion molecule 8
hsa-miR-383	0	0	1	1	0	0	ABCC10	ATP-binding cassette, sub-family C (CFTR/MRP), member 10
hsa-miR-383	0	0	1	1	1	1	SNRPB2	small nuclear ribonucleoprotein polypeptide B
hsa-miR-383	0	0	1	1	1	1	NR1D1	nuclear receptor subfamily 1, group D, member 1
hsa-miR-383	0	0	0	1	1	1	STATH	statherin
hsa-miR-383	0	0	0	1	1	1	HTN1	histatin 1
hsa-miR-383	1	0	0	1	1	1	WNK4	WNK lysine deficient protein kinase 4
hsa-miR-383	0	0	0	1	0	0	PYCARD	PYD and CARD domain containing
hsa-miR-383	0	0	0	1	0	0	NCF4	neutrophil cytosolic factor 4, 40kDa
hsa-miR-383	0	0	0	1	1	1	MTX2	metaxin 2
hsa-miR-383	0	0	0	1	0	0	CFHR4	complement factor H-related 4
hsa-miR-383	0	0	1	1	1	1	KRT12	keratin 12
hsa-miR-383	0	0	0	1	1	1	EFCAB4B	EF-hand calcium binding domain 4B
hsa-miR-383	0	0	0	1	1	1	ACSBG2	acyl-CoA synthetase bubblegum family member 2
hsa-miR-383	0	0	1	1	0	0	CACNG6	calcium channel, voltage-dependent, gamma subunit 6
hsa-miR-383	0	0	1	1	1	1	CCDC62	coiled-coil domain containing 62
hsa-miR-383	1	0	1	1	1	1	SLC35D2	solute carrier family 35, member D2
hsa-miR-383	0	0	1	1	1	1	RBM39	RNA binding motif protein 39
hsa-miR-383	1	0	1	1	0	0	ATP13A3	ATPase type 13A3
hsa-miR-383	0	0	0	1	1	1	VRTN	vertebrae development homolog (pig)
hsa-miR-383	1	0	1	1	1	1	ARF3	ADP-ribosylation factor 3
hsa-miR-383	0	0	1	1	1	1	GRP	gastrin-releasing peptide
hsa-miR-383	0	0	0	1	0	0	RNFT2	ring finger protein, transmembrane 2
hsa-miR-383	0	0	0	1	1	1	ASB4	ankyrin repeat and SOCS box containing 4
hsa-miR-383	0	0	0	1	1	1	ESPL1	extra spindle pole bodies homolog 1 (S. cerevisiae)
hsa-miR-383	0	0	0	1	1	1	MFSD9	major facilitator superfamily domain containing 9
hsa-miR-383	0	0	1	1	1	1	MED4	mediator complex subunit 4
hsa-miR-383	0	0	0	1	0	0	CIDEB	cell death-inducing DFFA-like effector b
hsa-miR-383	0	0	1	1	1	1	KCTD3	potassium channel tetramerisation domain containing 3
hsa-miR-383	0	0	1	1	0	0	PSORS1C2	psoriasis susceptibility 1 candidate 2
hsa-miR-383	0	0	1	1	1	1	SLC16A7	solute carrier family 16, member 7 (monocarboxylic acid transporter 2)
hsa-miR-383	0	0	1	1	1	1	HS3ST2	heparan sulfate (glucosamine) 3-O-sulfotransferase 2
hsa-miR-383	1	0	1	1	1	1	TBC1D1	TBC1 (tre-2/USP6, BUB2, cdc16) domain family, member 1
hsa-miR-383	0	0	1	1	1	1	UTP6	UTP6, small subunit (SSU) processome component, homolog (yeast)
hsa-miR-383	0	0	1	1	0	0	ANAPC5	anaphase promoting complex subunit 5
hsa-miR-383	0	0	1	1	1	1	HERC1	HECT and RLD domain containing E3 ubiquitin protein ligase family member 1
hsa-miR-383	0	0	0	1	0	0	MYOM2	myomesin (M-protein) 2, 165kDa
hsa-miR-383	0	0	1	1	0	0	ZNF839	zinc finger protein 839
hsa-miR-383	0	0	0	1	1	1	ALG1	asparagine-linked glycosylation 1, beta-1,4-mannosyltransferase homolog (S. cerevisiae)
hsa-miR-383	0	0	0	1	1	1	CDC45	cell division cycle 45 homolog (S. cerevisiae)
hsa-miR-383	0	0	1	1	0	0	NOVA2	neuro-oncological ventral antigen 2
hsa-miR-383	0	0	1	1	1	1	IL27RA	interleukin 27 receptor, alpha
hsa-miR-383	0	0	1	1	0	0	LTK	leukocyte receptor tyrosine kinase
hsa-miR-383	0	0	1	1	1	1	CHIC2	cysteine-rich hydrophobic domain 2
hsa-miR-383	1	0	0	1	1	1	MFN1	mitofusin 1
hsa-miR-383	0	0	1	1	1	1	CAPZB	capping protein (actin filament) muscle Z-line, beta
hsa-miR-383	1	0	0	1	0	0	ECE1	endothelin converting enzyme 1
hsa-miR-383	1	0	0	1	1	1	PPAT	phosphoribosyl pyrophosphate amidotransferase
hsa-miR-383	0	0	1	1	1	1	MFSD1	major facilitator superfamily domain containing 1
hsa-miR-383	0	0	1	1	1	1	TOP2B	topoisomerase (DNA) II beta 180kDa
hsa-miR-383	0	0	0	1	1	1	HERC6	HECT and RLD domain containing E3 ubiquitin protein ligase family member 6
hsa-miR-383	0	0	1	1	1	1	ZNF638	zinc finger protein 638
hsa-miR-383	0	0	0	1	1	1	RAB17	RAB17, member RAS oncogene family
hsa-miR-383	0	0	0	1	1	1	MLPH	melanophilin
hsa-miR-383	0	0	0	1	0	0	FGF10	fibroblast growth factor 10
hsa-miR-383	0	0	1	1	0	0	GCKR	glucokinase (hexokinase 4) regulator
hsa-miR-383	0	0	1	1	1	1	HOOK2	hook homolog 2 (Drosophila)
hsa-miR-383	1	0	0	1	1	1	WNT2	wingless-type MMTV integration site family member 2
hsa-miR-383	0	0	1	1	1	1	EXPH5	exophilin 5
hsa-miR-383	0	0	1	1	1	1	REXO2	REX2, RNA exonuclease 2 homolog (S. cerevisiae)
hsa-miR-383	0	0	0	1	0	0	SFRP5	secreted frizzled-related protein 5
hsa-miR-383	0	0	1	1	0	0	FBXO7	F-box protein 7
hsa-miR-383	0	0	1	1	0	0	TAPBPL	TAP binding protein-like
hsa-miR-383	0	0	0	1	0	0	GAS2L3	growth arrest-specific 2 like 3
hsa-miR-383	0	0	0	1	0	0	DIABLO	diablo, IAP-binding mitochondrial protein
hsa-miR-383	0	0	1	1	1	1	HDC	histidine decarboxylase
hsa-miR-383	1	0	1	1	0	0	SCAMP2	secretory carrier membrane protein 2
hsa-miR-383	0	0	0	1	1	1	MYO19	myosin XIX
hsa-miR-383	1	0	1	1	1	1	GNAL	guanine nucleotide binding protein (G protein), alpha activating activity polypeptide, olfactory type
hsa-miR-383	1	0	1	1	1	1	GATA6	GATA binding protein 6
hsa-miR-383	0	0	1	1	0	0	DMRTC2	DMRT-like family C2
hsa-miR-383	0	0	1	1	0	0	NTN5	netrin 5
hsa-miR-383	0	0	0	1	0	0	ECSIT	ECSIT homolog (Drosophila)
hsa-miR-383	1	0	0	1	0	0	PGD	phosphogluconate dehydrogenase
hsa-miR-383	1	0	0	1	1	1	SOX13	SRY (sex determining region Y)-box 13
hsa-miR-383	0	0	1	1	1	1	MALL	mal, T-cell differentiation protein-like
hsa-miR-383	0	0	0	1	1	1	SLC10A4	solute carrier family 10 (sodium/bile acid cotransporter family), member 4
hsa-miR-383	0	0	1	1	1	1	FABP2	fatty acid binding protein 2, intestinal
hsa-miR-383	0	0	0	1	1	1	METTL14	methyltransferase like 14
hsa-miR-383	0	0	0	1	1	1	SRD5A1	steroid-5-alpha-reductase, alpha polypeptide 1 (3-oxo-5 alpha-steroid delta 4-dehydrogenase alpha 1)
hsa-miR-383	0	0	1	1	0	0	PMS2P3	postmeiotic segregation increased 2 pseudogene 3
hsa-miR-383	0	0	1	1	0	0	AGBL3	ATP/GTP binding protein-like 3
hsa-miR-383	0	0	1	1	1	1	TAF1	TAF1 RNA polymerase II, TATA box binding protein (TBP)-associated factor, 250kDa
hsa-miR-383	0	0	1	1	0	0	SNX12	sorting nexin 12
hsa-miR-383	0	0	1	1	0	0	SSRP1	structure specific recognition protein 1
hsa-miR-383	0	0	1	1	0	0	TMX2	thioredoxin-related transmembrane protein 2
hsa-miR-383	0	0	1	1	0	0	WDR74	WD repeat domain 74
hsa-miR-383	0	0	1	1	0	0	VPS51	vacuolar protein sorting 51 homolog (S. cerevisiae)
hsa-miR-383	0	0	0	1	1	1	ZNF233	zinc finger protein 233
hsa-miR-383	0	0	0	1	1	1	LDHC	lactate dehydrogenase C
hsa-miR-383	0	0	0	1	1	1	LDHAL6A	lactate dehydrogenase A-like 6A
hsa-miR-383	0	0	0	1	0	0	C12orf45	chromosome 12 open reading frame 45
hsa-miR-383	0	0	0	1	0	0	PLBD2	phospholipase B domain containing 2
hsa-miR-383	0	0	1	1	1	1	MLF1IP	MLF1 interacting protein
hsa-miR-383	0	0	1	1	1	1	VWA8	von Willebrand factor A domain containing 8
hsa-miR-383	0	0	0	1	1	1	TDO2	tryptophan 2,3-dioxygenase
hsa-miR-383	1	0	0	1	0	0	POC5	POC5 centriolar protein homolog (Chlamydomonas)
hsa-miR-383	0	0	0	1	1	1	CAPSL	calcyphosine-like
hsa-miR-383	1	0	1	1	1	1	GTF2E1	general transcription factor IIE, polypeptide 1, alpha 56kDa
hsa-miR-383	0	0	1	1	1	1	TSEN2	tRNA splicing endonuclease 2 homolog (S. cerevisiae)
hsa-miR-383	0	0	0	1	0	0	C17orf50	chromosome 17 open reading frame 50
hsa-miR-383	0	0	0	1	0	0	OR4K1	olfactory receptor, family 4, subfamily K, member 1
hsa-miR-383	0	0	0	1	0	0	SLC7A7	solute carrier family 7 (amino acid transporter light chain, y+L system), member 7
hsa-miR-383	0	0	0	1	1	1	LRGUK	leucine-rich repeats and guanylate kinase domain containing
hsa-miR-383	0	0	0	1	1	1	KDM8	lysine (K)-specific demethylase 8
hsa-miR-383	0	0	1	1	0	0	NODAL	nodal homolog (mouse)
hsa-miR-383	0	0	1	1	0	0	AIFM1	apoptosis-inducing factor, mitochondrion-associated, 1
hsa-miR-383	0	0	0	1	1	1	LYZL4	lysozyme-like 4
hsa-miR-383	0	0	0	1	1	1	ZNF19	zinc finger protein 19
hsa-miR-383	0	0	0	1	0	0	CCNB2	cyclin B2
hsa-miR-383	0	0	1	1	0	0	GPR153	G protein-coupled receptor 153
hsa-miR-383	0	0	1	1	0	0	ACTR1B	ARP1 actin-related protein 1 homolog B, centractin beta (yeast)
hsa-miR-383	1	0	1	1	1	1	SLC12A6	solute carrier family 12 (potassium/chloride transporters), member 6
hsa-miR-383	1	0	1	1	0	0	ISL2	ISL LIM homeobox 2
hsa-miR-383	0	0	0	1	0	0	C21orf58	chromosome 21 open reading frame 58
hsa-miR-383	0	0	1	1	0	0	TLCD1	TLC domain containing 1
hsa-miR-383	0	0	0	1	1	1	CCR2	chemokine (C-C motif) receptor 2
hsa-miR-383	0	0	1	1	1	1	FCRL2	Fc receptor-like 2
hsa-miR-383	0	0	1	1	0	0	ALDH16A1	aldehyde dehydrogenase 16 family, member A1
hsa-miR-383	1	0	0	1	1	1	KRT72	keratin 72
hsa-miR-383	0	0	1	1	1	1	CXCL16	chemokine (C-X-C motif) ligand 16
hsa-miR-383	0	0	0	1	0	0	CYP4A22	cytochrome P450, family 4, subfamily A, polypeptide 22
hsa-miR-383	0	0	1	1	0	0	GMEB1	glucocorticoid modulatory element binding protein 1
hsa-miR-383	0	0	1	1	1	1	PEX13	peroxisomal biogenesis factor 13
hsa-miR-383	0	0	1	1	1	1	C2orf47	chromosome 2 open reading frame 47
hsa-miR-383	0	0	0	1	1	1	HPGDS	hematopoietic prostaglandin D synthase
hsa-miR-383	0	0	1	1	1	1	ARHGAP25	Rho GTPase activating protein 25
hsa-miR-383	1	0	0	1	1	1	MRPS18C	mitochondrial ribosomal protein S18C
hsa-miR-383	0	0	1	1	1	1	SMYD1	SET and MYND domain containing 1
hsa-miR-383	0	0	0	1	0	0	DRD3	dopamine receptor D3
hsa-miR-383	0	0	0	1	1	1	GDF9	growth differentiation factor 9
hsa-miR-383	0	0	1	1	1	1	BRI3	brain protein I3
hsa-miR-383	1	0	1	1	1	1	ORC5	origin recognition complex, subunit 5
hsa-miR-383	1	0	1	1	1	1	NLGN4Y	neuroligin 4, Y-linked
hsa-miR-383	0	0	1	1	1	1	MELK	maternal embryonic leucine zipper kinase
hsa-miR-383	0	0	1	1	1	1	SLC7A3	solute carrier family 7 (cationic amino acid transporter, y+ system), member 3
hsa-miR-383	1	0	1	1	1	1	COX11	COX11 cytochrome c oxidase assembly homolog (yeast)
hsa-miR-383	0	0	1	1	1	1	NETO1	neuropilin (NRP) and tolloid (TLL)-like 1
hsa-miR-383	0	0	1	1	0	0	PLD4	phospholipase D family, member 4
hsa-miR-383	0	0	0	1	0	0	SLC9A5	solute carrier family 9, subfamily A (NHE5, cation proton antiporter 5), member 5
hsa-miR-383	0	0	1	1	1	1	FANCI	Fanconi anemia, complementation group I
hsa-miR-383	0	0	1	1	1	1	FAM96A	family with sequence similarity 96, member A
hsa-miR-383	0	0	1	1	0	0	SLC26A10	solute carrier family 26, member 10
hsa-miR-383	0	0	1	1	1	1	ARHGEF25	Rho guanine nucleotide exchange factor (GEF) 25
hsa-miR-383	0	0	0	1	1	1	ENTHD2	ENTH domain containing 2
hsa-miR-383	0	0	0	1	1	1	FLJ30403	uncharacterized LOC729975
hsa-miR-383	0	0	1	1	0	0	CDK2AP2	cyclin-dependent kinase 2 associated protein 2
hsa-miR-383	0	0	1	1	1	1	FGA	fibrinogen alpha chain
hsa-miR-383	0	0	0	1	0	0	OR6F1	olfactory receptor, family 6, subfamily F, member 1
hsa-miR-383	0	0	0	1	0	0	CCBL1	cysteine conjugate-beta lyase, cytoplasmic
hsa-miR-383	1	0	1	1	1	1	HIPK3	homeodomain interacting protein kinase 3
hsa-miR-383	1	0	1	1	1	1	PCBP1	poly(rC) binding protein 1
hsa-miR-383	0	0	1	1	0	0	FGGY	FGGY carbohydrate kinase domain containing
hsa-miR-383	0	0	1	1	1	1	ATP6V1G2	ATPase, H+ transporting, lysosomal 13kDa, V1 subunit G2
hsa-miR-383	0	0	1	1	0	0	COPS6	COP9 constitutive photomorphogenic homolog subunit 6 (Arabidopsis)
hsa-miR-383	0	0	0	1	1	1	GPR37	G protein-coupled receptor 37 (endothelin receptor type B-like)
hsa-miR-383	1	0	1	1	1	1	FAM103A1	family with sequence similarity 103, member A1
hsa-miR-383	0	0	0	1	1	1	ZNF420	zinc finger protein 420
hsa-miR-383	0	0	1	1	0	0	HSPB2	heat shock 27kDa protein 2
hsa-miR-383	1	0	1	1	1	1	SOX7	SRY (sex determining region Y)-box 7
hsa-miR-383	0	0	1	1	1	1	CSN3	casein kappa
hsa-miR-383	0	0	1	1	1	1	PPIH	peptidylprolyl isomerase H (cyclophilin H)
hsa-miR-383	1	0	1	1	1	1	PCDHGA2	protocadherin gamma subfamily A, 2
hsa-miR-383	0	0	1	1	1	1	CCDC132	coiled-coil domain containing 132
hsa-miR-383	0	0	1	1	1	1	KCNG3	potassium voltage-gated channel, subfamily G, member 3
hsa-miR-383	1	0	1	1	1	1	TRIM56	tripartite motif containing 56
hsa-miR-383	0	0	1	1	1	1	SNX7	sorting nexin 7
hsa-miR-383	0	0	0	1	1	1	MRPL13	mitochondrial ribosomal protein L13
hsa-miR-383	0	0	1	1	1	1	TMEM87A	transmembrane protein 87A
hsa-miR-383	0	0	1	1	1	1	CCDC8	coiled-coil domain containing 8
hsa-miR-383	0	0	1	1	1	1	CMTM8	CKLF-like MARVEL transmembrane domain containing 8
hsa-miR-383	0	0	1	1	1	1	CCNE2	cyclin E2
hsa-miR-383	1	0	1	1	1	1	CASP3	caspase 3, apoptosis-related cysteine peptidase
hsa-miR-383	1	0	1	1	1	1	RSF1	remodeling and spacing factor 1
hsa-miR-383	0	0	0	1	0	0	GSDMB	gasdermin B
hsa-miR-383	0	0	1	1	1	1	CYP7B1	cytochrome P450, family 7, subfamily B, polypeptide 1
hsa-miR-383	1	0	0	1	1	1	CTSF	cathepsin F
hsa-miR-383	0	0	1	1	1	1	REP15	RAB15 effector protein
hsa-miR-383	0	0	1	1	0	0	RIN1	Ras and Rab interactor 1
hsa-miR-383	0	0	1	1	1	1	LSM1	LSM1 homolog, U6 small nuclear RNA associated (S. cerevisiae)
hsa-miR-383	1	0	1	1	1	1	COQ2	coenzyme Q2 homolog, prenyltransferase (yeast)
hsa-miR-383	0	0	0	1	1	1	RAG2	recombination activating gene 2
hsa-miR-383	0	0	0	1	0	0	OR9Q2	olfactory receptor, family 9, subfamily Q, member 2
hsa-miR-383	0	0	0	1	0	0	NFE2	nuclear factor (erythroid-derived 2), 45kDa
hsa-miR-383	1	0	1	1	1	1	STX16	syntaxin 16
hsa-miR-383	1	0	0	1	0	0	FBXL18	F-box and leucine-rich repeat protein 18
hsa-miR-383	1	0	0	1	1	1	TCHP	trichoplein, keratin filament binding
hsa-miR-383	1	0	1	1	0	0	PPP1CA	protein phosphatase 1, catalytic subunit, alpha isozyme
hsa-miR-383	0	0	0	1	1	1	C17orf101	chromosome 17 open reading frame 101
hsa-miR-383	0	0	1	1	0	0	SLC29A1	solute carrier family 29 (nucleoside transporters), member 1
hsa-miR-383	0	0	0	1	0	0	CXorf59	chromosome X open reading frame 59
hsa-miR-383	0	0	1	1	0	0	MKS1	Meckel syndrome, type 1
hsa-miR-383	0	0	0	1	0	0	OR4A15	olfactory receptor, family 4, subfamily A, member 15
hsa-miR-383	0	0	0	1	0	0	OR2A4	olfactory receptor, family 2, subfamily A, member 4
hsa-miR-383	0	0	1	1	0	0	LSM10	LSM10, U7 small nuclear RNA associated
hsa-miR-383	0	0	1	1	1	1	SCIMP	SLP adaptor and CSK interacting membrane protein
hsa-miR-383	1	0	1	1	1	1	PKN2	protein kinase N2
hsa-miR-383	0	0	0	1	0	0	ZFAND2A	zinc finger, AN1-type domain 2A
hsa-miR-383	1	0	1	1	1	1	TRIT1	tRNA isopentenyltransferase 1
hsa-miR-383	0	0	1	1	0	0	PARL	presenilin associated, rhomboid-like
hsa-miR-383	1	0	1	1	1	1	RFX7	regulatory factor X, 7
hsa-miR-383	0	0	0	1	0	0	PGAM5	phosphoglycerate mutase family member 5
hsa-miR-383	0	0	0	1	1	1	S100Z	S100 calcium binding protein Z
hsa-miR-383	0	0	1	1	0	0	SLC38A5	solute carrier family 38, member 5
hsa-miR-383	0	0	1	1	0	0	KDM5D	lysine (K)-specific demethylase 5D
hsa-miR-383	1	0	1	1	1	1	GANC	glucosidase, alpha; neutral C
hsa-miR-383	0	0	1	1	0	0	AVL9	AVL9 homolog (S. cerevisiase)
hsa-miR-383	0	0	1	1	1	1	ELL3	elongation factor RNA polymerase II-like 3
hsa-miR-383	1	0	1	1	1	1	RBBP6	retinoblastoma binding protein 6
hsa-miR-383	0	0	1	1	0	0	C17orf53	chromosome 17 open reading frame 53
hsa-miR-383	0	0	1	1	1	1	GALNT11	UDP-N-acetyl-alpha-D-galactosamine:polypeptide N-acetylgalactosaminyltransferase 11 (GalNAc-T11)
hsa-miR-383	0	0	0	1	1	1	SPPL2B	signal peptide peptidase like 2B
hsa-miR-383	0	0	1	1	0	0	TCP1	t-complex 1
hsa-miR-383	0	0	0	1	0	0	ROGDI	rogdi homolog (Drosophila)
hsa-miR-383	0	0	0	1	0	0	HECW1-IT1	HECW1 intronic transcript 1 (non-protein coding)
hsa-miR-383	0	0	0	1	0	0	OR6C2	olfactory receptor, family 6, subfamily C, member 2
hsa-miR-383	0	0	0	1	0	0	CDH7	cadherin 7, type 2
hsa-miR-383	1	0	1	1	1	1	METAP2	methionyl aminopeptidase 2
hsa-miR-383	0	0	1	1	1	1	USP39	ubiquitin specific peptidase 39
hsa-miR-383	0	0	1	1	1	1	SH3GL3	SH3-domain GRB2-like 3
hsa-miR-383	0	0	0	1	0	0	SLC47A2	solute carrier family 47, member 2
hsa-miR-383	0	0	1	1	1	1	CTNNAL1	catenin (cadherin-associated protein), alpha-like 1
hsa-miR-383	1	0	1	1	1	1	RNF10	ring finger protein 10
hsa-miR-383	0	0	1	1	1	1	KIF15	kinesin family member 15
hsa-miR-383	0	0	0	1	1	1	NR2E3	nuclear receptor subfamily 2, group E, member 3
hsa-miR-383	1	0	1	1	1	1	XKR4	XK, Kell blood group complex subunit-related family, member 4
hsa-miR-383	0	0	1	1	0	0	GPX5	glutathione peroxidase 5 (epididymal androgen-related protein)
hsa-miR-383	1	0	1	1	1	1	WT1-AS	WT1 antisense RNA
hsa-miR-383	0	0	1	1	1	1	XRCC5	X-ray repair complementing defective repair in Chinese hamster cells 5 (double-strand-break rejoining)
hsa-miR-383	0	0	1	1	0	0	KRT36	keratin 36
hsa-miR-383	0	0	1	1	1	1	CAPS2	calcyphosine 2
hsa-miR-383	0	0	0	1	0	0	TTTY8B	testis-specific transcript, Y-linked 8B (non-protein coding)
hsa-miR-383	0	0	0	1	1	1	C1S	complement component 1, s subcomponent
hsa-miR-383	0	0	0	1	0	0	PTCHD3	patched domain containing 3
hsa-miR-383	0	0	1	1	1	1	ZNF599	zinc finger protein 599
hsa-miR-383	0	0	0	1	0	0	GDF3	growth differentiation factor 3
hsa-miR-383	0	0	0	1	1	1	ZNF570	zinc finger protein 570
hsa-miR-383	0	0	0	1	0	0	LCN12	lipocalin 12
hsa-miR-383	0	0	0	1	0	0	KRT6A	keratin 6A
hsa-miR-383	1	0	1	1	1	1	EPB41L5	erythrocyte membrane protein band 4.1 like 5
hsa-miR-383	0	0	1	1	0	0	OTOP2	otopetrin 2
hsa-miR-383	0	0	1	1	1	1	BMP8A	bone morphogenetic protein 8a
hsa-miR-383	1	0	1	1	1	1	DND1	dead end homolog 1 (zebrafish)
hsa-miR-383	0	0	1	1	1	1	SPRR3	small proline-rich protein 3
hsa-miR-383	1	0	1	1	1	1	ACTG1	actin, gamma 1
hsa-miR-383	1	0	0	1	0	0	DGAT1	diacylglycerol O-acyltransferase 1
hsa-miR-383	0	0	1	1	0	0	WDR53	WD repeat domain 53
hsa-miR-383	0	0	1	1	1	1	DBX2	developing brain homeobox 2
hsa-miR-383	0	0	1	1	1	1	COLEC10	collectin sub-family member 10 (C-type lectin)
hsa-miR-383	0	0	1	1	0	0	GPR97	G protein-coupled receptor 97
hsa-miR-383	0	0	1	1	1	1	COL25A1	collagen, type XXV, alpha 1
hsa-miR-383	0	0	1	1	0	0	GABRQ	gamma-aminobutyric acid (GABA) A receptor, theta
hsa-miR-383	0	0	1	1	1	1	PION	pigeon homolog (Drosophila)
hsa-miR-383	0	0	0	1	1	1	CYP4Z1	cytochrome P450, family 4, subfamily Z, polypeptide 1
hsa-miR-383	0	0	0	1	1	1	CCDC84	coiled-coil domain containing 84
hsa-miR-383	0	0	0	1	1	1	GLDN	gliomedin
hsa-miR-383	1	0	0	1	1	1	CENPQ	centromere protein Q
hsa-miR-383	0	0	1	1	0	0	TUBA1B	tubulin, alpha 1b
hsa-miR-383	1	0	1	1	1	1	PNRC1	proline-rich nuclear receptor coactivator 1
hsa-miR-383	0	0	1	1	0	0	NME1	NME/NM23 nucleoside diphosphate kinase 1
hsa-miR-383	0	0	0	1	0	0	NME1-NME2	NME1-NME2 readthrough
hsa-miR-383	0	0	0	1	0	0	NME2	NME/NM23 nucleoside diphosphate kinase 2
hsa-miR-383	0	0	1	1	0	0	SARNP	SAP domain containing ribonucleoprotein
hsa-miR-383	0	0	1	1	1	1	SLC25A43	solute carrier family 25, member 43
hsa-miR-383	0	0	1	1	1	1	BRIX1	BRX1, biogenesis of ribosomes, homolog (S. cerevisiae)
hsa-miR-383	1	0	1	1	0	0	NRL	neural retina leucine zipper
hsa-miR-383	1	0	1	1	1	1	FTSJD1	FtsJ methyltransferase domain containing 1
hsa-miR-383	0	0	1	1	0	0	MOCS2	molybdenum cofactor synthesis 2
hsa-miR-383	1	0	1	1	1	1	CA7	carbonic anhydrase VII
hsa-miR-383	0	0	1	1	0	0	DYNLRB2	dynein, light chain, roadblock-type 2
hsa-miR-383	0	0	0	1	0	0	HELT	helt bHLH transcription factor
hsa-miR-383	1	0	1	1	1	1	NRG1	neuregulin 1
hsa-miR-383	0	0	0	1	0	0	SFN	stratifin
hsa-miR-383	0	0	1	1	1	1	LRRC17	leucine rich repeat containing 17
hsa-miR-383	0	0	1	1	0	0	STAMBP	STAM binding protein
hsa-miR-383	0	0	1	1	1	1	CCDC41	coiled-coil domain containing 41
hsa-miR-383	0	0	1	1	0	0	C3orf24	chromosome 3 open reading frame 24
hsa-miR-383	0	0	1	1	0	0	TSSK4	testis-specific serine kinase 4
hsa-miR-383	0	0	1	1	1	1	VRK2	vaccinia related kinase 2
hsa-miR-383	0	0	0	1	0	0	ALG1L	asparagine-linked glycosylation 1-like
hsa-miR-383	0	0	1	1	0	0	ART3	ADP-ribosyltransferase 3
hsa-miR-383	1	0	1	1	1	1	TMEM220	transmembrane protein 220
hsa-miR-383	1	0	1	1	1	1	GDAP1L1	ganglioside induced differentiation associated protein 1-like 1
hsa-miR-383	0	0	1	1	0	0	APOBEC3H	apolipoprotein B mRNA editing enzyme, catalytic polypeptide-like 3H
hsa-miR-383	1	0	1	1	1	1	ANKRD42	ankyrin repeat domain 42
hsa-miR-383	0	0	1	1	0	0	MXRA8	matrix-remodelling associated 8
hsa-miR-383	0	0	1	1	0	0	CXorf67	chromosome X open reading frame 67
hsa-miR-383	0	0	0	1	0	0	BSX	brain-specific homeobox
hsa-miR-383	1	0	1	1	1	1	FERMT2	fermitin family member 2
hsa-miR-383	0	0	1	1	1	1	GBP5	guanylate binding protein 5
hsa-miR-383	0	0	1	1	1	1	FHL2	four and a half LIM domains 2
hsa-miR-383	1	0	1	1	1	1	UNC79	unc-79 homolog (C. elegans)
hsa-miR-383	0	0	0	1	1	1	ABCG1	ATP-binding cassette, sub-family G (WHITE), member 1
hsa-miR-383	0	0	1	1	1	1	CCNB3	cyclin B3
hsa-miR-383	1	0	0	1	0	0	SNCG	synuclein, gamma (breast cancer-specific protein 1)
hsa-miR-383	0	0	0	1	0	0	MUC5B	mucin 5B, oligomeric mucus/gel-forming
hsa-miR-383	1	0	1	1	1	1	KDM5C	lysine (K)-specific demethylase 5C
hsa-miR-383	0	0	1	1	1	1	SCEL	sciellin
hsa-miR-383	0	0	0	1	1	1	NDUFB6	NADH dehydrogenase (ubiquinone) 1 beta subcomplex, 6, 17kDa
hsa-miR-383	1	0	1	1	1	1	TOR3A	torsin family 3, member A
hsa-miR-383	0	0	0	1	0	0	ZNF383	zinc finger protein 383
hsa-miR-383	0	0	0	1	1	1	MADCAM1	mucosal vascular addressin cell adhesion molecule 1
hsa-miR-383	0	0	0	1	0	0	EXOC3L1	exocyst complex component 3-like 1
hsa-miR-383	0	0	1	1	0	0	VPS72	vacuolar protein sorting 72 homolog (S. cerevisiae)
hsa-miR-383	0	0	0	1	0	0	CAPN9	calpain 9
hsa-miR-383	0	0	1	1	0	0	HIST1H4J	histone cluster 1, H4j
hsa-miR-383	0	0	1	1	0	0	C2orf27A	chromosome 2 open reading frame 27A
hsa-miR-383	0	0	1	1	1	1	C10orf32	chromosome 10 open reading frame 32
hsa-miR-383	1	0	1	1	1	1	NR3C2	nuclear receptor subfamily 3, group C, member 2
hsa-miR-383	0	0	1	1	0	0	MORN3	MORN repeat containing 3
hsa-miR-383	0	0	0	1	0	0	SHROOM1	shroom family member 1
hsa-miR-383	0	0	0	1	0	0	PLEKHA4	pleckstrin homology domain containing, family A (phosphoinositide binding specific) member 4
hsa-miR-383	1	0	1	1	1	1	MEX3D	mex-3 homolog D (C. elegans)
hsa-miR-383	0	0	1	1	0	0	TMPRSS11F	transmembrane protease, serine 11F
hsa-miR-383	0	0	1	1	0	0	ACOX3	acyl-CoA oxidase 3, pristanoyl
hsa-miR-383	1	0	1	1	0	0	GPI	glucose-6-phosphate isomerase
hsa-miR-383	0	0	1	1	0	0	IL27	interleukin 27
hsa-miR-383	0	0	0	1	0	0	TTC30B	tetratricopeptide repeat domain 30B
hsa-miR-383	0	0	1	1	0	0	C8orf76	chromosome 8 open reading frame 76
hsa-miR-383	0	0	1	1	1	1	GM2A	GM2 ganglioside activator
hsa-miR-383	1	0	1	1	1	1	SRPK2	SRSF protein kinase 2
hsa-miR-383	0	0	1	1	1	1	PLEC	plectin
hsa-miR-383	0	0	1	1	0	0	FAM115C	family with sequence similarity 115, member C
hsa-miR-383	0	0	1	1	1	1	SMC1B	structural maintenance of chromosomes 1B
hsa-miR-383	0	0	0	1	0	0	C1QTNF5	C1q and tumor necrosis factor related protein 5
hsa-miR-383	0	0	1	1	1	1	POT1	protection of telomeres 1 homolog (S. pombe)
hsa-miR-383	1	0	1	1	0	0	SAMD4A	sterile alpha motif domain containing 4A
hsa-miR-383	0	0	1	1	1	1	PRAMEF12	PRAME family member 12
hsa-miR-383	1	0	1	1	1	1	DDHD1	DDHD domain containing 1
hsa-miR-383	0	0	0	1	0	0	ANKLE2	ankyrin repeat and LEM domain containing 2
hsa-miR-383	1	0	0	1	0	0	RABEP2	rabaptin, RAB GTPase binding effector protein 2
hsa-miR-383	0	0	0	1	1	1	RPS6KL1	ribosomal protein S6 kinase-like 1
hsa-miR-383	0	0	1	1	0	0	ZCWPW1	zinc finger, CW type with PWWP domain 1
hsa-miR-383	0	0	1	1	1	1	CNGA1	cyclic nucleotide gated channel alpha 1
hsa-miR-383	0	0	0	1	0	0	GPR1	G protein-coupled receptor 1
hsa-miR-383	0	0	1	1	1	1	CNDP1	carnosine dipeptidase 1 (metallopeptidase M20 family)
hsa-miR-383	0	0	1	1	0	0	TRAPPC4	trafficking protein particle complex 4
hsa-miR-383	0	0	1	1	1	1	ST6GALNAC1	ST6 (alpha-N-acetyl-neuraminyl-2,3-beta-galactosyl-1,3)-N-acetylgalactosaminide alpha-2,6-sialyltransferase 1
hsa-miR-383	1	0	1	1	1	1	GULP1	GULP, engulfment adaptor PTB domain containing 1
hsa-miR-383	0	0	1	1	1	1	CCDC73	coiled-coil domain containing 73
hsa-miR-383	0	0	1	1	0	0	MYOZ1	myozenin 1
hsa-miR-383	0	0	0	1	1	1	AS3MT	arsenic (+3 oxidation state) methyltransferase
hsa-miR-383	0	0	1	1	1	1	ATP6V1H	ATPase, H+ transporting, lysosomal 50/57kDa, V1 subunit H
hsa-miR-383	0	0	1	1	1	1	AKR1B10	aldo-keto reductase family 1, member B10 (aldose reductase)
hsa-miR-383	0	0	0	1	0	0	CFH	complement factor H
hsa-miR-383	0	0	0	1	1	1	MB	myoglobin
hsa-miR-383	0	0	1	1	0	0	KIAA1211L	KIAA1211-like
hsa-miR-383	0	0	1	1	0	0	AMZ2	archaelysin family metallopeptidase 2
hsa-miR-383	1	0	0	1	0	0	TSTA3	tissue specific transplantation antigen P35B
hsa-miR-383	0	0	0	1	1	1	TXNRD3	thioredoxin reductase 3
hsa-miR-383	0	0	1	1	0	0	AARSD1	alanyl-tRNA synthetase domain containing 1
hsa-miR-383	0	0	0	1	0	0	C20orf96	chromosome 20 open reading frame 96
hsa-miR-383	0	0	0	1	1	1	SPRR2D	small proline-rich protein 2D
hsa-miR-383	0	0	1	1	0	0	STYXL1	serine/threonine/tyrosine interacting-like 1
hsa-miR-383	0	0	0	1	0	0	PARVB	parvin, beta
hsa-miR-383	0	0	1	1	1	1	CPZ	carboxypeptidase Z
hsa-miR-383	0	0	0	1	1	1	ECI2	enoyl-CoA delta isomerase 2
hsa-miR-383	0	0	1	1	1	1	PCDH15	protocadherin-related 15
hsa-miR-383	0	0	1	1	1	1	DIO1	deiodinase, iodothyronine, type I
hsa-miR-383	0	0	1	1	1	1	MRPS6	mitochondrial ribosomal protein S6
hsa-miR-383	1	0	1	1	1	1	DISC1	disrupted in schizophrenia 1
hsa-miR-383	0	0	1	1	1	1	COG2	component of oligomeric golgi complex 2
hsa-miR-383	1	0	1	1	1	1	CDC42BPA	CDC42 binding protein kinase alpha (DMPK-like)
hsa-miR-383	0	0	1	1	0	0	TMEM9	transmembrane protein 9
hsa-miR-383	1	0	1	1	1	1	ADAT2	adenosine deaminase, tRNA-specific 2
hsa-miR-383	0	0	1	1	1	1	DUSP12	dual specificity phosphatase 12
hsa-miR-383	1	0	1	1	1	1	SSR2	signal sequence receptor, beta (translocon-associated protein beta)
hsa-miR-383	0	0	1	1	0	0	DCST1	DC-STAMP domain containing 1
hsa-miR-383	0	0	0	1	0	0	LCE2B	late cornified envelope 2B
hsa-miR-383	0	0	0	1	0	0	LCE2C	late cornified envelope 2C
hsa-miR-383	0	0	0	1	1	1	LCE2D	late cornified envelope 2D
hsa-miR-383	0	0	1	1	1	1	S100A10	S100 calcium binding protein A10
hsa-miR-383	0	0	0	1	0	0	RPF2	ribosome production factor 2 homolog (S. cerevisiae)
hsa-miR-383	0	0	1	1	0	0	NSMCE4A	non-SMC element 4 homolog A (S. cerevisiae)
hsa-miR-383	0	0	1	1	1	1	ATG5	autophagy related 5
hsa-miR-383	1	0	1	1	1	1	PRDM1	PR domain containing 1, with ZNF domain
hsa-miR-383	0	0	1	1	0	0	MRPS21	mitochondrial ribosomal protein S21
hsa-miR-383	0	0	0	1	1	1	TDRD1	tudor domain containing 1
hsa-miR-383	0	0	0	1	1	1	GABRR1	gamma-aminobutyric acid (GABA) A receptor, rho 1
hsa-miR-383	0	0	1	1	0	0	CD58	CD58 molecule
hsa-miR-383	1	0	1	1	1	1	SORCS3	sortilin-related VPS10 domain containing receptor 3
hsa-miR-383	0	0	1	1	0	0	COX7A2	cytochrome c oxidase subunit VIIa polypeptide 2 (liver)
hsa-miR-383	1	0	1	1	1	1	VMA21	VMA21 vacuolar H+-ATPase homolog (S. cerevisiae)
hsa-miR-383	0	0	0	1	0	0	PSMA7	proteasome (prosome, macropain) subunit, alpha type, 7
hsa-miR-383	1	0	1	1	1	1	MIER1	mesoderm induction early response 1 homolog (Xenopus laevis)
hsa-miR-383	0	0	1	1	0	0	C1orf87	chromosome 1 open reading frame 87
hsa-miR-383	0	0	0	1	0	0	SPO11	SPO11 meiotic protein covalently bound to DSB homolog (S. cerevisiae)
hsa-miR-383	0	0	1	1	0	0	ACOT11	acyl-CoA thioesterase 11
hsa-miR-383	1	0	1	1	1	1	NOC3L	nucleolar complex associated 3 homolog (S. cerevisiae)
hsa-miR-383	0	0	1	1	1	1	NKAP	NFKB activating protein
hsa-miR-383	0	0	1	1	0	0	ORC1	origin recognition complex, subunit 1
hsa-miR-383	0	0	1	1	1	1	KTI12	KTI12 homolog, chromatin associated (S. cerevisiae)
hsa-miR-383	0	0	0	1	0	0	UBAC1	UBA domain containing 1
hsa-miR-383	0	0	1	1	1	1	C1orf185	chromosome 1 open reading frame 185
hsa-miR-383	0	0	0	1	1	1	CYP4A11	cytochrome P450, family 4, subfamily A, polypeptide 11
hsa-miR-383	0	0	1	1	0	0	MAD2L1BP	MAD2L1 binding protein
hsa-miR-383	0	0	0	1	0	0	PLAC9	placenta-specific 9
hsa-miR-383	0	0	0	1	0	0	CCDC24	coiled-coil domain containing 24
hsa-miR-383	1	0	1	1	0	0	ELOVL1	ELOVL fatty acid elongase 1
hsa-miR-383	0	0	0	1	0	0	ZNF642	zinc finger protein 642
hsa-miR-383	0	0	1	1	1	1	TCEAL6	transcription elongation factor A (SII)-like 6
hsa-miR-383	0	0	1	1	1	1	PABPC1L	poly(A) binding protein, cytoplasmic 1-like
hsa-miR-383	0	0	1	1	1	1	CNPY3	canopy 3 homolog (zebrafish)
hsa-miR-383	0	0	0	1	1	1	ADA	adenosine deaminase
hsa-miR-383	0	0	1	1	0	0	C1orf122	chromosome 1 open reading frame 122
hsa-miR-383	1	0	0	1	0	0	DPM2	dolichyl-phosphate mannosyltransferase polypeptide 2, regulatory subunit
hsa-miR-383	0	0	1	1	0	0	TTC16	tetratricopeptide repeat domain 16
hsa-miR-383	0	0	0	1	1	1	TBX22	T-box 22
hsa-miR-383	0	0	1	1	1	1	RNF19B	ring finger protein 19B
hsa-miR-383	0	0	1	1	0	0	HCRTR1	hypocretin (orexin) receptor 1
hsa-miR-383	0	0	1	1	1	1	MAPK13	mitogen-activated protein kinase 13
hsa-miR-383	0	0	0	1	0	0	TULP1	tubby like protein 1
hsa-miR-383	0	0	1	1	1	1	FAM76A	family with sequence similarity 76, member A
hsa-miR-383	0	0	0	1	1	1	C10orf71	chromosome 10 open reading frame 71
hsa-miR-383	0	0	1	1	0	0	CDC26	cell division cycle 26 homolog (S. cerevisiae)
hsa-miR-383	0	0	1	1	0	0	ALOX5	arachidonate 5-lipoxygenase
hsa-miR-383	0	0	0	1	0	0	FXYD4	FXYD domain containing ion transport regulator 4
hsa-miR-383	0	0	1	1	1	1	DYNLRB1	dynein, light chain, roadblock-type 1
hsa-miR-383	0	0	0	1	0	0	OR10G9	olfactory receptor, family 10, subfamily G, member 9
hsa-miR-383	1	0	1	1	0	0	RNF5	ring finger protein 5, E3 ubiquitin protein ligase
hsa-miR-383	0	0	0	1	1	1	C9orf156	chromosome 9 open reading frame 156
hsa-miR-383	0	0	1	1	0	0	RDBP	RD RNA binding protein
hsa-miR-383	0	0	1	1	0	0	BPIFA3	BPI fold containing family A, member 3
hsa-miR-383	0	0	0	1	0	0	ARHGEF19	Rho guanine nucleotide exchange factor (GEF) 19
hsa-miR-383	0	0	0	1	0	0	DAOA	D-amino acid oxidase activator
hsa-miR-383	0	0	1	1	1	1	DDX39B	DEAD (Asp-Glu-Ala-Asp) box polypeptide 39B
hsa-miR-383	1	0	1	1	0	0	MCCD1	mitochondrial coiled-coil domain 1
hsa-miR-383	1	0	1	1	1	1	GID4	GID complex subunit 4, VID24 homolog (S. cerevisiae)
hsa-miR-383	0	0	0	1	1	1	FLOT1	flotillin 1
hsa-miR-383	1	0	1	1	1	1	ARHGAP21	Rho GTPase activating protein 21
hsa-miR-383	0	0	1	1	1	1	FRMD3	FERM domain containing 3
hsa-miR-383	0	0	1	1	1	1	COMMD3	COMM domain containing 3
hsa-miR-383	1	0	1	1	0	0	DNAJC1	DnaJ (Hsp40) homolog, subfamily C, member 1
hsa-miR-383	1	0	1	1	1	1	TMEM2	transmembrane protein 2
hsa-miR-383	0	0	0	1	0	0	OR2B3	olfactory receptor, family 2, subfamily B, member 3
hsa-miR-383	0	0	0	1	1	1	KRTAP4-2	keratin associated protein 4-2
hsa-miR-383	1	0	1	1	1	1	PCDH9	protocadherin 9
hsa-miR-383	0	0	1	1	0	0	SLC3A2	solute carrier family 3 (activators of dibasic and neutral amino acid transport), member 2
hsa-miR-383	0	0	1	1	0	0	HES3	hairy and enhancer of split 3 (Drosophila)
hsa-miR-383	0	0	0	1	0	0	GRXCR2	glutaredoxin, cysteine rich 2
hsa-miR-383	0	0	0	1	0	0	OR13J1	olfactory receptor, family 13, subfamily J, member 1
hsa-miR-383	1	0	1	1	1	1	CHD5	chromodomain helicase DNA binding protein 5
hsa-miR-383	0	0	0	1	1	1	ARHGEF35	Rho guanine nucleotide exchange factor (GEF) 35
hsa-miR-383	0	0	1	1	1	1	ALG11	asparagine-linked glycosylation 11, alpha-1,2-mannosyltransferase homolog (yeast)
hsa-miR-383	0	0	1	1	1	1	EBPL	emopamil binding protein-like
hsa-miR-383	0	0	0	1	1	1	PHF11	PHD finger protein 11
hsa-miR-383	1	0	1	1	1	1	ANKRD11	ankyrin repeat domain 11
hsa-miR-383	0	0	1	1	0	0	GABRD	gamma-aminobutyric acid (GABA) A receptor, delta
hsa-miR-383	0	0	1	1	1	1	PCNA	proliferating cell nuclear antigen
hsa-miR-383	0	0	0	1	1	1	SIRT5	sirtuin 5
hsa-miR-383	1	0	1	1	1	1	ZSCAN2	zinc finger and SCAN domain containing 2
hsa-miR-383	1	0	1	1	1	1	KIN	KIN, antigenic determinant of recA protein homolog (mouse)
hsa-miR-383	1	0	0	1	1	1	PDHA1	pyruvate dehydrogenase (lipoamide) alpha 1
hsa-miR-383	0	0	1	1	1	1	TSPEAR	thrombospondin-type laminin G domain and EAR repeats
hsa-miR-383	0	0	1	1	0	0	RPS6	ribosomal protein S6
hsa-miR-383	0	0	0	1	1	1	TMPRSS3	transmembrane protease, serine 3
hsa-miR-383	0	0	0	1	0	0	UCN3	urocortin 3 (stresscopin)
hsa-miR-383	0	0	1	1	1	1	FAM154A	family with sequence similarity 154, member A
hsa-miR-383	0	0	1	1	1	1	IL4R	interleukin 4 receptor
hsa-miR-383	0	0	1	1	0	0	HTN3	histatin 3
hsa-miR-383	0	0	1	1	1	1	C2orf43	chromosome 2 open reading frame 43
hsa-miR-383	0	0	0	1	0	0	TLR6	toll-like receptor 6
hsa-miR-383	0	0	1	1	1	1	SLC45A2	solute carrier family 45, member 2
hsa-miR-383	0	0	0	1	0	0	MIPEP	mitochondrial intermediate peptidase
hsa-miR-383	1	0	1	1	1	1	KANK1	KN motif and ankyrin repeat domains 1
hsa-miR-383	0	0	0	1	1	1	EFHA1	EF-hand domain family, member A1
hsa-miR-383	0	0	0	1	0	0	LOC100131089	uncharacterized LOC100131089
hsa-miR-383	0	0	0	1	0	0	CHST13	carbohydrate (chondroitin 4) sulfotransferase 13
hsa-miR-383	0	0	0	1	0	0	FAM159B	family with sequence similarity 159, member B
hsa-miR-383	0	0	1	1	1	1	SMTNL2	smoothelin-like 2
hsa-miR-383	0	0	1	1	0	0	NLRP5	NLR family, pyrin domain containing 5
hsa-miR-383	0	0	1	1	1	1	NQO1	NAD(P)H dehydrogenase, quinone 1
hsa-miR-383	1	0	1	1	1	1	RORC	RAR-related orphan receptor C
hsa-miR-383	0	0	1	1	1	1	TRIM6	tripartite motif containing 6
hsa-miR-383	0	0	1	1	1	1	WDR33	WD repeat domain 33
hsa-miR-383	1	0	1	1	1	1	RAB3IP	RAB3A interacting protein (rabin3)
hsa-miR-383	0	0	1	1	1	1	ZNF451	zinc finger protein 451
hsa-miR-383	1	0	1	1	1	1	ZNF706	zinc finger protein 706
hsa-miR-383	1	0	1	1	1	1	C5orf43	chromosome 5 open reading frame 43
hsa-miR-383	0	0	1	0	1	1	ATR	ataxia telangiectasia and Rad3 related
hsa-miR-383	0	0	1	1	1	1	RCBTB2	regulator of chromosome condensation (RCC1) and BTB (POZ) domain containing protein 2
hsa-miR-383	1	0	1	0	1	1	MEST	mesoderm specific transcript homolog (mouse)
hsa-miR-383	1	0	1	1	1	1	MTMR6	myotubularin related protein 6
hsa-miR-383	0	0	1	1	1	1	DDX21	DEAD (Asp-Glu-Ala-Asp) box helicase 21
hsa-miR-383	0	0	1	1	1	1	PPP1R3D	protein phosphatase 1, regulatory subunit 3D
hsa-miR-383	1	0	1	1	1	1	PADI1	peptidyl arginine deiminase, type I
hsa-miR-383	0	0	0	0	1	1	MESDC2	mesoderm development candidate 2
hsa-miR-383	1	0	1	1	1	1	SYF2	SYF2 homolog, RNA splicing factor (S. cerevisiae)
hsa-miR-383	1	0	1	0	1	1	WNT16	wingless-type MMTV integration site family, member 16
hsa-miR-383	1	0	1	0	1	1	RNF141	ring finger protein 141
hsa-miR-383	0	0	1	0	1	1	GDE1	glycerophosphodiester phosphodiesterase 1
hsa-miR-383	1	0	0	0	1	1	POGK	pogo transposable element with KRAB domain
hsa-miR-383	0	0	1	1	1	1	COMMD8	COMM domain containing 8
hsa-miR-383	0	0	1	1	1	1	C10orf118	chromosome 10 open reading frame 118
hsa-miR-383	0	0	1	1	1	1	THAP1	THAP domain containing, apoptosis associated protein 1
hsa-miR-383	1	0	1	0	1	1	KIAA1456	KIAA1456
hsa-miR-383	0	0	1	1	1	1	PGM5	phosphoglucomutase 5
hsa-miR-383	0	0	1	1	1	1	PERP	PERP, TP53 apoptosis effector
hsa-miR-383	0	0	1	0	1	1	FUNDC2	FUN14 domain containing 2
hsa-miR-383	1	0	1	1	1	1	VTCN1	V-set domain containing T cell activation inhibitor 1
hsa-miR-383	0	0	1	0	1	1	C1QTNF7	C1q and tumor necrosis factor related protein 7
hsa-miR-383	0	0	0	0	1	1	CAPNS2	calpain, small subunit 2
hsa-miR-383	0	0	0	1	1	1	FAM120B	family with sequence similarity 120B
hsa-miR-383	0	0	1	1	1	1	HCAR1	hydroxycarboxylic acid receptor 1
hsa-miR-383	0	0	0	1	1	1	ABCC11	ATP-binding cassette, sub-family C (CFTR/MRP), member 11
hsa-miR-383	1	0	1	1	1	1	SLC2A13	solute carrier family 2 (facilitated glucose transporter), member 13
hsa-miR-383	1	0	1	1	1	1	CD109	CD109 molecule
hsa-miR-383	1	0	1	1	1	1	PKHD1	polycystic kidney and hepatic disease 1 (autosomal recessive)
hsa-miR-383	0	0	0	1	1	1	SEPSECS	Sep (O-phosphoserine) tRNA:Sec (selenocysteine) tRNA synthase
hsa-miR-383	1	0	1	1	1	1	KCNAB1	potassium voltage-gated channel, shaker-related subfamily, beta member 1
hsa-miR-383	1	0	1	1	1	1	LSM11	LSM11, U7 small nuclear RNA associated
hsa-miR-383	1	0	0	0	1	1	SASS6	spindle assembly 6 homolog (C. elegans)
hsa-miR-383	0	0	1	1	1	1	KBTBD12	kelch repeat and BTB (POZ) domain containing 12
hsa-miR-383	0	0	0	0	1	1	LOC645086	chromosome 11 open reading frame 58 pseudogene
