# Supplementary material for: Profiling of Selected MicroRNAs in Proliferative Eutopic Endometrium of Women with Ovarian Endometriosis
Source: Biomed Res Int. 2015 Aug 20;2015:760698. doi: 10.1155/2015/760698 (PMC4558423; doi:10.1155/2015/760698)
Supplement: Supplementary file 1 — Table I: The names of miRNAs significantly differentially expressed between eutopic endometrium of patients with endometriosis vs eutopic endometrium of patients without endometriosis. Table II: The associations between miRNA and mRNA, which presents detailed results of the search of six major databases i.e targetscan, tarbase, miranda, mirbase, mirtarget2 and pictar. [file 760698.f1.zip › 760698.f1/Table II/hsa-miR-410.tsv]

miR	targetscan	tarbase	miranda	mirbase	mirtarget2	pictar	GeneSymbol	GeneName
hsa-miR-410	1	0	1	1	1	1	BCL11A	B-cell CLL/lymphoma 11A (zinc finger protein)
hsa-miR-410	1	0	1	0	1	1	C3orf70	chromosome 3 open reading frame 70
hsa-miR-410	1	0	1	1	1	1	STARD13	StAR-related lipid transfer (START) domain containing 13
hsa-miR-410	1	0	1	1	1	1	MYLIP	myosin regulatory light chain interacting protein
hsa-miR-410	1	0	1	1	1	1	MCAM	melanoma cell adhesion molecule
hsa-miR-410	1	0	1	1	0	0	DFNB31	deafness, autosomal recessive 31
hsa-miR-410	1	0	1	1	1	1	HEXIM1	hexamethylene bis-acetamide inducible 1
hsa-miR-410	1	0	1	1	1	1	SETD3	SET domain containing 3
hsa-miR-410	1	0	1	0	1	1	LIN7C	lin-7 homolog C (C. elegans)
hsa-miR-410	1	0	1	1	1	1	ETS1	v-ets erythroblastosis virus E26 oncogene homolog 1 (avian)
hsa-miR-410	1	0	1	1	1	1	IQCK	IQ motif containing K
hsa-miR-410	1	0	1	1	1	1	NAMPT	nicotinamide phosphoribosyltransferase
hsa-miR-410	1	0	1	1	1	1	RGL1	ral guanine nucleotide dissociation stimulator-like 1
hsa-miR-410	1	0	1	1	1	1	VAT1L	vesicle amine transport protein 1 homolog (T. californica)-like
hsa-miR-410	1	0	1	0	1	1	KIT	v-kit Hardy-Zuckerman 4 feline sarcoma viral oncogene homolog
hsa-miR-410	1	0	1	1	0	0	ZFP36	zinc finger protein 36, C3H type, homolog (mouse)
hsa-miR-410	1	0	1	1	1	1	NRIP1	nuclear receptor interacting protein 1
hsa-miR-410	1	0	1	1	1	1	ZNF148	zinc finger protein 148
hsa-miR-410	1	0	1	1	0	0	UBXN7	UBX domain protein 7
hsa-miR-410	1	0	1	1	0	0	SENP3	SUMO1/sentrin/SMT3 specific peptidase 3
hsa-miR-410	1	0	1	0	1	1	ADIPOR2	adiponectin receptor 2
hsa-miR-410	1	0	1	1	1	1	PDZD2	PDZ domain containing 2
hsa-miR-410	1	0	1	1	1	1	HBEGF	heparin-binding EGF-like growth factor
hsa-miR-410	1	0	1	1	1	1	TMEM100	transmembrane protein 100
hsa-miR-410	1	0	1	1	0	0	SYP	synaptophysin
hsa-miR-410	1	0	1	1	1	1	LRP6	low density lipoprotein receptor-related protein 6
hsa-miR-410	1	0	1	1	0	0	PROSAPIP1	ProSAPiP1 protein
hsa-miR-410	1	0	1	1	1	1	COPS7B	COP9 constitutive photomorphogenic homolog subunit 7B (Arabidopsis)
hsa-miR-410	1	0	1	1	1	1	ZHX3	zinc fingers and homeoboxes 3
hsa-miR-410	1	0	1	1	1	1	NCOA1	nuclear receptor coactivator 1
hsa-miR-410	1	0	1	1	1	1	OR51E2	olfactory receptor, family 51, subfamily E, member 2
hsa-miR-410	1	0	1	1	1	1	RAI1	retinoic acid induced 1
hsa-miR-410	1	0	1	1	1	1	RC3H1	ring finger and CCCH-type domains 1
hsa-miR-410	1	0	1	1	1	1	CCNA2	cyclin A2
hsa-miR-410	1	0	0	1	1	1	ATG16L1	autophagy related 16-like 1 (S. cerevisiae)
hsa-miR-410	1	0	1	1	1	1	WT1-AS	WT1 antisense RNA
hsa-miR-410	1	0	1	0	1	1	BDNF	brain-derived neurotrophic factor
hsa-miR-410	1	0	1	0	1	1	PMEPA1	prostate transmembrane protein, androgen induced 1
hsa-miR-410	1	0	0	1	0	0	DMRTA2	DMRT-like family A2
hsa-miR-410	1	0	1	1	1	1	ST8SIA4	ST8 alpha-N-acetyl-neuraminide alpha-2,8-sialyltransferase 4
hsa-miR-410	1	0	1	1	1	1	BEND3	BEN domain containing 3
hsa-miR-410	1	0	1	0	1	1	PPFIBP1	PTPRF interacting protein, binding protein 1 (liprin beta 1)
hsa-miR-410	1	0	1	1	1	1	PLAGL2	pleiomorphic adenoma gene-like 2
hsa-miR-410	1	0	1	1	1	1	MGA	MAX gene associated
hsa-miR-410	1	0	1	0	1	1	CDK14	cyclin-dependent kinase 14
hsa-miR-410	1	0	1	1	1	1	IQCA1	IQ motif containing with AAA domain 1
hsa-miR-410	1	0	1	0	1	1	ATP11A	ATPase, class VI, type 11A
hsa-miR-410	1	0	1	0	1	1	MLL2	myeloid/lymphoid or mixed-lineage leukemia 2
hsa-miR-410	1	0	1	0	1	1	AGFG1	ArfGAP with FG repeats 1
hsa-miR-410	1	0	1	1	1	1	DACT1	dapper, antagonist of beta-catenin, homolog 1 (Xenopus laevis)
hsa-miR-410	1	0	1	1	1	1	TRPC1	transient receptor potential cation channel, subfamily C, member 1
hsa-miR-410	1	0	1	1	1	1	WNT11	wingless-type MMTV integration site family, member 11
hsa-miR-410	1	0	1	0	1	1	FAM19A5	family with sequence similarity 19 (chemokine (C-C motif)-like), member A5
hsa-miR-410	1	0	1	1	1	1	SMAD7	SMAD family member 7
hsa-miR-410	1	0	1	1	1	1	FAM120C	family with sequence similarity 120C
hsa-miR-410	1	0	1	1	1	1	TMEM132B	transmembrane protein 132B
hsa-miR-410	1	0	1	1	1	1	KDM6A	lysine (K)-specific demethylase 6A
hsa-miR-410	1	0	1	0	1	1	NFAT5	nuclear factor of activated T-cells 5, tonicity-responsive
hsa-miR-410	1	0	1	1	0	0	PRRC2B	proline-rich coiled-coil 2B
hsa-miR-410	1	0	1	1	1	1	ERG	v-ets erythroblastosis virus E26 oncogene homolog (avian)
hsa-miR-410	1	0	1	1	0	0	CAPN12	calpain 12
hsa-miR-410	1	0	1	1	1	1	DBT	dihydrolipoamide branched chain transacylase E2
hsa-miR-410	1	0	1	0	1	1	SKAP2	src kinase associated phosphoprotein 2
hsa-miR-410	1	0	1	1	1	1	TEAD1	TEA domain family member 1 (SV40 transcriptional enhancer factor)
hsa-miR-410	1	0	1	0	1	1	IGF2BP1	insulin-like growth factor 2 mRNA binding protein 1
hsa-miR-410	1	0	1	0	0	0	ZBTB34	zinc finger and BTB domain containing 34
hsa-miR-410	1	0	1	0	1	1	SMAD2	SMAD family member 2
hsa-miR-410	1	0	1	1	1	1	ATP8B2	ATPase, aminophospholipid transporter, class I, type 8B, member 2
hsa-miR-410	1	0	1	1	1	1	HMGB1	high mobility group box 1
hsa-miR-410	1	0	1	0	1	1	DDX3X	DEAD (Asp-Glu-Ala-Asp) box polypeptide 3, X-linked
hsa-miR-410	1	0	1	1	1	1	INPP5A	inositol polyphosphate-5-phosphatase, 40kDa
hsa-miR-410	1	0	1	1	1	1	NTF3	neurotrophin 3
hsa-miR-410	1	0	1	1	1	1	TCF4	transcription factor 4
hsa-miR-410	1	0	1	1	1	1	TEX14	testis expressed 14
hsa-miR-410	1	0	1	1	1	1	CADM4	cell adhesion molecule 4
hsa-miR-410	1	0	1	1	1	1	KIAA0247	KIAA0247
hsa-miR-410	1	0	1	1	1	1	PBRM1	polybromo 1
hsa-miR-410	1	0	1	0	1	1	MCFD2	multiple coagulation factor deficiency 2
hsa-miR-410	1	0	1	0	1	1	ARFGEF2	ADP-ribosylation factor guanine nucleotide-exchange factor 2 (brefeldin A-inhibited)
hsa-miR-410	1	0	1	1	1	1	MAF	v-maf musculoaponeurotic fibrosarcoma oncogene homolog (avian)
hsa-miR-410	1	0	1	1	1	1	TEC	tec protein tyrosine kinase
hsa-miR-410	1	0	1	1	1	1	PREX1	phosphatidylinositol-3,4,5-trisphosphate-dependent Rac exchange factor 1
hsa-miR-410	1	0	1	1	1	1	YY1	YY1 transcription factor
hsa-miR-410	1	0	1	0	1	1	MXD1	MAX dimerization protein 1
hsa-miR-410	1	0	1	1	1	1	CPSF6	cleavage and polyadenylation specific factor 6, 68kDa
hsa-miR-410	1	0	1	1	1	1	NDFIP1	Nedd4 family interacting protein 1
hsa-miR-410	1	0	1	1	1	1	C11orf87	chromosome 11 open reading frame 87
hsa-miR-410	1	0	1	1	1	1	PRIMA1	proline rich membrane anchor 1
hsa-miR-410	1	0	1	0	1	1	MEF2C	myocyte enhancer factor 2C
hsa-miR-410	1	0	1	1	0	0	PPM1H	protein phosphatase, Mg2+/Mn2+ dependent, 1H
hsa-miR-410	1	0	1	1	0	0	AGFG2	ArfGAP with FG repeats 2
hsa-miR-410	1	0	1	1	1	1	BHLHE40	basic helix-loop-helix family, member e40
hsa-miR-410	1	0	1	1	1	1	DCTN6	dynactin 6
hsa-miR-410	1	0	1	1	1	1	RANBP9	RAN binding protein 9
hsa-miR-410	1	0	1	1	1	1	ADM	adrenomedullin
hsa-miR-410	1	0	1	1	1	1	LDLR	low density lipoprotein receptor
hsa-miR-410	1	0	1	1	1	1	SOX21	SRY (sex determining region Y)-box 21
hsa-miR-410	1	0	1	0	1	1	CNTNAP1	contactin associated protein 1
hsa-miR-410	1	0	0	1	1	1	YIPF2	Yip1 domain family, member 2
hsa-miR-410	1	0	0	1	0	0	WNT5B	wingless-type MMTV integration site family, member 5B
hsa-miR-410	1	0	1	1	1	1	BACH2	BTB and CNC homology 1, basic leucine zipper transcription factor 2
hsa-miR-410	1	0	1	1	1	1	COL4A1	collagen, type IV, alpha 1
hsa-miR-410	1	0	1	0	1	1	CPEB2	cytoplasmic polyadenylation element binding protein 2
hsa-miR-410	1	0	1	1	1	1	PPP1R13B	protein phosphatase 1, regulatory subunit 13B
hsa-miR-410	1	0	1	1	1	1	FOXF1	forkhead box F1
hsa-miR-410	1	0	1	1	1	1	HNF4G	hepatocyte nuclear factor 4, gamma
hsa-miR-410	1	0	1	1	1	1	RUNX1	runt-related transcription factor 1
hsa-miR-410	1	0	1	0	1	1	ARHGAP35	Rho GTPase activating protein 35
hsa-miR-410	1	0	1	1	1	1	ZNF592	zinc finger protein 592
hsa-miR-410	1	0	1	1	1	1	FZD5	frizzled family receptor 5
hsa-miR-410	1	0	1	1	1	1	ENSA	endosulfine alpha
hsa-miR-410	1	0	1	0	1	1	CREB5	cAMP responsive element binding protein 5
hsa-miR-410	1	0	1	0	1	1	ITCH	itchy E3 ubiquitin protein ligase
hsa-miR-410	1	0	1	1	1	1	CASK	calcium/calmodulin-dependent serine protein kinase (MAGUK family)
hsa-miR-410	1	0	0	1	1	1	C10orf47	chromosome 10 open reading frame 47
hsa-miR-410	1	0	1	1	1	1	PPP1R9A	protein phosphatase 1, regulatory subunit 9A
hsa-miR-410	1	0	1	0	1	1	CSNK1G1	casein kinase 1, gamma 1
hsa-miR-410	1	0	1	1	1	1	ANKRD11	ankyrin repeat domain 11
hsa-miR-410	1	0	1	1	1	1	CPEB3	cytoplasmic polyadenylation element binding protein 3
hsa-miR-410	1	0	1	0	1	1	KPNA6	karyopherin alpha 6 (importin alpha 7)
hsa-miR-410	1	0	1	1	1	1	PRKAR2B	protein kinase, cAMP-dependent, regulatory, type II, beta
hsa-miR-410	1	0	1	0	1	1	CDK19	cyclin-dependent kinase 19
hsa-miR-410	1	0	1	1	1	1	NPTX2	neuronal pentraxin II
hsa-miR-410	1	0	1	0	0	0	ZC3H12C	zinc finger CCCH-type containing 12C
hsa-miR-410	1	0	1	1	1	1	CTNND1	catenin (cadherin-associated protein), delta 1
hsa-miR-410	1	0	1	0	1	1	WDR82	WD repeat domain 82
hsa-miR-410	1	0	1	1	1	1	ACVR2B	activin A receptor, type IIB
hsa-miR-410	1	0	1	1	0	0	RAPGEF2	Rap guanine nucleotide exchange factor (GEF) 2
hsa-miR-410	1	0	1	1	1	1	DCAF5	DDB1 and CUL4 associated factor 5
hsa-miR-410	1	0	1	0	1	1	CD47	CD47 molecule
hsa-miR-410	1	0	1	1	1	1	MECP2	methyl CpG binding protein 2 (Rett syndrome)
hsa-miR-410	1	0	1	0	1	1	DCDC2	doublecortin domain containing 2
hsa-miR-410	1	0	1	1	1	1	GLIS3	GLIS family zinc finger 3
hsa-miR-410	1	0	1	1	0	0	MAGI3	membrane associated guanylate kinase, WW and PDZ domain containing 3
hsa-miR-410	1	0	1	1	1	1	ZC3H7B	zinc finger CCCH-type containing 7B
hsa-miR-410	1	0	1	1	1	1	VEGFA	vascular endothelial growth factor A
hsa-miR-410	1	0	1	1	1	1	PHF16	PHD finger protein 16
hsa-miR-410	1	0	1	1	1	1	UBE2H	ubiquitin-conjugating enzyme E2H
hsa-miR-410	1	0	1	1	1	1	UBTF	upstream binding transcription factor, RNA polymerase I
hsa-miR-410	1	0	1	0	1	1	CHML	choroideremia-like (Rab escort protein 2)
hsa-miR-410	1	0	1	1	1	1	CNTN4	contactin 4
hsa-miR-410	1	0	1	1	1	1	AHCTF1	AT hook containing transcription factor 1
hsa-miR-410	1	0	1	1	1	1	TRAPPC3	trafficking protein particle complex 3
hsa-miR-410	1	0	1	1	1	1	AFF1	AF4/FMR2 family, member 1
hsa-miR-410	1	0	0	1	1	1	C14orf102	chromosome 14 open reading frame 102
hsa-miR-410	1	0	1	1	1	1	B4GALT5	UDP-Gal:betaGlcNAc beta 1,4- galactosyltransferase, polypeptide 5
hsa-miR-410	1	0	1	1	1	1	MKLN1	muskelin 1, intracellular mediator containing kelch motifs
hsa-miR-410	1	0	1	0	1	1	RGMB	RGM domain family, member B
hsa-miR-410	1	0	1	0	1	1	ZNF609	zinc finger protein 609
hsa-miR-410	1	0	1	0	1	1	PDE4D	phosphodiesterase 4D, cAMP-specific
hsa-miR-410	1	0	1	0	1	1	CYBRD1	cytochrome b reductase 1
hsa-miR-410	1	0	1	1	0	0	RBM27	RNA binding motif protein 27
hsa-miR-410	1	0	1	1	1	1	DGKG	diacylglycerol kinase, gamma 90kDa
hsa-miR-410	1	0	1	0	1	1	KIAA2022	KIAA2022
hsa-miR-410	1	0	1	1	1	1	HS3ST1	heparan sulfate (glucosamine) 3-O-sulfotransferase 1
hsa-miR-410	1	0	1	1	1	1	IGSF3	immunoglobulin superfamily, member 3
hsa-miR-410	1	0	1	1	1	1	SRPR	signal recognition particle receptor (docking protein)
hsa-miR-410	1	0	1	0	1	1	KDM2A	lysine (K)-specific demethylase 2A
hsa-miR-410	1	0	1	1	1	1	PTPRB	protein tyrosine phosphatase, receptor type, B
hsa-miR-410	1	0	1	1	1	1	CNOT2	CCR4-NOT transcription complex, subunit 2
hsa-miR-410	1	0	1	0	1	1	ATP1B2	ATPase, Na+/K+ transporting, beta 2 polypeptide
hsa-miR-410	1	0	0	1	1	1	MKL1	megakaryoblastic leukemia (translocation) 1
hsa-miR-410	1	0	1	0	1	1	CCDC6	coiled-coil domain containing 6
hsa-miR-410	1	0	1	1	1	1	PDPK1	3-phosphoinositide dependent protein kinase-1
hsa-miR-410	1	0	1	1	1	1	RERE	arginine-glutamic acid dipeptide (RE) repeats
hsa-miR-410	1	0	1	1	1	1	SYN2	synapsin II
hsa-miR-410	1	0	1	1	1	1	TGFBR2	transforming growth factor, beta receptor II (70/80kDa)
hsa-miR-410	1	0	1	1	1	1	DLX3	distal-less homeobox 3
hsa-miR-410	1	0	1	1	1	1	MGAT4A	mannosyl (alpha-1,3-)-glycoprotein beta-1,4-N-acetylglucosaminyltransferase, isozyme A
hsa-miR-410	1	0	1	1	1	1	MYH9	myosin, heavy chain 9, non-muscle
hsa-miR-410	1	0	1	1	1	1	LRRTM2	leucine rich repeat transmembrane neuronal 2
hsa-miR-410	1	0	1	1	1	1	LCORL	ligand dependent nuclear receptor corepressor-like
hsa-miR-410	1	0	1	1	1	1	RNF44	ring finger protein 44
hsa-miR-410	1	0	1	1	1	1	PDE4B	phosphodiesterase 4B, cAMP-specific
hsa-miR-410	1	0	1	0	1	1	SCN2B	sodium channel, voltage-gated, type II, beta subunit
hsa-miR-410	1	0	1	1	1	1	ARHGAP24	Rho GTPase activating protein 24
hsa-miR-410	1	0	1	1	1	1	MEF2A	myocyte enhancer factor 2A
hsa-miR-410	1	0	1	1	1	1	ESM1	endothelial cell-specific molecule 1
hsa-miR-410	1	0	1	1	1	1	SVIL	supervillin
hsa-miR-410	1	0	0	1	1	1	ATF1	activating transcription factor 1
hsa-miR-410	1	0	1	1	1	1	SMPX	small muscle protein, X-linked
hsa-miR-410	1	0	1	1	1	1	NFKBIZ	nuclear factor of kappa light polypeptide gene enhancer in B-cells inhibitor, zeta
hsa-miR-410	1	0	1	1	1	1	OSBP2	oxysterol binding protein 2
hsa-miR-410	1	0	1	1	1	1	OSBP	oxysterol binding protein
hsa-miR-410	1	0	1	0	1	1	KLHDC1	kelch domain containing 1
hsa-miR-410	1	0	1	0	0	0	ZDBF2	zinc finger, DBF-type containing 2
hsa-miR-410	1	0	1	1	1	1	UBE2B	ubiquitin-conjugating enzyme E2B
hsa-miR-410	1	0	1	0	1	1	SRCIN1	SRC kinase signaling inhibitor 1
hsa-miR-410	1	0	1	1	1	1	JHDM1D	jumonji C domain containing histone demethylase 1 homolog D (S. cerevisiae)
hsa-miR-410	1	0	1	0	1	1	MAP3K3	mitogen-activated protein kinase kinase kinase 3
hsa-miR-410	1	0	1	1	1	1	SPTBN1	spectrin, beta, non-erythrocytic 1
hsa-miR-410	1	0	1	1	1	1	CTNNBIP1	catenin, beta interacting protein 1
hsa-miR-410	1	0	1	1	1	1	BCL9L	B-cell CLL/lymphoma 9-like
hsa-miR-410	1	0	1	1	1	1	SH3GLB1	SH3-domain GRB2-like endophilin B1
hsa-miR-410	1	0	1	0	1	1	SLC34A2	solute carrier family 34 (sodium phosphate), member 2
hsa-miR-410	1	0	1	1	1	1	CBX4	chromobox homolog 4
hsa-miR-410	1	0	1	1	1	1	ELL2	elongation factor, RNA polymerase II, 2
hsa-miR-410	1	0	0	0	0	0	IL4	interleukin 4
hsa-miR-410	1	0	1	1	0	0	ANKIB1	ankyrin repeat and IBR domain containing 1
hsa-miR-410	1	0	1	1	1	1	RHEB	Ras homolog enriched in brain
hsa-miR-410	1	0	1	1	1	1	C5orf30	chromosome 5 open reading frame 30
hsa-miR-410	1	0	1	0	1	1	IP6K1	inositol hexakisphosphate kinase 1
hsa-miR-410	1	0	1	1	1	1	MEX3C	mex-3 homolog C (C. elegans)
hsa-miR-410	1	0	1	1	1	1	KLF12	Kruppel-like factor 12
hsa-miR-410	1	0	1	1	1	1	ZNF384	zinc finger protein 384
hsa-miR-410	1	0	1	1	1	1	PLXNA2	plexin A2
hsa-miR-410	1	0	1	0	1	1	CPEB4	cytoplasmic polyadenylation element binding protein 4
hsa-miR-410	1	0	1	1	1	1	SAMD4B	sterile alpha motif domain containing 4B
hsa-miR-410	1	0	1	1	1	1	BTG3	BTG family, member 3
hsa-miR-410	1	0	1	1	1	1	AEBP2	AE binding protein 2
hsa-miR-410	1	0	1	0	1	1	SP1	Sp1 transcription factor
hsa-miR-410	1	0	1	1	1	1	ADCYAP1	adenylate cyclase activating polypeptide 1 (pituitary)
hsa-miR-410	1	0	1	1	1	1	HTRA2	HtrA serine peptidase 2
hsa-miR-410	1	0	1	1	1	1	NDST1	N-deacetylase/N-sulfotransferase (heparan glucosaminyl) 1
hsa-miR-410	1	0	1	1	1	1	ABHD13	abhydrolase domain containing 13
hsa-miR-410	1	0	1	0	1	1	VANGL2	vang-like 2 (van gogh, Drosophila)
hsa-miR-410	1	0	1	1	1	1	GAD1	glutamate decarboxylase 1 (brain, 67kDa)
hsa-miR-410	1	0	1	1	1	1	PCDH19	protocadherin 19
hsa-miR-410	1	0	1	0	0	0	CSF2	colony stimulating factor 2 (granulocyte-macrophage)
hsa-miR-410	1	0	1	1	1	1	TUBGCP3	tubulin, gamma complex associated protein 3
hsa-miR-410	1	0	1	1	1	1	CBX3	chromobox homolog 3
hsa-miR-410	1	0	1	1	1	1	SERBP1	SERPINE1 mRNA binding protein 1
hsa-miR-410	1	0	1	1	1	1	RCC2	regulator of chromosome condensation 2
hsa-miR-410	1	0	1	1	1	1	PPARGC1A	peroxisome proliferator-activated receptor gamma, coactivator 1 alpha
hsa-miR-410	1	0	1	1	1	1	HLF	hepatic leukemia factor
hsa-miR-410	1	0	1	0	1	1	KIAA1024	KIAA1024
hsa-miR-410	1	0	1	1	1	1	PPAP2B	phosphatidic acid phosphatase type 2B
hsa-miR-410	1	0	1	1	0	0	LPCAT4	lysophosphatidylcholine acyltransferase 4
hsa-miR-410	1	0	1	1	1	1	RPS6KA3	ribosomal protein S6 kinase, 90kDa, polypeptide 3
hsa-miR-410	1	0	1	1	1	1	TMEFF2	transmembrane protein with EGF-like and two follistatin-like domains 2
hsa-miR-410	1	0	1	1	1	1	TMTC1	transmembrane and tetratricopeptide repeat containing 1
hsa-miR-410	1	0	1	1	0	0	FBRS	fibrosin
hsa-miR-410	1	0	1	1	0	0	ARHGAP39	Rho GTPase activating protein 39
hsa-miR-410	1	0	1	1	1	1	ZBTB44	zinc finger and BTB domain containing 44
hsa-miR-410	1	0	1	1	1	1	C9orf72	chromosome 9 open reading frame 72
hsa-miR-410	1	0	1	1	1	1	PTF1A	pancreas specific transcription factor, 1a
hsa-miR-410	1	0	1	0	1	1	CHD7	chromodomain helicase DNA binding protein 7
hsa-miR-410	1	0	1	0	1	1	DPYSL2	dihydropyrimidinase-like 2
hsa-miR-410	1	0	1	1	1	1	DIAPH2	diaphanous homolog 2 (Drosophila)
hsa-miR-410	1	0	1	1	1	1	PLXND1	plexin D1
hsa-miR-410	1	0	1	0	1	1	MFAP3L	microfibrillar-associated protein 3-like
hsa-miR-410	1	0	1	1	1	1	MTMR12	myotubularin related protein 12
hsa-miR-410	1	0	0	0	0	0	TMEM170B	transmembrane protein 170B
hsa-miR-410	1	0	1	1	1	1	TNS1	tensin 1
hsa-miR-410	1	0	1	1	1	1	NFIB	nuclear factor I/B
hsa-miR-410	1	0	1	1	1	1	CD200	CD200 molecule
hsa-miR-410	1	0	1	1	1	1	ZFHX3	zinc finger homeobox 3
hsa-miR-410	1	0	1	1	1	1	AFF4	AF4/FMR2 family, member 4
hsa-miR-410	1	0	1	1	1	1	CBL	Cbl proto-oncogene, E3 ubiquitin protein ligase
hsa-miR-410	1	0	1	1	1	1	H3F3B	H3 histone, family 3B (H3.3B)
hsa-miR-410	1	0	1	0	1	1	GLCE	glucuronic acid epimerase
hsa-miR-410	1	0	1	1	1	1	IGF1R	insulin-like growth factor 1 receptor
hsa-miR-410	1	0	1	1	1	1	GRIA2	glutamate receptor, ionotropic, AMPA 2
hsa-miR-410	1	0	1	0	1	1	RAB8B	RAB8B, member RAS oncogene family
hsa-miR-410	1	0	1	0	1	1	ARHGAP5	Rho GTPase activating protein 5
hsa-miR-410	1	0	0	1	0	0	PLEKHM2	pleckstrin homology domain containing, family M (with RUN domain) member 2
hsa-miR-410	1	0	1	0	1	1	TNFRSF10B	tumor necrosis factor receptor superfamily, member 10b
hsa-miR-410	1	0	1	0	1	1	XIAP	X-linked inhibitor of apoptosis
hsa-miR-410	1	0	1	1	1	1	ATN1	atrophin 1
hsa-miR-410	1	0	1	1	1	1	TBX5	T-box 5
hsa-miR-410	1	0	1	1	1	1	SLC20A2	solute carrier family 20 (phosphate transporter), member 2
hsa-miR-410	1	0	1	1	1	1	CTAGE5	CTAGE family, member 5
hsa-miR-410	1	0	1	1	1	1	CALN1	calneuron 1
hsa-miR-410	1	0	1	1	1	1	CREBBP	CREB binding protein
hsa-miR-410	1	0	1	1	1	1	MAFB	v-maf musculoaponeurotic fibrosarcoma oncogene homolog B (avian)
hsa-miR-410	1	0	1	1	1	1	SLC2A12	solute carrier family 2 (facilitated glucose transporter), member 12
hsa-miR-410	1	0	1	1	1	1	SCAMP5	secretory carrier membrane protein 5
hsa-miR-410	1	0	1	1	1	1	BAZ2B	bromodomain adjacent to zinc finger domain, 2B
hsa-miR-410	1	0	1	1	1	1	C18orf1	chromosome 18 open reading frame 1
hsa-miR-410	1	0	1	1	0	0	ITPRIPL2	inositol 1,4,5-trisphosphate receptor interacting protein-like 2
hsa-miR-410	1	0	1	0	1	1	TNRC6B	trinucleotide repeat containing 6B
hsa-miR-410	1	0	1	1	1	1	RGCC	regulator of cell cycle
hsa-miR-410	1	0	1	0	1	1	VAMP2	vesicle-associated membrane protein 2 (synaptobrevin 2)
hsa-miR-410	1	0	1	1	1	1	BSDC1	BSD domain containing 1
hsa-miR-410	1	0	1	0	1	1	ZFHX4	zinc finger homeobox 4
hsa-miR-410	1	0	1	0	1	1	ZC3H6	zinc finger CCCH-type containing 6
hsa-miR-410	1	0	1	1	1	1	SAV1	salvador homolog 1 (Drosophila)
hsa-miR-410	1	0	1	1	1	1	BNC2	basonuclin 2
hsa-miR-410	1	0	1	1	1	1	MYH10	myosin, heavy chain 10, non-muscle
hsa-miR-410	1	0	1	1	1	1	FZD1	frizzled family receptor 1
hsa-miR-410	1	0	1	1	1	1	PTX3	pentraxin 3, long
hsa-miR-410	1	0	1	0	1	1	FMNL2	formin-like 2
hsa-miR-410	1	0	1	0	1	1	LARP1	La ribonucleoprotein domain family, member 1
hsa-miR-410	1	0	1	1	1	1	PPP1R12B	protein phosphatase 1, regulatory subunit 12B
hsa-miR-410	1	0	1	1	1	1	STRN3	striatin, calmodulin binding protein 3
hsa-miR-410	1	0	1	1	1	1	MXRA5	matrix-remodelling associated 5
hsa-miR-410	1	0	1	1	1	1	PRDM4	PR domain containing 4
hsa-miR-410	1	0	1	1	1	1	MAPK1	mitogen-activated protein kinase 1
hsa-miR-410	1	0	1	0	1	1	SH3PXD2A	SH3 and PX domains 2A
hsa-miR-410	1	0	1	1	1	1	ELMO2	engulfment and cell motility 2
hsa-miR-410	1	0	1	1	1	1	NR2F2	nuclear receptor subfamily 2, group F, member 2
hsa-miR-410	1	0	1	1	1	1	SASH1	SAM and SH3 domain containing 1
hsa-miR-410	1	0	1	1	1	1	LRRC4	leucine rich repeat containing 4
hsa-miR-410	1	0	1	1	1	1	GATA2	GATA binding protein 2
hsa-miR-410	1	0	1	1	1	1	SNTB2	syntrophin, beta 2 (dystrophin-associated protein A1, 59kDa, basic component 2)
hsa-miR-410	1	0	1	1	1	1	LUZP2	leucine zipper protein 2
hsa-miR-410	1	0	1	1	0	0	FZD8	frizzled family receptor 8
hsa-miR-410	1	0	1	1	1	1	PIK3IP1	phosphoinositide-3-kinase interacting protein 1
hsa-miR-410	1	0	1	0	1	1	STAT3	signal transducer and activator of transcription 3 (acute-phase response factor)
hsa-miR-410	1	0	1	1	1	1	ACTN4	actinin, alpha 4
hsa-miR-410	1	0	1	1	1	1	SOX7	SRY (sex determining region Y)-box 7
hsa-miR-410	1	0	1	1	1	1	MYT1	myelin transcription factor 1
hsa-miR-410	1	0	1	0	1	1	ZIC1	Zic family member 1
hsa-miR-410	1	0	1	1	1	1	HDAC1	histone deacetylase 1
hsa-miR-410	1	0	1	1	1	1	MEX3D	mex-3 homolog D (C. elegans)
hsa-miR-410	1	0	1	1	1	1	ZFAND5	zinc finger, AN1-type domain 5
hsa-miR-410	1	0	1	1	1	1	MOB1B	MOB kinase activator 1B
hsa-miR-410	1	0	1	1	1	1	FOSB	FBJ murine osteosarcoma viral oncogene homolog B
hsa-miR-410	1	0	1	0	1	1	C18orf25	chromosome 18 open reading frame 25
hsa-miR-410	1	0	1	1	1	1	ZER1	zer-1 homolog (C. elegans)
hsa-miR-410	1	0	1	1	1	1	ESR1	estrogen receptor 1
hsa-miR-410	1	0	1	0	1	1	BTF3L4	basic transcription factor 3-like 4
hsa-miR-410	1	0	1	1	1	1	LGALSL	lectin, galactoside-binding-like
hsa-miR-410	1	0	1	0	1	1	CDON	Cdon homolog (mouse)
hsa-miR-410	1	0	1	1	1	1	RAB6B	RAB6B, member RAS oncogene family
hsa-miR-410	1	0	1	1	1	1	CBX8	chromobox homolog 8
hsa-miR-410	1	0	1	1	1	1	HACE1	HECT domain and ankyrin repeat containing E3 ubiquitin protein ligase 1
hsa-miR-410	1	0	1	0	0	0	TNPO1	transportin 1
hsa-miR-410	1	0	1	1	1	1	SLC8A1	solute carrier family 8 (sodium/calcium exchanger), member 1
hsa-miR-410	1	0	1	1	1	1	FNBP1L	formin binding protein 1-like
hsa-miR-410	1	0	1	0	1	1	NR3C1	nuclear receptor subfamily 3, group C, member 1 (glucocorticoid receptor)
hsa-miR-410	1	0	1	0	1	1	SORT1	sortilin 1
hsa-miR-410	1	0	1	0	1	1	OSBPL3	oxysterol binding protein-like 3
hsa-miR-410	1	0	1	1	1	1	NUP35	nucleoporin 35kDa
hsa-miR-410	1	0	1	1	1	1	SLC25A3	solute carrier family 25 (mitochondrial carrier; phosphate carrier), member 3
hsa-miR-410	1	0	1	1	1	1	EZR	ezrin
hsa-miR-410	1	0	1	1	1	1	NEMF	nuclear export mediator factor
hsa-miR-410	1	0	1	1	1	1	EIF4G2	eukaryotic translation initiation factor 4 gamma, 2
hsa-miR-410	1	0	1	1	1	1	RANBP10	RAN binding protein 10
hsa-miR-410	1	0	1	1	1	1	PLS1	plastin 1
hsa-miR-410	1	0	1	1	1	1	RDX	radixin
hsa-miR-410	1	0	1	1	1	1	GRHL3	grainyhead-like 3 (Drosophila)
hsa-miR-410	1	0	1	1	1	1	FGFR2	fibroblast growth factor receptor 2
hsa-miR-410	1	0	1	1	1	1	TFDP1	transcription factor Dp-1
hsa-miR-410	1	0	1	1	1	1	CDC42EP3	CDC42 effector protein (Rho GTPase binding) 3
hsa-miR-410	1	0	0	1	0	0	PRR12	proline rich 12
hsa-miR-410	1	0	1	0	1	1	ACVR1C	activin A receptor, type IC
hsa-miR-410	1	0	1	0	1	1	CUL3	cullin 3
hsa-miR-410	1	0	1	1	1	1	ATRX	alpha thalassemia/mental retardation syndrome X-linked
hsa-miR-410	1	0	1	1	1	1	SLC2A1	solute carrier family 2 (facilitated glucose transporter), member 1
hsa-miR-410	1	0	1	1	1	1	ITPKB	inositol-trisphosphate 3-kinase B
hsa-miR-410	1	0	1	0	1	1	RNF182	ring finger protein 182
hsa-miR-410	1	0	1	0	0	0	SH3RF3	SH3 domain containing ring finger 3
hsa-miR-410	1	0	1	1	1	1	LOXL3	lysyl oxidase-like 3
hsa-miR-410	1	0	1	1	1	1	WDR17	WD repeat domain 17
hsa-miR-410	1	0	1	1	1	1	ST18	suppression of tumorigenicity 18 (breast carcinoma) (zinc finger protein)
hsa-miR-410	1	0	1	0	0	0	DTX4	deltex homolog 4 (Drosophila)
hsa-miR-410	1	0	1	0	1	1	PJA2	praja ring finger 2, E3 ubiquitin protein ligase
hsa-miR-410	1	0	1	0	1	1	KLF3	Kruppel-like factor 3 (basic)
hsa-miR-410	1	0	1	1	1	1	BAZ2A	bromodomain adjacent to zinc finger domain, 2A
hsa-miR-410	1	0	1	1	1	1	DUSP8	dual specificity phosphatase 8
hsa-miR-410	1	0	1	1	1	1	RCOR1	REST corepressor 1
hsa-miR-410	1	0	1	1	1	1	CHD2	chromodomain helicase DNA binding protein 2
hsa-miR-410	1	0	1	1	1	1	AGPAT5	1-acylglycerol-3-phosphate O-acyltransferase 5 (lysophosphatidic acid acyltransferase, epsilon)
hsa-miR-410	1	0	1	1	1	1	EXTL3	exostoses (multiple)-like 3
hsa-miR-410	1	0	1	1	0	0	PCNX	pecanex homolog (Drosophila)
hsa-miR-410	1	0	1	1	1	1	PRUNE2	prune homolog 2 (Drosophila)
hsa-miR-410	1	0	1	1	0	0	HUWE1	HECT, UBA and WWE domain containing 1, E3 ubiquitin protein ligase
hsa-miR-410	1	0	1	1	1	1	SNX27	sorting nexin family member 27
hsa-miR-410	1	0	1	0	1	1	LIN54	lin-54 homolog (C. elegans)
hsa-miR-410	1	0	1	1	1	1	SLC26A4	solute carrier family 26, member 4
hsa-miR-410	1	0	1	1	1	1	LPHN2	latrophilin 2
hsa-miR-410	1	0	1	1	1	1	KRIT1	KRIT1, ankyrin repeat containing
hsa-miR-410	1	0	1	0	1	1	BEND4	BEN domain containing 4
hsa-miR-410	1	0	1	1	1	1	NUMB	numb homolog (Drosophila)
hsa-miR-410	1	0	1	1	1	1	MAP3K12	mitogen-activated protein kinase kinase kinase 12
hsa-miR-410	1	0	1	1	1	1	PPP1R3F	protein phosphatase 1, regulatory subunit 3F
hsa-miR-410	1	0	1	1	1	1	BOC	Boc homolog (mouse)
hsa-miR-410	1	0	1	1	1	1	ELFN2	extracellular leucine-rich repeat and fibronectin type III domain containing 2
hsa-miR-410	1	0	1	1	1	1	SMAD6	SMAD family member 6
hsa-miR-410	1	0	1	1	1	1	DLG3	discs, large homolog 3 (Drosophila)
hsa-miR-410	1	0	1	1	1	1	CELSR1	cadherin, EGF LAG seven-pass G-type receptor 1 (flamingo homolog, Drosophila)
hsa-miR-410	1	0	1	0	0	0	NTN1	netrin 1
hsa-miR-410	1	0	1	1	1	1	ZZZ3	zinc finger, ZZ-type containing 3
hsa-miR-410	1	0	1	1	1	1	OLIG3	oligodendrocyte transcription factor 3
hsa-miR-410	1	0	0	1	0	0	FOXD3	forkhead box D3
hsa-miR-410	1	0	1	0	1	1	KIAA0355	KIAA0355
hsa-miR-410	1	0	1	1	1	1	TIAM1	T-cell lymphoma invasion and metastasis 1
hsa-miR-410	1	0	0	1	1	1	PARD6G	par-6 partitioning defective 6 homolog gamma (C. elegans)
hsa-miR-410	1	0	1	1	1	1	PRRC2C	proline-rich coiled-coil 2C
hsa-miR-410	1	0	1	0	1	1	MPPED2	metallophosphoesterase domain containing 2
hsa-miR-410	1	0	1	1	1	1	SLC25A42	solute carrier family 25, member 42
hsa-miR-410	1	0	1	1	1	1	ZNRF1	zinc and ring finger 1, E3 ubiquitin protein ligase
hsa-miR-410	1	0	1	1	1	1	DNAL4	dynein, axonemal, light chain 4
hsa-miR-410	1	0	1	1	1	1	SNAI1	snail homolog 1 (Drosophila)
hsa-miR-410	1	0	1	1	1	1	PBX3	pre-B-cell leukemia homeobox 3
hsa-miR-410	1	0	1	1	1	1	ANKRD12	ankyrin repeat domain 12
hsa-miR-410	1	0	1	1	1	1	TRIOBP	TRIO and F-actin binding protein
hsa-miR-410	1	0	1	0	1	1	ARID2	AT rich interactive domain 2 (ARID, RFX-like)
hsa-miR-410	1	0	1	0	0	0	TNRC18	trinucleotide repeat containing 18
hsa-miR-410	1	0	1	0	1	1	CNOT6L	CCR4-NOT transcription complex, subunit 6-like
hsa-miR-410	1	0	1	0	1	1	PAPD7	PAP associated domain containing 7
hsa-miR-410	1	0	1	0	1	1	PAPPA	pregnancy-associated plasma protein A, pappalysin 1
hsa-miR-410	1	0	1	1	1	1	SP3	Sp3 transcription factor
hsa-miR-410	1	0	1	1	1	1	PRRX1	paired related homeobox 1
hsa-miR-410	1	0	1	1	1	1	SHANK2	SH3 and multiple ankyrin repeat domains 2
hsa-miR-410	1	0	1	0	1	1	NMT1	N-myristoyltransferase 1
hsa-miR-410	1	0	1	1	1	1	FGF7	fibroblast growth factor 7
hsa-miR-410	1	0	1	0	1	1	ATP11B	ATPase, class VI, type 11B
hsa-miR-410	1	0	1	1	1	1	MED13L	mediator complex subunit 13-like
hsa-miR-410	1	0	1	1	1	1	IGF1	insulin-like growth factor 1 (somatomedin C)
hsa-miR-410	1	0	1	1	1	1	GFPT1	glutamine--fructose-6-phosphate transaminase 1
hsa-miR-410	1	0	1	0	1	1	RAB1A	RAB1A, member RAS oncogene family
hsa-miR-410	1	0	1	1	1	1	MYT1L	myelin transcription factor 1-like
hsa-miR-410	1	0	1	0	1	1	BCL11B	B-cell CLL/lymphoma 11B (zinc finger protein)
hsa-miR-410	1	0	1	1	1	1	TAF4	TAF4 RNA polymerase II, TATA box binding protein (TBP)-associated factor, 135kDa
hsa-miR-410	1	0	1	1	1	1	RNF214	ring finger protein 214
hsa-miR-410	1	0	1	1	1	1	AKNA	AT-hook transcription factor
hsa-miR-410	1	0	1	1	0	0	MMP14	matrix metallopeptidase 14 (membrane-inserted)
hsa-miR-410	1	0	1	1	1	1	CLDN10	claudin 10
hsa-miR-410	1	0	1	1	1	1	PIAS3	protein inhibitor of activated STAT, 3
hsa-miR-410	1	0	1	0	1	1	RTN4RL1	reticulon 4 receptor-like 1
hsa-miR-410	1	0	1	1	1	1	TPPP	tubulin polymerization promoting protein
hsa-miR-410	1	0	1	1	1	1	FBXO33	F-box protein 33
hsa-miR-410	1	0	1	1	0	0	UNC5A	unc-5 homolog A (C. elegans)
hsa-miR-410	1	0	1	0	1	1	YAF2	YY1 associated factor 2
hsa-miR-410	1	0	1	1	0	0	ABLIM3	actin binding LIM protein family, member 3
hsa-miR-410	1	0	1	1	1	1	SUPT3H	suppressor of Ty 3 homolog (S. cerevisiae)
hsa-miR-410	1	0	1	1	1	1	ZDHHC5	zinc finger, DHHC-type containing 5
hsa-miR-410	1	0	1	1	1	1	NCOA5	nuclear receptor coactivator 5
hsa-miR-410	1	0	1	1	1	1	ZFYVE16	zinc finger, FYVE domain containing 16
hsa-miR-410	1	0	1	1	1	1	CHD9	chromodomain helicase DNA binding protein 9
hsa-miR-410	1	0	1	0	1	1	KIAA0408	KIAA0408
hsa-miR-410	1	0	1	1	1	1	PPIP5K2	diphosphoinositol pentakisphosphate kinase 2
hsa-miR-410	1	0	1	0	1	1	VPS13D	vacuolar protein sorting 13 homolog D (S. cerevisiae)
hsa-miR-410	1	0	1	1	1	1	RNGTT	RNA guanylyltransferase and 5'-phosphatase
hsa-miR-410	1	0	1	1	1	1	TP63	tumor protein p63
hsa-miR-410	1	0	1	1	1	1	MATR3	matrin 3
hsa-miR-410	1	0	1	0	1	1	RBM12	RNA binding motif protein 12
hsa-miR-410	1	0	1	1	1	1	WWC1	WW and C2 domain containing 1
hsa-miR-410	1	0	1	1	1	1	UBR5	ubiquitin protein ligase E3 component n-recognin 5
hsa-miR-410	1	0	1	0	0	0	KIAA0947	KIAA0947
hsa-miR-410	1	0	1	1	1	1	CNOT1	CCR4-NOT transcription complex, subunit 1
hsa-miR-410	0	0	1	1	1	1	AGTPBP1	ATP/GTP binding protein 1
hsa-miR-410	1	0	1	1	1	1	NLGN1	neuroligin 1
hsa-miR-410	1	0	1	1	1	1	SMARCAD1	SWI/SNF-related, matrix-associated actin-dependent regulator of chromatin, subfamily a, containing DEAD/H box 1
hsa-miR-410	1	0	1	1	1	1	NDRG4	NDRG family member 4
hsa-miR-410	1	0	1	1	1	1	RIMKLB	ribosomal modification protein rimK-like family member B
hsa-miR-410	1	0	1	1	1	1	LRRC7	leucine rich repeat containing 7
hsa-miR-410	0	0	1	0	0	0	KIAA1383	KIAA1383
hsa-miR-410	1	1	1	1	1	1	NFIA	nuclear factor I/A
hsa-miR-410	1	0	1	1	0	0	KIAA1462	KIAA1462
hsa-miR-410	0	0	1	0	1	1	KIAA1468	KIAA1468
hsa-miR-410	1	0	1	0	1	1	LMO3	LIM domain only 3 (rhombotin-like 2)
hsa-miR-410	0	0	1	0	1	1	ZSWIM6	zinc finger, SWIM-type containing 6
hsa-miR-410	1	0	1	1	1	1	ZNF532	zinc finger protein 532
hsa-miR-410	1	0	1	0	0	0	TANC2	tetratricopeptide repeat, ankyrin repeat and coiled-coil containing 2
hsa-miR-410	0	0	1	1	1	1	BHLHB9	basic helix-loop-helix domain containing, class B, 9
hsa-miR-410	1	0	1	0	1	1	RIMS1	regulating synaptic membrane exocytosis 1
hsa-miR-410	1	0	1	1	1	1	LCOR	ligand dependent nuclear receptor corepressor
hsa-miR-410	0	0	1	1	1	1	SLC11A2	solute carrier family 11 (proton-coupled divalent metal ion transporters), member 2
hsa-miR-410	1	0	1	1	1	1	NAV2	neuron navigator 2
hsa-miR-410	1	0	1	1	1	1	HNRPDL	heterogeneous nuclear ribonucleoprotein D-like
hsa-miR-410	1	0	1	0	1	1	SLC25A25	solute carrier family 25 (mitochondrial carrier; phosphate carrier), member 25
hsa-miR-410	1	0	1	1	1	1	SH3TC2	SH3 domain and tetratricopeptide repeats 2
hsa-miR-410	1	0	1	0	0	0	FAT3	FAT tumor suppressor homolog 3 (Drosophila)
hsa-miR-410	0	0	1	0	1	1	RASSF8	Ras association (RalGDS/AF-6) domain family (N-terminal) member 8
hsa-miR-410	1	0	1	1	1	1	UBR3	ubiquitin protein ligase E3 component n-recognin 3 (putative)
hsa-miR-410	0	0	1	0	1	1	ACE2	angiotensin I converting enzyme (peptidyl-dipeptidase A) 2
hsa-miR-410	1	0	1	0	1	1	NFE2L2	nuclear factor (erythroid-derived 2)-like 2
hsa-miR-410	1	0	1	1	1	1	KLHL5	kelch-like 5 (Drosophila)
hsa-miR-410	1	0	1	1	1	1	DAPK1	death-associated protein kinase 1
hsa-miR-410	1	0	1	0	1	1	PCDHA13	protocadherin alpha 13
hsa-miR-410	1	0	1	1	1	1	PCDHA4	protocadherin alpha 4
hsa-miR-410	1	0	1	1	1	1	SYNCRIP	synaptotagmin binding, cytoplasmic RNA interacting protein
hsa-miR-410	1	0	1	1	1	1	DTNA	dystrobrevin, alpha
hsa-miR-410	1	0	1	0	1	1	PLAG1	pleiomorphic adenoma gene 1
hsa-miR-410	1	0	1	1	1	1	FMR1	fragile X mental retardation 1
hsa-miR-410	1	0	1	1	1	1	PRKACB	protein kinase, cAMP-dependent, catalytic, beta
hsa-miR-410	1	0	1	0	1	1	ETV1	ets variant 1
hsa-miR-410	1	0	1	1	1	1	ABI1	abl-interactor 1
hsa-miR-410	1	0	1	1	1	1	ARFGEF1	ADP-ribosylation factor guanine nucleotide-exchange factor 1 (brefeldin A-inhibited)
hsa-miR-410	0	0	1	1	1	1	DGKE	diacylglycerol kinase, epsilon 64kDa
hsa-miR-410	1	0	1	1	1	1	EPHA5	EPH receptor A5
hsa-miR-410	1	0	1	1	1	1	MYO5A	myosin VA (heavy chain 12, myoxin)
hsa-miR-410	1	0	1	1	1	1	PDLIM5	PDZ and LIM domain 5
hsa-miR-410	1	0	1	1	1	1	HNRNPK	heterogeneous nuclear ribonucleoprotein K
hsa-miR-410	1	0	1	1	1	1	IPO8	importin 8
hsa-miR-410	0	0	1	1	1	1	HLA-DQA1	major histocompatibility complex, class II, DQ alpha 1
hsa-miR-410	1	0	1	1	1	1	ARHGEF3	Rho guanine nucleotide exchange factor (GEF) 3
hsa-miR-410	1	0	1	1	1	1	SLC6A8	solute carrier family 6 (neurotransmitter transporter, creatine), member 8
hsa-miR-410	1	0	1	0	1	1	ADD3	adducin 3 (gamma)
hsa-miR-410	1	0	1	1	1	1	ZFX	zinc finger protein, X-linked
hsa-miR-410	0	0	1	1	1	1	PON2	paraoxonase 2
hsa-miR-410	0	0	1	0	1	1	PARG	poly (ADP-ribose) glycohydrolase
hsa-miR-410	1	0	1	1	1	1	SLC4A4	solute carrier family 4, sodium bicarbonate cotransporter, member 4
hsa-miR-410	1	0	1	1	1	1	PCDH17	protocadherin 17
hsa-miR-410	1	0	1	0	1	1	CELF2	CUGBP, Elav-like family member 2
hsa-miR-410	1	0	1	1	1	1	GLS	glutaminase
hsa-miR-410	1	0	1	1	1	1	SLMAP	sarcolemma associated protein
hsa-miR-410	1	0	1	1	1	1	CAB39	calcium binding protein 39
hsa-miR-410	1	0	1	1	1	1	SORBS1	sorbin and SH3 domain containing 1
hsa-miR-410	0	0	1	0	1	1	PDP1	pyruvate dehyrogenase phosphatase catalytic subunit 1
hsa-miR-410	0	0	1	1	1	1	FGFR1OP2	FGFR1 oncogene partner 2
hsa-miR-410	0	0	1	0	1	1	SLC38A4	solute carrier family 38, member 4
hsa-miR-410	1	0	1	1	1	1	SENP7	SUMO1/sentrin specific peptidase 7
hsa-miR-410	1	0	1	1	1	1	KCNMB2	potassium large conductance calcium-activated channel, subfamily M, beta member 2
hsa-miR-410	0	0	1	1	1	1	CD28	CD28 molecule
hsa-miR-410	0	0	1	1	1	1	CASC5	cancer susceptibility candidate 5
hsa-miR-410	0	0	1	0	0	0	TIGD7	tigger transposable element derived 7
hsa-miR-410	1	0	1	1	1	1	ELF2	E74-like factor 2 (ets domain transcription factor)
hsa-miR-410	0	0	1	1	1	1	C21orf7	chromosome 21 open reading frame 7
hsa-miR-410	1	0	1	1	1	1	PUM2	pumilio homolog 2 (Drosophila)
hsa-miR-410	0	0	1	0	1	1	PRDM6	PR domain containing 6
hsa-miR-410	0	0	1	1	1	1	FCRLA	Fc receptor-like A
hsa-miR-410	0	0	1	1	1	1	MFSD1	major facilitator superfamily domain containing 1
hsa-miR-410	1	0	1	1	1	1	CASD1	CAS1 domain containing 1
hsa-miR-410	1	0	1	1	1	1	NTRK2	neurotrophic tyrosine kinase, receptor, type 2
hsa-miR-410	0	0	1	1	1	1	BEST3	bestrophin 3
hsa-miR-410	1	0	1	1	1	1	WAPAL	wings apart-like homolog (Drosophila)
hsa-miR-410	1	0	1	1	1	1	PTBP2	polypyrimidine tract binding protein 2
hsa-miR-410	1	0	1	1	1	1	GPR64	G protein-coupled receptor 64
hsa-miR-410	0	0	1	1	0	0	KLRD1	killer cell lectin-like receptor subfamily D, member 1
hsa-miR-410	1	0	1	1	1	1	AFF2	AF4/FMR2 family, member 2
hsa-miR-410	1	0	1	0	1	1	DICER1	dicer 1, ribonuclease type III
hsa-miR-410	0	0	1	1	1	1	TCFL5	transcription factor-like 5 (basic helix-loop-helix)
hsa-miR-410	1	0	1	1	1	1	PALM2	paralemmin 2
hsa-miR-410	0	0	1	1	0	0	LMLN	leishmanolysin-like (metallopeptidase M8 family)
hsa-miR-410	1	0	1	1	1	1	NRXN3	neurexin 3
hsa-miR-410	0	0	1	1	1	1	PIWIL2	piwi-like 2 (Drosophila)
hsa-miR-410	0	0	1	0	0	0	FLJ20518	FSHD region gene 2 family, member C pseudogene
hsa-miR-410	0	0	1	0	0	0	TUG1	taurine upregulated 1 (non-protein coding)
hsa-miR-410	1	0	1	1	1	1	ARHGAP12	Rho GTPase activating protein 12
hsa-miR-410	1	0	1	1	1	1	ZC3H7A	zinc finger CCCH-type containing 7A
hsa-miR-410	0	0	1	0	1	1	EBF2	early B-cell factor 2
hsa-miR-410	0	0	1	1	1	1	STOX2	storkhead box 2
hsa-miR-410	1	0	1	1	1	1	PTBP3	polypyrimidine tract binding protein 3
hsa-miR-410	1	0	1	1	1	1	SLC38A2	solute carrier family 38, member 2
hsa-miR-410	1	0	1	1	1	1	LRRN3	leucine rich repeat neuronal 3
hsa-miR-410	0	0	1	1	1	1	STAU2	staufen, RNA binding protein, homolog 2 (Drosophila)
hsa-miR-410	0	0	1	0	0	0	SOX2-OT	SOX2 overlapping transcript (non-protein coding)
hsa-miR-410	1	0	1	1	1	1	MACF1	microtubule-actin crosslinking factor 1
hsa-miR-410	1	0	1	1	1	1	PHF20L1	PHD finger protein 20-like 1
hsa-miR-410	0	0	1	0	0	0	LOC284561	uncharacterized LOC284561
hsa-miR-410	1	0	1	1	1	1	CEP85	centrosomal protein 85kDa
hsa-miR-410	1	0	1	1	1	1	DYRK2	dual-specificity tyrosine-(Y)-phosphorylation regulated kinase 2
hsa-miR-410	0	0	1	0	1	1	FLJ22447	uncharacterized LOC400221
hsa-miR-410	0	0	1	0	1	1	FLJ22763	uncharacterized LOC401081
hsa-miR-410	0	0	1	1	1	1	USP48	ubiquitin specific peptidase 48
hsa-miR-410	0	0	1	0	0	0	NEURL1B	neuralized homolog 1B (Drosophila)
hsa-miR-410	0	0	1	0	1	1	FLJ23152	uncharacterized LOC401236
hsa-miR-410	0	0	1	0	0	0	LOC729852	uncharacterized LOC729852
hsa-miR-410	0	0	1	1	1	1	SNAP47	synaptosomal-associated protein, 47kDa
hsa-miR-410	1	0	1	0	1	1	ZKSCAN1	zinc finger with KRAB and SCAN domains 1
hsa-miR-410	1	0	1	1	1	1	MBD5	methyl-CpG binding domain protein 5
hsa-miR-410	1	0	1	0	1	1	AP1G1	adaptor-related protein complex 1, gamma 1 subunit
hsa-miR-410	0	0	1	1	1	1	OPTN	optineurin
hsa-miR-410	0	0	1	1	1	1	BCAR3	breast cancer anti-estrogen resistance 3
hsa-miR-410	1	0	1	1	1	1	GULP1	GULP, engulfment adaptor PTB domain containing 1
hsa-miR-410	1	0	1	1	1	1	DIXDC1	DIX domain containing 1
hsa-miR-410	1	0	1	1	1	1	SHISA5	shisa homolog 5 (Xenopus laevis)
hsa-miR-410	1	0	1	1	1	1	CLCN5	chloride channel, voltage-sensitive 5
hsa-miR-410	1	0	1	1	1	1	PUM1	pumilio homolog 1 (Drosophila)
hsa-miR-410	0	0	1	0	1	1	AGBL1	ATP/GTP binding protein-like 1
hsa-miR-410	1	0	1	0	1	1	PCGF3	polycomb group ring finger 3
hsa-miR-410	1	0	1	1	1	1	TLE4	transducin-like enhancer of split 4 (E(sp1) homolog, Drosophila)
hsa-miR-410	0	0	1	1	1	1	SEC61A2	Sec61 alpha 2 subunit (S. cerevisiae)
hsa-miR-410	1	0	1	0	1	1	BLOC1S6	biogenesis of lysosomal organelles complex-1, subunit 6, pallidin
hsa-miR-410	1	0	1	1	1	1	ANKRD29	ankyrin repeat domain 29
hsa-miR-410	0	0	1	1	1	1	PKIB	protein kinase (cAMP-dependent, catalytic) inhibitor beta
hsa-miR-410	1	0	1	1	1	1	PAX6	paired box 6
hsa-miR-410	0	0	1	1	1	1	CAMKV	CaM kinase-like vesicle-associated
hsa-miR-410	1	0	1	1	1	1	STXBP5	syntaxin binding protein 5 (tomosyn)
hsa-miR-410	1	0	1	1	1	1	TLK1	tousled-like kinase 1
hsa-miR-410	0	0	1	1	1	1	DYNC1I1	dynein, cytoplasmic 1, intermediate chain 1
hsa-miR-410	0	0	1	0	0	0	KIAA1430	KIAA1430
hsa-miR-410	1	0	1	1	1	1	SLBP	stem-loop binding protein
hsa-miR-410	0	0	1	0	0	0	CXXC1P1	CXXC finger protein 1 pseudogene 1
hsa-miR-410	0	0	1	0	0	0	PART1	prostate androgen-regulated transcript 1 (non-protein coding)
hsa-miR-410	0	0	1	0	1	1	RALYL	RALY RNA binding protein-like
hsa-miR-410	0	0	1	1	1	1	ATP6V1H	ATPase, H+ transporting, lysosomal 50/57kDa, V1 subunit H
hsa-miR-410	1	0	1	1	1	1	CPNE8	copine VIII
hsa-miR-410	0	0	1	1	1	1	MOBP	myelin-associated oligodendrocyte basic protein
hsa-miR-410	0	0	1	1	0	0	ZNF185	zinc finger protein 185 (LIM domain)
hsa-miR-410	1	0	1	1	1	1	EPHB1	EPH receptor B1
hsa-miR-410	1	0	1	1	1	1	CNEP1R1	CTD nuclear envelope phosphatase 1 regulatory subunit 1
hsa-miR-410	1	0	1	1	1	1	SPATS2	spermatogenesis associated, serine-rich 2
hsa-miR-410	1	0	1	1	1	1	ZC3H11A	zinc finger CCCH-type containing 11A
hsa-miR-410	1	0	1	0	1	1	STC2	stanniocalcin 2
hsa-miR-410	0	0	1	1	1	1	BAG1	BCL2-associated athanogene
hsa-miR-410	0	0	1	0	0	0	ZNF815P	zinc finger protein 815, pseudogene
hsa-miR-410	1	0	1	0	1	1	KBTBD8	kelch repeat and BTB (POZ) domain containing 8
hsa-miR-410	1	0	1	1	1	1	STIM2	stromal interaction molecule 2
hsa-miR-410	1	0	1	1	1	1	CDV3	CDV3 homolog (mouse)
hsa-miR-410	0	0	1	0	0	0	LOC400680	uncharacterized LOC400680
hsa-miR-410	0	0	1	0	0	0	LINC00293	long intergenic non-protein coding RNA 293
hsa-miR-410	0	0	1	1	1	1	FAM9B	family with sequence similarity 9, member B
hsa-miR-410	1	0	1	1	1	1	NDFIP2	Nedd4 family interacting protein 2
hsa-miR-410	1	0	1	1	1	1	KALRN	kalirin, RhoGEF kinase
hsa-miR-410	0	0	1	0	0	0	MORN2	MORN repeat containing 2
hsa-miR-410	0	0	1	0	0	0	LOC650368	asparagine-linked glycosylation 1-like pseudogene
hsa-miR-410	1	0	1	1	1	1	MBTD1	mbt domain containing 1
hsa-miR-410	1	0	1	0	1	1	TTYH3	tweety homolog 3 (Drosophila)
hsa-miR-410	0	0	1	1	1	1	MKX	mohawk homeobox
hsa-miR-410	1	0	1	1	1	1	SACS	spastic ataxia of Charlevoix-Saguenay (sacsin)
hsa-miR-410	1	0	1	1	0	0	UBN2	ubinuclein 2
hsa-miR-410	1	0	1	1	1	1	LIN9	lin-9 homolog (C. elegans)
hsa-miR-410	1	0	1	1	1	1	PLEKHB2	pleckstrin homology domain containing, family B (evectins) member 2
hsa-miR-410	0	0	1	1	1	1	DOCK9	dedicator of cytokinesis 9
hsa-miR-410	1	0	1	1	1	1	PHF17	PHD finger protein 17
hsa-miR-410	0	0	1	0	0	0	LOC285812	uncharacterized LOC285812
hsa-miR-410	1	0	1	0	1	1	FNDC3B	fibronectin type III domain containing 3B
hsa-miR-410	0	0	1	1	1	1	MCU	mitochondrial calcium uniporter
hsa-miR-410	0	0	1	1	0	0	TMEM136	transmembrane protein 136
hsa-miR-410	1	0	1	1	1	1	FRYL	FRY-like
hsa-miR-410	0	0	1	1	1	1	TPK1	thiamin pyrophosphokinase 1
hsa-miR-410	0	0	1	0	0	0	LOC494141	mitochondrial carrier triple repeat 1 pseudogene
hsa-miR-410	1	0	1	1	1	1	RNF111	ring finger protein 111
hsa-miR-410	0	0	1	1	0	0	ZNF730	zinc finger protein 730
hsa-miR-410	1	0	1	1	1	1	LRRK2	leucine-rich repeat kinase 2
hsa-miR-410	1	0	1	1	1	1	CTSA	cathepsin A
hsa-miR-410	1	0	1	0	1	1	TMEM106B	transmembrane protein 106B
hsa-miR-410	0	0	1	1	1	1	PRIM2	primase, DNA, polypeptide 2 (58kDa)
hsa-miR-410	1	0	1	1	1	1	ACTN1	actinin, alpha 1
hsa-miR-410	1	0	1	1	1	1	COBLL1	COBL-like 1
hsa-miR-410	1	0	1	1	1	1	PHTF2	putative homeodomain transcription factor 2
hsa-miR-410	0	0	1	1	1	1	ENPP3	ectonucleotide pyrophosphatase/phosphodiesterase 3
hsa-miR-410	1	0	1	0	1	1	TEAD3	TEA domain family member 3
hsa-miR-410	0	0	1	1	0	0	FAM149A	family with sequence similarity 149, member A
hsa-miR-410	0	0	1	1	0	0	NEK7	NIMA (never in mitosis gene a)-related kinase 7
hsa-miR-410	1	0	1	1	1	1	SMAP2	small ArfGAP2
hsa-miR-410	1	0	1	1	1	1	SLC25A36	solute carrier family 25 (pyrimidine nucleotide carrier ), member 36
hsa-miR-410	0	0	1	1	1	1	RHOT1	ras homolog family member T1
hsa-miR-410	0	0	1	1	1	1	MYO9A	myosin IXA
hsa-miR-410	0	0	1	1	0	0	LRCH3	leucine-rich repeats and calponin homology (CH) domain containing 3
hsa-miR-410	1	0	1	1	0	0	CHTOP	chromatin target of PRMT1
hsa-miR-410	1	0	1	0	1	1	ZNF507	zinc finger protein 507
hsa-miR-410	0	0	1	1	1	1	COBL	cordon-bleu homolog (mouse)
hsa-miR-410	1	0	1	1	1	1	YTHDF3	YTH domain family, member 3
hsa-miR-410	1	0	1	0	1	1	HNRNPA3	heterogeneous nuclear ribonucleoprotein A3
hsa-miR-410	0	0	1	1	1	1	SRSF11	serine/arginine-rich splicing factor 11
hsa-miR-410	0	0	1	1	1	1	YAP1	Yes-associated protein 1
hsa-miR-410	1	0	1	1	1	1	DNAJC10	DnaJ (Hsp40) homolog, subfamily C, member 10
hsa-miR-410	1	0	1	1	1	1	NABP1	nucleic acid binding protein 1
hsa-miR-410	0	0	1	1	1	1	VIT	vitrin
hsa-miR-410	1	0	1	1	0	0	PTAR1	protein prenyltransferase alpha subunit repeat containing 1
hsa-miR-410	0	0	1	1	1	1	RANBP17	RAN binding protein 17
hsa-miR-410	1	0	1	1	1	1	UNC45B	unc-45 homolog B (C. elegans)
hsa-miR-410	0	0	1	1	1	1	KIAA1841	KIAA1841
hsa-miR-410	0	0	1	1	1	1	SOAT1	sterol O-acyltransferase 1
hsa-miR-410	1	0	1	0	1	1	JAZF1	JAZF zinc finger 1
hsa-miR-410	1	0	1	1	1	1	C1orf131	chromosome 1 open reading frame 131
hsa-miR-410	1	0	1	1	1	1	ZNF207	zinc finger protein 207
hsa-miR-410	0	0	1	0	1	1	SYNPO2	synaptopodin 2
hsa-miR-410	1	0	1	1	1	1	FAM76B	family with sequence similarity 76, member B
hsa-miR-410	1	0	1	0	1	1	PHYHIPL	phytanoyl-CoA 2-hydroxylase interacting protein-like
hsa-miR-410	1	0	1	1	1	1	PPP3CA	protein phosphatase 3, catalytic subunit, alpha isozyme
hsa-miR-410	1	0	1	1	1	1	WDR44	WD repeat domain 44
hsa-miR-410	1	0	1	1	1	1	IKZF2	IKAROS family zinc finger 2 (Helios)
hsa-miR-410	0	0	1	0	0	0	KGFLP1	fibroblast growth factor 7 pseudogene
hsa-miR-410	0	0	1	1	1	1	DNAJB14	DnaJ (Hsp40) homolog, subfamily B, member 14
hsa-miR-410	1	0	1	1	1	1	RAI14	retinoic acid induced 14
hsa-miR-410	0	0	1	1	1	1	KDELC2	KDEL (Lys-Asp-Glu-Leu) containing 2
hsa-miR-410	0	0	1	0	1	1	RAB18	RAB18, member RAS oncogene family
hsa-miR-410	1	0	1	0	1	1	FAM46A	family with sequence similarity 46, member A
hsa-miR-410	1	0	1	1	1	1	MYCN	v-myc myelocytomatosis viral related oncogene, neuroblastoma derived (avian)
hsa-miR-410	1	0	1	0	1	1	DCAF10	DDB1 and CUL4 associated factor 10
hsa-miR-410	0	0	1	1	1	1	FTO	fat mass and obesity associated
hsa-miR-410	0	0	1	1	1	1	ZNF85	zinc finger protein 85
hsa-miR-410	0	0	1	1	1	1	TMEM30A	transmembrane protein 30A
hsa-miR-410	1	0	1	1	1	1	AGK	acylglycerol kinase
hsa-miR-410	1	0	1	1	1	1	TRIM2	tripartite motif containing 2
hsa-miR-410	1	0	1	1	1	1	GDAP2	ganglioside induced differentiation associated protein 2
hsa-miR-410	0	0	1	0	0	0	LOC201651	arylacetamide deacetylase (esterase) pseudogene
hsa-miR-410	0	0	1	1	1	1	EAF2	ELL associated factor 2
hsa-miR-410	1	0	1	1	1	1	POLK	polymerase (DNA directed) kappa
hsa-miR-410	0	0	1	0	0	0	KLHL15	kelch-like 15 (Drosophila)
hsa-miR-410	1	0	1	0	1	1	ICMT	isoprenylcysteine carboxyl methyltransferase
hsa-miR-410	0	0	1	1	1	1	CSDE1	cold shock domain containing E1, RNA-binding
hsa-miR-410	1	0	1	1	1	1	SCAF11	SR-related CTD-associated factor 11
hsa-miR-410	0	0	1	0	0	0	FAM200B	family with sequence similarity 200, member B
hsa-miR-410	1	0	1	1	1	1	ARHGEF9	Cdc42 guanine nucleotide exchange factor (GEF) 9
hsa-miR-410	1	0	1	0	1	1	SLC19A2	solute carrier family 19 (thiamine transporter), member 2
hsa-miR-410	1	0	1	1	1	1	SUZ12	suppressor of zeste 12 homolog (Drosophila)
hsa-miR-410	1	0	1	1	1	1	MID1IP1	MID1 interacting protein 1
hsa-miR-410	0	0	1	1	1	1	C18orf32	chromosome 18 open reading frame 32
hsa-miR-410	0	0	1	1	0	0	ENOX1	ecto-NOX disulfide-thiol exchanger 1
hsa-miR-410	1	0	1	1	1	1	FAM213A	family with sequence similarity 213, member A
hsa-miR-410	1	0	1	1	1	1	ASPH	aspartate beta-hydroxylase
hsa-miR-410	0	0	1	1	1	1	MAP2	microtubule-associated protein 2
hsa-miR-410	1	0	1	0	1	1	CERS3	ceramide synthase 3
hsa-miR-410	1	0	1	1	1	1	RSPO2	R-spondin 2
hsa-miR-410	1	0	1	1	1	1	SENP6	SUMO1/sentrin specific peptidase 6
hsa-miR-410	1	0	1	1	1	1	HTR2C	5-hydroxytryptamine (serotonin) receptor 2C, G protein-coupled
hsa-miR-410	1	0	1	1	1	1	TIAL1	TIA1 cytotoxic granule-associated RNA binding protein-like 1
hsa-miR-410	1	0	1	1	1	1	EPB41L4A	erythrocyte membrane protein band 4.1 like 4A
hsa-miR-410	1	0	1	1	1	1	MUM1L1	melanoma associated antigen (mutated) 1-like 1
hsa-miR-410	0	0	1	1	0	0	TRIM69	tripartite motif containing 69
hsa-miR-410	0	0	1	1	1	1	C7orf53	chromosome 7 open reading frame 53
hsa-miR-410	1	0	1	1	1	1	C5orf25	chromosome 5 open reading frame 25
hsa-miR-410	1	0	1	1	1	1	RHOBTB1	Rho-related BTB domain containing 1
hsa-miR-410	1	0	1	1	1	1	SECISBP2L	SECIS binding protein 2-like
hsa-miR-410	1	0	1	1	1	1	MAK	male germ cell-associated kinase
hsa-miR-410	0	0	1	1	0	0	STK31	serine/threonine kinase 31
hsa-miR-410	0	0	1	0	0	0	LOC96610	BMS1 homolog, ribosome assembly protein (yeast) pseudogene
hsa-miR-410	1	0	1	0	1	1	KCTD2	potassium channel tetramerisation domain containing 2
hsa-miR-410	1	0	1	0	1	1	TBC1D2B	TBC1 domain family, member 2B
hsa-miR-410	1	0	1	1	1	1	PCDHA5	protocadherin alpha 5
hsa-miR-410	0	0	1	1	0	0	TNMD	tenomodulin
hsa-miR-410	0	0	1	0	0	0	NBR2	neighbor of BRCA1 gene 2 (non-protein coding)
hsa-miR-410	0	0	1	1	1	1	ZNF337	zinc finger protein 337
hsa-miR-410	1	0	1	0	1	1	PDE12	phosphodiesterase 12
hsa-miR-410	0	0	1	1	1	1	CLEC12B	C-type lectin domain family 12, member B
hsa-miR-410	1	0	1	1	1	1	ZNF618	zinc finger protein 618
hsa-miR-410	1	0	1	1	1	1	IMPACT	Impact homolog (mouse)
hsa-miR-410	1	0	1	1	1	1	LHX8	LIM homeobox 8
hsa-miR-410	1	0	1	1	1	1	HECTD2	HECT domain containing E3 ubiquitin protein ligase 2
hsa-miR-410	1	0	1	0	1	1	CLDN12	claudin 12
hsa-miR-410	1	0	1	1	1	1	RNMT	RNA (guanine-7-) methyltransferase
hsa-miR-410	1	0	1	1	1	1	CEP128	centrosomal protein 128kDa
hsa-miR-410	0	0	1	1	1	1	COG3	component of oligomeric golgi complex 3
hsa-miR-410	0	0	1	1	0	0	CCDC152	coiled-coil domain containing 152
hsa-miR-410	0	0	1	0	0	0	LINC00326	long intergenic non-protein coding RNA 326
hsa-miR-410	1	0	1	1	1	1	MARCKS	myristoylated alanine-rich protein kinase C substrate
hsa-miR-410	1	0	1	0	1	1	G2E3	G2/M-phase specific E3 ubiquitin protein ligase
hsa-miR-410	1	0	1	1	1	1	DACH2	dachshund homolog 2 (Drosophila)
hsa-miR-410	1	0	1	1	1	1	BVES	blood vessel epicardial substance
hsa-miR-410	0	0	1	1	1	1	PCMTD2	protein-L-isoaspartate (D-aspartate) O-methyltransferase domain containing 2
hsa-miR-410	1	0	1	1	1	1	GNG2	guanine nucleotide binding protein (G protein), gamma 2
hsa-miR-410	0	0	1	1	1	1	CARD8	caspase recruitment domain family, member 8
hsa-miR-410	0	0	1	1	1	1	GOLGA6L9	golgin A6 family-like 9
hsa-miR-410	1	0	1	1	1	1	FKBP5	FK506 binding protein 5
hsa-miR-410	1	0	1	1	1	1	ARHGAP30	Rho GTPase activating protein 30
hsa-miR-410	1	0	1	1	1	1	PSIP1	PC4 and SFRS1 interacting protein 1
hsa-miR-410	1	0	1	1	1	1	HLTF	helicase-like transcription factor
hsa-miR-410	1	0	1	0	1	1	PSD3	pleckstrin and Sec7 domain containing 3
hsa-miR-410	1	0	1	1	1	1	SF3B1	splicing factor 3b, subunit 1, 155kDa
hsa-miR-410	1	0	1	0	1	1	LYPD6	LY6/PLAUR domain containing 6
hsa-miR-410	1	0	1	1	1	1	PTPRG	protein tyrosine phosphatase, receptor type, G
hsa-miR-410	1	0	1	1	1	1	PELI1	pellino E3 ubiquitin protein ligase 1
hsa-miR-410	0	0	1	1	0	0	NLRC5	NLR family, CARD domain containing 5
hsa-miR-410	1	0	1	1	1	1	PCGF5	polycomb group ring finger 5
hsa-miR-410	1	0	1	1	1	1	ZEB2	zinc finger E-box binding homeobox 2
hsa-miR-410	1	0	1	1	1	1	PRKG1	protein kinase, cGMP-dependent, type I
hsa-miR-410	0	0	1	1	1	1	ZNF33B	zinc finger protein 33B
hsa-miR-410	0	0	1	1	1	1	ATP2A2	ATPase, Ca++ transporting, cardiac muscle, slow twitch 2
hsa-miR-410	1	0	1	1	1	1	NRSN1	neurensin 1
hsa-miR-410	1	0	1	1	0	0	SNX18	sorting nexin 18
hsa-miR-410	1	0	1	1	1	1	PDCD6IP	programmed cell death 6 interacting protein
hsa-miR-410	1	0	1	1	1	1	SLC26A7	solute carrier family 26, member 7
hsa-miR-410	0	0	1	0	0	0	SPDYE8P	speedy homolog E8 (Xenopus laevis), pseudogene
hsa-miR-410	1	0	1	1	1	1	AHR	aryl hydrocarbon receptor
hsa-miR-410	1	0	1	0	1	1	TGFBR1	transforming growth factor, beta receptor 1
hsa-miR-410	0	0	1	0	1	1	WDR27	WD repeat domain 27
hsa-miR-410	0	0	1	1	0	0	PPIG	peptidylprolyl isomerase G (cyclophilin G)
hsa-miR-410	0	0	1	0	0	0	ABCC6P1	ATP-binding cassette, sub-family C, member 6 pseudogene 1
hsa-miR-410	0	0	1	1	1	1	SPDYA	speedy homolog A (Xenopus laevis)
hsa-miR-410	0	0	1	1	1	1	LIMS3	LIM and senescent cell antigen-like domains 3
hsa-miR-410	1	0	1	1	1	1	ST8SIA2	ST8 alpha-N-acetyl-neuraminide alpha-2,8-sialyltransferase 2
hsa-miR-410	0	0	1	0	0	0	ABCA11P	ATP-binding cassette, sub-family A (ABC1), member 11, pseudogene
hsa-miR-410	1	0	1	0	1	1	LRRTM4	leucine rich repeat transmembrane neuronal 4
hsa-miR-410	0	0	1	0	1	1	TCAIM	T cell activation inhibitor, mitochondrial
hsa-miR-410	0	0	1	1	1	1	ZNF365	zinc finger protein 365
hsa-miR-410	1	0	1	1	1	1	ARFIP1	ADP-ribosylation factor interacting protein 1
hsa-miR-410	1	0	1	1	0	0	KIAA1644	KIAA1644
hsa-miR-410	1	0	1	0	1	1	DNAJC6	DnaJ (Hsp40) homolog, subfamily C, member 6
hsa-miR-410	1	0	1	1	1	1	SP4	Sp4 transcription factor
hsa-miR-410	1	0	1	1	1	1	SLK	STE20-like kinase
hsa-miR-410	0	0	1	1	0	0	C9orf84	chromosome 9 open reading frame 84
hsa-miR-410	0	0	1	1	1	1	ZNF621	zinc finger protein 621
hsa-miR-410	0	0	1	1	1	1	NAA35	N(alpha)-acetyltransferase 35, NatC auxiliary subunit
hsa-miR-410	1	0	1	1	1	1	OTUD4	OTU domain containing 4
hsa-miR-410	0	0	1	0	1	1	GOLGA8G	golgin A8 family, member G
hsa-miR-410	1	0	1	0	1	1	CAMSAP2	calmodulin regulated spectrin-associated protein family, member 2
hsa-miR-410	1	0	1	1	1	1	ZMYM4	zinc finger, MYM-type 4
hsa-miR-410	1	0	1	1	1	1	ACTR10	actin-related protein 10 homolog (S. cerevisiae)
hsa-miR-410	0	0	1	1	1	1	RAD17	RAD17 homolog (S. pombe)
hsa-miR-410	0	0	1	0	0	0	DKFZp686D0853	uncharacterized LOC401613
hsa-miR-410	1	0	1	1	1	1	RBL2	retinoblastoma-like 2 (p130)
hsa-miR-410	1	0	1	0	1	1	MTX3	metaxin 3
hsa-miR-410	1	0	1	1	1	1	NIPAL3	NIPA-like domain containing 3
hsa-miR-410	1	0	1	1	1	1	SPPL3	signal peptide peptidase like 3
hsa-miR-410	1	0	1	1	1	1	RAB30	RAB30, member RAS oncogene family
hsa-miR-410	1	0	1	1	1	1	RORB	RAR-related orphan receptor B
hsa-miR-410	1	0	1	1	1	1	SMAD4	SMAD family member 4
hsa-miR-410	1	0	1	1	1	1	MASP1	mannan-binding lectin serine peptidase 1 (C4/C2 activating component of Ra-reactive factor)
hsa-miR-410	1	0	1	1	1	1	USP6	ubiquitin specific peptidase 6 (Tre-2 oncogene)
hsa-miR-410	1	0	1	1	1	1	TC2N	tandem C2 domains, nuclear
hsa-miR-410	0	0	1	0	1	1	B3GALTL	beta 1,3-galactosyltransferase-like
hsa-miR-410	1	0	1	1	1	1	ATP6V1C1	ATPase, H+ transporting, lysosomal 42kDa, V1 subunit C1
hsa-miR-410	1	0	1	1	1	1	ZNF711	zinc finger protein 711
hsa-miR-410	1	0	1	0	1	1	TMEM184B	transmembrane protein 184B
hsa-miR-410	1	0	1	1	1	1	NAV1	neuron navigator 1
hsa-miR-410	1	0	1	0	1	1	KLHL24	kelch-like 24 (Drosophila)
hsa-miR-410	0	0	1	0	0	0	LOC286299	uncharacterized LOC286299
hsa-miR-410	0	0	1	1	1	1	DAZL	deleted in azoospermia-like
hsa-miR-410	0	0	1	1	1	1	THSD4	thrombospondin, type I, domain containing 4
hsa-miR-410	1	0	1	1	1	1	EOGT	EGF domain-specific O-linked N-acetylglucosamine (GlcNAc) transferase
hsa-miR-410	1	0	1	0	1	1	TBL1XR1	transducin (beta)-like 1 X-linked receptor 1
hsa-miR-410	1	0	1	1	1	1	FAM208A	family with sequence similarity 208, member A
hsa-miR-410	1	0	1	1	1	1	CREB3L2	cAMP responsive element binding protein 3-like 2
hsa-miR-410	0	0	1	1	1	1	UPRT	uracil phosphoribosyltransferase (FUR1) homolog (S. cerevisiae)
hsa-miR-410	1	0	1	1	1	1	EIF4B	eukaryotic translation initiation factor 4B
hsa-miR-410	0	0	1	1	1	1	CIRBP	cold inducible RNA binding protein
hsa-miR-410	1	0	1	0	1	1	BNIP3L	BCL2/adenovirus E1B 19kDa interacting protein 3-like
hsa-miR-410	1	0	1	1	1	1	ACTG1	actin, gamma 1
hsa-miR-410	1	0	1	1	1	1	CD9	CD9 molecule
hsa-miR-410	0	0	1	1	1	1	PPP1R1C	protein phosphatase 1, regulatory (inhibitor) subunit 1C
hsa-miR-410	0	0	1	1	1	1	GGPS1	geranylgeranyl diphosphate synthase 1
hsa-miR-410	1	0	1	0	1	1	RPS6KB1	ribosomal protein S6 kinase, 70kDa, polypeptide 1
hsa-miR-410	0	0	1	1	0	0	IFT46	intraflagellar transport 46 homolog (Chlamydomonas)
hsa-miR-410	0	0	1	1	1	1	ATG4A	autophagy related 4A, cysteine peptidase
hsa-miR-410	0	0	1	0	1	1	TMEM155	transmembrane protein 155
hsa-miR-410	1	0	1	1	1	1	TMEM66	transmembrane protein 66
hsa-miR-410	0	0	1	1	1	1	PDLIM1	PDZ and LIM domain 1
hsa-miR-410	0	0	1	1	0	0	NOX5	NADPH oxidase, EF-hand calcium binding domain 5
hsa-miR-410	0	0	1	1	1	1	SAP130	Sin3A-associated protein, 130kDa
hsa-miR-410	0	0	1	1	0	0	TUSC3	tumor suppressor candidate 3
hsa-miR-410	0	0	1	1	1	1	PEX19	peroxisomal biogenesis factor 19
hsa-miR-410	0	0	1	1	0	0	RPSA	ribosomal protein SA
hsa-miR-410	0	0	1	1	0	0	WDR43	WD repeat domain 43
hsa-miR-410	1	0	1	0	1	1	ANKH	ankylosis, progressive homolog (mouse)
hsa-miR-410	1	0	1	1	1	1	YWHAQ	tyrosine 3-monooxygenase/tryptophan 5-monooxygenase activation protein, theta polypeptide
hsa-miR-410	1	0	1	1	1	1	ARL4A	ADP-ribosylation factor-like 4A
hsa-miR-410	1	0	1	1	1	1	BAALC	brain and acute leukemia, cytoplasmic
hsa-miR-410	0	0	1	1	0	0	TAMM41	TAM41, mitochondrial translocator assembly and maintenance protein, homolog (S. cerevisiae)
hsa-miR-410	0	0	1	1	0	0	CFLAR	CASP8 and FADD-like apoptosis regulator
hsa-miR-410	0	0	1	1	1	1	DNAJC25	DnaJ (Hsp40) homolog, subfamily C , member 25
hsa-miR-410	1	0	1	1	1	1	ARHGEF40	Rho guanine nucleotide exchange factor (GEF) 40
hsa-miR-410	1	0	1	1	1	1	RNF2	ring finger protein 2
hsa-miR-410	0	0	1	1	0	0	GPC3	glypican 3
hsa-miR-410	0	0	1	1	1	1	TSEN15	tRNA splicing endonuclease 15 homolog (S. cerevisiae)
hsa-miR-410	1	0	1	1	1	1	SRSF2	serine/arginine-rich splicing factor 2
hsa-miR-410	0	0	1	1	1	1	PLAC8	placenta-specific 8
hsa-miR-410	1	0	1	1	1	1	ATPAF1	ATP synthase mitochondrial F1 complex assembly factor 1
hsa-miR-410	1	0	1	1	1	1	TIPRL	TIP41, TOR signaling pathway regulator-like (S. cerevisiae)
hsa-miR-410	0	0	1	1	1	1	ARHGEF25	Rho guanine nucleotide exchange factor (GEF) 25
hsa-miR-410	0	0	1	1	1	1	NUDT21	nudix (nucleoside diphosphate linked moiety X)-type motif 21
hsa-miR-410	0	0	1	1	0	0	DUSP11	dual specificity phosphatase 11 (RNA/RNP complex 1-interacting)
hsa-miR-410	1	0	1	0	1	1	KIAA0240	KIAA0240
hsa-miR-410	0	0	1	1	1	1	BDP1	B double prime 1, subunit of RNA polymerase III transcription initiation factor IIIB
hsa-miR-410	0	0	1	0	0	0	LOC731789	uncharacterized LOC731789
hsa-miR-410	0	0	1	1	1	1	CCP110	centriolar coiled coil protein 110kDa
hsa-miR-410	0	0	1	0	0	0	LINC00661	long intergenic non-protein coding RNA 661
hsa-miR-410	1	0	1	0	1	1	XRN1	5'-3' exoribonuclease 1
hsa-miR-410	1	0	1	0	1	1	OSBPL8	oxysterol binding protein-like 8
hsa-miR-410	0	0	1	1	1	1	SDAD1	SDA1 domain containing 1
hsa-miR-410	1	0	1	1	1	1	TIPARP	TCDD-inducible poly(ADP-ribose) polymerase
hsa-miR-410	0	0	1	0	1	1	SYNPR	synaptoporin
hsa-miR-410	1	0	1	1	1	1	MAN2A2	mannosidase, alpha, class 2A, member 2
hsa-miR-410	1	0	1	1	1	1	RB1CC1	RB1-inducible coiled-coil 1
hsa-miR-410	0	0	1	1	1	1	PTGS1	prostaglandin-endoperoxide synthase 1 (prostaglandin G/H synthase and cyclooxygenase)
hsa-miR-410	1	0	1	1	1	1	QKI	QKI, KH domain containing, RNA binding
hsa-miR-410	0	0	1	0	0	0	POM121L8P	POM121 transmembrane nucleoporin-like 8 pseudogene
hsa-miR-410	0	0	1	1	1	1	DHX36	DEAH (Asp-Glu-Ala-His) box polypeptide 36
hsa-miR-410	1	0	1	1	1	1	ATP2B2	ATPase, Ca++ transporting, plasma membrane 2
hsa-miR-410	0	0	1	1	1	1	CA2	carbonic anhydrase II
hsa-miR-410	1	0	1	1	1	1	COL3A1	collagen, type III, alpha 1
hsa-miR-410	1	0	1	1	1	1	COL4A3	collagen, type IV, alpha 3 (Goodpasture antigen)
hsa-miR-410	1	0	1	1	1	1	CYP19A1	cytochrome P450, family 19, subfamily A, polypeptide 1
hsa-miR-410	1	0	1	1	1	1	DMD	dystrophin
hsa-miR-410	0	0	1	0	1	1	MS4A2	membrane-spanning 4-domains, subfamily A, member 2
hsa-miR-410	0	0	1	0	1	1	GBE1	glucan (1,4-alpha-), branching enzyme 1
hsa-miR-410	1	0	1	1	1	1	JAG1	jagged 1
hsa-miR-410	0	0	1	0	1	1	KAL1	Kallmann syndrome 1 sequence
hsa-miR-410	0	0	1	1	1	1	LPL	lipoprotein lipase
hsa-miR-410	1	0	1	1	1	1	MET	met proto-oncogene (hepatocyte growth factor receptor)
hsa-miR-410	1	0	1	1	1	1	NF1	neurofibromin 1
hsa-miR-410	1	0	1	1	1	1	OCRL	oculocerebrorenal syndrome of Lowe
hsa-miR-410	0	0	1	1	1	1	PRNP	prion protein
hsa-miR-410	1	0	1	1	1	1	ATXN1	ataxin 1
hsa-miR-410	1	0	1	1	1	1	SOX9	SRY (sex determining region Y)-box 9
hsa-miR-410	1	0	1	1	1	1	TAT	tyrosine aminotransferase
hsa-miR-410	1	0	1	1	0	0	NOTCH3	notch 3
hsa-miR-410	1	0	1	1	1	1	DCX	doublecortin
hsa-miR-410	1	0	1	1	1	1	CD44	CD44 molecule (Indian blood group)
hsa-miR-410	0	0	1	1	1	1	IGF2	insulin-like growth factor 2 (somatomedin A)
hsa-miR-410	0	0	1	1	1	1	ADH4	alcohol dehydrogenase 4 (class II), pi polypeptide
hsa-miR-410	0	0	1	1	1	1	AGTR1	angiotensin II receptor, type 1
hsa-miR-410	1	0	1	0	1	1	GABRA4	gamma-aminobutyric acid (GABA) A receptor, alpha 4
hsa-miR-410	1	0	1	1	1	1	GRM1	glutamate receptor, metabotropic 1
hsa-miR-410	0	0	1	1	1	1	GRM3	glutamate receptor, metabotropic 3
hsa-miR-410	0	0	1	1	1	1	HTR7	5-hydroxytryptamine (serotonin) receptor 7, adenylate cyclase-coupled
hsa-miR-410	0	0	1	1	1	1	IL12A	interleukin 12A (natural killer cell stimulatory factor 1, cytotoxic lymphocyte maturation factor 1, p35)
hsa-miR-410	1	0	1	1	1	1	PDE3B	phosphodiesterase 3B, cGMP-inhibited
hsa-miR-410	1	0	1	1	1	1	PTGER2	prostaglandin E receptor 2 (subtype EP2), 53kDa
hsa-miR-410	1	0	1	1	1	1	REEP3	receptor accessory protein 3
hsa-miR-410	1	0	1	0	1	1	SMAD5	SMAD family member 5
hsa-miR-410	0	0	1	1	1	1	C16orf87	chromosome 16 open reading frame 87
hsa-miR-410	0	0	1	0	1	1	ZDHHC13	zinc finger, DHHC-type containing 13
hsa-miR-410	1	0	1	0	1	1	GDF6	growth differentiation factor 6
hsa-miR-410	1	0	1	0	1	1	ARHGEF37	Rho guanine nucleotide exchange factor (GEF) 37
hsa-miR-410	0	0	1	0	0	0	OR8G1	olfactory receptor, family 8, subfamily G, member 1
hsa-miR-410	1	0	1	1	1	1	TMEM200B	transmembrane protein 200B
hsa-miR-410	0	0	1	1	1	1	SMAD1	SMAD family member 1
hsa-miR-410	0	0	1	1	1	1	CCDC144NL	coiled-coil domain containing 144 family, N-terminal like
hsa-miR-410	0	0	1	1	1	1	MAP1LC3C	microtubule-associated protein 1 light chain 3 gamma
hsa-miR-410	1	0	1	0	1	1	LRRC55	leucine rich repeat containing 55
hsa-miR-410	0	0	1	1	1	1	FRG2	FSHD region gene 2
hsa-miR-410	1	0	1	1	1	1	PLCXD3	phosphatidylinositol-specific phospholipase C, X domain containing 3
hsa-miR-410	1	0	1	1	1	1	L3MBTL3	l(3)mbt-like 3 (Drosophila)
hsa-miR-410	1	0	1	1	1	1	BRWD1	bromodomain and WD repeat domain containing 1
hsa-miR-410	0	0	1	1	1	1	UACA	uveal autoantigen with coiled-coil domains and ankyrin repeats
hsa-miR-410	1	0	1	1	1	1	FNIP1	folliculin interacting protein 1
hsa-miR-410	0	0	1	1	1	1	GCSAM	germinal center-associated, signaling and motility
hsa-miR-410	1	0	1	0	1	1	RCHY1	ring finger and CHY zinc finger domain containing 1, E3 ubiquitin protein ligase
hsa-miR-410	1	0	1	1	1	1	ARHGAP28	Rho GTPase activating protein 28
hsa-miR-410	0	0	1	0	1	1	LPPR5	lipid phosphate phosphatase-related protein type 5
hsa-miR-410	1	0	1	1	1	1	ATP11C	ATPase, class VI, type 11C
hsa-miR-410	1	0	1	1	1	1	BTBD1	BTB (POZ) domain containing 1
hsa-miR-410	0	0	1	0	1	1	GOLGA8E	golgin A8 family, member E
hsa-miR-410	0	0	1	0	1	1	U2AF2	U2 small nuclear RNA auxiliary factor 2
hsa-miR-410	1	0	1	1	1	1	DISC1	disrupted in schizophrenia 1
hsa-miR-410	1	0	1	1	1	1	FXR1	fragile X mental retardation, autosomal homolog 1
hsa-miR-410	1	0	1	1	1	1	C12orf68	chromosome 12 open reading frame 68
hsa-miR-410	1	0	1	1	1	1	KATNAL1	katanin p60 subunit A-like 1
hsa-miR-410	1	0	1	1	1	1	PHF6	PHD finger protein 6
hsa-miR-410	0	0	1	1	1	1	NARG2	NMDA receptor regulated 2
hsa-miR-410	0	0	1	1	1	1	MURC	muscle-related coiled-coil protein
hsa-miR-410	1	0	1	1	1	1	IQCB1	IQ motif containing B1
hsa-miR-410	0	0	1	0	1	1	TM2D2	TM2 domain containing 2
hsa-miR-410	0	0	1	1	1	1	NBN	nibrin
hsa-miR-410	1	0	1	1	1	1	TPD52	tumor protein D52
hsa-miR-410	1	0	1	1	1	1	PLEKHG1	pleckstrin homology domain containing, family G (with RhoGef domain) member 1
hsa-miR-410	0	0	1	1	1	1	TRMT11	tRNA methyltransferase 11 homolog (S. cerevisiae)
hsa-miR-410	0	0	1	1	1	1	ASB9	ankyrin repeat and SOCS box containing 9
hsa-miR-410	1	0	1	1	1	1	CSNK1G3	casein kinase 1, gamma 3
hsa-miR-410	1	0	1	1	1	1	TFAP2A	transcription factor AP-2 alpha (activating enhancer binding protein 2 alpha)
hsa-miR-410	1	0	1	1	1	1	KLF10	Kruppel-like factor 10
hsa-miR-410	0	0	1	1	1	1	SLC35A2	solute carrier family 35 (UDP-galactose transporter), member A2
hsa-miR-410	0	0	1	1	1	1	C6orf225	chromosome 6 open reading frame 225
hsa-miR-410	1	0	1	1	1	1	ZNF704	zinc finger protein 704
hsa-miR-410	1	0	1	1	1	1	SCD5	stearoyl-CoA desaturase 5
hsa-miR-410	0	0	1	1	1	1	MAP9	microtubule-associated protein 9
hsa-miR-410	1	0	1	0	1	1	CREBZF	CREB/ATF bZIP transcription factor
hsa-miR-410	1	0	1	1	1	1	CHN2	chimerin (chimaerin) 2
hsa-miR-410	1	0	1	1	1	1	SCN2A	sodium channel, voltage-gated, type II, alpha subunit
hsa-miR-410	1	0	1	0	1	1	CD83	CD83 molecule
hsa-miR-410	1	0	1	1	1	1	SLC9A6	solute carrier family 9, subfamily A (NHE6, cation proton antiporter 6), member 6
hsa-miR-410	1	0	1	1	1	1	NSL1	NSL1, MIND kinetochore complex component, homolog (S. cerevisiae)
hsa-miR-410	1	0	1	1	1	1	FRS2	fibroblast growth factor receptor substrate 2
hsa-miR-410	1	0	1	1	1	1	ERBB4	v-erb-a erythroblastic leukemia viral oncogene homolog 4 (avian)
hsa-miR-410	0	0	1	1	1	1	SSTR2	somatostatin receptor 2
hsa-miR-410	0	0	1	1	1	1	SULT1C2	sulfotransferase family, cytosolic, 1C, member 2
hsa-miR-410	1	0	1	0	1	1	SLC7A6	solute carrier family 7 (amino acid transporter light chain, y+L system), member 6
hsa-miR-410	1	0	1	1	1	1	QSER1	glutamine and serine rich 1
hsa-miR-410	1	0	1	1	1	1	SREK1	splicing regulatory glutamine/lysine-rich protein 1
hsa-miR-410	1	0	1	1	1	1	IRF2BP2	interferon regulatory factor 2 binding protein 2
hsa-miR-410	1	0	1	0	1	1	CCDC85A	coiled-coil domain containing 85A
hsa-miR-410	1	0	1	1	1	1	ZNF697	zinc finger protein 697
hsa-miR-410	1	0	1	1	1	1	MBOAT1	membrane bound O-acyltransferase domain containing 1
hsa-miR-410	1	0	1	0	1	1	MEGF9	multiple EGF-like-domains 9
hsa-miR-410	1	0	1	1	1	1	REPS2	RALBP1 associated Eps domain containing 2
hsa-miR-410	1	0	1	0	1	1	SCN3A	sodium channel, voltage-gated, type III, alpha subunit
hsa-miR-410	1	0	1	0	1	1	PDE5A	phosphodiesterase 5A, cGMP-specific
hsa-miR-410	1	0	1	1	1	1	ADAM10	ADAM metallopeptidase domain 10
hsa-miR-410	1	0	1	1	1	1	ADCY9	adenylate cyclase 9
hsa-miR-410	1	0	1	0	1	1	BMPR2	bone morphogenetic protein receptor, type II (serine/threonine kinase)
hsa-miR-410	1	0	1	1	1	1	CHD1	chromodomain helicase DNA binding protein 1
hsa-miR-410	1	0	1	1	1	1	CREBL2	cAMP responsive element binding protein-like 2
hsa-miR-410	1	0	1	1	1	1	DYRK1A	dual-specificity tyrosine-(Y)-phosphorylation regulated kinase 1A
hsa-miR-410	1	0	1	0	1	1	EIF2S3	eukaryotic translation initiation factor 2, subunit 3 gamma, 52kDa
hsa-miR-410	0	0	1	0	1	1	EMP1	epithelial membrane protein 1
hsa-miR-410	0	0	1	1	0	0	IGFBP7	insulin-like growth factor binding protein 7
hsa-miR-410	1	0	1	1	1	1	IRAK2	interleukin-1 receptor-associated kinase 2
hsa-miR-410	1	0	1	1	1	1	AQP4	aquaporin 4
hsa-miR-410	1	0	1	1	1	1	BCL6	B-cell CLL/lymphoma 6
hsa-miR-410	1	0	1	1	1	1	CBFB	core-binding factor, beta subunit
hsa-miR-410	1	0	1	1	1	1	CDK2	cyclin-dependent kinase 2
hsa-miR-410	0	0	1	1	1	1	CEACAM8	carcinoembryonic antigen-related cell adhesion molecule 8
hsa-miR-410	1	0	1	1	1	1	COL15A1	collagen, type XV, alpha 1
hsa-miR-410	1	0	1	1	1	1	E2F3	E2F transcription factor 3
hsa-miR-410	1	0	1	1	1	1	GAB1	GRB2-associated binding protein 1
hsa-miR-410	0	0	1	1	1	1	HMGCS1	3-hydroxy-3-methylglutaryl-CoA synthase 1 (soluble)
hsa-miR-410	1	0	1	1	1	1	ITGA9	integrin, alpha 9
hsa-miR-410	1	0	1	1	1	1	ITPR2	inositol 1,4,5-trisphosphate receptor, type 2
hsa-miR-410	1	0	1	1	1	1	KCNJ3	potassium inwardly-rectifying channel, subfamily J, member 3
hsa-miR-410	1	0	1	1	1	1	KCNJ10	potassium inwardly-rectifying channel, subfamily J, member 10
hsa-miR-410	1	0	1	1	1	1	LEPR	leptin receptor
hsa-miR-410	0	0	1	1	1	1	LUM	lumican
hsa-miR-410	1	0	1	1	1	1	ME1	malic enzyme 1, NADP(+)-dependent, cytosolic
hsa-miR-410	1	0	1	1	1	1	MN1	meningioma (disrupted in balanced translocation) 1
hsa-miR-410	0	0	1	1	1	1	MRC1	mannose receptor, C type 1
hsa-miR-410	1	0	1	1	1	1	PCDH8	protocadherin 8
hsa-miR-410	0	0	1	1	1	1	PF4V1	platelet factor 4 variant 1
hsa-miR-410	1	0	1	1	1	1	PPP1CB	protein phosphatase 1, catalytic subunit, beta isozyme
hsa-miR-410	1	0	1	1	1	1	PPP1CC	protein phosphatase 1, catalytic subunit, gamma isozyme
hsa-miR-410	0	0	1	1	1	1	SRGN	serglycin
hsa-miR-410	1	0	1	0	1	1	PRKCA	protein kinase C, alpha
hsa-miR-410	0	0	1	1	1	1	PRKCB	protein kinase C, beta
hsa-miR-410	1	0	1	1	1	1	PRKD1	protein kinase D1
hsa-miR-410	1	0	1	1	1	1	PROX1	prospero homeobox 1
hsa-miR-410	1	0	1	1	1	1	PTPN4	protein tyrosine phosphatase, non-receptor type 4 (megakaryocyte)
hsa-miR-410	1	0	1	1	1	1	RAD23B	RAD23 homolog B (S. cerevisiae)
hsa-miR-410	1	0	1	1	1	1	ARID4A	AT rich interactive domain 4A (RBP1-like)
hsa-miR-410	1	0	1	1	1	1	RGS16	regulator of G-protein signaling 16
hsa-miR-410	1	0	1	0	1	1	CCL22	chemokine (C-C motif) ligand 22
hsa-miR-410	0	0	1	1	1	1	SDHD	succinate dehydrogenase complex, subunit D, integral membrane protein
hsa-miR-410	1	0	1	0	1	1	SLC6A6	solute carrier family 6 (neurotransmitter transporter, taurine), member 6
hsa-miR-410	1	0	1	1	1	1	SMARCC1	SWI/SNF related, matrix associated, actin dependent regulator of chromatin, subfamily c, member 1
hsa-miR-410	0	0	1	1	1	1	STIM1	stromal interaction molecule 1
hsa-miR-410	1	0	1	1	1	1	TDG	thymine-DNA glycosylase
hsa-miR-410	1	0	1	0	1	1	SEC62	SEC62 homolog (S. cerevisiae)
hsa-miR-410	0	0	1	1	1	1	TPR	translocated promoter region, nuclear basket protein
hsa-miR-410	1	0	1	1	1	1	VAV2	vav 2 guanine nucleotide exchange factor
hsa-miR-410	1	0	1	0	1	1	VCL	vinculin
hsa-miR-410	1	0	1	1	1	1	VSNL1	visinin-like 1
hsa-miR-410	1	0	1	0	1	1	YWHAB	tyrosine 3-monooxygenase/tryptophan 5-monooxygenase activation protein, beta polypeptide
hsa-miR-410	1	0	1	1	1	1	ZIC3	Zic family member 3
hsa-miR-410	0	0	1	1	1	1	STX7	syntaxin 7
hsa-miR-410	0	0	1	1	1	1	AGPS	alkylglycerone phosphate synthase
hsa-miR-410	1	0	1	1	1	1	TNFSF11	tumor necrosis factor (ligand) superfamily, member 11
hsa-miR-410	1	0	1	0	1	1	TNKS	tankyrase, TRF1-interacting ankyrin-related ADP-ribose polymerase
hsa-miR-410	1	0	1	1	1	1	VAMP8	vesicle-associated membrane protein 8 (endobrevin)
hsa-miR-410	1	0	1	1	1	1	PHOX2B	paired-like homeobox 2b
hsa-miR-410	0	0	1	1	1	1	RNF8	ring finger protein 8, E3 ubiquitin protein ligase
hsa-miR-410	0	0	1	0	1	1	RHOB	ras homolog family member B
hsa-miR-410	1	0	1	1	1	1	FGF13	fibroblast growth factor 13
hsa-miR-410	0	0	1	1	1	1	GYG1	glycogenin 1
hsa-miR-410	1	0	1	0	1	1	SLC1A2	solute carrier family 1 (glial high affinity glutamate transporter), member 2
hsa-miR-410	1	0	1	0	1	1	AKAP6	A kinase (PRKA) anchor protein 6
hsa-miR-410	0	0	1	0	1	1	ALK	anaplastic lymphoma receptor tyrosine kinase
hsa-miR-410	1	0	1	1	1	1	BCR	breakpoint cluster region
hsa-miR-410	0	0	1	1	1	1	COL12A1	collagen, type XII, alpha 1
hsa-miR-410	1	0	1	1	1	1	CREB1	cAMP responsive element binding protein 1
hsa-miR-410	1	0	1	1	1	1	DACH1	dachshund homolog 1 (Drosophila)
hsa-miR-410	1	0	1	1	1	1	DUSP2	dual specificity phosphatase 2
hsa-miR-410	1	0	1	1	1	1	EPS8	epidermal growth factor receptor pathway substrate 8
hsa-miR-410	1	0	1	0	1	1	ETV5	ets variant 5
hsa-miR-410	1	0	1	0	1	1	ACSL4	acyl-CoA synthetase long-chain family member 4
hsa-miR-410	1	0	1	1	1	1	FUT8	fucosyltransferase 8 (alpha (1,6) fucosyltransferase)
hsa-miR-410	0	0	1	1	1	1	FOXA1	forkhead box A1
hsa-miR-410	0	0	1	1	0	0	NDUFA1	NADH dehydrogenase (ubiquinone) 1 alpha subcomplex, 1, 7.5kDa
hsa-miR-410	1	0	1	0	1	1	PKNOX1	PBX/knotted 1 homeobox 1
hsa-miR-410	0	0	1	1	1	1	MMP20	matrix metallopeptidase 20
hsa-miR-410	1	0	1	1	1	1	KIF3B	kinesin family member 3B
hsa-miR-410	1	0	1	0	1	1	CDYL	chromodomain protein, Y-like
hsa-miR-410	1	0	1	0	1	1	ROCK2	Rho-associated, coiled-coil containing protein kinase 2
hsa-miR-410	1	0	1	1	1	1	CXCL14	chemokine (C-X-C motif) ligand 14
hsa-miR-410	0	0	1	1	1	1	ATP6V1G1	ATPase, H+ transporting, lysosomal 13kDa, V1 subunit G1
hsa-miR-410	0	0	1	1	1	1	CALB1	calbindin 1, 28kDa
hsa-miR-410	0	0	1	1	1	1	GDF10	growth differentiation factor 10
hsa-miR-410	0	0	1	1	1	1	NDUFA5	NADH dehydrogenase (ubiquinone) 1 alpha subcomplex, 5, 13kDa
hsa-miR-410	1	0	1	1	1	1	MED13	mediator complex subunit 13
hsa-miR-410	0	0	1	1	1	1	CLEC2B	C-type lectin domain family 2, member B
hsa-miR-410	0	0	1	1	1	1	MSTN	myostatin
hsa-miR-410	1	0	1	1	1	1	GFRA1	GDNF family receptor alpha 1
hsa-miR-410	1	0	1	0	1	1	PRKCE	protein kinase C, epsilon
hsa-miR-410	1	0	1	1	1	1	RALA	v-ral simian leukemia viral oncogene homolog A (ras related)
hsa-miR-410	0	0	1	1	1	1	ST5	suppression of tumorigenicity 5
hsa-miR-410	0	0	1	1	1	1	PAPSS1	3'-phosphoadenosine 5'-phosphosulfate synthase 1
hsa-miR-410	1	0	1	1	1	1	MED6	mediator complex subunit 6
hsa-miR-410	1	0	1	1	1	1	KCNE3	potassium voltage-gated channel, Isk-related family, member 3
hsa-miR-410	1	0	1	1	1	1	PIGK	phosphatidylinositol glycan anchor biosynthesis, class K
hsa-miR-410	1	0	1	1	1	1	SCARB2	scavenger receptor class B, member 2
hsa-miR-410	0	0	1	1	1	1	HSD11B1	hydroxysteroid (11-beta) dehydrogenase 1
hsa-miR-410	0	0	1	1	1	1	ING1	inhibitor of growth family, member 1
hsa-miR-410	1	0	1	1	1	1	IRS1	insulin receptor substrate 1
hsa-miR-410	1	0	1	1	1	1	LNPEP	leucyl/cystinyl aminopeptidase
hsa-miR-410	1	0	1	1	1	1	NHLH2	nescient helix loop helix 2
hsa-miR-410	1	0	1	1	1	1	RGS4	regulator of G-protein signaling 4
hsa-miR-410	1	0	1	0	1	1	REEP5	receptor accessory protein 5
hsa-miR-410	1	0	1	0	1	1	TSPAN2	tetraspanin 2
hsa-miR-410	0	0	1	1	1	1	RNF41	ring finger protein 41
hsa-miR-410	1	0	1	0	1	1	CALCRL	calcitonin receptor-like
hsa-miR-410	1	0	1	1	1	1	PRKD3	protein kinase D3
hsa-miR-410	1	0	1	0	1	1	DCAF7	DDB1 and CUL4 associated factor 7
hsa-miR-410	0	0	1	1	1	1	HRSP12	heat-responsive protein 12
hsa-miR-410	1	0	1	0	1	1	SPRY3	sprouty homolog 3 (Drosophila)
hsa-miR-410	0	0	1	1	1	1	SOX1	SRY (sex determining region Y)-box 1
hsa-miR-410	1	0	1	1	1	1	TBX3	T-box 3
hsa-miR-410	0	0	1	1	1	1	TSC22D1	TSC22 domain family, member 1
hsa-miR-410	1	0	1	1	1	1	CITED2	Cbp/p300-interacting transactivator, with Glu/Asp-rich carboxy-terminal domain, 2
hsa-miR-410	1	0	1	1	1	1	BPNT1	3'(2'), 5'-bisphosphate nucleotidase 1
hsa-miR-410	1	0	1	1	1	1	TMEM50B	transmembrane protein 50B
hsa-miR-410	1	0	1	1	1	1	NEFL	neurofilament, light polypeptide
hsa-miR-410	1	0	1	0	1	1	PPP1R2	protein phosphatase 1, regulatory (inhibitor) subunit 2
hsa-miR-410	1	0	1	1	1	1	PRKAA1	protein kinase, AMP-activated, alpha 1 catalytic subunit
hsa-miR-410	1	0	1	0	1	1	PRKAA2	protein kinase, AMP-activated, alpha 2 catalytic subunit
hsa-miR-410	1	0	1	1	1	1	RAD21	RAD21 homolog (S. pombe)
hsa-miR-410	0	0	1	1	1	1	SLC30A9	solute carrier family 30 (zinc transporter), member 9
hsa-miR-410	1	0	1	1	1	1	SEC23A	Sec23 homolog A (S. cerevisiae)
hsa-miR-410	1	0	1	0	1	1	APPBP2	amyloid beta precursor protein (cytoplasmic tail) binding protein 2
hsa-miR-410	1	0	1	1	1	1	PAIP1	poly(A) binding protein interacting protein 1
hsa-miR-410	1	0	1	0	1	1	GNAI3	guanine nucleotide binding protein (G protein), alpha inhibiting activity polypeptide 3
hsa-miR-410	0	0	1	1	1	1	CLCA2	chloride channel accessory 2
hsa-miR-410	1	0	1	0	1	1	MAP4K5	mitogen-activated protein kinase kinase kinase kinase 5
hsa-miR-410	1	0	1	1	1	1	MAP3K2	mitogen-activated protein kinase kinase kinase 2
hsa-miR-410	0	0	1	1	1	1	CLPX	ClpX caseinolytic peptidase X homolog (E. coli)
hsa-miR-410	1	0	1	1	1	1	MAN1A2	mannosidase, alpha, class 1A, member 2
hsa-miR-410	1	0	1	1	1	1	HIVEP2	human immunodeficiency virus type I enhancer binding protein 2
hsa-miR-410	0	0	1	1	1	1	SYPL1	synaptophysin-like 1
hsa-miR-410	1	0	1	1	1	1	KAT6A	K(lysine) acetyltransferase 6A
hsa-miR-410	1	0	1	1	1	1	ZBTB33	zinc finger and BTB domain containing 33
hsa-miR-410	1	0	1	1	1	1	SF3A3	splicing factor 3a, subunit 3, 60kDa
hsa-miR-410	0	0	1	1	0	0	HNRNPA0	heterogeneous nuclear ribonucleoprotein A0
hsa-miR-410	0	0	1	1	0	0	STIP1	stress-induced-phosphoprotein 1
hsa-miR-410	1	0	1	1	1	1	FERMT2	fermitin family member 2
hsa-miR-410	0	0	1	1	1	1	HOXA7	homeobox A7
hsa-miR-410	0	0	1	0	1	1	PSG1	pregnancy specific beta-1-glycoprotein 1
hsa-miR-410	1	0	1	1	1	1	RP2	retinitis pigmentosa 2 (X-linked recessive)
hsa-miR-410	1	0	1	1	1	1	SCN1A	sodium channel, voltage-gated, type I, alpha subunit
hsa-miR-410	1	0	1	1	1	1	SKP1	S-phase kinase-associated protein 1
hsa-miR-410	1	0	1	0	1	1	SLC5A3	solute carrier family 5 (sodium/myo-inositol cotransporter), member 3
hsa-miR-410	1	0	1	1	1	1	NR4A3	nuclear receptor subfamily 4, group A, member 3
hsa-miR-410	1	0	1	0	1	1	WASF2	WAS protein family, member 2
hsa-miR-410	0	0	1	1	1	1	RTN4	reticulon 4
hsa-miR-410	1	0	1	1	1	1	ABHD2	abhydrolase domain containing 2
hsa-miR-410	1	0	1	1	1	1	HPS5	Hermansky-Pudlak syndrome 5
hsa-miR-410	0	0	1	1	1	1	XPOT	exportin, tRNA (nuclear export receptor for tRNAs)
hsa-miR-410	1	0	1	0	1	1	CHP1	calcineurin-like EF hand protein 1
hsa-miR-410	0	0	1	0	1	1	PNMA2	paraneoplastic Ma antigen 2
hsa-miR-410	0	0	1	1	1	1	CHIC2	cysteine-rich hydrophobic domain 2
hsa-miR-410	1	0	1	1	1	1	RHOQ	ras homolog family member Q
hsa-miR-410	1	0	1	1	1	1	MMD	monocyte to macrophage differentiation-associated
hsa-miR-410	0	0	1	1	1	1	TTC33	tetratricopeptide repeat domain 33
hsa-miR-410	1	0	1	1	1	1	RANBP6	RAN binding protein 6
hsa-miR-410	1	0	1	1	1	1	TLL2	tolloid-like 2
hsa-miR-410	1	0	1	1	1	1	YWHAG	tyrosine 3-monooxygenase/tryptophan 5-monooxygenase activation protein, gamma polypeptide
hsa-miR-410	1	0	1	1	1	1	STK39	serine threonine kinase 39
hsa-miR-410	0	0	1	1	1	1	N6AMT1	N-6 adenine-specific DNA methyltransferase 1 (putative)
hsa-miR-410	1	0	1	1	1	1	CLCF1	cardiotrophin-like cytokine factor 1
hsa-miR-410	1	0	1	0	1	1	RBM15B	RNA binding motif protein 15B
hsa-miR-410	1	0	1	0	1	1	TRHDE	thyrotropin-releasing hormone degrading enzyme
hsa-miR-410	1	0	1	1	1	1	SOCS5	suppressor of cytokine signaling 5
hsa-miR-410	1	0	1	0	1	1	OSTM1	osteopetrosis associated transmembrane protein 1
hsa-miR-410	0	0	1	1	1	1	METTL7A	methyltransferase like 7A
hsa-miR-410	1	0	1	1	1	1	ASF1A	ASF1 anti-silencing function 1 homolog A (S. cerevisiae)
hsa-miR-410	1	0	1	1	1	1	LEMD3	LEM domain containing 3
hsa-miR-410	0	0	1	0	1	1	EID1	EP300 interacting inhibitor of differentiation 1
hsa-miR-410	0	0	1	1	1	1	ZNF318	zinc finger protein 318
hsa-miR-410	1	0	1	1	1	1	LHX6	LIM homeobox 6
hsa-miR-410	0	0	1	1	1	1	TSPAN13	tetraspanin 13
hsa-miR-410	1	0	1	1	1	1	ZBTB11	zinc finger and BTB domain containing 11
hsa-miR-410	1	0	1	1	1	1	SERP1	stress-associated endoplasmic reticulum protein 1
hsa-miR-410	1	0	1	1	1	1	RND1	Rho family GTPase 1
hsa-miR-410	0	0	1	1	1	1	ZNF330	zinc finger protein 330
hsa-miR-410	0	0	1	1	1	1	ZNRD1	zinc ribbon domain containing 1
hsa-miR-410	1	0	1	1	1	1	HERC3	HECT and RLD domain containing E3 ubiquitin protein ligase 3
hsa-miR-410	0	0	1	1	1	1	PSME4	proteasome (prosome, macropain) activator subunit 4
hsa-miR-410	1	0	1	0	1	1	KIAA0232	KIAA0232
hsa-miR-410	0	0	1	0	1	1	EPM2AIP1	EPM2A (laforin) interacting protein 1
hsa-miR-410	1	0	1	0	1	1	LPPR4	lipid phosphate phosphatase-related protein type 4
hsa-miR-410	1	0	1	1	1	1	JOSD1	Josephin domain containing 1
hsa-miR-410	1	0	1	0	1	1	ICK	intestinal cell (MAK-like) kinase
hsa-miR-410	1	0	1	1	1	1	SPAST	spastin
hsa-miR-410	1	0	1	0	1	1	WDFY3	WD repeat and FYVE domain containing 3
hsa-miR-410	0	0	1	1	0	0	DOPEY1	dopey family member 1
hsa-miR-410	0	0	1	1	1	1	FBXO28	F-box protein 28
hsa-miR-410	1	0	1	0	1	1	KHNYN	KH and NYN domain containing
hsa-miR-410	1	0	1	0	1	1	ARHGEF12	Rho guanine nucleotide exchange factor (GEF) 12
hsa-miR-410	0	0	1	0	1	1	RRP8	ribosomal RNA processing 8, methyltransferase, homolog (yeast)
hsa-miR-410	0	0	1	1	1	1	LEPROTL1	leptin receptor overlapping transcript-like 1
hsa-miR-410	1	0	1	1	1	1	PARM1	prostate androgen-regulated mucin-like protein 1
hsa-miR-410	1	0	1	1	1	1	RNF19A	ring finger protein 19A, E3 ubiquitin protein ligase
hsa-miR-410	1	0	1	1	1	1	MYRIP	myosin VIIA and Rab interacting protein
hsa-miR-410	0	0	1	1	1	1	KBTBD2	kelch repeat and BTB (POZ) domain containing 2
hsa-miR-410	0	0	1	1	1	1	C10orf12	chromosome 10 open reading frame 12
hsa-miR-410	1	0	1	1	1	1	HOOK1	hook homolog 1 (Drosophila)
hsa-miR-410	1	0	1	1	1	1	TAF9B	TAF9B RNA polymerase II, TATA box binding protein (TBP)-associated factor, 31kDa
hsa-miR-410	0	0	1	1	1	1	HDGFRP3	hepatoma-derived growth factor, related protein 3
hsa-miR-410	1	0	1	0	1	1	CNR1	cannabinoid receptor 1 (brain)
hsa-miR-410	1	0	1	0	1	1	WNT16	wingless-type MMTV integration site family, member 16
hsa-miR-410	1	0	1	1	1	1	VGLL3	vestigial like 3 (Drosophila)
hsa-miR-410	0	0	1	1	1	1	CYB5R1	cytochrome b5 reductase 1
hsa-miR-410	1	0	1	1	1	1	RNF138	ring finger protein 138, E3 ubiquitin protein ligase
hsa-miR-410	1	0	1	1	1	1	ARID4B	AT rich interactive domain 4B (RBP1-like)
hsa-miR-410	1	0	1	1	1	1	PHF20	PHD finger protein 20
hsa-miR-410	1	0	1	0	1	1	CRIM1	cysteine rich transmembrane BMP regulator 1 (chordin-like)
hsa-miR-410	1	0	1	1	1	1	IER5	immediate early response 5
hsa-miR-410	1	0	1	0	1	1	NT5DC3	5'-nucleotidase domain containing 3
hsa-miR-410	1	0	1	1	1	1	UFM1	ubiquitin-fold modifier 1
hsa-miR-410	1	0	1	1	1	1	SIX4	SIX homeobox 4
hsa-miR-410	1	0	1	1	1	1	CPSF2	cleavage and polyadenylation specific factor 2, 100kDa
hsa-miR-410	1	0	1	1	1	1	ARID1B	AT rich interactive domain 1B (SWI1-like)
hsa-miR-410	0	0	1	0	1	1	TRIM44	tripartite motif containing 44
hsa-miR-410	1	0	1	1	1	1	HAUS6	HAUS augmin-like complex, subunit 6
hsa-miR-410	1	0	1	0	1	1	FAM46C	family with sequence similarity 46, member C
hsa-miR-410	1	0	1	0	1	1	DCAF16	DDB1 and CUL4 associated factor 16
hsa-miR-410	1	0	1	1	1	1	LPPR1	lipid phosphate phosphatase-related protein type 1
hsa-miR-410	0	0	1	1	1	1	WHSC1L1	Wolf-Hirschhorn syndrome candidate 1-like 1
hsa-miR-410	1	0	1	0	1	1	MARCH5	membrane-associated ring finger (C3HC4) 5
hsa-miR-410	1	0	1	1	1	1	FBXO34	F-box protein 34
hsa-miR-410	0	0	1	1	1	1	FKBP14	FK506 binding protein 14, 22 kDa
hsa-miR-410	0	0	1	1	1	1	IWS1	IWS1 homolog (S. cerevisiae)
hsa-miR-410	1	0	1	1	1	1	C9orf40	chromosome 9 open reading frame 40
hsa-miR-410	1	0	1	1	1	1	ARGLU1	arginine and glutamate rich 1
hsa-miR-410	0	0	1	1	1	1	THAP1	THAP domain containing, apoptosis associated protein 1
hsa-miR-410	0	0	1	1	1	1	TMEM38B	transmembrane protein 38B
hsa-miR-410	1	0	1	0	1	1	MSL2	male-specific lethal 2 homolog (Drosophila)
hsa-miR-410	1	0	1	1	1	1	UBA6	ubiquitin-like modifier activating enzyme 6
hsa-miR-410	1	0	1	1	1	1	C20orf20	chromosome 20 open reading frame 20
hsa-miR-410	1	0	1	1	1	1	ZNF654	zinc finger protein 654
hsa-miR-410	1	0	1	1	1	1	KIAA1598	KIAA1598
hsa-miR-410	0	0	1	1	1	1	SYNJ2BP	synaptojanin 2 binding protein
hsa-miR-410	1	0	1	0	1	1	FOXJ2	forkhead box J2
hsa-miR-410	1	0	1	1	1	1	EPB41L4B	erythrocyte membrane protein band 4.1 like 4B
hsa-miR-410	1	0	1	1	1	1	PAG1	phosphoprotein associated with glycosphingolipid microdomains 1
hsa-miR-410	0	0	1	1	1	1	HDAC8	histone deacetylase 8
hsa-miR-410	1	0	1	1	1	1	LRRC59	leucine rich repeat containing 59
hsa-miR-410	1	0	1	0	1	1	LRP1B	low density lipoprotein receptor-related protein 1B
hsa-miR-410	1	0	1	1	1	1	ETNK1	ethanolamine kinase 1
hsa-miR-410	1	0	1	0	1	1	ELMOD1	ELMO/CED-12 domain containing 1
hsa-miR-410	1	0	1	1	1	1	GNG12	guanine nucleotide binding protein (G protein), gamma 12
hsa-miR-410	1	0	1	0	1	1	PCDHAC1	protocadherin alpha subfamily C, 1
hsa-miR-410	1	0	1	0	1	1	PCDHAC2	protocadherin alpha subfamily C, 2
hsa-miR-410	1	0	1	1	1	1	PCDHA1	protocadherin alpha 1
hsa-miR-410	1	0	1	0	1	1	PCDHA10	protocadherin alpha 10
hsa-miR-410	1	0	1	0	1	1	PCDHA11	protocadherin alpha 11
hsa-miR-410	1	0	1	0	1	1	PCDHA12	protocadherin alpha 12
hsa-miR-410	1	0	1	1	1	1	PCDHA2	protocadherin alpha 2
hsa-miR-410	1	0	1	1	1	1	PCDHA3	protocadherin alpha 3
hsa-miR-410	1	0	1	1	1	1	PCDHA6	protocadherin alpha 6
hsa-miR-410	1	0	1	0	1	1	PCDHA7	protocadherin alpha 7
hsa-miR-410	1	0	1	1	1	1	PCDHA8	protocadherin alpha 8
hsa-miR-410	0	0	1	1	1	1	NPAP1	nuclear pore associated protein 1
hsa-miR-410	1	0	1	0	1	1	FAM190B	family with sequence similarity 190, member B
hsa-miR-410	0	0	1	1	1	1	GNL3L	guanine nucleotide binding protein-like 3 (nucleolar)-like
hsa-miR-410	1	0	1	0	1	1	CCNJ	cyclin J
hsa-miR-410	1	0	1	1	1	1	CYP26B1	cytochrome P450, family 26, subfamily B, polypeptide 1
hsa-miR-410	0	0	1	1	1	1	TMEM167B	transmembrane protein 167B
hsa-miR-410	1	0	1	1	1	1	C1GALT1	core 1 synthase, glycoprotein-N-acetylgalactosamine 3-beta-galactosyltransferase, 1
hsa-miR-410	0	0	1	1	1	1	PDSS2	prenyl (decaprenyl) diphosphate synthase, subunit 2
hsa-miR-410	1	0	1	1	1	1	PTGFRN	prostaglandin F2 receptor negative regulator
hsa-miR-410	1	0	1	0	1	1	KCNS2	potassium voltage-gated channel, delayed-rectifier, subfamily S, member 2
hsa-miR-410	0	0	1	0	1	1	ZNF490	zinc finger protein 490
hsa-miR-410	0	0	1	1	1	1	SHROOM4	shroom family member 4
hsa-miR-410	1	0	1	1	1	1	ZNF608	zinc finger protein 608
hsa-miR-410	1	0	1	1	1	1	MIB1	mindbomb E3 ubiquitin protein ligase 1
hsa-miR-410	0	0	1	1	1	1	TXNDC16	thioredoxin domain containing 16
hsa-miR-410	1	0	1	0	1	1	GPAM	glycerol-3-phosphate acyltransferase, mitochondrial
hsa-miR-410	0	0	1	1	1	1	KIAA1586	KIAA1586
hsa-miR-410	1	0	1	1	1	1	FAM160B1	family with sequence similarity 160, member B1
hsa-miR-410	0	0	1	1	1	1	AQP9	aquaporin 9
hsa-miR-410	0	0	1	1	1	1	PPM1A	protein phosphatase, Mg2+/Mn2+ dependent, 1A
hsa-miR-410	1	0	1	1	1	1	HCN1	hyperpolarization activated cyclic nucleotide-gated potassium channel 1
hsa-miR-410	1	0	1	1	1	1	NTN4	netrin 4
hsa-miR-410	1	0	1	1	1	1	OTX2	orthodenticle homeobox 2
hsa-miR-410	0	0	1	0	1	1	CFL2	cofilin 2 (muscle)
hsa-miR-410	0	0	1	0	1	1	SPCS3	signal peptidase complex subunit 3 homolog (S. cerevisiae)
hsa-miR-410	0	0	1	1	1	1	RINT1	RAD50 interactor 1
hsa-miR-410	0	0	1	1	1	1	MS4A1	membrane-spanning 4-domains, subfamily A, member 1
hsa-miR-410	1	0	1	1	1	1	DMRT1	doublesex and mab-3 related transcription factor 1
hsa-miR-410	1	0	1	1	1	1	NAP1L2	nucleosome assembly protein 1-like 2
hsa-miR-410	1	0	1	1	1	1	SEC24A	SEC24 family, member A (S. cerevisiae)
hsa-miR-410	1	0	1	0	1	1	CERS2	ceramide synthase 2
hsa-miR-410	0	0	1	1	1	1	ASCC3	activating signal cointegrator 1 complex subunit 3
hsa-miR-410	0	0	1	1	1	1	ACBD3	acyl-CoA binding domain containing 3
hsa-miR-410	1	0	1	1	1	1	FBXL17	F-box and leucine-rich repeat protein 17
hsa-miR-410	1	0	1	0	1	1	USP46	ubiquitin specific peptidase 46
hsa-miR-410	1	0	1	1	1	1	REEP1	receptor accessory protein 1
hsa-miR-410	1	0	1	1	0	0	UBE2Z	ubiquitin-conjugating enzyme E2Z
hsa-miR-410	0	0	1	1	1	1	AUNIP	aurora kinase A and ninein interacting protein
hsa-miR-410	1	0	1	1	1	1	GID4	GID complex subunit 4, VID24 homolog (S. cerevisiae)
hsa-miR-410	1	0	1	0	1	1	NOTCH2	notch 2
hsa-miR-410	0	0	1	1	1	1	LPAL2	lipoprotein, Lp(a)-like 2, pseudogene
hsa-miR-410	0	0	1	1	1	1	NDNF	neuron-derived neurotrophic factor
hsa-miR-410	1	0	1	1	1	1	DHX40	DEAH (Asp-Glu-Ala-His) box polypeptide 40
hsa-miR-410	1	0	1	0	1	1	PLEKHF2	pleckstrin homology domain containing, family F (with FYVE domain) member 2
hsa-miR-410	0	0	1	1	1	1	GALNT12	UDP-N-acetyl-alpha-D-galactosamine:polypeptide N-acetylgalactosaminyltransferase 12 (GalNAc-T12)
hsa-miR-410	1	0	1	1	1	1	C15orf29	chromosome 15 open reading frame 29
hsa-miR-410	1	0	1	1	1	1	CCDC82	coiled-coil domain containing 82
hsa-miR-410	1	0	1	0	1	1	MOB3B	MOB kinase activator 3B
hsa-miR-410	1	0	1	1	1	1	EIF2C3	eukaryotic translation initiation factor 2C, 3
hsa-miR-410	0	0	1	1	1	1	HMGN5	high mobility group nucleosome binding domain 5
hsa-miR-410	1	0	1	1	1	1	SGPP1	sphingosine-1-phosphate phosphatase 1
hsa-miR-410	1	0	1	1	1	1	OR2H1	olfactory receptor, family 2, subfamily H, member 1
hsa-miR-410	1	0	1	1	1	1	HSDL1	hydroxysteroid dehydrogenase like 1
hsa-miR-410	1	0	1	1	1	1	PCDHA9	protocadherin alpha 9
hsa-miR-410	0	0	1	0	1	1	KRTAP1-5	keratin associated protein 1-5
hsa-miR-410	0	0	1	1	1	1	MAGT1	magnesium transporter 1
hsa-miR-410	1	0	1	1	1	1	FBXO30	F-box protein 30
hsa-miR-410	1	0	1	1	1	1	DSEL	dermatan sulfate epimerase-like
hsa-miR-410	1	0	1	1	1	1	ANTXR1	anthrax toxin receptor 1
hsa-miR-410	0	0	1	1	1	1	YIPF4	Yip1 domain family, member 4
hsa-miR-410	0	0	1	1	0	0	NICN1	nicolin 1
hsa-miR-410	1	0	1	1	1	1	HOOK3	hook homolog 3 (Drosophila)
hsa-miR-410	1	0	1	1	1	1	TRIM63	tripartite motif containing 63, E3 ubiquitin protein ligase
hsa-miR-410	1	0	1	0	1	1	UBASH3B	ubiquitin associated and SH3 domain containing B
hsa-miR-410	0	0	1	1	1	1	TRIM4	tripartite motif containing 4
hsa-miR-410	1	0	1	1	1	1	HIAT1	hippocampus abundant transcript 1
hsa-miR-410	1	0	1	0	1	1	EAF1	ELL associated factor 1
hsa-miR-410	1	0	1	1	0	0	WNT3A	wingless-type MMTV integration site family, member 3A
hsa-miR-410	1	0	1	1	1	1	TP53INP1	tumor protein p53 inducible nuclear protein 1
hsa-miR-410	1	0	1	1	1	1	TANC1	tetratricopeptide repeat, ankyrin repeat and coiled-coil containing 1
hsa-miR-410	1	0	1	1	1	1	EPT1	ethanolaminephosphotransferase 1 (CDP-ethanolamine-specific)
hsa-miR-410	1	0	1	1	1	1	TSPYL5	TSPY-like 5
hsa-miR-410	0	0	1	1	1	1	ZNF830	zinc finger protein 830
hsa-miR-410	0	0	1	1	0	0	SIGLEC11	sialic acid binding Ig-like lectin 11
hsa-miR-410	1	0	1	1	1	1	SLC2A13	solute carrier family 2 (facilitated glucose transporter), member 13
hsa-miR-410	1	0	1	1	1	1	MAL2	mal, T-cell differentiation protein 2 (gene/pseudogene)
hsa-miR-410	1	0	1	0	1	1	TMEM123	transmembrane protein 123
hsa-miR-410	0	0	1	1	1	1	IL22RA2	interleukin 22 receptor, alpha 2
hsa-miR-410	1	0	1	0	1	1	FAM129A	family with sequence similarity 129, member A
hsa-miR-410	0	0	1	0	1	1	ZNF518B	zinc finger protein 518B
hsa-miR-410	0	0	1	1	0	0	THEM4	thioesterase superfamily member 4
hsa-miR-410	0	0	1	1	1	1	ABCA10	ATP-binding cassette, sub-family A (ABC1), member 10
hsa-miR-410	0	0	1	1	1	1	CBLN4	cerebellin 4 precursor
hsa-miR-410	0	0	1	1	1	1	CCDC34	coiled-coil domain containing 34
hsa-miR-410	1	0	1	0	1	1	SOCS4	suppressor of cytokine signaling 4
hsa-miR-410	1	0	1	1	1	1	KLHL6	kelch-like 6 (Drosophila)
hsa-miR-410	0	0	1	1	0	0	ASZ1	ankyrin repeat, SAM and basic leucine zipper domain containing 1
hsa-miR-410	1	0	1	1	1	1	PRRC1	proline-rich coiled-coil 1
hsa-miR-410	1	0	1	1	1	1	BMPER	BMP binding endothelial regulator
hsa-miR-410	1	0	1	1	1	1	PANK1	pantothenate kinase 1
hsa-miR-410	0	0	1	1	1	1	MRAP2	melanocortin 2 receptor accessory protein 2
hsa-miR-410	0	0	1	1	1	1	CASC4	cancer susceptibility candidate 4
hsa-miR-410	1	0	1	1	1	1	GLCCI1	glucocorticoid induced transcript 1
hsa-miR-410	1	0	1	1	1	1	CD200R1	CD200 receptor 1
hsa-miR-410	0	0	1	1	1	1	PPIL4	peptidylprolyl isomerase (cyclophilin)-like 4
hsa-miR-410	0	0	1	1	1	1	TRUB1	TruB pseudouridine (psi) synthase homolog 1 (E. coli)
hsa-miR-410	1	0	1	1	1	1	MAPK1IP1L	mitogen-activated protein kinase 1 interacting protein 1-like
hsa-miR-410	1	0	1	1	1	1	TMEM182	transmembrane protein 182
hsa-miR-410	0	0	1	1	1	1	PUS10	pseudouridylate synthase 10
hsa-miR-410	1	0	1	1	1	1	FAM91A1	family with sequence similarity 91, member A1
hsa-miR-410	0	0	1	1	1	1	SLFN5	schlafen family member 5
hsa-miR-410	1	0	1	1	1	1	OSR1	odd-skipped related 1 (Drosophila)
hsa-miR-410	1	0	1	1	1	1	FAM110B	family with sequence similarity 110, member B
hsa-miR-410	1	0	1	1	1	1	FAM81A	family with sequence similarity 81, member A
hsa-miR-410	0	0	1	1	1	1	ATP6V0D2	ATPase, H+ transporting, lysosomal 38kDa, V0 subunit d2
hsa-miR-410	1	0	1	1	1	1	SPRED1	sprouty-related, EVH1 domain containing 1
hsa-miR-410	0	0	1	1	1	1	SNX31	sorting nexin 31
hsa-miR-410	0	0	1	1	1	1	CCER1	coiled-coil glutamate-rich protein 1
hsa-miR-410	1	0	1	0	1	1	RWDD4	RWD domain containing 4
hsa-miR-410	1	0	1	0	1	1	ST6GALNAC3	ST6 (alpha-N-acetyl-neuraminyl-2,3-beta-galactosyl-1,3)-N-acetylgalactosaminide alpha-2,6-sialyltransferase 3
hsa-miR-410	0	0	1	1	0	0	ANKFN1	ankyrin-repeat and fibronectin type III domain containing 1
hsa-miR-410	0	0	1	0	1	1	LNX2	ligand of numb-protein X 2
hsa-miR-410	1	0	1	1	1	1	POM121	POM121 transmembrane nucleoporin
hsa-miR-410	1	0	1	1	1	1	MMGT1	membrane magnesium transporter 1
hsa-miR-410	1	0	1	1	1	1	CNKSR3	CNKSR family member 3
hsa-miR-410	1	0	1	0	1	1	C3orf58	chromosome 3 open reading frame 58
hsa-miR-410	1	0	1	0	1	1	PGM2L1	phosphoglucomutase 2-like 1
hsa-miR-410	0	0	1	0	1	1	C5orf64	chromosome 5 open reading frame 64
hsa-miR-410	0	0	1	1	1	1	MAGEB18	melanoma antigen family B, 18
hsa-miR-410	1	0	1	1	1	1	PRTG	protogenin
hsa-miR-410	1	0	1	0	1	1	SREK1IP1	SREK1-interacting protein 1
hsa-miR-410	1	0	1	0	1	1	TMEM167A	transmembrane protein 167A
hsa-miR-410	0	0	1	1	1	1	FAM9A	family with sequence similarity 9, member A
hsa-miR-410	1	0	1	1	0	0	EMC10	ER membrane protein complex subunit 10
hsa-miR-410	0	0	1	0	1	1	PSME1	proteasome (prosome, macropain) activator subunit 1 (PA28 alpha)
hsa-miR-410	1	0	1	1	1	1	LRRTM3	leucine rich repeat transmembrane neuronal 3
hsa-miR-410	1	0	1	1	1	1	DCAF12L1	DDB1 and CUL4 associated factor 12-like 1
hsa-miR-410	1	0	1	1	1	1	TMEM26	transmembrane protein 26
hsa-miR-410	0	0	1	1	1	1	STXBP4	syntaxin binding protein 4
hsa-miR-410	1	0	1	0	1	1	ZDHHC21	zinc finger, DHHC-type containing 21
hsa-miR-410	1	0	1	1	1	1	RPS6KA5	ribosomal protein S6 kinase, 90kDa, polypeptide 5
hsa-miR-410	0	0	1	1	1	1	SKA2	spindle and kinetochore associated complex subunit 2
hsa-miR-410	1	0	1	0	1	1	RNF144B	ring finger protein 144B
hsa-miR-410	0	0	1	1	1	1	ISCA2	iron-sulfur cluster assembly 2 homolog (S. cerevisiae)
hsa-miR-410	1	0	1	1	1	1	RALGAPA1	Ral GTPase activating protein, alpha subunit 1 (catalytic)
hsa-miR-410	1	0	1	1	1	1	ZBTB41	zinc finger and BTB domain containing 41
hsa-miR-410	1	0	1	1	1	1	PHLPP1	PH domain and leucine rich repeat protein phosphatase 1
hsa-miR-410	1	0	1	0	1	1	GNPNAT1	glucosamine-phosphate N-acetyltransferase 1
hsa-miR-410	1	0	1	1	1	1	E2F6	E2F transcription factor 6
hsa-miR-410	1	0	1	1	1	1	GPRIN3	GPRIN family member 3
hsa-miR-410	1	0	1	1	1	1	E2F7	E2F transcription factor 7
hsa-miR-410	1	0	1	0	1	1	MBLAC2	metallo-beta-lactamase domain containing 2
hsa-miR-410	1	0	1	0	1	1	NCKAP5	NCK-associated protein 5
hsa-miR-410	0	0	1	1	1	1	SEPT14	septin 14
hsa-miR-410	0	0	1	1	1	1	C8orf86	chromosome 8 open reading frame 86
hsa-miR-410	0	0	1	0	1	1	FSD1L	fibronectin type III and SPRY domain containing 1-like
hsa-miR-410	0	0	1	0	1	1	TMEM215	transmembrane protein 215
hsa-miR-410	0	0	1	0	0	0	MIR155HG	MIR155 host gene (non-protein coding)
hsa-miR-410	0	0	1	0	0	0	TTTY2	testis-specific transcript, Y-linked 2 (non-protein coding)
hsa-miR-410	0	0	1	0	0	0	TTTY12	testis-specific transcript, Y-linked 12 (non-protein coding)
hsa-miR-410	0	0	1	0	0	0	SNORA4	small nucleolar RNA, H/ACA box 4
hsa-miR-410	0	0	1	0	0	0	ATXN8OS	ATXN8 opposite strand (non-protein coding)
hsa-miR-410	0	0	1	0	0	0	PCGEM1	prostate-specific transcript 1 (non-protein coding)
hsa-miR-410	0	0	1	0	0	0	TRIM78P	tripartite motif containing 78, pseudogene
hsa-miR-410	0	0	1	0	0	0	TPTE2P6	transmembrane phosphoinositide 3-phosphatase and tensin homolog 2 pseudogene 6
hsa-miR-410	0	0	1	0	0	0	HAS2-AS1	HAS2 antisense RNA 1
hsa-miR-410	0	0	1	0	0	0	SNORA28	small nucleolar RNA, H/ACA box 28
hsa-miR-410	0	0	1	0	0	0	HSP90AB2P	heat shock protein 90kDa alpha (cytosolic), class B member 2, pseudogene
hsa-miR-410	1	0	1	1	1	1	IFNAR2	interferon (alpha, beta and omega) receptor 2
hsa-miR-410	0	0	1	1	1	1	IFRD1	interferon-related developmental regulator 1
hsa-miR-410	1	0	1	1	1	1	BOD1L1	biorientation of chromosomes in cell division 1-like 1
hsa-miR-410	0	0	0	1	0	0	TARBP1	TAR (HIV-1) RNA binding protein 1
hsa-miR-410	0	0	0	1	1	1	C12orf5	chromosome 12 open reading frame 5
hsa-miR-410	0	0	1	1	0	0	FAR2	fatty acyl CoA reductase 2
hsa-miR-410	0	0	0	1	0	0	TMEM38A	transmembrane protein 38A
hsa-miR-410	0	0	1	1	1	1	PSG5	pregnancy specific beta-1-glycoprotein 5
hsa-miR-410	0	0	0	1	1	1	PSG4	pregnancy specific beta-1-glycoprotein 4
hsa-miR-410	1	0	1	1	1	1	DIMT1	DIM1 dimethyladenosine transferase 1 homolog (S. cerevisiae)
hsa-miR-410	0	0	1	1	0	0	OAS1	2'-5'-oligoadenylate synthetase 1, 40/46kDa
hsa-miR-410	0	0	1	1	1	1	TMEM14A	transmembrane protein 14A
hsa-miR-410	0	0	0	1	1	1	HMOX1	heme oxygenase (decycling) 1
hsa-miR-410	1	0	1	1	1	1	PVALB	parvalbumin
hsa-miR-410	1	0	1	1	0	0	ERH	enhancer of rudimentary homolog (Drosophila)
hsa-miR-410	0	0	1	1	1	1	MYL12A	myosin, light chain 12A, regulatory, non-sarcomeric
hsa-miR-410	0	0	0	1	1	1	TLR8	toll-like receptor 8
hsa-miR-410	0	0	0	1	0	0	NKG7	natural killer cell group 7 sequence
hsa-miR-410	0	0	0	1	1	1	SULT1E1	sulfotransferase family 1E, estrogen-preferring, member 1
hsa-miR-410	0	0	0	1	1	1	MANBA	mannosidase, beta A, lysosomal
hsa-miR-410	0	0	1	1	1	1	LDHA	lactate dehydrogenase A
hsa-miR-410	0	0	1	1	1	1	C11orf63	chromosome 11 open reading frame 63
hsa-miR-410	1	0	1	1	1	1	MYF5	myogenic factor 5
hsa-miR-410	0	0	1	1	0	0	MGP	matrix Gla protein
hsa-miR-410	0	0	0	1	1	1	RSPH4A	radial spoke head 4 homolog A (Chlamydomonas)
hsa-miR-410	0	0	1	1	1	1	PEX7	peroxisomal biogenesis factor 7
hsa-miR-410	1	0	0	1	1	1	KIF20A	kinesin family member 20A
hsa-miR-410	0	0	1	1	1	1	IL5	interleukin 5 (colony-stimulating factor, eosinophil)
hsa-miR-410	0	0	1	1	1	1	EIF1B	eukaryotic translation initiation factor 1B
hsa-miR-410	0	0	0	1	1	1	PASK	PAS domain containing serine/threonine kinase
hsa-miR-410	0	0	1	1	1	1	WDR77	WD repeat domain 77
hsa-miR-410	0	0	0	1	0	0	MMP8	matrix metallopeptidase 8 (neutrophil collagenase)
hsa-miR-410	0	0	0	1	1	1	PCDHB14	protocadherin beta 14
hsa-miR-410	0	0	1	1	1	1	MYOT	myotilin
hsa-miR-410	0	0	0	1	0	0	MTERFD3	MTERF domain containing 3
hsa-miR-410	0	0	1	1	1	1	SLC39A14	solute carrier family 39 (zinc transporter), member 14
hsa-miR-410	0	0	1	1	1	1	DYNLL1	dynein, light chain, LC8-type 1
hsa-miR-410	0	0	1	1	1	1	EBPL	emopamil binding protein-like
hsa-miR-410	1	0	1	1	1	1	C1orf63	chromosome 1 open reading frame 63
hsa-miR-410	0	0	0	1	1	1	H2BFM	H2B histone family, member M
hsa-miR-410	0	0	0	1	1	1	TRIM51	tripartite motif-containing 51
hsa-miR-410	0	0	1	1	1	1	PIWIL1	piwi-like 1 (Drosophila)
hsa-miR-410	0	0	1	1	1	1	NSRP1	nuclear speckle splicing regulatory protein 1
hsa-miR-410	0	0	1	1	1	1	METTL25	methyltransferase like 25
hsa-miR-410	0	0	0	1	1	1	MTX2	metaxin 2
hsa-miR-410	0	0	1	1	0	0	EMR1	egf-like module containing, mucin-like, hormone receptor-like 1
hsa-miR-410	0	0	0	1	0	0	CDY2A	chromodomain protein, Y-linked, 2A
hsa-miR-410	0	0	1	1	1	1	TRNT1	tRNA nucleotidyl transferase, CCA-adding, 1
hsa-miR-410	0	0	1	1	1	1	KRT12	keratin 12
hsa-miR-410	0	0	1	1	1	1	CDC16	cell division cycle 16 homolog (S. cerevisiae)
hsa-miR-410	0	0	0	1	0	0	RSPH3	radial spoke 3 homolog (Chlamydomonas)
hsa-miR-410	0	0	0	1	0	0	BMP15	bone morphogenetic protein 15
hsa-miR-410	0	0	0	1	0	0	LAMA5	laminin, alpha 5
hsa-miR-410	0	0	0	1	1	1	ZCCHC9	zinc finger, CCHC domain containing 9
hsa-miR-410	0	0	0	1	0	0	USP29	ubiquitin specific peptidase 29
hsa-miR-410	1	0	1	1	1	1	CHSY1	chondroitin sulfate synthase 1
hsa-miR-410	0	0	0	1	1	1	CARD6	caspase recruitment domain family, member 6
hsa-miR-410	0	0	1	1	1	1	NARS	asparaginyl-tRNA synthetase
hsa-miR-410	0	0	1	1	1	1	GRP	gastrin-releasing peptide
hsa-miR-410	0	0	1	1	1	1	RFK	riboflavin kinase
hsa-miR-410	1	0	0	1	1	1	USP30	ubiquitin specific peptidase 30
hsa-miR-410	0	0	0	1	1	1	PNPLA8	patatin-like phospholipase domain containing 8
hsa-miR-410	0	0	0	1	1	1	AVIL	advillin
hsa-miR-410	0	0	1	1	1	1	KCNMB4	potassium large conductance calcium-activated channel, subfamily M, beta member 4
hsa-miR-410	1	0	0	1	1	1	USP44	ubiquitin specific peptidase 44
hsa-miR-410	0	0	1	1	1	1	TANK	TRAF family member-associated NFKB activator
hsa-miR-410	0	0	1	1	1	1	SKIL	SKI-like oncogene
hsa-miR-410	0	0	1	1	0	0	DCUN1D5	DCN1, defective in cullin neddylation 1, domain containing 5 (S. cerevisiae)
hsa-miR-410	0	0	0	1	0	0	FDXACB1	ferredoxin-fold anticodon binding domain containing 1
hsa-miR-410	0	0	1	1	1	1	SSB	Sjogren syndrome antigen B (autoantigen La)
hsa-miR-410	0	0	0	1	0	0	FASTKD1	FAST kinase domains 1
hsa-miR-410	0	0	1	1	1	1	CHRNA1	cholinergic receptor, nicotinic, alpha 1 (muscle)
hsa-miR-410	0	0	0	1	1	1	COL8A1	collagen, type VIII, alpha 1
hsa-miR-410	0	0	1	1	1	1	GUCA1C	guanylate cyclase activator 1C
hsa-miR-410	0	0	1	1	1	1	SLC16A7	solute carrier family 16, member 7 (monocarboxylic acid transporter 2)
hsa-miR-410	0	0	0	1	1	1	PPP2R3C	protein phosphatase 2, regulatory subunit B'', gamma
hsa-miR-410	0	0	1	1	1	1	TTC19	tetratricopeptide repeat domain 19
hsa-miR-410	0	0	1	1	0	0	RRAGB	Ras-related GTP binding B
hsa-miR-410	1	0	1	1	1	1	NOX4	NADPH oxidase 4
hsa-miR-410	1	0	1	1	0	0	SLC10A3	solute carrier family 10 (sodium/bile acid cotransporter family), member 3
hsa-miR-410	0	0	1	1	1	1	GFM1	G elongation factor, mitochondrial 1
hsa-miR-410	0	0	1	1	1	1	MTRR	5-methyltetrahydrofolate-homocysteine methyltransferase reductase
hsa-miR-410	0	0	1	1	1	1	NDUFC1	NADH dehydrogenase (ubiquinone) 1, subcomplex unknown, 1, 6kDa
hsa-miR-410	0	0	1	1	1	1	USP4	ubiquitin specific peptidase 4 (proto-oncogene)
hsa-miR-410	0	0	1	1	1	1	TCTN3	tectonic family member 3
hsa-miR-410	0	0	1	1	1	1	TTC28	tetratricopeptide repeat domain 28
hsa-miR-410	0	0	1	1	1	1	AMDHD1	amidohydrolase domain containing 1
hsa-miR-410	0	0	1	1	0	0	SRP14	signal recognition particle 14kDa (homologous Alu RNA binding protein)
hsa-miR-410	0	0	0	1	0	0	RHCG	Rh family, C glycoprotein
hsa-miR-410	0	0	1	1	1	1	RLBP1	retinaldehyde binding protein 1
hsa-miR-410	1	0	1	1	1	1	CLTC	clathrin, heavy chain (Hc)
hsa-miR-410	0	0	0	1	1	1	TRIM65	tripartite motif containing 65
hsa-miR-410	0	0	0	1	1	1	ERBB2	v-erb-b2 erythroblastic leukemia viral oncogene homolog 2, neuro/glioblastoma derived oncogene homolog (avian)
hsa-miR-410	0	0	1	1	1	1	DOPEY2	dopey family member 2
hsa-miR-410	1	0	1	1	1	1	UBAP2L	ubiquitin associated protein 2-like
hsa-miR-410	0	0	1	1	0	0	CREB3L4	cAMP responsive element binding protein 3-like 4
hsa-miR-410	0	0	1	1	0	0	AHSG	alpha-2-HS-glycoprotein
hsa-miR-410	1	0	1	1	1	1	GLRA3	glycine receptor, alpha 3
hsa-miR-410	0	0	0	1	1	1	FAM105A	family with sequence similarity 105, member A
hsa-miR-410	1	0	1	1	1	1	TRIM23	tripartite motif containing 23
hsa-miR-410	0	0	1	1	0	0	PNLDC1	poly(A)-specific ribonuclease (PARN)-like domain containing 1
hsa-miR-410	0	0	1	1	1	1	LACTB2	lactamase, beta 2
hsa-miR-410	0	0	1	1	0	0	C8orf76	chromosome 8 open reading frame 76
hsa-miR-410	0	0	1	1	1	1	SESN3	sestrin 3
hsa-miR-410	0	0	1	1	0	0	SPINT4	serine peptidase inhibitor, Kunitz type 4
hsa-miR-410	0	0	1	1	1	1	UHRF1BP1L	UHRF1 binding protein 1-like
hsa-miR-410	0	0	1	1	1	1	TEX12	testis expressed 12
hsa-miR-410	0	0	1	1	0	0	AGAP11	ankyrin repeat and GTPase domain Arf GTPase activating protein 11
hsa-miR-410	0	0	0	1	1	1	CCDC122	coiled-coil domain containing 122
hsa-miR-410	0	0	1	1	0	0	FAM21A	family with sequence similarity 21, member A
hsa-miR-410	0	0	1	1	1	1	INO80C	INO80 complex subunit C
hsa-miR-410	1	0	1	1	1	1	MSI2	musashi homolog 2 (Drosophila)
hsa-miR-410	0	0	1	1	0	0	MAGED4	melanoma antigen family D, 4
hsa-miR-410	0	0	0	1	0	0	OR4K1	olfactory receptor, family 4, subfamily K, member 1
hsa-miR-410	0	0	1	1	1	1	SAMSN1	SAM domain, SH3 domain and nuclear localization signals 1
hsa-miR-410	0	0	1	1	1	1	CNOT8	CCR4-NOT transcription complex, subunit 8
hsa-miR-410	0	0	0	1	0	0	MED7	mediator complex subunit 7
hsa-miR-410	0	0	1	1	0	0	CCDC42	coiled-coil domain containing 42
hsa-miR-410	0	0	1	1	0	0	GMEB1	glucocorticoid modulatory element binding protein 1
hsa-miR-410	0	0	1	1	1	1	SPRTN	SprT-like N-terminal domain
hsa-miR-410	0	0	1	1	1	1	C2orf47	chromosome 2 open reading frame 47
hsa-miR-410	0	0	0	1	0	0	BMP10	bone morphogenetic protein 10
hsa-miR-410	1	0	1	1	1	1	PPP4R2	protein phosphatase 4, regulatory subunit 2
hsa-miR-410	0	0	1	1	1	1	KIAA1143	KIAA1143
hsa-miR-410	0	0	0	1	1	1	MFSD8	major facilitator superfamily domain containing 8
hsa-miR-410	0	0	1	1	0	0	HIST1H2AA	histone cluster 1, H2aa
hsa-miR-410	0	0	1	1	1	1	CPA6	carboxypeptidase A6
hsa-miR-410	0	0	1	1	1	1	MRRF	mitochondrial ribosome recycling factor
hsa-miR-410	0	0	0	1	0	0	OR4K2	olfactory receptor, family 4, subfamily K, member 2
hsa-miR-410	0	0	1	1	1	1	C12orf50	chromosome 12 open reading frame 50
hsa-miR-410	0	0	1	1	1	1	C1QL3	complement component 1, q subcomponent-like 3
hsa-miR-410	1	0	1	1	1	1	PHKB	phosphorylase kinase, beta
hsa-miR-410	0	0	1	1	1	1	NETO1	neuropilin (NRP) and tolloid (TLL)-like 1
hsa-miR-410	0	0	0	1	1	1	SERPINB2	serpin peptidase inhibitor, clade B (ovalbumin), member 2
hsa-miR-410	0	0	1	1	1	1	CDYL2	chromodomain protein, Y-like 2
hsa-miR-410	1	0	1	1	1	1	UEVLD	UEV and lactate/malate dehyrogenase domains
hsa-miR-410	0	0	0	1	0	0	GPR182	G protein-coupled receptor 182
hsa-miR-410	0	0	1	1	1	1	ZNF428	zinc finger protein 428
hsa-miR-410	0	0	0	1	0	0	PPP1R14A	protein phosphatase 1, regulatory (inhibitor) subunit 14A
hsa-miR-410	0	0	0	1	1	1	ZNF577	zinc finger protein 577
hsa-miR-410	1	0	1	1	1	1	TMEM99	transmembrane protein 99
hsa-miR-410	0	0	0	1	0	0	OR5A2	olfactory receptor, family 5, subfamily A, member 2
hsa-miR-410	0	0	1	1	1	1	RFX3	regulatory factor X, 3 (influences HLA class II expression)
hsa-miR-410	0	0	0	1	0	0	HTRA4	HtrA serine peptidase 4
hsa-miR-410	0	0	0	1	0	0	OR1S2	olfactory receptor, family 1, subfamily S, member 2
hsa-miR-410	0	0	0	1	1	1	ACYP2	acylphosphatase 2, muscle type
hsa-miR-410	0	0	0	1	1	1	SLC38A11	solute carrier family 38, member 11
hsa-miR-410	1	0	1	1	1	1	FAM103A1	family with sequence similarity 103, member A1
hsa-miR-410	0	0	0	1	0	0	ATP5I	ATP synthase, H+ transporting, mitochondrial Fo complex, subunit E
hsa-miR-410	0	0	1	1	0	0	RPS7	ribosomal protein S7
hsa-miR-410	0	0	0	1	0	0	OR4K14	olfactory receptor, family 4, subfamily K, member 14
hsa-miR-410	0	0	1	1	1	1	UGT2B4	UDP glucuronosyltransferase 2 family, polypeptide B4
hsa-miR-410	1	0	0	1	1	1	CNNM3	cyclin M3
hsa-miR-410	0	0	0	1	0	0	DTYMK	deoxythymidylate kinase (thymidylate kinase)
hsa-miR-410	0	0	1	1	0	0	MTBP	Mdm2, transformed 3T3 cell double minute 2, p53 binding protein (mouse) binding protein, 104kDa
hsa-miR-410	0	0	1	1	1	1	PRL	prolactin
hsa-miR-410	0	0	1	1	0	0	PSG8	pregnancy specific beta-1-glycoprotein 8
hsa-miR-410	0	0	0	1	1	1	LRRC8E	leucine rich repeat containing 8 family, member E
hsa-miR-410	0	0	0	1	0	0	FAM83B	family with sequence similarity 83, member B
hsa-miR-410	0	0	1	1	1	1	MPLKIP	M-phase specific PLK1 interacting protein
hsa-miR-410	0	0	0	1	1	1	LDHAL6B	lactate dehydrogenase A-like 6B
hsa-miR-410	0	0	1	1	0	0	AVPI1	arginine vasopressin-induced 1
hsa-miR-410	0	0	1	1	0	0	GP9	glycoprotein IX (platelet)
hsa-miR-410	1	0	1	1	1	1	RBM33	RNA binding motif protein 33
hsa-miR-410	0	0	0	1	0	0	CYTL1	cytokine-like 1
hsa-miR-410	0	0	0	1	1	1	LOC285299	FSHD region gene 2 family, member C-like
hsa-miR-410	0	0	1	1	0	0	DIRC1	disrupted in renal carcinoma 1
hsa-miR-410	1	0	1	1	1	1	PHC3	polyhomeotic homolog 3 (Drosophila)
hsa-miR-410	0	0	0	1	1	1	NPFFR2	neuropeptide FF receptor 2
hsa-miR-410	0	0	0	1	0	0	ANAPC10	anaphase promoting complex subunit 10
hsa-miR-410	0	0	0	1	0	0	HSPA6	heat shock 70kDa protein 6 (HSP70B')
hsa-miR-410	0	0	1	1	1	1	TRIM59	tripartite motif containing 59
hsa-miR-410	0	0	0	1	0	0	OR10A6	olfactory receptor, family 10, subfamily A, member 6
hsa-miR-410	0	0	1	1	1	1	C7orf10	chromosome 7 open reading frame 10
hsa-miR-410	0	0	1	1	1	1	WDR69	WD repeat domain 69
hsa-miR-410	0	0	0	1	1	1	ALAS1	aminolevulinate, delta-, synthase 1
hsa-miR-410	0	0	1	1	0	0	MRPL48	mitochondrial ribosomal protein L48
hsa-miR-410	0	0	1	1	1	1	C14orf126	chromosome 14 open reading frame 126
hsa-miR-410	0	0	1	1	0	0	MRPL11	mitochondrial ribosomal protein L11
hsa-miR-410	0	0	0	1	0	0	RPL21	ribosomal protein L21
hsa-miR-410	0	0	1	1	0	0	AGAP8	ArfGAP with GTPase domain, ankyrin repeat and PH domain 8
hsa-miR-410	0	0	0	1	1	1	FAM21D	family with sequence similarity 21, member D
hsa-miR-410	0	0	1	1	0	0	SSX5	synovial sarcoma, X breakpoint 5
hsa-miR-410	1	0	1	1	1	1	TRIP10	thyroid hormone receptor interactor 10
hsa-miR-410	0	0	0	1	0	0	OR4C6	olfactory receptor, family 4, subfamily C, member 6
hsa-miR-410	0	0	1	1	1	1	EXD1	exonuclease 3'-5' domain containing 1
hsa-miR-410	0	0	0	1	1	1	TDRD6	tudor domain containing 6
hsa-miR-410	0	0	0	1	0	0	OR2AE1	olfactory receptor, family 2, subfamily AE, member 1
hsa-miR-410	0	0	0	1	1	1	ZNF540	zinc finger protein 540
hsa-miR-410	0	0	1	1	0	0	PANK2	pantothenate kinase 2
hsa-miR-410	0	0	1	1	0	0	CDK1	cyclin-dependent kinase 1
hsa-miR-410	1	0	1	1	1	1	SLC25A5	solute carrier family 25 (mitochondrial carrier; adenine nucleotide translocator), member 5
hsa-miR-410	1	0	1	1	1	1	L3MBTL4	l(3)mbt-like 4 (Drosophila)
hsa-miR-410	0	0	0	1	0	0	OR2T33	olfactory receptor, family 2, subfamily T, member 33
hsa-miR-410	0	0	0	1	0	0	OR4F17	olfactory receptor, family 4, subfamily F, member 17
hsa-miR-410	0	0	1	1	1	1	CXCR2	chemokine (C-X-C motif) receptor 2
hsa-miR-410	1	0	1	1	1	1	GRIK2	glutamate receptor, ionotropic, kainate 2
hsa-miR-410	0	0	0	1	1	1	DIS3L	DIS3 mitotic control homolog (S. cerevisiae)-like
hsa-miR-410	1	0	1	1	1	1	RBBP6	retinoblastoma binding protein 6
hsa-miR-410	0	0	0	1	0	0	KLK11	kallikrein-related peptidase 11
hsa-miR-410	1	0	0	1	1	1	ZFP82	zinc finger protein 82 homolog (mouse)
hsa-miR-410	0	0	1	1	1	1	RABGGTB	Rab geranylgeranyltransferase, beta subunit
hsa-miR-410	0	0	1	1	0	0	ZDHHC20	zinc finger, DHHC-type containing 20
hsa-miR-410	0	0	1	1	1	1	C1orf172	chromosome 1 open reading frame 172
hsa-miR-410	1	0	1	1	0	0	SMCHD1	structural maintenance of chromosomes flexible hinge domain containing 1
hsa-miR-410	0	0	1	1	1	1	RCN2	reticulocalbin 2, EF-hand calcium binding domain
hsa-miR-410	1	0	1	1	1	1	ULK1	unc-51-like kinase 1 (C. elegans)
hsa-miR-410	1	0	1	1	1	1	BPTF	bromodomain PHD finger transcription factor
hsa-miR-410	1	0	1	1	0	0	CCDC71	coiled-coil domain containing 71
hsa-miR-410	1	0	1	1	1	1	EEA1	early endosome antigen 1
hsa-miR-410	0	0	1	1	0	0	ACADVL	acyl-CoA dehydrogenase, very long chain
hsa-miR-410	1	0	1	1	1	1	ST7	suppression of tumorigenicity 7
hsa-miR-410	0	0	1	1	1	1	SH3GL3	SH3-domain GRB2-like 3
hsa-miR-410	1	0	0	1	1	1	ANGPT2	angiopoietin 2
hsa-miR-410	0	0	0	1	0	0	SLC47A2	solute carrier family 47, member 2
hsa-miR-410	1	0	1	1	1	1	CEP57	centrosomal protein 57kDa
hsa-miR-410	0	0	0	1	1	1	CABP4	calcium binding protein 4
hsa-miR-410	0	0	1	1	1	1	RMI1	RMI1, RecQ mediated genome instability 1, homolog (S. cerevisiae)
hsa-miR-410	0	0	1	1	1	1	CEP192	centrosomal protein 192kDa
hsa-miR-410	0	0	1	1	0	0	KLK3	kallikrein-related peptidase 3
hsa-miR-410	0	0	0	1	0	0	OR4F5	olfactory receptor, family 4, subfamily F, member 5
hsa-miR-410	0	0	0	1	1	1	ZNF274	zinc finger protein 274
hsa-miR-410	0	0	1	1	1	1	CLEC4M	C-type lectin domain family 4, member M
hsa-miR-410	0	0	0	1	1	1	CNOT10	CCR4-NOT transcription complex, subunit 10
hsa-miR-410	0	0	0	1	0	0	KRTAP5-3	keratin associated protein 5-3
hsa-miR-410	1	0	1	1	0	0	RIMS2	regulating synaptic membrane exocytosis 2
hsa-miR-410	0	0	1	1	1	1	BLZF1	basic leucine zipper nuclear factor 1
hsa-miR-410	0	0	1	1	1	1	PSG2	pregnancy specific beta-1-glycoprotein 2
hsa-miR-410	0	0	0	1	1	1	FREM3	FRAS1 related extracellular matrix 3
hsa-miR-410	0	0	1	1	1	1	SETD2	SET domain containing 2
hsa-miR-410	0	0	1	1	1	1	ACTRT3	actin-related protein T3
hsa-miR-410	0	0	1	1	0	0	CLK3	CDC-like kinase 3
hsa-miR-410	0	0	0	1	0	0	C5orf50	chromosome 5 open reading frame 50
hsa-miR-410	1	0	1	1	1	1	DND1	dead end homolog 1 (zebrafish)
hsa-miR-410	0	0	0	1	0	0	RANBP1	RAN binding protein 1
hsa-miR-410	0	0	1	1	0	0	WDR53	WD repeat domain 53
hsa-miR-410	0	0	1	1	0	0	LYG2	lysozyme G-like 2
hsa-miR-410	0	0	1	1	0	0	C6orf201	chromosome 6 open reading frame 201
hsa-miR-410	0	0	0	1	1	1	TTC32	tetratricopeptide repeat domain 32
hsa-miR-410	0	0	0	1	0	0	OR4N5	olfactory receptor, family 4, subfamily N, member 5
hsa-miR-410	0	0	0	1	0	0	GABRG3	gamma-aminobutyric acid (GABA) A receptor, gamma 3
hsa-miR-410	0	0	0	1	0	0	KRTAP9-4	keratin associated protein 9-4
hsa-miR-410	0	0	1	1	1	1	PGAM4	phosphoglycerate mutase family member 4
hsa-miR-410	0	0	1	1	1	1	TRAPPC11	trafficking protein particle complex 11
hsa-miR-410	0	0	0	1	0	0	OR4F4	olfactory receptor, family 4, subfamily F, member 4
hsa-miR-410	0	0	1	1	0	0	MAGED4B	melanoma antigen family D, 4B
hsa-miR-410	1	0	1	1	1	1	SLITRK2	SLIT and NTRK-like family, member 2
hsa-miR-410	0	0	1	1	1	1	UNC119	unc-119 homolog (C. elegans)
hsa-miR-410	0	0	0	1	1	1	CYP3A7	cytochrome P450, family 3, subfamily A, polypeptide 7
hsa-miR-410	0	0	1	1	1	1	FAM21C	family with sequence similarity 21, member C
hsa-miR-410	0	0	1	1	1	1	MOXD1	monooxygenase, DBH-like 1
hsa-miR-410	1	0	0	1	1	1	P2RX4	purinergic receptor P2X, ligand-gated ion channel, 4
hsa-miR-410	1	0	1	1	1	1	NIPA2	non imprinted in Prader-Willi/Angelman syndrome 2
hsa-miR-410	0	0	0	1	1	1	ZNF420	zinc finger protein 420
hsa-miR-410	1	0	1	1	1	1	ERAS	ES cell expressed Ras
hsa-miR-410	0	0	0	1	1	1	NPY5R	neuropeptide Y receptor Y5
hsa-miR-410	1	0	1	1	1	1	ZNF81	zinc finger protein 81
hsa-miR-410	0	0	1	1	0	0	HTATIP2	HIV-1 Tat interactive protein 2, 30kDa
hsa-miR-410	0	0	1	1	0	0	DCBLD1	discoidin, CUB and LCCL domain containing 1
hsa-miR-410	0	0	1	1	1	1	GAL3ST1	galactose-3-O-sulfotransferase 1
hsa-miR-410	0	0	1	1	0	0	RNF17	ring finger protein 17
hsa-miR-410	1	0	1	1	1	1	SENP1	SUMO1/sentrin specific peptidase 1
hsa-miR-410	0	0	0	1	1	1	FPR2	formyl peptide receptor 2
hsa-miR-410	0	0	0	1	0	0	LOC100132581	putative speedy protein E8-like
hsa-miR-410	0	0	0	1	0	0	PDC	phosducin
hsa-miR-410	0	0	1	1	1	1	VRK2	vaccinia related kinase 2
hsa-miR-410	1	0	1	1	1	1	RNF207	ring finger protein 207
hsa-miR-410	0	0	0	1	1	1	ZNF823	zinc finger protein 823
hsa-miR-410	0	0	1	1	1	1	IGBP1	immunoglobulin (CD79A) binding protein 1
hsa-miR-410	0	0	1	1	1	1	AGMO	alkylglycerol monooxygenase
hsa-miR-410	0	0	1	1	0	0	AGAP4	ArfGAP with GTPase domain, ankyrin repeat and PH domain 4
hsa-miR-410	1	0	1	1	1	1	RUFY2	RUN and FYVE domain containing 2
hsa-miR-410	1	0	1	1	1	1	ANKRD42	ankyrin repeat domain 42
hsa-miR-410	0	0	1	1	1	1	RNFT1	ring finger protein, transmembrane 1
hsa-miR-410	0	0	0	1	1	1	ZNF678	zinc finger protein 678
hsa-miR-410	0	0	0	1	1	1	ZNF14	zinc finger protein 14
hsa-miR-410	0	0	1	1	1	1	FAM221A	family with sequence similarity 221, member A
hsa-miR-410	1	0	1	1	1	1	FGFR1OP	FGFR1 oncogene partner
hsa-miR-410	0	0	1	1	1	1	TCF7L2	transcription factor 7-like 2 (T-cell specific, HMG-box)
hsa-miR-410	1	0	1	1	1	1	MACROD2	MACRO domain containing 2
hsa-miR-410	0	0	1	1	1	1	DUSP19	dual specificity phosphatase 19
hsa-miR-410	1	0	1	1	1	1	DENND5B	DENN/MADD domain containing 5B
hsa-miR-410	0	0	0	1	0	0	ZNF774	zinc finger protein 774
hsa-miR-410	0	0	0	1	1	1	GNL3	guanine nucleotide binding protein-like 3 (nucleolar)
hsa-miR-410	0	0	1	1	1	1	FYN	FYN oncogene related to SRC, FGR, YES
hsa-miR-410	0	0	0	1	0	0	OR5H2	olfactory receptor, family 5, subfamily H, member 2
hsa-miR-410	0	0	1	1	1	1	ZCCHC10	zinc finger, CCHC domain containing 10
hsa-miR-410	1	0	1	1	1	1	FBXL3	F-box and leucine-rich repeat protein 3
hsa-miR-410	0	0	1	1	1	1	PRPF39	PRP39 pre-mRNA processing factor 39 homolog (S. cerevisiae)
hsa-miR-410	0	0	1	1	0	0	FAM21B	family with sequence similarity 21, member B
hsa-miR-410	0	0	1	1	0	0	AADACL2	arylacetamide deacetylase-like 2
hsa-miR-410	1	0	1	1	1	1	TAF7L	TAF7-like RNA polymerase II, TATA box binding protein (TBP)-associated factor, 50kDa
hsa-miR-410	1	0	0	1	1	1	COL9A1	collagen, type IX, alpha 1
hsa-miR-410	0	0	1	1	1	1	ZNF248	zinc finger protein 248
hsa-miR-410	1	0	1	1	1	1	ACSL3	acyl-CoA synthetase long-chain family member 3
hsa-miR-410	0	0	0	1	0	0	ARID5A	AT rich interactive domain 5A (MRF1-like)
hsa-miR-410	0	0	1	1	1	1	TMEM170A	transmembrane protein 170A
hsa-miR-410	1	0	1	1	1	1	DPP9	dipeptidyl-peptidase 9
hsa-miR-410	0	0	1	1	0	0	FAM3B	family with sequence similarity 3, member B
hsa-miR-410	0	0	1	1	1	1	C1orf109	chromosome 1 open reading frame 109
hsa-miR-410	0	0	0	1	1	1	OR2L13	olfactory receptor, family 2, subfamily L, member 13
hsa-miR-410	0	0	1	1	0	0	ELP2	elongator acetyltransferase complex subunit 2
hsa-miR-410	1	0	1	1	1	1	SLC4A8	solute carrier family 4, sodium bicarbonate cotransporter, member 8
hsa-miR-410	0	0	1	1	0	0	PCNT	pericentrin
hsa-miR-410	0	0	0	1	0	0	CFH	complement factor H
hsa-miR-410	0	0	1	1	1	1	HIBCH	3-hydroxyisobutyryl-CoA hydrolase
hsa-miR-410	0	0	0	1	0	0	OR2M2	olfactory receptor, family 2, subfamily M, member 2
hsa-miR-410	0	0	1	1	1	1	ANKRD36B	ankyrin repeat domain 36B
hsa-miR-410	0	0	1	1	0	0	AXDND1	axonemal dynein light chain domain containing 1
hsa-miR-410	0	0	0	1	0	0	OR5B21	olfactory receptor, family 5, subfamily B, member 21
hsa-miR-410	0	0	0	1	0	0	FABP12	fatty acid binding protein 12
hsa-miR-410	0	0	0	1	0	0	OR10S1	olfactory receptor, family 10, subfamily S, member 1
hsa-miR-410	0	0	0	1	1	1	PCDHB16	protocadherin beta 16
hsa-miR-410	0	0	0	1	0	0	MPEG1	macrophage expressed 1
hsa-miR-410	1	0	1	1	1	1	ZFP2	zinc finger protein 2 homolog (mouse)
hsa-miR-410	1	0	0	1	1	1	DCLRE1A	DNA cross-link repair 1A
hsa-miR-410	0	0	0	1	1	1	MAGEE1	melanoma antigen family E, 1
hsa-miR-410	0	0	0	1	0	0	MPHOSPH8	M-phase phosphoprotein 8
hsa-miR-410	1	0	1	1	1	1	ZNF521	zinc finger protein 521
hsa-miR-410	1	0	1	1	1	1	CD247	CD247 molecule
hsa-miR-410	0	0	0	1	0	0	DMAP1	DNA methyltransferase 1 associated protein 1
hsa-miR-410	0	0	0	1	1	1	HHLA3	HERV-H LTR-associating 3
hsa-miR-410	1	0	1	1	1	1	TSNAX	translin-associated factor X
hsa-miR-410	1	0	1	1	1	1	LEFTY2	left-right determination factor 2
hsa-miR-410	1	0	1	1	1	1	AGPAT4	1-acylglycerol-3-phosphate O-acyltransferase 4 (lysophosphatidic acid acyltransferase, delta)
hsa-miR-410	1	0	1	1	1	1	MARK1	MAP/microtubule affinity-regulating kinase 1
hsa-miR-410	0	0	1	1	1	1	SERAC1	serine active site containing 1
hsa-miR-410	0	0	1	1	1	1	UCHL5	ubiquitin carboxyl-terminal hydrolase L5
hsa-miR-410	0	0	1	1	1	1	RGS18	regulator of G-protein signaling 18
hsa-miR-410	0	0	1	1	1	1	FAM5C	family with sequence similarity 5, member C
hsa-miR-410	1	0	1	1	1	1	IVNS1ABP	influenza virus NS1A binding protein
hsa-miR-410	0	0	1	1	1	1	C1orf114	chromosome 1 open reading frame 114
hsa-miR-410	1	0	1	1	1	1	HBS1L	HBS1-like (S. cerevisiae)
hsa-miR-410	0	0	0	1	0	0	TAAR2	trace amine associated receptor 2
hsa-miR-410	0	0	0	1	1	1	MNDA	myeloid cell nuclear differentiation antigen
hsa-miR-410	0	0	0	1	0	0	FRG2B	FSHD region gene 2 family, member B
hsa-miR-410	0	0	0	1	1	1	BNIP3	BCL2/adenovirus E1B 19kDa interacting protein 3
hsa-miR-410	0	0	0	1	1	1	SEC23IP	SEC23 interacting protein
hsa-miR-410	1	0	1	1	1	1	RGS10	regulator of G-protein signaling 10
hsa-miR-410	0	0	0	1	1	1	CA14	carbonic anhydrase XIV
hsa-miR-410	0	0	0	1	0	0	NRAP	nebulin-related anchoring protein
hsa-miR-410	1	0	1	1	0	0	ZNF292	zinc finger protein 292
hsa-miR-410	0	0	0	1	1	1	KCNQ2	potassium voltage-gated channel, KQT-like subfamily, member 2
hsa-miR-410	0	0	1	1	0	0	EPHX4	epoxide hydrolase 4
hsa-miR-410	1	0	1	1	1	1	HS2ST1	heparan sulfate 2-O-sulfotransferase 1
hsa-miR-410	0	0	1	1	0	0	PYROXD2	pyridine nucleotide-disulphide oxidoreductase domain 2
hsa-miR-410	1	0	0	1	0	0	GNG5	guanine nucleotide binding protein (G protein), gamma 5
hsa-miR-410	1	0	1	1	1	1	DDX26B	DEAD/H (Asp-Glu-Ala-Asp/His) box polypeptide 26B
hsa-miR-410	0	0	1	1	1	1	DNAJB4	DnaJ (Hsp40) homolog, subfamily B, member 4
hsa-miR-410	1	0	1	1	1	1	USP33	ubiquitin specific peptidase 33
hsa-miR-410	0	0	0	1	0	0	USP26	ubiquitin specific peptidase 26
hsa-miR-410	1	0	1	1	1	1	MIER1	mesoderm induction early response 1 homolog (Xenopus laevis)
hsa-miR-410	0	0	1	1	1	1	TMEM59	transmembrane protein 59
hsa-miR-410	0	0	1	1	0	0	DPM1	dolichyl-phosphate mannosyltransferase polypeptide 1, catalytic subunit
hsa-miR-410	1	0	1	1	0	0	MAN1B1	mannosidase, alpha, class 1B, member 1
hsa-miR-410	0	0	1	1	0	0	PMPCA	peptidase (mitochondrial processing) alpha
hsa-miR-410	1	0	1	1	1	1	KCNMA1	potassium large conductance calcium-activated channel, subfamily M, alpha member 1
hsa-miR-410	1	0	1	1	0	0	ZSWIM1	zinc finger, SWIM-type containing 1
hsa-miR-410	0	0	1	1	0	0	LEPRE1	leucine proline-enriched proteoglycan (leprecan) 1
hsa-miR-410	0	0	1	1	0	0	IL1RAPL2	interleukin 1 receptor accessory protein-like 2
hsa-miR-410	0	0	0	1	1	1	H2BFWT	H2B histone family, member W, testis-specific
hsa-miR-410	0	0	1	1	1	1	NXF3	nuclear RNA export factor 3
hsa-miR-410	0	0	0	1	0	0	CENPI	centromere protein I
hsa-miR-410	0	0	1	1	1	1	PLA2G12B	phospholipase A2, group XIIB
hsa-miR-410	0	0	0	1	1	1	TBX22	T-box 22
hsa-miR-410	1	0	1	1	0	0	ANGPTL2	angiopoietin-like 2
hsa-miR-410	0	0	1	1	1	1	TTLL11	tubulin tyrosine ligase-like family, member 11
hsa-miR-410	1	0	0	1	1	1	CNTRL	centriolin
hsa-miR-410	0	0	0	1	0	0	CLPSL1	colipase-like 1
hsa-miR-410	0	0	1	1	1	1	PSMD5	proteasome (prosome, macropain) 26S subunit, non-ATPase, 5
hsa-miR-410	0	0	1	1	1	1	ZWINT	ZW10 interactor
hsa-miR-410	1	0	1	1	1	1	DBC1	deleted in bladder cancer 1
hsa-miR-410	1	0	1	1	0	0	ZMYM3	zinc finger, MYM-type 3
hsa-miR-410	1	0	1	1	0	0	CD164L2	CD164 sialomucin-like 2
hsa-miR-410	0	0	1	1	0	0	AGAP6	ArfGAP with GTPase domain, ankyrin repeat and PH domain 6
hsa-miR-410	1	0	1	1	1	1	KIF4A	kinesin family member 4A
hsa-miR-410	1	0	1	1	0	0	SVEP1	sushi, von Willebrand factor type A, EGF and pentraxin domain containing 1
hsa-miR-410	0	0	0	1	0	0	BMS1	BMS1 homolog, ribosome assembly protein (yeast)
hsa-miR-410	1	0	1	1	1	1	PGAP1	post-GPI attachment to proteins 1
hsa-miR-410	0	0	1	1	1	1	TBC1D2	TBC1 domain family, member 2
hsa-miR-410	0	0	0	1	1	1	AAED1	AhpC/TSA antioxidant enzyme domain containing 1
hsa-miR-410	0	0	1	1	0	0	XAGE5	X antigen family, member 5
hsa-miR-410	1	0	1	1	1	1	IPPK	inositol 1,3,4,5,6-pentakisphosphate 2-kinase
hsa-miR-410	1	0	1	1	0	0	ROR2	receptor tyrosine kinase-like orphan receptor 2
hsa-miR-410	0	0	1	1	1	1	ITGBL1	integrin, beta-like 1 (with EGF-like repeat domains)
hsa-miR-410	0	0	1	1	0	0	PDSS1	prenyl (decaprenyl) diphosphate synthase, subunit 1
hsa-miR-410	0	0	1	1	1	1	MYO3A	myosin IIIA
hsa-miR-410	0	0	1	1	0	0	UGGT2	UDP-glucose glycoprotein glucosyltransferase 2
hsa-miR-410	0	0	1	1	0	0	PCSK5	proprotein convertase subtilisin/kexin type 5
hsa-miR-410	1	0	0	1	0	0	TBC1D8	TBC1 domain family, member 8 (with GRAM domain)
hsa-miR-410	0	0	0	1	1	1	BTNL9	butyrophilin-like 9
hsa-miR-410	0	0	1	1	0	0	UXT	ubiquitously-expressed, prefoldin-like chaperone
hsa-miR-410	0	0	0	1	0	0	OR10C1	olfactory receptor, family 10, subfamily C, member 1
hsa-miR-410	0	0	1	1	0	0	PRKACG	protein kinase, cAMP-dependent, catalytic, gamma
hsa-miR-410	0	0	0	1	0	0	CBWD6	COBW domain containing 6
hsa-miR-410	0	0	1	1	0	0	FAM216A	family with sequence similarity 216, member A
hsa-miR-410	1	0	1	1	1	1	SHB	Src homology 2 domain containing adaptor protein B
hsa-miR-410	0	0	1	1	1	1	SLC36A3	solute carrier family 36 (proton/amino acid symporter), member 3
hsa-miR-410	0	0	0	1	1	1	BORA	bora, aurora kinase A activator
hsa-miR-410	1	0	1	1	1	1	DIAPH3	diaphanous homolog 3 (Drosophila)
hsa-miR-410	1	0	1	1	1	1	PPP3R1	protein phosphatase 3, regulatory subunit B, alpha
hsa-miR-410	1	0	1	1	1	1	WDR92	WD repeat domain 92
hsa-miR-410	0	0	1	1	1	1	KIAA0196	KIAA0196
hsa-miR-410	0	0	0	1	1	1	GPLD1	glycosylphosphatidylinositol specific phospholipase D1
hsa-miR-410	0	0	1	1	1	1	CDADC1	cytidine and dCMP deaminase domain containing 1
hsa-miR-410	0	0	1	1	1	1	RPGR	retinitis pigmentosa GTPase regulator
hsa-miR-410	0	0	0	1	0	0	DNAAF1	dynein, axonemal, assembly factor 1
hsa-miR-410	0	0	0	1	1	1	GDF9	growth differentiation factor 9
hsa-miR-410	0	0	1	1	0	0	KIF13A	kinesin family member 13A
hsa-miR-410	1	0	1	1	1	1	POLA1	polymerase (DNA directed), alpha 1, catalytic subunit
hsa-miR-410	1	0	1	1	1	1	ZBTB10	zinc finger and BTB domain containing 10
hsa-miR-410	1	0	1	1	1	1	HIVEP1	human immunodeficiency virus type I enhancer binding protein 1
hsa-miR-410	1	0	1	1	1	1	USP47	ubiquitin specific peptidase 47
hsa-miR-410	1	0	1	1	1	1	RBM17	RNA binding motif protein 17
hsa-miR-410	0	0	1	1	1	1	FAM9C	family with sequence similarity 9, member C
hsa-miR-410	0	0	0	1	0	0	AREGB	amphiregulin B
hsa-miR-410	0	0	1	1	0	0	CEP152	centrosomal protein 152kDa
hsa-miR-410	0	0	1	1	1	1	C2orf43	chromosome 2 open reading frame 43
hsa-miR-410	0	0	1	1	1	1	RPAIN	RPA interacting protein
hsa-miR-410	1	0	0	1	1	1	NT5C1B	5'-nucleotidase, cytosolic IB
hsa-miR-410	0	0	0	1	1	1	RDH14	retinol dehydrogenase 14 (all-trans/9-cis/11-cis)
hsa-miR-410	1	0	1	1	1	1	TMEM165	transmembrane protein 165
hsa-miR-410	0	0	1	1	1	1	CLEC6A	C-type lectin domain family 6, member A
hsa-miR-410	0	0	0	1	0	0	KCNV2	potassium channel, subfamily V, member 2
hsa-miR-410	0	0	1	1	1	1	DOCK8	dedicator of cytokinesis 8
hsa-miR-410	0	0	1	1	1	1	CBWD1	COBW domain containing 1
hsa-miR-410	0	0	1	1	1	1	GJB2	gap junction protein, beta 2, 26kDa
hsa-miR-410	1	0	1	1	1	1	C18orf34	chromosome 18 open reading frame 34
hsa-miR-410	1	0	1	1	1	1	FILIP1L	filamin A interacting protein 1-like
hsa-miR-410	0	0	0	1	1	1	FBXO43	F-box protein 43
hsa-miR-410	0	0	0	1	0	0	TAS2R14	taste receptor, type 2, member 14
hsa-miR-410	1	0	1	1	1	1	AGL	amylo-alpha-1, 6-glucosidase, 4-alpha-glucanotransferase
hsa-miR-410	0	0	0	1	1	1	NPHP1	nephronophthisis 1 (juvenile)
hsa-miR-410	0	0	0	1	1	1	RPE65	retinal pigment epithelium-specific protein 65kDa
hsa-miR-410	0	0	0	1	1	1	TPMT	thiopurine S-methyltransferase
hsa-miR-410	0	0	1	1	1	1	TTPA	tocopherol (alpha) transfer protein
hsa-miR-410	1	0	1	0	1	1	RAG1	recombination activating gene 1
hsa-miR-410	0	0	0	1	1	1	COL17A1	collagen, type XVII, alpha 1
hsa-miR-410	0	0	1	1	1	1	FSHB	follicle stimulating hormone, beta polypeptide
hsa-miR-410	0	0	0	1	1	1	AVPR1A	arginine vasopressin receptor 1A
hsa-miR-410	1	0	0	1	1	1	CYP24A1	cytochrome P450, family 24, subfamily A, polypeptide 1
hsa-miR-410	1	0	1	1	1	1	DIO2	deiodinase, iodothyronine, type II
hsa-miR-410	0	0	1	1	1	1	HPGD	hydroxyprostaglandin dehydrogenase 15-(NAD)
hsa-miR-410	1	0	1	1	1	1	ATP5G3	ATP synthase, H+ transporting, mitochondrial Fo complex, subunit C3 (subunit 9)
hsa-miR-410	1	0	1	0	1	1	SLC7A2	solute carrier family 7 (cationic amino acid transporter, y+ system), member 2
hsa-miR-410	1	0	1	1	1	1	EML1	echinoderm microtubule associated protein like 1
hsa-miR-410	1	0	1	1	1	1	KIAA2018	KIAA2018
hsa-miR-410	0	0	1	1	1	1	CHCHD7	coiled-coil-helix-coiled-coil-helix domain containing 7
hsa-miR-410	0	0	0	1	1	1	C5orf56	chromosome 5 open reading frame 56
hsa-miR-410	1	0	1	1	1	1	FAM13A	family with sequence similarity 13, member A
hsa-miR-410	0	0	1	1	1	1	MSS51	MSS51 mitochondrial translational activator homolog (S. cerevisiae)
hsa-miR-410	0	0	1	1	1	1	SC5DL	sterol-C5-desaturase (ERG3 delta-5-desaturase homolog, S. cerevisiae)-like
hsa-miR-410	0	0	1	1	1	1	CSTF1	cleavage stimulation factor, 3' pre-RNA, subunit 1, 50kDa
hsa-miR-410	0	0	1	0	1	1	ZNF765	zinc finger protein 765
hsa-miR-410	0	0	0	1	1	1	SRD5A1	steroid-5-alpha-reductase, alpha polypeptide 1 (3-oxo-5 alpha-steroid delta 4-dehydrogenase alpha 1)
hsa-miR-410	0	0	1	0	1	1	TOP2A	topoisomerase (DNA) II alpha 170kDa
hsa-miR-410	0	0	1	1	1	1	ZNF626	zinc finger protein 626
hsa-miR-410	1	0	1	1	1	1	GRIA4	glutamate receptor, ionotropic, AMPA 4
hsa-miR-410	1	0	1	1	1	1	SRSF1	serine/arginine-rich splicing factor 1
hsa-miR-410	0	0	1	0	1	1	ISCA1P1	iron-sulfur cluster assembly 1 homolog (S. cerevisiae) pseudogene 1
hsa-miR-410	1	0	1	0	1	1	FYB	FYN binding protein
hsa-miR-410	0	0	1	0	1	1	ACADSB	acyl-CoA dehydrogenase, short/branched chain
hsa-miR-410	1	0	1	1	1	1	AIM1	absent in melanoma 1
hsa-miR-410	1	0	1	1	1	1	SLC31A1	solute carrier family 31 (copper transporters), member 1
hsa-miR-410	0	0	1	1	1	1	DSG3	desmoglein 3
hsa-miR-410	0	0	1	0	1	1	FGF2	fibroblast growth factor 2 (basic)
hsa-miR-410	0	0	0	1	1	1	GUCA1B	guanylate cyclase activator 1B (retina)
hsa-miR-410	0	0	1	1	1	1	IFNA21	interferon, alpha 21
hsa-miR-410	1	0	1	1	1	1	ITGB8	integrin, beta 8
hsa-miR-410	1	0	0	0	1	1	MATN3	matrilin 3
hsa-miR-410	1	0	1	1	1	1	MSR1	macrophage scavenger receptor 1
hsa-miR-410	0	0	1	0	1	1	PLN	phospholamban
hsa-miR-410	0	0	1	1	1	1	PTPRC	protein tyrosine phosphatase, receptor type, C
hsa-miR-410	0	0	1	1	1	1	RGS13	regulator of G-protein signaling 13
hsa-miR-410	1	0	1	1	1	1	SNX1	sorting nexin 1
hsa-miR-410	0	0	1	1	1	1	UBE2D1	ubiquitin-conjugating enzyme E2D 1
hsa-miR-410	1	0	1	0	1	1	UBE2G2	ubiquitin-conjugating enzyme E2G 2
hsa-miR-410	0	0	0	1	1	1	ZFP37	zinc finger protein 37 homolog (mouse)
hsa-miR-410	1	0	1	1	1	1	ZNF200	zinc finger protein 200
hsa-miR-410	0	0	1	1	1	1	MFAP5	microfibrillar associated protein 5
hsa-miR-410	1	0	1	1	1	1	PPFIA1	protein tyrosine phosphatase, receptor type, f polypeptide (PTPRF), interacting protein (liprin), alpha 1
hsa-miR-410	0	0	0	1	1	1	STX11	syntaxin 11
hsa-miR-410	0	0	1	1	1	1	TNFRSF10D	tumor necrosis factor receptor superfamily, member 10d, decoy with truncated death domain
hsa-miR-410	0	0	1	0	1	1	ASAP2	ArfGAP with SH3 domain, ankyrin repeat and PH domain 2
hsa-miR-410	1	0	1	1	1	1	CTSS	cathepsin S
hsa-miR-410	0	0	0	1	1	1	FDX1	ferredoxin 1
hsa-miR-410	1	0	1	1	1	1	FGF12	fibroblast growth factor 12
hsa-miR-410	0	0	1	1	1	1	MGAM	maltase-glucoamylase (alpha-glucosidase)
hsa-miR-410	1	0	1	1	1	1	SCAMP1	secretory carrier membrane protein 1
hsa-miR-410	1	0	0	1	1	1	AKAP12	A kinase (PRKA) anchor protein 12
hsa-miR-410	1	0	1	1	1	1	LMO7	LIM domain 7
hsa-miR-410	1	0	1	1	1	1	DMXL1	Dmx-like 1
hsa-miR-410	0	0	1	1	1	1	PDCD7	programmed cell death 7
hsa-miR-410	0	0	1	1	1	1	PNMA1	paraneoplastic Ma antigen 1
hsa-miR-410	0	0	1	1	1	1	PPP1R3D	protein phosphatase 1, regulatory subunit 3D
hsa-miR-410	1	0	1	1	1	1	SEMA4D	sema domain, immunoglobulin domain (Ig), transmembrane domain (TM) and short cytoplasmic domain, (semaphorin) 4D
hsa-miR-410	1	0	1	0	1	1	EXOC5	exocyst complex component 5
hsa-miR-410	1	0	1	0	1	1	PSMF1	proteasome (prosome, macropain) inhibitor subunit 1 (PI31)
hsa-miR-410	0	0	0	1	1	1	ZNF17	zinc finger protein 17
hsa-miR-410	0	0	1	1	1	1	ZNF80	zinc finger protein 80
hsa-miR-410	0	0	1	1	1	1	SLC6A14	solute carrier family 6 (amino acid transporter), member 14
hsa-miR-410	0	0	0	1	1	1	FOXD4L1	forkhead box D4-like 1
hsa-miR-410	1	0	1	1	1	1	DNAJB9	DnaJ (Hsp40) homolog, subfamily B, member 9
hsa-miR-410	0	0	0	1	1	1	SPAG6	sperm associated antigen 6
hsa-miR-410	1	0	1	1	1	1	ZNF770	zinc finger protein 770
hsa-miR-410	0	0	1	1	1	1	DDX58	DEAD (Asp-Glu-Ala-Asp) box polypeptide 58
hsa-miR-410	0	0	1	1	1	1	KIAA0141	KIAA0141
hsa-miR-410	1	0	1	1	1	1	TBC1D4	TBC1 domain family, member 4
hsa-miR-410	0	0	1	0	1	1	KLHL21	kelch-like 21 (Drosophila)
hsa-miR-410	1	0	1	0	1	1	DIS3	DIS3 mitotic control homolog (S. cerevisiae)
hsa-miR-410	1	0	1	1	1	1	RUFY3	RUN and FYVE domain containing 3
hsa-miR-410	1	0	1	1	1	1	SPG20	spastic paraplegia 20 (Troyer syndrome)
hsa-miR-410	1	0	1	1	1	1	TRIM9	tripartite motif containing 9
hsa-miR-410	0	0	1	1	1	1	WSCD1	WSC domain containing 1
hsa-miR-410	1	0	1	1	1	1	RPGRIP1L	RPGRIP1-like
hsa-miR-410	0	0	1	0	1	1	KIAA0895	KIAA0895
hsa-miR-410	0	0	1	1	1	1	L3MBTL1	l(3)mbt-like 1 (Drosophila)
hsa-miR-410	1	0	1	1	1	1	DNM3	dynamin 3
hsa-miR-410	0	0	1	0	1	1	OTUD6B	OTU domain containing 6B
hsa-miR-410	1	0	1	1	1	1	RRP15	ribosomal RNA processing 15 homolog (S. cerevisiae)
hsa-miR-410	0	0	1	0	1	1	FAM8A1	family with sequence similarity 8, member A1
hsa-miR-410	0	0	0	1	1	1	CRBN	cereblon
hsa-miR-410	0	0	1	1	1	1	ORMDL1	ORM1-like 1 (S. cerevisiae)
hsa-miR-410	0	0	1	1	1	1	MYOZ2	myozenin 2
hsa-miR-410	0	0	1	1	1	1	SLCO1C1	solute carrier organic anion transporter family, member 1C1
hsa-miR-410	0	0	1	1	1	1	TRPM7	transient receptor potential cation channel, subfamily M, member 7
hsa-miR-410	1	0	1	1	1	1	SLC35A5	solute carrier family 35, member A5
hsa-miR-410	1	0	1	0	1	1	PARVA	parvin, alpha
hsa-miR-410	0	0	1	1	1	1	ABHD10	abhydrolase domain containing 10
hsa-miR-410	0	0	0	1	1	1	METTL2B	methyltransferase like 2B
hsa-miR-410	0	0	1	1	1	1	MCM10	minichromosome maintenance complex component 10
hsa-miR-410	0	0	1	1	1	1	NAA16	N(alpha)-acetyltransferase 16, NatA auxiliary subunit
hsa-miR-410	1	0	1	1	1	1	TRIM36	tripartite motif containing 36
hsa-miR-410	1	0	1	0	1	1	KLHL9	kelch-like 9 (Drosophila)
hsa-miR-410	1	0	1	1	1	1	ETAA1	Ewing tumor-associated antigen 1
hsa-miR-410	0	0	1	0	1	1	C11orf71	chromosome 11 open reading frame 71
hsa-miR-410	0	0	1	0	1	1	ZC3HAV1	zinc finger CCCH-type, antiviral 1
hsa-miR-410	0	0	1	1	1	1	ERCC6L2	excision repair cross-complementing rodent repair deficiency, complementation group 6-like 2
hsa-miR-410	1	0	0	1	1	1	ABCC9	ATP-binding cassette, sub-family C (CFTR/MRP), member 9
hsa-miR-410	0	0	1	1	1	1	IFT80	intraflagellar transport 80 homolog (Chlamydomonas)
hsa-miR-410	0	0	1	1	1	1	KLHL8	kelch-like 8 (Drosophila)
hsa-miR-410	0	0	1	1	1	1	HIST1H2AG	histone cluster 1, H2ag
hsa-miR-410	0	0	1	1	1	1	ZNF273	zinc finger protein 273
hsa-miR-410	0	0	0	0	1	1	PBOV1	prostate and breast cancer overexpressed 1
hsa-miR-410	1	0	1	1	1	1	TMEM35	transmembrane protein 35
hsa-miR-410	0	0	1	1	1	1	FAM111A	family with sequence similarity 111, member A
hsa-miR-410	0	0	0	0	1	1	ARV1	ARV1 homolog (S. cerevisiae)
hsa-miR-410	0	0	0	1	1	1	CCDC121	coiled-coil domain containing 121
hsa-miR-410	1	0	1	1	1	1	VTCN1	V-set domain containing T cell activation inhibitor 1
hsa-miR-410	0	0	0	1	1	1	MANEA	mannosidase, endo-alpha
hsa-miR-410	0	0	0	1	1	1	TTC21B	tetratricopeptide repeat domain 21B
hsa-miR-410	0	0	1	0	1	1	TM4SF20	transmembrane 4 L six family member 20
hsa-miR-410	1	0	0	1	1	1	ZNF614	zinc finger protein 614
hsa-miR-410	0	0	1	0	1	1	PDGFD	platelet derived growth factor D
hsa-miR-410	0	0	1	0	1	1	APOL6	apolipoprotein L, 6
hsa-miR-410	1	0	1	0	1	1	KIAA1715	KIAA1715
hsa-miR-410	0	0	1	1	1	1	C1QTNF3	C1q and tumor necrosis factor related protein 3
hsa-miR-410	0	0	1	1	1	1	PUS7L	pseudouridylate synthase 7 homolog (S. cerevisiae)-like
hsa-miR-410	1	0	1	1	1	1	HSDL2	hydroxysteroid dehydrogenase like 2
hsa-miR-410	1	0	1	1	1	1	MSANTD4	Myb/SANT-like DNA-binding domain containing 4 with coiled-coils
hsa-miR-410	0	0	0	1	1	1	ZNF559	zinc finger protein 559
hsa-miR-410	0	0	1	1	1	1	ZNF587	zinc finger protein 587
hsa-miR-410	1	0	1	1	1	1	FAM104A	family with sequence similarity 104, member A
hsa-miR-410	1	0	1	1	1	1	NKD1	naked cuticle homolog 1 (Drosophila)
hsa-miR-410	1	0	1	0	1	1	PURB	purine-rich element binding protein B
hsa-miR-410	0	0	1	0	1	1	C9orf123	chromosome 9 open reading frame 123
hsa-miR-410	0	0	1	0	1	1	TP53RK	TP53 regulating kinase
hsa-miR-410	0	0	1	1	1	1	TRIM10	tripartite motif containing 10
hsa-miR-410	0	0	1	1	1	1	ZNF300	zinc finger protein 300
hsa-miR-410	0	0	0	0	1	1	GBP4	guanylate binding protein 4
hsa-miR-410	0	0	1	1	1	1	MRGPRX2	MAS-related GPR, member X2
hsa-miR-410	0	0	1	0	1	1	ASB15	ankyrin repeat and SOCS box containing 15
hsa-miR-410	0	0	1	1	1	1	SLC4A5	solute carrier family 4, sodium bicarbonate cotransporter, member 5
hsa-miR-410	0	0	0	0	1	1	NOM1	nucleolar protein with MIF4G domain 1
hsa-miR-410	1	0	1	0	1	1	FCHO2	FCH domain only 2
hsa-miR-410	1	0	1	1	1	1	TMEM71	transmembrane protein 71
hsa-miR-410	0	0	1	1	1	1	ARL13B	ADP-ribosylation factor-like 13B
hsa-miR-410	0	0	0	1	1	1	CCDC108	coiled-coil domain containing 108
hsa-miR-410	0	0	1	1	1	1	C4orf32	chromosome 4 open reading frame 32
hsa-miR-410	0	0	0	0	1	1	ZNF786	zinc finger protein 786
hsa-miR-410	0	0	0	1	1	1	ZNF417	zinc finger protein 417
hsa-miR-410	0	0	0	1	1	1	ZNF569	zinc finger protein 569
hsa-miR-410	0	0	1	0	1	1	SNRNP48	small nuclear ribonucleoprotein 48kDa (U11/U12)
hsa-miR-410	0	0	1	1	1	1	CCDC89	coiled-coil domain containing 89
hsa-miR-410	1	0	1	0	1	1	TMEM196	transmembrane protein 196
hsa-miR-410	0	0	0	0	1	1	FAM26E	family with sequence similarity 26, member E
hsa-miR-410	0	0	0	1	1	1	CBWD2	COBW domain containing 2
hsa-miR-410	0	0	0	0	1	1	KIAA0825	KIAA0825
hsa-miR-410	1	0	1	0	1	1	NEGR1	neuronal growth regulator 1
hsa-miR-410	0	0	1	1	1	1	SPDYE1	speedy homolog E1 (Xenopus laevis)
hsa-miR-410	1	0	1	1	1	1	SOWAHA	sosondowah ankyrin repeat domain family member A
hsa-miR-410	1	0	1	0	1	1	EFHA2	EF-hand domain family, member A2
hsa-miR-410	1	0	1	1	1	1	DPY19L4	dpy-19-like 4 (C. elegans)
hsa-miR-410	0	0	1	1	1	1	MMS22L	MMS22-like, DNA repair protein
hsa-miR-410	0	0	0	1	1	1	FOXD4L3	forkhead box D4-like 3
hsa-miR-410	1	0	0	0	1	1	FAM45A	family with sequence similarity 45, member A
hsa-miR-410	0	0	0	1	1	1	FOXD4	forkhead box D4
hsa-miR-410	0	0	0	0	1	1	LOC727909	Golgin subfamily A member 8-like protein 2-like
hsa-miR-410	0	0	0	0	1	1	LOC728047	golgin subfamily A member 8-like protein 2-like
hsa-miR-410	0	0	0	0	1	1	KIAA1239	KIAA1239
hsa-miR-410	0	0	0	1	1	1	ZNF860	zinc finger protein 860
hsa-miR-410	0	0	0	0	1	1	LOC643699	golgin subfamily A member 8-like
hsa-miR-410	0	0	1	0	1	1	ERICH1-AS1	ERICH1 antisense RNA 1
hsa-miR-410	0	0	0	0	1	1	LOC645485	uncharacterized LOC645485
hsa-miR-410	0	0	1	1	1	1	KLHL29	kelch-like 29 (Drosophila)
