# Supplementary material for: Profiling of Selected MicroRNAs in Proliferative Eutopic Endometrium of Women with Ovarian Endometriosis
Source: Biomed Res Int. 2015 Aug 20;2015:760698. doi: 10.1155/2015/760698 (PMC4558423; doi:10.1155/2015/760698)
Supplement: Supplementary file 1 — Table I: The names of miRNAs significantly differentially expressed between eutopic endometrium of patients with endometriosis vs eutopic endometrium of patients without endometriosis. Table II: The associations between miRNA and mRNA, which presents detailed results of the search of six major databases i.e targetscan, tarbase, miranda, mirbase, mirtarget2 and pictar. [file 760698.f1.zip › 760698.f1/Table II/hsa-miR-412.tsv]

miR	targetscan	tarbase	miranda	mirbase	mirtarget2	pictar	GeneSymbol	GeneName
hsa-miR-412	1	0	1	1	1	1	PLAU	plasminogen activator, urokinase
hsa-miR-412	1	0	1	1	1	1	ARNTL	aryl hydrocarbon receptor nuclear translocator-like
hsa-miR-412	1	0	1	1	1	1	CHD9	chromodomain helicase DNA binding protein 9
hsa-miR-412	1	0	1	1	0	0	SRCAP	Snf2-related CREBBP activator protein
hsa-miR-412	1	0	1	0	1	1	KIAA0355	KIAA0355
hsa-miR-412	1	0	1	1	1	1	MCF2L	MCF.2 cell line derived transforming sequence-like
hsa-miR-412	1	0	1	0	1	1	PTPRT	protein tyrosine phosphatase, receptor type, T
hsa-miR-412	0	0	1	1	1	1	SPAG9	sperm associated antigen 9
hsa-miR-412	0	0	1	1	0	0	ZNF862	zinc finger protein 862
hsa-miR-412	1	0	1	1	1	1	HIPK1	homeodomain interacting protein kinase 1
hsa-miR-412	0	0	1	1	0	0	FKBP15	FK506 binding protein 15, 133kDa
hsa-miR-412	1	0	1	1	1	1	TP63	tumor protein p63
hsa-miR-412	1	0	1	0	1	1	SNX13	sorting nexin 13
hsa-miR-412	1	0	1	1	1	1	ARHGEF15	Rho guanine nucleotide exchange factor (GEF) 15
hsa-miR-412	0	0	1	1	1	1	MAN2B2	mannosidase, alpha, class 2B, member 2
hsa-miR-412	1	0	1	1	1	1	C11orf9	chromosome 11 open reading frame 9
hsa-miR-412	1	0	1	1	1	1	RGL1	ral guanine nucleotide dissociation stimulator-like 1
hsa-miR-412	0	0	1	1	1	1	TBC1D30	TBC1 domain family, member 30
hsa-miR-412	0	0	1	0	1	1	TP53TG3	TP53 target 3
hsa-miR-412	0	0	1	0	0	0	TP53TG3B	TP53 target 3B
hsa-miR-412	1	0	1	1	0	0	KIAA1045	KIAA1045
hsa-miR-412	1	0	1	1	1	1	NLGN1	neuroligin 1
hsa-miR-412	1	0	1	1	0	0	PPM1H	protein phosphatase, Mg2+/Mn2+ dependent, 1H
hsa-miR-412	1	0	1	1	1	1	ATXN7L1	ataxin 7-like 1
hsa-miR-412	1	0	1	1	1	1	ZMIZ1	zinc finger, MIZ-type containing 1
hsa-miR-412	1	0	1	1	1	1	ASAP1	ArfGAP with SH3 domain, ankyrin repeat and PH domain 1
hsa-miR-412	1	0	1	1	1	1	PCDH19	protocadherin 19
hsa-miR-412	1	0	1	1	1	1	SEMA6A	sema domain, transmembrane domain (TM), and cytoplasmic domain, (semaphorin) 6A
hsa-miR-412	0	0	1	1	0	0	POLR3E	polymerase (RNA) III (DNA directed) polypeptide E (80kD)
hsa-miR-412	1	0	1	1	1	1	TOPORS	topoisomerase I binding, arginine/serine-rich, E3 ubiquitin protein ligase
hsa-miR-412	0	0	1	1	0	0	TMEM132A	transmembrane protein 132A
hsa-miR-412	1	0	1	0	0	0	TANC2	tetratricopeptide repeat, ankyrin repeat and coiled-coil containing 2
hsa-miR-412	0	0	1	1	1	1	ANKRD36B	ankyrin repeat domain 36B
hsa-miR-412	0	0	1	0	0	0	LOC440792	proline dehydrogenase (oxidase) 1 pseudogene
hsa-miR-412	1	0	1	1	1	1	SH3TC2	SH3 domain and tetratricopeptide repeats 2
hsa-miR-412	1	0	1	1	1	1	PRDM16	PR domain containing 16
hsa-miR-412	0	0	1	0	1	1	RASSF8	Ras association (RalGDS/AF-6) domain family (N-terminal) member 8
hsa-miR-412	0	0	1	1	0	0	SSPO	SCO-spondin homolog (Bos taurus)
hsa-miR-412	1	1	1	1	1	1	BACE1	beta-site APP-cleaving enzyme 1
hsa-miR-412	0	0	1	1	0	0	PTPRF	protein tyrosine phosphatase, receptor type, F
hsa-miR-412	0	0	1	1	0	0	KCNC3	potassium voltage-gated channel, Shaw-related subfamily, member 3
hsa-miR-412	1	0	1	1	1	1	RPS6KA3	ribosomal protein S6 kinase, 90kDa, polypeptide 3
hsa-miR-412	1	0	1	1	0	0	ELN	elastin
hsa-miR-412	1	0	1	1	1	1	PCCB	propionyl CoA carboxylase, beta polypeptide
hsa-miR-412	0	0	1	1	1	1	MAZ	MYC-associated zinc finger protein (purine-binding transcription factor)
hsa-miR-412	1	0	1	1	1	1	MKNK2	MAP kinase interacting serine/threonine kinase 2
hsa-miR-412	1	0	1	1	1	1	SLC8A1	solute carrier family 8 (sodium/calcium exchanger), member 1
hsa-miR-412	1	0	1	1	1	1	SYNCRIP	synaptotagmin binding, cytoplasmic RNA interacting protein
hsa-miR-412	1	0	1	1	1	1	RASSF5	Ras association (RalGDS/AF-6) domain family member 5
hsa-miR-412	0	0	1	1	1	1	DDX39B	DEAD (Asp-Glu-Ala-Asp) box polypeptide 39B
hsa-miR-412	1	0	1	1	1	1	EPHA7	EPH receptor A7
hsa-miR-412	0	0	1	1	1	1	RYR1	ryanodine receptor 1 (skeletal)
hsa-miR-412	1	0	1	1	0	0	RGS6	regulator of G-protein signaling 6
hsa-miR-412	0	0	1	1	0	0	ITGA2B	integrin, alpha 2b (platelet glycoprotein IIb of IIb/IIIa complex, antigen CD41)
hsa-miR-412	0	0	1	1	0	0	BMP1	bone morphogenetic protein 1
hsa-miR-412	1	0	1	0	1	1	RPL28	ribosomal protein L28
hsa-miR-412	1	0	1	1	1	1	ARHGEF3	Rho guanine nucleotide exchange factor (GEF) 3
hsa-miR-412	0	0	1	1	0	0	SLC22A8	solute carrier family 22 (organic anion transporter), member 8
hsa-miR-412	1	0	1	1	1	1	SATB1	SATB homeobox 1
hsa-miR-412	0	0	1	1	1	1	KIF3A	kinesin family member 3A
hsa-miR-412	1	0	1	1	1	1	ZFX	zinc finger protein, X-linked
hsa-miR-412	1	0	1	1	1	1	PHLDB2	pleckstrin homology-like domain, family B, member 2
hsa-miR-412	1	0	1	0	1	1	CAV1	caveolin 1, caveolae protein, 22kDa
hsa-miR-412	1	0	1	1	0	0	TNPO2	transportin 2
hsa-miR-412	1	0	1	1	1	1	SDHC	succinate dehydrogenase complex, subunit C, integral membrane protein, 15kDa
hsa-miR-412	0	0	1	0	0	0	MIAT	myocardial infarction associated transcript (non-protein coding)
hsa-miR-412	1	0	1	1	1	1	TTC39A	tetratricopeptide repeat domain 39A
hsa-miR-412	0	0	1	1	0	0	MUC3A	mucin 3A, cell surface associated
hsa-miR-412	1	0	1	0	1	1	MLL2	myeloid/lymphoid or mixed-lineage leukemia 2
hsa-miR-412	1	0	1	1	1	1	CBFA2T2	core-binding factor, runt domain, alpha subunit 2; translocated to, 2
hsa-miR-412	0	0	1	0	0	0	ZNRD1-AS1	ZNRD1 antisense RNA 1
hsa-miR-412	1	0	1	0	0	0	MAP3K1	mitogen-activated protein kinase kinase kinase 1, E3 ubiquitin protein ligase
hsa-miR-412	1	0	1	1	1	1	MRAS	muscle RAS oncogene homolog
hsa-miR-412	0	0	1	0	0	0	FP588	uncharacterized LOC92973
hsa-miR-412	1	0	1	1	1	1	SHOC2	soc-2 suppressor of clear homolog (C. elegans)
hsa-miR-412	1	0	1	1	1	1	MBNL2	muscleblind-like splicing regulator 2
hsa-miR-412	0	0	1	1	0	0	SLC38A6	solute carrier family 38, member 6
hsa-miR-412	1	0	1	1	1	1	ZNF236	zinc finger protein 236
hsa-miR-412	0	0	1	1	1	1	PCF11	PCF11, cleavage and polyadenylation factor subunit, homolog (S. cerevisiae)
hsa-miR-412	0	0	1	1	1	1	GUCA1C	guanylate cyclase activator 1C
hsa-miR-412	0	0	1	1	1	1	IL18BP	interleukin 18 binding protein
hsa-miR-412	1	0	1	0	1	1	SLC25A37	solute carrier family 25 (mitochondrial iron transporter), member 37
hsa-miR-412	1	0	1	1	1	1	TAOK3	TAO kinase 3
hsa-miR-412	0	0	1	0	1	1	CLEC5A	C-type lectin domain family 5, member A
hsa-miR-412	0	0	1	1	0	0	CNTROB	centrobin, centrosomal BRCA2 interacting protein
hsa-miR-412	1	0	1	1	1	1	AGPAT3	1-acylglycerol-3-phosphate O-acyltransferase 3
hsa-miR-412	0	0	1	1	1	1	SLC39A8	solute carrier family 39 (zinc transporter), member 8
hsa-miR-412	0	0	1	0	0	0	BPESC1	blepharophimosis, epicanthus inversus and ptosis, candidate 1 (non-protein coding)
hsa-miR-412	0	0	1	1	1	1	CD28	CD28 molecule
hsa-miR-412	1	0	1	1	1	1	DESI2	desumoylating isopeptidase 2
hsa-miR-412	0	0	1	1	1	1	RBM8A	RNA binding motif protein 8A
hsa-miR-412	1	0	1	1	1	1	SNTB2	syntrophin, beta 2 (dystrophin-associated protein A1, 59kDa, basic component 2)
hsa-miR-412	1	0	1	1	1	1	STRN3	striatin, calmodulin binding protein 3
hsa-miR-412	0	0	1	0	0	0	TIGD7	tigger transposable element derived 7
hsa-miR-412	1	0	1	1	1	1	SNX21	sorting nexin family member 21
hsa-miR-412	0	0	1	1	0	0	ELMOD3	ELMO/CED-12 domain containing 3
hsa-miR-412	1	0	1	0	1	1	PARP11	poly (ADP-ribose) polymerase family, member 11
hsa-miR-412	0	0	1	1	0	0	CSAG2	CSAG family, member 2
hsa-miR-412	0	0	1	0	0	0	CSAG3	CSAG family, member 3
hsa-miR-412	0	0	1	0	1	1	ERBB2IP	erbb2 interacting protein
hsa-miR-412	1	0	1	1	1	1	VPS39	vacuolar protein sorting 39 homolog (S. cerevisiae)
hsa-miR-412	0	0	1	1	0	0	KCNK6	potassium channel, subfamily K, member 6
hsa-miR-412	0	0	1	0	1	1	KANSL3	KAT8 regulatory NSL complex subunit 3
hsa-miR-412	1	0	1	1	1	1	METTL10	methyltransferase like 10
hsa-miR-412	0	0	1	1	1	1	TBC1D2	TBC1 domain family, member 2
hsa-miR-412	1	0	1	1	1	1	VEGFA	vascular endothelial growth factor A
hsa-miR-412	1	0	1	1	1	1	SPTBN4	spectrin, beta, non-erythrocytic 4
hsa-miR-412	1	0	1	0	1	1	WIPF2	WAS/WASL interacting protein family, member 2
hsa-miR-412	0	0	1	1	1	1	CASP8	caspase 8, apoptosis-related cysteine peptidase
hsa-miR-412	0	0	1	1	0	0	ELP2	elongator acetyltransferase complex subunit 2
hsa-miR-412	0	0	1	0	0	0	MYO15B	myosin XVB pseudogene
hsa-miR-412	1	0	1	1	1	1	ST3GAL3	ST3 beta-galactoside alpha-2,3-sialyltransferase 3
hsa-miR-412	1	0	1	1	0	0	YTHDF2	YTH domain family, member 2
hsa-miR-412	1	0	1	1	0	0	POLR2J3	polymerase (RNA) II (DNA directed) polypeptide J3
hsa-miR-412	1	0	1	1	1	1	AFF2	AF4/FMR2 family, member 2
hsa-miR-412	1	0	1	1	1	1	FLNC	filamin C, gamma
hsa-miR-412	0	0	1	0	0	0	ADAM5	ADAM metallopeptidase domain 5, pseudogene
hsa-miR-412	0	0	1	1	1	1	GNAS	GNAS complex locus
hsa-miR-412	1	0	1	1	1	1	CACNA2D2	calcium channel, voltage-dependent, alpha 2/delta subunit 2
hsa-miR-412	0	0	1	0	0	0	CACNA2D3	calcium channel, voltage-dependent, alpha 2/delta subunit 3
hsa-miR-412	1	0	1	1	1	1	NRXN3	neurexin 3
hsa-miR-412	0	0	1	1	0	0	MBD1	methyl-CpG binding domain protein 1
hsa-miR-412	0	0	1	1	1	1	BANK1	B-cell scaffold protein with ankyrin repeats 1
hsa-miR-412	0	0	1	1	0	0	EIF3C	eukaryotic translation initiation factor 3, subunit C
hsa-miR-412	1	0	1	1	1	1	ZC3H7A	zinc finger CCCH-type containing 7A
hsa-miR-412	0	0	1	1	1	1	TAX1BP3	Tax1 (human T-cell leukemia virus type I) binding protein 3
hsa-miR-412	1	0	1	1	0	0	SMUG1	single-strand-selective monofunctional uracil-DNA glycosylase 1
hsa-miR-412	0	0	1	1	0	0	TMC6	transmembrane channel-like 6
hsa-miR-412	0	0	1	0	0	0	C17orf72	chromosome 17 open reading frame 72
hsa-miR-412	1	0	1	0	1	1	LIN28A	lin-28 homolog A (C. elegans)
hsa-miR-412	0	0	1	0	0	0	SOX2-OT	SOX2 overlapping transcript (non-protein coding)
hsa-miR-412	0	0	1	1	0	0	JMJD4	jumonji domain containing 4
hsa-miR-412	1	0	1	1	1	1	WDTC1	WD and tetratricopeptide repeats 1
hsa-miR-412	0	0	1	1	1	1	ARMC5	armadillo repeat containing 5
hsa-miR-412	1	0	1	1	1	1	BAZ2A	bromodomain adjacent to zinc finger domain, 2A
hsa-miR-412	1	0	1	1	1	1	FAM131A	family with sequence similarity 131, member A
hsa-miR-412	1	0	1	0	1	1	STK40	serine/threonine kinase 40
hsa-miR-412	1	0	1	0	1	1	ATP2B1	ATPase, Ca++ transporting, plasma membrane 1
hsa-miR-412	1	0	1	1	1	1	ABHD3	abhydrolase domain containing 3
hsa-miR-412	0	0	1	0	1	1	ATXN1L	ataxin 1-like
hsa-miR-412	1	0	1	1	1	1	DLC1	deleted in liver cancer 1
hsa-miR-412	1	0	1	0	1	1	ZCCHC3	zinc finger, CCHC domain containing 3
hsa-miR-412	1	0	1	1	1	1	DCAF8	DDB1 and CUL4 associated factor 8
hsa-miR-412	0	0	1	1	0	0	ZNF276	zinc finger protein 276
hsa-miR-412	0	0	1	1	1	1	TGIF1	TGFB-induced factor homeobox 1
hsa-miR-412	1	0	1	1	1	1	MARK1	MAP/microtubule affinity-regulating kinase 1
hsa-miR-412	0	0	1	1	1	1	FAM107A	family with sequence similarity 107, member A
hsa-miR-412	1	0	1	1	1	1	C7orf43	chromosome 7 open reading frame 43
hsa-miR-412	0	0	1	0	0	0	LOC154092	uncharacterized LOC154092
hsa-miR-412	0	0	1	1	1	1	FANCI	Fanconi anemia, complementation group I
hsa-miR-412	0	0	1	1	1	1	TTC19	tetratricopeptide repeat domain 19
hsa-miR-412	0	0	1	1	1	1	GLYATL1	glycine-N-acyltransferase-like 1
hsa-miR-412	0	0	1	1	0	0	ANXA11	annexin A11
hsa-miR-412	0	0	1	0	0	0	SEC14L2	SEC14-like 2 (S. cerevisiae)
hsa-miR-412	0	0	1	0	0	0	LOC654433	uncharacterized LOC654433
hsa-miR-412	0	0	1	0	0	0	FLJ12825	uncharacterized LOC440101
hsa-miR-412	1	0	1	1	1	1	SCAMP5	secretory carrier membrane protein 5
hsa-miR-412	0	0	1	1	1	1	BRD2	bromodomain containing 2
hsa-miR-412	1	0	1	1	1	1	CLCN5	chloride channel, voltage-sensitive 5
hsa-miR-412	0	0	1	0	0	0	LOC255187	hCG1980447
hsa-miR-412	0	0	1	1	1	1	XAF1	XIAP associated factor 1
hsa-miR-412	0	0	1	1	0	0	RELT	RELT tumor necrosis factor receptor
hsa-miR-412	0	0	1	1	0	0	COMMD4	COMM domain containing 4
hsa-miR-412	1	0	1	1	1	1	MGAT1	mannosyl (alpha-1,3-)-glycoprotein beta-1,2-N-acetylglucosaminyltransferase
hsa-miR-412	0	0	1	1	1	1	PSME3	proteasome (prosome, macropain) activator subunit 3 (PA28 gamma; Ki)
hsa-miR-412	0	0	1	1	0	0	NXF2	nuclear RNA export factor 2
hsa-miR-412	0	0	1	1	1	1	RANBP17	RAN binding protein 17
hsa-miR-412	1	0	1	0	1	1	NCAM1	neural cell adhesion molecule 1
hsa-miR-412	0	0	1	1	1	1	A2ML1	alpha-2-macroglobulin-like 1
hsa-miR-412	0	0	1	0	0	0	LINC00637	long intergenic non-protein coding RNA 637
hsa-miR-412	0	0	1	1	0	0	CD37	CD37 molecule
hsa-miR-412	0	0	1	1	0	0	SYTL1	synaptotagmin-like 1
hsa-miR-412	0	0	1	1	0	0	WDR83	WD repeat domain 83
hsa-miR-412	0	0	1	1	1	1	PDZRN3	PDZ domain containing ring finger 3
hsa-miR-412	0	0	1	0	0	0	SDHAP2	succinate dehydrogenase complex, subunit A, flavoprotein pseudogene 2
hsa-miR-412	0	0	1	1	0	0	LGR5	leucine-rich repeat containing G protein-coupled receptor 5
hsa-miR-412	0	0	1	1	1	1	LILRB5	leukocyte immunoglobulin-like receptor, subfamily B (with TM and ITIM domains), member 5
hsa-miR-412	0	0	1	1	0	0	PIGO	phosphatidylinositol glycan anchor biosynthesis, class O
hsa-miR-412	0	0	1	1	1	1	MTR	5-methyltetrahydrofolate-homocysteine methyltransferase
hsa-miR-412	0	0	1	1	1	1	SAE1	SUMO1 activating enzyme subunit 1
hsa-miR-412	0	0	1	0	0	0	LOC643837	uncharacterized LOC643837
hsa-miR-412	1	0	1	1	1	1	AMMECR1	Alport syndrome, mental retardation, midface hypoplasia and elliptocytosis chromosomal region gene 1
hsa-miR-412	1	0	1	0	1	1	TEF	thyrotrophic embryonic factor
hsa-miR-412	0	0	1	0	0	0	LOC283887	uncharacterized LOC283887
hsa-miR-412	1	0	1	1	1	1	SARM1	sterile alpha and TIR motif containing 1
hsa-miR-412	0	0	1	0	0	0	LOC550112	uncharacterized LOC550112
hsa-miR-412	0	0	1	1	0	0	SERPINH1	serpin peptidase inhibitor, clade H (heat shock protein 47), member 1, (collagen binding protein 1)
hsa-miR-412	0	0	1	1	0	0	WBP1	WW domain binding protein 1
hsa-miR-412	0	0	1	1	1	1	SPOCK1	sparc/osteonectin, cwcv and kazal-like domains proteoglycan (testican) 1
hsa-miR-412	1	0	1	0	1	1	GATAD2B	GATA zinc finger domain containing 2B
hsa-miR-412	0	0	1	0	0	0	LINC00340	long intergenic non-protein coding RNA 340
hsa-miR-412	1	0	1	0	1	1	GRSF1	G-rich RNA sequence binding factor 1
hsa-miR-412	0	0	1	1	1	1	METTL13	methyltransferase like 13
hsa-miR-412	1	0	1	1	1	1	LPPR2	lipid phosphate phosphatase-related protein type 2
hsa-miR-412	0	0	1	1	0	0	DPAGT1	dolichyl-phosphate (UDP-N-acetylglucosamine) N-acetylglucosaminephosphotransferase 1 (GlcNAc-1-P transferase)
hsa-miR-412	0	0	1	1	1	1	MOBP	myelin-associated oligodendrocyte basic protein
hsa-miR-412	0	0	1	0	0	0	LINC00486	long intergenic non-protein coding RNA 486
hsa-miR-412	1	0	1	1	1	1	CECR6	cat eye syndrome chromosome region, candidate 6
hsa-miR-412	0	0	1	0	0	0	LOC730101	uncharacterized LOC730101
hsa-miR-412	1	0	1	1	1	1	CS	citrate synthase
hsa-miR-412	1	0	1	0	1	1	STC2	stanniocalcin 2
hsa-miR-412	1	0	1	1	1	1	PEA15	phosphoprotein enriched in astrocytes 15
hsa-miR-412	0	0	1	1	0	0	C11orf74	chromosome 11 open reading frame 74
hsa-miR-412	0	0	1	1	1	1	BAG1	BCL2-associated athanogene
hsa-miR-412	1	0	1	1	0	0	ITPRIPL2	inositol 1,4,5-trisphosphate receptor interacting protein-like 2
hsa-miR-412	1	0	1	1	1	1	EPB41L1	erythrocyte membrane protein band 4.1-like 1
hsa-miR-412	0	0	1	1	1	1	PPP1R27	protein phosphatase 1, regulatory subunit 27
hsa-miR-412	0	0	1	1	1	1	FGD2	FYVE, RhoGEF and PH domain containing 2
hsa-miR-412	0	0	1	1	1	1	NEIL2	nei endonuclease VIII-like 2 (E. coli)
hsa-miR-412	0	0	1	0	0	0	LRRC69	leucine rich repeat containing 69
hsa-miR-412	0	0	1	0	0	0	LINC00293	long intergenic non-protein coding RNA 293
hsa-miR-412	0	0	1	0	0	0	LOC100128560	uncharacterized LOC100128560
hsa-miR-412	1	0	1	1	1	1	PRKAG1	protein kinase, AMP-activated, gamma 1 non-catalytic subunit
hsa-miR-412	0	0	1	0	0	0	CECR7	cat eye syndrome chromosome region, candidate 7 (non-protein coding)
hsa-miR-412	0	0	1	1	0	0	TMEM150A	transmembrane protein 150A
hsa-miR-412	0	0	1	1	1	1	TIMM50	translocase of inner mitochondrial membrane 50 homolog (S. cerevisiae)
hsa-miR-412	1	0	1	1	0	0	ENTPD1	ectonucleoside triphosphate diphosphohydrolase 1
hsa-miR-412	0	0	1	1	1	1	GRPEL1	GrpE-like 1, mitochondrial (E. coli)
hsa-miR-412	1	0	1	1	0	0	DGCR6	DiGeorge syndrome critical region gene 6
hsa-miR-412	0	0	1	1	1	1	GPR128	G protein-coupled receptor 128
hsa-miR-412	0	0	1	1	0	0	KIAA0146	KIAA0146
hsa-miR-412	1	0	1	1	0	0	CACNB3	calcium channel, voltage-dependent, beta 3 subunit
hsa-miR-412	1	0	1	1	1	1	FGD5	FYVE, RhoGEF and PH domain containing 5
hsa-miR-412	1	0	1	1	1	1	PPFIA1	protein tyrosine phosphatase, receptor type, f polypeptide (PTPRF), interacting protein (liprin), alpha 1
hsa-miR-412	1	0	1	0	1	1	KCNK2	potassium channel, subfamily K, member 2
hsa-miR-412	0	0	1	1	1	1	FAM19A2	family with sequence similarity 19 (chemokine (C-C motif)-like), member A2
hsa-miR-412	0	0	1	0	0	0	LOC650368	asparagine-linked glycosylation 1-like pseudogene
hsa-miR-412	1	0	1	0	1	1	WDR82	WD repeat domain 82
hsa-miR-412	0	0	1	1	1	1	BTN2A2	butyrophilin, subfamily 2, member A2
hsa-miR-412	0	0	1	1	1	1	ANKRD44	ankyrin repeat domain 44
hsa-miR-412	0	0	1	1	1	1	SLC9A1	solute carrier family 9, subfamily A (NHE1, cation proton antiporter 1), member 1
hsa-miR-412	0	0	1	1	1	1	PKP4	plakophilin 4
hsa-miR-412	0	0	1	1	0	0	NMI	N-myc (and STAT) interactor
hsa-miR-412	1	0	1	1	1	1	PLEKHH1	pleckstrin homology domain containing, family H (with MyTH4 domain) member 1
hsa-miR-412	1	0	1	1	1	1	SGSM2	small G protein signaling modulator 2
hsa-miR-412	1	0	1	1	1	1	METAP2	methionyl aminopeptidase 2
hsa-miR-412	0	0	1	1	0	0	LOC100128239	uncharacterized LOC100128239
hsa-miR-412	0	0	1	0	1	1	CTBP1-AS1	CTBP1 antisense RNA 1
hsa-miR-412	0	0	1	0	0	0	FAM95B1	family with sequence similarity 95, member B1
hsa-miR-412	1	0	1	1	1	1	ATP1A2	ATPase, Na+/K+ transporting, alpha 2 polypeptide
hsa-miR-412	1	0	1	1	1	1	SLC1A4	solute carrier family 1 (glutamate/neutral amino acid transporter), member 4
hsa-miR-412	0	0	1	1	0	0	SPATS1	spermatogenesis associated, serine-rich 1
hsa-miR-412	1	0	1	0	1	1	CLEC16A	C-type lectin domain family 16, member A
hsa-miR-412	1	0	1	0	1	1	GPR180	G protein-coupled receptor 180
hsa-miR-412	0	0	1	1	0	0	NPIP	nuclear pore complex interacting protein
hsa-miR-412	0	0	1	0	0	0	HNRNPKP3	heterogeneous nuclear ribonucleoprotein K pseudogene 3
hsa-miR-412	0	0	1	0	0	0	RPL23AP53	ribosomal protein L23a pseudogene 53
hsa-miR-412	1	0	1	1	1	1	MKRN1	makorin ring finger protein 1
hsa-miR-412	1	0	1	1	1	1	TSHZ1	teashirt zinc finger homeobox 1
hsa-miR-412	1	0	1	1	1	1	MFSD6	major facilitator superfamily domain containing 6
hsa-miR-412	0	0	1	0	0	0	LOC619207	scavenger receptor protein family member
hsa-miR-412	1	0	1	0	0	0	SLC16A3	solute carrier family 16, member 3 (monocarboxylic acid transporter 4)
hsa-miR-412	1	0	1	1	1	1	HYOU1	hypoxia up-regulated 1
hsa-miR-412	1	0	1	1	1	1	PHF17	PHD finger protein 17
hsa-miR-412	0	0	1	0	1	1	NPHP4	nephronophthisis 4
hsa-miR-412	1	0	1	1	1	1	KANK4	KN motif and ankyrin repeat domains 4
hsa-miR-412	0	0	1	0	0	0	LOC100128262	uncharacterized LOC100128262
hsa-miR-412	1	0	1	0	1	1	SP6	Sp6 transcription factor
hsa-miR-412	1	0	1	1	1	1	ZFP106	zinc finger protein 106 homolog (mouse)
hsa-miR-412	0	0	1	1	0	0	BPIFB1	BPI fold containing family B, member 1
hsa-miR-412	1	0	1	0	1	1	YOD1	YOD1 OTU deubiquinating enzyme 1 homolog (S. cerevisiae)
hsa-miR-412	1	0	1	1	1	1	SLC4A8	solute carrier family 4, sodium bicarbonate cotransporter, member 8
hsa-miR-412	0	0	1	0	0	0	LOC440993	uncharacterized LOC440993
hsa-miR-412	1	0	1	1	1	1	SH3D19	SH3 domain containing 19
hsa-miR-412	0	0	1	1	0	0	SMTN	smoothelin
hsa-miR-412	0	0	1	1	1	1	PDDC1	Parkinson disease 7 domain containing 1
hsa-miR-412	0	0	1	0	0	0	IDO2	indoleamine 2,3-dioxygenase 2
hsa-miR-412	0	0	1	1	0	0	WFIKKN1	WAP, follistatin/kazal, immunoglobulin, kunitz and netrin domain containing 1
hsa-miR-412	1	0	1	1	1	1	CEP97	centrosomal protein 97kDa
hsa-miR-412	0	0	1	1	1	1	MRPL49	mitochondrial ribosomal protein L49
hsa-miR-412	0	0	1	1	0	0	HEATR8	HEAT repeat containing 8
hsa-miR-412	1	0	1	1	1	1	ARHGAP24	Rho GTPase activating protein 24
hsa-miR-412	1	0	1	0	1	1	FMNL2	formin-like 2
hsa-miR-412	1	0	1	0	1	1	STK3	serine/threonine kinase 3
hsa-miR-412	1	0	1	1	1	1	MAP3K14	mitogen-activated protein kinase kinase kinase 14
hsa-miR-412	1	0	1	1	1	1	RABGAP1	RAB GTPase activating protein 1
hsa-miR-412	0	0	1	0	0	0	AGAP9	ArfGAP with GTPase domain, ankyrin repeat and PH domain 9
hsa-miR-412	0	0	1	1	0	0	CNOT3	CCR4-NOT transcription complex, subunit 3
hsa-miR-412	1	0	1	1	1	1	CYYR1	cysteine/tyrosine-rich 1
hsa-miR-412	1	0	1	1	0	0	ZNF219	zinc finger protein 219
hsa-miR-412	1	0	1	1	1	1	NCOA1	nuclear receptor coactivator 1
hsa-miR-412	1	0	1	1	0	0	PRRC2B	proline-rich coiled-coil 2B
hsa-miR-412	0	0	1	1	0	0	FAAH	fatty acid amide hydrolase
hsa-miR-412	0	0	1	1	0	0	NEK7	NIMA (never in mitosis gene a)-related kinase 7
hsa-miR-412	0	0	1	0	0	0	POM121L9P	POM121 transmembrane nucleoporin-like 9, pseudogene
hsa-miR-412	1	0	1	1	1	1	TAB2	TGF-beta activated kinase 1/MAP3K7 binding protein 2
hsa-miR-412	1	0	1	1	1	1	ARF6	ADP-ribosylation factor 6
hsa-miR-412	0	0	1	1	1	1	TTLL5	tubulin tyrosine ligase-like family, member 5
hsa-miR-412	0	0	1	0	0	0	KIAA0913	KIAA0913
hsa-miR-412	1	0	1	0	1	1	DNAJC5	DnaJ (Hsp40) homolog, subfamily C, member 5
hsa-miR-412	0	0	1	1	1	1	ARFGAP1	ADP-ribosylation factor GTPase activating protein 1
hsa-miR-412	1	0	1	1	1	1	CTTNBP2NL	CTTNBP2 N-terminal like
hsa-miR-412	1	0	1	1	1	1	TRIM3	tripartite motif containing 3
hsa-miR-412	0	0	1	0	0	0	RPL23AP82	ribosomal protein L23a pseudogene 82
hsa-miR-412	0	0	1	0	0	0	FAM66D	family with sequence similarity 66, member D
hsa-miR-412	0	0	1	1	0	0	KRBA1	KRAB-A domain containing 1
hsa-miR-412	0	0	1	0	1	1	GAB3	GRB2-associated binding protein 3
hsa-miR-412	0	0	1	1	1	1	BEND7	BEN domain containing 7
hsa-miR-412	0	0	1	0	0	0	ZNF720	zinc finger protein 720
hsa-miR-412	1	0	1	1	1	1	CHMP7	charged multivesicular body protein 7
hsa-miR-412	1	0	1	1	0	0	CELF5	CUGBP, Elav-like family member 5
hsa-miR-412	0	0	1	1	1	1	SYTL4	synaptotagmin-like 4
hsa-miR-412	1	0	1	1	1	1	PRRC1	proline-rich coiled-coil 1
hsa-miR-412	1	0	1	1	0	0	PTAR1	protein prenyltransferase alpha subunit repeat containing 1
hsa-miR-412	1	0	1	1	1	1	UHRF2	ubiquitin-like with PHD and ring finger domains 2, E3 ubiquitin protein ligase
hsa-miR-412	0	0	1	0	0	0	EPHA1-AS1	EPHA1 antisense RNA 1
hsa-miR-412	1	0	1	0	0	0	CCDC64B	coiled-coil domain containing 64B
hsa-miR-412	1	0	1	1	1	1	IL17RD	interleukin 17 receptor D
hsa-miR-412	0	0	1	1	1	1	BRD9	bromodomain containing 9
hsa-miR-412	0	0	1	1	0	0	HEATR7A	HEAT repeat containing 7A
hsa-miR-412	1	0	1	1	0	0	KIAA0895L	KIAA0895-like
hsa-miR-412	1	0	1	0	1	1	KIF21B	kinesin family member 21B
hsa-miR-412	1	0	1	1	1	1	IKZF2	IKAROS family zinc finger 2 (Helios)
hsa-miR-412	1	0	1	1	1	1	GAL3ST3	galactose-3-O-sulfotransferase 3
hsa-miR-412	1	0	1	0	1	1	BDNF	brain-derived neurotrophic factor
hsa-miR-412	0	0	1	0	1	1	CD80	CD80 molecule
hsa-miR-412	1	0	1	1	1	1	RFFL	ring finger and FYVE-like domain containing E3 ubiquitin protein ligase
hsa-miR-412	0	0	1	1	0	0	EIF5A	eukaryotic translation initiation factor 5A
hsa-miR-412	1	0	1	1	1	1	GGT7	gamma-glutamyltransferase 7
hsa-miR-412	0	0	1	1	1	1	CEP41	centrosomal protein 41kDa
hsa-miR-412	0	0	1	1	0	0	ESPN	espin
hsa-miR-412	1	0	1	1	1	1	NRG1	neuregulin 1
hsa-miR-412	1	0	1	1	1	1	WDR26	WD repeat domain 26
hsa-miR-412	0	0	1	1	1	1	IYD	iodotyrosine deiodinase
hsa-miR-412	1	0	1	1	1	1	PNRC1	proline-rich nuclear receptor coactivator 1
hsa-miR-412	0	0	1	1	1	1	GCOM1	GRINL1A complex locus 1
hsa-miR-412	0	0	1	1	1	1	GON4L	gon-4-like (C. elegans)
hsa-miR-412	0	0	1	1	1	1	RPTN	repetin
hsa-miR-412	1	0	1	1	1	1	FAM120A	family with sequence similarity 120A
hsa-miR-412	1	0	1	0	1	1	NHS	Nance-Horan syndrome (congenital cataracts and dental anomalies)
hsa-miR-412	0	0	1	1	1	1	POTEG	POTE ankyrin domain family, member G
hsa-miR-412	1	0	1	1	1	1	MECP2	methyl CpG binding protein 2 (Rett syndrome)
hsa-miR-412	1	0	1	1	0	0	ADAM15	ADAM metallopeptidase domain 15
hsa-miR-412	0	0	1	1	1	1	TERF1	telomeric repeat binding factor (NIMA-interacting) 1
hsa-miR-412	1	0	1	1	1	1	HMGA2	high mobility group AT-hook 2
hsa-miR-412	0	0	1	1	1	1	TMUB1	transmembrane and ubiquitin-like domain containing 1
hsa-miR-412	0	0	1	1	0	0	DHRS4	dehydrogenase/reductase (SDR family) member 4
hsa-miR-412	0	0	1	1	1	1	IL24	interleukin 24
hsa-miR-412	0	0	1	1	1	1	SMPD1	sphingomyelin phosphodiesterase 1, acid lysosomal
hsa-miR-412	1	0	1	1	1	1	QKI	QKI, KH domain containing, RNA binding
hsa-miR-412	0	0	1	0	1	1	KCNE1	potassium voltage-gated channel, Isk-related family, member 1
hsa-miR-412	0	0	1	1	1	1	NOLC1	nucleolar and coiled-body phosphoprotein 1
hsa-miR-412	1	0	1	1	0	0	TAF4B	TAF4b RNA polymerase II, TATA box binding protein (TBP)-associated factor, 105kDa
hsa-miR-412	0	0	1	1	0	0	NBPF8	neuroblastoma breakpoint family, member 8
hsa-miR-412	1	0	1	1	0	0	PLXNB3	plexin B3
hsa-miR-412	0	0	1	1	1	1	RAD51C	RAD51 homolog C (S. cerevisiae)
hsa-miR-412	1	0	1	0	1	1	FAM46A	family with sequence similarity 46, member A
hsa-miR-412	0	0	1	1	1	1	TMOD1	tropomodulin 1
hsa-miR-412	0	0	1	1	0	0	C20orf43	chromosome 20 open reading frame 43
hsa-miR-412	0	0	1	1	1	1	BOD1	biorientation of chromosomes in cell division 1
hsa-miR-412	1	0	1	1	0	0	DHDDS	dehydrodolichyl diphosphate synthase
hsa-miR-412	1	0	1	1	0	0	POLR3D	polymerase (RNA) III (DNA directed) polypeptide D, 44kDa
hsa-miR-412	0	0	1	0	0	0	LOC254896	uncharacterized LOC254896
hsa-miR-412	1	0	1	1	1	1	POU2F2	POU class 2 homeobox 2
hsa-miR-412	0	0	1	0	0	0	GLIS3-AS1	GLIS3 antisense RNA 1
hsa-miR-412	0	0	1	1	0	0	AGBL5	ATP/GTP binding protein-like 5
hsa-miR-412	1	0	1	1	1	1	CALM1	calmodulin 1 (phosphorylase kinase, delta)
hsa-miR-412	1	0	1	1	0	0	MARCH9	membrane-associated ring finger (C3HC4) 9
hsa-miR-412	1	0	1	1	1	1	B4GALT3	UDP-Gal:betaGlcNAc beta 1,4- galactosyltransferase, polypeptide 3
hsa-miR-412	1	0	1	1	1	1	ATP6AP2	ATPase, H+ transporting, lysosomal accessory protein 2
hsa-miR-412	0	0	1	1	0	0	ARHGAP8	Rho GTPase activating protein 8
hsa-miR-412	0	0	1	0	0	0	LRRC14	leucine rich repeat containing 14
hsa-miR-412	0	0	1	1	1	1	GNL3L	guanine nucleotide binding protein-like 3 (nucleolar)-like
hsa-miR-412	0	0	1	0	0	0	GRAMD1B	GRAM domain containing 1B
hsa-miR-412	1	0	1	0	1	1	MTMR2	myotubularin related protein 2
hsa-miR-412	1	0	1	0	1	1	FNDC3B	fibronectin type III domain containing 3B
hsa-miR-412	0	0	1	1	0	0	CCT8	chaperonin containing TCP1, subunit 8 (theta)
hsa-miR-412	0	0	1	1	1	1	KLF7	Kruppel-like factor 7 (ubiquitous)
hsa-miR-412	0	0	1	1	0	0	KLHDC3	kelch domain containing 3
hsa-miR-412	1	0	1	1	1	1	RBM7	RNA binding motif protein 7
hsa-miR-412	1	0	1	1	1	1	GAS2	growth arrest-specific 2
hsa-miR-412	1	0	1	1	1	1	ZNF3	zinc finger protein 3
hsa-miR-412	0	0	1	1	0	0	PTPMT1	protein tyrosine phosphatase, mitochondrial 1
hsa-miR-412	0	0	1	0	1	1	AHI1	Abelson helper integration site 1
hsa-miR-412	0	0	1	0	0	0	MGC21881	uncharacterized locus MGC21881
hsa-miR-412	0	0	1	0	1	1	ZNF37A	zinc finger protein 37A
hsa-miR-412	0	0	1	1	1	1	CMAS	cytidine monophosphate N-acetylneuraminic acid synthetase
hsa-miR-412	1	0	1	1	1	1	FAM199X	family with sequence similarity 199, X-linked
hsa-miR-412	1	0	1	1	1	1	NRF1	nuclear respiratory factor 1
hsa-miR-412	0	0	1	1	1	1	PARP9	poly (ADP-ribose) polymerase family, member 9
hsa-miR-412	0	0	1	1	1	1	CSDE1	cold shock domain containing E1, RNA-binding
hsa-miR-412	0	0	1	1	0	0	ZBTB32	zinc finger and BTB domain containing 32
hsa-miR-412	0	0	1	0	0	0	LOC100144602	uncharacterized LOC100144602
hsa-miR-412	1	0	1	1	1	1	MID1IP1	MID1 interacting protein 1
hsa-miR-412	0	0	1	1	0	0	CYP27B1	cytochrome P450, family 27, subfamily B, polypeptide 1
hsa-miR-412	0	0	1	1	1	1	TMEM40	transmembrane protein 40
hsa-miR-412	0	0	1	0	0	0	EEF1DP3	eukaryotic translation elongation factor 1 delta pseudogene 3
hsa-miR-412	0	0	1	0	0	0	LOC284260	uncharacterized LOC284260
hsa-miR-412	0	0	1	1	1	1	RNF103	ring finger protein 103
hsa-miR-412	1	0	1	0	1	1	CDK19	cyclin-dependent kinase 19
hsa-miR-412	1	0	1	1	1	1	CRKL	v-crk sarcoma virus CT10 oncogene homolog (avian)-like
hsa-miR-412	0	0	1	0	0	0	EVPLL	envoplakin-like
hsa-miR-412	0	0	1	1	1	1	MAP2	microtubule-associated protein 2
hsa-miR-412	0	0	1	1	1	1	ANKZF1	ankyrin repeat and zinc finger domain containing 1
hsa-miR-412	0	0	1	1	1	1	CASC1	cancer susceptibility candidate 1
hsa-miR-412	0	0	1	1	1	1	CAMKMT	calmodulin-lysine N-methyltransferase
hsa-miR-412	1	0	1	1	1	1	PPARGC1A	peroxisome proliferator-activated receptor gamma, coactivator 1 alpha
hsa-miR-412	1	0	1	1	1	1	TIAL1	TIA1 cytotoxic granule-associated RNA binding protein-like 1
hsa-miR-412	0	0	1	1	0	0	TRIM69	tripartite motif containing 69
hsa-miR-412	1	0	1	1	0	0	ANKRD13B	ankyrin repeat domain 13B
hsa-miR-412	0	0	1	0	0	0	LOC643648	uncharacterized LOC643648
hsa-miR-412	1	0	1	1	1	1	RAB5B	RAB5B, member RAS oncogene family
hsa-miR-412	0	0	1	1	1	1	IL20RB	interleukin 20 receptor beta
hsa-miR-412	1	0	1	1	1	1	CLK4	CDC-like kinase 4
hsa-miR-412	1	0	1	1	1	1	ABCA1	ATP-binding cassette, sub-family A (ABC1), member 1
hsa-miR-412	0	0	1	1	1	1	EDA2R	ectodysplasin A2 receptor
hsa-miR-412	1	0	1	1	1	1	NKAIN2	Na+/K+ transporting ATPase interacting 2
hsa-miR-412	0	0	1	1	1	1	TMEM139	transmembrane protein 139
hsa-miR-412	0	0	1	1	1	1	SNAPC3	small nuclear RNA activating complex, polypeptide 3, 50kDa
hsa-miR-412	0	0	1	0	0	0	FAM201A	family with sequence similarity 201, member A
hsa-miR-412	0	0	1	0	0	0	LINC00642	long intergenic non-protein coding RNA 642
hsa-miR-412	1	0	1	1	1	1	SMG7	smg-7 homolog, nonsense mediated mRNA decay factor (C. elegans)
hsa-miR-412	0	0	1	1	1	1	FAM171B	family with sequence similarity 171, member B
hsa-miR-412	1	0	1	0	1	1	CLDN12	claudin 12
hsa-miR-412	1	0	1	1	1	1	BNC2	basonuclin 2
hsa-miR-412	1	0	1	1	1	1	SOX6	SRY (sex determining region Y)-box 6
hsa-miR-412	0	0	1	1	1	1	EFCAB13	EF-hand calcium binding domain 13
hsa-miR-412	0	0	1	0	0	0	INHBA-AS1	INHBA antisense RNA 1
hsa-miR-412	0	0	1	1	1	1	C14orf118	chromosome 14 open reading frame 118
hsa-miR-412	0	0	1	0	0	0	LOC100134868	uncharacterized LOC100134868
hsa-miR-412	1	0	1	1	0	0	PROSAPIP1	ProSAPiP1 protein
hsa-miR-412	0	0	1	1	0	0	COX4I1	cytochrome c oxidase subunit IV isoform 1
hsa-miR-412	0	0	1	0	0	0	FLJ36000	uncharacterized FLJ36000
hsa-miR-412	1	0	1	1	1	1	NFYA	nuclear transcription factor Y, alpha
hsa-miR-412	0	0	1	0	0	0	USP32P1	ubiquitin specific peptidase 32 pseudogene 1
hsa-miR-412	0	0	1	0	0	0	LOC401074	uncharacterized LOC401074
hsa-miR-412	0	0	1	0	0	0	LOC221122	uncharacterized LOC221122
hsa-miR-412	1	0	1	1	1	1	CHD6	chromodomain helicase DNA binding protein 6
hsa-miR-412	0	0	1	0	1	1	LINC00634	long intergenic non-protein coding RNA 634
hsa-miR-412	0	0	1	0	0	0	LRRC48	leucine rich repeat containing 48
hsa-miR-412	1	0	1	0	1	1	PCSK2	proprotein convertase subtilisin/kexin type 2
hsa-miR-412	0	0	1	0	1	1	PCBP1-AS1	PCBP1 antisense RNA 1
hsa-miR-412	0	0	1	1	0	0	MTCH1	mitochondrial carrier 1
hsa-miR-412	0	0	1	1	0	0	KIAA1432	KIAA1432
hsa-miR-412	0	0	1	0	0	0	LOC154822	uncharacterized LOC154822
hsa-miR-412	0	0	1	1	0	0	AQP12B	aquaporin 12B
hsa-miR-412	0	0	1	1	0	0	FAM159A	family with sequence similarity 159, member A
hsa-miR-412	0	0	1	0	0	0	ALOX12P2	arachidonate 12-lipoxygenase pseudogene 2
hsa-miR-412	0	0	1	1	1	1	RABGAP1L	RAB GTPase activating protein 1-like
hsa-miR-412	0	0	1	0	0	0	LRRC37BP1	leucine rich repeat containing 37B pseudogene 1
hsa-miR-412	0	0	1	0	0	0	LOC339260	uncharacterized LOC339260
hsa-miR-412	0	0	1	1	1	1	C14orf45	chromosome 14 open reading frame 45
hsa-miR-412	1	0	1	1	1	1	PCYT1B	phosphate cytidylyltransferase 1, choline, beta
hsa-miR-412	1	0	1	1	1	1	SENP1	SUMO1/sentrin specific peptidase 1
hsa-miR-412	0	0	1	1	0	0	TF	transferrin
hsa-miR-412	1	0	1	1	1	1	HSDL2	hydroxysteroid dehydrogenase like 2
hsa-miR-412	0	0	1	1	1	1	LOC100499484-C9ORF174	LOC100499484-C9orf174 readthrough
hsa-miR-412	1	0	1	1	1	1	SLC39A9	solute carrier family 39 (zinc transporter), member 9
hsa-miR-412	0	0	1	1	0	0	MT3	metallothionein 3
hsa-miR-412	0	0	1	0	0	0	SUZ12P1	suppressor of zeste 12 homolog pseudogene 1
hsa-miR-412	0	0	1	1	0	0	FKBP11	FK506 binding protein 11, 19 kDa
hsa-miR-412	1	0	1	1	1	1	PTPRG	protein tyrosine phosphatase, receptor type, G
hsa-miR-412	1	0	1	1	1	1	CLVS1	clavesin 1
hsa-miR-412	0	0	1	1	0	0	ENTPD8	ectonucleoside triphosphate diphosphohydrolase 8
hsa-miR-412	0	0	1	1	0	0	ALMS1	Alstrom syndrome 1
hsa-miR-412	1	0	1	1	1	1	PDCD6	programmed cell death 6
hsa-miR-412	0	0	1	1	1	1	LINC00086	long intergenic non-protein coding RNA 86
hsa-miR-412	0	0	1	1	1	1	RHOT1	ras homolog family member T1
hsa-miR-412	0	0	1	1	1	1	HLA-DQA1	major histocompatibility complex, class II, DQ alpha 1
hsa-miR-412	1	0	1	0	1	1	C14orf43	chromosome 14 open reading frame 43
hsa-miR-412	0	0	1	1	0	0	C11orf70	chromosome 11 open reading frame 70
hsa-miR-412	0	0	1	1	1	1	C17orf97	chromosome 17 open reading frame 97
hsa-miR-412	0	0	1	0	0	0	LOC388436	uncharacterized LOC388436
hsa-miR-412	0	0	1	1	0	0	CSAG1	chondrosarcoma associated gene 1
hsa-miR-412	1	0	1	1	1	1	ZEB2	zinc finger E-box binding homeobox 2
hsa-miR-412	1	0	1	1	1	1	GTDC1	glycosyltransferase-like domain containing 1
hsa-miR-412	0	0	1	1	0	0	WDR90	WD repeat domain 90
hsa-miR-412	0	0	1	1	1	1	ELL3	elongation factor RNA polymerase II-like 3
hsa-miR-412	0	0	1	0	0	0	LOC550643	uncharacterized LOC550643
hsa-miR-412	0	0	1	1	0	0	SLC38A7	solute carrier family 38, member 7
hsa-miR-412	1	0	1	1	1	1	PDGFRA	platelet-derived growth factor receptor, alpha polypeptide
hsa-miR-412	0	0	1	1	0	0	DHX30	DEAH (Asp-Glu-Ala-His) box polypeptide 30
hsa-miR-412	1	0	1	1	0	0	ANKIB1	ankyrin repeat and IBR domain containing 1
hsa-miR-412	0	0	1	1	0	0	ADORA3	adenosine A3 receptor
hsa-miR-412	0	0	1	0	0	0	FLJ35390	uncharacterized LOC255031
hsa-miR-412	1	0	1	1	1	1	ADCY6	adenylate cyclase 6
hsa-miR-412	1	0	1	1	1	1	ZNF449	zinc finger protein 449
hsa-miR-412	0	0	1	0	0	0	UBE2Q2P2	ubiquitin-conjugating enzyme E2Q family member 2 pseudogene 2
hsa-miR-412	0	0	1	1	1	1	CTSL2	cathepsin L2
hsa-miR-412	1	0	1	0	1	1	MAGIX	MAGI family member, X-linked
hsa-miR-412	0	0	1	1	1	1	AQPEP	laeverin
hsa-miR-412	0	0	1	0	0	0	PTGER4P2	prostaglandin E receptor 4 (subtype EP4) pseudogene 2
hsa-miR-412	0	0	1	0	1	1	LOC728228	uncharacterized LOC728228
hsa-miR-412	0	0	1	1	0	0	TRIM46	tripartite motif containing 46
hsa-miR-412	0	0	1	1	0	0	CYP4F30P	cytochrome P450, family 4, subfamily F, polypeptide 30, pseudogene
hsa-miR-412	0	0	1	1	1	1	MSTO1	misato homolog 1 (Drosophila)
hsa-miR-412	0	0	1	1	1	1	CFHR3	complement factor H-related 3
hsa-miR-412	0	0	1	0	0	0	JPX	JPX transcript, XIST activator (non-protein coding)
hsa-miR-412	0	0	1	1	1	1	TNFSF12	tumor necrosis factor (ligand) superfamily, member 12
hsa-miR-412	0	0	1	0	0	0	ULK4P3	unc-51-like kinase 4 (C. elegans) pseudogene 3
hsa-miR-412	0	0	1	1	0	0	TRIM73	tripartite motif containing 73
hsa-miR-412	0	0	1	1	0	0	ASIC4	acid-sensing (proton-gated) ion channel family member 4
hsa-miR-412	1	0	1	0	1	1	DPYSL3	dihydropyrimidinase-like 3
hsa-miR-412	0	0	1	0	0	0	LOC642846	DEAD/H (Asp-Glu-Ala-Asp/His) box polypeptide 11-like
hsa-miR-412	0	0	1	0	0	0	LINC00537	long intergenic non-protein coding RNA 537
hsa-miR-412	1	0	1	1	1	1	SAMD4B	sterile alpha motif domain containing 4B
hsa-miR-412	0	0	1	0	0	0	TBC1D25	TBC1 domain family, member 25
hsa-miR-412	0	0	1	0	0	0	LOC554249	uncharacterized LOC554249
hsa-miR-412	1	0	1	1	1	1	ST8SIA2	ST8 alpha-N-acetyl-neuraminide alpha-2,8-sialyltransferase 2
hsa-miR-412	0	0	1	1	1	1	R3HCC1L	R3H domain and coiled-coil containing 1-like
hsa-miR-412	1	0	1	0	1	1	ARPP19	cAMP-regulated phosphoprotein, 19kDa
hsa-miR-412	0	0	1	0	1	1	TCAIM	T cell activation inhibitor, mitochondrial
hsa-miR-412	0	0	1	1	1	1	ZNF365	zinc finger protein 365
hsa-miR-412	0	0	1	0	0	0	LSAMP-AS3	LSAMP antisense RNA 3
hsa-miR-412	0	0	1	1	1	1	MUC21	mucin 21, cell surface associated
hsa-miR-412	1	0	1	1	1	1	NR2F2	nuclear receptor subfamily 2, group F, member 2
hsa-miR-412	0	0	1	0	1	1	C9orf91	chromosome 9 open reading frame 91
hsa-miR-412	1	0	1	1	1	1	PNISR	PNN-interacting serine/arginine-rich protein
hsa-miR-412	0	0	1	1	0	0	LEPRE1	leucine proline-enriched proteoglycan (leprecan) 1
hsa-miR-412	1	0	1	1	1	1	CERS6	ceramide synthase 6
hsa-miR-412	1	0	1	0	1	1	BTBD3	BTB (POZ) domain containing 3
hsa-miR-412	0	0	1	1	0	0	YDJC	YdjC homolog (bacterial)
hsa-miR-412	0	0	1	1	1	1	GOLGA2P5	golgin A2 pseudogene 5
hsa-miR-412	0	0	1	1	0	0	STK19	serine/threonine kinase 19
hsa-miR-412	1	0	1	1	1	1	MARCH6	membrane-associated ring finger (C3HC4) 6, E3 ubiquitin protein ligase
hsa-miR-412	0	0	1	0	0	0	LRRC37A11P	leucine rich repeat containing 37, member A11, pseudogene
hsa-miR-412	1	0	1	0	1	1	ROBO1	roundabout, axon guidance receptor, homolog 1 (Drosophila)
hsa-miR-412	0	0	1	1	0	0	RNF123	ring finger protein 123
hsa-miR-412	0	0	1	1	0	0	C14orf178	chromosome 14 open reading frame 178
hsa-miR-412	1	0	1	1	1	1	ST18	suppression of tumorigenicity 18 (breast carcinoma) (zinc finger protein)
hsa-miR-412	1	0	1	1	1	1	ZNF827	zinc finger protein 827
hsa-miR-412	1	0	1	0	1	1	PRDM10	PR domain containing 10
hsa-miR-412	1	0	1	1	1	1	FKBP1A	FK506 binding protein 1A, 12kDa
hsa-miR-412	0	0	1	0	0	0	KRT8P12	keratin 8 pseudogene 12
hsa-miR-412	1	0	1	1	1	1	ANK2	ankyrin 2, neuronal
hsa-miR-412	1	0	1	1	1	1	RNF207	ring finger protein 207
hsa-miR-412	0	0	1	0	0	0	FAM225B	family with sequence similarity 225, member B (non-protein coding)
hsa-miR-412	0	0	1	0	0	0	LINC00643	long intergenic non-protein coding RNA 643
hsa-miR-412	0	0	1	1	0	0	EYS	eyes shut homolog (Drosophila)
hsa-miR-412	0	0	1	1	1	1	PSMA2	proteasome (prosome, macropain) subunit, alpha type, 2
hsa-miR-412	1	0	1	1	1	1	PRKRIR	protein-kinase, interferon-inducible double stranded RNA dependent inhibitor, repressor of (P58 repressor)
hsa-miR-412	1	0	1	1	1	1	MYCBP2	MYC binding protein 2, E3 ubiquitin protein ligase
hsa-miR-412	0	0	1	1	1	1	PRR14L	proline rich 14-like
hsa-miR-412	0	0	1	1	1	1	CC2D2A	coiled-coil and C2 domain containing 2A
hsa-miR-412	1	0	1	1	1	1	CGN	cingulin
hsa-miR-412	1	0	1	1	1	1	SLC39A13	solute carrier family 39 (zinc transporter), member 13
hsa-miR-412	0	0	1	1	1	1	FAM9C	family with sequence similarity 9, member C
hsa-miR-412	0	0	1	1	1	1	ARMCX3	armadillo repeat containing, X-linked 3
hsa-miR-412	1	0	1	1	1	1	TC2N	tandem C2 domains, nuclear
hsa-miR-412	1	0	1	1	1	1	NEDD9	neural precursor cell expressed, developmentally down-regulated 9
hsa-miR-412	1	0	1	1	1	1	NFIB	nuclear factor I/B
hsa-miR-412	0	0	1	1	1	1	MPP4	membrane protein, palmitoylated 4 (MAGUK p55 subfamily member 4)
hsa-miR-412	1	0	1	1	1	1	RECK	reversion-inducing-cysteine-rich protein with kazal motifs
hsa-miR-412	0	0	1	1	1	1	THSD4	thrombospondin, type I, domain containing 4
hsa-miR-412	0	0	1	1	1	1	SSFA2	sperm specific antigen 2
hsa-miR-412	1	0	1	1	1	1	ASB6	ankyrin repeat and SOCS box containing 6
hsa-miR-412	1	0	1	1	1	1	AP2M1	adaptor-related protein complex 2, mu 1 subunit
hsa-miR-412	0	0	1	1	0	0	PYCR1	pyrroline-5-carboxylate reductase 1
hsa-miR-412	0	0	1	1	0	0	MRPL48	mitochondrial ribosomal protein L48
hsa-miR-412	0	0	1	1	1	1	HEXA	hexosaminidase A (alpha polypeptide)
hsa-miR-412	1	0	1	0	0	0	IGLON5	IgLON family member 5
hsa-miR-412	0	0	1	0	0	0	LOC400768	uncharacterized LOC400768
hsa-miR-412	0	0	1	1	0	0	TMEM62	transmembrane protein 62
hsa-miR-412	0	0	1	1	0	0	URM1	ubiquitin related modifier 1
hsa-miR-412	0	0	1	1	0	0	ACTB	actin, beta
hsa-miR-412	0	0	1	1	1	1	FANCL	Fanconi anemia, complementation group L
hsa-miR-412	0	0	1	1	1	1	APH1A	anterior pharynx defective 1 homolog A (C. elegans)
hsa-miR-412	0	0	1	1	1	1	NR2C2AP	nuclear receptor 2C2-associated protein
hsa-miR-412	0	0	1	0	0	0	COX4I2	cytochrome c oxidase subunit IV isoform 2 (lung)
hsa-miR-412	1	0	1	1	1	1	LETMD1	LETM1 domain containing 1
hsa-miR-412	0	0	1	1	1	1	ATP1B3	ATPase, Na+/K+ transporting, beta 3 polypeptide
hsa-miR-412	1	0	1	1	1	1	C8orf58	chromosome 8 open reading frame 58
hsa-miR-412	0	0	1	0	0	0	CMAHP	cytidine monophospho-N-acetylneuraminic acid hydroxylase, pseudogene
hsa-miR-412	1	0	1	1	1	1	SLC35D2	solute carrier family 35, member D2
hsa-miR-412	0	0	1	1	0	0	ITGB3BP	integrin beta 3 binding protein (beta3-endonexin)
hsa-miR-412	0	0	1	1	1	1	CYTH2	cytohesin 2
hsa-miR-412	0	0	1	0	0	0	ARRDC1	arrestin domain containing 1
hsa-miR-412	0	0	1	0	0	0	PRMT1	protein arginine methyltransferase 1
hsa-miR-412	1	0	1	1	1	1	FGF11	fibroblast growth factor 11
hsa-miR-412	0	0	1	1	1	1	PMPCB	peptidase (mitochondrial processing) beta
hsa-miR-412	0	0	1	1	1	1	INCENP	inner centromere protein antigens 135/155kDa
hsa-miR-412	0	0	1	1	0	0	SLC3A2	solute carrier family 3 (activators of dibasic and neutral amino acid transport), member 2
hsa-miR-412	0	0	1	1	0	0	HPCAL1	hippocalcin-like 1
hsa-miR-412	0	0	1	0	1	1	C17orf108	chromosome 17 open reading frame 108
hsa-miR-412	0	0	1	1	0	0	MFSD10	major facilitator superfamily domain containing 10
hsa-miR-412	0	0	1	1	0	0	C9orf16	chromosome 9 open reading frame 16
hsa-miR-412	0	0	1	1	0	0	RAD54B	RAD54 homolog B (S. cerevisiae)
hsa-miR-412	1	0	1	1	1	1	NTM	neurotrimin
hsa-miR-412	0	0	1	1	1	1	GRAP2	GRB2-related adaptor protein 2
hsa-miR-412	1	0	1	0	1	1	RPS6KB1	ribosomal protein S6 kinase, 70kDa, polypeptide 1
hsa-miR-412	0	0	1	1	1	1	PGAP2	post-GPI attachment to proteins 2
hsa-miR-412	0	0	1	1	0	0	CXorf40A	chromosome X open reading frame 40A
hsa-miR-412	1	0	1	1	1	1	LYPLA2	lysophospholipase II
hsa-miR-412	1	0	1	1	1	1	ARFIP2	ADP-ribosylation factor interacting protein 2
hsa-miR-412	1	0	1	1	1	1	TMEM245	transmembrane protein 245
hsa-miR-412	0	0	1	1	1	1	NFATC4	nuclear factor of activated T-cells, cytoplasmic, calcineurin-dependent 4
hsa-miR-412	0	0	1	0	0	0	FLJ45248	FLJ45248 protein
hsa-miR-412	1	0	1	1	1	1	PTPN18	protein tyrosine phosphatase, non-receptor type 18 (brain-derived)
hsa-miR-412	0	0	1	1	0	0	GMPPA	GDP-mannose pyrophosphorylase A
hsa-miR-412	0	0	1	0	0	0	LOC645513	uncharacterized LOC645513
hsa-miR-412	1	0	1	1	0	0	FAT4	FAT tumor suppressor homolog 4 (Drosophila)
hsa-miR-412	0	0	1	1	0	0	C1orf122	chromosome 1 open reading frame 122
hsa-miR-412	1	0	1	1	1	1	TAGLN2	transgelin 2
hsa-miR-412	0	0	1	1	1	1	PEX19	peroxisomal biogenesis factor 19
hsa-miR-412	1	0	1	0	1	1	C15orf41	chromosome 15 open reading frame 41
hsa-miR-412	1	0	1	1	1	1	CAMK2A	calcium/calmodulin-dependent protein kinase II alpha
hsa-miR-412	0	0	1	1	1	1	P2RX5	purinergic receptor P2X, ligand-gated ion channel, 5
hsa-miR-412	1	0	1	1	1	1	YWHAQ	tyrosine 3-monooxygenase/tryptophan 5-monooxygenase activation protein, theta polypeptide
hsa-miR-412	0	0	1	1	0	0	CD53	CD53 molecule
hsa-miR-412	0	0	1	1	0	0	PHPT1	phosphohistidine phosphatase 1
hsa-miR-412	0	0	1	1	0	0	FAM57B	family with sequence similarity 57, member B
hsa-miR-412	0	0	1	1	1	1	FUS	fused in sarcoma
hsa-miR-412	0	0	1	1	1	1	SLCO4A1	solute carrier organic anion transporter family, member 4A1
hsa-miR-412	1	0	1	1	1	1	SNX1	sorting nexin 1
hsa-miR-412	1	0	1	1	1	1	ARMC8	armadillo repeat containing 8
hsa-miR-412	1	0	1	1	1	1	PDCL	phosducin-like
hsa-miR-412	0	0	1	1	0	0	CCDC107	coiled-coil domain containing 107
hsa-miR-412	0	0	1	1	0	0	GLTSCR2	glioma tumor suppressor candidate region gene 2
hsa-miR-412	1	0	1	1	1	1	TMEM55B	transmembrane protein 55B
hsa-miR-412	1	0	1	1	1	1	RALY	RNA binding protein, autoantigenic (hnRNP-associated with lethal yellow homolog (mouse))
hsa-miR-412	1	0	1	1	1	1	TRAPPC3	trafficking protein particle complex 3
hsa-miR-412	0	0	1	0	0	0	NUDT18	nudix (nucleoside diphosphate linked moiety X)-type motif 18
hsa-miR-412	0	0	1	1	0	0	NT5C3L	5'-nucleotidase, cytosolic III-like
hsa-miR-412	1	0	1	1	1	1	WIPI2	WD repeat domain, phosphoinositide interacting 2
hsa-miR-412	1	0	1	1	0	0	FOXO3	forkhead box O3
hsa-miR-412	0	0	1	1	0	0	ARVCF	armadillo repeat gene deleted in velocardiofacial syndrome
hsa-miR-412	1	0	1	1	1	1	PHF20L1	PHD finger protein 20-like 1
hsa-miR-412	0	0	1	0	0	0	LOC100132984	uncharacterized LOC100132984
hsa-miR-412	1	0	1	1	1	1	JUNB	jun B proto-oncogene
hsa-miR-412	1	0	1	1	1	1	LGALSL	lectin, galactoside-binding-like
hsa-miR-412	0	0	1	1	1	1	TOP3B	topoisomerase (DNA) III beta
hsa-miR-412	0	0	1	1	0	0	PI16	peptidase inhibitor 16
hsa-miR-412	1	0	1	1	1	1	TFPI	tissue factor pathway inhibitor (lipoprotein-associated coagulation inhibitor)
hsa-miR-412	0	0	1	1	0	0	IL11RA	interleukin 11 receptor, alpha
hsa-miR-412	0	0	1	1	1	1	ARFRP1	ADP-ribosylation factor related protein 1
hsa-miR-412	1	0	1	1	1	1	STAG2	stromal antigen 2
hsa-miR-412	0	0	1	0	0	0	LOC731789	uncharacterized LOC731789
hsa-miR-412	0	0	1	1	1	1	BDP1	B double prime 1, subunit of RNA polymerase III transcription initiation factor IIIB
hsa-miR-412	0	0	1	1	1	1	MRPL42	mitochondrial ribosomal protein L42
hsa-miR-412	1	0	1	1	1	1	PHACTR2	phosphatase and actin regulator 2
hsa-miR-412	0	0	1	1	1	1	ISX	intestine-specific homeobox
hsa-miR-412	1	0	1	1	1	1	HECW2	HECT, C2 and WW domain containing E3 ubiquitin protein ligase 2
hsa-miR-412	1	0	1	1	1	1	ANKS6	ankyrin repeat and sterile alpha motif domain containing 6
hsa-miR-412	1	0	1	1	1	1	SNRK	SNF related kinase
hsa-miR-412	1	0	1	1	1	1	MAPK8IP3	mitogen-activated protein kinase 8 interacting protein 3
hsa-miR-412	0	0	1	1	0	0	TENC1	tensin like C1 domain containing phosphatase (tensin 2)
hsa-miR-412	0	0	1	0	0	0	ZNFX1-AS1	ZNFX1 antisense RNA 1
hsa-miR-412	0	0	1	1	0	0	STK25	serine/threonine kinase 25
hsa-miR-412	1	0	1	1	1	1	ZFHX3	zinc finger homeobox 3
hsa-miR-412	1	0	1	1	1	1	GRM5	glutamate receptor, metabotropic 5
hsa-miR-412	1	0	1	1	1	1	PRKG1	protein kinase, cGMP-dependent, type I
hsa-miR-412	0	0	1	1	1	1	FCAR	Fc fragment of IgA, receptor for
hsa-miR-412	0	0	1	1	1	1	P2RX7	purinergic receptor P2X, ligand-gated ion channel, 7
hsa-miR-412	0	0	1	1	1	1	MARVELD2	MARVEL domain containing 2
hsa-miR-412	0	0	1	0	0	0	PILRB	paired immunoglobin-like type 2 receptor beta
hsa-miR-412	1	0	1	1	1	1	LGR4	leucine-rich repeat containing G protein-coupled receptor 4
hsa-miR-412	0	0	1	0	0	0	GPR144	G protein-coupled receptor 144
hsa-miR-412	0	0	1	1	1	1	ALDH3B1	aldehyde dehydrogenase 3 family, member B1
hsa-miR-412	0	0	1	1	0	0	KIF22	kinesin family member 22
hsa-miR-412	1	0	1	1	1	1	GRM1	glutamate receptor, metabotropic 1
hsa-miR-412	0	0	1	0	0	0	PVT1	Pvt1 oncogene (non-protein coding)
hsa-miR-412	1	0	1	1	1	1	ARSB	arylsulfatase B
hsa-miR-412	1	0	1	1	1	1	CYP19A1	cytochrome P450, family 19, subfamily A, polypeptide 1
hsa-miR-412	1	0	1	0	1	1	EXT1	exostosin 1
hsa-miR-412	0	0	1	1	0	0	GJB1	gap junction protein, beta 1, 32kDa
hsa-miR-412	1	0	1	1	1	1	TBX5	T-box 5
hsa-miR-412	1	0	1	1	1	1	LEP	leptin
hsa-miR-412	1	0	1	1	1	1	ATXN1	ataxin 1
hsa-miR-412	1	0	1	1	1	1	TAT	tyrosine aminotransferase
hsa-miR-412	1	0	1	1	1	1	TIMP3	TIMP metallopeptidase inhibitor 3
hsa-miR-412	0	0	1	1	1	1	SLC25A20	solute carrier family 25 (carnitine/acylcarnitine translocase), member 20
hsa-miR-412	0	0	1	1	1	1	PLEC	plectin
hsa-miR-412	1	0	1	1	1	1	RFX5	regulatory factor X, 5 (influences HLA class II expression)
hsa-miR-412	0	0	1	1	0	0	C1QB	complement component 1, q subcomponent, B chain
hsa-miR-412	1	0	1	1	1	1	MPZ	myelin protein zero
hsa-miR-412	1	0	1	1	1	1	CD44	CD44 molecule (Indian blood group)
hsa-miR-412	0	0	1	1	1	1	IGF2	insulin-like growth factor 2 (somatomedin A)
hsa-miR-412	1	0	1	1	1	1	PPP3R1	protein phosphatase 3, regulatory subunit B, alpha
hsa-miR-412	1	0	1	1	1	1	PTGFR	prostaglandin F receptor (FP)
hsa-miR-412	1	0	1	1	1	1	TPD52L3	tumor protein D52-like 3
hsa-miR-412	1	0	1	0	1	1	CACNA1I	calcium channel, voltage-dependent, T type, alpha 1I subunit
hsa-miR-412	1	0	1	1	1	1	HMGXB4	HMG box domain containing 4
hsa-miR-412	1	0	1	1	1	1	BICD2	bicaudal D homolog 2 (Drosophila)
hsa-miR-412	1	0	1	1	1	1	HNRNPD	heterogeneous nuclear ribonucleoprotein D (AU-rich element RNA binding protein 1, 37kDa)
hsa-miR-412	0	0	1	1	1	1	CCDC144NL	coiled-coil domain containing 144 family, N-terminal like
hsa-miR-412	1	0	1	1	1	1	NRARP	NOTCH-regulated ankyrin repeat protein
hsa-miR-412	0	0	1	1	1	1	HMGN2P46	high mobility group nucleosomal binding domain 2 pseudogene 46
hsa-miR-412	1	0	1	1	1	1	AK4	adenylate kinase 4
hsa-miR-412	0	0	1	1	1	1	PLAUR	plasminogen activator, urokinase receptor
hsa-miR-412	1	0	1	0	1	1	YPEL2	yippee-like 2 (Drosophila)
hsa-miR-412	1	0	1	1	1	1	EDA	ectodysplasin A
hsa-miR-412	0	0	1	1	1	1	APOBEC3F	apolipoprotein B mRNA editing enzyme, catalytic polypeptide-like 3F
hsa-miR-412	0	0	1	1	1	1	KLHDC9	kelch domain containing 9
hsa-miR-412	1	0	1	0	1	1	KIAA2022	KIAA2022
hsa-miR-412	1	0	1	1	1	1	NUPL1	nucleoporin like 1
hsa-miR-412	0	0	1	1	1	1	HRNR	hornerin
hsa-miR-412	1	0	1	0	1	1	ZC3H12B	zinc finger CCCH-type containing 12B
hsa-miR-412	0	0	1	1	1	1	ZMAT1	zinc finger, matrin-type 1
hsa-miR-412	1	0	1	0	1	1	CREB5	cAMP responsive element binding protein 5
hsa-miR-412	0	0	1	1	1	1	CHCHD7	coiled-coil-helix-coiled-coil-helix domain containing 7
hsa-miR-412	0	0	1	1	0	0	SOHLH1	spermatogenesis and oogenesis specific basic helix-loop-helix 1
hsa-miR-412	1	0	1	1	1	1	C12orf68	chromosome 12 open reading frame 68
hsa-miR-412	1	0	1	1	1	1	H3F3C	H3 histone, family 3C
hsa-miR-412	1	0	1	1	1	1	KCNMA1	potassium large conductance calcium-activated channel, subfamily M, alpha member 1
hsa-miR-412	0	0	1	1	1	1	ME3	malic enzyme 3, NADP(+)-dependent, mitochondrial
hsa-miR-412	0	0	1	1	0	0	SPRR2B	small proline-rich protein 2B
hsa-miR-412	1	0	1	1	1	1	ZHX1	zinc fingers and homeoboxes 1
hsa-miR-412	0	0	1	1	0	0	POLR3H	polymerase (RNA) III (DNA directed) polypeptide H (22.9kD)
hsa-miR-412	1	0	1	1	1	1	SERBP1	SERPINE1 mRNA binding protein 1
hsa-miR-412	0	0	1	0	0	0	ADIG	adipogenin
hsa-miR-412	0	0	1	1	1	1	POLR2M	polymerase (RNA) II (DNA directed) polypeptide M
hsa-miR-412	1	0	1	1	1	1	GPHN	gephyrin
hsa-miR-412	1	0	1	0	1	1	BCL7A	B-cell CLL/lymphoma 7A
hsa-miR-412	1	0	1	0	1	1	TNRC6B	trinucleotide repeat containing 6B
hsa-miR-412	1	0	1	0	1	1	CELF2	CUGBP, Elav-like family member 2
hsa-miR-412	1	0	1	0	1	1	RAB12	RAB12, member RAS oncogene family
hsa-miR-412	1	0	1	0	1	1	ANO6	anoctamin 6
hsa-miR-412	1	0	1	1	1	1	PDE8B	phosphodiesterase 8B
hsa-miR-412	1	0	1	0	1	1	SAMD5	sterile alpha motif domain containing 5
hsa-miR-412	1	0	1	1	1	1	MYCL1	v-myc myelocytomatosis viral oncogene homolog 1, lung carcinoma derived (avian)
hsa-miR-412	0	0	1	1	0	0	CALCA	calcitonin-related polypeptide alpha
hsa-miR-412	1	0	1	1	1	1	KIAA0317	KIAA0317
hsa-miR-412	1	0	1	1	1	1	KCNC4	potassium voltage-gated channel, Shaw-related subfamily, member 4
hsa-miR-412	1	0	1	0	1	1	USP9X	ubiquitin specific peptidase 9, X-linked
hsa-miR-412	1	0	1	0	1	1	CREBZF	CREB/ATF bZIP transcription factor
hsa-miR-412	1	0	1	1	1	1	CDC42	cell division cycle 42 (GTP binding protein, 25kDa)
hsa-miR-412	0	0	1	0	0	0	C19orf55	chromosome 19 open reading frame 55
hsa-miR-412	1	0	1	1	1	1	CHN2	chimerin (chimaerin) 2
hsa-miR-412	1	0	1	1	1	1	PAPD5	PAP associated domain containing 5
hsa-miR-412	0	0	1	1	1	1	MTHFD2	methylenetetrahydrofolate dehydrogenase (NADP+ dependent) 2, methenyltetrahydrofolate cyclohydrolase
hsa-miR-412	0	0	1	1	1	1	BTNL8	butyrophilin-like 8
hsa-miR-412	0	0	1	1	0	0	DEFB107B	defensin, beta 107B
hsa-miR-412	1	0	1	1	1	1	CEP63	centrosomal protein 63kDa
hsa-miR-412	0	0	1	1	1	1	CCDC41	coiled-coil domain containing 41
hsa-miR-412	1	0	1	1	1	1	ZC2HC1C	zinc finger, C2HC-type containing 1C
hsa-miR-412	0	0	1	1	1	1	SLC35A2	solute carrier family 35 (UDP-galactose transporter), member A2
hsa-miR-412	1	0	1	1	1	1	SLC9A6	solute carrier family 9, subfamily A (NHE6, cation proton antiporter 6), member 6
hsa-miR-412	0	0	1	1	1	1	TMEM8B	transmembrane protein 8B
hsa-miR-412	1	0	1	1	1	1	TPM3	tropomyosin 3
hsa-miR-412	0	0	1	1	1	1	SLC6A3	solute carrier family 6 (neurotransmitter transporter, dopamine), member 3
hsa-miR-412	1	0	1	0	1	1	TMEM237	transmembrane protein 237
hsa-miR-412	0	0	1	1	1	1	FAM22G	family with sequence similarity 22, member G
hsa-miR-412	1	0	1	1	1	1	ZNF436	zinc finger protein 436
hsa-miR-412	1	0	1	1	1	1	ATG9A	autophagy related 9A
hsa-miR-412	1	0	1	1	1	1	IRF2BP2	interferon regulatory factor 2 binding protein 2
hsa-miR-412	0	0	1	1	0	0	CFC1B	cripto, FRL-1, cryptic family 1B
hsa-miR-412	1	0	1	1	1	1	TMTC4	transmembrane and tetratricopeptide repeat containing 4
hsa-miR-412	0	0	1	1	0	0	CT47A1	cancer/testis antigen family 47, member A1
hsa-miR-412	1	0	1	1	1	1	MGA	MAX gene associated
hsa-miR-412	1	0	1	1	1	1	NXF1	nuclear RNA export factor 1
hsa-miR-412	0	0	1	1	1	1	ENTPD3	ectonucleoside triphosphate diphosphohydrolase 3
hsa-miR-412	0	0	1	1	1	1	CLIC2	chloride intracellular channel 2
hsa-miR-412	0	0	1	1	0	0	CLPTM1	cleft lip and palate associated transmembrane protein 1
hsa-miR-412	1	0	1	1	1	1	CTNND2	catenin (cadherin-associated protein), delta 2
hsa-miR-412	0	0	1	1	0	0	DNAH9	dynein, axonemal, heavy chain 9
hsa-miR-412	1	0	1	1	1	1	DYRK1A	dual-specificity tyrosine-(Y)-phosphorylation regulated kinase 1A
hsa-miR-412	1	0	1	1	1	1	CELSR3	cadherin, EGF LAG seven-pass G-type receptor 3 (flamingo homolog, Drosophila)
hsa-miR-412	1	0	1	0	1	1	ELAVL3	ELAV (embryonic lethal, abnormal vision, Drosophila)-like 3 (Hu antigen C)
hsa-miR-412	1	0	1	1	1	1	EN2	engrailed homeobox 2
hsa-miR-412	0	0	1	1	1	1	B4GALNT1	beta-1,4-N-acetyl-galactosaminyl transferase 1
hsa-miR-412	0	0	1	1	1	1	ARF5	ADP-ribosylation factor 5
hsa-miR-412	1	0	1	0	1	1	ARNT	aryl hydrocarbon receptor nuclear translocator
hsa-miR-412	1	0	1	1	1	1	BAAT	bile acid CoA: amino acid N-acyltransferase (glycine N-choloyltransferase)
hsa-miR-412	0	0	1	0	0	0	BAI1	brain-specific angiogenesis inhibitor 1
hsa-miR-412	1	0	1	1	1	1	BCL6	B-cell CLL/lymphoma 6
hsa-miR-412	0	0	1	1	1	1	CALB2	calbindin 2
hsa-miR-412	1	0	1	1	1	1	CENPB	centromere protein B, 80kDa
hsa-miR-412	1	0	1	0	1	1	COL19A1	collagen, type XIX, alpha 1
hsa-miR-412	0	0	1	1	0	0	COX6B1	cytochrome c oxidase subunit VIb polypeptide 1 (ubiquitous)
hsa-miR-412	1	0	1	1	1	1	CSNK2A1	casein kinase 2, alpha 1 polypeptide
hsa-miR-412	1	0	1	1	1	1	EIF4E	eukaryotic translation initiation factor 4E
hsa-miR-412	1	0	1	0	1	1	ETV6	ets variant 6
hsa-miR-412	1	0	1	1	1	1	FKBP4	FK506 binding protein 4, 59kDa
hsa-miR-412	1	0	1	0	1	1	FOXO1	forkhead box O1
hsa-miR-412	1	0	1	0	1	1	FUT4	fucosyltransferase 4 (alpha (1,3) fucosyltransferase, myeloid-specific)
hsa-miR-412	1	0	1	1	1	1	LIFR	leukemia inhibitory factor receptor alpha
hsa-miR-412	1	0	1	1	1	1	LIMK1	LIM domain kinase 1
hsa-miR-412	1	0	1	1	1	1	LY75	lymphocyte antigen 75
hsa-miR-412	0	0	1	0	1	1	MFNG	MFNG O-fucosylpeptide 3-beta-N-acetylglucosaminyltransferase
hsa-miR-412	0	0	1	0	1	1	CXCL9	chemokine (C-X-C motif) ligand 9
hsa-miR-412	1	0	1	1	1	1	NPTX1	neuronal pentraxin I
hsa-miR-412	0	0	1	0	1	1	OAZ2	ornithine decarboxylase antizyme 2
hsa-miR-412	1	0	1	1	1	1	PLAGL2	pleiomorphic adenoma gene-like 2
hsa-miR-412	0	0	1	1	0	0	POU5F1	POU class 5 homeobox 1
hsa-miR-412	1	0	1	1	1	1	PPP1CC	protein phosphatase 1, catalytic subunit, gamma isozyme
hsa-miR-412	1	0	1	0	1	1	MAPK4	mitogen-activated protein kinase 4
hsa-miR-412	0	0	1	1	1	1	MAPK9	mitogen-activated protein kinase 9
hsa-miR-412	0	0	1	1	1	1	MAP2K6	mitogen-activated protein kinase kinase 6
hsa-miR-412	1	0	1	1	1	1	PTPN9	protein tyrosine phosphatase, non-receptor type 9
hsa-miR-412	1	0	1	1	1	1	PVRL1	poliovirus receptor-related 1 (herpesvirus entry mediator C)
hsa-miR-412	0	0	1	1	1	1	RING1	ring finger protein 1
hsa-miR-412	0	0	1	1	0	0	RNASE1	ribonuclease, RNase A family, 1 (pancreatic)
hsa-miR-412	1	0	1	0	1	1	CCL22	chemokine (C-C motif) ligand 22
hsa-miR-412	0	0	1	1	1	1	XCL1	chemokine (C motif) ligand 1
hsa-miR-412	0	0	1	1	1	1	SDC4	syndecan 4
hsa-miR-412	1	0	1	1	1	1	SLC9A2	solute carrier family 9, subfamily A (NHE2, cation proton antiporter 2), member 2
hsa-miR-412	0	0	1	1	0	0	SLC22A4	solute carrier family 22 (organic cation/ergothioneine transporter), member 4
hsa-miR-412	1	0	1	0	1	1	SOX11	SRY (sex determining region Y)-box 11
hsa-miR-412	1	0	1	1	1	1	SRF	serum response factor (c-fos serum response element-binding transcription factor)
hsa-miR-412	1	0	1	1	1	1	SRPR	signal recognition particle receptor (docking protein)
hsa-miR-412	1	0	1	1	1	1	STAC	SH3 and cysteine rich domain
hsa-miR-412	0	0	1	1	1	1	STIM1	stromal interaction molecule 1
hsa-miR-412	1	0	1	1	1	1	SUV39H1	suppressor of variegation 3-9 homolog 1 (Drosophila)
hsa-miR-412	0	0	1	0	1	1	TCEA3	transcription elongation factor A (SII), 3
hsa-miR-412	0	0	1	1	1	1	TPR	translocated promoter region, nuclear basket protein
hsa-miR-412	1	0	1	0	1	1	UBE2D2	ubiquitin-conjugating enzyme E2D 2
hsa-miR-412	1	0	1	1	1	1	FZD5	frizzled family receptor 5
hsa-miR-412	1	0	1	0	1	1	CUL3	cullin 3
hsa-miR-412	1	0	1	0	1	1	TNKS	tankyrase, TRF1-interacting ankyrin-related ADP-ribose polymerase
hsa-miR-412	1	0	1	1	1	1	MBTPS1	membrane-bound transcription factor peptidase, site 1
hsa-miR-412	1	0	1	0	1	1	CDK5R1	cyclin-dependent kinase 5, regulatory subunit 1 (p35)
hsa-miR-412	1	0	1	0	1	1	ST13	suppression of tumorigenicity 13 (colon carcinoma) (Hsp70 interacting protein)
hsa-miR-412	1	0	1	0	1	1	E2F2	E2F transcription factor 2
hsa-miR-412	1	0	1	1	1	1	EFNB2	ephrin-B2
hsa-miR-412	0	0	1	0	1	1	SLC1A3	solute carrier family 1 (glial high affinity glutamate transporter), member 3
hsa-miR-412	0	0	1	1	0	0	ATP6V1F	ATPase, H+ transporting, lysosomal 14kDa, V1 subunit F
hsa-miR-412	0	0	1	1	1	1	RAB28	RAB28, member RAS oncogene family
hsa-miR-412	1	0	1	1	1	1	GDA	guanine deaminase
hsa-miR-412	1	0	1	0	1	1	ACVR1B	activin A receptor, type IB
hsa-miR-412	1	0	1	1	1	1	BCL9	B-cell CLL/lymphoma 9
hsa-miR-412	1	0	1	1	1	1	DAG1	dystroglycan 1 (dystrophin-associated glycoprotein 1)
hsa-miR-412	1	0	1	1	1	1	EFNB1	ephrin-B1
hsa-miR-412	1	0	1	1	1	1	EPHA4	EPH receptor A4
hsa-miR-412	1	0	1	1	1	1	EPS8	epidermal growth factor receptor pathway substrate 8
hsa-miR-412	1	0	1	0	1	1	ETV5	ets variant 5
hsa-miR-412	1	0	1	1	1	1	FOXD2	forkhead box D2
hsa-miR-412	0	0	1	1	1	1	FOXA1	forkhead box A1
hsa-miR-412	1	0	1	0	1	1	SCN2B	sodium channel, voltage-gated, type II, beta subunit
hsa-miR-412	1	0	1	0	1	1	USP9Y	ubiquitin specific peptidase 9, Y-linked
hsa-miR-412	1	0	1	1	1	1	RABEP1	rabaptin, RAB GTPase binding effector protein 1
hsa-miR-412	1	0	1	1	1	1	SYNGR1	synaptogyrin 1
hsa-miR-412	0	0	1	1	0	0	DYRK1B	dual-specificity tyrosine-(Y)-phosphorylation regulated kinase 1B
hsa-miR-412	1	0	1	1	1	1	BZRAP1	benzodiazapine receptor (peripheral) associated protein 1
hsa-miR-412	1	0	1	0	1	1	MAPKAPK2	mitogen-activated protein kinase-activated protein kinase 2
hsa-miR-412	1	0	1	0	1	1	VAMP3	vesicle-associated membrane protein 3 (cellubrevin)
hsa-miR-412	1	0	1	1	1	1	KIF3B	kinesin family member 3B
hsa-miR-412	1	0	1	1	1	1	JARID2	jumonji, AT rich interactive domain 2
hsa-miR-412	1	0	1	0	1	1	SEL1L	sel-1 suppressor of lin-12-like (C. elegans)
hsa-miR-412	1	0	1	1	1	1	FOXN3	forkhead box N3
hsa-miR-412	1	0	1	1	1	1	DCC	deleted in colorectal carcinoma
hsa-miR-412	1	0	1	0	1	1	E2F1	E2F transcription factor 1
hsa-miR-412	1	0	1	1	0	0	EFNA4	ephrin-A4
hsa-miR-412	0	0	1	0	1	1	EPHA3	EPH receptor A3
hsa-miR-412	1	0	1	1	1	1	H3F3B	H3 histone, family 3B (H3.3B)
hsa-miR-412	1	0	1	1	0	0	HCFC1	host cell factor C1 (VP16-accessory protein)
hsa-miR-412	1	0	1	1	1	1	RND2	Rho family GTPase 2
hsa-miR-412	1	0	1	1	0	0	ZBTB22	zinc finger and BTB domain containing 22
hsa-miR-412	1	0	1	0	0	0	FRAT1	frequently rearranged in advanced T-cell lymphomas
hsa-miR-412	1	0	1	1	1	1	PIGK	phosphatidylinositol glycan anchor biosynthesis, class K
hsa-miR-412	1	0	1	1	1	1	SCARB2	scavenger receptor class B, member 2
hsa-miR-412	0	0	1	1	0	0	HLA-E	major histocompatibility complex, class I, E
hsa-miR-412	0	0	1	1	0	0	LMNB1	lamin B1
hsa-miR-412	0	0	1	1	1	1	SOX3	SRY (sex determining region Y)-box 3
hsa-miR-412	1	0	1	1	1	1	TERF2	telomeric repeat binding factor 2
hsa-miR-412	0	0	1	0	1	1	GPR55	G protein-coupled receptor 55
hsa-miR-412	1	0	1	1	1	1	PRKD3	protein kinase D3
hsa-miR-412	1	0	1	0	1	1	SPRY3	sprouty homolog 3 (Drosophila)
hsa-miR-412	1	0	1	1	0	0	TRAIP	TRAF interacting protein
hsa-miR-412	1	0	1	1	1	1	MEOX2	mesenchyme homeobox 2
hsa-miR-412	1	0	1	1	1	1	MMP16	matrix metallopeptidase 16 (membrane-inserted)
hsa-miR-412	1	0	1	1	1	1	MTF1	metal-regulatory transcription factor 1
hsa-miR-412	0	0	1	1	1	1	SMYD5	SMYD family member 5
hsa-miR-412	1	0	1	1	1	1	SEMA3A	sema domain, immunoglobulin domain (Ig), short basic domain, secreted, (semaphorin) 3A
hsa-miR-412	1	0	1	1	1	1	NEUROD2	neuronal differentiation 2
hsa-miR-412	1	0	1	1	1	1	CDK16	cyclin-dependent kinase 16
hsa-miR-412	0	0	1	1	0	0	PNOC	prepronociceptin
hsa-miR-412	0	0	1	1	1	1	PROP1	PROP paired-like homeobox 1
hsa-miR-412	0	0	1	1	1	1	RRAS	related RAS viral (r-ras) oncogene homolog
hsa-miR-412	1	0	1	1	1	1	SMC1A	structural maintenance of chromosomes 1A
hsa-miR-412	1	0	1	1	1	1	NPEPPS	aminopeptidase puromycin sensitive
hsa-miR-412	0	0	1	0	0	0	CREB3	cAMP responsive element binding protein 3
hsa-miR-412	1	0	1	0	1	1	IGF2BP1	insulin-like growth factor 2 mRNA binding protein 1
hsa-miR-412	1	0	1	1	1	1	SPIN1	spindlin 1
hsa-miR-412	1	0	1	1	1	1	CDH10	cadherin 10, type 2 (T2-cadherin)
hsa-miR-412	1	0	1	0	1	1	SYNGAP1	synaptic Ras GTPase activating protein 1
hsa-miR-412	1	0	1	1	1	1	CBX1	chromobox homolog 1
hsa-miR-412	0	0	1	1	1	1	PKIA	protein kinase (cAMP-dependent, catalytic) inhibitor alpha
hsa-miR-412	0	0	1	1	0	0	PIM2	pim-2 oncogene
hsa-miR-412	0	0	1	1	1	1	TAF5	TAF5 RNA polymerase II, TATA box binding protein (TBP)-associated factor, 100kDa
hsa-miR-412	0	0	1	1	0	0	RNF113A	ring finger protein 113A
hsa-miR-412	1	0	1	1	1	1	NR4A3	nuclear receptor subfamily 4, group A, member 3
hsa-miR-412	1	0	1	0	1	1	WASF2	WAS protein family, member 2
hsa-miR-412	1	0	1	0	1	1	PAPD7	PAP associated domain containing 7
hsa-miR-412	1	0	1	1	1	1	TUSC2	tumor suppressor candidate 2
hsa-miR-412	0	0	1	1	1	1	ATF5	activating transcription factor 5
hsa-miR-412	1	0	1	1	1	1	ELL2	elongation factor, RNA polymerase II, 2
hsa-miR-412	0	0	1	1	1	1	FRAT2	frequently rearranged in advanced T-cell lymphomas 2
hsa-miR-412	1	0	1	0	1	1	FZD4	frizzled family receptor 4
hsa-miR-412	1	0	1	1	1	1	RYBP	RING1 and YY1 binding protein
hsa-miR-412	1	0	1	1	0	0	TIMM10	translocase of inner mitochondrial membrane 10 homolog (yeast)
hsa-miR-412	1	0	1	0	1	1	FLRT2	fibronectin leucine rich transmembrane protein 2
hsa-miR-412	0	0	1	1	1	1	N6AMT1	N-6 adenine-specific DNA methyltransferase 1 (putative)
hsa-miR-412	1	0	1	0	1	1	VPS4A	vacuolar protein sorting 4 homolog A (S. cerevisiae)
hsa-miR-412	1	0	1	1	1	1	CLCF1	cardiotrophin-like cytokine factor 1
hsa-miR-412	0	0	1	1	0	0	GMPPB	GDP-mannose pyrophosphorylase B
hsa-miR-412	0	0	1	1	0	0	KCNJ14	potassium inwardly-rectifying channel, subfamily J, member 14
hsa-miR-412	1	0	1	1	1	1	AK2	adenylate kinase 2
hsa-miR-412	0	0	1	0	1	1	EMR2	egf-like module containing, mucin-like, hormone receptor-like 2
hsa-miR-412	1	0	1	1	0	0	HOXC11	homeobox C11
hsa-miR-412	0	0	1	1	1	1	APOL3	apolipoprotein L, 3
hsa-miR-412	1	0	1	0	1	1	DIEXF	digestive organ expansion factor homolog (zebrafish)
hsa-miR-412	1	0	1	1	1	1	SERP1	stress-associated endoplasmic reticulum protein 1
hsa-miR-412	1	0	1	1	1	1	TNFRSF21	tumor necrosis factor receptor superfamily, member 21
hsa-miR-412	1	0	1	1	1	1	RND1	Rho family GTPase 1
hsa-miR-412	0	0	1	1	1	1	PSME4	proteasome (prosome, macropain) activator subunit 4
hsa-miR-412	1	0	1	1	1	1	RALGPS1	Ral GEF with PH domain and SH3 binding motif 1
hsa-miR-412	1	0	1	1	0	0	TTLL4	tubulin tyrosine ligase-like family, member 4
hsa-miR-412	0	0	1	1	1	1	DZIP3	DAZ interacting protein 3, zinc finger
hsa-miR-412	1	0	1	0	1	1	EDEM1	ER degradation enhancer, mannosidase alpha-like 1
hsa-miR-412	1	0	1	1	1	1	ULK2	unc-51-like kinase 2 (C. elegans)
hsa-miR-412	1	0	1	0	1	1	MLEC	malectin
hsa-miR-412	1	0	1	0	1	1	KIAA0513	KIAA0513
hsa-miR-412	1	0	1	1	1	1	RASSF2	Ras association (RalGDS/AF-6) domain family member 2
hsa-miR-412	1	0	1	1	1	1	DAZAP2	DAZ associated protein 2
hsa-miR-412	0	0	1	1	1	1	KIAA0141	KIAA0141
hsa-miR-412	1	0	1	1	1	1	RUSC2	RUN and SH3 domain containing 2
hsa-miR-412	0	0	1	1	1	1	TOX4	TOX high mobility group box family member 4
hsa-miR-412	1	0	1	1	1	1	JOSD1	Josephin domain containing 1
hsa-miR-412	1	0	1	0	1	1	NMNAT2	nicotinamide nucleotide adenylyltransferase 2
hsa-miR-412	1	0	1	0	1	1	ZNF609	zinc finger protein 609
hsa-miR-412	1	0	1	0	1	1	PEG10	paternally expressed 10
hsa-miR-412	1	0	1	1	1	1	SMG1	smg-1 homolog, phosphatidylinositol 3-kinase-related kinase (C. elegans)
hsa-miR-412	1	0	1	1	1	1	SIK2	salt-inducible kinase 2
hsa-miR-412	1	0	1	0	1	1	KIAA1024	KIAA1024
hsa-miR-412	1	0	1	1	1	1	PHF15	PHD finger protein 15
hsa-miR-412	1	0	1	0	1	1	ARHGEF12	Rho guanine nucleotide exchange factor (GEF) 12
hsa-miR-412	1	0	1	0	1	1	LARP1	La ribonucleoprotein domain family, member 1
hsa-miR-412	1	0	1	1	1	1	PARM1	prostate androgen-regulated mucin-like protein 1
hsa-miR-412	0	0	1	1	0	0	SPEF1	sperm flagellar 1
hsa-miR-412	1	0	1	1	1	1	MYRIP	myosin VIIA and Rab interacting protein
hsa-miR-412	1	0	1	1	1	1	SLITRK5	SLIT and NTRK-like family, member 5
hsa-miR-412	1	0	1	1	1	1	ABCA12	ATP-binding cassette, sub-family A (ABC1), member 12
hsa-miR-412	1	0	1	1	0	0	SENP3	SUMO1/sentrin/SMT3 specific peptidase 3
hsa-miR-412	1	0	1	1	1	1	AZIN1	antizyme inhibitor 1
hsa-miR-412	0	0	1	1	1	1	HMP19	HMP19 protein
hsa-miR-412	0	0	1	1	1	1	ISOC1	isochorismatase domain containing 1
hsa-miR-412	1	0	1	1	1	1	SUFU	suppressor of fused homolog (Drosophila)
hsa-miR-412	1	0	1	0	1	1	HPCAL4	hippocalcin like 4
hsa-miR-412	0	0	1	1	1	1	FBXO40	F-box protein 40
hsa-miR-412	1	0	1	1	1	1	RAPGEFL1	Rap guanine nucleotide exchange factor (GEF)-like 1
hsa-miR-412	0	0	1	1	0	0	PLCE1	phospholipase C, epsilon 1
hsa-miR-412	0	0	1	1	1	1	SPAG11B	sperm associated antigen 11B
hsa-miR-412	1	0	1	1	1	1	RAB6B	RAB6B, member RAS oncogene family
hsa-miR-412	0	0	1	1	1	1	KDM3B	lysine (K)-specific demethylase 3B
hsa-miR-412	0	0	1	1	1	1	OGG1	8-oxoguanine DNA glycosylase
hsa-miR-412	1	0	1	1	1	1	SIX4	SIX homeobox 4
hsa-miR-412	1	0	1	1	1	1	INO80	INO80 homolog (S. cerevisiae)
hsa-miR-412	1	0	1	1	0	0	C17orf59	chromosome 17 open reading frame 59
hsa-miR-412	1	0	1	0	1	1	EIF2C4	eukaryotic translation initiation factor 2C, 4
hsa-miR-412	0	0	1	0	1	1	OTUB1	OTU domain, ubiquitin aldehyde binding 1
hsa-miR-412	0	0	1	1	1	1	MTMR8	myotubularin related protein 8
hsa-miR-412	1	0	1	1	1	1	ALKBH5	alkB, alkylation repair homolog 5 (E. coli)
hsa-miR-412	1	0	1	1	1	1	RNF125	ring finger protein 125, E3 ubiquitin protein ligase
hsa-miR-412	0	0	1	1	1	1	TMEM70	transmembrane protein 70
hsa-miR-412	1	0	1	1	1	1	HIF1AN	hypoxia inducible factor 1, alpha subunit inhibitor
hsa-miR-412	0	0	1	1	1	1	C14orf119	chromosome 14 open reading frame 119
hsa-miR-412	1	0	1	0	1	1	IPO9	importin 9
hsa-miR-412	1	0	1	1	1	1	FAM178A	family with sequence similarity 178, member A
hsa-miR-412	0	0	1	0	1	1	GOLPH3L	golgi phosphoprotein 3-like
hsa-miR-412	0	0	1	1	1	1	TRIM62	tripartite motif containing 62
hsa-miR-412	1	0	1	1	1	1	UBA6	ubiquitin-like modifier activating enzyme 6
hsa-miR-412	0	0	1	1	1	1	QRSL1	glutaminyl-tRNA synthase (glutamine-hydrolyzing)-like 1
hsa-miR-412	1	0	1	1	1	1	ZNF654	zinc finger protein 654
hsa-miR-412	1	0	1	1	1	1	KIAA1598	KIAA1598
hsa-miR-412	1	0	1	0	1	1	FOXJ2	forkhead box J2
hsa-miR-412	1	0	1	1	1	1	PI4K2A	phosphatidylinositol 4-kinase type 2 alpha
hsa-miR-412	0	0	1	1	0	0	ITFG2	integrin alpha FG-GAP repeat containing 2
hsa-miR-412	0	0	1	1	1	1	HDAC8	histone deacetylase 8
hsa-miR-412	0	0	1	1	1	1	KLHL4	kelch-like 4 (Drosophila)
hsa-miR-412	0	0	1	1	1	1	RNF20	ring finger protein 20, E3 ubiquitin protein ligase
hsa-miR-412	1	0	1	1	1	1	MDM1	Mdm1 nuclear protein homolog (mouse)
hsa-miR-412	1	0	1	0	1	1	MNT	MAX binding protein
hsa-miR-412	1	0	1	1	1	1	PAK7	p21 protein (Cdc42/Rac)-activated kinase 7
hsa-miR-412	0	0	1	1	0	0	GPR84	G protein-coupled receptor 84
hsa-miR-412	1	0	1	1	0	0	JPH2	junctophilin 2
hsa-miR-412	0	0	1	1	1	1	KIAA1161	KIAA1161
hsa-miR-412	0	0	1	1	1	1	SHROOM4	shroom family member 4
hsa-miR-412	0	0	1	1	1	1	ARRDC3	arrestin domain containing 3
hsa-miR-412	0	0	1	0	1	1	TRMT5	tRNA methyltransferase 5 homolog (S. cerevisiae)
hsa-miR-412	1	0	1	1	1	1	RANBP10	RAN binding protein 10
hsa-miR-412	1	0	1	1	1	1	ZBTB2	zinc finger and BTB domain containing 2
hsa-miR-412	0	0	1	1	1	1	PRX	periaxin
hsa-miR-412	0	0	1	1	1	1	B3GALT1	UDP-Gal:betaGlcNAc beta 1,3-galactosyltransferase, polypeptide 1
hsa-miR-412	0	0	1	1	0	0	DHH	desert hedgehog
hsa-miR-412	1	0	1	0	1	1	XK	X-linked Kx blood group (McLeod syndrome)
hsa-miR-412	1	0	1	1	1	1	MTMR3	myotubularin related protein 3
hsa-miR-412	1	0	1	1	1	1	TMSB4X	thymosin beta 4, X-linked
hsa-miR-412	1	0	1	1	1	1	C6orf47	chromosome 6 open reading frame 47
hsa-miR-412	1	0	1	0	1	1	TP53INP2	tumor protein p53 inducible nuclear protein 2
hsa-miR-412	1	0	1	1	1	1	NTN4	netrin 4
hsa-miR-412	0	0	1	1	1	1	IL22RA1	interleukin 22 receptor, alpha 1
hsa-miR-412	0	0	1	1	1	1	HRH4	histamine receptor H4
hsa-miR-412	1	0	1	1	1	1	GNB4	guanine nucleotide binding protein (G protein), beta polypeptide 4
hsa-miR-412	0	0	1	1	0	0	LMAN1L	lectin, mannose-binding, 1 like
hsa-miR-412	0	0	1	1	1	1	MS4A1	membrane-spanning 4-domains, subfamily A, member 1
hsa-miR-412	1	0	1	1	1	1	NAP1L2	nucleosome assembly protein 1-like 2
hsa-miR-412	0	0	1	1	1	1	PGM5	phosphoglucomutase 5
hsa-miR-412	0	0	1	1	0	0	ABHD4	abhydrolase domain containing 4
hsa-miR-412	1	0	1	1	1	1	ABCG4	ATP-binding cassette, sub-family G (WHITE), member 4
hsa-miR-412	1	0	1	1	1	1	PRRX1	paired related homeobox 1
hsa-miR-412	1	0	1	1	1	1	C6orf106	chromosome 6 open reading frame 106
hsa-miR-412	1	0	1	1	1	1	RMND5A	required for meiotic nuclear division 5 homolog A (S. cerevisiae)
hsa-miR-412	1	0	1	0	1	1	USP46	ubiquitin specific peptidase 46
hsa-miR-412	0	0	1	1	0	0	DDRGK1	DDRGK domain containing 1
hsa-miR-412	1	0	1	1	1	1	GID4	GID complex subunit 4, VID24 homolog (S. cerevisiae)
hsa-miR-412	0	0	1	1	0	0	CHAC1	ChaC, cation transport regulator homolog 1 (E. coli)
hsa-miR-412	1	0	1	1	1	1	HIVEP3	human immunodeficiency virus type I enhancer binding protein 3
hsa-miR-412	1	0	1	1	1	1	C10orf76	chromosome 10 open reading frame 76
hsa-miR-412	0	0	1	1	1	1	RNF219	ring finger protein 219
hsa-miR-412	0	0	1	1	0	0	TNFAIP8L2	tumor necrosis factor, alpha-induced protein 8-like 2
hsa-miR-412	0	0	1	1	1	1	LRRK1	leucine-rich repeat kinase 1
hsa-miR-412	1	0	1	1	1	1	CLMP	CXADR-like membrane protein
hsa-miR-412	0	0	1	1	0	0	RNF122	ring finger protein 122
hsa-miR-412	0	0	1	1	1	1	TREML2	triggering receptor expressed on myeloid cells-like 2
hsa-miR-412	0	0	1	1	1	1	ZNF767	zinc finger family member 767
hsa-miR-412	1	0	1	1	0	0	UBTD1	ubiquitin domain containing 1
hsa-miR-412	1	0	1	1	1	1	OPA3	optic atrophy 3 (autosomal recessive, with chorea and spastic paraplegia)
hsa-miR-412	1	0	1	0	1	1	EDEM3	ER degradation enhancer, mannosidase alpha-like 3
hsa-miR-412	1	0	1	1	1	1	JHDM1D	jumonji C domain containing histone demethylase 1 homolog D (S. cerevisiae)
hsa-miR-412	1	0	1	0	1	1	C1orf21	chromosome 1 open reading frame 21
hsa-miR-412	0	0	1	1	1	1	PLA2G12A	phospholipase A2, group XIIA
hsa-miR-412	0	0	1	1	1	1	APOL2	apolipoprotein L, 2
hsa-miR-412	1	0	1	1	0	0	PVRL4	poliovirus receptor-related 4
hsa-miR-412	1	0	1	1	1	1	GABARAPL1	GABA(A) receptor-associated protein like 1
hsa-miR-412	0	0	1	0	1	1	ENAM	enamelin
hsa-miR-412	0	0	1	1	1	1	KRTAP3-2	keratin associated protein 3-2
hsa-miR-412	0	0	1	1	0	0	MND1	meiotic nuclear divisions 1 homolog (S. cerevisiae)
hsa-miR-412	0	0	1	1	0	0	ATRIP	ATR interacting protein
hsa-miR-412	1	0	1	1	1	1	ARID5B	AT rich interactive domain 5B (MRF1-like)
hsa-miR-412	1	0	1	1	1	1	SETD3	SET domain containing 3
hsa-miR-412	1	0	1	1	1	1	ZNRF1	zinc and ring finger 1, E3 ubiquitin protein ligase
hsa-miR-412	1	0	1	1	1	1	ZDHHC18	zinc finger, DHHC-type containing 18
hsa-miR-412	1	0	1	0	1	1	PSD2	pleckstrin and Sec7 domain containing 2
hsa-miR-412	0	0	1	0	1	1	DNAJC30	DnaJ (Hsp40) homolog, subfamily C, member 30
hsa-miR-412	0	0	1	1	1	1	VPS25	vacuolar protein sorting 25 homolog (S. cerevisiae)
hsa-miR-412	0	0	1	1	1	1	JAGN1	jagunal homolog 1 (Drosophila)
hsa-miR-412	0	0	1	1	0	0	CFC1	cripto, FRL-1, cryptic family 1
hsa-miR-412	0	0	1	1	1	1	FAM136A	family with sequence similarity 136, member A
hsa-miR-412	1	0	1	1	1	1	RBM17	RNA binding motif protein 17
hsa-miR-412	1	0	1	0	1	1	C5orf62	chromosome 5 open reading frame 62
hsa-miR-412	0	0	1	1	1	1	POLR2J2	polymerase (RNA) II (DNA directed) polypeptide J2
hsa-miR-412	1	0	1	1	1	1	PDGFA	platelet-derived growth factor alpha polypeptide
hsa-miR-412	1	0	1	1	1	1	EPT1	ethanolaminephosphotransferase 1 (CDP-ethanolamine-specific)
hsa-miR-412	0	0	1	1	0	0	SLC38A5	solute carrier family 38, member 5
hsa-miR-412	1	0	1	1	0	0	CCDC120	coiled-coil domain containing 120
hsa-miR-412	1	0	1	1	1	1	BRWD1	bromodomain and WD repeat domain containing 1
hsa-miR-412	1	0	1	1	1	1	XKR4	XK, Kell blood group complex subunit-related family, member 4
hsa-miR-412	1	0	1	0	1	1	FAM129A	family with sequence similarity 129, member A
hsa-miR-412	1	0	1	1	0	0	BRD4	bromodomain containing 4
hsa-miR-412	1	0	1	1	1	1	BTN2A1	butyrophilin, subfamily 2, member A1
hsa-miR-412	0	0	1	1	1	1	CBLN4	cerebellin 4 precursor
hsa-miR-412	1	0	1	1	1	1	COL11A2	collagen, type XI, alpha 2
hsa-miR-412	1	0	1	1	1	1	ZNF280B	zinc finger protein 280B
hsa-miR-412	1	0	1	0	1	1	STK35	serine/threonine kinase 35
hsa-miR-412	1	0	1	1	1	1	KLHL6	kelch-like 6 (Drosophila)
hsa-miR-412	1	0	1	1	1	1	JDP2	Jun dimerization protein 2
hsa-miR-412	0	0	1	1	0	0	RXFP2	relaxin/insulin-like family peptide receptor 2
hsa-miR-412	0	0	1	1	0	0	XAGE1D	X antigen family, member 1D
hsa-miR-412	1	0	1	1	1	1	SYN1	synapsin I
hsa-miR-412	0	0	1	1	1	1	RAD51B	RAD51 homolog B (S. cerevisiae)
hsa-miR-412	1	0	1	1	0	0	PYGO2	pygopus homolog 2 (Drosophila)
hsa-miR-412	0	0	1	0	1	1	CEP95	centrosomal protein 95kDa
hsa-miR-412	0	0	1	1	1	1	TMEM129	transmembrane protein 129
hsa-miR-412	0	0	1	1	1	1	CASC4	cancer susceptibility candidate 4
hsa-miR-412	0	0	1	0	1	1	PRELID2	PRELI domain containing 2
hsa-miR-412	0	0	1	1	1	1	GALM	galactose mutarotase (aldose 1-epimerase)
hsa-miR-412	1	0	1	1	1	1	TEX261	testis expressed 261
hsa-miR-412	1	0	1	1	1	1	RFTN2	raftlin family member 2
hsa-miR-412	0	0	1	1	0	0	SFT2D1	SFT2 domain containing 1
hsa-miR-412	0	0	1	1	1	1	C7orf45	chromosome 7 open reading frame 45
hsa-miR-412	0	0	1	1	1	1	HFE2	hemochromatosis type 2 (juvenile)
hsa-miR-412	0	0	1	1	0	0	TCEB3C	transcription elongation factor B polypeptide 3C (elongin A3)
hsa-miR-412	1	0	1	1	1	1	SGMS1	sphingomyelin synthase 1
hsa-miR-412	0	0	1	1	1	1	DMBX1	diencephalon/mesencephalon homeobox 1
hsa-miR-412	1	0	1	1	1	1	BOD1L1	biorientation of chromosomes in cell division 1-like 1
hsa-miR-412	0	0	1	1	1	1	TTC30A	tetratricopeptide repeat domain 30A
hsa-miR-412	0	0	1	1	1	1	MRFAP1L1	Morf4 family associated protein 1-like 1
hsa-miR-412	0	0	1	1	1	1	UGT3A1	UDP glycosyltransferase 3 family, polypeptide A1
hsa-miR-412	1	0	1	1	1	1	LRFN5	leucine rich repeat and fibronectin type III domain containing 5
hsa-miR-412	0	0	1	1	1	1	SLC35G3	solute carrier family 35, member G3
hsa-miR-412	1	0	1	1	1	1	HEPACAM	hepatic and glial cell adhesion molecule
hsa-miR-412	0	0	1	1	1	1	CNPY4	canopy 4 homolog (zebrafish)
hsa-miR-412	1	0	1	1	1	1	PDIK1L	PDLIM1 interacting kinase 1 like
hsa-miR-412	1	0	1	1	1	1	FAS	Fas (TNF receptor superfamily, member 6)
hsa-miR-412	0	0	1	0	1	1	LIX1	Lix1 homolog (chicken)
hsa-miR-412	1	0	1	1	1	1	CREBRF	CREB3 regulatory factor
hsa-miR-412	1	0	1	1	1	1	C2orf69	chromosome 2 open reading frame 69
hsa-miR-412	0	0	1	1	1	1	WFDC13	WAP four-disulfide core domain 13
hsa-miR-412	1	0	1	1	1	1	POM121	POM121 transmembrane nucleoporin
hsa-miR-412	0	0	1	1	1	1	TAPBP	TAP binding protein (tapasin)
hsa-miR-412	0	0	1	1	1	1	REXO1L1	REX1, RNA exonuclease 1 homolog (S. cerevisiae)-like 1
hsa-miR-412	1	0	1	1	1	1	SIK1	salt-inducible kinase 1
hsa-miR-412	1	0	1	1	1	1	L3MBTL4	l(3)mbt-like 4 (Drosophila)
hsa-miR-412	1	0	1	1	1	1	CNTD1	cyclin N-terminal domain containing 1
hsa-miR-412	0	0	1	1	1	1	KLF17	Kruppel-like factor 17
hsa-miR-412	1	0	1	1	1	1	PIP5KL1	phosphatidylinositol-4-phosphate 5-kinase-like 1
hsa-miR-412	1	0	1	1	1	1	FAM117B	family with sequence similarity 117, member B
hsa-miR-412	1	0	1	0	1	1	RNF152	ring finger protein 152
hsa-miR-412	0	0	1	1	0	0	CT47A11	cancer/testis antigen family 47, member A11
hsa-miR-412	1	0	1	1	1	1	XKR6	XK, Kell blood group complex subunit-related family, member 6
hsa-miR-412	1	0	1	1	1	1	PRTG	protogenin
hsa-miR-412	0	0	1	1	1	1	YIPF6	Yip1 domain family, member 6
hsa-miR-412	1	0	1	1	1	1	UBR1	ubiquitin protein ligase E3 component n-recognin 1
hsa-miR-412	0	0	1	1	0	0	SEC14L4	SEC14-like 4 (S. cerevisiae)
hsa-miR-412	1	0	1	1	0	0	EMC10	ER membrane protein complex subunit 10
hsa-miR-412	1	0	1	1	1	1	ZADH2	zinc binding alcohol dehydrogenase domain containing 2
hsa-miR-412	0	0	1	1	1	1	MRPL43	mitochondrial ribosomal protein L43
hsa-miR-412	1	0	1	1	1	1	PPAP2B	phosphatidic acid phosphatase type 2B
hsa-miR-412	1	0	1	1	1	1	LRRTM3	leucine rich repeat transmembrane neuronal 3
hsa-miR-412	0	0	1	1	0	0	PAQR7	progestin and adipoQ receptor family member VII
hsa-miR-412	1	0	1	1	0	0	PHOSPHO1	phosphatase, orphan 1
hsa-miR-412	1	0	1	1	1	1	HIF1A	hypoxia inducible factor 1, alpha subunit (basic helix-loop-helix transcription factor)
hsa-miR-412	0	0	1	0	1	1	ZNF445	zinc finger protein 445
hsa-miR-412	0	0	1	1	1	1	CPLX4	complexin 4
hsa-miR-412	0	0	1	0	1	1	SPATA12	spermatogenesis associated 12
hsa-miR-412	1	0	1	1	1	1	BCL6B	B-cell CLL/lymphoma 6, member B
hsa-miR-412	1	0	1	1	1	1	TMEM229B	transmembrane protein 229B
hsa-miR-412	0	0	1	1	1	1	SKA2	spindle and kinetochore associated complex subunit 2
hsa-miR-412	1	0	1	1	1	1	SP8	Sp8 transcription factor
hsa-miR-412	1	0	1	1	1	1	PLCB1	phospholipase C, beta 1 (phosphoinositide-specific)
hsa-miR-412	0	0	1	1	1	1	P4HA3	prolyl 4-hydroxylase, alpha polypeptide III
hsa-miR-412	1	0	1	0	1	1	TMSB4XP8	thymosin beta 4, X-linked pseudogene 8
hsa-miR-412	0	0	1	1	1	1	TMEM37	transmembrane protein 37
hsa-miR-412	1	0	1	1	1	1	ZBTB41	zinc finger and BTB domain containing 41
hsa-miR-412	0	0	1	1	0	0	RPS19BP1	ribosomal protein S19 binding protein 1
hsa-miR-412	0	0	1	0	1	1	BTNL3	butyrophilin-like 3
hsa-miR-412	1	0	1	1	1	1	AQP1	aquaporin 1 (Colton blood group)
hsa-miR-412	1	0	1	1	0	0	HDDC3	HD domain containing 3
hsa-miR-412	1	0	1	1	1	1	NSUN4	NOP2/Sun domain family, member 4
hsa-miR-412	1	0	1	1	1	1	VAMP1	vesicle-associated membrane protein 1 (synaptobrevin 1)
hsa-miR-412	0	0	1	1	1	1	ARHGAP27	Rho GTPase activating protein 27
hsa-miR-412	1	0	1	1	1	1	WARS2	tryptophanyl tRNA synthetase 2, mitochondrial
hsa-miR-412	1	0	1	1	1	1	GLYAT	glycine-N-acyltransferase
hsa-miR-412	1	0	1	1	1	1	MOG	myelin oligodendrocyte glycoprotein
hsa-miR-412	1	0	1	1	1	1	ATRNL1	attractin-like 1
hsa-miR-412	1	0	1	1	1	1	FREM2	FRAS1 related extracellular matrix protein 2
hsa-miR-412	1	0	1	1	1	1	SKIDA1	SKI/DACH domain containing 1
hsa-miR-412	0	0	1	1	1	1	FAM211A	family with sequence similarity 211, member A
hsa-miR-412	1	0	1	1	0	0	CD164L2	CD164 sialomucin-like 2
hsa-miR-412	0	0	1	1	1	1	C8orf86	chromosome 8 open reading frame 86
hsa-miR-412	0	0	1	0	1	1	C11orf92	chromosome 11 open reading frame 92
hsa-miR-412	0	0	1	1	1	1	C15orf54	chromosome 15 open reading frame 54
hsa-miR-412	1	0	1	1	1	1	TEX19	testis expressed 19
hsa-miR-412	0	0	1	1	1	1	LYSMD1	LysM, putative peptidoglycan-binding, domain containing 1
hsa-miR-412	0	0	1	0	1	1	TMEM215	transmembrane protein 215
hsa-miR-412	1	0	1	0	1	1	STAT3	signal transducer and activator of transcription 3 (acute-phase response factor)
hsa-miR-412	0	0	1	0	0	0	ESRRAP2	estrogen-related receptor alpha pseudogene 2
hsa-miR-412	0	0	1	0	0	0	PCDHB17	protocadherin beta 17 pseudogene
hsa-miR-412	0	0	1	0	0	0	PCDHB19P	protocadherin beta 19 pseudogene
hsa-miR-412	0	0	1	0	0	0	LOC339240	keratin 17 pseudogene
hsa-miR-412	0	0	1	0	0	0	LYPLA2P1	lysophospholipase II pseudogene 1
hsa-miR-412	0	0	1	0	0	0	MIR155HG	MIR155 host gene (non-protein coding)
hsa-miR-412	0	0	1	0	0	0	TTTY2	testis-specific transcript, Y-linked 2 (non-protein coding)
hsa-miR-412	0	0	1	0	0	0	TTTY1	testis-specific transcript, Y-linked 1 (non-protein coding)
hsa-miR-412	0	0	1	0	0	0	TTTY4B	testis-specific transcript, Y-linked 4B (non-protein coding)
hsa-miR-412	0	0	1	0	0	0	NACAP1	nascent-polypeptide-associated complex alpha polypeptide pseudogene 1
hsa-miR-412	0	0	1	0	0	0	DKFZP586I1420	uncharacterized protein DKFZp586I1420
hsa-miR-412	0	0	1	0	0	0	COX6B1P1	cytochrome c oxidase subunit VIb polypeptide 1 (ubiquitous) pseudogene 1
hsa-miR-412	0	0	1	0	0	0	NXF4	nuclear RNA export factor 4 pseudogene
hsa-miR-412	0	0	1	0	0	0	DGCR5	DiGeorge syndrome critical region gene 5 (non-protein coding)
hsa-miR-412	0	0	1	0	0	0	LOC256880	uncharacterized LOC256880
hsa-miR-412	0	0	1	0	0	0	NPHP3-AS1	NPHP3 antisense RNA 1
hsa-miR-412	0	0	1	0	0	0	AQP7P1	aquaporin 7 pseudogene 1
hsa-miR-412	0	0	1	0	0	0	MALAT1	metastasis associated lung adenocarcinoma transcript 1 (non-protein coding)
hsa-miR-412	0	0	1	0	0	0	PTPRVP	protein tyrosine phosphatase, receptor type, V, pseudogene
hsa-miR-412	0	0	1	0	0	0	SNX29P2	sorting nexin 29 pseudogene 2
hsa-miR-412	0	0	1	0	0	0	TCAM1P	testicular cell adhesion molecule 1 homolog (mouse), pseudogene
hsa-miR-412	0	0	1	0	0	0	SCARNA17	small Cajal body-specific RNA 17
hsa-miR-412	0	0	1	0	0	0	SCARNA23	small Cajal body-specific RNA 23
hsa-miR-412	0	0	1	0	0	0	LILRP2	leukocyte immunoglobulin-like receptor pseudogene 2
hsa-miR-412	0	0	1	0	0	0	HSP90B3P	heat shock protein 90kDa beta (Grp94), member 3, pseudogene
hsa-miR-412	1	0	1	1	1	1	CTNNA1	catenin (cadherin-associated protein), alpha 1, 102kDa
hsa-miR-412	1	0	1	1	1	1	PDE4A	phosphodiesterase 4A, cAMP-specific
hsa-miR-412	1	0	1	0	1	1	NFIX	nuclear factor I/X (CCAAT-binding transcription factor)
hsa-miR-412	1	0	1	1	1	1	PAM	peptidylglycine alpha-amidating monooxygenase
hsa-miR-412	0	0	1	0	1	1	DDX12P	DEAD/H (Asp-Glu-Ala-Asp/His) box polypeptide 12, pseudogene
hsa-miR-412	1	0	1	1	1	1	ZNF238	zinc finger protein 238
hsa-miR-412	1	0	1	1	0	0	TNXB	tenascin XB
hsa-miR-412	1	0	1	1	1	1	ATF6B	activating transcription factor 6 beta
hsa-miR-412	1	0	1	1	1	1	IFNAR2	interferon (alpha, beta and omega) receptor 2
hsa-miR-412	0	0	1	1	0	0	SPATA20	spermatogenesis associated 20
hsa-miR-412	0	0	0	1	1	1	MS4A12	membrane-spanning 4-domains, subfamily A, member 12
hsa-miR-412	1	0	0	1	0	0	PLEKHO1	pleckstrin homology domain containing, family O member 1
hsa-miR-412	1	0	1	1	1	1	B4GALT7	xylosylprotein beta 1,4-galactosyltransferase, polypeptide 7
hsa-miR-412	1	0	1	1	1	1	PANX2	pannexin 2
hsa-miR-412	0	0	0	1	0	0	RGS11	regulator of G-protein signaling 11
hsa-miR-412	0	0	0	1	0	0	RAPGEF3	Rap guanine nucleotide exchange factor (GEF) 3
hsa-miR-412	0	0	1	1	1	1	ANKRD16	ankyrin repeat domain 16
hsa-miR-412	0	0	1	1	0	0	ZW10	ZW10, kinetochore associated, homolog (Drosophila)
hsa-miR-412	0	0	1	1	1	1	TMEM101	transmembrane protein 101
hsa-miR-412	0	0	1	1	0	0	TGM1	transglutaminase 1 (K polypeptide epidermal type I, protein-glutamine-gamma-glutamyltransferase)
hsa-miR-412	0	0	0	1	0	0	POLRMT	polymerase (RNA) mitochondrial (DNA directed)
hsa-miR-412	0	0	1	1	1	1	TBC1D10A	TBC1 domain family, member 10A
hsa-miR-412	0	0	0	1	0	0	MIOX	myo-inositol oxygenase
hsa-miR-412	1	0	1	1	1	1	SMCR7L	Smith-Magenis syndrome chromosome region, candidate 7-like
hsa-miR-412	0	0	1	1	0	0	SAMD15	sterile alpha motif domain containing 15
hsa-miR-412	0	0	1	1	1	1	PABPC1L	poly(A) binding protein, cytoplasmic 1-like
hsa-miR-412	0	0	0	1	0	0	CTSZ	cathepsin Z
hsa-miR-412	0	0	1	1	1	1	ZNF263	zinc finger protein 263
hsa-miR-412	0	0	1	1	1	1	DECR2	2,4-dienoyl CoA reductase 2, peroxisomal
hsa-miR-412	0	0	1	1	0	0	STUB1	STIP1 homology and U-box containing protein 1, E3 ubiquitin protein ligase
hsa-miR-412	0	0	0	1	1	1	MEFV	Mediterranean fever
hsa-miR-412	0	0	0	1	1	1	FDFT1	farnesyl-diphosphate farnesyltransferase 1
hsa-miR-412	0	0	0	1	0	0	SARS2	seryl-tRNA synthetase 2, mitochondrial
hsa-miR-412	0	0	0	1	0	0	POLR2I	polymerase (RNA) II (DNA directed) polypeptide I, 14.5kDa
hsa-miR-412	0	0	0	1	1	1	COMP	cartilage oligomeric matrix protein
hsa-miR-412	0	0	0	1	0	0	GAPDHS	glyceraldehyde-3-phosphate dehydrogenase, spermatogenic
hsa-miR-412	0	0	1	1	1	1	CYP3A43	cytochrome P450, family 3, subfamily A, polypeptide 43
hsa-miR-412	1	0	1	1	0	0	CPA4	carboxypeptidase A4
hsa-miR-412	0	0	0	1	0	0	CCL24	chemokine (C-C motif) ligand 24
hsa-miR-412	0	0	0	1	0	0	C8G	complement component 8, gamma polypeptide
hsa-miR-412	0	0	1	1	0	0	BLNK	B-cell linker
hsa-miR-412	1	0	1	1	1	1	NSF	N-ethylmaleimide-sensitive factor
hsa-miR-412	0	0	1	1	0	0	AATF	apoptosis antagonizing transcription factor
hsa-miR-412	1	0	0	1	1	1	WNT3	wingless-type MMTV integration site family, member 3
hsa-miR-412	0	0	0	1	0	0	SPSB2	splA/ryanodine receptor domain and SOCS box containing 2
hsa-miR-412	0	0	0	1	1	1	RSPH4A	radial spoke head 4 homolog A (Chlamydomonas)
hsa-miR-412	0	0	0	1	0	0	KIF6	kinesin family member 6
hsa-miR-412	0	0	0	1	0	0	POU4F3	POU class 4 homeobox 3
hsa-miR-412	0	0	1	1	0	0	SLC4A9	solute carrier family 4, sodium bicarbonate cotransporter, member 9
hsa-miR-412	0	0	0	1	0	0	BNIP1	BCL2/adenovirus E1B 19kDa interacting protein 1
hsa-miR-412	0	0	1	1	0	0	TLX2	T-cell leukemia homeobox 2
hsa-miR-412	0	0	0	1	1	1	WNT6	wingless-type MMTV integration site family, member 6
hsa-miR-412	0	0	1	1	0	0	MASP2	mannan-binding lectin serine peptidase 2
hsa-miR-412	0	0	0	1	1	1	CDC7	cell division cycle 7 homolog (S. cerevisiae)
hsa-miR-412	0	0	1	1	0	0	MIIP	migration and invasion inhibitory protein
hsa-miR-412	0	0	1	1	1	1	PTGR1	prostaglandin reductase 1
hsa-miR-412	0	0	1	1	0	0	CHRNA2	cholinergic receptor, nicotinic, alpha 2 (neuronal)
hsa-miR-412	0	0	1	1	0	0	PPP3CC	protein phosphatase 3, catalytic subunit, gamma isozyme
hsa-miR-412	0	0	1	1	0	0	DYNLL2	dynein, light chain, LC8-type 2
hsa-miR-412	0	0	1	1	1	1	MAPK8IP1	mitogen-activated protein kinase 8 interacting protein 1
hsa-miR-412	0	0	1	1	1	1	COPA	coatomer protein complex, subunit alpha
hsa-miR-412	0	0	1	1	0	0	STX10	syntaxin 10
hsa-miR-412	0	0	0	1	0	0	ATP5E	ATP synthase, H+ transporting, mitochondrial F1 complex, epsilon subunit
hsa-miR-412	0	0	0	1	0	0	SH2D3A	SH2 domain containing 3A
hsa-miR-412	0	0	1	1	0	0	MAGEC2	melanoma antigen family C, 2
hsa-miR-412	0	0	0	1	0	0	TAS2R3	taste receptor, type 2, member 3
hsa-miR-412	0	0	1	1	1	1	ZNF598	zinc finger protein 598
hsa-miR-412	0	0	0	1	0	0	TICAM1	toll-like receptor adaptor molecule 1
hsa-miR-412	1	0	1	1	0	0	SDF2L1	stromal cell-derived factor 2-like 1
hsa-miR-412	1	0	0	1	1	1	TST	thiosulfate sulfurtransferase (rhodanese)
hsa-miR-412	1	0	1	1	0	0	HOXD9	homeobox D9
hsa-miR-412	0	0	0	1	0	0	ART1	ADP-ribosyltransferase 1
hsa-miR-412	0	0	0	1	0	0	GAMT	guanidinoacetate N-methyltransferase
hsa-miR-412	0	0	0	1	0	0	ECSIT	ECSIT homolog (Drosophila)
hsa-miR-412	0	0	0	1	1	1	LSM4	LSM4 homolog, U6 small nuclear RNA associated (S. cerevisiae)
hsa-miR-412	0	0	1	1	0	0	RAMP2	receptor (G protein-coupled) activity modifying protein 2
hsa-miR-412	0	0	0	1	0	0	PODNL1	podocan-like 1
hsa-miR-412	0	0	1	1	0	0	RAMP1	receptor (G protein-coupled) activity modifying protein 1
hsa-miR-412	1	0	0	1	0	0	HAPLN2	hyaluronan and proteoglycan link protein 2
hsa-miR-412	0	0	1	1	1	1	SERINC3	serine incorporator 3
hsa-miR-412	0	0	1	1	1	1	CCDC134	coiled-coil domain containing 134
hsa-miR-412	0	0	1	1	0	0	MTNR1B	melatonin receptor 1B
hsa-miR-412	0	0	1	1	0	0	UPK3B	uroplakin 3B
hsa-miR-412	0	0	1	1	0	0	KRT84	keratin 84
hsa-miR-412	0	0	0	1	0	0	MRPL53	mitochondrial ribosomal protein L53
hsa-miR-412	0	0	0	1	1	1	TMBIM1	transmembrane BAX inhibitor motif containing 1
hsa-miR-412	0	0	0	1	0	0	IL36A	interleukin 36, alpha
hsa-miR-412	0	0	1	1	0	0	IMP4	IMP4, U3 small nucleolar ribonucleoprotein, homolog (yeast)
hsa-miR-412	0	0	0	1	0	0	CD72	CD72 molecule
hsa-miR-412	0	0	1	1	0	0	SGCA	sarcoglycan, alpha (50kDa dystrophin-associated glycoprotein)
hsa-miR-412	1	0	1	1	1	1	SCN1B	sodium channel, voltage-gated, type I, beta subunit
hsa-miR-412	1	0	1	1	1	1	CDH20	cadherin 20, type 2
hsa-miR-412	0	0	1	1	1	1	ARPC1A	actin related protein 2/3 complex, subunit 1A, 41kDa
hsa-miR-412	0	0	0	1	0	0	GNA15	guanine nucleotide binding protein (G protein), alpha 15 (Gq class)
hsa-miR-412	1	0	1	1	0	0	NOMO3	NODAL modulator 3
hsa-miR-412	1	0	0	1	1	1	SMARCB1	SWI/SNF related, matrix associated, actin dependent regulator of chromatin, subfamily b, member 1
hsa-miR-412	0	0	1	1	1	1	GIPR	gastric inhibitory polypeptide receptor
hsa-miR-412	0	0	0	1	0	0	CCDC61	coiled-coil domain containing 61
hsa-miR-412	0	0	1	1	0	0	WDR11	WD repeat domain 11
hsa-miR-412	0	0	0	1	1	1	PET112	PET112 homolog (yeast)
hsa-miR-412	0	0	1	1	0	0	MCOLN1	mucolipin 1
hsa-miR-412	0	0	0	1	0	0	GPR108	G protein-coupled receptor 108
hsa-miR-412	1	0	1	1	1	1	MUL1	mitochondrial E3 ubiquitin protein ligase 1
hsa-miR-412	1	0	1	1	0	0	CHST10	carbohydrate sulfotransferase 10
hsa-miR-412	0	0	0	1	0	0	GZMM	granzyme M (lymphocyte met-ase 1)
hsa-miR-412	0	0	0	1	1	1	RAB17	RAB17, member RAS oncogene family
hsa-miR-412	0	0	0	1	0	0	PPAP2A	phosphatidic acid phosphatase type 2A
hsa-miR-412	0	0	1	1	1	1	ARHGEF38	Rho guanine nucleotide exchange factor (GEF) 38
hsa-miR-412	0	0	0	1	0	0	SIL1	SIL1 homolog, endoplasmic reticulum chaperone (S. cerevisiae)
hsa-miR-412	0	0	1	1	0	0	FAM188B	family with sequence similarity 188, member B
hsa-miR-412	0	0	1	1	0	0	POR	P450 (cytochrome) oxidoreductase
hsa-miR-412	0	0	0	1	1	1	POLA2	polymerase (DNA directed), alpha 2, accessory subunit
hsa-miR-412	0	0	0	1	0	0	CD27	CD27 molecule
hsa-miR-412	0	0	0	1	0	0	RHCG	Rh family, C glycoprotein
hsa-miR-412	1	0	0	1	0	0	MYLK3	myosin light chain kinase 3
hsa-miR-412	0	0	1	1	0	0	DHX38	DEAH (Asp-Glu-Ala-His) box polypeptide 38
hsa-miR-412	0	0	0	1	0	0	ADAD2	adenosine deaminase domain containing 2
hsa-miR-412	0	0	0	1	1	1	ZNF174	zinc finger protein 174
hsa-miR-412	0	0	0	1	1	1	MED9	mediator complex subunit 9
hsa-miR-412	0	0	1	1	0	0	GFOD2	glucose-fructose oxidoreductase domain containing 2
hsa-miR-412	0	0	0	1	1	1	ZNF750	zinc finger protein 750
hsa-miR-412	0	0	1	1	0	0	TMEM91	transmembrane protein 91
hsa-miR-412	0	0	0	1	0	0	BCKDHA	branched chain keto acid dehydrogenase E1, alpha polypeptide
hsa-miR-412	0	0	1	1	0	0	FXYD1	FXYD domain containing ion transport regulator 1
hsa-miR-412	0	0	1	1	0	0	FXYD7	FXYD domain containing ion transport regulator 7
hsa-miR-412	0	0	1	1	1	1	ZNF160	zinc finger protein 160
hsa-miR-412	0	0	0	1	0	0	FAM176B	family with sequence similarity 176, member B
hsa-miR-412	0	0	1	1	0	0	EIF2D	eukaryotic translation initiation factor 2D
hsa-miR-412	0	0	0	1	1	1	C1orf35	chromosome 1 open reading frame 35
hsa-miR-412	0	0	1	1	1	1	RGPD5	RANBP2-like and GRIP domain containing 5
hsa-miR-412	0	0	1	1	0	0	ALDH1L1	aldehyde dehydrogenase 1 family, member L1
hsa-miR-412	0	0	0	1	1	1	SUMF2	sulfatase modifying factor 2
hsa-miR-412	0	0	0	1	0	0	GSDMC	gasdermin C
hsa-miR-412	0	0	0	1	0	0	WDR85	WD repeat domain 85
hsa-miR-412	0	0	1	1	0	0	FUOM	fucose mutarotase
hsa-miR-412	1	0	1	1	0	0	LAMTOR1	late endosomal/lysosomal adaptor, MAPK and MTOR activator 1
hsa-miR-412	0	0	0	1	0	0	ROM1	retinal outer segment membrane protein 1
hsa-miR-412	1	0	0	1	0	0	ROBO3	roundabout, axon guidance receptor, homolog 3 (Drosophila)
hsa-miR-412	0	0	1	1	0	0	LSM14B	LSM14B, SCD6 homolog B (S. cerevisiae)
hsa-miR-412	0	0	0	1	0	0	GPHA2	glycoprotein hormone alpha 2
hsa-miR-412	0	0	1	1	1	1	IFLTD1	intermediate filament tail domain containing 1
hsa-miR-412	0	0	0	1	0	0	C16orf74	chromosome 16 open reading frame 74
hsa-miR-412	0	0	0	1	0	0	USP43	ubiquitin specific peptidase 43
hsa-miR-412	0	0	0	1	0	0	NAA11	N(alpha)-acetyltransferase 11, NatA catalytic subunit
hsa-miR-412	1	0	1	1	1	1	CELF6	CUGBP, Elav-like family member 6
hsa-miR-412	1	0	1	1	1	1	PLS3	plastin 3
hsa-miR-412	1	0	1	1	1	1	ALDH4A1	aldehyde dehydrogenase 4 family, member A1
hsa-miR-412	0	0	1	1	0	0	C16orf86	chromosome 16 open reading frame 86
hsa-miR-412	0	0	0	1	0	0	GPSM1	G-protein signaling modulator 1
hsa-miR-412	0	0	0	1	1	1	FDXR	ferredoxin reductase
hsa-miR-412	0	0	0	1	0	0	RDM1	RAD52 motif 1
hsa-miR-412	0	0	0	1	0	0	CCL23	chemokine (C-C motif) ligand 23
hsa-miR-412	0	0	0	1	0	0	SSTR5	somatostatin receptor 5
hsa-miR-412	0	0	0	1	1	1	CYBASC3	cytochrome b, ascorbate dependent 3
hsa-miR-412	0	0	0	1	0	0	TAF6L	TAF6-like RNA polymerase II, p300/CBP-associated factor (PCAF)-associated factor, 65kDa
hsa-miR-412	0	0	1	1	1	1	C1orf123	chromosome 1 open reading frame 123
hsa-miR-412	0	0	1	1	0	0	RNF25	ring finger protein 25
hsa-miR-412	1	0	1	1	1	1	FBLN2	fibulin 2
hsa-miR-412	0	0	1	1	0	0	MON1A	MON1 homolog A (yeast)
hsa-miR-412	0	0	1	1	0	0	FAM170A	family with sequence similarity 170, member A
hsa-miR-412	1	0	1	1	1	1	LMTK2	lemur tyrosine kinase 2
hsa-miR-412	0	0	0	1	0	0	PHKG1	phosphorylase kinase, gamma 1 (muscle)
hsa-miR-412	0	0	1	1	0	0	RNF183	ring finger protein 183
hsa-miR-412	0	0	0	1	0	0	RPL36AL	ribosomal protein L36a-like
hsa-miR-412	0	0	0	1	0	0	STK32C	serine/threonine kinase 32C
hsa-miR-412	0	0	1	1	0	0	MAPK7	mitogen-activated protein kinase 7
hsa-miR-412	1	0	1	1	0	0	PPIB	peptidylprolyl isomerase B (cyclophilin B)
hsa-miR-412	1	0	1	1	1	1	SLC27A4	solute carrier family 27 (fatty acid transporter), member 4
hsa-miR-412	0	0	1	1	0	0	DNAH17	dynein, axonemal, heavy chain 17
hsa-miR-412	0	0	1	1	1	1	ENGASE	endo-beta-N-acetylglucosaminidase
hsa-miR-412	0	0	0	1	0	0	ZNF524	zinc finger protein 524
hsa-miR-412	0	0	0	1	0	0	C19orf33	chromosome 19 open reading frame 33
hsa-miR-412	0	0	1	1	0	0	TRPV3	transient receptor potential cation channel, subfamily V, member 3
hsa-miR-412	0	0	0	1	0	0	SPSB3	splA/ryanodine receptor domain and SOCS box containing 3
hsa-miR-412	0	0	0	1	0	0	ECI1	enoyl-CoA delta isomerase 1
hsa-miR-412	0	0	1	1	0	0	CCDC88B	coiled-coil domain containing 88B
hsa-miR-412	0	0	0	1	0	0	VPREB1	pre-B lymphocyte 1
hsa-miR-412	0	0	1	1	0	0	PDILT	protein disulfide isomerase-like, testis expressed
hsa-miR-412	0	0	1	1	0	0	KCNK3	potassium channel, subfamily K, member 3
hsa-miR-412	0	0	0	1	1	1	MRAP	melanocortin 2 receptor accessory protein
hsa-miR-412	0	0	1	1	0	0	KREMEN2	kringle containing transmembrane protein 2
hsa-miR-412	0	0	1	1	0	0	VAV1	vav 1 guanine nucleotide exchange factor
hsa-miR-412	0	0	1	1	1	1	SEC61A2	Sec61 alpha 2 subunit (S. cerevisiae)
hsa-miR-412	0	0	0	1	0	0	GPR27	G protein-coupled receptor 27
hsa-miR-412	0	0	0	1	0	0	ECEL1	endothelin converting enzyme-like 1
hsa-miR-412	0	0	0	1	1	1	NECAB2	N-terminal EF-hand calcium binding protein 2
hsa-miR-412	0	0	1	1	1	1	COG8	component of oligomeric golgi complex 8
hsa-miR-412	0	0	1	1	1	1	RAC3	ras-related C3 botulinum toxin substrate 3 (rho family, small GTP binding protein Rac3)
hsa-miR-412	0	0	1	1	0	0	HEXIM2	hexamethylene bis-acetamide inducible 2
hsa-miR-412	0	0	1	1	0	0	HSFY1	heat shock transcription factor, Y-linked 1
hsa-miR-412	0	0	1	1	1	1	CSPG4	chondroitin sulfate proteoglycan 4
hsa-miR-412	0	0	0	1	0	0	ATAD3B	ATPase family, AAA domain containing 3B
hsa-miR-412	0	0	1	1	1	1	ZCCHC12	zinc finger, CCHC domain containing 12
hsa-miR-412	1	0	0	1	1	1	FADS6	fatty acid desaturase domain family, member 6
hsa-miR-412	1	0	0	1	1	1	CTSF	cathepsin F
hsa-miR-412	1	0	1	1	1	1	CLTB	clathrin, light chain B
hsa-miR-412	1	0	1	1	1	1	NEFH	neurofilament, heavy polypeptide
hsa-miR-412	0	0	1	1	0	0	SPNS1	spinster homolog 1 (Drosophila)
hsa-miR-412	0	0	0	1	0	0	CST6	cystatin E/M
hsa-miR-412	1	0	1	1	0	0	SPEG	SPEG complex locus
hsa-miR-412	0	0	1	1	1	1	COL6A5	collagen, type VI, alpha 5
hsa-miR-412	0	0	0	1	0	0	FAM20C	family with sequence similarity 20, member C
hsa-miR-412	1	0	1	1	1	1	CSNK1D	casein kinase 1, delta
hsa-miR-412	0	0	1	1	0	0	GAK	cyclin G associated kinase
hsa-miR-412	0	0	0	1	0	0	FUT7	fucosyltransferase 7 (alpha (1,3) fucosyltransferase)
hsa-miR-412	0	0	1	1	0	0	TMEM136	transmembrane protein 136
hsa-miR-412	0	0	1	1	0	0	KCNH6	potassium voltage-gated channel, subfamily H (eag-related), member 6
hsa-miR-412	0	0	1	1	0	0	TMEM54	transmembrane protein 54
hsa-miR-412	0	0	1	1	0	0	PRSS50	protease, serine, 50
hsa-miR-412	0	0	1	1	0	0	ARL6IP4	ADP-ribosylation-like factor 6 interacting protein 4
hsa-miR-412	0	0	0	1	0	0	GPS2	G protein pathway suppressor 2
hsa-miR-412	0	0	1	1	0	0	LCN15	lipocalin 15
hsa-miR-412	0	0	1	1	0	0	DNAJC7	DnaJ (Hsp40) homolog, subfamily C, member 7
hsa-miR-412	0	0	1	1	1	1	RECQL5	RecQ protein-like 5
hsa-miR-412	0	0	1	1	1	1	COX14	COX14 cytochrome c oxidase assembly homolog (S. cerevisiae)
hsa-miR-412	0	0	1	1	0	0	PTPN6	protein tyrosine phosphatase, non-receptor type 6
hsa-miR-412	0	0	1	1	1	1	SHISA3	shisa homolog 3 (Xenopus laevis)
hsa-miR-412	1	0	1	1	0	0	UBASH3A	ubiquitin associated and SH3 domain containing A
hsa-miR-412	1	0	1	1	1	1	RBBP6	retinoblastoma binding protein 6
hsa-miR-412	0	0	1	1	1	1	GALNT11	UDP-N-acetyl-alpha-D-galactosamine:polypeptide N-acetylgalactosaminyltransferase 11 (GalNAc-T11)
hsa-miR-412	0	0	1	1	0	0	KIF1C	kinesin family member 1C
hsa-miR-412	0	0	0	1	1	1	SPTBN5	spectrin, beta, non-erythrocytic 5
hsa-miR-412	0	0	0	1	0	0	RPRML	reprimo-like
hsa-miR-412	0	0	1	1	0	0	CPSF3L	cleavage and polyadenylation specific factor 3-like
hsa-miR-412	0	0	0	1	0	0	SPHK1	sphingosine kinase 1
hsa-miR-412	0	0	0	1	0	0	FAM101A	family with sequence similarity 101, member A
hsa-miR-412	0	0	1	1	0	0	CIZ1	CDKN1A interacting zinc finger protein 1
hsa-miR-412	0	0	1	1	1	1	CREG2	cellular repressor of E1A-stimulated genes 2
hsa-miR-412	0	0	0	1	1	1	SIRT3	sirtuin 3
hsa-miR-412	0	0	1	1	0	0	AQP10	aquaporin 10
hsa-miR-412	0	0	0	1	0	0	PLCB3	phospholipase C, beta 3 (phosphatidylinositol-specific)
hsa-miR-412	1	0	1	1	0	0	UBC	ubiquitin C
hsa-miR-412	0	0	1	1	1	1	RPRM	reprimo, TP53 dependent G2 arrest mediator candidate
hsa-miR-412	0	0	0	1	0	0	SPAG11A	sperm associated antigen 11A
hsa-miR-412	0	0	1	1	1	1	C4orf17	chromosome 4 open reading frame 17
hsa-miR-412	1	0	0	1	1	1	PLEKHJ1	pleckstrin homology domain containing, family J member 1
hsa-miR-412	0	0	0	1	0	0	NOC2L	nucleolar complex associated 2 homolog (S. cerevisiae)
hsa-miR-412	0	0	0	1	0	0	TLE6	transducin-like enhancer of split 6 (E(sp1) homolog, Drosophila)
hsa-miR-412	0	0	1	1	0	0	GPX5	glutathione peroxidase 5 (epididymal androgen-related protein)
hsa-miR-412	1	0	1	1	1	1	GRID1	glutamate receptor, ionotropic, delta 1
hsa-miR-412	0	0	1	1	0	0	ZNF71	zinc finger protein 71
hsa-miR-412	1	0	0	1	1	1	SIRT7	sirtuin 7
hsa-miR-412	0	0	0	1	1	1	CNOT10	CCR4-NOT transcription complex, subunit 10
hsa-miR-412	0	0	0	1	1	1	RAX2	retina and anterior neural fold homeobox 2
hsa-miR-412	0	0	0	1	1	1	YBEY	ybeY metallopeptidase (putative)
hsa-miR-412	0	0	1	1	0	0	IRX3	iroquois homeobox 3
hsa-miR-412	0	0	0	1	0	0	ACTL10	actin-like 10
hsa-miR-412	0	0	0	1	1	1	RGPD6	RANBP2-like and GRIP domain containing 6
hsa-miR-412	0	0	1	1	1	1	ACTRT3	actin-related protein T3
hsa-miR-412	0	0	1	1	0	0	SLC5A2	solute carrier family 5 (sodium/glucose cotransporter), member 2
hsa-miR-412	0	0	0	1	0	0	LCN12	lipocalin 12
hsa-miR-412	0	0	0	1	0	0	TLCD2	TLC domain containing 2
hsa-miR-412	0	0	0	1	0	0	TMEM89	transmembrane protein 89
hsa-miR-412	0	0	0	1	0	0	NPBWR1	neuropeptides B/W receptor 1
hsa-miR-412	1	0	1	1	1	1	FBXW4	F-box and WD repeat domain containing 4
hsa-miR-412	0	0	0	1	0	0	HIST2H2AC	histone cluster 2, H2ac
hsa-miR-412	1	0	1	1	1	1	RAI2	retinoic acid induced 2
hsa-miR-412	0	0	1	1	1	1	ZNRD1	zinc ribbon domain containing 1
hsa-miR-412	0	0	0	1	0	0	CCR10	chemokine (C-C motif) receptor 10
hsa-miR-412	0	0	0	1	1	1	FTSJ2	FtsJ RNA methyltransferase homolog 2 (E. coli)
hsa-miR-412	1	0	1	1	0	0	GPR173	G protein-coupled receptor 173
hsa-miR-412	0	0	0	1	1	1	NR2C1	nuclear receptor subfamily 2, group C, member 1
hsa-miR-412	0	0	1	1	1	1	TPRN	taperin
hsa-miR-412	0	0	0	1	0	0	ACAA1	acetyl-CoA acyltransferase 1
hsa-miR-412	0	0	1	1	0	0	ZSCAN30	zinc finger and SCAN domain containing 30
hsa-miR-412	0	0	1	1	0	0	GPR113	G protein-coupled receptor 113
hsa-miR-412	1	0	1	1	0	0	TNK2	tyrosine kinase, non-receptor, 2
hsa-miR-412	1	0	1	1	1	1	PCDH11Y	protocadherin 11 Y-linked
hsa-miR-412	0	0	0	1	1	1	TTF1	transcription termination factor, RNA polymerase I
hsa-miR-412	0	0	0	1	0	0	DEFB131	defensin, beta 131
hsa-miR-412	0	0	1	1	0	0	PGS1	phosphatidylglycerophosphate synthase 1
hsa-miR-412	0	0	1	1	0	0	IGFN1	immunoglobulin-like and fibronectin type III domain containing 1
hsa-miR-412	0	0	0	1	0	0	PES1	pescadillo ribosomal biogenesis factor 1
hsa-miR-412	0	0	0	1	0	0	TBX10	T-box 10
hsa-miR-412	0	0	0	1	0	0	VWCE	von Willebrand factor C and EGF domains
hsa-miR-412	0	0	0	1	0	0	ST6GALNAC4	ST6 (alpha-N-acetyl-neuraminyl-2,3-beta-galactosyl-1,3)-N-acetylgalactosaminide alpha-2,6-sialyltransferase 4
hsa-miR-412	0	0	1	1	1	1	NLRP3	NLR family, pyrin domain containing 3
hsa-miR-412	0	0	0	1	0	0	STARD3	StAR-related lipid transfer (START) domain containing 3
hsa-miR-412	0	0	0	1	0	0	DNPEP	aspartyl aminopeptidase
hsa-miR-412	0	0	1	1	0	0	RPS21	ribosomal protein S21
hsa-miR-412	0	0	1	1	0	0	TBC1D22A	TBC1 domain family, member 22A
hsa-miR-412	0	0	1	1	1	1	MAOA	monoamine oxidase A
hsa-miR-412	0	0	0	1	0	0	SLC26A5	solute carrier family 26, member 5 (prestin)
hsa-miR-412	0	0	1	1	1	1	CCDC86	coiled-coil domain containing 86
hsa-miR-412	0	0	0	1	1	1	C21orf2	chromosome 21 open reading frame 2
hsa-miR-412	0	0	0	1	0	0	NAALADL1	N-acetylated alpha-linked acidic dipeptidase-like 1
hsa-miR-412	1	0	1	1	1	1	CCBL2	cysteine conjugate-beta lyase 2
hsa-miR-412	0	0	1	1	0	0	ARHGAP9	Rho GTPase activating protein 9
hsa-miR-412	1	0	1	1	0	0	NAPRT1	nicotinate phosphoribosyltransferase domain containing 1
hsa-miR-412	0	0	0	1	0	0	CXorf27	chromosome X open reading frame 27
hsa-miR-412	0	0	0	1	1	1	POP5	processing of precursor 5, ribonuclease P/MRP subunit (S. cerevisiae)
hsa-miR-412	0	0	1	1	1	1	LBX2	ladybird homeobox 2
hsa-miR-412	1	0	1	1	1	1	SYN2	synapsin II
hsa-miR-412	0	0	0	1	1	1	CTSL1	cathepsin L1
hsa-miR-412	0	0	1	1	0	0	MATN4	matrilin 4
hsa-miR-412	0	0	1	1	0	0	SYCE1	synaptonemal complex central element protein 1
hsa-miR-412	0	0	1	1	1	1	TFEB	transcription factor EB
hsa-miR-412	0	0	0	1	1	1	FAM111B	family with sequence similarity 111, member B
hsa-miR-412	0	0	1	1	0	0	HIST1H1C	histone cluster 1, H1c
hsa-miR-412	0	0	0	1	0	0	SPINT1	serine peptidase inhibitor, Kunitz type 1
hsa-miR-412	0	0	0	1	0	0	BCAP31	B-cell receptor-associated protein 31
hsa-miR-412	0	0	0	1	0	0	LTB4R	leukotriene B4 receptor
hsa-miR-412	1	0	1	1	1	1	TJP1	tight junction protein 1
hsa-miR-412	0	0	1	1	1	1	ZNF546	zinc finger protein 546
hsa-miR-412	1	0	1	1	1	1	ZFYVE26	zinc finger, FYVE domain containing 26
hsa-miR-412	0	0	0	1	1	1	MTERF	mitochondrial transcription termination factor
hsa-miR-412	0	0	0	1	1	1	SLC43A3	solute carrier family 43, member 3
hsa-miR-412	0	0	0	1	0	0	TH	tyrosine hydroxylase
hsa-miR-412	0	0	1	1	0	0	ETFB	electron-transfer-flavoprotein, beta polypeptide
hsa-miR-412	0	0	0	1	1	1	ITGB2	integrin, beta 2 (complement component 3 receptor 3 and 4 subunit)
hsa-miR-412	0	0	0	1	0	0	MFSD12	major facilitator superfamily domain containing 12
hsa-miR-412	0	0	1	1	1	1	TPRA1	transmembrane protein, adipocyte asscociated 1
hsa-miR-412	0	0	1	1	0	0	ADAMTS13	ADAM metallopeptidase with thrombospondin type 1 motif, 13
hsa-miR-412	0	0	1	1	0	0	TNFRSF25	tumor necrosis factor receptor superfamily, member 25
hsa-miR-412	0	0	1	1	1	1	KPNA5	karyopherin alpha 5 (importin alpha 6)
hsa-miR-412	0	0	1	1	0	0	DUOXA2	dual oxidase maturation factor 2
hsa-miR-412	1	0	1	1	1	1	TBC1D9B	TBC1 domain family, member 9B (with GRAM domain)
hsa-miR-412	1	0	1	1	1	1	IGF2R	insulin-like growth factor 2 receptor
hsa-miR-412	0	0	1	1	0	0	ASNA1	arsA arsenite transporter, ATP-binding, homolog 1 (bacterial)
hsa-miR-412	0	0	1	1	0	0	COL6A2	collagen, type VI, alpha 2
hsa-miR-412	1	0	1	1	1	1	NIPAL3	NIPA-like domain containing 3
hsa-miR-412	0	0	1	1	0	0	RGR	retinal G protein coupled receptor
hsa-miR-412	0	0	0	1	0	0	LRRC8B	leucine rich repeat containing 8 family, member B
hsa-miR-412	0	0	0	1	0	0	PIEZO1	piezo-type mechanosensitive ion channel component 1
hsa-miR-412	1	0	1	1	1	1	FAM222A	family with sequence similarity 222, member A
hsa-miR-412	0	0	1	1	1	1	SPRR2A	small proline-rich protein 2A
hsa-miR-412	1	0	1	1	1	1	FGFR2	fibroblast growth factor receptor 2
hsa-miR-412	1	0	1	1	0	0	EMP2	epithelial membrane protein 2
hsa-miR-412	0	0	0	1	1	1	LCE1B	late cornified envelope 1B
hsa-miR-412	0	0	0	1	1	1	UAP1L1	UDP-N-acteylglucosamine pyrophosphorylase 1-like 1
hsa-miR-412	0	0	1	1	1	1	PRKAR1B	protein kinase, cAMP-dependent, regulatory, type I, beta
hsa-miR-412	0	0	0	1	0	0	FLNA	filamin A, alpha
hsa-miR-412	0	0	0	1	0	0	C20orf96	chromosome 20 open reading frame 96
hsa-miR-412	0	0	0	1	1	1	SPRR2D	small proline-rich protein 2D
hsa-miR-412	0	0	0	1	0	0	ARTN	artemin
hsa-miR-412	0	0	0	1	0	0	CLPSL2	colipase-like 2
hsa-miR-412	0	0	1	1	1	1	MEPE	matrix extracellular phosphoglycoprotein
hsa-miR-412	1	0	1	1	1	1	TRPM6	transient receptor potential cation channel, subfamily M, member 6
hsa-miR-412	0	0	1	1	0	0	MTMR11	myotubularin related protein 11
hsa-miR-412	0	0	0	1	0	0	SLC25A47	solute carrier family 25, member 47
hsa-miR-412	1	0	1	1	1	1	TRPM3	transient receptor potential cation channel, subfamily M, member 3
hsa-miR-412	1	0	1	1	1	1	SORBS1	sorbin and SH3 domain containing 1
hsa-miR-412	0	0	1	1	1	1	CDY1	chromodomain protein, Y-linked, 1
hsa-miR-412	0	0	1	1	0	0	TMEM9	transmembrane protein 9
hsa-miR-412	0	0	0	1	1	1	QSOX1	quiescin Q6 sulfhydryl oxidase 1
hsa-miR-412	0	0	1	1	0	0	VSIG8	V-set and immunoglobulin domain containing 8
hsa-miR-412	1	0	1	1	0	0	SMG5	smg-5 homolog, nonsense mediated mRNA decay factor (C. elegans)
hsa-miR-412	0	0	1	1	0	0	PMVK	phosphomevalonate kinase
hsa-miR-412	1	0	1	1	1	1	ATP8B2	ATPase, aminophospholipid transporter, class I, type 8B, member 2
hsa-miR-412	1	0	1	1	1	1	INPP5A	inositol polyphosphate-5-phosphatase, 40kDa
hsa-miR-412	0	0	1	1	0	0	CREB3L4	cAMP responsive element binding protein 3-like 4
hsa-miR-412	0	0	0	1	0	0	DPYSL4	dihydropyrimidinase-like 4
hsa-miR-412	1	0	1	1	0	0	TCERG1L	transcription elongation regulator 1-like
hsa-miR-412	0	0	1	1	1	1	NPR1	natriuretic peptide receptor A/guanylate cyclase A (atrionatriuretic peptide receptor A)
hsa-miR-412	0	0	1	1	0	0	S100A1	S100 calcium binding protein A1
hsa-miR-412	0	0	1	1	1	1	SPRR2E	small proline-rich protein 2E
hsa-miR-412	0	0	1	1	0	0	IVL	involucrin
hsa-miR-412	0	0	0	1	0	0	RPF2	ribosome production factor 2 homolog (S. cerevisiae)
hsa-miR-412	0	0	0	1	1	1	DMBT1	deleted in malignant brain tumors 1
hsa-miR-412	1	0	1	1	1	1	CDC40	cell division cycle 40 homolog (S. cerevisiae)
hsa-miR-412	0	0	1	1	1	1	DKC1	dyskeratosis congenita 1, dyskerin
hsa-miR-412	1	0	0	1	1	1	RHOC	ras homolog family member C
hsa-miR-412	1	0	1	1	1	1	PLXNA3	plexin A3
hsa-miR-412	0	0	0	1	0	0	CALHM3	calcium homeostasis modulator 3
hsa-miR-412	0	0	0	1	1	1	TMEM187	transmembrane protein 187
hsa-miR-412	0	0	1	1	0	0	NAA10	N(alpha)-acetyltransferase 10, NatA catalytic subunit
hsa-miR-412	0	0	1	1	0	0	DPCD	deleted in primary ciliary dyskinesia homolog (mouse)
hsa-miR-412	1	0	1	1	1	1	ARHGAP29	Rho GTPase activating protein 29
hsa-miR-412	0	0	0	1	0	0	CXorf40B	chromosome X open reading frame 40B
hsa-miR-412	0	0	1	1	1	1	IDS	iduronate 2-sulfatase
hsa-miR-412	1	0	1	1	1	1	ZIC3	Zic family member 3
hsa-miR-412	0	0	0	1	0	0	RPF1	ribosome production factor 1 homolog (S. cerevisiae)
hsa-miR-412	0	0	0	1	0	0	CCDC160	coiled-coil domain containing 160
hsa-miR-412	0	0	1	1	1	1	RABGGTB	Rab geranylgeranyltransferase, beta subunit
hsa-miR-412	0	0	0	1	0	0	RRP12	ribosomal RNA processing 12 homolog (S. cerevisiae)
hsa-miR-412	0	0	0	1	0	0	CXorf64	chromosome X open reading frame 64
hsa-miR-412	0	0	0	1	0	0	CT47A2	cancer/testis antigen family 47, member A2
hsa-miR-412	0	0	0	1	0	0	CT47A3	cancer/testis antigen family 47, member A3
hsa-miR-412	0	0	0	1	0	0	CT47A4	cancer/testis antigen family 47, member A4
hsa-miR-412	0	0	0	1	0	0	CT47A5	cancer/testis antigen family 47, member A5
hsa-miR-412	0	0	0	1	0	0	CT47A8	cancer/testis antigen family 47, member A8
hsa-miR-412	0	0	0	1	0	0	CT47A10	cancer/testis antigen family 47, member A10
hsa-miR-412	0	0	0	1	0	0	EGFL7	EGF-like-domain, multiple 7
hsa-miR-412	0	0	1	1	0	0	PMPCA	peptidase (mitochondrial processing) alpha
hsa-miR-412	0	0	0	1	1	1	REXO4	REX4, RNA exonuclease 4 homolog (S. cerevisiae)
hsa-miR-412	0	0	0	1	1	1	TSPAN1	tetraspanin 1
hsa-miR-412	0	0	0	1	0	0	NTMT1	N-terminal Xaa-Pro-Lys N-methyltransferase 1
hsa-miR-412	0	0	1	1	0	0	ESX1	ESX homeobox 1
hsa-miR-412	0	0	0	1	0	0	PHYHD1	phytanoyl-CoA dioxygenase domain containing 1
hsa-miR-412	1	0	0	1	0	0	DPM2	dolichyl-phosphate mannosyltransferase polypeptide 2, regulatory subunit
hsa-miR-412	0	0	1	1	1	1	TOR2A	torsin family 2, member A
hsa-miR-412	0	0	1	1	1	1	SCLY	selenocysteine lyase
hsa-miR-412	0	0	0	1	1	1	GJB3	gap junction protein, beta 3, 31kDa
hsa-miR-412	0	0	1	1	1	1	RABEPK	Rab9 effector protein with kelch motifs
hsa-miR-412	1	0	1	1	1	1	NEK6	NIMA (never in mitosis gene a)-related kinase 6
hsa-miR-412	1	0	1	1	0	0	CCDC28B	coiled-coil domain containing 28B
hsa-miR-412	0	0	0	1	0	0	ATOH7	atonal homolog 7 (Drosophila)
hsa-miR-412	0	0	1	1	1	1	MYPN	myopalladin
hsa-miR-412	0	0	0	1	0	0	OR1N2	olfactory receptor, family 1, subfamily N, member 2
hsa-miR-412	0	0	1	1	0	0	HCRTR1	hypocretin (orexin) receptor 1
hsa-miR-412	0	0	1	1	0	0	OGDHL	oxoglutarate dehydrogenase-like
hsa-miR-412	0	0	0	1	0	0	SLC18A3	solute carrier family 18 (vesicular acetylcholine), member 3
hsa-miR-412	0	0	1	1	1	1	SYT15	synaptotagmin XV
hsa-miR-412	0	0	0	1	1	1	FAM83C	family with sequence similarity 83, member C
hsa-miR-412	0	0	1	1	0	0	P2RY4	pyrimidinergic receptor P2Y, G-protein coupled, 4
hsa-miR-412	0	0	0	1	0	0	KIFC1	kinesin family member C1
hsa-miR-412	0	0	0	1	1	1	C1QC	complement component 1, q subcomponent, C chain
hsa-miR-412	0	0	1	1	0	0	CELA3A	chymotrypsin-like elastase family, member 3A
hsa-miR-412	0	0	1	1	0	0	CELA3B	chymotrypsin-like elastase family, member 3B
hsa-miR-412	0	0	1	1	1	1	RXRB	retinoid X receptor, beta
hsa-miR-412	1	0	0	1	0	0	PSMB8	proteasome (prosome, macropain) subunit, beta type, 8 (large multifunctional peptidase 7)
hsa-miR-412	0	0	0	1	0	0	HLA-DOB	major histocompatibility complex, class II, DO beta
hsa-miR-412	0	0	1	1	0	0	PFKFB1	6-phosphofructo-2-kinase/fructose-2,6-biphosphatase 1
hsa-miR-412	0	0	1	1	0	0	TRO	trophinin
hsa-miR-412	0	0	1	1	0	0	VWA5B1	von Willebrand factor A domain containing 5B1
hsa-miR-412	0	0	0	1	1	1	EMC1	ER membrane protein complex subunit 1
hsa-miR-412	0	0	0	1	0	0	FAM70B	family with sequence similarity 70, member B
hsa-miR-412	0	0	0	1	0	0	BTBD17	BTB (POZ) domain containing 17
hsa-miR-412	0	0	1	1	0	0	CFB	complement factor B
hsa-miR-412	0	0	0	1	0	0	SPANXN5	SPANX family, member N5
hsa-miR-412	0	0	1	1	0	0	F10	coagulation factor X
hsa-miR-412	0	0	0	1	0	0	XAGE1B	X antigen family, member 1B
hsa-miR-412	0	0	0	1	0	0	XAGE1C	X antigen family, member 1C
hsa-miR-412	0	0	0	1	0	0	XAGE1E	X antigen family, member 1E
hsa-miR-412	0	0	0	1	0	0	XAGE1A	X antigen family, member 1A
hsa-miR-412	0	0	1	1	1	1	C6orf48	chromosome 6 open reading frame 48
hsa-miR-412	0	0	0	1	0	0	HSPA1A	heat shock 70kDa protein 1A
hsa-miR-412	0	0	1	1	0	0	CSNK2B	casein kinase 2, beta polypeptide
hsa-miR-412	0	0	0	1	1	1	LY6G5B	lymphocyte antigen 6 complex, locus G5B
hsa-miR-412	0	0	0	1	0	0	CTRC	chymotrypsin C (caldecrin)
hsa-miR-412	0	0	0	1	0	0	LOC100131048	uncharacterized LOC100131048
hsa-miR-412	0	0	0	1	0	0	CCHCR1	coiled-coil alpha-helical rod protein 1
hsa-miR-412	0	0	0	1	0	0	FAM182B	family with sequence similarity 182, member B
hsa-miR-412	0	0	1	1	1	1	FRMD3	FERM domain containing 3
hsa-miR-412	0	0	0	1	1	1	RABL2A	RAB, member of RAS oncogene family-like 2A
hsa-miR-412	0	0	1	1	1	1	C6orf136	chromosome 6 open reading frame 136
hsa-miR-412	0	0	0	1	1	1	ABHD12	abhydrolase domain containing 12
hsa-miR-412	0	0	0	1	0	0	CST7	cystatin F (leukocystatin)
hsa-miR-412	0	0	0	1	0	0	C1orf127	chromosome 1 open reading frame 127
hsa-miR-412	1	0	1	1	1	1	CASZ1	castor zinc finger 1
hsa-miR-412	0	0	0	1	0	0	OR2J3	olfactory receptor, family 2, subfamily J, member 3
hsa-miR-412	0	0	0	1	1	1	GRHPR	glyoxylate reductase/hydroxypyruvate reductase
hsa-miR-412	1	0	1	1	0	0	MEGF8	multiple EGF-like-domains 8
hsa-miR-412	0	0	0	1	1	1	OLAH	oleoyl-ACP hydrolase
hsa-miR-412	0	0	1	1	1	1	BCOR	BCL6 corepressor
hsa-miR-412	0	0	0	1	0	0	DKFZp779M0652	uncharacterized DKFZp779M0652
hsa-miR-412	0	0	1	1	0	0	CCL19	chemokine (C-C motif) ligand 19
hsa-miR-412	0	0	0	1	0	0	PLEKHN1	pleckstrin homology domain containing, family N member 1
hsa-miR-412	0	0	1	1	0	0	TRPC4	transient receptor potential cation channel, subfamily C, member 4
hsa-miR-412	1	0	1	1	1	1	PFKFB3	6-phosphofructo-2-kinase/fructose-2,6-biphosphatase 3
hsa-miR-412	0	0	1	1	1	1	MYH1	myosin, heavy chain 1, skeletal muscle, adult
hsa-miR-412	1	0	1	1	1	1	DCLK1	doublecortin-like kinase 1
hsa-miR-412	0	0	1	1	0	0	C9orf11	chromosome 9 open reading frame 11
hsa-miR-412	0	0	1	1	1	1	ZNF768	zinc finger protein 768
hsa-miR-412	0	0	1	1	0	0	UMODL1	uromodulin-like 1
hsa-miR-412	0	0	1	1	1	1	EPHX2	epoxide hydrolase 2, cytoplasmic
hsa-miR-412	0	0	0	1	0	0	HADHA	hydroxyacyl-CoA dehydrogenase/3-ketoacyl-CoA thiolase/enoyl-CoA hydratase (trifunctional protein), alpha subunit
hsa-miR-412	0	0	0	1	0	0	EIF3CL	eukaryotic translation initiation factor 3, subunit C-like
hsa-miR-412	0	0	1	1	0	0	ESRRB	estrogen-related receptor beta
hsa-miR-412	0	0	1	1	1	1	A4GALT	alpha 1,4-galactosyltransferase
hsa-miR-412	1	0	1	1	1	1	ETNK1	ethanolamine kinase 1
hsa-miR-412	0	0	1	1	0	0	NOMO2	NODAL modulator 2
hsa-miR-412	0	0	0	1	0	0	CRLF2	cytokine receptor-like factor 2
hsa-miR-412	0	0	0	1	0	0	ADCYAP1R1	adenylate cyclase activating polypeptide 1 (pituitary) receptor type I
hsa-miR-412	0	0	1	1	0	0	KLRD1	killer cell lectin-like receptor subfamily D, member 1
hsa-miR-412	0	0	0	1	0	0	OR1G1	olfactory receptor, family 1, subfamily G, member 1
hsa-miR-412	0	0	1	1	1	1	TSSC1	tumor suppressing subtransferable candidate 1
hsa-miR-412	0	0	0	1	0	0	ZNF205	zinc finger protein 205
hsa-miR-412	0	0	1	1	1	1	FBXO25	F-box protein 25
hsa-miR-412	0	0	1	1	1	1	RNASE13	ribonuclease, RNase A family, 13 (non-active)
hsa-miR-412	0	0	0	1	0	0	TSPY8	testis specific protein, Y-linked 8
hsa-miR-412	0	0	0	1	1	1	C3orf37	chromosome 3 open reading frame 37
hsa-miR-412	0	0	1	1	0	0	HRAS	v-Ha-ras Harvey rat sarcoma viral oncogene homolog
hsa-miR-412	1	0	1	1	1	1	DIO2	deiodinase, iodothyronine, type II
hsa-miR-412	1	0	1	1	0	0	C15orf27	chromosome 15 open reading frame 27
hsa-miR-412	1	0	1	1	1	1	SPTB	spectrin, beta, erythrocytic
hsa-miR-412	0	0	1	1	0	0	PRR5	proline rich 5 (renal)
hsa-miR-412	0	0	0	1	0	0	PRR5-ARHGAP8	PRR5-ARHGAP8 readthrough
hsa-miR-412	0	0	0	1	0	0	MRGPRE	MAS-related GPR, member E
hsa-miR-412	1	0	1	1	1	1	FUT1	fucosyltransferase 1 (galactoside 2-alpha-L-fucosyltransferase, H blood group)
hsa-miR-412	1	0	0	1	1	1	HNF4A	hepatocyte nuclear factor 4, alpha
hsa-miR-412	0	0	1	1	1	1	ZNF676	zinc finger protein 676
hsa-miR-412	1	0	1	0	1	1	PPARA	peroxisome proliferator-activated receptor alpha
hsa-miR-412	0	0	0	0	1	1	ZNF813	zinc finger protein 813
hsa-miR-412	0	0	1	0	1	1	FLJ16124	FLJ16124 protein
hsa-miR-412	1	0	0	1	1	1	CCT6A	chaperonin containing TCP1, subunit 6A (zeta 1)
hsa-miR-412	0	0	1	1	1	1	TECRL	trans-2,3-enoyl-CoA reductase-like
hsa-miR-412	0	0	1	1	1	1	GNG10	guanine nucleotide binding protein (G protein), gamma 10
hsa-miR-412	0	0	0	0	1	1	C10orf25	chromosome 10 open reading frame 25
hsa-miR-412	0	0	1	1	1	1	CXADR	coxsackie virus and adenovirus receptor
hsa-miR-412	1	0	1	1	1	1	CLU	clusterin
hsa-miR-412	1	0	1	1	1	1	KDSR	3-ketodihydrosphingosine reductase
hsa-miR-412	0	0	1	1	1	1	SLC22A2	solute carrier family 22 (organic cation transporter), member 2
hsa-miR-412	1	0	1	0	1	1	GAS7	growth arrest-specific 7
hsa-miR-412	0	0	1	1	1	1	KMO	kynurenine 3-monooxygenase (kynurenine 3-hydroxylase)
hsa-miR-412	0	0	1	1	1	1	DNAJC25-GNG10	DNAJC25-GNG10 readthrough
hsa-miR-412	1	0	1	1	1	1	DDX6	DEAD (Asp-Glu-Ala-Asp) box helicase 6
hsa-miR-412	1	0	1	1	1	1	RND3	Rho family GTPase 3
hsa-miR-412	0	0	1	1	1	1	C10orf10	chromosome 10 open reading frame 10
hsa-miR-412	1	0	1	1	1	1	PLEKHA6	pleckstrin homology domain containing, family A member 6
hsa-miR-412	1	0	1	1	1	1	PPP1R13B	protein phosphatase 1, regulatory subunit 13B
hsa-miR-412	0	0	0	1	1	1	TRIM58	tripartite motif containing 58
hsa-miR-412	0	0	0	1	1	1	PNPLA8	patatin-like phospholipase domain containing 8
hsa-miR-412	1	0	1	1	1	1	ZDHHC3	zinc finger, DHHC-type containing 3
hsa-miR-412	1	0	1	1	1	1	ADD2	adducin 2 (beta)
hsa-miR-412	0	0	1	0	1	1	WDR5	WD repeat domain 5
hsa-miR-412	1	0	1	0	1	1	OTUD7B	OTU domain containing 7B
hsa-miR-412	0	0	0	1	1	1	CYP4F11	cytochrome P450, family 4, subfamily F, polypeptide 11
hsa-miR-412	1	0	1	1	1	1	HSDL1	hydroxysteroid dehydrogenase like 1
hsa-miR-412	1	0	1	1	1	1	STARD3NL	STARD3 N-terminal like
hsa-miR-412	0	0	0	1	1	1	BOK	BCL2-related ovarian killer
hsa-miR-412	1	0	1	0	1	1	ADO	2-aminoethanethiol (cysteamine) dioxygenase
hsa-miR-412	0	0	1	1	1	1	COX15	COX15 homolog, cytochrome c oxidase assembly protein (yeast)
hsa-miR-412	0	0	1	1	1	1	C15orf40	chromosome 15 open reading frame 40
hsa-miR-412	0	0	1	1	1	1	SPICE1	spindle and centriole associated protein 1
hsa-miR-412	0	0	1	0	1	1	TRMT10A	tRNA methyltransferase 10 homolog A (S. cerevisiae)
hsa-miR-412	0	0	1	1	1	1	DCAF4L2	DDB1 and CUL4 associated factor 4-like 2
hsa-miR-412	0	0	1	1	1	1	DUSP18	dual specificity phosphatase 18
hsa-miR-412	1	0	1	0	1	1	DCP2	DCP2 decapping enzyme homolog (S. cerevisiae)
hsa-miR-412	0	0	0	1	1	1	ORAOV1	oral cancer overexpressed 1
hsa-miR-412	1	0	0	1	1	1	ZNF547	zinc finger protein 547
hsa-miR-412	0	0	1	1	1	1	GIMAP8	GTPase, IMAP family member 8
hsa-miR-412	0	0	1	1	1	1	ATPIF1	ATPase inhibitory factor 1
hsa-miR-412	0	0	1	1	1	1	C1orf88	chromosome 1 open reading frame 88
hsa-miR-412	0	0	1	1	1	1	ZNF621	zinc finger protein 621
hsa-miR-412	0	0	1	1	1	1	TMEM207	transmembrane protein 207
hsa-miR-412	0	0	0	0	1	1	LOC728724	hCG1814486
hsa-miR-412	0	0	0	0	1	1	LOC388948	uncharacterized LOC388948
hsa-miR-412	0	0	0	0	1	1	LOC340113	uncharacterized LOC340113
hsa-miR-412	0	0	0	0	1	1	LOC401220	uncharacterized LOC401220
