# Supplementary material for: Profiling of Selected MicroRNAs in Proliferative Eutopic Endometrium of Women with Ovarian Endometriosis
Source: Biomed Res Int. 2015 Aug 20;2015:760698. doi: 10.1155/2015/760698 (PMC4558423; doi:10.1155/2015/760698)
Supplement: Supplementary file 1 — Table I: The names of miRNAs significantly differentially expressed between eutopic endometrium of patients with endometriosis vs eutopic endometrium of patients without endometriosis. Table II: The associations between miRNA and mRNA, which presents detailed results of the search of six major databases i.e targetscan, tarbase, miranda, mirbase, mirtarget2 and pictar. [file 760698.f1.zip › 760698.f1/Table II/hsa-miR-421.tsv]

miR	targetscan	tarbase	miranda	mirbase	mirtarget2	pictar	GeneSymbol	GeneName
hsa-miR-421	1	0	1	0	1	1	BTBD3	BTB (POZ) domain containing 3
hsa-miR-421	1	0	1	0	1	1	PCDHA11	protocadherin alpha 11
hsa-miR-421	1	0	1	0	1	1	KIF3C	kinesin family member 3C
hsa-miR-421	1	0	1	1	1	1	QTRTD1	queuine tRNA-ribosyltransferase domain containing 1
hsa-miR-421	1	0	1	1	1	1	CASD1	CAS1 domain containing 1
hsa-miR-421	1	0	1	1	1	1	HMGA2	high mobility group AT-hook 2
hsa-miR-421	1	0	1	1	1	1	CAMTA1	calmodulin binding transcription activator 1
hsa-miR-421	1	0	1	1	1	1	MTOR	mechanistic target of rapamycin (serine/threonine kinase)
hsa-miR-421	1	0	1	0	1	1	ARHGAP26	Rho GTPase activating protein 26
hsa-miR-421	1	0	1	0	1	1	THRB	thyroid hormone receptor, beta
hsa-miR-421	1	0	1	0	1	1	PAPPA	pregnancy-associated plasma protein A, pappalysin 1
hsa-miR-421	1	0	1	0	1	1	CDK6	cyclin-dependent kinase 6
hsa-miR-421	1	0	1	1	1	1	CUL4B	cullin 4B
hsa-miR-421	1	0	1	1	1	1	CDC42	cell division cycle 42 (GTP binding protein, 25kDa)
hsa-miR-421	1	0	1	0	1	1	FAR1	fatty acyl CoA reductase 1
hsa-miR-421	1	0	1	1	1	1	METTL8	methyltransferase like 8
hsa-miR-421	1	0	1	1	1	1	TTBK2	tau tubulin kinase 2
hsa-miR-421	1	0	1	1	1	1	SMARCAD1	SWI/SNF-related, matrix-associated actin-dependent regulator of chromatin, subfamily a, containing DEAD/H box 1
hsa-miR-421	1	0	1	1	1	1	CTDSPL2	CTD (carboxy-terminal domain, RNA polymerase II, polypeptide A) small phosphatase like 2
hsa-miR-421	1	0	1	1	1	1	SYT14	synaptotagmin XIV
hsa-miR-421	1	0	1	0	1	1	DDX3X	DEAD (Asp-Glu-Ala-Asp) box polypeptide 3, X-linked
hsa-miR-421	1	0	1	1	1	1	PCDHA6	protocadherin alpha 6
hsa-miR-421	1	0	1	1	1	1	ZNF655	zinc finger protein 655
hsa-miR-421	1	0	1	1	1	1	CBX4	chromobox homolog 4
hsa-miR-421	1	0	1	1	1	1	SEPHS1	selenophosphate synthetase 1
hsa-miR-421	1	0	1	1	1	1	FOXP1	forkhead box P1
hsa-miR-421	1	0	1	1	1	1	MCMBP	minichromosome maintenance complex binding protein
hsa-miR-421	1	0	1	1	1	1	PLCXD3	phosphatidylinositol-specific phospholipase C, X domain containing 3
hsa-miR-421	1	0	0	0	0	0	LOC646227	cAMP-regulated phosphoprotein 19 pseudogene
hsa-miR-421	1	0	1	0	1	1	SYT14L	synaptotagmin XIV-like
hsa-miR-421	1	0	1	1	1	1	PPT1	palmitoyl-protein thioesterase 1
hsa-miR-421	1	0	1	1	1	1	CAMK2A	calcium/calmodulin-dependent protein kinase II alpha
hsa-miR-421	1	0	1	1	1	1	NXN	nucleoredoxin
hsa-miR-421	1	0	1	1	1	1	PTGER2	prostaglandin E receptor 2 (subtype EP2), 53kDa
hsa-miR-421	1	0	1	1	1	1	SIRPA	signal-regulatory protein alpha
hsa-miR-421	1	0	1	1	1	1	NOX4	NADPH oxidase 4
hsa-miR-421	1	0	1	1	1	1	AFF4	AF4/FMR2 family, member 4
hsa-miR-421	1	0	1	1	1	1	ZFP106	zinc finger protein 106 homolog (mouse)
hsa-miR-421	1	0	1	1	1	1	HNRNPUL2	heterogeneous nuclear ribonucleoprotein U-like 2
hsa-miR-421	1	0	1	1	1	1	PRRG4	proline rich Gla (G-carboxyglutamic acid) 4 (transmembrane)
hsa-miR-421	1	0	1	0	1	1	ODZ1	odz, odd Oz/ten-m homolog 1 (Drosophila)
hsa-miR-421	1	0	1	1	0	0	YTHDF2	YTH domain family, member 2
hsa-miR-421	1	0	1	0	1	1	NUFIP2	nuclear fragile X mental retardation protein interacting protein 2
hsa-miR-421	1	0	1	1	1	1	HNRPDL	heterogeneous nuclear ribonucleoprotein D-like
hsa-miR-421	1	0	1	0	1	1	KRAS	v-Ki-ras2 Kirsten rat sarcoma viral oncogene homolog
hsa-miR-421	1	0	1	0	1	1	KIAA0182	KIAA0182
hsa-miR-421	1	0	1	1	1	1	SORBS1	sorbin and SH3 domain containing 1
hsa-miR-421	1	0	1	1	1	1	ONECUT2	one cut homeobox 2
hsa-miR-421	1	0	1	1	1	1	MAK	male germ cell-associated kinase
hsa-miR-421	1	0	1	1	1	1	AFF3	AF4/FMR2 family, member 3
hsa-miR-421	1	0	1	0	1	1	CCNL2	cyclin L2
hsa-miR-421	1	0	1	0	1	1	LARP4B	La ribonucleoprotein domain family, member 4B
hsa-miR-421	1	0	1	1	1	1	PAPD5	PAP associated domain containing 5
hsa-miR-421	1	0	1	1	1	1	HMMR	hyaluronan-mediated motility receptor (RHAMM)
hsa-miR-421	1	0	1	1	1	1	SLC4A4	solute carrier family 4, sodium bicarbonate cotransporter, member 4
hsa-miR-421	1	0	1	1	1	1	PICALM	phosphatidylinositol binding clathrin assembly protein
hsa-miR-421	1	0	1	1	1	1	BEND3	BEN domain containing 3
hsa-miR-421	1	0	1	1	1	1	SPCS2	signal peptidase complex subunit 2 homolog (S. cerevisiae)
hsa-miR-421	1	0	1	0	1	1	GRB10	growth factor receptor-bound protein 10
hsa-miR-421	1	0	1	1	1	1	SRSF7	serine/arginine-rich splicing factor 7
hsa-miR-421	1	0	1	0	1	1	ACACA	acetyl-CoA carboxylase alpha
hsa-miR-421	1	0	1	1	1	1	MECP2	methyl CpG binding protein 2 (Rett syndrome)
hsa-miR-421	1	0	1	1	1	1	RNF44	ring finger protein 44
hsa-miR-421	1	0	1	0	1	1	EIF2S2	eukaryotic translation initiation factor 2, subunit 2 beta, 38kDa
hsa-miR-421	1	0	1	0	1	1	EDEM3	ER degradation enhancer, mannosidase alpha-like 3
hsa-miR-421	1	0	1	0	1	1	XIAP	X-linked inhibitor of apoptosis
hsa-miR-421	1	0	1	0	1	1	HDAC4	histone deacetylase 4
hsa-miR-421	1	0	1	1	1	1	RPS6KA3	ribosomal protein S6 kinase, 90kDa, polypeptide 3
hsa-miR-421	1	0	1	1	0	0	ATAD2B	ATPase family, AAA domain containing 2B
hsa-miR-421	1	0	1	1	1	1	PCDHA8	protocadherin alpha 8
hsa-miR-421	1	0	1	1	1	1	FRK	fyn-related kinase
hsa-miR-421	1	0	1	1	1	1	C18orf1	chromosome 18 open reading frame 1
hsa-miR-421	1	0	0	1	1	1	NT5C1B	5'-nucleotidase, cytosolic IB
hsa-miR-421	1	0	1	1	1	1	NR2C2	nuclear receptor subfamily 2, group C, member 2
hsa-miR-421	1	0	1	1	1	1	ZCCHC14	zinc finger, CCHC domain containing 14
hsa-miR-421	1	0	1	0	1	1	BCL11B	B-cell CLL/lymphoma 11B (zinc finger protein)
hsa-miR-421	1	0	1	1	1	1	ZNF148	zinc finger protein 148
hsa-miR-421	1	0	1	1	1	1	TMEM159	transmembrane protein 159
hsa-miR-421	1	0	1	0	1	1	GAS7	growth arrest-specific 7
hsa-miR-421	1	0	1	1	1	1	SORCS3	sortilin-related VPS10 domain containing receptor 3
hsa-miR-421	1	0	1	1	1	1	HMG20A	high mobility group 20A
hsa-miR-421	1	0	1	1	1	1	BTG2	BTG family, member 2
hsa-miR-421	1	0	1	0	1	1	PLXNA1	plexin A1
hsa-miR-421	1	0	1	1	1	1	NMB	neuromedin B
hsa-miR-421	1	0	1	1	1	1	DNAJC27	DnaJ (Hsp40) homolog, subfamily C, member 27
hsa-miR-421	1	0	1	1	1	1	ASAP1	ArfGAP with SH3 domain, ankyrin repeat and PH domain 1
hsa-miR-421	1	0	1	0	1	1	EXOC5	exocyst complex component 5
hsa-miR-421	1	0	1	1	1	1	ABCA13	ATP-binding cassette, sub-family A (ABC1), member 13
hsa-miR-421	1	0	1	1	1	1	IPO5	importin 5
hsa-miR-421	1	0	1	1	1	1	ELAVL2	ELAV (embryonic lethal, abnormal vision, Drosophila)-like 2 (Hu antigen B)
hsa-miR-421	1	0	1	0	1	1	FAM214A	family with sequence similarity 214, member A
hsa-miR-421	1	0	1	0	1	1	CNOT6L	CCR4-NOT transcription complex, subunit 6-like
hsa-miR-421	1	0	1	0	1	1	MEF2C	myocyte enhancer factor 2C
hsa-miR-421	1	0	1	1	1	1	SMARCD1	SWI/SNF related, matrix associated, actin dependent regulator of chromatin, subfamily d, member 1
hsa-miR-421	1	0	1	0	1	1	KCMF1	potassium channel modulatory factor 1
hsa-miR-421	1	0	1	1	1	1	SP8	Sp8 transcription factor
hsa-miR-421	1	0	1	1	1	1	GSPT1	G1 to S phase transition 1
hsa-miR-421	1	0	1	1	1	1	ZCCHC5	zinc finger, CCHC domain containing 5
hsa-miR-421	1	0	1	0	1	1	BMF	Bcl2 modifying factor
hsa-miR-421	1	0	1	1	1	1	VAT1L	vesicle amine transport protein 1 homolog (T. californica)-like
hsa-miR-421	1	0	1	1	1	1	SNAP91	synaptosomal-associated protein, 91kDa homolog (mouse)
hsa-miR-421	1	0	1	1	1	1	MLLT6	myeloid/lymphoid or mixed-lineage leukemia (trithorax homolog, Drosophila); translocated to, 6
hsa-miR-421	1	0	1	1	0	0	RAPGEF2	Rap guanine nucleotide exchange factor (GEF) 2
hsa-miR-421	1	0	1	1	1	1	CHD2	chromodomain helicase DNA binding protein 2
hsa-miR-421	1	0	1	1	1	1	KIAA0101	KIAA0101
hsa-miR-421	1	0	1	1	0	0	FRS3	fibroblast growth factor receptor substrate 3
hsa-miR-421	1	0	1	0	1	1	ARPP19	cAMP-regulated phosphoprotein, 19kDa
hsa-miR-421	1	0	1	1	1	1	PTPRB	protein tyrosine phosphatase, receptor type, B
hsa-miR-421	1	0	1	1	1	1	KIAA0528	KIAA0528
hsa-miR-421	1	0	1	1	1	1	SH2B3	SH2B adaptor protein 3
hsa-miR-421	1	0	1	0	1	1	PCDHAC1	protocadherin alpha subfamily C, 1
hsa-miR-421	1	0	1	1	0	0	UBN2	ubinuclein 2
hsa-miR-421	1	0	1	1	1	1	CDRT1	CMT1A duplicated region transcript 1
hsa-miR-421	1	0	1	1	1	1	DDX17	DEAD (Asp-Glu-Ala-Asp) box helicase 17
hsa-miR-421	1	0	1	1	1	1	CAMK2D	calcium/calmodulin-dependent protein kinase II delta
hsa-miR-421	1	0	1	1	1	1	CAPZA1	capping protein (actin filament) muscle Z-line, alpha 1
hsa-miR-421	1	0	1	1	1	1	SLC8A2	solute carrier family 8 (sodium/calcium exchanger), member 2
hsa-miR-421	1	0	1	1	1	1	POLQ	polymerase (DNA directed), theta
hsa-miR-421	1	0	1	1	1	1	INSC	inscuteable homolog (Drosophila)
hsa-miR-421	1	0	1	1	1	1	BACH2	BTB and CNC homology 1, basic leucine zipper transcription factor 2
hsa-miR-421	1	0	1	1	1	1	PIGA	phosphatidylinositol glycan anchor biosynthesis, class A
hsa-miR-421	1	0	1	1	1	1	ANKRD13C	ankyrin repeat domain 13C
hsa-miR-421	1	0	1	0	0	0	ZC3H12C	zinc finger CCCH-type containing 12C
hsa-miR-421	1	0	1	1	1	1	MEIS2	Meis homeobox 2
hsa-miR-421	1	0	1	1	1	1	PCDHA5	protocadherin alpha 5
hsa-miR-421	1	0	1	1	1	1	SKIDA1	SKI/DACH domain containing 1
hsa-miR-421	1	0	1	1	1	1	ANKRD17	ankyrin repeat domain 17
hsa-miR-421	1	0	1	1	1	1	MEF2D	myocyte enhancer factor 2D
hsa-miR-421	1	0	1	1	1	1	LRRC4	leucine rich repeat containing 4
hsa-miR-421	1	0	1	1	1	1	PFKFB2	6-phosphofructo-2-kinase/fructose-2,6-biphosphatase 2
hsa-miR-421	1	0	1	1	1	1	CS	citrate synthase
hsa-miR-421	1	0	1	1	1	1	JARID2	jumonji, AT rich interactive domain 2
hsa-miR-421	1	0	1	0	1	1	SPATS2L	spermatogenesis associated, serine-rich 2-like
hsa-miR-421	1	0	1	1	1	1	MTA1	metastasis associated 1
hsa-miR-421	1	0	1	0	1	1	CUL3	cullin 3
hsa-miR-421	1	0	1	1	1	1	NCS1	neuronal calcium sensor 1
hsa-miR-421	1	0	1	1	1	1	TEX261	testis expressed 261
hsa-miR-421	1	0	1	1	1	1	SRI	sorcin
hsa-miR-421	1	0	1	0	1	1	FAM172A	family with sequence similarity 172, member A
hsa-miR-421	1	0	1	1	0	0	USP7	ubiquitin specific peptidase 7 (herpes virus-associated)
hsa-miR-421	1	1	1	1	1	1	NFIA	nuclear factor I/A
hsa-miR-421	1	0	1	1	1	1	PIEZO2	piezo-type mechanosensitive ion channel component 2
hsa-miR-421	1	0	1	0	1	1	CRIM1	cysteine rich transmembrane BMP regulator 1 (chordin-like)
hsa-miR-421	1	0	1	1	1	1	ZC3H12A	zinc finger CCCH-type containing 12A
hsa-miR-421	1	0	1	1	1	1	SNRNP70	small nuclear ribonucleoprotein 70kDa (U1)
hsa-miR-421	1	0	1	1	1	1	SLC12A5	solute carrier family 12 (potassium/chloride transporter), member 5
hsa-miR-421	1	0	1	1	1	1	PCDHA1	protocadherin alpha 1
hsa-miR-421	1	0	1	1	1	1	OCIAD1	OCIA domain containing 1
hsa-miR-421	1	0	1	0	1	1	SOX4	SRY (sex determining region Y)-box 4
hsa-miR-421	1	0	1	0	1	1	CAPRIN1	cell cycle associated protein 1
hsa-miR-421	1	0	1	0	1	1	CPEB4	cytoplasmic polyadenylation element binding protein 4
hsa-miR-421	1	0	1	1	1	1	QKI	QKI, KH domain containing, RNA binding
hsa-miR-421	1	0	1	1	1	1	KAT6A	K(lysine) acetyltransferase 6A
hsa-miR-421	1	0	1	1	1	1	FAM122A	family with sequence similarity 122A
hsa-miR-421	1	0	1	1	1	1	ENAH	enabled homolog (Drosophila)
hsa-miR-421	1	0	1	0	1	1	ARHGAP5	Rho GTPase activating protein 5
hsa-miR-421	1	0	1	1	1	1	LPGAT1	lysophosphatidylglycerol acyltransferase 1
hsa-miR-421	1	0	1	1	1	1	IGSF3	immunoglobulin superfamily, member 3
hsa-miR-421	1	0	1	0	1	1	PCDHAC2	protocadherin alpha subfamily C, 2
hsa-miR-421	1	0	1	1	1	1	ARGLU1	arginine and glutamate rich 1
hsa-miR-421	1	0	1	1	1	1	NR3C2	nuclear receptor subfamily 3, group C, member 2
hsa-miR-421	1	0	1	1	1	1	PRCC	papillary renal cell carcinoma (translocation-associated)
hsa-miR-421	1	0	1	1	1	1	RRP15	ribosomal RNA processing 15 homolog (S. cerevisiae)
hsa-miR-421	1	0	1	1	1	1	CD109	CD109 molecule
hsa-miR-421	1	0	1	1	1	1	SUPT16H	suppressor of Ty 16 homolog (S. cerevisiae)
hsa-miR-421	1	0	1	1	1	1	PDGFRA	platelet-derived growth factor receptor, alpha polypeptide
hsa-miR-421	1	0	1	1	1	1	FGF13	fibroblast growth factor 13
hsa-miR-421	1	0	1	1	1	1	PDCD4	programmed cell death 4 (neoplastic transformation inhibitor)
hsa-miR-421	1	0	1	1	0	0	MAGED1	melanoma antigen family D, 1
hsa-miR-421	1	0	1	0	1	1	CACNA1C	calcium channel, voltage-dependent, L type, alpha 1C subunit
hsa-miR-421	1	0	1	1	1	1	NDFIP1	Nedd4 family interacting protein 1
hsa-miR-421	1	0	1	1	1	1	ARL4C	ADP-ribosylation factor-like 4C
hsa-miR-421	1	0	1	1	1	1	HNRNPA1	heterogeneous nuclear ribonucleoprotein A1
hsa-miR-421	1	0	1	0	1	1	IGF2BP1	insulin-like growth factor 2 mRNA binding protein 1
hsa-miR-421	1	0	1	1	1	1	KCNIP4	Kv channel interacting protein 4
hsa-miR-421	1	0	1	1	1	1	JHDM1D	jumonji C domain containing histone demethylase 1 homolog D (S. cerevisiae)
hsa-miR-421	1	0	1	1	1	1	ATXN1	ataxin 1
hsa-miR-421	1	0	1	1	0	0	SCGB2A2	secretoglobin, family 2A, member 2
hsa-miR-421	1	0	1	1	1	1	SCGB2A1	secretoglobin, family 2A, member 1
hsa-miR-421	1	0	1	1	1	1	SGIP1	SH3-domain GRB2-like (endophilin) interacting protein 1
hsa-miR-421	1	0	1	1	1	1	MUM1L1	melanoma associated antigen (mutated) 1-like 1
hsa-miR-421	1	0	1	1	1	1	UBE2B	ubiquitin-conjugating enzyme E2B
hsa-miR-421	1	0	1	0	1	1	C20orf72	chromosome 20 open reading frame 72
hsa-miR-421	1	0	1	0	1	1	RUNX1T1	runt-related transcription factor 1; translocated to, 1 (cyclin D-related)
hsa-miR-421	1	0	1	1	1	1	TOMM70A	translocase of outer mitochondrial membrane 70 homolog A (S. cerevisiae)
hsa-miR-421	1	0	1	1	1	1	CBL	Cbl proto-oncogene, E3 ubiquitin protein ligase
hsa-miR-421	1	0	1	1	1	1	RPRD1B	regulation of nuclear pre-mRNA domain containing 1B
hsa-miR-421	1	0	1	0	1	1	DLX6	distal-less homeobox 6
hsa-miR-421	1	0	1	1	1	1	SPRY1	sprouty homolog 1, antagonist of FGF signaling (Drosophila)
hsa-miR-421	1	0	1	0	1	1	NAA60	N(alpha)-acetyltransferase 60, NatF catalytic subunit
hsa-miR-421	1	0	1	1	1	1	MAGOHB	mago-nashi homolog B (Drosophila)
hsa-miR-421	1	0	1	1	1	1	MAFB	v-maf musculoaponeurotic fibrosarcoma oncogene homolog B (avian)
hsa-miR-421	1	0	1	1	1	1	RNF139	ring finger protein 139
hsa-miR-421	1	0	1	1	1	1	ARHGEF9	Cdc42 guanine nucleotide exchange factor (GEF) 9
hsa-miR-421	1	0	1	1	1	1	ACSL3	acyl-CoA synthetase long-chain family member 3
hsa-miR-421	1	0	1	1	1	1	CALN1	calneuron 1
hsa-miR-421	1	0	1	1	1	1	CLDN11	claudin 11
hsa-miR-421	1	0	1	1	1	1	HNRNPA1L2	heterogeneous nuclear ribonucleoprotein A1-like 2
hsa-miR-421	1	0	1	1	1	1	ILF2	interleukin enhancer binding factor 2, 45kDa
hsa-miR-421	1	0	1	1	1	1	TMEM245	transmembrane protein 245
hsa-miR-421	1	0	1	0	1	1	EDARADD	EDAR-associated death domain
hsa-miR-421	1	0	1	1	1	1	FBXL16	F-box and leucine-rich repeat protein 16
hsa-miR-421	1	0	1	1	1	1	SLC25A3	solute carrier family 25 (mitochondrial carrier; phosphate carrier), member 3
hsa-miR-421	1	0	1	1	1	1	PDE4B	phosphodiesterase 4B, cAMP-specific
hsa-miR-421	1	0	1	1	1	1	MYH10	myosin, heavy chain 10, non-muscle
hsa-miR-421	1	0	1	1	1	1	ZNF654	zinc finger protein 654
hsa-miR-421	1	0	1	1	1	1	SAMD12	sterile alpha motif domain containing 12
hsa-miR-421	1	0	1	0	1	1	PCDHA10	protocadherin alpha 10
hsa-miR-421	1	0	1	1	1	1	WWC2	WW and C2 domain containing 2
hsa-miR-421	1	0	1	1	1	1	TMEM65	transmembrane protein 65
hsa-miR-421	1	0	1	0	1	1	CREBZF	CREB/ATF bZIP transcription factor
hsa-miR-421	1	0	1	1	1	1	PRKD1	protein kinase D1
hsa-miR-421	1	0	1	1	1	1	GJC1	gap junction protein, gamma 1, 45kDa
hsa-miR-421	1	0	1	0	0	0	CPLX1	complexin 1
hsa-miR-421	1	0	1	1	1	1	UBE2O	ubiquitin-conjugating enzyme E2O
hsa-miR-421	1	0	1	1	0	0	DHDDS	dehydrodolichyl diphosphate synthase
hsa-miR-421	1	0	1	0	1	1	PCDHA13	protocadherin alpha 13
hsa-miR-421	1	0	1	0	1	1	ARHGAP35	Rho GTPase activating protein 35
hsa-miR-421	1	0	1	0	1	1	PRKAA2	protein kinase, AMP-activated, alpha 2 catalytic subunit
hsa-miR-421	1	0	1	1	1	1	TSN	translin
hsa-miR-421	1	0	1	1	1	1	KCNJ10	potassium inwardly-rectifying channel, subfamily J, member 10
hsa-miR-421	1	0	1	0	1	1	GCNT2	glucosaminyl (N-acetyl) transferase 2, I-branching enzyme (I blood group)
hsa-miR-421	1	0	1	0	1	1	CHD7	chromodomain helicase DNA binding protein 7
hsa-miR-421	1	0	1	1	1	1	LDB2	LIM domain binding 2
hsa-miR-421	1	0	1	1	1	1	PCDHA2	protocadherin alpha 2
hsa-miR-421	1	0	1	1	1	1	PPP2R2C	protein phosphatase 2, regulatory subunit B, gamma
hsa-miR-421	1	0	1	1	1	1	SPTY2D1	SPT2, Suppressor of Ty, domain containing 1 (S. cerevisiae)
hsa-miR-421	1	0	1	1	1	1	CPNE4	copine IV
hsa-miR-421	1	0	1	1	1	1	SLC2A4RG	SLC2A4 regulator
hsa-miR-421	1	0	1	0	1	1	PCDHA7	protocadherin alpha 7
hsa-miR-421	1	0	1	1	1	1	SSR3	signal sequence receptor, gamma (translocon-associated protein gamma)
hsa-miR-421	1	0	1	1	1	1	SRSF1	serine/arginine-rich splicing factor 1
hsa-miR-421	1	0	1	1	1	1	YTHDF1	YTH domain family, member 1
hsa-miR-421	1	0	1	1	1	1	FCHSD2	FCH and double SH3 domains 2
hsa-miR-421	1	0	1	1	1	1	STRN3	striatin, calmodulin binding protein 3
hsa-miR-421	1	0	1	0	1	1	TMEM237	transmembrane protein 237
hsa-miR-421	1	0	1	1	1	1	GRM8	glutamate receptor, metabotropic 8
hsa-miR-421	1	0	1	0	1	1	ELMOD1	ELMO/CED-12 domain containing 1
hsa-miR-421	1	0	1	1	1	1	TPRG1	tumor protein p63 regulated 1
hsa-miR-421	1	0	1	0	1	1	FLRT2	fibronectin leucine rich transmembrane protein 2
hsa-miR-421	1	0	1	1	1	1	KANSL1	KAT8 regulatory NSL complex subunit 1
hsa-miR-421	1	0	1	1	1	1	PCDHA3	protocadherin alpha 3
hsa-miR-421	1	0	1	1	1	1	SP3	Sp3 transcription factor
hsa-miR-421	1	0	1	1	1	1	AFF2	AF4/FMR2 family, member 2
hsa-miR-421	1	0	1	1	1	1	TIMP2	TIMP metallopeptidase inhibitor 2
hsa-miR-421	1	0	1	1	1	1	PCDHA4	protocadherin alpha 4
hsa-miR-421	1	0	1	0	1	1	XRN1	5'-3' exoribonuclease 1
hsa-miR-421	1	0	1	0	1	1	ZNF609	zinc finger protein 609
hsa-miR-421	1	0	1	0	1	1	TOMM20	translocase of outer mitochondrial membrane 20 homolog (yeast)
hsa-miR-421	1	0	1	1	1	1	ADAMTS18	ADAM metallopeptidase with thrombospondin type 1 motif, 18
hsa-miR-421	1	0	0	0	0	0	TMEM170B	transmembrane protein 170B
hsa-miR-421	1	0	1	1	1	1	SHANK2	SH3 and multiple ankyrin repeat domains 2
hsa-miR-421	1	0	1	1	1	1	PLS3	plastin 3
hsa-miR-421	1	0	1	1	1	1	PCGF5	polycomb group ring finger 5
hsa-miR-421	1	0	1	1	1	1	ASH1L	ash1 (absent, small, or homeotic)-like (Drosophila)
hsa-miR-421	1	0	1	1	1	1	CALM2	calmodulin 2 (phosphorylase kinase, delta)
hsa-miR-421	1	0	1	1	0	0	ENTPD1	ectonucleoside triphosphate diphosphohydrolase 1
hsa-miR-421	1	0	1	1	1	1	SRSF10	serine/arginine-rich splicing factor 10
hsa-miR-421	1	0	1	1	0	0	RIMS2	regulating synaptic membrane exocytosis 2
hsa-miR-421	1	0	1	1	1	1	CREBRF	CREB3 regulatory factor
hsa-miR-421	1	0	1	0	1	1	THAP2	THAP domain containing, apoptosis associated protein 2
hsa-miR-421	1	0	1	1	1	1	NFIB	nuclear factor I/B
hsa-miR-421	1	0	1	1	1	1	CXorf23	chromosome X open reading frame 23
hsa-miR-421	1	0	1	1	1	1	SNX1	sorting nexin 1
hsa-miR-421	1	0	1	1	1	1	DNAJA4	DnaJ (Hsp40) homolog, subfamily A, member 4
hsa-miR-421	1	0	1	0	1	1	NCAM1	neural cell adhesion molecule 1
hsa-miR-421	1	0	1	1	1	1	GRIA4	glutamate receptor, ionotropic, AMPA 4
hsa-miR-421	1	0	1	1	1	1	ZNF706	zinc finger protein 706
hsa-miR-421	1	0	1	1	1	1	DLX3	distal-less homeobox 3
hsa-miR-421	1	0	1	1	1	1	INPP5A	inositol polyphosphate-5-phosphatase, 40kDa
hsa-miR-421	1	0	1	0	1	1	PCDHA12	protocadherin alpha 12
hsa-miR-421	1	0	1	1	1	1	PLAU	plasminogen activator, urokinase
hsa-miR-421	1	0	1	1	1	1	PRUNE2	prune homolog 2 (Drosophila)
hsa-miR-421	1	0	1	1	1	1	DAAM2	dishevelled associated activator of morphogenesis 2
hsa-miR-421	1	0	1	1	1	1	ABCC5	ATP-binding cassette, sub-family C (CFTR/MRP), member 5
hsa-miR-421	1	0	1	0	1	1	PTPRT	protein tyrosine phosphatase, receptor type, T
hsa-miR-421	0	0	1	1	1	1	PREPL	prolyl endopeptidase-like
hsa-miR-421	0	0	1	1	1	1	PDE4DIP	phosphodiesterase 4D interacting protein
hsa-miR-421	1	0	1	1	1	1	BAI3	brain-specific angiogenesis inhibitor 3
hsa-miR-421	1	0	1	1	1	1	HIPK1	homeodomain interacting protein kinase 1
hsa-miR-421	1	0	1	0	1	1	DOCK4	dedicator of cytokinesis 4
hsa-miR-421	1	0	1	1	1	1	MATR3	matrin 3
hsa-miR-421	1	0	1	1	1	1	DMXL2	Dmx-like 2
hsa-miR-421	1	0	1	1	1	1	LMO7	LIM domain 7
hsa-miR-421	1	0	1	1	1	1	RNMT	RNA (guanine-7-) methyltransferase
hsa-miR-421	0	0	1	1	1	1	ST3GAL6	ST3 beta-galactoside alpha-2,3-sialyltransferase 6
hsa-miR-421	1	0	1	0	0	0	KIAA0947	KIAA0947
hsa-miR-421	1	0	1	1	1	1	C11orf9	chromosome 11 open reading frame 9
hsa-miR-421	0	0	1	1	0	0	FAM149B1	family with sequence similarity 149, member B1
hsa-miR-421	0	0	1	1	1	1	TBC1D30	TBC1 domain family, member 30
hsa-miR-421	1	0	1	1	1	1	RPGRIP1L	RPGRIP1-like
hsa-miR-421	0	0	1	0	1	1	TP53TG3	TP53 target 3
hsa-miR-421	0	0	1	0	0	0	TP53TG3B	TP53 target 3B
hsa-miR-421	1	0	1	1	1	1	SPIRE1	spire homolog 1 (Drosophila)
hsa-miR-421	1	0	1	1	1	1	ATXN7L1	ataxin 7-like 1
hsa-miR-421	1	0	1	1	1	1	RALGAPB	Ral GTPase activating protein, beta subunit (non-catalytic)
hsa-miR-421	1	0	1	0	1	1	ANKFY1	ankyrin repeat and FYVE domain containing 1
hsa-miR-421	0	0	1	1	1	1	FSTL5	follistatin-like 5
hsa-miR-421	0	0	1	1	1	1	KLHL13	kelch-like 13 (Drosophila)
hsa-miR-421	1	0	1	1	1	1	PCDH19	protocadherin 19
hsa-miR-421	0	0	1	0	0	0	NYAP2	neuronal tyrosine-phosphorylated phosphoinositide-3-kinase adaptor 2
hsa-miR-421	1	0	1	1	1	1	INADL	InaD-like (Drosophila)
hsa-miR-421	0	0	1	0	1	1	FBRSL1	fibrosin-like 1
hsa-miR-421	1	0	1	0	1	1	IGDCC4	immunoglobulin superfamily, DCC subclass, member 4
hsa-miR-421	1	0	1	1	1	1	PER3	period homolog 3 (Drosophila)
hsa-miR-421	0	0	1	1	0	0	TPGS2	tubulin polyglutamylase complex subunit 2
hsa-miR-421	1	0	1	1	1	1	MAT2B	methionine adenosyltransferase II, beta
hsa-miR-421	1	0	1	1	1	1	SH3TC2	SH3 domain and tetratricopeptide repeats 2
hsa-miR-421	1	0	1	1	1	1	PRDM16	PR domain containing 16
hsa-miR-421	1	0	1	0	0	0	ZBTB34	zinc finger and BTB domain containing 34
hsa-miR-421	1	0	1	1	1	1	RFX4	regulatory factor X, 4 (influences HLA class II expression)
hsa-miR-421	1	0	1	1	1	1	SMEK1	SMEK homolog 1, suppressor of mek1 (Dictyostelium)
hsa-miR-421	0	0	1	1	0	0	KRTAP24-1	keratin associated protein 24-1
hsa-miR-421	1	0	1	1	1	1	TRPM3	transient receptor potential cation channel, subfamily M, member 3
hsa-miR-421	1	0	1	0	1	1	BEND4	BEN domain containing 4
hsa-miR-421	0	0	1	1	1	1	PCBP2	poly(rC) binding protein 2
hsa-miR-421	0	0	1	0	1	1	ACE2	angiotensin I converting enzyme (peptidyl-dipeptidase A) 2
hsa-miR-421	1	0	1	1	1	1	ADARB1	adenosine deaminase, RNA-specific, B1
hsa-miR-421	1	0	1	0	1	1	CCDC88A	coiled-coil domain containing 88A
hsa-miR-421	0	0	1	1	1	1	CAST	calpastatin
hsa-miR-421	1	0	1	1	1	1	VLDLR	very low density lipoprotein receptor
hsa-miR-421	1	0	1	1	0	0	NDST2	N-deacetylase/N-sulfotransferase (heparan glucosaminyl) 2
hsa-miR-421	1	0	1	1	0	0	ELN	elastin
hsa-miR-421	1	0	1	1	1	1	MEF2A	myocyte enhancer factor 2A
hsa-miR-421	1	0	1	1	1	1	PCCB	propionyl CoA carboxylase, beta polypeptide
hsa-miR-421	1	0	1	1	1	1	PHC1	polyhomeotic homolog 1 (Drosophila)
hsa-miR-421	1	0	1	1	1	1	SLC8A1	solute carrier family 8 (sodium/calcium exchanger), member 1
hsa-miR-421	1	0	1	0	1	1	PLAG1	pleiomorphic adenoma gene 1
hsa-miR-421	1	0	1	0	1	1	MPPED2	metallophosphoesterase domain containing 2
hsa-miR-421	0	0	1	1	1	1	DGKI	diacylglycerol kinase, iota
hsa-miR-421	1	0	1	0	1	1	SLC6A6	solute carrier family 6 (neurotransmitter transporter, taurine), member 6
hsa-miR-421	1	0	1	1	1	1	PRKACB	protein kinase, cAMP-dependent, catalytic, beta
hsa-miR-421	1	0	1	0	1	1	DPYSL2	dihydropyrimidinase-like 2
hsa-miR-421	1	0	1	1	1	1	DMTF1	cyclin D binding myb-like transcription factor 1
hsa-miR-421	1	0	1	1	1	1	REV3L	REV3-like, polymerase (DNA directed), zeta, catalytic subunit
hsa-miR-421	1	0	1	1	1	1	EPHA7	EPH receptor A7
hsa-miR-421	1	0	1	1	1	1	PPFIA1	protein tyrosine phosphatase, receptor type, f polypeptide (PTPRF), interacting protein (liprin), alpha 1
hsa-miR-421	1	0	1	1	1	1	AEBP2	AE binding protein 2
hsa-miR-421	0	0	1	1	0	0	IFT27	intraflagellar transport 27 homolog (Chlamydomonas)
hsa-miR-421	1	0	1	1	1	1	RASSF4	Ras association (RalGDS/AF-6) domain family member 4
hsa-miR-421	1	0	1	1	1	1	MYO5A	myosin VA (heavy chain 12, myoxin)
hsa-miR-421	0	0	1	1	0	0	EIF4E2	eukaryotic translation initiation factor 4E family member 2
hsa-miR-421	1	0	1	1	1	1	COL24A1	collagen, type XXIV, alpha 1
hsa-miR-421	1	0	1	1	1	1	GOLGA4	golgin A4
hsa-miR-421	0	0	1	1	0	0	TRIM27	tripartite motif containing 27
hsa-miR-421	0	0	1	1	1	1	PLD1	phospholipase D1, phosphatidylcholine-specific
hsa-miR-421	1	0	1	1	1	1	SDHC	succinate dehydrogenase complex, subunit C, integral membrane protein, 15kDa
hsa-miR-421	0	0	1	0	0	0	MIAT	myocardial infarction associated transcript (non-protein coding)
hsa-miR-421	1	0	1	0	1	1	PDE4D	phosphodiesterase 4D, cAMP-specific
hsa-miR-421	0	0	1	1	0	0	SPTBN2	spectrin, beta, non-erythrocytic 2
hsa-miR-421	1	0	1	1	1	1	PCDH17	protocadherin 17
hsa-miR-421	1	0	1	0	1	1	CELF2	CUGBP, Elav-like family member 2
hsa-miR-421	1	0	1	1	1	1	SOCS2	suppressor of cytokine signaling 2
hsa-miR-421	1	0	1	1	0	0	SH2D2A	SH2 domain containing 2A
hsa-miR-421	1	0	1	1	1	1	CTNND1	catenin (cadherin-associated protein), delta 1
hsa-miR-421	1	0	1	1	1	1	ERLIN1	ER lipid raft associated 1
hsa-miR-421	1	0	1	1	1	1	CBFA2T2	core-binding factor, runt domain, alpha subunit 2; translocated to, 2
hsa-miR-421	0	0	1	1	1	1	ERAL1	Era G-protein-like 1 (E. coli)
hsa-miR-421	1	0	1	1	1	1	WHSC1	Wolf-Hirschhorn syndrome candidate 1
hsa-miR-421	0	0	1	1	1	1	BBS9	Bardet-Biedl syndrome 9
hsa-miR-421	1	0	1	1	1	1	GLS	glutaminase
hsa-miR-421	1	0	1	0	1	1	CD164	CD164 molecule, sialomucin
hsa-miR-421	0	0	1	1	1	1	GUCA1C	guanylate cyclase activator 1C
hsa-miR-421	0	0	1	1	1	1	MAP3K4	mitogen-activated protein kinase kinase kinase 4
hsa-miR-421	1	0	1	1	1	1	PRUNE	prune homolog (Drosophila)
hsa-miR-421	0	0	1	1	1	1	DMRT2	doublesex and mab-3 related transcription factor 2
hsa-miR-421	1	0	1	0	1	1	WDR82	WD repeat domain 82
hsa-miR-421	1	0	1	1	1	1	HNRNPH3	heterogeneous nuclear ribonucleoprotein H3 (2H9)
hsa-miR-421	0	0	1	0	1	1	CLEC5A	C-type lectin domain family 5, member A
hsa-miR-421	1	0	1	1	1	1	SCHIP1	schwannomin interacting protein 1
hsa-miR-421	1	0	1	1	1	1	ZNF202	zinc finger protein 202
hsa-miR-421	0	0	1	1	1	1	NBPF14	neuroblastoma breakpoint family, member 14
hsa-miR-421	0	0	1	1	1	1	SPAG11B	sperm associated antigen 11B
hsa-miR-421	0	0	1	0	1	1	CLDN2	claudin 2
hsa-miR-421	1	0	1	1	1	1	SENP7	SUMO1/sentrin specific peptidase 7
hsa-miR-421	1	0	1	1	1	1	TSC22D2	TSC22 domain family, member 2
hsa-miR-421	0	0	1	1	0	0	NCOA6	nuclear receptor coactivator 6
hsa-miR-421	1	0	1	1	1	1	FAM49B	family with sequence similarity 49, member B
hsa-miR-421	0	0	1	0	0	0	ARL17A	ADP-ribosylation factor-like 17A
hsa-miR-421	0	0	1	1	1	1	HERPUD1	homocysteine-inducible, endoplasmic reticulum stress-inducible, ubiquitin-like domain member 1
hsa-miR-421	0	0	1	1	1	1	SAMSN1	SAM domain, SH3 domain and nuclear localization signals 1
hsa-miR-421	1	0	1	1	1	1	OGT	O-linked N-acetylglucosamine (GlcNAc) transferase
hsa-miR-421	0	0	1	1	1	1	FASTKD2	FAST kinase domains 2
hsa-miR-421	1	0	1	1	1	1	C21orf91	chromosome 21 open reading frame 91
hsa-miR-421	0	0	1	1	1	1	DAZ2	deleted in azoospermia 2
hsa-miR-421	0	0	1	0	1	1	DAZ3	deleted in azoospermia 3
hsa-miR-421	1	0	1	1	1	1	RBM47	RNA binding motif protein 47
hsa-miR-421	1	0	1	1	1	1	SH3GLB1	SH3-domain GRB2-like endophilin B1
hsa-miR-421	1	0	1	0	1	1	PARP11	poly (ADP-ribose) polymerase family, member 11
hsa-miR-421	1	0	1	0	1	1	TRPS1	trichorhinophalangeal syndrome I
hsa-miR-421	0	0	1	1	0	0	CSAG2	CSAG family, member 2
hsa-miR-421	0	0	1	0	0	0	CSAG3	CSAG family, member 3
hsa-miR-421	0	0	1	1	1	1	C21orf7	chromosome 21 open reading frame 7
hsa-miR-421	0	0	1	1	1	1	DAZ1	deleted in azoospermia 1
hsa-miR-421	0	0	1	0	1	1	ERBB2IP	erbb2 interacting protein
hsa-miR-421	1	0	1	1	1	1	DCLRE1B	DNA cross-link repair 1B
hsa-miR-421	0	0	1	1	1	1	CEP192	centrosomal protein 192kDa
hsa-miR-421	1	0	1	1	1	1	LETMD1	LETM1 domain containing 1
hsa-miR-421	1	0	1	1	1	1	CHST9	carbohydrate (N-acetylgalactosamine 4-0) sulfotransferase 9
hsa-miR-421	1	0	1	1	1	1	BIVM	basic, immunoglobulin-like variable motif containing
hsa-miR-421	1	0	1	1	1	1	CALU	calumenin
hsa-miR-421	1	0	1	1	1	1	PBX3	pre-B-cell leukemia homeobox 3
hsa-miR-421	1	0	1	1	1	1	ATAD1	ATPase family, AAA domain containing 1
hsa-miR-421	1	0	1	1	1	1	KCNIP2	Kv channel interacting protein 2
hsa-miR-421	1	0	1	1	1	1	LARP4	La ribonucleoprotein domain family, member 4
hsa-miR-421	0	0	1	0	0	0	NBPF10	neuroblastoma breakpoint family, member 10
hsa-miR-421	0	0	1	1	1	1	WBP2NL	WBP2 N-terminal like
hsa-miR-421	1	0	1	1	1	1	RCAN1	regulator of calcineurin 1
hsa-miR-421	1	0	1	1	1	1	MAGI1	membrane associated guanylate kinase, WW and PDZ domain containing 1
hsa-miR-421	0	0	1	0	1	1	NBPF15	neuroblastoma breakpoint family, member 15
hsa-miR-421	1	0	1	1	0	0	FOXP2	forkhead box P2
hsa-miR-421	0	0	1	1	1	1	SAMD9L	sterile alpha motif domain containing 9-like
hsa-miR-421	0	0	1	1	0	0	HOPX	HOP homeobox
hsa-miR-421	0	0	1	0	0	0	SNHG11	small nucleolar RNA host gene 11 (non-protein coding)
hsa-miR-421	0	0	1	1	1	1	ZNF638	zinc finger protein 638
hsa-miR-421	1	0	1	0	1	1	IL1RAP	interleukin 1 receptor accessory protein
hsa-miR-421	1	0	1	1	1	1	GPR64	G protein-coupled receptor 64
hsa-miR-421	0	0	1	1	1	1	MTHFR	methylenetetrahydrofolate reductase (NAD(P)H)
hsa-miR-421	0	0	1	1	1	1	RANBP17	RAN binding protein 17
hsa-miR-421	1	0	1	1	1	1	VAMP7	vesicle-associated membrane protein 7
hsa-miR-421	1	0	1	1	1	1	NFYA	nuclear transcription factor Y, alpha
hsa-miR-421	0	0	1	1	1	1	MED23	mediator complex subunit 23
hsa-miR-421	0	0	1	1	1	1	TRDN	triadin
hsa-miR-421	0	0	1	1	1	1	ZNF248	zinc finger protein 248
hsa-miR-421	0	0	1	1	1	1	PHACTR3	phosphatase and actin regulator 3
hsa-miR-421	1	0	1	1	1	1	PPP1R9A	protein phosphatase 1, regulatory subunit 9A
hsa-miR-421	0	0	1	1	0	0	NHLRC2	NHL repeat containing 2
hsa-miR-421	1	0	1	1	1	1	ENOX2	ecto-NOX disulfide-thiol exchanger 2
hsa-miR-421	0	0	1	0	0	0	TUG1	taurine upregulated 1 (non-protein coding)
hsa-miR-421	1	0	1	1	1	1	ARHGAP12	Rho GTPase activating protein 12
hsa-miR-421	1	0	1	1	1	1	ZC3H7A	zinc finger CCCH-type containing 7A
hsa-miR-421	0	0	1	0	0	0	TPTEP1	transmembrane phosphatase with tensin homology pseudogene 1
hsa-miR-421	1	0	1	1	1	1	EPN2	epsin 2
hsa-miR-421	1	0	1	1	1	1	SCAMP1	secretory carrier membrane protein 1
hsa-miR-421	1	0	1	1	1	1	CADM3	cell adhesion molecule 3
hsa-miR-421	1	0	1	1	1	1	EIF2C1	eukaryotic translation initiation factor 2C, 1
hsa-miR-421	1	0	1	0	1	1	CLIC4	chloride intracellular channel 4
hsa-miR-421	1	0	1	1	1	1	PTBP3	polypyrimidine tract binding protein 3
hsa-miR-421	1	0	1	1	1	1	WDTC1	WD and tetratricopeptide repeats 1
hsa-miR-421	1	0	1	1	0	0	SMUG1	single-strand-selective monofunctional uracil-DNA glycosylase 1
hsa-miR-421	0	0	1	1	1	1	MBNL3	muscleblind-like splicing regulator 3
hsa-miR-421	0	0	1	1	1	1	TCP11L1	t-complex 11 (mouse)-like 1
hsa-miR-421	1	0	1	1	1	1	HNRNPUL1	heterogeneous nuclear ribonucleoprotein U-like 1
hsa-miR-421	0	0	1	0	0	0	C17orf72	chromosome 17 open reading frame 72
hsa-miR-421	1	0	1	1	1	1	PGAP1	post-GPI attachment to proteins 1
hsa-miR-421	0	0	1	0	0	0	SOX2-OT	SOX2 overlapping transcript (non-protein coding)
hsa-miR-421	0	0	1	0	0	0	DUXAP10	double homeobox A pseudogene 10
hsa-miR-421	1	0	1	1	1	1	S100PBP	S100P binding protein
hsa-miR-421	0	0	1	1	1	1	ARMC5	armadillo repeat containing 5
hsa-miR-421	0	0	1	1	1	1	NECAP2	NECAP endocytosis associated 2
hsa-miR-421	0	0	1	0	0	0	LOC284561	uncharacterized LOC284561
hsa-miR-421	1	0	1	1	1	1	DERL1	derlin 1
hsa-miR-421	1	0	1	1	1	1	PPFIA3	protein tyrosine phosphatase, receptor type, f polypeptide (PTPRF), interacting protein (liprin), alpha 3
hsa-miR-421	1	0	1	0	1	1	C14orf101	chromosome 14 open reading frame 101
hsa-miR-421	0	0	1	0	1	1	ZNF766	zinc finger protein 766
hsa-miR-421	0	0	1	0	1	1	FLJ14186	uncharacterized LOC401149
hsa-miR-421	0	0	1	0	0	0	IFFO2	intermediate filament family orphan 2
hsa-miR-421	1	0	1	1	1	1	DYRK2	dual-specificity tyrosine-(Y)-phosphorylation regulated kinase 2
hsa-miR-421	1	0	1	0	1	1	ATP2B1	ATPase, Ca++ transporting, plasma membrane 1
hsa-miR-421	1	0	1	1	1	1	YPEL5	yippee-like 5 (Drosophila)
hsa-miR-421	1	0	1	0	1	1	ZCCHC3	zinc finger, CCHC domain containing 3
hsa-miR-421	0	0	1	0	1	1	FLJ22447	uncharacterized LOC400221
hsa-miR-421	1	0	1	1	1	1	LRP4	low density lipoprotein receptor-related protein 4
hsa-miR-421	1	0	1	1	1	1	SEC63	SEC63 homolog (S. cerevisiae)
hsa-miR-421	0	0	1	1	1	1	RNF146	ring finger protein 146
hsa-miR-421	0	0	1	1	1	1	CCDC14	coiled-coil domain containing 14
hsa-miR-421	0	0	1	1	1	1	VWDE	von Willebrand factor D and EGF domains
hsa-miR-421	0	0	1	0	1	1	TWSG1	twisted gastrulation homolog 1 (Drosophila)
hsa-miR-421	1	0	1	1	1	1	GPD2	glycerol-3-phosphate dehydrogenase 2 (mitochondrial)
hsa-miR-421	0	0	1	0	0	0	CHST9-AS1	CHST9 antisense RNA 1
hsa-miR-421	1	0	1	0	1	1	AP1G1	adaptor-related protein complex 1, gamma 1 subunit
hsa-miR-421	1	0	1	1	1	1	TPM1	tropomyosin 1 (alpha)
hsa-miR-421	1	0	1	1	0	0	SPEG	SPEG complex locus
hsa-miR-421	0	0	1	0	0	0	FLJ30838	uncharacterized LOC400955
hsa-miR-421	0	0	1	1	1	1	CCND3	cyclin D3
hsa-miR-421	1	0	1	1	1	1	DHX15	DEAH (Asp-Glu-Ala-His) box polypeptide 15
hsa-miR-421	1	0	1	1	1	1	DIXDC1	DIX domain containing 1
hsa-miR-421	1	0	1	1	1	1	AGPAT1	1-acylglycerol-3-phosphate O-acyltransferase 1 (lysophosphatidic acid acyltransferase, alpha)
hsa-miR-421	0	0	1	0	1	1	FAM70A	family with sequence similarity 70, member A
hsa-miR-421	1	0	1	1	1	1	CLCN5	chloride channel, voltage-sensitive 5
hsa-miR-421	1	0	1	1	1	1	SORBS2	sorbin and SH3 domain containing 2
hsa-miR-421	0	0	1	1	1	1	ZNF606	zinc finger protein 606
hsa-miR-421	0	0	1	0	0	0	LOC157381	uncharacterized LOC157381
hsa-miR-421	1	0	1	1	1	1	ZBTB10	zinc finger and BTB domain containing 10
hsa-miR-421	0	0	1	1	1	1	VWA3B	von Willebrand factor A domain containing 3B
hsa-miR-421	0	0	1	1	0	0	LOC285033	uncharacterized LOC285033
hsa-miR-421	0	0	1	1	0	0	FAM156A	family with sequence similarity 156, member A
hsa-miR-421	1	0	1	1	1	1	IST1	increased sodium tolerance 1 homolog (yeast)
hsa-miR-421	0	0	1	1	0	0	CERS5	ceramide synthase 5
hsa-miR-421	0	0	1	1	1	1	ZBTB26	zinc finger and BTB domain containing 26
hsa-miR-421	1	0	1	1	1	1	C6orf89	chromosome 6 open reading frame 89
hsa-miR-421	0	0	1	0	0	0	LINC00301	long intergenic non-protein coding RNA 301
hsa-miR-421	1	0	1	1	1	1	CNOT4	CCR4-NOT transcription complex, subunit 4
hsa-miR-421	1	0	1	1	1	1	PAX6	paired box 6
hsa-miR-421	0	0	1	1	0	0	C9orf9	chromosome 9 open reading frame 9
hsa-miR-421	0	0	1	0	1	1	CADM1	cell adhesion molecule 1
hsa-miR-421	0	0	1	1	1	1	MTR	5-methyltetrahydrofolate-homocysteine methyltransferase
hsa-miR-421	0	0	1	0	0	0	LOC152225	uncharacterized LOC152225
hsa-miR-421	1	0	1	1	1	1	CYP46A1	cytochrome P450, family 46, subfamily A, polypeptide 1
hsa-miR-421	0	0	1	0	1	1	TMSB15B	thymosin beta 15B
hsa-miR-421	0	0	1	1	0	0	CTNNBL1	catenin, beta like 1
hsa-miR-421	0	0	1	1	1	1	DYNC1I1	dynein, cytoplasmic 1, intermediate chain 1
hsa-miR-421	1	0	1	1	1	1	FRY	furry homolog (Drosophila)
hsa-miR-421	0	0	1	1	1	1	USP8	ubiquitin specific peptidase 8
hsa-miR-421	1	0	1	1	1	1	FBXW2	F-box and WD repeat domain containing 2
hsa-miR-421	0	0	1	1	1	1	CD34	CD34 molecule
hsa-miR-421	1	0	1	1	1	1	LUC7L2	LUC7-like 2 (S. cerevisiae)
hsa-miR-421	1	0	1	1	1	1	ZNF286A	zinc finger protein 286A
hsa-miR-421	1	0	1	1	1	1	SPTBN1	spectrin, beta, non-erythrocytic 1
hsa-miR-421	1	0	1	1	1	1	LRRC57	leucine rich repeat containing 57
hsa-miR-421	0	0	1	1	1	1	C19orf47	chromosome 19 open reading frame 47
hsa-miR-421	0	0	1	0	0	0	PART1	prostate androgen-regulated transcript 1 (non-protein coding)
hsa-miR-421	0	0	1	0	1	1	RALYL	RALY RNA binding protein-like
hsa-miR-421	1	0	1	1	1	1	SNAP25	synaptosomal-associated protein, 25kDa
hsa-miR-421	0	0	1	0	0	0	ZNF806	zinc finger protein 806
hsa-miR-421	1	0	1	1	1	1	SIAH1	siah E3 ubiquitin protein ligase 1
hsa-miR-421	1	0	1	0	1	1	GATAD2B	GATA zinc finger domain containing 2B
hsa-miR-421	0	0	1	1	0	0	CES4A	carboxylesterase 4A
hsa-miR-421	1	0	1	1	1	1	CPNE8	copine VIII
hsa-miR-421	1	0	1	1	1	1	TMEM100	transmembrane protein 100
hsa-miR-421	0	0	1	1	1	1	MOBP	myelin-associated oligodendrocyte basic protein
hsa-miR-421	0	0	1	1	1	1	RTN4IP1	reticulon 4 interacting protein 1
hsa-miR-421	1	0	1	1	1	1	ANKRD46	ankyrin repeat domain 46
hsa-miR-421	0	0	1	1	0	0	ZNF185	zinc finger protein 185 (LIM domain)
hsa-miR-421	1	0	1	0	1	1	UVRAG	UV radiation resistance associated gene
hsa-miR-421	1	0	1	1	1	1	ANKRD10	ankyrin repeat domain 10
hsa-miR-421	1	0	1	1	1	1	ZC3H11A	zinc finger CCCH-type containing 11A
hsa-miR-421	1	0	1	0	1	1	STC2	stanniocalcin 2
hsa-miR-421	0	0	1	1	0	0	TRIM46	tripartite motif containing 46
hsa-miR-421	0	0	1	0	0	0	OTUD1	OTU domain containing 1
hsa-miR-421	1	0	1	0	1	1	COL21A1	collagen, type XXI, alpha 1
hsa-miR-421	1	0	1	0	1	1	KIAA1737	KIAA1737
hsa-miR-421	1	0	1	0	1	1	KBTBD8	kelch repeat and BTB (POZ) domain containing 8
hsa-miR-421	0	0	1	1	1	1	STAT1	signal transducer and activator of transcription 1, 91kDa
hsa-miR-421	1	0	1	1	1	1	SYT6	synaptotagmin VI
hsa-miR-421	1	0	1	1	1	1	STIM2	stromal interaction molecule 2
hsa-miR-421	0	0	1	1	1	1	GBAS	glioblastoma amplified sequence
hsa-miR-421	0	0	1	0	0	0	LOC400680	uncharacterized LOC400680
hsa-miR-421	1	0	1	1	1	1	POU2F3	POU class 2 homeobox 3
hsa-miR-421	0	0	1	0	0	0	LOC100128560	uncharacterized LOC100128560
hsa-miR-421	0	0	1	1	1	1	FAM9B	family with sequence similarity 9, member B
hsa-miR-421	1	0	1	1	1	1	GDA	guanine deaminase
hsa-miR-421	0	0	1	0	0	0	LOC285626	uncharacterized LOC285626
hsa-miR-421	1	0	1	1	1	1	LONRF3	LON peptidase N-terminal domain and ring finger 3
hsa-miR-421	0	0	1	1	1	1	GRPEL1	GrpE-like 1, mitochondrial (E. coli)
hsa-miR-421	0	0	1	1	1	1	TRPM7	transient receptor potential cation channel, subfamily M, member 7
hsa-miR-421	0	0	1	0	0	0	LOC338579	ankyrin repeat domain-containing protein 30B pseudogene
hsa-miR-421	1	0	1	0	1	1	UNC5D	unc-5 homolog D (C. elegans)
hsa-miR-421	0	0	1	1	1	1	SLFN13	schlafen family member 13
hsa-miR-421	1	0	1	1	1	1	SIK3	SIK family kinase 3
hsa-miR-421	0	0	1	1	1	1	NFKB1	nuclear factor of kappa light polypeptide gene enhancer in B-cells 1
hsa-miR-421	0	0	1	1	0	0	PMFBP1	polyamine modulated factor 1 binding protein 1
hsa-miR-421	0	0	1	1	0	0	SLC26A10	solute carrier family 26, member 10
hsa-miR-421	0	0	1	1	1	1	FRMPD2	FERM and PDZ domain containing 2
hsa-miR-421	1	0	1	1	1	1	KALRN	kalirin, RhoGEF kinase
hsa-miR-421	1	0	1	1	1	1	EGLN3	egl nine homolog 3 (C. elegans)
hsa-miR-421	1	0	1	0	1	1	KCNK2	potassium channel, subfamily K, member 2
hsa-miR-421	0	0	1	1	1	1	FAM19A2	family with sequence similarity 19 (chemokine (C-C motif)-like), member A2
hsa-miR-421	1	0	1	1	1	1	PHKB	phosphorylase kinase, beta
hsa-miR-421	1	0	1	1	1	1	SH2D4B	SH2 domain containing 4B
hsa-miR-421	0	0	1	1	1	1	ANKRD44	ankyrin repeat domain 44
hsa-miR-421	1	0	1	1	1	1	ESYT2	extended synaptotagmin-like protein 2
hsa-miR-421	0	0	1	1	0	0	NMI	N-myc (and STAT) interactor
hsa-miR-421	0	0	1	1	1	1	IDS	iduronate 2-sulfatase
hsa-miR-421	1	0	1	1	1	1	SLC44A1	solute carrier family 44, member 1
hsa-miR-421	1	0	1	1	0	0	GXYLT1	glucoside xylosyltransferase 1
hsa-miR-421	1	0	1	1	1	1	IGFBP3	insulin-like growth factor binding protein 3
hsa-miR-421	1	0	1	1	1	1	METAP2	methionyl aminopeptidase 2
hsa-miR-421	0	0	1	1	1	1	ZNF337	zinc finger protein 337
hsa-miR-421	1	0	1	1	1	1	KPNA1	karyopherin alpha 1 (importin alpha 5)
hsa-miR-421	1	0	1	0	0	0	MSL1	male-specific lethal 1 homolog (Drosophila)
hsa-miR-421	0	0	1	0	0	0	FAM95B1	family with sequence similarity 95, member B1
hsa-miR-421	0	0	1	1	0	0	RPRD2	regulation of nuclear pre-mRNA domain containing 2
hsa-miR-421	1	0	1	1	1	1	MACROD2	MACRO domain containing 2
hsa-miR-421	1	0	1	1	1	1	FAM122B	family with sequence similarity 122B
hsa-miR-421	0	0	1	1	0	0	C20orf141	chromosome 20 open reading frame 141
hsa-miR-421	1	0	1	1	1	1	CPNE2	copine II
hsa-miR-421	1	0	1	1	1	1	LIN9	lin-9 homolog (C. elegans)
hsa-miR-421	1	0	1	1	1	1	SACM1L	SAC1 suppressor of actin mutations 1-like (yeast)
hsa-miR-421	1	0	1	1	1	1	DLG2	discs, large homolog 2 (Drosophila)
hsa-miR-421	1	0	1	1	1	1	EIF4E3	eukaryotic translation initiation factor 4E family member 3
hsa-miR-421	1	0	1	1	1	1	MKRN1	makorin ring finger protein 1
hsa-miR-421	1	0	1	1	1	1	CLTC	clathrin, heavy chain (Hc)
hsa-miR-421	1	0	1	1	1	1	FMNL3	formin-like 3
hsa-miR-421	1	0	1	1	0	0	SLC30A3	solute carrier family 30 (zinc transporter), member 3
hsa-miR-421	1	0	1	1	1	1	HYOU1	hypoxia up-regulated 1
hsa-miR-421	0	0	1	1	1	1	ZNF503	zinc finger protein 503
hsa-miR-421	0	0	1	1	0	0	IQUB	IQ motif and ubiquitin domain containing
hsa-miR-421	1	0	1	1	1	1	EYA1	eyes absent homolog 1 (Drosophila)
hsa-miR-421	0	0	1	1	0	0	AADACL3	arylacetamide deacetylase-like 3
hsa-miR-421	0	0	1	1	0	0	TTC16	tetratricopeptide repeat domain 16
hsa-miR-421	1	0	1	0	1	1	YOD1	YOD1 OTU deubiquinating enzyme 1 homolog (S. cerevisiae)
hsa-miR-421	1	0	1	1	1	1	SLC12A6	solute carrier family 12 (potassium/chloride transporters), member 6
hsa-miR-421	1	0	1	0	1	1	KDM2A	lysine (K)-specific demethylase 2A
hsa-miR-421	0	0	1	1	0	0	C17orf107	chromosome 17 open reading frame 107
hsa-miR-421	1	0	1	1	1	1	FRYL	FRY-like
hsa-miR-421	1	0	1	1	1	1	BCAT1	branched chain amino-acid transaminase 1, cytosolic
hsa-miR-421	0	0	1	1	1	1	TPK1	thiamin pyrophosphokinase 1
hsa-miR-421	0	0	1	1	0	0	GSG1L	GSG1-like
hsa-miR-421	1	0	1	1	1	1	PHC2	polyhomeotic homolog 2 (Drosophila)
hsa-miR-421	0	0	1	1	1	1	PRAME	preferentially expressed antigen in melanoma
hsa-miR-421	1	0	1	1	1	1	CD200	CD200 molecule
hsa-miR-421	0	0	1	1	1	1	MRPL49	mitochondrial ribosomal protein L49
hsa-miR-421	0	0	1	1	1	1	LYPD1	LY6/PLAUR domain containing 1
hsa-miR-421	1	0	1	1	1	1	RNF111	ring finger protein 111
hsa-miR-421	0	0	1	1	0	0	CYP4X1	cytochrome P450, family 4, subfamily X, polypeptide 1
hsa-miR-421	1	0	1	0	1	1	STK3	serine/threonine kinase 3
hsa-miR-421	1	0	1	1	1	1	PPP2R5C	protein phosphatase 2, regulatory subunit B', gamma
hsa-miR-421	1	0	1	1	1	1	LRRK2	leucine-rich repeat kinase 2
hsa-miR-421	0	0	1	0	0	0	AGAP9	ArfGAP with GTPase domain, ankyrin repeat and PH domain 9
hsa-miR-421	0	0	1	1	0	0	SCNN1A	sodium channel, non-voltage-gated 1 alpha subunit
hsa-miR-421	0	0	1	1	1	1	ARID1A	AT rich interactive domain 1A (SWI-like)
hsa-miR-421	0	0	1	1	0	0	ADAM18	ADAM metallopeptidase domain 18
hsa-miR-421	0	0	1	1	1	1	IMMT	inner membrane protein, mitochondrial
hsa-miR-421	1	0	1	1	0	0	ZNF219	zinc finger protein 219
hsa-miR-421	0	0	1	1	1	1	SERPINE2	serpin peptidase inhibitor, clade E (nexin, plasminogen activator inhibitor type 1), member 2
hsa-miR-421	0	0	1	1	0	0	UFD1L	ubiquitin fusion degradation 1 like (yeast)
hsa-miR-421	1	0	1	1	1	1	LUC7L3	LUC7-like 3 (S. cerevisiae)
hsa-miR-421	0	0	1	1	1	1	TBC1D3G	TBC1 domain family, member 3G
hsa-miR-421	1	0	1	1	1	1	SETX	senataxin
hsa-miR-421	0	0	1	1	1	1	PTPN20B	protein tyrosine phosphatase, non-receptor type 20B
hsa-miR-421	0	0	1	1	1	1	PTPN20A	protein tyrosine phosphatase, non-receptor type 20A
hsa-miR-421	1	0	1	1	1	1	NECAP1	NECAP endocytosis associated 1
hsa-miR-421	0	0	1	0	1	1	NEK1	NIMA (never in mitosis gene a)-related kinase 1
hsa-miR-421	1	0	1	1	1	1	RIF1	RAP1 interacting factor homolog (yeast)
hsa-miR-421	0	0	1	1	1	1	BCL2A1	BCL2-related protein A1
hsa-miR-421	0	0	1	0	0	0	POM121L9P	POM121 transmembrane nucleoporin-like 9, pseudogene
hsa-miR-421	0	0	1	1	1	1	RTTN	rotatin
hsa-miR-421	0	0	1	1	1	1	ARIH1	ariadne homolog, ubiquitin-conjugating enzyme E2 binding protein, 1 (Drosophila)
hsa-miR-421	0	0	1	0	0	0	TPTE2P6	transmembrane phosphoinositide 3-phosphatase and tensin homolog 2 pseudogene 6
hsa-miR-421	0	0	1	1	0	0	H2AFJ	H2A histone family, member J
hsa-miR-421	0	0	1	0	0	0	KIAA0913	KIAA0913
hsa-miR-421	0	0	1	1	1	1	ZNF280D	zinc finger protein 280D
hsa-miR-421	0	0	1	0	1	1	TBC1D3F	TBC1 domain family, member 3F
hsa-miR-421	0	0	1	1	0	0	WDR96	WD repeat domain 96
hsa-miR-421	0	0	1	1	1	1	RHOT1	ras homolog family member T1
hsa-miR-421	0	0	1	1	0	0	WDR11	WD repeat domain 11
hsa-miR-421	1	0	1	0	1	1	GPR85	G protein-coupled receptor 85
hsa-miR-421	1	0	1	1	0	0	FAM108C1	family with sequence similarity 108, member C1
hsa-miR-421	0	0	1	0	0	0	LOC441204	uncharacterized LOC441204
hsa-miR-421	1	0	1	0	1	1	ZNF507	zinc finger protein 507
hsa-miR-421	0	0	1	1	1	1	ARL13B	ADP-ribosylation factor-like 13B
hsa-miR-421	1	0	1	1	1	1	SLC30A8	solute carrier family 30 (zinc transporter), member 8
hsa-miR-421	1	0	1	1	1	1	MIER1	mesoderm induction early response 1 homolog (Xenopus laevis)
hsa-miR-421	0	0	1	1	0	0	THADA	thyroid adenoma associated
hsa-miR-421	0	0	1	1	0	0	LETM2	leucine zipper-EF-hand containing transmembrane protein 2
hsa-miR-421	1	0	1	0	1	1	HNRNPA3	heterogeneous nuclear ribonucleoprotein A3
hsa-miR-421	1	0	1	0	1	1	MPP5	membrane protein, palmitoylated 5 (MAGUK p55 subfamily member 5)
hsa-miR-421	0	0	1	1	1	1	NEK9	NIMA (never in mitosis gene a)- related kinase 9
hsa-miR-421	1	0	1	1	1	1	NABP1	nucleic acid binding protein 1
hsa-miR-421	1	0	1	1	0	0	PTAR1	protein prenyltransferase alpha subunit repeat containing 1
hsa-miR-421	1	0	1	1	1	1	EHMT1	euchromatic histone-lysine N-methyltransferase 1
hsa-miR-421	0	0	1	1	1	1	DAZ4	deleted in azoospermia 4
hsa-miR-421	0	0	1	0	1	1	FBXO42	F-box protein 42
hsa-miR-421	1	0	1	1	1	1	HMCN1	hemicentin 1
hsa-miR-421	1	0	1	1	1	1	UNC45B	unc-45 homolog B (C. elegans)
hsa-miR-421	0	0	1	1	1	1	NFE2L1	nuclear factor (erythroid-derived 2)-like 1
hsa-miR-421	1	0	1	1	1	1	ANO1	anoctamin 1, calcium activated chloride channel
hsa-miR-421	0	0	1	0	0	0	EPHA1-AS1	EPHA1 antisense RNA 1
hsa-miR-421	1	0	1	1	1	1	NRP1	neuropilin 1
hsa-miR-421	0	0	1	0	0	0	ADCY10P1	adenylate cyclase 10 (soluble) pseudogene 1
hsa-miR-421	0	0	1	1	1	1	PCDH20	protocadherin 20
hsa-miR-421	1	0	1	1	1	1	ANKRD12	ankyrin repeat domain 12
hsa-miR-421	1	0	1	0	1	1	JAZF1	JAZF zinc finger 1
hsa-miR-421	1	0	1	1	1	1	CADM2	cell adhesion molecule 2
hsa-miR-421	0	0	1	1	1	1	PNMAL1	paraneoplastic Ma antigen family-like 1
hsa-miR-421	0	0	1	0	1	1	SRR	serine racemase
hsa-miR-421	1	0	1	1	1	1	MSANTD4	Myb/SANT-like DNA-binding domain containing 4 with coiled-coils
hsa-miR-421	1	0	1	0	1	1	NR3C1	nuclear receptor subfamily 3, group C, member 1 (glucocorticoid receptor)
hsa-miR-421	1	0	1	1	1	1	FAM76B	family with sequence similarity 76, member B
hsa-miR-421	1	0	1	1	1	1	FBXL5	F-box and leucine-rich repeat protein 5
hsa-miR-421	0	0	1	1	1	1	AMOTL1	angiomotin like 1
hsa-miR-421	1	0	1	1	1	1	WDR44	WD repeat domain 44
hsa-miR-421	1	0	1	1	1	1	RNF38	ring finger protein 38
hsa-miR-421	1	0	1	1	1	1	IKZF2	IKAROS family zinc finger 2 (Helios)
hsa-miR-421	1	0	1	1	1	1	RCAN2	regulator of calcineurin 2
hsa-miR-421	1	0	1	1	1	1	TXNRD1	thioredoxin reductase 1
hsa-miR-421	1	0	1	1	1	1	SORCS1	sortilin-related VPS10 domain containing receptor 1
hsa-miR-421	0	0	1	0	0	0	TDH	L-threonine dehydrogenase
hsa-miR-421	1	0	1	1	1	1	KIAA0907	KIAA0907
hsa-miR-421	1	0	1	1	1	1	GCNT1	glucosaminyl (N-acetyl) transferase 1, core 2
hsa-miR-421	0	0	1	0	0	0	MEG3	maternally expressed 3 (non-protein coding)
hsa-miR-421	1	0	1	1	1	1	RAI14	retinoic acid induced 14
hsa-miR-421	0	0	1	1	1	1	ASB9	ankyrin repeat and SOCS box containing 9
hsa-miR-421	0	0	1	1	1	1	PLD5	phospholipase D family, member 5
hsa-miR-421	1	0	1	1	1	1	MYNN	myoneurin
hsa-miR-421	0	0	1	1	0	0	SH2D6	SH2 domain containing 6
hsa-miR-421	1	0	1	0	1	1	LRAT	lecithin retinol acyltransferase (phosphatidylcholine--retinol O-acyltransferase)
hsa-miR-421	1	0	1	1	1	1	MAPT	microtubule-associated protein tau
hsa-miR-421	0	0	1	1	1	1	KCNJ13	potassium inwardly-rectifying channel, subfamily J, member 13
hsa-miR-421	1	0	1	1	1	1	NTNG1	netrin G1
hsa-miR-421	0	0	1	0	0	0	PTPRVP	protein tyrosine phosphatase, receptor type, V, pseudogene
hsa-miR-421	0	0	1	1	0	0	NBPF8	neuroblastoma breakpoint family, member 8
hsa-miR-421	0	0	1	1	1	1	CDK20	cyclin-dependent kinase 20
hsa-miR-421	1	0	1	1	1	1	ZNF449	zinc finger protein 449
hsa-miR-421	1	0	1	1	1	1	NEK6	NIMA (never in mitosis gene a)-related kinase 6
hsa-miR-421	1	0	1	0	1	1	FAM46A	family with sequence similarity 46, member A
hsa-miR-421	1	0	1	0	1	1	BAG4	BCL2-associated athanogene 4
hsa-miR-421	0	0	1	1	1	1	EMC4	ER membrane protein complex subunit 4
hsa-miR-421	0	0	1	1	1	1	TMOD1	tropomodulin 1
hsa-miR-421	1	0	1	1	1	1	NRGN	neurogranin (protein kinase C substrate, RC3)
hsa-miR-421	1	0	1	1	1	1	TSPAN14	tetraspanin 14
hsa-miR-421	0	0	1	1	0	0	ZNF576	zinc finger protein 576
hsa-miR-421	1	0	1	1	1	1	RIMS3	regulating synaptic membrane exocytosis 3
hsa-miR-421	1	0	1	1	1	1	NONO	non-POU domain containing, octamer-binding
hsa-miR-421	1	0	1	1	1	1	GABPB1	GA binding protein transcription factor, beta subunit 1
hsa-miR-421	1	0	1	1	1	1	ZNF410	zinc finger protein 410
hsa-miR-421	0	0	1	1	0	0	RBM14	RNA binding motif protein 14
hsa-miR-421	1	0	1	1	1	1	RSU1	Ras suppressor protein 1
hsa-miR-421	0	0	1	1	1	1	TMEM30A	transmembrane protein 30A
hsa-miR-421	0	0	1	0	0	0	ATXN7L3B	ataxin 7-like 3B
hsa-miR-421	1	0	1	1	0	0	SIGMAR1	sigma non-opioid intracellular receptor 1
hsa-miR-421	0	0	1	1	1	1	GNL3L	guanine nucleotide binding protein-like 3 (nucleolar)-like
hsa-miR-421	0	0	1	0	1	1	OAS3	2'-5'-oligoadenylate synthetase 3, 100kDa
hsa-miR-421	1	0	1	1	1	1	IDH1	isocitrate dehydrogenase 1 (NADP+), soluble
hsa-miR-421	0	0	1	1	1	1	PCNP	PEST proteolytic signal containing nuclear protein
hsa-miR-421	0	0	1	1	1	1	KLHL29	kelch-like 29 (Drosophila)
hsa-miR-421	0	0	1	1	1	1	KEAP1	kelch-like ECH-associated protein 1
hsa-miR-421	1	0	1	1	1	1	YY1	YY1 transcription factor
hsa-miR-421	0	0	1	0	0	0	LOC201651	arylacetamide deacetylase (esterase) pseudogene
hsa-miR-421	0	0	1	1	0	0	USP19	ubiquitin specific peptidase 19
hsa-miR-421	0	0	1	1	0	0	CIR1	corepressor interacting with RBPJ, 1
hsa-miR-421	0	0	1	0	0	0	MGC21881	uncharacterized locus MGC21881
hsa-miR-421	0	0	1	1	1	1	GIN1	gypsy retrotransposon integrase 1
hsa-miR-421	1	0	1	1	1	1	ZNF512	zinc finger protein 512
hsa-miR-421	0	0	1	1	1	1	KRCC1	lysine-rich coiled-coil 1
hsa-miR-421	1	0	1	0	1	1	NR1D2	nuclear receptor subfamily 1, group D, member 2
hsa-miR-421	0	0	1	1	1	1	CMAS	cytidine monophosphate N-acetylneuraminic acid synthetase
hsa-miR-421	0	0	1	1	1	1	FAM122C	family with sequence similarity 122C
hsa-miR-421	0	0	1	1	1	1	TRIM47	tripartite motif containing 47
hsa-miR-421	0	0	1	0	0	0	ASH1L-AS1	ASH1L antisense RNA 1
hsa-miR-421	0	0	1	0	0	0	FAM200B	family with sequence similarity 200, member B
hsa-miR-421	1	0	1	1	1	1	SUZ12	suppressor of zeste 12 homolog (Drosophila)
hsa-miR-421	0	0	1	1	1	1	C5orf46	chromosome 5 open reading frame 46
hsa-miR-421	1	0	1	1	1	1	SPRYD7	SPRY domain containing 7
hsa-miR-421	1	0	1	1	1	1	ZNF200	zinc finger protein 200
hsa-miR-421	0	0	1	1	1	1	SEC61A2	Sec61 alpha 2 subunit (S. cerevisiae)
hsa-miR-421	0	0	1	0	1	1	FHAD1	forkhead-associated (FHA) phosphopeptide binding domain 1
hsa-miR-421	0	0	1	1	1	1	MAP2	microtubule-associated protein 2
hsa-miR-421	1	0	1	1	1	1	RSPO2	R-spondin 2
hsa-miR-421	0	0	1	1	1	1	SELP	selectin P (granule membrane protein 140kDa, antigen CD62)
hsa-miR-421	0	0	1	0	1	1	PAPOLG	poly(A) polymerase gamma
hsa-miR-421	0	0	1	0	1	1	KIAA0895	KIAA0895
hsa-miR-421	1	0	1	1	1	1	HTR2C	5-hydroxytryptamine (serotonin) receptor 2C, G protein-coupled
hsa-miR-421	1	0	1	0	0	0	KCNU1	potassium channel, subfamily U, member 1
hsa-miR-421	0	0	1	1	1	1	KIAA1755	KIAA1755
hsa-miR-421	0	0	1	0	0	0	LOC100130950	uncharacterized LOC100130950
hsa-miR-421	0	0	1	1	1	1	SEMA3D	sema domain, immunoglobulin domain (Ig), short basic domain, secreted, (semaphorin) 3D
hsa-miR-421	0	0	1	1	1	1	PIK3AP1	phosphoinositide-3-kinase adaptor protein 1
hsa-miR-421	0	0	1	0	0	0	BCAS3	breast carcinoma amplified sequence 3
hsa-miR-421	0	0	1	1	0	0	AHSA2	AHA1, activator of heat shock 90kDa protein ATPase homolog 2 (yeast)
hsa-miR-421	0	0	1	0	1	1	FLJ25328	uncharacterized LOC148231
hsa-miR-421	1	0	1	1	1	1	GLUL	glutamate-ammonia ligase
hsa-miR-421	1	0	1	1	1	1	SF1	splicing factor 1
hsa-miR-421	1	0	1	1	1	1	RAB5B	RAB5B, member RAS oncogene family
hsa-miR-421	0	0	1	1	1	1	C5orf22	chromosome 5 open reading frame 22
hsa-miR-421	1	0	1	1	1	1	RHOBTB1	Rho-related BTB domain containing 1
hsa-miR-421	1	0	1	1	1	1	PLEKHA7	pleckstrin homology domain containing, family A member 7
hsa-miR-421	1	0	1	1	0	0	TMEM181	transmembrane protein 181
hsa-miR-421	1	0	1	1	1	1	PML	promyelocytic leukemia
hsa-miR-421	1	0	1	1	1	1	FAM120A	family with sequence similarity 120A
hsa-miR-421	1	0	1	0	1	1	DDX3Y	DEAD (Asp-Glu-Ala-Asp) box polypeptide 3, Y-linked
hsa-miR-421	0	0	1	1	0	0	SNRPN	small nuclear ribonucleoprotein polypeptide N
hsa-miR-421	0	0	1	1	1	1	NR1H4	nuclear receptor subfamily 1, group H, member 4
hsa-miR-421	0	0	1	1	0	0	VPS8	vacuolar protein sorting 8 homolog (S. cerevisiae)
hsa-miR-421	0	0	1	1	1	1	CLEC12B	C-type lectin domain family 12, member B
hsa-miR-421	0	0	1	1	1	1	UBE3D	ubiquitin protein ligase E3D
hsa-miR-421	0	0	1	0	0	0	FAM201A	family with sequence similarity 201, member A
hsa-miR-421	1	0	1	1	1	1	SLC35G1	solute carrier family 35, member G1
hsa-miR-421	0	0	1	1	1	1	IPO11	importin 11
hsa-miR-421	0	0	1	1	1	1	TADA1	transcriptional adaptor 1
hsa-miR-421	1	0	1	1	1	1	MEIS1	Meis homeobox 1
hsa-miR-421	1	0	1	1	1	1	BNC2	basonuclin 2
hsa-miR-421	0	0	1	0	0	0	CYP4F35P	cytochrome P450, family 4, subfamily F, polypeptide 35, pseudogene
hsa-miR-421	1	0	1	0	1	1	RAG1	recombination activating gene 1
hsa-miR-421	0	0	1	0	0	0	LOC286184	uncharacterized LOC286184
hsa-miR-421	0	0	1	1	1	1	FAM71D	family with sequence similarity 71, member D
hsa-miR-421	1	0	1	1	1	1	SOX6	SRY (sex determining region Y)-box 6
hsa-miR-421	1	0	1	1	1	1	GALNT1	UDP-N-acetyl-alpha-D-galactosamine:polypeptide N-acetylgalactosaminyltransferase 1 (GalNAc-T1)
hsa-miR-421	0	0	1	0	0	0	USP32P1	ubiquitin specific peptidase 32 pseudogene 1
hsa-miR-421	0	0	1	1	1	1	SLTM	SAFB-like, transcription modulator
hsa-miR-421	1	0	1	1	1	1	DACH2	dachshund homolog 2 (Drosophila)
hsa-miR-421	1	0	1	1	1	1	INTS6	integrator complex subunit 6
hsa-miR-421	0	0	1	0	1	1	METTL12	methyltransferase like 12
hsa-miR-421	1	0	1	0	1	1	HSPA12A	heat shock 70kDa protein 12A
hsa-miR-421	0	0	1	1	0	0	AQP12B	aquaporin 12B
hsa-miR-421	1	0	1	1	1	1	ARID3B	AT rich interactive domain 3B (BRIGHT-like)
hsa-miR-421	0	0	1	0	0	0	CDKL3	cyclin-dependent kinase-like 3
hsa-miR-421	1	0	1	1	1	1	ROCK1	Rho-associated, coiled-coil containing protein kinase 1
hsa-miR-421	0	0	1	0	0	0	ALOX12P2	arachidonate 12-lipoxygenase pseudogene 2
hsa-miR-421	0	0	1	1	1	1	NSUN7	NOP2/Sun domain family, member 7
hsa-miR-421	1	0	1	1	1	1	FKBP5	FK506 binding protein 5
hsa-miR-421	1	0	1	0	1	1	USP6NL	USP6 N-terminal like
hsa-miR-421	0	0	1	0	1	1	C12orf74	chromosome 12 open reading frame 74
hsa-miR-421	0	0	1	0	0	0	DKFZp686O1327	uncharacterized LOC401014
hsa-miR-421	1	0	1	1	0	0	WNK1	WNK lysine deficient protein kinase 1
hsa-miR-421	0	0	1	1	0	0	FAM165B	family with sequence similarity 165, member B
hsa-miR-421	0	0	1	0	1	1	LOC338758	uncharacterized LOC338758
hsa-miR-421	1	0	1	1	0	0	TTC9	tetratricopeptide repeat domain 9
hsa-miR-421	1	0	1	1	1	1	RTKN2	rhotekin 2
hsa-miR-421	0	0	1	0	0	0	LOC255025	uncharacterized LOC255025
hsa-miR-421	0	0	1	0	1	1	ITGA1	integrin, alpha 1
hsa-miR-421	0	0	1	1	1	1	FBXO38	F-box protein 38
hsa-miR-421	0	0	1	0	0	0	AURKAPS1	aurora kinase A pseudogene 1
hsa-miR-421	0	0	1	1	1	1	SLC25A35	solute carrier family 25, member 35
hsa-miR-421	1	0	1	1	1	1	PPP2R5E	protein phosphatase 2, regulatory subunit B', epsilon isoform
hsa-miR-421	0	0	1	1	1	1	ZNF254	zinc finger protein 254
hsa-miR-421	0	0	1	1	1	1	MPP3	membrane protein, palmitoylated 3 (MAGUK p55 subfamily member 3)
hsa-miR-421	0	0	1	1	0	0	C20orf152	chromosome 20 open reading frame 152
hsa-miR-421	1	0	1	1	1	1	SOX5	SRY (sex determining region Y)-box 5
hsa-miR-421	0	0	1	0	1	1	GUCY1B3	guanylate cyclase 1, soluble, beta 3
hsa-miR-421	0	0	1	1	1	1	MTRR	5-methyltetrahydrofolate-homocysteine methyltransferase reductase
hsa-miR-421	1	0	1	1	1	1	ANXA4	annexin A4
hsa-miR-421	1	0	1	1	1	1	NIPBL	Nipped-B homolog (Drosophila)
hsa-miR-421	0	0	1	0	0	0	GNN	Grp94 neighboring nucleotidase pseudogene
hsa-miR-421	1	0	1	1	0	0	XRRA1	X-ray radiation resistance associated 1
hsa-miR-421	1	0	1	1	1	1	ADCY6	adenylate cyclase 6
hsa-miR-421	0	0	1	1	1	1	GORAB	golgin, RAB6-interacting
hsa-miR-421	0	0	1	1	1	1	ZNF189	zinc finger protein 189
hsa-miR-421	0	0	1	0	0	0	ZNF66P	zinc finger protein 66, pseudogene
hsa-miR-421	0	0	1	0	1	1	ANKS1B	ankyrin repeat and sterile alpha motif domain containing 1B
hsa-miR-421	1	0	1	1	1	1	SLC26A7	solute carrier family 26, member 7
hsa-miR-421	1	0	1	1	1	1	MAPKAPK3	mitogen-activated protein kinase-activated protein kinase 3
hsa-miR-421	0	0	1	1	0	0	RELA	v-rel reticuloendotheliosis viral oncogene homolog A (avian)
hsa-miR-421	0	0	1	0	0	0	FOXN3-AS2	FOXN3 antisense RNA 2
hsa-miR-421	1	0	1	0	1	1	HMGB3	high mobility group box 3
hsa-miR-421	1	0	1	0	1	1	TGFBR1	transforming growth factor, beta receptor 1
hsa-miR-421	1	0	1	1	1	1	USP47	ubiquitin specific peptidase 47
hsa-miR-421	0	0	1	0	0	0	JPX	JPX transcript, XIST activator (non-protein coding)
hsa-miR-421	0	0	1	1	1	1	FRMPDP2	FERM and PDZ domain containing 2 pseudogene 2
hsa-miR-421	0	0	1	1	1	1	FRMPD2P1	FERM and PDZ domain containing 2 pseudogene 1
hsa-miR-421	1	0	1	1	1	1	WNT5A	wingless-type MMTV integration site family, member 5A
hsa-miR-421	1	0	1	0	1	1	AMMECR1L	AMME chromosomal region gene 1-like
hsa-miR-421	0	0	1	0	0	0	TBC1D25	TBC1 domain family, member 25
hsa-miR-421	0	0	1	1	1	1	C1orf141	chromosome 1 open reading frame 141
hsa-miR-421	0	0	1	1	1	1	RNASEL	ribonuclease L (2',5'-oligoisoadenylate synthetase-dependent)
hsa-miR-421	1	0	1	1	1	1	ZMYND11	zinc finger, MYND-type containing 11
hsa-miR-421	0	0	1	1	1	1	COBL	cordon-bleu homolog (mouse)
hsa-miR-421	1	0	1	0	1	1	PIK3R3	phosphoinositide-3-kinase, regulatory subunit 3 (gamma)
hsa-miR-421	1	0	1	1	1	1	PLXNA2	plexin A2
hsa-miR-421	0	0	1	1	1	1	NELL1	NEL-like 1 (chicken)
hsa-miR-421	1	0	1	1	1	1	ST8SIA2	ST8 alpha-N-acetyl-neuraminide alpha-2,8-sialyltransferase 2
hsa-miR-421	1	0	1	1	1	1	ACVR2B	activin A receptor, type IIB
hsa-miR-421	1	0	1	1	1	1	OTUD5	OTU domain containing 5
hsa-miR-421	0	0	1	1	1	1	TMEM52B	transmembrane protein 52B
hsa-miR-421	0	0	1	1	1	1	ZNF365	zinc finger protein 365
hsa-miR-421	1	0	1	0	1	1	CPEB2	cytoplasmic polyadenylation element binding protein 2
hsa-miR-421	0	0	1	0	0	0	LOC441493	uncharacterized LOC441493
hsa-miR-421	0	0	1	1	1	1	SPHKAP	SPHK1 interactor, AKAP domain containing
hsa-miR-421	0	0	1	1	0	0	RPL13A	ribosomal protein L13a
hsa-miR-421	0	0	1	1	0	0	ZNHIT3	zinc finger, HIT-type containing 3
hsa-miR-421	0	0	1	0	0	0	FBXL19-AS1	FBXL19 antisense RNA 1 (head to head)
hsa-miR-421	1	0	1	1	1	1	PNISR	PNN-interacting serine/arginine-rich protein
hsa-miR-421	0	0	1	1	1	1	TTN	titin
hsa-miR-421	0	0	1	1	1	1	ATG16L2	autophagy related 16-like 2 (S. cerevisiae)
hsa-miR-421	1	0	1	1	1	1	TBP	TATA box binding protein
hsa-miR-421	1	0	1	1	1	1	UBE4A	ubiquitination factor E4A
hsa-miR-421	1	0	1	1	1	1	SLK	STE20-like kinase
hsa-miR-421	0	0	1	0	0	0	LINC00310	long intergenic non-protein coding RNA 310
hsa-miR-421	1	0	1	1	1	1	OTUD4	OTU domain containing 4
hsa-miR-421	1	0	1	1	1	1	FKBP1A	FK506 binding protein 1A, 12kDa
hsa-miR-421	0	0	1	1	0	0	PRDM5	PR domain containing 5
hsa-miR-421	1	0	1	0	1	1	CAMSAP2	calmodulin regulated spectrin-associated protein family, member 2
hsa-miR-421	0	0	1	1	1	1	SMC1B	structural maintenance of chromosomes 1B
hsa-miR-421	1	0	1	1	1	1	JMJD1C	jumonji domain containing 1C
hsa-miR-421	1	0	1	1	1	1	ZMYM4	zinc finger, MYM-type 4
hsa-miR-421	0	0	1	0	0	0	FAM225B	family with sequence similarity 225, member B (non-protein coding)
hsa-miR-421	1	0	1	0	1	1	NFAT5	nuclear factor of activated T-cells 5, tonicity-responsive
hsa-miR-421	1	0	1	1	1	1	PTPRZ1	protein tyrosine phosphatase, receptor-type, Z polypeptide 1
hsa-miR-421	1	0	1	1	1	1	NIPAL2	NIPA-like domain containing 2
hsa-miR-421	0	0	1	0	0	0	LOC100133207	uncharacterized LOC100133207
hsa-miR-421	1	0	1	1	1	1	GOLGA5	golgin A5
hsa-miR-421	1	0	1	1	1	1	ERMAP	erythroblast membrane-associated protein (Scianna blood group)
hsa-miR-421	0	0	1	0	0	0	DKFZp686D0853	uncharacterized LOC401613
hsa-miR-421	1	0	1	1	1	1	ATP2B4	ATPase, Ca++ transporting, plasma membrane 4
hsa-miR-421	1	0	1	1	1	1	JPH1	junctophilin 1
hsa-miR-421	1	0	1	1	1	1	MTFR1	mitochondrial fission regulator 1
hsa-miR-421	0	0	1	1	1	1	KBTBD12	kelch repeat and BTB (POZ) domain containing 12
hsa-miR-421	1	0	1	1	1	1	TRIM37	tripartite motif containing 37
hsa-miR-421	0	0	1	1	1	1	NUP54	nucleoporin 54kDa
hsa-miR-421	1	0	1	1	1	1	ETS1	v-ets erythroblastosis virus E26 oncogene homolog 1 (avian)
hsa-miR-421	1	0	1	1	1	1	TGOLN2	trans-golgi network protein 2
hsa-miR-421	0	0	1	1	1	1	THSD4	thrombospondin, type I, domain containing 4
hsa-miR-421	1	0	1	1	1	1	PRKRIR	protein-kinase, interferon-inducible double stranded RNA dependent inhibitor, repressor of (P58 repressor)
hsa-miR-421	0	0	1	1	1	1	COL6A3	collagen, type VI, alpha 3
hsa-miR-421	1	0	1	1	1	1	RORB	RAR-related orphan receptor B
hsa-miR-421	1	0	1	1	1	1	SMAD4	SMAD family member 4
hsa-miR-421	1	0	1	1	1	1	SH3BP4	SH3-domain binding protein 4
hsa-miR-421	1	0	1	1	1	1	HMGB1	high mobility group box 1
hsa-miR-421	0	0	1	1	1	1	PRR14L	proline rich 14-like
hsa-miR-421	0	0	1	0	1	1	GTF2H2D	general transcription factor IIH, polypeptide 2D
hsa-miR-421	0	0	1	1	1	1	B4GALT4	UDP-Gal:betaGlcNAc beta 1,4- galactosyltransferase, polypeptide 4
hsa-miR-421	0	0	1	1	0	0	PRKCQ	protein kinase C, theta
hsa-miR-421	1	0	1	1	1	1	EPS15	epidermal growth factor receptor pathway substrate 15
hsa-miR-421	1	0	1	1	1	1	DROSHA	drosha, ribonuclease type III
hsa-miR-421	1	0	1	0	1	1	EML4	echinoderm microtubule associated protein like 4
hsa-miR-421	1	0	1	1	1	1	GTDC1	glycosyltransferase-like domain containing 1
hsa-miR-421	1	0	1	1	1	1	TSC22D3	TSC22 domain family, member 3
hsa-miR-421	1	0	1	1	1	1	DCAF5	DDB1 and CUL4 associated factor 5
hsa-miR-421	1	0	1	0	1	1	C2orf18	chromosome 2 open reading frame 18
hsa-miR-421	1	0	1	1	1	1	ATP6V1C1	ATPase, H+ transporting, lysosomal 42kDa, V1 subunit C1
hsa-miR-421	0	0	1	1	0	0	C3orf77	chromosome 3 open reading frame 77
hsa-miR-421	0	0	1	1	1	1	CCNT2	cyclin T2
hsa-miR-421	1	0	1	1	1	1	ATP7B	ATPase, Cu++ transporting, beta polypeptide
hsa-miR-421	1	0	1	1	1	1	RDX	radixin
hsa-miR-421	0	0	1	1	1	1	RBM20	RNA binding motif protein 20
hsa-miR-421	1	0	1	1	1	1	CACNB4	calcium channel, voltage-dependent, beta 4 subunit
hsa-miR-421	0	0	1	0	0	0	ZNRD1-AS1	ZNRD1 antisense RNA 1
hsa-miR-421	0	0	1	1	1	1	C4orf40	chromosome 4 open reading frame 40
hsa-miR-421	1	0	1	0	1	1	TBL1XR1	transducin (beta)-like 1 X-linked receptor 1
hsa-miR-421	0	0	1	0	0	0	DKFZp686K1684	uncharacterized LOC440034
hsa-miR-421	0	0	1	1	0	0	HNRNPAB	heterogeneous nuclear ribonucleoprotein A/B
hsa-miR-421	0	0	1	0	1	1	CD59	CD59 molecule, complement regulatory protein
hsa-miR-421	0	0	1	1	1	1	HPGD	hydroxyprostaglandin dehydrogenase 15-(NAD)
hsa-miR-421	0	0	1	1	1	1	POLR2H	polymerase (RNA) II (DNA directed) polypeptide H
hsa-miR-421	0	0	1	0	0	0	DCTN2	dynactin 2 (p50)
hsa-miR-421	1	0	1	1	1	1	PGGT1B	protein geranylgeranyltransferase type I, beta subunit
hsa-miR-421	1	0	1	1	1	1	NAGA	N-acetylgalactosaminidase, alpha-
hsa-miR-421	1	0	1	0	1	1	STX6	syntaxin 6
hsa-miR-421	0	0	1	1	1	1	RIPK2	receptor-interacting serine-threonine kinase 2
hsa-miR-421	1	0	1	1	1	1	RSBN1L	round spermatid basic protein 1-like
hsa-miR-421	0	0	1	1	0	0	SARS	seryl-tRNA synthetase
hsa-miR-421	0	0	1	0	0	0	RPS16P10	ribosomal protein S16 pseudogene 10
hsa-miR-421	0	0	1	1	0	0	RAD54L	RAD54-like (S. cerevisiae)
hsa-miR-421	0	0	1	1	1	1	ATP1B3	ATPase, Na+/K+ transporting, beta 3 polypeptide
hsa-miR-421	0	0	1	1	1	1	PACRGL	PARK2 co-regulated-like
hsa-miR-421	1	0	1	1	1	1	SLC35D2	solute carrier family 35, member D2
hsa-miR-421	1	0	1	1	1	1	RAP1A	RAP1A, member of RAS oncogene family
hsa-miR-421	0	0	1	1	1	1	PTGES3	prostaglandin E synthase 3 (cytosolic)
hsa-miR-421	1	0	1	0	1	1	BNIP3L	BCL2/adenovirus E1B 19kDa interacting protein 3-like
hsa-miR-421	0	0	1	1	1	1	FGL1	fibrinogen-like 1
hsa-miR-421	0	0	1	1	1	1	INCENP	inner centromere protein antigens 135/155kDa
hsa-miR-421	1	0	1	1	1	1	CLTA	clathrin, light chain A
hsa-miR-421	1	0	1	1	1	1	SSR1	signal sequence receptor, alpha
hsa-miR-421	0	0	1	0	1	1	CD99P1	CD99 molecule pseudogene 1
hsa-miR-421	1	0	1	1	1	1	COPS2	COP9 constitutive photomorphogenic homolog subunit 2 (Arabidopsis)
hsa-miR-421	1	0	1	1	1	1	DCN	decorin
hsa-miR-421	1	0	1	1	1	1	HMGN1	high mobility group nucleosome binding domain 1
hsa-miR-421	0	0	1	1	0	0	RAD54B	RAD54 homolog B (S. cerevisiae)
hsa-miR-421	0	0	1	0	0	0	STK16	serine/threonine kinase 16
hsa-miR-421	0	0	1	1	0	0	TMEM183A	transmembrane protein 183A
hsa-miR-421	0	0	1	1	1	1	C17orf76-AS1	C17orf76 antisense RNA 1
hsa-miR-421	1	0	1	1	1	1	TMEM248	transmembrane protein 248
hsa-miR-421	0	0	1	1	1	1	XBP1	X-box binding protein 1
hsa-miR-421	1	0	1	1	1	1	STK38L	serine/threonine kinase 38 like
hsa-miR-421	1	0	1	0	1	1	DCAF7	DDB1 and CUL4 associated factor 7
hsa-miR-421	1	0	1	1	1	1	WIPF1	WAS/WASL interacting protein family, member 1
hsa-miR-421	1	0	1	1	1	1	RAB3IP	RAB3A interacting protein (rabin3)
hsa-miR-421	0	0	1	1	1	1	ATG4A	autophagy related 4A, cysteine peptidase
hsa-miR-421	1	0	1	1	1	1	DKK3	dickkopf 3 homolog (Xenopus laevis)
hsa-miR-421	1	0	1	1	1	1	PTPN18	protein tyrosine phosphatase, non-receptor type 18 (brain-derived)
hsa-miR-421	0	0	1	1	1	1	C1orf88	chromosome 1 open reading frame 88
hsa-miR-421	1	0	1	1	1	1	DOK4	docking protein 4
hsa-miR-421	0	0	1	0	0	0	ZNF720	zinc finger protein 720
hsa-miR-421	1	0	1	1	1	1	ARNTL	aryl hydrocarbon receptor nuclear translocator-like
hsa-miR-421	1	0	1	1	1	1	PRDM2	PR domain containing 2, with ZNF domain
hsa-miR-421	0	0	1	1	1	1	SMNDC1	survival motor neuron domain containing 1
hsa-miR-421	0	0	1	1	1	1	TANK	TRAF family member-associated NFKB activator
hsa-miR-421	0	0	1	1	0	0	TMEM132A	transmembrane protein 132A
hsa-miR-421	0	0	1	0	1	1	VSTM2A	V-set and transmembrane domain containing 2A
hsa-miR-421	1	0	1	1	1	1	TIMP3	TIMP metallopeptidase inhibitor 3
hsa-miR-421	0	0	1	1	1	1	UBE2A	ubiquitin-conjugating enzyme E2A
hsa-miR-421	1	0	1	1	1	1	RBBP7	retinoblastoma binding protein 7
hsa-miR-421	0	0	1	1	1	1	CD1C	CD1c molecule
hsa-miR-421	0	0	1	1	1	1	TCTN3	tectonic family member 3
hsa-miR-421	1	0	1	1	1	1	PFN2	profilin 2
hsa-miR-421	0	0	1	1	1	1	NGLY1	N-glycanase 1
hsa-miR-421	0	0	1	1	1	1	RPL14	ribosomal protein L14
hsa-miR-421	1	0	1	1	1	1	TRPM6	transient receptor potential cation channel, subfamily M, member 6
hsa-miR-421	1	0	1	1	1	1	RNF2	ring finger protein 2
hsa-miR-421	0	0	1	0	0	0	ZNF674-AS1	ZNF674 antisense RNA 1
hsa-miR-421	1	0	1	1	1	1	HMGN2	high mobility group nucleosomal binding domain 2
hsa-miR-421	0	0	1	1	1	1	LGI1	leucine-rich, glioma inactivated 1
hsa-miR-421	1	0	1	0	1	1	CD47	CD47 molecule
hsa-miR-421	0	0	1	1	0	0	HP	haptoglobin
hsa-miR-421	0	0	1	1	1	1	ZFAND1	zinc finger, AN1-type domain 1
hsa-miR-421	1	0	1	1	1	1	RND3	Rho family GTPase 3
hsa-miR-421	0	0	1	1	1	1	BDP1	B double prime 1, subunit of RNA polymerase III transcription initiation factor IIIB
hsa-miR-421	0	0	1	0	0	0	LOC731789	uncharacterized LOC731789
hsa-miR-421	1	0	1	0	1	1	BTRC	beta-transducin repeat containing E3 ubiquitin protein ligase
hsa-miR-421	0	0	1	0	0	0	LINC00661	long intergenic non-protein coding RNA 661
hsa-miR-421	1	0	1	0	1	1	MEGF10	multiple EGF-like-domains 10
hsa-miR-421	1	0	1	0	1	1	OSBPL8	oxysterol binding protein-like 8
hsa-miR-421	1	0	1	1	1	1	TIPARP	TCDD-inducible poly(ADP-ribose) polymerase
hsa-miR-421	1	0	1	1	1	1	SLC39A10	solute carrier family 39 (zinc transporter), member 10
hsa-miR-421	1	0	1	1	1	1	PI15	peptidase inhibitor 15
hsa-miR-421	1	0	1	0	1	1	IRF4	interferon regulatory factor 4
hsa-miR-421	1	0	1	1	1	1	RB1CC1	RB1-inducible coiled-coil 1
hsa-miR-421	0	0	1	1	1	1	PTGS1	prostaglandin-endoperoxide synthase 1 (prostaglandin G/H synthase and cyclooxygenase)
hsa-miR-421	1	0	1	0	1	1	DCBLD2	discoidin, CUB and LCCL domain containing 2
hsa-miR-421	0	0	1	1	1	1	PROS1	protein S (alpha)
hsa-miR-421	0	0	1	0	0	0	C1orf81	chromosome 1 open reading frame 81
hsa-miR-421	1	0	1	1	1	1	MLL	myeloid/lymphoid or mixed-lineage leukemia (trithorax homolog, Drosophila)
hsa-miR-421	0	0	1	1	1	1	PCYT1A	phosphate cytidylyltransferase 1, choline, alpha
hsa-miR-421	0	0	1	1	1	1	PLCB4	phospholipase C, beta 4
hsa-miR-421	1	0	1	1	1	1	IGF1	insulin-like growth factor 1 (somatomedin C)
hsa-miR-421	1	0	1	1	1	1	ARSB	arylsulfatase B
hsa-miR-421	1	0	1	1	1	1	CYP19A1	cytochrome P450, family 19, subfamily A, polypeptide 1
hsa-miR-421	1	0	1	0	1	1	GHR	growth hormone receptor
hsa-miR-421	1	0	1	0	1	1	GLI3	GLI family zinc finger 3
hsa-miR-421	0	0	1	0	1	1	MBL2	mannose-binding lectin (protein C) 2, soluble
hsa-miR-421	1	0	1	1	1	1	MET	met proto-oncogene (hepatocyte growth factor receptor)
hsa-miR-421	1	0	1	1	1	1	MITF	microphthalmia-associated transcription factor
hsa-miR-421	1	0	1	1	1	1	PMP22	peripheral myelin protein 22
hsa-miR-421	1	0	1	1	1	1	HLCS	holocarboxylase synthetase (biotin-(proprionyl-CoA-carboxylase (ATP-hydrolysing)) ligase)
hsa-miR-421	1	0	1	0	1	1	PAFAH1B1	platelet-activating factor acetylhydrolase 1b, regulatory subunit 1 (45kDa)
hsa-miR-421	0	0	1	1	1	1	PECAM1	platelet/endothelial cell adhesion molecule 1
hsa-miR-421	0	0	1	0	1	1	SLC10A2	solute carrier family 10 (sodium/bile acid cotransporter family), member 2
hsa-miR-421	1	0	1	1	1	1	DCX	doublecortin
hsa-miR-421	1	0	1	1	1	1	IL10	interleukin 10
hsa-miR-421	0	0	1	1	1	1	GPX1	glutathione peroxidase 1
hsa-miR-421	0	0	1	1	1	1	HGF	hepatocyte growth factor (hepapoietin A; scatter factor)
hsa-miR-421	1	0	1	0	1	1	ABAT	4-aminobutyrate aminotransferase
hsa-miR-421	1	0	1	1	1	1	GABRB3	gamma-aminobutyric acid (GABA) A receptor, beta 3
hsa-miR-421	1	0	1	1	0	0	GRIN2A	glutamate receptor, ionotropic, N-methyl D-aspartate 2A
hsa-miR-421	1	0	1	1	1	1	HTR4	5-hydroxytryptamine (serotonin) receptor 4, G protein-coupled
hsa-miR-421	1	0	1	1	1	1	IGF1R	insulin-like growth factor 1 receptor
hsa-miR-421	1	0	1	1	1	1	PTGFR	prostaglandin F receptor (FP)
hsa-miR-421	0	0	1	1	1	1	PTGS2	prostaglandin-endoperoxide synthase 2 (prostaglandin G/H synthase and cyclooxygenase)
hsa-miR-421	0	0	1	1	1	1	TBC1D3C	TBC1 domain family, member 3C
hsa-miR-421	0	0	1	1	1	1	GALK2	galactokinase 2
hsa-miR-421	1	0	1	0	1	1	SPOPL	speckle-type POZ protein-like
hsa-miR-421	1	0	1	0	1	1	CLDN18	claudin 18
hsa-miR-421	1	0	1	1	0	0	AWAT2	acyl-CoA wax alcohol acyltransferase 2
hsa-miR-421	1	0	1	1	1	1	LCLAT1	lysocardiolipin acyltransferase 1
hsa-miR-421	1	0	1	1	1	1	GATA3	GATA binding protein 3
hsa-miR-421	0	0	1	1	1	1	STAG3L1	stromal antigen 3-like 1
hsa-miR-421	0	0	1	1	1	1	SMAD1	SMAD family member 1
hsa-miR-421	1	0	1	1	1	1	KLHL31	kelch-like 31 (Drosophila)
hsa-miR-421	0	0	1	1	1	1	TRIM6-TRIM34	TRIM6-TRIM34 readthrough
hsa-miR-421	0	0	1	1	1	1	TRIM34	tripartite motif containing 34
hsa-miR-421	1	0	1	0	1	1	ZNF740	zinc finger protein 740
hsa-miR-421	0	0	1	1	1	1	DBX2	developing brain homeobox 2
hsa-miR-421	0	0	1	1	1	1	PRR13	proline rich 13
hsa-miR-421	1	0	1	1	1	1	EBF3	early B-cell factor 3
hsa-miR-421	1	0	1	1	0	0	RPS6KA1	ribosomal protein S6 kinase, 90kDa, polypeptide 1
hsa-miR-421	1	0	1	1	0	0	SDC1	syndecan 1
hsa-miR-421	1	0	1	0	1	1	GOSR1	golgi SNAP receptor complex member 1
hsa-miR-421	0	0	1	0	1	1	C8orf22	chromosome 8 open reading frame 22
hsa-miR-421	1	0	1	1	1	1	BRWD1	bromodomain and WD repeat domain containing 1
hsa-miR-421	1	0	1	1	1	1	TULP4	tubby like protein 4
hsa-miR-421	1	0	1	0	1	1	C18orf25	chromosome 18 open reading frame 25
hsa-miR-421	1	0	1	1	1	1	RBM33	RNA binding motif protein 33
hsa-miR-421	0	0	1	1	1	1	MXI1	MAX interactor 1
hsa-miR-421	1	0	1	1	1	1	NUPL1	nucleoporin like 1
hsa-miR-421	0	0	1	1	0	0	CST9	cystatin 9 (testatin)
hsa-miR-421	0	0	1	1	1	1	SPIN3	spindlin family, member 3
hsa-miR-421	1	0	1	0	1	1	ZC3H12B	zinc finger CCCH-type containing 12B
hsa-miR-421	0	0	1	1	1	1	MUC21	mucin 21, cell surface associated
hsa-miR-421	1	0	1	1	1	1	BCL2L15	BCL2-like 15
hsa-miR-421	1	0	1	0	1	1	FYTTD1	forty-two-three domain containing 1
hsa-miR-421	1	0	1	0	1	1	BACH1	BTB and CNC homology 1, basic leucine zipper transcription factor 1
hsa-miR-421	1	0	1	0	1	1	CREB5	cAMP responsive element binding protein 5
hsa-miR-421	1	0	1	1	1	1	CTNNBIP1	catenin, beta interacting protein 1
hsa-miR-421	1	0	1	1	1	1	NTRK3	neurotrophic tyrosine kinase, receptor, type 3
hsa-miR-421	1	0	1	1	1	1	FOXP4	forkhead box P4
hsa-miR-421	1	0	1	1	1	1	SLC25A53	solute carrier family 25, member 53
hsa-miR-421	0	0	1	1	0	0	EPGN	epithelial mitogen homolog (mouse)
hsa-miR-421	0	0	1	1	1	1	LDLRAD2	low density lipoprotein receptor class A domain containing 2
hsa-miR-421	1	0	1	1	1	1	CA7	carbonic anhydrase VII
hsa-miR-421	0	0	1	1	0	0	KHDC3L	KH domain containing 3-like, subcortical maternal complex member
hsa-miR-421	0	0	1	1	1	1	USP1	ubiquitin specific peptidase 1
hsa-miR-421	0	0	1	1	0	0	SPRR2B	small proline-rich protein 2B
hsa-miR-421	0	0	1	1	1	1	DNTT	deoxynucleotidyltransferase, terminal
hsa-miR-421	0	0	1	1	1	1	BTBD11	BTB (POZ) domain containing 11
hsa-miR-421	0	0	1	1	1	1	KIAA2026	KIAA2026
hsa-miR-421	0	0	1	1	1	1	ACTBL2	actin, beta-like 2
hsa-miR-421	0	0	1	1	1	1	VPS13A	vacuolar protein sorting 13 homolog A (S. cerevisiae)
hsa-miR-421	0	0	1	1	0	0	POLR3H	polymerase (RNA) III (DNA directed) polypeptide H (22.9kD)
hsa-miR-421	1	0	1	0	1	1	BRCC3	BRCA1/BRCA2-containing complex, subunit 3
hsa-miR-421	0	0	1	0	0	0	MYADM	myeloid-associated differentiation marker
hsa-miR-421	0	0	1	1	1	1	ZNF187	zinc finger protein 187
hsa-miR-421	0	0	1	1	1	1	HNMT	histamine N-methyltransferase
hsa-miR-421	1	0	1	1	1	1	CANX	calnexin
hsa-miR-421	1	0	1	0	1	1	BCL7A	B-cell CLL/lymphoma 7A
hsa-miR-421	1	0	1	0	1	1	TNRC6B	trinucleotide repeat containing 6B
hsa-miR-421	1	0	1	1	1	1	FNBP1L	formin binding protein 1-like
hsa-miR-421	0	0	1	1	1	1	SC5DL	sterol-C5-desaturase (ERG3 delta-5-desaturase homolog, S. cerevisiae)-like
hsa-miR-421	1	0	1	1	1	1	TPD52	tumor protein D52
hsa-miR-421	1	0	1	0	1	1	C3orf70	chromosome 3 open reading frame 70
hsa-miR-421	1	0	1	1	1	1	UGGT1	UDP-glucose glycoprotein glucosyltransferase 1
hsa-miR-421	1	0	1	1	1	1	SLC10A7	solute carrier family 10 (sodium/bile acid cotransporter family), member 7
hsa-miR-421	1	0	1	0	1	1	SAMD5	sterile alpha motif domain containing 5
hsa-miR-421	0	0	1	1	1	1	TRMT11	tRNA methyltransferase 11 homolog (S. cerevisiae)
hsa-miR-421	1	0	1	1	1	1	TMPO	thymopoietin
hsa-miR-421	1	0	1	1	1	1	AMD1	adenosylmethionine decarboxylase 1
hsa-miR-421	1	0	1	0	1	1	RYR2	ryanodine receptor 2 (cardiac)
hsa-miR-421	1	0	1	1	1	1	USP14	ubiquitin specific peptidase 14 (tRNA-guanine transglycosylase)
hsa-miR-421	1	0	1	1	1	1	KCNC4	potassium voltage-gated channel, Shaw-related subfamily, member 4
hsa-miR-421	0	0	1	0	0	0	C19orf55	chromosome 19 open reading frame 55
hsa-miR-421	1	0	1	1	1	1	CHN2	chimerin (chimaerin) 2
hsa-miR-421	1	0	1	1	1	1	MLLT4	myeloid/lymphoid or mixed-lineage leukemia (trithorax homolog, Drosophila); translocated to, 4
hsa-miR-421	0	0	1	1	1	1	SERPINB7	serpin peptidase inhibitor, clade B (ovalbumin), member 7
hsa-miR-421	0	0	1	1	1	1	SPOCK3	sparc/osteonectin, cwcv and kazal-like domains proteoglycan (testican) 3
hsa-miR-421	0	0	1	1	1	1	MTHFD2	methylenetetrahydrofolate dehydrogenase (NADP+ dependent) 2, methenyltetrahydrofolate cyclohydrolase
hsa-miR-421	1	0	1	1	1	1	MTMR12	myotubularin related protein 12
hsa-miR-421	1	0	1	1	1	1	GDAP1	ganglioside induced differentiation associated protein 1
hsa-miR-421	1	0	1	1	1	1	FRS2	fibroblast growth factor receptor substrate 2
hsa-miR-421	1	0	1	1	1	1	ERBB4	v-erb-a erythroblastic leukemia viral oncogene homolog 4 (avian)
hsa-miR-421	1	0	1	1	1	1	KDM5A	lysine (K)-specific demethylase 5A
hsa-miR-421	1	0	1	1	1	1	PVRL2	poliovirus receptor-related 2 (herpesvirus entry mediator B)
hsa-miR-421	1	0	1	0	1	1	SLC12A2	solute carrier family 12 (sodium/potassium/chloride transporters), member 2
hsa-miR-421	1	0	1	1	1	1	NET1	neuroepithelial cell transforming 1
hsa-miR-421	0	0	1	0	1	1	SSTR1	somatostatin receptor 1
hsa-miR-421	0	0	1	1	0	0	TCN1	transcobalamin I (vitamin B12 binding protein, R binder family)
hsa-miR-421	1	0	1	1	1	1	QSER1	glutamine and serine rich 1
hsa-miR-421	1	0	1	1	1	1	IRF2BP2	interferon regulatory factor 2 binding protein 2
hsa-miR-421	1	0	1	1	1	1	PRR3	proline rich 3
hsa-miR-421	1	0	1	0	1	1	UBXN2B	UBX domain protein 2B
hsa-miR-421	1	0	1	1	1	1	DACT1	dapper, antagonist of beta-catenin, homolog 1 (Xenopus laevis)
hsa-miR-421	1	0	1	1	1	1	TMTC4	transmembrane and tetratricopeptide repeat containing 4
hsa-miR-421	0	0	1	0	0	0	TMEM183B	transmembrane protein 183B
hsa-miR-421	1	0	1	1	1	1	ITGA6	integrin, alpha 6
hsa-miR-421	1	0	1	1	1	1	VAV3	vav 3 guanine nucleotide exchange factor
hsa-miR-421	1	0	1	1	1	1	FAM155A	family with sequence similarity 155, member A
hsa-miR-421	1	0	1	0	1	1	CCDC85A	coiled-coil domain containing 85A
hsa-miR-421	0	0	1	1	1	1	TMEM202	transmembrane protein 202
hsa-miR-421	1	0	1	1	1	1	ZNF697	zinc finger protein 697
hsa-miR-421	1	0	1	0	1	1	ODZ3	odz, odd Oz/ten-m homolog 3 (Drosophila)
hsa-miR-421	0	0	1	1	1	1	TBX18	T-box 18
hsa-miR-421	0	0	1	1	1	1	SNTN	sentan, cilia apical structure protein
hsa-miR-421	1	0	1	1	1	1	MGA	MAX gene associated
hsa-miR-421	1	0	1	1	1	1	REPS2	RALBP1 associated Eps domain containing 2
hsa-miR-421	1	0	1	0	1	1	PDE5A	phosphodiesterase 5A, cGMP-specific
hsa-miR-421	0	0	1	1	1	1	CRISP1	cysteine-rich secretory protein 1
hsa-miR-421	1	0	1	1	1	1	BMP2	bone morphogenetic protein 2
hsa-miR-421	0	0	1	1	1	1	CDSN	corneodesmosin
hsa-miR-421	1	0	1	0	1	1	CPD	carboxypeptidase D
hsa-miR-421	1	0	1	1	1	1	CREBL2	cAMP responsive element binding protein-like 2
hsa-miR-421	1	0	1	1	1	1	MAPK14	mitogen-activated protein kinase 14
hsa-miR-421	1	0	1	1	1	1	DYRK1A	dual-specificity tyrosine-(Y)-phosphorylation regulated kinase 1A
hsa-miR-421	1	0	1	0	1	1	EFNB3	ephrin-B3
hsa-miR-421	1	0	1	1	1	1	EIF1AX	eukaryotic translation initiation factor 1A, X-linked
hsa-miR-421	1	0	1	0	1	1	EIF2S3	eukaryotic translation initiation factor 2, subunit 3 gamma, 52kDa
hsa-miR-421	0	0	1	0	1	1	FMO2	flavin containing monooxygenase 2 (non-functional)
hsa-miR-421	0	0	1	1	0	0	AARS	alanyl-tRNA synthetase
hsa-miR-421	1	0	1	0	1	1	ARNT	aryl hydrocarbon receptor nuclear translocator
hsa-miR-421	1	0	1	1	1	1	ATP6V1A	ATPase, H+ transporting, lysosomal 70kDa, V1 subunit A
hsa-miR-421	1	0	1	1	1	1	CDH11	cadherin 11, type 2, OB-cadherin (osteoblast)
hsa-miR-421	0	0	1	1	1	1	CKS1B	CDC28 protein kinase regulatory subunit 1B
hsa-miR-421	1	0	1	1	1	1	CLCN3	chloride channel, voltage-sensitive 3
hsa-miR-421	1	0	1	1	1	1	COL4A1	collagen, type IV, alpha 1
hsa-miR-421	1	0	1	0	1	1	COL19A1	collagen, type XIX, alpha 1
hsa-miR-421	0	0	1	1	1	1	CPS1	carbamoyl-phosphate synthase 1, mitochondrial
hsa-miR-421	0	0	1	1	0	0	CSNK2A2	casein kinase 2, alpha prime polypeptide
hsa-miR-421	1	0	1	1	1	1	DR1	down-regulator of transcription 1, TBP-binding (negative cofactor 2)
hsa-miR-421	0	0	1	0	1	1	FGF2	fibroblast growth factor 2 (basic)
hsa-miR-421	0	0	1	1	1	1	FPR3	formyl peptide receptor 3
hsa-miR-421	0	0	1	0	1	1	GYPA	glycophorin A (MNS blood group)
hsa-miR-421	1	0	1	1	1	1	HIVEP1	human immunodeficiency virus type I enhancer binding protein 1
hsa-miR-421	0	0	1	1	1	1	HOXA4	homeobox A4
hsa-miR-421	0	0	1	1	1	1	IL12B	interleukin 12B (natural killer cell stimulatory factor 2, cytotoxic lymphocyte maturation factor 2, p40)
hsa-miR-421	0	0	1	1	0	0	INSL4	insulin-like 4 (placenta)
hsa-miR-421	1	0	1	1	1	1	INSM1	insulinoma-associated 1
hsa-miR-421	1	0	1	1	1	1	ITGA5	integrin, alpha 5 (fibronectin receptor, alpha polypeptide)
hsa-miR-421	1	0	1	1	1	1	JAK1	Janus kinase 1
hsa-miR-421	1	0	1	1	1	1	KPNA4	karyopherin alpha 4 (importin alpha 3)
hsa-miR-421	1	0	1	1	1	1	MAFG	v-maf musculoaponeurotic fibrosarcoma oncogene homolog G (avian)
hsa-miR-421	1	0	1	1	1	1	ME1	malic enzyme 1, NADP(+)-dependent, cytosolic
hsa-miR-421	0	0	1	1	1	1	MMP19	matrix metallopeptidase 19
hsa-miR-421	1	0	1	1	1	1	MSN	moesin
hsa-miR-421	0	0	1	1	1	1	NDUFC1	NADH dehydrogenase (ubiquinone) 1, subcomplex unknown, 1, 6kDa
hsa-miR-421	1	0	1	1	1	1	NPTX1	neuronal pentraxin I
hsa-miR-421	0	0	1	0	1	1	OPHN1	oligophrenin 1
hsa-miR-421	1	0	1	1	1	1	OSBP	oxysterol binding protein
hsa-miR-421	0	0	1	1	0	0	PDGFRB	platelet-derived growth factor receptor, beta polypeptide
hsa-miR-421	1	0	1	1	1	1	PHB	prohibitin
hsa-miR-421	0	0	1	1	1	1	SERPINB8	serpin peptidase inhibitor, clade B (ovalbumin), member 8
hsa-miR-421	0	0	1	0	1	1	PLN	phospholamban
hsa-miR-421	1	0	1	1	1	1	PPP1CC	protein phosphatase 1, catalytic subunit, gamma isozyme
hsa-miR-421	0	0	1	1	1	1	PPP1R3A	protein phosphatase 1, regulatory subunit 3A
hsa-miR-421	0	0	1	1	1	1	MAPK9	mitogen-activated protein kinase 9
hsa-miR-421	1	0	1	1	0	0	PSMD7	proteasome (prosome, macropain) 26S subunit, non-ATPase, 7
hsa-miR-421	0	0	1	1	1	1	PSMD10	proteasome (prosome, macropain) 26S subunit, non-ATPase, 10
hsa-miR-421	1	0	1	1	1	1	PTPN9	protein tyrosine phosphatase, non-receptor type 9
hsa-miR-421	1	0	1	1	1	1	RASA1	RAS p21 protein activator (GTPase activating protein) 1
hsa-miR-421	0	0	1	1	1	1	RFC3	replication factor C (activator 1) 3, 38kDa
hsa-miR-421	0	0	1	1	1	1	RGS2	regulator of G-protein signaling 2, 24kDa
hsa-miR-421	1	0	1	1	1	1	ROBO2	roundabout, axon guidance receptor, homolog 2 (Drosophila)
hsa-miR-421	1	0	1	0	1	1	SORT1	sortilin 1
hsa-miR-421	0	0	1	1	1	1	CCL2	chemokine (C-C motif) ligand 2
hsa-miR-421	0	0	1	0	1	1	CXCL5	chemokine (C-X-C motif) ligand 5
hsa-miR-421	0	0	1	1	1	1	SDC4	syndecan 4
hsa-miR-421	1	0	1	1	1	1	SFRP2	secreted frizzled-related protein 2
hsa-miR-421	1	0	1	1	1	1	SSR2	signal sequence receptor, beta (translocon-associated protein beta)
hsa-miR-421	1	0	1	0	1	1	RPS6KB1	ribosomal protein S6 kinase, 70kDa, polypeptide 1
hsa-miR-421	0	0	1	1	1	1	STRN	striatin, calmodulin binding protein
hsa-miR-421	1	0	1	1	1	1	SVIL	supervillin
hsa-miR-421	1	0	1	1	1	1	TFAP2B	transcription factor AP-2 beta (activating enhancer binding protein 2 beta)
hsa-miR-421	1	0	1	0	1	1	THBS1	thrombospondin 1
hsa-miR-421	0	0	1	1	0	0	TULP2	tubby like protein 2
hsa-miR-421	1	0	1	0	1	1	UBE2G2	ubiquitin-conjugating enzyme E2G 2
hsa-miR-421	1	0	1	1	1	1	VAV2	vav 2 guanine nucleotide exchange factor
hsa-miR-421	1	0	1	0	1	1	CORO2A	coronin, actin binding protein, 2A
hsa-miR-421	1	0	1	1	1	1	YWHAH	tyrosine 3-monooxygenase/tryptophan 5-monooxygenase activation protein, eta polypeptide
hsa-miR-421	1	0	1	0	1	1	ZIC1	Zic family member 1
hsa-miR-421	1	0	1	1	1	1	ZNF131	zinc finger protein 131
hsa-miR-421	0	0	1	1	1	1	SCG2	secretogranin II
hsa-miR-421	1	0	1	1	1	1	ADAM12	ADAM metallopeptidase domain 12
hsa-miR-421	1	0	1	1	1	1	TAF15	TAF15 RNA polymerase II, TATA box binding protein (TBP)-associated factor, 68kDa
hsa-miR-421	1	0	1	1	1	1	AKAP1	A kinase (PRKA) anchor protein 1
hsa-miR-421	0	0	1	1	1	1	DDO	D-aspartate oxidase
hsa-miR-421	1	0	1	1	1	1	TNFSF11	tumor necrosis factor (ligand) superfamily, member 11
hsa-miR-421	0	0	1	1	1	1	SLC25A12	solute carrier family 25 (aspartate/glutamate carrier), member 12
hsa-miR-421	1	0	1	0	1	1	TNKS	tankyrase, TRF1-interacting ankyrin-related ADP-ribose polymerase
hsa-miR-421	0	0	1	1	1	1	EIF3A	eukaryotic translation initiation factor 3, subunit A
hsa-miR-421	1	0	1	1	1	1	B3GALT2	UDP-Gal:betaGlcNAc beta 1,3-galactosyltransferase, polypeptide 2
hsa-miR-421	0	0	1	1	1	1	PRPF4B	PRP4 pre-mRNA processing factor 4 homolog B (yeast)
hsa-miR-421	1	0	1	1	1	1	PHOX2B	paired-like homeobox 2b
hsa-miR-421	1	0	1	1	1	1	CDKL2	cyclin-dependent kinase-like 2 (CDC2-related kinase)
hsa-miR-421	1	0	1	1	1	1	BTAF1	BTAF1 RNA polymerase II, B-TFIID transcription factor-associated, 170kDa (Mot1 homolog, S. cerevisiae)
hsa-miR-421	1	0	1	1	1	1	BCL2L2	BCL2-like 2
hsa-miR-421	0	0	1	1	1	1	CDKN1B	cyclin-dependent kinase inhibitor 1B (p27, Kip1)
hsa-miR-421	1	0	1	0	1	1	DGKB	diacylglycerol kinase, beta 90kDa
hsa-miR-421	0	0	1	1	1	1	TIMM8A	translocase of inner mitochondrial membrane 8 homolog A (yeast)
hsa-miR-421	0	0	1	0	1	1	EIF4EBP2	eukaryotic translation initiation factor 4E binding protein 2
hsa-miR-421	1	0	1	0	1	1	SLC1A2	solute carrier family 1 (glial high affinity glutamate transporter), member 2
hsa-miR-421	1	0	1	0	1	1	CYTH3	cytohesin 3
hsa-miR-421	1	0	1	0	1	1	MED14	mediator complex subunit 14
hsa-miR-421	1	0	1	1	1	1	SOCS6	suppressor of cytokine signaling 6
hsa-miR-421	0	0	1	1	1	1	HOMER1	homer homolog 1 (Drosophila)
hsa-miR-421	1	0	1	0	1	1	AKAP6	A kinase (PRKA) anchor protein 6
hsa-miR-421	1	0	1	1	1	1	DACH1	dachshund homolog 1 (Drosophila)
hsa-miR-421	1	0	1	1	1	1	DAG1	dystroglycan 1 (dystrophin-associated glycoprotein 1)
hsa-miR-421	1	0	1	1	1	1	EPS8	epidermal growth factor receptor pathway substrate 8
hsa-miR-421	1	0	1	0	1	1	PKNOX1	PBX/knotted 1 homeobox 1
hsa-miR-421	0	0	1	1	0	0	SNRPD2	small nuclear ribonucleoprotein D2 polypeptide 16.5kDa
hsa-miR-421	1	0	1	0	1	1	USP9Y	ubiquitin specific peptidase 9, Y-linked
hsa-miR-421	1	0	1	0	1	1	MAPKAPK2	mitogen-activated protein kinase-activated protein kinase 2
hsa-miR-421	1	0	1	1	1	1	STK17A	serine/threonine kinase 17a
hsa-miR-421	1	0	1	1	1	1	KIF3B	kinesin family member 3B
hsa-miR-421	1	0	1	1	1	1	AKAP7	A kinase (PRKA) anchor protein 7
hsa-miR-421	1	0	1	1	1	1	CXCL14	chemokine (C-X-C motif) ligand 14
hsa-miR-421	0	0	1	1	1	1	PRDX6	peroxiredoxin 6
hsa-miR-421	1	0	1	1	1	1	KCNJ8	potassium inwardly-rectifying channel, subfamily J, member 8
hsa-miR-421	1	0	1	0	1	1	SCD	stearoyl-CoA desaturase (delta-9-desaturase)
hsa-miR-421	1	0	1	1	1	1	TLE1	transducin-like enhancer of split 1 (E(sp1) homolog, Drosophila)
hsa-miR-421	1	0	1	1	0	0	ZMYM3	zinc finger, MYM-type 3
hsa-miR-421	0	0	1	1	1	1	ABCD2	ATP-binding cassette, sub-family D (ALD), member 2
hsa-miR-421	0	0	1	1	1	1	CEBPB	CCAAT/enhancer binding protein (C/EBP), beta
hsa-miR-421	1	0	1	0	1	1	CEBPD	CCAAT/enhancer binding protein (C/EBP), delta
hsa-miR-421	1	0	1	1	1	1	FOXN3	forkhead box N3
hsa-miR-421	1	0	1	1	1	1	ELK3	ELK3, ETS-domain protein (SRF accessory protein 2)
hsa-miR-421	1	0	1	1	1	1	GEM	GTP binding protein overexpressed in skeletal muscle
hsa-miR-421	1	0	1	1	1	1	H3F3B	H3 histone, family 3B (H3.3B)
hsa-miR-421	1	0	1	0	1	1	PRKAB2	protein kinase, AMP-activated, beta 2 non-catalytic subunit
hsa-miR-421	0	0	1	1	1	1	SEPP1	selenoprotein P, plasma, 1
hsa-miR-421	0	0	1	1	1	1	XRCC2	X-ray repair complementing defective repair in Chinese hamster cells 2
hsa-miR-421	0	0	1	1	0	0	ARHGEF5	Rho guanine nucleotide exchange factor (GEF) 5
hsa-miR-421	1	0	1	0	1	1	CCDC6	coiled-coil domain containing 6
hsa-miR-421	1	0	1	1	1	1	AKT3	v-akt murine thymoma viral oncogene homolog 3 (protein kinase B, gamma)
hsa-miR-421	1	0	1	1	1	1	SCARB2	scavenger receptor class B, member 2
hsa-miR-421	1	0	1	1	1	1	IRS1	insulin receptor substrate 1
hsa-miR-421	1	0	1	1	1	1	LAMP1	lysosomal-associated membrane protein 1
hsa-miR-421	1	0	1	1	1	1	LAMC2	laminin, gamma 2
hsa-miR-421	1	0	1	1	1	1	NHLH2	nescient helix loop helix 2
hsa-miR-421	1	0	1	1	1	1	TERF2	telomeric repeat binding factor 2
hsa-miR-421	0	0	1	1	1	1	MKRN3	makorin ring finger protein 3
hsa-miR-421	1	0	1	1	1	1	ST8SIA4	ST8 alpha-N-acetyl-neuraminide alpha-2,8-sialyltransferase 4
hsa-miR-421	1	0	1	1	1	1	CTDSP2	CTD (carboxy-terminal domain, RNA polymerase II, polypeptide A) small phosphatase 2
hsa-miR-421	0	0	1	1	1	1	RNF41	ring finger protein 41
hsa-miR-421	1	0	1	0	1	1	SPRY3	sprouty homolog 3 (Drosophila)
hsa-miR-421	1	0	1	1	1	1	BET1	blocked early in transport 1 homolog (S. cerevisiae)
hsa-miR-421	0	0	1	1	1	1	SAP18	Sin3A-associated protein, 18kDa
hsa-miR-421	1	0	1	1	1	1	GOLGA3	golgin A3
hsa-miR-421	1	0	1	0	1	1	MAP1B	microtubule-associated protein 1B
hsa-miR-421	0	0	1	1	1	1	MFAP3	microfibrillar-associated protein 3
hsa-miR-421	1	0	1	1	1	1	MMP16	matrix metallopeptidase 16 (membrane-inserted)
hsa-miR-421	1	0	1	1	1	1	MTF1	metal-regulatory transcription factor 1
hsa-miR-421	0	0	1	1	1	1	S100A2	S100 calcium binding protein A2
hsa-miR-421	0	0	1	1	1	1	MANF	mesencephalic astrocyte-derived neurotrophic factor
hsa-miR-421	1	0	1	1	1	1	DAGLA	diacylglycerol lipase, alpha
hsa-miR-421	1	0	1	1	1	1	CAPZA2	capping protein (actin filament) muscle Z-line, alpha 2
hsa-miR-421	1	0	1	1	1	1	CDK16	cyclin-dependent kinase 16
hsa-miR-421	0	0	1	1	0	0	PDE6H	phosphodiesterase 6H, cGMP-specific, cone, gamma
hsa-miR-421	1	0	1	0	1	1	PPP1R2	protein phosphatase 1, regulatory (inhibitor) subunit 2
hsa-miR-421	0	0	1	0	1	1	PSME1	proteasome (prosome, macropain) activator subunit 1 (PA28 alpha)
hsa-miR-421	0	0	1	1	1	1	TNFAIP2	tumor necrosis factor, alpha-induced protein 2
hsa-miR-421	0	0	1	1	1	1	PGRMC2	progesterone receptor membrane component 2
hsa-miR-421	0	0	1	1	1	1	C1D	C1D nuclear receptor corepressor
hsa-miR-421	0	0	1	1	1	1	UBE2E3	ubiquitin-conjugating enzyme E2E 3
hsa-miR-421	1	0	1	0	1	1	APPBP2	amyloid beta precursor protein (cytoplasmic tail) binding protein 2
hsa-miR-421	1	0	1	1	1	1	NEBL	nebulette
hsa-miR-421	1	0	1	0	1	1	GNAI3	guanine nucleotide binding protein (G protein), alpha inhibiting activity polypeptide 3
hsa-miR-421	0	0	1	1	0	0	YEATS4	YEATS domain containing 4
hsa-miR-421	1	0	1	1	1	1	KHDRBS1	KH domain containing, RNA binding, signal transduction associated 1
hsa-miR-421	1	0	1	0	1	1	GNA13	guanine nucleotide binding protein (G protein), alpha 13
hsa-miR-421	1	0	1	0	1	1	API5	apoptosis inhibitor 5
hsa-miR-421	1	0	1	1	1	1	PLK2	polo-like kinase 2
hsa-miR-421	0	0	1	1	1	1	PPP1R17	protein phosphatase 1, regulatory subunit 17
hsa-miR-421	0	0	1	1	0	0	NMU	neuromedin U
hsa-miR-421	1	0	1	1	1	1	HIVEP2	human immunodeficiency virus type I enhancer binding protein 2
hsa-miR-421	1	0	1	1	1	1	SNTB2	syntrophin, beta 2 (dystrophin-associated protein A1, 59kDa, basic component 2)
hsa-miR-421	0	0	1	1	1	1	TMED10	transmembrane emp24-like trafficking protein 10 (yeast)
hsa-miR-421	1	0	1	1	1	1	FERMT2	fermitin family member 2
hsa-miR-421	1	0	1	1	0	0	RNF5	ring finger protein 5, E3 ubiquitin protein ligase
hsa-miR-421	1	0	1	1	1	1	SCN1A	sodium channel, voltage-gated, type I, alpha subunit
hsa-miR-421	0	0	1	1	1	1	TAF5	TAF5 RNA polymerase II, TATA box binding protein (TBP)-associated factor, 100kDa
hsa-miR-421	1	0	1	1	1	1	ZNF12	zinc finger protein 12
hsa-miR-421	1	0	1	1	1	1	CLDN10	claudin 10
hsa-miR-421	1	0	1	1	1	1	ADAMTS1	ADAM metallopeptidase with thrombospondin type 1 motif, 1
hsa-miR-421	1	0	1	0	1	1	PAPD7	PAP associated domain containing 7
hsa-miR-421	1	0	1	1	1	1	SOX30	SRY (sex determining region Y)-box 30
hsa-miR-421	1	0	1	1	1	1	ESM1	endothelial cell-specific molecule 1
hsa-miR-421	1	0	1	1	1	1	FSTL1	follistatin-like 1
hsa-miR-421	1	0	1	1	1	1	UBL3	ubiquitin-like 3
hsa-miR-421	1	0	1	1	1	1	UTRN	utrophin
hsa-miR-421	1	0	1	1	1	1	UTY	ubiquitously transcribed tetratricopeptide repeat gene, Y-linked
hsa-miR-421	1	0	1	1	1	1	VCP	valosin containing protein
hsa-miR-421	1	0	1	1	1	1	ZNF81	zinc finger protein 81
hsa-miR-421	1	0	1	1	1	1	VEZF1	vascular endothelial zinc finger 1
hsa-miR-421	1	0	1	1	1	1	TESK2	testis-specific kinase 2
hsa-miR-421	1	0	1	1	1	1	DUSP10	dual specificity phosphatase 10
hsa-miR-421	1	0	1	0	1	1	CHP1	calcineurin-like EF hand protein 1
hsa-miR-421	1	0	1	1	1	1	KLF12	Kruppel-like factor 12
hsa-miR-421	1	0	1	1	1	1	TUSC2	tumor suppressor candidate 2
hsa-miR-421	1	0	1	1	1	1	ELL2	elongation factor, RNA polymerase II, 2
hsa-miR-421	0	0	1	1	1	1	FRAT2	frequently rearranged in advanced T-cell lymphomas 2
hsa-miR-421	0	0	1	1	1	1	FAM50B	family with sequence similarity 50, member B
hsa-miR-421	0	0	1	1	1	1	EHF	ets homologous factor
hsa-miR-421	1	0	1	1	1	1	FBXL2	F-box and leucine-rich repeat protein 2
hsa-miR-421	1	0	1	1	1	1	MGAT4A	mannosyl (alpha-1,3-)-glycoprotein beta-1,4-N-acetylglucosaminyltransferase, isozyme A
hsa-miR-421	1	0	1	1	1	1	MGEA5	meningioma expressed antigen 5 (hyaluronidase)
hsa-miR-421	0	0	1	1	1	1	RAB3GAP1	RAB3 GTPase activating protein subunit 1 (catalytic)
hsa-miR-421	0	0	1	1	1	1	RRAS2	related RAS viral (r-ras) oncogene homolog 2
hsa-miR-421	1	0	1	1	1	1	HS2ST1	heparan sulfate 2-O-sulfotransferase 1
hsa-miR-421	1	0	1	1	1	1	KCND2	potassium voltage-gated channel, Shal-related subfamily, member 2
hsa-miR-421	1	0	1	0	1	1	GAB2	GRB2-associated binding protein 2
hsa-miR-421	1	0	1	1	1	1	KIF4A	kinesin family member 4A
hsa-miR-421	1	0	1	1	1	1	LSM5	LSM5 homolog, U6 small nuclear RNA associated (S. cerevisiae)
hsa-miR-421	1	0	1	1	1	1	MMD	monocyte to macrophage differentiation-associated
hsa-miR-421	1	0	1	1	0	0	TIMM10	translocase of inner mitochondrial membrane 10 homolog (yeast)
hsa-miR-421	0	0	1	1	0	0	TIMM8B	translocase of inner mitochondrial membrane 8 homolog B (yeast)
hsa-miR-421	1	0	1	1	1	1	TLL2	tolloid-like 2
hsa-miR-421	1	0	1	1	1	1	TRPC5	transient receptor potential cation channel, subfamily C, member 5
hsa-miR-421	0	0	1	1	1	1	DNAJC15	DnaJ (Hsp40) homolog, subfamily C, member 15
hsa-miR-421	0	0	1	1	1	1	N6AMT1	N-6 adenine-specific DNA methyltransferase 1 (putative)
hsa-miR-421	1	0	1	1	1	1	PPARGC1A	peroxisome proliferator-activated receptor gamma, coactivator 1 alpha
hsa-miR-421	0	0	1	0	1	1	LINC00312	long intergenic non-protein coding RNA 312
hsa-miR-421	1	0	1	1	1	1	SLC25A24	solute carrier family 25 (mitochondrial carrier; phosphate carrier), member 24
hsa-miR-421	1	0	1	1	1	1	AK2	adenylate kinase 2
hsa-miR-421	1	0	1	1	1	1	NCKAP1	NCK-associated protein 1
hsa-miR-421	0	0	1	1	1	1	UBQLN1	ubiquilin 1
hsa-miR-421	1	0	1	1	1	1	SOCS5	suppressor of cytokine signaling 5
hsa-miR-421	1	0	1	0	1	1	OSTM1	osteopetrosis associated transmembrane protein 1
hsa-miR-421	0	0	1	1	1	1	DUOX2	dual oxidase 2
hsa-miR-421	1	0	1	1	1	1	LGALSL	lectin, galactoside-binding-like
hsa-miR-421	0	0	1	1	0	0	OLFM1	olfactomedin 1
hsa-miR-421	1	0	1	1	1	1	LEMD3	LEM domain containing 3
hsa-miR-421	1	0	1	1	1	1	PATZ1	POZ (BTB) and AT hook containing zinc finger 1
hsa-miR-421	1	0	1	1	1	1	SLC7A11	solute carrier family 7 (anionic amino acid transporter light chain, xc- system), member 11
hsa-miR-421	1	0	1	1	0	0	SND1	staphylococcal nuclease and tudor domain containing 1
hsa-miR-421	0	0	1	0	0	0	SND1-IT1	SND1 intronic transcript 1 (non-protein coding)
hsa-miR-421	1	0	1	1	1	1	ZBTB11	zinc finger and BTB domain containing 11
hsa-miR-421	1	0	1	1	1	1	SERP1	stress-associated endoplasmic reticulum protein 1
hsa-miR-421	0	0	1	1	1	1	TMOD2	tropomodulin 2 (neuronal)
hsa-miR-421	1	0	1	1	1	1	ERO1L	ERO1-like (S. cerevisiae)
hsa-miR-421	1	0	1	0	1	1	ATP11B	ATPase, class VI, type 11B
hsa-miR-421	1	0	1	1	1	1	RALGPS1	Ral GEF with PH domain and SH3 binding motif 1
hsa-miR-421	1	0	1	0	1	1	BZW1	basic leucine zipper and W2 domains 1
hsa-miR-421	1	0	1	1	1	1	ULK2	unc-51-like kinase 2 (C. elegans)
hsa-miR-421	0	0	1	1	1	1	FAM115A	family with sequence similarity 115, member A
hsa-miR-421	1	0	1	0	1	1	TOX	thymocyte selection-associated high mobility group box
hsa-miR-421	1	0	1	0	1	1	MLEC	malectin
hsa-miR-421	1	0	1	0	1	1	SERTAD2	SERTA domain containing 2
hsa-miR-421	1	0	1	0	1	1	KIAA0494	KIAA0494
hsa-miR-421	1	0	1	1	1	1	JAKMIP2	janus kinase and microtubule interacting protein 2
hsa-miR-421	1	0	1	0	1	1	PJA2	praja ring finger 2, E3 ubiquitin protein ligase
hsa-miR-421	1	0	1	1	1	1	ZBTB39	zinc finger and BTB domain containing 39
hsa-miR-421	1	0	1	0	1	1	SV2B	synaptic vesicle glycoprotein 2B
hsa-miR-421	0	0	1	0	1	1	PPM1E	protein phosphatase, Mg2+/Mn2+ dependent, 1E
hsa-miR-421	0	0	1	1	1	1	ADNP2	ADNP homeobox 2
hsa-miR-421	1	0	1	1	1	1	CHSY1	chondroitin sulfate synthase 1
hsa-miR-421	1	0	1	0	1	1	ICK	intestinal cell (MAK-like) kinase
hsa-miR-421	1	0	1	1	1	1	SPAST	spastin
hsa-miR-421	0	0	1	1	0	0	KIFAP3	kinesin-associated protein 3
hsa-miR-421	1	0	1	1	1	1	PHLPP2	PH domain and leucine rich repeat protein phosphatase 2
hsa-miR-421	1	0	1	1	1	1	TRAK2	trafficking protein, kinesin binding 2
hsa-miR-421	1	0	1	1	1	1	ERP44	endoplasmic reticulum protein 44
hsa-miR-421	0	0	1	1	1	1	ZC3H13	zinc finger CCCH-type containing 13
hsa-miR-421	1	0	1	1	1	1	DDN	dendrin
hsa-miR-421	1	0	1	1	1	1	TAB2	TGF-beta activated kinase 1/MAP3K7 binding protein 2
hsa-miR-421	1	0	1	1	1	1	TBC1D9	TBC1 domain family, member 9 (with GRAM domain)
hsa-miR-421	1	0	1	1	1	1	RTF1	Rtf1, Paf1/RNA polymerase II complex component, homolog (S. cerevisiae)
hsa-miR-421	1	0	1	1	1	1	CUX2	cut-like homeobox 2
hsa-miR-421	1	0	1	1	1	1	MOB4	MOB family member 4, phocein
hsa-miR-421	1	0	1	1	1	1	PARM1	prostate androgen-regulated mucin-like protein 1
hsa-miR-421	0	0	1	1	1	1	ZNF10	zinc finger protein 10
hsa-miR-421	1	0	1	1	1	1	CCDC28A	coiled-coil domain containing 28A
hsa-miR-421	1	0	1	1	1	1	NSL1	NSL1, MIND kinetochore complex component, homolog (S. cerevisiae)
hsa-miR-421	1	0	1	1	1	1	LTN1	listerin E3 ubiquitin protein ligase 1
hsa-miR-421	1	0	1	1	1	1	WSB1	WD repeat and SOCS box containing 1
hsa-miR-421	1	0	1	1	0	0	SENP3	SUMO1/sentrin/SMT3 specific peptidase 3
hsa-miR-421	1	0	1	1	1	1	FAM155B	family with sequence similarity 155, member B
hsa-miR-421	1	0	1	1	1	1	AZIN1	antizyme inhibitor 1
hsa-miR-421	1	0	1	1	1	1	HOOK1	hook homolog 1 (Drosophila)
hsa-miR-421	1	0	1	1	1	1	CDC40	cell division cycle 40 homolog (S. cerevisiae)
hsa-miR-421	1	0	1	0	1	1	TRIM33	tripartite motif containing 33
hsa-miR-421	0	0	1	1	1	1	POLR1D	polymerase (RNA) I polypeptide D, 16kDa
hsa-miR-421	1	0	1	0	1	1	CNR1	cannabinoid receptor 1 (brain)
hsa-miR-421	0	0	1	1	1	1	ZFR	zinc finger RNA binding protein
hsa-miR-421	1	0	1	1	1	1	VGLL3	vestigial like 3 (Drosophila)
hsa-miR-421	0	0	1	1	1	1	VPS29	vacuolar protein sorting 29 homolog (S. cerevisiae)
hsa-miR-421	1	0	1	1	1	1	AKAP11	A kinase (PRKA) anchor protein 11
hsa-miR-421	1	0	1	0	1	1	SELT	selenoprotein T
hsa-miR-421	1	0	1	1	1	1	RAB14	RAB14, member RAS oncogene family
hsa-miR-421	1	0	1	1	1	1	ARID4B	AT rich interactive domain 4B (RBP1-like)
hsa-miR-421	0	0	1	1	1	1	DTL	denticleless E3 ubiquitin protein ligase homolog (Drosophila)
hsa-miR-421	0	0	1	1	1	1	MRPL27	mitochondrial ribosomal protein L27
hsa-miR-421	0	0	1	1	1	1	PIPOX	pipecolic acid oxidase
hsa-miR-421	0	0	1	1	0	0	ATP8A2	ATPase, aminophospholipid transporter, class I, type 8A, member 2
hsa-miR-421	1	0	1	1	1	1	RAB6B	RAB6B, member RAS oncogene family
hsa-miR-421	1	0	1	1	1	1	CYP39A1	cytochrome P450, family 39, subfamily A, polypeptide 1
hsa-miR-421	0	0	1	1	1	1	KDM3B	lysine (K)-specific demethylase 3B
hsa-miR-421	1	0	1	0	1	1	KLHL3	kelch-like 3 (Drosophila)
hsa-miR-421	1	0	1	1	1	1	SIX4	SIX homeobox 4
hsa-miR-421	0	0	1	1	1	1	POLE3	polymerase (DNA directed), epsilon 3, accessory subunit
hsa-miR-421	0	0	1	0	1	1	WDR5	WD repeat domain 5
hsa-miR-421	0	0	1	0	1	1	VEZT	vezatin, adherens junctions transmembrane protein
hsa-miR-421	1	0	1	1	1	1	NOTCH1	notch 1
hsa-miR-421	1	0	1	1	1	1	DNAJB12	DnaJ (Hsp40) homolog, subfamily B, member 12
hsa-miR-421	1	0	1	0	1	1	EIF2C4	eukaryotic translation initiation factor 2C, 4
hsa-miR-421	1	0	1	0	1	1	KCTD9	potassium channel tetramerisation domain containing 9
hsa-miR-421	0	0	1	1	0	0	NUP62CL	nucleoporin 62kDa C-terminal like
hsa-miR-421	1	0	1	1	1	1	VPS13C	vacuolar protein sorting 13 homolog C (S. cerevisiae)
hsa-miR-421	1	0	1	1	1	1	GDAP2	ganglioside induced differentiation associated protein 2
hsa-miR-421	1	0	1	0	1	1	FAM46C	family with sequence similarity 46, member C
hsa-miR-421	1	0	1	1	1	1	UBE2R2	ubiquitin-conjugating enzyme E2R 2
hsa-miR-421	1	0	1	0	1	1	MARCH5	membrane-associated ring finger (C3HC4) 5
hsa-miR-421	1	0	1	1	1	1	RNF125	ring finger protein 125, E3 ubiquitin protein ligase
hsa-miR-421	0	0	1	1	1	1	C2orf42	chromosome 2 open reading frame 42
hsa-miR-421	1	0	1	1	1	1	ZNHIT6	zinc finger, HIT-type containing 6
hsa-miR-421	1	0	1	1	1	1	WDYHV1	WDYHV motif containing 1
hsa-miR-421	1	0	1	1	1	1	FAM178A	family with sequence similarity 178, member A
hsa-miR-421	0	0	1	1	1	1	TSR1	TSR1, 20S rRNA accumulation, homolog (S. cerevisiae)
hsa-miR-421	1	0	1	0	1	1	MSL2	male-specific lethal 2 homolog (Drosophila)
hsa-miR-421	1	0	1	1	1	1	SLC25A36	solute carrier family 25 (pyrimidine nucleotide carrier ), member 36
hsa-miR-421	1	0	1	1	1	1	RIC8B	resistance to inhibitors of cholinesterase 8 homolog B (C. elegans)
hsa-miR-421	0	0	1	1	1	1	NUDT11	nudix (nucleoside diphosphate linked moiety X)-type motif 11
hsa-miR-421	1	0	1	1	1	1	RPRD1A	regulation of nuclear pre-mRNA domain containing 1A
hsa-miR-421	0	0	1	1	1	1	TMLHE	trimethyllysine hydroxylase, epsilon
hsa-miR-421	1	0	1	1	1	1	TBC1D13	TBC1 domain family, member 13
hsa-miR-421	0	0	1	1	1	1	TRIM62	tripartite motif containing 62
hsa-miR-421	1	0	1	1	1	1	LRRC1	leucine rich repeat containing 1
hsa-miR-421	1	0	1	0	1	1	PARVA	parvin, alpha
hsa-miR-421	1	0	1	1	1	1	UBA6	ubiquitin-like modifier activating enzyme 6
hsa-miR-421	1	0	1	1	1	1	AGPAT5	1-acylglycerol-3-phosphate O-acyltransferase 5 (lysophosphatidic acid acyltransferase, epsilon)
hsa-miR-421	1	0	1	0	1	1	LIN7C	lin-7 homolog C (C. elegans)
hsa-miR-421	1	0	1	1	1	1	RSBN1	round spermatid basic protein 1
hsa-miR-421	1	0	1	0	1	1	FOXJ2	forkhead box J2
hsa-miR-421	0	0	1	1	1	1	STYK1	serine/threonine/tyrosine kinase 1
hsa-miR-421	1	0	1	1	1	1	EPB41L4B	erythrocyte membrane protein band 4.1 like 4B
hsa-miR-421	1	0	1	1	1	1	CAMK2N1	calcium/calmodulin-dependent protein kinase II inhibitor 1
hsa-miR-421	1	0	1	1	1	1	ETNK1	ethanolamine kinase 1
hsa-miR-421	1	0	1	0	1	1	KLHL9	kelch-like 9 (Drosophila)
hsa-miR-421	0	0	1	1	0	0	SNTG2	syntrophin, gamma 2
hsa-miR-421	1	0	1	0	1	1	FAM190B	family with sequence similarity 190, member B
hsa-miR-421	1	0	1	0	1	1	CCDC93	coiled-coil domain containing 93
hsa-miR-421	1	0	1	1	1	1	CRCT1	cysteine-rich C-terminal 1
hsa-miR-421	0	0	1	1	1	1	KLHL4	kelch-like 4 (Drosophila)
hsa-miR-421	1	0	1	0	1	1	TM9SF3	transmembrane 9 superfamily member 3
hsa-miR-421	1	0	1	0	1	1	PMEPA1	prostate transmembrane protein, androgen induced 1
hsa-miR-421	1	0	1	0	1	1	MNT	MAX binding protein
hsa-miR-421	0	0	1	1	1	1	ANKMY2	ankyrin repeat and MYND domain containing 2
hsa-miR-421	1	0	1	0	1	1	EIF5A2	eukaryotic translation initiation factor 5A2
hsa-miR-421	0	0	1	1	1	1	PLXDC1	plexin domain containing 1
hsa-miR-421	1	0	1	1	0	0	JPH2	junctophilin 2
hsa-miR-421	1	0	1	1	1	1	PTGFRN	prostaglandin F2 receptor negative regulator
hsa-miR-421	1	0	1	1	1	1	LYRM2	LYR motif containing 2
hsa-miR-421	0	0	1	1	1	1	RIPK4	receptor-interacting serine-threonine kinase 4
hsa-miR-421	1	0	1	0	1	1	DCUN1D1	DCN1, defective in cullin neddylation 1, domain containing 1 (S. cerevisiae)
hsa-miR-421	0	0	1	1	1	1	TMEM27	transmembrane protein 27
hsa-miR-421	1	0	1	1	1	1	RAB22A	RAB22A, member RAS oncogene family
hsa-miR-421	1	0	1	1	1	1	SLC24A3	solute carrier family 24 (sodium/potassium/calcium exchanger), member 3
hsa-miR-421	1	0	1	1	1	1	USP31	ubiquitin specific peptidase 31
hsa-miR-421	1	0	1	1	1	1	MIB1	mindbomb E3 ubiquitin protein ligase 1
hsa-miR-421	1	0	1	0	1	1	ZNF398	zinc finger protein 398
hsa-miR-421	0	0	1	1	1	1	ARRDC3	arrestin domain containing 3
hsa-miR-421	1	0	1	0	1	1	WDFY1	WD repeat and FYVE domain containing 1
hsa-miR-421	1	0	1	1	1	1	RANBP10	RAN binding protein 10
hsa-miR-421	1	0	1	1	1	1	TSHZ3	teashirt zinc finger homeobox 3
hsa-miR-421	1	0	1	0	1	1	SH3RF1	SH3 domain containing ring finger 1
hsa-miR-421	1	0	1	1	1	1	ZFP14	zinc finger protein 14 homolog (mouse)
hsa-miR-421	0	0	1	1	1	1	SLC7A14	solute carrier family 7 (orphan transporter), member 14
hsa-miR-421	0	0	1	1	1	1	PRX	periaxin
hsa-miR-421	0	0	1	1	1	1	GNAO1	guanine nucleotide binding protein (G protein), alpha activating activity polypeptide O
hsa-miR-421	0	0	1	1	0	0	CTAG2	cancer/testis antigen 2
hsa-miR-421	0	0	1	1	1	1	PPM1A	protein phosphatase, Mg2+/Mn2+ dependent, 1A
hsa-miR-421	1	0	1	1	1	1	CLDN1	claudin 1
hsa-miR-421	1	0	1	0	1	1	TMX4	thioredoxin-related transmembrane protein 4
hsa-miR-421	0	0	1	1	0	0	HMHB1	histocompatibility (minor) HB-1
hsa-miR-421	0	0	1	1	0	0	MYL7	myosin, light chain 7, regulatory
hsa-miR-421	1	0	1	1	1	1	NTN4	netrin 4
hsa-miR-421	1	0	1	1	1	1	SNX6	sorting nexin 6
hsa-miR-421	0	0	1	0	1	1	CFL2	cofilin 2 (muscle)
hsa-miR-421	0	0	1	1	1	1	RINT1	RAD50 interactor 1
hsa-miR-421	1	0	1	0	1	1	MCL1	myeloid cell leukemia sequence 1 (BCL2-related)
hsa-miR-421	1	0	1	1	1	1	TIA1	TIA1 cytotoxic granule-associated RNA binding protein
hsa-miR-421	1	0	1	0	1	1	GAN	gigaxonin
hsa-miR-421	1	0	1	1	1	1	GOLPH3	golgi phosphoprotein 3 (coat-protein)
hsa-miR-421	1	0	1	1	1	1	SNX16	sorting nexin 16
hsa-miR-421	0	0	1	1	1	1	NOD2	nucleotide-binding oligomerization domain containing 2
hsa-miR-421	0	0	1	1	1	1	TCTA	T-cell leukemia translocation altered
hsa-miR-421	0	0	1	1	0	0	TFB2M	transcription factor B2, mitochondrial
hsa-miR-421	0	0	1	1	1	1	PCNXL4	pecanex-like 4 (Drosophila)
hsa-miR-421	1	0	1	0	1	1	HOXC8	homeobox C8
hsa-miR-421	1	0	1	1	1	1	PRRX1	paired related homeobox 1
hsa-miR-421	1	0	1	1	1	1	NEUROD6	neuronal differentiation 6
hsa-miR-421	0	0	1	1	1	1	ACBD3	acyl-CoA binding domain containing 3
hsa-miR-421	0	0	1	1	1	1	SFXN1	sideroflexin 1
hsa-miR-421	0	0	1	1	1	1	OSBPL11	oxysterol binding protein-like 11
hsa-miR-421	1	0	1	1	1	1	PER2	period homolog 2 (Drosophila)
hsa-miR-421	1	0	1	1	1	1	FBXL17	F-box and leucine-rich repeat protein 17
hsa-miR-421	1	0	1	0	1	1	USP46	ubiquitin specific peptidase 46
hsa-miR-421	0	0	1	1	1	1	METTL4	methyltransferase like 4
hsa-miR-421	1	0	1	1	1	1	RFX7	regulatory factor X, 7
hsa-miR-421	1	0	1	1	1	1	REEP1	receptor accessory protein 1
hsa-miR-421	1	0	1	1	1	1	GRAMD3	GRAM domain containing 3
hsa-miR-421	0	0	1	0	1	1	FUNDC2	FUN14 domain containing 2
hsa-miR-421	0	0	1	1	1	1	WDR77	WD repeat domain 77
hsa-miR-421	1	0	1	1	1	1	EFHD2	EF-hand domain family, member D2
hsa-miR-421	1	0	1	0	1	1	NOTCH2	notch 2
hsa-miR-421	1	0	1	1	1	1	RNF128	ring finger protein 128, E3 ubiquitin protein ligase
hsa-miR-421	0	0	1	1	1	1	NDNF	neuron-derived neurotrophic factor
hsa-miR-421	1	0	1	1	1	1	PPP1R3B	protein phosphatase 1, regulatory subunit 3B
hsa-miR-421	0	0	1	1	1	1	GAL3ST4	galactose-3-O-sulfotransferase 4
hsa-miR-421	0	0	1	0	1	1	ZYG11B	zyg-11 homolog B (C. elegans)
hsa-miR-421	0	0	1	1	1	1	LRRK1	leucine-rich repeat kinase 1
hsa-miR-421	0	0	1	1	1	1	SHCBP1	SHC SH2-domain binding protein 1
hsa-miR-421	1	0	1	0	1	1	MOB3B	MOB kinase activator 3B
hsa-miR-421	1	0	1	1	1	1	CLMP	CXADR-like membrane protein
hsa-miR-421	0	0	1	1	1	1	ESRP2	epithelial splicing regulatory protein 2
hsa-miR-421	1	0	1	0	1	1	NAA25	N(alpha)-acetyltransferase 25, NatB auxiliary subunit
hsa-miR-421	0	0	1	1	1	1	GFM1	G elongation factor, mitochondrial 1
hsa-miR-421	1	0	1	0	1	1	VCPIP1	valosin containing protein (p97)/p47 complex interacting protein 1
hsa-miR-421	1	0	1	1	1	1	NAA50	N(alpha)-acetyltransferase 50, NatE catalytic subunit
hsa-miR-421	1	0	1	1	1	1	TNKS2	tankyrase, TRF1-interacting ankyrin-related ADP-ribose polymerase 2
hsa-miR-421	0	0	1	1	1	1	SLC19A3	solute carrier family 19, member 3
hsa-miR-421	1	0	1	0	1	1	TET1	tet methylcytosine dioxygenase 1
hsa-miR-421	1	0	1	1	1	1	PTPRO	protein tyrosine phosphatase, receptor type, O
hsa-miR-421	1	0	1	1	1	1	SYNC	syncoilin, intermediate filament protein
hsa-miR-421	1	0	1	1	1	1	SGPP1	sphingosine-1-phosphate phosphatase 1
hsa-miR-421	1	0	1	1	0	0	PVRL4	poliovirus receptor-related 4
hsa-miR-421	1	0	1	1	1	1	SNX27	sorting nexin family member 27
hsa-miR-421	0	0	1	1	1	1	ISCA1	iron-sulfur cluster assembly 1 homolog (S. cerevisiae)
hsa-miR-421	1	0	1	1	1	1	PPP1R14C	protein phosphatase 1, regulatory (inhibitor) subunit 14C
hsa-miR-421	0	0	1	1	1	1	SEH1L	SEH1-like (S. cerevisiae)
hsa-miR-421	0	0	1	1	1	1	TEX15	testis expressed 15
hsa-miR-421	1	0	1	0	1	1	TMEM47	transmembrane protein 47
hsa-miR-421	0	0	1	1	1	1	TEX101	testis expressed 101
hsa-miR-421	0	0	1	1	1	1	INHBE	inhibin, beta E
hsa-miR-421	1	0	1	0	1	1	ITCH	itchy E3 ubiquitin protein ligase
hsa-miR-421	1	0	1	1	1	1	PCDHA9	protocadherin alpha 9
hsa-miR-421	1	0	1	1	0	0	FZD8	frizzled family receptor 8
hsa-miR-421	0	0	1	1	1	1	ARMC2	armadillo repeat containing 2
hsa-miR-421	1	0	1	0	1	1	ATP11A	ATPase, class VI, type 11A
hsa-miR-421	1	0	1	1	1	1	ANTXR1	anthrax toxin receptor 1
hsa-miR-421	0	0	1	1	0	0	ELMOD3	ELMO/CED-12 domain containing 3
hsa-miR-421	1	0	1	1	1	1	MEX3B	mex-3 homolog B (C. elegans)
hsa-miR-421	1	0	1	1	1	1	DNAJC14	DnaJ (Hsp40) homolog, subfamily C, member 14
hsa-miR-421	1	0	1	1	1	1	HOOK3	hook homolog 3 (Drosophila)
hsa-miR-421	1	0	1	1	1	1	SYVN1	synovial apoptosis inhibitor 1, synoviolin
hsa-miR-421	1	0	1	1	1	1	PHF6	PHD finger protein 6
hsa-miR-421	1	0	1	1	1	1	PARD6B	par-6 partitioning defective 6 homolog beta (C. elegans)
hsa-miR-421	1	0	1	1	1	1	FAM104A	family with sequence similarity 104, member A
hsa-miR-421	1	0	1	1	1	1	RAB2B	RAB2B, member RAS oncogene family
hsa-miR-421	1	0	1	0	1	1	UBASH3B	ubiquitin associated and SH3 domain containing B
hsa-miR-421	0	0	1	1	1	1	FBXL20	F-box and leucine-rich repeat protein 20
hsa-miR-421	1	0	1	0	1	1	PURB	purine-rich element binding protein B
hsa-miR-421	1	0	1	1	1	1	ADAM19	ADAM metallopeptidase domain 19
hsa-miR-421	0	0	1	1	1	1	SEC11C	SEC11 homolog C (S. cerevisiae)
hsa-miR-421	1	0	1	1	1	1	TP53INP1	tumor protein p53 inducible nuclear protein 1
hsa-miR-421	1	0	1	1	1	1	RASL10B	RAS-like, family 10, member B
hsa-miR-421	1	0	1	1	1	1	SYS1	SYS1 Golgi-localized integral membrane protein homolog (S. cerevisiae)
hsa-miR-421	1	0	1	1	1	1	LUZP1	leucine zipper protein 1
hsa-miR-421	0	0	1	0	1	1	CCDC97	coiled-coil domain containing 97
hsa-miR-421	1	0	1	0	0	0	ANKRD40	ankyrin repeat domain 40
hsa-miR-421	1	0	1	1	1	1	ELFN2	extracellular leucine-rich repeat and fibronectin type III domain containing 2
hsa-miR-421	1	0	1	1	1	1	SLITRK1	SLIT and NTRK-like family, member 1
hsa-miR-421	0	0	1	1	1	1	SCAND3	SCAN domain containing 3
hsa-miR-421	1	0	1	1	1	1	MED12L	mediator complex subunit 12-like
hsa-miR-421	1	0	1	1	1	1	GCFC1	GC-rich sequence DNA-binding factor 1
hsa-miR-421	1	0	1	1	0	0	BRD4	bromodomain containing 4
hsa-miR-421	0	0	1	1	1	1	VNN3	vanin 3
hsa-miR-421	0	0	1	1	1	1	ABCA9	ATP-binding cassette, sub-family A (ABC1), member 9
hsa-miR-421	0	0	1	1	0	0	ABCA6	ATP-binding cassette, sub-family A (ABC1), member 6
hsa-miR-421	0	0	1	1	1	1	CCDC34	coiled-coil domain containing 34
hsa-miR-421	0	0	1	1	1	1	RSAD2	radical S-adenosyl methionine domain containing 2
hsa-miR-421	0	0	1	1	1	1	RGS18	regulator of G-protein signaling 18
hsa-miR-421	1	0	1	1	1	1	PRRC1	proline-rich coiled-coil 1
hsa-miR-421	0	0	1	1	1	1	RAD51B	RAD51 homolog B (S. cerevisiae)
hsa-miR-421	1	0	1	1	1	1	ADAMTS19	ADAM metallopeptidase with thrombospondin type 1 motif, 19
hsa-miR-421	0	0	1	1	1	1	RFX3	regulatory factor X, 3 (influences HLA class II expression)
hsa-miR-421	1	0	1	1	1	1	SPTSSA	serine palmitoyltransferase, small subunit A
hsa-miR-421	0	0	1	1	1	1	MRAP2	melanocortin 2 receptor accessory protein 2
hsa-miR-421	1	0	1	0	1	1	NUS1	nuclear undecaprenyl pyrophosphate synthase 1 homolog (S. cerevisiae)
hsa-miR-421	0	0	1	1	1	1	ZMYND19	zinc finger, MYND-type containing 19
hsa-miR-421	0	0	1	1	1	1	PPIL4	peptidylprolyl isomerase (cyclophilin)-like 4
hsa-miR-421	1	0	1	1	1	1	PPTC7	PTC7 protein phosphatase homolog (S. cerevisiae)
hsa-miR-421	0	0	1	0	1	1	SLC17A8	solute carrier family 17 (sodium-dependent inorganic phosphate cotransporter), member 8
hsa-miR-421	1	0	1	1	1	1	MAPK1IP1L	mitogen-activated protein kinase 1 interacting protein 1-like
hsa-miR-421	1	0	1	1	1	1	TMEM182	transmembrane protein 182
hsa-miR-421	0	0	1	1	1	1	C6orf118	chromosome 6 open reading frame 118
hsa-miR-421	1	0	1	1	1	1	MRPL30	mitochondrial ribosomal protein L30
hsa-miR-421	0	0	1	1	1	1	LRTOMT	leucine rich transmembrane and 0-methyltransferase domain containing
hsa-miR-421	0	0	1	1	1	1	TIGD2	tigger transposable element derived 2
hsa-miR-421	1	0	1	1	1	1	CTSC	cathepsin C
hsa-miR-421	1	0	1	1	1	1	LSM12	LSM12 homolog (S. cerevisiae)
hsa-miR-421	1	0	1	1	1	1	FAM123B	family with sequence similarity 123B
hsa-miR-421	1	0	1	1	1	1	ZNF362	zinc finger protein 362
hsa-miR-421	1	0	1	1	1	1	C7orf60	chromosome 7 open reading frame 60
hsa-miR-421	1	0	1	0	1	1	DCP2	DCP2 decapping enzyme homolog (S. cerevisiae)
hsa-miR-421	1	0	1	0	1	1	ARID2	AT rich interactive domain 2 (ARID, RFX-like)
hsa-miR-421	1	0	1	0	1	1	FAM116A	family with sequence similarity 116, member A
hsa-miR-421	1	0	1	0	1	1	RWDD4	RWD domain containing 4
hsa-miR-421	0	0	1	1	0	0	DOK6	docking protein 6
hsa-miR-421	1	0	1	0	1	1	ZBTB9	zinc finger and BTB domain containing 9
hsa-miR-421	0	0	1	1	0	0	GPC2	glypican 2
hsa-miR-421	1	0	1	1	1	1	NXPH1	neurexophilin 1
hsa-miR-421	0	0	1	1	1	1	ASPRV1	aspartic peptidase, retroviral-like 1
hsa-miR-421	1	0	1	1	1	1	PDIK1L	PDLIM1 interacting kinase 1 like
hsa-miR-421	0	0	1	0	0	0	FLJ32955	uncharacterized protein FLJ32955
hsa-miR-421	1	0	1	1	1	1	ERI1	exoribonuclease 1
hsa-miR-421	1	0	1	1	1	1	TMEM161B	transmembrane protein 161B
hsa-miR-421	0	0	1	0	1	1	VGLL2	vestigial like 2 (Drosophila)
hsa-miR-421	1	0	1	0	1	1	SEMA6D	sema domain, transmembrane domain (TM), and cytoplasmic domain, (semaphorin) 6D
hsa-miR-421	0	0	1	1	1	1	IL12RB1	interleukin 12 receptor, beta 1
hsa-miR-421	1	0	1	1	1	1	FNDC5	fibronectin type III domain containing 5
hsa-miR-421	0	0	1	1	1	1	CREG2	cellular repressor of E1A-stimulated genes 2
hsa-miR-421	0	0	1	1	1	1	SALL3	sal-like 3 (Drosophila)
hsa-miR-421	0	0	1	1	0	0	KCNE2	potassium voltage-gated channel, Isk-related family, member 2
hsa-miR-421	1	0	1	1	1	1	NR4A2	nuclear receptor subfamily 4, group A, member 2
hsa-miR-421	1	0	1	1	1	1	MOB1B	MOB kinase activator 1B
hsa-miR-421	1	0	1	1	1	1	CCDC117	coiled-coil domain containing 117
hsa-miR-421	1	0	1	1	1	1	FAM117B	family with sequence similarity 117, member B
hsa-miR-421	0	0	1	1	1	1	UNC5CL	unc-5 homolog C (C. elegans)-like
hsa-miR-421	1	0	1	0	1	1	PGM2L1	phosphoglucomutase 2-like 1
hsa-miR-421	0	0	1	1	1	1	OTOGL	otogelin-like
hsa-miR-421	1	0	1	1	1	1	DIP2B	DIP2 disco-interacting protein 2 homolog B (Drosophila)
hsa-miR-421	0	0	1	1	1	1	NSMCE2	non-SMC element 2, MMS21 homolog (S. cerevisiae)
hsa-miR-421	1	0	1	0	1	1	FAM84B	family with sequence similarity 84, member B
hsa-miR-421	1	0	1	1	1	1	SCN4B	sodium channel, voltage-gated, type IV, beta subunit
hsa-miR-421	0	0	1	1	1	1	FAM9A	family with sequence similarity 9, member A
hsa-miR-421	0	0	1	1	1	1	CHSY3	chondroitin sulfate synthase 3
hsa-miR-421	1	0	1	1	1	1	LRRTM3	leucine rich repeat transmembrane neuronal 3
hsa-miR-421	0	0	1	1	1	1	TUBB	tubulin, beta class I
hsa-miR-421	1	0	1	1	1	1	PTF1A	pancreas specific transcription factor, 1a
hsa-miR-421	0	0	1	1	1	1	ATPIF1	ATPase inhibitory factor 1
hsa-miR-421	1	0	1	0	1	1	IQGAP3	IQ motif containing GTPase activating protein 3
hsa-miR-421	0	0	1	1	1	1	ZNF831	zinc finger protein 831
hsa-miR-421	0	0	1	1	1	1	SYT15	synaptotagmin XV
hsa-miR-421	0	0	1	0	1	1	KRTAP13-2	keratin associated protein 13-2
hsa-miR-421	0	0	1	1	1	1	KRT40	keratin 40
hsa-miR-421	1	0	1	1	1	1	FAM216B	family with sequence similarity 216, member B
hsa-miR-421	0	0	1	0	1	1	VSIG1	V-set and immunoglobulin domain containing 1
hsa-miR-421	0	0	1	1	1	1	C2orf48	chromosome 2 open reading frame 48
hsa-miR-421	1	0	1	0	1	1	WDR72	WD repeat domain 72
hsa-miR-421	1	0	1	1	1	1	ADAMTS6	ADAM metallopeptidase with thrombospondin type 1 motif, 6
hsa-miR-421	1	0	1	1	1	1	E2F6	E2F transcription factor 6
hsa-miR-421	1	0	1	0	1	1	FAM73A	family with sequence similarity 73, member A
hsa-miR-421	1	0	1	1	1	1	MIA3	melanoma inhibitory activity family, member 3
hsa-miR-421	1	0	1	0	1	1	ZC3H6	zinc finger CCCH-type containing 6
hsa-miR-421	1	0	1	1	1	1	PTGER3	prostaglandin E receptor 3 (subtype EP3)
hsa-miR-421	1	0	1	0	1	1	DLEU7	deleted in lymphocytic leukemia, 7
hsa-miR-421	1	0	1	1	1	1	NSUN4	NOP2/Sun domain family, member 4
hsa-miR-421	0	0	1	1	1	1	MDFIC	MyoD family inhibitor domain containing
hsa-miR-421	0	0	1	1	1	1	ILDR2	immunoglobulin-like domain containing receptor 2
hsa-miR-421	1	0	1	0	1	1	LURAP1L	leucine rich adaptor protein 1-like
hsa-miR-421	0	0	1	1	1	1	CMPK2	cytidine monophosphate (UMP-CMP) kinase 2, mitochondrial
hsa-miR-421	0	0	1	1	1	1	ZNF474	zinc finger protein 474
hsa-miR-421	1	0	1	1	1	1	GADL1	glutamate decarboxylase-like 1
hsa-miR-421	0	0	1	0	1	1	CLEC17A	C-type lectin domain family 17, member A
hsa-miR-421	1	0	1	0	1	1	C17orf102	chromosome 17 open reading frame 102
hsa-miR-421	1	0	1	1	1	1	TEX19	testis expressed 19
hsa-miR-421	1	0	1	1	1	1	C11orf87	chromosome 11 open reading frame 87
hsa-miR-421	0	0	1	1	1	1	DFFA	DNA fragmentation factor, 45kDa, alpha polypeptide
hsa-miR-421	0	0	1	0	0	0	TTTY12	testis-specific transcript, Y-linked 12 (non-protein coding)
hsa-miR-421	0	0	1	0	0	0	VENTXP1	VENT homeobox pseudogene 1
hsa-miR-421	0	0	1	0	0	0	PPP1R2P3	protein phosphatase 1, regulatory (inhibitor) subunit 2 pseudogene 3
hsa-miR-421	0	0	1	0	0	0	SUMO1P1	SUMO1 pseudogene 1
hsa-miR-421	0	0	1	0	0	0	PMS2CL	PMS2 C-terminal like pseudogene
hsa-miR-421	0	0	1	0	0	0	TRIM78P	tripartite motif containing 78, pseudogene
hsa-miR-421	0	0	1	0	0	0	SEPHS1P1	selenophosphate synthetase 1 pseudogene 1
hsa-miR-421	0	0	1	0	0	0	TPTE2P3	transmembrane phosphoinositide 3-phosphatase and tensin homolog 2 pseudogene 3
hsa-miR-421	0	0	1	0	0	0	LOC374443	C-type lectin domain family 2, member D pseudogene
hsa-miR-421	0	0	1	0	0	0	MALAT1	metastasis associated lung adenocarcinoma transcript 1 (non-protein coding)
hsa-miR-421	0	0	1	0	0	0	HNRNPA1P16	heterogeneous nuclear ribonucleoprotein A1 pseudogene 16
hsa-miR-421	0	0	1	0	0	0	HNRNPA1P10	heterogeneous nuclear ribonucleoprotein A1 pseudogene 10
hsa-miR-421	0	0	1	0	0	0	TCAM1P	testicular cell adhesion molecule 1 homolog (mouse), pseudogene
hsa-miR-421	0	0	1	0	0	0	RNF5P1	ring finger protein 5, E3 ubiquitin protein ligase pseudogene 1
hsa-miR-421	0	0	1	0	0	0	HSP90B3P	heat shock protein 90kDa beta (Grp94), member 3, pseudogene
hsa-miR-421	0	0	1	0	0	0	SNORD114-24	small nucleolar RNA, C/D box 114-24
hsa-miR-421	0	0	1	0	0	0	SNORD116-20	small nucleolar RNA, C/D box 116-20
hsa-miR-421	1	0	1	1	0	0	KIAA1549L	KIAA1549-like
hsa-miR-421	0	0	1	1	1	1	RXRB	retinoid X receptor, beta
hsa-miR-421	1	0	1	1	0	0	DTNB	dystrobrevin, beta
hsa-miR-421	0	0	0	1	0	0	RPS20	ribosomal protein S20
hsa-miR-421	0	0	0	1	0	0	QPCTL	glutaminyl-peptide cyclotransferase-like
hsa-miR-421	0	0	1	1	0	0	DNAH2	dynein, axonemal, heavy chain 2
hsa-miR-421	0	0	1	1	0	0	NOX3	NADPH oxidase 3
hsa-miR-421	0	0	0	1	0	0	TSPAN32	tetraspanin 32
hsa-miR-421	0	0	1	1	1	1	TDRD3	tudor domain containing 3
hsa-miR-421	0	0	1	1	0	0	MOGAT2	monoacylglycerol O-acyltransferase 2
hsa-miR-421	0	0	0	1	1	1	LAMB4	laminin, beta 4
hsa-miR-421	0	0	0	1	0	0	C19orf21	chromosome 19 open reading frame 21
hsa-miR-421	0	0	0	1	1	1	GADD45B	growth arrest and DNA-damage-inducible, beta
hsa-miR-421	0	0	1	1	0	0	CENPM	centromere protein M
hsa-miR-421	0	0	1	1	1	1	TIMM9	translocase of inner mitochondrial membrane 9 homolog (yeast)
hsa-miR-421	1	0	1	1	1	1	NFKBIA	nuclear factor of kappa light polypeptide gene enhancer in B-cells inhibitor, alpha
hsa-miR-421	1	0	0	1	1	1	SGCG	sarcoglycan, gamma (35kDa dystrophin-associated glycoprotein)
hsa-miR-421	0	0	0	1	1	1	NTHL1	nth endonuclease III-like 1 (E. coli)
hsa-miR-421	0	0	1	1	0	0	STUB1	STIP1 homology and U-box containing protein 1, E3 ubiquitin protein ligase
hsa-miR-421	1	0	0	1	1	1	C16orf88	chromosome 16 open reading frame 88
hsa-miR-421	0	0	1	1	0	0	GML	glycosylphosphatidylinositol anchored molecule like protein
hsa-miR-421	0	0	1	1	0	0	WDR83OS	WD repeat domain 83 opposite strand
hsa-miR-421	0	0	1	1	0	0	URGCP	upregulator of cell proliferation
hsa-miR-421	0	0	0	1	0	0	POLD2	polymerase (DNA directed), delta 2, accessory subunit
hsa-miR-421	0	0	0	1	1	1	SUPT4H1	suppressor of Ty 4 homolog 1 (S. cerevisiae)
hsa-miR-421	0	0	0	1	1	1	PNPO	pyridoxamine 5'-phosphate oxidase
hsa-miR-421	0	0	1	1	1	1	CXCL6	chemokine (C-X-C motif) ligand 6 (granulocyte chemotactic protein 2)
hsa-miR-421	1	0	1	1	0	0	RPS13	ribosomal protein S13
hsa-miR-421	0	0	0	1	1	1	RERGL	RERG/RAS-like
hsa-miR-421	0	0	1	1	0	0	GMNN	geminin, DNA replication inhibitor
hsa-miR-421	0	0	0	1	1	1	OR12D3	olfactory receptor, family 12, subfamily D, member 3
hsa-miR-421	0	0	0	1	0	0	OR5V1	olfactory receptor, family 5, subfamily V, member 1
hsa-miR-421	0	0	1	1	1	1	MRPS30	mitochondrial ribosomal protein S30
hsa-miR-421	0	0	0	1	1	1	PCDHB5	protocadherin beta 5
hsa-miR-421	1	0	0	1	0	0	PCDHB6	protocadherin beta 6
hsa-miR-421	0	0	0	1	0	0	LTF	lactotransferrin
hsa-miR-421	1	0	1	1	1	1	SLC1A4	solute carrier family 1 (glutamate/neutral amino acid transporter), member 4
hsa-miR-421	0	0	0	1	0	0	AKR7A2	aldo-keto reductase family 7, member A2 (aflatoxin aldehyde reductase)
hsa-miR-421	0	0	1	1	0	0	EBNA1BP2	EBNA1 binding protein 2
hsa-miR-421	0	0	1	1	1	1	ATP6V0B	ATPase, H+ transporting, lysosomal 21kDa, V0 subunit b
hsa-miR-421	0	0	1	1	1	1	C14orf45	chromosome 14 open reading frame 45
hsa-miR-421	0	0	0	1	1	1	GPR75	G protein-coupled receptor 75
hsa-miR-421	1	0	1	1	1	1	TEX14	testis expressed 14
hsa-miR-421	0	0	1	1	1	1	CXCR4	chemokine (C-X-C motif) receptor 4
hsa-miR-421	0	0	1	1	1	1	AKR1D1	aldo-keto reductase family 1, member D1 (delta 4-3-ketosteroid-5-beta-reductase)
hsa-miR-421	0	0	1	1	1	1	DDX39A	DEAD (Asp-Glu-Ala-Asp) box polypeptide 39A
hsa-miR-421	0	0	1	1	0	0	HIST1H3B	histone cluster 1, H3b
hsa-miR-421	0	0	1	1	1	1	ATP5S	ATP synthase, H+ transporting, mitochondrial Fo complex, subunit s (factor B)
hsa-miR-421	0	0	1	1	0	0	PLK1S1	polo-like kinase 1 substrate 1
hsa-miR-421	0	0	0	1	0	0	TUBA4A	tubulin, alpha 4a
hsa-miR-421	0	0	1	1	0	0	ATP6V1F	ATPase, H+ transporting, lysosomal 14kDa, V1 subunit F
hsa-miR-421	0	0	1	1	0	0	CLN6	ceroid-lipofuscinosis, neuronal 6, late infantile, variant
hsa-miR-421	1	0	0	1	0	0	PSMB11	proteasome (prosome, macropain) subunit, beta type, 11
hsa-miR-421	0	0	1	1	0	0	KRT34	keratin 34
hsa-miR-421	1	0	1	1	1	1	TSG101	tumor susceptibility gene 101
hsa-miR-421	0	0	0	1	0	0	KRT6B	keratin 6B
hsa-miR-421	0	0	0	1	1	1	EFCAB4B	EF-hand calcium binding domain 4B
hsa-miR-421	1	0	0	1	0	0	GADD45G	growth arrest and DNA-damage-inducible, gamma
hsa-miR-421	0	0	0	1	0	0	INF2	inverted formin, FH2 and WH2 domain containing
hsa-miR-421	1	0	0	1	0	0	SAFB2	scaffold attachment factor B2
hsa-miR-421	0	0	0	1	1	1	ACSBG2	acyl-CoA synthetase bubblegum family member 2
hsa-miR-421	1	0	1	1	1	1	NUMBL	numb homolog (Drosophila)-like
hsa-miR-421	0	0	1	1	0	0	GRWD1	glutamate-rich WD repeat containing 1
hsa-miR-421	0	0	0	1	1	1	FMO5	flavin containing monooxygenase 5
hsa-miR-421	0	0	0	1	0	0	USP29	ubiquitin specific peptidase 29
hsa-miR-421	0	0	1	1	1	1	LRRC41	leucine rich repeat containing 41
hsa-miR-421	0	0	0	1	1	1	UTP3	UTP3, small subunit (SSU) processome component, homolog (S. cerevisiae)
hsa-miR-421	0	0	0	1	0	0	ASGR2	asialoglycoprotein receptor 2
hsa-miR-421	0	0	1	1	0	0	NXT1	NTF2-like export factor 1
hsa-miR-421	0	0	1	1	1	1	PDE6A	phosphodiesterase 6A, cGMP-specific, rod, alpha
hsa-miR-421	0	0	1	1	1	1	CCDC134	coiled-coil domain containing 134
hsa-miR-421	0	0	1	1	0	0	SPOCD1	SPOC domain containing 1
hsa-miR-421	1	0	0	1	1	1	USP30	ubiquitin specific peptidase 30
hsa-miR-421	1	0	1	1	1	1	CKAP2	cytoskeleton associated protein 2
hsa-miR-421	0	0	1	1	1	1	MED4	mediator complex subunit 4
hsa-miR-421	0	0	0	1	1	1	FGFBP2	fibroblast growth factor binding protein 2
hsa-miR-421	0	0	0	1	0	0	GPR87	G protein-coupled receptor 87
hsa-miR-421	1	0	1	1	1	1	ST8SIA1	ST8 alpha-N-acetyl-neuraminide alpha-2,8-sialyltransferase 1
hsa-miR-421	0	0	0	1	1	1	PSMC1	proteasome (prosome, macropain) 26S subunit, ATPase, 1
hsa-miR-421	0	0	0	1	1	1	EMG1	EMG1 nucleolar protein homolog (S. cerevisiae)
hsa-miR-421	0	0	0	1	1	1	TMEM206	transmembrane protein 206
hsa-miR-421	0	0	0	1	1	1	C16orf7	chromosome 16 open reading frame 7
hsa-miR-421	0	0	1	1	1	1	TM9SF1	transmembrane 9 superfamily member 1
hsa-miR-421	0	0	1	1	1	1	CSNK1A1	casein kinase 1, alpha 1
hsa-miR-421	0	0	1	1	1	1	RHBDF1	rhomboid 5 homolog 1 (Drosophila)
hsa-miR-421	0	0	1	1	1	1	EFTUD2	elongation factor Tu GTP binding domain containing 2
hsa-miR-421	1	0	1	1	1	1	CCNE1	cyclin E1
hsa-miR-421	0	0	1	1	0	0	NOVA2	neuro-oncological ventral antigen 2
hsa-miR-421	0	0	1	1	0	0	TCF25	transcription factor 25 (basic helix-loop-helix)
hsa-miR-421	0	0	1	1	1	1	FAM32A	family with sequence similarity 32, member A
hsa-miR-421	0	0	1	1	0	0	TBXAS1	thromboxane A synthase 1 (platelet)
hsa-miR-421	1	0	0	1	1	1	MFN1	mitofusin 1
hsa-miR-421	1	0	1	1	1	1	UPK1B	uroplakin 1B
hsa-miR-421	1	0	1	1	1	1	WDR1	WD repeat domain 1
hsa-miR-421	0	0	1	1	1	1	HOOK2	hook homolog 2 (Drosophila)
hsa-miR-421	0	0	1	1	1	1	RIOK1	RIO kinase 1 (yeast)
hsa-miR-421	0	0	1	1	1	1	PAPSS1	3'-phosphoadenosine 5'-phosphosulfate synthase 1
hsa-miR-421	0	0	1	1	1	1	TAX1BP1	Tax1 (human T-cell leukemia virus type I) binding protein 1
hsa-miR-421	0	0	1	1	1	1	UBXN8	UBX domain protein 8
hsa-miR-421	0	0	1	1	1	1	ADAM2	ADAM metallopeptidase domain 2
hsa-miR-421	0	0	1	1	0	0	SLIT1	slit homolog 1 (Drosophila)
hsa-miR-421	1	0	0	1	1	1	SLC46A3	solute carrier family 46, member 3
hsa-miR-421	0	0	1	1	0	0	SUOX	sulfite oxidase
hsa-miR-421	0	0	1	1	1	1	PTGR2	prostaglandin reductase 2
hsa-miR-421	1	0	1	1	1	1	ZSCAN29	zinc finger and SCAN domain containing 29
hsa-miR-421	1	0	1	1	1	1	NKD1	naked cuticle homolog 1 (Drosophila)
hsa-miR-421	0	0	1	1	0	0	NDUFB10	NADH dehydrogenase (ubiquinone) 1 beta subcomplex, 10, 22kDa
hsa-miR-421	0	0	0	1	0	0	SPG7	spastic paraplegia 7 (pure and complicated autosomal recessive)
hsa-miR-421	1	0	1	1	1	1	TTYH2	tweety homolog 2 (Drosophila)
hsa-miR-421	0	0	0	1	0	0	SAMD1	sterile alpha motif domain containing 1
hsa-miR-421	0	0	0	1	0	0	MED16	mediator complex subunit 16
hsa-miR-421	1	0	1	1	0	0	SOD1	superoxide dismutase 1, soluble
hsa-miR-421	0	0	1	1	1	1	PLK4	polo-like kinase 4
hsa-miR-421	0	0	1	1	1	1	UAP1	UDP-N-acteylglucosamine pyrophosphorylase 1
hsa-miR-421	0	0	0	1	0	0	TRIM43	tripartite motif containing 43
hsa-miR-421	0	0	0	1	1	1	ANKRD31	ankyrin repeat domain 31
hsa-miR-421	0	0	1	1	0	0	NFKBIE	nuclear factor of kappa light polypeptide gene enhancer in B-cells inhibitor, epsilon
hsa-miR-421	0	0	1	1	0	0	IL2RG	interleukin 2 receptor, gamma
hsa-miR-421	0	0	0	1	1	1	CXorf48	chromosome X open reading frame 48
hsa-miR-421	0	0	0	1	0	0	RPL7A	ribosomal protein L7a
hsa-miR-421	1	0	1	1	1	1	CCDC82	coiled-coil domain containing 82
hsa-miR-421	1	0	1	1	1	1	SNPH	syntaphilin
hsa-miR-421	1	0	0	1	0	0	ROBO3	roundabout, axon guidance receptor, homolog 3 (Drosophila)
hsa-miR-421	0	0	0	1	0	0	TMCO3	transmembrane and coiled-coil domains 3
hsa-miR-421	0	0	1	1	1	1	MIA2	melanoma inhibitory activity 2
hsa-miR-421	1	0	1	1	1	1	GUCY1A2	guanylate cyclase 1, soluble, alpha 2
hsa-miR-421	0	0	1	1	0	0	FAM81B	family with sequence similarity 81, member B
hsa-miR-421	0	0	0	1	0	0	C16orf74	chromosome 16 open reading frame 74
hsa-miR-421	1	0	1	1	1	1	FAM105B	family with sequence similarity 105, member B
hsa-miR-421	0	0	1	1	1	1	NEIL2	nei endonuclease VIII-like 2 (E. coli)
hsa-miR-421	0	0	0	1	1	1	TMPRSS15	transmembrane protease, serine 15
hsa-miR-421	0	0	0	1	1	1	AKD1	adenylate kinase domain containing 1
hsa-miR-421	0	0	1	1	1	1	SETD9	SET domain containing 9
hsa-miR-421	0	0	1	1	0	0	PDIA4	protein disulfide isomerase family A, member 4
hsa-miR-421	0	0	1	1	0	0	PDZD9	PDZ domain containing 9
hsa-miR-421	0	0	0	1	1	1	NAT2	N-acetyltransferase 2 (arylamine N-acetyltransferase)
hsa-miR-421	0	0	1	1	1	1	C15orf26	chromosome 15 open reading frame 26
hsa-miR-421	0	0	0	1	1	1	COQ5	coenzyme Q5 homolog, methyltransferase (S. cerevisiae)
hsa-miR-421	0	0	0	1	1	1	ACSM3	acyl-CoA synthetase medium-chain family member 3
hsa-miR-421	0	0	1	1	0	0	CCDC58	coiled-coil domain containing 58
hsa-miR-421	0	0	0	1	0	0	MCM3AP	minichromosome maintenance complex component 3 associated protein
hsa-miR-421	0	0	1	1	1	1	ZNF626	zinc finger protein 626
hsa-miR-421	0	0	0	1	0	0	LY6K	lymphocyte antigen 6 complex, locus K
hsa-miR-421	0	0	1	1	0	0	YDJC	YdjC homolog (bacterial)
hsa-miR-421	0	0	0	1	0	0	AQP5	aquaporin 5
hsa-miR-421	1	0	1	1	1	1	STK36	serine/threonine kinase 36
hsa-miR-421	0	0	1	1	0	0	SUCLG1	succinate-CoA ligase, alpha subunit
hsa-miR-421	0	0	1	1	1	1	WDR52	WD repeat domain 52
hsa-miR-421	0	0	0	1	0	0	NKX6-1	NK6 homeobox 1
hsa-miR-421	0	0	0	1	0	0	ITGB5	integrin, beta 5
hsa-miR-421	0	0	0	1	0	0	S100P	S100 calcium binding protein P
hsa-miR-421	0	0	0	1	0	0	POC1A	POC1 centriolar protein homolog A (Chlamydomonas)
hsa-miR-421	0	0	1	1	0	0	SPINK1	serine peptidase inhibitor, Kazal type 1
hsa-miR-421	1	0	0	1	1	1	SLU7	SLU7 splicing factor homolog (S. cerevisiae)
hsa-miR-421	0	0	0	1	0	0	GPER	G protein-coupled estrogen receptor 1
hsa-miR-421	0	0	1	1	1	1	MELK	maternal embryonic leucine zipper kinase
hsa-miR-421	0	0	1	1	1	1	LRRC18	leucine rich repeat containing 18
hsa-miR-421	0	0	0	1	1	1	SLC37A2	solute carrier family 37 (glycerol-3-phosphate transporter), member 2
hsa-miR-421	0	0	1	1	1	1	KLHDC2	kelch domain containing 2
hsa-miR-421	0	0	0	1	0	0	FAM194B	family with sequence similarity 194, member B
hsa-miR-421	0	0	1	1	1	1	MRPL43	mitochondrial ribosomal protein L43
hsa-miR-421	0	0	0	1	0	0	WDR16	WD repeat domain 16
hsa-miR-421	1	0	1	1	1	1	XRCC6BP1	XRCC6 binding protein 1
hsa-miR-421	0	0	1	1	1	1	MRPL16	mitochondrial ribosomal protein L16
hsa-miR-421	0	0	1	1	1	1	DYNLRB1	dynein, light chain, roadblock-type 1
hsa-miR-421	0	0	0	1	0	0	C16orf92	chromosome 16 open reading frame 92
hsa-miR-421	0	0	1	1	0	0	SMG8	smg-8 homolog, nonsense mediated mRNA decay factor (C. elegans)
hsa-miR-421	0	0	0	1	0	0	PSCA	prostate stem cell antigen
hsa-miR-421	0	0	0	1	0	0	NXNL1	nucleoredoxin-like 1
hsa-miR-421	0	0	1	1	1	1	OGG1	8-oxoguanine DNA glycosylase
hsa-miR-421	0	0	0	1	0	0	OR4X2	olfactory receptor, family 4, subfamily X, member 2
hsa-miR-421	0	0	0	1	0	0	ALKBH3	alkB, alkylation repair homolog 3 (E. coli)
hsa-miR-421	0	0	1	1	1	1	CLP1	CLP1, cleavage and polyadenylation factor I subunit, homolog (S. cerevisiae)
hsa-miR-421	0	0	1	1	0	0	PRELID1	PRELI domain containing 1
hsa-miR-421	1	0	1	1	0	0	MRC2	mannose receptor, C type 2
hsa-miR-421	0	0	0	1	0	0	PRY2	PTPN13-like, Y-linked 2
hsa-miR-421	0	0	0	1	0	0	NFRKB	nuclear factor related to kappaB binding protein
hsa-miR-421	1	0	1	1	1	1	RNASE6	ribonuclease, RNase A family, k6
hsa-miR-421	0	0	0	1	1	1	MGAT2	mannosyl (alpha-1,6-)-glycoprotein beta-1,2-N-acetylglucosaminyltransferase
hsa-miR-421	0	0	0	1	1	1	NRG4	neuregulin 4
hsa-miR-421	0	0	1	1	0	0	ADAL	adenosine deaminase-like
hsa-miR-421	0	0	1	1	1	1	MLKL	mixed lineage kinase domain-like
hsa-miR-421	0	0	0	1	0	0	RBFA	ribosome binding factor A (putative)
hsa-miR-421	0	0	1	1	1	1	MPLKIP	M-phase specific PLK1 interacting protein
hsa-miR-421	0	0	1	1	1	1	PAH	phenylalanine hydroxylase
hsa-miR-421	0	0	0	1	0	0	PLA2G1B	phospholipase A2, group IB (pancreas)
hsa-miR-421	0	0	1	1	1	1	PSMD1	proteasome (prosome, macropain) 26S subunit, non-ATPase, 1
hsa-miR-421	0	0	1	1	0	0	TRMT112	tRNA methyltransferase 11-2 homolog (S. cerevisiae)
hsa-miR-421	0	0	0	1	1	1	TLR1	toll-like receptor 1
hsa-miR-421	0	0	1	1	1	1	GRIK1	glutamate receptor, ionotropic, kainate 1
hsa-miR-421	0	0	0	1	1	1	KRT2	keratin 2
hsa-miR-421	0	0	1	1	1	1	WDR69	WD repeat domain 69
hsa-miR-421	0	0	0	1	0	0	MAL	mal, T-cell differentiation protein
hsa-miR-421	0	0	0	1	0	0	ATP8B3	ATPase, aminophospholipid transporter, class I, type 8B, member 3
hsa-miR-421	1	0	1	1	1	1	CLTB	clathrin, light chain B
hsa-miR-421	1	0	1	1	1	1	CASP2	caspase 2, apoptosis-related cysteine peptidase
hsa-miR-421	0	0	0	1	0	0	TTC9B	tetratricopeptide repeat domain 9B
hsa-miR-421	0	0	0	1	0	0	OR9Q2	olfactory receptor, family 9, subfamily Q, member 2
hsa-miR-421	0	0	0	1	1	1	IL1RL1	interleukin 1 receptor-like 1
hsa-miR-421	0	0	1	1	0	0	COMMD1	copper metabolism (Murr1) domain containing 1
hsa-miR-421	0	0	0	1	1	1	USP36	ubiquitin specific peptidase 36
hsa-miR-421	0	0	1	1	0	0	RPS14	ribosomal protein S14
hsa-miR-421	0	0	0	1	0	0	OR5M3	olfactory receptor, family 5, subfamily M, member 3
hsa-miR-421	0	0	0	1	0	0	OR10AG1	olfactory receptor, family 10, subfamily AG, member 1
hsa-miR-421	0	0	0	1	0	0	GUK1	guanylate kinase 1
hsa-miR-421	0	0	0	1	0	0	PARP10	poly (ADP-ribose) polymerase family, member 10
hsa-miR-421	0	0	1	1	1	1	FAM220A	family with sequence similarity 220, member A
hsa-miR-421	0	0	1	1	0	0	AP4S1	adaptor-related protein complex 4, sigma 1 subunit
hsa-miR-421	0	0	0	1	0	0	RPL27A	ribosomal protein L27a
hsa-miR-421	1	0	1	1	1	1	HBS1L	HBS1-like (S. cerevisiae)
hsa-miR-421	0	0	0	1	0	0	WDR75	WD repeat domain 75
hsa-miR-421	0	0	1	1	1	1	PENK	proenkephalin
hsa-miR-421	0	0	1	1	0	0	WDR90	WD repeat domain 90
hsa-miR-421	0	0	1	1	0	0	RPS4X	ribosomal protein S4, X-linked
hsa-miR-421	0	0	0	1	0	0	OR2AE1	olfactory receptor, family 2, subfamily AE, member 1
hsa-miR-421	0	0	0	1	0	0	ZFAND2A	zinc finger, AN1-type domain 2A
hsa-miR-421	0	0	1	1	0	0	SNAPC5	small nuclear RNA activating complex, polypeptide 5, 19kDa
hsa-miR-421	1	0	1	1	1	1	SHMT1	serine hydroxymethyltransferase 1 (soluble)
hsa-miR-421	1	0	1	1	1	1	DNAJA2	DnaJ (Hsp40) homolog, subfamily A, member 2
hsa-miR-421	1	0	0	1	1	1	PLEKHA5	pleckstrin homology domain containing, family A member 5
hsa-miR-421	0	0	1	1	0	0	FCER1A	Fc fragment of IgE, high affinity I, receptor for; alpha polypeptide
hsa-miR-421	0	0	1	1	1	1	ATG4C	autophagy related 4C, cysteine peptidase
hsa-miR-421	0	0	0	1	1	1	ZSCAN4	zinc finger and SCAN domain containing 4
hsa-miR-421	1	0	1	1	1	1	BANP	BTG3 associated nuclear protein
hsa-miR-421	0	0	1	1	1	1	C8orf47	chromosome 8 open reading frame 47
hsa-miR-421	0	0	1	1	1	1	HDDC2	HD domain containing 2
hsa-miR-421	1	0	1	1	1	1	C1orf131	chromosome 1 open reading frame 131
hsa-miR-421	0	0	0	1	0	0	KLK11	kallikrein-related peptidase 11
hsa-miR-421	0	0	1	1	1	1	RABGGTB	Rab geranylgeranyltransferase, beta subunit
hsa-miR-421	0	0	0	1	0	0	FGF8	fibroblast growth factor 8 (androgen-induced)
hsa-miR-421	0	0	1	1	1	1	DYX1C1	dyslexia susceptibility 1 candidate 1
hsa-miR-421	0	0	0	1	0	0	TIGD5	tigger transposable element derived 5
hsa-miR-421	0	0	1	1	0	0	ZNF335	zinc finger protein 335
hsa-miR-421	0	0	1	1	1	1	TMEM67	transmembrane protein 67
hsa-miR-421	0	0	0	1	0	0	AGXT2L2	alanine-glyoxylate aminotransferase 2-like 2
hsa-miR-421	0	0	1	1	1	1	CALCB	calcitonin-related polypeptide beta
hsa-miR-421	0	0	1	1	1	1	YARS2	tyrosyl-tRNA synthetase 2, mitochondrial
hsa-miR-421	0	0	0	1	0	0	NKX2-6	NK2 homeobox 6
hsa-miR-421	0	0	1	1	1	1	CYTH2	cytohesin 2
hsa-miR-421	0	0	0	1	0	0	GSG2	germ cell associated 2 (haspin)
hsa-miR-421	0	0	1	1	0	0	BBX	bobby sox homolog (Drosophila)
hsa-miR-421	1	0	1	1	1	1	SLC37A3	solute carrier family 37 (glycerol-3-phosphate transporter), member 3
hsa-miR-421	1	0	0	1	0	0	KRT17	keratin 17
hsa-miR-421	0	0	1	1	1	1	PEG3	paternally expressed 3
hsa-miR-421	0	0	0	1	1	1	ZIM2	zinc finger, imprinted 2
hsa-miR-421	1	0	0	1	1	1	SSH1	slingshot homolog 1 (Drosophila)
hsa-miR-421	0	0	0	1	0	0	SPAG11A	sperm associated antigen 11A
hsa-miR-421	1	0	1	1	1	1	ZKSCAN5	zinc finger with KRAB and SCAN domains 5
hsa-miR-421	0	0	0	1	1	1	ZFP42	zinc finger protein 42 homolog (mouse)
hsa-miR-421	0	0	0	1	0	0	SSX10	synovial sarcoma, X breakpoint 10
hsa-miR-421	0	0	1	1	1	1	CETN1	centrin, EF-hand protein, 1
hsa-miR-421	1	0	0	1	1	1	MMS19	MMS19 nucleotide excision repair homolog (S. cerevisiae)
hsa-miR-421	1	0	1	1	1	1	FAM120C	family with sequence similarity 120C
hsa-miR-421	0	0	1	1	1	1	SMYD3	SET and MYND domain containing 3
hsa-miR-421	0	0	0	1	0	0	CLECL1	C-type lectin-like 1
hsa-miR-421	0	0	1	1	1	1	FBLN1	fibulin 1
hsa-miR-421	0	0	1	1	0	0	NLRC5	NLR family, CARD domain containing 5
hsa-miR-421	0	0	0	1	0	0	RAB11B	RAB11B, member RAS oncogene family
hsa-miR-421	1	0	1	1	1	1	COA5	cytochrome C oxidase assembly factor 5
hsa-miR-421	1	0	1	1	1	1	BACE2	beta-site APP-cleaving enzyme 2
hsa-miR-421	0	0	1	1	1	1	OAF	OAF homolog (Drosophila)
hsa-miR-421	1	0	1	1	1	1	C11orf82	chromosome 11 open reading frame 82
hsa-miR-421	1	0	1	1	1	1	RBM12B	RNA binding motif protein 12B
hsa-miR-421	0	0	0	1	0	0	ZNF775	zinc finger protein 775
hsa-miR-421	0	0	1	1	1	1	MRGPRX2	MAS-related GPR, member X2
hsa-miR-421	0	0	1	1	0	0	MFSD6L	major facilitator superfamily domain containing 6-like
hsa-miR-421	0	0	1	1	1	1	SETD2	SET domain containing 2
hsa-miR-421	0	0	1	1	1	1	ZNF397	zinc finger protein 397
hsa-miR-421	0	0	0	1	0	0	LCN12	lipocalin 12
hsa-miR-421	0	0	1	1	1	1	RGS7	regulator of G-protein signaling 7
hsa-miR-421	0	0	1	1	1	1	LINC00518	long intergenic non-protein coding RNA 518
hsa-miR-421	0	0	1	1	1	1	P4HA3	prolyl 4-hydroxylase, alpha polypeptide III
hsa-miR-421	0	0	1	1	1	1	MGAT4C	mannosyl (alpha-1,3-)-glycoprotein beta-1,4-N-acetylglucosaminyltransferase, isozyme C (putative)
hsa-miR-421	1	0	1	1	1	1	CSGALNACT1	chondroitin sulfate N-acetylgalactosaminyltransferase 1
hsa-miR-421	0	0	1	1	0	0	GPR19	G protein-coupled receptor 19
hsa-miR-421	0	0	1	1	0	0	GH2	growth hormone 2
hsa-miR-421	0	0	0	1	1	1	ANO9	anoctamin 9
hsa-miR-421	0	0	0	1	0	0	LCK	lymphocyte-specific protein tyrosine kinase
hsa-miR-421	1	0	1	1	1	1	CMPK1	cytidine monophosphate (UMP-CMP) kinase 1, cytosolic
hsa-miR-421	1	0	1	1	1	1	C19orf6	chromosome 19 open reading frame 6
hsa-miR-421	0	0	1	1	0	0	UBA7	ubiquitin-like modifier activating enzyme 7
hsa-miR-421	0	0	0	1	0	0	TUBB2A	tubulin, beta 2A class IIa
hsa-miR-421	0	0	1	1	0	0	KRTAP15-1	keratin associated protein 15-1
hsa-miR-421	1	0	1	1	1	1	ZSCAN2	zinc finger and SCAN domain containing 2
hsa-miR-421	1	0	1	1	1	1	TMEM68	transmembrane protein 68
hsa-miR-421	1	0	1	1	1	1	SUPT3H	suppressor of Ty 3 homolog (S. cerevisiae)
hsa-miR-421	0	0	0	1	1	1	INTU	inturned planar cell polarity effector homolog (Drosophila)
hsa-miR-421	1	0	1	1	1	1	WASF3	WAS protein family, member 3
hsa-miR-421	0	0	0	1	0	0	RC3H2	ring finger and CCCH-type domains 2
hsa-miR-421	0	0	1	1	1	1	SLC6A16	solute carrier family 6, member 16
hsa-miR-421	0	0	0	1	0	0	TMEM39B	transmembrane protein 39B
hsa-miR-421	0	0	1	1	0	0	ZFYVE19	zinc finger, FYVE domain containing 19
hsa-miR-421	0	0	1	1	0	0	TMEM217	transmembrane protein 217
hsa-miR-421	0	0	1	1	1	1	MOXD1	monooxygenase, DBH-like 1
hsa-miR-421	0	0	1	1	0	0	TBC1D22A	TBC1 domain family, member 22A
hsa-miR-421	0	0	0	1	0	0	LRRC71	leucine rich repeat containing 71
hsa-miR-421	0	0	0	1	0	0	KLC3	kinesin light chain 3
hsa-miR-421	1	0	1	1	1	1	HNRNPF	heterogeneous nuclear ribonucleoprotein F
hsa-miR-421	0	0	1	1	0	0	SLPI	secretory leukocyte peptidase inhibitor
hsa-miR-421	0	0	1	1	1	1	HPS1	Hermansky-Pudlak syndrome 1
hsa-miR-421	0	0	0	1	0	0	SCNN1D	sodium channel, non-voltage-gated 1, delta subunit
hsa-miR-421	0	0	1	1	0	0	DCBLD1	discoidin, CUB and LCCL domain containing 1
hsa-miR-421	0	0	0	1	1	1	NCCRP1	non-specific cytotoxic cell receptor protein 1 homolog (zebrafish)
hsa-miR-421	0	0	0	1	1	1	DDC	dopa decarboxylase (aromatic L-amino acid decarboxylase)
hsa-miR-421	0	0	1	1	0	0	HR	hairless homolog (mouse)
hsa-miR-421	0	0	1	1	0	0	GOLGB1	golgin B1
[truncated: 282 more rows]
