# Supplementary material for: Profiling of Selected MicroRNAs in Proliferative Eutopic Endometrium of Women with Ovarian Endometriosis
Source: Biomed Res Int. 2015 Aug 20;2015:760698. doi: 10.1155/2015/760698 (PMC4558423; doi:10.1155/2015/760698)
Supplement: Supplementary file 1 — Table I: The names of miRNAs significantly differentially expressed between eutopic endometrium of patients with endometriosis vs eutopic endometrium of patients without endometriosis. Table II: The associations between miRNA and mRNA, which presents detailed results of the search of six major databases i.e targetscan, tarbase, miranda, mirbase, mirtarget2 and pictar. [file 760698.f1.zip › 760698.f1/Table II/hsa-miR-423-3p.tsv]

miR	targetscan	tarbase	miranda	mirbase	mirtarget2	pictar	GeneSymbol	GeneName
hsa-miR-423-3p	0	0	1	1	0	0	PLCH2	phospholipase C, eta 2
hsa-miR-423-3p	1	0	1	1	1	1	ATG13	autophagy related 13
hsa-miR-423-3p	0	0	1	1	1	1	MAN2B2	mannosidase, alpha, class 2B, member 2
hsa-miR-423-3p	1	0	1	1	1	1	CNOT1	CCR4-NOT transcription complex, subunit 1
hsa-miR-423-3p	1	0	1	1	0	0	ZC3H4	zinc finger CCCH-type containing 4
hsa-miR-423-3p	1	0	1	1	1	1	ASAP1	ArfGAP with SH3 domain, ankyrin repeat and PH domain 1
hsa-miR-423-3p	0	0	1	1	1	1	TCF7L2	transcription factor 7-like 2 (T-cell specific, HMG-box)
hsa-miR-423-3p	0	0	1	0	0	0	KRT19P2	keratin 19 pseudogene 2
hsa-miR-423-3p	0	0	1	1	0	0	TMEM132A	transmembrane protein 132A
hsa-miR-423-3p	0	0	1	0	1	1	SETD5	SET domain containing 5
hsa-miR-423-3p	0	0	1	1	1	1	LENG8	leukocyte receptor cluster (LRC) member 8
hsa-miR-423-3p	0	0	1	1	0	0	SSPO	SCO-spondin homolog (Bos taurus)
hsa-miR-423-3p	0	0	1	1	0	0	KCNC3	potassium voltage-gated channel, Shaw-related subfamily, member 3
hsa-miR-423-3p	1	0	1	1	1	1	PLEKHH3	pleckstrin homology domain containing, family H (with MyTH4 domain) member 3
hsa-miR-423-3p	1	0	1	1	1	1	DTNA	dystrobrevin, alpha
hsa-miR-423-3p	1	0	1	0	1	1	MAML1	mastermind-like 1 (Drosophila)
hsa-miR-423-3p	1	0	1	1	1	1	MTA1	metastasis associated 1
hsa-miR-423-3p	0	0	1	1	1	1	RYR1	ryanodine receptor 1 (skeletal)
hsa-miR-423-3p	0	0	1	1	0	0	IGFBP2	insulin-like growth factor binding protein 2, 36kDa
hsa-miR-423-3p	0	0	1	1	0	0	CDK10	cyclin-dependent kinase 10
hsa-miR-423-3p	0	0	1	1	1	1	SGSH	N-sulfoglucosamine sulfohydrolase
hsa-miR-423-3p	0	0	1	1	1	1	MFSD11	major facilitator superfamily domain containing 11
hsa-miR-423-3p	0	0	1	1	1	1	PCF11	PCF11, cleavage and polyadenylation factor subunit, homolog (S. cerevisiae)
hsa-miR-423-3p	0	0	1	1	0	0	TCF25	transcription factor 25 (basic helix-loop-helix)
hsa-miR-423-3p	1	0	1	0	1	1	FAM19A5	family with sequence similarity 19 (chemokine (C-C motif)-like), member A5
hsa-miR-423-3p	0	0	1	1	1	1	CHRD	chordin
hsa-miR-423-3p	1	0	1	1	1	1	SYDE1	synapse defective 1, Rho GTPase, homolog 1 (C. elegans)
hsa-miR-423-3p	0	0	1	1	0	0	HES6	hairy and enhancer of split 6 (Drosophila)
hsa-miR-423-3p	0	0	1	1	1	1	CKS1B	CDC28 protein kinase regulatory subunit 1B
hsa-miR-423-3p	0	0	1	1	1	1	TBC1D2	TBC1 domain family, member 2
hsa-miR-423-3p	1	0	1	1	1	1	VEGFA	vascular endothelial growth factor A
hsa-miR-423-3p	0	0	1	1	1	1	SLC6A15	solute carrier family 6 (neutral amino acid transporter), member 15
hsa-miR-423-3p	1	0	1	1	1	1	BBC3	BCL2 binding component 3
hsa-miR-423-3p	0	0	1	0	1	1	MYO3B	myosin IIIB
hsa-miR-423-3p	0	0	1	1	0	0	SNRPN	small nuclear ribonucleoprotein polypeptide N
hsa-miR-423-3p	0	0	1	0	0	0	MYO15B	myosin XVB pseudogene
hsa-miR-423-3p	1	0	1	1	0	0	ST3GAL4	ST3 beta-galactoside alpha-2,3-sialyltransferase 4
hsa-miR-423-3p	0	0	1	1	1	1	TTLL11	tubulin tyrosine ligase-like family, member 11
hsa-miR-423-3p	1	0	1	1	1	1	NRXN3	neurexin 3
hsa-miR-423-3p	1	0	1	1	1	1	XIRP1	xin actin-binding repeat containing 1
hsa-miR-423-3p	1	0	1	1	1	1	SYNM	synemin, intermediate filament protein
hsa-miR-423-3p	1	0	1	1	1	1	AKAP2	A kinase (PRKA) anchor protein 2
hsa-miR-423-3p	0	0	1	1	0	0	CYP2W1	cytochrome P450, family 2, subfamily W, polypeptide 1
hsa-miR-423-3p	0	0	1	1	1	1	UBE2Q2	ubiquitin-conjugating enzyme E2Q family member 2
hsa-miR-423-3p	0	0	1	0	0	0	RNF31	ring finger protein 31
hsa-miR-423-3p	1	0	1	1	1	1	ACER3	alkaline ceramidase 3
hsa-miR-423-3p	1	0	1	1	1	1	STARD7	StAR-related lipid transfer (START) domain containing 7
hsa-miR-423-3p	1	0	1	1	1	1	BAZ2A	bromodomain adjacent to zinc finger domain, 2A
hsa-miR-423-3p	0	0	1	1	0	0	ZNF276	zinc finger protein 276
hsa-miR-423-3p	1	0	1	1	1	1	FAM53C	family with sequence similarity 53, member C
hsa-miR-423-3p	0	0	1	1	1	1	ANKRD36B	ankyrin repeat domain 36B
hsa-miR-423-3p	1	0	1	1	1	1	SCAMP5	secretory carrier membrane protein 5
hsa-miR-423-3p	0	0	1	1	1	1	BRD2	bromodomain containing 2
hsa-miR-423-3p	0	0	1	1	0	0	RGL3	ral guanine nucleotide dissociation stimulator-like 3
hsa-miR-423-3p	0	0	1	1	1	1	VWA3B	von Willebrand factor A domain containing 3B
hsa-miR-423-3p	1	0	1	0	1	1	NCAM1	neural cell adhesion molecule 1
hsa-miR-423-3p	0	0	1	1	0	0	PTOV1	prostate tumor overexpressed 1
hsa-miR-423-3p	1	0	1	1	1	1	IST1	increased sodium tolerance 1 homolog (yeast)
hsa-miR-423-3p	0	0	1	0	0	0	LOC284014	uncharacterized LOC284014
hsa-miR-423-3p	0	0	1	0	0	0	LINC00301	long intergenic non-protein coding RNA 301
hsa-miR-423-3p	0	0	1	1	0	0	RHBDF2	rhomboid 5 homolog 2 (Drosophila)
hsa-miR-423-3p	0	0	1	1	0	0	SYTL1	synaptotagmin-like 1
hsa-miR-423-3p	1	0	1	0	1	1	GRAMD1A	GRAM domain containing 1A
hsa-miR-423-3p	1	0	1	1	0	0	B3GAT3	beta-1,3-glucuronyltransferase 3 (glucuronosyltransferase I)
hsa-miR-423-3p	1	0	1	1	1	1	FRY	furry homolog (Drosophila)
hsa-miR-423-3p	1	0	1	1	1	1	FBXW2	F-box and WD repeat domain containing 2
hsa-miR-423-3p	1	0	1	1	1	1	RRBP1	ribosome binding protein 1 homolog 180kDa (dog)
hsa-miR-423-3p	1	0	1	0	0	0	SH3RF3	SH3 domain containing ring finger 3
hsa-miR-423-3p	1	0	1	1	0	0	RABL6	RAB, member RAS oncogene family-like 6
hsa-miR-423-3p	0	0	1	1	1	1	SLC9A3R1	solute carrier family 9, subfamily A (NHE3, cation proton antiporter 3), member 3 regulator 1
hsa-miR-423-3p	1	0	1	1	1	1	KLC2	kinesin light chain 2
hsa-miR-423-3p	0	0	1	1	0	0	PPOX	protoporphyrinogen oxidase
hsa-miR-423-3p	1	0	1	0	1	1	IL1RAP	interleukin 1 receptor accessory protein
hsa-miR-423-3p	1	0	1	1	0	0	DOT1L	DOT1-like, histone H3 methyltransferase (S. cerevisiae)
hsa-miR-423-3p	1	0	1	1	1	1	ATXN10	ataxin 10
hsa-miR-423-3p	0	0	1	1	1	1	PPP1R27	protein phosphatase 1, regulatory subunit 27
hsa-miR-423-3p	0	0	1	1	1	1	FGD2	FYVE, RhoGEF and PH domain containing 2
hsa-miR-423-3p	1	0	1	1	1	1	IGSF11	immunoglobulin superfamily, member 11
hsa-miR-423-3p	0	0	1	1	1	1	EHD1	EH-domain containing 1
hsa-miR-423-3p	0	0	1	1	0	0	CORO1A	coronin, actin binding protein, 1A
hsa-miR-423-3p	1	0	1	1	1	1	LZTS2	leucine zipper, putative tumor suppressor 2
hsa-miR-423-3p	0	0	1	1	0	0	TAPBPL	TAP binding protein-like
hsa-miR-423-3p	0	0	1	0	0	0	LOC100130954	uncharacterized LOC100130954
hsa-miR-423-3p	0	0	1	1	1	1	ARFGAP2	ADP-ribosylation factor GTPase activating protein 2
hsa-miR-423-3p	1	0	1	1	0	0	FBXL19	F-box and leucine-rich repeat protein 19
hsa-miR-423-3p	1	0	1	1	1	1	CRMP1	collapsin response mediator protein 1
hsa-miR-423-3p	1	0	1	1	0	0	WIZ	widely interspaced zinc finger motifs
hsa-miR-423-3p	0	0	1	0	0	0	CLEC4GP1	C-type lectin domain family 4, member G pseudogene 1
hsa-miR-423-3p	0	0	1	1	0	0	TJAP1	tight junction associated protein 1 (peripheral)
hsa-miR-423-3p	0	0	1	1	1	1	PRRT1	proline-rich transmembrane protein 1
hsa-miR-423-3p	1	0	1	1	1	1	SH2D4B	SH2 domain containing 4B
hsa-miR-423-3p	1	0	1	1	0	0	BCORL1	BCL6 corepressor-like 1
hsa-miR-423-3p	1	0	1	1	1	1	SGSM2	small G protein signaling modulator 2
hsa-miR-423-3p	0	0	1	0	0	0	C3orf72	chromosome 3 open reading frame 72
hsa-miR-423-3p	0	0	1	1	1	1	DENND5A	DENN/MADD domain containing 5A
hsa-miR-423-3p	0	0	1	1	1	1	MYOM3	myomesin family, member 3
hsa-miR-423-3p	1	0	1	1	1	1	COPS7B	COP9 constitutive photomorphogenic homolog subunit 7B (Arabidopsis)
hsa-miR-423-3p	1	0	1	1	1	1	DLG2	discs, large homolog 2 (Drosophila)
hsa-miR-423-3p	1	0	1	0	1	1	ADIPOR2	adiponectin receptor 2
hsa-miR-423-3p	0	0	1	1	1	1	DOCK9	dedicator of cytokinesis 9
hsa-miR-423-3p	1	0	1	1	1	1	PLA2G15	phospholipase A2, group XV
hsa-miR-423-3p	0	0	1	1	0	0	FAM159A	family with sequence similarity 159, member A
hsa-miR-423-3p	1	0	1	1	1	1	BCAT1	branched chain amino-acid transaminase 1, cytosolic
hsa-miR-423-3p	0	0	1	1	1	1	ATXN2	ataxin 2
hsa-miR-423-3p	1	0	1	1	1	1	ADAMTS19	ADAM metallopeptidase with thrombospondin type 1 motif, 19
hsa-miR-423-3p	0	0	1	1	1	1	LYPD1	LY6/PLAUR domain containing 1
hsa-miR-423-3p	0	0	1	1	1	1	RNF19B	ring finger protein 19B
hsa-miR-423-3p	1	0	1	1	1	1	EDN1	endothelin 1
hsa-miR-423-3p	0	0	1	1	0	0	FAM149A	family with sequence similarity 149, member A
hsa-miR-423-3p	0	0	1	1	0	0	PLK1S1	polo-like kinase 1 substrate 1
hsa-miR-423-3p	0	0	1	1	0	0	CDK5RAP2	CDK5 regulatory subunit associated protein 2
hsa-miR-423-3p	0	0	1	1	0	0	H2AFJ	H2A histone family, member J
hsa-miR-423-3p	0	0	1	1	0	0	DNAI2	dynein, axonemal, intermediate chain 2
hsa-miR-423-3p	0	0	1	1	0	0	NXF2	nuclear RNA export factor 2
hsa-miR-423-3p	1	0	1	0	1	1	GPR85	G protein-coupled receptor 85
hsa-miR-423-3p	0	0	1	1	1	1	MESP2	mesoderm posterior 2 homolog (mouse)
hsa-miR-423-3p	1	0	1	1	1	1	PKNOX2	PBX/knotted 1 homeobox 2
hsa-miR-423-3p	1	0	1	1	1	1	TRIOBP	TRIO and F-actin binding protein
hsa-miR-423-3p	0	0	1	1	0	0	KRBA1	KRAB-A domain containing 1
hsa-miR-423-3p	1	0	1	1	1	1	CHMP7	charged multivesicular body protein 7
hsa-miR-423-3p	1	0	1	1	1	1	SBF2	SET binding factor 2
hsa-miR-423-3p	0	0	1	1	1	1	NFE2L1	nuclear factor (erythroid-derived 2)-like 1
hsa-miR-423-3p	0	0	1	0	0	0	EPHA1-AS1	EPHA1 antisense RNA 1
hsa-miR-423-3p	1	0	1	1	1	1	FAM63B	family with sequence similarity 63, member B
hsa-miR-423-3p	1	0	1	1	1	1	MBD6	methyl-CpG binding domain protein 6
hsa-miR-423-3p	0	0	1	0	1	1	SYNPO2	synaptopodin 2
hsa-miR-423-3p	1	0	1	1	1	1	SET	SET nuclear oncogene
hsa-miR-423-3p	1	0	1	1	1	1	DUSP16	dual specificity phosphatase 16
hsa-miR-423-3p	0	0	1	1	1	1	CD209	CD209 molecule
hsa-miR-423-3p	0	0	1	1	0	0	DNAH1	dynein, axonemal, heavy chain 1
hsa-miR-423-3p	0	0	1	1	1	1	PIGG	phosphatidylinositol glycan anchor biosynthesis, class G
hsa-miR-423-3p	0	0	1	1	1	1	TNFRSF19	tumor necrosis factor receptor superfamily, member 19
hsa-miR-423-3p	0	0	1	1	1	1	TNFSF15	tumor necrosis factor (ligand) superfamily, member 15
hsa-miR-423-3p	0	0	1	1	1	1	UGT2B4	UDP glucuronosyltransferase 2 family, polypeptide B4
hsa-miR-423-3p	0	0	1	1	1	1	DIO1	deiodinase, iodothyronine, type I
hsa-miR-423-3p	1	0	1	1	0	0	ADAM15	ADAM metallopeptidase domain 15
hsa-miR-423-3p	1	0	1	1	1	1	PLCH1	phospholipase C, eta 1
hsa-miR-423-3p	1	0	1	1	1	1	MCHR1	melanin-concentrating hormone receptor 1
hsa-miR-423-3p	1	0	1	1	1	1	QKI	QKI, KH domain containing, RNA binding
hsa-miR-423-3p	1	0	1	1	0	0	PPP4C	protein phosphatase 4, catalytic subunit
hsa-miR-423-3p	1	0	1	1	1	1	PPP1R11	protein phosphatase 1, regulatory (inhibitor) subunit 11
hsa-miR-423-3p	1	0	1	1	0	0	POLR3D	polymerase (RNA) III (DNA directed) polypeptide D, 44kDa
hsa-miR-423-3p	1	0	1	1	1	1	POU2F2	POU class 2 homeobox 2
hsa-miR-423-3p	0	0	1	1	1	1	GTPBP8	GTP-binding protein 8 (putative)
hsa-miR-423-3p	1	0	1	1	1	1	DPH1	DPH1 homolog (S. cerevisiae)
hsa-miR-423-3p	0	0	1	1	1	1	KLHL29	kelch-like 29 (Drosophila)
hsa-miR-423-3p	0	0	1	1	0	0	LCMT1	leucine carboxyl methyltransferase 1
hsa-miR-423-3p	0	0	1	1	1	1	UCHL5	ubiquitin carboxyl-terminal hydrolase L5
hsa-miR-423-3p	0	0	1	1	0	0	UCK1	uridine-cytidine kinase 1
hsa-miR-423-3p	1	0	1	1	1	1	ARHGEF9	Cdc42 guanine nucleotide exchange factor (GEF) 9
hsa-miR-423-3p	0	0	1	1	0	0	HIST2H4A	histone cluster 2, H4a
hsa-miR-423-3p	0	0	1	1	0	0	HIST2H4B	histone cluster 2, H4b
hsa-miR-423-3p	0	0	1	1	1	1	TMEM40	transmembrane protein 40
hsa-miR-423-3p	0	0	1	0	0	0	LOC728485	uncharacterized LOC728485
hsa-miR-423-3p	1	0	1	1	1	1	VASP	vasodilator-stimulated phosphoprotein
hsa-miR-423-3p	0	0	1	1	0	0	TRO	trophinin
hsa-miR-423-3p	1	0	1	0	1	1	SV2B	synaptic vesicle glycoprotein 2B
hsa-miR-423-3p	0	0	1	0	1	1	MYO7A	myosin VIIA
hsa-miR-423-3p	0	0	1	1	1	1	CCP110	centriolar coiled coil protein 110kDa
hsa-miR-423-3p	1	0	1	1	1	1	ADARB1	adenosine deaminase, RNA-specific, B1
hsa-miR-423-3p	0	0	1	0	1	1	FLJ25328	uncharacterized LOC148231
hsa-miR-423-3p	1	0	1	1	1	1	RHOBTB1	Rho-related BTB domain containing 1
hsa-miR-423-3p	0	0	1	1	0	0	RAB4B	RAB4B, member RAS oncogene family
hsa-miR-423-3p	1	0	1	1	1	1	PML	promyelocytic leukemia
hsa-miR-423-3p	0	0	1	0	1	1	DKFZP434I0714	uncharacterized protein DKFZP434I0714
hsa-miR-423-3p	1	0	1	1	1	1	RAP2C	RAP2C, member of RAS oncogene family
hsa-miR-423-3p	0	0	1	0	0	0	FLJ10661	family with sequence similarity 86, member A pseudogene
hsa-miR-423-3p	1	0	1	1	1	1	SLC35G1	solute carrier family 35, member G1
hsa-miR-423-3p	0	0	1	1	1	1	ZNF141	zinc finger protein 141
hsa-miR-423-3p	0	0	1	1	1	1	MTHFD2L	methylenetetrahydrofolate dehydrogenase (NADP+ dependent) 2-like
hsa-miR-423-3p	0	0	1	1	0	0	VMO1	vitelline membrane outer layer 1 homolog (chicken)
hsa-miR-423-3p	1	0	1	1	0	0	CHD4	chromodomain helicase DNA binding protein 4
hsa-miR-423-3p	0	0	1	1	0	0	PRMT2	protein arginine methyltransferase 2
hsa-miR-423-3p	0	0	1	0	0	0	FLJ36000	uncharacterized FLJ36000
hsa-miR-423-3p	1	0	1	1	1	1	FGFR2	fibroblast growth factor receptor 2
hsa-miR-423-3p	0	0	1	1	0	0	ADAMTS13	ADAM metallopeptidase with thrombospondin type 1 motif, 13
hsa-miR-423-3p	0	0	1	0	0	0	LOC401074	uncharacterized LOC401074
hsa-miR-423-3p	0	0	1	1	1	1	SLTM	SAFB-like, transcription modulator
hsa-miR-423-3p	1	0	1	1	1	1	FOSB	FBJ murine osteosarcoma viral oncogene homolog B
hsa-miR-423-3p	1	0	1	0	1	1	HSPA12A	heat shock 70kDa protein 12A
hsa-miR-423-3p	0	0	1	1	0	0	AQP12B	aquaporin 12B
hsa-miR-423-3p	0	0	1	0	0	0	LRRC37BP1	leucine rich repeat containing 37B pseudogene 1
hsa-miR-423-3p	0	0	1	1	0	0	ZNF839	zinc finger protein 839
hsa-miR-423-3p	0	0	1	1	1	1	MGC57346	uncharacterized LOC401884
hsa-miR-423-3p	1	0	1	1	1	1	KLHL17	kelch-like 17 (Drosophila)
hsa-miR-423-3p	1	0	1	1	1	1	PTPRG	protein tyrosine phosphatase, receptor type, G
hsa-miR-423-3p	0	0	1	0	0	0	LOC283038	uncharacterized LOC283038
hsa-miR-423-3p	0	0	1	1	1	1	FKBP1B	FK506 binding protein 1B, 12.6 kDa
hsa-miR-423-3p	0	0	1	1	1	1	LINC00086	long intergenic non-protein coding RNA 86
hsa-miR-423-3p	0	0	1	1	1	1	MPP3	membrane protein, palmitoylated 3 (MAGUK p55 subfamily member 3)
hsa-miR-423-3p	1	0	1	0	0	0	MICAL3	microtubule associated monoxygenase, calponin and LIM domain containing 3
hsa-miR-423-3p	1	0	1	1	1	1	ADCY6	adenylate cyclase 6
hsa-miR-423-3p	0	0	1	0	0	0	ZRANB2-AS1	ZRANB2 antisense RNA 1
hsa-miR-423-3p	0	0	1	0	0	0	LINC00537	long intergenic non-protein coding RNA 537
hsa-miR-423-3p	0	0	1	1	0	0	DNHD1	dynein heavy chain domain 1
hsa-miR-423-3p	1	0	1	1	1	1	ZBTB7A	zinc finger and BTB domain containing 7A
hsa-miR-423-3p	1	0	1	1	1	1	ESRRA	estrogen-related receptor alpha
hsa-miR-423-3p	1	0	1	1	1	1	ACVR2B	activin A receptor, type IIB
hsa-miR-423-3p	0	0	1	1	0	0	NUBP1	nucleotide binding protein 1
hsa-miR-423-3p	1	0	1	1	0	0	KIAA1644	KIAA1644
hsa-miR-423-3p	0	0	1	0	0	0	FBXL19-AS1	FBXL19 antisense RNA 1 (head to head)
hsa-miR-423-3p	0	0	1	0	1	1	C9orf91	chromosome 9 open reading frame 91
hsa-miR-423-3p	0	0	1	0	0	0	INTS4L1	integrator complex subunit 4-like 1
hsa-miR-423-3p	0	0	1	0	0	0	LINC00643	long intergenic non-protein coding RNA 643
hsa-miR-423-3p	1	0	1	1	0	0	RGS6	regulator of G-protein signaling 6
hsa-miR-423-3p	0	0	1	1	1	1	IP6K2	inositol hexakisphosphate kinase 2
hsa-miR-423-3p	1	0	1	1	0	0	KRT80	keratin 80
hsa-miR-423-3p	1	0	1	1	1	1	MASP1	mannan-binding lectin serine peptidase 1 (C4/C2 activating component of Ra-reactive factor)
hsa-miR-423-3p	0	0	1	1	0	0	ANKRD33	ankyrin repeat domain 33
hsa-miR-423-3p	0	0	1	0	0	0	LOC286299	uncharacterized LOC286299
hsa-miR-423-3p	0	0	1	1	1	1	ABCD3	ATP-binding cassette, sub-family D (ALD), member 3
hsa-miR-423-3p	0	0	1	0	1	1	STT3A	STT3, subunit of the oligosaccharyltransferase complex, homolog A (S. cerevisiae)
hsa-miR-423-3p	1	0	1	0	1	1	TTL	tubulin tyrosine ligase
hsa-miR-423-3p	1	0	1	1	1	1	HIC2	hypermethylated in cancer 2
hsa-miR-423-3p	0	0	1	0	1	1	CD59	CD59 molecule, complement regulatory protein
hsa-miR-423-3p	1	0	1	1	1	1	MDK	midkine (neurite growth-promoting factor 2)
hsa-miR-423-3p	1	0	1	1	0	0	TOE1	target of EGR1, member 1 (nuclear)
hsa-miR-423-3p	0	0	1	1	1	1	DNM1	dynamin 1
hsa-miR-423-3p	0	0	1	1	0	0	H2AFY2	H2A histone family, member Y2
hsa-miR-423-3p	1	0	1	1	1	1	CSNK1D	casein kinase 1, delta
hsa-miR-423-3p	0	0	1	1	1	1	IER3	immediate early response 3
hsa-miR-423-3p	0	0	1	1	1	1	CYTH2	cytohesin 2
hsa-miR-423-3p	0	0	1	1	1	1	MRPS36	mitochondrial ribosomal protein S36
hsa-miR-423-3p	0	0	1	0	1	1	EMX2	empty spiracles homeobox 2
hsa-miR-423-3p	0	0	1	1	1	1	SAP130	Sin3A-associated protein, 130kDa
hsa-miR-423-3p	0	0	1	0	0	0	ZNF720	zinc finger protein 720
hsa-miR-423-3p	0	0	1	1	1	1	UBE2F	ubiquitin-conjugating enzyme E2F (putative)
hsa-miR-423-3p	0	0	1	1	1	1	RCN2	reticulocalbin 2, EF-hand calcium binding domain
hsa-miR-423-3p	1	0	1	1	1	1	RALY	RNA binding protein, autoantigenic (hnRNP-associated with lethal yellow homolog (mouse))
hsa-miR-423-3p	1	0	1	1	1	1	VLDLR	very low density lipoprotein receptor
hsa-miR-423-3p	1	0	1	1	0	0	CCM2	cerebral cavernous malformation 2
hsa-miR-423-3p	1	0	1	0	1	1	CD47	CD47 molecule
hsa-miR-423-3p	0	0	1	0	0	0	PRMT1	protein arginine methyltransferase 1
hsa-miR-423-3p	0	0	1	1	1	1	MBNL3	muscleblind-like splicing regulator 3
hsa-miR-423-3p	1	0	1	1	1	1	JUNB	jun B proto-oncogene
hsa-miR-423-3p	1	0	1	0	1	1	DNMT3A	DNA (cytosine-5-)-methyltransferase 3 alpha
hsa-miR-423-3p	1	0	1	1	0	0	MMP11	matrix metallopeptidase 11 (stromelysin 3)
hsa-miR-423-3p	0	0	1	1	1	1	UPRT	uracil phosphoribosyltransferase (FUR1) homolog (S. cerevisiae)
hsa-miR-423-3p	0	0	1	1	0	0	HMGXB3	HMG box domain containing 3
hsa-miR-423-3p	1	0	1	0	1	1	CBX7	chromobox homolog 7
hsa-miR-423-3p	0	0	1	1	0	0	SPATA20	spermatogenesis associated 20
hsa-miR-423-3p	0	0	1	1	1	1	CCKBR	cholecystokinin B receptor
hsa-miR-423-3p	0	0	1	1	1	1	P2RX7	purinergic receptor P2X, ligand-gated ion channel, 7
hsa-miR-423-3p	0	0	1	0	0	0	PILRB	paired immunoglobin-like type 2 receptor beta
hsa-miR-423-3p	1	0	1	1	1	1	MLL	myeloid/lymphoid or mixed-lineage leukemia (trithorax homolog, Drosophila)
hsa-miR-423-3p	1	0	1	0	1	1	BCL2	B-cell CLL/lymphoma 2
hsa-miR-423-3p	1	0	1	0	1	1	ITGB3	integrin, beta 3 (platelet glycoprotein IIIa, antigen CD61)
hsa-miR-423-3p	0	0	1	1	1	1	IGF2	insulin-like growth factor 2 (somatomedin A)
hsa-miR-423-3p	1	0	1	0	1	1	SMAD2	SMAD family member 2
hsa-miR-423-3p	1	0	1	1	1	1	TMEM200B	transmembrane protein 200B
hsa-miR-423-3p	0	0	1	1	1	1	RECQL5	RecQ protein-like 5
hsa-miR-423-3p	1	0	1	0	1	1	BMF	Bcl2 modifying factor
hsa-miR-423-3p	0	0	1	1	1	1	ALG11	asparagine-linked glycosylation 11, alpha-1,2-mannosyltransferase homolog (yeast)
hsa-miR-423-3p	0	0	1	0	1	1	FLJ46347	uncharacterized LOC389064
hsa-miR-423-3p	1	0	1	1	1	1	EBF3	early B-cell factor 3
hsa-miR-423-3p	1	0	1	0	1	1	IP6K1	inositol hexakisphosphate kinase 1
hsa-miR-423-3p	1	0	1	1	1	1	SPOP	speckle-type POZ protein
hsa-miR-423-3p	1	0	1	1	1	1	C10orf114	chromosome 10 open reading frame 114
hsa-miR-423-3p	1	0	1	1	1	1	DKK3	dickkopf 3 homolog (Xenopus laevis)
hsa-miR-423-3p	1	0	1	1	1	1	PRKAG2	protein kinase, AMP-activated, gamma 2 non-catalytic subunit
hsa-miR-423-3p	0	0	1	1	1	1	ZXDC	ZXD family zinc finger C
hsa-miR-423-3p	1	0	1	1	1	1	NSL1	NSL1, MIND kinetochore complex component, homolog (S. cerevisiae)
hsa-miR-423-3p	1	0	1	1	1	1	RERE	arginine-glutamic acid dipeptide (RE) repeats
hsa-miR-423-3p	1	0	1	1	1	1	TPM3	tropomyosin 3
hsa-miR-423-3p	1	0	1	1	1	1	HS6ST2	heparan sulfate 6-O-sulfotransferase 2
hsa-miR-423-3p	1	0	1	1	1	1	ATG9A	autophagy related 9A
hsa-miR-423-3p	1	0	1	1	1	1	NDST1	N-deacetylase/N-sulfotransferase (heparan glucosaminyl) 1
hsa-miR-423-3p	1	0	1	1	1	1	ID4	inhibitor of DNA binding 4, dominant negative helix-loop-helix protein
hsa-miR-423-3p	1	0	1	1	1	1	CENPB	centromere protein B, 80kDa
hsa-miR-423-3p	0	0	1	1	0	0	COX7A2	cytochrome c oxidase subunit VIIa polypeptide 2 (liver)
hsa-miR-423-3p	1	0	1	1	0	0	GYPC	glycophorin C (Gerbich blood group)
hsa-miR-423-3p	1	0	1	1	0	0	INHBB	inhibin, beta B
hsa-miR-423-3p	1	0	1	1	1	1	ITGA9	integrin, alpha 9
hsa-miR-423-3p	0	0	1	1	1	1	ITGB1	integrin, beta 1 (fibronectin receptor, beta polypeptide, antigen CD29 includes MDF2, MSK12)
hsa-miR-423-3p	1	0	1	1	1	1	KCNJ10	potassium inwardly-rectifying channel, subfamily J, member 10
hsa-miR-423-3p	1	0	1	1	0	0	KCNN3	potassium intermediate/small conductance calcium-activated channel, subfamily N, member 3
hsa-miR-423-3p	1	0	1	1	1	1	NGFR	nerve growth factor receptor
hsa-miR-423-3p	1	0	1	1	1	1	PHB	prohibitin
hsa-miR-423-3p	0	0	1	1	1	1	SEPT5	septin 5
hsa-miR-423-3p	0	0	1	1	0	0	MAPK7	mitogen-activated protein kinase 7
hsa-miR-423-3p	0	0	1	0	0	0	PSMB10	proteasome (prosome, macropain) subunit, beta type, 10
hsa-miR-423-3p	1	0	1	1	1	1	PTMS	parathymosin
hsa-miR-423-3p	1	0	1	1	1	1	PVRL1	poliovirus receptor-related 1 (herpesvirus entry mediator C)
hsa-miR-423-3p	1	0	1	0	1	1	SFRP1	secreted frizzled-related protein 1
hsa-miR-423-3p	1	0	1	1	1	1	SRF	serum response factor (c-fos serum response element-binding transcription factor)
hsa-miR-423-3p	1	0	1	1	0	0	SLC30A3	solute carrier family 30 (zinc transporter), member 3
hsa-miR-423-3p	1	0	1	1	1	1	FZD5	frizzled family receptor 5
hsa-miR-423-3p	1	0	1	1	1	1	CUL5	cullin 5
hsa-miR-423-3p	1	0	1	0	1	1	SNN	stannin
hsa-miR-423-3p	1	0	1	1	1	1	BHLHE40	basic helix-loop-helix family, member e40
hsa-miR-423-3p	1	0	1	0	1	1	IRS2	insulin receptor substrate 2
hsa-miR-423-3p	1	0	1	1	1	1	PHOX2B	paired-like homeobox 2b
hsa-miR-423-3p	0	0	1	1	1	1	CSK	c-src tyrosine kinase
hsa-miR-423-3p	1	0	1	0	1	1	ARHGAP35	Rho GTPase activating protein 35
hsa-miR-423-3p	1	0	1	1	1	1	BZRAP1	benzodiazapine receptor (peripheral) associated protein 1
hsa-miR-423-3p	1	0	1	1	1	1	RELN	reelin
hsa-miR-423-3p	1	0	1	1	1	1	CRK	v-crk sarcoma virus CT10 oncogene homolog (avian)
hsa-miR-423-3p	0	0	1	1	1	1	MALL	mal, T-cell differentiation protein-like
hsa-miR-423-3p	1	0	1	1	1	1	HOXA11	homeobox A11
hsa-miR-423-3p	1	0	1	1	1	1	DLL1	delta-like 1 (Drosophila)
hsa-miR-423-3p	0	0	1	1	0	0	SPRR1A	small proline-rich protein 1A
hsa-miR-423-3p	1	0	1	1	1	1	NEUROD2	neuronal differentiation 2
hsa-miR-423-3p	1	0	1	1	1	1	CDK16	cyclin-dependent kinase 16
hsa-miR-423-3p	0	0	1	1	1	1	TM9SF1	transmembrane 9 superfamily member 1
hsa-miR-423-3p	1	0	1	0	1	1	API5	apoptosis inhibitor 5
hsa-miR-423-3p	0	0	1	1	0	0	KIF1C	kinesin family member 1C
hsa-miR-423-3p	1	0	1	1	1	1	RAC1	ras-related C3 botulinum toxin substrate 1 (rho family, small GTP binding protein Rac1)
hsa-miR-423-3p	1	0	1	1	1	1	ERLIN2	ER lipid raft associated 2
hsa-miR-423-3p	1	0	1	1	1	1	PALM2-AKAP2	PALM2-AKAP2 readthrough
hsa-miR-423-3p	0	0	1	1	0	0	LTB	lymphotoxin beta (TNF superfamily, member 3)
hsa-miR-423-3p	0	0	1	0	1	1	PLA2G2D	phospholipase A2, group IID
hsa-miR-423-3p	1	0	1	1	1	1	CLCF1	cardiotrophin-like cytokine factor 1
hsa-miR-423-3p	1	0	1	1	1	1	LGALSL	lectin, galactoside-binding-like
hsa-miR-423-3p	1	0	1	1	0	0	HOXC11	homeobox C11
hsa-miR-423-3p	1	0	1	0	1	1	DIEXF	digestive organ expansion factor homolog (zebrafish)
hsa-miR-423-3p	1	0	1	1	1	1	ARHGEF11	Rho guanine nucleotide exchange factor (GEF) 11
hsa-miR-423-3p	1	0	1	1	1	1	ZCCHC14	zinc finger, CCHC domain containing 14
hsa-miR-423-3p	1	0	1	1	1	1	ASXL1	additional sex combs like 1 (Drosophila)
hsa-miR-423-3p	1	0	1	0	1	1	KCTD2	potassium channel tetramerisation domain containing 2
hsa-miR-423-3p	1	0	1	1	1	1	DSTYK	dual serine/threonine and tyrosine protein kinase
hsa-miR-423-3p	0	0	1	1	0	0	SPEF1	sperm flagellar 1
hsa-miR-423-3p	1	0	1	1	1	1	MAGI1	membrane associated guanylate kinase, WW and PDZ domain containing 1
hsa-miR-423-3p	1	0	1	1	1	1	RAB14	RAB14, member RAS oncogene family
hsa-miR-423-3p	1	0	1	0	1	1	EIF2C4	eukaryotic translation initiation factor 2C, 4
hsa-miR-423-3p	0	0	1	0	1	1	THUMPD1	THUMP domain containing 1
hsa-miR-423-3p	0	0	1	1	1	1	SEC61A2	Sec61 alpha 2 subunit (S. cerevisiae)
hsa-miR-423-3p	1	0	1	1	1	1	LRRC20	leucine rich repeat containing 20
hsa-miR-423-3p	0	0	1	1	0	0	TMEM176A	transmembrane protein 176A
hsa-miR-423-3p	1	0	1	1	1	1	AJAP1	adherens junctions associated protein 1
hsa-miR-423-3p	1	0	1	1	1	1	HOXA10	homeobox A10
hsa-miR-423-3p	1	0	1	1	1	1	HOXA5	homeobox A5
hsa-miR-423-3p	1	0	1	1	1	1	EPB41L4B	erythrocyte membrane protein band 4.1 like 4B
hsa-miR-423-3p	0	0	1	1	1	1	RNF20	ring finger protein 20, E3 ubiquitin protein ligase
hsa-miR-423-3p	0	0	1	1	1	1	PDSS2	prenyl (decaprenyl) diphosphate synthase, subunit 2
hsa-miR-423-3p	1	0	1	1	1	1	PTGFRN	prostaglandin F2 receptor negative regulator
hsa-miR-423-3p	1	0	1	1	1	1	EPHA8	EPH receptor A8
hsa-miR-423-3p	1	0	1	1	1	1	SLC12A5	solute carrier family 12 (potassium/chloride transporter), member 5
hsa-miR-423-3p	0	0	1	0	1	1	ZNF490	zinc finger protein 490
hsa-miR-423-3p	1	0	1	1	1	1	USP31	ubiquitin specific peptidase 31
hsa-miR-423-3p	1	0	1	1	1	1	SIPA1L2	signal-induced proliferation-associated 1 like 2
hsa-miR-423-3p	1	0	1	1	1	1	HOMEZ	homeobox and leucine zipper encoding
hsa-miR-423-3p	1	0	1	1	1	1	RANBP10	RAN binding protein 10
hsa-miR-423-3p	0	0	1	1	0	0	TRIB3	tribbles homolog 3 (Drosophila)
hsa-miR-423-3p	0	0	1	1	0	0	HOXD11	homeobox D11
hsa-miR-423-3p	1	0	1	1	1	1	TMEM35	transmembrane protein 35
hsa-miR-423-3p	1	0	1	1	1	1	GIGYF1	GRB10 interacting GYF protein 1
hsa-miR-423-3p	1	0	1	1	1	1	EFHD2	EF-hand domain family, member D2
hsa-miR-423-3p	1	0	1	0	1	1	LIN28A	lin-28 homolog A (C. elegans)
hsa-miR-423-3p	0	0	1	1	1	1	ARMC5	armadillo repeat containing 5
hsa-miR-423-3p	0	0	1	1	0	0	RNF122	ring finger protein 122
hsa-miR-423-3p	1	0	1	1	0	0	CNTD2	cyclin N-terminal domain containing 2
hsa-miR-423-3p	0	0	1	1	0	0	TMEM156	transmembrane protein 156
hsa-miR-423-3p	1	0	1	1	1	1	SNX27	sorting nexin family member 27
hsa-miR-423-3p	0	0	1	1	1	1	PABPC3	poly(A) binding protein, cytoplasmic 3
hsa-miR-423-3p	0	0	1	1	0	0	CACNG6	calcium channel, voltage-dependent, gamma subunit 6
hsa-miR-423-3p	0	0	1	1	1	1	TSSK1B	testis-specific serine kinase 1B
hsa-miR-423-3p	0	0	1	1	0	0	SLC4A11	solute carrier family 4, sodium borate transporter, member 11
hsa-miR-423-3p	1	0	1	0	1	1	PSD2	pleckstrin and Sec7 domain containing 2
hsa-miR-423-3p	1	0	1	1	1	1	CAMKK1	calcium/calmodulin-dependent protein kinase kinase 1, alpha
hsa-miR-423-3p	1	0	1	0	1	1	EAF1	ELL associated factor 1
hsa-miR-423-3p	1	0	1	1	0	0	CAMK2N2	calcium/calmodulin-dependent protein kinase II inhibitor 2
hsa-miR-423-3p	0	0	1	0	1	1	CCDC97	coiled-coil domain containing 97
hsa-miR-423-3p	1	0	1	1	0	0	FAM167A	family with sequence similarity 167, member A
hsa-miR-423-3p	0	0	1	1	0	0	COL6A2	collagen, type VI, alpha 2
hsa-miR-423-3p	0	0	1	1	1	1	FCAR	Fc fragment of IgA, receptor for
hsa-miR-423-3p	0	0	1	1	0	0	KIF12	kinesin family member 12
hsa-miR-423-3p	1	0	1	1	1	1	KCNH8	potassium voltage-gated channel, subfamily H (eag-related), member 8
hsa-miR-423-3p	0	0	1	1	0	0	CISH	cytokine inducible SH2-containing protein
hsa-miR-423-3p	1	0	1	1	1	1	PRRT2	proline-rich transmembrane protein 2
hsa-miR-423-3p	1	0	1	1	1	1	SEPT6	septin 6
hsa-miR-423-3p	1	0	1	1	1	1	FGFBP3	fibroblast growth factor binding protein 3
hsa-miR-423-3p	0	0	1	1	0	0	C19orf18	chromosome 19 open reading frame 18
hsa-miR-423-3p	1	0	1	1	1	1	ZNF362	zinc finger protein 362
hsa-miR-423-3p	1	0	1	1	1	1	PDIK1L	PDLIM1 interacting kinase 1 like
hsa-miR-423-3p	1	0	1	1	1	1	TMEM161B	transmembrane protein 161B
hsa-miR-423-3p	1	0	1	1	1	1	DAZAP1	DAZ associated protein 1
hsa-miR-423-3p	0	0	1	1	1	1	CYP4F22	cytochrome P450, family 4, subfamily F, polypeptide 22
hsa-miR-423-3p	0	0	1	1	0	0	PRSS36	protease, serine, 36
hsa-miR-423-3p	1	0	1	0	1	1	RNF152	ring finger protein 152
hsa-miR-423-3p	0	0	1	1	0	0	C17orf74	chromosome 17 open reading frame 74
hsa-miR-423-3p	1	0	1	1	1	1	FAM134C	family with sequence similarity 134, member C
hsa-miR-423-3p	1	0	1	1	1	1	MARCH3	membrane-associated ring finger (C3HC4) 3, E3 ubiquitin protein ligase
hsa-miR-423-3p	1	0	1	1	1	1	CREM	cAMP responsive element modulator
hsa-miR-423-3p	1	0	1	0	1	1	RIMS4	regulating synaptic membrane exocytosis 4
hsa-miR-423-3p	1	0	1	0	1	1	NRK	Nik related kinase
hsa-miR-423-3p	0	0	1	0	0	0	DRAXIN	dorsal inhibitory axon guidance protein
hsa-miR-423-3p	0	0	1	1	1	1	EDN3	endothelin 3
hsa-miR-423-3p	0	0	1	0	1	1	C1orf229	chromosome 1 open reading frame 229
hsa-miR-423-3p	0	0	1	0	0	0	PCDHB19P	protocadherin beta 19 pseudogene
hsa-miR-423-3p	0	0	1	0	0	0	NXF4	nuclear RNA export factor 4 pseudogene
hsa-miR-423-3p	0	0	1	0	0	0	TOP1P1	topoisomerase (DNA) I pseudogene 1
hsa-miR-423-3p	0	0	1	0	0	0	HTR7P1	5-hydroxytryptamine (serotonin) receptor 7 pseudogene 1
hsa-miR-423-3p	0	0	1	0	0	0	SCARNA1	small Cajal body-specific RNA 1
hsa-miR-423-3p	0	0	1	0	0	0	SNORA78	small nucleolar RNA, H/ACA box 78
hsa-miR-423-3p	0	0	1	0	0	0	HSP90AB2P	heat shock protein 90kDa alpha (cytosolic), class B member 2, pseudogene
hsa-miR-423-3p	1	0	1	0	1	1	NFIX	nuclear factor I/X (CCAAT-binding transcription factor)
hsa-miR-423-3p	1	0	1	1	1	1	AKAP1	A kinase (PRKA) anchor protein 1
hsa-miR-423-3p	1	0	1	1	0	0	TNXB	tenascin XB
hsa-miR-423-3p	1	0	1	1	1	1	ATF6B	activating transcription factor 6 beta
hsa-miR-423-3p	0	0	1	1	1	1	CD6	CD6 molecule
hsa-miR-423-3p	0	0	1	0	0	0	MUC5AC	mucin 5AC, oligomeric mucus/gel-forming
hsa-miR-423-3p	1	0	1	1	1	1	DVL2	dishevelled, dsh homolog 2 (Drosophila)
hsa-miR-423-3p	0	0	1	1	0	0	TSR3	TSR3, 20S rRNA accumulation, homolog (S. cerevisiae)
hsa-miR-423-3p	0	0	0	1	0	0	LRRC23	leucine rich repeat containing 23
hsa-miR-423-3p	1	0	1	1	1	1	PSD	pleckstrin and Sec7 domain containing
hsa-miR-423-3p	0	0	1	1	1	1	GABARAPL2	GABA(A) receptor-associated protein-like 2
hsa-miR-423-3p	0	0	1	1	0	0	ISOC2	isochorismatase domain containing 2
hsa-miR-423-3p	0	0	0	1	0	0	PRLH	prolactin releasing hormone
hsa-miR-423-3p	0	0	0	1	0	0	NMRK2	nicotinamide riboside kinase 2
hsa-miR-423-3p	0	0	1	1	0	0	BPIFB2	BPI fold containing family B, member 2
hsa-miR-423-3p	0	0	1	1	1	1	IL4R	interleukin 4 receptor
hsa-miR-423-3p	0	0	0	1	0	0	TSPAN32	tetraspanin 32
hsa-miR-423-3p	0	0	0	1	0	0	MRPL28	mitochondrial ribosomal protein L28
hsa-miR-423-3p	1	0	1	1	1	1	ADAM11	ADAM metallopeptidase domain 11
hsa-miR-423-3p	0	0	0	1	0	0	MYL6B	myosin, light chain 6B, alkali, smooth muscle and non-muscle
hsa-miR-423-3p	0	0	0	1	0	0	ATP5D	ATP synthase, H+ transporting, mitochondrial F1 complex, delta subunit
hsa-miR-423-3p	0	0	0	1	0	0	POLRMT	polymerase (RNA) mitochondrial (DNA directed)
hsa-miR-423-3p	0	0	1	1	1	1	TBC1D10A	TBC1 domain family, member 10A
hsa-miR-423-3p	0	0	1	1	1	1	C22orf28	chromosome 22 open reading frame 28
hsa-miR-423-3p	0	0	0	1	1	1	RHBDD3	rhomboid domain containing 3
hsa-miR-423-3p	0	0	0	1	0	0	EIF3D	eukaryotic translation initiation factor 3, subunit D
hsa-miR-423-3p	1	0	1	1	1	1	ZFYVE21	zinc finger, FYVE domain containing 21
hsa-miR-423-3p	0	0	1	1	0	0	CHMP4A	charged multivesicular body protein 4A
hsa-miR-423-3p	0	0	1	1	0	0	MYBL2	v-myb myeloblastosis viral oncogene homolog (avian)-like 2
hsa-miR-423-3p	0	0	1	1	0	0	PIGU	phosphatidylinositol glycan anchor biosynthesis, class U
hsa-miR-423-3p	0	0	0	1	0	0	RENBP	renin binding protein
hsa-miR-423-3p	0	0	1	1	1	1	AQP8	aquaporin 8
hsa-miR-423-3p	0	0	1	1	1	1	CDIPT	CDP-diacylglycerol--inositol 3-phosphatidyltransferase
hsa-miR-423-3p	1	0	1	1	0	0	PNPLA6	patatin-like phospholipase domain containing 6
hsa-miR-423-3p	1	0	1	1	0	0	TBC1D17	TBC1 domain family, member 17
hsa-miR-423-3p	0	0	0	1	0	0	C19orf53	chromosome 19 open reading frame 53
hsa-miR-423-3p	0	0	1	1	0	0	APLP1	amyloid beta (A4) precursor-like protein 1
hsa-miR-423-3p	0	0	0	1	0	0	PLIN3	perilipin 3
hsa-miR-423-3p	0	0	1	1	1	1	GCDH	glutaryl-CoA dehydrogenase
hsa-miR-423-3p	0	0	0	1	0	0	EPHB6	EPH receptor B6
hsa-miR-423-3p	0	0	1	1	1	1	HYAL4	hyaluronoglucosaminidase 4
hsa-miR-423-3p	0	0	0	1	0	0	MOGAT3	monoacylglycerol O-acyltransferase 3
hsa-miR-423-3p	0	0	0	1	0	0	RBP3	retinol binding protein 3, interstitial
hsa-miR-423-3p	0	0	1	1	0	0	FBXL15	F-box and leucine-rich repeat protein 15
hsa-miR-423-3p	1	0	0	1	1	1	WNT3	wingless-type MMTV integration site family, member 3
hsa-miR-423-3p	0	0	1	1	1	1	KRT32	keratin 32
hsa-miR-423-3p	0	0	1	1	0	0	VTN	vitronectin
hsa-miR-423-3p	1	0	1	1	1	1	WFS1	Wolfram syndrome 1 (wolframin)
hsa-miR-423-3p	0	0	1	1	1	1	ARHGDIB	Rho GDP dissociation inhibitor (GDI) beta
hsa-miR-423-3p	0	0	0	1	0	0	SPSB2	splA/ryanodine receptor domain and SOCS box containing 2
hsa-miR-423-3p	1	0	1	1	1	1	SRSF9	serine/arginine-rich splicing factor 9
hsa-miR-423-3p	0	0	1	1	0	0	GPX5	glutathione peroxidase 5 (epididymal androgen-related protein)
hsa-miR-423-3p	0	0	1	1	1	1	BYSL	bystin-like
hsa-miR-423-3p	0	0	0	1	1	1	PCDHB5	protocadherin beta 5
hsa-miR-423-3p	0	0	0	1	1	1	WNT6	wingless-type MMTV integration site family, member 6
hsa-miR-423-3p	0	0	0	1	0	0	VAX2	ventral anterior homeobox 2
hsa-miR-423-3p	0	0	0	1	1	1	OPRD1	opioid receptor, delta 1
hsa-miR-423-3p	0	0	0	1	0	0	CTSD	cathepsin D
hsa-miR-423-3p	1	0	1	1	1	1	TBPL1	TBP-like 1
hsa-miR-423-3p	1	0	1	1	0	0	CCDC92	coiled-coil domain containing 92
hsa-miR-423-3p	0	0	1	1	0	0	HELLS	helicase, lymphoid-specific
hsa-miR-423-3p	1	0	1	1	1	1	DUSP4	dual specificity phosphatase 4
hsa-miR-423-3p	1	0	1	1	1	1	ACHE	acetylcholinesterase
hsa-miR-423-3p	0	0	0	1	0	0	GSTM2	glutathione S-transferase mu 2 (muscle)
hsa-miR-423-3p	0	0	1	1	0	0	RASL11A	RAS-like, family 11, member A
hsa-miR-423-3p	0	0	1	1	1	1	HOXA7	homeobox A7
hsa-miR-423-3p	0	0	1	1	0	0	WDR83	WD repeat domain 83
hsa-miR-423-3p	0	0	0	1	0	0	HOXC12	homeobox C12
hsa-miR-423-3p	0	0	0	1	0	0	BATF3	basic leucine zipper transcription factor, ATF-like 3
hsa-miR-423-3p	0	0	1	1	0	0	LIPE	lipase, hormone-sensitive
hsa-miR-423-3p	0	0	1	1	0	0	C6orf130	chromosome 6 open reading frame 130
hsa-miR-423-3p	0	0	0	1	0	0	EMC3	ER membrane protein complex subunit 3
hsa-miR-423-3p	0	0	0	1	0	0	NT5C	5', 3'-nucleotidase, cytosolic
hsa-miR-423-3p	1	0	1	1	1	1	EML2	echinoderm microtubule associated protein like 2
hsa-miR-423-3p	1	0	1	1	1	1	NECAB3	N-terminal EF-hand calcium binding protein 3
hsa-miR-423-3p	1	0	1	1	0	0	BCL2L12	BCL2-like 12 (proline rich)
hsa-miR-423-3p	0	0	1	1	1	1	RRAS	related RAS viral (r-ras) oncogene homolog
hsa-miR-423-3p	0	0	0	1	1	1	MPV17L2	MPV17 mitochondrial membrane protein-like 2
hsa-miR-423-3p	0	0	1	1	0	0	SIRT2	sirtuin 2
hsa-miR-423-3p	0	0	1	1	1	1	HOXD3	homeobox D3
hsa-miR-423-3p	1	0	1	1	1	1	IVD	isovaleryl-CoA dehydrogenase
hsa-miR-423-3p	0	0	1	1	1	1	MMP28	matrix metallopeptidase 28
hsa-miR-423-3p	1	0	0	1	1	1	SBNO2	strawberry notch homolog 2 (Drosophila)
hsa-miR-423-3p	0	0	1	1	1	1	CNGB1	cyclic nucleotide gated channel beta 1
hsa-miR-423-3p	0	0	0	1	0	0	PBX4	pre-B-cell leukemia homeobox 4
hsa-miR-423-3p	1	0	0	1	1	1	ELOF1	elongation factor 1 homolog (S. cerevisiae)
hsa-miR-423-3p	0	0	0	1	1	1	APOC2	apolipoprotein C-II
hsa-miR-423-3p	0	0	1	1	1	1	CREB3L3	cAMP responsive element binding protein 3-like 3
hsa-miR-423-3p	1	0	1	1	0	0	MLLT1	myeloid/lymphoid or mixed-lineage leukemia (trithorax homolog, Drosophila); translocated to, 1
hsa-miR-423-3p	0	0	1	1	0	0	FCHO1	FCH domain only 1
hsa-miR-423-3p	0	0	0	1	0	0	C20orf151	chromosome 20 open reading frame 151
hsa-miR-423-3p	0	0	0	1	0	0	ZSCAN5A	zinc finger and SCAN domain containing 5A
hsa-miR-423-3p	0	0	0	1	0	0	PODNL1	podocan-like 1
hsa-miR-423-3p	1	0	1	1	1	1	NUP210	nucleoporin 210kDa
hsa-miR-423-3p	1	0	0	1	1	1	EMILIN2	elastin microfibril interfacer 2
hsa-miR-423-3p	0	0	1	1	0	0	RAMP1	receptor (G protein-coupled) activity modifying protein 1
hsa-miR-423-3p	0	0	1	1	0	0	MATN4	matrilin 4
hsa-miR-423-3p	0	0	1	1	1	1	CHI3L1	chitinase 3-like 1 (cartilage glycoprotein-39)
hsa-miR-423-3p	0	0	1	1	0	0	LGALS12	lectin, galactoside-binding, soluble, 12
hsa-miR-423-3p	0	0	1	1	1	1	MED10	mediator complex subunit 10
hsa-miR-423-3p	1	0	1	1	1	1	FHOD3	formin homology 2 domain containing 3
hsa-miR-423-3p	1	0	0	1	1	1	MSI1	musashi homolog 1 (Drosophila)
hsa-miR-423-3p	0	0	1	1	1	1	AKIRIN2	akirin 2
hsa-miR-423-3p	0	0	0	1	0	0	FBXL8	F-box and leucine-rich repeat protein 8
hsa-miR-423-3p	0	0	0	1	0	0	CHRND	cholinergic receptor, nicotinic, delta (muscle)
hsa-miR-423-3p	0	0	0	1	0	0	DDX56	DEAD (Asp-Glu-Ala-Asp) box helicase 56
hsa-miR-423-3p	0	0	1	1	0	0	ADAMTS7	ADAM metallopeptidase with thrombospondin type 1 motif, 7
hsa-miR-423-3p	0	0	1	1	0	0	IL36G	interleukin 36, gamma
hsa-miR-423-3p	1	0	1	1	1	1	PALM2	paralemmin 2
hsa-miR-423-3p	0	0	0	1	0	0	CD72	CD72 molecule
hsa-miR-423-3p	0	0	0	1	0	0	GCHFR	GTP cyclohydrolase I feedback regulator
hsa-miR-423-3p	1	0	1	1	1	1	CORO1C	coronin, actin binding protein, 1C
hsa-miR-423-3p	0	0	1	1	0	0	VWF	von Willebrand factor
hsa-miR-423-3p	0	0	0	1	1	1	VAC14	Vac14 homolog (S. cerevisiae)
hsa-miR-423-3p	0	0	1	1	0	0	RBMS2	RNA binding motif, single stranded interacting protein 2
hsa-miR-423-3p	0	0	1	1	1	1	SCPEP1	serine carboxypeptidase 1
hsa-miR-423-3p	0	0	0	1	0	0	TELO2	TEL2, telomere maintenance 2, homolog (S. cerevisiae)
hsa-miR-423-3p	0	0	1	1	0	0	ITGA2B	integrin, alpha 2b (platelet glycoprotein IIb of IIb/IIIa complex, antigen CD41)
hsa-miR-423-3p	0	0	1	1	1	1	DHX8	DEAH (Asp-Glu-Ala-His) box polypeptide 8
hsa-miR-423-3p	0	0	0	1	1	1	SLC4A1	solute carrier family 4, anion exchanger, member 1 (erythrocyte membrane protein band 3, Diego blood group)
hsa-miR-423-3p	0	0	1	1	0	0	DNAH9	dynein, axonemal, heavy chain 9
hsa-miR-423-3p	0	0	1	1	1	1	GNAO1	guanine nucleotide binding protein (G protein), alpha activating activity polypeptide O
hsa-miR-423-3p	0	0	0	1	0	0	CHST8	carbohydrate (N-acetylgalactosamine 4-0) sulfotransferase 8
hsa-miR-423-3p	0	0	1	1	0	0	HPN	hepsin
hsa-miR-423-3p	0	0	0	1	0	0	CCDC124	coiled-coil domain containing 124
hsa-miR-423-3p	0	0	0	1	0	0	PDE4C	phosphodiesterase 4C, cAMP-specific
hsa-miR-423-3p	0	0	1	1	0	0	KCNN4	potassium intermediate/small conductance calcium-activated channel, subfamily N, member 4
hsa-miR-423-3p	1	0	1	1	0	0	AGFG2	ArfGAP with FG repeats 2
hsa-miR-423-3p	0	0	0	1	0	0	C19orf10	chromosome 19 open reading frame 10
hsa-miR-423-3p	1	0	1	1	1	1	DPP9	dipeptidyl-peptidase 9
hsa-miR-423-3p	0	0	0	1	0	0	ZFR2	zinc finger RNA binding protein 2
hsa-miR-423-3p	1	0	1	1	1	1	TCF3	transcription factor 3 (E2A immunoglobulin enhancer binding factors E12/E47)
hsa-miR-423-3p	1	0	1	1	1	1	MAPK3	mitogen-activated protein kinase 3
hsa-miR-423-3p	1	0	1	1	1	1	STRN4	striatin, calmodulin binding protein 4
hsa-miR-423-3p	1	0	1	1	0	0	NOTCH3	notch 3
hsa-miR-423-3p	0	0	1	1	1	1	PPP1R12C	protein phosphatase 1, regulatory subunit 12C
hsa-miR-423-3p	0	0	0	1	0	0	DBH	dopamine beta-hydroxylase (dopamine beta-monooxygenase)
hsa-miR-423-3p	1	0	1	1	0	0	ARHGEF17	Rho guanine nucleotide exchange factor (GEF) 17
hsa-miR-423-3p	0	0	0	1	0	0	LCAT	lecithin-cholesterol acyltransferase
hsa-miR-423-3p	0	0	1	1	0	0	IFT46	intraflagellar transport 46 homolog (Chlamydomonas)
hsa-miR-423-3p	1	0	1	1	1	1	LOXL3	lysyl oxidase-like 3
hsa-miR-423-3p	1	0	0	1	0	0	ECE1	endothelin converting enzyme 1
hsa-miR-423-3p	0	0	1	1	1	1	SEC22C	SEC22 vesicle trafficking protein homolog C (S. cerevisiae)
hsa-miR-423-3p	1	0	1	1	1	1	ASB1	ankyrin repeat and SOCS box containing 1
hsa-miR-423-3p	0	0	1	1	1	1	HOOK2	hook homolog 2 (Drosophila)
hsa-miR-423-3p	0	0	1	1	0	0	FETUB	fetuin B
hsa-miR-423-3p	1	0	1	1	0	0	SPEG	SPEG complex locus
hsa-miR-423-3p	0	0	1	1	1	1	TRDN	triadin
hsa-miR-423-3p	0	0	0	1	0	0	SCAP	SREBF chaperone
hsa-miR-423-3p	1	0	1	1	1	1	SLC2A4RG	SLC2A4 regulator
hsa-miR-423-3p	0	0	1	1	0	0	ADAM21	ADAM metallopeptidase domain 21
hsa-miR-423-3p	0	0	1	1	1	1	SLC27A2	solute carrier family 27 (fatty acid transporter), member 2
hsa-miR-423-3p	1	0	1	1	1	1	CBFA2T3	core-binding factor, runt domain, alpha subunit 2; translocated to, 3
hsa-miR-423-3p	1	0	1	1	1	1	FOXK2	forkhead box K2
hsa-miR-423-3p	0	0	0	1	0	0	SLC39A3	solute carrier family 39 (zinc transporter), member 3
hsa-miR-423-3p	0	0	0	1	0	0	CIB3	calcium and integrin binding family member 3
hsa-miR-423-3p	0	0	1	1	0	0	NTN5	netrin 5
hsa-miR-423-3p	0	0	1	1	0	0	WTIP	Wilms tumor 1 interacting protein
hsa-miR-423-3p	0	0	1	1	0	0	FXYD1	FXYD domain containing ion transport regulator 1
hsa-miR-423-3p	0	0	1	1	0	0	FXYD7	FXYD domain containing ion transport regulator 7
hsa-miR-423-3p	0	0	0	1	1	1	FAM71E1	family with sequence similarity 71, member E1
hsa-miR-423-3p	0	0	0	1	1	1	OTOF	otoferlin
hsa-miR-423-3p	0	0	1	1	0	0	RTKN	rhotekin
hsa-miR-423-3p	0	0	1	1	0	0	GPR17	G protein-coupled receptor 17
hsa-miR-423-3p	0	0	1	1	0	0	SLC4A3	solute carrier family 4, anion exchanger, member 3
hsa-miR-423-3p	0	0	1	1	0	0	SPINK7	serine peptidase inhibitor, Kazal type 7 (putative)
hsa-miR-423-3p	0	0	0	1	0	0	FERD3L	Fer3-like (Drosophila)
hsa-miR-423-3p	0	0	0	1	0	0	RPL32P18	ribosomal protein L32 pseudogene 18
hsa-miR-423-3p	0	0	0	1	0	0	DENND2A	DENN/MADD domain containing 2A
hsa-miR-423-3p	0	0	0	1	1	1	ZNF16	zinc finger protein 16
hsa-miR-423-3p	1	0	1	1	1	1	NACC2	NACC family member 2, BEN and BTB (POZ) domain containing
hsa-miR-423-3p	1	0	1	1	1	1	ADM	adrenomedullin
hsa-miR-423-3p	0	0	1	1	0	0	SAA4	serum amyloid A4, constitutive
hsa-miR-423-3p	0	0	1	1	1	1	PGAP2	post-GPI attachment to proteins 2
hsa-miR-423-3p	0	0	1	1	1	1	TAGLN	transgelin
hsa-miR-423-3p	0	0	1	1	1	1	SIRPB1	signal-regulatory protein beta 1
hsa-miR-423-3p	1	0	1	1	1	1	KCNA6	potassium voltage-gated channel, shaker-related subfamily, member 6
hsa-miR-423-3p	0	0	1	1	1	1	CDC123	cell division cycle 123 homolog (S. cerevisiae)
hsa-miR-423-3p	0	0	1	1	0	0	TMEM163	transmembrane protein 163
hsa-miR-423-3p	0	0	1	1	0	0	SMARCA5	SWI/SNF related, matrix associated, actin dependent regulator of chromatin, subfamily a, member 5
hsa-miR-423-3p	0	0	1	1	0	0	TRIM74	tripartite motif containing 74
hsa-miR-423-3p	0	0	1	1	0	0	CSF1R	colony stimulating factor 1 receptor
hsa-miR-423-3p	0	0	1	1	1	1	SLC28A1	solute carrier family 28 (sodium-coupled nucleoside transporter), member 1
hsa-miR-423-3p	0	0	0	1	1	1	PDF	peptide deformylase (mitochondrial)
hsa-miR-423-3p	0	0	0	1	1	1	EXOSC6	exosome component 6
hsa-miR-423-3p	0	0	1	1	1	1	CIB4	calcium and integrin binding family member 4
hsa-miR-423-3p	0	0	0	1	0	0	LRRC43	leucine rich repeat containing 43
hsa-miR-423-3p	0	0	0	1	0	0	CDH15	cadherin 15, type 1, M-cadherin (myotubule)
hsa-miR-423-3p	0	0	0	1	0	0	HTR6	5-hydroxytryptamine (serotonin) receptor 6, G protein-coupled
hsa-miR-423-3p	0	0	1	1	0	0	SPATA2L	spermatogenesis associated 2-like
hsa-miR-423-3p	0	0	0	1	0	0	CHRNB3	cholinergic receptor, nicotinic, beta 3 (neuronal)
hsa-miR-423-3p	0	0	1	1	0	0	SCRN2	secernin 2
hsa-miR-423-3p	0	0	1	1	0	0	ARAF	v-raf murine sarcoma 3611 viral oncogene homolog
hsa-miR-423-3p	0	0	0	1	0	0	OGFR	opioid growth factor receptor
hsa-miR-423-3p	0	0	0	1	0	0	ACE	angiotensin I converting enzyme (peptidyl-dipeptidase A) 1
hsa-miR-423-3p	0	0	1	1	0	0	ATP13A1	ATPase type 13A1
hsa-miR-423-3p	0	0	1	1	0	0	PDE9A	phosphodiesterase 9A
hsa-miR-423-3p	0	0	1	1	1	1	HIPK4	homeodomain interacting protein kinase 4
hsa-miR-423-3p	0	0	0	1	0	0	RDH13	retinol dehydrogenase 13 (all-trans/9-cis)
hsa-miR-423-3p	0	0	0	1	0	0	AMICA1	adhesion molecule, interacts with CXADR antigen 1
hsa-miR-423-3p	0	0	1	1	0	0	AZGP1	alpha-2-glycoprotein 1, zinc-binding
hsa-miR-423-3p	0	0	0	1	0	0	LY6K	lymphocyte antigen 6 complex, locus K
hsa-miR-423-3p	1	0	1	1	0	0	IER2	immediate early response 2
hsa-miR-423-3p	0	0	0	1	0	0	ATP5J2	ATP synthase, H+ transporting, mitochondrial Fo complex, subunit F2
hsa-miR-423-3p	0	0	0	1	0	0	TONSL	tonsoku-like, DNA repair protein
hsa-miR-423-3p	0	0	1	1	0	0	THAP8	THAP domain containing 8
hsa-miR-423-3p	0	0	1	1	1	1	CD300LG	CD300 molecule-like family member g
hsa-miR-423-3p	1	0	1	1	0	0	GRASP	GRP1 (general receptor for phosphoinositides 1)-associated scaffold protein
hsa-miR-423-3p	0	0	1	1	1	1	SOX8	SRY (sex determining region Y)-box 8
hsa-miR-423-3p	0	0	0	1	0	0	TAF6L	TAF6-like RNA polymerase II, p300/CBP-associated factor (PCAF)-associated factor, 65kDa
hsa-miR-423-3p	1	0	1	1	1	1	NXF1	nuclear RNA export factor 1
hsa-miR-423-3p	1	0	1	1	0	0	C11orf84	chromosome 11 open reading frame 84
hsa-miR-423-3p	1	0	1	1	0	0	NCSTN	nicastrin
hsa-miR-423-3p	1	0	1	1	1	1	CDC42EP3	CDC42 effector protein (Rho GTPase binding) 3
hsa-miR-423-3p	0	0	1	1	0	0	C4orf36	chromosome 4 open reading frame 36
hsa-miR-423-3p	1	0	1	1	1	1	BAP1	BRCA1 associated protein-1 (ubiquitin carboxy-terminal hydrolase)
hsa-miR-423-3p	0	0	0	1	0	0	S100P	S100 calcium binding protein P
hsa-miR-423-3p	0	0	1	1	1	1	TLX3	T-cell leukemia homeobox 3
hsa-miR-423-3p	1	0	0	1	0	0	FBXL18	F-box and leucine-rich repeat protein 18
hsa-miR-423-3p	1	0	1	1	1	1	LMTK2	lemur tyrosine kinase 2
hsa-miR-423-3p	0	0	1	1	1	1	ISCA2	iron-sulfur cluster assembly 2 homolog (S. cerevisiae)
hsa-miR-423-3p	0	0	0	1	0	0	SERPINA4	serpin peptidase inhibitor, clade A (alpha-1 antiproteinase, antitrypsin), member 4
hsa-miR-423-3p	0	0	1	1	1	1	STAT6	signal transducer and activator of transcription 6, interleukin-4 induced
hsa-miR-423-3p	0	0	1	1	0	0	GNGT2	guanine nucleotide binding protein (G protein), gamma transducing activity polypeptide 2
hsa-miR-423-3p	0	0	1	1	1	1	ENGASE	endo-beta-N-acetylglucosaminidase
hsa-miR-423-3p	0	0	1	1	1	1	TRIM68	tripartite motif containing 68
hsa-miR-423-3p	1	0	1	1	0	0	JPH3	junctophilin 3
hsa-miR-423-3p	0	0	1	1	0	0	LALBA	lactalbumin, alpha-
hsa-miR-423-3p	0	0	0	1	0	0	TP53I13	tumor protein p53 inducible protein 13
hsa-miR-423-3p	0	0	0	1	0	0	CYP2A6	cytochrome P450, family 2, subfamily A, polypeptide 6
hsa-miR-423-3p	0	0	1	1	0	0	TRAPPC9	trafficking protein particle complex 9
hsa-miR-423-3p	0	0	0	1	0	0	PSCA	prostate stem cell antigen
hsa-miR-423-3p	0	0	0	1	0	0	LY6D	lymphocyte antigen 6 complex, locus D
hsa-miR-423-3p	0	0	1	1	1	1	HDGFRP2	hepatoma-derived growth factor-related protein 2
hsa-miR-423-3p	0	0	0	1	1	1	PLIN4	perilipin 4
hsa-miR-423-3p	0	0	0	1	0	0	RECQL4	RecQ protein-like 4
hsa-miR-423-3p	0	0	0	1	0	0	RILP	Rab interacting lysosomal protein
hsa-miR-423-3p	0	0	1	1	0	0	KLK15	kallikrein-related peptidase 15
hsa-miR-423-3p	0	0	0	1	1	1	KRT16	keratin 16
hsa-miR-423-3p	0	0	0	1	0	0	E4F1	E4F transcription factor 1
hsa-miR-423-3p	0	0	1	1	1	1	BFSP2	beaded filament structural protein 2, phakinin
hsa-miR-423-3p	0	0	0	1	0	0	C1QTNF4	C1q and tumor necrosis factor related protein 4
hsa-miR-423-3p	1	0	1	1	1	1	ZBTB46	zinc finger and BTB domain containing 46
hsa-miR-423-3p	1	0	1	1	1	1	SIX2	SIX homeobox 2
hsa-miR-423-3p	0	0	1	1	0	0	PRELID1	PRELI domain containing 1
hsa-miR-423-3p	0	0	1	1	0	0	HSPB2	heat shock 27kDa protein 2
hsa-miR-423-3p	0	0	0	1	0	0	IL17D	interleukin 17D
hsa-miR-423-3p	0	0	1	1	1	1	YEATS2	YEATS domain containing 2
hsa-miR-423-3p	0	0	0	1	1	1	PTAFR	platelet-activating factor receptor
hsa-miR-423-3p	1	0	1	1	0	0	TET3	tet methylcytosine dioxygenase 3
hsa-miR-423-3p	0	0	1	1	0	0	CCL11	chemokine (C-C motif) ligand 11
hsa-miR-423-3p	0	0	1	1	1	1	SMOX	spermine oxidase
hsa-miR-423-3p	0	0	1	1	0	0	HOXD4	homeobox D4
hsa-miR-423-3p	0	0	1	1	0	0	ZNF692	zinc finger protein 692
hsa-miR-423-3p	1	0	1	1	0	0	ADRA1B	adrenoceptor alpha 1B
hsa-miR-423-3p	1	0	1	1	1	1	GFRA2	GDNF family receptor alpha 2
hsa-miR-423-3p	0	0	1	1	1	1	COG8	component of oligomeric golgi complex 8
hsa-miR-423-3p	0	0	1	1	0	0	TSNARE1	t-SNARE domain containing 1
hsa-miR-423-3p	0	0	1	1	1	1	HTRA3	HtrA serine peptidase 3
hsa-miR-423-3p	0	0	0	1	0	0	EME2	essential meiotic endonuclease 1 homolog 2 (S. pombe)
hsa-miR-423-3p	0	0	1	1	1	1	MRPS12	mitochondrial ribosomal protein S12
hsa-miR-423-3p	1	0	1	1	1	1	LRRN3	leucine rich repeat neuronal 3
hsa-miR-423-3p	0	0	0	1	0	0	ATAD3B	ATPase family, AAA domain containing 3B
hsa-miR-423-3p	0	0	1	1	1	1	PSMD1	proteasome (prosome, macropain) 26S subunit, non-ATPase, 1
hsa-miR-423-3p	0	0	1	1	0	0	RHOD	ras homolog family member D
hsa-miR-423-3p	0	0	0	1	0	0	C20orf201	chromosome 20 open reading frame 201
hsa-miR-423-3p	0	0	1	1	0	0	CCDC106	coiled-coil domain containing 106
hsa-miR-423-3p	0	0	1	1	0	0	GRB7	growth factor receptor-bound protein 7
hsa-miR-423-3p	0	0	0	1	1	1	FAM86B2	family with sequence similarity 86, member B2
hsa-miR-423-3p	0	0	0	1	0	0	GSTM1	glutathione S-transferase mu 1
hsa-miR-423-3p	0	0	1	1	0	0	TIGD3	tigger transposable element derived 3
hsa-miR-423-3p	1	0	1	1	1	1	DAB2IP	DAB2 interacting protein
hsa-miR-423-3p	1	0	1	1	1	1	CDK13	cyclin-dependent kinase 13
hsa-miR-423-3p	1	0	0	1	1	1	ELF3	E74-like factor 3 (ets domain transcription factor, epithelial-specific )
hsa-miR-423-3p	0	0	1	1	0	0	SPERT	spermatid associated
hsa-miR-423-3p	1	0	1	1	1	1	FAM131A	family with sequence similarity 131, member A
hsa-miR-423-3p	0	0	0	1	1	1	CYP4A11	cytochrome P450, family 4, subfamily A, polypeptide 11
hsa-miR-423-3p	0	0	1	1	1	1	CARHSP1	calcium regulated heat stable protein 1, 24kDa
hsa-miR-423-3p	0	0	1	1	0	0	HRAS	v-Ha-ras Harvey rat sarcoma viral oncogene homolog
hsa-miR-423-3p	0	0	1	1	0	0	UBQLN3	ubiquilin 3
hsa-miR-423-3p	0	0	0	1	1	1	SLC22A13	solute carrier family 22 (organic anion transporter), member 13
hsa-miR-423-3p	0	0	1	1	0	0	CPT1B	carnitine palmitoyltransferase 1B (muscle)
hsa-miR-423-3p	0	0	1	1	1	1	GLIS1	GLIS family zinc finger 1
hsa-miR-423-3p	1	0	1	1	1	1	SWSAP1	SWIM-type zinc finger 7 associated protein 1
hsa-miR-423-3p	0	0	0	1	0	0	TSGA10IP	testis specific, 10 interacting protein
hsa-miR-423-3p	0	0	1	1	0	0	MRPL46	mitochondrial ribosomal protein L46
hsa-miR-423-3p	0	0	0	1	0	0	GUK1	guanylate kinase 1
hsa-miR-423-3p	0	0	1	1	1	1	RNF166	ring finger protein 166
hsa-miR-423-3p	0	0	1	1	1	1	PDE4DIP	phosphodiesterase 4D interacting protein
hsa-miR-423-3p	0	0	1	1	1	1	MRPS23	mitochondrial ribosomal protein S23
hsa-miR-423-3p	0	0	0	1	0	0	CSNK1G2-AS1	CSNK1G2 antisense RNA 1
hsa-miR-423-3p	0	0	1	1	1	1	R3HCC1L	R3H domain and coiled-coil containing 1-like
hsa-miR-423-3p	0	0	0	1	0	0	UBXN11	UBX domain protein 11
hsa-miR-423-3p	0	0	1	1	1	1	ST8SIA5	ST8 alpha-N-acetyl-neuraminide alpha-2,8-sialyltransferase 5
hsa-miR-423-3p	0	0	1	1	0	0	CALML3	calmodulin-like 3
hsa-miR-423-3p	1	0	1	1	0	0	DLGAP1	discs, large (Drosophila) homolog-associated protein 1
hsa-miR-423-3p	0	0	0	1	0	0	TMEM125	transmembrane protein 125
hsa-miR-423-3p	0	0	0	1	1	1	ITGA11	integrin, alpha 11
hsa-miR-423-3p	1	0	0	1	1	1	WNK4	WNK lysine deficient protein kinase 4
hsa-miR-423-3p	1	0	1	1	1	1	PRIMA1	proline rich membrane anchor 1
hsa-miR-423-3p	1	0	1	1	0	0	SEMA3B	sema domain, immunoglobulin domain (Ig), short basic domain, secreted, (semaphorin) 3B
hsa-miR-423-3p	0	0	1	1	0	0	DNAJC7	DnaJ (Hsp40) homolog, subfamily C, member 7
hsa-miR-423-3p	0	0	1	1	1	1	BIN1	bridging integrator 1
hsa-miR-423-3p	1	0	0	1	0	0	APBA3	amyloid beta (A4) precursor protein-binding, family A, member 3
hsa-miR-423-3p	0	0	1	1	0	0	LRRN4CL	LRRN4 C-terminal like
hsa-miR-423-3p	1	0	1	1	1	1	CC2D1A	coiled-coil and C2 domain containing 1A
hsa-miR-423-3p	1	0	0	1	1	1	PABPC1	poly(A) binding protein, cytoplasmic 1
hsa-miR-423-3p	1	0	1	1	1	1	RARA	retinoic acid receptor, alpha
hsa-miR-423-3p	0	0	1	1	1	1	ZNF771	zinc finger protein 771
hsa-miR-423-3p	0	0	0	1	1	1	ETV4	ets variant 4
hsa-miR-423-3p	0	0	1	1	0	0	KARS	lysyl-tRNA synthetase
hsa-miR-423-3p	1	0	0	1	0	0	ZFPM1	zinc finger protein, multitype 1
hsa-miR-423-3p	0	1	1	1	0	0	PKM	pyruvate kinase, muscle
hsa-miR-423-3p	0	0	0	1	0	0	AMIGO3	adhesion molecule with Ig-like domain 3
hsa-miR-423-3p	0	0	1	1	1	1	ARHGEF25	Rho guanine nucleotide exchange factor (GEF) 25
hsa-miR-423-3p	0	0	1	1	0	0	SLC26A10	solute carrier family 26, member 10
hsa-miR-423-3p	0	0	1	1	0	0	ZDHHC8	zinc finger, DHHC-type containing 8
hsa-miR-423-3p	0	0	1	1	1	1	NQO1	NAD(P)H dehydrogenase, quinone 1
hsa-miR-423-3p	0	0	1	1	0	0	INPPL1	inositol polyphosphate phosphatase-like 1
hsa-miR-423-3p	1	0	1	1	0	0	IGSF9B	immunoglobulin superfamily, member 9B
hsa-miR-423-3p	0	0	1	1	0	0	PRPF31	PRP31 pre-mRNA processing factor 31 homolog (S. cerevisiae)
hsa-miR-423-3p	1	0	1	1	1	1	DYRK1A	dual-specificity tyrosine-(Y)-phosphorylation regulated kinase 1A
hsa-miR-423-3p	0	0	0	1	0	0	C10orf91	chromosome 10 open reading frame 91
hsa-miR-423-3p	0	0	0	1	0	0	LINC00476	long intergenic non-protein coding RNA 476
hsa-miR-423-3p	0	0	1	1	1	1	FAM109B	family with sequence similarity 109, member B
hsa-miR-423-3p	0	0	1	1	0	0	SPACA4	sperm acrosome associated 4
hsa-miR-423-3p	0	0	0	1	0	0	P2RY11	purinergic receptor P2Y, G-protein coupled, 11
hsa-miR-423-3p	0	0	0	1	0	0	PPAN	peter pan homolog (Drosophila)
hsa-miR-423-3p	0	0	0	1	0	0	PPAN-P2RY11	PPAN-P2RY11 readthrough
hsa-miR-423-3p	0	0	1	1	0	0	CD151	CD151 molecule (Raph blood group)
hsa-miR-423-3p	0	0	0	1	1	1	POLR2L	polymerase (RNA) II (DNA directed) polypeptide L, 7.6kDa
hsa-miR-423-3p	0	0	0	1	0	0	ROGDI	rogdi homolog (Drosophila)
hsa-miR-423-3p	0	0	1	1	1	1	DDX10	DEAD (Asp-Glu-Ala-Asp) box polypeptide 10
hsa-miR-423-3p	0	0	0	1	1	1	MTHFSD	methenyltetrahydrofolate synthetase domain containing
hsa-miR-423-3p	0	0	1	1	0	0	TCOF1	Treacher Collins-Franceschetti syndrome 1
hsa-miR-423-3p	0	0	1	1	0	0	TRIM73	tripartite motif containing 73
hsa-miR-423-3p	0	0	1	1	0	0	STRA6	stimulated by retinoic acid gene 6 homolog (mouse)
hsa-miR-423-3p	1	0	1	1	1	1	FBXL16	F-box and leucine-rich repeat protein 16
hsa-miR-423-3p	0	0	1	1	0	0	PPIE	peptidylprolyl isomerase E (cyclophilin E)
hsa-miR-423-3p	0	0	0	1	0	0	H1FOO	H1 histone family, member O, oocyte-specific
hsa-miR-423-3p	0	0	1	1	0	0	MRVI1-AS1	MRVI1 antisense RNA 1
hsa-miR-423-3p	0	0	0	1	0	0	CHMP6	charged multivesicular body protein 6
hsa-miR-423-3p	0	0	1	1	1	1	ATXN2L	ataxin 2-like
hsa-miR-423-3p	0	0	1	1	1	1	KLHDC7A	kelch domain containing 7A
hsa-miR-423-3p	1	0	1	1	0	0	PACS2	phosphofurin acidic cluster sorting protein 2
hsa-miR-423-3p	0	0	1	1	0	0	CEP152	centrosomal protein 152kDa
hsa-miR-423-3p	0	0	1	1	0	0	BBX	bobby sox homolog (Drosophila)
hsa-miR-423-3p	1	0	1	1	1	1	RNF10	ring finger protein 10
hsa-miR-423-3p	1	0	1	1	1	1	HMGB1	high mobility group box 1
hsa-miR-423-3p	0	0	1	1	0	0	PTPMT1	protein tyrosine phosphatase, mitochondrial 1
hsa-miR-423-3p	0	0	0	1	0	0	IMPDH2	IMP (inosine 5'-monophosphate) dehydrogenase 2
hsa-miR-423-3p	1	0	1	1	1	1	BRSK1	BR serine/threonine kinase 1
hsa-miR-423-3p	0	0	1	1	1	1	PTPLA	protein tyrosine phosphatase-like (proline instead of catalytic arginine), member A
hsa-miR-423-3p	1	0	1	1	1	1	PPP6R1	protein phosphatase 6, regulatory subunit 1
hsa-miR-423-3p	0	0	0	1	0	0	NOC2L	nucleolar complex associated 2 homolog (S. cerevisiae)
hsa-miR-423-3p	0	0	1	1	0	0	TIMM22	translocase of inner mitochondrial membrane 22 homolog (yeast)
hsa-miR-423-3p	1	0	0	1	1	1	SLC25A18	solute carrier family 25 (glutamate carrier), member 18
hsa-miR-423-3p	0	0	0	1	0	0	FAM110C	family with sequence similarity 110, member C
hsa-miR-423-3p	0	0	0	1	0	0	CFD	complement factor D (adipsin)
hsa-miR-423-3p	1	0	1	1	0	0	C17orf70	chromosome 17 open reading frame 70
hsa-miR-423-3p	1	0	1	1	1	1	GRID1	glutamate receptor, ionotropic, delta 1
hsa-miR-423-3p	0	0	1	1	0	0	CTAG1B	cancer/testis antigen 1B
hsa-miR-423-3p	0	0	1	1	1	1	C1QTNF8	C1q and tumor necrosis factor related protein 8
hsa-miR-423-3p	1	0	1	1	1	1	XKRX	XK, Kell blood group complex subunit-related, X-linked
hsa-miR-423-3p	0	0	1	1	0	0	CIB1	calcium and integrin binding 1 (calmyrin)
hsa-miR-423-3p	0	0	0	1	0	0	OTOP3	otopetrin 3
hsa-miR-423-3p	0	0	1	1	0	0	DHX30	DEAH (Asp-Glu-Ala-His) box polypeptide 30
hsa-miR-423-3p	0	0	0	1	0	0	NKX2-5	NK2 homeobox 5
hsa-miR-423-3p	0	0	1	1	0	0	GPR39	G protein-coupled receptor 39
hsa-miR-423-3p	0	0	0	1	0	0	ADAT3	adenosine deaminase, tRNA-specific 3
hsa-miR-423-3p	0	0	0	1	0	0	C19orf71	chromosome 19 open reading frame 71
hsa-miR-423-3p	1	0	0	1	0	0	FAM193B	family with sequence similarity 193, member B
hsa-miR-423-3p	1	0	1	1	1	1	TMCC2	transmembrane and coiled-coil domain family 2
hsa-miR-423-3p	0	0	1	1	0	0	DTWD1	DTW domain containing 1
hsa-miR-423-3p	0	0	0	1	0	0	CLDN5	claudin 5
hsa-miR-423-3p	0	0	1	1	0	0	WBSCR16	Williams-Beuren syndrome chromosome region 16
hsa-miR-423-3p	0	0	1	1	0	0	FAM156A	family with sequence similarity 156, member A
hsa-miR-423-3p	0	0	1	1	0	0	IDH2	isocitrate dehydrogenase 2 (NADP+), mitochondrial
hsa-miR-423-3p	1	0	1	1	0	0	HDDC3	HD domain containing 3
hsa-miR-423-3p	1	0	1	1	1	1	PRKCD	protein kinase C, delta
hsa-miR-423-3p	0	0	1	1	0	0	CLK3	CDC-like kinase 3
hsa-miR-423-3p	0	0	0	1	0	0	ADSSL1	adenylosuccinate synthase like 1
hsa-miR-423-3p	0	0	1	1	0	0	ALYREF	Aly/REF export factor
hsa-miR-423-3p	1	0	1	1	1	1	DUSP8	dual specificity phosphatase 8
hsa-miR-423-3p	0	0	0	1	0	0	CTAG1A	cancer/testis antigen 1A
hsa-miR-423-3p	0	0	1	1	0	0	TAS1R1	taste receptor, type 1, member 1
hsa-miR-423-3p	0	0	0	1	0	0	PRODH	proline dehydrogenase (oxidase) 1
hsa-miR-423-3p	0	0	1	1	1	1	TCP11L1	t-complex 11 (mouse)-like 1
hsa-miR-423-3p	1	0	1	1	0	0	CELF5	CUGBP, Elav-like family member 5
hsa-miR-423-3p	0	0	1	1	1	1	AKR1CL1	aldo-keto reductase family 1, member C-like 1
hsa-miR-423-3p	0	0	0	1	0	0	AZU1	azurocidin 1
hsa-miR-423-3p	0	0	1	1	0	0	STARD10	StAR-related lipid transfer (START) domain containing 10
hsa-miR-423-3p	0	0	0	1	1	1	RAX	retina and anterior neural fold homeobox
hsa-miR-423-3p	0	0	0	1	0	0	TBX10	T-box 10
hsa-miR-423-3p	0	0	1	1	0	0	PLA2G6	phospholipase A2, group VI (cytosolic, calcium-independent)
hsa-miR-423-3p	1	0	1	1	1	1	SPTB	spectrin, beta, erythrocytic
hsa-miR-423-3p	1	0	1	1	0	0	LMO1	LIM domain only 1 (rhombotin 1)
hsa-miR-423-3p	0	0	0	1	0	0	STARD3	StAR-related lipid transfer (START) domain containing 3
hsa-miR-423-3p	0	0	1	1	0	0	GDPD5	glycerophosphodiester phosphodiesterase domain containing 5
hsa-miR-423-3p	1	0	1	1	1	1	EME1	essential meiotic endonuclease 1 homolog 1 (S. pombe)
hsa-miR-423-3p	1	0	0	1	0	0	LRFN2	leucine rich repeat and fibronectin type III domain containing 2
hsa-miR-423-3p	1	0	1	1	1	1	CA7	carbonic anhydrase VII
hsa-miR-423-3p	0	0	0	1	1	1	C11orf95	chromosome 11 open reading frame 95
hsa-miR-423-3p	0	0	0	1	0	0	SCNN1D	sodium channel, non-voltage-gated 1, delta subunit
hsa-miR-423-3p	0	0	0	1	0	0	TEKT1	tektin 1
hsa-miR-423-3p	0	0	1	1	0	0	DCBLD1	discoidin, CUB and LCCL domain containing 1
hsa-miR-423-3p	1	0	0	1	0	0	CRTC1	CREB regulated transcription coactivator 1
hsa-miR-423-3p	0	0	0	1	0	0	TPSAB1	tryptase alpha/beta 1
hsa-miR-423-3p	0	0	1	1	1	1	GAL3ST1	galactose-3-O-sulfotransferase 1
hsa-miR-423-3p	0	0	0	1	1	1	ABHD12	abhydrolase domain containing 12
hsa-miR-423-3p	0	0	1	1	0	0	S100A13	S100 calcium binding protein A13
hsa-miR-423-3p	0	0	1	1	1	1	ADAM33	ADAM metallopeptidase domain 33
hsa-miR-423-3p	1	0	1	1	1	1	ENSA	endosulfine alpha
hsa-miR-423-3p	1	0	1	1	1	1	SENP1	SUMO1/sentrin specific peptidase 1
hsa-miR-423-3p	0	0	1	1	1	1	HRH3	histamine receptor H3
hsa-miR-423-3p	0	0	1	1	1	1	ETV7	ets variant 7
hsa-miR-423-3p	0	0	0	1	0	0	FAM86B1	family with sequence similarity 86, member B1
hsa-miR-423-3p	1	0	1	1	1	1	KCNK10	potassium channel, subfamily K, member 10
hsa-miR-423-3p	0	0	1	1	0	0	CLDN4	claudin 4
hsa-miR-423-3p	0	0	0	1	1	1	POMT1	protein-O-mannosyltransferase 1
hsa-miR-423-3p	1	0	1	1	1	1	VAPB	VAMP (vesicle-associated membrane protein)-associated protein B and C
hsa-miR-423-3p	0	0	1	1	0	0	GSN	gelsolin
hsa-miR-423-3p	0	0	1	1	0	0	TEX264	testis expressed 264
hsa-miR-423-3p	0	0	1	1	1	1	LRRC29	leucine rich repeat containing 29
hsa-miR-423-3p	0	0	0	1	1	1	MYL1	myosin, light chain 1, alkali; skeletal, fast
hsa-miR-423-3p	0	0	1	1	0	0	SLC24A2	solute carrier family 24 (sodium/potassium/calcium exchanger), member 2
hsa-miR-423-3p	0	0	0	1	0	0	PODXL2	podocalyxin-like 2
hsa-miR-423-3p	0	0	0	1	1	1	PROZ	protein Z, vitamin K-dependent plasma glycoprotein
hsa-miR-423-3p	0	0	1	1	0	0	FXYD5	FXYD domain containing ion transport regulator 5
hsa-miR-423-3p	1	0	1	1	0	0	ST3GAL2	ST3 beta-galactoside alpha-2,3-sialyltransferase 2
hsa-miR-423-3p	0	0	1	1	0	0	SLC6A13	solute carrier family 6 (neurotransmitter transporter, GABA), member 13
hsa-miR-423-3p	0	0	1	1	1	1	GBP5	guanylate binding protein 5
hsa-miR-423-3p	1	0	1	1	1	1	UBAP2L	ubiquitin associated protein 2-like
hsa-miR-423-3p	0	0	1	1	0	0	PPM1G	protein phosphatase, Mg2+/Mn2+ dependent, 1G
hsa-miR-423-3p	0	0	0	1	0	0	ZMAT5	zinc finger, matrin-type 5
hsa-miR-423-3p	0	0	1	1	0	0	FZD9	frizzled family receptor 9
hsa-miR-423-3p	0	0	1	1	1	1	FLYWCH1	FLYWCH-type zinc finger 1
hsa-miR-423-3p	0	0	0	1	0	0	IZUMO4	IZUMO family member 4
hsa-miR-423-3p	0	0	1	1	0	0	EVC2	Ellis van Creveld syndrome 2
hsa-miR-423-3p	0	0	0	1	0	0	RPL36	ribosomal protein L36
hsa-miR-423-3p	0	0	1	1	0	0	SLC28A2	solute carrier family 28 (sodium-coupled nucleoside transporter), member 2
hsa-miR-423-3p	1	0	1	1	1	1	VPS39	vacuolar protein sorting 39 homolog (S. cerevisiae)
hsa-miR-423-3p	1	0	1	1	0	0	ZDHHC1	zinc finger, DHHC-type containing 1
hsa-miR-423-3p	0	0	1	1	0	0	MYBPHL	myosin binding protein H-like
hsa-miR-423-3p	0	0	1	1	1	1	PSRC1	proline/serine-rich coiled-coil 1
hsa-miR-423-3p	0	0	0	1	0	0	CCDC37	coiled-coil domain containing 37
hsa-miR-423-3p	0	0	1	1	1	1	GPX4	glutathione peroxidase 4
hsa-miR-423-3p	0	0	1	1	0	0	BPIFA1	BPI fold containing family A, member 1
hsa-miR-423-3p	1	0	1	1	1	1	COL2A1	collagen, type II, alpha 1
hsa-miR-423-3p	0	0	1	1	0	0	CCDC81	coiled-coil domain containing 81
hsa-miR-423-3p	0	0	0	1	0	0	GPBAR1	G protein-coupled bile acid receptor 1
hsa-miR-423-3p	0	0	1	1	0	0	TBL3	transducin (beta)-like 3
hsa-miR-423-3p	1	0	1	1	1	1	APP	amyloid beta (A4) precursor protein
hsa-miR-423-3p	0	0	1	1	0	0	DPF1	D4, zinc and double PHD fingers family 1
hsa-miR-423-3p	0	0	0	1	0	0	SPNS3	spinster homolog 3 (Drosophila)
hsa-miR-423-3p	0	0	0	1	0	0	KIR3DL1	killer cell immunoglobulin-like receptor, three domains, long cytoplasmic tail, 1
hsa-miR-423-3p	0	0	1	1	0	0	SREBF1	sterol regulatory element binding transcription factor 1
hsa-miR-423-3p	1	0	1	1	1	1	LAMB3	laminin, beta 3
hsa-miR-423-3p	1	0	1	1	1	1	ANXA2	annexin A2
hsa-miR-423-3p	0	0	0	1	1	1	PITPNM1	phosphatidylinositol transfer protein, membrane-associated 1
hsa-miR-423-3p	0	0	0	1	1	1	OPRL1	opiate receptor-like 1
hsa-miR-423-3p	0	0	0	1	1	1	ABCC11	ATP-binding cassette, sub-family C (CFTR/MRP), member 11
hsa-miR-423-3p	0	0	0	1	0	0	NUDT1	nudix (nucleoside diphosphate linked moiety X)-type motif 1
hsa-miR-423-3p	1	0	1	1	0	0	PCED1A	PC-esterase domain containing 1A
hsa-miR-423-3p	0	0	1	1	1	1	ABCD4	ATP-binding cassette, sub-family D (ALD), member 4
hsa-miR-423-3p	0	0	0	1	0	0	TPSB2	tryptase beta 2 (gene/pseudogene)
hsa-miR-423-3p	0	0	0	1	0	0	C1QTNF5	C1q and tumor necrosis factor related protein 5
hsa-miR-423-3p	0	0	0	1	1	1	RIPK3	receptor-interacting serine-threonine kinase 3
hsa-miR-423-3p	0	0	1	1	1	1	THSD4	thrombospondin, type I, domain containing 4
hsa-miR-423-3p	0	0	1	1	1	1	SPSB1	splA/ryanodine receptor domain and SOCS box containing 1
hsa-miR-423-3p	0	0	0	1	1	1	RPS6KL1	ribosomal protein S6 kinase-like 1
hsa-miR-423-3p	0	0	0	1	0	0	LONP1	lon peptidase 1, mitochondrial
hsa-miR-423-3p	1	0	1	1	1	1	ENTPD4	ectonucleoside triphosphate diphosphohydrolase 4
hsa-miR-423-3p	1	0	1	1	1	1	GATAD2A	GATA zinc finger domain containing 2A
hsa-miR-423-3p	0	0	1	1	1	1	PTMA	prothymosin, alpha
hsa-miR-423-3p	0	0	0	1	0	0	ABCB8	ATP-binding cassette, sub-family B (MDR/TAP), member 8
hsa-miR-423-3p	0	0	1	1	0	0	C9orf169	chromosome 9 open reading frame 169
hsa-miR-423-3p	0	0	1	1	1	1	SPRR2A	small proline-rich protein 2A
hsa-miR-423-3p	0	0	0	1	0	0	HAPLN3	hyaluronan and proteoglycan link protein 3
hsa-miR-423-3p	0	0	0	1	1	1	KCNQ2	potassium voltage-gated channel, KQT-like subfamily, member 2
hsa-miR-423-3p	0	0	0	1	1	1	HHLA3	HERV-H LTR-associating 3
hsa-miR-423-3p	0	0	0	1	0	0	LPPR3	lipid phosphate phosphatase-related protein type 3
hsa-miR-423-3p	0	0	0	1	0	0	CHCHD2	coiled-coil-helix-coiled-coil-helix domain containing 2
hsa-miR-423-3p	0	0	1	1	0	0	SIGLEC6	sialic acid binding Ig-like lectin 6
hsa-miR-423-3p	1	0	1	1	1	1	ZNF436	zinc finger protein 436
hsa-miR-423-3p	0	0	1	1	1	1	ZNF667	zinc finger protein 667
hsa-miR-423-3p	0	0	1	1	0	0	CUEDC1	CUE domain containing 1
hsa-miR-423-3p	0	0	1	1	0	0	CLDN7	claudin 7
hsa-miR-423-3p	0	0	0	1	1	1	SPRR2D	small proline-rich protein 2D
hsa-miR-423-3p	0	0	0	1	0	0	PLEKHG4	pleckstrin homology domain containing, family G (with RhoGef domain) member 4
hsa-miR-423-3p	0	0	1	1	1	1	CDH4	cadherin 4, type 1, R-cadherin (retinal)
hsa-miR-423-3p	0	0	1	1	0	0	DNAH2	dynein, axonemal, heavy chain 2
hsa-miR-423-3p	0	0	1	1	1	1	MAP1LC3A	microtubule-associated protein 1 light chain 3 alpha
hsa-miR-423-3p	0	0	0	1	1	1	CCDC135	coiled-coil domain containing 135
hsa-miR-423-3p	0	0	1	1	1	1	CPZ	carboxypeptidase Z
hsa-miR-423-3p	1	0	1	1	1	1	PIK3CD	phosphatidylinositol-4,5-bisphosphate 3-kinase, catalytic subunit delta
hsa-miR-423-3p	1	0	1	1	0	0	KAZN	kazrin, periplakin interacting protein
hsa-miR-423-3p	1	0	1	1	1	1	RUSC2	RUN and SH3 domain containing 2
hsa-miR-423-3p	1	0	1	1	1	1	BCL2L11	BCL2-like 11 (apoptosis facilitator)
hsa-miR-423-3p	0	0	1	1	0	0	CNKSR1	connector enhancer of kinase suppressor of Ras 1
hsa-miR-423-3p	0	0	0	1	1	1	KRTAP5-9	keratin associated protein 5-9
hsa-miR-423-3p	1	0	1	1	1	1	CELF4	CUGBP, Elav-like family member 4
hsa-miR-423-3p	1	0	1	1	1	1	ILF2	interleukin enhancer binding factor 2, 45kDa
hsa-miR-423-3p	1	0	1	1	0	0	PLXNB3	plexin B3
hsa-miR-423-3p	0	0	0	1	0	0	SHISA4	shisa homolog 4 (Xenopus laevis)
hsa-miR-423-3p	0	0	1	1	1	1	ZNF695	zinc finger protein 695
hsa-miR-423-3p	0	0	1	1	1	1	ACTA1	actin, alpha 1, skeletal muscle
hsa-miR-423-3p	0	0	0	1	0	0	G0S2	G0/G1switch 2
hsa-miR-423-3p	0	0	0	1	0	0	TNNT2	troponin T type 2 (cardiac)
hsa-miR-423-3p	0	0	1	1	0	0	MR1	major histocompatibility complex, class I-related
hsa-miR-423-3p	1	0	1	1	1	1	OLIG3	oligodendrocyte transcription factor 3
hsa-miR-423-3p	0	0	1	1	1	1	NR1I3	nuclear receptor subfamily 1, group I, member 3
hsa-miR-423-3p	0	0	0	1	0	0	FCER1G	Fc fragment of IgE, high affinity I, receptor for; gamma polypeptide
hsa-miR-423-3p	0	0	1	1	0	0	NIT1	nitrilase 1
hsa-miR-423-3p	0	0	0	1	0	0	IGSF8	immunoglobulin superfamily, member 8
hsa-miR-423-3p	0	0	1	1	0	0	VSIG8	V-set and immunoglobulin domain containing 8
hsa-miR-423-3p	0	0	0	1	1	1	MNDA	myeloid cell nuclear differentiation antigen
hsa-miR-423-3p	0	0	0	1	0	0	TTC24	tetratricopeptide repeat domain 24
hsa-miR-423-3p	0	0	1	1	1	1	ECHDC1	enoyl CoA hydratase domain containing 1
hsa-miR-423-3p	0	0	1	1	0	0	CLK2	CDC-like kinase 2
hsa-miR-423-3p	0	0	0	1	0	0	CALY	calcyon neuron-specific vesicular protein
hsa-miR-423-3p	0	0	0	1	0	0	ADAM8	ADAM metallopeptidase domain 8
hsa-miR-423-3p	0	0	1	1	1	1	NPR1	natriuretic peptide receptor A/guanylate cyclase A (atrionatriuretic peptide receptor A)
hsa-miR-423-3p	0	0	1	1	1	1	S100A2	S100 calcium binding protein A2
hsa-miR-423-3p	0	0	0	1	0	0	S100A4	S100 calcium binding protein A4
hsa-miR-423-3p	0	0	1	1	0	0	SPRR2B	small proline-rich protein 2B
hsa-miR-423-3p	0	0	1	1	0	0	LCE3D	late cornified envelope 3D
hsa-miR-423-3p	0	0	1	1	1	1	LCE3E	late cornified envelope 3E
hsa-miR-423-3p	0	0	0	1	1	1	DMBT1	deleted in malignant brain tumors 1
hsa-miR-423-3p	1	0	1	1	1	1	NR2E1	nuclear receptor subfamily 2, group E, member 1
hsa-miR-423-3p	0	0	0	1	1	1	CD2	CD2 molecule
hsa-miR-423-3p	0	0	1	1	1	1	MTCP1	mature T-cell proliferation 1
hsa-miR-423-3p	0	0	1	1	1	1	SLC22A15	solute carrier family 22, member 15
hsa-miR-423-3p	1	0	1	1	1	1	SYT6	synaptotagmin VI
hsa-miR-423-3p	0	0	0	1	0	0	CALHM3	calcium homeostasis modulator 3
hsa-miR-423-3p	1	0	1	1	1	1	SUFU	suppressor of fused homolog (Drosophila)
hsa-miR-423-3p	0	0	1	1	0	0	CUEDC2	CUE domain containing 2
hsa-miR-423-3p	0	0	0	1	0	0	TNFRSF6B	tumor necrosis factor receptor superfamily, member 6b, decoy
hsa-miR-423-3p	0	0	1	1	0	0	RTEL1	regulator of telomere elongation helicase 1
hsa-miR-423-3p	0	0	1	1	0	0	NAA10	N(alpha)-acetyltransferase 10, NatA catalytic subunit
hsa-miR-423-3p	0	0	1	1	1	1	RTCA	RNA 3'-terminal phosphate cyclase
hsa-miR-423-3p	0	0	0	1	1	1	CHRNA4	cholinergic receptor, nicotinic, alpha 4 (neuronal)
hsa-miR-423-3p	0	0	0	1	0	0	LINC00029	long intergenic non-protein coding RNA 29
hsa-miR-423-3p	0	0	1	1	0	0	RPS21	ribosomal protein S21
hsa-miR-423-3p	0	0	0	1	1	1	CRTAC1	cartilage acidic protein 1
hsa-miR-423-3p	0	0	1	1	1	1	CRISP3	cysteine-rich secretory protein 3
hsa-miR-423-3p	1	0	1	1	1	1	NELF	nasal embryonic LHRH factor
hsa-miR-423-3p	0	0	1	1	1	1	KTI12	KTI12 homolog, chromatin associated (S. cerevisiae)
hsa-miR-423-3p	0	0	0	1	0	0	C9orf141	chromosome 9 open reading frame 141
hsa-miR-423-3p	0	0	0	1	0	0	LCN8	lipocalin 8
hsa-miR-423-3p	0	0	0	1	0	0	EGFL7	EGF-like-domain, multiple 7
hsa-miR-423-3p	0	0	1	1	0	0	PMPCA	peptidase (mitochondrial processing) alpha
hsa-miR-423-3p	0	0	0	1	0	0	UBAC1	UBA domain containing 1
hsa-miR-423-3p	0	0	0	1	0	0	CYP4A22	cytochrome P450, family 4, subfamily A, polypeptide 22
hsa-miR-423-3p	1	0	1	1	1	1	TSPAN14	tetraspanin 14
hsa-miR-423-3p	0	0	1	1	1	1	KIF2C	kinesin family member 2C
hsa-miR-423-3p	0	0	0	1	0	0	LOC100128028	uncharacterized LOC100128028
hsa-miR-423-3p	0	0	0	1	0	0	CCDC24	coiled-coil domain containing 24
hsa-miR-423-3p	0	0	0	1	0	0	SFTPA2	surfactant protein A2
hsa-miR-423-3p	0	0	0	1	1	1	ABL1	c-abl oncogene 1, non-receptor tyrosine kinase
hsa-miR-423-3p	1	0	1	1	0	0	LRRC73	leucine rich repeat containing 73
hsa-miR-423-3p	1	0	1	1	0	0	ELOVL1	ELOVL fatty acid elongase 1
hsa-miR-423-3p	0	0	0	1	0	0	PRRX2	paired related homeobox 2
hsa-miR-423-3p	1	0	1	1	1	1	NFYC	nuclear transcription factor Y, gamma
hsa-miR-423-3p	0	0	0	1	1	1	ZDHHC12	zinc finger, DHHC-type containing 12
hsa-miR-423-3p	0	0	0	1	0	0	NXF2B	nuclear RNA export factor 2B
hsa-miR-423-3p	1	0	1	1	1	1	TOMM34	translocase of outer mitochondrial membrane 34
hsa-miR-423-3p	1	0	1	1	0	0	FHL3	four and a half LIM domains 3
hsa-miR-423-3p	1	0	1	1	0	0	FRS3	fibroblast growth factor receptor substrate 3
hsa-miR-423-3p	1	0	1	1	1	1	MTF1	metal-regulatory transcription factor 1
hsa-miR-423-3p	1	0	1	1	1	1	ZC3H12A	zinc finger CCCH-type containing 12A
hsa-miR-423-3p	0	0	1	1	1	1	TRIM62	tripartite motif containing 62
hsa-miR-423-3p	0	0	1	1	1	1	LHX2	LIM homeobox 2
hsa-miR-423-3p	0	0	1	1	1	1	BAI2	brain-specific angiogenesis inhibitor 2
hsa-miR-423-3p	0	0	1	1	0	0	PI16	peptidase inhibitor 16
hsa-miR-423-3p	0	0	0	1	0	0	SMPDL3B	sphingomyelin phosphodiesterase, acid-like 3B
hsa-miR-423-3p	1	0	1	1	0	0	DES	desmin
hsa-miR-423-3p	0	0	1	1	0	0	SCAND1	SCAN domain containing 1
hsa-miR-423-3p	0	0	1	1	1	1	DEC1	deleted in esophageal cancer 1
hsa-miR-423-3p	0	0	1	1	1	1	HMGCL	3-hydroxymethyl-3-methylglutaryl-CoA lyase
hsa-miR-423-3p	1	0	1	1	1	1	PHF1	PHD finger protein 1
hsa-miR-423-3p	0	0	1	1	0	0	CELA3A	chymotrypsin-like elastase family, member 3A
hsa-miR-423-3p	0	0	1	1	0	0	CELA3B	chymotrypsin-like elastase family, member 3B
hsa-miR-423-3p	0	0	1	1	0	0	RAP1GAP	RAP1 GTPase activating protein
hsa-miR-423-3p	0	0	1	1	0	0	SPIN2A	spindlin family, member 2A
hsa-miR-423-3p	0	0	1	1	0	0	TMEM136	transmembrane protein 136
hsa-miR-423-3p	0	0	0	1	0	0	FKBPL	FK506 binding protein like
hsa-miR-423-3p	0	0	1	1	1	1	IGSF21	immunoglobin superfamily, member 21
hsa-miR-423-3p	1	0	1	1	1	1	PADI1	peptidyl arginine deiminase, type I
hsa-miR-423-3p	0	0	0	1	1	1	SUSD3	sushi domain containing 3
hsa-miR-423-3p	0	0	0	1	0	0	FAM156B	family with sequence similarity 156, member B
hsa-miR-423-3p	1	0	1	1	1	1	MCF2L	MCF.2 cell line derived transforming sequence-like
hsa-miR-423-3p	1	0	1	1	1	1	WAC	WW domain containing adaptor with coiled-coil
hsa-miR-423-3p	0	0	1	1	0	0	DDAH2	dimethylarginine dimethylaminohydrolase 2
hsa-miR-423-3p	0	0	0	1	0	0	PSORS1C3	psoriasis susceptibility 1 candidate 3 (non-protein coding)
hsa-miR-423-3p	0	0	0	1	1	1	PLOD1	procollagen-lysine, 2-oxoglutarate 5-dioxygenase 1
hsa-miR-423-3p	0	0	0	1	0	0	FAM75B	family with sequence similarity 75, member B
hsa-miR-423-3p	0	0	1	1	0	0	RPP21	ribonuclease P/MRP 21kDa subunit
hsa-miR-423-3p	0	0	0	1	0	0	FBXO6	F-box protein 6
hsa-miR-423-3p	0	0	1	1	1	1	HLA-G	major histocompatibility complex, class I, G
hsa-miR-423-3p	0	0	1	1	0	0	CST3	cystatin C
hsa-miR-423-3p	0	0	1	1	0	0	NR1H2	nuclear receptor subfamily 1, group H, member 2
hsa-miR-423-3p	0	0	0	1	0	0	CST9L	cystatin 9-like
hsa-miR-423-3p	0	0	1	1	1	1	UBA1	ubiquitin-like modifier activating enzyme 1
hsa-miR-423-3p	0	0	1	1	0	0	SPATC1	spermatogenesis and centriole associated 1
hsa-miR-423-3p	1	0	1	1	0	0	AUP1	ancient ubiquitous protein 1
hsa-miR-423-3p	0	0	0	1	0	0	ZNF133	zinc finger protein 133
hsa-miR-423-3p	1	0	1	1	1	1	ANKRD11	ankyrin repeat domain 11
hsa-miR-423-3p	1	0	0	1	0	0	REEP2	receptor accessory protein 2
hsa-miR-423-3p	1	0	1	1	1	1	MID1IP1	MID1 interacting protein 1
hsa-miR-423-3p	0	0	0	1	0	0	SPI1	spleen focus forming virus (SFFV) proviral integration oncogene spi1
hsa-miR-423-3p	0	0	1	1	0	0	GABRD	gamma-aminobutyric acid (GABA) A receptor, delta
hsa-miR-423-3p	1	0	1	1	1	1	CCL21	chemokine (C-C motif) ligand 21
hsa-miR-423-3p	0	0	1	1	1	1	PHF12	PHD finger protein 12
hsa-miR-423-3p	0	0	1	1	0	0	PRODH2	proline dehydrogenase (oxidase) 2
hsa-miR-423-3p	0	0	1	1	0	0	NPHS1	nephrosis 1, congenital, Finnish type (nephrin)
hsa-miR-423-3p	0	0	0	1	0	0	ETV2	ets variant 2
hsa-miR-423-3p	1	0	0	1	1	1	C10orf47	chromosome 10 open reading frame 47
hsa-miR-423-3p	0	0	0	1	0	0	TNFRSF4	tumor necrosis factor receptor superfamily, member 4
hsa-miR-423-3p	1	0	1	1	1	1	ACSL6	acyl-CoA synthetase long-chain family member 6
hsa-miR-423-3p	0	0	0	1	0	0	TNFRSF18	tumor necrosis factor receptor superfamily, member 18
hsa-miR-423-3p	0	0	0	1	0	0	C1orf159	chromosome 1 open reading frame 159
hsa-miR-423-3p	0	0	1	1	0	0	KATNB1	katanin p80 (WD repeat containing) subunit B 1
hsa-miR-423-3p	0	0	1	1	1	1	POSTN	periostin, osteoblast specific factor
hsa-miR-423-3p	1	0	1	1	1	1	PFKFB3	6-phosphofructo-2-kinase/fructose-2,6-biphosphatase 3
hsa-miR-423-3p	0	0	0	1	0	0	TECPR1	tectonin beta-propeller repeat containing 1
hsa-miR-423-3p	1	0	0	1	1	1	TECPR2	tectonin beta-propeller repeat containing 2
hsa-miR-423-3p	0	0	1	1	1	1	ITPA	inosine triphosphatase (nucleoside triphosphate pyrophosphatase)
hsa-miR-423-3p	0	0	0	1	1	1	CDKN2A	cyclin-dependent kinase inhibitor 2A
hsa-miR-423-3p	0	0	1	1	1	1	FAM50B	family with sequence similarity 50, member B
hsa-miR-423-3p	0	0	1	1	1	1	PXDC1	PX domain containing 1
hsa-miR-423-3p	1	0	1	1	1	1	ACER2	alkaline ceramidase 2
hsa-miR-423-3p	0	0	1	1	0	0	PIR	pirin (iron-binding nuclear protein)
hsa-miR-423-3p	0	0	1	1	1	1	SHROOM3	shroom family member 3
hsa-miR-423-3p	0	0	0	1	0	0	LOC389906	zinc finger protein 839 pseudogene
hsa-miR-423-3p	0	0	1	1	1	1	CD99	CD99 molecule
hsa-miR-423-3p	0	0	1	1	0	0	SCUBE1	signal peptide, CUB domain, EGF-like 1
hsa-miR-423-3p	1	0	1	1	1	1	ZMYND11	zinc finger, MYND-type containing 11
hsa-miR-423-3p	0	0	1	1	0	0	TMEM74B	transmembrane protein 74B
hsa-miR-423-3p	1	0	1	1	1	1	MAP1A	microtubule-associated protein 1A
hsa-miR-423-3p	0	0	1	1	1	1	ADI1	acireductone dioxygenase 1
hsa-miR-423-3p	0	0	0	1	0	0	ONECUT3	one cut homeobox 3
hsa-miR-423-3p	0	0	1	1	1	1	SH3TC1	SH3 domain and tetratricopeptide repeats 1
hsa-miR-423-3p	1	0	1	1	1	1	AFAP1	actin filament associated protein 1
hsa-miR-423-3p	0	0	1	1	0	0	RGL4	ral guanine nucleotide dissociation stimulator-like 4
hsa-miR-423-3p	0	0	1	1	0	0	SNRNP25	small nuclear ribonucleoprotein 25kDa (U11/U12)
hsa-miR-423-3p	0	0	1	1	1	1	C11orf31	chromosome 11 open reading frame 31
hsa-miR-423-3p	0	0	0	1	1	1	VPS53	vacuolar protein sorting 53 homolog (S. cerevisiae)
hsa-miR-423-3p	1	0	1	1	1	1	PDPK1	3-phosphoinositide dependent protein kinase-1
hsa-miR-423-3p	1	0	1	1	0	0	DGCR2	DiGeorge syndrome critical region gene 2
hsa-miR-423-3p	0	0	1	1	1	1	ZNF557	zinc finger protein 557
hsa-miR-423-3p	1	0	1	1	1	1	L2HGDH	L-2-hydroxyglutarate dehydrogenase
