# Supplementary material for: Profiling of Selected MicroRNAs in Proliferative Eutopic Endometrium of Women with Ovarian Endometriosis
Source: Biomed Res Int. 2015 Aug 20;2015:760698. doi: 10.1155/2015/760698 (PMC4558423; doi:10.1155/2015/760698)
Supplement: Supplementary file 1 — Table I: The names of miRNAs significantly differentially expressed between eutopic endometrium of patients with endometriosis vs eutopic endometrium of patients without endometriosis. Table II: The associations between miRNA and mRNA, which presents detailed results of the search of six major databases i.e targetscan, tarbase, miranda, mirbase, mirtarget2 and pictar. [file 760698.f1.zip › 760698.f1/Table II/hsa-miR-433.tsv]

miR	targetscan	tarbase	miranda	mirbase	mirtarget2	pictar	GeneSymbol	GeneName
hsa-miR-433	1	0	1	1	1	1	LSM14A	LSM14A, SCD6 homolog A (S. cerevisiae)
hsa-miR-433	1	0	1	1	1	1	TIPRL	TIP41, TOR signaling pathway regulator-like (S. cerevisiae)
hsa-miR-433	1	0	1	0	1	1	TGFBR1	transforming growth factor, beta receptor 1
hsa-miR-433	1	0	1	1	1	1	ACTC1	actin, alpha, cardiac muscle 1
hsa-miR-433	1	0	1	1	1	1	HNRNPU	heterogeneous nuclear ribonucleoprotein U (scaffold attachment factor A)
hsa-miR-433	1	0	1	1	1	1	TOP1	topoisomerase (DNA) I
hsa-miR-433	1	0	1	1	0	0	RNF24	ring finger protein 24
hsa-miR-433	1	0	1	1	1	1	KIAA0195	KIAA0195
hsa-miR-433	1	0	1	1	1	1	GLIS3	GLIS family zinc finger 3
hsa-miR-433	1	0	1	1	1	1	UST	uronyl-2-sulfotransferase
hsa-miR-433	1	0	1	1	1	1	QKI	QKI, KH domain containing, RNA binding
hsa-miR-433	1	0	1	0	1	1	KLF13	Kruppel-like factor 13
hsa-miR-433	1	0	1	1	1	1	SLC30A6	solute carrier family 30 (zinc transporter), member 6
hsa-miR-433	1	0	1	0	1	1	CDK5R1	cyclin-dependent kinase 5, regulatory subunit 1 (p35)
hsa-miR-433	1	0	1	1	0	0	FOXP2	forkhead box P2
hsa-miR-433	1	0	1	1	1	1	EPHA7	EPH receptor A7
hsa-miR-433	1	0	1	1	1	1	HBS1L	HBS1-like (S. cerevisiae)
hsa-miR-433	1	0	1	1	1	1	ST8SIA3	ST8 alpha-N-acetyl-neuraminide alpha-2,8-sialyltransferase 3
hsa-miR-433	1	0	1	1	1	1	B4GALT3	UDP-Gal:betaGlcNAc beta 1,4- galactosyltransferase, polypeptide 3
hsa-miR-433	1	0	0	1	1	1	TRIM67	tripartite motif containing 67
hsa-miR-433	1	0	0	1	1	1	ZNF615	zinc finger protein 615
hsa-miR-433	1	0	1	0	1	1	INTS2	integrator complex subunit 2
hsa-miR-433	1	0	1	1	1	1	MMD	monocyte to macrophage differentiation-associated
hsa-miR-433	1	0	1	1	1	1	IMPAD1	inositol monophosphatase domain containing 1
hsa-miR-433	1	0	1	1	1	1	NR2F6	nuclear receptor subfamily 2, group F, member 6
hsa-miR-433	1	0	1	1	1	1	MED1	mediator complex subunit 1
hsa-miR-433	1	0	1	1	1	1	TMED5	transmembrane emp24 protein transport domain containing 5
hsa-miR-433	1	0	1	1	1	1	RIMKLA	ribosomal modification protein rimK-like family member A
hsa-miR-433	1	0	1	1	1	1	AZIN1	antizyme inhibitor 1
hsa-miR-433	1	0	1	1	1	1	DENND4C	DENN/MADD domain containing 4C
hsa-miR-433	1	0	1	1	1	1	GRB2	growth factor receptor-bound protein 2
hsa-miR-433	1	0	1	0	1	1	DNAJC5	DnaJ (Hsp40) homolog, subfamily C, member 5
hsa-miR-433	1	0	1	0	1	1	SRGAP2	SLIT-ROBO Rho GTPase activating protein 2
hsa-miR-433	1	0	1	1	1	1	UXS1	UDP-glucuronate decarboxylase 1
hsa-miR-433	1	0	1	1	0	0	SMG5	smg-5 homolog, nonsense mediated mRNA decay factor (C. elegans)
hsa-miR-433	1	0	1	1	1	1	SH3TC2	SH3 domain and tetratricopeptide repeats 2
hsa-miR-433	1	0	1	1	0	0	HIPK2	homeodomain interacting protein kinase 2
hsa-miR-433	1	0	1	1	1	1	MIER1	mesoderm induction early response 1 homolog (Xenopus laevis)
hsa-miR-433	1	0	1	1	1	1	RAD21	RAD21 homolog (S. pombe)
hsa-miR-433	1	0	1	0	1	1	C18orf25	chromosome 18 open reading frame 25
hsa-miR-433	1	0	1	1	1	1	WTAP	Wilms tumor 1 associated protein
hsa-miR-433	1	0	0	1	0	0	CENPJ	centromere protein J
hsa-miR-433	1	0	0	0	0	0	AAK1	AP2 associated kinase 1
hsa-miR-433	1	0	1	1	1	1	CTSC	cathepsin C
hsa-miR-433	1	0	1	1	1	1	CLIP1	CAP-GLY domain containing linker protein 1
hsa-miR-433	1	0	1	1	0	0	HDLBP	high density lipoprotein binding protein
hsa-miR-433	1	0	1	1	1	1	EBF3	early B-cell factor 3
hsa-miR-433	1	0	1	1	1	1	GCLC	glutamate-cysteine ligase, catalytic subunit
hsa-miR-433	1	0	1	1	1	1	PCCB	propionyl CoA carboxylase, beta polypeptide
hsa-miR-433	1	0	1	1	1	1	RBM17	RNA binding motif protein 17
hsa-miR-433	1	0	1	1	1	1	MECP2	methyl CpG binding protein 2 (Rett syndrome)
hsa-miR-433	1	0	1	1	1	1	MBNL1	muscleblind-like splicing regulator 1
hsa-miR-433	1	0	1	1	1	1	UBR1	ubiquitin protein ligase E3 component n-recognin 1
hsa-miR-433	1	0	1	1	1	1	ZMIZ1	zinc finger, MIZ-type containing 1
hsa-miR-433	1	0	1	0	1	1	C7orf41	chromosome 7 open reading frame 41
hsa-miR-433	1	0	1	1	1	1	HNRNPR	heterogeneous nuclear ribonucleoprotein R
hsa-miR-433	1	0	1	1	1	1	SMC1A	structural maintenance of chromosomes 1A
hsa-miR-433	1	0	1	1	1	1	DPY19L4	dpy-19-like 4 (C. elegans)
hsa-miR-433	1	0	1	1	1	1	TBC1D19	TBC1 domain family, member 19
hsa-miR-433	1	0	1	1	0	0	CELF5	CUGBP, Elav-like family member 5
hsa-miR-433	1	0	1	1	1	1	HIVEP1	human immunodeficiency virus type I enhancer binding protein 1
hsa-miR-433	1	0	1	1	1	1	SREK1	splicing regulatory glutamine/lysine-rich protein 1
hsa-miR-433	1	0	1	1	1	1	ADRA1A	adrenoceptor alpha 1A
hsa-miR-433	1	0	1	0	1	1	ZC3H6	zinc finger CCCH-type containing 6
hsa-miR-433	1	0	1	0	1	1	CHL1	cell adhesion molecule with homology to L1CAM (close homolog of L1)
hsa-miR-433	1	0	0	1	1	1	RECQL	RecQ protein-like (DNA helicase Q1-like)
hsa-miR-433	1	0	1	1	1	1	MAPK1IP1L	mitogen-activated protein kinase 1 interacting protein 1-like
hsa-miR-433	1	0	1	0	1	1	ENPP6	ectonucleotide pyrophosphatase/phosphodiesterase 6
hsa-miR-433	1	0	0	1	1	1	CRLF3	cytokine receptor-like factor 3
hsa-miR-433	1	0	1	1	1	1	MARK3	MAP/microtubule affinity-regulating kinase 3
hsa-miR-433	1	0	1	1	1	1	YWHAG	tyrosine 3-monooxygenase/tryptophan 5-monooxygenase activation protein, gamma polypeptide
hsa-miR-433	1	0	1	1	1	1	C1orf131	chromosome 1 open reading frame 131
hsa-miR-433	1	0	1	1	1	1	DNAJB12	DnaJ (Hsp40) homolog, subfamily B, member 12
hsa-miR-433	1	0	1	1	1	1	LEPR	leptin receptor
hsa-miR-433	1	0	1	1	1	1	EPC2	enhancer of polycomb homolog 2 (Drosophila)
hsa-miR-433	1	0	1	0	1	1	CEP170	centrosomal protein 170kDa
hsa-miR-433	1	0	1	1	1	1	PBRM1	polybromo 1
hsa-miR-433	1	0	1	0	0	0	ANKRD52	ankyrin repeat domain 52
hsa-miR-433	1	0	1	1	1	1	ARL10	ADP-ribosylation factor-like 10
hsa-miR-433	1	0	1	1	1	1	NAV1	neuron navigator 1
hsa-miR-433	1	0	1	1	1	1	YTHDF3	YTH domain family, member 3
hsa-miR-433	1	0	1	1	1	1	SKP1	S-phase kinase-associated protein 1
hsa-miR-433	1	0	1	1	1	1	RALB	v-ral simian leukemia viral oncogene homolog B (ras related; GTP binding protein)
hsa-miR-433	1	0	1	0	1	1	TNRC6B	trinucleotide repeat containing 6B
hsa-miR-433	1	0	1	1	0	0	CLYBL	citrate lyase beta like
hsa-miR-433	1	0	0	1	1	1	IGFBP1	insulin-like growth factor binding protein 1
hsa-miR-433	1	0	1	0	1	1	PLEKHH2	pleckstrin homology domain containing, family H (with MyTH4 domain) member 2
hsa-miR-433	1	0	1	0	1	1	KRAS	v-Ki-ras2 Kirsten rat sarcoma viral oncogene homolog
hsa-miR-433	1	0	1	1	1	1	ATAD1	ATPase family, AAA domain containing 1
hsa-miR-433	1	0	1	1	1	1	TLR10	toll-like receptor 10
hsa-miR-433	1	0	1	0	1	1	CLINT1	clathrin interactor 1
hsa-miR-433	1	0	1	1	0	0	RAD9A	RAD9 homolog A (S. pombe)
hsa-miR-433	1	0	1	1	1	1	WAPAL	wings apart-like homolog (Drosophila)
hsa-miR-433	1	0	1	1	1	1	E2F3	E2F transcription factor 3
hsa-miR-433	1	0	1	1	1	1	UBR5	ubiquitin protein ligase E3 component n-recognin 5
hsa-miR-433	1	0	1	1	1	1	ENAH	enabled homolog (Drosophila)
hsa-miR-433	1	0	1	1	1	1	SRFBP1	serum response factor binding protein 1
hsa-miR-433	1	0	1	1	1	1	CFTR	cystic fibrosis transmembrane conductance regulator (ATP-binding cassette sub-family C, member 7)
hsa-miR-433	1	0	1	1	1	1	AGPAT5	1-acylglycerol-3-phosphate O-acyltransferase 5 (lysophosphatidic acid acyltransferase, epsilon)
hsa-miR-433	1	0	1	1	1	1	NFYB	nuclear transcription factor Y, beta
hsa-miR-433	1	0	1	0	1	1	NAB1	NGFI-A binding protein 1 (EGR1 binding protein 1)
hsa-miR-433	1	0	1	1	1	1	CCAR1	cell division cycle and apoptosis regulator 1
hsa-miR-433	1	0	1	1	1	1	HIVEP2	human immunodeficiency virus type I enhancer binding protein 2
hsa-miR-433	1	0	1	1	1	1	ARRDC4	arrestin domain containing 4
hsa-miR-433	1	0	1	0	1	1	TMX3	thioredoxin-related transmembrane protein 3
hsa-miR-433	1	0	1	0	0	0	RNF169	ring finger protein 169
hsa-miR-433	1	0	1	1	1	1	TRIP12	thyroid hormone receptor interactor 12
hsa-miR-433	1	0	1	1	1	1	CLTC	clathrin, heavy chain (Hc)
hsa-miR-433	1	0	1	1	1	1	ANKRD12	ankyrin repeat domain 12
hsa-miR-433	1	0	1	1	1	1	HOXA1	homeobox A1
hsa-miR-433	1	0	1	1	1	1	VKORC1L1	vitamin K epoxide reductase complex, subunit 1-like 1
hsa-miR-433	1	0	1	1	1	1	PHC3	polyhomeotic homolog 3 (Drosophila)
hsa-miR-433	1	0	1	0	1	1	LAMC1	laminin, gamma 1 (formerly LAMB2)
hsa-miR-433	1	0	1	0	1	1	ZFHX4	zinc finger homeobox 4
hsa-miR-433	1	0	1	1	0	0	GXYLT1	glucoside xylosyltransferase 1
hsa-miR-433	1	0	1	0	1	1	CYCS	cytochrome c, somatic
hsa-miR-433	1	0	1	1	1	1	ST8SIA4	ST8 alpha-N-acetyl-neuraminide alpha-2,8-sialyltransferase 4
hsa-miR-433	1	0	1	1	1	1	ABI1	abl-interactor 1
hsa-miR-433	1	0	1	1	1	1	TTC13	tetratricopeptide repeat domain 13
hsa-miR-433	1	0	1	1	1	1	SORBS1	sorbin and SH3 domain containing 1
hsa-miR-433	1	0	1	1	1	1	IQGAP1	IQ motif containing GTPase activating protein 1
hsa-miR-433	1	0	1	1	1	1	CREB1	cAMP responsive element binding protein 1
hsa-miR-433	1	0	1	1	1	1	GPATCH8	G patch domain containing 8
hsa-miR-433	1	0	1	1	1	1	YWHAZ	tyrosine 3-monooxygenase/tryptophan 5-monooxygenase activation protein, zeta polypeptide
hsa-miR-433	1	0	1	1	1	1	TDRD5	tudor domain containing 5
hsa-miR-433	1	0	0	1	1	1	CEP135	centrosomal protein 135kDa
hsa-miR-433	1	0	1	1	1	1	SUPT7L	suppressor of Ty 7 (S. cerevisiae)-like
hsa-miR-433	1	0	1	1	1	1	PAX6	paired box 6
hsa-miR-433	1	0	1	0	1	1	SMAD2	SMAD family member 2
hsa-miR-433	1	0	1	1	1	1	ZDHHC7	zinc finger, DHHC-type containing 7
hsa-miR-433	1	0	1	1	1	1	NOTCH1	notch 1
hsa-miR-433	1	0	1	1	1	1	IGSF22	immunoglobulin superfamily, member 22
hsa-miR-433	1	0	1	1	0	0	ATP6V0A1	ATPase, H+ transporting, lysosomal V0 subunit a1
hsa-miR-433	1	0	1	1	1	1	SERBP1	SERPINE1 mRNA binding protein 1
hsa-miR-433	1	0	1	1	1	1	LRRTM2	leucine rich repeat transmembrane neuronal 2
hsa-miR-433	1	0	0	1	1	1	SLU7	SLU7 splicing factor homolog (S. cerevisiae)
hsa-miR-433	1	0	1	1	0	0	LRRC58	leucine rich repeat containing 58
hsa-miR-433	1	0	1	0	1	1	PURB	purine-rich element binding protein B
hsa-miR-433	1	0	1	1	0	0	TET3	tet methylcytosine dioxygenase 3
hsa-miR-433	1	0	1	1	1	1	PAPD5	PAP associated domain containing 5
hsa-miR-433	1	0	1	1	1	1	RSBN1	round spermatid basic protein 1
hsa-miR-433	1	0	1	1	1	1	SCAF1	SR-related CTD-associated factor 1
hsa-miR-433	1	0	1	1	1	1	CDC27	cell division cycle 27 homolog (S. cerevisiae)
hsa-miR-433	1	0	1	1	1	1	PHF20L1	PHD finger protein 20-like 1
hsa-miR-433	1	0	1	1	1	1	GALNT1	UDP-N-acetyl-alpha-D-galactosamine:polypeptide N-acetylgalactosaminyltransferase 1 (GalNAc-T1)
hsa-miR-433	1	0	1	1	1	1	FOXN3	forkhead box N3
hsa-miR-433	1	0	1	1	1	1	FAM91A1	family with sequence similarity 91, member A1
hsa-miR-433	1	0	1	1	1	1	SPARC	secreted protein, acidic, cysteine-rich (osteonectin)
hsa-miR-433	1	0	1	1	1	1	ELOVL2	ELOVL fatty acid elongase 2
hsa-miR-433	1	0	1	1	1	1	PAK4	p21 protein (Cdc42/Rac)-activated kinase 4
hsa-miR-433	1	0	1	1	1	1	LPHN2	latrophilin 2
hsa-miR-433	1	0	0	1	1	1	COQ3	coenzyme Q3 homolog, methyltransferase (S. cerevisiae)
hsa-miR-433	1	0	1	0	1	1	FBXO48	F-box protein 48
hsa-miR-433	1	0	1	1	1	1	NIP7	nuclear import 7 homolog (S. cerevisiae)
hsa-miR-433	1	0	1	1	1	1	AKAP9	A kinase (PRKA) anchor protein (yotiao) 9
hsa-miR-433	1	0	1	1	1	1	TIA1	TIA1 cytotoxic granule-associated RNA binding protein
hsa-miR-433	1	0	1	1	1	1	NMT2	N-myristoyltransferase 2
hsa-miR-433	1	0	1	1	1	1	SCN1B	sodium channel, voltage-gated, type I, beta subunit
hsa-miR-433	1	0	1	1	1	1	MN1	meningioma (disrupted in balanced translocation) 1
hsa-miR-433	1	0	1	0	1	1	MTX3	metaxin 3
hsa-miR-433	1	0	1	1	1	1	HOXA5	homeobox A5
hsa-miR-433	1	0	1	1	1	1	TRIM2	tripartite motif containing 2
hsa-miR-433	1	0	1	0	1	1	ST6GALNAC3	ST6 (alpha-N-acetyl-neuraminyl-2,3-beta-galactosyl-1,3)-N-acetylgalactosaminide alpha-2,6-sialyltransferase 3
hsa-miR-433	1	0	1	0	1	1	SREK1IP1	SREK1-interacting protein 1
hsa-miR-433	1	0	1	1	1	1	RIOK3	RIO kinase 3 (yeast)
hsa-miR-433	1	0	1	1	0	0	COX8A	cytochrome c oxidase subunit VIIIA (ubiquitous)
hsa-miR-433	1	0	1	1	1	1	SLC17A5	solute carrier family 17 (anion/sugar transporter), member 5
hsa-miR-433	1	0	1	1	1	1	GATA3	GATA binding protein 3
hsa-miR-433	1	0	1	0	1	1	ZC3H12B	zinc finger CCCH-type containing 12B
hsa-miR-433	1	0	1	1	1	1	SULF1	sulfatase 1
hsa-miR-433	1	0	1	1	1	1	CUL5	cullin 5
hsa-miR-433	1	0	1	0	1	1	ARMC1	armadillo repeat containing 1
hsa-miR-433	1	0	0	0	1	1	SASS6	spindle assembly 6 homolog (C. elegans)
hsa-miR-433	1	0	1	1	0	0	CCDC138	coiled-coil domain containing 138
hsa-miR-433	1	0	1	1	1	1	EPAS1	endothelial PAS domain protein 1
hsa-miR-433	1	0	1	1	1	1	ERBB4	v-erb-a erythroblastic leukemia viral oncogene homolog 4 (avian)
hsa-miR-433	1	0	0	1	1	1	ABCC9	ATP-binding cassette, sub-family C (CFTR/MRP), member 9
hsa-miR-433	1	0	1	1	1	1	PPP3R1	protein phosphatase 3, regulatory subunit B, alpha
hsa-miR-433	1	0	1	1	1	1	CNOT6	CCR4-NOT transcription complex, subunit 6
hsa-miR-433	1	0	1	1	1	1	TMEM33	transmembrane protein 33
hsa-miR-433	1	0	1	1	1	1	FAM208A	family with sequence similarity 208, member A
hsa-miR-433	1	0	1	1	1	1	CHD9	chromodomain helicase DNA binding protein 9
hsa-miR-433	1	0	1	0	1	1	MSL2	male-specific lethal 2 homolog (Drosophila)
hsa-miR-433	1	0	1	1	1	1	CLCN5	chloride channel, voltage-sensitive 5
hsa-miR-433	1	0	1	1	1	1	CCDC82	coiled-coil domain containing 82
hsa-miR-433	1	0	1	1	1	1	LSM5	LSM5 homolog, U6 small nuclear RNA associated (S. cerevisiae)
hsa-miR-433	1	0	1	1	1	1	GNPTAB	N-acetylglucosamine-1-phosphate transferase, alpha and beta subunits
hsa-miR-433	1	0	1	1	1	1	WDR45L	WDR45-like
hsa-miR-433	1	0	1	0	1	1	TMEM216	transmembrane protein 216
hsa-miR-433	1	0	1	1	1	1	CTNNA1	catenin (cadherin-associated protein), alpha 1, 102kDa
hsa-miR-433	1	0	1	1	1	1	HP1BP3	heterochromatin protein 1, binding protein 3
hsa-miR-433	1	0	1	1	1	1	USP6	ubiquitin specific peptidase 6 (Tre-2 oncogene)
hsa-miR-433	1	0	1	1	1	1	XRCC6BP1	XRCC6 binding protein 1
hsa-miR-433	1	0	1	0	1	1	CDK17	cyclin-dependent kinase 17
hsa-miR-433	1	0	0	0	0	0	RBFOX3	RNA binding protein, fox-1 homolog (C. elegans) 3
hsa-miR-433	1	0	1	0	1	1	C5orf62	chromosome 5 open reading frame 62
hsa-miR-433	1	0	1	0	1	1	FBXO22	F-box protein 22
hsa-miR-433	1	0	1	1	1	1	BRWD1	bromodomain and WD repeat domain containing 1
hsa-miR-433	1	0	1	1	1	1	MYH9	myosin, heavy chain 9, non-muscle
hsa-miR-433	1	0	1	1	1	1	GIGYF2	GRB10 interacting GYF protein 2
hsa-miR-433	1	0	1	1	1	1	TMPO	thymopoietin
hsa-miR-433	1	0	1	1	1	1	FERMT2	fermitin family member 2
hsa-miR-433	1	0	1	0	1	1	UBE2D2	ubiquitin-conjugating enzyme E2D 2
hsa-miR-433	1	0	1	0	1	1	TEF	thyrotrophic embryonic factor
hsa-miR-433	1	0	1	1	1	1	FBXW7	F-box and WD repeat domain containing 7, E3 ubiquitin protein ligase
hsa-miR-433	1	0	1	1	1	1	FGF7	fibroblast growth factor 7
hsa-miR-433	1	0	1	1	1	1	EPN2	epsin 2
hsa-miR-433	0	1	0	1	0	0	FGF20	fibroblast growth factor 20
hsa-miR-433	1	0	1	0	1	1	PTPRT	protein tyrosine phosphatase, receptor type, T
hsa-miR-433	1	0	1	1	1	1	NUPL1	nucleoporin like 1
hsa-miR-433	1	0	1	0	1	1	NEDD4L	neural precursor cell expressed, developmentally down-regulated 4-like, E3 ubiquitin protein ligase
hsa-miR-433	0	0	1	1	1	1	PDE4DIP	phosphodiesterase 4D interacting protein
hsa-miR-433	0	0	1	1	1	1	NEU3	sialidase 3 (membrane sialidase)
hsa-miR-433	0	0	1	1	0	0	ZNF862	zinc finger protein 862
hsa-miR-433	1	0	1	0	1	1	RBM12	RNA binding motif protein 12
hsa-miR-433	1	0	1	1	1	1	DNM3	dynamin 3
hsa-miR-433	0	0	1	1	1	1	MAU2	MAU2 chromatid cohesion factor homolog (C. elegans)
hsa-miR-433	0	0	1	1	1	1	MAN2B2	mannosidase, alpha, class 2B, member 2
hsa-miR-433	1	0	1	1	0	0	FRMD4B	FERM domain containing 4B
hsa-miR-433	1	0	1	0	1	1	ODZ2	odz, odd Oz/ten-m homolog 2 (Drosophila)
hsa-miR-433	1	0	1	1	1	1	PCDH19	protocadherin 19
hsa-miR-433	1	0	1	1	1	1	USP28	ubiquitin specific peptidase 28
hsa-miR-433	1	0	1	1	0	0	MAGI3	membrane associated guanylate kinase, WW and PDZ domain containing 3
hsa-miR-433	1	0	1	1	1	1	CSMD3	CUB and Sushi multiple domains 3
hsa-miR-433	1	0	1	0	0	0	ZBTB34	zinc finger and BTB domain containing 34
hsa-miR-433	0	0	1	1	1	1	NELL1	NEL-like 1 (chicken)
hsa-miR-433	1	0	1	0	0	0	ZC3H12C	zinc finger CCCH-type containing 12C
hsa-miR-433	0	0	1	1	1	1	IL7	interleukin 7
hsa-miR-433	1	0	1	1	1	1	KCNMA1	potassium large conductance calcium-activated channel, subfamily M, alpha member 1
hsa-miR-433	1	0	1	1	1	1	ADARB1	adenosine deaminase, RNA-specific, B1
hsa-miR-433	0	0	1	1	0	0	DBP	D site of albumin promoter (albumin D-box) binding protein
hsa-miR-433	0	0	1	1	0	0	KCNC3	potassium voltage-gated channel, Shaw-related subfamily, member 3
hsa-miR-433	1	0	1	1	1	1	RPS6KA3	ribosomal protein S6 kinase, 90kDa, polypeptide 3
hsa-miR-433	0	0	1	1	1	1	PTK2	PTK2 protein tyrosine kinase 2
hsa-miR-433	1	0	1	1	1	1	SLC8A1	solute carrier family 8 (sodium/calcium exchanger), member 1
hsa-miR-433	1	0	1	1	1	1	SYNCRIP	synaptotagmin binding, cytoplasmic RNA interacting protein
hsa-miR-433	1	0	1	0	1	1	PLAG1	pleiomorphic adenoma gene 1
hsa-miR-433	1	0	1	1	0	0	TSPYL2	TSPY-like 2
hsa-miR-433	1	0	1	0	1	1	ETV1	ets variant 1
hsa-miR-433	0	0	1	0	1	1	NPY1R	neuropeptide Y receptor Y1
hsa-miR-433	0	0	1	1	1	1	RYR1	ryanodine receptor 1 (skeletal)
hsa-miR-433	0	0	1	1	0	0	CFLAR	CASP8 and FADD-like apoptosis regulator
hsa-miR-433	0	0	1	1	0	0	PXK	PX domain containing serine/threonine kinase
hsa-miR-433	1	0	1	0	1	1	ADD3	adducin 3 (gamma)
hsa-miR-433	0	0	1	1	0	0	TRIM27	tripartite motif containing 27
hsa-miR-433	1	0	1	1	1	1	ZFX	zinc finger protein, X-linked
hsa-miR-433	1	0	1	1	1	1	PHLDB2	pleckstrin homology-like domain, family B, member 2
hsa-miR-433	1	0	1	0	1	1	FYB	FYN binding protein
hsa-miR-433	1	0	1	0	1	1	MLL2	myeloid/lymphoid or mixed-lineage leukemia 2
hsa-miR-433	1	0	1	1	1	1	SLC4A4	solute carrier family 4, sodium bicarbonate cotransporter, member 4
hsa-miR-433	1	0	1	0	1	1	CELF2	CUGBP, Elav-like family member 2
hsa-miR-433	1	0	1	0	0	0	MAP3K1	mitogen-activated protein kinase kinase kinase 1, E3 ubiquitin protein ligase
hsa-miR-433	1	0	1	1	1	1	MBNL2	muscleblind-like splicing regulator 2
hsa-miR-433	1	0	1	1	1	1	CEP63	centrosomal protein 63kDa
hsa-miR-433	1	0	1	1	1	1	PRUNE	prune homolog (Drosophila)
hsa-miR-433	0	0	1	1	1	1	AIG1	androgen-induced 1
hsa-miR-433	1	0	1	1	1	1	USP15	ubiquitin specific peptidase 15
hsa-miR-433	0	0	1	1	1	1	NBPF14	neuroblastoma breakpoint family, member 14
hsa-miR-433	1	0	1	1	0	0	TH1L	TH1-like (Drosophila)
hsa-miR-433	1	0	1	1	1	1	NXT2	nuclear transport factor 2-like export factor 2
hsa-miR-433	0	0	1	0	0	0	TIGD7	tigger transposable element derived 7
hsa-miR-433	1	0	1	1	0	0	LMO2	LIM domain only 2 (rhombotin-like 1)
hsa-miR-433	1	0	1	1	1	1	SNX21	sorting nexin family member 21
hsa-miR-433	1	0	1	1	1	1	SH3GLB1	SH3-domain GRB2-like endophilin B1
hsa-miR-433	1	0	1	1	0	0	ZBTB37	zinc finger and BTB domain containing 37
hsa-miR-433	1	0	1	1	1	1	CALU	calumenin
hsa-miR-433	1	0	1	1	1	1	KLHL32	kelch-like 32 (Drosophila)
hsa-miR-433	0	0	1	0	0	0	NBPF10	neuroblastoma breakpoint family, member 10
hsa-miR-433	1	0	1	1	1	1	MAGI1	membrane associated guanylate kinase, WW and PDZ domain containing 1
hsa-miR-433	1	0	1	1	1	1	RBFOX1	RNA binding protein, fox-1 homolog (C. elegans) 1
hsa-miR-433	0	0	1	0	0	0	SNHG11	small nucleolar RNA host gene 11 (non-protein coding)
hsa-miR-433	0	0	1	1	1	1	RBM11	RNA binding motif protein 11
hsa-miR-433	0	0	1	1	1	1	MBD4	methyl-CpG binding domain protein 4
hsa-miR-433	1	0	1	1	1	1	AFF2	AF4/FMR2 family, member 2
hsa-miR-433	1	0	1	1	1	1	ILF3	interleukin enhancer binding factor 3, 90kDa
hsa-miR-433	0	0	1	0	0	0	CACNA2D3	calcium channel, voltage-dependent, alpha 2/delta subunit 3
hsa-miR-433	1	0	1	1	1	1	SLAMF6	SLAM family member 6
hsa-miR-433	1	0	1	1	1	1	PALM2	paralemmin 2
hsa-miR-433	1	0	1	1	1	1	NRXN3	neurexin 3
hsa-miR-433	0	0	1	1	1	1	PDE1A	phosphodiesterase 1A, calmodulin-dependent
hsa-miR-433	0	0	1	1	1	1	CCNB3	cyclin B3
hsa-miR-433	1	0	1	1	1	1	PPP3CB	protein phosphatase 3, catalytic subunit, beta isozyme
hsa-miR-433	1	0	1	1	1	1	SYT14	synaptotagmin XIV
hsa-miR-433	0	0	1	0	0	0	TUG1	taurine upregulated 1 (non-protein coding)
hsa-miR-433	1	0	1	1	1	1	MEIS2	Meis homeobox 2
hsa-miR-433	0	0	1	1	1	1	STOX2	storkhead box 2
hsa-miR-433	1	0	1	1	1	1	ACER3	alkaline ceramidase 3
hsa-miR-433	0	0	1	1	0	0	C17orf53	chromosome 17 open reading frame 53
hsa-miR-433	1	0	1	1	1	1	MON2	MON2 homolog (S. cerevisiae)
hsa-miR-433	1	0	1	1	1	1	STARD7	StAR-related lipid transfer (START) domain containing 7
hsa-miR-433	0	0	1	0	0	0	LINC00475	long intergenic non-protein coding RNA 475
hsa-miR-433	0	0	1	0	0	0	LOC284561	uncharacterized LOC284561
hsa-miR-433	1	0	1	0	1	1	C14orf101	chromosome 14 open reading frame 101
hsa-miR-433	0	0	1	0	0	0	LOC286059	tumor necrosis factor receptor superfamily, member 10d, decoy with truncated death domain pseudogene
hsa-miR-433	0	0	1	1	1	1	GGNBP2	gametogenetin binding protein 2
hsa-miR-433	1	0	1	1	1	1	NAA30	N(alpha)-acetyltransferase 30, NatC catalytic subunit
hsa-miR-433	1	0	1	1	1	1	FBXO31	F-box protein 31
hsa-miR-433	0	0	1	1	1	1	MYEOV	myeloma overexpressed (in a subset of t(11;14) positive multiple myelomas)
hsa-miR-433	0	0	1	0	0	0	LINC00340	long intergenic non-protein coding RNA 340
hsa-miR-433	0	0	1	0	1	1	FLJ22763	uncharacterized LOC401081
hsa-miR-433	1	0	1	1	1	1	SLAIN1	SLAIN motif family, member 1
hsa-miR-433	1	0	1	1	1	1	RAP1GDS1	RAP1, GTP-GDP dissociation stimulator 1
hsa-miR-433	0	0	1	1	1	1	MTRF1	mitochondrial translational release factor 1
hsa-miR-433	0	0	1	1	1	1	FBXO5	F-box protein 5
hsa-miR-433	0	0	1	0	0	0	FLJ30838	uncharacterized LOC400955
hsa-miR-433	1	0	1	1	1	1	TMTC1	transmembrane and tetratricopeptide repeat containing 1
hsa-miR-433	0	0	1	1	1	1	ANKRD36B	ankyrin repeat domain 36B
hsa-miR-433	0	0	1	0	1	1	FAM70A	family with sequence similarity 70, member A
hsa-miR-433	1	0	1	1	1	1	SORBS2	sorbin and SH3 domain containing 2
hsa-miR-433	1	0	1	1	1	1	GABARAPL1	GABA(A) receptor-associated protein like 1
hsa-miR-433	0	0	1	1	0	0	RGL3	ral guanine nucleotide dissociation stimulator-like 3
hsa-miR-433	1	0	1	1	1	1	MGAT1	mannosyl (alpha-1,3-)-glycoprotein beta-1,2-N-acetylglucosaminyltransferase
hsa-miR-433	0	0	1	1	0	0	PTOV1	prostate tumor overexpressed 1
hsa-miR-433	0	0	1	0	1	1	UHMK1	U2AF homology motif (UHM) kinase 1
hsa-miR-433	0	0	1	1	0	0	TRIM41	tripartite motif containing 41
hsa-miR-433	1	0	1	0	1	1	CLASP1	cytoplasmic linker associated protein 1
hsa-miR-433	0	0	1	1	1	1	PDZRN3	PDZ domain containing ring finger 3
hsa-miR-433	0	0	1	1	1	1	ITGBL1	integrin, beta-like 1 (with EGF-like repeat domains)
hsa-miR-433	1	0	1	1	1	1	WDR20	WD repeat domain 20
hsa-miR-433	1	0	1	1	1	1	ARIH2	ariadne homolog 2 (Drosophila)
hsa-miR-433	0	0	1	0	0	0	SEC14L2	SEC14-like 2 (S. cerevisiae)
hsa-miR-433	0	0	1	1	0	0	TMEM9	transmembrane protein 9
hsa-miR-433	0	0	1	0	0	0	LOC440910	uncharacterized LOC440910
hsa-miR-433	0	0	1	1	1	1	NRCAM	neuronal cell adhesion molecule
hsa-miR-433	0	0	1	0	1	1	SSPN	sarcospan
hsa-miR-433	1	0	1	0	1	1	CRTAP	cartilage associated protein
hsa-miR-433	0	0	1	1	1	1	CHPT1	choline phosphotransferase 1
hsa-miR-433	1	0	1	1	1	1	GPD2	glycerol-3-phosphate dehydrogenase 2 (mitochondrial)
hsa-miR-433	0	0	1	1	1	1	N4BP2L2	NEDD4 binding protein 2-like 2
hsa-miR-433	1	0	1	1	1	1	DEM1	defects in morphology 1 homolog (S. cerevisiae)
hsa-miR-433	0	0	1	0	0	0	CXXC1P1	CXXC finger protein 1 pseudogene 1
hsa-miR-433	0	0	1	1	1	1	SPOCK1	sparc/osteonectin, cwcv and kazal-like domains proteoglycan (testican) 1
hsa-miR-433	0	0	1	0	0	0	ZNF806	zinc finger protein 806
hsa-miR-433	1	0	1	0	1	1	GATAD2B	GATA zinc finger domain containing 2B
hsa-miR-433	1	0	1	0	1	1	ARL6IP6	ADP-ribosylation-like factor 6 interacting protein 6
hsa-miR-433	1	0	1	1	1	1	LPPR2	lipid phosphate phosphatase-related protein type 2
hsa-miR-433	0	0	1	1	1	1	GPT2	glutamic pyruvate transaminase (alanine aminotransferase) 2
hsa-miR-433	1	0	1	1	1	1	RASGEF1A	RasGEF domain family, member 1A
hsa-miR-433	0	0	1	1	1	1	MOBP	myelin-associated oligodendrocyte basic protein
hsa-miR-433	1	0	1	1	1	1	CUL2	cullin 2
hsa-miR-433	1	0	1	0	1	1	UVRAG	UV radiation resistance associated gene
hsa-miR-433	0	0	1	0	0	0	LOC100129858	uncharacterized LOC100129858
hsa-miR-433	0	0	1	0	1	1	NBPF3	neuroblastoma breakpoint family, member 3
hsa-miR-433	0	0	1	0	0	0	LOC284577	uncharacterized LOC284577
hsa-miR-433	0	0	1	1	1	1	CDK5RAP1	CDK5 regulatory subunit associated protein 1
hsa-miR-433	0	0	1	1	0	0	DCBLD1	discoidin, CUB and LCCL domain containing 1
hsa-miR-433	0	0	1	1	1	1	SLC36A4	solute carrier family 36 (proton/amino acid symporter), member 4
hsa-miR-433	1	0	1	0	1	1	KIAA1737	KIAA1737
hsa-miR-433	1	0	1	0	1	1	KBTBD8	kelch repeat and BTB (POZ) domain containing 8
hsa-miR-433	1	0	1	1	1	1	SYT6	synaptotagmin VI
hsa-miR-433	0	0	1	1	1	1	EXTL2	exostoses (multiple)-like 2
hsa-miR-433	0	0	1	0	1	1	TNFAIP8	tumor necrosis factor, alpha-induced protein 8
hsa-miR-433	1	0	1	1	1	1	IGSF11	immunoglobulin superfamily, member 11
hsa-miR-433	0	0	1	0	0	0	CECR7	cat eye syndrome chromosome region, candidate 7 (non-protein coding)
hsa-miR-433	1	0	1	1	1	1	CHD6	chromodomain helicase DNA binding protein 6
hsa-miR-433	0	0	1	0	0	0	LOC100130954	uncharacterized LOC100130954
hsa-miR-433	0	0	1	1	1	1	GRPEL1	GrpE-like 1, mitochondrial (E. coli)
hsa-miR-433	0	0	1	0	0	0	LOC728095	uncharacterized LOC728095
hsa-miR-433	0	0	1	1	1	1	ABCC12	ATP-binding cassette, sub-family C (CFTR/MRP), member 12
hsa-miR-433	0	0	1	1	0	0	ZACN	zinc activated ligand-gated ion channel
hsa-miR-433	1	0	1	1	1	1	RPS6KC1	ribosomal protein S6 kinase, 52kDa, polypeptide 1
hsa-miR-433	0	0	1	1	0	0	HDAC6	histone deacetylase 6
hsa-miR-433	0	0	1	0	1	1	PATE4	prostate and testis expressed 4
hsa-miR-433	0	0	1	1	1	1	SLC13A3	solute carrier family 13 (sodium-dependent dicarboxylate transporter), member 3
hsa-miR-433	1	0	1	0	1	1	KCNK2	potassium channel, subfamily K, member 2
hsa-miR-433	1	0	1	0	0	0	GPR137C	G protein-coupled receptor 137C
hsa-miR-433	1	0	1	1	1	1	ESYT2	extended synaptotagmin-like protein 2
hsa-miR-433	1	0	1	1	1	1	GJC1	gap junction protein, gamma 1, 45kDa
hsa-miR-433	1	0	1	1	1	1	SACS	spastic ataxia of Charlevoix-Saguenay (sacsin)
hsa-miR-433	1	0	1	1	1	1	KPNA1	karyopherin alpha 1 (importin alpha 5)
hsa-miR-433	0	0	1	0	1	1	CTBP1-AS1	CTBP1 antisense RNA 1
hsa-miR-433	1	0	1	1	1	1	DPY19L3	dpy-19-like 3 (C. elegans)
hsa-miR-433	0	0	1	0	0	0	FAM95B1	family with sequence similarity 95, member B1
hsa-miR-433	0	0	1	1	0	0	FSIP2	fibrous sheath interacting protein 2
hsa-miR-433	1	0	1	1	1	1	CSRNP3	cysteine-serine-rich nuclear protein 3
hsa-miR-433	1	0	1	1	1	1	MRPL30	mitochondrial ribosomal protein L30
hsa-miR-433	1	0	1	0	1	1	ANO6	anoctamin 6
hsa-miR-433	1	0	1	1	0	0	SPEG	SPEG complex locus
hsa-miR-433	1	0	1	0	1	1	CLEC16A	C-type lectin domain family 16, member A
hsa-miR-433	0	0	1	0	0	0	HNRNPKP3	heterogeneous nuclear ribonucleoprotein K pseudogene 3
hsa-miR-433	0	0	1	0	0	0	RPL23AP53	ribosomal protein L23a pseudogene 53
hsa-miR-433	1	0	1	1	0	0	PTPN5	protein tyrosine phosphatase, non-receptor type 5 (striatum-enriched)
hsa-miR-433	0	0	1	1	0	0	PSMC6	proteasome (prosome, macropain) 26S subunit, ATPase, 6
hsa-miR-433	0	0	1	1	0	0	TRIM46	tripartite motif containing 46
hsa-miR-433	1	0	1	1	1	1	SH3D19	SH3 domain containing 19
hsa-miR-433	0	0	1	1	0	0	WFIKKN1	WAP, follistatin/kazal, immunoglobulin, kunitz and netrin domain containing 1
hsa-miR-433	0	0	1	0	0	0	AGAP9	ArfGAP with GTPase domain, ankyrin repeat and PH domain 9
hsa-miR-433	1	0	1	1	1	1	CTSA	cathepsin A
hsa-miR-433	0	0	1	0	1	1	PEX5	peroxisomal biogenesis factor 5
hsa-miR-433	0	0	1	1	0	0	ADAM18	ADAM metallopeptidase domain 18
hsa-miR-433	1	0	1	1	1	1	CAMK2G	calcium/calmodulin-dependent protein kinase II gamma
hsa-miR-433	0	0	1	1	1	1	PTPN20B	protein tyrosine phosphatase, non-receptor type 20B
hsa-miR-433	0	0	1	1	1	1	PTPN20A	protein tyrosine phosphatase, non-receptor type 20A
hsa-miR-433	0	0	1	0	0	0	PART1	prostate androgen-regulated transcript 1 (non-protein coding)
hsa-miR-433	0	0	1	0	0	0	POM121L8P	POM121 transmembrane nucleoporin-like 8 pseudogene
hsa-miR-433	1	0	1	1	1	1	ARF6	ADP-ribosylation factor 6
hsa-miR-433	0	0	1	1	0	0	DNAI2	dynein, axonemal, intermediate chain 2
hsa-miR-433	1	0	1	1	1	1	TRIM3	tripartite motif containing 3
hsa-miR-433	1	0	1	0	1	1	FAM19A1	family with sequence similarity 19 (chemokine (C-C motif)-like), member A1
hsa-miR-433	1	0	1	1	1	1	USP45	ubiquitin specific peptidase 45
hsa-miR-433	0	0	1	1	1	1	FILIP1	filamin A interacting protein 1
hsa-miR-433	0	0	1	0	1	1	GAB3	GRB2-associated binding protein 3
hsa-miR-433	1	0	1	1	1	1	CHMP7	charged multivesicular body protein 7
hsa-miR-433	1	0	1	1	1	1	NFX1	nuclear transcription factor, X-box binding 1
hsa-miR-433	1	0	1	1	1	1	KANK1	KN motif and ankyrin repeat domains 1
hsa-miR-433	0	0	1	1	1	1	YAP1	Yes-associated protein 1
hsa-miR-433	0	0	1	1	1	1	U2AF1	U2 small nuclear RNA auxiliary factor 1
hsa-miR-433	1	0	1	1	1	1	SBF2	SET binding factor 2
hsa-miR-433	0	0	1	1	1	1	INPP5B	inositol polyphosphate-5-phosphatase, 75kDa
hsa-miR-433	0	0	1	1	1	1	CCDC66	coiled-coil domain containing 66
hsa-miR-433	1	0	1	1	1	1	BPTF	bromodomain PHD finger transcription factor
hsa-miR-433	0	0	1	1	0	0	FCRL3	Fc receptor-like 3
hsa-miR-433	1	0	1	1	1	1	IL17RD	interleukin 17 receptor D
hsa-miR-433	1	0	1	1	1	1	PRPF38B	PRP38 pre-mRNA processing factor 38 (yeast) domain containing B
hsa-miR-433	0	0	1	1	1	1	SLC35F2	solute carrier family 35, member F2
hsa-miR-433	1	0	1	1	1	1	STXBP5	syntaxin binding protein 5 (tomosyn)
hsa-miR-433	1	0	1	1	1	1	SLC24A4	solute carrier family 24 (sodium/potassium/calcium exchanger), member 4
hsa-miR-433	1	0	1	1	1	1	MBD6	methyl-CpG binding domain protein 6
hsa-miR-433	1	0	1	0	1	1	JAZF1	JAZF zinc finger 1
hsa-miR-433	1	0	1	1	1	1	CADM2	cell adhesion molecule 2
hsa-miR-433	1	0	1	0	1	1	KIF21B	kinesin family member 21B
hsa-miR-433	1	0	1	0	1	1	NR3C1	nuclear receptor subfamily 3, group C, member 1 (glucocorticoid receptor)
hsa-miR-433	0	0	1	0	1	1	PSG1	pregnancy specific beta-1-glycoprotein 1
hsa-miR-433	1	0	1	1	1	1	IKZF2	IKAROS family zinc finger 2 (Helios)
hsa-miR-433	0	0	1	1	1	1	KLHL7	kelch-like 7 (Drosophila)
hsa-miR-433	1	0	1	0	1	1	BDNF	brain-derived neurotrophic factor
hsa-miR-433	0	0	1	0	0	0	KGFLP1	fibroblast growth factor 7 pseudogene
hsa-miR-433	1	0	1	1	1	1	CNRIP1	cannabinoid receptor interacting protein 1
hsa-miR-433	0	0	1	1	1	1	CEP41	centrosomal protein 41kDa
hsa-miR-433	0	0	1	1	1	1	DNAJB14	DnaJ (Hsp40) homolog, subfamily B, member 14
hsa-miR-433	1	0	1	1	1	1	PIH1D3	PIH1 domain containing 3
hsa-miR-433	1	0	1	1	1	1	RIC8B	resistance to inhibitors of cholinesterase 8 homolog B (C. elegans)
hsa-miR-433	1	0	1	1	1	1	WDR26	WD repeat domain 26
hsa-miR-433	0	0	1	1	1	1	IYD	iodotyrosine deiodinase
hsa-miR-433	1	0	1	1	1	1	CAMTA1	calmodulin binding transcription activator 1
hsa-miR-433	0	0	1	1	0	0	PDZD11	PDZ domain containing 11
hsa-miR-433	0	0	1	1	0	0	GFRA3	GDNF family receptor alpha 3
hsa-miR-433	0	0	1	1	1	1	VWA5A	von Willebrand factor A domain containing 5A
hsa-miR-433	0	0	1	1	1	1	RPTN	repetin
hsa-miR-433	0	0	1	1	1	1	UGT2B4	UDP glucuronosyltransferase 2 family, polypeptide B4
hsa-miR-433	0	0	1	1	1	1	KLK7	kallikrein-related peptidase 7
hsa-miR-433	1	0	1	1	1	1	PLCH1	phospholipase C, eta 1
hsa-miR-433	1	0	1	1	1	1	SAT1	spermidine/spermine N1-acetyltransferase 1
hsa-miR-433	1	0	1	1	1	1	PCDH11X	protocadherin 11 X-linked
hsa-miR-433	0	0	1	1	0	0	NBPF8	neuroblastoma breakpoint family, member 8
hsa-miR-433	1	0	1	1	1	1	PRKACB	protein kinase, cAMP-dependent, catalytic, beta
hsa-miR-433	1	0	1	1	0	0	PLXNB3	plexin B3
hsa-miR-433	1	0	1	1	1	1	AMOT	angiomotin
hsa-miR-433	0	0	1	1	1	1	ICA1	islet cell autoantigen 1, 69kDa
hsa-miR-433	0	0	1	0	0	0	ATXN7L3B	ataxin 7-like 3B
hsa-miR-433	0	0	1	0	0	0	HIST1H2BN	histone cluster 1, H2bn
hsa-miR-433	0	0	1	1	0	0	NDUFA3	NADH dehydrogenase (ubiquinone) 1 alpha subcomplex, 3, 9kDa
hsa-miR-433	0	0	1	1	1	1	GNL3L	guanine nucleotide binding protein-like 3 (nucleolar)-like
hsa-miR-433	1	0	1	1	1	1	SNCA	synuclein, alpha (non A4 component of amyloid precursor)
hsa-miR-433	0	0	1	1	1	1	H2AFY	H2A histone family, member Y
hsa-miR-433	1	0	1	1	1	1	PRDM2	PR domain containing 2, with ZNF domain
hsa-miR-433	0	0	1	1	1	1	TOMM40L	translocase of outer mitochondrial membrane 40 homolog (yeast)-like
hsa-miR-433	0	0	1	1	1	1	GIN1	gypsy retrotransposon integrase 1
hsa-miR-433	1	0	1	1	0	0	ARMCX2	armadillo repeat containing, X-linked 2
hsa-miR-433	1	0	1	1	1	1	SCAMP1	secretory carrier membrane protein 1
hsa-miR-433	1	0	1	1	1	1	FAM199X	family with sequence similarity 199, X-linked
hsa-miR-433	1	0	1	0	1	1	CYBRD1	cytochrome b reductase 1
hsa-miR-433	0	0	1	1	1	1	RDH11	retinol dehydrogenase 11 (all-trans/9-cis/11-cis)
hsa-miR-433	0	0	1	1	0	0	DTWD1	DTW domain containing 1
hsa-miR-433	1	0	1	1	1	1	ARHGEF9	Cdc42 guanine nucleotide exchange factor (GEF) 9
hsa-miR-433	0	0	1	1	1	1	CENPL	centromere protein L
hsa-miR-433	0	0	1	1	1	1	FGA	fibrinogen alpha chain
hsa-miR-433	0	0	1	0	0	0	AZGP1P1	alpha-2-glycoprotein 1, zinc-binding pseudogene 1
hsa-miR-433	0	0	1	1	1	1	ABCA8	ATP-binding cassette, sub-family A (ABC1), member 8
hsa-miR-433	0	0	1	1	0	0	GLS2	glutaminase 2 (liver, mitochondrial)
hsa-miR-433	1	0	1	1	1	1	CD300LF	CD300 molecule-like family member f
hsa-miR-433	1	0	1	1	1	1	TMEM127	transmembrane protein 127
hsa-miR-433	1	0	1	0	0	0	KCNU1	potassium channel, subfamily U, member 1
hsa-miR-433	0	0	1	0	0	0	C3orf55	chromosome 3 open reading frame 55
hsa-miR-433	1	0	1	1	1	1	MRO	maestro
hsa-miR-433	1	0	1	0	1	1	SV2B	synaptic vesicle glycoprotein 2B
hsa-miR-433	0	0	1	1	1	1	CCP110	centriolar coiled coil protein 110kDa
hsa-miR-433	1	0	1	1	1	1	MLLT3	myeloid/lymphoid or mixed-lineage leukemia (trithorax homolog, Drosophila); translocated to, 3
hsa-miR-433	1	0	1	1	1	1	EYA4	eyes absent homolog 4 (Drosophila)
hsa-miR-433	0	0	1	1	0	0	AGBL3	ATP/GTP binding protein-like 3
hsa-miR-433	0	0	1	1	0	0	TTC12	tetratricopeptide repeat domain 12
hsa-miR-433	1	0	1	1	1	1	TTC39C	tetratricopeptide repeat domain 39C
hsa-miR-433	1	0	1	1	1	1	SORL1	sortilin-related receptor, L(DLR class) A repeats containing
hsa-miR-433	0	0	1	0	0	0	LINC00238	long intergenic non-protein coding RNA 238
hsa-miR-433	0	0	1	1	1	1	ZNF337	zinc finger protein 337
hsa-miR-433	1	0	1	1	1	1	CLK4	CDC-like kinase 4
hsa-miR-433	1	0	1	0	1	1	PDE12	phosphodiesterase 12
hsa-miR-433	0	0	1	1	1	1	KIF16B	kinesin family member 16B
hsa-miR-433	0	0	1	1	1	1	C12orf29	chromosome 12 open reading frame 29
hsa-miR-433	0	0	1	1	1	1	PAK6	p21 protein (Cdc42/Rac)-activated kinase 6
hsa-miR-433	0	0	1	0	1	1	TMSB15B	thymosin beta 15B
hsa-miR-433	1	0	1	1	0	0	INO80E	INO80 complex subunit E
hsa-miR-433	0	0	1	1	1	1	SNAPC3	small nuclear RNA activating complex, polypeptide 3, 50kDa
hsa-miR-433	1	0	1	0	1	1	NEGR1	neuronal growth regulator 1
hsa-miR-433	1	0	1	1	0	0	TMEM131	transmembrane protein 131
hsa-miR-433	0	0	1	1	1	1	FAM71D	family with sequence similarity 71, member D
hsa-miR-433	1	0	1	0	1	1	YAF2	YY1 associated factor 2
hsa-miR-433	1	0	1	1	1	1	SOX6	SRY (sex determining region Y)-box 6
hsa-miR-433	1	0	1	1	1	1	PLS3	plastin 3
hsa-miR-433	0	0	1	0	0	0	FLJ36000	uncharacterized FLJ36000
hsa-miR-433	0	0	1	0	0	0	LOC401074	uncharacterized LOC401074
hsa-miR-433	0	0	1	1	0	0	CNGA4	cyclic nucleotide gated channel alpha 4
hsa-miR-433	1	0	1	1	1	1	UNC13C	unc-13 homolog C (C. elegans)
hsa-miR-433	0	0	1	1	1	1	BCO2	beta-carotene oxygenase 2
hsa-miR-433	0	0	1	1	1	1	GOLGA6L9	golgin A6 family-like 9
hsa-miR-433	0	0	1	0	0	0	LINC00347	long intergenic non-protein coding RNA 347
hsa-miR-433	0	0	1	1	1	1	STRADA	STE20-related kinase adaptor alpha
hsa-miR-433	0	0	1	1	1	1	MST1	macrophage stimulating 1 (hepatocyte growth factor-like)
hsa-miR-433	1	0	1	0	1	1	PSD3	pleckstrin and Sec7 domain containing 3
hsa-miR-433	0	0	1	1	1	1	DOCK8	dedicator of cytokinesis 8
hsa-miR-433	0	0	1	0	0	0	LOC339529	uncharacterized LOC339529
hsa-miR-433	1	0	1	0	1	1	LYPD6	LY6/PLAUR domain containing 6
hsa-miR-433	0	0	1	0	0	0	LOC348120	uncharacterized LOC348120
hsa-miR-433	1	0	1	0	1	1	GALNT2	UDP-N-acetyl-alpha-D-galactosamine:polypeptide N-acetylgalactosaminyltransferase 2 (GalNAc-T2)
hsa-miR-433	0	0	1	1	1	1	HLA-DQA1	major histocompatibility complex, class II, DQ alpha 1
hsa-miR-433	1	0	1	1	1	1	PCGF5	polycomb group ring finger 5
hsa-miR-433	0	0	1	1	1	1	MPP3	membrane protein, palmitoylated 3 (MAGUK p55 subfamily member 3)
hsa-miR-433	1	0	1	1	1	1	KLHL28	kelch-like 28 (Drosophila)
hsa-miR-433	1	0	1	1	1	1	GTDC1	glycosyltransferase-like domain containing 1
hsa-miR-433	0	0	1	1	1	1	B4GALT4	UDP-Gal:betaGlcNAc beta 1,4- galactosyltransferase, polypeptide 4
hsa-miR-433	0	0	1	1	1	1	GPATCH2	G patch domain containing 2
hsa-miR-433	0	0	1	1	0	0	C8orf31	chromosome 8 open reading frame 31
hsa-miR-433	0	0	1	1	1	1	SCLT1	sodium channel and clathrin linker 1
hsa-miR-433	0	0	1	1	1	1	STAG1	stromal antigen 1
hsa-miR-433	1	0	1	1	1	1	GANAB	glucosidase, alpha; neutral AB
hsa-miR-433	1	0	1	1	1	1	C5orf25	chromosome 5 open reading frame 25
hsa-miR-433	1	0	1	1	1	1	FAM129B	family with sequence similarity 129, member B
hsa-miR-433	1	0	1	0	1	1	DCP2	DCP2 decapping enzyme homolog (S. cerevisiae)
hsa-miR-433	0	0	1	1	0	0	CYP4F30P	cytochrome P450, family 4, subfamily F, polypeptide 30, pseudogene
hsa-miR-433	1	0	1	1	1	1	AHR	aryl hydrocarbon receptor
hsa-miR-433	0	0	1	1	1	1	PCDH18	protocadherin 18
hsa-miR-433	0	0	1	1	0	0	RPS16	ribosomal protein S16
hsa-miR-433	0	0	1	0	0	0	JPX	JPX transcript, XIST activator (non-protein coding)
hsa-miR-433	0	0	1	1	1	1	TNFSF12	tumor necrosis factor (ligand) superfamily, member 12
hsa-miR-433	1	0	1	1	1	1	OPCML	opioid binding protein/cell adhesion molecule-like
hsa-miR-433	1	0	1	1	1	1	NTRK2	neurotrophic tyrosine kinase, receptor, type 2
hsa-miR-433	0	0	1	0	0	0	LOC441259	PMS2 postmeiotic segregation increased 2 (S. cerevisiae)-like
hsa-miR-433	1	0	1	1	1	1	HNRNPC	heterogeneous nuclear ribonucleoprotein C (C1/C2)
hsa-miR-433	1	0	1	1	1	1	STK38	serine/threonine kinase 38
hsa-miR-433	1	0	1	1	1	1	ACVR2B	activin A receptor, type IIB
hsa-miR-433	0	0	1	1	1	1	R3HCC1L	R3H domain and coiled-coil containing 1-like
hsa-miR-433	0	0	1	0	0	0	ABCA11P	ATP-binding cassette, sub-family A (ABC1), member 11, pseudogene
hsa-miR-433	0	0	1	1	1	1	ZNF365	zinc finger protein 365
hsa-miR-433	1	0	1	1	0	0	HAND2	heart and neural crest derivatives expressed 2
hsa-miR-433	0	0	1	1	1	1	CCDC126	coiled-coil domain containing 126
hsa-miR-433	1	0	1	1	1	1	ZNF763	zinc finger protein 763
hsa-miR-433	0	0	1	0	0	0	HIST2H2BA	histone cluster 2, H2ba (pseudogene)
hsa-miR-433	0	0	1	1	1	1	TTN	titin
hsa-miR-433	0	0	1	1	1	1	GOLGA2P5	golgin A2 pseudogene 5
hsa-miR-433	1	0	1	1	1	1	TET2	tet methylcytosine dioxygenase 2
hsa-miR-433	0	0	1	0	0	0	INTS4L1	integrator complex subunit 4-like 1
hsa-miR-433	0	0	1	1	1	1	UNC13B	unc-13 homolog B (C. elegans)
hsa-miR-433	1	0	1	1	1	1	TMEM132B	transmembrane protein 132B
hsa-miR-433	0	0	1	0	0	0	BTF3P11	basic transcription factor 3 pseudogene 11
hsa-miR-433	0	0	1	1	1	1	ATP1B4	ATPase, Na+/K+ transporting, beta 4 polypeptide
hsa-miR-433	1	0	1	1	1	1	FKBP1A	FK506 binding protein 1A, 12kDa
hsa-miR-433	0	0	1	0	0	0	LSP1P3	lymphocyte-specific protein 1 pseudogene 3
hsa-miR-433	0	0	1	0	0	0	EEF1DP3	eukaryotic translation elongation factor 1 delta pseudogene 3
hsa-miR-433	1	0	1	0	1	1	LRCH2	leucine-rich repeats and calponin homology (CH) domain containing 2
hsa-miR-433	1	0	1	0	1	1	CAMSAP2	calmodulin regulated spectrin-associated protein family, member 2
hsa-miR-433	1	0	1	1	1	1	ZMYM4	zinc finger, MYM-type 4
hsa-miR-433	1	0	1	1	1	1	MACROD2	MACRO domain containing 2
hsa-miR-433	1	0	1	1	1	1	MLLT10	myeloid/lymphoid or mixed-lineage leukemia (trithorax homolog, Drosophila); translocated to, 10
hsa-miR-433	0	0	1	0	1	1	FEZ2	fasciculation and elongation protein zeta 2 (zygin II)
hsa-miR-433	1	0	1	1	0	0	ABL2	v-abl Abelson murine leukemia viral oncogene homolog 2
hsa-miR-433	1	0	1	1	1	1	TJP1	tight junction protein 1
hsa-miR-433	0	0	1	1	1	1	VPS35	vacuolar protein sorting 35 homolog (S. cerevisiae)
hsa-miR-433	0	0	1	1	0	0	RPS24	ribosomal protein S24
hsa-miR-433	0	0	1	1	1	1	PRR14L	proline rich 14-like
hsa-miR-433	0	0	1	0	0	0	SMG1P1	smg-1 homolog, phosphatidylinositol 3-kinase-related kinase pseudogene 1
hsa-miR-433	0	0	1	1	0	0	SNAPC2	small nuclear RNA activating complex, polypeptide 2, 45kDa
hsa-miR-433	0	0	1	1	1	1	PPP1R1C	protein phosphatase 1, regulatory (inhibitor) subunit 1C
hsa-miR-433	1	0	1	1	1	1	CASP3	caspase 3, apoptosis-related cysteine peptidase
hsa-miR-433	1	0	1	0	1	1	EML4	echinoderm microtubule associated protein like 4
hsa-miR-433	0	0	1	1	1	1	ARMCX3	armadillo repeat containing, X-linked 3
hsa-miR-433	0	0	1	0	1	1	MYO3B	myosin IIIB
hsa-miR-433	0	0	1	0	0	0	OVOS	ovostatin
hsa-miR-433	1	0	1	1	1	1	NEDD9	neural precursor cell expressed, developmentally down-regulated 9
hsa-miR-433	1	0	1	1	1	1	ATP6V1C1	ATPase, H+ transporting, lysosomal 42kDa, V1 subunit C1
hsa-miR-433	1	0	1	1	1	1	CORIN	corin, serine peptidase
hsa-miR-433	1	0	1	1	1	1	NFIB	nuclear factor I/B
hsa-miR-433	1	0	1	1	1	1	TMEM135	transmembrane protein 135
hsa-miR-433	1	0	1	1	1	1	HIF1A	hypoxia inducible factor 1, alpha subunit (basic helix-loop-helix transcription factor)
hsa-miR-433	1	0	1	1	1	1	SLC30A7	solute carrier family 30 (zinc transporter), member 7
hsa-miR-433	0	0	1	1	0	0	HNRNPAB	heterogeneous nuclear ribonucleoprotein A/B
hsa-miR-433	0	0	1	1	0	0	STMN4	stathmin-like 4
hsa-miR-433	0	0	1	1	1	1	DUSP26	dual specificity phosphatase 26 (putative)
hsa-miR-433	0	0	1	1	1	1	DNM1	dynamin 1
hsa-miR-433	0	0	1	1	0	0	ABCA6	ATP-binding cassette, sub-family A (ABC1), member 6
hsa-miR-433	1	0	1	1	1	1	VIM	vimentin
hsa-miR-433	0	0	1	0	0	0	RPS16P10	ribosomal protein S16 pseudogene 10
hsa-miR-433	0	0	1	1	0	0	PSG8	pregnancy specific beta-1-glycoprotein 8
hsa-miR-433	0	0	1	1	1	1	BTF3	basic transcription factor 3
hsa-miR-433	0	0	1	0	0	0	PRMT1	protein arginine methyltransferase 1
hsa-miR-433	0	0	1	1	0	0	CCNDBP1	cyclin D-type binding-protein 1
hsa-miR-433	0	0	1	1	0	0	CD81	CD81 molecule
hsa-miR-433	1	0	1	1	1	1	FGF11	fibroblast growth factor 11
hsa-miR-433	1	0	1	0	1	1	BNIP3L	BCL2/adenovirus E1B 19kDa interacting protein 3-like
hsa-miR-433	0	0	1	1	1	1	FGL1	fibrinogen-like 1
hsa-miR-433	1	0	1	1	1	1	SMARCE1	SWI/SNF related, matrix associated, actin dependent regulator of chromatin, subfamily e, member 1
hsa-miR-433	0	0	1	1	1	1	CCDC91	coiled-coil domain containing 91
hsa-miR-433	1	0	1	1	1	1	BAI3	brain-specific angiogenesis inhibitor 3
hsa-miR-433	0	0	1	1	1	1	PECR	peroxisomal trans-2-enoyl-CoA reductase
hsa-miR-433	0	0	1	1	1	1	STON1	stonin 1
hsa-miR-433	0	0	1	1	1	1	CHMP5	charged multivesicular body protein 5
hsa-miR-433	0	0	1	1	1	1	ATG4A	autophagy related 4A, cysteine peptidase
hsa-miR-433	0	0	1	0	0	0	LOC150568	uncharacterized LOC150568
hsa-miR-433	0	0	1	0	1	1	TMEM155	transmembrane protein 155
hsa-miR-433	1	0	1	1	1	1	OSBPL9	oxysterol binding protein-like 9
hsa-miR-433	0	0	1	1	0	0	GMPPA	GDP-mannose pyrophosphorylase A
hsa-miR-433	1	0	1	1	1	1	CUL4A	cullin 4A
hsa-miR-433	0	0	1	0	1	1	SRSF5	serine/arginine-rich splicing factor 5
hsa-miR-433	1	0	1	1	1	1	ARNTL	aryl hydrocarbon receptor nuclear translocator-like
hsa-miR-433	0	0	1	1	0	0	RGS9	regulator of G-protein signaling 9
hsa-miR-433	0	0	1	1	1	1	PABPN1	poly(A) binding protein, nuclear 1
hsa-miR-433	0	0	1	1	0	0	NEK7	NIMA (never in mitosis gene a)-related kinase 7
hsa-miR-433	1	0	1	1	1	1	ATAT1	alpha tubulin acetyltransferase 1
hsa-miR-433	0	0	1	1	1	1	CD1C	CD1c molecule
hsa-miR-433	1	0	1	1	1	1	RAB4A	RAB4A, member RAS oncogene family
hsa-miR-433	1	0	1	1	1	1	GOLGA7	golgin A7
hsa-miR-433	0	0	1	1	1	1	DNAJC25	DnaJ (Hsp40) homolog, subfamily C , member 25
hsa-miR-433	1	0	1	0	1	1	MAP1B	microtubule-associated protein 1B
hsa-miR-433	0	0	1	1	1	1	FMO1	flavin containing monooxygenase 1
hsa-miR-433	1	0	1	0	1	1	SLC2A3	solute carrier family 2 (facilitated glucose transporter), member 3
hsa-miR-433	1	0	1	0	1	1	CD47	CD47 molecule
hsa-miR-433	0	0	1	0	0	0	NUDT18	nudix (nucleoside diphosphate linked moiety X)-type motif 18
hsa-miR-433	0	0	1	1	1	1	COPS4	COP9 constitutive photomorphogenic homolog subunit 4 (Arabidopsis)
hsa-miR-433	0	0	1	1	1	1	ZFAND1	zinc finger, AN1-type domain 1
hsa-miR-433	0	0	1	1	1	1	VPS16	vacuolar protein sorting 16 homolog (S. cerevisiae)
hsa-miR-433	1	0	1	1	1	1	STAG2	stromal antigen 2
hsa-miR-433	0	0	1	0	0	0	LOC731789	uncharacterized LOC731789
hsa-miR-433	1	0	1	1	1	1	PHACTR2	phosphatase and actin regulator 2
hsa-miR-433	0	0	1	0	0	0	LINC00661	long intergenic non-protein coding RNA 661
hsa-miR-433	1	0	1	1	1	1	HECW2	HECT, C2 and WW domain containing E3 ubiquitin protein ligase 2
hsa-miR-433	1	0	1	0	1	1	MEGF10	multiple EGF-like-domains 10
hsa-miR-433	1	0	1	0	1	1	PTP4A1	protein tyrosine phosphatase type IVA, member 1
hsa-miR-433	1	0	1	1	1	1	SNRK	SNF related kinase
hsa-miR-433	1	0	1	1	1	1	PI15	peptidase inhibitor 15
hsa-miR-433	0	0	1	0	0	0	61E3.4	nuclear pore complex interacting protein-like
hsa-miR-433	0	0	1	1	1	1	CEACAM1	carcinoembryonic antigen-related cell adhesion molecule 1 (biliary glycoprotein)
hsa-miR-433	1	0	1	1	0	0	DPY19L1	dpy-19-like 1 (C. elegans)
hsa-miR-433	0	0	1	0	0	0	LOC728377	Rho guanine nucleotide exchange factor (GEF) 5 pseudogene
hsa-miR-433	1	0	1	0	1	1	DCBLD2	discoidin, CUB and LCCL domain containing 2
hsa-miR-433	0	0	1	1	1	1	PROS1	protein S (alpha)
hsa-miR-433	0	0	1	0	0	0	GPR144	G protein-coupled receptor 144
hsa-miR-433	1	0	1	0	1	1	BCL2	B-cell CLL/lymphoma 2
hsa-miR-433	1	0	1	1	1	1	IGF1	insulin-like growth factor 1 (somatomedin C)
hsa-miR-433	0	0	1	0	0	0	AR	androgen receptor
hsa-miR-433	1	0	1	1	1	1	COL4A4	collagen, type IV, alpha 4
hsa-miR-433	0	0	1	0	1	1	CYP1B1	cytochrome P450, family 1, subfamily B, polypeptide 1
hsa-miR-433	0	0	1	1	1	1	DPYD	dihydropyrimidine dehydrogenase
hsa-miR-433	0	0	1	1	1	1	EDN3	endothelin 3
hsa-miR-433	1	0	1	1	1	1	GALC	galactosylceramidase
hsa-miR-433	1	0	1	1	1	1	MET	met proto-oncogene (hepatocyte growth factor receptor)
hsa-miR-433	1	0	1	1	1	1	PTCH1	patched 1
hsa-miR-433	1	0	1	1	1	1	TIMP3	TIMP metallopeptidase inhibitor 3
hsa-miR-433	1	0	1	0	1	1	TSC1	tuberous sclerosis 1
hsa-miR-433	0	0	1	1	1	1	TSHR	thyroid stimulating hormone receptor
hsa-miR-433	1	0	1	1	1	1	TEK	TEK tyrosine kinase, endothelial
hsa-miR-433	0	0	1	1	1	1	SELL	selectin L
hsa-miR-433	0	0	1	1	1	1	CALCB	calcitonin-related polypeptide beta
hsa-miR-433	1	0	1	1	1	1	CSF1	colony stimulating factor 1 (macrophage)
hsa-miR-433	1	0	1	1	1	1	DIO2	deiodinase, iodothyronine, type II
hsa-miR-433	1	0	1	1	1	1	IGF1R	insulin-like growth factor 1 receptor
hsa-miR-433	0	0	1	1	1	1	IL12A	interleukin 12A (natural killer cell stimulatory factor 1, cytotoxic lymphocyte maturation factor 1, p35)
hsa-miR-433	1	0	1	0	1	1	KCNJ2	potassium inwardly-rectifying channel, subfamily J, member 2
hsa-miR-433	0	0	1	0	0	0	KLK2	kallikrein-related peptidase 2
hsa-miR-433	0	0	1	1	1	1	TRIM6-TRIM34	TRIM6-TRIM34 readthrough
hsa-miR-433	0	0	1	1	1	1	TRIM34	tripartite motif containing 34
hsa-miR-433	1	0	1	0	1	1	YPEL2	yippee-like 2 (Drosophila)
hsa-miR-433	0	0	1	0	1	1	WDR35	WD repeat domain 35
hsa-miR-433	0	0	1	1	1	1	CLEC6A	C-type lectin domain family 6, member A
hsa-miR-433	0	0	1	1	1	1	SCP2	sterol carrier protein 2
hsa-miR-433	1	0	1	1	1	1	IGSF3	immunoglobulin superfamily, member 3
hsa-miR-433	0	0	1	1	0	0	REG3G	regenerating islet-derived 3 gamma
hsa-miR-433	1	0	1	1	1	1	RBM33	RNA binding motif protein 33
hsa-miR-433	0	0	1	1	1	1	MXI1	MAX interactor 1
hsa-miR-433	0	0	1	1	1	1	SLC35D3	solute carrier family 35, member D3
hsa-miR-433	1	0	1	1	1	1	FAM168B	family with sequence similarity 168, member B
hsa-miR-433	1	0	1	1	1	1	ARHGAP28	Rho GTPase activating protein 28
hsa-miR-433	1	0	1	0	1	1	C6orf222	chromosome 6 open reading frame 222
hsa-miR-433	1	0	1	1	1	1	DISC1	disrupted in schizophrenia 1
hsa-miR-433	0	0	1	1	1	1	SPIN4	spindlin family, member 4
hsa-miR-433	1	0	1	0	1	1	ZKSCAN2	zinc finger with KRAB and SCAN domains 2
hsa-miR-433	1	0	1	1	1	1	SORCS1	sortilin-related VPS10 domain containing receptor 1
hsa-miR-433	0	0	1	0	1	1	LINC00268	long intergenic non-protein coding RNA 268
hsa-miR-433	1	0	1	1	1	1	KATNAL1	katanin p60 subunit A-like 1
hsa-miR-433	1	0	1	1	1	1	RUNX2	runt-related transcription factor 2
hsa-miR-433	0	0	1	1	1	1	PURG	purine-rich element binding protein G
hsa-miR-433	0	0	1	1	0	0	SPRR2B	small proline-rich protein 2B
hsa-miR-433	0	0	1	1	1	1	BTBD11	BTB (POZ) domain containing 11
hsa-miR-433	1	0	1	1	1	1	VMA21	VMA21 vacuolar H+-ATPase homolog (S. cerevisiae)
hsa-miR-433	1	0	1	1	1	1	SH3PXD2B	SH3 and PX domains 2B
hsa-miR-433	0	0	1	1	1	1	ZNF187	zinc finger protein 187
hsa-miR-433	0	0	1	1	1	1	HNMT	histamine N-methyltransferase
hsa-miR-433	1	0	1	0	1	1	BCL7A	B-cell CLL/lymphoma 7A
hsa-miR-433	0	0	1	1	0	0	KLK3	kallikrein-related peptidase 3
hsa-miR-433	1	0	1	0	1	1	SAMD5	sterile alpha motif domain containing 5
hsa-miR-433	1	0	1	1	1	1	SAR1B	SAR1 homolog B (S. cerevisiae)
hsa-miR-433	0	0	1	1	0	0	CALCA	calcitonin-related polypeptide alpha
hsa-miR-433	0	0	1	1	1	1	KCNIP1	Kv channel interacting protein 1
hsa-miR-433	0	0	1	1	1	1	CTLA4	cytotoxic T-lymphocyte-associated protein 4
hsa-miR-433	0	0	1	0	1	1	RGS21	regulator of G-protein signaling 21
hsa-miR-433	1	0	1	1	1	1	KIAA0317	KIAA0317
hsa-miR-433	1	0	1	1	0	0	ANKRD34A	ankyrin repeat domain 34A
hsa-miR-433	1	0	1	1	1	1	CHN2	chimerin (chimaerin) 2
hsa-miR-433	1	0	1	0	1	1	DCUN1D4	DCN1, defective in cullin neddylation 1, domain containing 4 (S. cerevisiae)
hsa-miR-433	1	0	1	1	1	1	PRKAG2	protein kinase, AMP-activated, gamma 2 non-catalytic subunit
hsa-miR-433	0	0	1	0	1	1	STEAP2	STEAP family member 2, metalloreductase
hsa-miR-433	1	0	1	1	1	1	PPP4R1	protein phosphatase 4, regulatory subunit 1
hsa-miR-433	0	0	1	1	1	1	POT1	protection of telomeres 1 homolog (S. pombe)
hsa-miR-433	1	0	1	1	1	1	HS6ST2	heparan sulfate 6-O-sulfotransferase 2
hsa-miR-433	1	0	1	1	1	1	ZNF436	zinc finger protein 436
hsa-miR-433	1	0	1	1	1	1	ALG9	asparagine-linked glycosylation 9, alpha-1,2-mannosyltransferase homolog (S. cerevisiae)
hsa-miR-433	1	0	1	1	1	1	N4BP2L1	NEDD4 binding protein 2-like 1
hsa-miR-433	1	0	1	1	1	1	DMP1	dentin matrix acidic phosphoprotein 1
hsa-miR-433	1	0	1	0	1	1	UNC13A	unc-13 homolog A (C. elegans)
hsa-miR-433	0	0	1	1	1	1	TBX18	T-box 18
hsa-miR-433	1	0	1	1	1	1	REPS2	RALBP1 associated Eps domain containing 2
hsa-miR-433	0	0	1	1	1	1	ACPP	acid phosphatase, prostate
hsa-miR-433	1	0	1	1	1	1	CDH13	cadherin 13, H-cadherin (heart)
hsa-miR-433	1	0	1	1	1	1	MAPK14	mitogen-activated protein kinase 14
hsa-miR-433	0	0	1	0	1	1	DOCK1	dedicator of cytokinesis 1
hsa-miR-433	1	0	1	1	1	1	EIF1AX	eukaryotic translation initiation factor 1A, X-linked
hsa-miR-433	0	0	1	1	1	1	FRZB	frizzled-related protein
hsa-miR-433	1	0	1	1	1	1	AHNAK	AHNAK nucleoprotein
hsa-miR-433	1	0	1	1	1	1	BAAT	bile acid CoA: amino acid N-acyltransferase (glycine N-choloyltransferase)
hsa-miR-433	1	0	1	1	1	1	CBFB	core-binding factor, beta subunit
hsa-miR-433	1	0	1	0	1	1	CCND2	cyclin D2
hsa-miR-433	0	0	1	1	1	1	CD1D	CD1d molecule
hsa-miR-433	0	0	1	1	0	0	COX6B1	cytochrome c oxidase subunit VIb polypeptide 1 (ubiquitous)
hsa-miR-433	1	0	1	1	1	1	DR1	down-regulator of transcription 1, TBP-binding (negative cofactor 2)
hsa-miR-433	0	0	1	1	1	1	EDNRA	endothelin receptor type A
hsa-miR-433	0	0	1	1	0	0	EFNA5	ephrin-A5
hsa-miR-433	0	0	1	1	1	1	F13B	coagulation factor XIII, B polypeptide
hsa-miR-433	1	0	1	1	1	1	FGF9	fibroblast growth factor 9 (glia-activating factor)
hsa-miR-433	0	0	1	1	1	1	FPR3	formyl peptide receptor 3
hsa-miR-433	1	0	1	0	1	1	GNAI1	guanine nucleotide binding protein (G protein), alpha inhibiting activity polypeptide 1
hsa-miR-433	1	0	1	1	1	1	ISL1	ISL LIM homeobox 1
hsa-miR-433	1	0	1	1	1	1	ITGB8	integrin, beta 8
hsa-miR-433	1	0	1	1	1	1	MAFK	v-maf musculoaponeurotic fibrosarcoma oncogene homolog K (avian)
hsa-miR-433	0	0	1	0	1	1	CXCL9	chemokine (C-X-C motif) ligand 9
hsa-miR-433	0	0	1	1	1	1	NID1	nidogen 1
hsa-miR-433	0	0	1	0	1	1	OPHN1	oligophrenin 1
hsa-miR-433	0	0	1	1	0	0	REG3A	regenerating islet-derived 3 alpha
hsa-miR-433	1	0	1	0	1	1	PCDHGC3	protocadherin gamma subfamily C, 3
hsa-miR-433	0	0	1	1	1	1	PIM1	pim-1 oncogene
hsa-miR-433	1	0	1	1	1	1	PLAGL2	pleiomorphic adenoma gene-like 2
hsa-miR-433	1	0	1	1	1	1	PPP1CB	protein phosphatase 1, catalytic subunit, beta isozyme
hsa-miR-433	1	0	1	0	1	1	PRKCA	protein kinase C, alpha
hsa-miR-433	0	0	1	1	1	1	MAPK9	mitogen-activated protein kinase 9
hsa-miR-433	1	0	1	1	1	1	PTPN4	protein tyrosine phosphatase, non-receptor type 4 (megakaryocyte)
hsa-miR-433	0	0	1	1	1	1	RGS13	regulator of G-protein signaling 13
hsa-miR-433	1	0	1	0	1	1	SORT1	sortilin 1
hsa-miR-433	1	0	1	1	1	1	SFRP2	secreted frizzled-related protein 2
hsa-miR-433	1	0	1	1	1	1	SRSF3	serine/arginine-rich splicing factor 3
hsa-miR-433	1	0	1	0	1	1	ST6GAL1	ST6 beta-galactosamide alpha-2,6-sialyltranferase 1
hsa-miR-433	0	0	1	1	1	1	SLAMF1	signaling lymphocytic activation molecule family member 1
hsa-miR-433	1	0	1	1	1	1	SRI	sorcin
hsa-miR-433	0	0	1	1	1	1	SRP54	signal recognition particle 54kDa
hsa-miR-433	1	0	1	0	1	1	RPS6KB1	ribosomal protein S6 kinase, 70kDa, polypeptide 1
hsa-miR-433	1	0	1	1	1	1	TFAP2B	transcription factor AP-2 beta (activating enhancer binding protein 2 beta)
hsa-miR-433	1	0	1	0	1	1	SEC62	SEC62 homolog (S. cerevisiae)
hsa-miR-433	0	0	1	1	0	0	TYROBP	TYRO protein tyrosine kinase binding protein
hsa-miR-433	1	0	1	1	1	1	VAV2	vav 2 guanine nucleotide exchange factor
hsa-miR-433	1	0	1	0	1	1	BSN	bassoon (presynaptic cytomatrix protein)
hsa-miR-433	0	0	1	1	1	1	AP3B1	adaptor-related protein complex 3, beta 1 subunit
hsa-miR-433	1	0	1	0	1	1	PCDHGA12	protocadherin gamma subfamily A, 12
hsa-miR-433	1	0	1	0	1	1	PCDHGB4	protocadherin gamma subfamily B, 4
hsa-miR-433	1	0	1	0	1	1	TNKS	tankyrase, TRF1-interacting ankyrin-related ADP-ribose polymerase
hsa-miR-433	0	0	1	1	1	1	JRKL	jerky homolog-like (mouse)
hsa-miR-433	1	0	1	1	1	1	MBTPS1	membrane-bound transcription factor peptidase, site 1
hsa-miR-433	1	0	1	1	1	1	NR5A2	nuclear receptor subfamily 5, group A, member 2
hsa-miR-433	0	0	1	1	1	1	TRIM24	tripartite motif containing 24
hsa-miR-433	0	0	1	1	1	1	IL18R1	interleukin 18 receptor 1
hsa-miR-433	1	0	1	1	1	1	KAT2B	K(lysine) acetyltransferase 2B
hsa-miR-433	0	0	1	1	0	0	FCGBP	Fc fragment of IgG binding protein
hsa-miR-433	1	0	1	0	1	1	WASL	Wiskott-Aldrich syndrome-like
hsa-miR-433	1	0	1	1	1	1	KALRN	kalirin, RhoGEF kinase
hsa-miR-433	0	0	1	1	1	1	FLT3	fms-related tyrosine kinase 3
hsa-miR-433	1	0	1	0	1	1	SLC1A2	solute carrier family 1 (glial high affinity glutamate transporter), member 2
hsa-miR-433	1	0	1	1	1	1	MED21	mediator complex subunit 21
hsa-miR-433	1	0	1	0	1	1	ACSL4	acyl-CoA synthetase long-chain family member 4
hsa-miR-433	0	0	1	1	1	1	GPC5	glypican 5
hsa-miR-433	0	0	1	1	1	1	GP5	glycoprotein V (platelet)
hsa-miR-433	1	0	1	1	1	1	RAB5C	RAB5C, member RAS oncogene family
hsa-miR-433	1	0	1	1	1	1	MTMR4	myotubularin related protein 4
hsa-miR-433	0	0	1	1	0	0	NMI	N-myc (and STAT) interactor
hsa-miR-433	1	0	1	1	1	1	AKAP7	A kinase (PRKA) anchor protein 7
hsa-miR-433	1	0	1	1	1	1	ONECUT2	one cut homeobox 2
hsa-miR-433	0	0	1	1	1	1	CLCA3P	chloride channel accessory 3, pseudogene
hsa-miR-433	0	0	1	1	1	1	JAK2	Janus kinase 2
hsa-miR-433	1	0	1	0	1	1	SCD	stearoyl-CoA desaturase (delta-9-desaturase)
hsa-miR-433	0	0	1	1	0	0	ALDOC	aldolase C, fructose-bisphosphate
hsa-miR-433	1	0	1	1	1	1	DLX3	distal-less homeobox 3
hsa-miR-433	1	0	1	1	1	1	GABPB1	GA binding protein transcription factor, beta subunit 1
hsa-miR-433	0	0	1	1	1	1	NCOA4	nuclear receptor coactivator 4
hsa-miR-433	1	0	1	1	1	1	GABBR2	gamma-aminobutyric acid (GABA) B receptor, 2
hsa-miR-433	1	0	1	1	1	1	AKT3	v-akt murine thymoma viral oncogene homolog 3 (protein kinase B, gamma)
hsa-miR-433	1	0	1	1	1	1	MED6	mediator complex subunit 6
hsa-miR-433	1	0	1	1	1	1	ABCF2	ATP-binding cassette, sub-family F (GCN20), member 2
hsa-miR-433	1	0	1	0	1	1	SPRY3	sprouty homolog 3 (Drosophila)
hsa-miR-433	1	0	1	1	1	1	MAT2A	methionine adenosyltransferase II, alpha
hsa-miR-433	1	0	1	1	1	1	MMP16	matrix metallopeptidase 16 (membrane-inserted)
hsa-miR-433	1	0	1	1	1	1	HS3ST4	heparan sulfate (glucosamine) 3-O-sulfotransferase 4
hsa-miR-433	1	0	1	1	1	1	DYNC1LI2	dynein, cytoplasmic 1, light intermediate chain 2
hsa-miR-433	0	0	1	1	0	0	PDE6H	phosphodiesterase 6H, cGMP-specific, cone, gamma
hsa-miR-433	1	0	1	0	1	1	PITPNA	phosphatidylinositol transfer protein, alpha
hsa-miR-433	0	0	1	1	0	0	IPO7	importin 7
hsa-miR-433	0	0	1	1	0	0	CCT4	chaperonin containing TCP1, subunit 4 (delta)
hsa-miR-433	1	0	1	0	1	1	GNAI3	guanine nucleotide binding protein (G protein), alpha inhibiting activity polypeptide 3
hsa-miR-433	1	0	1	0	1	1	NCOA2	nuclear receptor coactivator 2
hsa-miR-433	1	0	1	1	1	1	CTCF	CCCTC-binding factor (zinc finger protein)
hsa-miR-433	1	0	1	1	1	1	MMP24	matrix metallopeptidase 24 (membrane-inserted)
hsa-miR-433	0	0	1	1	1	1	SYPL1	synaptophysin-like 1
hsa-miR-433	1	0	1	1	1	1	BTG2	BTG family, member 2
hsa-miR-433	0	0	1	1	1	1	RAB40B	RAB40B, member RAS oncogene family
hsa-miR-433	1	0	1	0	1	1	SLC5A3	solute carrier family 5 (sodium/myo-inositol cotransporter), member 3
hsa-miR-433	1	0	1	0	1	1	SOX12	SRY (sex determining region Y)-box 12
hsa-miR-433	1	0	1	1	1	1	DDX52	DEAD (Asp-Glu-Ala-Asp) box polypeptide 52
hsa-miR-433	1	0	1	1	1	1	ABHD2	abhydrolase domain containing 2
hsa-miR-433	0	0	1	1	1	1	POLR3A	polymerase (RNA) III (DNA directed) polypeptide A, 155kDa
hsa-miR-433	0	0	1	1	1	1	USH2A	Usher syndrome 2A (autosomal recessive, mild)
hsa-miR-433	1	0	1	1	1	1	ERLIN2	ER lipid raft associated 2
hsa-miR-433	1	0	1	1	1	1	HPS5	Hermansky-Pudlak syndrome 5
hsa-miR-433	0	0	1	1	1	1	XPOT	exportin, tRNA (nuclear export receptor for tRNAs)
hsa-miR-433	1	0	1	0	1	1	CHP1	calcineurin-like EF hand protein 1
hsa-miR-433	1	0	1	1	1	1	KLF12	Kruppel-like factor 12
hsa-miR-433	0	0	1	1	1	1	STXBP3	syntaxin binding protein 3
hsa-miR-433	0	0	1	1	1	1	ATF5	activating transcription factor 5
hsa-miR-433	1	0	1	1	1	1	APPL1	adaptor protein, phosphotyrosine interaction, PH domain and leucine zipper containing 1
hsa-miR-433	1	0	1	0	1	1	FZD4	frizzled family receptor 4
hsa-miR-433	1	0	1	1	1	1	MGEA5	meningioma expressed antigen 5 (hyaluronidase)
hsa-miR-433	1	0	1	1	1	1	DKK1	dickkopf 1 homolog (Xenopus laevis)
hsa-miR-433	1	0	1	1	1	1	RHOQ	ras homolog family member Q
hsa-miR-433	1	0	1	1	1	1	HS2ST1	heparan sulfate 2-O-sulfotransferase 1
hsa-miR-433	1	0	1	0	1	1	ACAP2	ArfGAP with coiled-coil, ankyrin repeat and PH domains 2
hsa-miR-433	1	0	1	1	1	1	PITPNB	phosphatidylinositol transfer protein, beta
hsa-miR-433	0	0	1	0	1	1	TLL1	tolloid-like 1
hsa-miR-433	1	0	1	1	1	1	TLL2	tolloid-like 2
hsa-miR-433	0	0	1	1	1	1	UCK2	uridine-cytidine kinase 2
hsa-miR-433	0	0	1	1	1	1	DNAJC15	DnaJ (Hsp40) homolog, subfamily C, member 15
hsa-miR-433	0	0	1	1	1	1	N6AMT1	N-6 adenine-specific DNA methyltransferase 1 (putative)
hsa-miR-433	1	0	1	1	1	1	PPARGC1A	peroxisome proliferator-activated receptor gamma, coactivator 1 alpha
hsa-miR-433	1	0	1	1	1	1	SLC25A24	solute carrier family 25 (mitochondrial carrier; phosphate carrier), member 24
hsa-miR-433	1	0	1	0	1	1	OSTM1	osteopetrosis associated transmembrane protein 1
hsa-miR-433	0	0	1	1	1	1	C22orf28	chromosome 22 open reading frame 28
hsa-miR-433	1	0	1	1	1	1	SLC7A11	solute carrier family 7 (anionic amino acid transporter light chain, xc- system), member 11
hsa-miR-433	0	0	1	1	0	0	NGFRAP1	nerve growth factor receptor (TNFRSF16) associated protein 1
hsa-miR-433	0	0	1	1	1	1	ANKRD1	ankyrin repeat domain 1 (cardiac muscle)
hsa-miR-433	0	0	1	1	1	1	LAMP3	lysosomal-associated membrane protein 3
hsa-miR-433	0	0	1	1	0	0	A1CF	APOBEC1 complementation factor
hsa-miR-433	1	0	1	1	1	1	RALGPS1	Ral GEF with PH domain and SH3 binding motif 1
hsa-miR-433	0	0	1	1	1	1	FRMPD4	FERM and PDZ domain containing 4
hsa-miR-433	1	0	1	0	1	1	SERTAD2	SERTA domain containing 2
hsa-miR-433	1	0	1	0	1	1	LPPR4	lipid phosphate phosphatase-related protein type 4
hsa-miR-433	1	0	1	0	1	1	KBTBD11	kelch repeat and BTB (POZ) domain containing 11
hsa-miR-433	1	0	1	0	1	1	ZBTB40	zinc finger and BTB domain containing 40
hsa-miR-433	1	0	1	1	1	1	ZBTB5	zinc finger and BTB domain containing 5
hsa-miR-433	1	0	1	1	1	1	SPAST	spastin
hsa-miR-433	1	0	1	1	1	1	FBXO21	F-box protein 21
hsa-miR-433	1	0	1	1	1	1	PHLPP2	PH domain and leucine rich repeat protein phosphatase 2
hsa-miR-433	1	0	1	0	1	1	GGA2	golgi-associated, gamma adaptin ear containing, ARF binding protein 2
hsa-miR-433	1	0	1	1	1	1	RTF1	Rtf1, Paf1/RNA polymerase II complex component, homolog (S. cerevisiae)
hsa-miR-433	0	0	1	1	1	1	LEPROTL1	leptin receptor overlapping transcript-like 1
hsa-miR-433	1	0	1	1	1	1	NSL1	NSL1, MIND kinetochore complex component, homolog (S. cerevisiae)
hsa-miR-433	0	0	1	1	1	1	KBTBD2	kelch repeat and BTB (POZ) domain containing 2
hsa-miR-433	1	0	1	1	1	1	CLIP3	CAP-GLY domain containing linker protein 3
hsa-miR-433	1	0	1	0	1	1	OSBPL3	oxysterol binding protein-like 3
hsa-miR-433	0	0	1	1	1	1	C10orf12	chromosome 10 open reading frame 12
hsa-miR-433	1	0	1	1	1	1	ABCA12	ATP-binding cassette, sub-family A (ABC1), member 12
hsa-miR-433	1	0	1	0	1	1	RRM2B	ribonucleotide reductase M2 B (TP53 inducible)
hsa-miR-433	0	0	1	1	1	1	LACTB2	lactamase, beta 2
hsa-miR-433	0	0	1	1	1	1	HSD17B11	hydroxysteroid (17-beta) dehydrogenase 11
hsa-miR-433	1	0	1	1	1	1	TOB2	transducer of ERBB2, 2
hsa-miR-433	0	0	1	1	1	1	RSL24D1	ribosomal L24 domain containing 1
hsa-miR-433	0	0	1	1	1	1	DNAJB11	DnaJ (Hsp40) homolog, subfamily B, member 11
hsa-miR-433	1	0	1	1	1	1	CMPK1	cytidine monophosphate (UMP-CMP) kinase 1, cytosolic
hsa-miR-433	0	0	1	1	1	1	SPA17	sperm autoantigenic protein 17
hsa-miR-433	1	0	1	0	1	1	ZRANB1	zinc finger, RAN-binding domain containing 1
hsa-miR-433	0	0	1	1	1	1	BHMT2	betaine--homocysteine S-methyltransferase 2
hsa-miR-433	1	0	1	1	1	1	GDAP2	ganglioside induced differentiation associated protein 2
hsa-miR-433	1	0	1	0	1	1	FAM46C	family with sequence similarity 46, member C
hsa-miR-433	0	0	1	1	1	1	FKBP14	FK506 binding protein 14, 22 kDa
hsa-miR-433	0	0	1	1	1	1	AKIRIN2	akirin 2
hsa-miR-433	0	0	1	1	1	1	SEC61A2	Sec61 alpha 2 subunit (S. cerevisiae)
hsa-miR-433	1	0	1	1	1	1	RPRD1A	regulation of nuclear pre-mRNA domain containing 1A
hsa-miR-433	1	0	1	0	1	1	ARL8B	ADP-ribosylation factor-like 8B
hsa-miR-433	1	0	1	1	1	1	C9orf72	chromosome 9 open reading frame 72
hsa-miR-433	1	0	1	0	1	1	LIN7C	lin-7 homolog C (C. elegans)
hsa-miR-433	1	0	1	1	1	1	TAP2	transporter 2, ATP-binding cassette, sub-family B (MDR/TAP)
hsa-miR-433	1	0	1	1	1	1	PCDHGA1	protocadherin gamma subfamily A, 1
hsa-miR-433	1	0	1	0	1	1	PCDHGA10	protocadherin gamma subfamily A, 10
hsa-miR-433	1	0	1	0	1	1	PCDHGA11	protocadherin gamma subfamily A, 11
hsa-miR-433	1	0	1	1	1	1	PCDHGA2	protocadherin gamma subfamily A, 2
hsa-miR-433	1	0	1	0	1	1	PCDHGA3	protocadherin gamma subfamily A, 3
hsa-miR-433	1	0	1	0	1	1	PCDHGA4	protocadherin gamma subfamily A, 4
hsa-miR-433	1	0	1	0	1	1	PCDHGA5	protocadherin gamma subfamily A, 5
hsa-miR-433	1	0	1	0	1	1	PCDHGA6	protocadherin gamma subfamily A, 6
hsa-miR-433	1	0	1	0	1	1	PCDHGA7	protocadherin gamma subfamily A, 7
hsa-miR-433	1	0	1	0	1	1	PCDHGA9	protocadherin gamma subfamily A, 9
hsa-miR-433	1	0	1	0	1	1	PCDHGB1	protocadherin gamma subfamily B, 1
hsa-miR-433	1	0	1	0	1	1	PCDHGB2	protocadherin gamma subfamily B, 2
hsa-miR-433	1	0	1	0	1	1	PCDHGB3	protocadherin gamma subfamily B, 3
hsa-miR-433	1	0	1	0	1	1	PCDHGB5	protocadherin gamma subfamily B, 5
hsa-miR-433	1	0	1	0	1	1	PCDHGB6	protocadherin gamma subfamily B, 6
hsa-miR-433	1	0	1	0	1	1	PCDHGB7	protocadherin gamma subfamily B, 7
hsa-miR-433	1	0	1	0	1	1	PCDHGC4	protocadherin gamma subfamily C, 4
hsa-miR-433	1	0	1	0	1	1	PCDHGC5	protocadherin gamma subfamily C, 5
hsa-miR-433	1	0	1	0	1	1	CCDC93	coiled-coil domain containing 93
hsa-miR-433	0	0	1	1	1	1	KLHL4	kelch-like 4 (Drosophila)
hsa-miR-433	1	0	1	1	1	1	C1GALT1	core 1 synthase, glycoprotein-N-acetylgalactosamine 3-beta-galactosyltransferase, 1
hsa-miR-433	1	0	1	0	1	1	MNT	MAX binding protein
hsa-miR-433	0	0	1	1	0	0	ENTPD7	ectonucleoside triphosphate diphosphohydrolase 7
hsa-miR-433	0	0	1	1	1	1	IL22	interleukin 22
hsa-miR-433	1	0	1	0	1	1	DCUN1D1	DCN1, defective in cullin neddylation 1, domain containing 1 (S. cerevisiae)
hsa-miR-433	1	0	1	1	1	1	RAB22A	RAB22A, member RAS oncogene family
hsa-miR-433	1	0	1	1	1	1	DSCAML1	Down syndrome cell adhesion molecule like 1
hsa-miR-433	1	0	1	1	1	1	USP31	ubiquitin specific peptidase 31
hsa-miR-433	0	0	1	1	1	1	ARRDC3	arrestin domain containing 3
hsa-miR-433	1	0	1	1	1	1	KLHL14	kelch-like 14 (Drosophila)
hsa-miR-433	0	0	1	1	1	1	PPM1A	protein phosphatase, Mg2+/Mn2+ dependent, 1A
hsa-miR-433	0	0	1	0	1	1	SLCO1A2	solute carrier organic anion transporter family, member 1A2
hsa-miR-433	1	0	1	1	1	1	RPRD1B	regulation of nuclear pre-mRNA domain containing 1B
hsa-miR-433	1	0	1	1	1	1	ZFYVE1	zinc finger, FYVE domain containing 1
hsa-miR-433	0	0	1	1	1	1	CHST6	carbohydrate (N-acetylglucosamine 6-O) sulfotransferase 6
hsa-miR-433	1	0	1	0	1	1	ZNF70	zinc finger protein 70
hsa-miR-433	1	0	1	0	1	1	GAN	gigaxonin
hsa-miR-433	0	0	1	1	1	1	PERP	PERP, TP53 apoptosis effector
hsa-miR-433	1	0	1	1	1	1	XYLT1	xylosyltransferase I
hsa-miR-433	0	0	1	1	1	1	MS4A6A	membrane-spanning 4-domains, subfamily A, member 6A
hsa-miR-433	1	0	1	1	1	1	ATL2	atlastin GTPase 2
hsa-miR-433	1	0	1	1	1	1	HIF3A	hypoxia inducible factor 3, alpha subunit
hsa-miR-433	1	0	1	1	1	1	PRRX1	paired related homeobox 1
hsa-miR-433	1	0	1	1	1	1	C16orf58	chromosome 16 open reading frame 58
hsa-miR-433	1	0	1	0	1	1	MAP1LC3B	microtubule-associated protein 1 light chain 3 beta
hsa-miR-433	0	0	1	1	1	1	METTL4	methyltransferase like 4
hsa-miR-433	1	0	1	1	1	1	RFX7	regulatory factor X, 7
hsa-miR-433	0	0	1	1	1	1	HTR5A	5-hydroxytryptamine (serotonin) receptor 5A, G protein-coupled
hsa-miR-433	1	0	1	0	1	1	PLEKHF2	pleckstrin homology domain containing, family F (with FYVE domain) member 2
hsa-miR-433	1	0	1	0	1	1	MOB3B	MOB kinase activator 3B
hsa-miR-433	0	0	1	1	1	1	RPAP2	RNA polymerase II associated protein 2
hsa-miR-433	0	0	1	1	1	1	ZNF767	zinc finger family member 767
hsa-miR-433	0	0	1	1	0	0	TMEM156	transmembrane protein 156
hsa-miR-433	1	0	1	0	1	1	EDEM3	ER degradation enhancer, mannosidase alpha-like 3
hsa-miR-433	1	0	1	1	1	1	SOST	sclerostin
hsa-miR-433	1	0	1	1	1	1	JHDM1D	jumonji C domain containing histone demethylase 1 homolog D (S. cerevisiae)
hsa-miR-433	1	0	1	1	1	1	ITFG1	integrin alpha FG-GAP repeat containing 1
hsa-miR-433	1	0	1	0	1	1	LBH	limb bud and heart development homolog (mouse)
hsa-miR-433	1	0	1	1	1	1	SNX27	sorting nexin family member 27
hsa-miR-433	1	0	1	1	1	1	PPP1R14C	protein phosphatase 1, regulatory (inhibitor) subunit 14C
hsa-miR-433	1	0	1	0	1	1	THAP2	THAP domain containing, apoptosis associated protein 2
hsa-miR-433	1	0	1	0	1	1	SH3BGRL2	SH3 domain binding glutamic acid-rich protein like 2
hsa-miR-433	1	0	1	0	1	1	PCDHGA8	protocadherin gamma subfamily A, 8
hsa-miR-433	0	0	1	1	0	0	CHCHD6	coiled-coil-helix-coiled-coil-helix domain containing 6
hsa-miR-433	1	0	1	1	1	1	BRMS1L	breast cancer metastasis-suppressor 1-like
hsa-miR-433	0	0	1	1	1	1	ACBD6	acyl-CoA binding domain containing 6
hsa-miR-433	1	0	1	1	1	1	ARHGEF39	Rho guanine nucleotide exchange factor (GEF) 39
hsa-miR-433	0	0	1	1	1	1	TMEM87B	transmembrane protein 87B
hsa-miR-433	1	0	1	1	1	1	AJUBA	ajuba LIM protein
hsa-miR-433	1	0	1	1	1	1	ARHGAP19	Rho GTPase activating protein 19
hsa-miR-433	1	0	1	1	1	1	PCDH10	protocadherin 10
hsa-miR-433	1	0	1	1	1	1	PCDH11Y	protocadherin 11 Y-linked
hsa-miR-433	0	0	1	1	1	1	TRIM4	tripartite motif containing 4
hsa-miR-433	1	0	1	1	1	1	FGD3	FYVE, RhoGEF and PH domain containing 3
hsa-miR-433	0	0	1	1	0	0	HSFY1	heat shock transcription factor, Y-linked 1
hsa-miR-433	1	0	1	1	0	0	CCDC120	coiled-coil domain containing 120
hsa-miR-433	1	0	1	1	1	1	XKR4	XK, Kell blood group complex subunit-related family, member 4
hsa-miR-433	1	0	1	1	1	1	SLC44A1	solute carrier family 44, member 1
hsa-miR-433	0	0	1	1	1	1	C14orf126	chromosome 14 open reading frame 126
hsa-miR-433	0	0	1	0	1	1	SP140L	SP140 nuclear body protein-like
hsa-miR-433	0	0	1	1	1	1	SLC25A46	solute carrier family 25, member 46
hsa-miR-433	1	0	1	1	1	1	CD200R1	CD200 receptor 1
hsa-miR-433	0	0	1	1	0	0	SGCZ	sarcoglycan, zeta
hsa-miR-433	1	0	1	1	1	1	TSTD2	thiosulfate sulfurtransferase (rhodanese)-like domain containing 2
hsa-miR-433	0	0	1	1	1	1	C15orf40	chromosome 15 open reading frame 40
hsa-miR-433	0	0	1	1	1	1	RIBC1	RIB43A domain with coiled-coils 1
hsa-miR-433	0	0	1	1	1	1	C7orf33	chromosome 7 open reading frame 33
hsa-miR-433	0	0	1	1	0	0	KLK12	kallikrein-related peptidase 12
hsa-miR-433	1	0	1	1	1	1	BOD1L1	biorientation of chromosomes in cell division 1-like 1
hsa-miR-433	0	0	1	1	1	1	CHMP4C	charged multivesicular body protein 4C
hsa-miR-433	1	0	1	1	1	1	FAM123B	family with sequence similarity 123B
hsa-miR-433	1	0	1	1	1	1	CEP128	centrosomal protein 128kDa
hsa-miR-433	1	0	1	1	1	1	C7orf60	chromosome 7 open reading frame 60
hsa-miR-433	1	0	1	0	1	1	FAM116A	family with sequence similarity 116, member A
hsa-miR-433	1	0	1	0	1	1	RWDD4	RWD domain containing 4
hsa-miR-433	0	0	1	1	1	1	C6orf170	chromosome 6 open reading frame 170
hsa-miR-433	1	0	1	1	1	1	NXPH1	neurexophilin 1
hsa-miR-433	0	0	1	1	0	0	CXorf58	chromosome X open reading frame 58
hsa-miR-433	1	0	1	1	1	1	PDIK1L	PDLIM1 interacting kinase 1 like
hsa-miR-433	1	0	1	1	1	1	LRIG3	leucine-rich repeats and immunoglobulin-like domains 3
hsa-miR-433	0	0	1	1	1	1	ZFP91-CNTF	ZFP91-CNTF readthrough (non-protein coding)
hsa-miR-433	1	0	1	1	1	1	RAB39B	RAB39B, member RAS oncogene family
hsa-miR-433	0	0	1	1	1	1	SALL3	sal-like 3 (Drosophila)
hsa-miR-433	0	0	1	1	1	1	WFDC13	WAP four-disulfide core domain 13
hsa-miR-433	0	0	1	1	1	1	REXO1L1	REX1, RNA exonuclease 1 homolog (S. cerevisiae)-like 1
hsa-miR-433	1	0	1	1	1	1	FAM117B	family with sequence similarity 117, member B
hsa-miR-433	1	0	1	0	1	1	C3orf58	chromosome 3 open reading frame 58
hsa-miR-433	1	0	1	0	1	1	RNF152	ring finger protein 152
hsa-miR-433	0	0	1	1	0	0	LYG2	lysozyme G-like 2
hsa-miR-433	1	0	1	1	1	1	SOWAHA	sosondowah ankyrin repeat domain family member A
hsa-miR-433	0	0	1	1	1	1	SESTD1	SEC14 and spectrin domains 1
hsa-miR-433	1	0	1	1	1	1	DCAF12L1	DDB1 and CUL4 associated factor 12-like 1
hsa-miR-433	1	0	1	1	1	1	RNF180	ring finger protein 180
hsa-miR-433	1	0	1	1	1	1	NF2	neurofibromin 2 (merlin)
hsa-miR-433	0	0	1	1	0	0	MTMR11	myotubularin related protein 11
hsa-miR-433	1	0	1	0	1	1	SLC16A9	solute carrier family 16, member 9 (monocarboxylic acid transporter 9)
hsa-miR-433	1	0	1	1	1	1	E2F6	E2F transcription factor 6
hsa-miR-433	1	0	1	0	1	1	LYSMD3	LysM, putative peptidoglycan-binding, domain containing 3
hsa-miR-433	1	0	1	1	1	1	PAQR9	progestin and adipoQ receptor family member IX
hsa-miR-433	1	0	1	1	1	1	PTGER3	prostaglandin E receptor 3 (subtype EP3)
hsa-miR-433	0	0	1	1	1	1	PTHLH	parathyroid hormone-like hormone
hsa-miR-433	0	0	1	1	0	0	TGM6	transglutaminase 6
hsa-miR-433	1	0	1	1	1	1	NSUN4	NOP2/Sun domain family, member 4
hsa-miR-433	0	0	1	1	1	1	MDFIC	MyoD family inhibitor domain containing
hsa-miR-433	1	0	1	1	1	1	GLYAT	glycine-N-acyltransferase
hsa-miR-433	0	0	1	1	1	1	SHC4	SHC (Src homology 2 domain containing) family, member 4
hsa-miR-433	0	0	1	1	1	1	AMACR	alpha-methylacyl-CoA racemase
hsa-miR-433	1	0	1	1	1	1	METTL21B	methyltransferase like 21B
hsa-miR-433	0	0	1	1	1	1	CRIP3	cysteine-rich protein 3
hsa-miR-433	1	0	1	1	1	1	SPRYD4	SPRY domain containing 4
hsa-miR-433	1	0	1	1	1	1	CAPN3	calpain 3, (p94)
hsa-miR-433	0	0	1	0	0	0	SNORD21	small nucleolar RNA, C/D box 21
hsa-miR-433	0	0	1	0	0	0	TOP1P2	topoisomerase (DNA) I pseudogene 2
hsa-miR-433	0	0	1	0	0	0	TFAMP1	transcription factor A, mitochondrial pseudogene 1
hsa-miR-433	0	0	1	0	0	0	TTTY6	testis-specific transcript, Y-linked 6 (non-protein coding)
hsa-miR-433	0	0	1	0	0	0	TTTY2	testis-specific transcript, Y-linked 2 (non-protein coding)
hsa-miR-433	0	0	1	0	0	0	TTTY1	testis-specific transcript, Y-linked 1 (non-protein coding)
hsa-miR-433	0	0	1	0	0	0	TTTY15	testis-specific transcript, Y-linked 15 (non-protein coding)
hsa-miR-433	0	0	1	0	0	0	FAM224B	family with sequence similarity 224, member B (non-protein coding)
hsa-miR-433	0	0	1	0	0	0	SUMO1P1	SUMO1 pseudogene 1
hsa-miR-433	0	0	1	0	0	0	COX6B1P1	cytochrome c oxidase subunit VIb polypeptide 1 (ubiquitous) pseudogene 1
hsa-miR-433	0	0	1	0	0	0	NXF4	nuclear RNA export factor 4 pseudogene
hsa-miR-433	0	0	1	0	0	0	RPL23AP32	ribosomal protein L23a pseudogene 32
hsa-miR-433	0	0	1	0	0	0	TOP1P1	topoisomerase (DNA) I pseudogene 1
hsa-miR-433	0	0	1	0	0	0	HTR7P1	5-hydroxytryptamine (serotonin) receptor 7 pseudogene 1
hsa-miR-433	0	0	1	0	0	0	TRIM78P	tripartite motif containing 78, pseudogene
hsa-miR-433	0	0	1	0	0	0	LOC285359	phosducin-like 3 pseudogene
hsa-miR-433	0	0	1	0	0	0	SNORD112	small nucleolar RNA, C/D box 112
hsa-miR-433	0	0	1	0	0	0	NBR2	neighbor of BRCA1 gene 2 (non-protein coding)
hsa-miR-433	0	0	1	0	0	0	HSP90B3P	heat shock protein 90kDa beta (Grp94), member 3, pseudogene
hsa-miR-433	0	0	1	0	0	0	HSP90AB2P	heat shock protein 90kDa alpha (cytosolic), class B member 2, pseudogene
hsa-miR-433	0	0	1	0	0	0	GBP1P1	guanylate binding protein 1, interferon-inducible pseudogene 1
hsa-miR-433	0	0	1	0	0	0	USP32P1	ubiquitin specific peptidase 32 pseudogene 1
hsa-miR-433	0	0	1	1	0	0	GPR17	G protein-coupled receptor 17
hsa-miR-433	0	0	1	1	0	0	STPG1	sperm-tail PG-rich repeat containing 1
hsa-miR-433	0	0	0	1	1	1	CCL18	chemokine (C-C motif) ligand 18 (pulmonary and activation-regulated)
hsa-miR-433	0	0	0	1	0	0	TARBP1	TAR (HIV-1) RNA binding protein 1
hsa-miR-433	1	0	1	1	0	0	PHF23	PHD finger protein 23
hsa-miR-433	0	0	0	1	1	1	KRT20	keratin 20
hsa-miR-433	0	0	0	1	1	1	TIMM21	translocase of inner mitochondrial membrane 21 homolog (yeast)
hsa-miR-433	1	0	1	1	1	1	MTMR7	myotubularin related protein 7
hsa-miR-433	0	0	1	1	1	1	CEACAM6	carcinoembryonic antigen-related cell adhesion molecule 6 (non-specific cross reacting antigen)
hsa-miR-433	0	0	1	1	1	1	TMEM14A	transmembrane protein 14A
hsa-miR-433	1	0	1	1	0	0	MAPK12	mitogen-activated protein kinase 12
hsa-miR-433	0	0	1	1	1	1	TIMM9	translocase of inner mitochondrial membrane 9 homolog (yeast)
hsa-miR-433	0	0	1	1	1	1	PABPC1L	poly(A) binding protein, cytoplasmic 1-like
hsa-miR-433	0	0	1	1	1	1	SLC52A3	solute carrier family 52, riboflavin transporter, member 3
hsa-miR-433	0	0	1	1	0	0	POLI	polymerase (DNA directed) iota
hsa-miR-433	0	0	1	1	1	1	SLC25A43	solute carrier family 25, member 43
hsa-miR-433	0	0	1	1	0	0	CRYM	crystallin, mu
hsa-miR-433	0	0	1	1	0	0	CTSH	cathepsin H
hsa-miR-433	0	0	0	1	1	1	SGTA	small glutamine-rich tetratricopeptide repeat (TPR)-containing, alpha
hsa-miR-433	0	0	1	1	0	0	SLC1A6	solute carrier family 1 (high affinity aspartate/glutamate transporter), member 6
hsa-miR-433	0	0	0	1	0	0	GAPDHS	glyceraldehyde-3-phosphate dehydrogenase, spermatogenic
hsa-miR-433	0	0	1	1	1	1	NPVF	neuropeptide VF precursor
hsa-miR-433	0	0	0	1	0	0	MYL10	myosin, light chain 10, regulatory
hsa-miR-433	0	0	0	1	1	1	MRPL32	mitochondrial ribosomal protein L32
hsa-miR-433	0	0	1	1	1	1	PLGRKT	plasminogen receptor, C-terminal lysine transmembrane protein
hsa-miR-433	1	0	1	1	1	1	UTP18	UTP18 small subunit (SSU) processome component homolog (yeast)
hsa-miR-433	0	0	1	1	1	1	P2RX5	purinergic receptor P2X, ligand-gated ion channel, 5
hsa-miR-433	0	0	1	1	0	0	NUP107	nucleoporin 107kDa
hsa-miR-433	0	0	1	1	1	1	MCM3	minichromosome maintenance complex component 3
hsa-miR-433	0	0	0	1	1	1	HRH2	histamine receptor H2
hsa-miR-433	0	0	1	1	1	1	COMMD2	COMM domain containing 2
hsa-miR-433	0	0	1	1	1	1	CPS1	carbamoyl-phosphate synthase 1, mitochondrial
hsa-miR-433	0	0	1	1	1	1	HEATR5B	HEAT repeat containing 5B
hsa-miR-433	1	0	1	1	0	0	TMSB10	thymosin beta 10
hsa-miR-433	0	0	1	1	1	1	RGS2	regulator of G-protein signaling 2, 24kDa
hsa-miR-433	0	0	0	1	0	0	AKR7A2	aldo-keto reductase family 7, member A2 (aflatoxin aldehyde reductase)
hsa-miR-433	0	0	1	1	1	1	GBP3	guanylate binding protein 3
hsa-miR-433	0	0	0	1	0	0	ZC2HC1B	zinc finger, C2HC-type containing 1B
hsa-miR-433	1	0	0	1	1	1	GLRX	glutaredoxin (thioltransferase)
hsa-miR-433	0	0	1	1	1	1	DDX55	DEAD (Asp-Glu-Ala-Asp) box polypeptide 55
hsa-miR-433	0	0	0	1	1	1	GPR75	G protein-coupled receptor 75
hsa-miR-433	1	0	1	1	1	1	KCNIP2	Kv channel interacting protein 2
hsa-miR-433	0	0	1	1	0	0	IFNA7	interferon, alpha 7
hsa-miR-433	0	0	0	1	1	1	PCDHB12	protocadherin beta 12
hsa-miR-433	1	0	1	1	0	0	ST3GAL4	ST3 beta-galactoside alpha-2,3-sialyltransferase 4
hsa-miR-433	0	0	1	1	1	1	FBXO24	F-box protein 24
hsa-miR-433	0	0	0	1	0	0	RAMP3	receptor (G protein-coupled) activity modifying protein 3
hsa-miR-433	0	0	0	1	1	1	SLC35C2	solute carrier family 35, member C2
hsa-miR-433	0	0	1	1	1	1	SEMG1	semenogelin I
hsa-miR-433	0	0	1	1	0	0	LIPE	lipase, hormone-sensitive
hsa-miR-433	0	0	0	1	1	1	PSG4	pregnancy specific beta-1-glycoprotein 4
hsa-miR-433	0	0	1	1	1	1	PSG5	pregnancy specific beta-1-glycoprotein 5
hsa-miR-433	0	0	0	1	1	1	AARS2	alanyl-tRNA synthetase 2, mitochondrial (putative)
hsa-miR-433	0	0	0	1	0	0	HIST1H1A	histone cluster 1, H1a
hsa-miR-433	0	0	1	1	1	1	ATP5S	ATP synthase, H+ transporting, mitochondrial Fo complex, subunit s (factor B)
hsa-miR-433	1	0	0	1	1	1	TNFSF9	tumor necrosis factor (ligand) superfamily, member 9
hsa-miR-433	0	0	1	1	0	0	PLK1S1	polo-like kinase 1 substrate 1
hsa-miR-433	1	0	1	1	1	1	SNPH	syntaphilin
hsa-miR-433	0	0	0	1	0	0	S1PR4	sphingosine-1-phosphate receptor 4
hsa-miR-433	1	0	1	1	1	1	PITHD1	PITH (C-terminal proteasome-interacting domain of thioredoxin-like) domain containing 1
hsa-miR-433	1	0	0	1	0	0	PRR12	proline rich 12
hsa-miR-433	0	0	0	1	1	1	SDF2	stromal cell-derived factor 2
hsa-miR-433	0	0	1	1	1	1	SLC35A2	solute carrier family 35 (UDP-galactose transporter), member A2
hsa-miR-433	0	0	1	1	1	1	DHX29	DEAH (Asp-Glu-Ala-His) box polypeptide 29
hsa-miR-433	0	0	0	1	1	1	TRMT2A	tRNA methyltransferase 2 homolog A (S. cerevisiae)
hsa-miR-433	0	0	1	1	1	1	MICB	MHC class I polypeptide-related sequence B
hsa-miR-433	0	0	0	1	0	0	USHBP1	Usher syndrome 1C binding protein 1
hsa-miR-433	1	0	1	1	1	1	ARPC1B	actin related protein 2/3 complex, subunit 1B, 41kDa
hsa-miR-433	0	0	1	1	0	0	ALKBH6	alkB, alkylation repair homolog 6 (E. coli)
hsa-miR-433	0	0	1	1	0	0	SYNE4	spectrin repeat containing, nuclear envelope family member 4
hsa-miR-433	1	0	1	1	0	0	MAP3K10	mitogen-activated protein kinase kinase kinase 10
hsa-miR-433	0	0	1	1	1	1	DEFB118	defensin, beta 118
hsa-miR-433	0	0	1	1	1	1	EDA2R	ectodysplasin A2 receptor
hsa-miR-433	0	0	0	1	1	1	ZCCHC9	zinc finger, CCHC domain containing 9
hsa-miR-433	0	0	1	1	1	1	FSHB	follicle stimulating hormone, beta polypeptide
hsa-miR-433	1	0	0	1	1	1	ZNF700	zinc finger protein 700
hsa-miR-433	0	0	0	1	0	0	HSPA12B	heat shock 70kD protein 12B
hsa-miR-433	1	0	1	1	1	1	IER3IP1	immediate early response 3 interacting protein 1
hsa-miR-433	0	0	1	1	0	0	CAMK1	calcium/calmodulin-dependent protein kinase I
hsa-miR-433	0	0	1	1	1	1	HRH4	histamine receptor H4
hsa-miR-433	0	0	0	1	1	1	DOCK2	dedicator of cytokinesis 2
hsa-miR-433	0	0	1	1	1	1	ARHGEF25	Rho guanine nucleotide exchange factor (GEF) 25
hsa-miR-433	0	0	1	1	0	0	SLC26A10	solute carrier family 26, member 10
hsa-miR-433	0	0	0	1	0	0	SMPD2	sphingomyelin phosphodiesterase 2, neutral membrane (neutral sphingomyelinase)
hsa-miR-433	0	0	1	1	1	1	KCNMB4	potassium large conductance calcium-activated channel, subfamily M, beta member 4
hsa-miR-433	1	0	1	1	1	1	NEK3	NIMA (never in mitosis gene a)-related kinase 3
hsa-miR-433	0	0	1	1	0	0	ADAMTS7	ADAM metallopeptidase with thrombospondin type 1 motif, 7
hsa-miR-433	0	0	1	1	1	1	IFNA14	interferon, alpha 14
hsa-miR-433	0	0	1	1	1	1	DDX60	DEAD (Asp-Glu-Ala-Asp) box polypeptide 60
hsa-miR-433	1	0	1	1	0	0	HAUS2	HAUS augmin-like complex, subunit 2
hsa-miR-433	0	0	1	1	1	1	ZNF397	zinc finger protein 397
hsa-miR-433	0	0	1	1	0	0	SFSWAP	splicing factor, suppressor of white-apricot homolog (Drosophila)
hsa-miR-433	1	0	1	1	1	1	BLMH	bleomycin hydrolase
hsa-miR-433	1	0	1	1	1	1	CYP46A1	cytochrome P450, family 46, subfamily A, polypeptide 1
hsa-miR-433	0	0	0	1	0	0	MCM4	minichromosome maintenance complex component 4
hsa-miR-433	0	0	1	1	1	1	CSPP1	centrosome and spindle pole associated protein 1
hsa-miR-433	0	0	1	1	0	0	NLRC5	NLR family, CARD domain containing 5
hsa-miR-433	0	0	1	1	1	1	ARPC1A	actin related protein 2/3 complex, subunit 1A, 41kDa
hsa-miR-433	0	0	1	1	0	0	TCF25	transcription factor 25 (basic helix-loop-helix)
hsa-miR-433	1	0	0	1	1	1	ITPKC	inositol-trisphosphate 3-kinase C
hsa-miR-433	0	0	1	1	1	1	COMMD9	COMM domain containing 9
hsa-miR-433	0	0	1	1	0	0	LTK	leukocyte receptor tyrosine kinase
hsa-miR-433	0	0	0	1	1	1	NOL10	nucleolar protein 10
hsa-miR-433	0	0	1	1	0	0	LPXN	leupaxin
hsa-miR-433	0	0	1	1	1	1	NOP58	NOP58 ribonucleoprotein homolog (yeast)
hsa-miR-433	0	0	1	1	1	1	CSTA	cystatin A (stefin A)
hsa-miR-433	1	0	1	1	0	0	KIAA1109	KIAA1109
hsa-miR-433	0	0	1	1	1	1	FASTKD3	FAST kinase domains 3
hsa-miR-433	0	0	0	1	1	1	NME5	NME/NM23 family member 5
hsa-miR-433	1	0	1	1	0	0	RBM27	RNA binding motif protein 27
hsa-miR-433	0	0	1	1	1	1	REXO2	REX2, RNA exonuclease 2 homolog (S. cerevisiae)
hsa-miR-433	1	0	1	1	0	0	KIAA1644	KIAA1644
hsa-miR-433	0	0	1	1	0	0	NDUFA9	NADH dehydrogenase (ubiquinone) 1 alpha subcomplex, 9, 39kDa
hsa-miR-433	1	0	1	1	1	1	CPSF6	cleavage and polyadenylation specific factor 6, 68kDa
hsa-miR-433	0	0	0	1	0	0	C12orf10	chromosome 12 open reading frame 10
hsa-miR-433	0	0	1	1	1	1	WDR61	WD repeat domain 61
hsa-miR-433	0	0	1	1	0	0	CLEC18B	C-type lectin domain family 18, member B
hsa-miR-433	0	0	1	1	1	1	IRF8	interferon regulatory factor 8
hsa-miR-433	0	0	0	1	1	1	ZNF174	zinc finger protein 174
hsa-miR-433	0	0	1	1	0	0	GALNS	galactosamine (N-acetyl)-6-sulfate sulfatase
hsa-miR-433	0	0	0	1	1	1	CPNE7	copine VII
hsa-miR-433	0	0	0	1	1	1	MYO19	myosin XIX
hsa-miR-433	1	0	1	1	1	1	IMPA2	inositol(myo)-1(or 4)-monophosphatase 2
hsa-miR-433	0	0	0	1	1	1	C19orf52	chromosome 19 open reading frame 52
hsa-miR-433	0	0	1	1	0	0	ADCY10	adenylate cyclase 10 (soluble)
hsa-miR-433	0	0	1	1	1	1	TM4SF19	transmembrane 4 L six family member 19
hsa-miR-433	0	0	1	1	0	0	AHSG	alpha-2-HS-glycoprotein
hsa-miR-433	1	0	1	1	1	1	EPHA5	EPH receptor A5
hsa-miR-433	0	0	0	1	1	1	SLC25A48	solute carrier family 25, member 48
hsa-miR-433	1	0	0	1	1	1	CHST7	carbohydrate (N-acetylglucosamine 6-O) sulfotransferase 7
hsa-miR-433	0	0	1	1	1	1	TAF1	TAF1 RNA polymerase II, TATA box binding protein (TBP)-associated factor, 250kDa
hsa-miR-433	0	0	0	1	0	0	PSKH2	protein serine kinase H2
hsa-miR-433	0	0	0	1	1	1	TATDN1	TatD DNase domain containing 1
hsa-miR-433	0	0	1	1	0	0	C8orf76	chromosome 8 open reading frame 76
hsa-miR-433	0	0	0	1	0	0	TTTY7B	testis-specific transcript, Y-linked 7B (non-protein coding)
hsa-miR-433	0	0	0	1	0	0	OR1K1	olfactory receptor, family 1, subfamily K, member 1
hsa-miR-433	0	0	0	1	1	1	IDI2	isopentenyl-diphosphate delta isomerase 2
hsa-miR-433	0	0	0	1	0	0	WDR85	WD repeat domain 85
hsa-miR-433	1	0	1	1	1	1	LRRC4C	leucine rich repeat containing 4C
hsa-miR-433	0	0	1	1	1	1	SESN3	sestrin 3
hsa-miR-433	0	0	1	1	0	0	SLC22A9	solute carrier family 22 (organic anion transporter), member 9
hsa-miR-433	1	0	0	1	0	0	CDC42EP2	CDC42 effector protein (Rho GTPase binding) 2
hsa-miR-433	0	0	1	1	1	1	SIRPB1	signal-regulatory protein beta 1
hsa-miR-433	0	0	1	1	1	1	NGLY1	N-glycanase 1
hsa-miR-433	0	0	1	1	1	1	FAM53B	family with sequence similarity 53, member B
hsa-miR-433	1	0	1	1	1	1	NUBPL	nucleotide binding protein-like
hsa-miR-433	0	0	0	1	1	1	ACAD8	acyl-CoA dehydrogenase family, member 8
hsa-miR-433	0	0	1	1	1	1	DST	dystonin
hsa-miR-433	1	0	0	1	0	0	POC5	POC5 centriolar protein homolog (Chlamydomonas)
hsa-miR-433	0	0	0	1	1	1	JMY	junction mediating and regulatory protein, p53 cofactor
hsa-miR-433	0	0	1	1	1	1	ANKRD44	ankyrin repeat domain 44
hsa-miR-433	1	0	1	1	1	1	TOMM70A	translocase of outer mitochondrial membrane 70 homolog A (S. cerevisiae)
hsa-miR-433	0	0	0	1	0	0	LY96	lymphocyte antigen 96
hsa-miR-433	0	0	1	1	1	1	ACAA2	acetyl-CoA acyltransferase 2
hsa-miR-433	0	0	0	1	0	0	GEMIN5	gem (nuclear organelle) associated protein 5
hsa-miR-433	0	0	1	1	1	1	GNAQ	guanine nucleotide binding protein (G protein), q polypeptide
hsa-miR-433	1	0	1	1	1	1	GPR61	G protein-coupled receptor 61
hsa-miR-433	0	0	1	1	0	0	CLEC18A	C-type lectin domain family 18, member A
hsa-miR-433	0	0	1	1	0	0	C1orf158	chromosome 1 open reading frame 158
hsa-miR-433	0	0	0	1	1	1	COQ5	coenzyme Q5 homolog, methyltransferase (S. cerevisiae)
hsa-miR-433	0	0	0	1	0	0	PIK3CB	phosphatidylinositol-4,5-bisphosphate 3-kinase, catalytic subunit beta
hsa-miR-433	0	0	0	1	1	1	CD1A	CD1a molecule
hsa-miR-433	0	0	1	1	0	0	CCDC142	coiled-coil domain containing 142
hsa-miR-433	0	0	1	1	0	0	CRYAA	crystallin, alpha A
hsa-miR-433	0	0	0	1	1	1	LRRC3	leucine rich repeat containing 3
hsa-miR-433	0	0	0	1	1	1	ANO10	anoctamin 10
hsa-miR-433	0	0	1	1	0	0	GRIN2C	glutamate receptor, ionotropic, N-methyl D-aspartate 2C
hsa-miR-433	0	0	0	1	0	0	C1orf159	chromosome 1 open reading frame 159
hsa-miR-433	1	0	1	1	1	1	SSR2	signal sequence receptor, beta (translocon-associated protein beta)
hsa-miR-433	0	0	0	1	0	0	DRD3	dopamine receptor D3
hsa-miR-433	0	0	1	1	1	1	MTMR14	myotubularin related protein 14
hsa-miR-433	0	0	1	1	1	1	MAD2L1	MAD2 mitotic arrest deficient-like 1 (yeast)
hsa-miR-433	0	0	1	1	1	1	C5orf54	chromosome 5 open reading frame 54
hsa-miR-433	1	0	1	1	1	1	KIAA1324L	KIAA1324-like
hsa-miR-433	0	0	0	1	0	0	ALDH7A1	aldehyde dehydrogenase 7 family, member A1
hsa-miR-433	0	0	0	1	1	1	ZNF488	zinc finger protein 488
hsa-miR-433	0	0	0	1	0	0	VWA2	von Willebrand factor A domain containing 2
hsa-miR-433	0	0	1	1	1	1	C1QL3	complement component 1, q subcomponent-like 3
hsa-miR-433	0	0	0	1	0	0	CENPN	centromere protein N
hsa-miR-433	1	0	1	1	1	1	KIAA0101	KIAA0101
hsa-miR-433	0	0	1	1	1	1	SGK494	uncharacterized serine/threonine-protein kinase SgK494
hsa-miR-433	1	0	1	1	1	1	ZNF83	zinc finger protein 83
hsa-miR-433	0	0	0	1	1	1	ZNF443	zinc finger protein 443
hsa-miR-433	0	0	0	1	0	0	SPDYE5	speedy homolog E5 (Xenopus laevis)
hsa-miR-433	0	0	0	1	0	0	OR5A2	olfactory receptor, family 5, subfamily A, member 2
hsa-miR-433	0	0	0	1	0	0	VPREB1	pre-B lymphocyte 1
hsa-miR-433	1	0	1	1	1	1	SF3B3	splicing factor 3b, subunit 3, 130kDa
hsa-miR-433	1	0	0	1	0	0	ATPAF2	ATP synthase mitochondrial F1 complex assembly factor 2
hsa-miR-433	0	0	0	1	0	0	ACOX2	acyl-CoA oxidase 2, branched chain
hsa-miR-433	0	0	0	1	0	0	PRY2	PTPN13-like, Y-linked 2
hsa-miR-433	0	0	0	1	0	0	OR1A1	olfactory receptor, family 1, subfamily A, member 1
hsa-miR-433	0	0	0	1	0	0	FPR1	formyl peptide receptor 1
hsa-miR-433	0	0	0	1	1	1	TACR3	tachykinin receptor 3
hsa-miR-433	0	0	0	1	1	1	ESCO2	establishment of cohesion 1 homolog 2 (S. cerevisiae)
hsa-miR-433	0	0	0	1	1	1	PTAFR	platelet-activating factor receptor
hsa-miR-433	0	0	0	1	0	0	DTYMK	deoxythymidylate kinase (thymidylate kinase)
hsa-miR-433	0	0	1	1	1	1	MUC17	mucin 17, cell surface associated
hsa-miR-433	0	0	0	1	1	1	PPIC	peptidylprolyl isomerase C (cyclophilin C)
hsa-miR-433	0	0	1	1	1	1	ROBO4	roundabout, axon guidance receptor, homolog 4 (Drosophila)
hsa-miR-433	0	0	0	1	0	0	RLN3	relaxin 3
hsa-miR-433	1	0	1	1	1	1	TLN2	talin 2
hsa-miR-433	0	0	1	1	1	1	MYOZ2	myozenin 2
hsa-miR-433	0	0	0	1	1	1	COG7	component of oligomeric golgi complex 7
hsa-miR-433	0	0	0	1	1	1	NAT1	N-acetyltransferase 1 (arylamine N-acetyltransferase)
hsa-miR-433	0	0	0	1	0	0	RXFP1	relaxin/insulin-like family peptide receptor 1
hsa-miR-433	0	0	0	1	0	0	EFEMP2	EGF containing fibulin-like extracellular matrix protein 2
hsa-miR-433	1	0	1	1	1	1	ANTXR1	anthrax toxin receptor 1
hsa-miR-433	0	0	1	1	1	1	PCMTD2	protein-L-isoaspartate (D-aspartate) O-methyltransferase domain containing 2
hsa-miR-433	0	0	0	1	0	0	GLRXP3	glutaredoxin (thioltransferase) pseudogene 3
hsa-miR-433	0	0	0	1	0	0	OR10W1	olfactory receptor, family 10, subfamily W, member 1
hsa-miR-433	0	0	0	1	1	1	FAM86B2	family with sequence similarity 86, member B2
hsa-miR-433	1	0	1	1	1	1	RIC3	resistance to inhibitors of cholinesterase 3 homolog (C. elegans)
hsa-miR-433	1	0	1	1	1	1	CHD2	chromodomain helicase DNA binding protein 2
hsa-miR-433	0	0	1	1	1	1	WDR69	WD repeat domain 69
hsa-miR-433	0	0	0	1	1	1	PRLR	prolactin receptor
hsa-miR-433	0	0	1	1	1	1	MAP9	microtubule-associated protein 9
hsa-miR-433	0	0	1	1	1	1	LPL	lipoprotein lipase
hsa-miR-433	0	0	0	1	0	0	ZNF408	zinc finger protein 408
hsa-miR-433	0	0	0	1	0	0	MCTP1	multiple C2 domains, transmembrane 1
hsa-miR-433	0	0	0	1	0	0	NAGPA	N-acetylglucosamine-1-phosphodiester alpha-N-acetylglucosaminidase
hsa-miR-433	0	0	1	1	0	0	RPS6KB2	ribosomal protein S6 kinase, 70kDa, polypeptide 2
hsa-miR-433	1	0	1	1	1	1	ZBTB11	zinc finger and BTB domain containing 11
hsa-miR-433	0	0	1	1	0	0	DNAH17	dynein, axonemal, heavy chain 17
hsa-miR-433	1	0	1	1	1	1	GALE	UDP-galactose-4-epimerase
hsa-miR-433	0	0	1	1	1	1	MRPS23	mitochondrial ribosomal protein S23
hsa-miR-433	0	0	1	1	0	0	CLEC18C	C-type lectin domain family 18, member C
hsa-miR-433	0	0	1	1	0	0	KCNMB3	potassium large conductance calcium-activated channel, subfamily M beta member 3
hsa-miR-433	1	0	1	1	1	1	ADAMTS6	ADAM metallopeptidase with thrombospondin type 1 motif, 6
hsa-miR-433	0	0	1	1	0	0	CIRH1A	cirrhosis, autosomal recessive 1A (cirhin)
hsa-miR-433	1	0	1	1	1	1	HTR4	5-hydroxytryptamine (serotonin) receptor 4, G protein-coupled
hsa-miR-433	0	0	0	1	1	1	ZNF620	zinc finger protein 620
hsa-miR-433	0	0	0	1	1	1	ZNF77	zinc finger protein 77
hsa-miR-433	0	0	0	1	0	0	OR4P4	olfactory receptor, family 4, subfamily P, member 4
hsa-miR-433	0	0	1	1	1	1	AMBRA1	autophagy/beclin-1 regulator 1
hsa-miR-433	1	0	1	1	1	1	PDCD6	programmed cell death 6
hsa-miR-433	1	0	1	1	1	1	AHRR	aryl-hydrocarbon receptor repressor
hsa-miR-433	1	0	0	1	1	1	LLGL1	lethal giant larvae homolog 1 (Drosophila)
hsa-miR-433	0	0	0	1	0	0	ARMCX4	armadillo repeat containing, X-linked 4
hsa-miR-433	0	0	0	1	0	0	ZNF554	zinc finger protein 554
hsa-miR-433	0	0	1	1	1	1	BAG1	BCL2-associated athanogene
hsa-miR-433	0	0	0	1	0	0	CYC1	cytochrome c-1
hsa-miR-433	0	0	1	1	0	0	NADSYN1	NAD synthetase 1
hsa-miR-433	0	1	1	1	0	0	PKM	pyruvate kinase, muscle
hsa-miR-433	0	0	0	1	0	0	OR4C12	olfactory receptor, family 4, subfamily C, member 12
hsa-miR-433	0	0	0	1	1	1	C8orf40	chromosome 8 open reading frame 40
hsa-miR-433	0	0	1	1	1	1	GALNT11	UDP-N-acetyl-alpha-D-galactosamine:polypeptide N-acetylgalactosaminyltransferase 11 (GalNAc-T11)
hsa-miR-433	0	0	0	1	0	0	AMIGO3	adhesion molecule with Ig-like domain 3
hsa-miR-433	0	0	1	1	1	1	C1orf172	chromosome 1 open reading frame 172
hsa-miR-433	0	0	1	1	0	0	PRPF31	PRP31 pre-mRNA processing factor 31 homolog (S. cerevisiae)
hsa-miR-433	0	0	0	1	0	0	OR6C4	olfactory receptor, family 6, subfamily C, member 4
hsa-miR-433	1	0	1	1	1	1	NCL	nucleolin
hsa-miR-433	0	0	1	1	0	0	TYMS	thymidylate synthetase
hsa-miR-433	0	0	1	1	1	1	TMEM45A	transmembrane protein 45A
hsa-miR-433	0	0	1	1	0	0	PLA2G16	phospholipase A2, group XVI
hsa-miR-433	0	0	1	1	0	0	STRA6	stimulated by retinoic acid gene 6 homolog (mouse)
hsa-miR-433	0	0	0	1	0	0	B3GNT4	UDP-GlcNAc:betaGal beta-1,3-N-acetylglucosaminyltransferase 4
hsa-miR-433	0	0	0	1	1	1	CCDC121	coiled-coil domain containing 121
hsa-miR-433	0	0	1	1	1	1	DYNC1I1	dynein, cytoplasmic 1, intermediate chain 1
hsa-miR-433	0	0	0	1	1	1	TTC29	tetratricopeptide repeat domain 29
hsa-miR-433	0	0	1	1	1	1	CTNNAL1	catenin (cadherin-associated protein), alpha-like 1
hsa-miR-433	0	0	1	1	0	0	CIZ1	CDKN1A interacting zinc finger protein 1
hsa-miR-433	0	0	1	1	1	1	KIAA0319L	KIAA0319-like
hsa-miR-433	0	0	0	1	1	1	DMRTA1	DMRT-like family A1
hsa-miR-433	0	0	1	1	1	1	IFT80	intraflagellar transport 80 homolog (Chlamydomonas)
hsa-miR-433	0	0	1	1	0	0	TMEM86B	transmembrane protein 86B
hsa-miR-433	0	0	0	1	1	1	CLRN1	clarin 1
hsa-miR-433	0	0	1	1	0	0	EFCAB4A	EF-hand calcium binding domain 4A
hsa-miR-433	0	0	1	1	1	1	PARPBP	PARP1 binding protein
hsa-miR-433	0	0	1	1	1	1	CAPS2	calcyphosine 2
hsa-miR-433	0	0	0	1	1	1	NOP10	NOP10 ribonucleoprotein homolog (yeast)
hsa-miR-433	1	0	1	1	0	0	CAPN12	calpain 12
hsa-miR-433	0	0	0	1	1	1	C1S	complement component 1, s subcomponent
hsa-miR-433	0	0	0	1	0	0	KRTAP6-1	keratin associated protein 6-1
hsa-miR-433	0	0	0	1	0	0	GDPGP1	GDP-D-glucose phosphorylase 1
hsa-miR-433	0	0	0	1	1	1	C6orf58	chromosome 6 open reading frame 58
hsa-miR-433	0	0	1	1	0	0	MFSD6L	major facilitator superfamily domain containing 6-like
hsa-miR-433	0	0	1	1	0	0	EIF4ENIF1	eukaryotic translation initiation factor 4E nuclear import factor 1
hsa-miR-433	0	0	1	1	1	1	FMN2	formin 2
hsa-miR-433	0	0	1	1	1	1	ACTRT3	actin-related protein T3
hsa-miR-433	0	0	0	1	0	0	KRT6A	keratin 6A
hsa-miR-433	0	0	1	1	1	1	BEST3	bestrophin 3
hsa-miR-433	0	0	1	1	0	0	EWSR1	Ewing sarcoma breakpoint region 1
hsa-miR-433	0	0	1	1	1	1	GLRX3	glutaredoxin 3
hsa-miR-433	1	0	1	1	1	1	ROBO2	roundabout, axon guidance receptor, homolog 2 (Drosophila)
hsa-miR-433	0	0	0	1	0	0	OR10J3	olfactory receptor, family 10, subfamily J, member 3
hsa-miR-433	0	0	0	1	0	0	ZNF578	zinc finger protein 578
hsa-miR-433	0	0	0	1	1	1	ZNF528	zinc finger protein 528
hsa-miR-433	0	0	1	1	0	0	NXF5	nuclear RNA export factor 5
hsa-miR-433	0	0	0	1	0	0	SCN10A	sodium channel, voltage-gated, type X, alpha subunit
hsa-miR-433	0	0	1	1	0	0	ZSCAN30	zinc finger and SCAN domain containing 30
hsa-miR-433	0	0	0	1	0	0	LRRC37A2	leucine rich repeat containing 37, member A2
hsa-miR-433	0	0	1	1	1	1	NLRP9	NLR family, pyrin domain containing 9
hsa-miR-433	0	0	1	1	1	1	RALGAPA2	Ral GTPase activating protein, alpha subunit 2 (catalytic)
hsa-miR-433	0	0	0	1	0	0	C20orf94	chromosome 20 open reading frame 94
hsa-miR-433	1	0	1	1	1	1	GRIA3	glutamate receptor, ionotropic, AMPA 3
hsa-miR-433	0	0	1	1	0	0	HBD	hemoglobin, delta
hsa-miR-433	0	0	0	1	1	1	HBB	hemoglobin, beta
hsa-miR-433	0	0	1	1	1	1	TMEM17	transmembrane protein 17
hsa-miR-433	0	0	1	1	0	0	SAMD7	sterile alpha motif domain containing 7
hsa-miR-433	0	0	1	1	1	1	APOBEC3B	apolipoprotein B mRNA editing enzyme, catalytic polypeptide-like 3B
hsa-miR-433	0	0	0	1	0	0	ST6GALNAC4	ST6 (alpha-N-acetyl-neuraminyl-2,3-beta-galactosyl-1,3)-N-acetylgalactosaminide alpha-2,6-sialyltransferase 4
hsa-miR-433	0	0	1	1	1	1	PISD	phosphatidylserine decarboxylase
hsa-miR-433	1	0	0	1	1	1	NPHP3	nephronophthisis 3 (adolescent)
hsa-miR-433	0	0	1	1	1	1	ACAD11	acyl-CoA dehydrogenase family, member 11
hsa-miR-433	0	0	1	1	1	1	AADAT	aminoadipate aminotransferase
hsa-miR-433	0	0	1	1	0	0	NQO2	NAD(P)H dehydrogenase, quinone 2
hsa-miR-433	0	0	1	1	0	0	SNTG1	syntrophin, gamma 1
hsa-miR-433	0	0	1	1	1	1	PSMD10	proteasome (prosome, macropain) 26S subunit, non-ATPase, 10
hsa-miR-433	0	0	1	1	1	1	SPDYE2	speedy homolog E2 (Xenopus laevis)
hsa-miR-433	0	0	0	1	0	0	PTGES2	prostaglandin E synthase 2
hsa-miR-433	0	0	0	1	0	0	TAS1R3	taste receptor, type 1, member 3
hsa-miR-433	1	0	1	1	1	1	PHKA1	phosphorylase kinase, alpha 1 (muscle)
hsa-miR-433	1	0	1	1	1	1	RET	ret proto-oncogene
hsa-miR-433	1	0	1	1	1	1	ATRN	attractin
hsa-miR-433	0	0	0	1	0	0	FAM86B1	family with sequence similarity 86, member B1
hsa-miR-433	1	0	1	1	0	0	PFKM	phosphofructokinase, muscle
hsa-miR-433	0	0	0	1	0	0	CXorf27	chromosome X open reading frame 27
hsa-miR-433	0	0	0	1	1	1	ZNF823	zinc finger protein 823
hsa-miR-433	1	0	1	1	1	1	NEK10	NIMA (never in mitosis gene a)- related kinase 10
hsa-miR-433	0	0	0	1	0	0	ARHGAP11B	Rho GTPase activating protein 11B
hsa-miR-433	1	0	1	1	0	0	CECR2	cat eye syndrome chromosome region, candidate 2
hsa-miR-433	1	0	0	1	1	1	NADK	NAD kinase
hsa-miR-433	0	0	1	1	0	0	EYS	eyes shut homolog (Drosophila)
hsa-miR-433	0	0	1	1	1	1	AGMO	alkylglycerol monooxygenase
hsa-miR-433	0	0	0	1	0	0	OTOG	otogelin
hsa-miR-433	1	0	1	1	0	0	ST3GAL2	ST3 beta-galactoside alpha-2,3-sialyltransferase 2
hsa-miR-433	0	0	0	1	0	0	CLRN2	clarin 2
hsa-miR-433	1	0	1	1	1	1	RAP2C	RAP2C, member of RAS oncogene family
hsa-miR-433	0	0	1	1	1	1	LRRC66	leucine rich repeat containing 66
hsa-miR-433	0	0	0	1	0	0	TMEM247	transmembrane protein 247
hsa-miR-433	0	0	1	1	1	1	C1orf162	chromosome 1 open reading frame 162
hsa-miR-433	0	0	1	1	1	1	SRPX	sushi-repeat containing protein, X-linked
hsa-miR-433	0	0	1	1	1	1	SUSD4	sushi domain containing 4
hsa-miR-433	1	0	0	1	1	1	COL9A3	collagen, type IX, alpha 3
hsa-miR-433	0	0	0	1	1	1	ZNF136	zinc finger protein 136
hsa-miR-433	1	0	1	1	1	1	ABCB9	ATP-binding cassette, sub-family B (MDR/TAP), member 9
hsa-miR-433	0	0	1	1	1	1	APTX	aprataxin
hsa-miR-433	0	0	1	1	0	0	PRICKLE1	prickle homolog 1 (Drosophila)
hsa-miR-433	0	0	1	1	1	1	LYNX1	Ly6/neurotoxin 1
hsa-miR-433	1	0	1	1	1	1	NPTN	neuroplastin
hsa-miR-433	0	0	0	1	0	0	ACTG2	actin, gamma 2, smooth muscle, enteric
hsa-miR-433	0	0	0	1	0	0	C19orf48	chromosome 19 open reading frame 48
hsa-miR-433	0	0	1	1	0	0	TUSC3	tumor suppressor candidate 3
hsa-miR-433	1	0	1	1	1	1	EED	embryonic ectoderm development
hsa-miR-433	1	0	0	1	1	1	RBAK	RB-associated KRAB zinc finger
hsa-miR-433	0	0	0	1	0	0	B3GNT6	UDP-GlcNAc:betaGal beta-1,3-N-acetylglucosaminyltransferase 6 (core 3 synthase)
hsa-miR-433	0	0	0	1	0	0	ANKRD18B	ankyrin repeat domain 18B
hsa-miR-433	1	0	1	1	1	1	ANXA4	annexin A4
hsa-miR-433	1	0	1	1	1	1	KIF1B	kinesin family member 1B
hsa-miR-433	0	0	0	1	0	0	CGB8	chorionic gonadotropin, beta polypeptide 8
hsa-miR-433	0	0	0	1	1	1	TXNL4A	thioredoxin-like 4A
hsa-miR-433	1	0	1	1	1	1	TRRAP	transformation/transcription domain-associated protein
hsa-miR-433	1	0	1	1	1	1	UBE2H	ubiquitin-conjugating enzyme E2H
hsa-miR-433	0	0	0	1	1	1	CLEC12A	C-type lectin domain family 12, member A
hsa-miR-433	0	0	1	1	1	1	CLEC12B	C-type lectin domain family 12, member B
hsa-miR-433	0	0	0	1	0	0	ZNF625	zinc finger protein 625
hsa-miR-433	0	0	1	1	1	1	C1D	C1D nuclear receptor corepressor
hsa-miR-433	0	0	0	1	1	1	ZNF658B	zinc finger protein 658B, pseudogene
hsa-miR-433	0	0	0	1	0	0	CDK11B	cyclin-dependent kinase 11B
hsa-miR-433	1	0	0	1	1	1	ZNF614	zinc finger protein 614
hsa-miR-433	0	0	0	1	0	0	ZNF432	zinc finger protein 432
hsa-miR-433	0	0	1	1	1	1	KPNA5	karyopherin alpha 5 (importin alpha 6)
hsa-miR-433	1	0	1	1	1	1	RAP1A	RAP1A, member of RAS oncogene family
hsa-miR-433	0	0	1	1	1	1	PIWIL2	piwi-like 2 (Drosophila)
hsa-miR-433	0	0	1	1	1	1	TPCN2	two pore segment channel 2
hsa-miR-433	0	0	1	1	0	0	MAGEB10	melanoma antigen family B, 10
hsa-miR-433	1	0	1	1	0	0	C10orf137	chromosome 10 open reading frame 137
hsa-miR-433	0	0	0	1	0	0	POTEE	POTE ankyrin domain family, member E
hsa-miR-433	0	0	1	1	1	1	HIST1H2BK	histone cluster 1, H2bk
hsa-miR-433	0	0	1	1	1	1	CAPN10	calpain 10
hsa-miR-433	0	0	0	1	0	0	IFNA10	interferon, alpha 10
hsa-miR-433	0	0	1	1	0	0	GIP	gastric inhibitory polypeptide
hsa-miR-433	0	0	0	1	0	0	POTEF	POTE ankyrin domain family, member F
hsa-miR-433	0	0	1	1	0	0	RAD51D	RAD51 homolog D (S. cerevisiae)
hsa-miR-433	0	0	0	1	0	0	DDX47	DEAD (Asp-Glu-Ala-Asp) box polypeptide 47
hsa-miR-433	1	0	1	1	1	1	TRIM5	tripartite motif containing 5
hsa-miR-433	1	0	1	1	1	1	ENTPD4	ectonucleoside triphosphate diphosphohydrolase 4
hsa-miR-433	0	0	1	1	1	1	CCL20	chemokine (C-C motif) ligand 20
hsa-miR-433	0	0	1	1	0	0	C9orf169	chromosome 9 open reading frame 169
hsa-miR-433	0	0	1	1	1	1	CCDC73	coiled-coil domain containing 73
hsa-miR-433	0	0	1	1	0	0	CXorf40A	chromosome X open reading frame 40A
hsa-miR-433	0	0	1	1	0	0	CGB2	chorionic gonadotropin, beta polypeptide 2
hsa-miR-433	0	0	0	1	0	0	TMC3	transmembrane channel-like 3
hsa-miR-433	0	0	1	1	1	1	MRPL33	mitochondrial ribosomal protein L33
hsa-miR-433	0	0	1	1	0	0	NIF3L1	NIF3 NGG1 interacting factor 3-like 1 (S. cerevisiae)
hsa-miR-433	1	0	1	1	1	1	CADPS	Ca++-dependent secretion activator
hsa-miR-433	1	0	1	1	1	1	FGFR2	fibroblast growth factor receptor 2
hsa-miR-433	0	0	0	1	0	0	OR2T8	olfactory receptor, family 2, subfamily T, member 8
hsa-miR-433	0	0	0	1	0	0	OR5B21	olfactory receptor, family 5, subfamily B, member 21
hsa-miR-433	0	0	0	1	1	1	SPRR2D	small proline-rich protein 2D
hsa-miR-433	0	0	1	1	1	1	CDH4	cadherin 4, type 1, R-cadherin (retinal)
hsa-miR-433	0	0	1	1	1	1	SLC17A3	solute carrier family 17 (sodium phosphate), member 3
hsa-miR-433	0	0	1	1	1	1	KIAA1704	KIAA1704
hsa-miR-433	0	0	0	1	0	0	ITPRIPL1	inositol 1,4,5-trisphosphate receptor interacting protein-like 1
hsa-miR-433	0	0	1	1	1	1	TAF11	TAF11 RNA polymerase II, TATA box binding protein (TBP)-associated factor, 28kDa
hsa-miR-433	0	0	0	1	0	0	POU3F3	POU class 3 homeobox 3
hsa-miR-433	0	0	1	1	0	0	CTNNBL1	catenin, beta like 1
hsa-miR-433	0	0	1	1	0	0	RPL12	ribosomal protein L12
hsa-miR-433	0	0	0	1	0	0	RPL39	ribosomal protein L39
hsa-miR-433	0	0	0	1	1	1	MOK	MOK protein kinase
hsa-miR-433	0	0	1	1	1	1	CDY1	chromodomain protein, Y-linked, 1
hsa-miR-433	0	0	0	1	0	0	OR2AK2	olfactory receptor, family 2, subfamily AK, member 2
hsa-miR-433	0	0	0	1	1	1	OBSCN	obscurin, cytoskeletal calmodulin and titin-interacting RhoGEF
hsa-miR-433	0	0	0	1	1	1	TAF1A	TATA box binding protein (TBP)-associated factor, RNA polymerase I, A, 48kDa
hsa-miR-433	0	0	0	1	0	0	EPRS	glutamyl-prolyl-tRNA synthetase
hsa-miR-433	0	0	0	1	0	0	MRPL18	mitochondrial ribosomal protein L18
hsa-miR-433	0	0	1	1	1	1	SERAC1	serine active site containing 1
hsa-miR-433	0	0	1	1	1	1	PIK3C2B	phosphatidylinositol-4-phosphate 3-kinase, catalytic subunit type 2 beta
hsa-miR-433	0	0	0	1	1	1	ULBP2	UL16 binding protein 2
hsa-miR-433	0	0	0	1	0	0	RAET1G	retinoic acid early transcript 1G
hsa-miR-433	0	0	1	1	1	1	PTPRC	protein tyrosine phosphatase, receptor type, C
hsa-miR-433	0	0	0	1	0	0	ASPM	asp (abnormal spindle) homolog, microcephaly associated (Drosophila)
hsa-miR-433	0	0	1	1	1	1	GINM1	glycoprotein integral membrane 1
hsa-miR-433	0	0	1	1	1	1	CFHR3	complement factor H-related 3
hsa-miR-433	0	0	1	1	1	1	PLA2G4A	phospholipase A2, group IVA (cytosolic, calcium-dependent)
hsa-miR-433	1	0	1	1	1	1	SASH1	SAM and SH3 domain containing 1
hsa-miR-433	0	0	1	1	1	1	ADGB	androglobin
hsa-miR-433	1	0	1	1	1	1	ADAT2	adenosine deaminase, tRNA-specific 2
hsa-miR-433	1	0	1	1	1	1	TOR3A	torsin family 3, member A
hsa-miR-433	0	0	1	1	0	0	ABRACL	ABRA C-terminal like
hsa-miR-433	0	0	1	1	1	1	FMO3	flavin containing monooxygenase 3
hsa-miR-433	0	0	1	1	1	1	MAEL	maelstrom homolog (Drosophila)
hsa-miR-433	0	0	0	1	0	0	RPS12	ribosomal protein S12
hsa-miR-433	0	0	1	1	1	1	STX7	syntaxin 7
hsa-miR-433	0	0	1	1	1	1	ATP1A4	ATPase, Na+/K+ transporting, alpha 4 polypeptide
hsa-miR-433	0	0	0	1	0	0	OR6K3	olfactory receptor, family 6, subfamily K, member 3
hsa-miR-433	0	0	1	1	1	1	CD1B	CD1b molecule
hsa-miR-433	0	0	0	1	1	1	FAM26D	family with sequence similarity 26, member D
hsa-miR-433	0	0	1	1	0	0	CREB3L4	cAMP responsive element binding protein 3-like 4
hsa-miR-433	0	0	0	1	0	0	CLRN3	clarin 3
hsa-miR-433	0	0	1	1	0	0	SPRR2G	small proline-rich protein 2G
hsa-miR-433	0	0	1	1	1	1	SPRR2E	small proline-rich protein 2E
hsa-miR-433	0	0	1	1	1	1	HRNR	hornerin
hsa-miR-433	0	0	1	1	1	1	THEM5	thioesterase superfamily member 5
hsa-miR-433	1	0	1	1	0	0	PI4KB	phosphatidylinositol 4-kinase, catalytic, beta
hsa-miR-433	0	0	0	1	1	1	PSTK	phosphoseryl-tRNA kinase
hsa-miR-433	0	0	1	1	0	0	CUZD1	CUB and zona pellucida-like domains 1
hsa-miR-433	0	0	1	1	0	0	TARS2	threonyl-tRNA synthetase 2, mitochondrial (putative)
hsa-miR-433	1	0	1	1	1	1	TIAL1	TIA1 cytotoxic granule-associated RNA binding protein-like 1
hsa-miR-433	0	0	0	1	0	0	ACP6	acid phosphatase 6, lysophosphatidic
hsa-miR-433	1	0	1	1	1	1	SLC35A1	solute carrier family 35 (CMP-sialic acid transporter), member A1
hsa-miR-433	1	0	1	1	1	1	SNAP91	synaptosomal-associated protein, 91kDa homolog (mouse)
hsa-miR-433	0	0	1	1	1	1	NT5C2	5'-nucleotidase, cytosolic II
hsa-miR-433	0	0	1	1	0	0	KIAA1324	KIAA1324
hsa-miR-433	0	0	0	1	1	1	TMEM187	transmembrane protein 187
hsa-miR-433	0	0	1	1	0	0	AVPR2	arginine vasopressin receptor 2
hsa-miR-433	1	0	1	1	1	1	FAM178A	family with sequence similarity 178, member A
hsa-miR-433	0	0	0	1	0	0	MB21D1	Mab-21 domain containing 1
hsa-miR-433	0	0	1	1	0	0	GLMN	glomulin, FKBP associated protein
hsa-miR-433	0	0	1	1	0	0	CPN1	carboxypeptidase N, polypeptide 1
hsa-miR-433	0	0	0	1	1	1	GBP2	guanylate binding protein 2, interferon-inducible
hsa-miR-433	0	0	1	1	1	1	CUTC	cutC copper transporter homolog (E. coli)
hsa-miR-433	1	0	1	1	1	1	GTF2B	general transcription factor IIB
hsa-miR-433	0	0	1	1	1	1	GOT1	glutamic-oxaloacetic transaminase 1, soluble (aspartate aminotransferase 1)
hsa-miR-433	0	0	0	1	0	0	RPF1	ribosome production factor 1 homolog (S. cerevisiae)
hsa-miR-433	1	0	1	1	1	1	BEND6	BEN domain containing 6
hsa-miR-433	0	0	0	1	0	0	PSMA7	proteasome (prosome, macropain) subunit, alpha type, 7
hsa-miR-433	0	0	1	1	1	1	DEPDC1	DEP domain containing 1
hsa-miR-433	0	0	1	1	0	0	SLIT1	slit homolog 1 (Drosophila)
hsa-miR-433	0	0	0	1	0	0	ACTRT1	actin-related protein T1
hsa-miR-433	0	0	1	1	1	1	OMA1	OMA1 zinc metallopeptidase homolog (S. cerevisiae)
hsa-miR-433	0	0	1	1	0	0	HEATR8	HEAT repeat containing 8
hsa-miR-433	0	0	1	1	1	1	TTC4	tetratricopeptide repeat domain 4
hsa-miR-433	1	0	1	1	1	1	LAMP2	lysosomal-associated membrane protein 2
hsa-miR-433	0	0	0	1	1	1	CPT2	carnitine palmitoyltransferase 2
hsa-miR-433	0	0	1	1	0	0	ORC1	origin recognition complex, subunit 1
hsa-miR-433	0	0	0	1	0	0	EDF1	endothelial differentiation-related factor 1
hsa-miR-433	0	0	1	1	1	1	C1orf185	chromosome 1 open reading frame 185
hsa-miR-433	0	0	1	1	1	1	TMEM164	transmembrane protein 164
hsa-miR-433	0	0	0	1	0	0	C10orf99	chromosome 10 open reading frame 99
hsa-miR-433	1	0	1	1	1	1	SH2D4B	SH2 domain containing 4B
hsa-miR-433	1	0	0	1	0	0	C1orf50	chromosome 1 open reading frame 50
hsa-miR-433	0	0	1	1	1	1	ZMYND12	zinc finger, MYND-type containing 12
hsa-miR-433	0	0	0	1	1	1	H2BFWT	H2B histone family, member W, testis-specific
hsa-miR-433	0	0	1	1	0	0	TCEAL2	transcription elongation factor A (SII)-like 2
hsa-miR-433	0	0	0	1	1	1	PABPC4	poly(A) binding protein, cytoplasmic 4 (inducible form)
hsa-miR-433	0	0	1	1	1	1	MSS51	MSS51 mitochondrial translational activator homolog (S. cerevisiae)
hsa-miR-433	0	0	1	1	1	1	RHBDL2	rhomboid, veinlet-like 2 (Drosophila)
hsa-miR-433	1	0	1	1	1	1	TSPAN6	tetraspanin 6
hsa-miR-433	0	0	1	1	0	0	CSF3R	colony stimulating factor 3 receptor (granulocyte)
hsa-miR-433	1	0	1	1	1	1	ZFAND3	zinc finger, AN1-type domain 3
hsa-miR-433	0	0	1	1	1	1	FBXO36	F-box protein 36
hsa-miR-433	0	0	0	1	0	0	SMPDL3B	sphingomyelin phosphodiesterase, acid-like 3B
hsa-miR-433	0	0	1	1	0	0	MAP3K6	mitogen-activated protein kinase kinase kinase 6
hsa-miR-433	0	0	1	1	1	1	EXTL1	exostoses (multiple)-like 1
hsa-miR-433	0	0	0	1	0	0	CUTA	cutA divalent cation tolerance homolog (E. coli)
hsa-miR-433	0	0	0	1	1	1	C1QC	complement component 1, q subcomponent, C chain
hsa-miR-433	0	0	0	1	1	1	PSMB9	proteasome (prosome, macropain) subunit, beta type, 9 (large multifunctional peptidase 2)
hsa-miR-433	1	0	1	1	1	1	NUP35	nucleoporin 35kDa
hsa-miR-433	0	0	1	1	1	1	TBRG1	transforming growth factor beta regulator 1
hsa-miR-433	0	0	1	1	0	0	C6orf10	chromosome 6 open reading frame 10
hsa-miR-433	0	0	0	1	0	0	PADI4	peptidyl arginine deiminase, type IV
hsa-miR-433	1	0	0	1	0	0	ATP13A2	ATPase type 13A2
hsa-miR-433	0	0	1	1	0	0	SLC44A4	solute carrier family 44, member 4
hsa-miR-433	0	0	1	1	0	0	DDAH2	dimethylarginine dimethylaminohydrolase 2
hsa-miR-433	0	0	1	1	0	0	ABHD16A	abhydrolase domain containing 16A
hsa-miR-433	1	0	1	1	1	1	GOLM1	golgi membrane protein 1
hsa-miR-433	0	0	0	1	0	0	PSORS1C3	psoriasis susceptibility 1 candidate 3 (non-protein coding)
hsa-miR-433	1	0	1	1	1	1	ARHGAP21	Rho GTPase activating protein 21
hsa-miR-433	1	0	1	1	1	1	PTF1A	pancreas specific transcription factor, 1a
hsa-miR-433	0	0	1	1	1	1	ZNRD1	zinc ribbon domain containing 1
hsa-miR-433	0	0	1	1	1	1	HLA-G	major histocompatibility complex, class I, G
hsa-miR-433	1	0	1	1	1	1	CLDN10	claudin 10
hsa-miR-433	0	0	0	1	0	0	CST9L	cystatin 9-like
hsa-miR-433	0	0	0	1	0	0	CGB7	chorionic gonadotropin, beta polypeptide 7
hsa-miR-433	0	0	0	1	0	0	LOC100128059	uncharacterized LOC100128059
hsa-miR-433	0	0	0	1	1	1	UTS2	urotensin 2
hsa-miR-433	0	0	0	1	0	0	FAM74A3	family with sequence similarity 74, member A3
hsa-miR-433	1	0	1	1	1	1	PLCXD3	phosphatidylinositol-specific phospholipase C, X domain containing 3
hsa-miR-433	0	0	1	1	1	1	ZNF638	zinc finger protein 638
hsa-miR-433	0	0	1	1	0	0	SLC22A6	solute carrier family 22 (organic anion transporter), member 6
hsa-miR-433	0	0	1	1	0	0	SLC17A4	solute carrier family 17 (sodium phosphate), member 4
hsa-miR-433	0	0	0	1	0	0	RPL23	ribosomal protein L23
hsa-miR-433	0	0	1	1	1	1	UTP14C	UTP14, U3 small nucleolar ribonucleoprotein, homolog C (yeast)
hsa-miR-433	0	0	1	1	1	1	CDADC1	cytidine and dCMP deaminase domain containing 1
hsa-miR-433	1	0	1	1	1	1	MID1IP1	MID1 interacting protein 1
hsa-miR-433	0	0	1	1	1	1	CAMKMT	calmodulin-lysine N-methyltransferase
hsa-miR-433	1	0	1	1	0	0	PRKCZ	protein kinase C, zeta
hsa-miR-433	0	0	0	1	0	0	C4orf47	chromosome 4 open reading frame 47
hsa-miR-433	0	0	0	1	0	0	ARID3C	AT rich interactive domain 3C (BRIGHT-like)
hsa-miR-433	0	0	0	1	0	0	NR0B1	nuclear receptor subfamily 0, group B, member 1
hsa-miR-433	0	0	0	1	0	0	ETV2	ets variant 2
hsa-miR-433	1	0	1	1	1	1	SARM1	sterile alpha and TIR motif containing 1
hsa-miR-433	0	0	1	1	1	1	ANKRD27	ankyrin repeat domain 27 (VPS9 domain)
hsa-miR-433	0	0	0	1	0	0	PRDX4	peroxiredoxin 4
hsa-miR-433	0	0	1	1	0	0	PHEX	phosphate regulating endopeptidase homolog, X-linked
hsa-miR-433	0	0	1	1	1	1	PRNP	prion protein
hsa-miR-433	0	0	1	1	1	1	GPR56	G protein-coupled receptor 56
hsa-miR-433	0	0	1	1	1	1	BEND2	BEN domain containing 2
hsa-miR-433	0	0	1	1	1	1	SLC25A35	solute carrier family 25, member 35
hsa-miR-433	0	0	0	1	0	0	IZUMO3	IZUMO family member 3
hsa-miR-433	0	0	1	1	1	1	PRPF4B	PRP4 pre-mRNA processing factor 4 homolog B (yeast)
hsa-miR-433	0	0	1	1	0	0	DDRGK1	DDRGK domain containing 1
hsa-miR-433	0	0	0	1	0	0	IFNA4	interferon, alpha 4
hsa-miR-433	0	0	1	1	0	0	RPS6	ribosomal protein S6
hsa-miR-433	0	0	1	1	0	0	CARS	cysteinyl-tRNA synthetase
hsa-miR-433	0	0	0	1	0	0	GPS2	G protein pathway suppressor 2
hsa-miR-433	0	0	0	1	0	0	SELO	selenoprotein O
hsa-miR-433	0	0	0	1	0	0	ARSH	arylsulfatase family, member H
hsa-miR-433	1	0	1	1	1	1	OCIAD1	OCIA domain containing 1
hsa-miR-433	0	0	1	1	0	0	CATSPERD	catsper channel auxiliary subunit delta
hsa-miR-433	1	0	1	1	1	1	DDX17	DEAD (Asp-Glu-Ala-Asp) box helicase 17
hsa-miR-433	0	0	1	1	0	0	EIF3L	eukaryotic translation initiation factor 3, subunit L
hsa-miR-433	0	0	0	1	1	1	GART	phosphoribosylglycinamide formyltransferase, phosphoribosylglycinamide synthetase, phosphoribosylaminoimidazole synthetase
hsa-miR-433	0	0	1	1	1	1	SPATA6L	spermatogenesis associated 6-like
hsa-miR-433	0	0	1	1	1	1	KLRC3	killer cell lectin-like receptor subfamily C, member 3
hsa-miR-433	0	0	0	1	0	0	KCNV2	potassium channel, subfamily V, member 2
hsa-miR-433	0	0	0	1	0	0	KRTAP5-1	keratin associated protein 5-1
hsa-miR-433	0	0	1	1	1	1	SLIT2	slit homolog 2 (Drosophila)
hsa-miR-433	0	0	1	1	1	1	RBMY1B	RNA binding motif protein, Y-linked, family 1, member B
hsa-miR-433	0	0	1	1	1	1	RBMY1A1	RNA binding motif protein, Y-linked, family 1, member A1
hsa-miR-433	1	0	1	1	1	1	C18orf34	chromosome 18 open reading frame 34
hsa-miR-433	0	0	1	1	0	0	TSNAXIP1	translin-associated factor X interacting protein 1
hsa-miR-433	0	0	1	1	1	1	ITGAD	integrin, alpha D
hsa-miR-433	1	0	1	1	0	0	ZNF594	zinc finger protein 594
hsa-miR-433	1	0	1	1	1	1	SPTB	spectrin, beta, erythrocytic
hsa-miR-433	0	0	1	1	1	1	FAM124B	family with sequence similarity 124B
hsa-miR-433	0	0	0	1	0	0	ZC3H12D	zinc finger CCCH-type containing 12D
hsa-miR-433	0	0	0	1	0	0	TAS2R50	taste receptor, type 2, member 50
hsa-miR-433	1	0	1	1	1	1	NAGA	N-acetylgalactosaminidase, alpha-
hsa-miR-433	1	0	1	1	1	1	CHM	choroideremia (Rab escort protein 1)
hsa-miR-433	0	0	1	0	1	1	IFNAR1	interferon (alpha, beta and omega) receptor 1
hsa-miR-433	0	0	0	1	1	1	COMT	catechol-O-methyltransferase
hsa-miR-433	1	0	1	1	1	1	ITGA4	integrin, alpha 4 (antigen CD49D, alpha 4 subunit of VLA-4 receptor)
hsa-miR-433	0	0	0	1	1	1	FNDC9	fibronectin type III domain containing 9
hsa-miR-433	1	0	1	1	1	1	MARCH8	membrane-associated ring finger (C3HC4) 8, E3 ubiquitin protein ligase
hsa-miR-433	1	0	1	1	1	1	SMC4	structural maintenance of chromosomes 4
hsa-miR-433	0	0	1	1	1	1	TUSC1	tumor suppressor candidate 1
hsa-miR-433	1	0	1	0	1	1	CPM	carboxypeptidase M
hsa-miR-433	1	0	1	1	1	1	SHE	Src homology 2 domain containing E
hsa-miR-433	0	0	1	0	1	1	ZNF302	zinc finger protein 302
hsa-miR-433	1	0	1	1	1	1	GOSR2	golgi SNAP receptor complex member 2
hsa-miR-433	1	0	1	1	1	1	C14orf28	chromosome 14 open reading frame 28
hsa-miR-433	0	0	1	1	1	1	MBP	myelin basic protein
hsa-miR-433	1	0	1	0	1	1	ACVR2A	activin A receptor, type IIA
hsa-miR-433	0	0	1	0	1	1	ITGAV	integrin, alpha V
hsa-miR-433	0	0	0	1	1	1	ORC4	origin recognition complex, subunit 4
hsa-miR-433	1	0	1	0	1	1	PAK2	p21 protein (Cdc42/Rac)-activated kinase 2
hsa-miR-433	0	0	1	0	1	1	PLN	phospholamban
hsa-miR-433	1	0	1	1	1	1	SNX1	sorting nexin 1
hsa-miR-433	0	0	1	0	1	1	GCFC2	GC-rich sequence DNA-binding factor 2
hsa-miR-433	1	0	1	1	1	1	UGDH	UDP-glucose 6-dehydrogenase
hsa-miR-433	0	0	0	1	1	1	ZNF91	zinc finger protein 91
hsa-miR-433	0	0	1	0	1	1	ZNF134	zinc finger protein 134
hsa-miR-433	1	0	1	1	1	1	IKBKAP	inhibitor of kappa light polypeptide gene enhancer in B-cells, kinase complex-associated protein
hsa-miR-433	1	0	0	1	1	1	NINJ1	ninjurin 1
hsa-miR-433	0	0	0	1	1	1	ACP1	acid phosphatase 1, soluble
hsa-miR-433	0	0	1	1	1	1	RAB27A	RAB27A, member RAS oncogene family
hsa-miR-433	0	0	1	1	1	1	PNPLA4	patatin-like phospholipase domain containing 4
hsa-miR-433	1	0	1	1	1	1	NREP	neuronal regeneration related protein homolog (rat)
hsa-miR-433	0	0	1	1	1	1	TRIM25	tripartite motif containing 25
hsa-miR-433	1	0	1	1	1	1	GFRA1	GDNF family receptor alpha 1
hsa-miR-433	0	0	0	1	1	1	RAD50	RAD50 homolog (S. cerevisiae)
hsa-miR-433	0	0	1	1	1	1	SLC30A9	solute carrier family 30 (zinc transporter), member 9
hsa-miR-433	0	0	1	1	1	1	CAP2	CAP, adenylate cyclase-associated protein, 2 (yeast)
hsa-miR-433	0	0	0	1	1	1	ZNF211	zinc finger protein 211
hsa-miR-433	0	0	0	1	1	1	TRPA1	transient receptor potential cation channel, subfamily A, member 1
hsa-miR-433	1	0	1	0	1	1	CD2AP	CD2-associated protein
hsa-miR-433	0	0	1	0	1	1	PIGN	phosphatidylinositol glycan anchor biosynthesis, class N
hsa-miR-433	1	0	1	1	1	1	ZMYND8	zinc finger, MYND-type containing 8
hsa-miR-433	0	0	1	0	1	1	PRND	prion protein 2 (dublet)
hsa-miR-433	0	0	1	1	1	1	H2AFV	H2A histone family, member V
hsa-miR-433	0	0	0	1	1	1	TRA2A	transformer 2 alpha homolog (Drosophila)
hsa-miR-433	1	0	1	1	1	1	PCDHA9	protocadherin alpha 9
hsa-miR-433	1	0	1	0	1	1	TRPS1	trichorhinophalangeal syndrome I
hsa-miR-433	1	0	1	1	1	1	CORO1C	coronin, actin binding protein, 1C
hsa-miR-433	0	0	0	1	1	1	ADAMDEC1	ADAM-like, decysin 1
hsa-miR-433	0	0	0	1	1	1	ZNF354C	zinc finger protein 354C
hsa-miR-433	1	0	1	1	1	1	SMG1	smg-1 homolog, phosphatidylinositol 3-kinase-related kinase (C. elegans)
hsa-miR-433	0	0	1	1	1	1	ERLEC1	endoplasmic reticulum lectin 1
hsa-miR-433	0	0	1	1	1	1	KCTD3	potassium channel tetramerisation domain containing 3
hsa-miR-433	1	0	1	1	1	1	MTMR10	myotubularin related protein 10
hsa-miR-433	1	0	1	0	1	1	C2orf18	chromosome 2 open reading frame 18
hsa-miR-433	1	0	1	1	1	1	GID8	GID complex subunit 8 homolog (S. cerevisiae)
hsa-miR-433	0	0	1	1	1	1	C5orf22	chromosome 5 open reading frame 22
hsa-miR-433	1	0	1	1	1	1	AGPAT4	1-acylglycerol-3-phosphate O-acyltransferase 4 (lysophosphatidic acid acyltransferase, delta)
hsa-miR-433	0	0	0	1	1	1	THAP10	THAP domain containing 10
hsa-miR-433	1	0	1	1	1	1	ASPH	aspartate beta-hydroxylase
hsa-miR-433	0	0	1	1	1	1	PAPPA2	pappalysin 2
hsa-miR-433	1	0	1	1	1	1	ANKRD50	ankyrin repeat domain 50
hsa-miR-433	1	0	1	1	1	1	ZNF304	zinc finger protein 304
hsa-miR-433	1	0	0	1	1	1	PDP2	pyruvate dehyrogenase phosphatase catalytic subunit 2
hsa-miR-433	1	0	1	1	1	1	SLC22A3	solute carrier family 22 (extraneuronal monoamine transporter), member 3
hsa-miR-433	0	0	1	1	1	1	FAM204A	family with sequence similarity 204, member A
hsa-miR-433	1	0	1	1	1	1	PRDM16	PR domain containing 16
hsa-miR-433	1	0	0	1	1	1	ZFYVE20	zinc finger, FYVE domain containing 20
hsa-miR-433	1	0	1	0	1	1	MRPS25	mitochondrial ribosomal protein S25
hsa-miR-433	0	0	0	0	1	1	ZNF649	zinc finger protein 649
hsa-miR-433	0	0	1	1	1	1	ALS2CR8	amyotrophic lateral sclerosis 2 (juvenile) chromosome region, candidate 8
hsa-miR-433	1	0	1	1	1	1	NAA40	N(alpha)-acetyltransferase 40, NatD catalytic subunit, homolog (S. cerevisiae)
hsa-miR-433	1	0	1	1	1	1	PTPRO	protein tyrosine phosphatase, receptor type, O
hsa-miR-433	1	0	1	1	1	1	MAP4	microtubule-associated protein 4
hsa-miR-433	1	0	1	1	1	1	STARD3NL	STARD3 N-terminal like
hsa-miR-433	1	0	1	1	1	1	DSEL	dermatan sulfate epimerase-like
hsa-miR-433	0	0	1	1	1	1	FAM83A	family with sequence similarity 83, member A
hsa-miR-433	1	0	1	1	1	1	PSIP1	PC4 and SFRS1 interacting protein 1
hsa-miR-433	1	0	0	1	1	1	MFN1	mitofusin 1
hsa-miR-433	1	0	0	1	1	1	TAGAP	T-cell activation RhoGTPase activating protein
hsa-miR-433	1	0	1	1	1	1	CD109	CD109 molecule
hsa-miR-433	0	0	0	1	1	1	NRG4	neuregulin 4
hsa-miR-433	1	0	1	1	1	1	PKHD1	polycystic kidney and hepatic disease 1 (autosomal recessive)
hsa-miR-433	1	0	1	1	1	1	MSR1	macrophage scavenger receptor 1
hsa-miR-433	1	0	1	1	1	1	NIPA1	non imprinted in Prader-Willi/Angelman syndrome 1
hsa-miR-433	1	0	1	1	1	1	ZNF563	zinc finger protein 563
hsa-miR-433	0	0	0	0	1	1	ZNF567	zinc finger protein 567
hsa-miR-433	1	0	1	1	1	1	CNST	consortin, connexin sorting protein
hsa-miR-433	0	0	1	1	1	1	LINC00518	long intergenic non-protein coding RNA 518
hsa-miR-433	1	0	1	0	1	1	TMEM196	transmembrane protein 196
hsa-miR-433	0	0	0	1	1	1	ZNF461	zinc finger protein 461
hsa-miR-433	0	0	0	1	1	1	SEPSECS	Sep (O-phosphoserine) tRNA:Sec (selenocysteine) tRNA synthase
hsa-miR-433	1	0	1	1	1	1	SLC38A9	solute carrier family 38, member 9
hsa-miR-433	1	0	1	0	1	1	C5orf51	chromosome 5 open reading frame 51
hsa-miR-433	0	0	1	1	1	1	NLRC3	NLR family, CARD domain containing 3
hsa-miR-433	1	0	1	1	1	1	ORC5	origin recognition complex, subunit 5
hsa-miR-433	0	0	1	1	1	1	TMTC3	transmembrane and tetratricopeptide repeat containing 3
hsa-miR-433	0	0	0	1	1	1	GLDN	gliomedin
hsa-miR-433	1	0	1	1	1	1	BCL6B	B-cell CLL/lymphoma 6, member B
hsa-miR-433	0	0	1	1	1	1	BCKDHB	branched chain keto acid dehydrogenase E1, beta polypeptide
hsa-miR-433	1	0	1	1	1	1	TMEM65	transmembrane protein 65
hsa-miR-433	0	0	1	0	1	1	B3GALTL	beta 1,3-galactosyltransferase-like
hsa-miR-433	0	0	1	1	1	1	FAM179A	family with sequence similarity 179, member A
hsa-miR-433	0	0	0	1	1	1	LINC00610	long intergenic non-protein coding RNA 610
hsa-miR-433	0	0	0	0	1	1	LOC728715	ovostatin homolog 2-like
hsa-miR-433	0	0	0	0	1	1	SKA2L	spindle and kinetochore associated complex subunit 2-like
hsa-miR-433	0	0	0	0	1	1	LOC729020	rcRPE
hsa-miR-433	0	0	0	0	1	1	KIAA1239	KIAA1239
hsa-miR-433	0	0	1	1	1	1	LRRC38	leucine rich repeat containing 38
hsa-miR-433	0	0	0	0	1	1	LOC284100	tyrosine 3-monooxygenase/tryptophan 5-monooxygenase activation protein, epsilon polypeptide pseudogene
hsa-miR-433	0	0	0	1	1	1	OCSTAMP	osteoclast stimulatory transmembrane protein
