# Supplementary material for: Profiling of Selected MicroRNAs in Proliferative Eutopic Endometrium of Women with Ovarian Endometriosis
Source: Biomed Res Int. 2015 Aug 20;2015:760698. doi: 10.1155/2015/760698 (PMC4558423; doi:10.1155/2015/760698)
Supplement: Supplementary file 1 — Table I: The names of miRNAs significantly differentially expressed between eutopic endometrium of patients with endometriosis vs eutopic endometrium of patients without endometriosis. Table II: The associations between miRNA and mRNA, which presents detailed results of the search of six major databases i.e targetscan, tarbase, miranda, mirbase, mirtarget2 and pictar. [file 760698.f1.zip › 760698.f1/Table II/hsa-miR-448.tsv]

miR	targetscan	tarbase	miranda	mirbase	mirtarget2	pictar	GeneSymbol	GeneName
hsa-miR-448	1	0	1	1	1	1	BTBD7	BTB (POZ) domain containing 7
hsa-miR-448	1	0	1	1	1	1	MTF1	metal-regulatory transcription factor 1
hsa-miR-448	1	0	1	0	1	1	SERTAD2	SERTA domain containing 2
hsa-miR-448	1	0	1	1	1	1	OTUD4	OTU domain containing 4
hsa-miR-448	1	0	1	0	1	1	UBE2W	ubiquitin-conjugating enzyme E2W (putative)
hsa-miR-448	1	0	1	0	1	1	CPEB2	cytoplasmic polyadenylation element binding protein 2
hsa-miR-448	1	0	1	1	1	1	FAM76B	family with sequence similarity 76, member B
hsa-miR-448	1	0	1	0	1	1	PCDHGB6	protocadherin gamma subfamily B, 6
hsa-miR-448	1	0	1	1	1	1	JAG1	jagged 1
hsa-miR-448	1	0	1	1	1	1	JOSD1	Josephin domain containing 1
hsa-miR-448	1	0	1	1	1	1	SH3KBP1	SH3-domain kinase binding protein 1
hsa-miR-448	1	0	1	1	1	1	SIRT1	sirtuin 1
hsa-miR-448	1	0	1	1	1	1	ANK1	ankyrin 1, erythrocytic
hsa-miR-448	1	0	1	1	1	1	CALM2	calmodulin 2 (phosphorylase kinase, delta)
hsa-miR-448	1	0	1	0	1	1	PCDHGB7	protocadherin gamma subfamily B, 7
hsa-miR-448	1	0	1	0	1	1	PCDHAC2	protocadherin alpha subfamily C, 2
hsa-miR-448	1	0	1	1	1	1	C9orf40	chromosome 9 open reading frame 40
hsa-miR-448	1	0	1	1	1	1	SNAI1	snail homolog 1 (Drosophila)
hsa-miR-448	1	0	1	1	1	1	PLEKHA3	pleckstrin homology domain containing, family A (phosphoinositide binding specific) member 3
hsa-miR-448	1	0	1	0	1	1	RAB11FIP2	RAB11 family interacting protein 2 (class I)
hsa-miR-448	1	0	1	1	1	1	MAP3K7	mitogen-activated protein kinase kinase kinase 7
hsa-miR-448	1	0	1	0	1	1	PCDHGB1	protocadherin gamma subfamily B, 1
hsa-miR-448	1	0	1	1	1	1	NF1	neurofibromin 1
hsa-miR-448	1	0	1	1	1	1	AUTS2	autism susceptibility candidate 2
hsa-miR-448	1	0	1	0	1	1	PCDHGA10	protocadherin gamma subfamily A, 10
hsa-miR-448	1	0	1	1	1	1	ANKRD50	ankyrin repeat domain 50
hsa-miR-448	1	1	1	1	0	0	EFNA3	ephrin-A3
hsa-miR-448	1	0	1	0	1	1	ARHGEF6	Rac/Cdc42 guanine nucleotide exchange factor (GEF) 6
hsa-miR-448	1	0	1	1	1	1	VASH2	vasohibin 2
hsa-miR-448	1	0	1	1	1	1	PRDM16	PR domain containing 16
hsa-miR-448	1	0	0	0	0	0	TMEM170B	transmembrane protein 170B
hsa-miR-448	1	0	0	1	1	1	SYT10	synaptotagmin X
hsa-miR-448	1	0	1	1	1	1	PTGFRN	prostaglandin F2 receptor negative regulator
hsa-miR-448	1	0	1	1	1	1	EBF1	early B-cell factor 1
hsa-miR-448	1	0	1	1	1	1	FXR1	fragile X mental retardation, autosomal homolog 1
hsa-miR-448	1	0	1	1	1	1	RAI14	retinoic acid induced 14
hsa-miR-448	1	0	1	1	1	1	LIMS1	LIM and senescent cell antigen-like domains 1
hsa-miR-448	1	0	0	1	1	1	IKZF1	IKAROS family zinc finger 1 (Ikaros)
hsa-miR-448	1	0	1	1	1	1	UBE2J1	ubiquitin-conjugating enzyme E2, J1
hsa-miR-448	1	0	1	1	1	1	KCNA1	potassium voltage-gated channel, shaker-related subfamily, member 1 (episodic ataxia with myokymia)
hsa-miR-448	1	0	1	1	1	1	BACH2	BTB and CNC homology 1, basic leucine zipper transcription factor 2
hsa-miR-448	1	0	1	1	1	1	ADAT2	adenosine deaminase, tRNA-specific 2
hsa-miR-448	1	0	1	0	1	1	PCDHGB5	protocadherin gamma subfamily B, 5
hsa-miR-448	1	0	1	0	1	1	TRPS1	trichorhinophalangeal syndrome I
hsa-miR-448	1	0	1	1	1	1	NEUROD2	neuronal differentiation 2
hsa-miR-448	1	0	1	1	1	1	SPRED1	sprouty-related, EVH1 domain containing 1
hsa-miR-448	1	0	1	1	1	1	FBXO33	F-box protein 33
hsa-miR-448	1	0	1	1	1	1	NTF3	neurotrophin 3
hsa-miR-448	1	0	1	1	1	1	H3F3C	H3 histone, family 3C
hsa-miR-448	1	0	1	0	1	1	GIT2	G protein-coupled receptor kinase interacting ArfGAP 2
hsa-miR-448	1	0	1	1	1	1	SGK3	serum/glucocorticoid regulated kinase family, member 3
hsa-miR-448	1	0	1	1	1	1	TESK2	testis-specific kinase 2
hsa-miR-448	1	0	1	1	1	1	IQCK	IQ motif containing K
hsa-miR-448	1	0	1	1	1	1	TBX3	T-box 3
hsa-miR-448	1	0	1	1	1	1	GNAZ	guanine nucleotide binding protein (G protein), alpha z polypeptide
hsa-miR-448	1	0	1	1	1	1	RSBN1	round spermatid basic protein 1
hsa-miR-448	1	0	1	1	1	1	PLCB1	phospholipase C, beta 1 (phosphoinositide-specific)
hsa-miR-448	1	0	1	1	1	1	RABGAP1	RAB GTPase activating protein 1
hsa-miR-448	1	0	1	1	1	1	KCNA4	potassium voltage-gated channel, shaker-related subfamily, member 4
hsa-miR-448	1	0	1	1	1	1	MDGA2	MAM domain containing glycosylphosphatidylinositol anchor 2
hsa-miR-448	1	0	1	1	1	1	ARNTL	aryl hydrocarbon receptor nuclear translocator-like
hsa-miR-448	1	0	1	0	1	1	PAPPA	pregnancy-associated plasma protein A, pappalysin 1
hsa-miR-448	1	0	1	1	1	1	GEM	GTP binding protein overexpressed in skeletal muscle
hsa-miR-448	1	0	1	1	1	1	SP8	Sp8 transcription factor
hsa-miR-448	1	0	1	1	1	1	GPR124	G protein-coupled receptor 124
hsa-miR-448	1	0	1	0	1	1	VCL	vinculin
hsa-miR-448	1	0	1	1	1	1	FAM168B	family with sequence similarity 168, member B
hsa-miR-448	1	0	1	1	1	1	FAM160B1	family with sequence similarity 160, member B1
hsa-miR-448	1	0	1	1	1	1	LPP	LIM domain containing preferred translocation partner in lipoma
hsa-miR-448	1	0	1	1	1	1	SLITRK5	SLIT and NTRK-like family, member 5
hsa-miR-448	1	0	1	1	1	1	BNC2	basonuclin 2
hsa-miR-448	1	0	1	1	1	1	XYLT2	xylosyltransferase II
hsa-miR-448	1	0	1	1	1	1	HTR1F	5-hydroxytryptamine (serotonin) receptor 1F, G protein-coupled
hsa-miR-448	1	0	1	0	1	1	OTUD7B	OTU domain containing 7B
hsa-miR-448	1	0	1	1	1	1	SATB1	SATB homeobox 1
hsa-miR-448	1	0	1	1	1	1	RANBP2	RAN binding protein 2
hsa-miR-448	1	0	1	0	0	0	FAT3	FAT tumor suppressor homolog 3 (Drosophila)
hsa-miR-448	1	0	1	1	1	1	PEA15	phosphoprotein enriched in astrocytes 15
hsa-miR-448	1	0	1	0	1	1	PRKAB2	protein kinase, AMP-activated, beta 2 non-catalytic subunit
hsa-miR-448	1	0	1	0	1	1	RYR3	ryanodine receptor 3
hsa-miR-448	1	0	1	0	1	1	SYT4	synaptotagmin IV
hsa-miR-448	1	0	1	1	1	1	CDH13	cadherin 13, H-cadherin (heart)
hsa-miR-448	1	0	1	1	1	1	PTBP1	polypyrimidine tract binding protein 1
hsa-miR-448	1	0	1	1	1	1	PCDHA1	protocadherin alpha 1
hsa-miR-448	1	0	1	0	1	1	CHD7	chromodomain helicase DNA binding protein 7
hsa-miR-448	1	0	1	1	1	1	BCL11A	B-cell CLL/lymphoma 11A (zinc finger protein)
hsa-miR-448	1	0	1	0	1	1	PAPD7	PAP associated domain containing 7
hsa-miR-448	1	0	1	1	1	1	PIK3R1	phosphoinositide-3-kinase, regulatory subunit 1 (alpha)
hsa-miR-448	1	0	1	1	1	1	AZIN1	antizyme inhibitor 1
hsa-miR-448	1	0	1	0	1	1	CYTH3	cytohesin 3
hsa-miR-448	1	0	1	0	1	1	GAN	gigaxonin
hsa-miR-448	1	0	1	1	1	1	GNPDA2	glucosamine-6-phosphate deaminase 2
hsa-miR-448	1	0	1	1	1	1	DCAF5	DDB1 and CUL4 associated factor 5
hsa-miR-448	1	0	1	1	1	1	SYT9	synaptotagmin IX
hsa-miR-448	1	0	1	0	1	1	PCDHGB4	protocadherin gamma subfamily B, 4
hsa-miR-448	1	0	1	1	1	1	VEZF1	vascular endothelial zinc finger 1
hsa-miR-448	1	0	1	1	1	1	ZMIZ1	zinc finger, MIZ-type containing 1
hsa-miR-448	1	0	1	1	1	1	SULT4A1	sulfotransferase family 4A, member 1
hsa-miR-448	1	0	1	1	1	1	PFN2	profilin 2
hsa-miR-448	1	0	1	1	0	0	KCNH7	potassium voltage-gated channel, subfamily H (eag-related), member 7
hsa-miR-448	1	0	1	1	1	1	EFNB2	ephrin-B2
hsa-miR-448	1	0	1	1	1	1	DPP4	dipeptidyl-peptidase 4
hsa-miR-448	1	0	1	1	1	1	ETNK1	ethanolamine kinase 1
hsa-miR-448	1	0	1	1	1	1	PTCH1	patched 1
hsa-miR-448	1	0	1	1	1	1	GATAD2A	GATA zinc finger domain containing 2A
hsa-miR-448	1	0	0	1	1	1	FAM177A1	family with sequence similarity 177, member A1
hsa-miR-448	1	0	1	1	1	1	RICTOR	RPTOR independent companion of MTOR, complex 2
hsa-miR-448	1	0	1	0	1	1	MEF2C	myocyte enhancer factor 2C
hsa-miR-448	1	0	1	1	1	1	FNBP4	formin binding protein 4
hsa-miR-448	1	0	1	1	0	0	RAPGEF2	Rap guanine nucleotide exchange factor (GEF) 2
hsa-miR-448	1	0	1	1	1	1	YTHDF3	YTH domain family, member 3
hsa-miR-448	1	0	1	1	1	1	RP2	retinitis pigmentosa 2 (X-linked recessive)
hsa-miR-448	1	0	1	1	1	1	NFIB	nuclear factor I/B
hsa-miR-448	1	0	1	0	1	1	RNF144A	ring finger protein 144A
hsa-miR-448	1	0	1	0	1	1	PCDHA10	protocadherin alpha 10
hsa-miR-448	1	0	1	0	1	1	CCND2	cyclin D2
hsa-miR-448	1	0	1	1	1	1	AGAP1	ArfGAP with GTPase domain, ankyrin repeat and PH domain 1
hsa-miR-448	1	0	1	1	1	1	PKHD1	polycystic kidney and hepatic disease 1 (autosomal recessive)
hsa-miR-448	1	0	1	1	1	1	TMEM64	transmembrane protein 64
hsa-miR-448	1	0	1	1	1	1	NEUROD1	neuronal differentiation 1
hsa-miR-448	1	0	1	0	1	1	TTYH3	tweety homolog 3 (Drosophila)
hsa-miR-448	1	0	1	0	1	1	KCTD9	potassium channel tetramerisation domain containing 9
hsa-miR-448	1	0	1	1	1	1	DTNA	dystrobrevin, alpha
hsa-miR-448	1	0	1	0	1	1	PDE4D	phosphodiesterase 4D, cAMP-specific
hsa-miR-448	1	0	1	0	1	1	PCDHAC1	protocadherin alpha subfamily C, 1
hsa-miR-448	1	0	1	1	1	1	SNTB2	syntrophin, beta 2 (dystrophin-associated protein A1, 59kDa, basic component 2)
hsa-miR-448	1	0	1	1	1	1	PKNOX2	PBX/knotted 1 homeobox 2
hsa-miR-448	1	0	1	1	0	0	UBN2	ubinuclein 2
hsa-miR-448	1	0	1	1	1	1	KDM6A	lysine (K)-specific demethylase 6A
hsa-miR-448	1	0	1	0	1	1	GPR158	G protein-coupled receptor 158
hsa-miR-448	1	0	1	1	1	1	SOX30	SRY (sex determining region Y)-box 30
hsa-miR-448	1	0	1	0	1	1	PPP1R12A	protein phosphatase 1, regulatory subunit 12A
hsa-miR-448	1	0	1	1	1	1	PCDHGA1	protocadherin gamma subfamily A, 1
hsa-miR-448	1	0	1	1	1	1	ZNF711	zinc finger protein 711
hsa-miR-448	1	0	1	1	0	0	KIAA1549	KIAA1549
hsa-miR-448	1	0	1	0	1	1	SEMA4G	sema domain, immunoglobulin domain (Ig), transmembrane domain (TM) and short cytoplasmic domain, (semaphorin) 4G
hsa-miR-448	1	0	1	1	1	1	PURA	purine-rich element binding protein A
hsa-miR-448	1	0	1	1	1	1	TBC1D8B	TBC1 domain family, member 8B (with GRAM domain)
hsa-miR-448	1	0	1	1	1	1	MBTD1	mbt domain containing 1
hsa-miR-448	1	0	1	0	1	1	FAM190B	family with sequence similarity 190, member B
hsa-miR-448	1	0	1	1	1	1	SLCO5A1	solute carrier organic anion transporter family, member 5A1
hsa-miR-448	1	0	1	1	1	1	HECW2	HECT, C2 and WW domain containing E3 ubiquitin protein ligase 2
hsa-miR-448	1	0	1	1	1	1	PIGA	phosphatidylinositol glycan anchor biosynthesis, class A
hsa-miR-448	1	0	1	1	0	0	MARCH9	membrane-associated ring finger (C3HC4) 9
hsa-miR-448	1	0	1	0	1	1	PCDHGA9	protocadherin gamma subfamily A, 9
hsa-miR-448	1	0	1	0	1	1	CNTN5	contactin 5
hsa-miR-448	1	0	1	1	1	1	KCNMB2	potassium large conductance calcium-activated channel, subfamily M, beta member 2
hsa-miR-448	1	0	1	1	1	1	PHF13	PHD finger protein 13
hsa-miR-448	1	0	1	1	1	1	OXR1	oxidation resistance 1
hsa-miR-448	1	0	1	1	1	1	SOLH	small optic lobes homolog (Drosophila)
hsa-miR-448	1	0	1	1	1	1	UNKL	unkempt homolog (Drosophila)-like
hsa-miR-448	1	0	1	1	1	1	E2F3	E2F transcription factor 3
hsa-miR-448	1	0	1	1	1	1	PTF1A	pancreas specific transcription factor, 1a
hsa-miR-448	1	0	1	1	1	1	RCOR1	REST corepressor 1
hsa-miR-448	1	0	1	1	1	1	LYST	lysosomal trafficking regulator
hsa-miR-448	1	0	1	1	1	1	SEL1L3	sel-1 suppressor of lin-12-like 3 (C. elegans)
hsa-miR-448	1	0	1	1	1	1	NOVA1	neuro-oncological ventral antigen 1
hsa-miR-448	1	0	1	0	1	1	MYCBP	c-myc binding protein
hsa-miR-448	1	0	1	1	0	0	ATAD2B	ATPase family, AAA domain containing 2B
hsa-miR-448	1	0	1	1	1	1	OTX2	orthodenticle homeobox 2
hsa-miR-448	1	0	1	1	1	1	C21orf91	chromosome 21 open reading frame 91
hsa-miR-448	1	0	1	0	1	1	CPEB4	cytoplasmic polyadenylation element binding protein 4
hsa-miR-448	1	0	1	1	1	1	DESI2	desumoylating isopeptidase 2
hsa-miR-448	1	0	1	0	1	1	FZD3	frizzled family receptor 3
hsa-miR-448	1	0	1	1	1	1	PHF21A	PHD finger protein 21A
hsa-miR-448	1	0	1	1	1	1	FURIN	furin (paired basic amino acid cleaving enzyme)
hsa-miR-448	1	0	1	1	1	1	STK4	serine/threonine kinase 4
hsa-miR-448	1	0	1	1	1	1	RAVER2	ribonucleoprotein, PTB-binding 2
hsa-miR-448	1	0	1	1	1	1	PCDHA4	protocadherin alpha 4
hsa-miR-448	1	0	1	1	1	1	T	T, brachyury homolog (mouse)
hsa-miR-448	1	0	1	1	1	1	APC	adenomatous polyposis coli
hsa-miR-448	1	0	1	1	1	1	PHF17	PHD finger protein 17
hsa-miR-448	1	0	1	1	1	1	ADAMTS8	ADAM metallopeptidase with thrombospondin type 1 motif, 8
hsa-miR-448	1	0	1	1	1	1	CNTN4	contactin 4
hsa-miR-448	1	0	1	1	0	0	GRIK3	glutamate receptor, ionotropic, kainate 3
hsa-miR-448	1	0	1	0	1	1	SOX11	SRY (sex determining region Y)-box 11
hsa-miR-448	1	0	1	0	1	1	PCDHGB3	protocadherin gamma subfamily B, 3
hsa-miR-448	1	0	1	1	1	1	PCDHA6	protocadherin alpha 6
hsa-miR-448	1	0	1	0	1	1	PCDHA12	protocadherin alpha 12
hsa-miR-448	1	0	1	1	1	1	H3F3B	H3 histone, family 3B (H3.3B)
hsa-miR-448	1	0	1	1	1	1	RAB7A	RAB7A, member RAS oncogene family
hsa-miR-448	1	0	1	0	1	1	CNTNAP1	contactin associated protein 1
hsa-miR-448	1	0	1	0	1	1	PXDN	peroxidasin homolog (Drosophila)
hsa-miR-448	1	0	1	0	1	1	RBBP5	retinoblastoma binding protein 5
hsa-miR-448	1	0	1	1	1	1	ADAM19	ADAM metallopeptidase domain 19
hsa-miR-448	1	0	1	1	1	1	C6orf106	chromosome 6 open reading frame 106
hsa-miR-448	1	0	1	1	1	1	DLGAP4	discs, large (Drosophila) homolog-associated protein 4
hsa-miR-448	1	0	1	1	1	1	DACT1	dapper, antagonist of beta-catenin, homolog 1 (Xenopus laevis)
hsa-miR-448	1	0	1	1	1	1	ROBO2	roundabout, axon guidance receptor, homolog 2 (Drosophila)
hsa-miR-448	1	0	1	0	1	1	PCDHGB2	protocadherin gamma subfamily B, 2
hsa-miR-448	1	0	1	1	1	1	ZNF654	zinc finger protein 654
hsa-miR-448	1	0	1	1	1	1	TBX2	T-box 2
hsa-miR-448	1	0	1	1	1	1	CAP1	CAP, adenylate cyclase-associated protein 1 (yeast)
hsa-miR-448	1	0	1	1	1	1	HEY2	hairy/enhancer-of-split related with YRPW motif 2
hsa-miR-448	1	0	1	0	1	1	ZNF793	zinc finger protein 793
hsa-miR-448	1	0	1	1	1	1	FERMT2	fermitin family member 2
hsa-miR-448	1	0	1	1	1	1	SPARCL1	SPARC-like 1 (hevin)
hsa-miR-448	1	0	1	1	1	1	RCAN2	regulator of calcineurin 2
hsa-miR-448	1	0	1	1	1	1	CELF6	CUGBP, Elav-like family member 6
hsa-miR-448	1	0	1	0	1	1	SCML2	sex comb on midleg-like 2 (Drosophila)
hsa-miR-448	1	0	1	1	1	1	FMR1	fragile X mental retardation 1
hsa-miR-448	1	0	1	1	1	1	PRKAR2B	protein kinase, cAMP-dependent, regulatory, type II, beta
hsa-miR-448	1	0	1	0	1	1	ZZEF1	zinc finger, ZZ-type with EF-hand domain 1
hsa-miR-448	1	0	1	1	0	0	AGFG2	ArfGAP with FG repeats 2
hsa-miR-448	1	0	1	1	0	0	PAX2	paired box 2
hsa-miR-448	1	0	1	1	1	1	PAN3	PAN3 poly(A) specific ribonuclease subunit homolog (S. cerevisiae)
hsa-miR-448	1	0	1	1	1	1	PCDHA8	protocadherin alpha 8
hsa-miR-448	1	0	1	1	1	1	CLCN5	chloride channel, voltage-sensitive 5
hsa-miR-448	1	0	0	1	1	1	GPR4	G protein-coupled receptor 4
hsa-miR-448	1	0	1	1	0	0	JPH3	junctophilin 3
hsa-miR-448	1	0	0	1	0	0	CRTC1	CREB regulated transcription coactivator 1
hsa-miR-448	1	0	1	1	1	1	ADAM10	ADAM metallopeptidase domain 10
hsa-miR-448	1	0	1	1	1	1	TMSB4X	thymosin beta 4, X-linked
hsa-miR-448	1	0	1	1	1	1	PALM2	paralemmin 2
hsa-miR-448	1	0	1	0	1	1	FLRT2	fibronectin leucine rich transmembrane protein 2
hsa-miR-448	1	0	1	1	1	1	TAGLN3	transgelin 3
hsa-miR-448	1	0	1	1	1	1	KCNC4	potassium voltage-gated channel, Shaw-related subfamily, member 4
hsa-miR-448	1	0	1	1	0	0	FOXO3	forkhead box O3
hsa-miR-448	1	0	1	1	1	1	MON2	MON2 homolog (S. cerevisiae)
hsa-miR-448	1	0	1	0	1	1	ADO	2-aminoethanethiol (cysteamine) dioxygenase
hsa-miR-448	1	0	1	1	1	1	SLC26A7	solute carrier family 26, member 7
hsa-miR-448	1	0	1	0	1	1	MPPED2	metallophosphoesterase domain containing 2
hsa-miR-448	1	0	1	1	1	1	SPRY2	sprouty homolog 2 (Drosophila)
hsa-miR-448	1	0	1	1	1	1	GCFC1	GC-rich sequence DNA-binding factor 1
hsa-miR-448	1	0	1	1	1	1	KIAA1522	KIAA1522
hsa-miR-448	1	0	1	0	0	0	RNF169	ring finger protein 169
hsa-miR-448	1	0	1	1	1	1	EPHB2	EPH receptor B2
hsa-miR-448	1	0	1	1	1	1	SLC4A4	solute carrier family 4, sodium bicarbonate cotransporter, member 4
hsa-miR-448	1	0	1	1	1	1	MAPK1IP1L	mitogen-activated protein kinase 1 interacting protein 1-like
hsa-miR-448	1	0	1	1	1	1	MAMLD1	mastermind-like domain containing 1
hsa-miR-448	1	0	1	1	1	1	PPP1R12B	protein phosphatase 1, regulatory subunit 12B
hsa-miR-448	1	0	1	1	1	1	PLEKHA6	pleckstrin homology domain containing, family A member 6
hsa-miR-448	1	0	1	1	1	1	DCC	deleted in colorectal carcinoma
hsa-miR-448	1	0	1	0	1	1	IRS2	insulin receptor substrate 2
hsa-miR-448	1	0	1	1	1	1	PELI1	pellino E3 ubiquitin protein ligase 1
hsa-miR-448	1	0	1	1	1	1	NAV1	neuron navigator 1
hsa-miR-448	1	0	1	1	1	1	ELL2	elongation factor, RNA polymerase II, 2
hsa-miR-448	1	0	1	1	0	0	ANO8	anoctamin 8
hsa-miR-448	1	0	1	1	1	1	SOCS2	suppressor of cytokine signaling 2
hsa-miR-448	1	0	1	1	1	1	SH2B3	SH2B adaptor protein 3
hsa-miR-448	1	0	1	1	1	1	KANK4	KN motif and ankyrin repeat domains 4
hsa-miR-448	1	0	1	1	1	1	MYT1L	myelin transcription factor 1-like
hsa-miR-448	1	0	1	1	1	1	PLEKHM1	pleckstrin homology domain containing, family M (with RUN domain) member 1
hsa-miR-448	1	0	1	1	1	1	WDR48	WD repeat domain 48
hsa-miR-448	1	0	1	0	1	1	ZCCHC24	zinc finger, CCHC domain containing 24
hsa-miR-448	1	0	1	0	1	1	FAXC	failed axon connections homolog (Drosophila)
hsa-miR-448	1	0	1	1	0	0	SIGMAR1	sigma non-opioid intracellular receptor 1
hsa-miR-448	1	0	1	0	0	0	PLSCR5	phospholipid scramblase family, member 5
hsa-miR-448	1	0	1	1	1	1	IMPAD1	inositol monophosphatase domain containing 1
hsa-miR-448	1	0	1	1	1	1	HSDL2	hydroxysteroid dehydrogenase like 2
hsa-miR-448	1	0	1	0	1	1	GPCPD1	glycerophosphocholine phosphodiesterase GDE1 homolog (S. cerevisiae)
hsa-miR-448	1	0	1	0	1	1	PSD3	pleckstrin and Sec7 domain containing 3
hsa-miR-448	1	0	1	0	1	1	CDK19	cyclin-dependent kinase 19
hsa-miR-448	1	0	1	0	1	1	CACNA1C	calcium channel, voltage-dependent, L type, alpha 1C subunit
hsa-miR-448	1	0	1	1	1	1	MTMR12	myotubularin related protein 12
hsa-miR-448	1	0	1	1	1	1	KPNA3	karyopherin alpha 3 (importin alpha 4)
hsa-miR-448	1	0	0	1	0	0	RNF26	ring finger protein 26
hsa-miR-448	1	0	1	1	1	1	FOXJ3	forkhead box J3
hsa-miR-448	1	0	1	1	0	0	TCERG1L	transcription elongation regulator 1-like
hsa-miR-448	1	0	1	0	1	1	RAP2B	RAP2B, member of RAS oncogene family
hsa-miR-448	1	0	1	0	1	1	SCML1	sex comb on midleg-like 1 (Drosophila)
hsa-miR-448	1	0	0	1	1	1	C1GALT1C1	C1GALT1-specific chaperone 1
hsa-miR-448	1	0	1	1	1	1	AZI2	5-azacytidine induced 2
hsa-miR-448	1	0	1	1	1	1	PAIP1	poly(A) binding protein interacting protein 1
hsa-miR-448	1	0	1	0	1	1	KIAA0430	KIAA0430
hsa-miR-448	1	0	0	1	1	1	SBNO2	strawberry notch homolog 2 (Drosophila)
hsa-miR-448	1	0	1	1	1	1	GRIK2	glutamate receptor, ionotropic, kainate 2
hsa-miR-448	1	0	1	1	1	1	PCDHA5	protocadherin alpha 5
hsa-miR-448	1	0	1	1	1	1	FAM102A	family with sequence similarity 102, member A
hsa-miR-448	1	0	1	1	1	1	SENP7	SUMO1/sentrin specific peptidase 7
hsa-miR-448	1	0	1	0	1	1	SPOPL	speckle-type POZ protein-like
hsa-miR-448	1	0	1	1	1	1	BTG3	BTG family, member 3
hsa-miR-448	1	0	1	1	1	1	DLL4	delta-like 4 (Drosophila)
hsa-miR-448	1	0	1	0	1	1	PTPRE	protein tyrosine phosphatase, receptor type, E
hsa-miR-448	1	0	1	1	1	1	PCDHA9	protocadherin alpha 9
hsa-miR-448	1	0	1	1	1	1	FOXN3	forkhead box N3
hsa-miR-448	1	0	1	1	1	1	SOCS5	suppressor of cytokine signaling 5
hsa-miR-448	1	0	1	1	1	1	TMEM110	transmembrane protein 110
hsa-miR-448	1	0	1	1	1	1	ARF1	ADP-ribosylation factor 1
hsa-miR-448	1	0	1	1	1	1	GABRB3	gamma-aminobutyric acid (GABA) A receptor, beta 3
hsa-miR-448	1	0	1	1	1	1	ZEB2	zinc finger E-box binding homeobox 2
hsa-miR-448	1	0	1	1	1	1	AFF2	AF4/FMR2 family, member 2
hsa-miR-448	1	0	1	0	1	1	INA	internexin neuronal intermediate filament protein, alpha
hsa-miR-448	1	0	1	0	0	0	ZC3H12C	zinc finger CCCH-type containing 12C
hsa-miR-448	1	0	1	1	1	1	UTY	ubiquitously transcribed tetratricopeptide repeat gene, Y-linked
hsa-miR-448	1	0	1	1	1	1	GRB2	growth factor receptor-bound protein 2
hsa-miR-448	1	0	1	0	1	1	GDF6	growth differentiation factor 6
hsa-miR-448	1	0	1	0	1	1	KLHL3	kelch-like 3 (Drosophila)
hsa-miR-448	1	0	1	0	1	1	LAMC1	laminin, gamma 1 (formerly LAMB2)
hsa-miR-448	1	0	1	1	1	1	RAB3IP	RAB3A interacting protein (rabin3)
hsa-miR-448	1	0	1	0	1	1	PCDHGA8	protocadherin gamma subfamily A, 8
hsa-miR-448	1	0	1	1	1	1	SMARCD2	SWI/SNF related, matrix associated, actin dependent regulator of chromatin, subfamily d, member 2
hsa-miR-448	1	0	1	0	1	1	ACVR2A	activin A receptor, type IIA
hsa-miR-448	1	0	1	1	1	1	ERO1LB	ERO1-like beta (S. cerevisiae)
hsa-miR-448	1	0	1	1	1	1	IKZF2	IKAROS family zinc finger 2 (Helios)
hsa-miR-448	1	0	1	1	1	1	CDC42	cell division cycle 42 (GTP binding protein, 25kDa)
hsa-miR-448	1	0	1	1	1	1	ACTN4	actinin, alpha 4
hsa-miR-448	1	0	1	1	1	1	TACC1	transforming, acidic coiled-coil containing protein 1
hsa-miR-448	1	0	1	1	1	1	PCDHA3	protocadherin alpha 3
hsa-miR-448	1	0	1	0	1	1	ATP11A	ATPase, class VI, type 11A
hsa-miR-448	1	0	1	1	1	1	CMIP	c-Maf inducing protein
hsa-miR-448	1	0	1	1	1	1	DMD	dystrophin
hsa-miR-448	1	0	1	1	1	1	SH3BP4	SH3-domain binding protein 4
hsa-miR-448	1	0	1	0	0	0	ZBTB34	zinc finger and BTB domain containing 34
hsa-miR-448	1	0	1	1	1	1	CKAP4	cytoskeleton-associated protein 4
hsa-miR-448	1	0	1	1	1	1	ZCCHC14	zinc finger, CCHC domain containing 14
hsa-miR-448	1	0	1	1	1	1	UTRN	utrophin
hsa-miR-448	1	0	1	1	1	1	C18orf1	chromosome 18 open reading frame 1
hsa-miR-448	1	0	1	0	1	1	CLDN18	claudin 18
hsa-miR-448	1	0	1	1	1	1	ZNF644	zinc finger protein 644
hsa-miR-448	1	0	1	1	0	0	PCLO	piccolo (presynaptic cytomatrix protein)
hsa-miR-448	1	0	1	0	1	1	PCDHGA4	protocadherin gamma subfamily A, 4
hsa-miR-448	1	0	1	0	1	1	ACVR1C	activin A receptor, type IC
hsa-miR-448	1	0	1	1	1	1	SCN5A	sodium channel, voltage-gated, type V, alpha subunit
hsa-miR-448	1	0	1	0	1	1	GLCE	glucuronic acid epimerase
hsa-miR-448	1	0	1	1	0	0	ADC	arginine decarboxylase
hsa-miR-448	1	0	1	1	1	1	NAPB	N-ethylmaleimide-sensitive factor attachment protein, beta
hsa-miR-448	1	0	1	1	1	1	DTX3	deltex homolog 3 (Drosophila)
hsa-miR-448	1	0	1	1	1	1	ADD1	adducin 1 (alpha)
hsa-miR-448	1	0	1	1	1	1	DAGLA	diacylglycerol lipase, alpha
hsa-miR-448	1	0	1	1	1	1	LMX1A	LIM homeobox transcription factor 1, alpha
hsa-miR-448	1	0	1	1	1	1	NUDT4	nudix (nucleoside diphosphate linked moiety X)-type motif 4
hsa-miR-448	1	0	0	1	1	1	PIGV	phosphatidylinositol glycan anchor biosynthesis, class V
hsa-miR-448	1	0	1	1	1	1	NAMPT	nicotinamide phosphoribosyltransferase
hsa-miR-448	1	0	1	1	1	1	ARHGEF40	Rho guanine nucleotide exchange factor (GEF) 40
hsa-miR-448	1	0	1	1	1	1	AEBP2	AE binding protein 2
hsa-miR-448	1	0	1	1	1	1	RAB2B	RAB2B, member RAS oncogene family
hsa-miR-448	1	0	1	1	1	1	ING2	inhibitor of growth family, member 2
hsa-miR-448	1	0	0	1	1	1	YIPF2	Yip1 domain family, member 2
hsa-miR-448	1	0	1	0	1	1	SS18	synovial sarcoma translocation, chromosome 18
hsa-miR-448	1	0	1	1	1	1	KREMEN1	kringle containing transmembrane protein 1
hsa-miR-448	1	0	1	0	1	1	BLOC1S6	biogenesis of lysosomal organelles complex-1, subunit 6, pallidin
hsa-miR-448	1	0	1	0	1	1	ODZ3	odz, odd Oz/ten-m homolog 3 (Drosophila)
hsa-miR-448	1	0	1	1	1	1	SPTBN1	spectrin, beta, non-erythrocytic 1
hsa-miR-448	1	0	1	1	1	1	ANK3	ankyrin 3, node of Ranvier (ankyrin G)
hsa-miR-448	1	0	1	1	1	1	DOC2A	double C2-like domains, alpha
hsa-miR-448	1	0	1	1	1	1	TSHZ1	teashirt zinc finger homeobox 1
hsa-miR-448	1	0	1	0	1	1	USP9X	ubiquitin specific peptidase 9, X-linked
hsa-miR-448	1	0	1	1	1	1	PACRG	PARK2 co-regulated
hsa-miR-448	1	0	1	1	1	1	SUN2	Sad1 and UNC84 domain containing 2
hsa-miR-448	1	0	1	0	1	1	PCDHGA6	protocadherin gamma subfamily A, 6
hsa-miR-448	1	0	1	1	1	1	ZNF148	zinc finger protein 148
hsa-miR-448	1	0	1	1	1	1	GFPT2	glutamine-fructose-6-phosphate transaminase 2
hsa-miR-448	1	0	1	1	0	0	LGSN	lengsin, lens protein with glutamine synthetase domain
hsa-miR-448	1	0	1	1	1	1	SEMA4F	sema domain, immunoglobulin domain (Ig), transmembrane domain (TM) and short cytoplasmic domain, (semaphorin) 4F
hsa-miR-448	1	0	0	1	0	0	ZNF385C	zinc finger protein 385C
hsa-miR-448	1	0	1	1	1	1	PXMP4	peroxisomal membrane protein 4, 24kDa
hsa-miR-448	1	0	1	1	1	1	MITF	microphthalmia-associated transcription factor
hsa-miR-448	1	0	1	1	1	1	XYLT1	xylosyltransferase I
hsa-miR-448	1	0	1	1	1	1	DACH1	dachshund homolog 1 (Drosophila)
hsa-miR-448	1	0	1	0	1	1	KLF3	Kruppel-like factor 3 (basic)
hsa-miR-448	1	0	1	1	1	1	PHTF1	putative homeodomain transcription factor 1
hsa-miR-448	1	0	1	1	1	1	CALN1	calneuron 1
hsa-miR-448	1	0	1	1	1	1	SYN1	synapsin I
hsa-miR-448	1	0	1	1	1	1	GRHL3	grainyhead-like 3 (Drosophila)
hsa-miR-448	1	0	1	1	1	1	MTMR10	myotubularin related protein 10
hsa-miR-448	1	0	1	1	1	1	IGF1R	insulin-like growth factor 1 receptor
hsa-miR-448	1	0	1	0	1	1	KLF13	Kruppel-like factor 13
hsa-miR-448	1	0	1	1	1	1	RHOU	ras homolog family member U
hsa-miR-448	1	0	1	1	1	1	HNRNPA2B1	heterogeneous nuclear ribonucleoprotein A2/B1
hsa-miR-448	1	0	1	0	1	1	CNOT6L	CCR4-NOT transcription complex, subunit 6-like
hsa-miR-448	1	0	1	1	0	0	DOT1L	DOT1-like, histone H3 methyltransferase (S. cerevisiae)
hsa-miR-448	1	0	1	1	1	1	ARID4A	AT rich interactive domain 4A (RBP1-like)
hsa-miR-448	1	0	1	1	1	1	NFASC	neurofascin
hsa-miR-448	1	0	1	1	1	1	ZNF217	zinc finger protein 217
hsa-miR-448	1	0	1	1	1	1	RBM26	RNA binding motif protein 26
hsa-miR-448	1	0	1	1	1	1	KDSR	3-ketodihydrosphingosine reductase
hsa-miR-448	1	0	1	1	1	1	ZCCHC2	zinc finger, CCHC domain containing 2
hsa-miR-448	1	0	1	1	1	1	GPHN	gephyrin
hsa-miR-448	1	0	1	1	1	1	DDX6	DEAD (Asp-Glu-Ala-Asp) box helicase 6
hsa-miR-448	1	0	1	1	1	1	NBEA	neurobeachin
hsa-miR-448	1	0	1	0	1	1	PCDHGA12	protocadherin gamma subfamily A, 12
hsa-miR-448	1	0	1	1	1	1	PRDM2	PR domain containing 2, with ZNF domain
hsa-miR-448	1	0	1	1	1	1	PCDHGA2	protocadherin gamma subfamily A, 2
hsa-miR-448	1	0	1	0	1	1	PCDHA11	protocadherin alpha 11
hsa-miR-448	1	0	1	1	1	1	SH3GL2	SH3-domain GRB2-like 2
hsa-miR-448	1	0	1	1	1	1	RAB21	RAB21, member RAS oncogene family
hsa-miR-448	1	0	1	0	1	1	GPR85	G protein-coupled receptor 85
hsa-miR-448	1	0	1	1	1	1	FAM168A	family with sequence similarity 168, member A
hsa-miR-448	1	0	1	1	1	1	CPSF2	cleavage and polyadenylation specific factor 2, 100kDa
hsa-miR-448	1	0	1	0	1	1	BCL2	B-cell CLL/lymphoma 2
hsa-miR-448	1	0	1	1	1	1	EFHD2	EF-hand domain family, member D2
hsa-miR-448	1	0	1	1	0	0	DPY19L1	dpy-19-like 1 (C. elegans)
hsa-miR-448	1	0	1	1	0	0	HIPK2	homeodomain interacting protein kinase 2
hsa-miR-448	1	0	1	1	1	1	RNGTT	RNA guanylyltransferase and 5'-phosphatase
hsa-miR-448	1	0	1	1	0	0	INO80D	INO80 complex subunit D
hsa-miR-448	1	0	1	0	1	1	SCN3A	sodium channel, voltage-gated, type III, alpha subunit
hsa-miR-448	1	0	1	1	1	1	DYNLT3	dynein, light chain, Tctex-type 3
hsa-miR-448	1	0	1	1	1	1	TMCC1	transmembrane and coiled-coil domain family 1
hsa-miR-448	1	0	1	1	1	1	RORB	RAR-related orphan receptor B
hsa-miR-448	1	0	1	1	0	0	HDLBP	high density lipoprotein binding protein
hsa-miR-448	1	0	1	1	1	1	KIAA0247	KIAA0247
hsa-miR-448	1	0	1	1	1	1	WRNIP1	Werner helicase interacting protein 1
hsa-miR-448	1	0	0	1	1	1	SDCCAG3	serologically defined colon cancer antigen 3
hsa-miR-448	1	0	0	0	0	0	FAM160A1	family with sequence similarity 160, member A1
hsa-miR-448	1	0	1	0	1	1	ICK	intestinal cell (MAK-like) kinase
hsa-miR-448	1	0	1	1	1	1	ASB7	ankyrin repeat and SOCS box containing 7
hsa-miR-448	1	0	1	0	1	1	UBFD1	ubiquitin family domain containing 1
hsa-miR-448	1	0	1	0	1	1	PCDHA13	protocadherin alpha 13
hsa-miR-448	1	0	1	1	1	1	TEK	TEK tyrosine kinase, endothelial
hsa-miR-448	1	0	1	1	1	1	WWP1	WW domain containing E3 ubiquitin protein ligase 1
hsa-miR-448	1	0	1	1	1	1	APBB2	amyloid beta (A4) precursor protein-binding, family B, member 2
hsa-miR-448	1	0	1	0	1	1	BEND4	BEN domain containing 4
hsa-miR-448	1	0	1	1	1	1	DUSP3	dual specificity phosphatase 3
hsa-miR-448	1	0	1	1	1	1	SNPH	syntaphilin
hsa-miR-448	1	0	1	1	1	1	GABRB2	gamma-aminobutyric acid (GABA) A receptor, beta 2
hsa-miR-448	1	0	1	1	1	1	PCDHA2	protocadherin alpha 2
hsa-miR-448	1	0	1	0	1	1	ACVR1B	activin A receptor, type IB
hsa-miR-448	1	0	1	0	1	1	PCDHGA5	protocadherin gamma subfamily A, 5
hsa-miR-448	1	0	1	1	0	0	INHBB	inhibin, beta B
hsa-miR-448	1	0	1	0	1	1	ETV1	ets variant 1
hsa-miR-448	1	0	1	1	1	1	PEX5L	peroxisomal biogenesis factor 5-like
hsa-miR-448	1	0	1	1	1	1	PCDH8	protocadherin 8
hsa-miR-448	1	0	1	0	1	1	TMSB4XP8	thymosin beta 4, X-linked pseudogene 8
hsa-miR-448	1	0	1	0	1	1	TP53INP2	tumor protein p53 inducible nuclear protein 2
hsa-miR-448	1	0	1	1	1	1	ENAH	enabled homolog (Drosophila)
hsa-miR-448	1	0	1	1	1	1	HERC3	HECT and RLD domain containing E3 ubiquitin protein ligase 3
hsa-miR-448	1	0	1	0	1	1	PCDHGA7	protocadherin gamma subfamily A, 7
hsa-miR-448	1	0	0	1	1	1	ZFP1	zinc finger protein 1 homolog (mouse)
hsa-miR-448	1	0	1	1	0	0	SLAIN2	SLAIN motif family, member 2
hsa-miR-448	1	0	1	1	1	1	SOST	sclerostin
hsa-miR-448	1	0	1	1	1	1	PHLDA1	pleckstrin homology-like domain, family A, member 1
hsa-miR-448	1	0	1	1	1	1	ZBTB7B	zinc finger and BTB domain containing 7B
hsa-miR-448	1	0	1	1	1	1	CDH10	cadherin 10, type 2 (T2-cadherin)
hsa-miR-448	1	0	1	0	0	0	IGLON5	IgLON family member 5
hsa-miR-448	1	0	1	0	1	1	PCDHGA11	protocadherin gamma subfamily A, 11
hsa-miR-448	1	0	1	1	1	1	CIB2	calcium and integrin binding family member 2
hsa-miR-448	1	0	1	0	1	1	CREB5	cAMP responsive element binding protein 5
hsa-miR-448	1	0	1	0	1	1	TMEM55A	transmembrane protein 55A
hsa-miR-448	1	0	1	1	1	1	HECW1	HECT, C2 and WW domain containing E3 ubiquitin protein ligase 1
hsa-miR-448	1	0	1	1	1	1	C14orf37	chromosome 14 open reading frame 37
hsa-miR-448	1	0	1	0	0	0	ANKRD52	ankyrin repeat domain 52
hsa-miR-448	1	0	1	0	1	1	SCRT2	scratch homolog 2, zinc finger protein (Drosophila)
hsa-miR-448	1	0	1	1	1	1	SRSF10	serine/arginine-rich splicing factor 10
hsa-miR-448	1	0	1	1	1	1	WWC2	WW and C2 domain containing 2
hsa-miR-448	1	0	1	1	1	1	ATP2B4	ATPase, Ca++ transporting, plasma membrane 4
hsa-miR-448	1	0	1	1	1	1	KLHL5	kelch-like 5 (Drosophila)
hsa-miR-448	1	0	1	1	1	1	ME1	malic enzyme 1, NADP(+)-dependent, cytosolic
hsa-miR-448	1	0	1	0	1	1	KCNB1	potassium voltage-gated channel, Shab-related subfamily, member 1
hsa-miR-448	1	0	1	1	1	1	RFFL	ring finger and FYVE-like domain containing E3 ubiquitin protein ligase
hsa-miR-448	1	0	1	1	1	1	FAM210B	family with sequence similarity 210, member B
hsa-miR-448	1	0	1	1	1	1	OPN5	opsin 5
hsa-miR-448	1	0	1	1	1	1	MPC1	mitochondrial pyruvate carrier 1
hsa-miR-448	1	0	1	1	1	1	ABHD13	abhydrolase domain containing 13
hsa-miR-448	1	0	1	1	1	1	SPHK2	sphingosine kinase 2
hsa-miR-448	1	0	1	0	1	1	PCDHGA3	protocadherin gamma subfamily A, 3
hsa-miR-448	1	0	1	1	1	1	EIF2C1	eukaryotic translation initiation factor 2C, 1
hsa-miR-448	1	0	1	1	1	1	SEMA3A	sema domain, immunoglobulin domain (Ig), short basic domain, secreted, (semaphorin) 3A
hsa-miR-448	1	0	1	1	1	1	ADCY1	adenylate cyclase 1 (brain)
hsa-miR-448	1	0	1	1	1	1	MYO5A	myosin VA (heavy chain 12, myoxin)
hsa-miR-448	1	0	1	1	1	1	KLF5	Kruppel-like factor 5 (intestinal)
hsa-miR-448	1	0	1	1	0	0	UNC5A	unc-5 homolog A (C. elegans)
hsa-miR-448	1	0	1	1	1	1	ITSN2	intersectin 2
hsa-miR-448	1	0	1	0	1	1	BSN	bassoon (presynaptic cytomatrix protein)
hsa-miR-448	1	0	1	1	1	1	EPHA4	EPH receptor A4
hsa-miR-448	1	0	1	0	1	1	PCDHA7	protocadherin alpha 7
hsa-miR-448	1	0	1	1	1	1	EIF2C3	eukaryotic translation initiation factor 2C, 3
hsa-miR-448	1	0	1	0	0	0	TPCN1	two pore segment channel 1
hsa-miR-448	1	0	1	0	1	1	PCDHGC4	protocadherin gamma subfamily C, 4
hsa-miR-448	1	0	1	1	1	1	KCND1	potassium voltage-gated channel, Shal-related subfamily, member 1
hsa-miR-448	1	0	1	1	1	1	NEBL	nebulette
hsa-miR-448	1	0	1	1	0	0	KIAA0556	KIAA0556
hsa-miR-448	1	0	1	0	1	1	THAP2	THAP domain containing, apoptosis associated protein 2
hsa-miR-448	1	0	1	1	1	1	ALDH3A2	aldehyde dehydrogenase 3 family, member A2
hsa-miR-448	1	0	0	1	0	0	NEUROD4	neuronal differentiation 4
hsa-miR-448	1	0	1	0	1	1	MLL2	myeloid/lymphoid or mixed-lineage leukemia 2
hsa-miR-448	1	0	1	1	1	1	PHF3	PHD finger protein 3
hsa-miR-448	1	0	1	1	1	1	KCNIP4	Kv channel interacting protein 4
hsa-miR-448	1	0	1	1	1	1	MYH3	myosin, heavy chain 3, skeletal muscle, embryonic
hsa-miR-448	1	0	1	1	1	1	SP3	Sp3 transcription factor
hsa-miR-448	1	0	1	1	1	1	LARP1B	La ribonucleoprotein domain family, member 1B
hsa-miR-448	1	0	1	1	1	1	FRMD4A	FERM domain containing 4A
hsa-miR-448	1	0	1	1	1	1	ATP2C1	ATPase, Ca++ transporting, type 2C, member 1
hsa-miR-448	1	0	1	0	1	1	VAMP2	vesicle-associated membrane protein 2 (synaptobrevin 2)
hsa-miR-448	1	0	1	1	1	1	TCEAL1	transcription elongation factor A (SII)-like 1
hsa-miR-448	1	0	1	1	1	1	EGR3	early growth response 3
hsa-miR-448	1	0	1	1	1	1	CTTN	cortactin
hsa-miR-448	1	0	1	1	0	0	PRKCZ	protein kinase C, zeta
hsa-miR-448	1	0	1	1	1	1	ZBTB7A	zinc finger and BTB domain containing 7A
hsa-miR-448	1	0	1	1	1	1	CXCL12	chemokine (C-X-C motif) ligand 12
hsa-miR-448	1	0	1	1	0	0	UBE2Z	ubiquitin-conjugating enzyme E2Z
hsa-miR-448	1	0	1	0	0	0	BAHCC1	BAH domain and coiled-coil containing 1
hsa-miR-448	1	0	1	1	1	1	YTHDC1	YTH domain containing 1
hsa-miR-448	1	0	1	1	1	1	AMMECR1	Alport syndrome, mental retardation, midface hypoplasia and elliptocytosis chromosomal region gene 1
hsa-miR-448	1	0	1	0	1	1	TRHDE	thyrotropin-releasing hormone degrading enzyme
hsa-miR-448	1	0	1	1	1	1	USP31	ubiquitin specific peptidase 31
hsa-miR-448	1	0	1	1	0	0	STXBP5L	syntaxin binding protein 5-like
hsa-miR-448	1	0	1	0	1	1	VAMP3	vesicle-associated membrane protein 3 (cellubrevin)
hsa-miR-448	1	0	1	1	1	1	JHDM1D	jumonji C domain containing histone demethylase 1 homolog D (S. cerevisiae)
hsa-miR-448	1	0	1	1	1	1	ANKRD13C	ankyrin repeat domain 13C
hsa-miR-448	1	0	1	0	1	1	KRAS	v-Ki-ras2 Kirsten rat sarcoma viral oncogene homolog
hsa-miR-448	1	0	1	1	1	1	SSBP3	single stranded DNA binding protein 3
hsa-miR-448	1	0	1	1	1	1	KCNA6	potassium voltage-gated channel, shaker-related subfamily, member 6
hsa-miR-448	1	0	1	0	1	1	PCDHGC5	protocadherin gamma subfamily C, 5
hsa-miR-448	1	0	1	0	1	1	NCAM1	neural cell adhesion molecule 1
hsa-miR-448	1	0	1	1	1	1	UBL3	ubiquitin-like 3
hsa-miR-448	1	0	1	1	1	1	NAV2	neuron navigator 2
hsa-miR-448	1	0	1	1	1	1	ZDHHC2	zinc finger, DHHC-type containing 2
hsa-miR-448	1	0	1	1	1	1	NLGN1	neuroligin 1
hsa-miR-448	1	0	1	1	1	1	LRRC57	leucine rich repeat containing 57
hsa-miR-448	1	0	1	0	1	1	PCDHGC3	protocadherin gamma subfamily C, 3
hsa-miR-448	1	0	1	1	1	1	HECTD2	HECT domain containing E3 ubiquitin protein ligase 2
hsa-miR-448	1	0	1	0	1	1	DCP2	DCP2 decapping enzyme homolog (S. cerevisiae)
hsa-miR-448	1	0	1	0	1	1	ZFHX4	zinc finger homeobox 4
hsa-miR-448	1	0	1	1	1	1	FRS2	fibroblast growth factor receptor substrate 2
hsa-miR-448	1	0	1	1	1	1	PITPNB	phosphatidylinositol transfer protein, beta
hsa-miR-448	1	0	1	1	1	1	JAK1	Janus kinase 1
hsa-miR-448	1	0	1	1	1	1	DBC1	deleted in bladder cancer 1
hsa-miR-448	1	0	1	1	1	1	MFHAS1	malignant fibrous histiocytoma amplified sequence 1
hsa-miR-448	1	0	1	1	1	1	PHKB	phosphorylase kinase, beta
hsa-miR-448	1	0	1	0	1	1	RTN4RL1	reticulon 4 receptor-like 1
hsa-miR-448	1	0	1	0	1	1	CAPRIN1	cell cycle associated protein 1
hsa-miR-448	1	0	1	1	1	1	NAA50	N(alpha)-acetyltransferase 50, NatE catalytic subunit
hsa-miR-448	1	0	1	1	1	1	ASB8	ankyrin repeat and SOCS box containing 8
hsa-miR-448	1	0	1	1	1	1	SERBP1	SERPINE1 mRNA binding protein 1
hsa-miR-448	1	0	1	1	1	1	ZNF521	zinc finger protein 521
hsa-miR-448	1	0	1	1	1	1	DDIT4	DNA-damage-inducible transcript 4
hsa-miR-448	1	0	1	0	1	1	TNRC6B	trinucleotide repeat containing 6B
hsa-miR-448	1	0	1	1	1	1	MED13L	mediator complex subunit 13-like
hsa-miR-448	1	0	1	0	1	1	SMURF1	SMAD specific E3 ubiquitin protein ligase 1
hsa-miR-448	1	0	1	1	1	1	NPTN	neuroplastin
hsa-miR-448	1	0	1	0	1	1	UBE2G1	ubiquitin-conjugating enzyme E2G 1
hsa-miR-448	1	0	1	1	1	1	ZFYVE16	zinc finger, FYVE domain containing 16
hsa-miR-448	1	0	1	1	1	1	CHD9	chromodomain helicase DNA binding protein 9
hsa-miR-448	1	0	1	1	1	1	PRUNE2	prune homolog 2 (Drosophila)
hsa-miR-448	1	0	1	0	1	1	PTPRT	protein tyrosine phosphatase, receptor type, T
hsa-miR-448	1	0	1	0	1	1	KIAA0408	KIAA0408
hsa-miR-448	1	0	1	1	1	1	PPIP5K2	diphosphoinositol pentakisphosphate kinase 2
hsa-miR-448	1	0	1	0	1	1	VPS13D	vacuolar protein sorting 13 homolog D (S. cerevisiae)
hsa-miR-448	0	0	1	1	1	1	NEU3	sialidase 3 (membrane sialidase)
hsa-miR-448	1	0	1	1	1	1	NRXN1	neurexin 1
hsa-miR-448	1	0	1	1	1	1	KIF1B	kinesin family member 1B
hsa-miR-448	1	0	1	0	1	1	CHST15	carbohydrate (N-acetylgalactosamine 4-sulfate 6-O) sulfotransferase 15
hsa-miR-448	1	0	1	1	1	1	SLC4A7	solute carrier family 4, sodium bicarbonate cotransporter, member 7
hsa-miR-448	1	0	1	1	1	1	HIPK1	homeodomain interacting protein kinase 1
hsa-miR-448	1	0	1	1	0	0	SMCHD1	structural maintenance of chromosomes flexible hinge domain containing 1
hsa-miR-448	1	0	1	0	1	1	DOCK4	dedicator of cytokinesis 4
hsa-miR-448	1	0	1	1	1	1	DNM3	dynamin 3
hsa-miR-448	0	0	1	0	1	1	RASGRP3	RAS guanyl releasing protein 3 (calcium and DAG-regulated)
hsa-miR-448	0	0	1	1	1	1	MAU2	MAU2 chromatid cohesion factor homolog (C. elegans)
hsa-miR-448	0	0	1	1	1	1	WDR47	WD repeat domain 47
hsa-miR-448	1	0	1	1	1	1	ARHGEF15	Rho guanine nucleotide exchange factor (GEF) 15
hsa-miR-448	1	0	1	1	1	1	RNMT	RNA (guanine-7-) methyltransferase
hsa-miR-448	1	0	1	0	0	0	DTX4	deltex homolog 4 (Drosophila)
hsa-miR-448	1	0	1	1	1	1	RGL1	ral guanine nucleotide dissociation stimulator-like 1
hsa-miR-448	0	0	1	1	1	1	TBC1D30	TBC1 domain family, member 30
hsa-miR-448	1	0	1	1	1	1	PALLD	palladin, cytoskeletal associated protein
hsa-miR-448	1	0	1	1	0	0	KIAA1045	KIAA1045
hsa-miR-448	0	0	1	1	1	1	SETD1B	SET domain containing 1B
hsa-miR-448	1	0	1	1	1	1	SPIRE1	spire homolog 1 (Drosophila)
hsa-miR-448	1	0	1	0	1	1	SRGAP3	SLIT-ROBO Rho GTPase activating protein 3
hsa-miR-448	1	0	1	1	0	0	PPM1H	protein phosphatase, Mg2+/Mn2+ dependent, 1H
hsa-miR-448	1	0	1	1	0	0	KIAA1210	KIAA1210
hsa-miR-448	0	0	1	1	1	1	COPS7A	COP9 constitutive photomorphogenic homolog subunit 7A (Arabidopsis)
hsa-miR-448	0	0	1	1	1	1	TCF7L2	transcription factor 7-like 2 (T-cell specific, HMG-box)
hsa-miR-448	1	0	1	0	1	1	KCTD16	potassium channel tetramerisation domain containing 16
hsa-miR-448	1	0	1	1	1	1	HACE1	HECT domain and ankyrin repeat containing E3 ubiquitin protein ligase 1
hsa-miR-448	1	0	1	1	1	1	TAOK1	TAO kinase 1
hsa-miR-448	1	0	1	1	1	1	FAM135A	family with sequence similarity 135, member A
hsa-miR-448	1	0	1	1	1	1	BAZ2B	bromodomain adjacent to zinc finger domain, 2B
hsa-miR-448	1	0	1	0	1	1	SEMA6D	sema domain, transmembrane domain (TM), and cytoplasmic domain, (semaphorin) 6D
hsa-miR-448	0	0	1	0	0	0	NYAP2	neuronal tyrosine-phosphorylated phosphoinositide-3-kinase adaptor 2
hsa-miR-448	1	0	1	1	1	1	USP28	ubiquitin specific peptidase 28
hsa-miR-448	1	0	1	0	1	1	LMO3	LIM domain only 3 (rhombotin-like 2)
hsa-miR-448	1	0	1	1	1	1	HIVEP3	human immunodeficiency virus type I enhancer binding protein 3
hsa-miR-448	0	0	1	0	1	1	ZSWIM6	zinc finger, SWIM-type containing 6
hsa-miR-448	1	0	1	1	1	1	ZNF532	zinc finger protein 532
hsa-miR-448	1	0	1	1	1	1	SNX3	sorting nexin 3
hsa-miR-448	0	0	1	0	1	1	SETD5	SET domain containing 5
hsa-miR-448	0	0	1	1	1	1	SPEF2	sperm flagellar 2
hsa-miR-448	1	0	1	1	1	1	IKZF4	IKAROS family zinc finger 4 (Eos)
hsa-miR-448	1	0	1	1	1	1	LCOR	ligand dependent nuclear receptor corepressor
hsa-miR-448	1	0	1	1	1	1	AHCTF1	AT hook containing transcription factor 1
hsa-miR-448	0	0	1	0	0	0	MYSM1	Myb-like, SWIRM and MPN domains 1
hsa-miR-448	1	0	1	1	1	1	SH3TC2	SH3 domain and tetratricopeptide repeats 2
hsa-miR-448	0	0	1	0	1	1	RASSF8	Ras association (RalGDS/AF-6) domain family (N-terminal) member 8
hsa-miR-448	1	0	1	1	1	1	KCNMA1	potassium large conductance calcium-activated channel, subfamily M, alpha member 1
hsa-miR-448	0	0	1	1	1	1	FN1	fibronectin 1
hsa-miR-448	1	0	1	1	1	1	SHC1	SHC (Src homology 2 domain containing) transforming protein 1
hsa-miR-448	1	0	1	1	1	1	DAPK1	death-associated protein kinase 1
hsa-miR-448	0	0	1	1	0	0	TNNI3K	TNNI3 interacting kinase
hsa-miR-448	1	0	1	1	1	1	PCCB	propionyl CoA carboxylase, beta polypeptide
hsa-miR-448	1	0	1	1	1	1	SYNCRIP	synaptotagmin binding, cytoplasmic RNA interacting protein
hsa-miR-448	1	0	1	0	1	1	PLAG1	pleiomorphic adenoma gene 1
hsa-miR-448	1	0	1	0	1	1	DPYSL2	dihydropyrimidinase-like 2
hsa-miR-448	1	0	1	1	1	1	EPHA7	EPH receptor A7
hsa-miR-448	1	0	1	1	1	1	TWF1	twinfilin, actin-binding protein, homolog 1 (Drosophila)
hsa-miR-448	1	0	1	1	1	1	LIMA1	LIM domain and actin binding 1
hsa-miR-448	0	0	1	1	0	0	EIF4E2	eukaryotic translation initiation factor 4E family member 2
hsa-miR-448	0	0	1	1	1	1	GPM6B	glycoprotein M6B
hsa-miR-448	1	0	1	1	1	1	CTAGE5	CTAGE family, member 5
hsa-miR-448	1	0	1	1	1	1	PDLIM5	PDZ and LIM domain 5
hsa-miR-448	1	0	1	1	1	1	HNRNPK	heterogeneous nuclear ribonucleoprotein K
hsa-miR-448	1	0	1	1	1	1	IPO8	importin 8
hsa-miR-448	1	0	1	1	1	1	ARHGEF3	Rho guanine nucleotide exchange factor (GEF) 3
hsa-miR-448	0	0	1	1	1	1	PTPRA	protein tyrosine phosphatase, receptor type, A
hsa-miR-448	0	0	1	1	1	1	KIF3A	kinesin family member 3A
hsa-miR-448	1	0	1	0	1	1	ADD3	adducin 3 (gamma)
hsa-miR-448	1	0	1	1	0	0	PPP2R5D	protein phosphatase 2, regulatory subunit B', delta
hsa-miR-448	1	0	1	1	1	1	NCOA3	nuclear receptor coactivator 3
hsa-miR-448	0	0	1	1	1	1	PLD1	phospholipase D1, phosphatidylcholine-specific
hsa-miR-448	0	0	1	1	1	1	CD55	CD55 molecule, decay accelerating factor for complement (Cromer blood group)
hsa-miR-448	1	0	1	1	1	1	SLC22A5	solute carrier family 22 (organic cation/carnitine transporter), member 5
hsa-miR-448	1	0	1	1	1	1	DLGAP2	discs, large (Drosophila) homolog-associated protein 2
hsa-miR-448	1	0	1	1	1	1	PCDH17	protocadherin 17
hsa-miR-448	1	0	1	1	1	1	POLQ	polymerase (DNA directed), theta
hsa-miR-448	1	0	1	1	1	1	CSE1L	CSE1 chromosome segregation 1-like (yeast)
hsa-miR-448	1	0	1	1	1	1	SHOC2	soc-2 suppressor of clear homolog (C. elegans)
hsa-miR-448	1	0	1	1	1	1	CTNND1	catenin (cadherin-associated protein), delta 1
hsa-miR-448	0	0	1	1	1	1	SC5DL	sterol-C5-desaturase (ERG3 delta-5-desaturase homolog, S. cerevisiae)-like
hsa-miR-448	0	0	1	0	0	0	ZNF880	zinc finger protein 880
hsa-miR-448	1	0	1	1	1	1	GLS	glutaminase
hsa-miR-448	1	0	1	0	1	1	CD164	CD164 molecule, sialomucin
hsa-miR-448	0	0	1	1	1	1	MSTO1	misato homolog 1 (Drosophila)
hsa-miR-448	0	0	1	1	1	1	SMC2	structural maintenance of chromosomes 2
hsa-miR-448	1	0	1	1	1	1	EDNRB	endothelin receptor type B
hsa-miR-448	1	0	1	1	1	1	CAB39	calcium binding protein 39
hsa-miR-448	1	0	1	1	1	1	SORBS1	sorbin and SH3 domain containing 1
hsa-miR-448	0	0	1	0	1	1	CLEC5A	C-type lectin domain family 5, member A
hsa-miR-448	0	0	1	0	1	1	LINC00493	long intergenic non-protein coding RNA 493
hsa-miR-448	1	0	1	1	1	1	C14orf129	chromosome 14 open reading frame 129
hsa-miR-448	1	0	1	1	1	1	USP15	ubiquitin specific peptidase 15
hsa-miR-448	1	0	1	1	1	1	ZNF202	zinc finger protein 202
hsa-miR-448	1	0	1	1	1	1	ANKRD13A	ankyrin repeat domain 13A
hsa-miR-448	0	0	1	0	1	1	PDP1	pyruvate dehyrogenase phosphatase catalytic subunit 1
hsa-miR-448	0	0	1	1	1	1	FAM114A2	family with sequence similarity 114, member A2
hsa-miR-448	1	0	1	1	1	1	MARK3	MAP/microtubule affinity-regulating kinase 3
hsa-miR-448	1	0	1	0	1	1	AMOTL2	angiomotin like 2
hsa-miR-448	1	0	1	1	1	1	C3orf18	chromosome 3 open reading frame 18
hsa-miR-448	0	0	1	0	1	1	SLC38A4	solute carrier family 38, member 4
hsa-miR-448	1	0	1	1	1	1	FAM49B	family with sequence similarity 49, member B
hsa-miR-448	0	0	1	0	0	0	ARL17A	ADP-ribosylation factor-like 17A
hsa-miR-448	1	0	1	1	1	1	SYDE1	synapse defective 1, Rho GTPase, homolog 1 (C. elegans)
hsa-miR-448	0	0	1	1	1	1	CSNK1A1	casein kinase 1, alpha 1
hsa-miR-448	0	0	1	1	1	1	CD28	CD28 molecule
hsa-miR-448	0	0	1	1	0	0	NYX	nyctalopin
hsa-miR-448	1	0	1	1	1	1	ELF2	E74-like factor 2 (ets domain transcription factor)
hsa-miR-448	1	0	1	1	1	1	RBM47	RNA binding motif protein 47
hsa-miR-448	1	0	1	1	1	1	SH3GLB1	SH3-domain GRB2-like endophilin B1
hsa-miR-448	1	0	1	1	1	1	PUM2	pumilio homolog 2 (Drosophila)
hsa-miR-448	0	0	1	1	1	1	CYP3A43	cytochrome P450, family 3, subfamily A, polypeptide 43
hsa-miR-448	1	0	1	1	1	1	METTL10	methyltransferase like 10
hsa-miR-448	1	0	1	1	1	1	CPEB1	cytoplasmic polyadenylation element binding protein 1
hsa-miR-448	0	0	1	1	1	1	FCRLA	Fc receptor-like A
hsa-miR-448	0	0	1	1	1	1	RERG	RAS-like, estrogen-regulated, growth inhibitor
hsa-miR-448	1	0	1	0	1	1	USP32	ubiquitin specific peptidase 32
hsa-miR-448	1	0	1	1	1	1	BBC3	BCL2 binding component 3
hsa-miR-448	1	0	1	1	1	1	CASD1	CAS1 domain containing 1
hsa-miR-448	1	0	1	1	1	1	LARP4	La ribonucleoprotein domain family, member 4
hsa-miR-448	1	0	1	1	1	1	RBFOX1	RNA binding protein, fox-1 homolog (C. elegans) 1
hsa-miR-448	1	0	1	1	1	1	CACNB2	calcium channel, voltage-dependent, beta 2 subunit
hsa-miR-448	0	0	1	1	1	1	LGI1	leucine-rich, glioma inactivated 1
hsa-miR-448	1	0	1	1	1	1	F3	coagulation factor III (thromboplastin, tissue factor)
hsa-miR-448	0	0	1	1	1	1	R3HCC1L	R3H domain and coiled-coil containing 1-like
hsa-miR-448	1	0	1	1	1	1	PTBP2	polypyrimidine tract binding protein 2
hsa-miR-448	1	0	1	0	1	1	DICER1	dicer 1, ribonuclease type III
hsa-miR-448	0	0	1	0	0	0	SNHG4	small nucleolar RNA host gene 4 (non-protein coding)
hsa-miR-448	1	0	1	1	1	1	SUCO	SUN domain containing ossification factor
hsa-miR-448	0	0	1	1	1	1	TCFL5	transcription factor-like 5 (basic helix-loop-helix)
hsa-miR-448	1	0	1	1	1	1	VAMP7	vesicle-associated membrane protein 7
hsa-miR-448	1	0	1	1	1	1	NAV3	neuron navigator 3
hsa-miR-448	1	0	1	1	1	1	PPP3CB	protein phosphatase 3, catalytic subunit, beta isozyme
hsa-miR-448	0	0	1	1	0	0	MBD1	methyl-CpG binding domain protein 1
hsa-miR-448	0	0	1	1	1	1	PHACTR3	phosphatase and actin regulator 3
hsa-miR-448	0	0	1	0	0	0	TUG1	taurine upregulated 1 (non-protein coding)
hsa-miR-448	1	0	1	1	1	1	ARHGAP12	Rho GTPase activating protein 12
hsa-miR-448	1	0	1	1	1	1	RIC8B	resistance to inhibitors of cholinesterase 8 homolog B (C. elegans)
hsa-miR-448	1	0	1	1	1	1	PTBP3	polypyrimidine tract binding protein 3
hsa-miR-448	1	0	1	1	1	1	ARMC8	armadillo repeat containing 8
hsa-miR-448	1	0	1	1	1	1	WDTC1	WD and tetratricopeptide repeats 1
hsa-miR-448	0	0	1	1	1	1	EXOC6	exocyst complex component 6
hsa-miR-448	0	0	1	1	1	1	FAM175A	family with sequence similarity 175, member A
hsa-miR-448	1	0	1	1	1	1	INSIG2	insulin induced gene 2
hsa-miR-448	1	0	1	1	1	1	SUN1	Sad1 and UNC84 domain containing 1
hsa-miR-448	0	0	1	1	1	1	DEPDC1	DEP domain containing 1
hsa-miR-448	1	0	1	0	0	0	ZNRF3	zinc and ring finger 3
hsa-miR-448	1	0	1	1	1	1	SMEK2	SMEK homolog 2, suppressor of mek1 (Dictyostelium)
hsa-miR-448	1	0	1	1	1	1	DERL1	derlin 1
hsa-miR-448	0	0	1	1	1	1	IPP	intracisternal A particle-promoted polypeptide
hsa-miR-448	0	0	1	1	1	1	NSUN7	NOP2/Sun domain family, member 7
hsa-miR-448	0	0	1	1	1	1	CXorf57	chromosome X open reading frame 57
hsa-miR-448	0	0	1	0	0	0	LOC286059	tumor necrosis factor receptor superfamily, member 10d, decoy with truncated death domain pseudogene
hsa-miR-448	0	0	1	1	1	1	METTL7A	methyltransferase like 7A
hsa-miR-448	1	0	1	1	1	1	DYRK2	dual-specificity tyrosine-(Y)-phosphorylation regulated kinase 2
hsa-miR-448	1	0	1	1	1	1	SLC35A3	solute carrier family 35 (UDP-N-acetylglucosamine (UDP-GlcNAc) transporter), member A3
hsa-miR-448	1	0	1	1	1	1	ABHD3	abhydrolase domain containing 3
hsa-miR-448	0	0	1	0	0	0	KIAA1671	KIAA1671
hsa-miR-448	1	0	1	1	1	1	TNRC6A	trinucleotide repeat containing 6A
hsa-miR-448	1	0	1	1	1	1	YPEL5	yippee-like 5 (Drosophila)
hsa-miR-448	1	0	1	1	0	0	UBXN7	UBX domain protein 7
hsa-miR-448	0	0	1	0	1	1	ZCCHC8	zinc finger, CCHC domain containing 8
hsa-miR-448	1	0	1	1	1	1	FOXP1	forkhead box P1
hsa-miR-448	0	0	1	1	1	1	MINA	MYC induced nuclear antigen
hsa-miR-448	0	0	1	1	1	1	KDM2B	lysine (K)-specific demethylase 2B
hsa-miR-448	1	0	1	0	1	1	ATP10D	ATPase, class V, type 10D
hsa-miR-448	0	0	1	1	1	1	DTL	denticleless E3 ubiquitin protein ligase homolog (Drosophila)
hsa-miR-448	1	0	1	1	1	1	KCTD15	potassium channel tetramerisation domain containing 15
hsa-miR-448	0	0	1	1	0	0	RTN4R	reticulon 4 receptor
hsa-miR-448	1	0	1	0	1	1	ZKSCAN1	zinc finger with KRAB and SCAN domains 1
hsa-miR-448	0	0	1	1	0	0	FGGY	FGGY carbohydrate kinase domain containing
hsa-miR-448	0	0	1	0	0	0	CHST9-AS1	CHST9 antisense RNA 1
hsa-miR-448	0	0	1	0	0	0	CASC2	cancer susceptibility candidate 2 (non-protein coding)
hsa-miR-448	1	0	1	1	1	1	TPM1	tropomyosin 1 (alpha)
hsa-miR-448	1	0	1	1	1	1	FRMD6	FERM domain containing 6
hsa-miR-448	0	0	1	1	0	0	IFT172	intraflagellar transport 172 homolog (Chlamydomonas)
hsa-miR-448	1	0	1	1	1	1	DIXDC1	DIX domain containing 1
hsa-miR-448	1	0	1	0	1	1	RNF165	ring finger protein 165
hsa-miR-448	1	0	1	1	1	1	SHISA5	shisa homolog 5 (Xenopus laevis)
hsa-miR-448	0	0	1	0	0	0	LOC654433	uncharacterized LOC654433
hsa-miR-448	1	0	1	1	1	1	SCAMP5	secretory carrier membrane protein 5
hsa-miR-448	0	0	1	0	0	0	LOC441204	uncharacterized LOC441204
hsa-miR-448	0	0	1	0	0	0	FLJ30901	uncharacterized protein FLJ30901
hsa-miR-448	1	0	1	1	1	1	SORBS2	sorbin and SH3 domain containing 2
hsa-miR-448	0	0	1	0	0	0	LOC255187	hCG1980447
hsa-miR-448	1	0	1	1	1	1	FOPNL	FGFR1OP N-terminal like
hsa-miR-448	1	0	1	0	1	1	RABGEF1	RAB guanine nucleotide exchange factor (GEF) 1
hsa-miR-448	0	0	1	1	0	0	BTN2A3P	butyrophilin, subfamily 2, member A3, pseudogene
hsa-miR-448	0	0	1	0	0	0	LOC157381	uncharacterized LOC157381
hsa-miR-448	1	0	1	1	1	1	ANKRD29	ankyrin repeat domain 29
hsa-miR-448	0	0	1	1	0	0	CERS5	ceramide synthase 5
hsa-miR-448	0	0	1	0	1	1	UHMK1	U2AF homology motif (UHM) kinase 1
hsa-miR-448	0	0	1	1	1	1	PDZRN3	PDZ domain containing ring finger 3
hsa-miR-448	0	0	1	1	0	0	NISCH	nischarin
hsa-miR-448	0	0	1	1	0	0	UBAC2	UBA domain containing 2
hsa-miR-448	0	0	1	1	0	0	PIGO	phosphatidylinositol glycan anchor biosynthesis, class O
hsa-miR-448	0	0	1	1	1	1	DYNC1I1	dynein, cytoplasmic 1, intermediate chain 1
hsa-miR-448	1	0	1	1	1	1	FRY	furry homolog (Drosophila)
hsa-miR-448	1	0	1	1	1	1	TSN	translin
hsa-miR-448	0	0	1	1	1	1	NRCAM	neuronal cell adhesion molecule
hsa-miR-448	1	0	1	1	1	1	GNG2	guanine nucleotide binding protein (G protein), gamma 2
hsa-miR-448	1	0	1	1	0	0	PRMT8	protein arginine methyltransferase 8
hsa-miR-448	1	0	1	1	1	1	DZIP1	DAZ interacting protein 1
hsa-miR-448	1	0	1	1	1	1	BANP	BTG3 associated nuclear protein
hsa-miR-448	1	0	1	1	1	1	MAP3K12	mitogen-activated protein kinase kinase kinase 12
hsa-miR-448	1	0	1	1	1	1	RCN1	reticulocalbin 1, EF-hand calcium binding domain
hsa-miR-448	0	0	1	1	1	1	SPOCK1	sparc/osteonectin, cwcv and kazal-like domains proteoglycan (testican) 1
hsa-miR-448	0	0	1	0	0	0	PART1	prostate androgen-regulated transcript 1 (non-protein coding)
hsa-miR-448	0	0	1	0	0	0	ZNF806	zinc finger protein 806
hsa-miR-448	1	0	1	1	1	1	SIAH1	siah E3 ubiquitin protein ligase 1
hsa-miR-448	1	0	1	0	1	1	GATAD2B	GATA zinc finger domain containing 2B
hsa-miR-448	1	0	1	0	1	1	NCOA7	nuclear receptor coactivator 7
hsa-miR-448	0	0	1	0	0	0	LINC00340	long intergenic non-protein coding RNA 340
hsa-miR-448	0	0	1	1	1	1	TMEM170A	transmembrane protein 170A
hsa-miR-448	1	0	1	1	1	1	TCF4	transcription factor 4
hsa-miR-448	1	0	1	1	1	1	ARHGEF7	Rho guanine nucleotide exchange factor (GEF) 7
hsa-miR-448	0	0	1	0	0	0	FLJ37798	uncharacterized LOC401264
hsa-miR-448	1	0	1	1	1	1	ANKRD46	ankyrin repeat domain 46
hsa-miR-448	1	0	1	1	1	1	CTNNB1	catenin (cadherin-associated protein), beta 1, 88kDa
hsa-miR-448	1	0	1	1	1	1	EPHB1	EPH receptor B1
hsa-miR-448	1	0	1	1	1	1	CNEP1R1	CTD nuclear envelope phosphatase 1 regulatory subunit 1
hsa-miR-448	0	0	1	0	0	0	LOC284577	uncharacterized LOC284577
hsa-miR-448	1	0	1	1	1	1	ANKRD10	ankyrin repeat domain 10
hsa-miR-448	1	0	1	0	1	1	CLIC4	chloride intracellular channel 4
hsa-miR-448	1	0	1	1	1	1	FAM98A	family with sequence similarity 98, member A
hsa-miR-448	0	0	1	0	0	0	ZNF300P1	zinc finger protein 300 pseudogene 1
hsa-miR-448	1	0	1	0	1	1	THRB	thyroid hormone receptor, beta
hsa-miR-448	1	0	1	0	0	0	PID1	phosphotyrosine interaction domain containing 1
hsa-miR-448	1	0	1	1	1	1	ETS2	v-ets erythroblastosis virus E26 oncogene homolog 2 (avian)
hsa-miR-448	1	0	1	1	1	1	STIM2	stromal interaction molecule 2
hsa-miR-448	0	0	1	1	1	1	EXTL2	exostoses (multiple)-like 2
hsa-miR-448	1	0	1	1	1	1	KL	klotho
hsa-miR-448	1	0	1	1	1	1	TMEM185A	transmembrane protein 185A
hsa-miR-448	0	0	1	0	0	0	LINC00293	long intergenic non-protein coding RNA 293
hsa-miR-448	0	0	1	1	1	1	CBWD5	COBW domain containing 5
hsa-miR-448	1	0	1	1	1	1	HOOK1	hook homolog 1 (Drosophila)
hsa-miR-448	0	0	1	1	1	1	ATP9B	ATPase, class II, type 9B
hsa-miR-448	1	0	1	1	1	1	GATM	glycine amidinotransferase (L-arginine:glycine amidinotransferase)
hsa-miR-448	1	0	1	1	1	1	NDFIP2	Nedd4 family interacting protein 2
hsa-miR-448	0	0	1	1	1	1	UPP2	uridine phosphorylase 2
hsa-miR-448	1	0	1	1	1	1	CRMP1	collapsin response mediator protein 1
hsa-miR-448	0	0	1	0	1	1	EML5	echinoderm microtubule associated protein like 5
hsa-miR-448	1	0	1	1	1	1	SIK3	SIK family kinase 3
hsa-miR-448	0	0	1	1	1	1	DNAJC24	DnaJ (Hsp40) homolog, subfamily C, member 24
hsa-miR-448	0	0	1	1	1	1	SLC13A3	solute carrier family 13 (sodium-dependent dicarboxylate transporter), member 3
hsa-miR-448	0	0	1	0	0	0	LGALS17A	Charcot-Leyden crystal protein pseudogene
hsa-miR-448	1	0	1	1	1	1	SMAP1	small ArfGAP 1
hsa-miR-448	1	0	1	1	1	1	FAM122B	family with sequence similarity 122B
hsa-miR-448	0	0	1	0	0	0	LINC00282	long intergenic non-protein coding RNA 282
hsa-miR-448	0	0	1	0	0	0	LOC728716	uncharacterized LOC728716
hsa-miR-448	1	0	1	1	1	1	HARS	histidyl-tRNA synthetase
hsa-miR-448	1	0	1	1	0	0	GXYLT1	glucoside xylosyltransferase 1
hsa-miR-448	0	0	1	0	1	1	PRELID2	PRELI domain containing 2
hsa-miR-448	1	0	1	1	1	1	CTGF	connective tissue growth factor
hsa-miR-448	1	0	1	1	1	1	IGFBP3	insulin-like growth factor binding protein 3
hsa-miR-448	1	0	1	1	1	1	DENND5B	DENN/MADD domain containing 5B
hsa-miR-448	1	0	1	1	1	1	MACROD2	MACRO domain containing 2
hsa-miR-448	1	0	1	1	1	1	KALRN	kalirin, RhoGEF kinase
hsa-miR-448	0	0	1	1	0	0	C20orf141	chromosome 20 open reading frame 141
hsa-miR-448	0	0	1	1	0	0	FSIP2	fibrous sheath interacting protein 2
hsa-miR-448	1	0	1	0	1	1	PLXNA1	plexin A1
hsa-miR-448	1	0	1	1	0	0	ATXN7L3	ataxin 7-like 3
hsa-miR-448	1	0	1	1	1	1	PTPRB	protein tyrosine phosphatase, receptor type, B
hsa-miR-448	1	0	1	1	1	1	CSRNP3	cysteine-serine-rich nuclear protein 3
hsa-miR-448	0	0	1	0	1	1	LOC388942	uncharacterized LOC388942
hsa-miR-448	1	0	1	1	0	0	SPEG	SPEG complex locus
hsa-miR-448	0	0	1	1	1	1	ZFYVE28	zinc finger, FYVE domain containing 28
hsa-miR-448	1	0	1	1	1	1	DMXL1	Dmx-like 1
hsa-miR-448	0	0	1	1	0	0	HS3ST5	heparan sulfate (glucosamine) 3-O-sulfotransferase 5
hsa-miR-448	1	0	1	1	1	1	CLIP1	CAP-GLY domain containing linker protein 1
hsa-miR-448	1	0	1	1	1	1	EIF4E3	eukaryotic translation initiation factor 4E family member 3
hsa-miR-448	0	0	1	1	1	1	MOBP	myelin-associated oligodendrocyte basic protein
hsa-miR-448	1	0	1	1	1	1	MFSD6	major facilitator superfamily domain containing 6
hsa-miR-448	1	0	1	0	1	1	ADIPOR2	adiponectin receptor 2
hsa-miR-448	0	0	1	1	1	1	DOCK9	dedicator of cytokinesis 9
hsa-miR-448	1	0	1	1	1	1	CTNNA2	catenin (cadherin-associated protein), alpha 2
hsa-miR-448	0	0	1	0	0	0	LOC285812	uncharacterized LOC285812
hsa-miR-448	1	0	1	1	0	0	PEAK1	NKF3 kinase family member
hsa-miR-448	0	0	1	1	0	0	IQUB	IQ motif and ubiquitin domain containing
hsa-miR-448	1	0	1	1	1	1	R3HDM1	R3H domain containing 1
hsa-miR-448	1	0	1	0	1	1	FNDC3B	fibronectin type III domain containing 3B
hsa-miR-448	0	0	1	0	0	0	LRRC9	leucine rich repeat containing 9
hsa-miR-448	1	0	1	1	1	1	NSUN4	NOP2/Sun domain family, member 4
hsa-miR-448	1	0	1	0	1	1	ESRRG	estrogen-related receptor gamma
hsa-miR-448	0	0	1	0	1	1	GALNT13	UDP-N-acetyl-alpha-D-galactosamine:polypeptide N-acetylgalactosaminyltransferase 13 (GalNAc-T13)
hsa-miR-448	0	0	1	1	1	1	RNF19B	ring finger protein 19B
hsa-miR-448	0	0	1	1	0	0	ZNF730	zinc finger protein 730
hsa-miR-448	0	0	1	1	1	1	CRISP3	cysteine-rich secretory protein 3
hsa-miR-448	1	0	1	1	1	1	CYYR1	cysteine/tyrosine-rich 1
hsa-miR-448	0	0	1	0	0	0	RRN3P2	RNA polymerase I transcription factor homolog (S. cerevisiae) pseudogene 2
hsa-miR-448	1	0	1	1	0	0	ABLIM3	actin binding LIM protein family, member 3
hsa-miR-448	1	0	1	1	1	1	NCOA1	nuclear receptor coactivator 1
hsa-miR-448	0	0	1	1	0	0	NEK7	NIMA (never in mitosis gene a)-related kinase 7
hsa-miR-448	1	0	1	1	1	1	RIF1	RAP1 interacting factor homolog (yeast)
hsa-miR-448	1	0	1	1	1	1	GNB5	guanine nucleotide binding protein (G protein), beta 5
hsa-miR-448	1	0	1	1	1	1	ARF6	ADP-ribosylation factor 6
hsa-miR-448	0	0	1	1	0	0	FAM153B	family with sequence similarity 153, member B
hsa-miR-448	0	0	1	1	1	1	ARIH1	ariadne homolog, ubiquitin-conjugating enzyme E2 binding protein, 1 (Drosophila)
hsa-miR-448	0	0	1	1	1	1	RHOT1	ras homolog family member T1
hsa-miR-448	1	0	1	0	1	1	DNAJC5	DnaJ (Hsp40) homolog, subfamily C, member 5
hsa-miR-448	0	0	1	1	1	1	UBE3D	ubiquitin protein ligase E3D
hsa-miR-448	0	0	1	1	1	1	ING3	inhibitor of growth family, member 3
hsa-miR-448	1	0	1	1	1	1	TMEFF1	transmembrane protein with EGF-like and two follistatin-like domains 1
hsa-miR-448	1	0	1	1	1	1	MIER1	mesoderm induction early response 1 homolog (Xenopus laevis)
hsa-miR-448	0	0	1	0	0	0	ZNF720	zinc finger protein 720
hsa-miR-448	0	0	1	1	0	0	LETM2	leucine zipper-EF-hand containing transmembrane protein 2
hsa-miR-448	0	0	1	1	1	1	EGFLAM	EGF-like, fibronectin type III and laminin G domains
hsa-miR-448	0	0	1	1	1	1	SRSF11	serine/arginine-rich splicing factor 11
hsa-miR-448	1	0	1	1	1	1	NFX1	nuclear transcription factor, X-box binding 1
hsa-miR-448	1	0	1	0	0	0	YLPM1	YLP motif containing 1
hsa-miR-448	1	0	1	0	1	1	FAM214A	family with sequence similarity 214, member A
hsa-miR-448	1	0	1	1	1	1	RNF180	ring finger protein 180
hsa-miR-448	1	0	1	1	0	0	PTAR1	protein prenyltransferase alpha subunit repeat containing 1
hsa-miR-448	0	0	1	1	1	1	INPP5B	inositol polyphosphate-5-phosphatase, 75kDa
hsa-miR-448	0	0	1	1	1	1	CCDC132	coiled-coil domain containing 132
hsa-miR-448	0	0	1	1	1	1	ZMYM6	zinc finger, MYM-type 6
hsa-miR-448	0	0	1	1	1	1	C12orf50	chromosome 12 open reading frame 50
hsa-miR-448	0	0	1	1	0	0	TMEM116	transmembrane protein 116
hsa-miR-448	0	0	1	1	1	1	SLC30A5	solute carrier family 30 (zinc transporter), member 5
hsa-miR-448	1	0	1	1	1	1	HERC2	HECT and RLD domain containing E3 ubiquitin protein ligase 2
hsa-miR-448	1	0	1	1	1	1	ANKRD12	ankyrin repeat domain 12
hsa-miR-448	0	0	1	1	1	1	C8orf34	chromosome 8 open reading frame 34
hsa-miR-448	1	0	1	1	1	1	BOLL	bol, boule-like (Drosophila)
hsa-miR-448	1	0	1	1	1	1	AP1AR	adaptor-related protein complex 1 associated regulatory protein
hsa-miR-448	1	0	1	0	1	1	PHYHIPL	phytanoyl-CoA 2-hydroxylase interacting protein-like
hsa-miR-448	0	0	1	1	0	0	ERAP2	endoplasmic reticulum aminopeptidase 2
hsa-miR-448	1	0	1	1	1	1	DUSP16	dual specificity phosphatase 16
hsa-miR-448	0	0	1	0	0	0	KGFLP1	fibroblast growth factor 7 pseudogene
hsa-miR-448	1	0	1	1	1	1	ANGPT1	angiopoietin 1
hsa-miR-448	1	0	1	1	1	1	LUZP2	leucine zipper protein 2
hsa-miR-448	0	0	1	1	0	0	NIF3L1	NIF3 NGG1 interacting factor 3-like 1 (S. cerevisiae)
hsa-miR-448	0	0	1	1	1	1	BCOR	BCL6 corepressor
hsa-miR-448	0	0	1	0	0	0	TAG	tumor antigen gene
hsa-miR-448	1	0	1	1	1	1	SSX2IP	synovial sarcoma, X breakpoint 2 interacting protein
hsa-miR-448	1	0	1	0	1	1	ANKRD28	ankyrin repeat domain 28
hsa-miR-448	1	0	1	1	1	1	ECT2	epithelial cell transforming sequence 2 oncogene
hsa-miR-448	1	0	1	0	1	1	NHS	Nance-Horan syndrome (congenital cataracts and dental anomalies)
hsa-miR-448	1	0	1	1	1	1	ARHGAP20	Rho GTPase activating protein 20
hsa-miR-448	1	0	1	1	0	0	ZNF594	zinc finger protein 594
hsa-miR-448	0	0	1	1	1	1	EHBP1	EH domain binding protein 1
hsa-miR-448	1	0	1	1	1	1	MOG	myelin oligodendrocyte glycoprotein
hsa-miR-448	0	0	1	0	1	1	RAB18	RAB18, member RAS oncogene family
hsa-miR-448	1	0	1	1	1	1	PLCH1	phospholipase C, eta 1
hsa-miR-448	1	0	1	1	1	1	MCHR1	melanin-concentrating hormone receptor 1
hsa-miR-448	0	0	1	1	1	1	RHD	Rh blood group, D antigen
hsa-miR-448	1	0	1	1	1	1	QKI	QKI, KH domain containing, RNA binding
hsa-miR-448	1	0	1	1	1	1	MYB	v-myb myeloblastosis viral oncogene homolog (avian)
hsa-miR-448	1	0	1	1	1	1	PCDH11X	protocadherin 11 X-linked
hsa-miR-448	1	0	1	1	0	0	TAF4B	TAF4b RNA polymerase II, TATA box binding protein (TBP)-associated factor, 105kDa
hsa-miR-448	1	0	1	1	1	1	ZNF449	zinc finger protein 449
hsa-miR-448	1	0	1	0	1	1	RASGRP1	RAS guanyl releasing protein 1 (calcium and DAG-regulated)
hsa-miR-448	1	0	1	1	1	1	AMOT	angiomotin
hsa-miR-448	1	0	1	1	1	1	NEK6	NIMA (never in mitosis gene a)-related kinase 6
hsa-miR-448	1	0	1	0	1	1	FAM46A	family with sequence similarity 46, member A
hsa-miR-448	1	0	1	1	1	1	CPSF6	cleavage and polyadenylation specific factor 6, 68kDa
hsa-miR-448	0	0	1	1	1	1	ENOPH1	enolase-phosphatase 1
hsa-miR-448	0	0	1	1	1	1	MPPE1	metallophosphoesterase 1
hsa-miR-448	1	0	1	1	1	1	RIMS3	regulating synaptic membrane exocytosis 3
hsa-miR-448	0	0	1	1	1	1	REXO2	REX2, RNA exonuclease 2 homolog (S. cerevisiae)
hsa-miR-448	0	0	1	0	0	0	MGC13053	uncharacterized MGC13053
hsa-miR-448	0	0	1	1	0	0	NFKBID	nuclear factor of kappa light polypeptide gene enhancer in B-cells inhibitor, delta
hsa-miR-448	0	0	1	1	1	1	TMEM30A	transmembrane protein 30A
hsa-miR-448	0	0	1	1	0	0	PANK2	pantothenate kinase 2
hsa-miR-448	0	0	1	1	1	1	WSCD1	WSC domain containing 1
hsa-miR-448	1	0	1	1	1	1	ATP6AP2	ATPase, H+ transporting, lysosomal accessory protein 2
hsa-miR-448	1	0	1	1	1	1	ZFAND5	zinc finger, AN1-type domain 5
hsa-miR-448	1	0	1	1	1	1	IDH1	isocitrate dehydrogenase 1 (NADP+), soluble
hsa-miR-448	1	0	1	1	1	1	YY1	YY1 transcription factor
hsa-miR-448	1	0	1	1	1	1	ETF1	eukaryotic translation termination factor 1
hsa-miR-448	1	0	1	1	1	1	PAPOLA	poly(A) polymerase alpha
hsa-miR-448	0	0	1	0	0	0	MGC21881	uncharacterized locus MGC21881
hsa-miR-448	0	0	1	1	1	1	C8orf33	chromosome 8 open reading frame 33
hsa-miR-448	0	0	1	0	0	0	KLHL15	kelch-like 15 (Drosophila)
hsa-miR-448	1	0	1	1	1	1	ZBTB38	zinc finger and BTB domain containing 38
hsa-miR-448	1	0	1	1	1	1	ZNF512	zinc finger protein 512
hsa-miR-448	0	0	1	0	1	1	ZNF37A	zinc finger protein 37A
hsa-miR-448	0	0	1	1	1	1	MYL12A	myosin, light chain 12A, regulatory, non-sarcomeric
hsa-miR-448	1	0	1	0	1	1	CYBRD1	cytochrome b reductase 1
hsa-miR-448	1	0	1	1	1	1	NRF1	nuclear respiratory factor 1
hsa-miR-448	0	0	1	1	1	1	CASP8	caspase 8, apoptosis-related cysteine peptidase
hsa-miR-448	0	0	1	1	0	0	ZDHHC6	zinc finger, DHHC-type containing 6
hsa-miR-448	0	0	1	1	1	1	PARP9	poly (ADP-ribose) polymerase family, member 9
hsa-miR-448	0	0	1	1	1	1	RDH11	retinol dehydrogenase 11 (all-trans/9-cis/11-cis)
hsa-miR-448	1	0	1	0	1	1	SLC19A2	solute carrier family 19 (thiamine transporter), member 2
hsa-miR-448	0	0	1	0	0	0	IQCF3	IQ motif containing F3
hsa-miR-448	0	0	1	1	1	1	C10orf88	chromosome 10 open reading frame 88
hsa-miR-448	1	0	1	1	0	0	TET3	tet methylcytosine dioxygenase 3
hsa-miR-448	0	0	1	1	1	1	PDE1C	phosphodiesterase 1C, calmodulin-dependent 70kDa
hsa-miR-448	0	0	1	1	1	1	TLR4	toll-like receptor 4
hsa-miR-448	0	0	1	0	0	0	RNF216P1	ring finger protein 216 pseudogene 1
hsa-miR-448	0	0	1	1	1	1	RHBDD1	rhomboid domain containing 1
hsa-miR-448	0	0	1	0	0	0	TRGV7	T cell receptor gamma variable 7 (pseudogene)
hsa-miR-448	0	0	1	1	1	1	C1orf101	chromosome 1 open reading frame 101
hsa-miR-448	1	0	1	1	1	1	HTR2C	5-hydroxytryptamine (serotonin) receptor 2C, G protein-coupled
hsa-miR-448	0	0	1	1	0	0	FCRL3	Fc receptor-like 3
hsa-miR-448	0	0	1	1	0	0	TOMM5	translocase of outer mitochondrial membrane 5 homolog (yeast)
hsa-miR-448	0	0	1	1	1	1	SEMA3D	sema domain, immunoglobulin domain (Ig), short basic domain, secreted, (semaphorin) 3D
hsa-miR-448	1	0	1	1	1	1	ATRNL1	attractin-like 1
hsa-miR-448	1	0	1	1	1	1	PPARGC1A	peroxisome proliferator-activated receptor gamma, coactivator 1 alpha
hsa-miR-448	0	0	1	1	1	1	PIK3AP1	phosphoinositide-3-kinase adaptor protein 1
hsa-miR-448	0	0	1	1	1	1	TMEM117	transmembrane protein 117
hsa-miR-448	0	0	1	1	1	1	CTNNA3	catenin (cadherin-associated protein), alpha 3
hsa-miR-448	1	0	1	1	1	1	ADARB1	adenosine deaminase, RNA-specific, B1
hsa-miR-448	0	0	1	1	1	1	ZNF197	zinc finger protein 197
hsa-miR-448	0	0	1	0	0	0	LOC729307	uncharacterized LOC729307
hsa-miR-448	0	0	1	0	0	0	ATP8B5P	ATPase, class I, type 8B, member 5, pseudogene
hsa-miR-448	1	0	1	1	1	1	RCOR3	REST corepressor 3
hsa-miR-448	0	0	1	0	0	0	C6orf228	chromosome 6 open reading frame 228
hsa-miR-448	1	0	1	1	1	1	RAB5B	RAB5B, member RAS oncogene family
hsa-miR-448	1	0	1	1	1	1	RHOBTB1	Rho-related BTB domain containing 1
hsa-miR-448	1	0	1	1	1	1	PPP2R2C	protein phosphatase 2, regulatory subunit B, gamma
hsa-miR-448	1	0	1	1	1	1	SECISBP2L	SECIS binding protein 2-like
hsa-miR-448	1	0	1	1	1	1	MAK	male germ cell-associated kinase
hsa-miR-448	0	0	1	1	1	1	IL20RB	interleukin 20 receptor beta
hsa-miR-448	1	0	1	1	1	1	FBXL16	F-box and leucine-rich repeat protein 16
hsa-miR-448	0	0	1	1	0	0	TNMD	tenomodulin
hsa-miR-448	0	0	1	1	1	1	ZNF337	zinc finger protein 337
hsa-miR-448	1	0	1	1	1	1	LPGAT1	lysophosphatidylglycerol acyltransferase 1
hsa-miR-448	0	0	1	0	0	0	FAM66C	family with sequence similarity 66, member C
hsa-miR-448	0	0	1	0	1	1	DKFZP434I0714	uncharacterized protein DKFZP434I0714
hsa-miR-448	1	0	1	1	1	1	ABCA1	ATP-binding cassette, sub-family A (ABC1), member 1
hsa-miR-448	0	0	1	1	1	1	EDA2R	ectodysplasin A2 receptor
hsa-miR-448	1	0	1	1	1	1	FAM120A	family with sequence similarity 120A
hsa-miR-448	1	0	1	0	1	1	DDX3Y	DEAD (Asp-Glu-Ala-Asp) box polypeptide 3, Y-linked
hsa-miR-448	1	0	1	1	1	1	NKAIN2	Na+/K+ transporting ATPase interacting 2
hsa-miR-448	0	0	1	1	0	0	TMEM171	transmembrane protein 171
hsa-miR-448	1	0	1	1	1	1	RAP2C	RAP2C, member of RAS oncogene family
hsa-miR-448	1	0	1	1	1	1	CTDSPL2	CTD (carboxy-terminal domain, RNA polymerase II, polypeptide A) small phosphatase like 2
hsa-miR-448	0	0	1	1	1	1	ARHGAP6	Rho GTPase activating protein 6
hsa-miR-448	0	0	1	1	1	1	CBLN2	cerebellin 2 precursor
hsa-miR-448	0	0	1	0	0	0	LOC339862	uncharacterized LOC339862
hsa-miR-448	0	0	1	1	1	1	TMEM139	transmembrane protein 139
hsa-miR-448	0	0	1	1	1	1	SNAPC3	small nuclear RNA activating complex, polypeptide 3, 50kDa
hsa-miR-448	1	0	1	1	1	1	IMPACT	Impact homolog (mouse)
hsa-miR-448	1	0	1	1	1	1	MIPOL1	mirror-image polydactyly 1
hsa-miR-448	0	0	1	0	0	0	LINC00642	long intergenic non-protein coding RNA 642
hsa-miR-448	1	0	1	1	1	1	MEIS1	Meis homeobox 1
hsa-miR-448	1	0	1	1	1	1	ACVR1	activin A receptor, type I
hsa-miR-448	1	0	1	1	0	0	TMEM131	transmembrane protein 131
hsa-miR-448	0	0	1	0	0	0	SRGAP2C	SLIT-ROBO Rho GTPase activating protein 2C
hsa-miR-448	1	0	1	0	1	1	YAF2	YY1 associated factor 2
hsa-miR-448	1	0	1	1	1	1	CTBP2	C-terminal binding protein 2
hsa-miR-448	1	0	1	1	1	1	UBXN2A	UBX domain protein 2A
hsa-miR-448	0	0	1	1	1	1	KIAA1328	KIAA1328
hsa-miR-448	1	0	1	1	1	1	C4orf19	chromosome 4 open reading frame 19
hsa-miR-448	0	0	1	0	0	0	INHBA-AS1	INHBA antisense RNA 1
hsa-miR-448	1	0	1	1	1	1	GALNT1	UDP-N-acetyl-alpha-D-galactosamine:polypeptide N-acetylgalactosaminyltransferase 1 (GalNAc-T1)
hsa-miR-448	1	0	1	0	1	1	ARID2	AT rich interactive domain 2 (ARID, RFX-like)
hsa-miR-448	1	0	1	1	1	1	PRR16	proline rich 16
hsa-miR-448	0	0	1	0	0	0	USP32P1	ubiquitin specific peptidase 32 pseudogene 1
hsa-miR-448	0	0	1	0	1	1	MYO3B	myosin IIIB
hsa-miR-448	0	0	1	0	0	0	LRRC48	leucine rich repeat containing 48
hsa-miR-448	0	0	1	0	0	0	LOC339622	uncharacterized LOC339622
hsa-miR-448	1	0	1	0	1	1	PCSK2	proprotein convertase subtilisin/kexin type 2
hsa-miR-448	0	0	1	0	0	0	LOC339240	keratin 17 pseudogene
hsa-miR-448	1	0	1	1	1	1	UNC13C	unc-13 homolog C (C. elegans)
hsa-miR-448	0	0	1	1	1	1	PCMTD2	protein-L-isoaspartate (D-aspartate) O-methyltransferase domain containing 2
hsa-miR-448	0	0	1	0	1	1	FAM13B	family with sequence similarity 13, member B
hsa-miR-448	1	0	1	1	1	1	ARPP21	cAMP-regulated phosphoprotein, 21kDa
hsa-miR-448	1	0	1	1	1	1	FAM123A	family with sequence similarity 123A
hsa-miR-448	1	0	1	0	1	1	HSPA12A	heat shock 70kDa protein 12A
hsa-miR-448	0	0	1	1	1	1	BCO2	beta-carotene oxygenase 2
hsa-miR-448	0	0	1	0	1	1	PDGFC	platelet derived growth factor C
hsa-miR-448	1	0	1	0	1	1	TNFAIP3	tumor necrosis factor, alpha-induced protein 3
hsa-miR-448	0	0	1	0	0	0	CDKL3	cyclin-dependent kinase-like 3
hsa-miR-448	1	0	1	1	1	1	ROCK1	Rho-associated, coiled-coil containing protein kinase 1
hsa-miR-448	0	0	1	1	1	1	RABGAP1L	RAB GTPase activating protein 1-like
hsa-miR-448	0	0	1	0	1	1	C11orf93	chromosome 11 open reading frame 93
hsa-miR-448	1	0	1	0	1	1	USP6NL	USP6 N-terminal like
hsa-miR-448	0	0	1	0	0	0	LOC338579	ankyrin repeat domain-containing protein 30B pseudogene
hsa-miR-448	0	0	1	0	0	0	LINC00347	long intergenic non-protein coding RNA 347
hsa-miR-448	0	0	1	0	1	1	C12orf74	chromosome 12 open reading frame 74
hsa-miR-448	0	0	1	0	0	0	LOC283914	uncharacterized LOC283914
hsa-miR-448	0	0	1	1	1	1	DOCK8	dedicator of cytokinesis 8
hsa-miR-448	1	0	1	1	1	1	PCYT1B	phosphate cytidylyltransferase 1, choline, beta
hsa-miR-448	1	0	1	1	1	1	SF3B1	splicing factor 3b, subunit 1, 155kDa
hsa-miR-448	0	0	1	0	0	0	LOC348120	uncharacterized LOC348120
hsa-miR-448	0	0	1	0	0	0	DPY19L2P4	dpy-19-like 2 pseudogene 4 (C. elegans)
hsa-miR-448	0	0	1	0	1	1	LOC338758	uncharacterized LOC338758
hsa-miR-448	1	0	1	1	1	1	BRD1	bromodomain containing 1
hsa-miR-448	1	0	1	1	1	1	SMARCE1	SWI/SNF related, matrix associated, actin dependent regulator of chromatin, subfamily e, member 1
hsa-miR-448	0	0	1	1	1	1	ZNF589	zinc finger protein 589
hsa-miR-448	0	0	1	0	0	0	LOC283038	uncharacterized LOC283038
hsa-miR-448	1	0	1	1	1	1	CLVS1	clavesin 1
hsa-miR-448	1	0	1	1	1	1	RECK	reversion-inducing-cysteine-rich protein with kazal motifs
hsa-miR-448	1	0	1	1	1	1	ZFP91	zinc finger protein 91 homolog (mouse)
hsa-miR-448	0	0	1	1	1	1	KDELC1	KDEL (Lys-Asp-Glu-Leu) containing 1
hsa-miR-448	1	0	1	1	1	1	RCC2	regulator of chromosome condensation 2
hsa-miR-448	1	0	1	1	1	1	KDM5C	lysine (K)-specific demethylase 5C
hsa-miR-448	1	0	1	1	1	1	KLHL28	kelch-like 28 (Drosophila)
hsa-miR-448	1	0	1	1	1	1	PRRG1	proline rich Gla (G-carboxyglutamic acid) 1
hsa-miR-448	0	0	1	0	1	1	GUCY1B3	guanylate cyclase 1, soluble, beta 3
hsa-miR-448	0	0	1	0	1	1	ASAP2	ArfGAP with SH3 domain, ankyrin repeat and PH domain 2
hsa-miR-448	0	0	1	1	1	1	GPATCH2	G patch domain containing 2
hsa-miR-448	1	0	1	1	1	1	UEVLD	UEV and lactate/malate dehyrogenase domains
hsa-miR-448	0	0	1	1	1	1	ZNF333	zinc finger protein 333
hsa-miR-448	1	0	1	1	1	1	MYLK	myosin light chain kinase
hsa-miR-448	1	0	1	1	1	1	STXBP5	syntaxin binding protein 5 (tomosyn)
hsa-miR-448	1	0	1	1	1	1	LMO4	LIM domain only 4
hsa-miR-448	0	0	1	0	0	0	LINC00052	long intergenic non-protein coding RNA 52
hsa-miR-448	1	0	1	1	1	1	ASPH	aspartate beta-hydroxylase
hsa-miR-448	0	0	1	0	0	0	PCP4L1	Purkinje cell protein 4 like 1
hsa-miR-448	1	0	1	1	1	1	SRPK2	SRSF protein kinase 2
hsa-miR-448	0	0	1	0	0	0	PTGER4P2	prostaglandin E receptor 4 (subtype EP4) pseudogene 2
hsa-miR-448	0	0	1	1	0	0	TRIM46	tripartite motif containing 46
hsa-miR-448	1	0	1	1	1	1	ANLN	anillin, actin binding protein
hsa-miR-448	0	0	1	1	1	1	CTXN3	cortexin 3
hsa-miR-448	0	0	1	0	0	0	LOC727849	golgin A2 pseudogene
hsa-miR-448	0	0	1	0	0	0	LOC727751	uncharacterized LOC727751
hsa-miR-448	0	0	1	0	0	0	AGSK1	golgin subfamily A member 2-like
hsa-miR-448	0	0	1	0	1	1	WDR27	WD repeat domain 27
hsa-miR-448	1	0	1	1	1	1	OPCML	opioid binding protein/cell adhesion molecule-like
hsa-miR-448	1	0	1	1	1	1	WNT5A	wingless-type MMTV integration site family, member 5A
hsa-miR-448	0	0	1	1	0	0	TSPY3	testis specific protein, Y-linked 3
hsa-miR-448	0	0	1	1	1	1	C3orf67	chromosome 3 open reading frame 67
hsa-miR-448	0	0	1	0	0	0	LOC554249	uncharacterized LOC554249
hsa-miR-448	0	0	1	0	1	1	LOC389043	uncharacterized LOC389043
hsa-miR-448	0	0	1	1	1	1	C1orf141	chromosome 1 open reading frame 141
hsa-miR-448	0	0	1	1	1	1	COBL	cordon-bleu homolog (mouse)
hsa-miR-448	0	0	1	1	0	0	HERC2P3	hect domain and RLD 2 pseudogene 3
hsa-miR-448	1	0	1	1	1	1	WARS	tryptophanyl-tRNA synthetase
hsa-miR-448	1	0	1	1	1	1	SYNJ1	synaptojanin 1
hsa-miR-448	0	0	1	1	1	1	TMEM52B	transmembrane protein 52B
hsa-miR-448	1	0	1	1	1	1	ZNF763	zinc finger protein 763
hsa-miR-448	1	0	1	1	1	1	PTPRD	protein tyrosine phosphatase, receptor type, D
hsa-miR-448	0	0	1	1	1	1	PAX4	paired box 4
hsa-miR-448	1	0	1	1	1	1	PNISR	PNN-interacting serine/arginine-rich protein
hsa-miR-448	0	0	1	1	1	1	TTN	titin
hsa-miR-448	1	0	1	0	1	1	DNAJC6	DnaJ (Hsp40) homolog, subfamily C, member 6
hsa-miR-448	1	0	1	1	1	1	ANO4	anoctamin 4
hsa-miR-448	1	0	1	1	1	1	TET2	tet methylcytosine dioxygenase 2
hsa-miR-448	0	0	1	1	1	1	ZNF621	zinc finger protein 621
hsa-miR-448	0	0	1	1	1	1	SLC8A3	solute carrier family 8 (sodium/calcium exchanger), member 3
hsa-miR-448	1	0	1	1	1	1	ITSN1	intersectin 1 (SH3 domain protein)
hsa-miR-448	1	0	1	1	1	1	ST18	suppression of tumorigenicity 18 (breast carcinoma) (zinc finger protein)
hsa-miR-448	0	0	1	1	0	0	PRDM5	PR domain containing 5
hsa-miR-448	1	0	1	1	1	1	ANK2	ankyrin 2, neuronal
hsa-miR-448	1	0	1	1	1	1	MEGF11	multiple EGF-like-domains 11
hsa-miR-448	0	0	1	0	1	1	PIK3C2G	phosphatidylinositol-4-phosphate 3-kinase, catalytic subunit type 2 gamma
hsa-miR-448	0	0	1	1	0	0	DZANK1	double zinc ribbon and ankyrin repeat domains 1
hsa-miR-448	0	0	1	0	0	0	FAM225B	family with sequence similarity 225, member B (non-protein coding)
hsa-miR-448	0	0	1	1	0	0	AGAP6	ArfGAP with GTPase domain, ankyrin repeat and PH domain 6
hsa-miR-448	1	0	1	1	1	1	CADPS	Ca++-dependent secretion activator
hsa-miR-448	0	0	1	1	0	0	CCDC144A	coiled-coil domain containing 144A
hsa-miR-448	0	0	1	1	1	1	UCHL5	ubiquitin carboxyl-terminal hydrolase L5
hsa-miR-448	0	0	1	1	1	1	PRKAR2A	protein kinase, cAMP-dependent, regulatory, type II, alpha
hsa-miR-448	0	0	1	1	0	0	NDRG2	NDRG family member 2
hsa-miR-448	1	0	1	1	1	1	GOLGA5	golgin A5
hsa-miR-448	1	0	1	1	1	1	DLST	dihydrolipoamide S-succinyltransferase (E2 component of 2-oxo-glutarate complex)
hsa-miR-448	1	0	1	1	1	1	EIF5	eukaryotic translation initiation factor 5
hsa-miR-448	0	0	1	0	1	1	AP1S2	adaptor-related protein complex 1, sigma 2 subunit
hsa-miR-448	0	0	1	0	1	1	FEZ2	fasciculation and elongation protein zeta 2 (zygin II)
hsa-miR-448	0	0	1	0	1	1	GPX8	glutathione peroxidase 8 (putative)
hsa-miR-448	1	0	1	0	1	1	MTX3	metaxin 3
hsa-miR-448	0	0	1	1	1	1	PDZRN4	PDZ domain containing ring finger 4
hsa-miR-448	0	0	1	1	1	1	KLHL8	kelch-like 8 (Drosophila)
hsa-miR-448	1	0	1	1	1	1	C7orf31	chromosome 7 open reading frame 31
hsa-miR-448	0	0	1	1	1	1	GLIPR1L2	GLI pathogenesis-related 1 like 2
hsa-miR-448	0	0	1	1	1	1	PSMA2	proteasome (prosome, macropain) subunit, alpha type, 2
hsa-miR-448	1	0	1	0	1	1	GALNT4	UDP-N-acetyl-alpha-D-galactosamine:polypeptide N-acetylgalactosaminyltransferase 4 (GalNAc-T4)
hsa-miR-448	0	0	1	0	1	1	POLR1B	polymerase (RNA) I polypeptide B, 128kDa
hsa-miR-448	0	0	1	1	1	1	ADH1B	alcohol dehydrogenase 1B (class I), beta polypeptide
hsa-miR-448	0	0	1	1	1	1	MLIP	muscular LMNA-interacting protein
hsa-miR-448	0	0	1	0	1	1	THAP6	THAP domain containing 6
hsa-miR-448	1	0	1	0	1	1	EML4	echinoderm microtubule associated protein like 4
hsa-miR-448	0	0	1	1	1	1	ARMCX3	armadillo repeat containing, X-linked 3
hsa-miR-448	1	0	1	1	1	1	TC2N	tandem C2 domains, nuclear
hsa-miR-448	0	0	1	0	0	0	OVOS	ovostatin
hsa-miR-448	1	0	1	1	1	1	ATP6V1C1	ATPase, H+ transporting, lysosomal 42kDa, V1 subunit C1
hsa-miR-448	1	0	1	1	1	1	DDAH1	dimethylarginine dimethylaminohydrolase 1
hsa-miR-448	1	0	1	1	1	1	LCA5	Leber congenital amaurosis 5
hsa-miR-448	1	0	1	0	1	1	PCGF3	polycomb group ring finger 3
hsa-miR-448	0	0	1	0	0	0	LOC286299	uncharacterized LOC286299
hsa-miR-448	0	0	1	0	0	0	TMEM232	transmembrane protein 232
hsa-miR-448	1	0	1	1	1	1	PTER	phosphotriesterase related
hsa-miR-448	0	0	1	1	1	1	THSD4	thrombospondin, type I, domain containing 4
hsa-miR-448	1	0	1	1	1	1	HIF1A	hypoxia inducible factor 1, alpha subunit (basic helix-loop-helix transcription factor)
hsa-miR-448	1	0	1	1	1	1	EOGT	EGF domain-specific O-linked N-acetylglucosamine (GlcNAc) transferase
hsa-miR-448	0	0	1	1	1	1	SSFA2	sperm specific antigen 2
hsa-miR-448	1	0	1	0	1	1	TBL1XR1	transducin (beta)-like 1 X-linked receptor 1
hsa-miR-448	1	0	1	0	1	1	C1orf21	chromosome 1 open reading frame 21
hsa-miR-448	0	0	1	0	1	1	STT3A	STT3, subunit of the oligosaccharyltransferase complex, homolog A (S. cerevisiae)
hsa-miR-448	1	0	1	0	1	1	TTL	tubulin tyrosine ligase
hsa-miR-448	0	0	1	0	1	1	CD59	CD59 molecule, complement regulatory protein
hsa-miR-448	0	0	1	1	1	1	SNRNP27	small nuclear ribonucleoprotein 27kDa (U4/U6.U5)
hsa-miR-448	0	0	1	1	1	1	CAT	catalase
hsa-miR-448	0	0	1	1	1	1	TMEM53	transmembrane protein 53
hsa-miR-448	1	0	1	1	1	1	PCGF2	polycomb group ring finger 2
hsa-miR-448	0	0	1	1	1	1	UPRT	uracil phosphoribosyltransferase (FUR1) homolog (S. cerevisiae)
hsa-miR-448	1	0	1	1	1	1	EIF4B	eukaryotic translation initiation factor 4B
hsa-miR-448	1	0	1	0	1	1	OLA1	Obg-like ATPase 1
hsa-miR-448	1	0	1	1	1	1	SLC35D2	solute carrier family 35, member D2
hsa-miR-448	0	0	1	1	1	1	APBB1	amyloid beta (A4) precursor protein-binding, family B, member 1 (Fe65)
hsa-miR-448	0	0	1	1	0	0	ASS1	argininosuccinate synthase 1
hsa-miR-448	0	0	1	1	1	1	CHCHD4	coiled-coil-helix-coiled-coil-helix domain containing 4
hsa-miR-448	0	0	1	1	1	1	FGL1	fibrinogen-like 1
hsa-miR-448	1	0	1	1	1	1	TARBP2	TAR (HIV-1) RNA binding protein 2
hsa-miR-448	1	0	1	1	1	1	BPNT1	3'(2'), 5'-bisphosphate nucleotidase 1
hsa-miR-448	1	0	1	1	1	1	CAAP1	caspase activity and apoptosis inhibitor 1
hsa-miR-448	0	0	1	1	0	0	TFCP2	transcription factor CP2
hsa-miR-448	1	0	1	1	1	1	CDK7	cyclin-dependent kinase 7
hsa-miR-448	0	0	1	1	1	1	MTCP1	mature T-cell proliferation 1
hsa-miR-448	0	0	1	1	0	0	MRPS2	mitochondrial ribosomal protein S2
hsa-miR-448	0	0	1	1	1	1	KCTD1	potassium channel tetramerisation domain containing 1
hsa-miR-448	0	0	1	0	0	0	C12orf75	chromosome 12 open reading frame 75
hsa-miR-448	1	0	1	1	1	1	WIPF1	WAS/WASL interacting protein family, member 1
hsa-miR-448	0	0	1	1	1	1	PSMA1	proteasome (prosome, macropain) subunit, alpha type, 1
hsa-miR-448	0	0	1	1	1	1	BMPR1A	bone morphogenetic protein receptor, type IA
hsa-miR-448	0	0	1	1	1	1	KLHDC2	kelch domain containing 2
hsa-miR-448	0	0	1	1	0	0	NOX5	NADPH oxidase, EF-hand calcium binding domain 5
hsa-miR-448	1	0	1	1	1	1	TLE1	transducin-like enhancer of split 1 (E(sp1) homolog, Drosophila)
hsa-miR-448	0	0	1	1	0	0	MRPL4	mitochondrial ribosomal protein L4
hsa-miR-448	0	0	1	1	1	1	TRMT61B	tRNA methyltransferase 61 homolog B (S. cerevisiae)
hsa-miR-448	1	0	1	0	1	1	C15orf41	chromosome 15 open reading frame 41
hsa-miR-448	1	0	1	1	1	1	NT5DC1	5'-nucleotidase domain containing 1
hsa-miR-448	0	0	1	1	1	1	CHEK1	checkpoint kinase 1
hsa-miR-448	0	0	1	1	1	1	RHEBL1	Ras homolog enriched in brain like 1
hsa-miR-448	0	0	1	0	1	1	VSTM2A	V-set and transmembrane domain containing 2A
hsa-miR-448	0	0	1	0	1	1	TMEM56	transmembrane protein 56
hsa-miR-448	1	0	1	1	1	1	ARL4A	ADP-ribosylation factor-like 4A
hsa-miR-448	1	0	1	1	1	1	RBBP7	retinoblastoma binding protein 7
hsa-miR-448	1	0	1	1	1	1	NFYB	nuclear transcription factor Y, beta
hsa-miR-448	0	0	1	1	1	1	RCN2	reticulocalbin 2, EF-hand calcium binding domain
hsa-miR-448	0	0	1	1	1	1	CXADR	coxsackie virus and adenovirus receptor
hsa-miR-448	0	0	1	1	1	1	FAM18B1	family with sequence similarity 18, member B1
hsa-miR-448	1	0	1	1	1	1	RNF2	ring finger protein 2
hsa-miR-448	0	0	1	1	1	1	EMC4	ER membrane protein complex subunit 4
hsa-miR-448	1	0	1	1	1	1	VLDLR	very low density lipoprotein receptor
hsa-miR-448	1	0	1	1	0	0	STAG3L4	stromal antigen 3-like 4
hsa-miR-448	0	0	1	1	1	1	TSEN15	tRNA splicing endonuclease 15 homolog (S. cerevisiae)
hsa-miR-448	1	0	1	0	1	1	CD47	CD47 molecule
hsa-miR-448	0	0	1	0	0	0	FAM92A1	family with sequence similarity 92, member A1
hsa-miR-448	0	0	1	0	1	1	SEPT7	septin 7
hsa-miR-448	0	0	1	0	1	1	TSPAN7	tetraspanin 7
hsa-miR-448	0	0	1	1	1	1	COPS4	COP9 constitutive photomorphogenic homolog subunit 4 (Arabidopsis)
hsa-miR-448	0	0	1	1	1	1	EPCAM	epithelial cell adhesion molecule
hsa-miR-448	1	0	1	1	1	1	GABPB2	GA binding protein transcription factor, beta subunit 2
hsa-miR-448	0	0	1	1	0	0	IDH3G	isocitrate dehydrogenase 3 (NAD+) gamma
hsa-miR-448	1	0	1	1	1	1	SLMAP	sarcolemma associated protein
hsa-miR-448	0	0	1	0	0	0	LOC731789	uncharacterized LOC731789
hsa-miR-448	1	0	1	1	1	1	PHACTR2	phosphatase and actin regulator 2
hsa-miR-448	0	0	1	0	0	0	C18orf63	chromosome 18 open reading frame 63
hsa-miR-448	1	0	1	0	1	1	MEGF10	multiple EGF-like-domains 10
hsa-miR-448	1	0	1	0	1	1	SLC7A6	solute carrier family 7 (amino acid transporter light chain, y+L system), member 6
hsa-miR-448	1	0	1	0	1	1	OSBPL8	oxysterol binding protein-like 8
hsa-miR-448	1	0	1	1	1	1	SLC39A10	solute carrier family 39 (zinc transporter), member 10
hsa-miR-448	0	0	1	0	1	1	SYNPR	synaptoporin
hsa-miR-448	0	0	1	1	1	1	TMEM41B	transmembrane protein 41B
hsa-miR-448	1	0	1	1	1	1	MAN2A2	mannosidase, alpha, class 2A, member 2
hsa-miR-448	1	0	1	1	1	1	MOSPD1	motile sperm domain containing 1
hsa-miR-448	1	0	1	0	1	1	CACNA1G	calcium channel, voltage-dependent, T type, alpha 1G subunit
hsa-miR-448	1	0	1	1	1	1	IRF1	interferon regulatory factor 1
hsa-miR-448	1	0	1	1	1	1	AFF1	AF4/FMR2 family, member 1
hsa-miR-448	1	0	1	1	1	1	CCNG2	cyclin G2
hsa-miR-448	1	0	1	0	1	1	YES1	v-yes-1 Yamaguchi sarcoma viral oncogene homolog 1
hsa-miR-448	0	0	1	1	1	1	ELF1	E74-like factor 1 (ets domain transcription factor)
hsa-miR-448	0	0	1	0	0	0	TSPY1	testis specific protein, Y-linked 1
hsa-miR-448	1	0	1	1	1	1	AGL	amylo-alpha-1, 6-glucosidase, 4-alpha-glucanotransferase
hsa-miR-448	1	0	1	1	1	1	FAS	Fas (TNF receptor superfamily, member 6)
hsa-miR-448	1	0	1	1	1	1	COL4A4	collagen, type IV, alpha 4
hsa-miR-448	0	0	1	0	1	1	CYP1B1	cytochrome P450, family 1, subfamily B, polypeptide 1
hsa-miR-448	0	0	1	1	1	1	DPYD	dihydropyrimidine dehydrogenase
hsa-miR-448	1	0	1	1	1	1	FBN1	fibrillin 1
hsa-miR-448	0	0	1	0	1	1	GBE1	glucan (1,4-alpha-), branching enzyme 1
hsa-miR-448	0	0	1	1	1	1	HPRT1	hypoxanthine phosphoribosyltransferase 1
hsa-miR-448	0	0	1	1	1	1	MAOA	monoamine oxidase A
hsa-miR-448	0	0	1	1	1	1	MTM1	myotubularin 1
hsa-miR-448	1	0	1	0	1	1	PKD2	polycystic kidney disease 2 (autosomal dominant)
hsa-miR-448	1	0	1	1	1	1	PMP22	peripheral myelin protein 22
hsa-miR-448	0	0	1	1	1	1	PRNP	prion protein
hsa-miR-448	1	0	1	0	1	1	PTEN	phosphatase and tensin homolog
hsa-miR-448	1	0	1	1	1	1	ATXN1	ataxin 1
hsa-miR-448	0	0	1	1	1	1	XDH	xanthine dehydrogenase
hsa-miR-448	1	0	1	1	1	1	CHM	choroideremia (Rab escort protein 1)
hsa-miR-448	1	0	1	0	1	1	PAFAH1B1	platelet-activating factor acetylhydrolase 1b, regulatory subunit 1 (45kDa)
hsa-miR-448	1	0	1	1	1	1	SLC26A4	solute carrier family 26, member 4
hsa-miR-448	1	0	1	0	1	1	RAG1	recombination activating gene 1
hsa-miR-448	1	0	1	1	1	1	RFX5	regulatory factor X, 5 (influences HLA class II expression)
hsa-miR-448	1	0	1	1	1	1	APP	amyloid beta (A4) precursor protein
hsa-miR-448	0	0	1	1	1	1	CRX	cone-rod homeobox
hsa-miR-448	1	0	1	1	1	1	IL1A	interleukin 1, alpha
hsa-miR-448	1	0	1	1	1	1	CD44	CD44 molecule (Indian blood group)
hsa-miR-448	1	0	1	0	1	1	ABAT	4-aminobutyrate aminotransferase
hsa-miR-448	1	0	1	1	1	1	DIO2	deiodinase, iodothyronine, type II
hsa-miR-448	1	0	1	0	1	1	GABRA4	gamma-aminobutyric acid (GABA) A receptor, alpha 4
hsa-miR-448	1	0	1	1	1	1	GAD1	glutamate decarboxylase 1 (brain, 67kDa)
hsa-miR-448	0	0	1	1	1	1	GLRB	glycine receptor, beta
hsa-miR-448	1	0	1	1	0	0	GRIN2A	glutamate receptor, ionotropic, N-methyl D-aspartate 2A
hsa-miR-448	1	0	1	1	1	1	GRM1	glutamate receptor, metabotropic 1
hsa-miR-448	0	0	1	1	1	1	HTR7	5-hydroxytryptamine (serotonin) receptor 7, adenylate cyclase-coupled
hsa-miR-448	1	0	1	1	1	1	PPP3R1	protein phosphatase 3, regulatory subunit B, alpha
hsa-miR-448	1	0	1	1	1	1	PTGFR	prostaglandin F receptor (FP)
hsa-miR-448	1	0	1	1	1	1	RARB	retinoic acid receptor, beta
hsa-miR-448	1	0	1	1	1	1	REEP3	receptor accessory protein 3
hsa-miR-448	0	0	1	0	1	1	ZDHHC13	zinc finger, DHHC-type containing 13
hsa-miR-448	1	0	1	0	1	1	ARHGEF37	Rho guanine nucleotide exchange factor (GEF) 37
hsa-miR-448	1	0	1	1	1	1	ATP1B1	ATPase, Na+/K+ transporting, beta 1 polypeptide
hsa-miR-448	1	0	1	1	1	1	KCTD11	potassium channel tetramerisation domain containing 11
hsa-miR-448	1	0	1	0	1	1	CACNA1I	calcium channel, voltage-dependent, T type, alpha 1I subunit
hsa-miR-448	1	0	1	1	1	1	BICD2	bicaudal D homolog 2 (Drosophila)
hsa-miR-448	0	0	1	1	1	1	ANXA13	annexin A13
hsa-miR-448	0	0	1	1	1	1	DYRK3	dual-specificity tyrosine-(Y)-phosphorylation regulated kinase 3
hsa-miR-448	0	0	1	0	1	1	ZNF705A	zinc finger protein 705A
hsa-miR-448	1	0	1	0	1	1	LRRC55	leucine rich repeat containing 55
hsa-miR-448	1	0	1	1	1	1	PLCXD3	phosphatidylinositol-specific phospholipase C, X domain containing 3
hsa-miR-448	0	0	1	1	1	1	CR2	complement component (3d/Epstein Barr virus) receptor 2
hsa-miR-448	1	0	1	1	1	1	TCEAL8	transcription elongation factor A (SII)-like 8
hsa-miR-448	1	0	1	0	1	1	GOSR1	golgi SNAP receptor complex member 1
hsa-miR-448	0	0	1	0	1	1	C8orf22	chromosome 8 open reading frame 22
hsa-miR-448	1	0	1	1	1	1	ZDHHC9	zinc finger, DHHC-type containing 9
hsa-miR-448	0	0	1	1	1	1	UACA	uveal autoantigen with coiled-coil domains and ankyrin repeats
hsa-miR-448	1	0	1	1	1	1	CNOT4	CCR4-NOT transcription complex, subunit 4
hsa-miR-448	1	0	1	1	1	1	CTDSPL	CTD (carboxy-terminal domain, RNA polymerase II, polypeptide A) small phosphatase-like
hsa-miR-448	1	0	1	1	1	1	BCAP29	B-cell receptor-associated protein 29
hsa-miR-448	1	0	1	0	1	1	KIAA2022	KIAA2022
hsa-miR-448	1	0	1	1	1	1	NUPL1	nucleoporin like 1
hsa-miR-448	1	0	1	1	1	1	EML1	echinoderm microtubule associated protein like 1
hsa-miR-448	0	0	1	1	1	1	FBXO47	F-box protein 47
hsa-miR-448	1	0	1	1	1	1	CUL4A	cullin 4A
hsa-miR-448	1	0	1	0	1	1	ERMN	ermin, ERM-like protein
hsa-miR-448	1	0	1	1	1	1	SHE	Src homology 2 domain containing E
hsa-miR-448	0	0	1	0	1	1	LPPR5	lipid phosphate phosphatase-related protein type 5
hsa-miR-448	0	0	1	1	1	1	SPIN3	spindlin family, member 3
hsa-miR-448	0	0	1	1	1	1	SAMD13	sterile alpha motif domain containing 13
hsa-miR-448	1	0	1	0	1	1	FYTTD1	forty-two-three domain containing 1
hsa-miR-448	0	0	1	1	1	1	DSTN	destrin (actin depolymerizing factor)
hsa-miR-448	1	0	1	0	1	1	FAM125B	family with sequence similarity 125, member B
hsa-miR-448	1	0	1	1	1	1	SLC25A53	solute carrier family 25, member 53
hsa-miR-448	1	0	1	1	1	1	SORCS1	sortilin-related VPS10 domain containing receptor 1
hsa-miR-448	0	0	1	0	1	1	LINC00268	long intergenic non-protein coding RNA 268
hsa-miR-448	1	0	1	1	1	1	RUNX2	runt-related transcription factor 2
hsa-miR-448	1	0	1	1	1	1	MSMO1	methylsterol monooxygenase 1
hsa-miR-448	1	0	1	0	1	1	GOPC	golgi-associated PDZ and coiled-coil motif containing
hsa-miR-448	1	0	1	1	1	1	ZHX1	zinc fingers and homeoboxes 1
hsa-miR-448	1	0	1	1	1	1	VMA21	VMA21 vacuolar H+-ATPase homolog (S. cerevisiae)
hsa-miR-448	1	0	1	1	1	1	AFF3	AF4/FMR2 family, member 3
hsa-miR-448	1	0	1	0	1	1	RAB12	RAB12, member RAS oncogene family
hsa-miR-448	1	0	1	1	1	1	SLC10A7	solute carrier family 10 (sodium/bile acid cotransporter family), member 7
hsa-miR-448	1	0	1	0	1	1	SAMD5	sterile alpha motif domain containing 5
hsa-miR-448	0	0	1	1	1	1	TRMT11	tRNA methyltransferase 11 homolog (S. cerevisiae)
hsa-miR-448	0	0	1	1	1	1	SLC35A2	solute carrier family 35 (UDP-galactose transporter), member A2
hsa-miR-448	1	0	1	0	1	1	NPNT	nephronectin
hsa-miR-448	1	0	1	1	1	1	PPM1B	protein phosphatase, Mg2+/Mn2+ dependent, 1B
hsa-miR-448	0	0	1	1	1	1	CEP112	centrosomal protein 112kDa
hsa-miR-448	0	0	1	1	1	1	EFEMP1	EGF containing fibulin-like extracellular matrix protein 1
hsa-miR-448	0	0	1	1	1	1	MAP9	microtubule-associated protein 9
hsa-miR-448	1	0	1	0	1	1	CREBZF	CREB/ATF bZIP transcription factor
hsa-miR-448	0	0	1	1	0	0	C7orf63	chromosome 7 open reading frame 63
hsa-miR-448	1	0	1	1	0	0	ANKRD34A	ankyrin repeat domain 34A
hsa-miR-448	0	0	1	1	0	0	FAM83G	family with sequence similarity 83, member G
hsa-miR-448	1	0	1	0	1	1	FAM133B	family with sequence similarity 133, member B
hsa-miR-448	0	0	1	0	1	1	OPALIN	oligodendrocytic myelin paranodal and inner loop protein
hsa-miR-448	0	0	1	1	1	1	SPOCK3	sparc/osteonectin, cwcv and kazal-like domains proteoglycan (testican) 3
hsa-miR-448	1	0	1	0	1	1	CD83	CD83 molecule
hsa-miR-448	1	0	1	0	1	1	DCUN1D4	DCN1, defective in cullin neddylation 1, domain containing 4 (S. cerevisiae)
hsa-miR-448	1	0	1	1	0	0	KIAA0895L	KIAA0895-like
hsa-miR-448	0	0	1	1	1	1	SI	sucrase-isomaltase (alpha-glucosidase)
hsa-miR-448	1	0	1	1	1	1	ERBB4	v-erb-a erythroblastic leukemia viral oncogene homolog 4 (avian)
hsa-miR-448	1	0	1	1	1	1	PVRL2	poliovirus receptor-related 2 (herpesvirus entry mediator B)
hsa-miR-448	1	0	1	0	1	1	SLC12A2	solute carrier family 12 (sodium/potassium/chloride transporters), member 2
hsa-miR-448	1	0	1	1	1	1	QSER1	glutamine and serine rich 1
hsa-miR-448	1	0	1	1	1	1	CDC14B	CDC14 cell division cycle 14 homolog B (S. cerevisiae)
hsa-miR-448	0	0	1	1	1	1	VCAM1	vascular cell adhesion molecule 1
hsa-miR-448	1	0	1	1	1	1	N4BP2L1	NEDD4 binding protein 2-like 1
hsa-miR-448	1	0	1	1	1	1	CASZ1	castor zinc finger 1
hsa-miR-448	1	0	1	1	1	1	CUL4B	cullin 4B
hsa-miR-448	1	0	1	1	1	1	LDB3	LIM domain binding 3
hsa-miR-448	1	0	1	1	1	1	FAM155A	family with sequence similarity 155, member A
hsa-miR-448	1	0	1	1	1	1	ZNF629	zinc finger protein 629
hsa-miR-448	1	0	1	1	1	1	BEND3	BEN domain containing 3
hsa-miR-448	1	0	1	0	1	1	MEGF9	multiple EGF-like-domains 9
hsa-miR-448	0	0	1	0	1	1	TMEM150C	transmembrane protein 150C
hsa-miR-448	0	0	1	1	1	1	TBX18	T-box 18
hsa-miR-448	0	0	1	1	1	1	SNTN	sentan, cilia apical structure protein
hsa-miR-448	0	0	1	0	1	1	ISCA1P1	iron-sulfur cluster assembly 1 homolog (S. cerevisiae) pseudogene 1
hsa-miR-448	1	0	1	1	1	1	REPS2	RALBP1 associated Eps domain containing 2
hsa-miR-448	1	0	1	0	1	1	PDE5A	phosphodiesterase 5A, cGMP-specific
hsa-miR-448	1	0	1	0	0	0	ACAN	aggrecan
hsa-miR-448	1	0	1	0	1	1	XIAP	X-linked inhibitor of apoptosis
hsa-miR-448	1	0	1	0	1	1	KLF9	Kruppel-like factor 9
hsa-miR-448	1	0	1	1	1	1	CCNA2	cyclin A2
hsa-miR-448	1	0	1	0	1	1	CDK6	cyclin-dependent kinase 6
hsa-miR-448	0	0	1	1	1	1	CHUK	conserved helix-loop-helix ubiquitous kinase
hsa-miR-448	0	0	1	1	1	1	CLIC2	chloride intracellular channel 2
hsa-miR-448	1	0	1	1	1	1	CREBL2	cAMP responsive element binding protein-like 2
hsa-miR-448	1	0	1	1	1	1	CTNND2	catenin (cadherin-associated protein), delta 2
hsa-miR-448	0	0	1	1	1	1	DARS	aspartyl-tRNA synthetase
hsa-miR-448	1	0	1	1	1	1	EIF1AX	eukaryotic translation initiation factor 1A, X-linked
hsa-miR-448	0	0	1	0	1	1	ELF5	E74-like factor 5 (ets domain transcription factor)
hsa-miR-448	1	0	1	1	1	1	EN2	engrailed homeobox 2
hsa-miR-448	1	0	1	1	1	1	FOXC1	forkhead box C1
hsa-miR-448	0	0	1	0	1	1	FMO2	flavin containing monooxygenase 2 (non-functional)
hsa-miR-448	1	0	1	0	1	1	B4GALT1	UDP-Gal:betaGlcNAc beta 1,4- galactosyltransferase, polypeptide 1
hsa-miR-448	1	0	1	1	1	1	AHR	aryl hydrocarbon receptor
hsa-miR-448	1	0	1	1	1	1	ATP6V1A	ATPase, H+ transporting, lysosomal 70kDa, V1 subunit A
hsa-miR-448	1	0	1	0	0	0	CDH3	cadherin 3, type 1, P-cadherin (placental)
hsa-miR-448	1	0	1	1	1	1	CDH11	cadherin 11, type 2, OB-cadherin (osteoblast)
hsa-miR-448	1	0	1	1	1	1	CDK2	cyclin-dependent kinase 2
hsa-miR-448	1	0	1	1	1	1	CLCN4	chloride channel, voltage-sensitive 4
hsa-miR-448	1	0	1	0	1	1	COL19A1	collagen, type XIX, alpha 1
hsa-miR-448	1	0	1	1	1	1	MASP1	mannan-binding lectin serine peptidase 1 (C4/C2 activating component of Ra-reactive factor)
hsa-miR-448	0	0	1	1	1	1	CSN2	casein beta
hsa-miR-448	0	0	1	1	1	1	CTSE	cathepsin E
hsa-miR-448	0	0	1	1	1	1	DSG1	desmoglein 1
hsa-miR-448	1	0	1	1	1	1	EGR1	early growth response 1
hsa-miR-448	1	0	1	1	1	1	FBN2	fibrillin 2
hsa-miR-448	1	0	1	0	1	1	FUT4	fucosyltransferase 4 (alpha (1,3) fucosyltransferase, myeloid-specific)
hsa-miR-448	1	0	1	0	1	1	GNAI1	guanine nucleotide binding protein (G protein), alpha inhibiting activity polypeptide 1
hsa-miR-448	1	0	1	1	1	1	HIVEP1	human immunodeficiency virus type I enhancer binding protein 1
hsa-miR-448	0	0	1	1	1	1	HLA-DPB1	major histocompatibility complex, class II, DP beta 1
hsa-miR-448	0	0	1	1	1	1	IRF8	interferon regulatory factor 8
hsa-miR-448	0	0	1	1	1	1	IL17A	interleukin 17A
hsa-miR-448	0	0	1	1	0	0	INSL4	insulin-like 4 (placenta)
hsa-miR-448	0	0	1	0	1	1	ITGAV	integrin, alpha V
hsa-miR-448	1	0	1	1	1	1	KCNJ3	potassium inwardly-rectifying channel, subfamily J, member 3
hsa-miR-448	1	0	1	1	1	1	KPNA4	karyopherin alpha 4 (importin alpha 3)
hsa-miR-448	1	0	1	1	1	1	MARCKS	myristoylated alanine-rich protein kinase C substrate
hsa-miR-448	1	0	1	1	1	1	MATN2	matrilin 2
hsa-miR-448	0	0	1	1	1	1	MRC1	mannose receptor, C type 1
hsa-miR-448	0	0	1	1	1	1	MSMB	microseminoprotein, beta-
hsa-miR-448	1	0	1	0	1	1	IRF4	interferon regulatory factor 4
hsa-miR-448	0	0	1	0	1	1	OPHN1	oligophrenin 1
hsa-miR-448	1	0	1	1	1	1	OSBP	oxysterol binding protein
hsa-miR-448	1	0	1	1	1	1	PBX2	pre-B-cell leukemia homeobox 2
hsa-miR-448	0	0	1	1	1	1	PCNA	proliferating cell nuclear antigen
hsa-miR-448	1	0	1	0	1	1	PLEK	pleckstrin
hsa-miR-448	0	0	1	1	1	1	MAP2K6	mitogen-activated protein kinase kinase 6
hsa-miR-448	0	0	1	1	1	1	EIF2AK2	eukaryotic translation initiation factor 2-alpha kinase 2
hsa-miR-448	0	0	1	1	1	1	HTRA1	HtrA serine peptidase 1
hsa-miR-448	0	0	1	1	1	1	PTK7	PTK7 protein tyrosine kinase 7
hsa-miR-448	1	0	1	1	1	1	PTPN1	protein tyrosine phosphatase, non-receptor type 1
hsa-miR-448	1	0	1	1	1	1	PTPN2	protein tyrosine phosphatase, non-receptor type 2
hsa-miR-448	1	0	1	1	1	1	PTPN11	protein tyrosine phosphatase, non-receptor type 11
hsa-miR-448	0	0	1	1	1	1	PTPN12	protein tyrosine phosphatase, non-receptor type 12
hsa-miR-448	0	0	1	1	1	1	PTPRC	protein tyrosine phosphatase, receptor type, C
hsa-miR-448	1	0	1	1	1	1	PTPRK	protein tyrosine phosphatase, receptor type, K
hsa-miR-448	0	0	1	1	1	1	PTPRR	protein tyrosine phosphatase, receptor type, R
hsa-miR-448	1	0	1	0	1	1	SORT1	sortilin 1
hsa-miR-448	1	0	1	1	1	1	SRSF3	serine/arginine-rich splicing factor 3
hsa-miR-448	1	0	1	1	1	1	SNAI2	snail homolog 2 (Drosophila)
hsa-miR-448	0	0	1	1	1	1	SMARCA1	SWI/SNF related, matrix associated, actin dependent regulator of chromatin, subfamily a, member 1
hsa-miR-448	1	0	1	1	1	1	SRF	serum response factor (c-fos serum response element-binding transcription factor)
hsa-miR-448	1	0	1	0	1	1	STC1	stanniocalcin 1
hsa-miR-448	1	0	1	1	1	1	SYN2	synapsin II
hsa-miR-448	1	0	1	0	1	1	TAL1	T-cell acute lymphocytic leukemia 1
hsa-miR-448	1	0	1	1	1	1	TGFB3	transforming growth factor, beta 3
hsa-miR-448	1	0	1	1	1	1	TRAPPC10	trafficking protein particle complex 10
hsa-miR-448	0	0	1	1	1	1	TPP2	tripeptidyl peptidase II
hsa-miR-448	1	0	1	1	1	1	NR2C2	nuclear receptor subfamily 2, group C, member 2
hsa-miR-448	0	0	1	1	1	1	UBE2V2	ubiquitin-conjugating enzyme E2 variant 2
hsa-miR-448	0	0	1	0	1	1	ZFY	zinc finger protein, Y-linked
hsa-miR-448	1	0	1	1	1	1	FZD5	frizzled family receptor 5
hsa-miR-448	1	0	1	1	1	1	NRIP1	nuclear receptor interacting protein 1
hsa-miR-448	1	0	1	1	1	1	FZD7	frizzled family receptor 7
hsa-miR-448	0	0	1	1	1	1	PIP5K1A	phosphatidylinositol-4-phosphate 5-kinase, type I, alpha
hsa-miR-448	0	0	1	1	1	1	PIP5K1B	phosphatidylinositol-4-phosphate 5-kinase, type I, beta
hsa-miR-448	1	0	1	1	1	1	CDC14A	CDC14 cell division cycle 14 homolog A (S. cerevisiae)
hsa-miR-448	1	0	1	0	1	1	TNKS	tankyrase, TRF1-interacting ankyrin-related ADP-ribose polymerase
hsa-miR-448	1	0	1	1	1	1	URI1	URI1, prefoldin-like chaperone
hsa-miR-448	0	0	1	1	0	0	PEX11A	peroxisomal biogenesis factor 11 alpha
hsa-miR-448	1	0	1	1	1	1	ALDH1A2	aldehyde dehydrogenase 1 family, member A2
hsa-miR-448	0	0	1	1	1	1	PRPF4B	PRP4 pre-mRNA processing factor 4 homolog B (yeast)
hsa-miR-448	1	0	1	1	1	1	PHOX2B	paired-like homeobox 2b
hsa-miR-448	1	0	1	0	1	1	WASL	Wiskott-Aldrich syndrome-like
hsa-miR-448	0	0	1	1	1	1	MPZL1	myelin protein zero-like 1
hsa-miR-448	0	0	1	1	1	1	UBA3	ubiquitin-like modifier activating enzyme 3
hsa-miR-448	1	0	1	1	1	1	BTAF1	BTAF1 RNA polymerase II, B-TFIID transcription factor-associated, 170kDa (Mot1 homolog, S. cerevisiae)
hsa-miR-448	0	0	1	1	0	0	NPR2	natriuretic peptide receptor B/guanylate cyclase B (atrionatriuretic peptide receptor B)
hsa-miR-448	1	0	1	1	1	1	BCL2L2	BCL2-like 2
hsa-miR-448	1	0	1	1	1	1	CDH12	cadherin 12, type 2 (N-cadherin 2)
hsa-miR-448	1	0	1	1	1	1	EYA4	eyes absent homolog 4 (Drosophila)
hsa-miR-448	0	0	1	1	1	1	SLC1A1	solute carrier family 1 (neuronal/epithelial high affinity glutamate transporter, system Xag), member 1
hsa-miR-448	1	0	1	0	1	1	SLC1A2	solute carrier family 1 (glial high affinity glutamate transporter), member 2
hsa-miR-448	0	0	1	1	0	0	EBAG9	estrogen receptor binding site associated, antigen, 9
hsa-miR-448	0	0	1	1	1	1	HOMER1	homer homolog 1 (Drosophila)
hsa-miR-448	1	0	1	0	1	1	CHST3	carbohydrate (chondroitin 6) sulfotransferase 3
hsa-miR-448	1	0	1	0	1	1	AKAP6	A kinase (PRKA) anchor protein 6
hsa-miR-448	1	0	1	1	1	1	SLC25A27	solute carrier family 25, member 27
hsa-miR-448	1	0	1	1	1	1	BNIP2	BCL2/adenovirus E1B 19kDa interacting protein 2
hsa-miR-448	1	0	1	1	1	1	CREB1	cAMP responsive element binding protein 1
hsa-miR-448	1	0	1	0	1	1	ACSL4	acyl-CoA synthetase long-chain family member 4
hsa-miR-448	1	0	1	1	1	1	LRP2	low density lipoprotein receptor-related protein 2
hsa-miR-448	1	0	1	0	1	1	PKNOX1	PBX/knotted 1 homeobox 1
hsa-miR-448	1	0	1	0	1	1	SCN2B	sodium channel, voltage-gated, type II, beta subunit
hsa-miR-448	1	0	1	1	1	1	RAB11A	RAB11A, member RAS oncogene family
hsa-miR-448	0	0	1	1	1	1	MGAM	maltase-glucoamylase (alpha-glucosidase)
hsa-miR-448	0	0	1	0	1	1	BPY2	basic charge, Y-linked, 2
hsa-miR-448	1	0	1	1	1	1	MTMR4	myotubularin related protein 4
hsa-miR-448	1	0	1	1	1	1	AKAP7	A kinase (PRKA) anchor protein 7
hsa-miR-448	1	0	1	0	1	1	ROCK2	Rho-associated, coiled-coil containing protein kinase 2
hsa-miR-448	1	0	1	1	1	1	KIF23	kinesin family member 23
hsa-miR-448	1	0	1	1	1	1	VPS4B	vacuolar protein sorting 4 homolog B (S. cerevisiae)
hsa-miR-448	0	0	1	1	1	1	NRG2	neuregulin 2
hsa-miR-448	0	0	1	1	1	1	NDUFA5	NADH dehydrogenase (ubiquinone) 1 alpha subcomplex, 5, 13kDa
hsa-miR-448	0	0	1	1	1	1	PSMD5	proteasome (prosome, macropain) 26S subunit, non-ATPase, 5
hsa-miR-448	1	0	1	0	1	1	SEL1L	sel-1 suppressor of lin-12-like (C. elegans)
hsa-miR-448	0	0	1	1	1	1	SIM1	single-minded homolog 1 (Drosophila)
hsa-miR-448	1	0	1	1	1	1	SIM2	single-minded homolog 2 (Drosophila)
hsa-miR-448	0	0	1	1	0	0	MSC	musculin
hsa-miR-448	1	0	1	1	1	1	MED13	mediator complex subunit 13
hsa-miR-448	0	0	1	1	1	1	CLEC2B	C-type lectin domain family 2, member B
hsa-miR-448	1	0	1	1	1	1	BMI1	BMI1 polycomb ring finger oncogene
hsa-miR-448	1	0	1	1	1	1	CBL	Cbl proto-oncogene, E3 ubiquitin protein ligase
hsa-miR-448	0	0	1	0	1	1	EPHA3	EPH receptor A3
hsa-miR-448	0	0	1	1	1	1	MSTN	myostatin
hsa-miR-448	1	0	1	1	1	1	GPM6A	glycoprotein M6A
hsa-miR-448	1	0	1	1	1	1	GPR3	G protein-coupled receptor 3
hsa-miR-448	1	0	1	1	1	1	RALA	v-ral simian leukemia viral oncogene homolog A (ras related)
hsa-miR-448	1	0	1	0	1	1	CCDC6	coiled-coil domain containing 6
hsa-miR-448	1	0	1	1	1	1	GABBR2	gamma-aminobutyric acid (GABA) B receptor, 2
hsa-miR-448	1	0	1	1	1	1	AKT3	v-akt murine thymoma viral oncogene homolog 3 (protein kinase B, gamma)
hsa-miR-448	1	0	1	1	1	1	KCNE3	potassium voltage-gated channel, Isk-related family, member 3
hsa-miR-448	1	0	1	1	1	1	SCARB2	scavenger receptor class B, member 2
hsa-miR-448	1	0	1	1	1	1	MNX1	motor neuron and pancreas homeobox 1
hsa-miR-448	1	0	1	1	1	1	HOXA11	homeobox A11
hsa-miR-448	1	0	1	1	1	1	ST8SIA4	ST8 alpha-N-acetyl-neuraminide alpha-2,8-sialyltransferase 4
hsa-miR-448	0	0	1	1	1	1	TAF1B	TATA box binding protein (TBP)-associated factor, RNA polymerase I, B, 63kDa
hsa-miR-448	1	0	1	1	1	1	LHFP	lipoma HMGIC fusion partner
hsa-miR-448	1	0	1	0	1	1	CALCRL	calcitonin receptor-like
hsa-miR-448	1	0	1	0	1	1	SPRY3	sprouty homolog 3 (Drosophila)
hsa-miR-448	1	0	1	1	1	1	MAN1A1	mannosidase, alpha, class 1A, member 1
hsa-miR-448	1	0	1	1	1	1	MMP16	matrix metallopeptidase 16 (membrane-inserted)
hsa-miR-448	1	0	1	0	1	1	NAB1	NGFI-A binding protein 1 (EGR1 binding protein 1)
hsa-miR-448	1	0	1	1	1	1	RNF6	ring finger protein (C3H2C3 type) 6
hsa-miR-448	0	0	1	1	1	1	TSC22D1	TSC22 domain family, member 1
hsa-miR-448	1	0	1	1	1	1	LIPG	lipase, endothelial
hsa-miR-448	1	0	1	0	1	1	HDAC4	histone deacetylase 4
hsa-miR-448	1	0	1	0	1	1	SPATA2	spermatogenesis associated 2
hsa-miR-448	0	0	1	1	1	1	TRDN	triadin
hsa-miR-448	1	0	1	1	1	1	SPON1	spondin 1, extracellular matrix protein
hsa-miR-448	0	0	1	1	1	1	LRMP	lymphoid-restricted membrane protein
hsa-miR-448	1	0	1	1	1	1	NCK1	NCK adaptor protein 1
hsa-miR-448	1	0	1	1	1	1	NFATC1	nuclear factor of activated T-cells, cytoplasmic, calcineurin-dependent 1
hsa-miR-448	0	0	1	0	1	1	OAS3	2'-5'-oligoadenylate synthetase 3, 100kDa
hsa-miR-448	1	0	1	1	1	1	PDGFRA	platelet-derived growth factor receptor, alpha polypeptide
hsa-miR-448	1	0	1	1	1	1	PRKAA1	protein kinase, AMP-activated, alpha 1 catalytic subunit
hsa-miR-448	0	0	1	1	1	1	PRKCH	protein kinase C, eta
hsa-miR-448	1	0	1	1	1	1	PKN2	protein kinase N2
hsa-miR-448	1	0	1	1	1	1	CCL7	chemokine (C-C motif) ligand 7
hsa-miR-448	1	0	1	1	1	1	SMC1A	structural maintenance of chromosomes 1A
hsa-miR-448	0	0	1	1	1	1	UBE2E3	ubiquitin-conjugating enzyme E2E 3
hsa-miR-448	1	0	1	0	1	1	APPBP2	amyloid beta precursor protein (cytoplasmic tail) binding protein 2
hsa-miR-448	1	0	1	0	1	1	NCOA2	nuclear receptor coactivator 2
hsa-miR-448	1	0	1	1	1	1	RRAGA	Ras-related GTP binding A
hsa-miR-448	1	0	1	0	1	1	MAP4K5	mitogen-activated protein kinase kinase kinase kinase 5
hsa-miR-448	1	0	1	0	1	1	API5	apoptosis inhibitor 5
hsa-miR-448	0	0	1	1	0	0	VAMP5	vesicle-associated membrane protein 5 (myobrevin)
hsa-miR-448	1	0	1	1	1	1	PGRMC1	progesterone receptor membrane component 1
hsa-miR-448	0	0	1	1	0	0	ACTL7A	actin-like 7A
hsa-miR-448	0	0	1	1	1	1	NUDT3	nudix (nucleoside diphosphate linked moiety X)-type motif 3
hsa-miR-448	1	0	1	1	1	1	SPIN1	spindlin 1
hsa-miR-448	1	0	1	1	1	1	DIAPH2	diaphanous homolog 2 (Drosophila)
hsa-miR-448	1	0	1	1	1	1	HIVEP2	human immunodeficiency virus type I enhancer binding protein 2
hsa-miR-448	0	0	1	1	1	1	SYPL1	synaptophysin-like 1
hsa-miR-448	0	0	1	1	1	1	RAB40B	RAB40B, member RAS oncogene family
hsa-miR-448	1	0	1	1	1	1	RIT1	Ras-like without CAAX 1
hsa-miR-448	1	0	1	1	1	1	SCN1A	sodium channel, voltage-gated, type I, alpha subunit
hsa-miR-448	1	0	1	0	1	1	SOX12	SRY (sex determining region Y)-box 12
hsa-miR-448	1	0	1	1	1	1	HSPA13	heat shock protein 70kDa family, member 13
hsa-miR-448	1	0	1	1	1	1	NR4A3	nuclear receptor subfamily 4, group A, member 3
hsa-miR-448	1	0	1	1	1	1	CLDN10	claudin 10
hsa-miR-448	1	0	1	1	1	1	ADAMTS1	ADAM metallopeptidase with thrombospondin type 1 motif, 1
hsa-miR-448	1	0	1	0	1	1	WASF2	WAS protein family, member 2
hsa-miR-448	0	0	1	1	1	1	RTN4	reticulon 4
hsa-miR-448	1	0	1	1	1	1	RAPGEF4	Rap guanine nucleotide exchange factor (GEF) 4
hsa-miR-448	1	0	1	1	1	1	ADAMTS5	ADAM metallopeptidase with thrombospondin type 1 motif, 5
hsa-miR-448	0	0	1	1	1	1	RPP14	ribonuclease P/MRP 14kDa subunit
hsa-miR-448	0	0	1	0	1	1	KRR1	KRR1, small subunit (SSU) processome component, homolog (yeast)
hsa-miR-448	1	0	1	1	1	1	TMF1	TATA element modulatory factor 1
hsa-miR-448	1	0	1	1	1	1	TRIO	trio Rho guanine nucleotide exchange factor
hsa-miR-448	0	0	1	0	1	1	ZXDB	zinc finger, X-linked, duplicated B
hsa-miR-448	1	0	1	1	1	1	DUSP10	dual specificity phosphatase 10
hsa-miR-448	1	0	1	1	1	1	CA5B	carbonic anhydrase VB, mitochondrial
hsa-miR-448	0	0	1	1	1	1	SLC6A14	solute carrier family 6 (amino acid transporter), member 14
hsa-miR-448	1	0	1	0	1	1	CHP1	calcineurin-like EF hand protein 1
hsa-miR-448	1	0	1	1	1	1	KLF12	Kruppel-like factor 12
hsa-miR-448	1	0	1	1	1	1	ZNF236	zinc finger protein 236
hsa-miR-448	0	0	1	1	0	0	SIX6	SIX homeobox 6
hsa-miR-448	1	0	1	1	1	1	APPL1	adaptor protein, phosphotyrosine interaction, PH domain and leucine zipper containing 1
hsa-miR-448	1	0	1	0	1	1	CASP8AP2	caspase 8 associated protein 2
hsa-miR-448	1	0	1	0	1	1	CD2AP	CD2-associated protein
hsa-miR-448	1	0	1	1	1	1	RYBP	RING1 and YY1 binding protein
hsa-miR-448	0	0	1	1	1	1	SEPHS2	selenophosphate synthetase 2
hsa-miR-448	1	0	1	1	1	1	HS2ST1	heparan sulfate 2-O-sulfotransferase 1
hsa-miR-448	0	0	1	1	1	1	IL36RN	interleukin 36 receptor antagonist
hsa-miR-448	1	0	1	0	1	1	ACAP2	ArfGAP with coiled-coil, ankyrin repeat and PH domains 2
hsa-miR-448	1	0	1	0	1	1	RAPGEF5	Rap guanine nucleotide exchange factor (GEF) 5
hsa-miR-448	1	0	1	0	1	1	G3BP2	GTPase activating protein (SH3 domain) binding protein 2
hsa-miR-448	1	0	1	1	1	1	FBXW11	F-box and WD repeat domain containing 11
hsa-miR-448	0	0	1	1	1	1	SLC39A6	solute carrier family 39 (zinc transporter), member 6
hsa-miR-448	1	0	1	1	1	1	DNAJB9	DnaJ (Hsp40) homolog, subfamily B, member 9
hsa-miR-448	1	0	1	1	1	1	MMD	monocyte to macrophage differentiation-associated
hsa-miR-448	0	0	1	1	1	1	TTC33	tetratricopeptide repeat domain 33
hsa-miR-448	1	0	1	1	1	1	RANBP6	RAN binding protein 6
hsa-miR-448	1	0	1	1	1	1	RGS17	regulator of G-protein signaling 17
hsa-miR-448	1	0	1	1	1	1	TLL2	tolloid-like 2
hsa-miR-448	0	0	1	1	0	0	LRRC6	leucine rich repeat containing 6
hsa-miR-448	0	0	1	1	1	1	N6AMT1	N-6 adenine-specific DNA methyltransferase 1 (putative)
hsa-miR-448	1	0	1	1	1	1	LRP12	low density lipoprotein receptor-related protein 12
hsa-miR-448	0	0	1	1	1	1	UBQLN2	ubiquilin 2
hsa-miR-448	1	0	1	1	1	1	NRG1	neuregulin 1
hsa-miR-448	1	0	1	1	1	1	WDR37	WD repeat domain 37
hsa-miR-448	1	0	1	0	1	1	OSTM1	osteopetrosis associated transmembrane protein 1
hsa-miR-448	1	0	1	1	0	0	HOXC11	homeobox C11
hsa-miR-448	0	0	1	0	1	1	ADAMTS3	ADAM metallopeptidase with thrombospondin type 1 motif, 3
hsa-miR-448	1	0	1	0	1	1	ODZ1	odz, odd Oz/ten-m homolog 1 (Drosophila)
hsa-miR-448	0	0	1	1	1	1	HSPA4L	heat shock 70kDa protein 4-like
hsa-miR-448	0	0	1	1	1	1	TRAM1	translocation associated membrane protein 1
hsa-miR-448	1	0	1	1	1	1	LEMD3	LEM domain containing 3
hsa-miR-448	1	0	1	1	1	1	SLC7A11	solute carrier family 7 (anionic amino acid transporter light chain, xc- system), member 11
hsa-miR-448	1	0	1	1	1	1	GHITM	growth hormone inducible transmembrane protein
hsa-miR-448	1	0	1	1	1	1	AFF4	AF4/FMR2 family, member 4
hsa-miR-448	1	0	1	1	1	1	SERP1	stress-associated endoplasmic reticulum protein 1
hsa-miR-448	0	0	1	1	1	1	TMOD2	tropomodulin 2 (neuronal)
hsa-miR-448	1	0	1	1	1	1	GRHL1	grainyhead-like 1 (Drosophila)
hsa-miR-448	1	0	1	1	1	1	SLC40A1	solute carrier family 40 (iron-regulated transporter), member 1
hsa-miR-448	0	0	1	1	1	1	PSME4	proteasome (prosome, macropain) activator subunit 4
hsa-miR-448	1	0	1	0	1	1	RAB11FIP3	RAB11 family interacting protein 3 (class II)
hsa-miR-448	0	0	1	1	1	1	FRMPD4	FERM and PDZ domain containing 4
hsa-miR-448	1	0	1	0	1	1	TOX	thymocyte selection-associated high mobility group box
hsa-miR-448	0	0	1	0	1	1	EPM2AIP1	EPM2A (laforin) interacting protein 1
hsa-miR-448	1	0	1	1	1	1	LRIG2	leucine-rich repeats and immunoglobulin-like domains 2
hsa-miR-448	0	0	1	1	1	1	OSBPL2	oxysterol binding protein-like 2
hsa-miR-448	1	0	1	1	0	0	IQSEC1	IQ motif and Sec7 domain 1
hsa-miR-448	0	0	1	1	1	1	N4BP2L2	NEDD4 binding protein 2-like 2
hsa-miR-448	1	0	1	0	1	1	PDAP1	PDGFA associated protein 1
hsa-miR-448	1	0	1	1	1	1	DIP2C	DIP2 disco-interacting protein 2 homolog C (Drosophila)
hsa-miR-448	0	0	1	1	0	0	MAST1	microtubule associated serine/threonine kinase 1
hsa-miR-448	1	0	1	1	1	1	SORCS3	sortilin-related VPS10 domain containing receptor 3
hsa-miR-448	1	0	1	0	1	1	WDFY3	WD repeat and FYVE domain containing 3
hsa-miR-448	1	0	1	1	1	1	SPEN	spen homolog, transcriptional regulator (Drosophila)
hsa-miR-448	1	0	1	1	1	1	FBXO21	F-box protein 21
hsa-miR-448	1	0	1	0	1	1	PDS5B	PDS5, regulator of cohesion maintenance, homolog B (S. cerevisiae)
hsa-miR-448	1	0	1	0	1	1	ZNF609	zinc finger protein 609
hsa-miR-448	1	0	1	1	1	1	TRAK2	trafficking protein, kinesin binding 2
hsa-miR-448	1	0	1	0	1	1	PEG10	paternally expressed 10
hsa-miR-448	1	0	1	1	0	0	CIC	capicua homolog (Drosophila)
hsa-miR-448	1	0	1	0	1	1	SNX13	sorting nexin 13
hsa-miR-448	1	0	1	0	1	1	LARP4B	La ribonucleoprotein domain family, member 4B
hsa-miR-448	0	0	1	1	1	1	FBXO28	F-box protein 28
hsa-miR-448	1	0	1	1	1	1	PDS5A	PDS5, regulator of cohesion maintenance, homolog A (S. cerevisiae)
hsa-miR-448	1	0	1	1	1	1	WDR7	WD repeat domain 7
hsa-miR-448	1	0	1	1	1	1	PHF15	PHD finger protein 15
hsa-miR-448	0	0	1	1	1	1	ANGEL1	angel homolog 1 (Drosophila)
hsa-miR-448	0	0	1	1	1	1	LEPROTL1	leptin receptor overlapping transcript-like 1
hsa-miR-448	1	0	1	1	1	1	RIMBP2	RIMS binding protein 2
hsa-miR-448	1	0	1	1	1	1	MORC3	MORC family CW-type zinc finger 3
hsa-miR-448	1	0	1	1	1	1	MOB4	MOB family member 4, phocein
hsa-miR-448	0	0	1	1	1	1	ANAPC13	anaphase promoting complex subunit 13
hsa-miR-448	1	0	1	1	1	1	RNF19A	ring finger protein 19A, E3 ubiquitin protein ligase
hsa-miR-448	1	0	1	1	1	1	MYRIP	myosin VIIA and Rab interacting protein
hsa-miR-448	0	0	1	1	1	1	SOSTDC1	sclerostin domain containing 1
hsa-miR-448	1	0	1	1	1	1	CLIP3	CAP-GLY domain containing linker protein 3
hsa-miR-448	1	0	1	1	1	1	LTN1	listerin E3 ubiquitin protein ligase 1
hsa-miR-448	0	0	1	1	1	1	C10orf12	chromosome 10 open reading frame 12
hsa-miR-448	1	0	1	1	1	1	FAM155B	family with sequence similarity 155, member B
hsa-miR-448	1	0	1	1	1	1	ST8SIA3	ST8 alpha-N-acetyl-neuraminide alpha-2,8-sialyltransferase 3
hsa-miR-448	1	0	1	1	1	1	MEMO1	mediator of cell motility 1
hsa-miR-448	0	0	1	1	1	1	SNX7	sorting nexin 7
hsa-miR-448	0	0	1	1	1	1	HMP19	HMP19 protein
hsa-miR-448	0	0	1	1	0	0	HEBP1	heme binding protein 1
hsa-miR-448	1	0	1	1	1	1	PHF20L1	PHD finger protein 20-like 1
hsa-miR-448	0	0	1	0	1	1	OTUD6B	OTU domain containing 6B
hsa-miR-448	0	0	1	1	1	1	CCDC53	coiled-coil domain containing 53
hsa-miR-448	1	0	1	0	1	1	CNR1	cannabinoid receptor 1 (brain)
hsa-miR-448	0	0	1	1	0	0	SCFD1	sec1 family domain containing 1
hsa-miR-448	1	0	1	1	1	1	VGLL3	vestigial like 3 (Drosophila)
hsa-miR-448	1	0	1	1	1	1	SNX9	sorting nexin 9
hsa-miR-448	1	0	1	1	1	1	RNF138	ring finger protein 138, E3 ubiquitin protein ligase
hsa-miR-448	1	0	1	1	1	1	TOB2	transducer of ERBB2, 2
hsa-miR-448	0	0	1	1	1	1	ADAM22	ADAM metallopeptidase domain 22
hsa-miR-448	0	0	1	1	1	1	HSD17B7	hydroxysteroid (17-beta) dehydrogenase 7
hsa-miR-448	1	0	1	1	1	1	ARID4B	AT rich interactive domain 4B (RBP1-like)
hsa-miR-448	1	0	1	1	1	1	LUC7L3	LUC7-like 3 (S. cerevisiae)
hsa-miR-448	1	0	1	1	1	1	PHF20	PHD finger protein 20
hsa-miR-448	0	0	1	0	1	1	ERAP1	endoplasmic reticulum aminopeptidase 1
hsa-miR-448	0	0	1	1	0	0	NCKIPSD	NCK interacting protein with SH3 domain
hsa-miR-448	0	0	1	1	1	1	SPAG11B	sperm associated antigen 11B
hsa-miR-448	1	0	1	1	1	1	RAB6B	RAB6B, member RAS oncogene family
hsa-miR-448	0	0	1	1	1	1	SHC3	SHC (Src homology 2 domain containing) transforming protein 3
hsa-miR-448	0	0	1	1	1	1	USP18	ubiquitin specific peptidase 18
hsa-miR-448	1	0	1	1	1	1	SIX4	SIX homeobox 4
hsa-miR-448	1	0	1	1	0	0	DUOX1	dual oxidase 1
hsa-miR-448	1	0	1	1	1	1	MDM1	Mdm1 nuclear protein homolog (mouse)
hsa-miR-448	0	0	1	1	1	1	RAB39A	RAB39A, member RAS oncogene family
hsa-miR-448	1	0	1	1	1	1	INO80	INO80 homolog (S. cerevisiae)
hsa-miR-448	1	0	1	0	1	1	EIF2C4	eukaryotic translation initiation factor 2C, 4
hsa-miR-448	0	0	1	1	1	1	LRRC16A	leucine rich repeat containing 16A
hsa-miR-448	1	0	1	1	1	1	HAUS6	HAUS augmin-like complex, subunit 6
hsa-miR-448	1	0	1	1	1	1	VPS13C	vacuolar protein sorting 13 homolog C (S. cerevisiae)
hsa-miR-448	0	0	1	1	1	1	NCAPG2	non-SMC condensin II complex, subunit G2
hsa-miR-448	0	0	1	1	1	1	SOHLH2	spermatogenesis and oogenesis specific basic helix-loop-helix 2
hsa-miR-448	0	0	1	1	0	0	INTS8	integrator complex subunit 8
hsa-miR-448	0	0	1	1	1	1	SCYL2	SCY1-like 2 (S. cerevisiae)
hsa-miR-448	0	0	1	0	1	1	MREG	melanoregulin
hsa-miR-448	1	0	1	1	1	1	IFT57	intraflagellar transport 57 homolog (Chlamydomonas)
hsa-miR-448	1	0	1	1	1	1	LRRC8D	leucine rich repeat containing 8 family, member D
hsa-miR-448	1	0	1	0	1	1	MSL2	male-specific lethal 2 homolog (Drosophila)
hsa-miR-448	1	0	1	1	1	1	TMEM184C	transmembrane protein 184C
hsa-miR-448	1	0	1	1	1	1	DDX19A	DEAD (Asp-Glu-Ala-Asp) box polypeptide 19A
hsa-miR-448	1	0	1	1	1	1	AGPAT5	1-acylglycerol-3-phosphate O-acyltransferase 5 (lysophosphatidic acid acyltransferase, epsilon)
hsa-miR-448	1	0	1	0	1	1	TMEM106B	transmembrane protein 106B
hsa-miR-448	0	0	1	1	1	1	STK32B	serine/threonine kinase 32B
hsa-miR-448	0	0	1	1	1	1	ZC3H15	zinc finger CCCH-type containing 15
hsa-miR-448	1	0	1	1	1	1	ASH1L	ash1 (absent, small, or homeotic)-like (Drosophila)
hsa-miR-448	1	0	1	0	1	1	LRP1B	low density lipoprotein receptor-related protein 1B
hsa-miR-448	1	0	1	1	1	1	MLL5	myeloid/lymphoid or mixed-lineage leukemia 5 (trithorax homolog, Drosophila)
hsa-miR-448	1	0	1	1	1	1	KIAA1199	KIAA1199
hsa-miR-448	1	0	1	1	1	1	AJAP1	adherens junctions associated protein 1
hsa-miR-448	1	0	1	1	1	1	GNG12	guanine nucleotide binding protein (G protein), gamma 12
hsa-miR-448	0	0	1	1	1	1	NPAP1	nuclear pore associated protein 1
hsa-miR-448	1	0	1	1	1	1	SASH3	SAM and SH3 domain containing 3
hsa-miR-448	0	0	1	1	1	1	RIN2	Ras and Rab interactor 2
hsa-miR-448	1	0	1	0	1	1	CCDC93	coiled-coil domain containing 93
hsa-miR-448	1	0	1	0	1	1	CCNJ	cyclin J
hsa-miR-448	0	0	1	1	1	1	CRLS1	cardiolipin synthase 1
hsa-miR-448	1	0	1	0	1	1	PAPOLB	poly(A) polymerase beta (testis specific)
hsa-miR-448	1	0	1	1	1	1	FEM1C	fem-1 homolog c (C. elegans)
hsa-miR-448	0	0	1	1	1	1	PRTFDC1	phosphoribosyl transferase domain containing 1
hsa-miR-448	1	0	1	0	1	1	EIF5A2	eukaryotic translation initiation factor 5A2
hsa-miR-448	1	0	1	1	1	1	PCDH9	protocadherin 9
hsa-miR-448	0	0	1	1	0	0	AMHR2	anti-Mullerian hormone receptor, type II
hsa-miR-448	1	0	1	0	1	1	DCUN1D1	DCN1, defective in cullin neddylation 1, domain containing 1 (S. cerevisiae)
hsa-miR-448	0	0	1	1	1	1	TMEM27	transmembrane protein 27
hsa-miR-448	1	0	1	0	1	1	KCNS2	potassium voltage-gated channel, delayed-rectifier, subfamily S, member 2
hsa-miR-448	1	0	1	1	1	1	SLC12A5	solute carrier family 12 (potassium/chloride transporter), member 5
hsa-miR-448	1	0	1	1	1	1	NCEH1	neutral cholesterol ester hydrolase 1
hsa-miR-448	0	0	1	1	1	1	ARRDC3	arrestin domain containing 3
hsa-miR-448	1	0	1	0	1	1	CRAMP1L	Crm, cramped-like (Drosophila)
hsa-miR-448	1	0	1	0	1	1	WDFY1	WD repeat and FYVE domain containing 1
hsa-miR-448	1	0	1	0	1	1	KIAA1456	KIAA1456
hsa-miR-448	1	0	1	1	1	1	RANBP10	RAN binding protein 10
hsa-miR-448	1	0	1	1	1	1	CNTN3	contactin 3 (plasmacytoma associated)
hsa-miR-448	1	0	1	0	1	1	GPAM	glycerol-3-phosphate acyltransferase, mitochondrial
hsa-miR-448	0	0	1	1	1	1	KIAA1586	KIAA1586
hsa-miR-448	0	0	1	1	1	1	EPG5	ectopic P-granules autophagy protein 5 homolog (C. elegans)
hsa-miR-448	1	0	1	1	1	1	ZNFX1	zinc finger, NFX1-type containing 1
hsa-miR-448	1	0	1	1	1	1	NTN4	netrin 4
hsa-miR-448	1	0	1	1	1	1	FAM60A	family with sequence similarity 60, member A
hsa-miR-448	1	0	1	1	1	1	TGIF2	TGFB-induced factor homeobox 2
hsa-miR-448	0	0	1	0	1	1	CFL2	cofilin 2 (muscle)
hsa-miR-448	0	0	1	1	1	1	ITM2B	integral membrane protein 2B
hsa-miR-448	1	0	1	1	1	1	GOLPH3	golgi phosphoprotein 3 (coat-protein)
hsa-miR-448	1	0	1	1	1	1	LRRC4	leucine rich repeat containing 4
hsa-miR-448	0	0	1	1	1	1	RAB38	RAB38, member RAS oncogene family
hsa-miR-448	0	0	1	1	0	0	KIF9	kinesin family member 9
hsa-miR-448	0	0	1	1	1	1	POPDC3	popeye domain containing 3
hsa-miR-448	1	0	1	1	1	1	XPO4	exportin 4
hsa-miR-448	1	0	1	0	1	1	GREM2	gremlin 2
hsa-miR-448	0	0	1	1	1	1	HHIP	hedgehog interacting protein
hsa-miR-448	1	0	1	1	1	1	ALDH8A1	aldehyde dehydrogenase 8 family, member A1
hsa-miR-448	0	0	1	1	0	0	TSPY2	testis specific protein, Y-linked 2
hsa-miR-448	1	0	1	1	1	1	RMND5A	required for meiotic nuclear division 5 homolog A (S. cerevisiae)
hsa-miR-448	1	0	1	1	1	1	FBXL17	F-box and leucine-rich repeat protein 17
hsa-miR-448	1	0	1	1	1	1	AIDA	axin interactor, dorsalization associated
hsa-miR-448	1	0	1	1	1	1	RFX7	regulatory factor X, 7
hsa-miR-448	0	0	1	0	1	1	NAIP	NLR family, apoptosis inhibitory protein
hsa-miR-448	1	0	1	1	1	1	REEP1	receptor accessory protein 1
hsa-miR-448	1	0	1	1	1	1	GID4	GID complex subunit 4, VID24 homolog (S. cerevisiae)
hsa-miR-448	0	0	1	1	1	1	PLA2G4A	phospholipase A2, group IVA (cytosolic, calcium-dependent)
hsa-miR-448	1	0	1	1	1	1	ATP10A	ATPase, class V, type 10A
hsa-miR-448	0	0	1	0	1	1	ZYG11B	zyg-11 homolog B (C. elegans)
hsa-miR-448	0	0	1	1	1	1	LRRK1	leucine-rich repeat kinase 1
hsa-miR-448	0	0	1	1	1	1	BBS10	Bardet-Biedl syndrome 10
hsa-miR-448	0	0	1	1	1	1	TTLL7	tubulin tyrosine ligase-like family, member 7
hsa-miR-448	1	0	1	1	1	1	C15orf29	chromosome 15 open reading frame 29
hsa-miR-448	0	0	1	1	1	1	SHCBP1	SHC SH2-domain binding protein 1
hsa-miR-448	1	0	1	0	1	1	MOB3B	MOB kinase activator 3B
hsa-miR-448	0	0	1	1	0	0	CATSPERB	catsper channel auxiliary subunit beta
hsa-miR-448	1	0	1	1	1	1	TMC7	transmembrane channel-like 7
hsa-miR-448	0	0	1	1	1	1	ZNF767	zinc finger family member 767
hsa-miR-448	1	0	1	1	1	1	GRHL2	grainyhead-like 2 (Drosophila)
hsa-miR-448	1	0	1	1	1	1	POF1B	premature ovarian failure, 1B
hsa-miR-448	1	0	1	0	1	1	NAA25	N(alpha)-acetyltransferase 25, NatB auxiliary subunit
hsa-miR-448	1	0	1	1	1	1	KLHL18	kelch-like 18 (Drosophila)
hsa-miR-448	1	0	1	0	1	1	VCPIP1	valosin containing protein (p97)/p47 complex interacting protein 1
hsa-miR-448	1	0	1	1	1	1	PROSER1	proline and serine rich 1
hsa-miR-448	1	0	1	1	1	1	SYNC	syncoilin, intermediate filament protein
hsa-miR-448	1	0	1	1	1	1	SGPP1	sphingosine-1-phosphate phosphatase 1
hsa-miR-448	1	0	1	1	1	1	MAP4	microtubule-associated protein 4
hsa-miR-448	0	0	1	1	1	1	ISCA1	iron-sulfur cluster assembly 1 homolog (S. cerevisiae)
hsa-miR-448	0	0	1	1	1	1	FCRL5	Fc receptor-like 5
hsa-miR-448	0	0	1	1	1	1	FCRL4	Fc receptor-like 4
hsa-miR-448	0	0	1	0	1	1	ENAM	enamelin
hsa-miR-448	1	0	1	1	1	1	TMEM133	transmembrane protein 133
hsa-miR-448	0	0	1	1	1	1	MAGT1	magnesium transporter 1
hsa-miR-448	1	0	1	1	1	1	FBXO30	F-box protein 30
hsa-miR-448	1	0	1	1	1	1	SON	SON DNA binding protein
hsa-miR-448	1	0	1	1	1	1	ANTXR1	anthrax toxin receptor 1
hsa-miR-448	1	0	1	0	1	1	FAR1	fatty acyl CoA reductase 1
hsa-miR-448	1	0	1	1	1	1	SLITRK6	SLIT and NTRK-like family, member 6
hsa-miR-448	0	0	1	0	1	1	LDOC1L	leucine zipper, down-regulated in cancer 1-like
hsa-miR-448	1	0	1	0	1	1	PSD2	pleckstrin and Sec7 domain containing 2
hsa-miR-448	0	0	1	1	0	0	CHCHD6	coiled-coil-helix-coiled-coil-helix domain containing 6
hsa-miR-448	1	0	1	1	1	1	HOOK3	hook homolog 3 (Drosophila)
hsa-miR-448	1	0	1	1	1	1	PARD6B	par-6 partitioning defective 6 homolog beta (C. elegans)
hsa-miR-448	0	0	1	1	1	1	FNDC1	fibronectin type III domain containing 1
hsa-miR-448	0	0	1	0	1	1	IMMP2L	IMP2 inner mitochondrial membrane peptidase-like (S. cerevisiae)
hsa-miR-448	1	0	1	1	1	1	TRIM63	tripartite motif containing 63, E3 ubiquitin protein ligase
hsa-miR-448	1	0	1	1	1	1	PPP1R9B	protein phosphatase 1, regulatory subunit 9B
hsa-miR-448	1	0	1	0	1	1	PPP1R15B	protein phosphatase 1, regulatory subunit 15B
hsa-miR-448	0	0	1	1	1	1	C13orf33	chromosome 13 open reading frame 33
hsa-miR-448	1	0	1	0	1	1	UBASH3B	ubiquitin associated and SH3 domain containing B
hsa-miR-448	1	0	1	1	1	1	PCDH11Y	protocadherin 11 Y-linked
hsa-miR-448	1	0	1	1	1	1	PDGFA	platelet-derived growth factor alpha polypeptide
hsa-miR-448	1	0	1	1	1	1	HIAT1	hippocampus abundant transcript 1
hsa-miR-448	1	0	1	1	1	1	TP53INP1	tumor protein p53 inducible nuclear protein 1
hsa-miR-448	0	0	1	1	1	1	ZNF160	zinc finger protein 160
hsa-miR-448	1	0	1	1	1	1	ADRA1A	adrenoceptor alpha 1A
hsa-miR-448	0	0	1	1	1	1	CTTNBP2	cortactin binding protein 2
hsa-miR-448	1	0	1	1	1	1	EPT1	ethanolaminephosphotransferase 1 (CDP-ethanolamine-specific)
hsa-miR-448	0	0	1	1	1	1	ARHGAP18	Rho GTPase activating protein 18
hsa-miR-448	1	0	1	1	1	1	BRWD1	bromodomain and WD repeat domain containing 1
hsa-miR-448	1	0	1	1	1	1	SLITRK1	SLIT and NTRK-like family, member 1
hsa-miR-448	0	0	1	1	1	1	IL22RA2	interleukin 22 receptor, alpha 2
hsa-miR-448	0	0	1	1	0	0	THEM4	thioesterase superfamily member 4
hsa-miR-448	1	0	1	1	1	1	NAA15	N(alpha)-acetyltransferase 15, NatA auxiliary subunit
hsa-miR-448	0	0	1	1	1	1	ABCA10	ATP-binding cassette, sub-family A (ABC1), member 10
hsa-miR-448	0	0	1	1	0	0	TCEAL2	transcription elongation factor A (SII)-like 2
hsa-miR-448	1	0	1	1	1	1	SLC44A1	solute carrier family 44, member 1
hsa-miR-448	1	0	1	0	1	1	SOCS4	suppressor of cytokine signaling 4
hsa-miR-448	0	0	1	1	1	1	COLEC12	collectin sub-family member 12
hsa-miR-448	1	0	1	1	1	1	KLHL6	kelch-like 6 (Drosophila)
hsa-miR-448	0	0	1	1	1	1	ATP6V1G2	ATPase, H+ transporting, lysosomal 13kDa, V1 subunit G2
hsa-miR-448	1	0	1	1	1	1	WHSC1	Wolf-Hirschhorn syndrome candidate 1
hsa-miR-448	1	0	1	1	1	1	BMPER	BMP binding endothelial regulator
hsa-miR-448	0	0	1	0	1	1	SYNPO2	synaptopodin 2
hsa-miR-448	0	0	1	1	1	1	RAD51B	RAD51 homolog B (S. cerevisiae)
hsa-miR-448	1	0	1	1	1	1	PANK1	pantothenate kinase 1
hsa-miR-448	1	0	1	1	1	1	FAM122A	family with sequence similarity 122A
hsa-miR-448	0	0	1	1	1	1	KTI12	KTI12 homolog, chromatin associated (S. cerevisiae)
hsa-miR-448	1	0	1	1	1	1	KCTD12	potassium channel tetramerisation domain containing 12
hsa-miR-448	1	0	1	0	1	1	NUS1	nuclear undecaprenyl pyrophosphate synthase 1 homolog (S. cerevisiae)
hsa-miR-448	0	0	1	0	0	0	TM4SF18	transmembrane 4 L six family member 18
hsa-miR-448	0	0	1	1	0	0	LEO1	Leo1, Paf1/RNA polymerase II complex component, homolog (S. cerevisiae)
hsa-miR-448	0	0	1	1	1	1	TRUB1	TruB pseudouridine (psi) synthase homolog 1 (E. coli)
hsa-miR-448	0	0	1	1	1	1	SLC23A3	solute carrier family 23 (nucleobase transporters), member 3
hsa-miR-448	1	0	1	1	1	1	MBNL2	muscleblind-like splicing regulator 2
hsa-miR-448	0	0	1	1	0	0	CSNK1A1L	casein kinase 1, alpha 1-like
hsa-miR-448	1	0	1	1	1	1	CCSAP	centriole, cilia and spindle-associated protein
hsa-miR-448	0	0	1	1	0	0	SPESP1	sperm equatorial segment protein 1
hsa-miR-448	1	0	1	1	1	1	SEPT6	septin 6
hsa-miR-448	1	0	1	0	1	1	MTPN	myotrophin
hsa-miR-448	0	0	1	1	1	1	GLIS1	GLIS family zinc finger 1
hsa-miR-448	1	0	1	1	1	1	BOD1L1	biorientation of chromosomes in cell division 1-like 1
hsa-miR-448	0	0	1	1	1	1	IPMK	inositol polyphosphate multikinase
hsa-miR-448	1	0	1	1	1	1	TBX15	T-box 15
hsa-miR-448	0	0	1	0	1	1	AFAP1L1	actin filament associated protein 1-like 1
hsa-miR-448	1	0	1	1	1	1	FGFBP3	fibroblast growth factor binding protein 3
hsa-miR-448	0	0	1	1	1	1	C15orf43	chromosome 15 open reading frame 43
hsa-miR-448	1	0	1	0	1	1	MOSPD2	motile sperm domain containing 2
hsa-miR-448	1	0	1	0	1	1	RWDD4	RWD domain containing 4
hsa-miR-448	1	0	1	1	1	1	ZCCHC5	zinc finger, CCHC domain containing 5
hsa-miR-448	1	0	1	1	1	1	HOXA9	homeobox A9
hsa-miR-448	1	0	1	1	1	1	PDIK1L	PDLIM1 interacting kinase 1 like
hsa-miR-448	1	0	1	1	1	1	WTAP	Wilms tumor 1 associated protein
hsa-miR-448	1	0	1	1	1	1	PXT1	peroxisomal, testis specific 1
hsa-miR-448	1	0	1	1	0	0	SVEP1	sushi, von Willebrand factor type A, EGF and pentraxin domain containing 1
hsa-miR-448	0	0	1	0	1	1	VGLL2	vestigial like 2 (Drosophila)
hsa-miR-448	1	0	1	1	1	1	CREBRF	CREB3 regulatory factor
hsa-miR-448	1	0	1	1	1	1	MSI2	musashi homolog 2 (Drosophila)
hsa-miR-448	1	0	1	0	1	1	KLHDC1	kelch domain containing 1
hsa-miR-448	0	0	1	0	1	1	CTAGE1	cutaneous T-cell lymphoma-associated antigen 1
hsa-miR-448	0	0	1	1	0	0	SSX7	synovial sarcoma, X breakpoint 7
hsa-miR-448	1	0	1	1	1	1	MMGT1	membrane magnesium transporter 1
hsa-miR-448	1	0	1	1	1	1	VKORC1L1	vitamin K epoxide reductase complex, subunit 1-like 1
hsa-miR-448	0	0	1	1	1	1	DZIP1L	DAZ interacting protein 1-like
hsa-miR-448	1	0	1	1	1	1	RFX6	regulatory factor X, 6
hsa-miR-448	1	0	1	0	1	1	KSR2	kinase suppressor of ras 2
hsa-miR-448	1	0	1	1	1	1	DIP2B	DIP2 disco-interacting protein 2 homolog B (Drosophila)
hsa-miR-448	1	0	1	1	1	1	SLC9A9	solute carrier family 9, subfamily A (NHE9, cation proton antiporter 9), member 9
hsa-miR-448	0	0	1	0	0	0	PDZD8	PDZ domain containing 8
hsa-miR-448	0	0	1	1	1	1	ZCCHC12	zinc finger, CCHC domain containing 12
hsa-miR-448	0	0	1	1	1	1	HARBI1	harbinger transposase derived 1
hsa-miR-448	1	0	1	0	1	1	DPY19L2	dpy-19-like 2 (C. elegans)
hsa-miR-448	0	0	1	1	1	1	SCARA5	scavenger receptor class A, member 5 (putative)
hsa-miR-448	0	0	1	1	1	1	LYG1	lysozyme G-like 1
hsa-miR-448	1	0	1	1	1	1	LDLRAD3	low density lipoprotein receptor class A domain containing 3
hsa-miR-448	1	0	1	1	1	1	SCN4B	sodium channel, voltage-gated, type IV, beta subunit
hsa-miR-448	1	0	1	1	1	1	SWSAP1	SWIM-type zinc finger 7 associated protein 1
hsa-miR-448	1	0	1	1	1	1	EXOC8	exocyst complex component 8
hsa-miR-448	0	0	1	1	0	0	AGR3	anterior gradient 3 homolog (Xenopus laevis)
hsa-miR-448	1	0	1	1	1	1	INADL	InaD-like (Drosophila)
hsa-miR-448	1	0	1	1	1	1	PPAP2B	phosphatidic acid phosphatase type 2B
hsa-miR-448	0	0	1	1	1	1	RASSF6	Ras association (RalGDS/AF-6) domain family member 6
hsa-miR-448	1	0	1	1	1	1	GMCL1	germ cell-less, spermatogenesis associated 1
hsa-miR-448	0	0	1	1	1	1	ZNF831	zinc finger protein 831
hsa-miR-448	1	0	1	1	1	1	MB21D2	Mab-21 domain containing 2
hsa-miR-448	1	0	1	1	1	1	TMEM26	transmembrane protein 26
hsa-miR-448	1	0	1	1	1	1	MTDH	metadherin
hsa-miR-448	0	0	1	1	1	1	CCDC67	coiled-coil domain containing 67
hsa-miR-448	0	0	1	1	0	0	ANKRD37	ankyrin repeat domain 37
hsa-miR-448	0	0	1	0	1	1	SPATA12	spermatogenesis associated 12
hsa-miR-448	1	0	1	1	1	1	ZSCAN22	zinc finger and SCAN domain containing 22
hsa-miR-448	0	0	1	1	1	1	USP12	ubiquitin specific peptidase 12
hsa-miR-448	0	0	1	1	1	1	ARL13B	ADP-ribosylation factor-like 13B
hsa-miR-448	1	0	1	0	1	1	SLC16A9	solute carrier family 16, member 9 (monocarboxylic acid transporter 9)
hsa-miR-448	1	0	1	1	1	1	ZBTB41	zinc finger and BTB domain containing 41
hsa-miR-448	1	0	1	1	1	1	PHLPP1	PH domain and leucine rich repeat protein phosphatase 1
hsa-miR-448	1	0	1	1	1	1	CPXM2	carboxypeptidase X (M14 family), member 2
hsa-miR-448	1	0	1	0	1	1	LYSMD3	LysM, putative peptidoglycan-binding, domain containing 3
hsa-miR-448	0	0	1	1	1	1	FAM174A	family with sequence similarity 174, member A
hsa-miR-448	0	0	1	1	1	1	GJB7	gap junction protein, beta 7, 25kDa
hsa-miR-448	1	0	1	1	1	1	PTGER3	prostaglandin E receptor 3 (subtype EP3)
hsa-miR-448	1	0	1	0	1	1	LHFPL3	lipoma HMGIC fusion partner-like 3
hsa-miR-448	0	0	1	1	1	1	MDFIC	MyoD family inhibitor domain containing
hsa-miR-448	0	0	1	1	1	1	SHC4	SHC (Src homology 2 domain containing) family, member 4
hsa-miR-448	1	0	1	0	1	1	MBLAC2	metallo-beta-lactamase domain containing 2
hsa-miR-448	0	0	1	1	1	1	APOBEC4	apolipoprotein B mRNA editing enzyme, catalytic polypeptide-like 4 (putative)
hsa-miR-448	0	0	1	1	1	1	ACYP1	acylphosphatase 1, erythrocyte (common) type
hsa-miR-448	1	0	1	0	1	1	NAALADL2	N-acetylated alpha-linked acidic dipeptidase-like 2
hsa-miR-448	0	0	1	1	1	1	SEPT14	septin 14
hsa-miR-448	1	0	1	1	1	1	TNFAIP8L3	tumor necrosis factor, alpha-induced protein 8-like 3
hsa-miR-448	0	0	1	1	1	1	C8orf86	chromosome 8 open reading frame 86
hsa-miR-448	0	0	1	0	1	1	FSD1L	fibronectin type III and SPRY domain containing 1-like
hsa-miR-448	0	0	1	1	0	0	AMTN	amelotin
hsa-miR-448	0	0	1	0	1	1	TMEM215	transmembrane protein 215
hsa-miR-448	0	0	1	1	1	1	ZNF543	zinc finger protein 543
hsa-miR-448	0	0	1	0	0	0	HLA-H	major histocompatibility complex, class I, H (pseudogene)
hsa-miR-448	0	0	1	0	0	0	MIR155HG	MIR155 host gene (non-protein coding)
hsa-miR-448	0	0	1	1	0	0	TTTY8	testis-specific transcript, Y-linked 8 (non-protein coding)
hsa-miR-448	0	0	1	0	0	0	TTTY15	testis-specific transcript, Y-linked 15 (non-protein coding)
hsa-miR-448	0	0	1	0	0	0	VENTXP1	VENT homeobox pseudogene 1
hsa-miR-448	0	0	1	0	0	0	NUDT4P1	nudix (nucleoside diphosphate linked moiety X)-type motif 4 pseudogene 1
hsa-miR-448	0	0	1	0	0	0	ST7-OT4	ST7 overlapping transcript 4 (non-protein coding)
hsa-miR-448	0	0	1	0	0	0	SNORA4	small nucleolar RNA, H/ACA box 4
hsa-miR-448	0	0	1	0	0	0	NUDT9P1	nudix (nucleoside diphosphate linked moiety X)-type motif 9 pseudogene 1
hsa-miR-448	0	0	1	0	0	0	HCG26	HLA complex group 26 (non-protein coding)
hsa-miR-448	0	0	1	0	0	0	LOC374443	C-type lectin domain family 2, member D pseudogene
hsa-miR-448	0	0	1	0	0	0	MALAT1	metastasis associated lung adenocarcinoma transcript 1 (non-protein coding)
hsa-miR-448	0	0	1	0	0	0	TCAM1P	testicular cell adhesion molecule 1 homolog (mouse), pseudogene
hsa-miR-448	0	0	1	0	0	0	SNORD113-4	small nucleolar RNA, C/D box 113-4
hsa-miR-448	0	0	1	1	0	0	SNRPN	small nuclear ribonucleoprotein polypeptide N
hsa-miR-448	0	0	1	0	0	0	SNORD116-21	small nucleolar RNA, C/D box 116-21
hsa-miR-448	1	0	1	1	1	1	PAM	peptidylglycine alpha-amidating monooxygenase
hsa-miR-448	1	0	1	1	1	1	ZNF238	zinc finger protein 238
hsa-miR-448	0	0	1	1	0	0	STK19	serine/threonine kinase 19
hsa-miR-448	0	0	0	1	1	1	CCL18	chemokine (C-C motif) ligand 18 (pulmonary and activation-regulated)
hsa-miR-448	0	0	1	1	1	1	RPAP3	RNA polymerase II associated protein 3
hsa-miR-448	0	0	1	1	0	0	RHBDD2	rhomboid domain containing 2
hsa-miR-448	0	0	1	1	1	1	GPATCH1	G patch domain containing 1
hsa-miR-448	0	0	0	1	1	1	LAMB4	laminin, beta 4
hsa-miR-448	0	0	0	1	0	0	FGF22	fibroblast growth factor 22
hsa-miR-448	0	0	0	1	0	0	PYGL	phosphorylase, glycogen, liver
hsa-miR-448	1	0	0	1	1	1	SALL4	sal-like 4 (Drosophila)
hsa-miR-448	0	0	1	1	1	1	TKTL1	transketolase-like 1
hsa-miR-448	0	0	1	1	0	0	GPR50	G protein-coupled receptor 50
hsa-miR-448	0	0	1	1	0	0	HTATSF1	HIV-1 Tat specific factor 1
hsa-miR-448	1	0	0	1	1	1	ZNF419	zinc finger protein 419
hsa-miR-448	0	0	0	1	0	0	SLC5A5	solute carrier family 5 (sodium iodide symporter), member 5
hsa-miR-448	0	0	1	1	1	1	TFPI2	tissue factor pathway inhibitor 2
hsa-miR-448	1	0	1	1	1	1	DDX5	DEAD (Asp-Glu-Ala-Asp) box helicase 5
hsa-miR-448	0	0	0	1	1	1	SULT1E1	sulfotransferase family 1E, estrogen-preferring, member 1
hsa-miR-448	1	0	1	1	1	1	HSPA8	heat shock 70kDa protein 8
hsa-miR-448	0	0	0	1	1	1	RERGL	RERG/RAS-like
hsa-miR-448	1	0	1	1	1	1	REV3L	REV3-like, polymerase (DNA directed), zeta, catalytic subunit
hsa-miR-448	0	0	1	1	1	1	C6orf118	chromosome 6 open reading frame 118
hsa-miR-448	0	0	0	1	0	0	NEU2	sialidase 2 (cytosolic sialidase)
hsa-miR-448	0	0	0	1	1	1	IL1RL1	interleukin 1 receptor-like 1
hsa-miR-448	0	0	0	1	0	0	SLIRP	SRA stem-loop interacting RNA binding protein
hsa-miR-448	1	0	1	1	0	0	ST3GAL4	ST3 beta-galactoside alpha-2,3-sialyltransferase 4
hsa-miR-448	0	0	1	1	0	0	MND1	meiotic nuclear divisions 1 homolog (S. cerevisiae)
hsa-miR-448	0	0	0	1	1	1	DEPDC7	DEP domain containing 7
hsa-miR-448	1	0	1	1	1	1	CLTA	clathrin, light chain A
hsa-miR-448	0	0	0	1	1	1	RAB9A	RAB9A, member RAS oncogene family
hsa-miR-448	0	0	0	1	1	1	TNFAIP6	tumor necrosis factor, alpha-induced protein 6
hsa-miR-448	0	0	1	1	1	1	SEMG1	semenogelin I
hsa-miR-448	0	0	0	1	1	1	APOBEC2	apolipoprotein B mRNA editing enzyme, catalytic polypeptide-like 2
hsa-miR-448	0	0	1	1	1	1	ATP5S	ATP synthase, H+ transporting, mitochondrial Fo complex, subunit s (factor B)
hsa-miR-448	1	0	0	1	0	0	PRR12	proline rich 12
hsa-miR-448	0	0	1	1	1	1	HSPA2	heat shock 70kDa protein 2
hsa-miR-448	0	0	1	1	1	1	TSPAN8	tetraspanin 8
hsa-miR-448	0	0	1	1	1	1	LRRC17	leucine rich repeat containing 17
hsa-miR-448	1	0	1	1	1	1	HOXD13	homeobox D13
hsa-miR-448	0	0	0	1	0	0	PDGFRL	platelet-derived growth factor receptor-like
hsa-miR-448	0	0	0	1	0	0	DHX58	DEXH (Asp-Glu-X-His) box polypeptide 58
hsa-miR-448	0	0	0	1	1	1	TDRD1	tudor domain containing 1
hsa-miR-448	0	0	1	1	1	1	PHF10	PHD finger protein 10
hsa-miR-448	0	0	0	1	0	0	MAS1	MAS1 oncogene
hsa-miR-448	0	0	1	1	1	1	NOL11	nucleolar protein 11
hsa-miR-448	0	0	1	1	1	1	TEX101	testis expressed 101
hsa-miR-448	0	0	0	1	1	1	AOC2	amine oxidase, copper containing 2 (retina-specific)
hsa-miR-448	0	0	0	1	0	0	ZSCAN5A	zinc finger and SCAN domain containing 5A
hsa-miR-448	0	0	1	1	1	1	VIMP	VCP-interacting membrane protein
hsa-miR-448	0	0	1	1	0	0	LGALS3	lectin, galactoside-binding, soluble, 3
hsa-miR-448	0	0	0	1	1	1	APCS	amyloid P component, serum
hsa-miR-448	1	0	1	1	0	0	MTUS2	microtubule associated tumor suppressor candidate 2
hsa-miR-448	0	0	1	1	0	0	SLC2A11	solute carrier family 2 (facilitated glucose transporter), member 11
hsa-miR-448	0	0	1	1	0	0	KRBA1	KRAB-A domain containing 1
hsa-miR-448	0	0	1	1	1	1	HBXIP	hepatitis B virus x interacting protein
hsa-miR-448	1	0	1	1	0	0	TIMM10	translocase of inner mitochondrial membrane 10 homolog (yeast)
hsa-miR-448	0	0	1	1	0	0	GPR77	G protein-coupled receptor 77
hsa-miR-448	1	0	1	1	0	0	REPS1	RALBP1 associated Eps domain containing 1
hsa-miR-448	0	0	1	1	1	1	NUPL2	nucleoporin like 2
hsa-miR-448	0	0	0	1	0	0	IL36A	interleukin 36, alpha
hsa-miR-448	0	0	0	1	1	1	PGBD1	piggyBac transposable element derived 1
hsa-miR-448	0	0	0	1	1	1	FGFBP2	fibroblast growth factor binding protein 2
hsa-miR-448	0	0	0	1	0	0	RPLP1	ribosomal protein, large, P1
hsa-miR-448	0	0	1	1	1	1	LRRC49	leucine rich repeat containing 49
hsa-miR-448	1	0	1	1	1	1	CCBL2	cysteine conjugate-beta lyase 2
hsa-miR-448	0	0	1	1	1	1	LIN7A	lin-7 homolog A (C. elegans)
hsa-miR-448	0	0	1	1	0	0	PPWD1	peptidylprolyl isomerase domain and WD repeat containing 1
hsa-miR-448	1	0	1	1	1	1	PROX1	prospero homeobox 1
hsa-miR-448	0	0	0	1	0	0	DSG2	desmoglein 2
hsa-miR-448	0	0	1	1	1	1	WDR59	WD repeat domain 59
hsa-miR-448	1	0	1	1	1	1	SEC23B	Sec23 homolog B (S. cerevisiae)
hsa-miR-448	0	0	1	1	0	0	RRAGB	Ras-related GTP binding B
hsa-miR-448	0	0	1	1	0	0	ASPA	aspartoacylase
hsa-miR-448	0	0	1	1	1	1	BIRC3	baculoviral IAP repeat containing 3
hsa-miR-448	0	0	1	1	0	0	ZC2HC1A	zinc finger, C2HC-type containing 1A
hsa-miR-448	0	0	1	1	1	1	CHIC2	cysteine-rich hydrophobic domain 2
hsa-miR-448	0	0	0	1	1	1	GTF3C3	general transcription factor IIIC, polypeptide 3, 102kDa
hsa-miR-448	0	0	1	1	1	1	TIMMDC1	translocase of inner mitochondrial membrane domain containing 1
hsa-miR-448	0	0	1	1	0	0	NDST4	N-deacetylase/N-sulfotransferase (heparan glucosaminyl) 4
hsa-miR-448	0	0	1	1	1	1	ASIC5	acid-sensing (proton-gated) ion channel family member 5
hsa-miR-448	0	0	0	1	1	1	RAB17	RAB17, member RAS oncogene family
hsa-miR-448	0	0	0	1	0	0	FGF10	fibroblast growth factor 10
hsa-miR-448	0	0	0	1	0	0	KLKB1	kallikrein B, plasma (Fletcher factor) 1
hsa-miR-448	0	0	1	1	1	1	DNAJB11	DnaJ (Hsp40) homolog, subfamily B, member 11
hsa-miR-448	0	0	1	1	1	1	ADAM2	ADAM metallopeptidase domain 2
hsa-miR-448	0	0	1	1	1	1	GTF2IRD1	GTF2I repeat domain containing 1
hsa-miR-448	0	0	0	1	0	0	KIAA0020	KIAA0020
hsa-miR-448	0	0	1	1	1	1	SQLE	squalene epoxidase
hsa-miR-448	1	0	1	1	1	1	FAM160A2	family with sequence similarity 160, member A2
hsa-miR-448	0	0	1	1	1	1	TTC28	tetratricopeptide repeat domain 28
hsa-miR-448	0	0	0	1	1	1	ZCRB1	zinc finger CCHC-type and RNA binding motif 1
hsa-miR-448	0	0	1	1	0	0	GPR65	G protein-coupled receptor 65
hsa-miR-448	0	0	0	1	1	1	ZNF223	zinc finger protein 223
hsa-miR-448	0	0	1	1	0	0	FXYD1	FXYD domain containing ion transport regulator 1
hsa-miR-448	0	0	1	1	0	0	FXYD7	FXYD domain containing ion transport regulator 7
hsa-miR-448	0	0	0	1	0	0	PSMB6	proteasome (prosome, macropain) subunit, beta type, 6
hsa-miR-448	0	0	1	1	0	0	WRAP73	WD repeat containing, antisense to TP73
hsa-miR-448	0	0	1	1	0	0	SLC44A3	solute carrier family 44, member 3
hsa-miR-448	0	0	1	1	1	1	PSMA5	proteasome (prosome, macropain) subunit, alpha type, 5
hsa-miR-448	0	0	0	1	1	1	SPATA5	spermatogenesis associated 5
hsa-miR-448	1	0	1	1	1	1	MARCH6	membrane-associated ring finger (C3HC4) 6, E3 ubiquitin protein ligase
hsa-miR-448	0	0	1	1	1	1	IFNK	interferon, kappa
hsa-miR-448	0	0	1	1	1	1	HSD17B12	hydroxysteroid (17-beta) dehydrogenase 12
hsa-miR-448	0	0	1	1	1	1	SESN3	sestrin 3
hsa-miR-448	0	0	0	1	0	0	MMP10	matrix metallopeptidase 10 (stromelysin 2)
hsa-miR-448	0	0	1	1	1	1	DLAT	dihydrolipoamide S-acetyltransferase
hsa-miR-448	0	0	0	1	1	1	TDO2	tryptophan 2,3-dioxygenase
hsa-miR-448	0	0	1	1	1	1	DST	dystonin
hsa-miR-448	1	0	1	1	1	1	RIT2	Ras-like without CAAX 2
hsa-miR-448	0	0	0	1	1	1	SPC25	SPC25, NDC80 kinetochore complex component, homolog (S. cerevisiae)
hsa-miR-448	0	0	0	1	1	1	JMY	junction mediating and regulatory protein, p53 cofactor
hsa-miR-448	0	0	1	1	1	1	CCDC148	coiled-coil domain containing 148
hsa-miR-448	0	0	0	1	1	1	TUBGCP5	tubulin, gamma complex associated protein 5
hsa-miR-448	0	0	0	1	1	1	HHIPL2	HHIP-like 2
hsa-miR-448	0	0	0	1	1	1	TMPRSS15	transmembrane protease, serine 15
hsa-miR-448	1	0	1	1	0	0	GRIA1	glutamate receptor, ionotropic, AMPA 1
hsa-miR-448	1	0	1	1	1	1	LSM11	LSM11, U7 small nuclear RNA associated
hsa-miR-448	0	0	1	1	0	0	TRIM42	tripartite motif containing 42
hsa-miR-448	0	0	1	1	1	1	GNAQ	guanine nucleotide binding protein (G protein), q polypeptide
hsa-miR-448	0	0	1	1	1	1	RWDD2B	RWD domain containing 2B
hsa-miR-448	0	0	1	1	0	0	FRRS1	ferric-chelate reductase 1
hsa-miR-448	0	0	1	1	1	1	RAB28	RAB28, member RAS oncogene family
hsa-miR-448	0	0	0	1	1	1	CD1A	CD1a molecule
hsa-miR-448	0	0	1	1	0	0	SPATA2L	spermatogenesis associated 2-like
hsa-miR-448	0	0	1	1	0	0	CCDC12	coiled-coil domain containing 12
hsa-miR-448	0	0	0	1	0	0	SDR9C7	short chain dehydrogenase/reductase family 9C, member 7
hsa-miR-448	0	0	0	1	1	1	TMCO4	transmembrane and coiled-coil domains 4
hsa-miR-448	0	0	1	1	0	0	RGSL1	regulator of G-protein signaling like 1
hsa-miR-448	0	0	0	1	1	1	HPGDS	hematopoietic prostaglandin D synthase
hsa-miR-448	0	0	1	1	1	1	SLC9A4	solute carrier family 9, subfamily A (NHE4, cation proton antiporter 4), member 4
hsa-miR-448	1	0	0	1	1	1	MRPS18C	mitochondrial ribosomal protein S18C
hsa-miR-448	0	0	1	1	1	1	SERPINI1	serpin peptidase inhibitor, clade I (neuroserpin), member 1
hsa-miR-448	1	0	1	1	1	1	PPP4R2	protein phosphatase 4, regulatory subunit 2
hsa-miR-448	0	0	1	1	1	1	WDR52	WD repeat domain 52
hsa-miR-448	1	0	1	1	1	1	CCNL1	cyclin L1
[truncated: 400 more rows]
