# Supplementary material for: Profiling of Selected MicroRNAs in Proliferative Eutopic Endometrium of Women with Ovarian Endometriosis
Source: Biomed Res Int. 2015 Aug 20;2015:760698. doi: 10.1155/2015/760698 (PMC4558423; doi:10.1155/2015/760698)
Supplement: Supplementary file 1 — Table I: The names of miRNAs significantly differentially expressed between eutopic endometrium of patients with endometriosis vs eutopic endometrium of patients without endometriosis. Table II: The associations between miRNA and mRNA, which presents detailed results of the search of six major databases i.e targetscan, tarbase, miranda, mirbase, mirtarget2 and pictar. [file 760698.f1.zip › 760698.f1/Table II/hsa-miR-483-3p.tsv]

miR	targetscan	tarbase	miranda	mirbase	mirtarget2	pictar	GeneSymbol	GeneName
hsa-miR-483-3p	0	0	1	0	0	0	NOP14-AS1	NOP14 antisense RNA 1
hsa-miR-483-3p	1	0	1	1	1	1	PRUNE2	prune homolog 2 (Drosophila)
hsa-miR-483-3p	0	0	1	1	1	1	PPIP5K1	diphosphoinositol pentakisphosphate kinase 1
hsa-miR-483-3p	1	0	1	0	1	1	PTPRT	protein tyrosine phosphatase, receptor type, T
hsa-miR-483-3p	0	0	1	1	1	1	C2CD2L	C2CD2-like
hsa-miR-483-3p	1	0	1	1	1	1	ZHX3	zinc fingers and homeoboxes 3
hsa-miR-483-3p	1	0	1	0	1	1	KIAA0408	KIAA0408
hsa-miR-483-3p	1	0	1	0	1	1	MTSS1	metastasis suppressor 1
hsa-miR-483-3p	1	0	1	1	1	1	TTC39A	tetratricopeptide repeat domain 39A
hsa-miR-483-3p	1	0	1	1	0	0	DENND4B	DENN/MADD domain containing 4B
hsa-miR-483-3p	0	0	1	1	0	0	ZNF862	zinc finger protein 862
hsa-miR-483-3p	1	0	1	0	1	1	MFAP3L	microfibrillar-associated protein 3-like
hsa-miR-483-3p	1	0	1	1	1	1	HIPK1	homeodomain interacting protein kinase 1
hsa-miR-483-3p	1	0	1	1	1	1	DNM3	dynamin 3
hsa-miR-483-3p	1	0	1	1	1	1	AHCYL2	adenosylhomocysteinase-like 2
hsa-miR-483-3p	1	0	1	1	1	1	WWC1	WW and C2 domain containing 1
hsa-miR-483-3p	1	0	1	1	1	1	CPEB3	cytoplasmic polyadenylation element binding protein 3
hsa-miR-483-3p	1	0	1	1	1	1	BAHD1	bromo adjacent homology domain containing 1
hsa-miR-483-3p	1	0	1	1	1	1	C11orf9	chromosome 11 open reading frame 9
hsa-miR-483-3p	0	0	1	1	1	1	FASTKD2	FAST kinase domains 2
hsa-miR-483-3p	0	0	1	1	0	0	RTEL1	regulator of telomere elongation helicase 1
hsa-miR-483-3p	1	0	1	1	1	1	PHF8	PHD finger protein 8
hsa-miR-483-3p	0	0	1	0	0	0	ELTD1	EGF, latrophilin and seven transmembrane domain containing 1
hsa-miR-483-3p	1	0	1	0	1	1	ODZ2	odz, odd Oz/ten-m homolog 2 (Drosophila)
hsa-miR-483-3p	0	0	1	1	0	0	ZC4H2	zinc finger, C4H2 domain containing
hsa-miR-483-3p	1	0	1	1	1	1	ATXN7L1	ataxin 7-like 1
hsa-miR-483-3p	1	0	1	0	1	1	PPFIBP1	PTPRF interacting protein, binding protein 1 (liprin beta 1)
hsa-miR-483-3p	0	0	1	0	0	0	MTA3	metastasis associated 1 family, member 3
hsa-miR-483-3p	1	0	1	0	0	0	ODZ4	odz, odd Oz/ten-m homolog 4 (Drosophila)
hsa-miR-483-3p	1	0	1	1	1	1	ATP2C1	ATPase, Ca++ transporting, type 2C, member 1
hsa-miR-483-3p	1	0	1	1	1	1	BAZ2B	bromodomain adjacent to zinc finger domain, 2B
hsa-miR-483-3p	0	0	1	0	0	0	COL20A1	collagen, type XX, alpha 1
hsa-miR-483-3p	0	0	1	1	1	1	PBLD	phenazine biosynthesis-like protein domain containing
hsa-miR-483-3p	1	0	1	1	1	1	PHF21A	PHD finger protein 21A
hsa-miR-483-3p	0	0	1	1	1	1	AMBRA1	autophagy/beclin-1 regulator 1
hsa-miR-483-3p	1	0	1	1	1	1	IKZF4	IKAROS family zinc finger 4 (Eos)
hsa-miR-483-3p	0	0	1	1	0	0	FOCAD	focadhesin
hsa-miR-483-3p	1	0	1	0	1	1	JPH4	junctophilin 4
hsa-miR-483-3p	0	0	1	1	0	0	ARMC9	armadillo repeat containing 9
hsa-miR-483-3p	1	0	1	1	1	1	NAV2	neuron navigator 2
hsa-miR-483-3p	0	0	1	1	1	1	LENG8	leukocyte receptor cluster (LRC) member 8
hsa-miR-483-3p	1	0	1	1	1	1	SH3TC2	SH3 domain and tetratricopeptide repeats 2
hsa-miR-483-3p	1	0	1	1	1	1	ACBD5	acyl-CoA binding domain containing 5
hsa-miR-483-3p	1	0	1	1	1	1	FHOD3	formin homology 2 domain containing 3
hsa-miR-483-3p	0	0	1	1	1	1	NELL1	NEL-like 1 (chicken)
hsa-miR-483-3p	1	0	1	0	0	0	ZC3H12C	zinc finger CCCH-type containing 12C
hsa-miR-483-3p	0	0	1	1	0	0	DDB2	damage-specific DNA binding protein 2, 48kDa
hsa-miR-483-3p	1	0	1	1	1	1	PAN3	PAN3 poly(A) specific ribonuclease subunit homolog (S. cerevisiae)
hsa-miR-483-3p	0	0	1	1	0	0	SSPO	SCO-spondin homolog (Bos taurus)
hsa-miR-483-3p	1	0	1	1	1	1	SLC43A2	solute carrier family 43, member 2
hsa-miR-483-3p	1	0	1	1	1	1	FAT2	FAT tumor suppressor homolog 2 (Drosophila)
hsa-miR-483-3p	1	0	1	1	1	1	NRXN2	neurexin 2
hsa-miR-483-3p	0	0	1	1	1	1	ING4	inhibitor of growth family, member 4
hsa-miR-483-3p	0	0	1	1	0	0	IGHMBP2	immunoglobulin mu binding protein 2
hsa-miR-483-3p	1	0	1	1	1	1	SHC1	SHC (Src homology 2 domain containing) transforming protein 1
hsa-miR-483-3p	1	0	1	1	1	1	BACH2	BTB and CNC homology 1, basic leucine zipper transcription factor 2
hsa-miR-483-3p	0	0	1	1	0	0	KCNC3	potassium voltage-gated channel, Shaw-related subfamily, member 3
hsa-miR-483-3p	1	0	1	1	1	1	PLEKHH3	pleckstrin homology domain containing, family H (with MyTH4 domain) member 3
hsa-miR-483-3p	1	0	1	0	1	1	SLC6A6	solute carrier family 6 (neurotransmitter transporter, taurine), member 6
hsa-miR-483-3p	1	0	1	1	0	0	CACNB1	calcium channel, voltage-dependent, beta 1 subunit
hsa-miR-483-3p	1	0	1	1	0	0	TSPYL2	TSPY-like 2
hsa-miR-483-3p	1	0	1	1	1	1	ERF	Ets2 repressor factor
hsa-miR-483-3p	1	0	1	1	1	1	ANK1	ankyrin 1, erythrocytic
hsa-miR-483-3p	0	0	1	1	0	0	IGFBP2	insulin-like growth factor binding protein 2, 36kDa
hsa-miR-483-3p	0	0	1	1	0	0	EIF2B4	eukaryotic translation initiation factor 2B, subunit 4 delta, 67kDa
hsa-miR-483-3p	1	0	1	1	0	0	SYN3	synapsin III
hsa-miR-483-3p	1	0	1	1	1	1	SATB1	SATB homeobox 1
hsa-miR-483-3p	1	0	1	1	0	0	ARRB2	arrestin, beta 2
hsa-miR-483-3p	1	0	1	1	0	0	TNPO2	transportin 2
hsa-miR-483-3p	0	0	1	0	0	0	MIAT	myocardial infarction associated transcript (non-protein coding)
hsa-miR-483-3p	1	0	1	0	1	1	MLL2	myeloid/lymphoid or mixed-lineage leukemia 2
hsa-miR-483-3p	1	0	1	1	1	1	SLC4A4	solute carrier family 4, sodium bicarbonate cotransporter, member 4
hsa-miR-483-3p	1	0	1	1	1	1	CBFA2T2	core-binding factor, runt domain, alpha subunit 2; translocated to, 2
hsa-miR-483-3p	0	0	1	1	0	0	ITGA7	integrin, alpha 7
hsa-miR-483-3p	0	0	1	1	0	0	BMX	BMX non-receptor tyrosine kinase
hsa-miR-483-3p	1	0	1	1	1	1	MBNL2	muscleblind-like splicing regulator 2
hsa-miR-483-3p	0	0	1	1	1	1	ZNF33A	zinc finger protein 33A
hsa-miR-483-3p	1	0	1	1	1	1	ERLIN1	ER lipid raft associated 1
hsa-miR-483-3p	1	0	1	1	1	1	NUDT4	nudix (nucleoside diphosphate linked moiety X)-type motif 4
hsa-miR-483-3p	1	0	1	1	0	0	SLC44A2	solute carrier family 44, member 2
hsa-miR-483-3p	0	0	1	1	1	1	EPN1	epsin 1
hsa-miR-483-3p	1	0	1	1	1	1	TP63	tumor protein p63
hsa-miR-483-3p	0	0	1	1	1	1	PCF11	PCF11, cleavage and polyadenylation factor subunit, homolog (S. cerevisiae)
hsa-miR-483-3p	0	0	1	1	0	0	CARD10	caspase recruitment domain family, member 10
hsa-miR-483-3p	1	0	1	0	1	1	CELF2	CUGBP, Elav-like family member 2
hsa-miR-483-3p	0	0	1	1	1	1	RER1	RER1 retention in endoplasmic reticulum 1 homolog (S. cerevisiae)
hsa-miR-483-3p	0	0	1	1	1	1	PLEKHB1	pleckstrin homology domain containing, family B (evectins) member 1
hsa-miR-483-3p	1	0	1	1	1	1	GLS	glutaminase
hsa-miR-483-3p	0	0	1	1	1	1	FHL1	four and a half LIM domains 1
hsa-miR-483-3p	1	0	1	1	1	1	LPHN2	latrophilin 2
hsa-miR-483-3p	0	0	1	1	0	0	RBM5	RNA binding motif protein 5
hsa-miR-483-3p	0	0	1	1	1	1	DCAF6	DDB1 and CUL4 associated factor 6
hsa-miR-483-3p	0	0	1	1	0	0	TCF25	transcription factor 25 (basic helix-loop-helix)
hsa-miR-483-3p	1	0	1	1	1	1	ANKRD13A	ankyrin repeat domain 13A
hsa-miR-483-3p	0	0	1	1	1	1	FAM114A2	family with sequence similarity 114, member A2
hsa-miR-483-3p	1	0	1	1	1	1	TACC2	transforming, acidic coiled-coil containing protein 2
hsa-miR-483-3p	0	0	1	0	1	1	CLDN2	claudin 2
hsa-miR-483-3p	0	0	1	1	1	1	SLCO2B1	solute carrier organic anion transporter family, member 2B1
hsa-miR-483-3p	1	0	1	1	1	1	KCNMB2	potassium large conductance calcium-activated channel, subfamily M, beta member 2
hsa-miR-483-3p	0	0	1	1	1	1	SLC30A5	solute carrier family 30 (zinc transporter), member 5
hsa-miR-483-3p	0	0	1	0	0	0	IDI2-AS1	IDI2 antisense RNA 1
hsa-miR-483-3p	1	0	1	1	1	1	OGT	O-linked N-acetylglucosamine (GlcNAc) transferase
hsa-miR-483-3p	1	0	1	1	0	0	TDRKH	tudor and KH domain containing
hsa-miR-483-3p	1	0	1	1	0	0	LMO2	LIM domain only 2 (rhombotin-like 1)
hsa-miR-483-3p	1	0	1	0	1	1	TRPS1	trichorhinophalangeal syndrome I
hsa-miR-483-3p	0	0	1	1	1	1	RANGRF	RAN guanine nucleotide release factor
hsa-miR-483-3p	1	0	1	1	1	1	NRP1	neuropilin 1
hsa-miR-483-3p	1	0	1	1	1	1	KLHL12	kelch-like 12 (Drosophila)
hsa-miR-483-3p	1	0	1	1	1	1	DCLRE1B	DNA cross-link repair 1B
hsa-miR-483-3p	1	0	1	1	1	1	VEGFA	vascular endothelial growth factor A
hsa-miR-483-3p	1	0	1	1	1	1	SPTBN4	spectrin, beta, non-erythrocytic 4
hsa-miR-483-3p	0	0	1	1	1	1	FCRL1	Fc receptor-like 1
hsa-miR-483-3p	0	0	1	1	0	0	TTTY7	testis-specific transcript, Y-linked 7 (non-protein coding)
hsa-miR-483-3p	0	0	1	1	0	0	TRO	trophinin
hsa-miR-483-3p	1	0	1	1	1	1	BBC3	BCL2 binding component 3
hsa-miR-483-3p	1	0	1	0	1	1	WIPF2	WAS/WASL interacting protein family, member 2
hsa-miR-483-3p	1	0	1	1	1	1	CALCOCO1	calcium binding and coiled-coil domain 1
hsa-miR-483-3p	1	0	1	1	1	1	SON	SON DNA binding protein
hsa-miR-483-3p	0	0	1	1	1	1	ORMDL1	ORM1-like 1 (S. cerevisiae)
hsa-miR-483-3p	1	0	1	1	1	1	NTRK2	neurotrophic tyrosine kinase, receptor, type 2
hsa-miR-483-3p	0	0	1	0	0	0	MYO15B	myosin XVB pseudogene
hsa-miR-483-3p	1	0	1	1	1	1	ST3GAL3	ST3 beta-galactoside alpha-2,3-sialyltransferase 3
hsa-miR-483-3p	1	0	1	1	1	1	STX16	syntaxin 16
hsa-miR-483-3p	1	0	1	1	1	1	ASB8	ankyrin repeat and SOCS box containing 8
hsa-miR-483-3p	0	0	1	1	1	1	CARD8	caspase recruitment domain family, member 8
hsa-miR-483-3p	1	0	1	1	0	0	PI4KB	phosphatidylinositol 4-kinase, catalytic, beta
hsa-miR-483-3p	1	0	1	1	1	1	FLNC	filamin C, gamma
hsa-miR-483-3p	1	0	1	0	1	1	CACNA1C	calcium channel, voltage-dependent, L type, alpha 1C subunit
hsa-miR-483-3p	1	0	1	1	1	1	SUCO	SUN domain containing ossification factor
hsa-miR-483-3p	0	0	1	1	1	1	RANBP17	RAN binding protein 17
hsa-miR-483-3p	0	0	1	0	0	0	CD177	CD177 molecule
hsa-miR-483-3p	0	0	1	1	1	1	RNASE7	ribonuclease, RNase A family, 7
hsa-miR-483-3p	1	0	1	1	1	1	PALM2	paralemmin 2
hsa-miR-483-3p	1	0	1	1	1	1	RAB3IP	RAB3A interacting protein (rabin3)
hsa-miR-483-3p	1	0	1	1	1	1	NRXN3	neurexin 3
hsa-miR-483-3p	1	0	1	1	1	1	PDE1B	phosphodiesterase 1B, calmodulin-dependent
hsa-miR-483-3p	0	0	1	1	1	1	PHACTR3	phosphatase and actin regulator 3
hsa-miR-483-3p	0	0	1	1	1	1	DEPDC5	DEP domain containing 5
hsa-miR-483-3p	0	0	1	1	0	0	ACSS2	acyl-CoA synthetase short-chain family member 2
hsa-miR-483-3p	1	0	1	1	1	1	AKAP2	A kinase (PRKA) anchor protein 2
hsa-miR-483-3p	0	0	1	0	0	0	TUG1	taurine upregulated 1 (non-protein coding)
hsa-miR-483-3p	0	0	1	0	0	0	RNF31	ring finger protein 31
hsa-miR-483-3p	1	0	1	1	1	1	ARGLU1	arginine and glutamate rich 1
hsa-miR-483-3p	0	0	1	1	1	1	STOX2	storkhead box 2
hsa-miR-483-3p	1	0	1	1	1	1	RIC8B	resistance to inhibitors of cholinesterase 8 homolog B (C. elegans)
hsa-miR-483-3p	1	0	1	1	1	1	EIF2C1	eukaryotic translation initiation factor 2C, 1
hsa-miR-483-3p	1	0	1	1	1	1	KLHDC8B	kelch domain containing 8B
hsa-miR-483-3p	0	0	1	1	0	0	MLST8	MTOR associated protein, LST8 homolog (S. cerevisiae)
hsa-miR-483-3p	0	0	1	1	0	0	JMJD4	jumonji domain containing 4
hsa-miR-483-3p	1	0	1	1	1	1	WDTC1	WD and tetratricopeptide repeats 1
hsa-miR-483-3p	1	0	1	1	1	1	POMT2	protein-O-mannosyltransferase 2
hsa-miR-483-3p	1	0	1	1	1	1	BAZ2A	bromodomain adjacent to zinc finger domain, 2A
hsa-miR-483-3p	1	0	1	1	1	1	DERL1	derlin 1
hsa-miR-483-3p	0	0	1	0	0	0	LOC286059	tumor necrosis factor receptor superfamily, member 10d, decoy with truncated death domain pseudogene
hsa-miR-483-3p	1	0	1	1	1	1	ZNF385A	zinc finger protein 385A
hsa-miR-483-3p	0	0	1	1	1	1	HDAC7	histone deacetylase 7
hsa-miR-483-3p	0	0	1	0	0	0	IFFO2	intermediate filament family orphan 2
hsa-miR-483-3p	1	0	1	0	1	1	ATP2B1	ATPase, Ca++ transporting, plasma membrane 1
hsa-miR-483-3p	0	0	1	0	0	0	FLJ21408	uncharacterized LOC400512
hsa-miR-483-3p	0	0	1	0	1	1	ATXN1L	ataxin 1-like
hsa-miR-483-3p	0	0	1	1	1	1	CNOT8	CCR4-NOT transcription complex, subunit 8
hsa-miR-483-3p	1	0	1	1	1	1	DLC1	deleted in liver cancer 1
hsa-miR-483-3p	0	0	1	0	1	1	HEMK1	HemK methyltransferase family member 1
hsa-miR-483-3p	1	0	1	1	1	1	DCAF8	DDB1 and CUL4 associated factor 8
hsa-miR-483-3p	0	0	1	1	1	1	USP48	ubiquitin specific peptidase 48
hsa-miR-483-3p	0	0	1	1	1	1	GTF2H1	general transcription factor IIH, polypeptide 1, 62kDa
hsa-miR-483-3p	1	0	1	1	1	1	SEC63	SEC63 homolog (S. cerevisiae)
hsa-miR-483-3p	1	0	1	1	1	1	FAM53C	family with sequence similarity 53, member C
hsa-miR-483-3p	0	0	1	1	1	1	KDM2B	lysine (K)-specific demethylase 2B
hsa-miR-483-3p	1	0	1	1	1	1	GPD2	glycerol-3-phosphate dehydrogenase 2 (mitochondrial)
hsa-miR-483-3p	0	0	1	0	0	0	FAM185A	family with sequence similarity 185, member A
hsa-miR-483-3p	1	0	1	0	1	1	AP1G1	adaptor-related protein complex 1, gamma 1 subunit
hsa-miR-483-3p	0	0	1	0	0	0	FLJ30838	uncharacterized LOC400955
hsa-miR-483-3p	0	0	1	0	0	0	SNHG11	small nucleolar RNA host gene 11 (non-protein coding)
hsa-miR-483-3p	0	0	1	0	0	0	FLJ31104	uncharacterized LOC441072
hsa-miR-483-3p	1	0	1	1	1	1	DIXDC1	DIX domain containing 1
hsa-miR-483-3p	1	0	1	0	1	1	RNF165	ring finger protein 165
hsa-miR-483-3p	1	0	1	1	1	1	ZNF664	zinc finger protein 664
hsa-miR-483-3p	0	0	1	1	0	0	BEAN1	brain expressed, associated with NEDD4, 1
hsa-miR-483-3p	1	0	1	1	1	1	LMNA	lamin A/C
hsa-miR-483-3p	0	0	1	1	1	1	PDE1C	phosphodiesterase 1C, calmodulin-dependent 70kDa
hsa-miR-483-3p	0	0	1	0	1	1	FAM70A	family with sequence similarity 70, member A
hsa-miR-483-3p	1	0	1	1	1	1	SCAMP5	secretory carrier membrane protein 5
hsa-miR-483-3p	1	0	1	1	1	1	CLCN5	chloride channel, voltage-sensitive 5
hsa-miR-483-3p	0	0	1	0	0	0	LOC255187	hCG1980447
hsa-miR-483-3p	0	0	1	0	0	0	ANTXRL	anthrax toxin receptor-like
hsa-miR-483-3p	0	0	1	1	1	1	ZBTB26	zinc finger and BTB domain containing 26
hsa-miR-483-3p	0	0	1	0	0	0	LOC100128505	uncharacterized LOC100128505
hsa-miR-483-3p	0	0	1	1	0	0	UBAP2	ubiquitin associated protein 2
hsa-miR-483-3p	1	0	1	1	1	1	IST1	increased sodium tolerance 1 homolog (yeast)
hsa-miR-483-3p	0	0	1	1	0	0	KRT86	keratin 86
hsa-miR-483-3p	0	0	1	1	0	0	CD37	CD37 molecule
hsa-miR-483-3p	1	0	1	1	1	1	AKNA	AT-hook transcription factor
hsa-miR-483-3p	1	0	1	1	1	1	PEAR1	platelet endothelial aggregation receptor 1
hsa-miR-483-3p	0	0	1	1	0	0	SYTL1	synaptotagmin-like 1
hsa-miR-483-3p	0	0	1	1	0	0	C6orf132	chromosome 6 open reading frame 132
hsa-miR-483-3p	0	0	1	0	0	0	SDHAP2	succinate dehydrogenase complex, subunit A, flavoprotein pseudogene 2
hsa-miR-483-3p	0	0	1	1	1	1	CAMKV	CaM kinase-like vesicle-associated
hsa-miR-483-3p	0	0	1	1	0	0	UBAC2	UBA domain containing 2
hsa-miR-483-3p	1	0	1	1	1	1	PIP4K2C	phosphatidylinositol-5-phosphate 4-kinase, type II, gamma
hsa-miR-483-3p	1	0	1	1	1	1	TTC13	tetratricopeptide repeat domain 13
hsa-miR-483-3p	1	0	1	0	0	0	YLPM1	YLP motif containing 1
hsa-miR-483-3p	1	0	1	1	1	1	STXBP5	syntaxin binding protein 5 (tomosyn)
hsa-miR-483-3p	0	0	1	1	1	1	STBD1	starch binding domain 1
hsa-miR-483-3p	0	0	1	0	1	1	TMSB15B	thymosin beta 15B
hsa-miR-483-3p	0	0	1	1	0	0	CDK15	cyclin-dependent kinase 15
hsa-miR-483-3p	1	0	1	1	1	1	HDAC2	histone deacetylase 2
hsa-miR-483-3p	1	0	1	1	1	1	ODF2	outer dense fiber of sperm tails 2
hsa-miR-483-3p	0	0	1	1	0	0	AXDND1	axonemal dynein light chain domain containing 1
hsa-miR-483-3p	1	0	1	1	1	1	MAP3K12	mitogen-activated protein kinase kinase kinase 12
hsa-miR-483-3p	0	0	1	0	0	0	PART1	prostate androgen-regulated transcript 1 (non-protein coding)
hsa-miR-483-3p	0	0	1	1	1	1	NSRP1	nuclear speckle splicing regulatory protein 1
hsa-miR-483-3p	1	0	1	0	1	1	GATAD2B	GATA zinc finger domain containing 2B
hsa-miR-483-3p	1	0	1	1	1	1	TBC1D20	TBC1 domain family, member 20
hsa-miR-483-3p	1	0	1	1	1	1	EPHB1	EPH receptor B1
hsa-miR-483-3p	0	0	1	1	1	1	GPR115	G protein-coupled receptor 115
hsa-miR-483-3p	0	0	1	1	1	1	FUT11	fucosyltransferase 11 (alpha (1,3) fucosyltransferase)
hsa-miR-483-3p	1	0	1	0	1	1	STC2	stanniocalcin 2
hsa-miR-483-3p	0	0	1	1	0	0	KDM5D	lysine (K)-specific demethylase 5D
hsa-miR-483-3p	0	0	1	1	1	1	BAG1	BCL2-associated athanogene
hsa-miR-483-3p	1	0	1	1	0	0	CHD3	chromodomain helicase DNA binding protein 3
hsa-miR-483-3p	1	0	1	0	0	0	PID1	phosphotyrosine interaction domain containing 1
hsa-miR-483-3p	1	0	1	1	1	1	CCDC141	coiled-coil domain containing 141
hsa-miR-483-3p	1	0	1	1	1	1	EPB41L1	erythrocyte membrane protein band 4.1-like 1
hsa-miR-483-3p	0	0	1	0	0	0	LOC400680	uncharacterized LOC400680
hsa-miR-483-3p	0	0	1	0	0	0	DNAJB8-AS1	DNAJB8 antisense RNA 1
hsa-miR-483-3p	0	0	1	1	1	1	TEX35	testis expressed 35
hsa-miR-483-3p	0	0	1	1	0	0	KLHDC3	kelch domain containing 3
hsa-miR-483-3p	1	0	1	1	1	1	ST7L	suppression of tumorigenicity 7 like
hsa-miR-483-3p	0	0	1	1	1	1	EHD1	EH-domain containing 1
hsa-miR-483-3p	0	0	1	1	1	1	CKAP2L	cytoskeleton associated protein 2-like
hsa-miR-483-3p	0	0	1	1	0	0	CORO1A	coronin, actin binding protein, 1A
hsa-miR-483-3p	0	0	1	0	0	0	CECR7	cat eye syndrome chromosome region, candidate 7 (non-protein coding)
hsa-miR-483-3p	1	0	1	1	0	0	FBXL19	F-box and leucine-rich repeat protein 19
hsa-miR-483-3p	1	0	1	1	1	1	BCL6B	B-cell CLL/lymphoma 6, member B
hsa-miR-483-3p	0	0	1	1	0	0	PROKR1	prokineticin receptor 1
hsa-miR-483-3p	0	0	1	1	0	0	MARS	methionyl-tRNA synthetase
hsa-miR-483-3p	1	0	1	1	1	1	ZBTB4	zinc finger and BTB domain containing 4
hsa-miR-483-3p	0	0	1	1	0	0	DCLK3	doublecortin-like kinase 3
hsa-miR-483-3p	0	0	1	1	0	0	TJAP1	tight junction associated protein 1 (peripheral)
hsa-miR-483-3p	0	0	1	1	0	0	LIX1L	Lix1 homolog (mouse)-like
hsa-miR-483-3p	1	0	1	0	1	1	WDR82	WD repeat domain 82
hsa-miR-483-3p	1	0	1	1	1	1	FAM219A	family with sequence similarity 219, member A
hsa-miR-483-3p	0	0	1	0	0	0	LOC285043	uncharacterized LOC285043
hsa-miR-483-3p	0	0	1	0	0	0	DKFZP434H168	uncharacterized LOC26077
hsa-miR-483-3p	1	0	1	1	1	1	PRDM2	PR domain containing 2, with ZNF domain
hsa-miR-483-3p	1	0	1	0	1	1	DCUN1D4	DCN1, defective in cullin neddylation 1, domain containing 4 (S. cerevisiae)
hsa-miR-483-3p	1	0	1	1	1	1	XPO1	exportin 1 (CRM1 homolog, yeast)
hsa-miR-483-3p	0	0	1	1	1	1	C2orf91	chromosome 2 open reading frame 91
hsa-miR-483-3p	1	0	1	1	1	1	C17orf85	chromosome 17 open reading frame 85
hsa-miR-483-3p	1	0	1	1	0	0	GXYLT1	glucoside xylosyltransferase 1
hsa-miR-483-3p	1	0	1	1	1	1	C15orf52	chromosome 15 open reading frame 52
hsa-miR-483-3p	0	0	1	1	0	0	ANKHD1-EIF4EBP3	ANKHD1-EIF4EBP3 readthrough
hsa-miR-483-3p	1	0	1	1	0	0	UBN2	ubinuclein 2
hsa-miR-483-3p	1	0	1	1	1	1	KALRN	kalirin, RhoGEF kinase
hsa-miR-483-3p	0	0	1	1	1	1	MORF4L2	mortality factor 4 like 2
hsa-miR-483-3p	1	0	1	1	0	0	ATXN7L3	ataxin 7-like 3
hsa-miR-483-3p	0	0	1	1	0	0	HSPG2	heparan sulfate proteoglycan 2
hsa-miR-483-3p	0	0	1	1	1	1	BDH1	3-hydroxybutyrate dehydrogenase, type 1
hsa-miR-483-3p	1	0	1	1	0	0	TNK2	tyrosine kinase, non-receptor, 2
hsa-miR-483-3p	0	0	1	0	0	0	RPL23AP53	ribosomal protein L23a pseudogene 53
hsa-miR-483-3p	1	0	1	1	1	1	MKRN1	makorin ring finger protein 1
hsa-miR-483-3p	0	0	1	1	1	1	MOBP	myelin-associated oligodendrocyte basic protein
hsa-miR-483-3p	1	0	1	1	1	1	FMNL3	formin-like 3
hsa-miR-483-3p	1	0	1	0	1	1	N4BP3	NEDD4 binding protein 3
hsa-miR-483-3p	0	0	1	0	0	0	LOC619207	scavenger receptor protein family member
hsa-miR-483-3p	0	0	1	1	1	1	PIN4	protein (peptidylprolyl cis/trans isomerase) NIMA-interacting, 4 (parvulin)
hsa-miR-483-3p	1	0	1	1	1	1	R3HDM1	R3H domain containing 1
hsa-miR-483-3p	1	0	1	0	1	1	FNDC3B	fibronectin type III domain containing 3B
hsa-miR-483-3p	0	0	1	1	1	1	PITX2	paired-like homeodomain 2
hsa-miR-483-3p	1	0	1	0	1	1	CAPRIN1	cell cycle associated protein 1
hsa-miR-483-3p	0	0	1	0	1	1	LOC401321	uncharacterized LOC401321
hsa-miR-483-3p	0	0	1	1	0	0	LOC100128682	uncharacterized LOC100128682
hsa-miR-483-3p	0	0	1	1	1	1	ATXN2	ataxin 2
hsa-miR-483-3p	1	0	1	1	1	1	ADAMTS19	ADAM metallopeptidase with thrombospondin type 1 motif, 19
hsa-miR-483-3p	0	0	1	0	0	0	FLJ46906	uncharacterized LOC441172
hsa-miR-483-3p	1	0	1	1	1	1	DPY19L3	dpy-19-like 3 (C. elegans)
hsa-miR-483-3p	1	0	1	1	1	1	GPD1	glycerol-3-phosphate dehydrogenase 1 (soluble)
hsa-miR-483-3p	1	0	1	0	1	1	ESRRG	estrogen-related receptor gamma
hsa-miR-483-3p	0	0	1	1	0	0	ISOC2	isochorismatase domain containing 2
hsa-miR-483-3p	0	0	1	1	0	0	ZNF730	zinc finger protein 730
hsa-miR-483-3p	0	0	1	1	1	1	PDE2A	phosphodiesterase 2A, cGMP-stimulated
hsa-miR-483-3p	1	0	1	1	1	1	RPS6KA4	ribosomal protein S6 kinase, 90kDa, polypeptide 4
hsa-miR-483-3p	1	0	1	1	1	1	CYYR1	cysteine/tyrosine-rich 1
hsa-miR-483-3p	0	0	1	0	1	1	PEX5	peroxisomal biogenesis factor 5
hsa-miR-483-3p	1	0	1	0	1	1	CHD7	chromodomain helicase DNA binding protein 7
hsa-miR-483-3p	1	0	1	1	1	1	CAMK2G	calcium/calmodulin-dependent protein kinase II gamma
hsa-miR-483-3p	0	0	1	1	1	1	IMMT	inner membrane protein, mitochondrial
hsa-miR-483-3p	0	0	1	1	0	0	TRIM69	tripartite motif containing 69
hsa-miR-483-3p	1	0	1	0	1	1	TEAD3	TEA domain family member 3
hsa-miR-483-3p	1	0	1	1	1	1	NECAP1	NECAP endocytosis associated 1
hsa-miR-483-3p	0	0	1	1	0	0	PSTPIP1	proline-serine-threonine phosphatase interacting protein 1
hsa-miR-483-3p	0	0	1	1	1	1	ARIH1	ariadne homolog, ubiquitin-conjugating enzyme E2 binding protein, 1 (Drosophila)
hsa-miR-483-3p	0	0	1	0	0	0	DNAJC5B	DnaJ (Hsp40) homolog, subfamily C, member 5 beta
hsa-miR-483-3p	1	0	1	0	1	1	DNAJC5	DnaJ (Hsp40) homolog, subfamily C, member 5
hsa-miR-483-3p	1	0	1	1	1	1	TFE3	transcription factor binding to IGHM enhancer 3
hsa-miR-483-3p	1	0	1	1	1	1	CTTNBP2NL	CTTNBP2 N-terminal like
hsa-miR-483-3p	1	0	1	0	1	1	GRIN3A	glutamate receptor, ionotropic, N-methyl-D-aspartate 3A
hsa-miR-483-3p	0	0	1	0	0	0	FAM66D	family with sequence similarity 66, member D
hsa-miR-483-3p	1	0	1	1	1	1	PKNOX2	PBX/knotted 1 homeobox 2
hsa-miR-483-3p	0	0	1	1	0	0	KRBA1	KRAB-A domain containing 1
hsa-miR-483-3p	1	0	1	1	1	1	FAM126B	family with sequence similarity 126, member B
hsa-miR-483-3p	1	0	1	1	0	0	USP24	ubiquitin specific peptidase 24
hsa-miR-483-3p	1	0	1	0	1	1	FAM214A	family with sequence similarity 214, member A
hsa-miR-483-3p	1	0	1	0	1	1	STYX	serine/threonine/tyrosine interacting protein
hsa-miR-483-3p	0	0	1	1	1	1	SYTL4	synaptotagmin-like 4
hsa-miR-483-3p	0	0	1	1	1	1	NEK9	NIMA (never in mitosis gene a)- related kinase 9
hsa-miR-483-3p	0	0	1	0	0	0	FAM225A	family with sequence similarity 225, member A (non-protein coding)
hsa-miR-483-3p	0	0	1	1	1	1	VWA3B	von Willebrand factor A domain containing 3B
hsa-miR-483-3p	0	0	1	1	1	1	INPP5B	inositol polyphosphate-5-phosphatase, 75kDa
hsa-miR-483-3p	0	0	1	0	0	0	EPHA1-AS1	EPHA1 antisense RNA 1
hsa-miR-483-3p	0	0	1	1	1	1	KIAA1841	KIAA1841
hsa-miR-483-3p	1	0	1	0	1	1	CNOT7	CCR4-NOT transcription complex, subunit 7
hsa-miR-483-3p	1	0	1	1	1	1	MBD6	methyl-CpG binding domain protein 6
hsa-miR-483-3p	1	0	1	1	1	1	RICTOR	RPTOR independent companion of MTOR, complex 2
hsa-miR-483-3p	0	0	1	1	1	1	LMAN2L	lectin, mannose-binding 2-like
hsa-miR-483-3p	1	0	1	1	1	1	FAM76B	family with sequence similarity 76, member B
hsa-miR-483-3p	1	0	1	1	0	0	LRRC58	leucine rich repeat containing 58
hsa-miR-483-3p	1	0	1	0	1	1	APOLD1	apolipoprotein L domain containing 1
hsa-miR-483-3p	0	0	1	1	1	1	C5orf45	chromosome 5 open reading frame 45
hsa-miR-483-3p	1	0	1	1	1	1	WDR44	WD repeat domain 44
hsa-miR-483-3p	1	0	1	1	1	1	CLIC5	chloride intracellular channel 5
hsa-miR-483-3p	1	0	1	1	1	1	RCAN2	regulator of calcineurin 2
hsa-miR-483-3p	1	0	1	0	1	1	BDNF	brain-derived neurotrophic factor
hsa-miR-483-3p	0	0	1	1	1	1	CYP4B1	cytochrome P450, family 4, subfamily B, polypeptide 1
hsa-miR-483-3p	1	0	1	1	1	1	NRG1	neuregulin 1
hsa-miR-483-3p	0	0	1	0	0	0	MUC19	mucin 19, oligomeric
hsa-miR-483-3p	0	0	1	1	1	1	GCOM1	GRINL1A complex locus 1
hsa-miR-483-3p	0	0	1	1	0	0	EGFL8	EGF-like-domain, multiple 8
hsa-miR-483-3p	0	0	1	1	0	0	C16orf48	chromosome 16 open reading frame 48
hsa-miR-483-3p	0	0	1	1	1	1	NYAP1	neuronal tyrosine-phosphorylated phosphoinositide-3-kinase adaptor 1
hsa-miR-483-3p	0	0	1	1	1	1	PTPRC	protein tyrosine phosphatase, receptor type, C
hsa-miR-483-3p	1	0	1	1	1	1	MECP2	methyl CpG binding protein 2 (Rett syndrome)
hsa-miR-483-3p	0	0	1	1	0	0	ASB16	ankyrin repeat and SOCS box containing 16
hsa-miR-483-3p	0	0	1	1	1	1	TMUB1	transmembrane and ubiquitin-like domain containing 1
hsa-miR-483-3p	1	0	1	1	1	1	PLCH1	phospholipase C, eta 1
hsa-miR-483-3p	1	0	1	1	1	1	RTN3	reticulon 3
hsa-miR-483-3p	0	0	1	1	1	1	CEACAM1	carcinoembryonic antigen-related cell adhesion molecule 1 (biliary glycoprotein)
hsa-miR-483-3p	1	0	1	1	1	1	QKI	QKI, KH domain containing, RNA binding
hsa-miR-483-3p	0	0	1	0	1	1	KCNE1	potassium voltage-gated channel, Isk-related family, member 1
hsa-miR-483-3p	1	0	1	1	1	1	TMUB2	transmembrane and ubiquitin-like domain containing 2
hsa-miR-483-3p	0	0	1	1	1	1	TMOD1	tropomodulin 1
hsa-miR-483-3p	1	0	1	1	1	1	RIMS3	regulating synaptic membrane exocytosis 3
hsa-miR-483-3p	1	0	1	1	1	1	NONO	non-POU domain containing, octamer-binding
hsa-miR-483-3p	0	0	1	1	1	1	FTO	fat mass and obesity associated
hsa-miR-483-3p	1	0	1	1	1	1	NUMA1	nuclear mitotic apparatus protein 1
hsa-miR-483-3p	0	0	1	1	1	1	ZNF589	zinc finger protein 589
hsa-miR-483-3p	1	0	1	1	1	1	POU2F2	POU class 2 homeobox 2
hsa-miR-483-3p	0	0	1	1	0	0	NFKBID	nuclear factor of kappa light polypeptide gene enhancer in B-cells inhibitor, delta
hsa-miR-483-3p	0	0	1	1	1	1	KIRREL2	kin of IRRE like 2 (Drosophila)
hsa-miR-483-3p	1	0	1	1	1	1	PCGF5	polycomb group ring finger 5
hsa-miR-483-3p	1	0	1	1	0	0	SAP30BP	SAP30 binding protein
hsa-miR-483-3p	0	0	1	1	1	1	ZNF85	zinc finger protein 85
hsa-miR-483-3p	0	0	1	1	0	0	FUZ	fuzzy homolog (Drosophila)
hsa-miR-483-3p	1	0	1	1	1	1	OTUD5	OTU domain containing 5
hsa-miR-483-3p	1	0	1	1	1	1	ZBTB7B	zinc finger and BTB domain containing 7B
hsa-miR-483-3p	0	0	1	1	0	0	PTPMT1	protein tyrosine phosphatase, mitochondrial 1
hsa-miR-483-3p	0	0	1	0	0	0	MGC20647	uncharacterized protein MGC20647
hsa-miR-483-3p	1	0	1	1	0	0	FHL3	four and a half LIM domains 3
hsa-miR-483-3p	0	0	1	1	1	1	PTK7	PTK7 protein tyrosine kinase 7
hsa-miR-483-3p	0	0	1	0	0	0	MGC21881	uncharacterized locus MGC21881
hsa-miR-483-3p	0	0	1	1	1	1	UCHL5	ubiquitin carboxyl-terminal hydrolase L5
hsa-miR-483-3p	0	0	1	0	1	1	ZNF37A	zinc finger protein 37A
hsa-miR-483-3p	1	0	1	1	1	1	ASH2L	ash2 (absent, small, or homeotic)-like (Drosophila)
hsa-miR-483-3p	0	0	1	1	0	0	MANBAL	mannosidase, beta A, lysosomal-like
hsa-miR-483-3p	0	0	1	1	1	1	CSDE1	cold shock domain containing E1, RNA-binding
hsa-miR-483-3p	0	0	1	1	1	1	RDH11	retinol dehydrogenase 11 (all-trans/9-cis/11-cis)
hsa-miR-483-3p	0	0	1	1	1	1	EXOC7	exocyst complex component 7
hsa-miR-483-3p	0	0	1	0	0	0	WDFY3-AS2	WDFY3 antisense RNA 2
hsa-miR-483-3p	1	0	1	1	0	0	TMEM63B	transmembrane protein 63B
hsa-miR-483-3p	0	0	1	1	1	1	CDC42SE2	CDC42 small effector 2
hsa-miR-483-3p	1	0	1	1	1	1	SPOCK2	sparc/osteonectin, cwcv and kazal-like domains proteoglycan (testican) 2
hsa-miR-483-3p	0	0	1	0	0	0	SNX29P2	sorting nexin 29 pseudogene 2
hsa-miR-483-3p	1	0	1	1	1	1	ASPH	aspartate beta-hydroxylase
hsa-miR-483-3p	1	0	1	1	1	1	ZDHHC5	zinc finger, DHHC-type containing 5
hsa-miR-483-3p	0	0	1	0	0	0	EVPLL	envoplakin-like
hsa-miR-483-3p	0	0	1	1	1	1	MAP2	microtubule-associated protein 2
hsa-miR-483-3p	1	0	1	1	1	1	ZBTB11	zinc finger and BTB domain containing 11
hsa-miR-483-3p	1	0	1	1	1	1	ACACB	acetyl-CoA carboxylase beta
hsa-miR-483-3p	0	0	1	1	0	0	FCRL3	Fc receptor-like 3
hsa-miR-483-3p	0	0	1	1	1	1	SEMA3D	sema domain, immunoglobulin domain (Ig), short basic domain, secreted, (semaphorin) 3D
hsa-miR-483-3p	0	0	1	1	1	1	TFAM	transcription factor A, mitochondrial
hsa-miR-483-3p	1	0	1	0	1	1	PSMF1	proteasome (prosome, macropain) inhibitor subunit 1 (PI31)
hsa-miR-483-3p	0	0	1	1	1	1	CCP110	centriolar coiled coil protein 110kDa
hsa-miR-483-3p	0	0	1	1	1	1	SH3TC1	SH3 domain and tetratricopeptide repeats 1
hsa-miR-483-3p	1	0	1	1	1	1	RCOR3	REST corepressor 3
hsa-miR-483-3p	1	0	1	0	1	1	RNF4	ring finger protein 4
hsa-miR-483-3p	0	0	1	1	1	1	C7orf53	chromosome 7 open reading frame 53
hsa-miR-483-3p	0	0	1	1	0	0	TTC12	tetratricopeptide repeat domain 12
hsa-miR-483-3p	0	0	1	1	0	0	TREM2	triggering receptor expressed on myeloid cells 2
hsa-miR-483-3p	1	0	1	1	1	1	RAB5B	RAB5B, member RAS oncogene family
hsa-miR-483-3p	1	0	1	1	0	0	MRC2	mannose receptor, C type 2
hsa-miR-483-3p	1	0	1	1	1	1	SECISBP2L	SECIS binding protein 2-like
hsa-miR-483-3p	1	0	1	1	1	1	FAM13A	family with sequence similarity 13, member A
hsa-miR-483-3p	1	0	1	1	1	1	ANO1	anoctamin 1, calcium activated chloride channel
hsa-miR-483-3p	0	0	1	0	0	0	LINC00238	long intergenic non-protein coding RNA 238
hsa-miR-483-3p	0	0	1	0	1	1	DKFZP434I0714	uncharacterized protein DKFZP434I0714
hsa-miR-483-3p	1	0	1	1	1	1	ABCA1	ATP-binding cassette, sub-family A (ABC1), member 1
hsa-miR-483-3p	0	0	1	1	1	1	EDA2R	ectodysplasin A2 receptor
hsa-miR-483-3p	1	0	1	1	1	1	GRIA4	glutamate receptor, ionotropic, AMPA 4
hsa-miR-483-3p	1	0	1	1	0	0	TBC1D10C	TBC1 domain family, member 10C
hsa-miR-483-3p	0	0	1	0	0	0	LOC339862	uncharacterized LOC339862
hsa-miR-483-3p	0	0	1	1	1	1	TMEM139	transmembrane protein 139
hsa-miR-483-3p	0	0	1	1	1	1	SNAPC3	small nuclear RNA activating complex, polypeptide 3, 50kDa
hsa-miR-483-3p	0	0	1	1	1	1	UBE3D	ubiquitin protein ligase E3D
hsa-miR-483-3p	1	0	1	1	0	0	EGLN2	egl nine homolog 2 (C. elegans)
hsa-miR-483-3p	0	0	1	0	0	0	LINC00642	long intergenic non-protein coding RNA 642
hsa-miR-483-3p	1	0	1	1	1	1	MEIS1	Meis homeobox 1
hsa-miR-483-3p	0	0	1	0	0	0	LOC654433	uncharacterized LOC654433
hsa-miR-483-3p	1	0	1	1	1	1	BNC2	basonuclin 2
hsa-miR-483-3p	0	0	1	0	0	0	CYP4F35P	cytochrome P450, family 4, subfamily F, polypeptide 35, pseudogene
hsa-miR-483-3p	0	0	1	1	1	1	FAM71F1	family with sequence similarity 71, member F1
hsa-miR-483-3p	1	0	1	1	1	1	FAM135B	family with sequence similarity 135, member B
hsa-miR-483-3p	1	0	1	1	1	1	SOX6	SRY (sex determining region Y)-box 6
hsa-miR-483-3p	1	0	1	1	0	0	CHD4	chromodomain helicase DNA binding protein 4
hsa-miR-483-3p	0	0	1	0	0	0	TOB1-AS1	TOB1 antisense RNA 1
hsa-miR-483-3p	1	0	1	1	1	1	FOSB	FBJ murine osteosarcoma viral oncogene homolog B
hsa-miR-483-3p	0	0	1	0	0	0	LOC339240	keratin 17 pseudogene
hsa-miR-483-3p	0	0	1	0	0	0	A1BG-AS1	A1BG antisense RNA 1
hsa-miR-483-3p	0	0	1	0	1	1	FAM13B	family with sequence similarity 13, member B
hsa-miR-483-3p	0	0	1	1	1	1	USP2	ubiquitin specific peptidase 2
hsa-miR-483-3p	1	0	1	1	1	1	ARPP21	cAMP-regulated phosphoprotein, 21kDa
hsa-miR-483-3p	0	0	1	0	0	0	LOC154822	uncharacterized LOC154822
hsa-miR-483-3p	0	0	1	1	0	0	FAM159A	family with sequence similarity 159, member A
hsa-miR-483-3p	1	0	1	1	1	1	TNFSF4	tumor necrosis factor (ligand) superfamily, member 4
hsa-miR-483-3p	1	0	1	1	1	1	CTIF	CBP80/20-dependent translation initiation factor
hsa-miR-483-3p	1	0	1	1	0	0	PRRC2A	proline-rich coiled-coil 2A
hsa-miR-483-3p	0	0	1	1	1	1	C14orf45	chromosome 14 open reading frame 45
hsa-miR-483-3p	1	0	1	0	1	1	PSD3	pleckstrin and Sec7 domain containing 3
hsa-miR-483-3p	0	0	1	1	1	1	MGC57346	uncharacterized LOC401884
hsa-miR-483-3p	0	0	1	1	0	0	FAM165B	family with sequence similarity 165, member B
hsa-miR-483-3p	1	0	1	1	1	1	CARM1	coactivator-associated arginine methyltransferase 1
hsa-miR-483-3p	1	0	1	1	1	1	TOMM40	translocase of outer mitochondrial membrane 40 homolog (yeast)
hsa-miR-483-3p	0	0	1	0	0	0	AURKAPS1	aurora kinase A pseudogene 1
hsa-miR-483-3p	1	0	1	1	1	1	FNDC3A	fibronectin type III domain containing 3A
hsa-miR-483-3p	1	0	1	0	1	1	SEMA4G	sema domain, immunoglobulin domain (Ig), transmembrane domain (TM) and short cytoplasmic domain, (semaphorin) 4G
hsa-miR-483-3p	1	0	1	1	1	1	LIMD2	LIM domain containing 2
hsa-miR-483-3p	0	0	1	1	1	1	SLC25A35	solute carrier family 25, member 35
hsa-miR-483-3p	0	0	1	1	0	0	TENC1	tensin like C1 domain containing phosphatase (tensin 2)
hsa-miR-483-3p	0	0	1	1	1	1	ZNF254	zinc finger protein 254
hsa-miR-483-3p	1	0	1	1	1	1	ATP8B4	ATPase, class I, type 8B, member 4
hsa-miR-483-3p	0	0	1	1	1	1	C17orf97	chromosome 17 open reading frame 97
hsa-miR-483-3p	0	0	1	1	0	0	RPL7L1	ribosomal protein L7-like 1
hsa-miR-483-3p	0	0	1	1	1	1	ZNF365	zinc finger protein 365
hsa-miR-483-3p	1	0	1	0	1	1	CSNK1G1	casein kinase 1, gamma 1
hsa-miR-483-3p	0	0	1	1	0	0	DHX30	DEAH (Asp-Glu-Ala-His) box polypeptide 30
hsa-miR-483-3p	0	0	1	1	0	0	PRSS55	protease, serine, 55
hsa-miR-483-3p	0	0	1	1	1	1	VNN2	vanin 2
hsa-miR-483-3p	1	0	1	1	1	1	ADCY6	adenylate cyclase 6
hsa-miR-483-3p	1	0	1	1	1	1	GANAB	glucosidase, alpha; neutral AB
hsa-miR-483-3p	1	0	1	1	1	1	FAM129B	family with sequence similarity 129, member B
hsa-miR-483-3p	1	0	1	1	1	1	CCDC149	coiled-coil domain containing 149
hsa-miR-483-3p	0	0	1	0	0	0	ZNF66P	zinc finger protein 66, pseudogene
hsa-miR-483-3p	0	0	1	0	0	0	LINC00442	long intergenic non-protein coding RNA 442
hsa-miR-483-3p	0	0	1	1	0	0	CELF3	CUGBP, Elav-like family member 3
hsa-miR-483-3p	1	0	1	1	0	0	TMEM198	transmembrane protein 198
hsa-miR-483-3p	0	0	1	0	0	0	PTGER4P2	prostaglandin E receptor 4 (subtype EP4) pseudogene 2
hsa-miR-483-3p	1	0	1	0	1	1	HMGB3	high mobility group box 3
hsa-miR-483-3p	1	0	1	0	1	1	TGFBR1	transforming growth factor, beta receptor 1
hsa-miR-483-3p	1	0	1	1	0	0	TNXB	tenascin XB
hsa-miR-483-3p	0	0	1	1	0	0	TRIM41	tripartite motif containing 41
hsa-miR-483-3p	0	0	1	0	0	0	LOC727849	golgin A2 pseudogene
hsa-miR-483-3p	0	0	1	0	0	0	LOC727751	uncharacterized LOC727751
hsa-miR-483-3p	0	0	1	0	0	0	AGSK1	golgin subfamily A member 2-like
hsa-miR-483-3p	0	0	1	0	1	1	SH3RF2	SH3 domain containing ring finger 2
hsa-miR-483-3p	1	0	1	0	1	1	DPYSL3	dihydropyrimidinase-like 3
hsa-miR-483-3p	1	0	1	0	1	1	AMMECR1L	AMME chromosomal region gene 1-like
hsa-miR-483-3p	0	0	1	0	0	0	LINC00537	long intergenic non-protein coding RNA 537
hsa-miR-483-3p	1	0	1	1	1	1	APBA2	amyloid beta (A4) precursor protein-binding, family A, member 2
hsa-miR-483-3p	1	0	1	1	1	1	GBF1	golgi brefeldin A resistant guanine nucleotide exchange factor 1
hsa-miR-483-3p	0	0	1	1	1	1	XG	Xg blood group
hsa-miR-483-3p	1	0	1	1	1	1	SLC36A2	solute carrier family 36 (proton/amino acid symporter), member 2
hsa-miR-483-3p	1	0	1	1	1	1	ARFIP1	ADP-ribosylation factor interacting protein 1
hsa-miR-483-3p	0	0	1	1	0	0	SFTPC	surfactant protein C
hsa-miR-483-3p	1	0	1	1	1	1	GABRB2	gamma-aminobutyric acid (GABA) A receptor, beta 2
hsa-miR-483-3p	0	0	1	1	1	1	PAX4	paired box 4
hsa-miR-483-3p	0	0	1	1	1	1	TTN	titin
hsa-miR-483-3p	1	0	1	1	1	1	CERS6	ceramide synthase 6
hsa-miR-483-3p	1	0	1	0	1	1	MAP3K9	mitogen-activated protein kinase kinase kinase 9
hsa-miR-483-3p	0	0	1	1	1	1	UNC13B	unc-13 homolog B (C. elegans)
hsa-miR-483-3p	0	0	1	0	0	0	LINC00661	long intergenic non-protein coding RNA 661
hsa-miR-483-3p	1	0	1	1	1	1	OTUD4	OTU domain containing 4
hsa-miR-483-3p	1	0	1	1	0	0	RASGEF1B	RasGEF domain family, member 1B
hsa-miR-483-3p	1	0	1	1	1	1	ANK2	ankyrin 2, neuronal
hsa-miR-483-3p	1	0	1	1	1	1	MLLT10	myeloid/lymphoid or mixed-lineage leukemia (trithorax homolog, Drosophila); translocated to, 10
hsa-miR-483-3p	0	0	1	0	0	0	FAM225B	family with sequence similarity 225, member B (non-protein coding)
hsa-miR-483-3p	0	0	1	0	0	0	FUT8-AS1	FUT8 antisense RNA 1
hsa-miR-483-3p	0	0	1	1	1	1	TINF2	TERF1 (TRF1)-interacting nuclear factor 2
hsa-miR-483-3p	0	0	1	0	0	0	LINC00643	long intergenic non-protein coding RNA 643
hsa-miR-483-3p	0	0	1	0	0	0	FLJ39632	uncharacterized LOC642477
hsa-miR-483-3p	0	0	1	1	1	1	IP6K2	inositol hexakisphosphate kinase 2
hsa-miR-483-3p	0	0	1	0	0	0	DKFZp686D0853	uncharacterized LOC401613
hsa-miR-483-3p	0	0	1	0	0	0	ZNF542	zinc finger protein 542
hsa-miR-483-3p	0	0	1	0	1	1	NHSL1	NHS-like 1
hsa-miR-483-3p	1	0	1	1	1	1	CGN	cingulin
hsa-miR-483-3p	0	0	1	1	1	1	UHRF1BP1L	UHRF1 binding protein 1-like
hsa-miR-483-3p	1	0	1	1	0	0	RBM27	RNA binding motif protein 27
hsa-miR-483-3p	1	0	1	1	0	0	CECR2	cat eye syndrome chromosome region, candidate 2
hsa-miR-483-3p	0	0	1	0	1	1	THAP6	THAP domain containing 6
hsa-miR-483-3p	1	0	1	1	1	1	TLN2	talin 2
hsa-miR-483-3p	0	0	1	0	0	0	OVOS	ovostatin
hsa-miR-483-3p	1	0	1	1	1	1	DCAF5	DDB1 and CUL4 associated factor 5
hsa-miR-483-3p	1	0	1	1	1	1	LCA5	Leber congenital amaurosis 5
hsa-miR-483-3p	1	0	1	0	0	0	CTSB	cathepsin B
hsa-miR-483-3p	1	0	1	1	1	1	KLHL6	kelch-like 6 (Drosophila)
hsa-miR-483-3p	1	0	1	0	1	1	KLHL24	kelch-like 24 (Drosophila)
hsa-miR-483-3p	0	0	1	0	0	0	DKFZp686K1684	uncharacterized LOC440034
hsa-miR-483-3p	0	0	1	1	1	1	USP54	ubiquitin specific peptidase 54
hsa-miR-483-3p	1	0	1	1	1	1	CREB3L2	cAMP responsive element binding protein 3-like 2
hsa-miR-483-3p	1	0	1	1	1	1	HIC2	hypermethylated in cancer 2
hsa-miR-483-3p	1	0	1	1	1	1	AAMP	angio-associated, migratory cell protein
hsa-miR-483-3p	1	0	1	1	1	1	MDK	midkine (neurite growth-promoting factor 2)
hsa-miR-483-3p	1	0	1	1	1	1	PCMT1	protein-L-isoaspartate (D-aspartate) O-methyltransferase
hsa-miR-483-3p	1	0	1	1	0	0	LAYN	layilin
hsa-miR-483-3p	0	0	1	1	0	0	STMN4	stathmin-like 4
hsa-miR-483-3p	1	0	1	1	1	1	RNF10	ring finger protein 10
hsa-miR-483-3p	1	0	1	0	1	1	STX6	syntaxin 6
hsa-miR-483-3p	0	0	1	1	1	1	ARFGAP2	ADP-ribosylation factor GTPase activating protein 2
hsa-miR-483-3p	1	0	1	0	0	0	IGLON5	IgLON family member 5
hsa-miR-483-3p	0	0	1	1	0	0	SLC39A7	solute carrier family 39 (zinc transporter), member 7
hsa-miR-483-3p	1	0	1	1	0	0	INO80E	INO80 complex subunit E
hsa-miR-483-3p	0	0	1	1	0	0	H2AFY2	H2A histone family, member Y2
hsa-miR-483-3p	1	0	1	1	1	1	FUT9	fucosyltransferase 9 (alpha (1,3) fucosyltransferase)
hsa-miR-483-3p	0	0	1	0	0	0	GGTA1P	glycoprotein, alpha-galactosyltransferase 1 pseudogene
hsa-miR-483-3p	0	0	1	0	0	0	RPS16P10	ribosomal protein S16 pseudogene 10
hsa-miR-483-3p	0	0	1	1	1	1	FBXO36	F-box protein 36
hsa-miR-483-3p	1	0	1	1	1	1	DOLPP1	dolichyl pyrophosphate phosphatase 1
hsa-miR-483-3p	0	0	1	1	1	1	ADK	adenosine kinase
hsa-miR-483-3p	1	0	1	1	1	1	NEU1	sialidase 1 (lysosomal sialidase)
hsa-miR-483-3p	1	0	1	1	1	1	E2F3	E2F transcription factor 3
hsa-miR-483-3p	0	0	1	1	1	1	BPGM	2,3-bisphosphoglycerate mutase
hsa-miR-483-3p	1	0	1	1	1	1	HSPA9	heat shock 70kDa protein 9 (mortalin)
hsa-miR-483-3p	0	0	1	1	0	0	DNAJB2	DnaJ (Hsp40) homolog, subfamily B, member 2
hsa-miR-483-3p	0	0	1	1	1	1	MTCP1	mature T-cell proliferation 1
hsa-miR-483-3p	1	0	1	1	1	1	EI24	etoposide induced 2.4 mRNA
hsa-miR-483-3p	0	0	1	1	0	0	HAS1	hyaluronan synthase 1
hsa-miR-483-3p	1	0	1	1	1	1	COPZ1	coatomer protein complex, subunit zeta 1
hsa-miR-483-3p	0	0	1	1	0	0	NARF	nuclear prelamin A recognition factor
hsa-miR-483-3p	0	0	1	1	1	1	GRAP2	GRB2-related adaptor protein 2
hsa-miR-483-3p	0	0	1	1	0	0	TMEM183A	transmembrane protein 183A
hsa-miR-483-3p	1	0	1	0	1	1	RPS6KB1	ribosomal protein S6 kinase, 70kDa, polypeptide 1
hsa-miR-483-3p	1	0	1	1	1	1	LYPLA2	lysophospholipase II
hsa-miR-483-3p	1	0	1	1	1	1	ARFIP2	ADP-ribosylation factor interacting protein 2
hsa-miR-483-3p	1	0	1	1	1	1	STK38L	serine/threonine kinase 38 like
hsa-miR-483-3p	1	0	1	1	1	1	WIPF1	WAS/WASL interacting protein family, member 1
hsa-miR-483-3p	0	0	1	0	0	0	LOC150568	uncharacterized LOC150568
hsa-miR-483-3p	0	0	1	1	1	1	NFATC4	nuclear factor of activated T-cells, cytoplasmic, calcineurin-dependent 4
hsa-miR-483-3p	0	0	1	1	1	1	MPDU1	mannose-P-dolichol utilization defect 1
hsa-miR-483-3p	1	0	1	0	1	1	IP6K1	inositol hexakisphosphate kinase 1
hsa-miR-483-3p	0	0	1	0	1	1	SRSF5	serine/arginine-rich splicing factor 5
hsa-miR-483-3p	0	0	1	1	0	0	CCDC22	coiled-coil domain containing 22
hsa-miR-483-3p	0	0	1	1	1	1	PEX19	peroxisomal biogenesis factor 19
hsa-miR-483-3p	1	0	1	1	1	1	EIF4A2	eukaryotic translation initiation factor 4A2
hsa-miR-483-3p	0	0	1	1	1	1	DEDD	death effector domain containing
hsa-miR-483-3p	1	0	1	1	1	1	CAMK2A	calcium/calmodulin-dependent protein kinase II alpha
hsa-miR-483-3p	0	0	1	1	0	0	TMEM120A	transmembrane protein 120A
hsa-miR-483-3p	1	0	1	1	1	1	CNBP	CCHC-type zinc finger, nucleic acid binding protein
hsa-miR-483-3p	0	0	1	1	1	1	HOXC9	homeobox C9
hsa-miR-483-3p	0	0	1	1	1	1	IL15	interleukin 15
hsa-miR-483-3p	1	0	1	1	1	1	RPUSD3	RNA pseudouridylate synthase domain containing 3
hsa-miR-483-3p	0	0	1	1	1	1	FAM18B1	family with sequence similarity 18, member B1
hsa-miR-483-3p	1	0	1	1	1	1	GDA	guanine deaminase
hsa-miR-483-3p	1	0	1	1	1	1	TRAPPC3	trafficking protein particle complex 3
hsa-miR-483-3p	1	0	1	1	1	1	UBE2K	ubiquitin-conjugating enzyme E2K
hsa-miR-483-3p	0	0	1	1	1	1	RPE	ribulose-5-phosphate-3-epimerase
hsa-miR-483-3p	0	0	1	0	0	0	NUDT18	nudix (nucleoside diphosphate linked moiety X)-type motif 18
hsa-miR-483-3p	1	0	1	1	1	1	RUNX1	runt-related transcription factor 1
hsa-miR-483-3p	0	0	1	1	0	0	HP	haptoglobin
hsa-miR-483-3p	0	0	1	1	1	1	INPP5K	inositol polyphosphate-5-phosphatase K
hsa-miR-483-3p	1	0	1	1	0	0	FOXO3	forkhead box O3
hsa-miR-483-3p	1	0	1	1	1	1	ANKS6	ankyrin repeat and sterile alpha motif domain containing 6
hsa-miR-483-3p	1	0	1	1	1	1	BSDC1	BSD domain containing 1
hsa-miR-483-3p	0	0	1	0	0	0	LOC731789	uncharacterized LOC731789
hsa-miR-483-3p	1	0	1	0	1	1	BTRC	beta-transducin repeat containing E3 ubiquitin protein ligase
hsa-miR-483-3p	0	0	1	1	1	1	SDAD1	SDA1 domain containing 1
hsa-miR-483-3p	1	0	1	1	0	0	GSK3A	glycogen synthase kinase 3 alpha
hsa-miR-483-3p	1	0	1	1	1	1	METAP1	methionyl aminopeptidase 1
hsa-miR-483-3p	0	0	1	0	0	0	LOC440518	golgin A2 pseudogene
hsa-miR-483-3p	0	0	1	1	0	0	STK25	serine/threonine kinase 25
hsa-miR-483-3p	1	0	1	1	1	1	MAN2A2	mannosidase, alpha, class 2A, member 2
hsa-miR-483-3p	0	0	1	1	0	0	HMGXB3	HMG box domain containing 3
hsa-miR-483-3p	1	0	1	1	1	1	RB1CC1	RB1-inducible coiled-coil 1
hsa-miR-483-3p	0	0	1	1	1	1	PTGS1	prostaglandin-endoperoxide synthase 1 (prostaglandin G/H synthase and cyclooxygenase)
hsa-miR-483-3p	1	0	1	1	1	1	KCNE3	potassium voltage-gated channel, Isk-related family, member 3
hsa-miR-483-3p	0	0	1	1	0	0	FAM58A	family with sequence similarity 58, member A
hsa-miR-483-3p	0	0	1	1	1	1	TNFSF10	tumor necrosis factor (ligand) superfamily, member 10
hsa-miR-483-3p	0	0	1	0	0	0	GPR144	G protein-coupled receptor 144
hsa-miR-483-3p	0	0	1	0	0	0	CTSL1P2	cathepsin L1 pseudogene 2
hsa-miR-483-3p	0	0	1	0	1	1	OPRK1	opioid receptor, kappa 1
hsa-miR-483-3p	1	0	1	1	1	1	PLAU	plasminogen activator, urokinase
hsa-miR-483-3p	1	0	1	1	1	1	IGF1	insulin-like growth factor 1 (somatomedin C)
hsa-miR-483-3p	1	0	1	1	1	1	FAS	Fas (TNF receptor superfamily, member 6)
hsa-miR-483-3p	0	0	1	1	0	0	CD40LG	CD40 ligand
hsa-miR-483-3p	0	0	1	0	1	1	MS4A2	membrane-spanning 4-domains, subfamily A, member 2
hsa-miR-483-3p	1	0	1	1	1	1	GALC	galactosylceramidase
hsa-miR-483-3p	1	0	1	0	1	1	GHR	growth hormone receptor
hsa-miR-483-3p	0	0	1	1	0	0	GJB1	gap junction protein, beta 1, 32kDa
hsa-miR-483-3p	0	0	1	1	1	1	GSS	glutathione synthetase
hsa-miR-483-3p	0	0	1	1	1	1	HSD11B2	hydroxysteroid (11-beta) dehydrogenase 2
hsa-miR-483-3p	1	0	1	0	1	1	KIT	v-kit Hardy-Zuckerman 4 feline sarcoma viral oncogene homolog
hsa-miR-483-3p	1	0	1	1	1	1	MITF	microphthalmia-associated transcription factor
hsa-miR-483-3p	0	0	1	1	1	1	SLC25A20	solute carrier family 25 (carnitine/acylcarnitine translocase), member 20
hsa-miR-483-3p	0	0	1	1	1	1	GM2A	GM2 ganglioside activator
hsa-miR-483-3p	0	0	1	0	1	1	GNRHR	gonadotropin-releasing hormone receptor
hsa-miR-483-3p	0	0	1	1	1	1	LTBP2	latent transforming growth factor beta binding protein 2
hsa-miR-483-3p	1	0	1	0	1	1	PAFAH1B1	platelet-activating factor acetylhydrolase 1b, regulatory subunit 1 (45kDa)
hsa-miR-483-3p	1	0	1	1	0	0	NOTCH3	notch 3
hsa-miR-483-3p	0	0	1	1	0	0	PSEN2	presenilin 2 (Alzheimer disease 4)
hsa-miR-483-3p	1	0	1	1	1	1	APP	amyloid beta (A4) precursor protein
hsa-miR-483-3p	1	0	1	1	1	1	MPZ	myelin protein zero
hsa-miR-483-3p	0	0	1	1	1	1	FCGR1A	Fc fragment of IgG, high affinity Ia, receptor (CD64)
hsa-miR-483-3p	1	0	1	1	1	1	CR1	complement component (3b/4b) receptor 1 (Knops blood group)
hsa-miR-483-3p	0	0	1	1	1	1	IGF2	insulin-like growth factor 2 (somatomedin A)
hsa-miR-483-3p	0	0	1	1	1	1	BDKRB2	bradykinin receptor B2
hsa-miR-483-3p	0	0	1	1	1	1	IL11	interleukin 11
hsa-miR-483-3p	0	0	1	0	1	1	ADRA2A	adrenoceptor alpha 2A
hsa-miR-483-3p	1	0	1	0	1	1	ADRA2B	adrenoceptor alpha 2B
hsa-miR-483-3p	1	0	1	1	1	1	CSF1	colony stimulating factor 1 (macrophage)
hsa-miR-483-3p	1	0	1	1	1	1	DRD1	dopamine receptor D1
hsa-miR-483-3p	0	0	1	1	1	1	HTR7	5-hydroxytryptamine (serotonin) receptor 7, adenylate cyclase-coupled
hsa-miR-483-3p	1	0	1	1	1	1	RARA	retinoic acid receptor, alpha
hsa-miR-483-3p	1	0	1	0	1	1	GDF6	growth differentiation factor 6
hsa-miR-483-3p	0	0	1	0	1	1	BLID	BH3-like motif containing, cell death inducer
hsa-miR-483-3p	1	0	1	1	1	1	TPD52L3	tumor protein D52-like 3
hsa-miR-483-3p	1	0	1	1	1	1	LCLAT1	lysocardiolipin acyltransferase 1
hsa-miR-483-3p	1	0	1	0	1	1	ZNF740	zinc finger protein 740
hsa-miR-483-3p	0	0	1	1	1	1	MAP1LC3C	microtubule-associated protein 1 light chain 3 gamma
hsa-miR-483-3p	1	0	1	1	1	1	NRARP	NOTCH-regulated ankyrin repeat protein
hsa-miR-483-3p	1	0	1	0	1	1	YPEL2	yippee-like 2 (Drosophila)
hsa-miR-483-3p	1	0	1	1	1	1	PLCXD3	phosphatidylinositol-specific phospholipase C, X domain containing 3
hsa-miR-483-3p	1	0	1	1	0	0	SDC1	syndecan 1
hsa-miR-483-3p	1	0	1	1	1	1	L3MBTL3	l(3)mbt-like 3 (Drosophila)
hsa-miR-483-3p	1	0	1	1	1	1	NTRK3	neurotrophic tyrosine kinase, receptor, type 3
hsa-miR-483-3p	1	0	1	1	1	1	RBM33	RNA binding motif protein 33
hsa-miR-483-3p	1	0	1	0	1	1	KIAA2022	KIAA2022
hsa-miR-483-3p	0	0	1	1	1	1	CXCR4	chemokine (C-X-C motif) receptor 4
hsa-miR-483-3p	1	0	1	1	1	1	FNIP1	folliculin interacting protein 1
hsa-miR-483-3p	0	0	1	1	1	1	FBXO47	F-box protein 47
hsa-miR-483-3p	1	0	1	0	1	1	RCHY1	ring finger and CHY zinc finger domain containing 1, E3 ubiquitin protein ligase
hsa-miR-483-3p	1	0	1	1	1	1	FOXP4	forkhead box P4
hsa-miR-483-3p	1	0	1	1	1	1	SLC25A53	solute carrier family 25, member 53
hsa-miR-483-3p	0	0	1	0	1	1	ARL13A	ADP-ribosylation factor-like 13A
hsa-miR-483-3p	1	0	1	1	1	1	SORCS1	sortilin-related VPS10 domain containing receptor 1
hsa-miR-483-3p	0	0	1	1	1	1	C2orf68	chromosome 2 open reading frame 68
hsa-miR-483-3p	0	0	1	1	1	1	ZNF833P	zinc finger protein 833, pseudogene
hsa-miR-483-3p	1	0	1	1	1	1	H3F3C	H3 histone, family 3C
hsa-miR-483-3p	0	0	1	0	0	0	LOC441956	uncharacterized LOC441956
hsa-miR-483-3p	1	0	1	1	1	1	KATNAL1	katanin p60 subunit A-like 1
hsa-miR-483-3p	0	0	1	1	1	1	PGBD2	piggyBac transposable element derived 2
hsa-miR-483-3p	1	0	1	1	1	1	SH3PXD2B	SH3 and PX domains 2B
hsa-miR-483-3p	1	0	1	0	1	1	BRCC3	BRCA1/BRCA2-containing complex, subunit 3
hsa-miR-483-3p	1	0	1	0	1	1	RGAG4	retrotransposon gag domain containing 4
hsa-miR-483-3p	1	0	1	1	1	1	CANX	calnexin
hsa-miR-483-3p	1	0	1	0	1	1	BCL7A	B-cell CLL/lymphoma 7A
hsa-miR-483-3p	1	0	1	0	1	1	TNRC6B	trinucleotide repeat containing 6B
hsa-miR-483-3p	1	0	1	1	1	1	TPD52	tumor protein D52
hsa-miR-483-3p	1	0	1	1	1	1	UGGT1	UDP-glucose glycoprotein glucosyltransferase 1
hsa-miR-483-3p	0	0	1	1	1	1	PGAM4	phosphoglycerate mutase family member 4
hsa-miR-483-3p	0	0	1	1	1	1	LYPD5	LY6/PLAUR domain containing 5
hsa-miR-483-3p	1	0	1	1	1	1	CSNK1G3	casein kinase 1, gamma 3
hsa-miR-483-3p	0	0	1	1	1	1	PLGLB1	plasminogen-like B1
hsa-miR-483-3p	0	0	1	1	1	1	HNRNPH2	heterogeneous nuclear ribonucleoprotein H2 (H')
hsa-miR-483-3p	0	0	1	1	0	0	AMZ2	archaelysin family metallopeptidase 2
hsa-miR-483-3p	0	0	1	0	0	0	RUSC1-AS1	RUSC1 antisense RNA 1
hsa-miR-483-3p	1	0	1	1	1	1	C3orf65	chromosome 3 open reading frame 65
hsa-miR-483-3p	1	0	1	1	0	0	ANKRD34A	ankyrin repeat domain 34A
hsa-miR-483-3p	0	0	1	0	1	1	SCN3B	sodium channel, voltage-gated, type III, beta subunit
hsa-miR-483-3p	1	0	1	1	1	1	SLC9A6	solute carrier family 9, subfamily A (NHE6, cation proton antiporter 6), member 6
hsa-miR-483-3p	1	0	1	1	1	1	ERBB4	v-erb-a erythroblastic leukemia viral oncogene homolog 4 (avian)
hsa-miR-483-3p	1	0	1	0	1	1	TMEM237	transmembrane protein 237
hsa-miR-483-3p	1	0	1	1	1	1	UBTF	upstream binding transcription factor, RNA polymerase I
hsa-miR-483-3p	1	0	1	1	1	1	QSER1	glutamine and serine rich 1
hsa-miR-483-3p	1	0	1	1	1	1	PDE11A	phosphodiesterase 11A
hsa-miR-483-3p	1	0	1	1	1	1	PRR3	proline rich 3
hsa-miR-483-3p	0	0	1	1	0	0	VPS37D	vacuolar protein sorting 37 homolog D (S. cerevisiae)
hsa-miR-483-3p	0	0	1	0	1	1	WTH3DI	RAB6C-like
hsa-miR-483-3p	1	0	1	1	1	1	SRSF1	serine/arginine-rich splicing factor 1
hsa-miR-483-3p	1	0	1	1	1	1	HNRNPUL2	heterogeneous nuclear ribonucleoprotein U-like 2
hsa-miR-483-3p	0	0	1	0	0	0	TMEM183B	transmembrane protein 183B
hsa-miR-483-3p	1	0	1	0	1	1	FBXO41	F-box protein 41
hsa-miR-483-3p	1	0	1	1	1	1	ZNF697	zinc finger protein 697
hsa-miR-483-3p	1	0	1	0	0	0	CCDC159	coiled-coil domain containing 159
hsa-miR-483-3p	0	0	1	0	1	1	RBM44	RNA binding motif protein 44
hsa-miR-483-3p	1	0	1	1	1	1	MGA	MAX gene associated
hsa-miR-483-3p	1	0	1	1	1	1	MYO1C	myosin IC
hsa-miR-483-3p	0	0	1	1	1	1	AMELX	amelogenin, X-linked
hsa-miR-483-3p	1	0	1	0	1	1	CDK6	cyclin-dependent kinase 6
hsa-miR-483-3p	1	0	1	1	1	1	CREBL2	cAMP responsive element binding protein-like 2
hsa-miR-483-3p	0	0	1	1	0	0	DIO3	deiodinase, iodothyronine, type III
hsa-miR-483-3p	1	0	1	1	1	1	EXTL3	exostoses (multiple)-like 3
hsa-miR-483-3p	1	0	1	1	1	1	AHR	aryl hydrocarbon receptor
hsa-miR-483-3p	1	0	1	1	1	1	AQP4	aquaporin 4
hsa-miR-483-3p	1	0	1	0	1	1	ARNT	aryl hydrocarbon receptor nuclear translocator
hsa-miR-483-3p	0	0	1	1	1	1	BTN1A1	butyrophilin, subfamily 1, member A1
hsa-miR-483-3p	1	0	1	1	1	1	CBFB	core-binding factor, beta subunit
hsa-miR-483-3p	0	0	1	1	1	1	CD34	CD34 molecule
hsa-miR-483-3p	1	0	1	1	1	1	CDH2	cadherin 2, type 1, N-cadherin (neuronal)
hsa-miR-483-3p	1	0	1	1	1	1	CDH5	cadherin 5, type 2 (vascular endothelium)
hsa-miR-483-3p	1	0	1	1	1	1	CDK2	cyclin-dependent kinase 2
hsa-miR-483-3p	1	0	1	1	1	1	CLCN3	chloride channel, voltage-sensitive 3
hsa-miR-483-3p	0	0	1	1	0	0	CNTFR	ciliary neurotrophic factor receptor
hsa-miR-483-3p	1	0	1	1	1	1	COL4A6	collagen, type IV, alpha 6
hsa-miR-483-3p	1	0	1	1	1	1	CSNK2A1	casein kinase 2, alpha 1 polypeptide
hsa-miR-483-3p	1	0	1	1	0	0	DES	desmin
hsa-miR-483-3p	0	0	1	1	1	1	DPT	dermatopontin
hsa-miR-483-3p	0	0	1	1	0	0	EDN2	endothelin 2
hsa-miR-483-3p	1	0	1	1	1	1	EGR1	early growth response 1
hsa-miR-483-3p	0	0	1	1	1	1	F13B	coagulation factor XIII, B polypeptide
hsa-miR-483-3p	1	0	1	0	1	1	FUT4	fucosyltransferase 4 (alpha (1,3) fucosyltransferase, myeloid-specific)
hsa-miR-483-3p	0	0	1	1	1	1	GNB1	guanine nucleotide binding protein (G protein), beta polypeptide 1
hsa-miR-483-3p	0	0	1	1	1	1	GYS1	glycogen synthase 1 (muscle)
hsa-miR-483-3p	0	0	1	1	1	1	HOXA4	homeobox A4
hsa-miR-483-3p	1	0	1	1	1	1	INSM1	insulinoma-associated 1
hsa-miR-483-3p	1	0	1	1	1	1	ITPR2	inositol 1,4,5-trisphosphate receptor, type 2
hsa-miR-483-3p	1	0	1	0	1	1	KIF3C	kinesin family member 3C
hsa-miR-483-3p	1	0	1	1	1	1	KPNB1	karyopherin (importin) beta 1
hsa-miR-483-3p	0	0	1	1	0	0	KRT4	keratin 4
hsa-miR-483-3p	0	0	1	1	1	1	TACSTD2	tumor-associated calcium signal transducer 2
hsa-miR-483-3p	0	0	1	1	1	1	MAG	myelin associated glycoprotein
hsa-miR-483-3p	0	0	1	1	1	1	MTAP	methylthioadenosine phosphorylase
hsa-miR-483-3p	1	0	1	1	1	1	MYH9	myosin, heavy chain 9, non-muscle
hsa-miR-483-3p	0	0	1	1	1	1	NID1	nidogen 1
hsa-miR-483-3p	1	0	1	1	1	1	ORC5	origin recognition complex, subunit 5
hsa-miR-483-3p	1	0	1	1	1	1	OSBP	oxysterol binding protein
hsa-miR-483-3p	0	0	1	1	0	0	PER1	period homolog 1 (Drosophila)
hsa-miR-483-3p	1	0	1	1	1	1	PGAM1	phosphoglycerate mutase 1 (brain)
hsa-miR-483-3p	1	0	1	1	1	1	PHF1	PHD finger protein 1
hsa-miR-483-3p	0	0	1	1	1	1	PLGLB2	plasminogen-like B2
hsa-miR-483-3p	1	0	1	1	1	1	PRPS1	phosphoribosyl pyrophosphate synthetase 1
hsa-miR-483-3p	1	0	1	1	1	1	PVRL1	poliovirus receptor-related 1 (herpesvirus entry mediator C)
hsa-miR-483-3p	1	0	1	0	1	1	RAB6A	RAB6A, member RAS oncogene family
hsa-miR-483-3p	1	0	1	1	1	1	SFRP2	secreted frizzled-related protein 2
hsa-miR-483-3p	1	0	1	1	1	1	SRSF2	serine/arginine-rich splicing factor 2
hsa-miR-483-3p	1	0	1	1	1	1	SMARCD1	SWI/SNF related, matrix associated, actin dependent regulator of chromatin, subfamily d, member 1
hsa-miR-483-3p	1	0	1	1	1	1	SMARCD2	SWI/SNF related, matrix associated, actin dependent regulator of chromatin, subfamily d, member 2
hsa-miR-483-3p	0	0	1	1	1	1	SUPT6H	suppressor of Ty 6 homolog (S. cerevisiae)
hsa-miR-483-3p	1	0	1	0	1	1	TAL1	T-cell acute lymphocytic leukemia 1
hsa-miR-483-3p	1	0	1	1	1	1	NR2E1	nuclear receptor subfamily 2, group E, member 1
hsa-miR-483-3p	0	0	1	1	0	0	HIRA	HIR histone cell cycle regulation defective homolog A (S. cerevisiae)
hsa-miR-483-3p	0	0	1	1	1	1	ZNF137P	zinc finger protein 137, pseudogene
hsa-miR-483-3p	1	0	1	1	0	0	SLC30A3	solute carrier family 30 (zinc transporter), member 3
hsa-miR-483-3p	1	0	1	1	1	1	NRIP1	nuclear receptor interacting protein 1
hsa-miR-483-3p	1	0	1	0	1	1	CNTNAP1	contactin associated protein 1
hsa-miR-483-3p	0	0	1	1	1	1	AGPS	alkylglycerone phosphate synthase
hsa-miR-483-3p	1	0	1	1	0	0	TCAP	titin-cap (telethonin)
hsa-miR-483-3p	0	0	1	1	0	0	EIF4EBP3	eukaryotic translation initiation factor 4E binding protein 3
hsa-miR-483-3p	1	0	1	1	1	1	RIOK3	RIO kinase 3 (yeast)
hsa-miR-483-3p	1	0	1	0	1	1	E2F2	E2F transcription factor 2
hsa-miR-483-3p	1	0	1	1	1	1	FGF12	fibroblast growth factor 12
hsa-miR-483-3p	1	0	1	0	1	1	SLC1A2	solute carrier family 1 (glial high affinity glutamate transporter), member 2
hsa-miR-483-3p	0	0	1	1	1	1	HOMER1	homer homolog 1 (Drosophila)
hsa-miR-483-3p	0	0	1	1	0	0	PIGL	phosphatidylinositol glycan anchor biosynthesis, class L
hsa-miR-483-3p	1	0	1	0	1	1	ACVR1B	activin A receptor, type IB
hsa-miR-483-3p	1	0	1	1	1	1	DAG1	dystroglycan 1 (dystrophin-associated glycoprotein 1)
hsa-miR-483-3p	0	0	1	1	1	1	NFATC3	nuclear factor of activated T-cells, cytoplasmic, calcineurin-dependent 3
hsa-miR-483-3p	1	0	1	1	1	1	RAB5C	RAB5C, member RAS oncogene family
hsa-miR-483-3p	0	0	1	1	1	1	SMS	spermine synthase
hsa-miR-483-3p	0	0	1	1	0	0	PRY	PTPN13-like, Y-linked
hsa-miR-483-3p	0	0	1	1	0	0	ZW10	ZW10, kinetochore associated, homolog (Drosophila)
hsa-miR-483-3p	0	0	1	1	1	1	MTA2	metastasis associated 1 family, member 2
hsa-miR-483-3p	1	0	1	1	1	1	MED1	mediator complex subunit 1
hsa-miR-483-3p	1	0	1	1	1	1	KIF3B	kinesin family member 3B
hsa-miR-483-3p	0	0	1	1	1	1	TJP2	tight junction protein 2
hsa-miR-483-3p	1	0	1	0	1	1	CDYL	chromodomain protein, Y-like
hsa-miR-483-3p	1	0	1	1	1	1	ONECUT2	one cut homeobox 2
hsa-miR-483-3p	1	0	1	1	1	1	FXR2	fragile X mental retardation, autosomal homolog 2
hsa-miR-483-3p	0	0	1	1	1	1	CD8B	CD8b molecule
hsa-miR-483-3p	1	0	1	0	1	1	DOCK3	dedicator of cytokinesis 3
hsa-miR-483-3p	1	0	1	1	1	1	KCNC4	potassium voltage-gated channel, Shaw-related subfamily, member 4
hsa-miR-483-3p	0	0	1	1	0	0	MMP9	matrix metallopeptidase 9 (gelatinase B, 92kDa gelatinase, 92kDa type IV collagenase)
hsa-miR-483-3p	1	0	1	1	1	1	CRK	v-crk sarcoma virus CT10 oncogene homolog (avian)
hsa-miR-483-3p	1	0	1	1	1	1	DLX3	distal-less homeobox 3
hsa-miR-483-3p	1	0	1	0	1	1	E2F1	E2F transcription factor 1
hsa-miR-483-3p	1	0	1	1	1	1	H3F3B	H3 histone, family 3B (H3.3B)
hsa-miR-483-3p	0	0	1	1	1	1	PPP1R3C	protein phosphatase 1, regulatory subunit 3C
hsa-miR-483-3p	1	0	1	0	1	1	PRKAB2	protein kinase, AMP-activated, beta 2 non-catalytic subunit
hsa-miR-483-3p	1	0	1	1	1	1	RALA	v-ral simian leukemia viral oncogene homolog A (ras related)
hsa-miR-483-3p	1	0	1	1	0	0	ZBTB22	zinc finger and BTB domain containing 22
hsa-miR-483-3p	0	0	1	1	1	1	ING1	inhibitor of growth family, member 1
hsa-miR-483-3p	0	0	1	1	1	1	BCAM	basal cell adhesion molecule (Lutheran blood group)
hsa-miR-483-3p	1	0	1	1	1	1	NHLH2	nescient helix loop helix 2
hsa-miR-483-3p	0	0	1	1	1	1	SOX3	SRY (sex determining region Y)-box 3
hsa-miR-483-3p	0	0	1	1	0	0	NR2F1	nuclear receptor subfamily 2, group F, member 1
hsa-miR-483-3p	0	0	1	1	1	1	PDCD7	programmed cell death 7
hsa-miR-483-3p	1	0	1	1	1	1	UST	uronyl-2-sulfotransferase
hsa-miR-483-3p	1	0	1	1	1	1	ACTR1A	ARP1 actin-related protein 1 homolog A, centractin alpha (yeast)
hsa-miR-483-3p	0	0	1	1	0	0	DHRS2	dehydrogenase/reductase (SDR family) member 2
hsa-miR-483-3p	0	0	1	0	1	1	CD96	CD96 molecule
hsa-miR-483-3p	1	0	1	0	1	1	SPRY3	sprouty homolog 3 (Drosophila)
hsa-miR-483-3p	0	0	1	0	1	1	HCAR3	hydroxycarboxylic acid receptor 3
hsa-miR-483-3p	0	0	1	1	1	1	HS3ST2	heparan sulfate (glucosamine) 3-O-sulfotransferase 2
hsa-miR-483-3p	1	0	1	1	1	1	NEUROD2	neuronal differentiation 2
hsa-miR-483-3p	1	0	1	1	1	1	NEUROG1	neurogenin 1
hsa-miR-483-3p	1	0	1	1	1	1	CDK16	cyclin-dependent kinase 16
hsa-miR-483-3p	0	0	1	1	1	1	TYRO3	TYRO3 protein tyrosine kinase
hsa-miR-483-3p	0	0	1	1	0	0	ANP32A	acidic (leucine-rich) nuclear phosphoprotein 32 family, member A
hsa-miR-483-3p	1	0	1	1	1	1	SMC1A	structural maintenance of chromosomes 1A
hsa-miR-483-3p	1	0	1	1	1	1	BASP1	brain abundant, membrane attached signal protein 1
hsa-miR-483-3p	1	0	1	0	1	1	APPBP2	amyloid beta precursor protein (cytoplasmic tail) binding protein 2
hsa-miR-483-3p	1	0	1	0	1	1	MXD4	MAX dimerization protein 4
hsa-miR-483-3p	1	0	1	0	1	1	IGF2BP1	insulin-like growth factor 2 mRNA binding protein 1
hsa-miR-483-3p	0	0	1	1	0	0	PMVK	phosphomevalonate kinase
hsa-miR-483-3p	1	0	1	1	1	1	ZBTB6	zinc finger and BTB domain containing 6
hsa-miR-483-3p	0	0	1	1	1	1	CD300C	CD300c molecule
hsa-miR-483-3p	0	0	1	1	1	1	LYVE1	lymphatic vessel endothelial hyaluronan receptor 1
hsa-miR-483-3p	1	0	1	1	1	1	HIVEP2	human immunodeficiency virus type I enhancer binding protein 2
hsa-miR-483-3p	0	0	1	1	1	1	INMT	indolethylamine N-methyltransferase
hsa-miR-483-3p	0	0	1	1	0	0	HNRNPA0	heterogeneous nuclear ribonucleoprotein A0
hsa-miR-483-3p	1	0	1	1	1	1	CBX1	chromobox homolog 1
hsa-miR-483-3p	0	0	1	1	1	1	ASCC3	activating signal cointegrator 1 complex subunit 3
hsa-miR-483-3p	1	0	1	1	1	1	RAB35	RAB35, member RAS oncogene family
hsa-miR-483-3p	1	0	1	1	1	1	ESM1	endothelial cell-specific molecule 1
hsa-miR-483-3p	1	0	1	1	1	1	SOX21	SRY (sex determining region Y)-box 21
hsa-miR-483-3p	1	0	1	1	1	1	FSTL1	follistatin-like 1
hsa-miR-483-3p	1	0	1	1	1	1	VEZF1	vascular endothelial zinc finger 1
hsa-miR-483-3p	0	0	1	0	1	1	ZXDB	zinc finger, X-linked, duplicated B
hsa-miR-483-3p	1	0	1	1	1	1	TESK2	testis-specific kinase 2
hsa-miR-483-3p	1	0	1	1	1	1	PALM2-AKAP2	PALM2-AKAP2 readthrough
hsa-miR-483-3p	0	0	1	1	1	1	KLRK1	killer cell lectin-like receptor subfamily K, member 1
hsa-miR-483-3p	0	0	1	1	1	1	LMOD1	leiomodin 1 (smooth muscle)
hsa-miR-483-3p	1	0	1	1	1	1	RYBP	RING1 and YY1 binding protein
hsa-miR-483-3p	0	0	1	1	1	1	IL36RN	interleukin 36 receptor antagonist
hsa-miR-483-3p	1	0	1	1	1	1	KCND2	potassium voltage-gated channel, Shal-related subfamily, member 2
hsa-miR-483-3p	1	0	1	1	1	1	KCNE1L	KCNE1-like
hsa-miR-483-3p	1	0	1	0	1	1	PXDN	peroxidasin homolog (Drosophila)
hsa-miR-483-3p	1	0	1	0	1	1	GAB2	GRB2-associated binding protein 2
hsa-miR-483-3p	1	0	1	0	1	1	G3BP2	GTPase activating protein (SH3 domain) binding protein 2
hsa-miR-483-3p	1	0	1	0	1	1	MYCBP	c-myc binding protein
hsa-miR-483-3p	1	0	1	0	1	1	MYO10	myosin X
hsa-miR-483-3p	1	0	1	0	1	1	VPS4A	vacuolar protein sorting 4 homolog A (S. cerevisiae)
hsa-miR-483-3p	1	0	1	0	1	1	CHMP2B	charged multivesicular body protein 2B
hsa-miR-483-3p	1	0	1	0	1	1	VAMP2	vesicle-associated membrane protein 2 (synaptobrevin 2)
hsa-miR-483-3p	0	0	1	1	0	0	HSD17B8	hydroxysteroid (17-beta) dehydrogenase 8
hsa-miR-483-3p	0	0	1	0	0	0	SND1-IT1	SND1 intronic transcript 1 (non-protein coding)
hsa-miR-483-3p	1	0	1	1	1	1	RND1	Rho family GTPase 1
hsa-miR-483-3p	1	0	1	0	1	1	HUNK	hormonally up-regulated Neu-associated kinase
hsa-miR-483-3p	1	0	1	1	1	1	CDR2L	cerebellar degeneration-related protein 2-like
hsa-miR-483-3p	1	0	1	1	1	1	ZNF592	zinc finger protein 592
hsa-miR-483-3p	1	0	1	1	1	1	TBKBP1	TBK1 binding protein 1
hsa-miR-483-3p	1	0	1	0	1	1	MLEC	malectin
hsa-miR-483-3p	0	0	1	0	1	1	DHCR24	24-dehydrocholesterol reductase
hsa-miR-483-3p	1	0	1	1	1	1	JAKMIP2	janus kinase and microtubule interacting protein 2
hsa-miR-483-3p	1	0	1	0	1	1	LPPR4	lipid phosphate phosphatase-related protein type 4
hsa-miR-483-3p	1	0	1	1	1	1	NUAK1	NUAK family, SNF1-like kinase, 1
hsa-miR-483-3p	1	0	1	1	1	1	ARHGAP44	Rho GTPase activating protein 44
hsa-miR-483-3p	1	0	1	0	1	1	ZBTB40	zinc finger and BTB domain containing 40
hsa-miR-483-3p	1	0	1	0	1	1	WDFY3	WD repeat and FYVE domain containing 3
hsa-miR-483-3p	1	0	1	1	1	1	SPEN	spen homolog, transcriptional regulator (Drosophila)
hsa-miR-483-3p	1	0	1	1	1	1	RTF1	Rtf1, Paf1/RNA polymerase II complex component, homolog (S. cerevisiae)
hsa-miR-483-3p	1	0	1	1	1	1	GPD1L	glycerol-3-phosphate dehydrogenase 1-like
hsa-miR-483-3p	1	0	1	1	1	1	CSTF2T	cleavage stimulation factor, 3' pre-RNA, subunit 2, 64kDa, tau variant
hsa-miR-483-3p	1	0	1	0	1	1	ARHGEF12	Rho guanine nucleotide exchange factor (GEF) 12
hsa-miR-483-3p	1	0	1	0	1	1	LARP1	La ribonucleoprotein domain family, member 1
hsa-miR-483-3p	0	0	1	1	1	1	LEPROTL1	leptin receptor overlapping transcript-like 1
hsa-miR-483-3p	0	0	1	1	0	0	SPEF1	sperm flagellar 1
hsa-miR-483-3p	1	0	1	1	1	1	FAM155B	family with sequence similarity 155, member B
hsa-miR-483-3p	1	0	1	1	1	1	FGFR1	fibroblast growth factor receptor 1
hsa-miR-483-3p	1	0	1	1	1	1	PHF20L1	PHD finger protein 20-like 1
hsa-miR-483-3p	0	0	1	1	1	1	RAB10	RAB10, member RAS oncogene family
hsa-miR-483-3p	0	0	1	1	1	1	TRIP4	thyroid hormone receptor interactor 4
hsa-miR-483-3p	1	0	1	1	1	1	BIRC6	baculoviral IAP repeat containing 6
hsa-miR-483-3p	0	0	1	1	0	0	SRRM2	serine/arginine repetitive matrix 2
hsa-miR-483-3p	0	0	1	1	1	1	CENPF	centromere protein F, 350/400kDa (mitosin)
hsa-miR-483-3p	0	0	1	0	1	1	IGF2-AS	IGF2 antisense RNA
hsa-miR-483-3p	1	0	1	1	1	1	PHF20	PHD finger protein 20
hsa-miR-483-3p	1	0	1	1	1	1	IER5	immediate early response 5
hsa-miR-483-3p	0	0	1	1	1	1	GNAS	GNAS complex locus
hsa-miR-483-3p	1	0	1	1	1	1	CYP39A1	cytochrome P450, family 39, subfamily A, polypeptide 1
hsa-miR-483-3p	1	0	1	1	1	1	PLXNA3	plexin A3
hsa-miR-483-3p	1	0	1	1	1	1	INO80	INO80 homolog (S. cerevisiae)
hsa-miR-483-3p	1	0	1	0	1	1	EIF2C4	eukaryotic translation initiation factor 2C, 4
hsa-miR-483-3p	1	0	1	0	1	1	MARCH5	membrane-associated ring finger (C3HC4) 5
hsa-miR-483-3p	0	0	1	1	1	1	SDHAF2	succinate dehydrogenase complex assembly factor 2
hsa-miR-483-3p	1	0	1	1	1	1	HIF1AN	hypoxia inducible factor 1, alpha subunit inhibitor
hsa-miR-483-3p	1	0	1	0	1	1	KIF26B	kinesin family member 26B
hsa-miR-483-3p	0	0	1	1	0	0	LUC7L	LUC7-like (S. cerevisiae)
hsa-miR-483-3p	1	0	1	1	1	1	TMEM33	transmembrane protein 33
hsa-miR-483-3p	1	0	1	0	1	1	LGI2	leucine-rich repeat LGI family, member 2
hsa-miR-483-3p	0	0	1	1	1	1	ZFP64	zinc finger protein 64 homolog (mouse)
hsa-miR-483-3p	1	0	1	1	1	1	AGPAT5	1-acylglycerol-3-phosphate O-acyltransferase 5 (lysophosphatidic acid acyltransferase, epsilon)
hsa-miR-483-3p	1	0	1	1	1	1	ACER3	alkaline ceramidase 3
hsa-miR-483-3p	1	0	1	0	1	1	TMEM106B	transmembrane protein 106B
hsa-miR-483-3p	1	0	1	1	1	1	PI4K2A	phosphatidylinositol 4-kinase type 2 alpha
hsa-miR-483-3p	0	0	1	1	1	1	HDAC8	histone deacetylase 8
hsa-miR-483-3p	1	0	1	1	1	1	SLC16A10	solute carrier family 16, member 10 (aromatic amino acid transporter)
hsa-miR-483-3p	0	0	1	1	1	1	NPAP1	nuclear pore associated protein 1
hsa-miR-483-3p	1	0	1	0	1	1	CCDC93	coiled-coil domain containing 93
hsa-miR-483-3p	1	0	1	1	1	1	DDIT4	DNA-damage-inducible transcript 4
hsa-miR-483-3p	0	0	1	1	1	1	GNL3L	guanine nucleotide binding protein-like 3 (nucleolar)-like
hsa-miR-483-3p	1	0	1	1	1	1	DLL4	delta-like 4 (Drosophila)
hsa-miR-483-3p	1	0	1	1	1	1	ABCB9	ATP-binding cassette, sub-family B (MDR/TAP), member 9
hsa-miR-483-3p	0	0	1	1	1	1	RPRM	reprimo, TP53 dependent G2 arrest mediator candidate
hsa-miR-483-3p	1	0	1	1	1	1	MDM1	Mdm1 nuclear protein homolog (mouse)
hsa-miR-483-3p	0	0	1	1	1	1	UBQLN4	ubiquilin 4
hsa-miR-483-3p	1	0	1	0	1	1	PMEPA1	prostate transmembrane protein, androgen induced 1
hsa-miR-483-3p	1	0	1	1	0	0	SLC17A7	solute carrier family 17 (sodium-dependent inorganic phosphate cotransporter), member 7
hsa-miR-483-3p	1	0	1	1	1	1	PTGFRN	prostaglandin F2 receptor negative regulator
hsa-miR-483-3p	0	0	1	1	1	1	TCL6	T-cell leukemia/lymphoma 6 (non-protein coding)
hsa-miR-483-3p	0	0	1	1	0	0	AMIGO1	adhesion molecule with Ig-like domain 1
hsa-miR-483-3p	1	0	1	1	1	1	ZNF512B	zinc finger protein 512B
hsa-miR-483-3p	1	0	1	1	1	1	DLG3	discs, large homolog 3 (Drosophila)
hsa-miR-483-3p	1	0	1	1	1	1	NLGN2	neuroligin 2
hsa-miR-483-3p	1	0	1	1	1	1	HOMEZ	homeobox and leucine zipper encoding
hsa-miR-483-3p	1	0	1	1	1	1	CNTN3	contactin 3 (plasmacytoma associated)
hsa-miR-483-3p	1	0	1	1	1	1	ZNFX1	zinc finger, NFX1-type containing 1
hsa-miR-483-3p	1	0	1	1	1	1	NEFH	neurofilament, heavy polypeptide
hsa-miR-483-3p	1	0	1	1	1	1	CLDN1	claudin 1
hsa-miR-483-3p	0	0	1	1	1	1	IL22RA1	interleukin 22 receptor, alpha 1
hsa-miR-483-3p	1	0	1	1	1	1	TRIB2	tribbles homolog 2 (Drosophila)
hsa-miR-483-3p	0	0	1	1	0	0	LMAN1L	lectin, mannose-binding, 1 like
hsa-miR-483-3p	1	0	1	0	1	1	MCL1	myeloid cell leukemia sequence 1 (BCL2-related)
hsa-miR-483-3p	1	0	1	0	1	1	GAN	gigaxonin
hsa-miR-483-3p	0	0	1	1	0	0	KCNK13	potassium channel, subfamily K, member 13
hsa-miR-483-3p	1	0	1	1	1	1	EPB41L4A	erythrocyte membrane protein band 4.1 like 4A
hsa-miR-483-3p	1	0	1	1	1	1	LRRC4	leucine rich repeat containing 4
hsa-miR-483-3p	1	0	1	1	1	1	XYLT1	xylosyltransferase I
hsa-miR-483-3p	0	0	1	1	1	1	GLIPR2	GLI pathogenesis-related 2
hsa-miR-483-3p	1	0	1	1	1	1	NOC3L	nucleolar complex associated 3 homolog (S. cerevisiae)
hsa-miR-483-3p	1	0	1	1	1	1	NDRG3	NDRG family member 3
hsa-miR-483-3p	1	0	1	1	1	1	GIGYF1	GRB10 interacting GYF protein 1
hsa-miR-483-3p	1	0	1	1	1	1	S100PBP	S100P binding protein
hsa-miR-483-3p	1	0	1	0	1	1	MAP1LC3B	microtubule-associated protein 1 light chain 3 beta
hsa-miR-483-3p	1	0	1	1	1	1	RFX7	regulatory factor X, 7
hsa-miR-483-3p	1	0	1	0	1	1	BCL11B	B-cell CLL/lymphoma 11B (zinc finger protein)
hsa-miR-483-3p	1	0	1	1	0	0	CCDC71	coiled-coil domain containing 71
hsa-miR-483-3p	1	0	1	1	1	1	GID4	GID complex subunit 4, VID24 homolog (S. cerevisiae)
hsa-miR-483-3p	1	0	1	1	1	1	FAM134A	family with sequence similarity 134, member A
hsa-miR-483-3p	1	0	1	1	1	1	NKAIN1	Na+/K+ transporting ATPase interacting 1
hsa-miR-483-3p	1	0	1	1	1	1	MUL1	mitochondrial E3 ubiquitin protein ligase 1
hsa-miR-483-3p	0	0	1	1	1	1	LRRK1	leucine-rich repeat kinase 1
hsa-miR-483-3p	0	0	1	1	1	1	ZNF767	zinc finger family member 767
hsa-miR-483-3p	0	0	1	1	0	0	NRSN2	neurensin 2
hsa-miR-483-3p	1	0	1	1	1	1	KLHL18	kelch-like 18 (Drosophila)
hsa-miR-483-3p	0	0	1	1	1	1	DBF4B	DBF4 homolog B (S. cerevisiae)
hsa-miR-483-3p	1	0	1	1	1	1	NUBPL	nucleotide binding protein-like
hsa-miR-483-3p	1	0	1	0	1	1	SRCIN1	SRC kinase signaling inhibitor 1
hsa-miR-483-3p	1	0	1	0	1	1	C1orf21	chromosome 1 open reading frame 21
hsa-miR-483-3p	1	0	1	0	1	1	CSRNP2	cysteine-serine-rich nuclear protein 2
hsa-miR-483-3p	1	0	1	1	1	1	SNX27	sorting nexin family member 27
hsa-miR-483-3p	1	0	1	1	1	1	TRIM56	tripartite motif containing 56
hsa-miR-483-3p	1	0	1	0	1	1	SPRY4	sprouty homolog 4 (Drosophila)
hsa-miR-483-3p	1	0	1	1	1	1	GABARAPL1	GABA(A) receptor-associated protein like 1
hsa-miR-483-3p	0	0	1	1	1	1	KCNA7	potassium voltage-gated channel, shaker-related subfamily, member 7
hsa-miR-483-3p	1	0	1	1	1	1	GPR61	G protein-coupled receptor 61
hsa-miR-483-3p	0	0	1	0	1	1	RAB6C	RAB6C, member RAS oncogene family
hsa-miR-483-3p	0	0	1	1	0	0	ATRIP	ATR interacting protein
hsa-miR-483-3p	1	0	1	1	1	1	UTP15	UTP15, U3 small nucleolar ribonucleoprotein, homolog (S. cerevisiae)
hsa-miR-483-3p	1	0	1	1	1	1	FAM175B	family with sequence similarity 175, member B
hsa-miR-483-3p	1	0	1	1	1	1	ZNRF1	zinc and ring finger 1, E3 ubiquitin protein ligase
hsa-miR-483-3p	0	0	1	0	1	1	LDOC1L	leucine zipper, down-regulated in cancer 1-like
hsa-miR-483-3p	1	0	1	0	1	1	PSD2	pleckstrin and Sec7 domain containing 2
hsa-miR-483-3p	0	0	1	0	1	1	DNAJC30	DnaJ (Hsp40) homolog, subfamily C, member 30
hsa-miR-483-3p	0	0	1	1	1	1	COG8	component of oligomeric golgi complex 8
hsa-miR-483-3p	0	0	1	1	0	0	PCDH1	protocadherin 1
hsa-miR-483-3p	1	0	1	1	1	1	SYVN1	synovial apoptosis inhibitor 1, synoviolin
hsa-miR-483-3p	1	0	1	1	1	1	PPP1R9B	protein phosphatase 1, regulatory subunit 9B
hsa-miR-483-3p	1	0	1	1	1	1	PHF5A	PHD finger protein 5A
hsa-miR-483-3p	1	0	1	1	0	0	ZC3H10	zinc finger CCCH-type containing 10
hsa-miR-483-3p	1	0	1	0	1	1	UBASH3B	ubiquitin associated and SH3 domain containing B
hsa-miR-483-3p	0	0	1	1	1	1	POLR2J2	polymerase (RNA) II (DNA directed) polypeptide J2
hsa-miR-483-3p	1	0	1	1	0	0	DMRTB1	DMRT-like family B with proline-rich C-terminal, 1
hsa-miR-483-3p	1	0	1	0	1	1	EAF1	ELL associated factor 1
hsa-miR-483-3p	1	0	1	0	1	1	SCRT2	scratch homolog 2, zinc finger protein (Drosophila)
hsa-miR-483-3p	0	0	1	1	1	1	EPSTI1	epithelial stromal interaction 1 (breast)
hsa-miR-483-3p	1	0	1	1	0	0	CAMK2N2	calcium/calmodulin-dependent protein kinase II inhibitor 2
hsa-miR-483-3p	1	0	1	1	1	1	ADAM19	ADAM metallopeptidase domain 19
hsa-miR-483-3p	1	0	1	1	1	1	TANC1	tetratricopeptide repeat, ankyrin repeat and coiled-coil containing 1
hsa-miR-483-3p	1	0	1	1	0	0	FCHSD1	FCH and double SH3 domains 1
hsa-miR-483-3p	1	0	1	1	1	1	EPT1	ethanolaminephosphotransferase 1 (CDP-ethanolamine-specific)
hsa-miR-483-3p	1	0	1	1	1	1	RCSD1	RCSD domain containing 1
hsa-miR-483-3p	0	0	1	1	0	0	PGLYRP2	peptidoglycan recognition protein 2
hsa-miR-483-3p	0	0	1	1	1	1	PLEKHG4B	pleckstrin homology domain containing, family G (with RhoGef domain) member 4B
hsa-miR-483-3p	1	0	1	1	0	0	AP1S1	adaptor-related protein complex 1, sigma 1 subunit
hsa-miR-483-3p	1	0	1	1	1	1	NAA15	N(alpha)-acetyltransferase 15, NatA auxiliary subunit
hsa-miR-483-3p	1	0	1	1	1	1	COL11A2	collagen, type XI, alpha 2
hsa-miR-483-3p	0	0	1	0	1	1	SYNPO2	synaptopodin 2
hsa-miR-483-3p	0	0	1	1	1	1	POFUT2	protein O-fucosyltransferase 2
hsa-miR-483-3p	0	0	1	1	1	1	TM4SF19	transmembrane 4 L six family member 19
hsa-miR-483-3p	1	0	1	1	1	1	ICA1L	islet cell autoantigen 1,69kDa-like
hsa-miR-483-3p	1	0	1	0	1	1	CNOT6L	CCR4-NOT transcription complex, subunit 6-like
hsa-miR-483-3p	1	0	1	1	1	1	TEX261	testis expressed 261
hsa-miR-483-3p	1	0	1	1	1	1	KCNH8	potassium voltage-gated channel, subfamily H (eag-related), member 8
hsa-miR-483-3p	1	0	1	1	1	1	YPEL4	yippee-like 4 (Drosophila)
hsa-miR-483-3p	0	0	1	1	0	0	RNASE11	ribonuclease, RNase A family, 11 (non-active)
hsa-miR-483-3p	1	0	1	1	1	1	CADM4	cell adhesion molecule 4
hsa-miR-483-3p	1	0	1	1	1	1	FAM110B	family with sequence similarity 110, member B
hsa-miR-483-3p	0	0	1	1	1	1	GLIS1	GLIS family zinc finger 1
hsa-miR-483-3p	1	0	1	1	1	1	ZNF362	zinc finger protein 362
hsa-miR-483-3p	1	0	1	0	1	1	TMTC2	transmembrane and tetratricopeptide repeat containing 2
hsa-miR-483-3p	1	0	1	0	1	1	DCP2	DCP2 decapping enzyme homolog (S. cerevisiae)
hsa-miR-483-3p	1	0	1	0	1	1	TMEM154	transmembrane protein 154
hsa-miR-483-3p	0	0	1	1	0	0	GPC2	glypican 2
hsa-miR-483-3p	0	0	1	1	0	0	POMZP3	POM121 and ZP3 fusion
hsa-miR-483-3p	1	0	1	1	1	1	APCDD1	adenomatosis polyposis coli down-regulated 1
hsa-miR-483-3p	1	0	1	1	1	1	TMEM151A	transmembrane protein 151A
hsa-miR-483-3p	1	0	1	1	1	1	CREBRF	CREB3 regulatory factor
hsa-miR-483-3p	0	0	1	1	1	1	REXO1L1	REX1, RNA exonuclease 1 homolog (S. cerevisiae)-like 1
hsa-miR-483-3p	1	0	1	1	1	1	FAM117B	family with sequence similarity 117, member B
hsa-miR-483-3p	1	0	1	1	1	1	DIP2B	DIP2 disco-interacting protein 2 homolog B (Drosophila)
hsa-miR-483-3p	1	0	1	1	1	1	SLC41A1	solute carrier family 41, member 1
hsa-miR-483-3p	0	0	1	1	0	0	PDILT	protein disulfide isomerase-like, testis expressed
hsa-miR-483-3p	0	0	1	1	1	1	ZDHHC22	zinc finger, DHHC-type containing 22
hsa-miR-483-3p	0	0	1	1	1	1	GRIK1	glutamate receptor, ionotropic, kainate 1
hsa-miR-483-3p	1	0	1	1	1	1	PRR15	proline rich 15
hsa-miR-483-3p	0	0	1	0	1	1	SYT12	synaptotagmin XII
hsa-miR-483-3p	1	0	1	0	1	1	ERC1	ELKS/RAB6-interacting/CAST family member 1
hsa-miR-483-3p	1	0	1	1	1	1	DCAF12L1	DDB1 and CUL4 associated factor 12-like 1
hsa-miR-483-3p	1	0	1	1	1	1	TCF20	transcription factor 20 (AR1)
hsa-miR-483-3p	0	0	1	1	1	1	CPLX4	complexin 4
hsa-miR-483-3p	0	0	1	1	0	0	BPIFB4	BPI fold containing family B, member 4
hsa-miR-483-3p	1	0	1	0	1	1	C12orf36	chromosome 12 open reading frame 36
hsa-miR-483-3p	0	0	1	1	0	0	CCDC144B	coiled-coil domain containing 144B (pseudogene)
hsa-miR-483-3p	1	0	1	1	1	1	SUMF1	sulfatase modifying factor 1
hsa-miR-483-3p	1	0	1	1	1	1	ARRDC4	arrestin domain containing 4
hsa-miR-483-3p	0	0	1	1	1	1	ISCA2	iron-sulfur cluster assembly 2 homolog (S. cerevisiae)
hsa-miR-483-3p	1	0	1	0	1	1	SRRM4	serine/arginine repetitive matrix 4
hsa-miR-483-3p	1	0	1	1	1	1	ZBTB41	zinc finger and BTB domain containing 41
hsa-miR-483-3p	1	0	1	1	1	1	AQP1	aquaporin 1 (Colton blood group)
hsa-miR-483-3p	1	0	1	0	1	1	FAM73A	family with sequence similarity 73, member A
hsa-miR-483-3p	0	0	1	1	1	1	LHFPL4	lipoma HMGIC fusion partner-like 4
hsa-miR-483-3p	1	0	1	1	1	1	PTGER3	prostaglandin E receptor 3 (subtype EP3)
hsa-miR-483-3p	1	0	1	0	1	1	DLEU7	deleted in lymphocytic leukemia, 7
hsa-miR-483-3p	0	0	1	1	1	1	COL18A1-AS1	COL18A1 antisense RNA 1
hsa-miR-483-3p	1	0	1	1	1	1	GLYAT	glycine-N-acyltransferase
hsa-miR-483-3p	1	0	1	1	1	1	ENSA	endosulfine alpha
hsa-miR-483-3p	0	0	1	0	0	0	ESRRAP2	estrogen-related receptor alpha pseudogene 2
hsa-miR-483-3p	0	0	1	0	0	0	RAB9BP1	RAB9B, member RAS oncogene family pseudogene 1
hsa-miR-483-3p	0	0	1	0	0	0	CELP	carboxyl ester lipase pseudogene
hsa-miR-483-3p	0	0	1	0	0	0	LYPLA2P1	lysophospholipase II pseudogene 1
hsa-miR-483-3p	0	0	1	0	0	0	TTTY6	testis-specific transcript, Y-linked 6 (non-protein coding)
hsa-miR-483-3p	0	0	1	0	0	0	TTTY22	testis-specific transcript, Y-linked 22 (non-protein coding)
hsa-miR-483-3p	0	0	1	0	0	0	TTTY15	testis-specific transcript, Y-linked 15 (non-protein coding)
hsa-miR-483-3p	0	0	1	0	0	0	SUMO1P1	SUMO1 pseudogene 1
hsa-miR-483-3p	0	0	1	0	0	0	CSNK2A1P	casein kinase 2, alpha 1 polypeptide pseudogene
hsa-miR-483-3p	0	0	1	0	0	0	NUDT4P1	nudix (nucleoside diphosphate linked moiety X)-type motif 4 pseudogene 1
hsa-miR-483-3p	0	0	1	0	0	0	SNORA4	small nucleolar RNA, H/ACA box 4
hsa-miR-483-3p	0	0	1	0	0	0	LOC374443	C-type lectin domain family 2, member D pseudogene
hsa-miR-483-3p	0	0	1	0	0	0	AQP7P1	aquaporin 7 pseudogene 1
hsa-miR-483-3p	0	0	1	0	0	0	MALAT1	metastasis associated lung adenocarcinoma transcript 1 (non-protein coding)
hsa-miR-483-3p	0	0	1	0	0	0	HAS2-AS1	HAS2 antisense RNA 1
hsa-miR-483-3p	0	0	1	0	0	0	SNORA39	small nucleolar RNA, H/ACA box 39
hsa-miR-483-3p	0	0	1	0	0	0	RNF5P1	ring finger protein 5, E3 ubiquitin protein ligase pseudogene 1
hsa-miR-483-3p	0	0	1	0	0	0	GBP1P1	guanylate binding protein 1, interferon-inducible pseudogene 1
hsa-miR-483-3p	0	0	1	0	0	0	ANP32AP1	acidic (leucine-rich) nuclear phosphoprotein 32 family, member A pseudogene 1
hsa-miR-483-3p	1	0	1	1	0	0	KIAA1549L	KIAA1549-like
hsa-miR-483-3p	1	0	1	1	1	1	HOXA1	homeobox A1
hsa-miR-483-3p	0	0	1	1	0	0	EPX	eosinophil peroxidase
hsa-miR-483-3p	0	0	1	0	0	0	MUC5AC	mucin 5AC, oligomeric mucus/gel-forming
hsa-miR-483-3p	0	0	0	1	0	0	LRRC23	leucine rich repeat containing 23
hsa-miR-483-3p	1	0	1	1	1	1	PSD	pleckstrin and Sec7 domain containing
hsa-miR-483-3p	1	0	1	1	1	1	GPR124	G protein-coupled receptor 124
hsa-miR-483-3p	0	0	0	1	0	0	THAP3	THAP domain containing, apoptosis associated protein 3
hsa-miR-483-3p	1	0	1	1	1	1	CLDN11	claudin 11
hsa-miR-483-3p	0	0	1	1	1	1	BCAR1	breast cancer anti-estrogen resistance 1
hsa-miR-483-3p	0	0	1	1	0	0	LLGL2	lethal giant larvae homolog 2 (Drosophila)
hsa-miR-483-3p	0	0	0	1	0	0	RAPGEF3	Rap guanine nucleotide exchange factor (GEF) 3
hsa-miR-483-3p	0	0	1	1	1	1	HEATR6	HEAT repeat containing 6
hsa-miR-483-3p	0	0	0	1	1	1	PLOD1	procollagen-lysine, 2-oxoglutarate 5-dioxygenase 1
hsa-miR-483-3p	0	0	1	1	0	0	TGM6	transglutaminase 6
hsa-miR-483-3p	0	0	0	1	0	0	RPL6	ribosomal protein L6
hsa-miR-483-3p	0	0	1	1	1	1	CHRD	chordin
hsa-miR-483-3p	0	0	1	1	0	0	TECR	trans-2,3-enoyl-CoA reductase
hsa-miR-483-3p	0	0	0	1	1	1	GADD45B	growth arrest and DNA-damage-inducible, beta
hsa-miR-483-3p	0	0	1	1	0	0	MIF	macrophage migration inhibitory factor (glycosylation-inhibiting factor)
hsa-miR-483-3p	1	0	1	1	1	1	PATZ1	POZ (BTB) and AT hook containing zinc finger 1
hsa-miR-483-3p	1	0	0	1	0	0	MICALL1	MICAL-like 1
hsa-miR-483-3p	1	0	1	1	1	1	DNAL4	dynein, axonemal, light chain 4
hsa-miR-483-3p	0	0	0	1	1	1	BIK	BCL2-interacting killer (apoptosis-inducing)
hsa-miR-483-3p	0	0	0	1	1	1	PLEK2	pleckstrin 2
hsa-miR-483-3p	0	0	1	1	0	0	C14orf166B	chromosome 14 open reading frame 166B
hsa-miR-483-3p	1	0	1	1	1	1	MACROD2	MACRO domain containing 2
hsa-miR-483-3p	0	0	1	1	1	1	CBLN1	cerebellin 1 precursor
hsa-miR-483-3p	0	0	0	1	0	0	FAM173A	family with sequence similarity 173, member A
hsa-miR-483-3p	0	0	0	1	0	0	METRN	meteorin, glial cell differentiation regulator
hsa-miR-483-3p	0	0	1	1	1	1	RHOV	ras homolog family member V
hsa-miR-483-3p	0	0	1	1	0	0	TULP2	tubby like protein 2
hsa-miR-483-3p	1	0	1	1	0	0	DOT1L	DOT1-like, histone H3 methyltransferase (S. cerevisiae)
hsa-miR-483-3p	1	0	0	1	1	1	ZNF419	zinc finger protein 419
hsa-miR-483-3p	0	0	1	1	0	0	CCDC9	coiled-coil domain containing 9
hsa-miR-483-3p	0	0	0	1	1	1	TGFB1	transforming growth factor, beta 1
hsa-miR-483-3p	0	0	0	1	0	0	NOBOX	NOBOX oogenesis homeobox
hsa-miR-483-3p	0	0	1	1	1	1	TMEM176B	transmembrane protein 176B
hsa-miR-483-3p	1	0	1	1	0	0	RUNDC3A	RUN domain containing 3A
hsa-miR-483-3p	1	0	0	1	1	1	WNT3	wingless-type MMTV integration site family, member 3
hsa-miR-483-3p	0	0	1	1	0	0	KRT37	keratin 37
hsa-miR-483-3p	0	0	0	1	0	0	FAM18B2	family with sequence similarity 18, member B2
hsa-miR-483-3p	1	0	1	1	1	1	SYNGR2	synaptogyrin 2
hsa-miR-483-3p	0	0	1	1	1	1	ZNF259	zinc finger protein 259
hsa-miR-483-3p	0	0	0	1	0	0	OGFOD2	2-oxoglutarate and iron-dependent oxygenase domain containing 2
hsa-miR-483-3p	0	0	1	1	1	1	TIMELESS	timeless homolog (Drosophila)
hsa-miR-483-3p	0	0	0	1	0	0	ENO2	enolase 2 (gamma, neuronal)
hsa-miR-483-3p	1	0	1	1	1	1	PRKAB1	protein kinase, AMP-activated, beta 1 non-catalytic subunit
hsa-miR-483-3p	0	0	1	1	0	0	SLC4A9	solute carrier family 4, sodium bicarbonate cotransporter, member 9
hsa-miR-483-3p	1	0	0	1	0	0	ABTB1	ankyrin repeat and BTB (POZ) domain containing 1
hsa-miR-483-3p	0	0	1	1	1	1	HEATR5B	HEAT repeat containing 5B
hsa-miR-483-3p	0	0	1	1	0	0	MOGS	mannosyl-oligosaccharide glucosidase
hsa-miR-483-3p	0	0	1	1	0	0	KIAA1324	KIAA1324
hsa-miR-483-3p	0	0	0	1	1	1	OPRD1	opioid receptor, delta 1
hsa-miR-483-3p	0	0	0	1	0	0	AKR7A2	aldo-keto reductase family 7, member A2 (aflatoxin aldehyde reductase)
hsa-miR-483-3p	0	0	0	1	0	0	CTSD	cathepsin D
hsa-miR-483-3p	1	0	1	1	1	1	TBX4	T-box 4
hsa-miR-483-3p	0	0	0	1	0	0	PEX16	peroxisomal biogenesis factor 16
hsa-miR-483-3p	0	0	0	1	0	0	GSTM2	glutathione S-transferase mu 2 (muscle)
hsa-miR-483-3p	0	0	1	1	0	0	SLC17A1	solute carrier family 17 (sodium phosphate), member 1
hsa-miR-483-3p	0	0	1	1	0	0	HIST1H1D	histone cluster 1, H1d
hsa-miR-483-3p	0	0	0	1	0	0	PSPN	persephin
hsa-miR-483-3p	0	0	1	1	0	0	CD70	CD70 molecule
hsa-miR-483-3p	0	0	0	1	0	0	SH2D3A	SH2 domain containing 3A
hsa-miR-483-3p	0	0	0	1	0	0	IGFLR1	IGF-like family receptor 1
hsa-miR-483-3p	0	0	1	1	0	0	ARL2	ADP-ribosylation factor-like 2
hsa-miR-483-3p	0	0	1	1	0	0	AHDC1	AT hook, DNA binding motif, containing 1
hsa-miR-483-3p	0	0	1	1	0	0	CFP	complement factor properdin
hsa-miR-483-3p	1	0	1	1	1	1	FBXL12	F-box and leucine-rich repeat protein 12
hsa-miR-483-3p	0	0	0	1	1	1	HCFC1R1	host cell factor C1 regulator 1 (XPO1 dependent)
hsa-miR-483-3p	0	0	0	1	0	0	OPN1SW	opsin 1 (cone pigments), short-wave-sensitive
hsa-miR-483-3p	0	0	1	1	0	0	CD68	CD68 molecule
hsa-miR-483-3p	0	0	1	1	0	0	KLK12	kallikrein-related peptidase 12
hsa-miR-483-3p	1	0	0	1	0	0	PSMB11	proteasome (prosome, macropain) subunit, beta type, 11
hsa-miR-483-3p	0	0	0	1	0	0	ART1	ADP-ribosyltransferase 1
hsa-miR-483-3p	1	0	1	1	1	1	MAPK8IP3	mitogen-activated protein kinase 8 interacting protein 3
hsa-miR-483-3p	0	0	1	1	1	1	CLSPN	claspin
hsa-miR-483-3p	1	0	1	1	1	1	ARPC1B	actin related protein 2/3 complex, subunit 1B, 41kDa
hsa-miR-483-3p	0	0	1	1	0	0	RAMP1	receptor (G protein-coupled) activity modifying protein 1
hsa-miR-483-3p	0	0	0	1	0	0	RHBG	Rh family, B glycoprotein (gene/pseudogene)
hsa-miR-483-3p	0	0	1	1	0	0	TEX13A	testis expressed 13A
hsa-miR-483-3p	0	0	1	1	0	0	ZNF414	zinc finger protein 414
hsa-miR-483-3p	0	0	1	1	0	0	HSPBP1	HSPA (heat shock 70kDa) binding protein, cytoplasmic cochaperone 1
hsa-miR-483-3p	0	0	1	1	1	1	DUSP26	dual specificity phosphatase 26 (putative)
hsa-miR-483-3p	0	0	0	1	1	1	RAX	retina and anterior neural fold homeobox
hsa-miR-483-3p	0	0	1	1	0	0	ACP2	acid phosphatase 2, lysosomal
hsa-miR-483-3p	0	0	1	1	1	1	OASL	2'-5'-oligoadenylate synthetase-like
hsa-miR-483-3p	0	0	1	1	0	0	GDF11	growth differentiation factor 11
hsa-miR-483-3p	0	0	1	1	0	0	WNT10A	wingless-type MMTV integration site family, member 10A
hsa-miR-483-3p	0	0	1	1	0	0	GPR45	G protein-coupled receptor 45
hsa-miR-483-3p	0	0	1	1	0	0	TTC5	tetratricopeptide repeat domain 5
hsa-miR-483-3p	0	0	0	1	1	1	IL36B	interleukin 36, beta
hsa-miR-483-3p	1	0	1	1	0	0	HS6ST1	heparan sulfate 6-O-sulfotransferase 1
hsa-miR-483-3p	0	0	1	1	1	1	IFNA14	interferon, alpha 14
hsa-miR-483-3p	0	0	1	1	0	0	SIT1	signaling threshold regulating transmembrane adaptor 1
hsa-miR-483-3p	0	0	0	1	0	0	CD72	CD72 molecule
hsa-miR-483-3p	0	0	1	1	0	0	POU5F1	POU class 5 homeobox 1
hsa-miR-483-3p	0	0	1	1	0	0	NOX5	NADPH oxidase, EF-hand calcium binding domain 5
hsa-miR-483-3p	0	0	1	1	0	0	TMEM62	transmembrane protein 62
hsa-miR-483-3p	0	0	1	1	1	1	PAK6	p21 protein (Cdc42/Rac)-activated kinase 6
hsa-miR-483-3p	0	0	1	1	0	0	LPCAT3	lysophosphatidylcholine acyltransferase 3
hsa-miR-483-3p	1	0	1	1	1	1	HERC2	HECT and RLD domain containing E3 ubiquitin protein ligase 2
hsa-miR-483-3p	0	0	1	1	1	1	ERP29	endoplasmic reticulum protein 29
hsa-miR-483-3p	1	0	1	1	1	1	NDST1	N-deacetylase/N-sulfotransferase (heparan glucosaminyl) 1
hsa-miR-483-3p	0	0	1	1	1	1	PFDN1	prefoldin subunit 1
hsa-miR-483-3p	0	0	1	1	1	1	FLT4	fms-related tyrosine kinase 4
hsa-miR-483-3p	0	0	1	1	0	0	SGCA	sarcoglycan, alpha (50kDa dystrophin-associated glycoprotein)
hsa-miR-483-3p	0	0	1	1	1	1	DHX8	DEAH (Asp-Glu-Ala-His) box polypeptide 8
hsa-miR-483-3p	1	0	1	1	1	1	CDH20	cadherin 20, type 2
hsa-miR-483-3p	0	0	0	1	0	0	GNA15	guanine nucleotide binding protein (G protein), alpha 15 (Gq class)
hsa-miR-483-3p	0	0	0	1	0	0	PIAS4	protein inhibitor of activated STAT, 4
hsa-miR-483-3p	0	0	1	1	1	1	ZNF330	zinc finger protein 330
hsa-miR-483-3p	1	0	1	1	0	0	SYP	synaptophysin
hsa-miR-483-3p	0	0	1	1	0	0	FAM83E	family with sequence similarity 83, member E
hsa-miR-483-3p	1	0	1	1	0	0	GRIN2D	glutamate receptor, ionotropic, N-methyl D-aspartate 2D
hsa-miR-483-3p	0	0	0	1	0	0	LIG1	ligase I, DNA, ATP-dependent
hsa-miR-483-3p	0	0	0	1	0	0	CCDC61	coiled-coil domain containing 61
hsa-miR-483-3p	0	0	0	1	1	1	DCPS	decapping enzyme, scavenger
hsa-miR-483-3p	0	0	1	1	1	1	BARHL1	BarH-like homeobox 1
hsa-miR-483-3p	0	0	1	1	0	0	PRDM11	PR domain containing 11
hsa-miR-483-3p	1	0	1	1	1	1	THRA	thyroid hormone receptor, alpha
hsa-miR-483-3p	1	0	1	1	0	0	SPEG	SPEG complex locus
hsa-miR-483-3p	0	0	1	1	0	0	INTS9	integrator complex subunit 9
hsa-miR-483-3p	0	0	1	1	0	0	C12orf52	chromosome 12 open reading frame 52
hsa-miR-483-3p	0	0	0	1	0	0	C12orf10	chromosome 12 open reading frame 10
hsa-miR-483-3p	0	0	1	1	1	1	FAM181A	family with sequence similarity 181, member A
hsa-miR-483-3p	1	0	1	1	1	1	ITPK1	inositol-tetrakisphosphate 1-kinase
hsa-miR-483-3p	0	0	0	1	0	0	ETFA	electron-transfer-flavoprotein, alpha polypeptide
hsa-miR-483-3p	0	0	0	1	0	0	CYP11A1	cytochrome P450, family 11, subfamily A, polypeptide 1
hsa-miR-483-3p	0	0	1	1	1	1	DET1	de-etiolated homolog 1 (Arabidopsis)
hsa-miR-483-3p	1	0	1	1	1	1	FURIN	furin (paired basic amino acid cleaving enzyme)
hsa-miR-483-3p	0	0	1	1	0	0	CLEC18B	C-type lectin domain family 18, member B
hsa-miR-483-3p	0	0	0	1	0	0	ADAD2	adenosine deaminase domain containing 2
hsa-miR-483-3p	0	0	0	1	0	0	LRRC46	leucine rich repeat containing 46
hsa-miR-483-3p	1	0	1	1	1	1	CBX8	chromobox homolog 8
hsa-miR-483-3p	1	0	1	1	1	1	WDR45L	WDR45-like
hsa-miR-483-3p	0	0	0	1	0	0	LRRC56	leucine rich repeat containing 56
hsa-miR-483-3p	0	0	1	1	0	0	WTIP	Wilms tumor 1 interacting protein
hsa-miR-483-3p	0	0	0	1	0	0	ZNF581	zinc finger protein 581
hsa-miR-483-3p	1	0	1	1	1	1	OSBPL10	oxysterol binding protein-like 10
hsa-miR-483-3p	0	0	0	1	1	1	SLC25A38	solute carrier family 25, member 38
hsa-miR-483-3p	0	0	0	1	1	1	ZNF167	zinc finger protein 167
hsa-miR-483-3p	1	0	1	1	1	1	FGF18	fibroblast growth factor 18
hsa-miR-483-3p	0	0	1	1	1	1	CRIP3	cysteine-rich protein 3
hsa-miR-483-3p	0	0	0	1	1	1	TMEM140	transmembrane protein 140
hsa-miR-483-3p	0	0	0	1	1	1	EPHA1	EPH receptor A1
hsa-miR-483-3p	0	0	0	1	1	1	ZNF16	zinc finger protein 16
hsa-miR-483-3p	0	0	1	1	1	1	HIRIP3	HIRA interacting protein 3
hsa-miR-483-3p	0	0	1	1	1	1	TAOK2	TAO kinase 2
hsa-miR-483-3p	0	0	0	1	1	1	ACAD8	acyl-CoA dehydrogenase family, member 8
hsa-miR-483-3p	1	0	0	1	0	0	ZNF385D	zinc finger protein 385D
hsa-miR-483-3p	0	0	0	1	1	1	SPC25	SPC25, NDC80 kinetochore complex component, homolog (S. cerevisiae)
hsa-miR-483-3p	0	0	0	1	1	1	OBSCN	obscurin, cytoskeletal calmodulin and titin-interacting RhoGEF
hsa-miR-483-3p	0	0	1	1	1	1	TSEN2	tRNA splicing endonuclease 2 homolog (S. cerevisiae)
hsa-miR-483-3p	0	0	1	1	0	0	BATF	basic leucine zipper transcription factor, ATF-like
hsa-miR-483-3p	1	0	1	1	1	1	CELF6	CUGBP, Elav-like family member 6
hsa-miR-483-3p	0	0	1	1	0	0	CLEC18A	C-type lectin domain family 18, member A
hsa-miR-483-3p	1	0	1	1	1	1	MRPL17	mitochondrial ribosomal protein L17
hsa-miR-483-3p	0	0	0	1	0	0	OGFR	opioid growth factor receptor
hsa-miR-483-3p	0	0	1	1	1	1	MCAT	malonyl CoA:ACP acyltransferase (mitochondrial)
hsa-miR-483-3p	0	0	1	1	1	1	DERL3	derlin 3
hsa-miR-483-3p	0	0	0	1	0	0	ACE	angiotensin I converting enzyme (peptidyl-dipeptidase A) 1
hsa-miR-483-3p	0	0	0	1	0	0	PRKD2	protein kinase D2
hsa-miR-483-3p	0	0	1	1	1	1	TRIM62	tripartite motif containing 62
hsa-miR-483-3p	0	0	0	1	0	0	SIGLEC12	sialic acid binding Ig-like lectin 12 (gene/pseudogene)
hsa-miR-483-3p	1	0	1	1	1	1	ZER1	zer-1 homolog (C. elegans)
hsa-miR-483-3p	0	0	0	1	0	0	PKN3	protein kinase N3
hsa-miR-483-3p	1	0	0	1	0	0	NBEAL2	neurobeachin-like 2
hsa-miR-483-3p	0	0	0	1	0	0	ZSCAN21	zinc finger and SCAN domain containing 21
hsa-miR-483-3p	0	0	1	1	0	0	FOXH1	forkhead box H1
hsa-miR-483-3p	0	0	0	1	1	1	FDXR	ferredoxin reductase
hsa-miR-483-3p	1	0	1	1	1	1	UNK	unkempt homolog (Drosophila)
hsa-miR-483-3p	0	0	0	1	0	0	RDM1	RAD52 motif 1
hsa-miR-483-3p	0	0	1	1	0	0	PHF7	PHD finger protein 7
hsa-miR-483-3p	0	0	0	1	0	0	KCNF1	potassium voltage-gated channel, subfamily F, member 1
hsa-miR-483-3p	0	0	1	1	1	1	NES	nestin
hsa-miR-483-3p	1	0	1	1	1	1	ATXN7	ataxin 7
hsa-miR-483-3p	0	0	0	1	0	0	FAM194A	family with sequence similarity 194, member A
hsa-miR-483-3p	0	0	1	1	0	0	APEH	N-acylaminoacyl-peptide hydrolase
hsa-miR-483-3p	0	0	0	1	1	1	RP9	retinitis pigmentosa 9 (autosomal dominant)
hsa-miR-483-3p	0	0	1	1	1	1	ANKHD1	ankyrin repeat and KH domain containing 1
hsa-miR-483-3p	1	0	1	1	0	0	CCDC136	coiled-coil domain containing 136
hsa-miR-483-3p	0	0	0	1	1	1	NOL6	nucleolar protein family 6 (RNA-associated)
hsa-miR-483-3p	0	0	0	1	0	0	PHOX2A	paired-like homeobox 2a
hsa-miR-483-3p	0	0	1	1	1	1	ZMYND19	zinc finger, MYND-type containing 19
hsa-miR-483-3p	0	0	1	1	0	0	PACSIN3	protein kinase C and casein kinase substrate in neurons 3
hsa-miR-483-3p	0	0	0	1	0	0	SERPINA4	serpin peptidase inhibitor, clade A (alpha-1 antiproteinase, antitrypsin), member 4
hsa-miR-483-3p	0	0	0	1	1	1	PCBD1	pterin-4 alpha-carbinolamine dehydratase/dimerization cofactor of hepatocyte nuclear factor 1 alpha
hsa-miR-483-3p	0	0	0	1	0	0	PLEKHF1	pleckstrin homology domain containing, family F (with FYVE domain) member 1
hsa-miR-483-3p	1	0	1	1	0	0	AGFG2	ArfGAP with FG repeats 2
hsa-miR-483-3p	0	0	1	1	1	1	TBC1D21	TBC1 domain family, member 21
hsa-miR-483-3p	0	0	0	1	0	0	PCSK4	proprotein convertase subtilisin/kexin type 4
hsa-miR-483-3p	0	0	1	1	0	0	ANKRD33	ankyrin repeat domain 33
hsa-miR-483-3p	0	0	0	1	0	0	PSCA	prostate stem cell antigen
hsa-miR-483-3p	0	0	0	1	1	1	MYH14	myosin, heavy chain 14, non-muscle
hsa-miR-483-3p	0	0	1	1	0	0	CD320	CD320 molecule
hsa-miR-483-3p	0	0	1	1	0	0	TMEM88	transmembrane protein 88
hsa-miR-483-3p	1	0	0	1	1	1	RNF157	ring finger protein 157
hsa-miR-483-3p	0	0	0	1	0	0	NXNL1	nucleoredoxin-like 1
hsa-miR-483-3p	0	0	1	1	0	0	LGALS9	lectin, galactoside-binding, soluble, 9
hsa-miR-483-3p	0	0	0	1	0	0	IARS2	isoleucyl-tRNA synthetase 2, mitochondrial
hsa-miR-483-3p	0	0	0	1	0	0	AMDHD2	amidohydrolase domain containing 2
hsa-miR-483-3p	0	0	0	1	1	1	C17orf65	chromosome 17 open reading frame 65
hsa-miR-483-3p	0	0	1	1	0	0	IL7R	interleukin 7 receptor
hsa-miR-483-3p	0	0	1	1	1	1	GNB2	guanine nucleotide binding protein (G protein), beta polypeptide 2
hsa-miR-483-3p	0	0	1	1	0	0	ZNF30	zinc finger protein 30
hsa-miR-483-3p	1	0	1	1	0	0	BCORL1	BCL6 corepressor-like 1
hsa-miR-483-3p	0	0	0	1	0	0	WDR87	WD repeat domain 87
hsa-miR-483-3p	0	0	1	1	1	1	C15orf40	chromosome 15 open reading frame 40
hsa-miR-483-3p	0	0	0	1	0	0	ANKS3	ankyrin repeat and sterile alpha motif domain containing 3
hsa-miR-483-3p	0	0	1	1	1	1	SPACA5	sperm acrosome associated 5
hsa-miR-483-3p	0	0	0	1	0	0	NFRKB	nuclear factor related to kappaB binding protein
hsa-miR-483-3p	0	0	0	1	0	0	ETV3L	ets variant 3-like
hsa-miR-483-3p	0	0	0	1	0	0	ASL	argininosuccinate lyase
hsa-miR-483-3p	0	0	1	1	1	1	HDAC3	histone deacetylase 3
hsa-miR-483-3p	1	0	1	1	0	0	HTR1E	5-hydroxytryptamine (serotonin) receptor 1E, G protein-coupled
hsa-miR-483-3p	0	0	0	1	0	0	DEGS2	delta(4)-desaturase, sphingolipid 2
hsa-miR-483-3p	1	0	1	1	0	0	TSPAN5	tetraspanin 5
hsa-miR-483-3p	0	0	0	1	1	1	DDX54	DEAD (Asp-Glu-Ala-Asp) box polypeptide 54
hsa-miR-483-3p	0	0	1	1	1	1	MLKL	mixed lineage kinase domain-like
hsa-miR-483-3p	0	0	1	1	1	1	FOXI1	forkhead box I1
hsa-miR-483-3p	0	0	1	1	0	0	HOXD12	homeobox D12
hsa-miR-483-3p	0	0	0	1	1	1	LRRC45	leucine rich repeat containing 45
hsa-miR-483-3p	1	0	1	1	1	1	GTPBP2	GTP binding protein 2
hsa-miR-483-3p	0	0	0	1	1	1	PTDSS2	phosphatidylserine synthase 2
hsa-miR-483-3p	0	0	1	1	0	0	MUS81	MUS81 endonuclease homolog (S. cerevisiae)
hsa-miR-483-3p	1	0	1	1	1	1	PDLIM2	PDZ and LIM domain 2 (mystique)
hsa-miR-483-3p	0	0	0	1	0	0	ATAD3B	ATPase family, AAA domain containing 3B
hsa-miR-483-3p	0	0	0	1	0	0	SSSCA1	Sjogren syndrome/scleroderma autoantigen 1
hsa-miR-483-3p	0	0	1	1	1	1	CHST2	carbohydrate (N-acetylglucosamine-6-O) sulfotransferase 2
hsa-miR-483-3p	0	0	0	1	0	0	GSTM1	glutathione S-transferase mu 1
hsa-miR-483-3p	0	0	1	1	0	0	ZDHHC24	zinc finger, DHHC-type containing 24
hsa-miR-483-3p	0	0	1	1	0	0	NEURL3	neuralized homolog 3 (Drosophila) pseudogene
hsa-miR-483-3p	1	0	1	1	1	1	CBX2	chromobox homolog 2
hsa-miR-483-3p	0	0	1	1	1	1	TTLL9	tubulin tyrosine ligase-like family, member 9
hsa-miR-483-3p	0	0	1	1	0	0	SPNS1	spinster homolog 1 (Drosophila)
hsa-miR-483-3p	0	0	1	1	0	0	TEAD2	TEA domain family member 2
hsa-miR-483-3p	0	0	1	1	0	0	CD248	CD248 molecule, endosialin
hsa-miR-483-3p	1	0	0	1	1	1	PDP2	pyruvate dehyrogenase phosphatase catalytic subunit 2
hsa-miR-483-3p	0	0	0	1	0	0	ATHL1	ATH1, acid trehalase-like 1 (yeast)
hsa-miR-483-3p	0	0	0	1	0	0	NFE2	nuclear factor (erythroid-derived 2), 45kDa
hsa-miR-483-3p	0	0	0	1	0	0	PODN	podocan
hsa-miR-483-3p	0	0	1	1	0	0	MED25	mediator complex subunit 25
hsa-miR-483-3p	1	0	1	1	1	1	ATG9B	autophagy related 9B
hsa-miR-483-3p	1	0	1	1	1	1	SHOX2	short stature homeobox 2
hsa-miR-483-3p	0	0	1	1	0	0	DHRS4	dehydrogenase/reductase (SDR family) member 4
hsa-miR-483-3p	0	0	0	1	0	0	OR5K2	olfactory receptor, family 5, subfamily K, member 2
hsa-miR-483-3p	0	0	1	1	1	1	AKAP17A	A kinase (PRKA) anchor protein 17A
hsa-miR-483-3p	0	0	0	1	0	0	BHLHA15	basic helix-loop-helix family, member a15
hsa-miR-483-3p	0	0	1	1	0	0	CLEC18C	C-type lectin domain family 18, member C
hsa-miR-483-3p	0	0	1	1	0	0	EIF3B	eukaryotic translation initiation factor 3, subunit B
hsa-miR-483-3p	0	0	0	1	1	1	ODF3L2	outer dense fiber of sperm tails 3-like 2
hsa-miR-483-3p	0	0	0	1	1	1	ASB2	ankyrin repeat and SOCS box containing 2
hsa-miR-483-3p	0	0	1	1	0	0	TUBA8	tubulin, alpha 8
hsa-miR-483-3p	1	0	0	1	1	1	WNK4	WNK lysine deficient protein kinase 4
hsa-miR-483-3p	0	0	1	1	1	1	HYDIN	HYDIN, axonemal central pair apparatus protein
hsa-miR-483-3p	0	0	1	1	0	0	DNAJC7	DnaJ (Hsp40) homolog, subfamily C, member 7
hsa-miR-483-3p	1	0	1	1	1	1	TRIT1	tRNA isopentenyltransferase 1
hsa-miR-483-3p	0	0	1	1	1	1	MPPE1	metallophosphoesterase 1
hsa-miR-483-3p	0	0	1	1	1	1	WSCD1	WSC domain containing 1
hsa-miR-483-3p	0	0	1	1	1	1	NOS1	nitric oxide synthase 1 (neuronal)
hsa-miR-483-3p	0	0	1	1	0	0	RNF168	ring finger protein 168, E3 ubiquitin protein ligase
hsa-miR-483-3p	0	0	0	1	0	0	TNFRSF6B	tumor necrosis factor receptor superfamily, member 6b, decoy
hsa-miR-483-3p	0	0	0	1	0	0	ZNF101	zinc finger protein 101
hsa-miR-483-3p	0	0	1	1	0	0	DCTPP1	dCTP pyrophosphatase 1
hsa-miR-483-3p	0	0	0	1	1	1	IL17RA	interleukin 17 receptor A
hsa-miR-483-3p	0	0	1	1	0	0	KARS	lysyl-tRNA synthetase
hsa-miR-483-3p	0	0	0	1	0	0	OR6B3	olfactory receptor, family 6, subfamily B, member 3
hsa-miR-483-3p	0	0	1	1	1	1	RASGRP2	RAS guanyl releasing protein 2 (calcium and DAG-regulated)
hsa-miR-483-3p	0	0	0	1	0	0	AMIGO3	adhesion molecule with Ig-like domain 3
hsa-miR-483-3p	0	0	1	1	1	1	ARHGEF25	Rho guanine nucleotide exchange factor (GEF) 25
hsa-miR-483-3p	0	0	1	1	0	0	SLC26A10	solute carrier family 26, member 10
hsa-miR-483-3p	0	0	1	1	0	0	KIF1C	kinesin family member 1C
hsa-miR-483-3p	1	0	1	1	0	0	SENP3	SUMO1/sentrin/SMT3 specific peptidase 3
hsa-miR-483-3p	1	0	0	1	0	0	FAM123C	family with sequence similarity 123C
hsa-miR-483-3p	0	0	0	1	0	0	B3GNT8	UDP-GlcNAc:betaGal beta-1,3-N-acetylglucosaminyltransferase 8
hsa-miR-483-3p	0	0	0	1	0	0	ACBD4	acyl-CoA binding domain containing 4
hsa-miR-483-3p	0	0	0	1	0	0	ROGDI	rogdi homolog (Drosophila)
hsa-miR-483-3p	0	0	0	1	0	0	SSNA1	Sjogren syndrome nuclear autoantigen 1
hsa-miR-483-3p	0	0	1	1	0	0	DYRK1B	dual-specificity tyrosine-(Y)-phosphorylation regulated kinase 1B
hsa-miR-483-3p	0	0	1	1	1	1	ANKZF1	ankyrin repeat and zinc finger domain containing 1
hsa-miR-483-3p	1	0	1	1	1	1	PLEKHO2	pleckstrin homology domain containing, family O member 2
hsa-miR-483-3p	0	0	1	1	1	1	PRX	periaxin
hsa-miR-483-3p	0	0	0	1	1	1	LIMS2	LIM and senescent cell antigen-like domains 2
hsa-miR-483-3p	0	0	1	1	1	1	NUPR1	nuclear protein, transcriptional regulator, 1
hsa-miR-483-3p	0	0	0	1	1	1	SIRT3	sirtuin 3
hsa-miR-483-3p	0	0	0	1	0	0	SLC47A2	solute carrier family 47, member 2
hsa-miR-483-3p	0	0	1	1	0	0	CEP152	centrosomal protein 152kDa
hsa-miR-483-3p	1	0	1	1	1	1	PDXDC1	pyridoxal-dependent decarboxylase domain containing 1
hsa-miR-483-3p	0	0	1	1	1	1	LINC00086	long intergenic non-protein coding RNA 86
hsa-miR-483-3p	0	0	0	1	0	0	NEU4	sialidase 4
hsa-miR-483-3p	1	0	1	1	1	1	BRSK1	BR serine/threonine kinase 1
hsa-miR-483-3p	0	0	1	1	0	0	EFCAB4A	EF-hand calcium binding domain 4A
hsa-miR-483-3p	0	0	0	1	1	1	CCDC60	coiled-coil domain containing 60
hsa-miR-483-3p	0	0	0	1	0	0	ZAR1	zygote arrest 1
hsa-miR-483-3p	0	0	0	1	0	0	LGALS9C	lectin, galactoside-binding, soluble, 9C
hsa-miR-483-3p	0	0	0	1	0	0	LRRC14B	leucine rich repeat containing 14B
hsa-miR-483-3p	1	0	0	1	1	1	SSTR3	somatostatin receptor 3
hsa-miR-483-3p	1	0	0	1	1	1	SIRT7	sirtuin 7
hsa-miR-483-3p	0	0	1	1	0	0	NXPH3	neurexophilin 3
hsa-miR-483-3p	0	0	0	1	1	1	RAX2	retina and anterior neural fold homeobox 2
hsa-miR-483-3p	1	0	1	1	1	1	SHMT2	serine hydroxymethyltransferase 2 (mitochondrial)
hsa-miR-483-3p	0	0	0	1	1	1	BCAN	brevican
hsa-miR-483-3p	0	0	0	1	1	1	YBEY	ybeY metallopeptidase (putative)
hsa-miR-483-3p	0	0	0	1	0	0	MAPK8IP2	mitogen-activated protein kinase 8 interacting protein 2
hsa-miR-483-3p	0	0	0	1	0	0	C19orf71	chromosome 19 open reading frame 71
hsa-miR-483-3p	0	0	0	1	0	0	GDPGP1	GDP-D-glucose phosphorylase 1
hsa-miR-483-3p	0	0	0	1	0	0	NPW	neuropeptide W
hsa-miR-483-3p	1	0	1	1	0	0	RIMS2	regulating synaptic membrane exocytosis 2
hsa-miR-483-3p	0	0	0	1	0	0	GDF3	growth differentiation factor 3
hsa-miR-483-3p	0	0	0	1	1	1	SIVA1	SIVA1, apoptosis-inducing factor
hsa-miR-483-3p	1	0	0	1	1	1	EPHA10	EPH receptor A10
hsa-miR-483-3p	0	0	1	1	1	1	C1orf110	chromosome 1 open reading frame 110
hsa-miR-483-3p	0	0	1	1	1	1	MYOM3	myomesin family, member 3
hsa-miR-483-3p	1	0	1	1	1	1	CECR6	cat eye syndrome chromosome region, candidate 6
hsa-miR-483-3p	0	0	0	1	0	0	OR1D2	olfactory receptor, family 1, subfamily D, member 2
hsa-miR-483-3p	0	0	1	1	1	1	BMP8A	bone morphogenetic protein 8a
hsa-miR-483-3p	0	0	1	1	1	1	P4HA3	prolyl 4-hydroxylase, alpha polypeptide III
hsa-miR-483-3p	1	0	1	1	1	1	TMPRSS2	transmembrane protease, serine 2
hsa-miR-483-3p	0	0	1	1	0	0	PLA2G6	phospholipase A2, group VI (cytosolic, calcium-independent)
hsa-miR-483-3p	0	0	1	1	0	0	STAC3	SH3 and cysteine rich domain 3
hsa-miR-483-3p	0	0	1	1	0	0	DGAT2L6	diacylglycerol O-acyltransferase 2-like 6
hsa-miR-483-3p	0	0	0	1	1	1	OLIG1	oligodendrocyte transcription factor 1
hsa-miR-483-3p	0	0	0	1	0	0	ACAA1	acetyl-CoA acyltransferase 1
hsa-miR-483-3p	0	0	1	1	0	0	UPK3B	uroplakin 3B
hsa-miR-483-3p	0	0	0	1	1	1	PDCD1	programmed cell death 1
hsa-miR-483-3p	0	0	0	1	0	0	WDR86	WD repeat domain 86
hsa-miR-483-3p	0	0	0	1	0	0	SERPINA11	serpin peptidase inhibitor, clade A (alpha-1 antiproteinase, antitrypsin), member 11
hsa-miR-483-3p	0	0	1	1	1	1	NEXN	nexilin (F actin binding protein)
hsa-miR-483-3p	0	0	1	1	1	1	LGMN	legumain
hsa-miR-483-3p	0	0	1	1	1	1	ZNF212	zinc finger protein 212
hsa-miR-483-3p	0	0	0	1	1	1	GSTM4	glutathione S-transferase mu 4
hsa-miR-483-3p	1	0	1	1	0	0	RNF24	ring finger protein 24
hsa-miR-483-3p	0	0	1	1	0	0	PLSCR2	phospholipid scramblase 2
hsa-miR-483-3p	0	0	0	1	1	1	PKD1L2	polycystic kidney disease 1-like 2
hsa-miR-483-3p	0	0	1	1	0	0	WFDC3	WAP four-disulfide core domain 3
hsa-miR-483-3p	0	0	1	1	0	0	AVPR2	arginine vasopressin receptor 2
hsa-miR-483-3p	0	0	1	1	0	0	SIRT6	sirtuin 6
hsa-miR-483-3p	1	0	0	1	1	1	RBAK	RB-associated KRAB zinc finger
hsa-miR-483-3p	0	0	1	1	1	1	AIF1	allograft inflammatory factor 1
hsa-miR-483-3p	1	0	1	1	1	1	ERAS	ES cell expressed Ras
hsa-miR-483-3p	1	0	1	1	1	1	KLHL17	kelch-like 17 (Drosophila)
hsa-miR-483-3p	0	0	0	1	0	0	SFN	stratifin
hsa-miR-483-3p	0	0	1	1	1	1	ZNF621	zinc finger protein 621
hsa-miR-483-3p	0	0	0	1	0	0	GFI1B	growth factor independent 1B transcription repressor
hsa-miR-483-3p	0	0	1	1	1	1	TTC4	tetratricopeptide repeat domain 4
hsa-miR-483-3p	0	0	1	1	0	0	HEATR8	HEAT repeat containing 8
hsa-miR-483-3p	0	0	0	1	0	0	DNAJB13	DnaJ (Hsp40) homolog, subfamily B, member 13
hsa-miR-483-3p	1	0	0	1	0	0	GLB1L2	galactosidase, beta 1-like 2
hsa-miR-483-3p	0	0	0	1	1	1	C21orf2	chromosome 21 open reading frame 2
hsa-miR-483-3p	0	0	1	1	1	1	ETV7	ets variant 7
hsa-miR-483-3p	1	0	1	1	0	0	FSCN1	fascin homolog 1, actin-bundling protein (Strongylocentrotus purpuratus)
hsa-miR-483-3p	0	0	0	1	0	0	ZBP1	Z-DNA binding protein 1
hsa-miR-483-3p	0	0	0	1	0	0	OBP2A	odorant binding protein 2A
hsa-miR-483-3p	0	0	1	1	1	1	H1F0	H1 histone family, member 0
hsa-miR-483-3p	0	0	1	1	0	0	TEX264	testis expressed 264
hsa-miR-483-3p	0	0	1	1	0	0	DCTN3	dynactin 3 (p22)
hsa-miR-483-3p	1	0	1	1	1	1	MLL4	myeloid/lymphoid or mixed-lineage leukemia 4
hsa-miR-483-3p	0	0	0	1	0	0	SAMD11	sterile alpha motif domain containing 11
hsa-miR-483-3p	0	0	0	1	0	0	DIABLO	diablo, IAP-binding mitochondrial protein
hsa-miR-483-3p	1	0	1	1	1	1	FRMD4A	FERM domain containing 4A
hsa-miR-483-3p	0	0	1	1	0	0	MXRA8	matrix-remodelling associated 8
hsa-miR-483-3p	0	0	1	1	0	0	SYCE1	synaptonemal complex central element protein 1
hsa-miR-483-3p	0	0	0	1	1	1	HHIPL2	HHIP-like 2
hsa-miR-483-3p	0	0	1	1	0	0	OSGIN1	oxidative stress induced growth inhibitor 1
hsa-miR-483-3p	0	0	0	1	0	0	SPINT1	serine peptidase inhibitor, Kunitz type 1
hsa-miR-483-3p	0	0	1	1	1	1	C15orf48	chromosome 15 open reading frame 48
hsa-miR-483-3p	1	0	0	1	0	0	C7orf26	chromosome 7 open reading frame 26
hsa-miR-483-3p	0	0	1	1	0	0	FZD9	frizzled family receptor 9
hsa-miR-483-3p	0	0	0	1	0	0	FAM166A	family with sequence similarity 166, member A
hsa-miR-483-3p	0	0	0	1	0	0	IZUMO4	IZUMO family member 4
hsa-miR-483-3p	1	0	0	1	1	1	SMARCB1	SWI/SNF related, matrix associated, actin dependent regulator of chromatin, subfamily b, member 1
hsa-miR-483-3p	0	0	1	1	0	0	KCNQ1	potassium voltage-gated channel, KQT-like subfamily, member 1
hsa-miR-483-3p	0	0	1	1	0	0	SLC2A11	solute carrier family 2 (facilitated glucose transporter), member 11
hsa-miR-483-3p	0	0	0	1	0	0	C19orf48	chromosome 19 open reading frame 48
hsa-miR-483-3p	0	0	0	1	1	1	F7	coagulation factor VII (serum prothrombin conversion accelerator)
hsa-miR-483-3p	1	0	1	1	1	1	SORBS1	sorbin and SH3 domain containing 1
hsa-miR-483-3p	1	0	0	1	0	0	SNCG	synuclein, gamma (breast cancer-specific protein 1)
hsa-miR-483-3p	1	0	1	1	1	1	CTNNB1	catenin (cadherin-associated protein), beta 1, 88kDa
hsa-miR-483-3p	0	0	1	1	0	0	CDK10	cyclin-dependent kinase 10
hsa-miR-483-3p	1	0	1	1	1	1	SYF2	SYF2 homolog, RNA splicing factor (S. cerevisiae)
hsa-miR-483-3p	0	0	0	1	0	0	ATG7	autophagy related 7
hsa-miR-483-3p	0	0	1	1	1	1	BAX	BCL2-associated X protein
hsa-miR-483-3p	1	0	1	1	1	1	IGSF11	immunoglobulin superfamily, member 11
hsa-miR-483-3p	1	0	1	1	1	1	PTPRS	protein tyrosine phosphatase, receptor type, S
hsa-miR-483-3p	0	0	0	1	0	0	FTCD	formiminotransferase cyclodeaminase
hsa-miR-483-3p	0	0	0	1	0	0	SHROOM1	shroom family member 1
hsa-miR-483-3p	0	0	0	1	0	0	OR11L1	olfactory receptor, family 11, subfamily L, member 1
hsa-miR-483-3p	0	0	0	1	0	0	WDR88	WD repeat domain 88
hsa-miR-483-3p	0	0	1	1	0	0	PORCN	porcupine homolog (Drosophila)
hsa-miR-483-3p	0	0	0	1	0	0	CDK11B	cyclin-dependent kinase 11B
hsa-miR-483-3p	1	0	1	1	1	1	ENTPD4	ectonucleoside triphosphate diphosphohydrolase 4
hsa-miR-483-3p	1	0	1	1	1	1	ADD2	adducin 2 (beta)
hsa-miR-483-3p	0	0	0	1	1	1	FAM180B	family with sequence similarity 180, member B
hsa-miR-483-3p	1	0	1	1	1	1	BRD3	bromodomain containing 3
hsa-miR-483-3p	0	0	1	1	0	0	ASIC3	acid-sensing (proton-gated) ion channel 3
hsa-miR-483-3p	0	0	1	1	0	0	RTP2	receptor (chemosensory) transporter protein 2
hsa-miR-483-3p	1	0	1	1	1	1	AKT2	v-akt murine thymoma viral oncogene homolog 2
hsa-miR-483-3p	0	0	1	1	1	1	GGPS1	geranylgeranyl diphosphate synthase 1
hsa-miR-483-3p	1	0	1	1	1	1	TNPO3	transportin 3
hsa-miR-483-3p	0	0	0	1	1	1	ARSF	arylsulfatase F
hsa-miR-483-3p	0	0	1	1	0	0	SLC25A44	solute carrier family 25, member 44
hsa-miR-483-3p	1	0	1	1	0	0	EMP2	epithelial membrane protein 2
hsa-miR-483-3p	0	0	0	1	1	1	KCNQ2	potassium voltage-gated channel, KQT-like subfamily, member 2
hsa-miR-483-3p	1	0	1	1	0	0	GAS2L1	growth arrest-specific 2 like 1
hsa-miR-483-3p	0	0	0	1	0	0	FLNA	filamin A, alpha
hsa-miR-483-3p	0	0	1	1	1	1	CDH4	cadherin 4, type 1, R-cadherin (retinal)
hsa-miR-483-3p	0	0	0	1	0	0	MMP17	matrix metallopeptidase 17 (membrane-inserted)
hsa-miR-483-3p	0	0	1	1	0	0	NTNG2	netrin G2
hsa-miR-483-3p	0	0	0	1	0	0	PARVB	parvin, beta
hsa-miR-483-3p	0	0	1	1	0	0	ELMO3	engulfment and cell motility 3
hsa-miR-483-3p	0	0	1	1	1	1	PACRGL	PARK2 co-regulated-like
hsa-miR-483-3p	0	0	1	1	0	0	ZNF511	zinc finger protein 511
hsa-miR-483-3p	0	0	0	1	0	0	SLC25A47	solute carrier family 25, member 47
hsa-miR-483-3p	0	0	1	1	1	1	TAF5L	TAF5-like RNA polymerase II, p300/CBP-associated factor (PCAF)-associated factor, 65kDa
hsa-miR-483-3p	0	0	1	1	1	1	GJC2	gap junction protein, gamma 2, 47kDa
hsa-miR-483-3p	0	0	1	1	1	1	PIK3C2B	phosphatidylinositol-4-phosphate 3-kinase, catalytic subunit type 2 beta
hsa-miR-483-3p	0	0	1	1	1	1	MTHFD1L	methylenetetrahydrofolate dehydrogenase (NADP+ dependent) 1-like
hsa-miR-483-3p	1	0	1	1	1	1	TDRD5	tudor domain containing 5
hsa-miR-483-3p	1	0	1	1	1	1	CADM3	cell adhesion molecule 3
hsa-miR-483-3p	0	0	1	1	0	0	NTRK1	neurotrophic tyrosine kinase, receptor, type 1
hsa-miR-483-3p	0	0	1	1	1	1	C1orf85	chromosome 1 open reading frame 85
hsa-miR-483-3p	0	0	1	1	0	0	THBS3	thrombospondin 3
hsa-miR-483-3p	1	0	1	1	1	1	ATP8B2	ATPase, aminophospholipid transporter, class I, type 8B, member 2
hsa-miR-483-3p	0	0	1	1	0	0	RPS27	ribosomal protein S27
hsa-miR-483-3p	0	0	1	1	1	1	RAB13	RAB13, member RAS oncogene family
hsa-miR-483-3p	0	0	1	1	1	1	NPR1	natriuretic peptide receptor A/guanylate cyclase A (atrionatriuretic peptide receptor A)
hsa-miR-483-3p	0	0	1	1	1	1	THEM5	thioesterase superfamily member 5
hsa-miR-483-3p	1	0	1	1	1	1	METTL10	methyltransferase like 10
hsa-miR-483-3p	1	0	1	1	1	1	SV2A	synaptic vesicle glycoprotein 2A
hsa-miR-483-3p	0	0	1	1	1	1	CCDC147	coiled-coil domain containing 147
hsa-miR-483-3p	0	0	1	1	0	0	GSTO1	glutathione S-transferase omega 1
hsa-miR-483-3p	0	0	1	1	0	0	WDR96	WD repeat domain 96
hsa-miR-483-3p	0	0	1	1	0	0	GSTM5	glutathione S-transferase mu 5
hsa-miR-483-3p	1	0	1	1	1	1	CNNM2	cyclin M2
hsa-miR-483-3p	0	0	0	1	0	0	HTR1B	5-hydroxytryptamine (serotonin) receptor 1B, G protein-coupled
hsa-miR-483-3p	0	0	0	1	1	1	TMEM187	transmembrane protein 187
hsa-miR-483-3p	0	0	1	1	0	0	PITX3	paired-like homeodomain 3
hsa-miR-483-3p	0	0	1	1	1	1	ELOVL3	ELOVL fatty acid elongase 3
hsa-miR-483-3p	0	0	1	1	0	0	NDUFB8	NADH dehydrogenase (ubiquinone) 1 beta subcomplex, 8, 19kDa
hsa-miR-483-3p	0	0	0	1	0	0	LINC00029	long intergenic non-protein coding RNA 29
hsa-miR-483-3p	0	0	1	1	0	0	KHDC1	KH homology domain containing 1
hsa-miR-483-3p	0	0	0	1	0	0	KHDC1L	KH homology domain containing 1-like
hsa-miR-483-3p	0	0	1	1	0	0	RPS21	ribosomal protein S21
hsa-miR-483-3p	0	0	0	1	1	1	CRTAC1	cartilage acidic protein 1
hsa-miR-483-3p	0	0	0	1	0	0	UTP14A	UTP14, U3 small nucleolar ribonucleoprotein, homolog A (yeast)
hsa-miR-483-3p	0	0	1	1	1	1	C1orf177	chromosome 1 open reading frame 177
hsa-miR-483-3p	0	0	1	1	0	0	ENTPD8	ectonucleoside triphosphate diphosphohydrolase 8
hsa-miR-483-3p	1	0	1	1	1	1	PTPN1	protein tyrosine phosphatase, non-receptor type 1
hsa-miR-483-3p	0	0	0	1	0	0	EDF1	endothelial differentiation-related factor 1
hsa-miR-483-3p	0	0	1	1	0	0	PHPT1	phosphohistidine phosphatase 1
hsa-miR-483-3p	0	0	1	1	1	1	ELAVL4	ELAV (embryonic lethal, abnormal vision, Drosophila)-like 4
hsa-miR-483-3p	1	0	1	1	1	1	AIF1L	allograft inflammatory factor 1-like
hsa-miR-483-3p	0	0	1	1	0	0	PCIF1	PDX1 C-terminal inhibiting factor 1
hsa-miR-483-3p	1	0	1	1	1	1	ZNF691	zinc finger protein 691
hsa-miR-483-3p	0	0	1	1	0	0	DBNDD2	dysbindin (dystrobrevin binding protein 1) domain containing 2
hsa-miR-483-3p	0	0	1	1	1	1	PABPC1L	poly(A) binding protein, cytoplasmic 1-like
hsa-miR-483-3p	1	0	1	1	0	0	FRS3	fibroblast growth factor receptor substrate 3
hsa-miR-483-3p	0	0	0	1	0	0	TSPO2	translocator protein 2
hsa-miR-483-3p	0	0	0	1	0	0	KCNK16	potassium channel, subfamily K, member 16
hsa-miR-483-3p	1	0	0	1	0	0	FAM167B	family with sequence similarity 167, member B
hsa-miR-483-3p	1	0	1	1	0	0	CCDC28B	coiled-coil domain containing 28B
hsa-miR-483-3p	0	0	0	1	0	0	CLPSL1	colipase-like 1
hsa-miR-483-3p	0	0	0	1	0	0	SMPDL3B	sphingomyelin phosphodiesterase, acid-like 3B
hsa-miR-483-3p	1	0	1	1	0	0	CD164L2	CD164 sialomucin-like 2
hsa-miR-483-3p	0	0	1	1	0	0	SPDEF	SAM pointed domain containing ets transcription factor
hsa-miR-483-3p	1	0	1	1	0	0	DFNB31	deafness, autosomal recessive 31
hsa-miR-483-3p	0	0	1	1	1	1	SLC9A1	solute carrier family 9, subfamily A (NHE1, cation proton antiporter 1), member 1
hsa-miR-483-3p	0	0	1	1	0	0	ZNF593	zinc finger protein 593
hsa-miR-483-3p	0	0	1	1	1	1	AUNIP	aurora kinase A and ninein interacting protein
hsa-miR-483-3p	0	0	1	1	1	1	SYT15	synaptotagmin XV
hsa-miR-483-3p	0	0	1	1	0	0	GDF5	growth differentiation factor 5
hsa-miR-483-3p	0	0	1	1	1	1	HMGCL	3-hydroxymethyl-3-methylglutaryl-CoA lyase
hsa-miR-483-3p	0	0	0	1	0	0	KIFC1	kinesin family member C1
hsa-miR-483-3p	0	0	1	1	0	0	ID3	inhibitor of DNA binding 3, dominant negative helix-loop-helix protein
hsa-miR-483-3p	0	0	0	1	1	1	B3GALT4	UDP-Gal:betaGlcNAc beta 1,3-galactosyltransferase, polypeptide 4
hsa-miR-483-3p	0	0	1	1	0	0	PARD3	par-3 partitioning defective 3 homolog (C. elegans)
hsa-miR-483-3p	1	0	1	1	0	0	RNF5	ring finger protein 5, E3 ubiquitin protein ligase
hsa-miR-483-3p	0	0	0	1	1	1	EMC1	ER membrane protein complex subunit 1
hsa-miR-483-3p	0	0	0	1	0	0	HSD17B3	hydroxysteroid (17-beta) dehydrogenase 3
hsa-miR-483-3p	0	0	0	1	1	1	SUSD3	sushi domain containing 3
hsa-miR-483-3p	0	0	1	1	1	1	LSM2	LSM2 homolog, U6 small nuclear RNA associated (S. cerevisiae)
hsa-miR-483-3p	0	0	0	1	0	0	TMEM82	transmembrane protein 82
hsa-miR-483-3p	0	0	1	1	0	0	DDAH2	dimethylarginine dimethylaminohydrolase 2
hsa-miR-483-3p	0	0	0	1	0	0	LY6G6D	lymphocyte antigen 6 complex, locus G6D
hsa-miR-483-3p	0	0	0	1	0	0	LY6G6F	lymphocyte antigen 6 complex, locus G6F
hsa-miR-483-3p	0	0	1	1	0	0	ABHD16A	abhydrolase domain containing 16A
hsa-miR-483-3p	0	0	1	1	1	1	TEX30	testis expressed 30
hsa-miR-483-3p	0	0	1	1	0	0	NFKBIL1	nuclear factor of kappa light polypeptide gene enhancer in B-cells inhibitor-like 1
hsa-miR-483-3p	0	0	1	1	1	1	DDX39B	DEAD (Asp-Glu-Ala-Asp) box polypeptide 39B
hsa-miR-483-3p	0	0	0	1	0	0	ZSCAN5C	zinc finger and SCAN domain containing 5C
hsa-miR-483-3p	0	0	0	1	1	1	RABL2A	RAB, member of RAS oncogene family-like 2A
hsa-miR-483-3p	0	0	1	1	1	1	GATA1	GATA binding protein 1 (globin transcription factor 1)
hsa-miR-483-3p	0	0	0	1	0	0	TRIM31	tripartite motif containing 31
hsa-miR-483-3p	0	0	1	1	1	1	ZNRD1	zinc ribbon domain containing 1
hsa-miR-483-3p	1	0	1	1	1	1	NAPB	N-ethylmaleimide-sensitive factor attachment protein, beta
hsa-miR-483-3p	0	0	1	1	0	0	CHPF2	chondroitin polymerizing factor 2
hsa-miR-483-3p	1	0	1	1	1	1	PCDHA2	protocadherin alpha 2
hsa-miR-483-3p	0	0	1	1	0	0	PLCH2	phospholipase C, eta 2
hsa-miR-483-3p	0	0	1	1	0	0	GABRD	gamma-aminobutyric acid (GABA) A receptor, delta
hsa-miR-483-3p	1	0	1	1	1	1	PLCB1	phospholipase C, beta 1 (phosphoinositide-specific)
hsa-miR-483-3p	0	0	1	1	1	1	FUK	fucokinase
hsa-miR-483-3p	0	0	0	1	1	1	MAGEB3	melanoma antigen family B, 3
hsa-miR-483-3p	0	0	0	1	0	0	C11orf91	chromosome 11 open reading frame 91
hsa-miR-483-3p	0	0	0	1	0	0	ECHDC3	enoyl CoA hydratase domain containing 3
hsa-miR-483-3p	0	0	0	1	0	0	SLC9A5	solute carrier family 9, subfamily A (NHE5, cation proton antiporter 5), member 5
hsa-miR-483-3p	0	0	1	1	0	0	AQP7	aquaporin 7
hsa-miR-483-3p	0	0	0	1	0	0	KIFC3	kinesin family member C3
hsa-miR-483-3p	0	0	1	1	1	1	LY86	lymphocyte antigen 86
hsa-miR-483-3p	0	0	0	1	1	1	BRCA2	breast cancer 2, early onset
hsa-miR-483-3p	0	0	1	1	1	1	SLC22A23	solute carrier family 22, member 23
hsa-miR-483-3p	0	0	1	1	0	0	TROAP	trophinin associated protein (tastin)
hsa-miR-483-3p	0	0	1	1	1	1	ZNF768	zinc finger protein 768
hsa-miR-483-3p	0	0	0	1	0	0	SAT2	spermidine/spermine N1-acetyltransferase family member 2
hsa-miR-483-3p	1	0	1	1	1	1	ADRA1A	adrenoceptor alpha 1A
hsa-miR-483-3p	0	0	1	1	0	0	CPXM1	carboxypeptidase X (M14 family), member 1
hsa-miR-483-3p	1	0	1	1	1	1	TMSB4X	thymosin beta 4, X-linked
hsa-miR-483-3p	0	0	0	1	1	1	TTC38	tetratricopeptide repeat domain 38
hsa-miR-483-3p	0	0	1	1	1	1	SLC8A3	solute carrier family 8 (sodium/calcium exchanger), member 3
hsa-miR-483-3p	0	0	0	1	1	1	IL3RA	interleukin 3 receptor, alpha (low affinity)
hsa-miR-483-3p	0	0	1	1	1	1	MYBBP1A	MYB binding protein (P160) 1a
hsa-miR-483-3p	0	0	0	1	0	0	ADCYAP1R1	adenylate cyclase activating polypeptide 1 (pituitary) receptor type I
hsa-miR-483-3p	0	0	1	1	0	0	ARRDC5	arrestin domain containing 5
hsa-miR-483-3p	0	0	0	1	0	0	KRTAP5-2	keratin associated protein 5-2
hsa-miR-483-3p	0	0	0	1	0	0	ZNF205	zinc finger protein 205
hsa-miR-483-3p	0	0	0	1	1	1	RIPK3	receptor-interacting serine-threonine kinase 3
hsa-miR-483-3p	0	0	0	1	0	0	SLC7A4	solute carrier family 7 (orphan transporter), member 4
hsa-miR-483-3p	0	0	0	1	0	0	CRIPAK	cysteine-rich PAK1 inhibitor
hsa-miR-483-3p	0	0	1	1	0	0	GAK	cyclin G associated kinase
hsa-miR-483-3p	1	0	1	1	1	1	ZIC4	Zic family member 4
hsa-miR-483-3p	1	0	0	1	1	1	NPHP3	nephronophthisis 3 (adolescent)
hsa-miR-483-3p	0	0	1	1	1	1	ACAD11	acyl-CoA dehydrogenase family, member 11
hsa-miR-483-3p	0	0	0	1	0	0	C3orf19	chromosome 3 open reading frame 19
hsa-miR-483-3p	0	0	1	1	0	0	TMEM151B	transmembrane protein 151B
hsa-miR-483-3p	0	0	1	1	0	0	GARS	glycyl-tRNA synthetase
hsa-miR-483-3p	0	0	1	1	0	0	PRR5	proline rich 5 (renal)
hsa-miR-483-3p	0	0	1	1	0	0	ARHGAP8	Rho GTPase activating protein 8
hsa-miR-483-3p	0	0	0	1	0	0	PRR5-ARHGAP8	PRR5-ARHGAP8 readthrough
hsa-miR-483-3p	0	0	1	1	1	1	ICAM1	intercellular adhesion molecule 1
hsa-miR-483-3p	0	0	1	1	1	1	CRX	cone-rod homeobox
hsa-miR-483-3p	1	0	1	0	1	1	ADRB1	adrenoceptor beta 1
hsa-miR-483-3p	0	0	1	1	1	1	BRD9	bromodomain containing 9
hsa-miR-483-3p	0	0	0	0	1	1	IBA57	IBA57, iron-sulfur cluster assembly homolog (S. cerevisiae)
hsa-miR-483-3p	1	0	1	1	1	1	KCNMA1	potassium large conductance calcium-activated channel, subfamily M, alpha member 1
hsa-miR-483-3p	0	0	1	1	1	1	DCAF4L1	DDB1 and CUL4 associated factor 4-like 1
hsa-miR-483-3p	0	0	1	0	1	1	PIGY	phosphatidylinositol glycan anchor biosynthesis, class Y
hsa-miR-483-3p	1	0	1	1	1	1	ZBTB38	zinc finger and BTB domain containing 38
hsa-miR-483-3p	1	0	0	0	1	1	CCDC88C	coiled-coil domain containing 88C
hsa-miR-483-3p	1	0	0	1	1	1	HSBP1	heat shock factor binding protein 1
hsa-miR-483-3p	0	0	1	1	1	1	DSG1	desmoglein 1
hsa-miR-483-3p	1	0	1	0	1	1	HTT	huntingtin
hsa-miR-483-3p	0	0	1	0	1	1	ZNF268	zinc finger protein 268
hsa-miR-483-3p	0	0	0	1	1	1	CSRP3	cysteine and glycine-rich protein 3 (cardiac LIM protein)
hsa-miR-483-3p	0	0	1	1	1	1	PIP5K1A	phosphatidylinositol-4-phosphate 5-kinase, type I, alpha
hsa-miR-483-3p	1	0	1	1	1	1	ACOX1	acyl-CoA oxidase 1, palmitoyl
hsa-miR-483-3p	1	0	1	1	1	1	BZRAP1	benzodiazapine receptor (peripheral) associated protein 1
hsa-miR-483-3p	0	0	1	1	1	1	TRIM25	tripartite motif containing 25
hsa-miR-483-3p	1	0	1	1	1	1	TBX3	T-box 3
hsa-miR-483-3p	1	0	0	1	1	1	IKZF1	IKAROS family zinc finger 1 (Ikaros)
hsa-miR-483-3p	1	0	1	1	1	1	TACC1	transforming, acidic coiled-coil containing protein 1
hsa-miR-483-3p	1	0	1	1	1	1	TUBGCP3	tubulin, gamma complex associated protein 3
hsa-miR-483-3p	1	0	1	0	1	1	EXOC5	exocyst complex component 5
hsa-miR-483-3p	0	0	1	1	1	1	TMPRSS11E	transmembrane protease, serine 11E
hsa-miR-483-3p	0	0	0	1	1	1	TIMM21	translocase of inner mitochondrial membrane 21 homolog (yeast)
hsa-miR-483-3p	0	0	1	0	1	1	KSR1	kinase suppressor of ras 1
hsa-miR-483-3p	1	0	1	1	1	1	DZIP1	DAZ interacting protein 1
hsa-miR-483-3p	0	0	0	1	1	1	SAMD9	sterile alpha motif domain containing 9
hsa-miR-483-3p	1	0	1	0	1	1	KLHDC5	kelch domain containing 5
hsa-miR-483-3p	0	0	1	1	1	1	GABBR1	gamma-aminobutyric acid (GABA) B receptor, 1
hsa-miR-483-3p	1	0	1	1	1	1	TEAD1	TEA domain family member 1 (SV40 transcriptional enhancer factor)
hsa-miR-483-3p	0	0	1	1	1	1	HS1BP3	HCLS1 binding protein 3
hsa-miR-483-3p	0	0	1	1	1	1	C5orf42	chromosome 5 open reading frame 42
hsa-miR-483-3p	0	0	1	1	1	1	C8orf33	chromosome 8 open reading frame 33
hsa-miR-483-3p	0	0	1	1	1	1	SEH1L	SEH1-like (S. cerevisiae)
hsa-miR-483-3p	1	0	1	1	1	1	ANTXR1	anthrax toxin receptor 1
hsa-miR-483-3p	1	0	1	0	1	1	MAPKAPK2	mitogen-activated protein kinase-activated protein kinase 2
hsa-miR-483-3p	1	0	1	0	1	1	C5orf20	chromosome 5 open reading frame 20
hsa-miR-483-3p	0	0	1	1	1	1	IGJ	immunoglobulin J polypeptide, linker protein for immunoglobulin alpha and mu polypeptides
hsa-miR-483-3p	0	0	1	0	1	1	SNRNP48	small nuclear ribonucleoprotein 48kDa (U11/U12)
hsa-miR-483-3p	0	0	1	1	1	1	PRNT	prion protein (testis specific)
hsa-miR-483-3p	1	0	1	0	1	1	ZDHHC21	zinc finger, DHHC-type containing 21
hsa-miR-483-3p	0	0	1	0	1	1	ZNF445	zinc finger protein 445
hsa-miR-483-3p	0	0	0	0	1	1	LOC728056	IQ motif and Sec7 domain 3 pseudogene
