# Supplementary material for: Profiling of Selected MicroRNAs in Proliferative Eutopic Endometrium of Women with Ovarian Endometriosis
Source: Biomed Res Int. 2015 Aug 20;2015:760698. doi: 10.1155/2015/760698 (PMC4558423; doi:10.1155/2015/760698)
Supplement: Supplementary file 1 — Table I: The names of miRNAs significantly differentially expressed between eutopic endometrium of patients with endometriosis vs eutopic endometrium of patients without endometriosis. Table II: The associations between miRNA and mRNA, which presents detailed results of the search of six major databases i.e targetscan, tarbase, miranda, mirbase, mirtarget2 and pictar. [file 760698.f1.zip › 760698.f1/Table II/hsa-miR-485-5p.tsv]

miR	targetscan	tarbase	miranda	mirbase	mirtarget2	pictar	GeneSymbol	GeneName
hsa-miR-485-5p	1	0	1	1	1	1	BAZ2A	bromodomain adjacent to zinc finger domain, 2A
hsa-miR-485-5p	1	0	1	1	0	0	EEFSEC	eukaryotic elongation factor, selenocysteine-tRNA-specific
hsa-miR-485-5p	1	0	1	0	1	1	RNF165	ring finger protein 165
hsa-miR-485-5p	1	0	1	1	0	0	PLXNA4	plexin A4
hsa-miR-485-5p	1	0	1	1	1	1	THTPA	thiamine triphosphatase
hsa-miR-485-5p	1	0	1	1	1	1	ABCF2	ATP-binding cassette, sub-family F (GCN20), member 2
hsa-miR-485-5p	1	0	1	1	1	1	PRUNE	prune homolog (Drosophila)
hsa-miR-485-5p	1	0	1	1	1	1	SH3TC2	SH3 domain and tetratricopeptide repeats 2
hsa-miR-485-5p	1	0	1	1	1	1	LPIN1	lipin 1
hsa-miR-485-5p	1	0	1	1	0	0	TCF7	transcription factor 7 (T-cell specific, HMG-box)
hsa-miR-485-5p	1	0	1	1	1	1	PACS1	phosphofurin acidic cluster sorting protein 1
hsa-miR-485-5p	1	0	1	1	1	1	TEX261	testis expressed 261
hsa-miR-485-5p	1	0	1	1	0	0	GBA2	glucosidase, beta (bile acid) 2
hsa-miR-485-5p	1	0	1	1	1	1	ATG9B	autophagy related 9B
hsa-miR-485-5p	1	0	1	1	1	1	SLAMF6	SLAM family member 6
hsa-miR-485-5p	1	0	1	0	1	1	SEMA4G	sema domain, immunoglobulin domain (Ig), transmembrane domain (TM) and short cytoplasmic domain, (semaphorin) 4G
hsa-miR-485-5p	1	0	1	1	1	1	MBD6	methyl-CpG binding domain protein 6
hsa-miR-485-5p	1	0	1	1	1	1	MIR22HG	MIR22 host gene (non-protein coding)
hsa-miR-485-5p	1	0	1	1	1	1	SV2A	synaptic vesicle glycoprotein 2A
hsa-miR-485-5p	1	0	1	1	0	0	RGS6	regulator of G-protein signaling 6
hsa-miR-485-5p	1	0	0	1	0	0	KRT17	keratin 17
hsa-miR-485-5p	1	0	1	1	1	1	KCNJ11	potassium inwardly-rectifying channel, subfamily J, member 11
hsa-miR-485-5p	1	0	1	1	1	1	MAN1A1	mannosidase, alpha, class 1A, member 1
hsa-miR-485-5p	1	0	1	1	0	0	CHD3	chromodomain helicase DNA binding protein 3
hsa-miR-485-5p	1	0	1	1	1	1	ARHGEF15	Rho guanine nucleotide exchange factor (GEF) 15
hsa-miR-485-5p	1	0	1	1	1	1	SYT9	synaptotagmin IX
hsa-miR-485-5p	1	0	1	1	1	1	ZNF81	zinc finger protein 81
hsa-miR-485-5p	1	0	1	1	1	1	CENPB	centromere protein B, 80kDa
hsa-miR-485-5p	1	0	1	1	1	1	SIK3	SIK family kinase 3
hsa-miR-485-5p	1	0	1	1	0	0	ANKRD34A	ankyrin repeat domain 34A
hsa-miR-485-5p	1	0	1	0	1	1	NT5DC3	5'-nucleotidase domain containing 3
hsa-miR-485-5p	1	0	1	1	1	1	PDE10A	phosphodiesterase 10A
hsa-miR-485-5p	1	0	1	1	1	1	AMPD3	adenosine monophosphate deaminase 3
hsa-miR-485-5p	1	0	1	1	0	0	KIAA1549	KIAA1549
hsa-miR-485-5p	1	0	1	1	1	1	CLCN5	chloride channel, voltage-sensitive 5
hsa-miR-485-5p	1	0	1	1	1	1	C16orf70	chromosome 16 open reading frame 70
hsa-miR-485-5p	1	0	1	1	1	1	SSH3	slingshot homolog 3 (Drosophila)
hsa-miR-485-5p	1	0	1	1	1	1	TMEM151A	transmembrane protein 151A
hsa-miR-485-5p	1	0	1	1	1	1	CELSR2	cadherin, EGF LAG seven-pass G-type receptor 2 (flamingo homolog, Drosophila)
hsa-miR-485-5p	1	0	1	1	0	0	KIAA1644	KIAA1644
hsa-miR-485-5p	1	0	0	1	1	1	NKAIN4	Na+/K+ transporting ATPase interacting 4
hsa-miR-485-5p	1	0	1	1	1	1	PHF21A	PHD finger protein 21A
hsa-miR-485-5p	1	0	1	1	0	0	PROSAPIP1	ProSAPiP1 protein
hsa-miR-485-5p	1	0	1	0	1	1	MDGA1	MAM domain containing glycosylphosphatidylinositol anchor 1
hsa-miR-485-5p	1	0	1	1	1	1	OVCA2	ovarian tumor suppressor candidate 2
hsa-miR-485-5p	1	0	1	1	1	1	SNPH	syntaphilin
hsa-miR-485-5p	1	0	1	1	1	1	SOX5	SRY (sex determining region Y)-box 5
hsa-miR-485-5p	1	0	0	0	1	1	TMEM104	transmembrane protein 104
hsa-miR-485-5p	1	0	1	0	1	1	NMNAT2	nicotinamide nucleotide adenylyltransferase 2
hsa-miR-485-5p	1	0	1	1	1	1	SUFU	suppressor of fused homolog (Drosophila)
hsa-miR-485-5p	1	0	1	1	1	1	ACTG1	actin, gamma 1
hsa-miR-485-5p	1	0	1	1	1	1	DLK2	delta-like 2 homolog (Drosophila)
hsa-miR-485-5p	1	0	1	1	1	1	DAG1	dystroglycan 1 (dystrophin-associated glycoprotein 1)
hsa-miR-485-5p	1	0	1	1	1	1	JAM3	junctional adhesion molecule 3
hsa-miR-485-5p	1	0	0	1	1	1	HNF4A	hepatocyte nuclear factor 4, alpha
hsa-miR-485-5p	1	0	1	1	1	1	ERMAP	erythroblast membrane-associated protein (Scianna blood group)
hsa-miR-485-5p	1	0	1	1	1	1	IGFBP3	insulin-like growth factor binding protein 3
hsa-miR-485-5p	1	0	1	1	1	1	POU6F1	POU class 6 homeobox 1
hsa-miR-485-5p	1	0	1	1	1	1	YTHDC1	YTH domain containing 1
hsa-miR-485-5p	1	0	0	1	0	0	UNC45A	unc-45 homolog A (C. elegans)
hsa-miR-485-5p	1	0	1	1	0	0	ATXN7L3	ataxin 7-like 3
hsa-miR-485-5p	1	0	0	1	0	0	FAM193B	family with sequence similarity 193, member B
hsa-miR-485-5p	1	0	1	1	1	1	ARL2BP	ADP-ribosylation factor-like 2 binding protein
hsa-miR-485-5p	1	0	1	1	1	1	GRIA3	glutamate receptor, ionotropic, AMPA 3
hsa-miR-485-5p	1	0	1	1	1	1	ETNK1	ethanolamine kinase 1
hsa-miR-485-5p	1	0	1	1	1	1	LYRM2	LYR motif containing 2
hsa-miR-485-5p	1	0	1	1	1	1	LRRC7	leucine rich repeat containing 7
hsa-miR-485-5p	1	0	1	1	1	1	DVL3	dishevelled, dsh homolog 3 (Drosophila)
hsa-miR-485-5p	1	0	1	1	0	0	GSK3A	glycogen synthase kinase 3 alpha
hsa-miR-485-5p	1	0	1	1	1	1	LRP4	low density lipoprotein receptor-related protein 4
hsa-miR-485-5p	1	0	1	1	1	1	ZBTB39	zinc finger and BTB domain containing 39
hsa-miR-485-5p	1	0	1	0	1	1	GAB2	GRB2-associated binding protein 2
hsa-miR-485-5p	1	0	1	1	1	1	SORBS1	sorbin and SH3 domain containing 1
hsa-miR-485-5p	1	0	1	1	1	1	HIC2	hypermethylated in cancer 2
hsa-miR-485-5p	1	0	1	1	1	1	CROT	carnitine O-octanoyltransferase
hsa-miR-485-5p	1	0	1	1	1	1	CRY2	cryptochrome 2 (photolyase-like)
hsa-miR-485-5p	1	0	1	0	1	1	SRRM4	serine/arginine repetitive matrix 4
hsa-miR-485-5p	1	0	1	1	0	0	TMEM181	transmembrane protein 181
hsa-miR-485-5p	1	0	1	1	1	1	NOVA1	neuro-oncological ventral antigen 1
hsa-miR-485-5p	1	0	1	1	0	0	STX5	syntaxin 5
hsa-miR-485-5p	1	0	1	0	1	1	GNS	glucosamine (N-acetyl)-6-sulfatase
hsa-miR-485-5p	1	0	1	1	1	1	PFN2	profilin 2
hsa-miR-485-5p	1	0	1	1	1	1	BNC2	basonuclin 2
hsa-miR-485-5p	1	0	1	1	1	1	GPR3	G protein-coupled receptor 3
hsa-miR-485-5p	1	0	1	1	1	1	SLC12A6	solute carrier family 12 (potassium/chloride transporters), member 6
hsa-miR-485-5p	1	0	1	1	1	1	RC3H1	ring finger and CCCH-type domains 1
hsa-miR-485-5p	1	0	1	1	1	1	DLGAP2	discs, large (Drosophila) homolog-associated protein 2
hsa-miR-485-5p	1	0	1	0	1	1	DPYSL3	dihydropyrimidinase-like 3
hsa-miR-485-5p	1	0	1	1	1	1	ONECUT2	one cut homeobox 2
hsa-miR-485-5p	1	0	1	1	1	1	PPP3R1	protein phosphatase 3, regulatory subunit B, alpha
hsa-miR-485-5p	1	0	1	0	1	1	SYT11	synaptotagmin XI
hsa-miR-485-5p	1	0	1	1	1	1	TTYH2	tweety homolog 2 (Drosophila)
hsa-miR-485-5p	1	0	1	1	1	1	ZFP91	zinc finger protein 91 homolog (mouse)
hsa-miR-485-5p	1	0	1	1	1	1	OSBP	oxysterol binding protein
hsa-miR-485-5p	1	0	1	1	0	0	CCDC48	coiled-coil domain containing 48
hsa-miR-485-5p	1	0	1	0	1	1	ADIPOR2	adiponectin receptor 2
hsa-miR-485-5p	1	0	1	1	1	1	TPD52L2	tumor protein D52-like 2
hsa-miR-485-5p	1	0	1	1	1	1	PEX12	peroxisomal biogenesis factor 12
hsa-miR-485-5p	1	0	1	0	1	1	TUB	tubby homolog (mouse)
hsa-miR-485-5p	1	0	1	1	1	1	ATP6V1C2	ATPase, H+ transporting, lysosomal 42kDa, V1 subunit C2
hsa-miR-485-5p	1	0	1	1	1	1	PIEZO2	piezo-type mechanosensitive ion channel component 2
hsa-miR-485-5p	1	0	0	0	0	0	CLTCL1	clathrin, heavy chain-like 1
hsa-miR-485-5p	1	0	1	1	1	1	GABRB3	gamma-aminobutyric acid (GABA) A receptor, beta 3
hsa-miR-485-5p	1	0	1	1	1	1	ABHD2	abhydrolase domain containing 2
hsa-miR-485-5p	1	0	1	1	1	1	GABRE	gamma-aminobutyric acid (GABA) A receptor, epsilon
hsa-miR-485-5p	1	0	1	1	0	0	JUND	jun D proto-oncogene
hsa-miR-485-5p	1	0	1	1	0	0	PCNX	pecanex homolog (Drosophila)
hsa-miR-485-5p	1	0	0	1	1	1	DNAJC5G	DnaJ (Hsp40) homolog, subfamily C, member 5 gamma
hsa-miR-485-5p	1	0	1	1	1	1	TTBK1	tau tubulin kinase 1
hsa-miR-485-5p	1	0	0	1	0	0	CDX1	caudal type homeobox 1
hsa-miR-485-5p	1	0	1	1	1	1	SENP1	SUMO1/sentrin specific peptidase 1
hsa-miR-485-5p	1	0	1	1	1	1	AFF1	AF4/FMR2 family, member 1
hsa-miR-485-5p	1	0	1	1	1	1	CADM2	cell adhesion molecule 2
hsa-miR-485-5p	1	0	1	1	1	1	SLC23A2	solute carrier family 23 (nucleobase transporters), member 2
hsa-miR-485-5p	1	0	1	1	1	1	CTDNEP1	CTD nuclear envelope phosphatase 1
hsa-miR-485-5p	1	0	1	1	1	1	ATRN	attractin
hsa-miR-485-5p	1	0	1	0	1	1	ARHGAP35	Rho GTPase activating protein 35
hsa-miR-485-5p	1	0	1	0	1	1	ZFHX4	zinc finger homeobox 4
hsa-miR-485-5p	1	0	1	1	1	1	GLS	glutaminase
hsa-miR-485-5p	1	0	0	0	1	1	PLCD3	phospholipase C, delta 3
hsa-miR-485-5p	1	0	1	1	1	1	RBPMS	RNA binding protein with multiple splicing
hsa-miR-485-5p	1	0	1	0	1	1	PARP11	poly (ADP-ribose) polymerase family, member 11
hsa-miR-485-5p	1	0	1	1	1	1	GJA5	gap junction protein, alpha 5, 40kDa
hsa-miR-485-5p	1	0	1	1	1	1	DPH1	DPH1 homolog (S. cerevisiae)
hsa-miR-485-5p	1	0	1	1	1	1	PANK3	pantothenate kinase 3
hsa-miR-485-5p	1	0	1	1	0	0	CHST4	carbohydrate (N-acetylglucosamine 6-O) sulfotransferase 4
hsa-miR-485-5p	1	0	1	1	1	1	LPPR2	lipid phosphate phosphatase-related protein type 2
hsa-miR-485-5p	1	0	1	1	1	1	MRPS27	mitochondrial ribosomal protein S27
hsa-miR-485-5p	1	0	1	1	0	0	KCNC1	potassium voltage-gated channel, Shaw-related subfamily, member 1
hsa-miR-485-5p	1	0	0	1	0	0	RUFY1	RUN and FYVE domain containing 1
hsa-miR-485-5p	1	0	1	1	1	1	SSH2	slingshot homolog 2 (Drosophila)
hsa-miR-485-5p	1	0	1	0	0	0	NYNRIN	NYN domain and retroviral integrase containing
hsa-miR-485-5p	1	0	1	1	1	1	USP47	ubiquitin specific peptidase 47
hsa-miR-485-5p	1	0	1	1	1	1	VPS26A	vacuolar protein sorting 26 homolog A (S. pombe)
hsa-miR-485-5p	1	0	1	1	1	1	GOSR2	golgi SNAP receptor complex member 2
hsa-miR-485-5p	1	0	1	1	1	1	PEAR1	platelet endothelial aggregation receptor 1
hsa-miR-485-5p	1	0	1	1	0	0	TDRKH	tudor and KH domain containing
hsa-miR-485-5p	1	0	1	1	1	1	C7orf31	chromosome 7 open reading frame 31
hsa-miR-485-5p	1	0	1	1	0	0	LAMTOR1	late endosomal/lysosomal adaptor, MAPK and MTOR activator 1
hsa-miR-485-5p	1	0	0	1	0	0	ST3GAL1	ST3 beta-galactoside alpha-2,3-sialyltransferase 1
hsa-miR-485-5p	1	0	1	1	1	1	GGT7	gamma-glutamyltransferase 7
hsa-miR-485-5p	1	0	1	1	1	1	ARHGAP32	Rho GTPase activating protein 32
hsa-miR-485-5p	1	0	0	1	0	0	PSMB11	proteasome (prosome, macropain) subunit, beta type, 11
hsa-miR-485-5p	1	0	1	0	1	1	PAPPA	pregnancy-associated plasma protein A, pappalysin 1
hsa-miR-485-5p	1	0	1	1	1	1	YWHAG	tyrosine 3-monooxygenase/tryptophan 5-monooxygenase activation protein, gamma polypeptide
hsa-miR-485-5p	1	0	1	1	1	1	UPF2	UPF2 regulator of nonsense transcripts homolog (yeast)
hsa-miR-485-5p	1	0	1	1	1	1	SLC41A1	solute carrier family 41, member 1
hsa-miR-485-5p	1	0	1	1	1	1	TSTD2	thiosulfate sulfurtransferase (rhodanese)-like domain containing 2
hsa-miR-485-5p	1	0	1	1	1	1	LCLAT1	lysocardiolipin acyltransferase 1
hsa-miR-485-5p	1	0	1	1	1	1	MLLT3	myeloid/lymphoid or mixed-lineage leukemia (trithorax homolog, Drosophila); translocated to, 3
hsa-miR-485-5p	1	0	1	1	1	1	PLXNA2	plexin A2
hsa-miR-485-5p	1	0	1	1	1	1	HTRA2	HtrA serine peptidase 2
hsa-miR-485-5p	1	0	1	1	0	0	LRCH4	leucine-rich repeats and calponin homology (CH) domain containing 4
hsa-miR-485-5p	1	0	1	1	0	0	C22orf32	chromosome 22 open reading frame 32
hsa-miR-485-5p	1	0	1	1	0	0	SLC30A3	solute carrier family 30 (zinc transporter), member 3
hsa-miR-485-5p	1	0	1	1	1	1	ZDHHC2	zinc finger, DHHC-type containing 2
hsa-miR-485-5p	1	0	1	1	0	0	EFHC1	EF-hand domain (C-terminal) containing 1
hsa-miR-485-5p	1	0	1	1	1	1	TMEM99	transmembrane protein 99
hsa-miR-485-5p	1	0	1	0	1	1	DCAF7	DDB1 and CUL4 associated factor 7
hsa-miR-485-5p	1	0	1	1	1	1	C15orf52	chromosome 15 open reading frame 52
hsa-miR-485-5p	1	0	1	1	1	1	TAOK1	TAO kinase 1
hsa-miR-485-5p	1	0	1	1	1	1	ITPRIP	inositol 1,4,5-trisphosphate receptor interacting protein
hsa-miR-485-5p	1	0	1	1	0	0	PAK1	p21 protein (Cdc42/Rac)-activated kinase 1
hsa-miR-485-5p	1	0	1	1	1	1	ZCCHC14	zinc finger, CCHC domain containing 14
hsa-miR-485-5p	1	0	1	1	1	1	STRN4	striatin, calmodulin binding protein 4
hsa-miR-485-5p	1	0	1	1	1	1	MPZ	myelin protein zero
hsa-miR-485-5p	1	0	1	1	1	1	FOXL1	forkhead box L1
hsa-miR-485-5p	1	0	1	0	1	1	TNRC6B	trinucleotide repeat containing 6B
hsa-miR-485-5p	1	0	1	1	1	1	MGAT5B	mannosyl (alpha-1,6-)-glycoprotein beta-1,6-N-acetyl-glucosaminyltransferase, isozyme B
hsa-miR-485-5p	1	0	1	1	1	1	OXSR1	oxidative-stress responsive 1
hsa-miR-485-5p	1	0	1	1	0	0	DISP2	dispatched homolog 2 (Drosophila)
hsa-miR-485-5p	1	0	1	1	1	1	VTA1	Vps20-associated 1 homolog (S. cerevisiae)
hsa-miR-485-5p	1	0	1	1	1	1	PHC3	polyhomeotic homolog 3 (Drosophila)
hsa-miR-485-5p	1	0	1	1	1	1	MGST3	microsomal glutathione S-transferase 3
hsa-miR-485-5p	1	0	1	1	0	0	ATOH8	atonal homolog 8 (Drosophila)
hsa-miR-485-5p	1	0	1	0	1	1	PTEN	phosphatase and tensin homolog
hsa-miR-485-5p	1	0	1	1	0	0	MMP14	matrix metallopeptidase 14 (membrane-inserted)
hsa-miR-485-5p	1	0	1	0	1	1	KLHDC10	kelch domain containing 10
hsa-miR-485-5p	1	0	1	1	0	0	KAZN	kazrin, periplakin interacting protein
hsa-miR-485-5p	1	0	1	1	1	1	IGF2BP2	insulin-like growth factor 2 mRNA binding protein 2
hsa-miR-485-5p	1	0	1	1	1	1	ANKRD23	ankyrin repeat domain 23
hsa-miR-485-5p	1	0	1	1	1	1	SMG1	smg-1 homolog, phosphatidylinositol 3-kinase-related kinase (C. elegans)
hsa-miR-485-5p	1	0	1	1	1	1	RORC	RAR-related orphan receptor C
hsa-miR-485-5p	1	0	1	1	1	1	INPP5A	inositol polyphosphate-5-phosphatase, 40kDa
hsa-miR-485-5p	1	0	1	1	1	1	C6orf89	chromosome 6 open reading frame 89
hsa-miR-485-5p	1	0	1	0	1	1	CUL3	cullin 3
hsa-miR-485-5p	1	0	1	1	0	0	ETNK2	ethanolamine kinase 2
hsa-miR-485-5p	1	0	1	1	1	1	CHD9	chromodomain helicase DNA binding protein 9
hsa-miR-485-5p	1	0	1	1	1	1	OGT	O-linked N-acetylglucosamine (GlcNAc) transferase
hsa-miR-485-5p	1	0	1	1	1	1	FAM123B	family with sequence similarity 123B
hsa-miR-485-5p	1	0	1	1	1	1	SPRED2	sprouty-related, EVH1 domain containing 2
hsa-miR-485-5p	1	0	1	1	1	1	PPARGC1A	peroxisome proliferator-activated receptor gamma, coactivator 1 alpha
hsa-miR-485-5p	1	0	1	1	1	1	TMCC2	transmembrane and coiled-coil domain family 2
hsa-miR-485-5p	1	0	1	1	1	1	PEX26	peroxisomal biogenesis factor 26
hsa-miR-485-5p	1	0	1	1	1	1	SLC46A1	solute carrier family 46 (folate transporter), member 1
hsa-miR-485-5p	1	0	1	1	1	1	NBEA	neurobeachin
hsa-miR-485-5p	1	0	1	1	1	1	AIFM2	apoptosis-inducing factor, mitochondrion-associated, 2
hsa-miR-485-5p	1	0	1	1	1	1	PLAU	plasminogen activator, urokinase
hsa-miR-485-5p	1	0	1	1	0	0	SRCAP	Snf2-related CREBBP activator protein
hsa-miR-485-5p	1	0	1	1	0	0	RAPGEF2	Rap guanine nucleotide exchange factor (GEF) 2
hsa-miR-485-5p	0	0	1	1	1	1	PPIP5K1	diphosphoinositol pentakisphosphate kinase 1
hsa-miR-485-5p	0	0	1	1	1	1	BAI2	brain-specific angiogenesis inhibitor 2
hsa-miR-485-5p	1	0	1	0	1	1	PTPRT	protein tyrosine phosphatase, receptor type, T
hsa-miR-485-5p	1	0	1	1	1	1	GLI2	GLI family zinc finger 2
hsa-miR-485-5p	1	0	1	1	1	1	SGSM2	small G protein signaling modulator 2
hsa-miR-485-5p	1	0	1	1	0	0	OTUD3	OTU domain containing 3
hsa-miR-485-5p	0	0	1	1	0	0	RAP1GAP	RAP1 GTPase activating protein
hsa-miR-485-5p	1	0	1	0	1	1	CEP350	centrosomal protein 350kDa
hsa-miR-485-5p	1	0	1	1	1	1	RNGTT	RNA guanylyltransferase and 5'-phosphatase
hsa-miR-485-5p	0	0	1	1	0	0	ZNF862	zinc finger protein 862
hsa-miR-485-5p	1	0	1	1	1	1	GPATCH8	G patch domain containing 8
hsa-miR-485-5p	1	0	1	1	1	1	ATG13	autophagy related 13
hsa-miR-485-5p	0	0	1	1	1	1	MICAL2	microtubule associated monoxygenase, calponin and LIM domain containing 2
hsa-miR-485-5p	1	0	1	0	1	1	ATG14	autophagy related 14
hsa-miR-485-5p	1	0	1	1	1	1	UBR5	ubiquitin protein ligase E3 component n-recognin 5
hsa-miR-485-5p	1	0	1	1	1	1	SEMA4F	sema domain, immunoglobulin domain (Ig), transmembrane domain (TM) and short cytoplasmic domain, (semaphorin) 4F
hsa-miR-485-5p	0	0	1	1	1	1	ST3GAL6	ST3 beta-galactoside alpha-2,3-sialyltransferase 6
hsa-miR-485-5p	1	0	1	1	1	1	CIT	citron (rho-interacting, serine/threonine kinase 21)
hsa-miR-485-5p	0	0	1	1	1	1	FASTKD2	FAST kinase domains 2
hsa-miR-485-5p	1	0	1	1	1	1	CNOT1	CCR4-NOT transcription complex, subunit 1
hsa-miR-485-5p	1	0	1	1	0	0	KIAA1045	KIAA1045
hsa-miR-485-5p	1	0	1	1	1	1	CEP164	centrosomal protein 164kDa
hsa-miR-485-5p	1	0	1	1	1	1	PRRC2C	proline-rich coiled-coil 2C
hsa-miR-485-5p	1	0	1	1	1	1	PHF8	PHD finger protein 8
hsa-miR-485-5p	1	0	1	1	1	1	NDRG4	NDRG family member 4
hsa-miR-485-5p	1	0	1	1	0	0	KIAA1210	KIAA1210
hsa-miR-485-5p	1	0	1	1	1	1	RALGAPB	Ral GTPase activating protein, beta subunit (non-catalytic)
hsa-miR-485-5p	1	0	1	1	1	1	ASAP1	ArfGAP with SH3 domain, ankyrin repeat and PH domain 1
hsa-miR-485-5p	1	0	1	1	1	1	STK36	serine/threonine kinase 36
hsa-miR-485-5p	0	0	1	1	1	1	COPS7A	COP9 constitutive photomorphogenic homolog subunit 7A (Arabidopsis)
hsa-miR-485-5p	0	0	1	1	1	1	TCF7L2	transcription factor 7-like 2 (T-cell specific, HMG-box)
hsa-miR-485-5p	0	0	1	1	0	0	TNFRSF12A	tumor necrosis factor receptor superfamily, member 12A
hsa-miR-485-5p	0	0	1	0	0	0	KIAA1383	KIAA1383
hsa-miR-485-5p	1	0	1	1	0	0	EBF4	early B-cell factor 4
hsa-miR-485-5p	0	0	1	1	0	0	ISLR2	immunoglobulin superfamily containing leucine-rich repeat 2
hsa-miR-485-5p	1	0	1	1	1	1	FAM214B	family with sequence similarity 214, member B
hsa-miR-485-5p	1	0	1	1	1	1	INADL	InaD-like (Drosophila)
hsa-miR-485-5p	0	0	1	0	1	1	ZSWIM6	zinc finger, SWIM-type containing 6
hsa-miR-485-5p	1	0	1	1	1	1	SNX3	sorting nexin 3
hsa-miR-485-5p	0	0	1	0	0	0	LOC440792	proline dehydrogenase (oxidase) 1 pseudogene
hsa-miR-485-5p	1	0	1	1	0	0	SEMA4C	sema domain, immunoglobulin domain (Ig), transmembrane domain (TM) and short cytoplasmic domain, (semaphorin) 4C
hsa-miR-485-5p	0	0	1	0	1	1	SETD5	SET domain containing 5
hsa-miR-485-5p	1	0	1	1	1	1	LCOR	ligand dependent nuclear receptor corepressor
hsa-miR-485-5p	1	0	1	1	1	1	LZTS2	leucine zipper, putative tumor suppressor 2
hsa-miR-485-5p	1	0	1	0	1	1	JPH4	junctophilin 4
hsa-miR-485-5p	0	0	1	1	1	1	LENG8	leukocyte receptor cluster (LRC) member 8
hsa-miR-485-5p	1	0	1	1	1	1	POGZ	pogo transposable element with ZNF domain
hsa-miR-485-5p	0	0	1	0	0	0	NBLA00301	Nbla00301
hsa-miR-485-5p	1	0	1	0	1	1	SGSM1	small G protein signaling modulator 1
hsa-miR-485-5p	0	0	1	1	1	1	KIAA1967	KIAA1967
hsa-miR-485-5p	1	0	1	0	1	1	RNF43	ring finger protein 43
hsa-miR-485-5p	1	0	1	1	1	1	TP53	tumor protein p53
hsa-miR-485-5p	1	0	1	1	1	1	SMEK1	SMEK homolog 1, suppressor of mek1 (Dictyostelium)
hsa-miR-485-5p	0	0	1	1	0	0	FAM22D	family with sequence similarity 22, member D
hsa-miR-485-5p	0	0	1	1	1	1	SHPRH	SNF2 histone linker PHD RING helicase, E3 ubiquitin protein ligase
hsa-miR-485-5p	1	0	1	0	0	0	ZC3H12C	zinc finger CCCH-type containing 12C
hsa-miR-485-5p	0	0	1	1	0	0	SSPO	SCO-spondin homolog (Bos taurus)
hsa-miR-485-5p	1	0	1	1	1	1	KCNMA1	potassium large conductance calcium-activated channel, subfamily M, alpha member 1
hsa-miR-485-5p	1	0	1	1	1	1	SLC43A2	solute carrier family 43, member 2
hsa-miR-485-5p	1	1	1	1	1	1	BACE1	beta-site APP-cleaving enzyme 1
hsa-miR-485-5p	1	0	1	1	1	1	UBE3A	ubiquitin protein ligase E3A
hsa-miR-485-5p	1	0	1	1	1	1	ADARB1	adenosine deaminase, RNA-specific, B1
hsa-miR-485-5p	1	0	1	1	0	0	NDST2	N-deacetylase/N-sulfotransferase (heparan glucosaminyl) 2
hsa-miR-485-5p	1	0	1	1	1	1	BACH2	BTB and CNC homology 1, basic leucine zipper transcription factor 2
hsa-miR-485-5p	0	0	1	0	1	1	ATF6	activating transcription factor 6
hsa-miR-485-5p	0	0	1	1	0	0	KCNC3	potassium voltage-gated channel, Shaw-related subfamily, member 3
hsa-miR-485-5p	1	0	1	1	1	1	RPS6KA3	ribosomal protein S6 kinase, 90kDa, polypeptide 3
hsa-miR-485-5p	1	0	1	1	0	0	ELN	elastin
hsa-miR-485-5p	1	0	1	1	1	1	DTNA	dystrobrevin, alpha
hsa-miR-485-5p	1	0	1	1	1	1	RASSF5	Ras association (RalGDS/AF-6) domain family member 5
hsa-miR-485-5p	1	0	1	0	1	1	MPPED2	metallophosphoesterase domain containing 2
hsa-miR-485-5p	1	0	1	0	1	1	SLC6A6	solute carrier family 6 (neurotransmitter transporter, taurine), member 6
hsa-miR-485-5p	0	0	1	1	1	1	DDX39B	DEAD (Asp-Glu-Ala-Asp) box polypeptide 39B
hsa-miR-485-5p	1	0	1	1	1	1	ABI1	abl-interactor 1
hsa-miR-485-5p	1	0	1	1	1	1	ARFGEF1	ADP-ribosylation factor guanine nucleotide-exchange factor 1 (brefeldin A-inhibited)
hsa-miR-485-5p	0	0	1	1	0	0	ASIC3	acid-sensing (proton-gated) ion channel 3
hsa-miR-485-5p	0	0	1	1	1	1	PPP1R12C	protein phosphatase 1, regulatory subunit 12C
hsa-miR-485-5p	0	0	1	1	0	0	EIF2B4	eukaryotic translation initiation factor 2B, subunit 4 delta, 67kDa
hsa-miR-485-5p	0	0	1	1	0	0	ITGA2B	integrin, alpha 2b (platelet glycoprotein IIb of IIb/IIIa complex, antigen CD41)
hsa-miR-485-5p	0	0	1	1	0	0	BMP1	bone morphogenetic protein 1
hsa-miR-485-5p	0	0	1	1	0	0	CFLAR	CASP8 and FADD-like apoptosis regulator
hsa-miR-485-5p	0	0	1	1	1	1	HLA-DQA1	major histocompatibility complex, class II, DQ alpha 1
hsa-miR-485-5p	1	0	1	1	1	1	EPB41	erythrocyte membrane protein band 4.1 (elliptocytosis 1, RH-linked)
hsa-miR-485-5p	1	0	1	1	1	1	ARHGEF3	Rho guanine nucleotide exchange factor (GEF) 3
hsa-miR-485-5p	0	0	1	1	0	0	SLC22A8	solute carrier family 22 (organic anion transporter), member 8
hsa-miR-485-5p	1	0	1	1	1	1	MLLT10	myeloid/lymphoid or mixed-lineage leukemia (trithorax homolog, Drosophila); translocated to, 10
hsa-miR-485-5p	0	0	1	1	0	0	CDK10	cyclin-dependent kinase 10
hsa-miR-485-5p	1	0	1	1	1	1	HMGA2	high mobility group AT-hook 2
hsa-miR-485-5p	0	0	1	1	0	0	MSH5	mutS homolog 5 (E. coli)
hsa-miR-485-5p	1	0	1	1	1	1	PHLDB2	pleckstrin homology-like domain, family B, member 2
hsa-miR-485-5p	1	0	1	0	1	1	CAV1	caveolin 1, caveolae protein, 22kDa
hsa-miR-485-5p	1	0	1	0	1	1	PDE7B	phosphodiesterase 7B
hsa-miR-485-5p	1	0	1	1	1	1	MEF2D	myocyte enhancer factor 2D
hsa-miR-485-5p	1	0	1	1	0	0	TNPO2	transportin 2
hsa-miR-485-5p	1	0	1	1	1	1	SLC4A4	solute carrier family 4, sodium bicarbonate cotransporter, member 4
hsa-miR-485-5p	1	0	1	1	1	1	CBFA2T2	core-binding factor, runt domain, alpha subunit 2; translocated to, 2
hsa-miR-485-5p	0	0	1	1	1	1	CD3EAP	CD3e molecule, epsilon associated protein
hsa-miR-485-5p	0	0	1	0	0	0	ALOX12P2	arachidonate 12-lipoxygenase pseudogene 2
hsa-miR-485-5p	0	0	1	1	0	0	SPTBN2	spectrin, beta, non-erythrocytic 2
hsa-miR-485-5p	1	0	1	1	1	1	TMBIM6	transmembrane BAX inhibitor motif containing 6
hsa-miR-485-5p	1	0	1	0	1	1	CELF2	CUGBP, Elav-like family member 2
hsa-miR-485-5p	0	0	1	1	0	0	STARD10	StAR-related lipid transfer (START) domain containing 10
hsa-miR-485-5p	1	0	1	1	1	1	RUNX2	runt-related transcription factor 2
hsa-miR-485-5p	0	0	1	1	1	1	CD84	CD84 molecule
hsa-miR-485-5p	1	0	1	1	1	1	NUDT4	nudix (nucleoside diphosphate linked moiety X)-type motif 4
hsa-miR-485-5p	0	0	1	1	1	1	BIN1	bridging integrator 1
hsa-miR-485-5p	1	0	1	1	1	1	WHSC1	Wolf-Hirschhorn syndrome candidate 1
hsa-miR-485-5p	0	0	1	1	1	1	PCF11	PCF11, cleavage and polyadenylation factor subunit, homolog (S. cerevisiae)
hsa-miR-485-5p	0	0	1	1	0	0	AVPR2	arginine vasopressin receptor 2
hsa-miR-485-5p	0	0	1	1	1	1	MSTO1	misato homolog 1 (Drosophila)
hsa-miR-485-5p	1	0	1	1	1	1	LRRFIP1	leucine rich repeat (in FLII) interacting protein 1
hsa-miR-485-5p	0	0	1	1	0	0	SERPINI2	serpin peptidase inhibitor, clade I (pancpin), member 2
hsa-miR-485-5p	1	0	1	1	0	0	C16orf5	chromosome 16 open reading frame 5
hsa-miR-485-5p	1	0	1	1	1	1	CAB39	calcium binding protein 39
hsa-miR-485-5p	1	0	1	1	1	1	C14orf129	chromosome 14 open reading frame 129
hsa-miR-485-5p	0	0	1	1	1	1	SAP30L	SAP30-like
hsa-miR-485-5p	0	0	1	0	1	1	CLDN2	claudin 2
hsa-miR-485-5p	0	0	1	1	0	0	FXYD5	FXYD domain containing ion transport regulator 5
hsa-miR-485-5p	0	0	1	0	0	0	BPESC1	blepharophimosis, epicanthus inversus and ptosis, candidate 1 (non-protein coding)
hsa-miR-485-5p	0	0	1	1	1	1	SLC30A5	solute carrier family 30 (zinc transporter), member 5
hsa-miR-485-5p	0	0	1	1	1	1	CD28	CD28 molecule
hsa-miR-485-5p	1	0	1	1	1	1	CALD1	caldesmon 1
hsa-miR-485-5p	1	0	1	1	1	1	ABI2	abl-interactor 2
hsa-miR-485-5p	1	0	1	1	1	1	ERGIC1	endoplasmic reticulum-golgi intermediate compartment (ERGIC) 1
hsa-miR-485-5p	0	0	1	1	1	1	C21orf7	chromosome 21 open reading frame 7
hsa-miR-485-5p	1	0	1	1	1	1	NRP1	neuropilin 1
hsa-miR-485-5p	1	0	1	1	1	1	CALN1	calneuron 1
hsa-miR-485-5p	0	0	1	0	1	1	KANSL3	KAT8 regulatory NSL complex subunit 3
hsa-miR-485-5p	1	0	1	1	0	0	RAB34	RAB34, member RAS oncogene family
hsa-miR-485-5p	1	0	1	1	1	1	LETMD1	LETM1 domain containing 1
hsa-miR-485-5p	1	0	1	1	1	1	CHST9	carbohydrate (N-acetylgalactosamine 4-0) sulfotransferase 9
hsa-miR-485-5p	0	0	1	1	1	1	SLC6A15	solute carrier family 6 (neutral amino acid transporter), member 15
hsa-miR-485-5p	1	0	1	1	1	1	BBC3	BCL2 binding component 3
hsa-miR-485-5p	1	0	1	1	1	1	CALCOCO1	calcium binding and coiled-coil domain 1
hsa-miR-485-5p	0	0	1	0	0	0	NBPF10	neuroblastoma breakpoint family, member 10
hsa-miR-485-5p	0	0	1	1	1	1	PLEKHA8	pleckstrin homology domain containing, family A (phosphoinositide binding specific) member 8
hsa-miR-485-5p	0	0	1	1	0	0	SNRPN	small nuclear ribonucleoprotein polypeptide N
hsa-miR-485-5p	1	0	1	1	1	1	MAGI1	membrane associated guanylate kinase, WW and PDZ domain containing 1
hsa-miR-485-5p	1	0	1	1	1	1	NTRK2	neurotrophic tyrosine kinase, receptor, type 2
hsa-miR-485-5p	0	0	1	0	0	0	MYO15B	myosin XVB pseudogene
hsa-miR-485-5p	1	0	1	1	1	1	ST3GAL3	ST3 beta-galactoside alpha-2,3-sialyltransferase 3
hsa-miR-485-5p	1	0	1	1	0	0	SAMD4A	sterile alpha motif domain containing 4A
hsa-miR-485-5p	1	0	1	1	1	1	PSIP1	PC4 and SFRS1 interacting protein 1
hsa-miR-485-5p	0	0	1	0	1	1	LYPD6B	LY6/PLAUR domain containing 6B
hsa-miR-485-5p	1	0	1	1	0	0	FOXP2	forkhead box P2
hsa-miR-485-5p	0	0	1	1	1	1	CARD8	caspase recruitment domain family, member 8
hsa-miR-485-5p	0	0	1	1	1	1	CHODL	chondrolectin
hsa-miR-485-5p	0	0	1	1	1	1	PTK7	PTK7 protein tyrosine kinase 7
hsa-miR-485-5p	0	0	1	1	1	1	GPR56	G protein-coupled receptor 56
hsa-miR-485-5p	1	0	1	1	1	1	FLNC	filamin C, gamma
hsa-miR-485-5p	0	0	1	0	0	0	SNHG4	small nucleolar RNA host gene 4 (non-protein coding)
hsa-miR-485-5p	0	0	1	1	1	1	GNAS	GNAS complex locus
hsa-miR-485-5p	0	0	1	1	0	0	KIF13A	kinesin family member 13A
hsa-miR-485-5p	0	0	1	1	1	1	RNASE7	ribonuclease, RNase A family, 7
hsa-miR-485-5p	1	0	1	1	1	1	PALM2	paralemmin 2
hsa-miR-485-5p	0	0	1	0	0	0	LY6G6E	lymphocyte antigen 6 complex, locus G6E (pseudogene)
hsa-miR-485-5p	0	0	1	0	1	1	SRPK1	SRSF protein kinase 1
hsa-miR-485-5p	1	0	1	1	1	1	EMID2	EMI domain containing 2
hsa-miR-485-5p	0	0	1	1	0	0	KIAA1324	KIAA1324
hsa-miR-485-5p	0	0	1	1	1	1	TAF1	TAF1 RNA polymerase II, TATA box binding protein (TBP)-associated factor, 250kDa
hsa-miR-485-5p	0	0	1	1	0	0	MBD1	methyl-CpG binding domain protein 1
hsa-miR-485-5p	1	0	1	1	1	1	SYT14	synaptotagmin XIV
hsa-miR-485-5p	0	0	1	1	0	0	C22orf24	chromosome 22 open reading frame 24
hsa-miR-485-5p	0	0	1	1	0	0	IL4I1	interleukin 4 induced 1
hsa-miR-485-5p	0	0	1	1	0	0	ACSS2	acyl-CoA synthetase short-chain family member 2
hsa-miR-485-5p	1	0	1	1	1	1	AKAP2	A kinase (PRKA) anchor protein 2
hsa-miR-485-5p	1	0	1	0	1	1	NFAT5	nuclear factor of activated T-cells 5, tonicity-responsive
hsa-miR-485-5p	0	0	1	1	1	1	PARP16	poly (ADP-ribose) polymerase family, member 16
hsa-miR-485-5p	0	0	1	1	1	1	SMOX	spermine oxidase
hsa-miR-485-5p	0	0	1	0	0	0	TPTEP1	transmembrane phosphatase with tensin homology pseudogene 1
hsa-miR-485-5p	0	0	1	1	1	1	STOX2	storkhead box 2
hsa-miR-485-5p	0	0	1	1	1	1	RNF220	ring finger protein 220
hsa-miR-485-5p	1	0	1	1	1	1	EIF2C1	eukaryotic translation initiation factor 2C, 1
hsa-miR-485-5p	1	0	1	1	1	1	ARMC8	armadillo repeat containing 8
hsa-miR-485-5p	0	0	1	1	1	1	CXXC5	CXXC finger protein 5
hsa-miR-485-5p	0	0	1	1	0	0	C17orf53	chromosome 17 open reading frame 53
hsa-miR-485-5p	0	0	1	0	0	0	C17orf72	chromosome 17 open reading frame 72
hsa-miR-485-5p	1	0	1	1	1	1	C15orf63	chromosome 15 open reading frame 63
hsa-miR-485-5p	1	0	1	1	1	1	MON2	MON2 homolog (S. cerevisiae)
hsa-miR-485-5p	0	0	1	1	0	0	KIRREL	kin of IRRE like (Drosophila)
hsa-miR-485-5p	0	0	1	1	0	0	TRMT2B	tRNA methyltransferase 2 homolog B (S. cerevisiae)
hsa-miR-485-5p	0	0	1	0	0	0	LOC149134	uncharacterized LOC149134
hsa-miR-485-5p	0	0	1	0	0	0	DUXAP10	double homeobox A pseudogene 10
hsa-miR-485-5p	1	0	1	1	1	1	S100PBP	S100P binding protein
hsa-miR-485-5p	1	0	1	1	0	0	FASTK	Fas-activated serine/threonine kinase
hsa-miR-485-5p	0	0	1	1	1	1	SPATA5L1	spermatogenesis associated 5-like 1
hsa-miR-485-5p	1	0	1	1	1	1	PPFIA4	protein tyrosine phosphatase, receptor type, f polypeptide (PTPRF), interacting protein (liprin), alpha 4
hsa-miR-485-5p	1	0	1	1	0	0	CCDC136	coiled-coil domain containing 136
hsa-miR-485-5p	1	0	1	1	1	1	USP33	ubiquitin specific peptidase 33
hsa-miR-485-5p	1	0	1	1	1	1	PHF20L1	PHD finger protein 20-like 1
hsa-miR-485-5p	0	0	1	1	1	1	CLEC4M	C-type lectin domain family 4, member M
hsa-miR-485-5p	1	0	1	1	1	1	PPFIA3	protein tyrosine phosphatase, receptor type, f polypeptide (PTPRF), interacting protein (liprin), alpha 3
hsa-miR-485-5p	1	0	1	1	1	1	PAX8	paired box 8
hsa-miR-485-5p	1	0	1	1	0	0	ST6GALNAC6	ST6 (alpha-N-acetyl-neuraminyl-2,3-beta-galactosyl-1,3)-N-acetylgalactosaminide alpha-2,6-sialyltransferase 6
hsa-miR-485-5p	1	0	1	1	1	1	CEP85	centrosomal protein 85kDa
hsa-miR-485-5p	0	0	1	1	0	0	PFDN5	prefoldin subunit 5
hsa-miR-485-5p	0	0	1	0	1	1	FLJ14186	uncharacterized LOC401149
hsa-miR-485-5p	1	0	1	1	1	1	COPS7B	COP9 constitutive photomorphogenic homolog subunit 7B (Arabidopsis)
hsa-miR-485-5p	0	0	1	1	1	1	HDAC7	histone deacetylase 7
hsa-miR-485-5p	0	0	1	0	0	0	IFFO2	intermediate filament family orphan 2
hsa-miR-485-5p	1	0	1	1	1	1	ZMIZ1	zinc finger, MIZ-type containing 1
hsa-miR-485-5p	1	0	1	0	1	1	STK40	serine/threonine kinase 40
hsa-miR-485-5p	0	0	1	1	0	0	UBR4	ubiquitin protein ligase E3 component n-recognin 4
hsa-miR-485-5p	1	0	1	1	1	1	GBF1	golgi brefeldin A resistant guanine nucleotide exchange factor 1
hsa-miR-485-5p	0	0	1	0	1	1	HEMK1	HemK methyltransferase family member 1
hsa-miR-485-5p	0	0	1	1	1	1	HSPBAP1	HSPB (heat shock 27kDa) associated protein 1
hsa-miR-485-5p	1	0	1	1	1	1	POLK	polymerase (DNA directed) kappa
hsa-miR-485-5p	0	0	1	1	0	0	ZNF276	zinc finger protein 276
hsa-miR-485-5p	1	0	1	1	1	1	FBXL12	F-box and leucine-rich repeat protein 12
hsa-miR-485-5p	1	0	1	1	1	1	RNF185	ring finger protein 185
hsa-miR-485-5p	0	0	1	1	1	1	ZNF277	zinc finger protein 277
hsa-miR-485-5p	0	0	1	1	1	1	PLEKHS1	pleckstrin homology domain containing, family S member 1
hsa-miR-485-5p	1	0	1	1	1	1	FAM53C	family with sequence similarity 53, member C
hsa-miR-485-5p	0	0	1	0	0	0	JAKMIP2-AS1	JAKMIP2 antisense RNA 1
hsa-miR-485-5p	0	0	1	1	1	1	NETO2	neuropilin (NRP) and tolloid (TLL)-like 2
hsa-miR-485-5p	0	0	1	1	1	1	CHD1L	chromodomain helicase DNA binding protein 1-like
hsa-miR-485-5p	1	0	1	1	1	1	FAM40A	family with sequence similarity 40, member A
hsa-miR-485-5p	1	0	1	1	1	1	GPD2	glycerol-3-phosphate dehydrogenase 2 (mitochondrial)
hsa-miR-485-5p	0	0	1	1	1	1	PAQR4	progestin and adipoQ receptor family member IV
hsa-miR-485-5p	0	0	1	1	0	0	IMPDH1	IMP (inosine 5'-monophosphate) dehydrogenase 1
hsa-miR-485-5p	0	0	1	0	0	0	KIAA0664L3	KIAA0664-like 3
hsa-miR-485-5p	0	0	1	1	1	1	FAM107A	family with sequence similarity 107, member A
hsa-miR-485-5p	1	0	1	1	0	0	C15orf27	chromosome 15 open reading frame 27
hsa-miR-485-5p	0	0	1	0	0	0	LOC254559	uncharacterized LOC254559
hsa-miR-485-5p	0	0	1	0	0	0	CHST9-AS1	CHST9 antisense RNA 1
hsa-miR-485-5p	1	0	1	1	1	1	PPM1L	protein phosphatase, Mg2+/Mn2+ dependent, 1L
hsa-miR-485-5p	1	0	1	1	1	1	DLGAP4	discs, large (Drosophila) homolog-associated protein 4
hsa-miR-485-5p	0	0	1	1	1	1	GABRP	gamma-aminobutyric acid (GABA) A receptor, pi
hsa-miR-485-5p	1	0	1	1	0	0	SPEG	SPEG complex locus
hsa-miR-485-5p	0	0	1	1	1	1	TBC1D30	TBC1 domain family, member 30
hsa-miR-485-5p	1	0	1	1	1	1	PDLIM2	PDZ and LIM domain 2 (mystique)
hsa-miR-485-5p	0	0	1	0	0	0	LOC157273	uncharacterized LOC157273
hsa-miR-485-5p	1	0	1	1	0	0	MEPCE	methylphosphate capping enzyme
hsa-miR-485-5p	0	0	1	1	0	0	BEAN1	brain expressed, associated with NEDD4, 1
hsa-miR-485-5p	1	0	1	1	1	1	LMNA	lamin A/C
hsa-miR-485-5p	0	0	1	0	0	0	SEC14L2	SEC14-like 2 (S. cerevisiae)
hsa-miR-485-5p	0	0	1	0	0	0	JPX	JPX transcript, XIST activator (non-protein coding)
hsa-miR-485-5p	1	0	1	0	1	1	FSTL4	follistatin-like 4
hsa-miR-485-5p	1	0	1	1	1	1	SHISA5	shisa homolog 5 (Xenopus laevis)
hsa-miR-485-5p	1	0	1	1	1	1	SCAMP5	secretory carrier membrane protein 5
hsa-miR-485-5p	0	0	1	1	1	1	BRD2	bromodomain containing 2
hsa-miR-485-5p	0	0	1	1	0	0	ZNF185	zinc finger protein 185 (LIM domain)
hsa-miR-485-5p	1	0	1	1	0	0	SRL	sarcalumenin
hsa-miR-485-5p	1	0	1	1	1	1	SORBS2	sorbin and SH3 domain containing 2
hsa-miR-485-5p	0	0	1	1	1	1	PTCD2	pentatricopeptide repeat domain 2
hsa-miR-485-5p	1	0	1	1	1	1	TPM3	tropomyosin 3
hsa-miR-485-5p	0	0	1	1	0	0	COMMD4	COMM domain containing 4
hsa-miR-485-5p	1	0	1	1	1	1	MGAT1	mannosyl (alpha-1,3-)-glycoprotein beta-1,2-N-acetylglucosaminyltransferase
hsa-miR-485-5p	0	0	1	1	1	1	C14orf79	chromosome 14 open reading frame 79
hsa-miR-485-5p	1	0	1	1	1	1	MAP3K11	mitogen-activated protein kinase kinase kinase 11
hsa-miR-485-5p	0	0	1	0	1	1	ARHGAP42	Rho GTPase activating protein 42
hsa-miR-485-5p	0	0	1	1	0	0	NXF2	nuclear RNA export factor 2
hsa-miR-485-5p	1	0	1	0	1	1	PLEKHA1	pleckstrin homology domain containing, family A (phosphoinositide binding specific) member 1
hsa-miR-485-5p	1	0	1	1	1	1	IST1	increased sodium tolerance 1 homolog (yeast)
hsa-miR-485-5p	0	0	1	1	0	0	KRT86	keratin 86
hsa-miR-485-5p	0	0	1	1	0	0	CD37	CD37 molecule
hsa-miR-485-5p	0	0	1	1	0	0	PIGO	phosphatidylinositol glycan anchor biosynthesis, class O
hsa-miR-485-5p	0	0	1	1	1	1	ROBO4	roundabout, axon guidance receptor, homolog 4 (Drosophila)
hsa-miR-485-5p	1	0	1	1	1	1	BLCAP	bladder cancer associated protein
hsa-miR-485-5p	1	0	1	1	1	1	PRRT2	proline-rich transmembrane protein 2
hsa-miR-485-5p	0	0	1	1	1	1	GALNT6	UDP-N-acetyl-alpha-D-galactosamine:polypeptide N-acetylgalactosaminyltransferase 6 (GalNAc-T6)
hsa-miR-485-5p	0	0	1	1	0	0	NISCH	nischarin
hsa-miR-485-5p	1	0	1	0	1	1	SLC25A37	solute carrier family 25 (mitochondrial iron transporter), member 37
hsa-miR-485-5p	0	0	1	1	0	0	ATP6AP1	ATPase, H+ transporting, lysosomal accessory protein 1
hsa-miR-485-5p	0	0	1	0	1	1	TMSB15B	thymosin beta 15B
hsa-miR-485-5p	0	0	1	0	0	0	LOC643837	uncharacterized LOC643837
hsa-miR-485-5p	0	0	1	1	0	0	ACOT11	acyl-CoA thioesterase 11
hsa-miR-485-5p	0	0	1	1	1	1	KBTBD4	kelch repeat and BTB (POZ) domain containing 4
hsa-miR-485-5p	0	0	1	0	1	1	PIANP	PILR alpha associated neural protein
hsa-miR-485-5p	1	0	1	1	1	1	SUPT16H	suppressor of Ty 16 homolog (S. cerevisiae)
hsa-miR-485-5p	1	0	1	1	1	1	FBXW2	F-box and WD repeat domain containing 2
hsa-miR-485-5p	1	0	1	0	1	1	TEF	thyrotrophic embryonic factor
hsa-miR-485-5p	1	0	1	1	1	1	HHAT	hedgehog acyltransferase
hsa-miR-485-5p	0	0	1	1	0	0	APLP1	amyloid beta (A4) precursor-like protein 1
hsa-miR-485-5p	0	0	1	1	0	0	ADH6	alcohol dehydrogenase 6 (class V)
hsa-miR-485-5p	0	0	1	0	0	0	LOC283887	uncharacterized LOC283887
hsa-miR-485-5p	0	0	1	1	0	0	AXDND1	axonemal dynein light chain domain containing 1
hsa-miR-485-5p	1	0	1	0	0	0	SH3RF3	SH3 domain containing ring finger 3
hsa-miR-485-5p	0	0	1	1	1	1	TGFBI	transforming growth factor, beta-induced, 68kDa
hsa-miR-485-5p	0	0	1	0	0	0	CXXC1P1	CXXC finger protein 1 pseudogene 1
hsa-miR-485-5p	0	0	1	0	1	1	PVR	poliovirus receptor
hsa-miR-485-5p	0	0	1	1	1	1	FRMD3	FERM domain containing 3
hsa-miR-485-5p	1	0	1	1	0	0	TSEN54	tRNA splicing endonuclease 54 homolog (S. cerevisiae)
hsa-miR-485-5p	0	0	1	1	1	1	SPOCK1	sparc/osteonectin, cwcv and kazal-like domains proteoglycan (testican) 1
hsa-miR-485-5p	0	0	1	0	0	0	PART1	prostate androgen-regulated transcript 1 (non-protein coding)
hsa-miR-485-5p	1	0	1	1	1	1	SNAP25	synaptosomal-associated protein, 25kDa
hsa-miR-485-5p	0	0	1	0	0	0	ZNF806	zinc finger protein 806
hsa-miR-485-5p	0	0	1	1	0	0	CES4A	carboxylesterase 4A
hsa-miR-485-5p	0	0	1	1	0	0	HPN	hepsin
hsa-miR-485-5p	1	0	1	1	1	1	NDEL1	nudE nuclear distribution E homolog (A. nidulans)-like 1
hsa-miR-485-5p	0	0	1	1	1	1	AQP3	aquaporin 3 (Gill blood group)
hsa-miR-485-5p	0	0	1	1	1	1	LTBR	lymphotoxin beta receptor (TNFR superfamily, member 3)
hsa-miR-485-5p	0	0	1	1	1	1	SETD2	SET domain containing 2
hsa-miR-485-5p	0	0	1	1	1	1	SIRPB2	signal-regulatory protein beta 2
hsa-miR-485-5p	1	0	1	1	1	1	KCNIP3	Kv channel interacting protein 3, calsenilin
hsa-miR-485-5p	0	0	1	0	0	0	LOC100129620	uncharacterized LOC100129620
hsa-miR-485-5p	0	0	1	0	0	0	LOC100129858	uncharacterized LOC100129858
hsa-miR-485-5p	0	0	1	0	1	1	NBPF3	neuroblastoma breakpoint family, member 3
hsa-miR-485-5p	0	0	1	0	0	0	LOC284577	uncharacterized LOC284577
hsa-miR-485-5p	1	0	1	0	1	1	STC2	stanniocalcin 2
hsa-miR-485-5p	1	0	1	1	1	1	PEA15	phosphoprotein enriched in astrocytes 15
hsa-miR-485-5p	0	0	1	1	0	0	MAP7D1	MAP7 domain containing 1
hsa-miR-485-5p	0	0	1	0	1	1	C19orf66	chromosome 19 open reading frame 66
hsa-miR-485-5p	1	0	1	1	1	1	GAPVD1	GTPase activating protein and VPS9 domains 1
hsa-miR-485-5p	0	0	1	0	0	0	FAM66C	family with sequence similarity 66, member C
hsa-miR-485-5p	1	0	1	1	0	0	FBRS	fibrosin
hsa-miR-485-5p	0	0	1	0	1	1	FLJ39080	uncharacterized LOC441355
hsa-miR-485-5p	1	0	1	0	1	1	COL21A1	collagen, type XXI, alpha 1
hsa-miR-485-5p	0	0	1	0	0	0	LOC643327	uncharacterized LOC643327
hsa-miR-485-5p	1	0	1	0	1	1	THRB	thyroid hormone receptor, beta
hsa-miR-485-5p	0	0	1	0	0	0	LINC00340	long intergenic non-protein coding RNA 340
hsa-miR-485-5p	1	0	1	1	1	1	SYT6	synaptotagmin VI
hsa-miR-485-5p	1	0	1	1	1	1	SNRNP70	small nuclear ribonucleoprotein 70kDa (U1)
hsa-miR-485-5p	1	0	1	1	1	1	ETS2	v-ets erythroblastosis virus E26 oncogene homolog 2 (avian)
hsa-miR-485-5p	0	0	1	1	1	1	ZNF513	zinc finger protein 513
hsa-miR-485-5p	0	0	1	1	0	0	CHCHD5	coiled-coil-helix-coiled-coil-helix domain containing 5
hsa-miR-485-5p	0	0	1	1	1	1	CORO7	coronin 7
hsa-miR-485-5p	1	0	1	0	1	1	YPEL2	yippee-like 2 (Drosophila)
hsa-miR-485-5p	0	0	1	1	0	0	PRKRIP1	PRKR interacting protein 1 (IL11 inducible)
hsa-miR-485-5p	1	0	1	1	1	1	POU2F3	POU class 2 homeobox 3
hsa-miR-485-5p	0	0	1	1	1	1	PPFIBP2	PTPRF interacting protein, binding protein 2 (liprin beta 2)
hsa-miR-485-5p	0	0	1	0	0	0	KIRREL3-AS3	KIRREL3 antisense RNA 3
hsa-miR-485-5p	1	0	1	1	1	1	GOLGA8B	golgin A8 family, member B
hsa-miR-485-5p	1	0	1	1	1	1	IGSF11	immunoglobulin superfamily, member 11
hsa-miR-485-5p	0	0	1	0	0	0	LOC284385	uncharacterized LOC284385
hsa-miR-485-5p	0	0	1	1	1	1	PLA2G5	phospholipase A2, group V
hsa-miR-485-5p	0	0	1	1	0	0	PSAPL1	prosaposin-like 1 (gene/pseudogene)
hsa-miR-485-5p	0	0	1	1	0	0	TAPBPL	TAP binding protein-like
hsa-miR-485-5p	0	0	1	1	1	1	RP1	retinitis pigmentosa 1 (autosomal dominant)
hsa-miR-485-5p	0	0	1	0	0	0	LOC100130954	uncharacterized LOC100130954
hsa-miR-485-5p	0	0	1	1	1	1	FAM76A	family with sequence similarity 76, member A
hsa-miR-485-5p	0	0	1	1	1	1	TRPM7	transient receptor potential cation channel, subfamily M, member 7
hsa-miR-485-5p	0	0	1	1	1	1	SLFN13	schlafen family member 13
hsa-miR-485-5p	0	0	1	1	0	0	FBXO18	F-box protein, helicase, 18
hsa-miR-485-5p	0	0	1	1	0	0	KIAA0146	KIAA0146
hsa-miR-485-5p	1	0	1	1	1	1	GRM4	glutamate receptor, metabotropic 4
hsa-miR-485-5p	1	0	1	1	1	1	WEE1	WEE1 homolog (S. pombe)
hsa-miR-485-5p	0	0	1	1	1	1	GGA1	golgi-associated, gamma adaptin ear containing, ARF binding protein 1
hsa-miR-485-5p	1	0	1	1	0	0	CACNB3	calcium channel, voltage-dependent, beta 3 subunit
hsa-miR-485-5p	0	0	1	1	0	0	PMFBP1	polyamine modulated factor 1 binding protein 1
hsa-miR-485-5p	0	0	1	1	0	0	MX2	myxovirus (influenza virus) resistance 2 (mouse)
hsa-miR-485-5p	0	0	1	1	0	0	HDAC6	histone deacetylase 6
hsa-miR-485-5p	1	0	1	1	1	1	ZBTB4	zinc finger and BTB domain containing 4
hsa-miR-485-5p	0	0	1	1	0	0	SLC26A10	solute carrier family 26, member 10
hsa-miR-485-5p	0	0	1	1	1	1	FRMD5	FERM domain containing 5
hsa-miR-485-5p	0	0	1	1	1	1	FAM5B	family with sequence similarity 5, member B
hsa-miR-485-5p	1	0	1	0	1	1	KCNK2	potassium channel, subfamily K, member 2
hsa-miR-485-5p	0	0	1	1	1	1	FAM19A2	family with sequence similarity 19 (chemokine (C-C motif)-like), member A2
hsa-miR-485-5p	0	0	1	0	0	0	LOC650368	asparagine-linked glycosylation 1-like pseudogene
hsa-miR-485-5p	0	0	1	1	1	1	BTN2A2	butyrophilin, subfamily 2, member A2
hsa-miR-485-5p	0	0	1	0	0	0	LOC285043	uncharacterized LOC285043
hsa-miR-485-5p	0	0	1	0	0	0	DKFZP434H168	uncharacterized LOC26077
hsa-miR-485-5p	1	0	1	1	1	1	PRDM2	PR domain containing 2, with ZNF domain
hsa-miR-485-5p	0	0	1	0	1	1	LOC389641	uncharacterized LOC389641
hsa-miR-485-5p	1	0	1	1	1	1	GJC1	gap junction protein, gamma 1, 45kDa
hsa-miR-485-5p	0	0	1	1	0	0	NPIP	nuclear pore complex interacting protein
hsa-miR-485-5p	1	0	1	1	1	1	ABR	active BCR-related
hsa-miR-485-5p	0	0	1	0	0	0	EML6	echinoderm microtubule associated protein like 6
hsa-miR-485-5p	1	0	1	0	1	1	TTYH3	tweety homolog 3 (Drosophila)
hsa-miR-485-5p	1	0	1	1	1	1	DAB2IP	DAB2 interacting protein
hsa-miR-485-5p	1	0	1	1	1	1	CELF6	CUGBP, Elav-like family member 6
hsa-miR-485-5p	0	0	1	1	1	1	C2orf91	chromosome 2 open reading frame 91
hsa-miR-485-5p	0	0	1	1	0	0	ZNHIT1	zinc finger, HIT-type containing 1
hsa-miR-485-5p	1	0	1	1	1	1	CTGF	connective tissue growth factor
hsa-miR-485-5p	0	0	1	1	0	0	LOC100128239	uncharacterized LOC100128239
hsa-miR-485-5p	0	0	1	1	1	1	CCDC66	coiled-coil domain containing 66
hsa-miR-485-5p	1	0	1	0	0	0	ANKRD52	ankyrin repeat domain 52
hsa-miR-485-5p	0	0	1	1	1	1	ZNF337	zinc finger protein 337
hsa-miR-485-5p	0	0	1	0	1	1	RASGRP3	RAS guanyl releasing protein 3 (calcium and DAG-regulated)
hsa-miR-485-5p	1	0	1	1	1	1	KPNA1	karyopherin alpha 1 (importin alpha 5)
hsa-miR-485-5p	0	0	1	0	0	0	FAM75D4	family with sequence similarity 75, member D4
hsa-miR-485-5p	0	0	1	0	0	0	FAM95B1	family with sequence similarity 95, member B1
hsa-miR-485-5p	0	0	1	1	1	1	EPPIN	epididymal peptidase inhibitor
hsa-miR-485-5p	1	0	1	1	1	1	WWC2	WW and C2 domain containing 2
hsa-miR-485-5p	1	0	1	1	1	1	DPY19L3	dpy-19-like 3 (C. elegans)
hsa-miR-485-5p	0	0	1	1	1	1	TGM2	transglutaminase 2 (C polypeptide, protein-glutamine-gamma-glutamyltransferase)
hsa-miR-485-5p	0	0	1	1	0	0	SPATS1	spermatogenesis associated, serine-rich 1
hsa-miR-485-5p	0	0	1	1	0	0	TMEM151B	transmembrane protein 151B
hsa-miR-485-5p	0	0	1	0	0	0	RPL23AP53	ribosomal protein L23a pseudogene 53
hsa-miR-485-5p	0	0	1	1	1	1	KLC4	kinesin light chain 4
hsa-miR-485-5p	0	0	1	1	1	1	RAB37	RAB37, member RAS oncogene family
hsa-miR-485-5p	1	0	1	1	0	0	MRVI1	murine retrovirus integration site 1 homolog
hsa-miR-485-5p	1	0	1	0	1	1	N4BP3	NEDD4 binding protein 3
hsa-miR-485-5p	0	0	1	1	1	1	C6orf136	chromosome 6 open reading frame 136
hsa-miR-485-5p	1	0	1	1	1	1	NFYC	nuclear transcription factor Y, gamma
hsa-miR-485-5p	1	0	1	1	1	1	PLA2G15	phospholipase A2, group XV
hsa-miR-485-5p	0	0	1	0	0	0	TRAV20	T cell receptor alpha variable 20
hsa-miR-485-5p	0	0	1	0	1	1	LOC401321	uncharacterized LOC401321
hsa-miR-485-5p	0	0	1	1	0	0	LOC100128682	uncharacterized LOC100128682
hsa-miR-485-5p	0	0	1	0	0	0	FAM205B	transmembrane protein C9orf144B pseudogene
hsa-miR-485-5p	0	0	1	0	0	0	IDO2	indoleamine 2,3-dioxygenase 2
hsa-miR-485-5p	0	0	1	1	0	0	WFIKKN1	WAP, follistatin/kazal, immunoglobulin, kunitz and netrin domain containing 1
hsa-miR-485-5p	1	0	1	1	1	1	PHC2	polyhomeotic homolog 2 (Drosophila)
hsa-miR-485-5p	1	0	1	1	1	1	CD200	CD200 molecule
hsa-miR-485-5p	1	0	1	1	1	1	RBM24	RNA binding motif protein 24
hsa-miR-485-5p	0	0	1	1	0	0	HEATR8	HEAT repeat containing 8
hsa-miR-485-5p	0	0	1	1	1	1	ANXA6	annexin A6
hsa-miR-485-5p	0	0	1	0	0	0	FAM27A	family with sequence similarity 27, member A
hsa-miR-485-5p	0	0	1	1	1	1	TMEM202	transmembrane protein 202
hsa-miR-485-5p	0	0	1	1	1	1	BRAT1	BRCA1-associated ATM activator 1
hsa-miR-485-5p	1	0	1	0	1	1	ESRRG	estrogen-related receptor gamma
hsa-miR-485-5p	0	0	1	0	1	1	GALNT13	UDP-N-acetyl-alpha-D-galactosamine:polypeptide N-acetylgalactosaminyltransferase 13 (GalNAc-T13)
hsa-miR-485-5p	0	0	1	1	1	1	CDIPT	CDP-diacylglycerol--inositol 3-phosphatidyltransferase
hsa-miR-485-5p	0	0	1	1	1	1	FBN3	fibrillin 3
hsa-miR-485-5p	0	0	1	1	1	1	RNF19B	ring finger protein 19B
hsa-miR-485-5p	0	0	1	1	1	1	ZNF346	zinc finger protein 346
hsa-miR-485-5p	0	0	1	1	1	1	SLC36A3	solute carrier family 36 (proton/amino acid symporter), member 3
hsa-miR-485-5p	1	0	1	1	1	1	MAP2K4	mitogen-activated protein kinase kinase 4
hsa-miR-485-5p	1	0	1	0	1	1	ZNF607	zinc finger protein 607
hsa-miR-485-5p	0	0	1	1	1	1	NR4A1	nuclear receptor subfamily 4, group A, member 1
hsa-miR-485-5p	0	0	1	1	1	1	PHF12	PHD finger protein 12
hsa-miR-485-5p	0	0	1	0	0	0	AGAP9	ArfGAP with GTPase domain, ankyrin repeat and PH domain 9
hsa-miR-485-5p	1	0	1	1	1	1	CTSA	cathepsin A
hsa-miR-485-5p	1	0	1	1	1	1	CYFIP2	cytoplasmic FMR1 interacting protein 2
hsa-miR-485-5p	1	0	1	0	1	1	SEZ6	seizure related 6 homolog (mouse)
hsa-miR-485-5p	0	0	1	1	0	0	ZNF414	zinc finger protein 414
hsa-miR-485-5p	0	0	1	1	1	1	DHRS3	dehydrogenase/reductase (SDR family) member 3
hsa-miR-485-5p	0	0	1	0	1	1	PEX5	peroxisomal biogenesis factor 5
hsa-miR-485-5p	0	0	1	0	0	0	BCAS3	breast carcinoma amplified sequence 3
hsa-miR-485-5p	0	0	1	1	0	0	PCSK5	proprotein convertase subtilisin/kexin type 5
hsa-miR-485-5p	1	0	1	1	1	1	PHTF2	putative homeodomain transcription factor 2
hsa-miR-485-5p	0	0	1	1	0	0	HSPB11	heat shock protein family B (small), member 11
hsa-miR-485-5p	1	0	1	1	1	1	DUSP3	dual specificity phosphatase 3
hsa-miR-485-5p	0	0	1	0	1	1	NEK1	NIMA (never in mitosis gene a)-related kinase 1
hsa-miR-485-5p	0	0	1	0	0	0	POM121L9P	POM121 transmembrane nucleoporin-like 9, pseudogene
hsa-miR-485-5p	0	0	1	0	0	0	POM121L8P	POM121 transmembrane nucleoporin-like 8 pseudogene
hsa-miR-485-5p	0	0	1	0	0	0	KIAA0913	KIAA0913
hsa-miR-485-5p	0	0	1	1	0	0	CCDC88B	coiled-coil domain containing 88B
hsa-miR-485-5p	1	0	1	1	1	1	GOLGA8A	golgin A8 family, member A
hsa-miR-485-5p	0	0	1	1	1	1	AQP6	aquaporin 6, kidney specific
hsa-miR-485-5p	0	0	1	1	0	0	DOPEY1	dopey family member 1
hsa-miR-485-5p	1	0	1	1	1	1	CTTNBP2NL	CTTNBP2 N-terminal like
hsa-miR-485-5p	0	0	1	1	1	1	CD276	CD276 molecule
hsa-miR-485-5p	0	0	1	0	0	0	FAM66D	family with sequence similarity 66, member D
hsa-miR-485-5p	1	0	1	1	1	1	PKNOX2	PBX/knotted 1 homeobox 2
hsa-miR-485-5p	1	0	1	0	1	1	BRPF1	bromodomain and PHD finger containing, 1
hsa-miR-485-5p	1	0	1	1	1	1	SLC30A8	solute carrier family 30 (zinc transporter), member 8
hsa-miR-485-5p	0	0	1	0	0	0	ZNF720	zinc finger protein 720
hsa-miR-485-5p	1	0	1	1	1	1	CHMP7	charged multivesicular body protein 7
hsa-miR-485-5p	1	0	1	0	0	0	YLPM1	YLP motif containing 1
hsa-miR-485-5p	1	0	1	1	0	0	USP24	ubiquitin specific peptidase 24
hsa-miR-485-5p	0	0	1	1	1	1	MYPN	myopalladin
hsa-miR-485-5p	1	0	1	1	0	0	CELF5	CUGBP, Elav-like family member 5
hsa-miR-485-5p	0	0	1	0	1	1	CEP95	centrosomal protein 95kDa
hsa-miR-485-5p	1	0	1	1	1	1	TMEM68	transmembrane protein 68
hsa-miR-485-5p	0	0	1	1	1	1	CCDC132	coiled-coil domain containing 132
hsa-miR-485-5p	0	0	1	1	1	1	C12orf50	chromosome 12 open reading frame 50
hsa-miR-485-5p	0	0	1	1	0	0	FCRL3	Fc receptor-like 3
hsa-miR-485-5p	0	0	1	1	1	1	TAF8	TAF8 RNA polymerase II, TATA box binding protein (TBP)-associated factor, 43kDa
hsa-miR-485-5p	0	0	1	1	0	0	LRRN2	leucine rich repeat neuronal 2
hsa-miR-485-5p	0	0	1	1	0	0	PPIE	peptidylprolyl isomerase E (cyclophilin E)
hsa-miR-485-5p	0	0	1	0	0	0	EPHA1-AS1	EPHA1 antisense RNA 1
hsa-miR-485-5p	0	0	1	1	1	1	C20orf132	chromosome 20 open reading frame 132
hsa-miR-485-5p	0	0	1	1	1	1	CAND1	cullin-associated and neddylation-dissociated 1
hsa-miR-485-5p	1	0	1	1	1	1	IL17RD	interleukin 17 receptor D
hsa-miR-485-5p	1	0	1	1	1	1	ANKRD49	ankyrin repeat domain 49
hsa-miR-485-5p	0	0	1	1	1	1	BAIAP3	BAI1-associated protein 3
hsa-miR-485-5p	1	0	1	1	1	1	RICTOR	RPTOR independent companion of MTOR, complex 2
hsa-miR-485-5p	1	0	1	1	1	1	ZNF207	zinc finger protein 207
hsa-miR-485-5p	1	0	1	0	1	1	KIF21B	kinesin family member 21B
hsa-miR-485-5p	0	0	1	0	1	1	SYNPO2	synaptopodin 2
hsa-miR-485-5p	1	0	1	0	1	1	PATL1	protein associated with topoisomerase II homolog 1 (yeast)
hsa-miR-485-5p	0	0	1	1	1	1	C5orf45	chromosome 5 open reading frame 45
hsa-miR-485-5p	1	0	1	1	1	1	IKZF2	IKAROS family zinc finger 2 (Helios)
hsa-miR-485-5p	1	0	1	1	1	1	RCAN2	regulator of calcineurin 2
hsa-miR-485-5p	0	0	1	1	1	1	TSPAN17	tetraspanin 17
hsa-miR-485-5p	0	0	1	1	1	1	CD209	CD209 molecule
hsa-miR-485-5p	1	0	1	1	1	1	SORCS1	sortilin-related VPS10 domain containing receptor 1
hsa-miR-485-5p	1	0	1	1	1	1	KIAA0907	KIAA0907
hsa-miR-485-5p	0	0	1	0	1	1	UNC5B	unc-5 homolog B (C. elegans)
hsa-miR-485-5p	1	0	1	1	1	1	USF2	upstream transcription factor 2, c-fos interacting
hsa-miR-485-5p	0	0	1	1	0	0	CMTM1	CKLF-like MARVEL transmembrane domain containing 1
hsa-miR-485-5p	0	0	1	1	1	1	CEP41	centrosomal protein 41kDa
hsa-miR-485-5p	1	0	1	1	1	1	WDR26	WD repeat domain 26
hsa-miR-485-5p	0	0	1	1	0	0	DNAH1	dynein, axonemal, heavy chain 1
hsa-miR-485-5p	0	0	1	1	0	0	CCL4	chemokine (C-C motif) ligand 4
hsa-miR-485-5p	0	0	1	1	1	1	ATF3	activating transcription factor 3
hsa-miR-485-5p	0	0	1	1	0	0	MUC1	mucin 1, cell surface associated
hsa-miR-485-5p	0	0	1	1	1	1	GCOM1	GRINL1A complex locus 1
hsa-miR-485-5p	1	0	1	1	1	1	TAB3	TGF-beta activated kinase 1/MAP3K7 binding protein 3
hsa-miR-485-5p	0	0	1	1	1	1	ITGA10	integrin, alpha 10
hsa-miR-485-5p	0	0	1	1	1	1	GPR114	G protein-coupled receptor 114
hsa-miR-485-5p	0	0	1	1	1	1	TMPRSS4	transmembrane protease, serine 4
hsa-miR-485-5p	0	0	1	1	1	1	KDELC2	KDEL (Lys-Asp-Glu-Leu) containing 2
hsa-miR-485-5p	0	0	1	1	0	0	PDZD11	PDZ domain containing 11
hsa-miR-485-5p	0	0	1	1	0	0	RAET1E	retinoic acid early transcript 1E
hsa-miR-485-5p	0	0	1	1	1	1	PLD5	phospholipase D family, member 5
hsa-miR-485-5p	0	0	1	1	1	1	POTEG	POTE ankyrin domain family, member G
hsa-miR-485-5p	1	0	1	1	1	1	MECP2	methyl CpG binding protein 2 (Rett syndrome)
hsa-miR-485-5p	1	0	1	1	0	0	ADAM15	ADAM metallopeptidase domain 15
hsa-miR-485-5p	0	0	1	1	0	0	DHRS4	dehydrogenase/reductase (SDR family) member 4
hsa-miR-485-5p	0	0	1	1	1	1	SMPD1	sphingomyelin phosphodiesterase 1, acid lysosomal
hsa-miR-485-5p	0	0	1	1	1	1	RHD	Rh blood group, D antigen
hsa-miR-485-5p	0	0	1	0	1	1	CCL4L2	chemokine (C-C motif) ligand 4-like 2
hsa-miR-485-5p	0	0	1	1	1	1	CCL4L1	chemokine (C-C motif) ligand 4-like 1
hsa-miR-485-5p	1	0	1	1	1	1	QKI	QKI, KH domain containing, RNA binding
hsa-miR-485-5p	1	0	1	1	1	1	MYB	v-myb myeloblastosis viral oncogene homolog (avian)
hsa-miR-485-5p	1	0	1	1	1	1	SAT1	spermidine/spermine N1-acetyltransferase 1
hsa-miR-485-5p	1	0	1	1	0	0	TAF4B	TAF4b RNA polymerase II, TATA box binding protein (TBP)-associated factor, 105kDa
hsa-miR-485-5p	0	0	1	1	0	0	NBPF8	neuroblastoma breakpoint family, member 8
hsa-miR-485-5p	0	0	1	1	1	1	CDK20	cyclin-dependent kinase 20
hsa-miR-485-5p	1	0	1	1	1	1	RPRD1A	regulation of nuclear pre-mRNA domain containing 1A
hsa-miR-485-5p	1	0	1	1	1	1	NOL4	nucleolar protein 4
hsa-miR-485-5p	0	0	1	1	1	1	SLC6A2	solute carrier family 6 (neurotransmitter transporter, noradrenalin), member 2
hsa-miR-485-5p	0	0	1	1	1	1	FAM115A	family with sequence similarity 115, member A
hsa-miR-485-5p	1	0	1	0	1	1	FAM46A	family with sequence similarity 46, member A
hsa-miR-485-5p	1	0	1	1	1	1	TMUB2	transmembrane and ubiquitin-like domain containing 2
hsa-miR-485-5p	0	0	1	1	1	1	MRRF	mitochondrial ribosome recycling factor
hsa-miR-485-5p	0	0	1	1	1	1	ATG3	autophagy related 3
hsa-miR-485-5p	1	0	1	1	1	1	NRGN	neurogranin (protein kinase C substrate, RC3)
hsa-miR-485-5p	1	0	1	1	1	1	TSPAN14	tetraspanin 14
hsa-miR-485-5p	1	0	1	1	1	1	RIMS3	regulating synaptic membrane exocytosis 3
hsa-miR-485-5p	0	0	1	1	1	1	BOD1	biorientation of chromosomes in cell division 1
hsa-miR-485-5p	0	0	1	1	0	0	SNRPB	small nuclear ribonucleoprotein polypeptides B and B1
hsa-miR-485-5p	0	0	1	1	1	1	FTO	fat mass and obesity associated
hsa-miR-485-5p	0	0	1	1	1	1	CHEK1	checkpoint kinase 1
hsa-miR-485-5p	0	0	1	0	0	0	LOC254896	uncharacterized LOC254896
hsa-miR-485-5p	0	0	1	1	1	1	PRMT5	protein arginine methyltransferase 5
hsa-miR-485-5p	1	0	1	1	1	1	POU2F2	POU class 2 homeobox 2
hsa-miR-485-5p	1	0	1	1	0	0	EIF4A1	eukaryotic translation initiation factor 4A1
hsa-miR-485-5p	0	0	1	1	0	0	MBOAT7	membrane bound O-acyltransferase domain containing 7
hsa-miR-485-5p	0	0	1	1	0	0	AGBL5	ATP/GTP binding protein-like 5
hsa-miR-485-5p	0	0	1	1	0	0	MYLK2	myosin light chain kinase 2
hsa-miR-485-5p	1	0	1	1	1	1	CALM1	calmodulin 1 (phosphorylase kinase, delta)
hsa-miR-485-5p	1	0	1	1	1	1	SHMT2	serine hydroxymethyltransferase 2 (mitochondrial)
hsa-miR-485-5p	0	0	1	1	1	1	ICA1	islet cell autoantigen 1, 69kDa
hsa-miR-485-5p	0	0	1	1	1	1	ZNF85	zinc finger protein 85
hsa-miR-485-5p	0	0	1	0	0	0	ATXN7L3B	ataxin 7-like 3B
hsa-miR-485-5p	1	0	1	1	1	1	NXN	nucleoredoxin
hsa-miR-485-5p	0	0	1	0	0	0	LOC400043	uncharacterized LOC400043
hsa-miR-485-5p	0	0	1	1	0	0	PANK2	pantothenate kinase 2
hsa-miR-485-5p	0	0	1	1	0	0	MEF2BNB-MEF2B	MEF2BNB-MEF2B readthrough
hsa-miR-485-5p	0	0	1	1	0	0	TCN2	transcobalamin II
hsa-miR-485-5p	0	0	1	1	0	0	FLAD1	FAD1 flavin adenine dinucleotide synthetase homolog (S. cerevisiae)
hsa-miR-485-5p	0	0	1	1	1	1	GNL3L	guanine nucleotide binding protein-like 3 (nucleolar)-like
hsa-miR-485-5p	0	0	1	1	1	1	ATP5SL	ATP5S-like
hsa-miR-485-5p	0	0	1	1	1	1	KLHL29	kelch-like 29 (Drosophila)
hsa-miR-485-5p	1	0	1	1	1	1	MEIS3	Meis homeobox 3
hsa-miR-485-5p	1	0	1	1	0	0	LRFN1	leucine rich repeat and fibronectin type III domain containing 1
hsa-miR-485-5p	0	0	1	0	0	0	DTX2P1-UPK3BP1-PMS2P11	DTX2P1-UPK3BP1-PMS2P11 readthrough (non-protein coding)
hsa-miR-485-5p	1	0	1	1	1	1	NUMBL	numb homolog (Drosophila)-like
hsa-miR-485-5p	1	0	1	0	1	1	ZNF24	zinc finger protein 24
hsa-miR-485-5p	1	0	1	1	1	1	NRF1	nuclear respiratory factor 1
hsa-miR-485-5p	0	0	1	0	0	0	APOBEC3D	apolipoprotein B mRNA editing enzyme, catalytic polypeptide-like 3D
hsa-miR-485-5p	0	0	1	1	1	1	CSDE1	cold shock domain containing E1, RNA-binding
hsa-miR-485-5p	0	0	1	0	0	0	LOC100144602	uncharacterized LOC100144602
hsa-miR-485-5p	0	0	1	0	0	0	TCP11L2	t-complex 11 (mouse)-like 2
hsa-miR-485-5p	0	0	1	1	1	1	GLIPR2	GLI pathogenesis-related 2
hsa-miR-485-5p	0	0	1	0	0	0	FAM200B	family with sequence similarity 200, member B
hsa-miR-485-5p	1	0	1	1	1	1	KIAA1217	KIAA1217
hsa-miR-485-5p	0	0	1	0	0	0	WDFY3-AS2	WDFY3 antisense RNA 2
hsa-miR-485-5p	0	0	1	1	1	1	LRRK1	leucine-rich repeat kinase 1
hsa-miR-485-5p	0	0	1	0	1	1	ZNF718	zinc finger protein 718
hsa-miR-485-5p	0	0	1	0	0	0	ENTPD5	ectonucleoside triphosphate diphosphohydrolase 5
hsa-miR-485-5p	1	0	1	1	1	1	TM9SF4	transmembrane 9 superfamily protein member 4
hsa-miR-485-5p	0	0	1	0	0	0	LOC284260	uncharacterized LOC284260
hsa-miR-485-5p	0	0	1	0	0	0	NBR2	neighbor of BRCA1 gene 2 (non-protein coding)
hsa-miR-485-5p	0	0	1	1	1	1	CDC42SE2	CDC42 small effector 2
hsa-miR-485-5p	0	0	1	1	0	0	FAM89B	family with sequence similarity 89, member B
hsa-miR-485-5p	0	0	1	0	0	0	SNX29P2	sorting nexin 29 pseudogene 2
hsa-miR-485-5p	0	0	1	0	0	0	FLJ35390	uncharacterized LOC255031
hsa-miR-485-5p	1	0	1	1	1	1	ZDHHC5	zinc finger, DHHC-type containing 5
hsa-miR-485-5p	0	0	1	0	1	1	FHAD1	forkhead-associated (FHA) phosphopeptide binding domain 1
hsa-miR-485-5p	0	0	1	1	1	1	HS1BP3	HCLS1 binding protein 3
hsa-miR-485-5p	0	0	1	1	1	1	SELP	selectin P (granule membrane protein 140kDa, antigen CD62)
hsa-miR-485-5p	1	0	1	1	1	1	VASH2	vasohibin 2
hsa-miR-485-5p	0	0	1	1	0	0	SYT3	synaptotagmin III
hsa-miR-485-5p	1	0	1	1	0	0	PPIL2	peptidylprolyl isomerase (cyclophilin)-like 2
hsa-miR-485-5p	1	0	1	1	1	1	TMEM127	transmembrane protein 127
hsa-miR-485-5p	0	0	1	0	1	1	KIAA0895	KIAA0895
hsa-miR-485-5p	1	0	1	0	0	0	KCNU1	potassium channel, subfamily U, member 1
hsa-miR-485-5p	0	0	1	1	1	1	KIAA1755	KIAA1755
hsa-miR-485-5p	1	0	1	1	1	1	GIGYF2	GRB10 interacting GYF protein 2
hsa-miR-485-5p	0	0	1	0	0	0	LOC100130950	uncharacterized LOC100130950
hsa-miR-485-5p	1	0	1	0	1	1	SV2B	synaptic vesicle glycoprotein 2B
hsa-miR-485-5p	0	0	1	1	1	1	STAG3L1	stromal antigen 3-like 1
hsa-miR-485-5p	1	0	1	1	1	1	GCFC1	GC-rich sequence DNA-binding factor 1
hsa-miR-485-5p	0	0	1	1	1	1	CTNNA3	catenin (cadherin-associated protein), alpha 3
hsa-miR-485-5p	1	0	1	1	0	0	FAM83F	family with sequence similarity 83, member F
hsa-miR-485-5p	0	0	1	1	1	1	ZNF100	zinc finger protein 100
hsa-miR-485-5p	0	0	1	1	0	0	TRIM69	tripartite motif containing 69
hsa-miR-485-5p	0	0	1	1	0	0	FBXL13	F-box and leucine-rich repeat protein 13
hsa-miR-485-5p	0	0	1	1	0	0	GLG1	golgi glycoprotein 1
hsa-miR-485-5p	0	0	1	0	0	0	LINC00593	long intergenic non-protein coding RNA 593
hsa-miR-485-5p	0	0	1	1	1	1	C7orf53	chromosome 7 open reading frame 53
hsa-miR-485-5p	0	0	1	0	1	1	PLEKHM1P	pleckstrin homology domain containing, family M (with RUN domain) member 1 pseudogene
hsa-miR-485-5p	1	0	1	1	1	1	RAB5B	RAB5B, member RAS oncogene family
hsa-miR-485-5p	0	0	1	1	0	0	WASIR2	WASH and IL9R antisense RNA 2
hsa-miR-485-5p	0	0	1	1	0	0	RAB4B	RAB4B, member RAS oncogene family
hsa-miR-485-5p	1	0	1	1	1	1	CIB2	calcium and integrin binding family member 2
hsa-miR-485-5p	0	0	1	0	0	0	LOC96610	BMS1 homolog, ribosome assembly protein (yeast) pseudogene
hsa-miR-485-5p	1	0	1	0	1	1	KCTD2	potassium channel tetramerisation domain containing 2
hsa-miR-485-5p	0	0	1	1	1	1	ZCCHC7	zinc finger, CCHC domain containing 7
hsa-miR-485-5p	1	0	1	1	1	1	PML	promyelocytic leukemia
hsa-miR-485-5p	0	0	1	1	0	0	ADAMTS13	ADAM metallopeptidase with thrombospondin type 1 motif, 13
hsa-miR-485-5p	0	0	1	1	1	1	HEXA	hexosaminidase A (alpha polypeptide)
hsa-miR-485-5p	1	0	1	1	1	1	PAK4	p21 protein (Cdc42/Rac)-activated kinase 4
hsa-miR-485-5p	1	0	1	0	1	1	RHOBTB2	Rho-related BTB domain containing 2
hsa-miR-485-5p	1	0	1	1	1	1	SEC31B	SEC31 homolog B (S. cerevisiae)
hsa-miR-485-5p	0	0	1	0	0	0	BOD1L2	biorientation of chromosomes in cell division 1-like 2
hsa-miR-485-5p	1	0	1	0	1	1	RNF144A	ring finger protein 144A
hsa-miR-485-5p	0	0	1	0	1	1	KSR1	kinase suppressor of ras 1
hsa-miR-485-5p	0	0	1	1	0	0	PGS1	phosphatidylglycerophosphate synthase 1
hsa-miR-485-5p	0	0	1	1	0	0	HCRTR1	hypocretin (orexin) receptor 1
hsa-miR-485-5p	0	0	1	1	1	1	ARHGAP6	Rho GTPase activating protein 6
hsa-miR-485-5p	0	0	1	0	0	0	C12orf77	chromosome 12 open reading frame 77
hsa-miR-485-5p	0	0	1	1	1	1	TMEM139	transmembrane protein 139
hsa-miR-485-5p	1	0	1	1	1	1	PEX5L	peroxisomal biogenesis factor 5-like
hsa-miR-485-5p	0	0	1	0	0	0	FAM201A	family with sequence similarity 201, member A
hsa-miR-485-5p	0	0	1	0	0	0	LINC00642	long intergenic non-protein coding RNA 642
hsa-miR-485-5p	0	0	1	1	0	0	FAM3B	family with sequence similarity 3, member B
hsa-miR-485-5p	1	0	1	1	1	1	MACROD2	MACRO domain containing 2
hsa-miR-485-5p	1	0	1	1	1	1	ELMO2	engulfment and cell motility 2
hsa-miR-485-5p	0	0	1	0	0	0	LOC652276	potassium channel tetramerisation domain containing 5 pseudogene
hsa-miR-485-5p	0	0	1	0	0	0	SRGAP2C	SLIT-ROBO Rho GTPase activating protein 2C
hsa-miR-485-5p	1	0	1	0	1	1	CPEB4	cytoplasmic polyadenylation element binding protein 4
hsa-miR-485-5p	1	0	1	1	1	1	SOX6	SRY (sex determining region Y)-box 6
hsa-miR-485-5p	0	0	1	0	0	0	INHBA-AS1	INHBA antisense RNA 1
hsa-miR-485-5p	1	0	1	1	1	1	SF1	splicing factor 1
hsa-miR-485-5p	0	0	1	1	0	0	COX4I1	cytochrome c oxidase subunit IV isoform 1
hsa-miR-485-5p	0	0	1	0	0	0	FLJ36000	uncharacterized FLJ36000
hsa-miR-485-5p	1	0	1	1	1	1	FGFR2	fibroblast growth factor receptor 2
hsa-miR-485-5p	1	0	1	0	0	0	CT62	cancer/testis antigen 62
hsa-miR-485-5p	0	0	1	0	0	0	LOC401074	uncharacterized LOC401074
hsa-miR-485-5p	0	0	1	0	0	0	LOC388906	opioid growth factor receptor pseudogene
hsa-miR-485-5p	0	0	1	0	0	0	TOB1-AS1	TOB1 antisense RNA 1
hsa-miR-485-5p	0	0	1	0	0	0	LOC221122	uncharacterized LOC221122
hsa-miR-485-5p	0	0	1	1	1	1	SLTM	SAFB-like, transcription modulator
hsa-miR-485-5p	1	0	1	1	1	1	FOSB	FBJ murine osteosarcoma viral oncogene homolog B
hsa-miR-485-5p	1	0	1	1	0	0	ZNF292	zinc finger protein 292
hsa-miR-485-5p	0	0	1	0	0	0	A1BG-AS1	A1BG antisense RNA 1
hsa-miR-485-5p	0	0	1	1	0	0	AQP12B	aquaporin 12B
hsa-miR-485-5p	0	0	1	1	1	1	C17orf104	chromosome 17 open reading frame 104
hsa-miR-485-5p	1	0	1	1	0	0	INPP5J	inositol polyphosphate-5-phosphatase J
hsa-miR-485-5p	1	0	1	1	1	1	TNFSF4	tumor necrosis factor (ligand) superfamily, member 4
hsa-miR-485-5p	1	0	1	1	1	1	CTIF	CBP80/20-dependent translation initiation factor
hsa-miR-485-5p	0	0	1	0	0	0	LOC154822	uncharacterized LOC154822
hsa-miR-485-5p	0	0	1	1	1	1	FAM90A1	family with sequence similarity 90, member A1
hsa-miR-485-5p	0	0	1	1	0	0	PTOV1	prostate tumor overexpressed 1
hsa-miR-485-5p	0	0	1	0	0	0	LOC338579	ankyrin repeat domain-containing protein 30B pseudogene
hsa-miR-485-5p	0	0	1	0	0	0	LOC157381	uncharacterized LOC157381
hsa-miR-485-5p	0	0	1	0	0	0	LOC339260	uncharacterized LOC339260
hsa-miR-485-5p	0	0	1	1	1	1	STRADA	STE20-related kinase adaptor alpha
hsa-miR-485-5p	1	0	1	1	1	1	AGAP3	ArfGAP with GTPase domain, ankyrin repeat and PH domain 3
hsa-miR-485-5p	0	0	1	1	1	1	MYO3A	myosin IIIA
hsa-miR-485-5p	0	0	1	0	0	0	LOC283914	uncharacterized LOC283914
hsa-miR-485-5p	1	0	1	1	1	1	PCYT1B	phosphate cytidylyltransferase 1, choline, beta
hsa-miR-485-5p	0	0	1	1	0	0	ALDH1L1	aldehyde dehydrogenase 1 family, member L1
hsa-miR-485-5p	1	0	1	0	1	1	LYPD6	LY6/PLAUR domain containing 6
hsa-miR-485-5p	1	0	1	1	0	0	TBC1D10C	TBC1 domain family, member 10C
hsa-miR-485-5p	1	0	1	0	1	1	KDM2A	lysine (K)-specific demethylase 2A
hsa-miR-485-5p	1	0	1	1	1	1	SLC39A9	solute carrier family 39 (zinc transporter), member 9
hsa-miR-485-5p	1	0	1	1	1	1	PELI1	pellino E3 ubiquitin protein ligase 1
hsa-miR-485-5p	0	0	1	0	1	1	ITGA1	integrin, alpha 1
hsa-miR-485-5p	0	0	1	1	0	0	NLRC5	NLR family, CARD domain containing 5
hsa-miR-485-5p	0	0	1	1	0	0	NSUN5P2	NOP2/Sun domain family, member 5 pseudogene 2
hsa-miR-485-5p	0	0	1	1	1	1	WDR93	WD repeat domain 93
hsa-miR-485-5p	1	0	1	1	1	1	FNDC3A	fibronectin type III domain containing 3A
hsa-miR-485-5p	1	0	1	0	1	1	SMURF2	SMAD specific E3 ubiquitin protein ligase 2
hsa-miR-485-5p	0	0	1	1	0	0	SREBF2	sterol regulatory element binding transcription factor 2
hsa-miR-485-5p	1	0	1	1	1	1	LIMD2	LIM domain containing 2
hsa-miR-485-5p	0	0	1	1	1	1	RHOT1	ras homolog family member T1
hsa-miR-485-5p	0	0	1	1	1	1	SLC25A35	solute carrier family 25, member 35
hsa-miR-485-5p	1	0	1	0	1	1	NHLRC3	NHL repeat containing 3
hsa-miR-485-5p	1	0	1	0	1	1	C14orf43	chromosome 14 open reading frame 43
hsa-miR-485-5p	0	0	1	0	0	0	LINC00265	long intergenic non-protein coding RNA 265
hsa-miR-485-5p	0	0	1	0	1	1	C17orf51	chromosome 17 open reading frame 51
hsa-miR-485-5p	0	0	1	1	1	1	ZNF254	zinc finger protein 254
hsa-miR-485-5p	1	0	1	1	1	1	NCOA5	nuclear receptor coactivator 5
hsa-miR-485-5p	0	0	1	1	0	0	GRIN2C	glutamate receptor, ionotropic, N-methyl D-aspartate 2C
hsa-miR-485-5p	1	0	1	1	0	0	ANKRD13B	ankyrin repeat domain 13B
hsa-miR-485-5p	0	0	1	1	0	0	PRR19	proline rich 19
hsa-miR-485-5p	0	0	1	0	1	1	ASAP2	ArfGAP with SH3 domain, ankyrin repeat and PH domain 2
hsa-miR-485-5p	1	0	1	1	1	1	PDGFRA	platelet-derived growth factor receptor, alpha polypeptide
hsa-miR-485-5p	0	0	1	1	0	0	C8orf31	chromosome 8 open reading frame 31
hsa-miR-485-5p	0	0	1	1	0	0	DHX30	DEAH (Asp-Glu-Ala-His) box polypeptide 30
hsa-miR-485-5p	1	0	1	0	0	0	PRRT4	proline-rich transmembrane protein 4
hsa-miR-485-5p	0	0	1	1	1	1	VNN2	vanin 2
hsa-miR-485-5p	0	0	1	1	0	0	TSNARE1	t-SNARE domain containing 1
hsa-miR-485-5p	0	0	1	0	0	0	KANSL1-AS1	KANSL1 antisense RNA 1
hsa-miR-485-5p	1	0	1	1	1	1	RAB2B	RAB2B, member RAS oncogene family
hsa-miR-485-5p	1	0	1	1	1	1	ASPH	aspartate beta-hydroxylase
hsa-miR-485-5p	1	0	1	1	1	1	C5orf25	chromosome 5 open reading frame 25
hsa-miR-485-5p	0	0	1	0	0	0	DPY19L2P1	dpy-19-like 2 pseudogene 1 (C. elegans)
hsa-miR-485-5p	0	0	1	1	0	0	TMEM183A	transmembrane protein 183A
hsa-miR-485-5p	0	0	1	1	1	1	SLAMF1	signaling lymphocytic activation molecule family member 1
hsa-miR-485-5p	1	0	1	1	1	1	BAZ2B	bromodomain adjacent to zinc finger domain, 2B
hsa-miR-485-5p	0	0	1	0	0	0	FLJ12334	uncharacterized LOC400946
hsa-miR-485-5p	0	0	1	0	0	0	PTGER4P2	prostaglandin E receptor 4 (subtype EP4) pseudogene 2
hsa-miR-485-5p	1	0	1	1	0	0	DCAF15	DDB1 and CUL4 associated factor 15
hsa-miR-485-5p	0	0	1	1	0	0	CYP4F30P	cytochrome P450, family 4, subfamily F, polypeptide 30, pseudogene
hsa-miR-485-5p	0	0	1	0	0	0	ZRANB2-AS1	ZRANB2 antisense RNA 1
hsa-miR-485-5p	0	0	1	1	1	1	SLC11A1	solute carrier family 11 (proton-coupled divalent metal ion transporters), member 1
hsa-miR-485-5p	0	0	1	1	1	1	CTXN3	cortexin 3
hsa-miR-485-5p	1	0	1	1	1	1	CTBP1	C-terminal binding protein 1
hsa-miR-485-5p	0	0	1	1	1	1	PCED1B	PC-esterase domain containing 1B
hsa-miR-485-5p	0	0	1	0	0	0	LINC00152	long intergenic non-protein coding RNA 152
hsa-miR-485-5p	1	0	1	1	1	1	OPCML	opioid binding protein/cell adhesion molecule-like
hsa-miR-485-5p	0	0	1	0	0	0	ABCC6P1	ATP-binding cassette, sub-family C, member 6 pseudogene 1
hsa-miR-485-5p	1	0	1	0	1	1	AMMECR1L	AMME chromosomal region gene 1-like
hsa-miR-485-5p	0	0	1	1	0	0	C16orf86	chromosome 16 open reading frame 86
hsa-miR-485-5p	0	0	1	1	0	0	DNHD1	dynein heavy chain domain 1
hsa-miR-485-5p	0	0	1	1	1	1	SH2D4A	SH2 domain containing 4A
hsa-miR-485-5p	0	0	1	1	0	0	ZNF703	zinc finger protein 703
hsa-miR-485-5p	0	0	1	1	1	1	TMBIM4	transmembrane BAX inhibitor motif containing 4
hsa-miR-485-5p	0	0	1	0	0	0	FRG1B	FSHD region gene 1 family, member B
hsa-miR-485-5p	0	0	1	0	1	1	TGFB2	transforming growth factor, beta 2
hsa-miR-485-5p	1	0	1	1	1	1	WNT10B	wingless-type MMTV integration site family, member 10B
hsa-miR-485-5p	0	0	1	0	0	0	ABCA11P	ATP-binding cassette, sub-family A (ABC1), member 11, pseudogene
hsa-miR-485-5p	1	0	1	0	1	1	LRRTM4	leucine rich repeat transmembrane neuronal 4
hsa-miR-485-5p	0	0	1	0	0	0	FAM106A	family with sequence similarity 106, member A
hsa-miR-485-5p	1	0	1	1	1	1	SYNJ1	synaptojanin 1
hsa-miR-485-5p	0	0	1	1	0	0	MTMR11	myotubularin related protein 11
hsa-miR-485-5p	0	0	1	1	1	1	ZNF365	zinc finger protein 365
hsa-miR-485-5p	0	0	1	0	0	0	CCDC163P	coiled-coil domain containing 163, pseudogene
hsa-miR-485-5p	0	0	1	1	0	0	FBXO16	F-box protein 16
hsa-miR-485-5p	1	0	1	1	1	1	GABRB2	gamma-aminobutyric acid (GABA) A receptor, beta 2
hsa-miR-485-5p	1	0	1	1	1	1	KLHL17	kelch-like 17 (Drosophila)
hsa-miR-485-5p	0	0	1	0	0	0	FBXL19-AS1	FBXL19 antisense RNA 1 (head to head)
hsa-miR-485-5p	0	0	1	1	0	0	TMEM95	transmembrane protein 95
hsa-miR-485-5p	1	0	1	1	1	1	PNISR	PNN-interacting serine/arginine-rich protein
hsa-miR-485-5p	0	0	1	0	0	0	PHGR1	proline/histidine/glycine-rich 1
hsa-miR-485-5p	0	0	1	1	0	0	TMC2	transmembrane channel-like 2
hsa-miR-485-5p	0	0	1	0	0	0	LRRC37A11P	leucine rich repeat containing 37, member A11, pseudogene
hsa-miR-485-5p	0	0	1	1	1	1	UNC13B	unc-13 homolog B (C. elegans)
hsa-miR-485-5p	0	0	1	1	0	0	CNTN6	contactin 6
hsa-miR-485-5p	0	0	1	1	0	0	C14orf178	chromosome 14 open reading frame 178
hsa-miR-485-5p	1	0	1	1	1	1	PAX3	paired box 3
hsa-miR-485-5p	0	0	1	1	1	1	LRCH1	leucine-rich repeats and calponin homology (CH) domain containing 1
hsa-miR-485-5p	0	0	1	0	1	1	NWD1	NACHT and WD repeat domain containing 1
hsa-miR-485-5p	0	0	1	1	0	0	RGS12	regulator of G-protein signaling 12
hsa-miR-485-5p	0	0	1	1	0	0	RGSL1	regulator of G-protein signaling like 1
hsa-miR-485-5p	1	0	1	1	1	1	MEGF11	multiple EGF-like-domains 11
hsa-miR-485-5p	1	0	1	1	1	1	INSC	inscuteable homolog (Drosophila)
hsa-miR-485-5p	0	0	1	0	1	1	C20orf202	chromosome 20 open reading frame 202
hsa-miR-485-5p	0	0	1	0	0	0	FAM225B	family with sequence similarity 225, member B (non-protein coding)
hsa-miR-485-5p	0	0	1	1	0	0	C5orf60	chromosome 5 open reading frame 60
hsa-miR-485-5p	0	0	1	1	1	1	SNX5	sorting nexin 5
hsa-miR-485-5p	0	0	1	1	1	1	PRKAR2A	protein kinase, cAMP-dependent, regulatory, type II, alpha
hsa-miR-485-5p	0	0	1	1	1	1	TINF2	TERF1 (TRF1)-interacting nuclear factor 2
hsa-miR-485-5p	1	0	1	0	1	1	TTC7B	tetratricopeptide repeat domain 7B
hsa-miR-485-5p	0	0	1	0	0	0	LOC100133207	uncharacterized LOC100133207
hsa-miR-485-5p	1	0	1	1	1	1	NUMB	numb homolog (Drosophila)
hsa-miR-485-5p	1	0	1	1	1	1	CHGA	chromogranin A (parathyroid secretory protein 1)
hsa-miR-485-5p	1	0	1	1	1	1	BTBD7	BTB (POZ) domain containing 7
hsa-miR-485-5p	0	0	1	0	0	0	FLJ39632	uncharacterized LOC642477
hsa-miR-485-5p	0	0	1	0	0	0	ADCY10P1	adenylate cyclase 10 (soluble) pseudogene 1
hsa-miR-485-5p	1	0	1	1	1	1	ATP2B4	ATPase, Ca++ transporting, plasma membrane 4
hsa-miR-485-5p	1	0	1	1	1	1	MIER3	mesoderm induction early response 1, family member 3
hsa-miR-485-5p	0	0	1	1	1	1	DSG3	desmoglein 3
hsa-miR-485-5p	0	0	1	1	1	1	CRB1	crumbs homolog 1 (Drosophila)
hsa-miR-485-5p	1	0	1	1	1	1	SLC35F1	solute carrier family 35, member F1
hsa-miR-485-5p	0	0	1	1	0	0	CDK5RAP2	CDK5 regulatory subunit associated protein 2
hsa-miR-485-5p	0	0	1	0	0	0	PCNXL3	pecanex-like 3 (Drosophila)
hsa-miR-485-5p	1	0	1	1	1	1	MASP1	mannan-binding lectin serine peptidase 1 (C4/C2 activating component of Ra-reactive factor)
hsa-miR-485-5p	0	0	1	1	0	0	RPS24	ribosomal protein S24
hsa-miR-485-5p	0	0	1	1	1	1	PRR14L	proline rich 14-like
hsa-miR-485-5p	0	0	1	0	0	0	SMG1P1	smg-1 homolog, phosphatidylinositol 3-kinase-related kinase pseudogene 1
hsa-miR-485-5p	0	0	1	1	1	1	ADH1B	alcohol dehydrogenase 1B (class I), beta polypeptide
hsa-miR-485-5p	0	0	1	1	1	1	DUSP19	dual specificity phosphatase 19
hsa-miR-485-5p	1	0	1	1	1	1	TSC22D3	TSC22 domain family, member 3
hsa-miR-485-5p	1	0	1	1	1	1	DDAH1	dimethylarginine dimethylaminohydrolase 1
hsa-miR-485-5p	0	0	1	1	1	1	CCNT2	cyclin T2
hsa-miR-485-5p	1	0	1	1	1	1	KLHL6	kelch-like 6 (Drosophila)
hsa-miR-485-5p	1	0	1	1	1	1	NFIB	nuclear factor I/B
hsa-miR-485-5p	1	0	1	1	1	1	SOGA2	SOGA family member 2
hsa-miR-485-5p	1	0	1	1	1	1	NAV1	neuron navigator 1
hsa-miR-485-5p	1	0	1	1	1	1	PGAP1	post-GPI attachment to proteins 1
hsa-miR-485-5p	0	0	1	1	1	1	THSD4	thrombospondin, type I, domain containing 4
hsa-miR-485-5p	1	0	1	1	0	0	KHK	ketohexokinase (fructokinase)
hsa-miR-485-5p	0	0	1	1	1	1	KIAA1328	KIAA1328
hsa-miR-485-5p	0	0	1	1	1	1	C4orf40	chromosome 4 open reading frame 40
hsa-miR-485-5p	1	0	1	1	1	1	FAM208A	family with sequence similarity 208, member A
hsa-miR-485-5p	0	0	1	0	1	1	CD59	CD59 molecule, complement regulatory protein
hsa-miR-485-5p	0	0	1	1	1	1	HPGD	hydroxyprostaglandin dehydrogenase 15-(NAD)
hsa-miR-485-5p	1	0	1	1	1	1	ARHGDIA	Rho GDP dissociation inhibitor (GDI) alpha
hsa-miR-485-5p	0	0	1	1	1	1	POLR2H	polymerase (RNA) II (DNA directed) polypeptide H
hsa-miR-485-5p	1	0	1	1	1	1	ENTPD6	ectonucleoside triphosphate diphosphohydrolase 6 (putative)
hsa-miR-485-5p	0	0	1	1	0	0	STMN4	stathmin-like 4
hsa-miR-485-5p	1	0	1	1	1	1	NAGA	N-acetylgalactosaminidase, alpha-
hsa-miR-485-5p	1	0	1	1	1	1	CLU	clusterin
hsa-miR-485-5p	0	0	1	0	1	1	IDO1	indoleamine 2,3-dioxygenase 1
hsa-miR-485-5p	1	0	1	1	1	1	NME4	NME/NM23 nucleoside diphosphate kinase 4
hsa-miR-485-5p	1	0	1	0	0	0	IGLON5	IgLON family member 5
hsa-miR-485-5p	0	0	1	0	0	0	LOC401127	WD repeat domain 5 pseudogene
hsa-miR-485-5p	1	0	1	1	0	0	RAB24	RAB24, member RAS oncogene family
hsa-miR-485-5p	0	0	1	1	1	1	TMEM53	transmembrane protein 53
hsa-miR-485-5p	0	0	1	1	0	0	EMX1	empty spiracles homeobox 1
hsa-miR-485-5p	0	0	1	1	1	1	KIAA0141	KIAA0141
hsa-miR-485-5p	1	0	1	1	1	1	VIM	vimentin
hsa-miR-485-5p	0	0	1	0	0	0	RPS16P10	ribosomal protein S16 pseudogene 10
hsa-miR-485-5p	0	0	1	1	1	1	DGCR14	DiGeorge syndrome critical region gene 14
hsa-miR-485-5p	1	0	1	1	1	1	TARBP2	TAR (HIV-1) RNA binding protein 2
hsa-miR-485-5p	0	0	1	1	1	1	FEZ1	fasciculation and elongation protein zeta 1 (zygin I)
hsa-miR-485-5p	0	0	1	1	0	0	TMEM62	transmembrane protein 62
hsa-miR-485-5p	0	0	1	1	0	0	URM1	ubiquitin related modifier 1
hsa-miR-485-5p	1	0	1	0	1	1	OLA1	Obg-like ATPase 1
hsa-miR-485-5p	1	0	1	1	0	0	TSC22D4	TSC22 domain family, member 4
hsa-miR-485-5p	1	0	1	1	1	1	CNIH2	cornichon homolog 2 (Drosophila)
hsa-miR-485-5p	0	0	1	1	1	1	BTF3	basic transcription factor 3
hsa-miR-485-5p	0	0	1	1	0	0	FCGRT	Fc fragment of IgG, receptor, transporter, alpha
hsa-miR-485-5p	1	0	1	1	1	1	DOLPP1	dolichyl pyrophosphate phosphatase 1
hsa-miR-485-5p	0	0	1	0	0	0	ARRDC1	arrestin domain containing 1
hsa-miR-485-5p	0	0	1	1	0	0	FCHO1	FCH domain only 1
hsa-miR-485-5p	1	0	1	1	1	1	RBM3	RNA binding motif (RNP1, RRM) protein 3
hsa-miR-485-5p	0	0	1	0	0	0	ZBED3-AS1	ZBED3 antisense RNA 1
hsa-miR-485-5p	1	0	1	1	1	1	FGF11	fibroblast growth factor 11
hsa-miR-485-5p	1	0	1	1	0	0	CRELD1	cysteine-rich with EGF-like domains 1
hsa-miR-485-5p	1	0	1	1	0	0	ELOVL1	ELOVL fatty acid elongase 1
hsa-miR-485-5p	0	0	1	0	0	0	H19	H19, imprinted maternally expressed transcript (non-protein coding)
hsa-miR-485-5p	0	0	1	1	0	0	RPS3	ribosomal protein S3
hsa-miR-485-5p	0	0	1	1	0	0	DNAJB2	DnaJ (Hsp40) homolog, subfamily B, member 2
hsa-miR-485-5p	0	0	1	1	0	0	MYL6	myosin, light chain 6, alkali, smooth muscle and non-muscle
hsa-miR-485-5p	1	0	1	0	1	1	PTPLAD1	protein tyrosine phosphatase-like A domain containing 1
hsa-miR-485-5p	1	0	1	1	1	1	CHTF8	CTF8, chromosome transmission fidelity factor 8 homolog (S. cerevisiae)
hsa-miR-485-5p	1	0	1	1	0	0	CCM2	cerebral cavernous malformation 2
hsa-miR-485-5p	1	0	1	0	1	1	ARL6IP6	ADP-ribosylation-like factor 6 interacting protein 6
hsa-miR-485-5p	0	0	1	0	1	1	CD99P1	CD99 molecule pseudogene 1
hsa-miR-485-5p	1	0	1	1	1	1	CDK18	cyclin-dependent kinase 18
hsa-miR-485-5p	0	0	1	0	1	1	IGF2-AS	IGF2 antisense RNA
hsa-miR-485-5p	0	0	1	1	1	1	PKP4	plakophilin 4
hsa-miR-485-5p	1	0	1	1	1	1	NTM	neurotrimin
hsa-miR-485-5p	1	0	1	1	1	1	PLEKHB2	pleckstrin homology domain containing, family B (evectins) member 2
hsa-miR-485-5p	0	0	1	1	1	1	GRAP2	GRB2-related adaptor protein 2
hsa-miR-485-5p	0	0	1	1	0	0	TRMT44	tRNA methyltransferase 44 homolog (S. cerevisiae)
hsa-miR-485-5p	0	0	1	0	0	0	LOC729678	uncharacterized LOC729678
hsa-miR-485-5p	0	0	1	1	0	0	STK19	serine/threonine kinase 19
hsa-miR-485-5p	1	0	1	1	1	1	LYPLA2	lysophospholipase II
hsa-miR-485-5p	1	0	1	0	1	1	MGRN1	mahogunin ring finger 1, E3 ubiquitin protein ligase
hsa-miR-485-5p	0	0	1	1	0	0	NDUFS7	NADH dehydrogenase (ubiquinone) Fe-S protein 7, 20kDa (NADH-coenzyme Q reductase)
hsa-miR-485-5p	1	0	1	1	1	1	ARFIP2	ADP-ribosylation factor interacting protein 2
hsa-miR-485-5p	0	0	1	1	1	1	KLC1	kinesin light chain 1
hsa-miR-485-5p	0	0	1	1	1	1	RGS14	regulator of G-protein signaling 14
hsa-miR-485-5p	0	0	1	1	0	0	C11orf68	chromosome 11 open reading frame 68
hsa-miR-485-5p	0	0	1	1	1	1	NFATC4	nuclear factor of activated T-cells, cytoplasmic, calcineurin-dependent 4
hsa-miR-485-5p	0	0	1	0	0	0	FLJ45248	FLJ45248 protein
hsa-miR-485-5p	0	0	1	1	1	1	GLRX3	glutaredoxin 3
hsa-miR-485-5p	0	0	1	1	1	1	VPS16	vacuolar protein sorting 16 homolog (S. cerevisiae)
hsa-miR-485-5p	1	0	1	1	0	0	TBC1D17	TBC1 domain family, member 17
hsa-miR-485-5p	1	0	1	1	1	1	CUX1	cut-like homeobox 1
hsa-miR-485-5p	0	0	1	1	1	1	ZDHHC16	zinc finger, DHHC-type containing 16
hsa-miR-485-5p	1	0	1	1	1	1	DOK4	docking protein 4
hsa-miR-485-5p	0	0	1	1	0	0	C1orf122	chromosome 1 open reading frame 122
hsa-miR-485-5p	0	0	1	1	0	0	SCRN2	secernin 2
hsa-miR-485-5p	1	0	1	1	1	1	TAGLN2	transgelin 2
hsa-miR-485-5p	1	0	1	1	1	1	HN1	hematological and neurological expressed 1
hsa-miR-485-5p	0	0	1	1	0	0	PRR5	proline rich 5 (renal)
hsa-miR-485-5p	1	0	1	1	1	1	TIMP3	TIMP metallopeptidase inhibitor 3
hsa-miR-485-5p	0	0	1	1	0	0	CD53	CD53 molecule
hsa-miR-485-5p	1	0	1	1	1	1	DPF2	D4, zinc and double PHD fingers family 2
hsa-miR-485-5p	0	0	1	1	1	1	SFXN3	sideroflexin 3
hsa-miR-485-5p	1	0	1	1	1	1	EIF1	eukaryotic translation initiation factor 1
hsa-miR-485-5p	0	0	1	1	0	0	C9orf114	chromosome 9 open reading frame 114
hsa-miR-485-5p	1	0	1	1	1	1	F11R	F11 receptor
hsa-miR-485-5p	0	0	1	1	0	0	ZNF511	zinc finger protein 511
hsa-miR-485-5p	0	0	1	1	0	0	FXYD1	FXYD domain containing ion transport regulator 1
hsa-miR-485-5p	0	0	1	1	0	0	TUSC3	tumor suppressor candidate 3
hsa-miR-485-5p	1	0	1	1	1	1	RPUSD3	RNA pseudouridylate synthase domain containing 3
hsa-miR-485-5p	0	0	1	1	1	1	NFKBIB	nuclear factor of kappa light polypeptide gene enhancer in B-cells inhibitor, beta
hsa-miR-485-5p	0	0	1	0	0	0	ZNF674-AS1	ZNF674 antisense RNA 1
hsa-miR-485-5p	0	0	1	1	0	0	CCNDBP1	cyclin D-type binding-protein 1
hsa-miR-485-5p	0	0	1	1	0	0	BCKDK	branched chain ketoacid dehydrogenase kinase
hsa-miR-485-5p	1	0	1	1	1	1	TMEM55B	transmembrane protein 55B
hsa-miR-485-5p	1	0	1	1	1	1	RALY	RNA binding protein, autoantigenic (hnRNP-associated with lethal yellow homolog (mouse))
hsa-miR-485-5p	1	0	1	1	1	1	RBPJ	recombination signal binding protein for immunoglobulin kappa J region
hsa-miR-485-5p	1	0	1	1	1	1	TRAPPC3	trafficking protein particle complex 3
hsa-miR-485-5p	0	0	1	1	1	1	LGI1	leucine-rich, glioma inactivated 1
hsa-miR-485-5p	0	0	1	1	1	1	UBE2A	ubiquitin-conjugating enzyme E2A
hsa-miR-485-5p	0	0	1	1	1	1	ZNF259	zinc finger protein 259
hsa-miR-485-5p	0	0	1	1	0	0	GPRC5C	G protein-coupled receptor, family C, group 5, member C
hsa-miR-485-5p	1	0	1	1	0	0	CGREF1	cell growth regulator with EF-hand domain 1
hsa-miR-485-5p	0	0	1	1	0	0	TMEM222	transmembrane protein 222
hsa-miR-485-5p	0	0	1	1	1	1	CDKAL1	CDK5 regulatory subunit associated protein 1-like 1
hsa-miR-485-5p	1	0	1	1	0	0	FSD1	fibronectin type III and SPRY domain containing 1
hsa-miR-485-5p	0	0	1	1	0	0	ARVCF	armadillo repeat gene deleted in velocardiofacial syndrome
hsa-miR-485-5p	0	0	1	0	0	0	LOC100132984	uncharacterized LOC100132984
hsa-miR-485-5p	1	0	1	1	0	0	RAD9A	RAD9 homolog A (S. pombe)
hsa-miR-485-5p	0	0	1	1	0	0	TTYH1	tweety homolog 1 (Drosophila)
hsa-miR-485-5p	1	0	1	1	1	1	MYT1	myelin transcription factor 1
hsa-miR-485-5p	0	0	1	1	1	1	RNF126	ring finger protein 126
hsa-miR-485-5p	0	0	1	1	0	0	NFKBIL1	nuclear factor of kappa light polypeptide gene enhancer in B-cells inhibitor-like 1
hsa-miR-485-5p	0	0	1	0	1	1	UBA52	ubiquitin A-52 residue ribosomal protein fusion product 1
hsa-miR-485-5p	0	0	1	1	0	0	FCGR2A	Fc fragment of IgG, low affinity IIa, receptor (CD32)
hsa-miR-485-5p	1	0	1	1	1	1	JUNB	jun B proto-oncogene
hsa-miR-485-5p	0	0	1	1	0	0	PCOLCE	procollagen C-endopeptidase enhancer
hsa-miR-485-5p	0	0	1	1	1	1	BDH1	3-hydroxybutyrate dehydrogenase, type 1
hsa-miR-485-5p	1	0	1	0	1	1	NMT1	N-myristoyltransferase 1
hsa-miR-485-5p	1	0	1	0	1	1	KIAA0240	KIAA0240
hsa-miR-485-5p	0	0	1	0	0	0	LOC731789	uncharacterized LOC731789
hsa-miR-485-5p	1	0	1	0	1	1	BTRC	beta-transducin repeat containing E3 ubiquitin protein ligase
hsa-miR-485-5p	1	0	1	1	1	1	FBXW7	F-box and WD repeat domain containing 7, E3 ubiquitin protein ligase
hsa-miR-485-5p	0	0	1	1	1	1	UPRT	uracil phosphoribosyltransferase (FUR1) homolog (S. cerevisiae)
hsa-miR-485-5p	0	0	1	0	0	0	LINC00661	long intergenic non-protein coding RNA 661
hsa-miR-485-5p	1	0	1	0	1	1	SLC7A6	solute carrier family 7 (amino acid transporter light chain, y+L system), member 6
hsa-miR-485-5p	0	0	1	0	0	0	MUC19	mucin 19, oligomeric
hsa-miR-485-5p	1	0	1	0	1	1	XRN1	5'-3' exoribonuclease 1
hsa-miR-485-5p	1	0	1	1	1	1	SNRK	SNF related kinase
hsa-miR-485-5p	0	0	1	0	0	0	DNAJC27-AS1	DNAJC27 antisense RNA 1
hsa-miR-485-5p	0	0	1	0	0	0	ZNFX1-AS1	ZNFX1 antisense RNA 1
hsa-miR-485-5p	1	0	1	1	1	1	SLC30A7	solute carrier family 30 (zinc transporter), member 7
hsa-miR-485-5p	1	0	1	1	1	1	MED27	mediator complex subunit 27
hsa-miR-485-5p	1	0	1	1	1	1	RSPO1	R-spondin 1
hsa-miR-485-5p	1	0	1	1	1	1	TRIOBP	TRIO and F-actin binding protein
hsa-miR-485-5p	1	0	1	0	1	1	MAP2K7	mitogen-activated protein kinase kinase 7
hsa-miR-485-5p	0	0	1	1	1	1	MARVELD2	MARVEL domain containing 2
hsa-miR-485-5p	0	0	1	0	0	0	LOC728377	Rho guanine nucleotide exchange factor (GEF) 5 pseudogene
hsa-miR-485-5p	1	0	1	1	1	1	IRF1	interferon regulatory factor 1
hsa-miR-485-5p	1	0	1	0	1	1	EPDR1	ependymin related protein 1 (zebrafish)
hsa-miR-485-5p	0	0	1	1	0	0	CEACAM3	carcinoembryonic antigen-related cell adhesion molecule 3
hsa-miR-485-5p	0	0	1	0	0	0	GPR144	G protein-coupled receptor 144
hsa-miR-485-5p	0	0	1	1	1	1	ALDH3B1	aldehyde dehydrogenase 3 family, member B1
hsa-miR-485-5p	0	0	1	1	1	1	AKAP17A	A kinase (PRKA) anchor protein 17A
hsa-miR-485-5p	1	0	1	1	1	1	ATP2B2	ATPase, Ca++ transporting, plasma membrane 2
hsa-miR-485-5p	1	0	1	0	1	1	BCL2	B-cell CLL/lymphoma 2
hsa-miR-485-5p	0	0	1	1	0	0	COL6A2	collagen, type VI, alpha 2
hsa-miR-485-5p	0	0	1	1	1	1	NPR3	natriuretic peptide receptor C/guanylate cyclase C (atrionatriuretic peptide receptor C)
hsa-miR-485-5p	0	0	1	1	0	0	ASPA	aspartoacylase
hsa-miR-485-5p	1	0	1	1	1	1	COL1A2	collagen, type I, alpha 2
hsa-miR-485-5p	1	0	1	0	1	1	SLC26A2	solute carrier family 26 (sulfate transporter), member 2
hsa-miR-485-5p	1	0	1	1	1	1	F13A1	coagulation factor XIII, A1 polypeptide
hsa-miR-485-5p	1	0	1	1	1	1	FBN1	fibrillin 1
hsa-miR-485-5p	1	0	1	1	1	1	FUT1	fucosyltransferase 1 (galactoside 2-alpha-L-fucosyltransferase, H blood group)
hsa-miR-485-5p	1	0	1	1	1	1	GJA1	gap junction protein, alpha 1, 43kDa
hsa-miR-485-5p	0	0	1	1	1	1	GLDC	glycine dehydrogenase (decarboxylating)
hsa-miR-485-5p	0	0	1	0	1	1	KAL1	Kallmann syndrome 1 sequence
hsa-miR-485-5p	1	0	1	1	1	1	KCNA1	potassium voltage-gated channel, shaker-related subfamily, member 1 (episodic ataxia with myokymia)
hsa-miR-485-5p	0	0	1	1	1	1	PKP1	plakophilin 1 (ectodermal dysplasia/skin fragility syndrome)
hsa-miR-485-5p	1	0	1	1	1	1	PMP22	peripheral myelin protein 22
hsa-miR-485-5p	0	0	1	1	1	1	RHAG	Rh-associated glycoprotein
hsa-miR-485-5p	1	1	1	1	1	1	CDKN1A	cyclin-dependent kinase inhibitor 1A (p21, Cip1)
hsa-miR-485-5p	1	0	1	0	1	1	PAFAH1B1	platelet-activating factor acetylhydrolase 1b, regulatory subunit 1 (45kDa)
hsa-miR-485-5p	1	0	1	1	0	0	NOTCH3	notch 3
hsa-miR-485-5p	0	0	1	1	1	1	OXCT1	3-oxoacid CoA transferase 1
hsa-miR-485-5p	0	0	1	1	1	1	PECAM1	platelet/endothelial cell adhesion molecule 1
hsa-miR-485-5p	0	0	1	1	1	1	PLEC	plectin
hsa-miR-485-5p	1	0	1	1	1	1	APP	amyloid beta (A4) precursor protein
hsa-miR-485-5p	1	0	1	1	1	1	AQP2	aquaporin 2 (collecting duct)
hsa-miR-485-5p	0	0	1	1	1	1	CYP11B2	cytochrome P450, family 11, subfamily B, polypeptide 2
hsa-miR-485-5p	1	0	1	1	1	1	DCX	doublecortin
hsa-miR-485-5p	0	0	1	1	1	1	CRP	C-reactive protein, pentraxin-related
hsa-miR-485-5p	0	0	1	0	1	1	CCR5	chemokine (C-C motif) receptor 5 (gene/pseudogene)
hsa-miR-485-5p	1	0	1	1	1	1	CXCL12	chemokine (C-X-C motif) ligand 12
hsa-miR-485-5p	1	0	1	1	1	1	CD44	CD44 molecule (Indian blood group)
hsa-miR-485-5p	0	0	1	1	1	1	IGF2	insulin-like growth factor 2 (somatomedin A)
hsa-miR-485-5p	0	0	1	1	1	1	SELL	selectin L
hsa-miR-485-5p	0	0	1	0	1	1	ADH1C	alcohol dehydrogenase 1C (class I), gamma polypeptide
hsa-miR-485-5p	0	0	1	1	0	0	ALOX5	arachidonate 5-lipoxygenase
hsa-miR-485-5p	0	0	1	1	0	0	CA4	carbonic anhydrase IV
hsa-miR-485-5p	1	0	1	1	1	1	CSF1	colony stimulating factor 1 (macrophage)
hsa-miR-485-5p	0	0	1	1	1	1	DCK	deoxycytidine kinase
hsa-miR-485-5p	0	0	1	1	1	1	DIO1	deiodinase, iodothyronine, type I
hsa-miR-485-5p	0	0	1	1	1	1	EPO	erythropoietin
hsa-miR-485-5p	1	0	1	0	1	1	GABRA4	gamma-aminobutyric acid (GABA) A receptor, alpha 4
hsa-miR-485-5p	0	0	1	1	1	1	SERPINF2	serpin peptidase inhibitor, clade F (alpha-2 antiplasmin, pigment epithelium derived factor), member 2
hsa-miR-485-5p	0	0	1	0	1	1	PTGIS	prostaglandin I2 (prostacyclin) synthase
hsa-miR-485-5p	1	0	1	1	1	1	REEP3	receptor accessory protein 3
hsa-miR-485-5p	1	0	1	0	1	1	SPOPL	speckle-type POZ protein-like
hsa-miR-485-5p	1	0	1	1	1	1	WNK3	WNK lysine deficient protein kinase 3
hsa-miR-485-5p	0	0	1	0	0	0	OR8G1	olfactory receptor, family 8, subfamily G, member 1
hsa-miR-485-5p	0	0	1	1	1	1	PTRH1	peptidyl-tRNA hydrolase 1 homolog (S. cerevisiae)
hsa-miR-485-5p	1	0	1	1	1	1	KCTD11	potassium channel tetramerisation domain containing 11
hsa-miR-485-5p	1	0	1	1	1	1	ABLIM1	actin binding LIM protein 1
hsa-miR-485-5p	1	0	1	0	1	1	BMF	Bcl2 modifying factor
hsa-miR-485-5p	1	0	1	1	0	0	NOMO3	NODAL modulator 3
hsa-miR-485-5p	1	0	1	0	1	1	LIN28B	lin-28 homolog B (C. elegans)
hsa-miR-485-5p	0	0	1	1	1	1	FRG2	FSHD region gene 2
hsa-miR-485-5p	1	0	1	1	1	1	PLCXD3	phosphatidylinositol-specific phospholipase C, X domain containing 3
hsa-miR-485-5p	1	0	1	1	1	1	EDA	ectodysplasin A
hsa-miR-485-5p	0	0	1	1	1	1	LINC00478	long intergenic non-protein coding RNA 478
hsa-miR-485-5p	1	0	1	0	1	1	IP6K1	inositol hexakisphosphate kinase 1
hsa-miR-485-5p	0	0	1	1	1	1	WBP5	WW domain binding protein 5
hsa-miR-485-5p	1	0	1	0	1	1	PDPN	podoplanin
hsa-miR-485-5p	0	0	1	1	0	0	TCEAL3	transcription elongation factor A (SII)-like 3
hsa-miR-485-5p	0	0	1	1	1	1	TCEAL6	transcription elongation factor A (SII)-like 6
hsa-miR-485-5p	1	0	1	1	0	0	SDC1	syndecan 1
hsa-miR-485-5p	1	0	1	0	1	1	GOSR1	golgi SNAP receptor complex member 1
hsa-miR-485-5p	1	0	1	1	1	1	NTRK3	neurotrophic tyrosine kinase, receptor, type 3
hsa-miR-485-5p	0	0	1	1	1	1	RASL10A	RAS-like, family 10, member A
hsa-miR-485-5p	0	0	1	1	0	0	F8A3	coagulation factor VIII-associated 3
hsa-miR-485-5p	1	0	1	0	1	1	SS18	synovial sarcoma translocation, chromosome 18
hsa-miR-485-5p	1	0	1	0	1	1	C18orf25	chromosome 18 open reading frame 25
hsa-miR-485-5p	1	0	1	1	1	1	BCAP29	B-cell receptor-associated protein 29
hsa-miR-485-5p	0	0	1	1	1	1	MXI1	MAX interactor 1
hsa-miR-485-5p	1	0	1	1	1	1	NUPL1	nucleoporin like 1
hsa-miR-485-5p	0	0	1	1	1	1	FBXO47	F-box protein 47
hsa-miR-485-5p	0	0	1	1	1	1	GEMIN2	gem (nuclear organelle) associated protein 2
hsa-miR-485-5p	0	0	1	1	0	0	ARMCX6	armadillo repeat containing, X-linked 6
hsa-miR-485-5p	0	0	1	1	1	1	SPIN3	spindlin family, member 3
hsa-miR-485-5p	1	0	1	0	1	1	BACH1	BTB and CNC homology 1, basic leucine zipper transcription factor 1
hsa-miR-485-5p	0	0	1	0	1	1	C9orf106	chromosome 9 open reading frame 106
hsa-miR-485-5p	0	0	1	1	0	0	RGR	retinal G protein coupled receptor
hsa-miR-485-5p	1	0	1	1	1	1	SLC25A53	solute carrier family 25, member 53
hsa-miR-485-5p	0	0	1	1	0	0	SATL1	spermidine/spermine N1-acetyl transferase-like 1
hsa-miR-485-5p	0	0	1	1	0	0	EPGN	epithelial mitogen homolog (mouse)
hsa-miR-485-5p	0	0	1	1	0	0	FRRS1	ferric-chelate reductase 1
hsa-miR-485-5p	0	0	1	1	1	1	LDLRAD2	low density lipoprotein receptor class A domain containing 2
hsa-miR-485-5p	0	0	1	0	1	1	C12orf69	chromosome 12 open reading frame 69
hsa-miR-485-5p	0	0	1	0	0	0	LOC440157	uncharacterized LOC440157
hsa-miR-485-5p	0	0	1	0	1	1	LINC00268	long intergenic non-protein coding RNA 268
hsa-miR-485-5p	1	0	1	1	1	1	TMCC1	transmembrane and coiled-coil domain family 1
hsa-miR-485-5p	0	0	1	1	1	1	MURC	muscle-related coiled-coil protein
hsa-miR-485-5p	1	0	1	1	1	1	ABCC5	ATP-binding cassette, sub-family C (CFTR/MRP), member 5
hsa-miR-485-5p	0	0	1	1	1	1	HNMT	histamine N-methyltransferase
hsa-miR-485-5p	1	0	1	1	1	1	SLC6A9	solute carrier family 6 (neurotransmitter transporter, glycine), member 9
hsa-miR-485-5p	0	0	1	1	0	0	ARPC4	actin related protein 2/3 complex, subunit 4, 20kDa
hsa-miR-485-5p	0	0	1	1	0	0	ABCF1	ATP-binding cassette, sub-family F (GCN20), member 1
hsa-miR-485-5p	0	0	1	1	0	0	KPRP	keratinocyte proline-rich protein
hsa-miR-485-5p	1	0	1	1	1	1	RGS7BP	regulator of G-protein signaling 7 binding protein
hsa-miR-485-5p	0	0	1	1	1	1	CIB4	calcium and integrin binding family member 4
hsa-miR-485-5p	1	0	1	1	0	0	MANEAL	mannosidase, endo-alpha-like
hsa-miR-485-5p	1	0	1	1	1	1	CSNK1G3	casein kinase 1, gamma 3
hsa-miR-485-5p	0	0	1	1	1	1	HNRNPH2	heterogeneous nuclear ribonucleoprotein H2 (H')
hsa-miR-485-5p	0	0	1	1	0	0	CALCA	calcitonin-related polypeptide alpha
hsa-miR-485-5p	0	0	1	1	1	1	KCNIP1	Kv channel interacting protein 1
hsa-miR-485-5p	1	0	1	0	1	1	RYR2	ryanodine receptor 2 (cardiac)
hsa-miR-485-5p	1	0	1	1	1	1	SDHC	succinate dehydrogenase complex, subunit C, integral membrane protein, 15kDa
hsa-miR-485-5p	1	0	1	1	1	1	SCN1B	sodium channel, voltage-gated, type I, beta subunit
hsa-miR-485-5p	0	0	1	1	1	1	EFEMP1	EGF containing fibulin-like extracellular matrix protein 1
hsa-miR-485-5p	1	0	1	1	1	1	DPP6	dipeptidyl-peptidase 6
hsa-miR-485-5p	1	0	1	1	1	1	ELMO1	engulfment and cell motility 1
hsa-miR-485-5p	1	0	1	1	1	1	KCNC4	potassium voltage-gated channel, Shaw-related subfamily, member 4
hsa-miR-485-5p	1	0	1	0	1	1	CCNL2	cyclin L2
hsa-miR-485-5p	1	0	1	1	1	1	ZNF384	zinc finger protein 384
hsa-miR-485-5p	1	0	1	1	1	1	MTMR12	myotubularin related protein 12
hsa-miR-485-5p	0	0	1	1	0	0	INS-IGF2	INS-IGF2 readthrough
hsa-miR-485-5p	1	0	1	1	1	1	GLIS3	GLIS family zinc finger 3
hsa-miR-485-5p	0	0	1	1	1	1	C10orf53	chromosome 10 open reading frame 53
hsa-miR-485-5p	1	0	1	1	1	1	NSL1	NSL1, MIND kinetochore complex component, homolog (S. cerevisiae)
hsa-miR-485-5p	0	0	1	1	1	1	TTC14	tetratricopeptide repeat domain 14
hsa-miR-485-5p	0	0	1	1	1	1	SEC24B	SEC24 family, member B (S. cerevisiae)
hsa-miR-485-5p	0	0	1	1	1	1	FAM22G	family with sequence similarity 22, member G
hsa-miR-485-5p	1	0	1	1	1	1	ATG9A	autophagy related 9A
hsa-miR-485-5p	1	0	1	1	1	1	RNF214	ring finger protein 214
hsa-miR-485-5p	0	0	1	1	1	1	KLK10	kallikrein-related peptidase 10
hsa-miR-485-5p	0	0	1	1	1	1	MTMR14	myotubularin related protein 14
hsa-miR-485-5p	1	0	1	0	1	1	UBXN2B	UBX domain protein 2B
hsa-miR-485-5p	0	0	1	0	0	0	TMEM183B	transmembrane protein 183B
hsa-miR-485-5p	0	0	1	1	1	1	DIAPH1	diaphanous homolog 1 (Drosophila)
hsa-miR-485-5p	1	0	1	1	1	1	OCIAD1	OCIA domain containing 1
hsa-miR-485-5p	1	0	1	1	1	1	VAV3	vav 3 guanine nucleotide exchange factor
hsa-miR-485-5p	0	0	1	1	0	0	ARHGAP9	Rho GTPase activating protein 9
hsa-miR-485-5p	1	0	1	1	1	1	FAM155A	family with sequence similarity 155, member A
hsa-miR-485-5p	1	0	1	0	1	1	FBXO41	F-box protein 41
hsa-miR-485-5p	1	0	1	1	1	1	UNC119B	unc-119 homolog B (C. elegans)
hsa-miR-485-5p	1	0	1	1	1	1	MGA	MAX gene associated
hsa-miR-485-5p	1	0	1	1	1	1	DGKG	diacylglycerol kinase, gamma 90kDa
hsa-miR-485-5p	0	0	1	0	1	1	ALOX15	arachidonate 15-lipoxygenase
hsa-miR-485-5p	1	0	1	1	1	1	CASP10	caspase 10, apoptosis-related cysteine peptidase
hsa-miR-485-5p	0	0	1	1	0	0	CLK3	CDC-like kinase 3
hsa-miR-485-5p	0	0	1	1	1	1	DAD1	defender against cell death 1
hsa-miR-485-5p	1	0	1	1	1	1	EP300	E1A binding protein p300
hsa-miR-485-5p	1	0	1	0	1	1	GCNT2	glucosaminyl (N-acetyl) transferase 2, I-branching enzyme (I blood group)
hsa-miR-485-5p	1	0	1	0	1	1	B4GALT1	UDP-Gal:betaGlcNAc beta 1,4- galactosyltransferase, polypeptide 1
hsa-miR-485-5p	1	0	1	1	1	1	NDST1	N-deacetylase/N-sulfotransferase (heparan glucosaminyl) 1
hsa-miR-485-5p	0	0	1	0	0	0	BAI1	brain-specific angiogenesis inhibitor 1
hsa-miR-485-5p	1	0	1	0	1	1	BMP8B	bone morphogenetic protein 8b
hsa-miR-485-5p	0	0	1	1	0	0	CD19	CD19 molecule
hsa-miR-485-5p	1	0	1	1	1	1	CDC25A	cell division cycle 25 homolog A (S. pombe)
hsa-miR-485-5p	0	0	1	1	1	1	CEACAM8	carcinoembryonic antigen-related cell adhesion molecule 8
hsa-miR-485-5p	0	0	1	1	1	1	CKS1B	CDC28 protein kinase regulatory subunit 1B
hsa-miR-485-5p	0	0	1	1	0	0	CNTFR	ciliary neurotrophic factor receptor
hsa-miR-485-5p	0	0	1	1	1	1	SLC31A2	solute carrier family 31 (copper transporters), member 2
hsa-miR-485-5p	0	0	1	1	1	1	CPS1	carbamoyl-phosphate synthase 1, mitochondrial
hsa-miR-485-5p	1	0	1	1	1	1	CSNK2A1	casein kinase 2, alpha 1 polypeptide
hsa-miR-485-5p	1	0	1	1	0	0	DES	desmin
hsa-miR-485-5p	1	0	1	1	1	1	E2F3	E2F transcription factor 3
hsa-miR-485-5p	1	0	1	1	1	1	FKBP4	FK506 binding protein 4, 59kDa
hsa-miR-485-5p	0	0	1	1	0	0	GLP1R	glucagon-like peptide 1 receptor
hsa-miR-485-5p	0	0	1	1	1	1	GNB1	guanine nucleotide binding protein (G protein), beta polypeptide 1
hsa-miR-485-5p	1	0	1	1	1	1	GOT2	glutamic-oxaloacetic transaminase 2, mitochondrial (aspartate aminotransferase 2)
hsa-miR-485-5p	1	0	1	1	0	0	IHH	Indian hedgehog
hsa-miR-485-5p	1	0	1	1	0	0	INHBB	inhibin, beta B
hsa-miR-485-5p	1	0	1	1	1	1	INSM1	insulinoma-associated 1
hsa-miR-485-5p	1	0	1	0	1	1	IRF2	interferon regulatory factor 2
hsa-miR-485-5p	1	0	1	1	1	1	ITGA3	integrin, alpha 3 (antigen CD49C, alpha 3 subunit of VLA-3 receptor)
hsa-miR-485-5p	1	0	1	1	1	1	ITGA5	integrin, alpha 5 (fibronectin receptor, alpha polypeptide)
hsa-miR-485-5p	1	0	1	1	1	1	ITGB8	integrin, beta 8
hsa-miR-485-5p	1	0	1	1	1	1	KCNA5	potassium voltage-gated channel, shaker-related subfamily, member 5
hsa-miR-485-5p	1	0	1	1	1	1	KCNA6	potassium voltage-gated channel, shaker-related subfamily, member 6
hsa-miR-485-5p	1	0	1	0	1	1	KIF3C	kinesin family member 3C
hsa-miR-485-5p	0	0	1	1	1	1	KLRC1	killer cell lectin-like receptor subfamily C, member 1
hsa-miR-485-5p	0	0	1	1	1	1	KLRC2	killer cell lectin-like receptor subfamily C, member 2
hsa-miR-485-5p	1	0	1	1	1	1	LIF	leukemia inhibitory factor
hsa-miR-485-5p	1	0	1	1	1	1	LRP1	low density lipoprotein receptor-related protein 1
hsa-miR-485-5p	1	0	1	1	1	1	M6PR	mannose-6-phosphate receptor (cation dependent)
hsa-miR-485-5p	1	0	1	0	1	1	MXD1	MAX dimerization protein 1
hsa-miR-485-5p	1	0	1	1	1	1	MAN2A1	mannosidase, alpha, class 2A, member 1
hsa-miR-485-5p	0	0	1	0	1	1	CXCL9	chemokine (C-X-C motif) ligand 9
hsa-miR-485-5p	0	0	1	1	0	0	MNAT1	menage a trois homolog 1, cyclin H assembly factor (Xenopus laevis)
hsa-miR-485-5p	1	0	1	1	1	1	MSN	moesin
hsa-miR-485-5p	1	0	1	1	1	1	MSR1	macrophage scavenger receptor 1
hsa-miR-485-5p	1	0	1	1	1	1	MYH9	myosin, heavy chain 9, non-muscle
hsa-miR-485-5p	0	0	1	1	0	0	MYOG	myogenin (myogenic factor 4)
hsa-miR-485-5p	1	0	1	1	1	1	NPTX1	neuronal pentraxin I
hsa-miR-485-5p	1	0	1	1	1	1	OLR1	oxidized low density lipoprotein (lectin-like) receptor 1
hsa-miR-485-5p	1	0	1	1	1	1	PCDH7	protocadherin 7
hsa-miR-485-5p	1	0	1	1	1	1	PLAGL2	pleiomorphic adenoma gene-like 2
hsa-miR-485-5p	1	0	1	0	1	1	POU3F1	POU class 3 homeobox 1
hsa-miR-485-5p	1	0	1	0	0	0	PPP1R10	protein phosphatase 1, regulatory subunit 10
hsa-miR-485-5p	1	0	1	0	1	1	PRKCA	protein kinase C, alpha
hsa-miR-485-5p	0	0	1	0	0	0	PSMB10	proteasome (prosome, macropain) subunit, beta type, 10
hsa-miR-485-5p	1	0	1	1	1	1	PTMS	parathymosin
hsa-miR-485-5p	1	0	1	1	1	1	PTPN1	protein tyrosine phosphatase, non-receptor type 1
hsa-miR-485-5p	1	0	1	1	1	1	PTPN9	protein tyrosine phosphatase, non-receptor type 9
hsa-miR-485-5p	0	0	1	1	1	1	PTPN12	protein tyrosine phosphatase, non-receptor type 12
hsa-miR-485-5p	0	0	1	1	1	1	PTPRR	protein tyrosine phosphatase, receptor type, R
hsa-miR-485-5p	1	0	1	1	1	1	PVRL1	poliovirus receptor-related 1 (herpesvirus entry mediator C)
hsa-miR-485-5p	1	0	1	0	1	1	RAB6A	RAB6A, member RAS oncogene family
hsa-miR-485-5p	1	0	1	1	1	1	RAD23B	RAD23 homolog B (S. cerevisiae)
hsa-miR-485-5p	1	0	1	0	1	1	RAP2B	RAP2B, member of RAS oncogene family
hsa-miR-485-5p	0	0	1	1	0	0	RDBP	RD RNA binding protein
hsa-miR-485-5p	1	0	1	1	0	0	RFX1	regulatory factor X, 1 (influences HLA class II expression)
hsa-miR-485-5p	0	0	1	1	1	1	RING1	ring finger protein 1
hsa-miR-485-5p	1	0	1	0	1	1	SORT1	sortilin 1
hsa-miR-485-5p	1	0	1	1	1	1	CCL21	chemokine (C-C motif) ligand 21
hsa-miR-485-5p	0	0	1	1	1	1	SDC4	syndecan 4
hsa-miR-485-5p	1	0	1	1	1	1	SFRP2	secreted frizzled-related protein 2
hsa-miR-485-5p	1	0	1	0	1	1	ST6GAL1	ST6 beta-galactosamide alpha-2,6-sialyltranferase 1
hsa-miR-485-5p	1	0	1	1	1	1	SMARCD1	SWI/SNF related, matrix associated, actin dependent regulator of chromatin, subfamily d, member 1
hsa-miR-485-5p	1	0	1	1	1	1	SMARCD2	SWI/SNF related, matrix associated, actin dependent regulator of chromatin, subfamily d, member 2
hsa-miR-485-5p	1	0	1	1	1	1	SRF	serum response factor (c-fos serum response element-binding transcription factor)
hsa-miR-485-5p	0	0	1	0	1	1	TRIM21	tripartite motif containing 21
hsa-miR-485-5p	1	0	1	0	1	1	STC1	stanniocalcin 1
hsa-miR-485-5p	1	0	1	0	1	1	TAL1	T-cell acute lymphocytic leukemia 1
hsa-miR-485-5p	1	0	1	0	1	1	THBS1	thrombospondin 1
hsa-miR-485-5p	1	0	1	1	1	1	NR2E1	nuclear receptor subfamily 2, group E, member 1
hsa-miR-485-5p	0	0	1	1	0	0	VGF	VGF nerve growth factor inducible
hsa-miR-485-5p	1	0	1	0	1	1	YWHAB	tyrosine 3-monooxygenase/tryptophan 5-monooxygenase activation protein, beta polypeptide
hsa-miR-485-5p	0	0	1	0	1	1	ZFY	zinc finger protein, Y-linked
hsa-miR-485-5p	1	0	1	0	1	1	BSN	bassoon (presynaptic cytomatrix protein)
hsa-miR-485-5p	1	0	1	1	1	1	FZD7	frizzled family receptor 7
hsa-miR-485-5p	1	0	1	0	1	1	CNTNAP1	contactin associated protein 1
hsa-miR-485-5p	0	0	1	1	1	1	AGPS	alkylglycerone phosphate synthase
hsa-miR-485-5p	1	0	1	1	0	0	KHSRP	KH-type splicing regulatory protein
hsa-miR-485-5p	0	0	1	1	0	0	DCHS1	dachsous 1 (Drosophila)
hsa-miR-485-5p	1	0	1	1	1	1	NR5A2	nuclear receptor subfamily 5, group A, member 2
hsa-miR-485-5p	1	0	1	1	1	1	PEX11B	peroxisomal biogenesis factor 11 beta
hsa-miR-485-5p	0	0	1	1	1	1	SUCLA2	succinate-CoA ligase, ADP-forming, beta subunit
hsa-miR-485-5p	1	0	1	1	1	1	NRP2	neuropilin 2
hsa-miR-485-5p	0	0	1	1	1	1	LDB1	LIM domain binding 1
hsa-miR-485-5p	0	0	1	1	1	1	RNF8	ring finger protein 8, E3 ubiquitin protein ligase
hsa-miR-485-5p	0	0	1	0	1	1	RHOB	ras homolog family member B
hsa-miR-485-5p	1	0	1	1	0	0	COX8A	cytochrome c oxidase subunit VIIIA (ubiquitous)
hsa-miR-485-5p	0	0	1	0	1	1	HABP2	hyaluronan binding protein 2
hsa-miR-485-5p	0	0	1	1	1	1	SLC1A1	solute carrier family 1 (neuronal/epithelial high affinity glutamate transporter, system Xag), member 1
hsa-miR-485-5p	1	0	1	0	1	1	SLC1A2	solute carrier family 1 (glial high affinity glutamate transporter), member 2
hsa-miR-485-5p	1	0	1	1	1	1	SEMA3F	sema domain, immunoglobulin domain (Ig), short basic domain, secreted, (semaphorin) 3F
hsa-miR-485-5p	1	0	1	1	1	1	MFHAS1	malignant fibrous histiocytoma amplified sequence 1
hsa-miR-485-5p	1	0	1	0	1	1	CYTH3	cytohesin 3
hsa-miR-485-5p	1	0	1	1	1	1	GDA	guanine deaminase
hsa-miR-485-5p	0	0	1	1	1	1	BST1	bone marrow stromal cell antigen 1
hsa-miR-485-5p	0	0	1	1	1	1	COL12A1	collagen, type XII, alpha 1
hsa-miR-485-5p	1	0	1	1	1	1	CREB1	cAMP responsive element binding protein 1
hsa-miR-485-5p	0	0	1	1	1	1	CSK	c-src tyrosine kinase
hsa-miR-485-5p	1	0	1	1	1	1	DBN1	drebrin 1
hsa-miR-485-5p	1	0	1	1	1	1	EFNA1	ephrin-A1
hsa-miR-485-5p	1	0	1	1	1	1	EPS8	epidermal growth factor receptor pathway substrate 8
hsa-miR-485-5p	1	0	1	1	1	1	ERG	v-ets erythroblastosis virus E26 oncogene homolog (avian)
hsa-miR-485-5p	0	0	1	0	1	1	FOXE1	forkhead box E1 (thyroid transcription factor 2)
hsa-miR-485-5p	1	0	1	1	1	1	FOXD2	forkhead box D2
hsa-miR-485-5p	1	0	1	1	1	1	FLOT2	flotillin 2
hsa-miR-485-5p	0	0	1	1	1	1	NDUFB2	NADH dehydrogenase (ubiquinone) 1 beta subcomplex, 2, 8kDa
hsa-miR-485-5p	1	0	1	0	1	1	SCN2B	sodium channel, voltage-gated, type II, beta subunit
hsa-miR-485-5p	0	0	1	1	0	0	SFSWAP	splicing factor, suppressor of white-apricot homolog (Drosophila)
hsa-miR-485-5p	0	0	1	1	1	1	TK2	thymidine kinase 2, mitochondrial
hsa-miR-485-5p	1	0	1	1	1	1	WNT11	wingless-type MMTV integration site family, member 11
hsa-miR-485-5p	1	0	1	1	1	1	BAP1	BRCA1 associated protein-1 (ubiquitin carboxy-terminal hydrolase)
hsa-miR-485-5p	0	0	1	1	1	1	MGAM	maltase-glucoamylase (alpha-glucosidase)
hsa-miR-485-5p	0	0	1	0	1	1	BPY2	basic charge, Y-linked, 2
hsa-miR-485-5p	1	0	1	1	1	1	MTMR4	myotubularin related protein 4
hsa-miR-485-5p	1	0	1	1	1	1	LARGE	like-glycosyltransferase
hsa-miR-485-5p	0	0	1	1	1	1	MMP20	matrix metallopeptidase 20
hsa-miR-485-5p	1	0	1	0	1	1	CDYL	chromodomain protein, Y-like
hsa-miR-485-5p	0	0	1	1	0	0	AIM2	absent in melanoma 2
hsa-miR-485-5p	1	0	1	0	1	1	ROCK2	Rho-associated, coiled-coil containing protein kinase 2
hsa-miR-485-5p	1	0	1	1	1	1	CXCL14	chemokine (C-X-C motif) ligand 14
hsa-miR-485-5p	1	0	1	1	0	0	PIP4K2A	phosphatidylinositol-5-phosphate 4-kinase, type II, alpha
hsa-miR-485-5p	0	0	1	1	0	0	PITX3	paired-like homeodomain 3
hsa-miR-485-5p	0	0	1	1	1	1	PRB1	proline-rich protein BstNI subfamily 1
hsa-miR-485-5p	1	0	1	1	1	1	GFPT2	glutamine-fructose-6-phosphate transaminase 2
hsa-miR-485-5p	0	0	1	1	0	0	ASCL2	achaete-scute complex homolog 2 (Drosophila)
hsa-miR-485-5p	1	0	1	0	1	1	CALM3	calmodulin 3 (phosphorylase kinase, delta)
hsa-miR-485-5p	1	0	1	1	1	1	CBL	Cbl proto-oncogene, E3 ubiquitin protein ligase
hsa-miR-485-5p	1	0	1	1	1	1	CRK	v-crk sarcoma virus CT10 oncogene homolog (avian)
hsa-miR-485-5p	0	0	1	1	1	1	CSTA	cystatin A (stefin A)
hsa-miR-485-5p	1	0	1	1	1	1	DLX3	distal-less homeobox 3
hsa-miR-485-5p	1	0	1	1	1	1	ARID3A	AT rich interactive domain 3A (BRIGHT-like)
hsa-miR-485-5p	1	0	1	1	1	1	NR2F6	nuclear receptor subfamily 2, group F, member 6
hsa-miR-485-5p	0	0	1	0	1	1	FOSL2	FOS-like antigen 2
hsa-miR-485-5p	1	0	1	1	1	1	MYCL1	v-myc myelocytomatosis viral oncogene homolog 1, lung carcinoma derived (avian)
hsa-miR-485-5p	1	0	1	1	0	0	NNAT	neuronatin
hsa-miR-485-5p	1	0	1	1	1	1	PHF2	PHD finger protein 2
hsa-miR-485-5p	0	0	1	1	1	1	TIE1	tyrosine kinase with immunoglobulin-like and EGF-like domains 1
hsa-miR-485-5p	1	0	1	1	1	1	MLF2	myeloid leukemia factor 2
hsa-miR-485-5p	1	0	1	1	1	1	GABBR2	gamma-aminobutyric acid (GABA) B receptor, 2
hsa-miR-485-5p	1	0	1	0	0	0	FRAT1	frequently rearranged in advanced T-cell lymphomas
hsa-miR-485-5p	0	0	1	1	1	1	IMPA1	inositol(myo)-1(or 4)-monophosphatase 1
hsa-miR-485-5p	0	0	1	1	1	1	LMAN1	lectin, mannose-binding, 1
hsa-miR-485-5p	1	0	1	1	0	0	LOXL1	lysyl oxidase-like 1
hsa-miR-485-5p	0	0	1	1	1	1	ALDH6A1	aldehyde dehydrogenase 6 family, member A1
hsa-miR-485-5p	1	0	1	1	1	1	RGS4	regulator of G-protein signaling 4
hsa-miR-485-5p	1	0	1	1	1	1	ARPC5	actin related protein 2/3 complex, subunit 5, 16kDa
hsa-miR-485-5p	0	0	1	1	1	1	ACTR3	ARP3 actin-related protein 3 homolog (yeast)
hsa-miR-485-5p	1	0	1	1	1	1	ACTR1A	ARP1 actin-related protein 1 homolog A, centractin alpha (yeast)
hsa-miR-485-5p	0	0	1	1	0	0	LPCAT3	lysophosphatidylcholine acyltransferase 3
hsa-miR-485-5p	0	0	1	0	1	1	CD96	CD96 molecule
hsa-miR-485-5p	0	0	1	1	1	1	FSTL3	follistatin-like 3 (secreted glycoprotein)
hsa-miR-485-5p	1	0	1	1	0	0	TRAIP	TRAF interacting protein
hsa-miR-485-5p	1	0	1	1	1	1	MTF1	metal-regulatory transcription factor 1
hsa-miR-485-5p	1	0	1	1	1	1	RNF6	ring finger protein (C3H2C3 type) 6
hsa-miR-485-5p	1	0	1	1	1	1	SNAI1	snail homolog 1 (Drosophila)
hsa-miR-485-5p	1	0	1	0	1	1	HDAC4	histone deacetylase 4
hsa-miR-485-5p	1	0	1	0	1	1	SPATA2	spermatogenesis associated 2
hsa-miR-485-5p	1	0	1	1	1	1	SPON1	spondin 1, extracellular matrix protein
hsa-miR-485-5p	1	0	1	1	1	1	DAGLA	diacylglycerol lipase, alpha
hsa-miR-485-5p	1	0	1	1	1	1	CDK16	cyclin-dependent kinase 16
hsa-miR-485-5p	1	0	1	1	1	1	POU4F1	POU class 4 homeobox 1
hsa-miR-485-5p	0	0	1	1	0	0	PRB2	proline-rich protein BstNI subfamily 2
hsa-miR-485-5p	1	0	1	1	1	1	ITSN2	intersectin 2
hsa-miR-485-5p	1	0	1	1	1	1	TLN1	talin 1
hsa-miR-485-5p	0	0	1	1	1	1	TYRO3	TYRO3 protein tyrosine kinase
hsa-miR-485-5p	1	0	1	0	0	0	VARS	valyl-tRNA synthetase
hsa-miR-485-5p	1	0	1	1	1	1	VAT1	vesicle amine transport protein 1 homolog (T. californica)
hsa-miR-485-5p	1	0	1	0	1	1	APPBP2	amyloid beta precursor protein (cytoplasmic tail) binding protein 2
hsa-miR-485-5p	0	0	1	1	0	0	CIB1	calcium and integrin binding 1 (calmyrin)
hsa-miR-485-5p	1	0	1	1	1	1	HEXIM1	hexamethylene bis-acetamide inducible 1
hsa-miR-485-5p	0	0	1	0	1	1	SLC16A2	solute carrier family 16, member 2 (thyroid hormone transporter)
hsa-miR-485-5p	1	0	1	1	1	1	ZBTB6	zinc finger and BTB domain containing 6
hsa-miR-485-5p	1	0	1	1	1	1	TSPAN9	tetraspanin 9
hsa-miR-485-5p	1	0	1	1	0	0	PSKH1	protein serine kinase H1
hsa-miR-485-5p	0	0	1	1	1	1	SYPL1	synaptophysin-like 1
hsa-miR-485-5p	1	0	1	1	1	1	BTG2	BTG family, member 2
hsa-miR-485-5p	0	0	1	1	1	1	IFRD2	interferon-related developmental regulator 2
hsa-miR-485-5p	1	0	1	1	1	1	KAT6A	K(lysine) acetyltransferase 6A
hsa-miR-485-5p	0	0	1	1	0	0	STIP1	stress-induced-phosphoprotein 1
hsa-miR-485-5p	1	0	1	1	1	1	RAB35	RAB35, member RAS oncogene family
hsa-miR-485-5p	1	0	1	1	1	1	B3GNT1	UDP-GlcNAc:betaGal beta-1,3-N-acetylglucosaminyltransferase 1
hsa-miR-485-5p	0	0	1	1	1	1	ALX1	ALX homeobox 1
hsa-miR-485-5p	1	0	1	0	1	1	WASF2	WAS protein family, member 2
hsa-miR-485-5p	1	0	1	0	1	1	PAPD7	PAP associated domain containing 7
hsa-miR-485-5p	1	0	1	1	1	1	DDX52	DEAD (Asp-Glu-Ala-Asp) box polypeptide 52
hsa-miR-485-5p	1	0	1	1	1	1	SOX21	SRY (sex determining region Y)-box 21
hsa-miR-485-5p	0	0	1	1	0	0	USF1	upstream transcription factor 1
hsa-miR-485-5p	1	0	1	1	1	1	PALM2-AKAP2	PALM2-AKAP2 readthrough
hsa-miR-485-5p	1	0	1	1	1	1	KLF12	Kruppel-like factor 12
hsa-miR-485-5p	0	0	1	1	0	0	GABARAP	GABA(A) receptor-associated protein
hsa-miR-485-5p	1	0	1	1	0	0	GRIN1	glutamate receptor, ionotropic, N-methyl D-aspartate 1
hsa-miR-485-5p	1	0	1	0	1	1	CD2AP	CD2-associated protein
hsa-miR-485-5p	1	0	1	0	1	1	FZD4	frizzled family receptor 4
hsa-miR-485-5p	1	0	1	1	1	1	MGEA5	meningioma expressed antigen 5 (hyaluronidase)
hsa-miR-485-5p	0	0	1	1	1	1	RAB3GAP1	RAB3 GTPase activating protein subunit 1 (catalytic)
hsa-miR-485-5p	0	0	1	1	1	1	RRAS2	related RAS viral (r-ras) oncogene homolog 2
hsa-miR-485-5p	1	0	1	0	1	1	FBXL7	F-box and leucine-rich repeat protein 7
hsa-miR-485-5p	1	0	1	1	1	1	NNT	nicotinamide nucleotide transhydrogenase
hsa-miR-485-5p	0	0	1	1	1	1	TIMM13	translocase of inner mitochondrial membrane 13 homolog (yeast)
hsa-miR-485-5p	1	0	1	0	1	1	FLRT2	fibronectin leucine rich transmembrane protein 2
hsa-miR-485-5p	0	0	1	1	1	1	N6AMT1	N-6 adenine-specific DNA methyltransferase 1 (putative)
hsa-miR-485-5p	1	0	1	1	1	1	SLC30A4	solute carrier family 30 (zinc transporter), member 4
hsa-miR-485-5p	0	0	1	1	1	1	SNX10	sorting nexin 10
hsa-miR-485-5p	1	0	1	1	1	1	SERTAD3	SERTA domain containing 3
hsa-miR-485-5p	0	0	1	0	1	1	EMR2	egf-like module containing, mucin-like, hormone receptor-like 2
hsa-miR-485-5p	1	0	1	1	1	1	NRG1	neuregulin 1
hsa-miR-485-5p	0	0	1	1	0	0	MEOX1	mesenchyme homeobox 1
hsa-miR-485-5p	1	0	1	1	1	1	SCN11A	sodium channel, voltage-gated, type XI, alpha subunit
hsa-miR-485-5p	1	0	1	1	1	1	CRIPT	cysteine-rich PDZ-binding protein
hsa-miR-485-5p	1	0	1	0	1	1	ODZ1	odz, odd Oz/ten-m homolog 1 (Drosophila)
hsa-miR-485-5p	0	0	1	1	0	0	NOMO1	NODAL modulator 1
hsa-miR-485-5p	1	0	1	0	1	1	DIEXF	digestive organ expansion factor homolog (zebrafish)
hsa-miR-485-5p	0	0	1	0	1	1	VPS41	vacuolar protein sorting 41 homolog (S. cerevisiae)
hsa-miR-485-5p	0	0	1	1	1	1	TSPAN13	tetraspanin 13
hsa-miR-485-5p	1	0	1	1	1	1	CACNG4	calcium channel, voltage-dependent, gamma subunit 4
hsa-miR-485-5p	1	0	1	1	1	1	KLHL20	kelch-like 20 (Drosophila)
hsa-miR-485-5p	1	0	1	1	1	1	RND1	Rho family GTPase 1
hsa-miR-485-5p	0	0	1	1	0	0	APOBEC3C	apolipoprotein B mRNA editing enzyme, catalytic polypeptide-like 3C
hsa-miR-485-5p	1	0	1	1	1	1	OTX1	orthodenticle homeobox 1
hsa-miR-485-5p	1	0	1	1	1	1	EHD3	EH-domain containing 3
hsa-miR-485-5p	0	0	1	1	1	1	EHD2	EH-domain containing 2
hsa-miR-485-5p	1	0	1	1	1	1	CDR2L	cerebellar degeneration-related protein 2-like
hsa-miR-485-5p	1	0	1	1	1	1	ZNF592	zinc finger protein 592
hsa-miR-485-5p	1	0	1	0	1	1	SH3PXD2A	SH3 and PX domains 2A
hsa-miR-485-5p	1	0	1	1	1	1	RALGPS1	Ral GEF with PH domain and SH3 binding motif 1
hsa-miR-485-5p	1	0	1	1	0	0	TTLL4	tubulin tyrosine ligase-like family, member 4
hsa-miR-485-5p	0	0	1	0	1	1	LPIN2	lipin 2
hsa-miR-485-5p	1	0	1	1	1	1	KDM4A	lysine (K)-specific demethylase 4A
hsa-miR-485-5p	0	0	1	1	1	1	VPRBP	Vpr (HIV-1) binding protein
hsa-miR-485-5p	1	0	1	1	1	1	TBKBP1	TBK1 binding protein 1
hsa-miR-485-5p	1	0	1	0	1	1	MLEC	malectin
hsa-miR-485-5p	1	0	1	0	1	1	SERTAD2	SERTA domain containing 2
hsa-miR-485-5p	0	0	1	0	1	1	DHCR24	24-dehydrocholesterol reductase
hsa-miR-485-5p	1	0	1	1	1	1	DAZAP2	DAZ associated protein 2
hsa-miR-485-5p	0	0	1	0	1	1	EPM2AIP1	EPM2A (laforin) interacting protein 1
hsa-miR-485-5p	1	0	1	1	1	1	RUSC2	RUN and SH3 domain containing 2
hsa-miR-485-5p	1	0	1	1	1	1	ARHGAP44	Rho GTPase activating protein 44
hsa-miR-485-5p	1	0	1	1	1	1	JOSD1	Josephin domain containing 1
hsa-miR-485-5p	1	0	1	1	1	1	PLEKHA6	pleckstrin homology domain containing, family A member 6
hsa-miR-485-5p	0	0	1	1	0	0	MAST1	microtubule associated serine/threonine kinase 1
hsa-miR-485-5p	1	0	1	1	1	1	XPO7	exportin 7
hsa-miR-485-5p	1	0	1	0	1	1	ZNF609	zinc finger protein 609
hsa-miR-485-5p	1	0	1	1	1	1	ERP44	endoplasmic reticulum protein 44
hsa-miR-485-5p	1	0	1	0	1	1	PEG10	paternally expressed 10
hsa-miR-485-5p	1	0	1	1	1	1	RTF1	Rtf1, Paf1/RNA polymerase II complex component, homolog (S. cerevisiae)
hsa-miR-485-5p	1	0	1	1	1	1	RCOR1	REST corepressor 1
hsa-miR-485-5p	1	0	1	1	1	1	SIK2	salt-inducible kinase 2
hsa-miR-485-5p	1	0	1	1	1	1	MYO1D	myosin ID
hsa-miR-485-5p	1	0	1	1	0	0	KIAA0556	KIAA0556
hsa-miR-485-5p	1	0	1	1	1	1	CUX2	cut-like homeobox 2
hsa-miR-485-5p	1	0	1	1	1	1	PHF15	PHD finger protein 15
hsa-miR-485-5p	0	0	1	1	1	1	ANGEL1	angel homolog 1 (Drosophila)
hsa-miR-485-5p	1	0	1	0	1	1	LARP1	La ribonucleoprotein domain family, member 1
hsa-miR-485-5p	1	0	1	0	1	1	SRGAP2	SLIT-ROBO Rho GTPase activating protein 2
hsa-miR-485-5p	1	0	1	1	0	0	SMG5	smg-5 homolog, nonsense mediated mRNA decay factor (C. elegans)
hsa-miR-485-5p	1	0	1	1	1	1	MED13L	mediator complex subunit 13-like
hsa-miR-485-5p	1	0	1	1	1	1	PNKD	paroxysmal nonkinesigenic dyskinesia
hsa-miR-485-5p	1	0	1	0	1	1	GLCE	glucuronic acid epimerase
hsa-miR-485-5p	1	0	1	0	1	1	ERC2	ELKS/RAB6-interacting/CAST family member 2
hsa-miR-485-5p	1	0	1	1	1	1	FAM155B	family with sequence similarity 155, member B
hsa-miR-485-5p	1	0	1	1	1	1	PLA2G3	phospholipase A2, group III
hsa-miR-485-5p	1	0	1	1	1	1	TXNDC12	thioredoxin domain containing 12 (endoplasmic reticulum)
hsa-miR-485-5p	0	0	1	0	1	1	OTUD6B	OTU domain containing 6B
hsa-miR-485-5p	1	0	1	1	1	1	MPC1	mitochondrial pyruvate carrier 1
hsa-miR-485-5p	0	0	1	1	0	0	CRNN	cornulin
hsa-miR-485-5p	1	0	1	1	1	1	TOB2	transducer of ERBB2, 2
hsa-miR-485-5p	0	0	1	1	1	1	FBXO40	F-box protein 40
hsa-miR-485-5p	1	0	1	1	1	1	RAPGEFL1	Rap guanine nucleotide exchange factor (GEF)-like 1
hsa-miR-485-5p	0	0	1	1	0	0	FAM203A	family with sequence similarity 203, member A
hsa-miR-485-5p	0	0	1	1	1	1	PIPOX	pipecolic acid oxidase
hsa-miR-485-5p	0	0	1	1	1	1	KLRF1	killer cell lectin-like receptor subfamily F, member 1
hsa-miR-485-5p	0	0	1	1	1	1	BET1L	blocked early in transport 1 homolog (S. cerevisiae)-like
hsa-miR-485-5p	1	0	1	0	1	1	RAB8B	RAB8B, member RAS oncogene family
hsa-miR-485-5p	0	0	1	0	1	1	GPR83	G protein-coupled receptor 83
hsa-miR-485-5p	1	0	1	1	1	1	DNAJC27	DnaJ (Hsp40) homolog, subfamily C, member 27
hsa-miR-485-5p	1	0	1	1	1	1	RAB6B	RAB6B, member RAS oncogene family
hsa-miR-485-5p	1	0	1	0	1	1	KLHL3	kelch-like 3 (Drosophila)
hsa-miR-485-5p	1	0	1	1	1	1	SIX4	SIX homeobox 4
hsa-miR-485-5p	0	0	1	1	1	1	POLE3	polymerase (DNA directed), epsilon 3, accessory subunit
hsa-miR-485-5p	1	0	1	1	1	1	PLXNA3	plexin A3
hsa-miR-485-5p	1	0	1	1	1	1	INO80	INO80 homolog (S. cerevisiae)
hsa-miR-485-5p	1	0	1	1	1	1	ZC3H7B	zinc finger CCCH-type containing 7B
hsa-miR-485-5p	1	0	1	0	1	1	EIF2C4	eukaryotic translation initiation factor 2C, 4
hsa-miR-485-5p	1	0	1	0	1	1	FAM46C	family with sequence similarity 46, member C
hsa-miR-485-5p	0	0	1	1	0	0	PPP1R14D	protein phosphatase 1, regulatory (inhibitor) subunit 14D
hsa-miR-485-5p	1	0	1	1	1	1	TBC1D8B	TBC1 domain family, member 8B (with GRAM domain)
hsa-miR-485-5p	1	0	1	1	1	1	LPPR1	lipid phosphate phosphatase-related protein type 1
hsa-miR-485-5p	0	0	1	1	1	1	WHSC1L1	Wolf-Hirschhorn syndrome candidate 1-like 1
hsa-miR-485-5p	0	0	1	1	1	1	SDHAF2	succinate dehydrogenase complex assembly factor 2
hsa-miR-485-5p	1	0	1	1	1	1	HIF1AN	hypoxia inducible factor 1, alpha subunit inhibitor
hsa-miR-485-5p	0	0	1	1	1	1	C14orf119	chromosome 14 open reading frame 119
hsa-miR-485-5p	0	0	1	1	1	1	SCYL2	SCY1-like 2 (S. cerevisiae)
hsa-miR-485-5p	1	0	1	1	1	1	IFT57	intraflagellar transport 57 homolog (Chlamydomonas)
hsa-miR-485-5p	1	0	1	1	1	1	ARGLU1	arginine and glutamate rich 1
hsa-miR-485-5p	1	0	1	1	1	1	TMEM33	transmembrane protein 33
hsa-miR-485-5p	1	0	1	1	1	1	RIC8B	resistance to inhibitors of cholinesterase 8 homolog B (C. elegans)
hsa-miR-485-5p	0	0	1	1	1	1	TMLHE	trimethyllysine hydroxylase, epsilon
hsa-miR-485-5p	0	0	1	1	1	1	TRIM62	tripartite motif containing 62
hsa-miR-485-5p	1	0	1	0	1	1	SEPT11	septin 11
hsa-miR-485-5p	0	0	1	1	1	1	C1orf106	chromosome 1 open reading frame 106
hsa-miR-485-5p	1	0	1	1	1	1	SPTLC3	serine palmitoyltransferase, long chain base subunit 3
hsa-miR-485-5p	0	0	1	0	1	1	TXLNG	taxilin gamma
hsa-miR-485-5p	1	0	1	1	1	1	PAG1	phosphoprotein associated with glycosphingolipid microdomains 1
hsa-miR-485-5p	1	0	1	0	1	1	ELMOD1	ELMO/CED-12 domain containing 1
hsa-miR-485-5p	1	0	1	0	1	1	MAML3	mastermind-like 3 (Drosophila)
hsa-miR-485-5p	1	0	1	1	1	1	AJAP1	adherens junctions associated protein 1
hsa-miR-485-5p	1	0	1	0	1	1	KLHL9	kelch-like 9 (Drosophila)
hsa-miR-485-5p	1	0	1	0	1	1	CCDC93	coiled-coil domain containing 93
hsa-miR-485-5p	0	0	1	1	0	0	RNF186	ring finger protein 186
hsa-miR-485-5p	1	0	1	1	1	1	EPB41L4B	erythrocyte membrane protein band 4.1 like 4B
hsa-miR-485-5p	1	0	1	0	1	1	UBFD1	ubiquitin family domain containing 1
hsa-miR-485-5p	0	0	1	1	1	1	RNF20	ring finger protein 20, E3 ubiquitin protein ligase
hsa-miR-485-5p	1	0	1	0	1	1	SLAMF8	SLAM family member 8
hsa-miR-485-5p	0	0	1	1	1	1	TMEM167B	transmembrane protein 167B
hsa-miR-485-5p	0	0	1	1	1	1	PLXDC1	plexin domain containing 1
hsa-miR-485-5p	0	0	1	1	1	1	GJC2	gap junction protein, gamma 2, 47kDa
hsa-miR-485-5p	1	0	1	1	1	1	EPHA8	EPH receptor A8
hsa-miR-485-5p	0	0	1	1	1	1	TCL6	T-cell leukemia/lymphoma 6 (non-protein coding)
hsa-miR-485-5p	1	0	1	1	1	1	NRIP3	nuclear receptor interacting protein 3
hsa-miR-485-5p	1	0	1	0	1	1	FAM40B	family with sequence similarity 40, member B
hsa-miR-485-5p	0	0	1	0	1	1	ZNF490	zinc finger protein 490
hsa-miR-485-5p	0	0	1	1	1	1	SHROOM4	shroom family member 4
hsa-miR-485-5p	0	0	1	0	1	1	XPO5	exportin 5
hsa-miR-485-5p	1	0	1	1	1	1	RGAG1	retrotransposon gag domain containing 1
hsa-miR-485-5p	1	0	1	1	1	1	RANBP10	RAN binding protein 10
hsa-miR-485-5p	1	0	1	0	1	1	GPAM	glycerol-3-phosphate acyltransferase, mitochondrial
hsa-miR-485-5p	0	0	1	1	1	1	SLC7A14	solute carrier family 7 (orphan transporter), member 14
hsa-miR-485-5p	0	0	1	1	1	1	PRX	periaxin
hsa-miR-485-5p	1	0	1	1	1	1	SNTB1	syntrophin, beta 1 (dystrophin-associated protein A1, 59kDa, basic component 1)
hsa-miR-485-5p	1	0	1	1	1	1	KCNK10	potassium channel, subfamily K, member 10
hsa-miR-485-5p	1	0	1	0	1	1	TP53INP2	tumor protein p53 inducible nuclear protein 2
hsa-miR-485-5p	1	0	1	1	1	1	RPRD1B	regulation of nuclear pre-mRNA domain containing 1B
hsa-miR-485-5p	0	0	1	1	1	1	IL22RA1	interleukin 22 receptor, alpha 1
hsa-miR-485-5p	1	0	1	1	1	1	SLC5A7	solute carrier family 5 (choline transporter), member 7
hsa-miR-485-5p	1	0	1	0	0	0	ALX4	ALX homeobox 4
hsa-miR-485-5p	0	0	1	1	0	0	MIIP	migration and invasion inhibitory protein
hsa-miR-485-5p	0	0	1	1	0	0	C12orf44	chromosome 12 open reading frame 44
hsa-miR-485-5p	1	0	1	1	1	1	PPP1R11	protein phosphatase 1, regulatory (inhibitor) subunit 11
hsa-miR-485-5p	0	0	1	1	1	1	PGM5	phosphoglucomutase 5
hsa-miR-485-5p	1	0	1	1	1	1	GPR88	G protein-coupled receptor 88
hsa-miR-485-5p	0	0	1	1	1	1	PERP	PERP, TP53 apoptosis effector
hsa-miR-485-5p	1	0	1	1	1	1	GOLPH3	golgi phosphoprotein 3 (coat-protein)
hsa-miR-485-5p	1	0	1	1	1	1	XYLT1	xylosyltransferase I
hsa-miR-485-5p	0	0	1	1	1	1	TCTA	T-cell leukemia translocation altered
hsa-miR-485-5p	1	0	1	1	1	1	XPO4	exportin 4
hsa-miR-485-5p	1	0	1	1	1	1	HIF3A	hypoxia inducible factor 3, alpha subunit
hsa-miR-485-5p	1	0	1	1	1	1	PRRX1	paired related homeobox 1
hsa-miR-485-5p	0	0	1	1	1	1	ACBD3	acyl-CoA binding domain containing 3
hsa-miR-485-5p	1	0	1	1	1	1	FBXL17	F-box and leucine-rich repeat protein 17
hsa-miR-485-5p	1	0	1	1	0	0	CCDC71	coiled-coil domain containing 71
hsa-miR-485-5p	1	0	1	1	1	1	REEP1	receptor accessory protein 1
hsa-miR-485-5p	1	0	1	1	0	0	UBE2Z	ubiquitin-conjugating enzyme E2Z
hsa-miR-485-5p	1	0	1	1	1	1	GID4	GID complex subunit 4, VID24 homolog (S. cerevisiae)
hsa-miR-485-5p	0	0	1	1	0	0	DCTPP1	dCTP pyrophosphatase 1
hsa-miR-485-5p	1	0	1	1	1	1	EFHD2	EF-hand domain family, member D2
hsa-miR-485-5p	0	0	1	1	1	1	PDYN	prodynorphin
hsa-miR-485-5p	1	0	1	1	1	1	NKAIN1	Na+/K+ transporting ATPase interacting 1
hsa-miR-485-5p	1	0	1	1	1	1	C10orf76	chromosome 10 open reading frame 76
hsa-miR-485-5p	0	0	1	1	1	1	TREML2	triggering receptor expressed on myeloid cells-like 2
hsa-miR-485-5p	0	0	1	1	1	1	FBXO17	F-box protein 17
hsa-miR-485-5p	1	0	1	1	1	1	CPED1	cadherin-like and PC-esterase domain containing 1
hsa-miR-485-5p	0	0	1	1	1	1	DBF4B	DBF4 homolog B (S. cerevisiae)
hsa-miR-485-5p	0	0	1	1	1	1	ZXDC	ZXD family zinc finger C
hsa-miR-485-5p	1	0	1	0	1	1	DNAJC5	DnaJ (Hsp40) homolog, subfamily C, member 5
hsa-miR-485-5p	0	0	1	1	1	1	ITIH5	inter-alpha-trypsin inhibitor heavy chain family, member 5
hsa-miR-485-5p	1	0	1	1	1	1	TRIM8	tripartite motif containing 8
hsa-miR-485-5p	1	0	1	1	1	1	SNX27	sorting nexin family member 27
hsa-miR-485-5p	0	0	1	1	0	0	DEFB126	defensin, beta 126
hsa-miR-485-5p	0	0	1	1	1	1	FCRL5	Fc receptor-like 5
hsa-miR-485-5p	1	0	1	1	0	0	SCRT1	scratch homolog 1, zinc finger protein (Drosophila)
hsa-miR-485-5p	1	0	1	1	1	1	ANO3	anoctamin 3
hsa-miR-485-5p	0	0	1	1	1	1	MS4A8B	membrane-spanning 4-domains, subfamily A, member 8B
hsa-miR-485-5p	1	0	1	1	1	1	HSDL1	hydroxysteroid dehydrogenase like 1
hsa-miR-485-5p	1	0	1	0	1	1	SH3BGRL2	SH3 domain binding glutamic acid-rich protein like 2
hsa-miR-485-5p	1	0	1	0	1	1	ITCH	itchy E3 ubiquitin protein ligase
hsa-miR-485-5p	0	0	1	1	0	0	SLC4A11	solute carrier family 4, sodium borate transporter, member 11
hsa-miR-485-5p	1	0	1	1	1	1	PPP1R12B	protein phosphatase 1, regulatory subunit 12B
hsa-miR-485-5p	1	0	1	1	1	1	USP42	ubiquitin specific peptidase 42
hsa-miR-485-5p	1	0	1	1	1	1	ANTXR1	anthrax toxin receptor 1
hsa-miR-485-5p	1	0	1	1	1	1	ZDHHC18	zinc finger, DHHC-type containing 18
hsa-miR-485-5p	1	0	1	0	1	1	PSD2	pleckstrin and Sec7 domain containing 2
hsa-miR-485-5p	1	0	1	1	1	1	CAMKK1	calcium/calmodulin-dependent protein kinase kinase 1, alpha
hsa-miR-485-5p	1	0	1	1	1	1	PRADC1	protease-associated domain containing 1
hsa-miR-485-5p	1	0	1	1	1	1	SYVN1	synovial apoptosis inhibitor 1, synoviolin
hsa-miR-485-5p	1	0	1	1	1	1	DCTN5	dynactin 5 (p25)
hsa-miR-485-5p	1	0	1	1	1	1	PPP1R9B	protein phosphatase 1, regulatory subunit 9B
hsa-miR-485-5p	0	0	1	0	1	1	MYO18B	myosin XVIIIB
hsa-miR-485-5p	1	0	1	0	1	1	INA	internexin neuronal intermediate filament protein, alpha
hsa-miR-485-5p	1	0	1	1	1	1	RSPO3	R-spondin 3
hsa-miR-485-5p	1	0	1	1	1	1	ARHGEF39	Rho guanine nucleotide exchange factor (GEF) 39
hsa-miR-485-5p	1	0	1	1	1	1	SLC35B4	solute carrier family 35, member B4
hsa-miR-485-5p	1	0	1	1	1	1	RBM17	RNA binding motif protein 17
hsa-miR-485-5p	0	0	1	0	1	1	PIGY	phosphatidylinositol glycan anchor biosynthesis, class Y
hsa-miR-485-5p	1	0	1	0	1	1	C5orf62	chromosome 5 open reading frame 62
hsa-miR-485-5p	0	0	1	1	1	1	POLR2J2	polymerase (RNA) II (DNA directed) polypeptide J2
hsa-miR-485-5p	1	0	1	1	1	1	PCDH10	protocadherin 10
hsa-miR-485-5p	0	0	1	1	0	0	MUC13	mucin 13, cell surface associated
hsa-miR-485-5p	1	0	1	0	1	1	PURB	purine-rich element binding protein B
hsa-miR-485-5p	0	0	1	1	1	1	EPSTI1	epithelial stromal interaction 1 (breast)
hsa-miR-485-5p	1	0	1	1	0	0	CAMK2N2	calcium/calmodulin-dependent protein kinase II inhibitor 2
hsa-miR-485-5p	0	0	1	1	1	1	MRPS36	mitochondrial ribosomal protein S36
hsa-miR-485-5p	1	0	1	1	1	1	TP53INP1	tumor protein p53 inducible nuclear protein 1
hsa-miR-485-5p	1	0	1	1	1	1	RASL10B	RAS-like, family 10, member B
hsa-miR-485-5p	1	0	1	1	1	1	COL4A5	collagen, type IV, alpha 5
hsa-miR-485-5p	1	0	1	1	0	0	FCHSD1	FCH and double SH3 domains 1
hsa-miR-485-5p	1	0	1	1	1	1	EPT1	ethanolaminephosphotransferase 1 (CDP-ethanolamine-specific)
hsa-miR-485-5p	1	0	1	1	1	1	LUZP1	leucine zipper protein 1
hsa-miR-485-5p	1	0	1	1	1	1	BRWD1	bromodomain and WD repeat domain containing 1
hsa-miR-485-5p	0	0	1	1	1	1	ZNF830	zinc finger protein 830
hsa-miR-485-5p	0	0	1	1	0	0	SIGLEC11	sialic acid binding Ig-like lectin 11
hsa-miR-485-5p	0	0	1	1	0	0	STK11IP	serine/threonine kinase 11 interacting protein
hsa-miR-485-5p	0	0	1	1	0	0	TSGA13	testis specific, 13
hsa-miR-485-5p	0	0	1	1	0	0	FAM46B	family with sequence similarity 46, member B
hsa-miR-485-5p	0	0	1	1	0	0	APOA5	apolipoprotein A-V
hsa-miR-485-5p	1	0	1	1	1	1	NAA15	N(alpha)-acetyltransferase 15, NatA auxiliary subunit
hsa-miR-485-5p	0	0	1	1	1	1	COX15	COX15 homolog, cytochrome c oxidase assembly protein (yeast)
hsa-miR-485-5p	1	0	1	1	1	1	BTN2A1	butyrophilin, subfamily 2, member A1
hsa-miR-485-5p	0	0	1	1	0	0	S100A16	S100 calcium binding protein A16
hsa-miR-485-5p	1	0	1	1	0	0	ADAMTS14	ADAM metallopeptidase with thrombospondin type 1 motif, 14
hsa-miR-485-5p	1	0	1	0	1	1	SRXN1	sulfiredoxin 1
hsa-miR-485-5p	1	0	1	0	1	1	EDARADD	EDAR-associated death domain
hsa-miR-485-5p	0	0	1	1	1	1	CHST14	carbohydrate (N-acetylgalactosamine 4-0) sulfotransferase 14
hsa-miR-485-5p	1	0	1	1	1	1	JDP2	Jun dimerization protein 2
hsa-miR-485-5p	0	0	1	0	1	1	PAQR8	progestin and adipoQ receptor family member VIII
hsa-miR-485-5p	0	0	1	1	0	0	CITED4	Cbp/p300-interacting transactivator, with Glu/Asp-rich carboxy-terminal domain, 4
hsa-miR-485-5p	0	0	1	1	1	1	ZNF431	zinc finger protein 431
hsa-miR-485-5p	1	0	1	1	1	1	SYN1	synapsin I
hsa-miR-485-5p	1	0	1	1	0	0	SYN3	synapsin III
hsa-miR-485-5p	0	0	1	1	1	1	PATE1	prostate and testis expressed 1
hsa-miR-485-5p	0	0	1	1	1	1	PKD1L1	polycystic kidney disease 1 like 1
hsa-miR-485-5p	0	0	1	0	1	1	SP140L	SP140 nuclear body protein-like
hsa-miR-485-5p	1	0	1	1	1	1	ICA1L	islet cell autoantigen 1,69kDa-like
hsa-miR-485-5p	0	0	1	0	1	1	PRELID2	PRELI domain containing 2
hsa-miR-485-5p	0	0	1	0	1	1	MYO3B	myosin IIIB
hsa-miR-485-5p	1	0	1	1	1	1	MAPK14	mitogen-activated protein kinase 14
hsa-miR-485-5p	1	0	1	1	0	0	LIPH	lipase, member H
hsa-miR-485-5p	1	0	1	1	0	0	GNAT1	guanine nucleotide binding protein (G protein), alpha transducing activity polypeptide 1
hsa-miR-485-5p	0	0	1	1	1	1	CASC5	cancer susceptibility candidate 5
hsa-miR-485-5p	0	0	1	1	0	0	ANKRD35	ankyrin repeat domain 35
hsa-miR-485-5p	0	0	1	1	1	1	FUK	fucokinase
hsa-miR-485-5p	1	0	1	1	1	1	MAX	MYC associated factor X
hsa-miR-485-5p	0	0	1	1	0	0	EVI5L	ecotropic viral integration site 5-like
hsa-miR-485-5p	1	0	1	1	1	1	CCSAP	centriole, cilia and spindle-associated protein
hsa-miR-485-5p	0	0	1	1	1	1	APOBEC3F	apolipoprotein B mRNA editing enzyme, catalytic polypeptide-like 3F
hsa-miR-485-5p	0	0	1	1	0	0	IL27	interleukin 27
hsa-miR-485-5p	0	0	1	1	0	0	IL11RA	interleukin 11 receptor, alpha
hsa-miR-485-5p	0	0	1	0	1	1	CHKB	choline kinase beta
hsa-miR-485-5p	1	0	1	1	1	1	ZSCAN29	zinc finger and SCAN domain containing 29
hsa-miR-485-5p	1	0	1	0	1	1	TMTC2	transmembrane and tetratricopeptide repeat containing 2
hsa-miR-485-5p	1	0	1	0	1	1	TMEM154	transmembrane protein 154
hsa-miR-485-5p	1	0	1	0	1	1	RWDD4	RWD domain containing 4
hsa-miR-485-5p	0	0	1	1	0	0	MS4A15	membrane-spanning 4-domains, subfamily A, member 15
hsa-miR-485-5p	1	0	1	1	1	1	NXPH1	neurexophilin 1
hsa-miR-485-5p	1	0	1	1	1	1	PXT1	peroxisomal, testis specific 1
hsa-miR-485-5p	1	0	1	0	1	1	N4BP1	NEDD4 binding protein 1
hsa-miR-485-5p	0	0	1	1	1	1	CCDC140	coiled-coil domain containing 140
hsa-miR-485-5p	1	0	1	1	1	1	C3orf45	chromosome 3 open reading frame 45
hsa-miR-485-5p	0	0	1	1	0	0	ANKFN1	ankyrin-repeat and fibronectin type III domain containing 1
hsa-miR-485-5p	1	0	1	1	0	0	TMEM86A	transmembrane protein 86A
hsa-miR-485-5p	1	0	1	0	1	1	GPR26	G protein-coupled receptor 26
hsa-miR-485-5p	0	0	1	0	1	1	VGLL2	vestigial like 2 (Drosophila)
hsa-miR-485-5p	1	0	1	1	1	1	HS6ST3	heparan sulfate 6-O-sulfotransferase 3
hsa-miR-485-5p	1	0	1	1	1	1	CRYBG3	beta-gamma crystallin domain containing 3
hsa-miR-485-5p	1	0	1	1	1	1	CREBRF	CREB3 regulatory factor
hsa-miR-485-5p	1	0	1	1	0	0	LPCAT4	lysophosphatidylcholine acyltransferase 4
hsa-miR-485-5p	1	0	1	1	1	1	DAZAP1	DAZ associated protein 1
hsa-miR-485-5p	0	0	1	1	1	1	CDY1	chromodomain protein, Y-linked, 1
hsa-miR-485-5p	0	0	1	1	1	1	WFDC13	WAP four-disulfide core domain 13
hsa-miR-485-5p	0	0	1	1	1	1	TAPBP	TAP binding protein (tapasin)
hsa-miR-485-5p	1	0	1	1	1	1	IL16	interleukin 16
hsa-miR-485-5p	0	0	1	1	1	1	REXO1L1	REX1, RNA exonuclease 1 homolog (S. cerevisiae)-like 1
hsa-miR-485-5p	1	0	1	1	1	1	SMG7	smg-7 homolog, nonsense mediated mRNA decay factor (C. elegans)
hsa-miR-485-5p	0	0	1	1	0	0	C3orf24	chromosome 3 open reading frame 24
hsa-miR-485-5p	0	0	1	1	1	1	KLF17	Kruppel-like factor 17
hsa-miR-485-5p	1	0	1	1	1	1	LSM11	LSM11, U7 small nuclear RNA associated
hsa-miR-485-5p	0	0	1	1	1	1	C10orf107	chromosome 10 open reading frame 107
hsa-miR-485-5p	1	0	1	0	1	1	PGM2L1	phosphoglucomutase 2-like 1
hsa-miR-485-5p	0	0	1	1	0	0	NOMO2	NODAL modulator 2
hsa-miR-485-5p	1	0	1	1	1	1	ARL10	ADP-ribosylation factor-like 10
hsa-miR-485-5p	1	0	1	0	1	1	DPY19L2	dpy-19-like 2 (C. elegans)
hsa-miR-485-5p	1	0	1	1	1	1	RABL3	RAB, member of RAS oncogene family-like 3
hsa-miR-485-5p	0	0	1	1	1	1	LYG1	lysozyme G-like 1
hsa-miR-485-5p	1	0	1	1	1	1	LDLRAD3	low density lipoprotein receptor class A domain containing 3
hsa-miR-485-5p	1	0	1	0	1	1	FAM84B	family with sequence similarity 84, member B
hsa-miR-485-5p	0	0	1	1	1	1	ZDHHC22	zinc finger, DHHC-type containing 22
hsa-miR-485-5p	0	0	1	1	1	1	IL5RA	interleukin 5 receptor, alpha
hsa-miR-485-5p	1	0	1	1	0	0	KRTAP11-1	keratin associated protein 11-1
hsa-miR-485-5p	0	0	1	1	1	1	C16orf54	chromosome 16 open reading frame 54
hsa-miR-485-5p	0	0	1	1	0	0	TAS1R1	taste receptor, type 1, member 1
hsa-miR-485-5p	1	0	1	1	1	1	FAM134C	family with sequence similarity 134, member C
hsa-miR-485-5p	0	0	1	1	1	1	ZNF831	zinc finger protein 831
hsa-miR-485-5p	1	0	1	1	0	0	KCTD13	potassium channel tetramerisation domain containing 13
hsa-miR-485-5p	0	0	1	1	1	1	WFDC8	WAP four-disulfide core domain 8
hsa-miR-485-5p	0	0	1	1	0	0	KRT27	keratin 27
hsa-miR-485-5p	1	0	1	1	1	1	NF2	neurofibromin 2 (merlin)
hsa-miR-485-5p	1	0	1	1	1	1	ISM2	isthmin 2 homolog (zebrafish)
hsa-miR-485-5p	0	0	1	1	0	0	BPIFB4	BPI fold containing family B, member 4
hsa-miR-485-5p	0	0	1	0	1	1	VSTM2A	V-set and transmembrane domain containing 2A
hsa-miR-485-5p	1	0	1	1	1	1	BCL9L	B-cell CLL/lymphoma 9-like
hsa-miR-485-5p	1	0	1	0	1	1	C12orf36	chromosome 12 open reading frame 36
hsa-miR-485-5p	0	0	1	0	1	1	NBPF11	neuroblastoma breakpoint family, member 11
hsa-miR-485-5p	1	0	1	1	1	1	RBM38	RNA binding motif protein 38
hsa-miR-485-5p	1	0	1	1	1	1	SPTY2D1	SPT2, Suppressor of Ty, domain containing 1 (S. cerevisiae)
hsa-miR-485-5p	1	0	1	0	1	1	SLC16A9	solute carrier family 16, member 9 (monocarboxylic acid transporter 9)
hsa-miR-485-5p	0	0	1	1	0	0	RPS19BP1	ribosomal protein S19 binding protein 1
hsa-miR-485-5p	1	0	1	1	1	1	NAIF1	nuclear apoptosis inducing factor 1
hsa-miR-485-5p	1	0	1	1	1	1	AQP1	aquaporin 1 (Colton blood group)
hsa-miR-485-5p	1	0	1	0	1	1	PTPLB	protein tyrosine phosphatase-like (proline instead of catalytic arginine), member b
hsa-miR-485-5p	0	0	1	1	1	1	OLFML1	olfactomedin-like 1
hsa-miR-485-5p	0	0	1	1	0	0	ITIH6	inter-alpha-trypsin inhibitor heavy chain family, member 6
hsa-miR-485-5p	0	0	1	1	1	1	LHFPL4	lipoma HMGIC fusion partner-like 4
hsa-miR-485-5p	0	0	1	1	1	1	COL25A1	collagen, type XXV, alpha 1
hsa-miR-485-5p	0	0	1	1	0	0	ALKBH6	alkB, alkylation repair homolog 6 (E. coli)
hsa-miR-485-5p	0	0	1	1	1	1	TMEM189	transmembrane protein 189
hsa-miR-485-5p	1	0	1	1	1	1	VAX1	ventral anterior homeobox 1
hsa-miR-485-5p	0	0	1	1	1	1	COL18A1-AS1	COL18A1 antisense RNA 1
hsa-miR-485-5p	0	0	1	1	1	1	ILDR2	immunoglobulin-like domain containing receptor 2
hsa-miR-485-5p	0	0	1	1	0	0	TRIM7	tripartite motif containing 7
hsa-miR-485-5p	0	0	1	1	0	0	LCN15	lipocalin 15
hsa-miR-485-5p	1	0	1	0	1	1	MBLAC2	metallo-beta-lactamase domain containing 2
hsa-miR-485-5p	0	0	1	1	0	0	IER5L	immediate early response 5-like
hsa-miR-485-5p	0	0	1	1	1	1	CRIP3	cysteine-rich protein 3
hsa-miR-485-5p	1	0	1	1	1	1	ATRNL1	attractin-like 1
hsa-miR-485-5p	0	0	1	1	1	1	ZNF474	zinc finger protein 474
hsa-miR-485-5p	1	0	1	1	1	1	SPRYD4	SPRY domain containing 4
hsa-miR-485-5p	1	0	1	1	1	1	TNFAIP8L3	tumor necrosis factor, alpha-induced protein 8-like 3
hsa-miR-485-5p	0	0	1	0	0	0	C16orf47	chromosome 16 open reading frame 47
hsa-miR-485-5p	0	0	1	0	1	1	C11orf92	chromosome 11 open reading frame 92
hsa-miR-485-5p	1	0	1	0	1	1	C17orf102	chromosome 17 open reading frame 102
hsa-miR-485-5p	1	0	1	1	1	1	TEX19	testis expressed 19
hsa-miR-485-5p	0	0	1	1	1	1	LYSMD1	LysM, putative peptidoglycan-binding, domain containing 1
hsa-miR-485-5p	0	0	1	1	0	0	PDLIM7	PDZ and LIM domain 7 (enigma)
hsa-miR-485-5p	1	0	1	0	1	1	STAT3	signal transducer and activator of transcription 3 (acute-phase response factor)
hsa-miR-485-5p	0	0	1	0	0	0	ESRRAP2	estrogen-related receptor alpha pseudogene 2
hsa-miR-485-5p	0	0	1	0	0	0	ANXA2P3	annexin A2 pseudogene 3
hsa-miR-485-5p	0	0	1	0	0	0	TTTY2	testis-specific transcript, Y-linked 2 (non-protein coding)
hsa-miR-485-5p	0	0	1	0	0	0	TTTY15	testis-specific transcript, Y-linked 15 (non-protein coding)
hsa-miR-485-5p	0	0	1	0	0	0	TTTY6B	testis-specific transcript, Y-linked 6B (non-protein coding)
hsa-miR-485-5p	0	0	1	0	0	0	NUDT4P1	nudix (nucleoside diphosphate linked moiety X)-type motif 4 pseudogene 1
hsa-miR-485-5p	0	0	1	0	0	0	SLC7A5P2	solute carrier family 7 (amino acid transporter light chain, L system), member 5 pseudogene 2
hsa-miR-485-5p	0	0	1	0	0	0	ATXN8OS	ATXN8 opposite strand (non-protein coding)
hsa-miR-485-5p	0	0	1	0	0	0	HYALP1	hyaluronoglucosaminidase pseudogene 1
hsa-miR-485-5p	0	0	1	0	0	0	DGCR5	DiGeorge syndrome critical region gene 5 (non-protein coding)
hsa-miR-485-5p	0	0	1	0	0	0	SNORD56	small nucleolar RNA, C/D box 56
hsa-miR-485-5p	0	0	1	0	0	0	DLEU2L	deleted in lymphocytic leukemia 2-like
hsa-miR-485-5p	0	0	1	0	0	0	PER4	period homolog 3 (Drosophila) pseudogene
hsa-miR-485-5p	0	0	1	0	0	0	PRR24	proline rich 24
hsa-miR-485-5p	0	0	1	0	0	0	AQP7P1	aquaporin 7 pseudogene 1
hsa-miR-485-5p	0	0	1	0	0	0	MALAT1	metastasis associated lung adenocarcinoma transcript 1 (non-protein coding)
hsa-miR-485-5p	0	0	1	0	0	0	RNASEH2CP1	ribonuclease H2, subunit C pseudogene 1
hsa-miR-485-5p	0	0	1	0	0	0	HAS2-AS1	HAS2 antisense RNA 1
hsa-miR-485-5p	0	0	1	0	0	0	PTPRVP	protein tyrosine phosphatase, receptor type, V, pseudogene
hsa-miR-485-5p	0	0	1	0	0	0	TCAM1P	testicular cell adhesion molecule 1 homolog (mouse), pseudogene
hsa-miR-485-5p	0	0	1	0	0	0	SNORA23	small nucleolar RNA, H/ACA box 23
hsa-miR-485-5p	0	0	1	0	0	0	SNORA36A	small nucleolar RNA, H/ACA box 36A
hsa-miR-485-5p	0	0	1	0	0	0	LILRP2	leukocyte immunoglobulin-like receptor pseudogene 2
hsa-miR-485-5p	0	0	1	0	0	0	TUBA4B	tubulin, alpha 4b (pseudogene)
hsa-miR-485-5p	1	0	1	1	0	0	HOXC5	homeobox C5
hsa-miR-485-5p	0	0	1	0	0	0	RNF5P1	ring finger protein 5, E3 ubiquitin protein ligase pseudogene 1
hsa-miR-485-5p	0	0	1	0	0	0	HSP90B3P	heat shock protein 90kDa beta (Grp94), member 3, pseudogene
hsa-miR-485-5p	0	0	1	0	0	0	GBP1P1	guanylate binding protein 1, interferon-inducible pseudogene 1
hsa-miR-485-5p	0	0	1	0	0	0	MYADML	myeloid-associated differentiation marker-like (pseudogene)
hsa-miR-485-5p	0	0	1	0	0	0	USP32P1	ubiquitin specific peptidase 32 pseudogene 1
hsa-miR-485-5p	1	0	1	1	1	1	MLL	myeloid/lymphoid or mixed-lineage leukemia (trithorax homolog, Drosophila)
hsa-miR-485-5p	1	0	1	1	0	0	KIAA1549L	KIAA1549-like
hsa-miR-485-5p	1	0	1	1	1	1	CASP2	caspase 2, apoptosis-related cysteine peptidase
hsa-miR-485-5p	1	0	1	1	1	1	CBLB	Cbl proto-oncogene, E3 ubiquitin protein ligase B
hsa-miR-485-5p	1	0	1	1	1	1	TRIO	trio Rho guanine nucleotide exchange factor
hsa-miR-485-5p	1	0	1	1	1	1	ESR1	estrogen receptor 1
hsa-miR-485-5p	1	0	1	1	1	1	CUL5	cullin 5
hsa-miR-485-5p	0	0	1	1	0	0	GPR17	G protein-coupled receptor 17
hsa-miR-485-5p	0	0	1	1	0	0	TSR3	TSR3, 20S rRNA accumulation, homolog (S. cerevisiae)
hsa-miR-485-5p	0	0	0	1	0	0	LRRC23	leucine rich repeat containing 23
hsa-miR-485-5p	1	0	1	1	1	1	ZNF200	zinc finger protein 200
hsa-miR-485-5p	0	0	1	1	0	0	C20orf43	chromosome 20 open reading frame 43
hsa-miR-485-5p	1	0	1	1	1	1	PANX2	pannexin 2
hsa-miR-485-5p	1	0	1	1	1	1	FGF4	fibroblast growth factor 4
hsa-miR-485-5p	0	0	1	1	1	1	SLC9A3R2	solute carrier family 9, subfamily A (NHE3, cation proton antiporter 3), member 3 regulator 2
hsa-miR-485-5p	1	0	1	1	1	1	ACTN1	actinin, alpha 1
hsa-miR-485-5p	0	0	0	1	0	0	PCDHB2	protocadherin beta 2
hsa-miR-485-5p	1	0	1	1	1	1	PDPR	pyruvate dehydrogenase phosphatase regulatory subunit
hsa-miR-485-5p	0	0	0	1	0	0	NAT14	N-acetyltransferase 14 (GCN5-related, putative)
hsa-miR-485-5p	0	0	1	1	0	0	PSMD8	proteasome (prosome, macropain) 26S subunit, non-ATPase, 8
hsa-miR-485-5p	0	0	1	1	1	1	POLR2E	polymerase (RNA) II (DNA directed) polypeptide E, 25kDa
hsa-miR-485-5p	0	0	0	1	0	0	THAP7	THAP domain containing 7
hsa-miR-485-5p	0	0	1	1	0	0	CPNE6	copine VI (neuronal)
hsa-miR-485-5p	0	0	1	1	1	1	SLC25A14	solute carrier family 25 (mitochondrial carrier, brain), member 14
hsa-miR-485-5p	0	0	0	1	1	1	NME3	NME/NM23 nucleoside diphosphate kinase 3
hsa-miR-485-5p	0	0	1	1	0	0	COG4	component of oligomeric golgi complex 4
hsa-miR-485-5p	0	0	1	1	1	1	MTFMT	mitochondrial methionyl-tRNA formyltransferase
hsa-miR-485-5p	0	0	0	1	0	0	CACTIN	cactin, spliceosome C complex subunit
hsa-miR-485-5p	0	0	0	1	0	0	CD79A	CD79a molecule, immunoglobulin-associated alpha
hsa-miR-485-5p	0	0	0	1	0	0	CNFN	cornifelin
hsa-miR-485-5p	0	0	0	1	0	0	EVX1	even-skipped homeobox 1
hsa-miR-485-5p	0	0	0	1	0	0	EPHB6	EPH receptor B6
hsa-miR-485-5p	0	0	0	1	0	0	C8G	complement component 8, gamma polypeptide
hsa-miR-485-5p	0	0	1	1	0	0	PIGL	phosphatidylinositol glycan anchor biosynthesis, class L
hsa-miR-485-5p	0	0	1	1	0	0	CACNG1	calcium channel, voltage-dependent, gamma subunit 1
hsa-miR-485-5p	0	0	0	1	0	0	OGFOD2	2-oxoglutarate and iron-dependent oxygenase domain containing 2
hsa-miR-485-5p	0	0	1	1	1	1	GPR63	G protein-coupled receptor 63
hsa-miR-485-5p	0	0	1	1	0	0	PKD2L2	polycystic kidney disease 2-like 2
hsa-miR-485-5p	0	0	0	1	0	0	BNIP1	BCL2/adenovirus E1B 19kDa interacting protein 1
hsa-miR-485-5p	0	0	0	1	0	0	TNNC1	troponin C type 1 (slow)
hsa-miR-485-5p	0	0	1	1	1	1	EIF2AK2	eukaryotic translation initiation factor 2-alpha kinase 2
hsa-miR-485-5p	0	0	1	1	0	0	IGFBP2	insulin-like growth factor binding protein 2, 36kDa
hsa-miR-485-5p	0	0	0	1	1	1	WNT6	wingless-type MMTV integration site family, member 6
hsa-miR-485-5p	0	0	0	1	0	0	PEX16	peroxisomal biogenesis factor 16
hsa-miR-485-5p	0	0	1	1	1	1	POLM	polymerase (DNA directed), mu
hsa-miR-485-5p	0	0	0	1	0	0	PEPD	peptidase D
hsa-miR-485-5p	0	0	1	1	0	0	LIPE	lipase, hormone-sensitive
hsa-miR-485-5p	0	0	0	1	1	1	APOBEC2	apolipoprotein B mRNA editing enzyme, catalytic polypeptide-like 2
hsa-miR-485-5p	0	0	0	1	0	0	S1PR4	sphingosine-1-phosphate receptor 4
hsa-miR-485-5p	0	0	1	1	0	0	PDCD2L	programmed cell death 2-like
hsa-miR-485-5p	0	0	0	1	0	0	COX7C	cytochrome c oxidase subunit VIIc
hsa-miR-485-5p	0	0	1	1	0	0	PHPT1	phosphohistidine phosphatase 1
hsa-miR-485-5p	1	0	1	1	1	1	AAMP	angio-associated, migratory cell protein
hsa-miR-485-5p	0	0	0	1	0	0	ART1	ADP-ribosyltransferase 1
hsa-miR-485-5p	0	0	1	1	1	1	PSG2	pregnancy specific beta-1-glycoprotein 2
hsa-miR-485-5p	0	0	0	1	1	1	TRMT2A	tRNA methyltransferase 2 homolog A (S. cerevisiae)
hsa-miR-485-5p	0	0	0	1	0	0	KRT75	keratin 75
hsa-miR-485-5p	0	0	0	1	0	0	GAMT	guanidinoacetate N-methyltransferase
hsa-miR-485-5p	0	0	0	1	0	0	GALNT8	UDP-N-acetyl-alpha-D-galactosamine:polypeptide N-acetylgalactosaminyltransferase 8 (GalNAc-T8)
hsa-miR-485-5p	0	0	0	1	0	0	NSUN5	NOP2/Sun domain family, member 5
hsa-miR-485-5p	0	0	0	1	1	1	ACSBG2	acyl-CoA synthetase bubblegum family member 2
hsa-miR-485-5p	0	0	0	1	0	0	EIF3G	eukaryotic translation initiation factor 3, subunit G
hsa-miR-485-5p	0	0	1	1	0	0	BPIFA2	BPI fold containing family A, member 2
hsa-miR-485-5p	0	0	1	1	1	1	NR0B2	nuclear receptor subfamily 0, group B, member 2
hsa-miR-485-5p	0	0	1	1	0	0	RAMP1	receptor (G protein-coupled) activity modifying protein 1
hsa-miR-485-5p	0	0	1	1	1	1	TRIM47	tripartite motif containing 47
hsa-miR-485-5p	0	0	0	1	0	0	ASGR2	asialoglycoprotein receptor 2
hsa-miR-485-5p	0	0	0	1	0	0	PEMT	phosphatidylethanolamine N-methyltransferase
hsa-miR-485-5p	0	0	1	1	0	0	KRBA1	KRAB-A domain containing 1
hsa-miR-485-5p	0	0	0	1	0	0	RNFT2	ring finger protein, transmembrane 2
hsa-miR-485-5p	0	0	1	1	1	1	CD63	CD63 molecule
hsa-miR-485-5p	1	0	0	1	0	0	KCNH3	potassium voltage-gated channel, subfamily H (eag-related), member 3
hsa-miR-485-5p	0	0	0	1	0	0	MDM2	Mdm2, p53 E3 ubiquitin protein ligase homolog (mouse)
hsa-miR-485-5p	0	0	0	1	1	1	MRPL44	mitochondrial ribosomal protein L44
hsa-miR-485-5p	0	0	0	1	0	0	CAPN11	calpain 11
hsa-miR-485-5p	0	0	0	1	1	1	FGFBP2	fibroblast growth factor binding protein 2
hsa-miR-485-5p	0	0	0	1	0	0	FXYD2	FXYD domain containing ion transport regulator 2
hsa-miR-485-5p	0	0	1	1	0	0	NOX5	NADPH oxidase, EF-hand calcium binding domain 5
hsa-miR-485-5p	0	0	1	1	1	1	TM9SF1	transmembrane 9 superfamily member 1
hsa-miR-485-5p	0	0	1	1	0	0	SPG11	spastic paraplegia 11 (autosomal recessive)
hsa-miR-485-5p	0	0	1	1	0	0	SGCA	sarcoglycan, alpha (50kDa dystrophin-associated glycoprotein)
hsa-miR-485-5p	0	0	0	1	0	0	MOV10L1	Mov10l1, Moloney leukemia virus 10-like 1, homolog (mouse)
hsa-miR-485-5p	0	0	1	1	0	0	CSF2RB	colony stimulating factor 2 receptor, beta, low-affinity (granulocyte-macrophage)
hsa-miR-485-5p	0	0	0	1	0	0	CCDC94	coiled-coil domain containing 94
hsa-miR-485-5p	0	0	0	1	1	1	NUCB1	nucleobindin 1
hsa-miR-485-5p	0	0	1	1	1	1	BARHL1	BarH-like homeobox 1
hsa-miR-485-5p	0	0	1	1	0	0	NGEF	neuronal guanine nucleotide exchange factor
hsa-miR-485-5p	0	0	0	1	1	1	SLC25A23	solute carrier family 25 (mitochondrial carrier; phosphate carrier), member 23
hsa-miR-485-5p	0	0	1	1	1	1	CAPZB	capping protein (actin filament) muscle Z-line, beta
hsa-miR-485-5p	0	0	1	1	1	1	SEC22C	SEC22 vesicle trafficking protein homolog C (S. cerevisiae)
hsa-miR-485-5p	0	0	0	1	1	1	POMC	proopiomelanocortin
hsa-miR-485-5p	0	0	0	1	0	0	TYK2	tyrosine kinase 2
hsa-miR-485-5p	0	0	1	1	1	1	TAX1BP1	Tax1 (human T-cell leukemia virus type I) binding protein 1
hsa-miR-485-5p	0	0	1	1	0	0	PTPN23	protein tyrosine phosphatase, non-receptor type 23
hsa-miR-485-5p	0	0	0	1	0	0	SFRP5	secreted frizzled-related protein 5
hsa-miR-485-5p	0	0	0	1	0	0	PRPF6	PRP6 pre-mRNA processing factor 6 homolog (S. cerevisiae)
hsa-miR-485-5p	0	0	1	1	0	0	GPR84	G protein-coupled receptor 84
hsa-miR-485-5p	0	0	0	1	1	1	VPS33A	vacuolar protein sorting 33 homolog A (S. cerevisiae)
hsa-miR-485-5p	0	0	1	1	1	1	HDC	histidine decarboxylase
hsa-miR-485-5p	0	0	0	1	0	0	ETFA	electron-transfer-flavoprotein, alpha polypeptide
hsa-miR-485-5p	1	0	1	1	0	0	SCAMP2	secretory carrier membrane protein 2
hsa-miR-485-5p	0	0	0	1	0	0	RHCG	Rh family, C glycoprotein
hsa-miR-485-5p	0	0	0	1	0	0	ADAD2	adenosine deaminase domain containing 2
hsa-miR-485-5p	0	0	0	1	1	1	CPNE7	copine VII
hsa-miR-485-5p	0	0	0	1	0	0	ZNF287	zinc finger protein 287
hsa-miR-485-5p	0	0	1	1	0	0	AFG3L2	AFG3 ATPase family gene 3-like 2 (S. cerevisiae)
hsa-miR-485-5p	0	0	1	1	1	1	TNFRSF11A	tumor necrosis factor receptor superfamily, member 11a, NFKB activator
hsa-miR-485-5p	0	0	0	1	0	0	SAMD1	sterile alpha motif domain containing 1
hsa-miR-485-5p	0	0	1	1	1	1	PSG5	pregnancy specific beta-1-glycoprotein 5
hsa-miR-485-5p	0	0	0	1	1	1	PSG4	pregnancy specific beta-1-glycoprotein 4
hsa-miR-485-5p	0	0	1	1	0	0	FCN3	ficolin (collagen/fibrinogen domain containing) 3 (Hakata antigen)
hsa-miR-485-5p	0	0	0	1	0	0	NKD2	naked cuticle homolog 2 (Drosophila)
hsa-miR-485-5p	1	0	1	1	1	1	GABRA6	gamma-aminobutyric acid (GABA) A receptor, alpha 6
hsa-miR-485-5p	0	0	0	1	0	0	KAAG1	kidney associated antigen 1
hsa-miR-485-5p	0	0	0	1	0	0	DENND2A	DENN/MADD domain containing 2A
hsa-miR-485-5p	1	0	1	1	1	1	BIN3	bridging integrator 3
hsa-miR-485-5p	0	0	0	1	1	1	ZNF16	zinc finger protein 16
hsa-miR-485-5p	0	0	0	1	0	0	WDR85	WD repeat domain 85
hsa-miR-485-5p	0	0	0	1	0	0	SCGB1A1	secretoglobin, family 1A, member 1 (uteroglobin)
hsa-miR-485-5p	0	0	1	1	0	0	SERPING1	serpin peptidase inhibitor, clade G (C1 inhibitor), member 1
hsa-miR-485-5p	0	0	1	1	1	1	INCENP	inner centromere protein antigens 135/155kDa
hsa-miR-485-5p	0	0	1	1	1	1	TAGLN	transgelin
hsa-miR-485-5p	0	0	0	1	1	1	NVL	nuclear VCP-like
hsa-miR-485-5p	0	0	0	1	0	0	ZSCAN1	zinc finger and SCAN domain containing 1
hsa-miR-485-5p	1	0	1	1	1	1	GTF2E1	general transcription factor IIE, polypeptide 1, alpha 56kDa
hsa-miR-485-5p	0	0	0	1	0	0	OR4K1	olfactory receptor, family 4, subfamily K, member 1
hsa-miR-485-5p	0	0	1	1	1	1	PPIL3	peptidylprolyl isomerase (cyclophilin)-like 3
hsa-miR-485-5p	0	0	1	1	1	1	RWDD2B	RWD domain containing 2B
hsa-miR-485-5p	0	0	0	1	0	0	CDH15	cadherin 15, type 1, M-cadherin (myotubule)
hsa-miR-485-5p	0	0	1	1	0	0	WNT9B	wingless-type MMTV integration site family, member 9B
hsa-miR-485-5p	1	0	0	1	1	1	G6PD	glucose-6-phosphate dehydrogenase
hsa-miR-485-5p	0	0	0	1	0	0	FTCD	formiminotransferase cyclodeaminase
hsa-miR-485-5p	0	0	1	1	0	0	TLCD1	TLC domain containing 1
hsa-miR-485-5p	0	0	1	1	0	0	THAP8	THAP domain containing 8
hsa-miR-485-5p	0	0	0	1	0	0	CCL23	chemokine (C-C motif) ligand 23
hsa-miR-485-5p	0	0	0	1	0	0	PTX4	pentraxin 4, long
hsa-miR-485-5p	0	0	1	1	0	0	ZFPL1	zinc finger protein-like 1
hsa-miR-485-5p	0	0	0	1	0	0	CABP2	calcium binding protein 2
hsa-miR-485-5p	0	0	0	1	1	1	PDHA2	pyruvate dehydrogenase (lipoamide) alpha 2
hsa-miR-485-5p	0	0	1	1	1	1	PTPRN	protein tyrosine phosphatase, receptor type, N
hsa-miR-485-5p	0	0	1	1	0	0	MON1A	MON1 homolog A (yeast)
hsa-miR-485-5p	1	0	0	1	1	1	SLU7	SLU7 splicing factor homolog (S. cerevisiae)
hsa-miR-485-5p	1	0	0	1	1	1	GPR146	G protein-coupled receptor 146
hsa-miR-485-5p	0	0	0	1	0	0	SERPINA4	serpin peptidase inhibitor, clade A (alpha-1 antiproteinase, antitrypsin), member 4
hsa-miR-485-5p	1	0	1	1	1	1	UEVLD	UEV and lactate/malate dehyrogenase domains
hsa-miR-485-5p	0	0	0	1	0	0	LILRA5	leukocyte immunoglobulin-like receptor, subfamily A (with TM domain), member 5
hsa-miR-485-5p	0	0	1	1	0	0	TMEM88	transmembrane protein 88
hsa-miR-485-5p	0	0	0	1	0	0	EVPL	envoplakin
hsa-miR-485-5p	0	0	0	1	0	0	LTBP3	latent transforming growth factor beta binding protein 3
hsa-miR-485-5p	1	0	0	1	0	0	ATPAF2	ATP synthase mitochondrial F1 complex assembly factor 2
hsa-miR-485-5p	0	0	0	1	0	0	ADCYAP1R1	adenylate cyclase activating polypeptide 1 (pituitary) receptor type I
hsa-miR-485-5p	0	0	0	1	0	0	UTF1	undifferentiated embryonic cell transcription factor 1
hsa-miR-485-5p	1	0	1	1	0	0	PRPF8	PRP8 pre-mRNA processing factor 8 homolog (S. cerevisiae)
hsa-miR-485-5p	0	0	0	1	0	0	FAM83B	family with sequence similarity 83, member B
hsa-miR-485-5p	0	0	0	1	0	0	ANKRD2	ankyrin repeat domain 2 (stretch responsive muscle)
hsa-miR-485-5p	0	0	1	1	1	1	ASCC2	activating signal cointegrator 1 complex subunit 2
hsa-miR-485-5p	0	0	0	1	1	1	SRP68	signal recognition particle 68kDa
hsa-miR-485-5p	0	0	0	1	0	0	RPL4	ribosomal protein L4
hsa-miR-485-5p	0	0	1	1	0	0	MUS81	MUS81 endonuclease homolog (S. cerevisiae)
hsa-miR-485-5p	0	0	0	1	0	0	SNX32	sorting nexin 32
hsa-miR-485-5p	0	0	1	1	1	1	TAOK2	TAO kinase 2
hsa-miR-485-5p	0	0	0	1	0	0	PHYHD1	phytanoyl-CoA dioxygenase domain containing 1
hsa-miR-485-5p	0	0	1	1	1	1	MYEOV	myeloma overexpressed (in a subset of t(11;14) positive multiple myelomas)
hsa-miR-485-5p	1	0	1	1	1	1	TMEM9B	TMEM9 domain family, member B
hsa-miR-485-5p	0	0	0	1	0	0	PPM1J	protein phosphatase, Mg2+/Mn2+ dependent, 1J
hsa-miR-485-5p	1	0	1	1	1	1	AKIP1	A kinase (PRKA) interacting protein 1
hsa-miR-485-5p	1	0	1	1	0	0	LRFN4	leucine rich repeat and fibronectin type III domain containing 4
hsa-miR-485-5p	0	0	1	1	1	1	CCS	copper chaperone for superoxide dismutase
hsa-miR-485-5p	0	0	0	1	1	1	TMEM52	transmembrane protein 52
hsa-miR-485-5p	0	0	1	1	0	0	REC8	REC8 homolog (yeast)
hsa-miR-485-5p	0	0	0	1	0	0	DAK	dihydroxyacetone kinase 2 homolog (S. cerevisiae)
hsa-miR-485-5p	0	0	0	1	0	0	ATHL1	ATH1, acid trehalase-like 1 (yeast)
hsa-miR-485-5p	0	0	1	1	1	1	RMI2	RMI2, RecQ mediated genome instability 2, homolog (S. cerevisiae)
hsa-miR-485-5p	1	0	1	1	1	1	GALE	UDP-galactose-4-epimerase
hsa-miR-485-5p	0	0	1	1	0	0	GMPPA	GDP-mannose pyrophosphorylase A
hsa-miR-485-5p	0	0	0	1	1	1	NOS2	nitric oxide synthase 2, inducible
hsa-miR-485-5p	0	0	1	1	1	1	TSEN2	tRNA splicing endonuclease 2 homolog (S. cerevisiae)
hsa-miR-485-5p	0	0	0	1	1	1	ZNF619	zinc finger protein 619
hsa-miR-485-5p	0	0	0	1	0	0	EXOC3	exocyst complex component 3
hsa-miR-485-5p	1	0	1	1	1	1	TNRC6A	trinucleotide repeat containing 6A
[truncated: 351 more rows]
