# Supplementary material for: Profiling of Selected MicroRNAs in Proliferative Eutopic Endometrium of Women with Ovarian Endometriosis
Source: Biomed Res Int. 2015 Aug 20;2015:760698. doi: 10.1155/2015/760698 (PMC4558423; doi:10.1155/2015/760698)
Supplement: Supplementary file 1 — Table I: The names of miRNAs significantly differentially expressed between eutopic endometrium of patients with endometriosis vs eutopic endometrium of patients without endometriosis. Table II: The associations between miRNA and mRNA, which presents detailed results of the search of six major databases i.e targetscan, tarbase, miranda, mirbase, mirtarget2 and pictar. [file 760698.f1.zip › 760698.f1/Table II/hsa-miR-486-3p.tsv]

miR	targetscan	tarbase	miranda	mirbase	mirtarget2	pictar	GeneSymbol	GeneName
hsa-miR-486-3p	1	0	1	1	1	1	CHD9	chromodomain helicase DNA binding protein 9
hsa-miR-486-3p	1	0	1	1	0	0	SRCAP	Snf2-related CREBBP activator protein
hsa-miR-486-3p	1	0	1	1	0	0	HUWE1	HECT, UBA and WWE domain containing 1, E3 ubiquitin protein ligase
hsa-miR-486-3p	1	0	1	1	1	1	DAAM2	dishevelled associated activator of morphogenesis 2
hsa-miR-486-3p	0	0	1	1	0	0	SIPA1	signal-induced proliferation-associated 1
hsa-miR-486-3p	1	0	1	0	1	1	PTPRT	protein tyrosine phosphatase, receptor type, T
hsa-miR-486-3p	1	0	1	0	1	1	GAS7	growth arrest-specific 7
hsa-miR-486-3p	1	0	1	1	1	1	SGSM2	small G protein signaling modulator 2
hsa-miR-486-3p	0	0	1	1	0	0	PLXNB1	plexin B1
hsa-miR-486-3p	0	0	1	1	0	0	RAP1GAP	RAP1 GTPase activating protein
hsa-miR-486-3p	1	0	1	1	0	0	DENND4B	DENN/MADD domain containing 4B
hsa-miR-486-3p	0	0	1	1	0	0	ZNF862	zinc finger protein 862
hsa-miR-486-3p	0	0	1	1	1	1	PHLDB1	pleckstrin homology-like domain, family B, member 1
hsa-miR-486-3p	0	0	1	1	0	0	ARHGEF2	Rho/Rac guanine nucleotide exchange factor (GEF) 2
hsa-miR-486-3p	1	0	1	1	1	1	PPP6R2	protein phosphatase 6, regulatory subunit 2
hsa-miR-486-3p	1	0	1	0	1	1	SNX13	sorting nexin 13
hsa-miR-486-3p	1	0	1	1	1	1	CAMKK2	calcium/calmodulin-dependent protein kinase kinase 2, beta
hsa-miR-486-3p	1	0	1	1	1	1	DNM3	dynamin 3
hsa-miR-486-3p	1	0	1	1	1	1	SEMA4F	sema domain, immunoglobulin domain (Ig), transmembrane domain (TM) and short cytoplasmic domain, (semaphorin) 4F
hsa-miR-486-3p	1	0	1	1	1	1	CPEB3	cytoplasmic polyadenylation element binding protein 3
hsa-miR-486-3p	1	0	1	1	1	1	CIT	citron (rho-interacting, serine/threonine kinase 21)
hsa-miR-486-3p	1	0	1	1	1	1	C11orf9	chromosome 11 open reading frame 9
hsa-miR-486-3p	1	0	1	1	1	1	CNOT1	CCR4-NOT transcription complex, subunit 1
hsa-miR-486-3p	1	0	1	1	0	0	KIAA1045	KIAA1045
hsa-miR-486-3p	1	0	1	1	1	1	PRRC2C	proline-rich coiled-coil 2C
hsa-miR-486-3p	0	0	1	0	0	0	IQSEC3	IQ motif and Sec7 domain 3
hsa-miR-486-3p	1	0	1	1	1	1	PHF8	PHD finger protein 8
hsa-miR-486-3p	0	0	1	0	0	0	C11orf21	chromosome 11 open reading frame 21
hsa-miR-486-3p	1	0	1	0	1	1	SRGAP3	SLIT-ROBO Rho GTPase activating protein 3
hsa-miR-486-3p	0	0	1	1	0	0	ZC4H2	zinc finger, C4H2 domain containing
hsa-miR-486-3p	1	0	1	1	0	0	KIAA1210	KIAA1210
hsa-miR-486-3p	1	0	1	1	1	1	STK36	serine/threonine kinase 36
hsa-miR-486-3p	0	0	1	1	1	1	TCF7L2	transcription factor 7-like 2 (T-cell specific, HMG-box)
hsa-miR-486-3p	1	0	1	0	0	0	ODZ4	odz, odd Oz/ten-m homolog 4 (Drosophila)
hsa-miR-486-3p	1	0	1	0	0	0	NYNRIN	NYN domain and retroviral integrase containing
hsa-miR-486-3p	1	0	1	1	1	1	SEMA6A	sema domain, transmembrane domain (TM), and cytoplasmic domain, (semaphorin) 6A
hsa-miR-486-3p	1	0	1	1	0	0	EBF4	early B-cell factor 4
hsa-miR-486-3p	0	0	1	0	1	1	MUC3B	mucin 3B, cell surface associated
hsa-miR-486-3p	1	0	1	0	0	0	PITPNM2	phosphatidylinositol transfer protein, membrane-associated 2
hsa-miR-486-3p	1	0	1	1	0	0	KIAA1462	KIAA1462
hsa-miR-486-3p	1	0	1	1	1	1	FRAS1	Fraser syndrome 1
hsa-miR-486-3p	0	0	1	0	0	0	COL20A1	collagen, type XX, alpha 1
hsa-miR-486-3p	1	0	1	0	1	1	LMO3	LIM domain only 3 (rhombotin-like 2)
hsa-miR-486-3p	1	0	1	1	1	1	INADL	InaD-like (Drosophila)
hsa-miR-486-3p	1	0	1	1	0	0	NCKAP5L	NCK-associated protein 5-like
hsa-miR-486-3p	1	0	1	1	1	1	ZNF532	zinc finger protein 532
hsa-miR-486-3p	1	0	1	1	1	1	MOV10	Mov10, Moloney leukemia virus 10, homolog (mouse)
hsa-miR-486-3p	1	0	1	0	0	0	TANC2	tetratricopeptide repeat, ankyrin repeat and coiled-coil containing 2
hsa-miR-486-3p	0	0	1	0	0	0	TTC28-AS1	TTC28 antisense RNA 1
hsa-miR-486-3p	0	0	1	0	0	0	LOC440792	proline dehydrogenase (oxidase) 1 pseudogene
hsa-miR-486-3p	1	0	1	1	0	0	SEMA4C	sema domain, immunoglobulin domain (Ig), transmembrane domain (TM) and short cytoplasmic domain, (semaphorin) 4C
hsa-miR-486-3p	0	0	1	0	1	1	SETD5	SET domain containing 5
hsa-miR-486-3p	0	0	1	1	0	0	NCR3	natural cytotoxicity triggering receptor 3
hsa-miR-486-3p	1	0	1	1	1	1	IKZF4	IKAROS family zinc finger 4 (Eos)
hsa-miR-486-3p	0	0	1	1	0	0	COL27A1	collagen, type XXVII, alpha 1
hsa-miR-486-3p	1	0	1	1	1	1	CSRNP1	cysteine-serine-rich nuclear protein 1
hsa-miR-486-3p	0	0	1	1	1	1	LENG8	leukocyte receptor cluster (LRC) member 8
hsa-miR-486-3p	1	0	1	1	1	1	SH3TC2	SH3 domain and tetratricopeptide repeats 2
hsa-miR-486-3p	1	0	1	0	0	0	FAT3	FAT tumor suppressor homolog 3 (Drosophila)
hsa-miR-486-3p	1	0	1	0	1	1	RNF43	ring finger protein 43
hsa-miR-486-3p	1	0	1	0	0	0	RNF169	ring finger protein 169
hsa-miR-486-3p	1	0	1	0	0	0	ZBTB34	zinc finger and BTB domain containing 34
hsa-miR-486-3p	0	0	1	0	0	0	ARHGEF28	Rho guanine nucleotide exchange factor (GEF) 28
hsa-miR-486-3p	0	0	1	1	0	0	FAM22D	family with sequence similarity 22, member D
hsa-miR-486-3p	0	0	1	1	1	1	ACPP	acid phosphatase, prostate
hsa-miR-486-3p	0	0	1	1	0	0	DDB2	damage-specific DNA binding protein 2, 48kDa
hsa-miR-486-3p	0	0	1	1	0	0	SSPO	SCO-spondin homolog (Bos taurus)
hsa-miR-486-3p	1	0	1	1	1	1	KCNMA1	potassium large conductance calcium-activated channel, subfamily M, alpha member 1
hsa-miR-486-3p	1	0	1	1	1	1	SLC43A2	solute carrier family 43, member 2
hsa-miR-486-3p	1	1	1	1	1	1	BACE1	beta-site APP-cleaving enzyme 1
hsa-miR-486-3p	1	0	1	1	1	1	NRXN2	neurexin 2
hsa-miR-486-3p	0	0	1	1	0	0	DBP	D site of albumin promoter (albumin D-box) binding protein
hsa-miR-486-3p	1	0	1	0	1	1	LRBA	LPS-responsive vesicle trafficking, beach and anchor containing
hsa-miR-486-3p	1	0	1	1	1	1	BACH2	BTB and CNC homology 1, basic leucine zipper transcription factor 2
hsa-miR-486-3p	1	0	1	1	1	1	RPS6KA3	ribosomal protein S6 kinase, 90kDa, polypeptide 3
hsa-miR-486-3p	1	0	1	1	0	0	ELN	elastin
hsa-miR-486-3p	1	0	1	1	1	1	MEF2A	myocyte enhancer factor 2A
hsa-miR-486-3p	1	0	1	1	1	1	PCCB	propionyl CoA carboxylase, beta polypeptide
hsa-miR-486-3p	0	0	1	1	1	1	DNM1	dynamin 1
hsa-miR-486-3p	1	0	1	0	1	1	MPPED2	metallophosphoesterase domain containing 2
hsa-miR-486-3p	1	0	1	1	0	0	CACNB1	calcium channel, voltage-dependent, beta 1 subunit
hsa-miR-486-3p	1	0	1	1	1	1	FMR1	fragile X mental retardation 1
hsa-miR-486-3p	1	0	1	1	1	1	PRKACB	protein kinase, cAMP-dependent, catalytic, beta
hsa-miR-486-3p	0	0	1	1	1	1	DDX39B	DEAD (Asp-Glu-Ala-Asp) box polypeptide 39B
hsa-miR-486-3p	1	0	1	1	1	1	DMTF1	cyclin D binding myb-like transcription factor 1
hsa-miR-486-3p	0	0	1	1	1	1	RXRB	retinoid X receptor, beta
hsa-miR-486-3p	1	0	1	1	1	1	PPFIA1	protein tyrosine phosphatase, receptor type, f polypeptide (PTPRF), interacting protein (liprin), alpha 1
hsa-miR-486-3p	1	0	1	1	0	0	TNK2	tyrosine kinase, non-receptor, 2
hsa-miR-486-3p	1	0	1	1	1	1	TBX2	T-box 2
hsa-miR-486-3p	1	0	1	0	1	1	CDON	Cdon homolog (mouse)
hsa-miR-486-3p	0	0	1	1	1	1	RYR1	ryanodine receptor 1 (skeletal)
hsa-miR-486-3p	1	0	1	1	0	0	FGFR3	fibroblast growth factor receptor 3
hsa-miR-486-3p	1	0	1	1	1	1	MINK1	misshapen-like kinase 1
hsa-miR-486-3p	0	0	1	1	1	1	PPP1R12C	protein phosphatase 1, regulatory subunit 12C
hsa-miR-486-3p	0	0	1	1	0	0	IGFBP2	insulin-like growth factor binding protein 2, 36kDa
hsa-miR-486-3p	1	0	1	1	1	1	PDLIM5	PDZ and LIM domain 5
hsa-miR-486-3p	0	0	1	1	0	0	ITGA2B	integrin, alpha 2b (platelet glycoprotein IIb of IIb/IIIa complex, antigen CD41)
hsa-miR-486-3p	0	0	1	1	0	0	HLA-DMB	major histocompatibility complex, class II, DM beta
hsa-miR-486-3p	0	0	1	1	0	0	CFLAR	CASP8 and FADD-like apoptosis regulator
hsa-miR-486-3p	0	0	1	1	1	1	ALDH3B1	aldehyde dehydrogenase 3 family, member B1
hsa-miR-486-3p	0	0	1	1	0	0	SLC22A8	solute carrier family 22 (organic anion transporter), member 8
hsa-miR-486-3p	0	0	1	1	0	0	MBD1	methyl-CpG binding domain protein 1
hsa-miR-486-3p	1	0	1	1	0	0	ARRB2	arrestin, beta 2
hsa-miR-486-3p	1	0	1	1	1	1	CRTAM	cytotoxic and regulatory T cell molecule
hsa-miR-486-3p	0	0	1	1	0	0	TRIM27	tripartite motif containing 27
hsa-miR-486-3p	1	0	1	1	1	1	ANPEP	alanyl (membrane) aminopeptidase
hsa-miR-486-3p	1	0	1	1	1	1	MYO9B	myosin IXB
hsa-miR-486-3p	1	0	1	1	1	1	MEF2D	myocyte enhancer factor 2D
hsa-miR-486-3p	0	0	1	1	1	1	EIF4G1	eukaryotic translation initiation factor 4 gamma, 1
hsa-miR-486-3p	0	0	1	0	0	0	LOC646813	DEAH (Asp-Glu-Ala-His) box polypeptide 9 pseudogene
hsa-miR-486-3p	0	0	1	0	0	0	MIAT	myocardial infarction associated transcript (non-protein coding)
hsa-miR-486-3p	1	0	1	0	1	1	MLL2	myeloid/lymphoid or mixed-lineage leukemia 2
hsa-miR-486-3p	0	0	1	1	1	1	MFSD11	major facilitator superfamily domain containing 11
hsa-miR-486-3p	0	0	1	0	0	0	ALOX12P2	arachidonate 12-lipoxygenase pseudogene 2
hsa-miR-486-3p	0	0	1	1	0	0	ITGA7	integrin, alpha 7
hsa-miR-486-3p	0	0	1	0	0	0	FP588	uncharacterized LOC92973
hsa-miR-486-3p	0	0	1	1	0	0	LTBP4	latent transforming growth factor beta binding protein 4
hsa-miR-486-3p	0	0	1	1	1	1	CREB3L1	cAMP responsive element binding protein 3-like 1
hsa-miR-486-3p	1	0	1	1	1	1	CTNND1	catenin (cadherin-associated protein), delta 1
hsa-miR-486-3p	1	0	1	1	1	1	ERLIN1	ER lipid raft associated 1
hsa-miR-486-3p	1	0	1	1	1	1	CBFA2T2	core-binding factor, runt domain, alpha subunit 2; translocated to, 2
hsa-miR-486-3p	1	0	1	1	1	1	TMEM159	transmembrane protein 159
hsa-miR-486-3p	1	0	1	1	0	0	SLC44A2	solute carrier family 44, member 2
hsa-miR-486-3p	1	0	1	1	0	0	PAK1	p21 protein (Cdc42/Rac)-activated kinase 1
hsa-miR-486-3p	0	0	1	1	1	1	EPN1	epsin 1
hsa-miR-486-3p	1	0	1	1	1	1	PDE4A	phosphodiesterase 4A, cAMP-specific
hsa-miR-486-3p	0	0	1	1	1	1	SSBP2	single-stranded DNA binding protein 2
hsa-miR-486-3p	0	0	1	1	1	1	ERAL1	Era G-protein-like 1 (E. coli)
hsa-miR-486-3p	1	0	1	1	1	1	ZNF236	zinc finger protein 236
hsa-miR-486-3p	0	0	1	1	0	0	CARD10	caspase recruitment domain family, member 10
hsa-miR-486-3p	0	0	1	1	1	1	GNAS	GNAS complex locus
hsa-miR-486-3p	0	0	1	1	1	1	PCBP4	poly(rC) binding protein 4
hsa-miR-486-3p	0	0	1	1	1	1	SH2D1A	SH2 domain containing 1A
hsa-miR-486-3p	1	0	1	1	1	1	SLMAP	sarcolemma associated protein
hsa-miR-486-3p	0	0	1	1	1	1	IL18BP	interleukin 18 binding protein
hsa-miR-486-3p	0	0	1	1	1	1	MSTO1	misato homolog 1 (Drosophila)
hsa-miR-486-3p	1	0	1	0	1	1	FAM19A5	family with sequence similarity 19 (chemokine (C-C motif)-like), member A5
hsa-miR-486-3p	1	0	1	1	1	1	HMG20A	high mobility group 20A
hsa-miR-486-3p	1	0	1	0	1	1	SLC34A2	solute carrier family 34 (sodium phosphate), member 2
hsa-miR-486-3p	1	0	1	1	1	1	ZNF202	zinc finger protein 202
hsa-miR-486-3p	0	0	1	1	1	1	FAM114A2	family with sequence similarity 114, member A2
hsa-miR-486-3p	1	0	1	1	0	0	ZCCHC4	zinc finger, CCHC domain containing 4
hsa-miR-486-3p	1	0	1	1	1	1	C16orf70	chromosome 16 open reading frame 70
hsa-miR-486-3p	0	0	1	0	1	1	CLDN2	claudin 2
hsa-miR-486-3p	1	0	1	1	1	1	SNPH	syntaphilin
hsa-miR-486-3p	1	0	1	1	1	1	C3orf18	chromosome 3 open reading frame 18
hsa-miR-486-3p	0	0	1	1	1	1	CHPT1	choline phosphotransferase 1
hsa-miR-486-3p	0	0	1	0	0	0	BPESC1	blepharophimosis, epicanthus inversus and ptosis, candidate 1 (non-protein coding)
hsa-miR-486-3p	1	0	1	1	1	1	TSC22D2	TSC22 domain family, member 2
hsa-miR-486-3p	0	0	1	1	1	1	CHRD	chordin
hsa-miR-486-3p	1	0	1	1	1	1	OGT	O-linked N-acetylglucosamine (GlcNAc) transferase
hsa-miR-486-3p	1	0	1	1	1	1	DESI2	desumoylating isopeptidase 2
hsa-miR-486-3p	1	0	1	1	1	1	SNTB2	syntrophin, beta 2 (dystrophin-associated protein A1, 59kDa, basic component 2)
hsa-miR-486-3p	0	0	1	1	1	1	KIAA1704	KIAA1704
hsa-miR-486-3p	0	0	1	1	0	0	HES6	hairy and enhancer of split 6 (Drosophila)
hsa-miR-486-3p	1	0	1	0	1	1	TRPS1	trichorhinophalangeal syndrome I
hsa-miR-486-3p	1	0	1	1	1	1	ERGIC1	endoplasmic reticulum-golgi intermediate compartment (ERGIC) 1
hsa-miR-486-3p	0	0	1	0	1	1	PRDM6	PR domain containing 6
hsa-miR-486-3p	0	0	1	1	1	1	RASD2	RASD family, member 2
hsa-miR-486-3p	0	0	1	1	0	0	KCNK6	potassium channel, subfamily K, member 6
hsa-miR-486-3p	0	0	1	1	0	0	GHRHR	growth hormone releasing hormone receptor
hsa-miR-486-3p	0	0	1	1	0	0	HPSE2	heparanase 2
hsa-miR-486-3p	1	0	1	1	1	1	TAGLN3	transgelin 3
hsa-miR-486-3p	1	0	1	1	1	1	KLHL12	kelch-like 12 (Drosophila)
hsa-miR-486-3p	0	0	1	1	1	1	SLC37A1	solute carrier family 37 (glycerol-3-phosphate transporter), member 1
hsa-miR-486-3p	1	0	1	1	1	1	SPTBN4	spectrin, beta, non-erythrocytic 4
hsa-miR-486-3p	1	0	1	1	0	0	RAB34	RAB34, member RAS oncogene family
hsa-miR-486-3p	1	0	1	1	1	1	LETMD1	LETM1 domain containing 1
hsa-miR-486-3p	0	0	1	1	0	0	ZAN	zonadhesin
hsa-miR-486-3p	0	0	1	1	0	0	NOX5	NADPH oxidase, EF-hand calcium binding domain 5
hsa-miR-486-3p	1	0	1	0	1	1	WIPF2	WAS/WASL interacting protein family, member 2
hsa-miR-486-3p	0	0	1	0	0	0	C17orf109	chromosome 17 open reading frame 109
hsa-miR-486-3p	0	0	1	0	0	0	MYO15B	myosin XVB pseudogene
hsa-miR-486-3p	1	0	1	1	1	1	ST3GAL3	ST3 beta-galactoside alpha-2,3-sialyltransferase 3
hsa-miR-486-3p	0	0	1	0	0	0	RMST	rhabdomyosarcoma 2 associated transcript (non-protein coding)
hsa-miR-486-3p	0	0	1	1	1	1	PPP1R1B	protein phosphatase 1, regulatory (inhibitor) subunit 1B
hsa-miR-486-3p	0	0	1	0	0	0	RESP18	regulated endocrine-specific protein 18 homolog (rat)
hsa-miR-486-3p	1	0	1	1	1	1	SLC35A4	solute carrier family 35, member A4
hsa-miR-486-3p	0	0	1	1	0	0	RASGEF1C	RasGEF domain family, member 1C
hsa-miR-486-3p	1	0	1	1	0	0	POLR2J3	polymerase (RNA) II (DNA directed) polypeptide J3
hsa-miR-486-3p	0	0	1	1	0	0	MT1E	metallothionein 1E
hsa-miR-486-3p	0	0	1	1	1	1	AMPH	amphiphysin
hsa-miR-486-3p	1	0	1	1	1	1	TRIP10	thyroid hormone receptor interactor 10
hsa-miR-486-3p	1	0	1	0	1	1	TXLNA	taxilin alpha
hsa-miR-486-3p	0	0	1	1	0	0	TREML1	triggering receptor expressed on myeloid cells-like 1
hsa-miR-486-3p	1	0	1	1	0	0	PNPLA6	patatin-like phospholipase domain containing 6
hsa-miR-486-3p	1	0	1	1	1	1	FLNC	filamin C, gamma
hsa-miR-486-3p	0	0	1	1	1	1	MTHFR	methylenetetrahydrofolate reductase (NAD(P)H)
hsa-miR-486-3p	1	0	1	1	1	1	UBAP2L	ubiquitin associated protein 2-like
hsa-miR-486-3p	0	0	1	1	0	0	TREX1	three prime repair exonuclease 1
hsa-miR-486-3p	1	0	1	1	0	0	SEZ6L2	seizure related 6 homolog (mouse)-like 2
hsa-miR-486-3p	1	0	1	1	1	1	CACNA2D2	calcium channel, voltage-dependent, alpha 2/delta subunit 2
hsa-miR-486-3p	0	0	1	0	0	0	CACNA2D3	calcium channel, voltage-dependent, alpha 2/delta subunit 3
hsa-miR-486-3p	0	0	1	1	1	1	DMRTC1	DMRT-like family C1
hsa-miR-486-3p	0	0	1	1	0	0	DMRTC1B	DMRT-like family C1B
hsa-miR-486-3p	0	0	1	1	1	1	CD28	CD28 molecule
hsa-miR-486-3p	0	0	1	1	1	1	WWTR1	WW domain containing transcription regulator 1
hsa-miR-486-3p	0	0	1	0	0	0	CD177	CD177 molecule
hsa-miR-486-3p	1	0	1	1	1	1	PALM2	paralemmin 2
hsa-miR-486-3p	0	0	1	0	0	0	LY6G6E	lymphocyte antigen 6 complex, locus G6E (pseudogene)
hsa-miR-486-3p	1	0	1	1	1	1	NRXN3	neurexin 3
hsa-miR-486-3p	1	0	1	1	1	1	ARL4C	ADP-ribosylation factor-like 4C
hsa-miR-486-3p	0	0	1	1	1	1	TFEB	transcription factor EB
hsa-miR-486-3p	1	0	1	1	1	1	XIRP1	xin actin-binding repeat containing 1
hsa-miR-486-3p	0	0	1	1	1	1	PPARG	peroxisome proliferator-activated receptor gamma
hsa-miR-486-3p	1	0	1	1	1	1	SLC35A1	solute carrier family 35 (CMP-sialic acid transporter), member A1
hsa-miR-486-3p	0	0	1	1	1	1	ESRP1	epithelial splicing regulatory protein 1
hsa-miR-486-3p	0	0	1	1	1	1	PARP16	poly (ADP-ribose) polymerase family, member 16
hsa-miR-486-3p	0	0	1	0	0	0	FLJ20518	FSHD region gene 2 family, member C pseudogene
hsa-miR-486-3p	0	0	1	0	0	0	TUG1	taurine upregulated 1 (non-protein coding)
hsa-miR-486-3p	0	0	1	1	1	1	SMOX	spermine oxidase
hsa-miR-486-3p	1	0	1	1	1	1	SLC7A10	solute carrier family 7 (neutral amino acid transporter light chain, asc system), member 10
hsa-miR-486-3p	0	0	1	1	1	1	TAX1BP3	Tax1 (human T-cell leukemia virus type I) binding protein 3
hsa-miR-486-3p	0	0	1	1	1	1	STOX2	storkhead box 2
hsa-miR-486-3p	0	0	1	1	1	1	RNF220	ring finger protein 220
hsa-miR-486-3p	1	0	1	1	1	1	CADM3	cell adhesion molecule 3
hsa-miR-486-3p	1	0	1	1	1	1	EIF2C1	eukaryotic translation initiation factor 2C, 1
hsa-miR-486-3p	1	0	1	1	1	1	PTBP3	polypyrimidine tract binding protein 3
hsa-miR-486-3p	1	0	1	1	1	1	ACER3	alkaline ceramidase 3
hsa-miR-486-3p	1	0	1	1	1	1	KLHDC8B	kelch domain containing 8B
hsa-miR-486-3p	1	0	1	1	1	1	HNRNPUL1	heterogeneous nuclear ribonucleoprotein U-like 1
hsa-miR-486-3p	1	0	1	1	1	1	C12orf23	chromosome 12 open reading frame 23
hsa-miR-486-3p	0	0	1	1	0	0	MLST8	MTOR associated protein, LST8 homolog (S. cerevisiae)
hsa-miR-486-3p	1	0	1	1	0	0	PBXIP1	pre-B-cell leukemia homeobox interacting protein 1
hsa-miR-486-3p	1	0	1	0	1	1	LIN28A	lin-28 homolog A (C. elegans)
hsa-miR-486-3p	0	0	1	1	0	0	CPSF3L	cleavage and polyadenylation specific factor 3-like
hsa-miR-486-3p	0	0	1	0	0	0	LOC149134	uncharacterized LOC149134
hsa-miR-486-3p	0	0	1	0	0	0	DUXAP10	double homeobox A pseudogene 10
hsa-miR-486-3p	0	0	1	1	0	0	JMJD4	jumonji domain containing 4
hsa-miR-486-3p	1	0	1	1	1	1	WDTC1	WD and tetratricopeptide repeats 1
hsa-miR-486-3p	0	0	1	1	1	1	ARMC5	armadillo repeat containing 5
hsa-miR-486-3p	1	0	1	1	0	0	FASTK	Fas-activated serine/threonine kinase
hsa-miR-486-3p	0	0	1	1	1	1	C14orf118	chromosome 14 open reading frame 118
hsa-miR-486-3p	0	0	1	1	1	1	CLEC4M	C-type lectin domain family 4, member M
hsa-miR-486-3p	0	0	1	0	0	0	LOC284561	uncharacterized LOC284561
hsa-miR-486-3p	1	0	1	1	1	1	BAZ2A	bromodomain adjacent to zinc finger domain, 2A
hsa-miR-486-3p	1	0	1	1	1	1	ARHGEF15	Rho guanine nucleotide exchange factor (GEF) 15
hsa-miR-486-3p	1	0	1	1	0	0	ST6GALNAC6	ST6 (alpha-N-acetyl-neuraminyl-2,3-beta-galactosyl-1,3)-N-acetylgalactosaminide alpha-2,6-sialyltransferase 6
hsa-miR-486-3p	0	0	1	1	1	1	CDKAL1	CDK5 regulatory subunit associated protein 1-like 1
hsa-miR-486-3p	0	0	1	0	1	1	FLJ14186	uncharacterized LOC401149
hsa-miR-486-3p	0	0	1	0	0	0	LOC286059	tumor necrosis factor receptor superfamily, member 10d, decoy with truncated death domain pseudogene
hsa-miR-486-3p	1	0	1	1	1	1	SCAF1	SR-related CTD-associated factor 1
hsa-miR-486-3p	0	0	1	0	0	0	IFFO2	intermediate filament family orphan 2
hsa-miR-486-3p	0	0	1	1	0	0	SPON2	spondin 2, extracellular matrix protein
hsa-miR-486-3p	1	0	1	0	1	1	STK40	serine/threonine kinase 40
hsa-miR-486-3p	0	0	1	0	0	0	FLJ21408	uncharacterized LOC400512
hsa-miR-486-3p	0	0	1	0	0	0	RASAL3	RAS protein activator like 3
hsa-miR-486-3p	0	0	1	0	1	1	HEMK1	HemK methyltransferase family member 1
hsa-miR-486-3p	0	0	1	0	1	1	FLJ22447	uncharacterized LOC400221
hsa-miR-486-3p	0	0	1	1	0	0	PIF1	PIF1 5'-to-3' DNA helicase homolog (S. cerevisiae)
hsa-miR-486-3p	0	0	1	0	1	1	FLJ22763	uncharacterized LOC401081
hsa-miR-486-3p	1	0	1	1	1	1	DCAF8	DDB1 and CUL4 associated factor 8
hsa-miR-486-3p	0	0	1	1	0	0	ZNF276	zinc finger protein 276
hsa-miR-486-3p	0	0	1	0	1	1	RPL10	ribosomal protein L10
hsa-miR-486-3p	1	0	1	1	1	1	RNF185	ring finger protein 185
hsa-miR-486-3p	1	0	1	1	1	1	LRP4	low density lipoprotein receptor-related protein 4
hsa-miR-486-3p	1	0	1	1	1	1	GORASP2	golgi reassembly stacking protein 2, 55kDa
hsa-miR-486-3p	1	0	1	1	1	1	FAM53C	family with sequence similarity 53, member C
hsa-miR-486-3p	1	0	1	1	1	1	NFASC	neurofascin
hsa-miR-486-3p	0	0	1	0	0	0	JAKMIP2-AS1	JAKMIP2 antisense RNA 1
hsa-miR-486-3p	0	0	1	1	1	1	DTL	denticleless E3 ubiquitin protein ligase homolog (Drosophila)
hsa-miR-486-3p	1	0	1	0	1	1	CCNL2	cyclin L2
hsa-miR-486-3p	0	0	1	1	1	1	SNAP47	synaptosomal-associated protein, 47kDa
hsa-miR-486-3p	0	0	1	1	0	0	IMPDH1	IMP (inosine 5'-monophosphate) dehydrogenase 1
hsa-miR-486-3p	0	0	1	0	0	0	KIAA0664L3	KIAA0664-like 3
hsa-miR-486-3p	1	0	1	1	0	0	C17orf70	chromosome 17 open reading frame 70
hsa-miR-486-3p	1	0	1	1	1	1	C7orf43	chromosome 7 open reading frame 43
hsa-miR-486-3p	0	0	1	1	0	0	FAM153B	family with sequence similarity 153, member B
hsa-miR-486-3p	0	0	1	1	1	1	C8orf46	chromosome 8 open reading frame 46
hsa-miR-486-3p	1	0	1	0	1	1	AP1G1	adaptor-related protein complex 1, gamma 1 subunit
hsa-miR-486-3p	0	0	1	1	1	1	THEM6	thioesterase superfamily member 6
hsa-miR-486-3p	1	0	1	1	1	1	DLGAP4	discs, large (Drosophila) homolog-associated protein 4
hsa-miR-486-3p	1	0	1	1	0	0	DCTN1	dynactin 1
hsa-miR-486-3p	1	0	1	1	0	0	SPEG	SPEG complex locus
hsa-miR-486-3p	0	0	1	0	0	0	FLJ30838	uncharacterized LOC400955
hsa-miR-486-3p	0	0	1	1	1	1	CCND3	cyclin D3
hsa-miR-486-3p	1	0	1	1	1	1	FRMD6	FERM domain containing 6
hsa-miR-486-3p	0	0	1	0	0	0	LOC219688	uncharacterized LOC219688
hsa-miR-486-3p	0	0	1	0	0	0	FLJ31104	uncharacterized LOC441072
hsa-miR-486-3p	0	0	1	0	1	1	C17orf108	chromosome 17 open reading frame 108
hsa-miR-486-3p	1	0	1	1	1	1	DIXDC1	DIX domain containing 1
hsa-miR-486-3p	1	0	1	1	0	0	MEPCE	methylphosphate capping enzyme
hsa-miR-486-3p	1	0	1	0	1	1	RNF165	ring finger protein 165
hsa-miR-486-3p	0	0	1	0	0	0	LOC440894	uncharacterized LOC440894
hsa-miR-486-3p	0	0	1	1	0	0	BEAN1	brain expressed, associated with NEDD4, 1
hsa-miR-486-3p	0	0	1	0	0	0	BTBD19	BTB (POZ) domain containing 19
hsa-miR-486-3p	1	0	1	1	1	1	LMNA	lamin A/C
hsa-miR-486-3p	0	0	1	1	1	1	SEPT5	septin 5
hsa-miR-486-3p	1	0	1	1	1	1	SHISA5	shisa homolog 5 (Xenopus laevis)
hsa-miR-486-3p	1	0	1	1	1	1	AGPAT1	1-acylglycerol-3-phosphate O-acyltransferase 1 (lysophosphatidic acid acyltransferase, alpha)
hsa-miR-486-3p	0	0	1	0	0	0	KIAA1257	KIAA1257
hsa-miR-486-3p	1	0	1	1	1	1	ZIC4	Zic family member 4
hsa-miR-486-3p	1	0	1	1	1	1	SCAMP5	secretory carrier membrane protein 5
hsa-miR-486-3p	0	0	1	0	0	0	LOC284600	uncharacterized LOC284600
hsa-miR-486-3p	1	0	1	1	1	1	CLCN5	chloride channel, voltage-sensitive 5
hsa-miR-486-3p	1	0	1	1	1	1	SORBS2	sorbin and SH3 domain containing 2
hsa-miR-486-3p	0	0	1	1	0	0	ACOT8	acyl-CoA thioesterase 8
hsa-miR-486-3p	0	0	1	1	1	1	IPO4	importin 4
hsa-miR-486-3p	0	0	1	0	0	0	LOC255187	hCG1980447
hsa-miR-486-3p	0	0	1	0	0	0	MAGI1-IT1	MAGI1 intronic transcript 1 (non-protein coding)
hsa-miR-486-3p	0	0	1	1	0	0	HECTD3	HECT domain containing E3 ubiquitin protein ligase 3
hsa-miR-486-3p	0	0	1	1	0	0	SLC39A4	solute carrier family 39 (zinc transporter), member 4
hsa-miR-486-3p	0	0	1	0	1	1	THAP6	THAP domain containing 6
hsa-miR-486-3p	0	0	1	1	0	0	RELT	RELT tumor necrosis factor receptor
hsa-miR-486-3p	0	0	1	1	0	0	COMMD4	COMM domain containing 4
hsa-miR-486-3p	0	0	1	1	0	0	MEF2BNB-MEF2B	MEF2BNB-MEF2B readthrough
hsa-miR-486-3p	0	0	1	1	1	1	PSME3	proteasome (prosome, macropain) activator subunit 3 (PA28 gamma; Ki)
hsa-miR-486-3p	0	0	1	1	1	1	C14orf79	chromosome 14 open reading frame 79
hsa-miR-486-3p	1	0	1	1	1	1	MAP3K11	mitogen-activated protein kinase kinase kinase 11
hsa-miR-486-3p	0	0	1	0	0	0	LOC100125918	uncharacterized LOC100125918
hsa-miR-486-3p	0	0	1	0	0	0	ANTXRL	anthrax toxin receptor-like
hsa-miR-486-3p	0	0	1	1	0	0	NXF2	nuclear RNA export factor 2
hsa-miR-486-3p	0	0	1	1	1	1	MS4A14	membrane-spanning 4-domains, subfamily A, member 14
hsa-miR-486-3p	0	0	1	1	0	0	HSD3B7	hydroxy-delta-5-steroid dehydrogenase, 3 beta- and steroid delta-isomerase 7
hsa-miR-486-3p	0	0	1	1	0	0	UBAP2	ubiquitin associated protein 2
hsa-miR-486-3p	1	0	1	1	0	0	TCF7	transcription factor 7 (T-cell specific, HMG-box)
hsa-miR-486-3p	0	0	1	1	0	0	FAM156A	family with sequence similarity 156, member A
hsa-miR-486-3p	0	0	1	0	0	0	UBE2QL1	ubiquitin-conjugating enzyme E2Q family-like 1
hsa-miR-486-3p	0	0	1	1	0	0	CD320	CD320 molecule
hsa-miR-486-3p	0	0	1	1	0	0	CD37	CD37 molecule
hsa-miR-486-3p	0	0	1	0	0	0	C6orf228	chromosome 6 open reading frame 228
hsa-miR-486-3p	0	0	1	1	0	0	TRIM41	tripartite motif containing 41
hsa-miR-486-3p	1	0	1	1	1	1	FAM102A	family with sequence similarity 102, member A
hsa-miR-486-3p	0	0	1	1	0	0	GRIP2	glutamate receptor interacting protein 2
hsa-miR-486-3p	0	0	1	1	0	0	SYTL1	synaptotagmin-like 1
hsa-miR-486-3p	1	0	1	1	1	1	BLCAP	bladder cancer associated protein
hsa-miR-486-3p	0	0	1	1	1	1	ZFAND2B	zinc finger, AN1-type domain 2B
hsa-miR-486-3p	1	0	1	1	1	1	PRRT2	proline-rich transmembrane protein 2
hsa-miR-486-3p	0	0	1	1	0	0	NISCH	nischarin
hsa-miR-486-3p	1	0	1	1	1	1	NOTCH2NL	notch 2 N-terminal like
hsa-miR-486-3p	1	0	1	1	0	0	B3GAT3	beta-1,3-glucuronyltransferase 3 (glucuronosyltransferase I)
hsa-miR-486-3p	0	0	1	1	1	1	CAMKV	CaM kinase-like vesicle-associated
hsa-miR-486-3p	0	0	1	1	0	0	LGR5	leucine-rich repeat containing G protein-coupled receptor 5
hsa-miR-486-3p	1	0	1	1	0	0	MMP11	matrix metallopeptidase 11 (stromelysin 3)
hsa-miR-486-3p	1	0	1	1	1	1	PIP4K2C	phosphatidylinositol-5-phosphate 4-kinase, type II, gamma
hsa-miR-486-3p	0	0	1	1	0	0	PIGO	phosphatidylinositol glycan anchor biosynthesis, class O
hsa-miR-486-3p	1	0	1	1	1	1	CYP46A1	cytochrome P450, family 46, subfamily A, polypeptide 1
hsa-miR-486-3p	0	0	1	1	0	0	CTNNBL1	catenin, beta like 1
hsa-miR-486-3p	0	0	1	0	1	1	PIANP	PILR alpha associated neural protein
hsa-miR-486-3p	1	0	1	1	1	1	SUPT16H	suppressor of Ty 16 homolog (S. cerevisiae)
hsa-miR-486-3p	0	0	1	0	1	1	TBX5-AS1	TBX5 antisense RNA 1
hsa-miR-486-3p	1	0	1	1	1	1	FBXW2	F-box and WD repeat domain containing 2
hsa-miR-486-3p	1	0	1	0	1	1	TEF	thyrotrophic embryonic factor
hsa-miR-486-3p	1	0	1	1	1	1	GNG2	guanine nucleotide binding protein (G protein), gamma 2
hsa-miR-486-3p	0	0	1	1	1	1	NRBP1	nuclear receptor binding protein 1
hsa-miR-486-3p	1	0	1	1	1	1	GCFC1	GC-rich sequence DNA-binding factor 1
hsa-miR-486-3p	1	0	1	1	1	1	SLBP	stem-loop binding protein
hsa-miR-486-3p	0	0	1	0	0	0	LOC283887	uncharacterized LOC283887
hsa-miR-486-3p	0	0	1	0	0	0	LOC257358	uncharacterized LOC257358
hsa-miR-486-3p	0	0	1	1	0	0	WBP1	WW domain binding protein 1
hsa-miR-486-3p	1	0	1	1	1	1	KCND1	potassium voltage-gated channel, Shal-related subfamily, member 1
hsa-miR-486-3p	0	0	1	1	1	1	SLC9A3R1	solute carrier family 9, subfamily A (NHE3, cation proton antiporter 3), member 3 regulator 1
hsa-miR-486-3p	0	0	1	1	1	1	SPOCK1	sparc/osteonectin, cwcv and kazal-like domains proteoglycan (testican) 1
hsa-miR-486-3p	1	0	1	1	1	1	RNF121	ring finger protein 121
hsa-miR-486-3p	1	0	1	1	1	1	SLC7A8	solute carrier family 7 (amino acid transporter light chain, L system), member 8
hsa-miR-486-3p	1	0	1	1	1	1	KLC2	kinesin light chain 2
hsa-miR-486-3p	0	0	1	1	1	1	CORO7	coronin 7
hsa-miR-486-3p	1	0	1	0	1	1	GATAD2B	GATA zinc finger domain containing 2B
hsa-miR-486-3p	0	0	1	0	0	0	LINC00340	long intergenic non-protein coding RNA 340
hsa-miR-486-3p	0	0	1	1	0	0	CES4A	carboxylesterase 4A
hsa-miR-486-3p	0	0	1	1	1	1	METTL13	methyltransferase like 13
hsa-miR-486-3p	1	0	1	1	1	1	PTPRU	protein tyrosine phosphatase, receptor type, U
hsa-miR-486-3p	1	0	1	1	1	1	LPPR2	lipid phosphate phosphatase-related protein type 2
hsa-miR-486-3p	0	0	1	1	0	0	DPAGT1	dolichyl-phosphate (UDP-N-acetylglucosamine) N-acetylglucosaminephosphotransferase 1 (GlcNAc-1-P transferase)
hsa-miR-486-3p	0	0	1	1	1	1	AES	amino-terminal enhancer of split
hsa-miR-486-3p	1	0	1	1	1	1	NDEL1	nudE nuclear distribution E homolog (A. nidulans)-like 1
hsa-miR-486-3p	1	0	1	1	0	0	SAP30BP	SAP30 binding protein
hsa-miR-486-3p	1	0	1	0	1	1	UVRAG	UV radiation resistance associated gene
hsa-miR-486-3p	0	0	1	1	1	1	AQP3	aquaporin 3 (Gill blood group)
hsa-miR-486-3p	0	0	1	1	1	1	GPR115	G protein-coupled receptor 115
hsa-miR-486-3p	1	0	1	0	1	1	UBXN4	UBX domain protein 4
hsa-miR-486-3p	0	0	1	1	1	1	CHI3L1	chitinase 3-like 1 (cartilage glycoprotein-39)
hsa-miR-486-3p	0	0	1	1	1	1	SIRPB2	signal-regulatory protein beta 2
hsa-miR-486-3p	1	0	1	1	1	1	KCNIP3	Kv channel interacting protein 3, calsenilin
hsa-miR-486-3p	1	0	1	1	1	1	FAM222B	family with sequence similarity 222, member B
hsa-miR-486-3p	0	0	1	0	0	0	LOC284577	uncharacterized LOC284577
hsa-miR-486-3p	1	0	1	0	1	1	NAA60	N(alpha)-acetyltransferase 60, NatF catalytic subunit
hsa-miR-486-3p	1	0	1	1	1	1	CS	citrate synthase
hsa-miR-486-3p	1	0	1	1	1	1	PEA15	phosphoprotein enriched in astrocytes 15
hsa-miR-486-3p	0	0	1	1	0	0	MAP7D1	MAP7 domain containing 1
hsa-miR-486-3p	0	0	1	1	1	1	BAG1	BCL2-associated athanogene
hsa-miR-486-3p	1	0	1	1	1	1	AMT	aminomethyltransferase
hsa-miR-486-3p	1	0	1	1	1	1	FAM98A	family with sequence similarity 98, member A
hsa-miR-486-3p	0	0	1	1	1	1	GNAI2	guanine nucleotide binding protein (G protein), alpha inhibiting activity polypeptide 2
hsa-miR-486-3p	1	0	1	1	0	0	FBRS	fibrosin
hsa-miR-486-3p	1	0	1	1	1	1	SNRNP70	small nuclear ribonucleoprotein 70kDa (U1)
hsa-miR-486-3p	0	0	1	1	1	1	IL17RE	interleukin 17 receptor E
hsa-miR-486-3p	1	0	1	1	1	1	ETS2	v-ets erythroblastosis virus E26 oncogene homolog 2 (avian)
hsa-miR-486-3p	1	0	1	1	1	1	EPB41L1	erythrocyte membrane protein band 4.1-like 1
hsa-miR-486-3p	0	0	1	1	1	1	ZNF513	zinc finger protein 513
hsa-miR-486-3p	0	0	1	1	0	0	CHCHD5	coiled-coil-helix-coiled-coil-helix domain containing 5
hsa-miR-486-3p	0	0	1	1	0	0	TAF1C	TATA box binding protein (TBP)-associated factor, RNA polymerase I, C, 110kDa
hsa-miR-486-3p	0	0	1	1	0	0	ECM1	extracellular matrix protein 1
hsa-miR-486-3p	0	0	1	1	1	1	GBAS	glioblastoma amplified sequence
hsa-miR-486-3p	0	0	1	0	1	1	HDAC9	histone deacetylase 9
hsa-miR-486-3p	0	0	1	0	0	0	LOC400680	uncharacterized LOC400680
hsa-miR-486-3p	1	0	1	1	1	1	TMEM185A	transmembrane protein 185A
hsa-miR-486-3p	1	0	1	1	1	1	RAB11FIP4	RAB11 family interacting protein 4 (class II)
hsa-miR-486-3p	0	0	1	0	0	0	KIRREL3-AS3	KIRREL3 antisense RNA 3
hsa-miR-486-3p	0	0	1	0	0	0	LOC284385	uncharacterized LOC284385
hsa-miR-486-3p	1	0	1	1	0	0	CFL1	cofilin 1 (non-muscle)
hsa-miR-486-3p	0	0	1	1	0	0	KLHDC3	kelch domain containing 3
hsa-miR-486-3p	1	0	1	1	1	1	HOOK1	hook homolog 1 (Drosophila)
hsa-miR-486-3p	0	0	1	1	0	0	TOM1	target of myb1 (chicken)
hsa-miR-486-3p	0	0	1	1	0	0	LUC7L	LUC7-like (S. cerevisiae)
hsa-miR-486-3p	1	0	1	1	1	1	LZTS2	leucine zipper, putative tumor suppressor 2
hsa-miR-486-3p	0	0	1	0	0	0	CECR7	cat eye syndrome chromosome region, candidate 7 (non-protein coding)
hsa-miR-486-3p	0	0	1	1	0	0	TMEM150A	transmembrane protein 150A
hsa-miR-486-3p	0	0	1	1	1	1	ARFGAP2	ADP-ribosylation factor GTPase activating protein 2
hsa-miR-486-3p	1	0	1	1	1	1	THTPA	thiamine triphosphatase
hsa-miR-486-3p	1	0	1	1	0	0	FBXL19	F-box and leucine-rich repeat protein 19
hsa-miR-486-3p	0	0	1	1	0	0	ALDOA	aldolase A, fructose-bisphosphate
hsa-miR-486-3p	0	0	1	0	1	1	MYLK4	myosin light chain kinase family, member 4
hsa-miR-486-3p	1	0	1	1	1	1	TRAFD1	TRAF-type zinc finger domain containing 1
hsa-miR-486-3p	0	0	1	1	1	1	SLFN13	schlafen family member 13
hsa-miR-486-3p	1	0	1	1	1	1	CRMP1	collapsin response mediator protein 1
hsa-miR-486-3p	1	0	1	1	1	1	HBP1	HMG-box transcription factor 1
hsa-miR-486-3p	0	0	1	1	0	0	KIAA0146	KIAA0146
hsa-miR-486-3p	1	0	1	1	1	1	AGAP2	ArfGAP with GTPase domain, ankyrin repeat and PH domain 2
hsa-miR-486-3p	1	0	1	1	1	1	GRM4	glutamate receptor, metabotropic 4
hsa-miR-486-3p	1	0	1	1	0	0	WIZ	widely interspaced zinc finger motifs
hsa-miR-486-3p	1	0	1	1	1	1	BCL6B	B-cell CLL/lymphoma 6, member B
hsa-miR-486-3p	1	0	1	1	0	0	CACNB3	calcium channel, voltage-dependent, beta 3 subunit
hsa-miR-486-3p	1	0	1	1	1	1	ZBTB4	zinc finger and BTB domain containing 4
hsa-miR-486-3p	0	0	1	1	0	0	SLC26A10	solute carrier family 26, member 10
hsa-miR-486-3p	1	0	1	1	1	1	ABHD6	abhydrolase domain containing 6
hsa-miR-486-3p	0	0	1	0	0	0	C1orf132	chromosome 1 open reading frame 132
hsa-miR-486-3p	0	0	1	1	1	1	FAM5B	family with sequence similarity 5, member B
hsa-miR-486-3p	0	0	1	1	1	1	RGS3	regulator of G-protein signaling 3
hsa-miR-486-3p	0	0	1	1	1	1	BAI2	brain-specific angiogenesis inhibitor 2
hsa-miR-486-3p	0	0	1	1	0	0	C16orf86	chromosome 16 open reading frame 86
hsa-miR-486-3p	1	0	1	1	1	1	FAM219A	family with sequence similarity 219, member A
hsa-miR-486-3p	0	0	1	0	0	0	DKFZP434H168	uncharacterized LOC26077
hsa-miR-486-3p	0	0	1	1	1	1	SLC9A1	solute carrier family 9, subfamily A (NHE1, cation proton antiporter 1), member 1
hsa-miR-486-3p	0	0	1	1	0	0	C20orf27	chromosome 20 open reading frame 27
hsa-miR-486-3p	0	0	1	1	1	1	QDPR	quinoid dihydropteridine reductase
hsa-miR-486-3p	0	0	1	1	0	0	NPIP	nuclear pore complex interacting protein
hsa-miR-486-3p	1	0	1	0	1	1	RHBDL3	rhomboid, veinlet-like 3 (Drosophila)
hsa-miR-486-3p	1	0	1	0	1	1	TTYH3	tweety homolog 3 (Drosophila)
hsa-miR-486-3p	1	0	1	1	1	1	DAB2IP	DAB2 interacting protein
hsa-miR-486-3p	0	0	1	1	0	0	PMF1	polyamine-modulated factor 1
hsa-miR-486-3p	0	0	1	1	1	1	IDS	iduronate 2-sulfatase
hsa-miR-486-3p	0	0	1	1	0	0	PPP1R18	protein phosphatase 1, regulatory subunit 18
hsa-miR-486-3p	0	0	1	1	1	1	C2orf91	chromosome 2 open reading frame 91
hsa-miR-486-3p	0	0	1	1	1	1	ATPBD4	ATP binding domain 4
hsa-miR-486-3p	0	0	1	1	0	0	LOC100128239	uncharacterized LOC100128239
hsa-miR-486-3p	1	0	1	0	0	0	ANKRD52	ankyrin repeat domain 52
hsa-miR-486-3p	0	0	1	0	0	0	LOC100132731	uncharacterized LOC100132731
hsa-miR-486-3p	0	0	1	0	0	0	FAM75D4	family with sequence similarity 75, member D4
hsa-miR-486-3p	0	0	1	1	0	0	LOC399829	uncharacterized LOC399829
hsa-miR-486-3p	0	0	1	1	0	0	RPRD2	regulation of nuclear pre-mRNA domain containing 2
hsa-miR-486-3p	0	0	1	1	1	1	MYOM3	myomesin family, member 3
hsa-miR-486-3p	1	0	1	1	0	0	PFKM	phosphofructokinase, muscle
hsa-miR-486-3p	0	0	1	1	1	1	EPPIN	epididymal peptidase inhibitor
hsa-miR-486-3p	1	0	1	1	0	0	ATXN7L3	ataxin 7-like 3
hsa-miR-486-3p	1	0	1	1	1	1	CPNE2	copine II
hsa-miR-486-3p	0	0	1	1	1	1	PLEKHS1	pleckstrin homology domain containing, family S member 1
hsa-miR-486-3p	1	0	1	1	1	1	SACM1L	SAC1 suppressor of actin mutations 1-like (yeast)
hsa-miR-486-3p	0	0	1	1	0	0	CLDN4	claudin 4
hsa-miR-486-3p	0	0	1	1	0	0	HSPG2	heparan sulfate proteoglycan 2
hsa-miR-486-3p	1	0	1	1	1	1	DLG2	discs, large homolog 2 (Drosophila)
hsa-miR-486-3p	1	0	1	1	1	1	MKRN1	makorin ring finger protein 1
hsa-miR-486-3p	0	0	1	1	1	1	USP4	ubiquitin specific peptidase 4 (proto-oncogene)
hsa-miR-486-3p	1	0	1	1	0	0	MRVI1	murine retrovirus integration site 1 homolog
hsa-miR-486-3p	0	0	1	1	1	1	ARHGAP33	Rho GTPase activating protein 33
hsa-miR-486-3p	1	0	1	1	0	0	SLC30A3	solute carrier family 30 (zinc transporter), member 3
hsa-miR-486-3p	1	0	1	1	0	0	PTPN5	protein tyrosine phosphatase, non-receptor type 5 (striatum-enriched)
hsa-miR-486-3p	0	0	1	1	1	1	CCDC78	coiled-coil domain containing 78
hsa-miR-486-3p	1	0	1	0	1	1	YAF2	YY1 associated factor 2
hsa-miR-486-3p	0	0	1	0	0	0	LOC100128262	uncharacterized LOC100128262
hsa-miR-486-3p	0	0	1	1	0	0	GRINA	glutamate receptor, ionotropic, N-methyl D-aspartate-associated protein 1 (glutamate binding)
hsa-miR-486-3p	1	0	1	1	1	1	RNF44	ring finger protein 44
hsa-miR-486-3p	1	0	1	1	1	1	NFYC	nuclear transcription factor Y, gamma
hsa-miR-486-3p	1	0	1	0	1	1	SP6	Sp6 transcription factor
hsa-miR-486-3p	1	0	1	1	1	1	PLA2G15	phospholipase A2, group XV
hsa-miR-486-3p	0	0	1	1	0	0	TMEM136	transmembrane protein 136
hsa-miR-486-3p	1	0	1	1	1	1	NSUN4	NOP2/Sun domain family, member 4
hsa-miR-486-3p	0	0	1	1	0	0	MIB2	mindbomb E3 ubiquitin protein ligase 2
hsa-miR-486-3p	0	0	1	0	0	0	FAM205B	transmembrane protein C9orf144B pseudogene
hsa-miR-486-3p	1	0	1	1	0	0	C15orf39	chromosome 15 open reading frame 39
hsa-miR-486-3p	0	0	1	0	0	0	EP400NL	EP400 N-terminal like
hsa-miR-486-3p	1	0	1	0	1	1	KDM2A	lysine (K)-specific demethylase 2A
hsa-miR-486-3p	1	0	1	1	0	0	SMCR7	Smith-Magenis syndrome chromosome region, candidate 7
hsa-miR-486-3p	0	0	1	0	0	0	AFG3L1P	AFG3 ATPase family gene 3-like 1 (S. cerevisiae), pseudogene
hsa-miR-486-3p	0	0	1	1	1	1	MON1B	MON1 homolog B (yeast)
hsa-miR-486-3p	1	0	1	0	0	0	SP7	Sp7 transcription factor
hsa-miR-486-3p	1	0	1	0	1	1	KPNA6	karyopherin alpha 6 (importin alpha 7)
hsa-miR-486-3p	1	0	1	1	1	1	ADAMTS19	ADAM metallopeptidase with thrombospondin type 1 motif, 19
hsa-miR-486-3p	0	0	1	1	0	0	WFIKKN1	WAP, follistatin/kazal, immunoglobulin, kunitz and netrin domain containing 1
hsa-miR-486-3p	1	0	1	0	1	1	CYB561D1	cytochrome b-561 domain containing 1
hsa-miR-486-3p	0	0	1	1	0	0	HEATR8	HEAT repeat containing 8
hsa-miR-486-3p	0	0	1	0	0	0	LOC390660	FLJ00317 protein
hsa-miR-486-3p	1	0	1	0	1	1	ESRRG	estrogen-related receptor gamma
hsa-miR-486-3p	0	0	1	1	1	1	RNF19B	ring finger protein 19B
hsa-miR-486-3p	0	0	1	1	1	1	SLC36A3	solute carrier family 36 (proton/amino acid symporter), member 3
hsa-miR-486-3p	0	0	1	1	1	1	PDE2A	phosphodiesterase 2A, cGMP-stimulated
hsa-miR-486-3p	0	0	1	0	0	0	LOC619207	scavenger receptor protein family member
hsa-miR-486-3p	1	0	1	1	1	1	CYFIP2	cytoplasmic FMR1 interacting protein 2
hsa-miR-486-3p	1	0	1	0	1	1	SEZ6	seizure related 6 homolog (mouse)
hsa-miR-486-3p	0	0	1	0	1	1	PEX5	peroxisomal biogenesis factor 5
hsa-miR-486-3p	1	0	1	0	1	1	MGAT4B	mannosyl (alpha-1,3-)-glycoprotein beta-1,4-N-acetylglucosaminyltransferase, isozyme B
hsa-miR-486-3p	0	0	1	1	1	1	BTK	Bruton agammaglobulinemia tyrosine kinase
hsa-miR-486-3p	1	0	1	1	1	1	CAMK2G	calcium/calmodulin-dependent protein kinase II gamma
hsa-miR-486-3p	0	0	1	1	0	0	PCSK5	proprotein convertase subtilisin/kexin type 5
hsa-miR-486-3p	1	0	1	0	1	1	MAP3K3	mitogen-activated protein kinase kinase kinase 3
hsa-miR-486-3p	1	0	1	1	1	1	COBLL1	COBL-like 1
hsa-miR-486-3p	1	0	1	1	1	1	BIN2	bridging integrator 2
hsa-miR-486-3p	1	0	1	1	1	1	ZNF655	zinc finger protein 655
hsa-miR-486-3p	0	0	1	1	1	1	CCKBR	cholecystokinin B receptor
hsa-miR-486-3p	1	0	1	1	1	1	AHCYL1	adenosylhomocysteinase-like 1
hsa-miR-486-3p	0	0	1	1	0	0	CPNE6	copine VI (neuronal)
hsa-miR-486-3p	0	0	1	1	1	1	TTLL3	tubulin tyrosine ligase-like family, member 3
hsa-miR-486-3p	0	0	1	1	1	1	PGAP2	post-GPI attachment to proteins 2
hsa-miR-486-3p	0	0	1	0	0	0	POM121L9P	POM121 transmembrane nucleoporin-like 9, pseudogene
hsa-miR-486-3p	0	0	1	1	0	0	TBC1D10B	TBC1 domain family, member 10B
hsa-miR-486-3p	0	0	1	1	1	1	ARIH1	ariadne homolog, ubiquitin-conjugating enzyme E2 binding protein, 1 (Drosophila)
hsa-miR-486-3p	0	0	1	1	1	1	GFAP	glial fibrillary acidic protein
hsa-miR-486-3p	0	0	1	0	0	0	DNAJC5B	DnaJ (Hsp40) homolog, subfamily C, member 5 beta
hsa-miR-486-3p	0	0	1	0	0	0	KIAA0913	KIAA0913
hsa-miR-486-3p	0	0	1	1	1	1	ZNF280D	zinc finger protein 280D
hsa-miR-486-3p	1	0	1	0	1	1	CEP170	centrosomal protein 170kDa
hsa-miR-486-3p	1	0	1	1	1	1	TFE3	transcription factor binding to IGHM enhancer 3
hsa-miR-486-3p	1	0	1	1	1	1	NEO1	neogenin 1
hsa-miR-486-3p	1	0	1	1	1	1	YTHDF3	YTH domain family, member 3
hsa-miR-486-3p	1	0	1	0	0	0	SYNPO	synaptopodin
hsa-miR-486-3p	0	0	1	1	0	0	KRBA1	KRAB-A domain containing 1
hsa-miR-486-3p	1	0	1	1	1	1	MIER1	mesoderm induction early response 1 homolog (Xenopus laevis)
hsa-miR-486-3p	0	0	1	0	1	1	GAB3	GRB2-associated binding protein 3
hsa-miR-486-3p	1	0	1	1	1	1	LYPD3	LY6/PLAUR domain containing 3
hsa-miR-486-3p	1	0	1	0	1	1	HNRNPA3	heterogeneous nuclear ribonucleoprotein A3
hsa-miR-486-3p	0	0	1	1	1	1	EGFLAM	EGF-like, fibronectin type III and laminin G domains
hsa-miR-486-3p	1	0	1	1	1	1	CHMP7	charged multivesicular body protein 7
hsa-miR-486-3p	1	0	1	0	0	0	YLPM1	YLP motif containing 1
hsa-miR-486-3p	1	0	1	1	0	0	USP24	ubiquitin specific peptidase 24
hsa-miR-486-3p	1	0	1	1	1	1	MLL3	myeloid/lymphoid or mixed-lineage leukemia 3
hsa-miR-486-3p	1	0	1	0	1	1	STYX	serine/threonine/tyrosine interacting protein
hsa-miR-486-3p	1	0	1	1	1	1	TMEM182	transmembrane protein 182
hsa-miR-486-3p	0	0	1	0	0	0	LOC387647	patched domain containing 3 pseudogene
hsa-miR-486-3p	0	0	1	1	1	1	USPL1	ubiquitin specific peptidase like 1
hsa-miR-486-3p	0	0	1	1	0	0	TMEM44	transmembrane protein 44
hsa-miR-486-3p	0	0	1	1	1	1	INPP5B	inositol polyphosphate-5-phosphatase, 75kDa
hsa-miR-486-3p	0	0	1	1	0	0	TMEM91	transmembrane protein 91
hsa-miR-486-3p	0	0	1	1	1	1	NFE2L1	nuclear factor (erythroid-derived 2)-like 1
hsa-miR-486-3p	0	0	1	1	0	0	PPIE	peptidylprolyl isomerase E (cyclophilin E)
hsa-miR-486-3p	0	0	1	0	0	0	EPHA1-AS1	EPHA1 antisense RNA 1
hsa-miR-486-3p	1	0	1	1	1	1	FAM63B	family with sequence similarity 63, member B
hsa-miR-486-3p	0	0	1	0	0	0	ADCY10P1	adenylate cyclase 10 (soluble) pseudogene 1
hsa-miR-486-3p	1	0	1	1	1	1	IL17RD	interleukin 17 receptor D
hsa-miR-486-3p	1	0	1	0	0	0	NPEPL1	aminopeptidase-like 1
hsa-miR-486-3p	0	0	1	1	0	0	TTLL6	tubulin tyrosine ligase-like family, member 6
hsa-miR-486-3p	1	0	1	1	1	1	CAPRIN2	caprin family member 2
hsa-miR-486-3p	1	0	1	1	1	1	MBD6	methyl-CpG binding domain protein 6
hsa-miR-486-3p	0	0	1	0	1	1	USO1	USO1 vesicle docking protein homolog (yeast)
hsa-miR-486-3p	1	0	1	1	1	1	RNF38	ring finger protein 38
hsa-miR-486-3p	0	0	1	0	0	0	TRBJ2-2	T cell receptor beta joining 2-2
hsa-miR-486-3p	1	0	1	1	1	1	IKZF2	IKAROS family zinc finger 2 (Helios)
hsa-miR-486-3p	1	0	1	1	1	1	GAL3ST3	galactose-3-O-sulfotransferase 3
hsa-miR-486-3p	0	0	1	1	1	1	OSR2	odd-skipped related 2 (Drosophila)
hsa-miR-486-3p	0	0	1	1	0	0	FAM176C	family with sequence similarity 176, member C
hsa-miR-486-3p	0	0	1	1	1	1	CRB1	crumbs homolog 1 (Drosophila)
hsa-miR-486-3p	0	0	1	1	0	0	GPC2	glypican 2
hsa-miR-486-3p	1	0	1	1	1	1	RFFL	ring finger and FYVE-like domain containing E3 ubiquitin protein ligase
hsa-miR-486-3p	0	0	1	1	0	0	CRB3	crumbs homolog 3 (Drosophila)
hsa-miR-486-3p	0	0	1	0	0	0	CR1L	complement component (3b/4b) receptor 1-like
hsa-miR-486-3p	1	0	1	1	1	1	MARK4	MAP/microtubule affinity-regulating kinase 4
hsa-miR-486-3p	0	0	1	1	0	0	EIF5A	eukaryotic translation initiation factor 5A
hsa-miR-486-3p	1	0	1	1	1	1	GGT7	gamma-glutamyltransferase 7
hsa-miR-486-3p	1	0	1	1	1	1	USF2	upstream transcription factor 2, c-fos interacting
hsa-miR-486-3p	0	0	1	1	0	0	NLRP5	NLR family, pyrin domain containing 5
hsa-miR-486-3p	1	0	1	1	1	1	WDR26	WD repeat domain 26
hsa-miR-486-3p	1	0	1	1	1	1	BCL11A	B-cell CLL/lymphoma 11A (zinc finger protein)
hsa-miR-486-3p	0	0	1	1	1	1	IYD	iodotyrosine deiodinase
hsa-miR-486-3p	1	0	1	1	1	1	OPRM1	opioid receptor, mu 1
hsa-miR-486-3p	0	0	1	1	0	0	CCL4	chemokine (C-C motif) ligand 4
hsa-miR-486-3p	1	0	1	1	1	1	RAI14	retinoic acid induced 14
hsa-miR-486-3p	1	0	1	1	1	1	GFRA2	GDNF family receptor alpha 2
hsa-miR-486-3p	0	0	1	0	0	0	FAM138C	family with sequence similarity 138, member C
hsa-miR-486-3p	0	0	1	1	1	1	LINGO2	leucine rich repeat and Ig domain containing 2
hsa-miR-486-3p	1	0	1	1	1	1	TMCC2	transmembrane and coiled-coil domain family 2
hsa-miR-486-3p	0	0	1	1	1	1	TMPRSS4	transmembrane protease, serine 4
hsa-miR-486-3p	0	0	1	1	0	0	RAET1E	retinoic acid early transcript 1E
hsa-miR-486-3p	1	0	1	1	1	1	FGD4	FYVE, RhoGEF and PH domain containing 4
hsa-miR-486-3p	1	0	1	0	1	1	ANKRD28	ankyrin repeat domain 28
hsa-miR-486-3p	0	0	1	1	0	0	TP53I3	tumor protein p53 inducible protein 3
hsa-miR-486-3p	1	0	1	1	0	0	USP7	ubiquitin specific peptidase 7 (herpes virus-associated)
hsa-miR-486-3p	0	0	1	1	0	0	SH2D6	SH2 domain containing 6
hsa-miR-486-3p	0	0	1	0	1	1	XKR5	XK, Kell blood group complex subunit-related family, member 5
hsa-miR-486-3p	1	0	1	1	1	1	MECP2	methyl CpG binding protein 2 (Rett syndrome)
hsa-miR-486-3p	0	0	1	1	0	0	ASB16	ankyrin repeat and SOCS box containing 16
hsa-miR-486-3p	0	0	1	1	1	1	DIO1	deiodinase, iodothyronine, type I
hsa-miR-486-3p	1	0	1	1	0	0	ADAM15	ADAM metallopeptidase domain 15
hsa-miR-486-3p	0	0	1	1	1	1	TMUB1	transmembrane and ubiquitin-like domain containing 1
hsa-miR-486-3p	0	0	1	1	0	0	DHRS4	dehydrogenase/reductase (SDR family) member 4
hsa-miR-486-3p	0	0	1	1	1	1	SMPD1	sphingomyelin phosphodiesterase 1, acid lysosomal
hsa-miR-486-3p	1	0	1	1	1	1	RTN3	reticulon 3
hsa-miR-486-3p	0	0	1	1	1	1	RHD	Rh blood group, D antigen
hsa-miR-486-3p	1	0	1	1	1	1	PFKFB4	6-phosphofructo-2-kinase/fructose-2,6-biphosphatase 4
hsa-miR-486-3p	0	0	1	1	1	1	CEACAM1	carcinoembryonic antigen-related cell adhesion molecule 1 (biliary glycoprotein)
hsa-miR-486-3p	0	0	1	0	1	1	CCL4L2	chemokine (C-C motif) ligand 4-like 2
hsa-miR-486-3p	0	0	1	1	1	1	CCL4L1	chemokine (C-C motif) ligand 4-like 1
hsa-miR-486-3p	0	0	1	0	0	0	LOC100128076	protein tyrosine phosphatase pseudogene
hsa-miR-486-3p	0	0	1	1	0	0	DMKN	dermokine
hsa-miR-486-3p	0	0	1	0	0	0	PTPRVP	protein tyrosine phosphatase, receptor type, V, pseudogene
hsa-miR-486-3p	0	0	1	1	1	1	P2RX7	purinergic receptor P2X, ligand-gated ion channel, 7
hsa-miR-486-3p	0	0	1	1	0	0	NBPF8	neuroblastoma breakpoint family, member 8
hsa-miR-486-3p	0	0	1	1	1	1	CDK20	cyclin-dependent kinase 20
hsa-miR-486-3p	1	0	1	1	1	1	TBC1D22B	TBC1 domain family, member 22B
hsa-miR-486-3p	1	0	1	1	1	1	AMOT	angiomotin
hsa-miR-486-3p	0	0	1	1	0	0	C17orf53	chromosome 17 open reading frame 53
hsa-miR-486-3p	1	0	1	1	0	0	FAM108A1	family with sequence similarity 108, member A1
hsa-miR-486-3p	1	0	1	0	1	1	FAM46A	family with sequence similarity 46, member A
hsa-miR-486-3p	0	0	1	0	0	0	VWA5B2	von Willebrand factor A domain containing 5B2
hsa-miR-486-3p	1	0	1	1	0	0	PPP4C	protein phosphatase 4, catalytic subunit
hsa-miR-486-3p	0	0	1	1	0	0	ACOT11	acyl-CoA thioesterase 11
hsa-miR-486-3p	0	0	1	1	1	1	PAFAH1B2	platelet-activating factor acetylhydrolase 1b, catalytic subunit 2 (30kDa)
hsa-miR-486-3p	1	0	1	1	1	1	TMUB2	transmembrane and ubiquitin-like domain containing 2
hsa-miR-486-3p	0	0	1	1	1	1	WDR55	WD repeat domain 55
hsa-miR-486-3p	1	0	1	1	1	1	HOXC13	homeobox C13
hsa-miR-486-3p	1	0	1	0	1	1	DPYSL5	dihydropyrimidinase-like 5
hsa-miR-486-3p	0	0	1	1	1	1	TUFT1	tuftelin 1
hsa-miR-486-3p	1	0	1	1	0	0	DHDDS	dehydrodolichyl diphosphate synthase
hsa-miR-486-3p	0	0	1	1	0	0	RUSC1	RUN and SH3 domain containing 1
hsa-miR-486-3p	1	0	1	1	1	1	SMO	smoothened, frizzled family receptor
hsa-miR-486-3p	0	0	1	0	0	0	LOC254896	uncharacterized LOC254896
hsa-miR-486-3p	1	0	1	0	1	1	MAP2K7	mitogen-activated protein kinase kinase 7
hsa-miR-486-3p	1	0	1	1	1	1	VTA1	Vps20-associated 1 homolog (S. cerevisiae)
hsa-miR-486-3p	1	0	1	1	1	1	POU2F2	POU class 2 homeobox 2
hsa-miR-486-3p	0	0	1	1	1	1	SGK2	serum/glucocorticoid regulated kinase 2
hsa-miR-486-3p	0	0	1	1	0	0	OBSL1	obscurin-like 1
hsa-miR-486-3p	1	0	1	1	1	1	COL2A1	collagen, type II, alpha 1
hsa-miR-486-3p	0	0	1	1	0	0	ALKBH6	alkB, alkylation repair homolog 6 (E. coli)
hsa-miR-486-3p	0	0	1	1	0	0	RBM14	RNA binding motif protein 14
hsa-miR-486-3p	0	0	1	1	0	0	SPAG7	sperm associated antigen 7
hsa-miR-486-3p	0	0	1	1	1	1	ICA1	islet cell autoantigen 1, 69kDa
hsa-miR-486-3p	1	0	1	1	1	1	PTPN11	protein tyrosine phosphatase, non-receptor type 11
hsa-miR-486-3p	1	0	1	1	1	1	PLEKHO2	pleckstrin homology domain containing, family O member 2
hsa-miR-486-3p	1	0	1	1	1	1	HMGA1	high mobility group AT-hook 1
hsa-miR-486-3p	0	0	1	0	0	0	ATXN7L3B	ataxin 7-like 3B
hsa-miR-486-3p	0	0	1	1	0	0	SLC4A2	solute carrier family 4, anion exchanger, member 2 (erythrocyte membrane protein band 3-like 1)
hsa-miR-486-3p	0	0	1	1	0	0	BARX1	BARX homeobox 1
hsa-miR-486-3p	1	0	1	1	0	0	MARCH9	membrane-associated ring finger (C3HC4) 9
hsa-miR-486-3p	1	0	1	1	1	1	RELL2	RELT-like 2
hsa-miR-486-3p	0	0	1	0	0	0	HIST1H2BN	histone cluster 1, H2bn
hsa-miR-486-3p	1	0	1	1	1	1	SLC27A4	solute carrier family 27 (fatty acid transporter), member 4
hsa-miR-486-3p	1	0	1	1	1	1	B4GALT3	UDP-Gal:betaGlcNAc beta 1,4- galactosyltransferase, polypeptide 3
hsa-miR-486-3p	0	0	1	1	1	1	ATXN2L	ataxin 2-like
hsa-miR-486-3p	0	0	1	1	0	0	ARHGAP8	Rho GTPase activating protein 8
hsa-miR-486-3p	1	0	1	1	1	1	LRRFIP1	leucine rich repeat (in FLII) interacting protein 1
hsa-miR-486-3p	1	0	1	1	1	1	ZFAND5	zinc finger, AN1-type domain 5
hsa-miR-486-3p	0	0	1	1	0	0	NDUFA3	NADH dehydrogenase (ubiquinone) 1 alpha subcomplex, 3, 9kDa
hsa-miR-486-3p	1	0	1	1	1	1	TRIM2	tripartite motif containing 2
hsa-miR-486-3p	0	0	1	1	0	0	GHDC	GH3 domain containing
hsa-miR-486-3p	0	0	1	1	1	1	ZNF587	zinc finger protein 587
hsa-miR-486-3p	1	0	1	1	1	1	OTUD5	OTU domain containing 5
hsa-miR-486-3p	0	0	1	0	0	0	GRAMD1B	GRAM domain containing 1B
hsa-miR-486-3p	1	0	1	1	1	1	ZBTB7B	zinc finger and BTB domain containing 7B
hsa-miR-486-3p	0	0	1	0	0	0	TPTEP1	transmembrane phosphatase with tensin homology pseudogene 1
hsa-miR-486-3p	1	0	1	1	1	1	DNAJB5	DnaJ (Hsp40) homolog, subfamily B, member 5
hsa-miR-486-3p	1	0	1	1	1	1	SNCA	synuclein, alpha (non A4 component of amyloid precursor)
hsa-miR-486-3p	0	0	1	1	1	1	DEDD2	death effector domain containing 2
hsa-miR-486-3p	1	0	1	1	1	1	CAP1	CAP, adenylate cyclase-associated protein 1 (yeast)
hsa-miR-486-3p	1	0	1	1	0	0	FHL3	four and a half LIM domains 3
hsa-miR-486-3p	0	0	1	1	0	0	CCDC36	coiled-coil domain containing 36
hsa-miR-486-3p	0	0	1	1	1	1	C8orf33	chromosome 8 open reading frame 33
hsa-miR-486-3p	0	0	1	1	0	0	PARP6	poly (ADP-ribose) polymerase family, member 6
hsa-miR-486-3p	0	0	1	0	0	0	NUDT16P1	nudix (nucleoside diphosphate linked moiety X)-type motif 16 pseudogene 1
hsa-miR-486-3p	1	0	1	1	1	1	ZNF512	zinc finger protein 512
hsa-miR-486-3p	0	0	1	0	0	0	DTX2P1-UPK3BP1-PMS2P11	DTX2P1-UPK3BP1-PMS2P11 readthrough (non-protein coding)
hsa-miR-486-3p	1	0	1	0	1	1	NR1D2	nuclear receptor subfamily 1, group D, member 2
hsa-miR-486-3p	0	0	1	1	0	0	RBCK1	RanBP-type and C3HC4-type zinc finger containing 1
hsa-miR-486-3p	1	0	1	0	1	1	CYBRD1	cytochrome b reductase 1
hsa-miR-486-3p	1	0	1	1	1	1	NRF1	nuclear respiratory factor 1
hsa-miR-486-3p	1	0	1	1	0	0	UBR7	ubiquitin protein ligase E3 component n-recognin 7 (putative)
hsa-miR-486-3p	1	0	1	1	1	1	ELF4	E74-like factor 4 (ets domain transcription factor)
hsa-miR-486-3p	0	0	1	0	0	0	LOC441528	uncharacterized LOC441528
hsa-miR-486-3p	0	0	1	0	0	0	ASH1L-AS1	ASH1L antisense RNA 1
hsa-miR-486-3p	0	0	1	1	0	0	ZDHHC6	zinc finger, DHHC-type containing 6
hsa-miR-486-3p	0	0	1	1	0	0	ZBTB32	zinc finger and BTB domain containing 32
hsa-miR-486-3p	0	0	1	1	1	1	CCDC157	coiled-coil domain containing 157
hsa-miR-486-3p	1	0	1	1	1	1	ARHGEF9	Cdc42 guanine nucleotide exchange factor (GEF) 9
hsa-miR-486-3p	0	0	1	1	1	1	PTCD2	pentatricopeptide repeat domain 2
hsa-miR-486-3p	0	0	1	0	0	0	LOC100130776	uncharacterized LOC100130776
hsa-miR-486-3p	1	0	1	1	1	1	SLC25A22	solute carrier family 25 (mitochondrial carrier: glutamate), member 22
hsa-miR-486-3p	0	0	1	0	0	0	LOC283693	actin, alpha 2, smooth muscle, aorta pseudogene
hsa-miR-486-3p	1	0	1	1	1	1	TM9SF4	transmembrane 9 superfamily protein member 4
hsa-miR-486-3p	0	0	1	1	1	1	SNX17	sorting nexin 17
hsa-miR-486-3p	0	0	1	0	0	0	LOC728196	uncharacterized LOC728196
hsa-miR-486-3p	1	0	1	1	1	1	SPOCK2	sparc/osteonectin, cwcv and kazal-like domains proteoglycan (testican) 2
hsa-miR-486-3p	1	0	1	0	1	1	C14orf101	chromosome 14 open reading frame 101
hsa-miR-486-3p	1	0	1	0	1	1	CDK19	cyclin-dependent kinase 19
hsa-miR-486-3p	0	0	1	0	0	0	SNX29P2	sorting nexin 29 pseudogene 2
hsa-miR-486-3p	1	0	1	1	1	1	ASPH	aspartate beta-hydroxylase
hsa-miR-486-3p	1	0	1	1	1	1	FAM131A	family with sequence similarity 131, member A
hsa-miR-486-3p	0	0	1	1	0	0	TRO	trophinin
hsa-miR-486-3p	0	0	1	0	0	0	EVPLL	envoplakin-like
hsa-miR-486-3p	0	0	1	0	1	1	FHAD1	forkhead-associated (FHA) phosphopeptide binding domain 1
hsa-miR-486-3p	1	0	1	1	1	1	RSPO2	R-spondin 2
hsa-miR-486-3p	0	0	1	1	1	1	ZNF589	zinc finger protein 589
hsa-miR-486-3p	0	0	1	1	0	0	SYT3	synaptotagmin III
hsa-miR-486-3p	1	0	1	1	1	1	TMEM127	transmembrane protein 127
hsa-miR-486-3p	0	0	1	0	0	0	BCAS3	breast carcinoma amplified sequence 3
hsa-miR-486-3p	0	0	1	1	1	1	SH3TC1	SH3 domain and tetratricopeptide repeats 1
hsa-miR-486-3p	1	0	1	1	1	1	EYA4	eyes absent homolog 4 (Drosophila)
hsa-miR-486-3p	1	0	1	1	0	0	FAM83F	family with sequence similarity 83, member F
hsa-miR-486-3p	1	0	1	1	1	1	BZRAP1	benzodiazapine receptor (peripheral) associated protein 1
hsa-miR-486-3p	0	0	1	0	0	0	CFL1P1	cofilin 1 (non-muscle) pseudogene 1
hsa-miR-486-3p	0	0	1	1	0	0	KIAA1324	KIAA1324
hsa-miR-486-3p	0	0	1	1	1	1	RBM42	RNA binding motif protein 42
hsa-miR-486-3p	0	0	1	1	0	0	ASIC4	acid-sensing (proton-gated) ion channel family member 4
hsa-miR-486-3p	1	0	1	1	1	1	BRD3	bromodomain containing 3
hsa-miR-486-3p	1	0	1	1	1	1	SF1	splicing factor 1
hsa-miR-486-3p	0	0	1	1	1	1	UBXN1	UBX domain protein 1
hsa-miR-486-3p	1	0	1	1	1	1	DCLK2	doublecortin-like kinase 2
hsa-miR-486-3p	1	0	1	1	0	0	MRC2	mannose receptor, C type 2
hsa-miR-486-3p	0	0	1	1	0	0	RAB4B	RAB4B, member RAS oncogene family
hsa-miR-486-3p	1	0	1	1	1	1	SIRPA	signal-regulatory protein alpha
hsa-miR-486-3p	1	0	1	1	1	1	CRKL	v-crk sarcoma virus CT10 oncogene homolog (avian)-like
hsa-miR-486-3p	0	0	1	1	1	1	IL20RB	interleukin 20 receptor beta
hsa-miR-486-3p	0	0	1	1	0	0	LINC00176	long intergenic non-protein coding RNA 176
hsa-miR-486-3p	0	0	1	1	0	0	ZNF142	zinc finger protein 142
hsa-miR-486-3p	0	0	1	1	0	0	ADAP2	ArfGAP with dual PH domains 2
hsa-miR-486-3p	1	0	1	0	1	1	KIF5A	kinesin family member 5A
hsa-miR-486-3p	0	0	1	0	0	0	NBR2	neighbor of BRCA1 gene 2 (non-protein coding)
hsa-miR-486-3p	0	0	1	0	1	1	DKFZP434I0714	uncharacterized protein DKFZP434I0714
hsa-miR-486-3p	1	0	1	0	1	1	RHOBTB2	Rho-related BTB domain containing 2
hsa-miR-486-3p	0	0	1	0	0	0	LOC643529	hCG2024094
hsa-miR-486-3p	1	0	1	1	0	0	CKAP5	cytoskeleton associated protein 5
hsa-miR-486-3p	0	0	1	1	1	1	PAK6	p21 protein (Cdc42/Rac)-activated kinase 6
hsa-miR-486-3p	1	0	1	1	1	1	GRIA4	glutamate receptor, ionotropic, AMPA 4
hsa-miR-486-3p	0	0	1	0	1	1	TMSB15B	thymosin beta 15B
hsa-miR-486-3p	1	0	1	1	0	0	INO80E	INO80 complex subunit E
hsa-miR-486-3p	0	0	1	0	0	0	HOXA-AS2	HOXA cluster antisense RNA 2
hsa-miR-486-3p	1	0	1	1	1	1	ZNF618	zinc finger protein 618
hsa-miR-486-3p	1	0	1	1	0	0	EGLN2	egl nine homolog 2 (C. elegans)
hsa-miR-486-3p	0	0	1	1	1	1	DUSP28	dual specificity phosphatase 28
hsa-miR-486-3p	0	0	1	0	0	0	SPATA3	spermatogenesis associated 3
hsa-miR-486-3p	1	0	1	1	1	1	GAS8	growth arrest-specific 8
hsa-miR-486-3p	1	0	1	1	1	1	BNC2	basonuclin 2
hsa-miR-486-3p	0	0	1	0	0	0	CYP4F35P	cytochrome P450, family 4, subfamily F, polypeptide 35, pseudogene
hsa-miR-486-3p	1	0	1	0	1	1	RAG1	recombination activating gene 1
hsa-miR-486-3p	0	0	1	0	0	0	LOC286184	uncharacterized LOC286184
hsa-miR-486-3p	1	0	1	0	0	0	RAVER1	ribonucleoprotein, PTB-binding 1
hsa-miR-486-3p	0	0	1	1	1	1	EFCAB13	EF-hand calcium binding domain 13
hsa-miR-486-3p	1	0	1	1	1	1	WSCD2	WSC domain containing 2
hsa-miR-486-3p	1	0	1	1	0	0	PROSAPIP1	ProSAPiP1 protein
hsa-miR-486-3p	0	0	1	1	0	0	COX4I1	cytochrome c oxidase subunit IV isoform 1
hsa-miR-486-3p	0	0	1	0	0	0	FLJ36000	uncharacterized FLJ36000
hsa-miR-486-3p	0	0	1	1	1	1	CACHD1	cache domain containing 1
hsa-miR-486-3p	0	0	1	0	0	0	USP32P1	ubiquitin specific peptidase 32 pseudogene 1
hsa-miR-486-3p	0	0	1	1	1	1	RMI2	RMI2, RecQ mediated genome instability 2, homolog (S. cerevisiae)
hsa-miR-486-3p	0	0	1	0	0	0	LOC388906	opioid growth factor receptor pseudogene
hsa-miR-486-3p	0	0	1	0	0	0	DLGAP1-AS3	DLGAP1 antisense RNA 3
hsa-miR-486-3p	1	0	1	1	1	1	TIMP2	TIMP metallopeptidase inhibitor 2
hsa-miR-486-3p	1	0	1	1	0	0	HES7	hairy and enhancer of split 7 (Drosophila)
hsa-miR-486-3p	0	0	1	0	0	0	RNASEK	ribonuclease, RNase K
hsa-miR-486-3p	0	0	1	0	1	1	LINC00634	long intergenic non-protein coding RNA 634
hsa-miR-486-3p	1	0	1	1	1	1	FOSB	FBJ murine osteosarcoma viral oncogene homolog B
hsa-miR-486-3p	1	0	1	0	1	1	PACSIN1	protein kinase C and casein kinase substrate in neurons 1
hsa-miR-486-3p	1	0	1	1	1	1	PDPK1	3-phosphoinositide dependent protein kinase-1
hsa-miR-486-3p	0	0	1	1	1	1	ZFP90	zinc finger protein 90 homolog (mouse)
hsa-miR-486-3p	0	0	1	0	1	1	TSLP	thymic stromal lymphopoietin
hsa-miR-486-3p	0	0	1	1	0	0	TMEM95	transmembrane protein 95
hsa-miR-486-3p	0	0	1	1	1	1	FAM71F1	family with sequence similarity 71, member F1
hsa-miR-486-3p	0	0	1	0	1	1	METTL12	methyltransferase like 12
hsa-miR-486-3p	0	0	1	0	0	0	LOC154822	uncharacterized LOC154822
hsa-miR-486-3p	0	0	1	1	0	0	GRM2	glutamate receptor, metabotropic 2
hsa-miR-486-3p	0	0	1	1	0	0	PTGDS	prostaglandin D2 synthase 21kDa (brain)
hsa-miR-486-3p	1	0	1	1	0	0	INPP5J	inositol polyphosphate-5-phosphatase J
hsa-miR-486-3p	1	0	1	1	1	1	DOC2A	double C2-like domains, alpha
hsa-miR-486-3p	1	0	1	0	1	1	TNFAIP3	tumor necrosis factor, alpha-induced protein 3
hsa-miR-486-3p	0	0	1	0	0	0	SMIM1	small integral membrane protein 1
hsa-miR-486-3p	1	0	1	1	1	1	TNFRSF1B	tumor necrosis factor receptor superfamily, member 1B
hsa-miR-486-3p	0	0	1	1	0	0	TEX13A	testis expressed 13A
hsa-miR-486-3p	0	0	1	1	0	0	PLB1	phospholipase B1
hsa-miR-486-3p	1	0	1	0	1	1	USP6NL	USP6 N-terminal like
hsa-miR-486-3p	1	0	1	1	1	1	ADD1	adducin 1 (alpha)
hsa-miR-486-3p	0	0	1	0	0	0	LOC339260	uncharacterized LOC339260
hsa-miR-486-3p	0	0	1	0	0	0	DKFZp686O1327	uncharacterized LOC401014
hsa-miR-486-3p	1	0	1	1	1	1	AGAP3	ArfGAP with GTPase domain, ankyrin repeat and PH domain 3
hsa-miR-486-3p	1	0	1	1	1	1	RNF145	ring finger protein 145
hsa-miR-486-3p	1	0	1	0	1	1	PSD3	pleckstrin and Sec7 domain containing 3
hsa-miR-486-3p	1	0	1	1	1	1	MAMDC2	MAM domain containing 2
hsa-miR-486-3p	1	0	1	1	1	1	PPP2R5B	protein phosphatase 2, regulatory subunit B', beta
hsa-miR-486-3p	1	0	1	1	1	1	PCYT1B	phosphate cytidylyltransferase 1, choline, beta
hsa-miR-486-3p	1	0	1	1	1	1	SENP1	SUMO1/sentrin specific peptidase 1
hsa-miR-486-3p	0	0	1	1	0	0	FOXJ1	forkhead box J1
hsa-miR-486-3p	0	0	1	0	1	1	IL33	interleukin 33
hsa-miR-486-3p	1	0	1	1	1	1	TOMM40	translocase of outer mitochondrial membrane 40 homolog (yeast)
hsa-miR-486-3p	1	0	1	1	1	1	SLC39A9	solute carrier family 39 (zinc transporter), member 9
hsa-miR-486-3p	0	0	1	1	0	0	OXLD1	oxidoreductase-like domain containing 1
hsa-miR-486-3p	1	0	1	1	1	1	PTPRG	protein tyrosine phosphatase, receptor type, G
hsa-miR-486-3p	0	0	1	0	1	1	ITGA1	integrin, alpha 1
hsa-miR-486-3p	0	0	1	1	0	0	NLRC5	NLR family, CARD domain containing 5
hsa-miR-486-3p	0	0	1	0	0	0	AURKAPS1	aurora kinase A pseudogene 1
hsa-miR-486-3p	1	0	1	0	1	1	SEMA4G	sema domain, immunoglobulin domain (Ig), transmembrane domain (TM) and short cytoplasmic domain, (semaphorin) 4G
hsa-miR-486-3p	0	0	1	1	0	0	SREBF2	sterol regulatory element binding transcription factor 2
hsa-miR-486-3p	1	0	1	1	1	1	ZFP91	zinc finger protein 91 homolog (mouse)
hsa-miR-486-3p	1	0	1	1	1	1	LIMD2	LIM domain containing 2
hsa-miR-486-3p	1	0	1	0	1	1	C14orf43	chromosome 14 open reading frame 43
hsa-miR-486-3p	1	0	1	1	1	1	HP1BP3	heterochromatin protein 1, binding protein 3
hsa-miR-486-3p	0	0	1	1	0	0	LY6H	lymphocyte antigen 6 complex, locus H
hsa-miR-486-3p	1	0	1	1	0	0	ATG2A	autophagy related 2A
hsa-miR-486-3p	1	0	1	1	1	1	LIMCH1	LIM and calponin homology domains 1
hsa-miR-486-3p	0	0	1	0	1	1	C17orf51	chromosome 17 open reading frame 51
hsa-miR-486-3p	1	0	1	1	1	1	KDM5C	lysine (K)-specific demethylase 5C
hsa-miR-486-3p	0	0	1	1	1	1	C17orf97	chromosome 17 open reading frame 97
hsa-miR-486-3p	0	0	1	1	0	0	BCL7C	B-cell CLL/lymphoma 7C
hsa-miR-486-3p	1	0	1	1	1	1	PRRG1	proline rich Gla (G-carboxyglutamic acid) 1
hsa-miR-486-3p	1	0	1	0	1	1	C7orf41	chromosome 7 open reading frame 41
hsa-miR-486-3p	1	0	1	1	1	1	ZSCAN29	zinc finger and SCAN domain containing 29
hsa-miR-486-3p	1	0	1	1	0	0	ANKRD13B	ankyrin repeat domain 13B
hsa-miR-486-3p	0	0	1	1	0	0	NAA10	N(alpha)-acetyltransferase 10, NatA catalytic subunit
hsa-miR-486-3p	0	0	1	1	0	0	C8orf31	chromosome 8 open reading frame 31
hsa-miR-486-3p	1	0	1	1	1	1	ADCY6	adenylate cyclase 6
hsa-miR-486-3p	0	0	1	1	1	1	ZNF189	zinc finger protein 189
hsa-miR-486-3p	0	0	1	1	0	0	TTYH1	tweety homolog 1 (Drosophila)
hsa-miR-486-3p	0	0	1	0	0	0	KANSL1-AS1	KANSL1 antisense RNA 1
hsa-miR-486-3p	1	0	1	1	1	1	RAB2B	RAB2B, member RAS oncogene family
hsa-miR-486-3p	1	0	1	1	1	1	C18orf1	chromosome 18 open reading frame 1
hsa-miR-486-3p	1	0	1	1	1	1	FAM129B	family with sequence similarity 129, member B
hsa-miR-486-3p	0	0	1	1	0	0	LNP1	leukemia NUP98 fusion partner 1
hsa-miR-486-3p	0	0	1	0	0	0	PABPC1P2	poly(A) binding protein, cytoplasmic 1 pseudogene 2
hsa-miR-486-3p	1	0	1	1	1	1	MAPKAPK3	mitogen-activated protein kinase-activated protein kinase 3
hsa-miR-486-3p	1	0	1	1	1	1	PHACTR4	phosphatase and actin regulator 4
hsa-miR-486-3p	0	0	1	0	0	0	PTGER4P2	prostaglandin E receptor 4 (subtype EP4) pseudogene 2
hsa-miR-486-3p	1	0	1	1	0	0	DCAF15	DDB1 and CUL4 associated factor 15
hsa-miR-486-3p	0	0	1	1	0	0	RELA	v-rel reticuloendotheliosis viral oncogene homolog A (avian)
hsa-miR-486-3p	0	0	1	1	0	0	TRIM46	tripartite motif containing 46
hsa-miR-486-3p	0	0	1	1	0	0	CYP4F30P	cytochrome P450, family 4, subfamily F, polypeptide 30, pseudogene
hsa-miR-486-3p	0	0	1	1	0	0	SLAMF9	SLAM family member 9
hsa-miR-486-3p	0	0	1	0	0	0	AQP7P2	aquaporin 7 pseudogene 2
hsa-miR-486-3p	0	0	1	1	1	1	SLC11A1	solute carrier family 11 (proton-coupled divalent metal ion transporters), member 1
hsa-miR-486-3p	1	0	1	1	1	1	USP47	ubiquitin specific peptidase 47
hsa-miR-486-3p	1	0	1	0	1	1	TMEM194A	transmembrane protein 194A
hsa-miR-486-3p	0	0	1	1	1	1	TNFSF12	tumor necrosis factor (ligand) superfamily, member 12
hsa-miR-486-3p	1	0	1	1	1	1	LOXL3	lysyl oxidase-like 3
hsa-miR-486-3p	1	0	1	1	1	1	RARG	retinoic acid receptor, gamma
hsa-miR-486-3p	1	0	1	1	1	1	OPCML	opioid binding protein/cell adhesion molecule-like
hsa-miR-486-3p	0	0	1	1	1	1	C3orf67	chromosome 3 open reading frame 67
hsa-miR-486-3p	0	0	1	0	0	0	LOC642846	DEAD/H (Asp-Glu-Ala-Asp/His) box polypeptide 11-like
hsa-miR-486-3p	0	0	1	0	0	0	LINC00537	long intergenic non-protein coding RNA 537
hsa-miR-486-3p	0	0	1	0	0	0	TBC1D25	TBC1 domain family, member 25
hsa-miR-486-3p	0	0	1	1	1	1	HOXD8	homeobox D8
hsa-miR-486-3p	1	0	1	1	1	1	ESRRA	estrogen-related receptor alpha
hsa-miR-486-3p	0	0	1	0	0	0	FRG1B	FSHD region gene 1 family, member B
hsa-miR-486-3p	1	0	1	1	1	1	ST8SIA2	ST8 alpha-N-acetyl-neuraminide alpha-2,8-sialyltransferase 2
hsa-miR-486-3p	1	0	1	1	1	1	ACVR2B	activin A receptor, type IIB
hsa-miR-486-3p	1	0	1	1	0	0	SRRM3	serine/arginine repetitive matrix 3
hsa-miR-486-3p	1	0	1	1	0	0	PLD3	phospholipase D family, member 3
hsa-miR-486-3p	0	0	1	0	0	0	FAM106A	family with sequence similarity 106, member A
hsa-miR-486-3p	0	0	1	1	1	1	XG	Xg blood group
hsa-miR-486-3p	0	0	1	0	1	1	GALNT13	UDP-N-acetyl-alpha-D-galactosamine:polypeptide N-acetylgalactosaminyltransferase 13 (GalNAc-T13)
hsa-miR-486-3p	0	0	1	0	0	0	CCDC163P	coiled-coil domain containing 163, pseudogene
hsa-miR-486-3p	0	0	1	1	0	0	ADAMTS13	ADAM metallopeptidase with thrombospondin type 1 motif, 13
hsa-miR-486-3p	1	0	1	0	1	1	CPEB2	cytoplasmic polyadenylation element binding protein 2
hsa-miR-486-3p	0	0	1	0	0	0	LOC441493	uncharacterized LOC441493
hsa-miR-486-3p	1	0	1	1	0	0	KIAA1644	KIAA1644
hsa-miR-486-3p	1	0	1	1	1	1	PHKA1	phosphorylase kinase, alpha 1 (muscle)
hsa-miR-486-3p	1	0	1	1	1	1	GABRB2	gamma-aminobutyric acid (GABA) A receptor, beta 2
hsa-miR-486-3p	1	0	1	1	1	1	ZNF763	zinc finger protein 763
hsa-miR-486-3p	0	0	1	0	0	0	FBXL19-AS1	FBXL19 antisense RNA 1 (head to head)
hsa-miR-486-3p	1	0	1	1	1	1	NR2F2	nuclear receptor subfamily 2, group F, member 2
hsa-miR-486-3p	1	0	1	1	1	1	PTPRD	protein tyrosine phosphatase, receptor type, D
hsa-miR-486-3p	1	0	1	1	1	1	PNISR	PNN-interacting serine/arginine-rich protein
hsa-miR-486-3p	1	0	1	1	1	1	TBP	TATA box binding protein
hsa-miR-486-3p	0	0	1	1	0	0	SLC17A4	solute carrier family 17 (sodium phosphate), member 4
hsa-miR-486-3p	1	0	1	0	1	1	BTBD3	BTB (POZ) domain containing 3
hsa-miR-486-3p	1	0	1	0	1	1	KIF5C	kinesin family member 5C
hsa-miR-486-3p	0	0	1	1	0	0	NLRX1	NLR family member X1
hsa-miR-486-3p	0	0	1	1	0	0	TMC2	transmembrane channel-like 2
hsa-miR-486-3p	0	0	1	1	0	0	PRAMEF10	PRAME family member 10
hsa-miR-486-3p	0	0	1	1	0	0	RNF123	ring finger protein 123
hsa-miR-486-3p	0	0	1	1	1	1	ZNF621	zinc finger protein 621
hsa-miR-486-3p	1	0	1	1	0	0	MAPKBP1	mitogen-activated protein kinase binding protein 1
hsa-miR-486-3p	1	0	1	1	1	1	ITSN1	intersectin 1 (SH3 domain protein)
hsa-miR-486-3p	1	0	1	1	1	1	OSBP2	oxysterol binding protein 2
hsa-miR-486-3p	0	0	1	1	0	0	ANKLE1	ankyrin repeat and LEM domain containing 1
hsa-miR-486-3p	0	0	1	1	0	0	WDR90	WD repeat domain 90
hsa-miR-486-3p	0	0	1	1	0	0	USP19	ubiquitin specific peptidase 19
hsa-miR-486-3p	0	0	1	1	0	0	TTC21A	tetratricopeptide repeat domain 21A
hsa-miR-486-3p	0	0	1	0	0	0	FAM225B	family with sequence similarity 225, member B (non-protein coding)
hsa-miR-486-3p	0	0	1	1	0	0	FBXL15	F-box and leucine-rich repeat protein 15
hsa-miR-486-3p	1	0	1	0	0	0	SDR39U1	short chain dehydrogenase/reductase family 39U, member 1
hsa-miR-486-3p	0	0	1	0	0	0	FUT8-AS1	FUT8 antisense RNA 1
hsa-miR-486-3p	1	0	1	0	1	1	TTC7B	tetratricopeptide repeat domain 7B
hsa-miR-486-3p	1	0	1	1	1	1	CHGA	chromogranin A (parathyroid secretory protein 1)
hsa-miR-486-3p	0	0	1	0	0	0	FLJ39632	uncharacterized LOC642477
hsa-miR-486-3p	1	0	1	1	1	1	EIF5	eukaryotic translation initiation factor 5
hsa-miR-486-3p	0	0	1	1	1	1	IP6K2	inositol hexakisphosphate kinase 2
hsa-miR-486-3p	1	0	1	1	0	0	KRT80	keratin 80
hsa-miR-486-3p	0	0	1	1	1	1	AP1B1	adaptor-related protein complex 1, beta 1 subunit
hsa-miR-486-3p	1	0	1	1	1	1	JPH1	junctophilin 1
hsa-miR-486-3p	1	0	1	1	1	1	RAB7A	RAB7A, member RAS oncogene family
hsa-miR-486-3p	0	0	1	1	1	1	KBTBD12	kelch repeat and BTB (POZ) domain containing 12
hsa-miR-486-3p	0	0	1	1	1	1	SLC12A8	solute carrier family 12 (potassium/chloride transporters), member 8
hsa-miR-486-3p	0	0	1	1	1	1	APTX	aprataxin
hsa-miR-486-3p	0	0	1	1	1	1	DEPDC5	DEP domain containing 5
hsa-miR-486-3p	0	0	1	1	0	0	CDK5RAP2	CDK5 regulatory subunit associated protein 2
hsa-miR-486-3p	0	0	1	0	0	0	PCNXL3	pecanex-like 3 (Drosophila)
hsa-miR-486-3p	0	0	1	1	1	1	COL6A3	collagen, type VI, alpha 3
hsa-miR-486-3p	1	0	1	1	1	1	MASP1	mannan-binding lectin serine peptidase 1 (C4/C2 activating component of Ra-reactive factor)
hsa-miR-486-3p	1	0	1	1	1	1	CGN	cingulin
hsa-miR-486-3p	1	0	1	1	1	1	SLC39A13	solute carrier family 39 (zinc transporter), member 13
hsa-miR-486-3p	0	0	1	1	1	1	NIPSNAP3B	nipsnap homolog 3B (C. elegans)
hsa-miR-486-3p	1	0	1	1	1	1	FOXP1	forkhead box P1
hsa-miR-486-3p	0	0	1	1	0	0	ANKRD33	ankyrin repeat domain 33
hsa-miR-486-3p	1	0	1	1	1	1	TC2N	tandem C2 domains, nuclear
hsa-miR-486-3p	0	0	1	0	0	0	OVOS	ovostatin
hsa-miR-486-3p	1	0	1	1	1	1	DCAF5	DDB1 and CUL4 associated factor 5
hsa-miR-486-3p	1	0	1	0	0	0	CTSB	cathepsin B
hsa-miR-486-3p	1	0	1	1	1	1	KLHL6	kelch-like 6 (Drosophila)
hsa-miR-486-3p	1	0	1	1	1	1	NFIB	nuclear factor I/B
hsa-miR-486-3p	1	0	1	1	1	1	NAV1	neuron navigator 1
hsa-miR-486-3p	0	0	1	0	0	0	ZNRD1-AS1	ZNRD1 antisense RNA 1
hsa-miR-486-3p	0	0	1	1	1	1	IPO11	importin 11
hsa-miR-486-3p	1	0	1	1	1	1	SIN3A	SIN3 transcription regulator homolog A (yeast)
hsa-miR-486-3p	1	0	1	1	1	1	HIC2	hypermethylated in cancer 2
hsa-miR-486-3p	0	0	1	1	1	1	TMPRSS6	transmembrane protease, serine 6
hsa-miR-486-3p	1	0	1	1	1	1	MDK	midkine (neurite growth-promoting factor 2)
hsa-miR-486-3p	1	0	1	1	1	1	ARHGDIA	Rho GDP dissociation inhibitor (GDI) alpha
hsa-miR-486-3p	0	0	1	1	1	1	POLR2H	polymerase (RNA) II (DNA directed) polypeptide H
hsa-miR-486-3p	0	0	1	1	0	0	CRIP2	cysteine-rich protein 2
hsa-miR-486-3p	1	0	1	1	1	1	ADD2	adducin 2 (beta)
hsa-miR-486-3p	0	0	1	1	0	0	CSH1	chorionic somatomammotropin hormone 1 (placental lactogen)
hsa-miR-486-3p	0	0	1	1	0	0	PPAPDC1B	phosphatidic acid phosphatase type 2 domain containing 1B
hsa-miR-486-3p	0	0	1	1	0	0	PPT2	palmitoyl-protein thioesterase 2
hsa-miR-486-3p	0	0	1	1	1	1	SLC25A11	solute carrier family 25 (mitochondrial carrier; oxoglutarate carrier), member 11
hsa-miR-486-3p	1	0	1	1	0	0	TOE1	target of EGR1, member 1 (nuclear)
hsa-miR-486-3p	0	0	1	0	1	1	IDO1	indoleamine 2,3-dioxygenase 1
hsa-miR-486-3p	0	0	1	1	0	0	SLC39A7	solute carrier family 39 (zinc transporter), member 7
hsa-miR-486-3p	0	0	1	1	0	0	CDC37	cell division cycle 37 homolog (S. cerevisiae)
hsa-miR-486-3p	0	0	1	1	0	0	SARS	seryl-tRNA synthetase
hsa-miR-486-3p	0	0	1	0	0	0	LOC400768	uncharacterized LOC400768
hsa-miR-486-3p	0	0	1	1	0	0	URM1	ubiquitin related modifier 1
hsa-miR-486-3p	1	0	1	1	1	1	DDX19B	DEAD (Asp-Glu-Ala-Asp) box polypeptide 19B
hsa-miR-486-3p	0	0	1	1	0	0	F2	coagulation factor II (thrombin)
hsa-miR-486-3p	1	0	1	1	1	1	ERI3	ERI1 exoribonuclease family member 3
hsa-miR-486-3p	0	0	1	1	1	1	SLCO1C1	solute carrier organic anion transporter family, member 1C1
hsa-miR-486-3p	1	0	1	1	0	0	TSC22D4	TSC22 domain family, member 4
hsa-miR-486-3p	1	0	1	1	1	1	CNIH2	cornichon homolog 2 (Drosophila)
hsa-miR-486-3p	1	0	1	1	0	0	PHGDH	phosphoglycerate dehydrogenase
hsa-miR-486-3p	0	0	1	1	0	0	PPOX	protoporphyrinogen oxidase
hsa-miR-486-3p	1	0	1	1	1	1	NME4	NME/NM23 nucleoside diphosphate kinase 4
hsa-miR-486-3p	0	0	1	1	1	1	ATP1B3	ATPase, Na+/K+ transporting, beta 3 polypeptide
hsa-miR-486-3p	0	0	1	1	1	1	C1orf85	chromosome 1 open reading frame 85
hsa-miR-486-3p	0	0	1	1	0	0	FXYD7	FXYD domain containing ion transport regulator 7
hsa-miR-486-3p	0	0	1	1	0	0	FCGRT	Fc fragment of IgG, receptor, transporter, alpha
hsa-miR-486-3p	1	0	1	1	1	1	POLR2D	polymerase (RNA) II (DNA directed) polypeptide D
hsa-miR-486-3p	0	0	1	0	0	0	ARRDC1	arrestin domain containing 1
hsa-miR-486-3p	0	0	1	1	0	0	FCHO1	FCH domain only 1
hsa-miR-486-3p	1	1	1	1	0	0	EFNA3	ephrin-A3
hsa-miR-486-3p	1	0	1	1	1	1	SIX5	SIX homeobox 5
hsa-miR-486-3p	1	0	1	1	0	0	CRELD1	cysteine-rich with EGF-like domains 1
hsa-miR-486-3p	0	0	1	1	0	0	NOP56	NOP56 ribonucleoprotein homolog (yeast)
hsa-miR-486-3p	1	0	1	1	0	0	STX5	syntaxin 5
hsa-miR-486-3p	1	0	1	1	1	1	CTDNEP1	CTD nuclear envelope phosphatase 1
hsa-miR-486-3p	1	0	1	1	1	1	SSR1	signal sequence receptor, alpha
hsa-miR-486-3p	0	0	1	1	0	0	HPCAL1	hippocalcin-like 1
hsa-miR-486-3p	0	0	1	1	1	1	ABCD1	ATP-binding cassette, sub-family D (ALD), member 1
hsa-miR-486-3p	1	0	1	1	1	1	ADAM9	ADAM metallopeptidase domain 9
hsa-miR-486-3p	0	0	1	1	1	1	RNF41	ring finger protein 41
hsa-miR-486-3p	1	0	1	1	1	1	COPZ1	coatomer protein complex, subunit zeta 1
hsa-miR-486-3p	0	0	1	1	1	1	ELP5	elongator acetyltransferase complex subunit 5
hsa-miR-486-3p	0	0	1	1	1	1	GRAP2	GRB2-related adaptor protein 2
hsa-miR-486-3p	0	0	1	1	0	0	TMEM183A	transmembrane protein 183A
hsa-miR-486-3p	0	0	1	1	0	0	ASNA1	arsA arsenite transporter, ATP-binding, homolog 1 (bacterial)
hsa-miR-486-3p	1	0	1	1	0	0	YPEL3	yippee-like 3 (Drosophila)
hsa-miR-486-3p	1	0	1	1	1	1	PCTP	phosphatidylcholine transfer protein
hsa-miR-486-3p	0	0	1	1	0	0	HCRTR1	hypocretin (orexin) receptor 1
hsa-miR-486-3p	1	0	1	1	0	0	MAP3K10	mitogen-activated protein kinase kinase kinase 10
hsa-miR-486-3p	1	0	1	1	1	1	LYPLA2	lysophospholipase II
hsa-miR-486-3p	0	0	1	0	0	0	TMEM208	transmembrane protein 208
hsa-miR-486-3p	0	0	1	1	0	0	SNRPA	small nuclear ribonucleoprotein polypeptide A
hsa-miR-486-3p	0	0	1	1	0	0	BRE	brain and reproductive organ-expressed (TNFRSF1A modulator)
hsa-miR-486-3p	1	0	1	1	1	1	TMEM245	transmembrane protein 245
hsa-miR-486-3p	0	0	1	1	0	0	C11orf68	chromosome 11 open reading frame 68
hsa-miR-486-3p	1	0	1	1	1	1	DKK3	dickkopf 3 homolog (Xenopus laevis)
hsa-miR-486-3p	0	0	1	1	1	1	MAZ	MYC-associated zinc finger protein (purine-binding transcription factor)
hsa-miR-486-3p	0	0	1	1	1	1	NFATC4	nuclear factor of activated T-cells, cytoplasmic, calcineurin-dependent 4
hsa-miR-486-3p	0	0	1	0	0	0	FLJ45248	FLJ45248 protein
hsa-miR-486-3p	0	0	1	0	1	1	TMEM155	transmembrane protein 155
hsa-miR-486-3p	0	0	1	1	0	0	NRSN2	neurensin 2
hsa-miR-486-3p	0	0	1	1	0	0	CSHL1	chorionic somatomammotropin hormone-like 1
hsa-miR-486-3p	0	0	1	1	1	1	NARS	asparaginyl-tRNA synthetase
hsa-miR-486-3p	0	0	1	0	0	0	LOC677759	uncharacterized LOC677759
hsa-miR-486-3p	1	0	1	1	1	1	MMP2	matrix metallopeptidase 2 (gelatinase A, 72kDa gelatinase, 72kDa type IV collagenase)
hsa-miR-486-3p	1	0	1	1	1	1	PPP5C	protein phosphatase 5, catalytic subunit
hsa-miR-486-3p	0	0	1	1	0	0	NIT1	nitrilase 1
hsa-miR-486-3p	1	0	1	1	1	1	DOK4	docking protein 4
hsa-miR-486-3p	0	0	1	1	1	1	CD3E	CD3e molecule, epsilon (CD3-TCR complex)
hsa-miR-486-3p	0	0	1	1	0	0	POR	P450 (cytochrome) oxidoreductase
hsa-miR-486-3p	0	0	1	1	0	0	CSF3R	colony stimulating factor 3 receptor (granulocyte)
hsa-miR-486-3p	0	0	1	1	0	0	CCDC22	coiled-coil domain containing 22
hsa-miR-486-3p	0	0	1	1	1	1	RPUSD1	RNA pseudouridylate synthase domain containing 1
hsa-miR-486-3p	1	0	1	1	1	1	TAGLN2	transgelin 2
hsa-miR-486-3p	0	0	1	1	1	1	CPZ	carboxypeptidase Z
hsa-miR-486-3p	1	0	1	1	1	1	ARNTL	aryl hydrocarbon receptor nuclear translocator-like
hsa-miR-486-3p	0	0	1	1	0	0	MRPL4	mitochondrial ribosomal protein L4
hsa-miR-486-3p	0	0	1	1	0	0	WDR43	WD repeat domain 43
hsa-miR-486-3p	1	0	1	1	1	1	MPP2	membrane protein, palmitoylated 2 (MAGUK p55 subfamily member 2)
hsa-miR-486-3p	0	0	1	1	1	1	RHEBL1	Ras homolog enriched in brain like 1
hsa-miR-486-3p	0	0	1	1	0	0	TMEM132A	transmembrane protein 132A
hsa-miR-486-3p	1	0	1	1	1	1	TIMP3	TIMP metallopeptidase inhibitor 3
hsa-miR-486-3p	1	0	1	1	1	1	DPF2	D4, zinc and double PHD fingers family 2
hsa-miR-486-3p	0	0	1	1	0	0	PTOV1	prostate tumor overexpressed 1
hsa-miR-486-3p	0	0	1	1	0	0	FAM57B	family with sequence similarity 57, member B
hsa-miR-486-3p	1	0	1	1	1	1	BAALC	brain and acute leukemia, cytoplasmic
hsa-miR-486-3p	0	0	1	1	1	1	ACSF3	acyl-CoA synthetase family member 3
hsa-miR-486-3p	1	0	1	1	1	1	EIF1	eukaryotic translation initiation factor 1
hsa-miR-486-3p	0	0	1	1	1	1	SLCO4A1	solute carrier organic anion transporter family, member 4A1
hsa-miR-486-3p	0	0	1	1	1	1	GFM1	G elongation factor, mitochondrial 1
hsa-miR-486-3p	1	0	1	1	1	1	F11R	F11 receptor
hsa-miR-486-3p	1	0	1	1	1	1	RPUSD3	RNA pseudouridylate synthase domain containing 3
hsa-miR-486-3p	0	0	1	0	0	0	LOC100130954	uncharacterized LOC100130954
hsa-miR-486-3p	0	0	1	0	0	0	ZNF674-AS1	ZNF674 antisense RNA 1
hsa-miR-486-3p	0	0	1	1	0	0	CCDC107	coiled-coil domain containing 107
hsa-miR-486-3p	0	0	1	1	0	0	BCKDK	branched chain ketoacid dehydrogenase kinase
hsa-miR-486-3p	0	0	1	1	1	1	HUS1	HUS1 checkpoint homolog (S. pombe)
hsa-miR-486-3p	0	0	1	1	0	0	GPC3	glypican 3
hsa-miR-486-3p	1	0	1	1	1	1	RALY	RNA binding protein, autoantigenic (hnRNP-associated with lethal yellow homolog (mouse))
hsa-miR-486-3p	0	0	1	1	0	0	HEBP1	heme binding protein 1
hsa-miR-486-3p	1	0	1	1	1	1	TRAPPC3	trafficking protein particle complex 3
hsa-miR-486-3p	1	0	1	0	1	1	CD47	CD47 molecule
hsa-miR-486-3p	0	0	1	0	0	0	NUDT18	nudix (nucleoside diphosphate linked moiety X)-type motif 18
hsa-miR-486-3p	0	0	1	0	0	0	PRMT1	protein arginine methyltransferase 1
hsa-miR-486-3p	0	0	1	1	1	1	ZNF346	zinc finger protein 346
hsa-miR-486-3p	0	0	1	1	0	0	SLC15A3	solute carrier family 15, member 3
hsa-miR-486-3p	0	0	1	1	0	0	CLK2	CDC-like kinase 2
hsa-miR-486-3p	0	0	1	1	0	0	TESK1	testis-specific kinase 1
hsa-miR-486-3p	1	0	1	1	1	1	ATPAF1	ATP synthase mitochondrial F1 complex assembly factor 1
hsa-miR-486-3p	0	0	1	1	1	1	OTOR	otoraplin
hsa-miR-486-3p	1	0	1	1	0	0	RAD9A	RAD9 homolog A (S. pombe)
hsa-miR-486-3p	0	0	1	1	1	1	LIMK2	LIM domain kinase 2
hsa-miR-486-3p	1	0	1	1	1	1	JUNB	jun B proto-oncogene
hsa-miR-486-3p	0	0	1	1	0	0	INO80B	INO80 complex subunit B
hsa-miR-486-3p	0	0	1	1	1	1	C10orf2	chromosome 10 open reading frame 2
hsa-miR-486-3p	0	0	1	1	0	0	IL11RA	interleukin 11 receptor, alpha
hsa-miR-486-3p	1	0	1	0	1	1	NMT1	N-myristoyltransferase 1
hsa-miR-486-3p	1	0	1	1	1	1	TARBP2	TAR (HIV-1) RNA binding protein 2
hsa-miR-486-3p	0	0	1	0	0	0	MYSM1	Myb-like, SWIRM and MPN domains 1
hsa-miR-486-3p	1	0	1	0	1	1	KIAA0240	KIAA0240
hsa-miR-486-3p	1	0	1	0	1	1	KIAA0664	KIAA0664
hsa-miR-486-3p	0	0	1	0	0	0	LOC731789	uncharacterized LOC731789
hsa-miR-486-3p	0	0	1	1	1	1	SYNE2	spectrin repeat containing, nuclear envelope 2
hsa-miR-486-3p	0	0	1	0	0	0	LINC00661	long intergenic non-protein coding RNA 661
hsa-miR-486-3p	0	0	1	0	0	0	MUC19	mucin 19, oligomeric
hsa-miR-486-3p	1	0	1	1	1	1	TIPARP	TCDD-inducible poly(ADP-ribose) polymerase
hsa-miR-486-3p	0	0	1	1	1	1	SLC25A26	solute carrier family 25 (S-adenosylmethionine carrier), member 26
hsa-miR-486-3p	1	0	1	1	1	1	BCL2L1	BCL2-like 1
hsa-miR-486-3p	0	0	1	1	0	0	TENC1	tensin like C1 domain containing phosphatase (tensin 2)
hsa-miR-486-3p	0	0	1	1	0	0	STK25	serine/threonine kinase 25
hsa-miR-486-3p	0	0	1	1	0	0	GSTT2	glutathione S-transferase theta 2
hsa-miR-486-3p	1	0	1	1	1	1	ZFHX3	zinc finger homeobox 3
hsa-miR-486-3p	0	0	1	1	1	1	SLC39A14	solute carrier family 39 (zinc transporter), member 14
hsa-miR-486-3p	1	0	1	1	1	1	METAP1	methionyl aminopeptidase 1
hsa-miR-486-3p	1	0	1	1	1	1	PRKG1	protein kinase, cGMP-dependent, type I
hsa-miR-486-3p	1	0	1	1	1	1	SEC14L1	SEC14-like 1 (S. cerevisiae)
hsa-miR-486-3p	1	0	1	1	1	1	RBPMS	RNA binding protein with multiple splicing
hsa-miR-486-3p	1	0	1	0	1	1	KLHDC10	kelch domain containing 10
hsa-miR-486-3p	1	0	1	1	1	1	PHYHIP	phytanoyl-CoA 2-hydroxylase interacting protein
hsa-miR-486-3p	0	0	1	1	1	1	LTA	lymphotoxin alpha (TNF superfamily, member 1)
hsa-miR-486-3p	1	0	1	1	1	1	KCNE3	potassium voltage-gated channel, Isk-related family, member 3
hsa-miR-486-3p	1	0	1	1	1	1	TRIOBP	TRIO and F-actin binding protein
hsa-miR-486-3p	0	0	1	1	0	0	SPATA20	spermatogenesis associated 20
hsa-miR-486-3p	0	0	1	1	1	1	IRF5	interferon regulatory factor 5
hsa-miR-486-3p	1	0	1	0	1	1	CACNA1G	calcium channel, voltage-dependent, T type, alpha 1G subunit
hsa-miR-486-3p	0	0	1	0	0	0	PILRB	paired immunoglobin-like type 2 receptor beta
hsa-miR-486-3p	1	0	1	1	1	1	TNFAIP1	tumor necrosis factor, alpha-induced protein 1 (endothelial)
hsa-miR-486-3p	0	0	1	1	0	0	CYP27B1	cytochrome P450, family 27, subfamily B, polypeptide 1
hsa-miR-486-3p	0	0	1	0	0	0	C1orf81	chromosome 1 open reading frame 81
hsa-miR-486-3p	0	0	1	0	0	0	LCE6A	late cornified envelope 6A
hsa-miR-486-3p	1	0	1	1	1	1	MLL	myeloid/lymphoid or mixed-lineage leukemia (trithorax homolog, Drosophila)
hsa-miR-486-3p	1	0	1	0	1	1	STAT3	signal transducer and activator of transcription 3 (acute-phase response factor)
hsa-miR-486-3p	1	0	1	1	1	1	RALBP1	ralA binding protein 1
hsa-miR-486-3p	1	0	1	0	1	1	BCL2	B-cell CLL/lymphoma 2
hsa-miR-486-3p	1	0	1	1	1	1	PLAU	plasminogen activator, urokinase
hsa-miR-486-3p	0	0	1	1	1	1	HLA-DRB5	major histocompatibility complex, class II, DR beta 5
hsa-miR-486-3p	1	0	1	1	1	1	IGF1	insulin-like growth factor 1 (somatomedin C)
hsa-miR-486-3p	0	0	1	1	1	1	ATP7A	ATPase, Cu++ transporting, alpha polypeptide
hsa-miR-486-3p	1	0	1	1	1	1	COL4A4	collagen, type IV, alpha 4
hsa-miR-486-3p	1	0	1	1	0	0	ENG	endoglin
hsa-miR-486-3p	0	0	1	0	1	1	MS4A2	membrane-spanning 4-domains, subfamily A, member 2
hsa-miR-486-3p	1	0	1	1	1	1	FUT1	fucosyltransferase 1 (galactoside 2-alpha-L-fucosyltransferase, H blood group)
hsa-miR-486-3p	0	0	1	1	1	1	GSS	glutathione synthetase
hsa-miR-486-3p	1	0	1	1	1	1	KCNA1	potassium voltage-gated channel, shaker-related subfamily, member 1 (episodic ataxia with myokymia)
hsa-miR-486-3p	0	0	1	1	1	1	KRT12	keratin 12
hsa-miR-486-3p	0	0	1	1	0	0	SCNN1B	sodium channel, non-voltage-gated 1, beta subunit
hsa-miR-486-3p	1	1	1	1	1	1	CDKN1A	cyclin-dependent kinase inhibitor 1A (p21, Cip1)
hsa-miR-486-3p	1	0	1	0	1	1	CYBB	cytochrome b-245, beta polypeptide
hsa-miR-486-3p	0	0	1	1	1	1	L1CAM	L1 cell adhesion molecule
hsa-miR-486-3p	0	0	1	1	1	1	LTBP2	latent transforming growth factor beta binding protein 2
hsa-miR-486-3p	1	0	1	1	0	0	NOTCH3	notch 3
hsa-miR-486-3p	1	0	1	1	1	1	RFX5	regulatory factor X, 5 (influences HLA class II expression)
hsa-miR-486-3p	1	0	1	1	1	1	HNF1B	HNF1 homeobox B
hsa-miR-486-3p	0	0	1	1	0	0	APOA4	apolipoprotein A-IV
hsa-miR-486-3p	1	0	1	1	1	1	AQP2	aquaporin 2 (collecting duct)
hsa-miR-486-3p	0	0	1	1	1	1	CYP11B2	cytochrome P450, family 11, subfamily B, polypeptide 2
hsa-miR-486-3p	1	0	1	1	1	1	MPZ	myelin protein zero
hsa-miR-486-3p	0	0	1	1	1	1	IL1RN	interleukin 1 receptor antagonist
hsa-miR-486-3p	1	0	1	1	1	1	TNF	tumor necrosis factor
hsa-miR-486-3p	0	0	1	1	1	1	IGF2	insulin-like growth factor 2 (somatomedin A)
hsa-miR-486-3p	0	0	1	1	1	1	BDKRB2	bradykinin receptor B2
hsa-miR-486-3p	0	0	1	0	1	1	ADRA2A	adrenoceptor alpha 2A
hsa-miR-486-3p	0	0	1	1	0	0	AVPR1B	arginine vasopressin receptor 1B
hsa-miR-486-3p	1	0	1	0	1	1	CACNA1E	calcium channel, voltage-dependent, R type, alpha 1E subunit
hsa-miR-486-3p	1	0	1	1	1	1	CHRM1	cholinergic receptor, muscarinic 1
hsa-miR-486-3p	1	0	1	1	1	1	CSF1	colony stimulating factor 1 (macrophage)
hsa-miR-486-3p	1	0	1	1	1	1	DIO2	deiodinase, iodothyronine, type II
hsa-miR-486-3p	1	0	1	1	1	1	GABRG2	gamma-aminobutyric acid (GABA) A receptor, gamma 2
hsa-miR-486-3p	1	0	1	1	0	0	GRIK3	glutamate receptor, ionotropic, kainate 3
hsa-miR-486-3p	0	0	1	1	0	0	PTGIR	prostaglandin I2 (prostacyclin) receptor (IP)
hsa-miR-486-3p	0	0	1	0	1	1	PTGIS	prostaglandin I2 (prostacyclin) synthase
hsa-miR-486-3p	1	0	1	1	1	1	RARA	retinoic acid receptor, alpha
hsa-miR-486-3p	0	0	1	1	0	0	SNCB	synuclein, beta
hsa-miR-486-3p	0	0	1	1	1	1	MED11	mediator complex subunit 11
hsa-miR-486-3p	1	0	1	1	1	1	TPD52L3	tumor protein D52-like 3
hsa-miR-486-3p	1	0	1	1	1	1	DNAJB12	DnaJ (Hsp40) homolog, subfamily B, member 12
hsa-miR-486-3p	0	0	1	0	0	0	OR8G1	olfactory receptor, family 8, subfamily G, member 1
hsa-miR-486-3p	1	0	1	1	1	1	LEPR	leptin receptor
hsa-miR-486-3p	1	0	1	0	1	1	BMF	Bcl2 modifying factor
hsa-miR-486-3p	1	0	1	1	1	1	FBLN2	fibulin 2
hsa-miR-486-3p	0	0	1	1	0	0	PAPL	iron/zinc purple acid phosphatase-like protein
hsa-miR-486-3p	0	0	1	1	1	1	CLEC2D	C-type lectin domain family 2, member D
hsa-miR-486-3p	1	0	1	0	1	1	LRRC55	leucine rich repeat containing 55
hsa-miR-486-3p	0	0	1	1	1	1	FRG2	FSHD region gene 2
hsa-miR-486-3p	0	0	1	0	1	1	FLJ46347	uncharacterized LOC389064
hsa-miR-486-3p	1	0	1	1	1	1	PLCXD3	phosphatidylinositol-specific phospholipase C, X domain containing 3
hsa-miR-486-3p	1	0	1	1	1	1	EDA	ectodysplasin A
hsa-miR-486-3p	1	0	1	0	1	1	IP6K1	inositol hexakisphosphate kinase 1
hsa-miR-486-3p	1	0	1	1	1	1	ATN1	atrophin 1
hsa-miR-486-3p	1	0	1	1	1	1	NTRK3	neurotrophic tyrosine kinase, receptor, type 3
hsa-miR-486-3p	0	0	1	1	0	0	F8A3	coagulation factor VIII-associated 3
hsa-miR-486-3p	0	0	1	0	1	1	C3orf56	chromosome 3 open reading frame 56
hsa-miR-486-3p	1	0	1	0	1	1	CPLX2	complexin 2
hsa-miR-486-3p	1	0	1	1	1	1	ZDHHC9	zinc finger, DHHC-type containing 9
hsa-miR-486-3p	1	0	1	1	1	1	STEAP3	STEAP family member 3, metalloreductase
hsa-miR-486-3p	1	0	1	0	1	1	KIAA2022	KIAA2022
hsa-miR-486-3p	0	0	1	1	1	1	MXI1	MAX interactor 1
hsa-miR-486-3p	1	0	1	1	1	1	LPHN1	latrophilin 1
hsa-miR-486-3p	0	0	1	1	0	0	C10orf62	chromosome 10 open reading frame 62
hsa-miR-486-3p	1	0	1	0	1	1	ZC3H12B	zinc finger CCCH-type containing 12B
hsa-miR-486-3p	0	0	1	1	1	1	NCMAP	noncompact myelin associated protein
hsa-miR-486-3p	1	0	1	1	1	1	CTNNBIP1	catenin, beta interacting protein 1
hsa-miR-486-3p	1	0	1	1	1	1	FOXP4	forkhead box P4
hsa-miR-486-3p	0	0	1	1	1	1	C18orf56	chromosome 18 open reading frame 56
hsa-miR-486-3p	1	0	1	1	1	1	SORCS1	sortilin-related VPS10 domain containing receptor 1
hsa-miR-486-3p	0	0	1	1	1	1	LDLRAD2	low density lipoprotein receptor class A domain containing 2
hsa-miR-486-3p	1	0	1	1	1	1	CA7	carbonic anhydrase VII
hsa-miR-486-3p	1	0	1	1	1	1	NCDN	neurochondrin
hsa-miR-486-3p	0	0	1	1	0	0	BANF2	barrier to autointegration factor 2
hsa-miR-486-3p	0	0	1	1	0	0	LAT	linker for activation of T cells
hsa-miR-486-3p	1	0	1	1	1	1	TMCC1	transmembrane and coiled-coil domain family 1
hsa-miR-486-3p	1	0	1	0	1	1	KCNK2	potassium channel, subfamily K, member 2
hsa-miR-486-3p	0	0	1	1	1	1	RAB28	RAB28, member RAS oncogene family
hsa-miR-486-3p	0	0	1	1	1	1	GNG10	guanine nucleotide binding protein (G protein), gamma 10
hsa-miR-486-3p	1	0	1	1	1	1	SBK1	SH3-binding domain kinase 1
hsa-miR-486-3p	1	0	1	0	1	1	RGAG4	retrotransposon gag domain containing 4
hsa-miR-486-3p	1	0	1	1	1	1	SH3KBP1	SH3-domain kinase binding protein 1
hsa-miR-486-3p	1	0	1	0	1	1	BCL7A	B-cell CLL/lymphoma 7A
hsa-miR-486-3p	1	0	1	0	1	1	TNRC6B	trinucleotide repeat containing 6B
hsa-miR-486-3p	1	0	1	1	1	1	SLC6A9	solute carrier family 6 (neurotransmitter transporter, glycine), member 9
hsa-miR-486-3p	1	0	1	1	1	1	FNBP1L	formin binding protein 1-like
hsa-miR-486-3p	0	0	1	1	0	0	ARPC4	actin related protein 2/3 complex, subunit 4, 20kDa
hsa-miR-486-3p	1	0	1	1	1	1	VEGFA	vascular endothelial growth factor A
hsa-miR-486-3p	1	0	1	1	1	1	RGS7BP	regulator of G-protein signaling 7 binding protein
hsa-miR-486-3p	0	0	1	1	0	0	AHDC1	AT hook, DNA binding motif, containing 1
hsa-miR-486-3p	1	0	1	0	1	1	SAMD5	sterile alpha motif domain containing 5
hsa-miR-486-3p	0	0	1	1	1	1	ATF3	activating transcription factor 3
hsa-miR-486-3p	1	0	1	1	0	0	MANEAL	mannosidase, endo-alpha-like
hsa-miR-486-3p	1	0	1	1	1	1	MAF	v-maf musculoaponeurotic fibrosarcoma oncogene homolog (avian)
hsa-miR-486-3p	0	0	1	0	1	1	STXBP1	syntaxin binding protein 1
hsa-miR-486-3p	0	0	1	1	1	1	PHF12	PHD finger protein 12
hsa-miR-486-3p	0	0	1	1	1	1	NHP2	NHP2 ribonucleoprotein homolog (yeast)
hsa-miR-486-3p	0	0	1	1	1	1	KCNIP1	Kv channel interacting protein 1
hsa-miR-486-3p	1	0	1	1	1	1	SCN1B	sodium channel, voltage-gated, type I, beta subunit
hsa-miR-486-3p	1	0	1	0	1	1	CDC42SE1	CDC42 small effector 1
hsa-miR-486-3p	0	0	1	1	1	1	ATAD3C	ATPase family, AAA domain containing 3C
hsa-miR-486-3p	1	0	1	1	1	1	ELMO1	engulfment and cell motility 1
hsa-miR-486-3p	1	0	1	1	1	1	KIAA0317	KIAA0317
hsa-miR-486-3p	1	0	1	1	1	1	KCNC4	potassium voltage-gated channel, Shaw-related subfamily, member 4
hsa-miR-486-3p	1	0	1	0	1	1	USP9X	ubiquitin specific peptidase 9, X-linked
hsa-miR-486-3p	0	0	1	1	1	1	ZDHHC19	zinc finger, DHHC-type containing 19
hsa-miR-486-3p	1	0	1	1	1	1	CHTF8	CTF8, chromosome transmission fidelity factor 8 homolog (S. cerevisiae)
hsa-miR-486-3p	1	0	1	1	1	1	CDC42	cell division cycle 42 (GTP binding protein, 25kDa)
hsa-miR-486-3p	0	0	1	0	0	0	C19orf55	chromosome 19 open reading frame 55
hsa-miR-486-3p	1	0	1	1	1	1	CHN2	chimerin (chimaerin) 2
hsa-miR-486-3p	0	0	1	1	1	1	MLH3	mutL homolog 3 (E. coli)
hsa-miR-486-3p	0	0	1	0	1	1	SCN3B	sodium channel, voltage-gated, type III, beta subunit
hsa-miR-486-3p	1	0	1	1	1	1	LFNG	LFNG O-fucosylpeptide 3-beta-N-acetylglucosaminyltransferase
hsa-miR-486-3p	1	0	1	1	1	1	MTMR12	myotubularin related protein 12
hsa-miR-486-3p	0	0	1	0	1	1	ABCE1	ATP-binding cassette, sub-family E (OABP), member 1
hsa-miR-486-3p	0	0	1	1	1	1	C10orf53	chromosome 10 open reading frame 53
hsa-miR-486-3p	1	0	1	1	1	1	C2orf88	chromosome 2 open reading frame 88
hsa-miR-486-3p	0	0	1	1	1	1	FRMPD2P1	FERM and PDZ domain containing 2 pseudogene 1
hsa-miR-486-3p	0	0	1	0	1	1	MPPED1	metallophosphoesterase domain containing 1
hsa-miR-486-3p	1	0	1	0	1	1	TMEM237	transmembrane protein 237
hsa-miR-486-3p	0	0	1	1	1	1	FAM22G	family with sequence similarity 22, member G
hsa-miR-486-3p	0	0	1	1	0	0	UBL5	ubiquitin-like 5
hsa-miR-486-3p	1	0	1	1	1	1	UBTF	upstream binding transcription factor, RNA polymerase I
hsa-miR-486-3p	1	0	1	0	1	1	SLC7A6	solute carrier family 7 (amino acid transporter light chain, y+L system), member 6
hsa-miR-486-3p	1	0	1	1	1	1	ATG9A	autophagy related 9A
hsa-miR-486-3p	1	0	1	1	1	1	NCOR2	nuclear receptor corepressor 2
hsa-miR-486-3p	0	0	1	1	0	0	VPS37D	vacuolar protein sorting 37 homolog D (S. cerevisiae)
hsa-miR-486-3p	1	0	1	1	1	1	SRSF1	serine/arginine-rich splicing factor 1
hsa-miR-486-3p	1	0	1	0	1	1	FAM127C	family with sequence similarity 127, member C
hsa-miR-486-3p	0	0	1	0	0	0	TMEM183B	transmembrane protein 183B
hsa-miR-486-3p	0	0	1	1	1	1	DIAPH1	diaphanous homolog 1 (Drosophila)
hsa-miR-486-3p	1	0	1	1	1	1	HAP1	huntingtin-associated protein 1
hsa-miR-486-3p	1	0	1	1	1	1	LDB3	LIM domain binding 3
hsa-miR-486-3p	1	0	1	1	1	1	PACRG	PARK2 co-regulated
hsa-miR-486-3p	1	0	1	0	1	1	FBXO41	F-box protein 41
hsa-miR-486-3p	1	0	1	1	1	1	SHANK3	SH3 and multiple ankyrin repeat domains 3
hsa-miR-486-3p	1	0	1	0	1	1	UNC13A	unc-13 homolog A (C. elegans)
hsa-miR-486-3p	1	0	1	1	1	1	KDM6B	lysine (K)-specific demethylase 6B
hsa-miR-486-3p	1	0	1	1	1	1	MGA	MAX gene associated
hsa-miR-486-3p	1	0	1	1	1	1	DGKG	diacylglycerol kinase, gamma 90kDa
hsa-miR-486-3p	1	0	1	1	1	1	MYO1C	myosin IC
hsa-miR-486-3p	0	0	1	1	0	0	GSTT2B	glutathione S-transferase theta 2B (gene/pseudogene)
hsa-miR-486-3p	1	0	1	1	1	1	REPS2	RALBP1 associated Eps domain containing 2
hsa-miR-486-3p	1	0	1	1	1	1	NXF1	nuclear RNA export factor 1
hsa-miR-486-3p	1	0	1	1	1	1	ASIC1	acid-sensing (proton-gated) ion channel 1
hsa-miR-486-3p	1	0	1	1	1	1	ADCYAP1	adenylate cyclase activating polypeptide 1 (pituitary)
hsa-miR-486-3p	1	0	1	1	1	1	BMP2	bone morphogenetic protein 2
hsa-miR-486-3p	0	0	1	0	1	1	CASQ2	calsequestrin 2 (cardiac muscle)
hsa-miR-486-3p	0	0	1	1	0	0	CDC6	cell division cycle 6 homolog (S. cerevisiae)
hsa-miR-486-3p	1	0	1	0	1	1	CDK6	cyclin-dependent kinase 6
hsa-miR-486-3p	1	0	1	1	1	1	CNN1	calponin 1, basic, smooth muscle
hsa-miR-486-3p	1	0	1	0	1	1	CPD	carboxypeptidase D
hsa-miR-486-3p	1	0	1	0	0	0	DLG4	discs, large homolog 4 (Drosophila)
hsa-miR-486-3p	0	0	1	0	0	0	DYNC1H1	dynein, cytoplasmic 1, heavy chain 1
hsa-miR-486-3p	1	0	1	1	1	1	CELSR3	cadherin, EGF LAG seven-pass G-type receptor 3 (flamingo homolog, Drosophila)
hsa-miR-486-3p	1	0	1	1	1	1	CELSR2	cadherin, EGF LAG seven-pass G-type receptor 2 (flamingo homolog, Drosophila)
hsa-miR-486-3p	0	0	1	0	1	1	ELF5	E74-like factor 5 (ets domain transcription factor)
hsa-miR-486-3p	0	0	1	0	0	0	EMP3	epithelial membrane protein 3
hsa-miR-486-3p	1	0	1	1	1	1	EN1	engrailed homeobox 1
hsa-miR-486-3p	1	0	1	1	0	0	GDI1	GDP dissociation inhibitor 1
hsa-miR-486-3p	0	0	1	1	0	0	GSTZ1	glutathione S-transferase zeta 1
hsa-miR-486-3p	1	0	1	1	1	1	NDST1	N-deacetylase/N-sulfotransferase (heparan glucosaminyl) 1
hsa-miR-486-3p	0	0	1	1	0	0	ACP2	acid phosphatase 2, lysosomal
hsa-miR-486-3p	0	0	1	1	0	0	ACRV1	acrosomal vesicle protein 1
hsa-miR-486-3p	1	0	1	1	1	1	AQP4	aquaporin 4
hsa-miR-486-3p	1	0	1	1	1	1	ARF3	ADP-ribosylation factor 3
hsa-miR-486-3p	0	0	1	1	0	0	RHOG	ras homolog family member G
hsa-miR-486-3p	1	0	1	0	1	1	ATP1B2	ATPase, Na+/K+ transporting, beta 2 polypeptide
hsa-miR-486-3p	0	0	1	1	0	0	CXCR5	chemokine (C-X-C motif) receptor 5
hsa-miR-486-3p	0	0	1	1	1	1	BTN1A1	butyrophilin, subfamily 1, member A1
hsa-miR-486-3p	1	0	1	1	1	1	CBFB	core-binding factor, beta subunit
hsa-miR-486-3p	0	0	1	1	1	1	CD34	CD34 molecule
hsa-miR-486-3p	1	0	1	0	0	0	CDH3	cadherin 3, type 1, P-cadherin (placental)
hsa-miR-486-3p	0	0	1	1	0	0	CNTFR	ciliary neurotrophic factor receptor
hsa-miR-486-3p	1	0	1	1	1	1	COL4A6	collagen, type IV, alpha 6
hsa-miR-486-3p	1	0	1	1	1	1	SLC31A1	solute carrier family 31 (copper transporters), member 1
hsa-miR-486-3p	1	0	1	1	1	1	E2F3	E2F transcription factor 3
hsa-miR-486-3p	1	0	1	1	1	1	EPB49	erythrocyte membrane protein band 4.9 (dematin)
hsa-miR-486-3p	1	0	1	1	1	1	FMOD	fibromodulin
hsa-miR-486-3p	0	0	1	1	0	0	FUT5	fucosyltransferase 5 (alpha (1,3) fucosyltransferase)
hsa-miR-486-3p	0	0	1	1	1	1	FYN	FYN oncogene related to SRC, FGR, YES
hsa-miR-486-3p	0	0	1	1	0	0	GLP1R	glucagon-like peptide 1 receptor
hsa-miR-486-3p	0	0	1	1	1	1	HLA-DPB1	major histocompatibility complex, class II, DP beta 1
hsa-miR-486-3p	0	0	1	0	0	0	HLA-DRB1	major histocompatibility complex, class II, DR beta 1
hsa-miR-486-3p	1	0	1	1	1	1	INSM1	insulinoma-associated 1
hsa-miR-486-3p	1	0	1	1	1	1	ITGA3	integrin, alpha 3 (antigen CD49C, alpha 3 subunit of VLA-3 receptor)
hsa-miR-486-3p	1	0	1	1	1	1	ITGA5	integrin, alpha 5 (fibronectin receptor, alpha polypeptide)
hsa-miR-486-3p	1	0	1	1	1	1	KCNJ10	potassium inwardly-rectifying channel, subfamily J, member 10
hsa-miR-486-3p	1	0	1	0	1	1	KIF3C	kinesin family member 3C
hsa-miR-486-3p	0	0	1	1	0	0	KRT4	keratin 4
hsa-miR-486-3p	1	0	1	1	1	1	LIMK1	LIM domain kinase 1
hsa-miR-486-3p	1	0	1	1	1	1	LRP1	low density lipoprotein receptor-related protein 1
hsa-miR-486-3p	1	0	1	1	1	1	LRP6	low density lipoprotein receptor-related protein 6
hsa-miR-486-3p	1	0	1	0	1	1	MXD1	MAX dimerization protein 1
hsa-miR-486-3p	0	0	1	1	1	1	MAG	myelin associated glycoprotein
hsa-miR-486-3p	1	0	1	1	1	1	MAP1A	microtubule-associated protein 1A
hsa-miR-486-3p	1	0	1	1	1	1	ADAM11	ADAM metallopeptidase domain 11
hsa-miR-486-3p	0	0	1	1	1	1	MRC1	mannose receptor, C type 1
hsa-miR-486-3p	1	0	1	1	1	1	MSN	moesin
hsa-miR-486-3p	0	0	1	1	1	1	MSX2	msh homeobox 2
hsa-miR-486-3p	0	0	1	1	1	1	MTAP	methylthioadenosine phosphorylase
hsa-miR-486-3p	0	0	1	1	0	0	MYOG	myogenin (myogenic factor 4)
hsa-miR-486-3p	1	0	1	1	1	1	NGF	nerve growth factor (beta polypeptide)
hsa-miR-486-3p	0	0	1	1	1	1	NID1	nidogen 1
hsa-miR-486-3p	1	0	1	1	1	1	NPTX1	neuronal pentraxin I
hsa-miR-486-3p	0	0	1	0	1	1	OAZ2	ornithine decarboxylase antizyme 2
hsa-miR-486-3p	1	0	1	1	1	1	OSBP	oxysterol binding protein
hsa-miR-486-3p	1	0	1	1	1	1	PCSK6	proprotein convertase subtilisin/kexin type 6
hsa-miR-486-3p	0	0	1	1	1	1	PBX1	pre-B-cell leukemia homeobox 1
hsa-miR-486-3p	1	0	1	0	1	1	PCDHGC3	protocadherin gamma subfamily C, 3
hsa-miR-486-3p	0	0	1	1	0	0	SERPINF1	serpin peptidase inhibitor, clade F (alpha-2 antiplasmin, pigment epithelium derived factor), member 1
hsa-miR-486-3p	0	0	1	1	0	0	PER1	period homolog 1 (Drosophila)
hsa-miR-486-3p	0	0	1	1	1	1	PFDN1	prefoldin subunit 1
hsa-miR-486-3p	1	0	1	1	1	1	PHB	prohibitin
hsa-miR-486-3p	0	0	1	1	0	0	PI3	peptidase inhibitor 3, skin-derived
hsa-miR-486-3p	0	0	1	1	1	1	PIK3C2B	phosphatidylinositol-4-phosphate 3-kinase, catalytic subunit type 2 beta
hsa-miR-486-3p	1	0	1	1	1	1	PLAGL2	pleiomorphic adenoma gene-like 2
hsa-miR-486-3p	1	0	1	1	1	1	PPP1CB	protein phosphatase 1, catalytic subunit, beta isozyme
hsa-miR-486-3p	1	0	1	1	1	1	PPP6C	protein phosphatase 6, catalytic subunit
hsa-miR-486-3p	1	0	1	1	1	1	PTMS	parathymosin
hsa-miR-486-3p	1	0	1	1	1	1	PTPN9	protein tyrosine phosphatase, non-receptor type 9
hsa-miR-486-3p	1	0	1	1	1	1	PTPRJ	protein tyrosine phosphatase, receptor type, J
hsa-miR-486-3p	1	0	1	1	1	1	PVALB	parvalbumin
hsa-miR-486-3p	1	0	1	1	1	1	PVRL1	poliovirus receptor-related 1 (herpesvirus entry mediator C)
hsa-miR-486-3p	1	0	1	1	1	1	RAB2A	RAB2A, member RAS oncogene family
hsa-miR-486-3p	0	0	1	0	1	1	RAB3B	RAB3B, member RAS oncogene family
hsa-miR-486-3p	0	0	1	1	1	1	RNASE4	ribonuclease, RNase A family, 4
hsa-miR-486-3p	1	0	1	0	1	1	SORT1	sortilin 1
hsa-miR-486-3p	0	0	1	1	1	1	S100A10	S100 calcium binding protein A10
hsa-miR-486-3p	1	0	1	1	1	1	CCL21	chemokine (C-C motif) ligand 21
hsa-miR-486-3p	1	0	1	0	1	1	CCL22	chemokine (C-C motif) ligand 22
hsa-miR-486-3p	0	0	1	1	1	1	SDC2	syndecan 2
hsa-miR-486-3p	0	0	1	1	1	1	SDC4	syndecan 4
hsa-miR-486-3p	1	0	1	1	1	1	SH3GL2	SH3-domain GRB2-like 2
hsa-miR-486-3p	1	0	1	1	1	1	SHB	Src homology 2 domain containing adaptor protein B
hsa-miR-486-3p	1	0	1	1	1	1	SMARCD2	SWI/SNF related, matrix associated, actin dependent regulator of chromatin, subfamily d, member 2
hsa-miR-486-3p	0	0	1	1	0	0	SNTA1	syntrophin, alpha 1
hsa-miR-486-3p	1	0	1	1	1	1	SRF	serum response factor (c-fos serum response element-binding transcription factor)
hsa-miR-486-3p	0	0	1	0	1	1	TRIM21	tripartite motif containing 21
hsa-miR-486-3p	1	0	1	0	1	1	STC1	stanniocalcin 1
hsa-miR-486-3p	0	0	1	1	1	1	STIM1	stromal interaction molecule 1
hsa-miR-486-3p	0	0	1	1	1	1	SUPT6H	suppressor of Ty 6 homolog (S. cerevisiae)
hsa-miR-486-3p	1	0	1	1	1	1	SUV39H1	suppressor of variegation 3-9 homolog 1 (Drosophila)
hsa-miR-486-3p	1	0	1	1	0	0	SYP	synaptophysin
hsa-miR-486-3p	1	0	1	1	1	1	TAF4	TAF4 RNA polymerase II, TATA box binding protein (TBP)-associated factor, 135kDa
hsa-miR-486-3p	1	0	1	0	1	1	TAL1	T-cell acute lymphocytic leukemia 1
hsa-miR-486-3p	0	0	1	0	1	1	TCEB3	transcription elongation factor B (SIII), polypeptide 3 (110kDa, elongin A)
hsa-miR-486-3p	1	0	1	1	1	1	TGFB3	transforming growth factor, beta 3
hsa-miR-486-3p	1	0	1	0	1	1	THBS1	thrombospondin 1
hsa-miR-486-3p	1	0	1	1	1	1	TIAM1	T-cell lymphoma invasion and metastasis 1
hsa-miR-486-3p	1	0	1	1	1	1	NR2E1	nuclear receptor subfamily 2, group E, member 1
hsa-miR-486-3p	1	0	1	0	1	1	TUB	tubby homolog (mouse)
hsa-miR-486-3p	0	0	1	1	0	0	HIRA	HIR histone cell cycle regulation defective homolog A (S. cerevisiae)
hsa-miR-486-3p	1	0	1	1	1	1	UBE2H	ubiquitin-conjugating enzyme E2H
hsa-miR-486-3p	1	0	1	0	1	1	ZIC1	Zic family member 1
hsa-miR-486-3p	1	0	1	1	1	1	PAX8	paired box 8
hsa-miR-486-3p	1	0	1	0	1	1	SNN	stannin
hsa-miR-486-3p	1	0	1	1	1	1	FZD7	frizzled family receptor 7
hsa-miR-486-3p	1	0	1	0	1	1	CUL3	cullin 3
hsa-miR-486-3p	0	0	1	1	1	1	TPST1	tyrosylprotein sulfotransferase 1
hsa-miR-486-3p	1	0	1	0	1	1	CNTNAP1	contactin associated protein 1
hsa-miR-486-3p	0	0	1	1	1	1	ITGA10	integrin, alpha 10
hsa-miR-486-3p	0	0	1	1	1	1	CHST1	carbohydrate (keratan sulfate Gal-6) sulfotransferase 1
hsa-miR-486-3p	1	0	1	1	1	1	BARX2	BARX homeobox 2
hsa-miR-486-3p	1	0	1	1	1	1	BHLHE40	basic helix-loop-helix family, member e40
hsa-miR-486-3p	1	0	1	1	0	0	KHSRP	KH-type splicing regulatory protein
hsa-miR-486-3p	1	0	1	0	1	1	PCDHGA12	protocadherin gamma subfamily A, 12
hsa-miR-486-3p	1	0	1	0	1	1	PCDHGB4	protocadherin gamma subfamily B, 4
hsa-miR-486-3p	0	0	1	1	0	0	DCHS1	dachsous 1 (Drosophila)
hsa-miR-486-3p	1	0	1	1	1	1	NR5A2	nuclear receptor subfamily 5, group A, member 2
hsa-miR-486-3p	1	0	1	0	1	1	CDK5R1	cyclin-dependent kinase 5, regulatory subunit 1 (p35)
hsa-miR-486-3p	1	0	1	1	1	1	MAP7	microtubule-associated protein 7
hsa-miR-486-3p	0	0	1	1	0	0	NPR2	natriuretic peptide receptor B/guanylate cyclase B (atrionatriuretic peptide receptor B)
hsa-miR-486-3p	0	0	1	0	1	1	RHOB	ras homolog family member B
hsa-miR-486-3p	0	0	1	1	1	1	CDKN1B	cyclin-dependent kinase inhibitor 1B (p27, Kip1)
hsa-miR-486-3p	1	0	1	0	1	1	E2F2	E2F transcription factor 2
hsa-miR-486-3p	0	0	1	1	1	1	ECHS1	enoyl CoA hydratase, short chain, 1, mitochondrial
hsa-miR-486-3p	1	0	1	1	0	0	EIF4EBP1	eukaryotic translation initiation factor 4E binding protein 1
hsa-miR-486-3p	0	0	1	1	1	1	DNAJC25-GNG10	DNAJC25-GNG10 readthrough
hsa-miR-486-3p	0	0	1	0	1	1	HABP2	hyaluronan binding protein 2
hsa-miR-486-3p	1	0	1	1	1	1	HNF4G	hepatocyte nuclear factor 4, gamma
hsa-miR-486-3p	0	0	1	1	1	1	SLC1A1	solute carrier family 1 (neuronal/epithelial high affinity glutamate transporter, system Xag), member 1
hsa-miR-486-3p	1	0	1	1	1	1	SEMA3F	sema domain, immunoglobulin domain (Ig), short basic domain, secreted, (semaphorin) 3F
hsa-miR-486-3p	1	0	1	1	1	1	SYT7	synaptotagmin VII
hsa-miR-486-3p	0	0	1	0	1	1	TMSB4Y	thymosin beta 4, Y-linked
hsa-miR-486-3p	1	0	1	1	1	1	ARL3	ADP-ribosylation factor-like 3
hsa-miR-486-3p	0	0	1	1	1	1	COL12A1	collagen, type XII, alpha 1
hsa-miR-486-3p	0	0	1	1	0	0	CPT1B	carnitine palmitoyltransferase 1B (muscle)
hsa-miR-486-3p	1	0	1	1	1	1	DAG1	dystroglycan 1 (dystrophin-associated glycoprotein 1)
hsa-miR-486-3p	1	0	1	1	1	1	DAP	death-associated protein
hsa-miR-486-3p	1	0	1	1	1	1	DUSP5	dual specificity phosphatase 5
hsa-miR-486-3p	1	0	1	1	1	1	ENSA	endosulfine alpha
hsa-miR-486-3p	1	0	1	0	1	1	ACSL4	acyl-CoA synthetase long-chain family member 4
hsa-miR-486-3p	1	0	1	1	1	1	FLOT2	flotillin 2
hsa-miR-486-3p	1	0	1	1	0	0	HOXC6	homeobox C6
hsa-miR-486-3p	1	0	1	0	1	1	PKNOX1	PBX/knotted 1 homeobox 1
hsa-miR-486-3p	0	0	1	0	0	0	RABGGTA	Rab geranylgeranyltransferase, alpha subunit
hsa-miR-486-3p	1	0	1	1	1	1	RAB5C	RAB5C, member RAS oncogene family
hsa-miR-486-3p	1	0	1	0	1	1	SCN2B	sodium channel, voltage-gated, type II, beta subunit
hsa-miR-486-3p	0	0	1	1	1	1	TK2	thymidine kinase 2, mitochondrial
hsa-miR-486-3p	0	0	1	1	1	1	PABPN1	poly(A) binding protein, nuclear 1
hsa-miR-486-3p	1	0	1	1	1	1	BAP1	BRCA1 associated protein-1 (ubiquitin carboxy-terminal hydrolase)
hsa-miR-486-3p	1	0	1	1	1	1	MTMR4	myotubularin related protein 4
hsa-miR-486-3p	1	0	1	1	1	1	SYNGR1	synaptogyrin 1
hsa-miR-486-3p	0	0	1	1	0	0	DYRK1B	dual-specificity tyrosine-(Y)-phosphorylation regulated kinase 1B
hsa-miR-486-3p	1	0	1	1	1	1	LARGE	like-glycosyltransferase
hsa-miR-486-3p	1	0	1	0	1	1	MAPKAPK2	mitogen-activated protein kinase-activated protein kinase 2
hsa-miR-486-3p	0	0	1	1	1	1	TAOK2	TAO kinase 2
hsa-miR-486-3p	1	0	1	0	1	1	CDYL	chromodomain protein, Y-like
hsa-miR-486-3p	1	0	1	1	1	1	ONECUT2	one cut homeobox 2
hsa-miR-486-3p	1	0	1	1	1	1	FXR2	fragile X mental retardation, autosomal homolog 2
hsa-miR-486-3p	1	0	1	1	1	1	CXCL14	chemokine (C-X-C motif) ligand 14
hsa-miR-486-3p	1	0	1	0	1	1	DOCK3	dedicator of cytokinesis 3
hsa-miR-486-3p	0	0	1	1	0	0	NR5A1	nuclear receptor subfamily 5, group A, member 1
hsa-miR-486-3p	1	0	1	1	1	1	GABRE	gamma-aminobutyric acid (GABA) A receptor, epsilon
hsa-miR-486-3p	1	0	1	1	0	0	MMP14	matrix metallopeptidase 14 (membrane-inserted)
hsa-miR-486-3p	0	0	1	1	0	0	FXYD1	FXYD domain containing ion transport regulator 1
hsa-miR-486-3p	0	0	1	1	1	1	PRF1	perforin 1 (pore forming protein)
hsa-miR-486-3p	1	0	1	1	0	0	ADAMTS4	ADAM metallopeptidase with thrombospondin type 1 motif, 4
hsa-miR-486-3p	0	0	1	1	1	1	XYLB	xylulokinase homolog (H. influenzae)
hsa-miR-486-3p	1	0	1	1	1	1	GFPT2	glutamine-fructose-6-phosphate transaminase 2
hsa-miR-486-3p	0	0	1	1	0	0	ASCL2	achaete-scute complex homolog 2 (Drosophila)
hsa-miR-486-3p	1	0	1	1	0	0	BCL3	B-cell CLL/lymphoma 3
hsa-miR-486-3p	1	0	1	1	1	1	FOXN3	forkhead box N3
hsa-miR-486-3p	1	0	1	1	1	1	CRK	v-crk sarcoma virus CT10 oncogene homolog (avian)
hsa-miR-486-3p	1	0	1	1	1	1	DLX3	distal-less homeobox 3
hsa-miR-486-3p	1	0	1	0	1	1	E2F1	E2F transcription factor 1
hsa-miR-486-3p	0	0	1	0	1	1	FOSL2	FOS-like antigen 2
hsa-miR-486-3p	1	0	1	1	0	0	JUND	jun D proto-oncogene
hsa-miR-486-3p	1	0	1	0	1	1	PRKAB2	protein kinase, AMP-activated, beta 2 non-catalytic subunit
hsa-miR-486-3p	1	0	1	0	1	1	PRKCE	protein kinase C, epsilon
hsa-miR-486-3p	0	0	1	1	1	1	ST5	suppression of tumorigenicity 5
hsa-miR-486-3p	0	0	1	1	1	1	TIE1	tyrosine kinase with immunoglobulin-like and EGF-like domains 1
hsa-miR-486-3p	1	0	1	1	1	1	WNT1	wingless-type MMTV integration site family, member 1
hsa-miR-486-3p	0	0	1	1	1	1	FAIM3	Fas apoptotic inhibitory molecule 3
hsa-miR-486-3p	1	0	1	0	0	0	FRAT1	frequently rearranged in advanced T-cell lymphomas
hsa-miR-486-3p	1	0	1	1	1	1	SCARB2	scavenger receptor class B, member 2
hsa-miR-486-3p	1	0	1	1	1	1	GTF2E1	general transcription factor IIE, polypeptide 1, alpha 56kDa
hsa-miR-486-3p	1	0	1	1	1	1	LPP	LIM domain containing preferred translocation partner in lipoma
hsa-miR-486-3p	0	0	1	0	1	1	POU3F2	POU class 3 homeobox 2
hsa-miR-486-3p	0	0	1	1	0	0	RTN2	reticulon 2
hsa-miR-486-3p	1	0	1	1	1	1	SYT1	synaptotagmin I
hsa-miR-486-3p	1	0	1	1	1	1	TCF20	transcription factor 20 (AR1)
hsa-miR-486-3p	0	0	1	1	0	0	NR2F1	nuclear receptor subfamily 2, group F, member 1
hsa-miR-486-3p	0	0	1	1	1	1	SLC35A2	solute carrier family 35 (UDP-galactose transporter), member A2
hsa-miR-486-3p	1	0	1	1	1	1	GIPC1	GIPC PDZ domain containing family, member 1
hsa-miR-486-3p	1	0	1	1	1	1	NAMPT	nicotinamide phosphoribosyltransferase
hsa-miR-486-3p	1	0	1	0	1	1	CLEC3A	C-type lectin domain family 3, member A
hsa-miR-486-3p	1	0	1	0	1	1	DCAF7	DDB1 and CUL4 associated factor 7
hsa-miR-486-3p	1	0	1	0	1	1	SPRY3	sprouty homolog 3 (Drosophila)
hsa-miR-486-3p	1	0	1	1	0	0	TRAIP	TRAF interacting protein
hsa-miR-486-3p	1	0	1	1	1	1	FOXO4	forkhead box O4
hsa-miR-486-3p	1	0	1	1	1	1	MTF1	metal-regulatory transcription factor 1
hsa-miR-486-3p	0	0	1	0	1	1	HCAR3	hydroxycarboxylic acid receptor 3
hsa-miR-486-3p	1	0	1	1	1	1	DAGLA	diacylglycerol lipase, alpha
hsa-miR-486-3p	1	0	1	1	1	1	CAPZA2	capping protein (actin filament) muscle Z-line, alpha 2
hsa-miR-486-3p	0	0	1	1	0	0	NEDD8	neural precursor cell expressed, developmentally down-regulated 8
hsa-miR-486-3p	1	0	1	1	1	1	NEUROD2	neuronal differentiation 2
hsa-miR-486-3p	0	0	1	1	1	1	PA2G4	proliferation-associated 2G4, 38kDa
hsa-miR-486-3p	1	0	1	1	1	1	CDK16	cyclin-dependent kinase 16
hsa-miR-486-3p	1	0	1	0	1	1	PITPNA	phosphatidylinositol transfer protein, alpha
hsa-miR-486-3p	1	0	1	1	1	1	PRKCD	protein kinase C, delta
hsa-miR-486-3p	0	0	1	1	0	0	TAF10	TAF10 RNA polymerase II, TATA box binding protein (TBP)-associated factor, 30kDa
hsa-miR-486-3p	1	0	1	1	1	1	TLN1	talin 1
hsa-miR-486-3p	0	0	1	1	1	1	TYRO3	TYRO3 protein tyrosine kinase
hsa-miR-486-3p	1	0	1	1	1	1	SMC1A	structural maintenance of chromosomes 1A
hsa-miR-486-3p	1	0	1	1	1	1	ZER1	zer-1 homolog (C. elegans)
hsa-miR-486-3p	0	0	1	1	1	1	LRRC41	leucine rich repeat containing 41
hsa-miR-486-3p	1	0	1	1	1	1	VAT1	vesicle amine transport protein 1 homolog (T. californica)
hsa-miR-486-3p	0	0	1	1	1	1	TM9SF1	transmembrane 9 superfamily member 1
hsa-miR-486-3p	0	0	1	1	0	0	DRAP1	DR1-associated protein 1 (negative cofactor 2 alpha)
hsa-miR-486-3p	0	0	1	1	0	0	ALX3	ALX homeobox 3
hsa-miR-486-3p	0	0	1	0	0	0	RELB	v-rel reticuloendotheliosis viral oncogene homolog B
hsa-miR-486-3p	0	0	1	1	0	0	YEATS4	YEATS domain containing 4
hsa-miR-486-3p	0	0	1	1	1	1	CACNG3	calcium channel, voltage-dependent, gamma subunit 3
hsa-miR-486-3p	1	0	1	0	1	1	IGF2BP1	insulin-like growth factor 2 mRNA binding protein 1
hsa-miR-486-3p	1	0	1	1	1	1	MMP24	matrix metallopeptidase 24 (membrane-inserted)
hsa-miR-486-3p	0	0	1	1	1	1	LYVE1	lymphatic vessel endothelial hyaluronan receptor 1
hsa-miR-486-3p	0	0	1	1	1	1	NUDT3	nudix (nucleoside diphosphate linked moiety X)-type motif 3
hsa-miR-486-3p	1	0	1	1	1	1	DIAPH2	diaphanous homolog 2 (Drosophila)
hsa-miR-486-3p	1	0	1	1	0	0	PSKH1	protein serine kinase H1
hsa-miR-486-3p	1	0	1	1	1	1	LAPTM5	lysosomal protein transmembrane 5
hsa-miR-486-3p	1	0	1	0	1	1	SYNGAP1	synaptic Ras GTPase activating protein 1
hsa-miR-486-3p	0	0	1	1	1	1	TMED2	transmembrane emp24 domain trafficking protein 2
hsa-miR-486-3p	0	0	1	1	0	0	STIP1	stress-induced-phosphoprotein 1
hsa-miR-486-3p	0	0	1	1	1	1	PKIA	protein kinase (cAMP-dependent, catalytic) inhibitor alpha
hsa-miR-486-3p	0	0	1	1	1	1	ATF7	activating transcription factor 7
hsa-miR-486-3p	1	0	1	1	1	1	CD86	CD86 molecule
hsa-miR-486-3p	0	0	1	0	1	1	PSG1	pregnancy specific beta-1-glycoprotein 1
hsa-miR-486-3p	1	0	1	0	1	1	SOX12	SRY (sex determining region Y)-box 12
hsa-miR-486-3p	1	0	1	0	1	1	PAPD7	PAP associated domain containing 7
hsa-miR-486-3p	1	0	1	1	1	1	ABHD2	abhydrolase domain containing 2
hsa-miR-486-3p	0	0	1	1	1	1	RER1	RER1 retention in endoplasmic reticulum 1 homolog (S. cerevisiae)
hsa-miR-486-3p	1	0	1	1	1	1	PTPN21	protein tyrosine phosphatase, non-receptor type 21
hsa-miR-486-3p	1	0	1	1	1	1	UBL3	ubiquitin-like 3
hsa-miR-486-3p	0	0	1	1	0	0	USF1	upstream transcription factor 1
hsa-miR-486-3p	0	0	1	0	1	1	ZNF208	zinc finger protein 208
hsa-miR-486-3p	1	0	1	1	1	1	TESK2	testis-specific kinase 2
hsa-miR-486-3p	1	0	1	1	1	1	C14orf1	chromosome 14 open reading frame 1
hsa-miR-486-3p	1	0	1	1	1	1	ABCF2	ATP-binding cassette, sub-family F (GCN20), member 2
hsa-miR-486-3p	0	0	1	1	1	1	HRH3	histamine receptor H3
hsa-miR-486-3p	1	0	1	1	1	1	KLF12	Kruppel-like factor 12
hsa-miR-486-3p	0	0	1	1	0	0	GABARAP	GABA(A) receptor-associated protein
hsa-miR-486-3p	1	0	1	1	0	0	GRIN1	glutamate receptor, ionotropic, N-methyl D-aspartate 1
hsa-miR-486-3p	0	0	1	1	0	0	SNW1	SNW domain containing 1
hsa-miR-486-3p	0	0	1	1	1	1	TKTL1	transketolase-like 1
hsa-miR-486-3p	1	0	1	1	1	1	KCNE1L	KCNE1-like
hsa-miR-486-3p	1	0	1	0	1	1	G3BP2	GTPase activating protein (SH3 domain) binding protein 2
hsa-miR-486-3p	1	0	1	1	1	1	LDOC1	leucine zipper, down-regulated in cancer 1
hsa-miR-486-3p	0	0	1	1	1	1	MAFF	v-maf musculoaponeurotic fibrosarcoma oncogene homolog F (avian)
hsa-miR-486-3p	1	0	1	1	1	1	NNT	nicotinamide nucleotide transhydrogenase
hsa-miR-486-3p	1	0	1	1	1	1	PIP5K1C	phosphatidylinositol-4-phosphate 5-kinase, type I, gamma
hsa-miR-486-3p	1	0	1	1	1	1	PITPNB	phosphatidylinositol transfer protein, beta
hsa-miR-486-3p	0	0	1	1	1	1	C16orf80	chromosome 16 open reading frame 80
hsa-miR-486-3p	1	0	1	1	1	1	CLCF1	cardiotrophin-like cytokine factor 1
hsa-miR-486-3p	1	0	1	1	1	1	ZNF215	zinc finger protein 215
hsa-miR-486-3p	1	0	1	1	1	1	PADI1	peptidyl arginine deiminase, type I
hsa-miR-486-3p	0	0	1	1	0	0	ZDHHC8	zinc finger, DHHC-type containing 8
hsa-miR-486-3p	1	0	1	1	1	1	NRG1	neuregulin 1
hsa-miR-486-3p	0	0	1	1	0	0	DHX38	DEAH (Asp-Glu-Ala-His) box polypeptide 38
hsa-miR-486-3p	0	0	1	0	1	1	AP2A1	adaptor-related protein complex 2, alpha 1 subunit
hsa-miR-486-3p	1	0	1	0	1	1	VAMP2	vesicle-associated membrane protein 2 (synaptobrevin 2)
hsa-miR-486-3p	0	0	1	1	1	1	DNAJC8	DnaJ (Hsp40) homolog, subfamily C, member 8
hsa-miR-486-3p	0	0	1	1	1	1	CAPN6	calpain 6
hsa-miR-486-3p	1	0	1	1	1	1	PATZ1	POZ (BTB) and AT hook containing zinc finger 1
hsa-miR-486-3p	1	0	1	0	1	1	FJX1	four jointed box 1 (Drosophila)
hsa-miR-486-3p	1	0	1	1	1	1	LHX6	LIM homeobox 6
hsa-miR-486-3p	1	0	1	0	1	1	DIEXF	digestive organ expansion factor homolog (zebrafish)
hsa-miR-486-3p	0	0	1	1	1	1	TAF5L	TAF5-like RNA polymerase II, p300/CBP-associated factor (PCAF)-associated factor, 65kDa
hsa-miR-486-3p	0	0	1	1	0	0	DKKL1	dickkopf-like 1
hsa-miR-486-3p	0	0	1	1	0	0	SIT1	signaling threshold regulating transmembrane adaptor 1
hsa-miR-486-3p	0	0	1	1	1	1	GOLIM4	golgi integral membrane protein 4
hsa-miR-486-3p	1	0	1	1	1	1	OTX1	orthodenticle homeobox 1
hsa-miR-486-3p	1	0	1	1	1	1	EHD3	EH-domain containing 3
hsa-miR-486-3p	0	0	1	1	1	1	HOXC4	homeobox C4
hsa-miR-486-3p	1	0	1	1	1	1	ZNF592	zinc finger protein 592
hsa-miR-486-3p	1	0	1	1	1	1	RALGPS1	Ral GEF with PH domain and SH3 binding motif 1
hsa-miR-486-3p	0	0	1	1	0	0	ZNF646	zinc finger protein 646
hsa-miR-486-3p	1	0	1	0	1	1	MLEC	malectin
hsa-miR-486-3p	1	0	1	1	1	1	KIAA0247	KIAA0247
hsa-miR-486-3p	1	0	1	0	1	1	SERTAD2	SERTA domain containing 2
hsa-miR-486-3p	1	0	1	1	1	1	RUSC2	RUN and SH3 domain containing 2
hsa-miR-486-3p	1	0	1	1	1	1	ZBTB39	zinc finger and BTB domain containing 39
hsa-miR-486-3p	1	0	1	1	1	1	SV2A	synaptic vesicle glycoprotein 2A
hsa-miR-486-3p	1	0	1	1	0	0	IQSEC1	IQ motif and Sec7 domain 1
hsa-miR-486-3p	1	0	1	1	1	1	PLEKHA6	pleckstrin homology domain containing, family A member 6
hsa-miR-486-3p	0	0	1	1	0	0	MORC2	MORC family CW-type zinc finger 2
hsa-miR-486-3p	1	0	1	1	1	1	PHLPP2	PH domain and leucine rich repeat protein phosphatase 2
hsa-miR-486-3p	1	0	1	0	1	1	ZNF609	zinc finger protein 609
hsa-miR-486-3p	0	0	1	1	0	0	AVL9	AVL9 homolog (S. cerevisiase)
hsa-miR-486-3p	1	0	1	0	1	1	LARP4B	La ribonucleoprotein domain family, member 4B
hsa-miR-486-3p	1	0	1	1	1	1	SIK2	salt-inducible kinase 2
hsa-miR-486-3p	1	0	1	1	1	1	PLCB1	phospholipase C, beta 1 (phosphoinositide-specific)
hsa-miR-486-3p	1	0	1	0	1	1	LPHN3	latrophilin 3
hsa-miR-486-3p	1	0	1	1	1	1	PHF15	PHD finger protein 15
hsa-miR-486-3p	0	0	1	1	1	1	DOCK9	dedicator of cytokinesis 9
hsa-miR-486-3p	1	0	1	0	1	1	ARHGEF12	Rho guanine nucleotide exchange factor (GEF) 12
hsa-miR-486-3p	1	0	1	1	1	1	ASXL1	additional sex combs like 1 (Drosophila)
hsa-miR-486-3p	0	0	1	1	1	1	NUP188	nucleoporin 188kDa
hsa-miR-486-3p	0	0	1	1	0	0	SPEF1	sperm flagellar 1
hsa-miR-486-3p	1	0	1	1	1	1	PNKD	paroxysmal nonkinesigenic dyskinesia
hsa-miR-486-3p	0	0	1	1	1	1	TMEM87A	transmembrane protein 87A
hsa-miR-486-3p	0	0	1	1	0	0	TSKU	tsukushi small leucine rich proteoglycan homolog (Xenopus laevis)
hsa-miR-486-3p	1	0	1	1	1	1	CLIP3	CAP-GLY domain containing linker protein 3
hsa-miR-486-3p	1	0	1	0	1	1	PPP1R16B	protein phosphatase 1, regulatory subunit 16B
hsa-miR-486-3p	1	0	1	1	0	0	POLDIP2	polymerase (DNA-directed), delta interacting protein 2
hsa-miR-486-3p	0	0	1	1	1	1	TRPC4AP	transient receptor potential cation channel, subfamily C, member 4 associated protein
hsa-miR-486-3p	1	0	1	1	1	1	FAM155B	family with sequence similarity 155, member B
hsa-miR-486-3p	1	0	1	1	1	1	AZIN1	antizyme inhibitor 1
hsa-miR-486-3p	0	0	1	1	1	1	HMP19	HMP19 protein
hsa-miR-486-3p	1	0	1	1	1	1	SLMO2	slowmo homolog 2 (Drosophila)
hsa-miR-486-3p	1	0	1	1	1	1	NSFL1C	NSFL1 (p97) cofactor (p47)
hsa-miR-486-3p	1	0	1	1	1	1	SUFU	suppressor of fused homolog (Drosophila)
hsa-miR-486-3p	1	0	1	1	1	1	CERCAM	cerebral endothelial cell adhesion molecule
hsa-miR-486-3p	1	0	1	0	1	1	HPCAL4	hippocalcin like 4
hsa-miR-486-3p	1	0	1	1	1	1	RAPGEFL1	Rap guanine nucleotide exchange factor (GEF)-like 1
hsa-miR-486-3p	0	0	1	1	0	0	FAM203A	family with sequence similarity 203, member A
hsa-miR-486-3p	1	0	1	0	1	1	TMEM216	transmembrane protein 216
hsa-miR-486-3p	1	0	1	1	1	1	DNAJC27	DnaJ (Hsp40) homolog, subfamily C, member 27
hsa-miR-486-3p	1	0	1	1	1	1	IER5	immediate early response 5
hsa-miR-486-3p	0	0	1	1	0	0	BPIFA1	BPI fold containing family A, member 1
hsa-miR-486-3p	0	0	1	1	1	1	KDM3B	lysine (K)-specific demethylase 3B
hsa-miR-486-3p	0	0	1	1	0	0	DLL3	delta-like 3 (Drosophila)
hsa-miR-486-3p	1	0	1	0	1	1	KLHL3	kelch-like 3 (Drosophila)
hsa-miR-486-3p	0	0	1	1	1	1	CYTH2	cytohesin 2
hsa-miR-486-3p	1	0	1	1	1	1	RBM38	RNA binding motif protein 38
hsa-miR-486-3p	1	0	1	1	1	1	ARID1B	AT rich interactive domain 1B (SWI1-like)
hsa-miR-486-3p	1	0	1	1	1	1	INO80	INO80 homolog (S. cerevisiae)
hsa-miR-486-3p	1	0	1	0	1	1	UBE2Q1	ubiquitin-conjugating enzyme E2Q family member 1
hsa-miR-486-3p	0	0	1	0	1	1	VEZT	vezatin, adherens junctions transmembrane protein
hsa-miR-486-3p	1	0	1	1	1	1	CNNM2	cyclin M2
hsa-miR-486-3p	0	0	1	0	1	1	OTUB1	OTU domain, ubiquitin aldehyde binding 1
hsa-miR-486-3p	1	0	1	1	1	1	SLC48A1	solute carrier family 48 (heme transporter), member 1
hsa-miR-486-3p	1	0	1	1	1	1	HIF1AN	hypoxia inducible factor 1, alpha subunit inhibitor
hsa-miR-486-3p	1	0	1	1	0	0	LAMTOR1	late endosomal/lysosomal adaptor, MAPK and MTOR activator 1
hsa-miR-486-3p	0	0	1	1	0	0	VPS37C	vacuolar protein sorting 37 homolog C (S. cerevisiae)
hsa-miR-486-3p	0	0	1	1	1	1	OSBPL1A	oxysterol binding protein-like 1A
hsa-miR-486-3p	1	0	1	1	1	1	FAM178A	family with sequence similarity 178, member A
hsa-miR-486-3p	0	0	1	1	1	1	MRPS10	mitochondrial ribosomal protein S10
hsa-miR-486-3p	0	0	1	1	1	1	NUDT11	nudix (nucleoside diphosphate linked moiety X)-type motif 11
hsa-miR-486-3p	1	0	1	1	1	1	TBC1D13	TBC1 domain family, member 13
hsa-miR-486-3p	0	0	1	1	1	1	TRIM62	tripartite motif containing 62
hsa-miR-486-3p	1	0	1	1	1	1	C9orf72	chromosome 9 open reading frame 72
hsa-miR-486-3p	1	0	1	0	1	1	LIN7C	lin-7 homolog C (C. elegans)
hsa-miR-486-3p	0	0	1	1	1	1	STK32B	serine/threonine kinase 32B
hsa-miR-486-3p	1	0	1	1	1	1	ASH1L	ash1 (absent, small, or homeotic)-like (Drosophila)
hsa-miR-486-3p	1	0	1	1	1	1	STRADB	STE20-related kinase adaptor beta
hsa-miR-486-3p	0	0	1	1	1	1	LENEP	lens epithelial protein
hsa-miR-486-3p	0	0	1	0	0	0	APOBR	apolipoprotein B receptor
hsa-miR-486-3p	1	0	1	0	1	1	KLHL9	kelch-like 9 (Drosophila)
hsa-miR-486-3p	1	0	1	1	1	1	PCDHGA1	protocadherin gamma subfamily A, 1
hsa-miR-486-3p	1	0	1	0	1	1	PCDHGA10	protocadherin gamma subfamily A, 10
hsa-miR-486-3p	1	0	1	0	1	1	PCDHGA11	protocadherin gamma subfamily A, 11
hsa-miR-486-3p	1	0	1	1	1	1	PCDHGA2	protocadherin gamma subfamily A, 2
hsa-miR-486-3p	1	0	1	0	1	1	PCDHGA3	protocadherin gamma subfamily A, 3
hsa-miR-486-3p	1	0	1	0	1	1	PCDHGA4	protocadherin gamma subfamily A, 4
hsa-miR-486-3p	1	0	1	0	1	1	PCDHGA5	protocadherin gamma subfamily A, 5
hsa-miR-486-3p	1	0	1	0	1	1	PCDHGA6	protocadherin gamma subfamily A, 6
hsa-miR-486-3p	1	0	1	0	1	1	PCDHGA7	protocadherin gamma subfamily A, 7
hsa-miR-486-3p	1	0	1	0	1	1	PCDHGA9	protocadherin gamma subfamily A, 9
hsa-miR-486-3p	1	0	1	0	1	1	PCDHGB1	protocadherin gamma subfamily B, 1
hsa-miR-486-3p	1	0	1	0	1	1	PCDHGB2	protocadherin gamma subfamily B, 2
hsa-miR-486-3p	1	0	1	0	1	1	PCDHGB3	protocadherin gamma subfamily B, 3
hsa-miR-486-3p	1	0	1	0	1	1	PCDHGB5	protocadherin gamma subfamily B, 5
hsa-miR-486-3p	1	0	1	0	1	1	PCDHGB6	protocadherin gamma subfamily B, 6
hsa-miR-486-3p	1	0	1	0	1	1	PCDHGB7	protocadherin gamma subfamily B, 7
hsa-miR-486-3p	1	0	1	0	1	1	PCDHGC4	protocadherin gamma subfamily C, 4
hsa-miR-486-3p	1	0	1	0	1	1	PCDHGC5	protocadherin gamma subfamily C, 5
hsa-miR-486-3p	1	0	1	1	0	0	GPR173	G protein-coupled receptor 173
hsa-miR-486-3p	0	0	1	1	1	1	GNL3L	guanine nucleotide binding protein-like 3 (nucleolar)-like
hsa-miR-486-3p	1	0	1	1	1	1	DLL4	delta-like 4 (Drosophila)
hsa-miR-486-3p	1	0	1	1	1	1	SEPT3	septin 3
hsa-miR-486-3p	1	0	1	1	1	1	EPB41L4B	erythrocyte membrane protein band 4.1 like 4B
hsa-miR-486-3p	1	0	1	1	1	1	LRRC8A	leucine rich repeat containing 8 family, member A
hsa-miR-486-3p	0	0	1	1	1	1	RPRM	reprimo, TP53 dependent G2 arrest mediator candidate
hsa-miR-486-3p	1	0	1	0	1	1	SLAMF8	SLAM family member 8
hsa-miR-486-3p	0	0	1	1	1	1	TMEM167B	transmembrane protein 167B
hsa-miR-486-3p	1	0	1	1	1	1	SAR1A	SAR1 homolog A (S. cerevisiae)
hsa-miR-486-3p	1	0	1	1	0	0	SEMA3G	sema domain, immunoglobulin domain (Ig), short basic domain, secreted, (semaphorin) 3G
hsa-miR-486-3p	0	0	1	1	1	1	TOMM22	translocase of outer mitochondrial membrane 22 homolog (yeast)
hsa-miR-486-3p	1	0	1	1	0	0	SLC17A7	solute carrier family 17 (sodium-dependent inorganic phosphate cotransporter), member 7
hsa-miR-486-3p	0	0	1	1	1	1	ZNF695	zinc finger protein 695
hsa-miR-486-3p	0	0	1	1	1	1	PLXDC1	plexin domain containing 1
hsa-miR-486-3p	0	0	1	0	1	1	TMEM63C	transmembrane protein 63C
hsa-miR-486-3p	1	0	1	1	0	0	JPH2	junctophilin 2
hsa-miR-486-3p	1	0	1	1	1	1	PTGFRN	prostaglandin F2 receptor negative regulator
hsa-miR-486-3p	1	0	1	0	1	1	APMAP	adipocyte plasma membrane associated protein
hsa-miR-486-3p	1	0	1	0	1	1	KCNS2	potassium voltage-gated channel, delayed-rectifier, subfamily S, member 2
hsa-miR-486-3p	0	0	1	1	1	1	KIAA1161	KIAA1161
hsa-miR-486-3p	0	0	1	1	0	0	AMIGO1	adhesion molecule with Ig-like domain 1
hsa-miR-486-3p	0	0	1	1	1	1	SHROOM4	shroom family member 4
hsa-miR-486-3p	1	0	1	1	1	1	DLG3	discs, large homolog 3 (Drosophila)
hsa-miR-486-3p	1	0	1	1	1	1	CASKIN1	CASK interacting protein 1
hsa-miR-486-3p	1	0	1	1	1	1	RGAG1	retrotransposon gag domain containing 1
hsa-miR-486-3p	1	0	1	0	1	1	ZNF398	zinc finger protein 398
hsa-miR-486-3p	1	0	1	0	1	1	KLHDC5	kelch domain containing 5
hsa-miR-486-3p	0	0	1	1	1	1	ARRDC3	arrestin domain containing 3
hsa-miR-486-3p	0	0	1	0	1	1	SYT13	synaptotagmin XIII
hsa-miR-486-3p	1	0	1	1	1	1	WDR48	WD repeat domain 48
hsa-miR-486-3p	1	0	1	1	1	1	RANBP10	RAN binding protein 10
hsa-miR-486-3p	0	0	1	1	1	1	PRX	periaxin
hsa-miR-486-3p	1	0	1	1	1	1	KCNJ12	potassium inwardly-rectifying channel, subfamily J, member 12
hsa-miR-486-3p	1	0	1	1	1	1	NEFH	neurofilament, heavy polypeptide
hsa-miR-486-3p	1	0	1	1	1	1	MTMR3	myotubularin related protein 3
hsa-miR-486-3p	1	0	1	1	1	1	TMSB4X	thymosin beta 4, X-linked
hsa-miR-486-3p	0	0	1	1	0	0	TRAF2	TNF receptor-associated factor 2
hsa-miR-486-3p	1	0	1	0	1	1	TP53INP2	tumor protein p53 inducible nuclear protein 2
hsa-miR-486-3p	0	0	1	1	1	1	HRH4	histamine receptor H4
hsa-miR-486-3p	0	0	1	1	1	1	NR1D1	nuclear receptor subfamily 1, group D, member 1
hsa-miR-486-3p	0	0	1	1	1	1	ADAM30	ADAM metallopeptidase domain 30
hsa-miR-486-3p	1	0	1	1	1	1	TGIF2	TGFB-induced factor homeobox 2
hsa-miR-486-3p	0	0	1	1	1	1	GABBR1	gamma-aminobutyric acid (GABA) B receptor, 1
hsa-miR-486-3p	1	0	1	0	0	0	ALX4	ALX homeobox 4
hsa-miR-486-3p	1	0	1	1	1	1	DHX35	DEAH (Asp-Glu-Ala-His) box polypeptide 35
hsa-miR-486-3p	1	0	1	1	1	1	TIA1	TIA1 cytotoxic granule-associated RNA binding protein
hsa-miR-486-3p	1	0	1	1	1	1	FBXW4	F-box and WD repeat domain containing 4
hsa-miR-486-3p	1	0	1	0	1	1	CSNK1G1	casein kinase 1, gamma 1
hsa-miR-486-3p	0	0	1	1	0	0	ABHD4	abhydrolase domain containing 4
hsa-miR-486-3p	1	0	1	0	1	1	CERS2	ceramide synthase 2
hsa-miR-486-3p	1	0	1	1	1	1	XYLT1	xylosyltransferase I
hsa-miR-486-3p	1	0	1	1	1	1	XYLT2	xylosyltransferase II
hsa-miR-486-3p	1	0	1	1	1	1	ABCG4	ATP-binding cassette, sub-family G (WHITE), member 4
hsa-miR-486-3p	0	0	1	1	1	1	TCTA	T-cell leukemia translocation altered
hsa-miR-486-3p	0	0	1	1	1	1	NSD1	nuclear receptor binding SET domain protein 1
hsa-miR-486-3p	1	0	1	1	1	1	HIF3A	hypoxia inducible factor 3, alpha subunit
hsa-miR-486-3p	1	0	1	1	1	1	MESDC1	mesoderm development candidate 1
hsa-miR-486-3p	1	0	1	1	1	1	GIGYF1	GRB10 interacting GYF protein 1
hsa-miR-486-3p	1	0	1	0	1	1	HOXC8	homeobox C8
hsa-miR-486-3p	1	0	1	1	1	1	C16orf58	chromosome 16 open reading frame 58
hsa-miR-486-3p	1	0	1	1	1	1	FNDC4	fibronectin type III domain containing 4
hsa-miR-486-3p	1	0	1	1	1	1	YTHDC2	YTH domain containing 2
hsa-miR-486-3p	1	0	1	0	1	1	BCL11B	B-cell CLL/lymphoma 11B (zinc finger protein)
hsa-miR-486-3p	0	0	1	1	1	1	MARCKSL1	MARCKS-like 1
hsa-miR-486-3p	1	0	1	1	1	1	SOWAHC	sosondowah ankyrin repeat domain family member C
hsa-miR-486-3p	0	0	1	1	1	1	METTL1	methyltransferase like 1
hsa-miR-486-3p	1	0	1	1	0	0	UBE2Z	ubiquitin-conjugating enzyme E2Z
hsa-miR-486-3p	1	0	1	1	1	1	FAM134A	family with sequence similarity 134, member A
hsa-miR-486-3p	1	0	1	1	1	1	IRF2BPL	interferon regulatory factor 2 binding protein-like
hsa-miR-486-3p	1	0	1	1	1	1	C10orf76	chromosome 10 open reading frame 76
hsa-miR-486-3p	0	0	1	1	1	1	GLT25D1	glycosyltransferase 25 domain containing 1
hsa-miR-486-3p	1	0	1	0	1	1	MOB3B	MOB kinase activator 3B
hsa-miR-486-3p	0	0	1	1	1	1	ERMP1	endoplasmic reticulum metallopeptidase 1
hsa-miR-486-3p	1	0	1	1	0	0	UBTD1	ubiquitin domain containing 1
hsa-miR-486-3p	0	0	1	1	0	0	BAIAP2L2	BAI1-associated protein 2-like 2
hsa-miR-486-3p	1	0	1	1	1	1	ZC3H12A	zinc finger CCCH-type containing 12A
hsa-miR-486-3p	1	0	1	1	1	1	TRIB1	tribbles homolog 1 (Drosophila)
hsa-miR-486-3p	1	0	1	0	1	1	DNAJC5	DnaJ (Hsp40) homolog, subfamily C, member 5
hsa-miR-486-3p	0	0	1	1	0	0	BPIFB2	BPI fold containing family B, member 2
hsa-miR-486-3p	1	0	1	0	1	1	SRCIN1	SRC kinase signaling inhibitor 1
hsa-miR-486-3p	0	0	1	1	0	0	LY6G6C	lymphocyte antigen 6 complex, locus G6C
hsa-miR-486-3p	1	0	1	1	1	1	CYB5B	cytochrome b5 type B (outer mitochondrial membrane)
hsa-miR-486-3p	1	0	1	1	1	1	HOXA3	homeobox A3
hsa-miR-486-3p	1	0	1	0	1	1	VOPP1	vesicular, overexpressed in cancer, prosurvival protein 1
hsa-miR-486-3p	1	0	1	1	1	1	FAM117A	family with sequence similarity 117, member A
hsa-miR-486-3p	0	0	1	1	1	1	APOL2	apolipoprotein L, 2
hsa-miR-486-3p	1	0	1	1	1	1	RAB1B	RAB1B, member RAS oncogene family
hsa-miR-486-3p	0	0	1	1	1	1	FCRL5	Fc receptor-like 5
hsa-miR-486-3p	1	0	1	1	1	1	SOX7	SRY (sex determining region Y)-box 7
hsa-miR-486-3p	1	0	1	1	1	1	SESN2	sestrin 2
hsa-miR-486-3p	0	0	1	1	0	0	MRPS5	mitochondrial ribosomal protein S5
hsa-miR-486-3p	0	0	1	1	1	1	FCAMR	Fc receptor, IgA, IgM, high affinity
hsa-miR-486-3p	1	0	1	0	1	1	PCDHGA8	protocadherin gamma subfamily A, 8
hsa-miR-486-3p	1	0	1	0	1	1	SRSF8	serine/arginine-rich splicing factor 8
hsa-miR-486-3p	1	0	1	1	1	1	DSEL	dermatan sulfate epimerase-like
hsa-miR-486-3p	0	0	1	1	1	1	RNASEH2C	ribonuclease H2, subunit C
hsa-miR-486-3p	0	0	1	1	0	0	C19orf44	chromosome 19 open reading frame 44
hsa-miR-486-3p	1	0	1	1	1	1	LOXL4	lysyl oxidase-like 4
hsa-miR-486-3p	1	0	1	1	1	1	ZNRF1	zinc and ring finger 1, E3 ubiquitin protein ligase
hsa-miR-486-3p	1	0	1	1	1	1	ZDHHC18	zinc finger, DHHC-type containing 18
hsa-miR-486-3p	1	0	1	1	1	1	POLDIP3	polymerase (DNA-directed), delta interacting protein 3
hsa-miR-486-3p	0	0	1	1	0	0	NICN1	nicolin 1
hsa-miR-486-3p	0	0	1	0	1	1	DNAJC30	DnaJ (Hsp40) homolog, subfamily C, member 30
hsa-miR-486-3p	0	0	1	1	1	1	MNF1	mitochondrial nucleoid factor 1
hsa-miR-486-3p	1	0	1	1	1	1	BAZ1B	bromodomain adjacent to zinc finger domain, 1B
hsa-miR-486-3p	0	0	1	1	1	1	CYSTM1	cysteine-rich transmembrane module containing 1
hsa-miR-486-3p	1	0	1	1	1	1	SYVN1	synovial apoptosis inhibitor 1, synoviolin
hsa-miR-486-3p	1	0	1	1	0	0	ACRBP	acrosin binding protein
hsa-miR-486-3p	0	0	1	1	1	1	MAP1LC3A	microtubule-associated protein 1 light chain 3 alpha
hsa-miR-486-3p	1	0	1	1	1	1	TTBK1	tau tubulin kinase 1
hsa-miR-486-3p	1	0	1	0	1	1	INA	internexin neuronal intermediate filament protein, alpha
hsa-miR-486-3p	0	0	1	1	1	1	FAM136A	family with sequence similarity 136, member A
hsa-miR-486-3p	1	0	1	0	1	1	PPP1R15B	protein phosphatase 1, regulatory subunit 15B
hsa-miR-486-3p	0	0	1	1	0	0	TNS4	tensin 4
hsa-miR-486-3p	1	0	1	0	1	1	C5orf62	chromosome 5 open reading frame 62
hsa-miR-486-3p	0	0	1	1	1	1	POLR2J2	polymerase (RNA) II (DNA directed) polypeptide J2
hsa-miR-486-3p	1	0	1	1	1	1	TRIM55	tripartite motif containing 55
hsa-miR-486-3p	1	0	1	1	0	0	DMRTB1	DMRT-like family B with proline-rich C-terminal, 1
hsa-miR-486-3p	1	0	1	1	1	1	FGD3	FYVE, RhoGEF and PH domain containing 3
hsa-miR-486-3p	0	0	1	1	0	0	RRP36	ribosomal RNA processing 36 homolog (S. cerevisiae)
hsa-miR-486-3p	1	0	1	0	1	1	PURB	purine-rich element binding protein B
hsa-miR-486-3p	1	0	1	1	1	1	RASL10B	RAS-like, family 10, member B
hsa-miR-486-3p	0	0	1	1	1	1	LHX4	LIM homeobox 4
hsa-miR-486-3p	1	0	1	1	0	0	FCHSD1	FCH and double SH3 domains 1
hsa-miR-486-3p	1	0	1	1	1	1	EPT1	ethanolaminephosphotransferase 1 (CDP-ethanolamine-specific)
hsa-miR-486-3p	1	0	1	1	1	1	TSPYL5	TSPY-like 5
hsa-miR-486-3p	0	0	1	0	0	0	CEACAM21	carcinoembryonic antigen-related cell adhesion molecule 21
hsa-miR-486-3p	1	0	1	1	0	0	CCDC120	coiled-coil domain containing 120
hsa-miR-486-3p	1	0	1	1	1	1	LUZP1	leucine zipper protein 1
hsa-miR-486-3p	0	0	1	1	0	0	CARD9	caspase recruitment domain family, member 9
hsa-miR-486-3p	0	0	1	0	1	1	CCDC97	coiled-coil domain containing 97
hsa-miR-486-3p	1	0	1	1	1	1	ELFN2	extracellular leucine-rich repeat and fibronectin type III domain containing 2
hsa-miR-486-3p	0	0	1	1	1	1	PLEKHG4B	pleckstrin homology domain containing, family G (with RhoGef domain) member 4B
hsa-miR-486-3p	1	0	1	1	1	1	SLITRK1	SLIT and NTRK-like family, member 1
hsa-miR-486-3p	1	0	1	0	1	1	TMEM123	transmembrane protein 123
hsa-miR-486-3p	1	0	1	1	1	1	TRIM9	tripartite motif containing 9
hsa-miR-486-3p	0	0	1	1	0	0	KRT3	keratin 3
hsa-miR-486-3p	0	0	1	0	1	1	SLC36A1	solute carrier family 36 (proton/amino acid symporter), member 1
hsa-miR-486-3p	1	0	1	1	1	1	SLC44A1	solute carrier family 44, member 1
hsa-miR-486-3p	0	0	1	1	1	1	CTCFL	CCCTC-binding factor (zinc finger protein)-like
hsa-miR-486-3p	1	0	1	1	0	0	ADAMTS14	ADAM metallopeptidase with thrombospondin type 1 motif, 14
hsa-miR-486-3p	1	0	1	1	1	1	ZNF280B	zinc finger protein 280B
hsa-miR-486-3p	1	0	1	1	1	1	SPSB4	splA/ryanodine receptor domain and SOCS box containing 4
hsa-miR-486-3p	0	0	1	0	1	1	PAQR8	progestin and adipoQ receptor family member VIII
hsa-miR-486-3p	1	0	1	1	0	0	UNC5A	unc-5 homolog A (C. elegans)
hsa-miR-486-3p	0	0	1	1	0	0	CITED4	Cbp/p300-interacting transactivator, with Glu/Asp-rich carboxy-terminal domain, 4
hsa-miR-486-3p	0	0	1	1	1	1	POFUT2	protein O-fucosyltransferase 2
hsa-miR-486-3p	1	0	1	1	0	0	PYGO2	pygopus homolog 2 (Drosophila)
hsa-miR-486-3p	0	0	1	1	1	1	TMEM129	transmembrane protein 129
hsa-miR-486-3p	0	0	1	1	1	1	MRAP2	melanocortin 2 receptor accessory protein 2
hsa-miR-486-3p	0	0	1	1	1	1	CASC4	cancer susceptibility candidate 4
hsa-miR-486-3p	1	0	1	0	1	1	SP1	Sp1 transcription factor
hsa-miR-486-3p	0	0	1	1	0	0	PPP1R14B	protein phosphatase 1, regulatory (inhibitor) subunit 14B
hsa-miR-486-3p	0	0	1	1	0	0	ESAM	endothelial cell adhesion molecule
hsa-miR-486-3p	0	0	1	0	1	1	MYO3B	myosin IIIB
hsa-miR-486-3p	1	0	1	1	1	1	MAPK14	mitogen-activated protein kinase 14
hsa-miR-486-3p	0	0	1	1	0	0	RHOXF1	Rhox homeobox family, member 1
hsa-miR-486-3p	1	0	1	0	1	1	CNOT6L	CCR4-NOT transcription complex, subunit 6-like
hsa-miR-486-3p	0	0	1	1	0	0	COX6B2	cytochrome c oxidase subunit VIb polypeptide 2 (testis)
hsa-miR-486-3p	0	0	1	1	1	1	C10orf82	chromosome 10 open reading frame 82
hsa-miR-486-3p	0	0	1	1	0	0	OTOA	otoancorin
hsa-miR-486-3p	0	0	1	1	1	1	HIPK4	homeodomain interacting protein kinase 4
hsa-miR-486-3p	0	0	1	1	0	0	CCDC12	coiled-coil domain containing 12
hsa-miR-486-3p	1	0	1	1	0	0	SMCR8	Smith-Magenis syndrome chromosome region, candidate 8
hsa-miR-486-3p	1	0	1	1	1	1	YPEL4	yippee-like 4 (Drosophila)
hsa-miR-486-3p	0	0	1	1	1	1	TMEM106A	transmembrane protein 106A
hsa-miR-486-3p	1	0	1	1	1	1	UBQLNL	ubiquilin-like
hsa-miR-486-3p	1	0	1	0	1	1	DIRAS1	DIRAS family, GTP-binding RAS-like 1
hsa-miR-486-3p	1	0	1	1	1	1	FAM84A	family with sequence similarity 84, member A
hsa-miR-486-3p	1	0	1	1	0	0	NAPRT1	nicotinate phosphoribosyltransferase domain containing 1
hsa-miR-486-3p	1	0	1	1	1	1	VTI1A	vesicle transport through interaction with t-SNAREs homolog 1A (yeast)
hsa-miR-486-3p	0	0	1	1	0	0	EVI5L	ecotropic viral integration site 5-like
hsa-miR-486-3p	0	0	1	1	1	1	SCARF1	scavenger receptor class F, member 1
hsa-miR-486-3p	0	0	1	1	0	0	IL27	interleukin 27
hsa-miR-486-3p	1	0	1	1	1	1	TPM3	tropomyosin 3
hsa-miR-486-3p	0	0	1	1	1	1	PARS2	prolyl-tRNA synthetase 2, mitochondrial (putative)
hsa-miR-486-3p	0	0	1	1	1	1	LONRF1	LON peptidase N-terminal domain and ring finger 1
hsa-miR-486-3p	1	0	1	0	1	1	SYT11	synaptotagmin XI
hsa-miR-486-3p	1	0	1	1	1	1	TMEM178A	transmembrane protein 178A
hsa-miR-486-3p	1	0	1	1	1	1	FAM123B	family with sequence similarity 123B
hsa-miR-486-3p	1	0	1	1	1	1	ZNF362	zinc finger protein 362
hsa-miR-486-3p	0	0	1	1	0	0	WBSCR27	Williams Beuren syndrome chromosome region 27
hsa-miR-486-3p	0	0	1	1	0	0	MARCH10	membrane-associated ring finger (C3HC4) 10, E3 ubiquitin protein ligase
hsa-miR-486-3p	0	0	1	1	1	1	DAND5	DAN domain family, member 5
hsa-miR-486-3p	0	0	1	1	0	0	MUC20	mucin 20, cell surface associated
hsa-miR-486-3p	1	0	1	0	1	1	TMEM154	transmembrane protein 154
hsa-miR-486-3p	1	0	1	1	1	1	ZCCHC5	zinc finger, CCHC domain containing 5
hsa-miR-486-3p	0	0	1	1	1	1	ASPRV1	aspartic peptidase, retroviral-like 1
hsa-miR-486-3p	1	0	1	1	1	1	PDIK1L	PDLIM1 interacting kinase 1 like
hsa-miR-486-3p	1	0	1	0	1	1	N4BP1	NEDD4 binding protein 1
hsa-miR-486-3p	1	0	1	1	1	1	C3orf45	chromosome 3 open reading frame 45
hsa-miR-486-3p	0	0	1	1	1	1	SLC22A7	solute carrier family 22 (organic anion transporter), member 7
hsa-miR-486-3p	0	0	1	1	0	0	SCARF2	scavenger receptor class F, member 2
hsa-miR-486-3p	1	0	1	0	1	1	ZCCHC24	zinc finger, CCHC domain containing 24
hsa-miR-486-3p	1	0	1	1	1	1	HS6ST3	heparan sulfate 6-O-sulfotransferase 3
hsa-miR-486-3p	1	0	1	0	1	1	MDGA1	MAM domain containing glycosylphosphatidylinositol anchor 1
hsa-miR-486-3p	0	0	1	0	1	1	RTP1	receptor (chemosensory) transporter protein 1
hsa-miR-486-3p	1	0	1	1	1	1	FNDC5	fibronectin type III domain containing 5
hsa-miR-486-3p	1	0	1	1	1	1	PHF13	PHD finger protein 13
hsa-miR-486-3p	0	0	1	1	1	1	CREG2	cellular repressor of E1A-stimulated genes 2
hsa-miR-486-3p	1	0	1	1	1	1	MSI2	musashi homolog 2 (Drosophila)
hsa-miR-486-3p	1	0	1	0	1	1	PLEKHH2	pleckstrin homology domain containing, family H (with MyTH4 domain) member 2
hsa-miR-486-3p	0	0	1	1	1	1	REXO1L1	REX1, RNA exonuclease 1 homolog (S. cerevisiae)-like 1
hsa-miR-486-3p	1	0	1	1	1	1	IL28RA	interleukin 28 receptor, alpha (interferon, lambda receptor)
hsa-miR-486-3p	1	0	1	1	1	1	SMG7	smg-7 homolog, nonsense mediated mRNA decay factor (C. elegans)
hsa-miR-486-3p	1	0	1	1	1	1	NR4A2	nuclear receptor subfamily 4, group A, member 2
hsa-miR-486-3p	1	0	1	1	1	1	MMGT1	membrane magnesium transporter 1
hsa-miR-486-3p	1	0	1	1	1	1	CNKSR3	CNKSR family member 3
hsa-miR-486-3p	0	0	1	1	0	0	CLEC4F	C-type lectin domain family 4, member F
hsa-miR-486-3p	1	0	1	0	1	1	C3orf58	chromosome 3 open reading frame 58
hsa-miR-486-3p	1	0	1	1	1	1	DIP2B	DIP2 disco-interacting protein 2 homolog B (Drosophila)
hsa-miR-486-3p	0	0	1	0	1	1	C5orf64	chromosome 5 open reading frame 64
hsa-miR-486-3p	0	0	1	0	1	1	FLJ40852	uncharacterized LOC285962
hsa-miR-486-3p	1	0	1	1	1	1	ATG9B	autophagy related 9B
hsa-miR-486-3p	0	0	1	0	1	1	C17orf49	chromosome 17 open reading frame 49
hsa-miR-486-3p	1	0	1	1	1	1	UBR1	ubiquitin protein ligase E3 component n-recognin 1
hsa-miR-486-3p	1	0	1	1	0	0	EMC10	ER membrane protein complex subunit 10
hsa-miR-486-3p	0	0	1	1	0	0	C17orf74	chromosome 17 open reading frame 74
hsa-miR-486-3p	1	0	1	1	1	1	PDLIM2	PDZ and LIM domain 2 (mystique)
hsa-miR-486-3p	1	0	1	1	1	1	STX12	syntaxin 12
hsa-miR-486-3p	0	0	1	1	1	1	P4HTM	prolyl 4-hydroxylase, transmembrane (endoplasmic reticulum)
hsa-miR-486-3p	0	0	1	1	0	0	PAQR7	progestin and adipoQ receptor family member VII
hsa-miR-486-3p	0	0	1	1	0	0	HM13	histocompatibility (minor) 13
hsa-miR-486-3p	0	0	1	1	0	0	C7orf34	chromosome 7 open reading frame 34
hsa-miR-486-3p	1	0	1	1	0	0	KCTD13	potassium channel tetramerisation domain containing 13
hsa-miR-486-3p	0	0	1	1	1	1	MED22	mediator complex subunit 22
hsa-miR-486-3p	0	0	1	0	1	1	PITPNC1	phosphatidylinositol transfer protein, cytoplasmic 1
hsa-miR-486-3p	0	0	1	0	1	1	HCG27	HLA complex group 27 (non-protein coding)
hsa-miR-486-3p	1	0	1	1	1	1	ZSCAN22	zinc finger and SCAN domain containing 22
hsa-miR-486-3p	1	0	1	1	1	1	TMEM229B	transmembrane protein 229B
hsa-miR-486-3p	0	0	1	1	1	1	C1QL2	complement component 1, q subcomponent-like 2
hsa-miR-486-3p	1	0	1	1	1	1	DDX26B	DEAD/H (Asp-Glu-Ala-Asp/His) box polypeptide 26B
hsa-miR-486-3p	1	0	1	1	1	1	BCL9L	B-cell CLL/lymphoma 9-like
hsa-miR-486-3p	0	0	1	1	1	1	SKA2	spindle and kinetochore associated complex subunit 2
hsa-miR-486-3p	1	0	1	0	1	1	RNF144B	ring finger protein 144B
hsa-miR-486-3p	0	0	1	0	1	1	C16orf82	chromosome 16 open reading frame 82
hsa-miR-486-3p	1	0	1	0	1	1	RIMS4	regulating synaptic membrane exocytosis 4
hsa-miR-486-3p	1	0	1	0	1	1	TMSB4XP8	thymosin beta 4, X-linked pseudogene 8
hsa-miR-486-3p	1	0	1	1	1	1	SPTY2D1	SPT2, Suppressor of Ty, domain containing 1 (S. cerevisiae)
hsa-miR-486-3p	1	0	1	1	1	1	GANC	glucosidase, alpha; neutral C
hsa-miR-486-3p	1	0	1	1	1	1	CPXM2	carboxypeptidase X (M14 family), member 2
hsa-miR-486-3p	0	0	1	0	1	1	TCF21	transcription factor 21
hsa-miR-486-3p	0	0	1	1	1	1	DERL3	derlin 3
hsa-miR-486-3p	1	0	1	1	1	1	RAB43	RAB43, member RAS oncogene family
hsa-miR-486-3p	0	0	1	1	0	0	ITIH6	inter-alpha-trypsin inhibitor heavy chain family, member 6
hsa-miR-486-3p	0	0	1	1	0	0	DGAT2L6	diacylglycerol O-acyltransferase 2-like 6
hsa-miR-486-3p	0	0	1	0	0	0	IGFL1	IGF-like family member 1
hsa-miR-486-3p	0	0	1	1	1	1	LHFPL4	lipoma HMGIC fusion partner-like 4
hsa-miR-486-3p	1	0	1	0	1	1	ZC3H6	zinc finger CCCH-type containing 6
hsa-miR-486-3p	0	0	1	0	1	1	KLHL30	kelch-like 30 (Drosophila)
hsa-miR-486-3p	0	0	1	1	1	1	COL25A1	collagen, type XXV, alpha 1
hsa-miR-486-3p	0	0	1	1	0	0	C9orf169	chromosome 9 open reading frame 169
hsa-miR-486-3p	0	0	1	1	1	1	TMEM189	transmembrane protein 189
hsa-miR-486-3p	0	0	1	0	1	1	WASH3P	WAS protein family homolog 3 pseudogene
hsa-miR-486-3p	1	0	1	1	1	1	CXCL12	chemokine (C-X-C motif) ligand 12
hsa-miR-486-3p	0	0	1	0	1	1	SOGA1	suppressor of glucose, autophagy associated 1
hsa-miR-486-3p	1	0	1	1	1	1	WARS2	tryptophanyl tRNA synthetase 2, mitochondrial
hsa-miR-486-3p	1	0	1	1	1	1	BLOC1S5	biogenesis of lysosomal organelles complex-1, subunit 5, muted
hsa-miR-486-3p	0	0	1	1	1	1	SHC4	SHC (Src homology 2 domain containing) family, member 4
hsa-miR-486-3p	1	0	1	0	1	1	MBLAC2	metallo-beta-lactamase domain containing 2
hsa-miR-486-3p	0	0	1	1	0	0	C19orf70	chromosome 19 open reading frame 70
hsa-miR-486-3p	0	0	1	1	1	1	FAM180A	family with sequence similarity 180, member A
hsa-miR-486-3p	1	0	1	1	1	1	METTL21B	methyltransferase like 21B
hsa-miR-486-3p	1	0	1	1	1	1	TMEM132E	transmembrane protein 132E
hsa-miR-486-3p	1	0	1	1	1	1	FAM43B	family with sequence similarity 43, member B
hsa-miR-486-3p	0	0	1	0	0	0	C16orf47	chromosome 16 open reading frame 47
hsa-miR-486-3p	0	0	1	0	1	1	CLEC17A	C-type lectin domain family 17, member A
hsa-miR-486-3p	1	0	1	1	0	0	CD164L2	CD164 sialomucin-like 2
hsa-miR-486-3p	1	0	1	0	1	1	C17orf102	chromosome 17 open reading frame 102
hsa-miR-486-3p	1	0	1	1	1	1	TEX19	testis expressed 19
hsa-miR-486-3p	1	0	1	1	1	1	C11orf87	chromosome 11 open reading frame 87
hsa-miR-486-3p	0	0	1	1	0	0	AMTN	amelotin
hsa-miR-486-3p	0	0	1	0	0	0	ESRRAP2	estrogen-related receptor alpha pseudogene 2
hsa-miR-486-3p	0	0	1	0	0	0	CELP	carboxyl ester lipase pseudogene
hsa-miR-486-3p	0	0	1	0	0	0	CYP2B7P1	cytochrome P450, family 2, subfamily B, polypeptide 7 pseudogene 1
hsa-miR-486-3p	0	0	1	0	0	0	PCDHB19P	protocadherin beta 19 pseudogene
hsa-miR-486-3p	0	0	1	0	0	0	LYPLA2P1	lysophospholipase II pseudogene 1
hsa-miR-486-3p	0	0	1	0	0	0	MT1L	metallothionein 1L (gene/pseudogene)
hsa-miR-486-3p	0	0	1	0	0	0	TPI1P2	triosephosphate isomerase 1 pseudogene 2
hsa-miR-486-3p	0	0	1	0	0	0	COX6B1P1	cytochrome c oxidase subunit VIb polypeptide 1 (ubiquitous) pseudogene 1
hsa-miR-486-3p	0	0	1	0	0	0	TRPC2	transient receptor potential cation channel, subfamily C, member 2, pseudogene
hsa-miR-486-3p	0	0	1	0	0	0	DGCR5	DiGeorge syndrome critical region gene 5 (non-protein coding)
hsa-miR-486-3p	0	0	1	0	0	0	AOC4	amine oxidase, copper containing 3 (vascular adhesion protein 1) pseudogene
hsa-miR-486-3p	0	0	1	0	0	0	TPTE2P6	transmembrane phosphoinositide 3-phosphatase and tensin homolog 2 pseudogene 6
hsa-miR-486-3p	0	0	1	0	0	0	AQP7P1	aquaporin 7 pseudogene 1
hsa-miR-486-3p	0	0	1	0	0	0	RNF126P1	ring finger protein 126 pseudogene 1
hsa-miR-486-3p	0	0	1	0	0	0	SIGLEC16	sialic acid binding Ig-like lectin 16 (gene/pseudogene)
hsa-miR-486-3p	0	0	1	0	0	0	HERC2P8	hect domain and RLD 2 pseudogene 8
hsa-miR-486-3p	0	0	1	0	0	0	HAS2-AS1	HAS2 antisense RNA 1
hsa-miR-486-3p	0	0	1	0	0	0	LOC285359	phosducin-like 3 pseudogene
hsa-miR-486-3p	0	0	1	0	0	0	SNORA78	small nucleolar RNA, H/ACA box 78
hsa-miR-486-3p	0	0	1	0	0	0	LILRP2	leukocyte immunoglobulin-like receptor pseudogene 2
hsa-miR-486-3p	0	0	1	0	0	0	PYY2	peptide YY, 2 (pseudogene)
hsa-miR-486-3p	0	0	1	0	0	0	HSP90B3P	heat shock protein 90kDa beta (Grp94), member 3, pseudogene
hsa-miR-486-3p	0	0	1	0	0	0	MYADML	myeloid-associated differentiation marker-like (pseudogene)
hsa-miR-486-3p	1	0	1	0	1	1	NFIX	nuclear factor I/X (CCAAT-binding transcription factor)
hsa-miR-486-3p	0	0	1	1	1	1	CAST	calpastatin
hsa-miR-486-3p	1	0	1	1	0	0	TNXB	tenascin XB
hsa-miR-486-3p	1	0	1	1	1	1	ATF6B	activating transcription factor 6 beta
hsa-miR-486-3p	1	0	1	1	0	0	DLGAP1	discs, large (Drosophila) homolog-associated protein 1
hsa-miR-486-3p	0	0	1	1	0	0	SHBG	sex hormone-binding globulin
hsa-miR-486-3p	0	0	1	1	0	0	STK19	serine/threonine kinase 19
hsa-miR-486-3p	0	0	1	1	1	1	COL14A1	collagen, type XIV, alpha 1
hsa-miR-486-3p	0	0	1	0	0	0	MUC5AC	mucin 5AC, oligomeric mucus/gel-forming
hsa-miR-486-3p	0	0	0	1	0	0	TRAPPC6A	trafficking protein particle complex 6A
hsa-miR-486-3p	0	0	1	1	0	0	TSR3	TSR3, 20S rRNA accumulation, homolog (S. cerevisiae)
hsa-miR-486-3p	0	0	1	1	1	1	PIGQ	phosphatidylinositol glycan anchor biosynthesis, class Q
hsa-miR-486-3p	1	0	1	1	1	1	B4GALT7	xylosylprotein beta 1,4-galactosyltransferase, polypeptide 7
hsa-miR-486-3p	0	0	0	1	0	0	TMEM161A	transmembrane protein 161A
hsa-miR-486-3p	0	0	1	1	0	0	LLGL2	lethal giant larvae homolog 2 (Drosophila)
hsa-miR-486-3p	0	0	0	1	0	0	CACNG5	calcium channel, voltage-dependent, gamma subunit 5
hsa-miR-486-3p	0	0	1	1	1	1	SLC9A3R2	solute carrier family 9, subfamily A (NHE3, cation proton antiporter 3), member 3 regulator 2
hsa-miR-486-3p	0	0	0	1	0	0	IGSF9	immunoglobulin superfamily, member 9
hsa-miR-486-3p	0	0	0	1	0	0	MRPL28	mitochondrial ribosomal protein L28
hsa-miR-486-3p	1	0	1	1	0	0	ITGB4	integrin, beta 4
hsa-miR-486-3p	0	0	0	1	1	1	RAB26	RAB26, member RAS oncogene family
hsa-miR-486-3p	0	0	0	1	0	0	CATSPERG	catsper channel auxiliary subunit gamma
hsa-miR-486-3p	0	0	0	1	0	0	ATP5D	ATP synthase, H+ transporting, mitochondrial F1 complex, delta subunit
hsa-miR-486-3p	1	0	0	1	1	1	CDC34	cell division cycle 34 homolog (S. cerevisiae)
hsa-miR-486-3p	0	0	0	1	0	0	CRYBB1	crystallin, beta B1
hsa-miR-486-3p	0	0	1	1	0	0	CENPM	centromere protein M
hsa-miR-486-3p	0	0	0	1	0	0	LMF2	lipase maturation factor 2
hsa-miR-486-3p	0	0	1	1	0	0	MCM5	minichromosome maintenance complex component 5
hsa-miR-486-3p	0	0	1	1	0	0	UPK3A	uroplakin 3A
hsa-miR-486-3p	0	0	1	1	0	0	MYBL2	v-myb myeloblastosis viral oncogene homolog (avian)-like 2
hsa-miR-486-3p	0	0	1	1	0	0	BIRC7	baculoviral IAP repeat containing 7
hsa-miR-486-3p	0	0	0	1	1	1	NME3	NME/NM23 nucleoside diphosphate kinase 3
hsa-miR-486-3p	0	0	0	1	0	0	PDIA2	protein disulfide isomerase family A, member 2
hsa-miR-486-3p	0	0	1	1	1	1	AQP8	aquaporin 8
hsa-miR-486-3p	0	0	1	1	0	0	CNOT3	CCR4-NOT transcription complex, subunit 3
hsa-miR-486-3p	0	0	0	1	0	0	SARS2	seryl-tRNA synthetase 2, mitochondrial
hsa-miR-486-3p	0	0	0	1	0	0	SF3A2	splicing factor 3a, subunit 2, 66kDa
hsa-miR-486-3p	0	0	0	1	0	0	AMH	anti-Mullerian hormone
hsa-miR-486-3p	0	0	1	1	0	0	TBCB	tubulin folding cofactor B
hsa-miR-486-3p	0	0	1	1	0	0	CCDC9	coiled-coil domain containing 9
hsa-miR-486-3p	0	0	0	1	0	0	CD79A	CD79a molecule, immunoglobulin-associated alpha
hsa-miR-486-3p	0	0	1	1	0	0	RABAC1	Rab acceptor 1 (prenylated)
hsa-miR-486-3p	0	0	0	1	0	0	CNFN	cornifelin
hsa-miR-486-3p	0	0	0	1	0	0	HAMP	hepcidin antimicrobial peptide
hsa-miR-486-3p	1	0	1	1	0	0	GSK3A	glycogen synthase kinase 3 alpha
hsa-miR-486-3p	0	0	1	1	1	1	OGDH	oxoglutarate (alpha-ketoglutarate) dehydrogenase (lipoamide)
hsa-miR-486-3p	0	0	0	1	1	1	AEBP1	AE binding protein 1
hsa-miR-486-3p	0	0	0	1	0	0	C8G	complement component 8, gamma polypeptide
hsa-miR-486-3p	1	0	1	1	0	0	SLC25A39	solute carrier family 25, member 39
hsa-miR-486-3p	0	0	1	1	0	0	AATF	apoptosis antagonizing transcription factor
hsa-miR-486-3p	1	0	1	1	1	1	CCL1	chemokine (C-C motif) ligand 1
hsa-miR-486-3p	0	0	1	1	1	1	KRT32	keratin 32
hsa-miR-486-3p	0	0	0	1	1	1	ABI3	ABI family, member 3
hsa-miR-486-3p	0	0	1	1	0	0	CACNG1	calcium channel, voltage-dependent, gamma subunit 1
hsa-miR-486-3p	0	0	1	1	0	0	ALDOC	aldolase C, fructose-bisphosphate
hsa-miR-486-3p	0	0	0	1	0	0	APOC3	apolipoprotein C-III
hsa-miR-486-3p	1	0	1	1	0	0	MYL2	myosin, light chain 2, regulatory, cardiac, slow
hsa-miR-486-3p	0	0	0	1	1	1	GNB3	guanine nucleotide binding protein (G protein), beta polypeptide 3
hsa-miR-486-3p	1	0	1	1	1	1	ZNF76	zinc finger protein 76
hsa-miR-486-3p	0	0	0	1	1	1	MRPL2	mitochondrial ribosomal protein L2
hsa-miR-486-3p	0	0	0	1	0	0	LTF	lactotransferrin
hsa-miR-486-3p	0	0	0	1	0	0	VAX2	ventral anterior homeobox 2
hsa-miR-486-3p	0	0	0	1	0	0	OSCP1	organic solute carrier partner 1
hsa-miR-486-3p	0	0	1	1	0	0	GSC	goosecoid homeobox
hsa-miR-486-3p	0	0	1	1	1	1	POLM	polymerase (DNA directed), mu
hsa-miR-486-3p	0	0	0	1	0	0	RAMP3	receptor (G protein-coupled) activity modifying protein 3
hsa-miR-486-3p	0	0	0	1	0	0	ACADS	acyl-CoA dehydrogenase, C-2 to C-3 short chain
hsa-miR-486-3p	0	0	1	1	0	0	STX10	syntaxin 10
hsa-miR-486-3p	1	0	0	1	0	0	CD97	CD97 molecule
hsa-miR-486-3p	0	0	1	1	1	1	EBPL	emopamil binding protein-like
hsa-miR-486-3p	0	0	1	1	0	0	FAAH	fatty acid amide hydrolase
hsa-miR-486-3p	0	0	1	1	1	1	MAGEA9B	melanoma antigen family A, 9B
hsa-miR-486-3p	0	0	1	1	0	0	UBE2C	ubiquitin-conjugating enzyme E2C
hsa-miR-486-3p	0	0	0	1	1	1	LILRB3	leukocyte immunoglobulin-like receptor, subfamily B (with TM and ITIM domains), member 3
hsa-miR-486-3p	0	0	0	1	0	0	KRT35	keratin 35
hsa-miR-486-3p	1	0	0	1	0	0	PRR12	proline rich 12
hsa-miR-486-3p	0	0	1	1	0	0	FLRT1	fibronectin leucine rich transmembrane protein 1
hsa-miR-486-3p	0	0	1	1	0	0	DDX49	DEAD (Asp-Glu-Ala-Asp) box polypeptide 49
hsa-miR-486-3p	0	0	1	1	0	0	IDUA	iduronidase, alpha-L-
hsa-miR-486-3p	1	0	1	1	0	0	SYNGR3	synaptogyrin 3
hsa-miR-486-3p	1	0	1	1	1	1	AAMP	angio-associated, migratory cell protein
hsa-miR-486-3p	0	0	0	1	0	0	AANAT	aralkylamine N-acetyltransferase
hsa-miR-486-3p	1	0	1	1	0	0	HCN2	hyperpolarization activated cyclic nucleotide-gated potassium channel 2
hsa-miR-486-3p	0	0	1	1	0	0	CERS4	ceramide synthase 4
hsa-miR-486-3p	0	0	1	1	1	1	RAF1	v-raf-1 murine leukemia viral oncogene homolog 1
hsa-miR-486-3p	0	0	1	1	0	0	TMCO6	transmembrane and coiled-coil domains 6
hsa-miR-486-3p	0	0	0	1	0	0	KRT6C	keratin 6C
hsa-miR-486-3p	0	0	1	1	1	1	CDC16	cell division cycle 16 homolog (S. cerevisiae)
hsa-miR-486-3p	0	0	1	1	0	0	FAM98C	family with sequence similarity 98, member C
hsa-miR-486-3p	0	0	0	1	0	0	NDUFA13	NADH dehydrogenase (ubiquinone) 1 alpha subcomplex, 13
hsa-miR-486-3p	1	0	1	1	1	1	ARPC1B	actin related protein 2/3 complex, subunit 1B, 41kDa
hsa-miR-486-3p	0	0	1	1	0	0	CACNG6	calcium channel, voltage-dependent, gamma subunit 6
hsa-miR-486-3p	0	0	0	1	0	0	GDF15	growth differentiation factor 15
hsa-miR-486-3p	0	0	0	1	0	0	LAMA5	laminin, alpha 5
hsa-miR-486-3p	1	0	0	1	1	1	YIPF2	Yip1 domain family, member 2
hsa-miR-486-3p	1	0	1	1	0	0	ANGPTL6	angiopoietin-like 6
hsa-miR-486-3p	0	0	1	1	0	0	BPIFA2	BPI fold containing family A, member 2
hsa-miR-486-3p	1	0	0	1	0	0	C1QL1	complement component 1, q subcomponent-like 1
hsa-miR-486-3p	0	0	1	1	1	1	SCLY	selenocysteine lyase
[truncated: 531 more rows]
