# Supplementary material for: Profiling of Selected MicroRNAs in Proliferative Eutopic Endometrium of Women with Ovarian Endometriosis
Source: Biomed Res Int. 2015 Aug 20;2015:760698. doi: 10.1155/2015/760698 (PMC4558423; doi:10.1155/2015/760698)
Supplement: Supplementary file 1 — Table I: The names of miRNAs significantly differentially expressed between eutopic endometrium of patients with endometriosis vs eutopic endometrium of patients without endometriosis. Table II: The associations between miRNA and mRNA, which presents detailed results of the search of six major databases i.e targetscan, tarbase, miranda, mirbase, mirtarget2 and pictar. [file 760698.f1.zip › 760698.f1/Table II/hsa-miR-487a.tsv]

miR	targetscan	tarbase	miranda	mirbase	mirtarget2	pictar	GeneSymbol	GeneName
hsa-miR-487a	1	0	1	1	1	1	PDZD2	PDZ domain containing 2
hsa-miR-487a	1	0	1	1	0	0	SRCAP	Snf2-related CREBBP activator protein
hsa-miR-487a	0	0	1	1	1	1	PPIP5K1	diphosphoinositol pentakisphosphate kinase 1
hsa-miR-487a	0	0	1	1	1	1	C2CD2L	C2CD2-like
hsa-miR-487a	1	0	1	1	1	1	SGSM2	small G protein signaling modulator 2
hsa-miR-487a	1	0	1	1	1	1	PPIP5K2	diphosphoinositol pentakisphosphate kinase 2
hsa-miR-487a	1	0	1	1	1	1	CDC42BPA	CDC42 binding protein kinase alpha (DMPK-like)
hsa-miR-487a	1	0	1	0	1	1	CEP350	centrosomal protein 350kDa
hsa-miR-487a	0	0	1	1	1	1	NEU3	sialidase 3 (membrane sialidase)
hsa-miR-487a	1	0	1	1	1	1	PPP6R2	protein phosphatase 6, regulatory subunit 2
hsa-miR-487a	1	0	1	0	1	1	MAGI2	membrane associated guanylate kinase, WW and PDZ domain containing 2
hsa-miR-487a	1	0	1	0	1	1	DOCK4	dedicator of cytokinesis 4
hsa-miR-487a	0	0	1	1	1	1	GPR116	G protein-coupled receptor 116
hsa-miR-487a	0	0	1	1	1	1	SEC31A	SEC31 homolog A (S. cerevisiae)
hsa-miR-487a	1	0	1	1	1	1	RPGRIP1L	RPGRIP1-like
hsa-miR-487a	0	0	1	1	0	0	RTEL1	regulator of telomere elongation helicase 1
hsa-miR-487a	1	0	1	0	1	1	SRGAP3	SLIT-ROBO Rho GTPase activating protein 3
hsa-miR-487a	1	0	1	1	1	1	KIAA1217	KIAA1217
hsa-miR-487a	0	0	1	1	1	1	FSTL5	follistatin-like 5
hsa-miR-487a	1	0	1	0	0	0	ODZ4	odz, odd Oz/ten-m homolog 4 (Drosophila)
hsa-miR-487a	0	0	1	0	0	0	COG1	component of oligomeric golgi complex 1
hsa-miR-487a	0	0	1	0	1	1	MUC3B	mucin 3B, cell surface associated
hsa-miR-487a	1	0	1	1	0	0	KIAA1462	KIAA1462
hsa-miR-487a	0	0	1	1	1	1	CEP192	centrosomal protein 192kDa
hsa-miR-487a	1	0	1	1	1	1	DDHD1	DDHD domain containing 1
hsa-miR-487a	1	0	1	1	1	1	CSMD3	CUB and Sushi multiple domains 3
hsa-miR-487a	0	0	1	1	0	0	SEC16B	SEC16 homolog B (S. cerevisiae)
hsa-miR-487a	1	0	1	1	1	1	BCL2L11	BCL2-like 11 (apoptosis facilitator)
hsa-miR-487a	1	0	1	0	0	0	ZBTB34	zinc finger and BTB domain containing 34
hsa-miR-487a	1	0	1	1	1	1	UBR3	ubiquitin protein ligase E3 component n-recognin 3 (putative)
hsa-miR-487a	0	0	1	1	0	0	SSPO	SCO-spondin homolog (Bos taurus)
hsa-miR-487a	1	0	1	0	1	1	LIN54	lin-54 homolog (C. elegans)
hsa-miR-487a	1	0	1	1	1	1	KCNMA1	potassium large conductance calcium-activated channel, subfamily M, alpha member 1
hsa-miR-487a	1	0	1	1	1	1	TRIM36	tripartite motif containing 36
hsa-miR-487a	1	0	1	1	1	1	AP3D1	adaptor-related protein complex 3, delta 1 subunit
hsa-miR-487a	1	0	1	1	1	1	DAPK1	death-associated protein kinase 1
hsa-miR-487a	1	0	1	1	1	1	RPS6KA3	ribosomal protein S6 kinase, 90kDa, polypeptide 3
hsa-miR-487a	1	0	1	1	1	1	PML	promyelocytic leukemia
hsa-miR-487a	1	0	1	1	1	1	SLC8A1	solute carrier family 8 (sodium/calcium exchanger), member 1
hsa-miR-487a	1	0	1	0	1	1	MPPED2	metallophosphoesterase domain containing 2
hsa-miR-487a	1	0	1	1	1	1	FMR1	fragile X mental retardation 1
hsa-miR-487a	1	0	1	1	1	1	PRKACB	protein kinase, cAMP-dependent, catalytic, beta
hsa-miR-487a	1	0	1	0	1	1	ETV1	ets variant 1
hsa-miR-487a	1	0	1	0	1	1	CHL1	cell adhesion molecule with homology to L1CAM (close homolog of L1)
hsa-miR-487a	1	0	1	1	1	1	IPO8	importin 8
hsa-miR-487a	1	0	1	1	1	1	ARHGEF3	Rho guanine nucleotide exchange factor (GEF) 3
hsa-miR-487a	0	0	1	0	1	1	TGFB2	transforming growth factor, beta 2
hsa-miR-487a	1	0	1	1	1	1	TEAD1	TEA domain family member 1 (SV40 transcriptional enhancer factor)
hsa-miR-487a	1	0	1	1	1	1	ZFX	zinc finger protein, X-linked
hsa-miR-487a	0	0	1	1	1	1	EIF4G1	eukaryotic translation initiation factor 4 gamma, 1
hsa-miR-487a	1	0	1	0	1	1	PDE4D	phosphodiesterase 4D, cAMP-specific
hsa-miR-487a	1	0	1	1	1	1	LDB2	LIM domain binding 2
hsa-miR-487a	0	0	1	1	1	1	CYP4F3	cytochrome P450, family 4, subfamily F, polypeptide 3
hsa-miR-487a	0	0	1	1	1	1	SC5DL	sterol-C5-desaturase (ERG3 delta-5-desaturase homolog, S. cerevisiae)-like
hsa-miR-487a	1	0	1	1	0	0	PAK1	p21 protein (Cdc42/Rac)-activated kinase 1
hsa-miR-487a	1	0	1	1	1	1	TP63	tumor protein p63
hsa-miR-487a	1	0	1	1	1	1	VAPB	VAMP (vesicle-associated membrane protein)-associated protein B and C
hsa-miR-487a	0	0	1	1	0	0	ABRACL	ABRA C-terminal like
hsa-miR-487a	1	0	1	0	1	1	CDK14	cyclin-dependent kinase 14
hsa-miR-487a	1	0	1	0	1	1	WDR82	WD repeat domain 82
hsa-miR-487a	0	0	1	1	1	1	CNPPD1	cyclin Pas1/PHO80 domain containing 1
hsa-miR-487a	1	0	1	0	0	0	PRPF40A	PRP40 pre-mRNA processing factor 40 homolog A (S. cerevisiae)
hsa-miR-487a	0	0	1	1	1	1	FAM114A2	family with sequence similarity 114, member A2
hsa-miR-487a	0	0	1	1	1	1	SLC39A8	solute carrier family 39 (zinc transporter), member 8
hsa-miR-487a	1	0	1	1	0	0	TDRKH	tudor and KH domain containing
hsa-miR-487a	1	0	1	1	1	1	DESI2	desumoylating isopeptidase 2
hsa-miR-487a	0	0	1	1	1	1	NKX3-1	NK3 homeobox 1
hsa-miR-487a	0	0	1	1	1	1	DOCK10	dedicator of cytokinesis 10
hsa-miR-487a	1	0	1	1	1	1	ABI2	abl-interactor 2
hsa-miR-487a	0	0	1	1	1	1	PJA1	praja ring finger 1, E3 ubiquitin protein ligase
hsa-miR-487a	1	0	1	1	1	1	SH3GLB1	SH3-domain GRB2-like endophilin B1
hsa-miR-487a	1	0	1	1	1	1	PUM2	pumilio homolog 2 (Drosophila)
hsa-miR-487a	0	0	1	1	1	1	ZNF638	zinc finger protein 638
hsa-miR-487a	1	0	1	1	1	1	CHST9	carbohydrate (N-acetylgalactosamine 4-0) sulfotransferase 9
hsa-miR-487a	0	0	1	1	1	1	FCRL5	Fc receptor-like 5
hsa-miR-487a	1	0	1	1	1	1	CALU	calumenin
hsa-miR-487a	1	0	1	0	1	1	WIPF2	WAS/WASL interacting protein family, member 2
hsa-miR-487a	0	0	1	1	0	0	SNRPN	small nuclear ribonucleoprotein polypeptide N
hsa-miR-487a	1	0	1	1	1	1	ST3GAL3	ST3 beta-galactoside alpha-2,3-sialyltransferase 3
hsa-miR-487a	1	0	1	1	1	1	STX16	syntaxin 16
hsa-miR-487a	1	0	1	1	0	0	SAMD4A	sterile alpha motif domain containing 4A
hsa-miR-487a	1	0	1	1	1	1	PSIP1	PC4 and SFRS1 interacting protein 1
hsa-miR-487a	1	0	1	1	1	1	AKIP1	A kinase (PRKA) interacting protein 1
hsa-miR-487a	1	0	1	1	0	0	ST3GAL4	ST3 beta-galactoside alpha-2,3-sialyltransferase 4
hsa-miR-487a	0	0	1	1	1	1	RBM11	RNA binding motif protein 11
hsa-miR-487a	1	0	1	0	1	1	NUDCD1	NudC domain containing 1
hsa-miR-487a	0	0	1	1	1	1	PTK7	PTK7 protein tyrosine kinase 7
hsa-miR-487a	1	0	1	0	1	1	IL1RAP	interleukin 1 receptor accessory protein
hsa-miR-487a	1	0	1	1	1	1	FLNC	filamin C, gamma
hsa-miR-487a	1	0	1	0	1	1	CACNA1C	calcium channel, voltage-dependent, L type, alpha 1C subunit
hsa-miR-487a	1	0	1	1	1	1	SUCO	SUN domain containing ossification factor
hsa-miR-487a	0	0	1	0	1	1	COL13A1	collagen, type XIII, alpha 1
hsa-miR-487a	1	0	1	1	1	1	PALM2	paralemmin 2
hsa-miR-487a	1	0	1	1	1	1	PPP3CB	protein phosphatase 3, catalytic subunit, beta isozyme
hsa-miR-487a	0	0	1	1	1	1	TAF1	TAF1 RNA polymerase II, TATA box binding protein (TBP)-associated factor, 250kDa
hsa-miR-487a	1	0	1	1	1	1	PPP1R9A	protein phosphatase 1, regulatory subunit 9A
hsa-miR-487a	1	0	1	0	1	1	NFAT5	nuclear factor of activated T-cells 5, tonicity-responsive
hsa-miR-487a	0	0	1	1	0	0	ENY2	enhancer of yellow 2 homolog (Drosophila)
hsa-miR-487a	0	0	1	0	0	0	BABAM1	BRISC and BRCA1 A complex member 1
hsa-miR-487a	0	0	1	0	0	0	TUG1	taurine upregulated 1 (non-protein coding)
hsa-miR-487a	1	0	1	1	1	1	ZC3H7A	zinc finger CCCH-type containing 7A
hsa-miR-487a	1	0	1	1	1	1	EIF2C1	eukaryotic translation initiation factor 2C, 1
hsa-miR-487a	0	0	1	1	1	1	ABCG2	ATP-binding cassette, sub-family G (WHITE), member 2
hsa-miR-487a	1	0	1	1	1	1	MYEF2	myelin expression factor 2
hsa-miR-487a	1	0	1	1	1	1	C12orf23	chromosome 12 open reading frame 23
hsa-miR-487a	0	0	1	1	0	0	MLST8	MTOR associated protein, LST8 homolog (S. cerevisiae)
hsa-miR-487a	0	0	1	1	0	0	JMJD4	jumonji domain containing 4
hsa-miR-487a	1	0	1	1	1	1	MACF1	microtubule-actin crosslinking factor 1
hsa-miR-487a	1	0	1	1	1	1	BAZ2A	bromodomain adjacent to zinc finger domain, 2A
hsa-miR-487a	0	0	1	1	1	1	AMFR	autocrine motility factor receptor, E3 ubiquitin protein ligase
hsa-miR-487a	0	0	1	0	0	0	IFFO2	intermediate filament family orphan 2
hsa-miR-487a	1	0	1	1	1	1	TNRC6A	trinucleotide repeat containing 6A
hsa-miR-487a	1	0	1	1	1	1	YPEL5	yippee-like 5 (Drosophila)
hsa-miR-487a	0	0	1	0	1	1	FLJ22763	uncharacterized LOC401081
hsa-miR-487a	0	0	1	1	1	1	NETO2	neuropilin (NRP) and tolloid (TLL)-like 2
hsa-miR-487a	0	0	1	0	0	0	LOC254559	uncharacterized LOC254559
hsa-miR-487a	1	0	1	1	1	1	MBD5	methyl-CpG binding domain protein 5
hsa-miR-487a	0	0	1	1	0	0	IFT172	intraflagellar transport 172 homolog (Chlamydomonas)
hsa-miR-487a	0	0	1	0	0	0	JPX	JPX transcript, XIST activator (non-protein coding)
hsa-miR-487a	1	0	1	1	1	1	RAI2	retinoic acid induced 2
hsa-miR-487a	1	0	1	0	1	1	FSTL4	follistatin-like 4
hsa-miR-487a	0	0	1	1	1	1	VWA3B	von Willebrand factor A domain containing 3B
hsa-miR-487a	0	0	1	1	1	1	SEC61A2	Sec61 alpha 2 subunit (S. cerevisiae)
hsa-miR-487a	0	0	1	1	1	1	ZNF385B	zinc finger protein 385B
hsa-miR-487a	0	0	1	0	1	1	CCDC68	coiled-coil domain containing 68
hsa-miR-487a	0	0	1	0	1	1	UHMK1	U2AF homology motif (UHM) kinase 1
hsa-miR-487a	0	0	1	1	0	0	PIGO	phosphatidylinositol glycan anchor biosynthesis, class O
hsa-miR-487a	0	0	1	1	0	0	GRIP2	glutamate receptor interacting protein 2
hsa-miR-487a	1	0	1	0	1	1	RNF165	ring finger protein 165
hsa-miR-487a	1	0	1	1	1	1	SIRT1	sirtuin 1
hsa-miR-487a	1	0	1	1	1	1	PIP4K2C	phosphatidylinositol-5-phosphate 4-kinase, type II, gamma
hsa-miR-487a	0	0	1	0	1	1	TMSB15B	thymosin beta 15B
hsa-miR-487a	1	0	1	1	1	1	EGR2	early growth response 2
hsa-miR-487a	1	0	1	1	1	1	CTTN	cortactin
hsa-miR-487a	1	0	1	1	1	1	FBXW2	F-box and WD repeat domain containing 2
hsa-miR-487a	1	0	1	1	1	1	ZNF286A	zinc finger protein 286A
hsa-miR-487a	0	0	1	1	1	1	HNRNPH1	heterogeneous nuclear ribonucleoprotein H1 (H)
hsa-miR-487a	1	0	1	1	1	1	CLGN	calmegin
hsa-miR-487a	1	0	1	1	1	1	GPD2	glycerol-3-phosphate dehydrogenase 2 (mitochondrial)
hsa-miR-487a	1	0	1	1	1	1	GCFC1	GC-rich sequence DNA-binding factor 1
hsa-miR-487a	0	0	1	1	1	1	PRKRA	protein kinase, interferon-inducible double stranded RNA dependent activator
hsa-miR-487a	1	0	1	0	0	0	SH3RF3	SH3 domain containing ring finger 3
hsa-miR-487a	0	0	1	0	0	0	CXXC1P1	CXXC finger protein 1 pseudogene 1
hsa-miR-487a	0	0	1	0	0	0	ZNF806	zinc finger protein 806
hsa-miR-487a	1	0	1	0	1	1	GATAD2B	GATA zinc finger domain containing 2B
hsa-miR-487a	0	0	1	1	1	1	RBM25	RNA binding motif protein 25
hsa-miR-487a	0	0	1	0	1	1	AGBL4	ATP/GTP binding protein-like 4
hsa-miR-487a	1	0	1	1	1	1	KANSL1	KAT8 regulatory NSL complex subunit 1
hsa-miR-487a	1	0	1	1	1	1	ARHGEF7	Rho guanine nucleotide exchange factor (GEF) 7
hsa-miR-487a	1	0	1	1	1	1	FAM222B	family with sequence similarity 222, member B
hsa-miR-487a	1	0	1	1	1	1	ZC3H11A	zinc finger CCCH-type containing 11A
hsa-miR-487a	0	0	1	1	1	1	VDAC1	voltage-dependent anion channel 1
hsa-miR-487a	1	0	1	1	1	1	GAPVD1	GTPase activating protein and VPS9 domains 1
hsa-miR-487a	1	0	1	1	1	1	LRP8	low density lipoprotein receptor-related protein 8, apolipoprotein e receptor
hsa-miR-487a	1	0	1	0	1	1	THRB	thyroid hormone receptor, beta
hsa-miR-487a	1	0	1	1	1	1	ETS2	v-ets erythroblastosis virus E26 oncogene homolog 2 (avian)
hsa-miR-487a	1	0	1	1	1	1	STIM2	stromal interaction molecule 2
hsa-miR-487a	1	0	1	1	1	1	CDV3	CDV3 homolog (mouse)
hsa-miR-487a	0	0	1	1	1	1	ATP9B	ATPase, class II, type 9B
hsa-miR-487a	1	0	1	1	1	1	ZCCHC2	zinc finger, CCHC domain containing 2
hsa-miR-487a	0	0	1	1	1	1	RGS14	regulator of G-protein signaling 14
hsa-miR-487a	0	0	1	1	1	1	FAM76A	family with sequence similarity 76, member A
hsa-miR-487a	0	0	1	1	1	1	SLFN13	schlafen family member 13
hsa-miR-487a	0	0	1	1	1	1	ARHGEF26	Rho guanine nucleotide exchange factor (GEF) 26
hsa-miR-487a	1	0	1	1	0	0	KCNC1	potassium voltage-gated channel, Shaw-related subfamily, member 1
hsa-miR-487a	1	0	1	1	1	1	PLEKHH1	pleckstrin homology domain containing, family H (with MyTH4 domain) member 1
hsa-miR-487a	0	0	1	0	0	0	LGALS17A	Charcot-Leyden crystal protein pseudogene
hsa-miR-487a	1	0	1	1	1	1	PHKB	phosphorylase kinase, beta
hsa-miR-487a	1	0	1	1	1	1	SMAP1	small ArfGAP 1
hsa-miR-487a	0	0	1	1	0	0	NMI	N-myc (and STAT) interactor
hsa-miR-487a	1	0	1	1	1	1	VPS54	vacuolar protein sorting 54 homolog (S. cerevisiae)
hsa-miR-487a	0	0	1	1	1	1	IDS	iduronate 2-sulfatase
hsa-miR-487a	1	0	1	1	1	1	KIF21A	kinesin family member 21A
hsa-miR-487a	0	0	1	1	1	1	C3orf67	chromosome 3 open reading frame 67
hsa-miR-487a	1	0	1	1	1	1	SEPHS1	selenophosphate synthetase 1
hsa-miR-487a	0	0	1	0	1	1	PRELID2	PRELI domain containing 2
hsa-miR-487a	0	0	1	1	1	1	MKX	mohawk homeobox
hsa-miR-487a	0	0	1	0	0	0	FAM95B1	family with sequence similarity 95, member B1
hsa-miR-487a	1	0	1	1	0	0	UBN2	ubinuclein 2
hsa-miR-487a	1	0	1	1	0	0	SMCHD1	structural maintenance of chromosomes flexible hinge domain containing 1
hsa-miR-487a	1	0	1	1	1	1	PIK3R1	phosphoinositide-3-kinase, regulatory subunit 1 (alpha)
hsa-miR-487a	0	0	1	1	1	1	CCDC132	coiled-coil domain containing 132
hsa-miR-487a	1	0	1	1	1	1	NCAN	neurocan
hsa-miR-487a	1	0	1	1	1	1	IBTK	inhibitor of Bruton agammaglobulinemia tyrosine kinase
hsa-miR-487a	1	0	1	0	1	1	GPR180	G protein-coupled receptor 180
hsa-miR-487a	1	0	1	1	1	1	ODF2	outer dense fiber of sperm tails 2
hsa-miR-487a	1	0	1	1	1	1	LRP2BP	LRP2 binding protein
hsa-miR-487a	0	0	1	1	1	1	SZT2	seizure threshold 2 homolog (mouse)
hsa-miR-487a	1	0	1	1	1	1	CLIP1	CAP-GLY domain containing linker protein 1
hsa-miR-487a	0	0	1	0	0	0	FLJ46361	deleted in malignant brain tumors 1 pseudogene
hsa-miR-487a	1	0	1	1	1	1	ATP8B4	ATPase, class I, type 8B, member 4
hsa-miR-487a	1	0	1	1	1	1	CEP97	centrosomal protein 97kDa
hsa-miR-487a	1	0	1	1	1	1	NEK3	NIMA (never in mitosis gene a)-related kinase 3
hsa-miR-487a	1	0	1	1	1	1	SMAD7	SMAD family member 7
hsa-miR-487a	1	0	1	0	1	1	TMEM106B	transmembrane protein 106B
hsa-miR-487a	0	0	1	1	1	1	RNF135	ring finger protein 135
hsa-miR-487a	0	0	1	1	1	1	PRSS16	protease, serine, 16 (thymus)
hsa-miR-487a	0	0	1	1	1	1	TFDP2	transcription factor Dp-2 (E2F dimerization partner 2)
hsa-miR-487a	0	0	1	1	1	1	ARIH1	ariadne homolog, ubiquitin-conjugating enzyme E2 binding protein, 1 (Drosophila)
hsa-miR-487a	1	0	1	1	1	1	SMAP2	small ArfGAP2
hsa-miR-487a	0	0	1	0	0	0	KIAA0913	KIAA0913
hsa-miR-487a	1	0	1	1	1	1	ERI1	exoribonuclease 1
hsa-miR-487a	1	0	1	1	1	1	KIAA1033	KIAA1033
hsa-miR-487a	1	0	1	1	1	1	GPBP1	GC-rich promoter binding protein 1
hsa-miR-487a	0	0	1	1	0	0	DOPEY1	dopey family member 1
hsa-miR-487a	1	0	1	1	1	1	USP45	ubiquitin specific peptidase 45
hsa-miR-487a	1	0	1	1	1	1	YTHDF3	YTH domain family, member 3
hsa-miR-487a	1	0	1	1	1	1	MIER1	mesoderm induction early response 1 homolog (Xenopus laevis)
hsa-miR-487a	1	0	1	1	1	1	KDM6A	lysine (K)-specific demethylase 6A
hsa-miR-487a	1	0	1	1	1	1	FAM126B	family with sequence similarity 126, member B
hsa-miR-487a	0	0	1	1	0	0	LETM2	leucine zipper-EF-hand containing transmembrane protein 2
hsa-miR-487a	0	0	1	1	1	1	SRSF11	serine/arginine-rich splicing factor 11
hsa-miR-487a	1	0	1	1	1	1	NFX1	nuclear transcription factor, X-box binding 1
hsa-miR-487a	1	0	1	1	1	1	MLL3	myeloid/lymphoid or mixed-lineage leukemia 3
hsa-miR-487a	1	0	1	0	1	1	MPP5	membrane protein, palmitoylated 5 (MAGUK p55 subfamily member 5)
hsa-miR-487a	1	0	1	0	1	1	STYX	serine/threonine/tyrosine interacting protein
hsa-miR-487a	1	0	1	1	0	0	PTAR1	protein prenyltransferase alpha subunit repeat containing 1
hsa-miR-487a	0	0	1	1	1	1	CYR61	cysteine-rich, angiogenic inducer, 61
hsa-miR-487a	1	0	1	1	1	1	FAM126A	family with sequence similarity 126, member A
hsa-miR-487a	0	0	1	0	0	0	LOC286135	uncharacterized LOC286135
hsa-miR-487a	1	0	1	1	1	1	CEP164	centrosomal protein 164kDa
hsa-miR-487a	1	0	1	1	1	1	NRP1	neuropilin 1
hsa-miR-487a	0	0	1	1	1	1	SOAT1	sterol O-acyltransferase 1
hsa-miR-487a	1	0	1	1	1	1	ZNF207	zinc finger protein 207
hsa-miR-487a	1	0	1	1	1	1	FAM76B	family with sequence similarity 76, member B
hsa-miR-487a	0	0	1	0	1	1	USO1	USO1 vesicle docking protein homolog (yeast)
hsa-miR-487a	1	0	1	1	1	1	RNF38	ring finger protein 38
hsa-miR-487a	1	0	1	1	1	1	IKZF2	IKAROS family zinc finger 2 (Helios)
hsa-miR-487a	1	0	1	1	1	1	KIAA0907	KIAA0907
hsa-miR-487a	0	0	1	1	1	1	CEP41	centrosomal protein 41kDa
hsa-miR-487a	0	0	1	1	0	0	ZYG11A	zyg-11 homolog A (C. elegans)
hsa-miR-487a	0	0	1	1	0	0	CCL4	chemokine (C-C motif) ligand 4
hsa-miR-487a	1	0	1	1	1	1	TAB3	TGF-beta activated kinase 1/MAP3K7 binding protein 3
hsa-miR-487a	0	0	1	0	1	1	ANKS1B	ankyrin repeat and sterile alpha motif domain containing 1B
hsa-miR-487a	0	0	1	1	1	1	GPR114	G protein-coupled receptor 114
hsa-miR-487a	0	0	1	1	1	1	PTGR2	prostaglandin reductase 2
hsa-miR-487a	1	0	1	1	1	1	SP3	Sp3 transcription factor
hsa-miR-487a	1	0	1	1	1	1	ARHGAP20	Rho GTPase activating protein 20
hsa-miR-487a	0	0	1	1	1	1	AICDA	activation-induced cytidine deaminase
hsa-miR-487a	1	0	1	0	1	1	LRAT	lecithin retinol acyltransferase (phosphatidylcholine--retinol O-acyltransferase)
hsa-miR-487a	0	0	1	1	1	1	C9orf78	chromosome 9 open reading frame 78
hsa-miR-487a	1	0	1	1	1	1	NTNG1	netrin G1
hsa-miR-487a	0	0	1	0	1	1	CCL4L2	chemokine (C-C motif) ligand 4-like 2
hsa-miR-487a	0	0	1	1	1	1	CCL4L1	chemokine (C-C motif) ligand 4-like 1
hsa-miR-487a	0	0	1	1	1	1	CDK20	cyclin-dependent kinase 20
hsa-miR-487a	0	0	1	1	1	1	CDH6	cadherin 6, type 2, K-cadherin (fetal kidney)
hsa-miR-487a	0	0	1	1	0	0	TMEM51	transmembrane protein 51
hsa-miR-487a	1	0	1	0	1	1	CGGBP1	CGG triplet repeat binding protein 1
hsa-miR-487a	1	0	1	1	1	1	U2SURP	U2 snRNP-associated SURP domain containing
hsa-miR-487a	1	0	1	1	0	0	SIGMAR1	sigma non-opioid intracellular receptor 1
hsa-miR-487a	1	0	1	1	1	1	GRIA2	glutamate receptor, ionotropic, AMPA 2
hsa-miR-487a	0	0	1	1	1	1	ZNF587	zinc finger protein 587
hsa-miR-487a	1	0	1	1	1	1	RBM7	RNA binding motif protein 7
hsa-miR-487a	0	0	1	1	0	0	USP19	ubiquitin specific peptidase 19
hsa-miR-487a	1	0	1	1	1	1	NRF1	nuclear respiratory factor 1
hsa-miR-487a	1	0	1	0	1	1	ARHGAP26	Rho GTPase activating protein 26
hsa-miR-487a	1	0	1	1	1	1	TMEM71	transmembrane protein 71
hsa-miR-487a	0	0	1	1	0	0	SLC22A9	solute carrier family 22 (organic anion transporter), member 9
hsa-miR-487a	0	0	1	1	1	1	CDC42SE2	CDC42 small effector 2
hsa-miR-487a	1	0	1	1	1	1	MRO	maestro
hsa-miR-487a	1	0	1	1	1	1	TIAL1	TIA1 cytotoxic granule-associated RNA binding protein-like 1
hsa-miR-487a	1	0	1	1	1	1	ELAVL2	ELAV (embryonic lethal, abnormal vision, Drosophila)-like 2 (Hu antigen B)
hsa-miR-487a	1	0	1	1	1	1	ZNF518A	zinc finger protein 518A
hsa-miR-487a	1	0	1	1	1	1	RAB5B	RAB5B, member RAS oncogene family
hsa-miR-487a	0	0	1	0	0	0	BCAS3	breast carcinoma amplified sequence 3
hsa-miR-487a	0	0	1	1	1	1	IL20RB	interleukin 20 receptor beta
hsa-miR-487a	1	0	1	1	1	1	TTC26	tetratricopeptide repeat domain 26
hsa-miR-487a	0	0	1	1	1	1	ZNF337	zinc finger protein 337
hsa-miR-487a	1	0	1	0	1	1	DDX3Y	DEAD (Asp-Glu-Ala-Asp) box polypeptide 3, Y-linked
hsa-miR-487a	1	0	1	1	1	1	NKAIN2	Na+/K+ transporting ATPase interacting 2
hsa-miR-487a	1	0	1	1	1	1	ZZZ3	zinc finger, ZZ-type containing 3
hsa-miR-487a	0	0	1	0	0	0	FAM201A	family with sequence similarity 201, member A
hsa-miR-487a	1	0	1	1	1	1	SMG7	smg-7 homolog, nonsense mediated mRNA decay factor (C. elegans)
hsa-miR-487a	1	0	1	1	1	1	HECTD2	HECT domain containing E3 ubiquitin protein ligase 2
hsa-miR-487a	1	0	1	1	1	1	MEIS1	Meis homeobox 1
hsa-miR-487a	1	0	1	0	1	1	CLDN12	claudin 12
hsa-miR-487a	1	0	1	1	0	0	TMEM131	transmembrane protein 131
hsa-miR-487a	1	0	1	1	1	1	DPP10	dipeptidyl-peptidase 10 (non-functional)
hsa-miR-487a	1	0	1	0	1	1	ARID2	AT rich interactive domain 2 (ARID, RFX-like)
hsa-miR-487a	0	0	1	0	0	0	LOC415056	uncharacterized LOC415056
hsa-miR-487a	0	0	1	1	0	0	CCDC152	coiled-coil domain containing 152
hsa-miR-487a	0	0	1	0	0	0	FLJ36000	uncharacterized FLJ36000
hsa-miR-487a	1	0	1	1	1	1	TIMP2	TIMP metallopeptidase inhibitor 2
hsa-miR-487a	0	0	1	0	0	0	LOC339622	uncharacterized LOC339622
hsa-miR-487a	0	0	1	1	1	1	PCMTD2	protein-L-isoaspartate (D-aspartate) O-methyltransferase domain containing 2
hsa-miR-487a	1	0	1	1	1	1	GNG2	guanine nucleotide binding protein (G protein), gamma 2
hsa-miR-487a	1	0	1	1	1	1	ROCK1	Rho-associated, coiled-coil containing protein kinase 1
hsa-miR-487a	1	0	1	1	1	1	CLOCK	clock homolog (mouse)
hsa-miR-487a	0	0	1	0	0	0	SOX2-OT	SOX2 overlapping transcript (non-protein coding)
hsa-miR-487a	0	0	1	1	1	1	NSUN7	NOP2/Sun domain family, member 7
hsa-miR-487a	0	0	1	0	0	0	LOC643837	uncharacterized LOC643837
hsa-miR-487a	1	0	1	1	1	1	AGAP3	ArfGAP with GTPase domain, ankyrin repeat and PH domain 3
hsa-miR-487a	1	0	1	1	1	1	RNF145	ring finger protein 145
hsa-miR-487a	1	0	1	0	1	1	PSD3	pleckstrin and Sec7 domain containing 3
hsa-miR-487a	1	0	1	1	1	1	BRD1	bromodomain containing 1
hsa-miR-487a	1	0	1	1	1	1	RMND5A	required for meiotic nuclear division 5 homolog A (S. cerevisiae)
hsa-miR-487a	1	0	1	1	1	1	KLHL28	kelch-like 28 (Drosophila)
hsa-miR-487a	0	0	1	1	1	1	HMGN2P46	high mobility group nucleosomal binding domain 2 pseudogene 46
hsa-miR-487a	0	0	1	0	1	1	ASAP2	ArfGAP with SH3 domain, ankyrin repeat and PH domain 2
hsa-miR-487a	1	0	1	1	1	1	ANXA4	annexin A4
hsa-miR-487a	0	0	1	1	1	1	SCLT1	sodium channel and clathrin linker 1
hsa-miR-487a	0	0	1	1	1	1	ZNF33B	zinc finger protein 33B
hsa-miR-487a	1	0	1	1	1	1	PDCD6IP	programmed cell death 6 interacting protein
hsa-miR-487a	0	0	1	0	0	0	PTGER4P2	prostaglandin E receptor 4 (subtype EP4) pseudogene 2
hsa-miR-487a	1	0	1	1	0	0	CHTOP	chromatin target of PRMT1
hsa-miR-487a	1	0	1	1	0	0	PLEKHG3	pleckstrin homology domain containing, family G (with RhoGef domain) member 3
hsa-miR-487a	1	0	1	1	1	1	WNT5A	wingless-type MMTV integration site family, member 5A
hsa-miR-487a	1	0	1	1	1	1	WNT10B	wingless-type MMTV integration site family, member 10B
hsa-miR-487a	0	0	1	0	0	0	TP53TG3B	TP53 target 3B
hsa-miR-487a	0	0	1	0	1	1	TP53TG3	TP53 target 3
hsa-miR-487a	1	0	1	0	1	1	VANGL2	vang-like 2 (van gogh, Drosophila)
hsa-miR-487a	1	0	1	0	1	1	KCNT2	potassium channel, subfamily T, member 2
hsa-miR-487a	0	0	1	1	1	1	MUC21	mucin 21, cell surface associated
hsa-miR-487a	1	0	1	1	1	1	PNISR	PNN-interacting serine/arginine-rich protein
hsa-miR-487a	0	0	1	0	0	0	TPTEP1	transmembrane phosphatase with tensin homology pseudogene 1
hsa-miR-487a	1	0	1	1	1	1	USP34	ubiquitin specific peptidase 34
hsa-miR-487a	1	0	1	1	1	1	MARCH6	membrane-associated ring finger (C3HC4) 6, E3 ubiquitin protein ligase
hsa-miR-487a	0	0	1	1	1	1	LRCH1	leucine-rich repeats and calponin homology (CH) domain containing 1
hsa-miR-487a	0	0	1	1	0	0	RGSL1	regulator of G-protein signaling like 1
hsa-miR-487a	0	0	1	1	0	0	PPAPDC1A	phosphatidic acid phosphatase type 2 domain containing 1A
hsa-miR-487a	0	0	1	0	0	0	KRT8P12	keratin 8 pseudogene 12
hsa-miR-487a	1	0	1	1	1	1	ZEB2	zinc finger E-box binding homeobox 2
hsa-miR-487a	1	0	1	1	1	1	ZMYM4	zinc finger, MYM-type 4
hsa-miR-487a	0	0	1	1	1	1	ABCA8	ATP-binding cassette, sub-family A (ABC1), member 8
hsa-miR-487a	0	0	1	1	1	1	UCHL5	ubiquitin carboxyl-terminal hydrolase L5
hsa-miR-487a	0	0	1	1	0	0	EFCAB11	EF-hand calcium binding domain 11
hsa-miR-487a	0	0	1	0	1	1	C14orf23	chromosome 14 open reading frame 23
hsa-miR-487a	1	0	1	1	1	1	SASH1	SAM and SH3 domain containing 1
hsa-miR-487a	0	0	1	1	1	1	FUCA2	fucosidase, alpha-L- 2, plasma
hsa-miR-487a	1	0	1	1	1	1	JPH1	junctophilin 1
hsa-miR-487a	0	0	1	1	1	1	PDZRN4	PDZ domain containing ring finger 4
hsa-miR-487a	1	0	1	0	1	1	CLASP2	cytoplasmic linker associated protein 2
hsa-miR-487a	0	0	1	1	1	1	COL6A3	collagen, type VI, alpha 3
hsa-miR-487a	0	0	1	0	1	1	PRH2	proline-rich protein HaeIII subfamily 2
hsa-miR-487a	1	0	1	0	1	1	GALNT4	UDP-N-acetyl-alpha-D-galactosamine:polypeptide N-acetylgalactosaminyltransferase 4 (GalNAc-T4)
hsa-miR-487a	0	0	1	1	1	1	C5orf45	chromosome 5 open reading frame 45
hsa-miR-487a	0	0	1	1	1	1	MLIP	muscular LMNA-interacting protein
hsa-miR-487a	1	0	1	1	1	1	CASP3	caspase 3, apoptosis-related cysteine peptidase
hsa-miR-487a	0	0	1	0	1	1	TYW5	tRNA-yW synthesizing protein 5
hsa-miR-487a	1	0	1	1	1	1	STARD13	StAR-related lipid transfer (START) domain containing 13
hsa-miR-487a	0	0	1	1	1	1	ZNF365	zinc finger protein 365
hsa-miR-487a	0	0	1	1	0	0	LRR1	leucine rich repeat protein 1
hsa-miR-487a	1	0	1	1	1	1	ATP6V1C1	ATPase, H+ transporting, lysosomal 42kDa, V1 subunit C1
hsa-miR-487a	1	0	1	1	1	1	ZNF711	zinc finger protein 711
hsa-miR-487a	1	0	1	1	1	1	DDAH1	dimethylarginine dimethylaminohydrolase 1
hsa-miR-487a	1	0	1	1	1	1	LCA5	Leber congenital amaurosis 5
hsa-miR-487a	0	0	1	1	1	1	CCNT2	cyclin T2
hsa-miR-487a	1	0	1	1	1	1	PTPRB	protein tyrosine phosphatase, receptor type, B
hsa-miR-487a	1	0	1	1	1	1	CORIN	corin, serine peptidase
hsa-miR-487a	1	0	1	0	1	1	TMEM184B	transmembrane protein 184B
hsa-miR-487a	1	0	1	1	1	1	NAV1	neuron navigator 1
hsa-miR-487a	1	0	1	1	1	1	C5orf24	chromosome 5 open reading frame 24
hsa-miR-487a	1	0	1	1	1	1	RDX	radixin
hsa-miR-487a	0	0	1	1	1	1	THSD4	thrombospondin, type I, domain containing 4
hsa-miR-487a	0	0	1	0	0	0	ZNRD1-AS1	ZNRD1 antisense RNA 1
hsa-miR-487a	1	0	1	1	1	1	WLS	wntless homolog (Drosophila)
hsa-miR-487a	1	0	1	1	1	1	CALD1	caldesmon 1
hsa-miR-487a	1	0	1	1	1	1	SGK3	serum/glucocorticoid regulated kinase family, member 3
hsa-miR-487a	1	0	1	1	1	1	CREB3L2	cAMP responsive element binding protein 3-like 2
hsa-miR-487a	1	0	1	1	1	1	NABP1	nucleic acid binding protein 1
hsa-miR-487a	0	0	1	0	0	0	RPS16P10	ribosomal protein S16 pseudogene 10
hsa-miR-487a	0	0	1	1	1	1	FANCL	Fanconi anemia, complementation group L
hsa-miR-487a	0	0	1	1	1	1	MMADHC	methylmalonic aciduria (cobalamin deficiency) cblD type, with homocystinuria
hsa-miR-487a	1	0	1	1	1	1	NEU1	sialidase 1 (lysosomal sialidase)
hsa-miR-487a	0	0	1	1	0	0	CGRRF1	cell growth regulator with ring finger domain 1
hsa-miR-487a	0	0	1	1	0	0	HAS1	hyaluronan synthase 1
hsa-miR-487a	0	0	1	1	0	0	RAD54B	RAD54 homolog B (S. cerevisiae)
hsa-miR-487a	0	0	1	1	1	1	CCDC91	coiled-coil domain containing 91
hsa-miR-487a	0	0	1	1	0	0	NARF	nuclear prelamin A recognition factor
hsa-miR-487a	1	0	1	0	1	1	RPS6KB1	ribosomal protein S6 kinase, 70kDa, polypeptide 1
hsa-miR-487a	1	0	1	1	1	1	TMEM248	transmembrane protein 248
hsa-miR-487a	0	0	1	1	1	1	PGAP2	post-GPI attachment to proteins 2
hsa-miR-487a	1	0	1	1	1	1	TMEM245	transmembrane protein 245
hsa-miR-487a	1	0	1	1	1	1	PIAS1	protein inhibitor of activated STAT, 1
hsa-miR-487a	1	0	1	0	1	1	IP6K1	inositol hexakisphosphate kinase 1
hsa-miR-487a	0	0	1	0	0	0	LOC677759	uncharacterized LOC677759
hsa-miR-487a	1	0	1	1	1	1	KCNIP4	Kv channel interacting protein 4
hsa-miR-487a	1	0	1	1	1	1	TLK2	tousled-like kinase 2
hsa-miR-487a	0	0	1	1	0	0	WDR43	WD repeat domain 43
hsa-miR-487a	1	0	1	1	1	1	NT5DC1	5'-nucleotidase domain containing 1
hsa-miR-487a	0	0	1	1	1	1	TMCO1	transmembrane and coiled-coil domains 1
hsa-miR-487a	0	0	1	1	1	1	MAEL	maelstrom homolog (Drosophila)
hsa-miR-487a	1	0	1	1	1	1	NFYB	nuclear transcription factor Y, beta
hsa-miR-487a	0	0	1	1	1	1	RCN2	reticulocalbin 2, EF-hand calcium binding domain
hsa-miR-487a	1	0	1	1	1	1	ARHGEF40	Rho guanine nucleotide exchange factor (GEF) 40
hsa-miR-487a	1	0	1	1	1	1	GDA	guanine deaminase
hsa-miR-487a	0	0	1	1	1	1	RNF166	ring finger protein 166
hsa-miR-487a	0	0	1	1	1	1	PLAC8	placenta-specific 8
hsa-miR-487a	1	0	1	0	1	1	CD47	CD47 molecule
hsa-miR-487a	0	0	1	1	1	1	PSMD9	proteasome (prosome, macropain) 26S subunit, non-ATPase, 9
hsa-miR-487a	0	0	1	1	1	1	RFESD	Rieske (Fe-S) domain containing
hsa-miR-487a	1	0	1	1	1	1	LHX9	LIM homeobox 9
hsa-miR-487a	0	0	1	1	1	1	TOP3B	topoisomerase (DNA) III beta
hsa-miR-487a	1	0	1	0	1	1	DNMT3A	DNA (cytosine-5-)-methyltransferase 3 alpha
hsa-miR-487a	0	0	1	0	0	0	FAM47E	family with sequence similarity 47, member E
hsa-miR-487a	0	0	1	1	1	1	MRPL42	mitochondrial ribosomal protein L42
hsa-miR-487a	1	0	1	1	1	1	HECW2	HECT, C2 and WW domain containing E3 ubiquitin protein ligase 2
hsa-miR-487a	1	0	1	0	1	1	SLC7A6	solute carrier family 7 (amino acid transporter light chain, y+L system), member 6
hsa-miR-487a	1	0	1	0	1	1	OSBPL8	oxysterol binding protein-like 8
hsa-miR-487a	1	0	1	0	1	1	ZNF652	zinc finger protein 652
hsa-miR-487a	1	0	1	1	1	1	PHF21B	PHD finger protein 21B
hsa-miR-487a	1	0	1	1	1	1	MAN2A2	mannosidase, alpha, class 2A, member 2
hsa-miR-487a	0	0	1	0	0	0	ANKRD30BP2	ankyrin repeat domain 30B pseudogene 2
hsa-miR-487a	1	0	1	1	0	0	DPY19L1	dpy-19-like 1 (C. elegans)
hsa-miR-487a	1	0	1	1	1	1	QKI	QKI, KH domain containing, RNA binding
hsa-miR-487a	0	0	1	1	1	1	P2RX7	purinergic receptor P2X, ligand-gated ion channel, 7
hsa-miR-487a	1	0	1	1	1	1	GLIS3	GLIS family zinc finger 3
hsa-miR-487a	0	0	1	1	1	1	BBOX1	butyrobetaine (gamma), 2-oxoglutarate dioxygenase (gamma-butyrobetaine hydroxylase) 1
hsa-miR-487a	0	0	1	0	0	0	LOC728377	Rho guanine nucleotide exchange factor (GEF) 5 pseudogene
hsa-miR-487a	1	0	1	1	1	1	BNC2	basonuclin 2
hsa-miR-487a	1	0	1	1	1	1	LGR4	leucine-rich repeat containing G protein-coupled receptor 4
hsa-miR-487a	0	0	1	1	1	1	KLRG1	killer cell lectin-like receptor subfamily G, member 1
hsa-miR-487a	0	0	1	1	1	1	MORC4	MORC family CW-type zinc finger 4
hsa-miR-487a	1	0	1	1	1	1	ATP2B2	ATPase, Ca++ transporting, plasma membrane 2
hsa-miR-487a	1	0	1	1	1	1	GRM1	glutamate receptor, metabotropic 1
hsa-miR-487a	1	0	1	0	1	1	ACVR2A	activin A receptor, type IIA
hsa-miR-487a	1	0	1	1	1	1	CPOX	coproporphyrinogen oxidase
hsa-miR-487a	1	0	1	1	1	1	FUCA1	fucosidase, alpha-L- 1, tissue
hsa-miR-487a	0	0	1	0	1	1	GBE1	glucan (1,4-alpha-), branching enzyme 1
hsa-miR-487a	1	0	1	0	1	1	GLI3	GLI family zinc finger 3
hsa-miR-487a	1	0	1	1	1	1	JAG1	jagged 1
hsa-miR-487a	0	0	1	1	0	0	KCNQ1	potassium voltage-gated channel, KQT-like subfamily, member 1
hsa-miR-487a	1	0	1	0	1	1	KIT	v-kit Hardy-Zuckerman 4 feline sarcoma viral oncogene homolog
hsa-miR-487a	0	0	1	1	1	1	LPL	lipoprotein lipase
hsa-miR-487a	0	0	1	1	1	1	MAOA	monoamine oxidase A
hsa-miR-487a	1	0	1	1	1	1	MITF	microphthalmia-associated transcription factor
hsa-miR-487a	1	0	1	1	1	1	OCRL	oculocerebrorenal syndrome of Lowe
hsa-miR-487a	1	0	1	1	1	1	SOX9	SRY (sex determining region Y)-box 9
hsa-miR-487a	1	0	1	1	1	1	SLC26A4	solute carrier family 26, member 4
hsa-miR-487a	1	0	1	1	1	1	RFX5	regulatory factor X, 5 (influences HLA class II expression)
hsa-miR-487a	0	0	1	1	0	0	OTC	ornithine carbamoyltransferase
hsa-miR-487a	1	0	1	1	1	1	DCX	doublecortin
hsa-miR-487a	0	0	1	1	1	1	C7	complement component 7
hsa-miR-487a	1	0	1	1	1	1	FASLG	Fas ligand (TNF superfamily, member 6)
hsa-miR-487a	0	0	1	1	1	1	AGTR2	angiotensin II receptor, type 2
hsa-miR-487a	0	0	1	1	1	1	ALDH1A1	aldehyde dehydrogenase 1 family, member A1
hsa-miR-487a	0	0	1	1	1	1	ALDH1B1	aldehyde dehydrogenase 1 family, member B1
hsa-miR-487a	1	0	1	1	1	1	DIO2	deiodinase, iodothyronine, type II
hsa-miR-487a	1	0	1	1	1	1	GABRG2	gamma-aminobutyric acid (GABA) A receptor, gamma 2
hsa-miR-487a	0	0	1	1	1	1	GAD2	glutamate decarboxylase 2 (pancreatic islets and brain, 65kDa)
hsa-miR-487a	0	0	1	1	1	1	HTR7	5-hydroxytryptamine (serotonin) receptor 7, adenylate cyclase-coupled
hsa-miR-487a	0	0	1	1	1	1	NPY2R	neuropeptide Y receptor Y2
hsa-miR-487a	0	0	1	1	1	1	PON3	paraoxonase 3
hsa-miR-487a	1	0	1	1	1	1	PPP3R1	protein phosphatase 3, regulatory subunit B, alpha
hsa-miR-487a	1	0	1	1	1	1	PTGDR	prostaglandin D2 receptor (DP)
hsa-miR-487a	1	0	1	1	1	1	PTGER2	prostaglandin E receptor 2 (subtype EP2), 53kDa
hsa-miR-487a	1	0	1	1	1	1	FAM13C	family with sequence similarity 13, member C
hsa-miR-487a	0	0	1	0	0	0	KLK2	kallikrein-related peptidase 2
hsa-miR-487a	1	0	1	1	1	1	AFTPH	aftiphilin
hsa-miR-487a	1	0	1	1	1	1	LEPR	leptin receptor
hsa-miR-487a	1	0	1	0	1	1	LIN28B	lin-28 homolog B (C. elegans)
hsa-miR-487a	0	0	1	1	1	1	CLEC2D	C-type lectin domain family 2, member D
hsa-miR-487a	0	0	1	1	1	1	SUMO1	SMT3 suppressor of mif two 3 homolog 1 (S. cerevisiae)
hsa-miR-487a	0	0	1	1	1	1	MAPKAP1	mitogen-activated protein kinase associated protein 1
hsa-miR-487a	1	0	1	1	1	1	BRWD1	bromodomain and WD repeat domain containing 1
hsa-miR-487a	1	0	1	0	1	1	CPLX2	complexin 2
hsa-miR-487a	1	0	1	1	1	1	CNOT4	CCR4-NOT transcription complex, subunit 4
hsa-miR-487a	1	0	1	1	1	1	RBPMS	RNA binding protein with multiple splicing
hsa-miR-487a	1	0	1	1	1	1	CUL4A	cullin 4A
hsa-miR-487a	0	0	1	1	1	1	SPIN3	spindlin family, member 3
hsa-miR-487a	1	0	1	1	1	1	BCL2L15	BCL2-like 15
hsa-miR-487a	1	0	1	1	1	1	ATP11C	ATPase, class VI, type 11C
hsa-miR-487a	1	0	1	1	1	1	SLC25A53	solute carrier family 25, member 53
hsa-miR-487a	0	0	1	1	1	1	SPIN4	spindlin family, member 4
hsa-miR-487a	0	0	1	1	1	1	C1orf192	chromosome 1 open reading frame 192
hsa-miR-487a	1	0	1	1	1	1	H3F3C	H3 histone, family 3C
hsa-miR-487a	1	0	1	0	1	1	SYT14L	synaptotagmin XIV-like
hsa-miR-487a	0	0	1	1	1	1	PURG	purine-rich element binding protein G
hsa-miR-487a	1	0	1	1	1	1	PHF6	PHD finger protein 6
hsa-miR-487a	1	0	1	1	1	1	TMCC1	transmembrane and coiled-coil domain family 1
hsa-miR-487a	0	0	1	1	0	0	ALDH18A1	aldehyde dehydrogenase 18 family, member A1
hsa-miR-487a	0	0	1	1	1	1	BTBD11	BTB (POZ) domain containing 11
hsa-miR-487a	1	0	1	0	1	1	BRCC3	BRCA1/BRCA2-containing complex, subunit 3
hsa-miR-487a	1	0	1	1	1	1	SERBP1	SERPINE1 mRNA binding protein 1
hsa-miR-487a	0	0	1	0	1	1	TM2D2	TM2 domain containing 2
hsa-miR-487a	1	0	1	0	1	1	CELF2	CUGBP, Elav-like family member 2
hsa-miR-487a	1	0	1	0	1	1	RAB12	RAB12, member RAS oncogene family
hsa-miR-487a	0	0	1	0	1	1	C6orf120	chromosome 6 open reading frame 120
hsa-miR-487a	0	0	1	1	1	1	TRMT11	tRNA methyltransferase 11 homolog (S. cerevisiae)
hsa-miR-487a	1	0	1	1	1	1	YTHDC1	YTH domain containing 1
hsa-miR-487a	0	0	1	1	1	1	CALML4	calmodulin-like 4
hsa-miR-487a	0	0	1	1	1	1	HNRNPH2	heterogeneous nuclear ribonucleoprotein H2 (H')
hsa-miR-487a	1	0	1	1	1	1	AMD1	adenosylmethionine decarboxylase 1
hsa-miR-487a	1	0	1	0	1	1	RYR2	ryanodine receptor 2 (cardiac)
hsa-miR-487a	0	0	1	1	1	1	CTLA4	cytotoxic T-lymphocyte-associated protein 4
hsa-miR-487a	1	0	1	1	1	1	AP1S3	adaptor-related protein complex 1, sigma 3 subunit
hsa-miR-487a	1	0	1	0	1	1	CREBZF	CREB/ATF bZIP transcription factor
hsa-miR-487a	1	0	1	1	1	1	MLLT4	myeloid/lymphoid or mixed-lineage leukemia (trithorax homolog, Drosophila); translocated to, 4
hsa-miR-487a	1	0	1	0	1	1	FAM133B	family with sequence similarity 133, member B
hsa-miR-487a	1	0	1	0	1	1	DCUN1D4	DCN1, defective in cullin neddylation 1, domain containing 4 (S. cerevisiae)
hsa-miR-487a	1	0	1	1	1	1	MTMR12	myotubularin related protein 12
hsa-miR-487a	1	0	1	1	1	1	PPP4R1	protein phosphatase 4, regulatory subunit 1
hsa-miR-487a	1	0	1	1	1	1	NSL1	NSL1, MIND kinetochore complex component, homolog (S. cerevisiae)
hsa-miR-487a	1	0	1	1	1	1	ERBB4	v-erb-a erythroblastic leukemia viral oncogene homolog 4 (avian)
hsa-miR-487a	1	0	1	1	1	1	KDM5A	lysine (K)-specific demethylase 5A
hsa-miR-487a	0	0	1	1	1	1	ZNF557	zinc finger protein 557
hsa-miR-487a	0	0	1	1	1	1	SLC6A4	solute carrier family 6 (neurotransmitter transporter, serotonin), member 4
hsa-miR-487a	1	0	1	1	1	1	HIPK3	homeodomain interacting protein kinase 3
hsa-miR-487a	1	0	1	1	1	1	C5orf43	chromosome 5 open reading frame 43
hsa-miR-487a	0	0	1	0	1	1	WTH3DI	RAB6C-like
hsa-miR-487a	1	0	1	1	1	1	SRSF1	serine/arginine-rich splicing factor 1
hsa-miR-487a	1	0	1	1	1	1	CUL4B	cullin 4B
hsa-miR-487a	0	0	1	1	1	1	HSF5	heat shock transcription factor family member 5
hsa-miR-487a	1	0	1	0	1	1	MEGF9	multiple EGF-like-domains 9
hsa-miR-487a	0	0	1	0	1	1	WIPF3	WAS/WASL interacting protein family, member 3
hsa-miR-487a	0	0	1	1	0	0	NEURL3	neuralized homolog 3 (Drosophila) pseudogene
hsa-miR-487a	0	0	1	0	0	0	CCDC150	coiled-coil domain containing 150
hsa-miR-487a	1	0	1	1	1	1	MGA	MAX gene associated
hsa-miR-487a	1	0	1	1	1	1	REPS2	RALBP1 associated Eps domain containing 2
hsa-miR-487a	1	0	1	0	1	1	SCN3A	sodium channel, voltage-gated, type III, alpha subunit
hsa-miR-487a	0	0	1	1	1	1	ACYP1	acylphosphatase 1, erythrocyte (common) type
hsa-miR-487a	1	0	1	1	1	1	ADAM10	ADAM metallopeptidase domain 10
hsa-miR-487a	0	0	1	1	1	1	PLIN2	perilipin 2
hsa-miR-487a	1	0	1	1	1	1	CAMK2D	calcium/calmodulin-dependent protein kinase II delta
hsa-miR-487a	0	0	1	1	1	1	TNFSF8	tumor necrosis factor (ligand) superfamily, member 8
hsa-miR-487a	1	0	1	1	1	1	CHKA	choline kinase alpha
hsa-miR-487a	1	0	1	0	1	1	CPD	carboxypeptidase D
hsa-miR-487a	0	0	1	1	0	0	CSNK2B	casein kinase 2, beta polypeptide
hsa-miR-487a	1	0	1	1	1	1	DYRK1A	dual-specificity tyrosine-(Y)-phosphorylation regulated kinase 1A
hsa-miR-487a	0	0	1	1	0	0	HSPB2	heat shock 27kDa protein 2
hsa-miR-487a	1	0	1	1	1	1	AHR	aryl hydrocarbon receptor
hsa-miR-487a	1	0	1	1	1	1	AQP4	aquaporin 4
hsa-miR-487a	1	0	1	0	1	1	ARCN1	archain 1
hsa-miR-487a	1	0	1	1	1	1	ARL4D	ADP-ribosylation factor-like 4D
hsa-miR-487a	0	0	1	1	1	1	RHOA	ras homolog family member A
hsa-miR-487a	1	0	1	0	1	1	ARNT	aryl hydrocarbon receptor nuclear translocator
hsa-miR-487a	1	0	1	1	1	1	ATP6V1A	ATPase, H+ transporting, lysosomal 70kDa, V1 subunit A
hsa-miR-487a	1	0	1	1	1	1	BAAT	bile acid CoA: amino acid N-acyltransferase (glycine N-choloyltransferase)
hsa-miR-487a	0	0	1	1	1	1	CALB2	calbindin 2
hsa-miR-487a	0	0	1	0	0	0	CPE	carboxypeptidase E
hsa-miR-487a	1	0	1	1	1	1	MASP1	mannan-binding lectin serine peptidase 1 (C4/C2 activating component of Ra-reactive factor)
hsa-miR-487a	1	0	1	1	1	1	DBT	dihydrolipoamide branched chain transacylase E2
hsa-miR-487a	1	0	1	1	1	1	HBEGF	heparin-binding EGF-like growth factor
hsa-miR-487a	1	0	1	1	1	1	EGR1	early growth response 1
hsa-miR-487a	1	0	1	1	1	1	FGF9	fibroblast growth factor 9 (glia-activating factor)
hsa-miR-487a	1	0	1	1	1	1	GAS1	growth arrest-specific 1
hsa-miR-487a	0	0	1	1	1	1	HLA-DOA	major histocompatibility complex, class II, DO alpha
hsa-miR-487a	0	0	1	0	0	0	HLA-DRB1	major histocompatibility complex, class II, DR beta 1
hsa-miR-487a	1	0	1	1	1	1	JAG2	jagged 2
hsa-miR-487a	1	0	1	1	1	1	KPNA3	karyopherin alpha 3 (importin alpha 4)
hsa-miR-487a	1	0	1	1	1	1	LY75	lymphocyte antigen 75
hsa-miR-487a	0	0	1	1	1	1	TACSTD2	tumor-associated calcium signal transducer 2
hsa-miR-487a	0	0	1	1	1	1	MTAP	methylthioadenosine phosphorylase
hsa-miR-487a	0	0	1	1	1	1	NID1	nidogen 1
hsa-miR-487a	1	0	1	1	1	1	PHF1	PHD finger protein 1
hsa-miR-487a	0	0	1	0	1	1	PMP2	peripheral myelin protein 2
hsa-miR-487a	1	0	1	1	1	1	PPP1CC	protein phosphatase 1, catalytic subunit, gamma isozyme
hsa-miR-487a	1	0	1	1	1	1	PPP2R1B	protein phosphatase 2, regulatory subunit A, beta
hsa-miR-487a	0	0	1	1	1	1	MAPK13	mitogen-activated protein kinase 13
hsa-miR-487a	1	0	1	1	1	1	PTPN2	protein tyrosine phosphatase, non-receptor type 2
hsa-miR-487a	0	0	1	1	1	1	PTPRR	protein tyrosine phosphatase, receptor type, R
hsa-miR-487a	1	0	1	0	1	1	SORT1	sortilin 1
hsa-miR-487a	1	0	1	1	1	1	SNAI2	snail homolog 2 (Drosophila)
hsa-miR-487a	1	0	1	1	1	1	SRPR	signal recognition particle receptor (docking protein)
hsa-miR-487a	1	0	1	0	1	1	STC1	stanniocalcin 1
hsa-miR-487a	1	0	1	1	1	1	SYN2	synapsin II
hsa-miR-487a	0	0	1	1	1	1	TAC1	tachykinin, precursor 1
hsa-miR-487a	0	0	1	1	1	1	TAF2	TAF2 RNA polymerase II, TATA box binding protein (TBP)-associated factor, 150kDa
hsa-miR-487a	1	0	1	1	1	1	TAF4	TAF4 RNA polymerase II, TATA box binding protein (TBP)-associated factor, 135kDa
hsa-miR-487a	1	0	1	1	1	1	TFAP2C	transcription factor AP-2 gamma (activating enhancer binding protein 2 gamma)
hsa-miR-487a	1	0	1	1	1	1	TOP1	topoisomerase (DNA) I
hsa-miR-487a	1	0	1	1	1	1	DEK	DEK oncogene
hsa-miR-487a	1	0	1	1	1	1	PDHX	pyruvate dehydrogenase complex, component X
hsa-miR-487a	0	0	1	1	1	1	BLZF1	basic leucine zipper nuclear factor 1
hsa-miR-487a	1	0	1	1	1	1	CDC14A	CDC14 cell division cycle 14 homolog A (S. cerevisiae)
hsa-miR-487a	1	0	1	0	1	1	IRS2	insulin receptor substrate 2
hsa-miR-487a	0	0	1	1	0	0	ADAM23	ADAM metallopeptidase domain 23
hsa-miR-487a	1	0	1	1	1	1	IQGAP1	IQ motif containing GTPase activating protein 1
hsa-miR-487a	1	0	1	1	1	1	PHOX2B	paired-like homeobox 2b
hsa-miR-487a	0	0	1	1	1	1	MPZL1	myelin protein zero-like 1
hsa-miR-487a	1	0	1	0	1	1	DGKB	diacylglycerol kinase, beta 90kDa
hsa-miR-487a	1	0	1	1	1	1	EFNB2	ephrin-B2
hsa-miR-487a	1	0	1	1	1	1	EYA4	eyes absent homolog 4 (Drosophila)
hsa-miR-487a	1	0	1	1	1	1	FGF12	fibroblast growth factor 12
hsa-miR-487a	1	0	1	1	1	1	SOCS6	suppressor of cytokine signaling 6
hsa-miR-487a	0	0	1	1	1	1	CARTPT	CART prepropeptide
hsa-miR-487a	1	0	1	1	1	1	ASTN1	astrotactin 1
hsa-miR-487a	1	0	1	1	1	1	DACH1	dachshund homolog 1 (Drosophila)
hsa-miR-487a	1	0	1	1	1	1	EGR3	early growth response 3
hsa-miR-487a	1	0	1	0	1	1	ETV5	ets variant 5
hsa-miR-487a	1	0	1	1	0	0	FIGF	c-fos induced growth factor (vascular endothelial growth factor D)
hsa-miR-487a	0	0	1	0	1	1	GALNT3	UDP-N-acetyl-alpha-D-galactosamine:polypeptide N-acetylgalactosaminyltransferase 3 (GalNAc-T3)
hsa-miR-487a	1	0	1	1	1	1	SNRNP40	small nuclear ribonucleoprotein 40kDa (U5)
hsa-miR-487a	1	0	1	1	1	1	AKAP7	A kinase (PRKA) anchor protein 7
hsa-miR-487a	0	0	1	0	1	1	DSC2	desmocollin 2
hsa-miR-487a	1	0	1	1	1	1	GABRE	gamma-aminobutyric acid (GABA) A receptor, epsilon
hsa-miR-487a	1	0	1	1	1	1	ATXN3	ataxin 3
hsa-miR-487a	1	0	1	1	1	1	MED13	mediator complex subunit 13
hsa-miR-487a	1	0	1	1	1	1	BMI1	BMI1 polycomb ring finger oncogene
hsa-miR-487a	1	0	1	1	1	1	FOXN3	forkhead box N3
hsa-miR-487a	1	0	1	1	1	1	GPM6A	glycoprotein M6A
hsa-miR-487a	0	0	1	1	1	1	GRPR	gastrin-releasing peptide receptor
hsa-miR-487a	1	0	1	1	1	1	H3F3B	H3 histone, family 3B (H3.3B)
hsa-miR-487a	1	0	1	1	1	1	PHF2	PHD finger protein 2
hsa-miR-487a	1	0	1	0	1	1	PRKAB2	protein kinase, AMP-activated, beta 2 non-catalytic subunit
hsa-miR-487a	1	0	1	1	1	1	AKT3	v-akt murine thymoma viral oncogene homolog 3 (protein kinase B, gamma)
hsa-miR-487a	1	0	1	1	1	1	IRS1	insulin receptor substrate 1
hsa-miR-487a	0	0	1	1	1	1	LMAN1	lectin, mannose-binding, 1
hsa-miR-487a	1	0	1	1	1	1	SMAD6	SMAD family member 6
hsa-miR-487a	1	0	1	1	1	1	NHLH2	nescient helix loop helix 2
hsa-miR-487a	1	0	1	1	1	1	EVI5	ecotropic viral integration site 5
hsa-miR-487a	0	0	1	1	1	1	TSPAN3	tetraspanin 3
hsa-miR-487a	1	0	1	0	1	1	TSPAN2	tetraspanin 2
hsa-miR-487a	1	0	1	1	1	1	SRRM1	serine/arginine repetitive matrix 1
hsa-miR-487a	0	0	1	1	1	1	SAP18	Sin3A-associated protein, 18kDa
hsa-miR-487a	0	0	1	1	1	1	IRF6	interferon regulatory factor 6
hsa-miR-487a	1	0	1	1	1	1	NFATC1	nuclear factor of activated T-cells, cytoplasmic, calcineurin-dependent 1
hsa-miR-487a	0	0	1	0	1	1	OAS3	2'-5'-oligoadenylate synthetase 3, 100kDa
hsa-miR-487a	1	0	1	1	1	1	PPP2R5E	protein phosphatase 2, regulatory subunit B', epsilon isoform
hsa-miR-487a	1	0	1	1	1	1	PRKAA1	protein kinase, AMP-activated, alpha 1 catalytic subunit
hsa-miR-487a	1	0	1	1	1	1	ZER1	zer-1 homolog (C. elegans)
hsa-miR-487a	0	0	1	1	1	1	SLC30A9	solute carrier family 30 (zinc transporter), member 9
hsa-miR-487a	1	0	1	1	1	1	SEMA3C	sema domain, immunoglobulin domain (Ig), short basic domain, secreted, (semaphorin) 3C
hsa-miR-487a	1	0	1	0	1	1	APPBP2	amyloid beta precursor protein (cytoplasmic tail) binding protein 2
hsa-miR-487a	0	0	1	1	0	0	CHERP	calcium homeostasis endoplasmic reticulum protein
hsa-miR-487a	1	0	1	1	1	1	HEXIM1	hexamethylene bis-acetamide inducible 1
hsa-miR-487a	0	0	1	1	1	1	ATP5L	ATP synthase, H+ transporting, mitochondrial Fo complex, subunit G
hsa-miR-487a	1	0	1	0	1	1	GNAI3	guanine nucleotide binding protein (G protein), alpha inhibiting activity polypeptide 3
hsa-miR-487a	0	0	1	0	1	1	SLC16A2	solute carrier family 16, member 2 (thyroid hormone transporter)
hsa-miR-487a	1	0	1	1	1	1	CTCF	CCCTC-binding factor (zinc finger protein)
hsa-miR-487a	0	0	1	1	1	1	PPP1R17	protein phosphatase 1, regulatory subunit 17
hsa-miR-487a	1	0	1	1	1	1	SPIN1	spindlin 1
hsa-miR-487a	1	0	1	1	1	1	BTG2	BTG family, member 2
hsa-miR-487a	0	0	1	1	1	1	PKIA	protein kinase (cAMP-dependent, catalytic) inhibitor alpha
hsa-miR-487a	0	0	1	1	1	1	TMED10	transmembrane emp24-like trafficking protein 10 (yeast)
hsa-miR-487a	0	0	1	1	1	1	RLN1	relaxin 1
hsa-miR-487a	1	0	1	1	1	1	RIT1	Ras-like without CAAX 1
hsa-miR-487a	1	0	1	1	1	1	RP2	retinitis pigmentosa 2 (X-linked recessive)
hsa-miR-487a	1	0	1	1	1	1	SKP1	S-phase kinase-associated protein 1
hsa-miR-487a	1	0	1	0	1	1	SLC5A3	solute carrier family 5 (sodium/myo-inositol cotransporter), member 3
hsa-miR-487a	1	0	1	1	1	1	HSPA13	heat shock protein 70kDa family, member 13
hsa-miR-487a	1	0	1	1	1	1	ADAMTS5	ADAM metallopeptidase with thrombospondin type 1 motif, 5
hsa-miR-487a	1	0	1	1	1	1	UBL3	ubiquitin-like 3
hsa-miR-487a	1	0	1	1	1	1	TMF1	TATA element modulatory factor 1
hsa-miR-487a	1	0	1	1	1	1	UTY	ubiquitously transcribed tetratricopeptide repeat gene, Y-linked
hsa-miR-487a	1	0	1	1	1	1	ZIC2	Zic family member 2
hsa-miR-487a	1	0	1	1	1	1	ZNF81	zinc finger protein 81
hsa-miR-487a	0	0	1	0	1	1	ZNF208	zinc finger protein 208
hsa-miR-487a	0	0	1	1	1	1	STXBP3	syntaxin binding protein 3
hsa-miR-487a	1	0	1	1	1	1	RNF13	ring finger protein 13
hsa-miR-487a	0	0	1	0	1	1	AP4E1	adaptor-related protein complex 4, epsilon 1 subunit
hsa-miR-487a	1	0	1	0	1	1	ZFPM2	zinc finger protein, multitype 2
hsa-miR-487a	1	0	1	1	1	1	APPL1	adaptor protein, phosphotyrosine interaction, PH domain and leucine zipper containing 1
hsa-miR-487a	1	0	1	1	1	1	KCNE1L	KCNE1-like
hsa-miR-487a	1	0	1	0	1	1	MYCBP	c-myc binding protein
hsa-miR-487a	0	0	1	0	1	1	TLL1	tolloid-like 1
hsa-miR-487a	1	0	1	1	1	1	ZNF281	zinc finger protein 281
hsa-miR-487a	0	0	1	1	1	1	N6AMT1	N-6 adenine-specific DNA methyltransferase 1 (putative)
hsa-miR-487a	1	0	1	1	1	1	PPARGC1A	peroxisome proliferator-activated receptor gamma, coactivator 1 alpha
hsa-miR-487a	1	0	1	1	1	1	LRP12	low density lipoprotein receptor-related protein 12
hsa-miR-487a	0	0	1	0	1	1	EMR2	egf-like module containing, mucin-like, hormone receptor-like 2
hsa-miR-487a	1	0	1	1	1	1	SOCS5	suppressor of cytokine signaling 5
hsa-miR-487a	1	0	1	1	1	1	ZNF770	zinc finger protein 770
hsa-miR-487a	0	0	1	1	1	1	CCDC113	coiled-coil domain containing 113
hsa-miR-487a	0	0	1	1	0	0	HSD17B8	hydroxysteroid (17-beta) dehydrogenase 8
hsa-miR-487a	1	0	1	0	1	1	ODZ1	odz, odd Oz/ten-m homolog 1 (Drosophila)
hsa-miR-487a	1	0	1	1	1	1	LEMD3	LEM domain containing 3
hsa-miR-487a	0	0	1	1	1	1	FAM162A	family with sequence similarity 162, member A
hsa-miR-487a	1	0	1	1	1	1	LYPD3	LY6/PLAUR domain containing 3
hsa-miR-487a	1	0	1	0	1	1	HUNK	hormonally up-regulated Neu-associated kinase
hsa-miR-487a	0	0	1	1	1	1	PSME4	proteasome (prosome, macropain) activator subunit 4
hsa-miR-487a	1	0	1	1	1	1	ULK2	unc-51-like kinase 2 (C. elegans)
hsa-miR-487a	0	0	1	1	1	1	FRMPD4	FERM and PDZ domain containing 4
hsa-miR-487a	1	0	1	0	1	1	SERTAD2	SERTA domain containing 2
hsa-miR-487a	0	0	1	0	1	1	DHCR24	24-dehydrocholesterol reductase
hsa-miR-487a	1	0	1	1	1	1	KIAA0753	KIAA0753
hsa-miR-487a	1	0	1	0	1	1	LPPR4	lipid phosphate phosphatase-related protein type 4
hsa-miR-487a	1	0	1	1	1	1	RNF44	ring finger protein 44
hsa-miR-487a	0	0	1	1	1	1	ADNP2	ADNP homeobox 2
hsa-miR-487a	1	0	1	1	1	1	CHSY1	chondroitin sulfate synthase 1
hsa-miR-487a	1	0	1	1	1	1	GPD1L	glycerol-3-phosphate dehydrogenase 1-like
hsa-miR-487a	1	0	1	1	1	1	PLCB1	phospholipase C, beta 1 (phosphoinositide-specific)
hsa-miR-487a	1	0	1	1	1	1	MYO1D	myosin ID
hsa-miR-487a	1	0	1	1	1	1	PDS5A	PDS5, regulator of cohesion maintenance, homolog A (S. cerevisiae)
hsa-miR-487a	1	0	1	0	1	1	KIAA1024	KIAA1024
hsa-miR-487a	1	0	1	1	1	1	RNF19A	ring finger protein 19A, E3 ubiquitin protein ligase
hsa-miR-487a	1	0	1	1	1	1	CAMSAP1	calmodulin regulated spectrin-associated protein 1
hsa-miR-487a	1	0	1	1	1	1	CNOT6	CCR4-NOT transcription complex, subunit 6
hsa-miR-487a	0	0	1	1	1	1	KBTBD2	kelch repeat and BTB (POZ) domain containing 2
hsa-miR-487a	0	0	1	1	1	1	TMEM87A	transmembrane protein 87A
hsa-miR-487a	1	0	1	0	1	1	GLCE	glucuronic acid epimerase
hsa-miR-487a	1	0	1	1	1	1	LRRTM2	leucine rich repeat transmembrane neuronal 2
hsa-miR-487a	1	0	1	1	1	1	AZIN1	antizyme inhibitor 1
hsa-miR-487a	0	0	1	1	0	0	PLEKHA8P1	pleckstrin homology domain containing, family A member 8 pseudogene 1
hsa-miR-487a	1	0	1	0	1	1	CNR1	cannabinoid receptor 1 (brain)
hsa-miR-487a	0	0	1	1	1	1	ZFR	zinc finger RNA binding protein
hsa-miR-487a	1	0	1	1	1	1	SNX9	sorting nexin 9
hsa-miR-487a	1	0	1	1	1	1	NLK	nemo-like kinase
hsa-miR-487a	0	0	1	1	1	1	CYB5R1	cytochrome b5 reductase 1
hsa-miR-487a	1	0	1	0	1	1	SELT	selenoprotein T
hsa-miR-487a	1	0	1	1	1	1	ARID4B	AT rich interactive domain 4B (RBP1-like)
hsa-miR-487a	0	0	1	1	1	1	CD244	CD244 molecule, natural killer cell receptor 2B4
hsa-miR-487a	0	0	1	1	0	0	CXorf26	chromosome X open reading frame 26
hsa-miR-487a	1	0	1	0	1	1	NT5DC3	5'-nucleotidase domain containing 3
hsa-miR-487a	1	0	1	1	1	1	MEX3C	mex-3 homolog C (C. elegans)
hsa-miR-487a	1	0	1	1	1	1	ZAK	sterile alpha motif and leucine zipper containing kinase AZK
hsa-miR-487a	1	0	1	0	1	1	KLHL3	kelch-like 3 (Drosophila)
hsa-miR-487a	1	0	1	0	1	1	UBE2Q1	ubiquitin-conjugating enzyme E2Q family member 1
hsa-miR-487a	1	0	1	1	1	1	ZC3H7B	zinc finger CCCH-type containing 7B
hsa-miR-487a	1	0	1	0	1	1	EIF2C4	eukaryotic translation initiation factor 2C, 4
hsa-miR-487a	0	0	1	0	1	1	GIPC2	GIPC PDZ domain containing family, member 2
hsa-miR-487a	0	0	1	1	1	1	ASPN	asporin
hsa-miR-487a	1	0	1	1	1	1	RNF125	ring finger protein 125, E3 ubiquitin protein ligase
hsa-miR-487a	1	0	1	1	1	1	FBXO34	F-box protein 34
hsa-miR-487a	1	0	1	0	1	1	SEPT11	septin 11
hsa-miR-487a	1	0	1	1	1	1	C20orf20	chromosome 20 open reading frame 20
hsa-miR-487a	1	0	1	1	1	1	BRF2	BRF2, subunit of RNA polymerase III transcription initiation factor, BRF1-like
hsa-miR-487a	1	0	1	0	1	1	LIN7C	lin-7 homolog C (C. elegans)
hsa-miR-487a	0	0	1	1	1	1	WDR33	WD repeat domain 33
hsa-miR-487a	0	0	1	1	1	1	BDP1	B double prime 1, subunit of RNA polymerase III transcription initiation factor IIIB
hsa-miR-487a	1	0	1	1	1	1	PAG1	phosphoprotein associated with glycosphingolipid microdomains 1
hsa-miR-487a	1	0	1	1	1	1	ASH1L	ash1 (absent, small, or homeotic)-like (Drosophila)
hsa-miR-487a	1	0	1	1	1	1	ETNK1	ethanolamine kinase 1
hsa-miR-487a	1	0	1	1	1	1	MLL5	myeloid/lymphoid or mixed-lineage leukemia 5 (trithorax homolog, Drosophila)
hsa-miR-487a	0	0	1	1	1	1	DHTKD1	dehydrogenase E1 and transketolase domain containing 1
hsa-miR-487a	1	0	1	0	1	1	ELMOD1	ELMO/CED-12 domain containing 1
hsa-miR-487a	0	0	1	1	1	1	RIN2	Ras and Rab interactor 2
hsa-miR-487a	1	0	1	1	1	1	EPB41L4B	erythrocyte membrane protein band 4.1 like 4B
hsa-miR-487a	0	0	1	1	1	1	FMN2	formin 2
hsa-miR-487a	0	0	1	1	1	1	TMEM167B	transmembrane protein 167B
hsa-miR-487a	1	0	1	1	1	1	PAK7	p21 protein (Cdc42/Rac)-activated kinase 7
hsa-miR-487a	0	0	1	1	0	0	ENTPD7	ectonucleoside triphosphate diphosphohydrolase 7
hsa-miR-487a	1	0	1	1	1	1	SLC24A3	solute carrier family 24 (sodium/potassium/calcium exchanger), member 3
hsa-miR-487a	1	0	1	0	1	1	FAM40B	family with sequence similarity 40, member B
hsa-miR-487a	1	0	1	0	1	1	SYT4	synaptotagmin IV
hsa-miR-487a	1	0	1	1	1	1	TSHZ3	teashirt zinc finger homeobox 3
hsa-miR-487a	1	0	1	1	1	1	ZFP14	zinc finger protein 14 homolog (mouse)
hsa-miR-487a	1	0	1	0	1	1	GPAM	glycerol-3-phosphate acyltransferase, mitochondrial
hsa-miR-487a	0	0	1	1	1	1	PPM1A	protein phosphatase, Mg2+/Mn2+ dependent, 1A
hsa-miR-487a	1	0	1	0	1	1	RAP2A	RAP2A, member of RAS oncogene family
hsa-miR-487a	1	0	1	1	1	1	HCN1	hyperpolarization activated cyclic nucleotide-gated potassium channel 1
hsa-miR-487a	0	0	1	1	1	1	SLC15A2	solute carrier family 15 (H+/peptide transporter), member 2
hsa-miR-487a	1	0	1	1	1	1	ADCY1	adenylate cyclase 1 (brain)
hsa-miR-487a	1	0	1	1	1	1	RTN1	reticulon 1
hsa-miR-487a	0	0	1	0	1	1	MS4A7	membrane-spanning 4-domains, subfamily A, member 7
hsa-miR-487a	1	0	1	1	1	1	FAM60A	family with sequence similarity 60, member A
hsa-miR-487a	1	0	1	1	1	1	SNX6	sorting nexin 6
hsa-miR-487a	1	0	1	1	1	1	TRIB2	tribbles homolog 2 (Drosophila)
hsa-miR-487a	1	0	1	0	1	1	TSPYL4	TSPY-like 4
hsa-miR-487a	1	0	1	1	1	1	SEC24A	SEC24 family, member A (S. cerevisiae)
hsa-miR-487a	0	0	1	1	1	1	ASCC3	activating signal cointegrator 1 complex subunit 3
hsa-miR-487a	1	0	1	1	1	1	PRRX1	paired related homeobox 1
hsa-miR-487a	1	0	1	1	1	1	FAM59A	family with sequence similarity 59, member A
hsa-miR-487a	1	0	1	1	1	1	S100PBP	S100P binding protein
hsa-miR-487a	1	0	1	1	1	1	C6orf106	chromosome 6 open reading frame 106
hsa-miR-487a	1	0	1	1	1	1	RFX7	regulatory factor X, 7
hsa-miR-487a	1	0	1	0	1	1	NOTCH2	notch 2
hsa-miR-487a	1	0	1	1	1	1	CDC73	cell division cycle 73, Paf1/RNA polymerase II complex component, homolog (S. cerevisiae)
hsa-miR-487a	1	0	1	1	1	1	MUL1	mitochondrial E3 ubiquitin protein ligase 1
hsa-miR-487a	0	0	1	0	1	1	C1orf115	chromosome 1 open reading frame 115
hsa-miR-487a	1	0	1	1	1	1	C15orf29	chromosome 15 open reading frame 29
hsa-miR-487a	0	0	1	1	0	0	RNF122	ring finger protein 122
hsa-miR-487a	1	0	1	1	1	1	CEP76	centrosomal protein 76kDa
hsa-miR-487a	1	0	1	1	1	1	PROSER1	proline and serine rich 1
hsa-miR-487a	1	0	1	1	1	1	JHDM1D	jumonji C domain containing histone demethylase 1 homolog D (S. cerevisiae)
hsa-miR-487a	1	0	1	0	1	1	SETD7	SET domain containing (lysine methyltransferase) 7
hsa-miR-487a	1	0	1	1	1	1	TMX1	thioredoxin-related transmembrane protein 1
hsa-miR-487a	1	0	1	1	1	1	SGPP1	sphingosine-1-phosphate phosphatase 1
hsa-miR-487a	1	0	1	0	1	1	LBH	limb bud and heart development homolog (mouse)
hsa-miR-487a	1	0	1	1	1	1	GABARAPL1	GABA(A) receptor-associated protein like 1
hsa-miR-487a	0	0	1	1	1	1	COG3	component of oligomeric golgi complex 3
hsa-miR-487a	1	0	1	1	1	1	SOX7	SRY (sex determining region Y)-box 7
hsa-miR-487a	1	0	1	1	1	1	ANTXR1	anthrax toxin receptor 1
hsa-miR-487a	1	0	1	0	1	1	FAR1	fatty acyl CoA reductase 1
hsa-miR-487a	0	0	1	1	1	1	ZMYND12	zinc finger, MYND-type containing 12
hsa-miR-487a	1	0	1	1	1	1	ZDHHC18	zinc finger, DHHC-type containing 18
hsa-miR-487a	0	0	1	1	0	0	NICN1	nicolin 1
hsa-miR-487a	0	0	1	1	1	1	CHAMP1	chromosome alignment maintaining phosphoprotein 1
hsa-miR-487a	0	0	1	1	1	1	MGARP	mitochondria-localized glutamic acid-rich protein
hsa-miR-487a	1	0	1	1	1	1	RBBP6	retinoblastoma binding protein 6
hsa-miR-487a	1	0	1	0	1	1	PPP1R15B	protein phosphatase 1, regulatory subunit 15B
hsa-miR-487a	0	0	1	1	1	1	ALG10	asparagine-linked glycosylation 10, alpha-1,2-glucosyltransferase homolog (S. pombe)
hsa-miR-487a	1	0	1	0	1	1	EAF1	ELL associated factor 1
hsa-miR-487a	0	0	1	1	1	1	ZIC5	Zic family member 5
hsa-miR-487a	1	0	1	0	1	1	PURB	purine-rich element binding protein B
hsa-miR-487a	1	0	1	1	1	1	FOXQ1	forkhead box Q1
hsa-miR-487a	1	0	1	0	1	1	FAM125B	family with sequence similarity 125, member B
hsa-miR-487a	1	0	1	1	0	0	FCHSD1	FCH and double SH3 domains 1
hsa-miR-487a	1	0	1	1	1	1	EPT1	ethanolaminephosphotransferase 1 (CDP-ethanolamine-specific)
hsa-miR-487a	1	0	1	1	1	1	SYS1	SYS1 Golgi-localized integral membrane protein homolog (S. cerevisiae)
hsa-miR-487a	1	0	1	0	1	1	TMEM123	transmembrane protein 123
hsa-miR-487a	1	0	1	0	1	1	CCND1	cyclin D1
hsa-miR-487a	0	0	1	1	1	1	PPP4R4	protein phosphatase 4, regulatory subunit 4
hsa-miR-487a	0	0	1	1	1	1	CLEC4D	C-type lectin domain family 4, member D
hsa-miR-487a	1	0	1	1	0	0	UNC5A	unc-5 homolog A (C. elegans)
hsa-miR-487a	1	0	1	1	1	1	BMPER	BMP binding endothelial regulator
hsa-miR-487a	0	0	1	1	1	1	RFX3	regulatory factor X, 3 (influences HLA class II expression)
hsa-miR-487a	1	0	1	0	1	1	NUS1	nuclear undecaprenyl pyrophosphate synthase 1 homolog (S. cerevisiae)
hsa-miR-487a	1	0	1	0	1	1	SP1	Sp1 transcription factor
hsa-miR-487a	1	0	1	0	1	1	FCHO2	FCH domain only 2
hsa-miR-487a	0	0	1	1	1	1	KCNH5	potassium voltage-gated channel, subfamily H (eag-related), member 5
hsa-miR-487a	1	0	1	0	1	1	CNOT6L	CCR4-NOT transcription complex, subunit 6-like
hsa-miR-487a	0	0	1	0	0	0	CAPN13	calpain 13
hsa-miR-487a	1	0	1	1	1	1	ZMAT2	zinc finger, matrin-type 2
hsa-miR-487a	0	0	1	1	1	1	RANBP3L	RAN binding protein 3-like
hsa-miR-487a	1	0	1	1	1	1	YPEL4	yippee-like 4 (Drosophila)
hsa-miR-487a	0	0	1	0	1	1	UBLCP1	ubiquitin-like domain containing CTD phosphatase 1
hsa-miR-487a	1	0	1	1	1	1	MAX	MYC associated factor X
hsa-miR-487a	0	0	1	1	1	1	DNAJC19	DnaJ (Hsp40) homolog, subfamily C, member 19
hsa-miR-487a	0	0	1	0	1	1	NUDCD2	NudC domain containing 2
hsa-miR-487a	0	0	1	1	0	0	C10orf35	chromosome 10 open reading frame 35
hsa-miR-487a	1	0	1	1	1	1	ABTB2	ankyrin repeat and BTB (POZ) domain containing 2
hsa-miR-487a	1	0	1	0	1	1	MTPN	myotrophin
hsa-miR-487a	1	0	1	1	1	1	BOD1L1	biorientation of chromosomes in cell division 1-like 1
hsa-miR-487a	0	0	1	1	1	1	TCEAL7	transcription elongation factor A (SII)-like 7
hsa-miR-487a	0	0	1	1	1	1	DEPDC4	DEP domain containing 4
hsa-miR-487a	1	0	1	1	1	1	TMEM178A	transmembrane protein 178A
hsa-miR-487a	1	0	1	1	1	1	FAM81A	family with sequence similarity 81, member A
hsa-miR-487a	1	0	1	1	1	1	ZSCAN29	zinc finger and SCAN domain containing 29
hsa-miR-487a	1	0	1	0	1	1	RWDD4	RWD domain containing 4
hsa-miR-487a	1	0	1	1	1	1	ABCA13	ATP-binding cassette, sub-family A (ABC1), member 13
hsa-miR-487a	1	0	1	1	1	1	PDIK1L	PDLIM1 interacting kinase 1 like
hsa-miR-487a	1	0	1	1	1	1	TMEM161B	transmembrane protein 161B
hsa-miR-487a	1	0	1	1	1	1	CREBRF	CREB3 regulatory factor
hsa-miR-487a	0	0	1	1	1	1	SALL3	sal-like 3 (Drosophila)
hsa-miR-487a	1	0	1	1	1	1	RC3H1	ring finger and CCCH-type domains 1
hsa-miR-487a	1	0	1	1	1	1	MOB1B	MOB kinase activator 1B
hsa-miR-487a	1	0	1	1	1	1	CNKSR3	CNKSR family member 3
hsa-miR-487a	1	0	1	1	1	1	OLIG3	oligodendrocyte transcription factor 3
hsa-miR-487a	1	0	1	1	1	1	INADL	InaD-like (Drosophila)
hsa-miR-487a	1	0	1	1	1	1	PPM1B	protein phosphatase, Mg2+/Mn2+ dependent, 1B
hsa-miR-487a	0	0	1	1	1	1	ZNF831	zinc finger protein 831
hsa-miR-487a	1	0	1	1	1	1	SPRED2	sprouty-related, EVH1 domain containing 2
hsa-miR-487a	0	0	1	1	1	1	ZNF428	zinc finger protein 428
hsa-miR-487a	1	0	1	0	1	1	RNF144B	ring finger protein 144B
hsa-miR-487a	1	0	1	1	1	1	SPTY2D1	SPT2, Suppressor of Ty, domain containing 1 (S. cerevisiae)
hsa-miR-487a	1	0	1	0	1	1	SLC16A9	solute carrier family 16, member 9 (monocarboxylic acid transporter 9)
hsa-miR-487a	1	0	1	0	1	1	NRK	Nik related kinase
hsa-miR-487a	0	0	1	1	0	0	GALNTL4	UDP-N-acetyl-alpha-D-galactosamine:polypeptide N-acetylgalactosaminyltransferase-like 4
hsa-miR-487a	1	0	1	0	1	1	ZC3H6	zinc finger CCCH-type containing 6
hsa-miR-487a	1	0	1	0	0	0	RAB15	RAB15, member RAS oncogene family
hsa-miR-487a	1	0	1	1	1	1	PTGER3	prostaglandin E receptor 3 (subtype EP3)
hsa-miR-487a	0	0	1	1	1	1	ZPBP2	zona pellucida binding protein 2
hsa-miR-487a	1	0	1	0	1	1	PRICKLE2	prickle homolog 2 (Drosophila)
hsa-miR-487a	1	0	1	1	1	1	CXCL12	chemokine (C-X-C motif) ligand 12
hsa-miR-487a	1	0	1	0	1	1	CAPRIN1	cell cycle associated protein 1
hsa-miR-487a	1	0	1	1	1	1	MOG	myelin oligodendrocyte glycoprotein
hsa-miR-487a	1	0	1	1	1	1	ATRNL1	attractin-like 1
hsa-miR-487a	1	0	1	0	1	1	NCKAP5	NCK-associated protein 5
hsa-miR-487a	1	0	1	1	1	1	RAPH1	Ras association (RalGDS/AF-6) and pleckstrin homology domains 1
hsa-miR-487a	0	0	1	0	0	0	SNORD55	small nucleolar RNA, C/D box 55
hsa-miR-487a	0	0	1	0	0	0	TOP1P2	topoisomerase (DNA) I pseudogene 2
hsa-miR-487a	0	0	1	0	0	0	SNORD108	small nucleolar RNA, C/D box 108
hsa-miR-487a	0	0	1	0	0	0	PAR5	Prader-Willi/Angelman syndrome-5
hsa-miR-487a	0	0	1	0	0	0	ANXA2P3	annexin A2 pseudogene 3
hsa-miR-487a	0	0	1	0	0	0	MIR155HG	MIR155 host gene (non-protein coding)
hsa-miR-487a	0	0	1	0	0	0	TTTY23	testis-specific transcript, Y-linked 23 (non-protein coding)
hsa-miR-487a	0	0	1	0	0	0	TTTY15	testis-specific transcript, Y-linked 15 (non-protein coding)
hsa-miR-487a	0	0	1	0	0	0	SUMO1P1	SUMO1 pseudogene 1
hsa-miR-487a	0	0	1	0	0	0	NXF4	nuclear RNA export factor 4 pseudogene
hsa-miR-487a	0	0	1	0	0	0	TOP1P1	topoisomerase (DNA) I pseudogene 1
hsa-miR-487a	0	0	1	0	0	0	DGCR5	DiGeorge syndrome critical region gene 5 (non-protein coding)
hsa-miR-487a	0	0	1	0	0	0	HTR7P1	5-hydroxytryptamine (serotonin) receptor 7 pseudogene 1
hsa-miR-487a	0	0	1	0	0	0	SEPHS1P1	selenophosphate synthetase 1 pseudogene 1
hsa-miR-487a	0	0	1	0	0	0	TMED10P1	transmembrane emp24-like trafficking protein 10 (yeast) pseudogene 1
hsa-miR-487a	0	0	1	0	0	0	MALAT1	metastasis associated lung adenocarcinoma transcript 1 (non-protein coding)
hsa-miR-487a	0	0	1	0	0	0	DUSP5P	dual specificity phosphatase 5 pseudogene
hsa-miR-487a	0	0	1	0	0	0	SCARNA16	small Cajal body-specific RNA 16
hsa-miR-487a	0	0	1	0	0	0	SNORD7	small nucleolar RNA, C/D box 7
hsa-miR-487a	0	0	1	0	0	0	NBR2	neighbor of BRCA1 gene 2 (non-protein coding)
hsa-miR-487a	1	0	1	1	1	1	TRIO	trio Rho guanine nucleotide exchange factor
hsa-miR-487a	1	0	1	1	1	1	CFTR	cystic fibrosis transmembrane conductance regulator (ATP-binding cassette sub-family C, member 7)
hsa-miR-487a	0	0	1	1	1	1	CYP51A1	cytochrome P450, family 51, subfamily A, polypeptide 1
hsa-miR-487a	0	0	0	1	1	1	CCL18	chemokine (C-C motif) ligand 18 (pulmonary and activation-regulated)
hsa-miR-487a	0	0	1	1	1	1	CRY1	cryptochrome 1 (photolyase-like)
hsa-miR-487a	1	0	1	1	0	0	PLEKHG6	pleckstrin homology domain containing, family G (with RhoGef domain) member 6
hsa-miR-487a	0	0	1	1	0	0	RWDD2A	RWD domain containing 2A
hsa-miR-487a	0	0	1	1	1	1	NSMAF	neutral sphingomyelinase (N-SMase) activation associated factor
hsa-miR-487a	0	0	0	1	1	1	MRI1	methylthioribose-1-phosphate isomerase homolog (S. cerevisiae)
hsa-miR-487a	1	0	1	1	1	1	CLDN11	claudin 11
hsa-miR-487a	1	0	1	1	1	1	QSER1	glutamine and serine rich 1
hsa-miR-487a	0	0	0	1	1	1	PDCD2	programmed cell death 2
hsa-miR-487a	1	0	1	1	1	1	OSBPL6	oxysterol binding protein-like 6
hsa-miR-487a	0	0	1	1	0	0	HSPB11	heat shock protein family B (small), member 11
hsa-miR-487a	0	0	0	1	0	0	IGSF9	immunoglobulin superfamily, member 9
hsa-miR-487a	1	0	1	1	1	1	TRMT6	tRNA methyltransferase 6 homolog (S. cerevisiae)
hsa-miR-487a	0	0	1	1	0	0	SPAG7	sperm associated antigen 7
hsa-miR-487a	0	0	0	1	0	0	RPGRIP1	retinitis pigmentosa GTPase regulator interacting protein 1
hsa-miR-487a	0	0	0	1	1	1	BIK	BCL2-interacting killer (apoptosis-inducing)
hsa-miR-487a	0	0	0	1	1	1	PNPLA3	patatin-like phospholipase domain containing 3
hsa-miR-487a	1	0	1	1	0	0	ERH	enhancer of rudimentary homolog (Drosophila)
hsa-miR-487a	0	0	1	1	1	1	CSTF1	cleavage stimulation factor, 3' pre-RNA, subunit 1, 50kDa
hsa-miR-487a	1	0	1	1	1	1	PXMP4	peroxisomal membrane protein 4, 24kDa
hsa-miR-487a	0	0	0	1	0	0	MLNR	motilin receptor
hsa-miR-487a	0	0	1	1	0	0	WFDC1	WAP four-disulfide core domain 1
hsa-miR-487a	0	0	1	1	1	1	RP1	retinitis pigmentosa 1 (autosomal dominant)
hsa-miR-487a	0	0	1	1	1	1	RIPK2	receptor-interacting serine-threonine kinase 2
hsa-miR-487a	0	0	0	1	1	1	TGFB1	transforming growth factor, beta 1
hsa-miR-487a	0	0	0	1	0	0	SLC5A5	solute carrier family 5 (sodium iodide symporter), member 5
hsa-miR-487a	0	0	0	1	0	0	HSD17B1	hydroxysteroid (17-beta) dehydrogenase 1
hsa-miR-487a	0	0	1	1	1	1	IL2	interleukin 2
hsa-miR-487a	0	0	1	1	1	1	USP5	ubiquitin specific peptidase 5 (isopeptidase T)
hsa-miR-487a	0	0	1	1	1	1	CMAS	cytidine monophosphate N-acetylneuraminic acid synthetase
hsa-miR-487a	0	0	1	1	0	0	MLH1	mutL homolog 1, colon cancer, nonpolyposis type 2 (E. coli)
hsa-miR-487a	0	0	1	1	1	1	EHHADH	enoyl-CoA, hydratase/3-hydroxyacyl CoA dehydrogenase
hsa-miR-487a	0	0	1	1	1	1	HES1	hairy and enhancer of split 1, (Drosophila)
hsa-miR-487a	0	0	0	1	0	0	CYB561D2	cytochrome b-561 domain containing 2
hsa-miR-487a	0	0	1	1	1	1	NEK4	NIMA (never in mitosis gene a)-related kinase 4
hsa-miR-487a	0	0	1	1	1	1	HEATR5B	HEAT repeat containing 5B
hsa-miR-487a	1	0	1	1	0	0	TMSB10	thymosin beta 10
hsa-miR-487a	1	0	1	1	1	1	GCA	grancalcin, EF-hand calcium binding protein
hsa-miR-487a	0	0	1	1	1	1	TMEM59	transmembrane protein 59
hsa-miR-487a	0	0	1	1	0	0	EBNA1BP2	EBNA1 binding protein 2
hsa-miR-487a	0	0	0	1	0	0	C2orf40	chromosome 2 open reading frame 40
hsa-miR-487a	0	0	1	1	1	1	C14orf45	chromosome 14 open reading frame 45
hsa-miR-487a	0	0	1	1	1	1	MLH3	mutL homolog 3 (E. coli)
hsa-miR-487a	0	0	0	1	0	0	MTERFD3	MTERF domain containing 3
hsa-miR-487a	0	0	1	1	0	0	CHRNA2	cholinergic receptor, nicotinic, alpha 2 (neuronal)
hsa-miR-487a	1	0	1	1	1	1	RDH10	retinol dehydrogenase 10 (all-trans)
hsa-miR-487a	0	0	1	1	1	1	SRGN	serglycin
hsa-miR-487a	0	0	0	1	0	0	HMGB1P1	high mobility group box 1 pseudogene 1
hsa-miR-487a	0	0	1	1	0	0	WFDC3	WAP four-disulfide core domain 3
hsa-miR-487a	0	0	1	1	0	0	KCNK17	potassium channel, subfamily K, member 17
hsa-miR-487a	0	0	0	1	1	1	TRIM51	tripartite motif-containing 51
hsa-miR-487a	0	0	1	1	0	0	NUP85	nucleoporin 85kDa
hsa-miR-487a	0	0	0	1	0	0	S1PR4	sphingosine-1-phosphate receptor 4
hsa-miR-487a	1	0	1	1	0	0	HOXD9	homeobox D9
hsa-miR-487a	1	0	1	1	1	1	HOXD10	homeobox D10
hsa-miR-487a	1	0	1	1	1	1	IVD	isovaleryl-CoA dehydrogenase
hsa-miR-487a	0	0	0	1	1	1	AP1M2	adaptor-related protein complex 1, mu 2 subunit
hsa-miR-487a	0	0	1	1	0	0	NGDN	neuroguidin, EIF4E binding protein
hsa-miR-487a	0	0	1	1	0	0	SAG	S-antigen; retina and pineal gland (arrestin)
hsa-miR-487a	0	0	1	1	0	0	BPIFB1	BPI fold containing family B, member 1
hsa-miR-487a	1	0	0	1	1	1	HAUS8	HAUS augmin-like complex, subunit 8
hsa-miR-487a	0	0	0	1	1	1	ZCCHC9	zinc finger, CCHC domain containing 9
hsa-miR-487a	0	0	1	1	0	0	DPH2	DPH2 homolog (S. cerevisiae)
hsa-miR-487a	0	0	0	1	1	1	RARRES3	retinoic acid receptor responder (tazarotene induced) 3
hsa-miR-487a	1	0	1	1	1	1	ARNTL	aryl hydrocarbon receptor nuclear translocator-like
hsa-miR-487a	0	0	1	1	1	1	COX16	COX16 cytochrome c oxidase assembly homolog (S. cerevisiae)
hsa-miR-487a	0	0	1	1	0	0	EMC7	ER membrane protein complex subunit 7
hsa-miR-487a	1	0	1	1	0	0	TIMM10	translocase of inner mitochondrial membrane 10 homolog (yeast)
hsa-miR-487a	0	0	1	1	1	1	MRAP2	melanocortin 2 receptor accessory protein 2
hsa-miR-487a	0	0	1	1	1	1	AKIRIN2	akirin 2
hsa-miR-487a	0	0	1	1	1	1	ARHGEF25	Rho guanine nucleotide exchange factor (GEF) 25
hsa-miR-487a	0	0	1	1	0	0	SLC26A10	solute carrier family 26, member 10
hsa-miR-487a	1	0	1	1	0	0	TTLL4	tubulin tyrosine ligase-like family, member 4
hsa-miR-487a	0	0	1	1	1	1	NDUFB5	NADH dehydrogenase (ubiquinone) 1 beta subcomplex, 5, 16kDa
hsa-miR-487a	0	0	1	1	1	1	TUBB2B	tubulin, beta 2B class IIb
hsa-miR-487a	1	0	1	1	1	1	ARHGAP29	Rho GTPase activating protein 29
hsa-miR-487a	0	0	1	1	1	1	RTCA	RNA 3'-terminal phosphate cyclase
hsa-miR-487a	1	0	1	1	1	1	MSMO1	methylsterol monooxygenase 1
hsa-miR-487a	0	0	1	1	1	1	TM9SF1	transmembrane 9 superfamily member 1
hsa-miR-487a	0	0	1	1	1	1	KDM2B	lysine (K)-specific demethylase 2B
hsa-miR-487a	0	0	1	1	1	1	WDR59	WD repeat domain 59
hsa-miR-487a	1	0	1	1	1	1	RNMT	RNA (guanine-7-) methyltransferase
hsa-miR-487a	0	0	1	1	1	1	CSPP1	centrosome and spindle pole associated protein 1
hsa-miR-487a	0	0	1	1	0	0	CD33	CD33 molecule
hsa-miR-487a	0	0	1	1	1	1	PRDX1	peroxiredoxin 1
hsa-miR-487a	1	0	1	1	1	1	CSE1L	CSE1 chromosome segregation 1-like (yeast)
hsa-miR-487a	0	0	1	1	0	0	NOVA2	neuro-oncological ventral antigen 2
hsa-miR-487a	0	0	1	1	0	0	AP2S1	adaptor-related protein complex 2, sigma 1 subunit
hsa-miR-487a	0	0	1	1	0	0	TCF25	transcription factor 25 (basic helix-loop-helix)
hsa-miR-487a	0	0	1	1	1	1	SIAE	sialic acid acetylesterase
hsa-miR-487a	0	0	1	1	1	1	HAT1	histone acetyltransferase 1
hsa-miR-487a	0	0	1	1	1	1	KYNU	kynureninase
hsa-miR-487a	1	0	1	1	1	1	POLQ	polymerase (DNA directed), theta
hsa-miR-487a	0	0	1	1	1	1	CLDN16	claudin 16
hsa-miR-487a	0	0	0	1	1	1	CEP72	centrosomal protein 72kDa
hsa-miR-487a	1	0	1	1	1	1	SOX30	SRY (sex determining region Y)-box 30
hsa-miR-487a	0	0	1	1	1	1	COBL	cordon-bleu homolog (mouse)
hsa-miR-487a	0	0	0	1	1	1	NME5	NME/NM23 family member 5
hsa-miR-487a	1	0	1	1	0	0	RBM27	RNA binding motif protein 27
hsa-miR-487a	0	0	1	1	1	1	ADAM2	ADAM metallopeptidase domain 2
hsa-miR-487a	1	0	1	1	1	1	CCAR1	cell division cycle and apoptosis regulator 1
hsa-miR-487a	0	0	1	1	1	1	SLC5A1	solute carrier family 5 (sodium/glucose cotransporter), member 1
hsa-miR-487a	0	0	1	1	1	1	AMIGO2	adhesion molecule with Ig-like domain 2
hsa-miR-487a	1	0	1	1	1	1	PHLDA1	pleckstrin homology-like domain, family A, member 1
hsa-miR-487a	1	0	1	1	1	1	CPSF6	cleavage and polyadenylation specific factor 6, 68kDa
hsa-miR-487a	0	0	1	1	0	0	REM2	RAS (RAD and GEM)-like GTP binding 2
hsa-miR-487a	0	0	1	1	0	0	NDUFB10	NADH dehydrogenase (ubiquinone) 1 beta subcomplex, 10, 22kDa
hsa-miR-487a	0	0	1	1	1	1	PRPSAP2	phosphoribosyl pyrophosphate synthetase-associated protein 2
hsa-miR-487a	0	0	1	1	1	1	SLC39A6	solute carrier family 39 (zinc transporter), member 6
hsa-miR-487a	0	0	1	1	0	0	WRAP73	WD repeat containing, antisense to TP73
hsa-miR-487a	1	0	0	1	0	0	PGD	phosphogluconate dehydrogenase
hsa-miR-487a	0	0	0	1	0	0	ANXA9	annexin A9
hsa-miR-487a	0	0	1	1	1	1	SUSD4	sushi domain containing 4
hsa-miR-487a	0	0	0	1	1	1	C1orf35	chromosome 1 open reading frame 35
hsa-miR-487a	0	0	1	1	0	0	SLC22A14	solute carrier family 22, member 14
hsa-miR-487a	1	0	1	1	0	0	EIF2B5	eukaryotic translation initiation factor 2B, subunit 5 epsilon, 82kDa
hsa-miR-487a	0	0	1	1	0	0	GC	group-specific component (vitamin D binding protein)
hsa-miR-487a	1	0	1	1	1	1	AP1AR	adaptor-related protein complex 1 associated regulatory protein
hsa-miR-487a	0	0	0	1	1	1	SPATA5	spermatogenesis associated 5
hsa-miR-487a	1	0	1	1	1	1	IQGAP2	IQ motif containing GTPase activating protein 2
hsa-miR-487a	0	0	0	1	1	1	CRHBP	corticotropin releasing hormone binding protein
hsa-miR-487a	0	0	1	1	1	1	FAM54A	family with sequence similarity 54, member A
hsa-miR-487a	0	0	0	1	0	0	PNPLA7	patatin-like phospholipase domain containing 7
hsa-miR-487a	0	0	0	1	0	0	GRIK4	glutamate receptor, ionotropic, kainate 4
hsa-miR-487a	0	0	0	1	1	1	CSRP2BP	CSRP2 binding protein
hsa-miR-487a	0	0	1	1	0	0	SPINT4	serine peptidase inhibitor, Kunitz type 4
hsa-miR-487a	0	0	1	1	1	1	SLC5A12	solute carrier family 5 (sodium/glucose cotransporter), member 12
hsa-miR-487a	1	0	0	1	1	1	NCAPD3	non-SMC condensin II complex, subunit D3
hsa-miR-487a	0	0	1	1	1	1	SLC25A4	solute carrier family 25 (mitochondrial carrier; adenine nucleotide translocator), member 4
hsa-miR-487a	0	0	0	1	1	1	GUF1	GUF1 GTPase homolog (S. cerevisiae)
hsa-miR-487a	0	0	1	1	0	0	TMEM163	transmembrane protein 163
hsa-miR-487a	1	0	1	1	1	1	MARS2	methionyl-tRNA synthetase 2, mitochondrial
hsa-miR-487a	0	0	1	1	1	1	CETN3	centrin, EF-hand protein, 3
hsa-miR-487a	0	0	1	1	0	0	ITGB3BP	integrin beta 3 binding protein (beta3-endonexin)
hsa-miR-487a	0	0	1	1	1	1	TTLL5	tubulin tyrosine ligase-like family, member 5
hsa-miR-487a	0	0	0	1	1	1	NAAA	N-acylethanolamine acid amidase
hsa-miR-487a	0	0	1	1	0	0	AIFM1	apoptosis-inducing factor, mitochondrion-associated, 1
hsa-miR-487a	0	0	0	1	1	1	ZNF19	zinc finger protein 19
hsa-miR-487a	0	0	0	1	0	0	CDH15	cadherin 15, type 1, M-cadherin (myotubule)
hsa-miR-487a	0	0	1	1	0	0	GPR162	G protein-coupled receptor 162
hsa-miR-487a	0	0	0	1	0	0	LEPREL2	leprecan-like 2
hsa-miR-487a	1	0	1	1	1	1	CPNE2	copine II
hsa-miR-487a	0	0	0	1	1	1	ZNF235	zinc finger protein 235
hsa-miR-487a	0	0	1	1	0	0	NLRX1	NLR family member X1
hsa-miR-487a	0	0	0	1	1	1	CCR2	chemokine (C-C motif) receptor 2
hsa-miR-487a	0	0	0	1	0	0	MYL3	myosin, light chain 3, alkali; ventricular, skeletal, slow
hsa-miR-487a	0	0	1	1	0	0	MYL6	myosin, light chain 6, alkali, smooth muscle and non-muscle
hsa-miR-487a	1	0	1	1	1	1	ZNF563	zinc finger protein 563
hsa-miR-487a	0	0	1	1	1	1	VCAM1	vascular cell adhesion molecule 1
hsa-miR-487a	1	0	0	1	1	1	MRPS18C	mitochondrial ribosomal protein S18C
hsa-miR-487a	0	0	0	1	1	1	KIAA1524	KIAA1524
hsa-miR-487a	1	0	1	1	1	1	CCNL1	cyclin L1
hsa-miR-487a	0	0	1	1	1	1	RSRC1	arginine/serine-rich coiled-coil 1
hsa-miR-487a	0	0	1	1	1	1	KIAA1143	KIAA1143
hsa-miR-487a	0	0	1	1	0	0	RPL39L	ribosomal protein L39-like
hsa-miR-487a	0	0	1	1	1	1	HMGB2	high mobility group box 2
hsa-miR-487a	1	0	0	1	1	1	CTHRC1	collagen triple helix repeat containing 1
hsa-miR-487a	1	0	1	1	1	1	KIAA1429	KIAA1429
hsa-miR-487a	0	0	1	1	1	1	CXorf22	chromosome X open reading frame 22
hsa-miR-487a	0	0	1	1	1	1	MELK	maternal embryonic leucine zipper kinase
hsa-miR-487a	0	0	1	1	1	1	WRN	Werner syndrome, RecQ helicase-like
hsa-miR-487a	0	0	1	1	0	0	RXFP2	relaxin/insulin-like family peptide receptor 2
hsa-miR-487a	0	0	1	1	1	1	PRPF18	PRP18 pre-mRNA processing factor 18 homolog (S. cerevisiae)
hsa-miR-487a	0	0	1	1	1	1	GPR176	G protein-coupled receptor 176
hsa-miR-487a	0	0	1	1	1	1	NETO1	neuropilin (NRP) and tolloid (TLL)-like 1
hsa-miR-487a	1	0	1	1	1	1	ZNF215	zinc finger protein 215
hsa-miR-487a	0	0	1	1	0	0	CENPV	centromere protein V
hsa-miR-487a	0	0	1	1	1	1	FAM96A	family with sequence similarity 96, member A
hsa-miR-487a	0	0	1	1	1	1	MYH11	myosin, heavy chain 11, smooth muscle
hsa-miR-487a	0	0	0	1	0	0	GNG8	guanine nucleotide binding protein (G protein), gamma 8
hsa-miR-487a	0	0	1	1	1	1	RHEBL1	Ras homolog enriched in brain like 1
hsa-miR-487a	0	0	1	1	1	1	ZFP28	zinc finger protein 28 homolog (mouse)
hsa-miR-487a	1	0	0	1	0	0	ZNF597	zinc finger protein 597
hsa-miR-487a	0	0	0	1	0	0	OR6F1	olfactory receptor, family 6, subfamily F, member 1
hsa-miR-487a	0	0	0	1	0	0	OR8U1	olfactory receptor, family 8, subfamily U, member 1
hsa-miR-487a	0	0	0	1	0	0	P2RY12	purinergic receptor P2Y, G-protein coupled, 12
hsa-miR-487a	0	0	0	1	0	0	OR10G3	olfactory receptor, family 10, subfamily G, member 3
hsa-miR-487a	0	0	1	1	0	0	ZNF30	zinc finger protein 30
hsa-miR-487a	0	0	0	1	1	1	RHNO1	RAD9-HUS1-RAD1 interacting nuclear orphan 1
hsa-miR-487a	0	0	0	1	1	1	GPR37	G protein-coupled receptor 37 (endothelin receptor type B-like)
hsa-miR-487a	1	0	1	1	1	1	MYO1B	myosin IB
hsa-miR-487a	0	0	0	1	0	0	OR1L3	olfactory receptor, family 1, subfamily L, member 3
hsa-miR-487a	0	0	1	1	1	1	TM4SF1	transmembrane 4 L six family member 1
hsa-miR-487a	1	0	1	1	1	1	ONECUT1	one cut homeobox 1
hsa-miR-487a	0	0	1	1	1	1	FOXI1	forkhead box I1
hsa-miR-487a	1	0	1	1	1	1	SOGA2	SOGA family member 2
hsa-miR-487a	0	0	1	1	1	1	PIGF	phosphatidylinositol glycan anchor biosynthesis, class F
hsa-miR-487a	0	0	0	1	0	0	FAM83B	family with sequence similarity 83, member B
hsa-miR-487a	0	0	0	1	1	1	ZNF57	zinc finger protein 57
hsa-miR-487a	0	0	1	1	0	0	CNTNAP4	contactin associated protein-like 4
hsa-miR-487a	0	0	0	1	0	0	RXFP1	relaxin/insulin-like family peptide receptor 1
hsa-miR-487a	0	0	0	1	1	1	PSMA8	proteasome (prosome, macropain) subunit, alpha type, 8
hsa-miR-487a	0	0	1	1	1	1	GEMIN2	gem (nuclear organelle) associated protein 2
hsa-miR-487a	0	0	1	1	0	0	RLN2	relaxin 2
hsa-miR-487a	0	0	1	1	0	0	SNTG2	syntrophin, gamma 2
hsa-miR-487a	0	0	0	1	1	1	NPFFR2	neuropeptide FF receptor 2
hsa-miR-487a	0	0	0	1	1	1	TLR1	toll-like receptor 1
hsa-miR-487a	0	0	1	1	1	1	ZNF407	zinc finger protein 407
hsa-miR-487a	0	0	1	1	1	1	CHRNA9	cholinergic receptor, nicotinic, alpha 9 (neuronal)
hsa-miR-487a	1	0	1	1	0	0	CSRP2	cysteine and glycine-rich protein 2
hsa-miR-487a	0	0	0	1	1	1	ANKS4B	ankyrin repeat and sterile alpha motif domain containing 4B
hsa-miR-487a	0	0	1	1	1	1	BTC	betacellulin
hsa-miR-487a	0	0	0	1	0	0	OR9G1	olfactory receptor, family 9, subfamily G, member 1
hsa-miR-487a	0	0	1	1	1	1	DCAF6	DDB1 and CUL4 associated factor 6
hsa-miR-487a	0	0	1	1	0	0	MRPL46	mitochondrial ribosomal protein L46
hsa-miR-487a	1	0	0	1	1	1	TCHP	trichoplein, keratin filament binding
hsa-miR-487a	0	0	1	1	0	0	SLC29A1	solute carrier family 29 (nucleoside transporters), member 1
hsa-miR-487a	0	0	0	1	1	1	TACC3	transforming, acidic coiled-coil containing protein 3
hsa-miR-487a	0	0	1	1	0	0	ZNF821	zinc finger protein 821
hsa-miR-487a	0	0	0	1	1	1	NOS2	nitric oxide synthase 2, inducible
hsa-miR-487a	1	0	1	1	0	0	PPP2R2D	protein phosphatase 2, regulatory subunit B, delta
hsa-miR-487a	0	0	0	1	0	0	LINS	lines homolog (Drosophila)
hsa-miR-487a	0	0	0	1	0	0	EXOC3	exocyst complex component 3
hsa-miR-487a	0	0	1	1	1	1	TNIP2	TNFAIP3 interacting protein 2
hsa-miR-487a	0	0	1	1	1	1	MPP4	membrane protein, palmitoylated 4 (MAGUK p55 subfamily member 4)
hsa-miR-487a	0	0	1	1	1	1	TUBAL3	tubulin, alpha-like 3
hsa-miR-487a	0	0	0	1	0	0	AURKB	aurora kinase B
hsa-miR-487a	0	0	0	1	0	0	OR2AE1	olfactory receptor, family 2, subfamily AE, member 1
hsa-miR-487a	1	0	1	1	1	1	SHMT1	serine hydroxymethyltransferase 1 (soluble)
hsa-miR-487a	1	0	0	1	0	0	APBA3	amyloid beta (A4) precursor protein-binding, family A, member 3
hsa-miR-487a	0	0	1	1	1	1	PNMA1	paraneoplastic Ma antigen 1
hsa-miR-487a	0	0	1	1	0	0	STOML1	stomatin (EPB72)-like 1
hsa-miR-487a	0	0	1	1	1	1	MSRA	methionine sulfoxide reductase A
hsa-miR-487a	1	0	1	1	1	1	DNAJC14	DnaJ (Hsp40) homolog, subfamily C, member 14
hsa-miR-487a	0	0	0	1	0	0	ZNF271	zinc finger protein 271
hsa-miR-487a	0	0	1	1	1	1	PSMG2	proteasome (prosome, macropain) assembly chaperone 2
hsa-miR-487a	0	0	1	1	1	1	CRAT	carnitine O-acetyltransferase
hsa-miR-487a	0	0	0	1	0	0	OR2M3	olfactory receptor, family 2, subfamily M, member 3
hsa-miR-487a	0	0	0	1	1	1	ZSCAN4	zinc finger and SCAN domain containing 4
hsa-miR-487a	0	0	0	1	0	0	KRTAP9-1	keratin associated protein 9-1
hsa-miR-487a	1	0	1	1	1	1	LEPREL1	leprecan-like 1
hsa-miR-487a	0	0	1	1	1	1	TEX35	testis expressed 35
hsa-miR-487a	0	0	1	1	1	1	CASC1	cancer susceptibility candidate 1
hsa-miR-487a	1	0	1	1	1	1	CHORDC1	cysteine and histidine-rich domain (CHORD) containing 1
hsa-miR-487a	0	0	0	1	1	1	PLD6	phospholipase D family, member 6
hsa-miR-487a	0	0	0	1	0	0	RPL7AP66	ribosomal protein L7a pseudogene 66
hsa-miR-487a	0	0	0	1	0	0	FAM3A	family with sequence similarity 3, member A
hsa-miR-487a	0	0	1	1	1	1	PDZD3	PDZ domain containing 3
hsa-miR-487a	0	0	0	1	0	0	CDH7	cadherin 7, type 2
hsa-miR-487a	0	0	1	1	0	0	SPNS1	spinster homolog 1 (Drosophila)
hsa-miR-487a	0	0	0	1	0	0	OR3A1	olfactory receptor, family 3, subfamily A, member 1
hsa-miR-487a	0	0	1	1	1	1	PRX	periaxin
hsa-miR-487a	0	0	1	1	1	1	SLC34A1	solute carrier family 34 (sodium phosphate), member 1
hsa-miR-487a	0	0	1	1	0	0	PRPF3	PRP3 pre-mRNA processing factor 3 homolog (S. cerevisiae)
hsa-miR-487a	1	0	0	1	0	0	KLHL36	kelch-like 36 (Drosophila)
hsa-miR-487a	0	0	1	1	1	1	RABGAP1L	RAB GTPase activating protein 1-like
hsa-miR-487a	0	0	1	1	1	1	SLC4A1AP	solute carrier family 4 (anion exchanger), member 1, adaptor protein
hsa-miR-487a	0	0	1	1	0	0	GHRHR	growth hormone releasing hormone receptor
hsa-miR-487a	0	0	0	1	0	0	SPAG11A	sperm associated antigen 11A
hsa-miR-487a	0	0	0	1	1	1	ZNF274	zinc finger protein 274
hsa-miR-487a	0	0	1	1	0	0	EDDM3A	epididymal protein 3A
hsa-miR-487a	0	0	0	1	0	0	SSX10	synovial sarcoma, X breakpoint 10
hsa-miR-487a	1	0	0	1	1	1	FANCF	Fanconi anemia, complementation group F
hsa-miR-487a	0	0	1	1	1	1	ZFP90	zinc finger protein 90 homolog (mouse)
hsa-miR-487a	0	0	1	1	0	0	NT5DC4	5'-nucleotidase domain containing 4
hsa-miR-487a	1	0	0	1	0	0	KRT81	keratin 81
hsa-miR-487a	0	0	1	1	0	0	TRMT12	tRNA methyltransferase 12 homolog (S. cerevisiae)
hsa-miR-487a	0	0	0	1	0	0	TTTY8B	testis-specific transcript, Y-linked 8B (non-protein coding)
hsa-miR-487a	0	0	0	1	1	1	NOP10	NOP10 ribonucleoprotein homolog (yeast)
hsa-miR-487a	0	0	1	1	1	1	SLC22A23	solute carrier family 22, member 23
hsa-miR-487a	0	0	1	1	1	1	LRRC16A	leucine rich repeat containing 16A
hsa-miR-487a	0	0	0	1	0	0	GDPGP1	GDP-D-glucose phosphorylase 1
hsa-miR-487a	0	0	1	1	0	0	KIAA2013	KIAA2013
hsa-miR-487a	0	0	1	1	1	1	CTNNA3	catenin (cadherin-associated protein), alpha 3
hsa-miR-487a	0	0	0	1	0	0	AMY1B	amylase, alpha 1B (salivary)
hsa-miR-487a	1	0	1	1	1	1	KPNA2	karyopherin alpha 2 (RAG cohort 1, importin alpha 1)
hsa-miR-487a	0	0	0	1	0	0	TMEM89	transmembrane protein 89
hsa-miR-487a	0	0	1	1	0	0	DNAJA1	DnaJ (Hsp40) homolog, subfamily A, member 1
hsa-miR-487a	1	0	1	1	0	0	C22orf32	chromosome 22 open reading frame 32
hsa-miR-487a	1	0	1	1	1	1	DSE	dermatan sulfate epimerase
hsa-miR-487a	0	0	1	1	1	1	PTPRM	protein tyrosine phosphatase, receptor type, M
hsa-miR-487a	0	0	1	1	0	0	GH2	growth hormone 2
hsa-miR-487a	0	0	0	1	1	1	ANO9	anoctamin 9
hsa-miR-487a	0	0	0	1	1	1	MACC1	metastasis associated in colon cancer 1
hsa-miR-487a	0	0	0	1	0	0	FAM200A	family with sequence similarity 200, member A
hsa-miR-487a	0	0	1	1	0	0	C3orf26	chromosome 3 open reading frame 26
hsa-miR-487a	1	0	1	1	1	1	EFHC2	EF-hand domain (C-terminal) containing 2
hsa-miR-487a	0	0	1	1	1	1	WHSC2	Wolf-Hirschhorn syndrome candidate 2
hsa-miR-487a	1	0	1	1	1	1	CAAP1	caspase activity and apoptosis inhibitor 1
hsa-miR-487a	0	0	1	1	1	1	ZNF568	zinc finger protein 568
hsa-miR-487a	0	0	1	1	1	1	PION	pigeon homolog (Drosophila)
hsa-miR-487a	0	0	0	1	0	0	OIT3	oncoprotein induced transcript 3
hsa-miR-487a	0	0	0	1	0	0	KRTAP19-3	keratin associated protein 19-3
hsa-miR-487a	0	0	0	1	0	0	NSAP11	nervous system abundant protein 11
hsa-miR-487a	0	0	1	1	0	0	ATPAF1-AS1	ATPAF1 antisense RNA 1
hsa-miR-487a	1	0	1	1	1	1	MIR22HG	MIR22 host gene (non-protein coding)
hsa-miR-487a	0	0	0	1	0	0	QRFPR	pyroglutamylated RFamide peptide receptor
hsa-miR-487a	0	0	1	1	1	1	INO80C	INO80 complex subunit C
hsa-miR-487a	0	0	1	1	1	1	CCK	cholecystokinin
hsa-miR-487a	1	0	1	1	1	1	RSBN1L	round spermatid basic protein 1-like
hsa-miR-487a	0	0	0	1	0	0	PES1	pescadillo ribosomal biogenesis factor 1
hsa-miR-487a	0	0	1	1	1	1	ZNF767	zinc finger family member 767
hsa-miR-487a	0	0	1	1	1	1	ACTR8	ARP8 actin-related protein 8 homolog (yeast)
hsa-miR-487a	0	0	1	1	1	1	PISD	phosphatidylserine decarboxylase
hsa-miR-487a	0	0	1	1	0	0	ARHGAP8	Rho GTPase activating protein 8
hsa-miR-487a	0	0	0	1	0	0	PRR5-ARHGAP8	PRR5-ARHGAP8 readthrough
hsa-miR-487a	0	0	1	1	0	0	PRR5	proline rich 5 (renal)
hsa-miR-487a	0	0	1	1	1	1	SOD2	superoxide dismutase 2, mitochondrial
hsa-miR-487a	1	0	1	1	1	1	SPTLC1	serine palmitoyltransferase, long chain base subunit 1
hsa-miR-487a	0	0	1	1	1	1	AIF1	allograft inflammatory factor 1
hsa-miR-487a	0	0	0	1	0	0	FBLL1	fibrillarin-like 1
hsa-miR-487a	0	0	1	1	0	0	SLPI	secretory leukocyte peptidase inhibitor
hsa-miR-487a	0	0	1	1	1	1	ATP5G2	ATP synthase, H+ transporting, mitochondrial Fo complex, subunit C2 (subunit 9)
hsa-miR-487a	0	0	0	1	1	1	SULT1A3	sulfotransferase family, cytosolic, 1A, phenol-preferring, member 3
hsa-miR-487a	1	0	1	1	1	1	TMEM242	transmembrane protein 242
hsa-miR-487a	1	0	1	1	1	1	ANP32B	acidic (leucine-rich) nuclear phosphoprotein 32 family, member B
hsa-miR-487a	1	0	1	1	1	1	HIF3A	hypoxia inducible factor 3, alpha subunit
hsa-miR-487a	0	0	0	1	1	1	PDZK1	PDZ domain containing 1
hsa-miR-487a	1	0	1	1	1	1	RBBP9	retinoblastoma binding protein 9
hsa-miR-487a	1	0	1	1	1	1	GLRA3	glycine receptor, alpha 3
hsa-miR-487a	0	0	0	1	1	1	CTSL1	cathepsin L1
hsa-miR-487a	0	0	1	1	1	1	DOCK9	dedicator of cytokinesis 9
hsa-miR-487a	1	0	1	1	1	1	MTMR10	myotubularin related protein 10
hsa-miR-487a	0	0	1	1	1	1	PTGES	prostaglandin E synthase
hsa-miR-487a	0	0	1	1	1	1	GPR18	G protein-coupled receptor 18
hsa-miR-487a	0	0	1	1	0	0	CFLAR	CASP8 and FADD-like apoptosis regulator
hsa-miR-487a	1	0	1	1	1	1	PVRL1	poliovirus receptor-related 1 (herpesvirus entry mediator C)
hsa-miR-487a	0	0	1	1	1	1	METTL15	methyltransferase like 15
hsa-miR-487a	0	0	0	1	0	0	TTLL1	tubulin tyrosine ligase-like family, member 1
hsa-miR-487a	0	0	1	1	0	0	SCNN1B	sodium channel, non-voltage-gated 1, beta subunit
hsa-miR-487a	1	0	1	1	1	1	DYRK2	dual-specificity tyrosine-(Y)-phosphorylation regulated kinase 2
hsa-miR-487a	1	0	1	1	1	1	DACH2	dachshund homolog 2 (Drosophila)
hsa-miR-487a	0	0	0	1	1	1	SULT1A4	sulfotransferase family, cytosolic, 1A, phenol-preferring, member 4
hsa-miR-487a	0	0	0	1	0	0	GTDC2	glycosyltransferase-like domain containing 2
hsa-miR-487a	1	0	1	1	1	1	NPTN	neuroplastin
hsa-miR-487a	1	0	1	1	1	1	MAP7	microtubule-associated protein 7
hsa-miR-487a	0	0	1	1	1	1	NFATC3	nuclear factor of activated T-cells, cytoplasmic, calcineurin-dependent 3
hsa-miR-487a	0	0	0	1	0	0	SRRT	serrate RNA effector molecule homolog (Arabidopsis)
hsa-miR-487a	0	0	1	1	1	1	SEC61G	Sec61 gamma subunit
hsa-miR-487a	1	0	1	1	1	1	ZC3H14	zinc finger CCCH-type containing 14
hsa-miR-487a	1	0	1	1	1	1	HMGA2	high mobility group AT-hook 2
hsa-miR-487a	1	0	1	1	1	1	TXNRD1	thioredoxin reductase 1
hsa-miR-487a	1	0	1	1	1	1	CTNNA1	catenin (cadherin-associated protein), alpha 1, 102kDa
hsa-miR-487a	0	0	0	1	0	0	CXorf40B	chromosome X open reading frame 40B
hsa-miR-487a	0	0	0	1	1	1	RPL23A	ribosomal protein L23a
hsa-miR-487a	0	0	1	1	1	1	NSD1	nuclear receptor binding SET domain protein 1
hsa-miR-487a	1	0	1	1	1	1	ANXA2	annexin A2
hsa-miR-487a	0	0	0	1	0	0	LSS	lanosterol synthase (2,3-oxidosqualene-lanosterol cyclase)
hsa-miR-487a	0	0	0	1	1	1	MYOM1	myomesin 1, 185kDa
hsa-miR-487a	0	0	0	1	0	0	OR5H15	olfactory receptor, family 5, subfamily H, member 15
hsa-miR-487a	1	0	1	1	0	0	DTNB	dystrobrevin, beta
hsa-miR-487a	0	0	0	1	0	0	ZKSCAN4	zinc finger with KRAB and SCAN domains 4
hsa-miR-487a	0	0	1	1	1	1	HIST1H2BK	histone cluster 1, H2bk
hsa-miR-487a	1	0	1	1	0	0	ELN	elastin
hsa-miR-487a	0	0	1	1	1	1	MAP1LC3C	microtubule-associated protein 1 light chain 3 gamma
hsa-miR-487a	1	0	0	1	1	1	COL9A1	collagen, type IX, alpha 1
hsa-miR-487a	1	0	1	1	1	1	GFPT1	glutamine--fructose-6-phosphate transaminase 1
hsa-miR-487a	0	0	0	1	0	0	LOC100132247	nuclear pore complex interacting protein related gene
hsa-miR-487a	0	0	1	1	1	1	PSEN1	presenilin 1
hsa-miR-487a	0	0	1	1	0	0	APOA4	apolipoprotein A-IV
hsa-miR-487a	0	0	1	1	0	0	ANKRD18A	ankyrin repeat domain 18A
hsa-miR-487a	0	0	0	1	1	1	OR2L13	olfactory receptor, family 2, subfamily L, member 13
hsa-miR-487a	0	0	0	1	1	1	WDSUB1	WD repeat, sterile alpha motif and U-box domain containing 1
hsa-miR-487a	1	0	1	1	0	0	APBB3	amyloid beta (A4) precursor protein-binding, family B, member 3
hsa-miR-487a	0	0	0	1	1	1	ZNF23	zinc finger protein 23
hsa-miR-487a	0	0	1	1	0	0	LPAR2	lysophosphatidic acid receptor 2
hsa-miR-487a	0	0	1	1	1	1	PIK3CG	phosphatidylinositol-4,5-bisphosphate 3-kinase, catalytic subunit gamma
hsa-miR-487a	0	0	1	1	0	0	CXorf40A	chromosome X open reading frame 40A
hsa-miR-487a	0	0	0	1	0	0	CFH	complement factor H
hsa-miR-487a	1	0	1	1	0	0	EFNA4	ephrin-A4
hsa-miR-487a	0	0	1	1	1	1	SPAG11B	sperm associated antigen 11B
hsa-miR-487a	0	0	1	1	1	1	ZMYM1	zinc finger, MYM-type 1
hsa-miR-487a	0	0	0	1	0	0	CHCHD2	coiled-coil-helix-coiled-coil-helix domain containing 2
hsa-miR-487a	0	0	1	1	0	0	HKR1	HKR1, GLI-Kruppel zinc finger family member
hsa-miR-487a	0	0	1	1	0	0	KCTD8	potassium channel tetramerisation domain containing 8
hsa-miR-487a	0	0	1	1	1	1	GTPBP4	GTP binding protein 4
hsa-miR-487a	0	0	0	1	0	0	PYY	peptide YY
hsa-miR-487a	0	0	0	1	1	1	SPN	sialophorin
hsa-miR-487a	0	0	1	1	0	0	AARSD1	alanyl-tRNA synthetase domain containing 1
hsa-miR-487a	0	0	1	1	1	1	LRRCC1	leucine rich repeat and coiled-coil centrosomal protein 1
hsa-miR-487a	1	0	1	1	1	1	PHLPP2	PH domain and leucine rich repeat protein phosphatase 2
hsa-miR-487a	0	0	0	1	0	0	PLEKHG4	pleckstrin homology domain containing, family G (with RhoGef domain) member 4
hsa-miR-487a	0	0	1	1	1	1	VWA5A	von Willebrand factor A domain containing 5A
hsa-miR-487a	0	0	1	1	1	1	ZNF277	zinc finger protein 277
hsa-miR-487a	0	0	0	1	1	1	C16orf59	chromosome 16 open reading frame 59
hsa-miR-487a	0	0	0	1	0	0	YY2	YY2 transcription factor
hsa-miR-487a	0	0	0	1	1	1	B3GALNT2	beta-1,3-N-acetylgalactosaminyltransferase 2
hsa-miR-487a	0	0	1	1	1	1	PARP1	poly (ADP-ribose) polymerase 1
hsa-miR-487a	0	0	0	1	0	0	GPR31	G protein-coupled receptor 31
hsa-miR-487a	1	0	1	1	1	1	FGFR1OP	FGFR1 oncogene partner
hsa-miR-487a	1	0	1	1	1	1	AGPAT4	1-acylglycerol-3-phosphate O-acyltransferase 4 (lysophosphatidic acid acyltransferase, delta)
hsa-miR-487a	0	0	1	1	1	1	KCTD3	potassium channel tetramerisation domain containing 3
hsa-miR-487a	1	0	1	1	0	0	NEK2	NIMA (never in mitosis gene a)-related kinase 2
hsa-miR-487a	1	0	1	1	1	1	EZR	ezrin
hsa-miR-487a	0	0	1	1	1	1	IL20	interleukin 20
hsa-miR-487a	1	0	1	1	1	1	MDM4	Mdm4 p53 binding protein homolog (mouse)
hsa-miR-487a	0	0	1	1	1	1	PIK3C2B	phosphatidylinositol-4-phosphate 3-kinase, catalytic subunit type 2 beta
hsa-miR-487a	0	0	1	1	1	1	TNNI1	troponin I type 1 (skeletal, slow)
hsa-miR-487a	0	0	1	1	0	0	TMEM9	transmembrane protein 9
hsa-miR-487a	0	0	1	1	1	1	GINM1	glycoprotein integral membrane 1
hsa-miR-487a	0	0	1	1	0	0	MR1	major histocompatibility complex, class I-related
hsa-miR-487a	0	0	1	1	1	1	HSD17B7	hydroxysteroid (17-beta) dehydrogenase 7
hsa-miR-487a	0	0	1	1	1	1	CD1B	CD1b molecule
hsa-miR-487a	0	0	1	1	1	1	CD1D	CD1d molecule
hsa-miR-487a	1	0	1	1	1	1	PRCC	papillary renal cell carcinoma (translocation-associated)
hsa-miR-487a	0	0	1	1	1	1	SEMA4A	sema domain, immunoglobulin domain (Ig), transmembrane domain (TM) and short cytoplasmic domain, (semaphorin) 4A
hsa-miR-487a	1	0	1	1	1	1	TACC2	transforming, acidic coiled-coil containing protein 2
hsa-miR-487a	0	0	1	1	0	0	NSMCE4A	non-SMC element 4 homolog A (S. cerevisiae)
hsa-miR-487a	0	0	1	1	1	1	GRK5	G protein-coupled receptor kinase 5
hsa-miR-487a	1	0	1	1	1	1	KLHL32	kelch-like 32 (Drosophila)
hsa-miR-487a	0	0	0	1	1	1	MANEA	mannosidase, endo-alpha
hsa-miR-487a	1	0	1	1	1	1	TXNIP	thioredoxin interacting protein
hsa-miR-487a	0	0	1	1	0	0	FAM72B	family with sequence similarity 72, member B
hsa-miR-487a	0	0	0	1	0	0	HAO2	hydroxyacid oxidase 2 (long chain)
hsa-miR-487a	0	0	1	1	1	1	TMLHE	trimethyllysine hydroxylase, epsilon
hsa-miR-487a	1	0	1	1	1	1	SLC35A1	solute carrier family 35 (CMP-sialic acid transporter), member A1
hsa-miR-487a	1	0	1	1	1	1	HIPK1	homeodomain interacting protein kinase 1
hsa-miR-487a	1	0	1	1	1	1	KCNA2	potassium voltage-gated channel, shaker-related subfamily, member 2
hsa-miR-487a	0	0	0	1	1	1	UCKL1	uridine-cytidine kinase 1-like 1
hsa-miR-487a	0	0	0	1	0	0	ABHD16B	abhydrolase domain containing 16B
hsa-miR-487a	0	0	0	1	1	1	TMEM187	transmembrane protein 187
hsa-miR-487a	0	0	1	1	1	1	ALG14	asparagine-linked glycosylation 14 homolog (S. cerevisiae)
hsa-miR-487a	0	0	0	1	1	1	KCNQ2	potassium voltage-gated channel, KQT-like subfamily, member 2
hsa-miR-487a	0	0	1	1	0	0	GLMN	glomulin, FKBP associated protein
hsa-miR-487a	0	0	1	1	0	0	CPN1	carboxypeptidase N, polypeptide 1
hsa-miR-487a	0	0	1	1	0	0	VGLL1	vestigial like 1 (Drosophila)
hsa-miR-487a	0	0	1	1	0	0	TNNI3K	TNNI3 interacting kinase
hsa-miR-487a	0	0	1	1	1	1	FPGT	fucose-1-phosphate guanylyltransferase
hsa-miR-487a	0	0	1	1	1	1	DEPDC1	DEP domain containing 1
hsa-miR-487a	1	0	1	1	1	1	SORBS1	sorbin and SH3 domain containing 1
hsa-miR-487a	0	0	1	1	1	1	IL13RA1	interleukin 13 receptor, alpha 1
hsa-miR-487a	0	0	1	1	1	1	DDX27	DEAD (Asp-Glu-Ala-Asp) box polypeptide 27
hsa-miR-487a	1	0	1	1	1	1	SLC16A12	solute carrier family 16, member 12 (monocarboxylic acid transporter 12)
hsa-miR-487a	0	0	0	1	1	1	IFIT1	interferon-induced protein with tetratricopeptide repeats 1
hsa-miR-487a	0	0	1	1	1	1	RNF220	ring finger protein 220
hsa-miR-487a	0	0	0	1	0	0	NTMT1	N-terminal Xaa-Pro-Lys N-methyltransferase 1
hsa-miR-487a	0	0	0	1	0	0	SPATA25	spermatogenesis associated 25
hsa-miR-487a	0	0	1	1	0	0	SERPINA7	serpin peptidase inhibitor, clade A (alpha-1 antiproteinase, antitrypsin), member 7
hsa-miR-487a	0	0	1	1	1	1	EPPIN	epididymal peptidase inhibitor
hsa-miR-487a	0	0	1	1	0	0	WFDC6	WAP four-disulfide core domain 6
hsa-miR-487a	1	0	0	1	1	1	HNF4A	hepatocyte nuclear factor 4, alpha
hsa-miR-487a	0	0	1	1	1	1	CCND3	cyclin D3
hsa-miR-487a	0	0	0	1	0	0	UTP11L	UTP11-like, U3 small nucleolar ribonucleoprotein, (yeast)
hsa-miR-487a	0	0	1	1	1	1	IFT52	intraflagellar transport 52 homolog (Chlamydomonas)
hsa-miR-487a	0	0	0	1	1	1	RPA4	replication protein A4, 30kDa
hsa-miR-487a	0	0	0	1	0	0	CYSLTR1	cysteinyl leukotriene receptor 1
hsa-miR-487a	0	0	0	1	1	1	TTI1	TELO2 interacting protein 1
hsa-miR-487a	1	0	1	1	1	1	RBBP4	retinoblastoma binding protein 4
hsa-miR-487a	0	0	1	1	1	1	HDAC8	histone deacetylase 8
hsa-miR-487a	1	0	1	1	1	1	NR6A1	nuclear receptor subfamily 6, group A, member 1
hsa-miR-487a	0	0	1	1	0	0	HCRTR1	hypocretin (orexin) receptor 1
hsa-miR-487a	0	0	1	1	1	1	TTLL11	tubulin tyrosine ligase-like family, member 11
hsa-miR-487a	0	0	0	1	0	0	FAM110D	family with sequence similarity 110, member D
hsa-miR-487a	0	0	1	1	1	1	ZNF483	zinc finger protein 483
hsa-miR-487a	1	0	1	1	1	1	SRSF10	serine/arginine-rich splicing factor 10
hsa-miR-487a	0	0	0	1	1	1	C1QC	complement component 1, q subcomponent, C chain
hsa-miR-487a	0	0	0	1	1	1	PSMB9	proteasome (prosome, macropain) subunit, beta type, 9 (large multifunctional peptidase 2)
hsa-miR-487a	0	0	1	1	1	1	ZNF341	zinc finger protein 341
hsa-miR-487a	1	0	1	1	0	0	TNXB	tenascin XB
hsa-miR-487a	1	0	1	1	1	1	PADI2	peptidyl arginine deiminase, type II
hsa-miR-487a	0	0	1	1	1	1	C6orf48	chromosome 6 open reading frame 48
hsa-miR-487a	0	0	0	1	0	0	ACAT1	acetyl-CoA acetyltransferase 1
hsa-miR-487a	0	0	0	1	0	0	TEX29	testis expressed 29
hsa-miR-487a	0	0	0	1	1	1	LY6G5B	lymphocyte antigen 6 complex, locus G5B
hsa-miR-487a	1	0	1	1	1	1	ARGLU1	arginine and glutamate rich 1
hsa-miR-487a	0	0	1	1	1	1	KDELC1	KDEL (Lys-Asp-Glu-Leu) containing 1
hsa-miR-487a	0	0	0	1	0	0	PYY3	peptide YY, 3 (pseudogene)
hsa-miR-487a	0	0	0	1	1	1	FLOT1	flotillin 1
hsa-miR-487a	1	0	1	1	1	1	PRR3	proline rich 3
hsa-miR-487a	0	0	0	1	0	0	SULT1C3	sulfotransferase family, cytosolic, 1C, member 3
hsa-miR-487a	1	0	1	1	1	1	PRUNE2	prune homolog 2 (Drosophila)
hsa-miR-487a	0	0	1	1	0	0	FAM216A	family with sequence similarity 216, member A
hsa-miR-487a	0	0	0	1	0	0	CUBN	cubilin (intrinsic factor-cobalamin receptor)
hsa-miR-487a	0	0	1	1	1	1	CSNK1A1	casein kinase 1, alpha 1
hsa-miR-487a	0	0	0	1	0	0	GRXCR2	glutaredoxin, cysteine rich 2
hsa-miR-487a	0	0	0	1	1	1	OLAH	oleoyl-ACP hydrolase
hsa-miR-487a	0	0	1	1	1	1	NRG2	neuregulin 2
hsa-miR-487a	0	0	0	1	1	1	DCLRE1C	DNA cross-link repair 1C
hsa-miR-487a	0	0	1	1	0	0	CCDC107	coiled-coil domain containing 107
hsa-miR-487a	0	0	0	1	0	0	OR4A47	olfactory receptor, family 4, subfamily A, member 47
hsa-miR-487a	1	0	1	1	1	1	DYNLT3	dynein, light chain, Tctex-type 3
hsa-miR-487a	0	0	0	1	0	0	CKS1BP6	CDC28 protein kinase regulatory subunit 1B pseudogene 6
hsa-miR-487a	0	0	0	1	1	1	CXorf21	chromosome X open reading frame 21
hsa-miR-487a	0	0	1	1	0	0	C20orf196	chromosome 20 open reading frame 196
hsa-miR-487a	0	0	0	1	1	1	SIRT5	sirtuin 5
hsa-miR-487a	1	0	1	1	1	1	SAT1	spermidine/spermine N1-acetyltransferase 1
hsa-miR-487a	1	0	1	1	1	1	SLC23A2	solute carrier family 23 (nucleobase transporters), member 2
hsa-miR-487a	0	0	0	1	0	0	PLEKHN1	pleckstrin homology domain containing, family N member 1
hsa-miR-487a	1	0	1	1	1	1	SMPX	small muscle protein, X-linked
hsa-miR-487a	0	0	1	1	0	0	TEX26	testis expressed 26
hsa-miR-487a	0	0	1	1	1	1	ASB9	ankyrin repeat and SOCS box containing 9
hsa-miR-487a	1	0	1	1	1	1	TMSB4X	thymosin beta 4, X-linked
hsa-miR-487a	0	0	1	1	0	0	FREM1	FRAS1 related extracellular matrix 1
hsa-miR-487a	0	0	1	1	1	1	FKBP1B	FK506 binding protein 1B, 12.6 kDa
hsa-miR-487a	1	0	1	1	1	1	NLGN4X	neuroligin 4, X-linked
hsa-miR-487a	1	0	1	1	1	1	WDR37	WD repeat domain 37
hsa-miR-487a	1	0	1	1	1	1	GREB1	growth regulation by estrogen in breast cancer 1
hsa-miR-487a	1	0	1	1	1	1	ZMYND11	zinc finger, MYND-type containing 11
hsa-miR-487a	0	0	0	1	0	0	PLCXD1	phosphatidylinositol-specific phospholipase C, X domain containing 1
hsa-miR-487a	1	0	1	1	1	1	SACS	spastic ataxia of Charlevoix-Saguenay (sacsin)
hsa-miR-487a	0	0	1	1	1	1	FGFBP1	fibroblast growth factor binding protein 1
hsa-miR-487a	0	0	0	1	1	1	LAMB4	laminin, beta 4
hsa-miR-487a	0	0	0	1	1	1	FBXO43	F-box protein 43
hsa-miR-487a	0	0	1	1	1	1	HDDC2	HD domain containing 2
hsa-miR-487a	0	0	1	1	0	0	DNAH2	dynein, axonemal, heavy chain 2
hsa-miR-487a	0	0	0	1	0	0	GXYLT2	glucoside xylosyltransferase 2
hsa-miR-487a	0	0	1	1	1	1	FGA	fibrinogen alpha chain
hsa-miR-487a	0	0	1	1	1	1	IL11	interleukin 11
hsa-miR-487a	1	0	1	0	1	1	GABRA4	gamma-aminobutyric acid (GABA) A receptor, alpha 4
hsa-miR-487a	0	0	0	1	1	1	RPL37	ribosomal protein L37
hsa-miR-487a	0	0	0	0	1	1	FLJ45831	uncharacterized FLJ45831
hsa-miR-487a	0	0	1	1	1	1	ANKRD34B	ankyrin repeat domain 34B
hsa-miR-487a	1	0	1	1	1	1	CHMP3	charged multivesicular body protein 3
hsa-miR-487a	1	0	1	0	1	1	MTX3	metaxin 3
hsa-miR-487a	0	0	1	1	1	1	CHCHD7	coiled-coil-helix-coiled-coil-helix domain containing 7
hsa-miR-487a	0	0	1	1	1	1	AGPHD1	aminoglycoside phosphotransferase domain containing 1
hsa-miR-487a	1	0	1	0	1	1	NPNT	nephronectin
hsa-miR-487a	1	0	0	1	1	1	USP44	ubiquitin specific peptidase 44
hsa-miR-487a	1	0	1	1	1	1	GRIA4	glutamate receptor, ionotropic, AMPA 4
hsa-miR-487a	0	0	1	1	1	1	RCBTB2	regulator of chromosome condensation (RCC1) and BTB (POZ) domain containing protein 2
hsa-miR-487a	1	0	1	1	1	1	CLCN6	chloride channel, voltage-sensitive 6
hsa-miR-487a	0	0	1	1	1	1	DST	dystonin
hsa-miR-487a	1	0	1	1	1	1	GABPA	GA binding protein transcription factor, alpha subunit 60kDa
hsa-miR-487a	0	0	1	1	1	1	KCNJ13	potassium inwardly-rectifying channel, subfamily J, member 13
hsa-miR-487a	0	0	0	1	1	1	ORC4	origin recognition complex, subunit 4
hsa-miR-487a	0	0	0	1	1	1	ZNF43	zinc finger protein 43
hsa-miR-487a	0	0	0	1	1	1	ZNF91	zinc finger protein 91
hsa-miR-487a	0	0	1	1	1	1	RGS5	regulator of G-protein signaling 5
hsa-miR-487a	0	0	1	1	1	1	IDI1	isopentenyl-diphosphate delta isomerase 1
hsa-miR-487a	0	0	1	1	1	1	PNPLA4	patatin-like phospholipase domain containing 4
hsa-miR-487a	1	0	1	1	1	1	SCAF11	SR-related CTD-associated factor 11
hsa-miR-487a	1	0	1	1	1	1	DLGAP2	discs, large (Drosophila) homolog-associated protein 2
hsa-miR-487a	1	0	1	1	1	1	KL	klotho
hsa-miR-487a	1	0	1	1	1	1	ACTN4	actinin, alpha 4
hsa-miR-487a	1	0	1	1	1	1	PTBP3	polypyrimidine tract binding protein 3
hsa-miR-487a	0	0	1	1	1	1	IMPA1	inositol(myo)-1(or 4)-monophosphatase 1
hsa-miR-487a	0	0	0	1	1	1	MPZL2	myelin protein zero-like 2
hsa-miR-487a	1	0	1	1	1	1	PKN2	protein kinase N2
hsa-miR-487a	0	0	1	1	1	1	CEACAM7	carcinoembryonic antigen-related cell adhesion molecule 7
hsa-miR-487a	0	0	1	1	1	1	ZNF33A	zinc finger protein 33A
hsa-miR-487a	1	0	1	0	1	1	CD2AP	CD2-associated protein
hsa-miR-487a	0	0	1	1	1	1	ABT1	activator of basal transcription 1
hsa-miR-487a	1	1	1	1	1	1	LATS2	LATS, large tumor suppressor, homolog 2 (Drosophila)
hsa-miR-487a	1	0	1	0	1	1	ATP11B	ATPase, class VI, type 11B
hsa-miR-487a	1	0	1	1	1	1	MRPL19	mitochondrial ribosomal protein L19
hsa-miR-487a	0	0	1	1	1	1	TRAK1	trafficking protein, kinesin binding 1
hsa-miR-487a	1	0	0	1	1	1	CRLF3	cytokine receptor-like factor 3
hsa-miR-487a	0	0	1	1	1	1	PAQR5	progestin and adipoQ receptor family member V
hsa-miR-487a	0	0	1	1	1	1	MARCH1	membrane-associated ring finger (C3HC4) 1, E3 ubiquitin protein ligase
hsa-miR-487a	1	0	0	1	1	1	PRMT6	protein arginine methyltransferase 6
hsa-miR-487a	1	0	1	1	1	1	FEM1C	fem-1 homolog c (C. elegans)
hsa-miR-487a	1	0	1	1	1	1	ANKRD50	ankyrin repeat domain 50
hsa-miR-487a	1	0	1	1	1	1	MRS2	MRS2 magnesium homeostasis factor homolog (S. cerevisiae)
hsa-miR-487a	0	0	1	1	1	1	IFT80	intraflagellar transport 80 homolog (Chlamydomonas)
hsa-miR-487a	0	0	0	1	1	1	CDH19	cadherin 19, type 2
hsa-miR-487a	1	0	1	1	1	1	C6orf47	chromosome 6 open reading frame 47
hsa-miR-487a	1	0	1	1	1	1	XYLT1	xylosyltransferase I
hsa-miR-487a	0	0	1	1	1	1	WHSC1L1	Wolf-Hirschhorn syndrome candidate 1-like 1
hsa-miR-487a	0	0	1	1	1	1	DBF4B	DBF4 homolog B (S. cerevisiae)
hsa-miR-487a	0	0	0	1	1	1	ULBP1	UL16 binding protein 1
hsa-miR-487a	1	0	1	1	1	1	ANO3	anoctamin 3
hsa-miR-487a	0	0	1	1	1	1	TKTL2	transketolase-like 2
hsa-miR-487a	1	0	1	1	1	1	LARP1B	La ribonucleoprotein domain family, member 1B
hsa-miR-487a	0	0	1	1	1	1	CAPS2	calcyphosine 2
hsa-miR-487a	0	0	1	1	1	1	LNX1	ligand of numb-protein X 1, E3 ubiquitin protein ligase
hsa-miR-487a	0	0	1	0	1	1	CBR4	carbonyl reductase 4
hsa-miR-487a	0	0	1	1	1	1	ASB5	ankyrin repeat and SOCS box containing 5
hsa-miR-487a	1	0	1	1	1	1	RFTN2	raftlin family member 2
hsa-miR-487a	0	0	0	0	1	1	TOR1AIP2	torsin A interacting protein 2
hsa-miR-487a	1	0	1	1	1	1	TC2N	tandem C2 domains, nuclear
hsa-miR-487a	1	0	1	1	1	1	TMEM68	transmembrane protein 68
hsa-miR-487a	0	0	0	0	1	1	ZNF567	zinc finger protein 567
hsa-miR-487a	0	0	0	1	1	1	SEPSECS	Sep (O-phosphoserine) tRNA:Sec (selenocysteine) tRNA synthase
hsa-miR-487a	1	0	1	0	1	1	GABRG1	gamma-aminobutyric acid (GABA) A receptor, gamma 1
hsa-miR-487a	0	0	0	0	1	1	KIAA0825	KIAA0825
hsa-miR-487a	0	0	1	0	1	1	C5orf64	chromosome 5 open reading frame 64
hsa-miR-487a	0	0	0	1	1	1	P2RY8	purinergic receptor P2Y, G-protein coupled, 8
hsa-miR-487a	1	0	1	0	1	1	C12orf36	chromosome 12 open reading frame 36
hsa-miR-487a	0	0	1	1	1	1	P4HA3	prolyl 4-hydroxylase, alpha polypeptide III
hsa-miR-487a	0	0	1	0	1	1	EML5	echinoderm microtubule associated protein like 5
hsa-miR-487a	0	0	0	0	1	1	LINC00290	long intergenic non-protein coding RNA 290
hsa-miR-487a	0	0	0	0	1	1	LOC283663	uncharacterized LOC283663
hsa-miR-487a	0	0	0	0	1	1	ZNF845	zinc finger protein 845
