# Supplementary material for: Profiling of Selected MicroRNAs in Proliferative Eutopic Endometrium of Women with Ovarian Endometriosis
Source: Biomed Res Int. 2015 Aug 20;2015:760698. doi: 10.1155/2015/760698 (PMC4558423; doi:10.1155/2015/760698)
Supplement: Supplementary file 1 — Table I: The names of miRNAs significantly differentially expressed between eutopic endometrium of patients with endometriosis vs eutopic endometrium of patients without endometriosis. Table II: The associations between miRNA and mRNA, which presents detailed results of the search of six major databases i.e targetscan, tarbase, miranda, mirbase, mirtarget2 and pictar. [file 760698.f1.zip › 760698.f1/Table II/hsa-miR-489.tsv]

miR	targetscan	tarbase	miranda	mirbase	mirtarget2	pictar	GeneSymbol	GeneName
hsa-miR-489	1	0	1	1	0	0	RAPGEF2	Rap guanine nucleotide exchange factor (GEF) 2
hsa-miR-489	1	0	1	1	1	1	FAM65B	family with sequence similarity 65, member B
hsa-miR-489	1	0	1	1	1	1	ABCC5	ATP-binding cassette, sub-family C (CFTR/MRP), member 5
hsa-miR-489	1	0	1	0	1	1	KIAA0408	KIAA0408
hsa-miR-489	1	0	1	1	0	0	DENND4B	DENN/MADD domain containing 4B
hsa-miR-489	0	0	1	1	1	1	NEU3	sialidase 3 (membrane sialidase)
hsa-miR-489	1	0	1	1	0	0	PCLO	piccolo (presynaptic cytomatrix protein)
hsa-miR-489	1	0	1	1	1	1	GREB1	growth regulation by estrogen in breast cancer 1
hsa-miR-489	1	0	1	1	0	0	TBC1D12	TBC1 domain family, member 12
hsa-miR-489	1	0	1	0	1	1	MAGI2	membrane associated guanylate kinase, WW and PDZ domain containing 2
hsa-miR-489	1	0	1	1	1	1	CPEB3	cytoplasmic polyadenylation element binding protein 3
hsa-miR-489	1	0	1	1	1	1	NLGN4Y	neuroligin 4, Y-linked
hsa-miR-489	0	0	1	1	0	0	FAM149B1	family with sequence similarity 149, member B1
hsa-miR-489	1	0	1	1	0	0	STXBP5L	syntaxin binding protein 5-like
hsa-miR-489	1	0	1	1	0	0	KIAA1045	KIAA1045
hsa-miR-489	1	0	1	0	1	1	ZNF507	zinc finger protein 507
hsa-miR-489	1	0	1	1	1	1	ZMYND8	zinc finger, MYND-type containing 8
hsa-miR-489	1	0	1	1	1	1	SPIRE1	spire homolog 1 (Drosophila)
hsa-miR-489	1	0	1	1	1	1	RALGAPB	Ral GTPase activating protein, beta subunit (non-catalytic)
hsa-miR-489	1	0	1	1	1	1	MKL2	MKL/myocardin-like 2
hsa-miR-489	0	0	1	1	1	1	FSTL5	follistatin-like 5
hsa-miR-489	0	0	1	1	1	1	KLHL13	kelch-like 13 (Drosophila)
hsa-miR-489	1	0	1	1	1	1	PCDH19	protocadherin 19
hsa-miR-489	1	0	1	0	1	1	KCTD16	potassium channel tetramerisation domain containing 16
hsa-miR-489	1	0	1	1	1	1	TAOK1	TAO kinase 1
hsa-miR-489	1	0	1	1	1	1	LRRC7	leucine rich repeat containing 7
hsa-miR-489	0	0	1	0	0	0	NYAP2	neuronal tyrosine-phosphorylated phosphoinositide-3-kinase adaptor 2
hsa-miR-489	1	0	1	1	1	1	INADL	InaD-like (Drosophila)
hsa-miR-489	1	0	1	1	1	1	PPP6R3	protein phosphatase 6, regulatory subunit 3
hsa-miR-489	1	0	1	1	1	1	DENND1A	DENN/MADD domain containing 1A
hsa-miR-489	1	0	1	0	0	0	TANC2	tetratricopeptide repeat, ankyrin repeat and coiled-coil containing 2
hsa-miR-489	1	0	1	1	1	1	SNX3	sorting nexin 3
hsa-miR-489	0	0	1	1	0	0	TPGS2	tubulin polyglutamylase complex subunit 2
hsa-miR-489	1	0	1	1	0	0	ZNF292	zinc finger protein 292
hsa-miR-489	0	0	1	1	1	1	KIAA1967	KIAA1967
hsa-miR-489	1	0	1	1	1	1	SH3TC2	SH3 domain and tetratricopeptide repeats 2
hsa-miR-489	0	0	1	1	0	0	CIRH1A	cirrhosis, autosomal recessive 1A (cirhin)
hsa-miR-489	0	0	1	1	1	1	DYNC2H1	dynein, cytoplasmic 2, heavy chain 1
hsa-miR-489	0	0	1	1	1	1	PDZD3	PDZ domain containing 3
hsa-miR-489	1	0	1	1	1	1	C11orf57	chromosome 11 open reading frame 57
hsa-miR-489	0	0	1	1	1	1	PAK3	p21 protein (Cdc42/Rac)-activated kinase 3
hsa-miR-489	1	0	1	1	1	1	PAN3	PAN3 poly(A) specific ribonuclease subunit homolog (S. cerevisiae)
hsa-miR-489	1	0	1	0	1	1	BEND4	BEN domain containing 4
hsa-miR-489	1	0	1	1	1	1	UBE3A	ubiquitin protein ligase E3A
hsa-miR-489	0	0	1	1	1	1	CAST	calpastatin
hsa-miR-489	0	0	1	1	0	0	MPST	mercaptopyruvate sulfurtransferase
hsa-miR-489	1	0	1	1	1	1	COL11A1	collagen, type XI, alpha 1
hsa-miR-489	1	0	1	0	1	1	PLAG1	pleiomorphic adenoma gene 1
hsa-miR-489	1	0	1	1	1	1	AEBP2	AE binding protein 2
hsa-miR-489	0	0	1	1	1	1	ACO1	aconitase 1, soluble
hsa-miR-489	1	0	1	1	1	1	MYO5A	myosin VA (heavy chain 12, myoxin)
hsa-miR-489	1	0	1	1	1	1	PDLIM5	PDZ and LIM domain 5
hsa-miR-489	1	0	1	1	1	1	ARHGEF3	Rho guanine nucleotide exchange factor (GEF) 3
hsa-miR-489	1	0	1	1	0	0	GRIN2A	glutamate receptor, ionotropic, N-methyl D-aspartate 2A
hsa-miR-489	1	0	1	0	1	1	ADD3	adducin 3 (gamma)
hsa-miR-489	1	0	1	1	1	1	TEAD1	TEA domain family member 1 (SV40 transcriptional enhancer factor)
hsa-miR-489	0	0	1	1	1	1	DDX10	DEAD (Asp-Glu-Ala-Asp) box polypeptide 10
hsa-miR-489	1	0	1	1	1	1	PCDH17	protocadherin 17
hsa-miR-489	1	0	1	1	1	1	MYT1L	myelin transcription factor 1-like
hsa-miR-489	1	0	1	0	1	1	CELF2	CUGBP, Elav-like family member 2
hsa-miR-489	0	0	1	1	0	0	SLC12A4	solute carrier family 12 (potassium/chloride transporters), member 4
hsa-miR-489	1	0	1	1	1	1	SHOC2	soc-2 suppressor of clear homolog (C. elegans)
hsa-miR-489	1	0	1	1	1	1	WHSC1	Wolf-Hirschhorn syndrome candidate 1
hsa-miR-489	0	0	1	0	0	0	ZNF880	zinc finger protein 880
hsa-miR-489	1	0	1	1	1	1	GLS	glutaminase
hsa-miR-489	0	0	1	1	1	1	SMC2	structural maintenance of chromosomes 2
hsa-miR-489	0	0	1	1	1	1	CNPPD1	cyclin Pas1/PHO80 domain containing 1
hsa-miR-489	0	0	1	1	1	1	AIG1	androgen-induced 1
hsa-miR-489	1	0	1	1	1	1	DNAJA4	DnaJ (Hsp40) homolog, subfamily A, member 4
hsa-miR-489	0	0	1	1	1	1	NPC1L1	NPC1 (Niemann-Pick disease, type C1, gene)-like 1
hsa-miR-489	1	0	1	1	1	1	SENP7	SUMO1/sentrin specific peptidase 7
hsa-miR-489	1	0	1	1	1	1	TSC22D2	TSC22 domain family, member 2
hsa-miR-489	0	0	1	1	1	1	SLCO2B1	solute carrier organic anion transporter family, member 2B1
hsa-miR-489	1	0	1	1	1	1	NXT2	nuclear transport factor 2-like export factor 2
hsa-miR-489	1	0	1	0	1	1	CSNK1G1	casein kinase 1, gamma 1
hsa-miR-489	0	0	1	1	1	1	NKX3-1	NK3 homeobox 1
hsa-miR-489	1	0	1	1	1	1	ERGIC1	endoplasmic reticulum-golgi intermediate compartment (ERGIC) 1
hsa-miR-489	1	0	1	1	1	1	PUM2	pumilio homolog 2 (Drosophila)
hsa-miR-489	1	0	1	1	1	1	TMUB2	transmembrane and ubiquitin-like domain containing 2
hsa-miR-489	1	0	1	1	1	1	DCLRE1B	DNA cross-link repair 1B
hsa-miR-489	1	0	1	1	1	1	LETMD1	LETM1 domain containing 1
hsa-miR-489	0	0	1	1	0	0	TRO	trophinin
hsa-miR-489	1	0	1	1	1	1	CALCOCO1	calcium binding and coiled-coil domain 1
hsa-miR-489	0	0	1	0	0	0	NBPF10	neuroblastoma breakpoint family, member 10
hsa-miR-489	0	0	1	1	0	0	SNRPN	small nuclear ribonucleoprotein polypeptide N
hsa-miR-489	1	0	1	1	1	1	ST3GAL3	ST3 beta-galactoside alpha-2,3-sialyltransferase 3
hsa-miR-489	1	0	1	1	1	1	STX16	syntaxin 16
hsa-miR-489	0	0	1	0	0	0	RMST	rhabdomyosarcoma 2 associated transcript (non-protein coding)
hsa-miR-489	1	0	1	0	1	1	PPP1R12A	protein phosphatase 1, regulatory subunit 12A
hsa-miR-489	1	0	1	1	1	1	HNRNPU	heterogeneous nuclear ribonucleoprotein U (scaffold attachment factor A)
hsa-miR-489	0	0	1	0	0	0	SNHG11	small nucleolar RNA host gene 11 (non-protein coding)
hsa-miR-489	1	0	1	0	1	1	IL1RAP	interleukin 1 receptor accessory protein
hsa-miR-489	1	0	1	1	1	1	AFF2	AF4/FMR2 family, member 2
hsa-miR-489	1	0	1	1	1	1	FLNC	filamin C, gamma
hsa-miR-489	1	0	1	0	1	1	DICER1	dicer 1, ribonuclease type III
hsa-miR-489	0	0	1	1	1	1	GNAS	GNAS complex locus
hsa-miR-489	1	0	1	1	1	1	SUCO	SUN domain containing ossification factor
hsa-miR-489	1	0	1	1	1	1	PALM2	paralemmin 2
hsa-miR-489	1	0	1	1	1	1	NRXN3	neurexin 3
hsa-miR-489	1	0	1	1	1	1	PNISR	PNN-interacting serine/arginine-rich protein
hsa-miR-489	1	0	1	1	1	1	ARL4C	ADP-ribosylation factor-like 4C
hsa-miR-489	0	0	1	1	1	1	SLC8A3	solute carrier family 8 (sodium/calcium exchanger), member 3
hsa-miR-489	1	0	1	1	1	1	PPP1R9A	protein phosphatase 1, regulatory subunit 9A
hsa-miR-489	0	0	1	1	0	0	TRMT1	tRNA methyltransferase 1 homolog (S. cerevisiae)
hsa-miR-489	1	0	1	1	1	1	AKAP2	A kinase (PRKA) anchor protein 2
hsa-miR-489	1	0	1	0	1	1	NFAT5	nuclear factor of activated T-cells 5, tonicity-responsive
hsa-miR-489	0	0	1	0	0	0	TUG1	taurine upregulated 1 (non-protein coding)
hsa-miR-489	0	0	1	1	0	0	RFWD2	ring finger and WD repeat domain 2, E3 ubiquitin protein ligase
hsa-miR-489	0	0	1	0	0	0	TPTEP1	transmembrane phosphatase with tensin homology pseudogene 1
hsa-miR-489	0	0	1	1	1	1	RSRC2	arginine/serine-rich coiled-coil 2
hsa-miR-489	1	0	1	0	1	1	SPATS2L	spermatogenesis associated, serine-rich 2-like
hsa-miR-489	1	0	1	1	1	1	ACER3	alkaline ceramidase 3
hsa-miR-489	0	0	1	1	1	1	FAM175A	family with sequence similarity 175, member A
hsa-miR-489	0	0	1	0	0	0	C17orf72	chromosome 17 open reading frame 72
hsa-miR-489	1	0	1	1	1	1	S100PBP	S100P binding protein
hsa-miR-489	1	0	1	1	0	0	FASTK	Fas-activated serine/threonine kinase
hsa-miR-489	0	0	1	0	1	1	GVINP1	GTPase, very large interferon inducible pseudogene 1
hsa-miR-489	1	0	1	1	1	1	PHF20L1	PHD finger protein 20-like 1
hsa-miR-489	0	0	1	1	1	1	CLEC4M	C-type lectin domain family 4, member M
hsa-miR-489	0	0	1	0	0	0	LOC284561	uncharacterized LOC284561
hsa-miR-489	1	0	1	0	1	1	C14orf101	chromosome 14 open reading frame 101
hsa-miR-489	0	0	1	1	1	1	CXorf57	chromosome X open reading frame 57
hsa-miR-489	0	0	1	0	0	0	LOC286059	tumor necrosis factor receptor superfamily, member 10d, decoy with truncated death domain pseudogene
hsa-miR-489	1	0	1	0	0	0	ZDBF2	zinc finger, DBF-type containing 2
hsa-miR-489	0	0	1	0	0	0	IFFO2	intermediate filament family orphan 2
hsa-miR-489	1	0	1	0	1	1	ATP2B1	ATPase, Ca++ transporting, plasma membrane 1
hsa-miR-489	1	0	1	1	1	1	YPEL5	yippee-like 5 (Drosophila)
hsa-miR-489	1	0	1	1	0	0	MAGI3	membrane associated guanylate kinase, WW and PDZ domain containing 3
hsa-miR-489	1	0	1	1	1	1	GORASP2	golgi reassembly stacking protein 2, 55kDa
hsa-miR-489	1	0	1	1	0	0	SLC44A2	solute carrier family 44, member 2
hsa-miR-489	1	0	1	1	1	1	NFASC	neurofascin
hsa-miR-489	1	0	1	1	1	1	FAM40A	family with sequence similarity 40, member A
hsa-miR-489	1	0	1	1	1	1	GPD2	glycerol-3-phosphate dehydrogenase 2 (mitochondrial)
hsa-miR-489	0	0	1	0	0	0	NBLA00301	Nbla00301
hsa-miR-489	1	0	1	1	1	1	ARHGAP36	Rho GTPase activating protein 36
hsa-miR-489	1	0	1	1	1	1	RAP1GDS1	RAP1, GTP-GDP dissociation stimulator 1
hsa-miR-489	0	0	1	1	1	1	THEM6	thioesterase superfamily member 6
hsa-miR-489	1	0	1	1	0	0	SMARCA4	SWI/SNF related, matrix associated, actin dependent regulator of chromatin, subfamily a, member 4
hsa-miR-489	0	0	1	1	1	1	FANCI	Fanconi anemia, complementation group I
hsa-miR-489	1	0	1	0	1	1	RAB1A	RAB1A, member RAS oncogene family
hsa-miR-489	0	0	1	0	0	0	LOC441204	uncharacterized LOC441204
hsa-miR-489	1	0	1	1	1	1	CLCN5	chloride channel, voltage-sensitive 5
hsa-miR-489	1	0	1	0	1	1	RABGEF1	RAB guanine nucleotide exchange factor (GEF) 1
hsa-miR-489	0	0	1	0	1	1	ZNF498	zinc finger protein 498
hsa-miR-489	1	0	1	1	1	1	MLLT6	myeloid/lymphoid or mixed-lineage leukemia (trithorax homolog, Drosophila); translocated to, 6
hsa-miR-489	0	0	1	1	1	1	SCIMP	SLP adaptor and CSK interacting membrane protein
hsa-miR-489	1	0	1	1	1	1	TLE4	transducin-like enhancer of split 4 (E(sp1) homolog, Drosophila)
hsa-miR-489	0	0	1	0	0	0	TUBA3FP	tubulin, alpha 3f, pseudogene
hsa-miR-489	1	0	1	1	1	1	MPP7	membrane protein, palmitoylated 7 (MAGUK p55 subfamily member 7)
hsa-miR-489	0	0	1	1	0	0	PTOV1	prostate tumor overexpressed 1
hsa-miR-489	0	0	1	1	0	0	CD37	CD37 molecule
hsa-miR-489	0	0	1	1	1	1	ALG2	asparagine-linked glycosylation 2, alpha-1,3-mannosyltransferase homolog (S. cerevisiae)
hsa-miR-489	0	0	1	1	1	1	PIK3C3	phosphatidylinositol 3-kinase, catalytic subunit type 3
hsa-miR-489	1	0	1	1	1	1	TLK1	tousled-like kinase 1
hsa-miR-489	0	0	1	0	1	1	TMSB15B	thymosin beta 15B
hsa-miR-489	0	0	1	0	0	0	LOC643837	uncharacterized LOC643837
hsa-miR-489	1	0	1	1	1	1	SYN2	synapsin II
hsa-miR-489	1	0	1	1	1	1	EGR2	early growth response 2
hsa-miR-489	1	0	1	1	1	1	AMMECR1	Alport syndrome, mental retardation, midface hypoplasia and elliptocytosis chromosomal region gene 1
hsa-miR-489	0	0	1	1	1	1	TGFBI	transforming growth factor, beta-induced, 68kDa
hsa-miR-489	0	0	1	0	0	0	CXXC1P1	CXXC finger protein 1 pseudogene 1
hsa-miR-489	1	0	1	1	1	1	KLF4	Kruppel-like factor 4 (gut)
hsa-miR-489	0	0	1	1	1	1	MOBP	myelin-associated oligodendrocyte basic protein
hsa-miR-489	0	0	1	0	0	0	LINC00486	long intergenic non-protein coding RNA 486
hsa-miR-489	0	0	1	1	0	0	ZNF185	zinc finger protein 185 (LIM domain)
hsa-miR-489	0	0	1	0	1	1	NBPF3	neuroblastoma breakpoint family, member 3
hsa-miR-489	1	0	1	0	1	1	STC2	stanniocalcin 2
hsa-miR-489	1	0	1	1	1	1	EPB41L4A	erythrocyte membrane protein band 4.1 like 4A
hsa-miR-489	1	0	1	1	1	1	ACSL1	acyl-CoA synthetase long-chain family member 1
hsa-miR-489	1	0	1	0	1	1	KBTBD8	kelch repeat and BTB (POZ) domain containing 8
hsa-miR-489	1	0	1	1	1	1	SNRNP70	small nuclear ribonucleoprotein 70kDa (U1)
hsa-miR-489	1	0	1	1	1	1	CCDC141	coiled-coil domain containing 141
hsa-miR-489	0	0	1	0	1	1	FLJ39639	uncharacterized protein FLJ39639
hsa-miR-489	0	0	1	1	0	0	RBM5	RNA binding motif protein 5
hsa-miR-489	0	0	1	0	0	0	LOC400680	uncharacterized LOC400680
hsa-miR-489	0	0	1	0	0	0	ZBTB20-AS1	ZBTB20 antisense RNA 1
hsa-miR-489	0	0	1	0	0	0	LOC338579	ankyrin repeat domain-containing protein 30B pseudogene
hsa-miR-489	1	0	1	0	1	1	UNC5D	unc-5 homolog D (C. elegans)
hsa-miR-489	1	0	1	1	1	1	ZMAT3	zinc finger, matrin-type 3
hsa-miR-489	0	0	1	1	0	0	KIAA0146	KIAA0146
hsa-miR-489	0	0	1	1	1	1	WDR64	WD repeat domain 64
hsa-miR-489	1	0	1	1	1	1	C17orf85	chromosome 17 open reading frame 85
hsa-miR-489	0	0	1	1	0	0	RPRD2	regulation of nuclear pre-mRNA domain containing 2
hsa-miR-489	1	0	1	1	1	1	MACROD2	MACRO domain containing 2
hsa-miR-489	1	0	1	1	1	1	PLEKHB2	pleckstrin homology domain containing, family B (evectins) member 2
hsa-miR-489	1	0	1	1	1	1	PIK3R1	phosphoinositide-3-kinase, regulatory subunit 1 (alpha)
hsa-miR-489	0	0	1	1	1	1	RHPN2	rhophilin, Rho GTPase binding protein 2
hsa-miR-489	1	0	1	0	1	1	CLEC16A	C-type lectin domain family 16, member A
hsa-miR-489	0	0	1	1	0	0	TMEM151B	transmembrane protein 151B
hsa-miR-489	1	0	1	1	1	1	EYA1	eyes absent homolog 1 (Drosophila)
hsa-miR-489	0	0	1	1	0	0	AADACL3	arylacetamide deacetylase-like 3
hsa-miR-489	1	0	1	1	1	1	AFAP1	actin filament associated protein 1
hsa-miR-489	0	0	1	1	0	0	BPIFB1	BPI fold containing family B, member 1
hsa-miR-489	0	0	1	0	0	0	LOC440993	uncharacterized LOC440993
hsa-miR-489	0	0	1	1	0	0	C17orf107	chromosome 17 open reading frame 107
hsa-miR-489	1	0	1	0	1	1	USP37	ubiquitin specific peptidase 37
hsa-miR-489	1	0	1	1	1	1	SDCBP	syndecan binding protein (syntenin)
hsa-miR-489	0	0	1	0	0	0	IDO2	indoleamine 2,3-dioxygenase 2
hsa-miR-489	1	0	1	1	1	1	ADAMTS19	ADAM metallopeptidase with thrombospondin type 1 motif, 19
hsa-miR-489	1	0	1	0	1	1	CYB561D1	cytochrome b-561 domain containing 1
hsa-miR-489	0	0	1	0	0	0	FLJ46906	uncharacterized LOC441172
hsa-miR-489	1	0	1	1	1	1	CD200	CD200 molecule
hsa-miR-489	1	0	1	1	1	1	RBM24	RNA binding motif protein 24
hsa-miR-489	1	0	1	1	0	0	FOXP2	forkhead box P2
hsa-miR-489	1	0	1	1	1	1	RNF111	ring finger protein 111
hsa-miR-489	0	0	1	1	0	0	DNASE1L3	deoxyribonuclease I-like 3
hsa-miR-489	0	0	1	1	0	0	ZNF730	zinc finger protein 730
hsa-miR-489	0	0	1	0	0	0	LOC619207	scavenger receptor protein family member
hsa-miR-489	0	0	1	1	1	1	PHF12	PHD finger protein 12
hsa-miR-489	0	0	1	0	0	0	AGAP9	ArfGAP with GTPase domain, ankyrin repeat and PH domain 9
hsa-miR-489	0	0	1	1	0	0	ZSCAN18	zinc finger and SCAN domain containing 18
hsa-miR-489	1	0	1	1	1	1	TAP2	transporter 2, ATP-binding cassette, sub-family B (MDR/TAP)
hsa-miR-489	0	0	1	1	1	1	RGS3	regulator of G-protein signaling 3
hsa-miR-489	1	0	1	1	0	0	ABLIM3	actin binding LIM protein family, member 3
hsa-miR-489	1	0	1	1	1	1	LUC7L3	LUC7-like 3 (S. cerevisiae)
hsa-miR-489	1	0	1	1	1	1	NCOA1	nuclear receptor coactivator 1
hsa-miR-489	0	0	1	1	1	1	PTPN20B	protein tyrosine phosphatase, non-receptor type 20B
hsa-miR-489	0	0	1	1	1	1	PTPN20A	protein tyrosine phosphatase, non-receptor type 20A
hsa-miR-489	1	0	1	1	1	1	RIF1	RAP1 interacting factor homolog (yeast)
hsa-miR-489	0	0	1	1	1	1	ARIH1	ariadne homolog, ubiquitin-conjugating enzyme E2 binding protein, 1 (Drosophila)
hsa-miR-489	1	0	1	0	1	1	DCDC2	doublecortin domain containing 2
hsa-miR-489	1	0	1	1	1	1	KIAA1033	KIAA1033
hsa-miR-489	1	0	1	1	1	1	TFE3	transcription factor binding to IGHM enhancer 3
hsa-miR-489	1	0	1	0	1	1	GRIN3A	glutamate receptor, ionotropic, N-methyl-D-aspartate 3A
hsa-miR-489	1	0	1	1	1	1	SLC30A8	solute carrier family 30 (zinc transporter), member 8
hsa-miR-489	1	0	1	0	1	1	HNRNPA3	heterogeneous nuclear ribonucleoprotein A3
hsa-miR-489	0	0	1	1	1	1	EGFLAM	EGF-like, fibronectin type III and laminin G domains
hsa-miR-489	0	0	1	1	0	0	EFCAB11	EF-hand calcium binding domain 11
hsa-miR-489	0	0	1	1	1	1	MYPN	myopalladin
hsa-miR-489	1	0	1	1	1	1	KANK1	KN motif and ankyrin repeat domains 1
hsa-miR-489	1	0	1	0	1	1	MPP5	membrane protein, palmitoylated 5 (MAGUK p55 subfamily member 5)
hsa-miR-489	1	0	1	0	1	1	GPCPD1	glycerophosphocholine phosphodiesterase GDE1 homolog (S. cerevisiae)
hsa-miR-489	0	0	1	0	0	0	C1RL-AS1	C1RL antisense RNA 1
hsa-miR-489	1	0	1	1	1	1	BPTF	bromodomain PHD finger transcription factor
hsa-miR-489	0	0	1	0	0	0	EPHA1-AS1	EPHA1 antisense RNA 1
hsa-miR-489	0	0	1	0	0	0	ADCY10P1	adenylate cyclase 10 (soluble) pseudogene 1
hsa-miR-489	1	0	1	1	1	1	ATAT1	alpha tubulin acetyltransferase 1
hsa-miR-489	1	0	1	1	1	1	IL17RD	interleukin 17 receptor D
hsa-miR-489	1	0	1	0	0	0	NPEPL1	aminopeptidase-like 1
hsa-miR-489	1	0	1	1	1	1	ANKRD49	ankyrin repeat domain 49
hsa-miR-489	1	0	1	1	1	1	DIS3L2	DIS3 mitotic control homolog (S. cerevisiae)-like 2
hsa-miR-489	0	0	1	1	1	1	TEX2	testis expressed 2
hsa-miR-489	1	0	1	1	1	1	CADM2	cell adhesion molecule 2
hsa-miR-489	1	0	1	0	1	1	PATL1	protein associated with topoisomerase II homolog 1 (yeast)
hsa-miR-489	0	0	1	1	1	1	C5orf45	chromosome 5 open reading frame 45
hsa-miR-489	0	0	1	0	1	1	PSG1	pregnancy specific beta-1-glycoprotein 1
hsa-miR-489	1	0	1	1	1	1	IKZF2	IKAROS family zinc finger 2 (Helios)
hsa-miR-489	1	0	1	1	1	1	ITSN1	intersectin 1 (SH3 domain protein)
hsa-miR-489	0	0	1	1	1	1	CEP41	centrosomal protein 41kDa
hsa-miR-489	1	0	1	1	1	1	WDR26	WD repeat domain 26
hsa-miR-489	1	0	1	1	1	1	OPRM1	opioid receptor, mu 1
hsa-miR-489	0	0	1	1	0	0	CCL4	chemokine (C-C motif) ligand 4
hsa-miR-489	0	0	1	1	1	1	GCOM1	GRINL1A complex locus 1
hsa-miR-489	1	0	1	1	1	1	NLGN4X	neuroligin 4, X-linked
hsa-miR-489	1	0	1	0	1	1	ANKRD28	ankyrin repeat domain 28
hsa-miR-489	0	0	1	1	1	1	NYAP1	neuronal tyrosine-phosphorylated phosphoinositide-3-kinase adaptor 1
hsa-miR-489	0	0	1	0	1	1	XKR5	XK, Kell blood group complex subunit-related family, member 5
hsa-miR-489	1	0	1	0	1	1	LRAT	lecithin retinol acyltransferase (phosphatidylcholine--retinol O-acyltransferase)
hsa-miR-489	1	0	1	1	1	1	MOG	myelin oligodendrocyte glycoprotein
hsa-miR-489	0	0	1	1	0	0	DHRS4	dehydrogenase/reductase (SDR family) member 4
hsa-miR-489	0	0	1	1	0	0	USP27X	ubiquitin specific peptidase 27, X-linked
hsa-miR-489	1	0	1	1	1	1	PLCH1	phospholipase C, eta 1
hsa-miR-489	1	0	1	1	1	1	PFKFB4	6-phosphofructo-2-kinase/fructose-2,6-biphosphatase 4
hsa-miR-489	1	0	1	1	1	1	QKI	QKI, KH domain containing, RNA binding
hsa-miR-489	0	0	1	1	0	0	NBPF8	neuroblastoma breakpoint family, member 8
hsa-miR-489	0	0	1	1	1	1	IL23R	interleukin 23 receptor
hsa-miR-489	1	0	1	0	1	1	FAM46A	family with sequence similarity 46, member A
hsa-miR-489	0	0	1	1	0	0	DGUOK	deoxyguanosine kinase
hsa-miR-489	0	0	1	1	1	1	ENOPH1	enolase-phosphatase 1
hsa-miR-489	0	0	1	1	1	1	RLIM	ring finger protein, LIM domain interacting
hsa-miR-489	1	0	1	0	1	1	DPYSL5	dihydropyrimidinase-like 5
hsa-miR-489	1	0	1	1	1	1	RIMS3	regulating synaptic membrane exocytosis 3
hsa-miR-489	1	0	1	0	1	1	DCAF10	DDB1 and CUL4 associated factor 10
hsa-miR-489	1	0	1	1	1	1	ZNF410	zinc finger protein 410
hsa-miR-489	1	0	1	0	1	1	DDX3X	DEAD (Asp-Glu-Ala-Asp) box polypeptide 3, X-linked
hsa-miR-489	0	0	1	0	1	1	TMEM169	transmembrane protein 169
hsa-miR-489	0	0	1	1	1	1	ZNF85	zinc finger protein 85
hsa-miR-489	0	0	1	0	0	0	ATXN7L3B	ataxin 7-like 3B
hsa-miR-489	0	0	1	1	1	1	WSCD1	WSC domain containing 1
hsa-miR-489	1	0	1	1	1	1	B4GALT3	UDP-Gal:betaGlcNAc beta 1,4- galactosyltransferase, polypeptide 3
hsa-miR-489	1	0	1	1	1	1	GRIA2	glutamate receptor, ionotropic, AMPA 2
hsa-miR-489	0	0	1	1	1	1	ATG12	autophagy related 12
hsa-miR-489	1	0	1	1	1	1	TRIM2	tripartite motif containing 2
hsa-miR-489	1	0	1	1	1	1	SUPT16H	suppressor of Ty 16 homolog (S. cerevisiae)
hsa-miR-489	0	0	1	1	1	1	TOMM40L	translocase of outer mitochondrial membrane 40 homolog (yeast)-like
hsa-miR-489	1	0	1	1	1	1	ZBTB38	zinc finger and BTB domain containing 38
hsa-miR-489	0	0	1	0	1	1	ZNF37A	zinc finger protein 37A
hsa-miR-489	1	0	1	1	1	1	TMEM9B	TMEM9 domain family, member B
hsa-miR-489	1	0	1	0	1	1	NR1D2	nuclear receptor subfamily 1, group D, member 2
hsa-miR-489	1	0	1	1	1	1	RAN	RAN, member RAS oncogene family
hsa-miR-489	0	0	1	1	1	1	FAM122C	family with sequence similarity 122C
hsa-miR-489	1	0	1	1	1	1	CC2D1B	coiled-coil and C2 domain containing 1B
hsa-miR-489	1	0	1	1	1	1	ELF4	E74-like factor 4 (ets domain transcription factor)
hsa-miR-489	0	0	1	1	1	1	RDH11	retinol dehydrogenase 11 (all-trans/9-cis/11-cis)
hsa-miR-489	0	0	1	1	1	1	GLIPR2	GLI pathogenesis-related 2
hsa-miR-489	1	0	1	0	1	1	SLC19A2	solute carrier family 19 (thiamine transporter), member 2
hsa-miR-489	1	0	1	1	1	1	SUZ12	suppressor of zeste 12 homolog (Drosophila)
hsa-miR-489	0	0	1	0	1	1	CD99P1	CD99 molecule pseudogene 1
hsa-miR-489	0	0	1	1	0	0	TPT1	tumor protein, translationally-controlled 1
hsa-miR-489	0	0	1	1	1	1	ZCCHC10	zinc finger, CCHC domain containing 10
hsa-miR-489	1	0	1	1	1	1	SPOCK2	sparc/osteonectin, cwcv and kazal-like domains proteoglycan (testican) 2
hsa-miR-489	1	0	1	1	1	1	FAM213A	family with sequence similarity 213, member A
hsa-miR-489	0	0	1	1	1	1	TLR4	toll-like receptor 4
hsa-miR-489	0	0	1	1	1	1	C18orf21	chromosome 18 open reading frame 21
hsa-miR-489	1	0	1	1	1	1	CNTN4	contactin 4
hsa-miR-489	0	0	1	0	0	0	ZBED3-AS1	ZBED3 antisense RNA 1
hsa-miR-489	1	0	1	1	1	1	ADAM9	ADAM metallopeptidase domain 9
hsa-miR-489	1	0	1	1	1	1	ZBTB11	zinc finger and BTB domain containing 11
hsa-miR-489	1	0	1	0	0	0	KCNU1	potassium channel, subfamily U, member 1
hsa-miR-489	1	0	1	0	1	1	SV2B	synaptic vesicle glycoprotein 2B
hsa-miR-489	0	0	1	1	0	0	AGBL3	ATP/GTP binding protein-like 3
hsa-miR-489	1	0	1	1	1	1	ADARB1	adenosine deaminase, RNA-specific, B1
hsa-miR-489	1	0	1	1	1	1	SULT4A1	sulfotransferase family 4A, member 1
hsa-miR-489	0	0	1	0	1	1	FLJ25328	uncharacterized LOC148231
hsa-miR-489	1	0	1	1	1	1	GLUL	glutamate-ammonia ligase
hsa-miR-489	0	0	1	1	1	1	C7orf53	chromosome 7 open reading frame 53
hsa-miR-489	1	0	1	1	1	1	TBC1D1	TBC1 (tre-2/USP6, BUB2, cdc16) domain family, member 1
hsa-miR-489	1	0	1	1	0	0	MRC2	mannose receptor, C type 2
hsa-miR-489	0	0	1	0	1	1	TTC23L	tetratricopeptide repeat domain 23-like
hsa-miR-489	0	0	1	1	0	0	WASIR2	WASH and IL9R antisense RNA 2
hsa-miR-489	1	0	1	1	1	1	SECISBP2L	SECIS binding protein 2-like
hsa-miR-489	1	0	1	1	1	1	MAK	male germ cell-associated kinase
hsa-miR-489	0	0	1	1	1	1	IL20RB	interleukin 20 receptor beta
hsa-miR-489	0	0	1	1	1	1	HEXA	hexosaminidase A (alpha polypeptide)
hsa-miR-489	0	0	1	1	1	1	EDA2R	ectodysplasin A2 receptor
hsa-miR-489	1	0	1	1	1	1	FAM120A	family with sequence similarity 120A
hsa-miR-489	0	0	1	1	0	0	STPG1	sperm-tail PG-rich repeat containing 1
hsa-miR-489	1	0	1	1	1	1	GRIA4	glutamate receptor, ionotropic, AMPA 4
hsa-miR-489	0	0	1	1	1	1	APBB1IP	amyloid beta (A4) precursor protein-binding, family B, member 1 interacting protein
hsa-miR-489	0	0	1	1	1	1	C6	complement component 6
hsa-miR-489	1	0	1	1	1	1	CTDSPL2	CTD (carboxy-terminal domain, RNA polymerase II, polypeptide A) small phosphatase like 2
hsa-miR-489	0	0	1	1	1	1	SEC24D	SEC24 family, member D (S. cerevisiae)
hsa-miR-489	0	0	1	1	0	0	SNTG2	syntrophin, gamma 2
hsa-miR-489	1	0	1	1	1	1	ZNF618	zinc finger protein 618
hsa-miR-489	0	0	1	0	0	0	SPATA3	spermatogenesis associated 3
hsa-miR-489	0	0	1	0	0	0	LINC00642	long intergenic non-protein coding RNA 642
hsa-miR-489	1	0	1	0	1	1	CPEB4	cytoplasmic polyadenylation element binding protein 4
hsa-miR-489	1	0	1	1	1	1	BNC2	basonuclin 2
hsa-miR-489	1	0	1	1	1	1	SOX6	SRY (sex determining region Y)-box 6
hsa-miR-489	0	0	1	0	0	0	MGC42157	uncharacterized locus MGC42157
hsa-miR-489	1	0	1	1	1	1	DPP10	dipeptidyl-peptidase 10 (non-functional)
hsa-miR-489	0	0	1	1	0	0	CCDC152	coiled-coil domain containing 152
hsa-miR-489	0	0	1	0	0	0	USP32P1	ubiquitin specific peptidase 32 pseudogene 1
hsa-miR-489	0	0	1	1	1	1	FAM21C	family with sequence similarity 21, member C
hsa-miR-489	1	0	1	1	1	1	TIMP2	TIMP metallopeptidase inhibitor 2
hsa-miR-489	0	0	1	0	1	1	LINC00634	long intergenic non-protein coding RNA 634
hsa-miR-489	0	0	1	0	0	0	LOC339240	keratin 17 pseudogene
hsa-miR-489	1	0	1	1	1	1	UNC13C	unc-13 homolog C (C. elegans)
hsa-miR-489	1	0	1	0	1	1	KIAA0430	KIAA0430
hsa-miR-489	0	0	1	1	1	1	C17orf104	chromosome 17 open reading frame 104
hsa-miR-489	0	0	1	1	1	1	BCO2	beta-carotene oxygenase 2
hsa-miR-489	1	0	1	1	1	1	TNFSF4	tumor necrosis factor (ligand) superfamily, member 4
hsa-miR-489	1	0	1	1	1	1	ARID3B	AT rich interactive domain 3B (BRIGHT-like)
hsa-miR-489	1	0	1	1	1	1	CLOCK	clock homolog (mouse)
hsa-miR-489	0	0	1	1	1	1	ZNF568	zinc finger protein 568
hsa-miR-489	0	0	1	1	1	1	C8orf34	chromosome 8 open reading frame 34
hsa-miR-489	0	0	1	1	1	1	C4orf32	chromosome 4 open reading frame 32
hsa-miR-489	0	0	1	1	1	1	STARD4	StAR-related lipid transfer (START) domain containing 4
hsa-miR-489	0	0	1	0	0	0	LOC340094	uncharacterized LOC340094
hsa-miR-489	0	0	1	1	0	0	NIT1	nitrilase 1
hsa-miR-489	0	0	1	0	0	0	LOC348120	uncharacterized LOC348120
hsa-miR-489	1	0	1	0	1	1	KDM2A	lysine (K)-specific demethylase 2A
hsa-miR-489	1	0	1	1	0	0	TTC9	tetratricopeptide repeat domain 9
hsa-miR-489	1	0	1	1	1	1	CLVS1	clavesin 1
hsa-miR-489	1	0	1	1	1	1	ANKRD46	ankyrin repeat domain 46
hsa-miR-489	1	0	1	1	1	1	FNDC3A	fibronectin type III domain containing 3A
hsa-miR-489	0	0	1	1	1	1	ZNF254	zinc finger protein 254
hsa-miR-489	1	0	1	1	1	1	KLHL28	kelch-like 28 (Drosophila)
hsa-miR-489	1	0	1	1	1	1	ZEB2	zinc finger E-box binding homeobox 2
hsa-miR-489	1	0	1	1	1	1	GTDC1	glycosyltransferase-like domain containing 1
hsa-miR-489	0	0	1	1	1	1	B4GALT4	UDP-Gal:betaGlcNAc beta 1,4- galactosyltransferase, polypeptide 4
hsa-miR-489	1	0	1	1	1	1	PDGFRA	platelet-derived growth factor receptor, alpha polypeptide
hsa-miR-489	1	0	1	1	1	1	NIPBL	Nipped-B homolog (Drosophila)
hsa-miR-489	1	0	1	1	1	1	ADCY6	adenylate cyclase 6
hsa-miR-489	0	0	1	1	1	1	RFX3	regulatory factor X, 3 (influences HLA class II expression)
hsa-miR-489	1	0	1	0	1	1	MAGIX	MAGI family member, X-linked
hsa-miR-489	0	0	1	0	0	0	ZNF66P	zinc finger protein 66, pseudogene
hsa-miR-489	1	0	1	1	1	1	SRPK2	SRSF protein kinase 2
hsa-miR-489	1	0	1	1	1	1	ANLN	anillin, actin binding protein
hsa-miR-489	0	0	1	0	0	0	LOC727849	golgin A2 pseudogene
hsa-miR-489	0	0	1	0	0	0	LOC727751	uncharacterized LOC727751
hsa-miR-489	0	0	1	0	0	0	AGSK1	golgin subfamily A member 2-like
hsa-miR-489	0	0	1	0	0	0	LINC00152	long intergenic non-protein coding RNA 152
hsa-miR-489	0	0	1	1	0	0	EBNA1BP2	EBNA1 binding protein 2
hsa-miR-489	1	0	1	1	1	1	WNT5A	wingless-type MMTV integration site family, member 5A
hsa-miR-489	0	0	1	1	1	1	C3orf67	chromosome 3 open reading frame 67
hsa-miR-489	1	0	1	0	1	1	AMMECR1L	AMME chromosomal region gene 1-like
hsa-miR-489	1	0	1	1	1	1	ZMYND11	zinc finger, MYND-type containing 11
hsa-miR-489	0	0	1	1	1	1	XG	Xg blood group
hsa-miR-489	0	0	1	0	1	1	TCAIM	T cell activation inhibitor, mitochondrial
hsa-miR-489	0	0	1	1	0	0	ADAMTS13	ADAM metallopeptidase with thrombospondin type 1 motif, 13
hsa-miR-489	0	0	1	0	0	0	LOC441493	uncharacterized LOC441493
hsa-miR-489	0	0	1	1	1	1	TTN	titin
hsa-miR-489	1	0	1	0	1	1	DNAJC6	DnaJ (Hsp40) homolog, subfamily C, member 6
hsa-miR-489	1	0	1	1	1	1	LARP1B	La ribonucleoprotein domain family, member 1B
hsa-miR-489	1	0	1	1	1	1	TET2	tet methylcytosine dioxygenase 2
hsa-miR-489	0	0	1	1	0	0	ASB3	ankyrin repeat and SOCS box containing 3
hsa-miR-489	1	0	1	1	1	1	UBE4A	ubiquitination factor E4A
hsa-miR-489	0	0	1	0	0	0	INTS4L1	integrator complex subunit 4-like 1
hsa-miR-489	1	0	1	1	1	1	NR3C2	nuclear receptor subfamily 3, group C, member 2
hsa-miR-489	1	0	1	1	1	1	TMEM64	transmembrane protein 64
hsa-miR-489	1	0	1	1	1	1	OTUD4	OTU domain containing 4
hsa-miR-489	1	0	1	1	1	1	ANK2	ankyrin 2, neuronal
hsa-miR-489	0	0	1	1	1	1	KANSL1L	KAT8 regulatory NSL complex subunit 1-like
hsa-miR-489	1	0	1	1	1	1	MEGF11	multiple EGF-like-domains 11
hsa-miR-489	1	0	1	1	1	1	ZMYM4	zinc finger, MYM-type 4
hsa-miR-489	1	0	1	1	1	1	MLLT10	myeloid/lymphoid or mixed-lineage leukemia (trithorax homolog, Drosophila); translocated to, 10
hsa-miR-489	0	0	1	0	0	0	DKFZp686D0853	uncharacterized LOC401613
hsa-miR-489	1	0	1	1	1	1	MIER3	mesoderm induction early response 1, family member 3
hsa-miR-489	1	0	1	1	1	1	SGCD	sarcoglycan, delta (35kDa dystrophin-associated glycoprotein)
hsa-miR-489	1	0	1	0	1	1	CCDC88A	coiled-coil domain containing 88A
hsa-miR-489	1	0	1	1	1	1	ETS1	v-ets erythroblastosis virus E26 oncogene homolog 1 (avian)
hsa-miR-489	1	0	1	0	1	1	CLASP2	cytoplasmic linker associated protein 2
hsa-miR-489	1	0	1	1	1	1	C7orf31	chromosome 7 open reading frame 31
hsa-miR-489	0	0	1	1	0	0	CDK5RAP2	CDK5 regulatory subunit associated protein 2
hsa-miR-489	1	0	1	1	1	1	MASP1	mannan-binding lectin serine peptidase 1 (C4/C2 activating component of Ra-reactive factor)
hsa-miR-489	0	0	1	1	0	0	RPS24	ribosomal protein S24
hsa-miR-489	1	0	1	0	1	1	CPNE3	copine III
hsa-miR-489	0	0	1	1	1	1	UHRF1BP1L	UHRF1 binding protein 1-like
hsa-miR-489	0	0	1	1	0	0	SNAPC2	small nuclear RNA activating complex, polypeptide 2, 45kDa
hsa-miR-489	0	0	1	0	1	1	THAP6	THAP domain containing 6
hsa-miR-489	1	0	1	1	1	1	TLN2	talin 2
hsa-miR-489	1	0	1	1	1	1	FOXP1	forkhead box P1
hsa-miR-489	1	0	1	1	1	1	TC2N	tandem C2 domains, nuclear
hsa-miR-489	1	0	1	1	1	1	BCLAF1	BCL2-associated transcription factor 1
hsa-miR-489	1	0	1	1	1	1	C5orf24	chromosome 5 open reading frame 24
hsa-miR-489	1	0	1	1	1	1	PGAP1	post-GPI attachment to proteins 1
hsa-miR-489	0	0	1	1	1	1	ABCD3	ATP-binding cassette, sub-family D (ALD), member 3
hsa-miR-489	0	0	1	1	1	1	THSD4	thrombospondin, type I, domain containing 4
hsa-miR-489	1	0	1	1	1	1	BZRAP1	benzodiazapine receptor (peripheral) associated protein 1
hsa-miR-489	0	0	1	1	1	1	ZCCHC11	zinc finger, CCHC domain containing 11
hsa-miR-489	1	0	1	1	1	1	PCMT1	protein-L-isoaspartate (D-aspartate) O-methyltransferase
hsa-miR-489	0	0	1	1	0	0	PPAPDC1B	phosphatidic acid phosphatase type 2 domain containing 1B
hsa-miR-489	0	0	1	1	0	0	PPT2	palmitoyl-protein thioesterase 2
hsa-miR-489	0	0	1	1	1	1	PSG2	pregnancy specific beta-1-glycoprotein 2
hsa-miR-489	0	0	1	1	0	0	AP4S1	adaptor-related protein complex 4, sigma 1 subunit
hsa-miR-489	1	0	1	1	0	0	RAB24	RAB24, member RAS oncogene family
hsa-miR-489	0	0	1	1	0	0	EMX1	empty spiracles homeobox 1
hsa-miR-489	1	0	1	1	1	1	FUT9	fucosyltransferase 9 (alpha (1,3) fucosyltransferase)
hsa-miR-489	0	0	1	0	0	0	RPS16P10	ribosomal protein S16 pseudogene 10
hsa-miR-489	0	0	1	1	1	1	DGCR14	DiGeorge syndrome critical region gene 14
hsa-miR-489	0	0	1	1	1	1	SEC22C	SEC22 vesicle trafficking protein homolog C (S. cerevisiae)
hsa-miR-489	0	0	1	1	0	0	PSG8	pregnancy specific beta-1-glycoprotein 8
hsa-miR-489	0	0	1	1	1	1	ATP1B3	ATPase, Na+/K+ transporting, beta 3 polypeptide
hsa-miR-489	0	0	1	1	0	0	ITGB3BP	integrin beta 3 binding protein (beta3-endonexin)
hsa-miR-489	1	0	1	1	1	1	PTN	pleiotrophin
hsa-miR-489	1	0	1	0	1	1	BNIP3L	BCL2/adenovirus E1B 19kDa interacting protein 3-like
hsa-miR-489	0	0	1	1	1	1	FAT1	FAT tumor suppressor homolog 1 (Drosophila)
hsa-miR-489	1	0	1	1	1	1	BPNT1	3'(2'), 5'-bisphosphate nucleotidase 1
hsa-miR-489	1	0	1	1	1	1	CHTF8	CTF8, chromosome transmission fidelity factor 8 homolog (S. cerevisiae)
hsa-miR-489	1	0	1	1	1	1	RALB	v-ral simian leukemia viral oncogene homolog B (ras related; GTP binding protein)
hsa-miR-489	1	0	1	1	1	1	DCN	decorin
hsa-miR-489	0	0	1	0	0	0	TRIQK	triple QxxK/R motif containing
hsa-miR-489	0	0	1	0	1	1	EMX2	empty spiracles homeobox 2
hsa-miR-489	0	0	1	1	0	0	EMC7	ER membrane protein complex subunit 7
hsa-miR-489	0	0	1	1	1	1	ACTR3B	ARP3 actin-related protein 3 homolog B (yeast)
hsa-miR-489	0	0	1	1	1	1	PGAP2	post-GPI attachment to proteins 2
hsa-miR-489	0	0	1	0	1	1	PSG11	pregnancy specific beta-1-glycoprotein 11
hsa-miR-489	0	0	1	1	1	1	ATG4A	autophagy related 4A, cysteine peptidase
hsa-miR-489	0	0	1	1	1	1	BEX2	brain expressed X-linked 2
hsa-miR-489	0	0	1	1	0	0	FGB	fibrinogen beta chain
hsa-miR-489	0	0	1	1	1	1	TMLHE	trimethyllysine hydroxylase, epsilon
hsa-miR-489	0	0	1	1	0	0	RPSA	ribosomal protein SA
hsa-miR-489	0	0	1	1	1	1	TANK	TRAF family member-associated NFKB activator
hsa-miR-489	0	0	1	1	1	1	RHEBL1	Ras homolog enriched in brain like 1
hsa-miR-489	0	0	1	1	1	1	CD1C	CD1c molecule
hsa-miR-489	0	0	1	1	1	1	LDHA	lactate dehydrogenase A
hsa-miR-489	0	0	1	1	1	1	CXADR	coxsackie virus and adenovirus receptor
hsa-miR-489	1	0	1	1	1	1	RNF2	ring finger protein 2
hsa-miR-489	0	0	1	0	0	0	ZNF674-AS1	ZNF674 antisense RNA 1
hsa-miR-489	1	0	1	0	1	1	SLC2A3	solute carrier family 2 (facilitated glucose transporter), member 3
hsa-miR-489	0	0	1	1	0	0	GPRC5C	G protein-coupled receptor, family C, group 5, member C
hsa-miR-489	0	0	1	1	1	1	SLC33A1	solute carrier family 33 (acetyl-CoA transporter), member 1
hsa-miR-489	1	0	1	1	1	1	ATP5G3	ATP synthase, H+ transporting, mitochondrial Fo complex, subunit C3 (subunit 9)
hsa-miR-489	0	0	1	1	1	1	ANXA7	annexin A7
hsa-miR-489	1	0	1	1	1	1	MAN1C1	mannosidase, alpha, class 1C, member 1
hsa-miR-489	1	0	1	1	1	1	MED1	mediator complex subunit 1
hsa-miR-489	0	0	1	1	1	1	ZFAND1	zinc finger, AN1-type domain 1
hsa-miR-489	0	0	1	1	1	1	COMMD3	COMM domain containing 3
hsa-miR-489	0	0	1	1	0	0	DPEP2	dipeptidase 2
hsa-miR-489	0	0	1	1	1	1	TOP3B	topoisomerase (DNA) III beta
hsa-miR-489	1	0	1	1	1	1	RND3	Rho family GTPase 3
hsa-miR-489	0	0	1	1	0	0	FAM3B	family with sequence similarity 3, member B
hsa-miR-489	0	0	1	0	0	0	LOC731789	uncharacterized LOC731789
hsa-miR-489	1	0	1	0	1	1	BTRC	beta-transducin repeat containing E3 ubiquitin protein ligase
hsa-miR-489	0	0	1	1	1	1	MRPL42	mitochondrial ribosomal protein L42
hsa-miR-489	1	0	1	0	1	1	MEGF10	multiple EGF-like-domains 10
hsa-miR-489	0	0	1	1	0	0	FMN1	formin 1
hsa-miR-489	0	0	1	0	0	0	MUC19	mucin 19, oligomeric
hsa-miR-489	1	0	1	1	1	1	MAPK8IP3	mitogen-activated protein kinase 8 interacting protein 3
hsa-miR-489	0	0	1	1	1	1	OAT	ornithine aminotransferase
hsa-miR-489	0	0	1	0	1	1	SYNPR	synaptoporin
hsa-miR-489	1	0	1	1	1	1	SLC30A7	solute carrier family 30 (zinc transporter), member 7
hsa-miR-489	1	0	1	0	1	1	EFR3A	EFR3 homolog A (S. cerevisiae)
hsa-miR-489	0	0	1	1	1	1	PARP14	poly (ADP-ribose) polymerase family, member 14
hsa-miR-489	1	0	1	1	1	1	BTLA	B and T lymphocyte associated
hsa-miR-489	1	0	1	1	1	1	ATP2B2	ATPase, Ca++ transporting, plasma membrane 2
hsa-miR-489	1	0	1	0	1	1	YES1	v-yes-1 Yamaguchi sarcoma viral oncogene homolog 1
hsa-miR-489	0	0	1	1	1	1	GAD2	glutamate decarboxylase 2 (pancreatic islets and brain, 65kDa)
hsa-miR-489	1	0	1	0	1	1	ACVR2A	activin A receptor, type IIA
hsa-miR-489	1	0	1	0	1	1	SLC26A2	solute carrier family 26 (sulfate transporter), member 2
hsa-miR-489	1	0	1	1	1	1	FBN1	fibrillin 1
hsa-miR-489	1	0	1	0	1	1	GHR	growth hormone receptor
hsa-miR-489	1	0	1	1	1	1	GJA1	gap junction protein, alpha 1, 43kDa
hsa-miR-489	0	0	1	1	1	1	GLDC	glycine dehydrogenase (decarboxylating)
hsa-miR-489	0	0	1	1	0	0	GP1BA	glycoprotein Ib (platelet), alpha polypeptide
hsa-miR-489	1	0	1	1	1	1	HK2	hexokinase 2
hsa-miR-489	1	0	1	0	1	1	ITGB3	integrin, beta 3 (platelet glycoprotein IIIa, antigen CD61)
hsa-miR-489	1	0	1	1	1	1	JAG1	jagged 1
hsa-miR-489	1	0	1	1	1	1	KCNA1	potassium voltage-gated channel, shaker-related subfamily, member 1 (episodic ataxia with myokymia)
hsa-miR-489	0	0	1	1	1	1	LPL	lipoprotein lipase
hsa-miR-489	1	0	1	1	1	1	MITF	microphthalmia-associated transcription factor
hsa-miR-489	1	0	1	1	1	1	OCRL	oculocerebrorenal syndrome of Lowe
hsa-miR-489	0	0	1	1	1	1	SLC5A1	solute carrier family 5 (sodium/glucose cotransporter), member 1
hsa-miR-489	1	0	1	1	1	1	TIMP3	TIMP metallopeptidase inhibitor 3
hsa-miR-489	0	0	1	1	0	0	PSEN2	presenilin 2 (Alzheimer disease 4)
hsa-miR-489	1	0	1	1	1	1	RFX5	regulatory factor X, 5 (influences HLA class II expression)
hsa-miR-489	1	0	1	1	1	1	HNF1B	HNF1 homeobox B
hsa-miR-489	1	0	1	1	1	1	ATRX	alpha thalassemia/mental retardation syndrome X-linked
hsa-miR-489	0	0	1	1	1	1	ALDH1A1	aldehyde dehydrogenase 1 family, member A1
hsa-miR-489	0	0	1	1	1	1	EPO	erythropoietin
hsa-miR-489	1	0	1	0	1	1	GABRA4	gamma-aminobutyric acid (GABA) A receptor, alpha 4
hsa-miR-489	1	0	1	1	1	1	GABRB3	gamma-aminobutyric acid (GABA) A receptor, beta 3
hsa-miR-489	1	0	1	1	1	1	GRM8	glutamate receptor, metabotropic 8
hsa-miR-489	1	0	1	1	1	1	IGF1R	insulin-like growth factor 1 receptor
hsa-miR-489	1	0	1	0	1	1	KCNJ2	potassium inwardly-rectifying channel, subfamily J, member 2
hsa-miR-489	1	0	1	1	1	1	REEP3	receptor accessory protein 3
hsa-miR-489	1	0	1	1	1	1	MIR22HG	MIR22 host gene (non-protein coding)
hsa-miR-489	1	0	1	0	1	1	PPARA	peroxisome proliferator-activated receptor alpha
hsa-miR-489	0	0	1	1	1	1	STAG3L1	stromal antigen 3-like 1
hsa-miR-489	1	0	1	1	1	1	KCTD11	potassium channel tetramerisation domain containing 11
hsa-miR-489	1	0	1	1	1	1	ABLIM1	actin binding LIM protein 1
hsa-miR-489	1	0	1	0	1	1	SMAD2	SMAD family member 2
hsa-miR-489	1	0	1	1	1	1	KLHL31	kelch-like 31 (Drosophila)
hsa-miR-489	1	0	1	1	1	1	RBMS3	RNA binding motif, single stranded interacting protein 3
hsa-miR-489	1	0	1	1	1	1	BICD2	bicaudal D homolog 2 (Drosophila)
hsa-miR-489	0	0	1	1	1	1	ALG11	asparagine-linked glycosylation 11, alpha-1,2-mannosyltransferase homolog (yeast)
hsa-miR-489	0	0	1	1	1	1	SUMO1	SMT3 suppressor of mif two 3 homolog 1 (S. cerevisiae)
hsa-miR-489	1	0	1	0	1	1	IP6K1	inositol hexakisphosphate kinase 1
hsa-miR-489	0	0	1	1	1	1	MAPKAP1	mitogen-activated protein kinase associated protein 1
hsa-miR-489	0	0	1	1	0	0	TCEAL3	transcription elongation factor A (SII)-like 3
hsa-miR-489	0	0	1	1	1	1	TCEAL6	transcription elongation factor A (SII)-like 6
hsa-miR-489	1	0	1	1	1	1	NTRK3	neurotrophic tyrosine kinase, receptor, type 3
hsa-miR-489	1	0	1	1	1	1	IGSF3	immunoglobulin superfamily, member 3
hsa-miR-489	1	0	1	1	1	1	BRWD1	bromodomain and WD repeat domain containing 1
hsa-miR-489	1	0	1	1	1	1	EI24	etoposide induced 2.4 mRNA
hsa-miR-489	1	0	1	1	1	1	ZDHHC9	zinc finger, DHHC-type containing 9
hsa-miR-489	0	0	1	1	1	1	MXI1	MAX interactor 1
hsa-miR-489	0	0	1	1	1	1	GCSAM	germinal center-associated, signaling and motility
hsa-miR-489	1	0	1	0	1	1	MTX3	metaxin 3
hsa-miR-489	0	0	1	1	1	1	SERP2	stress-associated endoplasmic reticulum protein family member 2
hsa-miR-489	0	0	1	1	1	1	NCMAP	noncompact myelin associated protein
hsa-miR-489	0	0	1	0	1	1	TRAPPC2	trafficking protein particle complex 2
hsa-miR-489	1	0	1	0	1	1	CREB5	cAMP responsive element binding protein 5
hsa-miR-489	1	0	1	1	1	1	GOSR2	golgi SNAP receptor complex member 2
hsa-miR-489	0	0	1	0	1	1	C9orf106	chromosome 9 open reading frame 106
hsa-miR-489	0	0	1	0	1	1	LINC00596	long intergenic non-protein coding RNA 596
hsa-miR-489	1	0	1	1	1	1	SLC25A53	solute carrier family 25, member 53
hsa-miR-489	1	0	1	1	1	1	DISC1	disrupted in schizophrenia 1
hsa-miR-489	1	0	1	1	1	1	TRNP1	TMF1-regulated nuclear protein 1
hsa-miR-489	1	0	1	1	1	1	H3F3C	H3 histone, family 3C
hsa-miR-489	1	0	1	1	1	1	KCNMA1	potassium large conductance calcium-activated channel, subfamily M, alpha member 1
hsa-miR-489	1	0	1	1	1	1	VMA21	VMA21 vacuolar H+-ATPase homolog (S. cerevisiae)
hsa-miR-489	1	0	1	1	1	1	PFKFB2	6-phosphofructo-2-kinase/fructose-2,6-biphosphatase 2
hsa-miR-489	0	0	1	1	1	1	POLR2M	polymerase (RNA) II (DNA directed) polypeptide M
hsa-miR-489	1	0	1	1	1	1	KALRN	kalirin, RhoGEF kinase
hsa-miR-489	1	0	1	1	1	1	PLEKHG1	pleckstrin homology domain containing, family G (with RhoGef domain) member 1
hsa-miR-489	0	0	1	1	1	1	ATF3	activating transcription factor 3
hsa-miR-489	1	0	1	0	1	1	MSRB3	methionine sulfoxide reductase B3
hsa-miR-489	1	0	1	1	1	1	SRSF7	serine/arginine-rich splicing factor 7
hsa-miR-489	0	0	1	1	1	1	TP53BP2	tumor protein p53 binding protein, 2
hsa-miR-489	1	0	1	1	1	1	NEK10	NIMA (never in mitosis gene a)- related kinase 10
hsa-miR-489	1	0	1	1	1	1	MAF	v-maf musculoaponeurotic fibrosarcoma oncogene homolog (avian)
hsa-miR-489	1	0	1	1	1	1	CSNK1G3	casein kinase 1, gamma 3
hsa-miR-489	0	0	1	0	1	1	STXBP1	syntaxin binding protein 1
hsa-miR-489	1	0	1	1	1	1	MYCL1	v-myc myelocytomatosis viral oncogene homolog 1, lung carcinoma derived (avian)
hsa-miR-489	0	0	1	1	1	1	FAM134B	family with sequence similarity 134, member B
hsa-miR-489	1	0	1	1	1	1	SCD5	stearoyl-CoA desaturase 5
hsa-miR-489	1	0	1	1	1	1	KREMEN1	kringle containing transmembrane protein 1
hsa-miR-489	1	0	1	0	1	1	CREBZF	CREB/ATF bZIP transcription factor
hsa-miR-489	1	0	1	1	1	1	SCN2A	sodium channel, voltage-gated, type II, alpha subunit
hsa-miR-489	1	0	1	1	1	1	PAPD5	PAP associated domain containing 5
hsa-miR-489	1	0	1	1	1	1	CYLD	cylindromatosis (turban tumor syndrome)
hsa-miR-489	0	0	1	1	1	1	GEMIN8	gem (nuclear organelle) associated protein 8
hsa-miR-489	1	0	1	1	1	1	DIAPH3	diaphanous homolog 3 (Drosophila)
hsa-miR-489	1	0	1	1	1	1	FRS2	fibroblast growth factor receptor substrate 2
hsa-miR-489	1	0	1	1	1	1	PVRL2	poliovirus receptor-related 2 (herpesvirus entry mediator B)
hsa-miR-489	1	0	1	1	1	1	HS6ST2	heparan sulfate 6-O-sulfotransferase 2
hsa-miR-489	1	0	1	0	1	1	UBXN2B	UBX domain protein 2B
hsa-miR-489	1	0	1	1	1	1	SRSF1	serine/arginine-rich splicing factor 1
hsa-miR-489	0	0	1	1	1	1	DIAPH1	diaphanous homolog 1 (Drosophila)
hsa-miR-489	1	0	1	1	1	1	CUL4B	cullin 4B
hsa-miR-489	1	0	1	1	1	1	PACRG	PARK2 co-regulated
hsa-miR-489	1	0	1	0	1	1	CCDC85A	coiled-coil domain containing 85A
hsa-miR-489	0	0	1	1	1	1	HSF5	heat shock transcription factor family member 5
hsa-miR-489	1	0	1	1	1	1	BICC1	bicaudal C homolog 1 (Drosophila)
hsa-miR-489	1	0	1	1	1	1	REPS2	RALBP1 associated Eps domain containing 2
hsa-miR-489	1	0	1	0	1	1	XIAP	X-linked inhibitor of apoptosis
hsa-miR-489	1	0	1	1	1	1	CASP10	caspase 10, apoptosis-related cysteine peptidase
hsa-miR-489	0	0	1	1	0	0	CLK3	CDC-like kinase 3
hsa-miR-489	1	0	1	1	1	1	MAPK14	mitogen-activated protein kinase 14
hsa-miR-489	0	0	1	1	1	1	ALOX5AP	arachidonate 5-lipoxygenase-activating protein
hsa-miR-489	1	0	1	1	1	1	ARF3	ADP-ribosylation factor 3
hsa-miR-489	0	0	1	1	0	0	CXCR5	chemokine (C-X-C motif) receptor 5
hsa-miR-489	0	0	1	1	1	1	CD1D	CD1d molecule
hsa-miR-489	1	0	1	1	1	1	COL4A1	collagen, type IV, alpha 1
hsa-miR-489	1	0	1	1	1	1	COL15A1	collagen, type XV, alpha 1
hsa-miR-489	1	0	1	1	1	1	DPP4	dipeptidyl-peptidase 4
hsa-miR-489	1	0	1	1	1	1	DR1	down-regulator of transcription 1, TBP-binding (negative cofactor 2)
hsa-miR-489	1	0	1	1	1	1	HBEGF	heparin-binding EGF-like growth factor
hsa-miR-489	0	0	1	1	0	0	EFNA5	ephrin-A5
hsa-miR-489	1	0	1	1	1	1	FKBP4	FK506 binding protein 4, 59kDa
hsa-miR-489	1	0	1	0	1	1	FUT4	fucosyltransferase 4 (alpha (1,3) fucosyltransferase, myeloid-specific)
hsa-miR-489	0	0	1	1	1	1	FYN	FYN oncogene related to SRC, FGR, YES
hsa-miR-489	1	0	1	1	1	1	GAB1	GRB2-associated binding protein 1
hsa-miR-489	1	0	1	0	1	1	GNAI1	guanine nucleotide binding protein (G protein), alpha inhibiting activity polypeptide 1
hsa-miR-489	1	0	1	1	1	1	KDR	kinase insert domain receptor (a type III receptor tyrosine kinase)
hsa-miR-489	1	0	1	1	1	1	IPO5	importin 5
hsa-miR-489	0	0	1	1	0	0	KRT4	keratin 4
hsa-miR-489	1	0	1	1	1	1	LY75	lymphocyte antigen 75
hsa-miR-489	1	0	1	1	1	1	MAFK	v-maf musculoaponeurotic fibrosarcoma oncogene homolog K (avian)
hsa-miR-489	1	0	1	1	1	1	MSN	moesin
hsa-miR-489	0	0	1	0	1	1	OAZ2	ornithine decarboxylase antizyme 2
hsa-miR-489	1	0	1	0	1	1	PAPPA	pregnancy-associated plasma protein A, pappalysin 1
hsa-miR-489	1	0	1	1	1	1	PCDH7	protocadherin 7
hsa-miR-489	1	0	1	1	1	1	PPP1CB	protein phosphatase 1, catalytic subunit, beta isozyme
hsa-miR-489	0	0	1	1	0	0	PPP1R8	protein phosphatase 1, regulatory subunit 8
hsa-miR-489	1	0	1	1	1	1	PPP2R1B	protein phosphatase 2, regulatory subunit A, beta
hsa-miR-489	0	0	1	1	0	0	PRPSAP1	phosphoribosyl pyrophosphate synthetase-associated protein 1
hsa-miR-489	0	0	1	0	0	0	PSMB10	proteasome (prosome, macropain) subunit, beta type, 10
hsa-miR-489	0	0	1	1	0	0	PSMC6	proteasome (prosome, macropain) 26S subunit, ATPase, 6
hsa-miR-489	1	0	1	1	1	1	PTPN1	protein tyrosine phosphatase, non-receptor type 1
hsa-miR-489	0	0	1	1	1	1	RNASE4	ribonuclease, RNase A family, 4
hsa-miR-489	1	0	1	0	1	1	CCL22	chemokine (C-C motif) ligand 22
hsa-miR-489	1	0	1	1	1	1	SRSF3	serine/arginine-rich splicing factor 3
hsa-miR-489	1	0	1	0	1	1	SLC6A1	solute carrier family 6 (neurotransmitter transporter, GABA), member 1
hsa-miR-489	0	0	1	1	1	1	SMARCA1	SWI/SNF related, matrix associated, actin dependent regulator of chromatin, subfamily a, member 1
hsa-miR-489	1	0	1	1	1	1	SMARCD1	SWI/SNF related, matrix associated, actin dependent regulator of chromatin, subfamily d, member 1
hsa-miR-489	0	0	1	1	1	1	SRP9	signal recognition particle 9kDa
hsa-miR-489	1	0	1	1	1	1	STAC	SH3 and cysteine rich domain
hsa-miR-489	1	0	1	0	1	1	RPS6KB1	ribosomal protein S6 kinase, 70kDa, polypeptide 1
hsa-miR-489	1	0	1	1	1	1	TFAP4	transcription factor AP-4 (activating enhancer binding protein 4)
hsa-miR-489	1	0	1	1	1	1	NR2C2	nuclear receptor subfamily 2, group C, member 2
hsa-miR-489	0	0	1	1	1	1	UBE2D1	ubiquitin-conjugating enzyme E2D 1
hsa-miR-489	0	0	1	1	1	1	UBE2I	ubiquitin-conjugating enzyme E2I
hsa-miR-489	1	0	1	1	1	1	VSNL1	visinin-like 1
hsa-miR-489	1	0	1	1	1	1	YY1	YY1 transcription factor
hsa-miR-489	1	0	1	1	1	1	ZIC3	Zic family member 3
hsa-miR-489	1	0	1	1	1	1	CUL5	cullin 5
hsa-miR-489	1	0	1	1	1	1	NRIP1	nuclear receptor interacting protein 1
hsa-miR-489	1	0	1	0	1	1	SNN	stannin
hsa-miR-489	0	0	1	1	1	1	PIP5K1B	phosphatidylinositol-4-phosphate 5-kinase, type I, beta
hsa-miR-489	1	0	1	0	1	1	VAPA	VAMP (vesicle-associated membrane protein)-associated protein A, 33kDa
hsa-miR-489	1	0	1	1	1	1	CILP	cartilage intermediate layer protein, nucleotide pyrophosphohydrolase
hsa-miR-489	1	0	1	0	1	1	KCNK5	potassium channel, subfamily K, member 5
hsa-miR-489	1	0	1	0	1	1	IRS2	insulin receptor substrate 2
hsa-miR-489	1	0	1	1	1	1	NR5A2	nuclear receptor subfamily 5, group A, member 2
hsa-miR-489	1	0	1	1	1	1	ALDH1A2	aldehyde dehydrogenase 1 family, member A2
hsa-miR-489	1	0	1	0	1	1	SGPL1	sphingosine-1-phosphate lyase 1
hsa-miR-489	0	0	1	1	1	1	PRPF4B	PRP4 pre-mRNA processing factor 4 homolog B (yeast)
hsa-miR-489	0	0	1	1	1	1	UBA3	ubiquitin-like modifier activating enzyme 3
hsa-miR-489	0	0	1	1	0	0	NPR2	natriuretic peptide receptor B/guanylate cyclase B (atrionatriuretic peptide receptor B)
hsa-miR-489	0	0	1	1	0	0	AP2S1	adaptor-related protein complex 2, sigma 1 subunit
hsa-miR-489	1	0	1	1	1	1	HNF4G	hepatocyte nuclear factor 4, gamma
hsa-miR-489	0	0	1	1	0	0	DRG1	developmentally regulated GTP binding protein 1
hsa-miR-489	1	0	1	0	1	1	SLC1A2	solute carrier family 1 (glial high affinity glutamate transporter), member 2
hsa-miR-489	0	0	1	1	0	0	ATP6V1F	ATPase, H+ transporting, lysosomal 14kDa, V1 subunit F
hsa-miR-489	1	0	1	0	1	1	AKAP6	A kinase (PRKA) anchor protein 6
hsa-miR-489	0	0	1	1	1	1	CARTPT	CART prepropeptide
hsa-miR-489	1	0	1	1	1	1	ARL3	ADP-ribosylation factor-like 3
hsa-miR-489	1	0	1	1	1	1	BCL9	B-cell CLL/lymphoma 9
hsa-miR-489	0	0	1	1	1	1	COL12A1	collagen, type XII, alpha 1
hsa-miR-489	1	0	1	1	1	1	CREB1	cAMP responsive element binding protein 1
hsa-miR-489	1	0	1	1	1	1	DAP	death-associated protein
hsa-miR-489	1	0	1	1	1	1	FGD1	FYVE, RhoGEF and PH domain containing 1
hsa-miR-489	1	0	1	1	1	1	KIF11	kinesin family member 11
hsa-miR-489	1	0	1	1	1	1	MLLT3	myeloid/lymphoid or mixed-lineage leukemia (trithorax homolog, Drosophila); translocated to, 3
hsa-miR-489	0	0	1	1	1	1	NAP1L3	nucleosome assembly protein 1-like 3
hsa-miR-489	1	0	1	1	1	1	ONECUT2	one cut homeobox 2
hsa-miR-489	1	0	1	1	1	1	SEC24C	SEC24 family, member C (S. cerevisiae)
hsa-miR-489	1	0	1	0	1	1	DOCK3	dedicator of cytokinesis 3
hsa-miR-489	0	0	1	1	1	1	PRF1	perforin 1 (pore forming protein)
hsa-miR-489	0	0	1	1	0	0	RLN2	relaxin 2
hsa-miR-489	1	0	1	0	1	1	SCD	stearoyl-CoA desaturase (delta-9-desaturase)
hsa-miR-489	1	0	1	0	1	1	SEL1L	sel-1 suppressor of lin-12-like (C. elegans)
hsa-miR-489	1	0	1	1	1	1	SFPQ	splicing factor proline/glutamine-rich
hsa-miR-489	1	0	1	1	1	1	MED13	mediator complex subunit 13
hsa-miR-489	1	0	1	1	1	1	CRK	v-crk sarcoma virus CT10 oncogene homolog (avian)
hsa-miR-489	1	0	1	1	0	0	HCFC1	host cell factor C1 (VP16-accessory protein)
hsa-miR-489	0	0	1	1	1	1	NFIL3	nuclear factor, interleukin 3 regulated
hsa-miR-489	1	0	1	0	1	1	CCDC6	coiled-coil domain containing 6
hsa-miR-489	0	0	1	1	1	1	ZRANB2	zinc finger, RAN-binding domain containing 2
hsa-miR-489	1	0	1	1	1	1	INSIG1	insulin induced gene 1
hsa-miR-489	0	0	1	1	1	1	LPA	lipoprotein, Lp(a)
hsa-miR-489	1	0	1	1	1	1	RGS4	regulator of G-protein signaling 4
hsa-miR-489	0	0	1	1	1	1	CCL8	chemokine (C-C motif) ligand 8
hsa-miR-489	0	0	1	1	1	1	TSPAN3	tetraspanin 3
hsa-miR-489	1	0	1	1	1	1	PRKD3	protein kinase D3
hsa-miR-489	0	0	1	0	1	1	CD96	CD96 molecule
hsa-miR-489	1	0	1	0	1	1	DCAF7	DDB1 and CUL4 associated factor 7
hsa-miR-489	0	0	1	0	1	1	CALCOCO2	calcium binding and coiled-coil domain 2
hsa-miR-489	1	0	1	0	1	1	SPRY3	sprouty homolog 3 (Drosophila)
hsa-miR-489	1	0	1	1	1	1	MAT2A	methionine adenosyltransferase II, alpha
hsa-miR-489	1	0	1	1	1	1	FOXO4	forkhead box O4
hsa-miR-489	1	0	1	1	1	1	MMP16	matrix metallopeptidase 16 (membrane-inserted)
hsa-miR-489	0	0	1	1	1	1	LANCL1	LanC lantibiotic synthetase component C-like 1 (bacterial)
hsa-miR-489	1	0	1	1	1	1	TMEM50B	transmembrane protein 50B
hsa-miR-489	0	0	1	0	1	1	OAS3	2'-5'-oligoadenylate synthetase 3, 100kDa
hsa-miR-489	0	0	1	1	1	1	PA2G4	proliferation-associated 2G4, 38kDa
hsa-miR-489	1	0	1	1	1	1	TACC1	transforming, acidic coiled-coil containing protein 1
hsa-miR-489	1	0	1	1	1	1	SMC1A	structural maintenance of chromosomes 1A
hsa-miR-489	0	0	1	1	1	1	PGRMC2	progesterone receptor membrane component 2
hsa-miR-489	0	0	1	1	0	0	IPO7	importin 7
hsa-miR-489	0	0	1	1	1	1	TM9SF1	transmembrane 9 superfamily member 1
hsa-miR-489	0	0	1	1	0	0	RABAC1	Rab acceptor 1 (prenylated)
hsa-miR-489	1	0	1	1	1	1	SLC2A1	solute carrier family 2 (facilitated glucose transporter), member 1
hsa-miR-489	0	0	1	0	1	1	SLC16A2	solute carrier family 16, member 2 (thyroid hormone transporter)
hsa-miR-489	1	0	1	1	1	1	ZNF217	zinc finger protein 217
hsa-miR-489	0	0	1	1	1	1	CACNG3	calcium channel, voltage-dependent, gamma subunit 3
hsa-miR-489	1	0	1	1	1	1	MAP3K2	mitogen-activated protein kinase kinase kinase 2
hsa-miR-489	1	0	1	1	0	0	RUVBL2	RuvB-like 2 (E. coli)
hsa-miR-489	0	0	1	0	1	1	SUB1	SUB1 homolog (S. cerevisiae)
hsa-miR-489	1	0	1	1	1	1	SPIN1	spindlin 1
hsa-miR-489	1	0	1	1	1	1	CDH10	cadherin 10, type 2 (T2-cadherin)
hsa-miR-489	0	0	1	1	1	1	ATF7	activating transcription factor 7
hsa-miR-489	1	0	1	1	1	1	CD86	CD86 molecule
hsa-miR-489	1	0	1	1	1	1	SKP1	S-phase kinase-associated protein 1
hsa-miR-489	1	0	1	0	1	1	SOX12	SRY (sex determining region Y)-box 12
hsa-miR-489	1	0	1	1	1	1	HSPA13	heat shock protein 70kDa family, member 13
hsa-miR-489	1	0	1	1	1	1	NR4A3	nuclear receptor subfamily 4, group A, member 3
hsa-miR-489	0	0	1	1	1	1	PAGE4	P antigen family, member 4 (prostate associated)
hsa-miR-489	1	0	1	1	1	1	ADAMTS5	ADAM metallopeptidase with thrombospondin type 1 motif, 5
hsa-miR-489	0	0	1	1	1	1	RPP14	ribonuclease P/MRP 14kDa subunit
hsa-miR-489	0	0	1	1	1	1	ZNF146	zinc finger protein 146
hsa-miR-489	1	0	1	0	1	1	PRSS23	protease, serine, 23
hsa-miR-489	1	0	1	1	1	1	PALM2-AKAP2	PALM2-AKAP2 readthrough
hsa-miR-489	1	0	1	1	1	1	HPS5	Hermansky-Pudlak syndrome 5
hsa-miR-489	1	0	1	1	1	1	FBXL3	F-box and leucine-rich repeat protein 3
hsa-miR-489	0	0	1	1	0	0	POMZP3	POM121 and ZP3 fusion
hsa-miR-489	1	0	1	0	1	1	RAPGEF5	Rap guanine nucleotide exchange factor (GEF) 5
hsa-miR-489	1	0	1	0	1	1	G3BP2	GTPase activating protein (SH3 domain) binding protein 2
hsa-miR-489	1	0	1	1	1	1	MAPRE1	microtubule-associated protein, RP/EB family, member 1
hsa-miR-489	1	0	1	1	1	1	TSPAN12	tetraspanin 12
hsa-miR-489	1	0	1	0	1	1	BLOC1S6	biogenesis of lysosomal organelles complex-1, subunit 6, pallidin
hsa-miR-489	0	0	1	0	1	1	PLA2G2D	phospholipase A2, group IID
hsa-miR-489	1	0	1	1	1	1	RANBP6	RAN binding protein 6
hsa-miR-489	1	0	1	1	1	1	SF3B1	splicing factor 3b, subunit 1, 155kDa
hsa-miR-489	0	0	1	0	1	1	TLL1	tolloid-like 1
hsa-miR-489	1	0	1	1	1	1	TLL2	tolloid-like 2
hsa-miR-489	1	0	1	0	1	1	FLRT2	fibronectin leucine rich transmembrane protein 2
hsa-miR-489	1	0	1	1	1	1	STK39	serine threonine kinase 39
hsa-miR-489	1	0	1	1	1	1	FLRT3	fibronectin leucine rich transmembrane protein 3
hsa-miR-489	0	0	1	1	1	1	PCOLCE2	procollagen C-endopeptidase enhancer 2
hsa-miR-489	1	0	1	0	1	1	TRHDE	thyrotropin-releasing hormone degrading enzyme
hsa-miR-489	1	0	1	1	1	1	NCKAP1	NCK-associated protein 1
hsa-miR-489	0	0	1	1	1	1	TMPRSS11E	transmembrane protease, serine 11E
hsa-miR-489	1	0	1	1	1	1	ATAD2	ATPase family, AAA domain containing 2
hsa-miR-489	1	0	1	0	1	1	C16orf72	chromosome 16 open reading frame 72
hsa-miR-489	0	0	1	1	1	1	CCDC113	coiled-coil domain containing 113
hsa-miR-489	1	0	1	1	1	1	CRIPT	cysteine-rich PDZ-binding protein
hsa-miR-489	0	0	1	1	1	1	TM4SF1	transmembrane 4 L six family member 1
hsa-miR-489	1	0	1	1	1	1	MAPRE2	microtubule-associated protein, RP/EB family, member 2
hsa-miR-489	0	0	1	1	1	1	TRAM1	translocation associated membrane protein 1
hsa-miR-489	0	0	1	1	1	1	C22orf28	chromosome 22 open reading frame 28
hsa-miR-489	1	0	1	1	1	1	SLC7A11	solute carrier family 7 (anionic amino acid transporter light chain, xc- system), member 11
hsa-miR-489	1	0	1	1	1	1	LHX6	LIM homeobox 6
hsa-miR-489	1	0	1	1	1	1	KIAA0247	KIAA0247
hsa-miR-489	1	0	1	1	1	1	RASSF2	Ras association (RalGDS/AF-6) domain family member 2
hsa-miR-489	1	0	1	1	1	1	SPCS2	signal peptidase complex subunit 2 homolog (S. cerevisiae)
hsa-miR-489	0	0	1	1	1	1	SNX19	sorting nexin 19
hsa-miR-489	1	0	1	1	1	1	MRPL19	mitochondrial ribosomal protein L19
hsa-miR-489	1	0	1	1	1	1	DAZAP2	DAZ associated protein 2
hsa-miR-489	1	0	1	1	1	1	LRIG2	leucine-rich repeats and immunoglobulin-like domains 2
hsa-miR-489	0	0	1	0	1	1	PPM1E	protein phosphatase, Mg2+/Mn2+ dependent, 1E
hsa-miR-489	1	0	1	1	1	1	PLEKHA6	pleckstrin homology domain containing, family A member 6
hsa-miR-489	1	0	1	0	1	1	WDFY3	WD repeat and FYVE domain containing 3
hsa-miR-489	1	0	1	1	1	1	PHLPP2	PH domain and leucine rich repeat protein phosphatase 2
hsa-miR-489	1	0	1	0	1	1	PDS5B	PDS5, regulator of cohesion maintenance, homolog B (S. cerevisiae)
hsa-miR-489	1	0	1	0	1	1	PEG10	paternally expressed 10
hsa-miR-489	1	0	1	1	1	1	TRIM9	tripartite motif containing 9
hsa-miR-489	1	0	1	1	1	1	PRRC2C	proline-rich coiled-coil 2C
hsa-miR-489	1	0	1	1	1	1	PDS5A	PDS5, regulator of cohesion maintenance, homolog A (S. cerevisiae)
hsa-miR-489	1	0	1	1	1	1	DNAJC13	DnaJ (Hsp40) homolog, subfamily C, member 13
hsa-miR-489	0	0	1	0	1	1	ZDHHC17	zinc finger, DHHC-type containing 17
hsa-miR-489	0	0	1	1	1	1	LEPROTL1	leptin receptor overlapping transcript-like 1
hsa-miR-489	0	0	1	1	1	1	NBPF14	neuroblastoma breakpoint family, member 14
hsa-miR-489	1	0	1	1	1	1	PARM1	prostate androgen-regulated mucin-like protein 1
hsa-miR-489	1	0	1	1	1	1	CNOT6	CCR4-NOT transcription complex, subunit 6
hsa-miR-489	1	0	1	0	1	1	OSBPL3	oxysterol binding protein-like 3
hsa-miR-489	1	0	1	1	1	1	SETBP1	SET binding protein 1
hsa-miR-489	1	0	1	0	1	1	PPP1R16B	protein phosphatase 1, regulatory subunit 16B
hsa-miR-489	1	0	1	1	1	1	EPC2	enhancer of polycomb homolog 2 (Drosophila)
hsa-miR-489	0	0	1	1	1	1	C10orf12	chromosome 10 open reading frame 12
hsa-miR-489	1	0	1	0	1	1	WWC3	WWC family member 3
hsa-miR-489	1	0	1	1	1	1	PLA2G3	phospholipase A2, group III
hsa-miR-489	0	0	1	0	0	0	RPS27L	ribosomal protein S27-like
hsa-miR-489	1	0	1	1	1	1	TAF9B	TAF9B RNA polymerase II, TATA box binding protein (TBP)-associated factor, 31kDa
hsa-miR-489	1	0	1	0	1	1	CNR1	cannabinoid receptor 1 (brain)
hsa-miR-489	0	0	1	1	1	1	ZFR	zinc finger RNA binding protein
hsa-miR-489	0	0	1	1	1	1	EMCN	endomucin
hsa-miR-489	0	0	1	1	1	1	HSD17B11	hydroxysteroid (17-beta) dehydrogenase 11
hsa-miR-489	0	0	1	1	1	1	CD244	CD244 molecule, natural killer cell receptor 2B4
hsa-miR-489	0	0	1	1	1	1	CHCHD8	coiled-coil-helix-coiled-coil-helix domain containing 8
hsa-miR-489	0	0	1	0	1	1	ERGIC2	ERGIC and golgi 2
hsa-miR-489	1	0	1	1	1	1	RAB6B	RAB6B, member RAS oncogene family
hsa-miR-489	1	0	1	1	1	1	ZAK	sterile alpha motif and leucine zipper containing kinase AZK
hsa-miR-489	1	0	1	1	1	1	HOXC13	homeobox C13
hsa-miR-489	1	0	1	0	1	1	KLHL3	kelch-like 3 (Drosophila)
hsa-miR-489	1	0	1	1	1	1	CPSF2	cleavage and polyadenylation specific factor 2, 100kDa
hsa-miR-489	1	0	1	0	1	1	UBE2Q1	ubiquitin-conjugating enzyme E2Q family member 1
hsa-miR-489	1	0	1	1	1	1	ZNF280C	zinc finger protein 280C
hsa-miR-489	1	0	1	0	1	1	FAM46C	family with sequence similarity 46, member C
hsa-miR-489	1	0	1	1	1	1	TBC1D8B	TBC1 domain family, member 8B (with GRAM domain)
hsa-miR-489	0	0	1	1	1	1	WHSC1L1	Wolf-Hirschhorn syndrome candidate 1-like 1
hsa-miR-489	1	0	1	0	1	1	CHD7	chromodomain helicase DNA binding protein 7
hsa-miR-489	1	0	1	0	1	1	CMTM6	CKLF-like MARVEL transmembrane domain containing 6
hsa-miR-489	1	0	1	0	1	1	MARCH5	membrane-associated ring finger (C3HC4) 5
hsa-miR-489	0	0	1	1	1	1	C1orf56	chromosome 1 open reading frame 56
hsa-miR-489	0	0	1	1	1	1	ACSM5	acyl-CoA synthetase medium-chain family member 5
hsa-miR-489	0	0	1	1	1	1	AKIRIN2	akirin 2
hsa-miR-489	0	0	1	1	1	1	TMEM38B	transmembrane protein 38B
hsa-miR-489	1	0	1	0	1	1	MSL2	male-specific lethal 2 homolog (Drosophila)
hsa-miR-489	1	0	1	1	1	1	RPRD1A	regulation of nuclear pre-mRNA domain containing 1A
hsa-miR-489	0	0	1	0	1	1	GOLPH3L	golgi phosphoprotein 3-like
hsa-miR-489	0	0	1	1	1	1	AP5M1	adaptor-related protein complex 5, mu 1 subunit
hsa-miR-489	1	0	1	1	1	1	BRF2	BRF2, subunit of RNA polymerase III transcription initiation factor, BRF1-like
hsa-miR-489	1	0	1	1	1	1	C9orf72	chromosome 9 open reading frame 72
hsa-miR-489	1	0	1	0	1	1	LIN7C	lin-7 homolog C (C. elegans)
hsa-miR-489	0	0	1	1	1	1	MNS1	meiosis-specific nuclear structural 1
hsa-miR-489	1	0	1	1	1	1	ETNK1	ethanolamine kinase 1
hsa-miR-489	0	0	1	1	1	1	ELAC1	elaC homolog 1 (E. coli)
hsa-miR-489	0	0	1	1	1	1	NPAP1	nuclear pore associated protein 1
hsa-miR-489	1	0	1	1	1	1	CRCT1	cysteine-rich C-terminal 1
hsa-miR-489	1	0	1	0	1	1	UBFD1	ubiquitin family domain containing 1
hsa-miR-489	0	0	1	1	1	1	KLHL4	kelch-like 4 (Drosophila)
hsa-miR-489	1	0	1	0	1	1	TM9SF3	transmembrane 9 superfamily member 3
hsa-miR-489	1	0	1	0	1	1	SLAMF8	SLAM family member 8
hsa-miR-489	0	0	1	1	1	1	TMEM167B	transmembrane protein 167B
hsa-miR-489	1	0	1	0	1	1	PMEPA1	prostate transmembrane protein, androgen induced 1
hsa-miR-489	1	0	1	1	1	1	PAK7	p21 protein (Cdc42/Rac)-activated kinase 7
hsa-miR-489	0	0	1	1	0	0	ENTPD7	ectonucleoside triphosphate diphosphohydrolase 7
hsa-miR-489	0	0	1	1	0	0	FSCN3	fascin homolog 3, actin-bundling protein, testicular (Strongylocentrotus purpuratus)
hsa-miR-489	0	0	1	1	0	0	CD248	CD248 molecule, endosialin
hsa-miR-489	0	0	1	1	1	1	PLXDC1	plexin domain containing 1
hsa-miR-489	1	0	1	1	1	1	LYRM2	LYR motif containing 2
hsa-miR-489	0	0	1	1	1	1	RIPK4	receptor-interacting serine-threonine kinase 4
hsa-miR-489	1	0	1	1	1	1	CBX8	chromobox homolog 8
hsa-miR-489	1	0	1	1	1	1	USP31	ubiquitin specific peptidase 31
hsa-miR-489	1	0	1	1	1	1	ZNF608	zinc finger protein 608
hsa-miR-489	1	0	1	1	1	1	ARHGAP31	Rho GTPase activating protein 31
hsa-miR-489	1	0	1	1	1	1	SEMA6A	sema domain, transmembrane domain (TM), and cytoplasmic domain, (semaphorin) 6A
hsa-miR-489	0	0	1	1	1	1	EPG5	ectopic P-granules autophagy protein 5 homolog (C. elegans)
hsa-miR-489	0	0	1	1	1	1	AQP9	aquaporin 9
hsa-miR-489	0	0	1	0	1	1	PSG3	pregnancy specific beta-1-glycoprotein 3
hsa-miR-489	1	0	1	1	1	1	SNX6	sorting nexin 6
hsa-miR-489	1	0	1	1	1	1	PELI2	pellino E3 ubiquitin protein ligase family member 2
hsa-miR-489	0	0	1	1	1	1	IL22RA1	interleukin 22 receptor, alpha 1
hsa-miR-489	0	0	1	1	1	1	KCNN2	potassium intermediate/small conductance calcium-activated channel, subfamily N, member 2
hsa-miR-489	1	0	1	1	1	1	TMEM35	transmembrane protein 35
hsa-miR-489	1	0	1	1	1	1	OTX2	orthodenticle homeobox 2
hsa-miR-489	0	0	1	1	1	1	CHP2	calcineurin-like EF hand protein 2
hsa-miR-489	1	0	1	1	1	1	LRRC4	leucine rich repeat containing 4
hsa-miR-489	0	0	1	0	1	1	EBF2	early B-cell factor 2
hsa-miR-489	1	0	1	1	1	1	NEUROD6	neuronal differentiation 6
hsa-miR-489	1	0	1	1	1	1	RFX7	regulatory factor X, 7
hsa-miR-489	0	0	1	1	1	1	MARCKSL1	MARCKS-like 1
hsa-miR-489	0	0	1	1	1	1	UPF3B	UPF3 regulator of nonsense transcripts homolog B (yeast)
hsa-miR-489	0	0	1	1	0	0	DCTPP1	dCTP pyrophosphatase 1
hsa-miR-489	1	0	1	1	1	1	EFHD2	EF-hand domain family, member D2
hsa-miR-489	1	0	1	0	1	1	NOTCH2	notch 2
hsa-miR-489	0	0	1	1	1	1	AKIRIN1	akirin 1
hsa-miR-489	1	0	1	1	1	1	TMC7	transmembrane channel-like 7
hsa-miR-489	1	0	1	1	1	1	KLHL18	kelch-like 18 (Drosophila)
hsa-miR-489	1	0	1	0	1	1	VCPIP1	valosin containing protein (p97)/p47 complex interacting protein 1
hsa-miR-489	0	0	1	1	1	1	COQ10B	coenzyme Q10 homolog B (S. cerevisiae)
hsa-miR-489	1	0	1	1	1	1	CYB5B	cytochrome b5 type B (outer mitochondrial membrane)
hsa-miR-489	1	0	1	1	1	1	JHDM1D	jumonji C domain containing histone demethylase 1 homolog D (S. cerevisiae)
hsa-miR-489	1	0	1	1	1	1	SGPP1	sphingosine-1-phosphate phosphatase 1
hsa-miR-489	0	0	1	0	0	0	FAM49A	family with sequence similarity 49, member A
hsa-miR-489	1	0	1	0	1	1	C1orf21	chromosome 1 open reading frame 21
hsa-miR-489	1	0	1	1	1	1	TIGD6	tigger transposable element derived 6
hsa-miR-489	0	0	1	1	1	1	SLC25A31	solute carrier family 25 (mitochondrial carrier; adenine nucleotide translocator), member 31
hsa-miR-489	0	0	1	1	1	1	INHBE	inhibin, beta E
hsa-miR-489	1	0	1	0	1	1	SRSF8	serine/arginine-rich splicing factor 8
hsa-miR-489	1	0	1	1	1	1	DSEL	dermatan sulfate epimerase-like
hsa-miR-489	1	0	1	0	1	1	FAR1	fatty acyl CoA reductase 1
hsa-miR-489	1	0	1	1	1	1	MEX3B	mex-3 homolog B (C. elegans)
hsa-miR-489	0	0	1	0	1	1	IMMP2L	IMP2 inner mitochondrial membrane peptidase-like (S. cerevisiae)
hsa-miR-489	1	0	1	0	1	1	UBASH3B	ubiquitin associated and SH3 domain containing B
hsa-miR-489	1	0	1	1	1	1	PCDH10	protocadherin 10
hsa-miR-489	0	0	1	1	1	1	TRIM4	tripartite motif containing 4
hsa-miR-489	1	0	1	1	1	1	TRIM55	tripartite motif containing 55
hsa-miR-489	1	0	1	1	1	1	SSH2	slingshot homolog 2 (Drosophila)
hsa-miR-489	1	0	1	1	1	1	TANC1	tetratricopeptide repeat, ankyrin repeat and coiled-coil containing 1
hsa-miR-489	0	0	1	1	0	0	RWDD2A	RWD domain containing 2A
hsa-miR-489	1	0	1	1	0	0	CCDC120	coiled-coil domain containing 120
hsa-miR-489	0	0	1	1	1	1	NALCN	sodium leak channel, non-selective
hsa-miR-489	1	0	1	1	1	1	XKR4	XK, Kell blood group complex subunit-related family, member 4
hsa-miR-489	1	0	1	1	0	0	AP1S1	adaptor-related protein complex 1, sigma 1 subunit
hsa-miR-489	0	0	1	1	1	1	ABCA9	ATP-binding cassette, sub-family A (ABC1), member 9
hsa-miR-489	1	0	1	1	0	0	ADAMTS14	ADAM metallopeptidase with thrombospondin type 1 motif, 14
hsa-miR-489	0	0	1	1	1	1	OXGR1	oxoglutarate (alpha-ketoglutarate) receptor 1
hsa-miR-489	0	0	1	1	1	1	RAD51B	RAD51 homolog B (S. cerevisiae)
hsa-miR-489	1	0	1	1	1	1	SPTSSA	serine palmitoyltransferase, small subunit A
hsa-miR-489	1	0	1	1	1	1	FAM122A	family with sequence similarity 122A
hsa-miR-489	0	0	1	0	1	1	PRELID2	PRELI domain containing 2
hsa-miR-489	0	0	1	1	1	1	ADAMTS17	ADAM metallopeptidase with thrombospondin type 1 motif, 17
hsa-miR-489	1	0	1	1	0	0	LIPH	lipase, member H
hsa-miR-489	1	0	1	0	1	1	CNOT6L	CCR4-NOT transcription complex, subunit 6-like
hsa-miR-489	1	0	1	1	1	1	FAM76B	family with sequence similarity 76, member B
hsa-miR-489	0	0	1	1	1	1	TIGD2	tigger transposable element derived 2
hsa-miR-489	1	0	1	1	1	1	UBTD2	ubiquitin domain containing 2
hsa-miR-489	0	0	1	1	1	1	ENTHD1	ENTH domain containing 1
hsa-miR-489	1	0	1	0	1	1	TMTC2	transmembrane and tetratricopeptide repeat containing 2
hsa-miR-489	1	0	1	1	1	1	FAS	Fas (TNF receptor superfamily, member 6)
hsa-miR-489	0	0	1	0	0	0	FLJ32955	uncharacterized protein FLJ32955
hsa-miR-489	1	0	1	1	1	1	SYT14	synaptotagmin XIV
hsa-miR-489	1	0	1	1	1	1	HS6ST3	heparan sulfate 6-O-sulfotransferase 3
hsa-miR-489	1	0	1	1	0	0	LPCAT4	lysophosphatidylcholine acyltransferase 4
hsa-miR-489	0	0	1	0	1	1	RTP1	receptor (chemosensory) transporter protein 1
hsa-miR-489	1	0	1	1	1	1	FNDC5	fibronectin type III domain containing 5
hsa-miR-489	1	0	1	1	1	1	PHF13	PHD finger protein 13
hsa-miR-489	0	0	1	1	1	1	SALL3	sal-like 3 (Drosophila)
hsa-miR-489	1	0	1	1	1	1	MOB1B	MOB kinase activator 1B
hsa-miR-489	1	0	1	1	1	1	CNTD1	cyclin N-terminal domain containing 1
hsa-miR-489	1	0	1	1	1	1	FAM117B	family with sequence similarity 117, member B
hsa-miR-489	0	0	1	1	1	1	FNDC7	fibronectin type III domain containing 7
hsa-miR-489	1	0	1	0	1	1	C3orf58	chromosome 3 open reading frame 58
hsa-miR-489	0	0	1	0	1	1	KRT18P55	keratin 18 pseudogene 55
hsa-miR-489	0	0	1	0	1	1	C5orf64	chromosome 5 open reading frame 64
hsa-miR-489	0	0	1	1	1	1	AQPEP	laeverin
hsa-miR-489	0	0	1	1	1	1	PLAC1L	placenta-specific 1-like
hsa-miR-489	1	0	1	1	0	0	EMC10	ER membrane protein complex subunit 10
hsa-miR-489	1	0	1	1	1	1	RAB3IP	RAB3A interacting protein (rabin3)
hsa-miR-489	1	0	1	1	1	1	SYT9	synaptotagmin IX
hsa-miR-489	0	0	1	1	1	1	MRPL43	mitochondrial ribosomal protein L43
hsa-miR-489	1	0	1	1	1	1	STX12	syntaxin 12
hsa-miR-489	1	0	1	1	1	1	GMCL1	germ cell-less, spermatogenesis associated 1
hsa-miR-489	0	0	1	1	1	1	SLC5A12	solute carrier family 5 (sodium/glucose cotransporter), member 12
hsa-miR-489	0	0	1	1	1	1	SLC9C2	solute carrier family 9, member C2 (putative)
hsa-miR-489	0	0	1	1	0	0	TBC1D26	TBC1 domain family, member 26
hsa-miR-489	1	0	1	0	1	1	ARL5B	ADP-ribosylation factor-like 5B
hsa-miR-489	0	0	1	0	1	1	ZNF445	zinc finger protein 445
hsa-miR-489	0	0	1	1	1	1	C17orf58	chromosome 17 open reading frame 58
hsa-miR-489	0	0	1	0	1	1	HCG27	HLA complex group 27 (non-protein coding)
hsa-miR-489	1	0	1	1	1	1	ADAT2	adenosine deaminase, tRNA-specific 2
hsa-miR-489	0	0	1	0	1	1	VSTM2A	V-set and transmembrane domain containing 2A
hsa-miR-489	0	0	1	0	1	1	VSIG1	V-set and immunoglobulin domain containing 1
hsa-miR-489	0	0	1	1	1	1	ZNF326	zinc finger protein 326
hsa-miR-489	1	0	1	1	1	1	SPTY2D1	SPT2, Suppressor of Ty, domain containing 1 (S. cerevisiae)
hsa-miR-489	1	0	1	1	1	1	TMEM65	transmembrane protein 65
hsa-miR-489	1	0	1	1	1	1	E2F6	E2F transcription factor 6
hsa-miR-489	0	0	1	0	1	1	TCF21	transcription factor 21
hsa-miR-489	1	0	1	1	1	1	KCTD4	potassium channel tetramerisation domain containing 4
hsa-miR-489	1	0	1	0	1	1	NRK	Nik related kinase
hsa-miR-489	0	0	1	1	1	1	FAM174A	family with sequence similarity 174, member A
hsa-miR-489	1	0	1	1	1	1	PTGER3	prostaglandin E receptor 3 (subtype EP3)
hsa-miR-489	1	0	1	0	1	1	PRICKLE2	prickle homolog 2 (Drosophila)
hsa-miR-489	1	0	1	1	1	1	NSUN4	NOP2/Sun domain family, member 4
hsa-miR-489	1	0	1	1	0	0	KAZN	kazrin, periplakin interacting protein
hsa-miR-489	0	0	1	1	1	1	ZNF321P	zinc finger protein 321, pseudogene
hsa-miR-489	0	0	1	1	1	1	SHC4	SHC (Src homology 2 domain containing) family, member 4
hsa-miR-489	0	0	1	1	0	0	TMPRSS11F	transmembrane protease, serine 11F
hsa-miR-489	0	0	1	1	1	1	C15orf53	chromosome 15 open reading frame 53
hsa-miR-489	0	0	1	0	0	0	ESRRAP2	estrogen-related receptor alpha pseudogene 2
hsa-miR-489	0	0	1	0	0	0	SNORD109A	small nucleolar RNA, C/D box 109A
hsa-miR-489	0	0	1	0	0	0	TTTY6	testis-specific transcript, Y-linked 6 (non-protein coding)
hsa-miR-489	0	0	1	1	0	0	TTTY8	testis-specific transcript, Y-linked 8 (non-protein coding)
hsa-miR-489	0	0	1	1	0	0	TTTY7	testis-specific transcript, Y-linked 7 (non-protein coding)
hsa-miR-489	0	0	1	0	0	0	TTTY2	testis-specific transcript, Y-linked 2 (non-protein coding)
hsa-miR-489	0	0	1	0	0	0	TTTY12	testis-specific transcript, Y-linked 12 (non-protein coding)
hsa-miR-489	0	0	1	0	0	0	FAM224B	family with sequence similarity 224, member B (non-protein coding)
hsa-miR-489	0	0	1	0	0	0	TTTY4B	testis-specific transcript, Y-linked 4B (non-protein coding)
hsa-miR-489	0	0	1	0	0	0	ST13P6	suppression of tumorigenicity 13 (colon carcinoma) (Hsp70 interacting protein) pseudogene 6
hsa-miR-489	0	0	1	0	0	0	ATXN8OS	ATXN8 opposite strand (non-protein coding)
hsa-miR-489	0	0	1	0	0	0	SNORD56	small nucleolar RNA, C/D box 56
hsa-miR-489	0	0	1	0	0	0	SNORD52	small nucleolar RNA, C/D box 52
hsa-miR-489	0	0	1	0	0	0	TRIM78P	tripartite motif containing 78, pseudogene
hsa-miR-489	0	0	1	0	0	0	SNORA13	small nucleolar RNA, H/ACA box 13
hsa-miR-489	0	0	1	0	0	0	LOC285359	phosducin-like 3 pseudogene
hsa-miR-489	0	0	1	0	0	0	TCAM1P	testicular cell adhesion molecule 1 homolog (mouse), pseudogene
hsa-miR-489	0	0	1	0	0	0	TUBA4B	tubulin, alpha 4b (pseudogene)
hsa-miR-489	0	0	1	0	0	0	GMCL1P1	germ cell-less, spermatogenesis associated 1 pseudogene 1
hsa-miR-489	1	0	1	1	1	1	ZNF238	zinc finger protein 238
hsa-miR-489	1	0	1	1	1	1	TRIO	trio Rho guanine nucleotide exchange factor
hsa-miR-489	0	0	0	1	0	0	ZNF195	zinc finger protein 195
hsa-miR-489	0	0	1	1	1	1	ALDH3B1	aldehyde dehydrogenase 3 family, member B1
hsa-miR-489	0	0	1	1	0	0	DNAH2	dynein, axonemal, heavy chain 2
hsa-miR-489	1	0	1	1	1	1	CAMKK1	calcium/calmodulin-dependent protein kinase kinase 1, alpha
hsa-miR-489	0	0	0	1	0	0	FAM50A	family with sequence similarity 50, member A
hsa-miR-489	0	0	0	1	0	0	NMRK2	nicotinamide riboside kinase 2
hsa-miR-489	0	0	1	1	1	1	IMPG2	interphotoreceptor matrix proteoglycan 2
hsa-miR-489	1	0	1	1	1	1	DIMT1	DIM1 dimethyladenosine transferase 1 homolog (S. cerevisiae)
hsa-miR-489	0	0	0	1	1	1	SLC24A6	solute carrier family 24 (sodium/lithium/calcium exchanger), member 6
hsa-miR-489	0	0	1	1	0	0	LTBP4	latent transforming growth factor beta binding protein 4
hsa-miR-489	1	0	1	1	0	0	OSGEP	O-sialoglycoprotein endopeptidase
hsa-miR-489	0	0	1	1	1	1	VNN3	vanin 3
hsa-miR-489	1	0	1	1	1	1	CDC23	cell division cycle 23 homolog (S. cerevisiae)
hsa-miR-489	0	0	1	1	1	1	VRK1	vaccinia related kinase 1
hsa-miR-489	0	0	0	1	0	0	RENBP	renin binding protein
hsa-miR-489	0	0	1	1	0	0	ACSM2A	acyl-CoA synthetase medium-chain family member 2A
hsa-miR-489	0	0	0	1	0	0	ZP2	zona pellucida glycoprotein 2 (sperm receptor)
hsa-miR-489	0	0	1	1	1	1	CDIPT	CDP-diacylglycerol--inositol 3-phosphatidyltransferase
hsa-miR-489	0	0	0	1	0	0	VPS18	vacuolar protein sorting 18 homolog (S. cerevisiae)
hsa-miR-489	0	0	0	1	0	0	PAF1	Paf1, RNA polymerase II associated factor, homolog (S. cerevisiae)
hsa-miR-489	0	0	0	1	0	0	SARS2	seryl-tRNA synthetase 2, mitochondrial
hsa-miR-489	0	0	0	1	0	0	ERCC2	excision repair cross-complementing rodent repair deficiency, complementation group 2
hsa-miR-489	0	0	0	1	0	0	SF3A2	splicing factor 3a, subunit 2, 66kDa
hsa-miR-489	0	0	1	1	1	1	RAB3A	RAB3A, member RAS oncogene family
hsa-miR-489	1	0	1	1	0	0	STX1A	syntaxin 1A (brain)
hsa-miR-489	1	0	1	1	1	1	PPIF	peptidylprolyl isomerase F
hsa-miR-489	0	0	1	1	0	0	FAM149A	family with sequence similarity 149, member A
hsa-miR-489	0	0	1	1	1	1	SPA17	sperm autoantigenic protein 17
hsa-miR-489	0	0	1	1	1	1	TMEM14C	transmembrane protein 14C
hsa-miR-489	0	0	1	1	1	1	TTK	TTK protein kinase
hsa-miR-489	0	0	1	1	1	1	AGXT2	alanine--glyoxylate aminotransferase 2
hsa-miR-489	0	0	1	1	1	1	HES1	hairy and enhancer of split 1, (Drosophila)
hsa-miR-489	0	0	1	1	0	0	MDH1	malate dehydrogenase 1, NAD (soluble)
hsa-miR-489	0	0	1	1	0	0	HSD3B1	hydroxy-delta-5-steroid dehydrogenase, 3 beta- and steroid delta-isomerase 1
hsa-miR-489	0	0	1	1	1	1	SELL	selectin L
hsa-miR-489	1	0	1	1	0	0	TNP1	transition protein 1 (during histone to protamine replacement)
hsa-miR-489	0	0	1	1	1	1	FASTKD2	FAST kinase domains 2
hsa-miR-489	1	0	0	1	1	1	PIGZ	phosphatidylinositol glycan anchor biosynthesis, class Z
hsa-miR-489	0	0	1	1	1	1	DDX55	DEAD (Asp-Glu-Ala-Asp) box polypeptide 55
hsa-miR-489	0	0	1	1	1	1	MRC1	mannose receptor, C type 1
hsa-miR-489	1	0	1	1	1	1	TNFSF11	tumor necrosis factor (ligand) superfamily, member 11
hsa-miR-489	1	0	1	1	1	1	DUSP4	dual specificity phosphatase 4
hsa-miR-489	0	0	1	1	0	0	DYNLL2	dynein, light chain, LC8-type 2
hsa-miR-489	1	0	1	1	1	1	TEX14	testis expressed 14
hsa-miR-489	0	0	1	1	0	0	MRPS2	mitochondrial ribosomal protein S2
hsa-miR-489	1	0	1	1	1	1	TWIST1	twist homolog 1 (Drosophila)
hsa-miR-489	1	0	0	1	0	0	CD97	CD97 molecule
hsa-miR-489	1	0	1	1	1	1	PDE1B	phosphodiesterase 1B, calmodulin-dependent
hsa-miR-489	1	0	1	1	1	1	LYPD3	LY6/PLAUR domain containing 3
hsa-miR-489	0	0	0	1	0	0	KATNAL2	katanin p60 subunit A-like 2
hsa-miR-489	0	0	1	1	0	0	MIF4GD	MIF4G domain containing
hsa-miR-489	0	0	1	1	0	0	PLK1S1	polo-like kinase 1 substrate 1
hsa-miR-489	1	0	1	1	1	1	TCF15	transcription factor 15 (basic helix-loop-helix)
hsa-miR-489	1	0	1	1	1	1	MAX	MYC associated factor X
hsa-miR-489	0	0	1	1	0	0	MLX	MAX-like protein X
hsa-miR-489	1	0	0	1	1	1	WNK4	WNK lysine deficient protein kinase 4
hsa-miR-489	0	0	1	1	1	1	NSRP1	nuclear speckle splicing regulatory protein 1
hsa-miR-489	0	0	0	1	0	0	TBPL2	TATA box binding protein like 2
hsa-miR-489	0	0	0	1	0	0	PLA2G2C	phospholipase A2, group IIC
hsa-miR-489	0	0	1	1	1	1	ZNF598	zinc finger protein 598
hsa-miR-489	1	0	1	1	1	1	AAMP	angio-associated, migratory cell protein
hsa-miR-489	0	0	1	1	0	0	PMS2P3	postmeiotic segregation increased 2 pseudogene 3
hsa-miR-489	0	0	0	1	1	1	MTX2	metaxin 2
hsa-miR-489	0	0	0	1	1	1	AP1M2	adaptor-related protein complex 1, mu 2 subunit
hsa-miR-489	0	0	0	1	0	0	KLK9	kallikrein-related peptidase 9
hsa-miR-489	0	0	0	1	1	1	UGT2A3	UDP glucuronosyltransferase 2 family, polypeptide A3
hsa-miR-489	0	0	0	1	0	0	PDGFRL	platelet-derived growth factor receptor-like
hsa-miR-489	0	0	0	1	0	0	USHBP1	Usher syndrome 1C binding protein 1
hsa-miR-489	0	0	0	1	0	0	SCO2	SCO cytochrome oxidase deficient homolog 2 (yeast)
hsa-miR-489	0	0	0	1	0	0	GATA5	GATA binding protein 5
hsa-miR-489	0	0	1	1	1	1	PPIL4	peptidylprolyl isomerase (cyclophilin)-like 4
hsa-miR-489	0	0	1	1	1	1	PSMC3IP	PSMC3 interacting protein
hsa-miR-489	0	0	0	1	0	0	KRTAP9-8	keratin associated protein 9-8
hsa-miR-489	1	0	1	1	1	1	NUP210	nucleoporin 210kDa
hsa-miR-489	1	0	0	1	1	1	COQ3	coenzyme Q3 homolog, methyltransferase (S. cerevisiae)
hsa-miR-489	0	0	1	1	1	1	SERINC3	serine incorporator 3
hsa-miR-489	0	0	0	1	1	1	SCO1	SCO cytochrome oxidase deficient homolog 1 (yeast)
hsa-miR-489	0	0	0	1	0	0	MYBPH	myosin binding protein H
hsa-miR-489	1	0	1	1	0	0	TIMM10	translocase of inner mitochondrial membrane 10 homolog (yeast)
hsa-miR-489	0	0	1	1	1	1	RINT1	RAD50 interactor 1
hsa-miR-489	0	0	0	1	1	1	KRT82	keratin 82
hsa-miR-489	0	0	0	1	1	1	EPB41L2	erythrocyte membrane protein band 4.1-like 2
hsa-miR-489	0	0	1	1	0	0	FHOD1	formin homology 2 domain containing 1
hsa-miR-489	0	0	0	1	0	0	ALDH1L2	aldehyde dehydrogenase 1 family, member L2
hsa-miR-489	1	0	0	1	1	1	USP44	ubiquitin specific peptidase 44
hsa-miR-489	1	0	1	1	1	1	KDELR2	KDEL (Lys-Asp-Glu-Leu) endoplasmic reticulum protein retention receptor 2
hsa-miR-489	0	0	1	1	1	1	FGFBP1	fibroblast growth factor binding protein 1
hsa-miR-489	0	0	0	1	1	1	MRPL15	mitochondrial ribosomal protein L15
hsa-miR-489	0	0	1	1	1	1	MMP7	matrix metallopeptidase 7 (matrilysin, uterine)
hsa-miR-489	0	0	1	1	1	1	ALKBH8	alkB, alkylation repair homolog 8 (E. coli)
hsa-miR-489	1	0	1	1	1	1	CCBL2	cysteine conjugate-beta lyase 2
hsa-miR-489	0	0	1	1	1	1	ASUN	asunder, spermatogenesis regulator homolog (Drosphila)
hsa-miR-489	1	0	1	1	1	1	BCAT1	branched chain amino-acid transaminase 1, cytosolic
hsa-miR-489	0	0	0	1	0	0	TMEM5	transmembrane protein 5
hsa-miR-489	0	0	1	1	1	1	PEBP1	phosphatidylethanolamine binding protein 1
hsa-miR-489	0	0	0	1	1	1	EMG1	EMG1 nucleolar protein homolog (S. cerevisiae)
hsa-miR-489	0	0	1	1	1	1	RASGRF1	Ras protein-specific guanine nucleotide-releasing factor 1
hsa-miR-489	0	0	1	1	1	1	WDR59	WD repeat domain 59
hsa-miR-489	0	0	1	1	0	0	CD33	CD33 molecule
hsa-miR-489	0	0	1	1	0	0	PRR11	proline rich 11
hsa-miR-489	0	0	1	1	1	1	CD274	CD274 molecule
hsa-miR-489	1	0	1	1	1	1	SPTLC1	serine palmitoyltransferase, long chain base subunit 1
hsa-miR-489	0	0	1	1	1	1	PRDX1	peroxiredoxin 1
hsa-miR-489	1	0	0	1	1	1	UHRF1	ubiquitin-like with PHD and ring finger domains 1
hsa-miR-489	0	0	1	1	0	0	NXF5	nuclear RNA export factor 5
hsa-miR-489	0	0	1	1	1	1	MTPAP	mitochondrial poly(A) polymerase
hsa-miR-489	1	0	0	1	1	1	ZNF264	zinc finger protein 264
hsa-miR-489	0	0	0	1	1	1	A1BG	alpha-1-B glycoprotein
hsa-miR-489	1	0	1	1	0	0	SYP	synaptophysin
hsa-miR-489	0	0	0	1	1	1	NUCB1	nucleobindin 1
hsa-miR-489	1	0	1	1	1	1	NOX4	NADPH oxidase 4
hsa-miR-489	0	0	1	1	0	0	TCF25	transcription factor 25 (basic helix-loop-helix)
hsa-miR-489	0	0	0	1	1	1	FOXRED1	FAD-dependent oxidoreductase domain containing 1
hsa-miR-489	0	0	0	1	0	0	CHRDL2	chordin-like 2
hsa-miR-489	1	0	1	1	1	1	SNRNP40	small nuclear ribonucleoprotein 40kDa (U5)
hsa-miR-489	0	0	1	1	1	1	PKP1	plakophilin 1 (ectodermal dysplasia/skin fragility syndrome)
hsa-miR-489	0	0	0	1	1	1	GTF3C3	general transcription factor IIIC, polypeptide 3, 102kDa
hsa-miR-489	0	0	1	1	0	0	IFT46	intraflagellar transport 46 homolog (Chlamydomonas)
hsa-miR-489	1	0	1	1	1	1	FAM13A	family with sequence similarity 13, member A
hsa-miR-489	1	0	1	1	0	0	FNIP2	folliculin interacting protein 2
hsa-miR-489	1	0	1	1	1	1	ASB1	ankyrin repeat and SOCS box containing 1
hsa-miR-489	0	0	1	1	0	0	SERPINI2	serpin peptidase inhibitor, clade I (pancpin), member 2
hsa-miR-489	0	0	0	1	0	0	TYK2	tyrosine kinase 2
hsa-miR-489	0	0	1	1	0	0	MCM2	minichromosome maintenance complex component 2
hsa-miR-489	1	0	1	1	1	1	WWC1	WW and C2 domain containing 1
hsa-miR-489	0	0	1	1	1	1	TAX1BP1	Tax1 (human T-cell leukemia virus type I) binding protein 1
hsa-miR-489	0	0	1	1	1	1	GAL	galanin prepropeptide
hsa-miR-489	0	0	1	1	1	1	ABCB1	ATP-binding cassette, sub-family B (MDR/TAP), member 1
hsa-miR-489	0	0	1	1	0	0	FBXO7	F-box protein 7
hsa-miR-489	0	0	1	1	1	1	AMIGO2	adhesion molecule with Ig-like domain 2
hsa-miR-489	0	0	1	1	1	1	LUM	lumican
hsa-miR-489	0	0	1	1	1	1	ASCL1	achaete-scute complex homolog 1 (Drosophila)
hsa-miR-489	0	0	1	1	1	1	DUOX2	dual oxidase 2
hsa-miR-489	0	0	1	1	0	0	PIF1	PIF1 5'-to-3' DNA helicase homolog (S. cerevisiae)
hsa-miR-489	0	0	1	1	1	1	PSMA5	proteasome (prosome, macropain) subunit, alpha type, 5
hsa-miR-489	0	0	0	1	0	0	SLC27A3	solute carrier family 27 (fatty acid transporter), member 3
hsa-miR-489	0	0	1	1	0	0	MRPS5	mitochondrial ribosomal protein S5
hsa-miR-489	0	0	0	1	0	0	SLC10A6	solute carrier family 10 (sodium/bile acid cotransporter family), member 6
hsa-miR-489	0	0	1	1	0	0	TRIM7	tripartite motif containing 7
hsa-miR-489	0	0	1	1	1	1	MUT	methylmalonyl CoA mutase
hsa-miR-489	1	0	0	1	1	1	IGFBP1	insulin-like growth factor binding protein 1
hsa-miR-489	1	0	0	1	1	1	CCT6A	chaperonin containing TCP1, subunit 6A (zeta 1)
hsa-miR-489	1	0	1	1	1	1	NONO	non-POU domain containing, octamer-binding
hsa-miR-489	0	0	0	1	1	1	APIP	APAF1 interacting protein
hsa-miR-489	1	0	1	1	1	1	GLYAT	glycine-N-acyltransferase
hsa-miR-489	0	0	0	1	1	1	CSRP2BP	CSRP2 binding protein
hsa-miR-489	0	0	1	1	0	0	WDR74	WD repeat domain 74
hsa-miR-489	0	0	1	1	1	1	FEZ1	fasciculation and elongation protein zeta 1 (zygin I)
hsa-miR-489	0	0	0	1	1	1	TIRAP	toll-interleukin 1 receptor (TIR) domain containing adaptor protein
hsa-miR-489	0	0	0	1	0	0	SPATA4	spermatogenesis associated 4
hsa-miR-489	0	0	0	1	1	1	RILPL2	Rab interacting lysosomal protein-like 2
hsa-miR-489	1	0	1	1	1	1	NUBPL	nucleotide binding protein-like
hsa-miR-489	0	0	0	1	1	1	GUF1	GUF1 GTPase homolog (S. cerevisiae)
hsa-miR-489	0	0	0	1	1	1	ZNF551	zinc finger protein 551
hsa-miR-489	0	0	1	1	1	1	DSPP	dentin sialophosphoprotein
hsa-miR-489	0	0	0	1	1	1	CAPSL	calcyphosine-like
hsa-miR-489	0	0	0	1	1	1	UGT3A2	UDP glycosyltransferase 3 family, polypeptide A2
hsa-miR-489	0	0	1	1	1	1	RAB3C	RAB3C, member RAS oncogene family
hsa-miR-489	0	0	1	1	0	0	FAM81B	family with sequence similarity 81, member B
hsa-miR-489	0	0	1	1	1	1	INO80C	INO80 complex subunit C
hsa-miR-489	1	0	1	1	1	1	MSI2	musashi homolog 2 (Drosophila)
hsa-miR-489	1	0	1	1	1	1	TOMM70A	translocase of outer mitochondrial membrane 70 homolog A (S. cerevisiae)
hsa-miR-489	0	0	0	1	1	1	TMPRSS15	transmembrane protease, serine 15
hsa-miR-489	0	0	1	1	1	1	CCDC146	coiled-coil domain containing 146
hsa-miR-489	0	0	0	1	0	0	MED7	mediator complex subunit 7
hsa-miR-489	0	0	1	1	1	1	SLC28A1	solute carrier family 28 (sodium-coupled nucleoside transporter), member 1
hsa-miR-489	1	0	0	1	1	1	WHAMM	WAS protein homolog associated with actin, golgi membranes and microtubules
hsa-miR-489	0	0	0	1	0	0	FUT6	fucosyltransferase 6 (alpha (1,3) fucosyltransferase)
hsa-miR-489	0	0	1	1	1	1	TDRD9	tudor domain containing 9
hsa-miR-489	0	0	1	1	0	0	SHCBP1L	SHC SH2-domain binding protein 1-like
hsa-miR-489	0	0	0	1	1	1	PDF	peptide deformylase (mitochondrial)
hsa-miR-489	1	0	1	1	1	1	CACNA1D	calcium channel, voltage-dependent, L type, alpha 1D subunit
hsa-miR-489	1	0	1	1	0	0	UBN2	ubinuclein 2
hsa-miR-489	0	0	0	1	0	0	HIST1H4H	histone cluster 1, H4h
hsa-miR-489	0	0	1	1	1	1	WFDC8	WAP four-disulfide core domain 8
hsa-miR-489	0	0	1	1	0	0	C21orf59	chromosome 21 open reading frame 59
hsa-miR-489	0	0	0	1	1	1	ZNF20	zinc finger protein 20
hsa-miR-489	1	0	0	1	0	0	NBEAL2	neurobeachin-like 2
hsa-miR-489	0	0	1	1	1	1	C2orf47	chromosome 2 open reading frame 47
hsa-miR-489	0	0	1	1	1	1	IWS1	IWS1 homolog (S. cerevisiae)
hsa-miR-489	0	0	0	1	0	0	FAM194A	family with sequence similarity 194, member A
hsa-miR-489	1	0	1	1	1	1	HPS3	Hermansky-Pudlak syndrome 3
hsa-miR-489	0	0	1	1	1	1	RHO	rhodopsin
hsa-miR-489	0	0	1	1	0	0	TKT	transketolase
hsa-miR-489	0	0	0	1	0	0	S100P	S100 calcium binding protein P
hsa-miR-489	0	0	1	1	0	0	SAP30	Sin3A-associated protein, 30kDa
hsa-miR-489	0	0	1	1	0	0	NDUFAF2	NADH dehydrogenase (ubiquinone) complex I, assembly factor 2
hsa-miR-489	0	0	1	1	1	1	NSA2	NSA2 ribosome biogenesis homolog (S. cerevisiae)
hsa-miR-489	1	0	1	1	1	1	KIAA1324L	KIAA1324-like
hsa-miR-489	1	0	1	1	1	1	XKR6	XK, Kell blood group complex subunit-related family, member 6
hsa-miR-489	0	0	1	1	1	1	TMEM74	transmembrane protein 74
hsa-miR-489	0	0	1	1	1	1	SLC7A3	solute carrier family 7 (cationic amino acid transporter, y+ system), member 3
hsa-miR-489	0	0	1	1	1	1	ZMYND19	zinc finger, MYND-type containing 19
hsa-miR-489	0	0	0	1	1	1	CRTAC1	cartilage acidic protein 1
hsa-miR-489	0	0	0	1	0	0	ADAMTS15	ADAM metallopeptidase with thrombospondin type 1 motif, 15
hsa-miR-489	0	0	1	1	1	1	CDYL2	chromodomain protein, Y-like 2
hsa-miR-489	0	0	0	1	0	0	WDR16	WD repeat domain 16
hsa-miR-489	0	0	0	1	0	0	COQ4	coenzyme Q4 homolog (S. cerevisiae)
hsa-miR-489	0	0	0	1	1	1	SLC25A23	solute carrier family 25 (mitochondrial carrier; phosphate carrier), member 23
hsa-miR-489	1	0	0	1	1	1	RCOR2	REST corepressor 2
hsa-miR-489	0	0	1	1	0	0	IGFBP6	insulin-like growth factor binding protein 6
hsa-miR-489	0	0	0	1	0	0	SPSB3	splA/ryanodine receptor domain and SOCS box containing 3
hsa-miR-489	1	0	1	1	1	1	B3GNT2	UDP-GlcNAc:betaGal beta-1,3-N-acetylglucosaminyltransferase 2
hsa-miR-489	0	0	0	1	0	0	OR4C11	olfactory receptor, family 4, subfamily C, member 11
hsa-miR-489	1	0	1	1	1	1	TRIAP1	TP53 regulated inhibitor of apoptosis 1
hsa-miR-489	0	0	1	1	0	0	HMCN2	hemicentin 2
hsa-miR-489	0	0	0	1	0	0	STARD5	StAR-related lipid transfer (START) domain containing 5
hsa-miR-489	0	0	0	1	1	1	FUT3	fucosyltransferase 3 (galactoside 3(4)-L-fucosyltransferase, Lewis blood group)
hsa-miR-489	1	0	1	1	1	1	BRD3	bromodomain containing 3
hsa-miR-489	0	0	0	1	0	0	KCNJ4	potassium inwardly-rectifying channel, subfamily J, member 4
hsa-miR-489	0	0	1	1	0	0	SLC6A19	solute carrier family 6 (neutral amino acid transporter), member 19
hsa-miR-489	0	0	1	1	1	1	FAM22G	family with sequence similarity 22, member G
hsa-miR-489	0	0	0	1	1	1	LRRC45	leucine rich repeat containing 45
hsa-miR-489	1	0	1	1	1	1	IGF1	insulin-like growth factor 1 (somatomedin C)
hsa-miR-489	0	0	0	1	1	1	LURAP1	leucine rich adaptor protein 1
hsa-miR-489	0	0	1	1	1	1	GLB1	galactosidase, beta 1
hsa-miR-489	0	0	0	1	0	0	STARD6	StAR-related lipid transfer (START) domain containing 6
hsa-miR-489	1	0	1	1	1	1	ADRBK1	adrenergic, beta, receptor kinase 1
hsa-miR-489	0	0	0	1	0	0	OR7D4	olfactory receptor, family 7, subfamily D, member 4
hsa-miR-489	0	0	1	1	1	1	OR13A1	olfactory receptor, family 13, subfamily A, member 1
hsa-miR-489	1	0	1	1	0	0	PBXIP1	pre-B-cell leukemia homeobox interacting protein 1
hsa-miR-489	0	0	1	1	0	0	SCUBE2	signal peptide, CUB domain, EGF-like 2
hsa-miR-489	0	0	1	1	0	0	EEF2	eukaryotic translation elongation factor 2
hsa-miR-489	1	0	1	1	1	1	CHD2	chromodomain helicase DNA binding protein 2
hsa-miR-489	0	0	0	1	1	1	ATP6V0A4	ATPase, H+ transporting, lysosomal V0 subunit a4
hsa-miR-489	0	0	1	1	0	0	PSMD2	proteasome (prosome, macropain) 26S subunit, non-ATPase, 2
hsa-miR-489	0	0	1	1	1	1	CELF1	CUGBP, Elav-like family member 1
hsa-miR-489	0	0	1	1	1	1	P2RY2	purinergic receptor P2Y, G-protein coupled, 2
hsa-miR-489	0	0	1	1	1	1	LSM1	LSM1 homolog, U6 small nuclear RNA associated (S. cerevisiae)
hsa-miR-489	0	0	0	1	0	0	RPL21	ribosomal protein L21
hsa-miR-489	0	0	0	1	0	0	MOS	v-mos Moloney murine sarcoma viral oncogene homolog
hsa-miR-489	0	0	1	1	1	1	TMEM70	transmembrane protein 70
hsa-miR-489	0	0	1	1	0	0	LAS1L	LAS1-like (S. cerevisiae)
hsa-miR-489	1	0	0	1	1	1	TCHP	trichoplein, keratin filament binding
hsa-miR-489	0	0	0	1	1	1	TACC3	transforming, acidic coiled-coil containing protein 3
hsa-miR-489	0	0	1	1	1	1	CD300LB	CD300 molecule-like family member b
hsa-miR-489	0	0	0	1	1	1	CCDC111	coiled-coil domain containing 111
hsa-miR-489	0	0	1	1	0	0	PRSS50	protease, serine, 50
hsa-miR-489	0	0	1	1	0	0	MRPL1	mitochondrial ribosomal protein L1
hsa-miR-489	1	0	1	1	1	1	WDR6	WD repeat domain 6
hsa-miR-489	0	0	0	1	0	0	MAP7D3	MAP7 domain containing 3
hsa-miR-489	0	0	1	1	0	0	NDUFAF4	NADH dehydrogenase (ubiquinone) complex I, assembly factor 4
hsa-miR-489	1	0	1	1	1	1	APBB2	amyloid beta (A4) precursor protein-binding, family B, member 2
hsa-miR-489	1	0	1	1	1	1	CLK4	CDC-like kinase 4
hsa-miR-489	1	0	1	1	0	0	SMCR8	Smith-Magenis syndrome chromosome region, candidate 8
hsa-miR-489	0	0	0	1	0	0	PVRIG	poliovirus receptor related immunoglobulin domain containing
hsa-miR-489	0	0	0	1	0	0	PXMP2	peroxisomal membrane protein 2, 22kDa
hsa-miR-489	1	0	1	1	1	1	MID1	midline 1 (Opitz/BBB syndrome)
hsa-miR-489	0	0	1	1	1	1	CCDC132	coiled-coil domain containing 132
hsa-miR-489	0	0	1	1	1	1	MBIP	MAP3K12 binding inhibitory protein 1
hsa-miR-489	0	0	1	1	0	0	CCDC158	coiled-coil domain containing 158
hsa-miR-489	0	0	1	1	1	1	NHEJ1	nonhomologous end-joining factor 1
hsa-miR-489	0	0	1	1	0	0	AVL9	AVL9 homolog (S. cerevisiase)
hsa-miR-489	0	0	0	1	0	0	PPEF1	protein phosphatase, EF-hand calcium binding domain 1
hsa-miR-489	0	0	1	1	0	0	CXorf56	chromosome X open reading frame 56
hsa-miR-489	0	0	1	1	0	0	VARS2	valyl-tRNA synthetase 2, mitochondrial (putative)
hsa-miR-489	0	0	0	1	1	1	POLR2L	polymerase (RNA) II (DNA directed) polypeptide L, 7.6kDa
hsa-miR-489	1	0	1	1	1	1	TSPYL5	TSPY-like 5
hsa-miR-489	0	0	0	1	0	0	POLG2	polymerase (DNA directed), gamma 2, accessory subunit
hsa-miR-489	1	0	1	1	1	1	CACNB2	calcium channel, voltage-dependent, beta 2 subunit
hsa-miR-489	0	0	1	1	0	0	PRPF3	PRP3 pre-mRNA processing factor 3 homolog (S. cerevisiae)
hsa-miR-489	0	0	0	1	0	0	SLC22A1	solute carrier family 22 (organic cation transporter), member 1
hsa-miR-489	1	0	1	1	1	1	PCM1	pericentriolar material 1
hsa-miR-489	0	0	1	1	1	1	ZNF639	zinc finger protein 639
hsa-miR-489	1	0	1	1	1	1	SSBP3	single stranded DNA binding protein 3
hsa-miR-489	0	0	1	1	0	0	BOLA3	bolA homolog 3 (E. coli)
hsa-miR-489	0	0	1	1	0	0	BRAP	BRCA1 associated protein
hsa-miR-489	0	0	1	1	1	1	SDHA	succinate dehydrogenase complex, subunit A, flavoprotein (Fp)
hsa-miR-489	0	0	0	1	0	0	FAM65C	family with sequence similarity 65, member C
hsa-miR-489	1	0	1	1	1	1	BACE2	beta-site APP-cleaving enzyme 2
hsa-miR-489	0	0	0	1	1	1	CLDN6	claudin 6
hsa-miR-489	0	0	0	1	1	1	SDR42E1	short chain dehydrogenase/reductase family 42E, member 1
hsa-miR-489	0	0	0	1	0	0	GALR2	galanin receptor 2
hsa-miR-489	1	0	1	1	1	1	CALN1	calneuron 1
hsa-miR-489	0	0	1	1	0	0	TPM2	tropomyosin 2 (beta)
hsa-miR-489	0	0	1	1	0	0	PRR23B	proline rich 23B
hsa-miR-489	0	0	1	1	1	1	DHX36	DEAH (Asp-Glu-Ala-His) box polypeptide 36
hsa-miR-489	1	0	1	1	1	1	RBM12B	RNA binding motif protein 12B
hsa-miR-489	0	0	0	1	0	0	GDF3	growth differentiation factor 3
hsa-miR-489	1	0	0	1	1	1	CTHRC1	collagen triple helix repeat containing 1
hsa-miR-489	0	0	1	1	1	1	C1orf110	chromosome 1 open reading frame 110
hsa-miR-489	0	0	0	1	0	0	AMY1B	amylase, alpha 1B (salivary)
hsa-miR-489	0	0	0	1	0	0	A3GALT2P	alpha 1,3-galactosyltransferase 2, pseudogene
hsa-miR-489	0	0	1	1	1	1	MAML2	mastermind-like 2 (Drosophila)
hsa-miR-489	0	0	1	1	0	0	CALCA	calcitonin-related polypeptide alpha
hsa-miR-489	0	0	0	1	1	1	KRT7	keratin 7
hsa-miR-489	0	0	0	1	0	0	OR4F15	olfactory receptor, family 4, subfamily F, member 15
hsa-miR-489	0	0	1	1	0	0	GPRASP2	G protein-coupled receptor associated sorting protein 2
hsa-miR-489	0	0	0	1	1	1	APOL4	apolipoprotein L, 4
hsa-miR-489	0	0	1	1	1	1	CCDC172	coiled-coil domain containing 172
hsa-miR-489	0	0	0	1	0	0	C19orf59	chromosome 19 open reading frame 59
hsa-miR-489	1	0	1	1	1	1	PCDH11Y	protocadherin 11 Y-linked
hsa-miR-489	0	0	0	1	0	0	KRTAP19-3	keratin associated protein 19-3
hsa-miR-489	1	0	1	1	1	1	SREK1	splicing regulatory glutamine/lysine-rich protein 1
hsa-miR-489	0	0	1	1	0	0	ATPAF1-AS1	ATPAF1 antisense RNA 1
hsa-miR-489	1	0	1	1	1	1	AP1S3	adaptor-related protein complex 1, sigma 3 subunit
hsa-miR-489	0	0	0	1	0	0	TAC4	tachykinin 4 (hemokinin)
hsa-miR-489	0	0	1	1	1	1	CCK	cholecystokinin
hsa-miR-489	0	0	1	1	0	0	TBC1D7	TBC1 domain family, member 7
hsa-miR-489	1	0	0	1	1	1	HAUS8	HAUS augmin-like complex, subunit 8
hsa-miR-489	0	0	1	1	0	0	KIF9	kinesin family member 9
hsa-miR-489	1	0	1	1	1	1	GNG2	guanine nucleotide binding protein (G protein), gamma 2
hsa-miR-489	0	0	1	1	0	0	ADAM7	ADAM metallopeptidase domain 7
hsa-miR-489	0	0	1	1	1	1	ACTR8	ARP8 actin-related protein 8 homolog (yeast)
hsa-miR-489	1	0	0	1	1	1	ZNF354A	zinc finger protein 354A
hsa-miR-489	0	0	0	1	0	0	KRTAP9-4	keratin associated protein 9-4
hsa-miR-489	1	0	1	1	1	1	BVES	blood vessel epicardial substance
hsa-miR-489	0	0	0	1	1	1	KRT13	keratin 13
hsa-miR-489	1	0	1	1	1	1	SUPT7L	suppressor of Ty 7 (S. cerevisiae)-like
hsa-miR-489	0	0	1	1	1	1	FBXO40	F-box protein 40
hsa-miR-489	0	0	1	1	0	0	ALDOA	aldolase A, fructose-bisphosphate
hsa-miR-489	1	0	1	1	1	1	ERAS	ES cell expressed Ras
hsa-miR-489	0	0	0	1	0	0	DPYSL4	dihydropyrimidinase-like 4
hsa-miR-489	0	0	1	1	0	0	AMY2B	amylase, alpha 2B (pancreatic)
hsa-miR-489	0	0	0	1	0	0	PTGES2	prostaglandin E synthase 2
hsa-miR-489	0	0	1	1	0	0	SLC35B3	solute carrier family 35, member B3
hsa-miR-489	1	0	1	1	1	1	ITGA4	integrin, alpha 4 (antigen CD49D, alpha 4 subunit of VLA-4 receptor)
hsa-miR-489	1	0	1	1	1	1	ENSA	endosulfine alpha
hsa-miR-489	0	0	0	1	0	0	TPSB2	tryptase beta 2 (gene/pseudogene)
hsa-miR-489	0	0	0	1	1	1	PDZK1	PDZ domain containing 1
hsa-miR-489	1	0	1	1	1	1	BTG3	BTG family, member 3
hsa-miR-489	0	0	1	1	0	0	HR	hairless homolog (mouse)
hsa-miR-489	1	0	1	1	1	1	PVRL1	poliovirus receptor-related 1 (herpesvirus entry mediator C)
hsa-miR-489	0	0	1	1	0	0	SENP8	SUMO/sentrin specific peptidase family member 8
hsa-miR-489	0	0	1	1	1	1	PAQR5	progestin and adipoQ receptor family member V
hsa-miR-489	0	0	1	1	1	1	BEND7	BEN domain containing 7
hsa-miR-489	1	0	1	1	1	1	C5orf25	chromosome 5 open reading frame 25
hsa-miR-489	0	0	1	1	0	0	STYXL1	serine/threonine/tyrosine interacting-like 1
hsa-miR-489	0	0	1	1	0	0	METTL23	methyltransferase like 23
hsa-miR-489	0	0	1	1	1	1	ZDHHC14	zinc finger, DHHC-type containing 14
hsa-miR-489	0	0	1	1	1	1	MSANTD1	Myb/SANT-like DNA-binding domain containing 1
hsa-miR-489	0	0	1	1	1	1	SCIN	scinderin
hsa-miR-489	0	0	1	1	1	1	ABLIM2	actin binding LIM protein family, member 2
hsa-miR-489	1	0	1	1	1	1	YTHDF1	YTH domain family, member 1
hsa-miR-489	1	0	1	1	1	1	ATG13	autophagy related 13
hsa-miR-489	0	0	1	1	1	1	DUSP28	dual specificity phosphatase 28
hsa-miR-489	1	0	1	1	1	1	LRRK2	leucine-rich repeat kinase 2
hsa-miR-489	0	0	0	1	0	0	OR6C74	olfactory receptor, family 6, subfamily C, member 74
hsa-miR-489	0	0	1	1	0	0	OSGIN1	oxidative stress induced growth inhibitor 1
hsa-miR-489	0	0	0	1	0	0	P2RX2	purinergic receptor P2X, ligand-gated ion channel, 2
hsa-miR-489	0	0	1	1	1	1	POU1F1	POU class 1 homeobox 1
hsa-miR-489	0	0	0	1	0	0	LARP7	La ribonucleoprotein domain family, member 7
hsa-miR-489	0	0	0	1	0	0	GTDC2	glycosyltransferase-like domain containing 2
hsa-miR-489	0	0	0	1	0	0	FAM166A	family with sequence similarity 166, member A
hsa-miR-489	0	0	0	1	0	0	MRPL20	mitochondrial ribosomal protein L20
hsa-miR-489	0	0	0	1	0	0	C19orf48	chromosome 19 open reading frame 48
hsa-miR-489	0	0	0	1	0	0	DHRS7B	dehydrogenase/reductase (SDR family) member 7B
hsa-miR-489	0	0	1	1	0	0	MAGED2	melanoma antigen family D, 2
hsa-miR-489	0	0	1	1	1	1	SMAD9	SMAD family member 9
hsa-miR-489	0	0	1	1	1	1	CSN2	casein beta
hsa-miR-489	0	0	0	1	1	1	UCKL1	uridine-cytidine kinase 1-like 1
hsa-miR-489	1	0	1	1	1	1	ARID1B	AT rich interactive domain 1B (SWI1-like)
hsa-miR-489	0	0	1	1	1	1	CD209	CD209 molecule
hsa-miR-489	0	0	0	1	0	0	C9orf131	chromosome 9 open reading frame 131
hsa-miR-489	0	0	0	1	0	0	CTSL3	cathepsin L family member 3
hsa-miR-489	0	0	1	1	1	1	ANAPC13	anaphase promoting complex subunit 13
hsa-miR-489	0	0	1	1	0	0	IL31RA	interleukin 31 receptor A
hsa-miR-489	0	0	0	1	1	1	ZNF565	zinc finger protein 565
hsa-miR-489	0	0	0	1	1	1	ITGB2	integrin, beta 2 (complement component 3 receptor 3 and 4 subunit)
hsa-miR-489	0	0	1	1	0	0	NHP2L1	NHP2 non-histone chromosome protein 2-like 1 (S. cerevisiae)
hsa-miR-489	0	0	1	1	1	1	ITGB1BP1	integrin beta 1 binding protein 1
hsa-miR-489	0	0	0	1	0	0	CGB8	chorionic gonadotropin, beta polypeptide 8
hsa-miR-489	0	0	1	1	1	1	KHDRBS3	KH domain containing, RNA binding, signal transduction associated 3
hsa-miR-489	1	0	1	1	1	1	SLMO2	slowmo homolog 2 (Drosophila)
hsa-miR-489	0	0	1	1	1	1	MYO9A	myosin IXA
hsa-miR-489	1	0	1	1	1	1	CACNA2D1	calcium channel, voltage-dependent, alpha 2/delta subunit 1
hsa-miR-489	1	0	1	1	1	1	PIGR	polymeric immunoglobulin receptor
hsa-miR-489	0	0	0	1	1	1	ZNF790	zinc finger protein 790
hsa-miR-489	1	0	1	1	1	1	NXN	nucleoredoxin
hsa-miR-489	0	0	1	1	1	1	SMC1B	structural maintenance of chromosomes 1B
hsa-miR-489	0	0	0	1	0	0	LOC79999	uncharacterized LOC79999
hsa-miR-489	0	0	1	1	1	1	TMEM170A	transmembrane protein 170A
hsa-miR-489	1	0	1	1	0	0	MANEAL	mannosidase, endo-alpha-like
hsa-miR-489	0	0	0	1	0	0	DDX47	DEAD (Asp-Glu-Ala-Asp) box polypeptide 47
hsa-miR-489	0	0	0	1	0	0	LONP1	lon peptidase 1, mitochondrial
hsa-miR-489	0	0	1	1	1	1	ATP5S	ATP synthase, H+ transporting, mitochondrial Fo complex, subunit s (factor B)
hsa-miR-489	0	0	0	1	1	1	ZNF682	zinc finger protein 682
hsa-miR-489	0	0	0	1	0	0	AKAP4	A kinase (PRKA) anchor protein 4
hsa-miR-489	0	0	1	1	1	1	EXT2	exostosin 2
hsa-miR-489	1	0	1	1	0	0	PDE3A	phosphodiesterase 3A, cGMP-inhibited
hsa-miR-489	0	0	1	1	1	1	MYOF	myoferlin
hsa-miR-489	0	0	0	1	0	0	BCS1L	BCS1-like (S. cerevisiae)
hsa-miR-489	0	0	0	1	0	0	TMC3	transmembrane channel-like 3
hsa-miR-489	0	0	1	1	1	1	TRDN	triadin
hsa-miR-489	0	0	0	1	1	1	IFI16	interferon, gamma-inducible protein 16
hsa-miR-489	0	0	0	1	0	0	OR5H6	olfactory receptor, family 5, subfamily H, member 6
hsa-miR-489	0	0	0	1	1	1	MB	myoglobin
hsa-miR-489	0	0	1	1	0	0	CCT8L2	chaperonin containing TCP1, subunit 8 (theta)-like 2
hsa-miR-489	0	0	1	1	0	0	SIGLEC6	sialic acid binding Ig-like lectin 6
hsa-miR-489	0	0	0	1	0	0	ARL9	ADP-ribosylation factor-like 9
hsa-miR-489	1	0	1	1	1	1	CEP85L	centrosomal protein 85kDa-like
hsa-miR-489	0	0	1	1	0	0	AXDND1	axonemal dynein light chain domain containing 1
hsa-miR-489	0	0	1	1	1	1	SLC12A8	solute carrier family 12 (potassium/chloride transporters), member 8
hsa-miR-489	1	0	1	1	1	1	ZNF148	zinc finger protein 148
hsa-miR-489	1	0	1	1	0	0	PCED1A	PC-esterase domain containing 1A
hsa-miR-489	0	0	0	1	0	0	OR10A3	olfactory receptor, family 10, subfamily A, member 3
hsa-miR-489	0	0	1	1	1	1	CHD1L	chromodomain helicase DNA binding protein 1-like
hsa-miR-489	0	0	1	1	0	0	MTMR11	myotubularin related protein 11
hsa-miR-489	0	0	1	1	1	1	PJA1	praja ring finger 1, E3 ubiquitin protein ligase
hsa-miR-489	0	0	1	1	0	0	PSMB5	proteasome (prosome, macropain) subunit, beta type, 5
hsa-miR-489	0	0	1	1	0	0	LSM14B	LSM14B, SCD6 homolog B (S. cerevisiae)
hsa-miR-489	0	0	1	1	1	1	FAM111A	family with sequence similarity 111, member A
hsa-miR-489	1	0	1	1	1	1	CDC42BPA	CDC42 binding protein kinase alpha (DMPK-like)
hsa-miR-489	0	0	0	1	1	1	NENF	neudesin neurotrophic factor
hsa-miR-489	0	0	0	1	0	0	TFB1M	transcription factor B1, mitochondrial
hsa-miR-489	0	0	1	1	0	0	UBE2T	ubiquitin-conjugating enzyme E2T (putative)
hsa-miR-489	0	0	0	1	1	1	LAD1	ladinin 1
hsa-miR-489	0	0	0	1	1	1	NUP43	nucleoporin 43kDa
hsa-miR-489	0	0	1	1	1	1	RGS18	regulator of G-protein signaling 18
hsa-miR-489	1	0	1	1	1	1	SASH1	SAM and SH3 domain containing 1
hsa-miR-489	0	0	0	1	1	1	RAB32	RAB32, member RAS oncogene family
hsa-miR-489	0	0	1	1	0	0	MR1	major histocompatibility complex, class I-related
hsa-miR-489	0	0	1	1	1	1	C1orf129	chromosome 1 open reading frame 129
hsa-miR-489	0	0	1	1	0	0	KIFAP3	kinesin-associated protein 3
hsa-miR-489	0	0	1	1	1	1	MOXD1	monooxygenase, DBH-like 1
hsa-miR-489	0	0	0	1	0	0	ITLN2	intelectin 2
hsa-miR-489	0	0	1	1	0	0	FCER1A	Fc fragment of IgE, high affinity I, receptor for; alpha polypeptide
hsa-miR-489	0	0	1	1	0	0	CREB3L4	cAMP responsive element binding protein 3-like 4
hsa-miR-489	0	0	1	1	0	0	LCE3D	late cornified envelope 3D
hsa-miR-489	0	0	1	1	1	1	LCE3E	late cornified envelope 3E
hsa-miR-489	0	0	0	1	1	1	PSTK	phosphoseryl-tRNA kinase
hsa-miR-489	0	0	0	1	1	1	DMBT1	deleted in malignant brain tumors 1
hsa-miR-489	1	0	1	1	1	1	CDC40	cell division cycle 40 homolog (S. cerevisiae)
hsa-miR-489	0	0	1	1	1	1	WASF1	WAS protein family, member 1
hsa-miR-489	0	0	0	1	1	1	FIG4	FIG4 homolog, SAC1 lipid phosphatase domain containing (S. cerevisiae)
hsa-miR-489	1	0	1	1	1	1	TIAL1	TIA1 cytotoxic granule-associated RNA binding protein-like 1
hsa-miR-489	1	0	1	1	1	1	GRIK2	glutamate receptor, ionotropic, kainate 2
hsa-miR-489	0	0	1	1	0	0	NBPF9	neuroblastoma breakpoint family, member 9
hsa-miR-489	0	0	0	1	0	0	VWA2	von Willebrand factor A domain containing 2
hsa-miR-489	1	0	1	1	1	1	SCAF11	SR-related CTD-associated factor 11
hsa-miR-489	0	0	1	1	1	1	TCF7L2	transcription factor 7-like 2 (T-cell specific, HMG-box)
hsa-miR-489	0	0	0	1	0	0	RARS2	arginyl-tRNA synthetase 2, mitochondrial
hsa-miR-489	0	0	1	1	0	0	OVGP1	oviductal glycoprotein 1, 120kDa
hsa-miR-489	0	0	0	1	0	0	CALHM3	calcium homeostasis modulator 3
hsa-miR-489	0	0	0	1	1	1	PDCD11	programmed cell death 11
hsa-miR-489	0	0	0	1	0	0	GSTM2	glutathione S-transferase mu 2 (muscle)
hsa-miR-489	1	0	1	1	1	1	SUFU	suppressor of fused homolog (Drosophila)
hsa-miR-489	0	0	1	1	0	0	NAA10	N(alpha)-acetyltransferase 10, NatA catalytic subunit
hsa-miR-489	1	0	1	1	1	1	TLX1	T-cell leukemia homeobox 1
hsa-miR-489	1	0	1	1	1	1	ARHGAP29	Rho GTPase activating protein 29
hsa-miR-489	1	0	1	1	1	1	TMED5	transmembrane emp24 protein transport domain containing 5
hsa-miR-489	0	0	1	1	0	0	PRRG3	proline rich Gla (G-carboxyglutamic acid) 3 (transmembrane)
hsa-miR-489	0	0	1	1	0	0	C10orf62	chromosome 10 open reading frame 62
hsa-miR-489	0	0	0	1	0	0	BRS3	bombesin-like receptor 3
hsa-miR-489	1	0	1	1	1	1	PTGFR	prostaglandin F receptor (FP)
hsa-miR-489	1	0	1	1	1	1	PHF6	PHD finger protein 6
hsa-miR-489	0	0	0	1	0	0	CCDC160	coiled-coil domain containing 160
hsa-miR-489	0	0	0	1	0	0	UBE2U	ubiquitin-conjugating enzyme E2U (putative)
hsa-miR-489	0	0	0	1	1	1	C20orf85	chromosome 20 open reading frame 85
hsa-miR-489	0	0	0	1	0	0	C8B	complement component 8, beta polypeptide
hsa-miR-489	0	0	0	1	0	0	SPO11	SPO11 meiotic protein covalently bound to DSB homolog (S. cerevisiae)
hsa-miR-489	0	0	0	1	0	0	ECHDC2	enoyl CoA hydratase domain containing 2
hsa-miR-489	0	0	1	1	1	1	C1orf185	chromosome 1 open reading frame 185
hsa-miR-489	0	0	1	1	1	1	ELAVL4	ELAV (embryonic lethal, abnormal vision, Drosophila)-like 4
hsa-miR-489	0	0	0	1	0	0	LIPK	lipase, family member K
hsa-miR-489	1	0	1	1	1	1	NCOA3	nuclear receptor coactivator 3
hsa-miR-489	0	0	0	1	0	0	IPO13	importin 13
hsa-miR-489	0	0	1	1	0	0	PTPRF	protein tyrosine phosphatase, receptor type, F
hsa-miR-489	0	0	1	1	0	0	ABCC10	ATP-binding cassette, sub-family C (CFTR/MRP), member 10
hsa-miR-489	0	0	1	1	1	1	PPCS	phosphopantothenoylcysteine synthetase
hsa-miR-489	0	0	1	1	0	0	TCEAL5	transcription elongation factor A (SII)-like 5
hsa-miR-489	0	0	0	1	0	0	TP53TG5	TP53 target 5
hsa-miR-489	0	0	1	1	1	1	ZMPSTE24	zinc metallopeptidase STE24 homolog (S. cerevisiae)
hsa-miR-489	0	0	0	1	0	0	CENPI	centromere protein I
hsa-miR-489	1	0	1	1	0	0	JPH2	junctophilin 2
hsa-miR-489	0	0	1	1	1	1	PLA2G12B	phospholipase A2, group XIIB
hsa-miR-489	1	0	1	1	1	1	TRAPPC3	trafficking protein particle complex 3
hsa-miR-489	0	0	1	1	1	1	PPA1	pyrophosphatase (inorganic) 1
hsa-miR-489	1	0	1	1	1	1	PLCG1	phospholipase C, gamma 1
hsa-miR-489	0	0	1	1	0	0	CDK1	cyclin-dependent kinase 1
hsa-miR-489	1	0	1	1	0	0	CD164L2	CD164 sialomucin-like 2
hsa-miR-489	1	0	1	1	1	1	PHF1	PHD finger protein 1
hsa-miR-489	0	0	0	1	1	1	B3GALT4	UDP-Gal:betaGlcNAc beta 1,3-galactosyltransferase, polypeptide 4
hsa-miR-489	0	0	0	1	1	1	PSMB9	proteasome (prosome, macropain) subunit, beta type, 9 (large multifunctional peptidase 2)
hsa-miR-489	0	0	1	1	0	0	EGFL8	EGF-like-domain, multiple 8
hsa-miR-489	0	0	0	1	1	1	EMC1	ER membrane protein complex subunit 1
hsa-miR-489	0	0	1	1	0	0	GALK1	galactokinase 1
hsa-miR-489	0	0	0	1	0	0	FAM22F	family with sequence similarity 22, member F
hsa-miR-489	0	0	1	1	0	0	RDBP	RD RNA binding protein
hsa-miR-489	0	0	0	1	0	0	PADI4	peptidyl arginine deiminase, type IV
hsa-miR-489	1	0	1	1	0	0	EHMT2	euchromatic histone-lysine N-methyltransferase 2
hsa-miR-489	0	0	1	1	1	1	CCDC148	coiled-coil domain containing 148
hsa-miR-489	0	0	1	1	0	0	HSPA1L	heat shock 70kDa protein 1-like
hsa-miR-489	0	0	1	1	1	1	KYNU	kynureninase
hsa-miR-489	0	0	1	1	0	0	CSNK2B	casein kinase 2, beta polypeptide
hsa-miR-489	0	0	0	1	1	1	LY6G5B	lymphocyte antigen 6 complex, locus G5B
hsa-miR-489	0	0	0	1	0	0	APOM	apolipoprotein M
hsa-miR-489	0	0	0	1	1	1	MDC1	mediator of DNA-damage checkpoint 1
hsa-miR-489	0	0	0	1	1	1	SLC15A1	solute carrier family 15 (oligopeptide transporter), member 1
hsa-miR-489	0	0	1	1	0	0	MAD2L2	MAD2 mitotic arrest deficient-like 2 (yeast)
hsa-miR-489	0	0	0	1	0	0	HCG9	HLA complex group 9 (non-protein coding)
hsa-miR-489	0	0	0	1	0	0	NMS	neuromedin S
hsa-miR-489	0	0	0	1	0	0	CST9L	cystatin 9-like
hsa-miR-489	1	0	1	1	1	1	CASZ1	castor zinc finger 1
hsa-miR-489	0	0	1	1	0	0	PAX1	paired box 1
hsa-miR-489	0	0	0	1	0	0	VPS28	vacuolar protein sorting 28 homolog (S. cerevisiae)
hsa-miR-489	0	0	1	1	1	1	CBWD3	COBW domain containing 3
hsa-miR-489	0	0	1	1	1	1	SLC39A12	solute carrier family 39 (zinc transporter), member 12
hsa-miR-489	0	0	1	1	1	1	CBWD5	COBW domain containing 5
hsa-miR-489	0	0	0	1	0	0	CBWD6	COBW domain containing 6
hsa-miR-489	0	0	1	1	0	0	TSNARE1	t-SNARE domain containing 1
hsa-miR-489	0	0	1	1	1	1	SLC36A3	solute carrier family 36 (proton/amino acid symporter), member 3
hsa-miR-489	0	0	0	1	0	0	KRTAP9-2	keratin associated protein 9-2
hsa-miR-489	0	0	0	1	0	0	LOC389602	uncharacterized LOC389602
hsa-miR-489	0	0	0	1	1	1	PLEKHG5	pleckstrin homology domain containing, family G (with RhoGef domain) member 5
hsa-miR-489	0	0	1	1	1	1	ZNF767	zinc finger family member 767
hsa-miR-489	0	0	1	1	0	0	KCNAB2	potassium voltage-gated channel, shaker-related subfamily, beta member 2
hsa-miR-489	1	0	1	1	1	1	PCDHGA1	protocadherin gamma subfamily A, 1
hsa-miR-489	0	0	0	1	0	0	RPP38	ribonuclease P/MRP 38kDa subunit
hsa-miR-489	0	0	1	1	1	1	PSME4	proteasome (prosome, macropain) activator subunit 4
hsa-miR-489	0	0	1	1	1	1	DEPDC4	DEP domain containing 4
hsa-miR-489	0	0	1	1	0	0	HSPA14	heat shock 70kDa protein 14
hsa-miR-489	0	0	0	1	1	1	TMEM52	transmembrane protein 52
hsa-miR-489	0	0	1	1	0	0	FERMT1	fermitin family member 1
hsa-miR-489	0	0	1	1	0	0	WDR62	WD repeat domain 62
hsa-miR-489	0	0	0	1	0	0	SDHAF1	succinate dehydrogenase complex assembly factor 1
hsa-miR-489	0	0	0	1	0	0	SLC10A5	solute carrier family 10 (sodium/bile acid cotransporter family), member 5
hsa-miR-489	0	0	1	1	0	0	ZNF584	zinc finger protein 584
hsa-miR-489	0	0	0	1	0	0	ZNF324B	zinc finger protein 324B
hsa-miR-489	1	0	1	1	0	0	AEN	apoptosis enhancing nuclease
hsa-miR-489	0	0	1	1	1	1	VWA8	von Willebrand factor A domain containing 8
hsa-miR-489	0	0	1	1	1	1	PDE7A	phosphodiesterase 7A
hsa-miR-489	1	0	1	1	1	1	EIF1AX	eukaryotic translation initiation factor 1A, X-linked
hsa-miR-489	1	0	0	1	1	1	PDHA1	pyruvate dehydrogenase (lipoamide) alpha 1
hsa-miR-489	0	0	1	1	0	0	IL2RA	interleukin 2 receptor, alpha
hsa-miR-489	0	0	0	1	1	1	CDKN2A	cyclin-dependent kinase inhibitor 2A
hsa-miR-489	0	0	1	1	1	1	IFNW1	interferon, omega 1
hsa-miR-489	1	0	1	1	1	1	FRY	furry homolog (Drosophila)
hsa-miR-489	0	0	1	1	1	1	FAM50B	family with sequence similarity 50, member B
hsa-miR-489	0	0	0	1	0	0	FBXW9	F-box and WD repeat domain containing 9
hsa-miR-489	1	0	1	1	1	1	ADAMTSL1	ADAMTS-like 1
hsa-miR-489	0	0	1	1	1	1	IL4R	interleukin 4 receptor
hsa-miR-489	0	0	1	1	0	0	PITRM1	pitrilysin metallopeptidase 1
hsa-miR-489	0	0	1	1	0	0	TBC1D22A	TBC1 domain family, member 22A
hsa-miR-489	0	0	1	1	1	1	SMR3B	submaxillary gland androgen regulated protein 3B
hsa-miR-489	1	0	1	1	1	1	HDHD1	haloacid dehalogenase-like hydrolase domain containing 1
hsa-miR-489	0	0	1	1	1	1	CD99	CD99 molecule
hsa-miR-489	0	0	1	1	1	1	SPATA6L	spermatogenesis associated 6-like
hsa-miR-489	0	0	1	1	0	0	RBCK1	RanBP-type and C3HC4-type zinc finger containing 1
hsa-miR-489	0	0	0	1	1	1	EFHA1	EF-hand domain family, member A1
hsa-miR-489	0	0	1	1	1	1	CBWD1	COBW domain containing 1
hsa-miR-489	0	0	1	1	0	0	ZDHHC20	zinc finger, DHHC-type containing 20
hsa-miR-489	0	0	1	1	1	1	SH3TC1	SH3 domain and tetratricopeptide repeats 1
hsa-miR-489	0	0	0	1	0	0	SERPINB11	serpin peptidase inhibitor, clade B (ovalbumin), member 11 (gene/pseudogene)
hsa-miR-489	0	0	1	1	1	1	PLEKHG4B	pleckstrin homology domain containing, family G (with RhoGef domain) member 4B
hsa-miR-489	0	0	1	1	0	0	TSPY2	testis specific protein, Y-linked 2
hsa-miR-489	1	0	1	1	1	1	RNMT	RNA (guanine-7-) methyltransferase
hsa-miR-489	0	0	0	1	0	0	TMEM42	transmembrane protein 42
hsa-miR-489	1	0	1	1	1	1	MKLN1	muskelin 1, intracellular mediator containing kelch motifs
hsa-miR-489	0	0	0	1	1	1	FBXO43	F-box protein 43
hsa-miR-489	0	0	1	1	0	0	LRRIQ3	leucine-rich repeats and IQ motif containing 3
hsa-miR-489	0	0	0	1	1	1	C16orf7	chromosome 16 open reading frame 7
hsa-miR-489	0	0	1	1	1	1	PRIM2	primase, DNA, polypeptide 2 (58kDa)
hsa-miR-489	0	0	0	1	0	0	TAS2R19	taste receptor, type 2, member 19
hsa-miR-489	0	0	0	1	0	0	TAS2R50	taste receptor, type 2, member 50
hsa-miR-489	1	0	1	1	1	1	GK	glycerol kinase
hsa-miR-489	1	0	1	1	1	1	NF2	neurofibromin 2 (merlin)
hsa-miR-489	0	0	1	1	1	1	TSHR	thyroid stimulating hormone receptor
hsa-miR-489	1	0	1	1	1	1	CHRNA3	cholinergic receptor, nicotinic, alpha 3 (neuronal)
hsa-miR-489	1	0	1	1	1	1	MTUS1	microtubule associated tumor suppressor 1
hsa-miR-489	1	0	1	1	1	1	RBPMS	RNA binding protein with multiple splicing
hsa-miR-489	0	0	0	1	1	1	ZIK1	zinc finger protein interacting with K protein 1 homolog (mouse)
hsa-miR-489	0	0	0	1	1	1	ESCO2	establishment of cohesion 1 homolog 2 (S. cerevisiae)
hsa-miR-489	1	0	1	0	1	1	TFEC	transcription factor EC
hsa-miR-489	0	0	1	1	1	1	MAP9	microtubule-associated protein 9
hsa-miR-489	0	0	0	0	1	1	ZNF826P	zinc finger protein 826, pseudogene
hsa-miR-489	1	0	1	1	1	1	FAM63B	family with sequence similarity 63, member B
hsa-miR-489	0	0	1	1	1	1	TTC23	tetratricopeptide repeat domain 23
hsa-miR-489	0	0	1	1	1	1	NCBP2	nuclear cap binding protein subunit 2, 20kDa
hsa-miR-489	0	0	1	0	1	1	PAICS	phosphoribosylaminoimidazole carboxylase, phosphoribosylaminoimidazole succinocarboxamide synthetase
hsa-miR-489	1	0	1	1	1	1	UNC119B	unc-119 homolog B (C. elegans)
hsa-miR-489	0	0	1	1	1	1	ATP5F1	ATP synthase, H+ transporting, mitochondrial Fo complex, subunit B1
hsa-miR-489	1	0	1	1	1	1	ATP6V1C1	ATPase, H+ transporting, lysosomal 42kDa, V1 subunit C1
hsa-miR-489	1	0	1	1	1	1	IL13	interleukin 13
hsa-miR-489	0	0	1	1	1	1	CEACAM6	carcinoembryonic antigen-related cell adhesion molecule 6 (non-specific cross reacting antigen)
hsa-miR-489	0	0	0	1	1	1	PSG4	pregnancy specific beta-1-glycoprotein 4
hsa-miR-489	1	0	1	0	1	1	TNFRSF10B	tumor necrosis factor receptor superfamily, member 10b
hsa-miR-489	1	0	1	0	1	1	SEMA5A	sema domain, seven thrombospondin repeats (type 1 and type 1-like), transmembrane domain (TM) and short cytoplasmic domain, (semaphorin) 5A
hsa-miR-489	0	0	0	1	1	1	ZNF235	zinc finger protein 235
hsa-miR-489	1	0	1	1	1	1	VPS4B	vacuolar protein sorting 4 homolog B (S. cerevisiae)
hsa-miR-489	0	0	0	1	1	1	CCR8	chemokine (C-C motif) receptor 8
hsa-miR-489	0	0	0	1	1	1	MPL	myeloproliferative leukemia virus oncogene
hsa-miR-489	1	0	1	1	1	1	RBBP4	retinoblastoma binding protein 4
hsa-miR-489	0	0	1	1	1	1	IGSF6	immunoglobulin superfamily, member 6
hsa-miR-489	1	0	1	1	1	1	PDE10A	phosphodiesterase 10A
hsa-miR-489	0	0	0	0	1	1	HCP5	HLA complex P5 (non-protein coding)
hsa-miR-489	1	0	1	1	1	1	SNTB2	syntrophin, beta 2 (dystrophin-associated protein A1, 59kDa, basic component 2)
hsa-miR-489	1	0	1	1	1	1	HS2ST1	heparan sulfate 2-O-sulfotransferase 1
hsa-miR-489	1	0	0	0	1	1	YPEL1	yippee-like 1 (Drosophila)
hsa-miR-489	1	0	1	1	1	1	PDXDC1	pyridoxal-dependent decarboxylase domain containing 1
hsa-miR-489	1	0	1	1	1	1	SYNM	synemin, intermediate filament protein
hsa-miR-489	1	0	1	1	1	1	MYEF2	myelin expression factor 2
hsa-miR-489	1	0	1	1	1	1	RAB14	RAB14, member RAS oncogene family
hsa-miR-489	0	0	0	1	1	1	GTSE1	G-2 and S-phase expressed 1
hsa-miR-489	0	0	0	1	1	1	CCRL1	chemokine (C-C motif) receptor-like 1
hsa-miR-489	0	0	1	0	1	1	CWC25	CWC25 spliceosome-associated protein homolog (S. cerevisiae)
hsa-miR-489	0	0	1	1	1	1	C14orf119	chromosome 14 open reading frame 119
hsa-miR-489	0	0	0	0	1	1	PTCD3	pentatricopeptide repeat domain 3
hsa-miR-489	0	0	1	1	1	1	BDH2	3-hydroxybutyrate dehydrogenase, type 2
hsa-miR-489	0	0	1	1	1	1	RAD18	RAD18 homolog (S. cerevisiae)
hsa-miR-489	1	0	1	0	1	1	ATP10D	ATPase, class V, type 10D
hsa-miR-489	0	0	1	0	1	1	SYT13	synaptotagmin XIII
hsa-miR-489	0	0	1	1	1	1	ZFP28	zinc finger protein 28 homolog (mouse)
hsa-miR-489	0	0	0	1	1	1	PCDHB16	protocadherin beta 16
hsa-miR-489	0	0	1	1	1	1	HRH4	histamine receptor H4
hsa-miR-489	1	0	1	1	1	1	SUDS3	suppressor of defective silencing 3 homolog (S. cerevisiae)
hsa-miR-489	0	0	1	1	1	1	ZNF665	zinc finger protein 665
hsa-miR-489	1	0	1	0	1	1	KIAA1715	KIAA1715
hsa-miR-489	1	0	1	1	1	1	FAM107B	family with sequence similarity 107, member B
hsa-miR-489	0	0	1	1	1	1	COG8	component of oligomeric golgi complex 8
hsa-miR-489	0	0	0	1	1	1	LRP11	low density lipoprotein receptor-related protein 11
hsa-miR-489	0	0	0	0	1	1	ZNF257	zinc finger protein 257
hsa-miR-489	0	0	1	0	1	1	TP53RK	TP53 regulating kinase
hsa-miR-489	0	0	1	1	1	1	C7orf29	chromosome 7 open reading frame 29
hsa-miR-489	0	0	1	1	1	1	VSTM4	V-set and transmembrane domain containing 4
hsa-miR-489	1	0	1	1	1	1	TXLNB	taxilin beta
hsa-miR-489	1	0	1	1	1	1	FAM126B	family with sequence similarity 126, member B
hsa-miR-489	1	0	1	0	1	1	LONRF2	LON peptidase N-terminal domain and ring finger 2
hsa-miR-489	0	0	1	1	1	1	FAM180A	family with sequence similarity 180, member A
hsa-miR-489	0	0	0	0	1	1	LOC728769	uncharacterized LOC728769
hsa-miR-489	0	0	0	0	1	1	LOC732226	uncharacterized LOC732226
hsa-miR-489	0	0	0	0	1	1	TMEM14E	transmembrane protein 14E
hsa-miR-489	0	0	0	0	1	1	RBBP4P1	retinoblastoma binding protein 4 pseudogene 1
