# Supplementary material for: Profiling of Selected MicroRNAs in Proliferative Eutopic Endometrium of Women with Ovarian Endometriosis
Source: Biomed Res Int. 2015 Aug 20;2015:760698. doi: 10.1155/2015/760698 (PMC4558423; doi:10.1155/2015/760698)
Supplement: Supplementary file 1 — Table I: The names of miRNAs significantly differentially expressed between eutopic endometrium of patients with endometriosis vs eutopic endometrium of patients without endometriosis. Table II: The associations between miRNA and mRNA, which presents detailed results of the search of six major databases i.e targetscan, tarbase, miranda, mirbase, mirtarget2 and pictar. [file 760698.f1.zip › 760698.f1/Table II/hsa-miR-490-5p.tsv]

miR	targetscan	tarbase	miranda	mirbase	mirtarget2	pictar	GeneSymbol	GeneName
hsa-miR-490-5p	1	0	1	1	0	0	SRCAP	Snf2-related CREBBP activator protein
hsa-miR-490-5p	1	0	1	0	1	1	PTPRT	protein tyrosine phosphatase, receptor type, T
hsa-miR-490-5p	0	0	1	1	1	1	RABGAP1L	RAB GTPase activating protein 1-like
hsa-miR-490-5p	1	0	1	1	1	1	GIGYF2	GRB10 interacting GYF protein 2
hsa-miR-490-5p	0	0	1	1	1	1	MAU2	MAU2 chromatid cohesion factor homolog (C. elegans)
hsa-miR-490-5p	1	0	1	1	1	1	ARHGEF15	Rho guanine nucleotide exchange factor (GEF) 15
hsa-miR-490-5p	1	0	1	1	1	1	SEMA4F	sema domain, immunoglobulin domain (Ig), transmembrane domain (TM) and short cytoplasmic domain, (semaphorin) 4F
hsa-miR-490-5p	1	0	1	1	1	1	BAHD1	bromo adjacent homology domain containing 1
hsa-miR-490-5p	1	0	1	1	1	1	NLGN4Y	neuroligin 4, Y-linked
hsa-miR-490-5p	0	0	1	1	0	0	RBPJL	recombination signal binding protein for immunoglobulin kappa J region-like
hsa-miR-490-5p	1	0	1	1	0	0	KIAA1045	KIAA1045
hsa-miR-490-5p	1	0	1	1	1	1	ZMIZ1	zinc finger, MIZ-type containing 1
hsa-miR-490-5p	0	0	1	0	0	0	MTA3	metastasis associated 1 family, member 3
hsa-miR-490-5p	0	0	1	0	0	0	KIAA1383	KIAA1383
hsa-miR-490-5p	1	0	1	1	1	1	FAM135A	family with sequence similarity 135, member A
hsa-miR-490-5p	1	0	1	1	1	1	BAZ2B	bromodomain adjacent to zinc finger domain, 2B
hsa-miR-490-5p	0	0	1	0	1	1	ZSWIM6	zinc finger, SWIM-type containing 6
hsa-miR-490-5p	1	0	1	1	1	1	LCOR	ligand dependent nuclear receptor corepressor
hsa-miR-490-5p	0	0	1	1	0	0	COL27A1	collagen, type XXVII, alpha 1
hsa-miR-490-5p	0	0	1	1	0	0	TPGS2	tubulin polyglutamylase complex subunit 2
hsa-miR-490-5p	1	0	1	1	1	1	MAT2B	methionine adenosyltransferase II, beta
hsa-miR-490-5p	1	0	1	0	1	1	RNF43	ring finger protein 43
hsa-miR-490-5p	1	0	1	1	1	1	UBR3	ubiquitin protein ligase E3 component n-recognin 3 (putative)
hsa-miR-490-5p	0	0	1	1	1	1	IL7	interleukin 7
hsa-miR-490-5p	1	0	1	1	1	1	PAN3	PAN3 poly(A) specific ribonuclease subunit homolog (S. cerevisiae)
hsa-miR-490-5p	1	0	1	1	1	1	VLDLR	very low density lipoprotein receptor
hsa-miR-490-5p	1	0	1	0	1	1	PCDHA13	protocadherin alpha 13
hsa-miR-490-5p	1	0	1	1	1	1	PCDHA4	protocadherin alpha 4
hsa-miR-490-5p	1	0	1	1	1	1	RPS6KA3	ribosomal protein S6 kinase, 90kDa, polypeptide 3
hsa-miR-490-5p	1	0	1	1	0	0	ELN	elastin
hsa-miR-490-5p	0	0	1	1	1	1	DYNC1I2	dynein, cytoplasmic 1, intermediate chain 2
hsa-miR-490-5p	1	0	1	1	1	1	PML	promyelocytic leukemia
hsa-miR-490-5p	1	0	1	1	1	1	SLC8A1	solute carrier family 8 (sodium/calcium exchanger), member 1
hsa-miR-490-5p	1	0	1	0	1	1	PLAG1	pleiomorphic adenoma gene 1
hsa-miR-490-5p	1	0	1	1	1	1	PRKACB	protein kinase, cAMP-dependent, catalytic, beta
hsa-miR-490-5p	1	0	1	0	1	1	ETV1	ets variant 1
hsa-miR-490-5p	1	0	1	1	1	1	SATB2	SATB homeobox 2
hsa-miR-490-5p	0	0	1	1	1	1	ZNF747	zinc finger protein 747
hsa-miR-490-5p	0	0	1	1	1	1	STAU1	staufen, RNA binding protein, homolog 1 (Drosophila)
hsa-miR-490-5p	0	0	1	1	0	0	HLA-DMB	major histocompatibility complex, class II, DM beta
hsa-miR-490-5p	0	0	1	1	1	1	HLA-DQA1	major histocompatibility complex, class II, DQ alpha 1
hsa-miR-490-5p	1	0	1	0	1	1	CAV1	caveolin 1, caveolae protein, 22kDa
hsa-miR-490-5p	1	0	1	1	1	1	TMBIM6	transmembrane BAX inhibitor motif containing 6
hsa-miR-490-5p	0	0	1	1	0	0	PLA1A	phospholipase A1 member A
hsa-miR-490-5p	1	0	1	1	1	1	MID1	midline 1 (Opitz/BBB syndrome)
hsa-miR-490-5p	1	0	1	0	1	1	CELF2	CUGBP, Elav-like family member 2
hsa-miR-490-5p	1	0	1	1	1	1	ERLIN1	ER lipid raft associated 1
hsa-miR-490-5p	1	0	1	1	1	1	CBFA2T2	core-binding factor, runt domain, alpha subunit 2; translocated to, 2
hsa-miR-490-5p	0	0	1	1	0	0	RBM5	RNA binding motif protein 5
hsa-miR-490-5p	0	0	1	1	0	0	ABRACL	ABRA C-terminal like
hsa-miR-490-5p	0	0	1	1	1	1	ZNF317	zinc finger protein 317
hsa-miR-490-5p	0	0	1	1	1	1	IFT52	intraflagellar transport 52 homolog (Chlamydomonas)
hsa-miR-490-5p	0	0	1	0	1	1	ZDHHC17	zinc finger, DHHC-type containing 17
hsa-miR-490-5p	0	0	1	1	1	1	SLC30A5	solute carrier family 30 (zinc transporter), member 5
hsa-miR-490-5p	0	0	1	1	1	1	CD28	CD28 molecule
hsa-miR-490-5p	1	0	1	1	0	0	TDRKH	tudor and KH domain containing
hsa-miR-490-5p	1	0	1	1	1	1	DESI2	desumoylating isopeptidase 2
hsa-miR-490-5p	1	0	1	1	1	1	RBM47	RNA binding motif protein 47
hsa-miR-490-5p	1	0	1	0	1	1	TRPS1	trichorhinophalangeal syndrome I
hsa-miR-490-5p	1	0	1	1	1	1	FASLG	Fas ligand (TNF superfamily, member 6)
hsa-miR-490-5p	1	0	1	1	1	1	KLHL12	kelch-like 12 (Drosophila)
hsa-miR-490-5p	1	0	1	1	1	1	DCLRE1B	DNA cross-link repair 1B
hsa-miR-490-5p	0	0	1	1	1	1	FCRL1	Fc receptor-like 1
hsa-miR-490-5p	0	0	1	1	1	1	FCRLA	Fc receptor-like A
hsa-miR-490-5p	1	0	1	1	1	1	PBX3	pre-B-cell leukemia homeobox 3
hsa-miR-490-5p	1	0	1	1	1	1	KCNIP2	Kv channel interacting protein 2
hsa-miR-490-5p	1	0	1	1	1	1	NTRK2	neurotrophic tyrosine kinase, receptor, type 2
hsa-miR-490-5p	0	0	1	1	1	1	PTK7	PTK7 protein tyrosine kinase 7
hsa-miR-490-5p	1	0	1	1	1	1	AFF2	AF4/FMR2 family, member 2
hsa-miR-490-5p	0	0	1	1	1	1	GNAS	GNAS complex locus
hsa-miR-490-5p	0	0	1	1	1	1	TCFL5	transcription factor-like 5 (basic helix-loop-helix)
hsa-miR-490-5p	1	0	1	1	1	1	PFKFB3	6-phosphofructo-2-kinase/fructose-2,6-biphosphatase 3
hsa-miR-490-5p	0	0	1	0	1	1	COL13A1	collagen, type XIII, alpha 1
hsa-miR-490-5p	1	0	1	1	1	1	NRXN3	neurexin 3
hsa-miR-490-5p	1	0	1	1	1	1	PDE1B	phosphodiesterase 1B, calmodulin-dependent
hsa-miR-490-5p	1	0	1	1	1	1	VAMP7	vesicle-associated membrane protein 7
hsa-miR-490-5p	0	0	1	1	1	1	PARP16	poly (ADP-ribose) polymerase family, member 16
hsa-miR-490-5p	0	0	1	1	1	1	OLFM4	olfactomedin 4
hsa-miR-490-5p	1	0	1	1	1	1	ARHGAP12	Rho GTPase activating protein 12
hsa-miR-490-5p	0	0	1	0	0	0	TPTEP1	transmembrane phosphatase with tensin homology pseudogene 1
hsa-miR-490-5p	1	0	1	1	1	1	HMGN3	high mobility group nucleosomal binding domain 3
hsa-miR-490-5p	1	0	1	1	1	1	RIC3	resistance to inhibitors of cholinesterase 3 homolog (C. elegans)
hsa-miR-490-5p	0	0	1	0	0	0	SOX2-OT	SOX2 overlapping transcript (non-protein coding)
hsa-miR-490-5p	0	0	1	0	0	0	DUXAP10	double homeobox A pseudogene 10
hsa-miR-490-5p	1	0	1	1	1	1	S100PBP	S100P binding protein
hsa-miR-490-5p	0	0	1	0	0	0	LINC00475	long intergenic non-protein coding RNA 475
hsa-miR-490-5p	0	0	1	0	1	1	ARHGAP42	Rho GTPase activating protein 42
hsa-miR-490-5p	0	0	1	0	0	0	LOC284561	uncharacterized LOC284561
hsa-miR-490-5p	0	0	1	1	0	0	OBSL1	obscurin-like 1
hsa-miR-490-5p	1	0	1	0	1	1	C14orf101	chromosome 14 open reading frame 101
hsa-miR-490-5p	1	0	1	0	1	1	STK40	serine/threonine kinase 40
hsa-miR-490-5p	0	0	1	1	1	1	CNOT8	CCR4-NOT transcription complex, subunit 8
hsa-miR-490-5p	0	0	1	0	1	1	FLJ22763	uncharacterized LOC401081
hsa-miR-490-5p	1	0	1	1	1	1	EML2	echinoderm microtubule associated protein like 2
hsa-miR-490-5p	1	0	1	1	0	0	PRMT8	protein arginine methyltransferase 8
hsa-miR-490-5p	1	0	1	1	1	1	ITGA9	integrin, alpha 9
hsa-miR-490-5p	1	0	1	0	1	1	TOX3	TOX high mobility group box family member 3
hsa-miR-490-5p	1	0	1	1	1	1	LRP4	low density lipoprotein receptor-related protein 4
hsa-miR-490-5p	0	0	1	1	1	1	DUSP14	dual specificity phosphatase 14
hsa-miR-490-5p	0	0	1	0	1	1	NEK1	NIMA (never in mitosis gene a)-related kinase 1
hsa-miR-490-5p	1	0	1	1	1	1	FAM40A	family with sequence similarity 40, member A
hsa-miR-490-5p	1	0	1	1	1	1	SLC38A1	solute carrier family 38, member 1
hsa-miR-490-5p	0	0	1	1	0	0	FGGY	FGGY carbohydrate kinase domain containing
hsa-miR-490-5p	1	0	1	1	1	1	RAP1GDS1	RAP1, GTP-GDP dissociation stimulator 1
hsa-miR-490-5p	0	0	1	1	1	1	PRR5L	proline rich 5 like
hsa-miR-490-5p	0	0	1	1	1	1	C8orf46	chromosome 8 open reading frame 46
hsa-miR-490-5p	1	0	1	0	1	1	AP1G1	adaptor-related protein complex 1, gamma 1 subunit
hsa-miR-490-5p	0	0	1	1	1	1	KLC4	kinesin light chain 4
hsa-miR-490-5p	1	0	1	1	1	1	MEIS2	Meis homeobox 2
hsa-miR-490-5p	0	0	1	0	0	0	RMST	rhabdomyosarcoma 2 associated transcript (non-protein coding)
hsa-miR-490-5p	1	0	1	1	1	1	AGPAT1	1-acylglycerol-3-phosphate O-acyltransferase 1 (lysophosphatidic acid acyltransferase, alpha)
hsa-miR-490-5p	1	0	1	1	1	1	SCAMP5	secretory carrier membrane protein 5
hsa-miR-490-5p	0	0	1	0	1	1	THAP6	THAP domain containing 6
hsa-miR-490-5p	0	0	1	1	0	0	RELT	RELT tumor necrosis factor receptor
hsa-miR-490-5p	0	0	1	1	1	1	ELL3	elongation factor RNA polymerase II-like 3
hsa-miR-490-5p	0	0	1	1	1	1	A2ML1	alpha-2-macroglobulin-like 1
hsa-miR-490-5p	0	0	1	1	1	1	ZNF385B	zinc finger protein 385B
hsa-miR-490-5p	0	0	1	0	1	1	UHMK1	U2AF homology motif (UHM) kinase 1
hsa-miR-490-5p	1	0	1	1	1	1	FAM73B	family with sequence similarity 73, member B
hsa-miR-490-5p	1	0	1	1	1	1	TBCK	TBC1 domain containing kinase
hsa-miR-490-5p	0	0	1	1	0	0	NISCH	nischarin
hsa-miR-490-5p	0	0	1	1	0	0	LGR5	leucine-rich repeat containing G protein-coupled receptor 5
hsa-miR-490-5p	0	0	1	1	0	0	PIGO	phosphatidylinositol glycan anchor biosynthesis, class O
hsa-miR-490-5p	1	0	1	1	1	1	TLK1	tousled-like kinase 1
hsa-miR-490-5p	0	0	1	0	1	1	TMSB15B	thymosin beta 15B
hsa-miR-490-5p	1	0	1	1	1	1	ARIH2	ariadne homolog 2 (Drosophila)
hsa-miR-490-5p	1	0	1	1	1	1	FBXW2	F-box and WD repeat domain containing 2
hsa-miR-490-5p	0	0	1	0	1	1	SSPN	sarcospan
hsa-miR-490-5p	1	0	1	1	1	1	GPD2	glycerol-3-phosphate dehydrogenase 2 (mitochondrial)
hsa-miR-490-5p	1	0	1	1	1	1	GCFC1	GC-rich sequence DNA-binding factor 1
hsa-miR-490-5p	0	0	1	1	1	1	SLC16A1	solute carrier family 16, member 1 (monocarboxylic acid transporter 1)
hsa-miR-490-5p	0	0	1	0	0	0	CXXC1P1	CXXC finger protein 1 pseudogene 1
hsa-miR-490-5p	1	0	1	1	1	1	RCN1	reticulocalbin 1, EF-hand calcium binding domain
hsa-miR-490-5p	0	0	1	0	0	0	ZNF806	zinc finger protein 806
hsa-miR-490-5p	1	0	1	0	1	1	NCOA7	nuclear receptor coactivator 7
hsa-miR-490-5p	0	0	1	0	0	0	LINC00340	long intergenic non-protein coding RNA 340
hsa-miR-490-5p	0	0	1	1	1	1	C9orf47	chromosome 9 open reading frame 47
hsa-miR-490-5p	1	0	1	1	1	1	RASGEF1A	RasGEF domain family, member 1A
hsa-miR-490-5p	1	0	1	0	1	1	UVRAG	UV radiation resistance associated gene
hsa-miR-490-5p	1	0	1	1	1	1	SPATS2	spermatogenesis associated, serine-rich 2
hsa-miR-490-5p	1	0	1	1	1	1	GAPVD1	GTPase activating protein and VPS9 domains 1
hsa-miR-490-5p	0	0	1	0	0	0	LOC643327	uncharacterized LOC643327
hsa-miR-490-5p	1	0	1	1	1	1	SYT6	synaptotagmin VI
hsa-miR-490-5p	0	0	1	1	1	1	EXTL2	exostoses (multiple)-like 2
hsa-miR-490-5p	0	0	1	1	0	0	NMRK1	nicotinamide riboside kinase 1
hsa-miR-490-5p	1	0	1	1	1	1	KL	klotho
hsa-miR-490-5p	0	0	1	0	0	0	LOC400680	uncharacterized LOC400680
hsa-miR-490-5p	1	0	1	0	1	1	PRKAR1A	protein kinase, cAMP-dependent, regulatory, type I, alpha
hsa-miR-490-5p	0	0	1	0	0	0	LOC284385	uncharacterized LOC284385
hsa-miR-490-5p	0	0	1	1	1	1	RP1	retinitis pigmentosa 1 (autosomal dominant)
hsa-miR-490-5p	0	0	1	0	0	0	GTF2IP1	general transcription factor IIi, pseudogene 1
hsa-miR-490-5p	1	0	1	1	1	1	SIK3	SIK family kinase 3
hsa-miR-490-5p	0	0	1	1	1	1	ZDHHC15	zinc finger, DHHC-type containing 15
hsa-miR-490-5p	0	0	1	1	0	0	MARS	methionyl-tRNA synthetase
hsa-miR-490-5p	0	0	1	1	1	1	FRMD5	FERM domain containing 5
hsa-miR-490-5p	0	0	1	1	1	1	BAI2	brain-specific angiogenesis inhibitor 2
hsa-miR-490-5p	0	0	1	1	1	1	TMEM17	transmembrane protein 17
hsa-miR-490-5p	0	0	1	0	1	1	NAIP	NLR family, apoptosis inhibitory protein
hsa-miR-490-5p	1	0	1	0	1	1	TTYH3	tweety homolog 3 (Drosophila)
hsa-miR-490-5p	0	0	1	1	1	1	IDS	iduronate 2-sulfatase
hsa-miR-490-5p	1	0	1	1	1	1	METAP2	methionyl aminopeptidase 2
hsa-miR-490-5p	0	0	1	1	0	0	LOC100128239	uncharacterized LOC100128239
hsa-miR-490-5p	0	0	1	1	0	0	GUCA1A	guanylate cyclase activator 1A (retina)
hsa-miR-490-5p	0	0	1	1	1	1	MYOM3	myomesin family, member 3
hsa-miR-490-5p	1	0	1	1	1	1	CSRNP3	cysteine-serine-rich nuclear protein 3
hsa-miR-490-5p	1	0	1	1	1	1	PIK3R1	phosphoinositide-3-kinase, regulatory subunit 1 (alpha)
hsa-miR-490-5p	0	0	1	0	0	0	PLEKHD1	pleckstrin homology domain containing, family D (with coiled-coil domains) member 1
hsa-miR-490-5p	0	0	1	1	0	0	TMEM151B	transmembrane protein 151B
hsa-miR-490-5p	0	0	1	1	1	1	SZT2	seizure threshold 2 homolog (mouse)
hsa-miR-490-5p	0	0	1	1	1	1	MOBP	myelin-associated oligodendrocyte basic protein
hsa-miR-490-5p	1	0	1	1	0	0	SLC30A3	solute carrier family 30 (zinc transporter), member 3
hsa-miR-490-5p	0	0	1	0	0	0	LRRC9	leucine rich repeat containing 9
hsa-miR-490-5p	1	0	1	1	1	1	KALRN	kalirin, RhoGEF kinase
hsa-miR-490-5p	1	0	1	0	1	1	KDM2A	lysine (K)-specific demethylase 2A
hsa-miR-490-5p	0	0	1	1	1	1	TMEM202	transmembrane protein 202
hsa-miR-490-5p	1	0	1	0	1	1	ESRRG	estrogen-related receptor gamma
hsa-miR-490-5p	0	0	1	0	1	1	RUFY4	RUN and FYVE domain containing 4
hsa-miR-490-5p	0	0	1	1	1	1	RNF19B	ring finger protein 19B
hsa-miR-490-5p	0	0	1	1	0	0	ZNF730	zinc finger protein 730
hsa-miR-490-5p	0	0	1	1	1	1	PDE2A	phosphodiesterase 2A, cGMP-stimulated
hsa-miR-490-5p	0	0	1	0	0	0	AGAP9	ArfGAP with GTPase domain, ankyrin repeat and PH domain 9
hsa-miR-490-5p	0	0	1	1	1	1	XRN2	5'-3' exoribonuclease 2
hsa-miR-490-5p	1	0	1	1	1	1	TAP2	transporter 2, ATP-binding cassette, sub-family B (MDR/TAP)
hsa-miR-490-5p	1	0	1	1	1	1	RPS6KA4	ribosomal protein S6 kinase, 90kDa, polypeptide 4
hsa-miR-490-5p	0	0	1	1	1	1	C5orf28	chromosome 5 open reading frame 28
hsa-miR-490-5p	1	0	1	1	1	1	LUC7L3	LUC7-like 3 (S. cerevisiae)
hsa-miR-490-5p	1	0	1	1	1	1	DNM3	dynamin 3
hsa-miR-490-5p	1	0	1	1	1	1	MARCH7	membrane-associated ring finger (C3HC4) 7, E3 ubiquitin protein ligase
hsa-miR-490-5p	0	0	1	0	0	0	ANKRD34C	ankyrin repeat domain 34C
hsa-miR-490-5p	0	0	1	0	0	0	POM121L8P	POM121 transmembrane nucleoporin-like 8 pseudogene
hsa-miR-490-5p	0	0	1	0	0	0	LRRC37BP1	leucine rich repeat containing 37B pseudogene 1
hsa-miR-490-5p	0	0	1	0	0	0	RPL23AP82	ribosomal protein L23a pseudogene 82
hsa-miR-490-5p	1	0	1	0	1	1	BRPF1	bromodomain and PHD finger containing, 1
hsa-miR-490-5p	1	0	1	0	1	1	ZNF507	zinc finger protein 507
hsa-miR-490-5p	1	0	1	1	0	0	FNIP2	folliculin interacting protein 2
hsa-miR-490-5p	1	0	1	1	1	1	YTHDF3	YTH domain family, member 3
hsa-miR-490-5p	0	0	1	1	1	1	SYTL4	synaptotagmin-like 4
hsa-miR-490-5p	0	0	1	0	0	0	ADCY10P1	adenylate cyclase 10 (soluble) pseudogene 1
hsa-miR-490-5p	1	0	1	1	1	1	IL17RD	interleukin 17 receptor D
hsa-miR-490-5p	1	0	1	0	1	1	KIF21B	kinesin family member 21B
hsa-miR-490-5p	1	0	1	0	1	1	NR3C1	nuclear receptor subfamily 3, group C, member 1 (glucocorticoid receptor)
hsa-miR-490-5p	1	0	1	1	1	1	FAM76B	family with sequence similarity 76, member B
hsa-miR-490-5p	1	0	1	1	1	1	WDR44	WD repeat domain 44
hsa-miR-490-5p	1	0	1	1	1	1	TACC1	transforming, acidic coiled-coil containing protein 1
hsa-miR-490-5p	1	0	1	1	1	1	TXNRD1	thioredoxin reductase 1
hsa-miR-490-5p	0	0	1	1	1	1	CEP41	centrosomal protein 41kDa
hsa-miR-490-5p	0	0	1	1	1	1	DNAJB14	DnaJ (Hsp40) homolog, subfamily B, member 14
hsa-miR-490-5p	1	0	1	1	1	1	RIC8B	resistance to inhibitors of cholinesterase 8 homolog B (C. elegans)
hsa-miR-490-5p	1	0	1	1	1	1	WDR26	WD repeat domain 26
hsa-miR-490-5p	1	0	1	1	1	1	OPRM1	opioid receptor, mu 1
hsa-miR-490-5p	0	0	1	1	1	1	GON4L	gon-4-like (C. elegans)
hsa-miR-490-5p	1	0	1	1	1	1	NLGN4X	neuroligin 4, X-linked
hsa-miR-490-5p	1	0	1	1	1	1	ECT2	epithelial cell transforming sequence 2 oncogene
hsa-miR-490-5p	1	0	1	0	1	1	NHS	Nance-Horan syndrome (congenital cataracts and dental anomalies)
hsa-miR-490-5p	0	0	1	1	0	0	ASB16	ankyrin repeat and SOCS box containing 16
hsa-miR-490-5p	1	0	1	1	1	1	CHRDL1	chordin-like 1
hsa-miR-490-5p	1	0	1	1	1	1	PLCH1	phospholipase C, eta 1
hsa-miR-490-5p	1	0	1	1	1	1	NTNG1	netrin G1
hsa-miR-490-5p	0	0	1	1	1	1	CEACAM1	carcinoembryonic antigen-related cell adhesion molecule 1 (biliary glycoprotein)
hsa-miR-490-5p	0	0	1	1	1	1	CDK20	cyclin-dependent kinase 20
hsa-miR-490-5p	1	0	1	1	1	1	CPSF6	cleavage and polyadenylation specific factor 6, 68kDa
hsa-miR-490-5p	1	0	1	1	1	1	SMO	smoothened, frizzled family receptor
hsa-miR-490-5p	1	0	1	1	0	0	POLR3D	polymerase (RNA) III (DNA directed) polypeptide D, 44kDa
hsa-miR-490-5p	1	0	1	1	1	1	ATAT1	alpha tubulin acetyltransferase 1
hsa-miR-490-5p	0	0	1	0	1	1	AIPL1	aryl hydrocarbon receptor interacting protein-like 1
hsa-miR-490-5p	1	0	1	1	0	0	RUVBL2	RuvB-like 2 (E. coli)
hsa-miR-490-5p	1	0	1	1	1	1	PLEKHO2	pleckstrin homology domain containing, family O member 2
hsa-miR-490-5p	0	0	1	0	0	0	ATXN7L3B	ataxin 7-like 3B
hsa-miR-490-5p	1	0	1	1	0	0	SIGMAR1	sigma non-opioid intracellular receptor 1
hsa-miR-490-5p	1	0	1	1	1	1	GRIA2	glutamate receptor, ionotropic, AMPA 2
hsa-miR-490-5p	1	0	1	1	1	1	TRIM2	tripartite motif containing 2
hsa-miR-490-5p	0	0	1	1	1	1	ZNF587	zinc finger protein 587
hsa-miR-490-5p	0	0	1	1	1	1	HDHD2	haloacid dehalogenase-like hydrolase domain containing 2
hsa-miR-490-5p	0	0	1	0	0	0	GRAMD1B	GRAM domain containing 1B
hsa-miR-490-5p	1	0	1	1	1	1	DNAJB5	DnaJ (Hsp40) homolog, subfamily B, member 5
hsa-miR-490-5p	1	0	1	1	1	1	ETF1	eukaryotic translation termination factor 1
hsa-miR-490-5p	0	0	1	0	0	0	KLHL15	kelch-like 15 (Drosophila)
hsa-miR-490-5p	1	0	1	1	1	1	ZBTB38	zinc finger and BTB domain containing 38
hsa-miR-490-5p	0	0	1	0	1	1	ZNF37A	zinc finger protein 37A
hsa-miR-490-5p	1	0	1	0	1	1	NUP50	nucleoporin 50kDa
hsa-miR-490-5p	1	0	1	1	1	1	FAM176A	family with sequence similarity 176, member A
hsa-miR-490-5p	0	0	1	1	0	0	PREB	prolactin regulatory element binding
hsa-miR-490-5p	0	0	1	1	0	0	SARNP	SAP domain containing ribonucleoprotein
hsa-miR-490-5p	1	0	1	1	1	1	DNAJC14	DnaJ (Hsp40) homolog, subfamily C, member 14
hsa-miR-490-5p	1	0	1	1	1	1	VTI1A	vesicle transport through interaction with t-SNAREs homolog 1A (yeast)
hsa-miR-490-5p	0	0	1	0	0	0	ZNF720	zinc finger protein 720
hsa-miR-490-5p	1	0	1	1	1	1	KIAA1217	KIAA1217
hsa-miR-490-5p	0	0	1	0	0	0	ENTPD5	ectonucleoside triphosphate diphosphohydrolase 5
hsa-miR-490-5p	1	0	1	0	1	1	ARHGAP26	Rho GTPase activating protein 26
hsa-miR-490-5p	0	0	1	0	0	0	SNX29P2	sorting nexin 29 pseudogene 2
hsa-miR-490-5p	1	0	1	1	1	1	ZNF200	zinc finger protein 200
hsa-miR-490-5p	0	0	1	1	0	0	TBX6	T-box 6
hsa-miR-490-5p	1	0	1	1	1	1	EPHA4	EPH receptor A4
hsa-miR-490-5p	0	0	1	1	1	1	KIAA1755	KIAA1755
hsa-miR-490-5p	0	0	1	1	1	1	LRMP	lymphoid-restricted membrane protein
hsa-miR-490-5p	0	0	1	1	1	1	PIK3AP1	phosphoinositide-3-kinase adaptor protein 1
hsa-miR-490-5p	0	0	1	1	1	1	TMEM117	transmembrane protein 117
hsa-miR-490-5p	1	0	1	0	1	1	RNF4	ring finger protein 4
hsa-miR-490-5p	1	0	1	1	1	1	RAB5B	RAB5B, member RAS oncogene family
hsa-miR-490-5p	0	0	1	1	1	1	C5orf22	chromosome 5 open reading frame 22
hsa-miR-490-5p	1	0	1	1	1	1	ADAM19	ADAM metallopeptidase domain 19
hsa-miR-490-5p	0	0	1	1	1	1	IL20RB	interleukin 20 receptor beta
hsa-miR-490-5p	1	0	1	1	1	1	PCDHA5	protocadherin alpha 5
hsa-miR-490-5p	0	0	1	1	1	1	ZCCHC7	zinc finger, CCHC domain containing 7
hsa-miR-490-5p	1	0	1	1	1	1	QTRTD1	queuine tRNA-ribosyltransferase domain containing 1
hsa-miR-490-5p	0	0	1	1	1	1	EDA2R	ectodysplasin A2 receptor
hsa-miR-490-5p	1	0	1	1	1	1	NKAIN2	Na+/K+ transporting ATPase interacting 2
hsa-miR-490-5p	1	0	1	1	1	1	RAP2C	RAP2C, member of RAS oncogene family
hsa-miR-490-5p	0	0	1	1	1	1	PAK6	p21 protein (Cdc42/Rac)-activated kinase 6
hsa-miR-490-5p	0	0	1	0	0	0	LOC339862	uncharacterized LOC339862
hsa-miR-490-5p	0	0	1	1	0	0	VPS8	vacuolar protein sorting 8 homolog (S. cerevisiae)
hsa-miR-490-5p	1	0	1	1	1	1	SLC35G1	solute carrier family 35, member G1
hsa-miR-490-5p	1	0	1	1	1	1	MACROD2	MACRO domain containing 2
hsa-miR-490-5p	1	0	1	1	1	1	MEIS1	Meis homeobox 1
hsa-miR-490-5p	0	0	1	0	0	0	CYP4F35P	cytochrome P450, family 4, subfamily F, polypeptide 35, pseudogene
hsa-miR-490-5p	0	0	1	1	1	1	FAM71F1	family with sequence similarity 71, member F1
hsa-miR-490-5p	0	0	1	1	1	1	EFCAB13	EF-hand calcium binding domain 13
hsa-miR-490-5p	1	0	1	1	1	1	DAAM1	dishevelled associated activator of morphogenesis 1
hsa-miR-490-5p	0	0	1	0	0	0	LOC284263	uncharacterized LOC284263
hsa-miR-490-5p	0	0	1	0	0	0	LOC100134868	uncharacterized LOC100134868
hsa-miR-490-5p	0	0	1	0	0	0	FLJ36000	uncharacterized FLJ36000
hsa-miR-490-5p	0	0	1	1	0	0	ADAMTS13	ADAM metallopeptidase with thrombospondin type 1 motif, 13
hsa-miR-490-5p	1	0	1	0	0	0	MSL1	male-specific lethal 1 homolog (Drosophila)
hsa-miR-490-5p	0	0	1	1	1	1	SLC14A1	solute carrier family 14 (urea transporter), member 1 (Kidd blood group)
hsa-miR-490-5p	0	0	1	1	1	1	ZFP90	zinc finger protein 90 homolog (mouse)
hsa-miR-490-5p	1	0	1	0	1	1	PCSK2	proprotein convertase subtilisin/kexin type 2
hsa-miR-490-5p	1	0	1	1	0	0	INPP5J	inositol polyphosphate-5-phosphatase J
hsa-miR-490-5p	1	0	1	0	1	1	TNFAIP3	tumor necrosis factor, alpha-induced protein 3
hsa-miR-490-5p	0	0	1	0	0	0	CDKL3	cyclin-dependent kinase-like 3
hsa-miR-490-5p	1	0	1	1	1	1	ROCK1	Rho-associated, coiled-coil containing protein kinase 1
hsa-miR-490-5p	0	0	1	0	0	0	LOC253044	uncharacterized LOC253044
hsa-miR-490-5p	1	0	1	1	1	1	FKBP5	FK506 binding protein 5
hsa-miR-490-5p	0	0	1	0	1	1	C12orf74	chromosome 12 open reading frame 74
hsa-miR-490-5p	0	0	1	0	0	0	DKFZp686O1327	uncharacterized LOC401014
hsa-miR-490-5p	1	0	1	0	1	1	PSD3	pleckstrin and Sec7 domain containing 3
hsa-miR-490-5p	1	0	1	1	1	1	PPP2R5B	protein phosphatase 2, regulatory subunit B', beta
hsa-miR-490-5p	0	0	1	1	0	0	TF	transferrin
hsa-miR-490-5p	0	0	1	1	0	0	LILRA1	leukocyte immunoglobulin-like receptor, subfamily A (with TM domain), member 1
hsa-miR-490-5p	1	0	1	0	1	1	LYPD6	LY6/PLAUR domain containing 6
hsa-miR-490-5p	1	0	1	0	1	1	ZNF800	zinc finger protein 800
hsa-miR-490-5p	1	0	1	1	0	0	BMPR1B	bone morphogenetic protein receptor, type IB
hsa-miR-490-5p	1	0	1	1	1	1	CLVS1	clavesin 1
hsa-miR-490-5p	0	0	1	0	1	1	ITGA1	integrin, alpha 1
hsa-miR-490-5p	1	0	1	1	1	1	FNDC3A	fibronectin type III domain containing 3A
hsa-miR-490-5p	1	0	1	1	1	1	YWHAZ	tyrosine 3-monooxygenase/tryptophan 5-monooxygenase activation protein, zeta polypeptide
hsa-miR-490-5p	0	0	1	0	0	0	ADAM5	ADAM metallopeptidase domain 5, pseudogene
hsa-miR-490-5p	1	0	1	1	1	1	PRRG1	proline rich Gla (G-carboxyglutamic acid) 1
hsa-miR-490-5p	0	0	1	0	0	0	C21orf128	chromosome 21 open reading frame 128
hsa-miR-490-5p	0	0	1	1	0	0	PLB1	phospholipase B1
hsa-miR-490-5p	1	0	1	1	1	1	C5orf25	chromosome 5 open reading frame 25
hsa-miR-490-5p	1	0	1	1	1	1	NRSN1	neurensin 1
hsa-miR-490-5p	1	0	1	1	1	1	FTL	ferritin, light polypeptide
hsa-miR-490-5p	0	0	1	1	0	0	TMEM183A	transmembrane protein 183A
hsa-miR-490-5p	1	0	1	1	1	1	MYEF2	myelin expression factor 2
hsa-miR-490-5p	0	0	1	0	0	0	AQP7P2	aquaporin 7 pseudogene 2
hsa-miR-490-5p	1	0	1	1	1	1	OPCML	opioid binding protein/cell adhesion molecule-like
hsa-miR-490-5p	0	0	1	0	0	0	ABCC6P1	ATP-binding cassette, sub-family C, member 6 pseudogene 1
hsa-miR-490-5p	0	0	1	0	0	0	LOC642846	DEAD/H (Asp-Glu-Ala-Asp/His) box polypeptide 11-like
hsa-miR-490-5p	1	0	1	0	1	1	AMMECR1L	AMME chromosomal region gene 1-like
hsa-miR-490-5p	1	0	1	1	1	1	APBA2	amyloid beta (A4) precursor protein-binding, family A, member 2
hsa-miR-490-5p	0	0	1	1	1	1	PRL	prolactin
hsa-miR-490-5p	1	0	1	1	1	1	ELOVL7	ELOVL fatty acid elongase 7
hsa-miR-490-5p	0	0	1	0	0	0	FRG1B	FSHD region gene 1 family, member B
hsa-miR-490-5p	1	0	1	1	1	1	ACVR2B	activin A receptor, type IIB
hsa-miR-490-5p	1	0	1	1	1	1	SYNJ1	synaptojanin 1
hsa-miR-490-5p	0	0	1	1	1	1	TMEM52B	transmembrane protein 52B
hsa-miR-490-5p	1	0	1	1	1	1	GTF2I	general transcription factor IIi
hsa-miR-490-5p	0	0	1	1	0	0	IDUA	iduronidase, alpha-L-
hsa-miR-490-5p	1	0	1	0	1	1	ARPP19	cAMP-regulated phosphoprotein, 19kDa
hsa-miR-490-5p	0	0	1	1	1	1	XG	Xg blood group
hsa-miR-490-5p	0	0	1	0	1	1	GALNT13	UDP-N-acetyl-alpha-D-galactosamine:polypeptide N-acetylgalactosaminyltransferase 13 (GalNAc-T13)
hsa-miR-490-5p	0	0	1	0	0	0	LOC283174	uncharacterized LOC283174
hsa-miR-490-5p	0	0	1	0	0	0	LOC150577	uncharacterized LOC150577
hsa-miR-490-5p	0	0	1	1	0	0	RIPPLY1	ripply1 homolog (zebrafish)
hsa-miR-490-5p	1	0	1	1	1	1	ZNF763	zinc finger protein 763
hsa-miR-490-5p	1	0	1	1	1	1	KLHL17	kelch-like 17 (Drosophila)
hsa-miR-490-5p	0	0	1	0	0	0	FBXL19-AS1	FBXL19 antisense RNA 1 (head to head)
hsa-miR-490-5p	0	0	1	1	1	1	SLC25A35	solute carrier family 25, member 35
hsa-miR-490-5p	1	0	1	1	1	1	PTPRD	protein tyrosine phosphatase, receptor type, D
hsa-miR-490-5p	0	0	1	1	0	0	C9orf153	chromosome 9 open reading frame 153
hsa-miR-490-5p	0	0	1	0	0	0	LOC389765	kinesin family member 27 pseudogene
hsa-miR-490-5p	1	0	1	0	1	1	BTBD3	BTB (POZ) domain containing 3
hsa-miR-490-5p	1	0	1	0	1	1	ATP8A1	ATPase, aminophospholipid transporter (APLT), class I, type 8A, member 1
hsa-miR-490-5p	0	0	1	1	1	1	IL4R	interleukin 4 receptor
hsa-miR-490-5p	1	0	1	1	1	1	C10orf54	chromosome 10 open reading frame 54
hsa-miR-490-5p	0	0	1	0	0	0	LRRC37A11P	leucine rich repeat containing 37, member A11, pseudogene
hsa-miR-490-5p	1	0	1	0	1	1	ROBO1	roundabout, axon guidance receptor, homolog 1 (Drosophila)
hsa-miR-490-5p	0	0	1	0	0	0	LOC286094	uncharacterized LOC286094
hsa-miR-490-5p	1	0	1	1	1	1	ANK2	ankyrin 2, neuronal
hsa-miR-490-5p	0	0	1	1	0	0	TTC21A	tetratricopeptide repeat domain 21A
hsa-miR-490-5p	0	0	1	0	0	0	LILRP2	leukocyte immunoglobulin-like receptor pseudogene 2
hsa-miR-490-5p	0	0	1	1	1	1	MBIP	MAP3K12 binding inhibitory protein 1
hsa-miR-490-5p	0	0	1	0	0	0	LINC00643	long intergenic non-protein coding RNA 643
hsa-miR-490-5p	1	0	1	1	1	1	BTBD7	BTB (POZ) domain containing 7
hsa-miR-490-5p	0	0	1	0	0	0	DKFZp686D0853	uncharacterized LOC401613
hsa-miR-490-5p	1	0	1	1	1	1	MIER3	mesoderm induction early response 1, family member 3
hsa-miR-490-5p	0	0	1	0	0	0	RGPD4	RANBP2-like and GRIP domain containing 4
hsa-miR-490-5p	1	0	1	0	1	1	TNFRSF10B	tumor necrosis factor receptor superfamily, member 10b
hsa-miR-490-5p	1	0	1	1	1	1	ETS1	v-ets erythroblastosis virus E26 oncogene homolog 1 (avian)
hsa-miR-490-5p	1	0	1	1	1	1	MLLT10	myeloid/lymphoid or mixed-lineage leukemia (trithorax homolog, Drosophila); translocated to, 10
hsa-miR-490-5p	0	0	1	1	1	1	DEPDC5	DEP domain containing 5
hsa-miR-490-5p	0	0	1	1	1	1	MAP2K6	mitogen-activated protein kinase kinase 6
hsa-miR-490-5p	0	0	1	1	1	1	TSGA10	testis specific, 10
hsa-miR-490-5p	1	0	1	1	1	1	MYCBP2	MYC binding protein 2, E3 ubiquitin protein ligase
hsa-miR-490-5p	1	0	1	1	0	0	RBM27	RNA binding motif protein 27
hsa-miR-490-5p	0	0	1	0	1	1	GTF2H2D	general transcription factor IIH, polypeptide 2D
hsa-miR-490-5p	0	0	1	1	1	1	MLIP	muscular LMNA-interacting protein
hsa-miR-490-5p	0	0	1	1	0	0	PRKCQ	protein kinase C, theta
hsa-miR-490-5p	0	0	1	0	1	1	ANKRD36	ankyrin repeat domain 36
hsa-miR-490-5p	0	0	1	0	0	0	OVOS	ovostatin
hsa-miR-490-5p	1	0	1	1	1	1	DCAF5	DDB1 and CUL4 associated factor 5
hsa-miR-490-5p	1	0	1	1	1	1	NFIB	nuclear factor I/B
hsa-miR-490-5p	1	0	1	1	1	1	NAV1	neuron navigator 1
hsa-miR-490-5p	1	0	1	1	1	1	PGAP1	post-GPI attachment to proteins 1
hsa-miR-490-5p	1	0	1	1	1	1	RECK	reversion-inducing-cysteine-rich protein with kazal motifs
hsa-miR-490-5p	1	0	1	1	1	1	TMEM135	transmembrane protein 135
hsa-miR-490-5p	1	0	1	1	1	1	WLS	wntless homolog (Drosophila)
hsa-miR-490-5p	1	0	1	1	1	1	LYST	lysosomal trafficking regulator
hsa-miR-490-5p	1	0	1	1	1	1	SEL1L3	sel-1 suppressor of lin-12-like 3 (C. elegans)
hsa-miR-490-5p	1	0	1	0	1	1	STX6	syntaxin 6
hsa-miR-490-5p	0	0	1	0	0	0	RPS16P10	ribosomal protein S16 pseudogene 10
hsa-miR-490-5p	0	0	1	1	0	0	CD81	CD81 molecule
hsa-miR-490-5p	0	0	1	1	1	1	FGL1	fibrinogen-like 1
hsa-miR-490-5p	0	0	1	1	1	1	INCENP	inner centromere protein antigens 135/155kDa
hsa-miR-490-5p	1	0	1	1	1	1	STARD3NL	STARD3 N-terminal like
hsa-miR-490-5p	0	0	1	1	1	1	IFNGR2	interferon gamma receptor 2 (interferon gamma transducer 1)
hsa-miR-490-5p	0	0	1	1	0	0	NDUFV1	NADH dehydrogenase (ubiquinone) flavoprotein 1, 51kDa
hsa-miR-490-5p	0	0	1	1	1	1	CD55	CD55 molecule, decay accelerating factor for complement (Cromer blood group)
hsa-miR-490-5p	1	0	1	1	1	1	PCTP	phosphatidylcholine transfer protein
hsa-miR-490-5p	1	0	1	1	0	0	MAP3K10	mitogen-activated protein kinase kinase kinase 10
hsa-miR-490-5p	1	0	1	1	1	1	TMEM245	transmembrane protein 245
hsa-miR-490-5p	0	0	1	0	0	0	LOC150568	uncharacterized LOC150568
hsa-miR-490-5p	1	0	1	0	1	1	IP6K1	inositol hexakisphosphate kinase 1
hsa-miR-490-5p	0	0	1	0	1	1	PSG1	pregnancy specific beta-1-glycoprotein 1
hsa-miR-490-5p	0	0	1	0	1	1	SRSF5	serine/arginine-rich splicing factor 5
hsa-miR-490-5p	1	0	1	1	0	0	SHF	Src homology 2 domain containing F
hsa-miR-490-5p	1	0	1	1	1	1	LAMTOR3	late endosomal/lysosomal adaptor, MAPK and MTOR activator 3
hsa-miR-490-5p	1	0	1	1	1	1	FOS	FBJ murine osteosarcoma viral oncogene homolog
hsa-miR-490-5p	0	0	1	1	1	1	LDHB	lactate dehydrogenase B
hsa-miR-490-5p	1	0	1	0	1	1	ANKH	ankylosis, progressive homolog (mouse)
hsa-miR-490-5p	0	0	1	1	1	1	UBE2A	ubiquitin-conjugating enzyme E2A
hsa-miR-490-5p	1	0	1	1	1	1	KCNS3	potassium voltage-gated channel, delayed-rectifier, subfamily S, member 3
hsa-miR-490-5p	0	0	1	1	1	1	HMGCS2	3-hydroxy-3-methylglutaryl-CoA synthase 2 (mitochondrial)
hsa-miR-490-5p	1	0	1	1	0	0	ZCCHC4	zinc finger, CCHC domain containing 4
hsa-miR-490-5p	1	0	1	0	1	1	MAP1B	microtubule-associated protein 1B
hsa-miR-490-5p	0	0	1	1	0	0	HEBP1	heme binding protein 1
hsa-miR-490-5p	0	0	1	1	0	0	RPS6KB2	ribosomal protein S6 kinase, 70kDa, polypeptide 2
hsa-miR-490-5p	1	0	1	1	0	0	PPP4C	protein phosphatase 4, catalytic subunit
hsa-miR-490-5p	1	0	1	0	1	1	KIAA0240	KIAA0240
hsa-miR-490-5p	0	0	1	0	0	0	FAM92A1	family with sequence similarity 92, member A1
hsa-miR-490-5p	0	0	1	0	0	0	LINC00661	long intergenic non-protein coding RNA 661
hsa-miR-490-5p	1	0	1	1	1	1	NAPEPLD	N-acyl phosphatidylethanolamine phospholipase D
hsa-miR-490-5p	1	0	1	1	1	1	RSPO1	R-spondin 1
hsa-miR-490-5p	0	0	1	0	0	0	ANKRD30BP2	ankyrin repeat domain 30B pseudogene 2
hsa-miR-490-5p	0	0	1	1	1	1	TNFSF10	tumor necrosis factor (ligand) superfamily, member 10
hsa-miR-490-5p	0	0	1	1	0	0	SPATA6	spermatogenesis associated 6
hsa-miR-490-5p	1	0	1	1	0	0	MYL2	myosin, light chain 2, regulatory, cardiac, slow
hsa-miR-490-5p	1	0	1	1	1	1	SLC4A8	solute carrier family 4, sodium bicarbonate cotransporter, member 8
hsa-miR-490-5p	0	0	1	1	0	0	CEACAM3	carcinoembryonic antigen-related cell adhesion molecule 3
hsa-miR-490-5p	1	0	1	1	1	1	MLL	myeloid/lymphoid or mixed-lineage leukemia (trithorax homolog, Drosophila)
hsa-miR-490-5p	1	0	1	1	1	1	ELK1	ELK1, member of ETS oncogene family
hsa-miR-490-5p	1	0	1	0	1	1	ACVR2A	activin A receptor, type IIA
hsa-miR-490-5p	1	0	1	1	1	1	COL4A4	collagen, type IV, alpha 4
hsa-miR-490-5p	1	0	1	1	1	1	DMD	dystrophin
hsa-miR-490-5p	0	0	1	1	1	1	F8	coagulation factor VIII, procoagulant component
hsa-miR-490-5p	1	0	1	0	1	1	GCH1	GTP cyclohydrolase 1
hsa-miR-490-5p	1	0	1	0	1	1	ITGB3	integrin, beta 3 (platelet glycoprotein IIIa, antigen CD61)
hsa-miR-490-5p	1	0	1	1	1	1	KCNA1	potassium voltage-gated channel, shaker-related subfamily, member 1 (episodic ataxia with myokymia)
hsa-miR-490-5p	1	0	1	1	1	1	OCRL	oculocerebrorenal syndrome of Lowe
hsa-miR-490-5p	1	0	1	0	1	1	PKD2	polycystic kidney disease 2 (autosomal dominant)
hsa-miR-490-5p	0	0	1	1	0	0	IAPP	islet amyloid polypeptide
hsa-miR-490-5p	0	0	1	1	0	0	KEL	Kell blood group, metallo-endopeptidase
hsa-miR-490-5p	1	0	1	1	0	0	LOR	loricrin
hsa-miR-490-5p	0	0	1	1	1	1	PECAM1	platelet/endothelial cell adhesion molecule 1
hsa-miR-490-5p	0	0	1	1	1	1	ALDH1B1	aldehyde dehydrogenase 1 family, member B1
hsa-miR-490-5p	1	0	1	1	1	1	CSF1	colony stimulating factor 1 (macrophage)
hsa-miR-490-5p	0	0	1	1	0	0	FOLR1	folate receptor 1 (adult)
hsa-miR-490-5p	1	0	1	1	1	1	GRM1	glutamate receptor, metabotropic 1
hsa-miR-490-5p	0	0	1	1	1	1	HTR1D	5-hydroxytryptamine (serotonin) receptor 1D, G protein-coupled
hsa-miR-490-5p	0	0	1	1	1	1	HTR7	5-hydroxytryptamine (serotonin) receptor 7, adenylate cyclase-coupled
hsa-miR-490-5p	1	0	1	1	1	1	PDE3B	phosphodiesterase 3B, cGMP-inhibited
hsa-miR-490-5p	1	0	1	0	1	1	SPOPL	speckle-type POZ protein-like
hsa-miR-490-5p	0	0	1	1	0	0	RNASE9	ribonuclease, RNase A family, 9 (non-active)
hsa-miR-490-5p	0	0	1	1	1	1	DDI1	DNA-damage inducible 1 homolog 1 (S. cerevisiae)
hsa-miR-490-5p	1	0	1	1	1	1	ATP1B1	ATPase, Na+/K+ transporting, beta 1 polypeptide
hsa-miR-490-5p	0	0	1	0	0	0	OR8G1	olfactory receptor, family 8, subfamily G, member 1
hsa-miR-490-5p	0	0	1	0	1	1	FLJ16124	FLJ16124 protein
hsa-miR-490-5p	1	0	1	0	1	1	LRRC55	leucine rich repeat containing 55
hsa-miR-490-5p	1	0	1	1	1	1	PLCXD3	phosphatidylinositol-specific phospholipase C, X domain containing 3
hsa-miR-490-5p	1	0	1	1	1	1	EDA	ectodysplasin A
hsa-miR-490-5p	0	0	1	1	1	1	LINC00478	long intergenic non-protein coding RNA 478
hsa-miR-490-5p	0	0	1	1	1	1	SCP2	sterol carrier protein 2
hsa-miR-490-5p	0	0	1	0	1	1	GIMAP6	GTPase, IMAP family member 6
hsa-miR-490-5p	0	0	1	1	0	0	F8A3	coagulation factor VIII-associated 3
hsa-miR-490-5p	1	0	1	0	1	1	CPLX2	complexin 2
hsa-miR-490-5p	1	0	1	0	1	1	KIAA2022	KIAA2022
hsa-miR-490-5p	0	0	1	1	1	1	MXI1	MAX interactor 1
hsa-miR-490-5p	0	0	1	1	1	1	FBXO47	F-box protein 47
hsa-miR-490-5p	1	0	1	1	1	1	ZNF468	zinc finger protein 468
hsa-miR-490-5p	0	0	1	1	1	1	HRNR	hornerin
hsa-miR-490-5p	0	0	1	0	1	1	ZNF648	zinc finger protein 648
hsa-miR-490-5p	1	0	1	0	1	1	MTX3	metaxin 3
hsa-miR-490-5p	0	0	1	1	1	1	NCMAP	noncompact myelin associated protein
hsa-miR-490-5p	1	0	1	0	1	1	CREB5	cAMP responsive element binding protein 5
hsa-miR-490-5p	0	0	1	1	1	1	C9orf152	chromosome 9 open reading frame 152
hsa-miR-490-5p	1	0	1	1	1	1	SORCS1	sortilin-related VPS10 domain containing receptor 1
hsa-miR-490-5p	0	0	1	0	1	1	TM2D2	TM2 domain containing 2
hsa-miR-490-5p	1	0	1	1	1	1	CANX	calnexin
hsa-miR-490-5p	1	0	1	0	1	1	BCL7A	B-cell CLL/lymphoma 7A
hsa-miR-490-5p	1	0	1	1	1	1	AFF3	AF4/FMR2 family, member 3
hsa-miR-490-5p	1	0	1	0	1	1	C3orf70	chromosome 3 open reading frame 70
hsa-miR-490-5p	0	0	1	1	0	0	CCDC7	coiled-coil domain containing 7
hsa-miR-490-5p	1	0	1	1	1	1	RGS7BP	regulator of G-protein signaling 7 binding protein
hsa-miR-490-5p	1	0	1	0	1	1	CYB5RL	cytochrome b5 reductase-like
hsa-miR-490-5p	1	0	1	0	1	1	MSRB3	methionine sulfoxide reductase B3
hsa-miR-490-5p	1	0	1	1	1	1	TFAP2A	transcription factor AP-2 alpha (activating enhancer binding protein 2 alpha)
hsa-miR-490-5p	1	0	1	0	1	1	NPNT	nephronectin
hsa-miR-490-5p	1	0	1	0	1	1	SRGAP3	SLIT-ROBO Rho GTPase activating protein 3
hsa-miR-490-5p	0	0	1	1	1	1	DYNLL1	dynein, light chain, LC8-type 1
hsa-miR-490-5p	1	0	1	1	1	1	SCD5	stearoyl-CoA desaturase 5
hsa-miR-490-5p	1	0	1	0	1	1	TTPAL	tocopherol (alpha) transfer protein-like
hsa-miR-490-5p	1	0	1	1	1	1	DPP6	dipeptidyl-peptidase 6
hsa-miR-490-5p	0	0	1	1	1	1	SPATA6L	spermatogenesis associated 6-like
hsa-miR-490-5p	1	0	1	0	1	1	USP9X	ubiquitin specific peptidase 9, X-linked
hsa-miR-490-5p	0	0	1	0	1	1	ZNF705D	zinc finger protein 705D
hsa-miR-490-5p	1	0	1	0	1	1	CREBZF	CREB/ATF bZIP transcription factor
hsa-miR-490-5p	0	0	1	1	1	1	MCHR2	melanin-concentrating hormone receptor 2
hsa-miR-490-5p	1	0	1	1	1	1	PAPD5	PAP associated domain containing 5
hsa-miR-490-5p	1	0	1	1	1	1	PRKAG2	protein kinase, AMP-activated, gamma 2 non-catalytic subunit
hsa-miR-490-5p	0	0	1	0	1	1	STEAP2	STEAP family member 2, metalloreductase
hsa-miR-490-5p	1	0	1	1	1	1	NSL1	NSL1, MIND kinetochore complex component, homolog (S. cerevisiae)
hsa-miR-490-5p	1	0	1	1	1	1	FRS2	fibroblast growth factor receptor substrate 2
hsa-miR-490-5p	0	0	1	1	1	1	SLC6A4	solute carrier family 6 (neurotransmitter transporter, serotonin), member 4
hsa-miR-490-5p	1	0	1	1	1	1	METTL9	methyltransferase like 9
hsa-miR-490-5p	1	0	1	1	1	1	ALG9	asparagine-linked glycosylation 9, alpha-1,2-mannosyltransferase homolog (S. cerevisiae)
hsa-miR-490-5p	1	0	1	1	1	1	CREBBP	CREB binding protein
hsa-miR-490-5p	1	0	1	1	1	1	DMP1	dentin matrix acidic phosphoprotein 1
hsa-miR-490-5p	1	0	1	1	1	1	LDB3	LIM domain binding 3
hsa-miR-490-5p	1	0	1	1	1	1	SHANK3	SH3 and multiple ankyrin repeat domains 3
hsa-miR-490-5p	1	0	1	0	1	1	THSD7B	thrombospondin, type I, domain containing 7B
hsa-miR-490-5p	0	0	1	0	1	1	ISCA1P1	iron-sulfur cluster assembly 1 homolog (S. cerevisiae) pseudogene 1
hsa-miR-490-5p	0	0	1	1	1	1	C15orf57	chromosome 15 open reading frame 57
hsa-miR-490-5p	1	0	1	0	1	1	SCN3A	sodium channel, voltage-gated, type III, alpha subunit
hsa-miR-490-5p	1	0	1	1	1	1	ADCYAP1	adenylate cyclase activating polypeptide 1 (pituitary)
hsa-miR-490-5p	0	0	1	1	1	1	ADSS	adenylosuccinate synthase
hsa-miR-490-5p	1	0	1	1	1	1	BMP2	bone morphogenetic protein 2
hsa-miR-490-5p	1	0	1	0	1	1	BMPR2	bone morphogenetic protein receptor, type II (serine/threonine kinase)
hsa-miR-490-5p	1	0	1	1	1	1	DYRK1A	dual-specificity tyrosine-(Y)-phosphorylation regulated kinase 1A
hsa-miR-490-5p	1	0	1	1	1	1	EIF1AX	eukaryotic translation initiation factor 1A, X-linked
hsa-miR-490-5p	0	0	1	0	1	1	ELF5	E74-like factor 5 (ets domain transcription factor)
hsa-miR-490-5p	1	0	1	1	1	1	EREG	epiregulin
hsa-miR-490-5p	1	0	1	1	1	1	IRAK2	interleukin-1 receptor-associated kinase 2
hsa-miR-490-5p	0	0	1	0	1	1	AREG	amphiregulin
hsa-miR-490-5p	1	0	1	1	1	1	ARL4D	ADP-ribosylation factor-like 4D
hsa-miR-490-5p	1	0	1	0	1	1	ARNT	aryl hydrocarbon receptor nuclear translocator
hsa-miR-490-5p	1	0	1	1	1	1	BAAT	bile acid CoA: amino acid N-acyltransferase (glycine N-choloyltransferase)
hsa-miR-490-5p	0	0	1	1	1	1	BTN1A1	butyrophilin, subfamily 1, member A1
hsa-miR-490-5p	1	0	1	1	1	1	CDH2	cadherin 2, type 1, N-cadherin (neuronal)
hsa-miR-490-5p	0	0	1	1	1	1	HOXB5	homeobox B5
hsa-miR-490-5p	1	0	1	1	1	1	ITGA5	integrin, alpha 5 (fibronectin receptor, alpha polypeptide)
hsa-miR-490-5p	1	0	1	1	1	1	KCNA5	potassium voltage-gated channel, shaker-related subfamily, member 5
hsa-miR-490-5p	0	0	1	0	1	1	CXCL9	chemokine (C-X-C motif) ligand 9
hsa-miR-490-5p	1	0	1	1	1	1	MSN	moesin
hsa-miR-490-5p	0	0	1	1	0	0	MYOG	myogenin (myogenic factor 4)
hsa-miR-490-5p	0	0	1	0	1	1	OPHN1	oligophrenin 1
hsa-miR-490-5p	1	0	1	1	1	1	PBX2	pre-B-cell leukemia homeobox 2
hsa-miR-490-5p	0	0	1	1	0	0	PER1	period homolog 1 (Drosophila)
hsa-miR-490-5p	0	0	1	1	1	1	PRKCB	protein kinase C, beta
hsa-miR-490-5p	0	0	1	1	0	0	MAPK7	mitogen-activated protein kinase 7
hsa-miR-490-5p	1	0	1	1	1	1	PVRL1	poliovirus receptor-related 1 (herpesvirus entry mediator C)
hsa-miR-490-5p	0	0	1	1	1	1	RGS1	regulator of G-protein signaling 1
hsa-miR-490-5p	0	0	1	1	1	1	RGS2	regulator of G-protein signaling 2, 24kDa
hsa-miR-490-5p	1	0	1	0	1	1	SLC6A1	solute carrier family 6 (neurotransmitter transporter, GABA), member 1
hsa-miR-490-5p	1	0	1	1	1	1	SLC9A2	solute carrier family 9, subfamily A (NHE2, cation proton antiporter 2), member 2
hsa-miR-490-5p	1	0	1	1	1	1	SOX2	SRY (sex determining region Y)-box 2
hsa-miR-490-5p	0	0	1	1	0	0	SSX2	synovial sarcoma, X breakpoint 2
hsa-miR-490-5p	1	0	1	0	1	1	STC1	stanniocalcin 1
hsa-miR-490-5p	0	0	1	1	1	1	STIM1	stromal interaction molecule 1
hsa-miR-490-5p	1	0	1	1	1	1	SUV39H1	suppressor of variegation 3-9 homolog 1 (Drosophila)
hsa-miR-490-5p	1	0	1	1	1	1	SVIL	supervillin
hsa-miR-490-5p	1	0	1	1	1	1	TFAP2B	transcription factor AP-2 beta (activating enhancer binding protein 2 beta)
hsa-miR-490-5p	1	0	1	0	1	1	THBS1	thrombospondin 1
hsa-miR-490-5p	1	0	1	1	1	1	TIAM1	T-cell lymphoma invasion and metastasis 1
hsa-miR-490-5p	1	0	1	1	1	1	YWHAH	tyrosine 3-monooxygenase/tryptophan 5-monooxygenase activation protein, eta polypeptide
hsa-miR-490-5p	0	0	1	0	1	1	ZFY	zinc finger protein, Y-linked
hsa-miR-490-5p	1	0	1	0	1	1	ZIC1	Zic family member 1
hsa-miR-490-5p	0	0	1	1	1	1	ZNF143	zinc finger protein 143
hsa-miR-490-5p	1	0	1	1	1	1	EEA1	early endosome antigen 1
hsa-miR-490-5p	0	0	1	1	1	1	AP3B1	adaptor-related protein complex 3, beta 1 subunit
hsa-miR-490-5p	0	0	1	1	1	1	KMO	kynurenine 3-monooxygenase (kynurenine 3-hydroxylase)
hsa-miR-490-5p	1	0	1	1	1	1	TNFSF11	tumor necrosis factor (ligand) superfamily, member 11
hsa-miR-490-5p	0	0	1	1	1	1	EIF3A	eukaryotic translation initiation factor 3, subunit A
hsa-miR-490-5p	1	0	1	1	1	1	NR5A2	nuclear receptor subfamily 5, group A, member 2
hsa-miR-490-5p	1	0	1	1	1	1	ALDH1A2	aldehyde dehydrogenase 1 family, member A2
hsa-miR-490-5p	1	0	1	1	1	1	PHOX2B	paired-like homeobox 2b
hsa-miR-490-5p	1	0	1	1	1	1	BTAF1	BTAF1 RNA polymerase II, B-TFIID transcription factor-associated, 170kDa (Mot1 homolog, S. cerevisiae)
hsa-miR-490-5p	1	0	1	1	1	1	EYA4	eyes absent homolog 4 (Drosophila)
hsa-miR-490-5p	1	0	1	0	1	1	IREB2	iron-responsive element binding protein 2
hsa-miR-490-5p	1	0	1	0	1	1	SLC1A2	solute carrier family 1 (glial high affinity glutamate transporter), member 2
hsa-miR-490-5p	1	0	1	1	1	1	DACH1	dachshund homolog 1 (Drosophila)
hsa-miR-490-5p	0	0	1	1	1	1	DDX10	DEAD (Asp-Glu-Ala-Asp) box polypeptide 10
hsa-miR-490-5p	0	0	1	1	1	1	GCSH	glycine cleavage system protein H (aminomethyl carrier)
hsa-miR-490-5p	1	0	1	1	1	1	ONECUT1	one cut homeobox 1
hsa-miR-490-5p	1	0	1	1	1	1	MLLT3	myeloid/lymphoid or mixed-lineage leukemia (trithorax homolog, Drosophila); translocated to, 3
hsa-miR-490-5p	0	0	1	1	1	1	RAB27A	RAB27A, member RAS oncogene family
hsa-miR-490-5p	1	0	1	0	1	1	SCN2B	sodium channel, voltage-gated, type II, beta subunit
hsa-miR-490-5p	0	0	1	0	1	1	CXorf1	chromosome X open reading frame 1
hsa-miR-490-5p	1	0	1	1	1	1	RPS6KA5	ribosomal protein S6 kinase, 90kDa, polypeptide 5
hsa-miR-490-5p	1	0	1	1	1	1	NREP	neuronal regeneration related protein homolog (rat)
hsa-miR-490-5p	0	0	1	1	1	1	DSC1	desmocollin 1
hsa-miR-490-5p	1	0	1	1	1	1	JARID2	jumonji, AT rich interactive domain 2
hsa-miR-490-5p	1	0	1	1	1	1	KCNC4	potassium voltage-gated channel, Shaw-related subfamily, member 4
hsa-miR-490-5p	0	0	1	1	1	1	SIM1	single-minded homolog 1 (Drosophila)
hsa-miR-490-5p	1	0	1	1	1	1	MED13	mediator complex subunit 13
hsa-miR-490-5p	0	0	1	1	1	1	DOPEY2	dopey family member 2
hsa-miR-490-5p	1	0	1	0	1	1	CALM3	calmodulin 3 (phosphorylase kinase, delta)
hsa-miR-490-5p	1	0	1	1	1	1	FOXN3	forkhead box N3
hsa-miR-490-5p	0	0	1	1	0	0	DLX5	distal-less homeobox 5
hsa-miR-490-5p	0	0	1	1	1	1	MSTN	myostatin
hsa-miR-490-5p	1	0	1	1	1	1	GEM	GTP binding protein overexpressed in skeletal muscle
hsa-miR-490-5p	0	0	1	1	0	0	ARHGEF5	Rho guanine nucleotide exchange factor (GEF) 5
hsa-miR-490-5p	1	0	1	0	1	1	CCDC6	coiled-coil domain containing 6
hsa-miR-490-5p	1	0	1	1	1	1	PIGK	phosphatidylinositol glycan anchor biosynthesis, class K
hsa-miR-490-5p	0	0	1	1	1	1	CST8	cystatin 8 (cystatin-related epididymal specific)
hsa-miR-490-5p	1	0	1	1	1	1	TLX1	T-cell leukemia homeobox 1
hsa-miR-490-5p	1	0	1	1	1	1	RNASE6	ribonuclease, RNase A family, k6
hsa-miR-490-5p	0	0	1	1	1	1	SSX1	synovial sarcoma, X breakpoint 1
hsa-miR-490-5p	0	0	1	1	0	0	SNURF	SNRPN upstream reading frame
hsa-miR-490-5p	1	0	1	1	1	1	GLYAT	glycine-N-acyltransferase
hsa-miR-490-5p	1	0	1	1	1	1	MAT2A	methionine adenosyltransferase II, alpha
hsa-miR-490-5p	1	0	1	1	1	1	SEMA3A	sema domain, immunoglobulin domain (Ig), short basic domain, secreted, (semaphorin) 3A
hsa-miR-490-5p	1	0	1	1	1	1	DYNC1LI2	dynein, cytoplasmic 1, light intermediate chain 2
hsa-miR-490-5p	1	0	1	1	1	1	PDGFRA	platelet-derived growth factor receptor, alpha polypeptide
hsa-miR-490-5p	0	0	1	1	1	1	PIK3CA	phosphatidylinositol-4,5-bisphosphate 3-kinase, catalytic subunit alpha
hsa-miR-490-5p	1	0	1	1	1	1	TIMM17A	translocase of inner mitochondrial membrane 17 homolog A (yeast)
hsa-miR-490-5p	0	0	1	1	1	1	SLC30A9	solute carrier family 30 (zinc transporter), member 9
hsa-miR-490-5p	1	0	1	1	1	1	HEXIM1	hexamethylene bis-acetamide inducible 1
hsa-miR-490-5p	1	0	1	1	1	1	MORF4L1	mortality factor 4 like 1
hsa-miR-490-5p	1	0	1	1	1	1	FERMT2	fermitin family member 2
hsa-miR-490-5p	1	0	1	1	1	1	CD86	CD86 molecule
hsa-miR-490-5p	1	0	1	1	1	1	SCN1A	sodium channel, voltage-gated, type I, alpha subunit
hsa-miR-490-5p	1	0	1	0	1	1	WASF2	WAS protein family, member 2
hsa-miR-490-5p	1	0	1	1	1	1	ABHD2	abhydrolase domain containing 2
hsa-miR-490-5p	1	0	1	1	1	1	UTRN	utrophin
hsa-miR-490-5p	0	0	1	0	1	1	ZXDB	zinc finger, X-linked, duplicated B
hsa-miR-490-5p	0	0	1	1	1	1	GPR176	G protein-coupled receptor 176
hsa-miR-490-5p	1	0	1	1	1	1	KLF12	Kruppel-like factor 12
hsa-miR-490-5p	0	0	1	0	1	1	AP4E1	adaptor-related protein complex 4, epsilon 1 subunit
hsa-miR-490-5p	1	0	1	1	1	1	CASC3	cancer susceptibility candidate 3
hsa-miR-490-5p	1	0	1	1	1	1	ELL2	elongation factor, RNA polymerase II, 2
hsa-miR-490-5p	1	0	1	1	1	1	APPL1	adaptor protein, phosphotyrosine interaction, PH domain and leucine zipper containing 1
hsa-miR-490-5p	1	0	1	1	1	1	FBXL3	F-box and leucine-rich repeat protein 3
hsa-miR-490-5p	1	0	1	1	1	1	RYBP	RING1 and YY1 binding protein
hsa-miR-490-5p	1	0	1	1	1	1	RHOQ	ras homolog family member Q
hsa-miR-490-5p	1	0	1	0	1	1	G3BP2	GTPase activating protein (SH3 domain) binding protein 2
hsa-miR-490-5p	1	0	1	1	1	1	TSPAN12	tetraspanin 12
hsa-miR-490-5p	1	0	1	1	1	1	YWHAG	tyrosine 3-monooxygenase/tryptophan 5-monooxygenase activation protein, gamma polypeptide
hsa-miR-490-5p	0	0	1	1	1	1	TBK1	TANK-binding kinase 1
hsa-miR-490-5p	0	0	1	1	1	1	SNX10	sorting nexin 10
hsa-miR-490-5p	0	0	1	1	0	0	ALG6	asparagine-linked glycosylation 6, alpha-1,3-glucosyltransferase homolog (S. cerevisiae)
hsa-miR-490-5p	1	0	1	1	1	1	RGCC	regulator of cell cycle
hsa-miR-490-5p	1	0	1	1	1	1	ZNF770	zinc finger protein 770
hsa-miR-490-5p	0	0	1	1	1	1	CD5	CD5 molecule
hsa-miR-490-5p	1	0	1	0	1	1	RNF11	ring finger protein 11
hsa-miR-490-5p	1	0	1	0	1	1	DIEXF	digestive organ expansion factor homolog (zebrafish)
hsa-miR-490-5p	1	0	1	0	1	1	HUNK	hormonally up-regulated Neu-associated kinase
hsa-miR-490-5p	1	0	1	1	1	1	HERC3	HECT and RLD domain containing E3 ubiquitin protein ligase 3
hsa-miR-490-5p	0	0	1	1	1	1	PSME4	proteasome (prosome, macropain) activator subunit 4
hsa-miR-490-5p	1	0	1	1	1	1	GCC2	GRIP and coiled-coil domain containing 2
hsa-miR-490-5p	0	0	1	1	0	0	EMC2	ER membrane protein complex subunit 2
hsa-miR-490-5p	1	0	1	0	1	1	TOX	thymocyte selection-associated high mobility group box
hsa-miR-490-5p	1	0	1	0	1	1	KIAA0232	KIAA0232
hsa-miR-490-5p	0	0	1	0	1	1	DHCR24	24-dehydrocholesterol reductase
hsa-miR-490-5p	1	0	1	0	1	1	KIAA0494	KIAA0494
hsa-miR-490-5p	1	0	1	1	1	1	NUAK1	NUAK family, SNF1-like kinase, 1
hsa-miR-490-5p	1	0	1	0	1	1	KBTBD11	kelch repeat and BTB (POZ) domain containing 11
hsa-miR-490-5p	1	0	1	1	1	1	ZBTB5	zinc finger and BTB domain containing 5
hsa-miR-490-5p	1	0	1	1	1	1	JOSD1	Josephin domain containing 1
hsa-miR-490-5p	0	0	1	0	1	1	PPM1E	protein phosphatase, Mg2+/Mn2+ dependent, 1E
hsa-miR-490-5p	0	0	1	0	1	1	VASH1	vasohibin 1
hsa-miR-490-5p	1	0	1	0	1	1	WDFY3	WD repeat and FYVE domain containing 3
hsa-miR-490-5p	0	0	1	1	1	1	MYO16	myosin XVI
hsa-miR-490-5p	1	0	1	0	1	1	ZNF609	zinc finger protein 609
hsa-miR-490-5p	1	0	1	0	1	1	PEG10	paternally expressed 10
hsa-miR-490-5p	1	0	1	1	1	1	ZNF423	zinc finger protein 423
hsa-miR-490-5p	1	0	1	0	1	1	TBC1D2B	TBC1 domain family, member 2B
hsa-miR-490-5p	1	0	1	1	1	1	RTF1	Rtf1, Paf1/RNA polymerase II complex component, homolog (S. cerevisiae)
hsa-miR-490-5p	1	0	1	1	1	1	PLCB1	phospholipase C, beta 1 (phosphoinositide-specific)
hsa-miR-490-5p	1	0	1	1	1	1	NUP160	nucleoporin 160kDa
hsa-miR-490-5p	1	0	1	1	1	1	RIMBP2	RIMS binding protein 2
hsa-miR-490-5p	1	0	1	1	1	1	PARM1	prostate androgen-regulated mucin-like protein 1
hsa-miR-490-5p	0	0	1	0	1	1	TMEM158	transmembrane protein 158 (gene/pseudogene)
hsa-miR-490-5p	1	0	1	1	1	1	ABCA12	ATP-binding cassette, sub-family A (ABC1), member 12
hsa-miR-490-5p	1	0	1	1	1	1	GOLT1B	golgi transport 1B
hsa-miR-490-5p	1	0	1	1	1	1	SUFU	suppressor of fused homolog (Drosophila)
hsa-miR-490-5p	0	0	1	1	1	1	PADI3	peptidyl arginine deiminase, type III
hsa-miR-490-5p	0	0	1	1	1	1	EMCN	endomucin
hsa-miR-490-5p	1	0	1	0	1	1	HPCAL4	hippocalcin like 4
hsa-miR-490-5p	0	0	1	1	1	1	DTL	denticleless E3 ubiquitin protein ligase homolog (Drosophila)
hsa-miR-490-5p	1	0	1	1	1	1	ZNF644	zinc finger protein 644
hsa-miR-490-5p	0	0	1	1	1	1	PRKAG3	protein kinase, AMP-activated, gamma 3 non-catalytic subunit
hsa-miR-490-5p	1	0	1	1	1	1	GDAP2	ganglioside induced differentiation associated protein 2
hsa-miR-490-5p	1	0	1	0	1	1	FAM46C	family with sequence similarity 46, member C
hsa-miR-490-5p	0	0	1	1	1	1	NCAPG2	non-SMC condensin II complex, subunit G2
hsa-miR-490-5p	0	0	1	1	1	1	SOHLH2	spermatogenesis and oogenesis specific basic helix-loop-helix 2
hsa-miR-490-5p	1	0	1	1	1	1	C9orf40	chromosome 9 open reading frame 40
hsa-miR-490-5p	0	0	1	0	1	1	MREG	melanoregulin
hsa-miR-490-5p	1	0	1	1	1	1	WDR6	WD repeat domain 6
hsa-miR-490-5p	1	0	1	1	1	1	MAGOHB	mago-nashi homolog B (Drosophila)
hsa-miR-490-5p	1	0	1	1	1	1	FAM178A	family with sequence similarity 178, member A
hsa-miR-490-5p	1	0	1	1	1	1	RPRD1A	regulation of nuclear pre-mRNA domain containing 1A
hsa-miR-490-5p	1	0	1	1	1	1	UBA6	ubiquitin-like modifier activating enzyme 6
hsa-miR-490-5p	1	0	1	1	1	1	ZNF654	zinc finger protein 654
hsa-miR-490-5p	1	0	1	1	1	1	KIAA1598	KIAA1598
hsa-miR-490-5p	1	0	1	1	1	1	RSBN1	round spermatid basic protein 1
hsa-miR-490-5p	0	0	1	0	0	0	KDM3A	lysine (K)-specific demethylase 3A
hsa-miR-490-5p	1	0	1	0	1	1	BRK1	BRICK1, SCAR/WAVE actin-nucleating complex subunit
hsa-miR-490-5p	1	0	1	0	1	1	PCDHAC1	protocadherin alpha subfamily C, 1
hsa-miR-490-5p	1	0	1	0	1	1	PCDHAC2	protocadherin alpha subfamily C, 2
hsa-miR-490-5p	1	0	1	1	1	1	PCDHA1	protocadherin alpha 1
hsa-miR-490-5p	1	0	1	0	1	1	PCDHA10	protocadherin alpha 10
hsa-miR-490-5p	1	0	1	0	1	1	PCDHA11	protocadherin alpha 11
hsa-miR-490-5p	1	0	1	0	1	1	PCDHA12	protocadherin alpha 12
hsa-miR-490-5p	1	0	1	1	1	1	PCDHA2	protocadherin alpha 2
hsa-miR-490-5p	1	0	1	1	1	1	PCDHA3	protocadherin alpha 3
hsa-miR-490-5p	1	0	1	1	1	1	PCDHA6	protocadherin alpha 6
hsa-miR-490-5p	1	0	1	0	1	1	PCDHA7	protocadherin alpha 7
hsa-miR-490-5p	1	0	1	1	1	1	PCDHA8	protocadherin alpha 8
hsa-miR-490-5p	1	0	1	0	1	1	FAM190B	family with sequence similarity 190, member B
hsa-miR-490-5p	1	0	1	1	1	1	DLL4	delta-like 4 (Drosophila)
hsa-miR-490-5p	1	0	1	0	1	1	CCNJ	cyclin J
hsa-miR-490-5p	1	0	1	1	1	1	PLEKHA3	pleckstrin homology domain containing, family A (phosphoinositide binding specific) member 3
hsa-miR-490-5p	1	0	1	1	1	1	SEPT3	septin 3
hsa-miR-490-5p	1	0	1	1	1	1	EPB41L4B	erythrocyte membrane protein band 4.1 like 4B
hsa-miR-490-5p	1	0	1	0	1	1	UBFD1	ubiquitin family domain containing 1
hsa-miR-490-5p	1	0	1	0	1	1	SLAMF8	SLAM family member 8
hsa-miR-490-5p	1	0	1	0	1	1	PAPOLB	poly(A) polymerase beta (testis specific)
hsa-miR-490-5p	1	0	1	0	1	1	MNT	MAX binding protein
hsa-miR-490-5p	1	0	1	1	1	1	SLC24A3	solute carrier family 24 (sodium/potassium/calcium exchanger), member 3
hsa-miR-490-5p	0	0	1	1	0	0	ISY1	ISY1 splicing factor homolog (S. cerevisiae)
hsa-miR-490-5p	0	0	1	1	1	1	SHROOM4	shroom family member 4
hsa-miR-490-5p	1	0	1	0	1	1	NUFIP2	nuclear fragile X mental retardation protein interacting protein 2
hsa-miR-490-5p	1	0	1	1	1	1	NLGN2	neuroligin 2
hsa-miR-490-5p	1	0	1	1	1	1	KLHL14	kelch-like 14 (Drosophila)
hsa-miR-490-5p	0	0	1	1	1	1	MARCH4	membrane-associated ring finger (C3HC4) 4, E3 ubiquitin protein ligase
hsa-miR-490-5p	0	0	1	0	1	1	SYT13	synaptotagmin XIII
hsa-miR-490-5p	1	0	1	0	1	1	SH3RF1	SH3 domain containing ring finger 1
hsa-miR-490-5p	0	0	1	1	1	1	BCOR	BCL6 corepressor
hsa-miR-490-5p	0	0	1	1	1	1	SSX3	synovial sarcoma, X breakpoint 3
hsa-miR-490-5p	1	0	1	1	1	1	MTMR3	myotubularin related protein 3
hsa-miR-490-5p	1	0	1	0	1	1	TP53INP2	tumor protein p53 inducible nuclear protein 2
hsa-miR-490-5p	1	0	1	1	1	1	TRIB2	tribbles homolog 2 (Drosophila)
hsa-miR-490-5p	0	0	1	1	1	1	GABBR1	gamma-aminobutyric acid (GABA) B receptor, 1
hsa-miR-490-5p	1	0	1	1	1	1	PPP1R11	protein phosphatase 1, regulatory (inhibitor) subunit 11
hsa-miR-490-5p	1	0	1	1	1	1	CLSTN2	calsyntenin 2
hsa-miR-490-5p	1	0	1	1	1	1	ABCG4	ATP-binding cassette, sub-family G (WHITE), member 4
hsa-miR-490-5p	1	0	1	1	1	1	C6orf106	chromosome 6 open reading frame 106
hsa-miR-490-5p	1	0	1	0	1	1	BCL11B	B-cell CLL/lymphoma 11B (zinc finger protein)
hsa-miR-490-5p	1	0	1	1	1	1	REEP1	receptor accessory protein 1
hsa-miR-490-5p	0	0	1	1	1	1	HTR5A	5-hydroxytryptamine (serotonin) receptor 5A, G protein-coupled
hsa-miR-490-5p	1	0	1	0	1	1	NOTCH2	notch 2
hsa-miR-490-5p	1	0	1	1	1	1	C10orf76	chromosome 10 open reading frame 76
hsa-miR-490-5p	0	0	1	1	1	1	ZNF767	zinc finger family member 767
hsa-miR-490-5p	1	0	1	1	1	1	NAA50	N(alpha)-acetyltransferase 50, NatE catalytic subunit
hsa-miR-490-5p	1	0	1	1	1	1	JHDM1D	jumonji C domain containing histone demethylase 1 homolog D (S. cerevisiae)
hsa-miR-490-5p	1	0	1	1	1	1	TMX1	thioredoxin-related transmembrane protein 1
hsa-miR-490-5p	1	0	1	1	1	1	SGPP1	sphingosine-1-phosphate phosphatase 1
hsa-miR-490-5p	1	0	1	0	1	1	C1orf21	chromosome 1 open reading frame 21
hsa-miR-490-5p	1	0	1	1	1	1	SNX27	sorting nexin family member 27
hsa-miR-490-5p	0	0	1	1	1	1	SEH1L	SEH1-like (S. cerevisiae)
hsa-miR-490-5p	1	0	1	1	1	1	PCDHA9	protocadherin alpha 9
hsa-miR-490-5p	0	0	1	0	1	1	KRTAP1-5	keratin associated protein 1-5
hsa-miR-490-5p	1	0	1	1	1	1	SLC10A7	solute carrier family 10 (sodium/bile acid cotransporter family), member 7
hsa-miR-490-5p	0	0	1	1	1	1	EMR3	egf-like module containing, mucin-like, hormone receptor-like 3
hsa-miR-490-5p	1	0	1	1	0	0	ZC3H10	zinc finger CCCH-type containing 10
hsa-miR-490-5p	1	0	1	0	1	1	UBASH3B	ubiquitin associated and SH3 domain containing B
hsa-miR-490-5p	1	0	1	1	1	1	NKD1	naked cuticle homolog 1 (Drosophila)
hsa-miR-490-5p	0	0	1	1	1	1	ZIC5	Zic family member 5
hsa-miR-490-5p	1	0	1	1	1	1	TANC1	tetratricopeptide repeat, ankyrin repeat and coiled-coil containing 1
hsa-miR-490-5p	1	0	1	1	1	1	EPT1	ethanolaminephosphotransferase 1 (CDP-ethanolamine-specific)
hsa-miR-490-5p	1	0	1	0	1	1	TMEM123	transmembrane protein 123
hsa-miR-490-5p	0	0	1	1	1	1	TSEN15	tRNA splicing endonuclease 15 homolog (S. cerevisiae)
hsa-miR-490-5p	0	0	1	0	1	1	ZNF518B	zinc finger protein 518B
hsa-miR-490-5p	0	0	1	1	1	1	MRGPRX2	MAS-related GPR, member X2
hsa-miR-490-5p	1	0	1	1	1	1	SLC44A1	solute carrier family 44, member 1
hsa-miR-490-5p	0	0	1	1	1	1	SLC32A1	solute carrier family 32 (GABA vesicular transporter), member 1
hsa-miR-490-5p	1	0	1	0	1	1	EDARADD	EDAR-associated death domain
hsa-miR-490-5p	1	0	1	1	1	1	SPSB4	splA/ryanodine receptor domain and SOCS box containing 4
hsa-miR-490-5p	1	0	1	1	1	1	KLHL6	kelch-like 6 (Drosophila)
hsa-miR-490-5p	0	0	1	1	1	1	RAD51B	RAD51 homolog B (S. cerevisiae)
hsa-miR-490-5p	1	0	1	1	1	1	PANK1	pantothenate kinase 1
hsa-miR-490-5p	1	0	1	0	1	1	SP1	Sp1 transcription factor
hsa-miR-490-5p	0	0	1	0	1	1	PRELID2	PRELI domain containing 2
hsa-miR-490-5p	0	0	1	1	1	1	ADAMTS17	ADAM metallopeptidase with thrombospondin type 1 motif, 17
hsa-miR-490-5p	0	0	1	1	1	1	MAPK9	mitogen-activated protein kinase 9
hsa-miR-490-5p	0	0	1	1	1	1	TGIF2LY	TGFB-induced factor homeobox 2-like, Y-linked
hsa-miR-490-5p	1	0	1	1	1	1	FAM84A	family with sequence similarity 84, member A
hsa-miR-490-5p	1	0	1	1	1	1	CDCA4	cell division cycle associated 4
hsa-miR-490-5p	1	0	1	1	1	1	UBTD2	ubiquitin domain containing 2
hsa-miR-490-5p	1	0	1	0	1	1	SYT11	synaptotagmin XI
hsa-miR-490-5p	1	0	1	1	1	1	FAM123B	family with sequence similarity 123B
hsa-miR-490-5p	1	0	1	1	1	1	LRFN5	leucine rich repeat and fibronectin type III domain containing 5
hsa-miR-490-5p	1	0	1	1	1	1	FAM81A	family with sequence similarity 81, member A
hsa-miR-490-5p	0	0	1	1	1	1	ATP6V0D2	ATPase, H+ transporting, lysosomal 38kDa, V0 subunit d2
hsa-miR-490-5p	0	0	1	1	0	0	MARCH10	membrane-associated ring finger (C3HC4) 10, E3 ubiquitin protein ligase
hsa-miR-490-5p	0	0	1	1	1	1	FAM227B	family with sequence similarity 227, member B
hsa-miR-490-5p	0	0	1	1	1	1	NANP	N-acetylneuraminic acid phosphatase
hsa-miR-490-5p	0	0	1	1	1	1	DNAJC18	DnaJ (Hsp40) homolog, subfamily C, member 18
hsa-miR-490-5p	1	0	1	1	1	1	ZCCHC5	zinc finger, CCHC domain containing 5
hsa-miR-490-5p	0	0	1	1	0	0	MS4A15	membrane-spanning 4-domains, subfamily A, member 15
hsa-miR-490-5p	1	0	1	1	1	1	TMEM151A	transmembrane protein 151A
hsa-miR-490-5p	1	0	1	0	1	1	SEMA6D	sema domain, transmembrane domain (TM), and cytoplasmic domain, (semaphorin) 6D
hsa-miR-490-5p	1	0	1	1	1	1	C2orf69	chromosome 2 open reading frame 69
hsa-miR-490-5p	1	0	1	1	1	1	PHF13	PHD finger protein 13
hsa-miR-490-5p	0	0	1	1	1	1	ZFP91-CNTF	ZFP91-CNTF readthrough (non-protein coding)
hsa-miR-490-5p	0	0	1	1	0	0	SSX6	synovial sarcoma, X breakpoint 6 (pseudogene)
hsa-miR-490-5p	0	0	1	1	0	0	COL23A1	collagen, type XXIII, alpha 1
hsa-miR-490-5p	1	0	1	0	1	1	RNF152	ring finger protein 152
hsa-miR-490-5p	1	0	1	1	1	1	IGSF22	immunoglobulin superfamily, member 22
hsa-miR-490-5p	0	0	1	0	1	1	C5orf64	chromosome 5 open reading frame 64
hsa-miR-490-5p	1	0	1	0	1	1	FAM84B	family with sequence similarity 84, member B
hsa-miR-490-5p	1	0	1	1	1	1	UBR1	ubiquitin protein ligase E3 component n-recognin 1
hsa-miR-490-5p	1	0	1	1	0	0	KRTAP11-1	keratin associated protein 11-1
hsa-miR-490-5p	1	0	1	1	0	0	JPH2	junctophilin 2
hsa-miR-490-5p	1	0	1	1	1	1	C8orf37	chromosome 8 open reading frame 37
hsa-miR-490-5p	0	0	1	1	1	1	ZNF831	zinc finger protein 831
hsa-miR-490-5p	1	0	1	1	1	1	MTDH	metadherin
hsa-miR-490-5p	1	0	1	0	1	1	ARL5B	ADP-ribosylation factor-like 5B
hsa-miR-490-5p	1	0	1	1	1	1	TCF20	transcription factor 20 (AR1)
hsa-miR-490-5p	0	0	1	1	0	0	ANKRD37	ankyrin repeat domain 37
hsa-miR-490-5p	1	0	1	1	1	1	BCL9L	B-cell CLL/lymphoma 9-like
hsa-miR-490-5p	0	0	1	0	1	1	EPHA3	EPH receptor A3
hsa-miR-490-5p	0	0	1	1	1	1	TMEM37	transmembrane protein 37
hsa-miR-490-5p	1	0	1	1	1	1	E2F6	E2F transcription factor 6
hsa-miR-490-5p	0	0	1	1	1	1	APOOL	apolipoprotein O-like
hsa-miR-490-5p	1	0	1	1	1	1	PTGER3	prostaglandin E receptor 3 (subtype EP3)
hsa-miR-490-5p	1	0	1	0	1	1	PRICKLE2	prickle homolog 2 (Drosophila)
hsa-miR-490-5p	0	0	1	1	1	1	UBE3D	ubiquitin protein ligase E3D
hsa-miR-490-5p	1	0	1	0	1	1	LHFPL3	lipoma HMGIC fusion partner-like 3
hsa-miR-490-5p	1	0	1	1	1	1	CXCL12	chemokine (C-X-C motif) ligand 12
hsa-miR-490-5p	1	0	1	1	1	1	FBXO33	F-box protein 33
hsa-miR-490-5p	1	0	1	1	1	1	PPAPDC2	phosphatidic acid phosphatase type 2 domain containing 2
hsa-miR-490-5p	1	0	1	1	1	1	ATRNL1	attractin-like 1
hsa-miR-490-5p	1	0	1	0	1	1	C17orf102	chromosome 17 open reading frame 102
hsa-miR-490-5p	0	0	1	1	1	1	CLEC4M	C-type lectin domain family 4, member M
hsa-miR-490-5p	0	0	1	0	0	0	TFAMP1	transcription factor A, mitochondrial pseudogene 1
hsa-miR-490-5p	0	0	1	0	0	0	TTTY2	testis-specific transcript, Y-linked 2 (non-protein coding)
hsa-miR-490-5p	0	0	1	0	0	0	TTTY15	testis-specific transcript, Y-linked 15 (non-protein coding)
hsa-miR-490-5p	0	0	1	0	0	0	CDH12P2	cadherin 12 (N-cadherin 2) pseudogene 2
hsa-miR-490-5p	0	0	1	0	0	0	NXF4	nuclear RNA export factor 4 pseudogene
hsa-miR-490-5p	0	0	1	0	0	0	HTR7P1	5-hydroxytryptamine (serotonin) receptor 7 pseudogene 1
hsa-miR-490-5p	0	0	1	0	0	0	SEPHS1P1	selenophosphate synthetase 1 pseudogene 1
hsa-miR-490-5p	0	0	1	0	0	0	LOC256880	uncharacterized LOC256880
hsa-miR-490-5p	0	0	1	0	0	0	LOC374443	C-type lectin domain family 2, member D pseudogene
hsa-miR-490-5p	0	0	1	0	0	0	AQP7P1	aquaporin 7 pseudogene 1
hsa-miR-490-5p	0	0	1	0	0	0	DUSP5P	dual specificity phosphatase 5 pseudogene
hsa-miR-490-5p	0	0	1	0	0	0	NBR2	neighbor of BRCA1 gene 2 (non-protein coding)
hsa-miR-490-5p	0	0	1	1	1	1	RGPD5	RANBP2-like and GRIP domain containing 5
hsa-miR-490-5p	1	0	1	1	1	1	HS3ST1	heparan sulfate (glucosamine) 3-O-sulfotransferase 1
hsa-miR-490-5p	0	0	1	1	1	1	CYP4F3	cytochrome P450, family 4, subfamily F, polypeptide 3
hsa-miR-490-5p	0	0	1	1	1	1	CD22	CD22 molecule
hsa-miR-490-5p	0	0	1	1	0	0	KCNQ1	potassium voltage-gated channel, KQT-like subfamily, member 1
hsa-miR-490-5p	0	0	1	1	0	0	KLK13	kallikrein-related peptidase 13
hsa-miR-490-5p	0	0	1	1	0	0	MEF2BNB-MEF2B	MEF2BNB-MEF2B readthrough
hsa-miR-490-5p	0	0	1	1	1	1	PIGB	phosphatidylinositol glycan anchor biosynthesis, class B
hsa-miR-490-5p	0	0	0	1	1	1	KRT20	keratin 20
hsa-miR-490-5p	0	0	1	1	1	1	POLR2E	polymerase (RNA) II (DNA directed) polypeptide E, 25kDa
hsa-miR-490-5p	0	0	1	1	1	1	LZTR1	leucine-zipper-like transcription regulator 1
hsa-miR-490-5p	0	0	1	1	1	1	TOMM22	translocase of outer mitochondrial membrane 22 homolog (yeast)
hsa-miR-490-5p	1	0	1	1	0	0	ALKBH1	alkB, alkylation repair homolog 1 (E. coli)
hsa-miR-490-5p	0	0	1	1	1	1	GSS	glutathione synthetase
hsa-miR-490-5p	1	0	1	1	1	1	TUBB1	tubulin, beta 1 class VI
hsa-miR-490-5p	0	0	0	1	1	1	H2BFWT	H2B histone family, member W, testis-specific
hsa-miR-490-5p	0	0	1	1	0	0	ITIH6	inter-alpha-trypsin inhibitor heavy chain family, member 6
hsa-miR-490-5p	0	0	1	1	1	1	ZNF263	zinc finger protein 263
hsa-miR-490-5p	0	0	1	1	1	1	RIPK2	receptor-interacting serine-threonine kinase 2
hsa-miR-490-5p	0	0	0	1	0	0	SARS2	seryl-tRNA synthetase 2, mitochondrial
hsa-miR-490-5p	1	0	1	1	0	0	RASIP1	Ras interacting protein 1
hsa-miR-490-5p	0	0	0	1	0	0	GAPDHS	glyceraldehyde-3-phosphate dehydrogenase, spermatogenic
hsa-miR-490-5p	0	0	0	1	0	0	MOGAT3	monoacylglycerol O-acyltransferase 3
hsa-miR-490-5p	0	0	1	1	0	0	PLOD3	procollagen-lysine, 2-oxoglutarate 5-dioxygenase 3
hsa-miR-490-5p	0	0	0	1	0	0	ZNF688	zinc finger protein 688
hsa-miR-490-5p	0	0	0	1	1	1	ZNF785	zinc finger protein 785
hsa-miR-490-5p	0	0	1	1	0	0	BLNK	B-cell linker
hsa-miR-490-5p	1	0	1	1	1	1	MYH3	myosin, heavy chain 3, skeletal muscle, embryonic
hsa-miR-490-5p	0	0	1	1	1	1	CWH43	cell wall biogenesis 43 C-terminal homolog (S. cerevisiae)
hsa-miR-490-5p	0	0	0	1	1	1	MANBA	mannosidase, beta A, lysosomal
hsa-miR-490-5p	0	0	1	1	1	1	C11orf63	chromosome 11 open reading frame 63
hsa-miR-490-5p	1	0	1	1	0	0	PRPF19	PRP19/PSO4 pre-mRNA processing factor 19 homolog (S. cerevisiae)
hsa-miR-490-5p	0	0	0	1	0	0	APOC3	apolipoprotein C-III
hsa-miR-490-5p	0	0	1	1	0	0	IL23A	interleukin 23, alpha subunit p19
hsa-miR-490-5p	0	0	1	1	0	0	AKAP3	A kinase (PRKA) anchor protein 3
hsa-miR-490-5p	0	0	1	1	0	0	MGP	matrix Gla protein
hsa-miR-490-5p	0	0	1	1	0	0	GPX5	glutathione peroxidase 5 (epididymal androgen-related protein)
hsa-miR-490-5p	1	0	1	1	1	1	FAM65B	family with sequence similarity 65, member B
hsa-miR-490-5p	0	0	0	1	0	0	KIF6	kinesin family member 6
hsa-miR-490-5p	0	0	1	1	1	1	BYSL	bystin-like
hsa-miR-490-5p	1	0	1	1	1	1	ISL1	ISL LIM homeobox 1
hsa-miR-490-5p	0	0	0	1	1	1	PCDHB5	protocadherin beta 5
hsa-miR-490-5p	0	0	1	1	0	0	PCDH12	protocadherin 12
hsa-miR-490-5p	0	0	1	1	0	0	HRG	histidine-rich glycoprotein
hsa-miR-490-5p	0	0	1	1	1	1	IL1R1	interleukin 1 receptor, type I
hsa-miR-490-5p	0	0	1	1	0	0	FAM82A1	family with sequence similarity 82, member A1
hsa-miR-490-5p	0	0	1	1	0	0	MASP2	mannan-binding lectin serine peptidase 2
hsa-miR-490-5p	0	0	0	1	0	0	AKR7A2	aldo-keto reductase family 7, member A2 (aflatoxin aldehyde reductase)
hsa-miR-490-5p	1	0	1	1	0	0	CCDC92	coiled-coil domain containing 92
hsa-miR-490-5p	0	0	0	1	0	0	SERPINB10	serpin peptidase inhibitor, clade B (ovalbumin), member 10
hsa-miR-490-5p	0	0	1	1	1	1	MLH3	mutL homolog 3 (E. coli)
hsa-miR-490-5p	0	0	1	1	1	1	CCDC77	coiled-coil domain containing 77
hsa-miR-490-5p	1	0	1	1	1	1	KCNJ8	potassium inwardly-rectifying channel, subfamily J, member 8
hsa-miR-490-5p	0	0	0	1	1	1	H2BFM	H2B histone family, member M
hsa-miR-490-5p	0	0	0	1	0	0	ZNF391	zinc finger protein 391
hsa-miR-490-5p	0	0	1	1	0	0	C17orf53	chromosome 17 open reading frame 53
hsa-miR-490-5p	0	0	1	1	1	1	BMP4	bone morphogenetic protein 4
hsa-miR-490-5p	0	0	0	1	0	0	C3	complement component 3
hsa-miR-490-5p	0	0	1	1	1	1	KLC1	kinesin light chain 1
hsa-miR-490-5p	0	0	1	1	0	0	DDX49	DEAD (Asp-Glu-Ala-Asp) box polypeptide 49
hsa-miR-490-5p	0	0	0	1	1	1	SDF2	stromal cell-derived factor 2
hsa-miR-490-5p	0	0	1	1	0	0	ZNF777	zinc finger protein 777
hsa-miR-490-5p	0	0	0	1	0	0	OPN1SW	opsin 1 (cone pigments), short-wave-sensitive
hsa-miR-490-5p	1	0	0	1	1	1	SBNO2	strawberry notch homolog 2 (Drosophila)
hsa-miR-490-5p	0	0	1	1	0	0	ZNF221	zinc finger protein 221
hsa-miR-490-5p	0	0	0	1	1	1	LILRA3	leukocyte immunoglobulin-like receptor, subfamily A (without TM domain), member 3
hsa-miR-490-5p	0	0	1	1	1	1	DHX29	DEAH (Asp-Glu-Ala-His) box polypeptide 29
hsa-miR-490-5p	0	0	0	1	1	1	APOC2	apolipoprotein C-II
hsa-miR-490-5p	0	0	0	1	0	0	INF2	inverted formin, FH2 and WH2 domain containing
hsa-miR-490-5p	0	0	1	1	1	1	PGPEP1	pyroglutamyl-peptidase I
hsa-miR-490-5p	1	0	1	1	0	0	ANGPTL6	angiopoietin-like 6
hsa-miR-490-5p	1	0	1	1	1	1	GGT7	gamma-glutamyltransferase 7
hsa-miR-490-5p	0	0	1	1	1	1	FUS	fused in sarcoma
hsa-miR-490-5p	1	0	1	1	1	1	NUP210	nucleoporin 210kDa
hsa-miR-490-5p	0	0	1	1	0	0	CHRM3	cholinergic receptor, muscarinic 3
hsa-miR-490-5p	0	0	0	1	1	1	C14orf159	chromosome 14 open reading frame 159
hsa-miR-490-5p	0	0	1	1	1	1	GIF	gastric intrinsic factor (vitamin B synthesis)
hsa-miR-490-5p	1	0	1	1	1	1	APLNR	apelin receptor
hsa-miR-490-5p	0	0	0	1	1	1	NAT10	N-acetyltransferase 10 (GCN5-related)
hsa-miR-490-5p	1	0	1	1	0	0	AUP1	ancient ubiquitous protein 1
hsa-miR-490-5p	0	0	1	1	1	1	PIGC	phosphatidylinositol glycan anchor biosynthesis, class C
hsa-miR-490-5p	1	0	1	1	1	1	KDELR2	KDEL (Lys-Asp-Glu-Leu) endoplasmic reticulum protein retention receptor 2
hsa-miR-490-5p	0	0	1	1	1	1	RSAD1	radical S-adenosyl methionine domain containing 1
hsa-miR-490-5p	0	0	1	1	0	0	PSORS1C2	psoriasis susceptibility 1 candidate 2
hsa-miR-490-5p	0	0	1	1	0	0	NOX5	NADPH oxidase, EF-hand calcium binding domain 5
hsa-miR-490-5p	0	0	1	1	0	0	BTBD16	BTB (POZ) domain containing 16
hsa-miR-490-5p	1	0	1	1	1	1	KIF11	kinesin family member 11
hsa-miR-490-5p	0	0	1	1	0	0	PLCE1	phospholipase C, epsilon 1
hsa-miR-490-5p	0	0	1	1	1	1	CHRNA1	cholinergic receptor, nicotinic, alpha 1 (muscle)
hsa-miR-490-5p	0	0	1	1	0	0	TSPAN11	tetraspanin 11
hsa-miR-490-5p	0	0	1	1	1	1	SLC16A7	solute carrier family 16, member 7 (monocarboxylic acid transporter 2)
hsa-miR-490-5p	0	0	1	1	1	1	ZNF397	zinc finger protein 397
hsa-miR-490-5p	0	0	0	1	0	0	PSMA6	proteasome (prosome, macropain) subunit, alpha type, 6
hsa-miR-490-5p	0	0	1	1	0	0	SFSWAP	splicing factor, suppressor of white-apricot homolog (Drosophila)
hsa-miR-490-5p	0	0	1	1	1	1	FLT4	fms-related tyrosine kinase 4
hsa-miR-490-5p	1	0	0	1	0	0	SERPINA3	serpin peptidase inhibitor, clade A (alpha-1 antiproteinase, antitrypsin), member 3
hsa-miR-490-5p	0	0	0	1	1	1	CDH19	cadherin 19, type 2
hsa-miR-490-5p	0	0	1	1	0	0	ZNF839	zinc finger protein 839
hsa-miR-490-5p	0	0	0	1	0	0	NUBP2	nucleotide binding protein 2
hsa-miR-490-5p	0	0	1	1	0	0	HAGH	hydroxyacylglutathione hydrolase
hsa-miR-490-5p	0	0	0	1	1	1	ATP2C2	ATPase, Ca++ transporting, type 2C, member 2
hsa-miR-490-5p	0	0	0	1	0	0	XRCC1	X-ray repair complementing defective repair in Chinese hamster cells 1
hsa-miR-490-5p	0	0	0	1	1	1	MAP2K2	mitogen-activated protein kinase kinase 2
hsa-miR-490-5p	1	0	1	1	1	1	OVCA2	ovarian tumor suppressor candidate 2
hsa-miR-490-5p	0	0	1	1	1	1	PPP1R12C	protein phosphatase 1, regulatory subunit 12C
hsa-miR-490-5p	1	0	1	1	0	0	HIPK2	homeodomain interacting protein kinase 2
hsa-miR-490-5p	0	0	0	1	1	1	FOXRED1	FAD-dependent oxidoreductase domain containing 1
hsa-miR-490-5p	0	0	1	1	1	1	DVL1	dishevelled, dsh homolog 1 (Drosophila)
hsa-miR-490-5p	0	0	1	1	0	0	PRDM11	PR domain containing 11
hsa-miR-490-5p	0	0	1	1	0	0	LTK	leukocyte receptor tyrosine kinase
hsa-miR-490-5p	0	0	1	1	0	0	LPXN	leupaxin
hsa-miR-490-5p	0	0	0	1	0	0	GPR108	G protein-coupled receptor 108
hsa-miR-490-5p	0	0	1	1	1	1	NID1	nidogen 1
hsa-miR-490-5p	0	0	0	1	1	1	TXK	TXK tyrosine kinase
hsa-miR-490-5p	0	0	1	1	1	1	KCNN2	potassium intermediate/small conductance calcium-activated channel, subfamily N, member 2
hsa-miR-490-5p	0	0	1	1	1	1	HOOK2	hook homolog 2 (Drosophila)
hsa-miR-490-5p	1	0	1	1	1	1	FRAS1	Fraser syndrome 1
hsa-miR-490-5p	1	0	1	1	1	1	PDE8B	phosphodiesterase 8B
hsa-miR-490-5p	0	0	1	1	0	0	RASGRF2	Ras protein-specific guanine nucleotide-releasing factor 2
hsa-miR-490-5p	0	0	1	1	1	1	ATP6V0E1	ATPase, H+ transporting, lysosomal 9kDa, V0 subunit e1
hsa-miR-490-5p	0	0	1	1	1	1	CENPE	centromere protein E, 312kDa
hsa-miR-490-5p	1	0	1	1	1	1	APBA1	amyloid beta (A4) precursor protein-binding, family A, member 1
hsa-miR-490-5p	0	0	0	1	1	1	POLA2	polymerase (DNA directed), alpha 2, accessory subunit
hsa-miR-490-5p	0	0	1	1	0	0	INTS9	integrator complex subunit 9
hsa-miR-490-5p	0	0	1	1	1	1	UBXN8	UBX domain protein 8
hsa-miR-490-5p	0	0	1	1	1	1	PON3	paraoxonase 3
hsa-miR-490-5p	1	0	1	1	1	1	ANK1	ankyrin 1, erythrocytic
hsa-miR-490-5p	1	0	1	1	1	1	SLC26A4	solute carrier family 26, member 4
hsa-miR-490-5p	1	0	0	1	0	0	PIK3C2A	phosphatidylinositol-4-phosphate 3-kinase, catalytic subunit type 2 alpha
hsa-miR-490-5p	0	0	0	1	1	1	RNF113B	ring finger protein 113B
hsa-miR-490-5p	0	0	1	1	1	1	HDC	histidine decarboxylase
hsa-miR-490-5p	0	0	0	1	1	1	CPNE7	copine VII
hsa-miR-490-5p	0	0	0	1	0	0	PIGS	phosphatidylinositol glycan anchor biosynthesis, class S
hsa-miR-490-5p	1	0	1	1	1	1	CBX2	chromobox homolog 2
hsa-miR-490-5p	0	0	1	1	1	1	KRT10	keratin 10
hsa-miR-490-5p	0	0	0	1	0	0	ARMC6	armadillo repeat containing 6
hsa-miR-490-5p	0	0	0	1	0	0	IL19	interleukin 19
hsa-miR-490-5p	0	0	0	1	0	0	CACNG8	calcium channel, voltage-dependent, gamma subunit 8
hsa-miR-490-5p	0	0	1	1	1	1	CYP4B1	cytochrome P450, family 4, subfamily B, polypeptide 1
hsa-miR-490-5p	0	0	0	1	0	0	CPO	carboxypeptidase O
hsa-miR-490-5p	1	0	1	1	1	1	CASP10	caspase 10, apoptosis-related cysteine peptidase
hsa-miR-490-5p	0	0	1	1	1	1	TM4SF19	transmembrane 4 L six family member 19
hsa-miR-490-5p	0	0	0	1	1	1	SPATA5	spermatogenesis associated 5
hsa-miR-490-5p	0	0	0	1	1	1	ADAMTS16	ADAM metallopeptidase with thrombospondin type 1 motif, 16
hsa-miR-490-5p	0	0	1	1	1	1	UGT3A1	UDP glycosyltransferase 3 family, polypeptide A1
hsa-miR-490-5p	1	0	1	1	1	1	GABRB2	gamma-aminobutyric acid (GABA) A receptor, beta 2
hsa-miR-490-5p	0	0	0	1	0	0	KCNMB1	potassium large conductance calcium-activated channel, subfamily M, beta member 1
hsa-miR-490-5p	1	0	1	1	1	1	ZMAT2	zinc finger, matrin-type 2
hsa-miR-490-5p	0	0	1	1	1	1	UIMC1	ubiquitin interaction motif containing 1
hsa-miR-490-5p	0	0	0	1	0	0	SSX2B	synovial sarcoma, X breakpoint 2B
hsa-miR-490-5p	0	0	1	1	1	1	EBP	emopamil binding protein (sterol isomerase)
hsa-miR-490-5p	0	0	0	1	1	1	ZNF16	zinc finger protein 16
hsa-miR-490-5p	0	0	1	1	1	1	ZNF33A	zinc finger protein 33A
hsa-miR-490-5p	1	0	1	1	1	1	GLUD1	glutamate dehydrogenase 1
hsa-miR-490-5p	1	0	1	1	1	1	TMPRSS13	transmembrane protease, serine 13
hsa-miR-490-5p	0	0	0	1	0	0	TRIM48	tripartite motif containing 48
hsa-miR-490-5p	0	0	1	1	1	1	CTF1	cardiotrophin 1
hsa-miR-490-5p	1	0	1	1	1	1	VEGFC	vascular endothelial growth factor C
hsa-miR-490-5p	1	0	1	1	1	1	USP15	ubiquitin specific peptidase 15
hsa-miR-490-5p	1	0	1	1	1	1	ABCB9	ATP-binding cassette, sub-family B (MDR/TAP), member 9
hsa-miR-490-5p	1	0	1	1	0	0	CCRN4L	CCR4 carbon catabolite repression 4-like (S. cerevisiae)
hsa-miR-490-5p	0	0	1	1	1	1	CDC123	cell division cycle 123 homolog (S. cerevisiae)
hsa-miR-490-5p	1	0	1	1	1	1	PPP1R21	protein phosphatase 1, regulatory subunit 21
hsa-miR-490-5p	0	0	0	1	1	1	TDO2	tryptophan 2,3-dioxygenase
hsa-miR-490-5p	0	0	1	1	0	0	TMEM163	transmembrane protein 163
hsa-miR-490-5p	1	0	1	1	1	1	PTH	parathyroid hormone
hsa-miR-490-5p	0	0	0	1	0	0	CWF19L2	CWF19-like 2, cell cycle control (S. pombe)
hsa-miR-490-5p	0	0	1	1	1	1	PGM3	phosphoglucomutase 3
hsa-miR-490-5p	0	0	0	1	0	0	OR8A1	olfactory receptor, family 8, subfamily A, member 1
hsa-miR-490-5p	0	0	1	1	1	1	PPP1R3A	protein phosphatase 1, regulatory subunit 3A
hsa-miR-490-5p	0	0	1	1	1	1	CXADR	coxsackie virus and adenovirus receptor
hsa-miR-490-5p	0	0	1	1	0	0	RASA2	RAS p21 protein activator 2
hsa-miR-490-5p	0	0	1	1	0	0	PARP6	poly (ADP-ribose) polymerase family, member 6
hsa-miR-490-5p	0	0	1	1	1	1	LHFPL4	lipoma HMGIC fusion partner-like 4
hsa-miR-490-5p	0	0	0	1	0	0	TSPY8	testis specific protein, Y-linked 8
hsa-miR-490-5p	0	0	1	1	1	1	KBTBD5	kelch repeat and BTB (POZ) domain containing 5
hsa-miR-490-5p	0	0	1	1	0	0	DHRS1	dehydrogenase/reductase (SDR family) member 1
hsa-miR-490-5p	0	0	1	1	1	1	PREX2	phosphatidylinositol-3,4,5-trisphosphate-dependent Rac exchange factor 2
hsa-miR-490-5p	0	0	0	1	0	0	NPM2	nucleophosmin/nucleoplasmin 2
hsa-miR-490-5p	0	0	1	1	1	1	SNF8	SNF8, ESCRT-II complex subunit, homolog (S. cerevisiae)
hsa-miR-490-5p	0	0	0	1	0	0	CBR1	carbonyl reductase 1
hsa-miR-490-5p	0	0	0	1	1	1	ZNF235	zinc finger protein 235
hsa-miR-490-5p	0	0	1	1	0	0	PDE9A	phosphodiesterase 9A
hsa-miR-490-5p	0	0	0	1	0	0	PKN3	protein kinase N3
hsa-miR-490-5p	0	0	1	1	0	0	SSRP1	structure specific recognition protein 1
hsa-miR-490-5p	0	0	0	1	0	0	CYP4A22	cytochrome P450, family 4, subfamily A, polypeptide 22
hsa-miR-490-5p	0	0	0	1	1	1	PDHA2	pyruvate dehydrogenase (lipoamide) alpha 2
hsa-miR-490-5p	0	0	1	1	1	1	ATP13A4	ATPase type 13A4
hsa-miR-490-5p	0	0	0	1	0	0	S100P	S100 calcium binding protein P
hsa-miR-490-5p	0	0	1	1	0	0	LEPRE1	leucine proline-enriched proteoglycan (leprecan) 1
hsa-miR-490-5p	0	0	1	1	1	1	SLC7A13	solute carrier family 7 (anionic amino acid transporter), member 13
hsa-miR-490-5p	0	0	1	1	0	0	SSX7	synovial sarcoma, X breakpoint 7
hsa-miR-490-5p	0	0	1	1	1	1	IKBIP	IKBKB interacting protein
hsa-miR-490-5p	0	0	1	1	0	0	COL6A2	collagen, type VI, alpha 2
hsa-miR-490-5p	1	0	1	1	1	1	ZNF701	zinc finger protein 701
hsa-miR-490-5p	0	0	1	1	0	0	TMEM145	transmembrane protein 145
hsa-miR-490-5p	0	0	0	1	0	0	LILRA5	leukocyte immunoglobulin-like receptor, subfamily A (with TM domain), member 5
hsa-miR-490-5p	0	0	0	1	0	0	RILP	Rab interacting lysosomal protein
hsa-miR-490-5p	1	0	1	1	1	1	SF3B3	splicing factor 3b, subunit 3, 130kDa
hsa-miR-490-5p	0	0	1	1	0	0	SLC25A33	solute carrier family 25 (pyrimidine nucleotide carrier), member 33
hsa-miR-490-5p	0	0	0	1	0	0	ALKBH3	alkB, alkylation repair homolog 3 (E. coli)
hsa-miR-490-5p	0	0	0	1	1	1	PYDC1	PYD (pyrin domain) containing 1
hsa-miR-490-5p	0	0	1	1	1	1	LIMS3	LIM and senescent cell antigen-like domains 3
hsa-miR-490-5p	0	0	1	1	0	0	PRELID1	PRELI domain containing 1
hsa-miR-490-5p	0	0	1	1	1	1	EMB	embigin
hsa-miR-490-5p	0	0	1	1	1	1	MMADHC	methylmalonic aciduria (cobalamin deficiency) cblD type, with homocystinuria
hsa-miR-490-5p	1	0	1	1	1	1	PCBP1	poly(rC) binding protein 1
hsa-miR-490-5p	0	0	1	1	0	0	ZNF30	zinc finger protein 30
hsa-miR-490-5p	1	0	0	1	0	0	TRAPPC1	trafficking protein particle complex 1
hsa-miR-490-5p	0	0	1	1	1	1	GPR22	G protein-coupled receptor 22
hsa-miR-490-5p	0	0	0	1	0	0	OR5AU1	olfactory receptor, family 5, subfamily AU, member 1
hsa-miR-490-5p	0	0	0	1	0	0	NFRKB	nuclear factor related to kappaB binding protein
hsa-miR-490-5p	0	0	1	1	1	1	SRP9	signal recognition particle 9kDa
hsa-miR-490-5p	0	0	1	1	1	1	SMR3B	submaxillary gland androgen regulated protein 3B
hsa-miR-490-5p	0	0	1	1	1	1	CSN3	casein kappa
hsa-miR-490-5p	0	0	0	1	0	0	TUBB3	tubulin, beta 3 class III
hsa-miR-490-5p	0	0	1	1	1	1	C17orf28	chromosome 17 open reading frame 28
hsa-miR-490-5p	0	0	0	1	0	0	OR7G2	olfactory receptor, family 7, subfamily G, member 2
hsa-miR-490-5p	0	0	1	1	1	1	WFDC13	WAP four-disulfide core domain 13
hsa-miR-490-5p	1	0	1	1	0	0	SLN	sarcolipin
hsa-miR-490-5p	0	0	1	1	1	1	TEFM	transcription elongation factor, mitochondrial
hsa-miR-490-5p	0	0	1	1	1	1	ASCC2	activating signal cointegrator 1 complex subunit 2
hsa-miR-490-5p	0	0	1	1	0	0	GOLT1A	golgi transport 1A
hsa-miR-490-5p	1	0	1	1	1	1	RSF1	remodeling and spacing factor 1
hsa-miR-490-5p	1	0	0	1	1	1	RBAK	RB-associated KRAB zinc finger
hsa-miR-490-5p	0	0	1	1	1	1	PSMD1	proteasome (prosome, macropain) 26S subunit, non-ATPase, 1
hsa-miR-490-5p	0	0	1	1	1	1	MLKL	mixed lineage kinase domain-like
hsa-miR-490-5p	0	0	1	1	0	0	BAD	BCL2-associated agonist of cell death
hsa-miR-490-5p	0	0	1	1	1	1	ATP6V1G3	ATPase, H+ transporting, lysosomal 13kDa, V1 subunit G3
hsa-miR-490-5p	1	0	1	1	1	1	IQCA1	IQ motif containing with AAA domain 1
hsa-miR-490-5p	0	0	0	1	0	0	LIME1	Lck interacting transmembrane adaptor 1
hsa-miR-490-5p	1	0	1	1	1	1	GLE1	GLE1 RNA export mediator homolog (yeast)
hsa-miR-490-5p	0	0	0	1	0	0	MAL	mal, T-cell differentiation protein
hsa-miR-490-5p	0	0	1	1	0	0	SNCB	synuclein, beta
hsa-miR-490-5p	0	0	1	1	0	0	UCP2	uncoupling protein 2 (mitochondrial, proton carrier)
hsa-miR-490-5p	0	0	1	1	1	1	REP15	RAB15 effector protein
hsa-miR-490-5p	0	0	1	1	1	1	ISCA1	iron-sulfur cluster assembly 1 homolog (S. cerevisiae)
hsa-miR-490-5p	0	0	1	1	1	1	CEP19	centrosomal protein 19kDa
hsa-miR-490-5p	0	0	0	1	1	1	ANKS4B	ankyrin repeat and sterile alpha motif domain containing 4B
hsa-miR-490-5p	0	0	1	1	0	0	SSX5	synovial sarcoma, X breakpoint 5
hsa-miR-490-5p	0	0	1	1	0	0	COMMD1	copper metabolism (Murr1) domain containing 1
hsa-miR-490-5p	0	0	0	1	0	0	CST6	cystatin E/M
hsa-miR-490-5p	0	0	1	1	1	1	GLIS1	GLIS family zinc finger 1
hsa-miR-490-5p	1	0	1	1	0	0	TBC1D10C	TBC1 domain family, member 10C
hsa-miR-490-5p	0	0	1	1	0	0	POLD4	polymerase (DNA-directed), delta 4, accessory subunit
hsa-miR-490-5p	0	0	0	1	0	0	PODN	podocan
hsa-miR-490-5p	0	0	0	1	0	0	SPG7	spastic paraplegia 7 (pure and complicated autosomal recessive)
hsa-miR-490-5p	0	0	1	1	0	0	MLF1	myeloid leukemia factor 1
hsa-miR-490-5p	0	0	0	1	0	0	OR5K2	olfactory receptor, family 5, subfamily K, member 2
hsa-miR-490-5p	0	0	0	1	1	1	DSCC1	defective in sister chromatid cohesion 1 homolog (S. cerevisiae)
hsa-miR-490-5p	0	0	1	1	0	0	STX4	syntaxin 4
hsa-miR-490-5p	0	0	1	1	0	0	C2orf57	chromosome 2 open reading frame 57
hsa-miR-490-5p	0	0	0	1	0	0	CSNK1G2-AS1	CSNK1G2 antisense RNA 1
hsa-miR-490-5p	0	0	0	1	0	0	LINS	lines homolog (Drosophila)
hsa-miR-490-5p	0	0	1	1	0	0	C12orf42	chromosome 12 open reading frame 42
hsa-miR-490-5p	1	0	1	1	1	1	PDCD6	programmed cell death 6
hsa-miR-490-5p	1	0	1	1	1	1	AHRR	aryl-hydrocarbon receptor repressor
hsa-miR-490-5p	0	0	1	1	0	0	PANK2	pantothenate kinase 2
hsa-miR-490-5p	0	0	1	1	1	1	PUS10	pseudouridylate synthase 10
hsa-miR-490-5p	0	0	0	1	0	0	SERPINB6	serpin peptidase inhibitor, clade B (ovalbumin), member 6
hsa-miR-490-5p	1	0	1	1	1	1	SEPT4	septin 4
hsa-miR-490-5p	1	0	1	1	1	1	RFX7	regulatory factor X, 7
hsa-miR-490-5p	0	0	0	1	0	0	C3orf32	chromosome 3 open reading frame 32
hsa-miR-490-5p	0	0	0	1	0	0	PGAM5	phosphoglycerate mutase family member 5
hsa-miR-490-5p	1	0	1	1	1	1	DISC1	disrupted in schizophrenia 1
hsa-miR-490-5p	1	0	1	1	1	1	SERF2	small EDRK-rich factor 2
hsa-miR-490-5p	1	0	1	1	1	1	C15orf63	chromosome 15 open reading frame 63
hsa-miR-490-5p	1	0	1	1	1	1	GANC	glucosidase, alpha; neutral C
hsa-miR-490-5p	0	0	1	1	0	0	PKD2L1	polycystic kidney disease 2-like 1
hsa-miR-490-5p	0	0	0	1	1	1	SRP9P1	signal recognition particle 9 pseudogene 1
hsa-miR-490-5p	1	0	1	1	1	1	SLBP	stem-loop binding protein
hsa-miR-490-5p	1	0	1	1	1	1	ILF3	interleukin enhancer binding factor 3, 90kDa
hsa-miR-490-5p	0	0	0	1	1	1	EPS8L2	EPS8-like 2
hsa-miR-490-5p	1	0	1	1	1	1	SLC25A42	solute carrier family 25, member 42
hsa-miR-490-5p	0	0	1	1	1	1	ALS2CL	ALS2 C-terminal like
hsa-miR-490-5p	0	0	1	1	1	1	RNF170	ring finger protein 170
hsa-miR-490-5p	0	0	1	1	1	1	ZNF611	zinc finger protein 611
hsa-miR-490-5p	1	0	1	1	1	1	MARCH8	membrane-associated ring finger (C3HC4) 8, E3 ubiquitin protein ligase
hsa-miR-490-5p	0	0	0	1	0	0	FAM83H	family with sequence similarity 83, member H
hsa-miR-490-5p	0	0	0	1	0	0	OR6S1	olfactory receptor, family 6, subfamily S, member 1
hsa-miR-490-5p	1	0	1	1	1	1	YBX1	Y box binding protein 1
hsa-miR-490-5p	0	0	1	1	1	1	PCED1B	PC-esterase domain containing 1B
hsa-miR-490-5p	0	0	1	1	0	0	SPACA4	sperm acrosome associated 4
hsa-miR-490-5p	1	0	1	1	1	1	BPTF	bromodomain PHD finger transcription factor
hsa-miR-490-5p	1	0	1	1	1	1	NCL	nucleolin
hsa-miR-490-5p	0	0	1	1	0	0	STRA6	stimulated by retinoic acid gene 6 homolog (mouse)
hsa-miR-490-5p	0	0	0	1	1	1	C8orf42	chromosome 8 open reading frame 42
hsa-miR-490-5p	1	0	0	1	1	1	CRLF3	cytokine receptor-like factor 3
hsa-miR-490-5p	0	0	1	1	1	1	PRMT5	protein arginine methyltransferase 5
hsa-miR-490-5p	0	0	1	1	1	1	METTL1	methyltransferase like 1
hsa-miR-490-5p	1	0	1	1	1	1	CRMP1	collapsin response mediator protein 1
hsa-miR-490-5p	1	0	1	1	1	1	RAB3IP	RAB3A interacting protein (rabin3)
hsa-miR-490-5p	0	0	1	1	1	1	RAD1	RAD1 homolog (S. pombe)
hsa-miR-490-5p	0	0	1	1	1	1	SLC4A1AP	solute carrier family 4 (anion exchanger), member 1, adaptor protein
hsa-miR-490-5p	0	0	0	1	0	0	LCE1D	late cornified envelope 1D
hsa-miR-490-5p	0	0	0	1	0	0	PTPRCAP	protein tyrosine phosphatase, receptor type, C-associated protein
hsa-miR-490-5p	0	0	0	1	0	0	SPAG11A	sperm associated antigen 11A
hsa-miR-490-5p	0	0	0	1	1	1	GSTM4	glutathione S-transferase mu 4
hsa-miR-490-5p	1	0	1	1	1	1	XKR4	XK, Kell blood group complex subunit-related family, member 4
hsa-miR-490-5p	0	0	1	1	1	1	FMNL1	formin-like 1
hsa-miR-490-5p	1	0	1	1	1	1	MYT1	myelin transcription factor 1
hsa-miR-490-5p	0	0	1	1	0	0	NXPH3	neurexophilin 3
hsa-miR-490-5p	0	0	1	1	0	0	DHX30	DEAH (Asp-Glu-Ala-His) box polypeptide 30
hsa-miR-490-5p	0	0	1	1	0	0	SPNS2	spinster homolog 2 (Drosophila)
hsa-miR-490-5p	0	0	0	1	0	0	USP17L3	ubiquitin specific peptidase 17-like 3
hsa-miR-490-5p	0	0	0	1	0	0	NKX2-5	NK2 homeobox 5
hsa-miR-490-5p	0	0	0	1	0	0	NUPR1L	nuclear protein, transcriptional regulator, 1-like
hsa-miR-490-5p	1	0	1	1	1	1	SETD3	SET domain containing 3
hsa-miR-490-5p	0	0	0	1	0	0	C2orf70	chromosome 2 open reading frame 70
hsa-miR-490-5p	0	0	0	1	0	0	MRPL54	mitochondrial ribosomal protein L54
hsa-miR-490-5p	0	0	0	1	0	0	ACTL10	actin-like 10
hsa-miR-490-5p	0	0	0	1	0	0	WDR4	WD repeat domain 4
hsa-miR-490-5p	0	0	0	1	0	0	AMY1B	amylase, alpha 1B (salivary)
hsa-miR-490-5p	0	0	0	1	0	0	KRT6A	keratin 6A
hsa-miR-490-5p	0	0	0	1	0	0	OR1D2	olfactory receptor, family 1, subfamily D, member 2
hsa-miR-490-5p	0	0	1	1	0	0	BGN	biglycan
hsa-miR-490-5p	0	0	0	1	0	0	SYNDIG1L	synapse differentiation inducing 1-like
hsa-miR-490-5p	0	0	0	1	0	0	TMPRSS9	transmembrane protease, serine 9
hsa-miR-490-5p	0	0	0	1	0	0	OR5K1	olfactory receptor, family 5, subfamily K, member 1
hsa-miR-490-5p	0	0	0	1	1	1	ZNF530	zinc finger protein 530
hsa-miR-490-5p	0	0	0	1	0	0	ACAA1	acetyl-CoA acyltransferase 1
hsa-miR-490-5p	0	0	0	1	1	1	TTC32	tetratricopeptide repeat domain 32
hsa-miR-490-5p	0	0	0	1	0	0	LSAMP	limbic system-associated membrane protein
hsa-miR-490-5p	0	0	0	1	0	0	USP17L2	ubiquitin specific peptidase 17-like 2
hsa-miR-490-5p	1	0	1	1	1	1	EFHC2	EF-hand domain (C-terminal) containing 2
hsa-miR-490-5p	0	0	1	1	0	0	LENG9	leukocyte receptor cluster (LRC) member 9
hsa-miR-490-5p	1	0	1	1	1	1	SPTBN1	spectrin, beta, non-erythrocytic 1
hsa-miR-490-5p	0	0	0	1	1	1	TOM1L2	target of myb1-like 2 (chicken)
hsa-miR-490-5p	0	0	0	1	0	0	NSAP11	nervous system abundant protein 11
hsa-miR-490-5p	0	0	0	1	1	1	ZNF761	zinc finger protein 761
hsa-miR-490-5p	0	0	0	1	1	1	CYP4Z1	cytochrome P450, family 4, subfamily Z, polypeptide 1
hsa-miR-490-5p	1	0	1	1	1	1	MLL5	myeloid/lymphoid or mixed-lineage leukemia 5 (trithorax homolog, Drosophila)
hsa-miR-490-5p	1	0	1	1	1	1	RSBN1L	round spermatid basic protein 1-like
hsa-miR-490-5p	0	0	0	1	0	0	KRTAP21-1	keratin associated protein 21-1
hsa-miR-490-5p	0	0	1	1	1	1	SELV	selenoprotein V
hsa-miR-490-5p	0	0	1	1	1	1	SLC6A16	solute carrier family 6, member 16
hsa-miR-490-5p	0	0	0	1	0	0	RASSF3	Ras association (RalGDS/AF-6) domain family member 3
hsa-miR-490-5p	0	0	1	1	1	1	NLRP3	NLR family, pyrin domain containing 3
hsa-miR-490-5p	0	0	0	1	0	0	ZNF224	zinc finger protein 224
hsa-miR-490-5p	1	0	1	1	1	1	LHX9	LIM homeobox 9
hsa-miR-490-5p	0	0	1	1	1	1	TRIM34	tripartite motif containing 34
hsa-miR-490-5p	0	0	1	1	1	1	TRIM6	tripartite motif containing 6
hsa-miR-490-5p	0	0	1	1	1	1	TRIM6-TRIM34	TRIM6-TRIM34 readthrough
hsa-miR-490-5p	0	0	0	1	1	1	PKD1L2	polycystic kidney disease 1-like 2
hsa-miR-490-5p	0	0	1	1	0	0	IL1F10	interleukin 1 family, member 10 (theta)
hsa-miR-490-5p	0	0	1	1	1	1	CLUL1	clusterin-like 1 (retinal)
hsa-miR-490-5p	0	0	1	1	0	0	DYNLRB2	dynein, light chain, roadblock-type 2
hsa-miR-490-5p	0	0	0	1	0	0	LOC642131	putative V-set and immunoglobulin domain-containing-like protein IGHV4OR15-8-like
hsa-miR-490-5p	0	0	1	1	1	1	PSPC1	paraspeckle component 1
hsa-miR-490-5p	0	0	1	1	0	0	DEFB119	defensin, beta 119
hsa-miR-490-5p	0	0	1	1	1	1	OASL	2'-5'-oligoadenylate synthetase-like
hsa-miR-490-5p	0	0	1	1	1	1	LRRC17	leucine rich repeat containing 17
hsa-miR-490-5p	1	0	1	1	1	1	RNF6	ring finger protein (C3H2C3 type) 6
hsa-miR-490-5p	0	0	1	1	1	1	SLC13A3	solute carrier family 13 (sodium-dependent dicarboxylate transporter), member 3
hsa-miR-490-5p	0	0	0	1	0	0	TUBB4B	tubulin, beta 4B class IVb
hsa-miR-490-5p	0	0	0	1	0	0	ANKRD20A4	ankyrin repeat domain 20 family, member A4
hsa-miR-490-5p	0	0	0	1	0	0	ANKRD20A8P	ankyrin repeat domain 20 family, member A8, pseudogene
hsa-miR-490-5p	0	0	0	1	0	0	ANKRD20A20P	ankyrin repeat domain 20 family, member A20, pseudogene
hsa-miR-490-5p	0	0	1	1	1	1	FBLN1	fibulin 1
hsa-miR-490-5p	0	0	1	1	1	1	ZNF606	zinc finger protein 606
hsa-miR-490-5p	1	0	1	1	1	1	NIPAL2	NIPA-like domain containing 2
hsa-miR-490-5p	0	0	1	1	0	0	SPRR2B	small proline-rich protein 2B
hsa-miR-490-5p	0	0	1	1	1	1	IGBP1	immunoglobulin (CD79A) binding protein 1
hsa-miR-490-5p	0	0	0	1	1	1	ASCL4	achaete-scute complex homolog 4 (Drosophila)
hsa-miR-490-5p	0	0	1	1	1	1	SLCO4A1	solute carrier organic anion transporter family, member 4A1
hsa-miR-490-5p	0	0	1	1	1	1	CASP8	caspase 8, apoptosis-related cysteine peptidase
hsa-miR-490-5p	1	0	1	1	1	1	WARS	tryptophanyl-tRNA synthetase
hsa-miR-490-5p	1	0	1	1	1	1	STARD13	StAR-related lipid transfer (START) domain containing 13
hsa-miR-490-5p	1	0	0	1	0	0	ZNF385C	zinc finger protein 385C
hsa-miR-490-5p	0	0	0	1	1	1	EXOC1	exocyst complex component 1
hsa-miR-490-5p	0	0	0	1	0	0	C19orf57	chromosome 19 open reading frame 57
hsa-miR-490-5p	0	0	1	1	0	0	CNTN6	contactin 6
hsa-miR-490-5p	0	0	0	1	0	0	DDT	D-dopachrome tautomerase
hsa-miR-490-5p	0	0	0	1	0	0	CCDC37	coiled-coil domain containing 37
hsa-miR-490-5p	0	0	1	1	1	1	ESR2	estrogen receptor 2 (ER beta)
hsa-miR-490-5p	0	0	1	1	0	0	FBXO2	F-box protein 2
hsa-miR-490-5p	0	0	0	1	0	0	CRYBA4	crystallin, beta A4
hsa-miR-490-5p	0	0	0	1	0	0	MOV10L1	Mov10l1, Moloney leukemia virus 10-like 1, homolog (mouse)
hsa-miR-490-5p	0	0	0	1	0	0	GPBAR1	G protein-coupled bile acid receptor 1
hsa-miR-490-5p	0	0	0	1	0	0	SLC35E2	solute carrier family 35, member E2
hsa-miR-490-5p	0	0	1	1	0	0	ERGIC3	ERGIC and golgi 3
hsa-miR-490-5p	0	0	0	1	0	0	TRIM17	tripartite motif containing 17
hsa-miR-490-5p	0	0	1	1	0	0	BTG4	B-cell translocation gene 4
hsa-miR-490-5p	0	0	1	1	1	1	SYNE2	spectrin repeat containing, nuclear envelope 2
hsa-miR-490-5p	0	0	0	1	0	0	ZNF578	zinc finger protein 578
hsa-miR-490-5p	0	0	0	1	1	1	ZNF528	zinc finger protein 528
hsa-miR-490-5p	0	0	0	1	0	0	CDK11B	cyclin-dependent kinase 11B
hsa-miR-490-5p	0	0	0	1	1	1	PITPNM1	phosphatidylinositol transfer protein, membrane-associated 1
hsa-miR-490-5p	0	0	1	1	0	0	GMNN	geminin, DNA replication inhibitor
hsa-miR-490-5p	0	0	1	1	0	0	ZAN	zonadhesin
hsa-miR-490-5p	1	0	1	1	0	0	APBB3	amyloid beta (A4) precursor protein-binding, family B, member 3
hsa-miR-490-5p	0	0	1	1	0	0	HYAL2	hyaluronoglucosaminidase 2
hsa-miR-490-5p	0	0	1	1	1	1	KBTBD4	kelch repeat and BTB (POZ) domain containing 4
hsa-miR-490-5p	0	0	1	1	0	0	NAT9	N-acetyltransferase 9 (GCN5-related, putative)
hsa-miR-490-5p	0	0	0	1	1	1	MAGEA12	melanoma antigen family A, 12
hsa-miR-490-5p	0	0	0	1	1	1	RPS6KL1	ribosomal protein S6 kinase-like 1
hsa-miR-490-5p	1	0	1	1	1	1	AKT2	v-akt murine thymoma viral oncogene homolog 2
hsa-miR-490-5p	0	0	1	1	1	1	GTPBP3	GTP binding protein 3 (mitochondrial)
hsa-miR-490-5p	0	0	1	1	0	0	PLAC1	placenta-specific 1
hsa-miR-490-5p	0	0	1	1	1	1	PCBP2	poly(rC) binding protein 2
hsa-miR-490-5p	0	0	1	1	1	1	SLC33A1	solute carrier family 33 (acetyl-CoA transporter), member 1
hsa-miR-490-5p	0	0	1	1	0	0	PCNT	pericentrin
hsa-miR-490-5p	0	0	1	1	1	1	SPAG11B	sperm associated antigen 11B
hsa-miR-490-5p	0	0	0	1	1	1	SIRT5	sirtuin 5
hsa-miR-490-5p	0	0	1	1	0	0	BRMS1	breast cancer metastasis suppressor 1
hsa-miR-490-5p	0	0	0	1	0	0	CLN3	ceroid-lipofuscinosis, neuronal 3
hsa-miR-490-5p	0	0	0	1	0	0	ARL9	ADP-ribosylation factor-like 9
hsa-miR-490-5p	1	0	1	1	1	1	SCN2A	sodium channel, voltage-gated, type II, alpha subunit
hsa-miR-490-5p	0	0	1	1	0	0	NPSR1	neuropeptide S receptor 1
hsa-miR-490-5p	0	0	1	1	1	1	PAK3	p21 protein (Cdc42/Rac)-activated kinase 3
hsa-miR-490-5p	1	0	1	1	1	1	NLE1	notchless homolog 1 (Drosophila)
hsa-miR-490-5p	0	0	1	1	1	1	PACRGL	PARK2 co-regulated-like
hsa-miR-490-5p	0	0	1	1	1	1	MEPE	matrix extracellular phosphoglycoprotein
hsa-miR-490-5p	0	0	1	1	1	1	PTPLA	protein tyrosine phosphatase-like (proline instead of catalytic arginine), member A
hsa-miR-490-5p	0	0	1	1	0	0	APOBEC3C	apolipoprotein B mRNA editing enzyme, catalytic polypeptide-like 3C
hsa-miR-490-5p	0	0	1	1	1	1	PHLDB1	pleckstrin homology-like domain, family B, member 1
hsa-miR-490-5p	0	0	0	1	0	0	PPEF1	protein phosphatase, EF-hand calcium binding domain 1
hsa-miR-490-5p	0	0	1	1	1	1	FAM5B	family with sequence similarity 5, member B
hsa-miR-490-5p	0	0	0	1	0	0	ZNF643	zinc finger protein 643
hsa-miR-490-5p	0	0	0	1	1	1	KRTAP5-9	keratin associated protein 5-9
hsa-miR-490-5p	0	0	1	1	0	0	EPS8L3	EPS8-like 3
hsa-miR-490-5p	0	0	0	1	1	1	BNIPL	BCL2/adenovirus E1B 19kD interacting protein like
hsa-miR-490-5p	1	0	1	1	0	0	DFNB31	deafness, autosomal recessive 31
hsa-miR-490-5p	0	0	1	1	0	0	C1orf31	chromosome 1 open reading frame 31
hsa-miR-490-5p	0	0	0	1	1	1	OBSCN	obscurin, cytoskeletal calmodulin and titin-interacting RhoGEF
hsa-miR-490-5p	0	0	0	1	0	0	TMEM81	transmembrane protein 81
hsa-miR-490-5p	0	0	1	1	1	1	TNNI1	troponin I type 1 (skeletal, slow)
hsa-miR-490-5p	1	0	1	1	1	1	TROVE2	TROVE domain family, member 2
hsa-miR-490-5p	1	0	1	1	1	1	SASH1	SAM and SH3 domain containing 1
hsa-miR-490-5p	0	0	1	1	0	0	RGS8	regulator of G-protein signaling 8
hsa-miR-490-5p	0	0	1	1	0	0	MR1	major histocompatibility complex, class I-related
hsa-miR-490-5p	1	0	1	1	1	1	IL20RA	interleukin 20 receptor, alpha
hsa-miR-490-5p	0	0	1	1	0	0	NUF2	NUF2, NDC80 kinetochore complex component, homolog (S. cerevisiae)
hsa-miR-490-5p	1	0	1	1	1	1	RGS4	regulator of G-protein signaling 4
hsa-miR-490-5p	0	0	0	1	0	0	C1orf111	chromosome 1 open reading frame 111
hsa-miR-490-5p	0	0	1	1	1	1	DUSP12	dual specificity phosphatase 12
hsa-miR-490-5p	0	0	1	1	1	1	C1orf192	chromosome 1 open reading frame 192
hsa-miR-490-5p	0	0	1	1	0	0	CCDC19	coiled-coil domain containing 19
hsa-miR-490-5p	1	0	1	1	1	1	PTPRK	protein tyrosine phosphatase, receptor type, K
hsa-miR-490-5p	0	0	1	1	1	1	C1orf43	chromosome 1 open reading frame 43
hsa-miR-490-5p	0	0	0	1	1	1	SPRR2D	small proline-rich protein 2D
hsa-miR-490-5p	0	0	0	1	0	0	LCE1E	late cornified envelope 1E
hsa-miR-490-5p	0	0	0	1	1	1	DMBT1	deleted in malignant brain tumors 1
hsa-miR-490-5p	0	0	0	1	1	1	AKD1	adenylate kinase domain containing 1
hsa-miR-490-5p	0	0	1	1	1	1	RTN4IP1	reticulon 4 interacting protein 1
hsa-miR-490-5p	0	0	1	1	1	1	ADAM30	ADAM metallopeptidase domain 30
hsa-miR-490-5p	0	0	0	1	1	1	F8A1	coagulation factor VIII-associated 1
hsa-miR-490-5p	0	0	0	1	0	0	F8A2	coagulation factor VIII-associated 2
hsa-miR-490-5p	1	0	0	1	1	1	RHOC	ras homolog family member C
hsa-miR-490-5p	0	0	0	1	1	1	NT5E	5'-nucleotidase, ecto (CD73)
hsa-miR-490-5p	0	0	0	1	1	1	DDX20	DEAD (Asp-Glu-Ala-Asp) box polypeptide 20
hsa-miR-490-5p	0	0	1	1	0	0	AVPR2	arginine vasopressin receptor 2
hsa-miR-490-5p	0	0	1	1	0	0	IDH3G	isocitrate dehydrogenase 3 (NAD+) gamma
hsa-miR-490-5p	0	0	0	1	0	0	HAUS7	HAUS augmin-like complex, subunit 7
hsa-miR-490-5p	0	0	0	1	1	1	CHRNA4	cholinergic receptor, nicotinic, alpha 4 (neuronal)
hsa-miR-490-5p	0	0	0	1	1	1	PASD1	PAS domain containing 1
hsa-miR-490-5p	0	0	0	1	1	1	ABCC2	ATP-binding cassette, sub-family C (CFTR/MRP), member 2
hsa-miR-490-5p	0	0	0	1	1	1	CRTAC1	cartilage acidic protein 1
hsa-miR-490-5p	0	0	1	1	0	0	C10orf62	chromosome 10 open reading frame 62
hsa-miR-490-5p	0	0	1	1	1	1	HOGA1	4-hydroxy-2-oxoglutarate aldolase 1
hsa-miR-490-5p	0	0	1	1	1	1	GSTA4	glutathione S-transferase alpha 4
hsa-miR-490-5p	0	0	1	1	0	0	SLIT1	slit homolog 1 (Drosophila)
hsa-miR-490-5p	0	0	0	1	1	1	EFCAB7	EF-hand calcium binding domain 7
hsa-miR-490-5p	0	0	1	1	0	0	DAB1	disabled homolog 1 (Drosophila)
hsa-miR-490-5p	0	0	0	1	0	0	C8B	complement component 8, beta polypeptide
hsa-miR-490-5p	0	0	1	1	1	1	LGI1	leucine-rich, glioma inactivated 1
hsa-miR-490-5p	1	0	1	1	1	1	NELF	nasal embryonic LHRH factor
hsa-miR-490-5p	1	0	1	1	1	1	SEPT6	septin 6
hsa-miR-490-5p	0	0	1	1	0	0	NFATC2	nuclear factor of activated T-cells, cytoplasmic, calcineurin-dependent 2
hsa-miR-490-5p	0	0	1	1	1	1	IL13RA1	interleukin 13 receptor, alpha 1
hsa-miR-490-5p	0	0	1	1	0	0	PMPCA	peptidase (mitochondrial processing) alpha
hsa-miR-490-5p	0	0	1	1	1	1	DDX27	DEAD (Asp-Glu-Ala-Asp) box polypeptide 27
hsa-miR-490-5p	0	0	0	1	0	0	SARDH	sarcosine dehydrogenase
hsa-miR-490-5p	0	0	0	1	1	1	CYP4A11	cytochrome P450, family 4, subfamily A, polypeptide 11
hsa-miR-490-5p	0	0	0	1	0	0	GBGT1	globoside alpha-1,3-N-acetylgalactosaminyltransferase 1
hsa-miR-490-5p	0	0	0	1	0	0	LRIT2	leucine-rich repeat, immunoglobulin-like and transmembrane domains 2
hsa-miR-490-5p	0	0	0	1	0	0	C10orf99	chromosome 10 open reading frame 99
hsa-miR-490-5p	0	0	0	1	0	0	PTCH2	patched 2
hsa-miR-490-5p	0	0	1	1	0	0	MAT1A	methionine adenosyltransferase I, alpha
hsa-miR-490-5p	0	0	0	1	0	0	CCDC24	coiled-coil domain containing 24
hsa-miR-490-5p	0	0	1	1	0	0	ABCC10	ATP-binding cassette, sub-family C (CFTR/MRP), member 10
hsa-miR-490-5p	0	0	0	1	1	1	ZNF684	zinc finger protein 684
hsa-miR-490-5p	0	0	1	1	0	0	DUSP13	dual specificity phosphatase 13
hsa-miR-490-5p	0	0	0	1	0	0	SEMG2	semenogelin II
hsa-miR-490-5p	0	0	1	1	1	1	SEMG1	semenogelin I
hsa-miR-490-5p	1	0	0	1	1	1	HNF4A	hepatocyte nuclear factor 4, alpha
hsa-miR-490-5p	0	0	1	1	1	1	SLC29A3	solute carrier family 29 (nucleoside transporters), member 3
hsa-miR-490-5p	0	0	1	1	1	1	ZSCAN20	zinc finger and SCAN domain containing 20
hsa-miR-490-5p	1	0	1	1	1	1	SYNC	syncoilin, intermediate filament protein
hsa-miR-490-5p	0	0	1	1	1	1	TFAM	transcription factor A, mitochondrial
hsa-miR-490-5p	0	0	1	1	0	0	TMEM222	transmembrane protein 222
hsa-miR-490-5p	0	0	0	1	0	0	ROMO1	reactive oxygen species modulator 1
hsa-miR-490-5p	0	0	1	1	1	1	SUSD1	sushi domain containing 1
hsa-miR-490-5p	0	0	0	1	0	0	GGNBP1	gametogenetin binding protein 1 (pseudogene)
hsa-miR-490-5p	0	0	1	1	1	1	HMGCL	3-hydroxymethyl-3-methylglutaryl-CoA lyase
hsa-miR-490-5p	1	0	1	1	0	0	FZD8	frizzled family receptor 8
hsa-miR-490-5p	0	0	1	1	1	1	USP48	ubiquitin specific peptidase 48
hsa-miR-490-5p	0	0	0	1	0	0	HLA-DMA	major histocompatibility complex, class II, DM alpha
hsa-miR-490-5p	0	0	0	1	1	1	PSMB9	proteasome (prosome, macropain) subunit, beta type, 9 (large multifunctional peptidase 2)
hsa-miR-490-5p	0	0	0	1	0	0	BTNL2	butyrophilin-like 2 (MHC class II associated)
hsa-miR-490-5p	0	0	1	1	0	0	GPSM3	G-protein signaling modulator 3
hsa-miR-490-5p	0	0	0	1	1	1	EMC1	ER membrane protein complex subunit 1
hsa-miR-490-5p	0	0	0	1	0	0	TMCO3	transmembrane and coiled-coil domains 3
hsa-miR-490-5p	1	0	1	1	0	0	TSPYL2	TSPY-like 2
hsa-miR-490-5p	0	0	1	1	0	0	C2	complement component 2
hsa-miR-490-5p	0	0	1	1	0	0	SSX4	synovial sarcoma, X breakpoint 4
hsa-miR-490-5p	0	0	0	1	0	0	RSG1	REM2 and RAB-like small GTPase 1
hsa-miR-490-5p	1	0	1	1	0	0	ROR2	receptor tyrosine kinase-like orphan receptor 2
hsa-miR-490-5p	1	0	0	1	0	0	PLEKHM2	pleckstrin homology domain containing, family M (with RUN domain) member 2
hsa-miR-490-5p	0	0	0	1	0	0	LY6G6F	lymphocyte antigen 6 complex, locus G6F
hsa-miR-490-5p	0	0	0	1	0	0	LY6G6D	lymphocyte antigen 6 complex, locus G6D
hsa-miR-490-5p	0	0	0	1	0	0	AKAP4	A kinase (PRKA) anchor protein 4
hsa-miR-490-5p	0	0	1	1	0	0	HLA-C	major histocompatibility complex, class I, C
hsa-miR-490-5p	0	0	0	1	0	0	CHRDL2	chordin-like 2
hsa-miR-490-5p	0	0	1	1	1	1	KIF27	kinesin family member 27
hsa-miR-490-5p	1	0	0	1	1	1	PRAF2	PRA1 domain family, member 2
hsa-miR-490-5p	1	0	0	1	0	0	NRM	nurim (nuclear envelope membrane protein)
hsa-miR-490-5p	0	0	1	1	1	1	MTHFR	methylenetetrahydrofolate reductase (NAD(P)H)
hsa-miR-490-5p	1	0	1	1	1	1	HS6ST3	heparan sulfate 6-O-sulfotransferase 3
hsa-miR-490-5p	0	0	1	1	1	1	SLC15A4	solute carrier family 15, member 4
hsa-miR-490-5p	0	0	1	1	0	0	SSX4B	synovial sarcoma, X breakpoint 4B
hsa-miR-490-5p	0	0	0	1	0	0	CST9L	cystatin 9-like
hsa-miR-490-5p	0	0	0	1	1	1	IL31	interleukin 31
hsa-miR-490-5p	1	0	1	1	1	1	CTNNBIP1	catenin, beta interacting protein 1
hsa-miR-490-5p	0	0	0	1	0	0	ZKSCAN4	zinc finger with KRAB and SCAN domains 4
hsa-miR-490-5p	0	0	1	1	1	1	DTD1	D-tyrosyl-tRNA deacylase 1 homolog (S. cerevisiae)
hsa-miR-490-5p	0	0	0	1	0	0	ASB10	ankyrin repeat and SOCS box containing 10
hsa-miR-490-5p	0	0	1	1	0	0	NPR2	natriuretic peptide receptor B/guanylate cyclase B (atrionatriuretic peptide receptor B)
hsa-miR-490-5p	1	0	1	1	0	0	GBA2	glucosidase, beta (bile acid) 2
hsa-miR-490-5p	0	0	1	1	0	0	DCTN3	dynactin 3 (p22)
hsa-miR-490-5p	0	0	1	1	1	1	HNRPLL	heterogeneous nuclear ribonucleoprotein L-like
hsa-miR-490-5p	0	0	0	1	1	1	C5orf56	chromosome 5 open reading frame 56
hsa-miR-490-5p	0	0	0	1	1	1	MAGEB6	melanoma antigen family B, 6
hsa-miR-490-5p	0	0	1	1	0	0	CXorf58	chromosome X open reading frame 58
hsa-miR-490-5p	1	0	1	1	1	1	NEDD9	neural precursor cell expressed, developmentally down-regulated 9
hsa-miR-490-5p	0	0	1	1	1	1	EEF1E1	eukaryotic translation elongation factor 1 epsilon 1
hsa-miR-490-5p	0	0	1	1	1	1	SOAT2	sterol O-acyltransferase 2
hsa-miR-490-5p	1	0	1	1	1	1	PPP1R13B	protein phosphatase 1, regulatory subunit 13B
hsa-miR-490-5p	0	0	0	1	0	0	IFNA5	interferon, alpha 5
hsa-miR-490-5p	0	0	1	1	0	0	FBXO16	F-box protein 16
hsa-miR-490-5p	0	0	0	1	0	0	HBG2	hemoglobin, gamma G
hsa-miR-490-5p	0	0	1	1	0	0	BCL7C	B-cell CLL/lymphoma 7C
hsa-miR-490-5p	0	0	1	1	0	0	CA5BP1	carbonic anhydrase VB pseudogene 1
hsa-miR-490-5p	0	0	1	1	0	0	TBCA	tubulin folding cofactor A
hsa-miR-490-5p	1	0	1	1	1	1	ARHGAP24	Rho GTPase activating protein 24
hsa-miR-490-5p	0	0	0	1	0	0	AKR1C4	aldo-keto reductase family 1, member C4 (chlordecone reductase; 3-alpha hydroxysteroid dehydrogenase, type I; dihydrodiol dehydrogenase 4)
hsa-miR-490-5p	1	0	0	1	1	1	CDX2	caudal type homeobox 2
hsa-miR-490-5p	0	0	1	1	1	1	TYRP1	tyrosinase-related protein 1
hsa-miR-490-5p	1	0	1	1	1	1	WDR37	WD repeat domain 37
hsa-miR-490-5p	1	0	1	1	1	1	OCIAD1	OCIA domain containing 1
hsa-miR-490-5p	0	0	0	1	0	0	DENND1C	DENN/MADD domain containing 1C
hsa-miR-490-5p	0	0	0	1	0	0	LOC728419	ubiquitin carboxyl-terminal hydrolase 17-like
hsa-miR-490-5p	0	0	0	1	0	0	LOC728379	ubiquitin carboxyl-terminal hydrolase 17-like
hsa-miR-490-5p	0	0	0	1	0	0	USP17L4	ubiquitin specific peptidase 17-like 4
hsa-miR-490-5p	0	0	0	1	1	1	N6AMT2	N-6 adenine-specific DNA methyltransferase 2 (putative)
hsa-miR-490-5p	0	0	0	1	1	1	UPB1	ureidopropionase, beta
hsa-miR-490-5p	0	0	0	1	0	0	SLC7A4	solute carrier family 7 (orphan transporter), member 4
hsa-miR-490-5p	0	0	0	1	0	0	TSPY4	testis specific protein, Y-linked 4
hsa-miR-490-5p	1	0	0	1	0	0	UROC1	urocanate hydratase 1
hsa-miR-490-5p	0	0	0	1	1	1	METTL6	methyltransferase like 6
hsa-miR-490-5p	0	0	1	1	0	0	C6orf163	chromosome 6 open reading frame 163
hsa-miR-490-5p	0	0	0	1	0	0	OR10J5	olfactory receptor, family 10, subfamily J, member 5
hsa-miR-490-5p	1	0	1	1	1	1	ASPH	aspartate beta-hydroxylase
hsa-miR-490-5p	0	0	0	1	1	1	ASB14	ankyrin repeat and SOCS box containing 14
hsa-miR-490-5p	0	0	0	1	1	1	SERPIND1	serpin peptidase inhibitor, clade D (heparin cofactor), member 1
hsa-miR-490-5p	0	0	1	1	1	1	IGF2	insulin-like growth factor 2 (somatomedin A)
hsa-miR-490-5p	1	0	1	0	1	1	BCL2	B-cell CLL/lymphoma 2
hsa-miR-490-5p	0	0	1	1	1	1	GSTM3	glutathione S-transferase mu 3 (brain)
hsa-miR-490-5p	1	0	1	0	1	1	SLC25A25	solute carrier family 25 (mitochondrial carrier; phosphate carrier), member 25
hsa-miR-490-5p	1	0	1	1	1	1	COA5	cytochrome C oxidase assembly factor 5
hsa-miR-490-5p	1	0	1	1	1	1	PHF19	PHD finger protein 19
hsa-miR-490-5p	0	0	1	1	1	1	EXOC6	exocyst complex component 6
hsa-miR-490-5p	1	0	1	1	1	1	ZHX1	zinc fingers and homeoboxes 1
hsa-miR-490-5p	0	0	1	1	1	1	DCAF8L1	DDB1 and CUL4 associated factor 8-like 1
hsa-miR-490-5p	0	0	1	0	1	1	TCAIM	T cell activation inhibitor, mitochondrial
hsa-miR-490-5p	0	0	1	1	1	1	ATF3	activating transcription factor 3
hsa-miR-490-5p	0	0	0	1	1	1	MRI1	methylthioribose-1-phosphate isomerase homolog (S. cerevisiae)
hsa-miR-490-5p	1	0	1	1	1	1	YTHDC1	YTH domain containing 1
hsa-miR-490-5p	0	0	1	1	1	1	PLGLB1	plasminogen-like B1
hsa-miR-490-5p	1	0	1	1	1	1	AP1S3	adaptor-related protein complex 1, sigma 3 subunit
hsa-miR-490-5p	1	0	0	1	1	1	PRDM15	PR domain containing 15
hsa-miR-490-5p	1	0	1	1	1	1	FRMD6	FERM domain containing 6
hsa-miR-490-5p	1	0	1	1	1	1	ERBB4	v-erb-a erythroblastic leukemia viral oncogene homolog 4 (avian)
hsa-miR-490-5p	1	0	0	1	1	1	CLCC1	chloride channel CLIC-like 1
hsa-miR-490-5p	1	0	1	0	1	1	MYO5B	myosin VB
hsa-miR-490-5p	1	0	1	0	1	1	USP6NL	USP6 N-terminal like
hsa-miR-490-5p	1	0	1	0	1	1	BACH1	BTB and CNC homology 1, basic leucine zipper transcription factor 1
hsa-miR-490-5p	0	0	0	1	1	1	COL6A1	collagen, type VI, alpha 1
hsa-miR-490-5p	1	0	1	1	1	1	IPO5	importin 5
hsa-miR-490-5p	0	0	1	1	1	1	CEACAM6	carcinoembryonic antigen-related cell adhesion molecule 6 (non-specific cross reacting antigen)
hsa-miR-490-5p	0	0	1	1	1	1	PLGLB2	plasminogen-like B2
hsa-miR-490-5p	0	0	0	0	1	1	PRELP	proline/arginine-rich end leucine-rich repeat protein
hsa-miR-490-5p	1	0	1	1	1	1	UGDH	UDP-glucose 6-dehydrogenase
hsa-miR-490-5p	1	0	1	1	1	1	PAX8	paired box 8
hsa-miR-490-5p	1	0	1	1	1	1	SLC25A27	solute carrier family 25, member 27
hsa-miR-490-5p	0	0	1	1	1	1	TRDMT1	tRNA aspartic acid methyltransferase 1
hsa-miR-490-5p	0	0	1	1	1	1	PDCD7	programmed cell death 7
hsa-miR-490-5p	1	0	1	0	1	1	NBR1	neighbor of BRCA1 gene 1
hsa-miR-490-5p	1	0	1	0	1	1	SCML2	sex comb on midleg-like 2 (Drosophila)
hsa-miR-490-5p	0	0	1	1	1	1	PEG3	paternally expressed 3
hsa-miR-490-5p	0	0	1	1	1	1	ZNF230	zinc finger protein 230
hsa-miR-490-5p	0	0	1	1	1	1	KLRAP1	killer cell lectin-like receptor subfamily A pseudogene 1
hsa-miR-490-5p	1	0	1	1	1	1	ZNF12	zinc finger protein 12
hsa-miR-490-5p	1	0	1	1	1	1	TFDP1	transcription factor Dp-1
hsa-miR-490-5p	0	0	1	1	1	1	LMOD1	leiomodin 1 (smooth muscle)
hsa-miR-490-5p	1	0	1	1	1	1	MGAT4A	mannosyl (alpha-1,3-)-glycoprotein beta-1,4-N-acetylglucosaminyltransferase, isozyme A
hsa-miR-490-5p	1	0	1	1	1	1	SHANK2	SH3 and multiple ankyrin repeat domains 2
hsa-miR-490-5p	0	0	1	1	1	1	TTC33	tetratricopeptide repeat domain 33
hsa-miR-490-5p	1	0	1	1	1	1	MYLIP	myosin regulatory light chain interacting protein
hsa-miR-490-5p	1	0	1	1	1	1	ZKSCAN5	zinc finger with KRAB and SCAN domains 5
hsa-miR-490-5p	0	0	1	1	1	1	TRAK1	trafficking protein, kinesin binding 1
hsa-miR-490-5p	0	0	0	1	1	1	UFL1	UFM1-specific ligase 1
hsa-miR-490-5p	0	0	1	1	1	1	NCAPH	non-SMC condensin I complex, subunit H
hsa-miR-490-5p	0	0	1	1	1	1	KANK2	KN motif and ankyrin repeat domains 2
hsa-miR-490-5p	1	0	1	0	1	1	TRIM33	tripartite motif containing 33
hsa-miR-490-5p	0	0	1	1	1	1	PION	pigeon homolog (Drosophila)
hsa-miR-490-5p	1	0	1	1	1	1	WBP1L	WW domain binding protein 1-like
hsa-miR-490-5p	1	0	1	1	1	1	HMG20A	high mobility group 20A
hsa-miR-490-5p	1	0	1	1	1	1	RRN3	RRN3 RNA polymerase I transcription factor homolog (S. cerevisiae)
hsa-miR-490-5p	0	0	0	1	1	1	CABP5	calcium binding protein 5
hsa-miR-490-5p	1	0	1	0	1	1	GPR158	G protein-coupled receptor 158
hsa-miR-490-5p	1	0	1	1	1	1	TAOK1	TAO kinase 1
hsa-miR-490-5p	1	0	1	0	1	1	USP37	ubiquitin specific peptidase 37
hsa-miR-490-5p	0	0	0	1	1	1	GYS2	glycogen synthase 2 (liver)
hsa-miR-490-5p	1	0	0	1	1	1	FANCF	Fanconi anemia, complementation group F
hsa-miR-490-5p	0	0	1	0	1	1	GINS3	GINS complex subunit 3 (Psf3 homolog)
hsa-miR-490-5p	0	0	0	1	1	1	LILRA6	leukocyte immunoglobulin-like receptor, subfamily A (with TM domain), member 6
hsa-miR-490-5p	1	0	1	1	1	1	SH3TC2	SH3 domain and tetratricopeptide repeats 2
hsa-miR-490-5p	0	0	1	0	1	1	EFCAB1	EF-hand calcium binding domain 1
hsa-miR-490-5p	0	0	0	1	1	1	BORA	bora, aurora kinase A activator
hsa-miR-490-5p	1	0	1	1	1	1	GRHL2	grainyhead-like 2 (Drosophila)
hsa-miR-490-5p	0	0	0	1	1	1	ZCCHC9	zinc finger, CCHC domain containing 9
hsa-miR-490-5p	1	0	1	1	1	1	SLC35B4	solute carrier family 35, member B4
hsa-miR-490-5p	1	0	1	1	1	1	RBM17	RNA binding motif protein 17
hsa-miR-490-5p	1	0	1	1	1	1	C16orf45	chromosome 16 open reading frame 45
hsa-miR-490-5p	0	0	0	1	1	1	TIFA	TRAF-interacting protein with forkhead-associated domain
hsa-miR-490-5p	0	0	1	0	1	1	ASB15	ankyrin repeat and SOCS box containing 15
hsa-miR-490-5p	1	0	1	0	1	1	TMEM132D	transmembrane protein 132D
hsa-miR-490-5p	1	0	1	1	1	1	CCSAP	centriole, cilia and spindle-associated protein
hsa-miR-490-5p	1	0	1	1	1	1	NFX1	nuclear transcription factor, X-box binding 1
hsa-miR-490-5p	0	0	0	0	1	1	NUDT16	nudix (nucleoside diphosphate linked moiety X)-type motif 16
hsa-miR-490-5p	0	0	0	1	1	1	NDUFAF6	NADH dehydrogenase (ubiquinone) complex I, assembly factor 6
hsa-miR-490-5p	1	0	1	1	1	1	SRFBP1	serum response factor binding protein 1
hsa-miR-490-5p	0	0	0	1	1	1	BTNL9	butyrophilin-like 9
hsa-miR-490-5p	0	0	1	1	1	1	USP54	ubiquitin specific peptidase 54
hsa-miR-490-5p	1	0	1	0	1	1	RNF182	ring finger protein 182
hsa-miR-490-5p	0	0	0	1	1	1	C20orf166-AS1	C20orf166 antisense RNA 1
hsa-miR-490-5p	1	0	1	0	1	1	RGMB	RGM domain family, member B
hsa-miR-490-5p	1	0	1	1	1	1	PLEKHA7	pleckstrin homology domain containing, family A member 7
hsa-miR-490-5p	0	0	0	0	1	1	FLJ37638	uncharacterized LOC400660
hsa-miR-490-5p	0	0	0	0	1	1	LOC728724	hCG1814486
hsa-miR-490-5p	0	0	0	0	1	1	SUCLG2P2	succinate-CoA ligase, GDP-forming, beta subunit pseudogene 2
hsa-miR-490-5p	0	0	0	0	1	1	LOC644006	ring finger protein 4 pseudogene
