# Supplementary material for: Profiling of Selected MicroRNAs in Proliferative Eutopic Endometrium of Women with Ovarian Endometriosis
Source: Biomed Res Int. 2015 Aug 20;2015:760698. doi: 10.1155/2015/760698 (PMC4558423; doi:10.1155/2015/760698)
Supplement: Supplementary file 1 — Table I: The names of miRNAs significantly differentially expressed between eutopic endometrium of patients with endometriosis vs eutopic endometrium of patients without endometriosis. Table II: The associations between miRNA and mRNA, which presents detailed results of the search of six major databases i.e targetscan, tarbase, miranda, mirbase, mirtarget2 and pictar. [file 760698.f1.zip › 760698.f1/Table II/hsa-miR-491-3p.tsv]

miR	targetscan	tarbase	miranda	mirbase	mirtarget2	pictar	GeneSymbol	GeneName
hsa-miR-491-3p	0	0	1	1	1	1	MKNK1	MAP kinase interacting serine/threonine kinase 1
hsa-miR-491-3p	1	0	1	1	1	1	PRUNE2	prune homolog 2 (Drosophila)
hsa-miR-491-3p	1	0	1	0	1	1	PTPRT	protein tyrosine phosphatase, receptor type, T
hsa-miR-491-3p	1	0	1	0	1	1	MTSS1	metastasis suppressor 1
hsa-miR-491-3p	0	0	1	1	1	1	PDE4DIP	phosphodiesterase 4D interacting protein
hsa-miR-491-3p	0	0	1	1	1	1	NEU3	sialidase 3 (membrane sialidase)
hsa-miR-491-3p	1	0	1	1	0	0	TBC1D12	TBC1 domain family, member 12
hsa-miR-491-3p	1	0	1	1	1	1	GIGYF2	GRB10 interacting GYF protein 2
hsa-miR-491-3p	1	0	1	1	1	1	TP63	tumor protein p63
hsa-miR-491-3p	0	0	1	1	0	0	ATP10B	ATPase, class V, type 10B
hsa-miR-491-3p	1	0	1	0	1	1	DOCK4	dedicator of cytokinesis 4
hsa-miR-491-3p	0	0	1	1	1	1	SEC31A	SEC31 homolog A (S. cerevisiae)
hsa-miR-491-3p	1	0	1	0	0	0	DTX4	deltex homolog 4 (Drosophila)
hsa-miR-491-3p	0	0	1	1	1	1	ANKRD6	ankyrin repeat domain 6
hsa-miR-491-3p	1	0	1	1	1	1	RGL1	ral guanine nucleotide dissociation stimulator-like 1
hsa-miR-491-3p	0	0	1	0	0	0	THSD7A	thrombospondin, type I, domain containing 7A
hsa-miR-491-3p	1	0	1	1	0	0	STXBP5L	syntaxin binding protein 5-like
hsa-miR-491-3p	1	0	1	1	1	1	FOXJ3	forkhead box J3
hsa-miR-491-3p	1	0	1	1	1	1	ASAP1	ArfGAP with SH3 domain, ankyrin repeat and PH domain 1
hsa-miR-491-3p	0	0	1	1	1	1	KLHL13	kelch-like 13 (Drosophila)
hsa-miR-491-3p	1	0	1	1	1	1	LRRC7	leucine rich repeat containing 7
hsa-miR-491-3p	1	0	1	0	1	1	RIMS1	regulating synaptic membrane exocytosis 1
hsa-miR-491-3p	1	0	1	1	1	1	IKZF4	IKAROS family zinc finger 4 (Eos)
hsa-miR-491-3p	1	0	1	1	1	1	CDK13	cyclin-dependent kinase 13
hsa-miR-491-3p	1	0	1	1	1	1	LCOR	ligand dependent nuclear receptor corepressor
hsa-miR-491-3p	0	0	1	1	0	0	SEC16B	SEC16 homolog B (S. cerevisiae)
hsa-miR-491-3p	1	0	1	1	1	1	SH3TC2	SH3 domain and tetratricopeptide repeats 2
hsa-miR-491-3p	1	0	1	1	1	1	PRDM16	PR domain containing 16
hsa-miR-491-3p	1	0	1	0	0	0	ZC3H12C	zinc finger CCCH-type containing 12C
hsa-miR-491-3p	0	0	1	1	1	1	MICAL2	microtubule associated monoxygenase, calponin and LIM domain containing 2
hsa-miR-491-3p	0	0	1	1	0	0	PTPRF	protein tyrosine phosphatase, receptor type, F
hsa-miR-491-3p	0	0	1	1	1	1	SYBU	syntabulin (syntaxin-interacting)
hsa-miR-491-3p	1	0	1	1	1	1	VLDLR	very low density lipoprotein receptor
hsa-miR-491-3p	0	0	1	0	1	1	ATR	ataxia telangiectasia and Rad3 related
hsa-miR-491-3p	0	0	1	0	1	1	ITPR1	inositol 1,4,5-trisphosphate receptor, type 1
hsa-miR-491-3p	1	0	1	1	1	1	FMR1	fragile X mental retardation 1
hsa-miR-491-3p	1	0	1	1	1	1	ZNF207	zinc finger protein 207
hsa-miR-491-3p	1	0	1	1	1	1	REV3L	REV3-like, polymerase (DNA directed), zeta, catalytic subunit
hsa-miR-491-3p	1	0	1	1	1	1	ABI1	abl-interactor 1
hsa-miR-491-3p	1	0	1	1	1	1	ERF	Ets2 repressor factor
hsa-miR-491-3p	1	0	1	1	1	1	TWF1	twinfilin, actin-binding protein, homolog 1 (Drosophila)
hsa-miR-491-3p	1	0	1	0	1	1	CHL1	cell adhesion molecule with homology to L1CAM (close homolog of L1)
hsa-miR-491-3p	1	0	1	1	1	1	AEBP2	AE binding protein 2
hsa-miR-491-3p	0	0	1	1	0	0	IGFBP2	insulin-like growth factor binding protein 2, 36kDa
hsa-miR-491-3p	1	0	1	1	1	1	LIMA1	LIM domain and actin binding 1
hsa-miR-491-3p	1	0	1	1	1	1	EPHB4	EPH receptor B4
hsa-miR-491-3p	1	0	1	1	1	1	ARHGEF3	Rho guanine nucleotide exchange factor (GEF) 3
hsa-miR-491-3p	1	0	1	0	1	1	ADD3	adducin 3 (gamma)
hsa-miR-491-3p	1	0	1	1	1	1	ZFX	zinc finger protein, X-linked
hsa-miR-491-3p	1	0	1	0	1	1	FYB	FYN binding protein
hsa-miR-491-3p	0	0	1	0	1	1	PARG	poly (ADP-ribose) glycohydrolase
hsa-miR-491-3p	1	0	1	0	1	1	PDE4D	phosphodiesterase 4D, cAMP-specific
hsa-miR-491-3p	0	0	1	1	1	1	SESN1	sestrin 1
hsa-miR-491-3p	1	0	1	1	1	1	MID1	midline 1 (Opitz/BBB syndrome)
hsa-miR-491-3p	1	0	1	1	1	1	MYT1L	myelin transcription factor 1-like
hsa-miR-491-3p	1	0	1	0	0	0	MAP3K1	mitogen-activated protein kinase kinase kinase 1, E3 ubiquitin protein ligase
hsa-miR-491-3p	0	0	1	1	1	1	CD84	CD84 molecule
hsa-miR-491-3p	1	0	1	1	1	1	SHOC2	soc-2 suppressor of clear homolog (C. elegans)
hsa-miR-491-3p	1	0	1	1	1	1	MBNL2	muscleblind-like splicing regulator 2
hsa-miR-491-3p	1	0	1	1	1	1	ZFAND6	zinc finger, AN1-type domain 6
hsa-miR-491-3p	1	0	1	1	1	1	NUDT4	nudix (nucleoside diphosphate linked moiety X)-type motif 4
hsa-miR-491-3p	1	0	1	1	1	1	CBFA2T2	core-binding factor, runt domain, alpha subunit 2; translocated to, 2
hsa-miR-491-3p	0	0	1	1	1	1	RGS7	regulator of G-protein signaling 7
hsa-miR-491-3p	0	0	1	1	1	1	FHL1	four and a half LIM domains 1
hsa-miR-491-3p	0	0	1	1	1	1	GUCA1C	guanylate cyclase activator 1C
hsa-miR-491-3p	1	0	1	1	1	1	KAT6B	K(lysine) acetyltransferase 6B
hsa-miR-491-3p	1	0	1	1	1	1	LRRFIP1	leucine rich repeat (in FLII) interacting protein 1
hsa-miR-491-3p	0	0	1	1	1	1	DCAF6	DDB1 and CUL4 associated factor 6
hsa-miR-491-3p	1	0	1	0	1	1	CDK14	cyclin-dependent kinase 14
hsa-miR-491-3p	0	0	1	0	1	1	CLEC5A	C-type lectin domain family 5, member A
hsa-miR-491-3p	1	0	1	1	1	1	MYNN	myoneurin
hsa-miR-491-3p	0	0	1	1	1	1	AIG1	androgen-induced 1
hsa-miR-491-3p	0	0	1	1	1	1	FGFR1OP2	FGFR1 oncogene partner 2
hsa-miR-491-3p	0	0	1	1	1	1	SLCO2B1	solute carrier organic anion transporter family, member 2B1
hsa-miR-491-3p	1	0	1	1	1	1	AXIN2	axin 2
hsa-miR-491-3p	0	0	1	1	1	1	HERPUD1	homocysteine-inducible, endoplasmic reticulum stress-inducible, ubiquitin-like domain member 1
hsa-miR-491-3p	1	0	1	1	1	1	DESI2	desumoylating isopeptidase 2
hsa-miR-491-3p	1	0	1	1	1	1	C21orf91	chromosome 21 open reading frame 91
hsa-miR-491-3p	0	0	1	1	1	1	DAZ2	deleted in azoospermia 2
hsa-miR-491-3p	0	0	1	0	1	1	DAZ3	deleted in azoospermia 3
hsa-miR-491-3p	0	0	1	1	1	1	DOCK10	dedicator of cytokinesis 10
hsa-miR-491-3p	1	0	1	1	1	1	RBM47	RNA binding motif protein 47
hsa-miR-491-3p	1	0	1	1	1	1	SH3GLB1	SH3-domain GRB2-like endophilin B1
hsa-miR-491-3p	1	0	1	0	1	1	PARP11	poly (ADP-ribose) polymerase family, member 11
hsa-miR-491-3p	0	0	1	1	1	1	DAZ1	deleted in azoospermia 1
hsa-miR-491-3p	1	0	1	1	1	1	PUM2	pumilio homolog 2 (Drosophila)
hsa-miR-491-3p	1	0	1	1	1	1	LETMD1	LETM1 domain containing 1
hsa-miR-491-3p	0	0	1	1	1	1	FCRLA	Fc receptor-like A
hsa-miR-491-3p	1	0	1	1	1	1	BIVM	basic, immunoglobulin-like variable motif containing
hsa-miR-491-3p	1	0	1	1	1	1	PBX3	pre-B-cell leukemia homeobox 3
hsa-miR-491-3p	1	0	1	1	1	1	ATAD1	ATPase family, AAA domain containing 1
hsa-miR-491-3p	0	0	1	1	0	0	SPATA22	spermatogenesis associated 22
hsa-miR-491-3p	1	0	1	1	1	1	RGS10	regulator of G-protein signaling 10
hsa-miR-491-3p	1	0	1	0	1	1	WIPF2	WAS/WASL interacting protein family, member 2
hsa-miR-491-3p	1	0	1	1	1	1	LARP4	La ribonucleoprotein domain family, member 4
hsa-miR-491-3p	1	0	1	1	1	1	NTRK2	neurotrophic tyrosine kinase, receptor, type 2
hsa-miR-491-3p	0	0	1	1	0	0	CNKSR2	connector enhancer of kinase suppressor of Ras 2
hsa-miR-491-3p	1	0	1	1	1	1	SLC35A4	solute carrier family 35, member A4
hsa-miR-491-3p	1	0	1	0	1	1	PPP1R12A	protein phosphatase 1, regulatory subunit 12A
hsa-miR-491-3p	1	0	1	1	1	1	WAPAL	wings apart-like homolog (Drosophila)
hsa-miR-491-3p	0	0	1	1	1	1	CHODL	chondrolectin
hsa-miR-491-3p	1	0	1	1	1	1	GPR64	G protein-coupled receptor 64
hsa-miR-491-3p	0	0	1	1	1	1	RANBP17	RAN binding protein 17
hsa-miR-491-3p	1	0	1	1	1	1	PNISR	PNN-interacting serine/arginine-rich protein
hsa-miR-491-3p	0	0	1	1	1	1	SLC25A13	solute carrier family 25 (aspartate/glutamate carrier), member 13
hsa-miR-491-3p	1	0	1	1	1	1	ARL4C	ADP-ribosylation factor-like 4C
hsa-miR-491-3p	0	0	1	1	1	1	ESRP1	epithelial splicing regulatory protein 1
hsa-miR-491-3p	1	0	1	1	1	1	AKAP2	A kinase (PRKA) anchor protein 2
hsa-miR-491-3p	0	0	1	0	1	1	TRMT10A	tRNA methyltransferase 10 homolog A (S. cerevisiae)
hsa-miR-491-3p	0	0	1	0	0	0	TUG1	taurine upregulated 1 (non-protein coding)
hsa-miR-491-3p	0	0	1	1	1	1	OLFM4	olfactomedin 4
hsa-miR-491-3p	0	0	1	1	1	1	STOX2	storkhead box 2
hsa-miR-491-3p	1	0	1	1	1	1	RIC8B	resistance to inhibitors of cholinesterase 8 homolog B (C. elegans)
hsa-miR-491-3p	1	0	1	1	1	1	PTBP3	polypyrimidine tract binding protein 3
hsa-miR-491-3p	1	0	1	1	1	1	ACER3	alkaline ceramidase 3
hsa-miR-491-3p	0	0	1	1	1	1	C5orf42	chromosome 5 open reading frame 42
hsa-miR-491-3p	1	0	1	1	1	1	PHF20L1	PHD finger protein 20-like 1
hsa-miR-491-3p	1	0	1	1	1	1	BAZ2A	bromodomain adjacent to zinc finger domain, 2A
hsa-miR-491-3p	1	0	1	1	1	1	DERL1	derlin 1
hsa-miR-491-3p	0	0	1	1	1	1	NSUN7	NOP2/Sun domain family, member 7
hsa-miR-491-3p	1	0	1	1	1	1	TNRC6A	trinucleotide repeat containing 6A
hsa-miR-491-3p	1	0	1	1	1	1	NAA30	N(alpha)-acetyltransferase 30, NatC catalytic subunit
hsa-miR-491-3p	0	0	1	0	1	1	FLJ22763	uncharacterized LOC401081
hsa-miR-491-3p	0	0	1	1	0	0	NUDT7	nudix (nucleoside diphosphate linked moiety X)-type motif 7
hsa-miR-491-3p	0	0	1	1	1	1	GTF2H1	general transcription factor IIH, polypeptide 1, 62kDa
hsa-miR-491-3p	0	0	1	0	0	0	LOC729852	uncharacterized LOC729852
hsa-miR-491-3p	0	0	1	1	1	1	GPBP1L1	GC-rich promoter binding protein 1-like 1
hsa-miR-491-3p	1	0	1	1	1	1	SEC63	SEC63 homolog (S. cerevisiae)
hsa-miR-491-3p	0	0	1	1	1	1	KDM2B	lysine (K)-specific demethylase 2B
hsa-miR-491-3p	0	0	1	1	1	1	CHD1L	chromodomain helicase DNA binding protein 1-like
hsa-miR-491-3p	1	0	1	1	1	1	GPD2	glycerol-3-phosphate dehydrogenase 2 (mitochondrial)
hsa-miR-491-3p	0	0	1	1	1	1	IGBP1	immunoglobulin (CD79A) binding protein 1
hsa-miR-491-3p	1	0	1	1	1	1	ARHGAP36	Rho GTPase activating protein 36
hsa-miR-491-3p	0	0	1	0	0	0	CHST9-AS1	CHST9 antisense RNA 1
hsa-miR-491-3p	1	0	1	1	1	1	PPM1L	protein phosphatase, Mg2+/Mn2+ dependent, 1L
hsa-miR-491-3p	0	0	1	1	1	1	TBC1D30	TBC1 domain family, member 30
hsa-miR-491-3p	1	0	1	1	1	1	SULF1	sulfatase 1
hsa-miR-491-3p	1	0	1	1	1	1	GULP1	GULP, engulfment adaptor PTB domain containing 1
hsa-miR-491-3p	0	0	1	0	0	0	LOC157273	uncharacterized LOC157273
hsa-miR-491-3p	1	0	1	1	1	1	DIXDC1	DIX domain containing 1
hsa-miR-491-3p	1	0	1	1	1	1	MAP3K7	mitogen-activated protein kinase kinase kinase 7
hsa-miR-491-3p	1	0	1	0	1	1	RAB1A	RAB1A, member RAS oncogene family
hsa-miR-491-3p	1	0	1	1	1	1	ZNF664	zinc finger protein 664
hsa-miR-491-3p	0	0	1	1	1	1	ANKRD36B	ankyrin repeat domain 36B
hsa-miR-491-3p	1	0	1	1	0	0	SLC26A6	solute carrier family 26, member 6
hsa-miR-491-3p	0	0	1	0	1	1	FAM70A	family with sequence similarity 70, member A
hsa-miR-491-3p	1	0	1	1	1	1	SORBS2	sorbin and SH3 domain containing 2
hsa-miR-491-3p	0	0	1	0	0	0	LOC255187	hCG1980447
hsa-miR-491-3p	0	0	1	1	0	0	HECTD3	HECT domain containing E3 ubiquitin protein ligase 3
hsa-miR-491-3p	1	0	1	1	1	1	TPM3	tropomyosin 3
hsa-miR-491-3p	1	0	1	1	1	1	MLLT6	myeloid/lymphoid or mixed-lineage leukemia (trithorax homolog, Drosophila); translocated to, 6
hsa-miR-491-3p	0	0	1	0	0	0	FLJ32742	uncharacterized locus FLJ32742
hsa-miR-491-3p	1	0	1	1	1	1	C6orf89	chromosome 6 open reading frame 89
hsa-miR-491-3p	1	0	1	1	1	1	SIRT1	sirtuin 1
hsa-miR-491-3p	1	0	1	1	1	1	UXS1	UDP-glucuronate decarboxylase 1
hsa-miR-491-3p	0	0	1	1	1	1	TFPI2	tissue factor pathway inhibitor 2
hsa-miR-491-3p	0	0	1	0	1	1	TMSB15B	thymosin beta 15B
hsa-miR-491-3p	0	0	1	1	1	1	DYNC1I1	dynein, cytoplasmic 1, intermediate chain 1
hsa-miR-491-3p	1	0	1	1	1	1	FRY	furry homolog (Drosophila)
hsa-miR-491-3p	0	0	1	0	0	0	LOC440910	uncharacterized LOC440910
hsa-miR-491-3p	1	0	1	1	1	1	GNG2	guanine nucleotide binding protein (G protein), gamma 2
hsa-miR-491-3p	0	0	1	0	0	0	CXXC1P1	CXXC finger protein 1 pseudogene 1
hsa-miR-491-3p	0	0	1	1	1	1	SPOCK1	sparc/osteonectin, cwcv and kazal-like domains proteoglycan (testican) 1
hsa-miR-491-3p	0	0	1	0	0	0	ZNF806	zinc finger protein 806
hsa-miR-491-3p	1	0	1	0	1	1	NCOA7	nuclear receptor coactivator 7
hsa-miR-491-3p	1	0	1	1	1	1	KANSL1	KAT8 regulatory NSL complex subunit 1
hsa-miR-491-3p	1	0	1	1	1	1	ARHGEF7	Rho guanine nucleotide exchange factor (GEF) 7
hsa-miR-491-3p	0	0	1	1	1	1	MOBP	myelin-associated oligodendrocyte basic protein
hsa-miR-491-3p	1	0	1	0	1	1	UVRAG	UV radiation resistance associated gene
hsa-miR-491-3p	0	0	1	1	1	1	AQP3	aquaporin 3 (Gill blood group)
hsa-miR-491-3p	1	0	1	1	1	1	CNEP1R1	CTD nuclear envelope phosphatase 1 regulatory subunit 1
hsa-miR-491-3p	0	0	1	1	1	1	CDK5RAP1	CDK5 regulatory subunit associated protein 1
hsa-miR-491-3p	1	0	1	0	1	1	CLIC4	chloride intracellular channel 4
hsa-miR-491-3p	0	0	1	0	1	1	FLJ39080	uncharacterized LOC441355
hsa-miR-491-3p	1	0	1	0	1	1	KBTBD8	kelch repeat and BTB (POZ) domain containing 8
hsa-miR-491-3p	1	0	1	1	1	1	CDV3	CDV3 homolog (mouse)
hsa-miR-491-3p	1	0	1	0	1	1	AGFG1	ArfGAP with FG repeats 1
hsa-miR-491-3p	0	0	1	1	1	1	FAM9B	family with sequence similarity 9, member B
hsa-miR-491-3p	1	0	1	1	1	1	IGSF11	immunoglobulin superfamily, member 11
hsa-miR-491-3p	1	0	1	1	1	1	HOOK1	hook homolog 1 (Drosophila)
hsa-miR-491-3p	1	0	1	1	1	1	PIGA	phosphatidylinositol glycan anchor biosynthesis, class A
hsa-miR-491-3p	0	0	1	1	1	1	FAM76A	family with sequence similarity 76, member A
hsa-miR-491-3p	0	0	1	1	1	1	CPXCR1	CPX chromosome region, candidate 1
hsa-miR-491-3p	0	0	1	1	0	0	CT45A4	cancer/testis antigen family 45, member A4
hsa-miR-491-3p	0	0	1	1	1	1	SLFN13	schlafen family member 13
hsa-miR-491-3p	0	0	1	1	0	0	MARS	methionyl-tRNA synthetase
hsa-miR-491-3p	0	0	1	0	1	1	PATE4	prostate and testis expressed 4
hsa-miR-491-3p	1	0	1	1	1	1	KALRN	kalirin, RhoGEF kinase
hsa-miR-491-3p	1	0	1	1	1	1	MDGA2	MAM domain containing glycosylphosphatidylinositol anchor 2
hsa-miR-491-3p	1	0	1	1	1	1	EGLN3	egl nine homolog 3 (C. elegans)
hsa-miR-491-3p	0	0	1	1	1	1	FAM19A2	family with sequence similarity 19 (chemokine (C-C motif)-like), member A2
hsa-miR-491-3p	0	0	1	0	1	1	CWC22	CWC22 spliceosome-associated protein homolog (S. cerevisiae)
hsa-miR-491-3p	1	0	1	1	1	1	FAM219A	family with sequence similarity 219, member A
hsa-miR-491-3p	0	0	1	0	0	0	LOC285043	uncharacterized LOC285043
hsa-miR-491-3p	1	0	1	0	0	0	GPR137C	G protein-coupled receptor 137C
hsa-miR-491-3p	1	0	1	1	1	1	GJC1	gap junction protein, gamma 1, 45kDa
hsa-miR-491-3p	1	0	1	1	1	1	FAM122B	family with sequence similarity 122B
hsa-miR-491-3p	0	0	1	1	1	1	IDS	iduronate 2-sulfatase
hsa-miR-491-3p	0	0	1	0	0	0	LOC728716	uncharacterized LOC728716
hsa-miR-491-3p	1	0	1	1	1	1	UBA2	ubiquitin-like modifier activating enzyme 2
hsa-miR-491-3p	0	0	1	1	1	1	ATPBD4	ATP binding domain 4
hsa-miR-491-3p	1	0	1	1	1	1	SEPHS1	selenophosphate synthetase 1
hsa-miR-491-3p	1	0	1	1	0	0	GXYLT1	glucoside xylosyltransferase 1
hsa-miR-491-3p	1	0	1	1	1	1	METAP2	methionyl aminopeptidase 2
hsa-miR-491-3p	0	0	1	1	1	1	CTPS2	CTP synthase 2
hsa-miR-491-3p	0	0	1	1	1	1	MKX	mohawk homeobox
hsa-miR-491-3p	0	0	1	1	1	1	RBM46	RNA binding motif protein 46
hsa-miR-491-3p	1	0	1	1	1	1	CPNE2	copine II
hsa-miR-491-3p	1	0	1	1	1	1	LIN9	lin-9 homolog (C. elegans)
hsa-miR-491-3p	1	0	1	1	0	0	SMCHD1	structural maintenance of chromosomes flexible hinge domain containing 1
hsa-miR-491-3p	1	0	1	1	1	1	SACM1L	SAC1 suppressor of actin mutations 1-like (yeast)
hsa-miR-491-3p	0	0	1	1	1	1	SPICE1	spindle and centriole associated protein 1
hsa-miR-491-3p	1	0	1	1	1	1	CLIP1	CAP-GLY domain containing linker protein 1
hsa-miR-491-3p	1	0	1	1	1	1	EIF4E3	eukaryotic translation initiation factor 4E family member 3
hsa-miR-491-3p	1	0	1	1	1	1	CTNNA2	catenin (cadherin-associated protein), alpha 2
hsa-miR-491-3p	1	0	1	1	0	0	PTPN5	protein tyrosine phosphatase, non-receptor type 5 (striatum-enriched)
hsa-miR-491-3p	0	0	1	0	1	1	NPHP4	nephronophthisis 4
hsa-miR-491-3p	1	0	1	1	1	1	SLC26A9	solute carrier family 26, member 9
hsa-miR-491-3p	1	0	1	0	1	1	FNDC3B	fibronectin type III domain containing 3B
hsa-miR-491-3p	1	0	1	0	1	1	CAPRIN1	cell cycle associated protein 1
hsa-miR-491-3p	0	0	1	0	0	0	LRRC9	leucine rich repeat containing 9
hsa-miR-491-3p	1	0	1	1	1	1	SLC12A6	solute carrier family 12 (potassium/chloride transporters), member 6
hsa-miR-491-3p	0	0	1	1	1	1	CD160	CD160 molecule
hsa-miR-491-3p	1	0	1	1	1	1	BCAT1	branched chain amino-acid transaminase 1, cytosolic
hsa-miR-491-3p	1	0	1	1	1	1	PUS7	pseudouridylate synthase 7 homolog (S. cerevisiae)
hsa-miR-491-3p	0	0	1	1	1	1	SHROOM3	shroom family member 3
hsa-miR-491-3p	0	0	1	0	0	0	IDO2	indoleamine 2,3-dioxygenase 2
hsa-miR-491-3p	0	0	1	0	0	0	LOC100129940	uncharacterized LOC100129940
hsa-miR-491-3p	0	0	1	0	0	0	EMBP1	embigin pseudogene 1
hsa-miR-491-3p	0	0	1	1	1	1	G3BP1	GTPase activating protein (SH3 domain) binding protein 1
hsa-miR-491-3p	1	0	1	0	1	1	GPC6	glypican 6
hsa-miR-491-3p	1	0	1	0	1	1	ESRRG	estrogen-related receptor gamma
hsa-miR-491-3p	1	0	1	1	1	1	RNF111	ring finger protein 111
hsa-miR-491-3p	0	0	1	1	1	1	PHF12	PHD finger protein 12
hsa-miR-491-3p	0	0	1	1	1	1	XRN2	5'-3' exoribonuclease 2
hsa-miR-491-3p	1	0	1	1	1	1	TAP2	transporter 2, ATP-binding cassette, sub-family B (MDR/TAP)
hsa-miR-491-3p	0	0	1	1	1	1	CRISP3	cysteine-rich secretory protein 3
hsa-miR-491-3p	1	0	1	1	1	1	GATA6	GATA binding protein 6
hsa-miR-491-3p	0	0	1	1	1	1	C5orf28	chromosome 5 open reading frame 28
hsa-miR-491-3p	1	0	1	1	1	1	TBC1D15	TBC1 domain family, member 15
hsa-miR-491-3p	1	0	1	1	1	1	CAMK2G	calcium/calmodulin-dependent protein kinase II gamma
hsa-miR-491-3p	0	0	1	1	0	0	UFD1L	ubiquitin fusion degradation 1 like (yeast)
hsa-miR-491-3p	0	0	1	1	0	0	HSPB11	heat shock protein family B (small), member 11
hsa-miR-491-3p	1	0	1	1	1	1	NCOA1	nuclear receptor coactivator 1
hsa-miR-491-3p	1	0	1	1	1	1	NOVA1	neuro-oncological ventral antigen 1
hsa-miR-491-3p	1	0	1	1	1	1	RIF1	RAP1 interacting factor homolog (yeast)
hsa-miR-491-3p	0	0	1	0	0	0	ANKRD34C	ankyrin repeat domain 34C
hsa-miR-491-3p	1	0	1	1	1	1	ARF6	ADP-ribosylation factor 6
hsa-miR-491-3p	0	0	1	1	1	1	ARIH1	ariadne homolog, ubiquitin-conjugating enzyme E2 binding protein, 1 (Drosophila)
hsa-miR-491-3p	0	0	1	1	1	1	RHOT1	ras homolog family member T1
hsa-miR-491-3p	1	0	1	1	1	1	NBEA	neurobeachin
hsa-miR-491-3p	1	0	1	1	1	1	KIAA1033	KIAA1033
hsa-miR-491-3p	0	0	1	1	0	0	DOPEY1	dopey family member 1
hsa-miR-491-3p	0	0	1	1	1	1	SLC30A10	solute carrier family 30, member 10
hsa-miR-491-3p	0	0	1	0	0	0	RPL23AP82	ribosomal protein L23a pseudogene 82
hsa-miR-491-3p	1	0	1	1	1	1	USP45	ubiquitin specific peptidase 45
hsa-miR-491-3p	0	0	1	1	1	1	COBL	cordon-bleu homolog (mouse)
hsa-miR-491-3p	1	0	1	1	1	1	SLC30A8	solute carrier family 30 (zinc transporter), member 8
hsa-miR-491-3p	1	0	1	1	1	1	YTHDF3	YTH domain family, member 3
hsa-miR-491-3p	0	0	1	0	0	0	ZNF720	zinc finger protein 720
hsa-miR-491-3p	0	0	1	1	0	0	LETM2	leucine zipper-EF-hand containing transmembrane protein 2
hsa-miR-491-3p	1	0	1	1	0	0	USP24	ubiquitin specific peptidase 24
hsa-miR-491-3p	1	0	1	0	1	1	MPP5	membrane protein, palmitoylated 5 (MAGUK p55 subfamily member 5)
hsa-miR-491-3p	1	0	1	1	0	0	PTAR1	protein prenyltransferase alpha subunit repeat containing 1
hsa-miR-491-3p	1	0	1	1	1	1	TMEM182	transmembrane protein 182
hsa-miR-491-3p	0	0	1	1	1	1	USPL1	ubiquitin specific peptidase like 1
hsa-miR-491-3p	0	0	1	1	1	1	DAZ4	deleted in azoospermia 4
hsa-miR-491-3p	1	0	1	0	1	1	GPCPD1	glycerophosphocholine phosphodiesterase GDE1 homolog (S. cerevisiae)
hsa-miR-491-3p	0	0	1	1	1	1	ZMYM6	zinc finger, MYM-type 6
hsa-miR-491-3p	1	0	1	0	1	1	MEF2C	myocyte enhancer factor 2C
hsa-miR-491-3p	1	0	1	1	1	1	BPTF	bromodomain PHD finger transcription factor
hsa-miR-491-3p	1	0	1	1	0	0	KIAA1109	KIAA1109
hsa-miR-491-3p	0	0	1	0	0	0	EPHA1-AS1	EPHA1 antisense RNA 1
hsa-miR-491-3p	0	0	1	1	1	1	KIAA1841	KIAA1841
hsa-miR-491-3p	0	0	1	1	1	1	CAND1	cullin-associated and neddylation-dissociated 1
hsa-miR-491-3p	1	0	1	1	1	1	ANKRD49	ankyrin repeat domain 49
hsa-miR-491-3p	1	0	1	0	1	1	JAZF1	JAZF zinc finger 1
hsa-miR-491-3p	1	0	1	1	1	1	RICTOR	RPTOR independent companion of MTOR, complex 2
hsa-miR-491-3p	1	0	1	1	1	1	SET	SET nuclear oncogene
hsa-miR-491-3p	1	0	1	1	1	1	AP1AR	adaptor-related protein complex 1 associated regulatory protein
hsa-miR-491-3p	1	0	1	1	0	0	LRRC58	leucine rich repeat containing 58
hsa-miR-491-3p	1	0	1	1	1	1	TSHZ3	teashirt zinc finger homeobox 3
hsa-miR-491-3p	0	0	1	1	1	1	AMOTL1	angiomotin like 1
hsa-miR-491-3p	1	0	1	1	1	1	PPP3CA	protein phosphatase 3, catalytic subunit, alpha isozyme
hsa-miR-491-3p	1	0	1	1	1	1	RNF38	ring finger protein 38
hsa-miR-491-3p	0	0	1	1	1	1	ALS2CR8	amyotrophic lateral sclerosis 2 (juvenile) chromosome region, candidate 8
hsa-miR-491-3p	1	0	1	0	1	1	BDNF	brain-derived neurotrophic factor
hsa-miR-491-3p	0	0	1	0	0	0	GRIK1-AS1	GRIK1 antisense RNA 1
hsa-miR-491-3p	0	0	1	1	1	1	CEP41	centrosomal protein 41kDa
hsa-miR-491-3p	0	0	1	1	1	1	CRISP2	cysteine-rich secretory protein 2
hsa-miR-491-3p	0	0	1	1	1	1	MFAP5	microfibrillar associated protein 5
hsa-miR-491-3p	0	0	1	0	0	0	ZNFX1-AS1	ZNFX1 antisense RNA 1
hsa-miR-491-3p	0	0	1	1	1	1	IL20	interleukin 20
hsa-miR-491-3p	0	0	1	1	1	1	GPR114	G protein-coupled receptor 114
hsa-miR-491-3p	1	0	1	0	1	1	ST6GALNAC3	ST6 (alpha-N-acetyl-neuraminyl-2,3-beta-galactosyl-1,3)-N-acetylgalactosaminide alpha-2,6-sialyltransferase 3
hsa-miR-491-3p	1	0	1	1	1	1	ECT2	epithelial cell transforming sequence 2 oncogene
hsa-miR-491-3p	1	0	1	1	1	1	SP3	Sp3 transcription factor
hsa-miR-491-3p	1	0	1	0	1	1	LRAT	lecithin retinol acyltransferase (phosphatidylcholine--retinol O-acyltransferase)
hsa-miR-491-3p	0	0	1	1	1	1	KANK2	KN motif and ankyrin repeat domains 2
hsa-miR-491-3p	1	0	1	1	1	1	PLCH1	phospholipase C, eta 1
hsa-miR-491-3p	1	0	1	1	1	1	NTNG1	netrin G1
hsa-miR-491-3p	1	0	1	1	1	1	QKI	QKI, KH domain containing, RNA binding
hsa-miR-491-3p	1	0	1	1	1	1	CD109	CD109 molecule
hsa-miR-491-3p	1	0	1	1	1	1	PCDH11X	protocadherin 11 X-linked
hsa-miR-491-3p	0	0	1	1	0	0	EWSR1	Ewing sarcoma breakpoint region 1
hsa-miR-491-3p	1	0	1	0	1	1	FAM46A	family with sequence similarity 46, member A
hsa-miR-491-3p	1	0	1	1	1	1	CPSF6	cleavage and polyadenylation specific factor 6, 68kDa
hsa-miR-491-3p	0	0	1	1	1	1	PTDSS1	phosphatidylserine synthase 1
hsa-miR-491-3p	0	0	1	1	1	1	RLIM	ring finger protein, LIM domain interacting
hsa-miR-491-3p	0	0	1	1	1	1	EMC4	ER membrane protein complex subunit 4
hsa-miR-491-3p	0	0	1	1	1	1	RAB7L1	RAB7, member RAS oncogene family-like 1
hsa-miR-491-3p	1	0	1	1	1	1	RIMS3	regulating synaptic membrane exocytosis 3
hsa-miR-491-3p	1	0	1	0	1	1	DCAF10	DDB1 and CUL4 associated factor 10
hsa-miR-491-3p	1	0	1	1	1	1	SPRY2	sprouty homolog 2 (Drosophila)
hsa-miR-491-3p	1	0	1	1	1	1	SMO	smoothened, frizzled family receptor
hsa-miR-491-3p	1	0	1	0	1	1	CGGBP1	CGG triplet repeat binding protein 1
hsa-miR-491-3p	0	0	1	0	0	0	MGC13053	uncharacterized MGC13053
hsa-miR-491-3p	1	0	1	1	1	1	U2SURP	U2 snRNP-associated SURP domain containing
hsa-miR-491-3p	1	0	1	0	1	1	VAMP4	vesicle-associated membrane protein 4
hsa-miR-491-3p	0	0	1	1	1	1	ACPP	acid phosphatase, prostate
hsa-miR-491-3p	1	0	1	1	1	1	TRIM39	tripartite motif containing 39
hsa-miR-491-3p	1	0	1	1	1	1	LMBR1L	limb region 1 homolog (mouse)-like
hsa-miR-491-3p	0	0	1	1	0	0	PRR11	proline rich 11
hsa-miR-491-3p	0	0	1	1	1	1	TMEM30A	transmembrane protein 30A
hsa-miR-491-3p	0	0	1	0	0	0	ATXN7L3B	ataxin 7-like 3B
hsa-miR-491-3p	0	0	1	1	0	0	SETMAR	SET domain and mariner transposase fusion gene
hsa-miR-491-3p	0	0	1	1	1	1	GNL3L	guanine nucleotide binding protein-like 3 (nucleolar)-like
hsa-miR-491-3p	0	0	1	1	0	0	WISP3	WNT1 inducible signaling pathway protein 3
hsa-miR-491-3p	1	0	1	1	1	1	IDH1	isocitrate dehydrogenase 1 (NADP+), soluble
hsa-miR-491-3p	0	0	1	1	1	1	PTK7	PTK7 protein tyrosine kinase 7
hsa-miR-491-3p	0	0	1	0	0	0	KLHL15	kelch-like 15 (Drosophila)
hsa-miR-491-3p	1	0	1	1	1	1	ZBTB38	zinc finger and BTB domain containing 38
hsa-miR-491-3p	1	0	1	1	1	1	ZNF512	zinc finger protein 512
hsa-miR-491-3p	1	0	1	0	1	1	NR1D2	nuclear receptor subfamily 1, group D, member 2
hsa-miR-491-3p	1	0	1	1	1	1	ASH2L	ash2 (absent, small, or homeotic)-like (Drosophila)
hsa-miR-491-3p	1	0	1	1	1	1	FAM176A	family with sequence similarity 176, member A
hsa-miR-491-3p	0	0	1	1	0	0	ZDHHC6	zinc finger, DHHC-type containing 6
hsa-miR-491-3p	0	0	1	1	1	1	PARP9	poly (ADP-ribose) polymerase family, member 9
hsa-miR-491-3p	0	0	1	1	1	1	SLC17A3	solute carrier family 17 (sodium phosphate), member 3
hsa-miR-491-3p	1	0	1	1	1	1	SCML4	sex comb on midleg-like 4 (Drosophila)
hsa-miR-491-3p	0	0	1	1	0	0	MORN1	MORN repeat containing 1
hsa-miR-491-3p	0	0	1	1	1	1	C10orf88	chromosome 10 open reading frame 88
hsa-miR-491-3p	0	0	1	1	1	1	CDC42SE2	CDC42 small effector 2
hsa-miR-491-3p	1	0	1	1	1	1	SPOCK2	sparc/osteonectin, cwcv and kazal-like domains proteoglycan (testican) 2
hsa-miR-491-3p	1	0	1	0	1	1	CDK19	cyclin-dependent kinase 19
hsa-miR-491-3p	1	0	1	1	1	1	FAM131A	family with sequence similarity 131, member A
hsa-miR-491-3p	0	0	1	1	1	1	MAP2	microtubule-associated protein 2
hsa-miR-491-3p	0	0	1	1	1	1	RHBDD1	rhomboid domain containing 1
hsa-miR-491-3p	0	0	1	1	1	1	ZNF589	zinc finger protein 589
hsa-miR-491-3p	0	0	1	0	1	1	PAPOLG	poly(A) polymerase gamma
hsa-miR-491-3p	0	0	1	1	1	1	LRMP	lymphoid-restricted membrane protein
hsa-miR-491-3p	1	0	1	1	1	1	TAF15	TAF15 RNA polymerase II, TATA box binding protein (TBP)-associated factor, 68kDa
hsa-miR-491-3p	1	0	1	1	1	1	ELAVL2	ELAV (embryonic lethal, abnormal vision, Drosophila)-like 2 (Hu antigen B)
hsa-miR-491-3p	1	0	1	1	1	1	ZNF518A	zinc finger protein 518A
hsa-miR-491-3p	0	0	1	1	0	0	C7orf57	chromosome 7 open reading frame 57
hsa-miR-491-3p	1	0	1	1	1	1	RCOR3	REST corepressor 3
hsa-miR-491-3p	0	0	1	1	1	1	CEPT1	choline/ethanolamine phosphotransferase 1
hsa-miR-491-3p	0	0	1	1	1	1	CDADC1	cytidine and dCMP deaminase domain containing 1
hsa-miR-491-3p	0	0	1	1	1	1	IL20RB	interleukin 20 receptor beta
hsa-miR-491-3p	1	0	1	1	1	1	HMGCR	3-hydroxy-3-methylglutaryl-CoA reductase
hsa-miR-491-3p	1	0	1	0	1	1	RNF144A	ring finger protein 144A
hsa-miR-491-3p	0	0	1	1	1	1	SLC39A12	solute carrier family 39 (zinc transporter), member 12
hsa-miR-491-3p	1	0	1	1	1	1	CTDSPL2	CTD (carboxy-terminal domain, RNA polymerase II, polypeptide A) small phosphatase like 2
hsa-miR-491-3p	0	0	1	1	1	1	ARHGAP6	Rho GTPase activating protein 6
hsa-miR-491-3p	0	0	1	1	1	1	TMEM144	transmembrane protein 144
hsa-miR-491-3p	0	0	1	0	0	0	FAM201A	family with sequence similarity 201, member A
hsa-miR-491-3p	1	0	1	1	1	1	HECTD2	HECT domain containing E3 ubiquitin protein ligase 2
hsa-miR-491-3p	1	0	1	0	1	1	CPEB4	cytoplasmic polyadenylation element binding protein 4
hsa-miR-491-3p	1	0	1	1	1	1	BNC2	basonuclin 2
hsa-miR-491-3p	0	0	1	1	1	1	ZNF138	zinc finger protein 138
hsa-miR-491-3p	1	0	1	1	1	1	GALNT1	UDP-N-acetyl-alpha-D-galactosamine:polypeptide N-acetylgalactosaminyltransferase 1 (GalNAc-T1)
hsa-miR-491-3p	1	0	1	0	1	1	ARID2	AT rich interactive domain 2 (ARID, RFX-like)
hsa-miR-491-3p	0	0	1	0	0	0	FLJ36000	uncharacterized FLJ36000
hsa-miR-491-3p	1	0	1	1	1	1	MARCKS	myristoylated alanine-rich protein kinase C substrate
hsa-miR-491-3p	1	0	1	1	1	1	DPP8	dipeptidyl-peptidase 8
hsa-miR-491-3p	0	0	1	1	1	1	AKR1C1	aldo-keto reductase family 1, member C1 (dihydrodiol dehydrogenase 1; 20-alpha (3-alpha)-hydroxysteroid dehydrogenase)
hsa-miR-491-3p	1	0	1	1	1	1	BVES	blood vessel epicardial substance
hsa-miR-491-3p	1	0	1	1	1	1	SOGA2	SOGA family member 2
hsa-miR-491-3p	1	0	1	1	1	1	INTS6	integrator complex subunit 6
hsa-miR-491-3p	0	0	1	0	0	0	LOC339240	keratin 17 pseudogene
hsa-miR-491-3p	1	0	1	1	1	1	UNC13C	unc-13 homolog C (C. elegans)
hsa-miR-491-3p	0	0	1	1	1	1	PCMTD2	protein-L-isoaspartate (D-aspartate) O-methyltransferase domain containing 2
hsa-miR-491-3p	1	0	1	0	1	1	KIAA0430	KIAA0430
hsa-miR-491-3p	0	0	1	1	1	1	VPS35	vacuolar protein sorting 35 homolog (S. cerevisiae)
hsa-miR-491-3p	1	0	1	0	1	1	HSPA12A	heat shock 70kDa protein 12A
hsa-miR-491-3p	1	0	1	0	1	1	TNFAIP3	tumor necrosis factor, alpha-induced protein 3
hsa-miR-491-3p	1	0	1	1	1	1	CLOCK	clock homolog (mouse)
hsa-miR-491-3p	0	0	1	1	1	1	RABGAP1L	RAB GTPase activating protein 1-like
hsa-miR-491-3p	0	0	1	1	0	0	TEX13A	testis expressed 13A
hsa-miR-491-3p	0	0	1	1	1	1	DGKH	diacylglycerol kinase, eta
hsa-miR-491-3p	0	0	1	0	0	0	LOC646168	uncharacterized LOC646168
hsa-miR-491-3p	1	0	1	1	0	0	WNK1	WNK lysine deficient protein kinase 1
hsa-miR-491-3p	1	0	1	0	1	1	PSD3	pleckstrin and Sec7 domain containing 3
hsa-miR-491-3p	0	0	1	1	1	1	NADKD1	NAD kinase domain containing 1
hsa-miR-491-3p	1	0	1	1	1	1	SF3B1	splicing factor 3b, subunit 1, 155kDa
hsa-miR-491-3p	1	0	1	0	1	1	LYPD6	LY6/PLAUR domain containing 6
hsa-miR-491-3p	0	0	1	1	1	1	OLFML2B	olfactomedin-like 2B
hsa-miR-491-3p	1	0	1	0	1	1	KDM2A	lysine (K)-specific demethylase 2A
hsa-miR-491-3p	1	0	1	1	1	1	BRD1	bromodomain containing 1
hsa-miR-491-3p	1	0	1	1	1	1	SMARCE1	SWI/SNF related, matrix associated, actin dependent regulator of chromatin, subfamily e, member 1
hsa-miR-491-3p	0	0	1	0	1	1	ITGA1	integrin, alpha 1
hsa-miR-491-3p	0	0	1	1	0	0	SREBF2	sterol regulatory element binding transcription factor 2
hsa-miR-491-3p	1	0	1	1	1	1	ZFP91	zinc finger protein 91 homolog (mouse)
hsa-miR-491-3p	1	0	1	1	1	1	PCGF5	polycomb group ring finger 5
hsa-miR-491-3p	0	0	1	0	1	1	C17orf51	chromosome 17 open reading frame 51
hsa-miR-491-3p	1	0	1	1	1	1	SOX5	SRY (sex determining region Y)-box 5
hsa-miR-491-3p	1	0	1	1	1	1	PRRG1	proline rich Gla (G-carboxyglutamic acid) 1
hsa-miR-491-3p	0	0	1	1	1	1	GPATCH2	G patch domain containing 2
hsa-miR-491-3p	1	0	1	1	1	1	RANBP9	RAN binding protein 9
hsa-miR-491-3p	0	0	1	1	1	1	STAG1	stromal antigen 1
hsa-miR-491-3p	1	0	1	1	1	1	EIF4G2	eukaryotic translation initiation factor 4 gamma, 2
hsa-miR-491-3p	0	0	1	0	0	0	DPY19L2P1	dpy-19-like 2 pseudogene 1 (C. elegans)
hsa-miR-491-3p	0	0	1	1	1	1	KCTD18	potassium channel tetramerisation domain containing 18
hsa-miR-491-3p	1	0	1	1	1	1	PDCD6IP	programmed cell death 6 interacting protein
hsa-miR-491-3p	1	0	1	1	1	1	SLC26A7	solute carrier family 26, member 7
hsa-miR-491-3p	1	0	1	1	1	1	WNT5A	wingless-type MMTV integration site family, member 5A
hsa-miR-491-3p	1	0	1	0	1	1	AMMECR1L	AMME chromosomal region gene 1-like
hsa-miR-491-3p	1	0	1	1	1	1	GRAMD4	GRAM domain containing 4
hsa-miR-491-3p	1	0	1	1	1	1	ZMYND11	zinc finger, MYND-type containing 11
hsa-miR-491-3p	0	0	1	1	1	1	TMBIM4	transmembrane BAX inhibitor motif containing 4
hsa-miR-491-3p	1	0	1	0	1	1	LRRTM4	leucine rich repeat transmembrane neuronal 4
hsa-miR-491-3p	0	0	1	1	0	0	PPP1R14D	protein phosphatase 1, regulatory (inhibitor) subunit 14D
hsa-miR-491-3p	1	0	1	1	1	1	SLC36A2	solute carrier family 36 (proton/amino acid symporter), member 2
hsa-miR-491-3p	1	0	1	0	1	1	MYBL1	v-myb myeloblastosis viral oncogene homolog (avian)-like 1
hsa-miR-491-3p	1	0	1	0	1	1	CPEB2	cytoplasmic polyadenylation element binding protein 2
hsa-miR-491-3p	0	0	1	1	1	1	CCDC126	coiled-coil domain containing 126
hsa-miR-491-3p	1	0	1	1	1	1	GABRB2	gamma-aminobutyric acid (GABA) A receptor, beta 2
hsa-miR-491-3p	0	0	1	1	0	0	BTBD16	BTB (POZ) domain containing 16
hsa-miR-491-3p	1	0	1	1	1	1	CERS6	ceramide synthase 6
hsa-miR-491-3p	1	0	1	1	1	1	ANO4	anoctamin 4
hsa-miR-491-3p	1	0	1	1	1	1	TET2	tet methylcytosine dioxygenase 2
hsa-miR-491-3p	0	0	1	1	0	0	ASB3	ankyrin repeat and SOCS box containing 3
hsa-miR-491-3p	1	0	1	1	1	1	MARCH6	membrane-associated ring finger (C3HC4) 6, E3 ubiquitin protein ligase
hsa-miR-491-3p	0	0	1	0	0	0	INTS4L1	integrator complex subunit 4-like 1
hsa-miR-491-3p	1	0	1	1	1	1	NR3C2	nuclear receptor subfamily 3, group C, member 2
hsa-miR-491-3p	1	0	1	0	1	1	ROBO1	roundabout, axon guidance receptor, homolog 1 (Drosophila)
hsa-miR-491-3p	0	0	1	1	1	1	FMN2	formin 2
hsa-miR-491-3p	1	0	1	0	1	1	PRDM10	PR domain containing 10
hsa-miR-491-3p	0	0	1	1	1	1	LRCH1	leucine-rich repeats and calponin homology (CH) domain containing 1
hsa-miR-491-3p	0	0	1	0	0	0	EEF1DP3	eukaryotic translation elongation factor 1 delta pseudogene 3
hsa-miR-491-3p	1	0	1	1	1	1	MEGF11	multiple EGF-like-domains 11
hsa-miR-491-3p	1	0	1	1	1	1	ZMYM4	zinc finger, MYM-type 4
hsa-miR-491-3p	1	0	1	1	1	1	CHIC1	cysteine-rich hydrophobic domain 1
hsa-miR-491-3p	0	0	1	1	0	0	TCHH	trichohyalin
hsa-miR-491-3p	1	0	1	1	1	1	FNDC3A	fibronectin type III domain containing 3A
hsa-miR-491-3p	0	0	1	1	0	0	EFCAB11	EF-hand calcium binding domain 11
hsa-miR-491-3p	0	0	1	1	1	1	CNIH	cornichon homolog (Drosophila)
hsa-miR-491-3p	0	0	1	0	0	0	LINC00643	long intergenic non-protein coding RNA 643
hsa-miR-491-3p	1	0	1	1	1	1	BTBD7	BTB (POZ) domain containing 7
hsa-miR-491-3p	1	0	1	1	1	1	LITAF	lipopolysaccharide-induced TNF factor
hsa-miR-491-3p	0	0	1	1	1	1	DNAJB14	DnaJ (Hsp40) homolog, subfamily B, member 14
hsa-miR-491-3p	1	0	1	1	1	1	ATP2B4	ATPase, Ca++ transporting, plasma membrane 4
hsa-miR-491-3p	1	0	1	1	1	1	RBL2	retinoblastoma-like 2 (p130)
hsa-miR-491-3p	1	0	1	1	1	1	RAB7A	RAB7A, member RAS oncogene family
hsa-miR-491-3p	0	0	1	1	1	1	NUP54	nucleoporin 54kDa
hsa-miR-491-3p	1	0	1	1	1	1	FAM184A	family with sequence similarity 184, member A
hsa-miR-491-3p	1	0	1	0	1	1	CLASP2	cytoplasmic linker associated protein 2
hsa-miR-491-3p	1	0	1	1	1	1	SLC35F1	solute carrier family 35, member F1
hsa-miR-491-3p	1	0	1	1	1	1	TGOLN2	trans-golgi network protein 2
hsa-miR-491-3p	1	0	1	1	1	1	NFASC	neurofascin
hsa-miR-491-3p	0	0	1	1	1	1	COL6A3	collagen, type VI, alpha 3
hsa-miR-491-3p	0	0	1	1	1	1	GTF3C2	general transcription factor IIIC, polypeptide 2, beta 110kDa
hsa-miR-491-3p	1	0	1	0	1	1	GALNT4	UDP-N-acetyl-alpha-D-galactosamine:polypeptide N-acetylgalactosaminyltransferase 4 (GalNAc-T4)
hsa-miR-491-3p	1	0	1	1	1	1	PRDM2	PR domain containing 2, with ZNF domain
hsa-miR-491-3p	0	0	1	1	0	0	PRKCQ	protein kinase C, theta
hsa-miR-491-3p	1	0	1	1	1	1	FOXP1	forkhead box P1
hsa-miR-491-3p	1	0	1	1	1	1	VPS26A	vacuolar protein sorting 26 homolog A (S. pombe)
hsa-miR-491-3p	0	0	1	1	1	1	ARMCX3	armadillo repeat containing, X-linked 3
hsa-miR-491-3p	0	0	1	1	1	1	DUSP19	dual specificity phosphatase 19
hsa-miR-491-3p	0	0	1	0	1	1	B3GALTL	beta 1,3-galactosyltransferase-like
hsa-miR-491-3p	0	0	1	1	0	0	ELP3	elongator acetyltransferase complex subunit 3
hsa-miR-491-3p	1	0	1	1	1	1	PPFIA1	protein tyrosine phosphatase, receptor type, f polypeptide (PTPRF), interacting protein (liprin), alpha 1
hsa-miR-491-3p	0	0	1	1	1	1	CCNT2	cyclin T2
hsa-miR-491-3p	0	0	1	1	1	1	ENOSF1	enolase superfamily member 1
hsa-miR-491-3p	1	0	1	1	1	1	NAV1	neuron navigator 1
hsa-miR-491-3p	1	0	1	1	1	1	AZI2	5-azacytidine induced 2
hsa-miR-491-3p	1	0	1	0	1	1	IGF2BP3	insulin-like growth factor 2 mRNA binding protein 3
hsa-miR-491-3p	1	0	1	1	1	1	C5orf24	chromosome 5 open reading frame 24
hsa-miR-491-3p	1	0	1	1	1	1	RDX	radixin
hsa-miR-491-3p	1	0	1	1	1	1	PGAP1	post-GPI attachment to proteins 1
hsa-miR-491-3p	0	0	1	1	1	1	ABCD3	ATP-binding cassette, sub-family D (ALD), member 3
hsa-miR-491-3p	0	0	1	0	0	0	ZNRD1-AS1	ZNRD1 antisense RNA 1
hsa-miR-491-3p	1	0	1	0	1	1	TBL1XR1	transducin (beta)-like 1 X-linked receptor 1
hsa-miR-491-3p	1	0	1	1	1	1	CREB3L2	cAMP responsive element binding protein 3-like 2
hsa-miR-491-3p	1	0	1	0	1	1	TTL	tubulin tyrosine ligase
hsa-miR-491-3p	0	0	1	1	1	1	IPO11	importin 11
hsa-miR-491-3p	1	0	1	1	1	1	HIC2	hypermethylated in cancer 2
hsa-miR-491-3p	1	0	1	0	0	0	PLSCR5	phospholipid scramblase family, member 5
hsa-miR-491-3p	0	0	1	1	1	1	SEC22C	SEC22 vesicle trafficking protein homolog C (S. cerevisiae)
hsa-miR-491-3p	0	0	1	1	0	0	MIF4GD	MIF4G domain containing
hsa-miR-491-3p	1	0	1	0	1	1	BNIP3L	BCL2/adenovirus E1B 19kDa interacting protein 3-like
hsa-miR-491-3p	0	0	1	1	1	1	TASP1	taspase, threonine aspartase, 1
hsa-miR-491-3p	1	0	1	1	1	1	SSR1	signal sequence receptor, alpha
hsa-miR-491-3p	1	0	1	1	1	1	ADM	adrenomedullin
hsa-miR-491-3p	1	0	1	1	1	1	DCN	decorin
hsa-miR-491-3p	1	0	1	0	1	1	RPS6KB1	ribosomal protein S6 kinase, 70kDa, polypeptide 1
hsa-miR-491-3p	0	0	1	1	1	1	PECR	peroxisomal trans-2-enoyl-CoA reductase
hsa-miR-491-3p	0	0	1	1	1	1	MS4A6A	membrane-spanning 4-domains, subfamily A, member 6A
hsa-miR-491-3p	1	0	1	1	1	1	STK38L	serine/threonine kinase 38 like
hsa-miR-491-3p	0	0	1	1	0	0	CD38	CD38 molecule
hsa-miR-491-3p	0	0	1	1	1	1	ATG4A	autophagy related 4A, cysteine peptidase
hsa-miR-491-3p	0	0	1	0	0	0	LOC150568	uncharacterized LOC150568
hsa-miR-491-3p	0	0	1	1	1	1	KLHDC2	kelch domain containing 2
hsa-miR-491-3p	1	0	1	1	1	1	GPR137B	G protein-coupled receptor 137B
hsa-miR-491-3p	0	0	1	1	0	0	TUSC3	tumor suppressor candidate 3
hsa-miR-491-3p	1	0	1	1	1	1	PPP3CB	protein phosphatase 3, catalytic subunit, beta isozyme
hsa-miR-491-3p	1	0	1	1	1	1	SLC39A1	solute carrier family 39 (zinc transporter), member 1
hsa-miR-491-3p	1	0	1	1	1	1	RBBP7	retinoblastoma binding protein 7
hsa-miR-491-3p	1	0	1	1	1	1	NFYB	nuclear transcription factor Y, beta
hsa-miR-491-3p	1	0	1	1	1	1	PDCL	phosducin-like
hsa-miR-491-3p	1	0	1	0	1	1	GIT2	G protein-coupled receptor kinase interacting ArfGAP 2
hsa-miR-491-3p	0	0	1	1	1	1	TBRG1	transforming growth factor beta regulator 1
hsa-miR-491-3p	1	0	1	1	1	1	DNAJA2	DnaJ (Hsp40) homolog, subfamily A, member 2
hsa-miR-491-3p	1	0	1	1	1	1	SRSF2	serine/arginine-rich splicing factor 2
hsa-miR-491-3p	0	0	1	1	1	1	TRNT1	tRNA nucleotidyl transferase, CCA-adding, 1
hsa-miR-491-3p	1	0	1	1	0	0	FOXO3	forkhead box O3
hsa-miR-491-3p	0	0	1	1	1	1	BEX4	brain expressed, X-linked 4
hsa-miR-491-3p	1	0	1	1	1	1	MAN1C1	mannosidase, alpha, class 1C, member 1
hsa-miR-491-3p	1	0	1	1	1	1	LGALSL	lectin, galactoside-binding-like
hsa-miR-491-3p	1	0	1	0	1	1	DNMT3A	DNA (cytosine-5-)-methyltransferase 3 alpha
hsa-miR-491-3p	1	0	1	1	1	1	GABPB2	GA binding protein transcription factor, beta subunit 2
hsa-miR-491-3p	0	0	1	0	0	0	FAM47E	family with sequence similarity 47, member E
hsa-miR-491-3p	1	0	1	1	1	1	HECW2	HECT, C2 and WW domain containing E3 ubiquitin protein ligase 2
hsa-miR-491-3p	1	0	1	1	1	1	KIAA2018	KIAA2018
hsa-miR-491-3p	0	0	1	0	1	1	HDAC9	histone deacetylase 9
hsa-miR-491-3p	0	0	1	1	1	1	ARMCX1	armadillo repeat containing, X-linked 1
hsa-miR-491-3p	1	0	1	1	1	1	SLC39A10	solute carrier family 39 (zinc transporter), member 10
hsa-miR-491-3p	1	0	1	0	1	1	CNTNAP2	contactin associated protein-like 2
hsa-miR-491-3p	1	0	1	0	1	1	ZNF652	zinc finger protein 652
hsa-miR-491-3p	0	0	1	0	1	1	SYNPR	synaptoporin
hsa-miR-491-3p	1	0	1	1	1	1	SP2	Sp2 transcription factor
hsa-miR-491-3p	1	0	1	1	1	1	KCNE3	potassium voltage-gated channel, Isk-related family, member 3
hsa-miR-491-3p	1	0	1	1	0	0	DPY19L1	dpy-19-like 1 (C. elegans)
hsa-miR-491-3p	1	0	1	1	1	1	SLC4A8	solute carrier family 4, sodium bicarbonate cotransporter, member 8
hsa-miR-491-3p	1	0	1	0	0	0	YLPM1	YLP motif containing 1
hsa-miR-491-3p	0	0	1	1	1	1	AKR1C2	aldo-keto reductase family 1, member C2 (dihydrodiol dehydrogenase 2; bile acid binding protein; 3-alpha hydroxysteroid dehydrogenase, type III)
hsa-miR-491-3p	1	0	1	0	1	1	ACVR2A	activin A receptor, type IIA
hsa-miR-491-3p	0	0	1	1	1	1	ERCC8	excision repair cross-complementing rodent repair deficiency, complementation group 8
hsa-miR-491-3p	1	0	1	1	1	1	COL4A4	collagen, type IV, alpha 4
hsa-miR-491-3p	0	0	1	0	1	1	CYP1B1	cytochrome P450, family 1, subfamily B, polypeptide 1
hsa-miR-491-3p	1	0	1	1	1	1	DMD	dystrophin
hsa-miR-491-3p	1	0	1	1	1	1	FBN1	fibrillin 1
hsa-miR-491-3p	1	0	1	1	1	1	GALC	galactosylceramidase
hsa-miR-491-3p	1	0	1	1	1	1	GK	glycerol kinase
hsa-miR-491-3p	1	0	1	1	1	1	MITF	microphthalmia-associated transcription factor
hsa-miR-491-3p	0	0	1	1	1	1	MTM1	myotubularin 1
hsa-miR-491-3p	0	0	1	1	1	1	PAH	phenylalanine hydroxylase
hsa-miR-491-3p	1	0	1	1	1	1	PMP22	peripheral myelin protein 22
hsa-miR-491-3p	1	0	1	1	1	1	PTH	parathyroid hormone
hsa-miR-491-3p	1	0	1	1	1	1	TIMP3	TIMP metallopeptidase inhibitor 3
hsa-miR-491-3p	0	0	1	1	1	1	XDH	xanthine dehydrogenase
hsa-miR-491-3p	0	0	1	1	1	1	CASR	calcium-sensing receptor
hsa-miR-491-3p	1	0	1	0	1	1	CYBB	cytochrome b-245, beta polypeptide
hsa-miR-491-3p	1	0	1	0	1	1	PAFAH1B1	platelet-activating factor acetylhydrolase 1b, regulatory subunit 1 (45kDa)
hsa-miR-491-3p	1	0	1	1	1	1	TEK	TEK tyrosine kinase, endothelial
hsa-miR-491-3p	1	0	1	1	1	1	IL1A	interleukin 1, alpha
hsa-miR-491-3p	0	0	1	1	1	1	AGTR1	angiotensin II receptor, type 1
hsa-miR-491-3p	0	0	1	1	1	1	ALDH1A1	aldehyde dehydrogenase 1 family, member A1
hsa-miR-491-3p	1	0	1	0	1	1	CACNA1E	calcium channel, voltage-dependent, R type, alpha 1E subunit
hsa-miR-491-3p	1	0	1	1	1	1	DIO2	deiodinase, iodothyronine, type II
hsa-miR-491-3p	1	0	1	0	1	1	GABRA4	gamma-aminobutyric acid (GABA) A receptor, alpha 4
hsa-miR-491-3p	1	0	1	1	1	1	GABRB3	gamma-aminobutyric acid (GABA) A receptor, beta 3
hsa-miR-491-3p	1	0	1	1	1	1	GRIA4	glutamate receptor, ionotropic, AMPA 4
hsa-miR-491-3p	1	0	1	1	0	0	GRIN2A	glutamate receptor, ionotropic, N-methyl D-aspartate 2A
hsa-miR-491-3p	1	0	1	1	1	1	GRM5	glutamate receptor, metabotropic 5
hsa-miR-491-3p	1	0	1	1	1	1	PPP3R1	protein phosphatase 3, regulatory subunit B, alpha
hsa-miR-491-3p	1	0	1	1	1	1	PTGFR	prostaglandin F receptor (FP)
hsa-miR-491-3p	1	0	1	0	1	1	SMAD5	SMAD family member 5
hsa-miR-491-3p	1	0	1	0	1	1	SPOPL	speckle-type POZ protein-like
hsa-miR-491-3p	1	0	1	0	1	1	ARHGEF37	Rho guanine nucleotide exchange factor (GEF) 37
hsa-miR-491-3p	0	0	1	0	1	1	C9orf170	chromosome 9 open reading frame 170
hsa-miR-491-3p	0	0	1	1	1	1	GPM6B	glycoprotein M6B
hsa-miR-491-3p	1	0	1	1	1	1	LCLAT1	lysocardiolipin acyltransferase 1
hsa-miR-491-3p	1	0	1	1	1	1	GATA3	GATA binding protein 3
hsa-miR-491-3p	0	0	1	0	1	1	ZNF705A	zinc finger protein 705A
hsa-miR-491-3p	0	0	1	1	1	1	DBX2	developing brain homeobox 2
hsa-miR-491-3p	1	0	1	1	1	1	EBF3	early B-cell factor 3
hsa-miR-491-3p	0	0	1	1	1	1	SUMO1	SMT3 suppressor of mif two 3 homolog 1 (S. cerevisiae)
hsa-miR-491-3p	1	0	1	1	0	0	RPS6KA1	ribosomal protein S6 kinase, 90kDa, polypeptide 1
hsa-miR-491-3p	0	0	1	0	1	1	C8orf22	chromosome 8 open reading frame 22
hsa-miR-491-3p	1	0	1	1	1	1	SPOP	speckle-type POZ protein
hsa-miR-491-3p	1	0	1	1	1	1	IGSF3	immunoglobulin superfamily, member 3
hsa-miR-491-3p	0	0	1	1	0	0	CT45A5	cancer/testis antigen family 45, member A5
hsa-miR-491-3p	1	0	1	1	1	1	CNOT4	CCR4-NOT transcription complex, subunit 4
hsa-miR-491-3p	1	0	1	0	1	1	C18orf25	chromosome 18 open reading frame 25
hsa-miR-491-3p	1	0	1	1	1	1	RBM33	RNA binding motif protein 33
hsa-miR-491-3p	0	0	1	1	1	1	GCSAM	germinal center-associated, signaling and motility
hsa-miR-491-3p	1	0	1	0	1	1	ERMN	ermin, ERM-like protein
hsa-miR-491-3p	0	0	1	1	1	1	SPIN3	spindlin family, member 3
hsa-miR-491-3p	1	0	1	0	1	1	ZC3H12B	zinc finger CCCH-type containing 12B
hsa-miR-491-3p	1	0	1	0	1	1	MTX3	metaxin 3
hsa-miR-491-3p	1	0	1	1	1	1	BCL2L15	BCL2-like 15
hsa-miR-491-3p	1	0	1	1	1	1	PCGF6	polycomb group ring finger 6
hsa-miR-491-3p	1	0	1	1	1	1	BTBD1	BTB (POZ) domain containing 1
hsa-miR-491-3p	0	0	1	1	1	1	MS4A13	membrane-spanning 4-domains, subfamily A, member 13
hsa-miR-491-3p	0	0	1	1	0	0	C9orf117	chromosome 9 open reading frame 117
hsa-miR-491-3p	1	0	1	1	1	1	SLC25A53	solute carrier family 25, member 53
hsa-miR-491-3p	1	0	1	1	1	1	FXR1	fragile X mental retardation, autosomal homolog 1
hsa-miR-491-3p	1	0	1	1	1	1	TRNP1	TMF1-regulated nuclear protein 1
hsa-miR-491-3p	1	0	1	1	1	1	PHF6	PHD finger protein 6
hsa-miR-491-3p	1	0	1	0	1	1	GOPC	golgi-associated PDZ and coiled-coil motif containing
hsa-miR-491-3p	0	0	1	1	0	0	CT45A1	cancer/testis antigen family 45, member A1
hsa-miR-491-3p	0	0	1	1	0	0	CT45A6	cancer/testis antigen family 45, member A6
hsa-miR-491-3p	0	0	1	1	1	1	RAB28	RAB28, member RAS oncogene family
hsa-miR-491-3p	1	0	1	1	1	1	VMA21	VMA21 vacuolar H+-ATPase homolog (S. cerevisiae)
hsa-miR-491-3p	1	0	1	1	1	1	SERBP1	SERPINE1 mRNA binding protein 1
hsa-miR-491-3p	1	0	1	1	1	1	ABCC5	ATP-binding cassette, sub-family C (CFTR/MRP), member 5
hsa-miR-491-3p	1	0	1	1	1	1	CANX	calnexin
hsa-miR-491-3p	1	0	1	1	1	1	FNBP1L	formin binding protein 1-like
hsa-miR-491-3p	1	0	1	1	1	1	KIAA0101	KIAA0101
hsa-miR-491-3p	1	0	1	1	1	1	OPN5	opsin 5
hsa-miR-491-3p	1	0	1	0	1	1	MSRB3	methionine sulfoxide reductase B3
hsa-miR-491-3p	1	0	1	1	1	1	STK24	serine/threonine kinase 24
hsa-miR-491-3p	1	0	1	1	1	1	AMD1	adenosylmethionine decarboxylase 1
hsa-miR-491-3p	1	0	1	1	1	1	SAR1B	SAR1 homolog B (S. cerevisiae)
hsa-miR-491-3p	1	0	1	0	1	1	ARL5A	ADP-ribosylation factor-like 5A
hsa-miR-491-3p	0	0	1	1	1	1	CTLA4	cytotoxic T-lymphocyte-associated protein 4
hsa-miR-491-3p	1	0	1	1	1	1	TCERG1	transcription elongation regulator 1
hsa-miR-491-3p	1	0	1	1	1	1	SCN2A	sodium channel, voltage-gated, type II, alpha subunit
hsa-miR-491-3p	0	0	1	1	1	1	SPOCK3	sparc/osteonectin, cwcv and kazal-like domains proteoglycan (testican) 3
hsa-miR-491-3p	1	0	1	1	1	1	PAPD5	PAP associated domain containing 5
hsa-miR-491-3p	1	0	1	0	1	1	DCUN1D4	DCN1, defective in cullin neddylation 1, domain containing 4 (S. cerevisiae)
hsa-miR-491-3p	0	0	1	1	1	1	ZXDC	ZXD family zinc finger C
hsa-miR-491-3p	1	0	1	1	1	1	HEY1	hairy/enhancer-of-split related with YRPW motif 1
hsa-miR-491-3p	0	0	1	0	1	1	ABCE1	ATP-binding cassette, sub-family E (OABP), member 1
hsa-miR-491-3p	1	0	1	1	1	1	RUFY2	RUN and FYVE domain containing 2
hsa-miR-491-3p	1	0	1	1	1	1	SLC9A6	solute carrier family 9, subfamily A (NHE6, cation proton antiporter 6), member 6
hsa-miR-491-3p	1	0	1	1	1	1	NSL1	NSL1, MIND kinetochore complex component, homolog (S. cerevisiae)
hsa-miR-491-3p	1	0	1	1	1	1	FRS2	fibroblast growth factor receptor substrate 2
hsa-miR-491-3p	1	0	1	1	1	1	CRTC3	CREB regulated transcription coactivator 3
hsa-miR-491-3p	1	0	1	1	1	1	ERBB4	v-erb-a erythroblastic leukemia viral oncogene homolog 4 (avian)
hsa-miR-491-3p	1	0	1	0	1	1	TMEM237	transmembrane protein 237
hsa-miR-491-3p	0	0	1	1	0	0	TCN1	transcobalamin I (vitamin B12 binding protein, R binder family)
hsa-miR-491-3p	1	0	1	1	1	1	QSER1	glutamine and serine rich 1
hsa-miR-491-3p	1	0	1	1	1	1	CDC14B	CDC14 cell division cycle 14 homolog B (S. cerevisiae)
hsa-miR-491-3p	1	0	1	1	1	1	ZNF436	zinc finger protein 436
hsa-miR-491-3p	1	0	1	0	1	1	UBXN2B	UBX domain protein 2B
hsa-miR-491-3p	1	0	1	1	1	1	UBN1	ubinuclein 1
hsa-miR-491-3p	1	0	1	1	1	1	DMP1	dentin matrix acidic phosphoprotein 1
hsa-miR-491-3p	1	0	1	1	1	1	SHANK3	SH3 and multiple ankyrin repeat domains 3
hsa-miR-491-3p	1	0	1	0	1	1	CCDC85A	coiled-coil domain containing 85A
hsa-miR-491-3p	0	0	1	1	1	1	HSF5	heat shock transcription factor family member 5
hsa-miR-491-3p	1	0	1	0	1	1	ODZ3	odz, odd Oz/ten-m homolog 3 (Drosophila)
hsa-miR-491-3p	1	0	1	1	1	1	THOC2	THO complex 2
hsa-miR-491-3p	1	0	1	0	1	1	PDE5A	phosphodiesterase 5A, cGMP-specific
hsa-miR-491-3p	1	0	1	0	1	1	BMPR2	bone morphogenetic protein receptor, type II (serine/threonine kinase)
hsa-miR-491-3p	1	0	1	0	1	1	KLF9	Kruppel-like factor 9
hsa-miR-491-3p	1	0	1	1	1	1	CAMK2D	calcium/calmodulin-dependent protein kinase II delta
hsa-miR-491-3p	1	0	1	0	1	1	CDK6	cyclin-dependent kinase 6
hsa-miR-491-3p	0	0	1	1	1	1	CDKN2C	cyclin-dependent kinase inhibitor 2C (p18, inhibits CDK4)
hsa-miR-491-3p	0	0	1	1	0	0	CLCA1	chloride channel accessory 1
hsa-miR-491-3p	1	0	1	0	1	1	CPD	carboxypeptidase D
hsa-miR-491-3p	0	0	1	0	1	1	DOCK1	dedicator of cytokinesis 1
hsa-miR-491-3p	1	0	1	1	1	1	DYRK1A	dual-specificity tyrosine-(Y)-phosphorylation regulated kinase 1A
hsa-miR-491-3p	1	0	1	1	1	1	S1PR1	sphingosine-1-phosphate receptor 1
hsa-miR-491-3p	1	0	1	1	1	1	EREG	epiregulin
hsa-miR-491-3p	0	0	1	1	0	0	HSPB2	heat shock 27kDa protein 2
hsa-miR-491-3p	1	0	1	1	1	1	ID4	inhibitor of DNA binding 4, dominant negative helix-loop-helix protein
hsa-miR-491-3p	1	0	1	1	1	1	IFIT2	interferon-induced protein with tetratricopeptide repeats 2
hsa-miR-491-3p	1	0	1	1	1	1	ING2	inhibitor of growth family, member 2
hsa-miR-491-3p	1	0	1	1	1	1	TRIM23	tripartite motif containing 23
hsa-miR-491-3p	1	0	1	1	1	1	BAAT	bile acid CoA: amino acid N-acyltransferase (glycine N-choloyltransferase)
hsa-miR-491-3p	1	0	1	1	1	1	BNC1	basonuclin 1
hsa-miR-491-3p	1	0	1	1	1	1	CBFB	core-binding factor, beta subunit
hsa-miR-491-3p	0	0	1	1	1	1	CD1C	CD1c molecule
hsa-miR-491-3p	1	0	1	1	1	1	CDH5	cadherin 5, type 2 (vascular endothelium)
hsa-miR-491-3p	1	0	1	1	1	1	COL4A1	collagen, type IV, alpha 1
hsa-miR-491-3p	1	0	1	0	1	1	COL19A1	collagen, type XIX, alpha 1
hsa-miR-491-3p	1	0	1	1	1	1	DPP4	dipeptidyl-peptidase 4
hsa-miR-491-3p	1	0	1	1	1	1	HBEGF	heparin-binding EGF-like growth factor
hsa-miR-491-3p	1	0	1	1	1	1	DUSP6	dual specificity phosphatase 6
hsa-miR-491-3p	1	0	1	1	1	1	E2F3	E2F transcription factor 3
hsa-miR-491-3p	1	0	1	1	1	1	EGR1	early growth response 1
hsa-miR-491-3p	1	0	1	1	1	1	FGF9	fibroblast growth factor 9 (glia-activating factor)
hsa-miR-491-3p	0	0	1	1	1	1	FLI1	Friend leukemia virus integration 1
hsa-miR-491-3p	1	0	1	1	1	1	FRK	fyn-related kinase
hsa-miR-491-3p	1	0	1	0	1	1	GNAI1	guanine nucleotide binding protein (G protein), alpha inhibiting activity polypeptide 1
hsa-miR-491-3p	0	0	1	1	1	1	GNAQ	guanine nucleotide binding protein (G protein), q polypeptide
hsa-miR-491-3p	1	0	1	1	1	1	HNRNPA2B1	heterogeneous nuclear ribonucleoprotein A2/B1
hsa-miR-491-3p	0	0	1	1	1	1	FOXN2	forkhead box N2
hsa-miR-491-3p	1	0	1	1	1	1	ITGA2	integrin, alpha 2 (CD49B, alpha 2 subunit of VLA-2 receptor)
hsa-miR-491-3p	1	0	1	1	1	1	ITGB8	integrin, beta 8
hsa-miR-491-3p	1	0	1	1	1	1	JAG2	jagged 2
hsa-miR-491-3p	0	0	1	1	1	1	KCNJ15	potassium inwardly-rectifying channel, subfamily J, member 15
hsa-miR-491-3p	0	0	1	1	1	1	KLRC1	killer cell lectin-like receptor subfamily C, member 1
hsa-miR-491-3p	0	0	1	1	1	1	KLRC2	killer cell lectin-like receptor subfamily C, member 2
hsa-miR-491-3p	1	0	1	1	1	1	KPNA4	karyopherin alpha 4 (importin alpha 3)
hsa-miR-491-3p	1	0	1	1	1	1	IPO5	importin 5
hsa-miR-491-3p	1	0	1	1	1	1	LAMP2	lysosomal-associated membrane protein 2
hsa-miR-491-3p	0	0	1	1	1	1	MRC1	mannose receptor, C type 1
hsa-miR-491-3p	1	0	1	1	1	1	MSR1	macrophage scavenger receptor 1
hsa-miR-491-3p	0	0	1	1	1	1	P2RY1	purinergic receptor P2Y, G-protein coupled, 1
hsa-miR-491-3p	1	0	1	0	1	1	PAK2	p21 protein (Cdc42/Rac)-activated kinase 2
hsa-miR-491-3p	1	0	1	0	1	1	PDK1	pyruvate dehydrogenase kinase, isozyme 1
hsa-miR-491-3p	0	0	1	1	1	1	PFDN4	prefoldin subunit 4
hsa-miR-491-3p	0	0	1	0	1	1	PLN	phospholamban
hsa-miR-491-3p	0	0	1	1	0	0	PMCH	pro-melanin-concentrating hormone
hsa-miR-491-3p	0	0	1	1	1	1	PNN	pinin, desmosome associated protein
hsa-miR-491-3p	1	0	1	0	1	1	POU3F1	POU class 3 homeobox 1
hsa-miR-491-3p	1	0	1	1	1	1	PRKAR2B	protein kinase, cAMP-dependent, regulatory, type II, beta
hsa-miR-491-3p	0	0	1	1	1	1	PRKCB	protein kinase C, beta
hsa-miR-491-3p	0	0	1	1	1	1	PTPRM	protein tyrosine phosphatase, receptor type, M
hsa-miR-491-3p	1	0	1	1	1	1	PTPRO	protein tyrosine phosphatase, receptor type, O
hsa-miR-491-3p	1	0	1	1	1	1	PTX3	pentraxin 3, long
hsa-miR-491-3p	1	0	1	1	1	1	RAB2A	RAB2A, member RAS oncogene family
hsa-miR-491-3p	1	0	1	1	1	1	RAD23B	RAD23 homolog B (S. cerevisiae)
hsa-miR-491-3p	1	0	1	1	1	1	ARID4A	AT rich interactive domain 4A (RBP1-like)
hsa-miR-491-3p	1	0	1	1	1	1	SRSF3	serine/arginine-rich splicing factor 3
hsa-miR-491-3p	0	0	1	1	1	1	SNAPC1	small nuclear RNA activating complex, polypeptide 1, 43kDa
hsa-miR-491-3p	1	0	1	0	1	1	SOX11	SRY (sex determining region Y)-box 11
hsa-miR-491-3p	1	0	1	1	1	1	SRI	sorcin
hsa-miR-491-3p	1	0	1	1	1	1	SYN2	synapsin II
hsa-miR-491-3p	0	0	1	1	1	1	TAF2	TAF2 RNA polymerase II, TATA box binding protein (TBP)-associated factor, 150kDa
hsa-miR-491-3p	1	0	1	1	1	1	TDG	thymine-DNA glycosylase
hsa-miR-491-3p	1	0	1	1	1	1	TFAP2B	transcription factor AP-2 beta (activating enhancer binding protein 2 beta)
hsa-miR-491-3p	1	0	1	1	1	1	TGFB3	transforming growth factor, beta 3
hsa-miR-491-3p	0	0	1	1	1	1	THBS2	thrombospondin 2
hsa-miR-491-3p	1	0	1	1	1	1	TIAM1	T-cell lymphoma invasion and metastasis 1
hsa-miR-491-3p	1	0	1	1	1	1	UBE2B	ubiquitin-conjugating enzyme E2B
hsa-miR-491-3p	0	0	1	1	1	1	UBE2D1	ubiquitin-conjugating enzyme E2D 1
hsa-miR-491-3p	1	0	1	1	1	1	UBE2D3	ubiquitin-conjugating enzyme E2D 3
hsa-miR-491-3p	1	0	1	1	1	1	UBE2N	ubiquitin-conjugating enzyme E2N
hsa-miR-491-3p	1	0	1	1	1	1	YY1	YY1 transcription factor
hsa-miR-491-3p	1	0	1	1	1	1	ZIC3	Zic family member 3
hsa-miR-491-3p	1	0	1	1	1	1	ZNF131	zinc finger protein 131
hsa-miR-491-3p	1	0	1	1	1	1	CUL5	cullin 5
hsa-miR-491-3p	1	0	1	1	1	1	HMGA2	high mobility group AT-hook 2
hsa-miR-491-3p	1	0	1	0	1	1	SNN	stannin
hsa-miR-491-3p	1	0	1	1	1	1	FZD7	frizzled family receptor 7
hsa-miR-491-3p	1	0	1	1	1	1	EEA1	early endosome antigen 1
hsa-miR-491-3p	1	0	1	1	1	1	SUPT3H	suppressor of Ty 3 homolog (S. cerevisiae)
hsa-miR-491-3p	1	0	1	0	1	1	ENC1	ectodermal-neural cortex 1 (with BTB-like domain)
hsa-miR-491-3p	0	0	1	1	1	1	ITGA10	integrin, alpha 10
hsa-miR-491-3p	0	0	1	1	1	1	AGPS	alkylglycerone phosphate synthase
hsa-miR-491-3p	1	0	1	0	1	1	IRS2	insulin receptor substrate 2
hsa-miR-491-3p	1	0	1	1	1	1	B3GALT2	UDP-Gal:betaGlcNAc beta 1,3-galactosyltransferase, polypeptide 2
hsa-miR-491-3p	0	0	1	1	1	1	SCEL	sciellin
hsa-miR-491-3p	0	0	1	1	1	1	PRPF4B	PRP4 pre-mRNA processing factor 4 homolog B (yeast)
hsa-miR-491-3p	1	0	1	0	1	1	WASL	Wiskott-Aldrich syndrome-like
hsa-miR-491-3p	0	0	1	1	1	1	MPZL1	myelin protein zero-like 1
hsa-miR-491-3p	1	0	1	1	1	1	BCL2L2	BCL2-like 2
hsa-miR-491-3p	1	0	1	0	1	1	DGKB	diacylglycerol kinase, beta 90kDa
hsa-miR-491-3p	1	0	1	1	1	1	EFNB2	ephrin-B2
hsa-miR-491-3p	1	0	1	1	1	1	GMFB	glia maturation factor, beta
hsa-miR-491-3p	0	0	1	1	0	0	DRG1	developmentally regulated GTP binding protein 1
hsa-miR-491-3p	1	0	1	0	1	1	SLC1A2	solute carrier family 1 (glial high affinity glutamate transporter), member 2
hsa-miR-491-3p	0	0	1	0	1	1	SLC1A3	solute carrier family 1 (glial high affinity glutamate transporter), member 3
hsa-miR-491-3p	0	0	1	1	0	0	EBAG9	estrogen receptor binding site associated, antigen, 9
hsa-miR-491-3p	0	0	1	1	1	1	SEP15	15 kDa selenoprotein
hsa-miR-491-3p	1	0	1	0	1	1	AKAP6	A kinase (PRKA) anchor protein 6
hsa-miR-491-3p	0	0	1	1	1	1	ACTL6A	actin-like 6A
hsa-miR-491-3p	0	0	1	0	1	1	ALK	anaplastic lymphoma receptor tyrosine kinase
hsa-miR-491-3p	1	0	1	1	1	1	ARL3	ADP-ribosylation factor-like 3
hsa-miR-491-3p	1	0	1	1	1	1	BNIP2	BCL2/adenovirus E1B 19kDa interacting protein 2
hsa-miR-491-3p	0	0	1	1	1	1	COL12A1	collagen, type XII, alpha 1
hsa-miR-491-3p	1	0	1	1	1	1	CREB1	cAMP responsive element binding protein 1
hsa-miR-491-3p	1	0	1	1	1	1	EFNB1	ephrin-B1
hsa-miR-491-3p	1	0	1	1	1	1	EGR3	early growth response 3
hsa-miR-491-3p	1	0	1	0	1	1	FGF5	fibroblast growth factor 5
hsa-miR-491-3p	1	0	1	0	1	1	ARHGAP35	Rho GTPase activating protein 35
hsa-miR-491-3p	0	0	1	1	1	1	PNPLA4	patatin-like phospholipase domain containing 4
hsa-miR-491-3p	1	0	1	1	1	1	MTMR4	myotubularin related protein 4
hsa-miR-491-3p	1	0	1	1	1	1	STK17A	serine/threonine kinase 17a
hsa-miR-491-3p	1	0	1	1	1	1	KCNB2	potassium voltage-gated channel, Shab-related subfamily, member 2
hsa-miR-491-3p	1	0	1	1	0	0	RAB33A	RAB33A, member RAS oncogene family
hsa-miR-491-3p	1	0	1	1	1	1	ONECUT2	one cut homeobox 2
hsa-miR-491-3p	1	0	1	1	1	1	ZFP36L1	zinc finger protein 36, C3H type-like 1
hsa-miR-491-3p	0	0	1	1	1	1	DSC1	desmocollin 1
hsa-miR-491-3p	1	0	1	1	1	1	KCNA2	potassium voltage-gated channel, shaker-related subfamily, member 2
hsa-miR-491-3p	0	0	1	1	0	0	PLK1	polo-like kinase 1
hsa-miR-491-3p	0	0	1	1	1	1	PSMD5	proteasome (prosome, macropain) 26S subunit, non-ATPase, 5
hsa-miR-491-3p	1	0	1	0	1	1	SEL1L	sel-1 suppressor of lin-12-like (C. elegans)
hsa-miR-491-3p	1	0	1	1	1	1	TLE1	transducin-like enhancer of split 1 (E(sp1) homolog, Drosophila)
hsa-miR-491-3p	1	0	1	1	1	1	MED13	mediator complex subunit 13
hsa-miR-491-3p	0	0	1	1	1	1	ABCD2	ATP-binding cassette, sub-family D (ALD), member 2
hsa-miR-491-3p	1	0	1	1	1	1	BMI1	BMI1 polycomb ring finger oncogene
hsa-miR-491-3p	1	0	1	1	1	1	FOXN3	forkhead box N3
hsa-miR-491-3p	1	0	1	1	1	1	CRK	v-crk sarcoma virus CT10 oncogene homolog (avian)
hsa-miR-491-3p	0	0	1	1	1	1	MSTN	myostatin
hsa-miR-491-3p	1	0	1	1	1	1	H3F3B	H3 histone, family 3B (H3.3B)
hsa-miR-491-3p	1	0	1	1	1	1	HAS2	hyaluronan synthase 2
hsa-miR-491-3p	0	0	1	1	1	1	PPP1R3C	protein phosphatase 1, regulatory subunit 3C
hsa-miR-491-3p	0	0	1	1	1	1	MALL	mal, T-cell differentiation protein-like
hsa-miR-491-3p	0	0	1	0	1	1	POU3F2	POU class 3 homeobox 2
hsa-miR-491-3p	1	0	1	1	1	1	NAMPT	nicotinamide phosphoribosyltransferase
hsa-miR-491-3p	1	0	1	1	1	1	LHFP	lipoma HMGIC fusion partner
hsa-miR-491-3p	1	0	1	1	1	1	PRKD3	protein kinase D3
hsa-miR-491-3p	1	0	1	0	1	1	SPRY3	sprouty homolog 3 (Drosophila)
hsa-miR-491-3p	1	0	1	0	1	1	NBR1	neighbor of BRCA1 gene 1
hsa-miR-491-3p	1	0	1	1	1	1	MTF1	metal-regulatory transcription factor 1
hsa-miR-491-3p	0	0	1	1	1	1	TSC22D1	TSC22 domain family, member 1
hsa-miR-491-3p	0	0	1	1	1	1	TRDN	triadin
hsa-miR-491-3p	1	0	1	1	1	1	NCK1	NCK adaptor protein 1
hsa-miR-491-3p	1	0	1	1	1	1	NEFL	neurofilament, light polypeptide
hsa-miR-491-3p	0	0	1	1	1	1	NKX3-1	NK3 homeobox 1
hsa-miR-491-3p	0	0	1	0	1	1	OAS3	2'-5'-oligoadenylate synthetase 3, 100kDa
hsa-miR-491-3p	1	0	1	1	1	1	PFKFB2	6-phosphofructo-2-kinase/fructose-2,6-biphosphatase 2
hsa-miR-491-3p	1	0	1	1	1	1	POU4F1	POU class 4 homeobox 1
hsa-miR-491-3p	1	0	1	0	1	1	PPP1R2	protein phosphatase 1, regulatory (inhibitor) subunit 2
hsa-miR-491-3p	1	0	1	1	1	1	PRKAA1	protein kinase, AMP-activated, alpha 1 catalytic subunit
hsa-miR-491-3p	1	0	1	1	1	1	RAD21	RAD21 homolog (S. pombe)
hsa-miR-491-3p	1	0	1	1	1	1	CCL7	chemokine (C-C motif) ligand 7
hsa-miR-491-3p	1	0	1	1	1	1	TSG101	tumor susceptibility gene 101
hsa-miR-491-3p	1	0	1	1	1	1	NPEPPS	aminopeptidase puromycin sensitive
hsa-miR-491-3p	1	0	1	1	1	1	TUBGCP3	tubulin, gamma complex associated protein 3
hsa-miR-491-3p	1	0	1	1	1	1	ZER1	zer-1 homolog (C. elegans)
hsa-miR-491-3p	0	0	1	1	1	1	SLC30A9	solute carrier family 30 (zinc transporter), member 9
hsa-miR-491-3p	0	0	1	1	1	1	FST	follistatin
hsa-miR-491-3p	1	0	1	1	1	1	SEC23A	Sec23 homolog A (S. cerevisiae)
hsa-miR-491-3p	1	0	1	0	1	1	APPBP2	amyloid beta precursor protein (cytoplasmic tail) binding protein 2
hsa-miR-491-3p	1	0	1	1	1	1	HEXIM1	hexamethylene bis-acetamide inducible 1
hsa-miR-491-3p	0	0	1	1	0	0	STAMBP	STAM binding protein
hsa-miR-491-3p	1	0	1	0	1	1	IGF2BP1	insulin-like growth factor 2 mRNA binding protein 1
hsa-miR-491-3p	1	0	1	1	1	1	CTCF	CCCTC-binding factor (zinc finger protein)
hsa-miR-491-3p	1	0	1	0	1	1	MAP4K5	mitogen-activated protein kinase kinase kinase kinase 5
hsa-miR-491-3p	1	0	1	1	1	1	B3GNT2	UDP-GlcNAc:betaGal beta-1,3-N-acetylglucosaminyltransferase 2
hsa-miR-491-3p	0	0	1	1	1	1	CLDN16	claudin 16
hsa-miR-491-3p	1	0	1	1	1	1	MAP3K2	mitogen-activated protein kinase kinase kinase 2
hsa-miR-491-3p	1	0	1	1	1	1	ZBTB6	zinc finger and BTB domain containing 6
hsa-miR-491-3p	1	0	1	1	1	1	MAN1A2	mannosidase, alpha, class 1A, member 2
hsa-miR-491-3p	1	0	1	1	1	1	SPIN1	spindlin 1
hsa-miR-491-3p	1	0	1	1	1	1	SNTB2	syntrophin, beta 2 (dystrophin-associated protein A1, 59kDa, basic component 2)
hsa-miR-491-3p	1	0	1	1	1	1	BTG2	BTG family, member 2
hsa-miR-491-3p	1	0	1	1	1	1	SF3A3	splicing factor 3a, subunit 3, 60kDa
hsa-miR-491-3p	1	0	1	1	1	1	RIT1	Ras-like without CAAX 1
hsa-miR-491-3p	1	0	1	0	1	1	SLC5A3	solute carrier family 5 (sodium/myo-inositol cotransporter), member 3
hsa-miR-491-3p	1	0	1	1	1	1	HSPA13	heat shock protein 70kDa family, member 13
hsa-miR-491-3p	1	0	1	1	1	1	RAPGEF4	Rap guanine nucleotide exchange factor (GEF) 4
hsa-miR-491-3p	0	0	1	1	1	1	DNAJB4	DnaJ (Hsp40) homolog, subfamily B, member 4
hsa-miR-491-3p	1	0	1	1	1	1	ADAMTS5	ADAM metallopeptidase with thrombospondin type 1 motif, 5
hsa-miR-491-3p	1	0	1	1	1	1	FSTL1	follistatin-like 1
hsa-miR-491-3p	1	0	1	1	1	1	TRIO	trio Rho guanine nucleotide exchange factor
hsa-miR-491-3p	0	0	1	0	1	1	ZXDB	zinc finger, X-linked, duplicated B
hsa-miR-491-3p	1	0	1	0	1	1	PRSS23	protease, serine, 23
hsa-miR-491-3p	0	0	1	1	0	0	IRAK3	interleukin-1 receptor-associated kinase 3
hsa-miR-491-3p	1	0	1	1	1	1	PALM2-AKAP2	PALM2-AKAP2 readthrough
hsa-miR-491-3p	0	0	1	1	1	1	SLC6A14	solute carrier family 6 (amino acid transporter), member 14
hsa-miR-491-3p	0	0	1	1	1	1	HRH3	histamine receptor H3
hsa-miR-491-3p	1	0	1	1	1	1	RNF13	ring finger protein 13
hsa-miR-491-3p	0	0	1	1	1	1	STAT1	signal transducer and activator of transcription 1, 91kDa
hsa-miR-491-3p	1	0	1	1	1	1	TARDBP	TAR DNA binding protein
hsa-miR-491-3p	1	0	1	0	1	1	CD2AP	CD2-associated protein
hsa-miR-491-3p	0	0	1	1	1	1	EHF	ets homologous factor
hsa-miR-491-3p	1	0	1	1	1	1	MGEA5	meningioma expressed antigen 5 (hyaluronidase)
hsa-miR-491-3p	1	0	1	1	1	1	RYBP	RING1 and YY1 binding protein
hsa-miR-491-3p	0	0	1	1	1	1	SEPHS2	selenophosphate synthetase 2
hsa-miR-491-3p	1	0	1	1	1	1	RHOQ	ras homolog family member Q
hsa-miR-491-3p	0	0	1	1	1	1	IL36RN	interleukin 36 receptor antagonist
hsa-miR-491-3p	1	0	1	1	1	1	MMD	monocyte to macrophage differentiation-associated
hsa-miR-491-3p	1	0	1	1	1	1	NPTN	neuroplastin
hsa-miR-491-3p	0	0	1	0	1	1	TLL1	tolloid-like 1
hsa-miR-491-3p	0	0	1	1	1	1	N6AMT1	N-6 adenine-specific DNA methyltransferase 1 (putative)
hsa-miR-491-3p	0	0	1	0	1	1	EMR2	egf-like module containing, mucin-like, hormone receptor-like 2
hsa-miR-491-3p	1	0	1	0	1	1	C16orf72	chromosome 16 open reading frame 72
hsa-miR-491-3p	1	0	1	1	1	1	ZBTB44	zinc finger and BTB domain containing 44
hsa-miR-491-3p	0	0	1	0	1	1	SCN8A	sodium channel, voltage gated, type VIII, alpha subunit
hsa-miR-491-3p	0	0	1	1	1	1	ADAM28	ADAM metallopeptidase domain 28
hsa-miR-491-3p	1	0	1	1	1	1	LEMD3	LEM domain containing 3
hsa-miR-491-3p	1	0	1	1	1	1	CORO1C	coronin, actin binding protein, 1C
hsa-miR-491-3p	1	0	1	0	1	1	FJX1	four jointed box 1 (Drosophila)
hsa-miR-491-3p	0	0	1	1	0	0	CLEC4E	C-type lectin domain family 4, member E
hsa-miR-491-3p	1	0	1	0	1	1	RNF11	ring finger protein 11
hsa-miR-491-3p	1	0	1	1	1	1	DKK2	dickkopf 2 homolog (Xenopus laevis)
hsa-miR-491-3p	1	0	1	1	1	1	SERP1	stress-associated endoplasmic reticulum protein 1
hsa-miR-491-3p	1	0	1	1	1	1	KLHL20	kelch-like 20 (Drosophila)
hsa-miR-491-3p	0	0	1	1	1	1	LSM3	LSM3 homolog, U6 small nuclear RNA associated (S. cerevisiae)
hsa-miR-491-3p	1	0	1	1	1	1	RND1	Rho family GTPase 1
hsa-miR-491-3p	0	0	1	1	1	1	TMOD2	tropomodulin 2 (neuronal)
hsa-miR-491-3p	1	0	1	1	1	1	RALGPS1	Ral GEF with PH domain and SH3 binding motif 1
hsa-miR-491-3p	1	0	1	0	1	1	EDEM1	ER degradation enhancer, mannosidase alpha-like 1
hsa-miR-491-3p	1	0	1	1	1	1	ARHGAP32	Rho GTPase activating protein 32
hsa-miR-491-3p	1	0	1	1	1	1	FCHSD2	FCH and double SH3 domains 2
hsa-miR-491-3p	1	0	1	0	1	1	LPPR4	lipid phosphate phosphatase-related protein type 4
hsa-miR-491-3p	1	0	1	0	1	1	RAB11FIP2	RAB11 family interacting protein 2 (class I)
hsa-miR-491-3p	1	0	1	0	1	1	ICK	intestinal cell (MAK-like) kinase
hsa-miR-491-3p	1	0	1	1	1	1	SPAST	spastin
hsa-miR-491-3p	1	0	1	0	1	1	WDFY3	WD repeat and FYVE domain containing 3
hsa-miR-491-3p	1	0	1	1	1	1	TRAK2	trafficking protein, kinesin binding 2
hsa-miR-491-3p	1	0	1	0	1	1	PEG10	paternally expressed 10
hsa-miR-491-3p	1	0	1	0	1	1	LARP4B	La ribonucleoprotein domain family, member 4B
hsa-miR-491-3p	0	0	1	1	1	1	ARL6IP1	ADP-ribosylation factor-like 6 interacting protein 1
hsa-miR-491-3p	1	0	1	1	1	1	PRRC2C	proline-rich coiled-coil 2C
hsa-miR-491-3p	1	0	1	1	1	1	PLCB1	phospholipase C, beta 1 (phosphoinositide-specific)
hsa-miR-491-3p	1	0	1	1	1	1	PDS5A	PDS5, regulator of cohesion maintenance, homolog A (S. cerevisiae)
hsa-miR-491-3p	1	0	1	0	1	1	LARP1	La ribonucleoprotein domain family, member 1
hsa-miR-491-3p	0	0	1	0	1	1	RRP8	ribosomal RNA processing 8, methyltransferase, homolog (yeast)
hsa-miR-491-3p	1	0	1	1	1	1	MED13L	mediator complex subunit 13-like
hsa-miR-491-3p	0	0	1	1	1	1	ZNF10	zinc finger protein 10
hsa-miR-491-3p	1	0	1	1	1	1	CNOT6	CCR4-NOT transcription complex, subunit 6
hsa-miR-491-3p	1	0	1	0	1	1	OSBPL3	oxysterol binding protein-like 3
hsa-miR-491-3p	1	0	1	0	1	1	ERC2	ELKS/RAB6-interacting/CAST family member 2
hsa-miR-491-3p	0	0	1	1	1	1	BRPF3	bromodomain and PHD finger containing, 3
hsa-miR-491-3p	1	0	1	1	1	1	COQ2	coenzyme Q2 homolog, prenyltransferase (yeast)
hsa-miR-491-3p	1	0	1	0	1	1	RRM2B	ribonucleotide reductase M2 B (TP53 inducible)
hsa-miR-491-3p	0	0	1	1	1	1	KRT76	keratin 76
hsa-miR-491-3p	1	0	1	1	1	1	AZIN1	antizyme inhibitor 1
hsa-miR-491-3p	1	0	1	1	1	1	ST8SIA3	ST8 alpha-N-acetyl-neuraminide alpha-2,8-sialyltransferase 3
hsa-miR-491-3p	1	0	1	0	1	1	TRIM33	tripartite motif containing 33
hsa-miR-491-3p	1	0	1	1	1	1	UBE2J1	ubiquitin-conjugating enzyme E2, J1
hsa-miR-491-3p	0	0	1	1	1	1	ZFR	zinc finger RNA binding protein
hsa-miR-491-3p	0	0	1	1	1	1	RAB10	RAB10, member RAS oncogene family
hsa-miR-491-3p	0	0	1	1	1	1	DYNC1LI1	dynein, cytoplasmic 1, light intermediate chain 1
hsa-miR-491-3p	1	0	1	1	1	1	VGLL3	vestigial like 3 (Drosophila)
hsa-miR-491-3p	1	0	1	1	1	1	RAB14	RAB14, member RAS oncogene family
hsa-miR-491-3p	0	0	1	1	0	0	SRRM2	serine/arginine repetitive matrix 2
hsa-miR-491-3p	1	0	1	1	1	1	VTA1	Vps20-associated 1 homolog (S. cerevisiae)
hsa-miR-491-3p	1	0	1	1	1	1	IER5	immediate early response 5
hsa-miR-491-3p	1	0	1	1	1	1	CYP39A1	cytochrome P450, family 39, subfamily A, polypeptide 1
hsa-miR-491-3p	1	0	1	1	1	1	CPSF2	cleavage and polyadenylation specific factor 2, 100kDa
hsa-miR-491-3p	1	0	1	1	1	1	DIRAS2	DIRAS family, GTP-binding RAS-like 2
hsa-miR-491-3p	1	0	1	0	1	1	EIF2C4	eukaryotic translation initiation factor 2C, 4
hsa-miR-491-3p	1	0	1	0	1	1	KCTD9	potassium channel tetramerisation domain containing 9
hsa-miR-491-3p	0	0	1	1	0	0	NUP62CL	nucleoporin 62kDa C-terminal like
hsa-miR-491-3p	1	0	1	1	1	1	ALKBH5	alkB, alkylation repair homolog 5 (E. coli)
hsa-miR-491-3p	0	0	1	1	1	1	COMMD8	COMM domain containing 8
hsa-miR-491-3p	1	0	1	1	1	1	VPS13B	vacuolar protein sorting 13 homolog B (yeast)
hsa-miR-491-3p	1	0	1	1	1	1	HIF1AN	hypoxia inducible factor 1, alpha subunit inhibitor
hsa-miR-491-3p	1	0	1	1	1	1	FBXO34	F-box protein 34
hsa-miR-491-3p	1	0	1	1	1	1	ARGLU1	arginine and glutamate rich 1
hsa-miR-491-3p	1	0	1	1	1	1	BCL11A	B-cell CLL/lymphoma 11A (zinc finger protein)
hsa-miR-491-3p	1	0	1	1	1	1	WDR6	WD repeat domain 6
hsa-miR-491-3p	1	0	1	1	1	1	FIGN	fidgetin
hsa-miR-491-3p	0	0	1	1	0	0	CEP55	centrosomal protein 55kDa
hsa-miR-491-3p	1	0	1	0	1	1	MSL2	male-specific lethal 2 homolog (Drosophila)
hsa-miR-491-3p	0	0	1	1	1	1	MRPS10	mitochondrial ribosomal protein S10
hsa-miR-491-3p	1	0	1	1	0	0	PLEKHG6	pleckstrin homology domain containing, family G (with RhoGef domain) member 6
hsa-miR-491-3p	0	0	1	0	1	1	GOLPH3L	golgi phosphoprotein 3-like
hsa-miR-491-3p	0	0	1	1	1	1	RCBTB1	regulator of chromosome condensation (RCC1) and BTB (POZ) domain containing protein 1
hsa-miR-491-3p	1	0	1	0	1	1	SEPT11	septin 11
hsa-miR-491-3p	1	0	1	1	1	1	ASXL2	additional sex combs like 2 (Drosophila)
hsa-miR-491-3p	1	0	1	1	1	1	ZNF654	zinc finger protein 654
hsa-miR-491-3p	1	0	1	1	1	1	TBC1D19	TBC1 domain family, member 19
hsa-miR-491-3p	1	0	1	1	1	1	SPTLC3	serine palmitoyltransferase, long chain base subunit 3
hsa-miR-491-3p	1	0	1	1	1	1	AGPAT5	1-acylglycerol-3-phosphate O-acyltransferase 5 (lysophosphatidic acid acyltransferase, epsilon)
hsa-miR-491-3p	0	0	1	1	1	1	ABHD10	abhydrolase domain containing 10
hsa-miR-491-3p	1	0	1	1	1	1	PAG1	phosphoprotein associated with glycosphingolipid microdomains 1
hsa-miR-491-3p	0	0	1	0	0	0	FAM45B	family with sequence similarity 45, member A pseudogene
hsa-miR-491-3p	1	0	1	1	1	1	ETNK1	ethanolamine kinase 1
hsa-miR-491-3p	1	0	1	1	1	1	CTTNBP2NL	CTTNBP2 N-terminal like
hsa-miR-491-3p	1	0	1	1	1	1	HOXA10	homeobox A10
hsa-miR-491-3p	1	0	1	0	1	1	FAM190B	family with sequence similarity 190, member B
hsa-miR-491-3p	1	0	1	1	1	1	DENND1B	DENN/MADD domain containing 1B
hsa-miR-491-3p	1	0	1	0	1	1	CCNJ	cyclin J
hsa-miR-491-3p	0	0	1	0	1	1	ARL15	ADP-ribosylation factor-like 15
hsa-miR-491-3p	1	0	1	1	1	1	SERTAD4	SERTA domain containing 4
hsa-miR-491-3p	1	0	1	1	1	1	CCBL2	cysteine conjugate-beta lyase 2
hsa-miR-491-3p	1	0	1	1	1	1	POLE4	polymerase (DNA-directed), epsilon 4, accessory subunit
hsa-miR-491-3p	1	0	1	1	1	1	C8orf4	chromosome 8 open reading frame 4
hsa-miR-491-3p	1	0	1	1	1	1	FEM1C	fem-1 homolog c (C. elegans)
hsa-miR-491-3p	1	0	1	1	1	1	CNNM4	cyclin M4
hsa-miR-491-3p	1	0	1	1	1	1	PRDM8	PR domain containing 8
hsa-miR-491-3p	1	0	1	1	1	1	C1orf63	chromosome 1 open reading frame 63
hsa-miR-491-3p	1	0	1	0	1	1	SLC17A6	solute carrier family 17 (sodium-dependent inorganic phosphate cotransporter), member 6
hsa-miR-491-3p	1	0	1	0	1	1	EIF5A2	eukaryotic translation initiation factor 5A2
hsa-miR-491-3p	1	0	1	0	1	1	ADCY2	adenylate cyclase 2 (brain)
hsa-miR-491-3p	1	0	1	0	1	1	DCUN1D1	DCN1, defective in cullin neddylation 1, domain containing 1 (S. cerevisiae)
hsa-miR-491-3p	0	0	1	0	1	1	ZNF490	zinc finger protein 490
hsa-miR-491-3p	1	0	1	1	1	1	ZNF608	zinc finger protein 608
hsa-miR-491-3p	1	0	1	1	1	1	MIB1	mindbomb E3 ubiquitin protein ligase 1
hsa-miR-491-3p	1	0	1	1	1	1	SEMA6A	sema domain, transmembrane domain (TM), and cytoplasmic domain, (semaphorin) 6A
hsa-miR-491-3p	1	0	1	1	1	1	PCDH10	protocadherin 10
hsa-miR-491-3p	1	0	1	1	1	1	ARHGAP21	Rho GTPase activating protein 21
hsa-miR-491-3p	1	0	1	0	1	1	CRAMP1L	Crm, cramped-like (Drosophila)
hsa-miR-491-3p	1	0	1	1	1	1	ZFP14	zinc finger protein 14 homolog (mouse)
hsa-miR-491-3p	1	0	1	1	1	1	ALS2	amyotrophic lateral sclerosis 2 (juvenile)
hsa-miR-491-3p	0	0	1	1	1	1	BCOR	BCL6 corepressor
hsa-miR-491-3p	1	0	1	1	1	1	FAM160B1	family with sequence similarity 160, member B1
hsa-miR-491-3p	0	0	1	1	1	1	B3GALT1	UDP-Gal:betaGlcNAc beta 1,3-galactosyltransferase, polypeptide 1
hsa-miR-491-3p	1	0	1	1	1	1	ZNFX1	zinc finger, NFX1-type containing 1
hsa-miR-491-3p	1	0	1	1	1	1	CLDN1	claudin 1
hsa-miR-491-3p	1	0	1	1	1	1	PMAIP1	phorbol-12-myristate-13-acetate-induced protein 1
hsa-miR-491-3p	1	0	1	1	1	1	RTN1	reticulon 1
hsa-miR-491-3p	0	0	1	0	1	1	SLC30A1	solute carrier family 30 (zinc transporter), member 1
hsa-miR-491-3p	1	0	1	1	1	1	RPRD1B	regulation of nuclear pre-mRNA domain containing 1B
hsa-miR-491-3p	1	0	1	1	1	1	OTX2	orthodenticle homeobox 2
hsa-miR-491-3p	0	0	1	0	1	1	CFL2	cofilin 2 (muscle)
hsa-miR-491-3p	0	0	1	1	1	1	MS4A1	membrane-spanning 4-domains, subfamily A, member 1
hsa-miR-491-3p	1	0	1	1	1	1	SEC24A	SEC24 family, member A (S. cerevisiae)
hsa-miR-491-3p	1	0	1	1	1	1	GPR88	G protein-coupled receptor 88
hsa-miR-491-3p	1	0	1	0	1	1	CERS2	ceramide synthase 2
hsa-miR-491-3p	1	0	1	1	1	1	SNX16	sorting nexin 16
hsa-miR-491-3p	1	0	1	1	1	1	XYLT1	xylosyltransferase I
hsa-miR-491-3p	1	0	1	1	1	1	ATL2	atlastin GTPase 2
hsa-miR-491-3p	0	0	1	1	1	1	HHIP	hedgehog interacting protein
hsa-miR-491-3p	1	0	1	1	1	1	TMEM168	transmembrane protein 168
hsa-miR-491-3p	1	0	1	0	1	1	MRPS25	mitochondrial ribosomal protein S25
hsa-miR-491-3p	1	0	1	1	1	1	RFX7	regulatory factor X, 7
hsa-miR-491-3p	0	0	1	1	1	1	MARCKSL1	MARCKS-like 1
hsa-miR-491-3p	1	0	1	1	0	0	UBE2Z	ubiquitin-conjugating enzyme E2Z
hsa-miR-491-3p	0	0	1	1	1	1	C8orf33	chromosome 8 open reading frame 33
hsa-miR-491-3p	1	0	1	1	1	1	AHNAK	AHNAK nucleoprotein
hsa-miR-491-3p	1	0	1	0	1	1	NOTCH2	notch 2
hsa-miR-491-3p	0	0	1	1	1	1	STEAP4	STEAP family member 4
hsa-miR-491-3p	0	0	1	0	1	1	ZYG11B	zyg-11 homolog B (C. elegans)
hsa-miR-491-3p	1	0	1	1	1	1	C15orf29	chromosome 15 open reading frame 29
hsa-miR-491-3p	1	0	1	0	1	1	ZFHX4	zinc finger homeobox 4
hsa-miR-491-3p	0	0	1	1	1	1	SHCBP1	SHC SH2-domain binding protein 1
hsa-miR-491-3p	1	0	1	0	1	1	MOB3B	MOB kinase activator 3B
hsa-miR-491-3p	1	0	1	1	1	1	NUP210	nucleoporin 210kDa
hsa-miR-491-3p	1	0	1	0	1	1	NAA25	N(alpha)-acetyltransferase 25, NatB auxiliary subunit
hsa-miR-491-3p	0	0	1	1	1	1	ZNF606	zinc finger protein 606
hsa-miR-491-3p	1	0	1	0	1	1	VCPIP1	valosin containing protein (p97)/p47 complex interacting protein 1
hsa-miR-491-3p	1	0	1	0	1	1	EDEM3	ER degradation enhancer, mannosidase alpha-like 3
hsa-miR-491-3p	1	0	1	1	1	1	TUBB1	tubulin, beta 1 class VI
hsa-miR-491-3p	1	0	1	1	1	1	SNX27	sorting nexin family member 27
hsa-miR-491-3p	0	0	1	1	1	1	TEX15	testis expressed 15
hsa-miR-491-3p	1	0	1	1	1	1	SOX7	SRY (sex determining region Y)-box 7
hsa-miR-491-3p	1	0	1	0	1	1	TMEM47	transmembrane protein 47
hsa-miR-491-3p	1	0	1	1	1	1	CRISPLD1	cysteine-rich secretory protein LCCL domain containing 1
hsa-miR-491-3p	1	0	1	0	1	1	SH3BGRL2	SH3 domain binding glutamic acid-rich protein like 2
hsa-miR-491-3p	0	0	1	1	1	1	CCNB1	cyclin B1
hsa-miR-491-3p	1	0	1	1	1	1	HOOK3	hook homolog 3 (Drosophila)
hsa-miR-491-3p	0	0	1	1	1	1	GNPTG	N-acetylglucosamine-1-phosphate transferase, gamma subunit
hsa-miR-491-3p	1	0	1	1	1	1	PARD6B	par-6 partitioning defective 6 homolog beta (C. elegans)
hsa-miR-491-3p	1	0	1	1	1	1	HIATL1	hippocampus abundant transcript-like 1
hsa-miR-491-3p	1	0	1	1	1	1	TRIM63	tripartite motif containing 63, E3 ubiquitin protein ligase
hsa-miR-491-3p	0	0	1	0	1	1	TRIM52	tripartite motif containing 52
hsa-miR-491-3p	1	0	1	0	1	1	PPP1R15B	protein phosphatase 1, regulatory subunit 15B
hsa-miR-491-3p	1	0	1	0	1	1	UBASH3B	ubiquitin associated and SH3 domain containing B
hsa-miR-491-3p	1	0	1	1	1	1	PCDH11Y	protocadherin 11 Y-linked
hsa-miR-491-3p	0	0	1	0	1	1	TSLP	thymic stromal lymphopoietin
hsa-miR-491-3p	1	0	1	1	1	1	HIAT1	hippocampus abundant transcript 1
hsa-miR-491-3p	1	0	1	1	1	1	TRIM55	tripartite motif containing 55
hsa-miR-491-3p	1	0	1	1	1	1	FGD3	FYVE, RhoGEF and PH domain containing 3
hsa-miR-491-3p	1	0	1	1	1	1	NKD1	naked cuticle homolog 1 (Drosophila)
hsa-miR-491-3p	1	0	1	0	1	1	PURB	purine-rich element binding protein B
hsa-miR-491-3p	1	0	1	1	1	1	TP53INP1	tumor protein p53 inducible nuclear protein 1
hsa-miR-491-3p	0	0	1	1	1	1	CTTNBP2	cortactin binding protein 2
hsa-miR-491-3p	1	0	1	1	0	0	CCDC120	coiled-coil domain containing 120
hsa-miR-491-3p	0	0	1	1	1	1	ANKRD30A	ankyrin repeat domain 30A
hsa-miR-491-3p	1	0	1	0	1	1	CCND1	cyclin D1
hsa-miR-491-3p	1	0	1	0	1	1	ANTXR2	anthrax toxin receptor 2
hsa-miR-491-3p	1	0	1	1	1	1	BTN2A1	butyrophilin, subfamily 2, member A1
hsa-miR-491-3p	1	0	1	1	1	1	SLC44A1	solute carrier family 44, member 1
hsa-miR-491-3p	0	0	1	1	1	1	PABPC5	poly(A) binding protein, cytoplasmic 5
hsa-miR-491-3p	1	0	1	0	1	1	SOCS4	suppressor of cytokine signaling 4
hsa-miR-491-3p	1	0	1	1	1	1	ZAK	sterile alpha motif and leucine zipper containing kinase AZK
hsa-miR-491-3p	1	0	1	1	1	1	KCTD12	potassium channel tetramerisation domain containing 12
hsa-miR-491-3p	1	0	1	0	1	1	NUS1	nuclear undecaprenyl pyrophosphate synthase 1 homolog (S. cerevisiae)
hsa-miR-491-3p	1	0	1	1	1	1	ICA1L	islet cell autoantigen 1,69kDa-like
hsa-miR-491-3p	1	0	1	0	1	1	SP1	Sp1 transcription factor
hsa-miR-491-3p	0	0	1	1	1	1	HIST1H2BD	histone cluster 1, H2bd
hsa-miR-491-3p	0	0	1	1	1	1	SLC25A46	solute carrier family 25, member 46
hsa-miR-491-3p	1	0	1	0	1	1	FCHO2	FCH domain only 2
hsa-miR-491-3p	0	0	1	1	1	1	KCNC2	potassium voltage-gated channel, Shaw-related subfamily, member 2
hsa-miR-491-3p	0	0	1	1	0	0	CDC26	cell division cycle 26 homolog (S. cerevisiae)
hsa-miR-491-3p	0	0	1	0	1	1	SLC17A8	solute carrier family 17 (sodium-dependent inorganic phosphate cotransporter), member 8
hsa-miR-491-3p	1	0	1	0	1	1	CNOT6L	CCR4-NOT transcription complex, subunit 6-like
hsa-miR-491-3p	1	0	1	1	1	1	KCNH8	potassium voltage-gated channel, subfamily H (eag-related), member 8
hsa-miR-491-3p	1	0	1	1	1	1	MRPL30	mitochondrial ribosomal protein L30
hsa-miR-491-3p	1	0	1	1	1	1	OSR1	odd-skipped related 1 (Drosophila)
hsa-miR-491-3p	0	0	1	0	1	1	SPATA18	spermatogenesis associated 18
hsa-miR-491-3p	1	0	1	0	1	1	MTPN	myotrophin
hsa-miR-491-3p	0	0	1	1	1	1	TTC30A	tetratricopeptide repeat domain 30A
hsa-miR-491-3p	1	0	1	1	1	1	UBTD2	ubiquitin domain containing 2
hsa-miR-491-3p	0	0	1	1	1	1	MRFAP1L1	Morf4 family associated protein 1-like 1
hsa-miR-491-3p	1	0	1	1	1	1	POGLUT1	protein O-glucosyltransferase 1
hsa-miR-491-3p	0	0	1	1	1	1	ERP27	endoplasmic reticulum protein 27
hsa-miR-491-3p	0	0	1	1	1	1	TRAM1L1	translocation associated membrane protein 1-like 1
hsa-miR-491-3p	1	0	1	1	1	1	FAM123B	family with sequence similarity 123B
hsa-miR-491-3p	1	0	1	1	1	1	ZSCAN29	zinc finger and SCAN domain containing 29
hsa-miR-491-3p	0	0	1	0	1	1	HORMAD2	HORMA domain containing 2
hsa-miR-491-3p	0	0	1	1	1	1	DUSP18	dual specificity phosphatase 18
hsa-miR-491-3p	1	0	1	1	1	1	C7orf60	chromosome 7 open reading frame 60
hsa-miR-491-3p	1	0	1	1	1	1	SPRED1	sprouty-related, EVH1 domain containing 1
hsa-miR-491-3p	0	0	1	1	1	1	BBS12	Bardet-Biedl syndrome 12
hsa-miR-491-3p	1	0	1	0	1	1	TMEM154	transmembrane protein 154
hsa-miR-491-3p	1	0	1	1	1	1	BEND6	BEN domain containing 6
hsa-miR-491-3p	1	0	1	0	1	1	ZBTB9	zinc finger and BTB domain containing 9
hsa-miR-491-3p	1	0	1	1	1	1	HOXA9	homeobox A9
hsa-miR-491-3p	1	0	1	1	1	1	HS6ST3	heparan sulfate 6-O-sulfotransferase 3
hsa-miR-491-3p	1	0	1	1	1	1	FNDC5	fibronectin type III domain containing 5
hsa-miR-491-3p	1	0	1	1	1	1	NAP1L5	nucleosome assembly protein 1-like 5
hsa-miR-491-3p	0	0	1	1	1	1	CREG2	cellular repressor of E1A-stimulated genes 2
hsa-miR-491-3p	1	0	1	1	1	1	MOB1B	MOB kinase activator 1B
hsa-miR-491-3p	1	0	1	1	1	1	CCDC117	coiled-coil domain containing 117
hsa-miR-491-3p	1	0	1	1	1	1	FAM117B	family with sequence similarity 117, member B
hsa-miR-491-3p	1	0	1	0	1	1	DPY19L2	dpy-19-like 2 (C. elegans)
hsa-miR-491-3p	1	0	1	1	1	1	UBR1	ubiquitin protein ligase E3 component n-recognin 1
hsa-miR-491-3p	1	0	1	1	0	0	TCERG1L	transcription elongation regulator 1-like
hsa-miR-491-3p	1	0	1	0	1	1	CCDC71L	coiled-coil domain containing 71-like
hsa-miR-491-3p	1	0	1	1	1	1	PPAP2B	phosphatidic acid phosphatase type 2B
hsa-miR-491-3p	1	0	1	1	1	1	STX12	syntaxin 12
hsa-miR-491-3p	1	0	1	1	1	1	LRRTM3	leucine rich repeat transmembrane neuronal 3
hsa-miR-491-3p	0	0	1	1	1	1	ZNF831	zinc finger protein 831
hsa-miR-491-3p	0	0	1	0	1	1	NAT8L	N-acetyltransferase 8-like (GCN5-related, putative)
hsa-miR-491-3p	1	0	1	1	1	1	MTDH	metadherin
hsa-miR-491-3p	0	0	1	1	1	1	USP12	ubiquitin specific peptidase 12
hsa-miR-491-3p	0	0	1	1	1	1	C9orf85	chromosome 9 open reading frame 85
hsa-miR-491-3p	1	0	1	1	1	1	DDX26B	DEAD/H (Asp-Glu-Ala-Asp/His) box polypeptide 26B
hsa-miR-491-3p	1	0	1	1	1	1	SP8	Sp8 transcription factor
hsa-miR-491-3p	1	0	1	0	1	1	RNF144B	ring finger protein 144B
hsa-miR-491-3p	0	0	1	1	1	1	ZNF326	zinc finger protein 326
hsa-miR-491-3p	0	0	1	0	1	1	CLDN23	claudin 23
hsa-miR-491-3p	1	0	1	1	1	1	SPTY2D1	SPT2, Suppressor of Ty, domain containing 1 (S. cerevisiae)
hsa-miR-491-3p	1	0	1	1	1	1	ZBTB41	zinc finger and BTB domain containing 41
hsa-miR-491-3p	1	0	1	1	1	1	GPRIN3	GPRIN family member 3
hsa-miR-491-3p	1	0	1	1	1	1	KCTD4	potassium channel tetramerisation domain containing 4
hsa-miR-491-3p	0	0	1	1	1	1	LHFPL4	lipoma HMGIC fusion partner-like 4
hsa-miR-491-3p	1	0	1	1	1	1	PTGER3	prostaglandin E receptor 3 (subtype EP3)
hsa-miR-491-3p	1	0	1	0	1	1	PRICKLE2	prickle homolog 2 (Drosophila)
hsa-miR-491-3p	1	0	1	0	1	1	DLEU7	deleted in lymphocytic leukemia, 7
hsa-miR-491-3p	1	0	1	1	1	1	CXCL12	chemokine (C-X-C motif) ligand 12
hsa-miR-491-3p	1	0	1	1	1	1	BLOC1S5	biogenesis of lysosomal organelles complex-1, subunit 5, muted
hsa-miR-491-3p	1	0	1	1	1	1	GADL1	glutamate decarboxylase-like 1
hsa-miR-491-3p	1	0	1	1	1	1	ADAMTSL3	ADAMTS-like 3
hsa-miR-491-3p	1	0	1	1	1	1	C11orf87	chromosome 11 open reading frame 87
hsa-miR-491-3p	1	0	1	1	1	1	RAPH1	Ras association (RalGDS/AF-6) and pleckstrin homology domains 1
hsa-miR-491-3p	0	0	1	0	0	0	TTTY12	testis-specific transcript, Y-linked 12 (non-protein coding)
hsa-miR-491-3p	0	0	1	0	0	0	VENTXP1	VENT homeobox pseudogene 1
hsa-miR-491-3p	0	0	1	0	0	0	PPP1R2P3	protein phosphatase 1, regulatory (inhibitor) subunit 2 pseudogene 3
hsa-miR-491-3p	0	0	1	0	0	0	TPI1P2	triosephosphate isomerase 1 pseudogene 2
hsa-miR-491-3p	0	0	1	0	0	0	NUDT4P1	nudix (nucleoside diphosphate linked moiety X)-type motif 4 pseudogene 1
hsa-miR-491-3p	0	0	1	0	0	0	HNRNPA3P1	heterogeneous nuclear ribonucleoprotein A3 pseudogene 1
hsa-miR-491-3p	0	0	1	0	0	0	HTR7P1	5-hydroxytryptamine (serotonin) receptor 7 pseudogene 1
hsa-miR-491-3p	0	0	1	0	0	0	SEPHS1P1	selenophosphate synthetase 1 pseudogene 1
hsa-miR-491-3p	0	0	1	0	0	0	TPTE2P6	transmembrane phosphoinositide 3-phosphatase and tensin homolog 2 pseudogene 6
hsa-miR-491-3p	0	0	1	0	0	0	SNORA13	small nucleolar RNA, H/ACA box 13
hsa-miR-491-3p	0	0	1	0	0	0	NBR2	neighbor of BRCA1 gene 2 (non-protein coding)
hsa-miR-491-3p	0	0	1	0	0	0	RNF5P1	ring finger protein 5, E3 ubiquitin protein ligase pseudogene 1
hsa-miR-491-3p	0	0	1	0	0	0	HSP90B3P	heat shock protein 90kDa beta (Grp94), member 3, pseudogene
hsa-miR-491-3p	0	0	1	0	0	0	USP32P1	ubiquitin specific peptidase 32 pseudogene 1
hsa-miR-491-3p	0	0	1	0	0	0	LOC729603	calcium binding protein P22 pseudogene
hsa-miR-491-3p	0	0	1	1	1	1	PEG3	paternally expressed 3
hsa-miR-491-3p	0	0	1	1	1	1	ARF5	ADP-ribosylation factor 5
hsa-miR-491-3p	0	0	0	1	0	0	KRT33A	keratin 33A
hsa-miR-491-3p	0	0	0	1	0	0	IL32	interleukin 32
hsa-miR-491-3p	0	0	0	1	0	0	BEST2	bestrophin 2
hsa-miR-491-3p	1	0	1	1	1	1	PPP1R3F	protein phosphatase 1, regulatory subunit 3F
hsa-miR-491-3p	0	0	1	1	0	0	KIF22	kinesin family member 22
hsa-miR-491-3p	0	0	1	1	1	1	SPP2	secreted phosphoprotein 2, 24kDa
hsa-miR-491-3p	0	0	0	1	1	1	TIMM21	translocase of inner mitochondrial membrane 21 homolog (yeast)
hsa-miR-491-3p	0	0	1	1	1	1	IL4R	interleukin 4 receptor
hsa-miR-491-3p	0	0	1	1	0	0	ACTR6	ARP6 actin-related protein 6 homolog (yeast)
hsa-miR-491-3p	0	0	0	1	1	1	FAP	fibroblast activation protein, alpha
hsa-miR-491-3p	0	0	1	1	0	0	NME8	NME/NM23 family member 8
hsa-miR-491-3p	0	0	1	1	1	1	NDUFB2	NADH dehydrogenase (ubiquinone) 1 beta subcomplex, 2, 8kDa
hsa-miR-491-3p	1	0	1	1	1	1	PDPR	pyruvate dehydrogenase phosphatase regulatory subunit
hsa-miR-491-3p	0	0	1	1	0	0	LGALS1	lectin, galactoside-binding, soluble, 1
hsa-miR-491-3p	0	0	0	1	1	1	ADSL	adenylosuccinate lyase
hsa-miR-491-3p	1	0	1	1	1	1	FAM118A	family with sequence similarity 118, member A
hsa-miR-491-3p	1	0	1	1	1	1	CCNK	cyclin K
hsa-miR-491-3p	1	0	1	1	1	1	COCH	coagulation factor C homolog, cochlin (Limulus polyphemus)
hsa-miR-491-3p	0	0	0	1	0	0	MTHFD1	methylenetetrahydrofolate dehydrogenase (NADP+ dependent) 1, methenyltetrahydrofolate cyclohydrolase, formyltetrahydrofolate synthetase
hsa-miR-491-3p	0	0	1	1	1	1	PCK2	phosphoenolpyruvate carboxykinase 2 (mitochondrial)
hsa-miR-491-3p	0	0	1	1	1	1	SLCO4A1	solute carrier organic anion transporter family, member 4A1
hsa-miR-491-3p	0	0	1	1	1	1	DECR2	2,4-dienoyl CoA reductase 2, peroxisomal
hsa-miR-491-3p	0	0	0	1	1	1	MEFV	Mediterranean fever
hsa-miR-491-3p	1	0	1	1	0	0	DOT1L	DOT1-like, histone H3 methyltransferase (S. cerevisiae)
hsa-miR-491-3p	0	0	0	1	1	1	GTPBP10	GTP-binding protein 10 (putative)
hsa-miR-491-3p	0	0	1	1	0	0	PITRM1	pitrilysin metallopeptidase 1
hsa-miR-491-3p	0	0	0	1	0	0	FAM18B2	family with sequence similarity 18, member B2
hsa-miR-491-3p	0	0	1	1	1	1	C1QBP	complement component 1, q subcomponent binding protein
hsa-miR-491-3p	0	0	1	1	1	1	MED31	mediator complex subunit 31
hsa-miR-491-3p	0	0	1	1	1	1	GAR1	GAR1 ribonucleoprotein homolog (yeast)
hsa-miR-491-3p	0	0	0	1	1	1	CD82	CD82 molecule
hsa-miR-491-3p	1	0	1	1	0	0	ATG2A	autophagy related 2A
hsa-miR-491-3p	0	0	1	1	1	1	CDKN1B	cyclin-dependent kinase inhibitor 1B (p27, Kip1)
hsa-miR-491-3p	0	0	1	1	0	0	H2AFJ	H2A histone family, member J
hsa-miR-491-3p	1	0	1	1	0	0	ACRBP	acrosin binding protein
hsa-miR-491-3p	0	0	0	1	1	1	RSPH4A	radial spoke head 4 homolog A (Chlamydomonas)
hsa-miR-491-3p	0	0	1	1	1	1	RHAG	Rh-associated glycoprotein
hsa-miR-491-3p	1	0	1	1	0	0	TMSB10	thymosin beta 10
hsa-miR-491-3p	0	0	1	1	1	1	FANCL	Fanconi anemia, complementation group L
hsa-miR-491-3p	0	0	0	1	0	0	PROC	protein C (inactivator of coagulation factors Va and VIIIa)
hsa-miR-491-3p	0	0	0	1	0	0	PRAMEF4	PRAME family member 4
hsa-miR-491-3p	0	0	1	1	1	1	ARMC2	armadillo repeat containing 2
hsa-miR-491-3p	1	0	0	1	1	1	CNTRL	centriolin
hsa-miR-491-3p	0	0	1	1	0	0	SLC25A2	solute carrier family 25 (mitochondrial carrier; ornithine transporter) member 2
hsa-miR-491-3p	0	0	0	1	1	1	TTLL2	tubulin tyrosine ligase-like family, member 2
hsa-miR-491-3p	0	0	1	1	1	1	TFG	TRK-fused gene
hsa-miR-491-3p	0	0	1	1	1	1	CXCR4	chemokine (C-X-C motif) receptor 4
hsa-miR-491-3p	0	0	1	1	1	1	DDX39A	DEAD (Asp-Glu-Ala-Asp) box polypeptide 39A
hsa-miR-491-3p	1	0	0	1	0	0	NEUROD4	neuronal differentiation 4
hsa-miR-491-3p	0	0	1	1	0	0	FAAH	fatty acid amide hydrolase
hsa-miR-491-3p	0	0	0	1	0	0	ZNF350	zinc finger protein 350
hsa-miR-491-3p	0	0	0	1	0	0	ARHGAP40	Rho GTPase activating protein 40
hsa-miR-491-3p	1	0	1	1	1	1	HIF3A	hypoxia inducible factor 3, alpha subunit
hsa-miR-491-3p	1	0	1	1	1	1	FBXO9	F-box protein 9
hsa-miR-491-3p	0	0	0	1	0	0	OR2B6	olfactory receptor, family 2, subfamily B, member 6
hsa-miR-491-3p	0	0	1	1	1	1	ATP5S	ATP synthase, H+ transporting, mitochondrial Fo complex, subunit s (factor B)
hsa-miR-491-3p	0	0	0	1	1	1	PCID2	PCI domain containing 2
hsa-miR-491-3p	0	0	1	1	1	1	L3HYPDH	L-3-hydroxyproline dehydratase (trans-)
hsa-miR-491-3p	0	0	0	1	0	0	TBPL2	TATA box binding protein like 2
hsa-miR-491-3p	1	0	0	1	1	1	SLC35E1	solute carrier family 35, member E1
hsa-miR-491-3p	0	0	0	1	0	0	OR7C1	olfactory receptor, family 7, subfamily C, member 1
hsa-miR-491-3p	0	0	1	1	1	1	GNG11	guanine nucleotide binding protein (G protein), gamma 11
hsa-miR-491-3p	0	0	0	1	0	0	GSTT1	glutathione S-transferase theta 1
hsa-miR-491-3p	0	0	0	1	0	0	ART1	ADP-ribosyltransferase 1
hsa-miR-491-3p	0	0	1	1	1	1	CLSPN	claspin
hsa-miR-491-3p	0	0	0	1	0	0	PBX4	pre-B-cell leukemia homeobox 4
hsa-miR-491-3p	0	0	1	1	0	0	RPS16	ribosomal protein S16
hsa-miR-491-3p	0	0	1	1	1	1	DHX29	DEAH (Asp-Glu-Ala-His) box polypeptide 29
hsa-miR-491-3p	0	0	0	1	0	0	USHBP1	Usher syndrome 1C binding protein 1
hsa-miR-491-3p	0	0	0	1	0	0	MAS1	MAS1 oncogene
hsa-miR-491-3p	0	0	1	1	1	1	CCDC62	coiled-coil domain containing 62
hsa-miR-491-3p	0	0	0	1	1	1	ZNF426	zinc finger protein 426
hsa-miR-491-3p	0	0	0	1	1	1	ZCCHC9	zinc finger, CCHC domain containing 9
hsa-miR-491-3p	0	0	0	1	0	0	ZSCAN5A	zinc finger and SCAN domain containing 5A
hsa-miR-491-3p	0	0	1	1	1	1	NR0B2	nuclear receptor subfamily 0, group B, member 2
hsa-miR-491-3p	1	0	0	1	1	1	COQ3	coenzyme Q3 homolog, methyltransferase (S. cerevisiae)
hsa-miR-491-3p	1	0	1	1	1	1	MATN2	matrilin 2
hsa-miR-491-3p	0	0	1	1	1	1	MED10	mediator complex subunit 10
hsa-miR-491-3p	1	0	0	1	0	0	PI4KA	phosphatidylinositol 4-kinase, catalytic, alpha
hsa-miR-491-3p	0	0	1	1	0	0	KRBA1	KRAB-A domain containing 1
hsa-miR-491-3p	0	0	1	1	0	0	HSD17B4	hydroxysteroid (17-beta) dehydrogenase 4
hsa-miR-491-3p	1	0	1	1	1	1	MRO	maestro
hsa-miR-491-3p	0	0	0	1	0	0	ANXA1	annexin A1
hsa-miR-491-3p	0	0	1	1	0	0	TBRG4	transforming growth factor beta regulator 4
hsa-miR-491-3p	0	0	1	1	1	1	SKIL	SKI-like oncogene
hsa-miR-491-3p	0	0	1	1	0	0	YIPF3	Yip1 domain family, member 3
hsa-miR-491-3p	1	0	1	1	1	1	FOXF2	forkhead box F2
hsa-miR-491-3p	0	0	0	1	1	1	TLR2	toll-like receptor 2
hsa-miR-491-3p	0	0	1	1	1	1	CCDC90B	coiled-coil domain containing 90B
hsa-miR-491-3p	0	0	0	1	1	1	MRPL15	mitochondrial ribosomal protein L15
hsa-miR-491-3p	0	0	0	1	0	0	CASP5	caspase 5, apoptosis-related cysteine peptidase
hsa-miR-491-3p	0	0	0	1	0	0	GCHFR	GTP cyclohydrolase I feedback regulator
hsa-miR-491-3p	1	0	1	1	1	1	DYNC2LI1	dynein, cytoplasmic 2, light intermediate chain 1
hsa-miR-491-3p	0	0	0	1	1	1	LRPPRC	leucine-rich pentatricopeptide repeat containing
hsa-miR-491-3p	0	0	0	1	0	0	ASNSD1	asparagine synthetase domain containing 1
hsa-miR-491-3p	0	0	1	1	0	0	CDK15	cyclin-dependent kinase 15
hsa-miR-491-3p	0	0	1	1	1	1	GUCY2C	guanylate cyclase 2C (heat stable enterotoxin receptor)
hsa-miR-491-3p	1	0	1	1	1	1	PTPRB	protein tyrosine phosphatase, receptor type, B
hsa-miR-491-3p	0	0	1	1	1	1	SNCAIP	synuclein, alpha interacting protein
hsa-miR-491-3p	0	0	0	1	0	0	NUP133	nucleoporin 133kDa
hsa-miR-491-3p	0	0	1	1	0	0	B9D1	B9 protein domain 1
hsa-miR-491-3p	0	0	1	1	1	1	C14orf118	chromosome 14 open reading frame 118
hsa-miR-491-3p	0	0	1	1	1	1	TRIP4	thyroid hormone receptor interactor 4
hsa-miR-491-3p	0	0	1	1	1	1	LTBP2	latent transforming growth factor beta binding protein 2
hsa-miR-491-3p	1	0	0	1	1	1	ATF1	activating transcription factor 1
hsa-miR-491-3p	1	0	1	1	1	1	CEP76	centrosomal protein 76kDa
hsa-miR-491-3p	0	0	1	1	1	1	INVS	inversin
hsa-miR-491-3p	0	0	1	1	1	1	SLC27A6	solute carrier family 27 (fatty acid transporter), member 6
hsa-miR-491-3p	0	0	1	1	0	0	FAM83E	family with sequence similarity 83, member E
hsa-miR-491-3p	0	0	0	1	0	0	LIG1	ligase I, DNA, ATP-dependent
hsa-miR-491-3p	0	0	0	1	0	0	IL37	interleukin 37
hsa-miR-491-3p	0	0	1	1	1	1	NAPA	N-ethylmaleimide-sensitive factor attachment protein, alpha
hsa-miR-491-3p	0	0	1	1	1	1	P4HA1	prolyl 4-hydroxylase, alpha polypeptide I
hsa-miR-491-3p	1	0	1	1	1	1	SNRNP40	small nuclear ribonucleoprotein 40kDa (U5)
hsa-miR-491-3p	1	0	1	1	1	1	TP53BP1	tumor protein p53 binding protein 1
hsa-miR-491-3p	0	0	1	1	0	0	LPXN	leupaxin
hsa-miR-491-3p	0	0	1	1	1	1	PIK3CA	phosphatidylinositol-4,5-bisphosphate 3-kinase, catalytic subunit alpha
hsa-miR-491-3p	0	0	1	1	0	0	MCOLN1	mucolipin 1
hsa-miR-491-3p	0	0	0	1	0	0	PDCL3	phosducin-like 3
hsa-miR-491-3p	0	0	0	1	1	1	HERC6	HECT and RLD domain containing E3 ubiquitin protein ligase family member 6
hsa-miR-491-3p	0	0	1	1	0	0	ALMS1	Alstrom syndrome 1
hsa-miR-491-3p	0	0	0	1	1	1	CEP72	centrosomal protein 72kDa
hsa-miR-491-3p	0	0	1	1	0	0	FETUB	fetuin B
hsa-miR-491-3p	0	0	1	1	0	0	WDR70	WD repeat domain 70
hsa-miR-491-3p	0	0	1	1	1	1	SSBP1	single-stranded DNA binding protein 1, mitochondrial
hsa-miR-491-3p	0	0	1	1	1	1	CALB1	calbindin 1, 28kDa
hsa-miR-491-3p	0	0	1	1	1	1	ADAM2	ADAM metallopeptidase domain 2
hsa-miR-491-3p	0	0	1	1	1	1	ABCB1	ATP-binding cassette, sub-family B (MDR/TAP), member 1
hsa-miR-491-3p	0	0	1	1	0	0	NEDD1	neural precursor cell expressed, developmentally down-regulated 1
hsa-miR-491-3p	0	0	1	1	1	1	SLC15A4	solute carrier family 15, member 4
hsa-miR-491-3p	0	0	0	1	0	0	SBNO1	strawberry notch homolog 1 (Drosophila)
hsa-miR-491-3p	0	0	1	1	1	1	METTL21C	methyltransferase like 21C
hsa-miR-491-3p	0	0	1	1	1	1	AK7	adenylate kinase 7
hsa-miR-491-3p	0	0	1	1	1	1	SLC27A2	solute carrier family 27 (fatty acid transporter), member 2
hsa-miR-491-3p	1	0	1	1	1	1	TPM1	tropomyosin 1 (alpha)
hsa-miR-491-3p	0	0	1	1	0	0	CYP1A1	cytochrome P450, family 1, subfamily A, polypeptide 1
hsa-miR-491-3p	0	0	1	1	1	1	RLBP1	retinaldehyde binding protein 1
hsa-miR-491-3p	0	0	1	1	1	1	ITGAD	integrin, alpha D
hsa-miR-491-3p	0	0	0	1	1	1	NOB1	NIN1/RPN12 binding protein 1 homolog (S. cerevisiae)
hsa-miR-491-3p	0	0	0	1	1	1	ZNF750	zinc finger protein 750
hsa-miR-491-3p	0	0	0	1	0	0	MED16	mediator complex subunit 16
hsa-miR-491-3p	1	0	1	1	0	0	SOD1	superoxide dismutase 1, soluble
hsa-miR-491-3p	0	0	1	1	1	1	CAPN10	calpain 10
hsa-miR-491-3p	0	0	1	1	1	1	TIMM44	translocase of inner mitochondrial membrane 44 homolog (yeast)
hsa-miR-491-3p	0	0	1	1	0	0	HES6	hairy and enhancer of split 6 (Drosophila)
hsa-miR-491-3p	0	0	0	1	1	1	SLC25A38	solute carrier family 25, member 38
hsa-miR-491-3p	1	0	1	1	1	1	TRPC1	transient receptor potential cation channel, subfamily C, member 1
hsa-miR-491-3p	1	0	1	1	1	1	BOD1L1	biorientation of chromosomes in cell division 1-like 1
hsa-miR-491-3p	0	0	1	1	0	0	LECT2	leukocyte cell-derived chemotaxin 2
hsa-miR-491-3p	1	0	1	1	1	1	GABRA6	gamma-aminobutyric acid (GABA) A receptor, alpha 6
hsa-miR-491-3p	0	0	1	1	1	1	LARS	leucyl-tRNA synthetase
hsa-miR-491-3p	0	0	0	1	1	1	HIGD2A	HIG1 hypoxia inducible domain family, member 2A
hsa-miR-491-3p	0	0	1	1	1	1	MMS22L	MMS22-like, DNA repair protein
hsa-miR-491-3p	0	0	0	1	0	0	RPL32P18	ribosomal protein L32 pseudogene 18
hsa-miR-491-3p	0	0	1	1	0	0	DOCK11	dedicator of cytokinesis 11
hsa-miR-491-3p	0	0	1	1	1	1	FBXO25	F-box protein 25
hsa-miR-491-3p	0	0	1	1	0	0	EIF3H	eukaryotic translation initiation factor 3, subunit H
hsa-miR-491-3p	0	0	0	1	0	0	OR13C4	olfactory receptor, family 13, subfamily C, member 4
hsa-miR-491-3p	0	0	1	1	0	0	FAM124A	family with sequence similarity 124A
hsa-miR-491-3p	0	0	1	1	1	1	CCDC83	coiled-coil domain containing 83
hsa-miR-491-3p	1	0	1	1	1	1	CEP128	centrosomal protein 128kDa
hsa-miR-491-3p	0	0	1	1	1	1	UNC80	unc-80 homolog (C. elegans)
hsa-miR-491-3p	0	0	0	1	1	1	FARSB	phenylalanyl-tRNA synthetase, beta subunit
hsa-miR-491-3p	0	0	0	1	1	1	UGT3A2	UDP glycosyltransferase 3 family, polypeptide A2
hsa-miR-491-3p	0	0	0	1	0	0	LIPM	lipase, family member M
hsa-miR-491-3p	0	0	1	1	1	1	DGKE	diacylglycerol kinase, epsilon 64kDa
hsa-miR-491-3p	0	0	1	1	1	1	CEP112	centrosomal protein 112kDa
hsa-miR-491-3p	0	0	0	1	0	0	MED7	mediator complex subunit 7
hsa-miR-491-3p	0	0	1	1	1	1	DCK	deoxycytidine kinase
hsa-miR-491-3p	0	0	1	1	0	0	C14orf2	chromosome 14 open reading frame 2
hsa-miR-491-3p	0	0	1	1	1	1	NSMCE2	non-SMC element 2, MMS21 homolog (S. cerevisiae)
hsa-miR-491-3p	1	0	1	1	1	1	CACNA1D	calcium channel, voltage-dependent, L type, alpha 1D subunit
hsa-miR-491-3p	0	0	0	1	0	0	PSMG3	proteasome (prosome, macropain) assembly chaperone 3
hsa-miR-491-3p	0	0	1	1	1	1	PKD1L1	polycystic kidney disease 1 like 1
hsa-miR-491-3p	0	0	1	1	0	0	WNT9B	wingless-type MMTV integration site family, member 9B
hsa-miR-491-3p	0	0	1	1	0	0	TEPP	testis, prostate and placenta expressed
hsa-miR-491-3p	0	0	0	1	0	0	PWP2	PWP2 periodic tryptophan protein homolog (yeast)
hsa-miR-491-3p	0	0	0	1	1	1	ZNF20	zinc finger protein 20
hsa-miR-491-3p	1	0	1	1	0	0	HK3	hexokinase 3 (white cell)
hsa-miR-491-3p	0	0	0	1	0	0	ZNF251	zinc finger protein 251
hsa-miR-491-3p	0	0	0	1	0	0	RDM1	RAD52 motif 1
hsa-miR-491-3p	1	0	1	1	1	1	RNF149	ring finger protein 149
hsa-miR-491-3p	0	0	1	1	0	0	IGFBP7	insulin-like growth factor binding protein 7
hsa-miR-491-3p	0	0	1	1	0	0	PSMD6	proteasome (prosome, macropain) 26S subunit, non-ATPase, 6
hsa-miR-491-3p	1	0	1	1	0	0	RPN1	ribophorin I
hsa-miR-491-3p	0	0	0	1	1	1	WDR65	WD repeat domain 65
hsa-miR-491-3p	0	0	1	1	0	0	APEH	N-acylaminoacyl-peptide hydrolase
hsa-miR-491-3p	0	0	1	1	1	1	HMGB2	high mobility group box 2
hsa-miR-491-3p	0	0	0	1	1	1	CCDC127	coiled-coil domain containing 127
hsa-miR-491-3p	0	0	1	1	1	1	RGS20	regulator of G-protein signaling 20
hsa-miR-491-3p	0	0	1	1	1	1	KCNV1	potassium channel, subfamily V, member 1
hsa-miR-491-3p	1	0	1	1	1	1	LRFN5	leucine rich repeat and fibronectin type III domain containing 5
hsa-miR-491-3p	0	0	1	1	0	0	LRR1	leucine rich repeat protein 1
hsa-miR-491-3p	0	0	1	1	1	1	RPUSD4	RNA pseudouridylate synthase domain containing 4
hsa-miR-491-3p	0	0	1	1	1	1	OTOGL	otogelin-like
hsa-miR-491-3p	0	0	1	1	1	1	IKBIP	IKBKB interacting protein
hsa-miR-491-3p	0	0	1	1	1	1	HEATR3	HEAT repeat containing 3
hsa-miR-491-3p	0	0	0	1	0	0	MC4R	melanocortin 4 receptor
hsa-miR-491-3p	0	0	1	1	0	0	PEX11A	peroxisomal biogenesis factor 11 alpha
hsa-miR-491-3p	1	0	1	1	1	1	TAC3	tachykinin 3
hsa-miR-491-3p	0	0	1	1	0	0	CCNDBP1	cyclin D-type binding-protein 1
hsa-miR-491-3p	0	0	0	1	0	0	COQ4	coenzyme Q4 homolog (S. cerevisiae)
hsa-miR-491-3p	0	0	1	1	1	1	ENGASE	endo-beta-N-acetylglucosaminidase
hsa-miR-491-3p	1	0	1	1	1	1	RRM1	ribonucleotide reductase M1
hsa-miR-491-3p	0	0	0	1	1	1	SPINT2	serine peptidase inhibitor, Kunitz type, 2
hsa-miR-491-3p	0	0	1	1	0	0	CD320	CD320 molecule
hsa-miR-491-3p	0	0	1	1	0	0	RPSA	ribosomal protein SA
hsa-miR-491-3p	0	0	0	1	0	0	ULK4	unc-51-like kinase 4 (C. elegans)
hsa-miR-491-3p	0	0	0	1	1	1	PBK	PDZ binding kinase
hsa-miR-491-3p	0	0	0	1	0	0	OR6F1	olfactory receptor, family 6, subfamily F, member 1
hsa-miR-491-3p	0	0	0	1	0	0	OR8U1	olfactory receptor, family 8, subfamily U, member 1
hsa-miR-491-3p	0	0	1	1	0	0	KARS	lysyl-tRNA synthetase
hsa-miR-491-3p	0	0	0	1	0	0	OR9I1	olfactory receptor, family 9, subfamily I, member 1
hsa-miR-491-3p	0	0	0	1	0	0	IARS2	isoleucyl-tRNA synthetase 2, mitochondrial
hsa-miR-491-3p	0	0	1	1	0	0	TEX13B	testis expressed 13B
hsa-miR-491-3p	0	0	0	1	0	0	KCNJ4	potassium inwardly-rectifying channel, subfamily J, member 4
hsa-miR-491-3p	0	0	1	1	0	0	TMEM51	transmembrane protein 51
hsa-miR-491-3p	0	0	0	1	0	0	WDR87	WD repeat domain 87
hsa-miR-491-3p	0	0	0	1	1	1	HINT1	histidine triad nucleotide binding protein 1
hsa-miR-491-3p	0	0	0	1	1	1	DRD5	dopamine receptor D5
hsa-miR-491-3p	0	0	0	1	0	0	OR5AU1	olfactory receptor, family 5, subfamily AU, member 1
hsa-miR-491-3p	0	0	0	1	0	0	HSFY2	heat shock transcription factor, Y linked 2
hsa-miR-491-3p	1	0	1	1	0	0	PRPF8	PRP8 pre-mRNA processing factor 8 homolog (S. cerevisiae)
hsa-miR-491-3p	0	0	1	1	0	0	TTLL6	tubulin tyrosine ligase-like family, member 6
hsa-miR-491-3p	0	0	0	1	1	1	KRT73	keratin 73
hsa-miR-491-3p	0	0	0	1	0	0	CEP89	centrosomal protein 89kDa
hsa-miR-491-3p	0	0	0	1	1	1	SLC9C1	solute carrier family 9, subfamily C (Na+-transporting carboxylic acid decarboxylase), member 1
hsa-miR-491-3p	1	0	0	1	0	0	KISS1	KiSS-1 metastasis-suppressor
hsa-miR-491-3p	0	0	1	1	0	0	TBCA	tubulin folding cofactor A
hsa-miR-491-3p	1	0	1	1	1	1	CEP120	centrosomal protein 120kDa
hsa-miR-491-3p	0	0	0	1	0	0	PCDHB1	protocadherin beta 1
hsa-miR-491-3p	0	0	1	1	0	0	SPRR1A	small proline-rich protein 1A
hsa-miR-491-3p	0	0	0	1	1	1	LDHAL6B	lactate dehydrogenase A-like 6B
hsa-miR-491-3p	0	0	0	1	0	0	MRPL39	mitochondrial ribosomal protein L39
hsa-miR-491-3p	0	0	1	1	0	0	FAM161A	family with sequence similarity 161, member A
hsa-miR-491-3p	0	0	1	1	1	1	GEMIN2	gem (nuclear organelle) associated protein 2
hsa-miR-491-3p	0	0	0	1	0	0	CLDN15	claudin 15
hsa-miR-491-3p	1	0	0	1	1	1	RBAK	RB-associated KRAB zinc finger
hsa-miR-491-3p	0	0	0	1	1	1	NPFFR2	neuropeptide FF receptor 2
hsa-miR-491-3p	0	0	0	1	0	0	C4orf21	chromosome 4 open reading frame 21
hsa-miR-491-3p	0	0	0	1	0	0	XCR1	chemokine (C motif) receptor 1
hsa-miR-491-3p	0	0	0	1	0	0	OR5B3	olfactory receptor, family 5, subfamily B, member 3
hsa-miR-491-3p	0	0	1	1	0	0	VEGFB	vascular endothelial growth factor B
hsa-miR-491-3p	0	0	1	1	0	0	CARD14	caspase recruitment domain family, member 14
hsa-miR-491-3p	1	0	1	1	0	0	NDST2	N-deacetylase/N-sulfotransferase (heparan glucosaminyl) 2
hsa-miR-491-3p	0	0	1	1	1	1	RBM4	RNA binding motif protein 4
hsa-miR-491-3p	1	0	0	1	1	1	XXYLT1	xyloside xylosyltransferase 1
hsa-miR-491-3p	0	0	0	1	0	0	METTL18	methyltransferase like 18
hsa-miR-491-3p	1	0	1	1	1	1	HAP1	huntingtin-associated protein 1
hsa-miR-491-3p	0	0	1	1	1	1	ZNF621	zinc finger protein 621
hsa-miR-491-3p	0	0	1	1	1	1	CCPG1	cell cycle progression 1
hsa-miR-491-3p	0	0	0	1	1	1	FNDC9	fibronectin type III domain containing 9
hsa-miR-491-3p	0	0	0	1	0	0	OR52I2	olfactory receptor, family 52, subfamily I, member 2
hsa-miR-491-3p	0	0	1	1	0	0	TUBA3E	tubulin, alpha 3e
hsa-miR-491-3p	1	0	1	1	1	1	SHOX2	short stature homeobox 2
hsa-miR-491-3p	0	0	1	1	0	0	GRINA	glutamate receptor, ionotropic, N-methyl D-aspartate-associated protein 1 (glutamate binding)
hsa-miR-491-3p	0	0	1	1	0	0	ZNF821	zinc finger protein 821
hsa-miR-491-3p	0	0	0	1	0	0	OR4C6	olfactory receptor, family 4, subfamily C, member 6
hsa-miR-491-3p	1	0	1	1	0	0	PPP2R2D	protein phosphatase 2, regulatory subunit B, delta
hsa-miR-491-3p	0	0	1	1	0	0	COPG1	coatomer protein complex, subunit gamma 1
hsa-miR-491-3p	1	0	1	1	1	1	PKN2	protein kinase N2
hsa-miR-491-3p	0	0	0	1	0	0	OR2AE1	olfactory receptor, family 2, subfamily AE, member 1
hsa-miR-491-3p	0	0	1	1	1	1	LRRC34	leucine rich repeat containing 34
hsa-miR-491-3p	1	0	1	1	0	0	SMCR8	Smith-Magenis syndrome chromosome region, candidate 8
hsa-miR-491-3p	0	0	0	1	0	0	CAPZA3	capping protein (actin filament) muscle Z-line, alpha 3
hsa-miR-491-3p	0	0	0	1	1	1	BOK	BCL2-related ovarian killer
hsa-miR-491-3p	1	0	0	1	0	0	MPDZ	multiple PDZ domain protein
hsa-miR-491-3p	0	0	1	1	1	1	ANKDD1A	ankyrin repeat and death domain containing 1A
hsa-miR-491-3p	1	0	1	1	1	1	HTR1F	5-hydroxytryptamine (serotonin) receptor 1F, G protein-coupled
hsa-miR-491-3p	0	0	1	1	1	1	RABGGTB	Rab geranylgeranyltransferase, beta subunit
hsa-miR-491-3p	0	0	0	1	1	1	C8orf40	chromosome 8 open reading frame 40
hsa-miR-491-3p	0	0	0	1	0	0	OR2G3	olfactory receptor, family 2, subfamily G, member 3
hsa-miR-491-3p	1	0	0	1	1	1	FAIM2	Fas apoptotic inhibitory molecule 2
hsa-miR-491-3p	0	0	1	1	1	1	NR1H4	nuclear receptor subfamily 1, group H, member 4
hsa-miR-491-3p	0	0	1	1	1	1	TGIF2LY	TGFB-induced factor homeobox 2-like, Y-linked
hsa-miR-491-3p	1	0	1	1	1	1	HIGD1A	HIG1 hypoxia inducible domain family, member 1A
hsa-miR-491-3p	0	0	1	1	1	1	PSMA1	proteasome (prosome, macropain) subunit, alpha type, 1
hsa-miR-491-3p	0	0	0	1	0	0	INPP1	inositol polyphosphate-1-phosphatase
hsa-miR-491-3p	0	0	1	1	1	1	ZNF660	zinc finger protein 660
hsa-miR-491-3p	1	0	1	1	1	1	NIN	ninein (GSK3B interacting protein)
hsa-miR-491-3p	0	0	1	1	1	1	TCP11L1	t-complex 11 (mouse)-like 1
hsa-miR-491-3p	0	0	1	1	1	1	PRMT5	protein arginine methyltransferase 5
hsa-miR-491-3p	0	0	1	1	0	0	HERC2P3	hect domain and RLD 2 pseudogene 3
hsa-miR-491-3p	0	0	0	1	0	0	SLC6A18	solute carrier family 6, member 18
hsa-miR-491-3p	0	0	1	1	1	1	LACC1	laccase (multicopper oxidoreductase) domain containing 1
hsa-miR-491-3p	0	0	1	1	1	1	CEP192	centrosomal protein 192kDa
hsa-miR-491-3p	1	0	1	1	1	1	HMGB1	high mobility group box 1
hsa-miR-491-3p	1	0	1	1	1	1	RIT2	Ras-like without CAAX 2
hsa-miR-491-3p	1	0	1	1	0	0	EXOSC3	exosome component 3
hsa-miR-491-3p	0	0	0	1	0	0	IFITM2	interferon induced transmembrane protein 2
hsa-miR-491-3p	0	0	1	1	1	1	SDHA	succinate dehydrogenase complex, subunit A, flavoprotein (Fp)
hsa-miR-491-3p	0	0	0	1	0	0	ZAR1	zygote arrest 1
hsa-miR-491-3p	0	0	0	1	0	0	OR4N4	olfactory receptor, family 4, subfamily N, member 4
hsa-miR-491-3p	0	0	1	1	1	1	TMIGD1	transmembrane and immunoglobulin domain containing 1
hsa-miR-491-3p	0	0	1	1	1	1	HNMT	histamine N-methyltransferase
hsa-miR-491-3p	0	0	0	1	0	0	DAOA	D-amino acid oxidase activator
hsa-miR-491-3p	0	0	0	1	0	0	PRAMEF15	PRAME family member 15
hsa-miR-491-3p	0	0	0	1	1	1	TMEM121	transmembrane protein 121
hsa-miR-491-3p	0	0	1	1	1	1	TBX18	T-box 18
hsa-miR-491-3p	0	0	0	1	1	1	WDR5B	WD repeat domain 5B
hsa-miR-491-3p	0	0	1	1	0	0	HIST2H2AB	histone cluster 2, H2ab
hsa-miR-491-3p	0	0	1	1	1	1	DUT	deoxyuridine triphosphatase
hsa-miR-491-3p	0	0	0	1	1	1	DDX59	DEAD (Asp-Glu-Ala-Asp) box polypeptide 59
hsa-miR-491-3p	0	0	1	1	0	0	ZNF703	zinc finger protein 703
hsa-miR-491-3p	0	0	1	1	0	0	GPR19	G protein-coupled receptor 19
hsa-miR-491-3p	0	0	1	1	0	0	MARCH11	membrane-associated ring finger (C3HC4) 11
hsa-miR-491-3p	0	0	0	1	0	0	OR5K1	olfactory receptor, family 5, subfamily K, member 1
hsa-miR-491-3p	0	0	1	1	1	1	GEMIN8	gem (nuclear organelle) associated protein 8
hsa-miR-491-3p	0	0	0	1	0	0	SCN10A	sodium channel, voltage-gated, type X, alpha subunit
hsa-miR-491-3p	0	0	1	1	0	0	PIF1	PIF1 5'-to-3' DNA helicase homolog (S. cerevisiae)
hsa-miR-491-3p	0	0	0	1	1	1	TTC32	tetratricopeptide repeat domain 32
hsa-miR-491-3p	0	0	0	1	1	1	SHOX	short stature homeobox
hsa-miR-491-3p	0	0	0	1	0	0	KRTAP13-4	keratin associated protein 13-4
hsa-miR-491-3p	0	0	1	1	0	0	TPGS2	tubulin polyglutamylase complex subunit 2
hsa-miR-491-3p	1	0	1	1	1	1	PNRC2	proline-rich nuclear receptor coactivator 2
hsa-miR-491-3p	0	0	1	1	1	1	RALGAPA2	Ral GTPase activating protein, alpha subunit 2 (catalytic)
hsa-miR-491-3p	0	0	0	1	0	0	TAC4	tachykinin 4 (hemokinin)
hsa-miR-491-3p	0	0	0	1	1	1	TBCD	tubulin folding cofactor D
hsa-miR-491-3p	0	0	1	1	1	1	TMPRSS11A	transmembrane protease, serine 11A
hsa-miR-491-3p	0	0	0	1	1	1	RAX	retina and anterior neural fold homeobox
hsa-miR-491-3p	0	0	1	1	1	1	RASSF6	Ras association (RalGDS/AF-6) domain family member 6
hsa-miR-491-3p	0	0	1	1	0	0	ADAM7	ADAM metallopeptidase domain 7
hsa-miR-491-3p	0	0	0	1	1	1	CYP3A7	cytochrome P450, family 3, subfamily A, polypeptide 7
hsa-miR-491-3p	0	0	1	1	0	0	FAM3B	family with sequence similarity 3, member B
hsa-miR-491-3p	1	0	1	1	0	0	SMUG1	single-strand-selective monofunctional uracil-DNA glycosylase 1
hsa-miR-491-3p	0	0	0	1	1	1	ZNF420	zinc finger protein 420
hsa-miR-491-3p	1	0	1	1	1	1	ISCU	iron-sulfur cluster scaffold homolog (E. coli)
hsa-miR-491-3p	0	0	1	1	1	1	STAG3L1	stromal antigen 3-like 1
hsa-miR-491-3p	0	0	1	1	1	1	FAIM	Fas apoptotic inhibitory molecule
hsa-miR-491-3p	1	0	0	1	0	0	RAP1BL	RAP1B, member of RAS oncogene family pseudogene
hsa-miR-491-3p	0	0	0	1	1	1	SERPINA13	serpin peptidase inhibitor, clade A (alpha-1 antiproteinase, antitrypsin), member 13 (pseudogene)
hsa-miR-491-3p	0	0	1	1	1	1	PSPC1	paraspeckle component 1
hsa-miR-491-3p	0	0	1	1	0	0	DEFB119	defensin, beta 119
hsa-miR-491-3p	0	0	0	1	0	0	NUDT14	nudix (nucleoside diphosphate linked moiety X)-type motif 14
hsa-miR-491-3p	0	0	1	1	1	1	LRRC17	leucine rich repeat containing 17
hsa-miR-491-3p	0	0	0	1	0	0	TTLL13	tubulin tyrosine ligase-like family, member 13
hsa-miR-491-3p	0	0	1	1	0	0	ELSPBP1	epididymal sperm binding protein 1
hsa-miR-491-3p	0	0	0	1	1	1	SDCBP2	syndecan binding protein (syntenin) 2
hsa-miR-491-3p	0	0	1	1	1	1	SLC26A3	solute carrier family 26, member 3
hsa-miR-491-3p	1	0	1	1	1	1	FASLG	Fas ligand (TNF superfamily, member 6)
hsa-miR-491-3p	0	0	1	1	1	1	GPR18	G protein-coupled receptor 18
hsa-miR-491-3p	1	0	1	1	1	1	KLHL6	kelch-like 6 (Drosophila)
hsa-miR-491-3p	0	0	1	1	1	1	CNTNAP3B	contactin associated protein-like 3B
hsa-miR-491-3p	0	0	1	1	0	0	DPY30	dpy-30 homolog (C. elegans)
hsa-miR-491-3p	1	0	1	1	1	1	RBPJ	recombination signal binding protein for immunoglobulin kappa J region
hsa-miR-491-3p	0	0	0	1	0	0	FAM22B	family with sequence similarity 22, member B
hsa-miR-491-3p	0	0	0	1	1	1	DFNA5	deafness, autosomal dominant 5
hsa-miR-491-3p	0	0	0	1	1	1	TM7SF3	transmembrane 7 superfamily member 3
hsa-miR-491-3p	0	0	1	1	0	0	RPS2	ribosomal protein S2
hsa-miR-491-3p	0	0	1	1	1	1	SP140	SP140 nuclear body protein
hsa-miR-491-3p	0	0	0	1	1	1	OR7D2	olfactory receptor, family 7, subfamily D, member 2
hsa-miR-491-3p	0	0	1	1	1	1	C15orf48	chromosome 15 open reading frame 48
hsa-miR-491-3p	0	0	0	1	0	0	LARP7	La ribonucleoprotein domain family, member 7
hsa-miR-491-3p	1	0	0	1	1	1	EGFR	epidermal growth factor receptor
hsa-miR-491-3p	0	0	1	1	1	1	ECM2	extracellular matrix protein 2, female organ and adipocyte specific
hsa-miR-491-3p	1	0	1	1	1	1	UNC79	unc-79 homolog (C. elegans)
hsa-miR-491-3p	1	0	0	1	1	1	SMARCB1	SWI/SNF related, matrix associated, actin dependent regulator of chromatin, subfamily b, member 1
hsa-miR-491-3p	0	0	0	1	0	0	ZNF433	zinc finger protein 433
hsa-miR-491-3p	0	0	1	1	1	1	LYNX1	Ly6/neurotoxin 1
hsa-miR-491-3p	1	0	1	1	1	1	ARID1B	AT rich interactive domain 1B (SWI1-like)
hsa-miR-491-3p	0	0	1	1	1	1	HAUS4	HAUS augmin-like complex, subunit 4
hsa-miR-491-3p	0	0	1	1	1	1	B2M	beta-2-microglobulin
hsa-miR-491-3p	0	0	1	1	1	1	DPYS	dihydropyrimidinase
hsa-miR-491-3p	0	0	0	1	1	1	MTERF	mitochondrial transcription termination factor
hsa-miR-491-3p	0	0	1	1	1	1	TEX9	testis expressed 9
hsa-miR-491-3p	0	0	0	1	1	1	POLR2K	polymerase (RNA) II (DNA directed) polypeptide K, 7.0kDa
hsa-miR-491-3p	0	0	0	1	1	1	SLC23A1	solute carrier family 23 (nucleobase transporters), member 1
hsa-miR-491-3p	0	0	1	1	1	1	POTEA	POTE ankyrin domain family, member A
hsa-miR-491-3p	0	0	0	1	0	0	FGF16	fibroblast growth factor 16
hsa-miR-491-3p	0	0	1	1	0	0	DNHD1	dynein heavy chain domain 1
hsa-miR-491-3p	0	0	0	1	1	1	GNL3	guanine nucleotide binding protein-like 3 (nucleolar)
hsa-miR-491-3p	0	0	1	1	1	1	UGT1A1	UDP glucuronosyltransferase 1 family, polypeptide A1
hsa-miR-491-3p	0	0	1	1	1	1	UGT1A7	UDP glucuronosyltransferase 1 family, polypeptide A7
hsa-miR-491-3p	0	0	1	1	1	1	UGT1A8	UDP glucuronosyltransferase 1 family, polypeptide A8
hsa-miR-491-3p	0	0	1	1	1	1	UGT1A9	UDP glucuronosyltransferase 1 family, polypeptide A9
hsa-miR-491-3p	0	0	1	1	1	1	UGT1A5	UDP glucuronosyltransferase 1 family, polypeptide A5
hsa-miR-491-3p	0	0	1	1	1	1	UGT1A10	UDP glucuronosyltransferase 1 family, polypeptide A10
hsa-miR-491-3p	0	0	1	1	1	1	UGT1A4	UDP glucuronosyltransferase 1 family, polypeptide A4
hsa-miR-491-3p	0	0	1	1	1	1	UGT1A6	UDP glucuronosyltransferase 1 family, polypeptide A6
hsa-miR-491-3p	0	0	1	1	1	1	UGT1A3	UDP glucuronosyltransferase 1 family, polypeptide A3
hsa-miR-491-3p	1	0	1	1	1	1	ABHD2	abhydrolase domain containing 2
hsa-miR-491-3p	0	0	0	1	1	1	ARSG	arylsulfatase G
hsa-miR-491-3p	0	0	1	1	1	1	NSD1	nuclear receptor binding SET domain protein 1
hsa-miR-491-3p	0	0	1	1	1	1	VWA3B	von Willebrand factor A domain containing 3B
hsa-miR-491-3p	0	0	0	1	0	0	ARSA	arylsulfatase A
hsa-miR-491-3p	1	0	1	1	1	1	AKAP9	A kinase (PRKA) anchor protein (yotiao) 9
hsa-miR-491-3p	1	0	1	1	1	1	CACNA2D1	calcium channel, voltage-dependent, alpha 2/delta subunit 1
hsa-miR-491-3p	1	0	1	1	1	1	RAP1A	RAP1A, member of RAS oncogene family
hsa-miR-491-3p	1	0	1	1	1	1	ATN1	atrophin 1
hsa-miR-491-3p	0	0	1	1	1	1	UHRF1BP1L	UHRF1 binding protein 1-like
hsa-miR-491-3p	0	0	0	1	0	0	TTC30B	tetratricopeptide repeat domain 30B
hsa-miR-491-3p	0	0	1	1	1	1	ELAVL4	ELAV (embryonic lethal, abnormal vision, Drosophila)-like 4
hsa-miR-491-3p	0	0	1	1	0	0	MPV17	MpV17 mitochondrial inner membrane protein
hsa-miR-491-3p	0	0	0	1	1	1	ZNF23	zinc finger protein 23
hsa-miR-491-3p	0	0	1	1	1	1	GALP	galanin-like peptide
hsa-miR-491-3p	0	0	1	1	1	1	CCDC147	coiled-coil domain containing 147
hsa-miR-491-3p	1	0	1	1	0	0	SMARCA4	SWI/SNF related, matrix associated, actin dependent regulator of chromatin, subfamily a, member 4
hsa-miR-491-3p	1	0	1	1	1	1	GRM8	glutamate receptor, metabotropic 8
hsa-miR-491-3p	0	0	1	1	1	1	RAD52	RAD52 homolog (S. cerevisiae)
hsa-miR-491-3p	0	0	1	1	1	1	PRAME	preferentially expressed antigen in melanoma
hsa-miR-491-3p	1	0	1	1	1	1	CELSR3	cadherin, EGF LAG seven-pass G-type receptor 3 (flamingo homolog, Drosophila)
hsa-miR-491-3p	0	0	1	1	0	0	FAM3D	family with sequence similarity 3, member D
hsa-miR-491-3p	1	0	1	1	1	1	SGMS2	sphingomyelin synthase 2
hsa-miR-491-3p	0	0	1	1	1	1	ANXA10	annexin A10
hsa-miR-491-3p	0	0	1	1	0	0	PDSS1	prenyl (decaprenyl) diphosphate synthase, subunit 1
hsa-miR-491-3p	0	0	1	1	0	0	HKR1	HKR1, GLI-Kruppel zinc finger family member
hsa-miR-491-3p	0	0	1	1	1	1	GTPBP4	GTP binding protein 4
hsa-miR-491-3p	0	0	0	1	1	1	LCE1B	late cornified envelope 1B
hsa-miR-491-3p	0	0	0	1	1	1	ZNF681	zinc finger protein 681
hsa-miR-491-3p	0	0	1	1	0	0	AXDND1	axonemal dynein light chain domain containing 1
hsa-miR-491-3p	0	0	1	1	1	1	POTEG	POTE ankyrin domain family, member G
hsa-miR-491-3p	0	0	1	1	1	1	FAM107A	family with sequence similarity 107, member A
hsa-miR-491-3p	0	0	1	1	1	1	KIAA1704	KIAA1704
hsa-miR-491-3p	0	0	0	1	0	0	POTEF	POTE ankyrin domain family, member F
hsa-miR-491-3p	0	0	0	1	1	1	EGFL6	EGF-like-domain, multiple 6
hsa-miR-491-3p	0	0	1	1	1	1	PHLDB1	pleckstrin homology-like domain, family B, member 1
hsa-miR-491-3p	1	0	1	1	1	1	PNP	purine nucleoside phosphorylase
hsa-miR-491-3p	0	0	0	1	1	1	MAGEB3	melanoma antigen family B, 3
hsa-miR-491-3p	0	0	1	1	0	0	PORCN	porcupine homolog (Drosophila)
hsa-miR-491-3p	0	0	1	1	1	1	C1orf101	chromosome 1 open reading frame 101
hsa-miR-491-3p	0	0	1	1	0	0	FH	fumarate hydratase
hsa-miR-491-3p	0	0	1	1	1	1	COG2	component of oligomeric golgi complex 2
hsa-miR-491-3p	0	0	1	1	1	1	PARP1	poly (ADP-ribose) polymerase 1
hsa-miR-491-3p	0	0	1	1	1	1	SDE2	SDE2 telomere maintenance homolog (S. pombe)
hsa-miR-491-3p	1	0	1	1	1	1	T	T, brachyury homolog (mouse)
hsa-miR-491-3p	0	0	1	1	1	1	PARK2	parkinson protein 2, E3 ubiquitin protein ligase (parkin)
hsa-miR-491-3p	0	0	1	1	1	1	LYPLAL1	lysophospholipase-like 1
hsa-miR-491-3p	0	0	1	1	1	1	KCTD3	potassium channel tetramerisation domain containing 3
hsa-miR-491-3p	0	0	0	1	0	0	C4BPA	complement component 4 binding protein, alpha
hsa-miR-491-3p	0	0	0	1	0	0	LEMD1	LEM domain containing 1
hsa-miR-491-3p	0	0	0	1	1	1	CLDN20	claudin 20
hsa-miR-491-3p	0	0	1	1	1	1	PTPRC	protein tyrosine phosphatase, receptor type, C
hsa-miR-491-3p	1	0	1	1	1	1	TROVE2	TROVE domain family, member 2
hsa-miR-491-3p	0	0	1	1	1	1	UCHL5	ubiquitin carboxyl-terminal hydrolase L5
hsa-miR-491-3p	1	0	1	1	1	1	HIVEP2	human immunodeficiency virus type I enhancer binding protein 2
hsa-miR-491-3p	1	0	1	1	1	1	CITED2	Cbp/p300-interacting transactivator, with Glu/Asp-rich carboxy-terminal domain, 2
hsa-miR-491-3p	0	0	1	1	1	1	SFT2D2	SFT2 domain containing 2
hsa-miR-491-3p	1	0	1	1	1	1	CD247	CD247 molecule
hsa-miR-491-3p	0	0	1	1	1	1	HSD17B7	hydroxysteroid (17-beta) dehydrogenase 7
hsa-miR-491-3p	0	0	1	1	1	1	CD48	CD48 molecule
hsa-miR-491-3p	1	0	1	1	1	1	PTPRK	protein tyrosine phosphatase, receptor type, K
hsa-miR-491-3p	0	0	0	1	1	1	SMPDL3A	sphingomyelin phosphodiesterase, acid-like 3A
hsa-miR-491-3p	0	0	1	1	1	1	OAT	ornithine aminotransferase
hsa-miR-491-3p	1	0	0	1	1	1	LACE1	lactation elevated 1
hsa-miR-491-3p	0	0	1	1	0	0	NSMCE4A	non-SMC element 4 homolog A (S. cerevisiae)
hsa-miR-491-3p	0	0	1	1	1	1	PDSS2	prenyl (decaprenyl) diphosphate synthase, subunit 2
hsa-miR-491-3p	0	0	1	1	1	1	RTN4IP1	reticulon 4 interacting protein 1
hsa-miR-491-3p	0	0	1	1	0	0	HIST2H4B	histone cluster 2, H4b
hsa-miR-491-3p	0	0	1	1	0	0	HIST2H4A	histone cluster 2, H4a
hsa-miR-491-3p	0	0	1	1	1	1	FAM204A	family with sequence similarity 204, member A
hsa-miR-491-3p	0	1	1	1	1	1	SYCP1	synaptonemal complex protein 1
hsa-miR-491-3p	1	0	1	1	1	1	ST7L	suppression of tumorigenicity 7 like
hsa-miR-491-3p	0	0	1	1	0	0	WDR96	WD repeat domain 96
hsa-miR-491-3p	0	0	0	1	0	0	GSTM2	glutathione S-transferase mu 2 (muscle)
hsa-miR-491-3p	0	0	0	1	1	1	AS3MT	arsenic (+3 oxidation state) methyltransferase
hsa-miR-491-3p	0	0	1	1	1	1	CYP17A1	cytochrome P450, family 17, subfamily A, polypeptide 1
hsa-miR-491-3p	0	0	1	1	0	0	KIAA1324	KIAA1324
hsa-miR-491-3p	0	0	0	1	1	1	TMEM187	transmembrane protein 187
hsa-miR-491-3p	1	0	1	1	1	1	C10orf76	chromosome 10 open reading frame 76
hsa-miR-491-3p	0	0	0	1	0	0	CXorf40B	chromosome X open reading frame 40B
hsa-miR-491-3p	0	0	1	1	1	1	CREG1	cellular repressor of E1A-stimulated genes 1
hsa-miR-491-3p	1	0	1	1	1	1	FGF13	fibroblast growth factor 13
hsa-miR-491-3p	0	0	0	1	0	0	RPF1	ribosome production factor 1 homolog (S. cerevisiae)
hsa-miR-491-3p	0	0	0	1	0	0	CT45A2	cancer/testis antigen family 45, member A2
hsa-miR-491-3p	0	0	0	1	0	0	CT45A3	cancer/testis antigen family 45, member A3
hsa-miR-491-3p	0	0	1	1	0	0	IFI44	interferon-induced protein 44
hsa-miR-491-3p	0	0	1	1	1	1	ATG4C	autophagy related 4C, cysteine peptidase
hsa-miR-491-3p	0	0	0	1	1	1	C20orf85	chromosome 20 open reading frame 85
hsa-miR-491-3p	0	0	1	1	1	1	DNTT	deoxynucleotidyltransferase, terminal
hsa-miR-491-3p	0	0	1	1	1	1	C1orf177	chromosome 1 open reading frame 177
hsa-miR-491-3p	0	0	1	1	1	1	TMEM59	transmembrane protein 59
hsa-miR-491-3p	0	0	0	1	0	0	RHOXF2	Rhox homeobox family, member 2
hsa-miR-491-3p	0	0	0	1	0	0	RHOXF2B	Rhox homeobox family, member 2B
hsa-miR-491-3p	0	0	0	1	0	0	SLC1A7	solute carrier family 1 (glutamate transporter), member 7
hsa-miR-491-3p	1	0	1	1	1	1	SEPT6	septin 6
hsa-miR-491-3p	1	0	1	1	1	1	CC2D1B	coiled-coil and C2 domain containing 1B
hsa-miR-491-3p	0	0	1	1	0	0	DPM1	dolichyl-phosphate mannosyltransferase polypeptide 1, catalytic subunit
hsa-miR-491-3p	1	0	1	1	1	1	LONRF3	LON peptidase N-terminal domain and ring finger 3
hsa-miR-491-3p	0	0	0	1	1	1	IFIT1	interferon-induced protein with tetratricopeptide repeats 1
hsa-miR-491-3p	0	0	1	1	0	0	RAD54L	RAD54-like (S. cerevisiae)
hsa-miR-491-3p	0	0	0	1	1	1	TSPAN1	tetraspanin 1
hsa-miR-491-3p	0	0	1	1	1	1	TMEM53	transmembrane protein 53
hsa-miR-491-3p	0	0	1	1	0	0	PLTP	phospholipid transfer protein
hsa-miR-491-3p	1	0	1	1	0	0	ZSWIM1	zinc finger, SWIM-type containing 1
hsa-miR-491-3p	0	0	0	1	1	1	ZNF684	zinc finger protein 684
hsa-miR-491-3p	1	0	1	1	1	1	RLF	rearranged L-myc fusion
hsa-miR-491-3p	0	0	1	1	0	0	SWI5	SWI5 recombination repair homolog (yeast)
hsa-miR-491-3p	0	0	1	1	0	0	TRERF1	transcriptional regulating factor 1
hsa-miR-491-3p	0	0	1	1	0	0	TRMT2B	tRNA methyltransferase 2 homolog B (S. cerevisiae)
hsa-miR-491-3p	1	0	1	1	0	0	FRS3	fibroblast growth factor receptor substrate 3
hsa-miR-491-3p	1	0	1	1	0	0	GRIK3	glutamate receptor, ionotropic, kainate 3
hsa-miR-491-3p	0	0	1	1	0	0	CSF3R	colony stimulating factor 3 receptor (granulocyte)
hsa-miR-491-3p	0	0	0	1	1	1	FARP2	FERM, RhoGEF and pleckstrin domain protein 2
hsa-miR-491-3p	0	0	1	1	1	1	ZDHHC15	zinc finger, DHHC-type containing 15
hsa-miR-491-3p	0	0	1	1	0	0	GARNL3	GTPase activating Rap/RanGAP domain-like 3
hsa-miR-491-3p	0	0	1	1	1	1	HDAC8	histone deacetylase 8
hsa-miR-491-3p	0	0	1	1	1	1	MRRF	mitochondrial ribosome recycling factor
hsa-miR-491-3p	0	0	1	1	1	1	MAPK13	mitogen-activated protein kinase 13
hsa-miR-491-3p	1	0	1	1	1	1	DBC1	deleted in bladder cancer 1
hsa-miR-491-3p	0	0	1	1	0	0	GPN2	GPN-loop GTPase 2
hsa-miR-491-3p	0	0	0	1	1	1	C10orf71	chromosome 10 open reading frame 71
hsa-miR-491-3p	0	0	0	1	1	1	RHCE	Rh blood group, CcEe antigens
hsa-miR-491-3p	0	0	1	1	0	0	ALOX5	arachidonate 5-lipoxygenase
hsa-miR-491-3p	0	0	0	1	0	0	GGNBP1	gametogenetin binding protein 1 (pseudogene)
hsa-miR-491-3p	0	0	1	1	0	0	ID3	inhibitor of DNA binding 3, dominant negative helix-loop-helix protein
hsa-miR-491-3p	0	0	1	1	1	1	SMC2	structural maintenance of chromosomes 2
hsa-miR-491-3p	0	0	0	1	1	1	APEX2	APEX nuclease (apurinic/apyrimidinic endonuclease) 2
hsa-miR-491-3p	1	0	1	1	0	0	RNF5	ring finger protein 5, E3 ubiquitin protein ligase
hsa-miR-491-3p	0	0	0	1	1	1	TMCO4	transmembrane and coiled-coil domains 4
hsa-miR-491-3p	0	0	0	1	0	0	XPA	xeroderma pigmentosum, complementation group A
hsa-miR-491-3p	1	0	1	1	1	1	OSBPL6	oxysterol binding protein-like 6
hsa-miR-491-3p	0	0	0	1	1	1	EMC1	ER membrane protein complex subunit 1
hsa-miR-491-3p	1	0	0	1	1	1	DCUN1D2	DCN1, defective in cullin neddylation 1, domain containing 2 (S. cerevisiae)
hsa-miR-491-3p	0	0	0	1	1	1	ADPRHL1	ADP-ribosylhydrolase like 1
hsa-miR-491-3p	0	0	0	1	1	1	SUSD3	sushi domain containing 3
hsa-miR-491-3p	0	0	0	1	0	0	SDHB	succinate dehydrogenase complex, subunit B, iron sulfur (Ip)
hsa-miR-491-3p	0	0	1	1	1	1	CARD16	caspase recruitment domain family, member 16
hsa-miR-491-3p	1	0	1	1	1	1	MASTL	microtubule associated serine/threonine kinase-like
hsa-miR-491-3p	0	0	1	1	1	1	ZCCHC6	zinc finger, CCHC domain containing 6
hsa-miR-491-3p	0	0	1	1	0	0	PRAMEF9	PRAME family member 9
hsa-miR-491-3p	0	0	0	1	0	0	PRAMEF6	PRAME family member 6
hsa-miR-491-3p	0	0	1	1	0	0	PCCA	propionyl CoA carboxylase, alpha polypeptide
hsa-miR-491-3p	0	0	0	1	1	1	KLHL35	kelch-like 35 (Drosophila)
hsa-miR-491-3p	0	0	1	1	1	1	FRMD3	FERM domain containing 3
hsa-miR-491-3p	0	0	0	1	0	0	PUS1	pseudouridylate synthase 1
hsa-miR-491-3p	0	0	1	1	0	0	MAD2L2	MAD2 mitotic arrest deficient-like 2 (yeast)
hsa-miR-491-3p	0	0	0	1	0	0	SULT1C3	sulfotransferase family, cytosolic, 1C, member 3
hsa-miR-491-3p	0	0	1	1	0	0	C20orf79	chromosome 20 open reading frame 79
hsa-miR-491-3p	0	0	0	1	0	0	CBWD6	COBW domain containing 6
hsa-miR-491-3p	0	0	1	1	1	1	CNTNAP3	contactin associated protein-like 3
hsa-miR-491-3p	0	0	0	1	0	0	HIST1H4C	histone cluster 1, H4c
hsa-miR-491-3p	0	0	0	1	0	0	CUBN	cubilin (intrinsic factor-cobalamin receptor)
hsa-miR-491-3p	0	0	1	1	0	0	SLC3A2	solute carrier family 3 (activators of dibasic and neutral amino acid transport), member 2
hsa-miR-491-3p	0	0	1	1	1	1	GPR34	G protein-coupled receptor 34
hsa-miR-491-3p	0	0	0	1	0	0	RPP38	ribonuclease P/MRP 38kDa subunit
hsa-miR-491-3p	0	0	0	1	1	1	PHF11	PHD finger protein 11
hsa-miR-491-3p	0	0	1	1	0	0	WRAP73	WD repeat containing, antisense to TP73
hsa-miR-491-3p	0	0	1	1	0	0	HSPA14	heat shock 70kDa protein 14
hsa-miR-491-3p	1	0	0	1	0	0	CTU2	cytosolic thiouridylase subunit 2 homolog (S. pombe)
hsa-miR-491-3p	0	0	0	1	0	0	OR4A47	olfactory receptor, family 4, subfamily A, member 47
hsa-miR-491-3p	0	0	1	1	1	1	CAMKMT	calmodulin-lysine N-methyltransferase
hsa-miR-491-3p	0	0	0	1	0	0	PHYH	phytanoyl-CoA 2-hydroxylase
hsa-miR-491-3p	0	0	1	1	0	0	DCTN3	dynactin 3 (p22)
hsa-miR-491-3p	0	0	1	1	1	1	CHGB	chromogranin B (secretogranin 1)
hsa-miR-491-3p	1	0	1	1	1	1	HIVEP1	human immunodeficiency virus type I enhancer binding protein 1
hsa-miR-491-3p	0	0	1	1	0	0	SGCE	sarcoglycan, epsilon
hsa-miR-491-3p	0	0	1	1	1	1	IFNA14	interferon, alpha 14
hsa-miR-491-3p	0	0	1	1	0	0	RPS6	ribosomal protein S6
hsa-miR-491-3p	0	0	1	1	1	1	FAM9C	family with sequence similarity 9, member C
hsa-miR-491-3p	0	0	1	1	0	0	CEP152	centrosomal protein 152kDa
hsa-miR-491-3p	0	0	1	1	1	1	CD99	CD99 molecule
hsa-miR-491-3p	0	0	1	1	1	1	TECRL	trans-2,3-enoyl-CoA reductase-like
hsa-miR-491-3p	0	0	0	1	0	0	SLCO1B7	solute carrier organic anion transporter family, member 1B7 (non-functional)
hsa-miR-491-3p	0	0	1	1	0	0	FAM22D	family with sequence similarity 22, member D
hsa-miR-491-3p	0	0	0	1	0	0	FAM22A	family with sequence similarity 22, member A
hsa-miR-491-3p	0	0	1	1	0	0	TMEM74B	transmembrane protein 74B
hsa-miR-491-3p	0	0	1	1	0	0	RNF17	ring finger protein 17
hsa-miR-491-3p	0	0	1	1	0	0	STK31	serine/threonine kinase 31
hsa-miR-491-3p	0	0	1	1	1	1	CLEC6A	C-type lectin domain family 6, member A
hsa-miR-491-3p	0	0	1	1	1	1	DEFB132	defensin, beta 132
hsa-miR-491-3p	0	0	0	1	1	1	RBMY1E	RNA binding motif protein, Y-linked, family 1, member E
hsa-miR-491-3p	0	0	0	1	1	1	RBMY1D	RNA binding motif protein, Y-linked, family 1, member D
hsa-miR-491-3p	1	0	1	1	1	1	APBA2	amyloid beta (A4) precursor protein-binding, family A, member 2
hsa-miR-491-3p	0	0	1	1	1	1	ZNF197	zinc finger protein 197
hsa-miR-491-3p	0	0	1	1	1	1	AGPHD1	aminoglycoside phosphotransferase domain containing 1
hsa-miR-491-3p	1	0	1	1	1	1	ARNTL	aryl hydrocarbon receptor nuclear translocator-like
hsa-miR-491-3p	1	0	1	1	1	1	PEX2	peroxisomal biogenesis factor 2
hsa-miR-491-3p	0	0	1	1	1	1	THBD	thrombomodulin
hsa-miR-491-3p	0	0	1	1	1	1	CLEC2D	C-type lectin domain family 2, member D
hsa-miR-491-3p	1	0	1	0	1	1	CACYBP	calcyclin binding protein
hsa-miR-491-3p	0	0	1	1	1	1	ZNF599	zinc finger protein 599
hsa-miR-491-3p	1	0	1	0	1	1	DNAJC21	DnaJ (Hsp40) homolog, subfamily C, member 21
hsa-miR-491-3p	1	0	1	1	1	1	SORCS1	sortilin-related VPS10 domain containing receptor 1
hsa-miR-491-3p	0	0	1	1	1	1	DCAF8L1	DDB1 and CUL4 associated factor 8-like 1
hsa-miR-491-3p	1	0	1	0	1	1	TFEC	transcription factor EC
hsa-miR-491-3p	1	0	1	0	1	1	ARHGAP5	Rho GTPase activating protein 5
hsa-miR-491-3p	0	0	1	1	1	1	ADPRH	ADP-ribosylarginine hydrolase
hsa-miR-491-3p	0	0	1	0	1	1	CAV2	caveolin 2
hsa-miR-491-3p	1	0	1	1	1	1	GAS8	growth arrest-specific 8
hsa-miR-491-3p	1	0	1	1	1	1	ALCAM	activated leukocyte cell adhesion molecule
hsa-miR-491-3p	1	0	1	1	1	1	DBT	dihydrolipoamide branched chain transacylase E2
hsa-miR-491-3p	1	0	1	1	1	1	DSC3	desmocollin 3
hsa-miR-491-3p	1	0	1	1	1	1	GABPA	GA binding protein transcription factor, alpha subunit 60kDa
hsa-miR-491-3p	0	0	1	0	1	1	GYPA	glycophorin A (MNS blood group)
hsa-miR-491-3p	0	0	1	1	1	1	CD46	CD46 molecule, complement regulatory protein
hsa-miR-491-3p	1	0	1	0	1	1	MEST	mesoderm specific transcript homolog (mouse)
hsa-miR-491-3p	1	0	1	0	1	1	PRKCI	protein kinase C, iota
hsa-miR-491-3p	1	0	0	1	1	1	RBMS1	RNA binding motif, single stranded interacting protein 1
hsa-miR-491-3p	1	0	1	1	1	1	CTSS	cathepsin S
hsa-miR-491-3p	0	0	1	1	1	1	ATG12	autophagy related 12
hsa-miR-491-3p	1	0	1	1	1	1	SCAF11	SR-related CTD-associated factor 11
hsa-miR-491-3p	0	0	0	1	1	1	SLC24A1	solute carrier family 24 (sodium/potassium/calcium exchanger), member 1
hsa-miR-491-3p	1	0	1	1	1	1	FOXL1	forkhead box L1
hsa-miR-491-3p	1	0	1	1	1	1	SCARB2	scavenger receptor class B, member 2
hsa-miR-491-3p	0	0	1	1	1	1	ITK	IL2-inducible T-cell kinase
hsa-miR-491-3p	1	0	1	1	1	1	HBS1L	HBS1-like (S. cerevisiae)
hsa-miR-491-3p	1	0	1	0	1	1	LRBA	LPS-responsive vesicle trafficking, beach and anchor containing
hsa-miR-491-3p	1	0	1	1	1	1	UPK1B	uroplakin 1B
hsa-miR-491-3p	0	0	0	1	1	1	ZNF175	zinc finger protein 175
hsa-miR-491-3p	1	0	1	1	1	1	SHANK2	SH3 and multiple ankyrin repeat domains 2
hsa-miR-491-3p	1	0	1	1	1	1	SNAP91	synaptosomal-associated protein, 91kDa homolog (mouse)
hsa-miR-491-3p	0	0	1	1	1	1	KIAA1009	KIAA1009
hsa-miR-491-3p	1	0	1	1	1	1	MON2	MON2 homolog (S. cerevisiae)
hsa-miR-491-3p	0	0	1	1	1	1	PTPN22	protein tyrosine phosphatase, non-receptor type 22 (lymphoid)
hsa-miR-491-3p	0	0	0	1	1	1	FAM82B	family with sequence similarity 82, member B
hsa-miR-491-3p	1	0	1	0	1	1	HECA	headcase homolog (Drosophila)
hsa-miR-491-3p	1	0	1	0	1	1	PTPLAD1	protein tyrosine phosphatase-like A domain containing 1
hsa-miR-491-3p	0	0	0	1	1	1	CCRL1	chemokine (C-C motif) receptor-like 1
hsa-miR-491-3p	0	0	0	1	1	1	CRNKL1	crooked neck pre-mRNA splicing factor-like 1 (Drosophila)
hsa-miR-491-3p	1	0	1	0	1	1	C14orf101	chromosome 14 open reading frame 101
hsa-miR-491-3p	0	0	1	1	1	1	OSBPL1A	oxysterol binding protein-like 1A
hsa-miR-491-3p	0	0	1	0	1	1	WDR60	WD repeat domain 60
hsa-miR-491-3p	1	0	1	1	1	1	PGM2	phosphoglucomutase 2
hsa-miR-491-3p	0	0	1	0	1	1	CPPED1	calcineurin-like phosphoesterase domain containing 1
hsa-miR-491-3p	1	0	1	1	1	1	LRP2BP	LRP2 binding protein
hsa-miR-491-3p	1	0	1	1	1	1	CSGALNACT2	chondroitin sulfate N-acetylgalactosaminyltransferase 2
hsa-miR-491-3p	0	0	0	1	1	1	PCDHB7	protocadherin beta 7
hsa-miR-491-3p	1	0	0	1	1	1	ABCC9	ATP-binding cassette, sub-family C (CFTR/MRP), member 9
hsa-miR-491-3p	1	0	1	1	1	1	ANKRD50	ankyrin repeat domain 50
hsa-miR-491-3p	0	0	0	0	1	1	PBOV1	prostate and breast cancer overexpressed 1
hsa-miR-491-3p	1	0	1	1	1	1	SLC5A7	solute carrier family 5 (choline transporter), member 7
hsa-miR-491-3p	0	0	1	1	1	1	HSPA2	heat shock 70kDa protein 2
hsa-miR-491-3p	1	0	1	0	1	1	NECAB1	N-terminal EF-hand calcium binding protein 1
hsa-miR-491-3p	1	0	1	0	1	1	LMBR1	limb region 1 homolog (mouse)
hsa-miR-491-3p	1	0	1	1	1	1	SMC6	structural maintenance of chromosomes 6
hsa-miR-491-3p	0	0	1	1	1	1	C1QTNF3	C1q and tumor necrosis factor related protein 3
hsa-miR-491-3p	0	0	1	1	1	1	IFT81	intraflagellar transport 81 homolog (Chlamydomonas)
hsa-miR-491-3p	1	0	1	1	1	1	TMEM128	transmembrane protein 128
hsa-miR-491-3p	0	0	1	1	1	1	BCCIP	BRCA2 and CDKN1A interacting protein
hsa-miR-491-3p	1	0	1	0	1	1	IL1RAP	interleukin 1 receptor accessory protein
hsa-miR-491-3p	0	0	0	0	1	1	NOM1	nucleolar protein with MIF4G domain 1
hsa-miR-491-3p	1	0	1	1	1	1	MIPOL1	mirror-image polydactyly 1
hsa-miR-491-3p	1	0	1	1	1	1	VTI1A	vesicle transport through interaction with t-SNAREs homolog 1A (yeast)
hsa-miR-491-3p	0	0	1	1	1	1	SGOL2	shugoshin-like 2 (S. pombe)
hsa-miR-491-3p	1	0	1	1	1	1	ABCA13	ATP-binding cassette, sub-family A (ABC1), member 13
hsa-miR-491-3p	1	0	1	1	1	1	MTERFD2	MTERF domain containing 2
hsa-miR-491-3p	0	0	1	1	1	1	CABP7	calcium binding protein 7
hsa-miR-491-3p	1	0	1	0	1	1	GNPNAT1	glucosamine-phosphate N-acetyltransferase 1
hsa-miR-491-3p	1	0	1	0	1	1	NRK	Nik related kinase
hsa-miR-491-3p	1	0	1	1	1	1	SAMD12	sterile alpha motif domain containing 12
hsa-miR-491-3p	1	0	1	1	1	1	METTL10	methyltransferase like 10
hsa-miR-491-3p	0	0	0	1	1	1	CCR2	chemokine (C-C motif) receptor 2
hsa-miR-491-3p	0	0	0	0	1	1	LOC401220	uncharacterized LOC401220
hsa-miR-491-3p	0	0	0	0	1	1	LOC150519	uncharacterized LOC150519
hsa-miR-491-3p	0	0	0	0	1	1	TMEM198B	transmembrane protein 198B, pseudogene
hsa-miR-491-3p	0	0	0	0	1	1	LOC645434	uncharacterized LOC645434
