# Supplementary material for: Profiling of Selected MicroRNAs in Proliferative Eutopic Endometrium of Women with Ovarian Endometriosis
Source: Biomed Res Int. 2015 Aug 20;2015:760698. doi: 10.1155/2015/760698 (PMC4558423; doi:10.1155/2015/760698)
Supplement: Supplementary file 1 — Table I: The names of miRNAs significantly differentially expressed between eutopic endometrium of patients with endometriosis vs eutopic endometrium of patients without endometriosis. Table II: The associations between miRNA and mRNA, which presents detailed results of the search of six major databases i.e targetscan, tarbase, miranda, mirbase, mirtarget2 and pictar. [file 760698.f1.zip › 760698.f1/Table II/hsa-miR-491-5p.tsv]

miR	targetscan	tarbase	miranda	mirbase	mirtarget2	pictar	GeneSymbol	GeneName
hsa-miR-491-5p	1	0	1	1	1	1	SMARCD1	SWI/SNF related, matrix associated, actin dependent regulator of chromatin, subfamily d, member 1
hsa-miR-491-5p	1	0	1	1	1	1	MAP1A	microtubule-associated protein 1A
hsa-miR-491-5p	1	0	1	1	1	1	SYN1	synapsin I
hsa-miR-491-5p	1	0	1	1	1	1	PTPN11	protein tyrosine phosphatase, non-receptor type 11
hsa-miR-491-5p	1	0	1	1	1	1	DNAJA2	DnaJ (Hsp40) homolog, subfamily A, member 2
hsa-miR-491-5p	1	0	1	0	1	1	ZBTB40	zinc finger and BTB domain containing 40
hsa-miR-491-5p	1	0	1	1	1	1	USP20	ubiquitin specific peptidase 20
hsa-miR-491-5p	1	0	1	0	1	1	DIS3	DIS3 mitotic control homolog (S. cerevisiae)
hsa-miR-491-5p	1	0	1	1	1	1	GAL3ST3	galactose-3-O-sulfotransferase 3
hsa-miR-491-5p	1	0	1	0	1	1	GATAD2B	GATA zinc finger domain containing 2B
hsa-miR-491-5p	1	0	1	1	1	1	BCL6B	B-cell CLL/lymphoma 6, member B
hsa-miR-491-5p	1	0	1	1	1	1	GIT1	G protein-coupled receptor kinase interacting ArfGAP 1
hsa-miR-491-5p	1	0	1	1	1	1	PGBD5	piggyBac transposable element derived 5
hsa-miR-491-5p	1	0	1	1	1	1	RD3	retinal degeneration 3
hsa-miR-491-5p	1	0	1	1	1	1	CYP26B1	cytochrome P450, family 26, subfamily B, polypeptide 1
hsa-miR-491-5p	1	0	0	1	1	1	TRIM67	tripartite motif containing 67
hsa-miR-491-5p	1	0	1	1	1	1	PDLIM2	PDZ and LIM domain 2 (mystique)
hsa-miR-491-5p	1	0	1	1	1	1	DNAJB5	DnaJ (Hsp40) homolog, subfamily B, member 5
hsa-miR-491-5p	1	0	1	1	1	1	SHOC2	soc-2 suppressor of clear homolog (C. elegans)
hsa-miR-491-5p	1	0	1	1	1	1	HAP1	huntingtin-associated protein 1
hsa-miR-491-5p	1	0	0	1	1	1	ASB13	ankyrin repeat and SOCS box containing 13
hsa-miR-491-5p	1	0	1	1	1	1	CBLN3	cerebellin 3 precursor
hsa-miR-491-5p	1	0	1	1	1	1	BCL2L2	BCL2-like 2
hsa-miR-491-5p	1	0	1	1	1	1	NFIB	nuclear factor I/B
hsa-miR-491-5p	1	0	1	1	1	1	OR2H1	olfactory receptor, family 2, subfamily H, member 1
hsa-miR-491-5p	1	0	1	1	1	1	RABIF	RAB interacting factor
hsa-miR-491-5p	1	0	1	1	1	1	ZC3H7B	zinc finger CCCH-type containing 7B
hsa-miR-491-5p	1	0	1	0	1	1	CCL22	chemokine (C-C motif) ligand 22
hsa-miR-491-5p	1	0	1	1	1	1	SCN4B	sodium channel, voltage-gated, type IV, beta subunit
hsa-miR-491-5p	1	0	1	1	1	1	CREB3L2	cAMP responsive element binding protein 3-like 2
hsa-miR-491-5p	1	0	1	1	1	1	B4GALT5	UDP-Gal:betaGlcNAc beta 1,4- galactosyltransferase, polypeptide 5
hsa-miR-491-5p	1	0	1	1	1	1	PDE1B	phosphodiesterase 1B, calmodulin-dependent
hsa-miR-491-5p	1	0	1	1	0	0	SRCAP	Snf2-related CREBBP activator protein
hsa-miR-491-5p	1	0	1	1	0	0	LRFN1	leucine rich repeat and fibronectin type III domain containing 1
hsa-miR-491-5p	1	0	1	1	0	0	SAP30BP	SAP30 binding protein
hsa-miR-491-5p	1	0	1	0	1	1	KIAA0664	KIAA0664
hsa-miR-491-5p	1	0	1	1	1	1	NIPAL2	NIPA-like domain containing 2
hsa-miR-491-5p	1	0	1	1	1	1	GIPC1	GIPC PDZ domain containing family, member 1
hsa-miR-491-5p	1	0	1	0	1	1	CSRNP2	cysteine-serine-rich nuclear protein 2
hsa-miR-491-5p	1	0	1	1	1	1	MARCKS	myristoylated alanine-rich protein kinase C substrate
hsa-miR-491-5p	1	0	1	1	1	1	CSTF2T	cleavage stimulation factor, 3' pre-RNA, subunit 2, 64kDa, tau variant
hsa-miR-491-5p	1	0	1	1	1	1	VTI1A	vesicle transport through interaction with t-SNAREs homolog 1A (yeast)
hsa-miR-491-5p	1	0	1	1	1	1	ZBTB8A	zinc finger and BTB domain containing 8A
hsa-miR-491-5p	1	0	1	1	0	0	INO80D	INO80 complex subunit D
hsa-miR-491-5p	1	0	1	1	1	1	CSMD2	CUB and Sushi multiple domains 2
hsa-miR-491-5p	1	0	1	1	0	0	IGSF9B	immunoglobulin superfamily, member 9B
hsa-miR-491-5p	1	0	1	1	1	1	EMID2	EMI domain containing 2
hsa-miR-491-5p	1	0	1	1	1	1	PDGFRA	platelet-derived growth factor receptor, alpha polypeptide
hsa-miR-491-5p	1	0	1	1	1	1	SZRD1	SUZ RNA binding domain containing 1
hsa-miR-491-5p	1	0	0	0	1	1	MED29	mediator complex subunit 29
hsa-miR-491-5p	1	0	1	1	1	1	TMEM132B	transmembrane protein 132B
hsa-miR-491-5p	1	0	1	1	1	1	GPD1	glycerol-3-phosphate dehydrogenase 1 (soluble)
hsa-miR-491-5p	1	0	1	1	1	1	FOXP4	forkhead box P4
hsa-miR-491-5p	1	0	1	1	1	1	NFASC	neurofascin
hsa-miR-491-5p	1	0	1	1	1	1	PBX2	pre-B-cell leukemia homeobox 2
hsa-miR-491-5p	1	0	1	0	1	1	ZNF609	zinc finger protein 609
hsa-miR-491-5p	1	0	1	1	1	1	GAS8	growth arrest-specific 8
hsa-miR-491-5p	1	0	1	1	1	1	RIMBP2	RIMS binding protein 2
hsa-miR-491-5p	1	0	1	0	1	1	SRGAP3	SLIT-ROBO Rho GTPase activating protein 3
hsa-miR-491-5p	1	0	1	1	1	1	DOK4	docking protein 4
hsa-miR-491-5p	1	0	1	0	1	1	MGAT4B	mannosyl (alpha-1,3-)-glycoprotein beta-1,4-N-acetylglucosaminyltransferase, isozyme B
hsa-miR-491-5p	1	0	1	0	1	1	IGF2BP1	insulin-like growth factor 2 mRNA binding protein 1
hsa-miR-491-5p	1	0	0	0	1	1	RAP1GAP2	RAP1 GTPase activating protein 2
hsa-miR-491-5p	1	0	1	1	1	1	RNF185	ring finger protein 185
hsa-miR-491-5p	1	0	1	1	1	1	SHANK3	SH3 and multiple ankyrin repeat domains 3
hsa-miR-491-5p	1	0	1	1	0	0	TCF7	transcription factor 7 (T-cell specific, HMG-box)
hsa-miR-491-5p	1	0	1	1	0	0	MEX3A	mex-3 homolog A (C. elegans)
hsa-miR-491-5p	1	1	1	1	0	0	EFNA3	ephrin-A3
hsa-miR-491-5p	1	0	1	1	1	1	MN1	meningioma (disrupted in balanced translocation) 1
hsa-miR-491-5p	1	0	1	1	1	1	FAM222B	family with sequence similarity 222, member B
hsa-miR-491-5p	1	0	1	1	1	1	KAT7	K(lysine) acetyltransferase 7
hsa-miR-491-5p	1	0	1	0	1	1	N4BP3	NEDD4 binding protein 3
hsa-miR-491-5p	1	0	1	1	1	1	IGSF22	immunoglobulin superfamily, member 22
hsa-miR-491-5p	1	0	0	0	0	0	PAIP2B	poly(A) binding protein interacting protein 2B
hsa-miR-491-5p	1	0	1	1	1	1	AGPAT1	1-acylglycerol-3-phosphate O-acyltransferase 1 (lysophosphatidic acid acyltransferase, alpha)
hsa-miR-491-5p	1	0	1	1	0	0	CHD3	chromodomain helicase DNA binding protein 3
hsa-miR-491-5p	1	0	1	1	1	1	STK4	serine/threonine kinase 4
hsa-miR-491-5p	1	0	1	1	1	1	DMPK	dystrophia myotonica-protein kinase
hsa-miR-491-5p	1	0	1	1	1	1	MBD6	methyl-CpG binding domain protein 6
hsa-miR-491-5p	1	0	0	1	0	0	CIDEC	cell death-inducing DFFA-like effector c
hsa-miR-491-5p	1	0	1	1	1	1	AMD1	adenosylmethionine decarboxylase 1
hsa-miR-491-5p	1	0	1	1	1	1	RASL10B	RAS-like, family 10, member B
hsa-miR-491-5p	1	0	1	0	1	1	IQGAP3	IQ motif containing GTPase activating protein 3
hsa-miR-491-5p	1	0	1	1	1	1	MYT1L	myelin transcription factor 1-like
hsa-miR-491-5p	1	0	1	1	1	1	GTPBP2	GTP binding protein 2
hsa-miR-491-5p	1	0	1	1	1	1	TMEM35	transmembrane protein 35
hsa-miR-491-5p	1	0	1	0	1	1	KCNK5	potassium channel, subfamily K, member 5
hsa-miR-491-5p	1	0	1	1	1	1	GLYAT	glycine-N-acyltransferase
hsa-miR-491-5p	1	0	1	0	1	1	FBXO41	F-box protein 41
hsa-miR-491-5p	1	0	1	1	1	1	SCAF1	SR-related CTD-associated factor 1
hsa-miR-491-5p	1	0	1	1	1	1	EPB41L1	erythrocyte membrane protein band 4.1-like 1
hsa-miR-491-5p	1	0	1	1	1	1	BNC2	basonuclin 2
hsa-miR-491-5p	1	0	1	1	1	1	PLAU	plasminogen activator, urokinase
hsa-miR-491-5p	1	0	1	1	0	0	HUWE1	HECT, UBA and WWE domain containing 1, E3 ubiquitin protein ligase
hsa-miR-491-5p	1	0	1	0	0	0	TRANK1	tetratricopeptide repeat and ankyrin repeat containing 1
hsa-miR-491-5p	1	0	1	0	1	1	KIAA0355	KIAA0355
hsa-miR-491-5p	1	0	1	1	1	1	IGSF1	immunoglobulin superfamily, member 1
hsa-miR-491-5p	1	0	1	1	1	1	ABCC5	ATP-binding cassette, sub-family C (CFTR/MRP), member 5
hsa-miR-491-5p	1	0	1	0	1	1	PTPRT	protein tyrosine phosphatase, receptor type, T
hsa-miR-491-5p	0	0	1	1	1	1	C2CD2L	C2CD2-like
hsa-miR-491-5p	1	0	1	1	1	1	SGSM2	small G protein signaling modulator 2
hsa-miR-491-5p	1	0	1	0	1	1	MTSS1	metastasis suppressor 1
hsa-miR-491-5p	0	0	1	1	0	0	RAP1GAP	RAP1 GTPase activating protein
hsa-miR-491-5p	0	0	1	1	1	1	NEU3	sialidase 3 (membrane sialidase)
hsa-miR-491-5p	1	0	1	1	0	0	PCLO	piccolo (presynaptic cytomatrix protein)
hsa-miR-491-5p	1	0	1	1	1	1	GREB1	growth regulation by estrogen in breast cancer 1
hsa-miR-491-5p	1	0	1	1	1	1	ANKRD17	ankyrin repeat domain 17
hsa-miR-491-5p	1	0	1	0	1	1	MAGI2	membrane associated guanylate kinase, WW and PDZ domain containing 2
hsa-miR-491-5p	1	0	1	0	0	0	DTX4	deltex homolog 4 (Drosophila)
hsa-miR-491-5p	1	0	1	1	1	1	CIT	citron (rho-interacting, serine/threonine kinase 21)
hsa-miR-491-5p	1	0	1	1	1	1	C11orf9	chromosome 11 open reading frame 9
hsa-miR-491-5p	0	0	1	1	1	1	TBC1D30	TBC1 domain family, member 30
hsa-miR-491-5p	1	0	1	1	1	1	PHF8	PHD finger protein 8
hsa-miR-491-5p	0	0	1	1	0	0	ZC4H2	zinc finger, C4H2 domain containing
hsa-miR-491-5p	1	0	1	1	1	1	KIAA1217	KIAA1217
hsa-miR-491-5p	1	0	1	1	1	1	ATXN7L1	ataxin 7-like 1
hsa-miR-491-5p	1	0	1	1	1	1	RALGAPB	Ral GTPase activating protein, beta subunit (non-catalytic)
hsa-miR-491-5p	1	0	1	1	1	1	ZMIZ1	zinc finger, MIZ-type containing 1
hsa-miR-491-5p	0	0	1	0	0	0	MTA3	metastasis associated 1 family, member 3
hsa-miR-491-5p	1	0	1	1	1	1	PCDH19	protocadherin 19
hsa-miR-491-5p	1	0	1	1	0	0	EBF4	early B-cell factor 4
hsa-miR-491-5p	1	0	1	1	1	1	FAM214B	family with sequence similarity 214, member B
hsa-miR-491-5p	0	0	1	0	0	0	TTC28-AS1	TTC28 antisense RNA 1
hsa-miR-491-5p	0	0	1	1	1	1	AKR1E2	aldo-keto reductase family 1, member E2
hsa-miR-491-5p	1	0	1	1	1	1	CDK13	cyclin-dependent kinase 13
hsa-miR-491-5p	1	0	1	1	1	1	LZTS2	leucine zipper, putative tumor suppressor 2
hsa-miR-491-5p	0	0	1	1	0	0	COL27A1	collagen, type XXVII, alpha 1
hsa-miR-491-5p	0	0	1	0	0	0	KIAA1908	uncharacterized LOC114796
hsa-miR-491-5p	1	0	1	1	1	1	SH3TC2	SH3 domain and tetratricopeptide repeats 2
hsa-miR-491-5p	1	0	1	1	1	1	ACBD5	acyl-CoA binding domain containing 5
hsa-miR-491-5p	1	0	1	1	1	1	TP53	tumor protein p53
hsa-miR-491-5p	0	0	1	1	0	0	FAM22D	family with sequence similarity 22, member D
hsa-miR-491-5p	1	0	1	0	0	0	ZC3H12C	zinc finger CCCH-type containing 12C
hsa-miR-491-5p	0	0	1	0	0	0	TIFAB	TRAF-interacting protein with forkhead-associated domain, family member B
hsa-miR-491-5p	1	1	1	1	1	1	BACE1	beta-site APP-cleaving enzyme 1
hsa-miR-491-5p	0	0	1	1	1	1	ING4	inhibitor of growth family, member 4
hsa-miR-491-5p	0	0	1	1	0	0	DBP	D site of albumin promoter (albumin D-box) binding protein
hsa-miR-491-5p	1	0	1	1	1	1	VLDLR	very low density lipoprotein receptor
hsa-miR-491-5p	1	0	1	1	1	1	OSBPL7	oxysterol binding protein-like 7
hsa-miR-491-5p	1	0	1	1	1	1	BACH2	BTB and CNC homology 1, basic leucine zipper transcription factor 2
hsa-miR-491-5p	0	0	1	1	0	0	KCNC3	potassium voltage-gated channel, Shaw-related subfamily, member 3
hsa-miR-491-5p	1	0	1	1	1	1	RPS6KA3	ribosomal protein S6 kinase, 90kDa, polypeptide 3
hsa-miR-491-5p	0	0	1	1	0	0	TNNI3K	TNNI3 interacting kinase
hsa-miR-491-5p	1	0	1	1	0	0	ELN	elastin
hsa-miR-491-5p	1	0	1	1	1	1	PML	promyelocytic leukemia
hsa-miR-491-5p	0	0	1	1	1	1	MAZ	MYC-associated zinc finger protein (purine-binding transcription factor)
hsa-miR-491-5p	1	0	1	1	1	1	PHC1	polyhomeotic homolog 1 (Drosophila)
hsa-miR-491-5p	0	0	1	0	1	1	DCAF11	DDB1 and CUL4 associated factor 11
hsa-miR-491-5p	1	0	1	0	1	1	MPPED2	metallophosphoesterase domain containing 2
hsa-miR-491-5p	1	0	1	1	0	0	CACNB1	calcium channel, voltage-dependent, beta 1 subunit
hsa-miR-491-5p	0	0	1	1	1	1	DDX39B	DEAD (Asp-Glu-Ala-Asp) box polypeptide 39B
hsa-miR-491-5p	0	0	1	0	0	0	SUPT5H	suppressor of Ty 5 homolog (S. cerevisiae)
hsa-miR-491-5p	1	0	1	1	1	1	EPHA7	EPH receptor A7
hsa-miR-491-5p	1	0	1	1	1	1	ERF	Ets2 repressor factor
hsa-miR-491-5p	1	0	1	1	1	1	EPHA5	EPH receptor A5
hsa-miR-491-5p	1	0	1	1	1	1	SPTB	spectrin, beta, erythrocytic
hsa-miR-491-5p	0	0	1	1	0	0	ASIC3	acid-sensing (proton-gated) ion channel 3
hsa-miR-491-5p	0	0	1	1	0	0	IGFBP2	insulin-like growth factor binding protein 2, 36kDa
hsa-miR-491-5p	0	0	1	1	0	0	ITGA2B	integrin, alpha 2b (platelet glycoprotein IIb of IIb/IIIa complex, antigen CD41)
hsa-miR-491-5p	1	0	1	1	1	1	COL16A1	collagen, type XVI, alpha 1
hsa-miR-491-5p	0	0	1	1	0	0	HLA-DMB	major histocompatibility complex, class II, DM beta
hsa-miR-491-5p	0	0	1	1	0	0	BMP1	bone morphogenetic protein 1
hsa-miR-491-5p	1	0	1	1	1	1	EPB41	erythrocyte membrane protein band 4.1 (elliptocytosis 1, RH-linked)
hsa-miR-491-5p	0	0	1	1	0	0	SLC22A8	solute carrier family 22 (organic anion transporter), member 8
hsa-miR-491-5p	1	0	1	1	1	1	CYP46A1	cytochrome P450, family 46, subfamily A, polypeptide 1
hsa-miR-491-5p	1	0	1	1	1	1	MEF2D	myocyte enhancer factor 2D
hsa-miR-491-5p	0	0	1	1	0	0	MUC3A	mucin 3A, cell surface associated
hsa-miR-491-5p	1	0	1	0	1	1	MLL2	myeloid/lymphoid or mixed-lineage leukemia 2
hsa-miR-491-5p	0	0	1	1	0	0	KIR2DL3	killer cell immunoglobulin-like receptor, two domains, long cytoplasmic tail, 3
hsa-miR-491-5p	0	0	1	1	0	0	SPTBN2	spectrin, beta, non-erythrocytic 2
hsa-miR-491-5p	0	0	1	1	1	1	SESN1	sestrin 1
hsa-miR-491-5p	1	0	1	1	1	1	MRAS	muscle RAS oncogene homolog
hsa-miR-491-5p	0	0	1	1	1	1	CYP4F3	cytochrome P450, family 4, subfamily F, polypeptide 3
hsa-miR-491-5p	1	0	1	1	1	1	CTNND1	catenin (cadherin-associated protein), delta 1
hsa-miR-491-5p	1	0	1	1	0	0	ASPHD1	aspartate beta-hydroxylase domain containing 1
hsa-miR-491-5p	0	0	1	1	1	1	EPN1	epsin 1
hsa-miR-491-5p	1	0	1	1	1	1	VAPB	VAMP (vesicle-associated membrane protein)-associated protein B and C
hsa-miR-491-5p	1	0	1	0	1	1	CELF2	CUGBP, Elav-like family member 2
hsa-miR-491-5p	0	0	1	1	1	1	PCBP4	poly(rC) binding protein 4
hsa-miR-491-5p	1	0	1	1	1	1	PFKFB3	6-phosphofructo-2-kinase/fructose-2,6-biphosphatase 3
hsa-miR-491-5p	0	0	1	1	1	1	TMEM176B	transmembrane protein 176B
hsa-miR-491-5p	0	0	1	1	1	1	DMRT2	doublesex and mab-3 related transcription factor 2
hsa-miR-491-5p	0	0	1	1	1	1	FAM178B	family with sequence similarity 178, member B
hsa-miR-491-5p	1	0	1	1	1	1	MARK3	MAP/microtubule affinity-regulating kinase 3
hsa-miR-491-5p	1	0	1	1	1	1	C3orf18	chromosome 3 open reading frame 18
hsa-miR-491-5p	0	0	1	0	0	0	BPESC1	blepharophimosis, epicanthus inversus and ptosis, candidate 1 (non-protein coding)
hsa-miR-491-5p	0	0	1	1	0	0	SH2B1	SH2B adaptor protein 1
hsa-miR-491-5p	0	0	1	1	1	1	NKX3-1	NK3 homeobox 1
hsa-miR-491-5p	0	0	1	0	0	0	TIGD7	tigger transposable element derived 7
hsa-miR-491-5p	1	0	1	1	1	1	ERGIC1	endoplasmic reticulum-golgi intermediate compartment (ERGIC) 1
hsa-miR-491-5p	0	0	1	1	1	1	ZNF331	zinc finger protein 331
hsa-miR-491-5p	0	0	1	1	0	0	GHRHR	growth hormone releasing hormone receptor
hsa-miR-491-5p	1	0	1	1	1	1	DCLRE1B	DNA cross-link repair 1B
hsa-miR-491-5p	1	0	1	1	1	1	FBXO31	F-box protein 31
hsa-miR-491-5p	0	0	1	1	0	0	ZAN	zonadhesin
hsa-miR-491-5p	1	0	1	1	1	1	ACHE	acetylcholinesterase
hsa-miR-491-5p	1	0	1	1	1	1	CALU	calumenin
hsa-miR-491-5p	1	0	1	1	1	1	KCNIP2	Kv channel interacting protein 2
hsa-miR-491-5p	0	0	1	0	0	0	C17orf109	chromosome 17 open reading frame 109
hsa-miR-491-5p	1	0	1	1	1	1	MAGI1	membrane associated guanylate kinase, WW and PDZ domain containing 1
hsa-miR-491-5p	0	0	1	0	0	0	MYO15B	myosin XVB pseudogene
hsa-miR-491-5p	1	0	1	1	1	1	ST3GAL3	ST3 beta-galactoside alpha-2,3-sialyltransferase 3
hsa-miR-491-5p	0	0	1	0	1	1	LYPD6B	LY6/PLAUR domain containing 6B
hsa-miR-491-5p	1	0	1	1	1	1	TNKS1BP1	tankyrase 1 binding protein 1, 182kDa
hsa-miR-491-5p	1	0	1	1	1	1	SLC35A4	solute carrier family 35, member A4
hsa-miR-491-5p	1	0	1	1	1	1	CPNE4	copine IV
hsa-miR-491-5p	0	0	1	1	1	1	SLC2A14	solute carrier family 2 (facilitated glucose transporter), member 14
hsa-miR-491-5p	0	0	1	1	1	1	AMPH	amphiphysin
hsa-miR-491-5p	0	0	1	1	1	1	TTLL11	tubulin tyrosine ligase-like family, member 11
hsa-miR-491-5p	1	0	1	1	1	1	AFF2	AF4/FMR2 family, member 2
hsa-miR-491-5p	1	0	1	1	1	1	UBAP2L	ubiquitin associated protein 2-like
hsa-miR-491-5p	0	0	1	1	1	1	DMRTC1	DMRT-like family C1
hsa-miR-491-5p	0	0	1	1	0	0	DMRTC1B	DMRT-like family C1B
hsa-miR-491-5p	1	0	1	1	1	1	PALM2	paralemmin 2
hsa-miR-491-5p	0	0	1	0	0	0	LY6G6E	lymphocyte antigen 6 complex, locus G6E (pseudogene)
hsa-miR-491-5p	1	0	1	1	1	1	NRXN3	neurexin 3
hsa-miR-491-5p	0	0	1	0	1	1	SRPK1	SRSF protein kinase 1
hsa-miR-491-5p	0	0	1	1	1	1	TRDN	triadin
hsa-miR-491-5p	0	0	1	1	0	0	KIAA1324	KIAA1324
hsa-miR-491-5p	1	0	1	1	1	1	MEIS2	Meis homeobox 2
hsa-miR-491-5p	0	0	1	1	1	1	STOX2	storkhead box 2
hsa-miR-491-5p	1	0	1	1	1	1	CADM3	cell adhesion molecule 3
hsa-miR-491-5p	1	0	1	1	1	1	EIF2C1	eukaryotic translation initiation factor 2C, 1
hsa-miR-491-5p	1	0	1	1	1	1	SLC38A2	solute carrier family 38, member 2
hsa-miR-491-5p	1	0	1	1	1	1	WDTC1	WD and tetratricopeptide repeats 1
hsa-miR-491-5p	0	0	1	1	1	1	CXXC5	CXXC finger protein 5
hsa-miR-491-5p	1	0	1	1	1	1	ZNF395	zinc finger protein 395
hsa-miR-491-5p	1	0	1	1	1	1	HNRNPUL1	heterogeneous nuclear ribonucleoprotein U-like 1
hsa-miR-491-5p	0	0	1	0	0	0	DUXAP10	double homeobox A pseudogene 10
hsa-miR-491-5p	0	0	1	0	0	0	LINC00475	long intergenic non-protein coding RNA 475
hsa-miR-491-5p	0	0	1	0	0	0	LOC284561	uncharacterized LOC284561
hsa-miR-491-5p	0	0	1	1	0	0	RAD54L2	RAD54-like 2 (S. cerevisiae)
hsa-miR-491-5p	1	0	1	1	1	1	BAZ2A	bromodomain adjacent to zinc finger domain, 2A
hsa-miR-491-5p	1	0	1	1	0	0	ST6GALNAC6	ST6 (alpha-N-acetyl-neuraminyl-2,3-beta-galactosyl-1,3)-N-acetylgalactosaminide alpha-2,6-sialyltransferase 6
hsa-miR-491-5p	0	0	1	0	1	1	FLJ14186	uncharacterized LOC401149
hsa-miR-491-5p	1	0	1	1	1	1	COPS7B	COP9 constitutive photomorphogenic homolog subunit 7B (Arabidopsis)
hsa-miR-491-5p	1	0	1	1	1	1	FAM131A	family with sequence similarity 131, member A
hsa-miR-491-5p	1	0	1	1	1	1	ZNF385A	zinc finger protein 385A
hsa-miR-491-5p	0	0	1	1	1	1	MUC12	mucin 12, cell surface associated
hsa-miR-491-5p	0	0	1	0	0	0	FLJ21408	uncharacterized LOC400512
hsa-miR-491-5p	1	0	1	1	1	1	ABI3BP	ABI family, member 3 (NESH) binding protein
hsa-miR-491-5p	1	0	1	1	1	1	GBF1	golgi brefeldin A resistant guanine nucleotide exchange factor 1
hsa-miR-491-5p	0	0	1	0	1	1	ATXN1L	ataxin 1-like
hsa-miR-491-5p	1	0	1	1	1	1	TNRC6A	trinucleotide repeat containing 6A
hsa-miR-491-5p	0	0	1	0	1	1	HEMK1	HemK methyltransferase family member 1
hsa-miR-491-5p	0	0	1	0	0	0	LINC00340	long intergenic non-protein coding RNA 340
hsa-miR-491-5p	0	0	1	1	0	0	ZNF276	zinc finger protein 276
hsa-miR-491-5p	1	0	1	1	0	0	PRMT8	protein arginine methyltransferase 8
hsa-miR-491-5p	1	0	1	1	1	1	ITGA9	integrin, alpha 9
hsa-miR-491-5p	0	0	1	0	0	0	A1BG-AS1	A1BG antisense RNA 1
hsa-miR-491-5p	1	0	1	1	1	1	KCTD15	potassium channel tetramerisation domain containing 15
hsa-miR-491-5p	0	0	1	1	1	1	PAQR4	progestin and adipoQ receptor family member IV
hsa-miR-491-5p	0	0	1	0	0	0	CASC2	cancer susceptibility candidate 2 (non-protein coding)
hsa-miR-491-5p	1	0	1	1	1	1	TPM1	tropomyosin 1 (alpha)
hsa-miR-491-5p	0	0	1	1	1	1	KLC4	kinesin light chain 4
hsa-miR-491-5p	1	0	1	1	0	0	SPEG	SPEG complex locus
hsa-miR-491-5p	0	0	1	0	0	0	FLJ31104	uncharacterized LOC441072
hsa-miR-491-5p	1	0	1	1	1	1	SFXN2	sideroflexin 2
hsa-miR-491-5p	0	0	1	0	1	1	C17orf108	chromosome 17 open reading frame 108
hsa-miR-491-5p	0	0	1	0	0	0	LOC157273	uncharacterized LOC157273
hsa-miR-491-5p	0	0	1	1	0	0	CENPT	centromere protein T
hsa-miR-491-5p	0	0	1	1	0	0	BEAN1	brain expressed, associated with NEDD4, 1
hsa-miR-491-5p	1	0	1	1	1	1	LMNA	lamin A/C
hsa-miR-491-5p	1	0	1	1	1	1	TMEM25	transmembrane protein 25
hsa-miR-491-5p	0	0	1	1	1	1	BRD2	bromodomain containing 2
hsa-miR-491-5p	1	0	1	1	1	1	CLCN5	chloride channel, voltage-sensitive 5
hsa-miR-491-5p	1	0	1	1	1	1	GABARAPL1	GABA(A) receptor-associated protein like 1
hsa-miR-491-5p	1	0	1	1	1	1	ZBTB10	zinc finger and BTB domain containing 10
hsa-miR-491-5p	0	0	1	0	1	1	THAP6	THAP domain containing 6
hsa-miR-491-5p	1	0	1	1	1	1	MAP3K11	mitogen-activated protein kinase kinase kinase 11
hsa-miR-491-5p	0	0	1	1	0	0	UBAP2	ubiquitin associated protein 2
hsa-miR-491-5p	1	0	1	1	1	1	SEC22A	SEC22 vesicle trafficking protein homolog A (S. cerevisiae)
hsa-miR-491-5p	0	0	1	1	0	0	PORCN	porcupine homolog (Drosophila)
hsa-miR-491-5p	0	0	1	1	0	0	PTOV1	prostate tumor overexpressed 1
hsa-miR-491-5p	1	0	1	1	1	1	IST1	increased sodium tolerance 1 homolog (yeast)
hsa-miR-491-5p	1	0	1	1	1	1	C6orf89	chromosome 6 open reading frame 89
hsa-miR-491-5p	1	0	1	1	1	1	FAM73B	family with sequence similarity 73, member B
hsa-miR-491-5p	0	0	1	1	0	0	SYTL1	synaptotagmin-like 1
hsa-miR-491-5p	1	0	1	1	1	1	GANC	glucosidase, alpha; neutral C
hsa-miR-491-5p	1	0	1	0	1	1	CLASP1	cytoplasmic linker associated protein 1
hsa-miR-491-5p	1	0	1	0	1	1	RNF165	ring finger protein 165
hsa-miR-491-5p	1	0	1	1	1	1	UBAP1	ubiquitin associated protein 1
hsa-miR-491-5p	0	0	1	1	0	0	SHKBP1	SH3KBP1 binding protein 1
hsa-miR-491-5p	1	0	1	1	1	1	DPH1	DPH1 homolog (S. cerevisiae)
hsa-miR-491-5p	0	0	1	1	1	1	SAE1	SUMO1 activating enzyme subunit 1
hsa-miR-491-5p	0	0	1	0	0	0	LOC643837	uncharacterized LOC643837
hsa-miR-491-5p	1	0	1	1	1	1	FRY	furry homolog (Drosophila)
hsa-miR-491-5p	0	0	1	1	0	0	CDK15	cyclin-dependent kinase 15
hsa-miR-491-5p	1	0	1	1	1	1	FBXW2	F-box and WD repeat domain containing 2
hsa-miR-491-5p	0	0	1	1	1	1	CD34	CD34 molecule
hsa-miR-491-5p	1	0	1	1	1	1	TSN	translin
hsa-miR-491-5p	1	0	1	1	1	1	GNG2	guanine nucleotide binding protein (G protein), gamma 2
hsa-miR-491-5p	0	0	1	1	0	0	APLP1	amyloid beta (A4) precursor-like protein 1
hsa-miR-491-5p	1	0	1	1	1	1	MAFK	v-maf musculoaponeurotic fibrosarcoma oncogene homolog K (avian)
hsa-miR-491-5p	1	0	1	1	1	1	GPD2	glycerol-3-phosphate dehydrogenase 2 (mitochondrial)
hsa-miR-491-5p	0	0	1	0	0	0	LOC257358	uncharacterized LOC257358
hsa-miR-491-5p	0	0	1	0	0	0	CXXC1P1	CXXC finger protein 1 pseudogene 1
hsa-miR-491-5p	1	0	1	1	1	1	LPPR2	lipid phosphate phosphatase-related protein type 2
hsa-miR-491-5p	0	0	1	0	0	0	MYO1H	myosin IH
hsa-miR-491-5p	0	0	1	1	1	1	CHRM5	cholinergic receptor, muscarinic 5
hsa-miR-491-5p	0	0	1	1	1	1	AQP3	aquaporin 3 (Gill blood group)
hsa-miR-491-5p	1	0	1	1	1	1	CNEP1R1	CTD nuclear envelope phosphatase 1 regulatory subunit 1
hsa-miR-491-5p	0	0	1	1	1	1	SETD2	SET domain containing 2
hsa-miR-491-5p	0	0	1	1	1	1	SIRPB2	signal-regulatory protein beta 2
hsa-miR-491-5p	1	0	1	1	1	1	KCNIP3	Kv channel interacting protein 3, calsenilin
hsa-miR-491-5p	1	0	1	1	1	1	SPATS2	spermatogenesis associated, serine-rich 2
hsa-miR-491-5p	1	0	1	1	1	1	CS	citrate synthase
hsa-miR-491-5p	1	0	1	1	1	1	PEA15	phosphoprotein enriched in astrocytes 15
hsa-miR-491-5p	0	0	1	0	0	0	METTL21CP1	methyltransferase like 21C pseudogene 1
hsa-miR-491-5p	0	0	1	1	0	0	ERGIC3	ERGIC and golgi 3
hsa-miR-491-5p	1	0	1	1	1	1	SYT6	synaptotagmin VI
hsa-miR-491-5p	0	0	1	0	0	0	LOC285505	uncharacterized LOC285505
hsa-miR-491-5p	1	0	1	1	1	1	STIM2	stromal interaction molecule 2
hsa-miR-491-5p	0	0	1	1	1	1	NEIL2	nei endonuclease VIII-like 2 (E. coli)
hsa-miR-491-5p	1	0	1	1	0	0	CFL1	cofilin 1 (non-muscle)
hsa-miR-491-5p	0	0	1	1	0	0	MEI1	meiosis inhibitor 1
hsa-miR-491-5p	1	0	1	0	1	1	SQSTM1	sequestosome 1
hsa-miR-491-5p	0	0	1	1	0	0	FBXO16	F-box protein 16
hsa-miR-491-5p	0	0	1	1	1	1	VIPAS39	VPS33B interacting protein, apical-basolateral polarity regulator, spe-39 homolog
hsa-miR-491-5p	0	0	1	1	1	1	FAM76A	family with sequence similarity 76, member A
hsa-miR-491-5p	1	0	1	1	0	0	FBXL19	F-box and leucine-rich repeat protein 19
hsa-miR-491-5p	1	0	1	1	1	1	TRAFD1	TRAF-type zinc finger domain containing 1
hsa-miR-491-5p	1	0	1	1	1	1	CRMP1	collapsin response mediator protein 1
hsa-miR-491-5p	1	0	1	1	1	1	AGAP2	ArfGAP with GTPase domain, ankyrin repeat and PH domain 2
hsa-miR-491-5p	0	0	1	1	1	1	GGA1	golgi-associated, gamma adaptin ear containing, ARF binding protein 1
hsa-miR-491-5p	1	0	1	1	0	0	CACNB3	calcium channel, voltage-dependent, beta 3 subunit
hsa-miR-491-5p	0	0	1	1	0	0	PROKR1	prokineticin receptor 1
hsa-miR-491-5p	1	0	1	1	1	1	ZBTB4	zinc finger and BTB domain containing 4
hsa-miR-491-5p	0	0	1	1	0	0	SLC26A10	solute carrier family 26, member 10
hsa-miR-491-5p	0	0	1	0	1	1	PATE4	prostate and testis expressed 4
hsa-miR-491-5p	0	0	1	1	0	0	SSPO	SCO-spondin homolog (Bos taurus)
hsa-miR-491-5p	0	0	1	0	0	0	C1orf132	chromosome 1 open reading frame 132
hsa-miR-491-5p	1	0	1	1	1	1	MDGA2	MAM domain containing glycosylphosphatidylinositol anchor 2
hsa-miR-491-5p	0	0	1	1	1	1	RGS3	regulator of G-protein signaling 3
hsa-miR-491-5p	1	0	1	0	1	1	KCNK2	potassium channel, subfamily K, member 2
hsa-miR-491-5p	0	0	1	1	1	1	PCBP2	poly(rC) binding protein 2
hsa-miR-491-5p	0	0	1	1	0	0	KRT37	keratin 37
hsa-miR-491-5p	1	0	1	1	1	1	EPAS1	endothelial PAS domain protein 1
hsa-miR-491-5p	0	0	1	1	1	1	BTN2A2	butyrophilin, subfamily 2, member A2
hsa-miR-491-5p	1	0	1	1	1	1	PRDM2	PR domain containing 2, with ZNF domain
hsa-miR-491-5p	0	0	1	1	1	1	SLC9A1	solute carrier family 9, subfamily A (NHE1, cation proton antiporter 1), member 1
hsa-miR-491-5p	1	0	1	1	1	1	GJC1	gap junction protein, gamma 1, 45kDa
hsa-miR-491-5p	0	0	1	1	0	0	C20orf27	chromosome 20 open reading frame 27
hsa-miR-491-5p	0	0	1	1	0	0	LOC100129995	uncharacterized LOC100129995
hsa-miR-491-5p	0	0	1	1	1	1	IDS	iduronate 2-sulfatase
hsa-miR-491-5p	0	0	1	1	1	1	LRTM2	leucine-rich repeats and transmembrane domains 2
hsa-miR-491-5p	1	0	1	1	1	1	CORO2B	coronin, actin binding protein, 2B
hsa-miR-491-5p	0	0	1	1	0	0	PPP1R18	protein phosphatase 1, regulatory subunit 18
hsa-miR-491-5p	0	0	1	1	1	1	C2orf91	chromosome 2 open reading frame 91
hsa-miR-491-5p	1	0	1	1	1	1	C17orf85	chromosome 17 open reading frame 85
hsa-miR-491-5p	1	0	1	1	1	1	C11orf30	chromosome 11 open reading frame 30
hsa-miR-491-5p	1	0	1	1	1	1	ATXN7	ataxin 7
hsa-miR-491-5p	1	0	1	0	0	0	ANKRD52	ankyrin repeat domain 52
hsa-miR-491-5p	1	0	1	1	1	1	KPNA1	karyopherin alpha 1 (importin alpha 5)
hsa-miR-491-5p	0	0	1	1	1	1	C11orf45	chromosome 11 open reading frame 45
hsa-miR-491-5p	0	0	1	0	1	1	CTBP1-AS1	CTBP1 antisense RNA 1
hsa-miR-491-5p	0	0	1	1	1	1	MYOM3	myomesin family, member 3
hsa-miR-491-5p	1	0	1	1	0	0	ATXN7L3	ataxin 7-like 3
hsa-miR-491-5p	1	0	1	1	1	1	CPNE2	copine II
hsa-miR-491-5p	1	0	1	1	1	1	PIK3R1	phosphoinositide-3-kinase, regulatory subunit 1 (alpha)
hsa-miR-491-5p	0	0	1	1	0	0	CLDN4	claudin 4
hsa-miR-491-5p	0	0	1	1	1	1	CCDC132	coiled-coil domain containing 132
hsa-miR-491-5p	0	0	1	1	1	1	USP54	ubiquitin specific peptidase 54
hsa-miR-491-5p	0	0	1	1	0	0	HSPG2	heparan sulfate proteoglycan 2
hsa-miR-491-5p	1	0	1	0	1	1	CLEC16A	C-type lectin domain family 16, member A
hsa-miR-491-5p	1	0	1	1	1	1	DLG2	discs, large homolog 2 (Drosophila)
hsa-miR-491-5p	1	0	1	1	1	1	CLIP1	CAP-GLY domain containing linker protein 1
hsa-miR-491-5p	0	0	1	0	0	0	RPL23AP53	ribosomal protein L23a pseudogene 53
hsa-miR-491-5p	1	0	1	1	1	1	CLTC	clathrin, heavy chain (Hc)
hsa-miR-491-5p	1	0	1	0	1	1	ADIPOR2	adiponectin receptor 2
hsa-miR-491-5p	0	0	1	1	1	1	ARHGAP33	Rho GTPase activating protein 33
hsa-miR-491-5p	1	0	1	1	0	0	SLC30A3	solute carrier family 30 (zinc transporter), member 3
hsa-miR-491-5p	1	0	1	1	0	0	PTPN5	protein tyrosine phosphatase, non-receptor type 5 (striatum-enriched)
hsa-miR-491-5p	1	0	1	1	1	1	PHF17	PHD finger protein 17
hsa-miR-491-5p	0	0	1	0	0	0	GRAMD1B	GRAM domain containing 1B
hsa-miR-491-5p	1	0	1	0	1	1	SP6	Sp6 transcription factor
hsa-miR-491-5p	0	0	1	0	0	0	ERVFRD-2	endogenous retrovirus group FRD, member 2
hsa-miR-491-5p	0	0	1	1	0	0	NCF1	neutrophil cytosolic factor 1
hsa-miR-491-5p	0	0	1	1	0	0	LOC100128682	uncharacterized LOC100128682
hsa-miR-491-5p	0	0	1	0	0	0	FAM205B	transmembrane protein C9orf144B pseudogene
hsa-miR-491-5p	1	0	1	0	0	0	HK1	hexokinase 1
hsa-miR-491-5p	1	0	1	0	1	1	KDM2A	lysine (K)-specific demethylase 2A
hsa-miR-491-5p	1	0	1	1	0	0	ATP2A1	ATPase, Ca++ transporting, cardiac muscle, fast twitch 1
hsa-miR-491-5p	1	0	1	0	1	1	KPNA6	karyopherin alpha 6 (importin alpha 7)
hsa-miR-491-5p	0	0	1	1	1	1	ATXN2	ataxin 2
hsa-miR-491-5p	0	0	1	1	1	1	RAB13	RAB13, member RAS oncogene family
hsa-miR-491-5p	1	0	1	1	1	1	ADAMTSL1	ADAMTS-like 1
hsa-miR-491-5p	0	0	1	1	0	0	WFIKKN1	WAP, follistatin/kazal, immunoglobulin, kunitz and netrin domain containing 1
hsa-miR-491-5p	1	0	1	1	1	1	PHC2	polyhomeotic homolog 2 (Drosophila)
hsa-miR-491-5p	1	0	1	1	1	1	SYDE1	synapse defective 1, Rho GTPase, homolog 1 (C. elegans)
hsa-miR-491-5p	1	0	1	1	1	1	DPY19L3	dpy-19-like 3 (C. elegans)
hsa-miR-491-5p	0	0	1	0	0	0	PINLYP	phospholipase A2 inhibitor and LY6/PLAUR domain containing
hsa-miR-491-5p	0	0	1	1	0	0	HEATR8	HEAT repeat containing 8
hsa-miR-491-5p	0	0	1	1	1	1	TRIM28	tripartite motif containing 28
hsa-miR-491-5p	0	0	1	1	1	1	CDIPT	CDP-diacylglycerol--inositol 3-phosphatidyltransferase
hsa-miR-491-5p	0	0	1	1	1	1	PDE2A	phosphodiesterase 2A, cGMP-stimulated
hsa-miR-491-5p	0	0	1	1	1	1	PHF12	PHD finger protein 12
hsa-miR-491-5p	0	0	1	0	0	0	AGAP9	ArfGAP with GTPase domain, ankyrin repeat and PH domain 9
hsa-miR-491-5p	0	0	1	1	0	0	SCNN1A	sodium channel, non-voltage-gated 1 alpha subunit
hsa-miR-491-5p	1	0	1	1	1	1	CTSA	cathepsin A
hsa-miR-491-5p	0	0	1	1	1	1	ARID1A	AT rich interactive domain 1A (SWI-like)
hsa-miR-491-5p	0	0	1	0	1	1	PEX5	peroxisomal biogenesis factor 5
hsa-miR-491-5p	1	0	1	1	0	0	TDRKH	tudor and KH domain containing
hsa-miR-491-5p	1	0	1	1	1	1	CAMK2G	calcium/calmodulin-dependent protein kinase II gamma
hsa-miR-491-5p	1	0	1	1	1	1	TGFBR3	transforming growth factor, beta receptor III
hsa-miR-491-5p	1	0	1	1	1	1	PHTF2	putative homeodomain transcription factor 2
hsa-miR-491-5p	0	0	1	1	1	1	TIMMDC1	translocase of inner mitochondrial membrane domain containing 1
hsa-miR-491-5p	1	0	1	0	1	1	TEAD3	TEA domain family member 3
hsa-miR-491-5p	1	0	1	1	1	1	AHCYL1	adenosylhomocysteinase-like 1
hsa-miR-491-5p	0	0	1	1	0	0	KAT8	K(lysine) acetyltransferase 8
hsa-miR-491-5p	0	0	1	1	1	1	TTLL3	tubulin tyrosine ligase-like family, member 3
hsa-miR-491-5p	1	0	1	0	1	1	SLC2A3	solute carrier family 2 (facilitated glucose transporter), member 3
hsa-miR-491-5p	0	0	1	1	0	0	TBC1D10B	TBC1 domain family, member 10B
hsa-miR-491-5p	1	0	1	1	1	1	SMAP2	small ArfGAP2
hsa-miR-491-5p	1	0	1	1	1	1	MLLT6	myeloid/lymphoid or mixed-lineage leukemia (trithorax homolog, Drosophila); translocated to, 6
hsa-miR-491-5p	0	0	1	0	0	0	KIAA0913	KIAA0913
hsa-miR-491-5p	1	0	1	0	1	1	GPR85	G protein-coupled receptor 85
hsa-miR-491-5p	1	0	1	1	1	1	TFE3	transcription factor binding to IGHM enhancer 3
hsa-miR-491-5p	0	0	1	1	0	0	DOPEY1	dopey family member 1
hsa-miR-491-5p	1	0	1	0	1	1	GRIN3A	glutamate receptor, ionotropic, N-methyl-D-aspartate 3A
hsa-miR-491-5p	0	0	1	0	0	0	FAM66D	family with sequence similarity 66, member D
hsa-miR-491-5p	1	0	1	1	1	1	PKNOX2	PBX/knotted 1 homeobox 2
hsa-miR-491-5p	1	0	1	0	0	0	BAHCC1	BAH domain and coiled-coil containing 1
hsa-miR-491-5p	0	0	1	1	1	1	ARL13B	ADP-ribosylation factor-like 13B
hsa-miR-491-5p	1	0	1	1	1	1	SLC30A8	solute carrier family 30 (zinc transporter), member 8
hsa-miR-491-5p	1	0	1	0	0	0	SYNPO	synaptopodin
hsa-miR-491-5p	0	0	1	1	0	0	KRBA1	KRAB-A domain containing 1
hsa-miR-491-5p	0	0	1	0	1	1	GAB3	GRB2-associated binding protein 3
hsa-miR-491-5p	0	0	1	1	1	1	FAM221A	family with sequence similarity 221, member A
hsa-miR-491-5p	0	0	1	1	0	0	KRT15	keratin 15
hsa-miR-491-5p	1	0	1	1	1	1	FAM126B	family with sequence similarity 126, member B
hsa-miR-491-5p	1	0	1	1	1	1	CHMP7	charged multivesicular body protein 7
hsa-miR-491-5p	0	0	1	1	1	1	CYR61	cysteine-rich, angiogenic inducer, 61
hsa-miR-491-5p	1	0	1	0	1	1	SLC25A37	solute carrier family 25 (mitochondrial iron transporter), member 37
hsa-miR-491-5p	0	0	1	1	1	1	NARG2	NMDA receptor regulated 2
hsa-miR-491-5p	0	0	1	1	1	1	SLC30A5	solute carrier family 30 (zinc transporter), member 5
hsa-miR-491-5p	1	0	1	0	0	0	NPEPL1	aminopeptidase-like 1
hsa-miR-491-5p	0	0	1	1	1	1	TEX2	testis expressed 2
hsa-miR-491-5p	1	0	1	1	1	1	RICTOR	RPTOR independent companion of MTOR, complex 2
hsa-miR-491-5p	1	0	1	0	1	1	PATL1	protein associated with topoisomerase II homolog 1 (yeast)
hsa-miR-491-5p	0	0	1	1	1	1	TMEM130	transmembrane protein 130
hsa-miR-491-5p	0	0	1	1	1	1	CD209	CD209 molecule
hsa-miR-491-5p	0	0	1	1	1	1	CRB1	crumbs homolog 1 (Drosophila)
hsa-miR-491-5p	1	0	1	1	1	1	TXNRD1	thioredoxin reductase 1
hsa-miR-491-5p	0	0	1	0	0	0	LOC374443	C-type lectin domain family 2, member D pseudogene
hsa-miR-491-5p	1	0	1	1	1	1	ITSN1	intersectin 1 (SH3 domain protein)
hsa-miR-491-5p	1	0	1	1	1	1	ILF3	interleukin enhancer binding factor 3, 90kDa
hsa-miR-491-5p	1	0	1	1	1	1	TPP1	tripeptidyl peptidase I
hsa-miR-491-5p	1	0	1	1	1	1	GFRA2	GDNF family receptor alpha 2
hsa-miR-491-5p	1	0	1	1	1	1	CAMTA1	calmodulin binding transcription activator 1
hsa-miR-491-5p	1	0	1	1	1	1	IQGAP2	IQ motif containing GTPase activating protein 2
hsa-miR-491-5p	0	0	1	1	1	1	SLC22A12	solute carrier family 22 (organic anion/urate transporter), member 12
hsa-miR-491-5p	0	0	1	1	1	1	PAQR5	progestin and adipoQ receptor family member V
hsa-miR-491-5p	1	0	1	1	1	1	VPS45	vacuolar protein sorting 45 homolog (S. cerevisiae)
hsa-miR-491-5p	0	0	1	1	0	0	SH2D6	SH2 domain containing 6
hsa-miR-491-5p	0	0	1	1	1	1	HMBOX1	homeobox containing 1
hsa-miR-491-5p	1	0	1	1	1	1	MECP2	methyl CpG binding protein 2 (Rett syndrome)
hsa-miR-491-5p	0	0	1	1	1	1	KANK2	KN motif and ankyrin repeat domains 2
hsa-miR-491-5p	0	0	1	1	1	1	MSRA	methionine sulfoxide reductase A
hsa-miR-491-5p	1	0	1	1	1	1	NIPA2	non imprinted in Prader-Willi/Angelman syndrome 2
hsa-miR-491-5p	0	0	1	1	0	0	CLSTN3	calsyntenin 3
hsa-miR-491-5p	0	0	1	0	1	1	KCNE1	potassium voltage-gated channel, Isk-related family, member 1
hsa-miR-491-5p	1	0	1	1	1	1	TBC1D22B	TBC1 domain family, member 22B
hsa-miR-491-5p	1	0	1	1	1	1	ZNF282	zinc finger protein 282
hsa-miR-491-5p	0	0	1	1	1	1	IL23R	interleukin 23 receptor
hsa-miR-491-5p	0	0	1	1	0	0	DDX49	DEAD (Asp-Glu-Ala-Asp) box polypeptide 49
hsa-miR-491-5p	1	0	1	1	0	0	PPP4C	protein phosphatase 4, catalytic subunit
hsa-miR-491-5p	1	0	1	1	1	1	TMUB2	transmembrane and ubiquitin-like domain containing 2
hsa-miR-491-5p	0	0	1	1	1	1	PTDSS1	phosphatidylserine synthase 1
hsa-miR-491-5p	0	0	1	1	1	1	WDR55	WD repeat domain 55
hsa-miR-491-5p	1	0	1	1	1	1	TSPAN14	tetraspanin 14
hsa-miR-491-5p	1	0	1	1	1	1	RIMS3	regulating synaptic membrane exocytosis 3
hsa-miR-491-5p	1	0	1	0	1	1	DCAF10	DDB1 and CUL4 associated factor 10
hsa-miR-491-5p	1	0	1	1	0	0	DHDDS	dehydrodolichyl diphosphate synthase
hsa-miR-491-5p	0	0	1	0	0	0	LOC254896	uncharacterized LOC254896
hsa-miR-491-5p	0	0	1	0	0	0	MGC13053	uncharacterized MGC13053
hsa-miR-491-5p	0	0	1	1	0	0	NFKBID	nuclear factor of kappa light polypeptide gene enhancer in B-cells inhibitor, delta
hsa-miR-491-5p	0	0	1	1	0	0	LOC100132167	uncharacterized LOC100132167
hsa-miR-491-5p	0	0	1	1	1	1	SGK2	serum/glucocorticoid regulated kinase 2
hsa-miR-491-5p	0	0	1	1	1	1	LZIC	leucine zipper and CTNNBIP1 domain containing
hsa-miR-491-5p	0	0	1	1	0	0	MYLK2	myosin light chain kinase 2
hsa-miR-491-5p	0	0	1	1	1	1	ICA1	islet cell autoantigen 1, 69kDa
hsa-miR-491-5p	1	0	1	1	1	1	HMGA1	high mobility group AT-hook 1
hsa-miR-491-5p	1	0	1	1	0	0	MARCH9	membrane-associated ring finger (C3HC4) 9
hsa-miR-491-5p	1	0	1	1	1	1	KCNMA1	potassium large conductance calcium-activated channel, subfamily M, alpha member 1
hsa-miR-491-5p	0	0	1	1	1	1	PRPF4B	PRP4 pre-mRNA processing factor 4 homolog B (yeast)
hsa-miR-491-5p	1	0	1	1	1	1	B4GALT3	UDP-Gal:betaGlcNAc beta 1,4- galactosyltransferase, polypeptide 3
hsa-miR-491-5p	1	0	1	1	0	0	SIGMAR1	sigma non-opioid intracellular receptor 1
hsa-miR-491-5p	0	0	1	1	1	1	ATXN2L	ataxin 2-like
hsa-miR-491-5p	0	0	1	1	1	1	ZNF587	zinc finger protein 587
hsa-miR-491-5p	0	0	1	1	1	1	GNL3L	guanine nucleotide binding protein-like 3 (nucleolar)-like
hsa-miR-491-5p	0	0	1	0	0	0	TPTEP1	transmembrane phosphatase with tensin homology pseudogene 1
hsa-miR-491-5p	0	0	1	1	1	1	KLHL29	kelch-like 29 (Drosophila)
hsa-miR-491-5p	0	0	1	1	1	1	KEAP1	kelch-like ECH-associated protein 1
hsa-miR-491-5p	0	0	1	1	1	1	DLX4	distal-less homeobox 4
hsa-miR-491-5p	1	0	1	1	0	0	FHL3	four and a half LIM domains 3
hsa-miR-491-5p	0	0	1	0	0	0	MGC21881	uncharacterized locus MGC21881
hsa-miR-491-5p	0	0	1	0	0	0	ABCC6P2	ATP-binding cassette, sub-family C, member 6 pseudogene 2
hsa-miR-491-5p	0	0	1	1	1	1	FAM122C	family with sequence similarity 122C
hsa-miR-491-5p	1	0	1	1	1	1	NRF1	nuclear respiratory factor 1
hsa-miR-491-5p	0	0	1	1	1	1	PARP9	poly (ADP-ribose) polymerase family, member 9
hsa-miR-491-5p	0	0	1	1	0	0	ZBTB32	zinc finger and BTB domain containing 32
hsa-miR-491-5p	0	0	1	1	1	1	NDUFB5	NADH dehydrogenase (ubiquinone) 1 beta subcomplex, 5, 16kDa
hsa-miR-491-5p	1	0	1	1	1	1	WWC2	WW and C2 domain containing 2
hsa-miR-491-5p	0	0	1	0	0	0	ZNF720	zinc finger protein 720
hsa-miR-491-5p	0	0	1	0	0	0	LOC100130776	uncharacterized LOC100130776
hsa-miR-491-5p	1	0	1	1	1	1	MID1IP1	MID1 interacting protein 1
hsa-miR-491-5p	0	0	1	0	1	1	CD99P1	CD99 molecule pseudogene 1
hsa-miR-491-5p	0	0	1	1	0	0	PTPMT1	protein tyrosine phosphatase, mitochondrial 1
hsa-miR-491-5p	0	0	1	1	1	1	LRRK1	leucine-rich repeat kinase 1
hsa-miR-491-5p	0	0	1	1	1	1	NELL2	NEL-like 2 (chicken)
hsa-miR-491-5p	0	0	1	0	1	1	ZNF718	zinc finger protein 718
hsa-miR-491-5p	1	0	1	0	1	1	CDK19	cyclin-dependent kinase 19
hsa-miR-491-5p	0	0	1	0	0	0	SNX29P2	sorting nexin 29 pseudogene 2
hsa-miR-491-5p	0	0	1	1	1	1	SEC61A2	Sec61 alpha 2 subunit (S. cerevisiae)
hsa-miR-491-5p	0	0	1	0	0	0	EVPLL	envoplakin-like
hsa-miR-491-5p	0	0	1	1	1	1	C14orf105	chromosome 14 open reading frame 105
hsa-miR-491-5p	0	0	1	1	1	1	SELP	selectin P (granule membrane protein 140kDa, antigen CD62)
hsa-miR-491-5p	1	0	1	0	0	0	KCNU1	potassium channel, subfamily U, member 1
hsa-miR-491-5p	0	0	1	1	1	1	KIAA1755	KIAA1755
hsa-miR-491-5p	1	0	1	1	1	1	PPARGC1A	peroxisome proliferator-activated receptor gamma, coactivator 1 alpha
hsa-miR-491-5p	1	0	1	0	1	1	PSMF1	proteasome (prosome, macropain) inhibitor subunit 1 (PI31)
hsa-miR-491-5p	1	0	1	1	1	1	TAF15	TAF15 RNA polymerase II, TATA box binding protein (TBP)-associated factor, 68kDa
hsa-miR-491-5p	0	0	1	1	1	1	APLF	aprataxin and PNKP like factor
hsa-miR-491-5p	1	0	1	1	0	0	FAM83F	family with sequence similarity 83, member F
hsa-miR-491-5p	0	0	1	0	1	1	FLJ25328	uncharacterized LOC148231
hsa-miR-491-5p	0	0	1	0	1	1	PLEKHM1P	pleckstrin homology domain containing, family M (with RUN domain) member 1 pseudogene
hsa-miR-491-5p	1	0	1	1	1	1	TTC39C	tetratricopeptide repeat domain 39C
hsa-miR-491-5p	1	0	1	1	1	1	FGF1	fibroblast growth factor 1 (acidic)
hsa-miR-491-5p	0	0	1	0	0	0	FAM86JP	family with sequence similarity 86, member A pseudogene
hsa-miR-491-5p	1	0	1	1	1	1	SIRPA	signal-regulatory protein alpha
hsa-miR-491-5p	1	0	1	0	1	1	KIF5A	kinesin family member 5A
hsa-miR-491-5p	1	0	1	1	1	1	FBXL16	F-box and leucine-rich repeat protein 16
hsa-miR-491-5p	1	0	1	1	1	1	RIC8B	resistance to inhibitors of cholinesterase 8 homolog B (C. elegans)
hsa-miR-491-5p	0	0	1	0	0	0	NBR2	neighbor of BRCA1 gene 2 (non-protein coding)
hsa-miR-491-5p	0	0	1	1	0	0	GGT1	gamma-glutamyltransferase 1
hsa-miR-491-5p	0	0	1	1	0	0	SEL1L2	sel-1 suppressor of lin-12-like 2 (C. elegans)
hsa-miR-491-5p	0	0	1	1	1	1	TMEM139	transmembrane protein 139
hsa-miR-491-5p	1	0	1	1	1	1	ZNF618	zinc finger protein 618
hsa-miR-491-5p	0	0	1	1	1	1	DUSP28	dual specificity phosphatase 28
hsa-miR-491-5p	0	0	1	0	0	0	SPATA3	spermatogenesis associated 3
hsa-miR-491-5p	1	0	1	1	1	1	ELMO2	engulfment and cell motility 2
hsa-miR-491-5p	0	0	1	1	1	1	SNX22	sorting nexin 22
hsa-miR-491-5p	0	0	1	1	1	1	CNTN1	contactin 1
hsa-miR-491-5p	0	0	1	0	0	0	LOC729013	uncharacterized LOC729013
hsa-miR-491-5p	0	0	1	0	0	0	LOC652276	potassium channel tetramerisation domain containing 5 pseudogene
hsa-miR-491-5p	1	0	1	1	1	1	ACVR1	activin A receptor, type I
hsa-miR-491-5p	1	0	1	1	0	0	TMEM131	transmembrane protein 131
hsa-miR-491-5p	0	0	1	0	0	0	CYP4F35P	cytochrome P450, family 4, subfamily F, polypeptide 35, pseudogene
hsa-miR-491-5p	1	0	1	0	0	0	RAVER1	ribonucleoprotein, PTB-binding 1
hsa-miR-491-5p	0	0	1	1	1	1	KIAA1328	KIAA1328
hsa-miR-491-5p	1	0	1	1	0	0	CHD4	chromodomain helicase DNA binding protein 4
hsa-miR-491-5p	0	0	1	0	0	0	LOC388906	opioid growth factor receptor pseudogene
hsa-miR-491-5p	1	0	1	1	1	1	UNK	unkempt homolog (Drosophila)
hsa-miR-491-5p	0	0	1	1	1	1	SLC14A1	solute carrier family 14 (urea transporter), member 1 (Kidd blood group)
hsa-miR-491-5p	1	0	1	1	1	1	FOSB	FBJ murine osteosarcoma viral oncogene homolog B
hsa-miR-491-5p	1	0	1	1	1	1	IL16	interleukin 16
hsa-miR-491-5p	0	0	1	0	1	1	TSLP	thymic stromal lymphopoietin
hsa-miR-491-5p	1	0	1	1	1	1	FAM123A	family with sequence similarity 123A
hsa-miR-491-5p	1	0	1	1	1	1	ARID3B	AT rich interactive domain 3B (BRIGHT-like)
hsa-miR-491-5p	0	0	1	1	1	1	C4orf32	chromosome 4 open reading frame 32
hsa-miR-491-5p	0	0	1	1	0	0	PLB1	phospholipase B1
hsa-miR-491-5p	0	0	1	1	1	1	STARD4	StAR-related lipid transfer (START) domain containing 4
hsa-miR-491-5p	0	0	1	0	0	0	LOC401176	uncharacterized LOC401176
hsa-miR-491-5p	1	0	1	1	1	1	ARHGAP30	Rho GTPase activating protein 30
hsa-miR-491-5p	1	0	1	1	1	1	SOLH	small optic lobes homolog (Drosophila)
hsa-miR-491-5p	1	0	1	1	1	1	AGAP3	ArfGAP with GTPase domain, ankyrin repeat and PH domain 3
hsa-miR-491-5p	1	0	1	1	1	1	MAMDC2	MAM domain containing 2
hsa-miR-491-5p	0	0	1	0	0	0	LOC283914	uncharacterized LOC283914
hsa-miR-491-5p	1	0	1	1	1	1	PPP2R5B	protein phosphatase 2, regulatory subunit B', beta
hsa-miR-491-5p	1	0	1	1	1	1	SENP1	SUMO1/sentrin specific peptidase 1
hsa-miR-491-5p	1	0	1	1	1	1	SF3B1	splicing factor 3b, subunit 1, 155kDa
hsa-miR-491-5p	0	0	1	1	0	0	NIT1	nitrilase 1
hsa-miR-491-5p	0	0	1	1	0	0	TOM1	target of myb1 (chicken)
hsa-miR-491-5p	1	0	1	1	1	1	CARM1	coactivator-associated arginine methyltransferase 1
hsa-miR-491-5p	0	0	1	1	0	0	LILRA1	leukocyte immunoglobulin-like receptor, subfamily A (with TM domain), member 1
hsa-miR-491-5p	0	0	1	0	0	0	DPY19L2P4	dpy-19-like 2 pseudogene 4 (C. elegans)
hsa-miR-491-5p	0	0	1	1	1	1	OLFML2B	olfactomedin-like 2B
hsa-miR-491-5p	1	0	1	1	1	1	PTPRG	protein tyrosine phosphatase, receptor type, G
hsa-miR-491-5p	1	0	1	1	1	1	PELI1	pellino E3 ubiquitin protein ligase 1
hsa-miR-491-5p	0	0	1	1	1	1	FKBP1B	FK506 binding protein 1B, 12.6 kDa
hsa-miR-491-5p	0	0	1	1	1	1	LINC00086	long intergenic non-protein coding RNA 86
hsa-miR-491-5p	0	0	1	1	1	1	RAB3IL1	RAB3A interacting protein (rabin3)-like 1
hsa-miR-491-5p	0	0	1	1	0	0	TUBG2	tubulin, gamma 2
hsa-miR-491-5p	1	0	1	0	1	1	C14orf43	chromosome 14 open reading frame 43
hsa-miR-491-5p	0	0	1	1	1	1	MPP3	membrane protein, palmitoylated 3 (MAGUK p55 subfamily member 3)
hsa-miR-491-5p	0	0	1	1	0	0	C20orf152	chromosome 20 open reading frame 152
hsa-miR-491-5p	0	0	1	1	0	0	PRR19	proline rich 19
hsa-miR-491-5p	0	0	1	1	1	1	P2RX6	purinergic receptor P2X, ligand-gated ion channel, 6
hsa-miR-491-5p	0	0	1	0	0	0	SCAND2	SCAN domain containing 2 pseudogene
hsa-miR-491-5p	1	0	1	1	1	1	NIPBL	Nipped-B homolog (Drosophila)
hsa-miR-491-5p	1	0	1	0	0	0	PRRT4	proline-rich transmembrane protein 4
hsa-miR-491-5p	0	0	1	1	0	0	PRSS55	protease, serine, 55
hsa-miR-491-5p	0	0	1	0	0	0	FLJ35390	uncharacterized LOC255031
hsa-miR-491-5p	0	0	1	1	1	1	ZNF333	zinc finger protein 333
hsa-miR-491-5p	1	0	1	1	1	1	MYLK	myosin light chain kinase
hsa-miR-491-5p	1	0	1	1	1	1	ADCY6	adenylate cyclase 6
hsa-miR-491-5p	0	0	1	1	0	0	TSNARE1	t-SNARE domain containing 1
hsa-miR-491-5p	0	0	1	0	0	0	LINC00052	long intergenic non-protein coding RNA 52
hsa-miR-491-5p	0	0	1	1	1	1	SLAMF1	signaling lymphocytic activation molecule family member 1
hsa-miR-491-5p	0	0	1	1	0	0	CELF3	CUGBP, Elav-like family member 3
hsa-miR-491-5p	1	0	1	1	1	1	PHACTR4	phosphatase and actin regulator 4
hsa-miR-491-5p	0	0	1	0	0	0	PTGER4P2	prostaglandin E receptor 4 (subtype EP4) pseudogene 2
hsa-miR-491-5p	0	0	1	0	0	0	SPDYE8P	speedy homolog E8 (Xenopus laevis), pseudogene
hsa-miR-491-5p	1	0	1	1	1	1	LRRC32	leucine rich repeat containing 32
hsa-miR-491-5p	1	0	1	0	1	1	MAP4K3	mitogen-activated protein kinase kinase kinase kinase 3
hsa-miR-491-5p	1	0	1	1	1	1	CTBP1	C-terminal binding protein 1
hsa-miR-491-5p	0	0	1	0	0	0	LOC727849	golgin A2 pseudogene
hsa-miR-491-5p	0	0	1	0	0	0	LOC727751	uncharacterized LOC727751
hsa-miR-491-5p	0	0	1	0	0	0	AGSK1	golgin subfamily A member 2-like
hsa-miR-491-5p	0	0	1	1	1	1	PCED1B	PC-esterase domain containing 1B
hsa-miR-491-5p	1	0	1	1	1	1	NTRK2	neurotrophic tyrosine kinase, receptor, type 2
hsa-miR-491-5p	0	0	1	0	0	0	LINC00537	long intergenic non-protein coding RNA 537
hsa-miR-491-5p	1	0	1	1	1	1	SAMD4B	sterile alpha motif domain containing 4B
hsa-miR-491-5p	0	0	1	0	0	0	LOC554249	uncharacterized LOC554249
hsa-miR-491-5p	0	0	1	1	0	0	ZNF703	zinc finger protein 703
hsa-miR-491-5p	1	0	1	0	1	1	MEST	mesoderm specific transcript homolog (mouse)
hsa-miR-491-5p	1	0	1	1	1	1	FMNL3	formin-like 3
hsa-miR-491-5p	1	0	1	1	1	1	ESRRA	estrogen-related receptor alpha
hsa-miR-491-5p	0	0	1	1	1	1	LIMS3	LIM and senescent cell antigen-like domains 3
hsa-miR-491-5p	1	0	1	1	1	1	STK38	serine/threonine kinase 38
hsa-miR-491-5p	1	0	1	1	0	0	SRRM3	serine/arginine repetitive matrix 3
hsa-miR-491-5p	0	0	1	0	0	0	ABCA11P	ATP-binding cassette, sub-family A (ABC1), member 11, pseudogene
hsa-miR-491-5p	1	0	1	1	1	1	HNRNPA1	heterogeneous nuclear ribonucleoprotein A1
hsa-miR-491-5p	1	0	1	0	1	1	VANGL2	vang-like 2 (van gogh, Drosophila)
hsa-miR-491-5p	1	0	1	0	1	1	KCNT2	potassium channel, subfamily T, member 2
hsa-miR-491-5p	0	0	1	0	0	0	FBXL19-AS1	FBXL19 antisense RNA 1 (head to head)
hsa-miR-491-5p	0	0	1	0	1	1	C9orf91	chromosome 9 open reading frame 91
hsa-miR-491-5p	1	0	1	1	1	1	CERS6	ceramide synthase 6
hsa-miR-491-5p	1	0	1	0	1	1	BTBD3	BTB (POZ) domain containing 3
hsa-miR-491-5p	0	0	1	1	0	0	RELA	v-rel reticuloendotheliosis viral oncogene homolog A (avian)
hsa-miR-491-5p	1	0	1	1	1	1	NR3C2	nuclear receptor subfamily 3, group C, member 2
hsa-miR-491-5p	1	0	1	0	1	1	PRDM10	PR domain containing 10
hsa-miR-491-5p	1	0	1	1	1	1	GRIA3	glutamate receptor, ionotropic, AMPA 3
hsa-miR-491-5p	0	0	1	1	0	0	RGS12	regulator of G-protein signaling 12
hsa-miR-491-5p	1	0	1	1	1	1	OSBP2	oxysterol binding protein 2
hsa-miR-491-5p	0	0	1	0	0	0	LGALS17A	Charcot-Leyden crystal protein pseudogene
hsa-miR-491-5p	1	0	1	1	1	1	ANK2	ankyrin 2, neuronal
hsa-miR-491-5p	1	0	1	1	1	1	ZMYM4	zinc finger, MYM-type 4
hsa-miR-491-5p	1	0	1	0	1	1	SEMA4G	sema domain, immunoglobulin domain (Ig), transmembrane domain (TM) and short cytoplasmic domain, (semaphorin) 4G
hsa-miR-491-5p	0	0	1	0	0	0	FAM225B	family with sequence similarity 225, member B (non-protein coding)
hsa-miR-491-5p	1	0	1	0	1	1	TTC7B	tetratricopeptide repeat domain 7B
hsa-miR-491-5p	0	0	1	0	0	0	FLJ39632	uncharacterized LOC642477
hsa-miR-491-5p	1	0	1	1	1	1	ERMAP	erythroblast membrane-associated protein (Scianna blood group)
hsa-miR-491-5p	0	0	1	0	0	0	DKFZp686D0853	uncharacterized LOC401613
hsa-miR-491-5p	1	0	1	1	1	1	ATP2B4	ATPase, Ca++ transporting, plasma membrane 4
hsa-miR-491-5p	1	0	1	1	1	1	RAB7A	RAB7A, member RAS oncogene family
hsa-miR-491-5p	1	0	1	1	1	1	MIER3	mesoderm induction early response 1, family member 3
hsa-miR-491-5p	0	0	1	0	0	0	RGPD4	RANBP2-like and GRIP domain containing 4
hsa-miR-491-5p	0	0	1	1	1	1	KBTBD12	kelch repeat and BTB (POZ) domain containing 12
hsa-miR-491-5p	0	0	1	0	0	0	IGHA2	immunoglobulin heavy constant alpha 2 (A2m marker)
hsa-miR-491-5p	1	0	1	1	1	1	TJP1	tight junction protein 1
hsa-miR-491-5p	0	0	1	1	0	0	CDK5RAP2	CDK5 regulatory subunit associated protein 2
hsa-miR-491-5p	0	0	1	0	1	1	PRH2	proline-rich protein HaeIII subfamily 2
hsa-miR-491-5p	1	0	1	1	1	1	MYCBP2	MYC binding protein 2, E3 ubiquitin protein ligase
hsa-miR-491-5p	0	0	1	1	1	1	IPCEF1	interaction protein for cytohesin exchange factors 1
hsa-miR-491-5p	1	0	1	1	1	1	SLC39A13	solute carrier family 39 (zinc transporter), member 13
hsa-miR-491-5p	1	0	1	1	1	1	RREB1	ras responsive element binding protein 1
hsa-miR-491-5p	1	0	1	1	1	1	GABPA	GA binding protein transcription factor, alpha subunit 60kDa
hsa-miR-491-5p	0	0	1	0	0	0	OVOS	ovostatin
hsa-miR-491-5p	0	0	1	1	1	1	ZNF250	zinc finger protein 250
hsa-miR-491-5p	0	0	1	1	1	1	ATP2A2	ATPase, Ca++ transporting, cardiac muscle, slow twitch 2
hsa-miR-491-5p	0	0	1	1	1	1	DOCK5	dedicator of cytokinesis 5
hsa-miR-491-5p	0	0	1	0	0	0	LINC00338	long intergenic non-protein coding RNA 338
hsa-miR-491-5p	1	0	1	1	1	1	GAP43	growth associated protein 43
hsa-miR-491-5p	1	0	1	1	1	1	NAV1	neuron navigator 1
hsa-miR-491-5p	1	0	1	1	1	1	RECK	reversion-inducing-cysteine-rich protein with kazal motifs
hsa-miR-491-5p	0	0	1	1	0	0	NDUFB11	NADH dehydrogenase (ubiquinone) 1 beta subcomplex, 11, 17.3kDa
hsa-miR-491-5p	0	0	1	0	0	0	LINC00341	long intergenic non-protein coding RNA 341
hsa-miR-491-5p	0	0	1	1	0	0	AHSG	alpha-2-HS-glycoprotein
hsa-miR-491-5p	1	0	1	0	1	1	RNF144A	ring finger protein 144A
hsa-miR-491-5p	1	0	1	0	0	0	IGLON5	IgLON family member 5
hsa-miR-491-5p	0	0	1	1	1	1	SMYD5	SMYD family member 5
hsa-miR-491-5p	0	0	1	1	0	0	H2AFY2	H2A histone family, member Y2
hsa-miR-491-5p	1	0	1	1	1	1	ARF1	ADP-ribosylation factor 1
hsa-miR-491-5p	0	0	1	1	0	0	CDC37	cell division cycle 37 homolog (S. cerevisiae)
hsa-miR-491-5p	0	0	1	1	1	1	TMEM53	transmembrane protein 53
hsa-miR-491-5p	0	0	1	1	0	0	ABCA6	ATP-binding cassette, sub-family A (ABC1), member 6
hsa-miR-491-5p	0	0	1	1	1	1	DGCR14	DiGeorge syndrome critical region gene 14
hsa-miR-491-5p	0	0	1	1	0	0	TMEM62	transmembrane protein 62
hsa-miR-491-5p	1	0	1	1	1	1	ERI3	ERI1 exoribonuclease family member 3
hsa-miR-491-5p	0	0	1	1	1	1	NR2C2AP	nuclear receptor 2C2-associated protein
hsa-miR-491-5p	0	0	1	1	1	1	ATP1B3	ATPase, Na+/K+ transporting, beta 3 polypeptide
hsa-miR-491-5p	0	0	1	1	0	0	CYGB	cytoglobin
hsa-miR-491-5p	0	0	1	1	1	1	PISD	phosphatidylserine decarboxylase
hsa-miR-491-5p	1	0	1	1	1	1	DOLPP1	dolichyl pyrophosphate phosphatase 1
hsa-miR-491-5p	0	0	1	1	0	0	CCNDBP1	cyclin D-type binding-protein 1
hsa-miR-491-5p	1	0	1	1	1	1	FGF11	fibroblast growth factor 11
hsa-miR-491-5p	0	0	1	1	1	1	HSPB8	heat shock 22kDa protein 8
hsa-miR-491-5p	1	0	1	1	0	0	ELOVL1	ELOVL fatty acid elongase 1
hsa-miR-491-5p	0	0	1	0	0	0	H19	H19, imprinted maternally expressed transcript (non-protein coding)
hsa-miR-491-5p	1	0	1	1	1	1	CDK18	cyclin-dependent kinase 18
hsa-miR-491-5p	0	0	1	1	1	1	SORD	sorbitol dehydrogenase
hsa-miR-491-5p	0	0	1	1	1	1	PKP4	plakophilin 4
hsa-miR-491-5p	1	0	1	1	1	1	NTM	neurotrimin
hsa-miR-491-5p	1	0	1	1	1	1	COPZ1	coatomer protein complex, subunit zeta 1
hsa-miR-491-5p	0	0	1	1	1	1	NAPA	N-ethylmaleimide-sensitive factor attachment protein, alpha
hsa-miR-491-5p	1	0	1	0	1	1	RPS6KB1	ribosomal protein S6 kinase, 70kDa, polypeptide 1
hsa-miR-491-5p	0	0	1	1	1	1	ANKRD53	ankyrin repeat domain 53
hsa-miR-491-5p	1	0	1	1	1	1	POU2F2	POU class 2 homeobox 2
hsa-miR-491-5p	0	0	1	1	1	1	TRIM68	tripartite motif containing 68
hsa-miR-491-5p	0	0	1	1	1	1	PGAP2	post-GPI attachment to proteins 2
hsa-miR-491-5p	1	0	1	1	1	1	LYPLA2	lysophospholipase II
hsa-miR-491-5p	0	0	1	1	1	1	AHSA1	AHA1, activator of heat shock 90kDa protein ATPase homolog 1 (yeast)
hsa-miR-491-5p	1	0	1	1	1	1	STK38L	serine/threonine kinase 38 like
hsa-miR-491-5p	1	0	1	1	1	1	PIAS1	protein inhibitor of activated STAT, 1
hsa-miR-491-5p	0	0	1	0	0	0	FLJ45248	FLJ45248 protein
hsa-miR-491-5p	0	0	1	1	1	1	MPDU1	mannose-P-dolichol utilization defect 1
hsa-miR-491-5p	0	0	1	0	1	1	RASA4	RAS p21 protein activator 4
hsa-miR-491-5p	0	0	1	1	0	0	CCDC22	coiled-coil domain containing 22
hsa-miR-491-5p	0	0	1	1	0	0	FAM64A	family with sequence similarity 64, member A
hsa-miR-491-5p	0	0	1	1	0	0	WDR43	WD repeat domain 43
hsa-miR-491-5p	0	0	1	1	1	1	DEDD	death effector domain containing
hsa-miR-491-5p	1	0	1	1	1	1	TIMP3	TIMP metallopeptidase inhibitor 3
hsa-miR-491-5p	0	0	1	1	0	0	PHPT1	phosphohistidine phosphatase 1
hsa-miR-491-5p	1	0	1	1	1	1	BAALC	brain and acute leukemia, cytoplasmic
hsa-miR-491-5p	1	0	1	1	1	1	EIF1	eukaryotic translation initiation factor 1
hsa-miR-491-5p	0	0	1	1	0	0	FXYD1	FXYD domain containing ion transport regulator 1
hsa-miR-491-5p	1	0	1	1	0	0	CRELD1	cysteine-rich with EGF-like domains 1
hsa-miR-491-5p	0	0	1	1	0	0	YIPF3	Yip1 domain family, member 3
hsa-miR-491-5p	0	0	1	1	0	0	CD79B	CD79b molecule, immunoglobulin-associated beta
hsa-miR-491-5p	1	0	1	1	1	1	RNF2	ring finger protein 2
hsa-miR-491-5p	1	0	1	1	1	1	CD40	CD40 molecule, TNF receptor superfamily member 5
hsa-miR-491-5p	1	0	1	1	1	1	HSPD1	heat shock 60kDa protein 1 (chaperonin)
hsa-miR-491-5p	1	0	1	0	1	1	MAP1B	microtubule-associated protein 1B
hsa-miR-491-5p	0	0	1	1	0	0	CCDC107	coiled-coil domain containing 107
hsa-miR-491-5p	1	0	1	1	1	1	TMEM55B	transmembrane protein 55B
hsa-miR-491-5p	1	0	1	1	1	1	RBPJ	recombination signal binding protein for immunoglobulin kappa J region
hsa-miR-491-5p	0	0	1	1	1	1	ZNF259	zinc finger protein 259
hsa-miR-491-5p	0	0	1	1	0	0	GPRC5C	G protein-coupled receptor, family C, group 5, member C
hsa-miR-491-5p	0	0	1	1	1	1	ZNF346	zinc finger protein 346
hsa-miR-491-5p	0	0	1	1	0	0	TESK1	testis-specific kinase 1
hsa-miR-491-5p	0	0	1	1	1	1	TOP3B	topoisomerase (DNA) III beta
hsa-miR-491-5p	0	0	1	1	0	0	INO80B	INO80 complex subunit B
hsa-miR-491-5p	0	0	1	1	0	0	PI16	peptidase inhibitor 16
hsa-miR-491-5p	0	0	1	1	1	1	C10orf2	chromosome 10 open reading frame 2
hsa-miR-491-5p	1	0	1	1	1	1	SERF2	small EDRK-rich factor 2
hsa-miR-491-5p	1	0	1	0	1	1	BTRC	beta-transducin repeat containing E3 ubiquitin protein ligase
hsa-miR-491-5p	1	0	1	1	1	1	PHACTR2	phosphatase and actin regulator 2
hsa-miR-491-5p	0	0	1	0	0	0	LINC00661	long intergenic non-protein coding RNA 661
hsa-miR-491-5p	1	0	1	0	1	1	SLC7A6	solute carrier family 7 (amino acid transporter light chain, y+L system), member 6
hsa-miR-491-5p	1	0	1	0	1	1	XRN1	5'-3' exoribonuclease 1
hsa-miR-491-5p	0	0	1	0	0	0	MIR143HG	MIR143 host gene (non-protein coding)
hsa-miR-491-5p	0	0	1	0	0	0	DNAJC27-AS1	DNAJC27 antisense RNA 1
hsa-miR-491-5p	1	0	1	1	1	1	BCL2L1	BCL2-like 1
hsa-miR-491-5p	0	0	1	1	0	0	TENC1	tensin like C1 domain containing phosphatase (tensin 2)
hsa-miR-491-5p	1	0	1	1	1	1	ATP2B3	ATPase, Ca++ transporting, plasma membrane 3
hsa-miR-491-5p	0	0	1	1	0	0	FAM58A	family with sequence similarity 58, member A
hsa-miR-491-5p	0	0	1	0	0	0	PILRB	paired immunoglobin-like type 2 receptor beta
hsa-miR-491-5p	1	0	1	1	1	1	TNFAIP1	tumor necrosis factor, alpha-induced protein 1 (endothelial)
hsa-miR-491-5p	0	0	1	1	0	0	CEACAM3	carcinoembryonic antigen-related cell adhesion molecule 3
hsa-miR-491-5p	0	0	1	1	1	1	AKAP17A	A kinase (PRKA) anchor protein 17A
hsa-miR-491-5p	1	0	1	1	1	1	MLL	myeloid/lymphoid or mixed-lineage leukemia (trithorax homolog, Drosophila)
hsa-miR-491-5p	0	0	1	1	0	0	SUOX	sulfite oxidase
hsa-miR-491-5p	0	0	1	1	0	0	HLA-DQB1	major histocompatibility complex, class II, DQ beta 1
hsa-miR-491-5p	1	0	1	1	1	1	ELK1	ELK1, member of ETS oncogene family
hsa-miR-491-5p	1	0	1	0	1	1	ACVR2A	activin A receptor, type IIA
hsa-miR-491-5p	0	0	1	0	0	0	AR	androgen receptor
hsa-miR-491-5p	1	0	1	1	1	1	COL4A3	collagen, type IV, alpha 3 (Goodpasture antigen)
hsa-miR-491-5p	0	0	1	1	1	1	EDN3	endothelin 3
hsa-miR-491-5p	1	0	1	1	1	1	F13A1	coagulation factor XIII, A1 polypeptide
hsa-miR-491-5p	1	0	1	0	1	1	GLI3	GLI family zinc finger 3
hsa-miR-491-5p	1	0	1	1	1	1	MET	met proto-oncogene (hepatocyte growth factor receptor)
hsa-miR-491-5p	0	0	1	1	1	1	MTM1	myotubularin 1
hsa-miR-491-5p	0	0	1	1	0	0	PHKG2	phosphorylase kinase, gamma 2 (testis)
hsa-miR-491-5p	0	0	1	1	1	1	TSHR	thyroid stimulating hormone receptor
hsa-miR-491-5p	0	0	1	1	1	1	WAS	Wiskott-Aldrich syndrome
hsa-miR-491-5p	0	0	1	1	1	1	XDH	xanthine dehydrogenase
hsa-miR-491-5p	0	0	1	1	1	1	CASR	calcium-sensing receptor
hsa-miR-491-5p	0	0	1	1	0	0	KRT5	keratin 5
hsa-miR-491-5p	0	0	1	1	1	1	L1CAM	L1 cell adhesion molecule
hsa-miR-491-5p	1	0	1	1	0	0	NOTCH3	notch 3
hsa-miR-491-5p	1	0	1	1	1	1	AQP2	aquaporin 2 (collecting duct)
hsa-miR-491-5p	0	0	1	1	1	1	CYP11B2	cytochrome P450, family 11, subfamily B, polypeptide 2
hsa-miR-491-5p	0	0	1	1	1	1	CRX	cone-rod homeobox
hsa-miR-491-5p	0	0	1	1	1	1	IL1RN	interleukin 1 receptor antagonist
hsa-miR-491-5p	0	0	1	1	1	1	GPX1	glutathione peroxidase 1
hsa-miR-491-5p	1	0	1	1	1	1	DIO2	deiodinase, iodothyronine, type II
hsa-miR-491-5p	1	0	1	0	1	1	GABRA4	gamma-aminobutyric acid (GABA) A receptor, alpha 4
hsa-miR-491-5p	1	0	1	1	1	1	GAD1	glutamate decarboxylase 1 (brain, 67kDa)
hsa-miR-491-5p	0	0	1	1	1	1	HTR7	5-hydroxytryptamine (serotonin) receptor 7, adenylate cyclase-coupled
hsa-miR-491-5p	0	0	1	1	1	1	ITGAX	integrin, alpha X (complement component 3 receptor 4 subunit)
hsa-miR-491-5p	0	0	1	1	1	1	MAOB	monoamine oxidase B
hsa-miR-491-5p	1	0	1	1	1	1	RARA	retinoic acid receptor, alpha
hsa-miR-491-5p	1	0	1	0	1	1	SMAD5	SMAD family member 5
hsa-miR-491-5p	0	0	1	1	0	0	SNCB	synuclein, beta
hsa-miR-491-5p	1	0	1	1	1	1	RORC	RAR-related orphan receptor C
hsa-miR-491-5p	1	0	1	0	1	1	CLDN18	claudin 18
hsa-miR-491-5p	1	0	1	1	1	1	WNK3	WNK lysine deficient protein kinase 3
hsa-miR-491-5p	1	0	1	1	1	1	HMGXB4	HMG box domain containing 4
hsa-miR-491-5p	1	0	1	1	1	1	BICD2	bicaudal D homolog 2 (Drosophila)
hsa-miR-491-5p	1	0	1	0	1	1	BMF	Bcl2 modifying factor
hsa-miR-491-5p	0	0	1	0	0	0	RNASEK	ribonuclease, RNase K
hsa-miR-491-5p	0	0	1	0	1	1	FLJ16124	FLJ16124 protein
hsa-miR-491-5p	0	0	1	0	1	1	FLJ46347	uncharacterized LOC389064
hsa-miR-491-5p	0	0	1	1	1	1	PRR13	proline rich 13
hsa-miR-491-5p	1	0	1	0	1	1	IP6K1	inositol hexakisphosphate kinase 1
hsa-miR-491-5p	0	0	1	1	1	1	MAPKAP1	mitogen-activated protein kinase associated protein 1
hsa-miR-491-5p	1	0	1	1	1	1	ATN1	atrophin 1
hsa-miR-491-5p	0	0	1	1	1	1	SCP2	sterol carrier protein 2
hsa-miR-491-5p	1	0	1	1	1	1	NTRK3	neurotrophic tyrosine kinase, receptor, type 3
hsa-miR-491-5p	1	0	1	0	1	1	CPLX2	complexin 2
hsa-miR-491-5p	0	0	1	1	1	1	IL4R	interleukin 4 receptor
hsa-miR-491-5p	1	0	1	1	1	1	LPHN1	latrophilin 1
hsa-miR-491-5p	1	0	1	1	1	1	FNIP1	folliculin interacting protein 1
hsa-miR-491-5p	1	0	1	1	1	1	SHE	Src homology 2 domain containing E
hsa-miR-491-5p	0	0	1	1	1	1	MUC21	mucin 21, cell surface associated
hsa-miR-491-5p	0	0	1	1	1	1	SAMD13	sterile alpha motif domain containing 13
hsa-miR-491-5p	0	0	1	0	1	1	U2AF2	U2 small nuclear RNA auxiliary factor 2
hsa-miR-491-5p	1	0	1	1	1	1	SLC25A53	solute carrier family 25, member 53
hsa-miR-491-5p	0	0	1	1	1	1	FAM53A	family with sequence similarity 53, member A
hsa-miR-491-5p	0	0	1	1	1	1	C2orf68	chromosome 2 open reading frame 68
hsa-miR-491-5p	0	0	1	1	1	1	C17orf97	chromosome 17 open reading frame 97
hsa-miR-491-5p	0	0	1	1	1	1	LDLRAD2	low density lipoprotein receptor class A domain containing 2
hsa-miR-491-5p	0	0	1	0	0	0	LOC440157	uncharacterized LOC440157
hsa-miR-491-5p	1	0	1	1	1	1	CA7	carbonic anhydrase VII
hsa-miR-491-5p	1	0	1	0	1	1	GOPC	golgi-associated PDZ and coiled-coil motif containing
hsa-miR-491-5p	0	0	1	1	0	0	ALDH18A1	aldehyde dehydrogenase 18 family, member A1
hsa-miR-491-5p	1	0	1	1	1	1	VMA21	VMA21 vacuolar H+-ATPase homolog (S. cerevisiae)
hsa-miR-491-5p	1	0	1	1	1	1	SH3PXD2B	SH3 and PX domains 2B
hsa-miR-491-5p	1	0	1	1	1	1	SORBS3	sorbin and SH3 domain containing 3
hsa-miR-491-5p	0	0	1	1	1	1	ZNF187	zinc finger protein 187
hsa-miR-491-5p	1	0	1	0	1	1	BCL7A	B-cell CLL/lymphoma 7A
hsa-miR-491-5p	1	0	1	0	1	1	TNRC6B	trinucleotide repeat containing 6B
hsa-miR-491-5p	1	0	1	1	1	1	FNBP1L	formin binding protein 1-like
hsa-miR-491-5p	0	0	1	1	0	0	KPRP	keratinocyte proline-rich protein
hsa-miR-491-5p	1	0	1	0	1	1	CLLU1	chronic lymphocytic leukemia up-regulated 1
hsa-miR-491-5p	1	0	1	0	1	1	C3orf70	chromosome 3 open reading frame 70
hsa-miR-491-5p	1	0	1	1	1	1	UGGT1	UDP-glucose glycoprotein glucosyltransferase 1
hsa-miR-491-5p	0	0	1	0	1	1	C6orf120	chromosome 6 open reading frame 120
hsa-miR-491-5p	0	0	1	1	1	1	RNLS	renalase, FAD-dependent amine oxidase
hsa-miR-491-5p	1	0	1	1	1	1	MASP1	mannan-binding lectin serine peptidase 1 (C4/C2 activating component of Ra-reactive factor)
hsa-miR-491-5p	1	0	1	1	1	1	RCE1	RCE1 homolog, prenyl protein protease (S. cerevisiae)
hsa-miR-491-5p	1	0	1	1	1	1	DLX1	distal-less homeobox 1
hsa-miR-491-5p	0	0	1	1	1	1	ATAD3C	ATPase family, AAA domain containing 3C
hsa-miR-491-5p	1	0	1	0	1	1	CCNL2	cyclin L2
hsa-miR-491-5p	1	0	1	1	1	1	MOSPD3	motile sperm domain containing 3
hsa-miR-491-5p	1	0	1	1	1	1	SCN2A	sodium channel, voltage-gated, type II, alpha subunit
hsa-miR-491-5p	1	0	1	1	1	1	NCALD	neurocalcin delta
hsa-miR-491-5p	0	0	1	0	1	1	STEAP2	STEAP family member 2, metalloreductase
hsa-miR-491-5p	1	0	1	1	0	0	KIAA0895L	KIAA0895-like
hsa-miR-491-5p	0	0	1	1	0	0	FAM110A	family with sequence similarity 110, member A
hsa-miR-491-5p	0	0	1	1	0	0	TRAPPC5	trafficking protein particle complex 5
hsa-miR-491-5p	1	0	1	1	1	1	NSL1	NSL1, MIND kinetochore complex component, homolog (S. cerevisiae)
hsa-miR-491-5p	1	0	1	1	1	1	ERBB4	v-erb-a erythroblastic leukemia viral oncogene homolog 4 (avian)
hsa-miR-491-5p	1	0	1	1	1	1	PVRL2	poliovirus receptor-related 2 (herpesvirus entry mediator B)
hsa-miR-491-5p	1	0	1	0	1	1	SRGAP2	SLIT-ROBO Rho GTPase activating protein 2
hsa-miR-491-5p	0	0	1	0	1	1	MPPED1	metallophosphoesterase domain containing 1
hsa-miR-491-5p	0	0	1	1	1	1	SLC6A4	solute carrier family 6 (neurotransmitter transporter, serotonin), member 4
hsa-miR-491-5p	1	0	1	1	1	1	UBTF	upstream binding transcription factor, RNA polymerase I
hsa-miR-491-5p	1	0	1	1	1	1	NCOR2	nuclear receptor corepressor 2
hsa-miR-491-5p	1	0	1	1	1	1	IRF2BP2	interferon regulatory factor 2 binding protein 2
hsa-miR-491-5p	1	0	1	1	1	1	PRR3	proline rich 3
hsa-miR-491-5p	0	0	1	1	0	0	FAM127A	family with sequence similarity 127, member A
hsa-miR-491-5p	1	0	1	0	1	1	FAM127C	family with sequence similarity 127, member C
hsa-miR-491-5p	1	0	1	1	0	0	DLGAP3	discs, large (Drosophila) homolog-associated protein 3
hsa-miR-491-5p	1	0	1	0	1	1	UNC13A	unc-13 homolog A (C. elegans)
hsa-miR-491-5p	1	0	1	0	1	1	THSD7B	thrombospondin, type I, domain containing 7B
hsa-miR-491-5p	1	0	1	1	1	1	REPS2	RALBP1 associated Eps domain containing 2
hsa-miR-491-5p	1	0	1	1	1	1	NXF1	nuclear RNA export factor 1
hsa-miR-491-5p	1	0	1	1	1	1	ASIC1	acid-sensing (proton-gated) ion channel 1
hsa-miR-491-5p	1	0	1	0	0	0	ACAN	aggrecan
hsa-miR-491-5p	0	0	1	1	1	1	ARHGDIB	Rho GDP dissociation inhibitor (GDI) beta
hsa-miR-491-5p	0	0	1	1	0	0	CA11	carbonic anhydrase XI
hsa-miR-491-5p	1	0	1	0	1	1	CDK6	cyclin-dependent kinase 6
hsa-miR-491-5p	1	0	1	1	1	1	CNN1	calponin 1, basic, smooth muscle
hsa-miR-491-5p	1	0	1	0	1	1	EFNB3	ephrin-B3
hsa-miR-491-5p	1	0	1	1	1	1	EXTL3	exostoses (multiple)-like 3
hsa-miR-491-5p	0	0	1	1	1	1	B4GALNT1	beta-1,4-N-acetyl-galactosaminyl transferase 1
hsa-miR-491-5p	1	0	1	1	0	0	GDI1	GDP dissociation inhibitor 1
hsa-miR-491-5p	1	0	1	0	1	1	B4GALT1	UDP-Gal:betaGlcNAc beta 1,4- galactosyltransferase, polypeptide 1
hsa-miR-491-5p	1	0	1	1	1	1	AQP4	aquaporin 4
hsa-miR-491-5p	1	0	1	1	1	1	ARF3	ADP-ribosylation factor 3
hsa-miR-491-5p	1	0	1	1	1	1	ARL4D	ADP-ribosylation factor-like 4D
hsa-miR-491-5p	0	0	1	0	0	0	BAI1	brain-specific angiogenesis inhibitor 1
hsa-miR-491-5p	0	0	1	1	0	0	COX6B1	cytochrome c oxidase subunit VIb polypeptide 1 (ubiquitous)
hsa-miR-491-5p	0	0	1	1	0	0	CRYAB	crystallin, alpha B
hsa-miR-491-5p	0	0	1	1	0	0	CST4	cystatin S
hsa-miR-491-5p	0	0	1	1	0	0	DDB1	damage-specific DNA binding protein 1, 127kDa
hsa-miR-491-5p	1	0	1	1	0	0	DES	desmin
hsa-miR-491-5p	0	0	1	1	1	1	DPT	dermatopontin
hsa-miR-491-5p	1	0	1	1	1	1	HBEGF	heparin-binding EGF-like growth factor
hsa-miR-491-5p	0	0	1	1	0	0	EIF5A	eukaryotic translation initiation factor 5A
hsa-miR-491-5p	1	0	1	1	1	1	FKBP4	FK506 binding protein 4, 59kDa
hsa-miR-491-5p	0	0	1	1	1	1	HOXA4	homeobox A4
hsa-miR-491-5p	1	0	1	1	0	0	IHH	Indian hedgehog
hsa-miR-491-5p	1	0	1	1	1	1	INSM1	insulinoma-associated 1
hsa-miR-491-5p	1	0	1	1	1	1	ISL1	ISL LIM homeobox 1
hsa-miR-491-5p	1	0	1	1	0	0	JUP	junction plakoglobin
hsa-miR-491-5p	1	0	1	1	1	1	KCNA6	potassium voltage-gated channel, shaker-related subfamily, member 6
hsa-miR-491-5p	1	0	1	1	0	0	KCNN3	potassium intermediate/small conductance calcium-activated channel, subfamily N, member 3
hsa-miR-491-5p	1	0	1	1	1	1	LIF	leukemia inhibitory factor
hsa-miR-491-5p	1	0	1	1	1	1	LIMK1	LIM domain kinase 1
hsa-miR-491-5p	0	0	1	0	1	1	MFNG	MFNG O-fucosylpeptide 3-beta-N-acetylglucosaminyltransferase
hsa-miR-491-5p	0	0	1	1	0	0	NTSR1	neurotensin receptor 1 (high affinity)
hsa-miR-491-5p	0	0	1	0	1	1	OAZ2	ornithine decarboxylase antizyme 2
hsa-miR-491-5p	1	0	1	1	1	1	TNFRSF11B	tumor necrosis factor receptor superfamily, member 11b
hsa-miR-491-5p	1	0	1	0	1	1	PAPPA	pregnancy-associated plasma protein A, pappalysin 1
hsa-miR-491-5p	1	0	1	0	1	1	PCDHGC3	protocadherin gamma subfamily C, 3
hsa-miR-491-5p	1	0	1	0	1	1	CDK17	cyclin-dependent kinase 17
hsa-miR-491-5p	1	0	1	1	1	1	PLAGL2	pleiomorphic adenoma gene-like 2
hsa-miR-491-5p	1	0	1	0	0	0	PPP1R10	protein phosphatase 1, regulatory subunit 10
hsa-miR-491-5p	1	0	1	1	1	1	PPP6C	protein phosphatase 6, catalytic subunit
hsa-miR-491-5p	0	0	1	1	1	1	PREP	prolyl endopeptidase
hsa-miR-491-5p	0	0	1	1	1	1	PRKCB	protein kinase C, beta
hsa-miR-491-5p	1	0	1	1	1	1	PTPRS	protein tyrosine phosphatase, receptor type, S
hsa-miR-491-5p	1	0	1	1	1	1	PVRL1	poliovirus receptor-related 1 (herpesvirus entry mediator C)
hsa-miR-491-5p	0	0	1	1	0	0	RDBP	RD RNA binding protein
hsa-miR-491-5p	1	0	1	1	0	0	RFX1	regulatory factor X, 1 (influences HLA class II expression)
hsa-miR-491-5p	0	0	1	1	0	0	CCL5	chemokine (C-C motif) ligand 5
hsa-miR-491-5p	0	0	1	0	1	1	CXCL5	chemokine (C-X-C motif) ligand 5
hsa-miR-491-5p	1	0	1	0	1	1	SLC6A1	solute carrier family 6 (neurotransmitter transporter, GABA), member 1
hsa-miR-491-5p	1	0	1	1	1	1	SMARCC1	SWI/SNF related, matrix associated, actin dependent regulator of chromatin, subfamily c, member 1
hsa-miR-491-5p	1	0	1	1	1	1	SRF	serum response factor (c-fos serum response element-binding transcription factor)
hsa-miR-491-5p	1	0	1	1	1	1	SRPR	signal recognition particle receptor (docking protein)
hsa-miR-491-5p	0	0	1	1	1	1	STAT6	signal transducer and activator of transcription 6, interleukin-4 induced
hsa-miR-491-5p	1	0	1	0	1	1	STC1	stanniocalcin 1
hsa-miR-491-5p	1	0	1	1	1	1	TFAP2C	transcription factor AP-2 gamma (activating enhancer binding protein 2 gamma)
hsa-miR-491-5p	0	0	1	1	1	1	TPR	translocated promoter region, nuclear basket protein
hsa-miR-491-5p	1	0	1	0	1	1	TSPYL1	TSPY-like 1
hsa-miR-491-5p	1	0	1	1	1	1	ADAM12	ADAM metallopeptidase domain 12
hsa-miR-491-5p	1	0	1	1	1	1	HMGA2	high mobility group AT-hook 2
hsa-miR-491-5p	1	0	1	1	1	1	FZD7	frizzled family receptor 7
hsa-miR-491-5p	0	0	1	1	1	1	ITGA10	integrin, alpha 10
hsa-miR-491-5p	1	0	1	1	1	1	BHLHE40	basic helix-loop-helix family, member e40
hsa-miR-491-5p	1	0	1	0	1	1	PCDHGA12	protocadherin gamma subfamily A, 12
hsa-miR-491-5p	1	0	1	0	1	1	PCDHGB4	protocadherin gamma subfamily B, 4
hsa-miR-491-5p	1	0	1	1	1	1	FUBP1	far upstream element (FUSE) binding protein 1
hsa-miR-491-5p	1	0	1	1	1	1	KALRN	kalirin, RhoGEF kinase
hsa-miR-491-5p	0	0	1	0	0	0	ARRB1	arrestin, beta 1
hsa-miR-491-5p	1	0	1	1	0	0	ATOX1	ATX1 antioxidant protein 1 homolog (yeast)
hsa-miR-491-5p	1	0	1	0	1	1	DGKB	diacylglycerol kinase, beta 90kDa
hsa-miR-491-5p	1	0	1	0	1	1	E2F2	E2F transcription factor 2
hsa-miR-491-5p	1	0	1	1	1	1	GMFB	glia maturation factor, beta
hsa-miR-491-5p	0	0	1	0	1	1	HABP2	hyaluronan binding protein 2
hsa-miR-491-5p	0	0	1	1	0	0	DRG1	developmentally regulated GTP binding protein 1
hsa-miR-491-5p	0	0	1	1	0	0	RBP2	retinol binding protein 2, cellular
hsa-miR-491-5p	0	0	1	1	1	1	SLC28A1	solute carrier family 28 (sodium-coupled nucleoside transporter), member 1
hsa-miR-491-5p	1	0	1	0	1	1	MED14	mediator complex subunit 14
hsa-miR-491-5p	0	0	1	1	1	1	COX5A	cytochrome c oxidase subunit Va
hsa-miR-491-5p	1	0	1	0	1	1	GTPBP1	GTP binding protein 1
hsa-miR-491-5p	1	0	1	0	1	1	ACVR1B	activin A receptor, type IB
hsa-miR-491-5p	0	0	1	1	1	1	COPA	coatomer protein complex, subunit alpha
hsa-miR-491-5p	1	0	1	1	1	1	DAG1	dystroglycan 1 (dystrophin-associated glycoprotein 1)
hsa-miR-491-5p	1	0	1	1	1	1	EFNA1	ephrin-A1
hsa-miR-491-5p	1	0	1	1	1	1	EGR3	early growth response 3
hsa-miR-491-5p	1	0	1	1	1	1	EPHB3	EPH receptor B3
hsa-miR-491-5p	1	0	1	0	1	1	ETV5	ets variant 5
hsa-miR-491-5p	1	0	1	0	1	1	ACSL4	acyl-CoA synthetase long-chain family member 4
hsa-miR-491-5p	1	0	1	1	1	1	FLOT2	flotillin 2
hsa-miR-491-5p	0	0	1	0	1	1	KCNQ3	potassium voltage-gated channel, KQT-like subfamily, member 3
hsa-miR-491-5p	1	0	1	0	1	1	PKNOX1	PBX/knotted 1 homeobox 1
hsa-miR-491-5p	1	0	1	1	1	1	SYNGR1	synaptogyrin 1
hsa-miR-491-5p	0	0	1	1	0	0	DYRK1B	dual-specificity tyrosine-(Y)-phosphorylation regulated kinase 1B
hsa-miR-491-5p	1	0	1	1	1	1	ONECUT2	one cut homeobox 2
hsa-miR-491-5p	1	0	1	1	1	1	SEC24C	SEC24 family, member C (S. cerevisiae)
hsa-miR-491-5p	1	0	1	0	1	1	DOCK3	dedicator of cytokinesis 3
hsa-miR-491-5p	0	0	1	1	1	1	GDF10	growth differentiation factor 10
hsa-miR-491-5p	0	0	1	1	1	1	KCND3	potassium voltage-gated channel, Shal-related subfamily, member 3
hsa-miR-491-5p	1	0	1	1	1	1	KCNJ8	potassium inwardly-rectifying channel, subfamily J, member 8
hsa-miR-491-5p	1	0	1	1	1	1	KDM5A	lysine (K)-specific demethylase 5A
hsa-miR-491-5p	1	0	1	1	1	1	GFPT2	glutamine-fructose-6-phosphate transaminase 2
hsa-miR-491-5p	1	0	1	1	1	1	APLNR	apelin receptor
hsa-miR-491-5p	0	0	1	1	0	0	ASCL2	achaete-scute complex homolog 2 (Drosophila)
hsa-miR-491-5p	1	0	1	0	1	1	DLX6	distal-less homeobox 6
hsa-miR-491-5p	1	0	1	0	1	1	E2F1	E2F transcription factor 1
hsa-miR-491-5p	1	0	1	1	1	1	ELK3	ELK3, ETS-domain protein (SRF accessory protein 2)
hsa-miR-491-5p	0	0	1	1	1	1	MSTN	myostatin
hsa-miR-491-5p	1	0	1	1	1	1	PDCL	phosducin-like
hsa-miR-491-5p	1	0	1	0	1	1	PRKAB2	protein kinase, AMP-activated, beta 2 non-catalytic subunit
hsa-miR-491-5p	1	0	1	1	1	1	RND2	Rho family GTPase 2
hsa-miR-491-5p	1	0	1	1	0	0	NOG	noggin
hsa-miR-491-5p	1	0	1	1	1	1	AKT3	v-akt murine thymoma viral oncogene homolog 3 (protein kinase B, gamma)
hsa-miR-491-5p	1	0	1	1	1	1	HOXA11	homeobox A11
hsa-miR-491-5p	0	0	1	1	0	0	IFI35	interferon-induced protein 35
hsa-miR-491-5p	0	0	1	1	1	1	LIMK2	LIM domain kinase 2
hsa-miR-491-5p	0	0	1	0	1	1	POU3F2	POU class 3 homeobox 2
hsa-miR-491-5p	1	0	1	1	1	1	SYT1	synaptotagmin I
hsa-miR-491-5p	0	0	1	1	1	1	SLC35A2	solute carrier family 35 (UDP-galactose transporter), member A2
hsa-miR-491-5p	0	0	1	1	0	0	VDAC3	voltage-dependent anion channel 3
hsa-miR-491-5p	1	0	1	1	1	1	CTDSP2	CTD (carboxy-terminal domain, RNA polymerase II, polypeptide A) small phosphatase 2
hsa-miR-491-5p	0	0	1	1	1	1	RNF41	ring finger protein 41
hsa-miR-491-5p	1	0	1	0	1	1	DCAF7	DDB1 and CUL4 associated factor 7
hsa-miR-491-5p	1	0	1	1	1	1	EFS	embryonal Fyn-associated substrate
hsa-miR-491-5p	1	0	1	1	1	1	MAN1A1	mannosidase, alpha, class 1A, member 1
hsa-miR-491-5p	1	0	1	1	1	1	MAT2A	methionine adenosyltransferase II, alpha
hsa-miR-491-5p	1	0	1	0	1	1	NAB1	NGFI-A binding protein 1 (EGR1 binding protein 1)
hsa-miR-491-5p	1	0	1	1	0	0	NAB2	NGFI-A binding protein 2 (EGR1 binding protein 2)
hsa-miR-491-5p	1	0	1	1	1	1	PRCC	papillary renal cell carcinoma (translocation-associated)
hsa-miR-491-5p	1	0	1	1	1	1	HS3ST4	heparan sulfate (glucosamine) 3-O-sulfotransferase 4
hsa-miR-491-5p	0	0	1	1	1	1	LANCL1	LanC lantibiotic synthetase component C-like 1 (bacterial)
hsa-miR-491-5p	1	0	1	1	1	1	SEMA3A	sema domain, immunoglobulin domain (Ig), short basic domain, secreted, (semaphorin) 3A
hsa-miR-491-5p	1	0	1	1	1	1	DAGLA	diacylglycerol lipase, alpha
hsa-miR-491-5p	1	0	1	1	1	1	DYNC1LI2	dynein, cytoplasmic 1, light intermediate chain 2
hsa-miR-491-5p	0	0	1	0	1	1	OAS3	2'-5'-oligoadenylate synthetase 3, 100kDa
hsa-miR-491-5p	0	0	1	1	0	0	PDE6H	phosphodiesterase 6H, cGMP-specific, cone, gamma
hsa-miR-491-5p	1	0	1	0	1	1	PITPNA	phosphatidylinositol transfer protein, alpha
hsa-miR-491-5p	1	0	1	0	1	1	PPP1R2	protein phosphatase 1, regulatory (inhibitor) subunit 2
hsa-miR-491-5p	0	0	1	1	1	1	RRAS	related RAS viral (r-ras) oncogene homolog
hsa-miR-491-5p	1	0	1	0	1	1	SRSF6	serine/arginine-rich splicing factor 6
hsa-miR-491-5p	0	0	1	1	0	0	TAF10	TAF10 RNA polymerase II, TATA box binding protein (TBP)-associated factor, 30kDa
hsa-miR-491-5p	1	0	1	1	1	1	TLN1	talin 1
hsa-miR-491-5p	1	0	1	1	1	1	SMC1A	structural maintenance of chromosomes 1A
hsa-miR-491-5p	0	0	1	1	0	0	RBM14	RNA binding motif protein 14
hsa-miR-491-5p	0	0	1	0	0	0	CREB3	cAMP responsive element binding protein 3
hsa-miR-491-5p	1	0	1	0	1	1	APPBP2	amyloid beta precursor protein (cytoplasmic tail) binding protein 2
hsa-miR-491-5p	1	0	1	1	1	1	TRIM3	tripartite motif containing 3
hsa-miR-491-5p	0	0	1	0	0	0	RELB	v-rel reticuloendotheliosis viral oncogene homolog B
hsa-miR-491-5p	1	0	1	1	1	1	SLC2A1	solute carrier family 2 (facilitated glucose transporter), member 1
hsa-miR-491-5p	0	0	1	0	1	1	SLC16A2	solute carrier family 16, member 2 (thyroid hormone transporter)
hsa-miR-491-5p	1	0	1	1	1	1	KHDRBS1	KH domain containing, RNA binding, signal transduction associated 1
hsa-miR-491-5p	1	0	1	1	1	1	CORIN	corin, serine peptidase
hsa-miR-491-5p	0	0	1	1	1	1	TBR1	T-box, brain, 1
hsa-miR-491-5p	1	0	1	1	1	1	MAN1A2	mannosidase, alpha, class 1A, member 2
hsa-miR-491-5p	1	0	1	1	1	1	BTG2	BTG family, member 2
hsa-miR-491-5p	1	0	1	1	1	1	KAT6A	K(lysine) acetyltransferase 6A
hsa-miR-491-5p	1	0	1	0	1	1	SYNGAP1	synaptic Ras GTPase activating protein 1
hsa-miR-491-5p	1	0	1	1	1	1	SF3A3	splicing factor 3a, subunit 3, 60kDa
hsa-miR-491-5p	0	0	1	1	1	1	ATF7	activating transcription factor 7
hsa-miR-491-5p	1	0	1	0	1	1	SOX12	SRY (sex determining region Y)-box 12
hsa-miR-491-5p	0	0	1	1	1	1	FAF1	Fas (TNFRSF6) associated factor 1
hsa-miR-491-5p	1	0	1	1	1	1	ZNF81	zinc finger protein 81
hsa-miR-491-5p	1	0	1	1	1	1	TESK2	testis-specific kinase 2
hsa-miR-491-5p	1	0	1	1	1	1	KLF12	Kruppel-like factor 12
hsa-miR-491-5p	0	0	1	0	0	0	PHB2	prohibitin 2
hsa-miR-491-5p	1	0	1	1	1	1	PADI2	peptidyl arginine deiminase, type II
hsa-miR-491-5p	1	0	1	1	1	1	ELL2	elongation factor, RNA polymerase II, 2
hsa-miR-491-5p	1	0	1	0	1	1	FZD4	frizzled family receptor 4
hsa-miR-491-5p	1	0	1	1	1	1	RHOQ	ras homolog family member Q
hsa-miR-491-5p	1	0	1	0	1	1	ACAP2	ArfGAP with coiled-coil, ankyrin repeat and PH domains 2
hsa-miR-491-5p	1	0	1	0	1	1	G3BP2	GTPase activating protein (SH3 domain) binding protein 2
hsa-miR-491-5p	0	0	1	1	0	0	KIR2DS4	killer cell immunoglobulin-like receptor, two domains, short cytoplasmic tail, 4
hsa-miR-491-5p	0	0	1	1	1	1	MAFF	v-maf musculoaponeurotic fibrosarcoma oncogene homolog F (avian)
hsa-miR-491-5p	0	0	1	0	0	0	OR2F1	olfactory receptor, family 2, subfamily F, member 1
hsa-miR-491-5p	1	0	1	0	1	1	BLOC1S6	biogenesis of lysosomal organelles complex-1, subunit 6, pallidin
hsa-miR-491-5p	0	0	1	0	1	1	TLL1	tolloid-like 1
hsa-miR-491-5p	1	0	1	1	1	1	TRPC5	transient receptor potential cation channel, subfamily C, member 5
hsa-miR-491-5p	0	0	1	1	1	1	N6AMT1	N-6 adenine-specific DNA methyltransferase 1 (putative)
hsa-miR-491-5p	1	0	1	1	1	1	CLCF1	cardiotrophin-like cytokine factor 1
hsa-miR-491-5p	1	0	1	1	0	0	DEXI	Dexi homolog (mouse)
hsa-miR-491-5p	0	0	1	1	1	1	CCDC113	coiled-coil domain containing 113
hsa-miR-491-5p	1	0	1	1	0	0	HOXC11	homeobox C11
hsa-miR-491-5p	0	0	1	1	1	1	TM4SF1	transmembrane 4 L six family member 1
hsa-miR-491-5p	1	0	1	1	1	1	VAMP1	vesicle-associated membrane protein 1 (synaptobrevin 1)
hsa-miR-491-5p	0	0	1	1	1	1	IL1RAPL1	interleukin 1 receptor accessory protein-like 1
hsa-miR-491-5p	1	0	1	1	1	1	PATZ1	POZ (BTB) and AT hook containing zinc finger 1
hsa-miR-491-5p	0	0	1	1	1	1	OPTC	opticin
hsa-miR-491-5p	1	0	1	0	1	1	RNF11	ring finger protein 11
hsa-miR-491-5p	1	0	1	1	1	1	LYPD3	LY6/PLAUR domain containing 3
hsa-miR-491-5p	1	0	1	1	1	1	AFF4	AF4/FMR2 family, member 4
hsa-miR-491-5p	0	0	1	1	0	0	SIT1	signaling threshold regulating transmembrane adaptor 1
hsa-miR-491-5p	1	0	1	1	1	1	EHD3	EH-domain containing 3
hsa-miR-491-5p	1	0	1	0	1	1	ATP11B	ATPase, class VI, type 11B
hsa-miR-491-5p	0	0	1	1	1	1	HOXC4	homeobox C4
hsa-miR-491-5p	1	0	1	1	1	1	ZNF592	zinc finger protein 592
hsa-miR-491-5p	1	0	1	0	1	1	SH3PXD2A	SH3 and PX domains 2A
hsa-miR-491-5p	1	0	1	1	1	1	GCC2	GRIP and coiled-coil domain containing 2
hsa-miR-491-5p	1	0	1	1	1	1	RALGPS1	Ral GEF with PH domain and SH3 binding motif 1
hsa-miR-491-5p	0	0	1	1	0	0	ZNF646	zinc finger protein 646
hsa-miR-491-5p	0	0	1	1	1	1	VPRBP	Vpr (HIV-1) binding protein
hsa-miR-491-5p	1	0	1	1	1	1	TBKBP1	TBK1 binding protein 1
hsa-miR-491-5p	1	0	1	1	1	1	RASSF2	Ras association (RalGDS/AF-6) domain family member 2
hsa-miR-491-5p	0	0	1	1	1	1	SNX19	sorting nexin 19
hsa-miR-491-5p	1	0	1	1	1	1	DAZAP2	DAZ associated protein 2
hsa-miR-491-5p	1	0	1	1	1	1	ARHGEF11	Rho guanine nucleotide exchange factor (GEF) 11
hsa-miR-491-5p	1	0	1	0	1	1	LPPR4	lipid phosphate phosphatase-related protein type 4
hsa-miR-491-5p	1	0	1	1	1	1	JOSD1	Josephin domain containing 1
hsa-miR-491-5p	1	0	1	1	1	1	PLEKHA6	pleckstrin homology domain containing, family A member 6
hsa-miR-491-5p	0	0	1	1	1	1	FTSJD2	FtsJ methyltransferase domain containing 2
hsa-miR-491-5p	1	0	1	1	1	1	DDN	dendrin
hsa-miR-491-5p	1	0	1	1	1	1	SMG1	smg-1 homolog, phosphatidylinositol 3-kinase-related kinase (C. elegans)
hsa-miR-491-5p	1	0	1	1	1	1	RTF1	Rtf1, Paf1/RNA polymerase II complex component, homolog (S. cerevisiae)
hsa-miR-491-5p	1	0	1	1	1	1	CUX2	cut-like homeobox 2
hsa-miR-491-5p	1	0	1	1	1	1	PHF15	PHD finger protein 15
hsa-miR-491-5p	1	0	1	0	1	1	ARHGEF12	Rho guanine nucleotide exchange factor (GEF) 12
hsa-miR-491-5p	1	0	1	0	1	1	LARP1	La ribonucleoprotein domain family, member 1
hsa-miR-491-5p	1	0	1	1	1	1	ASXL1	additional sex combs like 1 (Drosophila)
hsa-miR-491-5p	1	0	1	0	1	1	KCTD2	potassium channel tetramerisation domain containing 2
hsa-miR-491-5p	0	0	1	1	1	1	ANAPC13	anaphase promoting complex subunit 13
hsa-miR-491-5p	1	0	1	1	1	1	PARM1	prostate androgen-regulated mucin-like protein 1
hsa-miR-491-5p	1	0	1	1	1	1	CNRIP1	cannabinoid receptor interacting protein 1
hsa-miR-491-5p	1	0	1	1	1	1	PNKD	paroxysmal nonkinesigenic dyskinesia
hsa-miR-491-5p	1	0	1	1	1	1	CLIP3	CAP-GLY domain containing linker protein 3
hsa-miR-491-5p	1	0	1	1	1	1	PHF19	PHD finger protein 19
hsa-miR-491-5p	1	0	1	1	1	1	FAM155B	family with sequence similarity 155, member B
hsa-miR-491-5p	0	0	1	1	1	1	BRPF3	bromodomain and PHD finger containing, 3
hsa-miR-491-5p	0	0	1	1	1	1	KRT76	keratin 76
hsa-miR-491-5p	1	0	1	1	1	1	AZIN1	antizyme inhibitor 1
hsa-miR-491-5p	1	0	1	1	1	1	EIF5B	eukaryotic translation initiation factor 5B
hsa-miR-491-5p	1	0	1	0	1	1	TRIM33	tripartite motif containing 33
hsa-miR-491-5p	0	0	1	1	1	1	APH1A	anterior pharynx defective 1 homolog A (C. elegans)
hsa-miR-491-5p	1	0	1	1	1	1	DERL2	derlin 2
hsa-miR-491-5p	1	0	1	1	1	1	MPC1	mitochondrial pyruvate carrier 1
hsa-miR-491-5p	1	0	1	1	1	1	SNX9	sorting nexin 9
hsa-miR-491-5p	1	0	1	1	1	1	ZDHHC2	zinc finger, DHHC-type containing 2
hsa-miR-491-5p	0	0	1	1	1	1	CD244	CD244 molecule, natural killer cell receptor 2B4
hsa-miR-491-5p	0	0	1	1	0	0	NCKIPSD	NCK interacting protein with SH3 domain
hsa-miR-491-5p	0	0	1	1	1	1	AMBN	ameloblastin (enamel matrix protein)
hsa-miR-491-5p	1	0	1	1	1	1	IER5	immediate early response 5
hsa-miR-491-5p	0	0	1	1	1	1	KDM3B	lysine (K)-specific demethylase 3B
hsa-miR-491-5p	0	0	1	1	1	1	SLC22A17	solute carrier family 22, member 17
hsa-miR-491-5p	1	0	1	1	1	1	ZNF644	zinc finger protein 644
hsa-miR-491-5p	1	0	1	1	1	1	HAO1	hydroxyacid oxidase (glycolate oxidase) 1
hsa-miR-491-5p	0	0	1	0	1	1	TRIM44	tripartite motif containing 44
hsa-miR-491-5p	0	0	1	0	1	1	OTUB1	OTU domain, ubiquitin aldehyde binding 1
hsa-miR-491-5p	0	0	1	1	1	1	MTMR8	myotubularin related protein 8
hsa-miR-491-5p	1	0	1	1	1	1	GDAP2	ganglioside induced differentiation associated protein 2
hsa-miR-491-5p	0	0	1	1	0	0	GDPD2	glycerophosphodiester phosphodiesterase domain containing 2
hsa-miR-491-5p	1	0	1	1	1	1	ZNF3	zinc finger protein 3
hsa-miR-491-5p	0	0	1	0	1	1	THUMPD1	THUMP domain containing 1
hsa-miR-491-5p	1	0	1	0	1	1	CHD7	chromodomain helicase DNA binding protein 7
hsa-miR-491-5p	1	0	1	1	1	1	UBE2R2	ubiquitin-conjugating enzyme E2R 2
hsa-miR-491-5p	0	0	1	1	1	1	C2orf42	chromosome 2 open reading frame 42
hsa-miR-491-5p	1	0	1	1	1	1	HIF1AN	hypoxia inducible factor 1, alpha subunit inhibitor
hsa-miR-491-5p	0	0	1	1	1	1	IWS1	IWS1 homolog (S. cerevisiae)
hsa-miR-491-5p	1	0	1	1	1	1	MAGOHB	mago-nashi homolog B (Drosophila)
hsa-miR-491-5p	0	0	1	1	1	1	HEATR1	HEAT repeat containing 1
hsa-miR-491-5p	1	0	1	1	1	1	RPRD1A	regulation of nuclear pre-mRNA domain containing 1A
hsa-miR-491-5p	1	0	1	1	1	1	TBC1D13	TBC1 domain family, member 13
hsa-miR-491-5p	0	0	1	1	1	1	TRIM62	tripartite motif containing 62
hsa-miR-491-5p	0	0	1	1	0	0	CCDC87	coiled-coil domain containing 87
hsa-miR-491-5p	1	0	1	1	1	1	TMEM143	transmembrane protein 143
hsa-miR-491-5p	1	0	1	1	1	1	RSBN1	round spermatid basic protein 1
hsa-miR-491-5p	1	0	1	0	1	1	TMEM106B	transmembrane protein 106B
hsa-miR-491-5p	0	0	1	1	1	1	WDR33	WD repeat domain 33
hsa-miR-491-5p	0	0	1	1	1	1	STK32B	serine/threonine kinase 32B
hsa-miR-491-5p	1	0	1	0	1	1	BRK1	BRICK1, SCAR/WAVE actin-nucleating complex subunit
hsa-miR-491-5p	0	0	1	1	1	1	LENEP	lens epithelial protein
hsa-miR-491-5p	0	0	1	1	1	1	DHTKD1	dehydrogenase E1 and transketolase domain containing 1
hsa-miR-491-5p	1	0	1	1	1	1	PCDHGA1	protocadherin gamma subfamily A, 1
hsa-miR-491-5p	1	0	1	0	1	1	PCDHGA10	protocadherin gamma subfamily A, 10
hsa-miR-491-5p	1	0	1	0	1	1	PCDHGA11	protocadherin gamma subfamily A, 11
hsa-miR-491-5p	1	0	1	1	1	1	PCDHGA2	protocadherin gamma subfamily A, 2
hsa-miR-491-5p	1	0	1	0	1	1	PCDHGA3	protocadherin gamma subfamily A, 3
hsa-miR-491-5p	1	0	1	0	1	1	PCDHGA4	protocadherin gamma subfamily A, 4
hsa-miR-491-5p	1	0	1	0	1	1	PCDHGA5	protocadherin gamma subfamily A, 5
hsa-miR-491-5p	1	0	1	0	1	1	PCDHGA6	protocadherin gamma subfamily A, 6
hsa-miR-491-5p	1	0	1	0	1	1	PCDHGA7	protocadherin gamma subfamily A, 7
hsa-miR-491-5p	1	0	1	0	1	1	PCDHGA9	protocadherin gamma subfamily A, 9
hsa-miR-491-5p	1	0	1	0	1	1	PCDHGB1	protocadherin gamma subfamily B, 1
hsa-miR-491-5p	1	0	1	0	1	1	PCDHGB2	protocadherin gamma subfamily B, 2
hsa-miR-491-5p	1	0	1	0	1	1	PCDHGB3	protocadherin gamma subfamily B, 3
hsa-miR-491-5p	1	0	1	0	1	1	PCDHGB5	protocadherin gamma subfamily B, 5
hsa-miR-491-5p	1	0	1	0	1	1	PCDHGB6	protocadherin gamma subfamily B, 6
hsa-miR-491-5p	1	0	1	0	1	1	PCDHGB7	protocadherin gamma subfamily B, 7
hsa-miR-491-5p	1	0	1	0	1	1	PCDHGC4	protocadherin gamma subfamily C, 4
hsa-miR-491-5p	1	0	1	0	1	1	PCDHGC5	protocadherin gamma subfamily C, 5
hsa-miR-491-5p	1	0	1	0	1	1	CNGB3	cyclic nucleotide gated channel beta 3
hsa-miR-491-5p	1	0	1	1	1	1	SEPT3	septin 3
hsa-miR-491-5p	1	0	1	1	1	1	EPB41L4B	erythrocyte membrane protein band 4.1 like 4B
hsa-miR-491-5p	1	0	1	1	1	1	LRRC8A	leucine rich repeat containing 8 family, member A
hsa-miR-491-5p	0	0	1	1	1	1	RPRM	reprimo, TP53 dependent G2 arrest mediator candidate
hsa-miR-491-5p	0	0	1	1	1	1	BARHL1	BarH-like homeobox 1
hsa-miR-491-5p	1	0	1	0	1	1	SLAMF8	SLAM family member 8
hsa-miR-491-5p	1	0	1	0	1	1	OTUD7B	OTU domain containing 7B
hsa-miR-491-5p	1	0	1	1	1	1	KIAA1244	KIAA1244
hsa-miR-491-5p	1	0	1	1	1	1	SCYL3	SCY1-like 3 (S. cerevisiae)
hsa-miR-491-5p	1	0	1	1	0	0	JPH2	junctophilin 2
hsa-miR-491-5p	1	0	1	1	1	1	EPHA8	EPH receptor A8
hsa-miR-491-5p	1	0	1	0	1	1	ALPK3	alpha-kinase 3
hsa-miR-491-5p	1	0	1	1	1	1	SEMA6A	sema domain, transmembrane domain (TM), and cytoplasmic domain, (semaphorin) 6A
hsa-miR-491-5p	1	0	1	0	1	1	SH3RF1	SH3 domain containing ring finger 1
hsa-miR-491-5p	1	0	1	0	1	1	NMT1	N-myristoyltransferase 1
hsa-miR-491-5p	1	0	1	0	1	1	XK	X-linked Kx blood group (McLeod syndrome)
hsa-miR-491-5p	0	0	1	1	1	1	RNASEL	ribonuclease L (2',5'-oligoisoadenylate synthetase-dependent)
hsa-miR-491-5p	1	0	1	0	1	1	TP53INP2	tumor protein p53 inducible nuclear protein 2
hsa-miR-491-5p	0	0	1	1	0	0	MYOZ1	myozenin 1
hsa-miR-491-5p	1	0	1	1	1	1	SENP2	SUMO1/sentrin/SMT3 specific peptidase 2
hsa-miR-491-5p	1	0	1	1	1	1	CLCN6	chloride channel, voltage-sensitive 6
hsa-miR-491-5p	0	0	1	0	1	1	CFL2	cofilin 2 (muscle)
hsa-miR-491-5p	0	0	1	1	1	1	MS4A1	membrane-spanning 4-domains, subfamily A, member 1
hsa-miR-491-5p	1	0	1	0	1	1	MCL1	myeloid cell leukemia sequence 1 (BCL2-related)
hsa-miR-491-5p	1	0	1	0	1	1	CSNK1G1	casein kinase 1, gamma 1
hsa-miR-491-5p	0	0	1	1	1	1	FAM111A	family with sequence similarity 111, member A
hsa-miR-491-5p	1	0	1	1	1	1	XYLT2	xylosyltransferase II
hsa-miR-491-5p	1	0	1	1	1	1	ABCG4	ATP-binding cassette, sub-family G (WHITE), member 4
hsa-miR-491-5p	0	0	1	1	1	1	TCTA	T-cell leukemia translocation altered
hsa-miR-491-5p	0	0	1	1	1	1	HS1BP3	HCLS1 binding protein 3
hsa-miR-491-5p	1	0	1	1	1	1	GIGYF1	GRB10 interacting GYF protein 1
hsa-miR-491-5p	1	0	1	1	1	1	C6orf106	chromosome 6 open reading frame 106
hsa-miR-491-5p	1	0	1	1	1	1	FBXL17	F-box and leucine-rich repeat protein 17
hsa-miR-491-5p	1	0	1	1	1	1	RFX7	regulatory factor X, 7
hsa-miR-491-5p	0	0	1	1	1	1	MARCKSL1	MARCKS-like 1
hsa-miR-491-5p	1	0	1	1	0	0	UBE2Z	ubiquitin-conjugating enzyme E2Z
hsa-miR-491-5p	0	0	1	1	0	0	DDRGK1	DDRGK domain containing 1
hsa-miR-491-5p	1	0	1	1	1	1	FAM134A	family with sequence similarity 134, member A
hsa-miR-491-5p	1	0	1	1	0	0	PHF23	PHD finger protein 23
hsa-miR-491-5p	0	0	1	1	0	0	DHRS11	dehydrogenase/reductase (SDR family) member 11
hsa-miR-491-5p	1	0	1	1	1	1	NKAIN1	Na+/K+ transporting ATPase interacting 1
hsa-miR-491-5p	0	0	1	1	1	1	STEAP4	STEAP family member 4
hsa-miR-491-5p	0	0	1	0	1	1	ZYG11B	zyg-11 homolog B (C. elegans)
hsa-miR-491-5p	0	0	1	1	1	1	NSUN7	NOP2/Sun domain family, member 7
hsa-miR-491-5p	1	0	1	0	1	1	MOB3B	MOB kinase activator 3B
hsa-miR-491-5p	0	0	1	1	1	1	ZNF767	zinc finger family member 767
hsa-miR-491-5p	1	0	1	0	1	1	NAA25	N(alpha)-acetyltransferase 25, NatB auxiliary subunit
hsa-miR-491-5p	0	0	1	1	0	0	NRSN2	neurensin 2
hsa-miR-491-5p	1	0	1	1	1	1	KLHL18	kelch-like 18 (Drosophila)
hsa-miR-491-5p	1	0	1	1	1	1	JHDM1D	jumonji C domain containing histone demethylase 1 homolog D (S. cerevisiae)
hsa-miR-491-5p	1	0	1	0	1	1	SETD7	SET domain containing (lysine methyltransferase) 7
hsa-miR-491-5p	1	0	1	0	1	1	C1orf21	chromosome 1 open reading frame 21
hsa-miR-491-5p	1	0	1	1	0	0	PVRL4	poliovirus receptor-related 4
hsa-miR-491-5p	1	0	1	1	1	1	RAB1B	RAB1B, member RAS oncogene family
hsa-miR-491-5p	0	0	1	1	1	1	SEH1L	SEH1-like (S. cerevisiae)
hsa-miR-491-5p	0	0	1	1	1	1	FCRL5	Fc receptor-like 5
hsa-miR-491-5p	0	0	1	1	0	0	RNF208	ring finger protein 208
hsa-miR-491-5p	1	0	1	1	0	0	SCRT1	scratch homolog 1, zinc finger protein (Drosophila)
hsa-miR-491-5p	0	0	1	1	1	1	CRISPLD2	cysteine-rich secretory protein LCCL domain containing 2
hsa-miR-491-5p	0	0	1	1	1	1	TSSK1B	testis-specific serine kinase 1B
hsa-miR-491-5p	1	0	1	0	1	1	PCDHGA8	protocadherin gamma subfamily A, 8
hsa-miR-491-5p	1	0	1	1	1	1	ANTXR1	anthrax toxin receptor 1
hsa-miR-491-5p	1	0	1	0	1	1	FAR1	fatty acyl CoA reductase 1
hsa-miR-491-5p	1	0	1	1	1	1	ZNRF1	zinc and ring finger 1, E3 ubiquitin protein ligase
hsa-miR-491-5p	0	0	1	0	1	1	LDOC1L	leucine zipper, down-regulated in cancer 1-like
hsa-miR-491-5p	0	0	1	1	0	0	NICN1	nicolin 1
hsa-miR-491-5p	0	0	1	1	1	1	VPS25	vacuolar protein sorting 25 homolog (S. cerevisiae)
hsa-miR-491-5p	0	0	1	1	1	1	CHAMP1	chromosome alignment maintaining phosphoprotein 1
hsa-miR-491-5p	1	0	1	1	1	1	PCDH7	protocadherin 7
hsa-miR-491-5p	1	0	1	1	1	1	PPP1R9B	protein phosphatase 1, regulatory subunit 9B
hsa-miR-491-5p	1	0	1	1	1	1	SPRYD3	SPRY domain containing 3
hsa-miR-491-5p	1	0	1	0	1	1	UBASH3B	ubiquitin associated and SH3 domain containing B
hsa-miR-491-5p	0	0	1	1	0	0	ACPT	acid phosphatase, testicular
hsa-miR-491-5p	1	0	1	0	1	1	SCRT2	scratch homolog 2, zinc finger protein (Drosophila)
hsa-miR-491-5p	0	0	1	1	1	1	MRPS36	mitochondrial ribosomal protein S36
hsa-miR-491-5p	0	0	1	1	1	1	LHX4	LIM homeobox 4
hsa-miR-491-5p	1	0	1	1	0	0	FCHSD1	FCH and double SH3 domains 1
hsa-miR-491-5p	1	0	1	1	1	1	EPT1	ethanolaminephosphotransferase 1 (CDP-ethanolamine-specific)
hsa-miR-491-5p	1	0	1	1	1	1	LUZP1	leucine zipper protein 1
hsa-miR-491-5p	1	0	1	1	1	1	XKR4	XK, Kell blood group complex subunit-related family, member 4
hsa-miR-491-5p	1	0	1	1	1	1	GPRIN1	G protein regulated inducer of neurite outgrowth 1
hsa-miR-491-5p	1	0	1	1	1	1	NAA15	N(alpha)-acetyltransferase 15, NatA auxiliary subunit
hsa-miR-491-5p	1	0	1	1	0	0	BRD4	bromodomain containing 4
hsa-miR-491-5p	1	0	1	1	1	1	COL11A2	collagen, type XI, alpha 2
hsa-miR-491-5p	0	0	1	1	0	0	C20orf141	chromosome 20 open reading frame 141
hsa-miR-491-5p	1	0	1	1	1	1	ZNF280B	zinc finger protein 280B
hsa-miR-491-5p	1	0	1	1	1	1	SPSB4	splA/ryanodine receptor domain and SOCS box containing 4
hsa-miR-491-5p	0	0	1	1	0	0	GGTLC1	gamma-glutamyltransferase light chain 1
hsa-miR-491-5p	0	0	1	1	1	1	CHST14	carbohydrate (N-acetylgalactosamine 4-0) sulfotransferase 14
hsa-miR-491-5p	0	0	1	0	1	1	SYNPO2	synaptopodin 2
hsa-miR-491-5p	1	0	1	1	1	1	ADAMTS19	ADAM metallopeptidase with thrombospondin type 1 motif, 19
hsa-miR-491-5p	1	0	1	1	0	0	PKDCC	protein kinase domain containing, cytoplasmic homolog (mouse)
hsa-miR-491-5p	0	0	1	1	1	1	C7orf29	chromosome 7 open reading frame 29
hsa-miR-491-5p	1	0	1	0	1	1	NUS1	nuclear undecaprenyl pyrophosphate synthase 1 homolog (S. cerevisiae)
hsa-miR-491-5p	1	0	1	1	0	0	C11orf84	chromosome 11 open reading frame 84
hsa-miR-491-5p	1	0	1	0	1	1	SP1	Sp1 transcription factor
hsa-miR-491-5p	1	0	1	1	0	0	CCDC167	coiled-coil domain containing 167
hsa-miR-491-5p	1	0	1	1	1	1	HAS3	hyaluronan synthase 3
hsa-miR-491-5p	1	0	1	1	1	1	PRUNE2	prune homolog 2 (Drosophila)
hsa-miR-491-5p	1	0	1	1	1	1	TEX261	testis expressed 261
hsa-miR-491-5p	0	0	1	1	0	0	MBD3L2	methyl-CpG binding domain protein 3-like 2
hsa-miR-491-5p	0	0	1	1	0	0	STRA13	stimulated by retinoic acid 13 homolog (mouse)
hsa-miR-491-5p	1	0	1	1	1	1	YPEL4	yippee-like 4 (Drosophila)
hsa-miR-491-5p	0	0	1	1	1	1	DACT3	dapper, antagonist of beta-catenin, homolog 3 (Xenopus laevis)
hsa-miR-491-5p	1	0	1	0	1	1	DIRAS1	DIRAS family, GTP-binding RAS-like 1
hsa-miR-491-5p	0	0	1	1	0	0	CSNK1A1L	casein kinase 1, alpha 1-like
hsa-miR-491-5p	1	0	1	1	1	1	MRPL30	mitochondrial ribosomal protein L30
hsa-miR-491-5p	0	0	1	1	1	1	FAM100A	family with sequence similarity 100, member A
hsa-miR-491-5p	1	0	1	1	1	1	CADM4	cell adhesion molecule 4
hsa-miR-491-5p	0	0	1	1	0	0	TCEB3C	transcription elongation factor B polypeptide 3C (elongin A3)
hsa-miR-491-5p	1	0	1	1	1	1	UBTD2	ubiquitin domain containing 2
hsa-miR-491-5p	1	0	1	0	1	1	SYT11	synaptotagmin XI
hsa-miR-491-5p	1	0	1	1	1	1	POGLUT1	protein O-glucosyltransferase 1
hsa-miR-491-5p	0	0	1	1	1	1	ELOVL3	ELOVL fatty acid elongase 3
hsa-miR-491-5p	0	0	1	1	1	1	CDYL2	chromodomain protein, Y-like 2
hsa-miR-491-5p	1	0	1	1	1	1	LSM12	LSM12 homolog (S. cerevisiae)
hsa-miR-491-5p	1	0	1	1	1	1	FAM123B	family with sequence similarity 123B
hsa-miR-491-5p	1	0	1	1	1	1	ZNF362	zinc finger protein 362
hsa-miR-491-5p	1	0	1	1	1	1	C7orf60	chromosome 7 open reading frame 60
hsa-miR-491-5p	0	0	1	1	1	1	CCER1	coiled-coil glutamate-rich protein 1
hsa-miR-491-5p	0	0	1	1	0	0	MS4A15	membrane-spanning 4-domains, subfamily A, member 15
hsa-miR-491-5p	0	0	1	1	1	1	ASPRV1	aspartic peptidase, retroviral-like 1
hsa-miR-491-5p	1	0	1	1	1	1	TXLNB	taxilin beta
hsa-miR-491-5p	1	0	1	1	1	1	TMEM151A	transmembrane protein 151A
hsa-miR-491-5p	1	0	1	1	0	0	TMEM86A	transmembrane protein 86A
hsa-miR-491-5p	1	0	1	0	1	1	SEMA6D	sema domain, transmembrane domain (TM), and cytoplasmic domain, (semaphorin) 6D
hsa-miR-491-5p	0	0	1	1	1	1	TEDDM1	transmembrane epididymal protein 1
hsa-miR-491-5p	1	0	1	1	1	1	RDH10	retinol dehydrogenase 10 (all-trans)
hsa-miR-491-5p	1	0	1	0	1	1	PLEKHH2	pleckstrin homology domain containing, family H (with MyTH4 domain) member 2
hsa-miR-491-5p	0	0	1	1	1	1	TAPBP	TAP binding protein (tapasin)
hsa-miR-491-5p	0	0	1	1	0	0	SPRR4	small proline-rich protein 4
hsa-miR-491-5p	1	0	1	1	1	1	CCDC117	coiled-coil domain containing 117
hsa-miR-491-5p	1	0	1	0	1	1	C3orf58	chromosome 3 open reading frame 58
hsa-miR-491-5p	1	0	1	1	1	1	DIP2B	DIP2 disco-interacting protein 2 homolog B (Drosophila)
hsa-miR-491-5p	1	0	1	1	1	1	XKR6	XK, Kell blood group complex subunit-related family, member 6
hsa-miR-491-5p	1	0	1	1	0	0	EMC10	ER membrane protein complex subunit 10
hsa-miR-491-5p	0	0	1	1	1	1	GRIK1	glutamate receptor, ionotropic, kainate 1
hsa-miR-491-5p	1	0	1	1	1	1	SYT9	synaptotagmin IX
hsa-miR-491-5p	0	0	1	1	1	1	C16orf54	chromosome 16 open reading frame 54
hsa-miR-491-5p	1	0	1	1	1	1	PRIMA1	proline rich membrane anchor 1
hsa-miR-491-5p	0	0	1	1	1	1	GPIHBP1	glycosylphosphatidylinositol anchored high density lipoprotein binding protein 1
hsa-miR-491-5p	1	0	1	1	0	0	KCTD13	potassium channel tetramerisation domain containing 13
hsa-miR-491-5p	0	0	1	1	1	1	NPAS4	neuronal PAS domain protein 4
hsa-miR-491-5p	1	0	1	0	1	1	IL6R	interleukin 6 receptor
hsa-miR-491-5p	0	0	1	1	1	1	CCDC67	coiled-coil domain containing 67
hsa-miR-491-5p	0	0	1	0	1	1	TMED4	transmembrane emp24 protein transport domain containing 4
hsa-miR-491-5p	1	0	1	0	1	1	C12orf36	chromosome 12 open reading frame 36
hsa-miR-491-5p	1	0	1	1	1	1	SUMF1	sulfatase modifying factor 1
hsa-miR-491-5p	1	0	1	0	1	1	RIMS4	regulating synaptic membrane exocytosis 4
hsa-miR-491-5p	1	0	1	1	1	1	E2F6	E2F transcription factor 6
hsa-miR-491-5p	0	0	1	0	1	1	KLHL30	kelch-like 30 (Drosophila)
hsa-miR-491-5p	1	0	1	1	1	1	PTGER3	prostaglandin E receptor 3 (subtype EP3)
hsa-miR-491-5p	0	0	1	1	1	1	COL18A1-AS1	COL18A1 antisense RNA 1
hsa-miR-491-5p	0	0	1	0	1	1	CLEC17A	C-type lectin domain family 17, member A
hsa-miR-491-5p	0	0	1	0	0	0	ESRRAP2	estrogen-related receptor alpha pseudogene 2
hsa-miR-491-5p	0	0	1	0	0	0	LYPLA2P1	lysophospholipase II pseudogene 1
hsa-miR-491-5p	0	0	1	0	0	0	TTTY2	testis-specific transcript, Y-linked 2 (non-protein coding)
hsa-miR-491-5p	0	0	1	0	0	0	TTTY1	testis-specific transcript, Y-linked 1 (non-protein coding)
hsa-miR-491-5p	0	0	1	0	0	0	TTTY15	testis-specific transcript, Y-linked 15 (non-protein coding)
hsa-miR-491-5p	0	0	1	0	0	0	PPP1R2P3	protein phosphatase 1, regulatory (inhibitor) subunit 2 pseudogene 3
hsa-miR-491-5p	0	0	1	0	0	0	TTTY4B	testis-specific transcript, Y-linked 4B (non-protein coding)
hsa-miR-491-5p	0	0	1	0	0	0	COX6B1P1	cytochrome c oxidase subunit VIb polypeptide 1 (ubiquitous) pseudogene 1
hsa-miR-491-5p	0	0	1	0	0	0	NXF4	nuclear RNA export factor 4 pseudogene
hsa-miR-491-5p	0	0	1	0	0	0	GABPAP	GA binding protein transcription factor, alpha subunit pseudogene
hsa-miR-491-5p	0	0	1	0	0	0	TPTE2P3	transmembrane phosphoinositide 3-phosphatase and tensin homolog 2 pseudogene 3
hsa-miR-491-5p	0	0	1	0	0	0	AQP7P1	aquaporin 7 pseudogene 1
hsa-miR-491-5p	0	0	1	0	0	0	RNF126P1	ring finger protein 126 pseudogene 1
hsa-miR-491-5p	0	0	1	0	0	0	SIGLEC16	sialic acid binding Ig-like lectin 16 (gene/pseudogene)
hsa-miR-491-5p	0	0	1	0	0	0	HAS2-AS1	HAS2 antisense RNA 1
hsa-miR-491-5p	0	0	1	0	0	0	PTPRVP	protein tyrosine phosphatase, receptor type, V, pseudogene
hsa-miR-491-5p	0	0	1	0	0	0	HNRNPA1P10	heterogeneous nuclear ribonucleoprotein A1 pseudogene 10
hsa-miR-491-5p	0	0	1	0	0	0	TUBA4B	tubulin, alpha 4b (pseudogene)
hsa-miR-491-5p	0	0	1	1	1	1	PEG3	paternally expressed 3
hsa-miR-491-5p	0	0	1	1	0	0	EPX	eosinophil peroxidase
hsa-miR-491-5p	1	0	1	1	1	1	IFNAR2	interferon (alpha, beta and omega) receptor 2
hsa-miR-491-5p	0	0	1	1	0	0	KIR2DL4	killer cell immunoglobulin-like receptor, two domains, long cytoplasmic tail, 4
hsa-miR-491-5p	0	0	1	1	0	0	TSR3	TSR3, 20S rRNA accumulation, homolog (S. cerevisiae)
hsa-miR-491-5p	0	0	0	1	0	0	IL32	interleukin 32
hsa-miR-491-5p	1	0	1	1	1	1	GPR124	G protein-coupled receptor 124
hsa-miR-491-5p	0	0	0	1	0	0	KLK14	kallikrein-related peptidase 14
hsa-miR-491-5p	1	0	1	1	1	1	KDM4B	lysine (K)-specific demethylase 4B
hsa-miR-491-5p	0	0	0	1	0	0	ACTL6B	actin-like 6B
hsa-miR-491-5p	0	0	0	1	0	0	RAPGEF3	Rap guanine nucleotide exchange factor (GEF) 3
hsa-miR-491-5p	0	0	0	1	1	1	C4orf6	chromosome 4 open reading frame 6
hsa-miR-491-5p	0	0	0	1	0	0	MRPL28	mitochondrial ribosomal protein L28
hsa-miR-491-5p	0	0	0	1	0	0	HSD17B2	hydroxysteroid (17-beta) dehydrogenase 2
hsa-miR-491-5p	0	0	1	1	1	1	SPG21	spastic paraplegia 21 (autosomal recessive, Mast syndrome)
hsa-miR-491-5p	0	0	0	1	1	1	LAMB4	laminin, beta 4
hsa-miR-491-5p	0	0	0	1	0	0	MZF1	myeloid zinc finger 1
hsa-miR-491-5p	0	0	1	1	1	1	TBC1D10A	TBC1 domain family, member 10A
hsa-miR-491-5p	0	0	0	1	0	0	CRYBB2	crystallin, beta B2
hsa-miR-491-5p	0	0	0	1	0	0	GGTLC2	gamma-glutamyltransferase light chain 2
hsa-miR-491-5p	0	0	1	1	0	0	MCM5	minichromosome maintenance complex component 5
hsa-miR-491-5p	0	0	0	1	0	0	PMM1	phosphomannomutase 1
hsa-miR-491-5p	0	0	0	1	0	0	MTHFD1	methylenetetrahydrofolate dehydrogenase (NADP+ dependent) 1, methenyltetrahydrofolate cyclohydrolase, formyltetrahydrofolate synthetase
hsa-miR-491-5p	0	0	1	1	1	1	PABPC1L	poly(A) binding protein, cytoplasmic 1-like
hsa-miR-491-5p	0	0	1	1	0	0	PCSK1N	proprotein convertase subtilisin/kexin type 1 inhibitor
hsa-miR-491-5p	0	0	0	1	0	0	ACP5	acid phosphatase 5, tartrate resistant
hsa-miR-491-5p	0	0	0	1	0	0	ACSM1	acyl-CoA synthetase medium-chain family member 1
hsa-miR-491-5p	0	0	1	1	0	0	COG4	component of oligomeric golgi complex 4
hsa-miR-491-5p	0	0	0	1	0	0	PAF1	Paf1, RNA polymerase II associated factor, homolog (S. cerevisiae)
hsa-miR-491-5p	0	0	1	1	0	0	CKM	creatine kinase, muscle
hsa-miR-491-5p	0	0	1	1	0	0	EBI3	Epstein-Barr virus induced 3
hsa-miR-491-5p	1	0	1	1	0	0	FSD1	fibronectin type III and SPRY domain containing 1
hsa-miR-491-5p	0	0	1	1	1	1	RAB3A	RAB3A, member RAS oncogene family
hsa-miR-491-5p	0	0	0	1	0	0	ZNF574	zinc finger protein 574
hsa-miR-491-5p	0	0	1	1	1	1	OGDH	oxoglutarate (alpha-ketoglutarate) dehydrogenase (lipoamide)
hsa-miR-491-5p	0	0	1	1	0	0	TFR2	transferrin receptor 2
hsa-miR-491-5p	0	0	1	1	0	0	PLOD3	procollagen-lysine, 2-oxoglutarate 5-dioxygenase 3
hsa-miR-491-5p	0	0	0	1	0	0	FAM18B2	family with sequence similarity 18, member B2
hsa-miR-491-5p	0	0	1	1	0	0	PIGL	phosphatidylinositol glycan anchor biosynthesis, class L
hsa-miR-491-5p	0	0	1	1	0	0	PFN1	profilin 1
hsa-miR-491-5p	1	0	1	1	1	1	RASD1	RAS, dexamethasone-induced 1
hsa-miR-491-5p	0	0	0	1	1	1	NAGLU	N-acetylglucosaminidase, alpha
hsa-miR-491-5p	1	0	1	1	1	1	COL1A1	collagen, type I, alpha 1
hsa-miR-491-5p	0	0	1	1	0	0	CACNG1	calcium channel, voltage-dependent, gamma subunit 1
hsa-miR-491-5p	0	0	1	1	1	1	IL2	interleukin 2
hsa-miR-491-5p	0	0	0	1	1	1	CD82	CD82 molecule
hsa-miR-491-5p	0	0	1	1	1	1	PTK7	PTK7 protein tyrosine kinase 7
hsa-miR-491-5p	0	0	1	1	1	1	LY86	lymphocyte antigen 86
hsa-miR-491-5p	0	0	1	1	1	1	EIF1B	eukaryotic translation initiation factor 1B
hsa-miR-491-5p	1	0	1	1	0	0	TMSB10	thymosin beta 10
hsa-miR-491-5p	0	0	0	1	0	0	VAX2	ventral anterior homeobox 2
hsa-miR-491-5p	1	0	0	1	1	1	SLC5A9	solute carrier family 5 (sodium/glucose cotransporter), member 9
hsa-miR-491-5p	0	0	1	1	0	0	ADH6	alcohol dehydrogenase 6 (class V)
hsa-miR-491-5p	0	0	0	1	0	0	ADCK1	aarF domain containing kinase 1
hsa-miR-491-5p	0	0	1	1	0	0	IFNA7	interferon, alpha 7
hsa-miR-491-5p	0	0	1	1	0	0	STX10	syntaxin 10
hsa-miR-491-5p	0	0	0	1	1	1	RHCE	Rh blood group, CcEe antigens
hsa-miR-491-5p	1	0	1	1	0	0	RNF39	ring finger protein 39
hsa-miR-491-5p	0	0	1	1	0	0	MIF4GD	MIF4G domain containing
hsa-miR-491-5p	1	0	0	1	1	1	TNFSF9	tumor necrosis factor (ligand) superfamily, member 9
hsa-miR-491-5p	0	0	0	1	0	0	S1PR4	sphingosine-1-phosphate receptor 4
hsa-miR-491-5p	1	0	1	1	1	1	RALY	RNA binding protein, autoantigenic (hnRNP-associated with lethal yellow homolog (mouse))
hsa-miR-491-5p	0	0	0	1	0	0	IGFLR1	IGF-like family receptor 1
hsa-miR-491-5p	0	0	1	1	0	0	CAPNS1	calpain, small subunit 1
hsa-miR-491-5p	0	0	0	1	1	1	KRT9	keratin 9
hsa-miR-491-5p	0	0	1	1	0	0	DNASE1	deoxyribonuclease I
hsa-miR-491-5p	0	0	1	1	0	0	AHDC1	AT hook, DNA binding motif, containing 1
hsa-miR-491-5p	0	0	1	1	0	0	PIN1	peptidylprolyl cis/trans isomerase, NIMA-interacting 1
hsa-miR-491-5p	0	0	0	1	1	1	HCFC1R1	host cell factor C1 regulator 1 (XPO1 dependent)
hsa-miR-491-5p	0	0	0	1	0	0	GSTT1	glutathione S-transferase theta 1
hsa-miR-491-5p	1	0	1	1	1	1	IVD	isovaleryl-CoA dehydrogenase
hsa-miR-491-5p	0	0	0	1	1	1	AP1M2	adaptor-related protein complex 1, mu 2 subunit
hsa-miR-491-5p	1	0	1	1	1	1	CAPRIN2	caprin family member 2
hsa-miR-491-5p	0	0	0	1	1	1	USP40	ubiquitin specific peptidase 40
hsa-miR-491-5p	0	0	0	1	0	0	NDUFA13	NADH dehydrogenase (ubiquinone) 1 alpha subcomplex, 13
hsa-miR-491-5p	1	0	1	1	0	0	TRPM4	transient receptor potential cation channel, subfamily M, member 4
hsa-miR-491-5p	0	0	1	1	0	0	SAG	S-antigen; retina and pineal gland (arrestin)
hsa-miR-491-5p	0	0	0	1	0	0	HBZ	hemoglobin, zeta
hsa-miR-491-5p	0	0	1	1	0	0	RAMP2	receptor (G protein-coupled) activity modifying protein 2
hsa-miR-491-5p	0	0	0	1	0	0	ZSCAN5A	zinc finger and SCAN domain containing 5A
hsa-miR-491-5p	0	0	1	1	1	1	NR0B2	nuclear receptor subfamily 0, group B, member 2
hsa-miR-491-5p	0	0	0	1	0	0	FBXW9	F-box and WD repeat domain containing 9
hsa-miR-491-5p	0	0	1	1	1	1	IGJ	immunoglobulin J polypeptide, linker protein for immunoglobulin alpha and mu polypeptides
hsa-miR-491-5p	0	0	1	1	0	0	SLC14A2	solute carrier family 14 (urea transporter), member 2
hsa-miR-491-5p	1	0	0	1	0	0	PI4KA	phosphatidylinositol 4-kinase, catalytic, alpha
hsa-miR-491-5p	1	0	1	1	1	1	MRO	maestro
hsa-miR-491-5p	0	0	1	1	0	0	CAMK1	calcium/calmodulin-dependent protein kinase I
hsa-miR-491-5p	0	0	0	1	1	1	DOCK2	dedicator of cytokinesis 2
hsa-miR-491-5p	1	0	1	1	1	1	FHOD3	formin homology 2 domain containing 3
hsa-miR-491-5p	0	0	0	1	0	0	FAM189A2	family with sequence similarity 189, member A2
hsa-miR-491-5p	0	0	0	1	1	1	AVIL	advillin
hsa-miR-491-5p	0	0	0	1	1	1	KRT82	keratin 82
hsa-miR-491-5p	1	0	0	1	0	0	KCNH3	potassium voltage-gated channel, subfamily H (eag-related), member 3
hsa-miR-491-5p	1	0	1	1	0	0	REPS1	RALBP1 associated Eps domain containing 1
hsa-miR-491-5p	0	0	0	1	0	0	CIDEB	cell death-inducing DFFA-like effector b
hsa-miR-491-5p	0	0	0	1	0	0	CHAD	chondroadherin
hsa-miR-491-5p	0	0	1	1	1	1	IFNA14	interferon, alpha 14
hsa-miR-491-5p	1	0	1	1	1	1	FOXF2	forkhead box F2
hsa-miR-491-5p	0	0	0	1	0	0	C6orf15	chromosome 6 open reading frame 15
hsa-miR-491-5p	1	0	1	1	1	1	SORL1	sortilin-related receptor, L(DLR class) A repeats containing
hsa-miR-491-5p	0	0	1	1	0	0	ITPKA	inositol-trisphosphate 3-kinase A
hsa-miR-491-5p	0	0	1	1	1	1	GUCA1C	guanylate cyclase activator 1C
hsa-miR-491-5p	0	0	0	1	0	0	GPR133	G protein-coupled receptor 133
hsa-miR-491-5p	0	0	1	1	1	1	CSNK1A1	casein kinase 1, alpha 1
hsa-miR-491-5p	0	0	1	1	1	1	TRIP4	thyroid hormone receptor interactor 4
hsa-miR-491-5p	1	0	1	1	1	1	SNX1	sorting nexin 1
hsa-miR-491-5p	0	0	1	1	1	1	DNAJA3	DnaJ (Hsp40) homolog, subfamily A, member 3
hsa-miR-491-5p	0	0	1	1	1	1	CDKN2C	cyclin-dependent kinase inhibitor 2C (p18, inhibits CDK4)
hsa-miR-491-5p	0	0	1	1	0	0	PGS1	phosphatidylglycerophosphate synthase 1
hsa-miR-491-5p	0	0	0	1	0	0	COPE	coatomer protein complex, subunit epsilon
hsa-miR-491-5p	0	0	0	1	1	1	MAP2K2	mitogen-activated protein kinase kinase 2
hsa-miR-491-5p	0	0	1	1	0	0	ASPA	aspartoacylase
hsa-miR-491-5p	0	0	0	1	1	1	CABIN1	calcineurin binding protein 1
hsa-miR-491-5p	1	0	0	1	0	0	MED15	mediator complex subunit 15
hsa-miR-491-5p	0	0	0	1	0	0	PLEKHA4	pleckstrin homology domain containing, family A (phosphoinositide binding specific) member 4
hsa-miR-491-5p	0	0	1	1	0	0	P2RX3	purinergic receptor P2X, ligand-gated ion channel, 3
hsa-miR-491-5p	0	0	0	1	0	0	IL37	interleukin 37
hsa-miR-491-5p	0	0	0	1	0	0	LCN1	lipocalin 1
hsa-miR-491-5p	1	0	1	1	0	0	KIAA1211	KIAA1211
hsa-miR-491-5p	0	0	0	1	1	1	HERC6	HECT and RLD domain containing E3 ubiquitin protein ligase family member 6
hsa-miR-491-5p	1	0	0	1	0	0	KLF1	Kruppel-like factor 1 (erythroid)
hsa-miR-491-5p	0	0	1	1	0	0	ZAP70	zeta-chain (TCR) associated protein kinase 70kDa
hsa-miR-491-5p	0	0	1	1	0	0	MCM2	minichromosome maintenance complex component 2
hsa-miR-491-5p	0	0	0	1	0	0	DNAH5	dynein, axonemal, heavy chain 5
hsa-miR-491-5p	1	0	1	1	1	1	AQP1	aquaporin 1 (Colton blood group)
hsa-miR-491-5p	0	0	0	1	0	0	MGST2	microsomal glutathione S-transferase 2
hsa-miR-491-5p	0	0	1	1	0	0	ADAM18	ADAM metallopeptidase domain 18
hsa-miR-491-5p	0	0	1	1	1	1	SH2D4A	SH2 domain containing 4A
hsa-miR-491-5p	1	0	1	1	1	1	CHCHD10	coiled-coil-helix-coiled-coil-helix domain containing 10
hsa-miR-491-5p	1	0	1	1	0	0	DISP2	dispatched homolog 2 (Drosophila)
hsa-miR-491-5p	0	0	1	1	1	1	BCL2A1	BCL2-related protein A1
hsa-miR-491-5p	0	0	0	1	0	0	ZNF581	zinc finger protein 581
hsa-miR-491-5p	0	0	0	1	0	0	RPS11	ribosomal protein S11
hsa-miR-491-5p	0	0	1	1	1	1	SPIB	Spi-B transcription factor (Spi-1/PU.1 related)
hsa-miR-491-5p	0	0	1	1	0	0	WRAP73	WD repeat containing, antisense to TP73
hsa-miR-491-5p	0	0	1	1	1	1	IL22RA1	interleukin 22 receptor, alpha 1
hsa-miR-491-5p	0	0	0	1	0	0	FAM176B	family with sequence similarity 176, member B
hsa-miR-491-5p	0	0	0	1	0	0	ADAMTSL4	ADAMTS-like 4
hsa-miR-491-5p	0	0	1	1	1	1	JTB	jumping translocation breakpoint
hsa-miR-491-5p	0	0	1	1	0	0	CREB3L4	cAMP responsive element binding protein 3-like 4
hsa-miR-491-5p	0	0	1	1	1	1	MANF	mesencephalic astrocyte-derived neurotrophic factor
hsa-miR-491-5p	0	0	0	1	0	0	KCNMB1	potassium large conductance calcium-activated channel, subfamily M, beta member 1
hsa-miR-491-5p	0	0	1	1	0	0	IL2RG	interleukin 2 receptor, gamma
hsa-miR-491-5p	0	0	0	1	0	0	LYN	v-yes-1 Yamaguchi sarcoma viral related oncogene homolog
hsa-miR-491-5p	0	0	1	1	1	1	TERF1	telomeric repeat binding factor (NIMA-interacting) 1
hsa-miR-491-5p	0	0	0	1	1	1	IDI2	isopentenyl-diphosphate delta isomerase 2
hsa-miR-491-5p	0	0	0	1	0	0	WDR85	WD repeat domain 85
hsa-miR-491-5p	1	0	0	1	1	1	PPRC1	peroxisome proliferator-activated receptor gamma, coactivator-related 1
hsa-miR-491-5p	0	0	0	1	0	0	DUSP15	dual specificity phosphatase 15
hsa-miR-491-5p	0	0	0	1	0	0	MYL9	myosin, light chain 9, regulatory
hsa-miR-491-5p	0	0	1	1	0	0	VPS51	vacuolar protein sorting 51 homolog (S. cerevisiae)
hsa-miR-491-5p	0	0	1	1	0	0	TBX6	T-box 6
hsa-miR-491-5p	0	0	1	1	0	0	CWC15	CWC15 spliceosome-associated protein homolog (S. cerevisiae)
hsa-miR-491-5p	0	0	0	1	0	0	OXSM	3-oxoacyl-ACP synthase, mitochondrial
hsa-miR-491-5p	1	0	1	1	1	1	PTH	parathyroid hormone
hsa-miR-491-5p	0	0	0	1	0	0	LY96	lymphocyte antigen 96
hsa-miR-491-5p	0	0	0	1	0	0	C17orf50	chromosome 17 open reading frame 50
hsa-miR-491-5p	0	0	1	1	0	0	TRMT44	tRNA methyltransferase 44 homolog (S. cerevisiae)
hsa-miR-491-5p	0	0	1	1	1	1	KBTBD5	kelch repeat and BTB (POZ) domain containing 5
hsa-miR-491-5p	0	0	1	1	0	0	ARAF	v-raf murine sarcoma 3611 viral oncogene homolog
hsa-miR-491-5p	0	0	0	1	0	0	OGFR	opioid growth factor receptor
hsa-miR-491-5p	0	0	0	1	0	0	TRMU	tRNA 5-methylaminomethyl-2-thiouridylate methyltransferase
hsa-miR-491-5p	0	0	1	1	0	0	TEPP	testis, prostate and placenta expressed
hsa-miR-491-5p	0	0	0	1	0	0	CILP2	cartilage intermediate layer protein 2
hsa-miR-491-5p	0	0	0	1	0	0	KIR3DL3	killer cell immunoglobulin-like receptor, three domains, long cytoplasmic tail, 3
hsa-miR-491-5p	0	0	0	1	1	1	KIR2DL1	killer cell immunoglobulin-like receptor, two domains, long cytoplasmic tail, 1
hsa-miR-491-5p	0	0	0	1	1	1	ANO10	anoctamin 10
hsa-miR-491-5p	0	0	0	1	0	0	TONSL	tonsoku-like, DNA repair protein
hsa-miR-491-5p	0	0	0	1	0	0	PPP1R16A	protein phosphatase 1, regulatory subunit 16A
hsa-miR-491-5p	0	0	0	1	0	0	CCDC116	coiled-coil domain containing 116
hsa-miR-491-5p	0	0	1	1	0	0	LYZL6	lysozyme-like 6
hsa-miR-491-5p	0	0	0	1	1	1	JOSD2	Josephin domain containing 2
hsa-miR-491-5p	0	0	0	1	0	0	SYCE2	synaptonemal complex central element protein 2
hsa-miR-491-5p	0	0	1	1	1	1	ZNF653	zinc finger protein 653
hsa-miR-491-5p	0	0	1	1	0	0	LUC7L	LUC7-like (S. cerevisiae)
hsa-miR-491-5p	0	0	0	1	0	0	SSTR5	somatostatin receptor 5
hsa-miR-491-5p	1	0	0	1	1	1	MAP4K2	mitogen-activated protein kinase kinase kinase kinase 2
hsa-miR-491-5p	0	0	0	1	0	0	CYP4A22	cytochrome P450, family 4, subfamily A, polypeptide 22
hsa-miR-491-5p	0	0	1	1	1	1	MAD2L1	MAD2 mitotic arrest deficient-like 1 (yeast)
hsa-miR-491-5p	0	0	1	1	0	0	ANXA5	annexin A5
hsa-miR-491-5p	0	0	1	1	0	0	PACSIN3	protein kinase C and casein kinase substrate in neurons 3
hsa-miR-491-5p	0	0	1	1	0	0	RAPSN	receptor-associated protein of the synapse
hsa-miR-491-5p	0	0	0	1	1	1	PCBD1	pterin-4 alpha-carbinolamine dehydratase/dimerization cofactor of hepatocyte nuclear factor 1 alpha
hsa-miR-491-5p	0	0	1	1	0	0	DCHS1	dachsous 1 (Drosophila)
hsa-miR-491-5p	0	0	1	1	1	1	TK2	thymidine kinase 2, mitochondrial
hsa-miR-491-5p	0	0	1	1	0	0	MESP1	mesoderm posterior 1 homolog (mouse)
hsa-miR-491-5p	0	0	1	1	0	0	GNGT2	guanine nucleotide binding protein (G protein), gamma transducing activity polypeptide 2
hsa-miR-491-5p	0	0	0	1	0	0	FER1L4	fer-1-like 4 (C. elegans) pseudogene
hsa-miR-491-5p	0	0	1	1	1	1	ENGASE	endo-beta-N-acetylglucosaminidase
hsa-miR-491-5p	0	0	0	1	0	0	PIEZO1	piezo-type mechanosensitive ion channel component 1
hsa-miR-491-5p	1	0	1	1	0	0	RAB34	RAB34, member RAS oncogene family
hsa-miR-491-5p	0	0	1	1	0	0	GHDC	GH3 domain containing
hsa-miR-491-5p	0	0	1	1	1	1	SDHAF2	succinate dehydrogenase complex assembly factor 2
hsa-miR-491-5p	0	0	1	1	0	0	C11orf85	chromosome 11 open reading frame 85
hsa-miR-491-5p	0	0	1	1	0	0	FAM151A	family with sequence similarity 151, member A
hsa-miR-491-5p	0	0	0	1	0	0	GAA	glucosidase, alpha; acid
hsa-miR-491-5p	0	0	0	1	1	1	PDHB	pyruvate dehydrogenase (lipoamide) beta
hsa-miR-491-5p	1	0	1	1	1	1	INSR	insulin receptor
hsa-miR-491-5p	1	0	1	1	1	1	SLC50A1	solute carrier family 50 (sugar transporter), member 1
hsa-miR-491-5p	0	0	1	1	0	0	TMEM51	transmembrane protein 51
hsa-miR-491-5p	0	0	1	1	1	1	SPACA5	sperm acrosome associated 5
hsa-miR-491-5p	0	0	0	1	1	1	CST5	cystatin D
hsa-miR-491-5p	0	0	1	1	0	0	CST2	cystatin SA
hsa-miR-491-5p	0	0	0	1	0	0	CST1	cystatin SN
hsa-miR-491-5p	0	0	0	1	0	0	TUBB3	tubulin, beta 3 class III
hsa-miR-491-5p	0	0	0	1	0	0	CEP89	centrosomal protein 89kDa
hsa-miR-491-5p	0	0	1	1	0	0	TMEM150A	transmembrane protein 150A
hsa-miR-491-5p	0	0	1	1	0	0	RNF181	ring finger protein 181
hsa-miR-491-5p	0	0	0	1	1	1	LRRC45	leucine rich repeat containing 45
hsa-miR-491-5p	0	0	1	1	0	0	AVPI1	arginine vasopressin-induced 1
hsa-miR-491-5p	0	0	0	1	0	0	EME2	essential meiotic endonuclease 1 homolog 2 (S. pombe)
hsa-miR-491-5p	1	0	1	1	1	1	RBM33	RNA binding motif protein 33
hsa-miR-491-5p	1	0	1	1	1	1	HARS	histidyl-tRNA synthetase
hsa-miR-491-5p	0	0	0	1	0	0	THOP1	thimet oligopeptidase 1
hsa-miR-491-5p	0	0	1	1	1	1	ASCC2	activating signal cointegrator 1 complex subunit 2
hsa-miR-491-5p	0	0	0	1	0	0	CLDN15	claudin 15
hsa-miR-491-5p	1	0	1	1	1	1	PHC3	polyhomeotic homolog 3 (Drosophila)
hsa-miR-491-5p	0	0	1	1	0	0	CCDC106	coiled-coil domain containing 106
hsa-miR-491-5p	0	0	0	1	0	0	IRF3	interferon regulatory factor 3
hsa-miR-491-5p	1	0	1	1	0	0	LRCH4	leucine-rich repeats and calponin homology (CH) domain containing 4
hsa-miR-491-5p	1	0	1	1	0	0	PHOSPHO1	phosphatase, orphan 1
hsa-miR-491-5p	0	0	1	1	1	1	ABCC12	ATP-binding cassette, sub-family C (CFTR/MRP), member 12
hsa-miR-491-5p	0	0	0	1	0	0	DAK	dihydroxyacetone kinase 2 homolog (S. cerevisiae)
hsa-miR-491-5p	0	0	1	1	0	0	COMMD1	copper metabolism (Murr1) domain containing 1
hsa-miR-491-5p	0	0	0	1	1	1	CDCP2	CUB domain containing protein 2
hsa-miR-491-5p	1	0	1	1	1	1	NEFL	neurofilament, light polypeptide
hsa-miR-491-5p	0	0	0	1	0	0	CATSPER1	cation channel, sperm associated 1
hsa-miR-491-5p	0	0	1	1	0	0	CPT1B	carnitine palmitoyltransferase 1B (muscle)
hsa-miR-491-5p	0	0	0	1	0	0	NFE2	nuclear factor (erythroid-derived 2), 45kDa
hsa-miR-491-5p	0	0	1	1	0	0	CD7	CD7 molecule
hsa-miR-491-5p	1	0	1	1	1	1	PTH1R	parathyroid hormone 1 receptor
hsa-miR-491-5p	0	0	0	1	0	0	PARP10	poly (ADP-ribose) polymerase family, member 10
hsa-miR-491-5p	0	0	1	1	0	0	MPRIP	myosin phosphatase Rho interacting protein
hsa-miR-491-5p	0	0	1	1	0	0	STX4	syntaxin 4
hsa-miR-491-5p	0	0	1	1	0	0	GAK	cyclin G associated kinase
hsa-miR-491-5p	0	0	0	1	0	0	IGSF8	immunoglobulin superfamily, member 8
hsa-miR-491-5p	0	0	1	1	0	0	TTC12	tetratricopeptide repeat domain 12
hsa-miR-491-5p	1	0	1	1	0	0	SH2D3C	SH2 domain containing 3C
hsa-miR-491-5p	0	0	1	1	1	1	AQP6	aquaporin 6, kidney specific
hsa-miR-491-5p	1	0	0	1	0	0	ARHGEF1	Rho guanine nucleotide exchange factor (GEF) 1
hsa-miR-491-5p	1	0	0	1	1	1	WNK4	WNK lysine deficient protein kinase 4
hsa-miR-491-5p	1	0	1	1	0	0	PDIA5	protein disulfide isomerase family A, member 5
hsa-miR-491-5p	0	0	1	1	1	1	ITGAD	integrin, alpha D
hsa-miR-491-5p	0	0	1	1	1	1	VRK3	vaccinia related kinase 3
hsa-miR-491-5p	1	0	1	1	1	1	C7orf43	chromosome 7 open reading frame 43
hsa-miR-491-5p	0	0	1	1	0	0	ASCC1	activating signal cointegrator 1 complex subunit 1
hsa-miR-491-5p	0	0	0	1	0	0	INSL3	insulin-like 3 (Leydig cell)
hsa-miR-491-5p	0	0	0	1	1	1	JAK3	Janus kinase 3
hsa-miR-491-5p	0	0	0	1	0	0	TRPT1	tRNA phosphotransferase 1
hsa-miR-491-5p	0	0	1	1	1	1	GRM6	glutamate receptor, metabotropic 6
hsa-miR-491-5p	0	0	0	1	1	1	ETV4	ets variant 4
hsa-miR-491-5p	0	0	0	1	0	0	OTOS	otospiralin
hsa-miR-491-5p	0	0	0	1	0	0	OR4C12	olfactory receptor, family 4, subfamily C, member 12
hsa-miR-491-5p	0	0	0	1	0	0	FGF8	fibroblast growth factor 8 (androgen-induced)
hsa-miR-491-5p	0	0	0	1	1	1	FAM82B	family with sequence similarity 82, member B
hsa-miR-491-5p	0	0	0	1	1	1	OLFML3	olfactomedin-like 3
hsa-miR-491-5p	0	0	0	1	0	0	FOXC2	forkhead box C2 (MFH-1, mesenchyme forkhead 1)
hsa-miR-491-5p	1	0	1	1	0	0	DUOX1	dual oxidase 1
hsa-miR-491-5p	0	0	0	1	0	0	B3GNT8	UDP-GlcNAc:betaGal beta-1,3-N-acetylglucosaminyltransferase 8
hsa-miR-491-5p	0	0	0	1	0	0	TPPP2	tubulin polymerization-promoting protein family member 2
hsa-miR-491-5p	0	0	0	1	0	0	OR10H4	olfactory receptor, family 10, subfamily H, member 4
hsa-miR-491-5p	0	0	1	1	0	0	MYPOP	Myb-related transcription factor, partner of profilin
hsa-miR-491-5p	0	0	1	1	0	0	PNKP	polynucleotide kinase 3'-phosphatase
hsa-miR-491-5p	0	0	1	1	0	0	RUVBL1	RuvB-like 1 (E. coli)
hsa-miR-491-5p	0	0	1	1	0	0	POLR2A	polymerase (RNA) II (DNA directed) polypeptide A, 220kDa
hsa-miR-491-5p	0	0	1	1	1	1	KCNH5	potassium voltage-gated channel, subfamily H (eag-related), member 5
hsa-miR-491-5p	0	0	0	1	0	0	OR3A4P	olfactory receptor, family 3, subfamily A, member 4 pseudogene
hsa-miR-491-5p	0	0	0	1	0	0	TMEM102	transmembrane protein 102
hsa-miR-491-5p	0	0	0	1	0	0	ZNF687	zinc finger protein 687
hsa-miR-491-5p	0	0	1	1	0	0	HERC2P3	hect domain and RLD 2 pseudogene 3
hsa-miR-491-5p	0	0	1	1	0	0	ADCK4	aarF domain containing kinase 4
hsa-miR-491-5p	0	0	0	1	0	0	VIPR1	vasoactive intestinal peptide receptor 1
hsa-miR-491-5p	1	0	0	1	0	0	KLHL36	kelch-like 36 (Drosophila)
hsa-miR-491-5p	1	0	1	1	1	1	ZNF580	zinc finger protein 580
hsa-miR-491-5p	0	0	1	1	1	1	UBE2I	ubiquitin-conjugating enzyme E2I
hsa-miR-491-5p	0	0	0	1	0	0	KLHL38	kelch-like 38 (Drosophila)
hsa-miR-491-5p	1	0	1	1	1	1	HMGB1	high mobility group box 1
hsa-miR-491-5p	0	0	0	1	0	0	SPAG11A	sperm associated antigen 11A
hsa-miR-491-5p	1	0	1	1	1	1	RIT2	Ras-like without CAAX 2
hsa-miR-491-5p	0	0	0	1	0	0	PRM3	protamine 3
hsa-miR-491-5p	0	0	0	1	0	0	IFITM2	interferon induced transmembrane protein 2
hsa-miR-491-5p	0	0	1	1	0	0	EFCAB4A	EF-hand calcium binding domain 4A
hsa-miR-491-5p	0	0	1	1	0	0	GAS6	growth arrest-specific 6
hsa-miR-491-5p	0	0	1	1	1	1	GLUD2	glutamate dehydrogenase 2
hsa-miR-491-5p	0	0	1	1	1	1	FMNL1	formin-like 1
hsa-miR-491-5p	0	0	1	1	0	0	CIB1	calcium and integrin binding 1 (calmyrin)
hsa-miR-491-5p	0	0	0	1	0	0	ARSI	arylsulfatase family, member I
hsa-miR-491-5p	0	0	1	1	0	0	NOP56	NOP56 ribonucleoprotein homolog (yeast)
hsa-miR-491-5p	0	0	1	1	1	1	HNMT	histamine N-methyltransferase
hsa-miR-491-5p	0	0	0	1	0	0	MBD3L5	methyl-CpG binding domain protein 3-like 5
hsa-miR-491-5p	0	0	0	1	0	0	GPR132	G protein-coupled receptor 132
hsa-miR-491-5p	0	0	0	1	0	0	B4GALNT4	beta-1,4-N-acetyl-galactosaminyl transferase 4
hsa-miR-491-5p	0	0	0	1	0	0	GGTLC3	gamma-glutamyltransferase light chain 3
hsa-miR-491-5p	0	0	0	1	0	0	MRPL54	mitochondrial ribosomal protein L54
hsa-miR-491-5p	0	0	1	1	0	0	SGK223	homolog of rat pragma of Rnd2
hsa-miR-491-5p	0	0	1	1	0	0	SOCS7	suppressor of cytokine signaling 7
hsa-miR-491-5p	1	0	1	1	0	0	C22orf32	chromosome 22 open reading frame 32
hsa-miR-491-5p	0	0	1	1	0	0	DGKA	diacylglycerol kinase, alpha 80kDa
hsa-miR-491-5p	0	0	0	1	0	0	IL28A	interleukin 28A (interferon, lambda 2)
hsa-miR-491-5p	1	0	0	1	0	0	RGS19	regulator of G-protein signaling 19
hsa-miR-491-5p	1	0	0	1	0	0	DGAT1	diacylglycerol O-acyltransferase 1
hsa-miR-491-5p	1	0	1	1	0	0	GPR173	G protein-coupled receptor 173
hsa-miR-491-5p	0	0	0	1	1	1	TBX1	T-box 1
hsa-miR-491-5p	0	0	1	1	0	0	TSKU	tsukushi small leucine rich proteoglycan homolog (Xenopus laevis)
hsa-miR-491-5p	0	0	1	1	1	1	CCDC172	coiled-coil domain containing 172
hsa-miR-491-5p	0	0	0	1	0	0	TUBB2A	tubulin, beta 2A class IIa
hsa-miR-491-5p	0	0	0	1	0	0	MBD3L3	methyl-CpG binding domain protein 3-like 3
hsa-miR-491-5p	1	0	0	1	0	0	EMID1	EMI domain containing 1
hsa-miR-491-5p	0	0	0	1	1	1	TOM1L2	target of myb1-like 2 (chicken)
hsa-miR-491-5p	0	0	1	1	1	1	POFUT2	protein O-fucosyltransferase 2
hsa-miR-491-5p	0	0	0	1	0	0	LOC643630	ribosomal protein L7a pseudogene
hsa-miR-491-5p	0	0	0	1	1	1	HSP90AA1	heat shock protein 90kDa alpha (cytosolic), class A member 1
hsa-miR-491-5p	0	0	1	1	1	1	KLK5	kallikrein-related peptidase 5
hsa-miR-491-5p	0	0	0	1	1	1	CYP3A7	cytochrome P450, family 3, subfamily A, polypeptide 7
hsa-miR-491-5p	1	0	1	1	1	1	ZFP36L1	zinc finger protein 36, C3H type-like 1
hsa-miR-491-5p	0	0	1	1	0	0	ZFYVE19	zinc finger, FYVE domain containing 19
hsa-miR-491-5p	0	0	0	1	0	0	FTSJ3	FtsJ homolog 3 (E. coli)
hsa-miR-491-5p	0	0	1	1	1	1	PNPLA2	patatin-like phospholipase domain containing 2
hsa-miR-491-5p	0	0	0	1	1	1	GCK	glucokinase (hexokinase 4)
hsa-miR-491-5p	0	0	1	1	0	0	SKAP1	src kinase associated phosphoprotein 1
hsa-miR-491-5p	0	0	1	1	1	1	NECAP2	NECAP endocytosis associated 2
hsa-miR-491-5p	0	0	0	1	0	0	SEC13	SEC13 homolog (S. cerevisiae)
hsa-miR-491-5p	0	0	0	1	1	1	IL21R	interleukin 21 receptor
hsa-miR-491-5p	0	0	1	1	0	0	PYCR1	pyrroline-5-carboxylate reductase 1
hsa-miR-491-5p	1	0	0	1	0	0	LRFN2	leucine rich repeat and fibronectin type III domain containing 2
hsa-miR-491-5p	0	0	1	1	1	1	MMP28	matrix metallopeptidase 28
hsa-miR-491-5p	0	0	0	1	0	0	HELT	helt bHLH transcription factor
hsa-miR-491-5p	0	0	0	1	0	0	NANOS3	nanos homolog 3 (Drosophila)
hsa-miR-491-5p	1	0	1	1	1	1	RAP1GDS1	RAP1, GTP-GDP dissociation stimulator 1
hsa-miR-491-5p	0	0	1	1	0	0	STAMBP	STAM binding protein
hsa-miR-491-5p	0	0	1	1	0	0	DMKN	dermokine
hsa-miR-491-5p	0	0	1	1	0	0	RAD51D	RAD51 homolog D (S. cerevisiae)
hsa-miR-491-5p	0	0	0	1	1	1	MRAP	melanocortin 2 receptor accessory protein
hsa-miR-491-5p	0	0	1	1	0	0	GOLGB1	golgin B1
hsa-miR-491-5p	0	0	0	1	1	1	POP5	processing of precursor 5, ribonuclease P/MRP subunit (S. cerevisiae)
hsa-miR-491-5p	0	0	1	1	0	0	TEX264	testis expressed 264
hsa-miR-491-5p	0	0	1	1	1	1	ABLIM2	actin binding LIM protein family, member 2
hsa-miR-491-5p	0	0	0	1	1	1	DPH5	DPH5 homolog (S. cerevisiae)
hsa-miR-491-5p	1	0	1	1	1	1	SNX21	sorting nexin family member 21
hsa-miR-491-5p	0	0	0	1	0	0	SCGB1C1	secretoglobin, family 1C, member 1
hsa-miR-491-5p	0	0	0	1	0	0	ZNF93	zinc finger protein 93
hsa-miR-491-5p	0	0	0	1	0	0	RNF222	ring finger protein 222
hsa-miR-491-5p	1	0	1	1	1	1	STARD13	StAR-related lipid transfer (START) domain containing 13
hsa-miR-491-5p	0	0	1	1	0	0	FZD9	frizzled family receptor 9
hsa-miR-491-5p	0	0	1	1	1	1	S100A14	S100 calcium binding protein A14
hsa-miR-491-5p	0	0	1	1	1	1	OGG1	8-oxoguanine DNA glycosylase
hsa-miR-491-5p	1	0	1	1	1	1	UNC79	unc-79 homolog (C. elegans)
hsa-miR-491-5p	0	0	1	1	0	0	ASS1	argininosuccinate synthase 1
hsa-miR-491-5p	1	0	1	1	1	1	AP3D1	adaptor-related protein complex 3, delta 1 subunit
hsa-miR-491-5p	0	0	1	1	1	1	LYNX1	Ly6/neurotoxin 1
hsa-miR-491-5p	0	0	0	1	0	0	MUC4	mucin 4, cell surface associated
hsa-miR-491-5p	0	0	1	1	1	1	SLC37A1	solute carrier family 37 (glycerol-3-phosphate transporter), member 1
hsa-miR-491-5p	1	0	1	1	1	1	ATP2B2	ATPase, Ca++ transporting, plasma membrane 2
hsa-miR-491-5p	0	0	0	1	0	0	CCL14	chemokine (C-C motif) ligand 14
hsa-miR-491-5p	1	0	1	1	1	1	SLC12A9	solute carrier family 12 (potassium/chloride transporters), member 9
hsa-miR-491-5p	0	0	0	1	1	1	UCKL1	uridine-cytidine kinase 1-like 1
hsa-miR-491-5p	0	0	0	1	1	1	MADCAM1	mucosal vascular addressin cell adhesion molecule 1
hsa-miR-491-5p	1	0	1	1	1	1	DENND5B	DENN/MADD domain containing 5B
hsa-miR-491-5p	1	0	1	1	1	1	HNF4G	hepatocyte nuclear factor 4, gamma
hsa-miR-491-5p	1	0	1	1	1	1	IGSF11	immunoglobulin superfamily, member 11
hsa-miR-491-5p	0	0	0	1	1	1	RABL2B	RAB, member of RAS oncogene family-like 2B
hsa-miR-491-5p	0	0	1	1	1	1	TSGA10	testis specific, 10
hsa-miR-491-5p	0	0	1	1	0	0	MUSTN1	musculoskeletal, embryonic nuclear protein 1
hsa-miR-491-5p	1	0	1	1	1	1	TMEM110	transmembrane protein 110
hsa-miR-491-5p	1	0	1	1	1	1	ABHD2	abhydrolase domain containing 2
hsa-miR-491-5p	1	0	1	1	0	0	BEGAIN	brain-enriched guanylate kinase-associated homolog (rat)
hsa-miR-491-5p	0	0	1	1	0	0	KRT39	keratin 39
hsa-miR-491-5p	0	0	1	1	1	1	NSD1	nuclear receptor binding SET domain protein 1
hsa-miR-491-5p	0	0	0	1	0	0	OR11L1	olfactory receptor, family 11, subfamily L, member 1
hsa-miR-491-5p	0	0	0	1	1	1	ZNF658B	zinc finger protein 658B, pseudogene
hsa-miR-491-5p	1	0	1	1	1	1	LAMB3	laminin, beta 3
hsa-miR-491-5p	0	0	0	1	0	0	ARSA	arylsulfatase A
hsa-miR-491-5p	0	0	1	1	0	0	SH3BP1	SH3-domain binding protein 1
hsa-miR-491-5p	0	0	1	1	0	0	PDXP	pyridoxal (pyridoxine, vitamin B6) phosphatase
hsa-miR-491-5p	0	0	1	1	1	1	UHRF1BP1L	UHRF1 binding protein 1-like
hsa-miR-491-5p	0	0	1	1	1	1	DCTD	dCMP deaminase
hsa-miR-491-5p	0	0	1	1	0	0	ASNA1	arsA arsenite transporter, ATP-binding, homolog 1 (bacterial)
hsa-miR-491-5p	1	0	1	1	1	1	DLK2	delta-like 2 homolog (Drosophila)
hsa-miR-491-5p	0	0	1	1	1	1	LAGE3	L antigen family, member 3
hsa-miR-491-5p	1	0	1	1	0	0	RABL6	RAB, member RAS oncogene family-like 6
hsa-miR-491-5p	0	0	0	1	0	0	ZBP1	Z-DNA binding protein 1
hsa-miR-491-5p	0	0	0	1	1	1	PLOD1	procollagen-lysine, 2-oxoglutarate 5-dioxygenase 1
hsa-miR-491-5p	1	0	0	1	0	0	RABEP2	rabaptin, RAB GTPase binding effector protein 2
hsa-miR-491-5p	0	0	1	1	1	1	CX3CR1	chemokine (C-X3-C motif) receptor 1
hsa-miR-491-5p	0	0	0	1	0	0	LOC729458	methyl-CpG-binding domain protein 3-like 2-like
hsa-miR-491-5p	0	0	1	1	0	0	PLCG2	phospholipase C, gamma 2 (phosphatidylinositol-specific)
hsa-miR-491-5p	0	0	0	1	0	0	FGF17	fibroblast growth factor 17
hsa-miR-491-5p	0	0	0	1	0	0	HAPLN3	hyaluronan and proteoglycan link protein 3
hsa-miR-491-5p	0	0	1	1	1	1	SPAG11B	sperm associated antigen 11B
hsa-miR-491-5p	1	0	1	1	1	1	MDK	midkine (neurite growth-promoting factor 2)
hsa-miR-491-5p	0	0	0	1	1	1	HHLA3	HERV-H LTR-associating 3
hsa-miR-491-5p	0	0	0	1	0	0	CHCHD2	coiled-coil-helix-coiled-coil-helix domain containing 2
hsa-miR-491-5p	1	0	0	1	0	0	TSTA3	tissue specific transplantation antigen P35B
hsa-miR-491-5p	0	0	0	1	0	0	C20orf96	chromosome 20 open reading frame 96
hsa-miR-491-5p	0	0	1	1	1	1	CDH4	cadherin 4, type 1, R-cadherin (retinal)
hsa-miR-491-5p	0	0	1	1	0	0	NPSR1	neuropeptide S receptor 1
hsa-miR-491-5p	1	0	1	1	1	1	PCGF2	polycomb group ring finger 2
hsa-miR-491-5p	0	0	0	1	0	0	CTRB1	chymotrypsinogen B1
hsa-miR-491-5p	0	0	0	1	1	1	RAB25	RAB25, member RAS oncogene family
hsa-miR-491-5p	0	0	1	1	0	0	SLC34A3	solute carrier family 34 (sodium phosphate), member 3
hsa-miR-491-5p	0	0	0	1	0	0	PPP2R3B	protein phosphatase 2, regulatory subunit B'', beta
hsa-miR-491-5p	1	0	1	1	1	1	FAM110B	family with sequence similarity 110, member B
hsa-miR-491-5p	0	0	0	1	1	1	GPR161	G protein-coupled receptor 161
hsa-miR-491-5p	1	0	0	1	0	0	GPATCH3	G patch domain containing 3
hsa-miR-491-5p	0	0	0	1	1	1	COL6A1	collagen, type VI, alpha 1
hsa-miR-491-5p	0	0	1	1	0	0	GNPAT	glyceronephosphate O-acyltransferase
hsa-miR-491-5p	0	0	0	1	0	0	TMEM81	transmembrane protein 81
hsa-miR-491-5p	0	0	1	1	1	1	CFHR3	complement factor H-related 3
hsa-miR-491-5p	0	0	1	1	1	1	UCHL5	ubiquitin carboxyl-terminal hydrolase L5
hsa-miR-491-5p	0	0	0	1	1	1	RAB32	RAB32, member RAS oncogene family
hsa-miR-491-5p	0	0	0	1	1	1	LTV1	LTV1 homolog (S. cerevisiae)
hsa-miR-491-5p	0	0	1	1	1	1	RXRG	retinoid X receptor, gamma
hsa-miR-491-5p	0	0	1	1	1	1	RGS5	regulator of G-protein signaling 5
hsa-miR-491-5p	0	0	1	1	0	0	NDUFS2	NADH dehydrogenase (ubiquinone) Fe-S protein 2, 49kDa (NADH-coenzyme Q reductase)
hsa-miR-491-5p	0	0	1	1	0	0	APOA1BP	apolipoprotein A-I binding protein
hsa-miR-491-5p	0	0	0	1	0	0	BGLAP	bone gamma-carboxyglutamate (gla) protein
hsa-miR-491-5p	0	0	1	1	0	0	PMF1	polyamine-modulated factor 1
hsa-miR-491-5p	0	0	1	1	0	0	RUSC1	RUN and SH3 domain containing 1
hsa-miR-491-5p	1	0	1	1	0	0	EFNA4	ephrin-A4
hsa-miR-491-5p	1	0	1	1	1	1	ATP8B2	ATPase, aminophospholipid transporter, class I, type 8B, member 2
hsa-miR-491-5p	0	0	0	1	0	0	NKX6-2	NK6 homeobox 2
hsa-miR-491-5p	0	0	0	1	0	0	CLRN3	clarin 3
hsa-miR-491-5p	0	0	0	1	0	0	LCE2C	late cornified envelope 2C
hsa-miR-491-5p	0	0	0	1	1	1	LCE2D	late cornified envelope 2D
hsa-miR-491-5p	1	0	1	1	0	0	PI4KB	phosphatidylinositol 4-kinase, catalytic, beta
hsa-miR-491-5p	0	0	0	1	1	1	PSTK	phosphoseryl-tRNA kinase
hsa-miR-491-5p	0	0	1	1	0	0	ECM1	extracellular matrix protein 1
hsa-miR-491-5p	0	0	1	1	0	0	HIST2H2AA3	histone cluster 2, H2aa3
hsa-miR-491-5p	1	0	1	1	0	0	ZNF292	zinc finger protein 292
hsa-miR-491-5p	1	0	1	1	1	1	KCNC4	potassium voltage-gated channel, Shaw-related subfamily, member 4
hsa-miR-491-5p	0	0	1	1	1	1	CYP17A1	cytochrome P450, family 17, subfamily A, polypeptide 1
hsa-miR-491-5p	1	0	1	1	1	1	SUFU	suppressor of fused homolog (Drosophila)
hsa-miR-491-5p	0	0	0	1	0	0	ABHD16B	abhydrolase domain containing 16B
hsa-miR-491-5p	0	0	0	1	0	0	NFKB2	nuclear factor of kappa light polypeptide gene enhancer in B-cells 2 (p49/p100)
hsa-miR-491-5p	0	0	0	1	0	0	SRPK3	SRSF protein kinase 3
hsa-miR-491-5p	1	0	1	1	0	0	POLL	polymerase (DNA directed), lambda
hsa-miR-491-5p	1	0	1	1	1	1	ERLIN1	ER lipid raft associated 1
hsa-miR-491-5p	0	0	0	1	0	0	SPANXN2	SPANX family, member N2
hsa-miR-491-5p	0	0	1	1	1	1	CREG1	cellular repressor of E1A-stimulated genes 1
hsa-miR-491-5p	1	0	1	1	1	1	PI4K2A	phosphatidylinositol 4-kinase type 2 alpha
hsa-miR-491-5p	0	0	1	1	0	0	VGLL1	vestigial like 1 (Drosophila)
hsa-miR-491-5p	0	0	1	1	0	0	IFI44	interferon-induced protein 44
hsa-miR-491-5p	0	0	1	1	1	1	ZNF75D	zinc finger protein 75D
hsa-miR-491-5p	0	0	1	1	1	1	FPGT	fucose-1-phosphate guanylyltransferase
hsa-miR-491-5p	0	0	0	1	0	0	CYP2C8	cytochrome P450, family 2, subfamily C, polypeptide 8
hsa-miR-491-5p	1	0	1	1	1	1	SEPT6	septin 6
hsa-miR-491-5p	0	0	1	1	0	0	PTGDS	prostaglandin D2 synthase 21kDa (brain)
hsa-miR-491-5p	1	0	1	1	1	1	LONRF3	LON peptidase N-terminal domain and ring finger 3
hsa-miR-491-5p	0	0	0	1	0	0	EGFL7	EGF-like-domain, multiple 7
hsa-miR-491-5p	0	0	0	1	0	0	INPP5E	inositol polyphosphate-5-phosphatase, 72 kDa
hsa-miR-491-5p	0	0	1	1	0	0	PMPCA	peptidase (mitochondrial processing) alpha
hsa-miR-491-5p	0	0	0	1	0	0	FCN1	ficolin (collagen/fibrinogen domain containing) 1
hsa-miR-491-5p	0	0	0	1	1	1	CYP4A11	cytochrome P450, family 4, subfamily A, polypeptide 11
hsa-miR-491-5p	0	0	0	1	0	0	GBGT1	globoside alpha-1,3-N-acetylgalactosaminyltransferase 1
hsa-miR-491-5p	0	0	1	1	0	0	GTF3C5	general transcription factor IIIC, polypeptide 5, 63kDa
hsa-miR-491-5p	1	0	1	1	1	1	MED27	mediator complex subunit 27
hsa-miR-491-5p	1	0	1	1	1	1	SLC12A5	solute carrier family 12 (potassium/chloride transporter), member 5
hsa-miR-491-5p	0	0	1	1	0	0	MMP9	matrix metallopeptidase 9 (gelatinase B, 92kDa gelatinase, 92kDa type IV collagenase)
hsa-miR-491-5p	0	0	1	1	0	0	TJAP1	tight junction associated protein 1 (peripheral)
hsa-miR-491-5p	0	0	1	1	1	1	TIE1	tyrosine kinase with immunoglobulin-like and EGF-like domains 1
hsa-miR-491-5p	0	0	0	1	0	0	TNNC2	troponin C type 2 (fast)
hsa-miR-491-5p	0	0	1	1	1	1	NUP188	nucleoporin 188kDa
hsa-miR-491-5p	0	0	1	1	0	0	DOLK	dolichol kinase
hsa-miR-491-5p	1	0	1	1	1	1	TOMM34	translocase of outer mitochondrial membrane 34
hsa-miR-491-5p	0	0	1	1	0	0	GUCA1A	guanylate cyclase activator 1A (retina)
hsa-miR-491-5p	0	0	0	1	0	0	NDUFS5	NADH dehydrogenase (ubiquinone) Fe-S protein 5, 15kDa (NADH-coenzyme Q reductase)
hsa-miR-491-5p	0	0	1	1	0	0	C9orf16	chromosome 9 open reading frame 16
hsa-miR-491-5p	0	0	1	1	1	1	SRPX2	sushi-repeat containing protein, X-linked 2
hsa-miR-491-5p	0	0	0	1	0	0	LCN2	lipocalin 2
hsa-miR-491-5p	0	0	1	1	0	0	TREML1	triggering receptor expressed on myeloid cells-like 1
hsa-miR-491-5p	0	0	0	1	0	0	TDRG1	testis development related 1 (non-protein coding)
hsa-miR-491-5p	1	0	1	1	1	1	ADPRHL2	ADP-ribosylhydrolase like 2
hsa-miR-491-5p	1	0	0	1	1	1	LPIN3	lipin 3
hsa-miR-491-5p	0	0	1	1	0	0	TTC16	tetratricopeptide repeat domain 16
hsa-miR-491-5p	0	0	0	1	0	0	GPR35	G protein-coupled receptor 35
hsa-miR-491-5p	0	0	1	1	1	1	ZDHHC15	zinc finger, DHHC-type containing 15
hsa-miR-491-5p	0	0	1	1	1	1	HDAC8	histone deacetylase 8
hsa-miR-491-5p	0	0	0	1	0	0	WDR38	WD repeat domain 38
hsa-miR-491-5p	0	0	1	1	1	1	ZNF365	zinc finger protein 365
hsa-miR-491-5p	0	0	1	1	0	0	AAR2	AAR2 splicing factor homolog (S. cerevisiae)
hsa-miR-491-5p	0	0	1	1	0	0	OGDHL	oxoglutarate dehydrogenase-like
hsa-miR-491-5p	0	0	0	1	0	0	SLC18A3	solute carrier family 18 (vesicular acetylcholine), member 3
hsa-miR-491-5p	1	0	1	1	0	0	SNX30	sorting nexin family member 30
hsa-miR-491-5p	0	0	1	1	0	0	ZNF593	zinc finger protein 593
hsa-miR-491-5p	0	0	0	1	1	1	RAB41	RAB41, member RAS oncogene family
hsa-miR-491-5p	0	0	0	1	0	0	CUTA	cutA divalent cation tolerance homolog (E. coli)
hsa-miR-491-5p	0	0	1	1	0	0	P2RY4	pyrimidinergic receptor P2Y, G-protein coupled, 4
hsa-miR-491-5p	0	0	0	1	1	1	B3GALT4	UDP-Gal:betaGlcNAc beta 1,3-galactosyltransferase, polypeptide 4
hsa-miR-491-5p	0	0	1	1	0	0	PARD3	par-3 partitioning defective 3 homolog (C. elegans)
hsa-miR-491-5p	0	0	0	1	0	0	HLA-DMA	major histocompatibility complex, class II, DM alpha
hsa-miR-491-5p	0	0	1	1	1	1	AGER	advanced glycosylation end product-specific receptor
hsa-miR-491-5p	0	0	1	1	1	1	TBC1D2	TBC1 domain family, member 2
hsa-miR-491-5p	0	0	1	1	0	0	CDA	cytidine deaminase
hsa-miR-491-5p	1	0	1	1	1	1	FGD1	FYVE, RhoGEF and PH domain containing 1
hsa-miR-491-5p	0	0	1	1	1	1	ZNF341	zinc finger protein 341
hsa-miR-491-5p	0	0	0	1	0	0	PADI4	peptidyl arginine deiminase, type IV
hsa-miR-491-5p	0	0	1	1	0	0	BPIFB4	BPI fold containing family B, member 4
hsa-miR-491-5p	0	0	0	1	0	0	SPANXN5	SPANX family, member N5
hsa-miR-491-5p	1	0	1	1	0	0	EHMT2	euchromatic histone-lysine N-methyltransferase 2
hsa-miR-491-5p	0	0	0	1	1	1	MFAP2	microfibrillar-associated protein 2
hsa-miR-491-5p	1	0	1	1	1	1	C20orf112	chromosome 20 open reading frame 112
hsa-miR-491-5p	0	0	1	1	1	1	CARD16	caspase recruitment domain family, member 16
hsa-miR-491-5p	0	0	1	1	0	0	LY6G6C	lymphocyte antigen 6 complex, locus G6C
hsa-miR-491-5p	0	0	0	1	0	0	PYY3	peptide YY, 3 (pseudogene)
hsa-miR-491-5p	0	0	0	1	0	0	PSORS1C3	psoriasis susceptibility 1 candidate 3 (non-protein coding)
hsa-miR-491-5p	1	0	1	1	1	1	TLE1	transducin-like enhancer of split 1 (E(sp1) homolog, Drosophila)
hsa-miR-491-5p	0	0	1	1	0	0	MAD2L2	MAD2 mitotic arrest deficient-like 2 (yeast)
hsa-miR-491-5p	0	0	1	1	0	0	CST3	cystatin C
hsa-miR-491-5p	0	0	1	1	1	1	CNGA3	cyclic nucleotide gated channel alpha 3
hsa-miR-491-5p	0	0	1	1	1	1	GABBR1	gamma-aminobutyric acid (GABA) B receptor, 1
hsa-miR-491-5p	0	0	1	1	0	0	MED25	mediator complex subunit 25
hsa-miR-491-5p	0	0	0	1	0	0	ZNF311	zinc finger protein 311
hsa-miR-491-5p	0	0	0	1	1	1	ST8SIA6	ST8 alpha-N-acetyl-neuraminide alpha-2,8-sialyltransferase 6
hsa-miR-491-5p	0	0	1	1	1	1	RBM10	RNA binding motif protein 10
hsa-miR-491-5p	0	0	1	1	0	0	KCNAB2	potassium voltage-gated channel, shaker-related subfamily, beta member 2
hsa-miR-491-5p	0	0	1	1	1	1	ERLEC1	endoplasmic reticulum lectin 1
hsa-miR-491-5p	0	0	0	1	1	1	TPRG1L	tumor protein p63 regulated 1-like
hsa-miR-491-5p	0	0	1	1	1	1	ACSF3	acyl-CoA synthetase family member 3
hsa-miR-491-5p	1	0	1	1	1	1	MRS2	MRS2 magnesium homeostasis factor homolog (S. cerevisiae)
hsa-miR-491-5p	0	0	0	1	0	0	SPI1	spleen focus forming virus (SFFV) proviral integration oncogene spi1
hsa-miR-491-5p	0	0	1	1	1	1	LRRN4	leucine rich repeat neuronal 4
hsa-miR-491-5p	0	0	1	1	1	1	NUDT5	nudix (nucleoside diphosphate linked moiety X)-type motif 5
hsa-miR-491-5p	0	0	1	1	0	0	UPK1A	uroplakin 1A
hsa-miR-491-5p	1	0	1	1	1	1	SARM1	sterile alpha and TIR motif containing 1
hsa-miR-491-5p	0	0	0	1	0	0	SCGB2B2	secretoglobin, family 2B, member 2
hsa-miR-491-5p	0	0	0	1	0	0	C1orf159	chromosome 1 open reading frame 159
hsa-miR-491-5p	1	0	1	1	0	0	AGRN	agrin
hsa-miR-491-5p	0	0	1	1	0	0	PSTPIP1	proline-serine-threonine phosphatase interacting protein 1
hsa-miR-491-5p	1	0	1	1	1	1	TFAP2A	transcription factor AP-2 alpha (activating enhancer binding protein 2 alpha)
hsa-miR-491-5p	0	0	1	1	0	0	CNGA4	cyclic nucleotide gated channel alpha 4
hsa-miR-491-5p	1	0	1	1	1	1	IL15RA	interleukin 15 receptor, alpha
hsa-miR-491-5p	0	0	0	1	0	0	IFNA16	interferon, alpha 16
hsa-miR-491-5p	0	0	0	1	0	0	EMILIN1	elastin microfibril interfacer 1
hsa-miR-491-5p	0	0	1	1	0	0	CA5BP1	carbonic anhydrase VB pseudogene 1
hsa-miR-491-5p	0	0	0	1	0	0	ASB11	ankyrin repeat and SOCS box containing 11
hsa-miR-491-5p	0	0	1	1	1	1	FAM154A	family with sequence similarity 154, member A
hsa-miR-491-5p	0	0	1	1	1	1	C2orf43	chromosome 2 open reading frame 43
hsa-miR-491-5p	0	0	0	1	0	0	LOC389906	zinc finger protein 839 pseudogene
hsa-miR-491-5p	1	0	1	1	0	0	CCM2	cerebral cavernous malformation 2
hsa-miR-491-5p	0	0	1	1	1	1	CD99	CD99 molecule
hsa-miR-491-5p	0	0	1	1	1	1	SLC8A3	solute carrier family 8 (sodium/calcium exchanger), member 3
hsa-miR-491-5p	0	0	0	1	0	0	MBD3L4	methyl-CpG binding domain protein 3-like 4
hsa-miR-491-5p	1	0	1	1	0	0	ITPRIPL2	inositol 1,4,5-trisphosphate receptor interacting protein-like 2
hsa-miR-491-5p	0	0	0	1	0	0	FAM22A	family with sequence similarity 22, member A
hsa-miR-491-5p	0	0	0	1	0	0	ANGPT4	angiopoietin 4
hsa-miR-491-5p	0	0	0	1	0	0	SYT8	synaptotagmin VIII
hsa-miR-491-5p	0	0	1	1	0	0	SEC14L4	SEC14-like 4 (S. cerevisiae)
hsa-miR-491-5p	0	0	0	1	0	0	FAM99B	family with sequence similarity 99, member B (non-protein coding)
hsa-miR-491-5p	0	0	0	1	1	1	N6AMT2	N-6 adenine-specific DNA methyltransferase 2 (putative)
hsa-miR-491-5p	0	0	0	1	0	0	MSLN	mesothelin
hsa-miR-491-5p	0	0	1	1	1	1	RBMY1B	RNA binding motif protein, Y-linked, family 1, member B
hsa-miR-491-5p	0	0	1	1	1	1	RBMY1A1	RNA binding motif protein, Y-linked, family 1, member A1
hsa-miR-491-5p	1	0	1	1	0	0	ACOXL	acyl-CoA oxidase-like
hsa-miR-491-5p	0	0	1	1	1	1	HPS1	Hermansky-Pudlak syndrome 1
hsa-miR-491-5p	0	0	1	1	1	1	IGF2	insulin-like growth factor 2 (somatomedin A)
hsa-miR-491-5p	0	0	0	1	1	1	CHRNB2	cholinergic receptor, nicotinic, beta 2 (neuronal)
hsa-miR-491-5p	1	0	1	1	1	1	TTC3	tetratricopeptide repeat domain 3
hsa-miR-491-5p	0	0	1	1	1	1	C9orf47	chromosome 9 open reading frame 47
hsa-miR-491-5p	0	0	1	1	1	1	SF3A1	splicing factor 3a, subunit 1, 120kDa
hsa-miR-491-5p	0	0	1	1	1	1	JMJD8	jumonji domain containing 8
hsa-miR-491-5p	1	0	1	1	1	1	SLC6A17	solute carrier family 6, member 17
hsa-miR-491-5p	0	0	1	1	1	1	TAF5L	TAF5-like RNA polymerase II, p300/CBP-associated factor (PCAF)-associated factor, 65kDa
hsa-miR-491-5p	1	0	1	0	1	1	TTPAL	tocopherol (alpha) transfer protein-like
hsa-miR-491-5p	0	0	1	1	1	1	SERPINB7	serpin peptidase inhibitor, clade B (ovalbumin), member 7
hsa-miR-491-5p	1	0	1	0	1	1	PEG10	paternally expressed 10
hsa-miR-491-5p	0	0	0	1	1	1	SRD5A1	steroid-5-alpha-reductase, alpha polypeptide 1 (3-oxo-5 alpha-steroid delta 4-dehydrogenase alpha 1)
hsa-miR-491-5p	0	0	1	1	1	1	MOCS1	molybdenum cofactor synthesis 1
hsa-miR-491-5p	1	0	1	1	1	1	BEND3	BEN domain containing 3
hsa-miR-491-5p	0	0	0	1	1	1	KCNS1	potassium voltage-gated channel, delayed-rectifier, subfamily S, member 1
hsa-miR-491-5p	0	0	1	1	1	1	MTAP	methylthioadenosine phosphorylase
hsa-miR-491-5p	0	0	0	1	1	1	PDK4	pyruvate dehydrogenase kinase, isozyme 4
hsa-miR-491-5p	1	0	1	1	1	1	SHC1	SHC (Src homology 2 domain containing) transforming protein 1
hsa-miR-491-5p	1	0	1	1	1	1	SLC7A1	solute carrier family 7 (cationic amino acid transporter, y+ system), member 1
hsa-miR-491-5p	1	0	1	1	1	1	TFAP2B	transcription factor AP-2 beta (activating enhancer binding protein 2 beta)
hsa-miR-491-5p	0	0	0	1	1	1	DNALI1	dynein, axonemal, light intermediate chain 1
hsa-miR-491-5p	1	0	1	1	1	1	PIP4K2B	phosphatidylinositol-5-phosphate 4-kinase, type II, beta
hsa-miR-491-5p	0	0	1	1	1	1	PDXK	pyridoxal (pyridoxine, vitamin B6) kinase
hsa-miR-491-5p	0	0	1	1	1	1	GJB2	gap junction protein, beta 2, 26kDa
hsa-miR-491-5p	1	0	1	1	1	1	DUSP3	dual specificity phosphatase 3
hsa-miR-491-5p	0	0	1	1	1	1	ABCG2	ATP-binding cassette, sub-family G (WHITE), member 2
hsa-miR-491-5p	1	0	0	1	1	1	EGFR	epidermal growth factor receptor
hsa-miR-491-5p	1	0	1	1	1	1	SPON1	spondin 1, extracellular matrix protein
hsa-miR-491-5p	1	0	1	0	1	1	CRTAP	cartilage associated protein
hsa-miR-491-5p	0	0	0	1	1	1	SLMO1	slowmo homolog 1 (Drosophila)
hsa-miR-491-5p	1	0	1	1	1	1	KDM5B	lysine (K)-specific demethylase 5B
hsa-miR-491-5p	1	0	1	1	1	1	SEPT9	septin 9
hsa-miR-491-5p	0	0	0	1	1	1	TPX2	TPX2, microtubule-associated, homolog (Xenopus laevis)
hsa-miR-491-5p	1	0	1	1	1	1	RSU1	Ras suppressor protein 1
hsa-miR-491-5p	1	0	1	1	1	1	SEC61A1	Sec61 alpha 1 subunit (S. cerevisiae)
hsa-miR-491-5p	0	0	0	1	1	1	RABL2A	RAB, member of RAS oncogene family-like 2A
hsa-miR-491-5p	0	0	1	1	1	1	DUOX2	dual oxidase 2
hsa-miR-491-5p	1	0	1	0	1	1	DIEXF	digestive organ expansion factor homolog (zebrafish)
hsa-miR-491-5p	0	0	0	1	1	1	CPNE7	copine VII
hsa-miR-491-5p	0	0	1	1	1	1	ADNP2	ADNP homeobox 2
hsa-miR-491-5p	0	0	1	1	1	1	INPP5F	inositol polyphosphate-5-phosphatase F
hsa-miR-491-5p	1	0	1	0	1	1	TBC1D2B	TBC1 domain family, member 2B
hsa-miR-491-5p	1	0	1	1	1	1	ADARB1	adenosine deaminase, RNA-specific, B1
hsa-miR-491-5p	1	0	1	1	1	1	WT1-AS	WT1 antisense RNA
hsa-miR-491-5p	1	0	1	1	1	1	UBE2J1	ubiquitin-conjugating enzyme E2, J1
hsa-miR-491-5p	0	0	1	1	1	1	NUSAP1	nucleolar and spindle associated protein 1
hsa-miR-491-5p	0	0	0	1	1	1	LUZP4	leucine zipper protein 4
hsa-miR-491-5p	1	0	1	0	1	1	RNF141	ring finger protein 141
hsa-miR-491-5p	1	0	1	1	1	1	PEX5L	peroxisomal biogenesis factor 5-like
hsa-miR-491-5p	1	0	1	1	1	1	ZDHHC3	zinc finger, DHHC-type containing 3
hsa-miR-491-5p	0	0	1	1	1	1	TDP2	tyrosyl-DNA phosphodiesterase 2
hsa-miR-491-5p	1	0	1	0	1	1	KIF21B	kinesin family member 21B
hsa-miR-491-5p	1	0	0	0	1	1	TMEM104	transmembrane protein 104
hsa-miR-491-5p	1	0	1	1	1	1	ASB6	ankyrin repeat and SOCS box containing 6
hsa-miR-491-5p	0	0	0	1	1	1	TTC38	tetratricopeptide repeat domain 38
hsa-miR-491-5p	1	0	1	0	1	1	PARVA	parvin, alpha
hsa-miR-491-5p	0	0	1	1	1	1	TOMM22	translocase of outer mitochondrial membrane 22 homolog (yeast)
hsa-miR-491-5p	1	0	1	1	1	1	GALNTL1	UDP-N-acetyl-alpha-D-galactosamine:polypeptide N-acetylgalactosaminyltransferase-like 1
hsa-miR-491-5p	0	0	1	1	1	1	PLEKHB1	pleckstrin homology domain containing, family B (evectins) member 1
hsa-miR-491-5p	0	0	0	1	1	1	TICAM2	toll-like receptor adaptor molecule 2
hsa-miR-491-5p	1	0	1	1	1	1	CASD1	CAS1 domain containing 1
hsa-miR-491-5p	0	0	0	1	1	1	MMRN2	multimerin 2
hsa-miR-491-5p	1	0	1	1	1	1	SYNPO2L	synaptopodin 2-like
hsa-miR-491-5p	1	0	1	1	1	1	PLXNA2	plexin A2
hsa-miR-491-5p	0	0	0	1	1	1	C1QTNF6	C1q and tumor necrosis factor related protein 6
hsa-miR-491-5p	0	0	1	1	1	1	INSM2	insulinoma-associated 2
hsa-miR-491-5p	1	0	1	1	1	1	SLC46A1	solute carrier family 46 (folate transporter), member 1
hsa-miR-491-5p	1	0	1	1	1	1	IQCK	IQ motif containing K
hsa-miR-491-5p	0	0	0	1	1	1	SNX33	sorting nexin 33
hsa-miR-491-5p	1	0	1	0	1	1	KSR2	kinase suppressor of ras 2
hsa-miR-491-5p	1	0	1	1	1	1	EXOC8	exocyst complex component 8
hsa-miR-491-5p	1	0	0	1	1	1	MIDN	midnolin
hsa-miR-491-5p	0	0	1	1	1	1	BMP8A	bone morphogenetic protein 8a
hsa-miR-491-5p	0	0	1	0	1	1	VSIG1	V-set and immunoglobulin domain containing 1
hsa-miR-491-5p	0	0	1	1	1	1	FLT4	fms-related tyrosine kinase 4
hsa-miR-491-5p	0	0	0	0	1	1	NAT16	N-acetyltransferase 16 (GCN5-related, putative)
hsa-miR-491-5p	0	0	1	0	1	1	GYPE	glycophorin E (MNS blood group)
hsa-miR-491-5p	0	0	1	1	1	1	AKR7L	aldo-keto reductase family 7-like
hsa-miR-491-5p	0	0	1	0	1	1	FLJ44635	TPT1-like protein
hsa-miR-491-5p	0	0	0	0	1	1	KRTAP2-3	keratin associated protein 2-3
hsa-miR-491-5p	0	0	0	1	1	1	CCR2	chemokine (C-C motif) receptor 2
hsa-miR-491-5p	0	0	1	0	1	1	ARHGAP23	Rho GTPase activating protein 23
hsa-miR-491-5p	0	0	0	0	1	1	SULT1C2P1	sulfotransferase family, cytosolic, 1C, member 2 pseudogene 1
