# Supplementary material for: Profiling of Selected MicroRNAs in Proliferative Eutopic Endometrium of Women with Ovarian Endometriosis
Source: Biomed Res Int. 2015 Aug 20;2015:760698. doi: 10.1155/2015/760698 (PMC4558423; doi:10.1155/2015/760698)
Supplement: Supplementary file 1 — Table I: The names of miRNAs significantly differentially expressed between eutopic endometrium of patients with endometriosis vs eutopic endometrium of patients without endometriosis. Table II: The associations between miRNA and mRNA, which presents detailed results of the search of six major databases i.e targetscan, tarbase, miranda, mirbase, mirtarget2 and pictar. [file 760698.f1.zip › 760698.f1/Table II/hsa-miR-501-5p.tsv]

miR	targetscan	tarbase	miranda	mirbase	mirtarget2	pictar	GeneSymbol	GeneName
hsa-miR-501-5p	1	0	1	0	0	0	TRANK1	tetratricopeptide repeat and ankyrin repeat containing 1
hsa-miR-501-5p	0	0	1	1	1	1	KIAA0391	KIAA0391
hsa-miR-501-5p	1	0	1	0	1	1	PTPRT	protein tyrosine phosphatase, receptor type, T
hsa-miR-501-5p	1	0	1	0	1	1	MTSS1	metastasis suppressor 1
hsa-miR-501-5p	0	0	1	1	0	0	ZNF862	zinc finger protein 862
hsa-miR-501-5p	1	0	1	1	1	1	SLC4A7	solute carrier family 4, sodium bicarbonate cotransporter, member 7
hsa-miR-501-5p	1	0	1	1	1	1	HIPK1	homeodomain interacting protein kinase 1
hsa-miR-501-5p	1	0	1	1	1	1	GIGYF2	GRB10 interacting GYF protein 2
hsa-miR-501-5p	0	0	1	1	0	0	FKBP15	FK506 binding protein 15, 133kDa
hsa-miR-501-5p	1	0	1	1	1	1	ANKRD17	ankyrin repeat domain 17
hsa-miR-501-5p	1	0	1	0	1	1	MAGI2	membrane associated guanylate kinase, WW and PDZ domain containing 2
hsa-miR-501-5p	0	0	1	1	0	0	PAN2	PAN2 poly(A) specific ribonuclease subunit homolog (S. cerevisiae)
hsa-miR-501-5p	1	0	1	1	1	1	TP63	tumor protein p63
hsa-miR-501-5p	1	0	1	0	1	1	RBM12	RNA binding motif protein 12
hsa-miR-501-5p	1	0	1	1	1	1	RGL1	ral guanine nucleotide dissociation stimulator-like 1
hsa-miR-501-5p	1	0	1	1	1	1	NTNG1	netrin G1
hsa-miR-501-5p	0	0	1	1	1	1	TBC1D30	TBC1 domain family, member 30
hsa-miR-501-5p	1	0	1	1	1	1	RPGRIP1L	RPGRIP1-like
hsa-miR-501-5p	1	0	1	1	0	0	ZC3H4	zinc finger CCCH-type containing 4
hsa-miR-501-5p	1	0	1	1	1	1	NLGN1	neuroligin 1
hsa-miR-501-5p	1	0	1	0	1	1	ZNF507	zinc finger protein 507
hsa-miR-501-5p	1	0	1	1	1	1	PHF8	PHD finger protein 8
hsa-miR-501-5p	0	0	1	1	0	0	ZC4H2	zinc finger, C4H2 domain containing
hsa-miR-501-5p	1	0	1	1	1	1	ATXN7L1	ataxin 7-like 1
hsa-miR-501-5p	1	0	1	1	1	1	RIMKLB	ribosomal modification protein rimK-like family member B
hsa-miR-501-5p	1	0	1	1	0	0	ATAD2B	ATPase family, AAA domain containing 2B
hsa-miR-501-5p	1	0	1	0	0	0	ODZ4	odz, odd Oz/ten-m homolog 4 (Drosophila)
hsa-miR-501-5p	1	0	1	0	0	0	NYNRIN	NYN domain and retroviral integrase containing
hsa-miR-501-5p	1	0	1	1	1	1	PCDH19	protocadherin 19
hsa-miR-501-5p	1	0	1	1	1	1	HACE1	HECT domain and ankyrin repeat containing E3 ubiquitin protein ligase 1
hsa-miR-501-5p	1	0	1	1	1	1	UPF2	UPF2 regulator of nonsense transcripts homolog (yeast)
hsa-miR-501-5p	1	0	1	0	1	1	SEMA6D	sema domain, transmembrane domain (TM), and cytoplasmic domain, (semaphorin) 6D
hsa-miR-501-5p	0	0	1	0	0	0	NYAP2	neuronal tyrosine-phosphorylated phosphoinositide-3-kinase adaptor 2
hsa-miR-501-5p	1	0	1	1	1	1	FRAS1	Fraser syndrome 1
hsa-miR-501-5p	1	0	1	1	1	1	USP28	ubiquitin specific peptidase 28
hsa-miR-501-5p	0	0	1	1	0	0	PQBP1	polyglutamine binding protein 1
hsa-miR-501-5p	1	0	1	1	1	1	PPP6R3	protein phosphatase 6, regulatory subunit 3
hsa-miR-501-5p	1	0	1	0	0	0	TANC2	tetratricopeptide repeat, ankyrin repeat and coiled-coil containing 2
hsa-miR-501-5p	1	0	1	1	1	1	PHF21A	PHD finger protein 21A
hsa-miR-501-5p	0	0	1	1	1	1	SPEF2	sperm flagellar 2
hsa-miR-501-5p	1	0	1	1	1	1	NAV2	neuron navigator 2
hsa-miR-501-5p	1	0	1	1	1	1	LSM14A	LSM14A, SCD6 homolog A (S. cerevisiae)
hsa-miR-501-5p	1	0	1	1	1	1	ANKRD12	ankyrin repeat domain 12
hsa-miR-501-5p	1	0	1	1	1	1	SH3TC2	SH3 domain and tetratricopeptide repeats 2
hsa-miR-501-5p	1	0	1	0	1	1	RNF43	ring finger protein 43
hsa-miR-501-5p	1	0	1	0	0	0	ZBTB34	zinc finger and BTB domain containing 34
hsa-miR-501-5p	1	0	1	0	0	0	ZC3H12C	zinc finger CCCH-type containing 12C
hsa-miR-501-5p	0	0	1	1	1	1	BCO2	beta-carotene oxygenase 2
hsa-miR-501-5p	1	0	1	1	1	1	PAN3	PAN3 poly(A) specific ribonuclease subunit homolog (S. cerevisiae)
hsa-miR-501-5p	0	0	1	1	0	0	SSPO	SCO-spondin homolog (Bos taurus)
hsa-miR-501-5p	1	0	1	1	1	1	FAT2	FAT tumor suppressor homolog 2 (Drosophila)
hsa-miR-501-5p	0	0	1	0	0	0	TIFAB	TRAF-interacting protein with forkhead-associated domain, family member B
hsa-miR-501-5p	1	1	1	1	1	1	BACE1	beta-site APP-cleaving enzyme 1
hsa-miR-501-5p	0	0	1	1	0	0	MARK2	MAP/microtubule affinity-regulating kinase 2
hsa-miR-501-5p	1	0	1	1	1	1	UBE3A	ubiquitin protein ligase E3A
hsa-miR-501-5p	1	0	1	1	1	1	ADARB1	adenosine deaminase, RNA-specific, B1
hsa-miR-501-5p	1	0	1	0	1	1	NFE2L2	nuclear factor (erythroid-derived 2)-like 2
hsa-miR-501-5p	1	0	1	1	1	1	SEC14L1	SEC14-like 1 (S. cerevisiae)
hsa-miR-501-5p	1	0	1	1	1	1	RPS6KA3	ribosomal protein S6 kinase, 90kDa, polypeptide 3
hsa-miR-501-5p	0	0	1	1	0	0	SMARCC2	SWI/SNF related, matrix associated, actin dependent regulator of chromatin, subfamily c, member 2
hsa-miR-501-5p	1	0	1	1	1	1	PCCB	propionyl CoA carboxylase, beta polypeptide
hsa-miR-501-5p	0	0	1	1	1	1	MAZ	MYC-associated zinc finger protein (purine-binding transcription factor)
hsa-miR-501-5p	1	0	1	1	1	1	PHC1	polyhomeotic homolog 1 (Drosophila)
hsa-miR-501-5p	1	0	1	1	1	1	SLC8A1	solute carrier family 8 (sodium/calcium exchanger), member 1
hsa-miR-501-5p	1	0	1	1	1	1	SYNCRIP	synaptotagmin binding, cytoplasmic RNA interacting protein
hsa-miR-501-5p	1	0	1	1	1	1	RLF	rearranged L-myc fusion
hsa-miR-501-5p	1	0	1	0	1	1	PLAG1	pleiomorphic adenoma gene 1
hsa-miR-501-5p	1	0	1	0	1	1	MPPED2	metallophosphoesterase domain containing 2
hsa-miR-501-5p	0	0	1	1	1	1	DGKI	diacylglycerol kinase, iota
hsa-miR-501-5p	1	0	1	0	1	1	SLC6A6	solute carrier family 6 (neurotransmitter transporter, taurine), member 6
hsa-miR-501-5p	1	0	1	1	1	1	DMTF1	cyclin D binding myb-like transcription factor 1
hsa-miR-501-5p	1	0	1	1	1	1	SATB2	SATB homeobox 2
hsa-miR-501-5p	1	0	1	1	1	1	MAP4	microtubule-associated protein 4
hsa-miR-501-5p	0	0	1	1	1	1	GTF2IRD1	GTF2I repeat domain containing 1
hsa-miR-501-5p	0	0	1	1	0	0	IFT27	intraflagellar transport 27 homolog (Chlamydomonas)
hsa-miR-501-5p	0	0	1	1	1	1	ACO1	aconitase 1, soluble
hsa-miR-501-5p	0	0	1	1	0	0	EIF2B4	eukaryotic translation initiation factor 2B, subunit 4 delta, 67kDa
hsa-miR-501-5p	0	0	1	1	0	0	HLA-DMB	major histocompatibility complex, class II, DM beta
hsa-miR-501-5p	0	0	1	1	0	0	BMP1	bone morphogenetic protein 1
hsa-miR-501-5p	1	0	1	1	1	1	SLC6A8	solute carrier family 6 (neurotransmitter transporter, creatine), member 8
hsa-miR-501-5p	1	0	1	1	1	1	SATB1	SATB homeobox 1
hsa-miR-501-5p	0	0	1	1	1	1	ELOVL5	ELOVL fatty acid elongase 5
hsa-miR-501-5p	1	0	1	1	0	0	KAT5	K(lysine) acetyltransferase 5
hsa-miR-501-5p	1	0	1	1	1	1	HMGA2	high mobility group AT-hook 2
hsa-miR-501-5p	1	0	1	1	1	1	ZFX	zinc finger protein, X-linked
hsa-miR-501-5p	1	0	1	1	1	1	ANPEP	alanyl (membrane) aminopeptidase
hsa-miR-501-5p	1	0	1	1	1	1	INSC	inscuteable homolog (Drosophila)
hsa-miR-501-5p	0	0	1	1	1	1	CD55	CD55 molecule, decay accelerating factor for complement (Cromer blood group)
hsa-miR-501-5p	0	0	1	0	0	0	MIAT	myocardial infarction associated transcript (non-protein coding)
hsa-miR-501-5p	1	0	1	1	1	1	PCDH17	protocadherin 17
hsa-miR-501-5p	0	0	1	1	0	0	ITGA7	integrin, alpha 7
hsa-miR-501-5p	1	0	1	1	1	1	MYT1L	myelin transcription factor 1-like
hsa-miR-501-5p	1	0	1	0	0	0	MAP3K1	mitogen-activated protein kinase kinase kinase 1, E3 ubiquitin protein ligase
hsa-miR-501-5p	0	0	1	1	1	1	UBE4B	ubiquitination factor E4B
hsa-miR-501-5p	0	0	1	1	1	1	CYP4F3	cytochrome P450, family 4, subfamily F, polypeptide 3
hsa-miR-501-5p	1	0	1	1	1	1	MBNL2	muscleblind-like splicing regulator 2
hsa-miR-501-5p	1	0	1	1	1	1	CBFA2T2	core-binding factor, runt domain, alpha subunit 2; translocated to, 2
hsa-miR-501-5p	0	0	1	0	0	0	LOC400590	uncharacterized LOC400590
hsa-miR-501-5p	1	0	1	0	1	1	CELF2	CUGBP, Elav-like family member 2
hsa-miR-501-5p	0	0	1	1	1	1	SH2D1A	SH2 domain containing 1A
hsa-miR-501-5p	1	0	1	0	1	1	CD164	CD164 molecule, sialomucin
hsa-miR-501-5p	0	0	1	1	0	0	RBM5	RNA binding motif protein 5
hsa-miR-501-5p	0	0	1	1	0	0	PIF1	PIF1 5'-to-3' DNA helicase homolog (S. cerevisiae)
hsa-miR-501-5p	1	0	1	1	1	1	HP1BP3	heterochromatin protein 1, binding protein 3
hsa-miR-501-5p	0	0	1	1	1	1	SMC2	structural maintenance of chromosomes 2
hsa-miR-501-5p	1	0	1	1	1	1	EDNRB	endothelin receptor type B
hsa-miR-501-5p	0	0	1	0	1	1	ZC3HAV1	zinc finger CCCH-type, antiviral 1
hsa-miR-501-5p	0	0	1	0	1	1	CLEC5A	C-type lectin domain family 5, member A
hsa-miR-501-5p	1	0	1	1	1	1	C14orf129	chromosome 14 open reading frame 129
hsa-miR-501-5p	1	0	1	1	1	1	ANKRD13A	ankyrin repeat domain 13A
hsa-miR-501-5p	0	0	1	0	1	1	ZDHHC17	zinc finger, DHHC-type containing 17
hsa-miR-501-5p	0	0	1	1	1	1	SPAG11B	sperm associated antigen 11B
hsa-miR-501-5p	0	0	1	0	1	1	CLDN2	claudin 2
hsa-miR-501-5p	0	0	1	1	1	1	SLC39A8	solute carrier family 39 (zinc transporter), member 8
hsa-miR-501-5p	0	0	1	1	1	1	CHRD	chordin
hsa-miR-501-5p	0	0	1	1	1	1	CSNK1A1	casein kinase 1, alpha 1
hsa-miR-501-5p	0	0	1	1	0	0	DBNDD2	dysbindin (dystrobrevin binding protein 1) domain containing 2
hsa-miR-501-5p	1	0	1	1	0	0	TDRKH	tudor and KH domain containing
hsa-miR-501-5p	1	0	1	1	1	1	RSF1	remodeling and spacing factor 1
hsa-miR-501-5p	0	0	1	1	0	0	SH2B1	SH2B adaptor protein 1
hsa-miR-501-5p	0	0	1	1	1	1	RBM8A	RNA binding motif protein 8A
hsa-miR-501-5p	0	0	1	0	0	0	URB1	URB1 ribosome biogenesis 1 homolog (S. cerevisiae)
hsa-miR-501-5p	0	0	1	1	0	0	NYX	nyctalopin
hsa-miR-501-5p	1	0	1	1	1	1	ELF2	E74-like factor 2 (ets domain transcription factor)
hsa-miR-501-5p	1	0	1	1	0	0	LMO2	LIM domain only 2 (rhombotin-like 1)
hsa-miR-501-5p	0	0	1	1	0	0	TRIM41	tripartite motif containing 41
hsa-miR-501-5p	0	0	1	1	1	1	CTDSP1	CTD (carboxy-terminal domain, RNA polymerase II, polypeptide A) small phosphatase 1
hsa-miR-501-5p	1	0	1	1	1	1	SH3GLB1	SH3-domain GRB2-like endophilin B1
hsa-miR-501-5p	1	0	1	0	1	1	TRPS1	trichorhinophalangeal syndrome I
hsa-miR-501-5p	1	0	1	1	1	1	CPEB1	cytoplasmic polyadenylation element binding protein 1
hsa-miR-501-5p	1	0	1	1	1	1	CHST9	carbohydrate (N-acetylgalactosamine 4-0) sulfotransferase 9
hsa-miR-501-5p	0	0	1	1	1	1	SLC6A15	solute carrier family 6 (neutral amino acid transporter), member 15
hsa-miR-501-5p	1	0	1	0	1	1	WIPF2	WAS/WASL interacting protein family, member 2
hsa-miR-501-5p	0	0	1	1	0	0	SNRPN	small nuclear ribonucleoprotein polypeptide N
hsa-miR-501-5p	1	0	1	1	1	1	MAGI1	membrane associated guanylate kinase, WW and PDZ domain containing 1
hsa-miR-501-5p	1	0	1	1	1	1	NTRK2	neurotrophic tyrosine kinase, receptor, type 2
hsa-miR-501-5p	0	0	1	0	1	1	LYPD6B	LY6/PLAUR domain containing 6B
hsa-miR-501-5p	1	0	1	1	1	1	RBFOX1	RNA binding protein, fox-1 homolog (C. elegans) 1
hsa-miR-501-5p	1	0	1	1	1	1	LRRC7	leucine rich repeat containing 7
hsa-miR-501-5p	1	0	1	1	1	1	IQCK	IQ motif containing K
hsa-miR-501-5p	0	0	1	1	1	1	CHODL	chondrolectin
hsa-miR-501-5p	0	0	1	1	1	1	R3HCC1L	R3H domain and coiled-coil containing 1-like
hsa-miR-501-5p	0	0	1	1	1	1	ZNF638	zinc finger protein 638
hsa-miR-501-5p	1	0	1	0	1	1	IL1RAP	interleukin 1 receptor accessory protein
hsa-miR-501-5p	0	0	1	1	1	1	ANKRD36B	ankyrin repeat domain 36B
hsa-miR-501-5p	1	0	1	1	1	1	AFF2	AF4/FMR2 family, member 2
hsa-miR-501-5p	1	0	1	1	1	1	SH2B3	SH2B adaptor protein 3
hsa-miR-501-5p	0	0	1	0	0	0	CACNA2D3	calcium channel, voltage-dependent, alpha 2/delta subunit 3
hsa-miR-501-5p	1	0	1	1	1	1	PFKFB3	6-phosphofructo-2-kinase/fructose-2,6-biphosphatase 3
hsa-miR-501-5p	1	0	1	1	1	1	SLAMF6	SLAM family member 6
hsa-miR-501-5p	1	0	1	1	1	1	PALM2	paralemmin 2
hsa-miR-501-5p	1	0	1	1	1	1	RAB3IP	RAB3A interacting protein (rabin3)
hsa-miR-501-5p	1	0	1	1	1	1	NRXN3	neurexin 3
hsa-miR-501-5p	0	0	1	0	1	1	SRPK1	SRSF protein kinase 1
hsa-miR-501-5p	1	0	1	1	1	1	PPP3CB	protein phosphatase 3, catalytic subunit, beta isozyme
hsa-miR-501-5p	0	0	1	1	0	0	MBD1	methyl-CpG binding domain protein 1
hsa-miR-501-5p	1	0	1	1	1	1	SYT14	synaptotagmin XIV
hsa-miR-501-5p	0	0	1	1	0	0	ACSS2	acyl-CoA synthetase short-chain family member 2
hsa-miR-501-5p	1	0	1	0	1	1	NFAT5	nuclear factor of activated T-cells 5, tonicity-responsive
hsa-miR-501-5p	1	0	1	1	1	1	ENOX2	ecto-NOX disulfide-thiol exchanger 2
hsa-miR-501-5p	0	0	1	1	1	1	PARP16	poly (ADP-ribose) polymerase family, member 16
hsa-miR-501-5p	0	0	1	0	0	0	TUG1	taurine upregulated 1 (non-protein coding)
hsa-miR-501-5p	0	0	1	1	1	1	SMOX	spermine oxidase
hsa-miR-501-5p	1	0	1	1	1	1	ZC3H7A	zinc finger CCCH-type containing 7A
hsa-miR-501-5p	1	0	1	1	0	0	SENP3	SUMO1/sentrin/SMT3 specific peptidase 3
hsa-miR-501-5p	1	0	1	1	1	1	ARHGAP17	Rho GTPase activating protein 17
hsa-miR-501-5p	1	0	1	1	1	1	MEIS2	Meis homeobox 2
hsa-miR-501-5p	1	0	1	1	1	1	RIC3	resistance to inhibitors of cholinesterase 3 homolog (C. elegans)
hsa-miR-501-5p	1	0	1	1	1	1	INSIG2	insulin induced gene 2
hsa-miR-501-5p	0	0	1	0	0	0	C17orf72	chromosome 17 open reading frame 72
hsa-miR-501-5p	0	0	1	1	1	1	AMACR	alpha-methylacyl-CoA racemase
hsa-miR-501-5p	0	0	1	0	0	0	DUXAP10	double homeobox A pseudogene 10
hsa-miR-501-5p	1	0	1	1	1	1	WDTC1	WD and tetratricopeptide repeats 1
hsa-miR-501-5p	1	0	1	1	1	1	MACF1	microtubule-actin crosslinking factor 1
hsa-miR-501-5p	1	0	1	1	0	0	CCDC136	coiled-coil domain containing 136
hsa-miR-501-5p	0	0	1	1	1	1	C14orf118	chromosome 14 open reading frame 118
hsa-miR-501-5p	0	0	1	1	0	0	RAD54L2	RAD54-like 2 (S. cerevisiae)
hsa-miR-501-5p	0	0	1	0	0	0	LINC00085	long intergenic non-protein coding RNA 85
hsa-miR-501-5p	1	0	1	1	1	1	ZMIZ1	zinc finger, MIZ-type containing 1
hsa-miR-501-5p	1	0	1	1	1	1	SLC35A3	solute carrier family 35 (UDP-N-acetylglucosamine (UDP-GlcNAc) transporter), member A3
hsa-miR-501-5p	0	0	1	0	1	1	ATXN1L	ataxin 1-like
hsa-miR-501-5p	1	0	1	0	1	1	CADPS2	Ca++-dependent secretion activator 2
hsa-miR-501-5p	1	0	1	1	1	1	TNRC6A	trinucleotide repeat containing 6A
hsa-miR-501-5p	0	0	1	1	0	0	STPG1	sperm-tail PG-rich repeat containing 1
hsa-miR-501-5p	0	0	1	0	1	1	FLJ22447	uncharacterized LOC400221
hsa-miR-501-5p	1	0	1	1	0	0	PRRC2B	proline-rich coiled-coil 2B
hsa-miR-501-5p	0	0	1	1	0	0	DDAH2	dimethylarginine dimethylaminohydrolase 2
hsa-miR-501-5p	1	0	1	1	0	0	UBXN7	UBX domain protein 7
hsa-miR-501-5p	0	0	1	1	1	1	USP48	ubiquitin specific peptidase 48
hsa-miR-501-5p	0	0	1	1	1	1	TGIF1	TGFB-induced factor homeobox 1
hsa-miR-501-5p	1	0	1	1	1	1	LRP4	low density lipoprotein receptor-related protein 4
hsa-miR-501-5p	0	0	1	1	1	1	SPRTN	SprT-like N-terminal domain
hsa-miR-501-5p	0	0	1	1	1	1	UNC80	unc-80 homolog (C. elegans)
hsa-miR-501-5p	1	0	1	1	1	1	TMEM2	transmembrane protein 2
hsa-miR-501-5p	0	0	1	1	1	1	PAQR4	progestin and adipoQ receptor family member IV
hsa-miR-501-5p	1	0	1	1	1	1	ARHGAP36	Rho GTPase activating protein 36
hsa-miR-501-5p	1	0	1	1	1	1	C22orf13	chromosome 22 open reading frame 13
hsa-miR-501-5p	1	0	1	0	1	1	AP1G1	adaptor-related protein complex 1, gamma 1 subunit
hsa-miR-501-5p	0	0	1	0	0	0	FLJ30838	uncharacterized LOC400955
hsa-miR-501-5p	0	0	1	1	1	1	CCND3	cyclin D3
hsa-miR-501-5p	1	0	1	1	1	1	FRMD6	FERM domain containing 6
hsa-miR-501-5p	0	0	1	1	1	1	AGXT2	alanine--glyoxylate aminotransferase 2
hsa-miR-501-5p	1	0	1	0	1	1	RNF165	ring finger protein 165
hsa-miR-501-5p	1	0	1	1	1	1	ZNF664	zinc finger protein 664
hsa-miR-501-5p	0	0	1	0	0	0	LOC440894	uncharacterized LOC440894
hsa-miR-501-5p	0	0	1	1	1	1	SEPT5	septin 5
hsa-miR-501-5p	1	0	1	0	1	1	FSTL4	follistatin-like 4
hsa-miR-501-5p	1	0	1	1	1	1	ZIC4	Zic family member 4
hsa-miR-501-5p	0	0	1	1	1	1	BRD2	bromodomain containing 2
hsa-miR-501-5p	1	0	1	1	1	1	CLCN5	chloride channel, voltage-sensitive 5
hsa-miR-501-5p	0	0	1	0	0	0	LOC255187	hCG1980447
hsa-miR-501-5p	1	0	1	0	1	1	RABGEF1	RAB guanine nucleotide exchange factor (GEF) 1
hsa-miR-501-5p	0	0	1	1	0	0	BTN2A3P	butyrophilin, subfamily 2, member A3, pseudogene
hsa-miR-501-5p	0	0	1	1	1	1	COQ10A	coenzyme Q10 homolog A (S. cerevisiae)
hsa-miR-501-5p	1	0	1	0	1	1	PCGF3	polycomb group ring finger 3
hsa-miR-501-5p	0	0	1	1	0	0	COMMD4	COMM domain containing 4
hsa-miR-501-5p	0	0	1	1	1	1	TAF8	TAF8 RNA polymerase II, TATA box binding protein (TBP)-associated factor, 43kDa
hsa-miR-501-5p	0	0	1	1	1	1	RANBP17	RAN binding protein 17
hsa-miR-501-5p	1	0	1	0	1	1	NCAM1	neural cell adhesion molecule 1
hsa-miR-501-5p	1	0	1	1	1	1	ANKRD49	ankyrin repeat domain 49
hsa-miR-501-5p	0	0	1	0	0	0	UBE2QL1	ubiquitin-conjugating enzyme E2Q family-like 1
hsa-miR-501-5p	0	0	1	0	0	0	LOC284014	uncharacterized LOC284014
hsa-miR-501-5p	0	0	1	0	0	0	LINC00637	long intergenic non-protein coding RNA 637
hsa-miR-501-5p	0	0	1	1	1	1	GSG1	germ cell associated 1
hsa-miR-501-5p	0	0	1	0	0	0	C6orf228	chromosome 6 open reading frame 228
hsa-miR-501-5p	0	0	1	0	1	1	UHMK1	U2AF homology motif (UHM) kinase 1
hsa-miR-501-5p	1	0	1	1	1	1	FAM73B	family with sequence similarity 73, member B
hsa-miR-501-5p	0	0	1	1	0	0	GRIP2	glutamate receptor interacting protein 2
hsa-miR-501-5p	1	0	1	1	1	1	UBAP1	ubiquitin associated protein 1
hsa-miR-501-5p	0	0	1	1	1	1	CAMKV	CaM kinase-like vesicle-associated
hsa-miR-501-5p	0	0	1	1	0	0	CTNNBL1	catenin, beta like 1
hsa-miR-501-5p	1	0	1	1	1	1	ARIH2	ariadne homolog 2 (Drosophila)
hsa-miR-501-5p	0	0	1	1	1	1	BBS9	Bardet-Biedl syndrome 9
hsa-miR-501-5p	1	0	1	1	1	1	EGR2	early growth response 2
hsa-miR-501-5p	1	0	1	1	1	1	AMMECR1	Alport syndrome, mental retardation, midface hypoplasia and elliptocytosis chromosomal region gene 1
hsa-miR-501-5p	0	0	1	1	1	1	POU2F1	POU class 2 homeobox 1
hsa-miR-501-5p	0	0	1	0	0	0	LOC440910	uncharacterized LOC440910
hsa-miR-501-5p	1	0	1	1	1	1	FBXW2	F-box and WD repeat domain containing 2
hsa-miR-501-5p	0	0	1	1	0	0	ADH6	alcohol dehydrogenase 6 (class V)
hsa-miR-501-5p	1	0	1	1	1	1	IVNS1ABP	influenza virus NS1A binding protein
hsa-miR-501-5p	0	0	1	0	1	1	SSPN	sarcospan
hsa-miR-501-5p	0	0	1	1	0	0	C6orf163	chromosome 6 open reading frame 163
hsa-miR-501-5p	0	0	1	0	0	0	LOC550112	uncharacterized LOC550112
hsa-miR-501-5p	0	0	1	1	0	0	EIF3B	eukaryotic translation initiation factor 3, subunit B
hsa-miR-501-5p	0	0	1	1	1	1	SLC16A1	solute carrier family 16, member 1 (monocarboxylic acid transporter 1)
hsa-miR-501-5p	0	0	1	0	0	0	CXXC1P1	CXXC finger protein 1 pseudogene 1
hsa-miR-501-5p	1	0	1	1	1	1	LRRC57	leucine rich repeat containing 57
hsa-miR-501-5p	0	0	1	1	1	1	FRMD3	FERM domain containing 3
hsa-miR-501-5p	0	0	1	1	1	1	SPOCK1	sparc/osteonectin, cwcv and kazal-like domains proteoglycan (testican) 1
hsa-miR-501-5p	1	0	1	1	1	1	SLC7A8	solute carrier family 7 (amino acid transporter light chain, L system), member 8
hsa-miR-501-5p	0	0	1	1	1	1	ATP6V1H	ATPase, H+ transporting, lysosomal 50/57kDa, V1 subunit H
hsa-miR-501-5p	1	0	1	1	1	1	ARHGEF7	Rho guanine nucleotide exchange factor (GEF) 7
hsa-miR-501-5p	0	0	1	1	0	0	PSMD6	proteasome (prosome, macropain) 26S subunit, non-ATPase, 6
hsa-miR-501-5p	1	0	1	1	0	0	SAP30BP	SAP30 binding protein
hsa-miR-501-5p	0	0	1	1	1	1	LTBR	lymphotoxin beta receptor (TNFR superfamily, member 3)
hsa-miR-501-5p	1	0	1	1	1	1	CNEP1R1	CTD nuclear envelope phosphatase 1 regulatory subunit 1
hsa-miR-501-5p	0	0	1	1	0	0	PLCB2	phospholipase C, beta 2
hsa-miR-501-5p	1	0	1	1	1	1	SPATS2	spermatogenesis associated, serine-rich 2
hsa-miR-501-5p	1	0	1	1	1	1	CS	citrate synthase
hsa-miR-501-5p	1	0	1	0	1	1	NUP50	nucleoporin 50kDa
hsa-miR-501-5p	0	0	1	1	0	0	MAP7D1	MAP7 domain containing 1
hsa-miR-501-5p	1	0	1	0	1	1	CLIC4	chloride intracellular channel 4
hsa-miR-501-5p	1	0	1	1	1	1	AMT	aminomethyltransferase
hsa-miR-501-5p	1	0	1	1	1	1	SLITRK2	SLIT and NTRK-like family, member 2
hsa-miR-501-5p	0	0	1	1	0	0	TADA2A	transcriptional adaptor 2A
hsa-miR-501-5p	1	0	1	1	1	1	CRTC2	CREB regulated transcription coactivator 2
hsa-miR-501-5p	1	0	1	1	1	1	HDGF	hepatoma-derived growth factor
hsa-miR-501-5p	1	0	1	1	1	1	LRP8	low density lipoprotein receptor-related protein 8, apolipoprotein e receptor
hsa-miR-501-5p	1	0	1	1	1	1	TCEANC2	transcription elongation factor A (SII) N-terminal and central domain containing 2
hsa-miR-501-5p	0	0	1	0	0	0	C1orf204	chromosome 1 open reading frame 204
hsa-miR-501-5p	1	0	1	0	1	1	THRB	thyroid hormone receptor, beta
hsa-miR-501-5p	1	0	1	1	1	1	SNRNP70	small nuclear ribonucleoprotein 70kDa (U1)
hsa-miR-501-5p	1	0	1	1	1	1	STIM2	stromal interaction molecule 2
hsa-miR-501-5p	0	0	1	1	1	1	ITGAD	integrin, alpha D
hsa-miR-501-5p	1	0	1	1	1	1	TMEM185A	transmembrane protein 185A
hsa-miR-501-5p	0	0	1	1	1	1	CBWD5	COBW domain containing 5
hsa-miR-501-5p	0	0	1	1	0	0	C10orf68	chromosome 10 open reading frame 68
hsa-miR-501-5p	0	0	1	0	0	0	LOC284385	uncharacterized LOC284385
hsa-miR-501-5p	0	0	1	1	1	1	PLA2G5	phospholipase A2, group V
hsa-miR-501-5p	1	0	1	1	1	1	ST7L	suppression of tumorigenicity 7 like
hsa-miR-501-5p	0	0	1	1	1	1	EHD1	EH-domain containing 1
hsa-miR-501-5p	0	0	1	1	1	1	POLR1D	polymerase (RNA) I polypeptide D, 16kDa
hsa-miR-501-5p	0	0	1	1	0	0	ZNF283	zinc finger protein 283
hsa-miR-501-5p	0	0	1	1	1	1	ARFGAP2	ADP-ribosylation factor GTPase activating protein 2
hsa-miR-501-5p	0	0	1	1	0	0	CT45A4	cancer/testis antigen family 45, member A4
hsa-miR-501-5p	1	0	1	1	1	1	PCMT1	protein-L-isoaspartate (D-aspartate) O-methyltransferase
hsa-miR-501-5p	0	0	1	1	1	1	ABCC12	ATP-binding cassette, sub-family C (CFTR/MRP), member 12
hsa-miR-501-5p	1	0	1	1	1	1	NAP1L1	nucleosome assembly protein 1-like 1
hsa-miR-501-5p	1	0	1	1	1	1	DDX42	DEAD (Asp-Glu-Ala-Asp) box polypeptide 42
hsa-miR-501-5p	1	0	1	1	1	1	AGAP2	ArfGAP with GTPase domain, ankyrin repeat and PH domain 2
hsa-miR-501-5p	1	0	1	1	1	1	SIK3	SIK family kinase 3
hsa-miR-501-5p	1	0	1	1	0	0	CACNB3	calcium channel, voltage-dependent, beta 3 subunit
hsa-miR-501-5p	0	0	1	1	0	0	CFP	complement factor properdin
hsa-miR-501-5p	0	0	1	1	0	0	DCLK3	doublecortin-like kinase 3
hsa-miR-501-5p	0	0	1	1	0	0	GPR113	G protein-coupled receptor 113
hsa-miR-501-5p	1	0	1	1	1	1	TPRG1	tumor protein p63 regulated 1
hsa-miR-501-5p	0	0	1	0	0	0	MORN2	MORN repeat containing 2
hsa-miR-501-5p	0	0	1	1	1	1	EXD1	exonuclease 3'-5' domain containing 1
hsa-miR-501-5p	0	0	1	1	1	1	FAM19A2	family with sequence similarity 19 (chemokine (C-C motif)-like), member A2
hsa-miR-501-5p	0	0	1	1	0	0	KRT37	keratin 37
hsa-miR-501-5p	0	0	1	1	0	0	NMI	N-myc (and STAT) interactor
hsa-miR-501-5p	1	0	1	1	0	0	KIAA1549L	KIAA1549-like
hsa-miR-501-5p	1	0	1	1	1	1	VPS54	vacuolar protein sorting 54 homolog (S. cerevisiae)
hsa-miR-501-5p	0	0	1	0	0	0	EML6	echinoderm microtubule associated protein like 6
hsa-miR-501-5p	1	0	1	1	1	1	KIF21A	kinesin family member 21A
hsa-miR-501-5p	1	0	1	1	1	1	CORO2B	coronin, actin binding protein, 2B
hsa-miR-501-5p	1	0	1	1	1	1	FAM118A	family with sequence similarity 118, member A
hsa-miR-501-5p	1	0	1	1	1	1	SEPHS1	selenophosphate synthetase 1
hsa-miR-501-5p	0	0	1	0	0	0	TMEM232	transmembrane protein 232
hsa-miR-501-5p	0	0	1	1	0	0	GABRA2	gamma-aminobutyric acid (GABA) A receptor, alpha 2
hsa-miR-501-5p	1	0	1	1	1	1	KTN1	kinectin 1 (kinesin receptor)
hsa-miR-501-5p	0	0	1	0	1	1	RASGRP3	RAS guanyl releasing protein 3 (calcium and DAG-regulated)
hsa-miR-501-5p	1	0	1	1	1	1	KPNA1	karyopherin alpha 1 (importin alpha 5)
hsa-miR-501-5p	1	0	1	0	1	1	KIAA1456	KIAA1456
hsa-miR-501-5p	1	0	1	1	1	1	MACROD2	MACRO domain containing 2
hsa-miR-501-5p	1	0	1	1	0	0	UBN2	ubinuclein 2
hsa-miR-501-5p	0	0	1	1	1	1	EPPIN	epididymal peptidase inhibitor
hsa-miR-501-5p	0	0	1	1	0	0	FSIP2	fibrous sheath interacting protein 2
hsa-miR-501-5p	1	0	1	1	0	0	ATXN7L3	ataxin 7-like 3
hsa-miR-501-5p	0	0	1	0	0	0	LOC729177	uncharacterized LOC729177
hsa-miR-501-5p	1	0	1	1	0	0	TNK2	tyrosine kinase, non-receptor, 2
hsa-miR-501-5p	1	0	1	1	1	1	DLG2	discs, large homolog 2 (Drosophila)
hsa-miR-501-5p	1	0	1	0	1	1	GPR180	G protein-coupled receptor 180
hsa-miR-501-5p	0	0	1	0	0	0	HNRNPKP3	heterogeneous nuclear ribonucleoprotein K pseudogene 3
hsa-miR-501-5p	1	0	1	1	1	1	LRP2BP	LRP2 binding protein
hsa-miR-501-5p	0	0	1	1	0	0	HS3ST5	heparan sulfate (glucosamine) 3-O-sulfotransferase 5
hsa-miR-501-5p	0	0	1	1	1	1	SZT2	seizure threshold 2 homolog (mouse)
hsa-miR-501-5p	1	0	1	1	1	1	EIF4E3	eukaryotic translation initiation factor 4E family member 3
hsa-miR-501-5p	1	0	1	1	0	0	MAN1B1	mannosidase, alpha, class 1B, member 1
hsa-miR-501-5p	1	0	1	1	1	1	MFSD6	major facilitator superfamily domain containing 6
hsa-miR-501-5p	1	0	1	0	1	1	ADIPOR2	adiponectin receptor 2
hsa-miR-501-5p	1	0	1	1	1	1	PHF17	PHD finger protein 17
hsa-miR-501-5p	1	0	1	0	1	1	KIAA0182	KIAA0182
hsa-miR-501-5p	0	0	1	0	0	0	LOC285812	uncharacterized LOC285812
hsa-miR-501-5p	0	0	1	1	0	0	IQUB	IQ motif and ubiquitin domain containing
hsa-miR-501-5p	1	0	1	1	1	1	R3HDM1	R3H domain containing 1
hsa-miR-501-5p	0	0	1	1	1	1	PITX2	paired-like homeodomain 2
hsa-miR-501-5p	0	0	1	0	0	0	ERVFRD-2	endogenous retrovirus group FRD, member 2
hsa-miR-501-5p	1	0	1	0	1	1	YOD1	YOD1 OTU deubiquinating enzyme 1 homolog (S. cerevisiae)
hsa-miR-501-5p	0	0	1	1	1	1	MCU	mitochondrial calcium uniporter
hsa-miR-501-5p	0	0	1	0	0	0	LRRC9	leucine rich repeat containing 9
hsa-miR-501-5p	0	0	1	1	1	1	CD160	CD160 molecule
hsa-miR-501-5p	0	0	1	1	1	1	MON1B	MON1 homolog B (yeast)
hsa-miR-501-5p	1	0	1	1	1	1	BCAT1	branched chain amino-acid transaminase 1, cytosolic
hsa-miR-501-5p	0	0	1	0	0	0	IGHD	immunoglobulin heavy constant delta
hsa-miR-501-5p	1	0	1	0	1	1	KPNA6	karyopherin alpha 6 (importin alpha 7)
hsa-miR-501-5p	1	0	1	1	1	1	PUS7	pseudouridylate synthase 7 homolog (S. cerevisiae)
hsa-miR-501-5p	0	0	1	0	0	0	LOC100129940	uncharacterized LOC100129940
hsa-miR-501-5p	1	0	1	1	1	1	DPY19L3	dpy-19-like 3 (C. elegans)
hsa-miR-501-5p	0	0	1	1	1	1	NLRP11	NLR family, pyrin domain containing 11
hsa-miR-501-5p	1	0	1	1	1	1	CD200	CD200 molecule
hsa-miR-501-5p	0	0	1	1	1	1	G3BP1	GTPase activating protein (SH3 domain) binding protein 1
hsa-miR-501-5p	0	0	1	1	0	0	HEATR8	HEAT repeat containing 8
hsa-miR-501-5p	0	0	1	1	1	1	TMEM202	transmembrane protein 202
hsa-miR-501-5p	1	0	1	0	1	1	ESRRG	estrogen-related receptor gamma
hsa-miR-501-5p	0	0	1	0	1	1	GALNT13	UDP-N-acetyl-alpha-D-galactosamine:polypeptide N-acetylgalactosaminyltransferase 13 (GalNAc-T13)
hsa-miR-501-5p	0	0	1	0	1	1	RUFY4	RUN and FYVE domain containing 4
hsa-miR-501-5p	1	0	1	1	0	0	FOXP2	forkhead box P2
hsa-miR-501-5p	1	0	1	1	1	1	PPP2R5C	protein phosphatase 2, regulatory subunit B', gamma
hsa-miR-501-5p	0	0	1	1	1	1	SLC36A3	solute carrier family 36 (proton/amino acid symporter), member 3
hsa-miR-501-5p	1	0	1	1	1	1	LRRK2	leucine-rich repeat kinase 2
hsa-miR-501-5p	1	0	1	1	1	1	MAP2K4	mitogen-activated protein kinase kinase 4
hsa-miR-501-5p	0	0	1	0	0	0	AGAP9	ArfGAP with GTPase domain, ankyrin repeat and PH domain 9
hsa-miR-501-5p	0	0	1	1	1	1	KAZALD1	Kazal-type serine peptidase inhibitor domain 1
hsa-miR-501-5p	1	0	1	1	1	1	ATL2	atlastin GTPase 2
hsa-miR-501-5p	1	0	1	1	1	1	TBC1D15	TBC1 domain family, member 15
hsa-miR-501-5p	1	0	1	1	1	1	UBE2O	ubiquitin-conjugating enzyme E2O
hsa-miR-501-5p	1	0	1	1	1	1	MEAF6	MYST/Esa1-associated factor 6
hsa-miR-501-5p	1	0	1	1	0	0	ABLIM3	actin binding LIM protein family, member 3
hsa-miR-501-5p	0	0	1	1	0	0	HSPB11	heat shock protein family B (small), member 11
hsa-miR-501-5p	1	0	1	1	1	1	NCOA1	nuclear receptor coactivator 1
hsa-miR-501-5p	1	0	1	1	1	1	EDN1	endothelin 1
hsa-miR-501-5p	0	0	1	1	1	1	PTPN20B	protein tyrosine phosphatase, non-receptor type 20B
hsa-miR-501-5p	0	0	1	1	1	1	PTPN20A	protein tyrosine phosphatase, non-receptor type 20A
hsa-miR-501-5p	0	0	1	0	0	0	PART1	prostate androgen-regulated transcript 1 (non-protein coding)
hsa-miR-501-5p	0	0	1	1	0	0	NEK7	NIMA (never in mitosis gene a)-related kinase 7
hsa-miR-501-5p	0	0	1	1	0	0	PSTPIP1	proline-serine-threonine phosphatase interacting protein 1
hsa-miR-501-5p	0	0	1	0	0	0	POM121L8P	POM121 transmembrane nucleoporin-like 8 pseudogene
hsa-miR-501-5p	0	0	1	1	1	1	ARIH1	ariadne homolog, ubiquitin-conjugating enzyme E2 binding protein, 1 (Drosophila)
hsa-miR-501-5p	0	0	1	1	0	0	MSH5	mutS homolog 5 (E. coli)
hsa-miR-501-5p	0	0	1	1	0	0	SAPCD1	suppressor APC domain containing 1
hsa-miR-501-5p	0	0	1	0	0	0	TPTE2P6	transmembrane phosphoinositide 3-phosphatase and tensin homolog 2 pseudogene 6
hsa-miR-501-5p	1	0	1	0	1	1	DCDC2	doublecortin domain containing 2
hsa-miR-501-5p	0	0	1	0	0	0	DNAJC5B	DnaJ (Hsp40) homolog, subfamily C, member 5 beta
hsa-miR-501-5p	0	0	1	1	1	1	GRAMD1C	GRAM domain containing 1C
hsa-miR-501-5p	1	0	1	1	1	1	PREX1	phosphatidylinositol-3,4,5-trisphosphate-dependent Rac exchange factor 1
hsa-miR-501-5p	0	0	1	1	1	1	AQP6	aquaporin 6, kidney specific
hsa-miR-501-5p	1	0	1	1	1	1	TFE3	transcription factor binding to IGHM enhancer 3
hsa-miR-501-5p	0	0	1	1	0	0	DOPEY1	dopey family member 1
hsa-miR-501-5p	0	0	1	0	0	0	LRRC37BP1	leucine rich repeat containing 37B pseudogene 1
hsa-miR-501-5p	1	0	1	1	0	0	FAM108C1	family with sequence similarity 108, member C1
hsa-miR-501-5p	0	0	1	0	0	0	FAM66D	family with sequence similarity 66, member D
hsa-miR-501-5p	1	0	1	1	1	1	PKNOX2	PBX/knotted 1 homeobox 2
hsa-miR-501-5p	0	0	1	1	1	1	ING3	inhibitor of growth family, member 3
hsa-miR-501-5p	1	0	1	1	1	1	SLC30A8	solute carrier family 30 (zinc transporter), member 8
hsa-miR-501-5p	1	0	1	1	1	1	LIMCH1	LIM and calponin homology domains 1
hsa-miR-501-5p	1	0	1	1	1	1	MIER1	mesoderm induction early response 1 homolog (Xenopus laevis)
hsa-miR-501-5p	1	0	1	1	1	1	MTMR10	myotubularin related protein 10
hsa-miR-501-5p	0	0	1	1	0	0	NEDD1	neural precursor cell expressed, developmentally down-regulated 1
hsa-miR-501-5p	1	0	1	0	1	1	FAM214A	family with sequence similarity 214, member A
hsa-miR-501-5p	1	0	1	1	0	0	PTAR1	protein prenyltransferase alpha subunit repeat containing 1
hsa-miR-501-5p	0	0	1	0	0	0	LOC387647	patched domain containing 3 pseudogene
hsa-miR-501-5p	0	0	1	1	1	1	VWA3B	von Willebrand factor A domain containing 3B
hsa-miR-501-5p	0	0	1	1	1	1	TMEM138	transmembrane protein 138
hsa-miR-501-5p	1	0	1	1	1	1	POU6F1	POU class 6 homeobox 1
hsa-miR-501-5p	0	0	1	1	0	0	TMEM44	transmembrane protein 44
hsa-miR-501-5p	1	0	1	0	1	1	MEF2C	myocyte enhancer factor 2C
hsa-miR-501-5p	1	0	1	1	1	1	FAM126A	family with sequence similarity 126, member A
hsa-miR-501-5p	0	0	1	1	1	1	CCDC66	coiled-coil domain containing 66
hsa-miR-501-5p	0	0	1	1	1	1	C12orf50	chromosome 12 open reading frame 50
hsa-miR-501-5p	1	0	1	0	1	1	CLINT1	clathrin interactor 1
hsa-miR-501-5p	0	0	1	0	0	0	EPHA1-AS1	EPHA1 antisense RNA 1
hsa-miR-501-5p	0	0	1	1	1	1	KIAA1841	KIAA1841
hsa-miR-501-5p	1	0	1	1	1	1	NRP1	neuropilin 1
hsa-miR-501-5p	0	0	1	1	1	1	CAND1	cullin-associated and neddylation-dissociated 1
hsa-miR-501-5p	1	0	1	1	1	1	SLC24A4	solute carrier family 24 (sodium/potassium/calcium exchanger), member 4
hsa-miR-501-5p	1	0	1	0	1	1	JAZF1	JAZF zinc finger 1
hsa-miR-501-5p	1	0	1	0	1	1	SMURF1	SMAD specific E3 ubiquitin protein ligase 1
hsa-miR-501-5p	0	0	1	0	1	1	SRR	serine racemase
hsa-miR-501-5p	1	0	1	1	1	1	RICTOR	RPTOR independent companion of MTOR, complex 2
hsa-miR-501-5p	1	0	1	0	1	1	NR3C1	nuclear receptor subfamily 3, group C, member 1 (glucocorticoid receptor)
hsa-miR-501-5p	1	0	1	0	1	1	PATL1	protein associated with topoisomerase II homolog 1 (yeast)
hsa-miR-501-5p	1	0	1	1	1	1	SET	SET nuclear oncogene
hsa-miR-501-5p	0	0	1	1	0	0	TMEM134	transmembrane protein 134
hsa-miR-501-5p	1	0	1	1	1	1	IKZF2	IKAROS family zinc finger 2 (Helios)
hsa-miR-501-5p	0	0	1	0	1	1	STEAP2	STEAP family member 2, metalloreductase
hsa-miR-501-5p	0	0	1	1	1	1	KLHL7	kelch-like 7 (Drosophila)
hsa-miR-501-5p	0	0	1	1	1	1	ELAVL4	ELAV (embryonic lethal, abnormal vision, Drosophila)-like 4
hsa-miR-501-5p	1	0	1	0	1	1	BDNF	brain-derived neurotrophic factor
hsa-miR-501-5p	0	0	1	0	0	0	KGFLP1	fibroblast growth factor 7 pseudogene
hsa-miR-501-5p	1	0	1	1	1	1	RFFL	ring finger and FYVE-like domain containing E3 ubiquitin protein ligase
hsa-miR-501-5p	0	0	1	0	0	0	CR1L	complement component (3b/4b) receptor 1-like
hsa-miR-501-5p	0	0	1	1	1	1	KLC1	kinesin light chain 1
hsa-miR-501-5p	0	0	1	1	1	1	DNAJB14	DnaJ (Hsp40) homolog, subfamily B, member 14
hsa-miR-501-5p	0	0	1	1	0	0	DNAH1	dynein, axonemal, heavy chain 1
hsa-miR-501-5p	0	0	1	1	1	1	PINX1	PIN2/TERF1 interacting, telomerase inhibitor 1
hsa-miR-501-5p	0	0	1	1	0	0	CUZD1	CUB and zona pellucida-like domains 1
hsa-miR-501-5p	1	0	1	1	1	1	PBRM1	polybromo 1
hsa-miR-501-5p	1	0	1	1	1	1	OPRM1	opioid receptor, mu 1
hsa-miR-501-5p	0	0	1	1	0	0	CCL4	chemokine (C-C motif) ligand 4
hsa-miR-501-5p	1	0	1	1	1	1	LAMA3	laminin, alpha 3
hsa-miR-501-5p	1	0	1	1	1	1	TAB3	TGF-beta activated kinase 1/MAP3K7 binding protein 3
hsa-miR-501-5p	0	0	1	1	1	1	ATF7IP	activating transcription factor 7 interacting protein
hsa-miR-501-5p	1	0	1	1	1	1	CAMTA1	calmodulin binding transcription activator 1
hsa-miR-501-5p	0	0	1	1	1	1	GCOM1	GRINL1A complex locus 1
hsa-miR-501-5p	1	0	1	0	1	1	DLEU7	deleted in lymphocytic leukemia, 7
hsa-miR-501-5p	0	0	1	1	0	0	VSIG4	V-set and immunoglobulin domain containing 4
hsa-miR-501-5p	0	0	1	1	0	0	C16orf48	chromosome 16 open reading frame 48
hsa-miR-501-5p	0	0	1	1	0	0	TEX264	testis expressed 264
hsa-miR-501-5p	0	0	1	1	0	0	KRTCAP3	keratinocyte associated protein 3
hsa-miR-501-5p	1	0	1	1	1	1	SSX2IP	synovial sarcoma, X breakpoint 2 interacting protein
hsa-miR-501-5p	1	0	1	1	1	1	FAM120A	family with sequence similarity 120A
hsa-miR-501-5p	1	0	1	1	1	1	VPS45	vacuolar protein sorting 45 homolog (S. cerevisiae)
hsa-miR-501-5p	0	0	1	1	0	0	SH2D6	SH2 domain containing 6
hsa-miR-501-5p	0	0	1	1	1	1	HMBOX1	homeobox containing 1
hsa-miR-501-5p	0	0	1	1	1	1	AICDA	activation-induced cytidine deaminase
hsa-miR-501-5p	1	0	1	1	1	1	PLCH1	phospholipase C, eta 1
hsa-miR-501-5p	0	0	1	0	0	0	MEP1B	meprin A, beta
hsa-miR-501-5p	0	0	1	1	1	1	KCNJ13	potassium inwardly-rectifying channel, subfamily J, member 13
hsa-miR-501-5p	0	0	1	0	1	1	CCL4L2	chemokine (C-C motif) ligand 4-like 2
hsa-miR-501-5p	0	0	1	1	1	1	CCL4L1	chemokine (C-C motif) ligand 4-like 1
hsa-miR-501-5p	1	0	1	1	1	1	QKI	QKI, KH domain containing, RNA binding
hsa-miR-501-5p	1	0	1	1	1	1	MYB	v-myb myeloblastosis viral oncogene homolog (avian)
hsa-miR-501-5p	0	0	1	1	0	0	ARMC9	armadillo repeat containing 9
hsa-miR-501-5p	1	0	1	1	1	1	AMOT	angiomotin
hsa-miR-501-5p	0	0	1	1	1	1	CDH6	cadherin 6, type 2, K-cadherin (fetal kidney)
hsa-miR-501-5p	0	0	1	0	1	1	MIS12	MIS12, MIND kinetochore complex component, homolog (S. pombe)
hsa-miR-501-5p	1	0	1	0	1	1	FAM46A	family with sequence similarity 46, member A
hsa-miR-501-5p	1	0	1	1	1	1	TMUB2	transmembrane and ubiquitin-like domain containing 2
hsa-miR-501-5p	1	0	1	1	1	1	RIMS3	regulating synaptic membrane exocytosis 3
hsa-miR-501-5p	1	0	1	0	1	1	DCAF10	DDB1 and CUL4 associated factor 10
hsa-miR-501-5p	0	0	1	1	1	1	FTO	fat mass and obesity associated
hsa-miR-501-5p	0	0	1	1	1	1	CHEK1	checkpoint kinase 1
hsa-miR-501-5p	0	0	1	1	1	1	PRMT5	protein arginine methyltransferase 5
hsa-miR-501-5p	1	0	1	1	0	0	EIF4A1	eukaryotic translation initiation factor 4A1
hsa-miR-501-5p	1	0	1	0	1	1	ATM	ataxia telangiectasia mutated
hsa-miR-501-5p	0	0	1	1	0	0	NDUFB10	NADH dehydrogenase (ubiquinone) 1 beta subcomplex, 10, 22kDa
hsa-miR-501-5p	0	0	1	1	0	0	RBM14	RNA binding motif protein 14
hsa-miR-501-5p	1	0	1	1	1	1	TRIM39	tripartite motif containing 39
hsa-miR-501-5p	0	0	1	1	1	1	ICA1	islet cell autoantigen 1, 69kDa
hsa-miR-501-5p	1	0	1	1	1	1	RSU1	Ras suppressor protein 1
hsa-miR-501-5p	0	0	1	1	1	1	TMEM30A	transmembrane protein 30A
hsa-miR-501-5p	0	0	1	1	0	0	FPGS	folylpolyglutamate synthase
hsa-miR-501-5p	1	0	1	1	1	1	USB1	U6 snRNA biogenesis 1
hsa-miR-501-5p	0	0	1	1	0	0	SETMAR	SET domain and mariner transposase fusion gene
hsa-miR-501-5p	0	0	1	1	1	1	GNL3L	guanine nucleotide binding protein-like 3 (nucleolar)-like
hsa-miR-501-5p	1	0	1	0	1	1	FNDC3B	fibronectin type III domain containing 3B
hsa-miR-501-5p	0	0	1	1	1	1	C17orf76-AS1	C17orf76 antisense RNA 1
hsa-miR-501-5p	0	0	1	1	1	1	PLXDC2	plexin domain containing 2
hsa-miR-501-5p	0	0	1	1	0	0	VAV1	vav 1 guanine nucleotide exchange factor
hsa-miR-501-5p	0	0	1	1	0	0	C9orf11	chromosome 9 open reading frame 11
hsa-miR-501-5p	0	0	1	0	0	0	MGC21881	uncharacterized locus MGC21881
hsa-miR-501-5p	0	0	1	1	0	0	PARP6	poly (ADP-ribose) polymerase family, member 6
hsa-miR-501-5p	0	0	1	1	1	1	UCHL5	ubiquitin carboxyl-terminal hydrolase L5
hsa-miR-501-5p	1	0	1	1	1	1	ZBTB38	zinc finger and BTB domain containing 38
hsa-miR-501-5p	0	0	1	0	0	0	NUDT16P1	nudix (nucleoside diphosphate linked moiety X)-type motif 16 pseudogene 1
hsa-miR-501-5p	1	0	1	1	1	1	FAM176A	family with sequence similarity 176, member A
hsa-miR-501-5p	1	0	1	0	1	1	CYBRD1	cytochrome b reductase 1
hsa-miR-501-5p	0	0	1	0	0	0	ZNF720	zinc finger protein 720
hsa-miR-501-5p	1	0	1	1	1	1	SUZ12	suppressor of zeste 12 homolog (Drosophila)
hsa-miR-501-5p	0	0	1	0	0	0	WDFY3-AS2	WDFY3 antisense RNA 2
hsa-miR-501-5p	1	0	1	0	1	1	BTF3L4	basic transcription factor 3-like 4
hsa-miR-501-5p	1	0	1	1	1	1	SCML4	sex comb on midleg-like 4 (Drosophila)
hsa-miR-501-5p	0	0	1	1	0	0	CA5BP1	carbonic anhydrase VB pseudogene 1
hsa-miR-501-5p	0	0	1	0	0	0	FAM92A1P2	family with sequence similarity 92, member A3
hsa-miR-501-5p	0	0	1	1	1	1	FBXO36	F-box protein 36
hsa-miR-501-5p	0	0	1	1	1	1	CDC42SE2	CDC42 small effector 2
hsa-miR-501-5p	1	0	1	1	1	1	SPOCK2	sparc/osteonectin, cwcv and kazal-like domains proteoglycan (testican) 2
hsa-miR-501-5p	1	0	1	0	1	1	CDK19	cyclin-dependent kinase 19
hsa-miR-501-5p	1	0	1	1	1	1	ZNF200	zinc finger protein 200
hsa-miR-501-5p	1	0	1	1	1	1	VASP	vasodilator-stimulated phosphoprotein
hsa-miR-501-5p	1	0	1	1	1	1	CNTN4	contactin 4
hsa-miR-501-5p	0	0	1	0	0	0	ZBED3-AS1	ZBED3 antisense RNA 1
hsa-miR-501-5p	0	0	1	0	1	1	FHAD1	forkhead-associated (FHA) phosphopeptide binding domain 1
hsa-miR-501-5p	1	0	1	1	1	1	RSPO2	R-spondin 2
hsa-miR-501-5p	0	0	1	0	0	0	LOC400891	chromosome 14 open reading frame 166B pseudogene
hsa-miR-501-5p	0	0	1	1	0	0	SYT3	synaptotagmin III
hsa-miR-501-5p	1	0	1	1	1	1	HTR2C	5-hydroxytryptamine (serotonin) receptor 2C, G protein-coupled
hsa-miR-501-5p	0	0	1	1	1	1	SLC51A	solute carrier family 51, alpha subunit
hsa-miR-501-5p	0	0	1	1	1	1	TFAM	transcription factor A, mitochondrial
hsa-miR-501-5p	1	0	1	0	1	1	PSMF1	proteasome (prosome, macropain) inhibitor subunit 1 (PI31)
hsa-miR-501-5p	0	0	1	1	0	0	SWI5	SWI5 recombination repair homolog (yeast)
hsa-miR-501-5p	0	0	1	1	1	1	PIK3AP1	phosphoinositide-3-kinase adaptor protein 1
hsa-miR-501-5p	1	0	1	0	1	1	SV2B	synaptic vesicle glycoprotein 2B
hsa-miR-501-5p	0	0	1	1	1	1	CD48	CD48 molecule
hsa-miR-501-5p	0	0	1	1	1	1	PIP5K1B	phosphatidylinositol-4-phosphate 5-kinase, type I, beta
hsa-miR-501-5p	1	0	1	1	1	1	EYA4	eyes absent homolog 4 (Drosophila)
hsa-miR-501-5p	0	0	1	1	1	1	LPAR1	lysophosphatidic acid receptor 1
hsa-miR-501-5p	0	0	1	1	0	0	AGBL3	ATP/GTP binding protein-like 3
hsa-miR-501-5p	1	0	1	1	1	1	EPB41L4A	erythrocyte membrane protein band 4.1 like 4A
hsa-miR-501-5p	0	0	1	0	0	0	LOC729307	uncharacterized LOC729307
hsa-miR-501-5p	1	0	1	1	1	1	BZRAP1	benzodiazapine receptor (peripheral) associated protein 1
hsa-miR-501-5p	1	0	1	1	1	1	RCOR3	REST corepressor 3
hsa-miR-501-5p	1	0	1	1	1	1	ZNF282	zinc finger protein 282
hsa-miR-501-5p	1	0	1	1	1	1	C5orf25	chromosome 5 open reading frame 25
hsa-miR-501-5p	1	0	1	1	0	0	MRC2	mannose receptor, C type 2
hsa-miR-501-5p	1	0	1	1	1	1	EPB41L5	erythrocyte membrane protein band 4.1 like 5
hsa-miR-501-5p	1	0	1	1	1	1	PPP2R2C	protein phosphatase 2, regulatory subunit B, gamma
hsa-miR-501-5p	1	0	1	1	1	1	SIRPA	signal-regulatory protein alpha
hsa-miR-501-5p	0	0	1	0	0	0	LINC00238	long intergenic non-protein coding RNA 238
hsa-miR-501-5p	0	0	1	1	0	0	ADAP2	ArfGAP with dual PH domains 2
hsa-miR-501-5p	1	0	1	1	1	1	CUL1	cullin 1
hsa-miR-501-5p	1	0	1	1	1	1	CLK4	CDC-like kinase 4
hsa-miR-501-5p	0	0	1	0	0	0	FAM66C	family with sequence similarity 66, member C
hsa-miR-501-5p	0	0	1	0	1	1	DKFZP434I0714	uncharacterized protein DKFZP434I0714
hsa-miR-501-5p	0	0	1	1	1	1	EDA2R	ectodysplasin A2 receptor
hsa-miR-501-5p	0	0	1	0	1	1	FAM72A	family with sequence similarity 72, member A
hsa-miR-501-5p	1	0	1	1	1	1	ZEB2	zinc finger E-box binding homeobox 2
hsa-miR-501-5p	1	0	1	1	1	1	CTDSPL2	CTD (carboxy-terminal domain, RNA polymerase II, polypeptide A) small phosphatase like 2
hsa-miR-501-5p	0	0	1	1	1	1	ARHGAP6	Rho GTPase activating protein 6
hsa-miR-501-5p	0	0	1	0	0	0	LOC339862	uncharacterized LOC339862
hsa-miR-501-5p	0	0	1	0	0	0	C12orf77	chromosome 12 open reading frame 77
hsa-miR-501-5p	0	0	1	0	0	0	HOXA-AS2	HOXA cluster antisense RNA 2
hsa-miR-501-5p	1	0	1	1	1	1	PEX5L	peroxisomal biogenesis factor 5-like
hsa-miR-501-5p	0	0	1	1	1	1	CELF1	CUGBP, Elav-like family member 1
hsa-miR-501-5p	0	0	1	0	0	0	SRGAP2C	SLIT-ROBO Rho GTPase activating protein 2C
hsa-miR-501-5p	1	0	1	1	1	1	BNC2	basonuclin 2
hsa-miR-501-5p	1	0	1	1	1	1	C4orf19	chromosome 4 open reading frame 19
hsa-miR-501-5p	0	0	1	1	1	1	IFLTD1	intermediate filament tail domain containing 1
hsa-miR-501-5p	1	0	1	1	1	1	DAAM1	dishevelled associated activator of morphogenesis 1
hsa-miR-501-5p	0	0	1	0	0	0	LOC100134868	uncharacterized LOC100134868
hsa-miR-501-5p	0	0	1	1	0	0	H2AFZ	H2A histone family, member Z
hsa-miR-501-5p	1	0	1	1	1	1	PLS3	plastin 3
hsa-miR-501-5p	0	0	1	1	1	1	CACHD1	cache domain containing 1
hsa-miR-501-5p	0	0	1	1	1	1	C11orf88	chromosome 11 open reading frame 88
hsa-miR-501-5p	0	0	1	0	0	0	TOB1-AS1	TOB1 antisense RNA 1
hsa-miR-501-5p	1	0	1	1	0	0	HES7	hairy and enhancer of split 7 (Drosophila)
hsa-miR-501-5p	1	0	1	1	1	1	CHD6	chromodomain helicase DNA binding protein 6
hsa-miR-501-5p	0	0	1	1	1	1	SLC14A1	solute carrier family 14 (urea transporter), member 1 (Kidd blood group)
hsa-miR-501-5p	1	0	1	0	1	1	G2E3	G2/M-phase specific E3 ubiquitin protein ligase
hsa-miR-501-5p	1	0	1	1	1	1	DACH2	dachshund homolog 2 (Drosophila)
hsa-miR-501-5p	1	0	1	1	1	1	LEF1	lymphoid enhancer-binding factor 1
hsa-miR-501-5p	0	0	1	1	1	1	FAM71F1	family with sequence similarity 71, member F1
hsa-miR-501-5p	0	0	1	1	1	1	PCMTD2	protein-L-isoaspartate (D-aspartate) O-methyltransferase domain containing 2
hsa-miR-501-5p	0	0	1	1	1	1	SIAE	sialic acid acetylesterase
hsa-miR-501-5p	1	0	1	1	1	1	FAM123A	family with sequence similarity 123A
hsa-miR-501-5p	1	0	1	0	1	1	HSPA12A	heat shock 70kDa protein 12A
hsa-miR-501-5p	0	0	1	1	1	1	C17orf104	chromosome 17 open reading frame 104
hsa-miR-501-5p	1	0	1	1	0	0	INPP5J	inositol polyphosphate-5-phosphatase J
hsa-miR-501-5p	1	0	1	0	1	1	TNFAIP3	tumor necrosis factor, alpha-induced protein 3
hsa-miR-501-5p	0	0	1	1	1	1	C8orf34	chromosome 8 open reading frame 34
hsa-miR-501-5p	0	0	1	1	1	1	C4orf32	chromosome 4 open reading frame 32
hsa-miR-501-5p	1	0	1	1	0	0	PRRC2A	proline-rich coiled-coil 2A
hsa-miR-501-5p	0	0	1	1	1	1	STARD4	StAR-related lipid transfer (START) domain containing 4
hsa-miR-501-5p	1	0	1	0	1	1	PSD3	pleckstrin and Sec7 domain containing 3
hsa-miR-501-5p	1	0	1	1	1	1	MAMDC2	MAM domain containing 2
hsa-miR-501-5p	1	0	1	1	1	1	DIP2A	DIP2 disco-interacting protein 2 homolog A (Drosophila)
hsa-miR-501-5p	0	0	1	1	0	0	FAM72B	family with sequence similarity 72, member B
hsa-miR-501-5p	1	0	1	0	1	1	LYPD6	LY6/PLAUR domain containing 6
hsa-miR-501-5p	1	0	1	1	1	1	SLC35G1	solute carrier family 35, member G1
hsa-miR-501-5p	0	0	1	0	0	0	ADAM5	ADAM metallopeptidase domain 5, pseudogene
hsa-miR-501-5p	0	0	1	0	1	1	LOC338758	uncharacterized LOC338758
hsa-miR-501-5p	1	0	1	0	1	1	KDM2A	lysine (K)-specific demethylase 2A
hsa-miR-501-5p	1	0	1	1	1	1	KIF2A	kinesin heavy chain member 2A
hsa-miR-501-5p	0	0	1	0	1	1	LOC401021	uncharacterized LOC401021
hsa-miR-501-5p	1	0	1	1	1	1	RTKN2	rhotekin 2
hsa-miR-501-5p	1	0	1	1	1	1	PELI1	pellino E3 ubiquitin protein ligase 1
hsa-miR-501-5p	1	0	1	0	1	1	ARHGAP5	Rho GTPase activating protein 5
hsa-miR-501-5p	0	0	1	1	0	0	NLRC5	NLR family, CARD domain containing 5
hsa-miR-501-5p	0	0	1	0	0	0	AURKAPS1	aurora kinase A pseudogene 1
hsa-miR-501-5p	1	0	1	0	1	1	ZBTB1	zinc finger and BTB domain containing 1
hsa-miR-501-5p	0	0	1	1	1	1	HLA-DQA1	major histocompatibility complex, class II, DQ alpha 1
hsa-miR-501-5p	0	0	1	1	0	0	SYNE4	spectrin repeat containing, nuclear envelope family member 4
hsa-miR-501-5p	0	0	1	1	0	0	LAG3	lymphocyte-activation gene 3
hsa-miR-501-5p	1	0	1	1	0	0	ATG2A	autophagy related 2A
hsa-miR-501-5p	0	0	1	0	0	0	LINC00265	long intergenic non-protein coding RNA 265
hsa-miR-501-5p	0	0	1	0	1	1	C17orf51	chromosome 17 open reading frame 51
hsa-miR-501-5p	1	0	1	1	1	1	ATP8B4	ATPase, class I, type 8B, member 4
hsa-miR-501-5p	1	0	1	1	1	1	KLHL28	kelch-like 28 (Drosophila)
hsa-miR-501-5p	0	0	1	1	0	0	RPL12	ribosomal protein L12
hsa-miR-501-5p	1	0	1	1	1	1	PRRG1	proline rich Gla (G-carboxyglutamic acid) 1
hsa-miR-501-5p	0	0	1	1	1	1	B4GALT4	UDP-Gal:betaGlcNAc beta 1,4- galactosyltransferase, polypeptide 4
hsa-miR-501-5p	0	0	1	1	0	0	PRR19	proline rich 19
hsa-miR-501-5p	0	0	1	1	0	0	CERS4	ceramide synthase 4
hsa-miR-501-5p	0	0	1	1	1	1	KIAA1009	KIAA1009
hsa-miR-501-5p	1	0	1	1	1	1	MYLK	myosin light chain kinase
hsa-miR-501-5p	0	0	1	1	0	0	PLB1	phospholipase B1
hsa-miR-501-5p	0	0	1	1	1	1	ZNF33B	zinc finger protein 33B
hsa-miR-501-5p	0	0	1	0	1	1	DDX12P	DEAD/H (Asp-Glu-Ala-Asp/His) box polypeptide 12, pseudogene
hsa-miR-501-5p	0	0	1	1	1	1	TRIM6	tripartite motif containing 6
hsa-miR-501-5p	1	0	1	1	1	1	LMO4	LIM domain only 4
hsa-miR-501-5p	0	0	1	0	0	0	UBE2Q2P2	ubiquitin-conjugating enzyme E2Q family member 2 pseudogene 2
hsa-miR-501-5p	0	0	1	1	0	0	TBCA	tubulin folding cofactor A
hsa-miR-501-5p	0	0	1	1	1	1	SLAMF1	signaling lymphocytic activation molecule family member 1
hsa-miR-501-5p	0	0	1	0	0	0	LINC00442	long intergenic non-protein coding RNA 442
hsa-miR-501-5p	0	0	1	0	0	0	LEF1-AS1	LEF1 antisense RNA 1
hsa-miR-501-5p	0	0	1	0	0	0	PCP4L1	Purkinje cell protein 4 like 1
hsa-miR-501-5p	1	0	1	1	1	1	PDCD6IP	programmed cell death 6 interacting protein
hsa-miR-501-5p	1	0	1	1	1	1	MAPKAPK3	mitogen-activated protein kinase-activated protein kinase 3
hsa-miR-501-5p	1	0	1	1	1	1	PHACTR4	phosphatase and actin regulator 4
hsa-miR-501-5p	1	0	1	1	1	1	BAZ2B	bromodomain adjacent to zinc finger domain, 2B
hsa-miR-501-5p	0	0	1	1	0	0	CYP4F30P	cytochrome P450, family 4, subfamily F, polypeptide 30, pseudogene
hsa-miR-501-5p	1	0	1	1	0	0	CHTOP	chromatin target of PRMT1
hsa-miR-501-5p	1	0	1	0	1	1	TGFBR1	transforming growth factor, beta receptor 1
hsa-miR-501-5p	1	0	1	0	1	1	TMEM194A	transmembrane protein 194A
hsa-miR-501-5p	0	0	1	0	0	0	JPX	JPX transcript, XIST activator (non-protein coding)
hsa-miR-501-5p	0	0	1	1	1	1	CTXN3	cortexin 3
hsa-miR-501-5p	0	0	1	0	0	0	LOC727849	golgin A2 pseudogene
hsa-miR-501-5p	0	0	1	0	0	0	LOC727751	uncharacterized LOC727751
hsa-miR-501-5p	0	0	1	0	0	0	AGSK1	golgin subfamily A member 2-like
hsa-miR-501-5p	1	0	1	1	1	1	RARG	retinoic acid receptor, gamma
hsa-miR-501-5p	0	0	1	1	0	0	C8orf82	chromosome 8 open reading frame 82
hsa-miR-501-5p	0	0	1	0	0	0	OAZ3	ornithine decarboxylase antizyme 3
hsa-miR-501-5p	1	0	1	1	1	1	OPCML	opioid binding protein/cell adhesion molecule-like
hsa-miR-501-5p	0	0	1	1	1	1	IRX5	iroquois homeobox 5
hsa-miR-501-5p	0	0	1	1	0	0	TSPY3	testis specific protein, Y-linked 3
hsa-miR-501-5p	1	0	1	0	1	1	AMMECR1L	AMME chromosomal region gene 1-like
hsa-miR-501-5p	1	0	1	1	1	1	GRAMD4	GRAM domain containing 4
hsa-miR-501-5p	0	0	1	0	0	0	LINC00537	long intergenic non-protein coding RNA 537
hsa-miR-501-5p	0	0	1	1	0	0	DNHD1	dynein heavy chain domain 1
hsa-miR-501-5p	1	0	1	1	1	1	HNRNPC	heterogeneous nuclear ribonucleoprotein C (C1/C2)
hsa-miR-501-5p	1	0	1	1	1	1	NOTCH2NL	notch 2 N-terminal like
hsa-miR-501-5p	1	0	1	1	1	1	TRPM3	transient receptor potential cation channel, subfamily M, member 3
hsa-miR-501-5p	0	0	1	0	0	0	FRG1B	FSHD region gene 1 family, member B
hsa-miR-501-5p	0	0	1	1	1	1	SPRR2A	small proline-rich protein 2A
hsa-miR-501-5p	0	0	1	1	0	0	RPS9	ribosomal protein S9
hsa-miR-501-5p	0	0	1	1	1	1	XG	Xg blood group
hsa-miR-501-5p	0	0	1	1	1	1	ZNF365	zinc finger protein 365
hsa-miR-501-5p	1	0	1	1	1	1	ARFIP1	ADP-ribosylation factor interacting protein 1
hsa-miR-501-5p	0	0	1	0	1	1	FLJ25328	uncharacterized LOC148231
hsa-miR-501-5p	0	0	1	1	0	0	TRPV3	transient receptor potential cation channel, subfamily V, member 3
hsa-miR-501-5p	1	0	1	0	0	0	PWWP2A	PWWP domain containing 2A
hsa-miR-501-5p	0	0	1	1	0	0	SFTPC	surfactant protein C
hsa-miR-501-5p	1	0	1	1	1	1	GABRB2	gamma-aminobutyric acid (GABA) A receptor, beta 2
hsa-miR-501-5p	0	0	1	1	1	1	MUC21	mucin 21, cell surface associated
hsa-miR-501-5p	0	0	1	0	0	0	FBXL19-AS1	FBXL19 antisense RNA 1 (head to head)
hsa-miR-501-5p	1	0	1	1	1	1	NR2F2	nuclear receptor subfamily 2, group F, member 2
hsa-miR-501-5p	0	0	1	0	1	1	C9orf91	chromosome 9 open reading frame 91
hsa-miR-501-5p	0	0	1	1	0	0	PTPMT1	protein tyrosine phosphatase, mitochondrial 1
hsa-miR-501-5p	1	0	1	0	1	1	DNAJC6	DnaJ (Hsp40) homolog, subfamily C, member 6
hsa-miR-501-5p	1	0	1	1	1	1	CERS6	ceramide synthase 6
hsa-miR-501-5p	1	0	1	0	1	1	MAP3K9	mitogen-activated protein kinase kinase kinase 9
hsa-miR-501-5p	0	0	1	0	0	0	LOC143188	uncharacterized LOC143188
hsa-miR-501-5p	0	0	1	1	0	0	PRAMEF10	PRAME family member 10
hsa-miR-501-5p	0	0	1	1	1	1	FMN2	formin 2
hsa-miR-501-5p	0	0	1	1	1	1	FSHB	follicle stimulating hormone, beta polypeptide
hsa-miR-501-5p	1	0	1	1	1	1	TMEM64	transmembrane protein 64
hsa-miR-501-5p	1	0	1	1	1	1	PAX3	paired box 3
hsa-miR-501-5p	0	0	1	1	0	0	C20orf152	chromosome 20 open reading frame 152
hsa-miR-501-5p	0	0	1	0	0	0	BTF3P11	basic transcription factor 3 pseudogene 11
hsa-miR-501-5p	0	0	1	1	1	1	LRCH1	leucine-rich repeats and calponin homology (CH) domain containing 1
hsa-miR-501-5p	0	0	1	0	0	0	FAM27E3	family with sequence similarity 27, member E3
hsa-miR-501-5p	0	0	1	0	0	0	LINC00486	long intergenic non-protein coding RNA 486
hsa-miR-501-5p	0	0	1	0	0	0	EEF1DP3	eukaryotic translation elongation factor 1 delta pseudogene 3
hsa-miR-501-5p	1	0	1	1	1	1	ZMYM4	zinc finger, MYM-type 4
hsa-miR-501-5p	1	0	1	1	1	1	MLLT10	myeloid/lymphoid or mixed-lineage leukemia (trithorax homolog, Drosophila); translocated to, 10
hsa-miR-501-5p	0	0	1	0	0	0	FAM225B	family with sequence similarity 225, member B (non-protein coding)
hsa-miR-501-5p	1	0	1	0	1	1	FAM196A	family with sequence similarity 196, member A
hsa-miR-501-5p	0	0	1	1	1	1	PRKAR2A	protein kinase, cAMP-dependent, regulatory, type II, alpha
hsa-miR-501-5p	0	0	1	0	0	0	MEG3	maternally expressed 3 (non-protein coding)
hsa-miR-501-5p	0	0	1	1	0	0	NDRG2	NDRG family member 2
hsa-miR-501-5p	0	0	1	0	0	0	FLJ39632	uncharacterized LOC642477
hsa-miR-501-5p	1	0	1	1	0	0	RGS6	regulator of G-protein signaling 6
hsa-miR-501-5p	0	0	1	0	0	0	DKFZp686D0853	uncharacterized LOC401613
hsa-miR-501-5p	1	0	1	1	1	1	ATP2B4	ATPase, Ca++ transporting, plasma membrane 4
hsa-miR-501-5p	1	0	1	1	1	1	JPH1	junctophilin 1
hsa-miR-501-5p	0	0	1	0	1	1	GPX8	glutathione peroxidase 8 (putative)
hsa-miR-501-5p	0	0	1	1	0	0	CCDC171	coiled-coil domain containing 171
hsa-miR-501-5p	1	0	1	1	1	1	SGCD	sarcoglycan, delta (35kDa dystrophin-associated glycoprotein)
hsa-miR-501-5p	1	0	1	1	1	1	ETS1	v-ets erythroblastosis virus E26 oncogene homolog 1 (avian)
hsa-miR-501-5p	0	0	1	1	1	1	AIG1	androgen-induced 1
hsa-miR-501-5p	1	0	1	0	1	1	CLASP2	cytoplasmic linker associated protein 2
hsa-miR-501-5p	0	0	1	1	1	1	CRB1	crumbs homolog 1 (Drosophila)
hsa-miR-501-5p	1	0	1	1	1	1	SPPL3	signal peptide peptidase like 3
hsa-miR-501-5p	1	0	1	1	1	1	C7orf31	chromosome 7 open reading frame 31
hsa-miR-501-5p	1	0	1	1	1	1	TJP1	tight junction protein 1
hsa-miR-501-5p	0	0	1	1	1	1	PSMA2	proteasome (prosome, macropain) subunit, alpha type, 2
hsa-miR-501-5p	0	0	1	1	1	1	THSD4	thrombospondin, type I, domain containing 4
hsa-miR-501-5p	1	0	1	1	1	1	MASP1	mannan-binding lectin serine peptidase 1 (C4/C2 activating component of Ra-reactive factor)
hsa-miR-501-5p	1	0	1	1	1	1	HMGB1	high mobility group box 1
hsa-miR-501-5p	1	0	1	1	1	1	PRDM2	PR domain containing 2, with ZNF domain
hsa-miR-501-5p	1	0	1	1	0	0	RBM27	RNA binding motif protein 27
hsa-miR-501-5p	0	0	1	1	1	1	ADH1B	alcohol dehydrogenase 1B (class I), beta polypeptide
hsa-miR-501-5p	0	0	1	0	1	1	THAP6	THAP domain containing 6
hsa-miR-501-5p	1	0	1	1	1	1	EPS15	epidermal growth factor receptor pathway substrate 15
hsa-miR-501-5p	0	0	1	1	0	0	ANKRD33	ankyrin repeat domain 33
hsa-miR-501-5p	1	0	1	1	1	1	GABPA	GA binding protein transcription factor, alpha subunit 60kDa
hsa-miR-501-5p	0	0	1	1	1	1	HTR2A	5-hydroxytryptamine (serotonin) receptor 2A, G protein-coupled
hsa-miR-501-5p	0	0	1	0	1	1	MYO3B	myosin IIIB
hsa-miR-501-5p	1	0	1	1	1	1	CYB5B	cytochrome b5 type B (outer mitochondrial membrane)
hsa-miR-501-5p	0	0	1	1	0	0	ELP3	elongator acetyltransferase complex subunit 3
hsa-miR-501-5p	0	0	1	1	0	0	LRR1	leucine rich repeat protein 1
hsa-miR-501-5p	1	0	1	1	1	1	NEDD9	neural precursor cell expressed, developmentally down-regulated 9
hsa-miR-501-5p	1	0	1	1	1	1	MGA	MAX gene associated
hsa-miR-501-5p	1	0	1	1	1	1	DDAH1	dimethylarginine dimethylaminohydrolase 1
hsa-miR-501-5p	1	0	1	1	1	1	NFIB	nuclear factor I/B
hsa-miR-501-5p	1	0	1	1	1	1	BCLAF1	BCL2-associated transcription factor 1
hsa-miR-501-5p	0	0	1	1	0	0	SAMD7	sterile alpha motif domain containing 7
hsa-miR-501-5p	1	0	1	1	1	1	RDX	radixin
hsa-miR-501-5p	1	0	1	1	1	1	PTER	phosphotriesterase related
hsa-miR-501-5p	0	0	1	1	1	1	RBM20	RNA binding motif protein 20
hsa-miR-501-5p	1	0	1	1	1	1	RECK	reversion-inducing-cysteine-rich protein with kazal motifs
hsa-miR-501-5p	1	0	1	1	1	1	TMEM135	transmembrane protein 135
hsa-miR-501-5p	1	0	1	1	1	1	FAM179B	family with sequence similarity 179, member B
hsa-miR-501-5p	0	0	1	1	1	1	SSFA2	sperm specific antigen 2
hsa-miR-501-5p	1	0	1	1	1	1	FAM208A	family with sequence similarity 208, member A
hsa-miR-501-5p	0	0	1	0	0	0	DKFZp686K1684	uncharacterized LOC440034
hsa-miR-501-5p	1	0	1	1	1	1	CREB3L2	cAMP responsive element binding protein 3-like 2
hsa-miR-501-5p	0	0	1	1	1	1	IPO11	importin 11
hsa-miR-501-5p	1	0	1	1	1	1	HIC2	hypermethylated in cancer 2
hsa-miR-501-5p	0	0	1	0	1	1	GINS3	GINS complex subunit 3 (Psf3 homolog)
hsa-miR-501-5p	0	0	1	1	0	0	EIF3L	eukaryotic translation initiation factor 3, subunit L
hsa-miR-501-5p	0	0	1	0	1	1	CD59	CD59 molecule, complement regulatory protein
hsa-miR-501-5p	0	0	1	1	0	0	MRPL48	mitochondrial ribosomal protein L48
hsa-miR-501-5p	0	0	1	1	1	1	SLC25A11	solute carrier family 25 (mitochondrial carrier; oxoglutarate carrier), member 11
hsa-miR-501-5p	1	0	1	0	1	1	RNF144A	ring finger protein 144A
hsa-miR-501-5p	0	0	1	1	1	1	RIPK2	receptor-interacting serine-threonine kinase 2
hsa-miR-501-5p	1	0	1	1	1	1	FUT9	fucosyltransferase 9 (alpha (1,3) fucosyltransferase)
hsa-miR-501-5p	0	0	1	1	1	1	CETN2	centrin, EF-hand protein, 2
hsa-miR-501-5p	0	0	1	0	0	0	LOC400768	uncharacterized LOC400768
hsa-miR-501-5p	0	0	1	1	1	1	APH1A	anterior pharynx defective 1 homolog A (C. elegans)
hsa-miR-501-5p	0	0	1	1	1	1	APBB1	amyloid beta (A4) precursor protein-binding, family B, member 1 (Fe65)
hsa-miR-501-5p	1	0	1	1	1	1	DOLPP1	dolichyl pyrophosphate phosphatase 1
hsa-miR-501-5p	0	0	1	1	1	1	ERLEC1	endoplasmic reticulum lectin 1
hsa-miR-501-5p	0	0	1	1	0	0	CCNDBP1	cyclin D-type binding-protein 1
hsa-miR-501-5p	1	0	1	1	1	1	CHTF8	CTF8, chromosome transmission fidelity factor 8 homolog (S. cerevisiae)
hsa-miR-501-5p	0	0	1	1	1	1	PSG2	pregnancy specific beta-1-glycoprotein 2
hsa-miR-501-5p	1	0	1	1	1	1	DRAM2	DNA-damage regulated autophagy modulator 2
hsa-miR-501-5p	0	0	1	0	1	1	EMX2	empty spiracles homeobox 2
hsa-miR-501-5p	1	0	1	1	1	1	NTM	neurotrimin
hsa-miR-501-5p	0	0	1	1	1	1	GRAP2	GRB2-related adaptor protein 2
hsa-miR-501-5p	1	0	1	0	1	1	RPS6KB1	ribosomal protein S6 kinase, 70kDa, polypeptide 1
hsa-miR-501-5p	1	0	1	1	1	1	POU2F2	POU class 2 homeobox 2
hsa-miR-501-5p	1	0	1	1	1	1	CCDC25	coiled-coil domain containing 25
hsa-miR-501-5p	0	0	1	0	1	1	MMAA	methylmalonic aciduria (cobalamin deficiency) cblA type
hsa-miR-501-5p	1	0	1	1	1	1	DKK3	dickkopf 3 homolog (Xenopus laevis)
hsa-miR-501-5p	0	0	1	1	1	1	SSB	Sjogren syndrome antigen B (autoantigen La)
hsa-miR-501-5p	1	0	1	1	1	1	VANGL1	vang-like 1 (van gogh, Drosophila)
hsa-miR-501-5p	0	0	1	1	1	1	TMEM109	transmembrane protein 109
hsa-miR-501-5p	0	0	1	0	0	0	LOC645513	uncharacterized LOC645513
hsa-miR-501-5p	0	0	1	1	1	1	SAP130	Sin3A-associated protein, 130kDa
hsa-miR-501-5p	0	0	1	1	0	0	C1orf122	chromosome 1 open reading frame 122
hsa-miR-501-5p	1	0	1	1	1	1	TLK2	tousled-like kinase 2
hsa-miR-501-5p	1	0	1	1	1	1	ARNTL	aryl hydrocarbon receptor nuclear translocator-like
hsa-miR-501-5p	0	0	1	1	0	0	EXOSC8	exosome component 8
hsa-miR-501-5p	0	0	1	1	0	0	CD53	CD53 molecule
hsa-miR-501-5p	1	0	1	1	1	1	DPF2	D4, zinc and double PHD fingers family 2
hsa-miR-501-5p	1	0	1	1	1	1	BAALC	brain and acute leukemia, cytoplasmic
hsa-miR-501-5p	0	0	1	1	1	1	ZNF333	zinc finger protein 333
hsa-miR-501-5p	0	0	1	1	1	1	DNAJC25	DnaJ (Hsp40) homolog, subfamily C , member 25
hsa-miR-501-5p	0	0	1	1	1	1	FAM18B1	family with sequence similarity 18, member B1
hsa-miR-501-5p	0	0	1	0	0	0	ZNF674-AS1	ZNF674 antisense RNA 1
hsa-miR-501-5p	1	0	1	1	1	1	SRSF2	serine/arginine-rich splicing factor 2
hsa-miR-501-5p	0	0	1	1	1	1	LGI1	leucine-rich, glioma inactivated 1
hsa-miR-501-5p	0	0	1	1	1	1	TRNT1	tRNA nucleotidyl transferase, CCA-adding, 1
hsa-miR-501-5p	1	0	1	1	1	1	WIPI2	WD repeat domain, phosphoinositide interacting 2
hsa-miR-501-5p	0	0	1	1	1	1	TOR2A	torsin family 2, member A
hsa-miR-501-5p	1	0	1	1	1	1	MAN1C1	mannosidase, alpha, class 1C, member 1
hsa-miR-501-5p	0	0	1	1	1	1	COMMD3	COMM domain containing 3
hsa-miR-501-5p	1	0	1	1	1	1	LGALSL	lectin, galactoside-binding-like
hsa-miR-501-5p	1	0	1	1	1	1	SLMAP	sarcolemma associated protein
hsa-miR-501-5p	1	0	1	0	1	1	KIAA0240	KIAA0240
hsa-miR-501-5p	1	0	1	1	1	1	PTPRG	protein tyrosine phosphatase, receptor type, G
hsa-miR-501-5p	1	0	1	0	1	1	XRN1	5'-3' exoribonuclease 1
hsa-miR-501-5p	0	0	1	0	1	1	HDAC9	histone deacetylase 9
hsa-miR-501-5p	0	0	1	1	1	1	SLC25A26	solute carrier family 25 (S-adenosylmethionine carrier), member 26
hsa-miR-501-5p	1	0	1	1	1	1	SLC16A12	solute carrier family 16, member 12 (monocarboxylic acid transporter 12)
hsa-miR-501-5p	0	0	1	1	1	1	MSS51	MSS51 mitochondrial translational activator homolog (S. cerevisiae)
hsa-miR-501-5p	1	0	1	1	1	1	ZFHX3	zinc finger homeobox 3
hsa-miR-501-5p	0	0	1	1	1	1	CD274	CD274 molecule
hsa-miR-501-5p	0	0	1	1	1	1	P2RX7	purinergic receptor P2X, ligand-gated ion channel, 7
hsa-miR-501-5p	0	0	1	1	1	1	C1orf27	chromosome 1 open reading frame 27
hsa-miR-501-5p	0	0	1	1	1	1	TNFSF10	tumor necrosis factor (ligand) superfamily, member 10
hsa-miR-501-5p	1	0	1	0	1	1	RBBP5	retinoblastoma binding protein 5
hsa-miR-501-5p	0	0	1	1	1	1	PROS1	protein S (alpha)
hsa-miR-501-5p	1	0	1	1	1	1	LGR4	leucine-rich repeat containing G protein-coupled receptor 4
hsa-miR-501-5p	1	0	1	1	1	1	TNFAIP1	tumor necrosis factor, alpha-induced protein 1 (endothelial)
hsa-miR-501-5p	1	0	1	1	1	1	SLC4A8	solute carrier family 4, sodium bicarbonate cotransporter, member 8
hsa-miR-501-5p	1	0	1	1	1	1	TMEM220	transmembrane protein 220
hsa-miR-501-5p	0	0	1	1	1	1	ALDH3B1	aldehyde dehydrogenase 3 family, member B1
hsa-miR-501-5p	0	0	1	1	1	1	VDAC2	voltage-dependent anion channel 2
hsa-miR-501-5p	1	0	1	0	1	1	BCL2	B-cell CLL/lymphoma 2
hsa-miR-501-5p	0	0	1	1	1	1	GLB1	galactosidase, beta 1
hsa-miR-501-5p	0	0	1	0	0	0	PVT1	Pvt1 oncogene (non-protein coding)
hsa-miR-501-5p	0	0	1	1	1	1	NPR3	natriuretic peptide receptor C/guanylate cyclase C (atrionatriuretic peptide receptor C)
hsa-miR-501-5p	0	0	1	0	0	0	TSPY1	testis specific protein, Y-linked 1
hsa-miR-501-5p	1	0	1	1	1	1	ARSB	arylsulfatase B
hsa-miR-501-5p	1	0	1	1	1	1	COL5A1	collagen, type V, alpha 1
hsa-miR-501-5p	1	0	1	1	1	1	F13A1	coagulation factor XIII, A1 polypeptide
hsa-miR-501-5p	1	0	1	1	1	1	FBN1	fibrillin 1
hsa-miR-501-5p	1	0	1	0	1	1	GLI3	GLI family zinc finger 3
hsa-miR-501-5p	1	0	1	0	1	1	KIT	v-kit Hardy-Zuckerman 4 feline sarcoma viral oncogene homolog
hsa-miR-501-5p	0	0	1	1	1	1	NDP	Norrie disease (pseudoglioma)
hsa-miR-501-5p	1	0	1	1	1	1	PEX12	peroxisomal biogenesis factor 12
hsa-miR-501-5p	0	0	1	1	1	1	PEX7	peroxisomal biogenesis factor 7
hsa-miR-501-5p	1	0	1	1	1	1	ATXN1	ataxin 1
hsa-miR-501-5p	0	0	1	1	1	1	XDH	xanthine dehydrogenase
hsa-miR-501-5p	1	0	1	1	1	1	BLMH	bleomycin hydrolase
hsa-miR-501-5p	0	0	1	1	1	1	SLC25A20	solute carrier family 25 (carnitine/acylcarnitine translocase), member 20
hsa-miR-501-5p	0	0	1	1	1	1	CASR	calcium-sensing receptor
hsa-miR-501-5p	1	0	1	0	1	1	CYBB	cytochrome b-245, beta polypeptide
hsa-miR-501-5p	1	0	1	1	1	1	HLCS	holocarboxylase synthetase (biotin-(proprionyl-CoA-carboxylase (ATP-hydrolysing)) ligase)
hsa-miR-501-5p	0	0	1	1	0	0	IL2RA	interleukin 2 receptor, alpha
hsa-miR-501-5p	0	0	1	1	1	1	LTBP2	latent transforming growth factor beta binding protein 2
hsa-miR-501-5p	1	0	1	0	1	1	PAFAH1B1	platelet-activating factor acetylhydrolase 1b, regulatory subunit 1 (45kDa)
hsa-miR-501-5p	1	0	1	1	1	1	RFX5	regulatory factor X, 5 (influences HLA class II expression)
hsa-miR-501-5p	1	0	1	1	1	1	TEK	TEK tyrosine kinase, endothelial
hsa-miR-501-5p	1	0	1	1	1	1	AQP2	aquaporin 2 (collecting duct)
hsa-miR-501-5p	1	0	1	1	1	1	MPZ	myelin protein zero
hsa-miR-501-5p	1	0	1	1	1	1	PLP1	proteolipid protein 1
hsa-miR-501-5p	0	0	1	1	0	0	SAG	S-antigen; retina and pineal gland (arrestin)
hsa-miR-501-5p	1	0	1	1	1	1	DCX	doublecortin
hsa-miR-501-5p	1	0	1	0	1	1	IGFBP5	insulin-like growth factor binding protein 5
hsa-miR-501-5p	1	0	1	1	1	1	FASLG	Fas ligand (TNF superfamily, member 6)
hsa-miR-501-5p	0	0	1	1	1	1	SELL	selectin L
hsa-miR-501-5p	1	0	1	0	1	1	ADRA2B	adrenoceptor alpha 2B
hsa-miR-501-5p	1	0	1	1	1	1	DIO2	deiodinase, iodothyronine, type II
hsa-miR-501-5p	1	0	1	1	1	1	GABRB3	gamma-aminobutyric acid (GABA) A receptor, beta 3
hsa-miR-501-5p	1	0	1	1	1	1	GRIA4	glutamate receptor, ionotropic, AMPA 4
hsa-miR-501-5p	1	0	1	1	0	0	GRIK3	glutamate receptor, ionotropic, kainate 3
hsa-miR-501-5p	1	0	1	1	1	1	GRM1	glutamate receptor, metabotropic 1
hsa-miR-501-5p	1	0	1	1	1	1	GRM7	glutamate receptor, metabotropic 7
hsa-miR-501-5p	1	0	1	1	1	1	IGF1R	insulin-like growth factor 1 receptor
hsa-miR-501-5p	0	0	1	1	0	0	MGP	matrix Gla protein
hsa-miR-501-5p	0	0	1	1	1	1	C16orf87	chromosome 16 open reading frame 87
hsa-miR-501-5p	1	0	1	0	1	1	SPOPL	speckle-type POZ protein-like
hsa-miR-501-5p	1	0	1	0	1	1	ARHGEF37	Rho guanine nucleotide exchange factor (GEF) 37
hsa-miR-501-5p	0	0	1	1	0	0	RNASE9	ribonuclease, RNase A family, 9 (non-active)
hsa-miR-501-5p	0	0	1	0	1	1	BLID	BH3-like motif containing, cell death inducer
hsa-miR-501-5p	1	0	1	1	1	1	TPD52L3	tumor protein D52-like 3
hsa-miR-501-5p	1	0	1	1	1	1	LCLAT1	lysocardiolipin acyltransferase 1
hsa-miR-501-5p	1	0	1	1	1	1	GATA3	GATA binding protein 3
hsa-miR-501-5p	1	0	1	1	1	1	DNAJB12	DnaJ (Hsp40) homolog, subfamily B, member 12
hsa-miR-501-5p	1	0	1	0	1	1	BMF	Bcl2 modifying factor
hsa-miR-501-5p	1	0	1	0	1	1	ZNF740	zinc finger protein 740
hsa-miR-501-5p	1	0	1	0	1	1	LIN28B	lin-28 homolog B (C. elegans)
hsa-miR-501-5p	0	0	1	1	1	1	MTHFD2L	methylenetetrahydrofolate dehydrogenase (NADP+ dependent) 2-like
hsa-miR-501-5p	0	0	1	1	1	1	CLEC2D	C-type lectin domain family 2, member D
hsa-miR-501-5p	1	0	1	1	1	1	EBF3	early B-cell factor 3
hsa-miR-501-5p	0	0	1	1	1	1	RYK	receptor-like tyrosine kinase
hsa-miR-501-5p	1	0	1	1	1	1	IGF2BP2	insulin-like growth factor 2 mRNA binding protein 2
hsa-miR-501-5p	1	0	1	1	0	0	GEMIN7	gem (nuclear organelle) associated protein 7
hsa-miR-501-5p	0	0	1	1	0	0	CT45A5	cancer/testis antigen family 45, member A5
hsa-miR-501-5p	0	0	1	1	0	0	NTRK1	neurotrophic tyrosine kinase, receptor, type 1
hsa-miR-501-5p	1	0	1	0	1	1	C18orf25	chromosome 18 open reading frame 25
hsa-miR-501-5p	1	0	1	0	1	1	KIAA2022	KIAA2022
hsa-miR-501-5p	0	0	1	1	0	0	CDKL4	cyclin-dependent kinase-like 4
hsa-miR-501-5p	1	0	1	1	1	1	ARHGAP28	Rho GTPase activating protein 28
hsa-miR-501-5p	0	0	1	1	0	0	PRAMEF9	PRAME family member 9
hsa-miR-501-5p	1	0	1	1	1	1	BCL2L15	BCL2-like 15
hsa-miR-501-5p	0	0	1	1	0	0	HES5	hairy and enhancer of split 5 (Drosophila)
hsa-miR-501-5p	0	0	1	1	1	1	NCMAP	noncompact myelin associated protein
hsa-miR-501-5p	0	0	1	1	1	1	CHCHD7	coiled-coil-helix-coiled-coil-helix domain containing 7
hsa-miR-501-5p	0	0	1	1	0	0	PNLIPRP3	pancreatic lipase-related protein 3
hsa-miR-501-5p	1	0	1	1	1	1	CTNNBIP1	catenin, beta interacting protein 1
hsa-miR-501-5p	1	0	1	1	1	1	PABPC1L2A	poly(A) binding protein, cytoplasmic 1-like 2A
hsa-miR-501-5p	1	0	1	0	1	1	ZKSCAN2	zinc finger with KRAB and SCAN domains 2
hsa-miR-501-5p	0	0	1	1	1	1	CCNC	cyclin C
hsa-miR-501-5p	0	0	1	1	1	1	PRAMEF5	PRAME family member 5
hsa-miR-501-5p	0	0	1	0	1	1	LINC00268	long intergenic non-protein coding RNA 268
hsa-miR-501-5p	0	0	1	1	1	1	FLG2	filaggrin family member 2
hsa-miR-501-5p	0	0	1	0	0	0	SPRR2F	small proline-rich protein 2F
hsa-miR-501-5p	1	0	1	1	1	1	PHF6	PHD finger protein 6
hsa-miR-501-5p	1	0	1	1	1	1	TMCC1	transmembrane and coiled-coil domain family 1
hsa-miR-501-5p	0	0	1	1	0	0	CT45A1	cancer/testis antigen family 45, member A1
hsa-miR-501-5p	0	0	1	1	0	0	CT45A6	cancer/testis antigen family 45, member A6
hsa-miR-501-5p	1	0	1	1	1	1	VMA21	VMA21 vacuolar H+-ATPase homolog (S. cerevisiae)
hsa-miR-501-5p	1	0	1	1	1	1	PFKFB2	6-phosphofructo-2-kinase/fructose-2,6-biphosphatase 2
hsa-miR-501-5p	0	0	1	1	1	1	POLR2M	polymerase (RNA) II (DNA directed) polypeptide M
hsa-miR-501-5p	0	0	1	1	1	1	SPRR2E	small proline-rich protein 2E
hsa-miR-501-5p	0	0	1	0	1	1	TM2D2	TM2 domain containing 2
hsa-miR-501-5p	1	0	1	1	1	1	KALRN	kalirin, RhoGEF kinase
hsa-miR-501-5p	0	0	1	1	1	1	CD276	CD276 molecule
hsa-miR-501-5p	1	0	1	1	1	1	TGFBR2	transforming growth factor, beta receptor II (70/80kDa)
hsa-miR-501-5p	1	0	1	1	1	1	FNBP1L	formin binding protein 1-like
hsa-miR-501-5p	1	0	1	0	1	1	ADAR	adenosine deaminase, RNA-specific
hsa-miR-501-5p	0	0	1	1	0	0	CES1	carboxylesterase 1
hsa-miR-501-5p	1	0	1	0	1	1	CLLU1	chronic lymphocytic leukemia up-regulated 1
hsa-miR-501-5p	1	0	1	0	1	1	C3orf70	chromosome 3 open reading frame 70
hsa-miR-501-5p	0	0	1	0	1	1	C6orf120	chromosome 6 open reading frame 120
hsa-miR-501-5p	1	0	1	1	1	1	RGS7BP	regulator of G-protein signaling 7 binding protein
hsa-miR-501-5p	1	0	1	0	1	1	SAMD5	sterile alpha motif domain containing 5
hsa-miR-501-5p	1	0	1	0	1	1	MSRB3	methionine sulfoxide reductase B3
hsa-miR-501-5p	0	0	1	1	1	1	LYPD5	LY6/PLAUR domain containing 5
hsa-miR-501-5p	1	0	1	1	1	1	CSNK1G3	casein kinase 1, gamma 3
hsa-miR-501-5p	0	0	1	0	1	1	STXBP1	syntaxin binding protein 1
hsa-miR-501-5p	0	0	1	1	1	1	SLC35A2	solute carrier family 35 (UDP-galactose transporter), member A2
hsa-miR-501-5p	1	0	1	0	1	1	NPNT	nephronectin
hsa-miR-501-5p	1	0	1	1	1	1	MYCL1	v-myc myelocytomatosis viral oncogene homolog 1, lung carcinoma derived (avian)
hsa-miR-501-5p	0	0	1	1	1	1	CSTF3	cleavage stimulation factor, 3' pre-RNA, subunit 3, 77kDa
hsa-miR-501-5p	0	0	1	1	1	1	FAM134B	family with sequence similarity 134, member B
hsa-miR-501-5p	1	0	1	1	1	1	SMOC1	SPARC related modular calcium binding 1
hsa-miR-501-5p	0	0	1	1	0	0	AGBL5	ATP/GTP binding protein-like 5
hsa-miR-501-5p	0	0	1	1	1	1	EXOC4	exocyst complex component 4
hsa-miR-501-5p	1	0	1	1	1	1	AGAP1	ArfGAP with GTPase domain, ankyrin repeat and PH domain 1
hsa-miR-501-5p	1	0	1	0	1	1	GK5	glycerol kinase 5 (putative)
hsa-miR-501-5p	1	0	1	1	1	1	KCNC4	potassium voltage-gated channel, Shaw-related subfamily, member 4
hsa-miR-501-5p	1	0	1	0	1	1	CREBZF	CREB/ATF bZIP transcription factor
hsa-miR-501-5p	1	0	1	1	1	1	C3orf65	chromosome 3 open reading frame 65
hsa-miR-501-5p	1	0	1	1	0	0	ANKRD34A	ankyrin repeat domain 34A
hsa-miR-501-5p	1	0	1	0	1	1	FAM133B	family with sequence similarity 133, member B
hsa-miR-501-5p	1	0	1	1	1	1	SPTSSB	serine palmitoyltransferase, small subunit B
hsa-miR-501-5p	0	0	1	1	1	1	MTHFD2	methylenetetrahydrofolate dehydrogenase (NADP+ dependent) 2, methenyltetrahydrofolate cyclohydrolase
hsa-miR-501-5p	1	0	1	1	1	1	FAM63B	family with sequence similarity 63, member B
hsa-miR-501-5p	0	0	1	1	0	0	FAM110A	family with sequence similarity 110, member A
hsa-miR-501-5p	1	0	1	1	1	1	CYLD	cylindromatosis (turban tumor syndrome)
hsa-miR-501-5p	1	0	1	1	1	1	RUFY2	RUN and FYVE domain containing 2
hsa-miR-501-5p	0	0	1	1	1	1	MST4	serine/threonine protein kinase MST4
hsa-miR-501-5p	0	0	1	1	0	0	TRAPPC5	trafficking protein particle complex 5
hsa-miR-501-5p	1	0	1	1	1	1	NSL1	NSL1, MIND kinetochore complex component, homolog (S. cerevisiae)
hsa-miR-501-5p	1	0	1	1	1	1	ERBB4	v-erb-a erythroblastic leukemia viral oncogene homolog 4 (avian)
hsa-miR-501-5p	0	0	1	1	1	1	TTC14	tetratricopeptide repeat domain 14
hsa-miR-501-5p	1	0	1	0	1	1	SRGAP2	SLIT-ROBO Rho GTPase activating protein 2
hsa-miR-501-5p	1	0	1	1	1	1	TPM3	tropomyosin 3
hsa-miR-501-5p	0	0	1	1	1	1	SLC6A4	solute carrier family 6 (neurotransmitter transporter, serotonin), member 4
hsa-miR-501-5p	0	0	1	1	1	1	SULT1C2	sulfotransferase family, cytosolic, 1C, member 2
hsa-miR-501-5p	1	0	1	1	1	1	HS6ST2	heparan sulfate 6-O-sulfotransferase 2
hsa-miR-501-5p	1	0	1	1	1	1	PDE11A	phosphodiesterase 11A
hsa-miR-501-5p	0	0	1	1	1	1	PPCS	phosphopantothenoylcysteine synthetase
hsa-miR-501-5p	1	0	1	1	1	1	PRR3	proline rich 3
hsa-miR-501-5p	0	0	1	1	1	1	TCF19	transcription factor 19
hsa-miR-501-5p	1	0	1	1	1	1	SRSF1	serine/arginine-rich splicing factor 1
hsa-miR-501-5p	0	0	1	1	1	1	DIAPH1	diaphanous homolog 1 (Drosophila)
hsa-miR-501-5p	1	0	1	1	1	1	CREBBP	CREB binding protein
hsa-miR-501-5p	0	0	1	1	1	1	TAX1BP1	Tax1 (human T-cell leukemia virus type I) binding protein 1
hsa-miR-501-5p	1	0	1	1	1	1	DMP1	dentin matrix acidic phosphoprotein 1
hsa-miR-501-5p	1	0	1	1	1	1	LDB3	LIM domain binding 3
hsa-miR-501-5p	0	0	1	1	1	1	HSF5	heat shock transcription factor family member 5
hsa-miR-501-5p	1	0	1	0	1	1	ODZ3	odz, odd Oz/ten-m homolog 3 (Drosophila)
hsa-miR-501-5p	1	0	1	0	1	1	MEGF9	multiple EGF-like-domains 9
hsa-miR-501-5p	0	0	1	0	0	0	VWC2L	von Willebrand factor C domain containing protein 2-like
hsa-miR-501-5p	1	0	1	1	1	1	REPS2	RALBP1 associated Eps domain containing 2
hsa-miR-501-5p	1	0	1	0	1	1	SCN3A	sodium channel, voltage-gated, type III, alpha subunit
hsa-miR-501-5p	1	0	1	0	1	1	PDE5A	phosphodiesterase 5A, cGMP-specific
hsa-miR-501-5p	0	0	1	1	0	0	PLOD3	procollagen-lysine, 2-oxoglutarate 5-dioxygenase 3
hsa-miR-501-5p	1	0	1	1	1	1	ASIC1	acid-sensing (proton-gated) ion channel 1
hsa-miR-501-5p	1	0	1	1	1	1	ADCYAP1	adenylate cyclase activating polypeptide 1 (pituitary)
hsa-miR-501-5p	1	0	1	1	1	1	AFM	afamin
hsa-miR-501-5p	0	0	1	1	1	1	CLIC2	chloride intracellular channel 2
hsa-miR-501-5p	1	0	1	1	1	1	CREBL2	cAMP responsive element binding protein-like 2
hsa-miR-501-5p	1	0	1	1	1	1	MAPK14	mitogen-activated protein kinase 14
hsa-miR-501-5p	1	0	1	1	1	1	DYRK1A	dual-specificity tyrosine-(Y)-phosphorylation regulated kinase 1A
hsa-miR-501-5p	1	0	1	1	1	1	CELSR2	cadherin, EGF LAG seven-pass G-type receptor 2 (flamingo homolog, Drosophila)
hsa-miR-501-5p	0	0	1	0	1	1	EMP1	epithelial membrane protein 1
hsa-miR-501-5p	1	0	1	1	1	1	EXTL3	exostoses (multiple)-like 3
hsa-miR-501-5p	1	0	1	1	1	1	FOXC1	forkhead box C1
hsa-miR-501-5p	0	0	1	0	1	1	FMO2	flavin containing monooxygenase 2 (non-functional)
hsa-miR-501-5p	1	0	1	0	1	1	GCNT2	glucosaminyl (N-acetyl) transferase 2, I-branching enzyme (I blood group)
hsa-miR-501-5p	1	0	1	0	1	1	B4GALT1	UDP-Gal:betaGlcNAc beta 1,4- galactosyltransferase, polypeptide 1
hsa-miR-501-5p	0	0	1	1	1	1	IL13RA1	interleukin 13 receptor, alpha 1
hsa-miR-501-5p	0	0	1	1	1	1	AIF1	allograft inflammatory factor 1
hsa-miR-501-5p	0	0	1	1	1	1	AOAH	acyloxyacyl hydrolase (neutrophil)
hsa-miR-501-5p	1	0	1	1	1	1	ATP6V1A	ATPase, H+ transporting, lysosomal 70kDa, V1 subunit A
hsa-miR-501-5p	1	0	1	1	1	1	BCL6	B-cell CLL/lymphoma 6
hsa-miR-501-5p	0	0	1	1	1	1	CALB2	calbindin 2
hsa-miR-501-5p	1	0	1	1	1	1	CBFB	core-binding factor, beta subunit
hsa-miR-501-5p	1	0	1	0	1	1	CCND2	cyclin D2
hsa-miR-501-5p	0	0	1	1	1	1	CD1D	CD1d molecule
hsa-miR-501-5p	0	0	1	1	1	1	CD34	CD34 molecule
hsa-miR-501-5p	0	0	1	1	0	0	CEACAM3	carcinoembryonic antigen-related cell adhesion molecule 3
hsa-miR-501-5p	1	0	1	1	1	1	CLCN3	chloride channel, voltage-sensitive 3
hsa-miR-501-5p	1	0	1	1	1	1	CLCN4	chloride channel, voltage-sensitive 4
hsa-miR-501-5p	1	0	1	1	1	1	COL4A6	collagen, type IV, alpha 6
hsa-miR-501-5p	1	0	1	0	1	1	COL19A1	collagen, type XIX, alpha 1
hsa-miR-501-5p	1	0	1	1	1	1	E2F3	E2F transcription factor 3
hsa-miR-501-5p	1	0	1	1	1	1	FGF7	fibroblast growth factor 7
hsa-miR-501-5p	1	0	1	1	1	1	FMOD	fibromodulin
hsa-miR-501-5p	0	0	1	1	0	0	GLP1R	glucagon-like peptide 1 receptor
hsa-miR-501-5p	0	0	1	1	1	1	HMGCS1	3-hydroxy-3-methylglutaryl-CoA synthase 1 (soluble)
hsa-miR-501-5p	1	0	1	1	1	1	HNRNPA2B1	heterogeneous nuclear ribonucleoprotein A2/B1
hsa-miR-501-5p	1	0	1	1	1	1	HOXB3	homeobox B3
hsa-miR-501-5p	1	0	1	1	1	1	TNC	tenascin C
hsa-miR-501-5p	1	0	1	0	1	1	IRF2	interferon regulatory factor 2
hsa-miR-501-5p	1	0	1	1	1	1	ITGA9	integrin, alpha 9
hsa-miR-501-5p	1	0	1	1	1	1	JUN	jun proto-oncogene
hsa-miR-501-5p	1	0	1	1	1	1	KPNB1	karyopherin (importin) beta 1
hsa-miR-501-5p	1	0	1	0	1	1	LAMC1	laminin, gamma 1 (formerly LAMB2)
hsa-miR-501-5p	1	0	1	1	1	1	LRP1	low density lipoprotein receptor-related protein 1
hsa-miR-501-5p	1	0	1	1	1	1	LRP6	low density lipoprotein receptor-related protein 6
hsa-miR-501-5p	1	0	1	0	1	1	MXD1	MAX dimerization protein 1
hsa-miR-501-5p	1	0	1	1	1	1	MAP1A	microtubule-associated protein 1A
hsa-miR-501-5p	1	0	1	1	1	1	MN1	meningioma (disrupted in balanced translocation) 1
hsa-miR-501-5p	0	0	1	1	1	1	MTAP	methylthioadenosine phosphorylase
hsa-miR-501-5p	0	0	1	1	1	1	NID1	nidogen 1
hsa-miR-501-5p	1	0	1	1	1	1	NPTX1	neuronal pentraxin I
hsa-miR-501-5p	0	0	1	0	1	1	OPHN1	oligophrenin 1
hsa-miR-501-5p	1	0	1	1	1	1	OSBP	oxysterol binding protein
hsa-miR-501-5p	1	0	1	0	1	1	PAPPA	pregnancy-associated plasma protein A, pappalysin 1
hsa-miR-501-5p	1	0	1	1	1	1	PLAGL2	pleiomorphic adenoma gene-like 2
hsa-miR-501-5p	0	0	1	1	1	1	PNN	pinin, desmosome associated protein
hsa-miR-501-5p	1	0	1	0	1	1	POU3F1	POU class 3 homeobox 1
hsa-miR-501-5p	1	0	1	1	1	1	PPP1CB	protein phosphatase 1, catalytic subunit, beta isozyme
hsa-miR-501-5p	0	0	1	1	0	0	PPP1R8	protein phosphatase 1, regulatory subunit 8
hsa-miR-501-5p	0	0	1	1	1	1	SRGN	serglycin
hsa-miR-501-5p	1	0	1	1	1	1	PRKAR2B	protein kinase, cAMP-dependent, regulatory, type II, beta
hsa-miR-501-5p	0	0	1	1	1	1	MAP2K1	mitogen-activated protein kinase kinase 1
hsa-miR-501-5p	0	0	1	0	1	1	PSG11	pregnancy specific beta-1-glycoprotein 11
hsa-miR-501-5p	0	0	1	1	1	1	PSMD1	proteasome (prosome, macropain) 26S subunit, non-ATPase, 1
hsa-miR-501-5p	0	0	1	1	0	0	PTPRH	protein tyrosine phosphatase, receptor type, H
hsa-miR-501-5p	1	0	1	1	1	1	RCN1	reticulocalbin 1, EF-hand calcium binding domain
hsa-miR-501-5p	0	0	1	1	0	0	RDBP	RD RNA binding protein
hsa-miR-501-5p	0	0	1	1	1	1	RFC3	replication factor C (activator 1) 3, 38kDa
hsa-miR-501-5p	1	0	1	1	1	1	ROBO2	roundabout, axon guidance receptor, homolog 2 (Drosophila)
hsa-miR-501-5p	0	0	1	1	1	1	RPA1	replication protein A1, 70kDa
hsa-miR-501-5p	1	0	1	1	1	1	CCL1	chemokine (C-C motif) ligand 1
hsa-miR-501-5p	1	0	1	0	1	1	ST6GAL1	ST6 beta-galactosamide alpha-2,6-sialyltranferase 1
hsa-miR-501-5p	0	0	1	1	1	1	SMARCA1	SWI/SNF related, matrix associated, actin dependent regulator of chromatin, subfamily a, member 1
hsa-miR-501-5p	1	0	1	0	1	1	SOX4	SRY (sex determining region Y)-box 4
hsa-miR-501-5p	1	0	1	0	1	1	SOX11	SRY (sex determining region Y)-box 11
hsa-miR-501-5p	0	0	1	1	1	1	SSBP1	single-stranded DNA binding protein 1, mitochondrial
hsa-miR-501-5p	0	0	1	1	1	1	SULT2A1	sulfotransferase family, cytosolic, 2A, dehydroepiandrosterone (DHEA)-preferring, member 1
hsa-miR-501-5p	1	0	1	0	1	1	UBE2D2	ubiquitin-conjugating enzyme E2D 2
hsa-miR-501-5p	1	0	1	1	1	1	UBE2D3	ubiquitin-conjugating enzyme E2D 3
hsa-miR-501-5p	1	0	1	0	1	1	UBE2L3	ubiquitin-conjugating enzyme E2L 3
hsa-miR-501-5p	1	0	1	0	1	1	ZIC1	Zic family member 1
hsa-miR-501-5p	1	0	1	1	1	1	NRIP1	nuclear receptor interacting protein 1
hsa-miR-501-5p	0	0	1	1	1	1	STX7	syntaxin 7
hsa-miR-501-5p	0	0	1	1	1	1	SOAT2	sterol O-acyltransferase 2
hsa-miR-501-5p	0	0	1	1	1	1	ITGA10	integrin, alpha 10
hsa-miR-501-5p	0	0	1	1	1	1	CHST1	carbohydrate (keratan sulfate Gal-6) sulfotransferase 1
hsa-miR-501-5p	0	0	1	1	1	1	AGPS	alkylglycerone phosphate synthase
hsa-miR-501-5p	1	0	1	1	1	1	BHLHE40	basic helix-loop-helix family, member e40
hsa-miR-501-5p	1	0	1	1	1	1	TNFSF11	tumor necrosis factor (ligand) superfamily, member 11
hsa-miR-501-5p	1	0	1	0	1	1	IRS2	insulin receptor substrate 2
hsa-miR-501-5p	0	0	1	1	1	1	ADAM20	ADAM metallopeptidase domain 20
hsa-miR-501-5p	1	0	1	1	1	1	NR5A2	nuclear receptor subfamily 5, group A, member 2
hsa-miR-501-5p	1	0	1	1	1	1	SUCLG2	succinate-CoA ligase, GDP-forming, beta subunit
hsa-miR-501-5p	0	0	1	1	1	1	SUCLA2	succinate-CoA ligase, ADP-forming, beta subunit
hsa-miR-501-5p	1	0	1	1	1	1	FUBP1	far upstream element (FUSE) binding protein 1
hsa-miR-501-5p	0	0	1	1	1	1	MPZL1	myelin protein zero-like 1
hsa-miR-501-5p	0	0	1	0	1	1	EIF4EBP2	eukaryotic translation initiation factor 4E binding protein 2
hsa-miR-501-5p	1	0	1	1	1	1	FGF12	fibroblast growth factor 12
hsa-miR-501-5p	0	0	1	1	1	1	SLC1A1	solute carrier family 1 (neuronal/epithelial high affinity glutamate transporter, system Xag), member 1
hsa-miR-501-5p	1	0	1	0	1	1	SLC1A2	solute carrier family 1 (glial high affinity glutamate transporter), member 2
hsa-miR-501-5p	1	0	1	1	1	1	SYT7	synaptotagmin VII
hsa-miR-501-5p	1	0	1	0	1	1	AKAP6	A kinase (PRKA) anchor protein 6
hsa-miR-501-5p	1	0	1	1	1	1	GDA	guanine deaminase
hsa-miR-501-5p	1	0	1	1	1	1	TRAF4	TNF receptor-associated factor 4
hsa-miR-501-5p	1	0	1	1	1	1	ARL3	ADP-ribosylation factor-like 3
hsa-miR-501-5p	1	0	1	1	1	1	ASTN1	astrotactin 1
hsa-miR-501-5p	1	0	1	1	1	1	DACH1	dachshund homolog 1 (Drosophila)
hsa-miR-501-5p	1	0	1	1	1	1	EFNB1	ephrin-B1
hsa-miR-501-5p	1	0	1	0	1	1	FGF5	fibroblast growth factor 5
hsa-miR-501-5p	0	0	1	1	1	1	GP5	glycoprotein V (platelet)
hsa-miR-501-5p	1	0	1	1	1	1	MLLT3	myeloid/lymphoid or mixed-lineage leukemia (trithorax homolog, Drosophila); translocated to, 3
hsa-miR-501-5p	1	0	1	0	1	1	PKNOX1	PBX/knotted 1 homeobox 1
hsa-miR-501-5p	1	0	1	0	1	1	SCN2B	sodium channel, voltage-gated, type II, beta subunit
hsa-miR-501-5p	1	0	1	1	1	1	COIL	coilin
hsa-miR-501-5p	0	0	1	0	0	0	XKRY	XK, Kell blood group complex subunit-related, Y-linked
hsa-miR-501-5p	1	0	1	1	1	1	MTMR6	myotubularin related protein 6
hsa-miR-501-5p	1	0	1	1	1	1	XPR1	xenotropic and polytropic retrovirus receptor 1
hsa-miR-501-5p	1	0	1	1	1	1	NREP	neuronal regeneration related protein homolog (rat)
hsa-miR-501-5p	1	0	1	1	1	1	B4GALT6	UDP-Gal:betaGlcNAc beta 1,4- galactosyltransferase, polypeptide 6
hsa-miR-501-5p	1	0	1	1	1	1	ZFYVE9	zinc finger, FYVE domain containing 9
hsa-miR-501-5p	1	0	1	1	1	1	ONECUT2	one cut homeobox 2
hsa-miR-501-5p	0	0	1	1	1	1	CDKN2B	cyclin-dependent kinase inhibitor 2B (p15, inhibits CDK4)
hsa-miR-501-5p	0	0	1	1	1	1	PPID	peptidylprolyl isomerase D
hsa-miR-501-5p	1	0	1	0	1	1	SEL1L	sel-1 suppressor of lin-12-like (C. elegans)
hsa-miR-501-5p	1	0	1	1	0	0	ZMYM3	zinc finger, MYM-type 3
hsa-miR-501-5p	1	0	1	1	1	1	OXSR1	oxidative-stress responsive 1
hsa-miR-501-5p	0	0	1	1	1	1	GIF	gastric intrinsic factor (vitamin B synthesis)
hsa-miR-501-5p	0	0	1	1	0	0	ASCL2	achaete-scute complex homolog 2 (Drosophila)
hsa-miR-501-5p	1	0	1	1	1	1	BMI1	BMI1 polycomb ring finger oncogene
hsa-miR-501-5p	1	1	1	1	1	1	MAP3K8	mitogen-activated protein kinase kinase kinase 8
hsa-miR-501-5p	0	0	1	1	1	1	CSTA	cystatin A (stefin A)
hsa-miR-501-5p	1	0	1	1	1	1	DCC	deleted in colorectal carcinoma
hsa-miR-501-5p	1	0	1	1	1	1	DLX3	distal-less homeobox 3
hsa-miR-501-5p	1	0	1	1	1	1	ARID3A	AT rich interactive domain 3A (BRIGHT-like)
hsa-miR-501-5p	1	0	1	1	1	1	ELK1	ELK1, member of ETS oncogene family
hsa-miR-501-5p	1	0	1	1	1	1	GAS2	growth arrest-specific 2
hsa-miR-501-5p	1	0	1	1	1	1	HAS2	hyaluronan synthase 2
hsa-miR-501-5p	0	0	1	1	1	1	NFIL3	nuclear factor, interleukin 3 regulated
hsa-miR-501-5p	1	0	1	0	1	1	PRKCE	protein kinase C, epsilon
hsa-miR-501-5p	1	0	1	1	1	1	MAFB	v-maf musculoaponeurotic fibrosarcoma oncogene homolog B (avian)
hsa-miR-501-5p	1	0	1	1	1	1	MED6	mediator complex subunit 6
hsa-miR-501-5p	1	0	1	1	1	1	PIGK	phosphatidylinositol glycan anchor biosynthesis, class K
hsa-miR-501-5p	1	0	1	1	1	1	LPP	LIM domain containing preferred translocation partner in lipoma
hsa-miR-501-5p	0	0	1	0	1	1	POU3F2	POU class 3 homeobox 2
hsa-miR-501-5p	1	0	1	1	1	1	ST8SIA4	ST8 alpha-N-acetyl-neuraminide alpha-2,8-sialyltransferase 4
hsa-miR-501-5p	0	0	1	1	1	1	ACTR3	ARP3 actin-related protein 3 homolog (yeast)
hsa-miR-501-5p	1	0	1	1	1	1	LHFP	lipoma HMGIC fusion partner
hsa-miR-501-5p	0	0	1	1	0	0	GDF11	growth differentiation factor 11
hsa-miR-501-5p	1	0	1	1	1	1	PRKD3	protein kinase D3
hsa-miR-501-5p	0	0	1	0	1	1	CD96	CD96 molecule
hsa-miR-501-5p	1	0	1	1	1	1	SRRM1	serine/arginine repetitive matrix 1
hsa-miR-501-5p	1	0	1	0	1	1	SPRY3	sprouty homolog 3 (Drosophila)
hsa-miR-501-5p	1	0	1	1	1	1	PURA	purine-rich element binding protein A
hsa-miR-501-5p	1	0	1	1	1	1	MAN1A1	mannosidase, alpha, class 1A, member 1
hsa-miR-501-5p	1	0	1	1	1	1	MTF1	metal-regulatory transcription factor 1
hsa-miR-501-5p	1	0	1	1	1	1	LIPG	lipase, endothelial
hsa-miR-501-5p	1	0	1	1	1	1	HS3ST4	heparan sulfate (glucosamine) 3-O-sulfotransferase 4
hsa-miR-501-5p	1	0	1	1	1	1	SEMA3A	sema domain, immunoglobulin domain (Ig), short basic domain, secreted, (semaphorin) 3A
hsa-miR-501-5p	1	0	1	1	1	1	SPON1	spondin 1, extracellular matrix protein
hsa-miR-501-5p	1	0	1	1	1	1	MAN2A2	mannosidase, alpha, class 2A, member 2
hsa-miR-501-5p	1	0	1	1	1	1	CAPZA1	capping protein (actin filament) muscle Z-line, alpha 1
hsa-miR-501-5p	1	0	1	1	1	1	NEFL	neurofilament, light polypeptide
hsa-miR-501-5p	1	0	1	1	1	1	NEUROD2	neuronal differentiation 2
hsa-miR-501-5p	1	0	1	0	1	1	PPP1R2	protein phosphatase 1, regulatory (inhibitor) subunit 2
hsa-miR-501-5p	1	0	1	1	1	1	PPP2R5E	protein phosphatase 2, regulatory subunit B', epsilon isoform
hsa-miR-501-5p	1	0	1	1	1	1	PKN2	protein kinase N2
hsa-miR-501-5p	0	0	1	1	1	1	TNFAIP2	tumor necrosis factor, alpha-induced protein 2
hsa-miR-501-5p	1	0	1	1	1	1	SMC1A	structural maintenance of chromosomes 1A
hsa-miR-501-5p	0	0	1	1	1	1	SLC30A9	solute carrier family 30 (zinc transporter), member 9
hsa-miR-501-5p	1	0	1	1	1	1	ZNF238	zinc finger protein 238
hsa-miR-501-5p	1	0	1	0	1	1	APPBP2	amyloid beta precursor protein (cytoplasmic tail) binding protein 2
hsa-miR-501-5p	1	0	1	1	1	1	CDRT1	CMT1A duplicated region transcript 1
hsa-miR-501-5p	1	0	1	1	1	1	NEBL	nebulette
hsa-miR-501-5p	1	0	1	1	1	1	SPTLC1	serine palmitoyltransferase, long chain base subunit 1
hsa-miR-501-5p	1	0	1	1	1	1	SLC35A1	solute carrier family 35 (CMP-sialic acid transporter), member A1
hsa-miR-501-5p	1	0	1	1	1	1	PAIP1	poly(A) binding protein interacting protein 1
hsa-miR-501-5p	1	0	1	0	1	1	MXD4	MAX dimerization protein 4
hsa-miR-501-5p	1	0	1	1	1	1	TXNIP	thioredoxin interacting protein
hsa-miR-501-5p	1	0	1	0	1	1	NCOA2	nuclear receptor coactivator 2
hsa-miR-501-5p	1	0	1	0	1	1	API5	apoptosis inhibitor 5
hsa-miR-501-5p	0	0	1	1	0	0	KIF1C	kinesin family member 1C
hsa-miR-501-5p	1	0	1	1	1	1	SRSF10	serine/arginine-rich splicing factor 10
hsa-miR-501-5p	1	0	1	1	1	1	ZBTB6	zinc finger and BTB domain containing 6
hsa-miR-501-5p	1	0	1	1	1	1	PGRMC1	progesterone receptor membrane component 1
hsa-miR-501-5p	0	0	1	1	1	1	LYVE1	lymphatic vessel endothelial hyaluronan receptor 1
hsa-miR-501-5p	0	0	1	0	1	1	SUB1	SUB1 homolog (S. cerevisiae)
hsa-miR-501-5p	1	0	1	1	1	1	DIAPH2	diaphanous homolog 2 (Drosophila)
hsa-miR-501-5p	1	0	1	1	1	1	HIVEP2	human immunodeficiency virus type I enhancer binding protein 2
hsa-miR-501-5p	1	0	1	1	1	1	PRDX3	peroxiredoxin 3
hsa-miR-501-5p	1	0	1	1	1	1	FERMT2	fermitin family member 2
hsa-miR-501-5p	0	0	1	1	1	1	HOXA7	homeobox A7
hsa-miR-501-5p	0	0	1	1	1	1	HOXD3	homeobox D3
hsa-miR-501-5p	1	0	1	0	1	1	SLC2A3	solute carrier family 2 (facilitated glucose transporter), member 3
hsa-miR-501-5p	1	0	1	1	1	1	NR4A3	nuclear receptor subfamily 4, group A, member 3
hsa-miR-501-5p	0	0	1	1	1	1	ALX1	ALX homeobox 1
hsa-miR-501-5p	1	0	1	0	1	1	BTN3A2	butyrophilin, subfamily 3, member A2
hsa-miR-501-5p	1	0	1	1	1	1	FSTL1	follistatin-like 1
hsa-miR-501-5p	1	0	1	1	1	1	TESK2	testis-specific kinase 2
hsa-miR-501-5p	1	0	1	1	1	1	DUSP10	dual specificity phosphatase 10
hsa-miR-501-5p	1	0	1	1	1	1	KLF12	Kruppel-like factor 12
hsa-miR-501-5p	0	0	1	0	1	1	PNMA2	paraneoplastic Ma antigen 2
hsa-miR-501-5p	1	0	1	1	1	1	PHLDA1	pleckstrin homology-like domain, family A, member 1
hsa-miR-501-5p	1	0	1	0	1	1	CD2AP	CD2-associated protein
hsa-miR-501-5p	1	0	1	0	1	1	FZD4	frizzled family receptor 4
hsa-miR-501-5p	1	0	1	1	1	1	KCND2	potassium voltage-gated channel, Shal-related subfamily, member 2
hsa-miR-501-5p	1	0	1	1	1	1	KCNE1L	KCNE1-like
hsa-miR-501-5p	1	0	1	0	1	1	FBXL7	F-box and leucine-rich repeat protein 7
hsa-miR-501-5p	0	0	1	0	1	1	PIGN	phosphatidylinositol glycan anchor biosynthesis, class N
hsa-miR-501-5p	1	0	1	0	1	1	MYO10	myosin X
hsa-miR-501-5p	0	0	1	1	1	1	UCK2	uridine-cytidine kinase 2
hsa-miR-501-5p	0	0	1	1	1	1	CD24	CD24 molecule
hsa-miR-501-5p	0	0	1	1	1	1	N6AMT1	N-6 adenine-specific DNA methyltransferase 1 (putative)
hsa-miR-501-5p	1	0	1	1	1	1	PPARGC1A	peroxisome proliferator-activated receptor gamma, coactivator 1 alpha
hsa-miR-501-5p	1	0	1	1	1	1	FLRT3	fibronectin leucine rich transmembrane protein 3
hsa-miR-501-5p	1	0	1	0	1	1	RBM15B	RNA binding motif protein 15B
hsa-miR-501-5p	0	0	1	1	1	1	SNX10	sorting nexin 10
hsa-miR-501-5p	0	0	1	1	0	0	KCNJ14	potassium inwardly-rectifying channel, subfamily J, member 14
hsa-miR-501-5p	0	0	1	1	1	1	PURG	purine-rich element binding protein G
hsa-miR-501-5p	0	0	1	1	1	1	PCOLCE2	procollagen C-endopeptidase enhancer 2
hsa-miR-501-5p	0	0	1	0	0	0	PILRB	paired immunoglobin-like type 2 receptor beta
hsa-miR-501-5p	0	0	1	0	1	1	EMR2	egf-like module containing, mucin-like, hormone receptor-like 2
hsa-miR-501-5p	1	0	1	1	1	1	BAZ1A	bromodomain adjacent to zinc finger domain, 1A
hsa-miR-501-5p	1	0	1	0	1	1	C16orf72	chromosome 16 open reading frame 72
hsa-miR-501-5p	0	0	1	0	1	1	SCN8A	sodium channel, voltage gated, type VIII, alpha subunit
hsa-miR-501-5p	0	0	1	1	0	0	GNPAT	glyceronephosphate O-acyltransferase
hsa-miR-501-5p	1	0	1	0	1	1	ODZ1	odz, odd Oz/ten-m homolog 1 (Drosophila)
hsa-miR-501-5p	0	0	1	1	1	1	HSPA4L	heat shock 70kDa protein 4-like
hsa-miR-501-5p	0	0	1	1	1	1	CAPN6	calpain 6
hsa-miR-501-5p	0	0	1	1	0	0	QPRT	quinolinate phosphoribosyltransferase
hsa-miR-501-5p	1	0	1	1	1	1	SMPX	small muscle protein, X-linked
hsa-miR-501-5p	1	0	1	0	1	1	FJX1	four jointed box 1 (Drosophila)
hsa-miR-501-5p	1	0	1	0	1	1	RNF11	ring finger protein 11
hsa-miR-501-5p	1	0	1	0	1	1	DIEXF	digestive organ expansion factor homolog (zebrafish)
hsa-miR-501-5p	0	0	1	1	1	1	TAF5L	TAF5-like RNA polymerase II, p300/CBP-associated factor (PCAF)-associated factor, 65kDa
hsa-miR-501-5p	0	0	1	1	1	1	CLUL1	clusterin-like 1 (retinal)
hsa-miR-501-5p	1	0	1	1	1	1	AFF4	AF4/FMR2 family, member 4
hsa-miR-501-5p	1	0	1	0	1	1	HEYL	hairy/enhancer-of-split related with YRPW motif-like
hsa-miR-501-5p	1	0	1	1	1	1	FAF2	Fas associated factor family member 2
hsa-miR-501-5p	1	0	1	1	1	1	KDM4A	lysine (K)-specific demethylase 4A
hsa-miR-501-5p	1	0	1	0	1	1	MLEC	malectin
hsa-miR-501-5p	1	0	1	0	1	1	MAML1	mastermind-like 1 (Drosophila)
hsa-miR-501-5p	1	0	1	0	1	1	SCRN1	secernin 1
hsa-miR-501-5p	0	0	1	1	1	1	KIAA0141	KIAA0141
hsa-miR-501-5p	1	0	1	1	1	1	KIAA0753	KIAA0753
hsa-miR-501-5p	1	0	1	0	1	1	LPPR4	lipid phosphate phosphatase-related protein type 4
hsa-miR-501-5p	1	0	1	1	1	1	NUAK1	NUAK family, SNF1-like kinase, 1
hsa-miR-501-5p	0	0	1	1	1	1	N4BP2L2	NEDD4 binding protein 2-like 2
hsa-miR-501-5p	1	0	1	0	1	1	RAB11FIP2	RAB11 family interacting protein 2 (class I)
hsa-miR-501-5p	1	0	1	1	1	1	SPAST	spastin
hsa-miR-501-5p	1	0	1	1	1	1	DIP2C	DIP2 disco-interacting protein 2 homolog C (Drosophila)
hsa-miR-501-5p	1	0	1	0	1	1	WDFY3	WD repeat and FYVE domain containing 3
hsa-miR-501-5p	1	0	1	1	1	1	PIKFYVE	phosphoinositide kinase, FYVE finger containing
hsa-miR-501-5p	1	0	1	1	1	1	TRAK2	trafficking protein, kinesin binding 2
hsa-miR-501-5p	1	0	1	0	1	1	PEG10	paternally expressed 10
hsa-miR-501-5p	1	0	1	1	1	1	TAB2	TGF-beta activated kinase 1/MAP3K7 binding protein 2
hsa-miR-501-5p	1	0	1	0	1	1	ZZEF1	zinc finger, ZZ-type with EF-hand domain 1
hsa-miR-501-5p	1	0	1	1	1	1	RTF1	Rtf1, Paf1/RNA polymerase II complex component, homolog (S. cerevisiae)
hsa-miR-501-5p	1	0	1	1	1	1	PLCB1	phospholipase C, beta 1 (phosphoinositide-specific)
hsa-miR-501-5p	1	0	1	1	1	1	MYO1D	myosin ID
hsa-miR-501-5p	1	0	1	0	1	1	KIAA1024	KIAA1024
hsa-miR-501-5p	1	0	1	1	1	1	CUX2	cut-like homeobox 2
hsa-miR-501-5p	1	0	1	1	1	1	PHF15	PHD finger protein 15
hsa-miR-501-5p	1	0	1	0	1	1	ARHGEF12	Rho guanine nucleotide exchange factor (GEF) 12
hsa-miR-501-5p	1	0	1	0	1	1	LARP1	La ribonucleoprotein domain family, member 1
hsa-miR-501-5p	1	0	1	1	1	1	MED13L	mediator complex subunit 13-like
hsa-miR-501-5p	0	0	1	1	1	1	LEPROTL1	leptin receptor overlapping transcript-like 1
hsa-miR-501-5p	1	0	1	1	1	1	MOB4	MOB family member 4, phocein
hsa-miR-501-5p	1	0	1	1	1	1	PARM1	prostate androgen-regulated mucin-like protein 1
hsa-miR-501-5p	1	0	1	1	1	1	LTN1	listerin E3 ubiquitin protein ligase 1
hsa-miR-501-5p	1	0	1	1	1	1	SLITRK5	SLIT and NTRK-like family, member 5
hsa-miR-501-5p	1	0	1	0	1	1	PPP1R16B	protein phosphatase 1, regulatory subunit 16B
hsa-miR-501-5p	1	0	1	0	1	1	ERC2	ELKS/RAB6-interacting/CAST family member 2
hsa-miR-501-5p	1	0	1	1	1	1	EPC2	enhancer of polycomb homolog 2 (Drosophila)
hsa-miR-501-5p	0	0	1	1	1	1	BRPF3	bromodomain and PHD finger containing, 3
hsa-miR-501-5p	0	0	1	1	0	0	GPKOW	G patch domain and KOW motifs
hsa-miR-501-5p	1	0	1	1	1	1	WT1-AS	WT1 antisense RNA
hsa-miR-501-5p	1	0	1	1	1	1	CDC40	cell division cycle 40 homolog (S. cerevisiae)
hsa-miR-501-5p	1	0	1	1	1	1	TXNDC12	thioredoxin domain containing 12 (endoplasmic reticulum)
hsa-miR-501-5p	0	0	1	1	0	0	SLC35B3	solute carrier family 35, member B3
hsa-miR-501-5p	1	0	1	1	1	1	TAF9B	TAF9B RNA polymerase II, TATA box binding protein (TBP)-associated factor, 31kDa
hsa-miR-501-5p	1	0	1	1	1	1	PHF20L1	PHD finger protein 20-like 1
hsa-miR-501-5p	1	0	1	0	1	1	CNR1	cannabinoid receptor 1 (brain)
hsa-miR-501-5p	0	0	1	1	1	1	ZFR	zinc finger RNA binding protein
hsa-miR-501-5p	0	0	1	1	1	1	RAB10	RAB10, member RAS oncogene family
hsa-miR-501-5p	0	0	1	1	1	1	DYNC1LI1	dynein, cytoplasmic 1, light intermediate chain 1
hsa-miR-501-5p	1	0	1	1	1	1	VGLL3	vestigial like 3 (Drosophila)
hsa-miR-501-5p	0	0	1	1	1	1	TRIP4	thyroid hormone receptor interactor 4
hsa-miR-501-5p	1	0	1	0	1	1	HECA	headcase homolog (Drosophila)
hsa-miR-501-5p	1	0	1	1	1	1	NLK	nemo-like kinase
hsa-miR-501-5p	1	0	1	1	1	1	RAB14	RAB14, member RAS oncogene family
hsa-miR-501-5p	1	0	1	1	1	1	ARID4B	AT rich interactive domain 4B (RBP1-like)
hsa-miR-501-5p	0	0	1	1	0	0	C11orf73	chromosome 11 open reading frame 73
hsa-miR-501-5p	0	0	1	0	1	1	ERGIC2	ERGIC and golgi 2
hsa-miR-501-5p	0	0	1	1	0	0	PCDH12	protocadherin 12
hsa-miR-501-5p	1	0	1	1	1	1	ZAK	sterile alpha motif and leucine zipper containing kinase AZK
hsa-miR-501-5p	1	0	1	0	1	1	UBE2Q1	ubiquitin-conjugating enzyme E2Q family member 1
hsa-miR-501-5p	0	0	1	0	1	1	TRIM44	tripartite motif containing 44
hsa-miR-501-5p	1	0	1	1	0	0	C17orf59	chromosome 17 open reading frame 59
hsa-miR-501-5p	0	0	1	1	0	0	MED18	mediator complex subunit 18
hsa-miR-501-5p	1	0	1	1	1	1	UBE2R2	ubiquitin-conjugating enzyme E2R 2
hsa-miR-501-5p	1	0	1	1	1	1	IMPAD1	inositol monophosphatase domain containing 1
hsa-miR-501-5p	0	0	1	1	1	1	TMEM70	transmembrane protein 70
hsa-miR-501-5p	1	0	1	1	1	1	HIF1AN	hypoxia inducible factor 1, alpha subunit inhibitor
hsa-miR-501-5p	1	0	1	1	0	0	LAMTOR1	late endosomal/lysosomal adaptor, MAPK and MTOR activator 1
hsa-miR-501-5p	1	0	1	1	1	1	FBXO34	F-box protein 34
hsa-miR-501-5p	0	0	1	1	1	1	ANKHD1	ankyrin repeat and KH domain containing 1
hsa-miR-501-5p	0	0	1	1	1	1	SCYL2	SCY1-like 2 (S. cerevisiae)
hsa-miR-501-5p	1	0	1	1	1	1	IFT57	intraflagellar transport 57 homolog (Chlamydomonas)
hsa-miR-501-5p	1	0	1	0	1	1	KIF26B	kinesin family member 26B
hsa-miR-501-5p	0	0	1	1	1	1	RBM22	RNA binding motif protein 22
hsa-miR-501-5p	0	0	1	1	1	1	AKIRIN2	akirin 2
hsa-miR-501-5p	0	0	1	1	1	1	SRBD1	S1 RNA binding domain 1
hsa-miR-501-5p	1	0	1	0	1	1	CCDC88A	coiled-coil domain containing 88A
hsa-miR-501-5p	1	0	1	0	1	1	IPO9	importin 9
hsa-miR-501-5p	0	0	1	1	1	1	NECAP2	NECAP endocytosis associated 2
hsa-miR-501-5p	1	0	1	1	1	1	FAM178A	family with sequence similarity 178, member A
hsa-miR-501-5p	0	0	1	1	1	1	TMLHE	trimethyllysine hydroxylase, epsilon
hsa-miR-501-5p	1	0	1	1	1	1	UBA6	ubiquitin-like modifier activating enzyme 6
hsa-miR-501-5p	1	0	1	1	1	1	ZNF654	zinc finger protein 654
hsa-miR-501-5p	1	0	1	0	1	1	LIN7C	lin-7 homolog C (C. elegans)
hsa-miR-501-5p	1	0	1	1	1	1	RSBN1	round spermatid basic protein 1
hsa-miR-501-5p	0	0	1	1	1	1	SYNJ2BP	synaptojanin 2 binding protein
hsa-miR-501-5p	1	0	1	0	1	1	TMEM106B	transmembrane protein 106B
hsa-miR-501-5p	0	0	1	1	1	1	WDR33	WD repeat domain 33
hsa-miR-501-5p	0	0	1	1	1	1	LAPTM4B	lysosomal protein transmembrane 4 beta
hsa-miR-501-5p	1	0	1	0	1	1	FOXJ2	forkhead box J2
hsa-miR-501-5p	0	0	1	1	1	1	SLC22A15	solute carrier family 22, member 15
hsa-miR-501-5p	0	0	1	1	1	1	BDP1	B double prime 1, subunit of RNA polymerase III transcription initiation factor IIIB
hsa-miR-501-5p	0	0	1	0	0	0	FAM45B	family with sequence similarity 45, member A pseudogene
hsa-miR-501-5p	1	0	1	0	1	1	LRP1B	low density lipoprotein receptor-related protein 1B
hsa-miR-501-5p	0	0	1	1	1	1	ELAC1	elaC homolog 1 (E. coli)
hsa-miR-501-5p	1	0	1	0	1	1	CYCS	cytochrome c, somatic
hsa-miR-501-5p	0	0	1	1	1	1	ERRFI1	ERBB receptor feedback inhibitor 1
hsa-miR-501-5p	0	0	1	1	1	1	NPAP1	nuclear pore associated protein 1
hsa-miR-501-5p	1	0	1	0	1	1	FAM190B	family with sequence similarity 190, member B
hsa-miR-501-5p	1	0	1	0	1	1	UBFD1	ubiquitin family domain containing 1
hsa-miR-501-5p	0	0	1	1	1	1	KLHL4	kelch-like 4 (Drosophila)
hsa-miR-501-5p	1	0	1	1	1	1	CYP26B1	cytochrome P450, family 26, subfamily B, polypeptide 1
hsa-miR-501-5p	1	0	1	0	1	1	SLAMF8	SLAM family member 8
hsa-miR-501-5p	1	0	1	1	1	1	C8orf4	chromosome 8 open reading frame 4
hsa-miR-501-5p	0	0	1	1	1	1	UBQLN4	ubiquilin 4
hsa-miR-501-5p	1	0	1	0	1	1	PAPOLB	poly(A) polymerase beta (testis specific)
hsa-miR-501-5p	1	0	1	1	1	1	C5orf15	chromosome 5 open reading frame 15
hsa-miR-501-5p	0	0	1	1	1	1	PLXDC1	plexin domain containing 1
hsa-miR-501-5p	0	0	1	1	0	0	LYRM4	LYR motif containing 4
hsa-miR-501-5p	1	0	1	1	1	1	PTGFRN	prostaglandin F2 receptor negative regulator
hsa-miR-501-5p	1	0	1	1	1	1	RET	ret proto-oncogene
hsa-miR-501-5p	0	0	1	1	1	1	FGF23	fibroblast growth factor 23
hsa-miR-501-5p	1	0	1	1	0	0	JPH3	junctophilin 3
hsa-miR-501-5p	1	0	1	1	1	1	RAB22A	RAB22A, member RAS oncogene family
hsa-miR-501-5p	1	0	1	1	1	1	DSCAML1	Down syndrome cell adhesion molecule like 1
hsa-miR-501-5p	1	0	1	1	1	1	RNF150	ring finger protein 150
hsa-miR-501-5p	1	0	1	1	1	1	ARHGAP31	Rho GTPase activating protein 31
hsa-miR-501-5p	1	0	1	1	1	1	NLGN2	neuroligin 2
hsa-miR-501-5p	1	0	1	1	1	1	KLHL14	kelch-like 14 (Drosophila)
hsa-miR-501-5p	0	0	1	0	1	1	TRMT5	tRNA methyltransferase 5 homolog (S. cerevisiae)
hsa-miR-501-5p	0	0	1	1	1	1	MARCH4	membrane-associated ring finger (C3HC4) 4, E3 ubiquitin protein ligase
hsa-miR-501-5p	1	0	1	0	1	1	WDFY1	WD repeat and FYVE domain containing 1
hsa-miR-501-5p	1	0	1	1	1	1	HOMEZ	homeobox and leucine zipper encoding
hsa-miR-501-5p	1	0	1	1	1	1	KIAA1467	KIAA1467
hsa-miR-501-5p	1	0	1	1	1	1	TSHZ3	teashirt zinc finger homeobox 3
hsa-miR-501-5p	0	0	1	1	1	1	KLHL1	kelch-like 1 (Drosophila)
hsa-miR-501-5p	1	0	1	1	1	1	ALS2	amyotrophic lateral sclerosis 2 (juvenile)
hsa-miR-501-5p	1	0	1	1	1	1	FAM160B1	family with sequence similarity 160, member B1
hsa-miR-501-5p	0	0	1	1	1	1	EPG5	ectopic P-granules autophagy protein 5 homolog (C. elegans)
hsa-miR-501-5p	1	0	1	1	1	1	SNTB1	syntrophin, beta 1 (dystrophin-associated protein A1, 59kDa, basic component 1)
hsa-miR-501-5p	1	0	1	1	1	1	HCN1	hyperpolarization activated cyclic nucleotide-gated potassium channel 1
hsa-miR-501-5p	1	0	1	0	1	1	XK	X-linked Kx blood group (McLeod syndrome)
hsa-miR-501-5p	0	0	1	1	0	0	POLD4	polymerase (DNA-directed), delta 4, accessory subunit
hsa-miR-501-5p	1	0	1	1	1	1	C6orf47	chromosome 6 open reading frame 47
hsa-miR-501-5p	0	0	1	0	1	1	MS4A7	membrane-spanning 4-domains, subfamily A, member 7
hsa-miR-501-5p	0	0	1	1	0	0	MYOZ1	myozenin 1
hsa-miR-501-5p	0	0	1	0	1	1	CFL2	cofilin 2 (muscle)
hsa-miR-501-5p	0	0	1	1	1	1	PGM5	phosphoglucomutase 5
hsa-miR-501-5p	1	0	1	1	0	0	HAND2	heart and neural crest derivatives expressed 2
hsa-miR-501-5p	1	0	1	1	1	1	TIA1	TIA1 cytotoxic granule-associated RNA binding protein
hsa-miR-501-5p	1	0	1	0	1	1	CSNK1G1	casein kinase 1, gamma 1
hsa-miR-501-5p	1	0	1	0	1	1	CERS2	ceramide synthase 2
hsa-miR-501-5p	0	0	1	1	0	0	RRAGC	Ras-related GTP binding C
hsa-miR-501-5p	0	0	1	1	1	1	TCTA	T-cell leukemia translocation altered
hsa-miR-501-5p	1	0	1	1	1	1	XPO4	exportin 4
hsa-miR-501-5p	1	0	1	1	1	1	TMEM168	transmembrane protein 168
hsa-miR-501-5p	1	0	1	1	1	1	SUDS3	suppressor of defective silencing 3 homolog (S. cerevisiae)
hsa-miR-501-5p	1	0	1	0	1	1	DNMT3A	DNA (cytosine-5-)-methyltransferase 3 alpha
hsa-miR-501-5p	1	0	1	1	1	1	MESDC1	mesoderm development candidate 1
hsa-miR-501-5p	0	0	1	1	0	0	TSPY2	testis specific protein, Y-linked 2
hsa-miR-501-5p	1	0	1	0	1	1	ELOVL4	ELOVL fatty acid elongase 4
hsa-miR-501-5p	1	0	1	1	1	1	C6orf106	chromosome 6 open reading frame 106
hsa-miR-501-5p	1	0	1	1	1	1	REEP1	receptor accessory protein 1
hsa-miR-501-5p	1	0	1	1	0	0	UBE2Z	ubiquitin-conjugating enzyme E2Z
hsa-miR-501-5p	1	0	1	1	1	1	GRAMD3	GRAM domain containing 3
hsa-miR-501-5p	1	0	1	1	1	1	HOXB8	homeobox B8
hsa-miR-501-5p	0	0	1	1	0	0	IRX1	iroquois homeobox 1
hsa-miR-501-5p	1	0	1	1	1	1	DSC3	desmocollin 3
hsa-miR-501-5p	1	0	1	1	1	1	PANK3	pantothenate kinase 3
hsa-miR-501-5p	1	0	1	1	1	1	PPP1R3B	protein phosphatase 1, regulatory subunit 3B
hsa-miR-501-5p	1	0	1	0	1	1	PLEKHF2	pleckstrin homology domain containing, family F (with FYVE domain) member 2
hsa-miR-501-5p	0	0	1	0	1	1	C14orf169	chromosome 14 open reading frame 169
hsa-miR-501-5p	0	0	1	1	1	1	BBS10	Bardet-Biedl syndrome 10
hsa-miR-501-5p	1	0	1	0	1	1	MOB3B	MOB kinase activator 3B
hsa-miR-501-5p	1	0	1	1	1	1	CLMP	CXADR-like membrane protein
hsa-miR-501-5p	0	0	1	1	0	0	RNF122	ring finger protein 122
hsa-miR-501-5p	0	0	1	1	1	1	RPAP2	RNA polymerase II associated protein 2
hsa-miR-501-5p	1	0	1	1	1	1	CBLL1	Cbl proto-oncogene, E3 ubiquitin protein ligase-like 1
hsa-miR-501-5p	0	0	1	1	1	1	ZNF767	zinc finger family member 767
hsa-miR-501-5p	1	0	1	1	1	1	CPED1	cadherin-like and PC-esterase domain containing 1
hsa-miR-501-5p	1	0	1	1	1	1	KLHL18	kelch-like 18 (Drosophila)
hsa-miR-501-5p	0	0	1	1	1	1	ZNF606	zinc finger protein 606
hsa-miR-501-5p	1	0	1	0	1	1	EDEM3	ER degradation enhancer, mannosidase alpha-like 3
hsa-miR-501-5p	1	0	1	1	1	1	TNKS2	tankyrase, TRF1-interacting ankyrin-related ADP-ribose polymerase 2
hsa-miR-501-5p	1	0	1	1	1	1	SYNC	syncoilin, intermediate filament protein
hsa-miR-501-5p	1	0	1	1	1	1	SGPP1	sphingosine-1-phosphate phosphatase 1
hsa-miR-501-5p	1	0	1	0	1	1	C1orf21	chromosome 1 open reading frame 21
hsa-miR-501-5p	1	0	1	0	1	1	CSRNP2	cysteine-serine-rich nuclear protein 2
hsa-miR-501-5p	1	0	1	1	1	1	ANKRD13C	ankyrin repeat domain 13C
hsa-miR-501-5p	0	0	1	1	1	1	SPACA1	sperm acrosome associated 1
hsa-miR-501-5p	0	0	1	1	1	1	SEH1L	SEH1-like (S. cerevisiae)
hsa-miR-501-5p	1	0	1	1	1	1	GABARAPL1	GABA(A) receptor-associated protein like 1
hsa-miR-501-5p	1	0	1	0	1	1	TMEM47	transmembrane protein 47
hsa-miR-501-5p	1	0	1	0	1	1	SH3BGRL2	SH3 domain binding glutamic acid-rich protein like 2
hsa-miR-501-5p	1	0	1	0	1	1	SRSF8	serine/arginine-rich splicing factor 8
hsa-miR-501-5p	0	0	1	1	0	0	MND1	meiotic nuclear divisions 1 homolog (S. cerevisiae)
hsa-miR-501-5p	1	0	1	1	1	1	ARID5B	AT rich interactive domain 5B (MRF1-like)
hsa-miR-501-5p	0	0	1	1	1	1	FAM96A	family with sequence similarity 96, member A
hsa-miR-501-5p	1	0	1	1	0	0	MAF1	MAF1 homolog (S. cerevisiae)
hsa-miR-501-5p	1	0	1	1	1	1	ZDHHC18	zinc finger, DHHC-type containing 18
hsa-miR-501-5p	1	0	1	0	1	1	PSD2	pleckstrin and Sec7 domain containing 2
hsa-miR-501-5p	1	0	1	1	1	1	SYVN1	synovial apoptosis inhibitor 1, synoviolin
hsa-miR-501-5p	1	0	1	1	1	1	DCTN5	dynactin 5 (p25)
hsa-miR-501-5p	1	0	1	1	1	1	USP38	ubiquitin specific peptidase 38
hsa-miR-501-5p	1	0	1	1	1	1	HIATL1	hippocampus abundant transcript-like 1
hsa-miR-501-5p	0	0	1	1	0	0	SPINK7	serine peptidase inhibitor, Kazal type 7 (putative)
hsa-miR-501-5p	1	0	1	1	1	1	PHF5A	PHD finger protein 5A
hsa-miR-501-5p	1	0	1	1	0	0	ORAI1	ORAI calcium release-activated calcium modulator 1
hsa-miR-501-5p	1	0	1	1	1	1	ARHGEF39	Rho guanine nucleotide exchange factor (GEF) 39
hsa-miR-501-5p	0	0	1	1	1	1	FAM136A	family with sequence similarity 136, member A
hsa-miR-501-5p	1	0	1	0	1	1	PPP1R15B	protein phosphatase 1, regulatory subunit 15B
hsa-miR-501-5p	1	0	1	0	1	1	UBASH3B	ubiquitin associated and SH3 domain containing B
hsa-miR-501-5p	1	0	1	1	1	1	POLR2C	polymerase (RNA) II (DNA directed) polypeptide C, 33kDa
hsa-miR-501-5p	0	0	1	1	0	0	MUC13	mucin 13, cell surface associated
hsa-miR-501-5p	1	0	1	1	1	1	C5orf30	chromosome 5 open reading frame 30
hsa-miR-501-5p	1	0	1	1	1	1	RASL10B	RAS-like, family 10, member B
hsa-miR-501-5p	1	0	1	1	1	1	EPT1	ethanolaminephosphotransferase 1 (CDP-ethanolamine-specific)
hsa-miR-501-5p	0	0	1	0	0	0	CEACAM21	carcinoembryonic antigen-related cell adhesion molecule 21
hsa-miR-501-5p	1	0	1	1	1	1	BRWD1	bromodomain and WD repeat domain containing 1
hsa-miR-501-5p	1	0	1	1	1	1	CDC42	cell division cycle 42 (GTP binding protein, 25kDa)
hsa-miR-501-5p	0	0	1	1	1	1	MED8	mediator complex subunit 8
hsa-miR-501-5p	0	0	1	1	1	1	CARD16	caspase recruitment domain family, member 16
hsa-miR-501-5p	0	0	1	1	1	1	PLEKHG4B	pleckstrin homology domain containing, family G (with RhoGef domain) member 4B
hsa-miR-501-5p	1	0	1	0	0	0	SMYD4	SET and MYND domain containing 4
hsa-miR-501-5p	1	0	1	0	1	1	TMEM123	transmembrane protein 123
hsa-miR-501-5p	0	0	1	1	1	1	IL22RA2	interleukin 22 receptor, alpha 2
hsa-miR-501-5p	0	0	1	1	1	1	LEAP2	liver expressed antimicrobial peptide 2
hsa-miR-501-5p	0	0	1	1	0	0	ZSWIM3	zinc finger, SWIM-type containing 3
hsa-miR-501-5p	1	0	1	0	1	1	SOCS4	suppressor of cytokine signaling 4
hsa-miR-501-5p	0	0	1	1	1	1	COLEC12	collectin sub-family member 12
hsa-miR-501-5p	1	0	1	0	1	1	C5orf20	chromosome 5 open reading frame 20
hsa-miR-501-5p	0	0	1	1	0	0	KIAA2013	KIAA2013
hsa-miR-501-5p	1	0	1	1	1	1	KCTD12	potassium channel tetramerisation domain containing 12
hsa-miR-501-5p	1	0	1	1	1	1	ICA1L	islet cell autoantigen 1,69kDa-like
hsa-miR-501-5p	0	0	1	1	1	1	KLF14	Kruppel-like factor 14
hsa-miR-501-5p	1	0	1	0	1	1	FCHO2	FCH domain only 2
hsa-miR-501-5p	1	0	1	1	1	1	MBOAT2	membrane bound O-acyltransferase domain containing 2
hsa-miR-501-5p	0	0	1	1	0	0	ESAM	endothelial cell adhesion molecule
hsa-miR-501-5p	0	0	1	0	0	0	CAPN13	calpain 13
hsa-miR-501-5p	1	0	1	1	1	1	TEX261	testis expressed 261
hsa-miR-501-5p	1	0	1	1	1	1	RFTN2	raftlin family member 2
hsa-miR-501-5p	0	0	1	1	1	1	PPM1M	protein phosphatase, Mg2+/Mn2+ dependent, 1M
hsa-miR-501-5p	1	0	1	1	1	1	YPEL4	yippee-like 4 (Drosophila)
hsa-miR-501-5p	0	0	1	1	0	0	CISH	cytokine inducible SH2-containing protein
hsa-miR-501-5p	0	0	1	0	1	1	PIGM	phosphatidylinositol glycan anchor biosynthesis, class M
hsa-miR-501-5p	0	0	1	1	1	1	DNAJB7	DnaJ (Hsp40) homolog, subfamily B, member 7
hsa-miR-501-5p	0	0	1	1	1	1	OMA1	OMA1 zinc metallopeptidase homolog (S. cerevisiae)
hsa-miR-501-5p	0	0	1	1	1	1	FAM100A	family with sequence similarity 100, member A
hsa-miR-501-5p	1	0	1	1	1	1	TMEM99	transmembrane protein 99
hsa-miR-501-5p	0	0	1	1	1	1	SLC25A43	solute carrier family 25, member 43
hsa-miR-501-5p	0	0	1	1	0	0	IL27	interleukin 27
hsa-miR-501-5p	0	0	1	1	1	1	WFDC9	WAP four-disulfide core domain 9
hsa-miR-501-5p	0	0	1	1	1	1	TTC30A	tetratricopeptide repeat domain 30A
hsa-miR-501-5p	1	0	1	1	1	1	POGLUT1	protein O-glucosyltransferase 1
hsa-miR-501-5p	0	0	1	1	1	1	ERP27	endoplasmic reticulum protein 27
hsa-miR-501-5p	1	0	1	1	1	1	TMEM178A	transmembrane protein 178A
hsa-miR-501-5p	1	0	1	1	1	1	CEP128	centrosomal protein 128kDa
hsa-miR-501-5p	1	0	1	1	1	1	FAM81A	family with sequence similarity 81, member A
hsa-miR-501-5p	1	0	1	1	1	1	ZSCAN29	zinc finger and SCAN domain containing 29
hsa-miR-501-5p	0	0	1	1	1	1	SLC35G3	solute carrier family 35, member G3
hsa-miR-501-5p	1	0	1	1	1	1	ZNF362	zinc finger protein 362
hsa-miR-501-5p	0	0	1	0	1	1	HORMAD2	HORMA domain containing 2
hsa-miR-501-5p	1	0	1	0	1	1	TMTC2	transmembrane and tetratricopeptide repeat containing 2
hsa-miR-501-5p	1	0	1	1	1	1	SPRED1	sprouty-related, EVH1 domain containing 1
hsa-miR-501-5p	0	0	1	1	0	0	MFSD6L	major facilitator superfamily domain containing 6-like
hsa-miR-501-5p	0	0	1	1	1	1	BBS12	Bardet-Biedl syndrome 12
hsa-miR-501-5p	1	0	1	0	1	1	DCP2	DCP2 decapping enzyme homolog (S. cerevisiae)
hsa-miR-501-5p	0	0	1	1	0	0	THAP8	THAP domain containing 8
hsa-miR-501-5p	1	0	1	0	1	1	FAM116A	family with sequence similarity 116, member A
hsa-miR-501-5p	0	0	1	1	0	0	DOK6	docking protein 6
hsa-miR-501-5p	1	0	1	1	1	1	BEND6	BEN domain containing 6
hsa-miR-501-5p	1	0	1	1	1	1	NXPH1	neurexophilin 1
hsa-miR-501-5p	0	0	1	1	1	1	CNPY4	canopy 4 homolog (zebrafish)
hsa-miR-501-5p	1	0	1	0	1	1	C7orf41	chromosome 7 open reading frame 41
hsa-miR-501-5p	1	0	1	1	1	1	PDIK1L	PDLIM1 interacting kinase 1 like
hsa-miR-501-5p	1	0	1	0	1	1	ST6GALNAC3	ST6 (alpha-N-acetyl-neuraminyl-2,3-beta-galactosyl-1,3)-N-acetylgalactosaminide alpha-2,6-sialyltransferase 3
hsa-miR-501-5p	0	0	1	1	1	1	CCDC140	coiled-coil domain containing 140
hsa-miR-501-5p	1	0	1	1	1	1	C15orf32	chromosome 15 open reading frame 32
hsa-miR-501-5p	0	0	1	0	0	0	FLJ32955	uncharacterized protein FLJ32955
hsa-miR-501-5p	1	0	1	0	1	1	ENPP6	ectonucleotide pyrophosphatase/phosphodiesterase 6
hsa-miR-501-5p	1	0	1	1	0	0	TMEM86A	transmembrane protein 86A
hsa-miR-501-5p	1	0	1	1	1	1	LRIG3	leucine-rich repeats and immunoglobulin-like domains 3
hsa-miR-501-5p	0	0	1	1	0	0	CMYA5	cardiomyopathy associated 5
hsa-miR-501-5p	1	0	1	1	1	1	C2orf69	chromosome 2 open reading frame 69
hsa-miR-501-5p	1	0	1	1	1	1	FNDC5	fibronectin type III domain containing 5
hsa-miR-501-5p	1	0	1	1	1	1	CACUL1	CDK2-associated, cullin domain 1
hsa-miR-501-5p	0	0	1	1	1	1	TEDDM1	transmembrane epididymal protein 1
hsa-miR-501-5p	0	0	1	1	1	1	CATSPER2	cation channel, sperm associated 2
hsa-miR-501-5p	1	0	1	0	1	1	KLHDC1	kelch domain containing 1
hsa-miR-501-5p	0	0	1	0	1	1	GTF2A1L	general transcription factor IIA, 1-like
hsa-miR-501-5p	0	0	1	1	1	1	REXO1L1	REX1, RNA exonuclease 1 homolog (S. cerevisiae)-like 1
hsa-miR-501-5p	0	0	1	1	1	1	KLF17	Kruppel-like factor 17
hsa-miR-501-5p	1	0	1	1	1	1	FAM117B	family with sequence similarity 117, member B
hsa-miR-501-5p	1	0	1	1	1	1	VKORC1L1	vitamin K epoxide reductase complex, subunit 1-like 1
hsa-miR-501-5p	0	0	1	1	1	1	UNC5CL	unc-5 homolog C (C. elegans)-like
hsa-miR-501-5p	1	0	1	1	1	1	IGSF22	immunoglobulin superfamily, member 22
hsa-miR-501-5p	0	0	1	1	0	0	TMEM145	transmembrane protein 145
hsa-miR-501-5p	1	0	1	1	1	1	RABL3	RAB, member of RAS oncogene family-like 3
hsa-miR-501-5p	0	0	1	1	0	0	SPACA3	sperm acrosome associated 3
hsa-miR-501-5p	0	0	1	1	1	1	CD300LB	CD300 molecule-like family member b
hsa-miR-501-5p	1	0	1	1	1	1	LDLRAD3	low density lipoprotein receptor class A domain containing 3
hsa-miR-501-5p	1	0	1	0	1	1	TMEM167A	transmembrane protein 167A
hsa-miR-501-5p	0	0	1	1	0	0	TCTE3	t-complex-associated-testis-expressed 3
hsa-miR-501-5p	1	0	1	1	1	1	UBR1	ubiquitin protein ligase E3 component n-recognin 1
hsa-miR-501-5p	1	0	1	1	1	1	SCN4B	sodium channel, voltage-gated, type IV, beta subunit
hsa-miR-501-5p	0	0	1	1	1	1	C14orf39	chromosome 14 open reading frame 39
hsa-miR-501-5p	0	0	1	1	1	1	CLEC14A	C-type lectin domain family 14, member A
hsa-miR-501-5p	0	0	1	1	1	1	GRIK1	glutamate receptor, ionotropic, kainate 1
hsa-miR-501-5p	1	0	1	1	1	1	SYT9	synaptotagmin IX
hsa-miR-501-5p	1	0	1	1	1	1	ZADH2	zinc binding alcohol dehydrogenase domain containing 2
hsa-miR-501-5p	0	0	1	1	0	0	IL9R	interleukin 9 receptor
hsa-miR-501-5p	1	0	1	1	1	1	LRRTM3	leucine rich repeat transmembrane neuronal 3
hsa-miR-501-5p	0	0	1	1	1	1	ATPIF1	ATPase inhibitory factor 1
hsa-miR-501-5p	1	0	1	0	1	1	IQGAP3	IQ motif containing GTPase activating protein 3
hsa-miR-501-5p	0	0	1	1	1	1	ZNF831	zinc finger protein 831
hsa-miR-501-5p	0	0	1	1	1	1	SLC9C2	solute carrier family 9, member C2 (putative)
hsa-miR-501-5p	1	0	1	1	1	1	MTDH	metadherin
hsa-miR-501-5p	0	0	1	0	0	0	MRPL21	mitochondrial ribosomal protein L21
hsa-miR-501-5p	0	0	1	0	1	1	KRT28	keratin 28
hsa-miR-501-5p	1	0	1	1	1	1	CREM	cAMP responsive element modulator
hsa-miR-501-5p	0	0	1	1	1	1	ZBTB12	zinc finger and BTB domain containing 12
hsa-miR-501-5p	0	0	1	1	1	1	USP12	ubiquitin specific peptidase 12
hsa-miR-501-5p	1	0	1	1	1	1	FAM216B	family with sequence similarity 216, member B
hsa-miR-501-5p	1	0	1	1	1	1	BCL9L	B-cell CLL/lymphoma 9-like
hsa-miR-501-5p	0	0	1	1	1	1	SKA2	spindle and kinetochore associated complex subunit 2
hsa-miR-501-5p	1	0	1	0	1	1	RNF144B	ring finger protein 144B
hsa-miR-501-5p	1	0	1	1	1	1	SUMF1	sulfatase modifying factor 1
hsa-miR-501-5p	1	0	1	1	1	1	NIN	ninein (GSK3B interacting protein)
hsa-miR-501-5p	1	0	1	0	1	1	RIMS4	regulating synaptic membrane exocytosis 4
hsa-miR-501-5p	1	0	1	1	1	1	SPTY2D1	SPT2, Suppressor of Ty, domain containing 1 (S. cerevisiae)
hsa-miR-501-5p	1	0	1	1	1	1	ADAMTS6	ADAM metallopeptidase with thrombospondin type 1 motif, 6
hsa-miR-501-5p	0	0	1	0	1	1	TCF21	transcription factor 21
hsa-miR-501-5p	0	0	1	1	1	1	EMB	embigin
hsa-miR-501-5p	1	0	1	0	1	1	NRK	Nik related kinase
hsa-miR-501-5p	1	0	1	1	1	1	MIA3	melanoma inhibitory activity family, member 3
hsa-miR-501-5p	1	0	1	0	1	1	ZC3H6	zinc finger CCCH-type containing 6
hsa-miR-501-5p	0	0	1	1	1	1	ZPBP2	zona pellucida binding protein 2
hsa-miR-501-5p	0	0	1	0	1	1	SIAH3	siah E3 ubiquitin protein ligase family member 3
hsa-miR-501-5p	1	0	1	0	1	1	PRICKLE2	prickle homolog 2 (Drosophila)
hsa-miR-501-5p	0	0	1	1	1	1	UBE3D	ubiquitin protein ligase E3D
hsa-miR-501-5p	0	0	1	1	1	1	THAP1	THAP domain containing, apoptosis associated protein 1
hsa-miR-501-5p	1	0	1	1	1	1	VAMP1	vesicle-associated membrane protein 1 (synaptobrevin 1)
hsa-miR-501-5p	1	0	1	1	1	1	ADAMTS18	ADAM metallopeptidase with thrombospondin type 1 motif, 18
hsa-miR-501-5p	0	0	1	1	1	1	KCNRG	potassium channel regulator
hsa-miR-501-5p	0	0	1	1	1	1	SHC4	SHC (Src homology 2 domain containing) family, member 4
hsa-miR-501-5p	1	0	1	0	1	1	CAPRIN1	cell cycle associated protein 1
hsa-miR-501-5p	0	0	1	1	1	1	SPACA5	sperm acrosome associated 5
hsa-miR-501-5p	1	0	1	1	0	0	CLYBL	citrate lyase beta like
hsa-miR-501-5p	0	0	1	1	1	1	SPAG17	sperm associated antigen 17
hsa-miR-501-5p	0	0	1	1	1	1	EDN3	endothelin 3
hsa-miR-501-5p	0	0	1	0	1	1	NPSR1-AS1	NPSR1 antisense RNA 1
hsa-miR-501-5p	0	0	1	1	0	0	LINC00176	long intergenic non-protein coding RNA 176
hsa-miR-501-5p	1	0	1	1	1	1	CYP4V2	cytochrome P450, family 4, subfamily V, polypeptide 2
hsa-miR-501-5p	1	0	1	1	0	0	CD164L2	CD164 sialomucin-like 2
hsa-miR-501-5p	0	0	1	0	1	1	C1orf229	chromosome 1 open reading frame 229
hsa-miR-501-5p	1	0	1	1	1	1	SAMD12	sterile alpha motif domain containing 12
hsa-miR-501-5p	1	0	1	1	1	1	C11orf87	chromosome 11 open reading frame 87
hsa-miR-501-5p	1	0	1	1	1	1	RAPH1	Ras association (RalGDS/AF-6) and pleckstrin homology domains 1
hsa-miR-501-5p	1	0	1	0	1	1	STAT3	signal transducer and activator of transcription 3 (acute-phase response factor)
hsa-miR-501-5p	0	0	1	0	0	0	PPIAP29	peptidylprolyl isomerase A (cyclophilin A) pseudogene 29
hsa-miR-501-5p	0	0	1	0	0	0	TFAMP1	transcription factor A, mitochondrial pseudogene 1
hsa-miR-501-5p	0	0	1	1	0	0	TTTY8	testis-specific transcript, Y-linked 8 (non-protein coding)
hsa-miR-501-5p	0	0	1	0	0	0	TTTY2	testis-specific transcript, Y-linked 2 (non-protein coding)
hsa-miR-501-5p	0	0	1	0	0	0	TTTY1	testis-specific transcript, Y-linked 1 (non-protein coding)
hsa-miR-501-5p	0	0	1	0	0	0	TTTY15	testis-specific transcript, Y-linked 15 (non-protein coding)
hsa-miR-501-5p	0	0	1	0	0	0	CYCSP52	cytochrome c, somatic pseudogene 52
hsa-miR-501-5p	0	0	1	0	0	0	PPP1R2P3	protein phosphatase 1, regulatory (inhibitor) subunit 2 pseudogene 3
hsa-miR-501-5p	0	0	1	0	0	0	SUMO1P1	SUMO1 pseudogene 1
hsa-miR-501-5p	0	0	1	0	0	0	NXF4	nuclear RNA export factor 4 pseudogene
hsa-miR-501-5p	0	0	1	0	0	0	DPRXP4	divergent-paired related homeobox pseudogene 4
hsa-miR-501-5p	0	0	1	0	0	0	SNORA27	small nucleolar RNA, H/ACA box 27
hsa-miR-501-5p	0	0	1	0	0	0	SNORD10	small nucleolar RNA, C/D box 10
hsa-miR-501-5p	0	0	1	0	0	0	GABPAP	GA binding protein transcription factor, alpha subunit pseudogene
hsa-miR-501-5p	0	0	1	0	0	0	MBL1P	mannose-binding lectin (protein A) 1, pseudogene
hsa-miR-501-5p	0	0	1	0	0	0	PCGEM1	prostate-specific transcript 1 (non-protein coding)
hsa-miR-501-5p	0	0	1	0	0	0	SEPHS1P1	selenophosphate synthetase 1 pseudogene 1
hsa-miR-501-5p	0	0	1	0	0	0	MALAT1	metastasis associated lung adenocarcinoma transcript 1 (non-protein coding)
hsa-miR-501-5p	0	0	1	0	0	0	SIGLEC16	sialic acid binding Ig-like lectin 16 (gene/pseudogene)
hsa-miR-501-5p	0	0	1	0	0	0	HERC2P8	hect domain and RLD 2 pseudogene 8
hsa-miR-501-5p	0	0	1	0	0	0	DUSP5P	dual specificity phosphatase 5 pseudogene
hsa-miR-501-5p	0	0	1	0	0	0	SNX29P2	sorting nexin 29 pseudogene 2
hsa-miR-501-5p	0	0	1	0	0	0	SCARNA17	small Cajal body-specific RNA 17
hsa-miR-501-5p	0	0	1	0	0	0	SNORD93	small nucleolar RNA, C/D box 93
hsa-miR-501-5p	0	0	1	0	0	0	HSP90B3P	heat shock protein 90kDa beta (Grp94), member 3, pseudogene
hsa-miR-501-5p	0	0	1	0	0	0	GBP1P1	guanylate binding protein 1, interferon-inducible pseudogene 1
hsa-miR-501-5p	0	0	1	0	0	0	SYS1-DBNDD2	SYS1-DBNDD2 readthrough (non-protein coding)
hsa-miR-501-5p	0	0	1	0	0	0	LOC729603	calcium binding protein P22 pseudogene
hsa-miR-501-5p	0	0	1	0	0	0	SNORD115-19	small nucleolar RNA, C/D box 115-19
hsa-miR-501-5p	0	0	1	0	0	0	SNORD115-26	small nucleolar RNA, C/D box 115-26
hsa-miR-501-5p	1	0	1	0	1	1	NFIX	nuclear factor I/X (CCAAT-binding transcription factor)
hsa-miR-501-5p	0	0	1	0	0	0	GAGE3	G antigen 3
hsa-miR-501-5p	1	0	1	1	1	1	PAM	peptidylglycine alpha-amidating monooxygenase
hsa-miR-501-5p	0	0	1	1	1	1	CAST	calpastatin
hsa-miR-501-5p	1	0	1	1	1	1	ESR1	estrogen receptor 1
hsa-miR-501-5p	1	0	1	1	1	1	FXR1	fragile X mental retardation, autosomal homolog 1
hsa-miR-501-5p	1	0	1	1	0	0	YBX2	Y box binding protein 2
hsa-miR-501-5p	0	0	0	1	0	0	LRRC23	leucine rich repeat containing 23
hsa-miR-501-5p	0	0	0	1	0	0	IL32	interleukin 32
hsa-miR-501-5p	0	0	1	1	0	0	MAP2K5	mitogen-activated protein kinase kinase 5
hsa-miR-501-5p	0	0	0	1	1	1	ESF1	ESF1, nucleolar pre-rRNA processing protein, homolog (S. cerevisiae)
hsa-miR-501-5p	0	0	0	1	1	1	SLC24A6	solute carrier family 24 (sodium/lithium/calcium exchanger), member 6
hsa-miR-501-5p	0	0	1	1	0	0	GLG1	golgi glycoprotein 1
hsa-miR-501-5p	0	0	0	1	1	1	ZNF184	zinc finger protein 184
hsa-miR-501-5p	0	0	0	1	0	0	TMED1	transmembrane emp24 protein transport domain containing 1
hsa-miR-501-5p	0	0	1	1	1	1	TOMM22	translocase of outer mitochondrial membrane 22 homolog (yeast)
hsa-miR-501-5p	1	0	1	1	1	1	DNAL4	dynein, axonemal, light chain 4
hsa-miR-501-5p	0	0	0	1	1	1	HMOX1	heme oxygenase (decycling) 1
hsa-miR-501-5p	0	0	0	1	0	0	ACR	acrosin
hsa-miR-501-5p	1	0	1	1	1	1	SMCR7L	Smith-Magenis syndrome chromosome region, candidate 7-like
hsa-miR-501-5p	0	0	1	1	1	1	ACO2	aconitase 2, mitochondrial
hsa-miR-501-5p	0	0	0	1	1	1	TCL1A	T-cell leukemia/lymphoma 1A
hsa-miR-501-5p	0	0	1	1	0	0	CHMP4A	charged multivesicular body protein 4A
hsa-miR-501-5p	1	0	0	1	1	1	SALL4	sal-like 4 (Drosophila)
hsa-miR-501-5p	0	0	0	1	0	0	TGM5	transglutaminase 5
hsa-miR-501-5p	0	0	1	1	0	0	FCGBP	Fc fragment of IgG binding protein
hsa-miR-501-5p	0	0	1	1	0	0	ECH1	enoyl CoA hydratase 1, peroxisomal
hsa-miR-501-5p	0	0	1	1	0	0	CEACAM4	carcinoembryonic antigen-related cell adhesion molecule 4
hsa-miR-501-5p	0	0	1	1	0	0	SIGLEC5	sialic acid binding Ig-like lectin 5
hsa-miR-501-5p	0	0	1	1	0	0	HAS1	hyaluronan synthase 1
hsa-miR-501-5p	0	0	0	1	1	1	COMP	cartilage oligomeric matrix protein
hsa-miR-501-5p	0	0	0	1	0	0	EVX1	even-skipped homeobox 1
hsa-miR-501-5p	0	0	0	1	0	0	ZNF688	zinc finger protein 688
hsa-miR-501-5p	0	0	0	1	1	1	ZNF785	zinc finger protein 785
hsa-miR-501-5p	1	0	1	1	1	1	SEC61B	Sec61 beta subunit
hsa-miR-501-5p	0	0	0	1	0	0	C8G	complement component 8, gamma polypeptide
hsa-miR-501-5p	0	0	1	1	0	0	PIGL	phosphatidylinositol glycan anchor biosynthesis, class L
hsa-miR-501-5p	0	0	1	1	1	1	DRG2	developmentally regulated GTP binding protein 2
hsa-miR-501-5p	0	0	1	1	0	0	ALDOC	aldolase C, fructose-bisphosphate
hsa-miR-501-5p	0	0	1	1	1	1	LAP3	leucine aminopeptidase 3
hsa-miR-501-5p	0	0	1	1	1	1	PUS3	pseudouridylate synthase 3
hsa-miR-501-5p	1	0	1	1	0	0	DGAT2	diacylglycerol O-acyltransferase 2
hsa-miR-501-5p	0	0	1	1	0	0	GLI1	GLI family zinc finger 1
hsa-miR-501-5p	0	0	0	1	1	1	GTF2H3	general transcription factor IIH, polypeptide 3, 34kDa
hsa-miR-501-5p	0	0	0	1	0	0	MRPL51	mitochondrial ribosomal protein L51
hsa-miR-501-5p	0	0	1	1	0	0	CLEC4A	C-type lectin domain family 4, member A
hsa-miR-501-5p	0	0	1	1	0	0	PKD2L2	polycystic kidney disease 2-like 2
hsa-miR-501-5p	0	0	1	1	0	0	THG1L	tRNA-histidine guanylyltransferase 1-like (S. cerevisiae)
hsa-miR-501-5p	0	0	1	1	1	1	SNX17	sorting nexin 17
hsa-miR-501-5p	0	0	1	1	0	0	MOGS	mannosyl-oligosaccharide glucosidase
hsa-miR-501-5p	0	0	1	1	0	0	IGFBP2	insulin-like growth factor binding protein 2, 36kDa
hsa-miR-501-5p	1	0	1	1	1	1	SLC9A2	solute carrier family 9, subfamily A (NHE2, cation proton antiporter 2), member 2
hsa-miR-501-5p	0	0	1	1	1	1	ODC1	ornithine decarboxylase 1
hsa-miR-501-5p	0	0	1	1	0	0	MIIP	migration and invasion inhibitory protein
hsa-miR-501-5p	0	0	1	1	0	0	HSD3B1	hydroxy-delta-5-steroid dehydrogenase, 3 beta- and steroid delta-isomerase 1
hsa-miR-501-5p	0	0	1	1	1	1	TTR	transthyretin
hsa-miR-501-5p	0	0	1	1	1	1	ACYP1	acylphosphatase 1, erythrocyte (common) type
hsa-miR-501-5p	0	0	1	1	1	1	HOXB7	homeobox B7
hsa-miR-501-5p	0	0	1	1	0	0	ADORA3	adenosine A3 receptor
hsa-miR-501-5p	1	0	1	1	1	1	AHR	aryl hydrocarbon receptor
hsa-miR-501-5p	0	0	1	1	0	0	TCEAL3	transcription elongation factor A (SII)-like 3
hsa-miR-501-5p	0	0	1	1	1	1	PLA2G12A	phospholipase A2, group XIIA
hsa-miR-501-5p	0	0	0	1	0	0	B9D2	B9 protein domain 2
hsa-miR-501-5p	0	0	1	1	1	1	SEMG1	semenogelin I
hsa-miR-501-5p	0	0	1	1	1	1	ATP5S	ATP synthase, H+ transporting, mitochondrial Fo complex, subunit s (factor B)
hsa-miR-501-5p	0	0	1	1	0	0	MYH2	myosin, heavy chain 2, skeletal muscle, adult
hsa-miR-501-5p	0	0	1	1	0	0	SIX1	SIX homeobox 1
hsa-miR-501-5p	1	0	1	1	1	1	HIVEP3	human immunodeficiency virus type I enhancer binding protein 3
hsa-miR-501-5p	0	0	0	1	0	0	TAS2R4	taste receptor, type 2, member 4
hsa-miR-501-5p	0	0	0	1	0	0	OR7A10	olfactory receptor, family 7, subfamily A, member 10
hsa-miR-501-5p	0	0	0	1	0	0	TICAM1	toll-like receptor adaptor molecule 1
hsa-miR-501-5p	0	0	1	1	1	1	PMPCB	peptidase (mitochondrial processing) beta
hsa-miR-501-5p	0	0	0	1	1	1	SIGLEC9	sialic acid binding Ig-like lectin 9
hsa-miR-501-5p	0	0	1	1	0	0	DHRS2	dehydrogenase/reductase (SDR family) member 2
hsa-miR-501-5p	0	0	0	1	0	0	ART1	ADP-ribosyltransferase 1
hsa-miR-501-5p	0	0	1	1	0	0	CHRNA10	cholinergic receptor, nicotinic, alpha 10 (neuronal)
hsa-miR-501-5p	1	0	1	1	1	1	DMXL2	Dmx-like 2
hsa-miR-501-5p	0	0	0	1	0	0	APOC4	apolipoprotein C-IV
hsa-miR-501-5p	0	0	0	1	0	0	NSUN5	NOP2/Sun domain family, member 5
hsa-miR-501-5p	0	0	0	1	0	0	TNNI2	troponin I type 2 (skeletal, fast)
hsa-miR-501-5p	0	0	0	1	1	1	ZNF233	zinc finger protein 233
hsa-miR-501-5p	0	0	1	1	1	1	KIF3A	kinesin family member 3A
hsa-miR-501-5p	0	0	1	1	0	0	KRT15	keratin 15
hsa-miR-501-5p	0	0	1	1	0	0	RAMP1	receptor (G protein-coupled) activity modifying protein 1
hsa-miR-501-5p	1	0	0	1	1	1	COQ3	coenzyme Q3 homolog, methyltransferase (S. cerevisiae)
hsa-miR-501-5p	0	0	0	1	0	0	MYBPH	myosin binding protein H
hsa-miR-501-5p	0	0	0	1	1	1	C14orf159	chromosome 14 open reading frame 159
hsa-miR-501-5p	0	0	1	1	1	1	HBXIP	hepatitis B virus x interacting protein
hsa-miR-501-5p	0	0	1	1	0	0	BLOC1S1	biogenesis of lysosomal organelles complex-1, subunit 1
hsa-miR-501-5p	1	0	1	1	1	1	PRADC1	protease-associated domain containing 1
hsa-miR-501-5p	1	0	0	1	1	1	TGFBRAP1	transforming growth factor, beta receptor associated protein 1
hsa-miR-501-5p	0	0	1	1	1	1	PWP1	PWP1 homolog (S. cerevisiae)
hsa-miR-501-5p	0	0	1	1	0	0	KIF12	kinesin family member 12
hsa-miR-501-5p	0	0	0	1	0	0	CD72	CD72 molecule
hsa-miR-501-5p	0	0	0	1	1	1	MRPL15	mitochondrial ribosomal protein L15
hsa-miR-501-5p	1	0	1	1	1	1	PI15	peptidase inhibitor 15
hsa-miR-501-5p	0	0	0	1	1	1	ABCG5	ATP-binding cassette, sub-family G (WHITE), member 5
hsa-miR-501-5p	0	0	1	1	0	0	CALHM2	calcium homeostasis modulator 2
hsa-miR-501-5p	0	0	0	1	1	1	PSMC1	proteasome (prosome, macropain) 26S subunit, ATPase, 1
hsa-miR-501-5p	0	0	1	1	0	0	LPCAT3	lysophosphatidylcholine acyltransferase 3
hsa-miR-501-5p	0	0	0	1	1	1	PALB2	partner and localizer of BRCA2
hsa-miR-501-5p	0	0	0	1	0	0	FAH	fumarylacetoacetate hydrolase (fumarylacetoacetase)
hsa-miR-501-5p	1	0	0	1	1	1	ATF1	activating transcription factor 1
hsa-miR-501-5p	0	0	1	1	1	1	SCPEP1	serine carboxypeptidase 1
hsa-miR-501-5p	1	0	1	1	1	1	WSB1	WD repeat and SOCS box containing 1
hsa-miR-501-5p	0	0	0	1	0	0	CHST8	carbohydrate (N-acetylgalactosamine 4-0) sulfotransferase 8
hsa-miR-501-5p	0	0	1	1	0	0	KCNN4	potassium intermediate/small conductance calcium-activated channel, subfamily N, member 4
hsa-miR-501-5p	1	0	1	1	1	1	CSE1L	CSE1 chromosome segregation 1-like (yeast)
hsa-miR-501-5p	1	0	1	1	1	1	EP300	E1A binding protein p300
hsa-miR-501-5p	0	0	1	1	0	0	FAM83E	family with sequence similarity 83, member E
hsa-miR-501-5p	0	0	0	1	1	1	TYR	tyrosinase (oculocutaneous albinism IA)
hsa-miR-501-5p	0	0	0	1	1	1	CLCA4	chloride channel accessory 4
hsa-miR-501-5p	0	0	1	1	1	1	SLC25A12	solute carrier family 25 (aspartate/glutamate carrier), member 12
hsa-miR-501-5p	0	0	0	1	0	0	GPR108	G protein-coupled receptor 108
hsa-miR-501-5p	0	0	0	1	0	0	PPAP2A	phosphatidic acid phosphatase type 2A
hsa-miR-501-5p	0	0	1	1	1	1	RIOK1	RIO kinase 1 (yeast)
hsa-miR-501-5p	0	0	0	1	1	1	CASP6	caspase 6, apoptosis-related cysteine peptidase
hsa-miR-501-5p	0	0	0	1	0	0	IQCG	IQ motif containing G
hsa-miR-501-5p	0	0	1	1	1	1	SQLE	squalene epoxidase
hsa-miR-501-5p	0	0	0	1	0	0	SLC5A4	solute carrier family 5 (low affinity glucose cotransporter), member 4
hsa-miR-501-5p	0	0	1	1	1	1	DEPDC5	DEP domain containing 5
hsa-miR-501-5p	0	0	1	1	1	1	RDH12	retinol dehydrogenase 12 (all-trans/9-cis/11-cis)
hsa-miR-501-5p	0	0	1	1	1	1	ARMC5	armadillo repeat containing 5
hsa-miR-501-5p	0	0	1	1	0	0	AFG3L2	AFG3 ATPase family gene 3-like 2 (S. cerevisiae)
hsa-miR-501-5p	0	0	0	1	0	0	EIF4A3	eukaryotic translation initiation factor 4A3
hsa-miR-501-5p	0	0	1	1	1	1	DYM	dymeclin
hsa-miR-501-5p	0	0	0	1	0	0	RCN3	reticulocalbin 3, EF-hand calcium binding domain
hsa-miR-501-5p	0	0	1	1	1	1	PLK4	polo-like kinase 4
hsa-miR-501-5p	0	0	0	1	0	0	ADAMTSL4	ADAMTS-like 4
hsa-miR-501-5p	1	0	1	1	1	1	POGZ	pogo transposable element with ZNF domain
hsa-miR-501-5p	0	0	1	1	0	0	WDPCP	WD repeat containing planar cell polarity effector
hsa-miR-501-5p	0	0	1	1	0	0	SNRPG	small nuclear ribonucleoprotein polypeptide G
hsa-miR-501-5p	0	0	1	1	1	1	TMEM177	transmembrane protein 177
hsa-miR-501-5p	0	0	0	1	1	1	METTL14	methyltransferase like 14
hsa-miR-501-5p	1	0	1	1	1	1	TRIM23	tripartite motif containing 23
hsa-miR-501-5p	0	0	0	1	1	1	EPHA1	EPH receptor A1
hsa-miR-501-5p	0	0	1	1	0	0	DOK2	docking protein 2, 56kDa
hsa-miR-501-5p	0	0	1	1	0	0	EIF3H	eukaryotic translation initiation factor 3, subunit H
hsa-miR-501-5p	1	0	1	1	1	1	FAM13C	family with sequence similarity 13, member C
hsa-miR-501-5p	0	0	0	1	0	0	GRIK4	glutamate receptor, ionotropic, kainate 4
hsa-miR-501-5p	0	0	0	1	1	1	ST14	suppression of tumorigenicity 14 (colon carcinoma)
hsa-miR-501-5p	1	0	1	1	1	1	NINL	ninein-like
hsa-miR-501-5p	0	0	1	1	1	1	COMMD7	COMM domain containing 7
hsa-miR-501-5p	0	0	1	1	0	0	CWC15	CWC15 spliceosome-associated protein homolog (S. cerevisiae)
hsa-miR-501-5p	1	0	1	1	1	1	TMEM218	transmembrane protein 218
hsa-miR-501-5p	0	0	1	1	1	1	ANKRD44	ankyrin repeat domain 44
hsa-miR-501-5p	0	0	1	1	1	1	NADKD1	NAD kinase domain containing 1
hsa-miR-501-5p	0	0	1	1	0	0	JAKMIP1	janus kinase and microtubule interacting protein 1
hsa-miR-501-5p	0	0	0	1	1	1	OBSCN	obscurin, cytoskeletal calmodulin and titin-interacting RhoGEF
hsa-miR-501-5p	1	0	1	1	1	1	PDLIM3	PDZ and LIM domain 3
hsa-miR-501-5p	1	0	0	1	1	1	RHOC	ras homolog family member C
hsa-miR-501-5p	0	0	1	1	1	1	TMBIM4	transmembrane BAX inhibitor motif containing 4
hsa-miR-501-5p	0	0	0	1	0	0	MAGEA8	melanoma antigen family A, 8
hsa-miR-501-5p	0	0	0	1	0	0	FAM161B	family with sequence similarity 161, member B
hsa-miR-501-5p	0	0	1	1	1	1	TDRD9	tudor domain containing 9
hsa-miR-501-5p	0	0	0	1	1	1	LYZL4	lysozyme-like 4
hsa-miR-501-5p	1	0	1	1	1	1	PRKAG2	protein kinase, AMP-activated, gamma 2 non-catalytic subunit
hsa-miR-501-5p	0	0	1	1	0	0	MX1	myxovirus (influenza virus) resistance 1, interferon-inducible protein p78 (mouse)
hsa-miR-501-5p	1	0	1	1	0	0	DTNB	dystrobrevin, beta
hsa-miR-501-5p	0	0	1	1	0	0	ACTR1B	ARP1 actin-related protein 1 homolog B, centractin beta (yeast)
hsa-miR-501-5p	1	0	1	1	1	1	ELMO2	engulfment and cell motility 2
hsa-miR-501-5p	0	0	1	1	0	0	GFRA4	GDNF family receptor alpha 4
hsa-miR-501-5p	0	0	1	1	1	1	MCAT	malonyl CoA:ACP acyltransferase (mitochondrial)
hsa-miR-501-5p	1	0	1	1	0	0	SHF	Src homology 2 domain containing F
hsa-miR-501-5p	1	0	0	1	0	0	AGRP	agouti related protein homolog (mouse)
hsa-miR-501-5p	0	0	0	1	0	0	LRWD1	leucine-rich repeats and WD repeat domain containing 1
hsa-miR-501-5p	0	0	1	1	1	1	PCYT1A	phosphate cytidylyltransferase 1, choline, alpha
hsa-miR-501-5p	0	0	1	1	0	0	HBD	hemoglobin, delta
hsa-miR-501-5p	0	0	0	1	1	1	HBB	hemoglobin, beta
hsa-miR-501-5p	0	0	0	1	1	1	FDXR	ferredoxin reductase
hsa-miR-501-5p	0	0	1	1	0	0	POLR3K	polymerase (RNA) III (DNA directed) polypeptide K, 12.3 kDa
hsa-miR-501-5p	0	0	1	1	0	0	RGSL1	regulator of G-protein signaling like 1
hsa-miR-501-5p	0	0	0	1	1	1	FAM228A	family with sequence similarity 228, member A
hsa-miR-501-5p	0	0	1	1	1	1	SLC23A3	solute carrier family 23 (nucleobase transporters), member 3
hsa-miR-501-5p	1	0	1	1	1	1	FBLN2	fibulin 2
hsa-miR-501-5p	0	0	1	1	1	1	ALB	albumin
hsa-miR-501-5p	1	0	1	1	0	0	LIPH	lipase, member H
hsa-miR-501-5p	0	0	0	1	0	0	LRPAP1	low density lipoprotein receptor-related protein associated protein 1
hsa-miR-501-5p	0	0	0	1	1	1	RP9	retinitis pigmentosa 9 (autosomal dominant)
hsa-miR-501-5p	0	0	1	1	1	1	KIF27	kinesin family member 27
hsa-miR-501-5p	0	0	0	1	0	0	LIPC	lipase, hepatic
hsa-miR-501-5p	1	0	1	1	1	1	TMEM132B	transmembrane protein 132B
hsa-miR-501-5p	0	0	1	1	0	0	CRABP1	cellular retinoic acid binding protein 1
hsa-miR-501-5p	0	0	1	1	0	0	POLR3E	polymerase (RNA) III (DNA directed) polypeptide E (80kD)
hsa-miR-501-5p	1	0	1	1	1	1	RBPMS2	RNA binding protein with multiple splicing 2
hsa-miR-501-5p	1	0	1	1	1	1	TAC3	tachykinin 3
hsa-miR-501-5p	0	0	1	1	1	1	STAT6	signal transducer and activator of transcription 6, interleukin-4 induced
hsa-miR-501-5p	0	0	1	1	1	1	MRPL16	mitochondrial ribosomal protein L16
hsa-miR-501-5p	0	0	1	1	0	0	SLC26A10	solute carrier family 26, member 10
hsa-miR-501-5p	0	0	1	1	1	1	ARHGEF25	Rho guanine nucleotide exchange factor (GEF) 25
hsa-miR-501-5p	0	0	1	1	0	0	FAM176C	family with sequence similarity 176, member C
hsa-miR-501-5p	0	0	1	1	0	0	MEI1	meiosis inhibitor 1
hsa-miR-501-5p	0	0	1	1	0	0	GNGT2	guanine nucleotide binding protein (G protein), gamma transducing activity polypeptide 2
hsa-miR-501-5p	0	0	1	1	1	1	ENGASE	endo-beta-N-acetylglucosaminidase
hsa-miR-501-5p	0	0	0	1	0	0	LY6D	lymphocyte antigen 6 complex, locus D
hsa-miR-501-5p	0	0	1	1	0	0	DDB1	damage-specific DNA binding protein 1, 127kDa
hsa-miR-501-5p	0	0	1	1	0	0	TTC21A	tetratricopeptide repeat domain 21A
hsa-miR-501-5p	0	0	1	1	0	0	C11orf85	chromosome 11 open reading frame 85
hsa-miR-501-5p	1	0	1	1	1	1	ING2	inhibitor of growth family, member 2
hsa-miR-501-5p	1	0	1	1	1	1	NME6	NME/NM23 nucleoside diphosphate kinase 6
hsa-miR-501-5p	1	0	0	1	1	1	KIF5B	kinesin family member 5B
hsa-miR-501-5p	0	0	0	1	1	1	PDHB	pyruvate dehydrogenase (lipoamide) beta
hsa-miR-501-5p	1	0	1	1	1	1	INSR	insulin receptor
hsa-miR-501-5p	1	0	1	1	0	0	RAB24	RAB24, member RAS oncogene family
hsa-miR-501-5p	1	0	0	1	0	0	TRABD	TraB domain containing
hsa-miR-501-5p	1	0	0	1	1	1	SSH1	slingshot homolog 1 (Drosophila)
hsa-miR-501-5p	0	0	1	1	1	1	CHST11	carbohydrate (chondroitin 4) sulfotransferase 11
hsa-miR-501-5p	0	0	0	1	0	0	SPACA5B	sperm acrosome associated 5B
hsa-miR-501-5p	0	0	0	1	0	0	ANKS3	ankyrin repeat and sterile alpha motif domain containing 3
hsa-miR-501-5p	0	0	0	1	0	0	UTF1	undifferentiated embryonic cell transcription factor 1
hsa-miR-501-5p	0	0	1	1	0	0	ZNHIT1	zinc finger, HIT-type containing 1
hsa-miR-501-5p	0	0	1	1	0	0	ARMC4	armadillo repeat containing 4
hsa-miR-501-5p	1	0	0	1	1	1	TACR1	tachykinin receptor 1
hsa-miR-501-5p	1	0	1	1	0	0	HTR1E	5-hydroxytryptamine (serotonin) receptor 1E, G protein-coupled
hsa-miR-501-5p	0	0	0	1	1	1	PTAFR	platelet-activating factor receptor
hsa-miR-501-5p	0	0	1	1	1	1	FEN1	flap structure-specific endonuclease 1
hsa-miR-501-5p	0	0	1	1	1	1	INSM2	insulinoma-associated 2
hsa-miR-501-5p	0	0	1	1	1	1	MRPS12	mitochondrial ribosomal protein S12
hsa-miR-501-5p	0	0	0	1	1	1	PSMA8	proteasome (prosome, macropain) subunit, alpha type, 8
hsa-miR-501-5p	0	0	1	1	1	1	WDR52	WD repeat domain 52
hsa-miR-501-5p	0	0	0	1	0	0	PHYHD1	phytanoyl-CoA dioxygenase domain containing 1
hsa-miR-501-5p	1	0	1	1	1	1	FAM192A	family with sequence similarity 192, member A
hsa-miR-501-5p	0	0	0	1	1	1	LOC729317	voltage-dependent anion channel 2 pseudogene
hsa-miR-501-5p	0	0	1	1	1	1	IL20RB	interleukin 20 receptor beta
hsa-miR-501-5p	0	0	0	1	0	0	PSMC5	proteasome (prosome, macropain) 26S subunit, ATPase, 5
hsa-miR-501-5p	1	0	1	1	0	0	LRCH4	leucine-rich repeats and calponin homology (CH) domain containing 4
hsa-miR-501-5p	1	0	1	1	1	1	CLTB	clathrin, light chain B
hsa-miR-501-5p	1	0	1	1	1	1	SPSB4	splA/ryanodine receptor domain and SOCS box containing 4
hsa-miR-501-5p	1	0	1	1	1	1	NEFH	neurofilament, heavy polypeptide
hsa-miR-501-5p	0	0	1	1	0	0	HRAS	v-Ha-ras Harvey rat sarcoma viral oncogene homolog
hsa-miR-501-5p	0	0	1	1	0	0	C6orf203	chromosome 6 open reading frame 203
hsa-miR-501-5p	0	0	0	1	0	0	OR52I2	olfactory receptor, family 52, subfamily I, member 2
hsa-miR-501-5p	0	0	1	1	0	0	KRI1	KRI1 homolog (S. cerevisiae)
hsa-miR-501-5p	0	0	1	1	0	0	GRINA	glutamate receptor, ionotropic, N-methyl D-aspartate-associated protein 1 (glutamate binding)
hsa-miR-501-5p	0	0	1	1	1	1	RMND5B	required for meiotic nuclear division 5 homolog B (S. cerevisiae)
hsa-miR-501-5p	0	0	1	1	0	0	TP53I3	tumor protein p53 inducible protein 3
hsa-miR-501-5p	0	0	1	1	0	0	ZNF821	zinc finger protein 821
hsa-miR-501-5p	0	0	0	1	0	0	ZNF575	zinc finger protein 575
hsa-miR-501-5p	0	0	0	1	0	0	FARSA	phenylalanyl-tRNA synthetase, alpha subunit
hsa-miR-501-5p	0	0	0	1	0	0	OR4P4	olfactory receptor, family 4, subfamily P, member 4
hsa-miR-501-5p	0	0	1	1	1	1	MMP1	matrix metallopeptidase 1 (interstitial collagenase)
hsa-miR-501-5p	0	0	0	1	1	1	ZNF354C	zinc finger protein 354C
hsa-miR-501-5p	1	0	1	1	1	1	CNOT4	CCR4-NOT transcription complex, subunit 4
hsa-miR-501-5p	0	0	0	1	0	0	MATK	megakaryocyte-associated tyrosine kinase
hsa-miR-501-5p	0	0	1	1	0	0	ARL6IP4	ADP-ribosylation-like factor 6 interacting protein 4
hsa-miR-501-5p	0	0	0	1	1	1	ZNF843	zinc finger protein 843
hsa-miR-501-5p	1	0	1	1	1	1	COL4A3	collagen, type IV, alpha 3 (Goodpasture antigen)
hsa-miR-501-5p	0	0	1	1	0	0	ARPC2	actin related protein 2/3 complex, subunit 2, 34kDa
hsa-miR-501-5p	0	0	0	1	0	0	INSL3	insulin-like 3 (Leydig cell)
hsa-miR-501-5p	0	0	0	1	1	1	JAK3	Janus kinase 3
hsa-miR-501-5p	1	0	1	1	0	0	ZNF527	zinc finger protein 527
hsa-miR-501-5p	0	0	1	1	1	1	TTC27	tetratricopeptide repeat domain 27
hsa-miR-501-5p	1	0	0	1	1	1	PABPC1	poly(A) binding protein, cytoplasmic 1
hsa-miR-501-5p	1	0	1	1	0	0	UBASH3A	ubiquitin associated and SH3 domain containing A
hsa-miR-501-5p	1	0	1	1	1	1	EZH2	enhancer of zeste homolog 2 (Drosophila)
hsa-miR-501-5p	0	0	0	1	0	0	GJD4	gap junction protein, delta 4, 40.1kDa
hsa-miR-501-5p	0	0	1	1	1	1	USP39	ubiquitin specific peptidase 39
hsa-miR-501-5p	0	0	1	1	1	1	SNRNP200	small nuclear ribonucleoprotein 200kDa (U5)
hsa-miR-501-5p	0	0	1	1	0	0	PRPF3	PRP3 pre-mRNA processing factor 3 homolog (S. cerevisiae)
hsa-miR-501-5p	0	0	0	1	1	1	P2RY13	purinergic receptor P2Y, G-protein coupled, 13
hsa-miR-501-5p	1	0	0	1	1	1	TAGAP	T-cell activation RhoGTPase activating protein
hsa-miR-501-5p	0	0	1	1	0	0	MARCO	macrophage receptor with collagenous structure
hsa-miR-501-5p	0	0	1	1	1	1	ZFP90	zinc finger protein 90 homolog (mouse)
hsa-miR-501-5p	0	0	1	1	1	1	FAM178B	family with sequence similarity 178, member B
hsa-miR-501-5p	0	0	1	1	1	1	KCNN2	potassium intermediate/small conductance calcium-activated channel, subfamily N, member 2
hsa-miR-501-5p	0	0	0	1	1	1	C1S	complement component 1, s subcomponent
hsa-miR-501-5p	1	0	1	1	1	1	PLEKHH1	pleckstrin homology domain containing, family H (with MyTH4 domain) member 1
hsa-miR-501-5p	1	0	1	1	1	1	GRPEL2	GrpE-like 2, mitochondrial (E. coli)
hsa-miR-501-5p	0	0	0	1	0	0	GDPGP1	GDP-D-glucose phosphorylase 1
hsa-miR-501-5p	0	0	1	1	1	1	KRTAP8-1	keratin associated protein 8-1
hsa-miR-501-5p	1	0	1	1	1	1	USP45	ubiquitin specific peptidase 45
hsa-miR-501-5p	0	0	0	1	0	0	PRAMEF15	PRAME family member 15
hsa-miR-501-5p	0	0	1	1	0	0	RXFP3	relaxin/insulin-like family peptide receptor 3
hsa-miR-501-5p	0	0	1	1	1	1	C1orf110	chromosome 1 open reading frame 110
hsa-miR-501-5p	0	0	1	1	1	1	MINA	MYC induced nuclear antigen
hsa-miR-501-5p	0	0	0	1	0	0	AMY1B	amylase, alpha 1B (salivary)
hsa-miR-501-5p	1	0	1	1	1	1	NOTUM	notum pectinacetylesterase homolog (Drosophila)
hsa-miR-501-5p	0	0	0	1	1	1	ZNF789	zinc finger protein 789
hsa-miR-501-5p	0	0	1	1	0	0	CALCA	calcitonin-related polypeptide alpha
hsa-miR-501-5p	0	0	0	1	0	0	PP13439	uncharacterized LOC100128046
hsa-miR-501-5p	0	0	0	1	1	1	NDNL2	necdin-like 2
hsa-miR-501-5p	0	0	1	1	1	1	ZNRD1	zinc ribbon domain containing 1
hsa-miR-501-5p	0	0	1	1	1	1	CMTM3	CKLF-like MARVEL transmembrane domain containing 3
hsa-miR-501-5p	1	0	1	1	0	0	TSEN54	tRNA splicing endonuclease 54 homolog (S. cerevisiae)
hsa-miR-501-5p	0	0	1	1	1	1	NLRP9	NLR family, pyrin domain containing 9
hsa-miR-501-5p	0	0	1	1	0	0	DMRTC1B	DMRT-like family C1B
hsa-miR-501-5p	0	0	0	1	0	0	PRODH	proline dehydrogenase (oxidase) 1
hsa-miR-501-5p	0	0	1	1	1	1	HTR3D	5-hydroxytryptamine (serotonin) receptor 3D, ionotropic
hsa-miR-501-5p	1	0	1	1	1	1	EML1	echinoderm microtubule associated protein like 1
hsa-miR-501-5p	0	0	0	1	1	1	ZNF20	zinc finger protein 20
hsa-miR-501-5p	0	0	1	1	1	1	OR9Q1	olfactory receptor, family 9, subfamily Q, member 1
hsa-miR-501-5p	0	0	1	1	0	0	NME1	NME/NM23 nucleoside diphosphate kinase 1
hsa-miR-501-5p	0	0	0	1	0	0	NME1-NME2	NME1-NME2 readthrough
hsa-miR-501-5p	0	0	0	1	0	0	NME2	NME/NM23 nucleoside diphosphate kinase 2
hsa-miR-501-5p	1	0	1	1	1	1	TMPRSS13	transmembrane protease, serine 13
hsa-miR-501-5p	1	0	1	1	1	1	AKAP1	A kinase (PRKA) anchor protein 1
hsa-miR-501-5p	0	0	1	1	0	0	NUDT2	nudix (nucleoside diphosphate linked moiety X)-type motif 2
hsa-miR-501-5p	0	0	1	1	0	0	TAF13	TAF13 RNA polymerase II, TATA box binding protein (TBP)-associated factor, 18kDa
hsa-miR-501-5p	1	0	0	1	1	1	CYLC2	cylicin, basic protein of sperm head cytoskeleton 2
hsa-miR-501-5p	0	0	0	1	0	0	GJB5	gap junction protein, beta 5, 31.1kDa
hsa-miR-501-5p	0	0	1	1	0	0	TRPV2	transient receptor potential cation channel, subfamily V, member 2
hsa-miR-501-5p	1	0	1	1	1	1	EVI5	ecotropic viral integration site 5
hsa-miR-501-5p	0	0	0	1	0	0	TEKT3	tektin 3
hsa-miR-501-5p	0	0	0	1	1	1	CLEC12A	C-type lectin domain family 12, member A
hsa-miR-501-5p	0	0	1	1	1	1	CLEC12B	C-type lectin domain family 12, member B
hsa-miR-501-5p	0	0	1	1	1	1	GAL3ST1	galactose-3-O-sulfotransferase 1
hsa-miR-501-5p	1	0	1	1	1	1	YTHDF3	YTH domain family, member 3
hsa-miR-501-5p	0	0	1	1	1	1	ANKRD6	ankyrin repeat domain 6
hsa-miR-501-5p	1	0	1	1	1	1	C20orf26	chromosome 20 open reading frame 26
hsa-miR-501-5p	0	0	1	1	0	0	GOLGB1	golgin B1
hsa-miR-501-5p	1	0	1	1	1	1	NHLRC1	NHL repeat containing 1
hsa-miR-501-5p	1	0	1	1	1	1	PVRL1	poliovirus receptor-related 1 (herpesvirus entry mediator C)
hsa-miR-501-5p	0	0	1	1	0	0	MCCC2	methylcrotonoyl-CoA carboxylase 2 (beta)
hsa-miR-501-5p	0	0	1	1	0	0	TRAF3IP3	TRAF3 interacting protein 3
hsa-miR-501-5p	0	0	0	1	0	0	FAM22F	family with sequence similarity 22, member F
hsa-miR-501-5p	0	0	1	1	1	1	TRIM28	tripartite motif containing 28
hsa-miR-501-5p	1	0	1	1	1	1	GRHL3	grainyhead-like 3 (Drosophila)
hsa-miR-501-5p	0	0	1	1	0	0	PPCDC	phosphopantothenoylcysteine decarboxylase
hsa-miR-501-5p	0	0	0	1	0	0	QRFP	pyroglutamylated RFamide peptide
hsa-miR-501-5p	0	0	1	1	1	1	DUSP28	dual specificity phosphatase 28
hsa-miR-501-5p	0	0	1	1	1	1	APOD	apolipoprotein D
hsa-miR-501-5p	1	0	1	1	0	0	AKT1S1	AKT1 substrate 1 (proline-rich)
hsa-miR-501-5p	0	0	1	1	0	0	EVC2	Ellis van Creveld syndrome 2
hsa-miR-501-5p	1	0	1	1	0	0	NR1H3	nuclear receptor subfamily 1, group H, member 3
hsa-miR-501-5p	0	0	1	1	1	1	BPGM	2,3-bisphosphoglycerate mutase
hsa-miR-501-5p	0	0	0	1	0	0	CSTL1	cystatin-like 1
hsa-miR-501-5p	0	0	1	1	1	1	CASC1	cancer susceptibility candidate 1
hsa-miR-501-5p	0	0	1	1	0	0	SVIP	small VCP/p97-interacting protein
hsa-miR-501-5p	0	0	0	1	0	0	OSCP1	organic solute carrier partner 1
hsa-miR-501-5p	0	0	1	1	0	0	CUL9	cullin 9
hsa-miR-501-5p	0	0	0	1	1	1	TRIM16	tripartite motif containing 16
hsa-miR-501-5p	0	0	1	1	0	0	IL31RA	interleukin 31 receptor A
hsa-miR-501-5p	0	0	1	1	0	0	DNAJC4	DnaJ (Hsp40) homolog, subfamily C, member 4
hsa-miR-501-5p	1	0	1	1	1	1	SLC25A27	solute carrier family 25, member 27
hsa-miR-501-5p	0	0	1	1	0	0	EVL	Enah/Vasp-like
hsa-miR-501-5p	0	0	0	1	1	1	HTR3A	5-hydroxytryptamine (serotonin) receptor 3A, ionotropic
hsa-miR-501-5p	0	0	0	1	0	0	SFXN4	sideroflexin 4
hsa-miR-501-5p	0	0	1	1	1	1	UBA5	ubiquitin-like modifier activating enzyme 5
hsa-miR-501-5p	1	0	1	1	1	1	ATN1	atrophin 1
hsa-miR-501-5p	1	0	1	1	1	1	PCYT1B	phosphate cytidylyltransferase 1, choline, beta
hsa-miR-501-5p	1	0	1	1	1	1	TAF7L	TAF7-like RNA polymerase II, TATA box binding protein (TBP)-associated factor, 50kDa
hsa-miR-501-5p	0	0	1	1	0	0	WDR96	WD repeat domain 96
hsa-miR-501-5p	0	0	1	1	1	1	MAP1LC3C	microtubule-associated protein 1 light chain 3 gamma
hsa-miR-501-5p	0	0	0	1	1	1	ZNF23	zinc finger protein 23
hsa-miR-501-5p	1	0	1	1	1	1	SMC4	structural maintenance of chromosomes 4
hsa-miR-501-5p	0	0	0	1	0	0	C1QTNF5	C1q and tumor necrosis factor related protein 5
hsa-miR-501-5p	0	0	0	1	0	0	ARID5A	AT rich interactive domain 5A (MRF1-like)
hsa-miR-501-5p	0	0	0	1	1	1	TMEM79	transmembrane protein 79
hsa-miR-501-5p	0	0	1	1	0	0	HIST1H2BB	histone cluster 1, H2bb
hsa-miR-501-5p	0	0	1	1	0	0	ASIC4	acid-sensing (proton-gated) ion channel family member 4
hsa-miR-501-5p	0	0	1	1	1	1	C1orf177	chromosome 1 open reading frame 177
hsa-miR-501-5p	0	0	1	1	0	0	RTP2	receptor (chemosensory) transporter protein 2
hsa-miR-501-5p	1	0	1	1	1	1	NF1	neurofibromin 1
hsa-miR-501-5p	0	0	1	1	0	0	ZCWPW1	zinc finger, CW type with PWWP domain 1
hsa-miR-501-5p	1	0	1	1	1	1	TXLNB	taxilin beta
hsa-miR-501-5p	0	0	1	1	1	1	SLC2A10	solute carrier family 2 (facilitated glucose transporter), member 10
hsa-miR-501-5p	0	0	1	1	0	0	PLCG2	phospholipase C, gamma 2 (phosphatidylinositol-specific)
hsa-miR-501-5p	0	0	1	1	0	0	SH3GLB2	SH3-domain GRB2-like endophilin B2
hsa-miR-501-5p	0	0	0	1	1	1	ZNF675	zinc finger protein 675
hsa-miR-501-5p	1	0	1	1	1	1	MDK	midkine (neurite growth-promoting factor 2)
hsa-miR-501-5p	0	0	0	1	1	1	TBXA2R	thromboxane A2 receptor
hsa-miR-501-5p	0	0	0	1	1	1	LCE1B	late cornified envelope 1B
hsa-miR-501-5p	0	0	0	1	0	0	OR5B21	olfactory receptor, family 5, subfamily B, member 21
hsa-miR-501-5p	1	0	1	1	1	1	DIS3L2	DIS3 mitotic control homolog (S. cerevisiae)-like 2
hsa-miR-501-5p	0	0	1	1	0	0	GALNTL5	UDP-N-acetyl-alpha-D-galactosamine:polypeptide N-acetylgalactosaminyltransferase-like 5
hsa-miR-501-5p	0	0	0	1	1	1	PKD1L2	polycystic kidney disease 1-like 2
hsa-miR-501-5p	0	0	0	1	1	1	TTI2	TELO2 interacting protein 2
hsa-miR-501-5p	0	0	1	1	1	1	RBBP8	retinoblastoma binding protein 8
hsa-miR-501-5p	0	0	1	1	1	1	GON4L	gon-4-like (C. elegans)
hsa-miR-501-5p	0	0	1	1	1	1	MEPE	matrix extracellular phosphoglycoprotein
hsa-miR-501-5p	0	0	1	1	1	1	GSTM3	glutathione S-transferase mu 3 (brain)
hsa-miR-501-5p	0	0	0	1	1	1	ZNF627	zinc finger protein 627
hsa-miR-501-5p	1	0	0	1	1	1	DCLRE1A	DNA cross-link repair 1A
hsa-miR-501-5p	0	0	1	1	0	0	MTMR11	myotubularin related protein 11
hsa-miR-501-5p	0	0	1	1	1	1	PHLDB1	pleckstrin homology-like domain, family B, member 1
hsa-miR-501-5p	0	0	0	1	0	0	FICD	FIC domain containing
hsa-miR-501-5p	0	0	1	1	1	1	METTL13	methyltransferase like 13
hsa-miR-501-5p	1	0	1	1	1	1	CNST	consortin, connexin sorting protein
hsa-miR-501-5p	0	0	1	1	1	1	C1orf101	chromosome 1 open reading frame 101
hsa-miR-501-5p	1	0	0	1	1	1	TRIM67	tripartite motif containing 67
hsa-miR-501-5p	0	0	1	1	1	1	PARP1	poly (ADP-ribose) polymerase 1
hsa-miR-501-5p	1	0	1	1	1	1	SMYD2	SET and MYND domain containing 2
hsa-miR-501-5p	0	0	0	1	0	0	G0S2	G0/G1switch 2
hsa-miR-501-5p	1	0	1	1	1	1	RASSF5	Ras association (RalGDS/AF-6) domain family member 5
hsa-miR-501-5p	0	0	1	1	1	1	MTHFD1L	methylenetetrahydrofolate dehydrogenase (NADP+ dependent) 1-like
hsa-miR-501-5p	0	0	1	1	0	0	TMEM9	transmembrane protein 9
hsa-miR-501-5p	1	0	1	1	1	1	SASH1	SAM and SH3 domain containing 1
hsa-miR-501-5p	1	0	1	1	1	1	SCYL3	SCY1-like 3 (S. cerevisiae)
hsa-miR-501-5p	1	0	1	1	1	1	SGK1	serum/glucocorticoid regulated kinase 1
hsa-miR-501-5p	1	0	1	1	1	1	RGS4	regulator of G-protein signaling 4
hsa-miR-501-5p	0	0	1	1	1	1	ATP1A4	ATPase, Na+/K+ transporting, alpha 4 polypeptide
hsa-miR-501-5p	0	0	1	1	1	1	FCRL5	Fc receptor-like 5
hsa-miR-501-5p	0	0	0	1	0	0	INSRR	insulin receptor-related receptor
hsa-miR-501-5p	1	0	1	1	1	1	PTPRK	protein tyrosine phosphatase, receptor type, K
hsa-miR-501-5p	0	0	1	1	1	1	ECHDC1	enoyl CoA hydratase domain containing 1
hsa-miR-501-5p	1	0	1	1	0	0	PYGO2	pygopus homolog 2 (Drosophila)
hsa-miR-501-5p	1	0	1	1	0	0	PBXIP1	pre-B-cell leukemia homeobox interacting protein 1
hsa-miR-501-5p	0	0	1	1	0	0	PMVK	phosphomevalonate kinase
hsa-miR-501-5p	0	0	1	1	1	1	NPR1	natriuretic peptide receptor A/guanylate cyclase A (atrionatriuretic peptide receptor A)
hsa-miR-501-5p	0	0	1	1	0	0	S100A1	S100 calcium binding protein A1
hsa-miR-501-5p	0	0	1	1	1	1	SMCP	sperm mitochondria-associated cysteine-rich protein
hsa-miR-501-5p	0	0	0	1	0	0	LCE1A	late cornified envelope 1A
hsa-miR-501-5p	0	0	0	1	0	0	UROS	uroporphyrinogen III synthase
hsa-miR-501-5p	0	0	1	1	0	0	LCE3D	late cornified envelope 3D
hsa-miR-501-5p	0	0	1	1	0	0	PSMD4	proteasome (prosome, macropain) 26S subunit, non-ATPase, 4
hsa-miR-501-5p	0	0	1	1	1	1	GRK5	G protein-coupled receptor kinase 5
hsa-miR-501-5p	1	0	1	1	1	1	SV2A	synaptic vesicle glycoprotein 2A
hsa-miR-501-5p	0	0	0	1	0	0	ACP6	acid phosphatase 6, lysophosphatidic
hsa-miR-501-5p	0	0	0	1	0	0	VWA2	von Willebrand factor A domain containing 2
hsa-miR-501-5p	0	0	1	1	1	1	POLR3GL	polymerase (RNA) III (DNA directed) polypeptide G (32kD)-like
hsa-miR-501-5p	1	0	1	1	1	1	GDAP2	ganglioside induced differentiation associated protein 2
hsa-miR-501-5p	1	0	1	1	1	1	MPP1	membrane protein, palmitoylated 1, 55kDa
hsa-miR-501-5p	0	0	0	1	0	0	RARS2	arginyl-tRNA synthetase 2, mitochondrial
hsa-miR-501-5p	0	0	1	1	0	0	AP4B1	adaptor-related protein complex 4, beta 1 subunit
hsa-miR-501-5p	0	0	0	1	1	1	NT5E	5'-nucleotidase, ecto (CD73)
hsa-miR-501-5p	0	0	1	1	0	0	OVGP1	oviductal glycoprotein 1, 120kDa
hsa-miR-501-5p	1	0	1	1	0	0	GDI1	GDP dissociation inhibitor 1
hsa-miR-501-5p	0	0	1	1	0	0	EMD	emerin
hsa-miR-501-5p	0	0	0	1	0	0	FLNA	filamin A, alpha
hsa-miR-501-5p	0	0	0	1	0	0	NFKB2	nuclear factor of kappa light polypeptide gene enhancer in B-cells 2 (p49/p100)
[truncated: 263 more rows]
