# Supplementary material for: Profiling of Selected MicroRNAs in Proliferative Eutopic Endometrium of Women with Ovarian Endometriosis
Source: Biomed Res Int. 2015 Aug 20;2015:760698. doi: 10.1155/2015/760698 (PMC4558423; doi:10.1155/2015/760698)
Supplement: Supplementary file 1 — Table I: The names of miRNAs significantly differentially expressed between eutopic endometrium of patients with endometriosis vs eutopic endometrium of patients without endometriosis. Table II: The associations between miRNA and mRNA, which presents detailed results of the search of six major databases i.e targetscan, tarbase, miranda, mirbase, mirtarget2 and pictar. [file 760698.f1.zip › 760698.f1/Table II/hsa-miR-507.tsv]

miR	targetscan	tarbase	miranda	mirbase	mirtarget2	pictar	GeneSymbol	GeneName
hsa-miR-507	1	0	1	1	1	1	CHD9	chromodomain helicase DNA binding protein 9
hsa-miR-507	0	0	1	1	1	1	PPIP5K1	diphosphoinositol pentakisphosphate kinase 1
hsa-miR-507	1	0	1	1	1	1	FAM65B	family with sequence similarity 65, member B
hsa-miR-507	1	0	1	0	1	1	PTPRT	protein tyrosine phosphatase, receptor type, T
hsa-miR-507	0	0	1	0	0	0	FAM91A2	family with sequence similarity 91, member A2
hsa-miR-507	1	0	1	1	1	1	SLC4A7	solute carrier family 4, sodium bicarbonate cotransporter, member 7
hsa-miR-507	1	0	1	1	1	1	GIGYF2	GRB10 interacting GYF protein 2
hsa-miR-507	0	0	1	1	0	0	FKBP15	FK506 binding protein 15, 133kDa
hsa-miR-507	0	0	1	1	1	1	DZIP3	DAZ interacting protein 3, zinc finger
hsa-miR-507	0	0	1	1	1	1	XRCC4	X-ray repair complementing defective repair in Chinese hamster cells 4
hsa-miR-507	1	0	1	0	1	1	DOCK4	dedicator of cytokinesis 4
hsa-miR-507	1	0	1	1	1	1	DMXL2	Dmx-like 2
hsa-miR-507	1	0	1	1	1	1	C11orf9	chromosome 11 open reading frame 9
hsa-miR-507	1	0	1	1	1	1	RGL1	ral guanine nucleotide dissociation stimulator-like 1
hsa-miR-507	0	0	1	1	1	1	FASTKD2	FAST kinase domains 2
hsa-miR-507	1	0	1	1	1	1	NTNG1	netrin G1
hsa-miR-507	0	0	1	1	1	1	TBC1D30	TBC1 domain family, member 30
hsa-miR-507	1	0	1	1	0	0	FRMD4B	FERM domain containing 4B
hsa-miR-507	1	0	1	1	1	1	PDE10A	phosphodiesterase 10A
hsa-miR-507	1	0	1	1	0	0	ZC3H4	zinc finger CCCH-type containing 4
hsa-miR-507	1	0	1	0	1	1	SRGAP3	SLIT-ROBO Rho GTPase activating protein 3
hsa-miR-507	1	0	1	0	1	1	INTS2	integrator complex subunit 2
hsa-miR-507	1	0	1	0	0	0	ODZ4	odz, odd Oz/ten-m homolog 4 (Drosophila)
hsa-miR-507	1	0	1	1	1	1	PCDH19	protocadherin 19
hsa-miR-507	1	0	1	1	1	1	UNC79	unc-79 homolog (C. elegans)
hsa-miR-507	1	0	1	1	1	1	BAZ2B	bromodomain adjacent to zinc finger domain, 2B
hsa-miR-507	1	0	1	0	1	1	SEMA6D	sema domain, transmembrane domain (TM), and cytoplasmic domain, (semaphorin) 6D
hsa-miR-507	1	0	1	1	1	1	USP28	ubiquitin specific peptidase 28
hsa-miR-507	1	0	1	1	1	1	KIAA1522	KIAA1522
hsa-miR-507	0	0	1	0	1	1	FBRSL1	fibrosin-like 1
hsa-miR-507	1	0	1	1	1	1	PPP6R3	protein phosphatase 6, regulatory subunit 3
hsa-miR-507	0	0	1	0	0	0	CHD8	chromodomain helicase DNA binding protein 8
hsa-miR-507	0	0	1	0	1	1	ZSWIM6	zinc finger, SWIM-type containing 6
hsa-miR-507	1	0	1	1	1	1	PHF21A	PHD finger protein 21A
hsa-miR-507	0	0	1	1	1	1	FANCI	Fanconi anemia, complementation group I
hsa-miR-507	1	0	1	1	1	1	LCOR	ligand dependent nuclear receptor corepressor
hsa-miR-507	1	0	1	0	1	1	JPH4	junctophilin 4
hsa-miR-507	0	0	1	1	1	1	UNC80	unc-80 homolog (C. elegans)
hsa-miR-507	1	0	1	1	1	1	SH3TC2	SH3 domain and tetratricopeptide repeats 2
hsa-miR-507	1	0	1	1	1	1	PGR	progesterone receptor
hsa-miR-507	1	0	1	1	1	1	KCNMA1	potassium large conductance calcium-activated channel, subfamily M, alpha member 1
hsa-miR-507	1	0	1	0	1	1	BEND4	BEN domain containing 4
hsa-miR-507	1	1	1	1	1	1	BACE1	beta-site APP-cleaving enzyme 1
hsa-miR-507	1	0	1	1	1	1	UBE3A	ubiquitin protein ligase E3A
hsa-miR-507	1	0	1	1	1	1	LTBP1	latent transforming growth factor beta binding protein 1
hsa-miR-507	1	0	1	0	1	1	PCDHA13	protocadherin alpha 13
hsa-miR-507	1	0	1	1	1	1	PCDHA4	protocadherin alpha 4
hsa-miR-507	1	0	1	1	0	0	ELN	elastin
hsa-miR-507	1	0	1	1	1	1	MEF2A	myocyte enhancer factor 2A
hsa-miR-507	0	0	1	1	1	1	DNM1L	dynamin 1-like
hsa-miR-507	1	0	1	1	1	1	SLC8A1	solute carrier family 8 (sodium/calcium exchanger), member 1
hsa-miR-507	1	0	1	1	1	1	DTNA	dystrobrevin, alpha
hsa-miR-507	1	0	1	0	1	1	PLAG1	pleiomorphic adenoma gene 1
hsa-miR-507	1	0	1	1	1	1	RASSF5	Ras association (RalGDS/AF-6) domain family member 5
hsa-miR-507	0	0	1	1	1	1	DGKI	diacylglycerol kinase, iota
hsa-miR-507	1	0	1	1	1	1	E2F5	E2F transcription factor 5, p130-binding
hsa-miR-507	1	0	1	1	1	1	PRKACB	protein kinase, cAMP-dependent, catalytic, beta
hsa-miR-507	1	0	1	1	1	1	REV3L	REV3-like, polymerase (DNA directed), zeta, catalytic subunit
hsa-miR-507	1	0	1	1	1	1	PPFIA1	protein tyrosine phosphatase, receptor type, f polypeptide (PTPRF), interacting protein (liprin), alpha 1
hsa-miR-507	1	0	1	1	1	1	AEBP2	AE binding protein 2
hsa-miR-507	0	0	1	1	0	0	IFT27	intraflagellar transport 27 homolog (Chlamydomonas)
hsa-miR-507	0	0	1	1	1	1	PPP1R12C	protein phosphatase 1, regulatory subunit 12C
hsa-miR-507	0	0	1	1	0	0	EIF2B4	eukaryotic translation initiation factor 2B, subunit 4 delta, 67kDa
hsa-miR-507	0	0	1	1	0	0	ITGA2B	integrin, alpha 2b (platelet glycoprotein IIb of IIb/IIIa complex, antigen CD41)
hsa-miR-507	1	0	1	1	1	1	HNRNPK	heterogeneous nuclear ribonucleoprotein K
hsa-miR-507	0	0	1	1	0	0	CFLAR	CASP8 and FADD-like apoptosis regulator
hsa-miR-507	0	0	1	1	1	1	HLA-DQA1	major histocompatibility complex, class II, DQ alpha 1
hsa-miR-507	1	0	1	1	1	1	ARHGEF3	Rho guanine nucleotide exchange factor (GEF) 3
hsa-miR-507	0	0	1	1	0	0	PXK	PX domain containing serine/threonine kinase
hsa-miR-507	1	0	1	1	1	1	TEAD1	TEA domain family member 1 (SV40 transcriptional enhancer factor)
hsa-miR-507	1	0	1	1	1	1	ZFX	zinc finger protein, X-linked
hsa-miR-507	1	0	1	0	1	1	PDE4D	phosphodiesterase 4D, cAMP-specific
hsa-miR-507	1	0	1	1	1	1	YME1L1	YME1-like 1 (S. cerevisiae)
hsa-miR-507	0	0	1	0	0	0	ALOX12P2	arachidonate 12-lipoxygenase pseudogene 2
hsa-miR-507	1	0	1	1	1	1	PCDH17	protocadherin 17
hsa-miR-507	1	0	1	1	1	1	SOCS2	suppressor of cytokine signaling 2
hsa-miR-507	0	0	1	1	1	1	KHDRBS3	KH domain containing, RNA binding, signal transduction associated 3
hsa-miR-507	1	0	1	1	1	1	RUNX2	runt-related transcription factor 2
hsa-miR-507	1	0	1	1	1	1	TP63	tumor protein p63
hsa-miR-507	0	0	1	1	1	1	LYPLA1	lysophospholipase I
hsa-miR-507	1	0	1	0	1	1	MAP4K4	mitogen-activated protein kinase kinase kinase kinase 4
hsa-miR-507	0	0	1	1	1	1	EIF2A	eukaryotic translation initiation factor 2A, 65kDa
hsa-miR-507	0	0	1	1	1	1	TIAM2	T-cell lymphoma invasion and metastasis 2
hsa-miR-507	0	0	1	1	1	1	DMRT2	doublesex and mab-3 related transcription factor 2
hsa-miR-507	1	0	1	1	1	1	AASDHPPT	aminoadipate-semialdehyde dehydrogenase-phosphopantetheinyl transferase
hsa-miR-507	1	0	1	1	1	1	ANKRD13A	ankyrin repeat domain 13A
hsa-miR-507	1	0	1	1	1	1	AGPAT3	1-acylglycerol-3-phosphate O-acyltransferase 3
hsa-miR-507	1	0	1	1	1	1	MARK3	MAP/microtubule affinity-regulating kinase 3
hsa-miR-507	0	0	1	1	0	0	NCOA6	nuclear receptor coactivator 6
hsa-miR-507	0	0	1	1	1	1	LMBRD1	LMBR1 domain containing 1
hsa-miR-507	1	0	1	1	1	1	NXT2	nuclear transport factor 2-like export factor 2
hsa-miR-507	0	0	1	1	1	1	SPG21	spastic paraplegia 21 (autosomal recessive, Mast syndrome)
hsa-miR-507	0	0	1	0	0	0	TIGD7	tigger transposable element derived 7
hsa-miR-507	1	0	1	0	1	1	PARP11	poly (ADP-ribose) polymerase family, member 11
hsa-miR-507	0	0	1	1	0	0	TCP11	t-complex 11 homolog (mouse)
hsa-miR-507	0	0	1	1	0	0	EXOSC8	exosome component 8
hsa-miR-507	0	0	1	0	1	1	KANSL3	KAT8 regulatory NSL complex subunit 3
hsa-miR-507	1	0	1	1	1	1	METTL10	methyltransferase like 10
hsa-miR-507	1	0	1	1	1	1	CALU	calumenin
hsa-miR-507	1	0	1	0	1	1	USP32	ubiquitin specific peptidase 32
hsa-miR-507	1	0	1	1	1	1	PDE8A	phosphodiesterase 8A
hsa-miR-507	1	0	1	1	1	1	MAGI1	membrane associated guanylate kinase, WW and PDZ domain containing 1
hsa-miR-507	0	0	1	0	0	0	ANKRD30BP2	ankyrin repeat domain 30B pseudogene 2
hsa-miR-507	1	0	1	1	1	1	ZNF148	zinc finger protein 148
hsa-miR-507	1	0	1	1	0	0	SEPT8	septin 8
hsa-miR-507	1	0	1	1	1	1	RBFOX1	RNA binding protein, fox-1 homolog (C. elegans) 1
hsa-miR-507	1	0	1	1	1	1	WAPAL	wings apart-like homolog (Drosophila)
hsa-miR-507	0	0	1	1	1	1	AMPH	amphiphysin
hsa-miR-507	0	0	1	1	1	1	CHODL	chondrolectin
hsa-miR-507	0	0	1	1	1	1	ANKRD36B	ankyrin repeat domain 36B
hsa-miR-507	1	0	1	1	1	1	SUCO	SUN domain containing ossification factor
hsa-miR-507	0	0	1	0	0	0	CACNA2D3	calcium channel, voltage-dependent, alpha 2/delta subunit 3
hsa-miR-507	1	0	1	1	1	1	VAMP7	vesicle-associated membrane protein 7
hsa-miR-507	1	0	1	1	1	1	NRXN3	neurexin 3
hsa-miR-507	0	0	1	0	1	1	SRPK1	SRSF protein kinase 1
hsa-miR-507	1	0	1	1	1	1	ARL4C	ADP-ribosylation factor-like 4C
hsa-miR-507	0	0	1	1	1	1	PHACTR3	phosphatase and actin regulator 3
hsa-miR-507	1	0	1	1	1	1	XIRP1	xin actin-binding repeat containing 1
hsa-miR-507	0	0	1	1	0	0	IL4I1	interleukin 4 induced 1
hsa-miR-507	0	0	1	0	0	0	COL28A1	collagen, type XXVIII, alpha 1
hsa-miR-507	0	0	1	1	1	1	ESRP1	epithelial splicing regulatory protein 1
hsa-miR-507	1	0	1	1	1	1	AKAP2	A kinase (PRKA) anchor protein 2
hsa-miR-507	1	0	1	0	1	1	NFAT5	nuclear factor of activated T-cells 5, tonicity-responsive
hsa-miR-507	1	0	1	1	1	1	SIK2	salt-inducible kinase 2
hsa-miR-507	0	0	1	1	1	1	PARP16	poly (ADP-ribose) polymerase family, member 16
hsa-miR-507	0	0	1	0	0	0	TUG1	taurine upregulated 1 (non-protein coding)
hsa-miR-507	0	0	1	1	1	1	OLFM4	olfactomedin 4
hsa-miR-507	1	0	1	1	1	1	ARGLU1	arginine and glutamate rich 1
hsa-miR-507	1	0	1	1	1	1	RIC8B	resistance to inhibitors of cholinesterase 8 homolog B (C. elegans)
hsa-miR-507	1	0	1	1	1	1	EIF2C1	eukaryotic translation initiation factor 2C, 1
hsa-miR-507	1	0	1	1	1	1	SLC38A2	solute carrier family 38, member 2
hsa-miR-507	1	0	1	1	1	1	ARMC8	armadillo repeat containing 8
hsa-miR-507	1	0	1	0	0	0	ZNRF3	zinc and ring finger 3
hsa-miR-507	0	0	1	0	0	0	DUXAP10	double homeobox A pseudogene 10
hsa-miR-507	1	0	1	1	1	1	MACF1	microtubule-actin crosslinking factor 1
hsa-miR-507	1	0	1	1	1	1	PPFIA4	protein tyrosine phosphatase, receptor type, f polypeptide (PTPRF), interacting protein (liprin), alpha 4
hsa-miR-507	0	0	1	0	0	0	LOC284561	uncharacterized LOC284561
hsa-miR-507	1	0	1	1	1	1	BAZ2A	bromodomain adjacent to zinc finger domain, 2A
hsa-miR-507	1	0	1	1	1	1	DERL1	derlin 1
hsa-miR-507	1	0	1	1	1	1	ARHGEF15	Rho guanine nucleotide exchange factor (GEF) 15
hsa-miR-507	0	0	1	0	0	0	LOC286059	tumor necrosis factor receptor superfamily, member 10d, decoy with truncated death domain pseudogene
hsa-miR-507	0	0	1	1	1	1	METTL7A	methyltransferase like 7A
hsa-miR-507	1	0	1	1	1	1	DYRK2	dual-specificity tyrosine-(Y)-phosphorylation regulated kinase 2
hsa-miR-507	1	0	1	1	1	1	ABHD3	abhydrolase domain containing 3
hsa-miR-507	0	0	1	1	1	1	CC2D2A	coiled-coil and C2 domain containing 2A
hsa-miR-507	1	0	1	1	1	1	NAA30	N(alpha)-acetyltransferase 30, NatC catalytic subunit
hsa-miR-507	0	0	1	0	1	1	FLJ22447	uncharacterized LOC400221
hsa-miR-507	0	0	1	1	1	1	GTF2H1	general transcription factor IIH, polypeptide 1, 62kDa
hsa-miR-507	0	0	1	1	1	1	DUSP14	dual specificity phosphatase 14
hsa-miR-507	0	0	1	1	1	1	DTL	denticleless E3 ubiquitin protein ligase homolog (Drosophila)
hsa-miR-507	1	0	1	1	1	1	SLC38A1	solute carrier family 38, member 1
hsa-miR-507	1	0	1	1	1	1	PPM1L	protein phosphatase, Mg2+/Mn2+ dependent, 1L
hsa-miR-507	1	0	1	0	1	1	AP1G1	adaptor-related protein complex 1, gamma 1 subunit
hsa-miR-507	0	0	1	0	0	0	NYAP2	neuronal tyrosine-phosphorylated phosphoinositide-3-kinase adaptor 2
hsa-miR-507	0	0	1	1	1	1	BCAR3	breast cancer anti-estrogen resistance 3
hsa-miR-507	0	0	1	1	1	1	SDK1	sidekick cell adhesion molecule 1
hsa-miR-507	0	0	1	0	0	0	JPX	JPX transcript, XIST activator (non-protein coding)
hsa-miR-507	0	0	1	1	1	1	TP53I11	tumor protein p53 inducible protein 11
hsa-miR-507	1	0	1	1	1	1	SCAMP5	secretory carrier membrane protein 5
hsa-miR-507	0	0	1	0	0	0	LOC284600	uncharacterized LOC284600
hsa-miR-507	1	0	1	1	1	1	SORBS2	sorbin and SH3 domain containing 2
hsa-miR-507	1	0	1	0	1	1	RABGEF1	RAB guanine nucleotide exchange factor (GEF) 1
hsa-miR-507	0	0	1	1	1	1	SCIMP	SLP adaptor and CSK interacting membrane protein
hsa-miR-507	1	0	1	0	1	1	NCAM1	neural cell adhesion molecule 1
hsa-miR-507	0	0	1	1	1	1	ELL3	elongation factor RNA polymerase II-like 3
hsa-miR-507	0	0	1	1	0	0	ANKAR	ankyrin and armadillo repeat containing
hsa-miR-507	0	0	1	0	0	0	C6orf228	chromosome 6 open reading frame 228
hsa-miR-507	0	0	1	1	1	1	PDZRN3	PDZ domain containing ring finger 3
hsa-miR-507	1	0	1	1	1	1	PAX6	paired box 6
hsa-miR-507	1	0	1	1	0	0	APBB3	amyloid beta (A4) precursor protein-binding, family B, member 3
hsa-miR-507	1	0	1	1	1	1	UBAP1	ubiquitin associated protein 1
hsa-miR-507	0	0	1	1	0	0	LGR5	leucine-rich repeat containing G protein-coupled receptor 5
hsa-miR-507	1	0	1	1	1	1	TLK1	tousled-like kinase 1
hsa-miR-507	1	0	1	1	1	1	FBXW2	F-box and WD repeat domain containing 2
hsa-miR-507	1	0	1	1	1	1	TSN	translin
hsa-miR-507	0	0	1	0	0	0	KIAA1430	KIAA1430
hsa-miR-507	1	0	1	1	1	1	SLC25A3	solute carrier family 25 (mitochondrial carrier; phosphate carrier), member 3
hsa-miR-507	1	0	1	0	1	1	CRTAP	cartilage associated protein
hsa-miR-507	1	0	1	1	1	1	GCFC1	GC-rich sequence DNA-binding factor 1
hsa-miR-507	0	0	1	1	1	1	TMPRSS11D	transmembrane protease, serine 11D
hsa-miR-507	0	0	1	1	1	1	MARC1	mitochondrial amidoxime reducing component 1
hsa-miR-507	1	0	1	1	1	1	SSH3	slingshot homolog 3 (Drosophila)
hsa-miR-507	0	0	1	0	0	0	ZNF806	zinc finger protein 806
hsa-miR-507	1	0	1	0	1	1	ARL6IP6	ADP-ribosylation-like factor 6 interacting protein 6
hsa-miR-507	1	0	1	1	1	1	LPPR2	lipid phosphate phosphatase-related protein type 2
hsa-miR-507	1	0	1	1	1	1	TCF4	transcription factor 4
hsa-miR-507	0	0	1	0	0	0	FLJ37798	uncharacterized LOC401264
hsa-miR-507	1	0	1	1	1	1	EPHB1	EPH receptor B1
hsa-miR-507	0	0	1	0	0	0	LOC730101	uncharacterized LOC730101
hsa-miR-507	1	0	1	0	1	1	FAM129A	family with sequence similarity 129, member A
hsa-miR-507	0	0	1	0	0	0	LOC100129858	uncharacterized LOC100129858
hsa-miR-507	1	0	1	1	1	1	ZC3H11A	zinc finger CCCH-type containing 11A
hsa-miR-507	0	0	1	1	0	0	C11orf74	chromosome 11 open reading frame 74
hsa-miR-507	0	0	1	1	1	1	ZNF673	zinc finger family member 673
hsa-miR-507	0	0	1	0	0	0	METTL21CP1	methyltransferase like 21C pseudogene 1
hsa-miR-507	0	0	1	1	1	1	POLR3F	polymerase (RNA) III (DNA directed) polypeptide F, 39 kDa
hsa-miR-507	0	0	1	1	1	1	TMEM177	transmembrane protein 177
hsa-miR-507	0	0	1	1	0	0	KRI1	KRI1 homolog (S. cerevisiae)
hsa-miR-507	1	0	1	1	1	1	KL	klotho
hsa-miR-507	1	0	1	1	1	1	RAB11FIP4	RAB11 family interacting protein 4 (class II)
hsa-miR-507	1	0	1	0	1	1	AGFG1	ArfGAP with FG repeats 1
hsa-miR-507	1	0	1	1	1	1	GOLGA8B	golgin A8 family, member B
hsa-miR-507	1	0	1	1	1	1	PIGA	phosphatidylinositol glycan anchor biosynthesis, class A
hsa-miR-507	1	0	1	1	1	1	GATM	glycine amidinotransferase (L-arginine:glycine amidinotransferase)
hsa-miR-507	0	0	1	1	0	0	ZNF283	zinc finger protein 283
hsa-miR-507	0	0	1	1	0	0	ZACN	zinc activated ligand-gated ion channel
hsa-miR-507	0	0	1	1	0	0	KIAA0146	KIAA0146
hsa-miR-507	1	0	1	1	1	1	ABHD6	abhydrolase domain containing 6
hsa-miR-507	0	0	1	1	1	1	GFI1	growth factor independent 1 transcription repressor
hsa-miR-507	1	0	1	1	1	1	HNRNPA1L2	heterogeneous nuclear ribonucleoprotein A1-like 2
hsa-miR-507	0	0	1	0	1	1	FLJ41200	uncharacterized LOC401492
hsa-miR-507	1	0	1	1	1	1	MDGA2	MAM domain containing glycosylphosphatidylinositol anchor 2
hsa-miR-507	0	0	1	0	0	0	MORN2	MORN repeat containing 2
hsa-miR-507	0	0	1	1	1	1	PCBP2	poly(rC) binding protein 2
hsa-miR-507	1	0	1	1	1	1	IPPK	inositol 1,3,4,5,6-pentakisphosphate 2-kinase
hsa-miR-507	0	0	1	1	0	0	KRT37	keratin 37
hsa-miR-507	1	0	1	1	1	1	ABR	active BCR-related
hsa-miR-507	1	0	1	1	1	1	DAB2IP	DAB2 interacting protein
hsa-miR-507	0	0	1	0	0	0	LINC00282	long intergenic non-protein coding RNA 282
hsa-miR-507	0	0	1	1	0	0	JAKMIP1	janus kinase and microtubule interacting protein 1
hsa-miR-507	0	0	1	1	0	0	DOCK11	dedicator of cytokinesis 11
hsa-miR-507	0	0	1	1	1	1	KANSL1L	KAT8 regulatory NSL complex subunit 1-like
hsa-miR-507	1	0	1	1	1	1	SGIP1	SH3-domain GRB2-like (endophilin) interacting protein 1
hsa-miR-507	0	0	1	1	0	0	FAM21B	family with sequence similarity 21, member B
hsa-miR-507	1	0	1	1	1	1	KPNA1	karyopherin alpha 1 (importin alpha 5)
hsa-miR-507	1	0	1	0	0	0	MSL1	male-specific lethal 1 homolog (Drosophila)
hsa-miR-507	0	0	1	0	0	0	FAM95B1	family with sequence similarity 95, member B1
hsa-miR-507	1	0	1	1	0	0	UBN2	ubinuclein 2
hsa-miR-507	1	0	1	1	1	1	DCTN4	dynactin 4 (p62)
hsa-miR-507	0	0	1	1	1	1	EPPIN	epididymal peptidase inhibitor
hsa-miR-507	0	0	1	1	0	0	C20orf141	chromosome 20 open reading frame 141
hsa-miR-507	1	0	1	1	1	1	LIN9	lin-9 homolog (C. elegans)
hsa-miR-507	1	0	1	1	1	1	IL16	interleukin 16
hsa-miR-507	1	0	1	1	1	1	SACM1L	SAC1 suppressor of actin mutations 1-like (yeast)
hsa-miR-507	0	0	1	1	1	1	STRC	stereocilin
hsa-miR-507	1	0	1	1	1	1	DMXL1	Dmx-like 1
hsa-miR-507	1	0	1	1	1	1	DLG2	discs, large homolog 2 (Drosophila)
hsa-miR-507	1	0	1	1	1	1	C14orf28	chromosome 14 open reading frame 28
hsa-miR-507	1	0	1	1	1	1	TSHZ1	teashirt zinc finger homeobox 1
hsa-miR-507	0	0	1	1	1	1	CSPP1	centrosome and spindle pole associated protein 1
hsa-miR-507	0	0	1	1	1	1	DOCK9	dedicator of cytokinesis 9
hsa-miR-507	1	0	1	1	1	1	CTNNA2	catenin (cadherin-associated protein), alpha 2
hsa-miR-507	1	0	1	1	1	1	PHF17	PHD finger protein 17
hsa-miR-507	1	0	1	0	1	1	FNDC3B	fibronectin type III domain containing 3B
hsa-miR-507	0	0	1	0	0	0	ERVFRD-2	endogenous retrovirus group FRD, member 2
hsa-miR-507	0	0	1	1	1	1	MCU	mitochondrial calcium uniporter
hsa-miR-507	0	0	1	1	0	0	RASA3	RAS p21 protein activator 3
hsa-miR-507	0	0	1	0	0	0	AFG3L1P	AFG3 ATPase family gene 3-like 1 (S. cerevisiae), pseudogene
hsa-miR-507	0	0	1	1	1	1	RAB13	RAB13, member RAS oncogene family
hsa-miR-507	0	0	1	0	0	0	LOC100129940	uncharacterized LOC100129940
hsa-miR-507	1	0	1	1	1	1	ADAMTSL1	ADAMTS-like 1
hsa-miR-507	0	0	1	1	1	1	TBX19	T-box 19
hsa-miR-507	1	0	1	1	1	1	RBM24	RNA binding motif protein 24
hsa-miR-507	1	0	1	0	1	1	ESRRG	estrogen-related receptor gamma
hsa-miR-507	1	0	1	1	0	0	FOXP2	forkhead box P2
hsa-miR-507	0	0	1	1	0	0	ZNF730	zinc finger protein 730
hsa-miR-507	1	0	1	1	1	1	LRRK2	leucine-rich repeat kinase 2
hsa-miR-507	1	0	1	1	1	1	GATA6	GATA binding protein 6
hsa-miR-507	0	0	1	0	1	1	PEX5	peroxisomal biogenesis factor 5
hsa-miR-507	0	0	1	1	0	0	FERMT1	fermitin family member 1
hsa-miR-507	1	0	1	1	1	1	PTPN2	protein tyrosine phosphatase, non-receptor type 2
hsa-miR-507	1	0	1	1	1	1	LEF1	lymphoid enhancer-binding factor 1
hsa-miR-507	1	0	1	0	1	1	MAP3K3	mitogen-activated protein kinase kinase kinase 3
hsa-miR-507	1	0	1	1	1	1	COBLL1	COBL-like 1
hsa-miR-507	1	0	1	1	1	1	PHTF2	putative homeodomain transcription factor 2
hsa-miR-507	1	0	1	1	1	1	LUC7L3	LUC7-like 3 (S. cerevisiae)
hsa-miR-507	1	0	1	1	1	1	NCOA1	nuclear receptor coactivator 1
hsa-miR-507	0	0	1	1	1	1	MECR	mitochondrial trans-2-enoyl-CoA reductase
hsa-miR-507	0	0	1	0	0	0	PART1	prostate androgen-regulated transcript 1 (non-protein coding)
hsa-miR-507	0	0	1	1	0	0	NEK7	NIMA (never in mitosis gene a)-related kinase 7
hsa-miR-507	1	0	1	1	1	1	ARF6	ADP-ribosylation factor 6
hsa-miR-507	0	0	1	1	1	1	ARIH1	ariadne homolog, ubiquitin-conjugating enzyme E2 binding protein, 1 (Drosophila)
hsa-miR-507	1	0	1	0	1	1	DCDC2	doublecortin domain containing 2
hsa-miR-507	0	0	1	1	1	1	WDR52	WD repeat domain 52
hsa-miR-507	0	0	1	1	0	0	DOPEY1	dopey family member 1
hsa-miR-507	0	0	1	1	1	1	IDH3A	isocitrate dehydrogenase 3 (NAD+) alpha
hsa-miR-507	1	0	1	0	0	0	BAHCC1	BAH domain and coiled-coil containing 1
hsa-miR-507	1	0	1	1	1	1	YTHDF3	YTH domain family, member 3
hsa-miR-507	1	0	1	1	1	1	LIMCH1	LIM and calponin homology domains 1
hsa-miR-507	0	0	1	0	1	1	GAB3	GRB2-associated binding protein 3
hsa-miR-507	0	0	1	1	1	1	BEND7	BEN domain containing 7
hsa-miR-507	0	0	1	1	1	1	CCDC132	coiled-coil domain containing 132
hsa-miR-507	0	0	1	1	1	1	ZMYM6	zinc finger, MYM-type 6
hsa-miR-507	1	0	1	1	1	1	CAMK4	calcium/calmodulin-dependent protein kinase IV
hsa-miR-507	1	0	1	1	1	1	NRP1	neuropilin 1
hsa-miR-507	1	0	1	0	1	1	CNOT7	CCR4-NOT transcription complex, subunit 7
hsa-miR-507	1	0	1	1	1	1	HERC2	HECT and RLD domain containing E3 ubiquitin protein ligase 2
hsa-miR-507	1	0	1	1	1	1	ANKRD12	ankyrin repeat domain 12
hsa-miR-507	1	0	1	0	1	1	JAZF1	JAZF zinc finger 1
hsa-miR-507	1	0	1	1	1	1	RICTOR	RPTOR independent companion of MTOR, complex 2
hsa-miR-507	1	0	1	0	1	1	NR3C1	nuclear receptor subfamily 3, group C, member 1 (glucocorticoid receptor)
hsa-miR-507	1	0	1	1	1	1	RNF38	ring finger protein 38
hsa-miR-507	0	0	1	1	1	1	MTMR14	myotubularin related protein 14
hsa-miR-507	1	0	1	1	1	1	IKZF2	IKAROS family zinc finger 2 (Helios)
hsa-miR-507	1	0	1	1	1	1	TACC1	transforming, acidic coiled-coil containing protein 1
hsa-miR-507	0	0	1	1	1	1	CRB1	crumbs homolog 1 (Drosophila)
hsa-miR-507	1	0	1	1	1	1	MIPOL1	mirror-image polydactyly 1
hsa-miR-507	0	0	1	1	0	0	DHRS4	dehydrogenase/reductase (SDR family) member 4
hsa-miR-507	0	0	1	0	0	0	CR1L	complement component (3b/4b) receptor 1-like
hsa-miR-507	0	0	1	1	1	1	CEP41	centrosomal protein 41kDa
hsa-miR-507	0	0	1	1	0	0	ESPN	espin
hsa-miR-507	1	0	1	1	1	1	WDR26	WD repeat domain 26
hsa-miR-507	1	0	1	1	0	0	DSG4	desmoglein 4
hsa-miR-507	1	0	1	1	1	1	BCL11A	B-cell CLL/lymphoma 11A (zinc finger protein)
hsa-miR-507	0	0	1	1	1	1	IYD	iodotyrosine deiodinase
hsa-miR-507	1	0	1	1	1	1	OPRM1	opioid receptor, mu 1
hsa-miR-507	0	0	1	0	0	0	TAG	tumor antigen gene
hsa-miR-507	1	0	1	1	1	1	TAB3	TGF-beta activated kinase 1/MAP3K7 binding protein 3
hsa-miR-507	1	0	1	1	1	1	NLGN4X	neuroligin 4, X-linked
hsa-miR-507	0	0	1	0	0	0	LINC00085	long intergenic non-protein coding RNA 85
hsa-miR-507	0	0	1	1	1	1	TNFRSF19	tumor necrosis factor receptor superfamily, member 19
hsa-miR-507	1	0	1	1	1	1	SP3	Sp3 transcription factor
hsa-miR-507	1	0	1	1	1	1	FAM120A	family with sequence similarity 120A
hsa-miR-507	1	0	1	0	1	1	NHS	Nance-Horan syndrome (congenital cataracts and dental anomalies)
hsa-miR-507	1	0	1	1	1	1	MECP2	methyl CpG binding protein 2 (Rett syndrome)
hsa-miR-507	1	0	1	0	1	1	LRAT	lecithin retinol acyltransferase (phosphatidylcholine--retinol O-acyltransferase)
hsa-miR-507	1	0	1	1	1	1	ALCAM	activated leukocyte cell adhesion molecule
hsa-miR-507	1	0	1	1	1	1	QKI	QKI, KH domain containing, RNA binding
hsa-miR-507	1	0	1	1	0	0	TAF4B	TAF4b RNA polymerase II, TATA box binding protein (TBP)-associated factor, 105kDa
hsa-miR-507	1	0	1	1	1	1	TBC1D22B	TBC1 domain family, member 22B
hsa-miR-507	1	0	1	1	1	1	AMOT	angiomotin
hsa-miR-507	0	0	1	1	0	0	DDX49	DEAD (Asp-Glu-Ala-Asp) box polypeptide 49
hsa-miR-507	0	0	1	1	1	1	ATG3	autophagy related 3
hsa-miR-507	1	0	1	1	1	1	TSPAN14	tetraspanin 14
hsa-miR-507	1	0	1	1	1	1	RIMS3	regulating synaptic membrane exocytosis 3
hsa-miR-507	1	0	1	0	1	1	DCAF10	DDB1 and CUL4 associated factor 10
hsa-miR-507	0	0	1	1	1	1	NUPL2	nucleoporin like 2
hsa-miR-507	1	0	1	0	1	1	C15orf41	chromosome 15 open reading frame 41
hsa-miR-507	1	0	1	1	1	1	U2SURP	U2 snRNP-associated SURP domain containing
hsa-miR-507	0	0	1	0	0	0	DNM1P33	DNM1 pseudogene 33
hsa-miR-507	0	0	1	1	0	0	RBM14	RNA binding motif protein 14
hsa-miR-507	1	0	1	1	1	1	PLEKHO2	pleckstrin homology domain containing, family O member 2
hsa-miR-507	1	0	1	0	1	1	TMEM39A	transmembrane protein 39A
hsa-miR-507	0	0	1	1	1	1	C9orf85	chromosome 9 open reading frame 85
hsa-miR-507	1	0	1	1	1	1	TRIM2	tripartite motif containing 2
hsa-miR-507	0	0	1	0	0	0	LRRC14	leucine rich repeat containing 14
hsa-miR-507	0	0	1	1	1	1	GNL3L	guanine nucleotide binding protein-like 3 (nucleolar)-like
hsa-miR-507	1	0	1	1	1	1	OTUD5	OTU domain containing 5
hsa-miR-507	1	0	1	0	1	1	GUCY1A3	guanylate cyclase 1, soluble, alpha 3
hsa-miR-507	0	0	1	1	0	0	KLHDC3	kelch domain containing 3
hsa-miR-507	1	0	1	1	1	1	PRDM2	PR domain containing 2, with ZNF domain
hsa-miR-507	1	0	1	1	1	1	PDGFRA	platelet-derived growth factor receptor, alpha polypeptide
hsa-miR-507	1	0	1	0	1	1	NECAB1	N-terminal EF-hand calcium binding protein 1
hsa-miR-507	1	0	1	1	1	1	NRF1	nuclear respiratory factor 1
hsa-miR-507	1	0	1	1	1	1	ELF4	E74-like factor 4 (ets domain transcription factor)
hsa-miR-507	0	0	1	0	0	0	LOC100144602	uncharacterized LOC100144602
hsa-miR-507	0	0	1	1	1	1	PEX14	peroxisomal biogenesis factor 14
hsa-miR-507	0	0	1	1	1	1	PRMT3	protein arginine methyltransferase 3
hsa-miR-507	0	0	1	0	1	1	CD99P1	CD99 molecule pseudogene 1
hsa-miR-507	0	0	1	1	1	1	NELL2	NEL-like 2 (chicken)
hsa-miR-507	1	0	1	0	1	1	BTF3L4	basic transcription factor 3-like 4
hsa-miR-507	1	0	1	1	1	1	NIPA1	non imprinted in Prader-Willi/Angelman syndrome 1
hsa-miR-507	1	0	1	0	0	0	KCNU1	potassium channel, subfamily U, member 1
hsa-miR-507	0	0	1	0	0	0	ANKRD19P	ankyrin repeat domain 19, pseudogene
hsa-miR-507	0	0	1	1	0	0	FCRL3	Fc receptor-like 3
hsa-miR-507	0	0	1	0	0	0	LOC145837	uncharacterized LOC145837
hsa-miR-507	1	0	1	1	1	1	CASD1	CAS1 domain containing 1
hsa-miR-507	0	0	1	1	1	1	SEMA3D	sema domain, immunoglobulin domain (Ig), short basic domain, secreted, (semaphorin) 3D
hsa-miR-507	1	0	1	0	1	1	SV2B	synaptic vesicle glycoprotein 2B
hsa-miR-507	1	0	1	1	1	1	TIAL1	TIA1 cytotoxic granule-associated RNA binding protein-like 1
hsa-miR-507	0	0	1	1	1	1	RANBP17	RAN binding protein 17
hsa-miR-507	0	0	1	1	1	1	AADAT	aminoadipate aminotransferase
hsa-miR-507	0	0	1	0	0	0	LOC729307	uncharacterized LOC729307
hsa-miR-507	1	0	1	1	1	1	ZPLD1	zona pellucida-like domain containing 1
hsa-miR-507	1	0	1	1	1	1	RCOR3	REST corepressor 3
hsa-miR-507	1	0	1	1	1	1	ZNF282	zinc finger protein 282
hsa-miR-507	0	0	1	0	0	0	LOC402779	uncharacterized LOC402779
hsa-miR-507	0	0	1	0	0	0	FAM86JP	family with sequence similarity 86, member A pseudogene
hsa-miR-507	1	0	1	0	1	1	LYPD6	LY6/PLAUR domain containing 6
hsa-miR-507	1	0	1	1	1	1	RHOBTB1	Rho-related BTB domain containing 1
hsa-miR-507	1	0	1	1	1	1	SORL1	sortilin-related receptor, L(DLR class) A repeats containing
hsa-miR-507	1	0	1	1	1	1	SECISBP2L	SECIS binding protein 2-like
hsa-miR-507	1	0	1	1	1	1	ANO1	anoctamin 1, calcium activated chloride channel
hsa-miR-507	0	0	1	0	0	0	BCAS3	breast carcinoma amplified sequence 3
hsa-miR-507	1	0	1	1	1	1	PLEKHA7	pleckstrin homology domain containing, family A member 7
hsa-miR-507	0	0	1	0	0	0	LINC00238	long intergenic non-protein coding RNA 238
hsa-miR-507	1	0	1	1	1	1	PCDHA5	protocadherin alpha 5
hsa-miR-507	0	0	1	1	1	1	ZNF337	zinc finger protein 337
hsa-miR-507	1	0	1	1	1	1	LPGAT1	lysophosphatidylglycerol acyltransferase 1
hsa-miR-507	0	0	1	1	0	0	CCDC158	coiled-coil domain containing 158
hsa-miR-507	0	0	1	1	1	1	PAK6	p21 protein (Cdc42/Rac)-activated kinase 6
hsa-miR-507	0	0	1	0	0	0	HOXA-AS2	HOXA cluster antisense RNA 2
hsa-miR-507	1	0	1	1	1	1	ZNF618	zinc finger protein 618
hsa-miR-507	1	0	1	1	1	1	SLC35G1	solute carrier family 35, member G1
hsa-miR-507	1	0	1	1	1	1	LHX8	LIM homeobox 8
hsa-miR-507	1	0	1	1	1	1	LMO7	LIM domain 7
hsa-miR-507	1	0	1	1	1	1	MEIS1	Meis homeobox 1
hsa-miR-507	0	0	1	0	0	0	LOC654433	uncharacterized LOC654433
hsa-miR-507	0	0	1	0	0	0	SRGAP2C	SLIT-ROBO Rho GTPase activating protein 2C
hsa-miR-507	1	0	1	0	1	1	CPEB4	cytoplasmic polyadenylation element binding protein 4
hsa-miR-507	0	0	1	0	0	0	LOC286184	uncharacterized LOC286184
hsa-miR-507	0	0	1	0	0	0	CRYBB2P1	crystallin, beta B2 pseudogene 1
hsa-miR-507	1	0	1	1	1	1	DPP10	dipeptidyl-peptidase 10 (non-functional)
hsa-miR-507	0	0	1	1	0	0	PPP1R37	protein phosphatase 1, regulatory subunit 37
hsa-miR-507	0	0	1	1	1	1	CES5A	carboxylesterase 5A
hsa-miR-507	1	0	1	1	1	1	FGFR2	fibroblast growth factor receptor 2
hsa-miR-507	1	0	1	1	1	1	DACH2	dachshund homolog 2 (Drosophila)
hsa-miR-507	0	0	1	0	0	0	SNHG11	small nucleolar RNA host gene 11 (non-protein coding)
hsa-miR-507	0	0	1	0	0	0	LOC339622	uncharacterized LOC339622
hsa-miR-507	1	0	1	1	1	1	UNC13C	unc-13 homolog C (C. elegans)
hsa-miR-507	0	0	1	1	1	1	PCMTD2	protein-L-isoaspartate (D-aspartate) O-methyltransferase domain containing 2
hsa-miR-507	0	0	1	1	0	0	KIAA1432	KIAA1432
hsa-miR-507	1	0	1	1	1	1	ARPP21	cAMP-regulated phosphoprotein, 21kDa
hsa-miR-507	1	0	1	1	1	1	FAM123A	family with sequence similarity 123A
hsa-miR-507	1	0	1	1	1	1	CLOCK	clock homolog (mouse)
hsa-miR-507	1	0	1	1	1	1	C12orf76	chromosome 12 open reading frame 76
hsa-miR-507	0	0	1	1	1	1	FAM90A1	family with sequence similarity 90, member A1
hsa-miR-507	0	0	1	1	1	1	DGKH	diacylglycerol kinase, eta
hsa-miR-507	0	0	1	1	1	1	MGC57346	uncharacterized LOC401884
hsa-miR-507	0	0	1	0	0	0	LOC339529	uncharacterized LOC339529
hsa-miR-507	0	0	1	0	0	0	ADAM5	ADAM metallopeptidase domain 5, pseudogene
hsa-miR-507	0	0	1	1	1	1	OLFML2B	olfactomedin-like 2B
hsa-miR-507	0	0	1	0	1	1	LOC338758	uncharacterized LOC338758
hsa-miR-507	1	0	1	0	1	1	KDM2A	lysine (K)-specific demethylase 2A
hsa-miR-507	1	0	1	1	1	1	RMND5A	required for meiotic nuclear division 5 homolog A (S. cerevisiae)
hsa-miR-507	0	0	1	1	0	0	MT3	metallothionein 3
hsa-miR-507	1	0	1	1	1	1	UPF3A	UPF3 regulator of nonsense transcripts homolog A (yeast)
hsa-miR-507	0	0	1	1	1	1	ZNF589	zinc finger protein 589
hsa-miR-507	1	0	1	1	1	1	PTPRG	protein tyrosine phosphatase, receptor type, G
hsa-miR-507	1	0	1	0	1	1	ARHGAP5	Rho GTPase activating protein 5
hsa-miR-507	1	0	1	1	1	1	FNDC3A	fibronectin type III domain containing 3A
hsa-miR-507	1	0	1	0	1	1	SEMA4G	sema domain, immunoglobulin domain (Ig), transmembrane domain (TM) and short cytoplasmic domain, (semaphorin) 4G
hsa-miR-507	0	0	1	1	0	0	AGAP8	ArfGAP with GTPase domain, ankyrin repeat and PH domain 8
hsa-miR-507	1	0	1	1	1	1	YWHAZ	tyrosine 3-monooxygenase/tryptophan 5-monooxygenase activation protein, zeta polypeptide
hsa-miR-507	1	0	1	1	1	1	PCGF5	polycomb group ring finger 5
hsa-miR-507	1	0	1	1	1	1	SCUBE3	signal peptide, CUB domain, EGF-like 3
hsa-miR-507	1	0	1	0	1	1	C14orf43	chromosome 14 open reading frame 43
hsa-miR-507	1	0	1	1	1	1	ZFP161	zinc finger protein 161 homolog (mouse)
hsa-miR-507	0	0	1	1	1	1	IDI1	isopentenyl-diphosphate delta isomerase 1
hsa-miR-507	0	0	1	1	0	0	WISP2	WNT1 inducible signaling pathway protein 2
hsa-miR-507	0	0	1	0	0	0	ABCA11P	ATP-binding cassette, sub-family A (ABC1), member 11, pseudogene
hsa-miR-507	0	0	1	1	0	0	WDR90	WD repeat domain 90
hsa-miR-507	0	0	1	1	0	0	AGAP4	ArfGAP with GTPase domain, ankyrin repeat and PH domain 4
hsa-miR-507	1	0	1	1	1	1	SCOC	short coiled-coil protein
hsa-miR-507	1	0	1	1	1	1	NIPBL	Nipped-B homolog (Drosophila)
hsa-miR-507	1	0	1	1	1	1	MYLK	myosin light chain kinase
hsa-miR-507	1	0	1	1	1	1	EIF4G2	eukaryotic translation initiation factor 4 gamma, 2
hsa-miR-507	1	0	1	1	1	1	RAVER2	ribonucleoprotein, PTB-binding 2
hsa-miR-507	1	0	1	1	1	1	IARS	isoleucyl-tRNA synthetase
hsa-miR-507	1	0	1	1	1	1	CDKN1C	cyclin-dependent kinase inhibitor 1C (p57, Kip2)
hsa-miR-507	1	0	1	1	1	1	SRPK2	SRSF protein kinase 2
hsa-miR-507	0	0	1	1	1	1	TTLL9	tubulin tyrosine ligase-like family, member 9
hsa-miR-507	0	0	1	1	0	0	GP6	glycoprotein VI (platelet)
hsa-miR-507	1	0	1	1	1	1	ANLN	anillin, actin binding protein
hsa-miR-507	0	0	1	0	0	0	ZRANB2-AS1	ZRANB2 antisense RNA 1
hsa-miR-507	0	0	1	0	0	0	ULK4P1	unc-51-like kinase 4 (C. elegans) pseudogene 1
hsa-miR-507	1	0	1	0	1	1	TGFBR1	transforming growth factor, beta receptor 1
hsa-miR-507	1	0	1	1	1	1	USP47	ubiquitin specific peptidase 47
hsa-miR-507	0	0	1	1	1	1	PCDH18	protocadherin 18
hsa-miR-507	0	0	1	0	0	0	ULK4P3	unc-51-like kinase 4 (C. elegans) pseudogene 3
hsa-miR-507	1	0	1	1	1	1	KDELR2	KDEL (Lys-Asp-Glu-Leu) endoplasmic reticulum protein retention receptor 2
hsa-miR-507	0	0	1	0	0	0	LINC00152	long intergenic non-protein coding RNA 152
hsa-miR-507	0	0	1	1	0	0	FAM21A	family with sequence similarity 21, member A
hsa-miR-507	1	0	1	0	1	1	AMMECR1L	AMME chromosomal region gene 1-like
hsa-miR-507	0	0	1	0	0	0	C17orf89	chromosome 17 open reading frame 89
hsa-miR-507	1	0	1	1	1	1	ZMYND11	zinc finger, MYND-type containing 11
hsa-miR-507	1	0	1	0	1	1	PIK3R3	phosphoinositide-3-kinase, regulatory subunit 3 (gamma)
hsa-miR-507	1	0	1	0	1	1	LRRTM4	leucine rich repeat transmembrane neuronal 4
hsa-miR-507	0	0	1	1	1	1	RAB3GAP2	RAB3 GTPase activating protein subunit 2 (non-catalytic)
hsa-miR-507	1	0	1	1	1	1	SYNJ1	synaptojanin 1
hsa-miR-507	1	0	1	0	1	1	ARPP19	cAMP-regulated phosphoprotein, 19kDa
hsa-miR-507	0	0	1	1	1	1	XG	Xg blood group
hsa-miR-507	1	0	1	1	0	0	HAND2	heart and neural crest derivatives expressed 2
hsa-miR-507	1	0	1	1	1	1	HNRNPA1	heterogeneous nuclear ribonucleoprotein A1
hsa-miR-507	0	0	1	0	0	0	MT1JP	metallothionein 1J, pseudogene
hsa-miR-507	1	0	1	1	1	1	PTPRD	protein tyrosine phosphatase, receptor type, D
hsa-miR-507	1	0	1	1	1	1	SUV420H1	suppressor of variegation 4-20 homolog 1 (Drosophila)
hsa-miR-507	1	0	1	1	1	1	SP4	Sp4 transcription factor
hsa-miR-507	1	0	1	0	1	1	BTBD3	BTB (POZ) domain containing 3
hsa-miR-507	0	0	1	1	0	0	GKN2	gastrokine 2
hsa-miR-507	1	0	1	1	1	1	UBE4A	ubiquitination factor E4A
hsa-miR-507	0	0	1	1	0	0	PRAMEF10	PRAME family member 10
hsa-miR-507	1	0	1	1	1	1	TMEM132B	transmembrane protein 132B
hsa-miR-507	1	0	1	0	1	1	PRDM10	PR domain containing 10
hsa-miR-507	0	0	1	1	0	0	RGSL1	regulator of G-protein signaling like 1
hsa-miR-507	0	0	1	1	1	1	SLC7A13	solute carrier family 7 (anionic amino acid transporter), member 13
hsa-miR-507	0	0	1	0	1	1	GOLGA8G	golgin A8 family, member G
hsa-miR-507	1	0	1	1	1	1	ANK2	ankyrin 2, neuronal
hsa-miR-507	0	0	1	1	0	0	SAFB	scaffold attachment factor B
hsa-miR-507	0	0	1	0	0	0	LINC00314	long intergenic non-protein coding RNA 314
hsa-miR-507	1	0	1	1	1	1	JMJD1C	jumonji domain containing 1C
hsa-miR-507	1	0	1	1	1	1	ZMYM4	zinc finger, MYM-type 4
hsa-miR-507	1	0	1	1	1	1	CHIC1	cysteine-rich hydrophobic domain 1
hsa-miR-507	0	0	1	0	0	0	LOC399753	uncharacterized LOC399753
hsa-miR-507	0	0	1	1	0	0	TTC21A	tetratricopeptide repeat domain 21A
hsa-miR-507	0	0	1	1	0	0	AGAP6	ArfGAP with GTPase domain, ankyrin repeat and PH domain 6
hsa-miR-507	0	0	1	1	1	1	CNTNAP3	contactin associated protein-like 3
hsa-miR-507	0	0	1	1	1	1	BMP4	bone morphogenetic protein 4
hsa-miR-507	0	0	1	0	0	0	LOC100133207	uncharacterized LOC100133207
hsa-miR-507	1	0	1	1	1	1	EIF5	eukaryotic translation initiation factor 5
hsa-miR-507	1	0	1	0	1	1	HMGB3	high mobility group box 3
hsa-miR-507	0	0	1	0	1	1	AP1S2	adaptor-related protein complex 1, sigma 2 subunit
hsa-miR-507	1	0	1	1	1	1	MIER3	mesoderm induction early response 1, family member 3
hsa-miR-507	0	0	1	1	1	1	CNTNAP3B	contactin associated protein-like 3B
hsa-miR-507	1	0	1	1	0	0	MAPK12	mitogen-activated protein kinase 12
hsa-miR-507	0	0	1	1	1	1	PRR14L	proline rich 14-like
hsa-miR-507	0	0	1	1	1	1	PPP1R1C	protein phosphatase 1, regulatory (inhibitor) subunit 1C
hsa-miR-507	1	0	1	1	1	1	EPS15	epidermal growth factor receptor pathway substrate 15
hsa-miR-507	1	0	1	1	1	1	FOXP1	forkhead box P1
hsa-miR-507	1	0	1	1	1	1	USP6	ubiquitin specific peptidase 6 (Tre-2 oncogene)
hsa-miR-507	1	0	1	0	1	1	VPS36	vacuolar protein sorting 36 homolog (S. cerevisiae)
hsa-miR-507	0	0	1	0	1	1	MYO3B	myosin IIIB
hsa-miR-507	1	0	1	1	1	1	DCAF5	DDB1 and CUL4 associated factor 5
hsa-miR-507	1	0	1	1	1	1	ATP6V1C1	ATPase, H+ transporting, lysosomal 42kDa, V1 subunit C1
hsa-miR-507	1	0	1	1	1	1	ZNF711	zinc finger protein 711
hsa-miR-507	0	0	1	1	1	1	CCNT2	cyclin T2
hsa-miR-507	1	0	1	1	1	1	NFIB	nuclear factor I/B
hsa-miR-507	0	0	1	1	1	1	DAZL	deleted in azoospermia-like
hsa-miR-507	1	0	1	1	1	1	PGAP1	post-GPI attachment to proteins 1
hsa-miR-507	1	0	1	1	1	1	TMEM135	transmembrane protein 135
hsa-miR-507	1	0	1	1	1	1	FAM179B	family with sequence similarity 179, member B
hsa-miR-507	0	0	1	0	0	0	ZNRD1-AS1	ZNRD1 antisense RNA 1
hsa-miR-507	1	0	1	1	1	1	EOGT	EGF domain-specific O-linked N-acetylglucosamine (GlcNAc) transferase
hsa-miR-507	1	0	1	0	1	1	TBL1XR1	transducin (beta)-like 1 X-linked receptor 1
hsa-miR-507	1	0	1	1	1	1	FAM208A	family with sequence similarity 208, member A
hsa-miR-507	1	0	1	0	1	1	C1orf21	chromosome 1 open reading frame 21
hsa-miR-507	0	0	1	0	0	0	DKFZp686K1684	uncharacterized LOC440034
hsa-miR-507	1	0	1	1	1	1	LYST	lysosomal trafficking regulator
hsa-miR-507	1	0	1	1	1	1	HIC2	hypermethylated in cancer 2
hsa-miR-507	0	0	1	0	1	1	GINS3	GINS complex subunit 3 (Psf3 homolog)
hsa-miR-507	1	0	1	1	1	1	NAGA	N-acetylgalactosaminidase, alpha-
hsa-miR-507	0	0	1	1	1	1	CAT	catalase
hsa-miR-507	0	0	1	1	0	0	H2AFY2	H2A histone family, member Y2
hsa-miR-507	0	0	1	0	0	0	LOC100128988	uncharacterized LOC100128988
hsa-miR-507	1	0	1	1	1	1	FUT9	fucosyltransferase 9 (alpha (1,3) fucosyltransferase)
hsa-miR-507	0	0	1	0	0	0	RPS16P10	ribosomal protein S16 pseudogene 10
hsa-miR-507	0	0	1	1	1	1	FBXO36	F-box protein 36
hsa-miR-507	0	0	1	1	0	0	TMEM62	transmembrane protein 62
hsa-miR-507	1	0	1	1	1	1	ERI3	ERI1 exoribonuclease family member 3
hsa-miR-507	0	0	1	1	1	1	SEC22C	SEC22 vesicle trafficking protein homolog C (S. cerevisiae)
hsa-miR-507	1	0	1	1	1	1	SGSM2	small G protein signaling modulator 2
hsa-miR-507	0	0	1	1	0	0	ITGB3BP	integrin beta 3 binding protein (beta3-endonexin)
hsa-miR-507	1	0	1	0	1	1	SLCO2A1	solute carrier organic anion transporter family, member 2A1
hsa-miR-507	1	0	1	0	1	1	BNIP3L	BCL2/adenovirus E1B 19kDa interacting protein 3-like
hsa-miR-507	0	0	1	1	1	1	CHCHD4	coiled-coil-helix-coiled-coil-helix domain containing 4
hsa-miR-507	0	0	1	1	1	1	INCENP	inner centromere protein antigens 135/155kDa
hsa-miR-507	1	0	1	1	1	1	ADM	adrenomedullin
hsa-miR-507	0	0	1	1	1	1	MRPS36	mitochondrial ribosomal protein S36
hsa-miR-507	1	0	1	1	1	1	CDK7	cyclin-dependent kinase 7
hsa-miR-507	1	0	1	1	1	1	COPZ1	coatomer protein complex, subunit zeta 1
hsa-miR-507	0	0	1	0	0	0	HMGN1P37	high mobility group nucleosome binding domain 1 pseudogene 37
hsa-miR-507	1	0	1	1	1	1	MBNL1	muscleblind-like splicing regulator 1
hsa-miR-507	1	0	1	0	1	1	RPS6KB1	ribosomal protein S6 kinase, 70kDa, polypeptide 1
hsa-miR-507	0	0	1	1	1	1	KCTD1	potassium channel tetramerisation domain containing 1
hsa-miR-507	0	0	1	1	1	1	EIF3J	eukaryotic translation initiation factor 3, subunit J
hsa-miR-507	1	0	1	1	1	1	PHTF1	putative homeodomain transcription factor 1
hsa-miR-507	1	0	1	1	1	1	TMEM245	transmembrane protein 245
hsa-miR-507	0	0	1	0	0	0	LOC150568	uncharacterized LOC150568
hsa-miR-507	1	0	1	1	1	1	NABP1	nucleic acid binding protein 1
hsa-miR-507	0	0	1	0	0	0	LOC677759	uncharacterized LOC677759
hsa-miR-507	0	0	1	1	0	0	CCDC22	coiled-coil domain containing 22
hsa-miR-507	0	0	1	0	0	0	ZNF720	zinc finger protein 720
hsa-miR-507	0	0	1	1	1	1	BTF3	basic transcription factor 3
hsa-miR-507	0	0	1	1	1	1	CHEK1	checkpoint kinase 1
hsa-miR-507	1	0	1	1	1	1	FUBP3	far upstream element (FUSE) binding protein 3
hsa-miR-507	0	0	1	1	1	1	LDHA	lactate dehydrogenase A
hsa-miR-507	0	0	1	1	1	1	FAM18B1	family with sequence similarity 18, member B1
hsa-miR-507	1	0	1	1	1	1	GDA	guanine deaminase
hsa-miR-507	0	0	1	1	0	0	HEBP1	heme binding protein 1
hsa-miR-507	1	0	1	1	1	1	SRSF2	serine/arginine-rich splicing factor 2
hsa-miR-507	1	0	1	1	1	1	ATP1B1	ATPase, Na+/K+ transporting, beta 1 polypeptide
hsa-miR-507	1	0	1	1	1	1	RUNX1	runt-related transcription factor 1
hsa-miR-507	0	0	1	1	1	1	ZNF346	zinc finger protein 346
hsa-miR-507	0	0	1	0	0	0	LOC100132984	uncharacterized LOC100132984
hsa-miR-507	0	0	1	1	1	1	TOP3B	topoisomerase (DNA) III beta
hsa-miR-507	1	0	1	1	1	1	STAG2	stromal antigen 2
hsa-miR-507	0	0	1	0	0	0	LOC731789	uncharacterized LOC731789
hsa-miR-507	1	0	1	1	1	1	FBXW7	F-box and WD repeat domain containing 7, E3 ubiquitin protein ligase
hsa-miR-507	0	0	1	0	0	0	LINC00661	long intergenic non-protein coding RNA 661
hsa-miR-507	1	0	1	0	1	1	PTP4A1	protein tyrosine phosphatase type IVA, member 1
hsa-miR-507	1	0	1	1	1	1	ANKS6	ankyrin repeat and sterile alpha motif domain containing 6
hsa-miR-507	1	0	1	0	1	1	XRN1	5'-3' exoribonuclease 1
hsa-miR-507	1	0	1	1	1	1	SNRK	SNF related kinase
hsa-miR-507	0	0	1	1	1	1	SLC25A26	solute carrier family 25 (S-adenosylmethionine carrier), member 26
hsa-miR-507	1	0	1	1	1	1	BNC2	basonuclin 2
hsa-miR-507	1	0	1	1	1	1	ZFHX3	zinc finger homeobox 3
hsa-miR-507	1	0	1	1	1	1	PI15	peptidase inhibitor 15
hsa-miR-507	1	0	1	1	1	1	SEC14L1	SEC14-like 1 (S. cerevisiae)
hsa-miR-507	0	0	1	1	1	1	CEACAM1	carcinoembryonic antigen-related cell adhesion molecule 1 (biliary glycoprotein)
hsa-miR-507	1	0	1	1	1	1	TRIOBP	TRIO and F-actin binding protein
hsa-miR-507	0	0	1	1	1	1	ESR2	estrogen receptor 2 (ER beta)
hsa-miR-507	1	0	1	0	1	1	RBBP5	retinoblastoma binding protein 5
hsa-miR-507	0	0	1	1	0	0	SLCO3A1	solute carrier organic anion transporter family, member 3A1
hsa-miR-507	0	0	1	1	1	1	CCL20	chemokine (C-C motif) ligand 20
hsa-miR-507	1	0	1	1	1	1	MLL	myeloid/lymphoid or mixed-lineage leukemia (trithorax homolog, Drosophila)
hsa-miR-507	1	0	1	1	1	1	ATP2B2	ATPase, Ca++ transporting, plasma membrane 2
hsa-miR-507	1	0	1	0	1	1	STAT3	signal transducer and activator of transcription 3 (acute-phase response factor)
hsa-miR-507	0	0	1	1	1	1	PLCB4	phospholipase C, beta 4
hsa-miR-507	1	0	1	1	1	1	RALBP1	ralA binding protein 1
hsa-miR-507	1	0	1	1	1	1	GRM1	glutamate receptor, metabotropic 1
hsa-miR-507	0	0	1	1	1	1	GAD2	glutamate decarboxylase 2 (pancreatic islets and brain, 65kDa)
hsa-miR-507	0	0	1	1	1	1	CNGA1	cyclic nucleotide gated channel alpha 1
hsa-miR-507	0	0	1	1	1	1	CA2	carbonic anhydrase II
hsa-miR-507	0	0	1	0	1	1	MS4A2	membrane-spanning 4-domains, subfamily A, member 2
hsa-miR-507	1	0	1	1	1	1	KCNA1	potassium voltage-gated channel, shaker-related subfamily, member 1 (episodic ataxia with myokymia)
hsa-miR-507	0	0	1	1	1	1	LPL	lipoprotein lipase
hsa-miR-507	1	0	1	1	1	1	MET	met proto-oncogene (hepatocyte growth factor receptor)
hsa-miR-507	1	0	1	1	1	1	RB1	retinoblastoma 1
hsa-miR-507	0	0	1	1	0	0	IL2RA	interleukin 2 receptor, alpha
hsa-miR-507	1	0	1	0	1	1	PAFAH1B1	platelet-activating factor acetylhydrolase 1b, regulatory subunit 1 (45kDa)
hsa-miR-507	1	0	1	0	1	1	RAG1	recombination activating gene 1
hsa-miR-507	1	0	1	1	1	1	DCX	doublecortin
hsa-miR-507	0	0	1	1	1	1	IL1RN	interleukin 1 receptor antagonist
hsa-miR-507	0	0	1	1	1	1	SELL	selectin L
hsa-miR-507	0	0	1	0	1	1	ADRA2A	adrenoceptor alpha 2A
hsa-miR-507	1	0	1	0	1	1	GABRA4	gamma-aminobutyric acid (GABA) A receptor, alpha 4
hsa-miR-507	1	0	1	1	1	1	GABRB3	gamma-aminobutyric acid (GABA) A receptor, beta 3
hsa-miR-507	1	0	1	1	1	1	IGF1R	insulin-like growth factor 1 receptor
hsa-miR-507	1	0	1	1	1	1	PTGFR	prostaglandin F receptor (FP)
hsa-miR-507	1	0	1	0	1	1	GDF6	growth differentiation factor 6
hsa-miR-507	0	0	1	0	1	1	BLID	BH3-like motif containing, cell death inducer
hsa-miR-507	1	0	1	1	1	1	LCLAT1	lysocardiolipin acyltransferase 1
hsa-miR-507	1	0	1	0	1	1	CACNA1I	calcium channel, voltage-dependent, T type, alpha 1I subunit
hsa-miR-507	1	0	1	1	1	1	KLHL31	kelch-like 31 (Drosophila)
hsa-miR-507	1	0	1	1	1	1	RBMS3	RNA binding motif, single stranded interacting protein 3
hsa-miR-507	1	0	1	1	1	1	BICD2	bicaudal D homolog 2 (Drosophila)
hsa-miR-507	1	0	1	1	1	1	HNRNPD	heterogeneous nuclear ribonucleoprotein D (AU-rich element RNA binding protein 1, 37kDa)
hsa-miR-507	0	0	1	1	1	1	DBX2	developing brain homeobox 2
hsa-miR-507	0	0	1	1	1	1	CLEC2D	C-type lectin domain family 2, member D
hsa-miR-507	1	0	1	1	1	1	IGF2BP2	insulin-like growth factor 2 mRNA binding protein 2
hsa-miR-507	1	0	1	1	1	1	CTDSPL	CTD (carboxy-terminal domain, RNA polymerase II, polypeptide A) small phosphatase-like
hsa-miR-507	0	0	1	1	0	0	SLC41A3	solute carrier family 41, member 3
hsa-miR-507	1	0	1	0	1	1	KIAA2022	KIAA2022
hsa-miR-507	1	0	1	0	1	1	ERMN	ermin, ERM-like protein
hsa-miR-507	1	0	1	1	1	1	ARHGAP28	Rho GTPase activating protein 28
hsa-miR-507	1	0	1	0	1	1	FAM102B	family with sequence similarity 102, member B
hsa-miR-507	1	0	1	1	1	1	C10orf114	chromosome 10 open reading frame 114
hsa-miR-507	1	0	1	1	1	1	ATP11C	ATPase, class VI, type 11C
hsa-miR-507	1	0	1	0	1	1	FYTTD1	forty-two-three domain containing 1
hsa-miR-507	1	0	1	0	1	1	CREB5	cAMP responsive element binding protein 5
hsa-miR-507	0	0	1	1	1	1	MS4A13	membrane-spanning 4-domains, subfamily A, member 13
hsa-miR-507	0	0	1	0	1	1	GOLGA8E	golgin A8 family, member E
hsa-miR-507	0	0	1	1	1	1	GRP	gastrin-releasing peptide
hsa-miR-507	1	0	1	0	1	1	ZKSCAN2	zinc finger with KRAB and SCAN domains 2
hsa-miR-507	1	0	1	1	1	1	SORCS1	sortilin-related VPS10 domain containing receptor 1
hsa-miR-507	0	0	1	1	1	1	PURG	purine-rich element binding protein G
hsa-miR-507	0	0	1	1	1	1	PAPSS2	3'-phosphoadenosine 5'-phosphosulfate synthase 2
hsa-miR-507	0	0	1	1	1	1	PGBD2	piggyBac transposable element derived 2
hsa-miR-507	0	0	1	1	1	1	BTBD11	BTB (POZ) domain containing 11
hsa-miR-507	0	0	1	1	1	1	RAB28	RAB28, member RAS oncogene family
hsa-miR-507	1	0	1	1	1	1	PFKFB2	6-phosphofructo-2-kinase/fructose-2,6-biphosphatase 2
hsa-miR-507	1	0	1	1	1	1	NTRK2	neurotrophic tyrosine kinase, receptor, type 2
hsa-miR-507	1	0	1	0	1	1	RGAG4	retrotransposon gag domain containing 4
hsa-miR-507	1	0	1	1	1	1	CANX	calnexin
hsa-miR-507	1	0	1	0	1	1	BCL7A	B-cell CLL/lymphoma 7A
hsa-miR-507	1	0	1	0	1	1	TNRC6B	trinucleotide repeat containing 6B
hsa-miR-507	1	0	1	1	1	1	FNBP1L	formin binding protein 1-like
hsa-miR-507	1	0	1	0	1	1	CELF2	CUGBP, Elav-like family member 2
hsa-miR-507	1	0	1	1	1	1	AFF3	AF4/FMR2 family, member 3
hsa-miR-507	1	0	1	0	1	1	CLLU1	chronic lymphocytic leukemia up-regulated 1
hsa-miR-507	1	0	1	0	1	1	RAB12	RAB12, member RAS oncogene family
hsa-miR-507	0	0	1	1	1	1	ARRDC2	arrestin domain containing 2
hsa-miR-507	1	0	1	1	1	1	UGGT1	UDP-glucose glycoprotein glucosyltransferase 1
hsa-miR-507	1	0	1	1	1	1	KCTD21	potassium channel tetramerisation domain containing 21
hsa-miR-507	0	0	1	0	0	0	NPS	neuropeptide S
hsa-miR-507	1	0	1	0	1	1	MSRB3	methionine sulfoxide reductase B3
hsa-miR-507	1	0	1	1	1	1	MAF	v-maf musculoaponeurotic fibrosarcoma oncogene homolog (avian)
hsa-miR-507	1	0	1	1	1	1	RCE1	RCE1 homolog, prenyl protein protease (S. cerevisiae)
hsa-miR-507	0	0	1	1	1	1	PLGLB1	plasminogen-like B1
hsa-miR-507	1	0	1	0	1	1	GPR126	G protein-coupled receptor 126
hsa-miR-507	1	0	1	1	0	0	MTUS2	microtubule associated tumor suppressor candidate 2
hsa-miR-507	0	0	1	1	1	1	C18orf62	chromosome 18 open reading frame 62
hsa-miR-507	0	0	1	1	1	1	SPATA6L	spermatogenesis associated 6-like
hsa-miR-507	1	0	1	0	1	1	GK5	glycerol kinase 5 (putative)
hsa-miR-507	1	0	1	0	1	1	USP9X	ubiquitin specific peptidase 9, X-linked
hsa-miR-507	1	0	1	0	1	1	CREBZF	CREB/ATF bZIP transcription factor
hsa-miR-507	1	0	1	1	1	1	PAPD5	PAP associated domain containing 5
hsa-miR-507	1	0	1	0	1	1	DCUN1D4	DCN1, defective in cullin neddylation 1, domain containing 4 (S. cerevisiae)
hsa-miR-507	1	0	1	1	1	1	PPP4R1	protein phosphatase 4, regulatory subunit 1
hsa-miR-507	1	0	1	1	1	1	ZC2HC1C	zinc finger, C2HC-type containing 1C
hsa-miR-507	0	0	1	1	1	1	NUPR1	nuclear protein, transcriptional regulator, 1
hsa-miR-507	1	0	1	1	1	1	SLC9A6	solute carrier family 9, subfamily A (NHE6, cation proton antiporter 6), member 6
hsa-miR-507	0	0	1	1	1	1	TMEM8B	transmembrane protein 8B
hsa-miR-507	1	0	1	1	1	1	ERBB4	v-erb-a erythroblastic leukemia viral oncogene homolog 4 (avian)
hsa-miR-507	1	0	1	1	1	1	QSER1	glutamine and serine rich 1
hsa-miR-507	1	0	1	1	1	1	SREK1	splicing regulatory glutamine/lysine-rich protein 1
hsa-miR-507	0	0	1	0	0	0	AGAP7	ArfGAP with GTPase domain, ankyrin repeat and PH domain 7
hsa-miR-507	0	0	1	1	1	1	VCAM1	vascular cell adhesion molecule 1
hsa-miR-507	0	0	1	1	1	1	XIRP2	xin actin-binding repeat containing 2
hsa-miR-507	1	0	1	1	1	1	LDB3	LIM domain binding 3
hsa-miR-507	1	0	1	1	1	1	FAM155A	family with sequence similarity 155, member A
hsa-miR-507	1	0	1	0	1	1	THSD7B	thrombospondin, type I, domain containing 7B
hsa-miR-507	0	0	1	1	1	1	HSF5	heat shock transcription factor family member 5
hsa-miR-507	1	0	1	1	1	1	ZNF697	zinc finger protein 697
hsa-miR-507	1	0	1	0	1	1	ODZ3	odz, odd Oz/ten-m homolog 3 (Drosophila)
hsa-miR-507	0	0	1	1	1	1	TBX18	T-box 18
hsa-miR-507	1	0	1	1	1	1	MGA	MAX gene associated
hsa-miR-507	1	0	1	0	1	1	SCN3A	sodium channel, voltage-gated, type III, alpha subunit
hsa-miR-507	1	0	1	0	1	1	PDE5A	phosphodiesterase 5A, cGMP-specific
hsa-miR-507	1	0	1	1	1	1	ADAM10	ADAM metallopeptidase domain 10
hsa-miR-507	1	0	1	1	1	1	ADCY9	adenylate cyclase 9
hsa-miR-507	1	0	1	0	0	0	ACAN	aggrecan
hsa-miR-507	1	0	1	0	1	1	XIAP	X-linked inhibitor of apoptosis
hsa-miR-507	1	0	1	0	1	1	BACH1	BTB and CNC homology 1, basic leucine zipper transcription factor 1
hsa-miR-507	1	0	1	1	1	1	PRDM1	PR domain containing 1, with ZNF domain
hsa-miR-507	1	0	1	0	1	1	BMPR2	bone morphogenetic protein receptor, type II (serine/threonine kinase)
hsa-miR-507	1	0	1	0	1	1	KLF9	Kruppel-like factor 9
hsa-miR-507	0	0	1	0	1	1	CASQ2	calsequestrin 2 (cardiac muscle)
hsa-miR-507	1	0	1	0	1	1	CDK6	cyclin-dependent kinase 6
hsa-miR-507	0	0	1	1	1	1	DSCAM	Down syndrome cell adhesion molecule
hsa-miR-507	1	0	1	1	1	1	DYRK1A	dual-specificity tyrosine-(Y)-phosphorylation regulated kinase 1A
hsa-miR-507	0	0	1	0	1	1	EMP1	epithelial membrane protein 1
hsa-miR-507	1	0	1	1	1	1	EP300	E1A binding protein p300
hsa-miR-507	0	0	1	1	1	1	IL13RA1	interleukin 13 receptor, alpha 1
hsa-miR-507	1	0	1	1	1	1	AHNAK	AHNAK nucleoprotein
hsa-miR-507	1	0	1	1	1	1	AHR	aryl hydrocarbon receptor
hsa-miR-507	1	0	1	1	1	1	AQP4	aquaporin 4
hsa-miR-507	1	0	1	1	1	1	BCL6	B-cell CLL/lymphoma 6
hsa-miR-507	1	0	1	1	1	1	CBFB	core-binding factor, beta subunit
hsa-miR-507	1	0	1	0	1	1	CCND2	cyclin D2
hsa-miR-507	1	0	1	1	1	1	CDH11	cadherin 11, type 2, OB-cadherin (osteoblast)
hsa-miR-507	1	0	1	1	1	1	COL4A6	collagen, type IV, alpha 6
hsa-miR-507	1	0	1	1	1	1	DSC3	desmocollin 3
hsa-miR-507	1	0	1	1	1	1	E2F3	E2F transcription factor 3
hsa-miR-507	1	0	1	1	1	1	FBN2	fibrillin 2
hsa-miR-507	0	0	1	1	0	0	FUT5	fucosyltransferase 5 (alpha (1,3) fucosyltransferase)
hsa-miR-507	0	0	1	0	1	1	GYPA	glycophorin A (MNS blood group)
hsa-miR-507	0	0	1	1	1	1	HMGCS1	3-hydroxy-3-methylglutaryl-CoA synthase 1 (soluble)
hsa-miR-507	0	0	1	1	1	1	HOXB5	homeobox B5
hsa-miR-507	0	0	1	1	1	1	IL17A	interleukin 17A
hsa-miR-507	1	0	1	1	1	1	KCNJ3	potassium inwardly-rectifying channel, subfamily J, member 3
hsa-miR-507	0	0	1	1	1	1	KCNJ6	potassium inwardly-rectifying channel, subfamily J, member 6
hsa-miR-507	1	0	1	1	1	1	KPNA3	karyopherin alpha 3 (importin alpha 4)
hsa-miR-507	0	0	1	1	1	1	LOX	lysyl oxidase
hsa-miR-507	1	0	1	1	1	1	LY75	lymphocyte antigen 75
hsa-miR-507	1	0	1	1	1	1	MARCKS	myristoylated alanine-rich protein kinase C substrate
hsa-miR-507	1	0	1	1	1	1	MATN2	matrilin 2
hsa-miR-507	1	0	1	1	1	1	MSN	moesin
hsa-miR-507	1	0	1	1	1	1	NEUROD1	neuronal differentiation 1
hsa-miR-507	1	0	1	1	1	1	NPTX2	neuronal pentraxin II
hsa-miR-507	0	0	1	0	1	1	OPHN1	oligophrenin 1
hsa-miR-507	1	0	1	0	1	1	PAPPA	pregnancy-associated plasma protein A, pappalysin 1
hsa-miR-507	0	0	1	1	1	1	PLGLB2	plasminogen-like B2
hsa-miR-507	1	0	1	1	1	1	PPP1CB	protein phosphatase 1, catalytic subunit, beta isozyme
hsa-miR-507	1	0	1	1	1	1	PTPRK	protein tyrosine phosphatase, receptor type, K
hsa-miR-507	0	0	1	1	1	1	PTPRM	protein tyrosine phosphatase, receptor type, M
hsa-miR-507	0	0	1	0	1	1	RAB3B	RAB3B, member RAS oncogene family
hsa-miR-507	1	0	1	1	1	1	RAD23B	RAD23 homolog B (S. cerevisiae)
hsa-miR-507	1	0	1	1	1	1	ARID4A	AT rich interactive domain 4A (RBP1-like)
hsa-miR-507	1	0	1	1	1	1	ROBO2	roundabout, axon guidance receptor, homolog 2 (Drosophila)
hsa-miR-507	0	0	1	1	1	1	SDC2	syndecan 2
hsa-miR-507	1	0	1	1	1	1	SRSF3	serine/arginine-rich splicing factor 3
hsa-miR-507	1	0	1	1	1	1	SNAI2	snail homolog 2 (Drosophila)
hsa-miR-507	1	0	1	0	1	1	SOX4	SRY (sex determining region Y)-box 4
hsa-miR-507	1	0	1	0	1	1	SOX11	SRY (sex determining region Y)-box 11
hsa-miR-507	1	0	1	1	1	1	SPAM1	sperm adhesion molecule 1 (PH-20 hyaluronidase, zona pellucida binding)
hsa-miR-507	1	0	1	0	1	1	SEC62	SEC62 homolog (S. cerevisiae)
hsa-miR-507	1	0	1	1	1	1	NR2C2	nuclear receptor subfamily 2, group C, member 2
hsa-miR-507	0	0	1	1	1	1	TRAF3	TNF receptor-associated factor 3
hsa-miR-507	1	0	1	0	1	1	ZIC1	Zic family member 1
hsa-miR-507	0	0	1	1	1	1	ZNF137P	zinc finger protein 137, pseudogene
hsa-miR-507	0	0	1	1	1	1	ZNF143	zinc finger protein 143
hsa-miR-507	1	0	1	1	1	1	AKAP1	A kinase (PRKA) anchor protein 1
hsa-miR-507	0	0	1	1	1	1	HIST2H2BE	histone cluster 2, H2be
hsa-miR-507	0	0	1	1	1	1	SOAT2	sterol O-acyltransferase 2
hsa-miR-507	1	0	1	0	1	1	CUL3	cullin 3
hsa-miR-507	0	0	1	1	1	1	PEX3	peroxisomal biogenesis factor 3
hsa-miR-507	1	0	1	1	1	1	CBX4	chromobox homolog 4
hsa-miR-507	1	0	1	1	1	1	BHLHE40	basic helix-loop-helix family, member e40
hsa-miR-507	1	0	1	1	1	1	TNFSF11	tumor necrosis factor (ligand) superfamily, member 11
hsa-miR-507	0	0	1	1	0	0	ADAM21	ADAM metallopeptidase domain 21
hsa-miR-507	0	0	1	1	1	1	TRIM24	tripartite motif containing 24
hsa-miR-507	1	0	1	1	1	1	KALRN	kalirin, RhoGEF kinase
hsa-miR-507	1	0	1	1	1	1	CDKL2	cyclin-dependent kinase-like 2 (CDC2-related kinase)
hsa-miR-507	0	0	1	1	1	1	CDKN1B	cyclin-dependent kinase inhibitor 1B (p27, Kip1)
hsa-miR-507	1	0	1	1	1	1	GMFB	glia maturation factor, beta
hsa-miR-507	0	0	1	0	1	1	OAZ1	ornithine decarboxylase antizyme 1
hsa-miR-507	1	0	1	1	1	1	SHMT1	serine hydroxymethyltransferase 1 (soluble)
hsa-miR-507	1	0	1	0	1	1	SLC1A2	solute carrier family 1 (glial high affinity glutamate transporter), member 2
hsa-miR-507	1	0	1	1	1	1	MFHAS1	malignant fibrous histiocytoma amplified sequence 1
hsa-miR-507	0	0	1	1	1	1	HOMER1	homer homolog 1 (Drosophila)
hsa-miR-507	0	0	1	1	0	0	PIGL	phosphatidylinositol glycan anchor biosynthesis, class L
hsa-miR-507	1	0	1	1	1	1	COX11	COX11 cytochrome c oxidase assembly homolog (yeast)
hsa-miR-507	1	0	1	1	1	1	DUSP5	dual specificity phosphatase 5
hsa-miR-507	1	0	1	0	1	1	ARHGAP35	Rho GTPase activating protein 35
hsa-miR-507	0	0	1	1	1	1	FOXA1	forkhead box A1
hsa-miR-507	1	0	1	1	1	1	FOXK2	forkhead box K2
hsa-miR-507	0	0	1	1	1	1	MGAM	maltase-glucoamylase (alpha-glucosidase)
hsa-miR-507	1	0	1	1	1	1	MTMR4	myotubularin related protein 4
hsa-miR-507	0	0	1	0	1	1	CXorf1	chromosome X open reading frame 1
hsa-miR-507	0	0	1	1	1	1	BUB3	budding uninhibited by benzimidazoles 3 homolog (yeast)
hsa-miR-507	1	0	1	1	1	1	XPR1	xenotropic and polytropic retrovirus receptor 1
hsa-miR-507	1	0	1	1	1	1	B4GALT6	UDP-Gal:betaGlcNAc beta 1,4- galactosyltransferase, polypeptide 6
hsa-miR-507	1	0	1	0	1	1	ARHGEF6	Rac/Cdc42 guanine nucleotide exchange factor (GEF) 6
hsa-miR-507	1	0	1	1	1	1	CXCL14	chemokine (C-X-C motif) ligand 14
hsa-miR-507	0	0	1	1	1	1	CLCA3P	chloride channel accessory 3, pseudogene
hsa-miR-507	0	0	1	0	1	1	DSC2	desmocollin 2
hsa-miR-507	1	0	1	1	1	1	KDM5A	lysine (K)-specific demethylase 5A
hsa-miR-507	0	0	1	1	1	1	SIM1	single-minded homolog 1 (Drosophila)
hsa-miR-507	1	0	1	1	1	1	OXSR1	oxidative-stress responsive 1
hsa-miR-507	1	0	1	1	1	1	SLC23A2	solute carrier family 23 (nucleobase transporters), member 2
hsa-miR-507	1	0	1	1	1	1	CRK	v-crk sarcoma virus CT10 oncogene homolog (avian)
hsa-miR-507	1	0	1	1	1	1	GEM	GTP binding protein overexpressed in skeletal muscle
hsa-miR-507	1	0	1	1	1	1	GPM6A	glycoprotein M6A
hsa-miR-507	0	0	1	1	1	1	NUP98	nucleoporin 98kDa
hsa-miR-507	1	0	1	0	1	1	PRKCE	protein kinase C, epsilon
hsa-miR-507	1	0	1	1	1	1	RALA	v-ral simian leukemia viral oncogene homolog A (ras related)
hsa-miR-507	0	0	1	1	1	1	SEPP1	selenoprotein P, plasma, 1
hsa-miR-507	0	0	1	1	0	0	ARHGEF5	Rho guanine nucleotide exchange factor (GEF) 5
hsa-miR-507	1	0	1	0	1	1	CCDC6	coiled-coil domain containing 6
hsa-miR-507	0	0	1	1	1	1	ING1	inhibitor of growth family, member 1
hsa-miR-507	1	0	1	1	1	1	DLL1	delta-like 1 (Drosophila)
hsa-miR-507	1	0	1	1	1	1	ARPC5	actin related protein 2/3 complex, subunit 5, 16kDa
hsa-miR-507	1	0	1	1	1	1	ACTR1A	ARP1 actin-related protein 1 homolog A, centractin alpha (yeast)
hsa-miR-507	1	0	1	0	1	1	SPRY3	sprouty homolog 3 (Drosophila)
hsa-miR-507	0	0	1	1	1	1	CD5L	CD5 molecule-like
hsa-miR-507	1	0	1	1	1	1	MEOX2	mesenchyme homeobox 2
hsa-miR-507	1	0	1	1	1	1	MMP16	matrix metallopeptidase 16 (membrane-inserted)
hsa-miR-507	1	0	1	1	1	1	MTF1	metal-regulatory transcription factor 1
hsa-miR-507	1	0	1	1	1	1	RNF6	ring finger protein (C3H2C3 type) 6
hsa-miR-507	1	0	1	1	1	1	IRF9	interferon regulatory factor 9
hsa-miR-507	1	0	1	1	1	1	NEFL	neurofilament, light polypeptide
hsa-miR-507	1	0	1	1	1	1	ORC2	origin recognition complex, subunit 2
hsa-miR-507	1	0	1	1	1	1	PKN2	protein kinase N2
hsa-miR-507	1	0	1	1	1	1	RAD21	RAD21 homolog (S. pombe)
hsa-miR-507	1	0	1	1	1	1	BASP1	brain abundant, membrane attached signal protein 1
hsa-miR-507	1	0	1	1	1	1	ZER1	zer-1 homolog (C. elegans)
hsa-miR-507	0	0	1	1	1	1	PIBF1	progesterone immunomodulatory binding factor 1
hsa-miR-507	1	0	1	1	1	1	NEBL	nebulette
hsa-miR-507	1	0	1	1	1	1	DYNLT3	dynein, light chain, Tctex-type 3
hsa-miR-507	0	0	1	1	0	0	MIA	melanoma inhibitory activity
hsa-miR-507	1	0	1	0	1	1	NCOA2	nuclear receptor coactivator 2
hsa-miR-507	1	0	1	0	1	1	IGF2BP1	insulin-like growth factor 2 mRNA binding protein 1
hsa-miR-507	1	0	1	1	1	1	CTCF	CCCTC-binding factor (zinc finger protein)
hsa-miR-507	0	0	1	1	1	1	NUDT3	nudix (nucleoside diphosphate linked moiety X)-type motif 3
hsa-miR-507	1	0	1	1	1	1	RP2	retinitis pigmentosa 2 (X-linked recessive)
hsa-miR-507	1	0	1	1	1	1	SCN1A	sodium channel, voltage-gated, type I, alpha subunit
hsa-miR-507	1	0	1	0	1	1	SLC5A3	solute carrier family 5 (sodium/myo-inositol cotransporter), member 3
hsa-miR-507	1	0	1	1	1	1	NR4A3	nuclear receptor subfamily 4, group A, member 3
hsa-miR-507	1	0	1	1	1	1	WWP1	WW domain containing E3 ubiquitin protein ligase 1
hsa-miR-507	1	0	1	1	1	1	ADAMTS5	ADAM metallopeptidase with thrombospondin type 1 motif, 5
hsa-miR-507	0	0	1	0	1	1	ZNF208	zinc finger protein 208
hsa-miR-507	1	0	1	1	1	1	PALM2-AKAP2	PALM2-AKAP2 readthrough
hsa-miR-507	1	0	1	1	1	1	DUSP10	dual specificity phosphatase 10
hsa-miR-507	0	0	1	1	1	1	SLC6A14	solute carrier family 6 (amino acid transporter), member 14
hsa-miR-507	0	0	1	0	1	1	PNMA2	paraneoplastic Ma antigen 2
hsa-miR-507	0	0	1	0	1	1	PAXIP1	PAX interacting (with transcription-activation domain) protein 1
hsa-miR-507	1	0	1	1	1	1	MTF2	metal response element binding transcription factor 2
hsa-miR-507	0	0	1	1	1	1	MIP	major intrinsic protein of lens fiber
hsa-miR-507	0	0	1	1	1	1	FRAT2	frequently rearranged in advanced T-cell lymphomas 2
hsa-miR-507	0	0	1	1	1	1	AK5	adenylate kinase 5
hsa-miR-507	0	0	1	1	1	1	HARS2	histidyl-tRNA synthetase 2, mitochondrial
hsa-miR-507	0	0	1	1	1	1	RAB3GAP1	RAB3 GTPase activating protein subunit 1 (catalytic)
hsa-miR-507	1	0	1	1	1	1	KCND2	potassium voltage-gated channel, Shal-related subfamily, member 2
hsa-miR-507	1	0	1	0	1	1	FBXL7	F-box and leucine-rich repeat protein 7
hsa-miR-507	1	0	1	1	1	1	KIF4A	kinesin family member 4A
hsa-miR-507	0	0	1	0	0	0	OR2F1	olfactory receptor, family 2, subfamily F, member 1
hsa-miR-507	1	0	1	1	1	1	RGS17	regulator of G-protein signaling 17
hsa-miR-507	1	0	1	1	1	1	TLL2	tolloid-like 2
hsa-miR-507	0	0	1	1	1	1	N6AMT1	N-6 adenine-specific DNA methyltransferase 1 (putative)
hsa-miR-507	1	0	1	1	1	1	PPARGC1A	peroxisome proliferator-activated receptor gamma, coactivator 1 alpha
hsa-miR-507	0	0	1	1	0	0	KCNJ14	potassium inwardly-rectifying channel, subfamily J, member 14
hsa-miR-507	0	0	1	1	1	1	PCOLCE2	procollagen C-endopeptidase enhancer 2
hsa-miR-507	0	0	1	0	0	0	PILRB	paired immunoglobin-like type 2 receptor beta
hsa-miR-507	0	0	1	0	1	1	EMR2	egf-like module containing, mucin-like, hormone receptor-like 2
hsa-miR-507	0	0	1	1	1	1	LRP10	low density lipoprotein receptor-related protein 10
hsa-miR-507	1	0	1	1	0	0	HOXC11	homeobox C11
hsa-miR-507	1	0	1	0	1	1	ODZ1	odz, odd Oz/ten-m homolog 1 (Drosophila)
hsa-miR-507	1	0	1	1	1	1	MAPRE2	microtubule-associated protein, RP/EB family, member 2
hsa-miR-507	0	0	1	1	1	1	HSPA4L	heat shock 70kDa protein 4-like
hsa-miR-507	0	0	1	1	0	0	CLEC4E	C-type lectin domain family 4, member E
hsa-miR-507	0	0	1	1	1	1	ANKRD1	ankyrin repeat domain 1 (cardiac muscle)
hsa-miR-507	0	0	1	1	1	1	TSPAN13	tetraspanin 13
hsa-miR-507	1	0	1	1	1	1	KLHL20	kelch-like 20 (Drosophila)
hsa-miR-507	1	0	1	1	1	1	OTX1	orthodenticle homeobox 1
hsa-miR-507	1	0	1	1	1	1	VSX1	visual system homeobox 1
hsa-miR-507	1	0	1	1	1	1	HERC3	HECT and RLD domain containing E3 ubiquitin protein ligase 3
hsa-miR-507	0	0	1	0	1	1	CTR9	Ctr9, Paf1/RNA polymerase II complex component, homolog (S. cerevisiae)
hsa-miR-507	1	0	1	1	1	1	KDM4A	lysine (K)-specific demethylase 4A
hsa-miR-507	1	0	1	0	1	1	EDEM1	ER degradation enhancer, mannosidase alpha-like 1
hsa-miR-507	1	0	1	1	1	1	DAZAP2	DAZ associated protein 2
hsa-miR-507	1	0	1	1	1	1	KIAA0753	KIAA0753
hsa-miR-507	1	0	1	0	1	1	PJA2	praja ring finger 2, E3 ubiquitin protein ligase
hsa-miR-507	1	0	1	1	1	1	ZBTB5	zinc finger and BTB domain containing 5
hsa-miR-507	1	0	1	1	1	1	JOSD1	Josephin domain containing 1
hsa-miR-507	1	0	1	0	1	1	ICK	intestinal cell (MAK-like) kinase
hsa-miR-507	1	0	1	1	1	1	PLEKHA6	pleckstrin homology domain containing, family A member 6
hsa-miR-507	1	0	1	0	1	1	ZBTB1	zinc finger and BTB domain containing 1
hsa-miR-507	0	0	1	1	0	0	DHX30	DEAH (Asp-Glu-Ala-His) box polypeptide 30
hsa-miR-507	1	0	1	0	1	1	WDFY3	WD repeat and FYVE domain containing 3
hsa-miR-507	1	0	1	1	1	1	RAB21	RAB21, member RAS oncogene family
hsa-miR-507	1	0	1	0	1	1	PDS5B	PDS5, regulator of cohesion maintenance, homolog B (S. cerevisiae)
hsa-miR-507	1	0	1	0	1	1	PEG10	paternally expressed 10
hsa-miR-507	1	0	1	1	1	1	IQSEC2	IQ motif and Sec7 domain 2
hsa-miR-507	1	0	1	1	1	1	RTF1	Rtf1, Paf1/RNA polymerase II complex component, homolog (S. cerevisiae)
hsa-miR-507	1	0	1	1	1	1	GPD1L	glycerol-3-phosphate dehydrogenase 1-like
hsa-miR-507	1	0	1	1	1	1	RCOR1	REST corepressor 1
hsa-miR-507	1	0	1	1	1	1	MYO1D	myosin ID
hsa-miR-507	1	0	1	1	1	1	PDS5A	PDS5, regulator of cohesion maintenance, homolog A (S. cerevisiae)
hsa-miR-507	1	0	1	0	1	1	KIAA1024	KIAA1024
hsa-miR-507	1	0	1	1	1	1	CSTF2T	cleavage stimulation factor, 3' pre-RNA, subunit 2, 64kDa, tau variant
hsa-miR-507	1	0	1	0	1	1	LPHN3	latrophilin 3
hsa-miR-507	1	0	1	1	1	1	ANKS1A	ankyrin repeat and sterile alpha motif domain containing 1A
hsa-miR-507	1	0	1	1	1	1	DNAJC13	DnaJ (Hsp40) homolog, subfamily C, member 13
hsa-miR-507	1	0	1	1	1	1	SYNM	synemin, intermediate filament protein
hsa-miR-507	1	0	1	1	1	1	PHF15	PHD finger protein 15
hsa-miR-507	1	0	1	1	1	1	MED13L	mediator complex subunit 13-like
hsa-miR-507	0	0	1	0	1	1	ZDHHC17	zinc finger, DHHC-type containing 17
hsa-miR-507	0	0	1	1	1	1	LEPROTL1	leptin receptor overlapping transcript-like 1
hsa-miR-507	1	0	1	1	1	1	DSTYK	dual serine/threonine and tyrosine protein kinase
hsa-miR-507	1	0	1	1	1	1	MYRIP	myosin VIIA and Rab interacting protein
hsa-miR-507	1	0	1	1	1	1	NSL1	NSL1, MIND kinetochore complex component, homolog (S. cerevisiae)
hsa-miR-507	1	0	1	0	1	1	OSBPL3	oxysterol binding protein-like 3
hsa-miR-507	1	0	1	0	1	1	GLCE	glucuronic acid epimerase
hsa-miR-507	1	0	1	0	1	1	ERC2	ELKS/RAB6-interacting/CAST family member 2
hsa-miR-507	0	0	1	1	1	1	HERC4	HECT and RLD domain containing E3 ubiquitin protein ligase 4
hsa-miR-507	1	0	1	1	1	1	EPC2	enhancer of polycomb homolog 2 (Drosophila)
hsa-miR-507	1	0	1	0	1	1	WWC3	WWC family member 3
hsa-miR-507	1	0	1	1	1	1	AZIN1	antizyme inhibitor 1
hsa-miR-507	1	0	1	1	1	1	ST8SIA3	ST8 alpha-N-acetyl-neuraminide alpha-2,8-sialyltransferase 3
hsa-miR-507	0	0	1	1	1	1	PCF11	PCF11, cleavage and polyadenylation factor subunit, homolog (S. cerevisiae)
hsa-miR-507	1	0	1	0	1	1	TRIM33	tripartite motif containing 33
hsa-miR-507	0	0	1	1	1	1	POLR1D	polymerase (RNA) I polypeptide D, 16kDa
hsa-miR-507	1	0	1	1	1	1	PHF20L1	PHD finger protein 20-like 1
hsa-miR-507	0	0	1	1	1	1	ISOC1	isochorismatase domain containing 1
hsa-miR-507	0	0	1	1	1	1	MRPS33	mitochondrial ribosomal protein S33
hsa-miR-507	1	0	1	1	1	1	GOLT1B	golgi transport 1B
hsa-miR-507	0	0	1	1	1	1	DYNC1LI1	dynein, cytoplasmic 1, light intermediate chain 1
hsa-miR-507	1	0	1	1	1	1	CERCAM	cerebral endothelial cell adhesion molecule
hsa-miR-507	0	0	1	1	1	1	CYB5R1	cytochrome b5 reductase 1
hsa-miR-507	0	0	1	1	1	1	KLF2	Kruppel-like factor 2 (lung)
hsa-miR-507	1	0	1	1	1	1	RNF138	ring finger protein 138, E3 ubiquitin protein ligase
hsa-miR-507	0	0	1	1	1	1	CD244	CD244 molecule, natural killer cell receptor 2B4
hsa-miR-507	1	0	1	0	1	1	CRIM1	cysteine rich transmembrane BMP regulator 1 (chordin-like)
hsa-miR-507	1	0	1	1	1	1	DNAJC27	DnaJ (Hsp40) homolog, subfamily C, member 27
hsa-miR-507	0	0	1	0	1	1	ERGIC2	ERGIC and golgi 2
hsa-miR-507	1	0	1	1	1	1	RAB6B	RAB6B, member RAS oncogene family
hsa-miR-507	0	0	1	1	1	1	PLAC8	placenta-specific 8
hsa-miR-507	1	0	1	1	1	1	CPSF2	cleavage and polyadenylation specific factor 2, 100kDa
hsa-miR-507	0	0	1	1	1	1	POLE3	polymerase (DNA directed), epsilon 3, accessory subunit
hsa-miR-507	1	0	1	0	1	1	CYTH1	cytohesin 1
hsa-miR-507	1	0	1	1	1	1	ARID1B	AT rich interactive domain 1B (SWI1-like)
hsa-miR-507	1	0	1	0	1	1	EIF2C4	eukaryotic translation initiation factor 2C, 4
hsa-miR-507	1	0	1	0	1	1	FAM46C	family with sequence similarity 46, member C
hsa-miR-507	0	0	1	1	0	0	CNTLN	centlein, centrosomal protein
hsa-miR-507	1	0	1	1	1	1	ZDHHC7	zinc finger, DHHC-type containing 7
hsa-miR-507	1	0	1	0	1	1	DCAF16	DDB1 and CUL4 associated factor 16
hsa-miR-507	1	0	1	0	1	1	CMTM6	CKLF-like MARVEL transmembrane domain containing 6
hsa-miR-507	1	0	1	0	1	1	MARCH5	membrane-associated ring finger (C3HC4) 5
hsa-miR-507	1	0	1	1	1	1	HIF1AN	hypoxia inducible factor 1, alpha subunit inhibitor
hsa-miR-507	0	0	1	1	1	1	SCYL2	SCY1-like 2 (S. cerevisiae)
hsa-miR-507	1	0	1	0	1	1	KIF26B	kinesin family member 26B
hsa-miR-507	1	0	1	1	1	1	FIGN	fidgetin
hsa-miR-507	1	0	1	1	1	1	FAM178A	family with sequence similarity 178, member A
hsa-miR-507	1	0	1	0	1	1	ARL8B	ADP-ribosylation factor-like 8B
hsa-miR-507	1	0	1	1	1	1	LRRC20	leucine rich repeat containing 20
hsa-miR-507	1	0	1	0	1	1	PARVA	parvin, alpha
hsa-miR-507	1	0	1	1	1	1	UBA6	ubiquitin-like modifier activating enzyme 6
hsa-miR-507	0	0	1	1	1	1	RBM41	RNA binding motif protein 41
hsa-miR-507	1	0	1	1	1	1	DDX19A	DEAD (Asp-Glu-Ala-Asp) box polypeptide 19A
hsa-miR-507	1	0	1	1	1	1	RSBN1	round spermatid basic protein 1
hsa-miR-507	0	0	1	1	1	1	STK32B	serine/threonine kinase 32B
hsa-miR-507	1	0	1	0	1	1	FOXJ2	forkhead box J2
hsa-miR-507	1	0	1	1	1	1	RRN3	RRN3 RNA polymerase I transcription factor homolog (S. cerevisiae)
hsa-miR-507	1	0	1	1	1	1	ASH1L	ash1 (absent, small, or homeotic)-like (Drosophila)
hsa-miR-507	0	0	1	1	0	0	SAGE1	sarcoma antigen 1
hsa-miR-507	1	0	1	1	1	1	LANCL2	LanC lantibiotic synthetase component C-like 2 (bacterial)
hsa-miR-507	1	0	1	0	1	1	ELMOD1	ELMO/CED-12 domain containing 1
hsa-miR-507	1	0	1	0	1	1	PCDHAC1	protocadherin alpha subfamily C, 1
hsa-miR-507	1	0	1	0	1	1	PCDHAC2	protocadherin alpha subfamily C, 2
hsa-miR-507	1	0	1	1	1	1	PCDHA1	protocadherin alpha 1
hsa-miR-507	1	0	1	0	1	1	PCDHA10	protocadherin alpha 10
hsa-miR-507	1	0	1	0	1	1	PCDHA11	protocadherin alpha 11
hsa-miR-507	1	0	1	0	1	1	PCDHA12	protocadherin alpha 12
hsa-miR-507	1	0	1	1	1	1	PCDHA2	protocadherin alpha 2
hsa-miR-507	1	0	1	1	1	1	PCDHA3	protocadherin alpha 3
hsa-miR-507	1	0	1	1	1	1	PCDHA6	protocadherin alpha 6
hsa-miR-507	1	0	1	0	1	1	PCDHA7	protocadherin alpha 7
hsa-miR-507	1	0	1	1	1	1	PCDHA8	protocadherin alpha 8
hsa-miR-507	1	0	1	1	1	1	HOXA10	homeobox A10
hsa-miR-507	1	0	1	0	1	1	CCDC93	coiled-coil domain containing 93
hsa-miR-507	0	0	1	1	1	1	BARHL1	BarH-like homeobox 1
hsa-miR-507	0	0	1	1	1	1	FMN2	formin 2
hsa-miR-507	0	0	1	0	1	1	ZC3HAV1	zinc finger CCCH-type, antiviral 1
hsa-miR-507	1	0	1	1	1	1	C5orf15	chromosome 5 open reading frame 15
hsa-miR-507	1	0	1	0	1	1	CNNM1	cyclin M1
hsa-miR-507	1	0	1	1	1	1	PCDH9	protocadherin 9
hsa-miR-507	0	0	1	1	1	1	PLXDC1	plexin domain containing 1
hsa-miR-507	1	0	1	1	1	1	OSM	oncostatin M
hsa-miR-507	1	0	1	1	1	1	RAB22A	RAB22A, member RAS oncogene family
hsa-miR-507	1	0	1	1	1	1	USP31	ubiquitin specific peptidase 31
hsa-miR-507	1	0	1	1	1	1	DLG3	discs, large homolog 3 (Drosophila)
hsa-miR-507	1	0	1	0	1	1	SYT4	synaptotagmin IV
hsa-miR-507	0	0	1	1	1	1	ARRDC3	arrestin domain containing 3
hsa-miR-507	1	0	1	1	1	1	KLHL14	kelch-like 14 (Drosophila)
hsa-miR-507	0	0	1	1	1	1	MARCH4	membrane-associated ring finger (C3HC4) 4, E3 ubiquitin protein ligase
hsa-miR-507	1	0	1	0	1	1	WDFY1	WD repeat and FYVE domain containing 1
hsa-miR-507	1	0	1	0	1	1	KIAA1456	KIAA1456
hsa-miR-507	1	0	1	0	1	1	SH3RF1	SH3 domain containing ring finger 1
hsa-miR-507	1	0	1	1	1	1	VAT1L	vesicle amine transport protein 1 homolog (T. californica)-like
hsa-miR-507	0	0	1	1	1	1	PPM1A	protein phosphatase, Mg2+/Mn2+ dependent, 1A
hsa-miR-507	0	0	1	1	1	1	TLX3	T-cell leukemia homeobox 3
hsa-miR-507	1	0	1	1	1	1	KCNK10	potassium channel, subfamily K, member 10
hsa-miR-507	1	0	1	1	1	1	FAM60A	family with sequence similarity 60, member A
hsa-miR-507	0	0	1	1	1	1	PRDM13	PR domain containing 13
hsa-miR-507	1	0	1	1	1	1	TMEM35	transmembrane protein 35
hsa-miR-507	1	0	1	1	1	1	BACH2	BTB and CNC homology 1, basic leucine zipper transcription factor 2
hsa-miR-507	1	0	1	1	1	1	GRIK2	glutamate receptor, ionotropic, kainate 2
hsa-miR-507	1	0	1	1	1	1	TIA1	TIA1 cytotoxic granule-associated RNA binding protein
hsa-miR-507	0	0	1	1	1	1	NSUN3	NOP2/Sun domain family, member 3
hsa-miR-507	0	0	1	1	1	1	PERP	PERP, TP53 apoptosis effector
hsa-miR-507	1	0	1	1	1	1	XPO4	exportin 4
hsa-miR-507	0	0	1	1	1	1	HHIP	hedgehog interacting protein
hsa-miR-507	1	0	1	1	1	1	PER2	period homolog 2 (Drosophila)
hsa-miR-507	1	0	1	1	1	1	RFX7	regulatory factor X, 7
hsa-miR-507	1	0	1	1	1	1	SOWAHC	sosondowah ankyrin repeat domain family member C
hsa-miR-507	1	0	1	1	0	0	UBE2Z	ubiquitin-conjugating enzyme E2Z
hsa-miR-507	1	0	1	1	1	1	GRAMD3	GRAM domain containing 3
hsa-miR-507	1	0	1	1	1	1	GID4	GID complex subunit 4, VID24 homolog (S. cerevisiae)
hsa-miR-507	0	0	1	1	0	0	IRX1	iroquois homeobox 1
hsa-miR-507	1	0	1	0	1	1	NOTCH2	notch 2
hsa-miR-507	1	0	1	1	1	1	LRRC2	leucine rich repeat containing 2
hsa-miR-507	1	0	1	1	1	1	CCNJL	cyclin J-like
hsa-miR-507	0	0	1	1	1	1	AKIRIN1	akirin 1
hsa-miR-507	0	0	1	1	1	1	LRRK1	leucine-rich repeat kinase 1
hsa-miR-507	1	0	1	0	1	1	ZFHX4	zinc finger homeobox 4
hsa-miR-507	0	0	1	1	1	1	AGBL2	ATP/GTP binding protein-like 2
hsa-miR-507	0	0	1	1	1	1	GGNBP2	gametogenetin binding protein 2
hsa-miR-507	1	0	1	1	1	1	EIF2C3	eukaryotic translation initiation factor 2C, 3
hsa-miR-507	1	0	1	0	1	1	VCPIP1	valosin containing protein (p97)/p47 complex interacting protein 1
hsa-miR-507	1	0	1	0	1	1	TET1	tet methylcytosine dioxygenase 1
hsa-miR-507	1	0	1	0	1	1	SETD7	SET domain containing (lysine methyltransferase) 7
hsa-miR-507	0	0	1	1	1	1	FCRL2	Fc receptor-like 2
hsa-miR-507	1	0	1	0	1	1	VOPP1	vesicular, overexpressed in cancer, prosurvival protein 1
hsa-miR-507	1	0	1	0	1	1	CSRNP2	cysteine-serine-rich nuclear protein 2
hsa-miR-507	1	0	1	1	1	1	MAP4	microtubule-associated protein 4
hsa-miR-507	0	0	1	1	1	1	COG3	component of oligomeric golgi complex 3
hsa-miR-507	1	0	1	0	1	1	ITCH	itchy E3 ubiquitin protein ligase
hsa-miR-507	1	0	1	1	1	1	PCDHA9	protocadherin alpha 9
hsa-miR-507	1	0	1	1	0	0	FZD8	frizzled family receptor 8
hsa-miR-507	0	0	1	1	1	1	KCNA7	potassium voltage-gated channel, shaker-related subfamily, member 7
hsa-miR-507	0	0	1	1	1	1	FRMD8	FERM domain containing 8
hsa-miR-507	1	0	1	1	1	1	GPR61	G protein-coupled receptor 61
hsa-miR-507	1	0	1	1	1	1	PATZ1	POZ (BTB) and AT hook containing zinc finger 1
hsa-miR-507	1	0	1	0	1	1	SRSF8	serine/arginine-rich splicing factor 8
hsa-miR-507	1	0	1	1	1	1	ARID5B	AT rich interactive domain 5B (MRF1-like)
hsa-miR-507	0	0	1	0	1	1	DNAJC30	DnaJ (Hsp40) homolog, subfamily C, member 30
hsa-miR-507	0	0	1	1	1	1	C5orf4	chromosome 5 open reading frame 4
hsa-miR-507	1	0	1	1	1	1	TRIM63	tripartite motif containing 63, E3 ubiquitin protein ligase
hsa-miR-507	1	0	1	1	0	0	ZC3H10	zinc finger CCCH-type containing 10
hsa-miR-507	1	0	1	1	1	1	FAM104A	family with sequence similarity 104, member A
hsa-miR-507	1	0	1	0	1	1	LACTB	lactamase, beta
hsa-miR-507	1	0	1	0	1	1	UBASH3B	ubiquitin associated and SH3 domain containing B
hsa-miR-507	0	0	1	1	1	1	SUCNR1	succinate receptor 1
hsa-miR-507	0	0	1	1	1	1	ZIC5	Zic family member 5
hsa-miR-507	1	0	1	1	1	1	C5orf30	chromosome 5 open reading frame 30
hsa-miR-507	0	0	1	1	0	0	TBL1Y	transducin (beta)-like 1, Y-linked
hsa-miR-507	0	0	1	1	0	0	RWDD2A	RWD domain containing 2A
hsa-miR-507	0	0	1	1	1	1	ITGB1	integrin, beta 1 (fibronectin receptor, beta polypeptide, antigen CD29 includes MDF2, MSK12)
hsa-miR-507	0	0	1	1	1	1	IL22RA2	interleukin 22 receptor, alpha 2
hsa-miR-507	1	0	1	1	1	1	MED12L	mediator complex subunit 12-like
hsa-miR-507	1	0	1	1	1	1	NAA15	N(alpha)-acetyltransferase 15, NatA auxiliary subunit
hsa-miR-507	1	0	1	1	0	0	BRD4	bromodomain containing 4
hsa-miR-507	1	0	1	1	1	1	PTP4A2	protein tyrosine phosphatase type IVA, member 2
hsa-miR-507	1	0	1	0	1	1	EDARADD	EDAR-associated death domain
hsa-miR-507	0	0	1	0	1	1	PAQR8	progestin and adipoQ receptor family member VIII
hsa-miR-507	0	0	1	1	1	1	ZNF721	zinc finger protein 721
hsa-miR-507	1	0	1	1	1	1	ADAMTS19	ADAM metallopeptidase with thrombospondin type 1 motif, 19
hsa-miR-507	1	0	1	1	1	1	PCSK6	proprotein convertase subtilisin/kexin type 6
hsa-miR-507	1	0	1	1	1	1	ICA1L	islet cell autoantigen 1,69kDa-like
hsa-miR-507	1	0	1	0	1	1	FCHO2	FCH domain only 2
hsa-miR-507	0	0	1	1	1	1	ADAMTS17	ADAM metallopeptidase with thrombospondin type 1 motif, 17
hsa-miR-507	1	0	1	0	1	1	GIT2	G protein-coupled receptor kinase interacting ArfGAP 2
hsa-miR-507	1	0	1	1	1	1	ATRN	attractin
hsa-miR-507	1	0	1	1	0	0	GNAT1	guanine nucleotide binding protein (G protein), alpha transducing activity polypeptide 1
hsa-miR-507	1	0	1	0	1	1	CNOT6L	CCR4-NOT transcription complex, subunit 6-like
hsa-miR-507	1	0	1	1	1	1	MAPK1IP1L	mitogen-activated protein kinase 1 interacting protein 1-like
hsa-miR-507	1	0	1	1	1	1	CCDC43	coiled-coil domain containing 43
hsa-miR-507	1	0	1	1	1	1	RFTN2	raftlin family member 2
hsa-miR-507	0	0	1	1	1	1	SLFN5	schlafen family member 5
hsa-miR-507	0	0	1	0	1	1	UBLCP1	ubiquitin-like domain containing CTD phosphatase 1
hsa-miR-507	0	0	1	1	1	1	DACT3	dapper, antagonist of beta-catenin, homolog 3 (Xenopus laevis)
hsa-miR-507	1	0	1	1	1	1	CCSAP	centriole, cilia and spindle-associated protein
hsa-miR-507	1	0	1	1	1	1	SGMS1	sphingomyelin synthase 1
hsa-miR-507	1	0	1	1	1	1	FAM110B	family with sequence similarity 110, member B
hsa-miR-507	0	0	1	1	1	1	LONRF1	LON peptidase N-terminal domain and ring finger 1
hsa-miR-507	0	0	1	1	1	1	MRFAP1L1	Morf4 family associated protein 1-like 1
hsa-miR-507	1	0	1	1	1	1	C1orf216	chromosome 1 open reading frame 216
hsa-miR-507	1	0	1	1	1	1	FGFBP3	fibroblast growth factor binding protein 3
hsa-miR-507	1	0	1	0	1	1	TMTC2	transmembrane and tetratricopeptide repeat containing 2
hsa-miR-507	1	0	1	0	1	1	TMEM196	transmembrane protein 196
hsa-miR-507	1	0	1	0	1	1	C7orf41	chromosome 7 open reading frame 41
hsa-miR-507	1	0	1	0	1	1	ST6GALNAC3	ST6 (alpha-N-acetyl-neuraminyl-2,3-beta-galactosyl-1,3)-N-acetylgalactosaminide alpha-2,6-sialyltransferase 3
hsa-miR-507	0	0	1	1	1	1	FAM71C	family with sequence similarity 71, member C
hsa-miR-507	1	0	1	1	1	1	HS6ST3	heparan sulfate 6-O-sulfotransferase 3
hsa-miR-507	1	0	1	1	0	0	FAM43A	family with sequence similarity 43, member A
hsa-miR-507	1	0	1	1	1	1	DAZAP1	DAZ associated protein 1
hsa-miR-507	1	0	1	1	1	1	POM121	POM121 transmembrane nucleoporin
hsa-miR-507	1	0	1	1	1	1	RDH10	retinol dehydrogenase 10 (all-trans)
hsa-miR-507	0	0	1	1	1	1	REXO1L1	REX1, RNA exonuclease 1 homolog (S. cerevisiae)-like 1
hsa-miR-507	1	0	1	1	1	1	SMG7	smg-7 homolog, nonsense mediated mRNA decay factor (C. elegans)
hsa-miR-507	1	0	1	1	1	1	L3MBTL4	l(3)mbt-like 4 (Drosophila)
hsa-miR-507	1	0	1	1	1	1	MOB1B	MOB kinase activator 1B
hsa-miR-507	0	0	1	1	0	0	PRSS36	protease, serine, 36
hsa-miR-507	1	0	1	1	1	1	CCDC117	coiled-coil domain containing 117
hsa-miR-507	1	0	1	0	1	1	PGM2L1	phosphoglucomutase 2-like 1
hsa-miR-507	1	0	1	1	1	1	RABL3	RAB, member of RAS oncogene family-like 3
hsa-miR-507	1	0	1	1	1	1	OLIG3	oligodendrocyte transcription factor 3
hsa-miR-507	0	0	1	1	0	0	HRAS	v-Ha-ras Harvey rat sarcoma viral oncogene homolog
hsa-miR-507	0	0	1	1	0	0	AGR3	anterior gradient 3 homolog (Xenopus laevis)
hsa-miR-507	1	0	1	1	1	1	INADL	InaD-like (Drosophila)
hsa-miR-507	1	0	1	1	1	1	LRRTM3	leucine rich repeat transmembrane neuronal 3
hsa-miR-507	1	0	1	1	1	1	PRIMA1	proline rich membrane anchor 1
hsa-miR-507	0	0	1	1	1	1	HSD17B13	hydroxysteroid (17-beta) dehydrogenase 13
hsa-miR-507	1	0	1	1	1	1	MB21D2	Mab-21 domain containing 2
hsa-miR-507	0	0	1	1	1	1	OAF	OAF homolog (Drosophila)
hsa-miR-507	1	0	1	1	1	1	MTDH	metadherin
hsa-miR-507	1	0	1	1	1	1	LRRTM1	leucine rich repeat transmembrane neuronal 1
hsa-miR-507	1	0	1	1	1	1	ERAS	ES cell expressed Ras
hsa-miR-507	0	0	1	1	0	0	POLN	polymerase (DNA directed) nu
hsa-miR-507	1	0	1	0	1	1	BAGE2	B melanoma antigen family, member 2
hsa-miR-507	0	0	1	0	1	1	VSTM2A	V-set and transmembrane domain containing 2A
hsa-miR-507	1	0	1	1	1	1	SP8	Sp8 transcription factor
hsa-miR-507	1	0	1	1	1	1	KIF1B	kinesin family member 1B
hsa-miR-507	1	0	1	0	1	1	NRK	Nik related kinase
hsa-miR-507	1	0	1	1	1	1	MIA3	melanoma inhibitory activity family, member 3
hsa-miR-507	1	0	1	1	1	1	PTGER3	prostaglandin E receptor 3 (subtype EP3)
hsa-miR-507	0	0	1	1	0	0	SIGLEC6	sialic acid binding Ig-like lectin 6
hsa-miR-507	1	0	1	0	1	1	DLEU7	deleted in lymphocytic leukemia, 7
hsa-miR-507	1	0	1	1	1	1	NSUN4	NOP2/Sun domain family, member 4
hsa-miR-507	1	0	1	1	1	1	THRA	thyroid hormone receptor, alpha
hsa-miR-507	1	0	1	1	0	0	KAZN	kazrin, periplakin interacting protein
hsa-miR-507	1	0	1	1	1	1	E2F7	E2F transcription factor 7
hsa-miR-507	1	0	1	0	1	1	MBLAC2	metallo-beta-lactamase domain containing 2
hsa-miR-507	0	0	1	1	1	1	SERTM1	serine-rich and transmembrane domain containing 1
hsa-miR-507	0	0	1	1	1	1	TMIGD1	transmembrane and immunoglobulin domain containing 1
hsa-miR-507	1	0	1	1	1	1	ATRNL1	attractin-like 1
hsa-miR-507	0	0	1	0	1	1	CLEC17A	C-type lectin domain family 17, member A
hsa-miR-507	1	0	1	1	1	1	ADAMTSL3	ADAMTS-like 3
hsa-miR-507	1	0	1	1	1	1	XKRX	XK, Kell blood group complex subunit-related, X-linked
hsa-miR-507	1	0	1	1	1	1	RAPH1	Ras association (RalGDS/AF-6) and pleckstrin homology domains 1
hsa-miR-507	0	0	1	0	0	0	SNORA68	small nucleolar RNA, H/ACA box 68
hsa-miR-507	0	0	1	0	0	0	RAB9BP1	RAB9B, member RAS oncogene family pseudogene 1
hsa-miR-507	0	0	1	0	0	0	PCDHB19P	protocadherin beta 19 pseudogene
hsa-miR-507	0	0	1	0	0	0	MT1L	metallothionein 1L (gene/pseudogene)
hsa-miR-507	0	0	1	0	0	0	TTTY2	testis-specific transcript, Y-linked 2 (non-protein coding)
hsa-miR-507	0	0	1	0	0	0	TTTY4B	testis-specific transcript, Y-linked 4B (non-protein coding)
hsa-miR-507	0	0	1	0	0	0	MSX2P1	msh homeobox 2 pseudogene 1
hsa-miR-507	0	0	1	0	0	0	SNORD96A	small nucleolar RNA, C/D box 96A
hsa-miR-507	0	0	1	0	0	0	HTR7P1	5-hydroxytryptamine (serotonin) receptor 7 pseudogene 1
hsa-miR-507	0	0	1	0	0	0	TRIM78P	tripartite motif containing 78, pseudogene
hsa-miR-507	0	0	1	0	0	0	TREML5P	triggering receptor expressed on myeloid cells-like 5, pseudogene
hsa-miR-507	0	0	1	0	0	0	RPL13P5	ribosomal protein L13 pseudogene 5
hsa-miR-507	0	0	1	0	0	0	DUSP5P	dual specificity phosphatase 5 pseudogene
hsa-miR-507	0	0	1	0	0	0	SNORA74A	small nucleolar RNA, H/ACA box 74A
hsa-miR-507	0	0	1	0	0	0	SNX29P2	sorting nexin 29 pseudogene 2
hsa-miR-507	0	0	1	0	0	0	LOC285359	phosducin-like 3 pseudogene
hsa-miR-507	0	0	1	0	0	0	HNRNPA1P16	heterogeneous nuclear ribonucleoprotein A1 pseudogene 16
hsa-miR-507	0	0	1	0	0	0	HNRNPA1P10	heterogeneous nuclear ribonucleoprotein A1 pseudogene 10
hsa-miR-507	0	0	1	0	0	0	SNORA40	small nucleolar RNA, H/ACA box 40
hsa-miR-507	0	0	1	0	0	0	SNORA35	small nucleolar RNA, H/ACA box 35
hsa-miR-507	0	0	1	0	0	0	SCARNA1	small Cajal body-specific RNA 1
hsa-miR-507	0	0	1	0	0	0	GBP1P1	guanylate binding protein 1, interferon-inducible pseudogene 1
hsa-miR-507	0	0	1	0	0	0	USP32P1	ubiquitin specific peptidase 32 pseudogene 1
hsa-miR-507	0	0	1	0	0	0	GMCL1P1	germ cell-less, spermatogenesis associated 1 pseudogene 1
hsa-miR-507	1	0	1	1	1	1	PAM	peptidylglycine alpha-amidating monooxygenase
hsa-miR-507	0	0	1	1	0	0	EPX	eosinophil peroxidase
hsa-miR-507	0	0	1	1	1	1	CD6	CD6 molecule
hsa-miR-507	0	0	1	1	0	0	STK19	serine/threonine kinase 19
hsa-miR-507	0	0	0	1	0	0	LRRC23	leucine rich repeat containing 23
hsa-miR-507	0	0	1	1	0	0	VDAC3	voltage-dependent anion channel 3
hsa-miR-507	1	0	1	1	0	0	SLC45A4	solute carrier family 45, member 4
hsa-miR-507	0	0	1	1	0	0	RTN4R	reticulon 4 receptor
hsa-miR-507	0	0	1	1	0	0	PSMA4	proteasome (prosome, macropain) subunit, alpha type, 4
hsa-miR-507	0	0	0	1	1	1	NFE2L3	nuclear factor (erythroid-derived 2)-like 3
hsa-miR-507	0	0	1	1	0	0	GPKOW	G patch domain and KOW motifs
hsa-miR-507	0	0	1	1	0	0	KIF22	kinesin family member 22
hsa-miR-507	0	0	0	1	1	1	KRT20	keratin 20
hsa-miR-507	1	0	1	1	1	1	FGF4	fibroblast growth factor 4
hsa-miR-507	1	0	1	1	1	1	C20orf112	chromosome 20 open reading frame 112
hsa-miR-507	0	0	0	1	1	1	ESF1	ESF1, nucleolar pre-rRNA processing protein, homolog (S. cerevisiae)
hsa-miR-507	0	0	0	1	0	0	EFNA2	ephrin-A2
hsa-miR-507	1	0	0	1	1	1	NID2	nidogen 2 (osteonidogen)
hsa-miR-507	0	0	1	1	0	0	FKBP3	FK506 binding protein 3, 25kDa
hsa-miR-507	0	0	1	1	0	0	TAF9	TAF9 RNA polymerase II, TATA box binding protein (TBP)-associated factor, 32kDa
hsa-miR-507	0	0	0	1	0	0	RENBP	renin binding protein
hsa-miR-507	0	0	1	1	1	1	ZNF263	zinc finger protein 263
hsa-miR-507	0	0	1	1	1	1	AQP8	aquaporin 8
hsa-miR-507	1	0	0	1	1	1	C16orf88	chromosome 16 open reading frame 88
hsa-miR-507	0	0	1	1	1	1	CYP4F3	cytochrome P450, family 4, subfamily F, polypeptide 3
hsa-miR-507	0	0	0	1	1	1	AEBP1	AE binding protein 1
hsa-miR-507	0	0	1	1	1	1	PLGRKT	plasminogen receptor, C-terminal lysine transmembrane protein
hsa-miR-507	0	0	0	1	1	1	FAM20A	family with sequence similarity 20, member A
hsa-miR-507	0	0	0	1	0	0	IBSP	integrin-binding sialoprotein
hsa-miR-507	0	0	1	1	1	1	SLC7A14	solute carrier family 7 (orphan transporter), member 14
hsa-miR-507	0	0	0	1	0	0	SPCS1	signal peptidase complex subunit 1 homolog (S. cerevisiae)
hsa-miR-507	0	0	0	1	1	1	IL1RL1	interleukin 1 receptor-like 1
hsa-miR-507	0	0	1	1	1	1	MYL12B	myosin, light chain 12B, regulatory
hsa-miR-507	1	0	1	1	0	0	ST3GAL4	ST3 beta-galactoside alpha-2,3-sialyltransferase 4
hsa-miR-507	0	0	1	1	1	1	MRC1	mannose receptor, C type 1
hsa-miR-507	0	0	0	1	0	0	MTERFD3	MTERF domain containing 3
hsa-miR-507	0	0	1	1	0	0	PRAMEF2	PRAME family member 2
hsa-miR-507	0	0	1	1	1	1	DLX4	distal-less homeobox 4
hsa-miR-507	0	0	1	1	0	0	MND1	meiotic nuclear divisions 1 homolog (S. cerevisiae)
hsa-miR-507	0	0	1	1	0	0	NPY	neuropeptide Y
hsa-miR-507	0	0	0	1	1	1	ZNF415	zinc finger protein 415
hsa-miR-507	1	0	1	1	1	1	C20orf26	chromosome 20 open reading frame 26
hsa-miR-507	1	0	1	1	1	1	MAX	MYC associated factor X
hsa-miR-507	0	0	1	1	0	0	AHDC1	AT hook, DNA binding motif, containing 1
hsa-miR-507	0	0	0	1	0	0	COX7C	cytochrome c oxidase subunit VIIc
hsa-miR-507	0	0	0	1	1	1	RAC2	ras-related C3 botulinum toxin substrate 2 (rho family, small GTP binding protein Rac2)
hsa-miR-507	0	0	0	1	1	1	TXNDC17	thioredoxin domain containing 17
hsa-miR-507	0	0	0	1	1	1	SIGLEC9	sialic acid binding Ig-like lectin 9
hsa-miR-507	1	0	1	1	1	1	CAPRIN2	caprin family member 2
hsa-miR-507	0	0	0	1	0	0	NARFL	nuclear prelamin A recognition factor-like
hsa-miR-507	0	0	0	1	0	0	TUBGCP2	tubulin, gamma complex associated protein 2
hsa-miR-507	0	0	1	1	1	1	EMC8	ER membrane protein complex subunit 8
hsa-miR-507	0	0	1	1	0	0	LGALS3	lectin, galactoside-binding, soluble, 3
hsa-miR-507	1	0	0	1	1	1	EMILIN2	elastin microfibril interfacer 2
hsa-miR-507	0	0	1	1	0	0	LGALS12	lectin, galactoside-binding, soluble, 12
hsa-miR-507	0	0	1	1	1	1	ITIH5	inter-alpha-trypsin inhibitor heavy chain family, member 5
hsa-miR-507	0	0	1	1	1	1	GIF	gastric intrinsic factor (vitamin B synthesis)
hsa-miR-507	1	0	0	1	1	1	USP30	ubiquitin specific peptidase 30
hsa-miR-507	0	0	0	1	1	1	SDS	serine dehydratase
hsa-miR-507	0	0	1	1	1	1	ARHGEF25	Rho guanine nucleotide exchange factor (GEF) 25
hsa-miR-507	0	0	1	1	0	0	SLC26A10	solute carrier family 26, member 10
hsa-miR-507	0	0	0	1	0	0	TAAR5	trace amine associated receptor 5
hsa-miR-507	0	0	1	1	0	0	EIF4E2	eukaryotic translation initiation factor 4E family member 2
hsa-miR-507	0	0	1	1	1	1	REV1	REV1, polymerase (DNA directed)
hsa-miR-507	1	0	0	1	1	1	TGFBRAP1	transforming growth factor, beta receptor associated protein 1
hsa-miR-507	0	0	1	1	0	0	GPR45	G protein-coupled receptor 45
hsa-miR-507	0	0	0	1	1	1	FGFBP2	fibroblast growth factor binding protein 2
hsa-miR-507	0	0	1	1	1	1	CCDC90B	coiled-coil domain containing 90B
hsa-miR-507	1	0	1	1	1	1	POU2F3	POU class 2 homeobox 3
hsa-miR-507	0	0	0	1	0	0	GPR87	G protein-coupled receptor 87
hsa-miR-507	0	0	1	1	1	1	EPYC	epiphycan
hsa-miR-507	0	0	1	1	1	1	LIN7A	lin-7 homolog A (C. elegans)
hsa-miR-507	0	0	1	1	1	1	SPECC1	sperm antigen with calponin homology and coiled-coil domains 1
hsa-miR-507	0	0	1	1	0	0	SNW1	SNW domain containing 1
hsa-miR-507	0	0	1	1	1	1	AACS	acetoacetyl-CoA synthetase
hsa-miR-507	1	0	1	1	1	1	ZFAND6	zinc finger, AN1-type domain 6
hsa-miR-507	1	0	1	1	1	1	RNMT	RNA (guanine-7-) methyltransferase
hsa-miR-507	0	0	0	1	0	0	TELO2	TEL2, telomere maintenance 2, homolog (S. cerevisiae)
hsa-miR-507	0	0	1	1	1	1	INVS	inversin
hsa-miR-507	0	0	1	1	0	0	ZBTB32	zinc finger and BTB domain containing 32
hsa-miR-507	0	0	0	1	0	0	OVOL3	ovo-like 3 (Drosophila)
hsa-miR-507	0	0	0	1	0	0	QRICH2	glutamine rich 2
hsa-miR-507	1	0	0	1	0	0	INPP4B	inositol polyphosphate-4-phosphatase, type II, 105kDa
hsa-miR-507	0	0	1	1	1	1	SCARF1	scavenger receptor class F, member 1
hsa-miR-507	0	0	1	1	1	1	ITGAE	integrin, alpha E (antigen CD103, human mucosal lymphocyte antigen 1; alpha polypeptide)
hsa-miR-507	0	0	1	1	1	1	KIF18A	kinesin family member 18A
hsa-miR-507	0	0	1	1	0	0	HIRA	HIR histone cell cycle regulation defective homolog A (S. cerevisiae)
hsa-miR-507	0	0	1	1	0	0	APOBEC3G	apolipoprotein B mRNA editing enzyme, catalytic polypeptide-like 3G
hsa-miR-507	0	0	1	1	1	1	APOBEC3F	apolipoprotein B mRNA editing enzyme, catalytic polypeptide-like 3F
hsa-miR-507	0	0	0	1	0	0	CCDC61	coiled-coil domain containing 61
hsa-miR-507	1	0	1	1	1	1	TTBK2	tau tubulin kinase 2
hsa-miR-507	1	0	1	1	1	1	STK17B	serine/threonine kinase 17b
hsa-miR-507	0	0	0	1	1	1	EFHD1	EF-hand domain family, member D1
hsa-miR-507	0	0	0	1	1	1	SLC25A23	solute carrier family 25 (mitochondrial carrier; phosphate carrier), member 23
hsa-miR-507	0	0	1	1	1	1	ATF2	activating transcription factor 2
hsa-miR-507	0	0	0	1	0	0	LXN	latexin
hsa-miR-507	0	0	0	1	1	1	TXK	TXK tyrosine kinase
hsa-miR-507	0	0	0	1	1	1	HERC6	HECT and RLD domain containing E3 ubiquitin protein ligase family member 6
hsa-miR-507	1	0	1	1	1	1	GRIA3	glutamate receptor, ionotropic, AMPA 3
hsa-miR-507	0	0	1	1	1	1	COPS4	COP9 constitutive photomorphogenic homolog subunit 4 (Arabidopsis)
hsa-miR-507	0	0	1	1	1	1	GLRB	glycine receptor, beta
hsa-miR-507	0	0	1	1	1	1	CP	ceruloplasmin (ferroxidase)
hsa-miR-507	1	0	1	1	1	1	AHRR	aryl-hydrocarbon receptor repressor
hsa-miR-507	1	0	1	1	1	1	PDCD6	programmed cell death 6
hsa-miR-507	0	0	1	1	0	0	POR	P450 (cytochrome) oxidoreductase
hsa-miR-507	1	0	1	1	1	1	APBA1	amyloid beta (A4) precursor protein-binding, family A, member 1
hsa-miR-507	0	0	0	1	1	1	DUS4L	dihydrouridine synthase 4-like (S. cerevisiae)
hsa-miR-507	0	0	0	1	0	0	CD27	CD27 molecule
hsa-miR-507	0	0	1	1	1	1	LUM	lumican
hsa-miR-507	0	0	0	1	1	1	RNF113B	ring finger protein 113B
hsa-miR-507	0	0	1	1	0	0	GTF2A2	general transcription factor IIA, 2, 12kDa
hsa-miR-507	0	0	1	1	0	0	EPN3	epsin 3
hsa-miR-507	0	0	1	1	0	0	WRAP73	WD repeat containing, antisense to TP73
hsa-miR-507	0	0	1	1	0	0	RPS27A	ribosomal protein S27a
hsa-miR-507	0	0	1	1	1	1	FBLN7	fibulin 7
hsa-miR-507	0	0	0	1	0	0	CPO	carboxypeptidase O
hsa-miR-507	1	0	1	1	1	1	TAGLN3	transgelin 3
hsa-miR-507	0	0	1	1	0	0	CLVS2	clavesin 2
hsa-miR-507	0	0	0	1	1	1	EPHA1	EPH receptor A1
hsa-miR-507	0	0	1	1	1	1	CRH	corticotropin releasing hormone
hsa-miR-507	0	0	1	1	1	1	ADHFE1	alcohol dehydrogenase, iron containing, 1
hsa-miR-507	0	0	1	1	0	0	TTTY7	testis-specific transcript, Y-linked 7 (non-protein coding)
hsa-miR-507	0	0	0	1	0	0	C11orf52	chromosome 11 open reading frame 52
hsa-miR-507	0	0	1	1	1	1	COMMD7	COMM domain containing 7
hsa-miR-507	0	0	0	1	1	1	OCSTAMP	osteoclast stimulatory transmembrane protein
hsa-miR-507	0	0	1	1	0	0	LSM14B	LSM14B, SCD6 homolog B (S. cerevisiae)
hsa-miR-507	0	0	1	1	0	0	PIH1D2	PIH1 domain containing 2
hsa-miR-507	0	0	1	1	1	1	TEX12	testis expressed 12
hsa-miR-507	1	0	1	1	0	0	GXYLT1	glucoside xylosyltransferase 1
hsa-miR-507	0	0	1	1	0	0	AGAP11	ankyrin repeat and GTPase domain Arf GTPase activating protein 11
hsa-miR-507	1	0	0	1	1	1	NCAPD3	non-SMC condensin II complex, subunit D3
hsa-miR-507	1	0	1	1	1	1	ANO4	anoctamin 4
hsa-miR-507	0	0	0	1	1	1	AMN1	antagonist of mitotic exit network 1 homolog (S. cerevisiae)
hsa-miR-507	0	0	0	1	1	1	GUF1	GUF1 GTPase homolog (S. cerevisiae)
hsa-miR-507	0	0	1	1	0	0	ATP8A2	ATPase, aminophospholipid transporter, class I, type 8A, member 2
hsa-miR-507	0	0	1	1	0	0	GEMIN6	gem (nuclear organelle) associated protein 6
hsa-miR-507	0	0	1	1	0	0	TMEM251	transmembrane protein 251
hsa-miR-507	0	0	0	1	0	0	MCOLN2	mucolipin 2
hsa-miR-507	0	0	0	1	0	0	C16orf74	chromosome 16 open reading frame 74
hsa-miR-507	1	0	1	1	1	1	FAM105B	family with sequence similarity 105, member B
hsa-miR-507	0	0	1	1	0	0	OTOA	otoancorin
hsa-miR-507	0	0	1	1	0	0	SCAF4	SR-related CTD-associated factor 4
hsa-miR-507	0	0	0	1	0	0	FUT6	fucosyltransferase 6 (alpha (1,3) fucosyltransferase)
hsa-miR-507	0	0	0	1	1	1	PDF	peptide deformylase (mitochondrial)
hsa-miR-507	1	0	1	1	1	1	ACTC1	actin, alpha, cardiac muscle 1
hsa-miR-507	0	0	1	1	0	0	FABP1	fatty acid binding protein 1, liver
hsa-miR-507	0	0	1	1	1	1	ALB	albumin
hsa-miR-507	0	0	1	1	1	1	TMEM144	transmembrane protein 144
hsa-miR-507	0	0	0	1	0	0	SHH	sonic hedgehog
hsa-miR-507	0	0	0	1	0	0	NOS3	nitric oxide synthase 3 (endothelial cell)
hsa-miR-507	0	0	1	1	1	1	NFIL3	nuclear factor, interleukin 3 regulated
hsa-miR-507	0	0	1	1	1	1	CXorf22	chromosome X open reading frame 22
hsa-miR-507	0	0	0	1	1	1	NOL6	nucleolar protein family 6 (RNA-associated)
hsa-miR-507	0	0	1	1	1	1	PRPF18	PRP18 pre-mRNA processing factor 18 homolog (S. cerevisiae)
hsa-miR-507	0	0	1	1	1	1	BCL2L14	BCL2-like 14 (apoptosis facilitator)
hsa-miR-507	0	0	0	1	0	0	C12orf70	chromosome 12 open reading frame 70
hsa-miR-507	0	0	1	1	1	1	PIWIL4	piwi-like 4 (Drosophila)
hsa-miR-507	0	0	1	1	1	1	CASC4	cancer susceptibility candidate 4
hsa-miR-507	0	0	1	1	1	1	FAM96A	family with sequence similarity 96, member A
hsa-miR-507	0	0	1	1	1	1	ZNF85	zinc finger protein 85
hsa-miR-507	1	0	0	1	1	1	CHAF1A	chromatin assembly factor 1, subunit A (p150)
hsa-miR-507	0	0	0	1	1	1	PLIN4	perilipin 4
hsa-miR-507	0	0	1	1	1	1	TADA3	transcriptional adaptor 3
hsa-miR-507	1	0	1	1	1	1	SOCS6	suppressor of cytokine signaling 6
hsa-miR-507	0	0	1	1	0	0	FNTA	farnesyltransferase, CAAX box, alpha
hsa-miR-507	0	0	0	1	0	0	ALKBH3	alkB, alkylation repair homolog 3 (E. coli)
hsa-miR-507	0	0	1	1	0	0	TEX13B	testis expressed 13B
hsa-miR-507	0	0	1	1	1	1	DAZ1	deleted in azoospermia 1
hsa-miR-507	0	0	1	1	0	0	SYCE1	synaptonemal complex central element protein 1
hsa-miR-507	0	0	0	1	1	1	CXCR6	chemokine (C-X-C motif) receptor 6
hsa-miR-507	0	0	1	1	0	0	PEX6	peroxisomal biogenesis factor 6
hsa-miR-507	1	0	1	1	1	1	GAP43	growth associated protein 43
hsa-miR-507	1	0	0	1	1	1	TACR1	tachykinin receptor 1
hsa-miR-507	1	0	1	1	0	0	HTR1E	5-hydroxytryptamine (serotonin) receptor 1E, G protein-coupled
hsa-miR-507	0	0	1	1	1	1	TMPRSS11E	transmembrane protease, serine 11E
hsa-miR-507	0	0	1	1	0	0	KCNC3	potassium voltage-gated channel, Shaw-related subfamily, member 3
hsa-miR-507	0	0	1	1	1	1	LCMT2	leucine carboxyl methyltransferase 2
hsa-miR-507	1	0	1	1	0	0	TSPAN5	tetraspanin 5
hsa-miR-507	1	0	1	1	0	0	TET3	tet methylcytosine dioxygenase 3
hsa-miR-507	0	0	1	1	0	0	CCDC144B	coiled-coil domain containing 144B (pseudogene)
hsa-miR-507	0	0	0	1	1	1	FOXD4L1	forkhead box D4-like 1
hsa-miR-507	0	0	1	1	0	0	STRA13	stimulated by retinoic acid 13 homolog (mouse)
hsa-miR-507	0	0	0	1	1	1	LRRC8E	leucine rich repeat containing 8 family, member E
hsa-miR-507	1	0	1	1	1	1	DUS1L	dihydrouridine synthase 1-like (S. cerevisiae)
hsa-miR-507	0	0	1	1	1	1	SOSTDC1	sclerostin domain containing 1
hsa-miR-507	0	0	1	1	1	1	PTPN22	protein tyrosine phosphatase, non-receptor type 22 (lymphoid)
hsa-miR-507	0	0	0	1	0	0	ZNF556	zinc finger protein 556
hsa-miR-507	1	0	1	1	0	0	NKIRAS2	NFKB inhibitor interacting Ras-like 2
hsa-miR-507	0	0	1	1	1	1	MRPS12	mitochondrial ribosomal protein S12
hsa-miR-507	0	0	1	1	0	0	MUS81	MUS81 endonuclease homolog (S. cerevisiae)
hsa-miR-507	1	0	1	1	0	0	SEZ6L2	seizure related 6 homolog (mouse)-like 2
hsa-miR-507	0	0	0	1	0	0	ADCK5	aarF domain containing kinase 5
hsa-miR-507	0	0	1	1	0	0	BAD	BCL2-associated agonist of cell death
hsa-miR-507	0	0	0	1	1	1	P2RY14	purinergic receptor P2Y, G-protein coupled, 14
hsa-miR-507	0	0	0	1	0	0	ZNF519	zinc finger protein 519
hsa-miR-507	1	0	1	1	1	1	MKNK2	MAP kinase interacting serine/threonine kinase 2
hsa-miR-507	0	0	1	1	0	0	TIGD3	tigger transposable element derived 3
hsa-miR-507	0	0	0	1	0	0	PSMC5	proteasome (prosome, macropain) 26S subunit, ATPase, 5
hsa-miR-507	0	0	1	1	0	0	CCDC13	coiled-coil domain containing 13
hsa-miR-507	0	0	1	1	0	0	ZDHHC24	zinc finger, DHHC-type containing 24
hsa-miR-507	1	0	1	1	1	1	FGFR1	fibroblast growth factor receptor 1
hsa-miR-507	1	0	0	1	1	1	ADAM17	ADAM metallopeptidase domain 17
hsa-miR-507	1	0	1	1	1	1	TNS1	tensin 1
hsa-miR-507	0	0	1	1	0	0	MRPL11	mitochondrial ribosomal protein L11
hsa-miR-507	0	0	1	1	1	1	P2RY2	purinergic receptor P2Y, G-protein coupled, 2
hsa-miR-507	0	0	0	1	1	1	FAM21D	family with sequence similarity 21, member D
hsa-miR-507	1	0	1	1	0	0	PRPF8	PRP8 pre-mRNA processing factor 8 homolog (S. cerevisiae)
hsa-miR-507	0	0	1	1	1	1	C12orf66	chromosome 12 open reading frame 66
hsa-miR-507	0	0	0	1	0	0	OR10AG1	olfactory receptor, family 10, subfamily AG, member 1
hsa-miR-507	0	0	1	1	0	0	PGA5	pepsinogen 5, group I (pepsinogen A)
hsa-miR-507	1	0	1	1	1	1	CAMSAP1	calmodulin regulated spectrin-associated protein 1
hsa-miR-507	0	0	0	1	0	0	LOC100129726	uncharacterized LOC100129726
hsa-miR-507	0	0	0	1	0	0	PUF60	poly-U binding splicing factor 60KDa
hsa-miR-507	0	0	1	1	1	1	MRPS23	mitochondrial ribosomal protein S23
hsa-miR-507	0	0	0	1	0	0	OR4C6	olfactory receptor, family 4, subfamily C, member 6
hsa-miR-507	0	0	1	1	0	0	TTC12	tetratricopeptide repeat domain 12
hsa-miR-507	0	0	1	1	1	1	AMBRA1	autophagy/beclin-1 regulator 1
hsa-miR-507	0	0	1	1	0	0	SLIT1	slit homolog 1 (Drosophila)
hsa-miR-507	0	0	1	1	1	1	RNASEH1	ribonuclease H1
hsa-miR-507	0	0	0	1	0	0	OR4N2	olfactory receptor, family 4, subfamily N, member 2
hsa-miR-507	1	0	0	1	0	0	ARHGEF1	Rho guanine nucleotide exchange factor (GEF) 1
hsa-miR-507	0	0	1	1	1	1	LRRC34	leucine rich repeat containing 34
hsa-miR-507	0	0	1	1	0	0	DNAJC7	DnaJ (Hsp40) homolog, subfamily C, member 7
hsa-miR-507	0	0	1	1	1	1	PUS10	pseudouridylate synthase 10
hsa-miR-507	0	0	1	1	1	1	VRK3	vaccinia related kinase 3
hsa-miR-507	0	0	0	1	0	0	OR52N5	olfactory receptor, family 52, subfamily N, member 5
hsa-miR-507	0	0	1	1	0	0	ASCC1	activating signal cointegrator 1 complex subunit 1
hsa-miR-507	0	0	1	1	1	1	BID	BH3 interacting domain death agonist
hsa-miR-507	1	0	1	1	1	1	ASB8	ankyrin repeat and SOCS box containing 8
hsa-miR-507	0	0	0	1	0	0	HNRNPCL1	heterogeneous nuclear ribonucleoprotein C-like 1
hsa-miR-507	0	0	1	1	0	0	KDM5D	lysine (K)-specific demethylase 5D
hsa-miR-507	0	0	1	1	1	1	RNF170	ring finger protein 170
hsa-miR-507	0	0	0	1	0	0	OR6B3	olfactory receptor, family 6, subfamily B, member 3
hsa-miR-507	0	0	0	1	0	0	OR2T8	olfactory receptor, family 2, subfamily T, member 8
hsa-miR-507	0	0	1	1	1	1	EFCAB5	EF-hand calcium binding domain 5
hsa-miR-507	0	0	1	1	0	0	PPP2R1A	protein phosphatase 2, regulatory subunit A, alpha
hsa-miR-507	0	0	0	1	1	1	RPP25	ribonuclease P/MRP 25kDa subunit
hsa-miR-507	0	0	1	1	1	1	PSMA1	proteasome (prosome, macropain) subunit, alpha type, 1
hsa-miR-507	0	0	1	1	0	0	PRMT10	protein arginine methyltransferase 10 (putative)
hsa-miR-507	0	0	0	1	0	0	ANAPC2	anaphase promoting complex subunit 2
hsa-miR-507	0	0	1	1	1	1	KCNJ1	potassium inwardly-rectifying channel, subfamily J, member 1
hsa-miR-507	1	0	1	1	1	1	SLC25A36	solute carrier family 25 (pyrimidine nucleotide carrier ), member 36
hsa-miR-507	0	0	1	1	1	1	ARFRP1	ADP-ribosylation factor related protein 1
hsa-miR-507	0	0	1	1	1	1	PRMT5	protein arginine methyltransferase 5
hsa-miR-507	0	0	1	1	0	0	PPIE	peptidylprolyl isomerase E (cyclophilin E)
hsa-miR-507	1	0	1	1	1	1	SOX2	SRY (sex determining region Y)-box 2
hsa-miR-507	0	0	0	1	1	1	CABP4	calcium binding protein 4
hsa-miR-507	0	0	1	1	1	1	NAA16	N(alpha)-acetyltransferase 16, NatA auxiliary subunit
hsa-miR-507	0	0	1	1	0	0	BBX	bobby sox homolog (Drosophila)
hsa-miR-507	1	0	1	1	1	1	ZNF562	zinc finger protein 562
hsa-miR-507	0	0	0	1	1	1	GSTM4	glutathione S-transferase mu 4
hsa-miR-507	0	0	0	1	0	0	TRIML2	tripartite motif family-like 2
hsa-miR-507	0	0	0	1	0	0	OR5AK2	olfactory receptor, family 5, subfamily AK, member 2
hsa-miR-507	0	0	1	1	1	1	PDXK	pyridoxal (pyridoxine, vitamin B6) kinase
hsa-miR-507	0	0	1	1	1	1	PARPBP	PARP1 binding protein
hsa-miR-507	1	0	1	1	1	1	WT1-AS	WT1 antisense RNA
hsa-miR-507	1	0	1	1	1	1	PTPN21	protein tyrosine phosphatase, non-receptor type 21
hsa-miR-507	0	0	1	1	0	0	MFSD5	major facilitator superfamily domain containing 5
hsa-miR-507	1	0	1	1	0	0	RIMS2	regulating synaptic membrane exocytosis 2
hsa-miR-507	0	0	0	1	0	0	DEFA5	defensin, alpha 5, Paneth cell-specific
hsa-miR-507	0	0	0	1	0	0	PCYT2	phosphate cytidylyltransferase 2, ethanolamine
hsa-miR-507	0	0	1	1	0	0	BGN	biglycan
hsa-miR-507	0	0	0	1	0	0	SYNDIG1L	synapse differentiation inducing 1-like
hsa-miR-507	0	0	0	1	0	0	MCTP2	multiple C2 domains, transmembrane 2
hsa-miR-507	0	0	0	1	1	1	NDUFA6	NADH dehydrogenase (ubiquinone) 1 alpha subcomplex, 6, 14kDa
hsa-miR-507	0	0	0	1	0	0	PRAMEF1	PRAME family member 1
hsa-miR-507	0	0	0	1	0	0	ZNF484	zinc finger protein 484
hsa-miR-507	0	0	0	1	0	0	ACAA1	acetyl-CoA acyltransferase 1
hsa-miR-507	0	0	1	1	1	1	APOBEC3B	apolipoprotein B mRNA editing enzyme, catalytic polypeptide-like 3B
hsa-miR-507	0	0	1	1	0	0	DMRTC1B	DMRT-like family C1B
hsa-miR-507	0	0	0	1	0	0	OR5D18	olfactory receptor, family 5, subfamily D, member 18
hsa-miR-507	0	0	1	1	0	0	ATPAF1-AS1	ATPAF1 antisense RNA 1
hsa-miR-507	0	0	0	1	1	1	TTF1	transcription termination factor, RNA polymerase I
hsa-miR-507	1	0	1	1	1	1	TACC2	transforming, acidic coiled-coil containing protein 2
hsa-miR-507	0	0	1	1	0	0	NUDT17	nudix (nucleoside diphosphate linked moiety X)-type motif 17
hsa-miR-507	0	0	1	1	0	0	RLTPR	RGD motif, leucine rich repeats, tropomodulin domain and proline-rich containing
hsa-miR-507	0	0	0	1	0	0	PRAMEF14	PRAME family member 14
hsa-miR-507	0	0	1	1	1	1	CCK	cholecystokinin
hsa-miR-507	0	0	1	1	1	1	BMP2K	BMP2 inducible kinase
hsa-miR-507	0	0	1	1	0	0	DHRS4L2	dehydrogenase/reductase (SDR family) member 4 like 2
hsa-miR-507	0	0	0	1	0	0	PES1	pescadillo ribosomal biogenesis factor 1
hsa-miR-507	0	0	1	1	0	0	ZNF142	zinc finger protein 142
hsa-miR-507	0	0	1	1	1	1	SPAG17	sperm associated antigen 17
hsa-miR-507	0	0	1	1	1	1	FAM21C	family with sequence similarity 21, member C
hsa-miR-507	0	0	1	1	0	0	TESK1	testis-specific kinase 1
hsa-miR-507	0	0	0	1	0	0	NFKB2	nuclear factor of kappa light polypeptide gene enhancer in B-cells 2 (p49/p100)
hsa-miR-507	0	0	1	1	1	1	PISD	phosphatidylserine decarboxylase
hsa-miR-507	0	0	0	1	1	1	NEIL1	nei endonuclease VIII-like 1 (E. coli)
hsa-miR-507	1	0	1	1	1	1	UGP2	UDP-glucose pyrophosphorylase 2
hsa-miR-507	0	0	1	1	0	0	IL1F10	interleukin 1 family, member 10 (theta)
hsa-miR-507	0	0	0	1	0	0	GJB5	gap junction protein, beta 5, 31.1kDa
hsa-miR-507	1	0	1	1	1	1	ZNF81	zinc finger protein 81
hsa-miR-507	0	0	1	1	0	0	HTATIP2	HIV-1 Tat interactive protein 2, 30kDa
hsa-miR-507	0	0	1	1	0	0	DCBLD1	discoidin, CUB and LCCL domain containing 1
hsa-miR-507	1	0	1	1	1	1	EDA	ectodysplasin A
hsa-miR-507	0	0	0	1	1	1	SULT1A3	sulfotransferase family, cytosolic, 1A, phenol-preferring, member 3
hsa-miR-507	0	0	1	1	0	0	HAVCR1	hepatitis A virus cellular receptor 1
hsa-miR-507	0	0	1	1	1	1	ANKRD6	ankyrin repeat domain 6
hsa-miR-507	0	0	0	1	0	0	DNAJB13	DnaJ (Hsp40) homolog, subfamily B, member 13
hsa-miR-507	0	0	0	1	0	0	FSCB	fibrous sheath CABYR binding protein
hsa-miR-507	0	0	1	1	1	1	LIMK2	LIM domain kinase 2
hsa-miR-507	1	0	1	1	0	0	CCDC30	coiled-coil domain containing 30
hsa-miR-507	0	0	1	1	1	1	ZNF746	zinc finger protein 746
hsa-miR-507	1	0	1	1	1	1	NHLRC1	NHL repeat containing 1
hsa-miR-507	0	0	0	1	0	0	EXD3	exonuclease 3'-5' domain containing 3
hsa-miR-507	1	0	1	1	1	1	C5orf25	chromosome 5 open reading frame 25
hsa-miR-507	1	0	1	1	1	1	NEK10	NIMA (never in mitosis gene a)- related kinase 10
hsa-miR-507	0	0	0	1	0	0	VN1R2	vomeronasal 1 receptor 2
hsa-miR-507	0	0	1	1	1	1	C20orf24	chromosome 20 open reading frame 24
hsa-miR-507	1	0	1	1	1	1	DMPK	dystrophia myotonica-protein kinase
hsa-miR-507	0	0	0	1	1	1	FOXD4L3	forkhead box D4-like 3
hsa-miR-507	0	0	1	1	1	1	MAGEH1	melanoma antigen family H, 1
hsa-miR-507	0	0	1	1	1	1	APOD	apolipoprotein D
hsa-miR-507	1	0	0	1	1	1	COL9A3	collagen, type IX, alpha 3
hsa-miR-507	0	0	0	1	1	1	FAM69C	family with sequence similarity 69, member C
hsa-miR-507	0	0	1	1	0	0	GLT8D1	glycosyltransferase 8 domain containing 1
hsa-miR-507	0	0	1	1	1	1	ABCB10	ATP-binding cassette, sub-family B (MDR/TAP), member 10
hsa-miR-507	0	0	1	1	1	1	FLYWCH1	FLYWCH-type zinc finger 1
hsa-miR-507	0	0	0	1	1	1	SULT1A4	sulfotransferase family, cytosolic, 1A, phenol-preferring, member 4
hsa-miR-507	0	0	1	1	0	0	SAPCD1	suppressor APC domain containing 1
hsa-miR-507	0	0	1	1	0	0	BSPH1	binder of sperm protein homolog 1
hsa-miR-507	0	0	1	1	1	1	THUMPD3	THUMP domain containing 3
hsa-miR-507	1	0	1	1	1	1	NPTN	neuroplastin
hsa-miR-507	0	0	1	1	1	1	GPR114	G protein-coupled receptor 114
hsa-miR-507	0	0	0	1	0	0	BPIFB6	BPI fold containing family B, member 6
hsa-miR-507	1	0	1	1	1	1	KDM5C	lysine (K)-specific demethylase 5C
hsa-miR-507	0	0	0	1	0	0	ARHGAP4	Rho GTPase activating protein 4
hsa-miR-507	0	0	0	1	0	0	SULT1A1	sulfotransferase family, cytosolic, 1A, phenol-preferring, member 1
hsa-miR-507	1	0	0	1	1	1	ZFP30	zinc finger protein 30 homolog (mouse)
hsa-miR-507	0	0	1	1	1	1	ARPC5L	actin related protein 2/3 complex, subunit 5-like
hsa-miR-507	0	0	0	1	1	1	NDUFV3	NADH dehydrogenase (ubiquinone) flavoprotein 3, 10kDa
hsa-miR-507	1	0	1	1	1	1	HNF4G	hepatocyte nuclear factor 4, gamma
hsa-miR-507	0	0	1	1	1	1	MYPN	myopalladin
hsa-miR-507	1	0	1	1	1	1	MAK	male germ cell-associated kinase
hsa-miR-507	0	0	1	1	1	1	XKR9	XK, Kell blood group complex subunit-related family, member 9
hsa-miR-507	1	0	1	1	1	1	IGSF11	immunoglobulin superfamily, member 11
hsa-miR-507	0	0	1	1	1	1	FLJ45983	uncharacterized LOC399717
hsa-miR-507	0	0	0	1	0	0	SHROOM1	shroom family member 1
hsa-miR-507	1	0	1	1	1	1	NUDCD3	NudC domain containing 3
hsa-miR-507	1	0	1	1	0	0	KCNQ5	potassium voltage-gated channel, KQT-like subfamily, member 5
hsa-miR-507	0	0	0	1	0	0	OR2T6	olfactory receptor, family 2, subfamily T, member 6
hsa-miR-507	0	0	1	1	1	1	GTF2E2	general transcription factor IIE, polypeptide 2, beta 34kDa
hsa-miR-507	0	0	1	1	1	1	C13orf35	chromosome 13 open reading frame 35
hsa-miR-507	0	0	1	1	1	1	PSMD12	proteasome (prosome, macropain) 26S subunit, non-ATPase, 12
hsa-miR-507	1	0	1	1	1	1	TMF1	TATA element modulatory factor 1
hsa-miR-507	0	0	1	1	1	1	MED24	mediator complex subunit 24
hsa-miR-507	0	0	1	1	0	0	WDR96	WD repeat domain 96
hsa-miR-507	0	0	1	1	0	0	MPV17	MpV17 mitochondrial inner membrane protein
hsa-miR-507	0	0	0	1	0	0	IFNA10	interferon, alpha 10
hsa-miR-507	0	0	0	1	1	1	DCLRE1C	DNA cross-link repair 1C
hsa-miR-507	1	0	1	1	1	1	UNC50	unc-50 homolog (C. elegans)
hsa-miR-507	1	0	0	1	1	1	C14orf102	chromosome 14 open reading frame 102
hsa-miR-507	1	0	1	1	1	1	ZNF329	zinc finger protein 329
hsa-miR-507	1	0	1	1	1	1	HMGCLL1	3-hydroxymethyl-3-methylglutaryl-CoA lyase-like 1
hsa-miR-507	0	0	0	1	1	1	SUSD2	sushi domain containing 2
hsa-miR-507	1	0	1	1	1	1	SLC4A8	solute carrier family 4, sodium bicarbonate cotransporter, member 8
hsa-miR-507	0	0	1	1	1	1	EXT2	exostosin 2
hsa-miR-507	1	0	1	1	1	1	CELSR3	cadherin, EGF LAG seven-pass G-type receptor 3 (flamingo homolog, Drosophila)
hsa-miR-507	1	0	1	1	0	0	SLC26A6	solute carrier family 26, member 6
hsa-miR-507	0	0	1	1	0	0	LPAR2	lysophosphatidic acid receptor 2
hsa-miR-507	0	0	0	1	0	0	TMC3	transmembrane channel-like 3
hsa-miR-507	0	0	0	1	0	0	OR2M2	olfactory receptor, family 2, subfamily M, member 2
hsa-miR-507	0	0	1	1	1	1	ZMYM1	zinc finger, MYM-type 1
hsa-miR-507	0	0	1	1	1	1	MPP4	membrane protein, palmitoylated 4 (MAGUK p55 subfamily member 4)
hsa-miR-507	0	0	0	1	1	1	ZNF681	zinc finger protein 681
hsa-miR-507	0	0	1	1	1	1	CCDC102B	coiled-coil domain containing 102B
hsa-miR-507	0	0	1	1	0	0	FAM48A	family with sequence similarity 48, member A
hsa-miR-507	0	0	1	1	1	1	CASR	calcium-sensing receptor
hsa-miR-507	1	0	1	1	1	1	CPNE8	copine VIII
hsa-miR-507	0	0	0	1	0	0	CLPSL2	colipase-like 2
hsa-miR-507	0	0	1	1	0	0	STYXL1	serine/threonine/tyrosine interacting-like 1
hsa-miR-507	0	0	1	1	1	1	POTEG	POTE ankyrin domain family, member G
hsa-miR-507	0	0	1	1	0	0	SLC34A3	solute carrier family 34 (sodium phosphate), member 3
hsa-miR-507	0	0	1	1	1	1	PRC1	protein regulator of cytokinesis 1
hsa-miR-507	0	0	1	1	1	1	PTPLA	protein tyrosine phosphatase-like (proline instead of catalytic arginine), member A
hsa-miR-507	0	0	0	1	0	0	PPP2R3B	protein phosphatase 2, regulatory subunit B'', beta
hsa-miR-507	1	0	1	1	0	0	PAX9	paired box 9
hsa-miR-507	0	0	0	1	1	1	ZNF485	zinc finger protein 485
hsa-miR-507	1	0	1	1	0	0	PLXNB3	plexin B3
hsa-miR-507	0	0	1	1	0	0	FBXO18	F-box protein, helicase, 18
hsa-miR-507	0	0	0	1	0	0	OR2M5	olfactory receptor, family 2, subfamily M, member 5
hsa-miR-507	0	0	0	1	0	0	C6orf70	chromosome 6 open reading frame 70
hsa-miR-507	0	0	1	1	1	1	MAP3K4	mitogen-activated protein kinase kinase kinase 4
hsa-miR-507	0	0	0	1	1	1	PTPN14	protein tyrosine phosphatase, non-receptor type 14
hsa-miR-507	0	0	1	1	1	1	HSD11B1	hydroxysteroid (11-beta) dehydrogenase 1
hsa-miR-507	1	0	1	1	0	0	DYNLT1	dynein, light chain, Tctex-type 1
hsa-miR-507	1	0	1	1	1	1	SYNE1	spectrin repeat containing, nuclear envelope 1
hsa-miR-507	0	0	0	1	0	0	ASPM	asp (abnormal spindle) homolog, microcephaly associated (Drosophila)
hsa-miR-507	1	0	1	1	1	1	ADAT2	adenosine deaminase, tRNA-specific 2
hsa-miR-507	0	0	0	1	1	1	QSOX1	quiescin Q6 sulfhydryl oxidase 1
hsa-miR-507	1	0	1	1	1	1	DNM3	dynamin 3
hsa-miR-507	0	0	1	1	1	1	C1orf129	chromosome 1 open reading frame 129
hsa-miR-507	1	0	1	1	1	1	RCSD1	RCSD domain containing 1
hsa-miR-507	1	0	1	1	1	1	MGST3	microsomal glutathione S-transferase 3
hsa-miR-507	0	0	1	1	1	1	CD1D	CD1d molecule
hsa-miR-507	1	0	1	1	0	0	SH2D2A	SH2 domain containing 2A
hsa-miR-507	0	0	1	1	0	0	CLK2	CDC-like kinase 2
hsa-miR-507	1	0	1	1	1	1	CEP85L	centrosomal protein 85kDa-like
hsa-miR-507	0	0	1	1	1	1	C1orf43	chromosome 1 open reading frame 43
hsa-miR-507	0	0	0	1	0	0	LAMA4	laminin, alpha 4
hsa-miR-507	0	0	1	1	0	0	MRPS21	mitochondrial ribosomal protein S21
hsa-miR-507	0	0	1	1	0	0	C1orf51	chromosome 1 open reading frame 51
hsa-miR-507	1	0	1	1	1	1	USP45	ubiquitin specific peptidase 45
hsa-miR-507	0	0	1	1	1	1	POLR3GL	polymerase (RNA) III (DNA directed) polypeptide G (32kD)-like
hsa-miR-507	1	0	1	1	1	1	PNRC1	proline-rich nuclear receptor coactivator 1
hsa-miR-507	0	0	0	1	1	1	NT5E	5'-nucleotidase, ecto (CD73)
hsa-miR-507	0	0	1	1	0	0	ALX3	ALX homeobox 3
hsa-miR-507	0	0	1	1	0	0	C20orf195	chromosome 20 open reading frame 195
hsa-miR-507	1	0	1	1	1	1	TMED5	transmembrane emp24 protein transport domain containing 5
hsa-miR-507	1	0	0	1	1	1	BAG2	BCL2-associated athanogene 2
hsa-miR-507	0	0	1	1	1	1	KIAA1586	KIAA1586
hsa-miR-507	0	0	1	1	0	0	IFI44	interferon-induced protein 44
hsa-miR-507	0	0	0	1	0	0	BMP5	bone morphogenetic protein 5
hsa-miR-507	0	0	1	1	0	0	TNNI3K	TNNI3 interacting kinase
hsa-miR-507	0	0	1	1	1	1	FPGT	fucose-1-phosphate guanylyltransferase
hsa-miR-507	0	0	1	1	0	0	LRRIQ3	leucine-rich repeats and IQ motif containing 3
hsa-miR-507	1	0	1	1	1	1	MIER1	mesoderm induction early response 1 homolog (Xenopus laevis)
hsa-miR-507	1	0	1	1	1	1	CUL4B	cullin 4B
hsa-miR-507	0	0	1	1	0	0	PLCE1	phospholipase C, epsilon 1
hsa-miR-507	0	0	1	1	1	1	LGI1	leucine-rich, glioma inactivated 1
hsa-miR-507	0	0	1	1	1	1	PFDN4	prefoldin subunit 4
hsa-miR-507	0	0	0	1	1	1	PDE6C	phosphodiesterase 6C, cGMP-specific, cone, alpha prime
hsa-miR-507	0	0	1	1	0	0	PMPCA	peptidase (mitochondrial processing) alpha
hsa-miR-507	1	0	1	1	1	1	GRID1	glutamate receptor, ionotropic, delta 1
hsa-miR-507	0	0	1	1	0	0	TEX13A	testis expressed 13A
hsa-miR-507	0	0	1	1	0	0	DOLK	dolichol kinase
hsa-miR-507	0	0	0	1	1	1	ZNF684	zinc finger protein 684
hsa-miR-507	0	0	0	1	0	0	TP53TG5	TP53 target 5
hsa-miR-507	0	0	1	1	1	1	PABPC1L	poly(A) binding protein, cytoplasmic 1-like
hsa-miR-507	0	0	0	1	0	0	NDUFS5	NADH dehydrogenase (ubiquinone) Fe-S protein 5, 15kDa (NADH-coenzyme Q reductase)
hsa-miR-507	0	0	0	1	1	1	USP49	ubiquitin specific peptidase 49
hsa-miR-507	0	0	1	1	0	0	TREML1	triggering receptor expressed on myeloid cells-like 1
hsa-miR-507	0	0	1	1	1	1	APOOL	apolipoprotein O-like
hsa-miR-507	0	0	0	1	0	0	KIF6	kinesin family member 6
hsa-miR-507	0	0	1	1	1	1	CLSPN	claspin
hsa-miR-507	0	0	1	1	1	1	PPA1	pyrophosphatase (inorganic) 1
hsa-miR-507	0	0	1	1	1	1	ZSCAN20	zinc finger and SCAN domain containing 20
hsa-miR-507	0	0	1	1	1	1	DMRTC1	DMRT-like family C1
hsa-miR-507	1	0	0	1	0	0	FAM167B	family with sequence similarity 167, member B
hsa-miR-507	0	0	1	1	1	1	DSN1	DSN1, MIND kinetochore complex component, homolog (S. cerevisiae)
hsa-miR-507	1	0	0	1	1	1	CNTRL	centriolin
hsa-miR-507	1	0	1	1	1	1	BICC1	bicaudal C homolog 1 (Drosophila)
hsa-miR-507	0	0	1	1	1	1	ZWINT	ZW10 interactor
hsa-miR-507	0	0	1	1	0	0	RPL11	ribosomal protein L11
hsa-miR-507	1	0	1	1	1	1	NTM	neurotrimin
hsa-miR-507	0	0	1	1	1	1	BRD2	bromodomain containing 2
hsa-miR-507	0	0	0	1	0	0	XPA	xeroderma pigmentosum, complementation group A
hsa-miR-507	1	0	1	1	1	1	CDC14B	CDC14 cell division cycle 14 homolog B (S. cerevisiae)
hsa-miR-507	0	0	1	1	0	0	C9orf89	chromosome 9 open reading frame 89
hsa-miR-507	0	0	1	1	1	1	ZBTB12	zinc finger and BTB domain containing 12
hsa-miR-507	0	0	1	1	1	1	CARD16	caspase recruitment domain family, member 16
hsa-miR-507	0	0	1	1	0	0	AUH	AU RNA binding protein/enoyl-CoA hydratase
hsa-miR-507	0	0	1	1	1	1	DYNC2H1	dynein, cytoplasmic 2, heavy chain 1
hsa-miR-507	0	0	0	1	1	1	LY6G5B	lymphocyte antigen 6 complex, locus G5B
hsa-miR-507	0	0	1	1	0	0	CSNK2B	casein kinase 2, beta polypeptide
hsa-miR-507	0	0	0	1	0	0	PRAMEF13	PRAME family member 13
hsa-miR-507	0	0	1	1	0	0	PDSS1	prenyl (decaprenyl) diphosphate synthase, subunit 1
hsa-miR-507	0	0	1	1	1	1	TCF19	transcription factor 19
hsa-miR-507	0	0	1	1	1	1	C6orf136	chromosome 6 open reading frame 136
hsa-miR-507	0	0	0	1	1	1	TRIM15	tripartite motif containing 15
hsa-miR-507	0	0	1	1	1	1	COMMD3	COMM domain containing 3
hsa-miR-507	0	0	1	1	1	1	HLA-G	major histocompatibility complex, class I, G
hsa-miR-507	0	0	0	1	0	0	POLD1	polymerase (DNA directed), delta 1, catalytic subunit
hsa-miR-507	0	0	1	1	1	1	CNGA3	cyclic nucleotide gated channel alpha 3
hsa-miR-507	1	0	1	1	1	1	TMEM2	transmembrane protein 2
hsa-miR-507	1	0	1	1	1	1	NDFIP2	Nedd4 family interacting protein 2
hsa-miR-507	0	0	1	1	1	1	TJP2	tight junction protein 2
hsa-miR-507	0	0	0	1	0	0	FOXD4L6	forkhead box D4-like 6
hsa-miR-507	0	0	0	1	1	1	PYCRL	pyrroline-5-carboxylate reductase-like
hsa-miR-507	1	0	1	1	1	1	ESYT2	extended synaptotagmin-like protein 2
hsa-miR-507	0	0	0	1	0	0	IGFL4	IGF-like family member 4
hsa-miR-507	0	0	1	1	0	0	TOMM5	translocase of outer mitochondrial membrane 5 homolog (yeast)
hsa-miR-507	0	0	0	1	0	0	ASB10	ankyrin repeat and SOCS box containing 10
hsa-miR-507	1	0	1	1	1	1	YIPF5	Yip1 domain family, member 5
hsa-miR-507	0	0	1	1	1	1	FBXO47	F-box protein 47
hsa-miR-507	0	0	1	1	0	0	CXorf38	chromosome X open reading frame 38
hsa-miR-507	1	0	1	1	1	1	CCL7	chemokine (C-C motif) ligand 7
hsa-miR-507	0	0	0	1	0	0	SDHAF1	succinate dehydrogenase complex assembly factor 1
hsa-miR-507	0	0	1	1	1	1	NUDT5	nudix (nucleoside diphosphate linked moiety X)-type motif 5
hsa-miR-507	0	0	0	1	0	0	PROCA1	protein interacting with cyclin A1
hsa-miR-507	0	0	0	1	1	1	CXorf21	chromosome X open reading frame 21
hsa-miR-507	0	0	0	1	0	0	NR0B1	nuclear receptor subfamily 0, group B, member 1
hsa-miR-507	0	0	0	1	1	1	MAGEB1	melanoma antigen family B, 1
hsa-miR-507	0	0	1	1	1	1	MAGEB2	melanoma antigen family B, 2
hsa-miR-507	1	0	0	1	1	1	C10orf47	chromosome 10 open reading frame 47
hsa-miR-507	0	0	0	1	0	0	ADRA1D	adrenoceptor alpha 1D
hsa-miR-507	0	0	1	1	1	1	KBTBD7	kelch repeat and BTB (POZ) domain containing 7
hsa-miR-507	0	0	0	1	0	0	KLHL34	kelch-like 34 (Drosophila)
hsa-miR-507	1	0	1	1	1	1	MAB21L1	mab-21-like 1 (C. elegans)
hsa-miR-507	1	0	1	1	1	1	IL15RA	interleukin 15 receptor, alpha
hsa-miR-507	0	0	0	1	1	1	IFNA8	interferon, alpha 8
hsa-miR-507	0	0	0	1	0	0	IFNA17	interferon, alpha 17
hsa-miR-507	0	0	0	1	0	0	IFNA16	interferon, alpha 16
hsa-miR-507	0	0	0	1	0	0	OR51B6	olfactory receptor, family 51, subfamily B, member 6
hsa-miR-507	0	0	1	1	1	1	IFNA14	interferon, alpha 14
hsa-miR-507	0	0	1	1	1	1	IFNA21	interferon, alpha 21
hsa-miR-507	0	0	1	1	0	0	IFNB1	interferon, beta 1, fibroblast
hsa-miR-507	0	0	0	1	0	0	HBG2	hemoglobin, gamma G
hsa-miR-507	0	0	1	1	1	1	TUBAL3	tubulin, alpha-like 3
hsa-miR-507	0	0	0	1	0	0	SAT2	spermidine/spermine N1-acetyltransferase family member 2
hsa-miR-507	0	0	1	1	1	1	OFD1	oral-facial-digital syndrome 1
hsa-miR-507	0	0	1	1	1	1	FAM9C	family with sequence similarity 9, member C
hsa-miR-507	1	0	1	1	1	1	TMSB4X	thymosin beta 4, X-linked
hsa-miR-507	1	0	1	1	1	1	HMGN1	high mobility group nucleosome binding domain 1
hsa-miR-507	0	0	1	1	1	1	CWC27	CWC27 spliceosome-associated protein homolog (S. cerevisiae)
hsa-miR-507	0	0	1	1	1	1	C2orf43	chromosome 2 open reading frame 43
hsa-miR-507	0	0	0	1	1	1	ZBED1	zinc finger, BED-type containing 1
hsa-miR-507	1	0	1	1	1	1	ETNK1	ethanolamine kinase 1
hsa-miR-507	0	0	0	1	0	0	PZP	pregnancy-zone protein
hsa-miR-507	0	0	1	1	1	1	C1QTNF3	C1q and tumor necrosis factor related protein 3
hsa-miR-507	0	0	1	1	1	1	AMACR	alpha-methylacyl-CoA racemase
hsa-miR-507	0	0	0	1	0	0	KCNV2	potassium channel, subfamily V, member 2
hsa-miR-507	0	0	1	1	1	1	DEFB125	defensin, beta 125
hsa-miR-507	0	0	0	1	1	1	FOXD4	forkhead box D4
hsa-miR-507	0	0	0	1	1	1	N6AMT2	N-6 adenine-specific DNA methyltransferase 2 (putative)
hsa-miR-507	0	0	0	1	0	0	EGFEM1P	EGF-like and EMI domain containing 1, pseudogene
hsa-miR-507	0	0	1	1	1	1	TMEM191C	transmembrane protein 191C
hsa-miR-507	0	0	0	1	0	0	RNASE12	ribonuclease, RNase A family, 12 (non-active)
hsa-miR-507	0	0	0	1	1	1	LOC401052	uncharacterized LOC401052
hsa-miR-507	0	0	0	1	0	0	TBX20	T-box 20
hsa-miR-507	1	0	1	1	1	1	UNKL	unkempt homolog (Drosophila)-like
hsa-miR-507	0	0	1	1	1	1	KCNN2	potassium intermediate/small conductance calcium-activated channel, subfamily N, member 2
hsa-miR-507	0	0	1	1	1	1	FAM124B	family with sequence similarity 124B
hsa-miR-507	1	0	1	1	1	1	INSR	insulin receptor
hsa-miR-507	1	0	1	1	1	1	CHRNA3	cholinergic receptor, nicotinic, alpha 3 (neuronal)
hsa-miR-507	0	0	1	1	1	1	IL1R1	interleukin 1 receptor, type I
hsa-miR-507	0	0	1	0	1	1	OXTR	oxytocin receptor
hsa-miR-507	0	0	0	0	1	1	LCN10	lipocalin 10
hsa-miR-507	0	0	1	1	1	1	UQCR10	ubiquinol-cytochrome c reductase, complex III subunit X
hsa-miR-507	1	0	1	1	1	1	MOG	myelin oligodendrocyte glycoprotein
hsa-miR-507	1	0	1	1	1	1	STEAP3	STEAP family member 3, metalloreductase
hsa-miR-507	0	0	1	1	1	1	ISX	intestine-specific homeobox
hsa-miR-507	1	0	1	1	1	1	CUL4A	cullin 4A
hsa-miR-507	1	0	1	1	1	1	ABI1	abl-interactor 1
hsa-miR-507	1	0	1	0	1	1	NHLRC3	NHL repeat containing 3
hsa-miR-507	0	0	0	1	1	1	RFPL4B	ret finger protein-like 4B
hsa-miR-507	0	0	1	1	1	1	CPLX3	complexin 3
hsa-miR-507	1	0	1	1	1	1	AGAP1	ArfGAP with GTPase domain, ankyrin repeat and PH domain 1
hsa-miR-507	1	0	1	1	1	1	NSG1	neuron specific gene family member 1
hsa-miR-507	1	0	1	0	1	1	CEP44	centrosomal protein 44kDa
hsa-miR-507	1	0	1	1	1	1	C2orf88	chromosome 2 open reading frame 88
hsa-miR-507	1	0	1	1	1	1	GLRA3	glycine receptor, alpha 3
hsa-miR-507	0	0	1	1	1	1	SULT1C2	sulfotransferase family, cytosolic, 1C, member 2
hsa-miR-507	0	0	0	1	1	1	POMT1	protein-O-mannosyltransferase 1
hsa-miR-507	1	0	1	0	1	1	UNC13A	unc-13 homolog A (C. elegans)
hsa-miR-507	1	0	1	1	1	1	CASP7	caspase 7, apoptosis-related cysteine peptidase
hsa-miR-507	1	0	1	1	1	1	IFIT2	interferon-induced protein with tetratricopeptide repeats 2
hsa-miR-507	0	0	0	0	1	1	C1R	complement component 1, r subcomponent
hsa-miR-507	1	0	1	1	1	1	FGF7	fibroblast growth factor 7
hsa-miR-507	0	0	1	1	1	1	HPCA	hippocalcin
hsa-miR-507	1	0	0	0	1	1	MATN3	matrilin 3
hsa-miR-507	1	0	1	1	1	1	PPP1R12B	protein phosphatase 1, regulatory subunit 12B
hsa-miR-507	1	0	1	1	1	1	NKX2-2	NK2 homeobox 2
hsa-miR-507	0	0	1	1	1	1	PIK3CG	phosphatidylinositol-4,5-bisphosphate 3-kinase, catalytic subunit gamma
hsa-miR-507	0	0	0	1	1	1	VIPR2	vasoactive intestinal peptide receptor 2
hsa-miR-507	0	0	1	1	1	1	ZNF141	zinc finger protein 141
hsa-miR-507	1	0	1	1	1	1	ZNF200	zinc finger protein 200
hsa-miR-507	1	0	1	1	1	1	CUL1	cullin 1
hsa-miR-507	1	0	1	1	1	1	B3GALT2	UDP-Gal:betaGlcNAc beta 1,3-galactosyltransferase, polypeptide 2
hsa-miR-507	1	0	1	1	1	1	EFNB2	ephrin-B2
hsa-miR-507	1	0	1	1	1	1	MYO9B	myosin IXB
hsa-miR-507	0	0	1	1	1	1	TRIP13	thyroid hormone receptor interactor 13
hsa-miR-507	1	0	1	1	1	1	DFFB	DNA fragmentation factor, 40kDa, beta polypeptide (caspase-activated DNase)
hsa-miR-507	1	0	1	1	1	1	LRP2	low density lipoprotein receptor-related protein 2
hsa-miR-507	1	0	1	1	1	1	NMT2	N-myristoyltransferase 2
hsa-miR-507	1	0	1	1	1	1	MYCL1	v-myc myelocytomatosis viral oncogene homolog 1, lung carcinoma derived (avian)
hsa-miR-507	1	0	1	1	1	1	BCAT1	branched chain amino-acid transaminase 1, cytosolic
hsa-miR-507	1	0	1	1	1	1	EDIL3	EGF-like repeats and discoidin I-like domains 3
hsa-miR-507	0	0	0	1	1	1	NMUR1	neuromedin U receptor 1
hsa-miR-507	1	0	1	1	1	1	DLC1	deleted in liver cancer 1
hsa-miR-507	0	0	1	1	1	1	PENK	proenkephalin
hsa-miR-507	0	0	1	1	1	1	FST	follistatin
hsa-miR-507	1	0	1	1	1	1	SNTB2	syntrophin, beta 2 (dystrophin-associated protein A1, 59kDa, basic component 2)
hsa-miR-507	0	0	1	1	1	1	AP3M2	adaptor-related protein complex 3, mu 2 subunit
hsa-miR-507	0	0	1	1	1	1	MLLT11	myeloid/lymphoid or mixed-lineage leukemia (trithorax homolog, Drosophila); translocated to, 11
hsa-miR-507	1	0	1	0	1	1	CLDN12	claudin 12
hsa-miR-507	0	0	0	1	1	1	HACL1	2-hydroxyacyl-CoA lyase 1
hsa-miR-507	1	0	1	1	1	1	PRDM4	PR domain containing 4
hsa-miR-507	1	0	1	1	1	1	STAT5B	signal transducer and activator of transcription 5B
hsa-miR-507	0	0	1	1	1	1	DNAJC15	DnaJ (Hsp40) homolog, subfamily C, member 15
hsa-miR-507	1	0	1	1	1	1	LAMP2	lysosomal-associated membrane protein 2
hsa-miR-507	0	0	1	1	1	1	C11orf54	chromosome 11 open reading frame 54
hsa-miR-507	0	0	1	0	1	1	KSR1	kinase suppressor of ras 1
hsa-miR-507	1	0	1	1	1	1	PTPN18	protein tyrosine phosphatase, non-receptor type 18 (brain-derived)
hsa-miR-507	1	0	1	0	1	1	KIAA0232	KIAA0232
hsa-miR-507	1	0	1	1	1	1	RUFY3	RUN and FYVE domain containing 3
hsa-miR-507	0	0	1	1	1	1	NMD3	NMD3 homolog (S. cerevisiae)
hsa-miR-507	1	0	1	1	1	1	TRMT6	tRNA methyltransferase 6 homolog (S. cerevisiae)
hsa-miR-507	0	0	1	1	1	1	TCEB3B	transcription elongation factor B polypeptide 3B (elongin A2)
hsa-miR-507	0	0	1	1	1	1	PPHLN1	periphilin 1
hsa-miR-507	1	0	1	1	1	1	ZDHHC3	zinc finger, DHHC-type containing 3
hsa-miR-507	0	0	1	0	1	1	GDE1	glycerophosphodiester phosphodiesterase 1
hsa-miR-507	0	0	1	1	1	1	MRPS10	mitochondrial ribosomal protein S10
hsa-miR-507	0	0	0	0	1	1	SMU1	smu-1 suppressor of mec-8 and unc-52 homolog (C. elegans)
hsa-miR-507	1	0	1	1	1	1	SPIRE1	spire homolog 1 (Drosophila)
hsa-miR-507	1	0	1	1	1	1	NCEH1	neutral cholesterol ester hydrolase 1
hsa-miR-507	0	0	1	1	1	1	UVSSA	UV-stimulated scaffold protein A
hsa-miR-507	1	0	1	1	1	1	ALS2	amyotrophic lateral sclerosis 2 (juvenile)
hsa-miR-507	1	0	1	0	1	1	TSPYL4	TSPY-like 4
hsa-miR-507	1	0	0	0	1	1	GZF1	GDNF-inducible zinc finger protein 1
hsa-miR-507	1	0	1	0	1	1	USP46	ubiquitin specific peptidase 46
hsa-miR-507	0	0	1	1	1	1	KIAA0319L	KIAA0319-like
hsa-miR-507	1	0	1	1	1	1	NDFIP1	Nedd4 family interacting protein 1
hsa-miR-507	0	0	1	0	1	1	APOL6	apolipoprotein L, 6
hsa-miR-507	1	0	1	1	1	1	PTPRO	protein tyrosine phosphatase, receptor type, O
hsa-miR-507	1	0	1	1	1	1	BHLHE41	basic helix-loop-helix family, member e41
hsa-miR-507	0	0	1	1	1	1	RNF135	ring finger protein 135
hsa-miR-507	1	0	0	1	1	1	PARD6G	par-6 partitioning defective 6 homolog gamma (C. elegans)
hsa-miR-507	1	0	1	1	1	1	TTYH2	tweety homolog 2 (Drosophila)
hsa-miR-507	0	0	1	0	1	1	CBR4	carbonyl reductase 4
hsa-miR-507	0	0	1	0	1	1	PNPT1	polyribonucleotide nucleotidyltransferase 1
hsa-miR-507	0	0	1	1	1	1	SIGLEC10	sialic acid binding Ig-like lectin 10
hsa-miR-507	0	0	0	1	1	1	OBSCN	obscurin, cytoskeletal calmodulin and titin-interacting RhoGEF
hsa-miR-507	0	0	1	1	1	1	OLFM3	olfactomedin 3
hsa-miR-507	0	0	1	1	1	1	DNAJB6	DnaJ (Hsp40) homolog, subfamily B, member 6
hsa-miR-507	0	0	1	0	1	1	SLC36A1	solute carrier family 36 (proton/amino acid symporter), member 1
hsa-miR-507	0	0	1	0	1	1	MYOZ3	myozenin 3
hsa-miR-507	0	0	1	1	1	1	ZNF431	zinc finger protein 431
hsa-miR-507	0	0	0	1	1	1	C19orf52	chromosome 19 open reading frame 52
hsa-miR-507	1	0	1	0	1	1	NUS1	nuclear undecaprenyl pyrophosphate synthase 1 homolog (S. cerevisiae)
hsa-miR-507	0	0	1	0	1	1	THAP6	THAP domain containing 6
hsa-miR-507	0	0	1	1	1	1	SPEF2	sperm flagellar 2
hsa-miR-507	0	0	0	1	1	1	MPZL2	myelin protein zero-like 2
hsa-miR-507	1	0	1	1	1	1	VTI1A	vesicle transport through interaction with t-SNAREs homolog 1A (yeast)
hsa-miR-507	0	0	1	1	1	1	ZNF572	zinc finger protein 572
hsa-miR-507	0	0	1	1	1	1	MS4A6A	membrane-spanning 4-domains, subfamily A, member 6A
hsa-miR-507	0	0	1	0	1	1	KCTD7	potassium channel tetramerisation domain containing 7
hsa-miR-507	1	0	1	1	1	1	IQCK	IQ motif containing K
hsa-miR-507	1	0	1	1	1	1	SYT14	synaptotagmin XIV
hsa-miR-507	0	0	1	1	1	1	TRIM59	tripartite motif containing 59
hsa-miR-507	1	0	1	1	1	1	RFX6	regulatory factor X, 6
hsa-miR-507	1	0	1	0	1	1	ZNF776	zinc finger protein 776
hsa-miR-507	1	0	0	1	1	1	PRR18	proline rich 18
hsa-miR-507	0	0	1	0	1	1	ZNF445	zinc finger protein 445
hsa-miR-507	0	0	1	1	1	1	C1orf88	chromosome 1 open reading frame 88
hsa-miR-507	1	0	1	0	1	1	LONRF2	LON peptidase N-terminal domain and ring finger 2
hsa-miR-507	0	0	1	1	1	1	GJB7	gap junction protein, beta 7, 25kDa
hsa-miR-507	0	0	0	1	1	1	NUP43	nucleoporin 43kDa
hsa-miR-507	0	0	1	1	1	1	C1orf174	chromosome 1 open reading frame 174
hsa-miR-507	0	0	1	1	1	1	C11orf88	chromosome 11 open reading frame 88
hsa-miR-507	0	0	1	1	1	1	LYSMD1	LysM, putative peptidoglycan-binding, domain containing 1
hsa-miR-507	0	0	0	0	1	1	LOC727909	Golgin subfamily A member 8-like protein 2-like
hsa-miR-507	0	0	0	0	1	1	LOC728047	golgin subfamily A member 8-like protein 2-like
hsa-miR-507	0	0	0	0	1	1	LOC283688	uncharacterized LOC283688
hsa-miR-507	0	0	0	0	1	1	LOC729086	vesicular, overexpressed in cancer, prosurvival protein 1 pseudogene
hsa-miR-507	0	0	0	0	1	1	LOC400756	uncharacterized LOC400756
hsa-miR-507	0	0	0	0	1	1	KIAA1239	KIAA1239
hsa-miR-507	0	0	0	0	1	1	C2orf74	chromosome 2 open reading frame 74
hsa-miR-507	0	0	1	0	1	1	C14orf23	chromosome 14 open reading frame 23
hsa-miR-507	0	0	0	0	1	1	LOC643037	uncharacterized LOC643037
hsa-miR-507	0	0	0	0	1	1	LOC643699	golgin subfamily A member 8-like
hsa-miR-507	0	0	0	0	1	1	POTEJ	POTE ankyrin domain family, member J
hsa-miR-507	0	0	0	0	1	1	RPS26P8	ribosomal protein S26 pseudogene 8
hsa-miR-507	0	0	0	1	1	1	C11orf95	chromosome 11 open reading frame 95
