# Supplementary material for: Profiling of Selected MicroRNAs in Proliferative Eutopic Endometrium of Women with Ovarian Endometriosis
Source: Biomed Res Int. 2015 Aug 20;2015:760698. doi: 10.1155/2015/760698 (PMC4558423; doi:10.1155/2015/760698)
Supplement: Supplementary file 1 — Table I: The names of miRNAs significantly differentially expressed between eutopic endometrium of patients with endometriosis vs eutopic endometrium of patients without endometriosis. Table II: The associations between miRNA and mRNA, which presents detailed results of the search of six major databases i.e targetscan, tarbase, miranda, mirbase, mirtarget2 and pictar. [file 760698.f1.zip › 760698.f1/Table II/hsa-miR-508-3p.tsv]

miR	targetscan	tarbase	miranda	mirbase	mirtarget2	pictar	GeneSymbol	GeneName
hsa-miR-508-3p	1	0	1	1	1	1	CHD9	chromodomain helicase DNA binding protein 9
hsa-miR-508-3p	1	0	1	1	0	0	RAPGEF2	Rap guanine nucleotide exchange factor (GEF) 2
hsa-miR-508-3p	0	0	1	1	0	0	PLXNB2	plexin B2
hsa-miR-508-3p	1	0	1	1	1	1	NUPL1	nucleoporin like 1
hsa-miR-508-3p	1	0	1	1	1	1	PPIP5K2	diphosphoinositol pentakisphosphate kinase 2
hsa-miR-508-3p	1	0	1	0	1	1	CEP350	centrosomal protein 350kDa
hsa-miR-508-3p	0	0	1	0	0	0	FAM91A2	family with sequence similarity 91, member A2
hsa-miR-508-3p	1	0	1	1	1	1	GREB1	growth regulation by estrogen in breast cancer 1
hsa-miR-508-3p	1	0	1	1	1	1	GIGYF2	GRB10 interacting GYF protein 2
hsa-miR-508-3p	1	0	1	0	1	1	MAGI2	membrane associated guanylate kinase, WW and PDZ domain containing 2
hsa-miR-508-3p	1	0	1	0	1	1	DOCK4	dedicator of cytokinesis 4
hsa-miR-508-3p	1	0	1	0	1	1	RBM12	RNA binding motif protein 12
hsa-miR-508-3p	1	0	1	0	0	0	DTX4	deltex homolog 4 (Drosophila)
hsa-miR-508-3p	1	0	1	1	1	1	CPEB3	cytoplasmic polyadenylation element binding protein 3
hsa-miR-508-3p	1	0	1	1	1	1	PALLD	palladin, cytoskeletal associated protein
hsa-miR-508-3p	1	0	1	0	1	1	ODZ2	odz, odd Oz/ten-m homolog 2 (Drosophila)
hsa-miR-508-3p	1	0	1	1	0	0	KIAA1210	KIAA1210
hsa-miR-508-3p	1	0	1	1	1	1	MKL2	MKL/myocardin-like 2
hsa-miR-508-3p	0	0	1	1	1	1	FSTL5	follistatin-like 5
hsa-miR-508-3p	0	0	1	0	0	0	MTA3	metastasis associated 1 family, member 3
hsa-miR-508-3p	1	0	1	1	1	1	PCDH19	protocadherin 19
hsa-miR-508-3p	1	0	1	1	1	1	FAM135A	family with sequence similarity 135, member A
hsa-miR-508-3p	0	0	1	0	1	1	KIAA1468	KIAA1468
hsa-miR-508-3p	0	0	1	0	0	0	NYAP2	neuronal tyrosine-phosphorylated phosphoinositide-3-kinase adaptor 2
hsa-miR-508-3p	1	0	1	0	1	1	LMO3	LIM domain only 3 (rhombotin-like 2)
hsa-miR-508-3p	1	0	1	1	1	1	ZNF532	zinc finger protein 532
hsa-miR-508-3p	1	0	1	0	0	0	TANC2	tetratricopeptide repeat, ankyrin repeat and coiled-coil containing 2
hsa-miR-508-3p	1	0	1	1	1	1	SYNE1	spectrin repeat containing, nuclear envelope 1
hsa-miR-508-3p	1	0	1	1	1	1	ABI3BP	ABI family, member 3 (NESH) binding protein
hsa-miR-508-3p	1	0	1	1	1	1	IKZF4	IKAROS family zinc finger 4 (Eos)
hsa-miR-508-3p	1	0	1	1	1	1	LCOR	ligand dependent nuclear receptor corepressor
hsa-miR-508-3p	0	0	1	1	0	0	NTNG2	netrin G2
hsa-miR-508-3p	1	0	1	1	1	1	OXR1	oxidation resistance 1
hsa-miR-508-3p	1	0	1	1	1	1	SH3TC2	SH3 domain and tetratricopeptide repeats 2
hsa-miR-508-3p	0	0	1	1	0	0	CIRH1A	cirrhosis, autosomal recessive 1A (cirhin)
hsa-miR-508-3p	1	0	1	1	1	1	SMEK1	SMEK homolog 1, suppressor of mek1 (Dictyostelium)
hsa-miR-508-3p	0	0	1	1	0	0	FAM22D	family with sequence similarity 22, member D
hsa-miR-508-3p	1	0	1	0	0	0	ZC3H12C	zinc finger CCCH-type containing 12C
hsa-miR-508-3p	1	0	1	1	1	1	C11orf57	chromosome 11 open reading frame 57
hsa-miR-508-3p	1	0	1	0	1	1	LIN54	lin-54 homolog (C. elegans)
hsa-miR-508-3p	0	0	1	0	0	0	TIFAB	TRAF-interacting protein with forkhead-associated domain, family member B
hsa-miR-508-3p	0	0	1	1	1	1	SYBU	syntabulin (syntaxin-interacting)
hsa-miR-508-3p	0	0	1	1	1	1	CRB1	crumbs homolog 1 (Drosophila)
hsa-miR-508-3p	1	0	1	1	1	1	RPS6KA3	ribosomal protein S6 kinase, 90kDa, polypeptide 3
hsa-miR-508-3p	1	0	1	1	1	1	PLEKHH3	pleckstrin homology domain containing, family H (with MyTH4 domain) member 3
hsa-miR-508-3p	1	0	1	1	1	1	PCCB	propionyl CoA carboxylase, beta polypeptide
hsa-miR-508-3p	1	0	1	1	1	1	SLC8A1	solute carrier family 8 (sodium/calcium exchanger), member 1
hsa-miR-508-3p	1	0	1	1	1	1	SYNCRIP	synaptotagmin binding, cytoplasmic RNA interacting protein
hsa-miR-508-3p	1	0	1	1	1	1	RLF	rearranged L-myc fusion
hsa-miR-508-3p	1	0	1	0	1	1	PLAG1	pleiomorphic adenoma gene 1
hsa-miR-508-3p	1	0	1	1	1	1	PRKACB	protein kinase, cAMP-dependent, catalytic, beta
hsa-miR-508-3p	1	0	1	1	1	1	ERF	Ets2 repressor factor
hsa-miR-508-3p	1	0	1	1	1	1	EPHA5	EPH receptor A5
hsa-miR-508-3p	1	0	1	1	1	1	SATB2	SATB homeobox 2
hsa-miR-508-3p	1	0	1	1	1	1	MYO5A	myosin VA (heavy chain 12, myoxin)
hsa-miR-508-3p	0	0	1	0	1	1	ACTN2	actinin, alpha 2
hsa-miR-508-3p	0	0	1	1	1	1	GPM6B	glycoprotein M6B
hsa-miR-508-3p	1	0	1	1	1	1	PDLIM5	PDZ and LIM domain 5
hsa-miR-508-3p	1	0	1	1	1	1	SATB1	SATB homeobox 1
hsa-miR-508-3p	1	0	1	1	1	1	HMGA2	high mobility group AT-hook 2
hsa-miR-508-3p	0	0	1	1	1	1	PLD1	phospholipase D1, phosphatidylcholine-specific
hsa-miR-508-3p	1	0	1	1	1	1	INSC	inscuteable homolog (Drosophila)
hsa-miR-508-3p	1	0	1	1	1	1	STX16	syntaxin 16
hsa-miR-508-3p	1	0	1	1	1	1	DLGAP2	discs, large (Drosophila) homolog-associated protein 2
hsa-miR-508-3p	1	0	1	0	1	1	PDE4D	phosphodiesterase 4D, cAMP-specific
hsa-miR-508-3p	0	0	1	0	0	0	ALOX12P2	arachidonate 12-lipoxygenase pseudogene 2
hsa-miR-508-3p	1	0	1	1	1	1	PCDH17	protocadherin 17
hsa-miR-508-3p	0	0	1	0	0	0	ZNRD1-AS1	ZNRD1 antisense RNA 1
hsa-miR-508-3p	1	0	1	1	1	1	MID1	midline 1 (Opitz/BBB syndrome)
hsa-miR-508-3p	0	0	1	1	1	1	NAT6	N-acetyltransferase 6 (GCN5-related)
hsa-miR-508-3p	0	0	1	1	1	1	CD84	CD84 molecule
hsa-miR-508-3p	1	0	1	1	1	1	SHOC2	soc-2 suppressor of clear homolog (C. elegans)
hsa-miR-508-3p	1	0	1	1	1	1	TP63	tumor protein p63
hsa-miR-508-3p	0	0	1	1	1	1	SSBP2	single-stranded DNA binding protein 2
hsa-miR-508-3p	0	0	1	1	1	1	BBS9	Bardet-Biedl syndrome 9
hsa-miR-508-3p	1	0	1	1	1	1	C14orf129	chromosome 14 open reading frame 129
hsa-miR-508-3p	0	0	1	1	1	1	AIG1	androgen-induced 1
hsa-miR-508-3p	1	0	1	1	1	1	USP15	ubiquitin specific peptidase 15
hsa-miR-508-3p	1	0	1	1	1	1	STXBP6	syntaxin binding protein 6 (amisyn)
hsa-miR-508-3p	1	0	1	1	1	1	USP25	ubiquitin specific peptidase 25
hsa-miR-508-3p	1	0	1	1	1	1	KCNMB2	potassium large conductance calcium-activated channel, subfamily M, beta member 2
hsa-miR-508-3p	0	0	1	1	0	0	LGALS12	lectin, galactoside-binding, soluble, 12
hsa-miR-508-3p	1	0	1	1	1	1	METTL10	methyltransferase like 10
hsa-miR-508-3p	0	0	1	1	0	0	TTTY7	testis-specific transcript, Y-linked 7 (non-protein coding)
hsa-miR-508-3p	0	0	1	1	0	0	FEZF2	FEZ family zinc finger 2
hsa-miR-508-3p	0	0	1	1	1	1	RERG	RAS-like, estrogen-regulated, growth inhibitor
hsa-miR-508-3p	1	0	1	1	1	1	BIVM	basic, immunoglobulin-like variable motif containing
hsa-miR-508-3p	1	0	1	1	1	1	PDE8A	phosphodiesterase 8A
hsa-miR-508-3p	0	0	1	1	1	1	PSRC1	proline/serine-rich coiled-coil 1
hsa-miR-508-3p	1	0	1	1	1	1	RBFOX1	RNA binding protein, fox-1 homolog (C. elegans) 1
hsa-miR-508-3p	1	0	1	1	1	1	CACNB2	calcium channel, voltage-dependent, beta 2 subunit
hsa-miR-508-3p	1	0	1	1	1	1	F3	coagulation factor III (thromboplastin, tissue factor)
hsa-miR-508-3p	0	0	1	1	1	1	AMPH	amphiphysin
hsa-miR-508-3p	1	0	1	1	1	1	IQCK	IQ motif containing K
hsa-miR-508-3p	1	0	1	0	1	1	NUDCD1	NudC domain containing 1
hsa-miR-508-3p	1	0	1	1	1	1	GPR64	G protein-coupled receptor 64
hsa-miR-508-3p	0	0	1	0	0	0	ADAM5	ADAM metallopeptidase domain 5, pseudogene
hsa-miR-508-3p	0	0	1	1	1	1	GNAS	GNAS complex locus
hsa-miR-508-3p	0	0	1	0	0	0	CACNA2D3	calcium channel, voltage-dependent, alpha 2/delta subunit 3
hsa-miR-508-3p	0	0	1	1	1	1	CD1E	CD1e molecule
hsa-miR-508-3p	1	0	1	1	1	1	PALM2	paralemmin 2
hsa-miR-508-3p	1	0	1	1	1	1	RAB3IP	RAB3A interacting protein (rabin3)
hsa-miR-508-3p	1	0	1	1	1	1	NRXN3	neurexin 3
hsa-miR-508-3p	0	0	1	0	0	0	TOMM6	translocase of outer mitochondrial membrane 6 homolog (yeast)
hsa-miR-508-3p	1	0	1	1	1	1	NAV3	neuron navigator 3
hsa-miR-508-3p	1	0	1	1	1	1	ARL4C	ADP-ribosylation factor-like 4C
hsa-miR-508-3p	1	0	1	0	1	1	NFAT5	nuclear factor of activated T-cells 5, tonicity-responsive
hsa-miR-508-3p	0	0	1	1	1	1	PARP16	poly (ADP-ribose) polymerase family, member 16
hsa-miR-508-3p	0	0	1	0	0	0	FLJ20518	FSHD region gene 2 family, member C pseudogene
hsa-miR-508-3p	0	0	1	1	1	1	UBE2Q2	ubiquitin-conjugating enzyme E2Q family member 2
hsa-miR-508-3p	0	0	1	0	0	0	TUG1	taurine upregulated 1 (non-protein coding)
hsa-miR-508-3p	0	0	1	1	0	0	ZCWPW1	zinc finger, CW type with PWWP domain 1
hsa-miR-508-3p	1	0	1	1	1	1	SENP6	SUMO1/sentrin specific peptidase 6
hsa-miR-508-3p	1	0	1	1	1	1	PTBP3	polypyrimidine tract binding protein 3
hsa-miR-508-3p	0	0	1	1	1	1	LRIF1	ligand dependent nuclear receptor interacting factor 1
hsa-miR-508-3p	0	0	1	0	0	0	DUXAP10	double homeobox A pseudogene 10
hsa-miR-508-3p	1	0	1	1	1	1	STARD7	StAR-related lipid transfer (START) domain containing 7
hsa-miR-508-3p	0	0	1	0	0	0	LOC284561	uncharacterized LOC284561
hsa-miR-508-3p	1	0	1	1	1	1	BAZ2A	bromodomain adjacent to zinc finger domain, 2A
hsa-miR-508-3p	0	0	1	1	1	1	CWF19L1	CWF19-like 1, cell cycle control (S. pombe)
hsa-miR-508-3p	1	0	1	1	1	1	DLC1	deleted in liver cancer 1
hsa-miR-508-3p	1	0	1	1	1	1	ARFGEF1	ADP-ribosylation factor guanine nucleotide-exchange factor 1 (brefeldin A-inhibited)
hsa-miR-508-3p	1	0	1	1	0	0	SLAIN2	SLAIN motif family, member 2
hsa-miR-508-3p	0	0	1	1	1	1	TGIF1	TGFB-induced factor homeobox 1
hsa-miR-508-3p	0	0	1	1	1	1	C8orf46	chromosome 8 open reading frame 46
hsa-miR-508-3p	1	0	1	1	1	1	SGK1	serum/glucocorticoid regulated kinase 1
hsa-miR-508-3p	0	0	1	1	1	1	MTRF1	mitochondrial translational release factor 1
hsa-miR-508-3p	1	0	1	0	1	1	AP1G1	adaptor-related protein complex 1, gamma 1 subunit
hsa-miR-508-3p	0	0	1	1	1	1	OPTN	optineurin
hsa-miR-508-3p	0	0	1	1	1	1	GLYATL1	glycine-N-acyltransferase-like 1
hsa-miR-508-3p	1	0	1	0	1	1	RNF165	ring finger protein 165
hsa-miR-508-3p	0	0	1	1	1	1	ANKRD36B	ankyrin repeat domain 36B
hsa-miR-508-3p	0	0	1	0	1	1	FAM70A	family with sequence similarity 70, member A
hsa-miR-508-3p	0	0	1	1	1	1	BRD2	bromodomain containing 2
hsa-miR-508-3p	0	0	1	1	1	1	ZNF606	zinc finger protein 606
hsa-miR-508-3p	1	0	1	1	1	1	FOPNL	FGFR1OP N-terminal like
hsa-miR-508-3p	0	0	1	1	1	1	XAF1	XIAP associated factor 1
hsa-miR-508-3p	1	0	1	1	1	1	TBC1D14	TBC1 domain family, member 14
hsa-miR-508-3p	0	0	1	1	0	0	COMMD4	COMM domain containing 4
hsa-miR-508-3p	0	0	1	1	1	1	MS4A14	membrane-spanning 4-domains, subfamily A, member 14
hsa-miR-508-3p	0	0	1	1	1	1	USPL1	ubiquitin specific peptidase like 1
hsa-miR-508-3p	1	0	1	1	1	1	FAM102A	family with sequence similarity 102, member A
hsa-miR-508-3p	1	0	1	0	1	1	CLASP1	cytoplasmic linker associated protein 1
hsa-miR-508-3p	1	0	1	1	1	1	UBAP1	ubiquitin associated protein 1
hsa-miR-508-3p	1	0	1	1	1	1	MYO1B	myosin IB
hsa-miR-508-3p	0	0	1	1	1	1	CAMKV	CaM kinase-like vesicle-associated
hsa-miR-508-3p	0	0	1	0	1	1	CADM1	cell adhesion molecule 1
hsa-miR-508-3p	1	0	1	1	1	1	WDR20	WD repeat domain 20
hsa-miR-508-3p	0	0	1	0	0	0	LOC152225	uncharacterized LOC152225
hsa-miR-508-3p	0	0	1	1	1	1	CCDC102B	coiled-coil domain containing 102B
hsa-miR-508-3p	1	0	1	1	1	1	ARIH2	ariadne homolog 2 (Drosophila)
hsa-miR-508-3p	0	0	1	1	0	0	CDK15	cyclin-dependent kinase 15
hsa-miR-508-3p	0	0	1	1	1	1	CD34	CD34 molecule
hsa-miR-508-3p	1	0	1	1	1	1	GNG2	guanine nucleotide binding protein (G protein), gamma 2
hsa-miR-508-3p	0	0	1	1	1	1	NRBP1	nuclear receptor binding protein 1
hsa-miR-508-3p	0	0	1	1	1	1	ITGB1BP1	integrin beta 1 binding protein 1
hsa-miR-508-3p	1	0	1	1	0	0	TOE1	target of EGR1, member 1 (nuclear)
hsa-miR-508-3p	0	0	1	0	0	0	LOC550112	uncharacterized LOC550112
hsa-miR-508-3p	0	0	1	0	0	0	CXXC1P1	CXXC finger protein 1 pseudogene 1
hsa-miR-508-3p	0	0	1	0	0	0	PART1	prostate androgen-regulated transcript 1 (non-protein coding)
hsa-miR-508-3p	1	0	1	0	1	1	GATAD2B	GATA zinc finger domain containing 2B
hsa-miR-508-3p	0	0	1	0	0	0	FLJ37505	uncharacterized LOC400087
hsa-miR-508-3p	0	0	1	1	1	1	TMEM170A	transmembrane protein 170A
hsa-miR-508-3p	1	0	1	1	1	1	CPNE8	copine VIII
hsa-miR-508-3p	1	0	1	1	1	1	KLF4	Kruppel-like factor 4 (gut)
hsa-miR-508-3p	0	0	1	1	1	1	MOBP	myelin-associated oligodendrocyte basic protein
hsa-miR-508-3p	1	0	1	1	1	1	ANKRD46	ankyrin repeat domain 46
hsa-miR-508-3p	1	0	1	1	1	1	CNEP1R1	CTD nuclear envelope phosphatase 1 regulatory subunit 1
hsa-miR-508-3p	1	0	1	1	1	1	FADS1	fatty acid desaturase 1
hsa-miR-508-3p	0	0	1	0	0	0	FAM66C	family with sequence similarity 66, member C
hsa-miR-508-3p	0	0	1	1	1	1	MPHOSPH9	M-phase phosphoprotein 9
hsa-miR-508-3p	1	0	1	0	1	1	THRB	thyroid hormone receptor, beta
hsa-miR-508-3p	1	0	1	1	1	1	STIM2	stromal interaction molecule 2
hsa-miR-508-3p	0	0	1	1	1	1	EXTL2	exostoses (multiple)-like 2
hsa-miR-508-3p	1	0	1	1	1	1	POU2F3	POU class 2 homeobox 3
hsa-miR-508-3p	0	0	1	0	0	0	LRRC69	leucine rich repeat containing 69
hsa-miR-508-3p	1	0	1	1	1	1	SP2	Sp2 transcription factor
hsa-miR-508-3p	0	0	1	1	1	1	CBWD5	COBW domain containing 5
hsa-miR-508-3p	1	0	1	1	1	1	IGSF11	immunoglobulin superfamily, member 11
hsa-miR-508-3p	0	0	1	1	0	0	C10orf68	chromosome 10 open reading frame 68
hsa-miR-508-3p	0	0	1	0	0	0	LOC100130954	uncharacterized LOC100130954
hsa-miR-508-3p	0	0	1	0	0	0	LOC728095	uncharacterized LOC728095
hsa-miR-508-3p	1	0	1	1	1	1	UHRF2	ubiquitin-like with PHD and ring finger domains 2, E3 ubiquitin protein ligase
hsa-miR-508-3p	1	0	1	1	1	1	HBP1	HMG-box transcription factor 1
hsa-miR-508-3p	0	0	1	1	1	1	NFKB1	nuclear factor of kappa light polypeptide gene enhancer in B-cells 1
hsa-miR-508-3p	0	0	1	1	0	0	MARS	methionyl-tRNA synthetase
hsa-miR-508-3p	0	0	1	1	1	1	RNF103	ring finger protein 103
hsa-miR-508-3p	0	0	1	0	1	1	PATE4	prostate and testis expressed 4
hsa-miR-508-3p	0	0	1	0	0	0	LOC285043	uncharacterized LOC285043
hsa-miR-508-3p	1	0	1	1	1	1	VPS54	vacuolar protein sorting 54 homolog (S. cerevisiae)
hsa-miR-508-3p	1	0	1	1	1	1	XPO1	exportin 1 (CRM1 homolog, yeast)
hsa-miR-508-3p	0	0	1	1	1	1	GALNT11	UDP-N-acetyl-alpha-D-galactosamine:polypeptide N-acetylgalactosaminyltransferase 11 (GalNAc-T11)
hsa-miR-508-3p	0	0	1	1	1	1	KANSL1L	KAT8 regulatory NSL complex subunit 1-like
hsa-miR-508-3p	1	0	1	1	1	1	SEPHS1	selenophosphate synthetase 1
hsa-miR-508-3p	0	0	1	0	0	0	TMEM232	transmembrane protein 232
hsa-miR-508-3p	0	0	1	1	1	1	MKX	mohawk homeobox
hsa-miR-508-3p	1	0	1	1	1	1	SACS	spastic ataxia of Charlevoix-Saguenay (sacsin)
hsa-miR-508-3p	0	0	1	1	0	0	RPRD2	regulation of nuclear pre-mRNA domain containing 2
hsa-miR-508-3p	0	0	1	1	1	1	RBM46	RNA binding motif protein 46
hsa-miR-508-3p	1	0	1	1	1	1	TP53INP1	tumor protein p53 inducible nuclear protein 1
hsa-miR-508-3p	1	0	1	1	1	1	MACROD2	MACRO domain containing 2
hsa-miR-508-3p	1	0	1	1	0	0	UBN2	ubinuclein 2
hsa-miR-508-3p	0	0	1	0	0	0	ADCY10P1	adenylate cyclase 10 (soluble) pseudogene 1
hsa-miR-508-3p	1	0	1	1	1	1	CPNE2	copine II
hsa-miR-508-3p	1	0	1	1	1	1	PIK3R1	phosphoinositide-3-kinase, regulatory subunit 1 (alpha)
hsa-miR-508-3p	0	0	1	1	0	0	CLDN4	claudin 4
hsa-miR-508-3p	1	0	1	1	1	1	DLG2	discs, large homolog 2 (Drosophila)
hsa-miR-508-3p	1	0	1	1	1	1	C14orf28	chromosome 14 open reading frame 28
hsa-miR-508-3p	1	0	1	1	1	1	CLIP1	CAP-GLY domain containing linker protein 1
hsa-miR-508-3p	1	0	1	1	1	1	EIF4E3	eukaryotic translation initiation factor 4E family member 3
hsa-miR-508-3p	0	0	1	0	0	0	RPL23AP53	ribosomal protein L23a pseudogene 53
hsa-miR-508-3p	1	0	1	1	1	1	MFSD6	major facilitator superfamily domain containing 6
hsa-miR-508-3p	1	0	1	1	1	1	ENAH	enabled homolog (Drosophila)
hsa-miR-508-3p	1	0	1	1	1	1	R3HDM1	R3H domain containing 1
hsa-miR-508-3p	0	0	1	0	0	0	ERVFRD-2	endogenous retrovirus group FRD, member 2
hsa-miR-508-3p	1	0	1	0	1	1	CAPRIN1	cell cycle associated protein 1
hsa-miR-508-3p	1	0	1	0	1	1	YOD1	YOD1 OTU deubiquinating enzyme 1 homolog (S. cerevisiae)
hsa-miR-508-3p	0	0	1	0	0	0	FAM205B	transmembrane protein C9orf144B pseudogene
hsa-miR-508-3p	1	0	1	0	1	1	KDM2A	lysine (K)-specific demethylase 2A
hsa-miR-508-3p	1	0	1	0	1	1	PLSCR4	phospholipid scramblase 4
hsa-miR-508-3p	1	0	1	0	1	1	USP37	ubiquitin specific peptidase 37
hsa-miR-508-3p	0	0	1	1	1	1	ATXN2	ataxin 2
hsa-miR-508-3p	0	0	1	0	0	0	IDO2	indoleamine 2,3-dioxygenase 2
hsa-miR-508-3p	1	0	1	1	1	1	CD200	CD200 molecule
hsa-miR-508-3p	1	0	1	0	1	1	ESRRG	estrogen-related receptor gamma
hsa-miR-508-3p	1	0	1	0	1	1	FMNL2	formin-like 2
hsa-miR-508-3p	1	0	1	1	1	1	LRRK2	leucine-rich repeat kinase 2
hsa-miR-508-3p	0	0	1	1	1	1	CEACAM5	carcinoembryonic antigen-related cell adhesion molecule 5
hsa-miR-508-3p	0	0	1	1	1	1	CRISP3	cysteine-rich secretory protein 3
hsa-miR-508-3p	1	0	1	1	1	1	CYYR1	cysteine/tyrosine-rich 1
hsa-miR-508-3p	1	0	1	1	0	0	ATP13A3	ATPase type 13A3
hsa-miR-508-3p	0	0	1	0	1	1	PEX5	peroxisomal biogenesis factor 5
hsa-miR-508-3p	1	0	1	1	0	0	TDRKH	tudor and KH domain containing
hsa-miR-508-3p	1	0	1	1	1	1	ATL2	atlastin GTPase 2
hsa-miR-508-3p	0	0	1	1	1	1	C5orf28	chromosome 5 open reading frame 28
hsa-miR-508-3p	0	0	1	1	0	0	C6orf10	chromosome 6 open reading frame 10
hsa-miR-508-3p	1	0	1	1	1	1	PHTF2	putative homeodomain transcription factor 2
hsa-miR-508-3p	0	0	1	1	1	1	PUS7L	pseudouridylate synthase 7 homolog (S. cerevisiae)-like
hsa-miR-508-3p	1	0	1	1	1	1	NCOA1	nuclear receptor coactivator 1
hsa-miR-508-3p	1	0	1	1	1	1	NOVA1	neuro-oncological ventral antigen 1
hsa-miR-508-3p	0	0	1	1	1	1	PTPN20B	protein tyrosine phosphatase, non-receptor type 20B
hsa-miR-508-3p	0	0	1	1	1	1	PTPN20A	protein tyrosine phosphatase, non-receptor type 20A
hsa-miR-508-3p	0	0	1	0	1	1	NEK1	NIMA (never in mitosis gene a)-related kinase 1
hsa-miR-508-3p	1	0	1	1	1	1	SLC25A36	solute carrier family 25 (pyrimidine nucleotide carrier ), member 36
hsa-miR-508-3p	1	0	1	0	1	1	CEP170	centrosomal protein 170kDa
hsa-miR-508-3p	0	0	1	0	0	0	LRRC37BP1	leucine rich repeat containing 37B pseudogene 1
hsa-miR-508-3p	1	0	1	1	0	0	FAM108C1	family with sequence similarity 108, member C1
hsa-miR-508-3p	1	0	1	1	1	1	ZEB1	zinc finger E-box binding homeobox 1
hsa-miR-508-3p	0	0	1	1	1	1	BEND7	BEN domain containing 7
hsa-miR-508-3p	0	0	1	0	0	0	ZNF720	zinc finger protein 720
hsa-miR-508-3p	1	0	1	0	1	1	HNRNPA3	heterogeneous nuclear ribonucleoprotein A3
hsa-miR-508-3p	0	0	1	1	1	1	SRSF11	serine/arginine-rich splicing factor 11
hsa-miR-508-3p	1	0	1	1	0	0	USP24	ubiquitin specific peptidase 24
hsa-miR-508-3p	1	0	1	1	1	1	PRRC1	proline-rich coiled-coil 1
hsa-miR-508-3p	0	0	1	1	1	1	YAP1	Yes-associated protein 1
hsa-miR-508-3p	0	0	1	1	1	1	CCDC132	coiled-coil domain containing 132
hsa-miR-508-3p	1	0	1	1	1	1	HMCN1	hemicentin 1
hsa-miR-508-3p	0	0	1	0	1	1	C3orf43	chromosome 3 open reading frame 43
hsa-miR-508-3p	1	0	1	1	1	1	ANO1	anoctamin 1, calcium activated chloride channel
hsa-miR-508-3p	0	0	1	0	0	0	EPHA1-AS1	EPHA1 antisense RNA 1
hsa-miR-508-3p	1	0	1	1	1	1	NRP1	neuropilin 1
hsa-miR-508-3p	1	0	1	0	1	1	EXOC5	exocyst complex component 5
hsa-miR-508-3p	1	0	1	1	1	1	PRPF38B	PRP38 pre-mRNA processing factor 38 (yeast) domain containing B
hsa-miR-508-3p	0	0	1	1	1	1	SLC35F2	solute carrier family 35, member F2
hsa-miR-508-3p	1	0	1	1	1	1	CAPRIN2	caprin family member 2
hsa-miR-508-3p	1	0	1	1	1	1	CADM2	cell adhesion molecule 2
hsa-miR-508-3p	1	0	1	0	1	1	PHYHIPL	phytanoyl-CoA 2-hydroxylase interacting protein-like
hsa-miR-508-3p	1	0	1	1	1	1	PPP3CA	protein phosphatase 3, catalytic subunit, alpha isozyme
hsa-miR-508-3p	1	0	1	1	1	1	RNF38	ring finger protein 38
hsa-miR-508-3p	1	0	1	1	1	1	IKZF2	IKAROS family zinc finger 2 (Helios)
hsa-miR-508-3p	1	0	1	1	1	1	TACC1	transforming, acidic coiled-coil containing protein 1
hsa-miR-508-3p	1	0	1	0	1	1	BDNF	brain-derived neurotrophic factor
hsa-miR-508-3p	0	0	1	0	0	0	KGFLP1	fibroblast growth factor 7 pseudogene
hsa-miR-508-3p	0	0	1	1	1	1	MED19	mediator complex subunit 19
hsa-miR-508-3p	1	0	1	1	1	1	PIH1D3	PIH1 domain containing 3
hsa-miR-508-3p	0	0	1	1	1	1	IYD	iodotyrosine deiodinase
hsa-miR-508-3p	0	0	1	1	1	1	RAD9B	RAD9 homolog B (S. pombe)
hsa-miR-508-3p	1	0	1	1	1	1	OPRM1	opioid receptor, mu 1
hsa-miR-508-3p	1	0	1	1	1	1	TAB3	TGF-beta activated kinase 1/MAP3K7 binding protein 3
hsa-miR-508-3p	0	0	1	1	1	1	MFAP5	microfibrillar associated protein 5
hsa-miR-508-3p	1	0	1	1	1	1	FAM120A	family with sequence similarity 120A
hsa-miR-508-3p	0	0	1	1	1	1	DIDO1	death inducer-obliterator 1
hsa-miR-508-3p	0	0	1	1	1	1	ANXA10	annexin A10
hsa-miR-508-3p	0	0	1	1	1	1	MSRA	methionine sulfoxide reductase A
hsa-miR-508-3p	0	0	1	1	1	1	RHD	Rh blood group, D antigen
hsa-miR-508-3p	1	0	1	1	1	1	PCDH11X	protocadherin 11 X-linked
hsa-miR-508-3p	1	0	1	0	1	1	FAM46A	family with sequence similarity 46, member A
hsa-miR-508-3p	1	0	1	1	1	1	NONO	non-POU domain containing, octamer-binding
hsa-miR-508-3p	1	0	1	1	0	0	DHDDS	dehydrodolichyl diphosphate synthase
hsa-miR-508-3p	1	0	1	1	1	1	SPRY2	sprouty homolog 2 (Drosophila)
hsa-miR-508-3p	1	0	1	0	1	1	CGGBP1	CGG triplet repeat binding protein 1
hsa-miR-508-3p	1	0	1	1	1	1	MBNL1	muscleblind-like splicing regulator 1
hsa-miR-508-3p	0	0	1	0	0	0	LOC93622	Morf4 family associated protein 1-like 1 pseudogene
hsa-miR-508-3p	0	0	1	1	1	1	LZIC	leucine zipper and CTNNBIP1 domain containing
hsa-miR-508-3p	0	0	1	1	1	1	DPYD	dihydropyrimidine dehydrogenase
hsa-miR-508-3p	0	0	1	1	1	1	ZNF85	zinc finger protein 85
hsa-miR-508-3p	0	0	1	1	0	0	BARX1	BARX homeobox 1
hsa-miR-508-3p	1	0	1	1	1	1	RBM7	RNA binding motif protein 7
hsa-miR-508-3p	0	0	1	1	1	1	PCNP	PEST proteolytic signal containing nuclear protein
hsa-miR-508-3p	0	0	1	0	0	0	MGC21881	uncharacterized locus MGC21881
hsa-miR-508-3p	0	0	1	1	1	1	CCDC148	coiled-coil domain containing 148
hsa-miR-508-3p	1	0	1	1	1	1	ZBTB38	zinc finger and BTB domain containing 38
hsa-miR-508-3p	0	0	1	1	1	1	CMAS	cytidine monophosphate N-acetylneuraminic acid synthetase
hsa-miR-508-3p	1	0	1	1	1	1	FAM199X	family with sequence similarity 199, X-linked
hsa-miR-508-3p	1	0	1	1	1	1	ZMAT4	zinc finger, matrin-type 4
hsa-miR-508-3p	0	0	1	1	0	0	PTPMT1	protein tyrosine phosphatase, mitochondrial 1
hsa-miR-508-3p	0	0	1	1	1	1	FHL5	four and a half LIM domains 5
hsa-miR-508-3p	0	0	1	0	0	0	LOC284260	uncharacterized LOC284260
hsa-miR-508-3p	0	0	1	0	0	0	FAM92A1P2	family with sequence similarity 92, member A3
hsa-miR-508-3p	1	0	1	1	1	1	RACGAP1	Rac GTPase activating protein 1
hsa-miR-508-3p	0	0	1	0	0	0	SNX29P2	sorting nexin 29 pseudogene 2
hsa-miR-508-3p	1	0	1	1	1	1	CNTN4	contactin 4
hsa-miR-508-3p	0	0	1	1	1	1	RHBDD1	rhomboid domain containing 1
hsa-miR-508-3p	1	0	1	1	1	1	APPL2	adaptor protein, phosphotyrosine interaction, PH domain and leucine zipper containing 2
hsa-miR-508-3p	0	0	1	1	1	1	SELP	selectin P (granule membrane protein 140kDa, antigen CD62)
hsa-miR-508-3p	1	0	1	1	1	1	HTR2C	5-hydroxytryptamine (serotonin) receptor 2C, G protein-coupled
hsa-miR-508-3p	0	0	1	1	1	1	LRMP	lymphoid-restricted membrane protein
hsa-miR-508-3p	1	0	1	1	1	1	CASD1	CAS1 domain containing 1
hsa-miR-508-3p	0	0	1	1	0	0	GEMIN6	gem (nuclear organelle) associated protein 6
hsa-miR-508-3p	1	0	1	1	1	1	TIAL1	TIA1 cytotoxic granule-associated RNA binding protein-like 1
hsa-miR-508-3p	1	0	1	1	1	1	EYA4	eyes absent homolog 4 (Drosophila)
hsa-miR-508-3p	0	0	1	0	1	1	ERAP1	endoplasmic reticulum aminopeptidase 1
hsa-miR-508-3p	1	0	1	1	1	1	ZNF518A	zinc finger protein 518A
hsa-miR-508-3p	1	0	1	1	1	1	ZPLD1	zona pellucida-like domain containing 1
hsa-miR-508-3p	0	0	1	0	0	0	ATP8B5P	ATPase, class I, type 8B, member 5, pseudogene
hsa-miR-508-3p	1	0	1	1	1	1	FGF1	fibroblast growth factor 1 (acidic)
hsa-miR-508-3p	1	0	1	1	1	1	PPP2R2C	protein phosphatase 2, regulatory subunit B, gamma
hsa-miR-508-3p	0	0	1	1	1	1	SFI1	Sfi1 homolog, spindle assembly associated (yeast)
hsa-miR-508-3p	0	0	1	1	0	0	ADAP2	ArfGAP with dual PH domains 2
hsa-miR-508-3p	0	0	1	1	1	1	HRASLS5	HRAS-like suppressor family, member 5
hsa-miR-508-3p	0	0	1	1	1	1	NUB1	negative regulator of ubiquitin-like proteins 1
hsa-miR-508-3p	0	0	1	1	1	1	KIF16B	kinesin family member 16B
hsa-miR-508-3p	0	0	1	0	0	0	TMPRSS12	transmembrane (C-terminal) protease, serine 12
hsa-miR-508-3p	1	0	1	1	1	1	RAP2C	RAP2C, member of RAS oncogene family
hsa-miR-508-3p	1	0	1	1	1	1	CTDSPL2	CTD (carboxy-terminal domain, RNA polymerase II, polypeptide A) small phosphatase like 2
hsa-miR-508-3p	0	0	1	1	1	1	SEC24D	SEC24 family, member D (S. cerevisiae)
hsa-miR-508-3p	0	0	1	1	1	1	CLEC12B	C-type lectin domain family 12, member B
hsa-miR-508-3p	1	0	1	1	1	1	IMPACT	Impact homolog (mouse)
hsa-miR-508-3p	0	0	1	0	1	1	C9orf57	chromosome 9 open reading frame 57
hsa-miR-508-3p	1	0	1	1	1	1	LHX8	LIM homeobox 8
hsa-miR-508-3p	1	0	1	1	1	1	HECTD2	HECT domain containing E3 ubiquitin protein ligase 2
hsa-miR-508-3p	1	0	1	0	1	1	CLDN12	claudin 12
hsa-miR-508-3p	1	0	1	0	1	1	NEGR1	neuronal growth regulator 1
hsa-miR-508-3p	0	0	1	0	0	0	SRGAP2C	SLIT-ROBO Rho GTPase activating protein 2C
hsa-miR-508-3p	1	0	1	1	1	1	BNC2	basonuclin 2
hsa-miR-508-3p	1	0	1	1	1	1	C4orf19	chromosome 4 open reading frame 19
hsa-miR-508-3p	1	0	1	1	0	0	CCDC138	coiled-coil domain containing 138
hsa-miR-508-3p	1	0	1	1	1	1	GALNT1	UDP-N-acetyl-alpha-D-galactosamine:polypeptide N-acetylgalactosaminyltransferase 1 (GalNAc-T1)
hsa-miR-508-3p	0	0	1	1	0	0	H2AFZ	H2A histone family, member Z
hsa-miR-508-3p	0	0	1	1	0	0	CCDC152	coiled-coil domain containing 152
hsa-miR-508-3p	1	0	1	1	1	1	NFYA	nuclear transcription factor Y, alpha
hsa-miR-508-3p	1	0	1	0	0	0	MSL1	male-specific lethal 1 homolog (Drosophila)
hsa-miR-508-3p	1	0	1	0	1	1	LPHN3	latrophilin 3
hsa-miR-508-3p	0	0	1	1	1	1	SLC14A1	solute carrier family 14 (urea transporter), member 1 (Kidd blood group)
hsa-miR-508-3p	1	0	1	1	1	1	FOSB	FBJ murine osteosarcoma viral oncogene homolog B
hsa-miR-508-3p	1	0	1	1	1	1	FBXO8	F-box protein 8
hsa-miR-508-3p	0	0	1	0	0	0	SLC7A11-AS1	SLC7A11 antisense RNA 1
hsa-miR-508-3p	1	0	1	1	1	1	ARPP21	cAMP-regulated phosphoprotein, 21kDa
hsa-miR-508-3p	1	0	1	0	1	1	TNFAIP3	tumor necrosis factor, alpha-induced protein 3
hsa-miR-508-3p	1	0	1	1	1	1	ROCK1	Rho-associated, coiled-coil containing protein kinase 1
hsa-miR-508-3p	0	0	1	1	1	1	GOLGA6L9	golgin A6 family-like 9
hsa-miR-508-3p	0	0	1	1	1	1	MTHFD2L	methylenetetrahydrofolate dehydrogenase (NADP+ dependent) 2-like
hsa-miR-508-3p	0	0	1	1	1	1	C4orf32	chromosome 4 open reading frame 32
hsa-miR-508-3p	0	0	1	0	0	0	LOC728853	WD repeat domain 87 pseudogene
hsa-miR-508-3p	0	0	1	0	0	0	LOC401176	uncharacterized LOC401176
hsa-miR-508-3p	0	0	1	1	1	1	C14orf45	chromosome 14 open reading frame 45
hsa-miR-508-3p	0	0	1	0	0	0	LOC728342	uncharacterized LOC728342
hsa-miR-508-3p	1	0	1	1	1	1	ZFAND4	zinc finger, AN1-type domain 4
hsa-miR-508-3p	1	0	1	1	1	1	SENP1	SUMO1/sentrin specific peptidase 1
hsa-miR-508-3p	1	0	1	1	1	1	SF3B1	splicing factor 3b, subunit 1, 155kDa
hsa-miR-508-3p	0	0	1	1	0	0	NIT1	nitrilase 1
hsa-miR-508-3p	1	0	1	0	1	1	LYPD6	LY6/PLAUR domain containing 6
hsa-miR-508-3p	0	0	1	0	1	1	LOC338758	uncharacterized LOC338758
hsa-miR-508-3p	1	0	1	1	1	1	SMARCE1	SWI/SNF related, matrix associated, actin dependent regulator of chromatin, subfamily e, member 1
hsa-miR-508-3p	1	0	1	1	0	0	TTC9	tetratricopeptide repeat domain 9
hsa-miR-508-3p	1	0	1	1	1	1	PTPRG	protein tyrosine phosphatase, receptor type, G
hsa-miR-508-3p	0	0	1	1	1	1	INO80C	INO80 complex subunit C
hsa-miR-508-3p	0	0	1	0	1	1	ITGA1	integrin, alpha 1
hsa-miR-508-3p	1	0	1	0	1	1	SEMA4G	sema domain, immunoglobulin domain (Ig), transmembrane domain (TM) and short cytoplasmic domain, (semaphorin) 4G
hsa-miR-508-3p	1	0	1	1	1	1	ZFP91	zinc finger protein 91 homolog (mouse)
hsa-miR-508-3p	0	0	1	1	0	0	HYAL3	hyaluronoglucosaminidase 3
hsa-miR-508-3p	0	0	1	1	1	1	RHOT1	ras homolog family member T1
hsa-miR-508-3p	1	0	1	1	1	1	SCUBE3	signal peptide, CUB domain, EGF-like 3
hsa-miR-508-3p	0	0	1	1	1	1	B4GALT4	UDP-Gal:betaGlcNAc beta 1,4- galactosyltransferase, polypeptide 4
hsa-miR-508-3p	1	0	1	1	1	1	SCOC	short coiled-coil protein
hsa-miR-508-3p	0	0	1	0	1	1	ASAP2	ArfGAP with SH3 domain, ankyrin repeat and PH domain 2
hsa-miR-508-3p	0	0	1	0	0	0	C21orf128	chromosome 21 open reading frame 128
hsa-miR-508-3p	0	0	1	1	0	0	DHX30	DEAH (Asp-Glu-Ala-His) box polypeptide 30
hsa-miR-508-3p	0	0	1	1	0	0	PDSS1	prenyl (decaprenyl) diphosphate synthase, subunit 1
hsa-miR-508-3p	1	0	1	1	1	1	RANBP9	RAN binding protein 9
hsa-miR-508-3p	1	0	1	1	1	1	MYLK	myosin light chain kinase
hsa-miR-508-3p	0	0	1	1	1	1	ZNF33B	zinc finger protein 33B
hsa-miR-508-3p	1	0	1	1	1	1	IARS	isoleucyl-tRNA synthetase
hsa-miR-508-3p	0	0	1	0	0	0	KANSL1-AS1	KANSL1 antisense RNA 1
hsa-miR-508-3p	1	0	1	1	1	1	C18orf1	chromosome 18 open reading frame 1
hsa-miR-508-3p	1	0	1	1	1	1	AP3M1	adaptor-related protein complex 3, mu 1 subunit
hsa-miR-508-3p	0	0	1	1	0	0	TBCA	tubulin folding cofactor A
hsa-miR-508-3p	0	0	1	1	0	0	CELF3	CUGBP, Elav-like family member 3
hsa-miR-508-3p	1	0	1	1	1	1	SLC26A7	solute carrier family 26, member 7
hsa-miR-508-3p	1	0	1	1	1	1	SRPK2	SRSF protein kinase 2
hsa-miR-508-3p	0	0	1	0	0	0	PTGER4P2	prostaglandin E receptor 4 (subtype EP4) pseudogene 2
hsa-miR-508-3p	0	0	1	1	1	1	MSTO1	misato homolog 1 (Drosophila)
hsa-miR-508-3p	1	0	1	0	1	1	TMEM194A	transmembrane protein 194A
hsa-miR-508-3p	0	0	1	0	0	0	JPX	JPX transcript, XIST activator (non-protein coding)
hsa-miR-508-3p	0	0	1	0	0	0	LOC440416	uncharacterized LOC440416
hsa-miR-508-3p	0	0	1	1	0	0	PPIG	peptidylprolyl isomerase G (cyclophilin G)
hsa-miR-508-3p	1	0	1	0	1	1	AMMECR1L	AMME chromosomal region gene 1-like
hsa-miR-508-3p	0	0	1	0	0	0	FRG1B	FSHD region gene 1 family, member B
hsa-miR-508-3p	0	0	1	1	1	1	KLRF1	killer cell lectin-like receptor subfamily F, member 1
hsa-miR-508-3p	0	0	1	1	1	1	R3HCC1L	R3H domain and coiled-coil containing 1-like
hsa-miR-508-3p	1	0	1	1	1	1	KRIT1	KRIT1, ankyrin repeat containing
hsa-miR-508-3p	1	0	1	0	1	1	ARPP19	cAMP-regulated phosphoprotein, 19kDa
hsa-miR-508-3p	0	0	1	0	1	1	TCAIM	T cell activation inhibitor, mitochondrial
hsa-miR-508-3p	1	0	1	0	1	1	KCNT2	potassium channel, subfamily T, member 2
hsa-miR-508-3p	0	0	1	1	0	0	TMC1	transmembrane channel-like 1
hsa-miR-508-3p	0	0	1	1	1	1	CCDC126	coiled-coil domain containing 126
hsa-miR-508-3p	1	0	1	1	1	1	PTPRD	protein tyrosine phosphatase, receptor type, D
hsa-miR-508-3p	1	0	1	0	1	1	BTBD3	BTB (POZ) domain containing 3
hsa-miR-508-3p	0	0	1	1	1	1	STAU2	staufen, RNA binding protein, homolog 2 (Drosophila)
hsa-miR-508-3p	1	0	1	1	1	1	NR3C2	nuclear receptor subfamily 3, group C, member 2
hsa-miR-508-3p	1	0	1	0	1	1	ROBO1	roundabout, axon guidance receptor, homolog 1 (Drosophila)
hsa-miR-508-3p	0	0	1	1	1	1	ZNF621	zinc finger protein 621
hsa-miR-508-3p	1	0	1	1	1	1	CTSC	cathepsin C
hsa-miR-508-3p	1	0	1	1	1	1	PAX3	paired box 3
hsa-miR-508-3p	1	0	1	1	1	1	SHANK2	SH3 and multiple ankyrin repeat domains 2
hsa-miR-508-3p	1	0	1	1	1	1	OTUD4	OTU domain containing 4
hsa-miR-508-3p	0	0	1	1	0	0	RGSL1	regulator of G-protein signaling like 1
hsa-miR-508-3p	0	0	1	1	1	1	SULT1C4	sulfotransferase family, cytosolic, 1C, member 4
hsa-miR-508-3p	0	0	1	0	1	1	GOLGA8G	golgin A8 family, member G
hsa-miR-508-3p	1	0	1	1	1	1	MEGF11	multiple EGF-like-domains 11
hsa-miR-508-3p	1	0	1	1	1	1	COLQ	collagen-like tail subunit (single strand of homotrimer) of asymmetric acetylcholinesterase
hsa-miR-508-3p	0	0	1	0	0	0	FAM225B	family with sequence similarity 225, member B (non-protein coding)
hsa-miR-508-3p	0	0	1	0	0	0	FUT8-AS1	FUT8 antisense RNA 1
hsa-miR-508-3p	1	0	1	1	1	1	NUMB	numb homolog (Drosophila)
hsa-miR-508-3p	1	0	1	1	1	1	ERMAP	erythroblast membrane-associated protein (Scianna blood group)
hsa-miR-508-3p	0	0	1	0	0	0	DKFZp686D0853	uncharacterized LOC401613
hsa-miR-508-3p	1	0	1	1	1	1	RAB7A	RAB7A, member RAS oncogene family
hsa-miR-508-3p	1	0	1	0	1	1	MTX3	metaxin 3
hsa-miR-508-3p	1	0	1	1	1	1	RORB	RAR-related orphan receptor B
hsa-miR-508-3p	1	0	1	1	1	1	SMAD4	SMAD family member 4
hsa-miR-508-3p	1	0	1	1	1	1	PRDM2	PR domain containing 2, with ZNF domain
hsa-miR-508-3p	0	0	1	1	1	1	UHRF1BP1L	UHRF1 binding protein 1-like
hsa-miR-508-3p	1	0	1	1	0	0	RBM27	RNA binding motif protein 27
hsa-miR-508-3p	1	0	1	1	0	0	CECR2	cat eye syndrome chromosome region, candidate 2
hsa-miR-508-3p	0	0	1	1	1	1	ADH1B	alcohol dehydrogenase 1B (class I), beta polypeptide
hsa-miR-508-3p	0	0	1	0	1	1	THAP6	THAP domain containing 6
hsa-miR-508-3p	0	0	1	0	0	0	LINC00240	long intergenic non-protein coding RNA 240
hsa-miR-508-3p	1	0	1	1	1	1	STARD13	StAR-related lipid transfer (START) domain containing 13
hsa-miR-508-3p	1	0	1	1	1	1	GABPA	GA binding protein transcription factor, alpha subunit 60kDa
hsa-miR-508-3p	0	0	1	0	1	1	ANKRD36	ankyrin repeat domain 36
hsa-miR-508-3p	1	0	1	1	1	1	KLHL2	kelch-like 2, Mayven (Drosophila)
hsa-miR-508-3p	0	0	1	0	1	1	MYO3B	myosin IIIB
hsa-miR-508-3p	1	0	1	1	1	1	DCAF5	DDB1 and CUL4 associated factor 5
hsa-miR-508-3p	0	0	1	1	1	1	CCNT2	cyclin T2
hsa-miR-508-3p	1	0	1	1	1	1	CORIN	corin, serine peptidase
hsa-miR-508-3p	1	0	1	1	1	1	NFIB	nuclear factor I/B
hsa-miR-508-3p	1	0	1	1	1	1	AZI2	5-azacytidine induced 2
hsa-miR-508-3p	1	0	1	1	1	1	C5orf24	chromosome 5 open reading frame 24
hsa-miR-508-3p	0	0	1	1	1	1	RBM20	RNA binding motif protein 20
hsa-miR-508-3p	1	0	1	1	1	1	PGAP1	post-GPI attachment to proteins 1
hsa-miR-508-3p	0	0	1	1	1	1	THSD4	thrombospondin, type I, domain containing 4
hsa-miR-508-3p	1	0	1	1	1	1	FAM179B	family with sequence similarity 179, member B
hsa-miR-508-3p	1	0	1	1	1	1	HIF1A	hypoxia inducible factor 1, alpha subunit (basic helix-loop-helix transcription factor)
hsa-miR-508-3p	1	0	1	1	1	1	CALD1	caldesmon 1
hsa-miR-508-3p	1	0	1	0	1	1	TBL1XR1	transducin (beta)-like 1 X-linked receptor 1
hsa-miR-508-3p	1	0	1	1	1	1	FAM208A	family with sequence similarity 208, member A
hsa-miR-508-3p	1	0	1	1	1	1	PCMT1	protein-L-isoaspartate (D-aspartate) O-methyltransferase
hsa-miR-508-3p	1	0	1	1	0	0	LAYN	layilin
hsa-miR-508-3p	1	0	1	1	1	1	PGGT1B	protein geranylgeranyltransferase type I, beta subunit
hsa-miR-508-3p	1	0	1	1	1	1	NAGA	N-acetylgalactosaminidase, alpha-
hsa-miR-508-3p	0	0	1	1	1	1	PSG2	pregnancy specific beta-1-glycoprotein 2
hsa-miR-508-3p	0	0	1	0	0	0	RPS16P10	ribosomal protein S16 pseudogene 10
hsa-miR-508-3p	0	0	1	1	1	1	UPRT	uracil phosphoribosyltransferase (FUR1) homolog (S. cerevisiae)
hsa-miR-508-3p	1	0	1	0	1	1	OLA1	Obg-like ATPase 1
hsa-miR-508-3p	0	0	1	1	1	1	SLCO1C1	solute carrier organic anion transporter family, member 1C1
hsa-miR-508-3p	1	0	1	1	1	1	HAPLN1	hyaluronan and proteoglycan link protein 1
hsa-miR-508-3p	0	0	1	1	1	1	SORD	sorbitol dehydrogenase
hsa-miR-508-3p	0	0	1	0	0	0	HMGN1P37	high mobility group nucleosome binding domain 1 pseudogene 37
hsa-miR-508-3p	0	0	1	1	1	1	XBP1	X-box binding protein 1
hsa-miR-508-3p	0	0	1	0	1	1	PSG11	pregnancy specific beta-1-glycoprotein 11
hsa-miR-508-3p	0	0	1	1	1	1	EIF3J	eukaryotic translation initiation factor 3, subunit J
hsa-miR-508-3p	1	0	1	1	1	1	PTBP1	polypyrimidine tract binding protein 1
hsa-miR-508-3p	0	0	1	1	1	1	PSMA1	proteasome (prosome, macropain) subunit, alpha type, 1
hsa-miR-508-3p	0	0	1	1	1	1	KLHDC2	kelch domain containing 2
hsa-miR-508-3p	1	0	1	1	1	1	GPR137B	G protein-coupled receptor 137B
hsa-miR-508-3p	1	0	1	1	1	1	LAMTOR3	late endosomal/lysosomal adaptor, MAPK and MTOR activator 3
hsa-miR-508-3p	0	0	1	1	1	1	LDHB	lactate dehydrogenase B
hsa-miR-508-3p	0	0	1	1	1	1	DEDD	death effector domain containing
hsa-miR-508-3p	0	0	1	1	1	1	RPA2	replication protein A2, 32kDa
hsa-miR-508-3p	0	0	1	1	1	1	UBE2A	ubiquitin-conjugating enzyme E2A
hsa-miR-508-3p	1	0	1	1	1	1	ATAT1	alpha tubulin acetyltransferase 1
hsa-miR-508-3p	0	0	1	1	1	1	LDHA	lactate dehydrogenase A
hsa-miR-508-3p	1	0	1	1	1	1	PFN2	profilin 2
hsa-miR-508-3p	0	0	1	1	1	1	FUS	fused in sarcoma
hsa-miR-508-3p	0	0	1	1	1	1	PSG5	pregnancy specific beta-1-glycoprotein 5
hsa-miR-508-3p	1	0	1	1	1	1	F11R	F11 receptor
hsa-miR-508-3p	1	0	1	1	1	1	SNX1	sorting nexin 1
hsa-miR-508-3p	0	0	1	1	1	1	DNAJC25	DnaJ (Hsp40) homolog, subfamily C , member 25
hsa-miR-508-3p	1	0	1	1	1	1	LAPTM4A	lysosomal protein transmembrane 4 alpha
hsa-miR-508-3p	0	0	1	1	1	1	C18orf26	chromosome 18 open reading frame 26
hsa-miR-508-3p	1	0	1	0	1	1	CD47	CD47 molecule
hsa-miR-508-3p	1	0	1	1	1	1	RUNX1	runt-related transcription factor 1
hsa-miR-508-3p	0	0	1	0	1	1	DENR	density-regulated protein
hsa-miR-508-3p	0	0	1	0	1	1	SEPT7	septin 7
hsa-miR-508-3p	0	0	1	0	0	0	LOC100132984	uncharacterized LOC100132984
hsa-miR-508-3p	0	0	1	1	1	1	ANXA7	annexin A7
hsa-miR-508-3p	1	0	1	1	1	1	GABPB2	GA binding protein transcription factor, beta subunit 2
hsa-miR-508-3p	1	0	1	1	1	1	STAG2	stromal antigen 2
hsa-miR-508-3p	0	0	1	1	1	1	BDP1	B double prime 1, subunit of RNA polymerase III transcription initiation factor IIIB
hsa-miR-508-3p	1	0	1	1	1	1	PHACTR2	phosphatase and actin regulator 2
hsa-miR-508-3p	0	0	1	1	1	1	ATG5	autophagy related 5
hsa-miR-508-3p	1	0	1	0	1	1	XRN1	5'-3' exoribonuclease 1
hsa-miR-508-3p	0	0	1	0	1	1	HDAC9	histone deacetylase 9
hsa-miR-508-3p	1	0	1	1	1	1	SNRK	SNF related kinase
hsa-miR-508-3p	0	0	1	1	1	1	TMEM41B	transmembrane protein 41B
hsa-miR-508-3p	1	0	1	1	1	1	PI15	peptidase inhibitor 15
hsa-miR-508-3p	1	0	1	1	1	1	RB1CC1	RB1-inducible coiled-coil 1
hsa-miR-508-3p	1	0	1	0	1	1	KLHDC10	kelch domain containing 10
hsa-miR-508-3p	0	0	1	1	1	1	PTGS1	prostaglandin-endoperoxide synthase 1 (prostaglandin G/H synthase and cyclooxygenase)
hsa-miR-508-3p	1	0	1	1	1	1	KCNE3	potassium voltage-gated channel, Isk-related family, member 3
hsa-miR-508-3p	0	0	1	1	1	1	CD274	CD274 molecule
hsa-miR-508-3p	1	0	1	1	0	0	LGSN	lengsin, lens protein with glutamine synthetase domain
hsa-miR-508-3p	0	0	1	1	1	1	CD55	CD55 molecule, decay accelerating factor for complement (Cromer blood group)
hsa-miR-508-3p	1	0	1	1	1	1	IGF1	insulin-like growth factor 1 (somatomedin C)
hsa-miR-508-3p	0	0	1	0	0	0	HLA-DRA	major histocompatibility complex, class II, DR alpha
hsa-miR-508-3p	1	0	1	0	1	1	ACVR2A	activin A receptor, type IIA
hsa-miR-508-3p	0	0	1	1	1	1	BCHE	butyrylcholinesterase
hsa-miR-508-3p	1	0	1	1	1	1	CPOX	coproporphyrinogen oxidase
hsa-miR-508-3p	1	0	1	1	1	1	FBN1	fibrillin 1
hsa-miR-508-3p	0	0	1	0	1	1	MS4A2	membrane-spanning 4-domains, subfamily A, member 2
hsa-miR-508-3p	1	0	1	1	1	1	GALC	galactosylceramidase
hsa-miR-508-3p	1	0	1	1	1	1	MET	met proto-oncogene (hepatocyte growth factor receptor)
hsa-miR-508-3p	1	0	1	1	1	1	MITF	microphthalmia-associated transcription factor
hsa-miR-508-3p	1	0	1	1	1	1	OCRL	oculocerebrorenal syndrome of Lowe
hsa-miR-508-3p	0	0	1	1	1	1	PRNP	prion protein
hsa-miR-508-3p	0	0	1	1	1	1	RS1	retinoschisin 1
hsa-miR-508-3p	0	0	1	1	1	1	SRD5A2	steroid-5-alpha-reductase, alpha polypeptide 2 (3-oxo-5 alpha-steroid delta 4-dehydrogenase alpha 2)
hsa-miR-508-3p	1	0	1	0	1	1	TSC1	tuberous sclerosis 1
hsa-miR-508-3p	1	0	1	0	1	1	COL5A2	collagen, type V, alpha 2
hsa-miR-508-3p	1	0	1	0	1	1	PAFAH1B1	platelet-activating factor acetylhydrolase 1b, regulatory subunit 1 (45kDa)
hsa-miR-508-3p	0	0	1	1	1	1	OXCT1	3-oxoacid CoA transferase 1
hsa-miR-508-3p	1	0	1	1	1	1	TWIST1	twist homolog 1 (Drosophila)
hsa-miR-508-3p	1	0	1	1	1	1	HOXD13	homeobox D13
hsa-miR-508-3p	1	0	1	1	1	1	PLP1	proteolipid protein 1
hsa-miR-508-3p	1	0	1	1	1	1	DCX	doublecortin
hsa-miR-508-3p	0	0	1	0	1	1	CCR5	chemokine (C-C motif) receptor 5 (gene/pseudogene)
hsa-miR-508-3p	0	0	1	1	0	0	IL9	interleukin 9
hsa-miR-508-3p	0	0	1	1	1	1	CGA	glycoprotein hormones, alpha polypeptide
hsa-miR-508-3p	1	0	1	1	1	1	DIO2	deiodinase, iodothyronine, type II
hsa-miR-508-3p	1	0	1	1	1	1	GABRB3	gamma-aminobutyric acid (GABA) A receptor, beta 3
hsa-miR-508-3p	0	0	1	1	1	1	GLRB	glycine receptor, beta
hsa-miR-508-3p	1	0	1	1	1	1	GRM1	glutamate receptor, metabotropic 1
hsa-miR-508-3p	1	0	1	1	1	1	GRM8	glutamate receptor, metabotropic 8
hsa-miR-508-3p	0	0	1	1	1	1	PTGS2	prostaglandin-endoperoxide synthase 2 (prostaglandin G/H synthase and cyclooxygenase)
hsa-miR-508-3p	1	0	1	1	0	0	SLC35E4	solute carrier family 35, member E4
hsa-miR-508-3p	1	0	1	0	1	1	SPOPL	speckle-type POZ protein-like
hsa-miR-508-3p	0	0	1	1	1	1	FLJ45079	FLJ45079 protein
hsa-miR-508-3p	0	0	1	1	1	1	C4orf3	chromosome 4 open reading frame 3
hsa-miR-508-3p	1	0	1	0	1	1	PLEKHA1	pleckstrin homology domain containing, family A (phosphoinositide binding specific) member 1
hsa-miR-508-3p	1	0	1	1	1	1	BICD2	bicaudal D homolog 2 (Drosophila)
hsa-miR-508-3p	0	0	1	1	1	1	C1orf168	chromosome 1 open reading frame 168
hsa-miR-508-3p	0	0	1	1	1	1	ZCCHC16	zinc finger, CCHC domain containing 16
hsa-miR-508-3p	1	0	1	0	1	1	LIN28B	lin-28 homolog B (C. elegans)
hsa-miR-508-3p	1	0	1	0	1	1	LRRC55	leucine rich repeat containing 55
hsa-miR-508-3p	1	0	1	1	1	1	EBF3	early B-cell factor 3
hsa-miR-508-3p	1	0	1	1	1	1	PLCXD3	phosphatidylinositol-specific phospholipase C, X domain containing 3
hsa-miR-508-3p	1	0	1	0	1	1	IP6K1	inositol hexakisphosphate kinase 1
hsa-miR-508-3p	0	0	1	0	1	1	C8orf22	chromosome 8 open reading frame 22
hsa-miR-508-3p	1	0	1	1	1	1	CNOT4	CCR4-NOT transcription complex, subunit 4
hsa-miR-508-3p	1	0	1	1	1	1	RBM33	RNA binding motif protein 33
hsa-miR-508-3p	0	0	1	1	1	1	CXCR4	chemokine (C-X-C motif) receptor 4
hsa-miR-508-3p	1	0	1	1	1	1	LPHN1	latrophilin 1
hsa-miR-508-3p	0	0	1	1	1	1	HRNR	hornerin
hsa-miR-508-3p	1	0	1	0	1	1	ERMN	ermin, ERM-like protein
hsa-miR-508-3p	1	0	1	0	1	1	PM20D2	peptidase M20 domain containing 2
hsa-miR-508-3p	0	0	1	1	1	1	SPIN3	spindlin family, member 3
hsa-miR-508-3p	0	0	1	1	1	1	SERP2	stress-associated endoplasmic reticulum protein family member 2
hsa-miR-508-3p	1	0	1	0	1	1	CREB5	cAMP responsive element binding protein 5
hsa-miR-508-3p	1	0	1	1	1	1	CENPP	centromere protein P
hsa-miR-508-3p	0	0	1	0	1	1	GOLGA8E	golgin A8 family, member E
hsa-miR-508-3p	1	0	1	1	1	1	PABPC1L2A	poly(A) binding protein, cytoplasmic 1-like 2A
hsa-miR-508-3p	1	0	1	1	1	1	SORCS1	sortilin-related VPS10 domain containing receptor 1
hsa-miR-508-3p	0	0	1	1	0	0	EPGN	epithelial mitogen homolog (mouse)
hsa-miR-508-3p	1	0	1	0	1	1	SYT14L	synaptotagmin XIV-like
hsa-miR-508-3p	1	0	1	1	1	1	KCNMA1	potassium large conductance calcium-activated channel, subfamily M, alpha member 1
hsa-miR-508-3p	1	0	1	1	1	1	ZHX1	zinc fingers and homeoboxes 1
hsa-miR-508-3p	0	0	1	1	1	1	DCAF8L1	DDB1 and CUL4 associated factor 8-like 1
hsa-miR-508-3p	1	0	1	1	1	1	VMA21	VMA21 vacuolar H+-ATPase homolog (S. cerevisiae)
hsa-miR-508-3p	0	0	1	1	1	1	VNN3	vanin 3
hsa-miR-508-3p	1	0	1	0	1	1	BCL7A	B-cell CLL/lymphoma 7A
hsa-miR-508-3p	1	0	1	0	1	1	TNRC6B	trinucleotide repeat containing 6B
hsa-miR-508-3p	1	0	1	1	1	1	YIPF5	Yip1 domain family, member 5
hsa-miR-508-3p	1	0	1	0	1	1	CELF2	CUGBP, Elav-like family member 2
hsa-miR-508-3p	1	0	1	0	1	1	RAB12	RAB12, member RAS oncogene family
hsa-miR-508-3p	1	0	1	1	1	1	SLC35F1	solute carrier family 35, member F1
hsa-miR-508-3p	1	0	1	1	1	1	SLC10A7	solute carrier family 10 (sodium/bile acid cotransporter family), member 7
hsa-miR-508-3p	1	0	1	0	1	1	CYB5RL	cytochrome b5 reductase-like
hsa-miR-508-3p	1	0	1	1	1	1	TMPO	thymopoietin
hsa-miR-508-3p	1	0	1	0	1	1	SRGAP3	SLIT-ROBO Rho GTPase activating protein 3
hsa-miR-508-3p	1	0	1	1	1	1	SAR1B	SAR1 homolog B (S. cerevisiae)
hsa-miR-508-3p	0	0	1	1	1	1	PHF12	PHD finger protein 12
hsa-miR-508-3p	0	0	1	1	0	0	BOLA3	bolA homolog 3 (E. coli)
hsa-miR-508-3p	1	0	1	1	1	1	ELMO1	engulfment and cell motility 1
hsa-miR-508-3p	1	0	1	1	1	1	KIAA0317	KIAA0317
hsa-miR-508-3p	0	0	1	0	0	0	PRSS53	protease, serine, 53
hsa-miR-508-3p	1	0	1	0	1	1	GK5	glycerol kinase 5 (putative)
hsa-miR-508-3p	1	0	1	0	1	1	USP9X	ubiquitin specific peptidase 9, X-linked
hsa-miR-508-3p	0	0	1	1	1	1	ZMYM5	zinc finger, MYM-type 5
hsa-miR-508-3p	1	0	1	1	1	1	TCERG1	transcription elongation regulator 1
hsa-miR-508-3p	1	0	1	1	1	1	FAM3C	family with sequence similarity 3, member C
hsa-miR-508-3p	1	0	1	1	1	1	SCN2A	sodium channel, voltage-gated, type II, alpha subunit
hsa-miR-508-3p	1	0	1	1	1	1	FAM63B	family with sequence similarity 63, member B
hsa-miR-508-3p	1	0	1	1	1	1	NCALD	neurocalcin delta
hsa-miR-508-3p	1	0	1	1	1	1	CYLD	cylindromatosis (turban tumor syndrome)
hsa-miR-508-3p	1	0	1	1	1	1	PABPC1L2B	poly(A) binding protein, cytoplasmic 1-like 2B
hsa-miR-508-3p	1	0	1	1	1	1	ZNF706	zinc finger protein 706
hsa-miR-508-3p	1	0	1	1	1	1	SLC9A6	solute carrier family 9, subfamily A (NHE6, cation proton antiporter 6), member 6
hsa-miR-508-3p	1	0	1	1	1	1	FRS2	fibroblast growth factor receptor substrate 2
hsa-miR-508-3p	1	0	1	1	1	1	ERBB4	v-erb-a erythroblastic leukemia viral oncogene homolog 4 (avian)
hsa-miR-508-3p	1	0	1	1	1	1	RERE	arginine-glutamic acid dipeptide (RE) repeats
hsa-miR-508-3p	0	0	1	1	1	1	FAM22G	family with sequence similarity 22, member G
hsa-miR-508-3p	0	0	1	1	1	1	RCC1	regulator of chromosome condensation 1
hsa-miR-508-3p	1	0	1	1	1	1	CDC14B	CDC14 cell division cycle 14 homolog B (S. cerevisiae)
hsa-miR-508-3p	1	0	1	1	1	1	HS6ST2	heparan sulfate 6-O-sulfotransferase 2
hsa-miR-508-3p	1	0	1	1	1	1	SREK1	splicing regulatory glutamine/lysine-rich protein 1
hsa-miR-508-3p	1	0	1	1	1	1	GRIA4	glutamate receptor, ionotropic, AMPA 4
hsa-miR-508-3p	1	0	1	1	1	1	IRF2BP2	interferon regulatory factor 2 binding protein 2
hsa-miR-508-3p	1	0	1	1	1	1	SRSF1	serine/arginine-rich splicing factor 1
hsa-miR-508-3p	1	0	1	0	1	1	CCDC85A	coiled-coil domain containing 85A
hsa-miR-508-3p	0	0	1	1	0	0	WTIP	Wilms tumor 1 interacting protein
hsa-miR-508-3p	1	0	1	1	1	1	ZNF697	zinc finger protein 697
hsa-miR-508-3p	1	0	1	1	1	1	ADAM10	ADAM metallopeptidase domain 10
hsa-miR-508-3p	1	0	1	0	0	0	ACAN	aggrecan
hsa-miR-508-3p	0	0	1	1	1	1	AMELY	amelogenin, Y-linked
hsa-miR-508-3p	1	0	1	0	1	1	XIAP	X-linked inhibitor of apoptosis
hsa-miR-508-3p	1	0	1	1	1	1	PRDM1	PR domain containing 1, with ZNF domain
hsa-miR-508-3p	1	0	1	1	1	1	CAMK2D	calcium/calmodulin-dependent protein kinase II delta
hsa-miR-508-3p	1	0	1	1	1	1	CCNA2	cyclin A2
hsa-miR-508-3p	1	0	1	1	1	1	CHD1	chromodomain helicase DNA binding protein 1
hsa-miR-508-3p	1	0	1	1	1	1	CHKA	choline kinase alpha
hsa-miR-508-3p	0	0	1	1	1	1	CLIC2	chloride intracellular channel 2
hsa-miR-508-3p	1	0	1	0	1	1	CPD	carboxypeptidase D
hsa-miR-508-3p	1	0	1	1	1	1	DYRK1A	dual-specificity tyrosine-(Y)-phosphorylation regulated kinase 1A
hsa-miR-508-3p	1	0	1	1	1	1	EIF1AX	eukaryotic translation initiation factor 1A, X-linked
hsa-miR-508-3p	1	0	1	1	1	1	FOXC1	forkhead box C1
hsa-miR-508-3p	1	0	1	1	1	1	NDST1	N-deacetylase/N-sulfotransferase (heparan glucosaminyl) 1
hsa-miR-508-3p	0	0	1	1	1	1	IL13RA1	interleukin 13 receptor, alpha 1
hsa-miR-508-3p	0	0	1	1	1	1	IMPG1	interphotoreceptor matrix proteoglycan 1
hsa-miR-508-3p	1	0	1	1	1	1	BCL6	B-cell CLL/lymphoma 6
hsa-miR-508-3p	0	0	1	1	0	0	BICD1	bicaudal D homolog 1 (Drosophila)
hsa-miR-508-3p	0	0	1	1	1	1	CD1D	CD1d molecule
hsa-miR-508-3p	0	0	1	1	1	1	CEACAM8	carcinoembryonic antigen-related cell adhesion molecule 8
hsa-miR-508-3p	1	0	1	1	1	1	MASP1	mannan-binding lectin serine peptidase 1 (C4/C2 activating component of Ra-reactive factor)
hsa-miR-508-3p	0	0	1	1	1	1	CSN2	casein beta
hsa-miR-508-3p	0	0	1	1	1	1	CTSE	cathepsin E
hsa-miR-508-3p	1	0	1	1	1	1	DSC3	desmocollin 3
hsa-miR-508-3p	1	0	1	1	1	1	FGF7	fibroblast growth factor 7
hsa-miR-508-3p	0	0	1	1	1	1	HOXA4	homeobox A4
hsa-miR-508-3p	1	0	1	1	1	1	INSM1	insulinoma-associated 1
hsa-miR-508-3p	1	0	1	1	1	1	ITGB8	integrin, beta 8
hsa-miR-508-3p	1	0	1	1	1	1	KCNA6	potassium voltage-gated channel, shaker-related subfamily, member 6
hsa-miR-508-3p	1	0	1	1	1	1	KCNJ10	potassium inwardly-rectifying channel, subfamily J, member 10
hsa-miR-508-3p	0	0	1	1	1	1	KCNK1	potassium channel, subfamily K, member 1
hsa-miR-508-3p	1	0	1	0	1	1	MXD1	MAX dimerization protein 1
hsa-miR-508-3p	1	0	1	1	1	1	MAN2A1	mannosidase, alpha, class 2A, member 1
hsa-miR-508-3p	0	0	1	0	1	1	CXCL9	chemokine (C-X-C motif) ligand 9
hsa-miR-508-3p	1	0	1	1	1	1	MSN	moesin
hsa-miR-508-3p	1	0	1	1	1	1	NDN	necdin homolog (mouse)
hsa-miR-508-3p	0	0	1	1	0	0	OAS1	2'-5'-oligoadenylate synthetase 1, 40/46kDa
hsa-miR-508-3p	0	0	1	0	1	1	OPHN1	oligophrenin 1
hsa-miR-508-3p	0	0	1	1	1	1	PEX13	peroxisomal biogenesis factor 13
hsa-miR-508-3p	1	0	1	1	1	1	PIGR	polymeric immunoglobulin receptor
hsa-miR-508-3p	0	0	1	1	1	1	PREP	prolyl endopeptidase
hsa-miR-508-3p	0	0	1	1	1	1	MAPK9	mitogen-activated protein kinase 9
hsa-miR-508-3p	1	0	1	1	0	0	PSMD7	proteasome (prosome, macropain) 26S subunit, non-ATPase, 7
hsa-miR-508-3p	1	0	1	1	1	1	PTPN1	protein tyrosine phosphatase, non-receptor type 1
hsa-miR-508-3p	1	0	1	1	1	1	PTPN9	protein tyrosine phosphatase, non-receptor type 9
hsa-miR-508-3p	0	0	1	1	1	1	PTPRR	protein tyrosine phosphatase, receptor type, R
hsa-miR-508-3p	1	0	1	1	1	1	RAD23B	RAD23 homolog B (S. cerevisiae)
hsa-miR-508-3p	0	0	1	1	1	1	RARS	arginyl-tRNA synthetase
hsa-miR-508-3p	0	0	1	1	1	1	RARRES1	retinoic acid receptor responder (tazarotene induced) 1
hsa-miR-508-3p	1	0	1	0	1	1	SCN9A	sodium channel, voltage-gated, type IX, alpha subunit
hsa-miR-508-3p	1	0	1	1	1	1	CCL1	chemokine (C-C motif) ligand 1
hsa-miR-508-3p	1	0	1	0	1	1	ST6GAL1	ST6 beta-galactosamide alpha-2,6-sialyltranferase 1
hsa-miR-508-3p	1	0	1	0	1	1	SOX11	SRY (sex determining region Y)-box 11
hsa-miR-508-3p	0	0	1	1	1	1	SPAG1	sperm associated antigen 1
hsa-miR-508-3p	1	0	1	1	1	1	SRPR	signal recognition particle receptor (docking protein)
hsa-miR-508-3p	1	0	1	0	1	1	RPS6KB1	ribosomal protein S6 kinase, 70kDa, polypeptide 1
hsa-miR-508-3p	0	0	1	0	1	1	TDGF1	teratocarcinoma-derived growth factor 1
hsa-miR-508-3p	1	0	1	1	1	1	UBE2B	ubiquitin-conjugating enzyme E2B
hsa-miR-508-3p	1	0	1	0	1	1	ZIC1	Zic family member 1
hsa-miR-508-3p	1	0	1	0	1	1	BSN	bassoon (presynaptic cytomatrix protein)
hsa-miR-508-3p	1	0	1	1	1	1	FZD5	frizzled family receptor 5
hsa-miR-508-3p	1	0	1	1	1	1	NRIP1	nuclear receptor interacting protein 1
hsa-miR-508-3p	1	0	1	0	1	1	VAPA	VAMP (vesicle-associated membrane protein)-associated protein A, 33kDa
hsa-miR-508-3p	1	0	1	1	1	1	DYRK2	dual-specificity tyrosine-(Y)-phosphorylation regulated kinase 2
hsa-miR-508-3p	1	0	1	0	1	1	CUL3	cullin 3
hsa-miR-508-3p	0	0	1	1	1	1	SUCLA2	succinate-CoA ligase, ADP-forming, beta subunit
hsa-miR-508-3p	0	0	1	1	1	1	UBA3	ubiquitin-like modifier activating enzyme 3
hsa-miR-508-3p	1	0	1	1	1	1	BTAF1	BTAF1 RNA polymerase II, B-TFIID transcription factor-associated, 170kDa (Mot1 homolog, S. cerevisiae)
hsa-miR-508-3p	1	0	1	0	1	1	DGKB	diacylglycerol kinase, beta 90kDa
hsa-miR-508-3p	1	0	1	0	1	1	SLC1A2	solute carrier family 1 (glial high affinity glutamate transporter), member 2
hsa-miR-508-3p	1	0	1	1	1	1	MFHAS1	malignant fibrous histiocytoma amplified sequence 1
hsa-miR-508-3p	1	0	1	0	1	1	MED14	mediator complex subunit 14
hsa-miR-508-3p	1	0	1	0	1	1	AKAP6	A kinase (PRKA) anchor protein 6
hsa-miR-508-3p	0	0	1	1	1	1	COL12A1	collagen, type XII, alpha 1
hsa-miR-508-3p	1	0	1	1	1	1	ERG	v-ets erythroblastosis virus E26 oncogene homolog (avian)
hsa-miR-508-3p	1	0	1	0	1	1	ACSL4	acyl-CoA synthetase long-chain family member 4
hsa-miR-508-3p	1	0	1	1	1	1	FLOT2	flotillin 2
hsa-miR-508-3p	0	0	1	1	0	0	MOCS2	molybdenum cofactor synthesis 2
hsa-miR-508-3p	0	0	1	0	0	0	XKRY	XK, Kell blood group complex subunit-related, Y-linked
hsa-miR-508-3p	1	0	1	1	1	1	SPARCL1	SPARC-like 1 (hevin)
hsa-miR-508-3p	1	0	1	1	1	1	DCLK1	doublecortin-like kinase 1
hsa-miR-508-3p	1	0	1	1	1	1	XPR1	xenotropic and polytropic retrovirus receptor 1
hsa-miR-508-3p	0	0	1	1	1	1	GCM2	glial cells missing homolog 2 (Drosophila)
hsa-miR-508-3p	1	0	1	0	1	1	VAMP3	vesicle-associated membrane protein 3 (cellubrevin)
hsa-miR-508-3p	0	0	1	1	0	0	SLC22A14	solute carrier family 22, member 14
hsa-miR-508-3p	1	0	1	0	1	1	CDYL	chromodomain protein, Y-like
hsa-miR-508-3p	1	0	1	1	1	1	ONECUT2	one cut homeobox 2
hsa-miR-508-3p	1	0	1	1	1	1	KIF23	kinesin family member 23
hsa-miR-508-3p	0	0	1	1	1	1	CLCA3P	chloride channel accessory 3, pseudogene
hsa-miR-508-3p	0	0	1	0	1	1	DSC2	desmocollin 2
hsa-miR-508-3p	1	0	1	1	1	1	HS3ST1	heparan sulfate (glucosamine) 3-O-sulfotransferase 1
hsa-miR-508-3p	0	0	1	1	1	1	CLEC2B	C-type lectin domain family 2, member B
hsa-miR-508-3p	0	0	1	1	1	1	FGFBP1	fibroblast growth factor binding protein 1
hsa-miR-508-3p	1	0	1	1	1	1	BMI1	BMI1 polycomb ring finger oncogene
hsa-miR-508-3p	0	0	1	1	1	1	CA3	carbonic anhydrase III, muscle specific
hsa-miR-508-3p	1	0	1	1	1	1	GABPB1	GA binding protein transcription factor, beta subunit 1
hsa-miR-508-3p	0	0	1	1	1	1	MSTN	myostatin
hsa-miR-508-3p	1	0	1	1	1	1	GFRA1	GDNF family receptor alpha 1
hsa-miR-508-3p	0	0	1	1	1	1	PDIA3	protein disulfide isomerase family A, member 3
hsa-miR-508-3p	0	0	1	1	1	1	GRPR	gastrin-releasing peptide receptor
hsa-miR-508-3p	1	0	1	0	1	1	CCDC6	coiled-coil domain containing 6
hsa-miR-508-3p	0	0	1	1	1	1	PAPSS1	3'-phosphoadenosine 5'-phosphosulfate synthase 1
hsa-miR-508-3p	1	0	1	1	1	1	SCARB2	scavenger receptor class B, member 2
hsa-miR-508-3p	1	0	1	1	1	1	GTF2E1	general transcription factor IIE, polypeptide 1, alpha 56kDa
hsa-miR-508-3p	1	0	1	1	1	1	HOXA1	homeobox A1
hsa-miR-508-3p	1	0	1	1	1	1	LPP	LIM domain containing preferred translocation partner in lipoma
hsa-miR-508-3p	1	0	1	1	1	1	NHLH2	nescient helix loop helix 2
hsa-miR-508-3p	0	0	1	1	0	0	NR2F1	nuclear receptor subfamily 2, group F, member 1
hsa-miR-508-3p	1	0	1	0	1	1	TSPAN2	tetraspanin 2
hsa-miR-508-3p	1	0	1	1	1	1	ACTR1A	ARP1 actin-related protein 1 homolog A, centractin alpha (yeast)
hsa-miR-508-3p	1	0	1	0	1	1	CLEC3A	C-type lectin domain family 3, member A
hsa-miR-508-3p	0	0	1	1	1	1	SLC17A2	solute carrier family 17 (sodium phosphate), member 2
hsa-miR-508-3p	1	0	1	1	1	1	GLYAT	glycine-N-acyltransferase
hsa-miR-508-3p	1	0	1	0	1	1	SPRY3	sprouty homolog 3 (Drosophila)
hsa-miR-508-3p	1	0	1	1	1	1	BET1	blocked early in transport 1 homolog (S. cerevisiae)
hsa-miR-508-3p	0	0	1	1	0	0	MT1G	metallothionein 1G
hsa-miR-508-3p	1	0	1	1	1	1	MTF1	metal-regulatory transcription factor 1
hsa-miR-508-3p	1	0	1	0	1	1	NAB1	NGFI-A binding protein 1 (EGR1 binding protein 1)
hsa-miR-508-3p	0	0	1	1	1	1	UQCRFS1	ubiquinol-cytochrome c reductase, Rieske iron-sulfur polypeptide 1
hsa-miR-508-3p	1	0	1	1	1	1	DNAJB1	DnaJ (Hsp40) homolog, subfamily B, member 1
hsa-miR-508-3p	1	0	1	1	1	1	NEFL	neurofilament, light polypeptide
hsa-miR-508-3p	1	0	1	1	1	1	NEUROD2	neuronal differentiation 2
hsa-miR-508-3p	1	0	1	1	1	1	ORC2	origin recognition complex, subunit 2
hsa-miR-508-3p	1	0	1	0	1	1	PPP1R2	protein phosphatase 1, regulatory (inhibitor) subunit 2
hsa-miR-508-3p	1	0	1	1	1	1	PKN2	protein kinase N2
hsa-miR-508-3p	1	0	1	1	1	1	TIMM17A	translocase of inner mitochondrial membrane 17 homolog A (yeast)
hsa-miR-508-3p	1	0	1	1	1	1	NEBL	nebulette
hsa-miR-508-3p	0	0	1	1	0	0	AKAP3	A kinase (PRKA) anchor protein 3
hsa-miR-508-3p	1	0	1	1	1	1	HEXIM1	hexamethylene bis-acetamide inducible 1
hsa-miR-508-3p	1	0	1	1	1	1	DYNLT3	dynein, light chain, Tctex-type 3
hsa-miR-508-3p	1	0	1	1	1	1	ELL	elongation factor RNA polymerase II
hsa-miR-508-3p	0	0	1	1	0	0	MIA	melanoma inhibitory activity
hsa-miR-508-3p	1	0	1	0	1	1	IGF2BP1	insulin-like growth factor 2 mRNA binding protein 1
hsa-miR-508-3p	1	0	1	1	1	1	CTCF	CCCTC-binding factor (zinc finger protein)
hsa-miR-508-3p	0	0	1	1	1	1	JTB	jumping translocation breakpoint
hsa-miR-508-3p	0	0	1	0	1	1	SUB1	SUB1 homolog (S. cerevisiae)
hsa-miR-508-3p	1	0	1	1	1	1	DIAPH2	diaphanous homolog 2 (Drosophila)
hsa-miR-508-3p	1	0	1	1	1	1	HIVEP2	human immunodeficiency virus type I enhancer binding protein 2
hsa-miR-508-3p	0	0	1	1	1	1	SSFA2	sperm specific antigen 2
hsa-miR-508-3p	1	0	1	1	1	1	BTG2	BTG family, member 2
hsa-miR-508-3p	1	0	1	1	1	1	ZBTB33	zinc finger and BTB domain containing 33
hsa-miR-508-3p	1	0	1	1	1	1	FERMT2	fermitin family member 2
hsa-miR-508-3p	1	0	1	0	1	1	SLC5A3	solute carrier family 5 (sodium/myo-inositol cotransporter), member 3
hsa-miR-508-3p	1	0	1	1	1	1	NR4A3	nuclear receptor subfamily 4, group A, member 3
hsa-miR-508-3p	1	0	1	1	1	1	ADAMTS1	ADAM metallopeptidase with thrombospondin type 1 motif, 1
hsa-miR-508-3p	1	0	1	1	1	1	DDX52	DEAD (Asp-Glu-Ala-Asp) box polypeptide 52
hsa-miR-508-3p	1	0	1	1	1	1	ABHD2	abhydrolase domain containing 2
hsa-miR-508-3p	1	0	1	1	1	1	ESM1	endothelial cell-specific molecule 1
hsa-miR-508-3p	1	0	1	1	1	1	UBL3	ubiquitin-like 3
hsa-miR-508-3p	1	0	1	1	1	1	ZIC2	Zic family member 2
hsa-miR-508-3p	0	0	1	1	1	1	WIF1	WNT inhibitory factor 1
hsa-miR-508-3p	1	0	1	1	1	1	CA5B	carbonic anhydrase VB, mitochondrial
hsa-miR-508-3p	0	0	1	1	1	1	SLC6A14	solute carrier family 6 (amino acid transporter), member 14
hsa-miR-508-3p	1	0	1	1	1	1	KLF12	Kruppel-like factor 12
hsa-miR-508-3p	1	0	1	1	1	1	TARDBP	TAR DNA binding protein
hsa-miR-508-3p	1	0	1	0	1	1	ZFPM2	zinc finger protein, multitype 2
hsa-miR-508-3p	0	0	1	1	1	1	EHF	ets homologous factor
hsa-miR-508-3p	1	0	1	0	1	1	EIF2C2	eukaryotic translation initiation factor 2C, 2
hsa-miR-508-3p	1	0	1	1	1	1	MGEA5	meningioma expressed antigen 5 (hyaluronidase)
hsa-miR-508-3p	1	0	1	1	1	1	RHOQ	ras homolog family member Q
hsa-miR-508-3p	1	0	1	1	1	1	HEY2	hairy/enhancer-of-split related with YRPW motif 2
hsa-miR-508-3p	1	0	1	1	1	1	LAMP5	lysosomal-associated membrane protein family, member 5
hsa-miR-508-3p	1	0	1	1	1	1	HS2ST1	heparan sulfate 2-O-sulfotransferase 1
hsa-miR-508-3p	0	0	1	1	1	1	IL36RN	interleukin 36 receptor antagonist
hsa-miR-508-3p	1	0	1	1	1	1	KCND2	potassium voltage-gated channel, Shal-related subfamily, member 2
hsa-miR-508-3p	1	0	1	0	1	1	ACAP2	ArfGAP with coiled-coil, ankyrin repeat and PH domains 2
hsa-miR-508-3p	1	0	1	1	1	1	NUFIP1	nuclear fragile X mental retardation protein interacting protein 1
hsa-miR-508-3p	1	0	1	0	1	1	FLRT2	fibronectin leucine rich transmembrane protein 2
hsa-miR-508-3p	1	0	1	1	1	1	STK39	serine threonine kinase 39
hsa-miR-508-3p	1	0	1	1	1	1	CLCF1	cardiotrophin-like cytokine factor 1
hsa-miR-508-3p	1	0	1	1	1	1	PPARGC1A	peroxisome proliferator-activated receptor gamma, coactivator 1 alpha
hsa-miR-508-3p	0	0	1	1	1	1	PURG	purine-rich element binding protein G
hsa-miR-508-3p	0	0	1	1	1	1	PCOLCE2	procollagen C-endopeptidase enhancer 2
hsa-miR-508-3p	1	0	1	0	1	1	TRHDE	thyrotropin-releasing hormone degrading enzyme
hsa-miR-508-3p	0	0	1	1	1	1	PRICKLE4	prickle homolog 4 (Drosophila)
hsa-miR-508-3p	1	0	1	1	1	1	LRP12	low density lipoprotein receptor-related protein 12
hsa-miR-508-3p	1	0	1	0	1	1	C16orf72	chromosome 16 open reading frame 72
hsa-miR-508-3p	0	0	1	0	1	1	SCN8A	sodium channel, voltage gated, type VIII, alpha subunit
hsa-miR-508-3p	1	0	1	1	1	1	CELSR1	cadherin, EGF LAG seven-pass G-type receptor 1 (flamingo homolog, Drosophila)
hsa-miR-508-3p	1	0	1	0	1	1	ODZ1	odz, odd Oz/ten-m homolog 1 (Drosophila)
hsa-miR-508-3p	0	0	1	1	1	1	ADAM28	ADAM metallopeptidase domain 28
hsa-miR-508-3p	1	0	1	1	1	1	CORO1C	coronin, actin binding protein, 1C
hsa-miR-508-3p	1	0	1	1	1	1	LHX6	LIM homeobox 6
hsa-miR-508-3p	1	0	1	0	1	1	DIEXF	digestive organ expansion factor homolog (zebrafish)
hsa-miR-508-3p	1	0	1	1	1	1	AFF4	AF4/FMR2 family, member 4
hsa-miR-508-3p	0	0	1	1	0	0	SIT1	signaling threshold regulating transmembrane adaptor 1
hsa-miR-508-3p	1	0	1	1	1	1	KLHL20	kelch-like 20 (Drosophila)
hsa-miR-508-3p	1	0	1	1	1	1	RND1	Rho family GTPase 1
hsa-miR-508-3p	1	0	1	1	1	1	CDR2L	cerebellar degeneration-related protein 2-like
hsa-miR-508-3p	1	0	1	1	1	1	ZNF592	zinc finger protein 592
hsa-miR-508-3p	1	0	1	1	1	1	KDM4A	lysine (K)-specific demethylase 4A
hsa-miR-508-3p	0	0	1	0	1	1	KNTC1	kinetochore associated 1
hsa-miR-508-3p	1	0	1	0	1	1	MAML1	mastermind-like 1 (Drosophila)
hsa-miR-508-3p	0	0	1	1	1	1	TATDN2	TatD DNase domain containing 2
hsa-miR-508-3p	1	0	1	1	1	1	FCHSD2	FCH and double SH3 domains 2
hsa-miR-508-3p	1	0	1	0	1	1	LPPR4	lipid phosphate phosphatase-related protein type 4
hsa-miR-508-3p	0	0	1	1	1	1	N4BP2L2	NEDD4 binding protein 2-like 2
hsa-miR-508-3p	1	0	1	0	1	1	ICK	intestinal cell (MAK-like) kinase
hsa-miR-508-3p	1	0	1	1	1	1	PHLPP2	PH domain and leucine rich repeat protein phosphatase 2
hsa-miR-508-3p	1	0	1	1	1	1	PIKFYVE	phosphoinositide kinase, FYVE finger containing
hsa-miR-508-3p	1	0	1	1	1	1	TRAK2	trafficking protein, kinesin binding 2
hsa-miR-508-3p	1	0	1	1	1	1	ERP44	endoplasmic reticulum protein 44
hsa-miR-508-3p	1	0	1	1	1	1	SMG1	smg-1 homolog, phosphatidylinositol 3-kinase-related kinase (C. elegans)
hsa-miR-508-3p	1	0	1	1	1	1	TAB2	TGF-beta activated kinase 1/MAP3K7 binding protein 2
hsa-miR-508-3p	0	0	1	0	0	0	SLC35D1	solute carrier family 35 (UDP-glucuronic acid/UDP-N-acetylgalactosamine dual transporter), member D1
hsa-miR-508-3p	1	0	1	1	1	1	TRIM9	tripartite motif containing 9
hsa-miR-508-3p	1	0	1	1	1	1	PLCB1	phospholipase C, beta 1 (phosphoinositide-specific)
hsa-miR-508-3p	1	0	1	0	1	1	KHNYN	KH and NYN domain containing
hsa-miR-508-3p	1	0	1	0	1	1	ARHGEF12	Rho guanine nucleotide exchange factor (GEF) 12
hsa-miR-508-3p	0	0	1	1	1	1	ADNP	activity-dependent neuroprotector homeobox
hsa-miR-508-3p	1	0	1	1	1	1	MOB4	MOB family member 4, phocein
hsa-miR-508-3p	1	0	1	1	1	1	CNOT6	CCR4-NOT transcription complex, subunit 6
hsa-miR-508-3p	1	0	1	1	1	1	NSL1	NSL1, MIND kinetochore complex component, homolog (S. cerevisiae)
hsa-miR-508-3p	1	0	1	0	1	1	GLCE	glucuronic acid epimerase
hsa-miR-508-3p	1	0	1	1	1	1	LRRTM2	leucine rich repeat transmembrane neuronal 2
hsa-miR-508-3p	1	0	1	1	1	1	TOR1AIP1	torsin A interacting protein 1
hsa-miR-508-3p	1	0	1	0	1	1	RRM2B	ribonucleotide reductase M2 B (TP53 inducible)
hsa-miR-508-3p	1	0	1	1	1	1	WT1-AS	WT1 antisense RNA
hsa-miR-508-3p	0	0	1	1	1	1	ISOC1	isochorismatase domain containing 1
hsa-miR-508-3p	1	0	1	0	1	1	CNR1	cannabinoid receptor 1 (brain)
hsa-miR-508-3p	1	0	1	1	1	1	NLK	nemo-like kinase
hsa-miR-508-3p	1	0	1	0	1	1	HPCAL4	hippocalcin like 4
hsa-miR-508-3p	1	0	1	1	1	1	TOB2	transducer of ERBB2, 2
hsa-miR-508-3p	0	0	1	1	1	1	CENPF	centromere protein F, 350/400kDa (mitosin)
hsa-miR-508-3p	0	0	1	1	1	1	PIPOX	pipecolic acid oxidase
hsa-miR-508-3p	1	0	1	0	1	1	RAB8B	RAB8B, member RAS oncogene family
hsa-miR-508-3p	0	0	1	1	1	1	PRKAG3	protein kinase, AMP-activated, gamma 3 non-catalytic subunit
hsa-miR-508-3p	0	0	1	1	1	1	RAB39A	RAB39A, member RAS oncogene family
hsa-miR-508-3p	0	0	1	1	1	1	HYDIN	HYDIN, axonemal central pair apparatus protein
hsa-miR-508-3p	1	0	1	1	1	1	DIRAS2	DIRAS family, GTP-binding RAS-like 2
hsa-miR-508-3p	1	0	1	0	1	1	EIF2C4	eukaryotic translation initiation factor 2C, 4
hsa-miR-508-3p	1	0	1	1	1	1	ZNF280C	zinc finger protein 280C
hsa-miR-508-3p	0	0	1	1	1	1	MTMR8	myotubularin related protein 8
hsa-miR-508-3p	1	0	1	0	1	1	DCAF16	DDB1 and CUL4 associated factor 16
hsa-miR-508-3p	0	0	1	1	1	1	WHSC1L1	Wolf-Hirschhorn syndrome candidate 1-like 1
hsa-miR-508-3p	0	0	1	1	1	1	YEATS2	YEATS domain containing 2
hsa-miR-508-3p	0	0	1	1	0	0	CEP55	centrosomal protein 55kDa
hsa-miR-508-3p	0	0	1	1	1	1	TMLHE	trimethyllysine hydroxylase, epsilon
hsa-miR-508-3p	1	0	1	0	1	1	PARVA	parvin, alpha
hsa-miR-508-3p	1	0	1	1	1	1	PI4K2B	phosphatidylinositol 4-kinase type 2 beta
hsa-miR-508-3p	1	0	1	1	1	1	C9orf72	chromosome 9 open reading frame 72
hsa-miR-508-3p	1	0	1	1	1	1	KIAA1598	KIAA1598
hsa-miR-508-3p	0	0	1	1	1	1	TMEM144	transmembrane protein 144
hsa-miR-508-3p	1	0	1	1	1	1	RSBN1	round spermatid basic protein 1
hsa-miR-508-3p	0	0	1	0	1	1	BLOC1S4	biogenesis of lysosomal organelles complex-1, subunit 4, cappuccino
hsa-miR-508-3p	1	0	1	0	1	1	TMEM106B	transmembrane protein 106B
hsa-miR-508-3p	1	0	1	1	1	1	EPB41L4B	erythrocyte membrane protein band 4.1 like 4B
hsa-miR-508-3p	0	0	1	1	1	1	ALG13	asparagine-linked glycosylation 13 homolog (S. cerevisiae)
hsa-miR-508-3p	1	0	1	0	1	1	TMEM55A	transmembrane protein 55A
hsa-miR-508-3p	1	0	1	0	1	1	CYCS	cytochrome c, somatic
hsa-miR-508-3p	1	0	1	1	0	0	GPR173	G protein-coupled receptor 173
hsa-miR-508-3p	1	0	1	0	1	1	CCDC93	coiled-coil domain containing 93
hsa-miR-508-3p	0	0	1	1	1	1	RNF20	ring finger protein 20, E3 ubiquitin protein ligase
hsa-miR-508-3p	1	0	1	1	1	1	SERTAD4	SERTA domain containing 4
hsa-miR-508-3p	0	0	1	1	0	0	BARHL2	BarH-like homeobox 2
hsa-miR-508-3p	0	0	1	0	1	1	ZC3HAV1	zinc finger CCCH-type, antiviral 1
hsa-miR-508-3p	1	0	1	0	1	1	PMEPA1	prostate transmembrane protein, androgen induced 1
hsa-miR-508-3p	0	0	1	1	1	1	MEPE	matrix extracellular phosphoglycoprotein
hsa-miR-508-3p	0	0	1	1	0	0	MRPL1	mitochondrial ribosomal protein L1
hsa-miR-508-3p	1	0	1	1	1	1	KIAA1244	KIAA1244
hsa-miR-508-3p	0	0	1	1	0	0	ENTPD7	ectonucleoside triphosphate diphosphohydrolase 7
hsa-miR-508-3p	0	0	1	1	1	1	PDSS2	prenyl (decaprenyl) diphosphate synthase, subunit 2
hsa-miR-508-3p	1	0	1	0	1	1	FAM40B	family with sequence similarity 40, member B
hsa-miR-508-3p	1	0	1	1	1	1	ZNF608	zinc finger protein 608
hsa-miR-508-3p	0	0	1	0	1	1	SERINC1	serine incorporator 1
hsa-miR-508-3p	1	0	1	0	1	1	NUFIP2	nuclear fragile X mental retardation protein interacting protein 2
hsa-miR-508-3p	1	0	1	0	1	1	ALPK3	alpha-kinase 3
hsa-miR-508-3p	1	0	1	0	1	1	SYT4	synaptotagmin IV
hsa-miR-508-3p	1	0	1	0	1	1	WDFY1	WD repeat and FYVE domain containing 1
hsa-miR-508-3p	1	0	1	1	1	1	ZFP14	zinc finger protein 14 homolog (mouse)
hsa-miR-508-3p	1	0	1	1	1	1	FAM160B1	family with sequence similarity 160, member B1
hsa-miR-508-3p	0	0	1	0	1	1	PSG3	pregnancy specific beta-1-glycoprotein 3
hsa-miR-508-3p	1	0	1	1	1	1	SNTB1	syntrophin, beta 1 (dystrophin-associated protein A1, 59kDa, basic component 1)
hsa-miR-508-3p	1	0	1	0	1	1	RAP2A	RAP2A, member of RAS oncogene family
hsa-miR-508-3p	1	0	1	1	1	1	MTMR3	myotubularin related protein 3
hsa-miR-508-3p	1	0	1	1	1	1	ADCY1	adenylate cyclase 1 (brain)
hsa-miR-508-3p	0	0	1	1	1	1	RNASEL	ribonuclease L (2',5'-oligoisoadenylate synthetase-dependent)
hsa-miR-508-3p	0	0	1	0	1	1	MS4A7	membrane-spanning 4-domains, subfamily A, member 7
hsa-miR-508-3p	1	0	1	1	1	1	RPRD1B	regulation of nuclear pre-mRNA domain containing 1B
hsa-miR-508-3p	0	0	1	1	1	1	PRDM13	PR domain containing 13
hsa-miR-508-3p	0	0	1	0	1	1	CFL2	cofilin 2 (muscle)
hsa-miR-508-3p	1	0	1	1	1	1	SEC24A	SEC24 family, member A (S. cerevisiae)
hsa-miR-508-3p	1	0	1	0	1	1	CERS2	ceramide synthase 2
hsa-miR-508-3p	1	0	1	1	1	1	TXNDC5	thioredoxin domain containing 5 (endoplasmic reticulum)
hsa-miR-508-3p	1	0	1	1	1	1	SNX16	sorting nexin 16
hsa-miR-508-3p	1	0	1	1	1	1	HIF3A	hypoxia inducible factor 3, alpha subunit
hsa-miR-508-3p	0	0	1	1	0	0	MMP25	matrix metallopeptidase 25
hsa-miR-508-3p	1	0	1	1	1	1	PRRX1	paired related homeobox 1
hsa-miR-508-3p	1	0	1	1	1	1	S100PBP	S100P binding protein
hsa-miR-508-3p	1	0	1	0	1	1	USP46	ubiquitin specific peptidase 46
hsa-miR-508-3p	0	0	1	1	1	1	C8orf33	chromosome 8 open reading frame 33
hsa-miR-508-3p	1	0	1	1	1	1	GRAMD3	GRAM domain containing 3
hsa-miR-508-3p	0	0	1	1	1	1	HTR5A	5-hydroxytryptamine (serotonin) receptor 5A, G protein-coupled
hsa-miR-508-3p	0	0	1	1	0	0	C7orf25	chromosome 7 open reading frame 25
hsa-miR-508-3p	0	0	1	1	0	0	DCTN3	dynactin 3 (p22)
hsa-miR-508-3p	0	0	1	1	1	1	CEP70	centrosomal protein 70kDa
hsa-miR-508-3p	1	0	1	1	1	1	HOXD1	homeobox D1
hsa-miR-508-3p	1	0	1	1	1	1	LRRC2	leucine rich repeat containing 2
hsa-miR-508-3p	1	0	1	1	1	1	ARSJ	arylsulfatase family, member J
hsa-miR-508-3p	1	0	1	0	1	1	PLEKHF2	pleckstrin homology domain containing, family F (with FYVE domain) member 2
hsa-miR-508-3p	1	0	1	0	1	1	ZFHX4	zinc finger homeobox 4
hsa-miR-508-3p	1	0	1	0	1	1	MOB3B	MOB kinase activator 3B
hsa-miR-508-3p	0	0	1	1	1	1	WDR78	WD repeat domain 78
hsa-miR-508-3p	0	0	1	1	1	1	BTNL8	butyrophilin-like 8
hsa-miR-508-3p	1	0	1	1	1	1	CPED1	cadherin-like and PC-esterase domain containing 1
hsa-miR-508-3p	1	0	1	0	1	1	NAA25	N(alpha)-acetyltransferase 25, NatB auxiliary subunit
hsa-miR-508-3p	1	0	1	0	1	1	VCPIP1	valosin containing protein (p97)/p47 complex interacting protein 1
hsa-miR-508-3p	1	0	1	0	1	1	EDEM3	ER degradation enhancer, mannosidase alpha-like 3
hsa-miR-508-3p	0	0	1	1	0	0	WNT10A	wingless-type MMTV integration site family, member 10A
hsa-miR-508-3p	1	0	1	1	1	1	TNKS2	tankyrase, TRF1-interacting ankyrin-related ADP-ribose polymerase 2
hsa-miR-508-3p	1	0	1	1	1	1	BTBD1	BTB (POZ) domain containing 1
hsa-miR-508-3p	1	0	1	0	1	1	SETD7	SET domain containing (lysine methyltransferase) 7
hsa-miR-508-3p	1	0	1	1	1	1	SNX27	sorting nexin family member 27
hsa-miR-508-3p	0	0	1	1	1	1	KRTAP1-1	keratin associated protein 1-1
hsa-miR-508-3p	0	0	1	1	0	0	KCNK17	potassium channel, subfamily K, member 17
hsa-miR-508-3p	1	0	1	0	1	1	SH3BGRL2	SH3 domain binding glutamic acid-rich protein like 2
hsa-miR-508-3p	0	0	1	1	1	1	MAGT1	magnesium transporter 1
hsa-miR-508-3p	0	0	1	1	1	1	RNASEH2C	ribonuclease H2, subunit C
hsa-miR-508-3p	1	0	1	1	1	1	ANTXR1	anthrax toxin receptor 1
hsa-miR-508-3p	1	0	1	0	1	1	FAR1	fatty acyl CoA reductase 1
hsa-miR-508-3p	1	0	1	1	1	1	ZNRF1	zinc and ring finger 1, E3 ubiquitin protein ligase
hsa-miR-508-3p	1	0	1	1	1	1	BRMS1L	breast cancer metastasis-suppressor 1-like
hsa-miR-508-3p	0	0	1	1	1	1	MAML2	mastermind-like 2 (Drosophila)
hsa-miR-508-3p	1	0	1	1	1	1	SYVN1	synovial apoptosis inhibitor 1, synoviolin
hsa-miR-508-3p	0	0	1	1	1	1	SPZ1	spermatogenic leucine zipper 1
hsa-miR-508-3p	1	0	1	0	1	1	PPP1R15B	protein phosphatase 1, regulatory subunit 15B
hsa-miR-508-3p	0	0	1	1	1	1	C13orf33	chromosome 13 open reading frame 33
hsa-miR-508-3p	1	0	1	0	1	1	UBASH3B	ubiquitin associated and SH3 domain containing B
hsa-miR-508-3p	0	0	1	1	1	1	POLR2J2	polymerase (RNA) II (DNA directed) polypeptide J2
hsa-miR-508-3p	1	0	1	1	1	1	PCDH11Y	protocadherin 11 Y-linked
hsa-miR-508-3p	1	0	1	1	1	1	HIAT1	hippocampus abundant transcript 1
hsa-miR-508-3p	1	0	1	1	1	1	C5orf30	chromosome 5 open reading frame 30
hsa-miR-508-3p	1	0	1	0	1	1	PURB	purine-rich element binding protein B
hsa-miR-508-3p	1	0	1	1	1	1	XRCC6BP1	XRCC6 binding protein 1
hsa-miR-508-3p	1	0	1	1	1	1	EPT1	ethanolaminephosphotransferase 1 (CDP-ethanolamine-specific)
hsa-miR-508-3p	1	0	1	1	1	1	BRWD1	bromodomain and WD repeat domain containing 1
hsa-miR-508-3p	1	0	1	1	1	1	SLC2A13	solute carrier family 2 (facilitated glucose transporter), member 13
hsa-miR-508-3p	1	0	1	1	1	1	MAL2	mal, T-cell differentiation protein 2 (gene/pseudogene)
hsa-miR-508-3p	1	0	1	1	1	1	MBD6	methyl-CpG binding domain protein 6
hsa-miR-508-3p	0	0	1	1	1	1	PLEKHG4B	pleckstrin homology domain containing, family G (with RhoGef domain) member 4B
hsa-miR-508-3p	1	0	1	0	1	1	TMEM123	transmembrane protein 123
hsa-miR-508-3p	1	0	1	1	1	1	NAA15	N(alpha)-acetyltransferase 15, NatA auxiliary subunit
hsa-miR-508-3p	0	0	1	1	1	1	PPP4R4	protein phosphatase 4, regulatory subunit 4
hsa-miR-508-3p	1	0	1	1	1	1	SLC44A1	solute carrier family 44, member 1
hsa-miR-508-3p	1	0	1	1	1	1	KLHL6	kelch-like 6 (Drosophila)
hsa-miR-508-3p	1	0	1	1	0	0	MADD	MAP-kinase activating death domain
hsa-miR-508-3p	1	0	1	0	1	1	C5orf20	chromosome 5 open reading frame 20
hsa-miR-508-3p	1	0	1	1	1	1	WHSC1	Wolf-Hirschhorn syndrome candidate 1
hsa-miR-508-3p	0	0	1	1	1	1	ZNF431	zinc finger protein 431
hsa-miR-508-3p	1	0	1	1	1	1	ADAMTS19	ADAM metallopeptidase with thrombospondin type 1 motif, 19
hsa-miR-508-3p	0	0	1	1	1	1	CASC4	cancer susceptibility candidate 4
hsa-miR-508-3p	1	0	1	1	1	1	KCTD12	potassium channel tetramerisation domain containing 12
hsa-miR-508-3p	1	0	1	0	1	1	NUS1	nuclear undecaprenyl pyrophosphate synthase 1 homolog (S. cerevisiae)
hsa-miR-508-3p	1	0	1	1	1	1	MSR1	macrophage scavenger receptor 1
hsa-miR-508-3p	0	0	1	1	1	1	SLC25A46	solute carrier family 25, member 46
hsa-miR-508-3p	1	0	1	0	1	1	FCHO2	FCH domain only 2
hsa-miR-508-3p	1	0	1	1	1	1	MBOAT2	membrane bound O-acyltransferase domain containing 2
hsa-miR-508-3p	1	0	1	0	1	1	GIT2	G protein-coupled receptor kinase interacting ArfGAP 2
hsa-miR-508-3p	0	0	1	0	1	1	SLC17A8	solute carrier family 17 (sodium-dependent inorganic phosphate cotransporter), member 8
hsa-miR-508-3p	1	0	1	1	1	1	MAPK1IP1L	mitogen-activated protein kinase 1 interacting protein 1-like
hsa-miR-508-3p	1	0	1	1	1	1	RFTN2	raftlin family member 2
hsa-miR-508-3p	1	0	1	1	1	1	KCNH8	potassium voltage-gated channel, subfamily H (eag-related), member 8
hsa-miR-508-3p	0	0	1	1	0	0	PRKCDBP	protein kinase C, delta binding protein
hsa-miR-508-3p	1	0	1	1	1	1	UBQLNL	ubiquilin-like
hsa-miR-508-3p	1	0	1	0	1	1	ZBTB47	zinc finger and BTB domain containing 47
hsa-miR-508-3p	0	0	1	1	0	0	SENP8	SUMO/sentrin specific peptidase family member 8
hsa-miR-508-3p	1	0	1	1	1	1	MRPL30	mitochondrial ribosomal protein L30
hsa-miR-508-3p	0	0	1	1	1	1	DNAJC19	DnaJ (Hsp40) homolog, subfamily C, member 19
hsa-miR-508-3p	0	0	1	1	1	1	APOBEC3F	apolipoprotein B mRNA editing enzyme, catalytic polypeptide-like 3F
hsa-miR-508-3p	0	0	1	0	1	1	AFAP1L1	actin filament associated protein 1-like 1
hsa-miR-508-3p	1	0	1	1	1	1	ZSCAN29	zinc finger and SCAN domain containing 29
hsa-miR-508-3p	1	0	1	1	1	1	SLC16A14	solute carrier family 16, member 14 (monocarboxylic acid transporter 14)
hsa-miR-508-3p	0	0	1	1	1	1	C12orf50	chromosome 12 open reading frame 50
hsa-miR-508-3p	1	0	1	1	1	1	SPRED1	sprouty-related, EVH1 domain containing 1
hsa-miR-508-3p	0	0	1	1	1	1	C1orf177	chromosome 1 open reading frame 177
hsa-miR-508-3p	1	0	1	1	1	1	TCTEX1D1	Tctex1 domain containing 1
hsa-miR-508-3p	1	0	1	0	1	1	FAM116A	family with sequence similarity 116, member A
hsa-miR-508-3p	1	0	1	0	1	1	TMEM154	transmembrane protein 154
hsa-miR-508-3p	1	0	1	1	1	1	NXPH1	neurexophilin 1
hsa-miR-508-3p	1	0	1	0	1	1	TMEM196	transmembrane protein 196
hsa-miR-508-3p	0	0	1	1	1	1	ASPRV1	aspartic peptidase, retroviral-like 1
hsa-miR-508-3p	1	0	1	1	1	1	PDIK1L	PDLIM1 interacting kinase 1 like
hsa-miR-508-3p	0	0	1	1	1	1	COL6A5	collagen, type VI, alpha 5
hsa-miR-508-3p	0	0	1	1	1	1	BEND2	BEN domain containing 2
hsa-miR-508-3p	1	0	1	0	1	1	ZCCHC24	zinc finger, CCHC domain containing 24
hsa-miR-508-3p	0	0	1	0	1	1	LNX2	ligand of numb-protein X 2
hsa-miR-508-3p	1	0	1	1	1	1	NAP1L5	nucleosome assembly protein 1-like 5
hsa-miR-508-3p	0	0	1	1	1	1	WFDC13	WAP four-disulfide core domain 13
hsa-miR-508-3p	0	0	1	1	1	1	KLF17	Kruppel-like factor 17
hsa-miR-508-3p	1	0	1	1	1	1	TTBK2	tau tubulin kinase 2
hsa-miR-508-3p	1	0	1	0	1	1	RNF152	ring finger protein 152
hsa-miR-508-3p	1	0	1	1	1	1	DIP2B	DIP2 disco-interacting protein 2 homolog B (Drosophila)
hsa-miR-508-3p	0	0	1	1	1	1	C17orf78	chromosome 17 open reading frame 78
hsa-miR-508-3p	0	0	1	1	1	1	AQPEP	laeverin
hsa-miR-508-3p	1	0	1	1	1	1	UBR1	ubiquitin protein ligase E3 component n-recognin 1
hsa-miR-508-3p	1	0	1	1	1	1	SCN4B	sodium channel, voltage-gated, type IV, beta subunit
hsa-miR-508-3p	0	0	1	1	1	1	IL6ST	interleukin 6 signal transducer (gp130, oncostatin M receptor)
hsa-miR-508-3p	0	0	1	1	1	1	KRT79	keratin 79
hsa-miR-508-3p	0	0	1	1	1	1	IFNE	interferon, epsilon
hsa-miR-508-3p	1	0	1	1	1	1	STX12	syntaxin 12
hsa-miR-508-3p	1	0	1	1	1	1	LRRTM3	leucine rich repeat transmembrane neuronal 3
hsa-miR-508-3p	1	0	1	1	1	1	MARCH3	membrane-associated ring finger (C3HC4) 3, E3 ubiquitin protein ligase
hsa-miR-508-3p	0	0	1	1	1	1	ZNF831	zinc finger protein 831
hsa-miR-508-3p	0	0	1	1	0	0	C1orf64	chromosome 1 open reading frame 64
hsa-miR-508-3p	0	0	1	0	1	1	SLCO4C1	solute carrier organic anion transporter family, member 4C1
hsa-miR-508-3p	1	0	1	1	1	1	CREM	cAMP responsive element modulator
hsa-miR-508-3p	0	0	1	1	1	1	CCDC67	coiled-coil domain containing 67
hsa-miR-508-3p	1	0	1	1	1	1	SPRED2	sprouty-related, EVH1 domain containing 2
hsa-miR-508-3p	0	0	1	1	1	1	TMPRSS11B	transmembrane protease, serine 11B
hsa-miR-508-3p	1	0	1	1	1	1	ADAT2	adenosine deaminase, tRNA-specific 2
hsa-miR-508-3p	0	0	1	1	1	1	ZNF714	zinc finger protein 714
hsa-miR-508-3p	1	0	1	1	1	1	TMEM65	transmembrane protein 65
hsa-miR-508-3p	1	0	1	1	1	1	ADAMTS6	ADAM metallopeptidase with thrombospondin type 1 motif, 6
hsa-miR-508-3p	1	0	1	0	1	1	PTPLB	protein tyrosine phosphatase-like (proline instead of catalytic arginine), member b
hsa-miR-508-3p	1	0	1	0	1	1	NRK	Nik related kinase
hsa-miR-508-3p	1	0	1	0	1	1	FAM73A	family with sequence similarity 73, member A
hsa-miR-508-3p	1	0	1	0	1	1	ZC3H6	zinc finger CCCH-type containing 6
hsa-miR-508-3p	1	0	1	1	1	1	PTGER3	prostaglandin E receptor 3 (subtype EP3)
hsa-miR-508-3p	1	0	1	0	1	1	SS18L1	synovial sarcoma translocation gene on chromosome 18-like 1
hsa-miR-508-3p	0	0	1	1	1	1	THAP1	THAP domain containing, apoptosis associated protein 1
hsa-miR-508-3p	1	0	1	1	1	1	BLOC1S5	biogenesis of lysosomal organelles complex-1, subunit 5, muted
hsa-miR-508-3p	0	0	1	1	1	1	IKBIP	IKBKB interacting protein
hsa-miR-508-3p	0	0	1	1	0	0	HEATR4	HEAT repeat containing 4
hsa-miR-508-3p	1	0	1	1	1	1	IGSF1	immunoglobulin superfamily, member 1
hsa-miR-508-3p	1	0	1	1	1	1	ATRNL1	attractin-like 1
hsa-miR-508-3p	0	0	1	0	0	0	C16orf47	chromosome 16 open reading frame 47
hsa-miR-508-3p	1	0	1	1	1	1	C11orf87	chromosome 11 open reading frame 87
hsa-miR-508-3p	0	0	1	0	0	0	ESRRAP2	estrogen-related receptor alpha pseudogene 2
hsa-miR-508-3p	0	0	1	0	0	0	MIR155HG	MIR155 host gene (non-protein coding)
hsa-miR-508-3p	0	0	1	0	0	0	TTTY2	testis-specific transcript, Y-linked 2 (non-protein coding)
hsa-miR-508-3p	0	0	1	0	0	0	TTTY15	testis-specific transcript, Y-linked 15 (non-protein coding)
hsa-miR-508-3p	0	0	1	0	0	0	TTTY12	testis-specific transcript, Y-linked 12 (non-protein coding)
hsa-miR-508-3p	0	0	1	0	0	0	FAM224B	family with sequence similarity 224, member B (non-protein coding)
hsa-miR-508-3p	0	0	1	0	0	0	SUMO1P1	SUMO1 pseudogene 1
hsa-miR-508-3p	0	0	1	0	0	0	NXF4	nuclear RNA export factor 4 pseudogene
hsa-miR-508-3p	0	0	1	0	0	0	PDIA3P	protein disulfide isomerase family A, member 3 pseudogene
hsa-miR-508-3p	0	0	1	0	0	0	SNORD102	small nucleolar RNA, C/D box 102
hsa-miR-508-3p	0	0	1	0	0	0	DEFB122	defensin, beta 122 (pseudogene)
hsa-miR-508-3p	0	0	1	0	0	0	TDGF1P3	teratocarcinoma-derived growth factor 1 pseudogene 3
hsa-miR-508-3p	0	0	1	0	0	0	GABPAP	GA binding protein transcription factor, alpha subunit pseudogene
hsa-miR-508-3p	0	0	1	0	0	0	HNRNPA3P1	heterogeneous nuclear ribonucleoprotein A3 pseudogene 1
hsa-miR-508-3p	0	0	1	0	0	0	HYALP1	hyaluronoglucosaminidase pseudogene 1
hsa-miR-508-3p	0	0	1	0	0	0	SEPHS1P1	selenophosphate synthetase 1 pseudogene 1
hsa-miR-508-3p	0	0	1	0	0	0	TPTE2P6	transmembrane phosphoinositide 3-phosphatase and tensin homolog 2 pseudogene 6
hsa-miR-508-3p	0	0	1	0	0	0	AQP7P1	aquaporin 7 pseudogene 1
hsa-miR-508-3p	0	0	1	0	0	0	MALAT1	metastasis associated lung adenocarcinoma transcript 1 (non-protein coding)
hsa-miR-508-3p	0	0	1	0	0	0	SNORD116-28	small nucleolar RNA, C/D box 116-28
hsa-miR-508-3p	0	0	1	1	0	0	SNRPN	small nuclear ribonucleoprotein polypeptide N
hsa-miR-508-3p	0	0	0	1	0	0	QPCTL	glutaminyl-peptide cyclotransferase-like
hsa-miR-508-3p	0	0	1	1	0	0	RWDD2A	RWD domain containing 2A
hsa-miR-508-3p	0	0	1	1	0	0	VDAC3	voltage-dependent anion channel 3
hsa-miR-508-3p	0	0	1	1	1	1	STRAP	serine/threonine kinase receptor associated protein
hsa-miR-508-3p	0	0	1	1	0	0	ISOC2	isochorismatase domain containing 2
hsa-miR-508-3p	1	0	1	1	1	1	GOLGA5	golgin A5
hsa-miR-508-3p	0	0	0	1	0	0	METTL22	methyltransferase like 22
hsa-miR-508-3p	0	0	0	1	1	1	KRT20	keratin 20
hsa-miR-508-3p	0	0	1	1	0	0	NEB	nebulin
hsa-miR-508-3p	0	0	1	1	1	1	IMPG2	interphotoreceptor matrix proteoglycan 2
hsa-miR-508-3p	0	0	0	1	1	1	ESF1	ESF1, nucleolar pre-rRNA processing protein, homolog (S. cerevisiae)
hsa-miR-508-3p	0	0	1	1	0	0	SPAG7	sperm associated antigen 7
hsa-miR-508-3p	0	0	0	1	1	1	ADH7	alcohol dehydrogenase 7 (class IV), mu or sigma polypeptide
hsa-miR-508-3p	0	0	1	1	0	0	CDC6	cell division cycle 6 homolog (S. cerevisiae)
hsa-miR-508-3p	0	0	0	1	1	1	ZNF184	zinc finger protein 184
hsa-miR-508-3p	1	0	1	1	1	1	PPP6R2	protein phosphatase 6, regulatory subunit 2
hsa-miR-508-3p	1	0	0	1	1	1	NID2	nidogen 2 (osteonidogen)
hsa-miR-508-3p	1	0	0	1	1	1	SALL4	sal-like 4 (Drosophila)
hsa-miR-508-3p	0	0	0	1	0	0	CTSZ	cathepsin Z
hsa-miR-508-3p	0	0	0	1	0	0	PROKR2	prokineticin receptor 2
hsa-miR-508-3p	0	0	1	1	0	0	ACOT8	acyl-CoA thioesterase 8
hsa-miR-508-3p	0	0	1	1	0	0	PARD6A	par-6 partitioning defective 6 homolog alpha (C. elegans)
hsa-miR-508-3p	0	0	1	1	1	1	CMC2	COX assembly mitochondrial protein 2 homolog (S. cerevisiae)
hsa-miR-508-3p	0	0	1	1	1	1	DECR2	2,4-dienoyl CoA reductase 2, peroxisomal
hsa-miR-508-3p	0	0	1	1	0	0	CRYM	crystallin, mu
hsa-miR-508-3p	0	0	0	1	0	0	C19orf53	chromosome 19 open reading frame 53
hsa-miR-508-3p	0	0	1	1	1	1	CYP3A43	cytochrome P450, family 3, subfamily A, polypeptide 43
hsa-miR-508-3p	0	0	0	1	0	0	MYL10	myosin, light chain 10, regulatory
hsa-miR-508-3p	0	0	1	1	1	1	CHMP5	charged multivesicular body protein 5
hsa-miR-508-3p	0	0	1	1	0	0	KRT37	keratin 37
hsa-miR-508-3p	0	0	1	1	1	1	PF4V1	platelet factor 4 variant 1
hsa-miR-508-3p	0	0	0	1	0	0	APOC3	apolipoprotein C-III
hsa-miR-508-3p	1	0	1	1	1	1	SRSF9	serine/arginine-rich splicing factor 9
hsa-miR-508-3p	0	0	1	1	0	0	GPX5	glutathione peroxidase 5 (epididymal androgen-related protein)
hsa-miR-508-3p	0	0	1	1	0	0	C6orf108	chromosome 6 open reading frame 108
hsa-miR-508-3p	0	0	0	1	0	0	LTF	lactotransferrin
hsa-miR-508-3p	0	0	1	1	1	1	CPS1	carbamoyl-phosphate synthase 1, mitochondrial
hsa-miR-508-3p	1	0	1	1	1	1	TFPI	tissue factor pathway inhibitor (lipoprotein-associated coagulation inhibitor)
hsa-miR-508-3p	0	0	1	1	1	1	ATP6V0B	ATPase, H+ transporting, lysosomal 21kDa, V0 subunit b
hsa-miR-508-3p	0	0	1	1	1	1	MYL12B	myosin, light chain 12B, regulatory
hsa-miR-508-3p	0	0	0	1	0	0	IFI27L2	interferon, alpha-inducible protein 27-like 2
hsa-miR-508-3p	0	0	0	1	1	1	TTC21B	tetratricopeptide repeat domain 21B
hsa-miR-508-3p	0	0	0	1	0	0	IGFLR1	IGF-like family receptor 1
hsa-miR-508-3p	0	0	1	1	1	1	KLF2	Kruppel-like factor 2 (lung)
hsa-miR-508-3p	0	0	0	1	0	0	GNG13	guanine nucleotide binding protein (G protein), gamma 13
hsa-miR-508-3p	0	0	1	1	1	1	GNG11	guanine nucleotide binding protein (G protein), gamma 11
hsa-miR-508-3p	1	0	1	1	1	1	PIAS1	protein inhibitor of activated STAT, 1
hsa-miR-508-3p	0	0	1	1	0	0	COPB1	coatomer protein complex, subunit beta 1
hsa-miR-508-3p	1	0	1	1	1	1	DMXL2	Dmx-like 2
hsa-miR-508-3p	0	0	0	1	0	0	LILRA2	leukocyte immunoglobulin-like receptor, subfamily A (with TM domain), member 2
hsa-miR-508-3p	0	0	1	1	1	1	DHX29	DEAH (Asp-Glu-Ala-His) box polypeptide 29
hsa-miR-508-3p	0	0	1	1	0	0	TMCO6	transmembrane and coiled-coil domains 6
hsa-miR-508-3p	0	0	0	1	1	1	ZKSCAN3	zinc finger with KRAB and SCAN domains 3
hsa-miR-508-3p	0	0	0	1	1	1	APOC2	apolipoprotein C-II
hsa-miR-508-3p	0	0	1	1	1	1	ZNF557	zinc finger protein 557
hsa-miR-508-3p	0	0	1	1	0	0	BPIFB1	BPI fold containing family B, member 1
hsa-miR-508-3p	1	0	0	1	1	1	COQ3	coenzyme Q3 homolog, methyltransferase (S. cerevisiae)
hsa-miR-508-3p	0	0	0	1	0	0	MYBPH	myosin binding protein H
hsa-miR-508-3p	1	0	1	1	1	1	ARNTL	aryl hydrocarbon receptor nuclear translocator-like
hsa-miR-508-3p	0	0	0	1	1	1	TRPM1	transient receptor potential cation channel, subfamily M, member 1
hsa-miR-508-3p	0	0	1	1	1	1	DSG3	desmoglein 3
hsa-miR-508-3p	0	0	0	1	0	0	ANXA1	annexin A1
hsa-miR-508-3p	0	0	1	1	1	1	REV1	REV1, polymerase (DNA directed)
hsa-miR-508-3p	0	0	1	1	1	1	CHST12	carbohydrate (chondroitin 4) sulfotransferase 12
hsa-miR-508-3p	0	0	1	1	1	1	SKIL	SKI-like oncogene
hsa-miR-508-3p	0	0	0	1	1	1	IL36B	interleukin 36, beta
hsa-miR-508-3p	0	0	1	1	1	1	DDX60	DEAD (Asp-Glu-Ala-Asp) box polypeptide 60
hsa-miR-508-3p	0	0	1	1	1	1	MMP20	matrix metallopeptidase 20
hsa-miR-508-3p	0	0	1	1	1	1	SQRDL	sulfide quinone reductase-like (yeast)
hsa-miR-508-3p	0	0	1	1	1	1	PREPL	prolyl endopeptidase-like
hsa-miR-508-3p	0	0	1	1	1	1	EPYC	epiphycan
hsa-miR-508-3p	0	0	1	1	1	1	ASUN	asunder, spermatogenesis regulator homolog (Drosphila)
hsa-miR-508-3p	0	0	1	1	0	0	MNAT1	menage a trois homolog 1, cyclin H assembly factor (Xenopus laevis)
hsa-miR-508-3p	0	0	1	1	1	1	ZNF397	zinc finger protein 397
hsa-miR-508-3p	0	0	0	1	1	1	HEXB	hexosaminidase B (beta polypeptide)
hsa-miR-508-3p	0	0	1	1	1	1	CDK2AP1	cyclin-dependent kinase 2 associated protein 1
hsa-miR-508-3p	0	0	1	1	1	1	UTP6	UTP6, small subunit (SSU) processome component, homolog (yeast)
hsa-miR-508-3p	0	0	1	1	1	1	MYO9A	myosin IXA
hsa-miR-508-3p	0	0	0	1	1	1	RPE65	retinal pigment epithelium-specific protein 65kDa
hsa-miR-508-3p	0	0	0	1	0	0	HCK	hemopoietic cell kinase
hsa-miR-508-3p	0	0	1	1	0	0	EFCAB6	EF-hand calcium binding domain 6
hsa-miR-508-3p	0	0	1	1	1	1	MAU2	MAU2 chromatid cohesion factor homolog (C. elegans)
hsa-miR-508-3p	0	0	0	1	1	1	MAP2K2	mitogen-activated protein kinase kinase 2
hsa-miR-508-3p	0	0	1	1	0	0	FAM83E	family with sequence similarity 83, member E
hsa-miR-508-3p	0	0	1	1	0	0	PRPF31	PRP31 pre-mRNA processing factor 31 homolog (S. cerevisiae)
hsa-miR-508-3p	0	0	1	1	1	1	P4HA1	prolyl 4-hydroxylase, alpha polypeptide I
hsa-miR-508-3p	0	0	1	1	0	0	LPXN	leupaxin
hsa-miR-508-3p	0	0	1	1	1	1	HAT1	histone acetyltransferase 1
hsa-miR-508-3p	0	0	0	1	1	1	MCM6	minichromosome maintenance complex component 6
hsa-miR-508-3p	0	0	0	1	1	1	ORC4	origin recognition complex, subunit 4
hsa-miR-508-3p	0	0	1	1	0	0	ALMS1	Alstrom syndrome 1
hsa-miR-508-3p	0	0	1	1	0	0	CAD	carbamoyl-phosphate synthetase 2, aspartate transcarbamylase, and dihydroorotase
hsa-miR-508-3p	0	0	1	1	1	1	CCDC99	coiled-coil domain containing 99
hsa-miR-508-3p	0	0	1	1	1	1	SSBP1	single-stranded DNA binding protein 1, mitochondrial
hsa-miR-508-3p	1	0	1	1	1	1	WWP1	WW domain containing E3 ubiquitin protein ligase 1
hsa-miR-508-3p	0	0	1	1	0	0	PRDX5	peroxiredoxin 5
hsa-miR-508-3p	0	0	1	1	0	0	INTS9	integrator complex subunit 9
hsa-miR-508-3p	0	0	1	1	0	0	ABCB4	ATP-binding cassette, sub-family B (MDR/TAP), member 4
hsa-miR-508-3p	1	0	1	1	0	0	ANKIB1	ankyrin repeat and IBR domain containing 1
hsa-miR-508-3p	0	0	0	1	0	0	ACAT1	acetyl-CoA acetyltransferase 1
hsa-miR-508-3p	0	0	1	1	1	1	EXPH5	exophilin 5
hsa-miR-508-3p	1	0	1	1	0	0	KIAA1644	KIAA1644
hsa-miR-508-3p	0	0	1	1	1	1	AMDHD1	amidohydrolase domain containing 1
hsa-miR-508-3p	0	0	1	1	0	0	SYCP3	synaptonemal complex protein 3
hsa-miR-508-3p	1	0	1	1	1	1	RFX4	regulatory factor X, 4 (influences HLA class II expression)
hsa-miR-508-3p	0	0	0	1	0	0	ETFA	electron-transfer-flavoprotein, alpha polypeptide
hsa-miR-508-3p	0	0	1	1	1	1	WDR93	WD repeat domain 93
hsa-miR-508-3p	0	0	0	1	0	0	LOC113230	uncharacterized LOC113230
hsa-miR-508-3p	0	0	0	1	0	0	IL19	interleukin 19
hsa-miR-508-3p	0	0	1	1	1	1	CREG1	cellular repressor of E1A-stimulated genes 1
hsa-miR-508-3p	0	0	0	1	0	0	SLC27A3	solute carrier family 27 (fatty acid transporter), member 3
hsa-miR-508-3p	0	0	1	1	0	0	GC	group-specific component (vitamin D binding protein)
hsa-miR-508-3p	1	0	1	1	1	1	FGF18	fibroblast growth factor 18
hsa-miR-508-3p	0	0	0	1	0	0	GPR174	G protein-coupled receptor 174
hsa-miR-508-3p	0	0	1	1	0	0	MRPS28	mitochondrial ribosomal protein S28
hsa-miR-508-3p	1	0	1	1	1	1	FAM135B	family with sequence similarity 135, member B
hsa-miR-508-3p	0	0	0	1	1	1	ZNF214	zinc finger protein 214
hsa-miR-508-3p	0	0	0	1	0	0	TMCO3	transmembrane and coiled-coil domains 3
hsa-miR-508-3p	0	0	0	1	1	1	ZNF233	zinc finger protein 233
hsa-miR-508-3p	0	0	1	1	0	0	AGAP11	ankyrin repeat and GTPase domain Arf GTPase activating protein 11
hsa-miR-508-3p	0	0	1	1	0	0	NARS2	asparaginyl-tRNA synthetase 2, mitochondrial (putative)
hsa-miR-508-3p	0	0	1	1	1	1	SCLT1	sodium channel and clathrin linker 1
hsa-miR-508-3p	1	0	0	1	1	1	NCAPD3	non-SMC condensin II complex, subunit D3
hsa-miR-508-3p	0	0	1	1	1	1	SLC25A4	solute carrier family 25 (mitochondrial carrier; adenine nucleotide translocator), member 4
hsa-miR-508-3p	0	0	0	1	1	1	CCDC122	coiled-coil domain containing 122
hsa-miR-508-3p	0	0	1	1	1	1	XRCC4	X-ray repair complementing defective repair in Chinese hamster cells 4
hsa-miR-508-3p	0	0	1	1	1	1	CAST	calpastatin
hsa-miR-508-3p	0	0	1	1	1	1	CETN3	centrin, EF-hand protein, 3
hsa-miR-508-3p	0	0	1	1	1	1	PGM3	phosphoglucomutase 3
hsa-miR-508-3p	1	0	1	1	1	1	TOMM70A	translocase of outer mitochondrial membrane 70 homolog A (S. cerevisiae)
hsa-miR-508-3p	0	0	1	1	1	1	CEP112	centrosomal protein 112kDa
hsa-miR-508-3p	0	0	1	1	1	1	TMBIM4	transmembrane BAX inhibitor motif containing 4
hsa-miR-508-3p	0	0	1	1	0	0	C14orf2	chromosome 14 open reading frame 2
hsa-miR-508-3p	0	0	1	1	1	1	TDRD9	tudor domain containing 9
hsa-miR-508-3p	0	0	1	1	1	1	NSMCE2	non-SMC element 2, MMS21 homolog (S. cerevisiae)
hsa-miR-508-3p	0	0	0	1	0	0	CBR1	carbonyl reductase 1
hsa-miR-508-3p	0	0	1	1	1	1	CES5A	carboxylesterase 5A
hsa-miR-508-3p	0	0	0	1	0	0	ACE	angiotensin I converting enzyme (peptidyl-dipeptidase A) 1
hsa-miR-508-3p	1	0	1	1	0	0	KIAA0895L	KIAA0895-like
hsa-miR-508-3p	0	0	1	1	0	0	ATP13A1	ATPase type 13A1
hsa-miR-508-3p	0	0	0	1	0	0	KIR3DL3	killer cell immunoglobulin-like receptor, three domains, long cytoplasmic tail, 3
hsa-miR-508-3p	0	0	1	1	0	0	KIR2DS4	killer cell immunoglobulin-like receptor, two domains, short cytoplasmic tail, 4
hsa-miR-508-3p	0	0	0	1	1	1	KIR2DL1	killer cell immunoglobulin-like receptor, two domains, long cytoplasmic tail, 1
hsa-miR-508-3p	0	0	1	1	0	0	KIR2DL3	killer cell immunoglobulin-like receptor, two domains, long cytoplasmic tail, 3
hsa-miR-508-3p	0	0	0	1	1	1	PSG6	pregnancy specific beta-1-glycoprotein 6
hsa-miR-508-3p	0	0	1	1	0	0	CCDC105	coiled-coil domain containing 105
hsa-miR-508-3p	1	0	1	1	1	1	NAGS	N-acetylglutamate synthase
hsa-miR-508-3p	0	0	0	1	0	0	HS3ST6	heparan sulfate (glucosamine) 3-O-sulfotransferase 6
hsa-miR-508-3p	0	0	0	1	1	1	CLRN1	clarin 1
hsa-miR-508-3p	1	0	1	1	1	1	ZDHHC3	zinc finger, DHHC-type containing 3
hsa-miR-508-3p	0	0	1	1	1	1	HSPA4L	heat shock 70kDa protein 4-like
hsa-miR-508-3p	0	0	0	1	0	0	ADAD1	adenosine deaminase domain containing 1 (testis-specific)
hsa-miR-508-3p	0	0	0	1	1	1	LSM6	LSM6 homolog, U6 small nuclear RNA associated (S. cerevisiae)
hsa-miR-508-3p	0	0	1	1	1	1	ZNF474	zinc finger protein 474
hsa-miR-508-3p	0	0	0	1	0	0	TLR3	toll-like receptor 3
hsa-miR-508-3p	0	0	1	1	0	0	DCBLD1	discoidin, CUB and LCCL domain containing 1
hsa-miR-508-3p	0	0	1	1	1	1	COG5	component of oligomeric golgi complex 5
hsa-miR-508-3p	0	0	0	1	0	0	PGAM2	phosphoglycerate mutase 2 (muscle)
hsa-miR-508-3p	0	0	1	1	1	1	BRI3	brain protein I3
hsa-miR-508-3p	0	0	0	1	0	0	GPER	G protein-coupled estrogen receptor 1
hsa-miR-508-3p	0	0	1	1	1	1	COL14A1	collagen, type XIV, alpha 1
hsa-miR-508-3p	0	0	1	1	1	1	MELK	maternal embryonic leucine zipper kinase
hsa-miR-508-3p	0	0	1	1	1	1	VDAC2	voltage-dependent anion channel 2
hsa-miR-508-3p	0	0	1	1	1	1	STOX1	storkhead box 1
hsa-miR-508-3p	0	0	0	1	0	0	OR4K2	olfactory receptor, family 4, subfamily K, member 2
hsa-miR-508-3p	0	0	0	1	0	0	C12orf70	chromosome 12 open reading frame 70
hsa-miR-508-3p	0	0	0	1	0	0	SPIC	Spi-C transcription factor (Spi-1/PU.1 related)
hsa-miR-508-3p	0	0	1	1	1	1	FAM227B	family with sequence similarity 227, member B
hsa-miR-508-3p	0	0	1	1	1	1	SALL3	sal-like 3 (Drosophila)
hsa-miR-508-3p	0	0	0	1	1	1	WWOX	WW domain containing oxidoreductase
hsa-miR-508-3p	0	0	0	1	0	0	EPB42	erythrocyte membrane protein band 4.2
hsa-miR-508-3p	1	0	1	1	1	1	HNRNPUL2	heterogeneous nuclear ribonucleoprotein U-like 2
hsa-miR-508-3p	0	0	1	1	1	1	SCARA5	scavenger receptor class A, member 5 (putative)
hsa-miR-508-3p	0	0	0	1	0	0	OR5AR1	olfactory receptor, family 5, subfamily AR, member 1
hsa-miR-508-3p	0	0	1	1	1	1	CEBPB	CCAAT/enhancer binding protein (C/EBP), beta
hsa-miR-508-3p	0	0	1	1	0	0	BTD	biotinidase
hsa-miR-508-3p	0	0	0	1	1	1	GPR37	G protein-coupled receptor 37 (endothelin receptor type B-like)
hsa-miR-508-3p	1	0	1	1	1	1	FAM103A1	family with sequence similarity 103, member A1
hsa-miR-508-3p	0	0	0	1	0	0	ASL	argininosuccinate lyase
hsa-miR-508-3p	0	0	1	1	1	1	MUC12	mucin 12, cell surface associated
hsa-miR-508-3p	1	0	1	1	1	1	HAS3	hyaluronan synthase 3
hsa-miR-508-3p	0	0	1	1	1	1	CXCL10	chemokine (C-X-C motif) ligand 10
hsa-miR-508-3p	0	0	1	1	0	0	CNTNAP4	contactin associated protein-like 4
hsa-miR-508-3p	0	0	0	1	0	0	AGXT	alanine-glyoxylate aminotransferase
hsa-miR-508-3p	0	0	1	1	1	1	CMTM8	CKLF-like MARVEL transmembrane domain containing 8
hsa-miR-508-3p	0	0	1	1	1	1	ZBBX	zinc finger, B-box domain containing
hsa-miR-508-3p	0	0	0	1	0	0	GOT1L1	glutamic-oxaloacetic transaminase 1-like 1
hsa-miR-508-3p	0	0	0	1	1	1	LOC285299	FSHD region gene 2 family, member C-like
hsa-miR-508-3p	1	0	1	1	1	1	RAPH1	Ras association (RalGDS/AF-6) and pleckstrin homology domains 1
hsa-miR-508-3p	0	0	0	1	0	0	C1orf100	chromosome 1 open reading frame 100
hsa-miR-508-3p	0	0	1	1	1	1	CCNE2	cyclin E2
hsa-miR-508-3p	0	0	1	1	0	0	MUS81	MUS81 endonuclease homolog (S. cerevisiae)
hsa-miR-508-3p	1	0	1	1	1	1	CASP3	caspase 3, apoptosis-related cysteine peptidase
hsa-miR-508-3p	1	0	1	1	0	0	ASPHD1	aspartate beta-hydroxylase domain containing 1
hsa-miR-508-3p	0	0	0	1	1	1	LOC729317	voltage-dependent anion channel 2 pseudogene
hsa-miR-508-3p	0	0	0	1	0	0	STON1-GTF2A1L	STON1-GTF2A1L readthrough
hsa-miR-508-3p	0	0	1	1	1	1	STON1	stonin 1
hsa-miR-508-3p	0	0	0	1	0	0	OR10A6	olfactory receptor, family 10, subfamily A, member 6
hsa-miR-508-3p	0	0	0	1	0	0	C21orf58	chromosome 21 open reading frame 58
hsa-miR-508-3p	0	0	1	1	1	1	ZCCHC12	zinc finger, CCHC domain containing 12
hsa-miR-508-3p	0	0	0	1	0	0	OR8S1	olfactory receptor, family 8, subfamily S, member 1
hsa-miR-508-3p	0	0	1	1	0	0	GP6	glycoprotein VI (platelet)
hsa-miR-508-3p	0	0	1	1	0	0	EVC2	Ellis van Creveld syndrome 2
hsa-miR-508-3p	1	0	1	1	1	1	C10orf76	chromosome 10 open reading frame 76
hsa-miR-508-3p	0	0	1	1	1	1	CEP19	centrosomal protein 19kDa
hsa-miR-508-3p	0	0	1	1	0	0	AGAP8	ArfGAP with GTPase domain, ankyrin repeat and PH domain 8
hsa-miR-508-3p	0	0	1	1	0	0	UQCRH	ubiquinol-cytochrome c reductase hinge protein
hsa-miR-508-3p	0	0	0	1	0	0	OR5R1	olfactory receptor, family 5, subfamily R, member 1
hsa-miR-508-3p	0	0	1	1	1	1	JAM2	junctional adhesion molecule 2
hsa-miR-508-3p	0	0	1	1	0	0	TUBA3E	tubulin, alpha 3e
hsa-miR-508-3p	1	0	1	1	1	1	LAMA3	laminin, alpha 3
hsa-miR-508-3p	1	0	1	1	1	1	MSANTD4	Myb/SANT-like DNA-binding domain containing 4 with coiled-coils
hsa-miR-508-3p	0	0	0	1	0	0	C12orf54	chromosome 12 open reading frame 54
hsa-miR-508-3p	1	0	1	1	0	0	COX8A	cytochrome c oxidase subunit VIIIA (ubiquitous)
hsa-miR-508-3p	0	0	1	1	1	1	NSUN3	NOP2/Sun domain family, member 3
hsa-miR-508-3p	1	0	0	1	1	1	RECQL	RecQ protein-like (DNA helicase Q1-like)
hsa-miR-508-3p	0	0	0	1	1	1	CCDC111	coiled-coil domain containing 111
hsa-miR-508-3p	0	0	1	1	1	1	MPP4	membrane protein, palmitoylated 4 (MAGUK p55 subfamily member 4)
hsa-miR-508-3p	0	0	0	1	0	0	OR4N2	olfactory receptor, family 4, subfamily N, member 2
hsa-miR-508-3p	0	0	1	1	1	1	LILRB5	leukocyte immunoglobulin-like receptor, subfamily B (with TM and ITIM domains), member 5
hsa-miR-508-3p	0	0	1	1	0	0	TTC9C	tetratricopeptide repeat domain 9C
hsa-miR-508-3p	0	0	1	1	0	0	PANK2	pantothenate kinase 2
hsa-miR-508-3p	0	0	1	1	1	1	PUS10	pseudouridylate synthase 10
hsa-miR-508-3p	0	0	0	1	0	0	PGAM5	phosphoglycerate mutase family member 5
hsa-miR-508-3p	0	0	0	1	0	0	C2orf73	chromosome 2 open reading frame 73
hsa-miR-508-3p	0	0	1	1	1	1	SOHLH2	spermatogenesis and oogenesis specific basic helix-loop-helix 2
hsa-miR-508-3p	0	0	1	1	1	1	C18orf32	chromosome 18 open reading frame 32
hsa-miR-508-3p	0	0	1	1	1	1	PEX7	peroxisomal biogenesis factor 7
hsa-miR-508-3p	0	0	0	1	0	0	RNFT2	ring finger protein, transmembrane 2
hsa-miR-508-3p	0	0	0	1	0	0	LRRC37A3	leucine rich repeat containing 37, member A3
hsa-miR-508-3p	0	0	0	1	1	1	C8orf40	chromosome 8 open reading frame 40
hsa-miR-508-3p	0	0	1	1	0	0	TUBA3D	tubulin, alpha 3d
hsa-miR-508-3p	1	0	1	1	1	1	DSCAML1	Down syndrome cell adhesion molecule like 1
hsa-miR-508-3p	0	0	0	1	1	1	ME2	malic enzyme 2, NAD(+)-dependent, mitochondrial
hsa-miR-508-3p	0	0	1	1	1	1	PRKCB	protein kinase C, beta
hsa-miR-508-3p	0	0	0	1	0	0	ACBD4	acyl-CoA binding domain containing 4
hsa-miR-508-3p	1	0	1	1	1	1	NCL	nucleolin
hsa-miR-508-3p	0	0	1	1	1	1	RTBDN	retbindin
hsa-miR-508-3p	0	0	0	1	0	0	LGALS9B	lectin, galactoside-binding, soluble, 9B
hsa-miR-508-3p	0	0	1	1	0	0	SAGE1	sarcoma antigen 1
hsa-miR-508-3p	0	0	1	1	1	1	C12orf40	chromosome 12 open reading frame 40
hsa-miR-508-3p	1	0	1	1	1	1	VPS37A	vacuolar protein sorting 37 homolog A (S. cerevisiae)
hsa-miR-508-3p	0	0	0	1	0	0	IL32	interleukin 32
hsa-miR-508-3p	0	0	1	1	1	1	CEP192	centrosomal protein 192kDa
hsa-miR-508-3p	0	0	0	1	1	1	UPB1	ureidopropionase, beta
hsa-miR-508-3p	0	0	0	1	0	0	KIR3DL2	killer cell immunoglobulin-like receptor, three domains, long cytoplasmic tail, 2
hsa-miR-508-3p	0	0	1	1	1	1	VNN2	vanin 2
hsa-miR-508-3p	0	0	0	1	0	0	LGALS9C	lectin, galactoside-binding, soluble, 9C
hsa-miR-508-3p	1	0	1	1	1	1	SYNM	synemin, intermediate filament protein
hsa-miR-508-3p	0	0	1	1	1	1	CAPS2	calcyphosine 2
hsa-miR-508-3p	0	0	0	1	1	1	SDR42E1	short chain dehydrogenase/reductase family 42E, member 1
hsa-miR-508-3p	0	0	0	1	0	0	POTEKP	POTE ankyrin domain family, member K, pseudogene
hsa-miR-508-3p	1	0	1	1	1	1	C11orf82	chromosome 11 open reading frame 82
hsa-miR-508-3p	0	0	0	1	0	0	OR56A3	olfactory receptor, family 56, subfamily A, member 3
hsa-miR-508-3p	0	0	0	1	0	0	A3GALT2P	alpha 1,3-galactosyltransferase 2, pseudogene
hsa-miR-508-3p	0	0	0	1	0	0	OR2T11	olfactory receptor, family 2, subfamily T, member 11
hsa-miR-508-3p	0	0	1	1	0	0	CLK3	CDC-like kinase 3
hsa-miR-508-3p	0	0	1	1	1	1	BEST3	bestrophin 3
hsa-miR-508-3p	0	0	1	1	1	1	COPG2	coatomer protein complex, subunit gamma 2
hsa-miR-508-3p	1	0	1	1	1	1	FBXW4	F-box and WD repeat domain containing 4
hsa-miR-508-3p	0	0	1	1	1	1	XKR3	XK, Kell blood group complex subunit-related family, member 3
hsa-miR-508-3p	0	0	0	1	0	0	OR1D2	olfactory receptor, family 1, subfamily D, member 2
hsa-miR-508-3p	0	0	0	1	0	0	SLC25A10	solute carrier family 25 (mitochondrial carrier; dicarboxylate transporter), member 10
hsa-miR-508-3p	0	0	1	1	1	1	TCHHL1	trichohyalin-like 1
hsa-miR-508-3p	1	0	1	1	1	1	CEP63	centrosomal protein 63kDa
hsa-miR-508-3p	0	0	1	1	1	1	LRRC16A	leucine rich repeat containing 16A
hsa-miR-508-3p	0	0	1	1	1	1	ZNRD1	zinc ribbon domain containing 1
hsa-miR-508-3p	0	0	1	1	0	0	BAIAP2L2	BAI1-associated protein 2-like 2
hsa-miR-508-3p	0	0	0	1	0	0	TAS2R38	taste receptor, type 2, member 38
hsa-miR-508-3p	1	0	1	1	1	1	EFHC2	EF-hand domain (C-terminal) containing 2
hsa-miR-508-3p	0	0	1	1	0	0	CCDC87	coiled-coil domain containing 87
hsa-miR-508-3p	0	0	0	1	0	0	OR5L1	olfactory receptor, family 5, subfamily L, member 1
hsa-miR-508-3p	0	0	1	1	0	0	KRTAP15-1	keratin associated protein 15-1
hsa-miR-508-3p	0	0	0	1	1	1	TTF1	transcription termination factor, RNA polymerase I
hsa-miR-508-3p	0	0	0	1	1	1	ANGPTL5	angiopoietin-like 5
hsa-miR-508-3p	1	0	1	1	1	1	C14orf37	chromosome 14 open reading frame 37
hsa-miR-508-3p	0	0	1	1	0	0	PSMB5	proteasome (prosome, macropain) subunit, beta type, 5
hsa-miR-508-3p	0	0	0	1	0	0	C20orf94	chromosome 20 open reading frame 94
hsa-miR-508-3p	0	0	0	1	1	1	HSP90AA1	heat shock protein 90kDa alpha (cytosolic), class A member 1
hsa-miR-508-3p	0	0	1	1	0	0	GPAT2	glycerol-3-phosphate acyltransferase 2, mitochondrial
hsa-miR-508-3p	0	0	1	1	0	0	KRT26	keratin 26
hsa-miR-508-3p	0	0	1	1	0	0	ADAM7	ADAM metallopeptidase domain 7
hsa-miR-508-3p	0	0	1	1	1	1	SPAG17	sperm associated antigen 17
hsa-miR-508-3p	0	0	1	1	1	1	SERPINB7	serpin peptidase inhibitor, clade B (ovalbumin), member 7
hsa-miR-508-3p	0	0	1	1	1	1	MFSD11	major facilitator superfamily domain containing 11
hsa-miR-508-3p	1	0	1	1	1	1	LRRC8D	leucine rich repeat containing 8 family, member D
hsa-miR-508-3p	0	0	1	1	1	1	SOD2	superoxide dismutase 2, mitochondrial
hsa-miR-508-3p	0	0	0	1	0	0	SERPINA9	serpin peptidase inhibitor, clade A (alpha-1 antiproteinase, antitrypsin), member 9
hsa-miR-508-3p	0	0	1	1	1	1	AADAT	aminoadipate aminotransferase
hsa-miR-508-3p	0	0	0	1	0	0	CHCHD2P9	coiled-coil-helix-coiled-coil-helix domain containing 2 pseudogene 9
hsa-miR-508-3p	0	0	1	1	1	1	FAIM	Fas apoptotic inhibitory molecule
hsa-miR-508-3p	0	0	1	1	0	0	TRMT2B	tRNA methyltransferase 2 homolog B (S. cerevisiae)
hsa-miR-508-3p	1	0	1	1	1	1	SPTBN4	spectrin, beta, non-erythrocytic 4
hsa-miR-508-3p	0	0	1	1	0	0	HAVCR1	hepatitis A virus cellular receptor 1
hsa-miR-508-3p	1	0	1	1	1	1	CACNB4	calcium channel, voltage-dependent, beta 4 subunit
hsa-miR-508-3p	0	0	1	1	0	0	ELSPBP1	epididymal sperm binding protein 1
hsa-miR-508-3p	0	0	1	1	0	0	MBD1	methyl-CpG binding domain protein 1
hsa-miR-508-3p	0	0	0	1	0	0	PDC	phosducin
hsa-miR-508-3p	0	0	1	1	1	1	GTF2F2	general transcription factor IIF, polypeptide 2, 30kDa
hsa-miR-508-3p	0	0	1	1	1	1	PTGES	prostaglandin E synthase
hsa-miR-508-3p	1	0	1	1	1	1	TC2N	tandem C2 domains, nuclear
hsa-miR-508-3p	1	0	1	1	1	1	NEK10	NIMA (never in mitosis gene a)- related kinase 10
hsa-miR-508-3p	0	0	1	1	1	1	LCTL	lactase-like
hsa-miR-508-3p	0	0	1	1	1	1	DLGAP5	discs, large (Drosophila) homolog-associated protein 5
hsa-miR-508-3p	0	0	1	1	1	1	TSHR	thyroid stimulating hormone receptor
hsa-miR-508-3p	1	0	1	1	1	1	SAT1	spermidine/spermine N1-acetyltransferase 1
hsa-miR-508-3p	0	0	1	1	0	0	AGAP4	ArfGAP with GTPase domain, ankyrin repeat and PH domain 4
hsa-miR-508-3p	0	0	0	1	1	1	TM7SF3	transmembrane 7 superfamily member 3
hsa-miR-508-3p	0	0	1	1	1	1	LRRC41	leucine rich repeat containing 41
hsa-miR-508-3p	0	0	0	1	1	1	ZNF14	zinc finger protein 14
hsa-miR-508-3p	0	0	1	1	0	0	LIPI	lipase, member I
hsa-miR-508-3p	0	0	1	1	0	0	KLRD1	killer cell lectin-like receptor subfamily D, member 1
hsa-miR-508-3p	1	0	1	1	1	1	CNNM2	cyclin M2
hsa-miR-508-3p	0	0	0	1	1	1	NOL10	nucleolar protein 10
hsa-miR-508-3p	0	0	1	1	1	1	HAUS4	HAUS augmin-like complex, subunit 4
hsa-miR-508-3p	1	0	1	1	1	1	PTN	pleiotrophin
hsa-miR-508-3p	0	0	1	1	1	1	AMELX	amelogenin, X-linked
hsa-miR-508-3p	0	0	1	1	0	0	MYBPHL	myosin binding protein H-like
hsa-miR-508-3p	1	0	1	1	1	1	ARHGEF10	Rho guanine nucleotide exchange factor (GEF) 10
hsa-miR-508-3p	0	0	1	1	1	1	SCEL	sciellin
hsa-miR-508-3p	0	0	0	1	1	1	NDUFB6	NADH dehydrogenase (ubiquinone) 1 beta subcomplex, 6, 17kDa
hsa-miR-508-3p	0	0	0	1	0	0	GNAT2	guanine nucleotide binding protein (G protein), alpha transducing activity polypeptide 2
hsa-miR-508-3p	0	0	0	1	1	1	MTERF	mitochondrial transcription termination factor
hsa-miR-508-3p	0	0	1	1	1	1	DUSP19	dual specificity phosphatase 19
hsa-miR-508-3p	0	0	1	1	1	1	HGF	hepatocyte growth factor (hepapoietin A; scatter factor)
hsa-miR-508-3p	0	0	1	1	1	1	POTEA	POTE ankyrin domain family, member A
hsa-miR-508-3p	0	0	1	1	0	0	C10orf11	chromosome 10 open reading frame 11
hsa-miR-508-3p	0	0	0	1	1	1	RNH1	ribonuclease/angiogenin inhibitor 1
hsa-miR-508-3p	0	0	1	1	1	1	ODAM	odontogenic, ameloblast asssociated
hsa-miR-508-3p	0	0	1	1	1	1	UGT1A1	UDP glucuronosyltransferase 1 family, polypeptide A1
hsa-miR-508-3p	0	0	1	1	1	1	UGT1A7	UDP glucuronosyltransferase 1 family, polypeptide A7
hsa-miR-508-3p	0	0	1	1	1	1	UGT1A8	UDP glucuronosyltransferase 1 family, polypeptide A8
hsa-miR-508-3p	0	0	1	1	1	1	UGT1A9	UDP glucuronosyltransferase 1 family, polypeptide A9
hsa-miR-508-3p	0	0	1	1	1	1	UGT1A5	UDP glucuronosyltransferase 1 family, polypeptide A5
hsa-miR-508-3p	0	0	1	1	1	1	UGT1A10	UDP glucuronosyltransferase 1 family, polypeptide A10
hsa-miR-508-3p	0	0	1	1	1	1	UGT1A4	UDP glucuronosyltransferase 1 family, polypeptide A4
hsa-miR-508-3p	0	0	1	1	1	1	UGT1A6	UDP glucuronosyltransferase 1 family, polypeptide A6
hsa-miR-508-3p	0	0	1	1	1	1	UGT1A3	UDP glucuronosyltransferase 1 family, polypeptide A3
hsa-miR-508-3p	0	0	0	1	0	0	PLEKHA4	pleckstrin homology domain containing, family A (phosphoinositide binding specific) member 4
hsa-miR-508-3p	0	0	0	1	0	0	KIR3DL1	killer cell immunoglobulin-like receptor, three domains, long cytoplasmic tail, 1
hsa-miR-508-3p	0	0	1	1	1	1	CHCHD8	coiled-coil-helix-coiled-coil-helix domain containing 8
hsa-miR-508-3p	0	0	1	1	1	1	PLGLB1	plasminogen-like B1
hsa-miR-508-3p	0	0	0	1	0	0	ZNF625	zinc finger protein 625
hsa-miR-508-3p	1	0	1	1	1	1	SLC17A5	solute carrier family 17 (anion/sugar transporter), member 5
hsa-miR-508-3p	0	0	1	1	1	1	TMEM67	transmembrane protein 67
hsa-miR-508-3p	0	0	1	1	1	1	PPP1R26	protein phosphatase 1, regulatory subunit 26
hsa-miR-508-3p	0	0	1	1	1	1	WFDC8	WAP four-disulfide core domain 8
hsa-miR-508-3p	0	0	1	1	1	1	SMC1B	structural maintenance of chromosomes 1B
hsa-miR-508-3p	0	0	0	1	1	1	TMEM79	transmembrane protein 79
hsa-miR-508-3p	1	0	1	1	1	1	SLC30A7	solute carrier family 30 (zinc transporter), member 7
hsa-miR-508-3p	0	0	1	1	1	1	CDK5RAP1	CDK5 regulatory subunit associated protein 1
hsa-miR-508-3p	0	0	0	1	0	0	OR6C6	olfactory receptor, family 6, subfamily C, member 6
hsa-miR-508-3p	0	0	1	1	1	1	RAD52	RAD52 homolog (S. cerevisiae)
hsa-miR-508-3p	1	0	1	1	1	1	SLC4A8	solute carrier family 4, sodium bicarbonate cotransporter, member 8
hsa-miR-508-3p	0	0	0	1	0	0	HIST1H2AI	histone cluster 1, H2ai
hsa-miR-508-3p	1	0	1	1	1	1	MRPL19	mitochondrial ribosomal protein L19
hsa-miR-508-3p	0	0	1	1	0	0	FAM114A1	family with sequence similarity 114, member A1
hsa-miR-508-3p	0	0	1	1	0	0	KIR2DL4	killer cell immunoglobulin-like receptor, two domains, long cytoplasmic tail, 4
hsa-miR-508-3p	0	0	0	1	0	0	BCS1L	BCS1-like (S. cerevisiae)
hsa-miR-508-3p	0	0	0	1	1	1	ARSF	arylsulfatase F
hsa-miR-508-3p	0	0	1	1	1	1	PLGLB2	plasminogen-like B2
hsa-miR-508-3p	0	0	1	1	1	1	RNF217	ring finger protein 217
hsa-miR-508-3p	0	0	0	1	1	1	TBXA2R	thromboxane A2 receptor
hsa-miR-508-3p	0	0	1	1	0	0	SPINK5	serine peptidase inhibitor, Kazal type 5
hsa-miR-508-3p	0	0	1	1	1	1	SERHL	serine hydrolase-like
hsa-miR-508-3p	1	0	1	1	1	1	CD44	CD44 molecule (Indian blood group)
hsa-miR-508-3p	0	0	0	1	1	1	CLEC4C	C-type lectin domain family 4, member C
hsa-miR-508-3p	0	0	1	1	1	1	ANKRD53	ankyrin repeat domain 53
hsa-miR-508-3p	1	0	1	1	0	0	KAZN	kazrin, periplakin interacting protein
hsa-miR-508-3p	1	0	1	1	1	1	ZFP2	zinc finger protein 2 homolog (mouse)
hsa-miR-508-3p	1	0	1	1	1	1	TLR10	toll-like receptor 10
hsa-miR-508-3p	0	0	1	1	1	1	ZNF318	zinc finger protein 318
hsa-miR-508-3p	0	0	0	1	0	0	LSR	lipolysis stimulated lipoprotein receptor
hsa-miR-508-3p	1	0	1	1	1	1	ILF2	interleukin enhancer binding factor 2, 45kDa
hsa-miR-508-3p	0	0	1	1	1	1	PRC1	protein regulator of cytokinesis 1
hsa-miR-508-3p	0	0	0	1	0	0	C1orf68	chromosome 1 open reading frame 68
hsa-miR-508-3p	0	0	1	1	1	1	C1orf101	chromosome 1 open reading frame 101
hsa-miR-508-3p	0	0	0	1	0	0	MIXL1	Mix paired-like homeobox
hsa-miR-508-3p	0	0	0	1	0	0	PYCR2	pyrroline-5-carboxylate reductase family, member 2
hsa-miR-508-3p	1	0	1	1	0	0	DYNLT1	dynein, light chain, Tctex-type 1
hsa-miR-508-3p	0	0	0	1	0	0	TFB1M	transcription factor B1, mitochondrial
hsa-miR-508-3p	0	0	1	1	1	1	SNRPE	small nuclear ribonucleoprotein polypeptide E
hsa-miR-508-3p	0	0	0	1	1	1	RMND1	required for meiotic nuclear division 1 homolog (S. cerevisiae)
hsa-miR-508-3p	0	0	0	1	0	0	RAET1G	retinoic acid early transcript 1G
hsa-miR-508-3p	1	0	1	1	1	1	DENND1B	DENN/MADD domain containing 1B
hsa-miR-508-3p	0	0	1	1	1	1	UCHL5	ubiquitin carboxyl-terminal hydrolase L5
hsa-miR-508-3p	0	0	1	1	1	1	PLA2G4A	phospholipase A2, group IVA (cytosolic, calcium-dependent)
hsa-miR-508-3p	0	0	1	1	1	1	PRG4	proteoglycan 4
hsa-miR-508-3p	0	0	1	1	1	1	RALGPS2	Ral GEF with PH domain and SH3 binding motif 2
hsa-miR-508-3p	0	0	1	1	0	0	IFNGR1	interferon gamma receptor 1
hsa-miR-508-3p	0	0	1	1	1	1	BLZF1	basic leucine zipper nuclear factor 1
hsa-miR-508-3p	0	0	0	1	1	1	GPR161	G protein-coupled receptor 161
hsa-miR-508-3p	0	0	1	1	1	1	UFC1	ubiquitin-fold modifier conjugating enzyme 1
hsa-miR-508-3p	0	0	0	1	1	1	MKI67	antigen identified by monoclonal antibody Ki-67
hsa-miR-508-3p	0	0	1	1	1	1	SMCP	sperm mitochondria-associated cysteine-rich protein
hsa-miR-508-3p	0	0	1	1	1	1	IKZF5	IKAROS family zinc finger 5 (Pegasus)
hsa-miR-508-3p	0	0	1	1	1	1	POLR3GL	polymerase (RNA) III (DNA directed) polypeptide G (32kD)-like
hsa-miR-508-3p	1	0	0	1	1	1	CLCC1	chloride channel CLIC-like 1
hsa-miR-508-3p	0	0	1	1	1	1	ALG14	asparagine-linked glycosylation 14 homolog (S. cerevisiae)
hsa-miR-508-3p	1	0	1	1	1	1	TMED5	transmembrane emp24 protein transport domain containing 5
hsa-miR-508-3p	0	0	0	1	0	0	MB21D1	Mab-21 domain containing 1
hsa-miR-508-3p	0	0	1	1	1	1	CUTC	cutC copper transporter homolog (E. coli)
hsa-miR-508-3p	1	0	0	1	1	1	COL9A1	collagen, type IX, alpha 1
hsa-miR-508-3p	0	0	0	1	1	1	CLCA4	chloride channel accessory 4
hsa-miR-508-3p	0	0	1	1	1	1	DNAJB4	DnaJ (Hsp40) homolog, subfamily B, member 4
hsa-miR-508-3p	0	0	1	1	1	1	RABGGTB	Rab geranylgeranyltransferase, beta subunit
hsa-miR-508-3p	0	0	0	1	0	0	PSMA7	proteasome (prosome, macropain) subunit, alpha type, 7
hsa-miR-508-3p	0	0	0	1	0	0	C8B	complement component 8, beta polypeptide
hsa-miR-508-3p	0	0	1	1	1	1	LRRC42	leucine rich repeat containing 42
hsa-miR-508-3p	0	0	1	1	0	0	AKAP14	A kinase (PRKA) anchor protein 14
hsa-miR-508-3p	0	0	1	1	0	0	NDUFA1	NADH dehydrogenase (ubiquinone) 1 alpha subcomplex, 1, 7.5kDa
hsa-miR-508-3p	0	0	0	1	1	1	PDE6C	phosphodiesterase 6C, cGMP-specific, cone, alpha prime
hsa-miR-508-3p	0	0	0	1	1	1	RBP4	retinol binding protein 4, plasma
hsa-miR-508-3p	0	0	1	1	1	1	C1orf185	chromosome 1 open reading frame 185
hsa-miR-508-3p	0	0	0	1	1	1	IFIT1	interferon-induced protein with tetratricopeptide repeats 1
hsa-miR-508-3p	0	0	0	1	0	0	IRS4	insulin receptor substrate 4
hsa-miR-508-3p	0	0	1	1	1	1	TMEM53	transmembrane protein 53
hsa-miR-508-3p	0	0	1	1	0	0	PPAPDC3	phosphatidic acid phosphatase type 2 domain containing 3
hsa-miR-508-3p	0	0	0	1	0	0	GLRA4	glycine receptor, alpha 4
hsa-miR-508-3p	0	0	1	1	1	1	BEX4	brain expressed, X-linked 4
hsa-miR-508-3p	0	0	0	1	0	0	KCNK15	potassium channel, subfamily K, member 15
hsa-miR-508-3p	0	0	1	1	0	0	GUCA1A	guanylate cyclase activator 1A (retina)
hsa-miR-508-3p	1	0	1	1	1	1	ZC3H12A	zinc finger CCCH-type containing 12A
hsa-miR-508-3p	0	0	0	1	0	0	TSPO2	translocator protein 2
hsa-miR-508-3p	0	0	1	1	1	1	PRF1	perforin 1 (pore forming protein)
hsa-miR-508-3p	1	0	1	1	1	1	AIFM2	apoptosis-inducing factor, mitochondrion-associated, 2
hsa-miR-508-3p	0	0	0	1	1	1	TRAF3IP1	TNF receptor-associated factor 3 interacting protein 1
hsa-miR-508-3p	0	0	1	1	1	1	SPP2	secreted phosphoprotein 2, 24kDa
hsa-miR-508-3p	0	0	1	1	1	1	FTSJD2	FtsJ methyltransferase domain containing 2
hsa-miR-508-3p	1	0	1	1	1	1	CHIC1	cysteine-rich hydrophobic domain 1
hsa-miR-508-3p	0	0	0	1	0	0	ATOH7	atonal homolog 7 (Drosophila)
hsa-miR-508-3p	1	0	0	1	1	1	CNTRL	centriolin
hsa-miR-508-3p	0	0	1	1	1	1	ATPIF1	ATPase inhibitory factor 1
hsa-miR-508-3p	0	0	1	1	0	0	AGAP6	ArfGAP with GTPase domain, ankyrin repeat and PH domain 6
hsa-miR-508-3p	0	0	0	1	0	0	CXorf65	chromosome X open reading frame 65
hsa-miR-508-3p	0	0	1	1	0	0	C9orf84	chromosome 9 open reading frame 84
hsa-miR-508-3p	0	0	0	1	1	1	RAB41	RAB41, member RAS oncogene family
hsa-miR-508-3p	0	0	1	1	0	0	P2RY4	pyrimidinergic receptor P2Y, G-protein coupled, 4
hsa-miR-508-3p	0	0	1	1	1	1	ANKRD30A	ankyrin repeat domain 30A
hsa-miR-508-3p	0	0	1	1	0	0	ANKAR	ankyrin and armadillo repeat containing
hsa-miR-508-3p	0	0	0	1	1	1	TMCO4	transmembrane and coiled-coil domains 4
hsa-miR-508-3p	0	0	1	1	1	1	C9orf3	chromosome 9 open reading frame 3
hsa-miR-508-3p	0	0	1	1	1	1	FAM120AOS	family with sequence similarity 120A opposite strand
hsa-miR-508-3p	0	0	0	1	0	0	PADI4	peptidyl arginine deiminase, type IV
hsa-miR-508-3p	0	0	0	1	0	0	SPANXN5	SPANX family, member N5
hsa-miR-508-3p	1	0	0	1	0	0	PLEKHM2	pleckstrin homology domain containing, family M (with RUN domain) member 2
hsa-miR-508-3p	0	0	0	1	0	0	APOM	apolipoprotein M
hsa-miR-508-3p	0	0	0	1	0	0	GUCY2EP	guanylate cyclase 2E, pseudogene
hsa-miR-508-3p	0	0	1	1	1	1	GKAP1	G kinase anchoring protein 1
hsa-miR-508-3p	1	0	1	1	1	1	TLE4	transducin-like enhancer of split 4 (E(sp1) homolog, Drosophila)
hsa-miR-508-3p	0	0	0	1	0	0	FOXB2	forkhead box B2
hsa-miR-508-3p	0	0	1	1	0	0	UGGT2	UDP-glucose glycoprotein glucosyltransferase 2
hsa-miR-508-3p	0	0	1	1	0	0	KLK13	kallikrein-related peptidase 13
hsa-miR-508-3p	1	0	1	1	1	1	FAM108B1	family with sequence similarity 108, member B1
hsa-miR-508-3p	1	0	1	1	1	1	OR2H1	olfactory receptor, family 2, subfamily H, member 1
hsa-miR-508-3p	0	0	0	1	0	0	ZNF311	zinc finger protein 311
hsa-miR-508-3p	0	0	0	1	1	1	UTS2	urotensin 2
hsa-miR-508-3p	0	0	0	1	0	0	FAM27C	family with sequence similarity 27, member C
hsa-miR-508-3p	0	0	1	1	0	0	FAM216A	family with sequence similarity 216, member A
hsa-miR-508-3p	0	0	1	1	1	1	HIST1H2BD	histone cluster 1, H2bd
hsa-miR-508-3p	1	0	1	1	1	1	RNF207	ring finger protein 207
hsa-miR-508-3p	0	0	0	1	1	1	ARHGEF35	Rho guanine nucleotide exchange factor (GEF) 35
hsa-miR-508-3p	0	0	1	1	1	1	UTP14C	UTP14, U3 small nucleolar ribonucleoprotein, homolog C (yeast)
hsa-miR-508-3p	0	0	0	1	1	1	PHF11	PHD finger protein 11
hsa-miR-508-3p	1	0	1	1	1	1	MRS2	MRS2 magnesium homeostasis factor homolog (S. cerevisiae)
hsa-miR-508-3p	0	0	1	1	0	0	HSPA14	heat shock 70kDa protein 14
hsa-miR-508-3p	0	0	0	1	0	0	OR4A47	olfactory receptor, family 4, subfamily A, member 47
hsa-miR-508-3p	0	0	1	1	1	1	CAMKMT	calmodulin-lysine N-methyltransferase
hsa-miR-508-3p	0	0	1	1	0	0	MORN1	MORN repeat containing 1
hsa-miR-508-3p	0	0	1	1	0	0	PIGO	phosphatidylinositol glycan anchor biosynthesis, class O
hsa-miR-508-3p	1	0	1	1	1	1	DMD	dystrophin
hsa-miR-508-3p	0	0	1	1	0	0	FANCG	Fanconi anemia, complementation group G
hsa-miR-508-3p	1	0	1	1	1	1	VCP	valosin containing protein
hsa-miR-508-3p	0	0	1	1	1	1	KIF3A	kinesin family member 3A
hsa-miR-508-3p	0	0	0	1	1	1	MAGEB6	melanoma antigen family B, 6
hsa-miR-508-3p	0	0	0	1	1	1	MCMDC2	minichromosome maintenance domain containing 2
hsa-miR-508-3p	0	0	1	1	0	0	TM6SF1	transmembrane 6 superfamily member 1
hsa-miR-508-3p	1	0	1	1	1	1	NFX1	nuclear transcription factor, X-box binding 1
hsa-miR-508-3p	0	0	1	1	1	1	STOML3	stomatin (EPB72)-like 3
hsa-miR-508-3p	0	0	1	1	1	1	EEF1E1	eukaryotic translation elongation factor 1 epsilon 1
hsa-miR-508-3p	0	0	0	1	0	0	OR10A4	olfactory receptor, family 10, subfamily A, member 4
hsa-miR-508-3p	0	0	1	1	0	0	SGCE	sarcoglycan, epsilon
hsa-miR-508-3p	0	0	1	1	0	0	IFT74	intraflagellar transport 74 homolog (Chlamydomonas)
hsa-miR-508-3p	0	0	0	1	1	1	BRCA2	breast cancer 2, early onset
hsa-miR-508-3p	0	0	0	1	0	0	S100G	S100 calcium binding protein G
hsa-miR-508-3p	0	0	1	1	0	0	FAM208B	family with sequence similarity 208, member B
hsa-miR-508-3p	0	0	0	1	0	0	MRPS26	mitochondrial ribosomal protein S26
hsa-miR-508-3p	0	0	1	1	0	0	CD68	CD68 molecule
hsa-miR-508-3p	0	0	1	1	0	0	CARS	cysteinyl-tRNA synthetase
hsa-miR-508-3p	0	0	0	1	1	1	GMDS	GDP-mannose 4,6-dehydratase
hsa-miR-508-3p	0	0	1	1	1	1	TTC39B	tetratricopeptide repeat domain 39B
hsa-miR-508-3p	0	0	1	1	0	0	FREM1	FRAS1 related extracellular matrix 1
hsa-miR-508-3p	0	0	1	1	0	0	NOP56	NOP56 ribonucleoprotein homolog (yeast)
hsa-miR-508-3p	1	0	0	1	1	1	NT5C1B	5'-nucleotidase, cytosolic IB
hsa-miR-508-3p	0	0	0	1	1	1	RDH14	retinol dehydrogenase 14 (all-trans/9-cis/11-cis)
hsa-miR-508-3p	0	0	1	1	0	0	NPSR1	neuropeptide S receptor 1
hsa-miR-508-3p	1	0	1	1	1	1	ZMYND11	zinc finger, MYND-type containing 11
hsa-miR-508-3p	1	0	1	1	1	1	HOXA10	homeobox A10
hsa-miR-508-3p	0	0	0	1	0	0	OR1G1	olfactory receptor, family 1, subfamily G, member 1
hsa-miR-508-3p	0	0	0	1	1	1	RFPL3	ret finger protein-like 3
hsa-miR-508-3p	1	0	1	1	1	1	KANK1	KN motif and ankyrin repeat domains 1
hsa-miR-508-3p	0	0	0	1	1	1	CDY1B	chromodomain protein, Y-linked, 1B
hsa-miR-508-3p	0	0	1	1	1	1	DAZ2	deleted in azoospermia 2
hsa-miR-508-3p	0	0	0	1	1	1	N6AMT2	N-6 adenine-specific DNA methyltransferase 2 (putative)
hsa-miR-508-3p	0	0	1	1	1	1	SRY	sex determining region Y
hsa-miR-508-3p	0	0	0	1	0	0	VILL	villin-like
hsa-miR-508-3p	0	0	0	1	0	0	RPS3AP5	ribosomal protein S3A pseudogene 5
hsa-miR-508-3p	1	0	1	1	1	1	NPTXR	neuronal pentraxin receptor
hsa-miR-508-3p	1	0	1	1	1	1	CBX6	chromobox homolog 6
hsa-miR-508-3p	0	0	1	1	1	1	CHST6	carbohydrate (N-acetylglucosamine 6-O) sulfotransferase 6
hsa-miR-508-3p	0	0	1	0	1	1	GNRHR	gonadotropin-releasing hormone receptor
hsa-miR-508-3p	0	0	1	1	1	1	VHL	von Hippel-Lindau tumor suppressor, E3 ubiquitin protein ligase
hsa-miR-508-3p	1	0	1	1	1	1	GRIA2	glutamate receptor, ionotropic, AMPA 2
hsa-miR-508-3p	1	0	1	1	1	1	ITGA4	integrin, alpha 4 (antigen CD49D, alpha 4 subunit of VLA-4 receptor)
hsa-miR-508-3p	1	0	1	1	1	1	TTC3	tetratricopeptide repeat domain 3
hsa-miR-508-3p	1	0	1	1	1	1	C5orf43	chromosome 5 open reading frame 43
hsa-miR-508-3p	1	0	1	1	1	1	SLC38A1	solute carrier family 38, member 1
hsa-miR-508-3p	1	0	1	1	1	1	APAF1	apoptotic peptidase activating factor 1
hsa-miR-508-3p	1	0	1	1	1	1	CNN3	calponin 3, acidic
hsa-miR-508-3p	0	0	1	1	1	1	RGS13	regulator of G-protein signaling 13
hsa-miR-508-3p	1	0	1	1	1	1	TFAP2B	transcription factor AP-2 beta (activating enhancer binding protein 2 beta)
hsa-miR-508-3p	0	0	0	1	1	1	TTF2	transcription termination factor, RNA polymerase II
hsa-miR-508-3p	1	0	1	1	1	1	SLC4A4	solute carrier family 4, sodium bicarbonate cotransporter, member 4
hsa-miR-508-3p	1	0	1	0	1	1	CPNE3	copine III
hsa-miR-508-3p	1	0	1	1	1	1	ACOX1	acyl-CoA oxidase 1, palmitoyl
hsa-miR-508-3p	0	0	1	1	1	1	ABCD2	ATP-binding cassette, sub-family D (ALD), member 2
hsa-miR-508-3p	1	0	1	1	1	1	EDIL3	EGF-like repeats and discoidin I-like domains 3
hsa-miR-508-3p	1	0	1	1	1	1	LHFPL2	lipoma HMGIC fusion partner-like 2
hsa-miR-508-3p	1	0	0	1	1	1	NEDD4	neural precursor cell expressed, developmentally down-regulated 4, E3 ubiquitin protein ligase
hsa-miR-508-3p	1	0	1	1	1	1	ZBTB6	zinc finger and BTB domain containing 6
hsa-miR-508-3p	1	0	1	1	1	1	SSX2IP	synovial sarcoma, X breakpoint 2 interacting protein
hsa-miR-508-3p	0	0	0	1	1	1	HSPB7	heat shock 27kDa protein family, member 7 (cardiovascular)
hsa-miR-508-3p	1	0	1	1	1	1	SLC40A1	solute carrier family 40 (iron-regulated transporter), member 1
hsa-miR-508-3p	1	0	1	1	1	1	FAM20B	family with sequence similarity 20, member B
hsa-miR-508-3p	0	0	1	1	1	1	COMMD10	COMM domain containing 10
hsa-miR-508-3p	0	0	1	1	1	1	CISD1	CDGSH iron sulfur domain 1
hsa-miR-508-3p	1	0	1	1	1	1	ERO1LB	ERO1-like beta (S. cerevisiae)
hsa-miR-508-3p	1	0	1	0	1	1	ATP10D	ATPase, class V, type 10D
hsa-miR-508-3p	0	0	1	1	1	1	DGCR14	DiGeorge syndrome critical region gene 14
hsa-miR-508-3p	0	0	1	1	1	1	CERK	ceramide kinase
hsa-miR-508-3p	1	0	1	1	1	1	RFX7	regulatory factor X, 7
hsa-miR-508-3p	0	0	1	1	1	1	OXNAD1	oxidoreductase NAD-binding domain containing 1
hsa-miR-508-3p	0	0	1	1	1	1	NETO1	neuropilin (NRP) and tolloid (TLL)-like 1
hsa-miR-508-3p	0	0	1	1	1	1	WDR36	WD repeat domain 36
hsa-miR-508-3p	0	0	1	1	1	1	SLC25A43	solute carrier family 25, member 43
hsa-miR-508-3p	0	0	0	0	1	1	NUDT16	nudix (nucleoside diphosphate linked moiety X)-type motif 16
hsa-miR-508-3p	0	0	0	1	1	1	NDUFAF6	NADH dehydrogenase (ubiquinone) complex I, assembly factor 6
hsa-miR-508-3p	0	0	1	1	1	1	PTGR2	prostaglandin reductase 2
hsa-miR-508-3p	0	0	1	1	1	1	ZNF660	zinc finger protein 660
hsa-miR-508-3p	0	0	0	1	1	1	C3orf35	chromosome 3 open reading frame 35
hsa-miR-508-3p	1	0	1	0	1	1	SRRM4	serine/arginine repetitive matrix 4
