# Supplementary material for: Profiling of Selected MicroRNAs in Proliferative Eutopic Endometrium of Women with Ovarian Endometriosis
Source: Biomed Res Int. 2015 Aug 20;2015:760698. doi: 10.1155/2015/760698 (PMC4558423; doi:10.1155/2015/760698)
Supplement: Supplementary file 1 — Table I: The names of miRNAs significantly differentially expressed between eutopic endometrium of patients with endometriosis vs eutopic endometrium of patients without endometriosis. Table II: The associations between miRNA and mRNA, which presents detailed results of the search of six major databases i.e targetscan, tarbase, miranda, mirbase, mirtarget2 and pictar. [file 760698.f1.zip › 760698.f1/Table II/hsa-miR-509-3-5p.tsv]

miR	targetscan	tarbase	miranda	mirbase	mirtarget2	pictar	GeneSymbol	GeneName
hsa-miR-509-3-5p	1	0	1	1	1	1	ZFYVE16	zinc finger, FYVE domain containing 16
hsa-miR-509-3-5p	1	0	1	1	0	0	SRCAP	Snf2-related CREBBP activator protein
hsa-miR-509-3-5p	1	0	1	1	1	1	FAM65B	family with sequence similarity 65, member B
hsa-miR-509-3-5p	1	0	1	0	1	1	PTPRT	protein tyrosine phosphatase, receptor type, T
hsa-miR-509-3-5p	1	0	1	0	1	1	KIAA0408	KIAA0408
hsa-miR-509-3-5p	1	0	1	1	0	0	OTUD3	OTU domain containing 3
hsa-miR-509-3-5p	0	0	1	1	1	1	NEU3	sialidase 3 (membrane sialidase)
hsa-miR-509-3-5p	1	0	1	1	1	1	RNGTT	RNA guanylyltransferase and 5'-phosphatase
hsa-miR-509-3-5p	1	0	1	1	1	1	IQSEC2	IQ motif and Sec7 domain 2
hsa-miR-509-3-5p	0	0	1	1	0	0	ZNF862	zinc finger protein 862
hsa-miR-509-3-5p	1	0	1	1	1	1	SLC4A7	solute carrier family 4, sodium bicarbonate cotransporter, member 7
hsa-miR-509-3-5p	1	0	1	1	1	1	HIPK1	homeodomain interacting protein kinase 1
hsa-miR-509-3-5p	0	0	1	1	0	0	ARHGEF2	Rho/Rac guanine nucleotide exchange factor (GEF) 2
hsa-miR-509-3-5p	1	0	1	0	1	1	MAGI2	membrane associated guanylate kinase, WW and PDZ domain containing 2
hsa-miR-509-3-5p	1	0	1	0	1	1	DOCK4	dedicator of cytokinesis 4
hsa-miR-509-3-5p	0	0	1	1	1	1	KDM4C	lysine (K)-specific demethylase 4C
hsa-miR-509-3-5p	1	0	1	1	1	1	DNM3	dynamin 3
hsa-miR-509-3-5p	1	0	1	1	1	1	AHCYL2	adenosylhomocysteinase-like 2
hsa-miR-509-3-5p	1	0	1	1	1	1	DMXL2	Dmx-like 2
hsa-miR-509-3-5p	0	0	1	1	1	1	WDR47	WD repeat domain 47
hsa-miR-509-3-5p	1	0	1	1	1	1	CIT	citron (rho-interacting, serine/threonine kinase 21)
hsa-miR-509-3-5p	0	0	1	0	0	0	THSD7A	thrombospondin, type I, domain containing 7A
hsa-miR-509-3-5p	0	0	1	1	1	1	TBC1D30	TBC1 domain family, member 30
hsa-miR-509-3-5p	1	0	1	1	1	1	RPGRIP1L	RPGRIP1-like
hsa-miR-509-3-5p	1	0	1	1	0	0	FRMD4B	FERM domain containing 4B
hsa-miR-509-3-5p	0	0	1	0	1	1	TP53TG3	TP53 target 3
hsa-miR-509-3-5p	0	0	1	0	0	0	TP53TG3B	TP53 target 3B
hsa-miR-509-3-5p	1	0	1	1	0	0	KIAA1045	KIAA1045
hsa-miR-509-3-5p	1	0	1	1	1	1	NLGN1	neuroligin 1
hsa-miR-509-3-5p	1	0	1	0	1	1	ZNF507	zinc finger protein 507
hsa-miR-509-3-5p	0	0	1	1	0	0	RTEL1	regulator of telomere elongation helicase 1
hsa-miR-509-3-5p	1	0	1	1	1	1	PRRC2C	proline-rich coiled-coil 2C
hsa-miR-509-3-5p	1	0	1	1	1	1	SPIRE1	spire homolog 1 (Drosophila)
hsa-miR-509-3-5p	1	0	1	1	0	0	PPM1H	protein phosphatase, Mg2+/Mn2+ dependent, 1H
hsa-miR-509-3-5p	1	0	1	1	1	1	RALGAPB	Ral GTPase activating protein, beta subunit (non-catalytic)
hsa-miR-509-3-5p	1	0	1	1	0	0	ATAD2B	ATPase family, AAA domain containing 2B
hsa-miR-509-3-5p	1	0	1	1	1	1	DKK2	dickkopf 2 homolog (Xenopus laevis)
hsa-miR-509-3-5p	0	0	1	1	1	1	CA10	carbonic anhydrase X
hsa-miR-509-3-5p	1	0	1	1	1	1	TAOK1	TAO kinase 1
hsa-miR-509-3-5p	1	0	1	1	1	1	FAM135A	family with sequence similarity 135, member A
hsa-miR-509-3-5p	0	0	1	0	0	0	KRT19P2	keratin 19 pseudogene 2
hsa-miR-509-3-5p	1	0	1	1	1	1	HIVEP3	human immunodeficiency virus type I enhancer binding protein 3
hsa-miR-509-3-5p	0	0	1	0	1	1	ZSWIM6	zinc finger, SWIM-type containing 6
hsa-miR-509-3-5p	0	0	1	1	0	0	TMEM132A	transmembrane protein 132A
hsa-miR-509-3-5p	1	0	1	1	1	1	ZNF532	zinc finger protein 532
hsa-miR-509-3-5p	1	0	1	0	0	0	TANC2	tetratricopeptide repeat, ankyrin repeat and coiled-coil containing 2
hsa-miR-509-3-5p	1	0	1	1	1	1	SNX3	sorting nexin 3
hsa-miR-509-3-5p	0	0	1	0	1	1	SETD5	SET domain containing 5
hsa-miR-509-3-5p	1	0	1	0	1	1	RIMS1	regulating synaptic membrane exocytosis 1
hsa-miR-509-3-5p	1	0	1	1	1	1	LCOR	ligand dependent nuclear receptor corepressor
hsa-miR-509-3-5p	0	0	1	1	0	0	COL27A1	collagen, type XXVII, alpha 1
hsa-miR-509-3-5p	1	0	1	1	1	1	AHCTF1	AT hook containing transcription factor 1
hsa-miR-509-3-5p	1	0	1	1	1	1	LSM14A	LSM14A, SCD6 homolog A (S. cerevisiae)
hsa-miR-509-3-5p	1	0	1	1	1	1	BCL2L11	BCL2-like 11 (apoptosis facilitator)
hsa-miR-509-3-5p	1	0	1	1	1	1	MAT2B	methionine adenosyltransferase II, beta
hsa-miR-509-3-5p	1	0	1	1	0	0	ADC	arginine decarboxylase
hsa-miR-509-3-5p	1	0	1	1	1	1	SH3TC2	SH3 domain and tetratricopeptide repeats 2
hsa-miR-509-3-5p	1	0	1	0	0	0	FAT3	FAT tumor suppressor homolog 3 (Drosophila)
hsa-miR-509-3-5p	1	0	1	0	1	1	RNF43	ring finger protein 43
hsa-miR-509-3-5p	1	0	1	0	0	0	RNF169	ring finger protein 169
hsa-miR-509-3-5p	1	0	1	1	1	1	PAN3	PAN3 poly(A) specific ribonuclease subunit homolog (S. cerevisiae)
hsa-miR-509-3-5p	1	0	1	1	1	1	ADARB1	adenosine deaminase, RNA-specific, B1
hsa-miR-509-3-5p	1	0	1	0	1	1	LRBA	LPS-responsive vesicle trafficking, beach and anchor containing
hsa-miR-509-3-5p	0	0	1	1	0	0	CPT1C	carnitine palmitoyltransferase 1C
hsa-miR-509-3-5p	1	0	1	1	1	1	MEF2A	myocyte enhancer factor 2A
hsa-miR-509-3-5p	1	0	1	1	1	1	CLIP4	CAP-GLY domain containing linker protein family, member 4
hsa-miR-509-3-5p	1	0	1	1	1	1	SYNCRIP	synaptotagmin binding, cytoplasmic RNA interacting protein
hsa-miR-509-3-5p	1	0	1	0	1	1	PLAG1	pleiomorphic adenoma gene 1
hsa-miR-509-3-5p	1	0	1	1	0	0	CACNB1	calcium channel, voltage-dependent, beta 1 subunit
hsa-miR-509-3-5p	1	0	1	0	1	1	DPYSL2	dihydropyrimidinase-like 2
hsa-miR-509-3-5p	0	0	1	0	1	1	NPY1R	neuropeptide Y receptor Y1
hsa-miR-509-3-5p	1	0	1	1	1	1	EPHA7	EPH receptor A7
hsa-miR-509-3-5p	1	0	1	1	1	1	SATB2	SATB homeobox 2
hsa-miR-509-3-5p	1	0	1	1	1	1	MAP4	microtubule-associated protein 4
hsa-miR-509-3-5p	1	0	1	1	1	1	ANK1	ankyrin 1, erythrocytic
hsa-miR-509-3-5p	0	0	1	1	0	0	IFT27	intraflagellar transport 27 homolog (Chlamydomonas)
hsa-miR-509-3-5p	0	0	1	1	1	1	RYR1	ryanodine receptor 1 (skeletal)
hsa-miR-509-3-5p	0	0	1	1	1	1	ACO1	aconitase 1, soluble
hsa-miR-509-3-5p	1	0	1	1	1	1	MYO5A	myosin VA (heavy chain 12, myoxin)
hsa-miR-509-3-5p	0	0	1	1	0	0	EIF4E2	eukaryotic translation initiation factor 4E family member 2
hsa-miR-509-3-5p	0	0	1	1	1	1	GPM6B	glycoprotein M6B
hsa-miR-509-3-5p	0	0	1	1	0	0	EIF2B4	eukaryotic translation initiation factor 2B, subunit 4 delta, 67kDa
hsa-miR-509-3-5p	0	0	1	1	0	0	ITGA2B	integrin, alpha 2b (platelet glycoprotein IIb of IIb/IIIa complex, antigen CD41)
hsa-miR-509-3-5p	0	0	1	1	0	0	HLA-DMB	major histocompatibility complex, class II, DM beta
hsa-miR-509-3-5p	1	0	1	1	1	1	DDX17	DEAD (Asp-Glu-Ala-Asp) box helicase 17
hsa-miR-509-3-5p	1	0	1	1	1	1	IPO8	importin 8
hsa-miR-509-3-5p	1	0	1	1	1	1	EPB41	erythrocyte membrane protein band 4.1 (elliptocytosis 1, RH-linked)
hsa-miR-509-3-5p	0	0	1	1	1	1	ALDH3B1	aldehyde dehydrogenase 3 family, member B1
hsa-miR-509-3-5p	0	0	1	1	1	1	KIF3A	kinesin family member 3A
hsa-miR-509-3-5p	1	0	1	1	0	0	KAT5	K(lysine) acetyltransferase 5
hsa-miR-509-3-5p	1	0	1	1	1	1	TLE1	transducin-like enhancer of split 1 (E(sp1) homolog, Drosophila)
hsa-miR-509-3-5p	1	0	1	1	1	1	OSBPL10	oxysterol binding protein-like 10
hsa-miR-509-3-5p	1	0	1	0	1	1	PDE7B	phosphodiesterase 7B
hsa-miR-509-3-5p	1	0	1	1	1	1	MEF2D	myocyte enhancer factor 2D
hsa-miR-509-3-5p	1	0	1	1	1	1	PICALM	phosphatidylinositol binding clathrin assembly protein
hsa-miR-509-3-5p	0	0	1	1	1	1	ACLY	ATP citrate lyase
hsa-miR-509-3-5p	0	0	1	0	0	0	MIAT	myocardial infarction associated transcript (non-protein coding)
hsa-miR-509-3-5p	1	0	1	1	1	1	PDLIM3	PDZ and LIM domain 3
hsa-miR-509-3-5p	0	0	1	1	0	0	MUC3A	mucin 3A, cell surface associated
hsa-miR-509-3-5p	1	0	1	0	1	1	MLL2	myeloid/lymphoid or mixed-lineage leukemia 2
hsa-miR-509-3-5p	1	0	1	1	1	1	SLC4A4	solute carrier family 4, sodium bicarbonate cotransporter, member 4
hsa-miR-509-3-5p	0	0	1	0	0	0	ALOX12P2	arachidonate 12-lipoxygenase pseudogene 2
hsa-miR-509-3-5p	1	0	1	0	0	0	MAP3K1	mitogen-activated protein kinase kinase kinase 1, E3 ubiquitin protein ligase
hsa-miR-509-3-5p	0	0	1	1	1	1	KHDRBS3	KH domain containing, RNA binding, signal transduction associated 3
hsa-miR-509-3-5p	1	0	1	1	1	1	PFKFB3	6-phosphofructo-2-kinase/fructose-2,6-biphosphatase 3
hsa-miR-509-3-5p	1	0	1	1	1	1	CTNND1	catenin (cadherin-associated protein), delta 1
hsa-miR-509-3-5p	1	0	1	1	1	1	ERLIN1	ER lipid raft associated 1
hsa-miR-509-3-5p	1	0	1	1	1	1	CBFA2T2	core-binding factor, runt domain, alpha subunit 2; translocated to, 2
hsa-miR-509-3-5p	0	0	1	1	1	1	LYPLA1	lysophospholipase I
hsa-miR-509-3-5p	1	0	1	1	1	1	ZNF236	zinc finger protein 236
hsa-miR-509-3-5p	1	0	1	1	1	1	VAPB	VAMP (vesicle-associated membrane protein)-associated protein B and C
hsa-miR-509-3-5p	0	0	1	1	1	1	FHL1	four and a half LIM domains 1
hsa-miR-509-3-5p	0	0	1	1	1	1	SH2D1A	SH2 domain containing 1A
hsa-miR-509-3-5p	1	0	1	1	1	1	SLMAP	sarcolemma associated protein
hsa-miR-509-3-5p	0	0	1	1	1	1	GUCA1C	guanylate cyclase activator 1C
hsa-miR-509-3-5p	1	0	1	1	1	1	LRRFIP1	leucine rich repeat (in FLII) interacting protein 1
hsa-miR-509-3-5p	0	0	1	1	1	1	ACIN1	apoptotic chromatin condensation inducer 1
hsa-miR-509-3-5p	1	0	1	0	1	1	WDR82	WD repeat domain 82
hsa-miR-509-3-5p	1	0	1	1	1	1	SORBS1	sorbin and SH3 domain containing 1
hsa-miR-509-3-5p	1	0	1	1	1	1	AASDHPPT	aminoadipate-semialdehyde dehydrogenase-phosphopantetheinyl transferase
hsa-miR-509-3-5p	0	0	1	0	1	1	ZC3HAV1	zinc finger CCCH-type, antiviral 1
hsa-miR-509-3-5p	1	0	1	0	1	1	BECN1	beclin 1, autophagy related
hsa-miR-509-3-5p	0	0	1	0	1	1	CLEC5A	C-type lectin domain family 5, member A
hsa-miR-509-3-5p	0	0	1	1	1	1	HEPH	hephaestin
hsa-miR-509-3-5p	1	0	1	1	1	1	USP15	ubiquitin specific peptidase 15
hsa-miR-509-3-5p	1	0	1	1	1	1	ANKRD13A	ankyrin repeat domain 13A
hsa-miR-509-3-5p	0	0	1	0	1	1	PDP1	pyruvate dehyrogenase phosphatase catalytic subunit 1
hsa-miR-509-3-5p	0	0	1	1	0	0	MVK	mevalonate kinase
hsa-miR-509-3-5p	0	0	1	1	1	1	CD28	CD28 molecule
hsa-miR-509-3-5p	0	0	1	1	1	1	MFF	mitochondrial fission factor
hsa-miR-509-3-5p	0	0	1	1	1	1	KIAA1704	KIAA1704
hsa-miR-509-3-5p	1	0	1	1	1	1	SH3GLB1	SH3-domain GRB2-like endophilin B1
hsa-miR-509-3-5p	1	0	1	0	1	1	TRPS1	trichorhinophalangeal syndrome I
hsa-miR-509-3-5p	1	0	1	1	1	1	ERGIC1	endoplasmic reticulum-golgi intermediate compartment (ERGIC) 1
hsa-miR-509-3-5p	1	0	1	1	1	1	PCDH11Y	protocadherin 11 Y-linked
hsa-miR-509-3-5p	1	0	1	1	1	1	DCLRE1B	DNA cross-link repair 1B
hsa-miR-509-3-5p	1	0	1	1	1	1	LETMD1	LETM1 domain containing 1
hsa-miR-509-3-5p	1	0	1	1	1	1	CPEB1	cytoplasmic polyadenylation element binding protein 1
hsa-miR-509-3-5p	0	0	1	1	1	1	SEMA6C	sema domain, transmembrane domain (TM), and cytoplasmic domain, (semaphorin) 6C
hsa-miR-509-3-5p	0	0	1	1	0	0	TRO	trophinin
hsa-miR-509-3-5p	1	0	1	1	1	1	PBX3	pre-B-cell leukemia homeobox 3
hsa-miR-509-3-5p	1	0	1	1	1	1	ATAD1	ATPase family, AAA domain containing 1
hsa-miR-509-3-5p	0	0	1	1	1	1	CASP8	caspase 8, apoptosis-related cysteine peptidase
hsa-miR-509-3-5p	0	0	1	0	1	1	MYO3B	myosin IIIB
hsa-miR-509-3-5p	0	0	1	1	0	0	SNRPN	small nuclear ribonucleoprotein polypeptide N
hsa-miR-509-3-5p	1	0	1	1	1	1	NTRK2	neurotrophic tyrosine kinase, receptor, type 2
hsa-miR-509-3-5p	1	0	1	1	1	1	STX16	syntaxin 16
hsa-miR-509-3-5p	0	0	1	0	0	0	RMST	rhabdomyosarcoma 2 associated transcript (non-protein coding)
hsa-miR-509-3-5p	1	0	1	1	0	0	YTHDF2	YTH domain family, member 2
hsa-miR-509-3-5p	1	0	1	1	0	0	POLR2J3	polymerase (RNA) II (DNA directed) polypeptide J3
hsa-miR-509-3-5p	1	0	1	1	1	1	WAPAL	wings apart-like homolog (Drosophila)
hsa-miR-509-3-5p	0	0	1	1	1	1	SLC2A14	solute carrier family 2 (facilitated glucose transporter), member 14
hsa-miR-509-3-5p	0	0	1	1	0	0	SVIP	small VCP/p97-interacting protein
hsa-miR-509-3-5p	0	0	1	1	1	1	PTK7	PTK7 protein tyrosine kinase 7
hsa-miR-509-3-5p	0	0	1	1	1	1	ANKRD36B	ankyrin repeat domain 36B
hsa-miR-509-3-5p	1	0	1	1	1	1	AFF2	AF4/FMR2 family, member 2
hsa-miR-509-3-5p	0	0	1	1	1	1	GNAS	GNAS complex locus
hsa-miR-509-3-5p	0	0	1	0	0	0	CACNA2D3	calcium channel, voltage-dependent, alpha 2/delta subunit 3
hsa-miR-509-3-5p	1	0	1	1	1	1	VAMP7	vesicle-associated membrane protein 7
hsa-miR-509-3-5p	0	0	1	1	1	1	STK33	serine/threonine kinase 33
hsa-miR-509-3-5p	0	0	1	0	0	0	CD177	CD177 molecule
hsa-miR-509-3-5p	1	0	1	1	1	1	NRXN3	neurexin 3
hsa-miR-509-3-5p	1	0	1	1	1	1	PPP3CB	protein phosphatase 3, catalytic subunit, beta isozyme
hsa-miR-509-3-5p	0	0	1	1	0	0	KIAA1324	KIAA1324
hsa-miR-509-3-5p	1	0	1	1	1	1	ARL4C	ADP-ribosylation factor-like 4C
hsa-miR-509-3-5p	0	0	1	1	1	1	PHACTR3	phosphatase and actin regulator 3
hsa-miR-509-3-5p	1	0	1	1	1	1	SYT14	synaptotagmin XIV
hsa-miR-509-3-5p	0	0	1	1	0	0	C22orf24	chromosome 22 open reading frame 24
hsa-miR-509-3-5p	1	0	1	1	1	1	PPP1R9A	protein phosphatase 1, regulatory subunit 9A
hsa-miR-509-3-5p	0	0	1	1	1	1	ESRP1	epithelial splicing regulatory protein 1
hsa-miR-509-3-5p	1	0	1	1	1	1	AKAP2	A kinase (PRKA) anchor protein 2
hsa-miR-509-3-5p	1	0	1	0	1	1	NFAT5	nuclear factor of activated T-cells 5, tonicity-responsive
hsa-miR-509-3-5p	0	0	1	0	0	0	RNF31	ring finger protein 31
hsa-miR-509-3-5p	1	0	1	1	1	1	CCZ1B	CCZ1 vacuolar protein trafficking and biogenesis associated homolog B (S. cerevisiae)
hsa-miR-509-3-5p	0	0	1	1	1	1	STOX2	storkhead box 2
hsa-miR-509-3-5p	1	0	1	1	1	1	CADM3	cell adhesion molecule 3
hsa-miR-509-3-5p	0	0	1	1	1	1	THUMPD3	THUMP domain containing 3
hsa-miR-509-3-5p	1	0	1	1	1	1	LRRN3	leucine rich repeat neuronal 3
hsa-miR-509-3-5p	1	0	1	1	1	1	MKLN1	muskelin 1, intracellular mediator containing kelch motifs
hsa-miR-509-3-5p	1	0	1	1	1	1	MYEF2	myelin expression factor 2
hsa-miR-509-3-5p	0	0	1	0	0	0	FLJ11235	uncharacterized FLJ11235
hsa-miR-509-3-5p	1	0	1	1	1	1	ACER3	alkaline ceramidase 3
hsa-miR-509-3-5p	0	0	1	1	0	0	UBR4	ubiquitin protein ligase E3 component n-recognin 4
hsa-miR-509-3-5p	1	0	1	1	0	0	YPEL3	yippee-like 3 (Drosophila)
hsa-miR-509-3-5p	1	0	1	1	1	1	WDTC1	WD and tetratricopeptide repeats 1
hsa-miR-509-3-5p	1	0	1	1	1	1	MACF1	microtubule-actin crosslinking factor 1
hsa-miR-509-3-5p	0	0	1	0	0	0	LINC00475	long intergenic non-protein coding RNA 475
hsa-miR-509-3-5p	1	0	1	1	1	1	BAIAP2	BAI1-associated protein 2
hsa-miR-509-3-5p	1	0	1	0	1	1	C14orf101	chromosome 14 open reading frame 101
hsa-miR-509-3-5p	0	0	1	1	1	1	CXorf57	chromosome X open reading frame 57
hsa-miR-509-3-5p	1	0	1	1	1	1	COPS7B	COP9 constitutive photomorphogenic homolog subunit 7B (Arabidopsis)
hsa-miR-509-3-5p	0	0	1	1	1	1	METTL7A	methyltransferase like 7A
hsa-miR-509-3-5p	1	0	1	1	1	1	GBF1	golgi brefeldin A resistant guanine nucleotide exchange factor 1
hsa-miR-509-3-5p	0	0	1	0	1	1	ATXN1L	ataxin 1-like
hsa-miR-509-3-5p	1	0	1	1	1	1	ARFGEF1	ADP-ribosylation factor guanine nucleotide-exchange factor 1 (brefeldin A-inhibited)
hsa-miR-509-3-5p	1	0	1	1	1	1	TNRC6A	trinucleotide repeat containing 6A
hsa-miR-509-3-5p	1	0	1	1	1	1	DSCAML1	Down syndrome cell adhesion molecule like 1
hsa-miR-509-3-5p	0	0	1	0	1	1	HEMK1	HemK methyltransferase family member 1
hsa-miR-509-3-5p	1	0	1	1	0	0	UBXN7	UBX domain protein 7
hsa-miR-509-3-5p	1	0	1	1	1	1	DCAF8	DDB1 and CUL4 associated factor 8
hsa-miR-509-3-5p	0	0	1	1	1	1	GTF2H1	general transcription factor IIH, polypeptide 1, 62kDa
hsa-miR-509-3-5p	1	0	1	0	1	1	TOX3	TOX high mobility group box family member 3
hsa-miR-509-3-5p	1	0	1	1	1	1	RNF185	ring finger protein 185
hsa-miR-509-3-5p	0	0	1	0	0	0	A1BG-AS1	A1BG antisense RNA 1
hsa-miR-509-3-5p	1	0	1	1	1	1	FOXP1	forkhead box P1
hsa-miR-509-3-5p	1	0	1	1	1	1	SEC63	SEC63 homolog (S. cerevisiae)
hsa-miR-509-3-5p	1	0	1	1	1	1	NFASC	neurofascin
hsa-miR-509-3-5p	1	0	1	1	1	1	FAM40A	family with sequence similarity 40, member A
hsa-miR-509-3-5p	1	0	1	1	1	1	HIF3A	hypoxia inducible factor 3, alpha subunit
hsa-miR-509-3-5p	1	0	1	1	1	1	SLAIN1	SLAIN motif family, member 1
hsa-miR-509-3-5p	0	0	1	1	0	0	IMPDH1	IMP (inosine 5'-monophosphate) dehydrogenase 1
hsa-miR-509-3-5p	0	0	1	1	0	0	HAGHL	hydroxyacylglutathione hydrolase-like
hsa-miR-509-3-5p	0	0	1	0	0	0	LOC254559	uncharacterized LOC254559
hsa-miR-509-3-5p	0	0	1	1	1	1	C8orf46	chromosome 8 open reading frame 46
hsa-miR-509-3-5p	0	0	1	1	1	1	GABRP	gamma-aminobutyric acid (GABA) A receptor, pi
hsa-miR-509-3-5p	0	0	1	0	0	0	FLJ30838	uncharacterized LOC400955
hsa-miR-509-3-5p	0	0	1	1	1	1	AGXT2	alanine--glyoxylate aminotransferase 2
hsa-miR-509-3-5p	1	0	1	1	1	1	AKT2	v-akt murine thymoma viral oncogene homolog 2
hsa-miR-509-3-5p	1	0	1	1	1	1	MAP3K7	mitogen-activated protein kinase kinase kinase 7
hsa-miR-509-3-5p	1	0	1	0	1	1	PTPRE	protein tyrosine phosphatase, receptor type, E
hsa-miR-509-3-5p	0	0	1	0	0	0	SEC14L2	SEC14-like 2 (S. cerevisiae)
hsa-miR-509-3-5p	1	0	1	1	1	1	SHISA5	shisa homolog 5 (Xenopus laevis)
hsa-miR-509-3-5p	0	0	1	1	1	1	BRD2	bromodomain containing 2
hsa-miR-509-3-5p	1	0	1	1	1	1	CLCN5	chloride channel, voltage-sensitive 5
hsa-miR-509-3-5p	0	0	1	0	0	0	LOC255187	hCG1980447
hsa-miR-509-3-5p	0	0	1	0	0	0	MAGI1-IT1	MAGI1 intronic transcript 1 (non-protein coding)
hsa-miR-509-3-5p	1	0	1	1	1	1	TPM3	tropomyosin 3
hsa-miR-509-3-5p	0	0	1	1	1	1	PSME3	proteasome (prosome, macropain) activator subunit 3 (PA28 gamma; Ki)
hsa-miR-509-3-5p	0	0	1	0	0	0	FLJ32742	uncharacterized locus FLJ32742
hsa-miR-509-3-5p	0	0	1	0	0	0	LOC100125918	uncharacterized LOC100125918
hsa-miR-509-3-5p	0	0	1	0	1	1	ARHGAP42	Rho GTPase activating protein 42
hsa-miR-509-3-5p	0	0	1	1	0	0	HSD3B7	hydroxy-delta-5-steroid dehydrogenase, 3 beta- and steroid delta-isomerase 7
hsa-miR-509-3-5p	0	0	1	1	1	1	RANBP17	RAN binding protein 17
hsa-miR-509-3-5p	1	0	1	0	1	1	NCAM1	neural cell adhesion molecule 1
hsa-miR-509-3-5p	0	0	1	0	0	0	UBE2QL1	ubiquitin-conjugating enzyme E2Q family-like 1
hsa-miR-509-3-5p	0	0	1	0	0	0	LINC00637	long intergenic non-protein coding RNA 637
hsa-miR-509-3-5p	0	0	1	0	1	1	CCDC68	coiled-coil domain containing 68
hsa-miR-509-3-5p	0	0	1	1	0	0	ANKAR	ankyrin and armadillo repeat containing
hsa-miR-509-3-5p	0	0	1	0	1	1	UHMK1	U2AF homology motif (UHM) kinase 1
hsa-miR-509-3-5p	0	0	1	0	0	0	C10orf105	chromosome 10 open reading frame 105
hsa-miR-509-3-5p	0	0	1	0	0	0	SDHAP2	succinate dehydrogenase complex, subunit A, flavoprotein pseudogene 2
hsa-miR-509-3-5p	0	0	1	1	1	1	CAMKV	CaM kinase-like vesicle-associated
hsa-miR-509-3-5p	0	0	1	1	0	0	PIGO	phosphatidylinositol glycan anchor biosynthesis, class O
hsa-miR-509-3-5p	1	0	1	1	1	1	BOC	Boc homolog (mouse)
hsa-miR-509-3-5p	1	0	1	1	1	1	ARIH2	ariadne homolog 2 (Drosophila)
hsa-miR-509-3-5p	1	0	1	1	1	1	SYN2	synapsin II
hsa-miR-509-3-5p	0	0	1	1	1	1	POU2F1	POU class 2 homeobox 1
hsa-miR-509-3-5p	1	0	1	1	1	1	SUPT16H	suppressor of Ty 16 homolog (S. cerevisiae)
hsa-miR-509-3-5p	0	0	1	1	0	0	CDK15	cyclin-dependent kinase 15
hsa-miR-509-3-5p	1	0	1	1	1	1	FBXW2	F-box and WD repeat domain containing 2
hsa-miR-509-3-5p	1	0	1	0	1	1	RNF114	ring finger protein 114
hsa-miR-509-3-5p	1	0	1	1	1	1	MAFK	v-maf musculoaponeurotic fibrosarcoma oncogene homolog K (avian)
hsa-miR-509-3-5p	0	0	1	1	1	1	NRBP1	nuclear receptor binding protein 1
hsa-miR-509-3-5p	0	0	1	1	1	1	AP5S1	adaptor-related protein complex 5, sigma 1 subunit
hsa-miR-509-3-5p	0	0	1	0	0	0	LOC283887	uncharacterized LOC283887
hsa-miR-509-3-5p	0	0	1	1	0	0	AXDND1	axonemal dynein light chain domain containing 1
hsa-miR-509-3-5p	1	0	1	1	1	1	DEM1	defects in morphology 1 homolog (S. cerevisiae)
hsa-miR-509-3-5p	0	0	1	0	0	0	CXXC1P1	CXXC finger protein 1 pseudogene 1
hsa-miR-509-3-5p	1	0	1	1	1	1	LRRC57	leucine rich repeat containing 57
hsa-miR-509-3-5p	1	0	1	1	1	1	CTNNA1	catenin (cadherin-associated protein), alpha 1, 102kDa
hsa-miR-509-3-5p	0	0	1	1	0	0	WBP1	WW domain binding protein 1
hsa-miR-509-3-5p	0	0	1	0	1	1	KANSL2	KAT8 regulatory NSL complex subunit 2
hsa-miR-509-3-5p	1	0	1	1	1	1	KLC2	kinesin light chain 2
hsa-miR-509-3-5p	1	0	1	1	1	1	PTPRU	protein tyrosine phosphatase, receptor type, U
hsa-miR-509-3-5p	1	0	1	1	1	1	KIAA0195	KIAA0195
hsa-miR-509-3-5p	1	0	1	1	1	1	CPNE8	copine VIII
hsa-miR-509-3-5p	1	0	1	1	1	1	CUL2	cullin 2
hsa-miR-509-3-5p	0	0	1	1	1	1	MYO6	myosin VI
hsa-miR-509-3-5p	1	0	1	1	1	1	EPHB1	EPH receptor B1
hsa-miR-509-3-5p	1	0	1	0	1	1	UVRAG	UV radiation resistance associated gene
hsa-miR-509-3-5p	0	0	1	1	1	1	AQP3	aquaporin 3 (Gill blood group)
hsa-miR-509-3-5p	0	0	1	1	1	1	SIRPB2	signal-regulatory protein beta 2
hsa-miR-509-3-5p	1	0	1	1	1	1	SPATS2	spermatogenesis associated, serine-rich 2
hsa-miR-509-3-5p	1	0	1	1	1	1	ANKRD10	ankyrin repeat domain 10
hsa-miR-509-3-5p	1	0	1	0	1	1	NAA60	N(alpha)-acetyltransferase 60, NatF catalytic subunit
hsa-miR-509-3-5p	1	0	1	1	1	1	CS	citrate synthase
hsa-miR-509-3-5p	1	0	1	0	1	1	STC2	stanniocalcin 2
hsa-miR-509-3-5p	1	0	1	1	1	1	PEA15	phosphoprotein enriched in astrocytes 15
hsa-miR-509-3-5p	1	0	1	1	1	1	EPB41L4A	erythrocyte membrane protein band 4.1 like 4A
hsa-miR-509-3-5p	0	0	1	1	0	0	TRIM46	tripartite motif containing 46
hsa-miR-509-3-5p	0	0	1	1	0	0	ERGIC3	ERGIC and golgi 3
hsa-miR-509-3-5p	1	0	1	1	1	1	TCEANC2	transcription elongation factor A (SII) N-terminal and central domain containing 2
hsa-miR-509-3-5p	1	0	1	1	0	0	CHD3	chromodomain helicase DNA binding protein 3
hsa-miR-509-3-5p	1	0	1	1	1	1	SLC30A6	solute carrier family 30 (zinc transporter), member 6
hsa-miR-509-3-5p	0	0	1	0	0	0	LOC285505	uncharacterized LOC285505
hsa-miR-509-3-5p	1	0	1	1	1	1	CA12	carbonic anhydrase XII
hsa-miR-509-3-5p	1	0	1	1	1	1	KL	klotho
hsa-miR-509-3-5p	1	0	1	1	1	1	RAB11FIP4	RAB11 family interacting protein 4 (class II)
hsa-miR-509-3-5p	1	0	1	0	1	1	AGFG1	ArfGAP with FG repeats 1
hsa-miR-509-3-5p	0	0	1	0	0	0	DNAJB8-AS1	DNAJB8 antisense RNA 1
hsa-miR-509-3-5p	0	0	1	0	0	0	LOC284385	uncharacterized LOC284385
hsa-miR-509-3-5p	0	0	1	1	0	0	PSAPL1	prosaposin-like 1 (gene/pseudogene)
hsa-miR-509-3-5p	0	0	1	1	0	0	MEI1	meiosis inhibitor 1
hsa-miR-509-3-5p	0	0	1	0	0	0	LINC00514	long intergenic non-protein coding RNA 514
hsa-miR-509-3-5p	0	0	1	0	0	0	CECR7	cat eye syndrome chromosome region, candidate 7 (non-protein coding)
hsa-miR-509-3-5p	1	0	1	1	1	1	ZCCHC2	zinc finger, CCHC domain containing 2
hsa-miR-509-3-5p	0	0	1	1	1	1	ASAH1	N-acylsphingosine amidohydrolase (acid ceramidase) 1
hsa-miR-509-3-5p	0	0	1	1	1	1	TRPM7	transient receptor potential cation channel, subfamily M, member 7
hsa-miR-509-3-5p	0	0	1	0	0	0	LOC338579	ankyrin repeat domain-containing protein 30B pseudogene
hsa-miR-509-3-5p	0	0	1	0	0	0	GTF2IP1	general transcription factor IIi, pseudogene 1
hsa-miR-509-3-5p	1	0	1	1	1	1	GLUD1	glutamate dehydrogenase 1
hsa-miR-509-3-5p	1	0	1	1	1	1	HBP1	HMG-box transcription factor 1
hsa-miR-509-3-5p	0	0	1	1	0	0	KIAA0146	KIAA0146
hsa-miR-509-3-5p	0	0	1	1	0	0	MARS	methionyl-tRNA synthetase
hsa-miR-509-3-5p	0	0	1	1	0	0	ZNF335	zinc finger protein 335
hsa-miR-509-3-5p	0	0	1	1	0	0	SLC26A10	solute carrier family 26, member 10
hsa-miR-509-3-5p	0	0	1	1	1	1	FRMPD2	FERM and PDZ domain containing 2
hsa-miR-509-3-5p	0	0	1	1	1	1	DNAJC24	DnaJ (Hsp40) homolog, subfamily C, member 24
hsa-miR-509-3-5p	1	0	1	1	1	1	PDZD4	PDZ domain containing 4
hsa-miR-509-3-5p	1	0	1	1	1	1	IKBKAP	inhibitor of kappa light polypeptide gene enhancer in B-cells, kinase complex-associated protein
hsa-miR-509-3-5p	1	0	1	1	1	1	EGLN3	egl nine homolog 3 (C. elegans)
hsa-miR-509-3-5p	0	0	1	1	1	1	CC2D2B	coiled-coil and C2 domain containing 2B
hsa-miR-509-3-5p	0	0	1	0	0	0	LOC650368	asparagine-linked glycosylation 1-like pseudogene
hsa-miR-509-3-5p	1	0	1	1	1	1	IPPK	inositol 1,3,4,5,6-pentakisphosphate 2-kinase
hsa-miR-509-3-5p	1	0	1	1	1	1	ADAMTS8	ADAM metallopeptidase with thrombospondin type 1 motif, 8
hsa-miR-509-3-5p	1	0	1	0	0	0	GPR137C	G protein-coupled receptor 137C
hsa-miR-509-3-5p	1	0	1	1	1	1	SH2D4B	SH2 domain containing 4B
hsa-miR-509-3-5p	1	0	1	0	1	1	DCUN1D4	DCN1, defective in cullin neddylation 1, domain containing 4 (S. cerevisiae)
hsa-miR-509-3-5p	0	0	1	1	0	0	SSPO	SCO-spondin homolog (Bos taurus)
hsa-miR-509-3-5p	1	0	1	1	1	1	CORO2B	coronin, actin binding protein, 2B
hsa-miR-509-3-5p	1	0	1	1	1	1	XPO1	exportin 1 (CRM1 homolog, yeast)
hsa-miR-509-3-5p	1	0	1	1	1	1	C17orf85	chromosome 17 open reading frame 85
hsa-miR-509-3-5p	1	0	1	1	1	1	ATXN7	ataxin 7
hsa-miR-509-3-5p	1	0	1	1	1	1	PIAS3	protein inhibitor of activated STAT, 3
hsa-miR-509-3-5p	0	0	1	0	1	1	PRELID2	PRELI domain containing 2
hsa-miR-509-3-5p	0	0	1	1	1	1	MKX	mohawk homeobox
hsa-miR-509-3-5p	1	0	1	1	1	1	SACS	spastic ataxia of Charlevoix-Saguenay (sacsin)
hsa-miR-509-3-5p	1	0	1	0	0	0	MSL1	male-specific lethal 1 homolog (Drosophila)
hsa-miR-509-3-5p	1	0	1	1	1	1	DPY19L3	dpy-19-like 3 (C. elegans)
hsa-miR-509-3-5p	0	0	1	0	0	0	FAM95B1	family with sequence similarity 95, member B1
hsa-miR-509-3-5p	0	0	1	1	1	1	RBM46	RNA binding motif protein 46
hsa-miR-509-3-5p	1	0	1	1	1	1	TP53INP1	tumor protein p53 inducible nuclear protein 1
hsa-miR-509-3-5p	1	0	1	1	1	1	PIK3R1	phosphoinositide-3-kinase, regulatory subunit 1 (alpha)
hsa-miR-509-3-5p	1	0	1	1	1	1	NCAN	neurocan
hsa-miR-509-3-5p	0	0	1	1	1	1	ZFYVE28	zinc finger, FYVE domain containing 28
hsa-miR-509-3-5p	0	0	1	0	0	0	PLEKHD1	pleckstrin homology domain containing, family D (with coiled-coil domains) member 1
hsa-miR-509-3-5p	1	0	1	1	1	1	DLG2	discs, large homolog 2 (Drosophila)
hsa-miR-509-3-5p	1	0	1	1	1	1	IBTK	inhibitor of Bruton agammaglobulinemia tyrosine kinase
hsa-miR-509-3-5p	0	0	1	0	0	0	RPL23AP53	ribosomal protein L23a pseudogene 53
hsa-miR-509-3-5p	0	0	1	1	1	1	MOBP	myelin-associated oligodendrocyte basic protein
hsa-miR-509-3-5p	0	0	1	0	0	0	LOC100127955	uncharacterized LOC100127955
hsa-miR-509-3-5p	0	0	1	1	1	1	USP4	ubiquitin specific peptidase 4 (proto-oncogene)
hsa-miR-509-3-5p	0	0	1	1	1	1	RAB37	RAB37, member RAS oncogene family
hsa-miR-509-3-5p	1	0	1	1	1	1	CLTC	clathrin, heavy chain (Hc)
hsa-miR-509-3-5p	0	0	1	1	1	1	RALGAPA2	Ral GTPase activating protein, alpha subunit 2 (catalytic)
hsa-miR-509-3-5p	1	0	1	1	0	0	SLC30A3	solute carrier family 30 (zinc transporter), member 3
hsa-miR-509-3-5p	1	0	1	1	1	1	HYOU1	hypoxia up-regulated 1
hsa-miR-509-3-5p	1	0	1	1	1	1	PHF17	PHD finger protein 17
hsa-miR-509-3-5p	0	0	1	1	1	1	ERI2	ERI1 exoribonuclease family member 2
hsa-miR-509-3-5p	1	0	1	1	1	1	ENAH	enabled homolog (Drosophila)
hsa-miR-509-3-5p	1	0	1	1	0	0	PEAK1	NKF3 kinase family member
hsa-miR-509-3-5p	1	0	1	0	1	1	FNDC3B	fibronectin type III domain containing 3B
hsa-miR-509-3-5p	0	0	1	0	0	0	ERVFRD-2	endogenous retrovirus group FRD, member 2
hsa-miR-509-3-5p	0	0	1	1	0	0	BPIFB1	BPI fold containing family B, member 1
hsa-miR-509-3-5p	1	0	1	0	1	1	CAPRIN1	cell cycle associated protein 1
hsa-miR-509-3-5p	0	0	1	0	1	1	LOC401321	uncharacterized LOC401321
hsa-miR-509-3-5p	0	0	1	0	0	0	FAM205B	transmembrane protein C9orf144B pseudogene
hsa-miR-509-3-5p	0	0	1	0	0	0	FLJ46361	deleted in malignant brain tumors 1 pseudogene
hsa-miR-509-3-5p	1	0	1	1	1	1	FRYL	FRY-like
hsa-miR-509-3-5p	0	0	1	1	1	1	SLC11A2	solute carrier family 11 (proton-coupled divalent metal ion transporters), member 2
hsa-miR-509-3-5p	0	0	1	0	0	0	IDO2	indoleamine 2,3-dioxygenase 2
hsa-miR-509-3-5p	0	0	1	0	0	0	LOC100129940	uncharacterized LOC100129940
hsa-miR-509-3-5p	1	0	1	1	1	1	ADAMTSL1	ADAMTS-like 1
hsa-miR-509-3-5p	1	0	1	1	1	1	ADAMTS19	ADAM metallopeptidase with thrombospondin type 1 motif, 19
hsa-miR-509-3-5p	1	0	1	0	1	1	CYB561D1	cytochrome b-561 domain containing 1
hsa-miR-509-3-5p	0	0	1	1	1	1	LYPD1	LY6/PLAUR domain containing 1
hsa-miR-509-3-5p	0	0	1	1	1	1	SQRDL	sulfide quinone reductase-like (yeast)
hsa-miR-509-3-5p	0	0	1	1	1	1	ENPP2	ectonucleotide pyrophosphatase/phosphodiesterase 2
hsa-miR-509-3-5p	0	0	1	1	1	1	BRAT1	BRCA1-associated ATM activator 1
hsa-miR-509-3-5p	1	0	1	0	1	1	ESRRG	estrogen-related receptor gamma
hsa-miR-509-3-5p	1	0	1	1	0	0	FOXP2	forkhead box P2
hsa-miR-509-3-5p	0	0	1	1	1	1	RAD51	RAD51 homolog (S. cerevisiae)
hsa-miR-509-3-5p	1	0	1	1	1	1	RNF111	ring finger protein 111
hsa-miR-509-3-5p	0	0	1	0	0	0	LOC100124692	maltase-glucoamylase (alpha-glucosidase) pseudogene
hsa-miR-509-3-5p	0	0	1	1	1	1	SLC36A3	solute carrier family 36 (proton/amino acid symporter), member 3
hsa-miR-509-3-5p	0	0	1	0	0	0	AGAP9	ArfGAP with GTPase domain, ankyrin repeat and PH domain 9
hsa-miR-509-3-5p	1	0	1	1	1	1	SLC39A9	solute carrier family 39 (zinc transporter), member 9
hsa-miR-509-3-5p	1	0	1	0	1	1	TMEM106B	transmembrane protein 106B
hsa-miR-509-3-5p	0	0	1	0	0	0	RRN3P2	RNA polymerase I transcription factor homolog (S. cerevisiae) pseudogene 2
hsa-miR-509-3-5p	1	0	1	1	1	1	CAMK2G	calcium/calmodulin-dependent protein kinase II gamma
hsa-miR-509-3-5p	1	0	1	1	1	1	UPK1B	uroplakin 1B
hsa-miR-509-3-5p	1	0	1	1	1	1	LUC7L3	LUC7-like 3 (S. cerevisiae)
hsa-miR-509-3-5p	1	0	1	1	0	0	PRRC2B	proline-rich coiled-coil 2B
hsa-miR-509-3-5p	0	0	1	1	0	0	FAAH	fatty acid amide hydrolase
hsa-miR-509-3-5p	0	0	1	1	1	1	TFDP2	transcription factor Dp-2 (E2F dimerization partner 2)
hsa-miR-509-3-5p	1	0	1	0	1	1	SLC2A3	solute carrier family 2 (facilitated glucose transporter), member 3
hsa-miR-509-3-5p	0	0	1	0	0	0	POM121L9P	POM121 transmembrane nucleoporin-like 9, pseudogene
hsa-miR-509-3-5p	1	0	1	1	1	1	TAB2	TGF-beta activated kinase 1/MAP3K7 binding protein 2
hsa-miR-509-3-5p	1	0	1	1	1	1	ARF6	ADP-ribosylation factor 6
hsa-miR-509-3-5p	0	0	1	1	1	1	ARIH1	ariadne homolog, ubiquitin-conjugating enzyme E2 binding protein, 1 (Drosophila)
hsa-miR-509-3-5p	0	0	1	1	1	1	GFAP	glial fibrillary acidic protein
hsa-miR-509-3-5p	0	0	1	0	0	0	KIAA0913	KIAA0913
hsa-miR-509-3-5p	0	0	1	1	1	1	ZNF280D	zinc finger protein 280D
hsa-miR-509-3-5p	1	0	1	1	1	1	SLC25A36	solute carrier family 25 (pyrimidine nucleotide carrier ), member 36
hsa-miR-509-3-5p	0	0	1	1	1	1	RHOT1	ras homolog family member T1
hsa-miR-509-3-5p	0	0	1	1	1	1	STAG3L1	stromal antigen 3-like 1
hsa-miR-509-3-5p	0	0	1	1	1	1	UBE3D	ubiquitin protein ligase E3D
hsa-miR-509-3-5p	1	0	1	1	1	1	ERI1	exoribonuclease 1
hsa-miR-509-3-5p	0	0	1	1	1	1	SYNJ2	synaptojanin 2
hsa-miR-509-3-5p	1	0	1	0	1	1	GPR85	G protein-coupled receptor 85
hsa-miR-509-3-5p	1	0	1	1	1	1	NEO1	neogenin 1
hsa-miR-509-3-5p	0	0	1	0	0	0	FAM66D	family with sequence similarity 66, member D
hsa-miR-509-3-5p	1	0	1	0	0	0	SYNPO	synaptopodin
hsa-miR-509-3-5p	1	0	1	1	1	1	MIER1	mesoderm induction early response 1 homolog (Xenopus laevis)
hsa-miR-509-3-5p	1	0	1	1	1	1	MTMR10	myotubularin related protein 10
hsa-miR-509-3-5p	1	0	1	1	1	1	FAM126B	family with sequence similarity 126, member B
hsa-miR-509-3-5p	1	0	1	0	1	1	HNRNPA3	heterogeneous nuclear ribonucleoprotein A3
hsa-miR-509-3-5p	0	0	1	1	1	1	SRSF11	serine/arginine-rich splicing factor 11
hsa-miR-509-3-5p	1	0	1	1	1	1	CHMP7	charged multivesicular body protein 7
hsa-miR-509-3-5p	1	0	1	0	0	0	YLPM1	YLP motif containing 1
hsa-miR-509-3-5p	0	0	1	1	1	1	SYTL4	synaptotagmin-like 4
hsa-miR-509-3-5p	0	0	1	1	1	1	YAP1	Yes-associated protein 1
hsa-miR-509-3-5p	0	0	1	1	1	1	CCDC132	coiled-coil domain containing 132
hsa-miR-509-3-5p	0	0	1	0	1	1	PAPD4	PAP associated domain containing 4
hsa-miR-509-3-5p	1	0	1	1	1	1	ABI3BP	ABI family, member 3 (NESH) binding protein
hsa-miR-509-3-5p	0	0	1	1	1	1	ZMYM6	zinc finger, MYM-type 6
hsa-miR-509-3-5p	1	0	1	1	1	1	FAM126A	family with sequence similarity 126, member A
hsa-miR-509-3-5p	0	0	1	1	1	1	TAF8	TAF8 RNA polymerase II, TATA box binding protein (TBP)-associated factor, 43kDa
hsa-miR-509-3-5p	0	0	1	0	0	0	EPHA1-AS1	EPHA1 antisense RNA 1
hsa-miR-509-3-5p	1	0	1	1	1	1	NRP1	neuropilin 1
hsa-miR-509-3-5p	1	0	1	1	1	1	MARCH7	membrane-associated ring finger (C3HC4) 7, E3 ubiquitin protein ligase
hsa-miR-509-3-5p	1	0	1	0	1	1	EXOC5	exocyst complex component 5
hsa-miR-509-3-5p	1	0	1	1	1	1	CADM2	cell adhesion molecule 2
hsa-miR-509-3-5p	1	0	1	1	1	1	RICTOR	RPTOR independent companion of MTOR, complex 2
hsa-miR-509-3-5p	1	0	1	1	1	1	ZNF207	zinc finger protein 207
hsa-miR-509-3-5p	0	0	1	1	1	1	LMAN2L	lectin, mannose-binding 2-like
hsa-miR-509-3-5p	1	0	1	1	1	1	FAM76B	family with sequence similarity 76, member B
hsa-miR-509-3-5p	1	0	1	1	1	1	SET	SET nuclear oncogene
hsa-miR-509-3-5p	1	0	1	1	0	0	LRRC58	leucine rich repeat containing 58
hsa-miR-509-3-5p	1	0	1	1	1	1	TSHZ3	teashirt zinc finger homeobox 3
hsa-miR-509-3-5p	0	0	1	1	1	1	TMEM130	transmembrane protein 130
hsa-miR-509-3-5p	1	0	1	1	1	1	SORCS1	sortilin-related VPS10 domain containing receptor 1
hsa-miR-509-3-5p	0	0	1	0	0	0	CLCN1	chloride channel, voltage-sensitive 1
hsa-miR-509-3-5p	1	0	1	1	1	1	KIAA0907	KIAA0907
hsa-miR-509-3-5p	1	0	1	1	1	1	MAEA	macrophage erythroblast attacher
hsa-miR-509-3-5p	0	0	1	0	0	0	MUC19	mucin 19, oligomeric
hsa-miR-509-3-5p	0	0	1	1	1	1	IYD	iodotyrosine deiodinase
hsa-miR-509-3-5p	1	0	1	1	1	1	TAB3	TGF-beta activated kinase 1/MAP3K7 binding protein 3
hsa-miR-509-3-5p	0	0	1	0	0	0	FAM138C	family with sequence similarity 138, member C
hsa-miR-509-3-5p	1	0	1	1	1	1	CAMTA1	calmodulin binding transcription activator 1
hsa-miR-509-3-5p	0	0	1	1	1	1	TMPRSS4	transmembrane protease, serine 4
hsa-miR-509-3-5p	1	0	1	1	1	1	NLGN4X	neuroligin 4, X-linked
hsa-miR-509-3-5p	0	0	1	1	1	1	TNFRSF19	tumor necrosis factor receptor superfamily, member 19
hsa-miR-509-3-5p	0	0	1	1	0	0	RAET1E	retinoic acid early transcript 1E
hsa-miR-509-3-5p	1	0	1	1	1	1	FAM120A	family with sequence similarity 120A
hsa-miR-509-3-5p	1	0	1	0	1	1	NHS	Nance-Horan syndrome (congenital cataracts and dental anomalies)
hsa-miR-509-3-5p	1	0	1	1	1	1	ARHGAP20	Rho GTPase activating protein 20
hsa-miR-509-3-5p	1	0	1	1	1	1	MYNN	myoneurin
hsa-miR-509-3-5p	0	0	1	1	1	1	EHBP1	EH domain binding protein 1
hsa-miR-509-3-5p	0	0	1	1	1	1	AICDA	activation-induced cytidine deaminase
hsa-miR-509-3-5p	1	0	1	0	1	1	LRAT	lecithin retinol acyltransferase (phosphatidylcholine--retinol O-acyltransferase)
hsa-miR-509-3-5p	0	0	1	0	1	1	RAB18	RAB18, member RAS oncogene family
hsa-miR-509-3-5p	0	0	1	1	0	0	DHRS4	dehydrogenase/reductase (SDR family) member 4
hsa-miR-509-3-5p	0	0	1	1	1	1	FCRLB	Fc receptor-like B
hsa-miR-509-3-5p	0	0	1	1	0	0	USP27X	ubiquitin specific peptidase 27, X-linked
hsa-miR-509-3-5p	1	0	1	1	1	1	PLCH1	phospholipase C, eta 1
hsa-miR-509-3-5p	1	0	1	1	1	1	RTN3	reticulon 3
hsa-miR-509-3-5p	1	0	1	1	1	1	NTNG1	netrin G1
hsa-miR-509-3-5p	0	0	1	1	1	1	CEACAM1	carcinoembryonic antigen-related cell adhesion molecule 1 (biliary glycoprotein)
hsa-miR-509-3-5p	1	0	1	1	1	1	QKI	QKI, KH domain containing, RNA binding
hsa-miR-509-3-5p	1	0	1	1	1	1	SAT1	spermidine/spermine N1-acetyltransferase 1
hsa-miR-509-3-5p	1	0	1	1	1	1	PCDH11X	protocadherin 11 X-linked
hsa-miR-509-3-5p	1	0	1	1	0	0	PLXNB3	plexin B3
hsa-miR-509-3-5p	1	0	1	1	1	1	AMOT	angiomotin
hsa-miR-509-3-5p	1	0	1	1	1	1	NOL4	nucleolar protein 4
hsa-miR-509-3-5p	0	0	1	1	1	1	SLC6A2	solute carrier family 6 (neurotransmitter transporter, noradrenalin), member 2
hsa-miR-509-3-5p	0	0	1	1	1	1	ZCCHC17	zinc finger, CCHC domain containing 17
hsa-miR-509-3-5p	0	0	1	1	1	1	PAFAH1B2	platelet-activating factor acetylhydrolase 1b, catalytic subunit 2 (30kDa)
hsa-miR-509-3-5p	1	0	1	1	1	1	NRGN	neurogranin (protein kinase C substrate, RC3)
hsa-miR-509-3-5p	1	0	1	0	1	1	DPYSL5	dihydropyrimidinase-like 5
hsa-miR-509-3-5p	0	0	1	1	1	1	TUFT1	tuftelin 1
hsa-miR-509-3-5p	1	0	1	0	0	0	VGLL4	vestigial like 4 (Drosophila)
hsa-miR-509-3-5p	1	0	1	1	1	1	RIMS3	regulating synaptic membrane exocytosis 3
hsa-miR-509-3-5p	1	0	1	1	1	1	PPP1R11	protein phosphatase 1, regulatory (inhibitor) subunit 11
hsa-miR-509-3-5p	0	0	1	0	0	0	LINC00467	long intergenic non-protein coding RNA 467
hsa-miR-509-3-5p	1	0	1	1	1	1	TRIM39	tripartite motif containing 39
hsa-miR-509-3-5p	1	0	1	1	1	1	HMGA1	high mobility group AT-hook 1
hsa-miR-509-3-5p	0	0	1	1	1	1	TMEM30A	transmembrane protein 30A
hsa-miR-509-3-5p	0	0	1	1	1	1	MLIP	muscular LMNA-interacting protein
hsa-miR-509-3-5p	1	0	1	1	0	0	WDR45	WD repeat domain 45
hsa-miR-509-3-5p	0	0	1	0	0	0	ATXN7L3B	ataxin 7-like 3B
hsa-miR-509-3-5p	1	0	1	1	1	1	NXN	nucleoredoxin
hsa-miR-509-3-5p	0	0	1	1	0	0	SLC4A2	solute carrier family 4, anion exchanger, member 2 (erythrocyte membrane protein band 3-like 1)
hsa-miR-509-3-5p	1	0	1	1	1	1	KCNMA1	potassium large conductance calcium-activated channel, subfamily M, alpha member 1
hsa-miR-509-3-5p	0	0	1	1	1	1	GTPBP8	GTP-binding protein 8 (putative)
hsa-miR-509-3-5p	1	0	1	1	1	1	SZRD1	SUZ RNA binding domain containing 1
hsa-miR-509-3-5p	1	0	1	1	1	1	ZFAND5	zinc finger, AN1-type domain 5
hsa-miR-509-3-5p	1	0	1	1	1	1	TRIM2	tripartite motif containing 2
hsa-miR-509-3-5p	0	0	1	0	0	0	LRRC14	leucine rich repeat containing 14
hsa-miR-509-3-5p	0	0	1	1	0	0	CAPNS1	calpain, small subunit 1
hsa-miR-509-3-5p	1	0	1	1	1	1	DNAJB5	DnaJ (Hsp40) homolog, subfamily B, member 5
hsa-miR-509-3-5p	0	0	1	1	0	0	KLHDC3	kelch domain containing 3
hsa-miR-509-3-5p	1	0	1	1	1	1	PRDM2	PR domain containing 2, with ZNF domain
hsa-miR-509-3-5p	1	0	1	1	1	1	POLK	polymerase (DNA directed) kappa
hsa-miR-509-3-5p	1	0	1	1	1	1	ZBTB38	zinc finger and BTB domain containing 38
hsa-miR-509-3-5p	0	0	1	0	1	1	ZNF37A	zinc finger protein 37A
hsa-miR-509-3-5p	1	0	1	0	1	1	NR1D2	nuclear receptor subfamily 1, group D, member 2
hsa-miR-509-3-5p	0	0	1	0	0	0	GNN	Grp94 neighboring nucleotidase pseudogene
hsa-miR-509-3-5p	1	0	1	1	1	1	SCAMP1	secretory carrier membrane protein 1
hsa-miR-509-3-5p	1	0	1	1	1	1	RAN	RAN, member RAS oncogene family
hsa-miR-509-3-5p	1	0	1	0	1	1	ZNF24	zinc finger protein 24
hsa-miR-509-3-5p	0	0	1	1	0	0	CUL9	cullin 9
hsa-miR-509-3-5p	0	0	1	1	1	1	GLIPR2	GLI pathogenesis-related 2
hsa-miR-509-3-5p	0	0	1	0	0	0	FAM200B	family with sequence similarity 200, member B
hsa-miR-509-3-5p	0	0	1	0	1	1	ZNF641	zinc finger protein 641
hsa-miR-509-3-5p	1	0	1	1	1	1	ARHGEF9	Cdc42 guanine nucleotide exchange factor (GEF) 9
hsa-miR-509-3-5p	1	0	1	1	1	1	SUZ12	suppressor of zeste 12 homolog (Drosophila)
hsa-miR-509-3-5p	0	0	1	0	0	0	WDFY3-AS2	WDFY3 antisense RNA 2
hsa-miR-509-3-5p	0	0	1	0	1	1	ZNF134	zinc finger protein 134
hsa-miR-509-3-5p	1	0	1	1	1	1	SCML4	sex comb on midleg-like 4 (Drosophila)
hsa-miR-509-3-5p	1	0	1	1	1	1	C11orf30	chromosome 11 open reading frame 30
hsa-miR-509-3-5p	0	0	1	0	0	0	LOC284260	uncharacterized LOC284260
hsa-miR-509-3-5p	0	0	1	1	0	0	LYSMD2	LysM, putative peptidoglycan-binding, domain containing 2
hsa-miR-509-3-5p	0	0	1	1	1	1	ABCA8	ATP-binding cassette, sub-family A (ABC1), member 8
hsa-miR-509-3-5p	0	0	1	0	0	0	SNX29P2	sorting nexin 29 pseudogene 2
hsa-miR-509-3-5p	0	0	1	0	0	0	FLJ35390	uncharacterized LOC255031
hsa-miR-509-3-5p	0	0	1	0	0	0	JMJD7	jumonji domain containing 7
hsa-miR-509-3-5p	0	0	1	1	1	1	TLR4	toll-like receptor 4
hsa-miR-509-3-5p	0	0	1	1	0	0	GALNTL5	UDP-N-acetyl-alpha-D-galactosamine:polypeptide N-acetylgalactosaminyltransferase-like 5
hsa-miR-509-3-5p	0	0	1	1	0	0	GLS2	glutaminase 2 (liver, mitochondrial)
hsa-miR-509-3-5p	1	0	1	1	1	1	NIPA1	non imprinted in Prader-Willi/Angelman syndrome 1
hsa-miR-509-3-5p	0	0	1	1	1	1	HYAL1	hyaluronoglucosaminidase 1
hsa-miR-509-3-5p	1	0	1	1	1	1	SPG20	spastic paraplegia 20 (Troyer syndrome)
hsa-miR-509-3-5p	0	0	1	0	1	1	FHAD1	forkhead-associated (FHA) phosphopeptide binding domain 1
hsa-miR-509-3-5p	1	0	1	0	1	1	CERS3	ceramide synthase 3
hsa-miR-509-3-5p	0	0	1	1	1	1	HS1BP3	HCLS1 binding protein 3
hsa-miR-509-3-5p	0	0	1	1	1	1	SELP	selectin P (granule membrane protein 140kDa, antigen CD62)
hsa-miR-509-3-5p	1	0	1	1	1	1	HTR2C	5-hydroxytryptamine (serotonin) receptor 2C, G protein-coupled
hsa-miR-509-3-5p	0	0	1	1	1	1	CAMKMT	calmodulin-lysine N-methyltransferase
hsa-miR-509-3-5p	1	0	1	0	1	1	TFEC	transcription factor EC
hsa-miR-509-3-5p	0	0	1	0	0	0	BCAS3	breast carcinoma amplified sequence 3
hsa-miR-509-3-5p	1	0	1	0	1	1	SV2B	synaptic vesicle glycoprotein 2B
hsa-miR-509-3-5p	0	0	1	1	0	0	TMEM251	transmembrane protein 251
hsa-miR-509-3-5p	0	0	1	0	1	1	MYO7A	myosin VIIA
hsa-miR-509-3-5p	1	0	1	1	1	1	TAF15	TAF15 RNA polymerase II, TATA box binding protein (TBP)-associated factor, 68kDa
hsa-miR-509-3-5p	0	0	1	1	1	1	SLC22A2	solute carrier family 22 (organic cation transporter), member 2
hsa-miR-509-3-5p	0	0	1	1	1	1	IQCH	IQ motif containing H
hsa-miR-509-3-5p	0	0	1	1	1	1	AADAT	aminoadipate aminotransferase
hsa-miR-509-3-5p	1	0	1	1	0	0	FAM83F	family with sequence similarity 83, member F
hsa-miR-509-3-5p	1	0	1	1	1	1	ZPLD1	zona pellucida-like domain containing 1
hsa-miR-509-3-5p	0	0	1	1	0	0	TRIM69	tripartite motif containing 69
hsa-miR-509-3-5p	1	0	1	1	1	1	RCOR3	REST corepressor 3
hsa-miR-509-3-5p	0	0	1	1	0	0	ASIC4	acid-sensing (proton-gated) ion channel family member 4
hsa-miR-509-3-5p	1	0	1	1	1	1	TBC1D1	TBC1 (tre-2/USP6, BUB2, cdc16) domain family, member 1
hsa-miR-509-3-5p	1	0	1	1	1	1	RAB5B	RAB5B, member RAS oncogene family
hsa-miR-509-3-5p	1	0	1	1	1	1	ZNF521	zinc finger protein 521
hsa-miR-509-3-5p	0	0	1	1	0	0	LINC00176	long intergenic non-protein coding RNA 176
hsa-miR-509-3-5p	1	0	1	1	1	1	RIC8B	resistance to inhibitors of cholinesterase 8 homolog B (C. elegans)
hsa-miR-509-3-5p	0	0	1	1	1	1	ZNF337	zinc finger protein 337
hsa-miR-509-3-5p	0	0	1	1	1	1	EDA2R	ectodysplasin A2 receptor
hsa-miR-509-3-5p	0	0	1	0	1	1	GPR155	G protein-coupled receptor 155
hsa-miR-509-3-5p	1	0	1	1	1	1	NKAIN2	Na+/K+ transporting ATPase interacting 2
hsa-miR-509-3-5p	1	0	1	1	1	1	RAP2C	RAP2C, member of RAS oncogene family
hsa-miR-509-3-5p	0	0	1	0	1	1	TMSB15B	thymosin beta 15B
hsa-miR-509-3-5p	1	0	1	1	1	1	CTDSPL2	CTD (carboxy-terminal domain, RNA polymerase II, polypeptide A) small phosphatase like 2
hsa-miR-509-3-5p	1	0	1	1	1	1	IMPACT	Impact homolog (mouse)
hsa-miR-509-3-5p	0	0	1	1	1	1	DUSP28	dual specificity phosphatase 28
hsa-miR-509-3-5p	0	0	1	0	0	0	FAM201A	family with sequence similarity 201, member A
hsa-miR-509-3-5p	1	0	1	1	1	1	SLC38A9	solute carrier family 38, member 9
hsa-miR-509-3-5p	1	0	1	1	1	1	MEIS1	Meis homeobox 1
hsa-miR-509-3-5p	0	0	1	1	1	1	CNTN1	contactin 1
hsa-miR-509-3-5p	0	0	1	0	0	0	SRGAP2C	SLIT-ROBO Rho GTPase activating protein 2C
hsa-miR-509-3-5p	1	0	1	0	1	1	CPEB4	cytoplasmic polyadenylation element binding protein 4
hsa-miR-509-3-5p	1	0	1	1	1	1	BNC2	basonuclin 2
hsa-miR-509-3-5p	1	0	1	1	1	1	FAM135B	family with sequence similarity 135, member B
hsa-miR-509-3-5p	1	0	1	0	1	1	YAF2	YY1 associated factor 2
hsa-miR-509-3-5p	0	0	1	0	0	0	CRYBB2P1	crystallin, beta B2 pseudogene 1
hsa-miR-509-3-5p	1	0	1	1	1	1	GALNT1	UDP-N-acetyl-alpha-D-galactosamine:polypeptide N-acetylgalactosaminyltransferase 1 (GalNAc-T1)
hsa-miR-509-3-5p	0	0	1	1	1	1	C1orf177	chromosome 1 open reading frame 177
hsa-miR-509-3-5p	1	0	1	0	1	1	GPR107	G protein-coupled receptor 107
hsa-miR-509-3-5p	1	0	1	1	1	1	IL16	interleukin 16
hsa-miR-509-3-5p	0	0	1	1	0	0	SLC13A4	solute carrier family 13 (sodium/sulfate symporters), member 4
hsa-miR-509-3-5p	0	0	1	1	1	1	SIAE	sialic acid acetylesterase
hsa-miR-509-3-5p	0	0	1	0	0	0	SLC7A11-AS1	SLC7A11 antisense RNA 1
hsa-miR-509-3-5p	1	0	1	0	1	1	KIAA0430	KIAA0430
hsa-miR-509-3-5p	1	0	1	0	1	1	HSPA12A	heat shock 70kDa protein 12A
hsa-miR-509-3-5p	0	0	1	1	1	1	BCO2	beta-carotene oxygenase 2
hsa-miR-509-3-5p	0	0	1	0	0	0	OR7E47P	olfactory receptor, family 7, subfamily E, member 47 pseudogene
hsa-miR-509-3-5p	0	0	1	0	0	0	LRRC37BP1	leucine rich repeat containing 37B pseudogene 1
hsa-miR-509-3-5p	1	0	1	1	1	1	ADD1	adducin 1 (alpha)
hsa-miR-509-3-5p	1	0	1	1	1	1	ARHGAP30	Rho GTPase activating protein 30
hsa-miR-509-3-5p	0	0	1	1	1	1	TMEM200A	transmembrane protein 200A
hsa-miR-509-3-5p	1	0	1	0	1	1	PSD3	pleckstrin and Sec7 domain containing 3
hsa-miR-509-3-5p	0	0	1	0	0	0	LOC283914	uncharacterized LOC283914
hsa-miR-509-3-5p	1	0	1	1	1	1	SENP1	SUMO1/sentrin specific peptidase 1
hsa-miR-509-3-5p	1	0	1	0	1	1	LYPD6	LY6/PLAUR domain containing 6
hsa-miR-509-3-5p	0	0	1	1	1	1	P2RX6	purinergic receptor P2X, ligand-gated ion channel, 6
hsa-miR-509-3-5p	0	0	1	0	0	0	DPY19L2P4	dpy-19-like 2 pseudogene 4 (C. elegans)
hsa-miR-509-3-5p	1	0	1	0	1	1	KDM2A	lysine (K)-specific demethylase 2A
hsa-miR-509-3-5p	1	0	1	0	1	1	ZNF800	zinc finger protein 800
hsa-miR-509-3-5p	1	0	1	1	1	1	UPF3A	UPF3 regulator of nonsense transcripts homolog A (yeast)
hsa-miR-509-3-5p	1	0	1	1	1	1	RTKN2	rhotekin 2
hsa-miR-509-3-5p	1	0	1	1	1	1	WSB1	WD repeat and SOCS box containing 1
hsa-miR-509-3-5p	0	0	1	0	0	0	WASH2P	WAS protein family homolog 2 pseudogene
hsa-miR-509-3-5p	1	0	1	0	1	1	ARHGAP5	Rho GTPase activating protein 5
hsa-miR-509-3-5p	0	0	1	1	0	0	NLRC5	NLR family, CARD domain containing 5
hsa-miR-509-3-5p	1	0	1	1	1	1	MBNL1	muscleblind-like splicing regulator 1
hsa-miR-509-3-5p	0	0	1	1	0	0	NISCH	nischarin
hsa-miR-509-3-5p	1	0	1	1	1	1	FNDC3A	fibronectin type III domain containing 3A
hsa-miR-509-3-5p	1	0	1	0	1	1	SEMA4G	sema domain, immunoglobulin domain (Ig), transmembrane domain (TM) and short cytoplasmic domain, (semaphorin) 4G
hsa-miR-509-3-5p	0	0	1	0	0	0	BMS1P6	BMS1 pseudogene 6
hsa-miR-509-3-5p	0	0	1	1	0	0	SREBF2	sterol regulatory element binding transcription factor 2
hsa-miR-509-3-5p	0	0	1	1	0	0	AGAP8	ArfGAP with GTPase domain, ankyrin repeat and PH domain 8
hsa-miR-509-3-5p	0	0	1	1	1	1	SLC25A35	solute carrier family 25, member 35
hsa-miR-509-3-5p	1	0	1	1	1	1	SCUBE3	signal peptide, CUB domain, EGF-like 3
hsa-miR-509-3-5p	0	0	1	0	0	0	LINC00265	long intergenic non-protein coding RNA 265
hsa-miR-509-3-5p	0	0	1	1	1	1	MPP3	membrane protein, palmitoylated 3 (MAGUK p55 subfamily member 3)
hsa-miR-509-3-5p	0	0	1	1	0	0	APOA1BP	apolipoprotein A-I binding protein
hsa-miR-509-3-5p	0	0	1	0	0	0	ADAM5	ADAM metallopeptidase domain 5, pseudogene
hsa-miR-509-3-5p	0	0	1	1	0	0	GRIN2C	glutamate receptor, ionotropic, N-methyl D-aspartate 2C
hsa-miR-509-3-5p	1	0	1	1	1	1	ZEB2	zinc finger E-box binding homeobox 2
hsa-miR-509-3-5p	1	0	1	1	1	1	GTDC1	glycosyltransferase-like domain containing 1
hsa-miR-509-3-5p	0	0	1	0	0	0	CISD3	CDGSH iron sulfur domain 3
hsa-miR-509-3-5p	0	0	1	1	0	0	AGAP4	ArfGAP with GTPase domain, ankyrin repeat and PH domain 4
hsa-miR-509-3-5p	1	0	1	1	1	1	UEVLD	UEV and lactate/malate dehyrogenase domains
hsa-miR-509-3-5p	1	0	1	1	1	1	RAVER2	ribonucleoprotein, PTB-binding 2
hsa-miR-509-3-5p	0	0	1	1	1	1	SH2D1B	SH2 domain containing 1B
hsa-miR-509-3-5p	1	0	1	1	1	1	VIM	vimentin
hsa-miR-509-3-5p	1	0	1	1	1	1	AP3M1	adaptor-related protein complex 3, mu 1 subunit
hsa-miR-509-3-5p	0	0	1	1	0	0	LNP1	leukemia NUP98 fusion partner 1
hsa-miR-509-3-5p	0	0	1	0	0	0	PABPC1P2	poly(A) binding protein, cytoplasmic 1 pseudogene 2
hsa-miR-509-3-5p	1	0	1	1	1	1	PDCD6IP	programmed cell death 6 interacting protein
hsa-miR-509-3-5p	1	0	1	1	1	1	SLC26A7	solute carrier family 26, member 7
hsa-miR-509-3-5p	1	0	1	1	1	1	SRPK2	SRSF protein kinase 2
hsa-miR-509-3-5p	0	0	1	1	1	1	MSTO1	misato homolog 1 (Drosophila)
hsa-miR-509-3-5p	1	0	1	1	1	1	SCAF8	SR-related CTD-associated factor 8
hsa-miR-509-3-5p	1	0	1	0	1	1	TGFBR1	transforming growth factor, beta receptor 1
hsa-miR-509-3-5p	1	0	1	1	1	1	USP47	ubiquitin specific peptidase 47
hsa-miR-509-3-5p	1	0	1	0	1	1	MAP4K3	mitogen-activated protein kinase kinase kinase kinase 3
hsa-miR-509-3-5p	1	0	1	0	1	1	TMEM194A	transmembrane protein 194A
hsa-miR-509-3-5p	0	0	1	0	0	0	ULK4P1	unc-51-like kinase 4 (C. elegans) pseudogene 1
hsa-miR-509-3-5p	0	0	1	0	0	0	JPX	JPX transcript, XIST activator (non-protein coding)
hsa-miR-509-3-5p	0	0	1	0	0	0	ULK4P3	unc-51-like kinase 4 (C. elegans) pseudogene 3
hsa-miR-509-3-5p	0	0	1	1	0	0	TRIM41	tripartite motif containing 41
hsa-miR-509-3-5p	0	0	1	1	1	1	FRMPDP2	FERM and PDZ domain containing 2 pseudogene 2
hsa-miR-509-3-5p	0	0	1	1	1	1	FRMPD2P1	FERM and PDZ domain containing 2 pseudogene 1
hsa-miR-509-3-5p	1	0	1	1	1	1	WBP1L	WW domain binding protein 1-like
hsa-miR-509-3-5p	1	0	1	1	1	1	WNT5A	wingless-type MMTV integration site family, member 5A
hsa-miR-509-3-5p	0	0	1	0	0	0	LOC642846	DEAD/H (Asp-Glu-Ala-Asp/His) box polypeptide 11-like
hsa-miR-509-3-5p	0	0	1	1	1	1	SYNRG	synergin, gamma
hsa-miR-509-3-5p	0	0	1	1	1	1	ZCWPW2	zinc finger, CW type with PWWP domain 2
hsa-miR-509-3-5p	1	0	1	1	1	1	PLXNA2	plexin A2
hsa-miR-509-3-5p	0	0	1	0	0	0	FRG1B	FSHD region gene 1 family, member B
hsa-miR-509-3-5p	1	0	1	1	1	1	ST8SIA2	ST8 alpha-N-acetyl-neuraminide alpha-2,8-sialyltransferase 2
hsa-miR-509-3-5p	1	0	1	1	1	1	ACVR2B	activin A receptor, type IIB
hsa-miR-509-3-5p	0	0	1	1	1	1	R3HCC1L	R3H domain and coiled-coil containing 1-like
hsa-miR-509-3-5p	0	0	1	1	0	0	RGL4	ral guanine nucleotide dissociation stimulator-like 4
hsa-miR-509-3-5p	1	0	1	0	1	1	MYBL1	v-myb myeloblastosis viral oncogene homolog (avian)-like 1
hsa-miR-509-3-5p	1	0	1	1	1	1	ARFIP1	ADP-ribosylation factor interacting protein 1
hsa-miR-509-3-5p	0	0	1	1	0	0	ADAMTS13	ADAM metallopeptidase with thrombospondin type 1 motif, 13
hsa-miR-509-3-5p	1	0	1	0	1	1	VANGL2	vang-like 2 (van gogh, Drosophila)
hsa-miR-509-3-5p	0	0	1	0	0	0	GUSBP9	glucuronidase, beta pseudogene 9
hsa-miR-509-3-5p	1	0	1	1	1	1	GABRB2	gamma-aminobutyric acid (GABA) A receptor, beta 2
hsa-miR-509-3-5p	1	0	1	1	1	1	PTPRD	protein tyrosine phosphatase, receptor type, D
hsa-miR-509-3-5p	1	0	1	0	1	1	KIF5C	kinesin family member 5C
hsa-miR-509-3-5p	1	0	1	1	1	1	LARP1B	La ribonucleoprotein domain family, member 1B
hsa-miR-509-3-5p	0	0	1	1	1	1	IL4R	interleukin 4 receptor
hsa-miR-509-3-5p	0	0	1	1	1	1	RASAL2	RAS protein activator like 2
hsa-miR-509-3-5p	0	0	1	1	0	0	RELA	v-rel reticuloendotheliosis viral oncogene homolog A (avian)
hsa-miR-509-3-5p	0	0	1	0	0	0	LOC143188	uncharacterized LOC143188
hsa-miR-509-3-5p	0	0	1	0	0	0	FAM27E3	family with sequence similarity 27, member E3
hsa-miR-509-3-5p	0	0	1	1	0	0	RGSL1	regulator of G-protein signaling like 1
hsa-miR-509-3-5p	0	0	1	0	0	0	KRT8P12	keratin 8 pseudogene 12
hsa-miR-509-3-5p	0	0	1	0	1	1	GOLGA8G	golgin A8 family, member G
hsa-miR-509-3-5p	1	0	1	1	1	1	ZMYM4	zinc finger, MYM-type 4
hsa-miR-509-3-5p	0	0	1	0	1	1	C20orf202	chromosome 20 open reading frame 202
hsa-miR-509-3-5p	0	0	1	0	0	0	LOC399753	uncharacterized LOC399753
hsa-miR-509-3-5p	1	0	1	1	1	1	MLLT10	myeloid/lymphoid or mixed-lineage leukemia (trithorax homolog, Drosophila); translocated to, 10
hsa-miR-509-3-5p	0	0	1	0	1	1	PPIAL4G	peptidylprolyl isomerase A (cyclophilin A)-like 4G
hsa-miR-509-3-5p	0	0	1	1	0	0	HSF4	heat shock transcription factor 4
hsa-miR-509-3-5p	0	0	1	1	0	0	AGAP6	ArfGAP with GTPase domain, ankyrin repeat and PH domain 6
hsa-miR-509-3-5p	1	0	1	1	1	1	PTPRZ1	protein tyrosine phosphatase, receptor-type, Z polypeptide 1
hsa-miR-509-3-5p	0	0	1	0	0	0	SMA4	glucuronidase, beta pseudogene
hsa-miR-509-3-5p	0	0	1	1	1	1	PRKAR2A	protein kinase, cAMP-dependent, regulatory, type II, alpha
hsa-miR-509-3-5p	1	0	1	0	0	0	SDR39U1	short chain dehydrogenase/reductase family 39U, member 1
hsa-miR-509-3-5p	0	0	1	1	1	1	HAUS4	HAUS augmin-like complex, subunit 4
hsa-miR-509-3-5p	1	0	1	1	1	1	NUMB	numb homolog (Drosophila)
hsa-miR-509-3-5p	0	0	1	0	0	0	TMED8	transmembrane emp24 protein transport domain containing 8
hsa-miR-509-3-5p	0	0	1	0	0	0	LINC00643	long intergenic non-protein coding RNA 643
hsa-miR-509-3-5p	0	0	1	1	1	1	FUCA2	fucosidase, alpha-L- 2, plasma
hsa-miR-509-3-5p	1	0	1	1	1	1	MIER3	mesoderm induction early response 1, family member 3
hsa-miR-509-3-5p	0	0	1	1	1	1	SLC12A8	solute carrier family 12 (potassium/chloride transporters), member 8
hsa-miR-509-3-5p	1	0	1	1	1	1	CCNG1	cyclin G1
hsa-miR-509-3-5p	1	0	1	1	1	1	SLC35F1	solute carrier family 35, member F1
hsa-miR-509-3-5p	0	0	1	1	1	1	TSGA10	testis specific, 10
hsa-miR-509-3-5p	0	0	1	1	1	1	IPCEF1	interaction protein for cytohesin exchange factors 1
hsa-miR-509-3-5p	0	0	1	1	1	1	PRR14L	proline rich 14-like
hsa-miR-509-3-5p	0	0	1	0	0	0	SMG1P1	smg-1 homolog, phosphatidylinositol 3-kinase-related kinase pseudogene 1
hsa-miR-509-3-5p	1	0	1	1	1	1	ABCA13	ATP-binding cassette, sub-family A (ABC1), member 13
hsa-miR-509-3-5p	1	0	1	1	1	1	EPS15	epidermal growth factor receptor pathway substrate 15
hsa-miR-509-3-5p	0	0	1	0	1	1	TYW5	tRNA-yW synthesizing protein 5
hsa-miR-509-3-5p	1	0	1	1	1	1	GABPA	GA binding protein transcription factor, alpha subunit 60kDa
hsa-miR-509-3-5p	1	0	1	1	1	1	DCAF5	DDB1 and CUL4 associated factor 5
hsa-miR-509-3-5p	0	0	1	1	0	0	ELP3	elongator acetyltransferase complex subunit 3
hsa-miR-509-3-5p	1	0	1	1	1	1	PHF21A	PHD finger protein 21A
hsa-miR-509-3-5p	1	0	1	0	1	1	TMEM184B	transmembrane protein 184B
hsa-miR-509-3-5p	0	0	1	1	1	1	DOCK5	dedicator of cytokinesis 5
hsa-miR-509-3-5p	1	0	1	1	1	1	NFIB	nuclear factor I/B
hsa-miR-509-3-5p	1	0	1	1	1	1	PTER	phosphotriesterase related
hsa-miR-509-3-5p	1	0	1	1	1	1	RECK	reversion-inducing-cysteine-rich protein with kazal motifs
hsa-miR-509-3-5p	1	0	1	1	1	1	TMEM135	transmembrane protein 135
hsa-miR-509-3-5p	0	0	1	1	1	1	ABCD3	ATP-binding cassette, sub-family D (ALD), member 3
hsa-miR-509-3-5p	1	0	1	1	1	1	CALD1	caldesmon 1
hsa-miR-509-3-5p	0	0	1	1	1	1	C4orf40	chromosome 4 open reading frame 40
hsa-miR-509-3-5p	1	0	1	1	1	1	CREB3L2	cAMP responsive element binding protein 3-like 2
hsa-miR-509-3-5p	1	0	1	1	1	1	SIN3A	SIN3 transcription regulator homolog A (yeast)
hsa-miR-509-3-5p	0	0	1	1	0	0	HNRNPAB	heterogeneous nuclear ribonucleoprotein A/B
hsa-miR-509-3-5p	0	0	1	1	0	0	MARCH11	membrane-associated ring finger (C3HC4) 11
hsa-miR-509-3-5p	0	0	1	1	1	1	SLC25A11	solute carrier family 25 (mitochondrial carrier; oxoglutarate carrier), member 11
hsa-miR-509-3-5p	1	0	1	1	1	1	CLU	clusterin
hsa-miR-509-3-5p	1	0	1	0	1	1	STX6	syntaxin 6
hsa-miR-509-3-5p	0	0	1	1	1	1	RIPK2	receptor-interacting serine-threonine kinase 2
hsa-miR-509-3-5p	1	0	1	0	0	0	IGLON5	IgLON family member 5
hsa-miR-509-3-5p	1	0	1	0	0	0	TNPO1	transportin 1
hsa-miR-509-3-5p	0	0	1	1	1	1	GTPBP3	GTP binding protein 3 (mitochondrial)
hsa-miR-509-3-5p	0	0	1	1	0	0	URM1	ubiquitin related modifier 1
hsa-miR-509-3-5p	0	0	1	1	1	1	APH1A	anterior pharynx defective 1 homolog A (C. elegans)
hsa-miR-509-3-5p	1	0	1	1	1	1	ARL1	ADP-ribosylation factor-like 1
hsa-miR-509-3-5p	0	0	1	1	1	1	CIRBP	cold inducible RNA binding protein
hsa-miR-509-3-5p	0	0	1	1	0	0	CD81	CD81 molecule
hsa-miR-509-3-5p	1	0	1	0	1	1	BNIP3L	BCL2/adenovirus E1B 19kDa interacting protein 3-like
hsa-miR-509-3-5p	0	0	1	0	0	0	LOC100009676	uncharacterized LOC100009676
hsa-miR-509-3-5p	1	0	1	1	1	1	HMGN3	high mobility group nucleosomal binding domain 3
hsa-miR-509-3-5p	0	0	1	1	0	0	MYL6	myosin, light chain 6, alkali, smooth muscle and non-muscle
hsa-miR-509-3-5p	0	0	1	1	1	1	CCDC115	coiled-coil domain containing 115
hsa-miR-509-3-5p	0	0	1	0	1	1	CD99P1	CD99 molecule pseudogene 1
hsa-miR-509-3-5p	1	0	1	1	1	1	COPS2	COP9 constitutive photomorphogenic homolog subunit 2 (Arabidopsis)
hsa-miR-509-3-5p	1	0	1	1	1	1	EI24	etoposide induced 2.4 mRNA
hsa-miR-509-3-5p	0	0	1	1	0	0	CGRRF1	cell growth regulator with ring finger domain 1
hsa-miR-509-3-5p	0	0	1	1	0	0	MRPS2	mitochondrial ribosomal protein S2
hsa-miR-509-3-5p	1	0	1	1	1	1	COPZ1	coatomer protein complex, subunit zeta 1
hsa-miR-509-3-5p	0	0	1	1	1	1	GGPS1	geranylgeranyl diphosphate synthase 1
hsa-miR-509-3-5p	1	0	1	1	1	1	PLEKHB2	pleckstrin homology domain containing, family B (evectins) member 2
hsa-miR-509-3-5p	0	0	1	1	1	1	CCDC91	coiled-coil domain containing 91
hsa-miR-509-3-5p	1	0	1	0	1	1	RPS6KB1	ribosomal protein S6 kinase, 70kDa, polypeptide 1
hsa-miR-509-3-5p	0	0	1	1	0	0	KIAA0100	KIAA0100
hsa-miR-509-3-5p	0	0	1	0	1	1	WASH3P	WAS protein family homolog 3 pseudogene
hsa-miR-509-3-5p	1	0	1	1	1	1	LYPLA2	lysophospholipase II
hsa-miR-509-3-5p	0	0	1	0	0	0	TMEM208	transmembrane protein 208
hsa-miR-509-3-5p	1	0	1	1	1	1	MTCH2	mitochondrial carrier 2
hsa-miR-509-3-5p	1	0	1	1	1	1	TMEM245	transmembrane protein 245
hsa-miR-509-3-5p	0	0	1	1	0	0	ATRAID	all-trans retinoic acid-induced differentiation factor
hsa-miR-509-3-5p	1	0	1	1	1	1	WIPF1	WAS/WASL interacting protein family, member 1
hsa-miR-509-3-5p	0	0	1	0	1	1	TMEM155	transmembrane protein 155
hsa-miR-509-3-5p	0	0	1	1	1	1	MPDU1	mannose-P-dolichol utilization defect 1
hsa-miR-509-3-5p	0	0	1	1	1	1	UIMC1	ubiquitin interaction motif containing 1
hsa-miR-509-3-5p	0	0	1	0	0	0	LOC677759	uncharacterized LOC677759
hsa-miR-509-3-5p	0	0	1	1	0	0	NIT1	nitrilase 1
hsa-miR-509-3-5p	1	0	1	1	1	1	DOK4	docking protein 4
hsa-miR-509-3-5p	0	0	1	1	0	0	NOX5	NADPH oxidase, EF-hand calcium binding domain 5
hsa-miR-509-3-5p	0	0	1	1	0	0	ELP4	elongator acetyltransferase complex subunit 4
hsa-miR-509-3-5p	0	0	1	1	0	0	CCDC22	coiled-coil domain containing 22
hsa-miR-509-3-5p	0	0	1	1	1	1	CPZ	carboxypeptidase Z
hsa-miR-509-3-5p	1	0	1	1	1	1	FOS	FBJ murine osteosarcoma viral oncogene homolog
hsa-miR-509-3-5p	0	0	1	1	1	1	SMNDC1	survival motor neuron domain containing 1
hsa-miR-509-3-5p	1	0	1	1	1	1	NT5DC1	5'-nucleotidase domain containing 1
hsa-miR-509-3-5p	0	0	1	1	1	1	JMJD8	jumonji domain containing 8
hsa-miR-509-3-5p	1	0	1	0	1	1	ANKH	ankylosis, progressive homolog (mouse)
hsa-miR-509-3-5p	1	0	1	1	1	1	FUBP3	far upstream element (FUSE) binding protein 3
hsa-miR-509-3-5p	0	0	1	1	0	0	CD53	CD53 molecule
hsa-miR-509-3-5p	1	0	1	1	1	1	ATAT1	alpha tubulin acetyltransferase 1
hsa-miR-509-3-5p	1	0	1	1	1	1	PFN2	profilin 2
hsa-miR-509-3-5p	1	0	1	1	1	1	F11R	F11 receptor
hsa-miR-509-3-5p	0	0	1	1	1	1	DNAJC25	DnaJ (Hsp40) homolog, subfamily C , member 25
hsa-miR-509-3-5p	0	0	1	1	0	0	YIPF3	Yip1 domain family, member 3
hsa-miR-509-3-5p	1	0	1	0	1	1	GIT2	G protein-coupled receptor kinase interacting ArfGAP 2
hsa-miR-509-3-5p	1	0	1	0	1	1	MAP1B	microtubule-associated protein 1B
hsa-miR-509-3-5p	0	0	1	1	0	0	BCKDK	branched chain ketoacid dehydrogenase kinase
hsa-miR-509-3-5p	0	0	1	1	1	1	TBRG1	transforming growth factor beta regulator 1
hsa-miR-509-3-5p	1	0	1	1	1	1	TRAPPC3	trafficking protein particle complex 3
hsa-miR-509-3-5p	0	0	1	1	0	0	OLFM1	olfactomedin 1
hsa-miR-509-3-5p	0	0	1	0	0	0	NUDT18	nudix (nucleoside diphosphate linked moiety X)-type motif 18
hsa-miR-509-3-5p	0	0	1	1	1	1	SPECC1	sperm antigen with calponin homology and coiled-coil domains 1
hsa-miR-509-3-5p	0	0	1	1	1	1	SUGT1	SGT1, suppressor of G2 allele of SKP1 (S. cerevisiae)
hsa-miR-509-3-5p	1	0	1	1	1	1	LHX9	LIM homeobox 9
hsa-miR-509-3-5p	0	0	1	1	0	0	PCOLCE	procollagen C-endopeptidase enhancer
hsa-miR-509-3-5p	0	0	1	1	0	0	ISG20	interferon stimulated exonuclease gene 20kDa
hsa-miR-509-3-5p	0	0	1	1	1	1	TOP3B	topoisomerase (DNA) III beta
hsa-miR-509-3-5p	0	0	1	1	0	0	IL11RA	interleukin 11 receptor, alpha
hsa-miR-509-3-5p	1	0	1	1	1	1	TARBP2	TAR (HIV-1) RNA binding protein 2
hsa-miR-509-3-5p	0	0	1	1	1	1	MRPL42	mitochondrial ribosomal protein L42
hsa-miR-509-3-5p	1	0	1	1	1	1	PHACTR2	phosphatase and actin regulator 2
hsa-miR-509-3-5p	0	0	1	1	1	1	ATG5	autophagy related 5
hsa-miR-509-3-5p	0	0	1	0	0	0	LINC00661	long intergenic non-protein coding RNA 661
hsa-miR-509-3-5p	1	0	1	1	1	1	HECW2	HECT, C2 and WW domain containing E3 ubiquitin protein ligase 2
hsa-miR-509-3-5p	1	0	1	1	1	1	KIAA2018	KIAA2018
hsa-miR-509-3-5p	1	0	1	1	1	1	ANKS6	ankyrin repeat and sterile alpha motif domain containing 6
hsa-miR-509-3-5p	1	0	1	0	1	1	SLC7A6	solute carrier family 7 (amino acid transporter light chain, y+L system), member 6
hsa-miR-509-3-5p	1	0	1	0	1	1	XRN1	5'-3' exoribonuclease 1
hsa-miR-509-3-5p	1	0	1	0	1	1	OSBPL8	oxysterol binding protein-like 8
hsa-miR-509-3-5p	0	0	1	1	1	1	ARMCX1	armadillo repeat containing, X-linked 1
hsa-miR-509-3-5p	1	0	1	1	1	1	TIPARP	TCDD-inducible poly(ADP-ribose) polymerase
hsa-miR-509-3-5p	0	0	1	1	1	1	SLC25A26	solute carrier family 25 (S-adenosylmethionine carrier), member 26
hsa-miR-509-3-5p	0	0	1	0	0	0	MIR143HG	MIR143 host gene (non-protein coding)
hsa-miR-509-3-5p	0	0	1	0	0	0	DNAJC27-AS1	DNAJC27 antisense RNA 1
hsa-miR-509-3-5p	0	0	1	0	1	1	SYNPR	synaptoporin
hsa-miR-509-3-5p	0	0	1	1	1	1	MSS51	MSS51 mitochondrial translational activator homolog (S. cerevisiae)
hsa-miR-509-3-5p	0	0	1	1	1	1	SLC39A14	solute carrier family 39 (zinc transporter), member 14
hsa-miR-509-3-5p	1	0	1	1	1	1	METAP1	methionyl aminopeptidase 1
hsa-miR-509-3-5p	1	0	1	1	1	1	PI15	peptidase inhibitor 15
hsa-miR-509-3-5p	1	0	1	1	1	1	SEC14L1	SEC14-like 1 (S. cerevisiae)
hsa-miR-509-3-5p	1	0	1	1	1	1	RBPMS	RNA binding protein with multiple splicing
hsa-miR-509-3-5p	1	0	1	1	1	1	RB1CC1	RB1-inducible coiled-coil 1
hsa-miR-509-3-5p	0	0	1	1	1	1	ATF2	activating transcription factor 2
hsa-miR-509-3-5p	1	0	1	1	1	1	ATP2B3	ATPase, Ca++ transporting, plasma membrane 3
hsa-miR-509-3-5p	0	0	1	1	0	0	SPATA20	spermatogenesis associated 20
hsa-miR-509-3-5p	0	0	1	1	1	1	P2RX7	purinergic receptor P2X, ligand-gated ion channel, 7
hsa-miR-509-3-5p	1	0	1	0	1	1	DCBLD2	discoidin, CUB and LCCL domain containing 2
hsa-miR-509-3-5p	0	0	1	1	1	1	PROS1	protein S (alpha)
hsa-miR-509-3-5p	0	0	1	1	1	1	VDAC2	voltage-dependent anion channel 2
hsa-miR-509-3-5p	0	0	1	0	1	1	OPRK1	opioid receptor, kappa 1
hsa-miR-509-3-5p	1	0	1	1	1	1	GRM1	glutamate receptor, metabotropic 1
hsa-miR-509-3-5p	0	0	1	1	0	0	INHBA	inhibin, beta A
hsa-miR-509-3-5p	1	0	1	0	1	1	BCL2	B-cell CLL/lymphoma 2
hsa-miR-509-3-5p	1	0	1	1	1	1	PLAU	plasminogen activator, urokinase
hsa-miR-509-3-5p	0	0	1	0	0	0	PVT1	Pvt1 oncogene (non-protein coding)
hsa-miR-509-3-5p	0	0	1	1	0	0	COL6A2	collagen, type VI, alpha 2
hsa-miR-509-3-5p	0	0	1	0	0	0	ARSE	arylsulfatase E (chondrodysplasia punctata 1)
hsa-miR-509-3-5p	0	0	1	1	0	0	CD40LG	CD40 ligand
hsa-miR-509-3-5p	1	0	1	1	1	1	COL5A1	collagen, type V, alpha 1
hsa-miR-509-3-5p	1	0	1	1	1	1	CPOX	coproporphyrinogen oxidase
hsa-miR-509-3-5p	1	0	1	0	1	1	G6PC	glucose-6-phosphatase, catalytic subunit
hsa-miR-509-3-5p	1	0	1	1	1	1	GALC	galactosylceramidase
hsa-miR-509-3-5p	1	0	1	0	1	1	GHR	growth hormone receptor
hsa-miR-509-3-5p	1	0	1	0	1	1	GLI3	GLI family zinc finger 3
hsa-miR-509-3-5p	1	0	1	1	1	1	KCNA1	potassium voltage-gated channel, shaker-related subfamily, member 1 (episodic ataxia with myokymia)
hsa-miR-509-3-5p	0	0	1	1	0	0	KCNH2	potassium voltage-gated channel, subfamily H (eag-related), member 2
hsa-miR-509-3-5p	0	0	1	0	1	1	MBL2	mannose-binding lectin (protein C) 2, soluble
hsa-miR-509-3-5p	0	0	1	0	1	1	MTTP	microsomal triglyceride transfer protein
hsa-miR-509-3-5p	1	0	1	1	1	1	NF1	neurofibromin 1
hsa-miR-509-3-5p	0	0	1	1	0	0	PCCA	propionyl CoA carboxylase, alpha polypeptide
hsa-miR-509-3-5p	1	0	1	1	1	1	ATXN1	ataxin 1
hsa-miR-509-3-5p	1	1	1	1	1	1	CDKN1A	cyclin-dependent kinase inhibitor 1A (p21, Cip1)
hsa-miR-509-3-5p	1	0	1	0	1	1	COL5A2	collagen, type V, alpha 2
hsa-miR-509-3-5p	0	0	1	1	1	1	PECAM1	platelet/endothelial cell adhesion molecule 1
hsa-miR-509-3-5p	0	0	1	0	1	1	SLC10A2	solute carrier family 10 (sodium/bile acid cotransporter family), member 2
hsa-miR-509-3-5p	0	0	1	1	1	1	CYP11B2	cytochrome P450, family 11, subfamily B, polypeptide 2
hsa-miR-509-3-5p	0	0	1	1	1	1	GPX1	glutathione peroxidase 1
hsa-miR-509-3-5p	0	0	1	1	1	1	IGF2	insulin-like growth factor 2 (somatomedin A)
hsa-miR-509-3-5p	0	0	1	1	1	1	IFNG	interferon, gamma
hsa-miR-509-3-5p	0	0	1	1	1	1	NOS1	nitric oxide synthase 1 (neuronal)
hsa-miR-509-3-5p	1	0	1	0	1	1	GABRA4	gamma-aminobutyric acid (GABA) A receptor, alpha 4
hsa-miR-509-3-5p	1	0	1	1	1	1	GABRB3	gamma-aminobutyric acid (GABA) A receptor, beta 3
hsa-miR-509-3-5p	1	0	1	1	1	1	GRIA4	glutamate receptor, ionotropic, AMPA 4
hsa-miR-509-3-5p	0	0	1	1	1	1	HTR7	5-hydroxytryptamine (serotonin) receptor 7, adenylate cyclase-coupled
hsa-miR-509-3-5p	1	0	1	1	1	1	IGF1R	insulin-like growth factor 1 receptor
hsa-miR-509-3-5p	0	0	1	1	1	1	IL5	interleukin 5 (colony-stimulating factor, eosinophil)
hsa-miR-509-3-5p	0	0	1	1	0	0	MGP	matrix Gla protein
hsa-miR-509-3-5p	1	0	1	1	1	1	MME	membrane metallo-endopeptidase
hsa-miR-509-3-5p	0	0	1	1	1	1	NPY2R	neuropeptide Y receptor Y2
hsa-miR-509-3-5p	1	0	1	0	1	1	SMAD5	SMAD family member 5
hsa-miR-509-3-5p	1	0	1	0	1	1	UBE2W	ubiquitin-conjugating enzyme E2W (putative)
hsa-miR-509-3-5p	1	0	1	1	1	1	UGP2	UDP-glucose pyrophosphorylase 2
hsa-miR-509-3-5p	0	0	1	1	0	0	RNASE9	ribonuclease, RNase A family, 9 (non-active)
hsa-miR-509-3-5p	0	0	1	1	1	1	DDI1	DNA-damage inducible 1 homolog 1 (S. cerevisiae)
hsa-miR-509-3-5p	1	0	1	1	1	1	C14orf37	chromosome 14 open reading frame 37
hsa-miR-509-3-5p	1	0	1	1	1	1	FAM13C	family with sequence similarity 13, member C
hsa-miR-509-3-5p	1	0	1	1	0	0	AWAT2	acyl-CoA wax alcohol acyltransferase 2
hsa-miR-509-3-5p	0	0	1	1	1	1	FCGR2B	Fc fragment of IgG, low affinity IIb, receptor (CD32)
hsa-miR-509-3-5p	1	0	1	1	1	1	WNK3	WNK lysine deficient protein kinase 3
hsa-miR-509-3-5p	1	0	1	1	1	1	C1orf173	chromosome 1 open reading frame 173
hsa-miR-509-3-5p	0	0	1	1	1	1	PTRH1	peptidyl-tRNA hydrolase 1 homolog (S. cerevisiae)
hsa-miR-509-3-5p	0	0	1	1	0	0	PMS2P3	postmeiotic segregation increased 2 pseudogene 3
hsa-miR-509-3-5p	1	0	1	1	1	1	RREB1	ras responsive element binding protein 1
hsa-miR-509-3-5p	1	0	1	1	1	1	RBMS3	RNA binding motif, single stranded interacting protein 3
hsa-miR-509-3-5p	1	0	1	0	1	1	BMF	Bcl2 modifying factor
hsa-miR-509-3-5p	0	0	1	1	1	1	ALG11	asparagine-linked glycosylation 11, alpha-1,2-mannosyltransferase homolog (yeast)
hsa-miR-509-3-5p	0	0	1	1	1	1	CCDC144NL	coiled-coil domain containing 144 family, N-terminal like
hsa-miR-509-3-5p	0	0	1	1	1	1	ZCCHC16	zinc finger, CCHC domain containing 16
hsa-miR-509-3-5p	1	0	1	0	1	1	LIN28B	lin-28 homolog B (C. elegans)
hsa-miR-509-3-5p	0	0	1	0	1	1	ZNF705A	zinc finger protein 705A
hsa-miR-509-3-5p	0	0	1	0	1	1	FLJ46347	uncharacterized LOC389064
hsa-miR-509-3-5p	0	0	1	1	1	1	PRR13	proline rich 13
hsa-miR-509-3-5p	1	0	1	0	1	1	YPEL2	yippee-like 2 (Drosophila)
hsa-miR-509-3-5p	0	0	1	1	1	1	MAPKAP1	mitogen-activated protein kinase associated protein 1
hsa-miR-509-3-5p	1	0	1	1	1	1	L3MBTL3	l(3)mbt-like 3 (Drosophila)
hsa-miR-509-3-5p	1	0	1	1	1	1	NTRK3	neurotrophic tyrosine kinase, receptor, type 3
hsa-miR-509-3-5p	0	0	1	0	1	1	C8orf22	chromosome 8 open reading frame 22
hsa-miR-509-3-5p	0	0	1	0	0	0	RWDD1	RWD domain containing 1
hsa-miR-509-3-5p	1	0	1	1	1	1	BCAP29	B-cell receptor-associated protein 29
hsa-miR-509-3-5p	1	0	1	0	1	1	KIAA2022	KIAA2022
hsa-miR-509-3-5p	1	0	1	1	1	1	FNIP1	folliculin interacting protein 1
hsa-miR-509-3-5p	0	0	1	1	0	0	CDKL4	cyclin-dependent kinase-like 4
hsa-miR-509-3-5p	0	0	1	1	0	0	ARMCX6	armadillo repeat containing, X-linked 6
hsa-miR-509-3-5p	0	0	1	1	1	1	SPIN3	spindlin family, member 3
hsa-miR-509-3-5p	1	0	1	0	1	1	ZC3H12B	zinc finger CCCH-type containing 12B
hsa-miR-509-3-5p	0	0	1	1	1	1	HGF	hepatocyte growth factor (hepapoietin A; scatter factor)
hsa-miR-509-3-5p	0	0	1	1	1	1	SAMD13	sterile alpha motif domain containing 13
hsa-miR-509-3-5p	0	0	1	1	1	1	CHCHD7	coiled-coil-helix-coiled-coil-helix domain containing 7
hsa-miR-509-3-5p	0	0	1	1	1	1	XKR9	XK, Kell blood group complex subunit-related family, member 9
hsa-miR-509-3-5p	0	0	1	0	1	1	GOLGA8E	golgin A8 family, member E
hsa-miR-509-3-5p	1	0	1	1	1	1	SLC25A53	solute carrier family 25, member 53
hsa-miR-509-3-5p	1	0	1	0	1	1	FIGNL2	fidgetin-like 2
hsa-miR-509-3-5p	0	0	1	1	1	1	LDLRAD2	low density lipoprotein receptor class A domain containing 2
hsa-miR-509-3-5p	0	0	1	0	1	1	LINC00268	long intergenic non-protein coding RNA 268
hsa-miR-509-3-5p	1	0	1	1	1	1	CA7	carbonic anhydrase VII
hsa-miR-509-3-5p	1	0	1	1	1	1	RUNX2	runt-related transcription factor 2
hsa-miR-509-3-5p	1	0	1	1	1	1	PHF6	PHD finger protein 6
hsa-miR-509-3-5p	1	0	1	0	1	1	GOPC	golgi-associated PDZ and coiled-coil motif containing
hsa-miR-509-3-5p	1	0	1	0	1	1	KCNK2	potassium channel, subfamily K, member 2
hsa-miR-509-3-5p	0	0	1	1	1	1	BTBD11	BTB (POZ) domain containing 11
hsa-miR-509-3-5p	0	0	1	1	1	1	RAB28	RAB28, member RAS oncogene family
hsa-miR-509-3-5p	1	0	1	1	1	1	DKK3	dickkopf 3 homolog (Xenopus laevis)
hsa-miR-509-3-5p	1	0	1	1	1	1	SERF2	small EDRK-rich factor 2
hsa-miR-509-3-5p	1	0	1	1	1	1	IQCB1	IQ motif containing B1
hsa-miR-509-3-5p	1	0	1	1	1	1	ABCC5	ATP-binding cassette, sub-family C (CFTR/MRP), member 5
hsa-miR-509-3-5p	1	0	1	0	1	1	RGAG4	retrotransposon gag domain containing 4
hsa-miR-509-3-5p	0	0	1	1	1	1	RGPD1	RANBP2-like and GRIP domain containing 1
hsa-miR-509-3-5p	1	0	1	1	1	1	CANX	calnexin
hsa-miR-509-3-5p	1	0	1	0	1	1	TNRC6B	trinucleotide repeat containing 6B
hsa-miR-509-3-5p	1	0	1	1	1	1	TGFBR2	transforming growth factor, beta receptor II (70/80kDa)
hsa-miR-509-3-5p	1	0	1	0	1	1	CELF2	CUGBP, Elav-like family member 2
hsa-miR-509-3-5p	1	0	1	0	1	1	ADAR	adenosine deaminase, RNA-specific
hsa-miR-509-3-5p	1	0	1	1	1	1	AFF3	AF4/FMR2 family, member 3
hsa-miR-509-3-5p	1	0	1	1	1	1	OPN5	opsin 5
hsa-miR-509-3-5p	0	0	1	1	1	1	ATF3	activating transcription factor 3
hsa-miR-509-3-5p	1	0	1	0	1	1	MSRB3	methionine sulfoxide reductase B3
hsa-miR-509-3-5p	1	0	1	1	1	1	CTNS	cystinosin, lysosomal cystine transporter
hsa-miR-509-3-5p	1	0	1	1	1	1	CSNK1G3	casein kinase 1, gamma 3
hsa-miR-509-3-5p	1	0	1	1	1	1	TFAP2A	transcription factor AP-2 alpha (activating enhancer binding protein 2 alpha)
hsa-miR-509-3-5p	1	0	1	1	1	1	KLF10	Kruppel-like factor 10
hsa-miR-509-3-5p	1	0	1	1	1	1	MAGI1	membrane associated guanylate kinase, WW and PDZ domain containing 1
hsa-miR-509-3-5p	0	0	1	1	1	1	CSTF3	cleavage stimulation factor, 3' pre-RNA, subunit 3, 77kDa
hsa-miR-509-3-5p	1	0	1	1	1	1	PPM1B	protein phosphatase, Mg2+/Mn2+ dependent, 1B
hsa-miR-509-3-5p	1	0	1	1	1	1	GALNTL6	UDP-N-acetyl-alpha-D-galactosamine:polypeptide N-acetylgalactosaminyltransferase-like 6
hsa-miR-509-3-5p	0	0	1	1	1	1	FAM134B	family with sequence similarity 134, member B
hsa-miR-509-3-5p	1	0	1	0	1	1	RYR3	ryanodine receptor 3
hsa-miR-509-3-5p	1	0	1	1	1	1	ACPL2	acid phosphatase-like 2
hsa-miR-509-3-5p	1	0	1	0	1	1	CDC42SE1	CDC42 small effector 1
hsa-miR-509-3-5p	1	0	1	1	1	1	ELMO1	engulfment and cell motility 1
hsa-miR-509-3-5p	1	0	1	0	1	1	USP9X	ubiquitin specific peptidase 9, X-linked
hsa-miR-509-3-5p	0	0	1	0	1	1	ZNF705D	zinc finger protein 705D
hsa-miR-509-3-5p	1	0	1	0	1	1	FAM133B	family with sequence similarity 133, member B
hsa-miR-509-3-5p	1	0	1	1	1	1	SPTSSB	serine palmitoyltransferase, small subunit B
hsa-miR-509-3-5p	1	0	1	1	1	1	SCN2A	sodium channel, voltage-gated, type II, alpha subunit
hsa-miR-509-3-5p	1	0	1	0	1	1	CEP44	centrosomal protein 44kDa
hsa-miR-509-3-5p	1	0	1	1	1	1	PAPD5	PAP associated domain containing 5
hsa-miR-509-3-5p	0	0	1	1	1	1	MTHFD2	methylenetetrahydrofolate dehydrogenase (NADP+ dependent) 2, methenyltetrahydrofolate cyclohydrolase
hsa-miR-509-3-5p	1	0	1	1	1	1	ASB1	ankyrin repeat and SOCS box containing 1
hsa-miR-509-3-5p	1	0	1	1	1	1	MTMR12	myotubularin related protein 12
hsa-miR-509-3-5p	1	0	1	1	1	1	CYLD	cylindromatosis (turban tumor syndrome)
hsa-miR-509-3-5p	1	0	1	1	1	1	PPP4R1	protein phosphatase 4, regulatory subunit 1
hsa-miR-509-3-5p	1	0	1	1	1	1	SLC9A6	solute carrier family 9, subfamily A (NHE6, cation proton antiporter 6), member 6
hsa-miR-509-3-5p	1	0	1	1	1	1	FRS2	fibroblast growth factor receptor substrate 2
hsa-miR-509-3-5p	0	0	1	1	1	1	TMEM8B	transmembrane protein 8B
hsa-miR-509-3-5p	1	0	1	1	1	1	ERBB4	v-erb-a erythroblastic leukemia viral oncogene homolog 4 (avian)
hsa-miR-509-3-5p	0	0	1	1	1	1	SLC6A3	solute carrier family 6 (neurotransmitter transporter, dopamine), member 3
hsa-miR-509-3-5p	1	0	1	1	1	1	QSER1	glutamine and serine rich 1
hsa-miR-509-3-5p	1	0	1	1	1	1	CDC14B	CDC14 cell division cycle 14 homolog B (S. cerevisiae)
hsa-miR-509-3-5p	1	0	1	1	1	1	HS6ST2	heparan sulfate 6-O-sulfotransferase 2
hsa-miR-509-3-5p	1	0	1	1	1	1	PDE11A	phosphodiesterase 11A
hsa-miR-509-3-5p	1	0	1	0	1	1	UBXN2B	UBX domain protein 2B
hsa-miR-509-3-5p	0	0	1	0	0	0	AGAP7	ArfGAP with GTPase domain, ankyrin repeat and PH domain 7
hsa-miR-509-3-5p	0	0	1	1	1	1	RGPD2	RANBP2-like and GRIP domain containing 2
hsa-miR-509-3-5p	1	0	1	1	1	1	LDB3	LIM domain binding 3
hsa-miR-509-3-5p	0	0	1	1	1	1	HSF5	heat shock transcription factor family member 5
hsa-miR-509-3-5p	0	0	1	0	1	1	EPHA6	EPH receptor A6
hsa-miR-509-3-5p	1	0	1	0	1	1	MEGF9	multiple EGF-like-domains 9
hsa-miR-509-3-5p	0	0	1	0	1	1	RBM44	RNA binding motif protein 44
hsa-miR-509-3-5p	1	0	1	1	1	1	MGA	MAX gene associated
hsa-miR-509-3-5p	1	0	1	1	1	1	REPS2	RALBP1 associated Eps domain containing 2
hsa-miR-509-3-5p	1	0	1	0	1	1	SCN3A	sodium channel, voltage-gated, type III, alpha subunit
hsa-miR-509-3-5p	0	0	1	1	1	1	G6PC2	glucose-6-phosphatase, catalytic, 2
hsa-miR-509-3-5p	0	0	1	1	1	1	ARHGAP6	Rho GTPase activating protein 6
hsa-miR-509-3-5p	1	0	1	1	1	1	BMP2	bone morphogenetic protein 2
hsa-miR-509-3-5p	1	0	1	0	1	1	BMPR2	bone morphogenetic protein receptor, type II (serine/threonine kinase)
hsa-miR-509-3-5p	1	0	1	0	1	1	KLF9	Kruppel-like factor 9
hsa-miR-509-3-5p	1	0	1	1	1	1	CAMK2D	calcium/calmodulin-dependent protein kinase II delta
hsa-miR-509-3-5p	1	0	1	0	1	1	CDK6	cyclin-dependent kinase 6
hsa-miR-509-3-5p	0	0	1	1	1	1	CLIC2	chloride intracellular channel 2
hsa-miR-509-3-5p	0	0	1	1	0	0	CSNK2B	casein kinase 2, beta polypeptide
hsa-miR-509-3-5p	1	0	1	1	1	1	EIF1AX	eukaryotic translation initiation factor 1A, X-linked
hsa-miR-509-3-5p	0	0	1	1	1	1	CXCL10	chemokine (C-X-C motif) ligand 10
hsa-miR-509-3-5p	1	0	1	1	1	1	ARF3	ADP-ribosylation factor 3
hsa-miR-509-3-5p	0	0	1	1	1	1	ATP12A	ATPase, H+/K+ transporting, nongastric, alpha polypeptide
hsa-miR-509-3-5p	1	0	1	0	1	1	ATP1B2	ATPase, Na+/K+ transporting, beta 2 polypeptide
hsa-miR-509-3-5p	1	0	1	1	1	1	BNC1	basonuclin 1
hsa-miR-509-3-5p	1	0	1	1	1	1	BTG1	B-cell translocation gene 1, anti-proliferative
hsa-miR-509-3-5p	0	0	1	1	1	1	CD1D	CD1d molecule
hsa-miR-509-3-5p	1	0	1	1	1	1	CDH2	cadherin 2, type 1, N-cadherin (neuronal)
hsa-miR-509-3-5p	0	0	1	1	0	0	CDKN2D	cyclin-dependent kinase inhibitor 2D (p19, inhibits CDK4)
hsa-miR-509-3-5p	1	0	1	0	1	1	COL19A1	collagen, type XIX, alpha 1
hsa-miR-509-3-5p	1	0	1	1	1	1	SLC31A1	solute carrier family 31 (copper transporters), member 1
hsa-miR-509-3-5p	1	0	1	1	1	1	MASP1	mannan-binding lectin serine peptidase 1 (C4/C2 activating component of Ra-reactive factor)
hsa-miR-509-3-5p	0	0	1	1	1	1	DSG1	desmoglein 1
hsa-miR-509-3-5p	1	0	1	1	1	1	HBEGF	heparin-binding EGF-like growth factor
hsa-miR-509-3-5p	0	0	1	1	1	1	CELA1	chymotrypsin-like elastase family, member 1
hsa-miR-509-3-5p	1	0	1	1	1	1	ENPEP	glutamyl aminopeptidase (aminopeptidase A)
hsa-miR-509-3-5p	1	0	1	0	1	1	ETV6	ets variant 6
hsa-miR-509-3-5p	0	0	1	0	1	1	FGF2	fibroblast growth factor 2 (basic)
hsa-miR-509-3-5p	1	0	1	0	1	1	FUT4	fucosyltransferase 4 (alpha (1,3) fucosyltransferase, myeloid-specific)
hsa-miR-509-3-5p	0	0	1	1	0	0	GLP1R	glucagon-like peptide 1 receptor
hsa-miR-509-3-5p	1	0	1	0	1	1	GNAI1	guanine nucleotide binding protein (G protein), alpha inhibiting activity polypeptide 1
hsa-miR-509-3-5p	1	0	1	1	1	1	GOLGA1	golgin A1
hsa-miR-509-3-5p	0	0	1	1	0	0	IDH2	isocitrate dehydrogenase 2 (NADP+), mitochondrial
hsa-miR-509-3-5p	0	0	1	0	1	1	ITGAV	integrin, alpha V
hsa-miR-509-3-5p	1	0	1	1	1	1	ITPR2	inositol 1,4,5-trisphosphate receptor, type 2
hsa-miR-509-3-5p	1	0	1	1	1	1	KCNJ10	potassium inwardly-rectifying channel, subfamily J, member 10
hsa-miR-509-3-5p	0	0	1	1	0	0	KCNK3	potassium channel, subfamily K, member 3
hsa-miR-509-3-5p	0	0	1	1	1	1	KLRC2	killer cell lectin-like receptor subfamily C, member 2
hsa-miR-509-3-5p	1	0	1	1	1	1	KPNA3	karyopherin alpha 3 (importin alpha 4)
hsa-miR-509-3-5p	1	0	1	1	1	1	IPO5	importin 5
hsa-miR-509-3-5p	1	0	1	1	1	1	LIF	leukemia inhibitory factor
hsa-miR-509-3-5p	1	0	1	1	1	1	LIMK1	LIM domain kinase 1
hsa-miR-509-3-5p	1	0	1	1	1	1	MARCKS	myristoylated alanine-rich protein kinase C substrate
hsa-miR-509-3-5p	0	0	1	1	0	0	MBD1	methyl-CpG binding domain protein 1
hsa-miR-509-3-5p	0	0	1	0	1	1	CXCL9	chemokine (C-X-C motif) ligand 9
hsa-miR-509-3-5p	1	0	1	1	1	1	MN1	meningioma (disrupted in balanced translocation) 1
hsa-miR-509-3-5p	1	0	1	1	1	1	MSN	moesin
hsa-miR-509-3-5p	0	0	1	1	1	1	MTAP	methylthioadenosine phosphorylase
hsa-miR-509-3-5p	1	0	1	0	1	1	IRF4	interferon regulatory factor 4
hsa-miR-509-3-5p	0	0	1	1	1	1	NID1	nidogen 1
hsa-miR-509-3-5p	1	0	1	1	1	1	NPAS2	neuronal PAS domain protein 2
hsa-miR-509-3-5p	0	0	1	1	0	0	NRD1	nardilysin (N-arginine dibasic convertase)
hsa-miR-509-3-5p	0	0	1	0	1	1	OPHN1	oligophrenin 1
hsa-miR-509-3-5p	1	0	1	1	1	1	ORC5	origin recognition complex, subunit 5
hsa-miR-509-3-5p	1	0	1	1	1	1	OSBP	oxysterol binding protein
hsa-miR-509-3-5p	1	0	1	0	1	1	PAK2	p21 protein (Cdc42/Rac)-activated kinase 2
hsa-miR-509-3-5p	1	0	1	0	1	1	CDK17	cyclin-dependent kinase 17
hsa-miR-509-3-5p	0	0	1	1	1	1	PEX13	peroxisomal biogenesis factor 13
hsa-miR-509-3-5p	1	0	1	1	1	1	PLCG1	phospholipase C, gamma 1
hsa-miR-509-3-5p	0	0	1	1	0	0	PPP1R8	protein phosphatase 1, regulatory subunit 8
hsa-miR-509-3-5p	1	0	1	1	1	1	PPP2CA	protein phosphatase 2, catalytic subunit, alpha isozyme
hsa-miR-509-3-5p	1	0	1	0	1	1	PRKCA	protein kinase C, alpha
hsa-miR-509-3-5p	0	0	1	0	0	0	PSMB10	proteasome (prosome, macropain) subunit, beta type, 10
hsa-miR-509-3-5p	1	0	1	0	1	1	RAB6A	RAB6A, member RAS oncogene family
hsa-miR-509-3-5p	1	0	1	1	1	1	RAD23B	RAD23 homolog B (S. cerevisiae)
hsa-miR-509-3-5p	0	0	1	1	1	1	RGS2	regulator of G-protein signaling 2, 24kDa
hsa-miR-509-3-5p	1	0	1	0	1	1	SORT1	sortilin 1
hsa-miR-509-3-5p	1	0	1	0	1	1	CCL22	chemokine (C-C motif) ligand 22
hsa-miR-509-3-5p	0	0	1	1	1	1	SDC2	syndecan 2
hsa-miR-509-3-5p	1	0	1	1	1	1	SFRP4	secreted frizzled-related protein 4
hsa-miR-509-3-5p	1	0	1	1	1	1	SH3GL2	SH3-domain GRB2-like 2
hsa-miR-509-3-5p	1	0	1	1	0	0	SLN	sarcolipin
hsa-miR-509-3-5p	1	0	1	0	1	1	SOX11	SRY (sex determining region Y)-box 11
hsa-miR-509-3-5p	1	0	1	1	1	1	STAC	SH3 and cysteine rich domain
hsa-miR-509-3-5p	0	0	1	1	1	1	SULT2A1	sulfotransferase family, cytosolic, 2A, dehydroepiandrosterone (DHEA)-preferring, member 1
hsa-miR-509-3-5p	1	0	1	0	1	1	TAL1	T-cell acute lymphocytic leukemia 1
hsa-miR-509-3-5p	0	0	1	0	1	1	TCEB3	transcription elongation factor B (SIII), polypeptide 3 (110kDa, elongin A)
hsa-miR-509-3-5p	1	0	1	1	1	1	TDG	thymine-DNA glycosylase
hsa-miR-509-3-5p	0	0	1	1	1	1	UBE2V2	ubiquitin-conjugating enzyme E2 variant 2
hsa-miR-509-3-5p	1	0	1	0	1	1	VCL	vinculin
hsa-miR-509-3-5p	1	0	1	1	1	1	YY1	YY1 transcription factor
hsa-miR-509-3-5p	1	0	1	0	1	1	ZIC1	Zic family member 1
hsa-miR-509-3-5p	0	0	1	1	1	1	ZNF124	zinc finger protein 124
hsa-miR-509-3-5p	0	0	1	1	1	1	SCG2	secretogranin II
hsa-miR-509-3-5p	1	0	1	1	1	1	CUL5	cullin 5
hsa-miR-509-3-5p	1	0	1	1	1	1	HMGA2	high mobility group AT-hook 2
hsa-miR-509-3-5p	1	0	1	1	1	1	NRIP1	nuclear receptor interacting protein 1
hsa-miR-509-3-5p	1	0	1	1	1	1	FZD7	frizzled family receptor 7
hsa-miR-509-3-5p	0	0	1	1	0	0	HIST1H2BM	histone cluster 1, H2bm
hsa-miR-509-3-5p	1	0	1	1	1	1	PIP4K2B	phosphatidylinositol-5-phosphate 4-kinase, type II, beta
hsa-miR-509-3-5p	0	0	1	1	1	1	AGPS	alkylglycerone phosphate synthase
hsa-miR-509-3-5p	1	0	1	1	1	1	CDC14A	CDC14 cell division cycle 14 homolog A (S. cerevisiae)
hsa-miR-509-3-5p	1	0	1	1	1	1	B3GALT2	UDP-Gal:betaGlcNAc beta 1,3-galactosyltransferase, polypeptide 2
hsa-miR-509-3-5p	1	0	1	1	1	1	IQGAP1	IQ motif containing GTPase activating protein 1
hsa-miR-509-3-5p	1	0	1	1	1	1	NRP2	neuropilin 2
hsa-miR-509-3-5p	1	0	1	1	1	1	ALDH1A2	aldehyde dehydrogenase 1 family, member A2
hsa-miR-509-3-5p	1	0	1	0	1	1	ST13	suppression of tumorigenicity 13 (colon carcinoma) (Hsp70 interacting protein)
hsa-miR-509-3-5p	1	0	1	0	1	1	E2F2	E2F transcription factor 2
hsa-miR-509-3-5p	1	0	1	1	1	1	EFNB2	ephrin-B2
hsa-miR-509-3-5p	1	0	1	1	1	1	EYA4	eyes absent homolog 4 (Drosophila)
hsa-miR-509-3-5p	1	0	1	1	1	1	GMFB	glia maturation factor, beta
hsa-miR-509-3-5p	0	0	1	1	1	1	SLC1A1	solute carrier family 1 (neuronal/epithelial high affinity glutamate transporter, system Xag), member 1
hsa-miR-509-3-5p	1	0	1	0	1	1	SLC1A2	solute carrier family 1 (glial high affinity glutamate transporter), member 2
hsa-miR-509-3-5p	0	0	1	1	0	0	SLC6A5	solute carrier family 6 (neurotransmitter transporter, glycine), member 5
hsa-miR-509-3-5p	1	0	1	0	1	1	AKAP6	A kinase (PRKA) anchor protein 6
hsa-miR-509-3-5p	0	0	1	1	0	0	BAG3	BCL2-associated athanogene 3
hsa-miR-509-3-5p	1	0	1	1	1	1	ARL3	ADP-ribosylation factor-like 3
hsa-miR-509-3-5p	1	0	1	1	1	1	BCL9	B-cell CLL/lymphoma 9
hsa-miR-509-3-5p	1	0	1	0	1	1	RUNX1T1	runt-related transcription factor 1; translocated to, 1 (cyclin D-related)
hsa-miR-509-3-5p	0	0	1	1	1	1	CEACAM5	carcinoembryonic antigen-related cell adhesion molecule 5
hsa-miR-509-3-5p	1	0	1	1	1	1	COX11	COX11 cytochrome c oxidase assembly homolog (yeast)
hsa-miR-509-3-5p	1	0	1	1	1	1	DDX5	DEAD (Asp-Glu-Ala-Asp) box helicase 5
hsa-miR-509-3-5p	1	0	1	1	1	1	DLX2	distal-less homeobox 2
hsa-miR-509-3-5p	1	0	1	1	1	1	EFNA1	ephrin-A1
hsa-miR-509-3-5p	1	0	1	1	1	1	WNT11	wingless-type MMTV integration site family, member 11
hsa-miR-509-3-5p	1	0	1	1	1	1	RAB11A	RAB11A, member RAS oncogene family
hsa-miR-509-3-5p	0	0	1	1	1	1	LIN7A	lin-7 homolog A (C. elegans)
hsa-miR-509-3-5p	1	0	1	1	1	1	MTMR6	myotubularin related protein 6
hsa-miR-509-3-5p	1	0	1	1	0	0	COX7A2L	cytochrome c oxidase subunit VIIa polypeptide 2 like
hsa-miR-509-3-5p	0	0	1	1	1	1	BUB3	budding uninhibited by benzimidazoles 3 homolog (yeast)
hsa-miR-509-3-5p	1	0	1	1	1	1	DCLK1	doublecortin-like kinase 1
hsa-miR-509-3-5p	0	0	1	1	1	1	MMP20	matrix metallopeptidase 20
hsa-miR-509-3-5p	1	0	1	1	1	1	KIF3B	kinesin family member 3B
hsa-miR-509-3-5p	0	0	1	1	1	1	TJP2	tight junction protein 2
hsa-miR-509-3-5p	0	0	1	1	0	0	AIM2	absent in melanoma 2
hsa-miR-509-3-5p	1	0	1	0	1	1	ROCK2	Rho-associated, coiled-coil containing protein kinase 2
hsa-miR-509-3-5p	1	0	1	1	1	1	ONECUT2	one cut homeobox 2
hsa-miR-509-3-5p	0	0	1	1	1	1	ITM2A	integral membrane protein 2A
hsa-miR-509-3-5p	1	0	1	1	1	1	ZFP36L1	zinc finger protein 36, C3H type-like 1
hsa-miR-509-3-5p	0	0	1	1	1	1	CDH6	cadherin 6, type 2, K-cadherin (fetal kidney)
hsa-miR-509-3-5p	1	0	1	0	1	1	DOCK3	dedicator of cytokinesis 3
hsa-miR-509-3-5p	1	0	1	1	1	1	JARID2	jumonji, AT rich interactive domain 2
hsa-miR-509-3-5p	1	0	1	0	1	1	KRAS	v-Ki-ras2 Kirsten rat sarcoma viral oncogene homolog
hsa-miR-509-3-5p	1	0	1	1	1	1	APLNR	apelin receptor
hsa-miR-509-3-5p	0	0	1	1	0	0	ASCL2	achaete-scute complex homolog 2 (Drosophila)
hsa-miR-509-3-5p	1	0	1	1	1	1	BMI1	BMI1 polycomb ring finger oncogene
hsa-miR-509-3-5p	1	0	1	1	1	1	DCC	deleted in colorectal carcinoma
hsa-miR-509-3-5p	1	0	1	0	1	1	E2F1	E2F transcription factor 1
hsa-miR-509-3-5p	1	0	1	1	1	1	ETS1	v-ets erythroblastosis virus E26 oncogene homolog 1 (avian)
hsa-miR-509-3-5p	1	0	1	1	1	1	ETV3	ets variant 3
hsa-miR-509-3-5p	1	0	1	1	1	1	FOXG1	forkhead box G1
hsa-miR-509-3-5p	0	0	1	1	1	1	MSTN	myostatin
hsa-miR-509-3-5p	1	0	1	1	1	1	GEM	GTP binding protein overexpressed in skeletal muscle
hsa-miR-509-3-5p	1	0	1	1	1	1	PHF2	PHD finger protein 2
hsa-miR-509-3-5p	0	0	1	1	1	1	PPP1R3C	protein phosphatase 1, regulatory subunit 3C
hsa-miR-509-3-5p	1	0	1	0	1	1	PRKAB2	protein kinase, AMP-activated, beta 2 non-catalytic subunit
hsa-miR-509-3-5p	1	0	1	0	1	1	PRKCE	protein kinase C, epsilon
hsa-miR-509-3-5p	1	0	1	0	1	1	CCDC6	coiled-coil domain containing 6
hsa-miR-509-3-5p	1	0	1	1	1	1	RND2	Rho family GTPase 2
hsa-miR-509-3-5p	1	0	1	1	0	0	ZBTB22	zinc finger and BTB domain containing 22
hsa-miR-509-3-5p	1	0	1	1	1	1	GABBR2	gamma-aminobutyric acid (GABA) B receptor, 2
hsa-miR-509-3-5p	1	0	1	1	1	1	AKT3	v-akt murine thymoma viral oncogene homolog 3 (protein kinase B, gamma)
hsa-miR-509-3-5p	1	0	1	0	0	0	FRAT1	frequently rearranged in advanced T-cell lymphomas
hsa-miR-509-3-5p	1	0	1	1	1	1	LPP	LIM domain containing preferred translocation partner in lipoma
hsa-miR-509-3-5p	0	0	1	1	1	1	SRSF4	serine/arginine-rich splicing factor 4
hsa-miR-509-3-5p	0	0	1	1	1	1	SOX3	SRY (sex determining region Y)-box 3
hsa-miR-509-3-5p	1	0	1	1	1	1	TMPRSS2	transmembrane protease, serine 2
hsa-miR-509-3-5p	0	0	1	1	1	1	ACTR3	ARP3 actin-related protein 3 homolog (yeast)
hsa-miR-509-3-5p	1	0	1	1	0	0	TSPAN5	tetraspanin 5
hsa-miR-509-3-5p	1	0	1	1	1	1	ACTR1A	ARP1 actin-related protein 1 homolog A, centractin alpha (yeast)
hsa-miR-509-3-5p	1	0	1	1	1	1	PRKD3	protein kinase D3
hsa-miR-509-3-5p	1	0	1	0	1	1	SPRY3	sprouty homolog 3 (Drosophila)
hsa-miR-509-3-5p	0	0	1	1	1	1	EIF1B	eukaryotic translation initiation factor 1B
hsa-miR-509-3-5p	1	0	1	1	1	1	MAN1A1	mannosidase, alpha, class 1A, member 1
hsa-miR-509-3-5p	1	0	1	1	1	1	MMP16	matrix metallopeptidase 16 (membrane-inserted)
hsa-miR-509-3-5p	1	0	1	0	1	1	NAB1	NGFI-A binding protein 1 (EGR1 binding protein 1)
hsa-miR-509-3-5p	1	0	1	1	0	0	NAB2	NGFI-A binding protein 2 (EGR1 binding protein 2)
hsa-miR-509-3-5p	0	0	1	1	0	0	SPRR1A	small proline-rich protein 1A
hsa-miR-509-3-5p	1	0	1	0	1	1	HDAC4	histone deacetylase 4
hsa-miR-509-3-5p	1	0	1	1	1	1	SPON1	spondin 1, extracellular matrix protein
hsa-miR-509-3-5p	1	0	1	1	1	1	DAGLA	diacylglycerol lipase, alpha
hsa-miR-509-3-5p	1	0	1	1	1	1	TMEM50B	transmembrane protein 50B
hsa-miR-509-3-5p	0	0	1	1	0	0	NEDD8	neural precursor cell expressed, developmentally down-regulated 8
hsa-miR-509-3-5p	1	0	1	1	1	1	NR4A2	nuclear receptor subfamily 4, group A, member 2
hsa-miR-509-3-5p	0	0	1	0	1	1	OAS3	2'-5'-oligoadenylate synthetase 3, 100kDa
hsa-miR-509-3-5p	0	0	1	1	1	1	OCM2	oncomodulin 2
hsa-miR-509-3-5p	0	0	1	1	0	0	PAX1	paired box 1
hsa-miR-509-3-5p	1	0	1	1	1	1	CDK16	cyclin-dependent kinase 16
hsa-miR-509-3-5p	0	0	1	1	1	1	PPP2R5A	protein phosphatase 2, regulatory subunit B', alpha
hsa-miR-509-3-5p	1	0	1	1	1	1	SMC1A	structural maintenance of chromosomes 1A
hsa-miR-509-3-5p	0	0	1	1	1	1	FST	follistatin
hsa-miR-509-3-5p	1	0	1	1	1	1	NEBL	nebulette
hsa-miR-509-3-5p	1	0	1	1	0	0	DYNLT1	dynein, light chain, Tctex-type 1
hsa-miR-509-3-5p	1	0	1	0	1	1	IGF2BP1	insulin-like growth factor 2 mRNA binding protein 1
hsa-miR-509-3-5p	1	0	1	1	1	1	CTCF	CCCTC-binding factor (zinc finger protein)
hsa-miR-509-3-5p	1	0	1	0	1	1	API5	apoptosis inhibitor 5
hsa-miR-509-3-5p	1	0	1	1	1	1	SRSF10	serine/arginine-rich splicing factor 10
hsa-miR-509-3-5p	1	0	1	1	1	1	PGRMC1	progesterone receptor membrane component 1
hsa-miR-509-3-5p	0	0	1	1	1	1	NUDT3	nudix (nucleoside diphosphate linked moiety X)-type motif 3
hsa-miR-509-3-5p	0	0	1	0	1	1	SUB1	SUB1 homolog (S. cerevisiae)
hsa-miR-509-3-5p	1	0	1	1	1	1	SPIN1	spindlin 1
hsa-miR-509-3-5p	1	0	1	1	1	1	DIAPH2	diaphanous homolog 2 (Drosophila)
hsa-miR-509-3-5p	1	0	1	1	1	1	PPP1R1A	protein phosphatase 1, regulatory (inhibitor) subunit 1A
hsa-miR-509-3-5p	1	0	1	1	1	1	SNTB2	syntrophin, beta 2 (dystrophin-associated protein A1, 59kDa, basic component 2)
hsa-miR-509-3-5p	0	0	1	1	1	1	ASCC3	activating signal cointegrator 1 complex subunit 3
hsa-miR-509-3-5p	1	0	1	1	1	1	RAB35	RAB35, member RAS oncogene family
hsa-miR-509-3-5p	1	0	1	1	1	1	RIT1	Ras-like without CAAX 1
hsa-miR-509-3-5p	1	0	1	0	1	1	SOX12	SRY (sex determining region Y)-box 12
hsa-miR-509-3-5p	1	0	1	1	1	1	HSPA13	heat shock protein 70kDa family, member 13
hsa-miR-509-3-5p	1	0	1	1	1	1	DDX52	DEAD (Asp-Glu-Ala-Asp) box polypeptide 52
hsa-miR-509-3-5p	1	0	1	1	1	1	PTPN21	protein tyrosine phosphatase, non-receptor type 21
hsa-miR-509-3-5p	0	0	1	1	1	1	RPP14	ribonuclease P/MRP 14kDa subunit
hsa-miR-509-3-5p	0	0	1	1	0	0	USF1	upstream transcription factor 1
hsa-miR-509-3-5p	1	0	1	1	1	1	UTRN	utrophin
hsa-miR-509-3-5p	1	0	1	1	1	1	PALM2-AKAP2	PALM2-AKAP2 readthrough
hsa-miR-509-3-5p	1	0	1	1	1	1	CA5B	carbonic anhydrase VB, mitochondrial
hsa-miR-509-3-5p	1	0	1	1	1	1	KLF12	Kruppel-like factor 12
hsa-miR-509-3-5p	0	0	1	1	0	0	CYP4F8	cytochrome P450, family 4, subfamily F, polypeptide 8
hsa-miR-509-3-5p	0	0	1	1	0	0	TWF2	twinfilin, actin-binding protein, homolog 2 (Drosophila)
hsa-miR-509-3-5p	1	0	1	1	1	1	PHLDA1	pleckstrin homology-like domain, family A, member 1
hsa-miR-509-3-5p	1	0	1	1	1	1	CASC3	cancer susceptibility candidate 3
hsa-miR-509-3-5p	1	0	1	1	1	1	TARDBP	TAR DNA binding protein
hsa-miR-509-3-5p	0	0	1	1	1	1	ATF5	activating transcription factor 5
hsa-miR-509-3-5p	1	0	1	1	1	1	ICOS	inducible T-cell co-stimulator
hsa-miR-509-3-5p	1	0	1	1	1	1	APPL1	adaptor protein, phosphotyrosine interaction, PH domain and leucine zipper containing 1
hsa-miR-509-3-5p	1	0	1	1	1	1	FBXL3	F-box and leucine-rich repeat protein 3
hsa-miR-509-3-5p	1	0	1	1	1	1	RYBP	RING1 and YY1 binding protein
hsa-miR-509-3-5p	1	0	1	1	1	1	KCND2	potassium voltage-gated channel, Shal-related subfamily, member 2
hsa-miR-509-3-5p	1	0	1	1	1	1	KCNE1L	KCNE1-like
hsa-miR-509-3-5p	1	0	1	0	1	1	G3BP2	GTPase activating protein (SH3 domain) binding protein 2
hsa-miR-509-3-5p	1	0	1	1	1	1	LSM5	LSM5 homolog, U6 small nuclear RNA associated (S. cerevisiae)
hsa-miR-509-3-5p	1	0	1	1	1	1	MMD	monocyte to macrophage differentiation-associated
hsa-miR-509-3-5p	1	0	1	1	1	1	PITPNB	phosphatidylinositol transfer protein, beta
hsa-miR-509-3-5p	0	0	1	0	1	1	PLA2G2D	phospholipase A2, group IID
hsa-miR-509-3-5p	1	0	1	1	1	1	RANBP6	RAN binding protein 6
hsa-miR-509-3-5p	0	0	1	0	1	1	TLL1	tolloid-like 1
hsa-miR-509-3-5p	1	0	1	1	1	1	YWHAG	tyrosine 3-monooxygenase/tryptophan 5-monooxygenase activation protein, gamma polypeptide
hsa-miR-509-3-5p	0	0	1	1	1	1	CD24	CD24 molecule
hsa-miR-509-3-5p	0	0	1	1	1	1	C16orf80	chromosome 16 open reading frame 80
hsa-miR-509-3-5p	1	0	1	1	1	1	SLC30A4	solute carrier family 30 (zinc transporter), member 4
hsa-miR-509-3-5p	1	0	1	1	1	1	ZNF770	zinc finger protein 770
hsa-miR-509-3-5p	1	0	1	0	1	1	C16orf72	chromosome 16 open reading frame 72
hsa-miR-509-3-5p	0	0	1	1	1	1	CCDC113	coiled-coil domain containing 113
hsa-miR-509-3-5p	0	0	1	1	1	1	ORMDL2	ORM1-like 2 (S. cerevisiae)
hsa-miR-509-3-5p	1	0	1	1	1	1	CELSR1	cadherin, EGF LAG seven-pass G-type receptor 1 (flamingo homolog, Drosophila)
hsa-miR-509-3-5p	1	0	1	0	1	1	ODZ1	odz, odd Oz/ten-m homolog 1 (Drosophila)
hsa-miR-509-3-5p	1	0	1	1	1	1	MAPRE2	microtubule-associated protein, RP/EB family, member 2
hsa-miR-509-3-5p	0	0	1	1	1	1	IL1RAPL1	interleukin 1 receptor accessory protein-like 1
hsa-miR-509-3-5p	0	0	1	1	1	1	CAPN6	calpain 6
hsa-miR-509-3-5p	0	0	1	1	1	1	TRAM1	translocation associated membrane protein 1
hsa-miR-509-3-5p	1	0	1	1	1	1	CORO1C	coronin, actin binding protein, 1C
hsa-miR-509-3-5p	0	0	1	1	1	1	DAPK2	death-associated protein kinase 2
hsa-miR-509-3-5p	1	0	1	0	1	1	RNF11	ring finger protein 11
hsa-miR-509-3-5p	1	0	1	0	1	1	DIEXF	digestive organ expansion factor homolog (zebrafish)
hsa-miR-509-3-5p	0	0	1	1	1	1	TAF5L	TAF5-like RNA polymerase II, p300/CBP-associated factor (PCAF)-associated factor, 65kDa
hsa-miR-509-3-5p	1	0	1	1	1	1	ZBTB11	zinc finger and BTB domain containing 11
hsa-miR-509-3-5p	1	0	1	1	1	1	AFF4	AF4/FMR2 family, member 4
hsa-miR-509-3-5p	1	0	1	1	1	1	SERP1	stress-associated endoplasmic reticulum protein 1
hsa-miR-509-3-5p	1	0	1	1	1	1	SLC40A1	solute carrier family 40 (iron-regulated transporter), member 1
hsa-miR-509-3-5p	1	0	1	0	1	1	HUNK	hormonally up-regulated Neu-associated kinase
hsa-miR-509-3-5p	1	0	1	1	1	1	EHD3	EH-domain containing 3
hsa-miR-509-3-5p	1	0	1	1	1	1	CDR2L	cerebellar degeneration-related protein 2-like
hsa-miR-509-3-5p	1	0	1	0	1	1	ATP11B	ATPase, class VI, type 11B
hsa-miR-509-3-5p	1	0	1	1	1	1	ZNF592	zinc finger protein 592
hsa-miR-509-3-5p	1	0	1	0	1	1	SH3PXD2A	SH3 and PX domains 2A
hsa-miR-509-3-5p	0	0	1	0	1	1	CTR9	Ctr9, Paf1/RNA polymerase II complex component, homolog (S. cerevisiae)
hsa-miR-509-3-5p	1	0	1	1	1	1	RALGPS1	Ral GEF with PH domain and SH3 binding motif 1
hsa-miR-509-3-5p	0	0	1	0	1	1	LPIN2	lipin 2
hsa-miR-509-3-5p	1	0	1	1	1	1	KDM4A	lysine (K)-specific demethylase 4A
hsa-miR-509-3-5p	1	0	1	0	1	1	MLEC	malectin
hsa-miR-509-3-5p	1	0	1	1	1	1	RASSF2	Ras association (RalGDS/AF-6) domain family member 2
hsa-miR-509-3-5p	1	0	1	0	1	1	KIAA0232	KIAA0232
hsa-miR-509-3-5p	1	0	1	0	1	1	SERTAD2	SERTA domain containing 2
hsa-miR-509-3-5p	1	0	1	0	1	1	MAML1	mastermind-like 1 (Drosophila)
hsa-miR-509-3-5p	1	0	1	1	1	1	MRPL19	mitochondrial ribosomal protein L19
hsa-miR-509-3-5p	1	0	1	0	1	1	SCRN1	secernin 1
hsa-miR-509-3-5p	0	0	1	0	1	1	EPM2AIP1	EPM2A (laforin) interacting protein 1
hsa-miR-509-3-5p	1	0	1	1	1	1	RUSC2	RUN and SH3 domain containing 2
hsa-miR-509-3-5p	0	0	1	1	1	1	PPP1R26	protein phosphatase 1, regulatory subunit 26
hsa-miR-509-3-5p	1	0	1	1	1	1	ZBTB39	zinc finger and BTB domain containing 39
hsa-miR-509-3-5p	0	0	1	0	1	1	PPM1E	protein phosphatase, Mg2+/Mn2+ dependent, 1E
hsa-miR-509-3-5p	1	0	1	1	1	1	PLEKHA6	pleckstrin homology domain containing, family A member 6
hsa-miR-509-3-5p	1	0	1	1	1	1	SPAST	spastin
hsa-miR-509-3-5p	1	0	1	1	1	1	RAB21	RAB21, member RAS oncogene family
hsa-miR-509-3-5p	1	0	1	1	1	1	STK38L	serine/threonine kinase 38 like
hsa-miR-509-3-5p	1	0	1	1	1	1	PHLPP2	PH domain and leucine rich repeat protein phosphatase 2
hsa-miR-509-3-5p	1	0	1	0	1	1	PDS5B	PDS5, regulator of cohesion maintenance, homolog B (S. cerevisiae)
hsa-miR-509-3-5p	1	0	1	1	1	1	ERP44	endoplasmic reticulum protein 44
hsa-miR-509-3-5p	1	0	1	1	1	1	ZNF423	zinc finger protein 423
hsa-miR-509-3-5p	1	0	1	1	1	1	GPD1L	glycerol-3-phosphate dehydrogenase 1-like
hsa-miR-509-3-5p	1	0	1	1	1	1	ZCCHC14	zinc finger, CCHC domain containing 14
hsa-miR-509-3-5p	1	0	1	0	1	1	LARP4B	La ribonucleoprotein domain family, member 4B
hsa-miR-509-3-5p	1	0	1	1	1	1	RCOR1	REST corepressor 1
hsa-miR-509-3-5p	0	0	1	1	1	1	ARL6IP1	ADP-ribosylation factor-like 6 interacting protein 1
hsa-miR-509-3-5p	1	0	1	1	1	1	PLCB1	phospholipase C, beta 1 (phosphoinositide-specific)
hsa-miR-509-3-5p	1	0	1	1	1	1	PDS5A	PDS5, regulator of cohesion maintenance, homolog A (S. cerevisiae)
hsa-miR-509-3-5p	1	0	1	1	1	1	ANKS1A	ankyrin repeat and sterile alpha motif domain containing 1A
hsa-miR-509-3-5p	1	0	1	1	1	1	CUX2	cut-like homeobox 2
hsa-miR-509-3-5p	1	0	1	0	1	1	KHNYN	KH and NYN domain containing
hsa-miR-509-3-5p	1	0	1	0	1	1	ARHGEF12	Rho guanine nucleotide exchange factor (GEF) 12
hsa-miR-509-3-5p	1	0	1	0	1	1	SRGAP2	SLIT-ROBO Rho GTPase activating protein 2
hsa-miR-509-3-5p	1	0	1	1	0	0	SMG5	smg-5 homolog, nonsense mediated mRNA decay factor (C. elegans)
hsa-miR-509-3-5p	1	0	1	1	1	1	MED13L	mediator complex subunit 13-like
hsa-miR-509-3-5p	0	0	1	1	1	1	ADNP	activity-dependent neuroprotector homeobox
hsa-miR-509-3-5p	1	0	1	1	1	1	ZFYVE26	zinc finger, FYVE domain containing 26
hsa-miR-509-3-5p	1	0	1	1	1	1	RNF19A	ring finger protein 19A, E3 ubiquitin protein ligase
hsa-miR-509-3-5p	0	0	1	0	1	1	TMEM158	transmembrane protein 158 (gene/pseudogene)
hsa-miR-509-3-5p	0	0	1	1	1	1	KBTBD2	kelch repeat and BTB (POZ) domain containing 2
hsa-miR-509-3-5p	1	0	1	1	1	1	CLIP3	CAP-GLY domain containing linker protein 3
hsa-miR-509-3-5p	1	0	1	1	0	0	POLDIP2	polymerase (DNA-directed), delta interacting protein 2
hsa-miR-509-3-5p	0	0	1	1	1	1	BRPF3	bromodomain and PHD finger containing, 3
hsa-miR-509-3-5p	1	0	1	1	1	1	AZIN1	antizyme inhibitor 1
hsa-miR-509-3-5p	1	0	1	1	1	1	EIF5B	eukaryotic translation initiation factor 5B
hsa-miR-509-3-5p	1	0	1	1	1	1	GOLT1B	golgi transport 1B
hsa-miR-509-3-5p	1	0	1	1	1	1	MPC1	mitochondrial pyruvate carrier 1
hsa-miR-509-3-5p	1	0	1	1	1	1	VGLL3	vestigial like 3 (Drosophila)
hsa-miR-509-3-5p	0	0	1	1	1	1	IMPG2	interphotoreceptor matrix proteoglycan 2
hsa-miR-509-3-5p	1	0	1	1	1	1	TOB2	transducer of ERBB2, 2
hsa-miR-509-3-5p	0	0	1	1	1	1	RAB23	RAB23, member RAS oncogene family
hsa-miR-509-3-5p	1	0	1	1	1	1	RAB14	RAB14, member RAS oncogene family
hsa-miR-509-3-5p	1	0	1	1	1	1	RAPGEFL1	Rap guanine nucleotide exchange factor (GEF)-like 1
hsa-miR-509-3-5p	0	0	1	1	1	1	CENPF	centromere protein F, 350/400kDa (mitosin)
hsa-miR-509-3-5p	1	0	1	1	1	1	ARID4B	AT rich interactive domain 4B (RBP1-like)
hsa-miR-509-3-5p	1	0	1	0	1	1	CRIM1	cysteine rich transmembrane BMP regulator 1 (chordin-like)
hsa-miR-509-3-5p	0	0	1	1	0	0	NCKIPSD	NCK interacting protein with SH3 domain
hsa-miR-509-3-5p	0	0	1	1	1	1	AMBN	ameloblastin (enamel matrix protein)
hsa-miR-509-3-5p	0	0	1	1	0	0	ATP8A2	ATPase, aminophospholipid transporter, class I, type 8A, member 2
hsa-miR-509-3-5p	1	0	1	0	1	1	RAB8B	RAB8B, member RAS oncogene family
hsa-miR-509-3-5p	1	0	1	1	1	1	SIX4	SIX homeobox 4
hsa-miR-509-3-5p	1	0	1	1	1	1	GALNT7	UDP-N-acetyl-alpha-D-galactosamine:polypeptide N-acetylgalactosaminyltransferase 7 (GalNAc-T7)
hsa-miR-509-3-5p	0	0	1	1	1	1	PRKAG3	protein kinase, AMP-activated, gamma 3 non-catalytic subunit
hsa-miR-509-3-5p	1	0	1	1	1	1	MDM1	Mdm1 nuclear protein homolog (mouse)
hsa-miR-509-3-5p	0	0	1	1	1	1	POLE3	polymerase (DNA directed), epsilon 3, accessory subunit
hsa-miR-509-3-5p	0	0	1	0	1	1	TRIM44	tripartite motif containing 44
hsa-miR-509-3-5p	0	0	1	1	1	1	MTMR8	myotubularin related protein 8
hsa-miR-509-3-5p	0	0	1	1	0	0	NUP62CL	nucleoporin 62kDa C-terminal like
hsa-miR-509-3-5p	1	0	1	0	1	1	FAM46C	family with sequence similarity 46, member C
hsa-miR-509-3-5p	1	0	1	1	1	1	TBC1D8B	TBC1 domain family, member 8B (with GRAM domain)
hsa-miR-509-3-5p	1	0	1	0	1	1	UHRF1BP1	UHRF1 binding protein 1
hsa-miR-509-3-5p	1	0	1	1	0	0	INO80D	INO80 complex subunit D
hsa-miR-509-3-5p	0	0	1	1	1	1	WHSC1L1	Wolf-Hirschhorn syndrome candidate 1-like 1
hsa-miR-509-3-5p	1	0	1	0	1	1	CHD7	chromodomain helicase DNA binding protein 7
hsa-miR-509-3-5p	1	0	1	0	1	1	MARCH5	membrane-associated ring finger (C3HC4) 5
hsa-miR-509-3-5p	0	0	1	1	1	1	AIM1L	absent in melanoma 1-like
hsa-miR-509-3-5p	1	0	1	1	1	1	ARGLU1	arginine and glutamate rich 1
hsa-miR-509-3-5p	0	0	1	1	1	1	RBM22	RNA binding motif protein 22
hsa-miR-509-3-5p	1	0	1	1	1	1	FIGN	fidgetin
hsa-miR-509-3-5p	0	0	1	1	1	1	AP5M1	adaptor-related protein complex 5, mu 1 subunit
hsa-miR-509-3-5p	0	0	1	1	1	1	GIMAP4	GTPase, IMAP family member 4
hsa-miR-509-3-5p	1	0	1	1	1	1	KIAA1598	KIAA1598
hsa-miR-509-3-5p	1	0	1	0	1	1	LIN7C	lin-7 homolog C (C. elegans)
hsa-miR-509-3-5p	1	0	1	1	1	1	RSBN1	round spermatid basic protein 1
hsa-miR-509-3-5p	0	0	1	1	0	0	C17orf79	chromosome 17 open reading frame 79
hsa-miR-509-3-5p	0	0	1	0	0	0	KDM3A	lysine (K)-specific demethylase 3A
hsa-miR-509-3-5p	1	0	1	1	1	1	PAG1	phosphoprotein associated with glycosphingolipid microdomains 1
hsa-miR-509-3-5p	0	0	1	0	0	0	FAM45B	family with sequence similarity 45, member A pseudogene
hsa-miR-509-3-5p	1	0	1	1	1	1	SLC16A10	solute carrier family 16, member 10 (aromatic amino acid transporter)
hsa-miR-509-3-5p	1	0	1	1	1	1	CTTNBP2NL	CTTNBP2 N-terminal like
hsa-miR-509-3-5p	1	0	1	0	1	1	TMEM55A	transmembrane protein 55A
hsa-miR-509-3-5p	1	0	1	0	1	1	MAML3	mastermind-like 3 (Drosophila)
hsa-miR-509-3-5p	1	0	1	1	1	1	GNG12	guanine nucleotide binding protein (G protein), gamma 12
hsa-miR-509-3-5p	1	0	1	0	1	1	KLHL9	kelch-like 9 (Drosophila)
hsa-miR-509-3-5p	1	0	1	0	1	1	FAM190B	family with sequence similarity 190, member B
hsa-miR-509-3-5p	0	0	1	1	1	1	GNL3L	guanine nucleotide binding protein-like 3 (nucleolar)-like
hsa-miR-509-3-5p	1	0	1	1	1	1	PLEKHA3	pleckstrin homology domain containing, family A (phosphoinositide binding specific) member 3
hsa-miR-509-3-5p	1	0	1	0	1	1	UBFD1	ubiquitin family domain containing 1
hsa-miR-509-3-5p	0	0	1	1	1	1	KLHL4	kelch-like 4 (Drosophila)
hsa-miR-509-3-5p	1	0	1	1	1	1	ERO1LB	ERO1-like beta (S. cerevisiae)
hsa-miR-509-3-5p	1	0	1	0	1	1	KCMF1	potassium channel modulatory factor 1
hsa-miR-509-3-5p	1	0	1	0	1	1	SLAMF8	SLAM family member 8
hsa-miR-509-3-5p	1	0	1	1	1	1	C8orf4	chromosome 8 open reading frame 4
hsa-miR-509-3-5p	0	0	1	1	1	1	TMEM167B	transmembrane protein 167B
hsa-miR-509-3-5p	1	0	1	1	1	1	C1GALT1	core 1 synthase, glycoprotein-N-acetylgalactosamine 3-beta-galactosyltransferase, 1
hsa-miR-509-3-5p	1	0	1	1	1	1	FEM1C	fem-1 homolog c (C. elegans)
hsa-miR-509-3-5p	0	0	1	1	1	1	ACN9	ACN9 homolog (S. cerevisiae)
hsa-miR-509-3-5p	0	0	1	1	1	1	PDSS2	prenyl (decaprenyl) diphosphate synthase, subunit 2
hsa-miR-509-3-5p	1	0	1	1	0	0	JPH2	junctophilin 2
hsa-miR-509-3-5p	1	0	1	1	1	1	ATP8B2	ATPase, aminophospholipid transporter, class I, type 8B, member 2
hsa-miR-509-3-5p	1	0	1	1	1	1	JPH1	junctophilin 1
hsa-miR-509-3-5p	0	0	1	0	1	1	TWSG1	twisted gastrulation homolog 1 (Drosophila)
hsa-miR-509-3-5p	1	0	1	1	1	1	RAB22A	RAB22A, member RAS oncogene family
hsa-miR-509-3-5p	1	0	1	0	1	1	KCNS2	potassium voltage-gated channel, delayed-rectifier, subfamily S, member 2
hsa-miR-509-3-5p	0	0	1	0	1	1	ZNF490	zinc finger protein 490
hsa-miR-509-3-5p	0	0	1	1	1	1	SHROOM4	shroom family member 4
hsa-miR-509-3-5p	0	0	1	1	1	1	ARRDC3	arrestin domain containing 3
hsa-miR-509-3-5p	1	0	1	0	1	1	WDFY1	WD repeat and FYVE domain containing 1
hsa-miR-509-3-5p	1	0	1	0	1	1	GPAM	glycerol-3-phosphate acyltransferase, mitochondrial
hsa-miR-509-3-5p	1	0	1	1	1	1	VAT1L	vesicle amine transport protein 1 homolog (T. californica)-like
hsa-miR-509-3-5p	0	0	1	1	1	1	B3GALT1	UDP-Gal:betaGlcNAc beta 1,3-galactosyltransferase, polypeptide 1
hsa-miR-509-3-5p	1	0	1	1	1	1	SNTB1	syntrophin, beta 1 (dystrophin-associated protein A1, 59kDa, basic component 1)
hsa-miR-509-3-5p	1	0	1	0	1	1	RAP2A	RAP2A, member of RAS oncogene family
hsa-miR-509-3-5p	1	0	1	0	1	1	XK	X-linked Kx blood group (McLeod syndrome)
hsa-miR-509-3-5p	0	0	1	0	1	1	PPIA	peptidylprolyl isomerase A (cyclophilin A)
hsa-miR-509-3-5p	0	0	1	1	1	1	RNASEL	ribonuclease L (2',5'-oligoisoadenylate synthetase-dependent)
hsa-miR-509-3-5p	1	0	1	1	1	1	RTN1	reticulon 1
hsa-miR-509-3-5p	1	0	1	0	1	1	TMX4	thioredoxin-related transmembrane protein 4
hsa-miR-509-3-5p	0	0	1	0	1	1	MS4A7	membrane-spanning 4-domains, subfamily A, member 7
hsa-miR-509-3-5p	1	0	1	1	1	1	FAM60A	family with sequence similarity 60, member A
hsa-miR-509-3-5p	1	0	1	1	1	1	PELI2	pellino E3 ubiquitin protein ligase family member 2
hsa-miR-509-3-5p	0	0	1	1	0	0	FCGR2A	Fc fragment of IgG, low affinity IIa, receptor (CD32)
hsa-miR-509-3-5p	1	0	1	1	1	1	TRIB2	tribbles homolog 2 (Drosophila)
hsa-miR-509-3-5p	1	0	1	1	1	1	OTX2	orthodenticle homeobox 2
hsa-miR-509-3-5p	1	0	1	1	1	1	BACH2	BTB and CNC homology 1, basic leucine zipper transcription factor 2
hsa-miR-509-3-5p	0	0	1	0	1	1	CFL2	cofilin 2 (muscle)
hsa-miR-509-3-5p	1	0	1	1	1	1	ZFAND3	zinc finger, AN1-type domain 3
hsa-miR-509-3-5p	1	0	1	1	1	1	FOXM1	forkhead box M1
hsa-miR-509-3-5p	1	0	1	0	1	1	GAN	gigaxonin
hsa-miR-509-3-5p	1	0	1	1	0	0	SDF2L1	stromal cell-derived factor 2-like 1
hsa-miR-509-3-5p	1	0	1	0	1	1	CSNK1G1	casein kinase 1, gamma 1
hsa-miR-509-3-5p	0	0	1	1	0	0	ABHD4	abhydrolase domain containing 4
hsa-miR-509-3-5p	1	0	1	1	1	1	CLSTN2	calsyntenin 2
hsa-miR-509-3-5p	1	0	1	1	1	1	LRRC4	leucine rich repeat containing 4
hsa-miR-509-3-5p	1	0	1	1	1	1	XYLT1	xylosyltransferase I
hsa-miR-509-3-5p	0	0	1	1	0	0	KIF9	kinesin family member 9
hsa-miR-509-3-5p	1	0	1	0	1	1	GREM2	gremlin 2
hsa-miR-509-3-5p	1	0	1	1	1	1	SUDS3	suppressor of defective silencing 3 homolog (S. cerevisiae)
hsa-miR-509-3-5p	1	0	1	1	1	1	GIGYF1	GRB10 interacting GYF protein 1
hsa-miR-509-3-5p	1	0	1	0	1	1	HOXC8	homeobox C8
hsa-miR-509-3-5p	0	0	1	1	1	1	ACBD3	acyl-CoA binding domain containing 3
hsa-miR-509-3-5p	0	0	1	1	1	1	SFXN1	sideroflexin 1
hsa-miR-509-3-5p	1	0	1	0	1	1	USP46	ubiquitin specific peptidase 46
hsa-miR-509-3-5p	0	0	1	1	1	1	METTL4	methyltransferase like 4
hsa-miR-509-3-5p	1	0	1	1	1	1	RFX7	regulatory factor X, 7
hsa-miR-509-3-5p	0	0	1	0	1	1	CDCP1	CUB domain containing protein 1
hsa-miR-509-3-5p	1	0	1	1	1	1	REEP1	receptor accessory protein 1
hsa-miR-509-3-5p	1	0	1	1	0	0	UBE2Z	ubiquitin-conjugating enzyme E2Z
hsa-miR-509-3-5p	1	0	1	1	1	1	NEUROG2	neurogenin 2
hsa-miR-509-3-5p	1	0	1	1	1	1	AHNAK	AHNAK nucleoprotein
hsa-miR-509-3-5p	1	0	1	1	1	1	DSC3	desmocollin 3
hsa-miR-509-3-5p	1	0	1	1	1	1	PSTPIP2	proline-serine-threonine phosphatase interacting protein 2
hsa-miR-509-3-5p	1	0	1	1	1	1	NKAIN1	Na+/K+ transporting ATPase interacting 1
hsa-miR-509-3-5p	0	0	1	0	1	1	ZYG11B	zyg-11 homolog B (C. elegans)
hsa-miR-509-3-5p	0	0	1	1	1	1	SNIP1	Smad nuclear interacting protein 1
hsa-miR-509-3-5p	1	0	1	1	1	1	C15orf29	chromosome 15 open reading frame 29
hsa-miR-509-3-5p	1	0	1	0	1	1	ZFHX4	zinc finger homeobox 4
hsa-miR-509-3-5p	1	0	1	0	1	1	MOB3B	MOB kinase activator 3B
hsa-miR-509-3-5p	0	0	1	1	1	1	TNIP3	TNFAIP3 interacting protein 3
hsa-miR-509-3-5p	0	0	1	1	1	1	ZNF767	zinc finger family member 767
hsa-miR-509-3-5p	0	0	1	1	1	1	ESRP2	epithelial splicing regulatory protein 2
hsa-miR-509-3-5p	0	0	1	1	0	0	TMEM156	transmembrane protein 156
hsa-miR-509-3-5p	1	0	1	1	1	1	KLHL18	kelch-like 18 (Drosophila)
hsa-miR-509-3-5p	1	0	1	1	1	1	ZC3H12A	zinc finger CCCH-type containing 12A
hsa-miR-509-3-5p	1	0	1	1	1	1	HKDC1	hexokinase domain containing 1
hsa-miR-509-3-5p	1	0	1	1	1	1	OPA3	optic atrophy 3 (autosomal recessive, with chorea and spastic paraplegia)
hsa-miR-509-3-5p	1	0	1	1	1	1	TNKS2	tankyrase, TRF1-interacting ankyrin-related ADP-ribose polymerase 2
hsa-miR-509-3-5p	0	0	1	1	0	0	ACAD10	acyl-CoA dehydrogenase family, member 10
hsa-miR-509-3-5p	1	0	1	0	1	1	TET1	tet methylcytosine dioxygenase 1
hsa-miR-509-3-5p	1	0	1	1	1	1	JHDM1D	jumonji C domain containing histone demethylase 1 homolog D (S. cerevisiae)
hsa-miR-509-3-5p	1	0	1	1	1	1	TUBB1	tubulin, beta 1 class VI
hsa-miR-509-3-5p	1	0	1	1	1	1	SGPP1	sphingosine-1-phosphate phosphatase 1
hsa-miR-509-3-5p	1	0	1	0	1	1	C1orf21	chromosome 1 open reading frame 21
hsa-miR-509-3-5p	1	0	1	0	1	1	LBH	limb bud and heart development homolog (mouse)
hsa-miR-509-3-5p	1	0	1	1	1	1	SNX27	sorting nexin family member 27
hsa-miR-509-3-5p	1	0	1	1	1	1	ANO3	anoctamin 3
hsa-miR-509-3-5p	1	0	1	0	1	1	TMEM47	transmembrane protein 47
hsa-miR-509-3-5p	1	0	1	0	1	1	SH3BGRL2	SH3 domain binding glutamic acid-rich protein like 2
hsa-miR-509-3-5p	1	0	1	1	1	1	DSEL	dermatan sulfate epimerase-like
hsa-miR-509-3-5p	0	0	1	1	1	1	RNASEH2C	ribonuclease H2, subunit C
hsa-miR-509-3-5p	1	0	1	1	1	1	ARID5B	AT rich interactive domain 5B (MRF1-like)
hsa-miR-509-3-5p	1	0	1	1	1	1	ANTXR1	anthrax toxin receptor 1
hsa-miR-509-3-5p	0	0	1	1	0	0	ELMOD3	ELMO/CED-12 domain containing 3
hsa-miR-509-3-5p	1	0	1	1	0	0	MAF1	MAF1 homolog (S. cerevisiae)
hsa-miR-509-3-5p	1	0	1	1	1	1	ZDHHC18	zinc finger, DHHC-type containing 18
hsa-miR-509-3-5p	0	0	1	0	1	1	LDOC1L	leucine zipper, down-regulated in cancer 1-like
hsa-miR-509-3-5p	0	0	1	1	0	0	NICN1	nicolin 1
hsa-miR-509-3-5p	0	0	1	1	1	1	ACBD6	acyl-CoA binding domain containing 6
hsa-miR-509-3-5p	0	0	1	1	1	1	COG8	component of oligomeric golgi complex 8
hsa-miR-509-3-5p	0	0	1	1	1	1	MAML2	mastermind-like 2 (Drosophila)
hsa-miR-509-3-5p	1	0	1	1	1	1	SYVN1	synovial apoptosis inhibitor 1, synoviolin
hsa-miR-509-3-5p	0	0	1	1	1	1	MAP1LC3A	microtubule-associated protein 1 light chain 3 alpha
hsa-miR-509-3-5p	1	0	1	1	1	1	TTBK1	tau tubulin kinase 1
hsa-miR-509-3-5p	0	0	1	1	0	0	KIF2B	kinesin family member 2B
hsa-miR-509-3-5p	1	0	1	0	1	1	INA	internexin neuronal intermediate filament protein, alpha
hsa-miR-509-3-5p	0	0	1	0	1	1	TRIM52	tripartite motif containing 52
hsa-miR-509-3-5p	1	0	1	1	1	1	ARHGEF39	Rho guanine nucleotide exchange factor (GEF) 39
hsa-miR-509-3-5p	1	0	1	0	1	1	PPP1R15B	protein phosphatase 1, regulatory subunit 15B
hsa-miR-509-3-5p	1	0	1	0	1	1	UBASH3B	ubiquitin associated and SH3 domain containing B
hsa-miR-509-3-5p	1	0	1	1	0	0	ATG4D	autophagy related 4D, cysteine peptidase
hsa-miR-509-3-5p	1	0	1	1	1	1	ARHGAP19	Rho GTPase activating protein 19
hsa-miR-509-3-5p	1	0	1	0	1	1	C5orf62	chromosome 5 open reading frame 62
hsa-miR-509-3-5p	1	0	1	1	1	1	HIAT1	hippocampus abundant transcript 1
hsa-miR-509-3-5p	0	0	1	1	1	1	KRTAP3-3	keratin associated protein 3-3
hsa-miR-509-3-5p	1	0	1	0	1	1	PURB	purine-rich element binding protein B
hsa-miR-509-3-5p	1	0	1	1	1	1	COL4A5	collagen, type IV, alpha 5
hsa-miR-509-3-5p	1	0	1	1	0	0	FCHSD1	FCH and double SH3 domains 1
hsa-miR-509-3-5p	1	0	1	1	1	1	SYS1	SYS1 Golgi-localized integral membrane protein homolog (S. cerevisiae)
hsa-miR-509-3-5p	1	0	1	1	1	1	LUZP1	leucine zipper protein 1
hsa-miR-509-3-5p	1	0	1	1	1	1	CDC42	cell division cycle 42 (GTP binding protein, 25kDa)
hsa-miR-509-3-5p	1	0	1	1	1	1	VPS26B	vacuolar protein sorting 26 homolog B (S. pombe)
hsa-miR-509-3-5p	0	0	1	1	1	1	PLEKHG4B	pleckstrin homology domain containing, family G (with RhoGef domain) member 4B
hsa-miR-509-3-5p	1	0	1	1	1	1	PCMTD1	protein-L-isoaspartate (D-aspartate) O-methyltransferase domain containing 1
hsa-miR-509-3-5p	1	0	1	0	1	1	FAM129A	family with sequence similarity 129, member A
hsa-miR-509-3-5p	1	0	1	1	1	1	TRIM9	tripartite motif containing 9
hsa-miR-509-3-5p	0	0	1	1	1	1	PRDM7	PR domain containing 7
hsa-miR-509-3-5p	1	0	1	1	1	1	MED12L	mediator complex subunit 12-like
hsa-miR-509-3-5p	0	0	1	0	1	1	ZNF518B	zinc finger protein 518B
hsa-miR-509-3-5p	0	0	1	1	1	1	MRGPRX2	MAS-related GPR, member X2
hsa-miR-509-3-5p	0	0	1	1	1	1	IP6K3	inositol hexakisphosphate kinase 3
hsa-miR-509-3-5p	1	0	1	1	0	0	AP1S1	adaptor-related protein complex 1, sigma 1 subunit
hsa-miR-509-3-5p	1	0	1	1	1	1	NAA15	N(alpha)-acetyltransferase 15, NatA auxiliary subunit
hsa-miR-509-3-5p	0	0	1	1	1	1	KCNG3	potassium voltage-gated channel, subfamily G, member 3
hsa-miR-509-3-5p	0	0	1	0	1	1	PAQR8	progestin and adipoQ receptor family member VIII
hsa-miR-509-3-5p	1	0	1	1	1	1	BMPER	BMP binding endothelial regulator
hsa-miR-509-3-5p	1	0	1	1	1	1	NUP35	nucleoporin 35kDa
hsa-miR-509-3-5p	0	0	1	0	1	1	SP140L	SP140 nuclear body protein-like
hsa-miR-509-3-5p	1	0	1	0	1	1	SP1	Sp1 transcription factor
hsa-miR-509-3-5p	1	0	1	0	1	1	FCHO2	FCH domain only 2
hsa-miR-509-3-5p	1	0	1	1	1	1	MBOAT2	membrane bound O-acyltransferase domain containing 2
hsa-miR-509-3-5p	1	0	1	1	1	1	PRUNE2	prune homolog 2 (Drosophila)
hsa-miR-509-3-5p	1	0	1	1	1	1	CD200R1	CD200 receptor 1
hsa-miR-509-3-5p	1	0	1	1	1	1	PPTC7	PTC7 protein phosphatase homolog (S. cerevisiae)
hsa-miR-509-3-5p	0	0	1	1	1	1	C10orf82	chromosome 10 open reading frame 82
hsa-miR-509-3-5p	0	0	1	1	1	1	HIPK4	homeodomain interacting protein kinase 4
hsa-miR-509-3-5p	1	0	1	1	1	1	FAM91A1	family with sequence similarity 91, member A1
hsa-miR-509-3-5p	1	0	1	0	1	1	CENPBD1	CENPB DNA-binding domains containing 1
hsa-miR-509-3-5p	0	0	1	1	0	0	CISH	cytokine inducible SH2-containing protein
hsa-miR-509-3-5p	0	0	1	1	1	1	HFE2	hemochromatosis type 2 (juvenile)
hsa-miR-509-3-5p	0	0	1	1	1	1	APOBEC3F	apolipoprotein B mRNA editing enzyme, catalytic polypeptide-like 3F
hsa-miR-509-3-5p	0	0	1	1	1	1	SCARF1	scavenger receptor class F, member 1
hsa-miR-509-3-5p	0	0	1	1	1	1	TIGD2	tigger transposable element derived 2
hsa-miR-509-3-5p	1	0	1	0	1	1	MTPN	myotrophin
hsa-miR-509-3-5p	1	0	1	1	1	1	FAM110B	family with sequence similarity 110, member B
hsa-miR-509-3-5p	0	0	1	0	1	1	CHKB	choline kinase beta
hsa-miR-509-3-5p	1	0	1	0	1	1	SYT11	synaptotagmin XI
hsa-miR-509-3-5p	1	0	1	1	1	1	POGLUT1	protein O-glucosyltransferase 1
hsa-miR-509-3-5p	0	0	1	1	1	1	EFCAB13	EF-hand calcium binding domain 13
hsa-miR-509-3-5p	1	0	1	1	1	1	FAM123B	family with sequence similarity 123B
hsa-miR-509-3-5p	1	0	1	0	1	1	ARID2	AT rich interactive domain 2 (ARID, RFX-like)
hsa-miR-509-3-5p	1	0	1	0	1	1	FAM116A	family with sequence similarity 116, member A
hsa-miR-509-3-5p	0	0	1	1	1	1	LINC00518	long intergenic non-protein coding RNA 518
hsa-miR-509-3-5p	1	0	1	1	1	1	PDIK1L	PDLIM1 interacting kinase 1 like
hsa-miR-509-3-5p	0	0	1	0	1	1	KBTBD6	kelch repeat and BTB (POZ) domain containing 6
hsa-miR-509-3-5p	1	0	1	1	1	1	PXT1	peroxisomal, testis specific 1
hsa-miR-509-3-5p	1	0	1	0	1	1	N4BP1	NEDD4 binding protein 1
hsa-miR-509-3-5p	1	0	1	1	1	1	AEBP2	AE binding protein 2
hsa-miR-509-3-5p	0	0	1	1	1	1	BEND2	BEN domain containing 2
hsa-miR-509-3-5p	1	0	1	1	0	0	TMEM86A	transmembrane protein 86A
hsa-miR-509-3-5p	0	0	1	1	1	1	FAM71C	family with sequence similarity 71, member C
hsa-miR-509-3-5p	1	0	1	0	1	1	MDGA1	MAM domain containing glycosylphosphatidylinositol anchor 1
hsa-miR-509-3-5p	1	0	1	0	1	1	SEMA6D	sema domain, transmembrane domain (TM), and cytoplasmic domain, (semaphorin) 6D
hsa-miR-509-3-5p	1	0	1	1	1	1	FNDC5	fibronectin type III domain containing 5
hsa-miR-509-3-5p	1	0	1	1	1	1	PHF13	PHD finger protein 13
hsa-miR-509-3-5p	0	0	1	1	1	1	CREG2	cellular repressor of E1A-stimulated genes 2
hsa-miR-509-3-5p	0	0	1	1	1	1	SALL3	sal-like 3 (Drosophila)
hsa-miR-509-3-5p	1	0	1	1	1	1	SMG7	smg-7 homolog, nonsense mediated mRNA decay factor (C. elegans)
hsa-miR-509-3-5p	0	0	1	1	1	1	NFATC3	nuclear factor of activated T-cells, cytoplasmic, calcineurin-dependent 3
hsa-miR-509-3-5p	1	0	1	1	1	1	MOB1B	MOB kinase activator 1B
hsa-miR-509-3-5p	1	0	1	1	1	1	CCDC117	coiled-coil domain containing 117
hsa-miR-509-3-5p	1	0	1	0	1	1	PGM2L1	phosphoglucomutase 2-like 1
hsa-miR-509-3-5p	1	0	1	0	1	1	SREK1IP1	SREK1-interacting protein 1
hsa-miR-509-3-5p	0	0	1	1	1	1	IL6ST	interleukin 6 signal transducer (gp130, oncostatin M receptor)
hsa-miR-509-3-5p	0	0	1	1	1	1	KRT79	keratin 79
hsa-miR-509-3-5p	0	0	1	1	1	1	CHSY3	chondroitin sulfate synthase 3
hsa-miR-509-3-5p	1	0	1	0	1	1	CCDC71L	coiled-coil domain containing 71-like
hsa-miR-509-3-5p	1	0	1	1	1	1	ZADH2	zinc binding alcohol dehydrogenase domain containing 2
hsa-miR-509-3-5p	1	0	1	1	1	1	FAM134C	family with sequence similarity 134, member C
hsa-miR-509-3-5p	0	0	1	1	1	1	ATPIF1	ATPase inhibitory factor 1
hsa-miR-509-3-5p	1	0	1	0	1	1	IQGAP3	IQ motif containing GTPase activating protein 3
hsa-miR-509-3-5p	0	0	1	1	1	1	ZNF831	zinc finger protein 831
hsa-miR-509-3-5p	1	0	1	1	1	1	TMEM26	transmembrane protein 26
hsa-miR-509-3-5p	1	0	1	0	1	1	ARL5B	ADP-ribosylation factor-like 5B
hsa-miR-509-3-5p	0	0	1	1	0	0	CENPV	centromere protein V
hsa-miR-509-3-5p	0	0	1	0	1	1	SPATA12	spermatogenesis associated 12
hsa-miR-509-3-5p	1	0	1	1	1	1	SPRED2	sprouty-related, EVH1 domain containing 2
hsa-miR-509-3-5p	0	0	1	1	1	1	USP12	ubiquitin specific peptidase 12
hsa-miR-509-3-5p	1	0	1	1	1	1	TMEM229B	transmembrane protein 229B
hsa-miR-509-3-5p	1	0	1	0	1	1	RIMS4	regulating synaptic membrane exocytosis 4
hsa-miR-509-3-5p	1	0	1	1	1	1	PXMP4	peroxisomal membrane protein 4, 24kDa
hsa-miR-509-3-5p	1	0	1	0	1	1	SRRM4	serine/arginine repetitive matrix 4
hsa-miR-509-3-5p	1	0	1	1	1	1	ASB7	ankyrin repeat and SOCS box containing 7
hsa-miR-509-3-5p	1	0	1	1	1	1	E2F6	E2F transcription factor 6
hsa-miR-509-3-5p	0	0	1	1	0	0	KCTD8	potassium channel tetramerisation domain containing 8
hsa-miR-509-3-5p	1	0	1	0	1	1	PTPLB	protein tyrosine phosphatase-like (proline instead of catalytic arginine), member b
hsa-miR-509-3-5p	0	0	1	0	0	0	DRAXIN	dorsal inhibitory axon guidance protein
hsa-miR-509-3-5p	1	0	1	1	1	1	PTGER3	prostaglandin E receptor 3 (subtype EP3)
hsa-miR-509-3-5p	1	0	1	0	1	1	PRICKLE2	prickle homolog 2 (Drosophila)
hsa-miR-509-3-5p	1	0	1	1	1	1	NSUN4	NOP2/Sun domain family, member 4
hsa-miR-509-3-5p	0	0	1	0	1	1	SOGA1	suppressor of glucose, autophagy associated 1
hsa-miR-509-3-5p	1	0	1	1	1	1	THRA	thyroid hormone receptor, alpha
hsa-miR-509-3-5p	1	0	1	1	1	1	BLOC1S5	biogenesis of lysosomal organelles complex-1, subunit 5, muted
hsa-miR-509-3-5p	1	0	1	1	0	0	KAZN	kazrin, periplakin interacting protein
hsa-miR-509-3-5p	1	0	1	1	1	1	RBM12B	RNA binding motif protein 12B
hsa-miR-509-3-5p	1	0	1	1	1	1	E2F7	E2F transcription factor 7
hsa-miR-509-3-5p	1	0	1	1	1	1	FREM2	FRAS1 related extracellular matrix protein 2
hsa-miR-509-3-5p	1	0	1	1	1	1	TNFAIP8L3	tumor necrosis factor, alpha-induced protein 8-like 3
hsa-miR-509-3-5p	1	0	1	1	1	1	RGS9BP	regulator of G protein signaling 9 binding protein
hsa-miR-509-3-5p	0	0	1	1	1	1	FAM177B	family with sequence similarity 177, member B
hsa-miR-509-3-5p	1	0	1	1	1	1	SAMD12	sterile alpha motif domain containing 12
hsa-miR-509-3-5p	1	0	1	1	1	1	CAPN3	calpain 3, (p94)
hsa-miR-509-3-5p	0	0	1	1	1	1	DFFA	DNA fragmentation factor, 45kDa, alpha polypeptide
hsa-miR-509-3-5p	0	0	1	0	0	0	PPIAP29	peptidylprolyl isomerase A (cyclophilin A) pseudogene 29
hsa-miR-509-3-5p	0	0	1	0	0	0	ESRRAP2	estrogen-related receptor alpha pseudogene 2
hsa-miR-509-3-5p	0	0	1	0	0	0	LYPLA2P1	lysophospholipase II pseudogene 1
hsa-miR-509-3-5p	0	0	1	0	0	0	MIR155HG	MIR155 host gene (non-protein coding)
hsa-miR-509-3-5p	0	0	1	0	0	0	VENTXP1	VENT homeobox pseudogene 1
hsa-miR-509-3-5p	0	0	1	0	0	0	TTTY4B	testis-specific transcript, Y-linked 4B (non-protein coding)
hsa-miR-509-3-5p	0	0	1	0	0	0	SLC25A3P1	solute carrier family 25 (mitochondrial carrier; phosphate carrier), member 3 pseudogene 1
hsa-miR-509-3-5p	0	0	1	0	0	0	GABPAP	GA binding protein transcription factor, alpha subunit pseudogene
hsa-miR-509-3-5p	0	0	1	0	0	0	AOC4	amine oxidase, copper containing 3 (vascular adhesion protein 1) pseudogene
hsa-miR-509-3-5p	0	0	1	0	0	0	HTR7P1	5-hydroxytryptamine (serotonin) receptor 7 pseudogene 1
hsa-miR-509-3-5p	0	0	1	0	0	0	TPTE2P3	transmembrane phosphoinositide 3-phosphatase and tensin homolog 2 pseudogene 3
hsa-miR-509-3-5p	0	0	1	0	0	0	NEAT1	nuclear paraspeckle assembly transcript 1 (non-protein coding)
hsa-miR-509-3-5p	0	0	1	0	0	0	MALAT1	metastasis associated lung adenocarcinoma transcript 1 (non-protein coding)
hsa-miR-509-3-5p	0	0	1	0	0	0	PTPRVP	protein tyrosine phosphatase, receptor type, V, pseudogene
hsa-miR-509-3-5p	0	0	1	0	0	0	TCAM1P	testicular cell adhesion molecule 1 homolog (mouse), pseudogene
hsa-miR-509-3-5p	0	0	1	0	0	0	GBP1P1	guanylate binding protein 1, interferon-inducible pseudogene 1
hsa-miR-509-3-5p	0	0	1	0	0	0	LOC729603	calcium binding protein P22 pseudogene
hsa-miR-509-3-5p	1	0	1	1	1	1	TRIO	trio Rho guanine nucleotide exchange factor
hsa-miR-509-3-5p	1	0	1	1	1	1	MYB	v-myb myeloblastosis viral oncogene homolog (avian)
hsa-miR-509-3-5p	0	0	1	1	1	1	SPIB	Spi-B transcription factor (Spi-1/PU.1 related)
hsa-miR-509-3-5p	0	0	1	1	0	0	BMP1	bone morphogenetic protein 1
hsa-miR-509-3-5p	0	0	1	1	0	0	C20orf43	chromosome 20 open reading frame 43
hsa-miR-509-3-5p	0	0	1	1	0	0	KLK13	kallikrein-related peptidase 13
hsa-miR-509-3-5p	0	0	0	1	1	1	KRT20	keratin 20
hsa-miR-509-3-5p	0	0	1	1	0	0	NEB	nebulin
hsa-miR-509-3-5p	0	0	1	1	1	1	HEATR6	HEAT repeat containing 6
hsa-miR-509-3-5p	0	0	1	1	1	1	APOH	apolipoprotein H (beta-2-glycoprotein I)
hsa-miR-509-3-5p	0	0	1	1	1	1	TMEM101	transmembrane protein 101
hsa-miR-509-3-5p	0	0	0	1	0	0	OR1I1	olfactory receptor, family 1, subfamily I, member 1
hsa-miR-509-3-5p	0	0	0	1	0	0	AAAS	achalasia, adrenocortical insufficiency, alacrimia
hsa-miR-509-3-5p	0	0	1	1	0	0	SAMD15	sterile alpha motif domain containing 15
hsa-miR-509-3-5p	1	0	1	1	1	1	ZFYVE21	zinc finger, FYVE domain containing 21
hsa-miR-509-3-5p	0	0	1	1	0	0	PTK6	PTK6 protein tyrosine kinase 6
hsa-miR-509-3-5p	0	0	0	1	1	1	DHODH	dihydroorotate dehydrogenase (quinone)
hsa-miR-509-3-5p	1	0	1	1	1	1	HMOX2	heme oxygenase (decycling) 2
hsa-miR-509-3-5p	0	0	0	1	0	0	VPS18	vacuolar protein sorting 18 homolog (S. cerevisiae)
hsa-miR-509-3-5p	0	0	0	1	0	0	CACTIN	cactin, spliceosome C complex subunit
hsa-miR-509-3-5p	0	0	0	1	1	1	DNASE2	deoxyribonuclease II, lysosomal
hsa-miR-509-3-5p	0	0	0	1	0	0	FKBP8	FK506 binding protein 8, 38kDa
hsa-miR-509-3-5p	0	0	1	1	1	1	UBE2D4	ubiquitin-conjugating enzyme E2D 4 (putative)
hsa-miR-509-3-5p	0	0	1	1	0	0	TFR2	transferrin receptor 2
hsa-miR-509-3-5p	0	0	0	1	0	0	MYL10	myosin, light chain 10, regulatory
hsa-miR-509-3-5p	0	0	0	1	1	1	AEBP1	AE binding protein 1
hsa-miR-509-3-5p	0	0	1	1	1	1	CCL8	chemokine (C-C motif) ligand 8
hsa-miR-509-3-5p	0	0	0	1	0	0	RCVRN	recoverin
hsa-miR-509-3-5p	0	0	1	1	0	0	FOXN1	forkhead box N1
hsa-miR-509-3-5p	0	0	1	1	1	1	PF4V1	platelet factor 4 variant 1
hsa-miR-509-3-5p	0	0	1	1	1	1	C11orf63	chromosome 11 open reading frame 63
hsa-miR-509-3-5p	0	0	1	1	0	0	GLI1	GLI family zinc finger 1
hsa-miR-509-3-5p	0	0	1	1	1	1	MCM3	minichromosome maintenance complex component 3
hsa-miR-509-3-5p	0	0	1	1	1	1	GPR63	G protein-coupled receptor 63
hsa-miR-509-3-5p	0	0	1	1	0	0	HIST1H3F	histone cluster 1, H3f
hsa-miR-509-3-5p	0	0	1	1	0	0	APOB	apolipoprotein B (including Ag(x) antigen)
hsa-miR-509-3-5p	1	0	1	1	1	1	ID2	inhibitor of DNA binding 2, dominant negative helix-loop-helix protein
hsa-miR-509-3-5p	0	0	1	1	0	0	MASP2	mannan-binding lectin serine peptidase 2
hsa-miR-509-3-5p	0	0	1	1	1	1	ATP6V0B	ATPase, H+ transporting, lysosomal 21kDa, V0 subunit b
hsa-miR-509-3-5p	0	0	0	1	0	0	A4GNT	alpha-1,4-N-acetylglucosaminyltransferase
hsa-miR-509-3-5p	0	0	1	1	1	1	MED28	mediator complex subunit 28
hsa-miR-509-3-5p	1	0	1	1	1	1	SLITRK3	SLIT and NTRK-like family, member 3
hsa-miR-509-3-5p	0	0	1	1	0	0	OCM	oncomodulin
hsa-miR-509-3-5p	0	0	1	1	1	1	FAM124B	family with sequence similarity 124B
hsa-miR-509-3-5p	0	0	0	1	1	1	TBCC	tubulin folding cofactor C
hsa-miR-509-3-5p	0	0	0	1	1	1	APOBEC2	apolipoprotein B mRNA editing enzyme, catalytic polypeptide-like 2
hsa-miR-509-3-5p	0	0	1	1	0	0	TRMT2B	tRNA methyltransferase 2 homolog B (S. cerevisiae)
hsa-miR-509-3-5p	1	0	1	1	1	1	C20orf26	chromosome 20 open reading frame 26
hsa-miR-509-3-5p	0	0	1	1	1	1	NSRP1	nuclear speckle splicing regulatory protein 1
hsa-miR-509-3-5p	1	0	1	1	0	0	ABHD8	abhydrolase domain containing 8
hsa-miR-509-3-5p	0	0	0	1	0	0	MRM1	mitochondrial rRNA methyltransferase 1 homolog (S. cerevisiae)
hsa-miR-509-3-5p	0	0	1	1	1	1	CNGB1	cyclic nucleotide gated channel beta 1
hsa-miR-509-3-5p	0	0	0	1	0	0	DHX58	DEXH (Asp-Glu-X-His) box polypeptide 58
hsa-miR-509-3-5p	0	0	1	1	0	0	KRT31	keratin 31
hsa-miR-509-3-5p	0	0	0	1	0	0	PRKCSH	protein kinase C substrate 80K-H
hsa-miR-509-3-5p	0	0	0	1	0	0	EXOC3L2	exocyst complex component 3-like 2
hsa-miR-509-3-5p	0	0	0	1	0	0	TUBGCP2	tubulin, gamma complex associated protein 2
hsa-miR-509-3-5p	0	0	1	1	0	0	ADRM1	adhesion regulating molecule 1
hsa-miR-509-3-5p	0	0	0	1	0	0	NPAS1	neuronal PAS domain protein 1
hsa-miR-509-3-5p	0	0	1	1	0	0	FAM153B	family with sequence similarity 153, member B
hsa-miR-509-3-5p	0	0	1	1	0	0	HSH2D	hematopoietic SH2 domain containing
hsa-miR-509-3-5p	0	0	1	1	0	0	RPL27	ribosomal protein L27
hsa-miR-509-3-5p	0	0	1	1	1	1	PSMC3IP	PSMC3 interacting protein
hsa-miR-509-3-5p	0	0	0	1	0	0	PODNL1	podocan-like 1
hsa-miR-509-3-5p	0	0	0	1	0	0	GUCY2D	guanylate cyclase 2D, membrane (retina-specific)
hsa-miR-509-3-5p	0	0	0	1	1	1	APCS	amyloid P component, serum
hsa-miR-509-3-5p	0	0	1	1	0	0	IGHMBP2	immunoglobulin mu binding protein 2
hsa-miR-509-3-5p	0	0	1	1	0	0	DPH2	DPH2 homolog (S. cerevisiae)
hsa-miR-509-3-5p	1	0	1	1	1	1	C20orf111	chromosome 20 open reading frame 111
hsa-miR-509-3-5p	0	0	1	1	1	1	IMPA1	inositol(myo)-1(or 4)-monophosphatase 1
hsa-miR-509-3-5p	0	0	0	1	0	0	ERN2	endoplasmic reticulum to nucleus signaling 2
hsa-miR-509-3-5p	0	0	1	1	1	1	RBMX2	RNA binding motif protein, X-linked 2
hsa-miR-509-3-5p	0	0	0	1	0	0	FBXL8	F-box and leucine-rich repeat protein 8
hsa-miR-509-3-5p	0	0	1	1	0	0	FHOD1	formin homology 2 domain containing 1
hsa-miR-509-3-5p	0	0	1	1	1	1	PWP1	PWP1 homolog (S. cerevisiae)
hsa-miR-509-3-5p	0	0	0	1	0	0	CAMK2B	calcium/calmodulin-dependent protein kinase II beta
hsa-miR-509-3-5p	1	0	1	1	0	0	CCM2	cerebral cavernous malformation 2
hsa-miR-509-3-5p	0	0	1	1	1	1	MRPS18B	mitochondrial ribosomal protein S18B
hsa-miR-509-3-5p	0	0	0	1	0	0	HTR3B	5-hydroxytryptamine (serotonin) receptor 3B, ionotropic
hsa-miR-509-3-5p	0	0	0	1	0	0	FDXACB1	ferredoxin-fold anticodon binding domain containing 1
hsa-miR-509-3-5p	1	0	1	1	0	0	HAUS2	HAUS augmin-like complex, subunit 2
hsa-miR-509-3-5p	0	0	1	1	0	0	LIAS	lipoic acid synthetase
hsa-miR-509-3-5p	1	0	1	1	1	1	POMT2	protein-O-mannosyltransferase 2
hsa-miR-509-3-5p	1	0	1	1	1	1	TMEM98	transmembrane protein 98
hsa-miR-509-3-5p	0	0	0	1	0	0	RASAL1	RAS protein activator like 1 (GAP1 like)
hsa-miR-509-3-5p	0	0	0	1	0	0	NUBP2	nucleotide binding protein 2
hsa-miR-509-3-5p	0	0	0	1	1	1	ALG1	asparagine-linked glycosylation 1, beta-1,4-mannosyltransferase homolog (S. cerevisiae)
hsa-miR-509-3-5p	0	0	1	1	1	1	PRDX1	peroxiredoxin 1
hsa-miR-509-3-5p	0	0	1	1	1	1	RPS6KA6	ribosomal protein S6 kinase, 90kDa, polypeptide 6
hsa-miR-509-3-5p	0	0	0	1	0	0	MOV10L1	Mov10l1, Moloney leukemia virus 10-like 1, homolog (mouse)
hsa-miR-509-3-5p	0	0	1	1	1	1	OPTN	optineurin
hsa-miR-509-3-5p	0	0	1	1	1	1	IL27RA	interleukin 27 receptor, alpha
hsa-miR-509-3-5p	1	0	0	1	1	1	PARP12	poly (ADP-ribose) polymerase family, member 12
hsa-miR-509-3-5p	1	0	1	1	1	1	EIF2AK4	eukaryotic translation initiation factor 2 alpha kinase 4
hsa-miR-509-3-5p	0	0	1	1	0	0	LTK	leukocyte receptor tyrosine kinase
hsa-miR-509-3-5p	0	0	0	1	0	0	NEIL3	nei endonuclease VIII-like 3 (E. coli)
hsa-miR-509-3-5p	1	0	1	1	1	1	NNT	nicotinamide nucleotide transhydrogenase
hsa-miR-509-3-5p	0	0	0	1	0	0	FGF10	fibroblast growth factor 10
hsa-miR-509-3-5p	0	0	1	1	1	1	FASTKD3	FAST kinase domains 3
hsa-miR-509-3-5p	0	0	1	1	0	0	SERPINI2	serpin peptidase inhibitor, clade I (pancpin), member 2
hsa-miR-509-3-5p	0	0	0	1	0	0	UFSP2	UFM1-specific peptidase 2
hsa-miR-509-3-5p	0	0	1	1	0	0	ZAP70	zeta-chain (TCR) associated protein kinase 70kDa
hsa-miR-509-3-5p	0	0	1	1	0	0	FAM184B	family with sequence similarity 184, member B
hsa-miR-509-3-5p	0	0	1	1	1	1	MSH3	mutS homolog 3 (E. coli)
hsa-miR-509-3-5p	0	0	1	1	0	0	RPL24	ribosomal protein L24
hsa-miR-509-3-5p	0	0	1	1	0	0	FAM188B	family with sequence similarity 188, member B
hsa-miR-509-3-5p	0	0	1	1	1	1	SLC17A2	solute carrier family 17 (sodium phosphate), member 2
hsa-miR-509-3-5p	0	0	0	1	1	1	POLA2	polymerase (DNA directed), alpha 2, accessory subunit
hsa-miR-509-3-5p	0	0	0	1	1	1	WBSCR22	Williams Beuren syndrome chromosome region 22
hsa-miR-509-3-5p	0	0	1	1	0	0	NDUFA9	NADH dehydrogenase (ubiquinone) 1 alpha subcomplex, 9, 39kDa
hsa-miR-509-3-5p	0	0	1	1	1	1	KLRG1	killer cell lectin-like receptor subfamily G, member 1
hsa-miR-509-3-5p	0	0	1	1	0	0	TAPBPL	TAP binding protein-like
hsa-miR-509-3-5p	0	0	0	1	0	0	CD27	CD27 molecule
hsa-miR-509-3-5p	0	0	1	1	0	0	FOXN4	forkhead box N4
hsa-miR-509-3-5p	1	0	1	1	1	1	L2HGDH	L-2-hydroxyglutarate dehydrogenase
hsa-miR-509-3-5p	0	0	1	1	0	0	NUDT7	nudix (nucleoside diphosphate linked moiety X)-type motif 7
hsa-miR-509-3-5p	0	0	1	1	1	1	NCOR1	nuclear receptor corepressor 1
hsa-miR-509-3-5p	0	0	1	1	0	0	NEK8	NIMA (never in mitosis gene a)- related kinase 8
hsa-miR-509-3-5p	1	0	1	1	1	1	CSNK1D	casein kinase 1, delta
hsa-miR-509-3-5p	0	0	0	1	0	0	ARMC6	armadillo repeat containing 6
hsa-miR-509-3-5p	0	0	1	1	1	1	DMWD	dystrophia myotonica, WD repeat containing
hsa-miR-509-3-5p	1	0	1	1	1	1	PRUNE	prune homolog (Drosophila)
hsa-miR-509-3-5p	0	0	1	1	0	0	WDPCP	WD repeat containing planar cell polarity effector
hsa-miR-509-3-5p	0	0	0	1	1	1	SLC25A38	solute carrier family 25, member 38
hsa-miR-509-3-5p	0	0	1	1	1	1	ARG1	arginase, liver
hsa-miR-509-3-5p	1	0	0	1	1	1	CCT6A	chaperonin containing TCP1, subunit 6A (zeta 1)
hsa-miR-509-3-5p	0	0	1	1	0	0	PRDM14	PR domain containing 14
hsa-miR-509-3-5p	0	0	0	1	0	0	PNPLA7	patatin-like phospholipase domain containing 7
hsa-miR-509-3-5p	0	0	1	1	0	0	FUOM	fucose mutarotase
hsa-miR-509-3-5p	0	0	1	1	0	0	PIGT	phosphatidylinositol glycan anchor biosynthesis, class T
hsa-miR-509-3-5p	0	0	0	1	0	0	FERMT3	fermitin family member 3
hsa-miR-509-3-5p	0	0	1	1	0	0	AGAP11	ankyrin repeat and GTPase domain Arf GTPase activating protein 11
hsa-miR-509-3-5p	0	0	0	1	1	1	ACAD8	acyl-CoA dehydrogenase family, member 8
hsa-miR-509-3-5p	1	0	0	1	0	0	ZNF385D	zinc finger protein 385D
hsa-miR-509-3-5p	0	0	0	1	1	1	FARSB	phenylalanyl-tRNA synthetase, beta subunit
hsa-miR-509-3-5p	0	0	0	1	1	1	TUBGCP5	tubulin, gamma complex associated protein 5
hsa-miR-509-3-5p	1	0	1	1	1	1	TOMM70A	translocase of outer mitochondrial membrane 70 homolog A (S. cerevisiae)
hsa-miR-509-3-5p	0	0	1	1	1	1	CEP112	centrosomal protein 112kDa
hsa-miR-509-3-5p	0	0	0	1	1	1	OBSCN	obscurin, cytoskeletal calmodulin and titin-interacting RhoGEF
hsa-miR-509-3-5p	1	0	1	1	1	1	ATP5G3	ATP synthase, H+ transporting, mitochondrial Fo complex, subunit C3 (subunit 9)
hsa-miR-509-3-5p	1	0	0	1	1	1	RHOC	ras homolog family member C
hsa-miR-509-3-5p	0	0	0	1	0	0	GEMIN5	gem (nuclear organelle) associated protein 5
hsa-miR-509-3-5p	0	0	1	1	1	1	TMBIM4	transmembrane BAX inhibitor motif containing 4
hsa-miR-509-3-5p	1	0	1	1	1	1	DRAM2	DNA-damage regulated autophagy modulator 2
hsa-miR-509-3-5p	0	0	1	1	0	0	CCT8	chaperonin containing TCP1, subunit 8 (theta)
hsa-miR-509-3-5p	0	0	1	1	0	0	VPS8	vacuolar protein sorting 8 homolog (S. cerevisiae)
hsa-miR-509-3-5p	1	0	1	1	1	1	RPUSD3	RNA pseudouridylate synthase domain containing 3
hsa-miR-509-3-5p	0	0	0	1	1	1	PDF	peptide deformylase (mitochondrial)
hsa-miR-509-3-5p	0	0	1	1	1	1	C2orf62	chromosome 2 open reading frame 62
hsa-miR-509-3-5p	0	0	1	1	0	0	MIS18A	MIS18 kinetochore protein homolog A (S. pombe)
hsa-miR-509-3-5p	1	0	1	1	0	0	KIAA0895L	KIAA0895-like
hsa-miR-509-3-5p	0	0	0	1	1	1	IQCC	IQ motif containing C
hsa-miR-509-3-5p	0	0	0	1	0	0	RSPH1	radial spoke head 1 homolog (Chlamydomonas)
hsa-miR-509-3-5p	0	0	1	1	0	0	PDE9A	phosphodiesterase 9A
hsa-miR-509-3-5p	0	0	1	1	0	0	PSG8	pregnancy specific beta-1-glycoprotein 8
hsa-miR-509-3-5p	0	0	0	1	0	0	TONSL	tonsoku-like, DNA repair protein
hsa-miR-509-3-5p	0	0	0	1	1	1	ALKBH4	alkB, alkylation repair homolog 4 (E. coli)
hsa-miR-509-3-5p	0	0	1	1	1	1	ZNF250	zinc finger protein 250
hsa-miR-509-3-5p	0	0	1	1	1	1	FBXO17	F-box protein 17
hsa-miR-509-3-5p	0	0	0	1	1	1	CABP5	calcium binding protein 5
hsa-miR-509-3-5p	0	0	1	1	0	0	LUC7L	LUC7-like (S. cerevisiae)
hsa-miR-509-3-5p	0	0	1	1	1	1	SGOL2	shugoshin-like 2 (S. pombe)
hsa-miR-509-3-5p	0	0	1	1	0	0	SUCLG1	succinate-CoA ligase, alpha subunit
hsa-miR-509-3-5p	0	0	1	1	1	1	GYG1	glycogenin 1
hsa-miR-509-3-5p	0	0	0	1	0	0	TCF23	transcription factor 23
hsa-miR-509-3-5p	0	0	1	1	0	0	TMEM41A	transmembrane protein 41A
hsa-miR-509-3-5p	0	0	1	1	0	0	CLDN19	claudin 19
hsa-miR-509-3-5p	0	0	1	1	0	0	GRM2	glutamate receptor, metabotropic 2
hsa-miR-509-3-5p	1	0	1	1	1	1	T	T, brachyury homolog (mouse)
hsa-miR-509-3-5p	0	0	1	1	1	1	SCIN	scinderin
hsa-miR-509-3-5p	0	0	1	1	1	1	BRI3	brain protein I3
hsa-miR-509-3-5p	0	0	0	1	1	1	SBSPON	somatomedin B and thrombospondin, type 1 domain containing
hsa-miR-509-3-5p	0	0	1	1	0	0	RNF183	ring finger protein 183
hsa-miR-509-3-5p	0	0	1	1	1	1	TRMT10B	tRNA methyltransferase 10 homolog B (S. cerevisiae)
hsa-miR-509-3-5p	0	0	1	1	0	0	CYB5A	cytochrome b5 type A (microsomal)
hsa-miR-509-3-5p	0	0	0	1	0	0	SLC38A8	solute carrier family 38, member 8
hsa-miR-509-3-5p	0	0	0	1	0	0	CDH16	cadherin 16, KSP-cadherin
hsa-miR-509-3-5p	0	0	1	1	0	0	POLR3E	polymerase (RNA) III (DNA directed) polypeptide E (80kD)
hsa-miR-509-3-5p	0	0	1	1	0	0	PLK1	polo-like kinase 1
hsa-miR-509-3-5p	0	0	1	1	0	0	CCNDBP1	cyclin D-type binding-protein 1
hsa-miR-509-3-5p	0	0	0	1	1	1	ZNF91	zinc finger protein 91
hsa-miR-509-3-5p	1	0	1	1	0	0	VKORC1	vitamin K epoxide reductase complex, subunit 1
hsa-miR-509-3-5p	1	0	1	1	1	1	UNKL	unkempt homolog (Drosophila)-like
hsa-miR-509-3-5p	0	0	0	1	0	0	ULK4	unc-51-like kinase 4 (C. elegans)
hsa-miR-509-3-5p	0	0	0	1	1	1	FADD	Fas (TNFRSF6)-associated via death domain
hsa-miR-509-3-5p	0	0	0	1	0	0	VPREB1	pre-B lymphocyte 1
hsa-miR-509-3-5p	1	0	1	1	1	1	SCN11A	sodium channel, voltage-gated, type XI, alpha subunit
hsa-miR-509-3-5p	0	0	1	1	1	1	DMRT2	doublesex and mab-3 related transcription factor 2
hsa-miR-509-3-5p	0	0	0	1	1	1	FAM71B	family with sequence similarity 71, member B
hsa-miR-509-3-5p	0	0	1	1	0	0	PRELID1	PRELI domain containing 1
hsa-miR-509-3-5p	1	0	1	1	1	1	RNF139	ring finger protein 139
hsa-miR-509-3-5p	1	0	1	1	1	1	HAS2	hyaluronan synthase 2
hsa-miR-509-3-5p	0	0	1	1	1	1	C15orf40	chromosome 15 open reading frame 40
hsa-miR-509-3-5p	1	0	1	1	1	1	RNASE6	ribonuclease, RNase A family, k6
hsa-miR-509-3-5p	0	0	1	1	1	1	TPST1	tyrosylprotein sulfotransferase 1
hsa-miR-509-3-5p	0	0	0	1	0	0	ASL	argininosuccinate lyase
hsa-miR-509-3-5p	0	0	0	1	1	1	NECAB2	N-terminal EF-hand calcium binding protein 2
hsa-miR-509-3-5p	0	0	1	1	1	1	ITIH5	inter-alpha-trypsin inhibitor heavy chain family, member 5
hsa-miR-509-3-5p	0	0	1	1	1	1	RNFT1	ring finger protein, transmembrane 1
hsa-miR-509-3-5p	0	0	1	1	0	0	STRA13	stimulated by retinoic acid 13 homolog (mouse)
hsa-miR-509-3-5p	1	0	0	1	1	1	SLC1A5	solute carrier family 1 (neutral amino acid transporter), member 5
hsa-miR-509-3-5p	0	0	0	1	1	1	COG7	component of oligomeric golgi complex 7
hsa-miR-509-3-5p	0	0	1	1	1	1	HTRA3	HtrA serine peptidase 3
hsa-miR-509-3-5p	0	0	0	1	1	1	ZIK1	zinc finger protein interacting with K protein 1 homolog (mouse)
hsa-miR-509-3-5p	0	0	0	1	0	0	AGXT	alanine-glyoxylate aminotransferase
hsa-miR-509-3-5p	0	0	0	1	0	0	GOT1L1	glutamic-oxaloacetic transaminase 1-like 1
hsa-miR-509-3-5p	1	0	1	1	0	0	ACOT12	acyl-CoA thioesterase 12
hsa-miR-509-3-5p	1	0	1	1	1	1	HARS	histidyl-tRNA synthetase
hsa-miR-509-3-5p	0	0	1	1	0	0	PLG	plasminogen
hsa-miR-509-3-5p	0	0	0	1	0	0	C20orf201	chromosome 20 open reading frame 201
hsa-miR-509-3-5p	0	0	0	1	1	1	LOC729317	voltage-dependent anion channel 2 pseudogene
hsa-miR-509-3-5p	0	0	0	1	1	1	CYP2S1	cytochrome P450, family 2, subfamily S, polypeptide 1
hsa-miR-509-3-5p	0	0	0	1	1	1	EPS8L1	EPS8-like 1
hsa-miR-509-3-5p	0	0	1	1	0	0	PSMD2	proteasome (prosome, macropain) 26S subunit, non-ATPase, 2
hsa-miR-509-3-5p	0	0	0	1	1	1	SULT1B1	sulfotransferase family, cytosolic, 1B, member 1
hsa-miR-509-3-5p	1	0	1	1	1	1	RAB1B	RAB1B, member RAS oncogene family
hsa-miR-509-3-5p	0	0	0	1	0	0	CATSPER1	cation channel, sperm associated 1
hsa-miR-509-3-5p	0	0	1	1	1	1	MSL3	male-specific lethal 3 homolog (Drosophila)
hsa-miR-509-3-5p	0	0	1	1	0	0	MRPL46	mitochondrial ribosomal protein L46
hsa-miR-509-3-5p	1	0	1	1	0	0	PPP1CA	protein phosphatase 1, catalytic subunit, alpha isozyme
hsa-miR-509-3-5p	0	0	1	1	0	0	ISG20L2	interferon stimulated exonuclease gene 20kDa-like 2
hsa-miR-509-3-5p	0	0	0	1	0	0	OR4D11	olfactory receptor, family 4, subfamily D, member 11
hsa-miR-509-3-5p	0	0	1	1	1	1	HTR1D	5-hydroxytryptamine (serotonin) receptor 1D, G protein-coupled
hsa-miR-509-3-5p	1	0	1	1	0	0	RELL1	RELT-like 1
hsa-miR-509-3-5p	0	0	1	1	1	1	TMEM40	transmembrane protein 40
hsa-miR-509-3-5p	0	0	0	1	1	1	LILRB2	leukocyte immunoglobulin-like receptor, subfamily B (with TM and ITIM domains), member 2
hsa-miR-509-3-5p	0	0	0	1	0	0	SULT1A1	sulfotransferase family, cytosolic, 1A, phenol-preferring, member 1
hsa-miR-509-3-5p	0	0	1	1	0	0	SLC41A3	solute carrier family 41, member 3
hsa-miR-509-3-5p	0	0	1	1	1	1	CYP8B1	cytochrome P450, family 8, subfamily B, polypeptide 1
hsa-miR-509-3-5p	0	0	1	1	1	1	LILRB5	leukocyte immunoglobulin-like receptor, subfamily B (with TM and ITIM domains), member 5
hsa-miR-509-3-5p	1	0	1	1	1	1	KCNA2	potassium voltage-gated channel, shaker-related subfamily, member 2
hsa-miR-509-3-5p	0	0	1	1	0	0	STK25	serine/threonine kinase 25
hsa-miR-509-3-5p	0	0	1	1	1	1	VRK3	vaccinia related kinase 3
hsa-miR-509-3-5p	0	0	0	1	0	0	ZNF271	zinc finger protein 271
hsa-miR-509-3-5p	1	0	0	1	1	1	PLEKHA5	pleckstrin homology domain containing, family A member 5
hsa-miR-509-3-5p	1	0	1	1	1	1	SLC25A5	solute carrier family 25 (mitochondrial carrier; adenine nucleotide translocator), member 5
hsa-miR-509-3-5p	0	0	1	1	1	1	FAM83A	family with sequence similarity 83, member A
hsa-miR-509-3-5p	0	0	1	1	1	1	B3GNT3	UDP-GlcNAc:betaGal beta-1,3-N-acetylglucosaminyltransferase 3
hsa-miR-509-3-5p	0	0	0	1	1	1	DIS3L	DIS3 mitotic control homolog (S. cerevisiae)-like
hsa-miR-509-3-5p	0	0	0	1	1	1	IL17RA	interleukin 17 receptor A
hsa-miR-509-3-5p	0	0	1	1	1	1	ZNF611	zinc finger protein 611
hsa-miR-509-3-5p	0	0	1	1	1	1	USP54	ubiquitin specific peptidase 54
hsa-miR-509-3-5p	1	0	0	1	0	0	ST3GAL1	ST3 beta-galactoside alpha-2,3-sialyltransferase 1
hsa-miR-509-3-5p	0	0	0	1	0	0	METRNL	meteorin, glial cell differentiation regulator-like
hsa-miR-509-3-5p	0	0	0	1	1	1	ZNF454	zinc finger protein 454
hsa-miR-509-3-5p	0	0	0	1	0	0	SLC25A19	solute carrier family 25 (mitochondrial thiamine pyrophosphate carrier), member 19
hsa-miR-509-3-5p	1	0	1	1	1	1	ITFG1	integrin alpha FG-GAP repeat containing 1
hsa-miR-509-3-5p	0	0	1	1	0	0	DNAJC4	DnaJ (Hsp40) homolog, subfamily C, member 4
hsa-miR-509-3-5p	0	0	1	1	1	1	PINK1	PTEN induced putative kinase 1
hsa-miR-509-3-5p	0	0	0	1	0	0	RPL7AP66	ribosomal protein L7a pseudogene 66
hsa-miR-509-3-5p	0	0	0	1	0	0	GJD4	gap junction protein, delta 4, 40.1kDa
hsa-miR-509-3-5p	0	0	1	1	0	0	VARS2	valyl-tRNA synthetase 2, mitochondrial (putative)
hsa-miR-509-3-5p	0	0	0	1	1	1	TPRX1	tetra-peptide repeat homeobox 1
hsa-miR-509-3-5p	1	0	1	1	1	1	IFT20	intraflagellar transport 20 homolog (Chlamydomonas)
hsa-miR-509-3-5p	0	0	0	1	0	0	ZNF687	zinc finger protein 687
hsa-miR-509-3-5p	1	0	1	1	1	1	NIN	ninein (GSK3B interacting protein)
hsa-miR-509-3-5p	0	0	1	1	1	1	PRMT5	protein arginine methyltransferase 5
hsa-miR-509-3-5p	0	0	1	1	1	1	LILRB1	leukocyte immunoglobulin-like receptor, subfamily B (with TM and ITIM domains), member 1
hsa-miR-509-3-5p	0	0	1	1	1	1	FAM153C	family with sequence similarity 153, member C, pseudogene
hsa-miR-509-3-5p	0	0	1	1	1	1	DYNC1I1	dynein, cytoplasmic 1, intermediate chain 1
hsa-miR-509-3-5p	0	0	1	1	1	1	HPS1	Hermansky-Pudlak syndrome 1
hsa-miR-509-3-5p	0	0	0	1	0	0	GSG2	germ cell associated 2 (haspin)
hsa-miR-509-3-5p	0	0	1	1	1	1	MARVELD2	MARVEL domain containing 2
hsa-miR-509-3-5p	0	0	1	1	1	1	ORMDL1	ORM1-like 1 (S. cerevisiae)
hsa-miR-509-3-5p	1	0	1	1	1	1	MAF	v-maf musculoaponeurotic fibrosarcoma oncogene homolog (avian)
hsa-miR-509-3-5p	0	0	1	1	1	1	KIF15	kinesin family member 15
hsa-miR-509-3-5p	0	0	1	1	1	1	LRRC3B	leucine rich repeat containing 3B
hsa-miR-509-3-5p	0	0	0	1	1	1	TNFAIP8L1	tumor necrosis factor, alpha-induced protein 8-like 1
hsa-miR-509-3-5p	1	0	1	1	0	0	FAM100B	family with sequence similarity 100, member B
hsa-miR-509-3-5p	0	0	1	1	0	0	GPR97	G protein-coupled receptor 97
hsa-miR-509-3-5p	0	0	0	1	1	1	ZNF84	zinc finger protein 84
hsa-miR-509-3-5p	0	0	0	1	0	0	CFD	complement factor D (adipsin)
hsa-miR-509-3-5p	0	0	1	1	1	1	FMNL1	formin-like 1
hsa-miR-509-3-5p	0	0	0	1	1	1	CRELD2	cysteine-rich with EGF-like domains 2
hsa-miR-509-3-5p	0	0	1	1	0	0	FES	feline sarcoma oncogene
hsa-miR-509-3-5p	0	0	0	1	0	0	OR52A1	olfactory receptor, family 52, subfamily A, member 1
hsa-miR-509-3-5p	0	0	0	1	0	0	AIRE	autoimmune regulator
hsa-miR-509-3-5p	0	0	1	1	1	1	NPAP1	nuclear pore associated protein 1
hsa-miR-509-3-5p	0	0	1	1	0	0	CNGA2	cyclic nucleotide gated channel alpha 2
hsa-miR-509-3-5p	0	0	1	1	0	0	KIAA2013	KIAA2013
hsa-miR-509-3-5p	0	0	0	1	0	0	C21orf56	chromosome 21 open reading frame 56
hsa-miR-509-3-5p	0	0	0	1	0	0	ACTL10	actin-like 10
hsa-miR-509-3-5p	0	0	1	1	1	1	MTCP1	mature T-cell proliferation 1
hsa-miR-509-3-5p	0	0	1	1	0	0	SLC5A2	solute carrier family 5 (sodium/glucose cotransporter), member 2
hsa-miR-509-3-5p	0	0	0	1	0	0	LCN12	lipocalin 12
hsa-miR-509-3-5p	0	0	0	1	0	0	ZNF470	zinc finger protein 470
hsa-miR-509-3-5p	0	0	0	1	0	0	DDX24	DEAD (Asp-Glu-Ala-Asp) box polypeptide 24
hsa-miR-509-3-5p	0	0	0	1	0	0	CYP2F1	cytochrome P450, family 2, subfamily F, polypeptide 1
hsa-miR-509-3-5p	0	0	0	1	1	1	GLRX5	glutaredoxin 5
hsa-miR-509-3-5p	0	0	1	1	0	0	DDX28	DEAD (Asp-Glu-Ala-Asp) box polypeptide 28
hsa-miR-509-3-5p	0	0	0	1	1	1	ANO9	anoctamin 9
hsa-miR-509-3-5p	0	0	0	1	0	0	IZUMO1	izumo sperm-egg fusion 1
hsa-miR-509-3-5p	0	0	0	1	1	1	NR2C1	nuclear receptor subfamily 2, group C, member 1
hsa-miR-509-3-5p	0	0	0	1	0	0	FAM200A	family with sequence similarity 200, member A
hsa-miR-509-3-5p	1	0	1	1	1	1	C19orf6	chromosome 19 open reading frame 6
hsa-miR-509-3-5p	0	0	1	1	1	1	TM2D3	TM2 domain containing 3
hsa-miR-509-3-5p	1	0	1	1	0	0	TSEN54	tRNA splicing endonuclease 54 homolog (S. cerevisiae)
hsa-miR-509-3-5p	0	0	0	1	0	0	TSSC4	tumor suppressing subtransferable candidate 4
hsa-miR-509-3-5p	1	0	1	1	1	1	PALLD	palladin, cytoskeletal associated protein
hsa-miR-509-3-5p	0	0	1	1	1	1	WBSCR17	Williams-Beuren syndrome chromosome region 17
hsa-miR-509-3-5p	0	0	0	1	0	0	POLR3C	polymerase (RNA) III (DNA directed) polypeptide C (62kD)
hsa-miR-509-3-5p	0	0	0	1	0	0	ZNF347	zinc finger protein 347
hsa-miR-509-3-5p	0	0	1	1	0	0	TRIM7	tripartite motif containing 7
hsa-miR-509-3-5p	0	0	0	1	0	0	OR10H1	olfactory receptor, family 10, subfamily H, member 1
hsa-miR-509-3-5p	0	0	1	1	1	1	CYP27C1	cytochrome P450, family 27, subfamily C, polypeptide 1
hsa-miR-509-3-5p	1	0	1	1	1	1	WDR20	WD repeat domain 20
hsa-miR-509-3-5p	0	0	0	1	1	1	CYP3A7	cytochrome P450, family 3, subfamily A, polypeptide 7
hsa-miR-509-3-5p	1	0	0	1	1	1	P2RX4	purinergic receptor P2X, ligand-gated ion channel, 4
hsa-miR-509-3-5p	0	0	1	1	0	0	SLC12A4	solute carrier family 12 (potassium/chloride transporters), member 4
hsa-miR-509-3-5p	0	0	1	1	0	0	HSFY1	heat shock transcription factor, Y-linked 1
hsa-miR-509-3-5p	0	0	1	1	1	1	PLAUR	plasminogen activator, urokinase receptor
hsa-miR-509-3-5p	0	0	0	1	0	0	NOSIP	nitric oxide synthase interacting protein
hsa-miR-509-3-5p	0	0	1	1	0	0	NRN1L	neuritin 1-like
hsa-miR-509-3-5p	0	0	0	1	0	0	DUSP15	dual specificity phosphatase 15
hsa-miR-509-3-5p	0	0	0	1	1	1	DDC	dopa decarboxylase (aromatic L-amino acid decarboxylase)
hsa-miR-509-3-5p	0	0	0	1	0	0	ALG1L	asparagine-linked glycosylation 1-like
hsa-miR-509-3-5p	0	0	0	1	1	1	GFRAL	GDNF family receptor alpha like
hsa-miR-509-3-5p	0	0	1	1	1	1	PTGES	prostaglandin E synthase
hsa-miR-509-3-5p	0	0	1	1	0	0	PGLYRP2	peptidoglycan recognition protein 2
hsa-miR-509-3-5p	1	0	1	1	1	1	ACER2	alkaline ceramidase 2
hsa-miR-509-3-5p	0	0	1	1	1	1	ICAM4	intercellular adhesion molecule 4 (Landsteiner-Wiener blood group)
hsa-miR-509-3-5p	0	0	0	1	1	1	SYCP2L	synaptonemal complex protein 2-like
hsa-miR-509-3-5p	0	0	1	1	0	0	IL4I1	interleukin 4 induced 1
hsa-miR-509-3-5p	0	0	1	1	0	0	TEX264	testis expressed 264
hsa-miR-509-3-5p	0	0	1	1	1	1	LBX2	ladybird homeobox 2
hsa-miR-509-3-5p	1	0	1	1	1	1	NEK10	NIMA (never in mitosis gene a)- related kinase 10
hsa-miR-509-3-5p	0	0	0	1	0	0	TPH1	tryptophan hydroxylase 1
hsa-miR-509-3-5p	0	0	0	1	0	0	PRSS3	protease, serine, 3
hsa-miR-509-3-5p	0	0	1	1	1	1	SUSD4	sushi domain containing 4
hsa-miR-509-3-5p	0	0	1	1	0	0	DAP3	death associated protein 3
hsa-miR-509-3-5p	0	0	0	1	0	0	TICAM1	toll-like receptor adaptor molecule 1
hsa-miR-509-3-5p	0	0	1	1	0	0	ERAP2	endoplasmic reticulum aminopeptidase 2
hsa-miR-509-3-5p	0	0	1	1	1	1	GBP5	guanylate binding protein 5
hsa-miR-509-3-5p	0	0	1	1	1	1	ICOSLG	inducible T-cell co-stimulator ligand
hsa-miR-509-3-5p	0	0	0	1	1	1	NPFFR2	neuropeptide FF receptor 2
hsa-miR-509-3-5p	0	0	0	1	1	1	MCPH1	microcephalin 1
hsa-miR-509-3-5p	0	0	0	1	0	0	GTDC2	glycosyltransferase-like domain containing 2
hsa-miR-509-3-5p	0	0	0	1	1	1	TRADD	TNFRSF1A-associated via death domain
hsa-miR-509-3-5p	0	0	1	1	1	1	CASC5	cancer susceptibility candidate 5
hsa-miR-509-3-5p	0	0	1	1	1	1	GMPR2	guanosine monophosphate reductase 2
hsa-miR-509-3-5p	0	0	0	1	0	0	OSCP1	organic solute carrier partner 1
hsa-miR-509-3-5p	0	0	0	1	0	0	HRCT1	histidine rich carboxyl terminus 1
hsa-miR-509-3-5p	0	0	1	1	0	0	STK31	serine/threonine kinase 31
hsa-miR-509-3-5p	1	0	1	1	1	1	WLS	wntless homolog (Drosophila)
hsa-miR-509-3-5p	0	0	0	1	1	1	H2BFM	H2B histone family, member M
hsa-miR-509-3-5p	1	0	1	1	1	1	APP	amyloid beta (A4) precursor protein
hsa-miR-509-3-5p	1	0	1	1	1	1	DHX57	DEAH (Asp-Glu-Ala-Asp/His) box polypeptide 57
hsa-miR-509-3-5p	0	0	0	1	0	0	PDE4C	phosphodiesterase 4C, cAMP-specific
hsa-miR-509-3-5p	0	0	0	1	1	1	TBCD	tubulin folding cofactor D
hsa-miR-509-3-5p	0	0	1	1	0	0	PLXNB2	plexin B2
hsa-miR-509-3-5p	0	0	1	1	0	0	PC	pyruvate carboxylase
hsa-miR-509-3-5p	0	0	0	1	0	0	TNFRSF14	tumor necrosis factor receptor superfamily, member 14
hsa-miR-509-3-5p	0	0	0	1	0	0	ZNF625	zinc finger protein 625
hsa-miR-509-3-5p	1	0	1	1	1	1	GRHL3	grainyhead-like 3 (Drosophila)
hsa-miR-509-3-5p	0	0	1	1	0	0	HIST1H3D	histone cluster 1, H3d
hsa-miR-509-3-5p	0	0	1	1	1	1	KIAA1841	KIAA1841
hsa-miR-509-3-5p	0	0	1	1	0	0	PPP2R2B	protein phosphatase 2, regulatory subunit B, beta
hsa-miR-509-3-5p	0	0	1	1	1	1	NEK11	NIMA (never in mitosis gene a)- related kinase 11
hsa-miR-509-3-5p	1	0	1	1	0	0	ELN	elastin
hsa-miR-509-3-5p	0	0	1	1	1	1	ZNF74	zinc finger protein 74
hsa-miR-509-3-5p	0	0	0	1	0	0	LCA10	lung carcinoma-associated protein 10
hsa-miR-509-3-5p	0	0	1	1	0	0	HP	haptoglobin
hsa-miR-509-3-5p	0	0	1	1	1	1	TUSC1	tumor suppressor candidate 1
hsa-miR-509-3-5p	1	0	1	1	1	1	PAK4	p21 protein (Cdc42/Rac)-activated kinase 4
hsa-miR-509-3-5p	0	0	0	1	0	0	LONP1	lon peptidase 1, mitochondrial
hsa-miR-509-3-5p	0	0	1	1	1	1	OMA1	OMA1 zinc metallopeptidase homolog (S. cerevisiae)
hsa-miR-509-3-5p	0	0	1	1	0	0	C19orf60	chromosome 19 open reading frame 60
hsa-miR-509-3-5p	0	0	0	1	1	1	ZNF23	zinc finger protein 23
hsa-miR-509-3-5p	1	0	1	1	1	1	ANKRD46	ankyrin repeat domain 46
hsa-miR-509-3-5p	0	0	1	1	0	0	MAP3K15	mitogen-activated protein kinase kinase kinase 15
hsa-miR-509-3-5p	0	0	1	1	1	1	SLC2A10	solute carrier family 2 (facilitated glucose transporter), member 10
hsa-miR-509-3-5p	0	0	1	1	1	1	SLC4A5	solute carrier family 4, sodium bicarbonate cotransporter, member 5
hsa-miR-509-3-5p	1	0	1	1	1	1	LIN9	lin-9 homolog (C. elegans)
hsa-miR-509-3-5p	1	0	1	1	0	0	EMP2	epithelial membrane protein 2
hsa-miR-509-3-5p	0	0	0	1	1	1	INPP5D	inositol polyphosphate-5-phosphatase, 145kDa
hsa-miR-509-3-5p	0	0	0	1	0	0	ZNF808	zinc finger protein 808
hsa-miR-509-3-5p	0	0	1	1	0	0	ART5	ADP-ribosyltransferase 5
hsa-miR-509-3-5p	0	0	0	1	0	0	ZNF517	zinc finger protein 517
hsa-miR-509-3-5p	1	0	1	1	0	0	BRD4	bromodomain containing 4
hsa-miR-509-3-5p	0	0	0	1	0	0	ZNF93	zinc finger protein 93
hsa-miR-509-3-5p	0	0	0	1	0	0	ZMYND10	zinc finger, MYND-type containing 10
hsa-miR-509-3-5p	1	0	1	1	1	1	TOPORS	topoisomerase I binding, arginine/serine-rich, E3 ubiquitin protein ligase
hsa-miR-509-3-5p	0	0	1	1	0	0	EIF3B	eukaryotic translation initiation factor 3, subunit B
hsa-miR-509-3-5p	1	0	0	1	1	1	RBMS1	RNA binding motif, single stranded interacting protein 1
hsa-miR-509-3-5p	1	0	1	1	1	1	TLR10	toll-like receptor 10
hsa-miR-509-3-5p	0	0	1	1	1	1	PJA1	praja ring finger 1, E3 ubiquitin protein ligase
hsa-miR-509-3-5p	0	0	0	1	0	0	MPHOSPH8	M-phase phosphoprotein 8
hsa-miR-509-3-5p	0	0	0	1	1	1	ECI2	enoyl-CoA delta isomerase 2
hsa-miR-509-3-5p	0	0	0	1	1	1	ZNF485	zinc finger protein 485
hsa-miR-509-3-5p	0	0	0	1	0	0	SDCCAG8	serologically defined colon cancer antigen 8
hsa-miR-509-3-5p	1	0	0	1	1	1	TRIM67	tripartite motif containing 67
hsa-miR-509-3-5p	0	0	1	1	0	0	CNIH4	cornichon homolog 4 (Drosophila)
hsa-miR-509-3-5p	1	0	1	1	1	1	AGPAT4	1-acylglycerol-3-phosphate O-acyltransferase 4 (lysophosphatidic acid acyltransferase, delta)
hsa-miR-509-3-5p	0	0	1	1	1	1	INTS7	integrator complex subunit 7
hsa-miR-509-3-5p	1	0	1	1	1	1	TMEM242	transmembrane protein 242
hsa-miR-509-3-5p	0	0	1	1	1	1	MTHFD1L	methylenetetrahydrofolate dehydrogenase (NADP+ dependent) 1-like
hsa-miR-509-3-5p	0	0	1	1	0	0	TMEM9	transmembrane protein 9
hsa-miR-509-3-5p	0	0	1	1	1	1	PLA2G4A	phospholipase A2, group IVA (cytosolic, calcium-dependent)
hsa-miR-509-3-5p	1	0	1	1	1	1	NPL	N-acetylneuraminate pyruvate lyase (dihydrodipicolinate synthase)
hsa-miR-509-3-5p	0	0	1	1	0	0	MR1	major histocompatibility complex, class I-related
hsa-miR-509-3-5p	0	0	1	1	1	1	AIG1	androgen-induced 1
hsa-miR-509-3-5p	0	0	1	1	1	1	FMO3	flavin containing monooxygenase 3
hsa-miR-509-3-5p	0	0	1	1	1	1	UFC1	ubiquitin-fold modifier conjugating enzyme 1
hsa-miR-509-3-5p	0	0	1	1	1	1	FCRL5	Fc receptor-like 5
hsa-miR-509-3-5p	0	0	1	1	1	1	NES	nestin
hsa-miR-509-3-5p	0	0	0	1	0	0	RXFP4	relaxin/insulin-like family peptide receptor 4
hsa-miR-509-3-5p	0	0	0	1	0	0	YY1AP1	YY1 associated protein 1
hsa-miR-509-3-5p	0	0	0	1	0	0	CALY	calcyon neuron-specific vesicular protein
hsa-miR-509-3-5p	0	0	1	1	0	0	THEM4	thioesterase superfamily member 4
hsa-miR-509-3-5p	1	0	1	1	0	0	TDRKH	tudor and KH domain containing
hsa-miR-509-3-5p	0	0	0	1	0	0	BOLA1	bolA homolog 1 (E. coli)
hsa-miR-509-3-5p	0	0	0	1	1	1	TTF2	transcription termination factor, RNA polymerase II
hsa-miR-509-3-5p	0	0	0	1	0	0	RARS2	arginyl-tRNA synthetase 2, mitochondrial
hsa-miR-509-3-5p	0	0	0	1	0	0	TNFRSF6B	tumor necrosis factor receptor superfamily, member 6b, decoy
hsa-miR-509-3-5p	0	0	0	1	1	1	HENMT1	HEN1 methyltransferase homolog 1 (Arabidopsis)
hsa-miR-509-3-5p	1	0	1	1	1	1	FAM178A	family with sequence similarity 178, member A
hsa-miR-509-3-5p	0	0	1	1	1	1	SLCO4A1	solute carrier organic anion transporter family, member 4A1
hsa-miR-509-3-5p	0	0	0	1	0	0	LAMA5	laminin, alpha 5
hsa-miR-509-3-5p	0	0	1	1	1	1	IFI44L	interferon-induced protein 44-like
hsa-miR-509-3-5p	0	0	1	1	0	0	LRRIQ3	leucine-rich repeats and IQ motif containing 3
hsa-miR-509-3-5p	0	0	1	1	0	0	L1TD1	LINE-1 type transposase domain containing 1
hsa-miR-509-3-5p	1	0	0	1	1	1	C1GALT1C1	C1GALT1-specific chaperone 1
hsa-miR-509-3-5p	0	0	1	1	0	0	ENTPD8	ectonucleoside triphosphate diphosphohydrolase 8
hsa-miR-509-3-5p	0	0	0	1	0	0	EDF1	endothelial differentiation-related factor 1
hsa-miR-509-3-5p	1	0	1	1	1	1	ZNFX1	zinc finger, NFX1-type containing 1
hsa-miR-509-3-5p	0	0	0	1	0	0	UBAC1	UBA domain containing 1
hsa-miR-509-3-5p	0	0	1	1	0	0	C9orf96	chromosome 9 open reading frame 96
hsa-miR-509-3-5p	0	0	0	1	0	0	GBGT1	globoside alpha-1,3-N-acetylgalactosaminyltransferase 1
hsa-miR-509-3-5p	0	0	1	1	0	0	GTF3C5	general transcription factor IIIC, polypeptide 5, 63kDa
hsa-miR-509-3-5p	0	0	0	1	0	0	PTCH2	patched 2
hsa-miR-509-3-5p	0	0	1	1	1	1	POLR3A	polymerase (RNA) III (DNA directed) polypeptide A, 155kDa
hsa-miR-509-3-5p	0	0	0	1	0	0	NTMT1	N-terminal Xaa-Pro-Lys N-methyltransferase 1
hsa-miR-509-3-5p	0	0	1	1	0	0	LEPRE1	leucine proline-enriched proteoglycan (leprecan) 1
hsa-miR-509-3-5p	1	0	1	1	1	1	RLF	rearranged L-myc fusion
hsa-miR-509-3-5p	1	0	1	1	1	1	TOMM34	translocase of outer mitochondrial membrane 34
hsa-miR-509-3-5p	0	0	1	1	0	0	PPIE	peptidylprolyl isomerase E (cyclophilin E)
hsa-miR-509-3-5p	0	0	1	1	1	1	MRPS16	mitochondrial ribosomal protein S16
hsa-miR-509-3-5p	1	0	1	1	1	1	GDAP1L1	ganglioside induced differentiation associated protein 1-like 1
hsa-miR-509-3-5p	0	0	1	1	1	1	SRPX2	sushi-repeat containing protein, X-linked 2
hsa-miR-509-3-5p	1	0	1	1	1	1	CDCA8	cell division cycle associated 8
[truncated: 183 more rows]
