# Supplementary material for: Profiling of Selected MicroRNAs in Proliferative Eutopic Endometrium of Women with Ovarian Endometriosis
Source: Biomed Res Int. 2015 Aug 20;2015:760698. doi: 10.1155/2015/760698 (PMC4558423; doi:10.1155/2015/760698)
Supplement: Supplementary file 1 — Table I: The names of miRNAs significantly differentially expressed between eutopic endometrium of patients with endometriosis vs eutopic endometrium of patients without endometriosis. Table II: The associations between miRNA and mRNA, which presents detailed results of the search of six major databases i.e targetscan, tarbase, miranda, mirbase, mirtarget2 and pictar. [file 760698.f1.zip › 760698.f1/Table II/hsa-miR-509-3p.tsv]

miR	targetscan	tarbase	miranda	mirbase	mirtarget2	pictar	GeneSymbol	GeneName
hsa-miR-509-3p	1	0	1	0	1	1	KIAA0355	KIAA0355
hsa-miR-509-3p	1	0	1	0	1	1	PTPRT	protein tyrosine phosphatase, receptor type, T
hsa-miR-509-3p	1	0	1	0	1	1	MTSS1	metastasis suppressor 1
hsa-miR-509-3p	0	0	1	0	0	0	FAM91A2	family with sequence similarity 91, member A2
hsa-miR-509-3p	1	0	1	1	1	1	GIGYF2	GRB10 interacting GYF protein 2
hsa-miR-509-3p	1	0	1	0	1	1	ATG14	autophagy related 14
hsa-miR-509-3p	1	0	1	1	1	1	SPIRE1	spire homolog 1 (Drosophila)
hsa-miR-509-3p	1	0	1	0	1	1	GPR158	G protein-coupled receptor 158
hsa-miR-509-3p	1	0	1	0	1	1	SRGAP3	SLIT-ROBO Rho GTPase activating protein 3
hsa-miR-509-3p	1	0	1	1	1	1	RIMKLB	ribosomal modification protein rimK-like family member B
hsa-miR-509-3p	1	0	1	1	1	1	MKL2	MKL/myocardin-like 2
hsa-miR-509-3p	1	0	1	0	1	1	ANKFY1	ankyrin repeat and FYVE domain containing 1
hsa-miR-509-3p	0	0	1	1	1	1	FSTL5	follistatin-like 5
hsa-miR-509-3p	1	1	1	1	1	1	NFIA	nuclear factor I/A
hsa-miR-509-3p	1	0	1	0	0	0	PITPNM2	phosphatidylinositol transfer protein, membrane-associated 2
hsa-miR-509-3p	1	0	1	1	1	1	ZNF532	zinc finger protein 532
hsa-miR-509-3p	0	0	1	1	1	1	PBLD	phenazine biosynthesis-like protein domain containing
hsa-miR-509-3p	0	0	1	1	0	0	COL27A1	collagen, type XXVII, alpha 1
hsa-miR-509-3p	1	0	1	1	1	1	NAV2	neuron navigator 2
hsa-miR-509-3p	1	0	1	1	1	1	CSRNP1	cysteine-serine-rich nuclear protein 1
hsa-miR-509-3p	1	0	1	1	1	1	BCL2L11	BCL2-like 11 (apoptosis facilitator)
hsa-miR-509-3p	0	0	1	0	0	0	NBLA00301	Nbla00301
hsa-miR-509-3p	1	0	1	1	1	1	C11orf57	chromosome 11 open reading frame 57
hsa-miR-509-3p	1	0	1	1	1	1	ADARB1	adenosine deaminase, RNA-specific, B1
hsa-miR-509-3p	1	0	1	1	1	1	VLDLR	very low density lipoprotein receptor
hsa-miR-509-3p	1	0	1	0	1	1	PCDHA13	protocadherin alpha 13
hsa-miR-509-3p	1	0	1	1	1	1	PCDHA4	protocadherin alpha 4
hsa-miR-509-3p	1	0	1	1	1	1	PCCB	propionyl CoA carboxylase, beta polypeptide
hsa-miR-509-3p	1	0	1	1	1	1	PHC1	polyhomeotic homolog 1 (Drosophila)
hsa-miR-509-3p	1	0	1	1	0	0	TSPYL2	TSPY-like 2
hsa-miR-509-3p	1	0	1	1	1	1	PRKACB	protein kinase, cAMP-dependent, catalytic, beta
hsa-miR-509-3p	1	0	1	1	1	1	EPHA5	EPH receptor A5
hsa-miR-509-3p	1	0	1	1	1	1	ANK1	ankyrin 1, erythrocytic
hsa-miR-509-3p	0	0	1	1	0	0	ASIC3	acid-sensing (proton-gated) ion channel 3
hsa-miR-509-3p	0	0	1	1	0	0	SLC22A8	solute carrier family 22 (organic anion transporter), member 8
hsa-miR-509-3p	0	0	1	1	1	1	RNF130	ring finger protein 130
hsa-miR-509-3p	0	0	1	1	0	0	TRIM27	tripartite motif containing 27
hsa-miR-509-3p	1	0	1	1	1	1	ZFX	zinc finger protein, X-linked
hsa-miR-509-3p	1	0	1	1	1	1	FKBP5	FK506 binding protein 5
hsa-miR-509-3p	1	0	1	1	1	1	PHLDB2	pleckstrin homology-like domain, family B, member 2
hsa-miR-509-3p	0	0	1	1	1	1	CELF1	CUGBP, Elav-like family member 1
hsa-miR-509-3p	0	0	1	0	0	0	MIAT	myocardial infarction associated transcript (non-protein coding)
hsa-miR-509-3p	1	0	1	1	1	1	PCDH17	protocadherin 17
hsa-miR-509-3p	1	0	1	1	1	1	MYT1L	myelin transcription factor 1-like
hsa-miR-509-3p	1	0	1	0	0	0	MAP3K1	mitogen-activated protein kinase kinase kinase 1, E3 ubiquitin protein ligase
hsa-miR-509-3p	1	0	1	1	1	1	CTNND1	catenin (cadherin-associated protein), delta 1
hsa-miR-509-3p	1	0	1	1	1	1	RBBP6	retinoblastoma binding protein 6
hsa-miR-509-3p	0	0	1	1	1	1	PLEKHB1	pleckstrin homology domain containing, family B (evectins) member 1
hsa-miR-509-3p	1	0	1	0	1	1	CD164	CD164 molecule, sialomucin
hsa-miR-509-3p	1	0	1	0	0	0	PPME1	protein phosphatase methylesterase 1
hsa-miR-509-3p	1	0	1	1	1	1	PRUNE	prune homolog (Drosophila)
hsa-miR-509-3p	1	0	1	1	1	1	TAOK3	TAO kinase 3
hsa-miR-509-3p	0	0	1	0	1	1	CLDN2	claudin 2
hsa-miR-509-3p	1	0	1	1	1	1	SNPH	syntaphilin
hsa-miR-509-3p	0	0	1	1	0	0	P2RY6	pyrimidinergic receptor P2Y, G-protein coupled, 6
hsa-miR-509-3p	1	0	1	1	1	1	DESI2	desumoylating isopeptidase 2
hsa-miR-509-3p	0	0	1	1	1	1	PJA1	praja ring finger 1, E3 ubiquitin protein ligase
hsa-miR-509-3p	0	0	1	1	0	0	BCAT2	branched chain amino-acid transaminase 2, mitochondrial
hsa-miR-509-3p	0	0	1	0	1	1	ERBB2IP	erbb2 interacting protein
hsa-miR-509-3p	1	0	1	1	1	1	BBC3	BCL2 binding component 3
hsa-miR-509-3p	1	0	1	1	1	1	PBX3	pre-B-cell leukemia homeobox 3
hsa-miR-509-3p	1	0	1	1	1	1	LARP4	La ribonucleoprotein domain family, member 4
hsa-miR-509-3p	0	0	1	1	0	0	ELP2	elongator acetyltransferase complex subunit 2
hsa-miR-509-3p	1	0	1	1	1	1	TNKS1BP1	tankyrase 1 binding protein 1, 182kDa
hsa-miR-509-3p	1	0	1	1	1	1	RBFOX1	RNA binding protein, fox-1 homolog (C. elegans) 1
hsa-miR-509-3p	0	0	1	1	0	0	MPI	mannose phosphate isomerase
hsa-miR-509-3p	1	0	1	1	1	1	AFF2	AF4/FMR2 family, member 2
hsa-miR-509-3p	1	0	1	1	1	1	PLAGL1	pleiomorphic adenoma gene-like 1
hsa-miR-509-3p	0	0	1	1	1	1	GPR56	G protein-coupled receptor 56
hsa-miR-509-3p	1	0	1	0	1	1	GRB10	growth factor receptor-bound protein 10
hsa-miR-509-3p	1	0	1	1	1	1	ILF3	interleukin enhancer binding factor 3, 90kDa
hsa-miR-509-3p	0	0	1	0	0	0	CACNA2D3	calcium channel, voltage-dependent, alpha 2/delta subunit 3
hsa-miR-509-3p	0	0	1	1	0	0	OTOP2	otopetrin 2
hsa-miR-509-3p	1	0	1	1	1	1	PPP1R9A	protein phosphatase 1, regulatory subunit 9A
hsa-miR-509-3p	0	0	1	0	0	0	TUG1	taurine upregulated 1 (non-protein coding)
hsa-miR-509-3p	0	0	1	1	1	1	BANK1	B-cell scaffold protein with ankyrin repeats 1
hsa-miR-509-3p	1	0	1	1	1	1	MEIS2	Meis homeobox 2
hsa-miR-509-3p	0	0	1	1	1	1	STAU2	staufen, RNA binding protein, homolog 2 (Drosophila)
hsa-miR-509-3p	0	0	1	1	0	0	C17orf53	chromosome 17 open reading frame 53
hsa-miR-509-3p	0	0	1	1	0	0	TRMT2B	tRNA methyltransferase 2 homolog B (S. cerevisiae)
hsa-miR-509-3p	1	0	1	1	1	1	PPFIA4	protein tyrosine phosphatase, receptor type, f polypeptide (PTPRF), interacting protein (liprin), alpha 4
hsa-miR-509-3p	1	0	1	1	1	1	BAZ2A	bromodomain adjacent to zinc finger domain, 2A
hsa-miR-509-3p	1	0	1	1	1	1	DERL1	derlin 1
hsa-miR-509-3p	1	0	1	1	0	0	MEX3A	mex-3 homolog A (C. elegans)
hsa-miR-509-3p	0	0	1	0	1	1	FLJ14186	uncharacterized LOC401149
hsa-miR-509-3p	1	0	1	1	1	1	YPEL5	yippee-like 5 (Drosophila)
hsa-miR-509-3p	1	0	1	1	1	1	NAA30	N(alpha)-acetyltransferase 30, NatC catalytic subunit
hsa-miR-509-3p	0	0	1	0	0	0	LINC00340	long intergenic non-protein coding RNA 340
hsa-miR-509-3p	0	0	1	1	1	1	MINA	MYC induced nuclear antigen
hsa-miR-509-3p	1	0	1	1	1	1	NFASC	neurofascin
hsa-miR-509-3p	0	0	1	1	1	1	NETO2	neuropilin (NRP) and tolloid (TLL)-like 2
hsa-miR-509-3p	1	0	1	1	1	1	GPD2	glycerol-3-phosphate dehydrogenase 2 (mitochondrial)
hsa-miR-509-3p	0	0	1	1	1	1	ZNF213	zinc finger protein 213
hsa-miR-509-3p	0	0	1	1	1	1	SLCO1B3	solute carrier organic anion transporter family, member 1B3
hsa-miR-509-3p	1	0	1	0	1	1	RNF165	ring finger protein 165
hsa-miR-509-3p	0	0	1	1	0	0	MLF1	myeloid leukemia factor 1
hsa-miR-509-3p	0	0	1	1	1	1	PSME3	proteasome (prosome, macropain) activator subunit 3 (PA28 gamma; Ki)
hsa-miR-509-3p	0	0	1	1	1	1	A2ML1	alpha-2-macroglobulin-like 1
hsa-miR-509-3p	0	0	1	1	0	0	CERS5	ceramide synthase 5
hsa-miR-509-3p	0	0	1	1	1	1	ZBTB26	zinc finger and BTB domain containing 26
hsa-miR-509-3p	0	0	1	1	0	0	NISCH	nischarin
hsa-miR-509-3p	1	0	1	1	1	1	CYP46A1	cytochrome P450, family 46, subfamily A, polypeptide 1
hsa-miR-509-3p	0	0	1	0	1	1	TMSB15B	thymosin beta 15B
hsa-miR-509-3p	1	0	1	1	1	1	SUPT16H	suppressor of Ty 16 homolog (S. cerevisiae)
hsa-miR-509-3p	1	0	1	1	1	1	HDAC2	histone deacetylase 2
hsa-miR-509-3p	0	0	1	1	0	0	APOBEC3G	apolipoprotein B mRNA editing enzyme, catalytic polypeptide-like 3G
hsa-miR-509-3p	1	0	1	1	1	1	IVNS1ABP	influenza virus NS1A binding protein
hsa-miR-509-3p	0	0	1	0	1	1	SSPN	sarcospan
hsa-miR-509-3p	1	0	1	1	1	1	SPTBN1	spectrin, beta, non-erythrocytic 1
hsa-miR-509-3p	0	0	1	0	0	0	ZNF806	zinc finger protein 806
hsa-miR-509-3p	1	0	1	0	1	1	GATAD2B	GATA zinc finger domain containing 2B
hsa-miR-509-3p	0	0	1	1	0	0	DPAGT1	dolichyl-phosphate (UDP-N-acetylglucosamine) N-acetylglucosaminephosphotransferase 1 (GlcNAc-1-P transferase)
hsa-miR-509-3p	0	0	1	1	1	1	LOC284023	uncharacterized LOC284023
hsa-miR-509-3p	0	0	1	0	0	0	LOC730101	uncharacterized LOC730101
hsa-miR-509-3p	1	0	1	1	1	1	ZC3H11A	zinc finger CCCH-type containing 11A
hsa-miR-509-3p	1	0	1	1	1	1	LCP1	lymphocyte cytosolic protein 1 (L-plastin)
hsa-miR-509-3p	0	0	1	0	0	0	LOC284385	uncharacterized LOC284385
hsa-miR-509-3p	0	0	1	0	0	0	THAP7-AS1	THAP7 antisense RNA 1
hsa-miR-509-3p	1	0	1	1	1	1	MEIS1	Meis homeobox 1
hsa-miR-509-3p	0	0	1	1	0	0	MAP3K15	mitogen-activated protein kinase kinase kinase 15
hsa-miR-509-3p	0	0	1	1	1	1	UPP2	uridine phosphorylase 2
hsa-miR-509-3p	1	0	1	1	1	1	LMX1A	LIM homeobox transcription factor 1, alpha
hsa-miR-509-3p	0	0	1	1	1	1	WDR64	WD repeat domain 64
hsa-miR-509-3p	1	0	1	1	1	1	ZBTB4	zinc finger and BTB domain containing 4
hsa-miR-509-3p	0	0	1	1	0	0	SLC26A10	solute carrier family 26, member 10
hsa-miR-509-3p	0	0	1	1	1	1	FRMPD2	FERM and PDZ domain containing 2
hsa-miR-509-3p	0	0	1	0	0	0	LGALS17A	Charcot-Leyden crystal protein pseudogene
hsa-miR-509-3p	0	0	1	0	0	0	LOC100133029	sirtuin 5 pseudogene
hsa-miR-509-3p	1	0	1	1	1	1	MBTD1	mbt domain containing 1
hsa-miR-509-3p	1	0	1	1	1	1	ESYT2	extended synaptotagmin-like protein 2
hsa-miR-509-3p	0	0	1	0	1	1	NAIP	NLR family, apoptosis inhibitory protein
hsa-miR-509-3p	1	0	1	1	1	1	XPO1	exportin 1 (CRM1 homolog, yeast)
hsa-miR-509-3p	1	0	1	1	1	1	ATXN7	ataxin 7
hsa-miR-509-3p	1	0	1	1	1	1	KALRN	kalirin, RhoGEF kinase
hsa-miR-509-3p	0	0	1	1	0	0	C20orf141	chromosome 20 open reading frame 141
hsa-miR-509-3p	0	0	1	1	0	0	FSIP2	fibrous sheath interacting protein 2
hsa-miR-509-3p	1	0	1	1	1	1	PLEKHB2	pleckstrin homology domain containing, family B (evectins) member 2
hsa-miR-509-3p	0	0	1	1	0	0	TMEM151B	transmembrane protein 151B
hsa-miR-509-3p	1	0	1	1	1	1	CLIP1	CAP-GLY domain containing linker protein 1
hsa-miR-509-3p	1	0	1	0	1	1	N4BP3	NEDD4 binding protein 3
hsa-miR-509-3p	1	0	1	1	1	1	CTNNA2	catenin (cadherin-associated protein), alpha 2
hsa-miR-509-3p	1	0	1	1	0	0	ST3GAL2	ST3 beta-galactoside alpha-2,3-sialyltransferase 2
hsa-miR-509-3p	0	0	1	0	0	0	LRRC9	leucine rich repeat containing 9
hsa-miR-509-3p	1	0	1	1	1	1	SLC12A6	solute carrier family 12 (potassium/chloride transporters), member 6
hsa-miR-509-3p	1	0	1	0	0	0	HK1	hexokinase 1
hsa-miR-509-3p	0	0	1	1	0	0	C17orf107	chromosome 17 open reading frame 107
hsa-miR-509-3p	0	0	1	0	0	0	EMBP1	embigin pseudogene 1
hsa-miR-509-3p	0	0	1	0	0	0	PINLYP	phospholipase A2 inhibitor and LY6/PLAUR domain containing
hsa-miR-509-3p	0	0	1	1	1	1	ENPP2	ectonucleotide pyrophosphatase/phosphodiesterase 2
hsa-miR-509-3p	1	0	1	0	1	1	RXRA	retinoid X receptor, alpha
hsa-miR-509-3p	0	0	1	1	1	1	TMC5	transmembrane channel-like 5
hsa-miR-509-3p	0	0	1	1	0	0	CYP4X1	cytochrome P450, family 4, subfamily X, polypeptide 1
hsa-miR-509-3p	1	0	1	1	1	1	PPP2R5C	protein phosphatase 2, regulatory subunit B', gamma
hsa-miR-509-3p	0	0	1	1	0	0	ZNF730	zinc finger protein 730
hsa-miR-509-3p	0	0	1	1	1	1	PDE2A	phosphodiesterase 2A, cGMP-stimulated
hsa-miR-509-3p	0	0	1	0	0	0	AGAP9	ArfGAP with GTPase domain, ankyrin repeat and PH domain 9
hsa-miR-509-3p	1	0	1	1	1	1	TAP2	transporter 2, ATP-binding cassette, sub-family B (MDR/TAP)
hsa-miR-509-3p	0	0	1	1	1	1	C12orf43	chromosome 12 open reading frame 43
hsa-miR-509-3p	1	0	1	1	1	1	LUC7L3	LUC7-like 3 (S. cerevisiae)
hsa-miR-509-3p	0	0	1	1	0	0	TRIM69	tripartite motif containing 69
hsa-miR-509-3p	1	0	1	1	1	1	AHCYL1	adenosylhomocysteinase-like 1
hsa-miR-509-3p	1	0	1	1	1	1	NECAP1	NECAP endocytosis associated 1
hsa-miR-509-3p	0	0	1	1	1	1	TTLL5	tubulin tyrosine ligase-like family, member 5
hsa-miR-509-3p	1	0	1	0	1	1	GPR85	G protein-coupled receptor 85
hsa-miR-509-3p	1	0	1	1	1	1	CTTNBP2NL	CTTNBP2 N-terminal like
hsa-miR-509-3p	0	0	1	1	1	1	STOX2	storkhead box 2
hsa-miR-509-3p	0	0	1	1	0	0	THADA	thyroid adenoma associated
hsa-miR-509-3p	1	0	1	0	1	1	GPAM	glycerol-3-phosphate acyltransferase, mitochondrial
hsa-miR-509-3p	0	0	1	1	1	1	YAP1	Yes-associated protein 1
hsa-miR-509-3p	1	0	1	1	1	1	SH3TC2	SH3 domain and tetratricopeptide repeats 2
hsa-miR-509-3p	1	0	1	1	1	1	FBXO3	F-box protein 3
hsa-miR-509-3p	0	0	1	1	1	1	CYR61	cysteine-rich, angiogenic inducer, 61
hsa-miR-509-3p	1	0	1	1	1	1	SBF2	SET binding factor 2
hsa-miR-509-3p	0	0	1	1	0	0	TMEM116	transmembrane protein 116
hsa-miR-509-3p	0	0	1	0	0	0	EPHA1-AS1	EPHA1 antisense RNA 1
hsa-miR-509-3p	1	0	1	1	1	1	MARCH7	membrane-associated ring finger (C3HC4) 7, E3 ubiquitin protein ligase
hsa-miR-509-3p	1	0	1	1	1	1	RICTOR	RPTOR independent companion of MTOR, complex 2
hsa-miR-509-3p	1	0	1	1	1	1	ZNF207	zinc finger protein 207
hsa-miR-509-3p	1	0	1	0	1	1	PATL1	protein associated with topoisomerase II homolog 1 (yeast)
hsa-miR-509-3p	1	0	1	1	0	0	LRRC58	leucine rich repeat containing 58
hsa-miR-509-3p	1	0	1	1	1	1	FBXL5	F-box and leucine-rich repeat protein 5
hsa-miR-509-3p	1	0	1	1	1	1	WDR44	WD repeat domain 44
hsa-miR-509-3p	1	0	1	1	1	1	TXNRD1	thioredoxin reductase 1
hsa-miR-509-3p	1	0	1	1	1	1	MIPOL1	mirror-image polydactyly 1
hsa-miR-509-3p	0	0	1	1	0	0	DNAH1	dynein, axonemal, heavy chain 1
hsa-miR-509-3p	1	0	1	1	0	0	DSG4	desmoglein 4
hsa-miR-509-3p	1	0	1	1	1	1	RAI14	retinoic acid induced 14
hsa-miR-509-3p	0	0	1	1	1	1	BRDT	bromodomain, testis-specific
hsa-miR-509-3p	0	0	1	1	1	1	MFAP5	microfibrillar associated protein 5
hsa-miR-509-3p	0	0	1	0	1	1	ANKS1B	ankyrin repeat and sterile alpha motif domain containing 1B
hsa-miR-509-3p	1	0	1	1	1	1	ECT2	epithelial cell transforming sequence 2 oncogene
hsa-miR-509-3p	0	0	1	1	0	0	ESRRB	estrogen-related receptor beta
hsa-miR-509-3p	0	0	1	1	1	1	AICDA	activation-induced cytidine deaminase
hsa-miR-509-3p	1	0	1	0	1	1	LRAT	lecithin retinol acyltransferase (phosphatidylcholine--retinol O-acyltransferase)
hsa-miR-509-3p	0	0	1	1	1	1	IL23R	interleukin 23 receptor
hsa-miR-509-3p	1	0	1	1	1	1	AMOT	angiomotin
hsa-miR-509-3p	1	0	1	0	1	1	BAG4	BCL2-associated athanogene 4
hsa-miR-509-3p	0	0	1	1	1	1	PTDSS1	phosphatidylserine synthase 1
hsa-miR-509-3p	0	0	1	1	1	1	MRRF	mitochondrial ribosome recycling factor
hsa-miR-509-3p	1	0	1	0	0	0	VGLL4	vestigial like 4 (Drosophila)
hsa-miR-509-3p	0	0	1	1	1	1	PRMT5	protein arginine methyltransferase 5
hsa-miR-509-3p	1	0	1	1	1	1	COL2A1	collagen, type II, alpha 1
hsa-miR-509-3p	0	0	1	1	0	0	AGBL5	ATP/GTP binding protein-like 5
hsa-miR-509-3p	1	0	1	1	1	1	CALM1	calmodulin 1 (phosphorylase kinase, delta)
hsa-miR-509-3p	0	0	1	1	1	1	GNL3L	guanine nucleotide binding protein-like 3 (nucleolar)-like
hsa-miR-509-3p	1	0	1	0	1	1	GUCY1A3	guanylate cyclase 1, soluble, alpha 3
hsa-miR-509-3p	0	0	1	1	0	0	KLHDC3	kelch domain containing 3
hsa-miR-509-3p	0	0	1	1	1	1	DEDD2	death effector domain containing 2
hsa-miR-509-3p	0	0	1	1	1	1	TOMM40L	translocase of outer mitochondrial membrane 40 homolog (yeast)-like
hsa-miR-509-3p	1	0	1	1	1	1	ASH2L	ash2 (absent, small, or homeotic)-like (Drosophila)
hsa-miR-509-3p	0	0	1	1	1	1	C1QTNF3	C1q and tumor necrosis factor related protein 3
hsa-miR-509-3p	1	0	1	0	1	1	CYBRD1	cytochrome b reductase 1
hsa-miR-509-3p	0	0	1	1	1	1	TARP	TCR gamma alternate reading frame protein
hsa-miR-509-3p	1	0	1	1	1	1	ARHGEF9	Cdc42 guanine nucleotide exchange factor (GEF) 9
hsa-miR-509-3p	0	0	1	1	1	1	CENPL	centromere protein L
hsa-miR-509-3p	1	0	1	1	1	1	BEND6	BEN domain containing 6
hsa-miR-509-3p	0	0	1	1	0	0	GSTO2	glutathione S-transferase omega 2
hsa-miR-509-3p	0	0	1	1	0	0	IMMP1L	IMP1 inner mitochondrial membrane peptidase-like (S. cerevisiae)
hsa-miR-509-3p	0	0	1	0	0	0	SNX29P2	sorting nexin 29 pseudogene 2
hsa-miR-509-3p	0	0	1	0	1	1	FHAD1	forkhead-associated (FHA) phosphopeptide binding domain 1
hsa-miR-509-3p	0	0	1	1	1	1	CLK1	CDC-like kinase 1
hsa-miR-509-3p	1	0	1	1	1	1	HTR2C	5-hydroxytryptamine (serotonin) receptor 2C, G protein-coupled
hsa-miR-509-3p	0	0	1	1	0	0	GEMIN6	gem (nuclear organelle) associated protein 6
hsa-miR-509-3p	1	0	1	1	1	1	TIAL1	TIA1 cytotoxic granule-associated RNA binding protein-like 1
hsa-miR-509-3p	0	0	1	1	1	1	LPAR1	lysophosphatidic acid receptor 1
hsa-miR-509-3p	0	0	1	0	0	0	LOC729307	uncharacterized LOC729307
hsa-miR-509-3p	0	0	1	1	1	1	C5orf22	chromosome 5 open reading frame 22
hsa-miR-509-3p	1	0	1	1	1	1	PCDHA5	protocadherin alpha 5
hsa-miR-509-3p	0	0	1	0	1	1	DKFZP434I0714	uncharacterized protein DKFZP434I0714
hsa-miR-509-3p	1	0	1	1	1	1	NKAIN2	Na+/K+ transporting ATPase interacting 2
hsa-miR-509-3p	0	0	1	1	0	0	CCDC158	coiled-coil domain containing 158
hsa-miR-509-3p	0	0	1	0	0	0	LOC339862	uncharacterized LOC339862
hsa-miR-509-3p	1	0	1	0	1	1	CLDN12	claudin 12
hsa-miR-509-3p	0	0	1	1	1	1	PLGRKT	plasminogen receptor, C-terminal lysine transmembrane protein
hsa-miR-509-3p	1	0	1	1	1	1	CEP128	centrosomal protein 128kDa
hsa-miR-509-3p	1	0	1	0	0	0	RAVER1	ribonucleoprotein, PTB-binding 1
hsa-miR-509-3p	1	0	1	1	1	1	SLC35F3	solute carrier family 35, member F3
hsa-miR-509-3p	0	0	1	0	0	0	INHBA-AS1	INHBA antisense RNA 1
hsa-miR-509-3p	0	0	1	1	0	0	H2AFZ	H2A histone family, member Z
hsa-miR-509-3p	1	0	1	1	1	1	PLS3	plastin 3
hsa-miR-509-3p	1	0	1	1	1	1	PAIP2	poly(A) binding protein interacting protein 2
hsa-miR-509-3p	1	0	1	1	1	1	TIMP2	TIMP metallopeptidase inhibitor 2
hsa-miR-509-3p	1	0	1	1	1	1	FOSB	FBJ murine osteosarcoma viral oncogene homolog B
hsa-miR-509-3p	1	0	1	1	1	1	DYNC2LI1	dynein, cytoplasmic 2, light intermediate chain 1
hsa-miR-509-3p	0	0	1	1	0	0	TMEM95	transmembrane protein 95
hsa-miR-509-3p	0	0	1	0	0	0	SLC7A11-AS1	SLC7A11 antisense RNA 1
hsa-miR-509-3p	1	0	1	1	1	1	ARPP21	cAMP-regulated phosphoprotein, 21kDa
hsa-miR-509-3p	1	0	1	1	1	1	GNG2	guanine nucleotide binding protein (G protein), gamma 2
hsa-miR-509-3p	1	0	1	1	0	0	INPP5J	inositol polyphosphate-5-phosphatase J
hsa-miR-509-3p	0	0	1	1	1	1	GOLGA6L9	golgin A6 family-like 9
hsa-miR-509-3p	0	0	1	1	1	1	SH3GL3	SH3-domain GRB2-like 3
hsa-miR-509-3p	1	0	1	1	1	1	RNF145	ring finger protein 145
hsa-miR-509-3p	1	0	1	0	1	1	PSD3	pleckstrin and Sec7 domain containing 3
hsa-miR-509-3p	0	0	1	0	0	0	LOC283914	uncharacterized LOC283914
hsa-miR-509-3p	0	0	1	1	1	1	ZNF589	zinc finger protein 589
hsa-miR-509-3p	0	0	1	0	1	1	ITGA1	integrin, alpha 1
hsa-miR-509-3p	1	0	1	1	1	1	ZFP91	zinc finger protein 91 homolog (mouse)
hsa-miR-509-3p	1	0	1	1	1	1	SCUBE3	signal peptide, CUB domain, EGF-like 3
hsa-miR-509-3p	1	0	1	1	1	1	ATP8B4	ATPase, class I, type 8B, member 4
hsa-miR-509-3p	0	0	1	1	1	1	CAMLG	calcium modulating ligand
hsa-miR-509-3p	0	0	1	1	1	1	ZNF33B	zinc finger protein 33B
hsa-miR-509-3p	0	0	1	0	0	0	KANSL1-AS1	KANSL1 antisense RNA 1
hsa-miR-509-3p	1	0	1	1	1	1	C18orf1	chromosome 18 open reading frame 1
hsa-miR-509-3p	1	0	1	1	1	1	C5orf25	chromosome 5 open reading frame 25
hsa-miR-509-3p	0	0	1	1	1	1	SLAMF1	signaling lymphocytic activation molecule family member 1
hsa-miR-509-3p	1	0	1	1	1	1	PDCD6IP	programmed cell death 6 interacting protein
hsa-miR-509-3p	1	0	1	1	1	1	SLC26A7	solute carrier family 26, member 7
hsa-miR-509-3p	0	0	1	0	0	0	ZRANB2-AS1	ZRANB2 antisense RNA 1
hsa-miR-509-3p	0	0	1	1	0	0	NDUFAF2	NADH dehydrogenase (ubiquinone) complex I, assembly factor 2
hsa-miR-509-3p	1	0	1	1	1	1	USP47	ubiquitin specific peptidase 47
hsa-miR-509-3p	1	0	1	0	1	1	TMEM194A	transmembrane protein 194A
hsa-miR-509-3p	0	0	1	1	1	1	FRMPDP2	FERM and PDZ domain containing 2 pseudogene 2
hsa-miR-509-3p	0	0	1	1	1	1	FRMPD2P1	FERM and PDZ domain containing 2 pseudogene 1
hsa-miR-509-3p	1	0	1	1	1	1	GBF1	golgi brefeldin A resistant guanine nucleotide exchange factor 1
hsa-miR-509-3p	1	0	1	0	1	1	MYBL1	v-myb myeloblastosis viral oncogene homolog (avian)-like 1
hsa-miR-509-3p	0	0	1	1	1	1	TTN	titin
hsa-miR-509-3p	0	0	1	1	1	1	UNC13B	unc-13 homolog B (C. elegans)
hsa-miR-509-3p	0	0	1	0	0	0	LINC00310	long intergenic non-protein coding RNA 310
hsa-miR-509-3p	1	0	1	1	1	1	TMEM64	transmembrane protein 64
hsa-miR-509-3p	1	0	1	1	1	1	RFXANK	regulatory factor X-associated ankyrin-containing protein
hsa-miR-509-3p	0	0	1	0	1	1	GOLGA8G	golgin A8 family, member G
hsa-miR-509-3p	0	0	1	0	0	0	MEG3	maternally expressed 3 (non-protein coding)
hsa-miR-509-3p	1	0	1	1	1	1	BTBD7	BTB (POZ) domain containing 7
hsa-miR-509-3p	0	0	1	0	0	0	DKFZp686D0853	uncharacterized LOC401613
hsa-miR-509-3p	1	0	1	1	1	1	MIER3	mesoderm induction early response 1, family member 3
hsa-miR-509-3p	0	0	1	0	0	0	RGPD4	RANBP2-like and GRIP domain containing 4
hsa-miR-509-3p	0	0	1	1	0	0	EYS	eyes shut homolog (Drosophila)
hsa-miR-509-3p	0	0	1	1	1	1	PSMA2	proteasome (prosome, macropain) subunit, alpha type, 2
hsa-miR-509-3p	0	0	1	1	1	1	COL6A3	collagen, type VI, alpha 3
hsa-miR-509-3p	1	0	1	1	1	1	SH3BP4	SH3-domain binding protein 4
hsa-miR-509-3p	0	0	1	0	0	0	SMG1P1	smg-1 homolog, phosphatidylinositol 3-kinase-related kinase pseudogene 1
hsa-miR-509-3p	0	0	1	1	1	1	ADH1B	alcohol dehydrogenase 1B (class I), beta polypeptide
hsa-miR-509-3p	0	0	1	1	1	1	ZNF365	zinc finger protein 365
hsa-miR-509-3p	1	0	1	1	1	1	DDAH1	dimethylarginine dimethylaminohydrolase 1
hsa-miR-509-3p	1	0	1	1	1	1	NAV1	neuron navigator 1
hsa-miR-509-3p	0	0	1	0	0	0	LOC286299	uncharacterized LOC286299
hsa-miR-509-3p	1	0	1	1	1	1	WLS	wntless homolog (Drosophila)
hsa-miR-509-3p	0	0	1	1	1	1	KIAA1328	KIAA1328
hsa-miR-509-3p	1	0	1	1	1	1	KCNMA1	potassium large conductance calcium-activated channel, subfamily M, alpha member 1
hsa-miR-509-3p	0	0	1	1	0	0	CSH1	chorionic somatomammotropin hormone 1 (placental lactogen)
hsa-miR-509-3p	1	0	1	1	1	1	CLU	clusterin
hsa-miR-509-3p	0	0	1	1	1	1	CHEK1	checkpoint kinase 1
hsa-miR-509-3p	1	0	1	1	1	1	FAM192A	family with sequence similarity 192, member A
hsa-miR-509-3p	0	0	1	0	0	0	FLJ30838	uncharacterized LOC400955
hsa-miR-509-3p	1	0	1	1	1	1	NME4	NME/NM23 nucleoside diphosphate kinase 4
hsa-miR-509-3p	0	0	1	1	1	1	PPP1R1C	protein phosphatase 1, regulatory (inhibitor) subunit 1C
hsa-miR-509-3p	1	0	1	1	1	1	DRAM2	DNA-damage regulated autophagy modulator 2
hsa-miR-509-3p	1	0	1	1	1	1	NTM	neurotrimin
hsa-miR-509-3p	0	0	1	1	1	1	PGAP2	post-GPI attachment to proteins 2
hsa-miR-509-3p	1	0	1	1	1	1	STK38L	serine/threonine kinase 38 like
hsa-miR-509-3p	0	0	1	1	1	1	ATG4A	autophagy related 4A, cysteine peptidase
hsa-miR-509-3p	0	0	1	1	1	1	BMPR1A	bone morphogenetic protein receptor, type IA
hsa-miR-509-3p	1	0	1	1	0	0	FAT4	FAT tumor suppressor homolog 4 (Drosophila)
hsa-miR-509-3p	1	0	1	1	1	1	NRN1	neuritin 1
hsa-miR-509-3p	1	0	1	1	1	1	LAMTOR3	late endosomal/lysosomal adaptor, MAPK and MTOR activator 3
hsa-miR-509-3p	1	0	1	1	1	1	ARNTL	aryl hydrocarbon receptor nuclear translocator-like
hsa-miR-509-3p	1	0	1	1	1	1	EIF4A2	eukaryotic translation initiation factor 4A2
hsa-miR-509-3p	1	0	1	1	1	1	FOS	FBJ murine osteosarcoma viral oncogene homolog
hsa-miR-509-3p	0	0	1	1	1	1	DEDD	death effector domain containing
hsa-miR-509-3p	1	0	1	1	1	1	CAMK2A	calcium/calmodulin-dependent protein kinase II alpha
hsa-miR-509-3p	1	0	1	1	1	1	NT5DC1	5'-nucleotidase domain containing 1
hsa-miR-509-3p	1	0	1	1	0	0	ATP6V1B2	ATPase, H+ transporting, lysosomal 56/58kDa, V1 subunit B2
hsa-miR-509-3p	0	0	1	1	0	0	FXYD1	FXYD domain containing ion transport regulator 1
hsa-miR-509-3p	0	0	1	1	1	1	FAM18B1	family with sequence similarity 18, member B1
hsa-miR-509-3p	0	0	1	0	0	0	ZNF674-AS1	ZNF674 antisense RNA 1
hsa-miR-509-3p	0	0	1	1	1	1	RPE	ribulose-5-phosphate-3-epimerase
hsa-miR-509-3p	0	0	1	0	0	0	USP13	ubiquitin specific peptidase 13 (isopeptidase T-3)
hsa-miR-509-3p	1	0	1	1	1	1	TIPRL	TIP41, TOR signaling pathway regulator-like (S. cerevisiae)
hsa-miR-509-3p	0	0	1	0	0	0	LOC100132984	uncharacterized LOC100132984
hsa-miR-509-3p	0	0	1	1	1	1	NUDT21	nudix (nucleoside diphosphate linked moiety X)-type motif 21
hsa-miR-509-3p	0	0	1	1	1	1	EPCAM	epithelial cell adhesion molecule
hsa-miR-509-3p	1	0	1	0	1	1	SLC7A6	solute carrier family 7 (amino acid transporter light chain, y+L system), member 6
hsa-miR-509-3p	1	0	1	1	1	1	NAPEPLD	N-acyl phosphatidylethanolamine phospholipase D
hsa-miR-509-3p	1	0	1	1	1	1	SEC14L1	SEC14-like 1 (S. cerevisiae)
hsa-miR-509-3p	0	0	1	1	1	1	FCAR	Fc fragment of IgA, receptor for
hsa-miR-509-3p	1	0	1	1	1	1	ATP2B3	ATPase, Ca++ transporting, plasma membrane 3
hsa-miR-509-3p	1	0	1	1	1	1	IRF1	interferon regulatory factor 1
hsa-miR-509-3p	1	0	1	1	1	1	SLC4A8	solute carrier family 4, sodium bicarbonate cotransporter, member 8
hsa-miR-509-3p	0	0	1	1	0	0	INHBA	inhibin, beta A
hsa-miR-509-3p	1	0	1	0	1	1	YES1	v-yes-1 Yamaguchi sarcoma viral oncogene homolog 1
hsa-miR-509-3p	1	0	1	1	1	1	IGF1	insulin-like growth factor 1 (somatomedin C)
hsa-miR-509-3p	1	0	1	0	1	1	ACVR2A	activin A receptor, type IIA
hsa-miR-509-3p	1	0	1	0	1	1	SLC26A2	solute carrier family 26 (sulfate transporter), member 2
hsa-miR-509-3p	1	0	1	1	1	1	JAG1	jagged 1
hsa-miR-509-3p	1	0	1	1	1	1	MET	met proto-oncogene (hepatocyte growth factor receptor)
hsa-miR-509-3p	1	0	1	1	1	1	OCRL	oculocerebrorenal syndrome of Lowe
hsa-miR-509-3p	1	0	1	0	1	1	PTEN	phosphatase and tensin homolog
hsa-miR-509-3p	1	0	1	1	1	1	ATXN1	ataxin 1
hsa-miR-509-3p	0	0	1	1	1	1	CASR	calcium-sensing receptor
hsa-miR-509-3p	0	0	1	1	1	1	LTBP2	latent transforming growth factor beta binding protein 2
hsa-miR-509-3p	0	0	1	1	1	1	PECAM1	platelet/endothelial cell adhesion molecule 1
hsa-miR-509-3p	1	0	1	1	1	1	TWIST1	twist homolog 1 (Drosophila)
hsa-miR-509-3p	1	0	1	1	1	1	PLP1	proteolipid protein 1
hsa-miR-509-3p	0	0	1	1	1	1	RFXAP	regulatory factor X-associated protein
hsa-miR-509-3p	0	0	1	1	1	1	CRX	cone-rod homeobox
hsa-miR-509-3p	1	0	1	1	1	1	DCX	doublecortin
hsa-miR-509-3p	1	0	1	1	1	1	IL1A	interleukin 1, alpha
hsa-miR-509-3p	0	0	1	1	1	1	IFNG	interferon, gamma
hsa-miR-509-3p	0	0	1	0	1	1	IFNAR1	interferon (alpha, beta and omega) receptor 1
hsa-miR-509-3p	1	0	1	1	1	1	ADRA1A	adrenoceptor alpha 1A
hsa-miR-509-3p	1	0	1	1	1	1	CACNB4	calcium channel, voltage-dependent, beta 4 subunit
hsa-miR-509-3p	1	0	1	1	1	1	GAD1	glutamate decarboxylase 1 (brain, 67kDa)
hsa-miR-509-3p	0	0	1	1	1	1	GAD2	glutamate decarboxylase 2 (pancreatic islets and brain, 65kDa)
hsa-miR-509-3p	1	0	1	1	1	1	GRIA4	glutamate receptor, ionotropic, AMPA 4
hsa-miR-509-3p	0	0	1	1	0	0	NPY	neuropeptide Y
hsa-miR-509-3p	1	0	1	1	1	1	PPP3R1	protein phosphatase 3, regulatory subunit B, alpha
hsa-miR-509-3p	1	0	1	0	1	1	SMAD5	SMAD family member 5
hsa-miR-509-3p	1	0	1	1	1	1	LCLAT1	lysocardiolipin acyltransferase 1
hsa-miR-509-3p	1	0	1	0	1	1	SMAD2	SMAD family member 2
hsa-miR-509-3p	1	0	1	1	1	1	TMEM200B	transmembrane protein 200B
hsa-miR-509-3p	1	0	1	1	1	1	BICD2	bicaudal D homolog 2 (Drosophila)
hsa-miR-509-3p	0	0	1	0	1	1	ZNF705A	zinc finger protein 705A
hsa-miR-509-3p	0	0	1	1	1	1	RBMY1B	RNA binding motif protein, Y-linked, family 1, member B
hsa-miR-509-3p	0	0	1	1	1	1	WBP5	WW domain binding protein 5
hsa-miR-509-3p	1	0	1	0	1	1	GOSR1	golgi SNAP receptor complex member 1
hsa-miR-509-3p	0	0	1	1	1	1	SCP2	sterol carrier protein 2
hsa-miR-509-3p	1	0	1	1	1	1	IGF2BP2	insulin-like growth factor 2 mRNA binding protein 2
hsa-miR-509-3p	1	0	1	1	1	1	EI24	etoposide induced 2.4 mRNA
hsa-miR-509-3p	0	0	1	1	1	1	TRIM13	tripartite motif containing 13
hsa-miR-509-3p	0	0	1	1	1	1	RBMY1A1	RNA binding motif protein, Y-linked, family 1, member A1
hsa-miR-509-3p	1	0	1	0	1	1	C18orf25	chromosome 18 open reading frame 25
hsa-miR-509-3p	0	0	1	1	1	1	MXI1	MAX interactor 1
hsa-miR-509-3p	0	0	1	1	1	1	ZCCHC11	zinc finger, CCHC domain containing 11
hsa-miR-509-3p	1	0	1	1	1	1	ARHGAP28	Rho GTPase activating protein 28
hsa-miR-509-3p	0	0	1	1	1	1	SPIN3	spindlin family, member 3
hsa-miR-509-3p	0	0	1	1	1	1	C2orf68	chromosome 2 open reading frame 68
hsa-miR-509-3p	0	0	1	0	1	1	ZNF107	zinc finger protein 107
hsa-miR-509-3p	0	0	1	1	0	0	DDR2	discoidin domain receptor tyrosine kinase 2
hsa-miR-509-3p	0	0	1	1	1	1	DCAF8L1	DDB1 and CUL4 associated factor 8-like 1
hsa-miR-509-3p	1	0	1	0	1	1	TFEC	transcription factor EC
hsa-miR-509-3p	0	0	1	1	1	1	MURC	muscle-related coiled-coil protein
hsa-miR-509-3p	1	0	1	1	1	1	CANX	calnexin
hsa-miR-509-3p	1	0	1	1	1	1	FAM108B1	family with sequence similarity 108, member B1
hsa-miR-509-3p	1	0	1	1	1	1	SLC35F1	solute carrier family 35, member F1
hsa-miR-509-3p	1	0	1	1	1	1	RGS7BP	regulator of G-protein signaling 7 binding protein
hsa-miR-509-3p	0	0	1	1	1	1	MS4A3	membrane-spanning 4-domains, subfamily A, member 3 (hematopoietic cell-specific)
hsa-miR-509-3p	0	0	1	1	1	1	SLC35A2	solute carrier family 35 (UDP-galactose transporter), member A2
hsa-miR-509-3p	0	0	1	1	1	1	PHF12	PHD finger protein 12
hsa-miR-509-3p	1	0	1	0	1	1	RYR3	ryanodine receptor 3
hsa-miR-509-3p	1	0	1	1	1	1	CDC42	cell division cycle 42 (GTP binding protein, 25kDa)
hsa-miR-509-3p	0	0	1	1	1	1	MDH1B	malate dehydrogenase 1B, NAD (soluble)
hsa-miR-509-3p	1	0	1	1	1	1	PAPD5	PAP associated domain containing 5
hsa-miR-509-3p	1	0	1	0	1	1	DCUN1D4	DCN1, defective in cullin neddylation 1, domain containing 4 (S. cerevisiae)
hsa-miR-509-3p	1	0	1	1	1	1	ZBTB8A	zinc finger and BTB domain containing 8A
hsa-miR-509-3p	1	0	1	1	1	1	NCALD	neurocalcin delta
hsa-miR-509-3p	1	0	1	1	1	1	METTL9	methyltransferase like 9
hsa-miR-509-3p	1	0	1	0	1	1	UBXN2B	UBX domain protein 2B
hsa-miR-509-3p	1	0	1	0	1	1	TRAPPC6B	trafficking protein particle complex 6B
hsa-miR-509-3p	0	0	1	1	0	0	OVOS2	ovostatin 2
hsa-miR-509-3p	0	0	1	1	1	1	AMELY	amelogenin, Y-linked
hsa-miR-509-3p	1	0	1	0	1	1	BMPR2	bone morphogenetic protein receptor, type II (serine/threonine kinase)
hsa-miR-509-3p	1	0	1	0	1	1	CDK6	cyclin-dependent kinase 6
hsa-miR-509-3p	1	0	1	1	1	1	KLF6	Kruppel-like factor 6
hsa-miR-509-3p	1	0	1	0	1	1	CPD	carboxypeptidase D
hsa-miR-509-3p	1	0	1	1	1	1	ELAVL1	ELAV (embryonic lethal, abnormal vision, Drosophila)-like 1 (Hu antigen R)
hsa-miR-509-3p	1	0	1	1	1	1	ADD2	adducin 2 (beta)
hsa-miR-509-3p	1	0	1	1	1	1	AHR	aryl hydrocarbon receptor
hsa-miR-509-3p	1	0	1	1	1	1	ARF3	ADP-ribosylation factor 3
hsa-miR-509-3p	0	0	1	1	1	1	DST	dystonin
hsa-miR-509-3p	0	0	1	1	0	0	C9	complement component 9
hsa-miR-509-3p	1	0	1	1	1	1	CD69	CD69 molecule
hsa-miR-509-3p	1	0	1	1	1	1	CDK2	cyclin-dependent kinase 2
hsa-miR-509-3p	1	0	1	1	1	1	SLC31A1	solute carrier family 31 (copper transporters), member 1
hsa-miR-509-3p	1	0	1	1	1	1	CSNK1D	casein kinase 1, delta
hsa-miR-509-3p	0	0	1	1	1	1	FLI1	Friend leukemia virus integration 1
hsa-miR-509-3p	1	0	1	0	1	1	FUT4	fucosyltransferase 4 (alpha (1,3) fucosyltransferase, myeloid-specific)
hsa-miR-509-3p	1	0	1	1	1	1	GAB1	GRB2-associated binding protein 1
hsa-miR-509-3p	0	0	1	1	0	0	GLP1R	glucagon-like peptide 1 receptor
hsa-miR-509-3p	1	0	1	1	1	1	GOLGA1	golgin A1
hsa-miR-509-3p	0	0	1	1	1	1	HMGCS1	3-hydroxy-3-methylglutaryl-CoA synthase 1 (soluble)
hsa-miR-509-3p	0	0	1	1	1	1	FOXN2	forkhead box N2
hsa-miR-509-3p	1	0	1	1	0	0	INHBB	inhibin, beta B
hsa-miR-509-3p	1	0	1	1	1	1	INSM1	insulinoma-associated 1
hsa-miR-509-3p	1	0	1	1	1	1	KCNJ3	potassium inwardly-rectifying channel, subfamily J, member 3
hsa-miR-509-3p	1	0	1	1	1	1	KCNJ10	potassium inwardly-rectifying channel, subfamily J, member 10
hsa-miR-509-3p	1	0	1	1	1	1	MARCKS	myristoylated alanine-rich protein kinase C substrate
hsa-miR-509-3p	1	0	1	1	1	1	NPAS2	neuronal PAS domain protein 2
hsa-miR-509-3p	1	0	1	1	1	1	OSBP	oxysterol binding protein
hsa-miR-509-3p	1	0	1	0	1	1	CDK17	cyclin-dependent kinase 17
hsa-miR-509-3p	0	0	1	1	0	0	PGM1	phosphoglucomutase 1
hsa-miR-509-3p	0	0	1	1	0	0	PLP2	proteolipid protein 2 (colonic epithelium-enriched)
hsa-miR-509-3p	0	0	1	1	1	1	MAP2K1	mitogen-activated protein kinase kinase 1
hsa-miR-509-3p	0	0	1	1	1	1	PTPRR	protein tyrosine phosphatase, receptor type, R
hsa-miR-509-3p	1	0	1	1	1	1	PTX3	pentraxin 3, long
hsa-miR-509-3p	1	0	1	1	1	1	PVALB	parvalbumin
hsa-miR-509-3p	1	0	1	0	1	1	RAP2B	RAP2B, member of RAS oncogene family
hsa-miR-509-3p	1	0	1	1	1	1	RASA1	RAS p21 protein activator (GTPase activating protein) 1
hsa-miR-509-3p	0	0	1	1	1	1	SDC2	syndecan 2
hsa-miR-509-3p	1	0	1	0	1	1	ST6GAL1	ST6 beta-galactosamide alpha-2,6-sialyltranferase 1
hsa-miR-509-3p	1	0	1	1	1	1	SOX2	SRY (sex determining region Y)-box 2
hsa-miR-509-3p	1	0	1	0	1	1	RPS6KB1	ribosomal protein S6 kinase, 70kDa, polypeptide 1
hsa-miR-509-3p	1	0	1	1	1	1	TFAP2B	transcription factor AP-2 beta (activating enhancer binding protein 2 beta)
hsa-miR-509-3p	1	0	1	1	1	1	ZIC3	Zic family member 3
hsa-miR-509-3p	1	0	1	1	1	1	FZD1	frizzled family receptor 1
hsa-miR-509-3p	0	0	1	1	1	1	EIF3A	eukaryotic translation initiation factor 3, subunit A
hsa-miR-509-3p	0	0	1	1	1	1	SUCLA2	succinate-CoA ligase, ADP-forming, beta subunit
hsa-miR-509-3p	1	0	1	1	1	1	NRP2	neuropilin 2
hsa-miR-509-3p	1	0	1	1	1	1	BTAF1	BTAF1 RNA polymerase II, B-TFIID transcription factor-associated, 170kDa (Mot1 homolog, S. cerevisiae)
hsa-miR-509-3p	1	0	1	0	1	1	SLC1A2	solute carrier family 1 (glial high affinity glutamate transporter), member 2
hsa-miR-509-3p	1	0	1	1	1	1	CREB1	cAMP responsive element binding protein 1
hsa-miR-509-3p	1	0	1	1	1	1	DACH1	dachshund homolog 1 (Drosophila)
hsa-miR-509-3p	1	0	1	1	1	1	DTX1	deltex homolog 1 (Drosophila)
hsa-miR-509-3p	1	0	1	1	1	1	RAB5C	RAB5C, member RAS oncogene family
hsa-miR-509-3p	1	0	1	0	1	1	SCN2B	sodium channel, voltage-gated, type II, beta subunit
hsa-miR-509-3p	0	0	1	1	1	1	PNPLA4	patatin-like phospholipase domain containing 4
hsa-miR-509-3p	1	0	1	1	1	1	DCLK1	doublecortin-like kinase 1
hsa-miR-509-3p	1	0	1	1	1	1	RPS6KA5	ribosomal protein S6 kinase, 90kDa, polypeptide 5
hsa-miR-509-3p	1	0	1	1	1	1	NRXN3	neurexin 3
hsa-miR-509-3p	0	0	1	0	1	1	ADIPOQ	adiponectin, C1Q and collagen domain containing
hsa-miR-509-3p	1	0	1	1	1	1	KIF3B	kinesin family member 3B
hsa-miR-509-3p	0	0	1	1	1	1	CALB1	calbindin 1, 28kDa
hsa-miR-509-3p	0	0	1	1	1	1	CDH6	cadherin 6, type 2, K-cadherin (fetal kidney)
hsa-miR-509-3p	0	0	1	1	1	1	RGPD5	RANBP2-like and GRIP domain containing 5
hsa-miR-509-3p	1	0	1	1	1	1	KDM5A	lysine (K)-specific demethylase 5A
hsa-miR-509-3p	1	0	1	1	1	1	SFPQ	splicing factor proline/glutamine-rich
hsa-miR-509-3p	1	0	1	1	1	1	OXSR1	oxidative-stress responsive 1
hsa-miR-509-3p	1	0	1	1	1	1	WDR1	WD repeat domain 1
hsa-miR-509-3p	1	0	1	0	1	1	NR1D2	nuclear receptor subfamily 1, group D, member 2
hsa-miR-509-3p	0	0	1	1	1	1	CLEC2B	C-type lectin domain family 2, member B
hsa-miR-509-3p	1	0	1	1	0	0	BCL3	B-cell CLL/lymphoma 3
hsa-miR-509-3p	1	0	1	1	1	1	CRK	v-crk sarcoma virus CT10 oncogene homolog (avian)
hsa-miR-509-3p	1	0	1	1	1	1	DCC	deleted in colorectal carcinoma
hsa-miR-509-3p	0	0	1	1	1	1	H1F0	H1 histone family, member 0
hsa-miR-509-3p	0	0	1	1	0	0	NCKAP1L	NCK-associated protein 1-like
hsa-miR-509-3p	1	0	1	1	1	1	RND2	Rho family GTPase 2
hsa-miR-509-3p	1	0	1	1	1	1	GABBR2	gamma-aminobutyric acid (GABA) B receptor, 2
hsa-miR-509-3p	1	0	1	1	1	1	AKT3	v-akt murine thymoma viral oncogene homolog 3 (protein kinase B, gamma)
hsa-miR-509-3p	1	0	1	1	1	1	HCN4	hyperpolarization activated cyclic nucleotide-gated potassium channel 4
hsa-miR-509-3p	0	0	1	1	1	1	ING1	inhibitor of growth family, member 1
hsa-miR-509-3p	1	0	1	1	1	1	INSIG1	insulin induced gene 1
hsa-miR-509-3p	1	0	1	1	0	0	LOXL1	lysyl oxidase-like 1
hsa-miR-509-3p	0	0	1	1	0	0	SNURF	SNRPN upstream reading frame
hsa-miR-509-3p	1	0	1	1	1	1	UST	uronyl-2-sulfotransferase
hsa-miR-509-3p	1	0	1	1	1	1	ARPC5	actin related protein 2/3 complex, subunit 5, 16kDa
hsa-miR-509-3p	1	0	1	0	1	1	CLEC3A	C-type lectin domain family 3, member A
hsa-miR-509-3p	0	0	1	0	1	1	CD96	CD96 molecule
hsa-miR-509-3p	1	0	1	1	1	1	MAT2A	methionine adenosyltransferase II, alpha
hsa-miR-509-3p	1	0	1	1	1	1	MTF1	metal-regulatory transcription factor 1
hsa-miR-509-3p	1	0	1	1	1	1	LIPG	lipase, endothelial
hsa-miR-509-3p	1	0	1	0	1	1	HDAC4	histone deacetylase 4
hsa-miR-509-3p	1	0	1	1	1	1	HS3ST3A1	heparan sulfate (glucosamine) 3-O-sulfotransferase 3A1
hsa-miR-509-3p	0	0	1	0	0	0	PTPN13	protein tyrosine phosphatase, non-receptor type 13 (APO-1/CD95 (Fas)-associated phosphatase)
hsa-miR-509-3p	1	0	1	1	1	1	SMC1A	structural maintenance of chromosomes 1A
hsa-miR-509-3p	1	0	1	1	1	1	NEBL	nebulette
hsa-miR-509-3p	1	0	1	1	1	1	HEXIM1	hexamethylene bis-acetamide inducible 1
hsa-miR-509-3p	0	0	1	1	1	1	ATP5L	ATP synthase, H+ transporting, mitochondrial Fo complex, subunit G
hsa-miR-509-3p	1	0	1	0	1	1	GNAI3	guanine nucleotide binding protein (G protein), alpha inhibiting activity polypeptide 3
hsa-miR-509-3p	1	0	1	1	1	1	SLC2A1	solute carrier family 2 (facilitated glucose transporter), member 1
hsa-miR-509-3p	1	0	1	0	1	1	IGF2BP1	insulin-like growth factor 2 mRNA binding protein 1
hsa-miR-509-3p	0	0	1	1	1	1	IFI44L	interferon-induced protein 44-like
hsa-miR-509-3p	0	0	1	1	1	1	PKIA	protein kinase (cAMP-dependent, catalytic) inhibitor alpha
hsa-miR-509-3p	1	0	1	1	1	1	PRRX1	paired related homeobox 1
hsa-miR-509-3p	1	0	1	0	1	1	PAPD7	PAP associated domain containing 7
hsa-miR-509-3p	1	0	1	1	1	1	FSTL1	follistatin-like 1
hsa-miR-509-3p	1	0	1	1	1	1	VEZF1	vascular endothelial zinc finger 1
hsa-miR-509-3p	0	0	1	0	1	1	ZNF208	zinc finger protein 208
hsa-miR-509-3p	1	0	1	1	1	1	ERLIN2	ER lipid raft associated 2
hsa-miR-509-3p	1	0	1	1	1	1	KLF12	Kruppel-like factor 12
hsa-miR-509-3p	0	0	1	1	1	1	STXBP3	syntaxin binding protein 3
hsa-miR-509-3p	1	0	1	1	1	1	ZNF236	zinc finger protein 236
hsa-miR-509-3p	0	0	1	1	1	1	ABCB10	ATP-binding cassette, sub-family B (MDR/TAP), member 10
hsa-miR-509-3p	1	0	1	1	1	1	APPL1	adaptor protein, phosphotyrosine interaction, PH domain and leucine zipper containing 1
hsa-miR-509-3p	1	0	1	1	1	1	RYBP	RING1 and YY1 binding protein
hsa-miR-509-3p	1	0	1	1	1	1	KIF4A	kinesin family member 4A
hsa-miR-509-3p	0	0	1	1	1	1	N6AMT1	N-6 adenine-specific DNA methyltransferase 1 (putative)
hsa-miR-509-3p	1	0	1	0	1	1	TRHDE	thyrotropin-releasing hormone degrading enzyme
hsa-miR-509-3p	1	0	1	1	1	1	LAMP2	lysosomal-associated membrane protein 2
hsa-miR-509-3p	0	0	1	1	1	1	SNX24	sorting nexin 24
hsa-miR-509-3p	0	0	1	0	1	1	SCN8A	sodium channel, voltage gated, type VIII, alpha subunit
hsa-miR-509-3p	0	0	1	0	1	1	ADAMTS3	ADAM metallopeptidase with thrombospondin type 1 motif, 3
hsa-miR-509-3p	0	0	1	1	1	1	IL1RAPL1	interleukin 1 receptor accessory protein-like 1
hsa-miR-509-3p	0	0	1	1	1	1	DNAJC8	DnaJ (Hsp40) homolog, subfamily C, member 8
hsa-miR-509-3p	0	0	1	1	1	1	DAPK2	death-associated protein kinase 2
hsa-miR-509-3p	1	0	1	1	1	1	SLC7A11	solute carrier family 7 (anionic amino acid transporter light chain, xc- system), member 11
hsa-miR-509-3p	0	0	1	0	1	1	VPS41	vacuolar protein sorting 41 homolog (S. cerevisiae)
hsa-miR-509-3p	1	0	1	1	1	1	AFF4	AF4/FMR2 family, member 4
hsa-miR-509-3p	1	0	1	1	1	1	EHD3	EH-domain containing 3
hsa-miR-509-3p	1	0	1	1	1	1	GCC2	GRIP and coiled-coil domain containing 2
hsa-miR-509-3p	0	0	1	1	1	1	ZNF536	zinc finger protein 536
hsa-miR-509-3p	0	0	1	1	1	1	FRMPD4	FERM and PDZ domain containing 4
hsa-miR-509-3p	0	0	1	1	0	0	PCNXL2	pecanex-like 2 (Drosophila)
hsa-miR-509-3p	1	0	1	0	1	1	ZBTB1	zinc finger and BTB domain containing 1
hsa-miR-509-3p	1	0	1	1	1	1	SORCS3	sortilin-related VPS10 domain containing receptor 3
hsa-miR-509-3p	1	0	1	0	1	1	WDFY3	WD repeat and FYVE domain containing 3
hsa-miR-509-3p	1	0	1	1	1	1	PHLPP2	PH domain and leucine rich repeat protein phosphatase 2
hsa-miR-509-3p	1	0	1	0	1	1	GGA2	golgi-associated, gamma adaptin ear containing, ARF binding protein 2
hsa-miR-509-3p	1	0	1	1	1	1	ERP44	endoplasmic reticulum protein 44
hsa-miR-509-3p	1	0	1	0	1	1	PEG10	paternally expressed 10
hsa-miR-509-3p	1	0	1	1	1	1	RTF1	Rtf1, Paf1/RNA polymerase II complex component, homolog (S. cerevisiae)
hsa-miR-509-3p	1	0	1	1	1	1	ANKS1A	ankyrin repeat and sterile alpha motif domain containing 1A
hsa-miR-509-3p	1	0	1	0	1	1	ARHGEF12	Rho guanine nucleotide exchange factor (GEF) 12
hsa-miR-509-3p	0	0	1	1	1	1	ADNP	activity-dependent neuroprotector homeobox
hsa-miR-509-3p	1	0	1	1	1	1	CNOT6	CCR4-NOT transcription complex, subunit 6
hsa-miR-509-3p	1	0	1	1	1	1	KIAA1429	KIAA1429
hsa-miR-509-3p	1	0	1	0	1	1	OSBPL3	oxysterol binding protein-like 3
hsa-miR-509-3p	1	0	1	1	1	1	LRRTM2	leucine rich repeat transmembrane neuronal 2
hsa-miR-509-3p	0	0	1	1	0	0	ZNF777	zinc finger protein 777
hsa-miR-509-3p	0	0	1	1	1	1	BRPF3	bromodomain and PHD finger containing, 3
hsa-miR-509-3p	1	0	1	0	1	1	TRIM33	tripartite motif containing 33
hsa-miR-509-3p	0	0	1	1	1	1	PELO	pelota homolog (Drosophila)
hsa-miR-509-3p	1	0	1	1	1	1	NLK	nemo-like kinase
hsa-miR-509-3p	1	0	1	0	1	1	SELT	selenoprotein T
hsa-miR-509-3p	1	0	1	1	1	1	ARID1B	AT rich interactive domain 1B (SWI1-like)
hsa-miR-509-3p	0	0	1	1	1	1	SMG6	smg-6 homolog, nonsense mediated mRNA decay factor (C. elegans)
hsa-miR-509-3p	1	0	1	0	1	1	UBE2Q1	ubiquitin-conjugating enzyme E2Q family member 1
hsa-miR-509-3p	1	0	1	1	1	1	NOTCH1	notch 1
hsa-miR-509-3p	1	0	1	1	1	1	HAUS6	HAUS augmin-like complex, subunit 6
hsa-miR-509-3p	1	0	1	1	0	0	INO80D	INO80 complex subunit D
hsa-miR-509-3p	1	0	1	0	1	1	CMTM6	CKLF-like MARVEL transmembrane domain containing 6
hsa-miR-509-3p	1	0	1	0	1	1	NPLOC4	nuclear protein localization 4 homolog (S. cerevisiae)
hsa-miR-509-3p	1	0	1	1	1	1	RPRD1A	regulation of nuclear pre-mRNA domain containing 1A
hsa-miR-509-3p	1	0	1	1	1	1	AGPAT5	1-acylglycerol-3-phosphate O-acyltransferase 5 (lysophosphatidic acid acyltransferase, epsilon)
hsa-miR-509-3p	1	0	1	1	1	1	EPB41L4B	erythrocyte membrane protein band 4.1 like 4B
hsa-miR-509-3p	1	0	1	1	1	1	STRADB	STE20-related kinase adaptor beta
hsa-miR-509-3p	1	0	1	0	1	1	PCDHAC1	protocadherin alpha subfamily C, 1
hsa-miR-509-3p	1	0	1	0	1	1	PCDHAC2	protocadherin alpha subfamily C, 2
hsa-miR-509-3p	1	0	1	1	1	1	PCDHA1	protocadherin alpha 1
hsa-miR-509-3p	1	0	1	0	1	1	PCDHA10	protocadherin alpha 10
hsa-miR-509-3p	1	0	1	0	1	1	PCDHA11	protocadherin alpha 11
hsa-miR-509-3p	1	0	1	0	1	1	PCDHA12	protocadherin alpha 12
hsa-miR-509-3p	1	0	1	1	1	1	PCDHA2	protocadherin alpha 2
hsa-miR-509-3p	1	0	1	1	1	1	PCDHA3	protocadherin alpha 3
hsa-miR-509-3p	1	0	1	1	1	1	PCDHA6	protocadherin alpha 6
hsa-miR-509-3p	1	0	1	0	1	1	PCDHA7	protocadherin alpha 7
hsa-miR-509-3p	1	0	1	1	1	1	PCDHA8	protocadherin alpha 8
hsa-miR-509-3p	1	0	1	1	1	1	SASH3	SAM and SH3 domain containing 3
hsa-miR-509-3p	1	0	1	0	1	1	FAM190B	family with sequence similarity 190, member B
hsa-miR-509-3p	0	0	1	1	1	1	FMN2	formin 2
hsa-miR-509-3p	1	0	1	1	1	1	PTGFRN	prostaglandin F2 receptor negative regulator
hsa-miR-509-3p	1	0	1	0	1	1	DCUN1D1	DCN1, defective in cullin neddylation 1, domain containing 1 (S. cerevisiae)
hsa-miR-509-3p	1	0	1	1	1	1	RAB22A	RAB22A, member RAS oncogene family
hsa-miR-509-3p	1	0	1	0	1	1	KCNS2	potassium voltage-gated channel, delayed-rectifier, subfamily S, member 2
hsa-miR-509-3p	0	0	1	1	0	0	AMIGO1	adhesion molecule with Ig-like domain 1
hsa-miR-509-3p	1	0	1	1	1	1	RNF150	ring finger protein 150
hsa-miR-509-3p	1	0	1	1	1	1	ARHGAP31	Rho GTPase activating protein 31
hsa-miR-509-3p	1	0	1	1	1	1	SIPA1L2	signal-induced proliferation-associated 1 like 2
hsa-miR-509-3p	0	0	1	1	1	1	KLHL1	kelch-like 1 (Drosophila)
hsa-miR-509-3p	1	0	1	1	1	1	VAT1L	vesicle amine transport protein 1 homolog (T. californica)-like
hsa-miR-509-3p	0	0	1	1	1	1	GNAO1	guanine nucleotide binding protein (G protein), alpha activating activity polypeptide O
hsa-miR-509-3p	1	0	1	1	1	1	HCN1	hyperpolarization activated cyclic nucleotide-gated potassium channel 1
hsa-miR-509-3p	1	0	1	0	1	1	XK	X-linked Kx blood group (McLeod syndrome)
hsa-miR-509-3p	1	0	1	1	1	1	MTMR3	myotubularin related protein 3
hsa-miR-509-3p	1	0	1	1	1	1	CLDN1	claudin 1
hsa-miR-509-3p	0	0	1	1	1	1	OSTC	oligosaccharyltransferase complex subunit
hsa-miR-509-3p	1	0	1	1	1	1	DMRT3	doublesex and mab-3 related transcription factor 3
hsa-miR-509-3p	1	0	1	1	1	1	SNX6	sorting nexin 6
hsa-miR-509-3p	1	0	1	1	1	1	OTX2	orthodenticle homeobox 2
hsa-miR-509-3p	1	0	1	1	1	1	TGIF2	TGFB-induced factor homeobox 2
hsa-miR-509-3p	1	0	1	1	1	1	ZFAND3	zinc finger, AN1-type domain 3
hsa-miR-509-3p	0	0	1	1	1	1	ANKRD5	ankyrin repeat domain 5
hsa-miR-509-3p	1	0	1	1	1	1	GOLPH3	golgi phosphoprotein 3 (coat-protein)
hsa-miR-509-3p	0	0	1	1	1	1	NSD1	nuclear receptor binding SET domain protein 1
hsa-miR-509-3p	1	0	1	1	1	1	HIF3A	hypoxia inducible factor 3, alpha subunit
hsa-miR-509-3p	1	0	1	1	1	1	TMEM168	transmembrane protein 168
hsa-miR-509-3p	0	0	1	0	1	1	EBF2	early B-cell factor 2
hsa-miR-509-3p	0	0	1	1	1	1	SFXN1	sideroflexin 1
hsa-miR-509-3p	1	0	1	1	1	1	SOWAHC	sosondowah ankyrin repeat domain family member C
hsa-miR-509-3p	1	0	1	1	1	1	RNF128	ring finger protein 128, E3 ubiquitin protein ligase
hsa-miR-509-3p	0	0	1	1	1	1	SNIP1	Smad nuclear interacting protein 1
hsa-miR-509-3p	1	0	1	1	1	1	C15orf29	chromosome 15 open reading frame 29
hsa-miR-509-3p	0	0	1	1	1	1	ZNF767	zinc finger family member 767
hsa-miR-509-3p	0	0	1	1	1	1	DOCK5	dedicator of cytokinesis 5
hsa-miR-509-3p	1	0	1	1	1	1	FBXO11	F-box protein 11
hsa-miR-509-3p	1	0	1	1	0	0	RNF39	ring finger protein 39
hsa-miR-509-3p	1	0	1	0	1	1	CSRNP2	cysteine-serine-rich nuclear protein 2
hsa-miR-509-3p	0	0	1	1	1	1	COG3	component of oligomeric golgi complex 3
hsa-miR-509-3p	1	0	1	1	1	1	PCDHA9	protocadherin alpha 9
hsa-miR-509-3p	0	0	1	1	1	1	MAGT1	magnesium transporter 1
hsa-miR-509-3p	1	0	1	0	1	1	ATP11A	ATPase, class VI, type 11A
hsa-miR-509-3p	1	0	1	1	1	1	LOXL4	lysyl oxidase-like 4
hsa-miR-509-3p	0	0	1	1	1	1	ATP13A4	ATPase type 13A4
hsa-miR-509-3p	0	0	1	1	0	0	CHCHD6	coiled-coil-helix-coiled-coil-helix domain containing 6
hsa-miR-509-3p	1	0	1	1	1	1	HOOK3	hook homolog 3 (Drosophila)
hsa-miR-509-3p	1	0	1	1	1	1	ARHGEF39	Rho guanine nucleotide exchange factor (GEF) 39
hsa-miR-509-3p	1	0	1	0	1	1	UBASH3B	ubiquitin associated and SH3 domain containing B
hsa-miR-509-3p	0	0	1	1	1	1	SUCNR1	succinate receptor 1
hsa-miR-509-3p	1	0	1	1	1	1	TRIM55	tripartite motif containing 55
hsa-miR-509-3p	1	0	1	1	1	1	MAP6	microtubule-associated protein 6
hsa-miR-509-3p	1	0	1	0	1	1	PURB	purine-rich element binding protein B
hsa-miR-509-3p	1	0	1	1	1	1	TP53INP1	tumor protein p53 inducible nuclear protein 1
hsa-miR-509-3p	1	0	1	1	1	1	COL4A5	collagen, type IV, alpha 5
hsa-miR-509-3p	1	0	1	1	1	1	LUZP1	leucine zipper protein 1
hsa-miR-509-3p	1	0	1	1	1	1	PTP4A2	protein tyrosine phosphatase type IVA, member 2
hsa-miR-509-3p	1	0	1	1	1	1	DYRK1A	dual-specificity tyrosine-(Y)-phosphorylation regulated kinase 1A
hsa-miR-509-3p	0	0	1	0	1	1	PAQR8	progestin and adipoQ receptor family member VIII
hsa-miR-509-3p	0	0	1	1	1	1	RAD51B	RAD51 homolog B (S. cerevisiae)
hsa-miR-509-3p	1	0	1	1	1	1	PANK1	pantothenate kinase 1
hsa-miR-509-3p	1	0	1	1	1	1	MBOAT2	membrane bound O-acyltransferase domain containing 2
hsa-miR-509-3p	1	0	1	0	1	1	CNOT6L	CCR4-NOT transcription complex, subunit 6-like
hsa-miR-509-3p	1	0	1	1	1	1	ANKRD23	ankyrin repeat domain 23
hsa-miR-509-3p	0	0	1	1	1	1	DACT3	dapper, antagonist of beta-catenin, homolog 3 (Xenopus laevis)
hsa-miR-509-3p	0	0	1	1	1	1	APOBEC3F	apolipoprotein B mRNA editing enzyme, catalytic polypeptide-like 3F
hsa-miR-509-3p	1	0	1	1	1	1	SEPT6	septin 6
hsa-miR-509-3p	1	0	1	1	1	1	POGLUT1	protein O-glucosyltransferase 1
hsa-miR-509-3p	1	0	1	1	1	1	LSM12	LSM12 homolog (S. cerevisiae)
hsa-miR-509-3p	0	0	1	1	1	1	C1orf172	chromosome 1 open reading frame 172
hsa-miR-509-3p	1	0	1	1	1	1	ZSCAN29	zinc finger and SCAN domain containing 29
hsa-miR-509-3p	0	0	1	1	1	1	DUSP18	dual specificity phosphatase 18
hsa-miR-509-3p	1	0	1	0	1	1	MOSPD2	motile sperm domain containing 2
hsa-miR-509-3p	0	0	1	0	1	1	RBMY1F	RNA binding motif protein, Y-linked, family 1, member F
hsa-miR-509-3p	0	0	1	1	0	0	MARCH10	membrane-associated ring finger (C3HC4) 10, E3 ubiquitin protein ligase
hsa-miR-509-3p	0	0	1	1	1	1	ZNF366	zinc finger protein 366
hsa-miR-509-3p	0	0	1	1	0	0	GGN	gametogenetin
hsa-miR-509-3p	1	0	1	1	1	1	ZCCHC5	zinc finger, CCHC domain containing 5
hsa-miR-509-3p	1	0	1	1	1	1	NXPH1	neurexophilin 1
hsa-miR-509-3p	0	0	1	0	0	0	FLJ32955	uncharacterized protein FLJ32955
hsa-miR-509-3p	0	0	1	1	1	1	DEFB125	defensin, beta 125
hsa-miR-509-3p	1	0	1	1	1	1	CREBRF	CREB3 regulatory factor
hsa-miR-509-3p	1	0	1	1	1	1	NAP1L5	nucleosome assembly protein 1-like 5
hsa-miR-509-3p	1	0	1	1	1	1	MMGT1	membrane magnesium transporter 1
hsa-miR-509-3p	0	0	1	1	0	0	C3orf24	chromosome 3 open reading frame 24
hsa-miR-509-3p	1	0	1	1	1	1	IGSF22	immunoglobulin superfamily, member 22
hsa-miR-509-3p	1	0	1	1	1	1	DIP2B	DIP2 disco-interacting protein 2 homolog B (Drosophila)
hsa-miR-509-3p	1	0	1	1	0	0	TCERG1L	transcription elongation regulator 1-like
hsa-miR-509-3p	0	0	1	1	0	0	CCDC36	coiled-coil domain containing 36
hsa-miR-509-3p	0	0	1	1	1	1	FBXO27	F-box protein 27
hsa-miR-509-3p	1	0	1	1	1	1	LRRTM1	leucine rich repeat transmembrane neuronal 1
hsa-miR-509-3p	0	0	1	0	1	1	SPATA12	spermatogenesis associated 12
hsa-miR-509-3p	0	0	1	0	1	1	VSTM2A	V-set and transmembrane domain containing 2A
hsa-miR-509-3p	0	0	1	0	1	1	VSIG1	V-set and immunoglobulin domain containing 1
hsa-miR-509-3p	1	0	1	1	1	1	SUMF1	sulfatase modifying factor 1
hsa-miR-509-3p	0	0	1	1	1	1	ISCA2	iron-sulfur cluster assembly 2 homolog (S. cerevisiae)
hsa-miR-509-3p	1	0	1	1	1	1	SPTY2D1	SPT2, Suppressor of Ty, domain containing 1 (S. cerevisiae)
hsa-miR-509-3p	1	0	1	1	1	1	ZBTB41	zinc finger and BTB domain containing 41
hsa-miR-509-3p	1	0	1	1	1	1	AQP1	aquaporin 1 (Colton blood group)
hsa-miR-509-3p	1	0	1	1	1	1	PTGER3	prostaglandin E receptor 3 (subtype EP3)
hsa-miR-509-3p	0	0	1	0	1	1	WASH3P	WAS protein family homolog 3 pseudogene
hsa-miR-509-3p	1	0	1	1	1	1	GLYAT	glycine-N-acyltransferase
hsa-miR-509-3p	0	0	1	1	1	1	APOBEC4	apolipoprotein B mRNA editing enzyme, catalytic polypeptide-like 4 (putative)
hsa-miR-509-3p	1	0	1	1	1	1	IGSF1	immunoglobulin superfamily, member 1
hsa-miR-509-3p	1	0	1	1	1	1	FREM2	FRAS1 related extracellular matrix protein 2
hsa-miR-509-3p	1	0	1	1	1	1	SAMD12	sterile alpha motif domain containing 12
hsa-miR-509-3p	0	0	1	0	0	0	MIR155HG	MIR155 host gene (non-protein coding)
hsa-miR-509-3p	0	0	1	0	0	0	TPI1P2	triosephosphate isomerase 1 pseudogene 2
hsa-miR-509-3p	0	0	1	0	0	0	FTH1P2	ferritin, heavy polypeptide 1 pseudogene 2
hsa-miR-509-3p	0	0	1	0	0	0	FTH1P8	ferritin, heavy polypeptide 1 pseudogene 8
hsa-miR-509-3p	0	0	1	0	0	0	FAM192BP	family with sequence similarity 192, member B pseudogene
hsa-miR-509-3p	0	0	1	0	0	0	MSX2P1	msh homeobox 2 pseudogene 1
hsa-miR-509-3p	0	0	1	0	0	0	SNORA4	small nucleolar RNA, H/ACA box 4
hsa-miR-509-3p	0	0	1	0	0	0	TOP1P1	topoisomerase (DNA) I pseudogene 1
hsa-miR-509-3p	0	0	1	0	0	0	RPL29P2	ribosomal protein L29 pseudogene 2
hsa-miR-509-3p	0	0	1	0	0	0	PTPRVP	protein tyrosine phosphatase, receptor type, V, pseudogene
hsa-miR-509-3p	0	0	1	1	0	0	MUC1	mucin 1, cell surface associated
hsa-miR-509-3p	1	0	1	1	1	1	CFTR	cystic fibrosis transmembrane conductance regulator (ATP-binding cassette sub-family C, member 7)
hsa-miR-509-3p	0	0	0	1	1	1	CCL18	chemokine (C-C motif) ligand 18 (pulmonary and activation-regulated)
hsa-miR-509-3p	1	0	1	1	1	1	TFAP2D	transcription factor AP-2 delta (activating enhancer binding protein 2 delta)
hsa-miR-509-3p	0	0	0	1	1	1	ABHD5	abhydrolase domain containing 5
hsa-miR-509-3p	0	0	0	1	1	1	MS4A12	membrane-spanning 4-domains, subfamily A, member 12
hsa-miR-509-3p	1	0	1	1	1	1	LRRC7	leucine rich repeat containing 7
hsa-miR-509-3p	0	0	1	1	1	1	GABARAPL2	GABA(A) receptor-associated protein-like 2
hsa-miR-509-3p	1	0	1	1	1	1	CTNS	cystinosin, lysosomal cystine transporter
hsa-miR-509-3p	0	0	1	1	1	1	HEBP2	heme binding protein 2
hsa-miR-509-3p	0	0	0	1	0	0	ADCK2	aarF domain containing kinase 2
hsa-miR-509-3p	1	0	1	1	1	1	QSER1	glutamine and serine rich 1
hsa-miR-509-3p	0	0	1	1	0	0	DNAH2	dynein, axonemal, heavy chain 2
hsa-miR-509-3p	0	0	1	1	0	0	GPKOW	G patch domain and KOW motifs
hsa-miR-509-3p	1	0	1	1	0	0	ANO8	anoctamin 8
hsa-miR-509-3p	0	0	0	1	0	0	ICAM3	intercellular adhesion molecule 3
hsa-miR-509-3p	0	0	1	1	0	0	HSD17B10	hydroxysteroid (17-beta) dehydrogenase 10
hsa-miR-509-3p	0	0	0	1	0	0	CACNG5	calcium channel, voltage-dependent, gamma subunit 5
hsa-miR-509-3p	1	0	1	1	1	1	ALDH3A2	aldehyde dehydrogenase 3 family, member A2
hsa-miR-509-3p	0	0	0	1	1	1	PLOD1	procollagen-lysine, 2-oxoglutarate 5-dioxygenase 1
hsa-miR-509-3p	0	0	1	1	0	0	UQCRC1	ubiquinol-cytochrome c reductase core protein I
hsa-miR-509-3p	0	0	0	1	0	0	OR1I1	olfactory receptor, family 1, subfamily I, member 1
hsa-miR-509-3p	0	0	0	1	0	0	AAAS	achalasia, adrenocortical insufficiency, alacrimia
hsa-miR-509-3p	0	0	0	1	0	0	IGFALS	insulin-like growth factor binding protein, acid labile subunit
hsa-miR-509-3p	0	0	0	1	0	0	NDUFB7	NADH dehydrogenase (ubiquinone) 1 beta subcomplex, 7, 18kDa
hsa-miR-509-3p	0	0	0	1	1	1	SERPIND1	serpin peptidase inhibitor, clade D (heparin cofactor), member 1
hsa-miR-509-3p	0	0	1	1	0	0	PDXP	pyridoxal (pyridoxine, vitamin B6) phosphatase
hsa-miR-509-3p	0	0	1	1	0	0	SH3BP1	SH3-domain binding protein 1
hsa-miR-509-3p	0	0	1	1	0	0	CBY1	chibby homolog 1 (Drosophila)
hsa-miR-509-3p	0	0	1	1	1	1	C22orf28	chromosome 22 open reading frame 28
hsa-miR-509-3p	1	0	1	1	0	0	TXNL1	thioredoxin-like 1
hsa-miR-509-3p	0	0	1	1	0	0	USP11	ubiquitin specific peptidase 11
hsa-miR-509-3p	0	0	0	1	1	1	PLLP	plasmolipin
hsa-miR-509-3p	0	0	1	1	1	1	DECR2	2,4-dienoyl CoA reductase 2, peroxisomal
hsa-miR-509-3p	0	0	1	1	1	1	SCG3	secretogranin III
hsa-miR-509-3p	0	0	1	1	0	0	DNAJC17	DnaJ (Hsp40) homolog, subfamily C, member 17
hsa-miR-509-3p	0	0	1	1	1	1	TFPI2	tissue factor pathway inhibitor 2
hsa-miR-509-3p	0	0	1	1	1	1	MPP6	membrane protein, palmitoylated 6 (MAGUK p55 subfamily member 6)
hsa-miR-509-3p	0	0	0	1	1	1	AEBP1	AE binding protein 1
hsa-miR-509-3p	0	0	1	1	1	1	SPATA6L	spermatogenesis associated 6-like
hsa-miR-509-3p	0	0	1	1	0	0	C5	complement component 5
hsa-miR-509-3p	0	0	1	1	0	0	FBXL15	F-box and leucine-rich repeat protein 15
hsa-miR-509-3p	0	0	0	1	0	0	RCVRN	recoverin
hsa-miR-509-3p	0	0	1	1	1	1	GAR1	GAR1 ribonucleoprotein homolog (yeast)
hsa-miR-509-3p	1	0	1	1	1	1	CTSC	cathepsin C
hsa-miR-509-3p	0	0	0	1	0	0	PRR4	proline rich 4 (lacrimal)
hsa-miR-509-3p	0	0	1	1	1	1	MCM3	minichromosome maintenance complex component 3
hsa-miR-509-3p	0	0	1	1	0	0	SLC4A9	solute carrier family 4, sodium bicarbonate cotransporter, member 9
hsa-miR-509-3p	0	0	1	1	0	0	PCDH12	protocadherin 12
hsa-miR-509-3p	0	0	1	1	0	0	HRG	histidine-rich glycoprotein
hsa-miR-509-3p	0	0	1	1	1	1	EIF2AK2	eukaryotic translation initiation factor 2-alpha kinase 2
hsa-miR-509-3p	1	0	1	1	1	1	POLE4	polymerase (DNA-directed), epsilon 4, accessory subunit
hsa-miR-509-3p	0	0	1	1	0	0	KIAA1324	KIAA1324
hsa-miR-509-3p	0	0	0	1	0	0	AKR7A2	aldo-keto reductase family 7, member A2 (aflatoxin aldehyde reductase)
hsa-miR-509-3p	1	0	1	1	0	0	CCDC92	coiled-coil domain containing 92
hsa-miR-509-3p	0	0	1	1	1	1	C14orf45	chromosome 14 open reading frame 45
hsa-miR-509-3p	0	0	1	1	0	0	GJB6	gap junction protein, beta 6, 30kDa
hsa-miR-509-3p	0	0	0	1	1	1	NEUROG3	neurogenin 3
hsa-miR-509-3p	0	0	1	1	0	0	LIPE	lipase, hormone-sensitive
hsa-miR-509-3p	0	0	0	1	1	1	APOBEC2	apolipoprotein B mRNA editing enzyme, catalytic polypeptide-like 2
hsa-miR-509-3p	1	0	1	1	1	1	SPHK2	sphingosine kinase 2
hsa-miR-509-3p	1	0	1	1	1	1	SOX9	SRY (sex determining region Y)-box 9
hsa-miR-509-3p	0	0	1	1	1	1	ARMCX5	armadillo repeat containing, X-linked 5
hsa-miR-509-3p	0	0	0	1	1	1	SDF2	stromal cell-derived factor 2
hsa-miR-509-3p	0	0	1	1	1	1	RGS13	regulator of G-protein signaling 13
hsa-miR-509-3p	0	0	1	1	1	1	ZNF598	zinc finger protein 598
hsa-miR-509-3p	0	0	1	1	1	1	EMC4	ER membrane protein complex subunit 4
hsa-miR-509-3p	0	0	0	1	1	1	CCRL1	chemokine (C-C motif) receptor-like 1
hsa-miR-509-3p	0	0	1	1	1	1	MYOD1	myogenic differentiation 1
hsa-miR-509-3p	0	0	1	1	1	1	KIAA0391	KIAA0391
hsa-miR-509-3p	0	0	0	1	0	0	ART1	ADP-ribosyltransferase 1
hsa-miR-509-3p	0	0	1	1	1	1	ENOSF1	enolase superfamily member 1
hsa-miR-509-3p	0	0	1	1	0	0	PAM16	presequence translocase-associated motor 16 homolog (S. cerevisiae)
hsa-miR-509-3p	0	0	1	1	1	1	CORO7	coronin 7
hsa-miR-509-3p	0	0	1	1	0	0	WDR18	WD repeat domain 18
hsa-miR-509-3p	0	0	1	1	0	0	LILRA1	leukocyte immunoglobulin-like receptor, subfamily A (with TM domain), member 1
hsa-miR-509-3p	0	0	1	1	0	0	KRT31	keratin 31
hsa-miR-509-3p	0	0	1	1	0	0	NXPE1	neurexophilin and PC-esterase domain family, member 1
hsa-miR-509-3p	0	0	1	1	1	1	ALG13	asparagine-linked glycosylation 13 homolog (S. cerevisiae)
hsa-miR-509-3p	0	0	1	1	1	1	TRPC4AP	transient receptor potential cation channel, subfamily C, member 4 associated protein
hsa-miR-509-3p	0	0	0	1	0	0	RSPH3	radial spoke 3 homolog (Chlamydomonas)
hsa-miR-509-3p	0	0	0	1	0	0	MAS1	MAS1 oncogene
hsa-miR-509-3p	0	0	0	1	0	0	BMP15	bone morphogenetic protein 15
hsa-miR-509-3p	1	0	1	1	1	1	ARPC1B	actin related protein 2/3 complex, subunit 1B, 41kDa
hsa-miR-509-3p	1	0	1	1	0	0	TRPM4	transient receptor potential cation channel, subfamily M, member 4
hsa-miR-509-3p	0	0	0	1	0	0	LAMA5	laminin, alpha 5
hsa-miR-509-3p	0	0	1	1	0	0	COX4I1	cytochrome c oxidase subunit IV isoform 1
hsa-miR-509-3p	0	0	1	1	0	0	ANKHD1-EIF4EBP3	ANKHD1-EIF4EBP3 readthrough
hsa-miR-509-3p	0	0	1	1	0	0	EIF4EBP3	eukaryotic translation initiation factor 4E binding protein 3
hsa-miR-509-3p	0	0	1	1	1	1	ANKHD1	ankyrin repeat and KH domain containing 1
hsa-miR-509-3p	0	0	1	1	0	0	TNS4	tensin 4
hsa-miR-509-3p	0	0	1	1	1	1	FSHB	follicle stimulating hormone, beta polypeptide
hsa-miR-509-3p	1	0	1	1	1	1	ACTR10	actin-related protein 10 homolog (S. cerevisiae)
hsa-miR-509-3p	1	0	1	1	0	0	EEFSEC	eukaryotic elongation factor, selenocysteine-tRNA-specific
hsa-miR-509-3p	0	0	1	1	0	0	IGHMBP2	immunoglobulin mu binding protein 2
hsa-miR-509-3p	0	0	1	1	1	1	SERINC3	serine incorporator 3
hsa-miR-509-3p	0	0	1	1	0	0	CCNA1	cyclin A1
hsa-miR-509-3p	0	0	0	1	1	1	HRASLS2	HRAS-like suppressor 2
hsa-miR-509-3p	0	0	1	1	1	1	LRRIQ1	leucine-rich repeats and IQ motif containing 1
hsa-miR-509-3p	0	0	1	1	1	1	IL5RA	interleukin 5 receptor, alpha
hsa-miR-509-3p	0	0	1	1	0	0	CCNH	cyclin H
hsa-miR-509-3p	1	0	1	1	1	1	CABLES1	Cdk5 and Abl enzyme substrate 1
hsa-miR-509-3p	0	0	0	1	1	1	DOCK2	dedicator of cytokinesis 2
hsa-miR-509-3p	0	0	1	1	0	0	ORC3	origin recognition complex, subunit 3
hsa-miR-509-3p	0	0	0	1	0	0	FBXL8	F-box and leucine-rich repeat protein 8
hsa-miR-509-3p	1	0	0	1	1	1	TGFBRAP1	transforming growth factor, beta receptor associated protein 1
hsa-miR-509-3p	0	0	1	1	1	1	MED4	mediator complex subunit 4
hsa-miR-509-3p	0	0	0	1	1	1	MRPL47	mitochondrial ribosomal protein L47
hsa-miR-509-3p	0	0	1	1	1	1	IFNA14	interferon, alpha 14
hsa-miR-509-3p	0	0	1	1	0	0	DCTN3	dynactin 3 (p22)
hsa-miR-509-3p	0	0	0	1	0	0	HIST1H2AB	histone cluster 1, H2ab
hsa-miR-509-3p	0	0	1	1	1	1	TUBB2B	tubulin, beta 2B class IIb
hsa-miR-509-3p	0	0	0	1	0	0	NDUFAF1	NADH dehydrogenase (ubiquinone) complex I, assembly factor 1
hsa-miR-509-3p	0	0	1	1	1	1	SIX3	SIX homeobox 3
hsa-miR-509-3p	0	0	1	1	1	1	CHRNA1	cholinergic receptor, nicotinic, alpha 1 (muscle)
hsa-miR-509-3p	1	0	1	1	1	1	ST8SIA1	ST8 alpha-N-acetyl-neuraminide alpha-2,8-sialyltransferase 1
hsa-miR-509-3p	0	0	0	1	0	0	TMEM5	transmembrane protein 5
hsa-miR-509-3p	1	0	1	1	1	1	PTPRB	protein tyrosine phosphatase, receptor type, B
hsa-miR-509-3p	0	0	1	1	1	1	SNCAIP	synuclein, alpha interacting protein
hsa-miR-509-3p	0	0	0	1	0	0	NUP133	nucleoporin 133kDa
hsa-miR-509-3p	0	0	0	1	0	0	ZBTB25	zinc finger and BTB domain containing 25
hsa-miR-509-3p	0	0	1	1	0	0	PSMD11	proteasome (prosome, macropain) 26S subunit, non-ATPase, 11
hsa-miR-509-3p	0	0	0	1	0	0	CHRNB4	cholinergic receptor, nicotinic, beta 4 (neuronal)
hsa-miR-509-3p	0	0	0	1	0	0	CDHR2	cadherin-related family member 2
hsa-miR-509-3p	0	0	1	1	0	0	SGCA	sarcoglycan, alpha (50kDa dystrophin-associated glycoprotein)
hsa-miR-509-3p	1	0	0	1	1	1	ATF1	activating transcription factor 1
hsa-miR-509-3p	1	0	1	1	1	1	ZDHHC2	zinc finger, DHHC-type containing 2
hsa-miR-509-3p	1	0	1	1	1	1	MTUS1	microtubule associated tumor suppressor 1
hsa-miR-509-3p	0	0	0	1	0	0	PSMB1	proteasome (prosome, macropain) subunit, beta type, 1
hsa-miR-509-3p	0	0	0	1	1	1	TRPA1	transient receptor potential cation channel, subfamily A, member 1
hsa-miR-509-3p	0	0	1	1	1	1	TRAM1	translocation associated membrane protein 1
hsa-miR-509-3p	1	0	1	1	1	1	SLC46A1	solute carrier family 46 (folate transporter), member 1
hsa-miR-509-3p	0	0	1	1	0	0	NLRC5	NLR family, CARD domain containing 5
hsa-miR-509-3p	0	0	1	1	1	1	CDKN2C	cyclin-dependent kinase inhibitor 2C (p18, inhibits CDK4)
hsa-miR-509-3p	1	0	1	1	1	1	CDH20	cadherin 20, type 2
hsa-miR-509-3p	0	0	1	1	0	0	PAFAH1B3	platelet-activating factor acetylhydrolase 1b, catalytic subunit 3 (29kDa)
hsa-miR-509-3p	0	0	1	1	1	1	ASCC3	activating signal cointegrator 1 complex subunit 3
hsa-miR-509-3p	0	0	0	1	0	0	TFIP11	tuftelin interacting protein 11
hsa-miR-509-3p	0	0	0	1	0	0	PLEKHA4	pleckstrin homology domain containing, family A (phosphoinositide binding specific) member 4
hsa-miR-509-3p	1	0	1	1	1	1	NOX4	NADPH oxidase 4
hsa-miR-509-3p	0	0	1	1	0	0	IFIH1	interferon induced with helicase C domain 1
hsa-miR-509-3p	1	0	1	1	1	1	KAT2B	K(lysine) acetyltransferase 2B
hsa-miR-509-3p	0	0	1	1	1	1	IL7	interleukin 7
hsa-miR-509-3p	0	0	0	1	0	0	GPR108	G protein-coupled receptor 108
hsa-miR-509-3p	0	0	1	1	1	1	TIMMDC1	translocase of inner mitochondrial membrane domain containing 1
hsa-miR-509-3p	0	0	0	1	0	0	LXN	latexin
hsa-miR-509-3p	0	0	1	1	1	1	GLRB	glycine receptor, beta
hsa-miR-509-3p	0	0	1	1	1	1	SEC22C	SEC22 vesicle trafficking protein homolog C (S. cerevisiae)
hsa-miR-509-3p	0	0	0	1	0	0	GZMM	granzyme M (lymphocyte met-ase 1)
hsa-miR-509-3p	0	0	1	1	1	1	CLDN16	claudin 16
hsa-miR-509-3p	0	0	0	1	0	0	TYK2	tyrosine kinase 2
hsa-miR-509-3p	1	0	1	1	1	1	SOX30	SRY (sex determining region Y)-box 30
hsa-miR-509-3p	0	0	1	1	0	0	RPL24	ribosomal protein L24
hsa-miR-509-3p	1	0	1	1	1	1	JAKMIP2	janus kinase and microtubule interacting protein 2
hsa-miR-509-3p	1	0	1	1	1	1	SEMA3A	sema domain, immunoglobulin domain (Ig), short basic domain, secreted, (semaphorin) 3A
hsa-miR-509-3p	0	0	1	1	0	0	STAP1	signal transducing adaptor family member 1
hsa-miR-509-3p	0	0	1	1	1	1	GTF2IRD1	GTF2I repeat domain containing 1
hsa-miR-509-3p	1	0	0	1	0	0	PIK3C2A	phosphatidylinositol-4-phosphate 3-kinase, catalytic subunit type 2 alpha
hsa-miR-509-3p	0	0	1	1	1	1	HYAL1	hyaluronoglucosaminidase 1
hsa-miR-509-3p	0	0	1	1	0	0	FBXO7	F-box protein 7
hsa-miR-509-3p	0	0	1	1	0	0	EIF2B2	eukaryotic translation initiation factor 2B, subunit 2 beta, 39kDa
hsa-miR-509-3p	0	0	0	1	0	0	RBP5	retinol binding protein 5, cellular
hsa-miR-509-3p	0	0	1	1	1	1	TINF2	TERF1 (TRF1)-interacting nuclear factor 2
hsa-miR-509-3p	0	0	1	1	1	1	FAM181A	family with sequence similarity 181, member A
hsa-miR-509-3p	0	0	0	1	0	0	MAN2C1	mannosidase, alpha, class 2C, member 1
hsa-miR-509-3p	0	0	1	1	1	1	ADAMTS17	ADAM metallopeptidase with thrombospondin type 1 motif, 17
hsa-miR-509-3p	0	0	0	1	1	1	MARVELD3	MARVEL domain containing 3
hsa-miR-509-3p	1	0	1	1	1	1	ZFHX3	zinc finger homeobox 3
hsa-miR-509-3p	1	0	1	1	1	1	UNC45B	unc-45 homolog B (C. elegans)
hsa-miR-509-3p	0	0	1	1	1	1	SLC39A6	solute carrier family 39 (zinc transporter), member 6
hsa-miR-509-3p	0	0	1	1	0	0	CCDC40	coiled-coil domain containing 40
hsa-miR-509-3p	0	0	0	1	1	1	FEM1A	fem-1 homolog a (C. elegans)
hsa-miR-509-3p	0	0	0	1	0	0	SSBP4	single stranded DNA binding protein 4
hsa-miR-509-3p	0	0	1	1	0	0	NTN5	netrin 5
hsa-miR-509-3p	1	0	0	1	0	0	SF3B4	splicing factor 3b, subunit 4, 49kDa
hsa-miR-509-3p	0	0	0	1	0	0	PKLR	pyruvate kinase, liver and RBC
hsa-miR-509-3p	0	0	0	1	0	0	KLHL23	kelch-like 23 (Drosophila)
hsa-miR-509-3p	1	0	1	1	1	1	STAC	SH3 and cysteine rich domain
hsa-miR-509-3p	0	0	1	1	1	1	EIF2A	eukaryotic translation initiation factor 2A, 65kDa
hsa-miR-509-3p	1	0	1	1	1	1	GABRB2	gamma-aminobutyric acid (GABA) A receptor, beta 2
hsa-miR-509-3p	0	0	1	1	1	1	FARS2	phenylalanyl-tRNA synthetase 2, mitochondrial
hsa-miR-509-3p	0	0	0	1	0	0	KAAG1	kidney associated antigen 1
hsa-miR-509-3p	0	0	1	1	1	1	ARG1	arginase, liver
hsa-miR-509-3p	0	0	1	1	0	0	PNLDC1	poly(A)-specific ribonuclease (PARN)-like domain containing 1
hsa-miR-509-3p	0	0	0	1	1	1	TMEM140	transmembrane protein 140
hsa-miR-509-3p	0	0	0	1	1	1	STAR	steroidogenic acute regulatory protein
hsa-miR-509-3p	1	0	1	1	1	1	NACC2	NACC family member 2, BEN and BTB (POZ) domain containing
hsa-miR-509-3p	0	0	1	1	0	0	SSRP1	structure specific recognition protein 1
hsa-miR-509-3p	1	0	1	1	0	0	LAMTOR1	late endosomal/lysosomal adaptor, MAPK and MTOR activator 1
hsa-miR-509-3p	1	0	0	1	1	1	HMBS	hydroxymethylbilane synthase
hsa-miR-509-3p	0	0	0	1	0	0	GPHA2	glycoprotein hormone alpha 2
hsa-miR-509-3p	0	0	1	1	1	1	PRB4	proline-rich protein BstNI subfamily 4
hsa-miR-509-3p	0	0	1	1	1	1	PRB1	proline-rich protein BstNI subfamily 1
hsa-miR-509-3p	0	0	1	1	0	0	PRB2	proline-rich protein BstNI subfamily 2
hsa-miR-509-3p	1	0	0	1	1	1	THRSP	thyroid hormone responsive
hsa-miR-509-3p	0	0	1	1	0	0	TMEM163	transmembrane protein 163
hsa-miR-509-3p	0	0	0	1	0	0	CRYGC	crystallin, gamma C
hsa-miR-509-3p	0	0	1	1	1	1	ANKRD44	ankyrin repeat domain 44
hsa-miR-509-3p	1	0	1	1	1	1	CAMK4	calcium/calmodulin-dependent protein kinase IV
hsa-miR-509-3p	0	0	1	1	0	0	A1CF	APOBEC1 complementation factor
hsa-miR-509-3p	0	0	1	1	0	0	TMEM251	transmembrane protein 251
hsa-miR-509-3p	1	0	1	1	1	1	PLCL2	phospholipase C-like 2
hsa-miR-509-3p	0	0	0	1	0	0	MKI67IP	MKI67 (FHA domain) interacting nucleolar phosphoprotein
hsa-miR-509-3p	0	0	1	1	0	0	PDZD9	PDZ domain containing 9
hsa-miR-509-3p	1	0	1	1	1	1	GPR61	G protein-coupled receptor 61
hsa-miR-509-3p	0	0	1	1	1	1	MPV17L	MPV17 mitochondrial membrane protein-like
hsa-miR-509-3p	0	0	1	1	1	1	TATDN2	TatD DNase domain containing 2
hsa-miR-509-3p	0	0	0	1	1	1	LYZL4	lysozyme-like 4
hsa-miR-509-3p	0	0	0	1	1	1	COQ5	coenzyme Q5 homolog, methyltransferase (S. cerevisiae)
hsa-miR-509-3p	1	0	1	1	0	0	UBN2	ubinuclein 2
hsa-miR-509-3p	1	0	1	1	1	1	SMAD6	SMAD family member 6
hsa-miR-509-3p	0	0	0	1	1	1	BTN3A1	butyrophilin, subfamily 3, member A1
hsa-miR-509-3p	0	0	0	1	1	1	ACSM3	acyl-CoA synthetase medium-chain family member 3
hsa-miR-509-3p	0	0	1	1	0	0	WNT9B	wingless-type MMTV integration site family, member 9B
hsa-miR-509-3p	0	0	1	1	1	1	C21orf62	chromosome 21 open reading frame 62
hsa-miR-509-3p	0	0	1	1	0	0	ARAF	v-raf murine sarcoma 3611 viral oncogene homolog
hsa-miR-509-3p	1	0	1	1	1	1	ACTC1	actin, alpha, cardiac muscle 1
hsa-miR-509-3p	0	0	1	1	1	1	ZFYVE28	zinc finger, FYVE domain containing 28
hsa-miR-509-3p	0	0	1	1	0	0	CPAMD8	C3 and PZP-like, alpha-2-macroglobulin domain containing 8
hsa-miR-509-3p	1	0	1	1	1	1	ZNF583	zinc finger protein 583
hsa-miR-509-3p	0	0	1	1	1	1	C5orf45	chromosome 5 open reading frame 45
hsa-miR-509-3p	0	0	1	1	0	0	YDJC	YdjC homolog (bacterial)
hsa-miR-509-3p	0	0	0	1	0	0	SSTR5	somatostatin receptor 5
hsa-miR-509-3p	0	0	0	1	1	1	ZNF75A	zinc finger protein 75a
hsa-miR-509-3p	1	0	1	1	0	0	ADC	arginine decarboxylase
hsa-miR-509-3p	1	0	1	1	1	1	DOCK7	dedicator of cytokinesis 7
hsa-miR-509-3p	0	0	0	1	1	1	ZNF496	zinc finger protein 496
hsa-miR-509-3p	0	0	1	1	1	1	FCRLA	Fc receptor-like A
hsa-miR-509-3p	0	0	0	1	0	0	HAAO	3-hydroxyanthranilate 3,4-dioxygenase
hsa-miR-509-3p	0	0	1	1	1	1	FRZB	frizzled-related protein
hsa-miR-509-3p	0	0	1	1	1	1	IWS1	IWS1 homolog (S. cerevisiae)
hsa-miR-509-3p	0	0	1	1	0	0	C3orf30	chromosome 3 open reading frame 30
hsa-miR-509-3p	0	0	0	1	0	0	MST1R	macrophage stimulating 1 receptor (c-met-related tyrosine kinase)
hsa-miR-509-3p	0	0	1	1	0	0	SCGB3A2	secretoglobin, family 3A, member 2
hsa-miR-509-3p	0	0	1	1	1	1	NSA2	NSA2 ribosome biogenesis homolog (S. cerevisiae)
hsa-miR-509-3p	0	0	1	1	1	1	COG5	component of oligomeric golgi complex 5
hsa-miR-509-3p	0	0	1	1	1	1	KCNV1	potassium channel, subfamily V, member 1
hsa-miR-509-3p	0	0	1	1	1	1	TMEM74	transmembrane protein 74
hsa-miR-509-3p	0	0	0	1	0	0	ALDH7A1	aldehyde dehydrogenase 7 family, member A1
hsa-miR-509-3p	1	0	0	1	1	1	CTHRC1	collagen triple helix repeat containing 1
hsa-miR-509-3p	0	0	1	1	0	0	C7orf34	chromosome 7 open reading frame 34
hsa-miR-509-3p	0	0	1	1	0	0	RNF183	ring finger protein 183
hsa-miR-509-3p	1	0	1	1	1	1	LRFN5	leucine rich repeat and fibronectin type III domain containing 5
hsa-miR-509-3p	0	0	1	1	1	1	ITIH5	inter-alpha-trypsin inhibitor heavy chain family, member 5
hsa-miR-509-3p	0	0	1	1	1	1	VDAC2	voltage-dependent anion channel 2
hsa-miR-509-3p	0	0	1	1	1	1	STOX1	storkhead box 1
hsa-miR-509-3p	0	0	0	1	0	0	SARDH	sarcosine dehydrogenase
hsa-miR-509-3p	0	0	1	1	0	0	CCT2	chaperonin containing TCP1, subunit 2 (beta)
hsa-miR-509-3p	1	0	1	1	0	0	CDH8	cadherin 8, type 2
hsa-miR-509-3p	0	0	1	1	1	1	CDYL2	chromodomain protein, Y-like 2
hsa-miR-509-3p	0	0	1	1	1	1	TK2	thymidine kinase 2, mitochondrial
hsa-miR-509-3p	1	0	1	1	0	0	PPIB	peptidylprolyl isomerase B (cyclophilin B)
hsa-miR-509-3p	0	0	0	1	1	1	RCCD1	RCC1 domain containing 1
hsa-miR-509-3p	0	0	1	1	1	1	INTS10	integrator complex subunit 10
hsa-miR-509-3p	0	0	0	1	0	0	COQ4	coenzyme Q4 homolog (S. cerevisiae)
hsa-miR-509-3p	1	0	1	1	0	0	VKORC1	vitamin K epoxide reductase complex, subunit 1
hsa-miR-509-3p	0	0	0	1	0	0	NLRP4	NLR family, pyrin domain containing 4
hsa-miR-509-3p	0	0	1	1	1	1	ZNF558	zinc finger protein 558
hsa-miR-509-3p	0	0	1	1	0	0	PRDX2	peroxiredoxin 2
hsa-miR-509-3p	0	0	1	1	0	0	DDB1	damage-specific DNA binding protein 1, 127kDa
hsa-miR-509-3p	0	0	1	1	1	1	FGA	fibrinogen alpha chain
hsa-miR-509-3p	1	0	1	1	1	1	SCN11A	sodium channel, voltage-gated, type XI, alpha subunit
hsa-miR-509-3p	0	0	0	1	0	0	CCBL1	cysteine conjugate-beta lyase, cytoplasmic
hsa-miR-509-3p	0	0	0	1	0	0	P2RY12	purinergic receptor P2Y, G-protein coupled, 12
hsa-miR-509-3p	1	0	1	1	1	1	INSR	insulin receptor
hsa-miR-509-3p	0	0	0	1	1	1	PYDC1	PYD (pyrin domain) containing 1
hsa-miR-509-3p	0	0	0	1	0	0	OR5T3	olfactory receptor, family 5, subfamily T, member 3
hsa-miR-509-3p	0	0	1	1	1	1	GNB2	guanine nucleotide binding protein (G protein), beta polypeptide 2
hsa-miR-509-3p	0	0	0	1	1	1	CES3	carboxylesterase 3
hsa-miR-509-3p	0	0	1	1	0	0	ZNF30	zinc finger protein 30
hsa-miR-509-3p	0	0	1	1	0	0	CCDC11	coiled-coil domain containing 11
hsa-miR-509-3p	0	0	1	1	1	1	KLK7	kallikrein-related peptidase 7
hsa-miR-509-3p	0	0	0	1	0	0	NFRKB	nuclear factor related to kappaB binding protein
hsa-miR-509-3p	0	0	0	1	1	1	TACR3	tachykinin receptor 3
hsa-miR-509-3p	0	0	1	1	1	1	MUC12	mucin 12, cell surface associated
hsa-miR-509-3p	0	0	1	1	1	1	TMPRSS11E	transmembrane protease, serine 11E
hsa-miR-509-3p	1	0	1	1	0	0	TSPAN5	tetraspanin 5
hsa-miR-509-3p	1	0	0	1	0	0	KISS1	KiSS-1 metastasis-suppressor
hsa-miR-509-3p	0	0	0	1	0	0	REEP4	receptor accessory protein 4
hsa-miR-509-3p	0	0	1	1	0	0	RNF181	ring finger protein 181
hsa-miR-509-3p	0	0	1	1	0	0	AVPI1	arginine vasopressin-induced 1
hsa-miR-509-3p	0	0	1	1	0	0	DNAI2	dynein, axonemal, intermediate chain 2
hsa-miR-509-3p	1	0	1	1	1	1	AKNA	AT-hook transcription factor
hsa-miR-509-3p	1	0	1	1	1	1	HARS	histidyl-tRNA synthetase
hsa-miR-509-3p	0	0	0	1	1	1	C3AR1	complement component 3a receptor 1
hsa-miR-509-3p	0	0	1	1	0	0	WFDC5	WAP four-disulfide core domain 5
hsa-miR-509-3p	1	0	0	1	0	0	INPP4B	inositol polyphosphate-4-phosphatase, type II, 105kDa
hsa-miR-509-3p	0	0	1	1	0	0	SNTG2	syntrophin, gamma 2
hsa-miR-509-3p	0	0	1	1	1	1	LINC00478	long intergenic non-protein coding RNA 478
hsa-miR-509-3p	0	0	1	1	1	1	MLKL	mixed lineage kinase domain-like
hsa-miR-509-3p	0	0	1	1	1	1	SLC2A9	solute carrier family 2 (facilitated glucose transporter), member 9
hsa-miR-509-3p	1	0	1	1	1	1	OLR1	oxidized low density lipoprotein (lectin-like) receptor 1
hsa-miR-509-3p	0	0	0	1	1	1	LOC729317	voltage-dependent anion channel 2 pseudogene
hsa-miR-509-3p	0	0	1	1	0	0	C3orf77	chromosome 3 open reading frame 77
hsa-miR-509-3p	0	0	0	1	1	1	EPS8L1	EPS8-like 1
hsa-miR-509-3p	0	0	1	1	0	0	FABP6	fatty acid binding protein 6, ileal
hsa-miR-509-3p	0	0	1	1	1	1	MAP9	microtubule-associated protein 9
hsa-miR-509-3p	0	0	1	1	0	0	F2	coagulation factor II (thrombin)
hsa-miR-509-3p	0	0	1	1	0	0	PGA5	pepsinogen 5, group I (pepsinogen A)
hsa-miR-509-3p	1	0	1	1	1	1	USP15	ubiquitin specific peptidase 15
hsa-miR-509-3p	1	0	1	1	1	1	ZNF148	zinc finger protein 148
hsa-miR-509-3p	0	0	1	1	1	1	SLC12A8	solute carrier family 12 (potassium/chloride transporters), member 8
hsa-miR-509-3p	0	0	0	1	1	1	C17orf101	chromosome 17 open reading frame 101
hsa-miR-509-3p	1	0	1	1	1	1	SLITRK6	SLIT and NTRK-like family, member 6
hsa-miR-509-3p	1	0	1	1	1	1	AQP11	aquaporin 11
hsa-miR-509-3p	0	0	1	1	1	1	TMPRSS7	transmembrane protease, serine 7
hsa-miR-509-3p	1	0	1	1	1	1	LAMA3	laminin, alpha 3
hsa-miR-509-3p	0	0	1	1	0	0	HIST1H2BC	histone cluster 1, H2bc
hsa-miR-509-3p	0	0	1	1	1	1	CKS2	CDC28 protein kinase regulatory subunit 2
hsa-miR-509-3p	0	0	0	1	1	1	LILRB2	leukocyte immunoglobulin-like receptor, subfamily B (with TM and ITIM domains), member 2
hsa-miR-509-3p	0	0	1	1	0	0	EIF3B	eukaryotic translation initiation factor 3, subunit B
hsa-miR-509-3p	0	0	1	1	0	0	C1QB	complement component 1, q subcomponent, B chain
hsa-miR-509-3p	1	0	1	1	1	1	CNOT4	CCR4-NOT transcription complex, subunit 4
hsa-miR-509-3p	1	0	1	1	1	1	WDR6	WD repeat domain 6
hsa-miR-509-3p	0	0	0	1	0	0	MAP7D3	MAP7 domain containing 3
hsa-miR-509-3p	0	0	0	1	1	1	TDRD6	tudor domain containing 6
hsa-miR-509-3p	0	0	1	1	1	1	LILRB5	leukocyte immunoglobulin-like receptor, subfamily B (with TM and ITIM domains), member 5
hsa-miR-509-3p	0	0	0	1	0	0	LOC100132025	transmembrane domain-containing protein ENSP00000320207-like
hsa-miR-509-3p	0	0	1	1	1	1	ALX1	ALX homeobox 1
hsa-miR-509-3p	0	0	0	1	0	0	OR52N4	olfactory receptor, family 52, subfamily N, member 4
hsa-miR-509-3p	0	0	0	1	0	0	PXMP2	peroxisomal membrane protein 2, 22kDa
hsa-miR-509-3p	1	0	1	1	0	0	ZNF527	zinc finger protein 527
hsa-miR-509-3p	0	0	0	1	0	0	DEFB124	defensin, beta 124
hsa-miR-509-3p	0	0	1	1	1	1	ZNF345	zinc finger protein 345
hsa-miR-509-3p	0	0	1	1	1	1	KLHL11	kelch-like 11 (Drosophila)
hsa-miR-509-3p	0	0	0	1	1	1	ETV4	ets variant 4
hsa-miR-509-3p	0	0	1	1	0	0	KLK12	kallikrein-related peptidase 12
hsa-miR-509-3p	1	0	1	1	1	1	ARL4D	ADP-ribosylation factor-like 4D
hsa-miR-509-3p	0	0	1	1	0	0	B3GNTL1	UDP-GlcNAc:betaGal beta-1,3-N-acetylglucosaminyltransferase-like 1
hsa-miR-509-3p	0	0	1	1	1	1	DYX1C1	dyslexia susceptibility 1 candidate 1
hsa-miR-509-3p	0	0	0	1	0	0	TIGD5	tigger transposable element derived 5
hsa-miR-509-3p	0	0	1	1	1	1	GLDC	glycine dehydrogenase (decarboxylating)
hsa-miR-509-3p	1	0	1	1	1	1	IFT20	intraflagellar transport 20 homolog (Chlamydomonas)
hsa-miR-509-3p	0	0	0	1	0	0	TRIM75	tripartite motif containing 75
hsa-miR-509-3p	0	0	1	1	0	0	ZNF335	zinc finger protein 335
hsa-miR-509-3p	0	0	1	1	0	0	TYMS	thymidylate synthetase
hsa-miR-509-3p	0	0	0	1	0	0	CLDN22	claudin 22
hsa-miR-509-3p	0	0	1	1	1	1	LGALS8	lectin, galactoside-binding, soluble, 8
hsa-miR-509-3p	1	0	1	1	1	1	NIN	ninein (GSK3B interacting protein)
hsa-miR-509-3p	0	0	0	1	0	0	WFDC11	WAP four-disulfide core domain 11
hsa-miR-509-3p	1	0	1	1	0	0	ECE2	endothelin converting enzyme 2
hsa-miR-509-3p	0	0	1	1	1	1	YARS2	tyrosyl-tRNA synthetase 2, mitochondrial
hsa-miR-509-3p	0	0	0	1	0	0	SLC22A1	solute carrier family 22 (organic cation transporter), member 1
hsa-miR-509-3p	1	0	0	1	0	0	KLHL36	kelch-like 36 (Drosophila)
hsa-miR-509-3p	0	0	1	1	0	0	PGA3	pepsinogen 3, group I (pepsinogen A)
hsa-miR-509-3p	0	0	0	1	0	0	OR52K2	olfactory receptor, family 52, subfamily K, member 2
hsa-miR-509-3p	0	0	0	1	1	1	EID2	EP300 interacting inhibitor of differentiation 2
hsa-miR-509-3p	0	0	1	1	0	0	EDDM3B	epididymal protein 3B
hsa-miR-509-3p	1	0	1	1	1	1	APLNR	apelin receptor
hsa-miR-509-3p	0	0	0	1	1	1	FLII	flightless I homolog (Drosophila)
hsa-miR-509-3p	0	0	0	1	1	1	CCDC60	coiled-coil domain containing 60
hsa-miR-509-3p	0	0	0	1	0	0	FAM110C	family with sequence similarity 110, member C
hsa-miR-509-3p	0	0	1	1	1	1	PARPBP	PARP1 binding protein
hsa-miR-509-3p	0	0	0	1	1	1	DDX53	DEAD (Asp-Glu-Ala-Asp) box polypeptide 53
hsa-miR-509-3p	0	0	1	1	0	0	PHKG2	phosphorylase kinase, gamma 2 (testis)
hsa-miR-509-3p	0	0	0	1	0	0	OR5P3	olfactory receptor, family 5, subfamily P, member 3
hsa-miR-509-3p	0	0	0	1	0	0	TSPAN10	tetraspanin 10
hsa-miR-509-3p	0	0	1	1	0	0	CIB1	calcium and integrin binding 1 (calmyrin)
hsa-miR-509-3p	0	0	1	1	1	1	HAX1	HCLS1 associated protein X-1
hsa-miR-509-3p	0	0	0	1	1	1	C1S	complement component 1, s subcomponent
hsa-miR-509-3p	0	0	0	1	0	0	USP17L3	ubiquitin specific peptidase 17-like 3
hsa-miR-509-3p	0	0	1	1	0	0	GAST	gastrin
hsa-miR-509-3p	0	0	0	1	0	0	ACTL10	actin-like 10
hsa-miR-509-3p	0	0	0	1	1	1	CXorf69	chromosome X open reading frame 69
hsa-miR-509-3p	0	0	1	1	1	1	ADAMTSL5	ADAMTS-like 5
hsa-miR-509-3p	0	0	0	1	0	0	OR10G7	olfactory receptor, family 10, subfamily G, member 7
hsa-miR-509-3p	0	0	0	1	1	1	WDR5B	WD repeat domain 5B
hsa-miR-509-3p	0	0	1	1	0	0	HIST2H2AB	histone cluster 2, H2ab
hsa-miR-509-3p	0	0	0	1	0	0	HIST2H2AC	histone cluster 2, H2ac
hsa-miR-509-3p	0	0	1	1	0	0	CALCA	calcitonin-related polypeptide alpha
hsa-miR-509-3p	0	0	0	1	1	1	NDUFA6	NADH dehydrogenase (ubiquinone) 1 alpha subcomplex, 6, 14kDa
hsa-miR-509-3p	1	0	1	1	1	1	TMED9	transmembrane emp24 protein transport domain containing 9
hsa-miR-509-3p	0	0	1	1	1	1	TMPRSS11B	transmembrane protease, serine 11B
hsa-miR-509-3p	1	0	1	1	0	0	NOG	noggin
hsa-miR-509-3p	0	0	1	1	0	0	C1orf227	chromosome 1 open reading frame 227
hsa-miR-509-3p	0	0	1	1	0	0	SATL1	spermidine/spermine N1-acetyl transferase-like 1
hsa-miR-509-3p	1	0	1	1	0	0	FAM83F	family with sequence similarity 83, member F
hsa-miR-509-3p	0	0	1	1	0	0	PPFIA2	protein tyrosine phosphatase, receptor type, f polypeptide (PTPRF), interacting protein (liprin), alpha 2
hsa-miR-509-3p	0	0	1	1	0	0	USP27X	ubiquitin specific peptidase 27, X-linked
hsa-miR-509-3p	0	0	1	1	1	1	AIFM3	apoptosis-inducing factor, mitochondrion-associated, 3
hsa-miR-509-3p	0	0	0	1	0	0	TH	tyrosine hydroxylase
hsa-miR-509-3p	0	0	0	1	0	0	GABRG3	gamma-aminobutyric acid (GABA) A receptor, gamma 3
hsa-miR-509-3p	0	0	1	1	0	0	PPT2	palmitoyl-protein thioesterase 2
hsa-miR-509-3p	0	0	1	1	0	0	EGFL8	EGF-like-domain, multiple 8
hsa-miR-509-3p	0	0	0	1	1	1	NME9	NME/NM23 family member 9
hsa-miR-509-3p	0	0	0	1	0	0	OIT3	oncoprotein induced transcript 3
hsa-miR-509-3p	0	0	0	1	1	1	TOM1L2	target of myb1-like 2 (chicken)
hsa-miR-509-3p	1	0	0	1	0	0	UBL4B	ubiquitin-like 4B
hsa-miR-509-3p	0	0	1	1	0	0	TRIM7	tripartite motif containing 7
hsa-miR-509-3p	0	0	1	1	0	0	PSMB5	proteasome (prosome, macropain) subunit, beta type, 5
hsa-miR-509-3p	0	0	0	1	1	1	H1FNT	H1 histone family, member N, testis-specific
hsa-miR-509-3p	0	0	1	1	1	1	TMEM17	transmembrane protein 17
hsa-miR-509-3p	1	0	1	1	0	0	RORA	RAR-related orphan receptor A
hsa-miR-509-3p	0	0	1	1	1	1	C8orf34	chromosome 8 open reading frame 34
hsa-miR-509-3p	0	0	0	1	1	1	ELAC2	elaC homolog 2 (E. coli)
hsa-miR-509-3p	0	0	0	1	0	0	FBLL1	fibrillarin-like 1
hsa-miR-509-3p	0	0	1	1	0	0	SLC12A4	solute carrier family 12 (potassium/chloride transporters), member 4
hsa-miR-509-3p	0	0	0	1	1	1	NPY5R	neuropeptide Y receptor Y5
hsa-miR-509-3p	0	0	0	1	0	0	PPP1R32	protein phosphatase 1, regulatory subunit 32
hsa-miR-509-3p	0	0	1	1	1	1	MMP28	matrix metallopeptidase 28
hsa-miR-509-3p	0	0	1	1	0	0	HSFY1	heat shock transcription factor, Y-linked 1
hsa-miR-509-3p	1	0	1	1	1	1	TRIM9	tripartite motif containing 9
hsa-miR-509-3p	0	0	0	1	0	0	KRTAP10-12	keratin associated protein 10-12
hsa-miR-509-3p	0	0	0	1	0	0	OSTN	osteocrin
hsa-miR-509-3p	0	0	1	1	0	0	RPS16	ribosomal protein S16
hsa-miR-509-3p	0	0	1	1	1	1	CCDC86	coiled-coil domain containing 86
hsa-miR-509-3p	1	0	1	1	1	1	BAZ1B	bromodomain adjacent to zinc finger domain, 1B
hsa-miR-509-3p	1	0	1	1	1	1	DMP1	dentin matrix acidic phosphoprotein 1
hsa-miR-509-3p	0	0	1	1	1	1	SP100	SP100 nuclear antigen
hsa-miR-509-3p	0	0	1	1	1	1	ZNF326	zinc finger protein 326
hsa-miR-509-3p	0	0	1	1	0	0	VWC2	von Willebrand factor C domain containing 2
hsa-miR-509-3p	0	0	1	1	0	0	SERPING1	serpin peptidase inhibitor, clade G (C1 inhibitor), member 1
hsa-miR-509-3p	0	0	1	1	1	1	TCF7L2	transcription factor 7-like 2 (T-cell specific, HMG-box)
hsa-miR-509-3p	0	0	1	1	1	1	PLD1	phospholipase D1, phosphatidylcholine-specific
hsa-miR-509-3p	0	0	1	1	1	1	ANAPC1	anaphase promoting complex subunit 1
hsa-miR-509-3p	0	0	1	1	1	1	MCOLN3	mucolipin 3
hsa-miR-509-3p	0	0	1	1	0	0	GSN	gelsolin
hsa-miR-509-3p	0	0	0	1	0	0	ENO4	enolase family member 4
hsa-miR-509-3p	0	0	1	1	1	1	LBX2	ladybird homeobox 2
hsa-miR-509-3p	1	0	1	1	1	1	NEK10	NIMA (never in mitosis gene a)- related kinase 10
hsa-miR-509-3p	0	0	1	1	1	1	LCTL	lactase-like
hsa-miR-509-3p	1	0	1	1	1	1	TMEM248	transmembrane protein 248
hsa-miR-509-3p	0	0	1	1	1	1	BID	BH3 interacting domain death agonist
hsa-miR-509-3p	0	0	1	1	1	1	SMPD1	sphingomyelin phosphodiesterase 1, acid lysosomal
hsa-miR-509-3p	0	0	1	1	0	0	C2orf78	chromosome 2 open reading frame 78
hsa-miR-509-3p	1	0	1	1	1	1	ANKRD42	ankyrin repeat domain 42
hsa-miR-509-3p	0	0	1	1	1	1	APOD	apolipoprotein D
hsa-miR-509-3p	1	0	1	1	0	0	AKT1S1	AKT1 substrate 1 (proline-rich)
hsa-miR-509-3p	1	0	1	1	1	1	TRIO	trio Rho guanine nucleotide exchange factor
hsa-miR-509-3p	0	0	1	1	1	1	ILDR1	immunoglobulin-like domain containing receptor 1
hsa-miR-509-3p	0	0	0	1	1	1	OR7D2	olfactory receptor, family 7, subfamily D, member 2
hsa-miR-509-3p	0	0	1	1	0	0	BRE	brain and reproductive organ-expressed (TNFRSF1A modulator)
hsa-miR-509-3p	0	0	0	1	0	0	TNNI3	troponin I type 3 (cardiac)
hsa-miR-509-3p	0	0	0	1	0	0	ACTG2	actin, gamma 2, smooth muscle, enteric
hsa-miR-509-3p	1	0	1	1	1	1	SORBS1	sorbin and SH3 domain containing 1
hsa-miR-509-3p	0	0	1	1	0	0	MAGED2	melanoma antigen family D, 2
hsa-miR-509-3p	1	0	1	1	1	1	TOM1L1	target of myb1 (chicken)-like 1
hsa-miR-509-3p	0	0	1	1	1	1	SERPINB8	serpin peptidase inhibitor, clade B (ovalbumin), member 8
hsa-miR-509-3p	0	0	0	1	1	1	SLC23A1	solute carrier family 23 (nucleobase transporters), member 1
hsa-miR-509-3p	0	0	1	1	1	1	PLA2G4C	phospholipase A2, group IVC (cytosolic, calcium-independent)
hsa-miR-509-3p	1	0	0	1	1	1	SYT5	synaptotagmin V
hsa-miR-509-3p	1	0	1	1	1	1	IGSF11	immunoglobulin superfamily, member 11
hsa-miR-509-3p	0	0	0	1	1	1	ALDH9A1	aldehyde dehydrogenase 9 family, member A1
hsa-miR-509-3p	0	0	1	1	0	0	IL31RA	interleukin 31 receptor A
hsa-miR-509-3p	1	0	1	1	1	1	CTNNA1	catenin (cadherin-associated protein), alpha 1, 102kDa
hsa-miR-509-3p	0	0	0	1	1	1	ITGB2	integrin, beta 2 (complement component 3 receptor 3 and 4 subunit)
hsa-miR-509-3p	0	0	0	1	0	0	ERVW-1	endogenous retrovirus group W, member 1
hsa-miR-509-3p	0	0	1	1	1	1	C10orf32	chromosome 10 open reading frame 32
hsa-miR-509-3p	1	0	1	1	1	1	GRM1	glutamate receptor, metabotropic 1
hsa-miR-509-3p	0	0	1	1	0	0	SLC26A8	solute carrier family 26, member 8
hsa-miR-509-3p	0	0	0	1	0	0	TRIM17	tripartite motif containing 17
hsa-miR-509-3p	0	0	1	1	0	0	ADAMTS13	ADAM metallopeptidase with thrombospondin type 1 motif, 13
hsa-miR-509-3p	0	0	1	1	0	0	PORCN	porcupine homolog (Drosophila)
hsa-miR-509-3p	0	0	0	1	0	0	ZGPAT	zinc finger, CCCH-type with G patch domain
hsa-miR-509-3p	0	0	1	1	0	0	ACOX3	acyl-CoA oxidase 3, pristanoyl
hsa-miR-509-3p	0	0	0	1	0	0	HYLS1	hydrolethalus syndrome 1
hsa-miR-509-3p	0	0	1	1	1	1	OSCAR	osteoclast associated, immunoglobulin-like receptor
hsa-miR-509-3p	1	0	1	1	1	1	C19orf6	chromosome 19 open reading frame 6
hsa-miR-509-3p	0	0	1	1	0	0	PPP2R2B	protein phosphatase 2, regulatory subunit B, beta
hsa-miR-509-3p	1	0	1	1	0	0	PCED1A	PC-esterase domain containing 1A
hsa-miR-509-3p	0	0	1	1	0	0	WDR96	WD repeat domain 96
hsa-miR-509-3p	1	0	1	1	0	0	CCDC64	coiled-coil domain containing 64
hsa-miR-509-3p	0	0	1	1	1	1	DYNLRB1	dynein, light chain, roadblock-type 1
hsa-miR-509-3p	0	0	0	1	0	0	SMARCAL1	SWI/SNF related, matrix associated, actin dependent regulator of chromatin, subfamily a-like 1
hsa-miR-509-3p	0	0	0	1	0	0	IFNA10	interferon, alpha 10
hsa-miR-509-3p	0	0	0	1	0	0	DNAJC22	DnaJ (Hsp40) homolog, subfamily C, member 22
hsa-miR-509-3p	0	0	1	1	1	1	SEMA5B	sema domain, seven thrombospondin repeats (type 1 and type 1-like), transmembrane domain (TM) and short cytoplasmic domain, (semaphorin) 5B
hsa-miR-509-3p	0	0	1	1	0	0	HP	haptoglobin
hsa-miR-509-3p	0	0	1	1	1	1	LAMA2	laminin, alpha 2
hsa-miR-509-3p	0	0	0	1	1	1	WDSUB1	WD repeat, sterile alpha motif and U-box domain containing 1
hsa-miR-509-3p	0	0	1	1	1	1	ATP5S	ATP synthase, H+ transporting, mitochondrial Fo complex, subunit s (factor B)
hsa-miR-509-3p	0	0	0	1	0	0	AKAP4	A kinase (PRKA) anchor protein 4
hsa-miR-509-3p	1	0	1	1	1	1	DEM1	defects in morphology 1 homolog (S. cerevisiae)
hsa-miR-509-3p	0	0	0	1	0	0	ABCB8	ATP-binding cassette, sub-family B (MDR/TAP), member 8
hsa-miR-509-3p	0	0	1	1	0	0	HIST1H4A	histone cluster 1, H4a
hsa-miR-509-3p	0	0	0	1	0	0	ADAM29	ADAM metallopeptidase domain 29
hsa-miR-509-3p	1	0	1	1	1	1	FGFR2	fibroblast growth factor receptor 2
hsa-miR-509-3p	0	0	0	1	0	0	TMC3	transmembrane channel-like 3
hsa-miR-509-3p	1	0	1	1	1	1	MDK	midkine (neurite growth-promoting factor 2)
hsa-miR-509-3p	0	0	1	1	0	0	TRAF3IP2	TRAF3 interacting protein 2
hsa-miR-509-3p	1	0	0	1	1	1	AK3	adenylate kinase 3
hsa-miR-509-3p	0	0	0	1	0	0	OR2L3	olfactory receptor, family 2, subfamily L, member 3
hsa-miR-509-3p	0	0	1	1	0	0	SIGLEC6	sialic acid binding Ig-like lectin 6
hsa-miR-509-3p	0	0	0	1	0	0	CD300A	CD300a molecule
hsa-miR-509-3p	0	0	1	1	1	1	FAM118B	family with sequence similarity 118, member B
hsa-miR-509-3p	0	0	0	1	1	1	RDH14	retinol dehydrogenase 14 (all-trans/9-cis/11-cis)
hsa-miR-509-3p	1	0	0	1	1	1	NT5C1B	5'-nucleotidase, cytosolic IB
hsa-miR-509-3p	1	0	1	1	1	1	MYLK	myosin light chain kinase
hsa-miR-509-3p	1	0	1	1	0	0	DPP3	dipeptidyl-peptidase 3
hsa-miR-509-3p	0	0	1	1	1	1	BBS1	Bardet-Biedl syndrome 1
hsa-miR-509-3p	0	0	0	1	1	1	RDH16	retinol dehydrogenase 16 (all-trans)
hsa-miR-509-3p	0	0	0	1	0	0	C11orf80	chromosome 11 open reading frame 80
hsa-miR-509-3p	1	0	1	1	1	1	PNP	purine nucleoside phosphorylase
hsa-miR-509-3p	0	0	0	1	0	0	KRT19	keratin 19
hsa-miR-509-3p	1	0	1	1	1	1	PCDH7	protocadherin 7
hsa-miR-509-3p	1	0	1	1	1	1	L3MBTL3	l(3)mbt-like 3 (Drosophila)
hsa-miR-509-3p	0	0	0	1	1	1	ZNF485	zinc finger protein 485
hsa-miR-509-3p	0	0	1	1	0	0	FBXO18	F-box protein, helicase, 18
hsa-miR-509-3p	1	0	1	1	1	1	CREM	cAMP responsive element modulator
hsa-miR-509-3p	0	0	1	1	1	1	PARP1	poly (ADP-ribose) polymerase 1
hsa-miR-509-3p	0	0	0	1	1	1	DACT2	dapper, antagonist of beta-catenin, homolog 2 (Xenopus laevis)
hsa-miR-509-3p	0	0	1	1	0	0	CNIH4	cornichon homolog 4 (Drosophila)
hsa-miR-509-3p	0	0	1	1	1	1	MARC1	mitochondrial amidoxime reducing component 1
hsa-miR-509-3p	0	0	1	1	1	1	CENPF	centromere protein F, 350/400kDa (mitosin)
hsa-miR-509-3p	0	0	1	1	1	1	INTS7	integrator complex subunit 7
hsa-miR-509-3p	1	0	0	1	1	1	ACAT2	acetyl-CoA acetyltransferase 2
hsa-miR-509-3p	1	0	1	1	1	1	SLC41A1	solute carrier family 41, member 1
hsa-miR-509-3p	0	0	1	1	1	1	F13B	coagulation factor XIII, B polypeptide
hsa-miR-509-3p	0	0	0	1	0	0	CFH	complement factor H
hsa-miR-509-3p	1	0	1	1	1	1	TROVE2	TROVE domain family, member 2
hsa-miR-509-3p	0	0	1	1	1	1	FAM5C	family with sequence similarity 5, member C
hsa-miR-509-3p	0	0	1	1	1	1	PLA2G4A	phospholipase A2, group IVA (cytosolic, calcium-dependent)
hsa-miR-509-3p	0	0	0	1	0	0	SF3B5	splicing factor 3b, subunit 5, 10kDa
hsa-miR-509-3p	0	0	1	1	1	1	TEX35	testis expressed 35
hsa-miR-509-3p	1	0	1	1	1	1	ASTN1	astrotactin 1
hsa-miR-509-3p	0	0	1	1	1	1	RABGAP1L	RAB GTPase activating protein 1-like
hsa-miR-509-3p	0	0	1	1	1	1	C1orf105	chromosome 1 open reading frame 105
hsa-miR-509-3p	0	0	0	1	0	0	FMO4	flavin containing monooxygenase 4
hsa-miR-509-3p	0	0	1	1	1	1	FMO3	flavin containing monooxygenase 3
hsa-miR-509-3p	1	0	1	1	1	1	TBPL1	TBP-like 1
hsa-miR-509-3p	0	0	1	1	0	0	AIM2	absent in melanoma 2
hsa-miR-509-3p	1	0	1	1	1	1	PTPRK	protein tyrosine phosphatase, receptor type, K
hsa-miR-509-3p	1	0	1	1	1	1	HCN3	hyperpolarization activated cyclic nucleotide-gated potassium channel 3
hsa-miR-509-3p	1	0	1	1	0	0	EFNA4	ephrin-A4
hsa-miR-509-3p	0	0	1	1	0	0	ROS1	c-ros oncogene 1 , receptor tyrosine kinase
hsa-miR-509-3p	0	0	1	1	1	1	C1orf43	chromosome 1 open reading frame 43
hsa-miR-509-3p	0	0	0	1	1	1	FAM26D	family with sequence similarity 26, member D
hsa-miR-509-3p	0	0	1	1	0	0	FANK1	fibronectin type III and ankyrin repeat domains 1
hsa-miR-509-3p	0	0	0	1	0	0	S100A9	S100 calcium binding protein A9
hsa-miR-509-3p	0	0	0	1	0	0	LCE4A	late cornified envelope 4A
hsa-miR-509-3p	1	0	1	1	1	1	CACUL1	CDK2-associated, cullin domain 1
hsa-miR-509-3p	0	0	1	1	0	0	HIST2H4B	histone cluster 2, H4b
hsa-miR-509-3p	0	0	1	1	0	0	HIST2H4A	histone cluster 2, H4a
hsa-miR-509-3p	0	0	1	1	1	1	MCHR2	melanin-concentrating hormone receptor 2
hsa-miR-509-3p	1	0	1	1	1	1	FAM160B1	family with sequence similarity 160, member B1
hsa-miR-509-3p	0	0	1	1	0	0	CD101	CD101 molecule
hsa-miR-509-3p	1	0	1	1	1	1	ST7L	suppression of tumorigenicity 7 like
hsa-miR-509-3p	0	0	1	1	0	0	OVGP1	oviductal glycoprotein 1, 120kDa
hsa-miR-509-3p	0	0	1	1	0	0	NEURL	neuralized homolog (Drosophila)
hsa-miR-509-3p	0	0	0	1	1	1	AS3MT	arsenic (+3 oxidation state) methyltransferase
hsa-miR-509-3p	1	0	1	1	1	1	PRPF38B	PRP38 pre-mRNA processing factor 38 (yeast) domain containing B
hsa-miR-509-3p	0	0	1	1	0	0	LRRC39	leucine rich repeat containing 39
hsa-miR-509-3p	0	0	0	1	0	0	PPDPF	pancreatic progenitor cell differentiation and proliferation factor homolog (zebrafish)
hsa-miR-509-3p	0	0	1	1	0	0	PDZD7	PDZ domain containing 7
hsa-miR-509-3p	1	0	1	1	1	1	ARHGAP29	Rho GTPase activating protein 29
hsa-miR-509-3p	1	0	1	1	1	1	ZNHIT6	zinc finger, HIT-type containing 6
hsa-miR-509-3p	0	0	0	1	0	0	PSMA7	proteasome (prosome, macropain) subunit, alpha type, 7
hsa-miR-509-3p	1	0	1	1	1	1	LRRC1	leucine rich repeat containing 1
hsa-miR-509-3p	1	0	1	1	1	1	SERBP1	SERPINE1 mRNA binding protein 1
hsa-miR-509-3p	0	0	1	1	1	1	WDR78	WD repeat domain 78
hsa-miR-509-3p	0	0	0	1	0	0	ACTRT1	actin-related protein T1
hsa-miR-509-3p	0	0	1	1	0	0	DAB1	disabled homolog 1 (Drosophila)
hsa-miR-509-3p	1	0	1	1	1	1	RUNX2	runt-related transcription factor 2
hsa-miR-509-3p	0	0	1	1	0	0	NFATC2	nuclear factor of activated T-cells, cytoplasmic, calcineurin-dependent 2
hsa-miR-509-3p	0	0	1	1	1	1	IL13RA1	interleukin 13 receptor, alpha 1
hsa-miR-509-3p	0	0	0	1	1	1	IFIT1	interferon-induced protein with tetratricopeptide repeats 1
hsa-miR-509-3p	1	0	0	1	0	0	CCDC17	coiled-coil domain containing 17
hsa-miR-509-3p	0	0	0	1	0	0	C10orf99	chromosome 10 open reading frame 99
hsa-miR-509-3p	1	0	1	1	1	1	SH2D4B	SH2 domain containing 4B
hsa-miR-509-3p	0	0	1	1	1	1	EIF2B3	eukaryotic translation initiation factor 2B, subunit 3 gamma, 58kDa
hsa-miR-509-3p	0	0	0	1	0	0	PTCH2	patched 2
hsa-miR-509-3p	0	0	1	1	1	1	RBM41	RNA binding motif protein 41
hsa-miR-509-3p	0	0	1	1	1	1	PPCS	phosphopantothenoylcysteine synthetase
hsa-miR-509-3p	0	0	1	1	0	0	SERPINA7	serpin peptidase inhibitor, clade A (alpha-1 antiproteinase, antitrypsin), member 7
hsa-miR-509-3p	1	0	1	1	1	1	NFYC	nuclear transcription factor Y, gamma
hsa-miR-509-3p	0	0	1	1	0	0	TMCO2	transmembrane and coiled-coil domains 2
hsa-miR-509-3p	0	0	1	1	1	1	SEMG1	semenogelin I
hsa-miR-509-3p	1	0	1	1	1	1	STK4	serine/threonine kinase 4
hsa-miR-509-3p	1	0	0	1	1	1	HNF4A	hepatocyte nuclear factor 4, alpha
hsa-miR-509-3p	0	0	1	1	1	1	TAF8	TAF8 RNA polymerase II, TATA box binding protein (TBP)-associated factor, 43kDa
hsa-miR-509-3p	0	0	1	1	1	1	INPP5B	inositol polyphosphate-5-phosphatase, 75kDa
hsa-miR-509-3p	0	0	1	1	1	1	KLHL4	kelch-like 4 (Drosophila)
hsa-miR-509-3p	0	0	1	1	0	0	TREML1	triggering receptor expressed on myeloid cells-like 1
hsa-miR-509-3p	0	0	1	1	1	1	PPA1	pyrophosphatase (inorganic) 1
hsa-miR-509-3p	0	0	1	1	0	0	GARNL3	GTPase activating Rap/RanGAP domain-like 3
hsa-miR-509-3p	0	0	0	1	1	1	TTI1	TELO2 interacting protein 1
hsa-miR-509-3p	0	0	1	1	1	1	HERC4	HECT and RLD domain containing E3 ubiquitin protein ligase 4
hsa-miR-509-3p	0	0	0	1	0	0	SERINC2	serine incorporator 2
hsa-miR-509-3p	0	0	1	1	1	1	FABP3	fatty acid binding protein 3, muscle and heart (mammary-derived growth inhibitor)
hsa-miR-509-3p	1	0	1	1	1	1	PUM1	pumilio homolog 1 (Drosophila)
hsa-miR-509-3p	0	0	1	1	1	1	PSMD5	proteasome (prosome, macropain) 26S subunit, non-ATPase, 5
hsa-miR-509-3p	0	0	0	1	1	1	FGR	Gardner-Rasheed feline sarcoma viral (v-fgr) oncogene homolog
hsa-miR-509-3p	0	0	1	1	0	0	SYTL1	synaptotagmin-like 1
hsa-miR-509-3p	0	0	0	1	0	0	ROMO1	reactive oxygen species modulator 1
hsa-miR-509-3p	0	0	1	1	1	1	SLC9A1	solute carrier family 9, subfamily A (NHE1, cation proton antiporter 1), member 1
hsa-miR-509-3p	1	0	1	1	1	1	CSGALNACT2	chondroitin sulfate N-acetylgalactosaminyltransferase 2
hsa-miR-509-3p	1	0	1	1	1	1	LYPLA2	lysophospholipase II
hsa-miR-509-3p	0	0	1	1	0	0	P2RY4	pyrimidinergic receptor P2Y, G-protein coupled, 4
hsa-miR-509-3p	0	0	0	1	0	0	PDE6G	phosphodiesterase 6G, cGMP-specific, rod, gamma
hsa-miR-509-3p	0	0	1	1	1	1	NIPSNAP3A	nipsnap homolog 3A (C. elegans)
hsa-miR-509-3p	0	0	1	1	0	0	PARD3	par-3 partitioning defective 3 homolog (C. elegans)
hsa-miR-509-3p	0	0	1	1	1	1	ALDOB	aldolase B, fructose-bisphosphate
hsa-miR-509-3p	1	0	1	1	1	1	NUP35	nucleoporin 35kDa
hsa-miR-509-3p	0	0	1	1	0	0	TRO	trophinin
hsa-miR-509-3p	0	0	0	1	1	1	TMCO4	transmembrane and coiled-coil domains 4
hsa-miR-509-3p	0	0	1	1	1	1	PRRT1	proline-rich transmembrane protein 1
hsa-miR-509-3p	1	1	1	1	1	1	MAP3K8	mitogen-activated protein kinase kinase kinase 8
hsa-miR-509-3p	1	0	0	1	1	1	DCUN1D2	DCN1, defective in cullin neddylation 1, domain containing 2 (S. cerevisiae)
hsa-miR-509-3p	0	0	1	1	1	1	SDHD	succinate dehydrogenase complex, subunit D, integral membrane protein
hsa-miR-509-3p	0	0	0	1	0	0	LOC100130657	uncharacterized LOC100130657
hsa-miR-509-3p	1	0	1	1	1	1	NEU1	sialidase 1 (lysosomal sialidase)
hsa-miR-509-3p	1	0	1	1	1	1	C20orf112	chromosome 20 open reading frame 112
hsa-miR-509-3p	1	0	1	1	0	0	MAGED1	melanoma antigen family D, 1
hsa-miR-509-3p	1	0	1	1	1	1	MBD5	methyl-CpG binding domain protein 5
hsa-miR-509-3p	0	0	1	1	0	0	DDAH2	dimethylarginine dimethylaminohydrolase 2
hsa-miR-509-3p	1	0	1	1	1	1	DNAJC16	DnaJ (Hsp40) homolog, subfamily C, member 16
hsa-miR-509-3p	1	0	1	1	1	1	CLCN5	chloride channel, voltage-sensitive 5
hsa-miR-509-3p	1	0	1	1	1	1	ID1	inhibitor of DNA binding 1, dominant negative helix-loop-helix protein
hsa-miR-509-3p	0	0	0	1	0	0	A2LD1	AIG2-like domain 1
hsa-miR-509-3p	0	0	1	1	0	0	PCCA	propionyl CoA carboxylase, alpha polypeptide
hsa-miR-509-3p	1	0	0	1	1	1	PRAF2	PRA1 domain family, member 2
hsa-miR-509-3p	1	0	1	1	1	1	TLE4	transducin-like enhancer of split 4 (E(sp1) homolog, Drosophila)
hsa-miR-509-3p	0	0	1	1	1	1	ALDH1A1	aldehyde dehydrogenase 1 family, member A1
hsa-miR-509-3p	0	0	0	1	0	0	C1orf127	chromosome 1 open reading frame 127
hsa-miR-509-3p	0	0	1	1	0	0	TIMP1	TIMP metallopeptidase inhibitor 1
hsa-miR-509-3p	0	0	0	1	1	1	DCT	dopachrome tautomerase (dopachrome delta-isomerase, tyrosine-related protein 2)
hsa-miR-509-3p	0	0	0	1	0	0	ZNF311	zinc finger protein 311
hsa-miR-509-3p	0	0	1	1	0	0	SPATC1	spermatogenesis and centriole associated 1
hsa-miR-509-3p	0	0	1	1	1	1	ERRFI1	ERBB receptor feedback inhibitor 1
hsa-miR-509-3p	0	0	1	1	0	0	TCTN1	tectonic family member 1
hsa-miR-509-3p	0	0	1	1	0	0	FAM216A	family with sequence similarity 216, member A
hsa-miR-509-3p	0	0	0	1	1	1	KRTAP9-3	keratin associated protein 9-3
hsa-miR-509-3p	0	0	1	1	0	0	TOMM5	translocase of outer mitochondrial membrane 5 homolog (yeast)
hsa-miR-509-3p	1	0	1	1	1	1	RRBP1	ribosome binding protein 1 homolog 180kDa (dog)
hsa-miR-509-3p	0	0	0	1	0	0	ZNF227	zinc finger protein 227
hsa-miR-509-3p	1	0	1	1	1	1	FAM65B	family with sequence similarity 65, member B
hsa-miR-509-3p	0	0	1	1	0	0	PGA4	pepsinogen 4, group I (pepsinogen A)
hsa-miR-509-3p	1	0	1	1	1	1	PKHD1L1	polycystic kidney and hepatic disease 1 (autosomal recessive)-like 1
hsa-miR-509-3p	0	0	1	1	1	1	FAM213B	family with sequence similarity 213, member B
hsa-miR-509-3p	0	0	0	1	0	0	LPAR6	lysophosphatidic acid receptor 6
hsa-miR-509-3p	0	0	1	1	1	1	PREPL	prolyl endopeptidase-like
hsa-miR-509-3p	0	0	0	1	0	0	LIG3	ligase III, DNA, ATP-dependent
hsa-miR-509-3p	0	0	1	1	1	1	C12orf50	chromosome 12 open reading frame 50
hsa-miR-509-3p	1	0	0	1	1	1	NADK	NAD kinase
hsa-miR-509-3p	0	0	0	1	0	0	PHYH	phytanoyl-CoA 2-hydroxylase
hsa-miR-509-3p	0	0	0	1	0	0	OXER1	oxoeicosanoid (OXE) receptor 1
hsa-miR-509-3p	0	0	0	1	0	0	UCMA	upper zone of growth plate and cartilage matrix associated
hsa-miR-509-3p	0	0	1	1	1	1	MCM8	minichromosome maintenance complex component 8
hsa-miR-509-3p	0	0	1	1	1	1	MAGEB2	melanoma antigen family B, 2
hsa-miR-509-3p	0	0	0	1	1	1	MAGEB6	melanoma antigen family B, 6
hsa-miR-509-3p	0	0	1	1	0	0	DMKN	dermokine
hsa-miR-509-3p	0	0	1	1	1	1	KIAA1161	KIAA1161
hsa-miR-509-3p	0	0	1	1	0	0	PDK3	pyruvate dehydrogenase kinase, isozyme 3
hsa-miR-509-3p	0	0	1	1	1	1	ACO1	aconitase 1, soluble
hsa-miR-509-3p	0	0	0	1	0	0	CDKL5	cyclin-dependent kinase-like 5
hsa-miR-509-3p	0	0	1	1	0	0	ATRAID	all-trans retinoic acid-induced differentiation factor
hsa-miR-509-3p	0	0	0	1	1	1	IFNA2	interferon, alpha 2
hsa-miR-509-3p	0	0	0	1	0	0	IFNA16	interferon, alpha 16
hsa-miR-509-3p	0	0	0	1	0	0	IFNA4	interferon, alpha 4
hsa-miR-509-3p	0	0	1	1	1	1	IFNA21	interferon, alpha 21
hsa-miR-509-3p	0	0	1	1	1	1	IFNW1	interferon, omega 1
hsa-miR-509-3p	0	0	0	1	0	0	EMILIN1	elastin microfibril interfacer 1
hsa-miR-509-3p	1	0	0	1	0	0	SERPINA3	serpin peptidase inhibitor, clade A (alpha-1 antiproteinase, antitrypsin), member 3
hsa-miR-509-3p	0	0	0	1	0	0	OR52A1	olfactory receptor, family 52, subfamily A, member 1
hsa-miR-509-3p	0	0	1	1	1	1	BTF3	basic transcription factor 3
hsa-miR-509-3p	1	0	1	1	1	1	PSIP1	PC4 and SFRS1 interacting protein 1
hsa-miR-509-3p	0	0	1	1	1	1	RAD17	RAD17 homolog (S. pombe)
hsa-miR-509-3p	0	0	0	1	1	1	GMDS	GDP-mannose 4,6-dehydratase
hsa-miR-509-3p	0	0	1	1	1	1	RPAIN	RPA interacting protein
hsa-miR-509-3p	1	0	0	1	1	1	MLANA	melan-A
hsa-miR-509-3p	0	0	0	1	0	0	DENND1C	DENN/MADD domain containing 1C
hsa-miR-509-3p	0	0	0	1	0	0	PP13004	uncharacterized LOC402481
hsa-miR-509-3p	0	0	0	1	1	1	C2orf50	chromosome 2 open reading frame 50
hsa-miR-509-3p	1	0	1	1	1	1	RCL1	RNA terminal phosphate cyclase-like 1
hsa-miR-509-3p	0	0	1	1	1	1	GGA1	golgi-associated, gamma adaptin ear containing, ARF binding protein 1
hsa-miR-509-3p	0	0	0	1	0	0	TAS2R14	taste receptor, type 2, member 14
hsa-miR-509-3p	0	0	0	1	0	0	TLR6	toll-like receptor 6
hsa-miR-509-3p	0	0	0	1	0	0	DEFB135	defensin, beta 135
hsa-miR-509-3p	0	0	1	1	1	1	DOCK8	dedicator of cytokinesis 8
hsa-miR-509-3p	0	0	0	1	1	1	ABCA3	ATP-binding cassette, sub-family A (ABC1), member 3
hsa-miR-509-3p	0	0	1	1	1	1	HTR3D	5-hydroxytryptamine (serotonin) receptor 3D, ionotropic
hsa-miR-509-3p	0	0	0	1	0	0	IFITM5	interferon induced transmembrane protein 5
hsa-miR-509-3p	0	0	1	1	0	0	DOK6	docking protein 6
hsa-miR-509-3p	0	0	0	1	1	1	FANCD2	Fanconi anemia, complementation group D2
hsa-miR-509-3p	1	0	1	1	0	0	KIAA1109	KIAA1109
hsa-miR-509-3p	0	0	1	1	1	1	GKAP1	G kinase anchoring protein 1
hsa-miR-509-3p	1	0	1	1	1	1	RNF180	ring finger protein 180
hsa-miR-509-3p	0	0	0	1	0	0	PLEKHM3	pleckstrin homology domain containing, family M, member 3
hsa-miR-509-3p	1	0	1	1	1	1	SLAIN1	SLAIN motif family, member 1
hsa-miR-509-3p	0	0	1	1	1	1	ALKBH8	alkB, alkylation repair homolog 8 (E. coli)
hsa-miR-509-3p	0	0	0	1	0	0	GXYLT2	glucoside xylosyltransferase 2
hsa-miR-509-3p	1	0	1	1	1	1	TEX14	testis expressed 14
hsa-miR-509-3p	0	0	1	1	1	1	KCNJ1	potassium inwardly-rectifying channel, subfamily J, member 1
hsa-miR-509-3p	0	0	0	1	1	1	TPMT	thiopurine S-methyltransferase
hsa-miR-509-3p	0	0	1	1	1	1	TYRP1	tyrosinase-related protein 1
hsa-miR-509-3p	1	0	1	0	1	1	CACNA1C	calcium channel, voltage-dependent, L type, alpha 1C subunit
hsa-miR-509-3p	0	0	0	1	1	1	RBMY1J	RNA binding motif protein, Y-linked, family 1, member J
hsa-miR-509-3p	0	0	0	1	1	1	RBMY1E	RNA binding motif protein, Y-linked, family 1, member E
hsa-miR-509-3p	0	0	0	1	1	1	RBMY1D	RNA binding motif protein, Y-linked, family 1, member D
hsa-miR-509-3p	1	0	1	1	1	1	NTRK3	neurotrophic tyrosine kinase, receptor, type 3
hsa-miR-509-3p	1	0	1	1	1	1	RHOBTB1	Rho-related BTB domain containing 1
hsa-miR-509-3p	1	0	1	1	1	1	PTPRD	protein tyrosine phosphatase, receptor type, D
hsa-miR-509-3p	0	0	1	1	1	1	SORD	sorbitol dehydrogenase
hsa-miR-509-3p	1	0	1	0	1	1	GAS7	growth arrest-specific 7
hsa-miR-509-3p	0	0	1	1	1	1	STBD1	starch binding domain 1
hsa-miR-509-3p	1	0	1	1	1	1	COCH	coagulation factor C homolog, cochlin (Limulus polyphemus)
hsa-miR-509-3p	1	0	0	0	1	1	ARHGAP1	Rho GTPase activating protein 1
hsa-miR-509-3p	1	0	0	1	1	1	IKZF1	IKAROS family zinc finger 1 (Ikaros)
hsa-miR-509-3p	0	0	1	1	1	1	PEG3	paternally expressed 3
hsa-miR-509-3p	0	0	1	1	1	1	CEACAM7	carcinoembryonic antigen-related cell adhesion molecule 7
hsa-miR-509-3p	1	0	1	1	1	1	RAC1	ras-related C3 botulinum toxin substrate 1 (rho family, small GTP binding protein Rac1)
hsa-miR-509-3p	0	0	1	1	1	1	TMOD3	tropomodulin 3 (ubiquitous)
hsa-miR-509-3p	1	0	1	1	1	1	RHOBTB3	Rho-related BTB domain containing 3
hsa-miR-509-3p	1	0	1	0	1	1	SNX13	sorting nexin 13
hsa-miR-509-3p	1	0	1	1	1	1	ST8SIA3	ST8 alpha-N-acetyl-neuraminide alpha-2,8-sialyltransferase 3
hsa-miR-509-3p	0	0	1	1	1	1	PTPN22	protein tyrosine phosphatase, non-receptor type 22 (lymphoid)
hsa-miR-509-3p	1	0	1	1	1	1	PHF20L1	PHD finger protein 20-like 1
hsa-miR-509-3p	0	0	1	1	1	1	ZCCHC10	zinc finger, CCHC domain containing 10
hsa-miR-509-3p	0	0	1	1	1	1	BDH2	3-hydroxybutyrate dehydrogenase, type 2
hsa-miR-509-3p	0	0	1	0	1	1	APOL6	apolipoprotein L, 6
hsa-miR-509-3p	0	0	0	1	1	1	LONP2	lon peptidase 2, peroxisomal
hsa-miR-509-3p	0	0	1	1	1	1	MYPN	myopalladin
hsa-miR-509-3p	1	0	1	0	1	1	FAM78A	family with sequence similarity 78, member A
hsa-miR-509-3p	0	0	1	1	1	1	OXGR1	oxoglutarate (alpha-ketoglutarate) receptor 1
hsa-miR-509-3p	1	0	1	0	1	1	MCFD2	multiple coagulation factor deficiency 2
hsa-miR-509-3p	1	0	1	1	1	1	MAPK1IP1L	mitogen-activated protein kinase 1 interacting protein 1-like
hsa-miR-509-3p	0	0	0	0	1	1	FAM218A	family with sequence similarity 218, member A
hsa-miR-509-3p	1	0	1	0	1	1	ENPP6	ectonucleotide pyrophosphatase/phosphodiesterase 6
hsa-miR-509-3p	0	0	0	1	1	1	C20orf197	chromosome 20 open reading frame 197
hsa-miR-509-3p	0	0	1	0	1	1	GATS	GATS, stromal antigen 3 opposite strand
hsa-miR-509-3p	1	0	1	0	1	1	MMD2	monocyte to macrophage differentiation-associated 2
hsa-miR-509-3p	0	0	0	0	1	1	LOC730236	uncharacterized LOC730236
hsa-miR-509-3p	0	0	0	0	1	1	LOC645984	uncharacterized LOC645984
