# Supplementary material for: Profiling of Selected MicroRNAs in Proliferative Eutopic Endometrium of Women with Ovarian Endometriosis
Source: Biomed Res Int. 2015 Aug 20;2015:760698. doi: 10.1155/2015/760698 (PMC4558423; doi:10.1155/2015/760698)
Supplement: Supplementary file 1 — Table I: The names of miRNAs significantly differentially expressed between eutopic endometrium of patients with endometriosis vs eutopic endometrium of patients without endometriosis. Table II: The associations between miRNA and mRNA, which presents detailed results of the search of six major databases i.e targetscan, tarbase, miranda, mirbase, mirtarget2 and pictar. [file 760698.f1.zip › 760698.f1/Table II/hsa-miR-511.tsv]

miR	targetscan	tarbase	miranda	mirbase	mirtarget2	pictar	GeneSymbol	GeneName
hsa-miR-511	1	0	1	1	1	1	ZFYVE16	zinc finger, FYVE domain containing 16
hsa-miR-511	1	0	1	1	0	0	RAPGEF2	Rap guanine nucleotide exchange factor (GEF) 2
hsa-miR-511	1	0	1	1	1	1	PRUNE2	prune homolog 2 (Drosophila)
hsa-miR-511	0	0	1	1	1	1	PPIP5K1	diphosphoinositol pentakisphosphate kinase 1
hsa-miR-511	1	0	1	1	1	1	ABCC5	ATP-binding cassette, sub-family C (CFTR/MRP), member 5
hsa-miR-511	1	0	1	0	1	1	PTPRT	protein tyrosine phosphatase, receptor type, T
hsa-miR-511	1	0	1	1	1	1	NUPL1	nucleoporin like 1
hsa-miR-511	1	0	1	0	1	1	MTSS1	metastasis suppressor 1
hsa-miR-511	0	0	1	1	1	1	PDE4DIP	phosphodiesterase 4D interacting protein
hsa-miR-511	1	0	1	0	1	1	CEP350	centrosomal protein 350kDa
hsa-miR-511	0	0	1	1	1	1	NEU3	sialidase 3 (membrane sialidase)
hsa-miR-511	1	0	1	1	1	1	NRXN1	neurexin 1
hsa-miR-511	0	0	1	1	1	1	PHLDB1	pleckstrin homology-like domain, family B, member 1
hsa-miR-511	0	0	1	1	1	1	GPR116	G protein-coupled receptor 116
hsa-miR-511	1	0	1	0	1	1	RBM12	RNA binding motif protein 12
hsa-miR-511	1	0	1	0	1	1	LPHN3	latrophilin 3
hsa-miR-511	1	0	1	1	1	1	LPHN2	latrophilin 2
hsa-miR-511	0	0	1	1	1	1	MAU2	MAU2 chromatid cohesion factor homolog (C. elegans)
hsa-miR-511	1	0	1	1	1	1	CALCR	calcitonin receptor
hsa-miR-511	1	0	1	1	1	1	NLGN4Y	neuroligin 4, Y-linked
hsa-miR-511	1	0	1	1	1	1	RGL1	ral guanine nucleotide dissociation stimulator-like 1
hsa-miR-511	0	0	1	0	0	0	THSD7A	thrombospondin, type I, domain containing 7A
hsa-miR-511	1	0	1	1	1	1	PALLD	palladin, cytoskeletal associated protein
hsa-miR-511	1	0	1	1	0	0	FRMD4B	FERM domain containing 4B
hsa-miR-511	0	0	1	1	1	1	AGTPBP1	ATP/GTP binding protein 1
hsa-miR-511	1	0	1	1	0	0	KIAA1045	KIAA1045
hsa-miR-511	1	0	1	1	1	1	PLCL2	phospholipase C-like 2
hsa-miR-511	1	0	1	0	1	1	ODZ2	odz, odd Oz/ten-m homolog 2 (Drosophila)
hsa-miR-511	1	0	1	1	1	1	RALGAPB	Ral GTPase activating protein, beta subunit (non-catalytic)
hsa-miR-511	1	0	1	1	1	1	RIMKLB	ribosomal modification protein rimK-like family member B
hsa-miR-511	1	0	1	1	1	1	MKL2	MKL/myocardin-like 2
hsa-miR-511	0	0	1	0	0	0	MTA3	metastasis associated 1 family, member 3
hsa-miR-511	1	0	1	1	1	1	STK36	serine/threonine kinase 36
hsa-miR-511	1	0	1	0	0	0	ODZ4	odz, odd Oz/ten-m homolog 4 (Drosophila)
hsa-miR-511	0	0	1	1	1	1	KLHL13	kelch-like 13 (Drosophila)
hsa-miR-511	1	0	1	1	1	1	PCDH19	protocadherin 19
hsa-miR-511	1	0	1	0	1	1	KCTD16	potassium channel tetramerisation domain containing 16
hsa-miR-511	1	0	1	1	1	1	TAOK1	TAO kinase 1
hsa-miR-511	1	0	1	1	1	1	LRRC7	leucine rich repeat containing 7
hsa-miR-511	0	0	1	0	0	0	COG1	component of oligomeric golgi complex 1
hsa-miR-511	1	0	1	1	0	0	BEGAIN	brain-enriched guanylate kinase-associated homolog (rat)
hsa-miR-511	0	0	1	1	0	0	ISLR2	immunoglobulin superfamily containing leucine-rich repeat 2
hsa-miR-511	0	0	1	0	1	1	KIAA1468	KIAA1468
hsa-miR-511	1	0	1	0	1	1	SEMA6D	sema domain, transmembrane domain (TM), and cytoplasmic domain, (semaphorin) 6D
hsa-miR-511	0	0	1	0	0	0	NYAP2	neuronal tyrosine-phosphorylated phosphoinositide-3-kinase adaptor 2
hsa-miR-511	1	0	1	1	1	1	FRAS1	Fraser syndrome 1
hsa-miR-511	1	0	1	1	1	1	FAM214B	family with sequence similarity 214, member B
hsa-miR-511	1	0	1	0	1	1	ZNF295	zinc finger protein 295
hsa-miR-511	1	0	1	0	1	1	LMO3	LIM domain only 3 (rhombotin-like 2)
hsa-miR-511	1	0	1	0	1	1	IGDCC4	immunoglobulin superfamily, DCC subclass, member 4
hsa-miR-511	1	0	1	0	0	0	TANC2	tetratricopeptide repeat, ankyrin repeat and coiled-coil containing 2
hsa-miR-511	0	0	1	0	0	0	TTC28-AS1	TTC28 antisense RNA 1
hsa-miR-511	1	0	1	1	0	0	ARHGAP39	Rho GTPase activating protein 39
hsa-miR-511	1	0	1	1	1	1	ITPRIP	inositol 1,4,5-trisphosphate receptor interacting protein
hsa-miR-511	1	0	1	1	1	1	CDK13	cyclin-dependent kinase 13
hsa-miR-511	1	0	1	1	1	1	LCOR	ligand dependent nuclear receptor corepressor
hsa-miR-511	1	0	1	1	0	0	ZNF527	zinc finger protein 527
hsa-miR-511	0	0	1	1	1	1	SLC11A2	solute carrier family 11 (proton-coupled divalent metal ion transporters), member 2
hsa-miR-511	1	0	1	1	1	1	LSM14A	LSM14A, SCD6 homolog A (S. cerevisiae)
hsa-miR-511	0	0	1	1	0	0	TPGS2	tubulin polyglutamylase complex subunit 2
hsa-miR-511	1	0	1	1	1	1	ZNF827	zinc finger protein 827
hsa-miR-511	1	0	1	1	1	1	POGZ	pogo transposable element with ZNF domain
hsa-miR-511	1	0	1	1	1	1	TET2	tet methylcytosine dioxygenase 2
hsa-miR-511	1	0	1	1	1	1	SH3TC2	SH3 domain and tetratricopeptide repeats 2
hsa-miR-511	1	0	1	0	0	0	RNF169	ring finger protein 169
hsa-miR-511	1	0	1	1	1	1	FHOD3	formin homology 2 domain containing 3
hsa-miR-511	0	0	1	0	1	1	RASSF8	Ras association (RalGDS/AF-6) domain family (N-terminal) member 8
hsa-miR-511	1	0	1	1	1	1	RFX4	regulatory factor X, 4 (influences HLA class II expression)
hsa-miR-511	0	0	1	1	0	0	FAM208B	family with sequence similarity 208, member B
hsa-miR-511	0	0	1	1	1	1	PAK3	p21 protein (Cdc42/Rac)-activated kinase 3
hsa-miR-511	1	0	1	1	1	1	PAN3	PAN3 poly(A) specific ribonuclease subunit homolog (S. cerevisiae)
hsa-miR-511	1	0	1	1	1	1	KCNMA1	potassium large conductance calcium-activated channel, subfamily M, alpha member 1
hsa-miR-511	1	0	1	1	1	1	SCN5A	sodium channel, voltage-gated, type V, alpha subunit
hsa-miR-511	1	1	1	1	1	1	BACE1	beta-site APP-cleaving enzyme 1
hsa-miR-511	0	0	1	1	1	1	DOCK8	dedicator of cytokinesis 8
hsa-miR-511	0	0	1	1	1	1	FN1	fibronectin 1
hsa-miR-511	0	0	1	0	1	1	ACE2	angiotensin I converting enzyme (peptidyl-dipeptidase A) 2
hsa-miR-511	1	0	1	1	1	1	TRIM36	tripartite motif containing 36
hsa-miR-511	0	0	1	1	1	1	ING4	inhibitor of growth family, member 4
hsa-miR-511	0	0	1	1	0	0	HFM1	HFM1, ATP-dependent DNA helicase homolog (S. cerevisiae)
hsa-miR-511	0	0	1	0	1	1	ITPR1	inositol 1,4,5-trisphosphate receptor, type 1
hsa-miR-511	1	0	1	1	1	1	BACH2	BTB and CNC homology 1, basic leucine zipper transcription factor 2
hsa-miR-511	1	0	1	1	0	0	GRIN1	glutamate receptor, ionotropic, N-methyl D-aspartate 1
hsa-miR-511	1	0	1	0	1	1	PCDHA13	protocadherin alpha 13
hsa-miR-511	1	0	1	1	1	1	PCDHA4	protocadherin alpha 4
hsa-miR-511	1	0	1	1	1	1	RPS6KA3	ribosomal protein S6 kinase, 90kDa, polypeptide 3
hsa-miR-511	1	0	1	1	1	1	NFYC	nuclear transcription factor Y, gamma
hsa-miR-511	1	0	1	1	1	1	PHC1	polyhomeotic homolog 1 (Drosophila)
hsa-miR-511	1	0	1	1	1	1	MKNK2	MAP kinase interacting serine/threonine kinase 2
hsa-miR-511	1	0	1	1	1	1	DTNA	dystrobrevin, alpha
hsa-miR-511	1	0	1	1	1	1	EIF4G3	eukaryotic translation initiation factor 4 gamma, 3
hsa-miR-511	1	0	1	1	0	0	CACNB1	calcium channel, voltage-dependent, beta 1 subunit
hsa-miR-511	1	0	1	1	0	0	TSPYL2	TSPY-like 2
hsa-miR-511	1	0	1	1	1	1	FMR1	fragile X mental retardation 1
hsa-miR-511	1	0	1	1	1	1	REV3L	REV3-like, polymerase (DNA directed), zeta, catalytic subunit
hsa-miR-511	0	0	1	1	1	1	DGKE	diacylglycerol kinase, epsilon 64kDa
hsa-miR-511	1	0	1	1	1	1	SATB2	SATB homeobox 2
hsa-miR-511	1	0	1	1	1	1	TBX2	T-box 2
hsa-miR-511	1	0	1	0	1	1	CDON	Cdon homolog (mouse)
hsa-miR-511	0	0	1	1	1	1	RYR1	ryanodine receptor 1 (skeletal)
hsa-miR-511	1	0	1	1	0	0	FGFR3	fibroblast growth factor receptor 3
hsa-miR-511	1	0	1	1	1	1	MINK1	misshapen-like kinase 1
hsa-miR-511	0	0	1	0	0	0	CACNA1B	calcium channel, voltage-dependent, N type, alpha 1B subunit
hsa-miR-511	0	0	1	1	1	1	ACO1	aconitase 1, soluble
hsa-miR-511	1	0	1	1	1	1	MYO5A	myosin VA (heavy chain 12, myoxin)
hsa-miR-511	1	0	1	1	1	1	LIMA1	LIM domain and actin binding 1
hsa-miR-511	0	0	1	1	0	0	CFLAR	CASP8 and FADD-like apoptosis regulator
hsa-miR-511	1	0	1	1	1	1	IPO8	importin 8
hsa-miR-511	1	0	1	1	1	1	ARHGEF3	Rho guanine nucleotide exchange factor (GEF) 3
hsa-miR-511	1	0	1	1	1	1	TLE1	transducin-like enhancer of split 1 (E(sp1) homolog, Drosophila)
hsa-miR-511	1	0	1	1	1	1	TEAD1	TEA domain family member 1 (SV40 transcriptional enhancer factor)
hsa-miR-511	1	0	1	1	1	1	PHLDB2	pleckstrin homology-like domain, family B, member 2
hsa-miR-511	0	0	1	1	1	1	PLD1	phospholipase D1, phosphatidylcholine-specific
hsa-miR-511	1	0	1	0	1	1	PDE7B	phosphodiesterase 7B
hsa-miR-511	1	0	1	1	1	1	MEF2D	myocyte enhancer factor 2D
hsa-miR-511	1	0	1	1	1	1	PICALM	phosphatidylinositol binding clathrin assembly protein
hsa-miR-511	0	0	1	1	1	1	ACLY	ATP citrate lyase
hsa-miR-511	0	0	1	1	1	1	CD55	CD55 molecule, decay accelerating factor for complement (Cromer blood group)
hsa-miR-511	0	0	1	0	0	0	MIAT	myocardial infarction associated transcript (non-protein coding)
hsa-miR-511	0	0	1	1	1	1	BRCA1	breast cancer 1, early onset
hsa-miR-511	1	0	1	1	1	1	DLGAP2	discs, large (Drosophila) homolog-associated protein 2
hsa-miR-511	1	0	1	1	1	1	SLC4A4	solute carrier family 4, sodium bicarbonate cotransporter, member 4
hsa-miR-511	1	0	1	1	1	1	CBFA2T2	core-binding factor, runt domain, alpha subunit 2; translocated to, 2
hsa-miR-511	0	0	1	1	0	0	SPTBN2	spectrin, beta, non-erythrocytic 2
hsa-miR-511	0	0	1	0	0	0	ZNRD1-AS1	ZNRD1 antisense RNA 1
hsa-miR-511	1	0	1	1	1	1	MYT1L	myelin transcription factor 1-like
hsa-miR-511	1	0	1	1	1	1	SOCS2	suppressor of cytokine signaling 2
hsa-miR-511	0	0	1	1	1	1	UBE4B	ubiquitination factor E4B
hsa-miR-511	1	0	1	1	1	1	MRAS	muscle RAS oncogene homolog
hsa-miR-511	1	0	1	1	1	1	LDB2	LIM domain binding 2
hsa-miR-511	0	0	1	1	1	1	CD84	CD84 molecule
hsa-miR-511	0	0	1	1	1	1	CYP4F3	cytochrome P450, family 4, subfamily F, polypeptide 3
hsa-miR-511	1	0	1	1	1	1	SHOC2	soc-2 suppressor of clear homolog (C. elegans)
hsa-miR-511	1	0	1	1	1	1	MBNL2	muscleblind-like splicing regulator 2
hsa-miR-511	0	0	1	1	1	1	CRYL1	crystallin, lambda 1
hsa-miR-511	0	0	1	1	1	1	RGS7	regulator of G-protein signaling 7
hsa-miR-511	0	0	1	1	1	1	BBS9	Bardet-Biedl syndrome 9
hsa-miR-511	1	0	1	0	1	1	MAP4K4	mitogen-activated protein kinase kinase kinase kinase 4
hsa-miR-511	0	0	1	1	1	1	SH2D1A	SH2 domain containing 1A
hsa-miR-511	0	0	1	1	1	1	EIF2A	eukaryotic translation initiation factor 2A, 65kDa
hsa-miR-511	1	0	1	1	1	1	SORBS1	sorbin and SH3 domain containing 1
hsa-miR-511	0	0	1	0	1	1	CLEC5A	C-type lectin domain family 5, member A
hsa-miR-511	1	0	1	1	1	1	HMG20A	high mobility group 20A
hsa-miR-511	1	0	1	1	1	1	MYNN	myoneurin
hsa-miR-511	0	0	1	1	1	1	AIG1	androgen-induced 1
hsa-miR-511	1	0	1	1	1	1	AGPAT3	1-acylglycerol-3-phosphate O-acyltransferase 3
hsa-miR-511	0	0	1	0	1	1	ZDHHC17	zinc finger, DHHC-type containing 17
hsa-miR-511	1	0	1	1	0	0	ZCCHC4	zinc finger, CCHC domain containing 4
hsa-miR-511	1	0	1	1	1	1	USP25	ubiquitin specific peptidase 25
hsa-miR-511	1	0	1	1	1	1	C16orf70	chromosome 16 open reading frame 70
hsa-miR-511	1	0	1	1	1	1	TACC2	transforming, acidic coiled-coil containing protein 2
hsa-miR-511	0	0	1	0	1	1	CLDN2	claudin 2
hsa-miR-511	0	0	1	1	0	0	FXYD5	FXYD domain containing ion transport regulator 5
hsa-miR-511	0	0	1	1	1	1	NPC1L1	NPC1 (Niemann-Pick disease, type C1, gene)-like 1
hsa-miR-511	0	0	1	1	1	1	SLC39A8	solute carrier family 39 (zinc transporter), member 8
hsa-miR-511	0	0	1	0	1	1	SLC38A4	solute carrier family 38, member 4
hsa-miR-511	1	0	1	1	1	1	SENP7	SUMO1/sentrin specific peptidase 7
hsa-miR-511	1	0	1	1	1	1	TSC22D2	TSC22 domain family, member 2
hsa-miR-511	1	0	1	1	1	1	FAM49B	family with sequence similarity 49, member B
hsa-miR-511	1	0	1	1	1	1	EIF4A2	eukaryotic translation initiation factor 4A2
hsa-miR-511	1	0	1	1	1	1	SUFU	suppressor of fused homolog (Drosophila)
hsa-miR-511	0	0	1	1	0	0	LGALS12	lectin, galactoside-binding, soluble, 12
hsa-miR-511	1	0	1	1	1	1	OGT	O-linked N-acetylglucosamine (GlcNAc) transferase
hsa-miR-511	0	0	1	1	1	1	NKX3-1	NK3 homeobox 1
hsa-miR-511	0	0	1	0	0	0	TIGD7	tigger transposable element derived 7
hsa-miR-511	1	0	1	1	1	1	RBM47	RNA binding motif protein 47
hsa-miR-511	1	0	1	1	1	1	SH3GLB1	SH3-domain GRB2-like endophilin B1
hsa-miR-511	1	0	1	0	1	1	PARP11	poly (ADP-ribose) polymerase family, member 11
hsa-miR-511	1	0	1	0	1	1	TRPS1	trichorhinophalangeal syndrome I
hsa-miR-511	0	0	1	1	1	1	ZNF331	zinc finger protein 331
hsa-miR-511	0	0	1	0	1	1	ERBB2IP	erbb2 interacting protein
hsa-miR-511	1	0	1	1	1	1	PCDH11Y	protocadherin 11 Y-linked
hsa-miR-511	1	0	1	1	1	1	CALN1	calneuron 1
hsa-miR-511	1	0	1	1	1	1	TMUB2	transmembrane and ubiquitin-like domain containing 2
hsa-miR-511	0	0	1	1	1	1	SLC37A1	solute carrier family 37 (glycerol-3-phosphate transporter), member 1
hsa-miR-511	1	0	1	1	1	1	VEGFA	vascular endothelial growth factor A
hsa-miR-511	1	0	1	1	1	1	SPTBN4	spectrin, beta, non-erythrocytic 4
hsa-miR-511	0	0	1	0	1	1	C1QTNF7	C1q and tumor necrosis factor related protein 7
hsa-miR-511	1	0	1	1	1	1	CALU	calumenin
hsa-miR-511	1	0	1	0	1	1	WIPF2	WAS/WASL interacting protein family, member 2
hsa-miR-511	1	0	1	1	1	1	CALCOCO1	calcium binding and coiled-coil domain 1
hsa-miR-511	0	0	1	0	0	0	NBPF10	neuroblastoma breakpoint family, member 10
hsa-miR-511	1	0	1	1	1	1	PDE8A	phosphodiesterase 8A
hsa-miR-511	0	0	1	0	1	1	MYO3B	myosin IIIB
hsa-miR-511	0	0	1	1	1	1	ORMDL1	ORM1-like 1 (S. cerevisiae)
hsa-miR-511	1	0	1	1	1	1	NTRK2	neurotrophic tyrosine kinase, receptor, type 2
hsa-miR-511	1	0	1	1	1	1	ST3GAL3	ST3 beta-galactoside alpha-2,3-sialyltransferase 3
hsa-miR-511	0	0	1	0	0	0	RMST	rhabdomyosarcoma 2 associated transcript (non-protein coding)
hsa-miR-511	1	0	1	1	0	0	YTHDF2	YTH domain family, member 2
hsa-miR-511	1	0	1	1	0	0	SEPT8	septin 8
hsa-miR-511	1	0	1	1	1	1	ZC3H14	zinc finger CCCH-type containing 14
hsa-miR-511	1	0	1	1	1	1	WAPAL	wings apart-like homolog (Drosophila)
hsa-miR-511	0	0	1	1	0	0	HOPX	HOP homeobox
hsa-miR-511	0	0	1	1	1	1	TTLL11	tubulin tyrosine ligase-like family, member 11
hsa-miR-511	0	0	1	1	1	1	BMP2K	BMP2 inducible kinase
hsa-miR-511	0	0	1	1	1	1	PTK7	PTK7 protein tyrosine kinase 7
hsa-miR-511	0	0	1	1	1	1	ZNF638	zinc finger protein 638
hsa-miR-511	1	0	1	0	1	1	IL1RAP	interleukin 1 receptor accessory protein
hsa-miR-511	1	0	1	1	1	1	AFF2	AF4/FMR2 family, member 2
hsa-miR-511	0	0	1	1	1	1	KCNJ13	potassium inwardly-rectifying channel, subfamily J, member 13
hsa-miR-511	1	0	1	1	1	1	ZNF281	zinc finger protein 281
hsa-miR-511	0	0	1	0	0	0	ADAM5	ADAM metallopeptidase domain 5, pseudogene
hsa-miR-511	0	0	1	1	1	1	HIRIP3	HIRA interacting protein 3
hsa-miR-511	1	0	1	0	1	1	CACNA1C	calcium channel, voltage-dependent, L type, alpha 1C subunit
hsa-miR-511	0	0	1	1	0	0	SERGEF	secretion regulating guanine nucleotide exchange factor
hsa-miR-511	0	0	1	0	0	0	CACNA2D3	calcium channel, voltage-dependent, alpha 2/delta subunit 3
hsa-miR-511	0	0	1	1	1	1	RANBP17	RAN binding protein 17
hsa-miR-511	0	0	1	1	1	1	CD1E	CD1e molecule
hsa-miR-511	0	0	1	1	1	1	CHST11	carbohydrate (chondroitin 4) sulfotransferase 11
hsa-miR-511	0	0	1	1	1	1	STK33	serine/threonine kinase 33
hsa-miR-511	1	0	1	1	1	1	PALM2	paralemmin 2
hsa-miR-511	1	0	1	1	1	1	RAB3IP	RAB3A interacting protein (rabin3)
hsa-miR-511	1	0	1	1	1	1	NRXN3	neurexin 3
hsa-miR-511	0	0	1	0	1	1	SRPK1	SRSF protein kinase 1
hsa-miR-511	1	0	1	1	1	1	NAV3	neuron navigator 3
hsa-miR-511	0	0	1	1	1	1	TRDN	triadin
hsa-miR-511	0	0	1	1	0	0	MBD1	methyl-CpG binding domain protein 1
hsa-miR-511	1	0	1	1	1	1	ARL4C	ADP-ribosylation factor-like 4C
hsa-miR-511	0	0	1	1	1	1	PHACTR3	phosphatase and actin regulator 3
hsa-miR-511	0	0	1	1	1	1	PPARG	peroxisome proliferator-activated receptor gamma
hsa-miR-511	0	0	1	1	1	1	ABLIM2	actin binding LIM protein family, member 2
hsa-miR-511	1	0	1	1	1	1	PPP1R9A	protein phosphatase 1, regulatory subunit 9A
hsa-miR-511	0	0	1	1	0	0	NHLRC2	NHL repeat containing 2
hsa-miR-511	0	0	1	1	0	0	ACSS2	acyl-CoA synthetase short-chain family member 2
hsa-miR-511	1	0	1	0	1	1	NFAT5	nuclear factor of activated T-cells 5, tonicity-responsive
hsa-miR-511	1	0	1	1	0	0	DUS2L	dihydrouridine synthase 2-like, SMM1 homolog (S. cerevisiae)
hsa-miR-511	0	0	1	0	0	0	TUG1	taurine upregulated 1 (non-protein coding)
hsa-miR-511	0	0	1	1	1	1	SEMA5B	sema domain, seven thrombospondin repeats (type 1 and type 1-like), transmembrane domain (TM) and short cytoplasmic domain, (semaphorin) 5B
hsa-miR-511	1	0	1	1	1	1	MEIS2	Meis homeobox 2
hsa-miR-511	0	0	1	0	0	0	TPTEP1	transmembrane phosphatase with tensin homology pseudogene 1
hsa-miR-511	1	0	1	1	1	1	HNRNPF	heterogeneous nuclear ribonucleoprotein F
hsa-miR-511	0	0	1	1	1	1	STOX2	storkhead box 2
hsa-miR-511	1	0	1	0	1	1	VPS13D	vacuolar protein sorting 13 homolog D (S. cerevisiae)
hsa-miR-511	0	0	1	1	1	1	ARAP3	ArfGAP with RhoGAP domain, ankyrin repeat and PH domain 3
hsa-miR-511	1	0	1	1	1	1	EIF2C1	eukaryotic translation initiation factor 2C, 1
hsa-miR-511	1	0	1	1	1	1	MYEF2	myelin expression factor 2
hsa-miR-511	1	0	1	1	1	1	C12orf23	chromosome 12 open reading frame 23
hsa-miR-511	1	0	1	1	1	1	SUN1	Sad1 and UNC84 domain containing 1
hsa-miR-511	1	0	1	1	1	1	GALNT14	UDP-N-acetyl-alpha-D-galactosamine:polypeptide N-acetylgalactosaminyltransferase 14 (GalNAc-T14)
hsa-miR-511	0	0	1	0	0	0	SOX2-OT	SOX2 overlapping transcript (non-protein coding)
hsa-miR-511	0	0	1	0	0	0	DUXAP10	double homeobox A pseudogene 10
hsa-miR-511	1	0	1	1	1	1	WDTC1	WD and tetratricopeptide repeats 1
hsa-miR-511	1	0	1	1	1	1	SMEK2	SMEK homolog 2, suppressor of mek1 (Dictyostelium)
hsa-miR-511	0	0	1	1	1	1	TTC23	tetratricopeptide repeat domain 23
hsa-miR-511	0	0	1	1	1	1	LRRN1	leucine rich repeat neuronal 1
hsa-miR-511	0	0	1	0	0	0	MIRLET7BHG	MIRLET7B host gene (non-protein coding)
hsa-miR-511	0	0	1	0	0	0	LOC284561	uncharacterized LOC284561
hsa-miR-511	1	0	1	1	1	1	BAZ2A	bromodomain adjacent to zinc finger domain, 2A
hsa-miR-511	0	0	1	1	1	1	CXorf57	chromosome X open reading frame 57
hsa-miR-511	1	0	1	1	1	1	COPS7B	COP9 constitutive photomorphogenic homolog subunit 7B (Arabidopsis)
hsa-miR-511	0	0	1	0	0	0	LOC286059	tumor necrosis factor receptor superfamily, member 10d, decoy with truncated death domain pseudogene
hsa-miR-511	0	0	1	0	0	0	IFFO2	intermediate filament family orphan 2
hsa-miR-511	1	0	1	0	1	1	STK40	serine/threonine kinase 40
hsa-miR-511	1	0	1	0	1	1	ATP2B1	ATPase, Ca++ transporting, plasma membrane 1
hsa-miR-511	1	0	1	1	1	1	ABHD3	abhydrolase domain containing 3
hsa-miR-511	0	0	1	1	1	1	PPFIBP2	PTPRF interacting protein, binding protein 2 (liprin beta 2)
hsa-miR-511	0	0	1	1	1	1	CNOT8	CCR4-NOT transcription complex, subunit 8
hsa-miR-511	1	0	1	1	1	1	ARFGEF1	ADP-ribosylation factor guanine nucleotide-exchange factor 1 (brefeldin A-inhibited)
hsa-miR-511	1	0	1	1	1	1	TNRC6A	trinucleotide repeat containing 6A
hsa-miR-511	1	0	1	0	1	1	ZCCHC3	zinc finger, CCHC domain containing 3
hsa-miR-511	0	0	1	0	1	1	FLJ22447	uncharacterized LOC400221
hsa-miR-511	0	0	1	0	0	0	LINC00340	long intergenic non-protein coding RNA 340
hsa-miR-511	0	0	1	0	1	1	FLJ22763	uncharacterized LOC401081
hsa-miR-511	1	0	1	1	0	0	UBXN7	UBX domain protein 7
hsa-miR-511	1	0	1	1	0	0	SLAIN2	SLAIN motif family, member 2
hsa-miR-511	1	0	1	1	1	1	DCAF8	DDB1 and CUL4 associated factor 8
hsa-miR-511	1	0	1	1	1	1	EML2	echinoderm microtubule associated protein like 2
hsa-miR-511	0	0	1	0	1	1	FLJ23152	uncharacterized LOC401236
hsa-miR-511	0	0	1	1	1	1	CCDC33	coiled-coil domain containing 33
hsa-miR-511	1	0	1	1	1	1	ITGA9	integrin, alpha 9
hsa-miR-511	1	0	1	1	1	1	RNF185	ring finger protein 185
hsa-miR-511	1	0	1	1	1	1	LRP4	low density lipoprotein receptor-related protein 4
hsa-miR-511	0	0	1	1	1	1	MINA	MYC induced nuclear antigen
hsa-miR-511	0	0	1	1	0	0	C15orf23	chromosome 15 open reading frame 23
hsa-miR-511	1	0	1	1	1	1	GPD2	glycerol-3-phosphate dehydrogenase 2 (mitochondrial)
hsa-miR-511	1	0	1	1	1	1	ZNF462	zinc finger protein 462
hsa-miR-511	1	0	1	1	1	1	ARHGAP36	Rho GTPase activating protein 36
hsa-miR-511	0	0	1	0	0	0	KIAA0664L3	KIAA0664-like 3
hsa-miR-511	0	0	1	1	1	1	FAM107A	family with sequence similarity 107, member A
hsa-miR-511	0	0	1	0	0	0	LOC254559	uncharacterized LOC254559
hsa-miR-511	0	0	1	0	0	0	LOC283508	uncharacterized LOC283508
hsa-miR-511	0	0	1	0	1	1	HDX	highly divergent homeobox
hsa-miR-511	0	0	1	1	0	0	C21orf59	chromosome 21 open reading frame 59
hsa-miR-511	1	0	1	1	1	1	FRMD6	FERM domain containing 6
hsa-miR-511	1	0	1	1	1	1	HERPUD2	HERPUD family member 2
hsa-miR-511	0	0	1	1	1	1	GLYATL1	glycine-N-acyltransferase-like 1
hsa-miR-511	0	0	1	0	0	0	LOC201617	uncharacterized LOC201617
hsa-miR-511	1	0	1	1	1	1	DIXDC1	DIX domain containing 1
hsa-miR-511	0	0	1	1	1	1	ANKRD36B	ankyrin repeat domain 36B
hsa-miR-511	0	0	1	0	0	0	JPX	JPX transcript, XIST activator (non-protein coding)
hsa-miR-511	0	0	1	1	0	0	CHRM3	cholinergic receptor, muscarinic 3
hsa-miR-511	1	0	1	1	1	1	SCAMP5	secretory carrier membrane protein 5
hsa-miR-511	0	0	1	1	0	0	ZNF185	zinc finger protein 185 (LIM domain)
hsa-miR-511	1	0	1	1	1	1	CLCN5	chloride channel, voltage-sensitive 5
hsa-miR-511	0	0	1	1	1	1	DST	dystonin
hsa-miR-511	0	0	1	0	0	0	LOC157381	uncharacterized LOC157381
hsa-miR-511	1	0	1	1	1	1	PCMTD1	protein-L-isoaspartate (D-aspartate) O-methyltransferase domain containing 1
hsa-miR-511	0	0	1	0	1	1	THAP6	THAP domain containing 6
hsa-miR-511	0	0	1	1	1	1	COQ10A	coenzyme Q10 homolog A (S. cerevisiae)
hsa-miR-511	0	0	1	1	1	1	VWA3B	von Willebrand factor A domain containing 3B
hsa-miR-511	0	0	1	1	1	1	C14orf79	chromosome 14 open reading frame 79
hsa-miR-511	1	0	1	1	0	0	ZBTB37	zinc finger and BTB domain containing 37
hsa-miR-511	1	0	1	0	1	1	PLEKHA1	pleckstrin homology domain containing, family A (phosphoinositide binding specific) member 1
hsa-miR-511	1	0	1	1	1	1	ANKRD49	ankyrin repeat domain 49
hsa-miR-511	1	0	1	1	1	1	ANKRD29	ankyrin repeat domain 29
hsa-miR-511	1	0	1	1	1	1	IST1	increased sodium tolerance 1 homolog (yeast)
hsa-miR-511	0	0	1	0	0	0	LOC284014	uncharacterized LOC284014
hsa-miR-511	0	0	1	1	1	1	ZNF385B	zinc finger protein 385B
hsa-miR-511	0	0	1	1	1	1	ZBTB26	zinc finger and BTB domain containing 26
hsa-miR-511	0	0	1	1	0	0	CD37	CD37 molecule
hsa-miR-511	0	0	1	1	0	0	PIGO	phosphatidylinositol glycan anchor biosynthesis, class O
hsa-miR-511	0	0	1	1	0	0	GRIP2	glutamate receptor interacting protein 2
hsa-miR-511	0	0	1	1	1	1	KIDINS220	kinase D-interacting substrate, 220kDa
hsa-miR-511	1	0	1	1	1	1	HLF	hepatic leukemia factor
hsa-miR-511	0	0	1	1	1	1	PKIB	protein kinase (cAMP-dependent, catalytic) inhibitor beta
hsa-miR-511	0	0	1	1	1	1	ZFAND2B	zinc finger, AN1-type domain 2B
hsa-miR-511	0	0	1	1	1	1	GALNT6	UDP-N-acetyl-alpha-D-galactosamine:polypeptide N-acetylgalactosaminyltransferase 6 (GalNAc-T6)
hsa-miR-511	1	0	1	1	1	1	CNOT4	CCR4-NOT transcription complex, subunit 4
hsa-miR-511	1	0	1	1	1	1	NOTCH2NL	notch 2 N-terminal like
hsa-miR-511	0	0	1	0	1	1	TMSB15B	thymosin beta 15B
hsa-miR-511	0	0	1	1	0	0	ACOT11	acyl-CoA thioesterase 11
hsa-miR-511	1	0	1	1	1	1	ARIH2	ariadne homolog 2 (Drosophila)
hsa-miR-511	0	0	1	1	1	1	DYNC1I1	dynein, cytoplasmic 1, intermediate chain 1
hsa-miR-511	1	0	1	1	1	1	EGR2	early growth response 2
hsa-miR-511	0	0	1	0	0	0	LOC440910	uncharacterized LOC440910
hsa-miR-511	0	0	1	1	1	1	SP100	SP100 nuclear antigen
hsa-miR-511	1	0	1	1	1	1	TSN	translin
hsa-miR-511	1	0	1	1	1	1	LUC7L2	LUC7-like 2 (S. cerevisiae)
hsa-miR-511	0	0	1	1	0	0	RUVBL1	RuvB-like 1 (E. coli)
hsa-miR-511	0	0	1	1	1	1	HNRNPH1	heterogeneous nuclear ribonucleoprotein H1 (H)
hsa-miR-511	0	0	1	1	1	1	NRCAM	neuronal cell adhesion molecule
hsa-miR-511	0	0	1	1	1	1	CHPT1	choline phosphotransferase 1
hsa-miR-511	0	0	1	0	0	0	LOC283887	uncharacterized LOC283887
hsa-miR-511	0	0	1	1	0	0	AXDND1	axonemal dynein light chain domain containing 1
hsa-miR-511	1	0	1	1	1	1	LRRC57	leucine rich repeat containing 57
hsa-miR-511	0	0	1	1	1	1	C19orf47	chromosome 19 open reading frame 47
hsa-miR-511	0	0	1	1	0	0	CYHR1	cysteine/histidine-rich 1
hsa-miR-511	0	0	1	0	0	0	PART1	prostate androgen-regulated transcript 1 (non-protein coding)
hsa-miR-511	0	0	1	0	1	1	RALYL	RALY RNA binding protein-like
hsa-miR-511	1	0	1	1	1	1	KLC2	kinesin light chain 2
hsa-miR-511	1	0	1	1	1	1	SYT1	synaptotagmin I
hsa-miR-511	1	0	1	0	1	1	GATAD2B	GATA zinc finger domain containing 2B
hsa-miR-511	1	0	1	1	1	1	GALNTL2	UDP-N-acetyl-alpha-D-galactosamine:polypeptide N-acetylgalactosaminyltransferase-like 2
hsa-miR-511	0	0	1	1	1	1	HOGA1	4-hydroxy-2-oxoglutarate aldolase 1
hsa-miR-511	0	0	1	1	1	1	METTL13	methyltransferase like 13
hsa-miR-511	0	0	1	0	0	0	FLJ37505	uncharacterized LOC400087
hsa-miR-511	0	0	1	0	1	1	AGBL4	ATP/GTP binding protein-like 4
hsa-miR-511	1	0	1	1	1	1	NMT2	N-myristoyltransferase 2
hsa-miR-511	0	0	1	0	0	0	MYO1H	myosin IH
hsa-miR-511	0	0	1	0	0	0	LOC285500	uncharacterized LOC285500
hsa-miR-511	0	0	1	1	1	1	WBSCR17	Williams-Beuren syndrome chromosome region 17
hsa-miR-511	1	0	1	1	1	1	ARHGEF7	Rho guanine nucleotide exchange factor (GEF) 7
hsa-miR-511	1	0	1	1	1	1	KLF4	Kruppel-like factor 4 (gut)
hsa-miR-511	1	0	1	1	1	1	RASGEF1A	RasGEF domain family, member 1A
hsa-miR-511	0	0	1	1	1	1	MYO6	myosin VI
hsa-miR-511	1	0	1	0	1	1	UBXN4	UBX domain protein 4
hsa-miR-511	0	0	1	1	1	1	CHI3L1	chitinase 3-like 1 (cartilage glycoprotein-39)
hsa-miR-511	0	0	1	0	1	1	NBPF3	neuroblastoma breakpoint family, member 3
hsa-miR-511	0	0	1	0	0	0	LOC730101	uncharacterized LOC730101
hsa-miR-511	1	0	1	0	1	1	STC2	stanniocalcin 2
hsa-miR-511	0	0	1	1	0	0	MAP7D1	MAP7 domain containing 1
hsa-miR-511	0	0	1	1	1	1	AIMP1	aminoacyl tRNA synthetase complex-interacting multifunctional protein 1
hsa-miR-511	0	0	1	0	0	0	LOC100133029	sirtuin 5 pseudogene
hsa-miR-511	0	0	1	0	0	0	ZNF815P	zinc finger protein 815, pseudogene
hsa-miR-511	0	0	1	1	0	0	TADA2A	transcriptional adaptor 2A
hsa-miR-511	1	0	1	1	1	1	HDGF	hepatoma-derived growth factor
hsa-miR-511	1	0	1	1	1	1	LRP8	low density lipoprotein receptor-related protein 8, apolipoprotein e receptor
hsa-miR-511	0	0	1	0	0	0	C1orf204	chromosome 1 open reading frame 204
hsa-miR-511	0	0	1	1	1	1	MPHOSPH9	M-phase phosphoprotein 9
hsa-miR-511	1	0	1	0	1	1	KIAA1737	KIAA1737
hsa-miR-511	1	0	1	0	1	1	KBTBD8	kelch repeat and BTB (POZ) domain containing 8
hsa-miR-511	1	0	1	1	1	1	SYT6	synaptotagmin VI
hsa-miR-511	1	0	1	1	1	1	SNRNP70	small nuclear ribonucleoprotein 70kDa (U1)
hsa-miR-511	0	0	1	1	1	1	IL17RE	interleukin 17 receptor E
hsa-miR-511	1	0	1	1	1	1	CDV3	CDV3 homolog (mouse)
hsa-miR-511	0	0	1	0	0	0	LOC401463	uncharacterized LOC401463
hsa-miR-511	1	0	1	1	1	1	POU2F3	POU class 2 homeobox 3
hsa-miR-511	0	0	1	1	0	0	NUCB2	nucleobindin 2
hsa-miR-511	1	0	1	0	1	1	AGFG1	ArfGAP with FG repeats 1
hsa-miR-511	0	0	1	0	0	0	KIRREL3-AS3	KIRREL3 antisense RNA 3
hsa-miR-511	0	0	1	1	1	1	CBWD5	COBW domain containing 5
hsa-miR-511	0	0	1	1	0	0	C10orf68	chromosome 10 open reading frame 68
hsa-miR-511	1	0	1	1	0	0	CFL1	cofilin 1 (non-muscle)
hsa-miR-511	0	0	1	1	0	0	PSAPL1	prosaposin-like 1 (gene/pseudogene)
hsa-miR-511	0	0	1	1	0	0	CDC25C	cell division cycle 25 homolog C (S. pombe)
hsa-miR-511	1	0	1	1	1	1	HOOK1	hook homolog 1 (Drosophila)
hsa-miR-511	1	0	1	1	1	1	UGDH	UDP-glucose 6-dehydrogenase
hsa-miR-511	1	0	1	1	1	1	PIGA	phosphatidylinositol glycan anchor biosynthesis, class A
hsa-miR-511	0	0	1	1	1	1	RP1	retinitis pigmentosa 1 (autosomal dominant)
hsa-miR-511	0	0	1	1	0	0	PPAPDC1A	phosphatidic acid phosphatase type 2 domain containing 1A
hsa-miR-511	0	0	1	0	0	0	LOC338579	ankyrin repeat domain-containing protein 30B pseudogene
hsa-miR-511	0	0	1	0	0	0	LOC728095	uncharacterized LOC728095
hsa-miR-511	1	0	1	1	1	1	NDFIP2	Nedd4 family interacting protein 2
hsa-miR-511	0	0	1	1	1	1	CATSPER2	cation channel, sperm associated 2
hsa-miR-511	0	0	1	1	1	1	SLFN13	schlafen family member 13
hsa-miR-511	1	0	1	1	0	0	SLX4	SLX4 structure-specific endonuclease subunit homolog (S. cerevisiae)
hsa-miR-511	0	0	1	1	0	0	KIAA0146	KIAA0146
hsa-miR-511	0	0	1	1	0	0	PMFBP1	polyamine modulated factor 1 binding protein 1
hsa-miR-511	0	0	1	1	1	1	WDR64	WD repeat domain 64
hsa-miR-511	0	0	1	1	0	0	DCLK3	doublecortin-like kinase 3
hsa-miR-511	0	0	1	1	1	1	ARHGEF26	Rho guanine nucleotide exchange factor (GEF) 26
hsa-miR-511	1	0	1	1	1	1	MDGA2	MAM domain containing glycosylphosphatidylinositol anchor 2
hsa-miR-511	1	0	1	1	1	1	PPFIA1	protein tyrosine phosphatase, receptor type, f polypeptide (PTPRF), interacting protein (liprin), alpha 1
hsa-miR-511	1	0	1	0	1	1	KCNK2	potassium channel, subfamily K, member 2
hsa-miR-511	0	0	1	1	1	1	PRRT1	proline-rich transmembrane protein 1
hsa-miR-511	0	0	1	1	1	1	TMEM59	transmembrane protein 59
hsa-miR-511	1	0	1	1	1	1	ARHGEF10L	Rho guanine nucleotide exchange factor (GEF) 10-like
hsa-miR-511	1	0	1	0	1	1	WDR82	WD repeat domain 82
hsa-miR-511	0	0	1	0	0	0	LOC644248	uncharacterized LOC644248
hsa-miR-511	1	0	1	0	0	0	GPR137C	G protein-coupled receptor 137C
hsa-miR-511	1	0	1	1	1	1	METTL8	methyltransferase like 8
hsa-miR-511	0	0	1	0	1	1	LOC389641	uncharacterized LOC389641
hsa-miR-511	1	0	1	0	1	1	DCUN1D4	DCN1, defective in cullin neddylation 1, domain containing 4 (S. cerevisiae)
hsa-miR-511	0	0	1	0	0	0	LINC00282	long intergenic non-protein coding RNA 282
hsa-miR-511	0	0	1	0	0	0	LOC728716	uncharacterized LOC728716
hsa-miR-511	1	0	1	1	1	1	ERBB3	v-erb-b2 erythroblastic leukemia viral oncogene homolog 3 (avian)
hsa-miR-511	1	0	1	1	1	1	C17orf85	chromosome 17 open reading frame 85
hsa-miR-511	1	0	1	1	1	1	C11orf30	chromosome 11 open reading frame 30
hsa-miR-511	1	0	1	1	1	1	ATXN7	ataxin 7
hsa-miR-511	1	0	1	1	0	0	GXYLT1	glucoside xylosyltransferase 1
hsa-miR-511	1	0	1	1	1	1	CTGF	connective tissue growth factor
hsa-miR-511	1	0	1	1	1	1	METAP2	methionyl aminopeptidase 2
hsa-miR-511	0	0	1	1	0	0	LOC100128239	uncharacterized LOC100128239
hsa-miR-511	0	0	1	1	1	1	MKX	mohawk homeobox
hsa-miR-511	0	0	1	1	1	1	DENND5A	DENN/MADD domain containing 5A
hsa-miR-511	1	0	1	1	1	1	ATP11C	ATPase, class VI, type 11C
hsa-miR-511	1	0	1	1	1	1	KTN1	kinectin 1 (kinesin receptor)
hsa-miR-511	0	0	1	0	1	1	RASGRP3	RAS guanyl releasing protein 3 (calcium and DAG-regulated)
hsa-miR-511	0	0	1	1	0	0	LOC442075	uncharacterized LOC442075
hsa-miR-511	0	0	1	0	0	0	LOC613266	uncharacterized LOC613266
hsa-miR-511	1	0	1	1	1	1	KPNA1	karyopherin alpha 1 (importin alpha 5)
hsa-miR-511	0	0	1	1	1	1	C11orf45	chromosome 11 open reading frame 45
hsa-miR-511	1	0	1	0	0	0	MSL1	male-specific lethal 1 homolog (Drosophila)
hsa-miR-511	0	0	1	0	0	0	FAM75D4	family with sequence similarity 75, member D4
hsa-miR-511	1	0	1	1	1	1	MACROD2	MACRO domain containing 2
hsa-miR-511	1	0	1	1	1	1	DCTN4	dynactin 4 (p62)
hsa-miR-511	0	0	1	1	0	0	C20orf141	chromosome 20 open reading frame 141
hsa-miR-511	1	0	1	1	1	1	WWC2	WW and C2 domain containing 2
hsa-miR-511	0	0	1	1	0	0	FSIP2	fibrous sheath interacting protein 2
hsa-miR-511	1	0	1	1	1	1	CSRNP3	cysteine-serine-rich nuclear protein 3
hsa-miR-511	1	0	1	1	1	1	CPNE2	copine II
hsa-miR-511	1	0	1	1	1	1	SIKE1	suppressor of IKBKE 1
hsa-miR-511	0	0	1	1	1	1	C2orf65	chromosome 2 open reading frame 65
hsa-miR-511	0	0	1	0	1	1	LOC388942	uncharacterized LOC388942
hsa-miR-511	1	0	1	1	1	1	LRIG1	leucine-rich repeats and immunoglobulin-like domains 1
hsa-miR-511	1	0	1	1	1	1	DLG2	discs, large homolog 2 (Drosophila)
hsa-miR-511	0	0	1	1	0	0	TMEM151B	transmembrane protein 151B
hsa-miR-511	1	0	1	1	1	1	LRP2BP	LRP2 binding protein
hsa-miR-511	0	0	1	0	0	0	RPL23AP53	ribosomal protein L23a pseudogene 53
hsa-miR-511	1	0	1	1	1	1	TSHZ1	teashirt zinc finger homeobox 1
hsa-miR-511	1	0	1	1	1	1	CLTC	clathrin, heavy chain (Hc)
hsa-miR-511	1	0	1	0	1	1	ADIPOR2	adiponectin receptor 2
hsa-miR-511	1	0	1	1	1	1	FMNL3	formin-like 3
hsa-miR-511	0	0	1	1	1	1	DOCK9	dedicator of cytokinesis 9
hsa-miR-511	1	0	1	1	1	1	ZDHHC23	zinc finger, DHHC-type containing 23
hsa-miR-511	1	0	1	1	0	0	PTPN5	protein tyrosine phosphatase, non-receptor type 5 (striatum-enriched)
hsa-miR-511	1	0	1	1	1	1	SLC26A9	solute carrier family 26, member 9
hsa-miR-511	0	0	1	0	0	0	LOC285812	uncharacterized LOC285812
hsa-miR-511	1	0	1	1	1	1	CXorf23	chromosome X open reading frame 23
hsa-miR-511	1	0	1	1	1	1	EYA1	eyes absent homolog 1 (Drosophila)
hsa-miR-511	0	0	1	0	0	0	ERVFRD-2	endogenous retrovirus group FRD, member 2
hsa-miR-511	1	0	1	0	1	1	CAPRIN1	cell cycle associated protein 1
hsa-miR-511	0	0	1	0	0	0	LRRC9	leucine rich repeat containing 9
hsa-miR-511	0	0	1	1	0	0	TMEM136	transmembrane protein 136
hsa-miR-511	1	0	1	1	1	1	SLC12A6	solute carrier family 12 (potassium/chloride transporters), member 6
hsa-miR-511	0	0	1	0	0	0	FAM205B	transmembrane protein C9orf144B pseudogene
hsa-miR-511	0	0	1	1	1	1	CD160	CD160 molecule
hsa-miR-511	1	0	1	1	1	1	FRYL	FRY-like
hsa-miR-511	0	0	1	0	0	0	IGHD	immunoglobulin heavy constant delta
hsa-miR-511	1	0	1	0	1	1	USP37	ubiquitin specific peptidase 37
hsa-miR-511	0	0	1	1	1	1	TPK1	thiamin pyrophosphokinase 1
hsa-miR-511	0	0	1	1	1	1	ZNF662	zinc finger protein 662
hsa-miR-511	0	0	1	1	1	1	SHROOM3	shroom family member 3
hsa-miR-511	0	0	1	0	0	0	LOC100129940	uncharacterized LOC100129940
hsa-miR-511	1	0	1	1	1	1	ADAMTSL1	ADAMTS-like 1
hsa-miR-511	1	0	1	1	1	1	UPF1	UPF1 regulator of nonsense transcripts homolog (yeast)
hsa-miR-511	0	0	1	0	0	0	PINLYP	phospholipase A2 inhibitor and LY6/PLAUR domain containing
hsa-miR-511	1	0	1	0	1	1	GPC6	glypican 6
hsa-miR-511	0	0	1	1	0	0	HEATR8	HEAT repeat containing 8
hsa-miR-511	0	0	1	0	0	0	LOC494141	mitochondrial carrier triple repeat 1 pseudogene
hsa-miR-511	1	0	1	0	1	1	ESRRG	estrogen-related receptor gamma
hsa-miR-511	0	0	1	1	1	1	TMC5	transmembrane channel-like 5
hsa-miR-511	0	0	1	1	1	1	SLTM	SAFB-like, transcription modulator
hsa-miR-511	1	0	1	1	1	1	RNF111	ring finger protein 111
hsa-miR-511	1	0	1	1	1	1	PPP2R5C	protein phosphatase 2, regulatory subunit B', gamma
hsa-miR-511	0	0	1	1	1	1	RNF19B	ring finger protein 19B
hsa-miR-511	1	0	1	1	1	1	MAP2K4	mitogen-activated protein kinase kinase 4
hsa-miR-511	1	0	1	0	1	1	ZNF607	zinc finger protein 607
hsa-miR-511	0	0	1	1	1	1	NR4A1	nuclear receptor subfamily 4, group A, member 1
hsa-miR-511	0	0	1	0	0	0	AGAP9	ArfGAP with GTPase domain, ankyrin repeat and PH domain 9
hsa-miR-511	1	0	1	1	1	1	TAP2	transporter 2, ATP-binding cassette, sub-family B (MDR/TAP)
hsa-miR-511	0	0	1	1	1	1	FANCC	Fanconi anemia, complementation group C
hsa-miR-511	0	0	1	1	0	0	CYP1A1	cytochrome P450, family 1, subfamily A, polypeptide 1
hsa-miR-511	1	0	1	1	0	0	TDRKH	tudor and KH domain containing
hsa-miR-511	1	0	1	1	1	1	ATL2	atlastin GTPase 2
hsa-miR-511	1	0	1	1	1	1	TRPM6	transient receptor potential cation channel, subfamily M, member 6
hsa-miR-511	1	0	1	1	1	1	TOM1L1	target of myb1 (chicken)-like 1
hsa-miR-511	1	0	1	1	1	1	UBE2O	ubiquitin-conjugating enzyme E2O
hsa-miR-511	1	0	1	1	1	1	MEAF6	MYST/Esa1-associated factor 6
hsa-miR-511	1	0	1	1	1	1	COBLL1	COBL-like 1
hsa-miR-511	1	0	1	1	1	1	PHTF2	putative homeodomain transcription factor 2
hsa-miR-511	1	0	1	1	1	1	UPK1B	uroplakin 1B
hsa-miR-511	0	0	1	1	1	1	PUS7L	pseudouridylate synthase 7 homolog (S. cerevisiae)-like
hsa-miR-511	0	0	1	1	0	0	HSPB11	heat shock protein family B (small), member 11
hsa-miR-511	1	0	1	1	1	1	EDN1	endothelin 1
hsa-miR-511	0	0	1	1	0	0	TRIM69	tripartite motif containing 69
hsa-miR-511	1	0	1	1	1	1	NECAP1	NECAP endocytosis associated 1
hsa-miR-511	1	0	1	1	1	1	RIF1	RAP1 interacting factor homolog (yeast)
hsa-miR-511	0	0	1	1	1	1	BCL2A1	BCL2-related protein A1
hsa-miR-511	0	0	1	1	0	0	PLK1S1	polo-like kinase 1 substrate 1
hsa-miR-511	0	0	1	0	0	0	POM121L9P	POM121 transmembrane nucleoporin-like 9, pseudogene
hsa-miR-511	1	0	1	1	1	1	ARF6	ADP-ribosylation factor 6
hsa-miR-511	0	0	1	1	0	0	FAM153B	family with sequence similarity 153, member B
hsa-miR-511	0	0	1	0	0	0	TPTE2P6	transmembrane phosphoinositide 3-phosphatase and tensin homolog 2 pseudogene 6
hsa-miR-511	1	0	1	0	1	1	DCDC2	doublecortin domain containing 2
hsa-miR-511	0	0	1	1	1	1	WDR52	WD repeat domain 52
hsa-miR-511	0	0	1	0	0	0	DNAJC5B	DnaJ (Hsp40) homolog, subfamily C, member 5 beta
hsa-miR-511	0	0	1	0	0	0	KIAA0913	KIAA0913
hsa-miR-511	0	0	1	1	1	1	TAOK2	TAO kinase 2
hsa-miR-511	0	0	1	1	1	1	SYNJ2	synaptojanin 2
hsa-miR-511	1	0	1	1	1	1	TFE3	transcription factor binding to IGHM enhancer 3
hsa-miR-511	0	0	1	0	0	0	LRRC37BP1	leucine rich repeat containing 37B pseudogene 1
hsa-miR-511	0	0	1	0	0	0	FAM66D	family with sequence similarity 66, member D
hsa-miR-511	0	0	1	1	1	1	IDH3A	isocitrate dehydrogenase 3 (NAD+) alpha
hsa-miR-511	1	0	1	1	1	1	PKNOX2	PBX/knotted 1 homeobox 2
hsa-miR-511	0	0	1	1	1	1	ING3	inhibitor of growth family, member 3
hsa-miR-511	1	0	1	0	1	1	FAM19A1	family with sequence similarity 19 (chemokine (C-C motif)-like), member A1
hsa-miR-511	1	0	1	0	1	1	ZNF507	zinc finger protein 507
hsa-miR-511	1	0	1	1	1	1	SLC30A8	solute carrier family 30 (zinc transporter), member 8
hsa-miR-511	1	0	1	1	1	1	DENND1B	DENN/MADD domain containing 1B
hsa-miR-511	1	0	1	1	1	1	LIMCH1	LIM and calponin homology domains 1
hsa-miR-511	1	0	1	1	1	1	MIER1	mesoderm induction early response 1 homolog (Xenopus laevis)
hsa-miR-511	1	0	1	1	1	1	KDM6A	lysine (K)-specific demethylase 6A
hsa-miR-511	0	0	1	1	1	1	ZCCHC6	zinc finger, CCHC domain containing 6
hsa-miR-511	0	0	1	0	1	1	GAB3	GRB2-associated binding protein 3
hsa-miR-511	0	0	1	0	0	0	ZNF720	zinc finger protein 720
hsa-miR-511	0	0	1	1	1	1	RAD51AP1	RAD51 associated protein 1
hsa-miR-511	1	0	1	0	0	0	YLPM1	YLP motif containing 1
hsa-miR-511	0	0	1	1	1	1	C10orf57	chromosome 10 open reading frame 57
hsa-miR-511	1	0	1	0	1	1	MPP5	membrane protein, palmitoylated 5 (MAGUK p55 subfamily member 5)
hsa-miR-511	1	0	1	1	1	1	RNF180	ring finger protein 180
hsa-miR-511	1	0	1	1	1	1	DNAJC10	DnaJ (Hsp40) homolog, subfamily C, member 10
hsa-miR-511	0	0	1	1	1	1	CCDC125	coiled-coil domain containing 125
hsa-miR-511	0	0	1	0	1	1	PAPD4	PAP associated domain containing 4
hsa-miR-511	1	0	1	1	1	1	FAM126A	family with sequence similarity 126, member A
hsa-miR-511	0	0	1	1	1	1	CCDC14	coiled-coil domain containing 14
hsa-miR-511	0	0	1	1	1	1	NARG2	NMDA receptor regulated 2
hsa-miR-511	1	0	1	1	1	1	CAMK4	calcium/calmodulin-dependent protein kinase IV
hsa-miR-511	0	0	1	0	0	0	LOC286135	uncharacterized LOC286135
hsa-miR-511	0	0	1	1	1	1	KIAA1841	KIAA1841
hsa-miR-511	1	0	1	1	1	1	NRP1	neuropilin 1
hsa-miR-511	1	0	1	1	1	1	FAM63B	family with sequence similarity 63, member B
hsa-miR-511	1	0	1	0	1	1	CNOT7	CCR4-NOT transcription complex, subunit 7
hsa-miR-511	0	0	1	0	0	0	ADCY10P1	adenylate cyclase 10 (soluble) pseudogene 1
hsa-miR-511	0	0	1	1	1	1	SLC30A5	solute carrier family 30 (zinc transporter), member 5
hsa-miR-511	1	0	1	0	1	1	EXOC5	exocyst complex component 5
hsa-miR-511	0	0	1	1	1	1	CAND1	cullin-associated and neddylation-dissociated 1
hsa-miR-511	1	0	1	1	1	1	IL17RD	interleukin 17 receptor D
hsa-miR-511	1	0	1	1	1	1	STXBP5	syntaxin binding protein 5 (tomosyn)
hsa-miR-511	1	0	1	1	1	1	DIS3L2	DIS3 mitotic control homolog (S. cerevisiae)-like 2
hsa-miR-511	1	0	1	1	1	1	CAPRIN2	caprin family member 2
hsa-miR-511	1	0	1	1	1	1	SLC24A4	solute carrier family 24 (sodium/potassium/calcium exchanger), member 4
hsa-miR-511	1	0	1	1	1	1	MBD6	methyl-CpG binding domain protein 6
hsa-miR-511	1	0	1	1	1	1	CADM2	cell adhesion molecule 2
hsa-miR-511	1	0	1	1	1	1	RBM26	RNA binding motif protein 26
hsa-miR-511	0	0	1	0	1	1	SRR	serine racemase
hsa-miR-511	1	0	1	1	1	1	RICTOR	RPTOR independent companion of MTOR, complex 2
hsa-miR-511	0	0	1	1	0	0	FIP1L1	FIP1 like 1 (S. cerevisiae)
hsa-miR-511	0	0	1	0	1	1	SYNPO2	synaptopodin 2
hsa-miR-511	0	0	1	1	1	1	RBM10	RNA binding motif protein 10
hsa-miR-511	1	0	1	0	1	1	PHYHIPL	phytanoyl-CoA 2-hydroxylase interacting protein-like
hsa-miR-511	0	0	1	1	1	1	SLAMF7	SLAM family member 7
hsa-miR-511	1	0	1	0	1	1	APOLD1	apolipoprotein L domain containing 1
hsa-miR-511	1	0	1	1	1	1	FBXL5	F-box and leucine-rich repeat protein 5
hsa-miR-511	0	0	1	1	1	1	CCDC62	coiled-coil domain containing 62
hsa-miR-511	1	0	1	1	1	1	GAL3ST3	galactose-3-O-sulfotransferase 3
hsa-miR-511	1	0	1	1	1	1	CLIC5	chloride intracellular channel 5
hsa-miR-511	1	0	1	1	1	1	DUSP16	dual specificity phosphatase 16
hsa-miR-511	0	0	1	0	0	0	BDNF-AS	BDNF antisense RNA
hsa-miR-511	1	0	1	1	1	1	RBBP6	retinoblastoma binding protein 6
hsa-miR-511	0	0	1	0	1	1	CD80	CD80 molecule
hsa-miR-511	1	0	1	1	1	1	RFFL	ring finger and FYVE-like domain containing E3 ubiquitin protein ligase
hsa-miR-511	0	0	1	0	0	0	CR1L	complement component (3b/4b) receptor 1-like
hsa-miR-511	1	0	1	1	1	1	ITSN1	intersectin 1 (SH3 domain protein)
hsa-miR-511	0	0	1	1	1	1	CEP41	centrosomal protein 41kDa
hsa-miR-511	1	0	1	1	1	1	NRG1	neuregulin 1
hsa-miR-511	1	0	1	1	1	1	PIH1D3	PIH1 domain containing 3
hsa-miR-511	1	0	1	1	1	1	BCL11A	B-cell CLL/lymphoma 11A (zinc finger protein)
hsa-miR-511	0	0	1	0	0	0	MUC19	mucin 19, oligomeric
hsa-miR-511	0	0	1	1	1	1	FAM181A	family with sequence similarity 181, member A
hsa-miR-511	0	0	1	1	1	1	IYD	iodotyrosine deiodinase
hsa-miR-511	1	0	1	1	1	1	OPRM1	opioid receptor, mu 1
hsa-miR-511	0	0	1	1	1	1	BCOR	BCL6 corepressor
hsa-miR-511	1	0	1	1	1	1	RAI14	retinoic acid induced 14
hsa-miR-511	1	0	1	1	1	1	TAB3	TGF-beta activated kinase 1/MAP3K7 binding protein 3
hsa-miR-511	0	0	1	0	0	0	ZNFX1-AS1	ZNFX1 antisense RNA 1
hsa-miR-511	1	0	1	0	1	1	AP2B1	adaptor-related protein complex 2, beta 1 subunit
hsa-miR-511	0	0	1	0	0	0	FAM138C	family with sequence similarity 138, member C
hsa-miR-511	1	0	1	1	1	1	CAMTA1	calmodulin binding transcription activator 1
hsa-miR-511	0	0	1	1	1	1	PIGG	phosphatidylinositol glycan anchor biosynthesis, class G
hsa-miR-511	1	0	1	1	1	1	NLGN4X	neuroligin 4, X-linked
hsa-miR-511	0	0	1	1	1	1	KDELC2	KDEL (Lys-Asp-Glu-Leu) containing 2
hsa-miR-511	0	0	1	1	0	0	PDZD11	PDZ domain containing 11
hsa-miR-511	0	0	1	1	0	0	C16orf48	chromosome 16 open reading frame 48
hsa-miR-511	0	0	1	1	1	1	VWA5A	von Willebrand factor A domain containing 5A
hsa-miR-511	1	0	1	0	1	1	ANKRD28	ankyrin repeat domain 28
hsa-miR-511	0	0	1	1	1	1	RPTN	repetin
hsa-miR-511	1	0	1	0	1	1	CHRM2	cholinergic receptor, muscarinic 2
hsa-miR-511	1	0	1	1	1	1	ARHGAP20	Rho GTPase activating protein 20
hsa-miR-511	0	0	1	1	1	1	HMBOX1	homeobox containing 1
hsa-miR-511	0	0	1	1	1	1	EHBP1	EH domain binding protein 1
hsa-miR-511	1	0	1	1	1	1	MECP2	methyl CpG binding protein 2 (Rett syndrome)
hsa-miR-511	1	0	1	1	1	1	BHLHE41	basic helix-loop-helix family, member e41
hsa-miR-511	1	0	1	1	1	1	NTNG1	netrin G1
hsa-miR-511	0	0	1	0	0	0	MAST4	microtubule associated serine/threonine kinase family member 4
hsa-miR-511	1	0	1	1	1	1	SAT1	spermidine/spermine N1-acetyltransferase 1
hsa-miR-511	1	0	1	1	1	1	PCDH11X	protocadherin 11 X-linked
hsa-miR-511	1	0	1	1	0	0	TAF4B	TAF4b RNA polymerase II, TATA box binding protein (TBP)-associated factor, 105kDa
hsa-miR-511	0	0	1	1	0	0	NBPF8	neuroblastoma breakpoint family, member 8
hsa-miR-511	1	0	1	1	1	1	TBC1D22B	TBC1 domain family, member 22B
hsa-miR-511	0	0	1	1	1	1	IL23R	interleukin 23 receptor
hsa-miR-511	1	0	1	0	1	1	RASGRP1	RAS guanyl releasing protein 1 (calcium and DAG-regulated)
hsa-miR-511	1	0	1	1	1	1	AMOT	angiomotin
hsa-miR-511	0	0	1	0	1	1	MIS12	MIS12, MIND kinetochore complex component, homolog (S. pombe)
hsa-miR-511	0	0	1	1	0	0	TMEM116	transmembrane protein 116
hsa-miR-511	0	0	1	1	1	1	FAM115A	family with sequence similarity 115, member A
hsa-miR-511	0	0	1	1	1	1	ASB9	ankyrin repeat and SOCS box containing 9
hsa-miR-511	1	0	1	1	1	1	ELOVL6	ELOVL fatty acid elongase 6
hsa-miR-511	0	0	1	1	1	1	PAFAH1B2	platelet-activating factor acetylhydrolase 1b, catalytic subunit 2 (30kDa)
hsa-miR-511	0	0	1	1	1	1	RLIM	ring finger protein, LIM domain interacting
hsa-miR-511	0	0	1	1	1	1	MRRF	mitochondrial ribosome recycling factor
hsa-miR-511	0	0	1	1	1	1	TUFT1	tuftelin 1
hsa-miR-511	1	0	1	1	1	1	RIMS3	regulating synaptic membrane exocytosis 3
hsa-miR-511	0	0	1	1	1	1	BOD1	biorientation of chromosomes in cell division 1
hsa-miR-511	1	0	1	1	1	1	POU2F2	POU class 2 homeobox 2
hsa-miR-511	0	0	1	0	0	0	MGC13053	uncharacterized MGC13053
hsa-miR-511	0	0	1	1	0	0	LOC100132167	uncharacterized LOC100132167
hsa-miR-511	0	0	1	1	1	1	ARPC1A	actin related protein 2/3 complex, subunit 1A, 41kDa
hsa-miR-511	1	0	1	1	1	1	U2SURP	U2 snRNP-associated SURP domain containing
hsa-miR-511	0	0	1	1	1	1	ACPP	acid phosphatase, prostate
hsa-miR-511	1	0	1	0	1	1	DDX3X	DEAD (Asp-Glu-Ala-Asp) box polypeptide 3, X-linked
hsa-miR-511	1	0	1	1	1	1	CALM1	calmodulin 1 (phosphorylase kinase, delta)
hsa-miR-511	0	0	1	1	1	1	ICA1	islet cell autoantigen 1, 69kDa
hsa-miR-511	0	0	1	1	0	0	PRR11	proline rich 11
hsa-miR-511	0	0	1	1	1	1	ZNF85	zinc finger protein 85
hsa-miR-511	1	0	1	1	1	1	PLEKHO2	pleckstrin homology domain containing, family O member 2
hsa-miR-511	0	0	1	1	0	0	PANK2	pantothenate kinase 2
hsa-miR-511	0	0	1	1	0	0	C11orf74	chromosome 11 open reading frame 74
hsa-miR-511	1	0	1	0	1	1	MINOS1	mitochondrial inner membrane organizing system 1
hsa-miR-511	0	0	1	1	1	1	C9orf85	chromosome 9 open reading frame 85
hsa-miR-511	1	0	1	1	1	1	GRIA2	glutamate receptor, ionotropic, AMPA 2
hsa-miR-511	1	0	1	1	1	1	TRIM2	tripartite motif containing 2
hsa-miR-511	0	0	1	1	1	1	GNL3L	guanine nucleotide binding protein-like 3 (nucleolar)-like
hsa-miR-511	1	0	1	1	1	1	OTUD5	OTU domain containing 5
hsa-miR-511	0	0	1	1	0	0	WISP3	WNT1 inducible signaling pathway protein 3
hsa-miR-511	0	0	1	1	1	1	PLXDC2	plexin domain containing 2
hsa-miR-511	1	0	1	1	1	1	SNCA	synuclein, alpha (non A4 component of amyloid precursor)
hsa-miR-511	0	0	1	1	1	1	KLHL29	kelch-like 29 (Drosophila)
hsa-miR-511	1	0	1	1	1	1	PAPOLA	poly(A) polymerase alpha
hsa-miR-511	0	0	1	0	0	0	KLHL15	kelch-like 15 (Drosophila)
hsa-miR-511	1	0	1	1	1	1	ZBTB38	zinc finger and BTB domain containing 38
hsa-miR-511	0	0	1	0	1	1	ZNF37A	zinc finger protein 37A
hsa-miR-511	1	0	1	0	1	1	NR1D2	nuclear receptor subfamily 1, group D, member 2
hsa-miR-511	1	0	1	1	1	1	ASH2L	ash2 (absent, small, or homeotic)-like (Drosophila)
hsa-miR-511	1	0	1	0	1	1	CYBRD1	cytochrome b reductase 1
hsa-miR-511	1	0	1	1	1	1	ORMDL3	ORM1-like 3 (S. cerevisiae)
hsa-miR-511	0	0	1	0	0	0	FAM200B	family with sequence similarity 200, member B
hsa-miR-511	1	0	1	1	1	1	HMGA2	high mobility group AT-hook 2
hsa-miR-511	0	0	1	1	1	1	PTCD2	pentatricopeptide repeat domain 2
hsa-miR-511	0	0	1	0	1	1	ZNF718	zinc finger protein 718
hsa-miR-511	1	0	1	0	1	1	ARHGAP26	Rho GTPase activating protein 26
hsa-miR-511	0	0	1	1	0	0	DPF1	D4, zinc and double PHD fingers family 1
hsa-miR-511	1	0	1	1	1	1	AIF1L	allograft inflammatory factor 1-like
hsa-miR-511	1	0	1	1	1	1	SCML4	sex comb on midleg-like 4 (Drosophila)
hsa-miR-511	0	0	1	1	1	1	FHL5	four and a half LIM domains 5
hsa-miR-511	0	0	1	0	0	0	FAM92A1P2	family with sequence similarity 92, member A3
hsa-miR-511	1	0	1	1	0	0	ACOXL	acyl-CoA oxidase-like
hsa-miR-511	1	0	1	1	1	1	BEND6	BEN domain containing 6
hsa-miR-511	1	0	1	0	1	1	CDK19	cyclin-dependent kinase 19
hsa-miR-511	0	0	1	0	0	0	SNX29P2	sorting nexin 29 pseudogene 2
hsa-miR-511	0	0	1	0	0	0	LOC728485	uncharacterized LOC728485
hsa-miR-511	0	0	1	1	1	1	TLR4	toll-like receptor 4
hsa-miR-511	0	0	1	0	0	0	TRAV20	T cell receptor alpha variable 20
hsa-miR-511	0	0	1	1	1	1	TRIM4	tripartite motif containing 4
hsa-miR-511	1	0	1	1	1	1	CNTN4	contactin 4
hsa-miR-511	0	0	1	0	0	0	RNF216P1	ring finger protein 216 pseudogene 1
hsa-miR-511	0	0	1	0	0	0	ZBED3-AS1	ZBED3 antisense RNA 1
hsa-miR-511	0	0	1	0	1	1	FHAD1	forkhead-associated (FHA) phosphopeptide binding domain 1
hsa-miR-511	0	0	1	1	1	1	MAP2	microtubule-associated protein 2
hsa-miR-511	0	0	1	1	1	1	C14orf105	chromosome 14 open reading frame 105
hsa-miR-511	0	0	1	1	1	1	SELP	selectin P (granule membrane protein 140kDa, antigen CD62)
hsa-miR-511	0	0	1	1	1	1	ANKZF1	ankyrin repeat and zinc finger domain containing 1
hsa-miR-511	0	0	1	1	1	1	CASC1	cancer susceptibility candidate 1
hsa-miR-511	1	0	1	1	1	1	HTR2C	5-hydroxytryptamine (serotonin) receptor 2C, G protein-coupled
hsa-miR-511	0	0	1	0	0	0	ANKRD19P	ankyrin repeat domain 19, pseudogene
hsa-miR-511	0	0	1	1	1	1	F11	coagulation factor XI
hsa-miR-511	0	0	1	1	1	1	LRMP	lymphoid-restricted membrane protein
hsa-miR-511	0	0	1	1	0	0	CLEC1B	C-type lectin domain family 1, member B
hsa-miR-511	0	0	1	1	1	1	SEMA3D	sema domain, immunoglobulin domain (Ig), short basic domain, secreted, (semaphorin) 3D
hsa-miR-511	1	0	1	1	1	1	PPARGC1A	peroxisome proliferator-activated receptor gamma, coactivator 1 alpha
hsa-miR-511	1	0	1	0	1	1	PSMF1	proteasome (prosome, macropain) inhibitor subunit 1 (PI31)
hsa-miR-511	1	0	1	1	1	1	MRO	maestro
hsa-miR-511	1	0	1	0	1	1	SV2B	synaptic vesicle glycoprotein 2B
hsa-miR-511	1	0	1	1	1	1	TIAL1	TIA1 cytotoxic granule-associated RNA binding protein-like 1
hsa-miR-511	0	0	1	1	1	1	PIP5K1B	phosphatidylinositol-4-phosphate 5-kinase, type I, beta
hsa-miR-511	0	0	1	1	1	1	RBBP8	retinoblastoma binding protein 8
hsa-miR-511	1	0	1	1	1	1	SULT4A1	sulfotransferase family 4A, member 1
hsa-miR-511	1	0	1	1	1	1	GABRA1	gamma-aminobutyric acid (GABA) A receptor, alpha 1
hsa-miR-511	1	0	1	1	1	1	ZNF518A	zinc finger protein 518A
hsa-miR-511	1	0	1	1	1	1	MUM1L1	melanoma associated antigen (mutated) 1-like 1
hsa-miR-511	1	0	1	1	1	1	ZPLD1	zona pellucida-like domain containing 1
hsa-miR-511	0	0	1	0	1	1	FLJ25328	uncharacterized LOC148231
hsa-miR-511	1	0	1	1	1	1	BZRAP1	benzodiazapine receptor (peripheral) associated protein 1
hsa-miR-511	1	0	1	1	1	1	RCOR3	REST corepressor 3
hsa-miR-511	0	0	1	0	0	0	LOC387647	patched domain containing 3 pseudogene
hsa-miR-511	1	0	1	0	1	1	RNF4	ring finger protein 4
hsa-miR-511	1	0	1	1	1	1	GLUL	glutamate-ammonia ligase
hsa-miR-511	0	0	1	1	1	1	C7orf53	chromosome 7 open reading frame 53
hsa-miR-511	0	0	1	1	0	0	TREM2	triggering receptor expressed on myeloid cells 2
hsa-miR-511	0	0	1	1	1	1	CEPT1	choline/ethanolamine phosphotransferase 1
hsa-miR-511	1	0	1	1	1	1	ZNF521	zinc finger protein 521
hsa-miR-511	1	0	1	1	1	1	SECISBP2L	SECIS binding protein 2-like
hsa-miR-511	1	0	1	1	1	1	FAM13A	family with sequence similarity 13, member A
hsa-miR-511	1	0	1	1	1	1	ANO1	anoctamin 1, calcium activated chloride channel
hsa-miR-511	1	0	1	1	0	0	PCNX	pecanex homolog (Drosophila)
hsa-miR-511	1	0	1	1	1	1	CRKL	v-crk sarcoma virus CT10 oncogene homolog (avian)-like
hsa-miR-511	1	0	1	1	0	0	TMEM181	transmembrane protein 181
hsa-miR-511	0	0	1	0	0	0	LINC00238	long intergenic non-protein coding RNA 238
hsa-miR-511	1	0	1	1	1	1	HMGCR	3-hydroxy-3-methylglutaryl-CoA reductase
hsa-miR-511	1	0	1	1	1	1	FAM189B	family with sequence similarity 189, member B
hsa-miR-511	0	0	1	0	1	1	GATS	GATS, stromal antigen 3 opposite strand
hsa-miR-511	1	0	1	1	1	1	PCDHA5	protocadherin alpha 5
hsa-miR-511	0	0	1	1	0	0	ADAP2	ArfGAP with dual PH domains 2
hsa-miR-511	1	0	1	0	1	1	KIF5A	kinesin family member 5A
hsa-miR-511	1	0	1	1	1	1	NSG1	neuron specific gene family member 1
hsa-miR-511	0	0	1	1	1	1	ZNF337	zinc finger protein 337
hsa-miR-511	1	0	1	1	1	1	LPGAT1	lysophosphatidylglycerol acyltransferase 1
hsa-miR-511	1	0	1	1	1	1	CLK4	CDC-like kinase 4
hsa-miR-511	0	0	1	1	1	1	NUB1	negative regulator of ubiquitin-like proteins 1
hsa-miR-511	0	0	1	1	1	1	EDA2R	ectodysplasin A2 receptor
hsa-miR-511	1	0	1	0	1	1	DDX3Y	DEAD (Asp-Glu-Ala-Asp) box polypeptide 3, Y-linked
hsa-miR-511	1	0	1	1	1	1	CTDSPL2	CTD (carboxy-terminal domain, RNA polymerase II, polypeptide A) small phosphatase like 2
hsa-miR-511	0	0	1	1	1	1	TARSL2	threonyl-tRNA synthetase-like 2
hsa-miR-511	0	0	1	1	1	1	TRNAU1AP	tRNA selenocysteine 1 associated protein 1
hsa-miR-511	0	0	1	1	1	1	SNAPC3	small nuclear RNA activating complex, polypeptide 3, 50kDa
hsa-miR-511	0	0	1	1	1	1	CLEC12B	C-type lectin domain family 12, member B
hsa-miR-511	1	0	1	1	1	1	PEX5L	peroxisomal biogenesis factor 5-like
hsa-miR-511	0	0	1	1	1	1	FAM171B	family with sequence similarity 171, member B
hsa-miR-511	1	0	1	1	1	1	HECTD2	HECT domain containing E3 ubiquitin protein ligase 2
hsa-miR-511	1	0	1	1	1	1	MEIS1	Meis homeobox 1
hsa-miR-511	0	0	1	1	1	1	ZNF141	zinc finger protein 141
hsa-miR-511	0	0	1	0	0	0	SRGAP2C	SLIT-ROBO Rho GTPase activating protein 2C
hsa-miR-511	0	0	1	1	1	1	FAM71F1	family with sequence similarity 71, member F1
hsa-miR-511	1	0	1	1	1	1	FAM135B	family with sequence similarity 135, member B
hsa-miR-511	0	0	1	0	0	0	INHBA-AS1	INHBA antisense RNA 1
hsa-miR-511	1	0	1	0	1	1	CYB5RL	cytochrome b5 reductase-like
hsa-miR-511	1	0	1	1	1	1	DAAM1	dishevelled associated activator of morphogenesis 1
hsa-miR-511	1	0	1	1	1	1	DPP10	dipeptidyl-peptidase 10 (non-functional)
hsa-miR-511	0	0	1	1	1	1	TTC39B	tetratricopeptide repeat domain 39B
hsa-miR-511	1	0	1	1	0	0	CHD4	chromodomain helicase DNA binding protein 4
hsa-miR-511	0	0	1	0	0	0	LOC415056	uncharacterized LOC415056
hsa-miR-511	0	0	1	1	1	1	NUDT13	nudix (nucleoside diphosphate linked moiety X)-type motif 13
hsa-miR-511	0	0	1	1	0	0	H2AFZ	H2A histone family, member Z
hsa-miR-511	0	0	1	1	0	0	CCDC152	coiled-coil domain containing 152
hsa-miR-511	0	0	1	0	0	0	FLJ36000	uncharacterized FLJ36000
hsa-miR-511	0	0	1	0	0	0	USP32P1	ubiquitin specific peptidase 32 pseudogene 1
hsa-miR-511	0	0	1	0	0	0	TOB1-AS1	TOB1 antisense RNA 1
hsa-miR-511	1	0	1	1	1	1	T	T, brachyury homolog (mouse)
hsa-miR-511	1	0	1	1	1	1	DPP8	dipeptidyl-peptidase 8
hsa-miR-511	1	0	1	1	1	1	IL16	interleukin 16
hsa-miR-511	1	0	1	1	1	1	BVES	blood vessel epicardial substance
hsa-miR-511	1	0	1	0	1	1	PCSK2	proprotein convertase subtilisin/kexin type 2
hsa-miR-511	1	0	1	1	1	1	DYNC2LI1	dynein, cytoplasmic 2, light intermediate chain 1
hsa-miR-511	1	0	1	1	1	1	LEF1	lymphoid enhancer-binding factor 1
hsa-miR-511	0	0	1	0	0	0	LOC339240	keratin 17 pseudogene
hsa-miR-511	0	0	1	1	0	0	TMEM95	transmembrane protein 95
hsa-miR-511	0	0	1	0	1	1	FAM13B	family with sequence similarity 13, member B
hsa-miR-511	0	0	1	0	1	1	METTL12	methyltransferase like 12
hsa-miR-511	0	0	1	1	1	1	USP2	ubiquitin specific peptidase 2
hsa-miR-511	1	0	1	1	1	1	LRRC4C	leucine rich repeat containing 4C
hsa-miR-511	1	0	1	1	1	1	ARPP21	cAMP-regulated phosphoprotein, 21kDa
hsa-miR-511	1	0	1	1	1	1	FAM123A	family with sequence similarity 123A
hsa-miR-511	1	0	1	0	1	1	HSPA12A	heat shock 70kDa protein 12A
hsa-miR-511	1	0	1	1	1	1	ROCK1	Rho-associated, coiled-coil containing protein kinase 1
hsa-miR-511	0	0	1	1	1	1	GOLGA6L9	golgin A6 family-like 9
hsa-miR-511	0	0	1	1	1	1	MTHFD2L	methylenetetrahydrofolate dehydrogenase (NADP+ dependent) 2-like
hsa-miR-511	1	0	1	1	1	1	FKBP5	FK506 binding protein 5
hsa-miR-511	0	0	1	1	1	1	SH3GL3	SH3-domain GRB2-like 3
hsa-miR-511	0	0	1	0	0	0	LOC643837	uncharacterized LOC643837
hsa-miR-511	1	0	1	0	1	1	USP6NL	USP6 N-terminal like
hsa-miR-511	0	0	1	0	0	0	LOC401176	uncharacterized LOC401176
hsa-miR-511	1	0	1	1	0	0	WNK1	WNK lysine deficient protein kinase 1
hsa-miR-511	0	0	1	0	0	0	FAM27E3	family with sequence similarity 27, member E3
hsa-miR-511	0	0	1	1	1	1	C14orf45	chromosome 14 open reading frame 45
hsa-miR-511	1	0	1	0	1	1	PSD3	pleckstrin and Sec7 domain containing 3
hsa-miR-511	0	0	1	1	1	1	MYO3A	myosin IIIA
hsa-miR-511	0	0	1	1	1	1	NADKD1	NAD kinase domain containing 1
hsa-miR-511	0	0	1	1	1	1	MGC57346	uncharacterized LOC401884
hsa-miR-511	1	0	1	1	1	1	SENP1	SUMO1/sentrin specific peptidase 1
hsa-miR-511	1	0	1	1	1	1	SF3B1	splicing factor 3b, subunit 1, 155kDa
hsa-miR-511	0	0	1	1	0	0	IFIH1	interferon induced with helicase C domain 1
hsa-miR-511	1	0	1	0	1	1	LYPD6	LY6/PLAUR domain containing 6
hsa-miR-511	1	0	1	1	1	1	SLC35G1	solute carrier family 35, member G1
hsa-miR-511	0	0	1	0	0	0	LOC348120	uncharacterized LOC348120
hsa-miR-511	1	0	1	0	1	1	ZNF800	zinc finger protein 800
hsa-miR-511	1	0	1	1	1	1	RMND5A	required for meiotic nuclear division 5 homolog A (S. cerevisiae)
hsa-miR-511	0	0	1	0	0	0	RPL37A	ribosomal protein L37a
hsa-miR-511	1	0	1	1	0	0	TTC9	tetratricopeptide repeat domain 9
hsa-miR-511	1	0	1	1	1	1	RTKN2	rhotekin 2
hsa-miR-511	0	0	1	1	1	1	ZNF589	zinc finger protein 589
hsa-miR-511	1	0	1	1	1	1	CLVS1	clavesin 1
hsa-miR-511	1	0	1	1	1	1	PELI1	pellino E3 ubiquitin protein ligase 1
hsa-miR-511	1	0	1	0	1	1	RNF182	ring finger protein 182
hsa-miR-511	0	0	1	0	1	1	ITGA1	integrin, alpha 1
hsa-miR-511	1	0	1	1	1	1	RECK	reversion-inducing-cysteine-rich protein with kazal motifs
hsa-miR-511	1	0	1	1	1	1	TMPO	thymopoietin
hsa-miR-511	0	0	1	1	0	0	KATNA1	katanin p60 (ATPase containing) subunit A 1
hsa-miR-511	0	0	1	1	1	1	NCMAP	noncompact myelin associated protein
hsa-miR-511	1	0	1	1	1	1	FNDC3A	fibronectin type III domain containing 3A
hsa-miR-511	1	0	1	1	1	1	GATA2	GATA binding protein 2
hsa-miR-511	1	0	1	0	1	1	SMURF2	SMAD specific E3 ubiquitin protein ligase 2
hsa-miR-511	0	0	1	1	0	0	CCDC107	coiled-coil domain containing 107
hsa-miR-511	0	0	1	0	0	0	BMS1P6	BMS1 pseudogene 6
hsa-miR-511	0	0	1	1	1	1	LINC00086	long intergenic non-protein coding RNA 86
hsa-miR-511	0	0	1	1	1	1	HLA-DQA1	major histocompatibility complex, class II, DQ alpha 1
hsa-miR-511	1	0	1	1	1	1	PCGF5	polycomb group ring finger 5
hsa-miR-511	0	0	1	0	0	0	AQP7P1	aquaporin 7 pseudogene 1
hsa-miR-511	0	0	1	1	0	0	LAG3	lymphocyte-activation gene 3
hsa-miR-511	1	0	1	1	1	1	HP1BP3	heterochromatin protein 1, binding protein 3
hsa-miR-511	1	0	1	1	0	0	ATG2A	autophagy related 2A
hsa-miR-511	1	0	1	1	1	1	OLFML2A	olfactomedin-like 2A
hsa-miR-511	1	0	1	1	1	1	PPP2R5E	protein phosphatase 2, regulatory subunit B', epsilon isoform
hsa-miR-511	0	0	1	1	0	0	TINAG	tubulointerstitial nephritis antigen
hsa-miR-511	0	0	1	1	0	0	C20orf152	chromosome 20 open reading frame 152
hsa-miR-511	1	0	1	1	1	1	SOX5	SRY (sex determining region Y)-box 5
hsa-miR-511	0	0	1	0	0	0	LOC550643	uncharacterized LOC550643
hsa-miR-511	0	0	1	0	0	0	FRG1B	FSHD region gene 1 family, member B
hsa-miR-511	0	0	1	1	1	1	CLEC2D	C-type lectin domain family 2, member D
hsa-miR-511	0	0	1	0	1	1	ASAP2	ArfGAP with SH3 domain, ankyrin repeat and PH domain 2
hsa-miR-511	0	0	1	1	0	0	C8orf31	chromosome 8 open reading frame 31
hsa-miR-511	0	0	1	1	1	1	CAMLG	calcium modulating ligand
hsa-miR-511	0	0	1	1	0	0	CERS4	ceramide synthase 4
hsa-miR-511	0	0	1	1	1	1	HSPBAP1	HSPB (heat shock 27kDa) associated protein 1
hsa-miR-511	0	0	1	0	0	0	GNN	Grp94 neighboring nucleotidase pseudogene
hsa-miR-511	1	0	1	1	1	1	MYLK	myosin light chain kinase
hsa-miR-511	1	0	1	1	1	1	ADCY6	adenylate cyclase 6
hsa-miR-511	0	0	1	0	0	0	LOC158435	uncharacterized LOC158435
hsa-miR-511	0	0	1	1	1	1	ZNF33B	zinc finger protein 33B
hsa-miR-511	0	0	1	0	0	0	UBE2Q2P2	ubiquitin-conjugating enzyme E2Q family member 2 pseudogene 2
hsa-miR-511	1	0	1	1	1	1	FAM129B	family with sequence similarity 129, member B
hsa-miR-511	0	0	1	1	0	0	TMEM183A	transmembrane protein 183A
hsa-miR-511	0	0	1	1	0	0	CELF3	CUGBP, Elav-like family member 3
hsa-miR-511	0	0	1	1	1	1	C21orf62	chromosome 21 open reading frame 62
hsa-miR-511	1	0	1	1	0	0	HTR1E	5-hydroxytryptamine (serotonin) receptor 1E, G protein-coupled
hsa-miR-511	1	0	1	1	1	1	SCAF8	SR-related CTD-associated factor 8
hsa-miR-511	1	0	1	1	1	1	EEF1A1	eukaryotic translation elongation factor 1 alpha 1
hsa-miR-511	0	0	1	1	0	0	SLAMF9	SLAM family member 9
hsa-miR-511	1	0	1	1	1	1	MED27	mediator complex subunit 27
hsa-miR-511	1	0	1	0	1	1	MAP4K3	mitogen-activated protein kinase kinase kinase kinase 3
hsa-miR-511	1	0	1	0	1	1	TMEM194A	transmembrane protein 194A
hsa-miR-511	0	0	1	0	0	0	ULK4P1	unc-51-like kinase 4 (C. elegans) pseudogene 1
hsa-miR-511	0	0	1	1	1	1	CTXN3	cortexin 3
hsa-miR-511	0	0	1	0	0	0	ULK4P3	unc-51-like kinase 4 (C. elegans) pseudogene 3
hsa-miR-511	0	0	1	0	0	0	LOC727849	golgin A2 pseudogene
hsa-miR-511	0	0	1	0	0	0	LOC727751	uncharacterized LOC727751
hsa-miR-511	0	0	1	0	0	0	AGSK1	golgin subfamily A member 2-like
hsa-miR-511	0	0	1	0	0	0	LOC283070	uncharacterized LOC283070
hsa-miR-511	0	0	1	0	0	0	PHKA2-AS1	PHKA2 antisense RNA 1
hsa-miR-511	1	0	1	1	1	1	OPCML	opioid binding protein/cell adhesion molecule-like
hsa-miR-511	0	0	1	1	1	1	IRX5	iroquois homeobox 5
hsa-miR-511	0	0	1	0	0	0	ABCC6P1	ATP-binding cassette, sub-family C, member 6 pseudogene 1
hsa-miR-511	1	0	1	0	1	1	DPYSL3	dihydropyrimidinase-like 3
hsa-miR-511	0	0	1	0	0	0	LOC642846	DEAD/H (Asp-Glu-Ala-Asp/His) box polypeptide 11-like
hsa-miR-511	1	0	1	0	1	1	AMMECR1L	AMME chromosomal region gene 1-like
hsa-miR-511	1	0	1	1	1	1	ZBTB7A	zinc finger and BTB domain containing 7A
hsa-miR-511	0	0	1	0	1	1	LOC389043	uncharacterized LOC389043
hsa-miR-511	1	0	1	1	1	1	SYNE1	spectrin repeat containing, nuclear envelope 1
hsa-miR-511	0	0	1	1	0	0	HERC2P3	hect domain and RLD 2 pseudogene 3
hsa-miR-511	1	0	1	0	1	1	PIK3R3	phosphoinositide-3-kinase, regulatory subunit 3 (gamma)
hsa-miR-511	1	0	1	1	1	1	ELOVL7	ELOVL fatty acid elongase 7
hsa-miR-511	1	0	1	1	1	1	STK38	serine/threonine kinase 38
hsa-miR-511	1	0	1	1	1	1	ACVR2B	activin A receptor, type IIB
hsa-miR-511	0	0	1	0	0	0	ABCA11P	ATP-binding cassette, sub-family A (ABC1), member 11, pseudogene
hsa-miR-511	1	0	1	0	1	1	LRRTM4	leucine rich repeat transmembrane neuronal 4
hsa-miR-511	0	0	1	1	1	1	TMEM52B	transmembrane protein 52B
hsa-miR-511	0	0	1	1	1	1	COL8A2	collagen, type VIII, alpha 2
hsa-miR-511	0	0	1	1	1	1	PARPBP	PARP1 binding protein
hsa-miR-511	0	0	1	1	1	1	C10orf118	chromosome 10 open reading frame 118
hsa-miR-511	0	0	1	1	1	1	ZNF365	zinc finger protein 365
hsa-miR-511	0	0	1	1	1	1	FAM153C	family with sequence similarity 153, member C, pseudogene
hsa-miR-511	1	0	1	0	1	1	VANGL2	vang-like 2 (van gogh, Drosophila)
hsa-miR-511	1	0	1	0	1	1	CPEB2	cytoplasmic polyadenylation element binding protein 2
hsa-miR-511	0	0	1	1	0	0	TMC1	transmembrane channel-like 1
hsa-miR-511	0	0	1	0	0	0	LOC441493	uncharacterized LOC441493
hsa-miR-511	0	0	1	1	1	1	CCDC126	coiled-coil domain containing 126
hsa-miR-511	0	0	1	0	0	0	LOC283174	uncharacterized LOC283174
hsa-miR-511	0	0	1	1	0	0	TRPV3	transient receptor potential cation channel, subfamily V, member 3
hsa-miR-511	1	0	1	1	1	1	ZNF763	zinc finger protein 763
hsa-miR-511	0	0	1	1	0	0	ZNF276	zinc finger protein 276
hsa-miR-511	0	0	1	1	1	1	SLC25A35	solute carrier family 25, member 35
hsa-miR-511	1	0	1	1	1	1	PNISR	PNN-interacting serine/arginine-rich protein
hsa-miR-511	1	0	1	0	1	1	DNAJC6	DnaJ (Hsp40) homolog, subfamily C, member 6
hsa-miR-511	1	0	1	0	1	1	KIAA1715	KIAA1715
hsa-miR-511	0	0	1	1	1	1	SMTNL2	smoothelin-like 2
hsa-miR-511	1	0	1	1	1	1	NR3C2	nuclear receptor subfamily 3, group C, member 2
hsa-miR-511	0	0	1	1	1	1	UNC13B	unc-13 homolog B (C. elegans)
hsa-miR-511	0	0	1	1	1	1	LRCH1	leucine-rich repeats and calponin homology (CH) domain containing 1
hsa-miR-511	1	0	1	1	1	1	TRIP12	thyroid hormone receptor interactor 12
hsa-miR-511	1	0	1	1	1	1	PAX3	paired box 3
hsa-miR-511	1	0	1	1	0	0	MAPKBP1	mitogen-activated protein kinase binding protein 1
hsa-miR-511	1	0	1	1	1	1	ST18	suppression of tumorigenicity 18 (breast carcinoma) (zinc finger protein)
hsa-miR-511	1	0	1	0	1	1	PRDM10	PR domain containing 10
hsa-miR-511	1	0	1	1	1	1	GRIA3	glutamate receptor, ionotropic, AMPA 3
hsa-miR-511	0	0	1	1	0	0	PLCXD2	phosphatidylinositol-specific phospholipase C, X domain containing 2
hsa-miR-511	0	0	1	0	0	0	LINC00266-1	long intergenic non-protein coding RNA 266-1
hsa-miR-511	1	0	1	1	1	1	MEGF11	multiple EGF-like-domains 11
hsa-miR-511	1	0	1	1	1	1	TRAPPC8	trafficking protein particle complex 8
hsa-miR-511	0	0	1	1	1	1	HSF2	heat shock transcription factor 2
hsa-miR-511	0	0	1	0	1	1	PIK3C2G	phosphatidylinositol-4-phosphate 3-kinase, catalytic subunit type 2 gamma
hsa-miR-511	0	0	1	0	0	0	FAM225B	family with sequence similarity 225, member B (non-protein coding)
hsa-miR-511	1	0	1	1	1	1	C18orf34	chromosome 18 open reading frame 34
hsa-miR-511	0	0	1	1	0	0	EFCAB11	EF-hand calcium binding domain 11
hsa-miR-511	1	0	1	1	1	1	NUMB	numb homolog (Drosophila)
hsa-miR-511	0	0	1	0	0	0	LINC00643	long intergenic non-protein coding RNA 643
hsa-miR-511	1	0	1	1	1	1	LITAF	lipopolysaccharide-induced TNF factor
hsa-miR-511	0	0	1	0	0	0	DKFZp686D0853	uncharacterized LOC401613
hsa-miR-511	1	0	1	1	1	1	ATP2B4	ATPase, Ca++ transporting, plasma membrane 4
hsa-miR-511	1	0	1	1	1	1	SGCD	sarcoglycan, delta (35kDa dystrophin-associated glycoprotein)
hsa-miR-511	0	0	1	1	1	1	SIRPB1	signal-regulatory protein beta 1
hsa-miR-511	0	0	1	1	1	1	SLC12A8	solute carrier family 12 (potassium/chloride transporters), member 8
hsa-miR-511	1	0	1	0	1	1	MTX3	metaxin 3
hsa-miR-511	1	0	1	0	1	1	CLASP2	cytoplasmic linker associated protein 2
hsa-miR-511	0	0	1	1	1	1	KLHL8	kelch-like 8 (Drosophila)
hsa-miR-511	1	0	1	1	1	1	SLC35F1	solute carrier family 35, member F1
hsa-miR-511	1	0	1	1	1	1	MLLT10	myeloid/lymphoid or mixed-lineage leukemia (trithorax homolog, Drosophila); translocated to, 10
hsa-miR-511	0	0	1	0	1	1	CPPED1	calcineurin-like phosphoesterase domain containing 1
hsa-miR-511	1	0	1	1	1	1	C7orf31	chromosome 7 open reading frame 31
hsa-miR-511	1	0	1	1	1	1	TGOLN2	trans-golgi network protein 2
hsa-miR-511	1	0	1	1	1	1	TJP1	tight junction protein 1
hsa-miR-511	0	0	1	1	1	1	GLIPR1L2	GLI pathogenesis-related 1 like 2
hsa-miR-511	0	0	1	1	1	1	VCAN	versican
hsa-miR-511	1	0	1	1	1	1	NFASC	neurofascin
hsa-miR-511	0	0	1	1	1	1	PSMA2	proteasome (prosome, macropain) subunit, alpha type, 2
hsa-miR-511	1	0	1	1	1	1	MASP1	mannan-binding lectin serine peptidase 1 (C4/C2 activating component of Ra-reactive factor)
hsa-miR-511	0	0	1	1	1	1	PRR14L	proline rich 14-like
hsa-miR-511	0	0	1	0	0	0	SMG1P1	smg-1 homolog, phosphatidylinositol 3-kinase-related kinase pseudogene 1
hsa-miR-511	0	0	1	1	1	1	UHRF1BP1L	UHRF1 binding protein 1-like
hsa-miR-511	1	0	1	1	0	0	RBM27	RNA binding motif protein 27
hsa-miR-511	1	0	1	1	1	1	STARD13	StAR-related lipid transfer (START) domain containing 13
hsa-miR-511	1	0	1	1	1	1	USP6	ubiquitin specific peptidase 6 (Tre-2 oncogene)
hsa-miR-511	1	0	1	0	1	1	EML4	echinoderm microtubule associated protein like 4
hsa-miR-511	1	0	1	1	1	1	GABPA	GA binding protein transcription factor, alpha subunit 60kDa
hsa-miR-511	0	0	1	1	1	1	ARMCX3	armadillo repeat containing, X-linked 3
hsa-miR-511	1	0	1	1	1	1	TSC22D3	TSC22 domain family, member 3
hsa-miR-511	1	0	1	1	1	1	CYB5B	cytochrome b5 type B (outer mitochondrial membrane)
hsa-miR-511	0	0	1	0	0	0	OVOS	ovostatin
hsa-miR-511	1	0	1	1	1	1	DCAF5	DDB1 and CUL4 associated factor 5
hsa-miR-511	1	0	1	1	1	1	MGA	MAX gene associated
hsa-miR-511	1	0	1	1	1	1	LCA5	Leber congenital amaurosis 5
hsa-miR-511	0	0	1	0	1	1	TYW5	tRNA-yW synthesizing protein 5
hsa-miR-511	0	0	1	1	1	1	DOCK5	dedicator of cytokinesis 5
hsa-miR-511	1	0	1	1	1	1	NFIB	nuclear factor I/B
hsa-miR-511	1	0	1	0	1	1	KLHL24	kelch-like 24 (Drosophila)
hsa-miR-511	1	0	1	0	1	1	IGF2BP3	insulin-like growth factor 2 mRNA binding protein 3
hsa-miR-511	1	0	1	1	1	1	C5orf24	chromosome 5 open reading frame 24
hsa-miR-511	1	0	1	1	1	1	RDX	radixin
hsa-miR-511	1	0	1	1	1	1	PGAP1	post-GPI attachment to proteins 1
hsa-miR-511	1	0	1	1	1	1	TMEM135	transmembrane protein 135
hsa-miR-511	0	0	1	1	1	1	IFRD1	interferon-related developmental regulator 1
hsa-miR-511	1	0	1	1	1	1	CALD1	caldesmon 1
hsa-miR-511	1	0	1	0	1	1	TBL1XR1	transducin (beta)-like 1 X-linked receptor 1
hsa-miR-511	1	0	1	0	1	1	C1orf21	chromosome 1 open reading frame 21
hsa-miR-511	0	0	1	1	1	1	USP54	ubiquitin specific peptidase 54
hsa-miR-511	1	0	1	0	1	1	TTL	tubulin tyrosine ligase
hsa-miR-511	1	0	1	1	1	1	SIN3A	SIN3 transcription regulator homolog A (yeast)
hsa-miR-511	0	0	1	0	0	0	LINC00341	long intergenic non-protein coding RNA 341
hsa-miR-511	0	0	1	1	1	1	HPGD	hydroxyprostaglandin dehydrogenase 15-(NAD)
hsa-miR-511	0	0	1	1	1	1	POLR2H	polymerase (RNA) II (DNA directed) polypeptide H
hsa-miR-511	0	0	1	1	1	1	FGG	fibrinogen gamma chain
hsa-miR-511	0	0	1	1	1	1	CHEK1	checkpoint kinase 1
hsa-miR-511	1	0	1	1	1	1	ARF1	ADP-ribosylation factor 1
hsa-miR-511	0	0	1	1	0	0	CHCHD3	coiled-coil-helix-coiled-coil-helix domain containing 3
hsa-miR-511	1	0	1	1	1	1	RSBN1L	round spermatid basic protein 1-like
hsa-miR-511	1	0	1	1	0	0	CGREF1	cell growth regulator with EF-hand domain 1
hsa-miR-511	0	0	1	0	0	0	RPS16P10	ribosomal protein S16 pseudogene 10
hsa-miR-511	0	0	1	1	1	1	FBXO36	F-box protein 36
hsa-miR-511	0	0	1	1	1	1	PTPLAD2	protein tyrosine phosphatase-like A domain containing 2
hsa-miR-511	0	0	1	1	1	1	MFAP4	microfibrillar-associated protein 4
hsa-miR-511	1	0	1	1	1	1	LETMD1	LETM1 domain containing 1
hsa-miR-511	0	0	1	0	0	0	LOC285141	uncharacterized protein LOC285141
hsa-miR-511	0	0	1	1	0	0	ITGB3BP	integrin beta 3 binding protein (beta3-endonexin)
hsa-miR-511	0	0	1	1	0	0	FCGRT	Fc fragment of IgG, receptor, transporter, alpha
hsa-miR-511	1	0	1	1	1	1	SLC35D2	solute carrier family 35, member D2
hsa-miR-511	0	0	1	1	1	1	CIRBP	cold inducible RNA binding protein
hsa-miR-511	1	0	1	1	1	1	NEU1	sialidase 1 (lysosomal sialidase)
hsa-miR-511	1	0	1	0	1	1	BNIP3L	BCL2/adenovirus E1B 19kDa interacting protein 3-like
hsa-miR-511	0	0	1	0	0	0	H19	H19, imprinted maternally expressed transcript (non-protein coding)
hsa-miR-511	0	0	1	1	1	1	KIAA0141	KIAA0141
hsa-miR-511	1	0	1	1	1	1	CTDNEP1	CTD nuclear envelope phosphatase 1
hsa-miR-511	0	0	1	1	1	1	PROCR	protein C receptor, endothelial
hsa-miR-511	1	0	1	1	1	1	RALB	v-ral simian leukemia viral oncogene homolog B (ras related; GTP binding protein)
hsa-miR-511	0	0	1	1	0	0	RAD54B	RAD54 homolog B (S. cerevisiae)
hsa-miR-511	0	0	1	0	1	1	EMX2	empty spiracles homeobox 2
hsa-miR-511	0	0	1	1	1	1	IFNGR2	interferon gamma receptor 2 (interferon gamma transducer 1)
hsa-miR-511	1	0	1	1	1	1	TRA2B	transformer 2 beta homolog (Drosophila)
hsa-miR-511	1	0	1	1	1	1	MBNL1	muscleblind-like splicing regulator 1
hsa-miR-511	1	0	1	1	1	1	BAI3	brain-specific angiogenesis inhibitor 3
hsa-miR-511	0	0	1	1	0	0	ZFYVE19	zinc finger, FYVE domain containing 19
hsa-miR-511	0	0	1	0	1	1	PDCD5	programmed cell death 5
hsa-miR-511	1	0	1	1	1	1	TFDP1	transcription factor Dp-1
hsa-miR-511	0	0	1	1	1	1	HMGB2	high mobility group box 2
hsa-miR-511	0	0	1	1	1	1	KCTD1	potassium channel tetramerisation domain containing 1
hsa-miR-511	0	0	1	1	0	0	GPSM3	G-protein signaling modulator 3
hsa-miR-511	0	0	1	1	1	1	CCT5	chaperonin containing TCP1, subunit 5 (epsilon)
hsa-miR-511	0	0	1	1	0	0	HCRTR1	hypocretin (orexin) receptor 1
hsa-miR-511	1	0	1	1	1	1	TMEM248	transmembrane protein 248
hsa-miR-511	0	0	1	1	0	0	DDTL	D-dopachrome tautomerase-like
hsa-miR-511	0	0	1	1	0	0	PDK3	pyruvate dehydrogenase kinase, isozyme 3
hsa-miR-511	1	0	1	1	1	1	ARFIP2	ADP-ribosylation factor interacting protein 2
hsa-miR-511	1	0	1	1	1	1	STK38L	serine/threonine kinase 38 like
hsa-miR-511	0	0	1	1	1	1	PIGC	phosphatidylinositol glycan anchor biosynthesis, class C
hsa-miR-511	0	0	1	1	1	1	PSMA1	proteasome (prosome, macropain) subunit, alpha type, 1
hsa-miR-511	0	0	1	0	0	0	FLJ45248	FLJ45248 protein
hsa-miR-511	1	0	1	1	1	1	OSBPL9	oxysterol binding protein-like 9
hsa-miR-511	0	0	1	0	0	0	LOC677759	uncharacterized LOC677759
hsa-miR-511	0	0	1	1	1	1	ZDHHC16	zinc finger, DHHC-type containing 16
hsa-miR-511	1	0	1	1	1	1	DOK4	docking protein 4
hsa-miR-511	0	0	1	1	0	0	NOX5	NADPH oxidase, EF-hand calcium binding domain 5
hsa-miR-511	0	0	1	1	0	0	FAM64A	family with sequence similarity 64, member A
hsa-miR-511	1	0	1	1	1	1	ARNTL	aryl hydrocarbon receptor nuclear translocator-like
hsa-miR-511	0	0	1	1	0	0	DAP3	death associated protein 3
hsa-miR-511	0	0	1	1	0	0	C11orf48	chromosome 11 open reading frame 48
hsa-miR-511	0	0	1	1	1	1	DEDD	death effector domain containing
hsa-miR-511	0	0	1	1	0	0	RRNAD1	ribosomal RNA adenine dimethylase domain containing 1
hsa-miR-511	0	0	1	1	0	0	RGS9	regulator of G-protein signaling 9
hsa-miR-511	0	0	1	1	1	1	ACAD9	acyl-CoA dehydrogenase family, member 9
hsa-miR-511	1	0	1	1	1	1	FUBP3	far upstream element (FUSE) binding protein 3
hsa-miR-511	0	0	1	1	0	0	CD53	CD53 molecule
hsa-miR-511	0	0	1	0	1	1	SUMO2	SMT3 suppressor of mif two 3 homolog 2 (S. cerevisiae)
hsa-miR-511	1	0	1	1	1	1	ARL4A	ADP-ribosylation factor-like 4A
hsa-miR-511	1	0	1	1	1	1	ATAT1	alpha tubulin acetyltransferase 1
hsa-miR-511	0	0	1	1	1	1	CD1C	CD1c molecule
hsa-miR-511	1	0	1	1	1	1	BAALC	brain and acute leukemia, cytoplasmic
hsa-miR-511	1	0	1	1	1	1	PFN2	profilin 2
hsa-miR-511	0	0	1	0	0	0	LOC93622	Morf4 family associated protein 1-like 1 pseudogene
hsa-miR-511	0	0	1	1	1	1	HOXC9	homeobox C9
hsa-miR-511	1	0	1	1	0	0	CRELD1	cysteine-rich with EGF-like domains 1
hsa-miR-511	1	0	1	1	1	1	SNX1	sorting nexin 1
hsa-miR-511	0	0	1	1	1	1	TMEM14C	transmembrane protein 14C
hsa-miR-511	0	0	1	1	1	1	FAM18B1	family with sequence similarity 18, member B1
hsa-miR-511	1	0	1	1	1	1	ITGA4	integrin, alpha 4 (antigen CD49D, alpha 4 subunit of VLA-4 receptor)
hsa-miR-511	1	0	1	1	1	1	RNF2	ring finger protein 2
hsa-miR-511	0	0	1	1	0	0	CCNDBP1	cyclin D-type binding-protein 1
hsa-miR-511	1	0	1	1	1	1	GDA	guanine deaminase
hsa-miR-511	0	0	1	1	1	1	RNF166	ring finger protein 166
hsa-miR-511	1	0	1	1	1	1	RALY	RNA binding protein, autoantigenic (hnRNP-associated with lethal yellow homolog (mouse))
hsa-miR-511	0	0	1	1	0	0	PC	pyruvate carboxylase
hsa-miR-511	0	0	1	1	0	0	MAP2K5	mitogen-activated protein kinase kinase 5
hsa-miR-511	1	0	1	1	0	0	STAG3L4	stromal antigen 3-like 4
hsa-miR-511	1	0	1	1	1	1	TRAPPC3	trafficking protein particle complex 3
hsa-miR-511	0	0	1	1	0	0	RAMP2	receptor (G protein-coupled) activity modifying protein 2
hsa-miR-511	0	0	1	0	0	0	CHEK2P2	checkpoint kinase 2 pseudogene 2
hsa-miR-511	0	0	1	1	1	1	MRFAP1L1	Morf4 family associated protein 1-like 1
hsa-miR-511	0	0	1	1	0	0	TTYH1	tweety homolog 1 (Drosophila)
hsa-miR-511	1	0	1	1	1	1	MYT1	myelin transcription factor 1
hsa-miR-511	0	0	1	1	0	0	FES	feline sarcoma oncogene
hsa-miR-511	1	0	1	1	1	1	LHX9	LIM homeobox 9
hsa-miR-511	1	0	1	1	1	1	TFPI	tissue factor pathway inhibitor (lipoprotein-associated coagulation inhibitor)
hsa-miR-511	0	0	1	1	1	1	C10orf2	chromosome 10 open reading frame 2
hsa-miR-511	1	0	1	1	1	1	KIAA1551	KIAA1551
hsa-miR-511	0	0	1	0	0	0	MYSM1	Myb-like, SWIRM and MPN domains 1
hsa-miR-511	1	0	1	1	1	1	STAG2	stromal antigen 2
hsa-miR-511	0	0	1	0	0	0	LOC731789	uncharacterized LOC731789
hsa-miR-511	0	0	1	1	1	1	BDP1	B double prime 1, subunit of RNA polymerase III transcription initiation factor IIIB
hsa-miR-511	0	0	1	1	1	1	SYNE2	spectrin repeat containing, nuclear envelope 2
hsa-miR-511	1	0	1	1	1	1	PHACTR2	phosphatase and actin regulator 2
hsa-miR-511	1	0	1	1	1	1	HECW2	HECT, C2 and WW domain containing E3 ubiquitin protein ligase 2
hsa-miR-511	0	0	1	0	1	1	HDAC9	histone deacetylase 9
hsa-miR-511	0	0	1	1	1	1	SLC25A26	solute carrier family 25 (S-adenosylmethionine carrier), member 26
hsa-miR-511	0	0	1	0	1	1	ZNF28	zinc finger protein 28
hsa-miR-511	1	0	1	0	1	1	ZNF652	zinc finger protein 652
hsa-miR-511	1	0	1	1	1	1	SLC30A7	solute carrier family 30 (zinc transporter), member 7
hsa-miR-511	0	0	1	1	1	1	MSS51	MSS51 mitochondrial translational activator homolog (S. cerevisiae)
hsa-miR-511	1	0	1	1	1	1	ZFHX3	zinc finger homeobox 3
hsa-miR-511	1	0	1	1	1	1	SP2	Sp2 transcription factor
hsa-miR-511	1	0	1	1	1	1	PRKG1	protein kinase, cGMP-dependent, type I
hsa-miR-511	1	0	1	1	1	1	MAN2A2	mannosidase, alpha, class 2A, member 2
hsa-miR-511	1	0	1	0	1	1	EFR3A	EFR3 homolog A (S. cerevisiae)
hsa-miR-511	0	0	1	1	1	1	UBXN8	UBX domain protein 8
hsa-miR-511	1	0	1	1	1	1	RB1CC1	RB1-inducible coiled-coil 1
hsa-miR-511	1	0	1	1	0	0	KIAA0226	KIAA0226
hsa-miR-511	0	0	1	1	1	1	ATF2	activating transcription factor 2
hsa-miR-511	1	0	1	1	1	1	TMEFF2	transmembrane protein with EGF-like and two follistatin-like domains 2
hsa-miR-511	0	0	1	1	0	0	SPINK5	serine peptidase inhibitor, Kazal type 5
hsa-miR-511	0	0	1	1	1	1	PTGS1	prostaglandin-endoperoxide synthase 1 (prostaglandin G/H synthase and cyclooxygenase)
hsa-miR-511	0	0	1	1	0	0	SPATA20	spermatogenesis associated 20
hsa-miR-511	0	0	1	1	0	0	GPR111	G protein-coupled receptor 111
hsa-miR-511	1	0	1	1	1	1	QKI	QKI, KH domain containing, RNA binding
hsa-miR-511	1	0	1	0	1	1	MAP2K7	mitogen-activated protein kinase kinase 7
hsa-miR-511	1	0	1	1	1	1	BNC2	basonuclin 2
hsa-miR-511	1	0	1	0	1	1	RBBP5	retinoblastoma binding protein 5
hsa-miR-511	1	0	1	0	1	1	DCBLD2	discoidin, CUB and LCCL domain containing 2
hsa-miR-511	0	0	1	1	1	1	PROS1	protein S (alpha)
hsa-miR-511	1	0	1	1	1	1	TNFAIP1	tumor necrosis factor, alpha-induced protein 1 (endothelial)
hsa-miR-511	1	0	1	1	1	1	CDC27	cell division cycle 27 homolog (S. cerevisiae)
hsa-miR-511	0	0	1	0	0	0	C1orf81	chromosome 1 open reading frame 81
hsa-miR-511	1	0	1	0	1	1	KCNB1	potassium voltage-gated channel, Shab-related subfamily, member 1
hsa-miR-511	0	0	1	1	1	1	AKAP17A	A kinase (PRKA) anchor protein 17A
hsa-miR-511	1	0	1	1	1	1	ATP2B2	ATPase, Ca++ transporting, plasma membrane 2
hsa-miR-511	1	0	1	1	1	1	AFF1	AF4/FMR2 family, member 1
hsa-miR-511	0	0	1	1	1	1	PCYT1A	phosphate cytidylyltransferase 1, choline, alpha
hsa-miR-511	0	0	1	1	1	1	PLCB4	phospholipase C, beta 4
hsa-miR-511	1	0	1	1	1	1	GRM1	glutamate receptor, metabotropic 1
hsa-miR-511	0	0	1	1	0	0	INHBA	inhibin, beta A
hsa-miR-511	1	0	1	0	1	1	BCL2	B-cell CLL/lymphoma 2
hsa-miR-511	1	0	1	1	1	1	PLAU	plasminogen activator, urokinase
hsa-miR-511	0	0	1	1	1	1	NPR3	natriuretic peptide receptor C/guanylate cyclase C (atrionatriuretic peptide receptor C)
hsa-miR-511	1	0	1	1	1	1	PML	promyelocytic leukemia
hsa-miR-511	0	0	1	1	1	1	GAD2	glutamate decarboxylase 2 (pancreatic islets and brain, 65kDa)
hsa-miR-511	1	0	1	1	1	1	ZNF76	zinc finger protein 76
hsa-miR-511	1	0	1	0	1	1	ACVR2A	activin A receptor, type IIA
hsa-miR-511	1	0	1	1	0	0	ADRB3	adrenoceptor beta 3
hsa-miR-511	1	0	1	0	1	1	ATM	ataxia telangiectasia mutated
hsa-miR-511	0	0	1	1	1	1	ATP7A	ATPase, Cu++ transporting, alpha polypeptide
hsa-miR-511	0	0	1	1	0	0	CD40LG	CD40 ligand
hsa-miR-511	1	0	1	1	1	1	COL1A1	collagen, type I, alpha 1
hsa-miR-511	1	0	1	1	1	1	COL3A1	collagen, type III, alpha 1
hsa-miR-511	1	0	1	1	1	1	COL4A3	collagen, type IV, alpha 3 (Goodpasture antigen)
hsa-miR-511	1	0	1	1	1	1	COL4A4	collagen, type IV, alpha 4
hsa-miR-511	0	0	1	1	1	1	EDN3	endothelin 3
hsa-miR-511	1	0	1	1	1	1	GJA1	gap junction protein, alpha 1, 43kDa
hsa-miR-511	1	0	1	1	1	1	GK	glycerol kinase
hsa-miR-511	1	0	1	0	1	1	GLI3	GLI family zinc finger 3
hsa-miR-511	0	0	1	1	1	1	HPRT1	hypoxanthine phosphoribosyltransferase 1
hsa-miR-511	0	0	1	1	1	1	HSD11B2	hydroxysteroid (11-beta) dehydrogenase 2
hsa-miR-511	1	0	1	0	1	1	ITGB3	integrin, beta 3 (platelet glycoprotein IIIa, antigen CD61)
hsa-miR-511	1	0	1	1	1	1	KCNA1	potassium voltage-gated channel, shaker-related subfamily, member 1 (episodic ataxia with myokymia)
hsa-miR-511	1	0	1	0	1	1	KIT	v-kit Hardy-Zuckerman 4 feline sarcoma viral oncogene homolog
hsa-miR-511	1	0	1	1	1	1	MET	met proto-oncogene (hepatocyte growth factor receptor)
hsa-miR-511	1	0	1	1	1	1	MITF	microphthalmia-associated transcription factor
hsa-miR-511	0	0	1	1	1	1	MTM1	myotubularin 1
hsa-miR-511	0	0	1	1	1	1	MTR	5-methyltetrahydrofolate-homocysteine methyltransferase
hsa-miR-511	1	0	1	0	1	1	PKD2	polycystic kidney disease 2 (autosomal dominant)
hsa-miR-511	1	0	1	0	1	1	PTEN	phosphatase and tensin homolog
hsa-miR-511	1	0	1	1	1	1	SOX9	SRY (sex determining region Y)-box 9
hsa-miR-511	1	0	1	1	1	1	BLMH	bleomycin hydrolase
hsa-miR-511	0	0	1	1	1	1	CASR	calcium-sensing receptor
hsa-miR-511	1	0	1	0	1	1	COL5A2	collagen, type V, alpha 2
hsa-miR-511	0	0	1	1	1	1	LTBP2	latent transforming growth factor beta binding protein 2
hsa-miR-511	1	0	1	0	1	1	PAFAH1B1	platelet-activating factor acetylhydrolase 1b, regulatory subunit 1 (45kDa)
hsa-miR-511	0	0	1	1	1	1	OXCT1	3-oxoacid CoA transferase 1
hsa-miR-511	0	0	1	1	1	1	PECAM1	platelet/endothelial cell adhesion molecule 1
hsa-miR-511	0	0	1	1	0	0	PSEN2	presenilin 2 (Alzheimer disease 4)
hsa-miR-511	1	0	1	1	1	1	RFX5	regulatory factor X, 5 (influences HLA class II expression)
hsa-miR-511	1	0	1	1	1	1	HNF1B	HNF1 homeobox B
hsa-miR-511	1	0	1	1	1	1	ATRX	alpha thalassemia/mental retardation syndrome X-linked
hsa-miR-511	0	0	1	1	1	1	COL10A1	collagen, type X, alpha 1
hsa-miR-511	1	0	1	1	1	1	HOXA13	homeobox A13
hsa-miR-511	1	0	1	1	1	1	PLP1	proteolipid protein 1
hsa-miR-511	0	0	1	1	1	1	CRX	cone-rod homeobox
hsa-miR-511	1	0	1	1	1	1	DCX	doublecortin
hsa-miR-511	0	0	1	1	1	1	FCGR1A	Fc fragment of IgG, high affinity Ia, receptor (CD64)
hsa-miR-511	1	0	1	1	1	1	CD44	CD44 molecule (Indian blood group)
hsa-miR-511	1	0	1	1	1	1	FASLG	Fas ligand (TNF superfamily, member 6)
hsa-miR-511	0	0	1	1	0	0	IL13RA2	interleukin 13 receptor, alpha 2
hsa-miR-511	0	0	1	0	1	1	ADRA2A	adrenoceptor alpha 2A
hsa-miR-511	1	0	1	0	1	1	ADRB1	adrenoceptor beta 1
hsa-miR-511	0	0	1	1	1	1	ALDH1A1	aldehyde dehydrogenase 1 family, member A1
hsa-miR-511	1	0	1	0	1	1	CACNA1E	calcium channel, voltage-dependent, R type, alpha 1E subunit
hsa-miR-511	1	0	1	1	1	1	DIO2	deiodinase, iodothyronine, type II
hsa-miR-511	1	0	1	1	1	1	GABRB3	gamma-aminobutyric acid (GABA) A receptor, beta 3
hsa-miR-511	1	0	1	1	1	1	GUCY1A2	guanylate cyclase 1, soluble, alpha 2
hsa-miR-511	0	0	1	1	1	1	HTR1D	5-hydroxytryptamine (serotonin) receptor 1D, G protein-coupled
hsa-miR-511	1	0	1	1	1	1	HTR4	5-hydroxytryptamine (serotonin) receptor 4, G protein-coupled
hsa-miR-511	0	0	1	1	1	1	HTR7	5-hydroxytryptamine (serotonin) receptor 7, adenylate cyclase-coupled
hsa-miR-511	1	0	1	1	1	1	IGF1R	insulin-like growth factor 1 receptor
hsa-miR-511	0	0	1	1	1	1	IL5	interleukin 5 (colony-stimulating factor, eosinophil)
hsa-miR-511	0	0	1	1	0	0	KNG1	kininogen 1
hsa-miR-511	0	0	1	1	1	1	MAOB	monoamine oxidase B
hsa-miR-511	0	0	1	0	1	1	PTGIS	prostaglandin I2 (prostacyclin) synthase
hsa-miR-511	1	0	1	1	1	1	RARB	retinoic acid receptor, beta
hsa-miR-511	1	0	1	0	1	1	SMAD5	SMAD family member 5
hsa-miR-511	1	0	1	0	1	1	SPOPL	speckle-type POZ protein-like
hsa-miR-511	0	0	1	1	0	0	RNASE9	ribonuclease, RNase A family, 9 (non-active)
hsa-miR-511	1	0	1	1	1	1	TPD52L3	tumor protein D52-like 3
hsa-miR-511	0	0	1	1	1	1	ATP5G2	ATP synthase, H+ transporting, mitochondrial Fo complex, subunit C2 (subunit 9)
hsa-miR-511	1	0	1	1	0	0	AWAT2	acyl-CoA wax alcohol acyltransferase 2
hsa-miR-511	1	0	1	1	1	1	DNAJB12	DnaJ (Hsp40) homolog, subfamily B, member 12
hsa-miR-511	1	0	1	1	1	1	ABLIM1	actin binding LIM protein 1
hsa-miR-511	1	0	1	1	1	1	TMEM200B	transmembrane protein 200B
hsa-miR-511	1	0	1	1	1	1	KLHL31	kelch-like 31 (Drosophila)
hsa-miR-511	1	0	1	1	1	1	BICD2	bicaudal D homolog 2 (Drosophila)
hsa-miR-511	1	0	1	0	1	1	BMF	Bcl2 modifying factor
hsa-miR-511	0	0	1	1	1	1	ANXA13	annexin A13
hsa-miR-511	0	0	1	1	1	1	ALG11	asparagine-linked glycosylation 11, alpha-1,2-mannosyltransferase homolog (yeast)
hsa-miR-511	0	0	1	1	1	1	OR13A1	olfactory receptor, family 13, subfamily A, member 1
hsa-miR-511	0	0	1	1	1	1	CCDC144NL	coiled-coil domain containing 144 family, N-terminal like
hsa-miR-511	1	0	1	0	1	1	LIN28B	lin-28 homolog B (C. elegans)
hsa-miR-511	0	0	1	1	1	1	AGMO	alkylglycerol monooxygenase
hsa-miR-511	0	0	1	0	1	1	ZNF705A	zinc finger protein 705A
hsa-miR-511	0	0	1	0	0	0	FLJ42842	uncharacterized FLJ42842
hsa-miR-511	0	0	1	0	1	1	SPDYE3	speedy homolog E3 (Xenopus laevis)
hsa-miR-511	1	0	1	1	1	1	NCK2	NCK adaptor protein 2
hsa-miR-511	0	0	1	1	0	0	MARCH2	membrane-associated ring finger (C3HC4) 2, E3 ubiquitin protein ligase
hsa-miR-511	1	0	1	1	1	1	PLCXD3	phosphatidylinositol-specific phospholipase C, X domain containing 3
hsa-miR-511	0	0	1	1	1	1	RYK	receptor-like tyrosine kinase
hsa-miR-511	1	0	1	0	1	1	PDPN	podoplanin
hsa-miR-511	0	0	1	1	1	1	TCEAL6	transcription elongation factor A (SII)-like 6
hsa-miR-511	1	0	1	1	1	1	L3MBTL3	l(3)mbt-like 3 (Drosophila)
hsa-miR-511	0	0	1	1	0	0	DUSP13	dual specificity phosphatase 13
hsa-miR-511	1	0	1	1	1	1	TULP4	tubby like protein 4
hsa-miR-511	0	0	1	1	0	0	F8A3	coagulation factor VIII-associated 3
hsa-miR-511	1	0	1	0	1	1	SS18	synovial sarcoma translocation, chromosome 18
hsa-miR-511	1	0	1	0	1	1	CPLX2	complexin 2
hsa-miR-511	0	0	1	1	1	1	UACA	uveal autoantigen with coiled-coil domains and ankyrin repeats
hsa-miR-511	1	0	1	0	1	1	C18orf25	chromosome 18 open reading frame 25
hsa-miR-511	1	0	1	0	1	1	KIAA2022	KIAA2022
hsa-miR-511	0	0	1	1	1	1	CXCR4	chemokine (C-X-C motif) receptor 4
hsa-miR-511	0	0	1	1	1	1	MXI1	MAX interactor 1
hsa-miR-511	0	0	1	1	1	1	IL4R	interleukin 4 receptor
hsa-miR-511	1	0	1	1	1	1	LPHN1	latrophilin 1
hsa-miR-511	0	0	1	1	0	0	CCT3	chaperonin containing TCP1, subunit 3 (gamma)
hsa-miR-511	0	0	1	1	0	0	GTSF1L	gametocyte specific factor 1-like
hsa-miR-511	1	0	1	0	1	1	ERMN	ermin, ERM-like protein
hsa-miR-511	0	0	1	1	1	1	SERP2	stress-associated endoplasmic reticulum protein family member 2
hsa-miR-511	1	0	1	1	1	1	C10orf114	chromosome 10 open reading frame 114
hsa-miR-511	0	0	1	0	1	1	THEMIS	thymocyte selection associated
hsa-miR-511	1	0	1	0	1	1	FYTTD1	forty-two-three domain containing 1
hsa-miR-511	0	0	1	1	1	1	ZMAT1	zinc finger, matrin-type 1
hsa-miR-511	0	0	1	1	1	1	CHCHD7	coiled-coil-helix-coiled-coil-helix domain containing 7
hsa-miR-511	0	0	1	1	0	0	PNLIPRP3	pancreatic lipase-related protein 3
hsa-miR-511	1	0	1	1	1	1	CTNNBIP1	catenin, beta interacting protein 1
hsa-miR-511	0	0	1	1	0	0	RGR	retinal G protein coupled receptor
hsa-miR-511	1	0	1	1	1	1	SLC25A53	solute carrier family 25, member 53
hsa-miR-511	0	0	1	1	0	0	LINC00207	long intergenic non-protein coding RNA 207
hsa-miR-511	1	0	1	1	1	1	SORCS1	sortilin-related VPS10 domain containing receptor 1
hsa-miR-511	1	0	1	1	1	1	KATNAL1	katanin p60 subunit A-like 1
hsa-miR-511	0	0	1	1	1	1	FAM96A	family with sequence similarity 96, member A
hsa-miR-511	1	0	1	1	1	1	RUNX2	runt-related transcription factor 2
hsa-miR-511	1	0	1	1	1	1	PHF6	PHD finger protein 6
hsa-miR-511	1	0	1	0	1	1	GOPC	golgi-associated PDZ and coiled-coil motif containing
hsa-miR-511	0	0	1	1	0	0	CXorf61	chromosome X open reading frame 61
hsa-miR-511	0	0	1	1	1	1	MTCP1	mature T-cell proliferation 1
hsa-miR-511	1	0	1	0	1	1	BRCC3	BRCA1/BRCA2-containing complex, subunit 3
hsa-miR-511	1	0	1	1	1	1	DKK3	dickkopf 3 homolog (Xenopus laevis)
hsa-miR-511	1	0	1	0	1	1	TFEC	transcription factor EC
hsa-miR-511	0	0	1	1	1	1	GCOM1	GRINL1A complex locus 1
hsa-miR-511	1	0	1	1	1	1	GPHN	gephyrin
hsa-miR-511	1	0	1	1	1	1	SBK1	SH3-binding domain kinase 1
hsa-miR-511	1	0	1	0	1	1	RGAG4	retrotransposon gag domain containing 4
hsa-miR-511	0	0	1	1	1	1	VNN3	vanin 3
hsa-miR-511	0	0	1	1	1	1	LRRC66	leucine rich repeat containing 66
hsa-miR-511	1	0	1	0	1	1	TNRC6B	trinucleotide repeat containing 6B
hsa-miR-511	1	0	1	1	1	1	TGFBR2	transforming growth factor, beta receptor II (70/80kDa)
hsa-miR-511	1	0	1	1	1	1	FNBP1L	formin binding protein 1-like
hsa-miR-511	1	0	1	0	1	1	CELF2	CUGBP, Elav-like family member 2
hsa-miR-511	1	0	1	0	1	1	CLLU1	chronic lymphocytic leukemia up-regulated 1
hsa-miR-511	0	0	1	0	1	1	C6orf120	chromosome 6 open reading frame 120
hsa-miR-511	1	0	1	1	1	1	RGS7BP	regulator of G-protein signaling 7 binding protein
hsa-miR-511	1	0	1	0	1	1	C2orf71	chromosome 2 open reading frame 71
hsa-miR-511	0	0	1	1	1	1	RPS29	ribosomal protein S29
hsa-miR-511	1	0	1	1	1	1	OPN5	opsin 5
hsa-miR-511	1	0	1	0	1	1	SAMD5	sterile alpha motif domain containing 5
hsa-miR-511	1	0	1	0	1	1	MSRB3	methionine sulfoxide reductase B3
hsa-miR-511	0	0	1	1	1	1	TRMT11	tRNA methyltransferase 11 homolog (S. cerevisiae)
hsa-miR-511	1	0	1	1	1	1	MAF	v-maf musculoaponeurotic fibrosarcoma oncogene homolog (avian)
hsa-miR-511	1	0	1	1	1	1	CSNK1G3	casein kinase 1, gamma 3
hsa-miR-511	1	0	1	1	1	1	UBE2V1	ubiquitin-conjugating enzyme E2 variant 1
hsa-miR-511	1	0	1	1	1	1	STK24	serine/threonine kinase 24
hsa-miR-511	0	0	1	0	1	1	ZNF226	zinc finger protein 226
hsa-miR-511	0	0	1	1	1	1	FAIM	Fas apoptotic inhibitory molecule
hsa-miR-511	1	0	1	0	1	1	NPNT	nephronectin
hsa-miR-511	1	0	1	0	1	1	SRGAP3	SLIT-ROBO Rho GTPase activating protein 3
hsa-miR-511	0	0	1	1	1	1	SPECC1	sperm antigen with calponin homology and coiled-coil domains 1
hsa-miR-511	1	0	1	1	0	0	MTUS2	microtubule associated tumor suppressor candidate 2
hsa-miR-511	0	0	1	1	1	1	FAM134B	family with sequence similarity 134, member B
hsa-miR-511	1	0	1	0	1	1	RYR3	ryanodine receptor 3
hsa-miR-511	0	0	1	1	1	1	EXOC4	exocyst complex component 4
hsa-miR-511	1	0	1	1	1	1	USP14	ubiquitin specific peptidase 14 (tRNA-guanine transglycosylase)
hsa-miR-511	1	0	1	1	1	1	SCD5	stearoyl-CoA desaturase 5
hsa-miR-511	0	0	1	1	1	1	CTLA4	cytotoxic T-lymphocyte-associated protein 4
hsa-miR-511	0	0	1	0	1	1	FER1L6-AS1	FER1L6 antisense RNA 1
hsa-miR-511	0	0	1	1	0	0	SCNN1G	sodium channel, non-voltage-gated 1, gamma subunit
hsa-miR-511	0	0	1	0	1	1	RGS21	regulator of G-protein signaling 21
hsa-miR-511	1	0	1	1	1	1	DPP6	dipeptidyl-peptidase 6
hsa-miR-511	1	0	1	0	1	1	GK5	glycerol kinase 5 (putative)
hsa-miR-511	1	0	1	1	1	1	AP1S3	adaptor-related protein complex 1, sigma 3 subunit
hsa-miR-511	1	0	1	1	1	1	KCNC4	potassium voltage-gated channel, Shaw-related subfamily, member 4
hsa-miR-511	0	0	1	1	1	1	MAP9	microtubule-associated protein 9
hsa-miR-511	0	0	1	0	1	1	ZNF705D	zinc finger protein 705D
hsa-miR-511	0	0	1	1	1	1	ANKRD55	ankyrin repeat domain 55
hsa-miR-511	1	0	1	1	1	1	LFNG	LFNG O-fucosylpeptide 3-beta-N-acetylglucosaminyltransferase
hsa-miR-511	1	0	1	0	1	1	CD83	CD83 molecule
hsa-miR-511	0	0	1	1	1	1	TBC1D3G	TBC1 domain family, member 3G
hsa-miR-511	1	0	1	1	1	1	NCALD	neurocalcin delta
hsa-miR-511	1	0	1	1	1	1	GLIS3	GLIS family zinc finger 3
hsa-miR-511	1	0	1	1	1	1	GLRA3	glycine receptor, alpha 3
hsa-miR-511	1	0	1	1	1	1	NSL1	NSL1, MIND kinetochore complex component, homolog (S. cerevisiae)
hsa-miR-511	1	0	1	1	1	1	FRS2	fibroblast growth factor receptor substrate 2
hsa-miR-511	0	0	1	1	1	1	POT1	protection of telomeres 1 homolog (S. pombe)
hsa-miR-511	1	0	1	1	1	1	ERBB4	v-erb-a erythroblastic leukemia viral oncogene homolog 4 (avian)
hsa-miR-511	0	0	1	1	1	1	TTC14	tetratricopeptide repeat domain 14
hsa-miR-511	1	0	1	1	1	1	NET1	neuroepithelial cell transforming 1
hsa-miR-511	1	0	1	1	1	1	QSER1	glutamine and serine rich 1
hsa-miR-511	1	0	1	1	1	1	METTL9	methyltransferase like 9
hsa-miR-511	1	0	1	1	1	1	PDE11A	phosphodiesterase 11A
hsa-miR-511	1	0	1	1	1	1	IRF2BP2	interferon regulatory factor 2 binding protein 2
hsa-miR-511	0	0	1	1	0	0	VPS37D	vacuolar protein sorting 37 homolog D (S. cerevisiae)
hsa-miR-511	0	0	1	0	1	1	WTH3DI	RAB6C-like
hsa-miR-511	1	0	1	1	1	1	ALG9	asparagine-linked glycosylation 9, alpha-1,2-mannosyltransferase homolog (S. cerevisiae)
hsa-miR-511	1	0	1	1	1	1	ECT2L	epithelial cell transforming sequence 2 oncogene-like
hsa-miR-511	1	0	1	1	1	1	TMTC4	transmembrane and tetratricopeptide repeat containing 4
hsa-miR-511	1	0	1	1	1	1	VAV3	vav 3 guanine nucleotide exchange factor
hsa-miR-511	0	0	1	1	0	0	ARHGAP9	Rho GTPase activating protein 9
hsa-miR-511	1	0	1	1	1	1	FAM155A	family with sequence similarity 155, member A
hsa-miR-511	1	0	1	1	1	1	SHANK3	SH3 and multiple ankyrin repeat domains 3
hsa-miR-511	1	0	1	0	1	1	CCDC85A	coiled-coil domain containing 85A
hsa-miR-511	0	0	1	1	0	0	LMTK3	lemur tyrosine kinase 3
hsa-miR-511	0	0	1	1	0	0	WTIP	Wilms tumor 1 interacting protein
hsa-miR-511	0	0	1	0	1	1	WIPF3	WAS/WASL interacting protein family, member 3
hsa-miR-511	0	0	1	1	1	1	SNTN	sentan, cilia apical structure protein
hsa-miR-511	1	0	1	1	1	1	MYO1C	myosin IC
hsa-miR-511	1	0	1	0	1	1	SCN3A	sodium channel, voltage-gated, type III, alpha subunit
hsa-miR-511	0	0	1	1	0	0	PLOD3	procollagen-lysine, 2-oxoglutarate 5-dioxygenase 3
hsa-miR-511	1	0	1	1	1	1	ADCY9	adenylate cyclase 9
hsa-miR-511	0	0	1	1	1	1	ADSS	adenylosuccinate synthase
hsa-miR-511	0	0	1	1	0	0	AFP	alpha-fetoprotein
hsa-miR-511	1	0	1	0	0	0	ACAN	aggrecan
hsa-miR-511	0	0	1	1	0	0	AOX1	aldehyde oxidase 1
hsa-miR-511	1	0	1	0	1	1	KLF9	Kruppel-like factor 9
hsa-miR-511	0	0	1	1	1	1	CASQ1	calsequestrin 1 (fast-twitch, skeletal muscle)
hsa-miR-511	0	0	1	1	1	1	CCNT2	cyclin T2
hsa-miR-511	0	0	1	1	0	0	SIGLEC6	sialic acid binding Ig-like lectin 6
hsa-miR-511	0	0	1	1	1	1	ENTPD3	ectonucleoside triphosphate diphosphohydrolase 3
hsa-miR-511	1	0	1	0	1	1	CDK6	cyclin-dependent kinase 6
hsa-miR-511	0	0	1	1	1	1	CDSN	corneodesmosin
hsa-miR-511	0	0	1	1	1	1	CLIC2	chloride intracellular channel 2
hsa-miR-511	0	0	1	1	1	1	CCR1	chemokine (C-C motif) receptor 1
hsa-miR-511	1	0	1	0	0	0	DLG4	discs, large homolog 4 (Drosophila)
hsa-miR-511	1	0	1	1	1	1	DYRK1A	dual-specificity tyrosine-(Y)-phosphorylation regulated kinase 1A
hsa-miR-511	1	0	1	1	1	1	EIF1AX	eukaryotic translation initiation factor 1A, X-linked
hsa-miR-511	1	0	1	0	1	1	EIF2S3	eukaryotic translation initiation factor 2, subunit 3 gamma, 52kDa
hsa-miR-511	1	0	1	0	1	1	ELAVL3	ELAV (embryonic lethal, abnormal vision, Drosophila)-like 3 (Hu antigen C)
hsa-miR-511	1	0	1	1	1	1	EP300	E1A binding protein p300
hsa-miR-511	1	0	1	1	1	1	GTF2B	general transcription factor IIB
hsa-miR-511	1	0	1	1	1	1	ID4	inhibitor of DNA binding 4, dominant negative helix-loop-helix protein
hsa-miR-511	0	0	1	1	1	1	TNFRSF9	tumor necrosis factor receptor superfamily, member 9
hsa-miR-511	0	0	1	0	1	1	ACADSB	acyl-CoA dehydrogenase, short/branched chain
hsa-miR-511	1	0	1	1	1	1	AQP4	aquaporin 4
hsa-miR-511	1	0	1	1	1	1	BCL6	B-cell CLL/lymphoma 6
hsa-miR-511	1	0	1	1	1	1	BTG1	B-cell translocation gene 1, anti-proliferative
hsa-miR-511	0	0	1	1	1	1	BTN1A1	butyrophilin, subfamily 1, member A1
hsa-miR-511	0	0	1	1	0	0	C5	complement component 5
hsa-miR-511	0	0	1	1	1	1	CD1D	CD1d molecule
hsa-miR-511	1	0	1	1	1	1	CD69	CD69 molecule
hsa-miR-511	1	0	1	1	1	1	CDC25A	cell division cycle 25 homolog A (S. pombe)
hsa-miR-511	1	0	1	1	1	1	CDH2	cadherin 2, type 1, N-cadherin (neuronal)
hsa-miR-511	0	0	1	1	1	1	CHGB	chromogranin B (secretogranin 1)
hsa-miR-511	1	0	1	1	1	1	CLCN3	chloride channel, voltage-sensitive 3
hsa-miR-511	1	0	1	1	1	1	CLCN4	chloride channel, voltage-sensitive 4
hsa-miR-511	0	0	1	1	1	1	CNTN1	contactin 1
hsa-miR-511	1	0	1	1	1	1	COL4A1	collagen, type IV, alpha 1
hsa-miR-511	1	0	1	1	1	1	COL15A1	collagen, type XV, alpha 1
hsa-miR-511	0	0	1	1	1	1	CPS1	carbamoyl-phosphate synthase 1, mitochondrial
hsa-miR-511	0	0	1	1	1	1	DLAT	dihydrolipoamide S-acetyltransferase
hsa-miR-511	1	0	1	1	1	1	DPP4	dipeptidyl-peptidase 4
hsa-miR-511	1	0	1	1	1	1	DUSP6	dual specificity phosphatase 6
hsa-miR-511	1	0	1	1	1	1	E2F3	E2F transcription factor 3
hsa-miR-511	1	0	1	1	1	1	FBN2	fibrillin 2
hsa-miR-511	1	0	1	1	1	1	FGF9	fibroblast growth factor 9 (glia-activating factor)
hsa-miR-511	0	0	1	1	1	1	FLI1	Friend leukemia virus integration 1
hsa-miR-511	0	0	1	1	1	1	GFAP	glial fibrillary acidic protein
hsa-miR-511	0	0	1	0	1	1	GCLM	glutamate-cysteine ligase, modifier subunit
hsa-miR-511	0	0	1	1	0	0	GLP1R	glucagon-like peptide 1 receptor
hsa-miR-511	1	0	1	1	1	1	GLRA2	glycine receptor, alpha 2
hsa-miR-511	0	0	1	0	1	1	GYPA	glycophorin A (MNS blood group)
hsa-miR-511	1	0	1	1	1	1	HNRNPA2B1	heterogeneous nuclear ribonucleoprotein A2/B1
hsa-miR-511	0	0	1	1	1	1	HOXA4	homeobox A4
hsa-miR-511	1	0	1	1	1	1	TNC	tenascin C
hsa-miR-511	0	0	1	1	0	0	IL7R	interleukin 7 receptor
hsa-miR-511	0	0	1	1	1	1	IL12B	interleukin 12B (natural killer cell stimulatory factor 2, cytotoxic lymphocyte maturation factor 2, p40)
hsa-miR-511	1	0	1	1	0	0	INHBB	inhibin, beta B
hsa-miR-511	1	0	1	1	1	1	ISL1	ISL LIM homeobox 1
hsa-miR-511	1	0	1	1	1	1	ITGA3	integrin, alpha 3 (antigen CD49C, alpha 3 subunit of VLA-3 receptor)
hsa-miR-511	0	0	1	0	1	1	ITGAV	integrin, alpha V
hsa-miR-511	0	0	1	1	1	1	ITGB1	integrin, beta 1 (fibronectin receptor, beta polypeptide, antigen CD29 includes MDF2, MSK12)
hsa-miR-511	0	0	1	1	0	0	ITPKA	inositol-trisphosphate 3-kinase A
hsa-miR-511	0	0	1	1	1	1	KCNJ6	potassium inwardly-rectifying channel, subfamily J, member 6
hsa-miR-511	1	0	1	1	1	1	KDR	kinase insert domain receptor (a type III receptor tyrosine kinase)
hsa-miR-511	1	0	1	0	1	1	KIF3C	kinesin family member 3C
hsa-miR-511	1	0	1	1	1	1	KPNB1	karyopherin (importin) beta 1
hsa-miR-511	1	0	1	1	1	1	KPNA4	karyopherin alpha 4 (importin alpha 3)
hsa-miR-511	1	0	1	1	1	1	IPO5	importin 5
hsa-miR-511	0	0	1	1	0	0	KRT33B	keratin 33B
hsa-miR-511	0	0	1	1	0	0	KRT85	keratin 85
hsa-miR-511	1	0	1	1	1	1	MAFG	v-maf musculoaponeurotic fibrosarcoma oncogene homolog G (avian)
hsa-miR-511	1	0	1	1	1	1	MAN2A1	mannosidase, alpha, class 2A, member 1
hsa-miR-511	1	0	1	1	1	1	ME1	malic enzyme 1, NADP(+)-dependent, cytosolic
hsa-miR-511	0	0	1	1	1	1	MRC1	mannose receptor, C type 1
hsa-miR-511	0	0	1	1	1	1	MTAP	methylthioadenosine phosphorylase
hsa-miR-511	0	0	1	1	0	0	NTSR1	neurotensin receptor 1 (high affinity)
hsa-miR-511	0	0	1	0	1	1	OAZ2	ornithine decarboxylase antizyme 2
hsa-miR-511	1	0	1	0	1	1	PAK2	p21 protein (Cdc42/Rac)-activated kinase 2
hsa-miR-511	1	0	1	0	1	1	PAPPA	pregnancy-associated plasma protein A, pappalysin 1
hsa-miR-511	0	0	1	1	1	1	PPP1R3A	protein phosphatase 1, regulatory subunit 3A
hsa-miR-511	0	0	1	1	1	1	PRKCB	protein kinase C, beta
hsa-miR-511	1	0	1	0	1	1	MAPK4	mitogen-activated protein kinase 4
hsa-miR-511	1	0	1	1	1	1	MAPK6	mitogen-activated protein kinase 6
hsa-miR-511	0	0	1	1	1	1	MAPK9	mitogen-activated protein kinase 9
hsa-miR-511	0	0	1	1	1	1	PTPN12	protein tyrosine phosphatase, non-receptor type 12
hsa-miR-511	0	0	1	1	0	0	PTPRH	protein tyrosine phosphatase, receptor type, H
hsa-miR-511	1	0	1	1	1	1	PTX3	pentraxin 3, long
hsa-miR-511	1	0	1	1	1	1	RAB2A	RAB2A, member RAS oncogene family
hsa-miR-511	0	0	1	0	1	1	RAB3B	RAB3B, member RAS oncogene family
hsa-miR-511	1	0	1	0	1	1	RAB6A	RAB6A, member RAS oncogene family
hsa-miR-511	1	0	1	1	1	1	ARID4A	AT rich interactive domain 4A (RBP1-like)
hsa-miR-511	1	0	1	1	0	0	RFX1	regulatory factor X, 1 (influences HLA class II expression)
hsa-miR-511	1	0	1	1	1	1	ROBO2	roundabout, axon guidance receptor, homolog 2 (Drosophila)
hsa-miR-511	0	0	1	1	0	0	RPS27A	ribosomal protein S27a
hsa-miR-511	1	0	1	0	1	1	CCL22	chemokine (C-C motif) ligand 22
hsa-miR-511	1	0	1	1	1	1	SFRP2	secreted frizzled-related protein 2
hsa-miR-511	1	0	1	1	1	1	SH3GL2	SH3-domain GRB2-like 2
hsa-miR-511	1	0	1	0	1	1	ST6GAL1	ST6 beta-galactosamide alpha-2,6-sialyltranferase 1
hsa-miR-511	1	0	1	0	1	1	SLC6A1	solute carrier family 6 (neurotransmitter transporter, GABA), member 1
hsa-miR-511	1	0	1	1	1	1	SNAI2	snail homolog 2 (Drosophila)
hsa-miR-511	1	0	1	0	1	1	SOX4	SRY (sex determining region Y)-box 4
hsa-miR-511	1	0	1	0	1	1	SOX11	SRY (sex determining region Y)-box 11
hsa-miR-511	1	0	1	1	1	1	SRI	sorcin
hsa-miR-511	1	0	1	1	1	1	SRF	serum response factor (c-fos serum response element-binding transcription factor)
hsa-miR-511	0	0	1	1	1	1	NEK4	NIMA (never in mitosis gene a)-related kinase 4
hsa-miR-511	1	0	1	0	1	1	RPS6KB1	ribosomal protein S6 kinase, 70kDa, polypeptide 1
hsa-miR-511	0	0	1	1	1	1	STRN	striatin, calmodulin binding protein
hsa-miR-511	0	0	1	1	1	1	TAF2	TAF2 RNA polymerase II, TATA box binding protein (TBP)-associated factor, 150kDa
hsa-miR-511	1	0	1	0	1	1	TAL1	T-cell acute lymphocytic leukemia 1
hsa-miR-511	0	0	1	0	1	1	TDGF1	teratocarcinoma-derived growth factor 1
hsa-miR-511	1	0	1	1	1	1	TGFB3	transforming growth factor, beta 3
hsa-miR-511	1	0	1	0	1	1	THBS1	thrombospondin 1
hsa-miR-511	1	0	1	0	1	1	TSPYL1	TSPY-like 1
hsa-miR-511	1	0	1	0	1	1	TUB	tubby homolog (mouse)
hsa-miR-511	1	0	1	1	1	1	UBE2B	ubiquitin-conjugating enzyme E2B
hsa-miR-511	0	0	1	1	1	1	UBE2D1	ubiquitin-conjugating enzyme E2D 1
hsa-miR-511	1	0	1	1	1	1	UBE2H	ubiquitin-conjugating enzyme E2H
hsa-miR-511	1	0	1	0	1	1	VCL	vinculin
hsa-miR-511	1	0	1	1	1	1	YY1	YY1 transcription factor
hsa-miR-511	1	0	1	0	1	1	YWHAB	tyrosine 3-monooxygenase/tryptophan 5-monooxygenase activation protein, beta polypeptide
hsa-miR-511	0	0	1	0	1	1	ZFY	zinc finger protein, Y-linked
hsa-miR-511	1	0	1	0	1	1	ZIC1	Zic family member 1
hsa-miR-511	1	0	1	1	1	1	PAX8	paired box 8
hsa-miR-511	1	0	1	1	1	1	FZD5	frizzled family receptor 5
hsa-miR-511	1	0	1	1	1	1	ADAM12	ADAM metallopeptidase domain 12
hsa-miR-511	1	0	1	1	1	1	CUL5	cullin 5
hsa-miR-511	1	0	1	1	1	1	TRRAP	transformation/transcription domain-associated protein
hsa-miR-511	0	0	1	1	1	1	HIST2H2BE	histone cluster 2, H2be
hsa-miR-511	1	0	1	1	1	1	DYRK2	dual-specificity tyrosine-(Y)-phosphorylation regulated kinase 2
hsa-miR-511	0	0	1	1	0	0	SMARCA5	SWI/SNF related, matrix associated, actin dependent regulator of chromatin, subfamily a, member 5
hsa-miR-511	0	0	1	1	1	1	AGPS	alkylglycerone phosphate synthase
hsa-miR-511	1	0	1	1	1	1	CDC14A	CDC14 cell division cycle 14 homolog A (S. cerevisiae)
hsa-miR-511	1	0	1	1	1	1	B3GALT2	UDP-Gal:betaGlcNAc beta 1,3-galactosyltransferase, polypeptide 2
hsa-miR-511	1	0	1	1	1	1	MBTPS1	membrane-bound transcription factor peptidase, site 1
hsa-miR-511	0	0	1	1	0	0	ADAM23	ADAM metallopeptidase domain 23
hsa-miR-511	1	0	1	1	1	1	NR5A2	nuclear receptor subfamily 5, group A, member 2
hsa-miR-511	1	0	1	1	1	1	SNAP23	synaptosomal-associated protein, 23kDa
hsa-miR-511	0	0	1	1	0	0	SIGLEC5	sialic acid binding Ig-like lectin 5
hsa-miR-511	0	0	1	1	1	1	LDB1	LIM domain binding 1
hsa-miR-511	0	0	1	1	1	1	PRPF4B	PRP4 pre-mRNA processing factor 4 homolog B (yeast)
hsa-miR-511	1	0	1	1	1	1	PHOX2B	paired-like homeobox 2b
hsa-miR-511	1	0	1	0	1	1	ST13	suppression of tumorigenicity 13 (colon carcinoma) (Hsp70 interacting protein)
hsa-miR-511	1	0	1	0	1	1	WASL	Wiskott-Aldrich syndrome-like
hsa-miR-511	1	0	1	1	1	1	CDKL2	cyclin-dependent kinase-like 2 (CDC2-related kinase)
hsa-miR-511	0	0	1	1	1	1	RNF8	ring finger protein 8, E3 ubiquitin protein ligase
hsa-miR-511	1	0	1	1	1	1	MAP7	microtubule-associated protein 7
hsa-miR-511	1	0	1	1	1	1	CDH12	cadherin 12, type 2 (N-cadherin 2)
hsa-miR-511	1	0	1	1	1	1	EFNB2	ephrin-B2
hsa-miR-511	0	0	1	0	1	1	EIF4EBP2	eukaryotic translation initiation factor 4E binding protein 2
hsa-miR-511	1	0	1	1	1	1	EYA4	eyes absent homolog 4 (Drosophila)
hsa-miR-511	1	0	1	1	1	1	FGF12	fibroblast growth factor 12
hsa-miR-511	1	0	1	1	1	1	FGF13	fibroblast growth factor 13
hsa-miR-511	1	0	1	0	1	1	SLC1A2	solute carrier family 1 (glial high affinity glutamate transporter), member 2
hsa-miR-511	0	0	1	0	1	1	SLC1A3	solute carrier family 1 (glial high affinity glutamate transporter), member 3
hsa-miR-511	1	0	1	1	1	1	SEMA3F	sema domain, immunoglobulin domain (Ig), short basic domain, secreted, (semaphorin) 3F
hsa-miR-511	0	0	1	0	1	1	TMSB4Y	thymosin beta 4, Y-linked
hsa-miR-511	1	0	1	1	1	1	SOCS6	suppressor of cytokine signaling 6
hsa-miR-511	1	0	1	0	1	1	CHST3	carbohydrate (chondroitin 6) sulfotransferase 3
hsa-miR-511	1	0	1	1	1	1	ARL3	ADP-ribosylation factor-like 3
hsa-miR-511	1	0	1	1	1	1	BNIP2	BCL2/adenovirus E1B 19kDa interacting protein 2
hsa-miR-511	1	0	1	0	1	1	RUNX1T1	runt-related transcription factor 1; translocated to, 1 (cyclin D-related)
hsa-miR-511	1	0	1	1	1	1	CREB1	cAMP responsive element binding protein 1
hsa-miR-511	1	0	1	1	1	1	DACH1	dachshund homolog 1 (Drosophila)
hsa-miR-511	1	0	1	1	1	1	DUSP5	dual specificity phosphatase 5
hsa-miR-511	1	0	1	1	1	1	EGR3	early growth response 3
hsa-miR-511	1	0	1	1	1	1	EPHB3	EPH receptor B3
hsa-miR-511	1	0	1	1	1	1	ERG	v-ets erythroblastosis virus E26 oncogene homolog (avian)
hsa-miR-511	1	0	1	0	1	1	ETV5	ets variant 5
hsa-miR-511	1	0	1	1	1	1	FOXD2	forkhead box D2
hsa-miR-511	1	0	1	1	1	1	FLOT2	flotillin 2
hsa-miR-511	0	0	1	1	1	1	FOXA1	forkhead box A1
hsa-miR-511	0	0	1	0	1	1	POU4F2	POU class 4 homeobox 2
hsa-miR-511	0	0	1	1	1	1	SDPR	serum deprivation response
hsa-miR-511	0	0	1	1	1	1	LIN7A	lin-7 homolog A (C. elegans)
hsa-miR-511	0	0	1	1	0	0	MAP3K6	mitogen-activated protein kinase kinase kinase 6
hsa-miR-511	0	0	1	1	0	0	PRY	PTPN13-like, Y-linked
hsa-miR-511	0	0	1	1	1	1	LATS1	LATS, large tumor suppressor, homolog 1 (Drosophila)
hsa-miR-511	0	0	1	1	0	0	DYRK1B	dual-specificity tyrosine-(Y)-phosphorylation regulated kinase 1B
hsa-miR-511	0	0	1	1	1	1	BUB3	budding uninhibited by benzimidazoles 3 homolog (yeast)
hsa-miR-511	1	0	1	1	1	1	XPR1	xenotropic and polytropic retrovirus receptor 1
hsa-miR-511	1	0	1	1	0	0	TXNL1	thioredoxin-like 1
hsa-miR-511	1	0	1	1	1	1	KIF3B	kinesin family member 3B
hsa-miR-511	1	0	1	0	1	1	ROCK2	Rho-associated, coiled-coil containing protein kinase 2
hsa-miR-511	1	0	1	1	1	1	ONECUT2	one cut homeobox 2
hsa-miR-511	1	0	1	1	1	1	KIF23	kinesin family member 23
hsa-miR-511	1	0	1	0	1	1	SPTLC2	serine palmitoyltransferase, long chain base subunit 2
hsa-miR-511	1	0	1	1	1	1	VPS4B	vacuolar protein sorting 4 homolog B (S. cerevisiae)
hsa-miR-511	0	0	1	1	1	1	CD8B	CD8b molecule
hsa-miR-511	0	0	1	1	1	1	DSC1	desmocollin 1
hsa-miR-511	0	0	1	1	1	1	JAK2	Janus kinase 2
hsa-miR-511	0	0	1	1	1	1	KCNJ9	potassium inwardly-rectifying channel, subfamily J, member 9
hsa-miR-511	1	0	1	0	1	1	KRAS	v-Ki-ras2 Kirsten rat sarcoma viral oncogene homolog
hsa-miR-511	1	0	1	1	1	1	ATXN3	ataxin 3
hsa-miR-511	0	0	1	1	1	1	NDUFA5	NADH dehydrogenase (ubiquinone) 1 alpha subcomplex, 5, 13kDa
hsa-miR-511	1	0	1	1	1	1	KDM5A	lysine (K)-specific demethylase 5A
hsa-miR-511	1	0	1	0	1	1	SCD	stearoyl-CoA desaturase (delta-9-desaturase)
hsa-miR-511	1	0	1	1	0	0	ZMYM3	zinc finger, MYM-type 3
hsa-miR-511	0	0	1	1	1	1	XYLB	xylulokinase homolog (H. influenzae)
hsa-miR-511	1	0	1	1	1	1	OXSR1	oxidative-stress responsive 1
hsa-miR-511	1	0	1	1	1	1	GFPT2	glutamine-fructose-6-phosphate transaminase 2
hsa-miR-511	0	0	1	1	1	1	CLEC2B	C-type lectin domain family 2, member B
hsa-miR-511	1	0	1	1	1	1	APLNR	apelin receptor
hsa-miR-511	0	0	1	1	1	1	ABCD2	ATP-binding cassette, sub-family D (ALD), member 2
hsa-miR-511	0	0	1	1	1	1	CA3	carbonic anhydrase III, muscle specific
hsa-miR-511	1	0	1	0	1	1	CEBPD	CCAAT/enhancer binding protein (C/EBP), delta
hsa-miR-511	1	0	1	1	1	1	FOXN3	forkhead box N3
hsa-miR-511	0	0	1	1	0	0	DLX5	distal-less homeobox 5
hsa-miR-511	1	0	1	1	1	1	NR2F6	nuclear receptor subfamily 2, group F, member 6
hsa-miR-511	0	0	1	0	1	1	FOSL2	FOS-like antigen 2
hsa-miR-511	0	0	1	1	1	1	MSTN	myostatin
hsa-miR-511	1	0	1	1	1	1	GFRA1	GDNF family receptor alpha 1
hsa-miR-511	1	0	1	1	1	1	GPM6A	glycoprotein M6A
hsa-miR-511	1	0	1	1	1	1	GPR3	G protein-coupled receptor 3
hsa-miR-511	0	0	1	1	1	1	FFAR3	free fatty acid receptor 3
hsa-miR-511	1	0	1	1	1	1	HAS2	hyaluronan synthase 2
hsa-miR-511	1	0	1	1	1	1	PDCL	phosducin-like
hsa-miR-511	0	0	1	1	1	1	PPP1R3C	protein phosphatase 1, regulatory subunit 3C
hsa-miR-511	0	0	1	1	1	1	SEPP1	selenoprotein P, plasma, 1
hsa-miR-511	1	0	1	1	1	1	RND2	Rho family GTPase 2
hsa-miR-511	0	0	1	1	1	1	ZRANB2	zinc finger, RAN-binding domain containing 2
hsa-miR-511	1	0	1	1	1	1	GABBR2	gamma-aminobutyric acid (GABA) B receptor, 2
hsa-miR-511	1	0	1	1	1	1	HCN4	hyperpolarization activated cyclic nucleotide-gated potassium channel 4
hsa-miR-511	1	0	1	1	1	1	PIGK	phosphatidylinositol glycan anchor biosynthesis, class K
hsa-miR-511	0	0	1	1	1	1	DNAJB6	DnaJ (Hsp40) homolog, subfamily B, member 6
hsa-miR-511	1	0	1	1	1	1	SCARB2	scavenger receptor class B, member 2
hsa-miR-511	1	0	1	1	1	1	LAMC2	laminin, gamma 2
hsa-miR-511	0	0	1	0	1	1	LCP2	lymphocyte cytosolic protein 2 (SH2 domain containing leukocyte protein of 76kDa)
hsa-miR-511	0	0	1	1	1	1	LMAN1	lectin, mannose-binding, 1
hsa-miR-511	1	0	1	1	1	1	LPP	LIM domain containing preferred translocation partner in lipoma
hsa-miR-511	1	0	1	1	1	1	NHLH2	nescient helix loop helix 2
hsa-miR-511	1	0	1	1	1	1	ATP8B1	ATPase, aminophospholipid transporter, class I, type 8B, member 1
hsa-miR-511	0	0	1	0	1	1	POU3F2	POU class 3 homeobox 2
hsa-miR-511	1	0	1	1	1	1	RGS4	regulator of G-protein signaling 4
hsa-miR-511	0	0	1	1	1	1	ACTR3	ARP3 actin-related protein 3 homolog (yeast)
hsa-miR-511	1	0	1	1	1	1	ACTR1A	ARP1 actin-related protein 1 homolog A, centractin alpha (yeast)
hsa-miR-511	0	0	1	1	1	1	TOB1	transducer of ERBB2, 1
hsa-miR-511	0	0	1	1	0	0	GDF11	growth differentiation factor 11
hsa-miR-511	1	0	1	1	1	1	PRKD3	protein kinase D3
hsa-miR-511	0	0	1	1	0	0	POP7	processing of precursor 7, ribonuclease P/MRP subunit (S. cerevisiae)
hsa-miR-511	1	0	1	0	1	1	SPRY3	sprouty homolog 3 (Drosophila)
hsa-miR-511	0	0	1	1	1	1	ZMPSTE24	zinc metallopeptidase STE24 homolog (S. cerevisiae)
hsa-miR-511	0	0	1	1	1	1	BCAS2	breast carcinoma amplified sequence 2
hsa-miR-511	1	0	1	0	1	1	NBR1	neighbor of BRCA1 gene 1
hsa-miR-511	1	0	1	1	1	1	MAN1A1	mannosidase, alpha, class 1A, member 1
hsa-miR-511	1	0	1	1	1	1	MMP16	matrix metallopeptidase 16 (membrane-inserted)
hsa-miR-511	1	0	1	1	1	1	MTF1	metal-regulatory transcription factor 1
hsa-miR-511	0	0	1	1	1	1	AKR1D1	aldo-keto reductase family 1, member D1 (delta 4-3-ketosteroid-5-beta-reductase)
hsa-miR-511	0	0	1	1	1	1	UQCRFS1	ubiquinol-cytochrome c reductase, Rieske iron-sulfur polypeptide 1
hsa-miR-511	1	0	1	1	1	1	LIPG	lipase, endothelial
hsa-miR-511	1	0	1	1	1	1	HS3ST3A1	heparan sulfate (glucosamine) 3-O-sulfotransferase 3A1
hsa-miR-511	1	0	1	1	1	1	SPON1	spondin 1, extracellular matrix protein
hsa-miR-511	1	0	1	1	1	1	CAPZA1	capping protein (actin filament) muscle Z-line, alpha 1
hsa-miR-511	1	0	1	1	1	1	DYNC1LI2	dynein, cytoplasmic 1, light intermediate chain 2
hsa-miR-511	1	0	1	1	1	1	NEUROD2	neuronal differentiation 2
hsa-miR-511	1	0	1	1	1	1	NR4A2	nuclear receptor subfamily 4, group A, member 2
hsa-miR-511	0	0	1	0	1	1	OAS3	2'-5'-oligoadenylate synthetase 3, 100kDa
hsa-miR-511	1	0	1	1	1	1	ORC2	origin recognition complex, subunit 2
hsa-miR-511	1	0	1	1	1	1	RAD21	RAD21 homolog (S. pombe)
hsa-miR-511	1	0	1	1	1	1	ITSN2	intersectin 2
hsa-miR-511	1	0	1	1	1	1	SMC1A	structural maintenance of chromosomes 1A
hsa-miR-511	1	0	1	1	1	1	TUBGCP3	tubulin, gamma complex associated protein 3
hsa-miR-511	1	0	1	1	1	1	ZER1	zer-1 homolog (C. elegans)
hsa-miR-511	1	0	1	1	1	1	VAT1	vesicle amine transport protein 1 homolog (T. californica)
hsa-miR-511	1	0	1	1	1	1	CDRT1	CMT1A duplicated region transcript 1
hsa-miR-511	0	0	1	1	0	0	AKAP3	A kinase (PRKA) anchor protein 3
hsa-miR-511	0	0	1	1	1	1	SLCO1B1	solute carrier organic anion transporter family, member 1B1
hsa-miR-511	1	0	1	1	1	1	CDC42EP3	CDC42 effector protein (Rho GTPase binding) 3
hsa-miR-511	1	0	1	1	1	1	SLC2A1	solute carrier family 2 (facilitated glucose transporter), member 1
hsa-miR-511	0	0	1	0	1	1	SLC16A2	solute carrier family 16, member 2 (thyroid hormone transporter)
hsa-miR-511	1	0	1	1	1	1	ELL	elongation factor RNA polymerase II
hsa-miR-511	1	0	1	0	1	1	IGF2BP1	insulin-like growth factor 2 mRNA binding protein 1
hsa-miR-511	0	0	1	1	1	1	KHDRBS3	KH domain containing, RNA binding, signal transduction associated 3
hsa-miR-511	1	0	1	1	1	1	KHDRBS1	KH domain containing, RNA binding, signal transduction associated 1
hsa-miR-511	1	0	1	1	1	1	DCTN6	dynactin 6
hsa-miR-511	1	0	1	1	1	1	CORIN	corin, serine peptidase
hsa-miR-511	1	0	1	1	1	1	MAP3K2	mitogen-activated protein kinase kinase kinase 2
hsa-miR-511	1	0	1	1	1	1	ZBTB6	zinc finger and BTB domain containing 6
hsa-miR-511	1	0	1	1	1	1	PGRMC1	progesterone receptor membrane component 1
hsa-miR-511	0	0	1	1	1	1	SMR3B	submaxillary gland androgen regulated protein 3B
hsa-miR-511	1	0	1	1	1	1	SPIN1	spindlin 1
hsa-miR-511	1	0	1	1	1	1	BTG2	BTG family, member 2
hsa-miR-511	0	0	1	1	0	0	BRAP	BRCA1 associated protein
hsa-miR-511	1	0	1	1	1	1	CBX1	chromobox homolog 1
hsa-miR-511	0	0	1	1	1	1	SERINC3	serine incorporator 3
hsa-miR-511	0	0	1	1	1	1	MLLT11	myeloid/lymphoid or mixed-lineage leukemia (trithorax homolog, Drosophila); translocated to, 11
hsa-miR-511	1	0	1	1	1	1	RAC1	ras-related C3 botulinum toxin substrate 1 (rho family, small GTP binding protein Rac1)
hsa-miR-511	1	0	1	1	1	1	SKP1	S-phase kinase-associated protein 1
hsa-miR-511	1	0	1	0	1	1	SOX12	SRY (sex determining region Y)-box 12
hsa-miR-511	0	0	1	1	1	1	TAF5	TAF5 RNA polymerase II, TATA box binding protein (TBP)-associated factor, 100kDa
hsa-miR-511	1	0	1	0	1	1	WASF2	WAS protein family, member 2
hsa-miR-511	1	0	1	1	1	1	UTRN	utrophin
hsa-miR-511	0	0	1	1	1	1	ZNF80	zinc finger protein 80
hsa-miR-511	0	0	1	0	1	1	ZNF208	zinc finger protein 208
hsa-miR-511	1	0	1	1	1	1	FZD10	frizzled family receptor 10
hsa-miR-511	1	0	1	1	1	1	DUSP10	dual specificity phosphatase 10
hsa-miR-511	1	0	1	1	1	1	HPS5	Hermansky-Pudlak syndrome 5
hsa-miR-511	0	0	1	1	1	1	XPOT	exportin, tRNA (nuclear export receptor for tRNAs)
hsa-miR-511	1	0	1	1	1	1	ZNF236	zinc finger protein 236
hsa-miR-511	0	0	1	0	1	1	PAXIP1	PAX interacting (with transcription-activation domain) protein 1
hsa-miR-511	0	0	1	1	1	1	KLRK1	killer cell lectin-like receptor subfamily K, member 1
hsa-miR-511	0	0	1	1	1	1	PLA2R1	phospholipase A2 receptor 1, 180kDa
hsa-miR-511	1	0	1	1	1	1	TARDBP	TAR DNA binding protein
hsa-miR-511	1	0	1	0	1	1	ZFPM2	zinc finger protein, multitype 2
hsa-miR-511	1	0	1	1	1	1	ICOS	inducible T-cell co-stimulator
hsa-miR-511	1	0	1	0	1	1	EIF2C2	eukaryotic translation initiation factor 2C, 2
hsa-miR-511	1	0	1	1	1	1	FBXL2	F-box and leucine-rich repeat protein 2
hsa-miR-511	1	0	1	1	1	1	FBXL3	F-box and leucine-rich repeat protein 3
hsa-miR-511	0	0	1	1	1	1	HARS2	histidyl-tRNA synthetase 2, mitochondrial
hsa-miR-511	1	0	1	1	1	1	MGAT4A	mannosyl (alpha-1,3-)-glycoprotein beta-1,4-N-acetylglucosaminyltransferase, isozyme A
hsa-miR-511	1	0	1	1	1	1	RYBP	RING1 and YY1 binding protein
hsa-miR-511	0	0	1	1	1	1	IL36RN	interleukin 36 receptor antagonist
hsa-miR-511	1	0	1	0	1	1	RAPGEF5	Rap guanine nucleotide exchange factor (GEF) 5
hsa-miR-511	1	0	1	0	1	1	GAB2	GRB2-associated binding protein 2
hsa-miR-511	1	0	1	0	1	1	MYCBP	c-myc binding protein
hsa-miR-511	1	0	1	0	1	1	MYO10	myosin X
hsa-miR-511	0	0	1	1	1	1	TTC33	tetratricopeptide repeat domain 33
hsa-miR-511	1	0	1	1	1	1	PITPNB	phosphatidylinositol transfer protein, beta
hsa-miR-511	0	0	1	0	1	1	PITPNC1	phosphatidylinositol transfer protein, cytoplasmic 1
hsa-miR-511	1	0	1	1	1	1	TLL2	tolloid-like 2
hsa-miR-511	1	0	1	0	1	1	FLRT2	fibronectin leucine rich transmembrane protein 2
hsa-miR-511	0	0	1	1	1	1	N6AMT1	N-6 adenine-specific DNA methyltransferase 1 (putative)
hsa-miR-511	1	0	1	0	1	1	RBM15B	RNA binding motif protein 15B
hsa-miR-511	0	0	1	1	0	0	KCNJ14	potassium inwardly-rectifying channel, subfamily J, member 14
hsa-miR-511	0	0	1	1	0	0	TBX21	T-box 21
hsa-miR-511	0	0	1	1	0	0	DNMT3L	DNA (cytosine-5-)-methyltransferase 3-like
hsa-miR-511	0	0	1	1	1	1	SERTAD1	SERTA domain containing 1
hsa-miR-511	1	0	1	1	1	1	LAMP2	lysosomal-associated membrane protein 2
hsa-miR-511	1	0	1	1	1	1	WDR37	WD repeat domain 37
hsa-miR-511	1	0	1	0	1	1	OSTM1	osteopetrosis associated transmembrane protein 1
hsa-miR-511	0	0	1	1	1	1	CCDC113	coiled-coil domain containing 113
hsa-miR-511	0	0	1	1	1	1	MED4	mediator complex subunit 4
hsa-miR-511	1	0	1	1	1	1	LGALSL	lectin, galactoside-binding-like
hsa-miR-511	0	0	1	1	0	0	GNPAT	glyceronephosphate O-acyltransferase
hsa-miR-511	1	0	1	1	1	1	MAPRE2	microtubule-associated protein, RP/EB family, member 2
hsa-miR-511	0	0	1	1	1	1	TRAM1	translocation associated membrane protein 1
hsa-miR-511	1	0	1	1	1	1	SLC7A11	solute carrier family 7 (anionic amino acid transporter light chain, xc- system), member 11
hsa-miR-511	1	0	1	1	1	1	LHX6	LIM homeobox 6
hsa-miR-511	0	0	1	1	1	1	KCNV1	potassium channel, subfamily V, member 1
hsa-miR-511	0	0	1	1	1	1	LAMP3	lysosomal-associated membrane protein 3
hsa-miR-511	0	0	1	1	1	1	TCL6	T-cell leukemia/lymphoma 6 (non-protein coding)
hsa-miR-511	0	0	1	1	0	0	SIT1	signaling threshold regulating transmembrane adaptor 1
hsa-miR-511	0	0	1	1	0	0	DHDH	dihydrodiol dehydrogenase (dimeric)
hsa-miR-511	1	0	1	1	1	1	CNOT2	CCR4-NOT transcription complex, subunit 2
hsa-miR-511	1	0	1	0	1	1	HEYL	hairy/enhancer-of-split related with YRPW motif-like
hsa-miR-511	1	1	1	1	1	1	LATS2	LATS, large tumor suppressor, homolog 2 (Drosophila)
hsa-miR-511	0	0	1	1	0	0	LMCD1	LIM and cysteine-rich domains 1
hsa-miR-511	1	0	1	0	1	1	HUNK	hormonally up-regulated Neu-associated kinase
hsa-miR-511	0	0	1	1	1	1	SOX8	SRY (sex determining region Y)-box 8
hsa-miR-511	1	0	1	1	1	1	VSX1	visual system homeobox 1
hsa-miR-511	1	0	1	0	1	1	SH3PXD2A	SH3 and PX domains 2A
hsa-miR-511	0	0	1	1	1	1	FAM53B	family with sequence similarity 53, member B
hsa-miR-511	1	0	1	0	1	1	BZW1	basic leucine zipper and W2 domains 1
hsa-miR-511	0	0	1	1	1	1	FRMPD4	FERM and PDZ domain containing 4
hsa-miR-511	1	0	1	0	1	1	MLEC	malectin
hsa-miR-511	1	0	1	1	1	1	RASSF2	Ras association (RalGDS/AF-6) domain family member 2
hsa-miR-511	1	0	1	0	1	1	SERTAD2	SERTA domain containing 2
hsa-miR-511	1	0	1	1	1	1	DAZAP2	DAZ associated protein 2
hsa-miR-511	0	0	1	1	0	0	PCNXL2	pecanex-like 2 (Drosophila)
hsa-miR-511	0	0	1	0	1	1	EPM2AIP1	EPM2A (laforin) interacting protein 1
hsa-miR-511	1	0	1	1	1	1	TOMM70A	translocase of outer mitochondrial membrane 70 homolog A (S. cerevisiae)
hsa-miR-511	1	0	1	1	1	1	FCHSD2	FCH and double SH3 domains 2
hsa-miR-511	1	0	1	1	1	1	ZBTB39	zinc finger and BTB domain containing 39
hsa-miR-511	1	0	1	0	1	1	LPPR4	lipid phosphate phosphatase-related protein type 4
hsa-miR-511	1	0	1	1	1	1	NUAK1	NUAK family, SNF1-like kinase, 1
hsa-miR-511	1	0	1	0	1	1	ICK	intestinal cell (MAK-like) kinase
hsa-miR-511	1	0	1	1	1	1	PLEKHA6	pleckstrin homology domain containing, family A member 6
hsa-miR-511	0	0	1	1	0	0	MORC2	MORC family CW-type zinc finger 2
hsa-miR-511	1	0	1	1	1	1	SPAST	spastin
hsa-miR-511	1	0	1	1	1	1	SORCS3	sortilin-related VPS10 domain containing receptor 3
hsa-miR-511	1	0	1	0	1	1	WDFY3	WD repeat and FYVE domain containing 3
hsa-miR-511	1	0	1	1	1	1	RAB21	RAB21, member RAS oncogene family
hsa-miR-511	1	0	1	1	1	1	FBXO21	F-box protein 21
hsa-miR-511	1	0	1	0	1	1	PDS5B	PDS5, regulator of cohesion maintenance, homolog B (S. cerevisiae)
hsa-miR-511	1	0	1	1	1	1	HECW1	HECT, C2 and WW domain containing E3 ubiquitin protein ligase 1
hsa-miR-511	1	0	1	1	1	1	TAB2	TGF-beta activated kinase 1/MAP3K7 binding protein 2
hsa-miR-511	0	0	1	1	1	1	FBXO28	F-box protein 28
hsa-miR-511	1	0	1	0	1	1	KIAA1024	KIAA1024
hsa-miR-511	1	0	1	1	1	1	DNAJC13	DnaJ (Hsp40) homolog, subfamily C, member 13
hsa-miR-511	1	0	1	0	1	1	KHNYN	KH and NYN domain containing
hsa-miR-511	1	0	1	0	1	1	ARHGEF12	Rho guanine nucleotide exchange factor (GEF) 12
hsa-miR-511	1	0	1	0	1	1	LARP1	La ribonucleoprotein domain family, member 1
hsa-miR-511	1	0	1	1	1	1	AHCYL2	adenosylhomocysteinase-like 2
hsa-miR-511	1	0	1	1	1	1	MED13L	mediator complex subunit 13-like
hsa-miR-511	1	0	1	0	1	1	KCTD2	potassium channel tetramerisation domain containing 2
hsa-miR-511	1	0	1	1	1	1	NIPBL	Nipped-B homolog (Drosophila)
hsa-miR-511	0	0	1	1	1	1	ANAPC13	anaphase promoting complex subunit 13
hsa-miR-511	1	0	1	1	1	1	DCAF12	DDB1 and CUL4 associated factor 12
hsa-miR-511	1	0	1	1	1	1	RNF19A	ring finger protein 19A, E3 ubiquitin protein ligase
hsa-miR-511	1	0	1	1	1	1	CAMSAP1	calmodulin regulated spectrin-associated protein 1
hsa-miR-511	1	0	1	0	1	1	GLCE	glucuronic acid epimerase
hsa-miR-511	1	0	1	1	1	1	SETBP1	SET binding protein 1
hsa-miR-511	1	0	1	1	1	1	EPC2	enhancer of polycomb homolog 2 (Drosophila)
hsa-miR-511	1	0	1	1	1	1	ABCA12	ATP-binding cassette, sub-family A (ABC1), member 12
hsa-miR-511	1	0	1	1	1	1	FAM155B	family with sequence similarity 155, member B
hsa-miR-511	1	0	1	1	1	1	FGFR1	fibroblast growth factor receptor 1
hsa-miR-511	1	0	1	1	1	1	TAF9B	TAF9B RNA polymerase II, TATA box binding protein (TBP)-associated factor, 31kDa
hsa-miR-511	0	0	1	1	1	1	EXOSC1	exosome component 1
hsa-miR-511	0	0	1	1	1	1	PPIL1	peptidylprolyl isomerase (cyclophilin)-like 1
hsa-miR-511	0	0	1	1	1	1	MED31	mediator complex subunit 31
hsa-miR-511	0	0	1	1	1	1	HDGFRP3	hepatoma-derived growth factor, related protein 3
hsa-miR-511	0	0	1	1	1	1	ZFR	zinc finger RNA binding protein
hsa-miR-511	1	0	1	1	1	1	VGLL3	vestigial like 3 (Drosophila)
hsa-miR-511	1	0	1	0	1	1	HECA	headcase homolog (Drosophila)
hsa-miR-511	1	0	1	1	1	1	NLK	nemo-like kinase
hsa-miR-511	0	0	1	1	1	1	RSL24D1	ribosomal L24 domain containing 1
hsa-miR-511	0	0	1	1	1	1	DNAJB11	DnaJ (Hsp40) homolog, subfamily B, member 11
hsa-miR-511	1	0	1	1	1	1	RAB14	RAB14, member RAS oncogene family
hsa-miR-511	1	0	1	1	1	1	TRIAP1	TP53 regulated inhibitor of apoptosis 1
hsa-miR-511	1	0	1	1	1	1	LUC7L3	LUC7-like 3 (S. cerevisiae)
hsa-miR-511	1	0	1	1	1	1	PHF20	PHD finger protein 20
hsa-miR-511	1	0	1	0	1	1	CRIM1	cysteine rich transmembrane BMP regulator 1 (chordin-like)
hsa-miR-511	1	0	1	1	1	1	VTA1	Vps20-associated 1 homolog (S. cerevisiae)
hsa-miR-511	0	0	1	1	1	1	SPAG11B	sperm associated antigen 11B
hsa-miR-511	1	0	1	1	1	1	IER5	immediate early response 5
hsa-miR-511	0	0	1	1	1	1	SLC22A17	solute carrier family 22, member 17
hsa-miR-511	1	0	1	1	1	1	MEX3C	mex-3 homolog C (C. elegans)
hsa-miR-511	1	0	1	1	1	1	WAC	WW domain containing adaptor with coiled-coil
hsa-miR-511	1	0	1	0	1	1	KLHL3	kelch-like 3 (Drosophila)
hsa-miR-511	1	0	1	1	1	1	SIX4	SIX homeobox 4
hsa-miR-511	1	0	1	1	1	1	CPSF2	cleavage and polyadenylation specific factor 2, 100kDa
hsa-miR-511	1	0	1	1	1	1	MDM1	Mdm1 nuclear protein homolog (mouse)
hsa-miR-511	1	0	1	1	1	1	INO80	INO80 homolog (S. cerevisiae)
hsa-miR-511	1	0	1	1	1	1	ZC3H7B	zinc finger CCCH-type containing 7B
hsa-miR-511	1	0	1	0	1	1	EIF2C4	eukaryotic translation initiation factor 2C, 4
hsa-miR-511	1	0	1	1	1	1	MBTD1	mbt domain containing 1
hsa-miR-511	0	0	1	0	1	1	GIPC2	GIPC PDZ domain containing family, member 2
hsa-miR-511	1	0	1	1	1	1	ZNF280C	zinc finger protein 280C
hsa-miR-511	1	0	1	0	1	1	FAM46C	family with sequence similarity 46, member C
hsa-miR-511	0	0	1	1	1	1	QRICH1	glutamine-rich 1
hsa-miR-511	1	0	1	1	1	1	TBC1D8B	TBC1 domain family, member 8B (with GRAM domain)
hsa-miR-511	1	0	1	1	1	1	UBE2R2	ubiquitin-conjugating enzyme E2R 2
hsa-miR-511	0	0	1	1	1	1	SOHLH2	spermatogenesis and oogenesis specific basic helix-loop-helix 2
hsa-miR-511	1	0	1	1	1	1	RNF125	ring finger protein 125, E3 ubiquitin protein ligase
hsa-miR-511	1	0	1	0	1	1	SEMA4G	sema domain, immunoglobulin domain (Ig), transmembrane domain (TM) and short cytoplasmic domain, (semaphorin) 4G
hsa-miR-511	1	0	1	0	1	1	KIF26B	kinesin family member 26B
hsa-miR-511	1	0	1	1	1	1	WDR6	WD repeat domain 6
hsa-miR-511	1	0	1	1	1	1	FIGN	fidgetin
hsa-miR-511	0	0	1	1	0	0	CEP55	centrosomal protein 55kDa
hsa-miR-511	0	0	1	1	1	1	SLC4A1AP	solute carrier family 4 (anion exchanger), member 1, adaptor protein
hsa-miR-511	1	0	1	1	1	1	RPRD1A	regulation of nuclear pre-mRNA domain containing 1A
hsa-miR-511	1	0	1	0	1	1	LGI2	leucine-rich repeat LGI family, member 2
hsa-miR-511	1	0	1	0	1	1	ARL8B	ADP-ribosylation factor-like 8B
hsa-miR-511	1	0	1	1	1	1	LRRC20	leucine rich repeat containing 20
hsa-miR-511	0	0	1	1	1	1	TRIM62	tripartite motif containing 62
hsa-miR-511	1	0	1	0	1	1	PARVA	parvin, alpha
hsa-miR-511	0	0	1	1	1	1	SLC47A1	solute carrier family 47, member 1
hsa-miR-511	1	0	1	1	1	1	ZNF654	zinc finger protein 654
hsa-miR-511	1	0	1	1	1	1	SPTLC3	serine palmitoyltransferase, long chain base subunit 3
hsa-miR-511	1	0	1	1	1	1	DRAM1	DNA-damage regulated autophagy modulator 1
hsa-miR-511	1	0	1	0	1	1	TMEM106B	transmembrane protein 106B
hsa-miR-511	1	0	1	1	1	1	PAG1	phosphoprotein associated with glycosphingolipid microdomains 1
hsa-miR-511	1	0	1	1	1	1	ASH1L	ash1 (absent, small, or homeotic)-like (Drosophila)
hsa-miR-511	1	0	1	1	1	1	CAMK2N1	calcium/calmodulin-dependent protein kinase II inhibitor 1
hsa-miR-511	1	0	1	1	1	1	ETNK1	ethanolamine kinase 1
hsa-miR-511	1	0	1	1	1	1	LANCL2	LanC lantibiotic synthetase component C-like 2 (bacterial)
hsa-miR-511	1	0	1	1	1	1	GNG12	guanine nucleotide binding protein (G protein), gamma 12
hsa-miR-511	1	0	1	1	1	1	BCAP29	B-cell receptor-associated protein 29
hsa-miR-511	1	0	1	0	1	1	KLHL9	kelch-like 9 (Drosophila)
hsa-miR-511	1	0	1	0	1	1	PCDHAC1	protocadherin alpha subfamily C, 1
hsa-miR-511	1	0	1	0	1	1	PCDHAC2	protocadherin alpha subfamily C, 2
hsa-miR-511	1	0	1	1	1	1	PCDHA1	protocadherin alpha 1
hsa-miR-511	1	0	1	0	1	1	PCDHA10	protocadherin alpha 10
hsa-miR-511	1	0	1	0	1	1	PCDHA11	protocadherin alpha 11
hsa-miR-511	1	0	1	0	1	1	PCDHA12	protocadherin alpha 12
hsa-miR-511	1	0	1	1	1	1	PCDHA2	protocadherin alpha 2
hsa-miR-511	1	0	1	1	1	1	PCDHA3	protocadherin alpha 3
hsa-miR-511	1	0	1	1	1	1	PCDHA6	protocadherin alpha 6
hsa-miR-511	1	0	1	0	1	1	PCDHA7	protocadherin alpha 7
hsa-miR-511	1	0	1	1	1	1	PCDHA8	protocadherin alpha 8
hsa-miR-511	1	0	1	1	1	1	HOXA10	homeobox A10
hsa-miR-511	1	0	1	0	1	1	FAM190B	family with sequence similarity 190, member B
hsa-miR-511	0	0	1	0	1	1	ARL15	ADP-ribosylation factor-like 15
hsa-miR-511	1	0	1	0	1	1	UBFD1	ubiquitin family domain containing 1
hsa-miR-511	0	0	1	1	1	1	KLHL4	kelch-like 4 (Drosophila)
hsa-miR-511	1	0	1	1	1	1	SERTAD4	SERTA domain containing 4
hsa-miR-511	1	0	1	1	1	1	CYP26B1	cytochrome P450, family 26, subfamily B, polypeptide 1
hsa-miR-511	1	0	1	1	1	1	ERO1LB	ERO1-like beta (S. cerevisiae)
hsa-miR-511	0	0	1	1	1	1	TMEM167B	transmembrane protein 167B
hsa-miR-511	1	0	1	0	1	1	PAPOLB	poly(A) polymerase beta (testis specific)
hsa-miR-511	1	0	1	0	1	1	PMEPA1	prostate transmembrane protein, androgen induced 1
hsa-miR-511	1	0	1	1	1	1	ANKRD50	ankyrin repeat domain 50
hsa-miR-511	1	0	1	1	1	1	KIAA1244	KIAA1244
hsa-miR-511	0	0	1	1	0	0	ENTPD7	ectonucleoside triphosphate diphosphohydrolase 7
hsa-miR-511	0	0	1	1	1	1	PDSS2	prenyl (decaprenyl) diphosphate synthase, subunit 2
hsa-miR-511	1	0	1	0	1	1	EIF5A2	eukaryotic translation initiation factor 5A2
hsa-miR-511	0	0	1	1	1	1	PLXDC1	plexin domain containing 1
hsa-miR-511	1	0	1	1	1	1	PTGFRN	prostaglandin F2 receptor negative regulator
hsa-miR-511	1	0	1	1	1	1	SLC24A3	solute carrier family 24 (sodium/potassium/calcium exchanger), member 3
hsa-miR-511	0	0	1	1	1	1	SHROOM4	shroom family member 4
hsa-miR-511	1	0	1	1	1	1	DLG3	discs, large homolog 3 (Drosophila)
hsa-miR-511	1	0	1	1	1	1	ZNF608	zinc finger protein 608
hsa-miR-511	1	0	1	0	1	1	NUFIP2	nuclear fragile X mental retardation protein interacting protein 2
hsa-miR-511	1	0	1	1	1	1	MIB1	mindbomb E3 ubiquitin protein ligase 1
hsa-miR-511	0	0	1	1	1	1	ZNF319	zinc finger protein 319
hsa-miR-511	1	0	1	1	1	1	RANBP10	RAN binding protein 10
hsa-miR-511	1	0	1	1	1	1	TSHZ3	teashirt zinc finger homeobox 3
hsa-miR-511	0	0	1	1	1	1	KLHL1	kelch-like 1 (Drosophila)
hsa-miR-511	1	0	1	1	1	1	EPB41L5	erythrocyte membrane protein band 4.1 like 5
hsa-miR-511	1	0	1	1	1	1	ALS2	amyotrophic lateral sclerosis 2 (juvenile)
hsa-miR-511	0	0	1	1	1	1	PRX	periaxin
hsa-miR-511	0	0	1	1	1	1	AQP9	aquaporin 9
hsa-miR-511	1	0	1	1	1	1	KCNJ12	potassium inwardly-rectifying channel, subfamily J, member 12
hsa-miR-511	1	0	1	1	0	0	SLC5A6	solute carrier family 5 (sodium-dependent vitamin transporter), member 6
hsa-miR-511	0	0	1	0	1	1	SLC30A1	solute carrier family 30 (zinc transporter), member 1
hsa-miR-511	1	0	1	1	1	1	FAM60A	family with sequence similarity 60, member A
hsa-miR-511	1	0	1	1	1	1	GNB4	guanine nucleotide binding protein (G protein), beta polypeptide 4
hsa-miR-511	1	0	1	1	1	1	TMEM35	transmembrane protein 35
hsa-miR-511	1	0	1	1	1	1	TRIB2	tribbles homolog 2 (Drosophila)
hsa-miR-511	1	0	1	1	1	1	OTX2	orthodenticle homeobox 2
hsa-miR-511	1	0	1	1	1	1	TGIF2	TGFB-induced factor homeobox 2
hsa-miR-511	0	0	1	0	1	1	CFL2	cofilin 2 (muscle)
hsa-miR-511	0	0	1	1	1	1	MS4A1	membrane-spanning 4-domains, subfamily A, member 1
hsa-miR-511	0	0	1	1	1	1	PGM5	phosphoglucomutase 5
hsa-miR-511	1	0	1	1	0	0	HAND2	heart and neural crest derivatives expressed 2
hsa-miR-511	1	0	1	1	1	1	LRRC4	leucine rich repeat containing 4
hsa-miR-511	1	0	1	1	1	1	XYLT1	xylosyltransferase I
hsa-miR-511	1	0	1	0	1	1	EIF4H	eukaryotic translation initiation factor 4H
hsa-miR-511	0	0	1	1	1	1	RAB38	RAB38, member RAS oncogene family
hsa-miR-511	1	0	1	0	1	1	GREM2	gremlin 2
hsa-miR-511	1	0	1	1	1	1	GPR135	G protein-coupled receptor 135
hsa-miR-511	1	0	1	1	1	1	GIGYF1	GRB10 interacting GYF protein 1
hsa-miR-511	1	0	1	0	1	1	HOXC8	homeobox C8
hsa-miR-511	1	0	1	0	1	1	ELOVL4	ELOVL fatty acid elongase 4
hsa-miR-511	1	0	1	1	1	1	NEUROD6	neuronal differentiation 6
hsa-miR-511	1	0	1	1	1	1	S100PBP	S100P binding protein
hsa-miR-511	1	0	1	1	1	1	C6orf106	chromosome 6 open reading frame 106
hsa-miR-511	1	0	1	1	1	1	YTHDC2	YTH domain containing 2
hsa-miR-511	1	0	1	1	1	1	RFX7	regulatory factor X, 7
hsa-miR-511	1	0	1	1	1	1	REEP1	receptor accessory protein 1
hsa-miR-511	1	0	1	1	1	1	HOXB4	homeobox B4
hsa-miR-511	0	0	1	0	1	1	MRP63	mitochondrial ribosomal protein 63
hsa-miR-511	0	0	1	0	1	1	KXD1	KxDL motif containing 1
hsa-miR-511	1	0	1	1	1	1	C7orf23	chromosome 7 open reading frame 23
hsa-miR-511	0	0	1	1	0	0	IRX1	iroquois homeobox 1
hsa-miR-511	1	0	1	0	1	1	NOTCH2	notch 2
hsa-miR-511	0	0	1	1	1	1	PDYN	prodynorphin
hsa-miR-511	1	0	1	1	1	1	LRRC2	leucine rich repeat containing 2
hsa-miR-511	0	0	1	1	0	0	TNFAIP8L2	tumor necrosis factor, alpha-induced protein 8-like 2
hsa-miR-511	1	0	1	1	1	1	PPP1R3B	protein phosphatase 1, regulatory subunit 3B
hsa-miR-511	1	0	1	1	1	1	DHX40	DEAH (Asp-Glu-Ala-His) box polypeptide 40
hsa-miR-511	1	0	1	1	1	1	CCDC82	coiled-coil domain containing 82
hsa-miR-511	1	0	1	1	1	1	IQCA1	IQ motif containing with AAA domain 1
hsa-miR-511	0	0	1	1	0	0	CLMN	calmin (calponin-like, transmembrane)
hsa-miR-511	1	0	1	0	1	1	MOB3B	MOB kinase activator 3B
hsa-miR-511	0	0	1	1	1	1	BTNL8	butyrophilin-like 8
hsa-miR-511	1	0	1	1	0	0	SYNDIG1	synapse differentiation inducing 1
hsa-miR-511	0	0	1	1	1	1	ZNF767	zinc finger family member 767
hsa-miR-511	1	0	1	1	1	1	CPED1	cadherin-like and PC-esterase domain containing 1
hsa-miR-511	1	0	1	1	1	1	GRHL2	grainyhead-like 2 (Drosophila)
hsa-miR-511	1	0	1	1	1	1	POF1B	premature ovarian failure, 1B
hsa-miR-511	0	0	1	1	1	1	ESRP2	epithelial splicing regulatory protein 2
hsa-miR-511	1	0	1	1	1	1	KLHL18	kelch-like 18 (Drosophila)
hsa-miR-511	1	0	1	0	1	1	VCPIP1	valosin containing protein (p97)/p47 complex interacting protein 1
hsa-miR-511	0	0	1	1	0	0	CENPT	centromere protein T
hsa-miR-511	1	0	1	1	1	1	NAA50	N(alpha)-acetyltransferase 50, NatE catalytic subunit
hsa-miR-511	1	0	1	1	1	1	SLC35F5	solute carrier family 35, member F5
hsa-miR-511	1	0	1	0	1	1	EDEM3	ER degradation enhancer, mannosidase alpha-like 3
hsa-miR-511	0	0	1	0	1	1	PDGFD	platelet derived growth factor D
hsa-miR-511	1	0	1	1	1	1	SOST	sclerostin
hsa-miR-511	1	0	1	1	1	1	JHDM1D	jumonji C domain containing histone demethylase 1 homolog D (S. cerevisiae)
hsa-miR-511	0	0	1	1	1	1	BCL2L14	BCL2-like 14 (apoptosis facilitator)
hsa-miR-511	1	0	1	1	1	1	SYNC	syncoilin, intermediate filament protein
hsa-miR-511	1	0	1	0	1	1	VOPP1	vesicular, overexpressed in cancer, prosurvival protein 1
hsa-miR-511	1	0	1	1	1	1	FAM117A	family with sequence similarity 117, member A
hsa-miR-511	1	0	1	1	1	1	TRIM8	tripartite motif containing 8
hsa-miR-511	1	0	1	1	1	1	VMP1	vacuole membrane protein 1
hsa-miR-511	1	0	1	1	1	1	PPP1R14C	protein phosphatase 1, regulatory (inhibitor) subunit 14C
hsa-miR-511	1	0	1	1	1	1	RAB1B	RAB1B, member RAS oncogene family
hsa-miR-511	0	0	1	1	1	1	TEX15	testis expressed 15
hsa-miR-511	0	0	1	1	1	1	FCRL4	Fc receptor-like 4
hsa-miR-511	1	0	1	0	1	1	RAB33B	RAB33B, member RAS oncogene family
hsa-miR-511	1	0	1	1	1	1	ANO3	anoctamin 3
hsa-miR-511	1	0	1	1	1	1	SOX7	SRY (sex determining region Y)-box 7
hsa-miR-511	1	0	1	0	1	1	TMEM47	transmembrane protein 47
hsa-miR-511	1	0	1	0	1	1	NRIP2	nuclear receptor interacting protein 2
hsa-miR-511	1	0	1	1	1	1	PCDHA9	protocadherin alpha 9
hsa-miR-511	1	0	1	1	0	0	SPATA16	spermatogenesis associated 16
hsa-miR-511	0	0	1	0	1	1	KRTAP1-5	keratin associated protein 1-5
hsa-miR-511	0	0	1	1	1	1	TSSK1B	testis-specific serine kinase 1B
hsa-miR-511	0	0	1	1	1	1	CCDC8	coiled-coil domain containing 8
hsa-miR-511	1	0	1	0	1	1	SRSF8	serine/arginine-rich splicing factor 8
hsa-miR-511	1	0	1	1	1	1	PPP1R12B	protein phosphatase 1, regulatory subunit 12B
hsa-miR-511	0	0	1	1	1	1	MAGT1	magnesium transporter 1
hsa-miR-511	0	0	1	0	1	1	RAB6C	RAB6C, member RAS oncogene family
hsa-miR-511	1	0	1	1	1	1	FBXO30	F-box protein 30
hsa-miR-511	1	0	1	1	1	1	FAM175B	family with sequence similarity 175, member B
hsa-miR-511	1	0	1	1	1	1	PHF20L1	PHD finger protein 20-like 1
hsa-miR-511	1	0	1	1	1	1	ANTXR1	anthrax toxin receptor 1
hsa-miR-511	1	0	1	1	1	1	SETD3	SET domain containing 3
hsa-miR-511	1	0	1	1	1	1	ZDHHC18	zinc finger, DHHC-type containing 18
hsa-miR-511	1	0	1	0	1	1	PSD2	pleckstrin and Sec7 domain containing 2
hsa-miR-511	1	0	1	1	1	1	CAMKK1	calcium/calmodulin-dependent protein kinase kinase 1, alpha
hsa-miR-511	1	0	1	1	1	1	ING5	inhibitor of growth family, member 5
hsa-miR-511	1	0	1	1	1	1	HIATL1	hippocampus abundant transcript-like 1
hsa-miR-511	0	0	1	0	1	1	CBR4	carbonyl reductase 4
hsa-miR-511	1	0	1	1	1	1	RSPO3	R-spondin 3
hsa-miR-511	1	0	1	1	1	1	SYAP1	synapse associated protein 1
hsa-miR-511	0	0	1	1	1	1	ALG10	asparagine-linked glycosylation 10, alpha-1,2-glucosyltransferase homolog (S. pombe)
hsa-miR-511	1	0	1	1	1	1	CGNL1	cingulin-like 1
hsa-miR-511	1	0	1	0	1	1	UBASH3B	ubiquitin associated and SH3 domain containing B
hsa-miR-511	0	0	1	1	1	1	FBXL20	F-box and leucine-rich repeat protein 20
hsa-miR-511	1	0	1	1	1	1	PCDH10	protocadherin 10
hsa-miR-511	1	0	1	1	1	1	PDGFA	platelet-derived growth factor alpha polypeptide
hsa-miR-511	0	0	1	0	1	1	TSLP	thymic stromal lymphopoietin
hsa-miR-511	0	0	1	1	1	1	SUCNR1	succinate receptor 1
hsa-miR-511	0	0	1	1	1	1	DMRTC1	DMRT-like family C1
hsa-miR-511	1	0	1	1	1	1	TRIM5	tripartite motif containing 5
hsa-miR-511	0	0	1	1	1	1	RBM18	RNA binding motif protein 18
hsa-miR-511	0	0	1	1	1	1	ZIC5	Zic family member 5
hsa-miR-511	1	0	1	1	1	1	FOXQ1	forkhead box Q1
hsa-miR-511	1	0	1	1	1	1	TP53INP1	tumor protein p53 inducible nuclear protein 1
hsa-miR-511	1	0	1	1	1	1	EPT1	ethanolaminephosphotransferase 1 (CDP-ethanolamine-specific)
hsa-miR-511	1	0	1	1	1	1	SYS1	SYS1 Golgi-localized integral membrane protein homolog (S. cerevisiae)
hsa-miR-511	1	0	1	1	1	1	BRWD1	bromodomain and WD repeat domain containing 1
hsa-miR-511	1	0	1	0	0	0	ANKRD40	ankyrin repeat domain 40
hsa-miR-511	0	0	1	1	1	1	NACC1	nucleus accumbens associated 1, BEN and BTB (POZ) domain containing
hsa-miR-511	0	0	1	1	0	0	PGLYRP2	peptidoglycan recognition protein 2
hsa-miR-511	1	0	1	1	1	1	XKR4	XK, Kell blood group complex subunit-related family, member 4
hsa-miR-511	1	0	1	1	1	1	ELFN2	extracellular leucine-rich repeat and fibronectin type III domain containing 2
hsa-miR-511	0	0	1	1	1	1	PLEKHG4B	pleckstrin homology domain containing, family G (with RhoGef domain) member 4B
hsa-miR-511	1	0	1	1	1	1	SLITRK1	SLIT and NTRK-like family, member 1
hsa-miR-511	1	0	1	0	1	1	TMEM123	transmembrane protein 123
hsa-miR-511	0	0	1	1	0	0	TNFRSF13C	tumor necrosis factor receptor superfamily, member 13C
hsa-miR-511	1	0	1	0	1	1	FAM129A	family with sequence similarity 129, member A
hsa-miR-511	1	0	1	1	1	1	TRIM9	tripartite motif containing 9
hsa-miR-511	0	0	1	1	1	1	PRDM7	PR domain containing 7
hsa-miR-511	1	0	1	1	1	1	MED12L	mediator complex subunit 12-like
hsa-miR-511	1	0	1	0	1	1	CCND1	cyclin D1
hsa-miR-511	1	0	1	1	1	1	NAA15	N(alpha)-acetyltransferase 15, NatA auxiliary subunit
hsa-miR-511	1	0	1	0	1	1	ANTXR2	anthrax toxin receptor 2
hsa-miR-511	1	0	1	1	1	1	SLC44A1	solute carrier family 44, member 1
hsa-miR-511	1	0	1	1	1	1	C20orf112	chromosome 20 open reading frame 112
hsa-miR-511	0	0	1	1	1	1	CTCFL	CCCTC-binding factor (zinc finger protein)-like
hsa-miR-511	1	0	1	1	1	1	KCNE4	potassium voltage-gated channel, Isk-related family, member 4
hsa-miR-511	1	0	1	1	1	1	COL11A2	collagen, type XI, alpha 2
hsa-miR-511	0	0	1	1	1	1	OXGR1	oxoglutarate (alpha-ketoglutarate) receptor 1
hsa-miR-511	0	0	1	1	1	1	COLEC12	collectin sub-family member 12
hsa-miR-511	0	0	1	1	1	1	CHST14	carbohydrate (N-acetylgalactosamine 4-0) sulfotransferase 14
hsa-miR-511	1	0	1	1	1	1	BMPER	BMP binding endothelial regulator
hsa-miR-511	1	0	1	1	1	1	ZAK	sterile alpha motif and leucine zipper containing kinase AZK
hsa-miR-511	1	0	1	1	1	1	PCSK6	proprotein convertase subtilisin/kexin type 6
hsa-miR-511	1	0	1	1	1	1	MARS2	methionyl-tRNA synthetase 2, mitochondrial
hsa-miR-511	0	0	1	1	1	1	CASC4	cancer susceptibility candidate 4
hsa-miR-511	1	0	1	1	1	1	GLCCI1	glucocorticoid induced transcript 1
hsa-miR-511	1	0	1	1	1	1	ZNF689	zinc finger protein 689
hsa-miR-511	1	0	1	0	1	1	SP1	Sp1 transcription factor
hsa-miR-511	0	0	1	1	1	1	HIST1H2BD	histone cluster 1, H2bd
hsa-miR-511	1	0	1	1	1	1	HLTF	helicase-like transcription factor
hsa-miR-511	0	0	1	1	1	1	PPIL4	peptidylprolyl isomerase (cyclophilin)-like 4
hsa-miR-511	0	0	1	1	1	1	KCNC2	potassium voltage-gated channel, Shaw-related subfamily, member 2
hsa-miR-511	0	0	1	1	0	0	BRD8	bromodomain containing 8
hsa-miR-511	0	0	1	1	1	1	C1orf105	chromosome 1 open reading frame 105
hsa-miR-511	1	0	1	1	1	1	TSTD2	thiosulfate sulfurtransferase (rhodanese)-like domain containing 2
hsa-miR-511	1	0	1	0	1	1	CNOT6L	CCR4-NOT transcription complex, subunit 6-like
hsa-miR-511	1	0	1	1	1	1	MAPK1IP1L	mitogen-activated protein kinase 1 interacting protein 1-like
hsa-miR-511	1	0	1	1	1	1	FAM76B	family with sequence similarity 76, member B
hsa-miR-511	0	0	1	0	1	1	TTC23L	tetratricopeptide repeat domain 23-like
hsa-miR-511	1	0	1	1	1	1	FAM91A1	family with sequence similarity 91, member A1
hsa-miR-511	1	0	1	1	1	1	YPEL4	yippee-like 4 (Drosophila)
hsa-miR-511	0	0	1	0	1	1	PIGM	phosphatidylinositol glycan anchor biosynthesis, class M
hsa-miR-511	1	0	1	1	1	1	SLC2A12	solute carrier family 2 (facilitated glucose transporter), member 12
hsa-miR-511	0	0	1	0	1	1	SPATA18	spermatogenesis associated 18
hsa-miR-511	0	0	1	1	1	1	HFE2	hemochromatosis type 2 (juvenile)
hsa-miR-511	1	0	1	1	1	1	MOB3C	MOB kinase activator 3C
hsa-miR-511	1	0	1	1	1	1	CADM4	cell adhesion molecule 4
hsa-miR-511	0	0	1	1	1	1	SCARF1	scavenger receptor class F, member 1
hsa-miR-511	0	0	1	1	0	0	TCEB3C	transcription elongation factor B polypeptide 3C (elongin A3)
hsa-miR-511	1	0	1	0	1	1	MTPN	myotrophin
hsa-miR-511	1	0	1	1	1	1	SGMS1	sphingomyelin synthase 1
hsa-miR-511	1	0	1	1	1	1	CTSC	cathepsin C
hsa-miR-511	1	0	1	1	1	1	BOD1L1	biorientation of chromosomes in cell division 1-like 1
hsa-miR-511	1	0	1	0	1	1	SYT11	synaptotagmin XI
hsa-miR-511	0	0	1	1	1	1	ERP27	endoplasmic reticulum protein 27
hsa-miR-511	0	0	1	1	1	1	AK7	adenylate kinase 7
[truncated: 850 more rows]
