# Supplementary material for: Profiling of Selected MicroRNAs in Proliferative Eutopic Endometrium of Women with Ovarian Endometriosis
Source: Biomed Res Int. 2015 Aug 20;2015:760698. doi: 10.1155/2015/760698 (PMC4558423; doi:10.1155/2015/760698)
Supplement: Supplementary file 1 — Table I: The names of miRNAs significantly differentially expressed between eutopic endometrium of patients with endometriosis vs eutopic endometrium of patients without endometriosis. Table II: The associations between miRNA and mRNA, which presents detailed results of the search of six major databases i.e targetscan, tarbase, miranda, mirbase, mirtarget2 and pictar. [file 760698.f1.zip › 760698.f1/Table II/hsa-miR-512-3p.tsv]

miR	targetscan	tarbase	miranda	mirbase	mirtarget2	pictar	GeneSymbol	GeneName
hsa-miR-512-3p	1	0	1	1	1	1	PLAU	plasminogen activator, urokinase
hsa-miR-512-3p	1	0	1	1	1	1	ZFYVE16	zinc finger, FYVE domain containing 16
hsa-miR-512-3p	0	0	1	1	1	1	PPIP5K1	diphosphoinositol pentakisphosphate kinase 1
hsa-miR-512-3p	1	0	1	0	1	1	PTPRT	protein tyrosine phosphatase, receptor type, T
hsa-miR-512-3p	1	0	1	0	1	1	GAS7	growth arrest-specific 7
hsa-miR-512-3p	1	0	1	1	1	1	CDC42BPA	CDC42 binding protein kinase alpha (DMPK-like)
hsa-miR-512-3p	1	0	1	1	1	1	TTC39A	tetratricopeptide repeat domain 39A
hsa-miR-512-3p	0	0	1	1	1	1	PDE4DIP	phosphodiesterase 4D interacting protein
hsa-miR-512-3p	1	0	1	1	1	1	RNGTT	RNA guanylyltransferase and 5'-phosphatase
hsa-miR-512-3p	1	0	1	1	1	1	HIPK1	homeodomain interacting protein kinase 1
hsa-miR-512-3p	1	0	1	1	1	1	TP63	tumor protein p63
hsa-miR-512-3p	1	0	1	0	1	1	SNX13	sorting nexin 13
hsa-miR-512-3p	0	0	1	1	0	0	ATP10B	ATPase, class V, type 10B
hsa-miR-512-3p	1	0	1	1	0	0	ESYT1	extended synaptotagmin-like protein 1
hsa-miR-512-3p	1	0	1	0	1	1	RBM12	RNA binding motif protein 12
hsa-miR-512-3p	0	0	1	1	1	1	MAN2B2	mannosidase, alpha, class 2B, member 2
hsa-miR-512-3p	1	0	1	1	1	1	BAHD1	bromo adjacent homology domain containing 1
hsa-miR-512-3p	1	0	1	1	1	1	CIT	citron (rho-interacting, serine/threonine kinase 21)
hsa-miR-512-3p	0	0	1	1	1	1	TBC1D30	TBC1 domain family, member 30
hsa-miR-512-3p	1	0	1	1	0	0	KIAA1045	KIAA1045
hsa-miR-512-3p	1	0	1	1	1	1	PRRC2C	proline-rich coiled-coil 2C
hsa-miR-512-3p	1	0	1	1	1	1	SMARCAD1	SWI/SNF-related, matrix-associated actin-dependent regulator of chromatin, subfamily a, containing DEAD/H box 1
hsa-miR-512-3p	1	0	1	0	1	1	ODZ2	odz, odd Oz/ten-m homolog 2 (Drosophila)
hsa-miR-512-3p	1	0	1	0	1	1	GPR158	G protein-coupled receptor 158
hsa-miR-512-3p	1	0	1	0	1	1	SRGAP3	SLIT-ROBO Rho GTPase activating protein 3
hsa-miR-512-3p	1	0	1	1	1	1	KIAA1217	KIAA1217
hsa-miR-512-3p	1	0	1	1	0	0	ATAD2B	ATPase family, AAA domain containing 2B
hsa-miR-512-3p	1	0	1	1	1	1	ASAP1	ArfGAP with SH3 domain, ankyrin repeat and PH domain 1
hsa-miR-512-3p	1	0	1	1	1	1	PCDH19	protocadherin 19
hsa-miR-512-3p	1	0	1	1	1	1	LRRC7	leucine rich repeat containing 7
hsa-miR-512-3p	1	0	1	1	0	0	EBF4	early B-cell factor 4
hsa-miR-512-3p	1	0	1	0	0	0	PITPNM2	phosphatidylinositol transfer protein, membrane-associated 2
hsa-miR-512-3p	0	0	1	0	1	1	KIAA1468	KIAA1468
hsa-miR-512-3p	1	0	1	0	1	1	SEMA6D	sema domain, transmembrane domain (TM), and cytoplasmic domain, (semaphorin) 6D
hsa-miR-512-3p	1	0	1	1	1	1	FAM214B	family with sequence similarity 214, member B
hsa-miR-512-3p	1	0	1	1	1	1	TOPORS	topoisomerase I binding, arginine/serine-rich, E3 ubiquitin protein ligase
hsa-miR-512-3p	1	0	1	1	0	0	KIAA1549	KIAA1549
hsa-miR-512-3p	1	0	1	1	0	0	NCKAP5L	NCK-associated protein 5-like
hsa-miR-512-3p	1	0	1	0	0	0	TANC2	tetratricopeptide repeat, ankyrin repeat and coiled-coil containing 2
hsa-miR-512-3p	1	0	1	1	1	1	CSMD3	CUB and Sushi multiple domains 3
hsa-miR-512-3p	1	0	1	1	1	1	BCL2L11	BCL2-like 11 (apoptosis facilitator)
hsa-miR-512-3p	0	0	1	1	0	0	TPGS2	tubulin polyglutamylase complex subunit 2
hsa-miR-512-3p	1	0	1	1	1	1	OXR1	oxidation resistance 1
hsa-miR-512-3p	1	0	1	1	0	0	ZNF292	zinc finger protein 292
hsa-miR-512-3p	1	0	1	0	0	0	ZBTB34	zinc finger and BTB domain containing 34
hsa-miR-512-3p	0	0	1	1	1	1	DYNC2H1	dynein, cytoplasmic 2, heavy chain 1
hsa-miR-512-3p	0	0	1	1	0	0	FAM22D	family with sequence similarity 22, member D
hsa-miR-512-3p	1	0	1	0	0	0	ZC3H12C	zinc finger CCCH-type containing 12C
hsa-miR-512-3p	1	0	1	1	1	1	PAN3	PAN3 poly(A) specific ribonuclease subunit homolog (S. cerevisiae)
hsa-miR-512-3p	1	0	1	0	1	1	BEND4	BEN domain containing 4
hsa-miR-512-3p	1	1	1	1	1	1	BACE1	beta-site APP-cleaving enzyme 1
hsa-miR-512-3p	0	0	1	1	0	0	PTPRF	protein tyrosine phosphatase, receptor type, F
hsa-miR-512-3p	0	0	1	1	0	0	APH1B	anterior pharynx defective 1 homolog B (C. elegans)
hsa-miR-512-3p	1	0	1	1	1	1	ADARB1	adenosine deaminase, RNA-specific, B1
hsa-miR-512-3p	1	0	1	0	1	1	LRBA	LPS-responsive vesicle trafficking, beach and anchor containing
hsa-miR-512-3p	1	0	1	0	1	1	PCDHA13	protocadherin alpha 13
hsa-miR-512-3p	1	0	1	1	1	1	PCDHA4	protocadherin alpha 4
hsa-miR-512-3p	0	0	1	1	0	0	KCNC3	potassium voltage-gated channel, Shaw-related subfamily, member 3
hsa-miR-512-3p	0	0	1	1	1	1	DNM1	dynamin 1
hsa-miR-512-3p	1	0	1	0	1	1	CHL1	cell adhesion molecule with homology to L1CAM (close homolog of L1)
hsa-miR-512-3p	1	0	1	1	1	1	PML	promyelocytic leukemia
hsa-miR-512-3p	1	0	1	1	1	1	NEO1	neogenin 1
hsa-miR-512-3p	0	0	1	1	0	0	ASIC3	acid-sensing (proton-gated) ion channel 3
hsa-miR-512-3p	1	0	1	1	1	1	PDLIM5	PDZ and LIM domain 5
hsa-miR-512-3p	0	0	1	1	0	0	BMP1	bone morphogenetic protein 1
hsa-miR-512-3p	1	0	1	1	1	1	ARHGEF3	Rho guanine nucleotide exchange factor (GEF) 3
hsa-miR-512-3p	0	0	1	1	0	0	SLC22A8	solute carrier family 22 (organic anion transporter), member 8
hsa-miR-512-3p	1	0	1	0	1	1	ADD3	adducin 3 (gamma)
hsa-miR-512-3p	1	0	1	1	1	1	HMGA2	high mobility group AT-hook 2
hsa-miR-512-3p	1	0	1	1	1	1	ZFX	zinc finger protein, X-linked
hsa-miR-512-3p	1	0	1	0	1	1	PDE7B	phosphodiesterase 7B
hsa-miR-512-3p	1	0	1	1	1	1	MYH10	myosin, heavy chain 10, non-muscle
hsa-miR-512-3p	0	0	1	0	0	0	MIAT	myocardial infarction associated transcript (non-protein coding)
hsa-miR-512-3p	1	0	1	0	1	1	DDX3X	DEAD (Asp-Glu-Ala-Asp) box polypeptide 3, X-linked
hsa-miR-512-3p	1	0	1	1	1	1	SLC4A4	solute carrier family 4, sodium bicarbonate cotransporter, member 4
hsa-miR-512-3p	1	0	1	1	1	1	CBFA2T2	core-binding factor, runt domain, alpha subunit 2; translocated to, 2
hsa-miR-512-3p	1	0	1	1	1	1	MID1	midline 1 (Opitz/BBB syndrome)
hsa-miR-512-3p	1	0	1	1	1	1	MYT1L	myelin transcription factor 1-like
hsa-miR-512-3p	0	0	1	1	1	1	SLC16A7	solute carrier family 16, member 7 (monocarboxylic acid transporter 2)
hsa-miR-512-3p	1	0	1	1	1	1	MBNL2	muscleblind-like splicing regulator 2
hsa-miR-512-3p	1	0	1	1	1	1	USP3	ubiquitin specific peptidase 3
hsa-miR-512-3p	0	0	1	1	1	1	GNAS	GNAS complex locus
hsa-miR-512-3p	0	0	1	1	1	1	RER1	RER1 retention in endoplasmic reticulum 1 homolog (S. cerevisiae)
hsa-miR-512-3p	1	0	1	0	1	1	CD164	CD164 molecule, sialomucin
hsa-miR-512-3p	1	0	1	0	0	0	PPME1	protein phosphatase methylesterase 1
hsa-miR-512-3p	0	0	1	1	1	1	DMRT2	doublesex and mab-3 related transcription factor 2
hsa-miR-512-3p	1	0	1	1	1	1	CAB39	calcium binding protein 39
hsa-miR-512-3p	0	0	1	0	1	1	CLEC5A	C-type lectin domain family 5, member A
hsa-miR-512-3p	1	0	1	1	1	1	HTRA2	HtrA serine peptidase 2
hsa-miR-512-3p	1	0	1	1	1	1	HMG20A	high mobility group 20A
hsa-miR-512-3p	1	0	1	0	1	1	SLC34A2	solute carrier family 34 (sodium phosphate), member 2
hsa-miR-512-3p	1	0	1	1	1	1	MYNN	myoneurin
hsa-miR-512-3p	1	0	1	1	1	1	C14orf129	chromosome 14 open reading frame 129
hsa-miR-512-3p	1	0	1	1	1	1	USP25	ubiquitin specific peptidase 25
hsa-miR-512-3p	1	0	1	1	1	1	EDC3	enhancer of mRNA decapping 3 homolog (S. cerevisiae)
hsa-miR-512-3p	0	0	1	0	0	0	BPESC1	blepharophimosis, epicanthus inversus and ptosis, candidate 1 (non-protein coding)
hsa-miR-512-3p	1	0	1	1	1	1	TSC22D2	TSC22 domain family, member 2
hsa-miR-512-3p	0	0	1	1	1	1	CD28	CD28 molecule
hsa-miR-512-3p	1	0	1	1	1	1	SNTB2	syntrophin, beta 2 (dystrophin-associated protein A1, 59kDa, basic component 2)
hsa-miR-512-3p	0	0	1	1	1	1	NKX3-1	NK3 homeobox 1
hsa-miR-512-3p	0	0	1	1	1	1	DOCK10	dedicator of cytokinesis 10
hsa-miR-512-3p	1	0	1	1	1	1	ELF2	E74-like factor 2 (ets domain transcription factor)
hsa-miR-512-3p	0	0	1	1	0	0	ELMOD3	ELMO/CED-12 domain containing 3
hsa-miR-512-3p	0	0	1	1	0	0	TRIM41	tripartite motif containing 41
hsa-miR-512-3p	1	0	1	1	1	1	ABI2	abl-interactor 2
hsa-miR-512-3p	1	0	1	0	1	1	PARP11	poly (ADP-ribose) polymerase family, member 11
hsa-miR-512-3p	1	0	1	1	1	1	DYRK4	dual-specificity tyrosine-(Y)-phosphorylation regulated kinase 4
hsa-miR-512-3p	0	0	1	1	0	0	BCAT2	branched chain amino-acid transaminase 2, mitochondrial
hsa-miR-512-3p	0	0	1	0	1	1	ERBB2IP	erbb2 interacting protein
hsa-miR-512-3p	0	0	1	1	1	1	CYP3A43	cytochrome P450, family 3, subfamily A, polypeptide 43
hsa-miR-512-3p	1	0	1	1	1	1	CALN1	calneuron 1
hsa-miR-512-3p	1	0	1	1	1	1	TMUB2	transmembrane and ubiquitin-like domain containing 2
hsa-miR-512-3p	1	0	1	1	1	1	DCLRE1B	DNA cross-link repair 1B
hsa-miR-512-3p	1	0	1	1	1	1	VEGFA	vascular endothelial growth factor A
hsa-miR-512-3p	1	0	1	1	0	0	CANT1	calcium activated nucleotidase 1
hsa-miR-512-3p	1	0	1	1	1	1	LETMD1	LETM1 domain containing 1
hsa-miR-512-3p	0	0	1	1	1	1	FCRL1	Fc receptor-like 1
hsa-miR-512-3p	0	0	1	1	1	1	SEMA6C	sema domain, transmembrane domain (TM), and cytoplasmic domain, (semaphorin) 6C
hsa-miR-512-3p	1	0	1	1	1	1	CABLES1	Cdk5 and Abl enzyme substrate 1
hsa-miR-512-3p	0	0	1	1	1	1	SLC6A15	solute carrier family 6 (neutral amino acid transporter), member 15
hsa-miR-512-3p	0	0	1	1	1	1	MS4A4A	membrane-spanning 4-domains, subfamily A, member 4A
hsa-miR-512-3p	1	0	1	1	1	1	PBX3	pre-B-cell leukemia homeobox 3
hsa-miR-512-3p	1	0	1	1	1	1	ATAD1	ATPase family, AAA domain containing 1
hsa-miR-512-3p	1	0	1	0	1	1	WIPF2	WAS/WASL interacting protein family, member 2
hsa-miR-512-3p	1	0	1	1	1	1	CALCOCO1	calcium binding and coiled-coil domain 1
hsa-miR-512-3p	1	0	1	1	1	1	LARP4	La ribonucleoprotein domain family, member 4
hsa-miR-512-3p	0	0	1	0	0	0	NBPF10	neuroblastoma breakpoint family, member 10
hsa-miR-512-3p	1	0	1	1	1	1	SON	SON DNA binding protein
hsa-miR-512-3p	0	0	1	1	1	1	CASP8	caspase 8, apoptosis-related cysteine peptidase
hsa-miR-512-3p	1	0	1	1	1	1	NTRK2	neurotrophic tyrosine kinase, receptor, type 2
hsa-miR-512-3p	0	0	1	0	0	0	MYO15B	myosin XVB pseudogene
hsa-miR-512-3p	1	0	1	1	1	1	ST3GAL3	ST3 beta-galactoside alpha-2,3-sialyltransferase 3
hsa-miR-512-3p	1	0	1	1	0	0	FOXP2	forkhead box P2
hsa-miR-512-3p	1	0	1	1	1	1	NCOA5	nuclear receptor coactivator 5
hsa-miR-512-3p	1	0	1	1	0	0	ST3GAL4	ST3 beta-galactoside alpha-2,3-sialyltransferase 4
hsa-miR-512-3p	0	0	1	1	1	1	TTLL11	tubulin tyrosine ligase-like family, member 11
hsa-miR-512-3p	1	0	1	1	1	1	PTBP2	polypyrimidine tract binding protein 2
hsa-miR-512-3p	1	0	1	1	1	1	AFF2	AF4/FMR2 family, member 2
hsa-miR-512-3p	1	0	1	1	1	1	UBAP2L	ubiquitin associated protein 2-like
hsa-miR-512-3p	0	0	1	0	0	0	CACNA2D3	calcium channel, voltage-dependent, alpha 2/delta subunit 3
hsa-miR-512-3p	1	0	1	1	1	1	PALM2	paralemmin 2
hsa-miR-512-3p	1	0	1	1	1	1	NRXN3	neurexin 3
hsa-miR-512-3p	1	0	1	1	1	1	NFYA	nuclear transcription factor Y, alpha
hsa-miR-512-3p	0	0	1	0	0	0	TOMM6	translocase of outer mitochondrial membrane 6 homolog (yeast)
hsa-miR-512-3p	1	0	1	1	1	1	NAV2	neuron navigator 2
hsa-miR-512-3p	1	0	1	1	1	1	SYT14	synaptotagmin XIV
hsa-miR-512-3p	0	0	1	1	0	0	IL4I1	interleukin 4 induced 1
hsa-miR-512-3p	1	0	1	0	1	1	NFAT5	nuclear factor of activated T-cells 5, tonicity-responsive
hsa-miR-512-3p	1	0	1	1	1	1	ENOX2	ecto-NOX disulfide-thiol exchanger 2
hsa-miR-512-3p	0	0	1	0	0	0	TUG1	taurine upregulated 1 (non-protein coding)
hsa-miR-512-3p	0	0	1	1	1	1	OLFM4	olfactomedin 4
hsa-miR-512-3p	0	0	1	0	0	0	TPTEP1	transmembrane phosphatase with tensin homology pseudogene 1
hsa-miR-512-3p	0	0	1	1	1	1	STOX2	storkhead box 2
hsa-miR-512-3p	1	0	1	1	1	1	EIF2C1	eukaryotic translation initiation factor 2C, 1
hsa-miR-512-3p	0	0	1	1	1	1	OGFOD1	2-oxoglutarate and iron-dependent oxygenase domain containing 1
hsa-miR-512-3p	1	0	1	1	1	1	WDTC1	WD and tetratricopeptide repeats 1
hsa-miR-512-3p	1	0	1	1	1	1	ACER3	alkaline ceramidase 3
hsa-miR-512-3p	1	0	1	1	1	1	C12orf23	chromosome 12 open reading frame 23
hsa-miR-512-3p	0	0	1	1	0	0	ADCK4	aarF domain containing kinase 4
hsa-miR-512-3p	0	0	1	0	0	0	LOC149134	uncharacterized LOC149134
hsa-miR-512-3p	0	0	1	0	0	0	DUXAP10	double homeobox A pseudogene 10
hsa-miR-512-3p	0	0	1	1	0	0	RPS15A	ribosomal protein S15a
hsa-miR-512-3p	1	0	1	1	1	1	SMEK2	SMEK homolog 2, suppressor of mek1 (Dictyostelium)
hsa-miR-512-3p	1	0	1	1	1	1	STARD7	StAR-related lipid transfer (START) domain containing 7
hsa-miR-512-3p	0	0	1	1	1	1	LRRN1	leucine rich repeat neuronal 1
hsa-miR-512-3p	0	0	1	0	0	0	MIRLET7BHG	MIRLET7B host gene (non-protein coding)
hsa-miR-512-3p	1	0	1	1	1	1	POMT2	protein-O-mannosyltransferase 2
hsa-miR-512-3p	1	0	1	1	1	1	BAZ2A	bromodomain adjacent to zinc finger domain, 2A
hsa-miR-512-3p	1	0	1	0	1	1	C14orf101	chromosome 14 open reading frame 101
hsa-miR-512-3p	1	0	1	1	1	1	ZNF385A	zinc finger protein 385A
hsa-miR-512-3p	0	0	1	0	0	0	IFFO2	intermediate filament family orphan 2
hsa-miR-512-3p	1	0	1	0	1	1	STK40	serine/threonine kinase 40
hsa-miR-512-3p	1	0	1	0	1	1	ATP2B1	ATPase, Ca++ transporting, plasma membrane 1
hsa-miR-512-3p	0	0	1	0	1	1	ATXN1L	ataxin 1-like
hsa-miR-512-3p	0	0	1	1	0	0	TRAF3IP2	TRAF3 interacting protein 2
hsa-miR-512-3p	1	0	1	1	1	1	PHACTR4	phosphatase and actin regulator 4
hsa-miR-512-3p	1	0	1	0	1	1	CADPS2	Ca++-dependent secretion activator 2
hsa-miR-512-3p	1	0	1	1	0	0	FBXO45	F-box protein 45
hsa-miR-512-3p	1	0	1	1	1	1	YPEL5	yippee-like 5 (Drosophila)
hsa-miR-512-3p	1	0	1	0	1	1	ZCCHC3	zinc finger, CCHC domain containing 3
hsa-miR-512-3p	0	0	1	0	1	1	HEMK1	HemK methyltransferase family member 1
hsa-miR-512-3p	0	0	1	1	0	0	PIF1	PIF1 5'-to-3' DNA helicase homolog (S. cerevisiae)
hsa-miR-512-3p	1	0	1	1	0	0	SLAIN2	SLAIN motif family, member 2
hsa-miR-512-3p	1	0	1	1	1	1	RNF185	ring finger protein 185
hsa-miR-512-3p	0	0	1	1	1	1	PLEKHS1	pleckstrin homology domain containing, family S member 1
hsa-miR-512-3p	1	0	1	1	1	1	FOXP1	forkhead box P1
hsa-miR-512-3p	1	0	1	1	1	1	FAM53C	family with sequence similarity 53, member C
hsa-miR-512-3p	0	0	1	0	0	0	NBLA00301	Nbla00301
hsa-miR-512-3p	0	0	1	1	0	0	IMPDH1	IMP (inosine 5'-monophosphate) dehydrogenase 1
hsa-miR-512-3p	0	0	1	0	0	0	KIAA0664L3	KIAA0664-like 3
hsa-miR-512-3p	1	0	1	1	0	0	C15orf27	chromosome 15 open reading frame 27
hsa-miR-512-3p	0	0	1	1	0	0	FAM153B	family with sequence similarity 153, member B
hsa-miR-512-3p	0	0	1	0	0	0	CHST9-AS1	CHST9 antisense RNA 1
hsa-miR-512-3p	0	0	1	1	1	1	THEM6	thioesterase superfamily member 6
hsa-miR-512-3p	0	0	1	0	0	0	LOC154092	uncharacterized LOC154092
hsa-miR-512-3p	1	0	1	1	0	0	SMARCA4	SWI/SNF related, matrix associated, actin dependent regulator of chromatin, subfamily a, member 4
hsa-miR-512-3p	0	0	1	1	1	1	GABRP	gamma-aminobutyric acid (GABA) A receptor, pi
hsa-miR-512-3p	0	0	1	1	1	1	KLC4	kinesin light chain 4
hsa-miR-512-3p	0	0	1	0	0	0	FLJ30838	uncharacterized LOC400955
hsa-miR-512-3p	0	0	1	0	0	0	FLJ31104	uncharacterized LOC441072
hsa-miR-512-3p	1	0	1	1	1	1	HERPUD2	HERPUD family member 2
hsa-miR-512-3p	0	0	1	0	0	0	LOC149684	uncharacterized LOC149684
hsa-miR-512-3p	1	0	1	1	1	1	MAP3K7	mitogen-activated protein kinase kinase kinase 7
hsa-miR-512-3p	1	0	1	1	1	1	MEIS2	Meis homeobox 2
hsa-miR-512-3p	1	0	1	0	1	1	RNF165	ring finger protein 165
hsa-miR-512-3p	0	0	1	1	1	1	ANKRD36B	ankyrin repeat domain 36B
hsa-miR-512-3p	0	0	1	0	0	0	LOC440894	uncharacterized LOC440894
hsa-miR-512-3p	0	0	1	0	0	0	BTBD19	BTB (POZ) domain containing 19
hsa-miR-512-3p	0	0	1	1	1	1	SEPT5	septin 5
hsa-miR-512-3p	0	0	1	0	1	1	FAM70A	family with sequence similarity 70, member A
hsa-miR-512-3p	1	0	1	1	1	1	SCAMP5	secretory carrier membrane protein 5
hsa-miR-512-3p	0	0	1	1	0	0	ACOT8	acyl-CoA thioesterase 8
hsa-miR-512-3p	1	0	1	0	1	1	RABGEF1	RAB guanine nucleotide exchange factor (GEF) 1
hsa-miR-512-3p	0	0	1	0	0	0	MAGI1-IT1	MAGI1 intronic transcript 1 (non-protein coding)
hsa-miR-512-3p	0	0	1	1	0	0	AARSD1	alanyl-tRNA synthetase domain containing 1
hsa-miR-512-3p	1	0	1	1	1	1	MLLT6	myeloid/lymphoid or mixed-lineage leukemia (trithorax homolog, Drosophila); translocated to, 6
hsa-miR-512-3p	1	0	1	1	1	1	TLE4	transducin-like enhancer of split 4 (E(sp1) homolog, Drosophila)
hsa-miR-512-3p	1	0	1	1	1	1	MAP3K11	mitogen-activated protein kinase kinase kinase 11
hsa-miR-512-3p	0	0	1	0	0	0	TUBA3FP	tubulin, alpha 3f, pseudogene
hsa-miR-512-3p	1	0	1	1	0	0	ZBTB37	zinc finger and BTB domain containing 37
hsa-miR-512-3p	0	0	1	0	0	0	LOC147004	uncharacterized LOC147004
hsa-miR-512-3p	0	0	1	1	1	1	RANBP17	RAN binding protein 17
hsa-miR-512-3p	1	0	1	0	1	1	NCAM1	neural cell adhesion molecule 1
hsa-miR-512-3p	1	0	1	1	0	0	GBA2	glucosidase, beta (bile acid) 2
hsa-miR-512-3p	0	0	1	0	1	1	CHURC1	churchill domain containing 1
hsa-miR-512-3p	0	0	1	1	0	0	FAM156A	family with sequence similarity 156, member A
hsa-miR-512-3p	1	0	1	1	1	1	IST1	increased sodium tolerance 1 homolog (yeast)
hsa-miR-512-3p	0	0	1	0	0	0	LINC00301	long intergenic non-protein coding RNA 301
hsa-miR-512-3p	0	0	1	1	0	0	ANKAR	ankyrin and armadillo repeat containing
hsa-miR-512-3p	0	0	1	1	0	0	PIGO	phosphatidylinositol glycan anchor biosynthesis, class O
hsa-miR-512-3p	1	0	1	1	1	1	FAM73B	family with sequence similarity 73, member B
hsa-miR-512-3p	1	0	1	1	1	1	HLF	hepatic leukemia factor
hsa-miR-512-3p	1	0	1	1	1	1	TBCK	TBC1 domain containing kinase
hsa-miR-512-3p	0	0	1	0	1	1	CDHR3	cadherin-related family member 3
hsa-miR-512-3p	1	0	1	1	1	1	CNOT4	CCR4-NOT transcription complex, subunit 4
hsa-miR-512-3p	0	0	1	0	0	0	SDHAP2	succinate dehydrogenase complex, subunit A, flavoprotein pseudogene 2
hsa-miR-512-3p	1	0	1	1	1	1	UBAP1	ubiquitin associated protein 1
hsa-miR-512-3p	0	0	1	1	0	0	LGR5	leucine-rich repeat containing G protein-coupled receptor 5
hsa-miR-512-3p	0	0	1	1	1	1	TOR2A	torsin family 2, member A
hsa-miR-512-3p	1	0	1	1	1	1	BOC	Boc homolog (mouse)
hsa-miR-512-3p	0	0	1	0	0	0	LOC643837	uncharacterized LOC643837
hsa-miR-512-3p	0	0	1	1	1	1	MAPK10	mitogen-activated protein kinase 10
hsa-miR-512-3p	0	0	1	0	0	0	LOC440910	uncharacterized LOC440910
hsa-miR-512-3p	0	0	1	1	1	1	CD34	CD34 molecule
hsa-miR-512-3p	1	0	1	0	1	1	ERC1	ELKS/RAB6-interacting/CAST family member 1
hsa-miR-512-3p	1	0	1	1	1	1	GNG2	guanine nucleotide binding protein (G protein), gamma 2
hsa-miR-512-3p	0	0	1	1	1	1	PRKRA	protein kinase, interferon-inducible double stranded RNA dependent activator
hsa-miR-512-3p	1	0	1	1	1	1	SPTBN1	spectrin, beta, non-erythrocytic 1
hsa-miR-512-3p	0	0	1	1	1	1	MARC1	mitochondrial amidoxime reducing component 1
hsa-miR-512-3p	1	0	1	1	1	1	KCND1	potassium voltage-gated channel, Shal-related subfamily, member 1
hsa-miR-512-3p	1	0	1	1	0	0	TSEN54	tRNA splicing endonuclease 54 homolog (S. cerevisiae)
hsa-miR-512-3p	0	0	1	1	1	1	SPOCK1	sparc/osteonectin, cwcv and kazal-like domains proteoglycan (testican) 1
hsa-miR-512-3p	0	0	1	0	0	0	PART1	prostate androgen-regulated transcript 1 (non-protein coding)
hsa-miR-512-3p	1	0	1	1	1	1	NSG1	neuron specific gene family member 1
hsa-miR-512-3p	0	0	1	0	0	0	ZNF806	zinc finger protein 806
hsa-miR-512-3p	1	0	1	0	1	1	GATAD2B	GATA zinc finger domain containing 2B
hsa-miR-512-3p	1	0	1	0	1	1	NCOA7	nuclear receptor coactivator 7
hsa-miR-512-3p	0	0	1	0	0	0	MYO1H	myosin IH
hsa-miR-512-3p	0	0	1	1	0	0	DPAGT1	dolichyl-phosphate (UDP-N-acetylglucosamine) N-acetylglucosaminephosphotransferase 1 (GlcNAc-1-P transferase)
hsa-miR-512-3p	0	0	1	0	0	0	LOC730101	uncharacterized LOC730101
hsa-miR-512-3p	1	0	1	0	1	1	UBXN4	UBX domain protein 4
hsa-miR-512-3p	0	0	1	1	1	1	SIRPB2	signal-regulatory protein beta 2
hsa-miR-512-3p	1	0	1	1	1	1	SPATS2	spermatogenesis associated, serine-rich 2
hsa-miR-512-3p	0	0	1	0	1	1	HDAC9	histone deacetylase 9
hsa-miR-512-3p	1	0	1	1	1	1	PEA15	phosphoprotein enriched in astrocytes 15
hsa-miR-512-3p	1	0	1	0	1	1	CLIC4	chloride intracellular channel 4
hsa-miR-512-3p	0	0	1	0	0	0	ZNF815P	zinc finger protein 815, pseudogene
hsa-miR-512-3p	0	0	1	0	0	0	OTUD1	OTU domain containing 1
hsa-miR-512-3p	1	0	1	0	1	1	COL21A1	collagen, type XXI, alpha 1
hsa-miR-512-3p	1	0	1	0	1	1	THRB	thyroid hormone receptor, beta
hsa-miR-512-3p	1	0	1	0	0	0	PID1	phosphotyrosine interaction domain containing 1
hsa-miR-512-3p	0	0	1	0	0	0	FLJ39534	uncharacterized FLJ39534
hsa-miR-512-3p	0	0	1	0	0	0	LOC400680	uncharacterized LOC400680
hsa-miR-512-3p	0	0	1	1	1	1	PPFIBP2	PTPRF interacting protein, binding protein 2 (liprin beta 2)
hsa-miR-512-3p	1	0	1	0	1	1	AGFG1	ArfGAP with FG repeats 1
hsa-miR-512-3p	0	0	1	0	0	0	LINC00293	long intergenic non-protein coding RNA 293
hsa-miR-512-3p	0	0	1	1	1	1	TEX35	testis expressed 35
hsa-miR-512-3p	0	0	1	1	1	1	CBWD5	COBW domain containing 5
hsa-miR-512-3p	0	0	1	0	0	0	LOC284385	uncharacterized LOC284385
hsa-miR-512-3p	1	0	1	1	1	1	VAV3	vav 3 guanine nucleotide exchange factor
hsa-miR-512-3p	0	0	1	0	0	0	CECR7	cat eye syndrome chromosome region, candidate 7 (non-protein coding)
hsa-miR-512-3p	1	0	1	1	1	1	CHD6	chromodomain helicase DNA binding protein 6
hsa-miR-512-3p	0	0	1	0	0	0	LOC100130954	uncharacterized LOC100130954
hsa-miR-512-3p	0	0	1	1	1	1	ARFGAP2	ADP-ribosylation factor GTPase activating protein 2
hsa-miR-512-3p	0	0	1	1	0	0	MAGED2	melanoma antigen family D, 2
hsa-miR-512-3p	0	0	1	0	1	1	MYLK4	myosin light chain kinase family, member 4
hsa-miR-512-3p	0	0	1	1	0	0	SLC14A2	solute carrier family 14 (urea transporter), member 2
hsa-miR-512-3p	0	0	1	1	0	0	FBXO18	F-box protein, helicase, 18
hsa-miR-512-3p	1	0	1	1	0	0	SLX4	SLX4 structure-specific endonuclease subunit homolog (S. cerevisiae)
hsa-miR-512-3p	0	0	1	1	0	0	KIAA0146	KIAA0146
hsa-miR-512-3p	1	0	1	1	0	0	WIZ	widely interspaced zinc finger motifs
hsa-miR-512-3p	0	0	1	1	0	0	PMFBP1	polyamine modulated factor 1 binding protein 1
hsa-miR-512-3p	0	0	1	1	0	0	MARCH10	membrane-associated ring finger (C3HC4) 10, E3 ubiquitin protein ligase
hsa-miR-512-3p	0	0	1	1	0	0	MARS	methionyl-tRNA synthetase
hsa-miR-512-3p	0	0	1	1	1	1	FRMPD2	FERM and PDZ domain containing 2
hsa-miR-512-3p	0	0	1	1	0	0	SCUBE2	signal peptide, CUB domain, EGF-like 2
hsa-miR-512-3p	0	0	1	1	1	1	DNAJC24	DnaJ (Hsp40) homolog, subfamily C, member 24
hsa-miR-512-3p	0	0	1	1	0	0	SSPO	SCO-spondin homolog (Bos taurus)
hsa-miR-512-3p	1	0	1	1	1	1	TPRG1	tumor protein p63 regulated 1
hsa-miR-512-3p	1	0	1	0	1	1	KCNK2	potassium channel, subfamily K, member 2
hsa-miR-512-3p	0	0	1	0	0	0	LGALS17A	Charcot-Leyden crystal protein pseudogene
hsa-miR-512-3p	1	0	1	1	1	1	MBTD1	mbt domain containing 1
hsa-miR-512-3p	0	0	1	1	1	1	TMEM17	transmembrane protein 17
hsa-miR-512-3p	1	0	1	1	1	1	FAM126B	family with sequence similarity 126, member B
hsa-miR-512-3p	1	0	1	1	1	1	ADIPOR1	adiponectin receptor 1
hsa-miR-512-3p	0	0	1	1	0	0	NPIP	nuclear pore complex interacting protein
hsa-miR-512-3p	1	0	1	1	1	1	ABR	active BCR-related
hsa-miR-512-3p	1	0	1	1	1	1	FAM122B	family with sequence similarity 122B
hsa-miR-512-3p	1	0	1	1	0	0	BCORL1	BCL6 corepressor-like 1
hsa-miR-512-3p	0	0	1	0	0	0	LOC728716	uncharacterized LOC728716
hsa-miR-512-3p	1	0	1	1	1	1	ERBB3	v-erb-b2 erythroblastic leukemia viral oncogene homolog 3 (avian)
hsa-miR-512-3p	0	0	1	1	1	1	ATPBD4	ATP binding domain 4
hsa-miR-512-3p	1	0	1	1	1	1	C17orf85	chromosome 17 open reading frame 85
hsa-miR-512-3p	1	0	1	1	1	1	ATXN7	ataxin 7
hsa-miR-512-3p	1	0	1	1	0	0	GXYLT1	glucoside xylosyltransferase 1
hsa-miR-512-3p	0	0	1	0	1	1	RASGRP3	RAS guanyl releasing protein 3 (calcium and DAG-regulated)
hsa-miR-512-3p	1	0	1	0	0	0	MSL1	male-specific lethal 1 homolog (Drosophila)
hsa-miR-512-3p	1	0	1	1	1	1	DPY19L3	dpy-19-like 3 (C. elegans)
hsa-miR-512-3p	0	0	1	0	0	0	FAM95B1	family with sequence similarity 95, member B1
hsa-miR-512-3p	1	0	1	1	1	1	TP53INP1	tumor protein p53 inducible nuclear protein 1
hsa-miR-512-3p	1	0	1	1	1	1	CHD5	chromodomain helicase DNA binding protein 5
hsa-miR-512-3p	1	0	1	1	0	0	ATXN7L3	ataxin 7-like 3
hsa-miR-512-3p	1	0	1	1	1	1	CSRNP3	cysteine-serine-rich nuclear protein 3
hsa-miR-512-3p	0	0	1	1	0	0	HSPG2	heparan sulfate proteoglycan 2
hsa-miR-512-3p	1	0	1	1	1	1	DMXL1	Dmx-like 1
hsa-miR-512-3p	1	0	1	1	1	1	DLG2	discs, large homolog 2 (Drosophila)
hsa-miR-512-3p	1	0	1	1	1	1	EIF4E3	eukaryotic translation initiation factor 4E family member 3
hsa-miR-512-3p	0	0	1	0	0	0	RPL23AP53	ribosomal protein L23a pseudogene 53
hsa-miR-512-3p	1	0	1	1	1	1	MFSD6	major facilitator superfamily domain containing 6
hsa-miR-512-3p	1	0	1	1	1	1	LSM14A	LSM14A, SCD6 homolog A (S. cerevisiae)
hsa-miR-512-3p	0	0	1	1	1	1	C6orf136	chromosome 6 open reading frame 136
hsa-miR-512-3p	1	0	1	1	0	0	PEAK1	NKF3 kinase family member
hsa-miR-512-3p	1	0	1	1	1	1	CXorf23	chromosome X open reading frame 23
hsa-miR-512-3p	1	0	1	0	1	1	FNDC3B	fibronectin type III domain containing 3B
hsa-miR-512-3p	1	0	1	0	1	1	CAPRIN1	cell cycle associated protein 1
hsa-miR-512-3p	0	0	1	0	1	1	LOC401321	uncharacterized LOC401321
hsa-miR-512-3p	0	0	1	1	1	1	MCU	mitochondrial calcium uniporter
hsa-miR-512-3p	1	0	1	0	1	1	KDM2A	lysine (K)-specific demethylase 2A
hsa-miR-512-3p	0	0	1	0	0	0	LOC440993	uncharacterized LOC440993
hsa-miR-512-3p	0	0	1	0	0	0	AFG3L1P	AFG3 ATPase family gene 3-like 1 (S. cerevisiae), pseudogene
hsa-miR-512-3p	1	0	1	0	1	1	NBR1	neighbor of BRCA1 gene 1
hsa-miR-512-3p	0	0	1	1	1	1	SHROOM3	shroom family member 3
hsa-miR-512-3p	0	0	1	1	0	0	WFIKKN1	WAP, follistatin/kazal, immunoglobulin, kunitz and netrin domain containing 1
hsa-miR-512-3p	1	0	1	1	1	1	CSNK1D	casein kinase 1, delta
hsa-miR-512-3p	0	0	1	1	1	1	SQRDL	sulfide quinone reductase-like (yeast)
hsa-miR-512-3p	0	0	1	0	1	1	GALNT13	UDP-N-acetyl-alpha-D-galactosamine:polypeptide N-acetylgalactosaminyltransferase 13 (GalNAc-T13)
hsa-miR-512-3p	0	0	1	1	1	1	SLTM	SAFB-like, transcription modulator
hsa-miR-512-3p	0	0	1	0	1	1	RUFY4	RUN and FYVE domain containing 4
hsa-miR-512-3p	0	0	1	1	0	0	B4GALNT3	beta-1,4-N-acetyl-galactosaminyl transferase 3
hsa-miR-512-3p	1	0	1	0	1	1	STK3	serine/threonine kinase 3
hsa-miR-512-3p	1	0	1	1	1	1	MAP2K4	mitogen-activated protein kinase kinase 4
hsa-miR-512-3p	0	0	1	0	0	0	AGAP9	ArfGAP with GTPase domain, ankyrin repeat and PH domain 9
hsa-miR-512-3p	1	0	1	1	1	1	NME6	NME/NM23 nucleoside diphosphate kinase 6
hsa-miR-512-3p	0	0	1	1	1	1	AKTIP	AKT interacting protein
hsa-miR-512-3p	0	0	1	1	1	1	MSH2	mutS homolog 2, colon cancer, nonpolyposis type 1 (E. coli)
hsa-miR-512-3p	1	0	1	1	1	1	GATA6	GATA binding protein 6
hsa-miR-512-3p	1	0	1	1	0	0	ATP13A3	ATPase type 13A3
hsa-miR-512-3p	1	0	1	1	1	1	TBC1D15	TBC1 domain family, member 15
hsa-miR-512-3p	0	0	1	1	1	1	PDSS2	prenyl (decaprenyl) diphosphate synthase, subunit 2
hsa-miR-512-3p	1	0	1	1	1	1	CAMK2G	calcium/calmodulin-dependent protein kinase II gamma
hsa-miR-512-3p	1	0	1	0	1	1	MAP3K3	mitogen-activated protein kinase kinase kinase 3
hsa-miR-512-3p	0	0	1	1	1	1	CCKBR	cholecystokinin B receptor
hsa-miR-512-3p	1	0	1	1	1	1	NCOA1	nuclear receptor coactivator 1
hsa-miR-512-3p	1	0	1	0	1	1	TEAD3	TEA domain family member 3
hsa-miR-512-3p	1	0	1	1	1	1	APBB2	amyloid beta (A4) precursor protein-binding, family B, member 2
hsa-miR-512-3p	1	0	1	1	0	0	PRRC2B	proline-rich coiled-coil 2B
hsa-miR-512-3p	0	0	1	0	1	1	NEK1	NIMA (never in mitosis gene a)-related kinase 1
hsa-miR-512-3p	0	0	1	1	1	1	TFDP2	transcription factor Dp-2 (E2F dimerization partner 2)
hsa-miR-512-3p	0	0	1	0	0	0	POM121L9P	POM121 transmembrane nucleoporin-like 9, pseudogene
hsa-miR-512-3p	0	0	1	0	0	0	POM121L8P	POM121 transmembrane nucleoporin-like 8 pseudogene
hsa-miR-512-3p	0	0	1	1	1	1	TTLL5	tubulin tyrosine ligase-like family, member 5
hsa-miR-512-3p	1	0	1	1	1	1	FBXL17	F-box and leucine-rich repeat protein 17
hsa-miR-512-3p	0	0	1	0	0	0	DNAJC5B	DnaJ (Hsp40) homolog, subfamily C, member 5 beta
hsa-miR-512-3p	0	0	1	0	0	0	KIAA0913	KIAA0913
hsa-miR-512-3p	0	0	1	1	1	1	SYNJ2	synaptojanin 2
hsa-miR-512-3p	1	0	1	0	1	1	GPR85	G protein-coupled receptor 85
hsa-miR-512-3p	0	0	1	1	0	0	DOPEY1	dopey family member 1
hsa-miR-512-3p	1	0	1	1	1	1	CTTNBP2NL	CTTNBP2 N-terminal like
hsa-miR-512-3p	0	0	1	1	1	1	SLC30A10	solute carrier family 30, member 10
hsa-miR-512-3p	0	0	1	1	1	1	COBL	cordon-bleu homolog (mouse)
hsa-miR-512-3p	0	0	1	1	1	1	ARL13B	ADP-ribosylation factor-like 13B
hsa-miR-512-3p	0	0	1	1	1	1	ZCCHC6	zinc finger, CCHC domain containing 6
hsa-miR-512-3p	0	0	1	1	1	1	BEND7	BEN domain containing 7
hsa-miR-512-3p	1	0	1	0	1	1	HNRNPA3	heterogeneous nuclear ribonucleoprotein A3
hsa-miR-512-3p	1	0	1	0	0	0	YLPM1	YLP motif containing 1
hsa-miR-512-3p	1	0	1	1	0	0	USP24	ubiquitin specific peptidase 24
hsa-miR-512-3p	1	0	1	1	1	1	MLL3	myeloid/lymphoid or mixed-lineage leukemia 3
hsa-miR-512-3p	1	0	1	0	1	1	MPP5	membrane protein, palmitoylated 5 (MAGUK p55 subfamily member 5)
hsa-miR-512-3p	1	0	1	1	1	1	RNF180	ring finger protein 180
hsa-miR-512-3p	0	0	1	1	1	1	YAP1	Yes-associated protein 1
hsa-miR-512-3p	1	0	1	1	1	1	DNAJC10	DnaJ (Hsp40) homolog, subfamily C, member 10
hsa-miR-512-3p	0	0	1	1	1	1	U2AF1	U2 small nuclear RNA auxiliary factor 1
hsa-miR-512-3p	1	0	1	1	1	1	FBXO3	F-box protein 3
hsa-miR-512-3p	1	0	1	1	1	1	SBF2	SET binding factor 2
hsa-miR-512-3p	1	0	1	1	1	1	EZH1	enhancer of zeste homolog 1 (Drosophila)
hsa-miR-512-3p	1	0	1	1	1	1	LPP	LIM domain containing preferred translocation partner in lipoma
hsa-miR-512-3p	0	0	1	0	1	1	PLEKHM1P	pleckstrin homology domain containing, family M (with RUN domain) member 1 pseudogene
hsa-miR-512-3p	0	0	1	1	0	0	PPIE	peptidylprolyl isomerase E (cyclophilin E)
hsa-miR-512-3p	0	0	1	0	0	0	EPHA1-AS1	EPHA1 antisense RNA 1
hsa-miR-512-3p	0	0	1	1	1	1	KIAA1841	KIAA1841
hsa-miR-512-3p	1	0	1	1	1	1	MARCH7	membrane-associated ring finger (C3HC4) 7, E3 ubiquitin protein ligase
hsa-miR-512-3p	1	0	1	1	1	1	ANKRD12	ankyrin repeat domain 12
hsa-miR-512-3p	1	0	1	1	1	1	CADM2	cell adhesion molecule 2
hsa-miR-512-3p	1	0	1	0	1	1	PHYHIPL	phytanoyl-CoA 2-hydroxylase interacting protein-like
hsa-miR-512-3p	1	0	1	1	1	1	PPP3CA	protein phosphatase 3, catalytic subunit, alpha isozyme
hsa-miR-512-3p	1	0	1	1	1	1	RNF38	ring finger protein 38
hsa-miR-512-3p	0	0	1	1	1	1	ALS2CR8	amyotrophic lateral sclerosis 2 (juvenile) chromosome region, candidate 8
hsa-miR-512-3p	0	0	1	1	1	1	CD209	CD209 molecule
hsa-miR-512-3p	0	0	1	0	0	0	GRIK1-AS1	GRIK1 antisense RNA 1
hsa-miR-512-3p	1	0	1	1	1	1	SORCS1	sortilin-related VPS10 domain containing receptor 1
hsa-miR-512-3p	1	0	1	1	1	1	USF2	upstream transcription factor 2, c-fos interacting
hsa-miR-512-3p	0	0	1	1	0	0	DNAH1	dynein, axonemal, heavy chain 1
hsa-miR-512-3p	0	0	1	1	1	1	IYD	iodotyrosine deiodinase
hsa-miR-512-3p	0	0	1	1	0	0	CCL4	chemokine (C-C motif) ligand 4
hsa-miR-512-3p	1	0	1	1	1	1	RAI14	retinoic acid induced 14
hsa-miR-512-3p	0	0	1	1	1	1	GCOM1	GRINL1A complex locus 1
hsa-miR-512-3p	0	0	1	1	1	1	PROK2	prokineticin 2
hsa-miR-512-3p	1	0	1	1	1	1	CAMTA1	calmodulin binding transcription activator 1
hsa-miR-512-3p	0	0	1	0	1	1	ANKS1B	ankyrin repeat and sterile alpha motif domain containing 1B
hsa-miR-512-3p	1	0	1	0	1	1	DLEU7	deleted in lymphocytic leukemia, 7
hsa-miR-512-3p	1	0	1	1	1	1	FGD4	FYVE, RhoGEF and PH domain containing 4
hsa-miR-512-3p	0	0	1	1	0	0	FETUB	fetuin B
hsa-miR-512-3p	1	0	1	1	1	1	FAM120A	family with sequence similarity 120A
hsa-miR-512-3p	0	0	1	1	0	0	SH2D6	SH2 domain containing 6
hsa-miR-512-3p	0	0	1	1	1	1	EHBP1	EH domain binding protein 1
hsa-miR-512-3p	0	0	1	1	1	1	KLK7	kallikrein-related peptidase 7
hsa-miR-512-3p	1	0	1	1	1	1	BHLHE41	basic helix-loop-helix family, member e41
hsa-miR-512-3p	1	0	1	1	1	1	PLCH1	phospholipase C, eta 1
hsa-miR-512-3p	0	0	1	1	0	0	FAM170A	family with sequence similarity 170, member A
hsa-miR-512-3p	0	0	1	0	0	0	LOC646743	uncharacterized LOC646743
hsa-miR-512-3p	1	0	1	1	1	1	RTN3	reticulon 3
hsa-miR-512-3p	1	0	1	1	1	1	NTNG1	netrin G1
hsa-miR-512-3p	0	0	1	0	1	1	CCL4L2	chemokine (C-C motif) ligand 4-like 2
hsa-miR-512-3p	0	0	1	1	1	1	CCL4L1	chemokine (C-C motif) ligand 4-like 1
hsa-miR-512-3p	1	0	1	1	1	1	QKI	QKI, KH domain containing, RNA binding
hsa-miR-512-3p	1	0	1	1	1	1	MYB	v-myb myeloblastosis viral oncogene homolog (avian)
hsa-miR-512-3p	0	0	1	0	0	0	MAST4	microtubule associated serine/threonine kinase family member 4
hsa-miR-512-3p	1	0	1	1	1	1	PCDH11X	protocadherin 11 X-linked
hsa-miR-512-3p	0	0	1	1	0	0	NBPF8	neuroblastoma breakpoint family, member 8
hsa-miR-512-3p	1	0	1	1	1	1	TBC1D22B	TBC1 domain family, member 22B
hsa-miR-512-3p	1	0	1	1	1	1	PAFAH2	platelet-activating factor acetylhydrolase 2, 40kDa
hsa-miR-512-3p	0	0	1	1	1	1	PTDSS1	phosphatidylserine synthase 1
hsa-miR-512-3p	1	0	1	1	1	1	HOXC13	homeobox C13
hsa-miR-512-3p	1	0	1	0	1	1	DCAF10	DDB1 and CUL4 associated factor 10
hsa-miR-512-3p	1	0	1	0	1	1	CGGBP1	CGG triplet repeat binding protein 1
hsa-miR-512-3p	1	0	1	0	0	0	TGFA	transforming growth factor, alpha
hsa-miR-512-3p	1	0	1	1	1	1	PCGF5	polycomb group ring finger 5
hsa-miR-512-3p	0	0	1	1	0	0	PRR11	proline rich 11
hsa-miR-512-3p	0	0	1	1	1	1	ZNF85	zinc finger protein 85
hsa-miR-512-3p	0	0	1	1	1	1	TMEM30A	transmembrane protein 30A
hsa-miR-512-3p	1	0	1	1	0	0	WDR45	WD repeat domain 45
hsa-miR-512-3p	1	0	1	1	0	0	MARCH9	membrane-associated ring finger (C3HC4) 9
hsa-miR-512-3p	1	0	1	1	1	1	RELL2	RELT-like 2
hsa-miR-512-3p	1	0	1	1	1	1	AGK	acylglycerol kinase
hsa-miR-512-3p	1	0	1	1	0	0	BSCL2	Berardinelli-Seip congenital lipodystrophy 2 (seipin)
hsa-miR-512-3p	1	0	1	0	1	1	TMEM39A	transmembrane protein 39A
hsa-miR-512-3p	1	0	1	1	1	1	GRIA2	glutamate receptor, ionotropic, AMPA 2
hsa-miR-512-3p	1	0	1	1	1	1	ZFAND5	zinc finger, AN1-type domain 5
hsa-miR-512-3p	1	0	1	1	1	1	TRIM2	tripartite motif containing 2
hsa-miR-512-3p	1	0	1	1	1	1	OTUD5	OTU domain containing 5
hsa-miR-512-3p	0	0	1	0	0	0	GRAMD1B	GRAM domain containing 1B
hsa-miR-512-3p	0	0	1	1	0	0	C8orf76	chromosome 8 open reading frame 76
hsa-miR-512-3p	1	0	1	1	1	1	SUPT16H	suppressor of Ty 16 homolog (S. cerevisiae)
hsa-miR-512-3p	0	0	1	1	1	1	KLF7	Kruppel-like factor 7 (ubiquitous)
hsa-miR-512-3p	0	0	1	1	1	1	H2AFY	H2A histone family, member Y
hsa-miR-512-3p	1	0	1	1	1	1	CAP1	CAP, adenylate cyclase-associated protein 1 (yeast)
hsa-miR-512-3p	1	0	1	1	1	1	YY1	YY1 transcription factor
hsa-miR-512-3p	0	0	1	1	0	0	LCMT1	leucine carboxyl methyltransferase 1
hsa-miR-512-3p	0	0	1	1	1	1	EAF2	ELL associated factor 2
hsa-miR-512-3p	1	0	1	1	0	0	LRFN1	leucine rich repeat and fibronectin type III domain containing 1
hsa-miR-512-3p	0	0	1	1	0	0	TMEM44	transmembrane protein 44
hsa-miR-512-3p	1	0	1	1	1	1	PAPOLA	poly(A) polymerase alpha
hsa-miR-512-3p	0	0	1	1	0	0	MAST2	microtubule associated serine/threonine kinase 2
hsa-miR-512-3p	1	0	1	1	1	1	NUMBL	numb homolog (Drosophila)-like
hsa-miR-512-3p	1	0	1	0	1	1	CYBRD1	cytochrome b reductase 1
hsa-miR-512-3p	0	0	1	1	0	0	ZBTB32	zinc finger and BTB domain containing 32
hsa-miR-512-3p	0	0	1	1	1	1	RDH11	retinol dehydrogenase 11 (all-trans/9-cis/11-cis)
hsa-miR-512-3p	0	0	1	0	0	0	FAM200B	family with sequence similarity 200, member B
hsa-miR-512-3p	0	0	1	1	1	1	CCDC157	coiled-coil domain containing 157
hsa-miR-512-3p	1	0	1	1	1	1	ARHGEF9	Cdc42 guanine nucleotide exchange factor (GEF) 9
hsa-miR-512-3p	0	0	1	0	0	0	ZNF720	zinc finger protein 720
hsa-miR-512-3p	1	0	1	1	1	1	SUZ12	suppressor of zeste 12 homolog (Drosophila)
hsa-miR-512-3p	1	0	1	1	1	1	ZNF148	zinc finger protein 148
hsa-miR-512-3p	0	0	1	0	0	0	LOC100130776	uncharacterized LOC100130776
hsa-miR-512-3p	1	0	1	1	1	1	MID1IP1	MID1 interacting protein 1
hsa-miR-512-3p	0	0	1	0	1	1	TP53RK	TP53 regulating kinase
hsa-miR-512-3p	0	0	1	1	1	1	CCBP2	chemokine binding protein 2
hsa-miR-512-3p	0	0	1	1	1	1	TMEM40	transmembrane protein 40
hsa-miR-512-3p	0	0	1	1	1	1	HLA-G	major histocompatibility complex, class I, G
hsa-miR-512-3p	1	0	1	0	1	1	BTF3L4	basic transcription factor 3-like 4
hsa-miR-512-3p	1	0	1	1	0	0	TET3	tet methylcytosine dioxygenase 3
hsa-miR-512-3p	1	0	1	0	1	1	CDK19	cyclin-dependent kinase 19
hsa-miR-512-3p	0	0	1	0	0	0	SNX29P2	sorting nexin 29 pseudogene 2
hsa-miR-512-3p	0	0	1	1	0	0	CCDC114	coiled-coil domain containing 114
hsa-miR-512-3p	1	0	1	1	1	1	EPHA4	EPH receptor A4
hsa-miR-512-3p	0	0	1	1	0	0	TRO	trophinin
hsa-miR-512-3p	0	0	1	0	0	0	EVPLL	envoplakin-like
hsa-miR-512-3p	0	0	1	1	1	1	ZNF589	zinc finger protein 589
hsa-miR-512-3p	1	0	1	1	1	1	TMEM127	transmembrane protein 127
hsa-miR-512-3p	0	0	1	1	1	1	LRMP	lymphoid-restricted membrane protein
hsa-miR-512-3p	0	0	1	1	1	1	SH3TC1	SH3 domain and tetratricopeptide repeats 1
hsa-miR-512-3p	0	0	1	1	1	1	PIP5K1B	phosphatidylinositol-4-phosphate 5-kinase, type I, beta
hsa-miR-512-3p	1	0	1	1	1	1	EYA4	eyes absent homolog 4 (Drosophila)
hsa-miR-512-3p	0	0	1	1	0	0	AGBL3	ATP/GTP binding protein-like 3
hsa-miR-512-3p	1	0	1	1	1	1	GLUL	glutamate-ammonia ligase
hsa-miR-512-3p	0	0	1	1	0	0	GDF5	growth differentiation factor 5
hsa-miR-512-3p	1	0	1	1	1	1	ZNF521	zinc finger protein 521
hsa-miR-512-3p	0	0	1	1	0	0	RAB4B	RAB4B, member RAS oncogene family
hsa-miR-512-3p	1	0	1	1	1	1	SIRPA	signal-regulatory protein alpha
hsa-miR-512-3p	1	0	1	1	1	1	PCDHA5	protocadherin alpha 5
hsa-miR-512-3p	1	0	1	1	1	1	RIC8B	resistance to inhibitors of cholinesterase 8 homolog B (C. elegans)
hsa-miR-512-3p	1	0	1	1	1	1	CUL1	cullin 1
hsa-miR-512-3p	0	0	1	1	1	1	NUB1	negative regulator of ubiquitin-like proteins 1
hsa-miR-512-3p	0	0	1	1	1	1	EDA2R	ectodysplasin A2 receptor
hsa-miR-512-3p	1	0	1	0	1	1	PDE12	phosphodiesterase 12
hsa-miR-512-3p	1	0	1	1	1	1	NKAIN2	Na+/K+ transporting ATPase interacting 2
hsa-miR-512-3p	1	0	1	1	0	0	CHST4	carbohydrate (N-acetylglucosamine 6-O) sulfotransferase 4
hsa-miR-512-3p	0	0	1	0	1	1	KSR1	kinase suppressor of ras 1
hsa-miR-512-3p	0	0	1	0	0	0	FLJ10661	family with sequence similarity 86, member A pseudogene
hsa-miR-512-3p	0	0	1	1	1	1	CLEC12B	C-type lectin domain family 12, member B
hsa-miR-512-3p	1	0	1	1	1	1	ZNF618	zinc finger protein 618
hsa-miR-512-3p	1	0	1	1	1	1	MIPOL1	mirror-image polydactyly 1
hsa-miR-512-3p	1	0	1	1	1	1	SLC35G1	solute carrier family 35, member G1
hsa-miR-512-3p	1	0	1	1	1	1	ELMO2	engulfment and cell motility 2
hsa-miR-512-3p	1	0	1	1	1	1	HECTD2	HECT domain containing E3 ubiquitin protein ligase 2
hsa-miR-512-3p	1	0	1	1	1	1	MEIS1	Meis homeobox 1
hsa-miR-512-3p	0	0	1	0	0	0	LOC652276	potassium channel tetramerisation domain containing 5 pseudogene
hsa-miR-512-3p	0	0	1	0	0	0	SRGAP2C	SLIT-ROBO Rho GTPase activating protein 2C
hsa-miR-512-3p	1	0	1	0	1	1	CPEB4	cytoplasmic polyadenylation element binding protein 4
hsa-miR-512-3p	1	0	1	1	1	1	CEP128	centrosomal protein 128kDa
hsa-miR-512-3p	1	0	1	1	1	1	WDR48	WD repeat domain 48
hsa-miR-512-3p	0	0	1	0	0	0	CYP4F35P	cytochrome P450, family 4, subfamily F, polypeptide 35, pseudogene
hsa-miR-512-3p	1	0	1	1	1	1	FAM135B	family with sequence similarity 135, member B
hsa-miR-512-3p	0	0	1	1	0	0	FNTA	farnesyltransferase, CAAX box, alpha
hsa-miR-512-3p	0	0	1	0	0	0	LOC286184	uncharacterized LOC286184
hsa-miR-512-3p	1	0	1	0	1	1	YAF2	YY1 associated factor 2
hsa-miR-512-3p	0	0	1	1	1	1	KIAA1328	KIAA1328
hsa-miR-512-3p	1	0	1	1	1	1	CMIP	c-Maf inducing protein
hsa-miR-512-3p	0	0	1	0	0	0	LOC100134868	uncharacterized LOC100134868
hsa-miR-512-3p	1	0	1	1	1	1	FGFR2	fibroblast growth factor receptor 2
hsa-miR-512-3p	0	0	1	0	0	0	USP32P1	ubiquitin specific peptidase 32 pseudogene 1
hsa-miR-512-3p	0	0	1	0	0	0	LOC401074	uncharacterized LOC401074
hsa-miR-512-3p	0	0	1	0	0	0	DLGAP1-AS3	DLGAP1 antisense RNA 3
hsa-miR-512-3p	1	0	1	1	1	1	UNK	unkempt homolog (Drosophila)
hsa-miR-512-3p	0	0	1	0	0	0	LOC221122	uncharacterized LOC221122
hsa-miR-512-3p	1	0	1	1	1	1	DPP8	dipeptidyl-peptidase 8
hsa-miR-512-3p	0	0	1	0	0	0	LOC339622	uncharacterized LOC339622
hsa-miR-512-3p	1	0	1	1	1	1	BVES	blood vessel epicardial substance
hsa-miR-512-3p	1	0	1	1	1	1	LEF1	lymphoid enhancer-binding factor 1
hsa-miR-512-3p	0	0	1	0	1	1	TSLP	thymic stromal lymphopoietin
hsa-miR-512-3p	0	0	1	1	0	0	SLC13A4	solute carrier family 13 (sodium/sulfate symporters), member 4
hsa-miR-512-3p	1	0	1	1	0	0	RGL2	ral guanine nucleotide dissociation stimulator-like 2
hsa-miR-512-3p	0	0	1	0	0	0	SLC7A11-AS1	SLC7A11 antisense RNA 1
hsa-miR-512-3p	0	0	1	0	1	1	FAM13B	family with sequence similarity 13, member B
hsa-miR-512-3p	1	0	1	1	1	1	FAM123A	family with sequence similarity 123A
hsa-miR-512-3p	0	0	1	1	0	0	FAM159A	family with sequence similarity 159, member A
hsa-miR-512-3p	1	0	1	1	0	0	INPP5J	inositol polyphosphate-5-phosphatase J
hsa-miR-512-3p	0	0	1	1	1	1	CARD8	caspase recruitment domain family, member 8
hsa-miR-512-3p	1	0	1	1	1	1	ARID3B	AT rich interactive domain 3B (BRIGHT-like)
hsa-miR-512-3p	0	0	1	1	1	1	C4orf32	chromosome 4 open reading frame 32
hsa-miR-512-3p	0	0	1	0	0	0	LRRC37BP1	leucine rich repeat containing 37B pseudogene 1
hsa-miR-512-3p	1	0	1	1	1	1	FKBP5	FK506 binding protein 5
hsa-miR-512-3p	0	0	1	0	0	0	LOC157381	uncharacterized LOC157381
hsa-miR-512-3p	0	0	1	0	1	1	C12orf74	chromosome 12 open reading frame 74
hsa-miR-512-3p	0	0	1	0	0	0	MORF4L2-AS1	MORF4L2 antisense RNA 1
hsa-miR-512-3p	0	0	1	1	1	1	MICB	MHC class I polypeptide-related sequence B
hsa-miR-512-3p	0	0	1	0	0	0	LOC100130015	5-hydroxyisourate hydrolase pseudogene
hsa-miR-512-3p	1	0	1	1	0	0	WNK1	WNK lysine deficient protein kinase 1
hsa-miR-512-3p	1	0	1	1	1	1	RNF145	ring finger protein 145
hsa-miR-512-3p	1	0	1	0	1	1	PSD3	pleckstrin and Sec7 domain containing 3
hsa-miR-512-3p	0	0	1	1	1	1	MYO3A	myosin IIIA
hsa-miR-512-3p	0	0	1	0	0	0	LOC283914	uncharacterized LOC283914
hsa-miR-512-3p	1	0	1	1	1	1	SF3B1	splicing factor 3b, subunit 1, 155kDa
hsa-miR-512-3p	1	0	1	1	1	1	HSDL2	hydroxysteroid dehydrogenase like 2
hsa-miR-512-3p	0	0	1	0	0	0	INHBA-AS1	INHBA antisense RNA 1
hsa-miR-512-3p	0	0	1	0	1	1	LOC401021	uncharacterized LOC401021
hsa-miR-512-3p	1	0	1	0	1	1	ZNF800	zinc finger protein 800
hsa-miR-512-3p	1	0	1	1	1	1	RTKN2	rhotekin 2
hsa-miR-512-3p	0	0	1	1	0	0	OXLD1	oxidoreductase-like domain containing 1
hsa-miR-512-3p	0	0	1	0	0	0	WASH2P	WAS protein family homolog 2 pseudogene
hsa-miR-512-3p	1	0	1	1	1	1	PELI1	pellino E3 ubiquitin protein ligase 1
hsa-miR-512-3p	0	0	1	0	1	1	ITGA1	integrin, alpha 1
hsa-miR-512-3p	1	0	1	1	1	1	LARP1B	La ribonucleoprotein domain family, member 1B
hsa-miR-512-3p	0	0	1	1	1	1	WDR93	WD repeat domain 93
hsa-miR-512-3p	1	0	1	0	1	1	SEMA4G	sema domain, immunoglobulin domain (Ig), transmembrane domain (TM) and short cytoplasmic domain, (semaphorin) 4G
hsa-miR-512-3p	0	0	1	1	0	0	AGAP8	ArfGAP with GTPase domain, ankyrin repeat and PH domain 8
hsa-miR-512-3p	1	0	1	1	1	1	ZFP91	zinc finger protein 91 homolog (mouse)
hsa-miR-512-3p	0	0	1	1	1	1	RAB3IL1	RAB3A interacting protein (rabin3)-like 1
hsa-miR-512-3p	1	0	1	1	1	1	HP1BP3	heterochromatin protein 1, binding protein 3
hsa-miR-512-3p	1	0	1	1	1	1	PPP2R5E	protein phosphatase 2, regulatory subunit B', epsilon isoform
hsa-miR-512-3p	0	0	1	1	0	0	SBF1	SET binding factor 1
hsa-miR-512-3p	1	0	1	1	1	1	KLHL28	kelch-like 28 (Drosophila)
hsa-miR-512-3p	1	0	1	0	1	1	LYSMD3	LysM, putative peptidoglycan-binding, domain containing 3
hsa-miR-512-3p	0	0	1	1	1	1	ZNF365	zinc finger protein 365
hsa-miR-512-3p	0	0	1	1	0	0	AGAP4	ArfGAP with GTPase domain, ankyrin repeat and PH domain 4
hsa-miR-512-3p	0	0	1	1	0	0	C8orf31	chromosome 8 open reading frame 31
hsa-miR-512-3p	0	0	1	0	0	0	GNN	Grp94 neighboring nucleotidase pseudogene
hsa-miR-512-3p	1	0	1	1	1	1	ADCY6	adenylate cyclase 6
hsa-miR-512-3p	1	0	1	1	1	1	ASXL1	additional sex combs like 1 (Drosophila)
hsa-miR-512-3p	0	0	1	1	1	1	SGK2	serum/glucocorticoid regulated kinase 2
hsa-miR-512-3p	0	0	1	0	0	0	KANSL1-AS1	KANSL1 antisense RNA 1
hsa-miR-512-3p	1	0	1	0	1	1	MAGIX	MAGI family member, X-linked
hsa-miR-512-3p	1	0	1	1	1	1	SLC26A7	solute carrier family 26, member 7
hsa-miR-512-3p	1	0	1	1	1	1	MAPKAPK3	mitogen-activated protein kinase-activated protein kinase 3
hsa-miR-512-3p	1	0	1	1	1	1	MYEF2	myelin expression factor 2
hsa-miR-512-3p	0	0	1	0	0	0	PTGER4P2	prostaglandin E receptor 4 (subtype EP4) pseudogene 2
hsa-miR-512-3p	1	0	1	1	0	0	DCAF15	DDB1 and CUL4 associated factor 15
hsa-miR-512-3p	0	0	1	1	0	0	RELA	v-rel reticuloendotheliosis viral oncogene homolog A (avian)
hsa-miR-512-3p	0	0	1	1	1	1	MSTO1	misato homolog 1 (Drosophila)
hsa-miR-512-3p	0	0	1	1	0	0	NDUFAF2	NADH dehydrogenase (ubiquinone) complex I, assembly factor 2
hsa-miR-512-3p	1	0	1	1	1	1	USP47	ubiquitin specific peptidase 47
hsa-miR-512-3p	0	0	1	0	0	0	JPX	JPX transcript, XIST activator (non-protein coding)
hsa-miR-512-3p	1	0	1	1	0	0	TNXB	tenascin XB
hsa-miR-512-3p	0	0	1	0	0	0	LOC440416	uncharacterized LOC440416
hsa-miR-512-3p	1	0	1	1	1	1	RARG	retinoic acid receptor, gamma
hsa-miR-512-3p	0	0	1	0	0	0	LINC00152	long intergenic non-protein coding RNA 152
hsa-miR-512-3p	1	0	1	1	1	1	OPCML	opioid binding protein/cell adhesion molecule-like
hsa-miR-512-3p	1	0	1	1	1	1	PARP8	poly (ADP-ribose) polymerase family, member 8
hsa-miR-512-3p	0	0	1	1	1	1	C3orf67	chromosome 3 open reading frame 67
hsa-miR-512-3p	1	0	1	1	1	1	EIF2AK4	eukaryotic translation initiation factor 2 alpha kinase 4
hsa-miR-512-3p	0	0	1	0	0	0	LINC00537	long intergenic non-protein coding RNA 537
hsa-miR-512-3p	0	0	1	1	0	0	TMX2	thioredoxin-related transmembrane protein 2
hsa-miR-512-3p	1	0	1	1	1	1	ELOVL7	ELOVL fatty acid elongase 7
hsa-miR-512-3p	0	0	1	1	0	0	RNASE2	ribonuclease, RNase A family, 2 (liver, eosinophil-derived neurotoxin)
hsa-miR-512-3p	1	0	1	1	1	1	ST8SIA2	ST8 alpha-N-acetyl-neuraminide alpha-2,8-sialyltransferase 2
hsa-miR-512-3p	0	0	1	0	1	1	TGFB2	transforming growth factor, beta 2
hsa-miR-512-3p	0	0	1	1	1	1	TMEM52B	transmembrane protein 52B
hsa-miR-512-3p	1	0	1	1	1	1	IL28RA	interleukin 28 receptor, alpha (interferon, lambda receptor)
hsa-miR-512-3p	0	0	1	1	1	1	TTLL9	tubulin tyrosine ligase-like family, member 9
hsa-miR-512-3p	0	0	1	0	0	0	GUSBP9	glucuronidase, beta pseudogene 9
hsa-miR-512-3p	1	0	1	1	1	1	GABRB2	gamma-aminobutyric acid (GABA) A receptor, beta 2
hsa-miR-512-3p	0	0	1	1	1	1	MUC21	mucin 21, cell surface associated
hsa-miR-512-3p	1	0	1	1	1	1	PNISR	PNN-interacting serine/arginine-rich protein
hsa-miR-512-3p	1	0	1	1	1	1	TBP	TATA box binding protein
hsa-miR-512-3p	0	0	1	1	0	0	C1QTNF9B	C1q and tumor necrosis factor related protein 9B
hsa-miR-512-3p	1	0	1	1	1	1	TCF3	transcription factor 3 (E2A immunoglobulin enhancer binding factors E12/E47)
hsa-miR-512-3p	0	0	1	1	1	1	SMTNL2	smoothelin-like 2
hsa-miR-512-3p	1	0	1	1	1	1	MARCH6	membrane-associated ring finger (C3HC4) 6, E3 ubiquitin protein ligase
hsa-miR-512-3p	0	0	1	0	0	0	LRRC37A11P	leucine rich repeat containing 37, member A11, pseudogene
hsa-miR-512-3p	0	0	1	1	1	1	FMN2	formin 2
hsa-miR-512-3p	1	0	1	1	1	1	SLMAP	sarcolemma associated protein
hsa-miR-512-3p	1	0	1	1	1	1	ST18	suppression of tumorigenicity 18 (breast carcinoma) (zinc finger protein)
hsa-miR-512-3p	0	0	1	0	0	0	LOC286094	uncharacterized LOC286094
hsa-miR-512-3p	0	0	1	1	0	0	RGSL1	regulator of G-protein signaling like 1
hsa-miR-512-3p	0	0	1	0	0	0	LINC00486	long intergenic non-protein coding RNA 486
hsa-miR-512-3p	0	0	1	0	0	0	EEF1DP3	eukaryotic translation elongation factor 1 delta pseudogene 3
hsa-miR-512-3p	1	0	1	0	1	1	LRCH2	leucine-rich repeats and calponin homology (CH) domain containing 2
hsa-miR-512-3p	1	0	1	1	1	1	ANK2	ankyrin 2, neuronal
hsa-miR-512-3p	0	0	1	0	1	1	RBM44	RNA binding motif protein 44
hsa-miR-512-3p	1	0	1	1	1	1	JMJD1C	jumonji domain containing 1C
hsa-miR-512-3p	0	0	1	1	0	0	EPGN	epithelial mitogen homolog (mouse)
hsa-miR-512-3p	0	0	1	1	1	1	TPRN	taperin
hsa-miR-512-3p	1	0	1	1	1	1	MLLT10	myeloid/lymphoid or mixed-lineage leukemia (trithorax homolog, Drosophila); translocated to, 10
hsa-miR-512-3p	0	0	1	1	0	0	TTC21A	tetratricopeptide repeat domain 21A
hsa-miR-512-3p	0	0	1	1	0	0	HSF4	heat shock transcription factor 4
hsa-miR-512-3p	0	0	1	0	0	0	FAM225B	family with sequence similarity 225, member B (non-protein coding)
hsa-miR-512-3p	1	0	1	1	1	1	PHC2	polyhomeotic homolog 2 (Drosophila)
hsa-miR-512-3p	0	0	1	0	0	0	SMA4	glucuronidase, beta pseudogene
hsa-miR-512-3p	0	0	1	1	1	1	PRKAR2A	protein kinase, cAMP-dependent, regulatory, type II, alpha
hsa-miR-512-3p	0	0	1	0	0	0	MEG3	maternally expressed 3 (non-protein coding)
hsa-miR-512-3p	0	0	1	1	1	1	TINF2	TERF1 (TRF1)-interacting nuclear factor 2
hsa-miR-512-3p	1	0	1	0	1	1	TTC7B	tetratricopeptide repeat domain 7B
hsa-miR-512-3p	0	0	1	0	0	0	FLJ39632	uncharacterized LOC642477
hsa-miR-512-3p	0	0	1	1	0	0	C2	complement component 2
hsa-miR-512-3p	0	0	1	0	0	0	ADCY10P1	adenylate cyclase 10 (soluble) pseudogene 1
hsa-miR-512-3p	0	0	1	0	0	0	DKFZp686D0853	uncharacterized LOC401613
hsa-miR-512-3p	1	0	1	1	1	1	RBL2	retinoblastoma-like 2 (p130)
hsa-miR-512-3p	0	0	1	1	1	1	KBTBD12	kelch repeat and BTB (POZ) domain containing 12
hsa-miR-512-3p	1	0	1	1	1	1	EPHA5	EPH receptor A5
hsa-miR-512-3p	1	0	1	1	1	1	SGCD	sarcoglycan, delta (35kDa dystrophin-associated glycoprotein)
hsa-miR-512-3p	0	0	1	1	1	1	TRDMT1	tRNA aspartic acid methyltransferase 1
hsa-miR-512-3p	0	0	1	0	1	1	ZNF498	zinc finger protein 498
hsa-miR-512-3p	0	0	1	0	1	1	CPPED1	calcineurin-like phosphoesterase domain containing 1
hsa-miR-512-3p	0	0	1	1	0	0	CDK5RAP2	CDK5 regulatory subunit associated protein 2
hsa-miR-512-3p	1	0	1	1	1	1	MASP1	mannan-binding lectin serine peptidase 1 (C4/C2 activating component of Ra-reactive factor)
hsa-miR-512-3p	1	0	1	0	1	1	GALNT4	UDP-N-acetyl-alpha-D-galactosamine:polypeptide N-acetylgalactosaminyltransferase 4 (GalNAc-T4)
hsa-miR-512-3p	1	0	1	1	0	0	CECR2	cat eye syndrome chromosome region, candidate 2
hsa-miR-512-3p	0	0	1	1	1	1	NIPSNAP3B	nipsnap homolog 3B (C. elegans)
hsa-miR-512-3p	1	0	1	1	1	1	S100PBP	S100P binding protein
hsa-miR-512-3p	0	0	1	1	0	0	ANKRD33	ankyrin repeat domain 33
hsa-miR-512-3p	1	0	1	1	1	1	KLHL2	kelch-like 2, Mayven (Drosophila)
hsa-miR-512-3p	0	0	1	1	1	1	HTR2A	5-hydroxytryptamine (serotonin) receptor 2A, G protein-coupled
hsa-miR-512-3p	0	0	1	1	1	1	ARMCX3	armadillo repeat containing, X-linked 3
hsa-miR-512-3p	1	0	1	1	1	1	ZNF711	zinc finger protein 711
hsa-miR-512-3p	1	0	1	1	1	1	PAQR3	progestin and adipoQ receptor family member III
hsa-miR-512-3p	0	0	1	1	1	1	DOCK5	dedicator of cytokinesis 5
hsa-miR-512-3p	1	0	1	1	1	1	NFIB	nuclear factor I/B
hsa-miR-512-3p	1	0	1	0	1	1	IGF2BP3	insulin-like growth factor 2 mRNA binding protein 3
hsa-miR-512-3p	0	0	1	1	1	1	DAZL	deleted in azoospermia-like
hsa-miR-512-3p	1	0	1	1	1	1	CALD1	caldesmon 1
hsa-miR-512-3p	0	0	1	0	0	0	DKFZp686K1684	uncharacterized LOC440034
hsa-miR-512-3p	0	0	1	1	0	0	PITRM1	pitrilysin metallopeptidase 1
hsa-miR-512-3p	1	0	1	1	1	1	CREB3L2	cAMP responsive element binding protein 3-like 2
hsa-miR-512-3p	1	0	1	1	1	1	MDK	midkine (neurite growth-promoting factor 2)
hsa-miR-512-3p	0	0	1	1	0	0	STMN4	stathmin-like 4
hsa-miR-512-3p	1	0	1	1	0	0	SMARCA2	SWI/SNF related, matrix associated, actin dependent regulator of chromatin, subfamily a, member 2
hsa-miR-512-3p	0	0	1	1	1	1	CAT	catalase
hsa-miR-512-3p	1	0	1	1	0	0	RAB24	RAB24, member RAS oncogene family
hsa-miR-512-3p	1	0	1	1	1	1	RSBN1L	round spermatid basic protein 1-like
hsa-miR-512-3p	0	0	1	0	0	0	LOC100128988	uncharacterized LOC100128988
hsa-miR-512-3p	1	0	1	1	1	1	FUT9	fucosyltransferase 9 (alpha (1,3) fucosyltransferase)
hsa-miR-512-3p	0	0	1	1	1	1	DGCR14	DiGeorge syndrome critical region gene 14
hsa-miR-512-3p	0	0	1	0	0	0	LOC400768	uncharacterized LOC400768
hsa-miR-512-3p	0	0	1	1	1	1	IER3	immediate early response 3
hsa-miR-512-3p	0	0	1	1	0	0	PPOX	protoporphyrinogen oxidase
hsa-miR-512-3p	0	0	1	1	0	0	ITGB3BP	integrin beta 3 binding protein (beta3-endonexin)
hsa-miR-512-3p	0	0	1	0	0	0	ARRDC1	arrestin domain containing 1
hsa-miR-512-3p	1	1	1	1	0	0	EFNA3	ephrin-A3
hsa-miR-512-3p	0	0	1	1	0	0	CCNDBP1	cyclin D-type binding-protein 1
hsa-miR-512-3p	0	0	1	1	1	1	HSPB8	heat shock 22kDa protein 8
hsa-miR-512-3p	1	0	1	0	1	1	BNIP3L	BCL2/adenovirus E1B 19kDa interacting protein 3-like
hsa-miR-512-3p	1	0	1	1	1	1	ACTG1	actin, gamma 1
hsa-miR-512-3p	0	0	1	1	1	1	PMPCB	peptidase (mitochondrial processing) beta
hsa-miR-512-3p	1	0	1	1	0	0	CCM2	cerebral cavernous malformation 2
hsa-miR-512-3p	0	0	1	0	1	1	CD99P1	CD99 molecule pseudogene 1
hsa-miR-512-3p	1	0	1	1	1	1	COPZ1	coatomer protein complex, subunit zeta 1
hsa-miR-512-3p	0	0	1	1	1	1	GGPS1	geranylgeranyl diphosphate synthase 1
hsa-miR-512-3p	0	0	1	1	1	1	ALB	albumin
hsa-miR-512-3p	0	0	1	1	1	1	STON1	stonin 1
hsa-miR-512-3p	0	0	1	0	1	1	WASH3P	WAS protein family homolog 3 pseudogene
hsa-miR-512-3p	1	0	1	1	1	1	CCDC25	coiled-coil domain containing 25
hsa-miR-512-3p	1	0	1	1	1	1	NAP1L1	nucleosome assembly protein 1-like 1
hsa-miR-512-3p	0	0	1	1	0	0	BRE	brain and reproductive organ-expressed (TNFRSF1A modulator)
hsa-miR-512-3p	1	0	1	1	1	1	DKK3	dickkopf 3 homolog (Xenopus laevis)
hsa-miR-512-3p	0	0	1	0	1	1	TMEM155	transmembrane protein 155
hsa-miR-512-3p	1	0	1	1	1	1	PEX2	peroxisomal biogenesis factor 2
hsa-miR-512-3p	0	0	1	1	0	0	NIT1	nitrilase 1
hsa-miR-512-3p	0	0	1	1	1	1	ZDHHC16	zinc finger, DHHC-type containing 16
hsa-miR-512-3p	1	0	1	1	0	0	FAT4	FAT tumor suppressor homolog 4 (Drosophila)
hsa-miR-512-3p	0	0	1	1	1	1	PEX19	peroxisomal biogenesis factor 19
hsa-miR-512-3p	0	0	1	1	0	0	WDR43	WD repeat domain 43
hsa-miR-512-3p	0	0	1	1	1	1	SLC9A3R1	solute carrier family 9, subfamily A (NHE3, cation proton antiporter 3), member 3 regulator 1
hsa-miR-512-3p	0	0	1	1	0	0	DDB2	damage-specific DNA binding protein 2, 48kDa
hsa-miR-512-3p	1	0	1	1	1	1	ANAPC16	anaphase promoting complex subunit 16
hsa-miR-512-3p	1	0	1	1	1	1	PFN2	profilin 2
hsa-miR-512-3p	0	0	1	1	1	1	HOXC9	homeobox C9
hsa-miR-512-3p	0	0	1	1	1	1	ZNF333	zinc finger protein 333
hsa-miR-512-3p	1	0	1	1	1	1	AZI2	5-azacytidine induced 2
hsa-miR-512-3p	0	0	1	0	0	0	ZNF674-AS1	ZNF674 antisense RNA 1
hsa-miR-512-3p	1	0	1	0	1	1	CD47	CD47 molecule
hsa-miR-512-3p	1	0	1	1	1	1	ATP1B1	ATPase, Na+/K+ transporting, beta 1 polypeptide
hsa-miR-512-3p	0	0	1	0	0	0	LOC100132984	uncharacterized LOC100132984
hsa-miR-512-3p	0	0	1	1	1	1	PSMD9	proteasome (prosome, macropain) 26S subunit, non-ATPase, 9
hsa-miR-512-3p	1	0	1	1	1	1	MYT1	myelin transcription factor 1
hsa-miR-512-3p	0	0	1	1	1	1	NUDT21	nudix (nucleoside diphosphate linked moiety X)-type motif 21
hsa-miR-512-3p	0	0	1	1	1	1	TOP3B	topoisomerase (DNA) III beta
hsa-miR-512-3p	0	0	1	1	1	1	C10orf2	chromosome 10 open reading frame 2
hsa-miR-512-3p	0	0	1	1	0	0	IL11RA	interleukin 11 receptor, alpha
hsa-miR-512-3p	1	0	1	1	1	1	RND3	Rho family GTPase 3
hsa-miR-512-3p	0	0	1	1	1	1	C9orf3	chromosome 9 open reading frame 3
hsa-miR-512-3p	0	0	1	1	1	1	BDP1	B double prime 1, subunit of RNA polymerase III transcription initiation factor IIIB
hsa-miR-512-3p	0	0	1	1	1	1	UPRT	uracil phosphoribosyltransferase (FUR1) homolog (S. cerevisiae)
hsa-miR-512-3p	0	0	1	0	0	0	LINC00661	long intergenic non-protein coding RNA 661
hsa-miR-512-3p	1	0	1	0	1	1	OSBPL8	oxysterol binding protein-like 8
hsa-miR-512-3p	0	0	1	1	1	1	SLC25A26	solute carrier family 25 (S-adenosylmethionine carrier), member 26
hsa-miR-512-3p	0	0	1	1	0	0	TENC1	tensin like C1 domain containing phosphatase (tensin 2)
hsa-miR-512-3p	1	0	1	1	1	1	SP2	Sp2 transcription factor
hsa-miR-512-3p	1	0	1	0	1	1	KLHDC10	kelch domain containing 10
hsa-miR-512-3p	1	0	1	0	1	1	LONRF2	LON peptidase N-terminal domain and ring finger 2
hsa-miR-512-3p	1	0	1	1	1	1	RSPO1	R-spondin 1
hsa-miR-512-3p	1	0	1	1	1	1	BNC2	basonuclin 2
hsa-miR-512-3p	1	0	1	1	1	1	TNFAIP1	tumor necrosis factor, alpha-induced protein 1 (endothelial)
hsa-miR-512-3p	0	0	1	1	0	0	CYP27B1	cytochrome P450, family 27, subfamily B, polypeptide 1
hsa-miR-512-3p	0	0	1	1	0	0	CEACAM3	carcinoembryonic antigen-related cell adhesion molecule 3
hsa-miR-512-3p	0	0	1	1	1	1	ALDH3B1	aldehyde dehydrogenase 3 family, member B1
hsa-miR-512-3p	1	0	1	1	1	1	MLL	myeloid/lymphoid or mixed-lineage leukemia (trithorax homolog, Drosophila)
hsa-miR-512-3p	1	0	1	1	1	1	ATP2B2	ATPase, Ca++ transporting, plasma membrane 2
hsa-miR-512-3p	1	0	1	1	1	1	MAN2A2	mannosidase, alpha, class 2A, member 2
hsa-miR-512-3p	1	0	1	0	1	1	BCL2	B-cell CLL/lymphoma 2
hsa-miR-512-3p	1	0	1	1	1	1	CD44	CD44 molecule (Indian blood group)
hsa-miR-512-3p	0	0	1	0	0	0	AR	androgen receptor
hsa-miR-512-3p	1	0	1	0	0	0	CACNA1A	calcium channel, voltage-dependent, P/Q type, alpha 1A subunit
hsa-miR-512-3p	1	0	1	1	1	1	COL4A3	collagen, type IV, alpha 3 (Goodpasture antigen)
hsa-miR-512-3p	1	0	1	1	1	1	F13A1	coagulation factor XIII, A1 polypeptide
hsa-miR-512-3p	0	0	1	1	0	0	GJB1	gap junction protein, beta 1, 32kDa
hsa-miR-512-3p	1	0	1	0	1	1	GLI3	GLI family zinc finger 3
hsa-miR-512-3p	0	0	1	1	1	1	HPRT1	hypoxanthine phosphoribosyltransferase 1
hsa-miR-512-3p	1	0	1	0	1	1	ITGB3	integrin, beta 3 (platelet glycoprotein IIIa, antigen CD61)
hsa-miR-512-3p	1	0	1	1	1	1	KCNA1	potassium voltage-gated channel, shaker-related subfamily, member 1 (episodic ataxia with myokymia)
hsa-miR-512-3p	1	0	1	0	1	1	KIT	v-kit Hardy-Zuckerman 4 feline sarcoma viral oncogene homolog
hsa-miR-512-3p	1	0	1	0	1	1	SGCB	sarcoglycan, beta (43kDa dystrophin-associated glycoprotein)
hsa-miR-512-3p	1	0	1	1	1	1	MET	met proto-oncogene (hepatocyte growth factor receptor)
hsa-miR-512-3p	1	0	1	1	1	1	OCRL	oculocerebrorenal syndrome of Lowe
hsa-miR-512-3p	1	0	1	0	1	1	PTEN	phosphatase and tensin homolog
hsa-miR-512-3p	1	0	1	1	1	1	ATXN1	ataxin 1
hsa-miR-512-3p	0	0	1	1	1	1	THBD	thrombomodulin
hsa-miR-512-3p	0	0	1	1	0	0	IL2RA	interleukin 2 receptor, alpha
hsa-miR-512-3p	0	0	1	1	1	1	CYP11B2	cytochrome P450, family 11, subfamily B, polypeptide 2
hsa-miR-512-3p	1	0	1	1	1	1	HOXA13	homeobox A13
hsa-miR-512-3p	1	0	1	1	1	1	DCX	doublecortin
hsa-miR-512-3p	0	0	1	1	1	1	IL11	interleukin 11
hsa-miR-512-3p	1	0	1	0	1	1	CACNA1E	calcium channel, voltage-dependent, R type, alpha 1E subunit
hsa-miR-512-3p	1	0	1	0	1	1	GABRA4	gamma-aminobutyric acid (GABA) A receptor, alpha 4
hsa-miR-512-3p	1	0	1	1	1	1	GRIA4	glutamate receptor, ionotropic, AMPA 4
hsa-miR-512-3p	1	0	1	1	1	1	GRM7	glutamate receptor, metabotropic 7
hsa-miR-512-3p	1	0	1	1	1	1	HTR1F	5-hydroxytryptamine (serotonin) receptor 1F, G protein-coupled
hsa-miR-512-3p	1	0	1	1	1	1	HTR4	5-hydroxytryptamine (serotonin) receptor 4, G protein-coupled
hsa-miR-512-3p	1	0	1	1	1	1	IGF1R	insulin-like growth factor 1 receptor
hsa-miR-512-3p	1	0	1	0	1	1	KCNJ2	potassium inwardly-rectifying channel, subfamily J, member 2
hsa-miR-512-3p	1	0	1	0	1	1	SMAD5	SMAD family member 5
hsa-miR-512-3p	0	0	1	1	1	1	FLJ45079	FLJ45079 protein
hsa-miR-512-3p	1	0	1	0	1	1	FLJ33360	FLJ33360 protein
hsa-miR-512-3p	0	0	1	1	1	1	DDI1	DNA-damage inducible 1 homolog 1 (S. cerevisiae)
hsa-miR-512-3p	0	0	1	0	0	0	OR8G1	olfactory receptor, family 8, subfamily G, member 1
hsa-miR-512-3p	1	0	1	1	1	1	ABLIM1	actin binding LIM protein 1
hsa-miR-512-3p	1	0	1	0	1	1	SMAD2	SMAD family member 2
hsa-miR-512-3p	1	0	1	1	1	1	KLHL31	kelch-like 31 (Drosophila)
hsa-miR-512-3p	0	0	1	1	1	1	ATP5S	ATP synthase, H+ transporting, mitochondrial Fo complex, subunit s (factor B)
hsa-miR-512-3p	0	0	1	1	0	0	TXNDC8	thioredoxin domain containing 8 (spermatozoa)
hsa-miR-512-3p	1	0	1	0	1	1	ZNF740	zinc finger protein 740
hsa-miR-512-3p	0	0	1	1	1	1	CCDC144NL	coiled-coil domain containing 144 family, N-terminal like
hsa-miR-512-3p	0	0	1	1	1	1	CLEC2D	C-type lectin domain family 2, member D
hsa-miR-512-3p	1	0	1	1	1	1	SFMBT1	Scm-like with four mbt domains 1
hsa-miR-512-3p	1	0	1	0	1	1	LRRC55	leucine rich repeat containing 55
hsa-miR-512-3p	1	0	1	1	1	1	EBF3	early B-cell factor 3
hsa-miR-512-3p	1	0	1	1	1	1	PLCXD3	phosphatidylinositol-specific phospholipase C, X domain containing 3
hsa-miR-512-3p	1	0	1	0	1	1	IP6K1	inositol hexakisphosphate kinase 1
hsa-miR-512-3p	0	0	1	1	0	0	SPIN2B	spindlin family, member 2B
hsa-miR-512-3p	0	0	1	0	1	1	C8orf22	chromosome 8 open reading frame 22
hsa-miR-512-3p	1	0	1	1	1	1	SPOP	speckle-type POZ protein
hsa-miR-512-3p	0	0	1	1	0	0	CARD17	caspase recruitment domain family, member 17
hsa-miR-512-3p	1	0	1	1	1	1	EI24	etoposide induced 2.4 mRNA
hsa-miR-512-3p	0	0	1	1	1	1	TRIM13	tripartite motif containing 13
hsa-miR-512-3p	1	0	1	0	1	1	SS18	synovial sarcoma translocation, chromosome 18
hsa-miR-512-3p	1	0	1	1	1	1	ZDHHC9	zinc finger, DHHC-type containing 9
hsa-miR-512-3p	1	0	1	0	1	1	C18orf25	chromosome 18 open reading frame 25
hsa-miR-512-3p	1	0	1	1	1	1	CTDSPL	CTD (carboxy-terminal domain, RNA polymerase II, polypeptide A) small phosphatase-like
hsa-miR-512-3p	1	0	1	1	1	1	BCAP29	B-cell receptor-associated protein 29
hsa-miR-512-3p	1	0	1	0	1	1	KIAA2022	KIAA2022
hsa-miR-512-3p	0	0	1	1	1	1	MXI1	MAX interactor 1
hsa-miR-512-3p	0	0	1	1	1	1	SLC35D3	solute carrier family 35, member D3
hsa-miR-512-3p	1	0	1	1	1	1	LUZP2	leucine zipper protein 2
hsa-miR-512-3p	0	0	1	0	1	1	LPPR5	lipid phosphate phosphatase-related protein type 5
hsa-miR-512-3p	0	0	1	1	0	0	PNLIPRP3	pancreatic lipase-related protein 3
hsa-miR-512-3p	1	0	1	1	1	1	SLC25A53	solute carrier family 25, member 53
hsa-miR-512-3p	0	0	1	1	1	1	SPIN4	spindlin family, member 4
hsa-miR-512-3p	1	0	1	0	1	1	ZKSCAN2	zinc finger with KRAB and SCAN domains 2
hsa-miR-512-3p	0	0	1	1	0	0	LINC00207	long intergenic non-protein coding RNA 207
hsa-miR-512-3p	1	0	1	1	1	1	H3F3C	H3 histone, family 3C
hsa-miR-512-3p	1	0	1	0	1	1	SYT14L	synaptotagmin XIV-like
hsa-miR-512-3p	1	0	1	1	1	1	RUNX2	runt-related transcription factor 2
hsa-miR-512-3p	1	0	1	1	1	1	PHF6	PHD finger protein 6
hsa-miR-512-3p	1	0	1	1	1	1	TMCC1	transmembrane and coiled-coil domain family 1
hsa-miR-512-3p	1	0	1	0	1	1	RGAG4	retrotransposon gag domain containing 4
hsa-miR-512-3p	1	0	1	0	1	1	TNRC6B	trinucleotide repeat containing 6B
hsa-miR-512-3p	1	0	1	1	1	1	TGFBR2	transforming growth factor, beta receptor II (70/80kDa)
hsa-miR-512-3p	1	0	1	1	1	1	FNBP1L	formin binding protein 1-like
hsa-miR-512-3p	0	0	1	1	1	1	SC5DL	sterol-C5-desaturase (ERG3 delta-5-desaturase homolog, S. cerevisiae)-like
hsa-miR-512-3p	0	0	1	1	0	0	ARPC4	actin related protein 2/3 complex, subunit 4, 20kDa
hsa-miR-512-3p	1	0	1	0	1	1	CELF2	CUGBP, Elav-like family member 2
hsa-miR-512-3p	0	0	1	1	0	0	IRAK1	interleukin-1 receptor-associated kinase 1
hsa-miR-512-3p	0	0	1	1	1	1	ARRDC2	arrestin domain containing 2
hsa-miR-512-3p	1	0	1	1	1	1	FAM108B1	family with sequence similarity 108, member B1
hsa-miR-512-3p	0	0	1	1	1	1	SOWAHB	sosondowah ankyrin repeat domain family member B
hsa-miR-512-3p	0	0	1	1	1	1	CIB4	calcium and integrin binding family member 4
hsa-miR-512-3p	0	0	1	1	1	1	PLAA	phospholipase A2-activating protein
hsa-miR-512-3p	1	0	1	1	1	1	MAF	v-maf musculoaponeurotic fibrosarcoma oncogene homolog (avian)
hsa-miR-512-3p	0	0	1	1	1	1	USP48	ubiquitin specific peptidase 48
hsa-miR-512-3p	1	0	1	1	1	1	ZNF704	zinc finger protein 704
hsa-miR-512-3p	0	0	1	0	1	1	RGS21	regulator of G-protein signaling 21
hsa-miR-512-3p	1	0	1	1	1	1	FAM3C	family with sequence similarity 3, member C
hsa-miR-512-3p	1	0	1	0	1	1	CEP44	centrosomal protein 44kDa
hsa-miR-512-3p	1	0	1	1	1	1	PAPD5	PAP associated domain containing 5
hsa-miR-512-3p	0	0	1	1	1	1	MTHFD2	methylenetetrahydrofolate dehydrogenase (NADP+ dependent) 2, methenyltetrahydrofolate cyclohydrolase
hsa-miR-512-3p	1	0	1	1	1	1	ZBTB8A	zinc finger and BTB domain containing 8A
hsa-miR-512-3p	1	0	1	1	0	0	KIAA0895L	KIAA0895-like
hsa-miR-512-3p	0	0	1	1	1	1	SI	sucrase-isomaltase (alpha-glucosidase)
hsa-miR-512-3p	1	0	1	1	1	1	SLC2A4	solute carrier family 2 (facilitated glucose transporter), member 4
hsa-miR-512-3p	1	0	1	1	1	1	C2orf88	chromosome 2 open reading frame 88
hsa-miR-512-3p	0	0	1	1	1	1	FRMPD2P1	FERM and PDZ domain containing 2 pseudogene 1
hsa-miR-512-3p	1	0	1	1	1	1	SLC9A6	solute carrier family 9, subfamily A (NHE6, cation proton antiporter 6), member 6
hsa-miR-512-3p	1	0	1	1	1	1	FRS2	fibroblast growth factor receptor substrate 2
hsa-miR-512-3p	1	0	1	1	1	1	ERBB4	v-erb-a erythroblastic leukemia viral oncogene homolog 4 (avian)
hsa-miR-512-3p	0	0	1	1	1	1	SEC24B	SEC24 family, member B (S. cerevisiae)
hsa-miR-512-3p	0	0	1	1	1	1	FAM22G	family with sequence similarity 22, member G
hsa-miR-512-3p	1	0	1	1	1	1	HIPK3	homeodomain interacting protein kinase 3
hsa-miR-512-3p	1	0	1	1	1	1	SREK1	splicing regulatory glutamine/lysine-rich protein 1
hsa-miR-512-3p	1	0	1	1	1	1	PRR3	proline rich 3
hsa-miR-512-3p	0	0	1	0	0	0	AGAP7	ArfGAP with GTPase domain, ankyrin repeat and PH domain 7
hsa-miR-512-3p	1	0	1	1	1	1	HNRNPUL2	heterogeneous nuclear ribonucleoprotein U-like 2
hsa-miR-512-3p	1	0	1	1	1	1	LDB3	LIM domain binding 3
hsa-miR-512-3p	1	0	1	0	1	1	FBXO41	F-box protein 41
hsa-miR-512-3p	0	0	1	1	1	1	HSF5	heat shock transcription factor family member 5
hsa-miR-512-3p	0	0	1	0	1	1	TMEM150C	transmembrane protein 150C
hsa-miR-512-3p	1	0	1	1	1	1	BICC1	bicaudal C homolog 1 (Drosophila)
hsa-miR-512-3p	1	0	1	1	1	1	MGA	MAX gene associated
hsa-miR-512-3p	1	0	1	1	0	0	ASIC2	acid-sensing (proton-gated) ion channel 2
hsa-miR-512-3p	1	0	1	0	1	1	XIAP	X-linked inhibitor of apoptosis
hsa-miR-512-3p	1	0	1	1	1	1	CAMK2D	calcium/calmodulin-dependent protein kinase II delta
hsa-miR-512-3p	1	0	1	1	1	1	CASP10	caspase 10, apoptosis-related cysteine peptidase
hsa-miR-512-3p	0	0	1	0	1	1	CASQ2	calsequestrin 2 (cardiac muscle)
hsa-miR-512-3p	1	0	1	1	1	1	CREBL2	cAMP responsive element binding protein-like 2
hsa-miR-512-3p	0	0	1	1	0	0	DIO3	deiodinase, iodothyronine, type III
hsa-miR-512-3p	1	0	1	0	1	1	GCNT2	glucosaminyl (N-acetyl) transferase 2, I-branching enzyme (I blood group)
hsa-miR-512-3p	1	0	1	1	1	1	AHNAK	AHNAK nucleoprotein
hsa-miR-512-3p	1	0	1	1	1	1	CBFB	core-binding factor, beta subunit
hsa-miR-512-3p	1	0	1	1	1	1	CDC25A	cell division cycle 25 homolog A (S. pombe)
hsa-miR-512-3p	1	0	1	0	0	0	CDH3	cadherin 3, type 1, P-cadherin (placental)
hsa-miR-512-3p	1	0	1	0	1	1	CEBPG	CCAAT/enhancer binding protein (C/EBP), gamma
hsa-miR-512-3p	1	0	1	1	1	1	CENPB	centromere protein B, 80kDa
hsa-miR-512-3p	1	0	1	1	1	1	CLCN4	chloride channel, voltage-sensitive 4
hsa-miR-512-3p	0	0	1	1	1	1	SLC31A2	solute carrier family 31 (copper transporters), member 2
hsa-miR-512-3p	1	0	1	1	1	1	DBT	dihydrolipoamide branched chain transacylase E2
hsa-miR-512-3p	1	0	1	1	1	1	DSC3	desmocollin 3
hsa-miR-512-3p	1	0	1	1	1	1	E2F3	E2F transcription factor 3
hsa-miR-512-3p	1	0	1	1	1	1	EPB49	erythrocyte membrane protein band 4.9 (dematin)
hsa-miR-512-3p	1	0	1	1	1	1	FGF7	fibroblast growth factor 7
hsa-miR-512-3p	1	0	1	1	1	1	FGF9	fibroblast growth factor 9 (glia-activating factor)
hsa-miR-512-3p	1	0	1	0	1	1	FOXO1	forkhead box O1
hsa-miR-512-3p	0	0	1	1	1	1	GFAP	glial fibrillary acidic protein
hsa-miR-512-3p	0	0	1	1	0	0	GLP1R	glucagon-like peptide 1 receptor
hsa-miR-512-3p	0	0	1	1	1	1	HLA-DOA	major histocompatibility complex, class II, DO alpha
hsa-miR-512-3p	0	0	1	1	1	1	HLA-DPB1	major histocompatibility complex, class II, DP beta 1
hsa-miR-512-3p	1	0	1	1	1	1	HOXB3	homeobox B3
hsa-miR-512-3p	1	0	1	1	1	1	IL13	interleukin 13
hsa-miR-512-3p	1	0	1	0	1	1	IRF2	interferon regulatory factor 2
hsa-miR-512-3p	1	0	1	1	1	1	JUN	jun proto-oncogene
hsa-miR-512-3p	1	0	1	1	1	1	KPNB1	karyopherin (importin) beta 1
hsa-miR-512-3p	0	0	1	1	0	0	KRT4	keratin 4
hsa-miR-512-3p	1	0	1	0	1	1	LAMC1	laminin, gamma 1 (formerly LAMB2)
hsa-miR-512-3p	1	0	1	1	1	1	LIFR	leukemia inhibitory factor receptor alpha
hsa-miR-512-3p	1	0	1	1	1	1	MAFG	v-maf musculoaponeurotic fibrosarcoma oncogene homolog G (avian)
hsa-miR-512-3p	0	0	1	1	1	1	MMP19	matrix metallopeptidase 19
hsa-miR-512-3p	1	0	1	1	1	1	MSR1	macrophage scavenger receptor 1
hsa-miR-512-3p	0	0	1	1	1	1	MTAP	methylthioadenosine phosphorylase
hsa-miR-512-3p	1	0	1	1	0	0	NDUFS4	NADH dehydrogenase (ubiquinone) Fe-S protein 4, 18kDa (NADH-coenzyme Q reductase)
hsa-miR-512-3p	0	0	1	0	1	1	OAZ2	ornithine decarboxylase antizyme 2
hsa-miR-512-3p	0	0	1	0	1	1	OPHN1	oligophrenin 1
hsa-miR-512-3p	1	0	1	0	1	1	PAPPA	pregnancy-associated plasma protein A, pappalysin 1
hsa-miR-512-3p	1	0	1	1	1	1	PFKP	phosphofructokinase, platelet
hsa-miR-512-3p	1	0	1	1	1	1	PLAGL2	pleiomorphic adenoma gene-like 2
hsa-miR-512-3p	0	0	1	1	1	1	PPP1R3A	protein phosphatase 1, regulatory subunit 3A
hsa-miR-512-3p	1	0	1	1	1	1	PPP2R3A	protein phosphatase 2, regulatory subunit B'', alpha
hsa-miR-512-3p	1	0	1	0	1	1	MAPK4	mitogen-activated protein kinase 4
hsa-miR-512-3p	1	0	1	1	1	1	PTPN4	protein tyrosine phosphatase, non-receptor type 4 (megakaryocyte)
hsa-miR-512-3p	1	0	1	1	1	1	PTPN9	protein tyrosine phosphatase, non-receptor type 9
hsa-miR-512-3p	1	0	1	1	1	1	PTPRK	protein tyrosine phosphatase, receptor type, K
hsa-miR-512-3p	1	0	1	1	1	1	PVRL1	poliovirus receptor-related 1 (herpesvirus entry mediator C)
hsa-miR-512-3p	0	0	1	0	1	1	RAB3B	RAB3B, member RAS oncogene family
hsa-miR-512-3p	0	0	1	1	0	0	RDBP	RD RNA binding protein
hsa-miR-512-3p	0	0	1	1	1	1	RNASE4	ribonuclease, RNase A family, 4
hsa-miR-512-3p	1	0	1	1	1	1	SHB	Src homology 2 domain containing adaptor protein B
hsa-miR-512-3p	1	0	1	0	1	1	SOX11	SRY (sex determining region Y)-box 11
hsa-miR-512-3p	0	0	1	1	0	0	SSX2	synovial sarcoma, X breakpoint 2
hsa-miR-512-3p	1	0	1	1	1	1	STAC	SH3 and cysteine rich domain
hsa-miR-512-3p	0	0	1	1	1	1	STAT6	signal transducer and activator of transcription 6, interleukin-4 induced
hsa-miR-512-3p	1	0	1	0	1	1	STC1	stanniocalcin 1
hsa-miR-512-3p	0	0	1	1	1	1	SULT2A1	sulfotransferase family, cytosolic, 2A, dehydroepiandrosterone (DHEA)-preferring, member 1
hsa-miR-512-3p	1	0	1	0	1	1	TAL1	T-cell acute lymphocytic leukemia 1
hsa-miR-512-3p	0	0	1	1	0	0	TGM4	transglutaminase 4 (prostate)
hsa-miR-512-3p	1	0	1	1	1	1	NR2E1	nuclear receptor subfamily 2, group E, member 1
hsa-miR-512-3p	1	0	1	1	1	1	UBE2B	ubiquitin-conjugating enzyme E2B
hsa-miR-512-3p	0	0	1	1	1	1	ZNF137P	zinc finger protein 137, pseudogene
hsa-miR-512-3p	1	0	1	0	1	1	BSN	bassoon (presynaptic cytomatrix protein)
hsa-miR-512-3p	1	0	1	1	1	1	FZD5	frizzled family receptor 5
hsa-miR-512-3p	1	0	1	1	1	1	DEK	DEK oncogene
hsa-miR-512-3p	1	0	1	1	1	1	EEA1	early endosome antigen 1
hsa-miR-512-3p	1	0	1	1	1	1	DYRK2	dual-specificity tyrosine-(Y)-phosphorylation regulated kinase 2
hsa-miR-512-3p	0	0	1	1	0	0	DUSP11	dual specificity phosphatase 11 (RNA/RNP complex 1-interacting)
hsa-miR-512-3p	0	0	1	1	0	0	PPFIA2	protein tyrosine phosphatase, receptor type, f polypeptide (PTPRF), interacting protein (liprin), alpha 2
hsa-miR-512-3p	0	0	1	1	1	1	ITGA10	integrin, alpha 10
hsa-miR-512-3p	1	0	1	1	1	1	BARX2	BARX homeobox 2
hsa-miR-512-3p	1	0	1	0	1	1	TNKS	tankyrase, TRF1-interacting ankyrin-related ADP-ribose polymerase
hsa-miR-512-3p	1	0	1	0	1	1	IRS2	insulin receptor substrate 2
hsa-miR-512-3p	1	0	1	1	1	1	URI1	URI1, prefoldin-like chaperone
hsa-miR-512-3p	1	0	1	1	1	1	NR5A2	nuclear receptor subfamily 5, group A, member 2
hsa-miR-512-3p	0	0	1	1	1	1	PRPF4B	PRP4 pre-mRNA processing factor 4 homolog B (yeast)
hsa-miR-512-3p	1	0	1	0	1	1	WASL	Wiskott-Aldrich syndrome-like
hsa-miR-512-3p	1	0	1	1	1	1	EFNB2	ephrin-B2
hsa-miR-512-3p	1	0	1	1	1	1	FGF13	fibroblast growth factor 13
hsa-miR-512-3p	1	0	1	1	1	1	GMFB	glia maturation factor, beta
hsa-miR-512-3p	1	0	1	1	1	1	HNF4G	hepatocyte nuclear factor 4, gamma
hsa-miR-512-3p	0	0	1	1	1	1	LBP	lipopolysaccharide binding protein
hsa-miR-512-3p	1	0	1	0	1	1	CYTH3	cytohesin 3
hsa-miR-512-3p	1	0	1	0	1	1	AKAP6	A kinase (PRKA) anchor protein 6
hsa-miR-512-3p	1	0	1	1	1	1	SLC25A27	solute carrier family 25, member 27
hsa-miR-512-3p	0	0	1	1	0	0	COX6A1	cytochrome c oxidase subunit VIa polypeptide 1
hsa-miR-512-3p	1	0	1	1	1	1	DUSP1	dual specificity phosphatase 1
hsa-miR-512-3p	1	0	1	1	1	1	EFNA1	ephrin-A1
hsa-miR-512-3p	1	0	1	0	1	1	ACSL4	acyl-CoA synthetase long-chain family member 4
hsa-miR-512-3p	1	0	1	1	0	0	FIGF	c-fos induced growth factor (vascular endothelial growth factor D)
hsa-miR-512-3p	1	0	1	1	1	1	FOXK2	forkhead box K2
hsa-miR-512-3p	1	0	1	1	1	1	XPR1	xenotropic and polytropic retrovirus receptor 1
hsa-miR-512-3p	1	0	1	1	1	1	BZRAP1	benzodiazapine receptor (peripheral) associated protein 1
hsa-miR-512-3p	1	0	1	0	1	1	MAPKAPK2	mitogen-activated protein kinase-activated protein kinase 2
hsa-miR-512-3p	1	0	1	1	1	1	B4GALT6	UDP-Gal:betaGlcNAc beta 1,4- galactosyltransferase, polypeptide 6
hsa-miR-512-3p	1	0	1	0	1	1	SEC22B	SEC22 vesicle trafficking protein homolog B (S. cerevisiae) (gene/pseudogene)
hsa-miR-512-3p	0	0	1	1	1	1	PRDX6	peroxiredoxin 6
hsa-miR-512-3p	1	0	1	0	1	1	DOCK3	dedicator of cytokinesis 3
hsa-miR-512-3p	1	0	1	1	1	1	GABRE	gamma-aminobutyric acid (GABA) A receptor, epsilon
hsa-miR-512-3p	1	0	1	1	1	1	PIK3CD	phosphatidylinositol-4,5-bisphosphate 3-kinase, catalytic subunit delta
hsa-miR-512-3p	1	0	1	0	1	1	PRKX	protein kinase, X-linked
hsa-miR-512-3p	0	0	1	1	1	1	SIM1	single-minded homolog 1 (Drosophila)
hsa-miR-512-3p	1	0	1	1	1	1	GFPT2	glutamine-fructose-6-phosphate transaminase 2
hsa-miR-512-3p	1	0	1	1	1	1	FGF19	fibroblast growth factor 19
hsa-miR-512-3p	1	0	1	1	1	1	MED13	mediator complex subunit 13
hsa-miR-512-3p	1	0	1	1	1	1	CBL	Cbl proto-oncogene, E3 ubiquitin protein ligase
hsa-miR-512-3p	1	0	1	1	1	1	FOXN3	forkhead box N3
hsa-miR-512-3p	1	0	1	0	1	1	DLX6	distal-less homeobox 6
hsa-miR-512-3p	1	0	1	1	1	1	ETS1	v-ets erythroblastosis virus E26 oncogene homolog 1 (avian)
hsa-miR-512-3p	1	0	1	1	1	1	GAS2	growth arrest-specific 2
hsa-miR-512-3p	1	0	1	1	1	1	GPR6	G protein-coupled receptor 6
hsa-miR-512-3p	1	0	1	1	1	1	H3F3B	H3 histone, family 3B (H3.3B)
hsa-miR-512-3p	1	0	1	1	1	1	HAS3	hyaluronan synthase 3
hsa-miR-512-3p	1	0	1	0	1	1	PRKAB2	protein kinase, AMP-activated, beta 2 non-catalytic subunit
hsa-miR-512-3p	0	0	1	1	1	1	ST5	suppression of tumorigenicity 5
hsa-miR-512-3p	1	0	1	0	1	1	CCDC6	coiled-coil domain containing 6
hsa-miR-512-3p	1	0	1	1	1	1	RND2	Rho family GTPase 2
hsa-miR-512-3p	1	0	1	1	1	1	HCN4	hyperpolarization activated cyclic nucleotide-gated potassium channel 4
hsa-miR-512-3p	1	0	1	1	1	1	PIGK	phosphatidylinositol glycan anchor biosynthesis, class K
hsa-miR-512-3p	0	0	1	1	0	0	DNAJC4	DnaJ (Hsp40) homolog, subfamily C, member 4
hsa-miR-512-3p	1	0	1	1	1	1	NHLH2	nescient helix loop helix 2
hsa-miR-512-3p	0	0	1	1	1	1	SSX1	synovial sarcoma, X breakpoint 1
hsa-miR-512-3p	1	0	1	1	1	1	SYT1	synaptotagmin I
hsa-miR-512-3p	1	0	1	1	0	0	DPP3	dipeptidyl-peptidase 3
hsa-miR-512-3p	1	0	1	1	1	1	UST	uronyl-2-sulfotransferase
hsa-miR-512-3p	0	0	1	0	1	1	CD96	CD96 molecule
hsa-miR-512-3p	1	0	1	1	1	1	EFS	embryonal Fyn-associated substrate
hsa-miR-512-3p	1	0	1	1	1	1	MAT2A	methionine adenosyltransferase II, alpha
hsa-miR-512-3p	1	0	1	1	1	1	MMP16	matrix metallopeptidase 16 (membrane-inserted)
hsa-miR-512-3p	0	0	1	1	1	1	SOX1	SRY (sex determining region Y)-box 1
hsa-miR-512-3p	1	0	1	0	1	1	HDAC4	histone deacetylase 4
hsa-miR-512-3p	0	0	1	1	1	1	LANCL1	LanC lantibiotic synthetase component C-like 1 (bacterial)
hsa-miR-512-3p	0	0	1	1	1	1	SMYD5	SMYD family member 5
hsa-miR-512-3p	0	0	1	1	1	1	TRDN	triadin
hsa-miR-512-3p	0	0	1	1	1	1	CSF2RA	colony stimulating factor 2 receptor, alpha, low-affinity (granulocyte-macrophage)
hsa-miR-512-3p	1	0	1	1	1	1	DYNC1LI2	dynein, cytoplasmic 1, light intermediate chain 2
hsa-miR-512-3p	1	0	1	1	1	1	LASP1	LIM and SH3 protein 1
hsa-miR-512-3p	0	0	1	1	1	1	PA2G4	proliferation-associated 2G4, 38kDa
hsa-miR-512-3p	0	0	1	1	1	1	PIK3CA	phosphatidylinositol-4,5-bisphosphate 3-kinase, catalytic subunit alpha
hsa-miR-512-3p	1	0	1	1	1	1	TLN1	talin 1
hsa-miR-512-3p	0	0	1	0	1	1	ZNF192	zinc finger protein 192
hsa-miR-512-3p	1	0	1	1	1	1	SMC1A	structural maintenance of chromosomes 1A
hsa-miR-512-3p	0	0	1	1	1	1	SLC30A9	solute carrier family 30 (zinc transporter), member 9
hsa-miR-512-3p	1	0	1	1	1	1	SEC23A	Sec23 homolog A (S. cerevisiae)
hsa-miR-512-3p	1	0	1	0	1	1	APPBP2	amyloid beta precursor protein (cytoplasmic tail) binding protein 2
hsa-miR-512-3p	1	0	1	1	1	1	NEBL	nebulette
hsa-miR-512-3p	1	0	1	1	1	1	ANP32B	acidic (leucine-rich) nuclear phosphoprotein 32 family, member B
hsa-miR-512-3p	0	0	1	1	1	1	RPP30	ribonuclease P/MRP 30kDa subunit
hsa-miR-512-3p	0	0	1	1	1	1	NPC2	Niemann-Pick disease, type C2
hsa-miR-512-3p	1	0	1	1	1	1	TRIM3	tripartite motif containing 3
hsa-miR-512-3p	1	0	1	1	1	1	TXNIP	thioredoxin interacting protein
hsa-miR-512-3p	1	0	1	0	1	1	IGF2BP1	insulin-like growth factor 2 mRNA binding protein 1
hsa-miR-512-3p	1	0	1	1	1	1	MAP3K2	mitogen-activated protein kinase kinase kinase 2
hsa-miR-512-3p	0	0	1	1	1	1	FGL2	fibrinogen-like 2
hsa-miR-512-3p	1	0	1	1	1	1	MMP24	matrix metallopeptidase 24 (membrane-inserted)
hsa-miR-512-3p	1	0	1	1	1	1	KAT6A	K(lysine) acetyltransferase 6A
hsa-miR-512-3p	1	0	1	0	1	1	SYNGAP1	synaptic Ras GTPase activating protein 1
hsa-miR-512-3p	1	0	1	1	1	1	ZBTB33	zinc finger and BTB domain containing 33
hsa-miR-512-3p	1	0	1	1	1	1	CBX1	chromobox homolog 1
hsa-miR-512-3p	0	0	1	1	1	1	PKIA	protein kinase (cAMP-dependent, catalytic) inhibitor alpha
hsa-miR-512-3p	1	0	1	1	1	1	RAB35	RAB35, member RAS oncogene family
hsa-miR-512-3p	1	0	1	1	1	1	RIT1	Ras-like without CAAX 1
hsa-miR-512-3p	1	0	1	1	1	1	SCN1A	sodium channel, voltage-gated, type I, alpha subunit
hsa-miR-512-3p	1	0	1	1	1	1	NR4A3	nuclear receptor subfamily 4, group A, member 3
hsa-miR-512-3p	1	0	1	1	1	1	ABHD2	abhydrolase domain containing 2
hsa-miR-512-3p	1	0	1	1	1	1	ADAMTS5	ADAM metallopeptidase with thrombospondin type 1 motif, 5
hsa-miR-512-3p	0	0	1	1	1	1	RPP14	ribonuclease P/MRP 14kDa subunit
hsa-miR-512-3p	1	0	1	1	1	1	KAT7	K(lysine) acetyltransferase 7
hsa-miR-512-3p	1	0	1	1	1	1	UBL3	ubiquitin-like 3
hsa-miR-512-3p	1	0	1	1	1	1	VEZF1	vascular endothelial zinc finger 1
hsa-miR-512-3p	0	0	1	0	1	1	ZNF208	zinc finger protein 208
hsa-miR-512-3p	0	0	1	0	1	1	ZXDB	zinc finger, X-linked, duplicated B
hsa-miR-512-3p	0	0	1	1	1	1	AKAP10	A kinase (PRKA) anchor protein 10
hsa-miR-512-3p	1	0	1	1	1	1	KLF12	Kruppel-like factor 12
hsa-miR-512-3p	1	0	1	1	1	1	TUSC2	tumor suppressor candidate 2
hsa-miR-512-3p	0	0	1	1	0	0	GABARAP	GABA(A) receptor-associated protein
hsa-miR-512-3p	1	0	1	1	1	1	CASC3	cancer susceptibility candidate 3
hsa-miR-512-3p	1	0	1	1	1	1	MGEA5	meningioma expressed antigen 5 (hyaluronidase)
hsa-miR-512-3p	0	0	1	1	0	0	SNW1	SNW domain containing 1
hsa-miR-512-3p	1	0	1	1	1	1	KCNE1L	KCNE1-like
hsa-miR-512-3p	1	0	1	0	1	1	RAPGEF5	Rap guanine nucleotide exchange factor (GEF) 5
hsa-miR-512-3p	1	0	1	0	1	1	GAB2	GRB2-associated binding protein 2
hsa-miR-512-3p	1	0	1	0	1	1	G3BP2	GTPase activating protein (SH3 domain) binding protein 2
hsa-miR-512-3p	0	0	1	0	1	1	PIGN	phosphatidylinositol glycan anchor biosynthesis, class N
hsa-miR-512-3p	1	0	1	0	1	1	BLOC1S6	biogenesis of lysosomal organelles complex-1, subunit 6, pallidin
hsa-miR-512-3p	0	0	1	0	1	1	TLL1	tolloid-like 1
hsa-miR-512-3p	0	0	1	1	1	1	CD24	CD24 molecule
hsa-miR-512-3p	1	0	1	1	1	1	STK39	serine threonine kinase 39
hsa-miR-512-3p	0	0	1	1	1	1	N6AMT1	N-6 adenine-specific DNA methyltransferase 1 (putative)
hsa-miR-512-3p	1	0	1	1	1	1	PPARGC1A	peroxisome proliferator-activated receptor gamma, coactivator 1 alpha
hsa-miR-512-3p	1	0	1	0	1	1	TRHDE	thyrotropin-releasing hormone degrading enzyme
hsa-miR-512-3p	0	0	1	1	1	1	PRICKLE4	prickle homolog 4 (Drosophila)
hsa-miR-512-3p	1	0	1	1	1	1	AK2	adenylate kinase 2
hsa-miR-512-3p	0	0	1	0	1	1	EMR2	egf-like module containing, mucin-like, hormone receptor-like 2
hsa-miR-512-3p	1	0	1	1	1	1	LAMP2	lysosomal-associated membrane protein 2
hsa-miR-512-3p	1	0	1	0	1	1	C16orf72	chromosome 16 open reading frame 72
hsa-miR-512-3p	1	0	1	1	0	0	HOXC11	homeobox C11
hsa-miR-512-3p	0	0	1	1	1	1	TM4SF1	transmembrane 4 L six family member 1
hsa-miR-512-3p	1	0	1	0	1	1	ODZ1	odz, odd Oz/ten-m homolog 1 (Drosophila)
hsa-miR-512-3p	1	0	1	1	1	1	CORO1C	coronin, actin binding protein, 1C
hsa-miR-512-3p	1	0	1	0	1	1	FJX1	four jointed box 1 (Drosophila)
hsa-miR-512-3p	1	0	1	1	1	1	LHX6	LIM homeobox 6
hsa-miR-512-3p	0	0	1	1	1	1	LAMP3	lysosomal-associated membrane protein 3
hsa-miR-512-3p	0	0	1	1	1	1	ARFGAP3	ADP-ribosylation factor GTPase activating protein 3
hsa-miR-512-3p	1	0	1	1	1	1	SLC40A1	solute carrier family 40 (iron-regulated transporter), member 1
hsa-miR-512-3p	1	0	1	0	1	1	SH3PXD2A	SH3 and PX domains 2A
hsa-miR-512-3p	1	0	1	1	1	1	RALGPS1	Ral GEF with PH domain and SH3 binding motif 1
hsa-miR-512-3p	0	0	1	0	1	1	LPIN2	lipin 2
hsa-miR-512-3p	1	0	1	0	1	1	TOX	thymocyte selection-associated high mobility group box
hsa-miR-512-3p	1	0	1	0	1	1	MLEC	malectin
hsa-miR-512-3p	1	0	1	1	1	1	DAZAP2	DAZ associated protein 2
hsa-miR-512-3p	1	0	1	1	1	1	RUSC2	RUN and SH3 domain containing 2
hsa-miR-512-3p	1	0	1	0	1	1	TRIL	TLR4 interactor with leucine-rich repeats
hsa-miR-512-3p	1	0	1	1	1	1	TBC1D4	TBC1 domain family, member 4
hsa-miR-512-3p	1	0	1	1	1	1	NUAK1	NUAK family, SNF1-like kinase, 1
hsa-miR-512-3p	1	0	1	1	1	1	JOSD1	Josephin domain containing 1
hsa-miR-512-3p	1	0	1	1	1	1	PLEKHA6	pleckstrin homology domain containing, family A member 6
hsa-miR-512-3p	1	0	1	1	1	1	SORCS3	sortilin-related VPS10 domain containing receptor 3
hsa-miR-512-3p	1	0	1	1	1	1	RAB21	RAB21, member RAS oncogene family
hsa-miR-512-3p	1	0	1	0	1	1	NMNAT2	nicotinamide nucleotide adenylyltransferase 2
hsa-miR-512-3p	1	0	1	0	1	1	GGA2	golgi-associated, gamma adaptin ear containing, ARF binding protein 2
hsa-miR-512-3p	1	0	1	1	1	1	SMG1	smg-1 homolog, phosphatidylinositol 3-kinase-related kinase (C. elegans)
hsa-miR-512-3p	1	0	1	1	1	1	RCOR1	REST corepressor 1
hsa-miR-512-3p	1	0	1	1	1	1	PLCB1	phospholipase C, beta 1 (phosphoinositide-specific)
hsa-miR-512-3p	1	0	1	1	1	1	WDR7	WD repeat domain 7
hsa-miR-512-3p	1	0	1	0	1	1	LARP1	La ribonucleoprotein domain family, member 1
hsa-miR-512-3p	1	0	1	0	1	1	SRGAP2	SLIT-ROBO Rho GTPase activating protein 2
hsa-miR-512-3p	1	0	1	1	0	0	SMG5	smg-5 homolog, nonsense mediated mRNA decay factor (C. elegans)
hsa-miR-512-3p	0	0	1	1	1	1	LEPROTL1	leptin receptor overlapping transcript-like 1
hsa-miR-512-3p	1	0	1	1	1	1	RIMBP2	RIMS binding protein 2
hsa-miR-512-3p	1	0	1	1	1	1	DSTYK	dual serine/threonine and tyrosine protein kinase
hsa-miR-512-3p	1	0	1	1	1	1	MOB4	MOB family member 4, phocein
hsa-miR-512-3p	0	0	1	1	1	1	ANAPC13	anaphase promoting complex subunit 13
hsa-miR-512-3p	1	0	1	1	1	1	DCAF12	DDB1 and CUL4 associated factor 12
hsa-miR-512-3p	1	0	1	1	1	1	CNOT6	CCR4-NOT transcription complex, subunit 6
hsa-miR-512-3p	1	0	1	1	1	1	MYRIP	myosin VIIA and Rab interacting protein
hsa-miR-512-3p	1	0	1	0	1	1	GLCE	glucuronic acid epimerase
hsa-miR-512-3p	1	0	1	1	1	1	LRRTM2	leucine rich repeat transmembrane neuronal 2
hsa-miR-512-3p	1	0	1	1	1	1	FAM155B	family with sequence similarity 155, member B
hsa-miR-512-3p	0	0	1	1	1	1	KRT76	keratin 76
hsa-miR-512-3p	1	0	1	0	1	1	TRIM33	tripartite motif containing 33
hsa-miR-512-3p	1	0	1	1	1	1	PHF20L1	PHD finger protein 20-like 1
hsa-miR-512-3p	1	0	1	1	1	1	UBE2J1	ubiquitin-conjugating enzyme E2, J1
hsa-miR-512-3p	1	0	1	1	1	1	PALLD	palladin, cytoskeletal associated protein
hsa-miR-512-3p	1	0	1	0	1	1	CNR1	cannabinoid receptor 1 (brain)
hsa-miR-512-3p	0	0	1	1	1	1	ZFR	zinc finger RNA binding protein
hsa-miR-512-3p	1	0	1	1	1	1	TOB2	transducer of ERBB2, 2
hsa-miR-512-3p	1	0	1	0	1	1	SELT	selenoprotein T
hsa-miR-512-3p	1	0	1	1	1	1	CMPK1	cytidine monophosphate (UMP-CMP) kinase 1, cytosolic
hsa-miR-512-3p	1	0	1	1	0	0	IRX4	iroquois homeobox 4
hsa-miR-512-3p	0	0	1	0	1	1	ERAP1	endoplasmic reticulum aminopeptidase 1
hsa-miR-512-3p	1	0	1	0	1	1	RAB8B	RAB8B, member RAS oncogene family
hsa-miR-512-3p	0	0	1	1	1	1	SMN2	survival of motor neuron 2, centromeric
hsa-miR-512-3p	1	0	1	0	1	1	KLHL3	kelch-like 3 (Drosophila)
hsa-miR-512-3p	0	0	1	1	1	1	POLE3	polymerase (DNA directed), epsilon 3, accessory subunit
hsa-miR-512-3p	0	0	1	1	1	1	NKRF	NFKB repressing factor
hsa-miR-512-3p	0	0	1	1	1	1	SMG6	smg-6 homolog, nonsense mediated mRNA decay factor (C. elegans)
hsa-miR-512-3p	1	0	1	0	1	1	UBE2Q1	ubiquitin-conjugating enzyme E2Q family member 1
hsa-miR-512-3p	0	0	1	1	1	1	BHMT2	betaine--homocysteine S-methyltransferase 2
hsa-miR-512-3p	1	0	1	1	1	1	DNAJB12	DnaJ (Hsp40) homolog, subfamily B, member 12
hsa-miR-512-3p	1	0	1	0	1	1	EIF2C4	eukaryotic translation initiation factor 2C, 4
hsa-miR-512-3p	0	0	1	0	1	1	GIPC2	GIPC PDZ domain containing family, member 2
hsa-miR-512-3p	1	0	1	1	1	1	GDAP2	ganglioside induced differentiation associated protein 2
hsa-miR-512-3p	0	0	1	1	0	0	PPP1R14D	protein phosphatase 1, regulatory (inhibitor) subunit 14D
hsa-miR-512-3p	1	0	1	0	1	1	DCAF16	DDB1 and CUL4 associated factor 16
hsa-miR-512-3p	1	0	1	1	1	1	TBC1D8B	TBC1 domain family, member 8B (with GRAM domain)
hsa-miR-512-3p	1	0	1	1	1	1	ALKBH5	alkB, alkylation repair homolog 5 (E. coli)
hsa-miR-512-3p	1	0	1	1	1	1	ELOVL2	ELOVL fatty acid elongase 2
hsa-miR-512-3p	0	0	1	1	1	1	WHSC1L1	Wolf-Hirschhorn syndrome candidate 1-like 1
hsa-miR-512-3p	1	0	1	0	1	1	CHD7	chromodomain helicase DNA binding protein 7
hsa-miR-512-3p	1	0	1	1	1	1	RNF125	ring finger protein 125, E3 ubiquitin protein ligase
hsa-miR-512-3p	0	0	1	1	1	1	C2orf42	chromosome 2 open reading frame 42
hsa-miR-512-3p	0	0	1	1	0	0	VPS37C	vacuolar protein sorting 37 homolog C (S. cerevisiae)
hsa-miR-512-3p	1	0	1	1	1	1	C9orf40	chromosome 9 open reading frame 40
hsa-miR-512-3p	1	0	1	1	1	1	SOBP	sine oculis binding protein homolog (Drosophila)
hsa-miR-512-3p	1	0	1	0	1	1	MSL2	male-specific lethal 2 homolog (Drosophila)
hsa-miR-512-3p	0	0	1	1	1	1	MRPS10	mitochondrial ribosomal protein S10
hsa-miR-512-3p	0	0	1	1	1	1	SEC61A2	Sec61 alpha 2 subunit (S. cerevisiae)
hsa-miR-512-3p	1	0	1	0	1	1	ARL8B	ADP-ribosylation factor-like 8B
hsa-miR-512-3p	1	0	1	0	1	1	SEPT11	septin 11
hsa-miR-512-3p	1	0	1	0	1	1	LIN7C	lin-7 homolog C (C. elegans)
hsa-miR-512-3p	1	0	1	1	1	1	RSBN1	round spermatid basic protein 1
hsa-miR-512-3p	0	0	1	0	0	0	FAM45B	family with sequence similarity 45, member A pseudogene
hsa-miR-512-3p	0	0	1	1	0	0	TMEM176A	transmembrane protein 176A
hsa-miR-512-3p	1	0	1	1	1	1	NRP2	neuropilin 2
hsa-miR-512-3p	1	0	1	1	1	1	ETNK1	ethanolamine kinase 1
hsa-miR-512-3p	1	0	1	1	1	1	MLL5	myeloid/lymphoid or mixed-lineage leukemia 5 (trithorax homolog, Drosophila)
hsa-miR-512-3p	0	0	1	1	1	1	DHTKD1	dehydrogenase E1 and transketolase domain containing 1
hsa-miR-512-3p	0	0	1	1	0	0	TRPV1	transient receptor potential cation channel, subfamily V, member 1
hsa-miR-512-3p	1	0	1	0	1	1	PCDHAC1	protocadherin alpha subfamily C, 1
hsa-miR-512-3p	1	0	1	0	1	1	PCDHAC2	protocadherin alpha subfamily C, 2
hsa-miR-512-3p	1	0	1	1	1	1	PCDHA1	protocadherin alpha 1
hsa-miR-512-3p	1	0	1	0	1	1	PCDHA10	protocadherin alpha 10
hsa-miR-512-3p	1	0	1	0	1	1	PCDHA11	protocadherin alpha 11
hsa-miR-512-3p	1	0	1	0	1	1	PCDHA12	protocadherin alpha 12
hsa-miR-512-3p	1	0	1	1	1	1	PCDHA2	protocadherin alpha 2
hsa-miR-512-3p	1	0	1	1	1	1	PCDHA3	protocadherin alpha 3
hsa-miR-512-3p	1	0	1	1	1	1	PCDHA6	protocadherin alpha 6
hsa-miR-512-3p	1	0	1	0	1	1	PCDHA7	protocadherin alpha 7
hsa-miR-512-3p	1	0	1	1	1	1	PCDHA8	protocadherin alpha 8
hsa-miR-512-3p	0	0	1	1	0	0	SPIN2A	spindlin family, member 2A
hsa-miR-512-3p	0	0	1	1	1	1	GNL3L	guanine nucleotide binding protein-like 3 (nucleolar)-like
hsa-miR-512-3p	1	0	1	0	1	1	CCNJ	cyclin J
hsa-miR-512-3p	1	0	1	0	1	1	CNGB3	cyclic nucleotide gated channel beta 3
hsa-miR-512-3p	1	0	1	1	1	1	SEPT3	septin 3
hsa-miR-512-3p	1	0	1	0	1	1	SLAMF8	SLAM family member 8
hsa-miR-512-3p	1	0	1	1	1	1	FEM1C	fem-1 homolog c (C. elegans)
hsa-miR-512-3p	1	0	1	1	1	1	SMYD2	SET and MYND domain containing 2
hsa-miR-512-3p	1	0	1	1	0	0	THAP11	THAP domain containing 11
hsa-miR-512-3p	1	0	1	1	1	1	EPHA8	EPH receptor A8
hsa-miR-512-3p	1	0	1	0	1	1	DCUN1D1	DCN1, defective in cullin neddylation 1, domain containing 1 (S. cerevisiae)
hsa-miR-512-3p	0	0	1	1	1	1	KIAA1161	KIAA1161
hsa-miR-512-3p	1	0	1	1	1	1	RGAG1	retrotransposon gag domain containing 1
hsa-miR-512-3p	1	0	1	0	1	1	ZNF398	zinc finger protein 398
hsa-miR-512-3p	1	0	1	0	1	1	KLHDC5	kelch domain containing 5
hsa-miR-512-3p	1	0	1	0	1	1	SYT4	synaptotagmin IV
hsa-miR-512-3p	1	0	1	1	1	1	NLGN2	neuroligin 2
hsa-miR-512-3p	1	0	1	1	1	1	KLHL14	kelch-like 14 (Drosophila)
hsa-miR-512-3p	1	0	1	0	1	1	WDFY1	WD repeat and FYVE domain containing 1
hsa-miR-512-3p	1	0	1	1	1	1	TSHZ3	teashirt zinc finger homeobox 3
hsa-miR-512-3p	1	0	1	1	1	1	ZFP14	zinc finger protein 14 homolog (mouse)
hsa-miR-512-3p	1	0	1	1	1	1	FAM160B1	family with sequence similarity 160, member B1
hsa-miR-512-3p	0	0	1	1	1	1	SSX3	synovial sarcoma, X breakpoint 3
hsa-miR-512-3p	1	0	1	0	1	1	RAP2A	RAP2A, member of RAS oncogene family
hsa-miR-512-3p	1	0	1	0	1	1	XK	X-linked Kx blood group (McLeod syndrome)
hsa-miR-512-3p	1	0	1	0	1	1	TMX4	thioredoxin-related transmembrane protein 4
hsa-miR-512-3p	1	0	1	0	1	1	TP53INP2	tumor protein p53 inducible nuclear protein 2
hsa-miR-512-3p	1	0	1	1	1	1	RPRD1B	regulation of nuclear pre-mRNA domain containing 1B
hsa-miR-512-3p	1	0	1	1	1	1	NTN4	netrin 4
hsa-miR-512-3p	0	0	1	1	0	0	ALOXE3	arachidonate lipoxygenase 3
hsa-miR-512-3p	1	0	1	1	1	1	TRIB2	tribbles homolog 2 (Drosophila)
hsa-miR-512-3p	0	0	1	1	1	1	ADAM30	ADAM metallopeptidase domain 30
hsa-miR-512-3p	0	0	1	0	1	1	CFL2	cofilin 2 (muscle)
hsa-miR-512-3p	1	0	1	0	0	0	ALX4	ALX homeobox 4
hsa-miR-512-3p	0	0	1	1	0	0	MIIP	migration and invasion inhibitory protein
hsa-miR-512-3p	1	0	1	0	1	1	CSNK1G1	casein kinase 1, gamma 1
hsa-miR-512-3p	1	0	1	1	1	1	GPR88	G protein-coupled receptor 88
hsa-miR-512-3p	1	0	1	1	1	1	XYLT1	xylosyltransferase I
hsa-miR-512-3p	1	0	1	0	1	1	EIF4H	eukaryotic translation initiation factor 4H
hsa-miR-512-3p	1	0	1	1	1	1	XPO4	exportin 4
hsa-miR-512-3p	1	0	1	1	1	1	TMEM168	transmembrane protein 168
hsa-miR-512-3p	0	0	1	1	1	1	SUSD1	sushi domain containing 1
hsa-miR-512-3p	1	0	1	0	1	1	DNMT3A	DNA (cytosine-5-)-methyltransferase 3 alpha
hsa-miR-512-3p	1	0	1	1	1	1	GIGYF1	GRB10 interacting GYF protein 1
hsa-miR-512-3p	1	0	1	1	1	1	PRRX1	paired related homeobox 1
hsa-miR-512-3p	1	0	1	1	1	1	NEUROD6	neuronal differentiation 6
hsa-miR-512-3p	1	0	1	1	1	1	AIDA	axin interactor, dorsalization associated
hsa-miR-512-3p	1	0	1	0	1	1	USP46	ubiquitin specific peptidase 46
hsa-miR-512-3p	0	0	1	1	1	1	METTL4	methyltransferase like 4
hsa-miR-512-3p	1	0	1	1	1	1	RFX7	regulatory factor X, 7
hsa-miR-512-3p	0	0	1	0	1	1	NAIP	NLR family, apoptosis inhibitory protein
hsa-miR-512-3p	0	0	1	1	1	1	AUNIP	aurora kinase A and ninein interacting protein
hsa-miR-512-3p	1	0	1	1	1	1	C7orf23	chromosome 7 open reading frame 23
hsa-miR-512-3p	1	0	1	1	1	1	PSTPIP2	proline-serine-threonine phosphatase interacting protein 2
hsa-miR-512-3p	1	0	1	1	1	1	HOXD1	homeobox D1
hsa-miR-512-3p	1	0	1	1	1	1	C10orf76	chromosome 10 open reading frame 76
hsa-miR-512-3p	0	0	1	1	1	1	AKIRIN1	akirin 1
hsa-miR-512-3p	1	0	1	1	1	1	DHX40	DEAH (Asp-Glu-Ala-His) box polypeptide 40
hsa-miR-512-3p	0	0	1	0	1	1	ZYG11B	zyg-11 homolog B (C. elegans)
hsa-miR-512-3p	0	0	1	1	1	1	LRRK1	leucine-rich repeat kinase 1
hsa-miR-512-3p	0	0	1	1	1	1	SNIP1	Smad nuclear interacting protein 1
hsa-miR-512-3p	1	0	1	1	0	0	CCDC48	coiled-coil domain containing 48
hsa-miR-512-3p	0	0	1	1	1	1	AGBL2	ATP/GTP binding protein-like 2
hsa-miR-512-3p	1	0	1	1	1	1	EIF2C3	eukaryotic translation initiation factor 2C, 3
hsa-miR-512-3p	1	0	1	1	0	0	SYNDIG1	synapse differentiation inducing 1
hsa-miR-512-3p	0	0	1	1	1	1	ZNF767	zinc finger family member 767
hsa-miR-512-3p	0	0	1	1	1	1	ESRP2	epithelial splicing regulatory protein 2
hsa-miR-512-3p	0	0	1	1	0	0	TMEM156	transmembrane protein 156
hsa-miR-512-3p	1	0	1	0	1	1	VCPIP1	valosin containing protein (p97)/p47 complex interacting protein 1
hsa-miR-512-3p	1	0	1	1	1	1	HKDC1	hexokinase domain containing 1
hsa-miR-512-3p	1	0	1	1	1	1	FBXO11	F-box protein 11
hsa-miR-512-3p	0	0	1	1	1	1	COQ10B	coenzyme Q10 homolog B (S. cerevisiae)
hsa-miR-512-3p	1	0	1	0	1	1	EDEM3	ER degradation enhancer, mannosidase alpha-like 3
hsa-miR-512-3p	1	0	1	1	1	1	TNKS2	tankyrase, TRF1-interacting ankyrin-related ADP-ribose polymerase 2
hsa-miR-512-3p	1	0	1	1	1	1	JHDM1D	jumonji C domain containing histone demethylase 1 homolog D (S. cerevisiae)
hsa-miR-512-3p	0	0	1	1	1	1	SMCP	sperm mitochondria-associated cysteine-rich protein
hsa-miR-512-3p	1	0	1	1	1	1	RAI1	retinoic acid induced 1
hsa-miR-512-3p	1	0	1	1	1	1	PTPRO	protein tyrosine phosphatase, receptor type, O
hsa-miR-512-3p	1	0	1	1	1	1	TUBB1	tubulin, beta 1 class VI
hsa-miR-512-3p	1	0	1	0	1	1	C1orf21	chromosome 1 open reading frame 21
hsa-miR-512-3p	1	0	1	1	1	1	ANKRD13C	ankyrin repeat domain 13C
hsa-miR-512-3p	0	0	1	1	0	0	URM1	ubiquitin related modifier 1
hsa-miR-512-3p	1	0	1	1	1	1	SNX27	sorting nexin family member 27
hsa-miR-512-3p	0	0	1	1	1	1	FAHD1	fumarylacetoacetate hydrolase domain containing 1
hsa-miR-512-3p	1	0	1	1	0	0	TCF7L1	transcription factor 7-like 1 (T-cell specific, HMG-box)
hsa-miR-512-3p	1	0	1	0	1	1	SH3BGRL2	SH3 domain binding glutamic acid-rich protein like 2
hsa-miR-512-3p	1	0	1	0	1	1	ITCH	itchy E3 ubiquitin protein ligase
hsa-miR-512-3p	1	0	1	1	1	1	PCDHA9	protocadherin alpha 9
hsa-miR-512-3p	1	0	1	1	1	1	GPR61	G protein-coupled receptor 61
hsa-miR-512-3p	0	0	1	0	0	0	KRTAP3-1	keratin associated protein 3-1
hsa-miR-512-3p	0	0	1	0	1	1	LDOC1L	leucine zipper, down-regulated in cancer 1-like
hsa-miR-512-3p	1	0	1	1	1	1	BRMS1L	breast cancer metastasis-suppressor 1-like
hsa-miR-512-3p	0	0	1	1	1	1	CYSTM1	cysteine-rich transmembrane module containing 1
hsa-miR-512-3p	1	0	1	1	1	1	SYVN1	synovial apoptosis inhibitor 1, synoviolin
hsa-miR-512-3p	1	0	1	1	1	1	DCTN5	dynactin 5 (p25)
hsa-miR-512-3p	1	0	1	1	1	1	RSPO3	R-spondin 3
hsa-miR-512-3p	1	0	1	1	0	0	ZC3H10	zinc finger CCCH-type containing 10
hsa-miR-512-3p	1	0	1	0	1	1	PPP1R15B	protein phosphatase 1, regulatory subunit 15B
hsa-miR-512-3p	1	0	1	1	1	1	SPRYD3	SPRY domain containing 3
hsa-miR-512-3p	0	0	1	1	1	1	MICALCL	MICAL C-terminal like
hsa-miR-512-3p	1	0	1	1	1	1	AJUBA	ajuba LIM protein
hsa-miR-512-3p	1	0	1	1	1	1	ARHGAP19	Rho GTPase activating protein 19
hsa-miR-512-3p	1	0	1	1	1	1	TMEM60	transmembrane protein 60
hsa-miR-512-3p	1	0	1	0	1	1	C5orf62	chromosome 5 open reading frame 62
hsa-miR-512-3p	0	0	1	1	1	1	POLR2J2	polymerase (RNA) II (DNA directed) polypeptide J2
hsa-miR-512-3p	1	0	1	1	1	1	PCDH10	protocadherin 10
hsa-miR-512-3p	1	0	1	1	1	1	PCDH11Y	protocadherin 11 Y-linked
hsa-miR-512-3p	1	0	1	1	1	1	PDGFA	platelet-derived growth factor alpha polypeptide
hsa-miR-512-3p	1	0	1	0	1	1	PURB	purine-rich element binding protein B
hsa-miR-512-3p	1	0	1	1	1	1	ADAM19	ADAM metallopeptidase domain 19
hsa-miR-512-3p	1	0	1	1	1	1	SSH2	slingshot homolog 2 (Drosophila)
hsa-miR-512-3p	1	0	1	1	1	1	TANC1	tetratricopeptide repeat, ankyrin repeat and coiled-coil containing 1
hsa-miR-512-3p	1	0	1	1	1	1	EPT1	ethanolaminephosphotransferase 1 (CDP-ethanolamine-specific)
hsa-miR-512-3p	1	0	1	1	1	1	TPD52L3	tumor protein D52-like 3
hsa-miR-512-3p	0	0	1	1	1	1	ZNF830	zinc finger protein 830
hsa-miR-512-3p	0	0	1	1	1	1	NALCN	sodium leak channel, non-selective
hsa-miR-512-3p	0	0	1	1	1	1	PLEKHG4B	pleckstrin homology domain containing, family G (with RhoGef domain) member 4B
hsa-miR-512-3p	1	0	1	1	1	1	SLITRK1	SLIT and NTRK-like family, member 1
hsa-miR-512-3p	1	0	1	0	1	1	TMEM123	transmembrane protein 123
hsa-miR-512-3p	0	0	1	1	0	0	FAM46B	family with sequence similarity 46, member B
hsa-miR-512-3p	1	0	1	1	1	1	SRSF10	serine/arginine-rich splicing factor 10
hsa-miR-512-3p	0	0	1	1	1	1	CCNE2	cyclin E2
hsa-miR-512-3p	0	0	1	1	1	1	PPP4R4	protein phosphatase 4, regulatory subunit 4
hsa-miR-512-3p	0	0	1	1	1	1	ABCA10	ATP-binding cassette, sub-family A (ABC1), member 10
hsa-miR-512-3p	0	0	1	1	1	1	RPL10L	ribosomal protein L10-like
hsa-miR-512-3p	0	0	1	1	1	1	PABPC5	poly(A) binding protein, cytoplasmic 5
hsa-miR-512-3p	1	0	1	1	1	1	SPSB4	splA/ryanodine receptor domain and SOCS box containing 4
hsa-miR-512-3p	0	0	1	0	1	1	CNTNAP5	contactin associated protein-like 5
hsa-miR-512-3p	0	0	1	1	1	1	FCAR	Fc fragment of IgA, receptor for
hsa-miR-512-3p	0	0	1	0	1	1	PAQR8	progestin and adipoQ receptor family member VIII
hsa-miR-512-3p	1	0	1	1	1	1	ZAK	sterile alpha motif and leucine zipper containing kinase AZK
hsa-miR-512-3p	0	0	1	1	0	0	KIAA2013	KIAA2013
hsa-miR-512-3p	1	0	1	1	0	0	PKDCC	protein kinase domain containing, cytoplasmic homolog (mouse)
hsa-miR-512-3p	0	0	1	1	1	1	MRAP2	melanocortin 2 receptor accessory protein 2
hsa-miR-512-3p	1	0	1	0	1	1	NUS1	nuclear undecaprenyl pyrophosphate synthase 1 homolog (S. cerevisiae)
hsa-miR-512-3p	0	0	1	0	1	1	PRELID2	PRELI domain containing 2
hsa-miR-512-3p	1	0	1	1	1	1	MBOAT2	membrane bound O-acyltransferase domain containing 2
hsa-miR-512-3p	0	0	1	1	1	1	FAM122C	family with sequence similarity 122C
hsa-miR-512-3p	1	0	1	0	1	1	CNOT6L	CCR4-NOT transcription complex, subunit 6-like
hsa-miR-512-3p	1	0	1	1	1	1	KCNH8	potassium voltage-gated channel, subfamily H (eag-related), member 8
hsa-miR-512-3p	1	0	1	1	1	1	FAM91A1	family with sequence similarity 91, member A1
hsa-miR-512-3p	1	0	1	0	1	1	CENPBD1	CENPB DNA-binding domains containing 1
hsa-miR-512-3p	0	0	1	1	0	0	PRKCDBP	protein kinase C, delta binding protein
hsa-miR-512-3p	0	0	1	0	1	1	PIGM	phosphatidylinositol glycan anchor biosynthesis, class M
hsa-miR-512-3p	1	0	1	1	1	1	FAM84A	family with sequence similarity 84, member A
hsa-miR-512-3p	0	0	1	1	0	0	TMEM217	transmembrane protein 217
hsa-miR-512-3p	0	0	1	1	0	0	WFDC5	WAP four-disulfide core domain 5
hsa-miR-512-3p	1	0	1	1	1	1	SEPT6	septin 6
hsa-miR-512-3p	1	0	1	1	1	1	SGMS1	sphingomyelin synthase 1
hsa-miR-512-3p	1	0	1	1	1	1	FAM110B	family with sequence similarity 110, member B
hsa-miR-512-3p	0	0	1	1	1	1	GLIS1	GLIS family zinc finger 1
hsa-miR-512-3p	1	0	1	1	1	1	UBTD2	ubiquitin domain containing 2
hsa-miR-512-3p	1	0	1	1	1	1	TMEM178A	transmembrane protein 178A
hsa-miR-512-3p	1	0	1	1	1	1	FAM123B	family with sequence similarity 123B
hsa-miR-512-3p	0	0	1	1	1	1	C16orf89	chromosome 16 open reading frame 89
hsa-miR-512-3p	1	0	1	1	1	1	C7orf60	chromosome 7 open reading frame 60
hsa-miR-512-3p	0	0	1	1	1	1	SNX31	sorting nexin 31
hsa-miR-512-3p	0	0	1	1	1	1	METTL15	methyltransferase like 15
hsa-miR-512-3p	1	0	1	0	1	1	TMEM154	transmembrane protein 154
hsa-miR-512-3p	1	0	1	1	1	1	ZCCHC5	zinc finger, CCHC domain containing 5
hsa-miR-512-3p	0	0	1	1	0	0	DOK6	docking protein 6
hsa-miR-512-3p	1	0	1	0	1	1	ZBTB9	zinc finger and BTB domain containing 9
hsa-miR-512-3p	1	0	1	1	1	1	PDIK1L	PDLIM1 interacting kinase 1 like
hsa-miR-512-3p	1	0	1	1	1	1	EED	embryonic ectoderm development
hsa-miR-512-3p	1	0	1	1	1	1	HS6ST3	heparan sulfate 6-O-sulfotransferase 3
hsa-miR-512-3p	1	0	1	0	1	1	MDGA1	MAM domain containing glycosylphosphatidylinositol anchor 1
hsa-miR-512-3p	1	0	1	1	1	1	CREBRF	CREB3 regulatory factor
hsa-miR-512-3p	1	0	1	1	0	0	LPCAT4	lysophosphatidylcholine acyltransferase 4
hsa-miR-512-3p	1	0	1	1	1	1	FNDC5	fibronectin type III domain containing 5
hsa-miR-512-3p	0	0	1	1	1	1	TAF1L	TAF1 RNA polymerase II, TATA box binding protein (TBP)-associated factor, 210kDa-like
hsa-miR-512-3p	0	0	1	1	1	1	WFDC13	WAP four-disulfide core domain 13
hsa-miR-512-3p	0	0	1	1	1	1	REXO1L1	REX1, RNA exonuclease 1 homolog (S. cerevisiae)-like 1
hsa-miR-512-3p	0	0	1	1	0	0	SSX6	synovial sarcoma, X breakpoint 6 (pseudogene)
hsa-miR-512-3p	1	0	1	1	1	1	FAM117B	family with sequence similarity 117, member B
hsa-miR-512-3p	0	0	1	1	1	1	FNDC7	fibronectin type III domain containing 7
hsa-miR-512-3p	1	0	1	0	1	1	C3orf58	chromosome 3 open reading frame 58
hsa-miR-512-3p	1	0	1	0	1	1	PGM2L1	phosphoglucomutase 2-like 1
hsa-miR-512-3p	1	0	1	0	1	1	KSR2	kinase suppressor of ras 2
hsa-miR-512-3p	1	0	1	1	1	1	DIP2B	DIP2 disco-interacting protein 2 homolog B (Drosophila)
hsa-miR-512-3p	0	0	1	0	1	1	KRT18P55	keratin 18 pseudogene 55
hsa-miR-512-3p	1	0	1	1	1	1	RIMKLA	ribosomal modification protein rimK-like family member A
hsa-miR-512-3p	0	0	1	0	1	1	C5orf64	chromosome 5 open reading frame 64
hsa-miR-512-3p	1	0	1	1	1	1	XKR6	XK, Kell blood group complex subunit-related family, member 6
hsa-miR-512-3p	0	0	1	1	1	1	FAM133A	family with sequence similarity 133, member A
hsa-miR-512-3p	0	0	1	1	1	1	AQPEP	laeverin
hsa-miR-512-3p	0	0	1	1	1	1	YIPF6	Yip1 domain family, member 6
hsa-miR-512-3p	1	0	1	0	1	1	FAM84B	family with sequence similarity 84, member B
hsa-miR-512-3p	1	0	1	1	1	1	SCN4B	sodium channel, voltage-gated, type IV, beta subunit
hsa-miR-512-3p	1	0	1	1	1	1	SYT9	synaptotagmin IX
hsa-miR-512-3p	1	0	1	1	1	1	PRR15	proline rich 15
hsa-miR-512-3p	0	0	1	1	1	1	SESTD1	SEC14 and spectrin domains 1
hsa-miR-512-3p	0	0	1	1	1	1	GPIHBP1	glycosylphosphatidylinositol anchored high density lipoprotein binding protein 1
hsa-miR-512-3p	1	0	1	1	1	1	TMEM26	transmembrane protein 26
hsa-miR-512-3p	1	0	1	0	1	1	RTN4RL1	reticulon 4 receptor-like 1
hsa-miR-512-3p	1	0	1	0	1	1	ARL5B	ADP-ribosylation factor-like 5B
hsa-miR-512-3p	0	0	1	1	1	1	FBXO27	F-box protein 27
hsa-miR-512-3p	1	0	1	1	1	1	TCF20	transcription factor 20 (AR1)
hsa-miR-512-3p	1	0	1	1	1	1	ZSCAN22	zinc finger and SCAN domain containing 22
hsa-miR-512-3p	1	0	1	0	1	1	BAGE2	B melanoma antigen family, member 2
hsa-miR-512-3p	1	0	1	1	1	1	ISM2	isthmin 2 homolog (zebrafish)
hsa-miR-512-3p	0	0	1	1	1	1	ZNF714	zinc finger protein 714
hsa-miR-512-3p	1	0	1	0	1	1	RNF144B	ring finger protein 144B
hsa-miR-512-3p	0	0	1	0	1	1	C16orf82	chromosome 16 open reading frame 82
hsa-miR-512-3p	0	0	1	1	1	1	FLT4	fms-related tyrosine kinase 4
hsa-miR-512-3p	1	0	1	0	1	1	RIMS4	regulating synaptic membrane exocytosis 4
hsa-miR-512-3p	0	0	1	0	1	1	NBPF11	neuroblastoma breakpoint family, member 11
hsa-miR-512-3p	1	0	1	1	1	1	ADAMTS6	ADAM metallopeptidase with thrombospondin type 1 motif, 6
hsa-miR-512-3p	1	0	1	1	1	1	CPXM2	carboxypeptidase X (M14 family), member 2
hsa-miR-512-3p	1	0	1	0	1	1	NRK	Nik related kinase
hsa-miR-512-3p	1	0	1	1	1	1	RAB43	RAB43, member RAS oncogene family
hsa-miR-512-3p	0	0	1	1	1	1	EFCAB5	EF-hand calcium binding domain 5
hsa-miR-512-3p	0	0	1	1	1	1	COL25A1	collagen, type XXV, alpha 1
hsa-miR-512-3p	0	0	1	1	1	1	MKNK1	MAP kinase interacting serine/threonine kinase 1
hsa-miR-512-3p	1	0	1	1	1	1	CXCL12	chemokine (C-X-C motif) ligand 12
hsa-miR-512-3p	0	0	1	1	1	1	KCNRG	potassium channel regulator
hsa-miR-512-3p	1	0	1	1	1	1	BLOC1S5	biogenesis of lysosomal organelles complex-1, subunit 5, muted
hsa-miR-512-3p	1	0	1	1	0	0	TCF7	transcription factor 7 (T-cell specific, HMG-box)
hsa-miR-512-3p	0	0	1	1	1	1	SHC4	SHC (Src homology 2 domain containing) family, member 4
hsa-miR-512-3p	0	0	1	0	1	1	TP73-AS1	TP73 antisense RNA 1
hsa-miR-512-3p	1	0	1	1	1	1	TEX19	testis expressed 19
hsa-miR-512-3p	0	0	1	0	1	1	C1orf220	chromosome 1 open reading frame 220
hsa-miR-512-3p	1	0	1	1	1	1	C11orf87	chromosome 11 open reading frame 87
hsa-miR-512-3p	0	0	1	0	1	1	SIGLEC15	sialic acid binding Ig-like lectin 15
hsa-miR-512-3p	0	0	1	0	0	0	ESRRAP2	estrogen-related receptor alpha pseudogene 2
hsa-miR-512-3p	0	0	1	0	0	0	HLA-DPB2	major histocompatibility complex, class II, DP beta 2 (pseudogene)
hsa-miR-512-3p	0	0	1	0	0	0	ANXA2P3	annexin A2 pseudogene 3
hsa-miR-512-3p	0	0	1	0	0	0	TTTY15	testis-specific transcript, Y-linked 15 (non-protein coding)
hsa-miR-512-3p	0	0	1	0	0	0	GOLGA2P3Y	golgin A2 pseudogene 3, Y-linked
hsa-miR-512-3p	0	0	1	0	0	0	H3F3AP4	H3 histone, family 3A, pseudogene 4
hsa-miR-512-3p	0	0	1	0	0	0	HYALP1	hyaluronoglucosaminidase pseudogene 1
hsa-miR-512-3p	0	0	1	0	0	0	DGCR5	DiGeorge syndrome critical region gene 5 (non-protein coding)
hsa-miR-512-3p	0	0	1	0	0	0	TPTE2P6	transmembrane phosphoinositide 3-phosphatase and tensin homolog 2 pseudogene 6
hsa-miR-512-3p	0	0	1	0	0	0	TCAM1P	testicular cell adhesion molecule 1 homolog (mouse), pseudogene
hsa-miR-512-3p	0	0	1	0	0	0	SNORA35	small nucleolar RNA, H/ACA box 35
hsa-miR-512-3p	0	0	1	0	0	0	SCARNA1	small Cajal body-specific RNA 1
hsa-miR-512-3p	0	0	1	0	0	0	NBR2	neighbor of BRCA1 gene 2 (non-protein coding)
hsa-miR-512-3p	0	0	1	0	0	0	GBP1P1	guanylate binding protein 1, interferon-inducible pseudogene 1
hsa-miR-512-3p	0	0	1	0	0	0	NCF1B	neutrophil cytosolic factor 1B pseudogene
hsa-miR-512-3p	0	0	1	1	0	0	PHKG2	phosphorylase kinase, gamma 2 (testis)
hsa-miR-512-3p	0	0	1	1	1	1	B2M	beta-2-microglobulin
hsa-miR-512-3p	1	0	1	1	1	1	ESR1	estrogen receptor 1
hsa-miR-512-3p	0	0	1	1	0	0	EPX	eosinophil peroxidase
hsa-miR-512-3p	1	0	1	1	1	1	WIPF1	WAS/WASL interacting protein family, member 1
hsa-miR-512-3p	0	0	1	0	0	0	MUC5AC	mucin 5AC, oligomeric mucus/gel-forming
hsa-miR-512-3p	1	0	1	1	0	0	PLEKHG6	pleckstrin homology domain containing, family G (with RhoGef domain) member 6
hsa-miR-512-3p	0	0	1	1	0	0	RWDD2A	RWD domain containing 2A
hsa-miR-512-3p	0	0	0	1	1	1	MYOC	myocilin, trabecular meshwork inducible glucocorticoid response
hsa-miR-512-3p	1	0	1	1	1	1	PDZD4	PDZ domain containing 4
hsa-miR-512-3p	0	0	1	1	0	0	UQCRC1	ubiquinol-cytochrome c reductase core protein I
hsa-miR-512-3p	0	0	1	1	0	0	SPAG7	sperm associated antigen 7
hsa-miR-512-3p	0	0	1	1	1	1	SNRPD3	small nuclear ribonucleoprotein D3 polypeptide 18kDa
hsa-miR-512-3p	0	0	1	1	0	0	CENPM	centromere protein M
hsa-miR-512-3p	0	0	0	1	0	0	HSCB	HscB iron-sulfur cluster co-chaperone homolog (E. coli)
hsa-miR-512-3p	0	0	0	1	1	1	ADSL	adenylosuccinate lyase
hsa-miR-512-3p	0	0	1	1	0	0	AP4S1	adaptor-related protein complex 4, sigma 1 subunit
hsa-miR-512-3p	0	0	1	1	1	1	ATP6V1D	ATPase, H+ transporting, lysosomal 34kDa, V1 subunit D
hsa-miR-512-3p	1	0	1	1	1	1	ZFYVE21	zinc finger, FYVE domain containing 21
hsa-miR-512-3p	0	0	1	1	0	0	BIRC7	baculoviral IAP repeat containing 7
hsa-miR-512-3p	0	0	1	1	1	1	ORC6	origin recognition complex, subunit 6
hsa-miR-512-3p	0	0	0	1	1	1	PLLP	plasmolipin
hsa-miR-512-3p	0	0	1	1	0	0	CRYM	crystallin, mu
hsa-miR-512-3p	0	0	1	1	0	0	QPRT	quinolinate phosphoribosyltransferase
hsa-miR-512-3p	0	0	0	1	0	0	DKK4	dickkopf homolog 4 (Xenopus laevis)
hsa-miR-512-3p	0	0	0	1	0	0	TNFRSF10A	tumor necrosis factor receptor superfamily, member 10a
hsa-miR-512-3p	1	0	1	1	1	1	PPP2CB	protein phosphatase 2, catalytic subunit, beta isozyme
hsa-miR-512-3p	0	0	1	1	0	0	PPP1R37	protein phosphatase 1, regulatory subunit 37
hsa-miR-512-3p	0	0	0	1	0	0	C19orf53	chromosome 19 open reading frame 53
hsa-miR-512-3p	0	0	0	1	0	0	PLIN3	perilipin 3
hsa-miR-512-3p	0	0	0	1	1	1	DNASE2	deoxyribonuclease II, lysosomal
hsa-miR-512-3p	1	0	1	1	1	1	ABCF2	ATP-binding cassette, sub-family F (GCN20), member 2
hsa-miR-512-3p	1	0	1	1	1	1	HOXA5	homeobox A5
hsa-miR-512-3p	0	0	0	1	0	0	ABHD11	abhydrolase domain containing 11
hsa-miR-512-3p	0	0	0	1	0	0	MOGAT3	monoacylglycerol O-acyltransferase 3
hsa-miR-512-3p	0	0	0	1	0	0	RARRES2	retinoic acid receptor responder (tazarotene induced) 2
hsa-miR-512-3p	0	0	1	1	0	0	URGCP	upregulator of cell proliferation
hsa-miR-512-3p	0	0	0	1	1	1	AEBP1	AE binding protein 1
hsa-miR-512-3p	1	0	1	1	0	0	RUNDC3A	RUN domain containing 3A
hsa-miR-512-3p	0	0	0	1	1	1	KAT2A	K(lysine) acetyltransferase 2A
hsa-miR-512-3p	0	0	0	1	0	0	HSD17B1	hydroxysteroid (17-beta) dehydrogenase 1
hsa-miR-512-3p	0	0	1	1	1	1	PF4V1	platelet factor 4 variant 1
hsa-miR-512-3p	0	0	0	1	1	1	CD82	CD82 molecule
hsa-miR-512-3p	0	0	1	1	0	0	IL23A	interleukin 23, alpha subunit p19
hsa-miR-512-3p	0	0	1	1	1	1	ARPC3	actin related protein 2/3 complex, subunit 3, 21kDa
hsa-miR-512-3p	0	0	0	1	0	0	GPRC5D	G protein-coupled receptor, family C, group 5, member D
hsa-miR-512-3p	0	0	0	1	0	0	GABRR2	gamma-aminobutyric acid (GABA) A receptor, rho 2
hsa-miR-512-3p	0	0	1	1	0	0	MLH1	mutL homolog 1, colon cancer, nonpolyposis type 2 (E. coli)
hsa-miR-512-3p	0	0	1	1	1	1	COMMD2	COMM domain containing 2
hsa-miR-512-3p	0	0	0	1	0	0	VAX2	ventral anterior homeobox 2
hsa-miR-512-3p	0	0	0	1	0	0	ACTL8	actin-like 8
hsa-miR-512-3p	0	0	1	1	0	0	LEPRE1	leucine proline-enriched proteoglycan (leprecan) 1
hsa-miR-512-3p	1	0	0	1	1	1	SLC5A9	solute carrier family 5 (sodium/glucose cotransporter), member 9
hsa-miR-512-3p	0	0	0	1	0	0	PEPD	peptidase D
hsa-miR-512-3p	1	0	1	1	0	0	RNF39	ring finger protein 39
hsa-miR-512-3p	0	0	1	1	0	0	PEX6	peroxisomal biogenesis factor 6
hsa-miR-512-3p	0	0	0	1	0	0	SH2D3A	SH2 domain containing 3A
hsa-miR-512-3p	0	0	0	1	0	0	TNFSF14	tumor necrosis factor (ligand) superfamily, member 14
hsa-miR-512-3p	0	0	1	1	0	0	CAPNS1	calpain, small subunit 1
hsa-miR-512-3p	0	0	0	1	1	1	STATH	statherin
hsa-miR-512-3p	0	0	1	1	0	0	GCAT	glycine C-acetyltransferase
hsa-miR-512-3p	0	0	1	1	1	1	APOBEC3A	apolipoprotein B mRNA editing enzyme, catalytic polypeptide-like 3A
hsa-miR-512-3p	0	0	1	1	0	0	CD68	CD68 molecule
hsa-miR-512-3p	0	0	1	1	0	0	KLK12	kallikrein-related peptidase 12
hsa-miR-512-3p	1	0	1	1	1	1	DMXL2	Dmx-like 2
hsa-miR-512-3p	0	0	1	1	1	1	CNGB1	cyclic nucleotide gated channel beta 1
hsa-miR-512-3p	0	0	1	1	1	1	CLSPN	claspin
hsa-miR-512-3p	0	0	1	1	0	0	TMCO6	transmembrane and coiled-coil domains 6
hsa-miR-512-3p	0	0	0	1	1	1	ZKSCAN3	zinc finger with KRAB and SCAN domains 3
hsa-miR-512-3p	0	0	0	1	0	0	PSMG3	proteasome (prosome, macropain) assembly chaperone 3
hsa-miR-512-3p	0	0	0	1	1	1	ZNF426	zinc finger protein 426
hsa-miR-512-3p	0	0	1	1	1	1	C12orf65	chromosome 12 open reading frame 65
hsa-miR-512-3p	0	0	1	1	1	1	EMC8	ER membrane protein complex subunit 8
hsa-miR-512-3p	0	0	1	1	1	1	NR0B2	nuclear receptor subfamily 0, group B, member 2
hsa-miR-512-3p	0	0	0	1	0	0	PODNL1	podocan-like 1
hsa-miR-512-3p	0	0	1	1	1	1	HSD17B7	hydroxysteroid (17-beta) dehydrogenase 7
hsa-miR-512-3p	0	0	1	1	0	0	IGHMBP2	immunoglobulin mu binding protein 2
hsa-miR-512-3p	0	0	0	1	0	0	ZBED3	zinc finger, BED-type containing 3
hsa-miR-512-3p	1	0	1	1	0	0	MTUS2	microtubule associated tumor suppressor candidate 2
hsa-miR-512-3p	0	0	1	1	1	1	RTTN	rotatin
hsa-miR-512-3p	0	0	1	1	0	0	SLC2A11	solute carrier family 2 (facilitated glucose transporter), member 11
hsa-miR-512-3p	0	0	1	1	0	0	HSD17B4	hydroxysteroid (17-beta) dehydrogenase 4
hsa-miR-512-3p	0	0	1	1	0	0	FKBP11	FK506 binding protein 11, 19 kDa
hsa-miR-512-3p	0	0	0	1	0	0	ERN2	endoplasmic reticulum to nucleus signaling 2
hsa-miR-512-3p	0	0	0	1	0	0	CARS2	cysteinyl-tRNA synthetase 2, mitochondrial (putative)
hsa-miR-512-3p	0	0	0	1	0	0	MRPL53	mitochondrial ribosomal protein L53
hsa-miR-512-3p	0	0	0	1	1	1	MRPS9	mitochondrial ribosomal protein S9
hsa-miR-512-3p	0	0	1	1	0	0	BLK	B lymphoid tyrosine kinase
hsa-miR-512-3p	1	0	1	1	0	0	HS6ST1	heparan sulfate 6-O-sulfotransferase 1
hsa-miR-512-3p	0	0	1	1	0	0	YIPF3	Yip1 domain family, member 3
hsa-miR-512-3p	0	0	0	1	0	0	C6orf15	chromosome 6 open reading frame 15
hsa-miR-512-3p	0	0	1	1	1	1	MRPS18B	mitochondrial ribosomal protein S18B
hsa-miR-512-3p	0	0	1	1	0	0	BUD13	BUD13 homolog (S. cerevisiae)
hsa-miR-512-3p	0	0	0	1	0	0	FXYD2	FXYD domain containing ion transport regulator 2
hsa-miR-512-3p	0	0	1	1	0	0	PARP6	poly (ADP-ribose) polymerase family, member 6
hsa-miR-512-3p	0	0	0	1	0	0	TUBGCP4	tubulin, gamma complex associated protein 4
hsa-miR-512-3p	0	0	1	1	0	0	LPCAT3	lysophosphatidylcholine acyltransferase 3
hsa-miR-512-3p	0	0	1	1	0	0	LIAS	lipoic acid synthetase
hsa-miR-512-3p	0	0	1	1	1	1	SPECC1	sperm antigen with calponin homology and coiled-coil domains 1
hsa-miR-512-3p	0	0	0	1	1	1	C4orf27	chromosome 4 open reading frame 27
hsa-miR-512-3p	0	0	1	1	0	0	ZNF430	zinc finger protein 430
hsa-miR-512-3p	0	0	1	1	1	1	BFAR	bifunctional apoptosis regulator
hsa-miR-512-3p	1	0	0	1	0	0	LHX5	LIM homeobox 5
hsa-miR-512-3p	0	0	1	1	0	0	ANAPC5	anaphase promoting complex subunit 5
hsa-miR-512-3p	0	0	0	1	0	0	MCM4	minichromosome maintenance complex component 4
hsa-miR-512-3p	0	0	1	1	1	1	DNAJA3	DnaJ (Hsp40) homolog, subfamily A, member 3
hsa-miR-512-3p	0	0	1	1	1	1	MAU2	MAU2 chromatid cohesion factor homolog (C. elegans)
hsa-miR-512-3p	1	0	1	1	1	1	DPP9	dipeptidyl-peptidase 9
hsa-miR-512-3p	0	0	0	1	0	0	CCDC94	coiled-coil domain containing 94
hsa-miR-512-3p	1	0	0	1	0	0	MED15	mediator complex subunit 15
hsa-miR-512-3p	0	0	1	1	1	1	IL27RA	interleukin 27 receptor, alpha
hsa-miR-512-3p	0	0	1	1	1	1	KYNU	kynureninase
hsa-miR-512-3p	0	0	1	1	1	1	SEC22C	SEC22 vesicle trafficking protein homolog C (S. cerevisiae)
hsa-miR-512-3p	0	0	1	1	1	1	HOOK2	hook homolog 2 (Drosophila)
hsa-miR-512-3p	0	0	0	1	1	1	CASP6	caspase 6, apoptosis-related cysteine peptidase
hsa-miR-512-3p	0	0	1	1	1	1	CSAD	cysteine sulfinic acid decarboxylase
hsa-miR-512-3p	0	0	0	1	1	1	VPS33A	vacuolar protein sorting 33 homolog A (S. cerevisiae)
hsa-miR-512-3p	1	0	1	1	1	1	L2HGDH	L-2-hydroxyglutarate dehydrogenase
hsa-miR-512-3p	1	0	0	1	0	0	UNC45A	unc-45 homolog A (C. elegans)
hsa-miR-512-3p	0	0	1	1	0	0	NEK8	NIMA (never in mitosis gene a)- related kinase 8
hsa-miR-512-3p	0	0	1	1	0	0	NT5C3L	5'-nucleotidase, cytosolic III-like
hsa-miR-512-3p	0	0	0	1	1	1	ZIM3	zinc finger, imprinted 3
hsa-miR-512-3p	0	0	1	1	1	1	DOPEY2	dopey family member 2
hsa-miR-512-3p	0	0	1	1	0	0	KLHDC4	kelch domain containing 4
hsa-miR-512-3p	0	0	1	1	1	1	ILDR1	immunoglobulin-like domain containing receptor 1
hsa-miR-512-3p	0	0	0	1	1	1	CRHBP	corticotropin releasing hormone binding protein
hsa-miR-512-3p	0	0	1	1	1	1	CDKN2AIPNL	CDKN2A interacting protein N-terminal like
hsa-miR-512-3p	0	0	1	1	1	1	ADHFE1	alcohol dehydrogenase, iron containing, 1
hsa-miR-512-3p	0	0	1	1	0	0	PRDM14	PR domain containing 14
hsa-miR-512-3p	0	0	1	1	1	1	INCENP	inner centromere protein antigens 135/155kDa
hsa-miR-512-3p	1	0	1	1	1	1	NINL	ninein-like
hsa-miR-512-3p	0	0	1	1	0	0	PIGT	phosphatidylinositol glycan anchor biosynthesis, class T
hsa-miR-512-3p	0	0	1	1	0	0	TM7SF2	transmembrane 7 superfamily member 2
hsa-miR-512-3p	1	0	1	1	1	1	USP15	ubiquitin specific peptidase 15
hsa-miR-512-3p	0	0	1	1	0	0	AGAP11	ankyrin repeat and GTPase domain Arf GTPase activating protein 11
hsa-miR-512-3p	1	0	1	1	1	1	MYCN	v-myc myelocytomatosis viral related oncogene, neuroblastoma derived (avian)
hsa-miR-512-3p	0	0	0	1	0	0	CCNO	cyclin O
hsa-miR-512-3p	0	0	1	1	1	1	PGM3	phosphoglucomutase 3
hsa-miR-512-3p	1	0	1	1	1	1	GDPD1	glycerophosphodiester phosphodiesterase domain containing 1
hsa-miR-512-3p	0	0	1	1	0	0	DHX32	DEAH (Asp-Glu-Ala-His) box polypeptide 32
hsa-miR-512-3p	1	0	1	1	1	1	L3MBTL4	l(3)mbt-like 4 (Drosophila)
hsa-miR-512-3p	0	0	1	1	0	0	OXA1L	oxidase (cytochrome c) assembly 1-like
hsa-miR-512-3p	0	0	0	1	1	1	NAT2	N-acetyltransferase 2 (arylamine N-acetyltransferase)
hsa-miR-512-3p	0	0	1	1	0	0	CCT8	chaperonin containing TCP1, subunit 8 (theta)
hsa-miR-512-3p	0	0	1	1	0	0	C14orf2	chromosome 14 open reading frame 2
hsa-miR-512-3p	0	0	1	1	1	1	FBXO32	F-box protein 32
hsa-miR-512-3p	0	0	0	1	1	1	FANCD2	Fanconi anemia, complementation group D2
hsa-miR-512-3p	1	0	1	1	0	0	WNT4	wingless-type MMTV integration site family, member 4
hsa-miR-512-3p	0	0	1	1	0	0	CCDC142	coiled-coil domain containing 142
hsa-miR-512-3p	0	0	1	1	0	0	TNFRSF13C	tumor necrosis factor receptor superfamily, member 13C
hsa-miR-512-3p	0	0	0	1	1	1	IQCC	IQ motif containing C
hsa-miR-512-3p	0	0	1	1	1	1	S100B	S100 calcium binding protein B
hsa-miR-512-3p	0	0	0	1	1	1	NLRP8	NLR family, pyrin domain containing 8
hsa-miR-512-3p	1	0	0	1	0	0	NBEAL2	neurobeachin-like 2
hsa-miR-512-3p	0	0	1	1	1	1	FCRL2	Fc receptor-like 2
hsa-miR-512-3p	0	0	0	1	0	0	ZSCAN21	zinc finger and SCAN domain containing 21
hsa-miR-512-3p	0	0	1	1	1	1	FBXO17	F-box protein 17
hsa-miR-512-3p	0	0	1	1	0	0	CCL5	chemokine (C-C motif) ligand 5
hsa-miR-512-3p	0	0	0	1	1	1	JOSD2	Josephin domain containing 2
hsa-miR-512-3p	0	0	1	1	0	0	SSRP1	structure specific recognition protein 1
hsa-miR-512-3p	0	0	1	1	0	0	TTC9C	tetratricopeptide repeat domain 9C
hsa-miR-512-3p	0	0	1	1	0	0	SPOCD1	SPOC domain containing 1
hsa-miR-512-3p	0	0	0	1	1	1	C2orf61	chromosome 2 open reading frame 61
hsa-miR-512-3p	0	0	0	1	0	0	HAAO	3-hydroxyanthranilate 3,4-dioxygenase
hsa-miR-512-3p	0	0	0	1	0	0	ALPPL2	alkaline phosphatase, placental-like 2
hsa-miR-512-3p	0	0	0	1	0	0	GLB1L	galactosidase, beta 1-like
hsa-miR-512-3p	1	0	1	1	1	1	PPM1K	protein phosphatase, Mg2+/Mn2+ dependent, 1K
hsa-miR-512-3p	0	0	1	1	1	1	PRRT3	proline-rich transmembrane protein 3
hsa-miR-512-3p	1	0	1	1	1	1	LRRC2	leucine rich repeat containing 2
hsa-miR-512-3p	0	0	1	1	0	0	TMEM41A	transmembrane protein 41A
hsa-miR-512-3p	0	0	0	1	0	0	LRPAP1	low density lipoprotein receptor-related protein associated protein 1
hsa-miR-512-3p	0	0	1	1	1	1	SCIN	scinderin
hsa-miR-512-3p	0	0	0	1	0	0	SLC29A4	solute carrier family 29 (nucleoside transporters), member 4
hsa-miR-512-3p	0	0	0	1	0	0	PHKG1	phosphorylase kinase, gamma 1 (muscle)
hsa-miR-512-3p	0	0	0	1	0	0	SPATA19	spermatogenesis associated 19
hsa-miR-512-3p	0	0	0	1	0	0	WDR16	WD repeat domain 16
hsa-miR-512-3p	0	0	1	1	1	1	MRPL16	mitochondrial ribosomal protein L16
hsa-miR-512-3p	1	0	1	1	1	1	METTL21B	methyltransferase like 21B
hsa-miR-512-3p	0	0	0	1	0	0	C16orf92	chromosome 16 open reading frame 92
hsa-miR-512-3p	0	0	1	1	0	0	DNAH17	dynein, axonemal, heavy chain 17
hsa-miR-512-3p	0	0	0	1	0	0	MVD	mevalonate (diphospho) decarboxylase
hsa-miR-512-3p	0	0	1	1	0	0	CDK2AP2	cyclin-dependent kinase 2 associated protein 2
hsa-miR-512-3p	0	0	1	1	0	0	TMC8	transmembrane channel-like 8
hsa-miR-512-3p	0	0	0	1	0	0	NXNL1	nucleoredoxin-like 1
hsa-miR-512-3p	1	0	1	1	1	1	BPNT1	3'(2'), 5'-bisphosphate nucleotidase 1
hsa-miR-512-3p	0	0	1	1	1	1	MMADHC	methylmalonic aciduria (cobalamin deficiency) cblD type, with homocystinuria
hsa-miR-512-3p	1	0	1	1	1	1	SLC50A1	solute carrier family 50 (sugar transporter), member 1
hsa-miR-512-3p	0	0	0	1	1	1	CES3	carboxylesterase 3
hsa-miR-512-3p	0	0	1	1	0	0	ZNF30	zinc finger protein 30
hsa-miR-512-3p	0	0	1	1	1	1	C15orf40	chromosome 15 open reading frame 40
hsa-miR-512-3p	1	0	1	1	1	1	ADORA2B	adenosine A2b receptor
hsa-miR-512-3p	0	0	0	1	0	0	ANKS3	ankyrin repeat and sterile alpha motif domain containing 3
hsa-miR-512-3p	0	0	0	1	0	0	ASL	argininosuccinate lyase
hsa-miR-512-3p	0	0	0	1	0	0	OR2C1	olfactory receptor, family 2, subfamily C, member 1
hsa-miR-512-3p	0	0	1	1	1	1	ITIH5	inter-alpha-trypsin inhibitor heavy chain family, member 5
hsa-miR-512-3p	0	0	1	1	1	1	FAM178B	family with sequence similarity 178, member B
hsa-miR-512-3p	1	0	0	1	1	1	CNNM3	cyclin M3
hsa-miR-512-3p	0	0	0	1	0	0	DEGS2	delta(4)-desaturase, sphingolipid 2
hsa-miR-512-3p	1	0	1	1	0	0	MYO1F	myosin IF
hsa-miR-512-3p	0	0	1	1	1	1	SNX7	sorting nexin 7
hsa-miR-512-3p	0	0	1	1	0	0	C3orf78	chromosome 3 open reading frame 78
hsa-miR-512-3p	0	0	0	1	1	1	LDHAL6B	lactate dehydrogenase A-like 6B
hsa-miR-512-3p	0	0	0	1	1	1	COG7	component of oligomeric golgi complex 7
hsa-miR-512-3p	0	0	0	1	0	0	OR51I1	olfactory receptor, family 51, subfamily I, member 1
hsa-miR-512-3p	0	0	0	1	0	0	OR10A2	olfactory receptor, family 10, subfamily A, member 2
hsa-miR-512-3p	0	0	0	1	0	0	TMEM223	transmembrane protein 223
hsa-miR-512-3p	0	0	1	1	0	0	CNTNAP4	contactin associated protein-like 4
hsa-miR-512-3p	0	0	0	1	0	0	ZNF556	zinc finger protein 556
hsa-miR-512-3p	1	0	1	1	0	0	NKIRAS2	NFKB inhibitor interacting Ras-like 2
hsa-miR-512-3p	0	0	1	1	0	0	FAM195A	family with sequence similarity 195, member A
hsa-miR-512-3p	0	0	1	1	1	1	APOF	apolipoprotein F
hsa-miR-512-3p	0	0	1	1	0	0	CYP2W1	cytochrome P450, family 2, subfamily W, polypeptide 1
hsa-miR-512-3p	0	0	1	1	0	0	TPT1	tumor protein, translationally-controlled 1
hsa-miR-512-3p	0	0	0	1	0	0	ZNF519	zinc finger protein 519
hsa-miR-512-3p	1	0	1	1	1	1	MKNK2	MAP kinase interacting serine/threonine kinase 2
hsa-miR-512-3p	0	0	0	1	1	1	KRT2	keratin 2
hsa-miR-512-3p	0	0	1	1	0	0	CFLAR	CASP8 and FADD-like apoptosis regulator
hsa-miR-512-3p	0	0	1	1	1	1	MPPE1	metallophosphoesterase 1
hsa-miR-512-3p	0	0	1	1	1	1	TTLL3	tubulin tyrosine ligase-like family, member 3
hsa-miR-512-3p	1	0	1	1	1	1	PDE8A	phosphodiesterase 8A
hsa-miR-512-3p	0	0	1	1	0	0	GP6	glycoprotein VI (platelet)
hsa-miR-512-3p	1	0	1	1	1	1	KIAA1033	KIAA1033
hsa-miR-512-3p	1	0	0	1	0	0	RNF26	ring finger protein 26
hsa-miR-512-3p	0	0	1	1	1	1	CEP19	centrosomal protein 19kDa
hsa-miR-512-3p	0	0	1	1	1	1	C12orf66	chromosome 12 open reading frame 66
hsa-miR-512-3p	0	0	0	1	1	1	FBLIM1	filamin binding LIM protein 1
hsa-miR-512-3p	1	0	1	1	1	1	SWSAP1	SWIM-type zinc finger 7 associated protein 1
hsa-miR-512-3p	0	0	0	1	1	1	MRPL45	mitochondrial ribosomal protein L45
hsa-miR-512-3p	0	0	1	1	0	0	KRI1	KRI1 homolog (S. cerevisiae)
hsa-miR-512-3p	0	0	0	1	1	1	CDK4	cyclin-dependent kinase 4
hsa-miR-512-3p	1	0	1	1	0	0	DALRD3	DALR anticodon binding domain containing 3
hsa-miR-512-3p	1	0	1	1	0	0	GPR89A	G protein-coupled receptor 89A
hsa-miR-512-3p	0	0	1	1	1	1	IFT43	intraflagellar transport 43 homolog (Chlamydomonas)
hsa-miR-512-3p	0	0	1	1	1	1	HTR1D	5-hydroxytryptamine (serotonin) receptor 1D, G protein-coupled
hsa-miR-512-3p	0	0	1	1	1	1	GPR89B	G protein-coupled receptor 89B
hsa-miR-512-3p	0	0	0	1	0	0	ZNF575	zinc finger protein 575
hsa-miR-512-3p	0	0	0	1	1	1	ZNF77	zinc finger protein 77
hsa-miR-512-3p	0	0	1	1	0	0	KCNH6	potassium voltage-gated channel, subfamily H (eag-related), member 6
hsa-miR-512-3p	1	0	1	1	1	1	RHOT2	ras homolog family member T2
hsa-miR-512-3p	0	0	0	1	0	0	NCAPD2	non-SMC condensin I complex, subunit D2
hsa-miR-512-3p	0	0	1	1	0	0	ARL6IP4	ADP-ribosylation-like factor 6 interacting protein 4
hsa-miR-512-3p	0	0	1	1	1	1	ABCD3	ATP-binding cassette, sub-family D (ALD), member 3
hsa-miR-512-3p	0	0	1	1	0	0	C7orf55	chromosome 7 open reading frame 55
hsa-miR-512-3p	1	0	1	1	1	1	PDCD6	programmed cell death 6
hsa-miR-512-3p	1	0	1	1	1	1	AHRR	aryl-hydrocarbon receptor repressor
hsa-miR-512-3p	0	0	0	1	0	0	MAMDC4	MAM domain containing 4
hsa-miR-512-3p	0	0	0	1	1	1	CPNE1	copine I
hsa-miR-512-3p	0	0	0	1	0	0	ZNF101	zinc finger protein 101
hsa-miR-512-3p	0	0	1	1	1	1	HTR3C	5-hydroxytryptamine (serotonin) receptor 3C, ionotropic
hsa-miR-512-3p	0	0	0	1	1	1	DIS3L	DIS3 mitotic control homolog (S. cerevisiae)-like
hsa-miR-512-3p	0	0	1	1	1	1	USP54	ubiquitin specific peptidase 54
hsa-miR-512-3p	0	0	0	1	0	0	SHROOM1	shroom family member 1
hsa-miR-512-3p	1	0	1	1	0	0	PHF23	PHD finger protein 23
hsa-miR-512-3p	1	0	1	1	1	1	MAP4	microtubule-associated protein 4
hsa-miR-512-3p	0	0	0	1	1	1	NUDC	nuclear distribution C homolog (A. nidulans)
hsa-miR-512-3p	0	0	0	1	1	1	ZNF785	zinc finger protein 785
hsa-miR-512-3p	0	0	0	1	0	0	ZNF688	zinc finger protein 688
hsa-miR-512-3p	0	0	1	1	0	0	SPACA4	sperm acrosome associated 4
hsa-miR-512-3p	0	0	0	1	0	0	TRIM72	tripartite motif containing 72
hsa-miR-512-3p	1	0	1	1	1	1	IFT20	intraflagellar transport 20 homolog (Chlamydomonas)
hsa-miR-512-3p	0	0	1	1	0	0	ACADVL	acyl-CoA dehydrogenase, very long chain
hsa-miR-512-3p	0	0	1	1	1	1	ATXN2L	ataxin 2-like
hsa-miR-512-3p	0	0	0	1	1	1	CABP4	calcium binding protein 4
hsa-miR-512-3p	0	0	1	1	0	0	CEP152	centrosomal protein 152kDa
hsa-miR-512-3p	0	0	1	1	0	0	MRPS11	mitochondrial ribosomal protein S11
hsa-miR-512-3p	0	0	0	1	0	0	NEU4	sialidase 4
hsa-miR-512-3p	0	0	0	1	1	1	CDHR5	cadherin-related family member 5
hsa-miR-512-3p	0	0	1	1	1	1	HARBI1	harbinger transposase derived 1
hsa-miR-512-3p	0	0	0	1	0	0	IMPDH2	IMP (inosine 5'-monophosphate) dehydrogenase 2
hsa-miR-512-3p	0	0	1	1	0	0	GPR97	G protein-coupled receptor 97
hsa-miR-512-3p	0	0	0	1	0	0	HSF1	heat shock transcription factor 1
hsa-miR-512-3p	0	0	1	1	1	1	IP6K2	inositol hexakisphosphate kinase 2
hsa-miR-512-3p	0	0	0	1	0	0	TTTY8B	testis-specific transcript, Y-linked 8B (non-protein coding)
hsa-miR-512-3p	0	0	0	1	1	1	BCAN	brevican
hsa-miR-512-3p	0	0	1	1	0	0	CCDC137	coiled-coil domain containing 137
hsa-miR-512-3p	0	0	1	1	0	0	MFSD10	major facilitator superfamily domain containing 10
hsa-miR-512-3p	0	0	1	1	0	0	AVL9	AVL9 homolog (S. cerevisiase)
hsa-miR-512-3p	0	0	0	1	1	1	C14orf80	chromosome 14 open reading frame 80
hsa-miR-512-3p	0	0	1	1	1	1	SETD2	SET domain containing 2
hsa-miR-512-3p	1	0	1	1	1	1	KPNA2	karyopherin alpha 2 (RAG cohort 1, importin alpha 1)
hsa-miR-512-3p	1	0	1	1	1	1	NOTUM	notum pectinacetylesterase homolog (Drosophila)
hsa-miR-512-3p	0	0	1	1	0	0	KRBA2	KRAB-A domain containing 2
hsa-miR-512-3p	0	0	1	1	0	0	PKP3	plakophilin 3
hsa-miR-512-3p	0	0	0	1	0	0	OR10J3	olfactory receptor, family 10, subfamily J, member 3
hsa-miR-512-3p	0	0	0	1	0	0	ZNF578	zinc finger protein 578
hsa-miR-512-3p	0	0	0	1	1	1	ZNF528	zinc finger protein 528
hsa-miR-512-3p	0	0	1	1	0	0	WDR53	WD repeat domain 53
hsa-miR-512-3p	0	0	0	1	1	1	ZNF530	zinc finger protein 530
hsa-miR-512-3p	0	0	0	1	0	0	TMEM186	transmembrane protein 186
hsa-miR-512-3p	0	0	0	1	0	0	ACAA1	acetyl-CoA acyltransferase 1
hsa-miR-512-3p	0	0	1	1	0	0	GABRQ	gamma-aminobutyric acid (GABA) A receptor, theta
hsa-miR-512-3p	0	0	0	1	1	1	NME9	NME/NM23 family member 9
hsa-miR-512-3p	0	0	0	1	0	0	NSAP11	nervous system abundant protein 11
hsa-miR-512-3p	0	0	0	1	0	0	TAL2	T-cell acute lymphocytic leukemia 2
hsa-miR-512-3p	0	0	0	1	0	0	ZNF749	zinc finger protein 749
hsa-miR-512-3p	1	0	1	1	0	0	CELF5	CUGBP, Elav-like family member 5
hsa-miR-512-3p	1	0	1	1	0	0	RPL21P44	ribosomal protein L21 pseudogene 44
hsa-miR-512-3p	0	0	0	1	0	0	NBPF6	neuroblastoma breakpoint family, member 6
hsa-miR-512-3p	0	0	0	1	1	1	SLC25A23	solute carrier family 25 (mitochondrial carrier; phosphate carrier), member 23
hsa-miR-512-3p	0	0	1	1	1	1	KLC1	kinesin light chain 1
hsa-miR-512-3p	0	0	1	1	1	1	ZXDC	ZXD family zinc finger C
hsa-miR-512-3p	1	0	1	1	0	0	PPARD	peroxisome proliferator-activated receptor delta
hsa-miR-512-3p	0	0	1	1	1	1	SOD2	superoxide dismutase 2, mitochondrial
hsa-miR-512-3p	1	0	1	1	0	0	ZFYVE27	zinc finger, FYVE domain containing 27
hsa-miR-512-3p	0	0	1	1	1	1	AADAT	aminoadipate aminotransferase
hsa-miR-512-3p	0	0	0	1	0	0	ZNF394	zinc finger protein 394
hsa-miR-512-3p	0	0	1	1	0	0	YIF1B	Yip1 interacting factor homolog B (S. cerevisiae)
hsa-miR-512-3p	1	0	1	1	1	1	SPTLC1	serine palmitoyltransferase, long chain base subunit 1
hsa-miR-512-3p	0	0	0	1	1	1	OTUD6A	OTU domain containing 6A
hsa-miR-512-3p	0	0	1	1	1	1	MAFF	v-maf musculoaponeurotic fibrosarcoma oncogene homolog F (avian)
hsa-miR-512-3p	0	0	0	1	0	0	GJB5	gap junction protein, beta 5, 31.1kDa
hsa-miR-512-3p	0	0	0	1	0	0	TEKT3	tektin 3
hsa-miR-512-3p	0	0	1	1	1	1	MMP28	matrix metallopeptidase 28
hsa-miR-512-3p	0	0	0	1	0	0	NOSIP	nitric oxide synthase interacting protein
hsa-miR-512-3p	0	0	0	1	0	0	TFPT	TCF3 (E2A) fusion partner (in childhood Leukemia)
hsa-miR-512-3p	0	0	0	1	0	0	OR6N2	olfactory receptor, family 6, subfamily N, member 2
hsa-miR-512-3p	0	0	1	1	1	1	SIGLEC10	sialic acid binding Ig-like lectin 10
hsa-miR-512-3p	0	0	1	1	0	0	RNF17	ring finger protein 17
hsa-miR-512-3p	0	0	0	1	0	0	KIR3DL3	killer cell immunoglobulin-like receptor, three domains, long cytoplasmic tail, 3
hsa-miR-512-3p	0	0	1	1	0	0	KIR2DL3	killer cell immunoglobulin-like receptor, two domains, long cytoplasmic tail, 3
hsa-miR-512-3p	0	0	1	1	0	0	KIR2DS4	killer cell immunoglobulin-like receptor, two domains, short cytoplasmic tail, 4
hsa-miR-512-3p	0	0	0	1	1	1	KIR2DL1	killer cell immunoglobulin-like receptor, two domains, long cytoplasmic tail, 1
hsa-miR-512-3p	0	0	0	1	0	0	TMEM8C	transmembrane protein 8C
hsa-miR-512-3p	0	0	0	1	0	0	OBP2A	odorant binding protein 2A
hsa-miR-512-3p	0	0	1	1	0	0	PGLYRP2	peptidoglycan recognition protein 2
hsa-miR-512-3p	0	0	1	1	1	1	ICAM4	intercellular adhesion molecule 4 (Landsteiner-Wiener blood group)
hsa-miR-512-3p	1	0	1	1	1	1	MAX	MYC associated factor X
hsa-miR-512-3p	0	0	1	1	1	1	TMEM202	transmembrane protein 202
hsa-miR-512-3p	0	0	1	1	1	1	AGMO	alkylglycerol monooxygenase
hsa-miR-512-3p	0	0	0	1	0	0	OTOG	otogelin
hsa-miR-512-3p	0	0	0	1	0	0	PPAN	peter pan homolog (Drosophila)
hsa-miR-512-3p	0	0	0	1	0	0	P2RY11	purinergic receptor P2Y, G-protein coupled, 11
hsa-miR-512-3p	0	0	0	1	0	0	PPAN-P2RY11	PPAN-P2RY11 readthrough
hsa-miR-512-3p	0	0	0	1	1	1	TM7SF3	transmembrane 7 superfamily member 3
hsa-miR-512-3p	0	0	0	1	1	1	KRTAP4-5	keratin associated protein 4-5
hsa-miR-512-3p	0	0	0	1	1	1	ZNF791	zinc finger protein 791
hsa-miR-512-3p	0	0	1	1	0	0	ERAP2	endoplasmic reticulum aminopeptidase 2
hsa-miR-512-3p	0	0	0	1	0	0	ZNF669	zinc finger protein 669
hsa-miR-512-3p	0	0	0	1	1	1	HHIPL2	HHIP-like 2
hsa-miR-512-3p	0	0	1	1	0	0	THNSL2	threonine synthase-like 2 (S. cerevisiae)
hsa-miR-512-3p	0	0	1	1	1	1	C7orf29	chromosome 7 open reading frame 29
hsa-miR-512-3p	1	0	1	1	1	1	ABCB9	ATP-binding cassette, sub-family B (MDR/TAP), member 9
hsa-miR-512-3p	1	0	0	1	0	0	C7orf26	chromosome 7 open reading frame 26
hsa-miR-512-3p	0	0	0	1	0	0	LARP7	La ribonucleoprotein domain family, member 7
hsa-miR-512-3p	0	0	0	1	0	0	GTDC2	glycosyltransferase-like domain containing 2
hsa-miR-512-3p	0	0	1	1	0	0	BSPH1	binder of sperm protein homolog 1
hsa-miR-512-3p	0	0	1	1	1	1	CENPL	centromere protein L
hsa-miR-512-3p	1	0	1	1	1	1	RAB5C	RAB5C, member RAS oncogene family
hsa-miR-512-3p	0	0	0	1	0	0	DHRS7B	dehydrogenase/reductase (SDR family) member 7B
hsa-miR-512-3p	1	0	0	1	1	1	PCBP3	poly(rC) binding protein 3
hsa-miR-512-3p	0	0	1	1	0	0	SLC28A2	solute carrier family 28 (sodium-coupled nucleoside transporter), member 2
hsa-miR-512-3p	0	0	0	1	1	1	ABCG1	ATP-binding cassette, sub-family G (WHITE), member 1
hsa-miR-512-3p	0	0	1	1	1	1	SMAD9	SMAD family member 9
hsa-miR-512-3p	0	0	1	1	1	1	NIPSNAP3A	nipsnap homolog 3A (C. elegans)
hsa-miR-512-3p	1	0	1	1	0	0	STAG3L4	stromal antigen 3-like 4
hsa-miR-512-3p	0	0	1	1	1	1	TAP1	transporter 1, ATP-binding cassette, sub-family B (MDR/TAP)
hsa-miR-512-3p	0	0	0	1	0	0	OSCP1	organic solute carrier partner 1
hsa-miR-512-3p	0	0	1	1	1	1	PLA2G4C	phospholipase A2, group IVC (cytosolic, calcium-independent)
hsa-miR-512-3p	0	0	0	1	1	1	KRT74	keratin 74
hsa-miR-512-3p	0	0	1	1	0	0	DNHD1	dynein heavy chain domain 1
hsa-miR-512-3p	0	0	0	1	1	1	TRIM16	tripartite motif containing 16
hsa-miR-512-3p	1	0	1	1	1	1	CDRT1	CMT1A duplicated region transcript 1
hsa-miR-512-3p	0	0	1	1	1	1	FMO1	flavin containing monooxygenase 1
hsa-miR-512-3p	0	0	0	1	0	0	HSPB9	heat shock protein, alpha-crystallin-related, B9
hsa-miR-512-3p	0	0	1	1	1	1	KANK2	KN motif and ankyrin repeat domains 2
hsa-miR-512-3p	0	0	1	1	0	0	MORN3	MORN repeat containing 3
hsa-miR-512-3p	0	0	0	1	0	0	SLC35E2	solute carrier family 35, member E2
hsa-miR-512-3p	0	0	0	1	0	0	SPNS3	spinster homolog 3 (Drosophila)
hsa-miR-512-3p	0	0	1	1	1	1	RSL1D1	ribosomal L1 domain containing 1
hsa-miR-512-3p	0	0	0	1	0	0	ZNF625	zinc finger protein 625
hsa-miR-512-3p	0	0	1	1	0	0	CEP250	centrosomal protein 250kDa
hsa-miR-512-3p	0	0	0	1	0	0	GPR89C	G protein-coupled receptor 89C
hsa-miR-512-3p	0	0	1	1	0	0	DLL3	delta-like 3 (Drosophila)
hsa-miR-512-3p	0	0	1	1	0	0	HIST1H3D	histone cluster 1, H3d
hsa-miR-512-3p	1	0	1	1	0	0	GPI	glucose-6-phosphate isomerase
hsa-miR-512-3p	0	0	1	1	0	0	CCDC88B	coiled-coil domain containing 88B
hsa-miR-512-3p	0	0	1	1	1	1	PPP1R26	protein phosphatase 1, regulatory subunit 26
hsa-miR-512-3p	1	0	1	1	1	1	DDX26B	DEAD/H (Asp-Glu-Ala-Asp/His) box polypeptide 26B
hsa-miR-512-3p	0	0	1	1	0	0	DZANK1	double zinc ribbon and ankyrin repeat domains 1
hsa-miR-512-3p	0	0	1	1	0	0	CCRL2	chemokine (C-C motif) receptor-like 2
hsa-miR-512-3p	0	0	1	1	1	1	PPA2	pyrophosphatase (inorganic) 2
hsa-miR-512-3p	0	0	0	1	0	0	DNAJC22	DnaJ (Hsp40) homolog, subfamily C, member 22
hsa-miR-512-3p	0	0	0	1	1	1	DCLRE1C	DNA cross-link repair 1C
hsa-miR-512-3p	0	0	1	1	0	0	RAD51D	RAD51 homolog D (S. cerevisiae)
hsa-miR-512-3p	0	0	0	1	0	0	DDX47	DEAD (Asp-Glu-Ala-Asp) box polypeptide 47
hsa-miR-512-3p	0	0	1	1	0	0	SETMAR	SET domain and mariner transposase fusion gene
hsa-miR-512-3p	0	0	0	1	0	0	LRRC8B	leucine rich repeat containing 8 family, member B
hsa-miR-512-3p	1	0	1	1	1	1	MYO5A	myosin VA (heavy chain 12, myoxin)
hsa-miR-512-3p	0	0	1	1	1	1	ZNF100	zinc finger protein 100
hsa-miR-512-3p	1	0	1	1	1	1	SLC4A8	solute carrier family 4, sodium bicarbonate cotransporter, member 8
hsa-miR-512-3p	1	0	1	1	1	1	ENTPD4	ectonucleoside triphosphate diphosphohydrolase 4
hsa-miR-512-3p	0	0	0	1	0	0	GPR1	G protein-coupled receptor 1
hsa-miR-512-3p	1	0	0	1	1	1	ZNF566	zinc finger protein 566
hsa-miR-512-3p	1	0	1	1	1	1	TRPM6	transient receptor potential cation channel, subfamily M, member 6
hsa-miR-512-3p	0	0	1	1	0	0	KIR2DL4	killer cell immunoglobulin-like receptor, two domains, long cytoplasmic tail, 4
hsa-miR-512-3p	0	0	1	1	1	1	NLRC3	NLR family, CARD domain containing 3
hsa-miR-512-3p	1	0	1	1	1	1	C6orf89	chromosome 6 open reading frame 89
hsa-miR-512-3p	0	0	1	1	0	0	DNMT1	DNA (cytosine-5-)-methyltransferase 1
hsa-miR-512-3p	1	0	1	1	1	1	KLHL5	kelch-like 5 (Drosophila)
hsa-miR-512-3p	0	0	0	1	0	0	CYP2D6	cytochrome P450, family 2, subfamily D, polypeptide 6
hsa-miR-512-3p	0	0	0	1	0	0	ARTN	artemin
hsa-miR-512-3p	0	0	1	1	1	1	BBS1	Bardet-Biedl syndrome 1
hsa-miR-512-3p	0	0	1	1	1	1	FBXL22	F-box and leucine-rich repeat protein 22
hsa-miR-512-3p	0	0	1	1	1	1	TTN	titin
hsa-miR-512-3p	0	0	0	1	0	0	ABP1	amiloride binding protein 1 (amine oxidase (copper-containing))
hsa-miR-512-3p	0	0	1	1	1	1	GSTM3	glutathione S-transferase mu 3 (brain)
hsa-miR-512-3p	0	0	1	1	0	0	RNF208	ring finger protein 208
hsa-miR-512-3p	0	0	0	1	0	0	C19orf45	chromosome 19 open reading frame 45
hsa-miR-512-3p	0	0	1	1	0	0	WISP3	WNT1 inducible signaling pathway protein 3
hsa-miR-512-3p	0	0	0	1	1	1	C16orf59	chromosome 16 open reading frame 59
hsa-miR-512-3p	0	0	1	1	1	1	NOS1AP	nitric oxide synthase 1 (neuronal) adaptor protein
hsa-miR-512-3p	0	0	0	1	1	1	BNIPL	BCL2/adenovirus E1B 19kD interacting protein like
hsa-miR-512-3p	0	0	0	1	1	1	TRIM58	tripartite motif containing 58
hsa-miR-512-3p	1	0	1	1	1	1	DISC1	disrupted in schizophrenia 1
hsa-miR-512-3p	0	0	0	1	0	0	TRIM11	tripartite motif containing 11
hsa-miR-512-3p	1	0	1	1	1	1	ITPKB	inositol-trisphosphate 3-kinase B
hsa-miR-512-3p	0	0	0	1	0	0	MIXL1	Mix paired-like homeobox
hsa-miR-512-3p	1	0	1	1	1	1	MPC1	mitochondrial pyruvate carrier 1
hsa-miR-512-3p	0	0	0	1	1	1	TAF1A	TATA box binding protein (TBP)-associated factor, RNA polymerase I, A, 48kDa
hsa-miR-512-3p	0	0	1	1	1	1	INTS7	integrator complex subunit 7
hsa-miR-512-3p	0	0	1	1	0	0	TRAF3IP3	TRAF3 interacting protein 3
hsa-miR-512-3p	0	0	0	1	0	0	G0S2	G0/G1switch 2
hsa-miR-512-3p	0	0	0	1	1	1	RMND1	required for meiotic nuclear division 1 homolog (S. cerevisiae)
hsa-miR-512-3p	0	0	0	1	1	1	DDX59	DEAD (Asp-Glu-Ala-Asp) box polypeptide 59
hsa-miR-512-3p	0	0	0	1	0	0	SF3B5	splicing factor 3b, subunit 5, 10kDa
hsa-miR-512-3p	0	0	1	1	1	1	FMO3	flavin containing monooxygenase 3
hsa-miR-512-3p	0	0	1	1	1	1	C1orf129	chromosome 1 open reading frame 129
hsa-miR-512-3p	0	0	1	1	1	1	STX7	syntaxin 7
hsa-miR-512-3p	0	0	1	1	1	1	NES	nestin
hsa-miR-512-3p	0	0	0	1	0	0	YY1AP1	YY1 associated protein 1
hsa-miR-512-3p	0	0	0	1	0	0	PRAP1	proline-rich acidic protein 1
hsa-miR-512-3p	0	0	0	1	0	0	TTC40	tetratricopeptide repeat domain 40
hsa-miR-512-3p	0	0	0	1	0	0	CLRN3	clarin 3
hsa-miR-512-3p	0	0	1	1	1	1	FAM204A	family with sequence similarity 204, member A
hsa-miR-512-3p	0	0	0	1	0	0	NBPF24	neuroblastoma breakpoint family, member 24
hsa-miR-512-3p	0	0	0	1	0	0	FAM165A	family with sequence similarity 165, member B pseudogene
hsa-miR-512-3p	1	0	1	1	1	1	CYB5R4	cytochrome b5 reductase 4
hsa-miR-512-3p	1	0	1	1	1	1	PLXNA3	plexin A3
hsa-miR-512-3p	1	0	1	1	1	1	FAM40A	family with sequence similarity 40, member A
hsa-miR-512-3p	1	0	1	1	1	1	FAM178A	family with sequence similarity 178, member A
hsa-miR-512-3p	0	0	0	1	0	0	BTBD8	BTB (POZ) domain containing 8
hsa-miR-512-3p	0	0	1	1	1	1	IDS	iduronate 2-sulfatase
hsa-miR-512-3p	0	0	1	1	1	1	SLCO4A1	solute carrier organic anion transporter family, member 4A1
hsa-miR-512-3p	0	0	0	1	0	0	LAMA5	laminin, alpha 5
hsa-miR-512-3p	1	0	1	1	1	1	BEND6	BEN domain containing 6
hsa-miR-512-3p	0	0	1	1	0	0	TNNI3K	TNNI3 interacting kinase
hsa-miR-512-3p	0	0	1	1	1	1	FPGT	fucose-1-phosphate guanylyltransferase
hsa-miR-512-3p	0	0	1	1	0	0	LRRIQ3	leucine-rich repeats and IQ motif containing 3
hsa-miR-512-3p	0	0	1	1	1	1	C1orf141	chromosome 1 open reading frame 141
hsa-miR-512-3p	0	0	1	1	0	0	DAB1	disabled homolog 1 (Drosophila)
hsa-miR-512-3p	1	0	1	1	1	1	GRIA3	glutamate receptor, ionotropic, AMPA 3
hsa-miR-512-3p	0	0	1	1	0	0	FAM151A	family with sequence similarity 151, member A
hsa-miR-512-3p	1	0	1	1	1	1	CUL4B	cullin 4B
hsa-miR-512-3p	0	0	1	1	0	0	PLCE1	phospholipase C, epsilon 1
hsa-miR-512-3p	1	0	1	1	1	1	SUPT3H	suppressor of Ty 3 homolog (S. cerevisiae)
hsa-miR-512-3p	0	0	0	1	0	0	AGPAT2	1-acylglycerol-3-phosphate O-acyltransferase 2 (lysophosphatidic acid acyltransferase, beta)
hsa-miR-512-3p	0	0	0	1	0	0	SARDH	sarcosine dehydrogenase
hsa-miR-512-3p	0	0	0	1	0	0	GBGT1	globoside alpha-1,3-N-acetylgalactosaminyltransferase 1
hsa-miR-512-3p	1	0	1	1	1	1	FAM213A	family with sequence similarity 213, member A
hsa-miR-512-3p	0	0	0	1	1	1	POLH	polymerase (DNA directed), eta
hsa-miR-512-3p	0	0	1	1	0	0	PPAPDC3	phosphatidic acid phosphatase type 2 domain containing 3
hsa-miR-512-3p	0	0	1	1	1	1	TIE1	tyrosine kinase with immunoglobulin-like and EGF-like domains 1
hsa-miR-512-3p	0	0	0	1	0	0	NTMT1	N-terminal Xaa-Pro-Lys N-methyltransferase 1
hsa-miR-512-3p	1	0	1	1	1	1	STK4	serine/threonine kinase 4
hsa-miR-512-3p	0	0	1	1	1	1	MRPS16	mitochondrial ribosomal protein S16
hsa-miR-512-3p	0	0	1	1	1	1	DNAJC9	DnaJ (Hsp40) homolog, subfamily C, member 9
hsa-miR-512-3p	0	0	1	1	0	0	GUCA1A	guanylate cyclase activator 1A (retina)
hsa-miR-512-3p	0	0	1	1	1	1	TAF8	TAF8 RNA polymerase II, TATA box binding protein (TBP)-associated factor, 43kDa
hsa-miR-512-3p	0	0	0	1	1	1	FARP2	FERM, RhoGEF and pleckstrin domain protein 2
hsa-miR-512-3p	0	0	1	1	0	0	TTC16	tetratricopeptide repeat domain 16
hsa-miR-512-3p	0	0	0	1	1	1	TRAF3IP1	TNF receptor-associated factor 3 interacting protein 1
hsa-miR-512-3p	0	0	1	1	0	0	CXorf26	chromosome X open reading frame 26
hsa-miR-512-3p	1	0	1	1	1	1	NR6A1	nuclear receptor subfamily 6, group A, member 1
hsa-miR-512-3p	1	0	1	1	1	1	COL16A1	collagen, type XVI, alpha 1
hsa-miR-512-3p	0	0	1	1	1	1	MYPN	myopalladin
hsa-miR-512-3p	0	0	1	1	0	0	NHSL2	NHS-like 2
hsa-miR-512-3p	0	0	1	1	1	1	ATPIF1	ATPase inhibitory factor 1
hsa-miR-512-3p	0	0	1	1	0	0	AGAP6	ArfGAP with GTPase domain, ankyrin repeat and PH domain 6
hsa-miR-512-3p	0	0	1	1	1	1	SLC9A1	solute carrier family 9, subfamily A (NHE1, cation proton antiporter 1), member 1
hsa-miR-512-3p	1	0	1	1	1	1	SLC31A1	solute carrier family 31 (copper transporters), member 1
hsa-miR-512-3p	0	0	1	1	0	0	ALOX5	arachidonate 5-lipoxygenase
hsa-miR-512-3p	0	0	0	1	0	0	OR2K2	olfactory receptor, family 2, subfamily K, member 2
hsa-miR-512-3p	1	0	1	1	1	1	EDA	ectodysplasin A
hsa-miR-512-3p	1	0	1	1	1	1	EIF4G3	eukaryotic translation initiation factor 4 gamma, 3
hsa-miR-512-3p	0	0	1	1	1	1	DDOST	dolichyl-diphosphooligosaccharide--protein glycosyltransferase
hsa-miR-512-3p	0	0	1	1	0	0	CDA	cytidine deaminase
hsa-miR-512-3p	0	0	0	1	0	0	HSD17B3	hydroxysteroid (17-beta) dehydrogenase 3
hsa-miR-512-3p	1	1	1	1	1	1	MAP3K8	mitogen-activated protein kinase kinase kinase 8
hsa-miR-512-3p	0	0	0	1	0	0	KIF19	kinesin family member 19
hsa-miR-512-3p	0	0	0	1	0	0	GPR142	G protein-coupled receptor 142
hsa-miR-512-3p	0	0	1	1	1	1	FAM120AOS	family with sequence similarity 120A opposite strand
hsa-miR-512-3p	1	0	0	1	0	0	ATP13A2	ATPase type 13A2
hsa-miR-512-3p	0	0	0	1	1	1	NXNL2	nucleoredoxin-like 2
hsa-miR-512-3p	1	0	1	1	1	1	ATAT1	alpha tubulin acetyltransferase 1
hsa-miR-512-3p	1	0	1	1	1	1	CLCN6	chloride channel, voltage-sensitive 6
hsa-miR-512-3p	0	0	1	1	0	0	MAD2L2	MAD2 mitotic arrest deficient-like 2 (yeast)
hsa-miR-512-3p	0	0	0	1	0	0	FBXO6	F-box protein 6
hsa-miR-512-3p	0	0	0	1	1	1	ANGPTL7	angiopoietin-like 7
hsa-miR-512-3p	0	0	0	1	1	1	MYH14	myosin, heavy chain 14, non-muscle
hsa-miR-512-3p	0	0	0	1	0	0	CST9L	cystatin 9-like
hsa-miR-512-3p	0	0	0	1	0	0	SPDYC	speedy homolog C (Xenopus laevis)
hsa-miR-512-3p	0	0	1	1	1	1	CD300LG	CD300 molecule-like family member g
hsa-miR-512-3p	0	0	1	1	0	0	SPATC1	spermatogenesis and centriole associated 1
hsa-miR-512-3p	0	0	0	1	1	1	PYCRL	pyrroline-5-carboxylate reductase-like
hsa-miR-512-3p	1	0	1	1	1	1	PPP3R1	protein phosphatase 3, regulatory subunit B, alpha
hsa-miR-512-3p	1	0	1	1	1	1	WDR92	WD repeat domain 92
hsa-miR-512-3p	0	0	0	1	1	1	ARHGEF35	Rho guanine nucleotide exchange factor (GEF) 35
hsa-miR-512-3p	0	0	0	1	1	1	OLAH	oleoyl-ACP hydrolase
hsa-miR-512-3p	0	0	0	1	0	0	AARD	alanine and arginine rich domain containing protein
hsa-miR-512-3p	0	0	0	1	0	0	MMP23B	matrix metallopeptidase 23B
hsa-miR-512-3p	0	0	1	1	0	0	CDKL4	cyclin-dependent kinase-like 4
hsa-miR-512-3p	0	0	0	1	0	0	TMEM88B	transmembrane protein 88B
hsa-miR-512-3p	0	0	0	1	0	0	C4orf47	chromosome 4 open reading frame 47
hsa-miR-512-3p	0	0	1	1	1	1	CRLS1	cardiolipin synthase 1
hsa-miR-512-3p	0	0	1	1	1	1	PHF12	PHD finger protein 12
hsa-miR-512-3p	0	0	1	1	0	0	PRODH2	proline dehydrogenase (oxidase) 2
hsa-miR-512-3p	0	0	1	1	0	0	NPHS1	nephrosis 1, congenital, Finnish type (nephrin)
hsa-miR-512-3p	0	0	0	1	0	0	PUSL1	pseudouridylate synthase-like 1
hsa-miR-512-3p	0	0	1	1	1	1	NFATC3	nuclear factor of activated T-cells, cytoplasmic, calcineurin-dependent 3
hsa-miR-512-3p	0	0	0	1	0	0	CCDC90A	coiled-coil domain containing 90A
hsa-miR-512-3p	0	0	1	1	0	0	ZNF584	zinc finger protein 584
hsa-miR-512-3p	0	0	0	1	0	0	ZNF324B	zinc finger protein 324B
hsa-miR-512-3p	0	0	1	1	1	1	ADTRP	androgen-dependent TFPI-regulating protein
hsa-miR-512-3p	0	0	0	1	0	0	DGAT2L7	diacylglycerol O-acyltransferase 2 like protein 7
hsa-miR-512-3p	1	0	1	1	1	1	NFX1	nuclear transcription factor, X-box binding 1
hsa-miR-512-3p	0	0	1	1	0	0	PSTPIP1	proline-serine-threonine phosphatase interacting protein 1
hsa-miR-512-3p	0	0	0	1	0	0	TECPR1	tectonin beta-propeller repeat containing 1
hsa-miR-512-3p	0	0	0	1	0	0	SKOR1	SKI family transcriptional corepressor 1
hsa-miR-512-3p	0	0	0	1	1	1	ECI2	enoyl-CoA delta isomerase 2
hsa-miR-512-3p	1	0	1	1	1	1	TPM1	tropomyosin 1 (alpha)
hsa-miR-512-3p	0	0	1	1	1	1	BPHL	biphenyl hydrolase-like (serine hydrolase)
hsa-miR-512-3p	0	0	1	1	0	0	SHBG	sex hormone-binding globulin
hsa-miR-512-3p	0	0	1	1	1	1	FAM154A	family with sequence similarity 154, member A
hsa-miR-512-3p	0	0	1	1	1	1	SNAPC3	small nuclear RNA activating complex, polypeptide 3, 50kDa
hsa-miR-512-3p	0	0	0	1	0	0	FAM116B	family with sequence similarity 116, member B
hsa-miR-512-3p	0	0	0	1	1	1	ZBED1	zinc finger, BED-type containing 1
hsa-miR-512-3p	1	0	0	1	0	0	TGM3	transglutaminase 3 (E polypeptide, protein-glutamine-gamma-glutamyltransferase)
hsa-miR-512-3p	0	0	0	1	1	1	GGT6	gamma-glutamyltransferase 6
hsa-miR-512-3p	0	0	0	1	0	0	CRLF2	cytokine receptor-like factor 2
hsa-miR-512-3p	0	0	1	1	1	1	SERPINF2	serpin peptidase inhibitor, clade F (alpha-2 antiplasmin, pigment epithelium derived factor), member 2
hsa-miR-512-3p	1	0	1	1	1	1	GPR125	G protein-coupled receptor 125
hsa-miR-512-3p	0	0	1	1	1	1	TNFRSF19	tumor necrosis factor receptor superfamily, member 19
hsa-miR-512-3p	1	0	1	1	0	0	OLIG2	oligodendrocyte lineage transcription factor 2
hsa-miR-512-3p	0	0	1	1	1	1	CRYL1	crystallin, lambda 1
hsa-miR-512-3p	0	0	1	1	1	1	SRY	sex determining region Y
hsa-miR-512-3p	0	0	1	1	1	1	NEK4	NIMA (never in mitosis gene a)-related kinase 4
hsa-miR-512-3p	0	0	1	1	1	1	GPX1	glutathione peroxidase 1
hsa-miR-512-3p	0	0	0	1	1	1	PKD1L2	polycystic kidney disease 1-like 2
hsa-miR-512-3p	0	0	1	1	0	0	FAM221B	family with sequence similarity 221, member B
hsa-miR-512-3p	0	0	0	1	1	1	VPS53	vacuolar protein sorting 53 homolog (S. cerevisiae)
hsa-miR-512-3p	1	0	1	1	1	1	ASPH	aspartate beta-hydroxylase
hsa-miR-512-3p	1	0	1	1	1	1	NIPAL3	NIPA-like domain containing 3
hsa-miR-512-3p	1	0	1	1	1	1	HOXD13	homeobox D13
hsa-miR-512-3p	1	0	1	1	1	1	PTGFR	prostaglandin F receptor (FP)
hsa-miR-512-3p	0	0	1	1	1	1	CALHM1	calcium homeostasis modulator 1
hsa-miR-512-3p	1	0	1	0	1	1	SPOPL	speckle-type POZ protein-like
hsa-miR-512-3p	1	0	1	0	1	1	PPARA	peroxisome proliferator-activated receptor alpha
hsa-miR-512-3p	1	0	1	1	1	1	MARCH8	membrane-associated ring finger (C3HC4) 8, E3 ubiquitin protein ligase
hsa-miR-512-3p	1	0	1	1	1	1	BICD2	bicaudal D homolog 2 (Drosophila)
hsa-miR-512-3p	1	0	1	0	1	1	CPM	carboxypeptidase M
hsa-miR-512-3p	1	0	0	0	1	1	ZNF473	zinc finger protein 473
hsa-miR-512-3p	1	0	1	1	1	1	BCL2L15	BCL2-like 15
hsa-miR-512-3p	1	0	1	0	1	1	FAM125B	family with sequence similarity 125, member B
hsa-miR-512-3p	0	0	1	1	1	1	AADACL4	arylacetamide deacetylase-like 4
hsa-miR-512-3p	0	0	1	1	1	1	PLIN5	perilipin 5
hsa-miR-512-3p	0	0	0	1	1	1	SPN	sialophorin
hsa-miR-512-3p	0	0	1	1	1	1	C18orf32	chromosome 18 open reading frame 32
hsa-miR-512-3p	1	0	1	0	1	1	TTPAL	tocopherol (alpha) transfer protein-like
hsa-miR-512-3p	1	0	1	0	1	1	GK5	glycerol kinase 5 (putative)
hsa-miR-512-3p	1	0	1	1	1	1	KREMEN1	kringle containing transmembrane protein 1
[truncated: 83 more rows]
