# Supplementary material for: Profiling of Selected MicroRNAs in Proliferative Eutopic Endometrium of Women with Ovarian Endometriosis
Source: Biomed Res Int. 2015 Aug 20;2015:760698. doi: 10.1155/2015/760698 (PMC4558423; doi:10.1155/2015/760698)
Supplement: Supplementary file 1 — Table I: The names of miRNAs significantly differentially expressed between eutopic endometrium of patients with endometriosis vs eutopic endometrium of patients without endometriosis. Table II: The associations between miRNA and mRNA, which presents detailed results of the search of six major databases i.e targetscan, tarbase, miranda, mirbase, mirtarget2 and pictar. [file 760698.f1.zip › 760698.f1/Table II/hsa-miR-512-5p.tsv]

miR	targetscan	tarbase	miranda	mirbase	mirtarget2	pictar	GeneSymbol	GeneName
hsa-miR-512-5p	1	0	1	1	1	1	CHD9	chromodomain helicase DNA binding protein 9
hsa-miR-512-5p	1	0	1	0	1	1	KIAA0355	KIAA0355
hsa-miR-512-5p	1	0	1	1	1	1	FAM65B	family with sequence similarity 65, member B
hsa-miR-512-5p	1	0	1	0	1	1	PTPRT	protein tyrosine phosphatase, receptor type, T
hsa-miR-512-5p	1	0	1	1	1	1	NUPL1	nucleoporin like 1
hsa-miR-512-5p	1	0	1	0	1	1	MTSS1	metastasis suppressor 1
hsa-miR-512-5p	0	0	1	1	1	1	PREPL	prolyl endopeptidase-like
hsa-miR-512-5p	1	0	1	0	1	1	CEP350	centrosomal protein 350kDa
hsa-miR-512-5p	0	0	1	1	1	1	SPAG9	sperm associated antigen 9
hsa-miR-512-5p	1	0	1	1	1	1	HIPK1	homeodomain interacting protein kinase 1
hsa-miR-512-5p	0	0	1	1	1	1	PHLDB1	pleckstrin homology-like domain, family B, member 1
hsa-miR-512-5p	1	0	1	1	1	1	WWC1	WW and C2 domain containing 1
hsa-miR-512-5p	1	0	1	1	1	1	UBR5	ubiquitin protein ligase E3 component n-recognin 5
hsa-miR-512-5p	1	0	1	1	1	1	SEMA4F	sema domain, immunoglobulin domain (Ig), transmembrane domain (TM) and short cytoplasmic domain, (semaphorin) 4F
hsa-miR-512-5p	1	0	1	0	0	0	DTX4	deltex homolog 4 (Drosophila)
hsa-miR-512-5p	1	0	1	1	1	1	FOXJ3	forkhead box J3
hsa-miR-512-5p	1	0	1	1	1	1	PHF8	PHD finger protein 8
hsa-miR-512-5p	1	0	1	0	1	1	SRGAP3	SLIT-ROBO Rho GTPase activating protein 3
hsa-miR-512-5p	1	0	1	1	0	0	PPM1H	protein phosphatase, Mg2+/Mn2+ dependent, 1H
hsa-miR-512-5p	0	0	1	1	0	0	ZC4H2	zinc finger, C4H2 domain containing
hsa-miR-512-5p	0	0	1	0	0	0	MTA3	metastasis associated 1 family, member 3
hsa-miR-512-5p	1	0	1	0	1	1	KCTD16	potassium channel tetramerisation domain containing 16
hsa-miR-512-5p	1	0	1	1	1	1	TAOK1	TAO kinase 1
hsa-miR-512-5p	1	0	1	1	1	1	SEMA6A	sema domain, transmembrane domain (TM), and cytoplasmic domain, (semaphorin) 6A
hsa-miR-512-5p	0	0	1	0	0	0	KIAA1383	KIAA1383
hsa-miR-512-5p	0	0	1	1	0	0	DHX37	DEAH (Asp-Glu-Ala-His) box polypeptide 37
hsa-miR-512-5p	1	0	1	1	1	1	KIAA1522	KIAA1522
hsa-miR-512-5p	1	0	1	1	1	1	FAM214B	family with sequence similarity 214, member B
hsa-miR-512-5p	1	0	1	0	1	1	LMO3	LIM domain only 3 (rhombotin-like 2)
hsa-miR-512-5p	1	0	1	1	1	1	INADL	InaD-like (Drosophila)
hsa-miR-512-5p	0	0	1	1	0	0	TMEM132A	transmembrane protein 132A
hsa-miR-512-5p	1	0	1	1	0	0	NCKAP5L	NCK-associated protein 5-like
hsa-miR-512-5p	1	0	1	0	0	0	TANC2	tetratricopeptide repeat, ankyrin repeat and coiled-coil containing 2
hsa-miR-512-5p	0	0	1	1	1	1	BHLHB9	basic helix-loop-helix domain containing, class B, 9
hsa-miR-512-5p	0	0	1	1	1	1	SPEF2	sperm flagellar 2
hsa-miR-512-5p	1	0	1	0	1	1	RIMS1	regulating synaptic membrane exocytosis 1
hsa-miR-512-5p	1	0	1	1	1	1	LCOR	ligand dependent nuclear receptor corepressor
hsa-miR-512-5p	0	0	1	1	1	1	SLC11A2	solute carrier family 11 (proton-coupled divalent metal ion transporters), member 2
hsa-miR-512-5p	0	0	1	0	0	0	NBLA00301	Nbla00301
hsa-miR-512-5p	0	0	1	1	0	0	CIRH1A	cirrhosis, autosomal recessive 1A (cirhin)
hsa-miR-512-5p	1	0	1	0	1	1	RNF43	ring finger protein 43
hsa-miR-512-5p	1	0	1	0	0	0	RNF169	ring finger protein 169
hsa-miR-512-5p	0	0	1	1	0	0	KREMEN2	kringle containing transmembrane protein 2
hsa-miR-512-5p	1	0	1	1	1	1	C11orf57	chromosome 11 open reading frame 57
hsa-miR-512-5p	0	0	1	1	0	0	SSPO	SCO-spondin homolog (Bos taurus)
hsa-miR-512-5p	1	0	1	1	1	1	HIF3A	hypoxia inducible factor 3, alpha subunit
hsa-miR-512-5p	1	0	1	1	1	1	TRIM36	tripartite motif containing 36
hsa-miR-512-5p	0	0	1	1	1	1	ING4	inhibitor of growth family, member 4
hsa-miR-512-5p	0	0	1	0	0	0	PIDD	p53-induced death domain protein
hsa-miR-512-5p	0	0	1	1	1	1	PTK2	PTK2 protein tyrosine kinase 2
hsa-miR-512-5p	1	0	1	1	1	1	MKNK2	MAP kinase interacting serine/threonine kinase 2
hsa-miR-512-5p	1	0	1	1	1	1	SLC8A1	solute carrier family 8 (sodium/calcium exchanger), member 1
hsa-miR-512-5p	1	0	1	1	1	1	RLF	rearranged L-myc fusion
hsa-miR-512-5p	1	0	1	1	1	1	DTNA	dystrobrevin, alpha
hsa-miR-512-5p	0	0	1	1	1	1	DNM1	dynamin 1
hsa-miR-512-5p	1	0	1	0	1	1	MPPED2	metallophosphoesterase domain containing 2
hsa-miR-512-5p	1	0	1	1	1	1	ZNF207	zinc finger protein 207
hsa-miR-512-5p	0	0	1	1	1	1	TFRC	transferrin receptor (p90, CD71)
hsa-miR-512-5p	1	0	1	0	1	1	CDON	Cdon homolog (mouse)
hsa-miR-512-5p	0	0	1	1	0	0	IFT27	intraflagellar transport 27 homolog (Chlamydomonas)
hsa-miR-512-5p	0	0	1	1	0	0	EIF4E2	eukaryotic translation initiation factor 4E family member 2
hsa-miR-512-5p	1	0	1	1	1	1	GIT1	G protein-coupled receptor kinase interacting ArfGAP 1
hsa-miR-512-5p	0	0	1	1	0	0	CFLAR	CASP8 and FADD-like apoptosis regulator
hsa-miR-512-5p	0	0	1	0	0	0	LOC348162	uncharacterized protein 348162
hsa-miR-512-5p	1	0	1	0	1	1	ADD3	adducin 3 (gamma)
hsa-miR-512-5p	1	0	1	1	1	1	NCOA3	nuclear receptor coactivator 3
hsa-miR-512-5p	0	0	1	1	0	0	TRIM27	tripartite motif containing 27
hsa-miR-512-5p	1	0	1	1	1	1	ZFX	zinc finger protein, X-linked
hsa-miR-512-5p	1	0	1	0	1	1	CAV1	caveolin 1, caveolae protein, 22kDa
hsa-miR-512-5p	1	0	1	1	1	1	DLGAP2	discs, large (Drosophila) homolog-associated protein 2
hsa-miR-512-5p	0	0	1	0	1	1	ZMYM2	zinc finger, MYM-type 2
hsa-miR-512-5p	0	0	1	1	0	0	SPTBN2	spectrin, beta, non-erythrocytic 2
hsa-miR-512-5p	1	0	1	1	1	1	PCDH17	protocadherin 17
hsa-miR-512-5p	1	0	1	1	1	1	MID1	midline 1 (Opitz/BBB syndrome)
hsa-miR-512-5p	1	0	1	1	1	1	MYT1L	myelin transcription factor 1-like
hsa-miR-512-5p	1	0	1	1	1	1	CTNND1	catenin (cadherin-associated protein), delta 1
hsa-miR-512-5p	0	0	1	1	0	0	SLC38A6	solute carrier family 38, member 6
hsa-miR-512-5p	0	0	1	1	0	0	CARD10	caspase recruitment domain family, member 10
hsa-miR-512-5p	1	0	1	0	1	1	CD164	CD164 molecule, sialomucin
hsa-miR-512-5p	0	0	1	1	1	1	MSTO1	misato homolog 1 (Drosophila)
hsa-miR-512-5p	1	0	1	0	0	0	PPME1	protein phosphatase methylesterase 1
hsa-miR-512-5p	0	0	1	1	1	1	SMC2	structural maintenance of chromosomes 2
hsa-miR-512-5p	0	0	1	1	0	0	ACOT9	acyl-CoA thioesterase 9
hsa-miR-512-5p	1	0	1	1	1	1	CAB39	calcium binding protein 39
hsa-miR-512-5p	0	0	1	0	1	1	CLEC5A	C-type lectin domain family 5, member A
hsa-miR-512-5p	1	0	1	1	1	1	HTRA2	HtrA serine peptidase 2
hsa-miR-512-5p	0	0	1	1	1	1	HEPH	hephaestin
hsa-miR-512-5p	1	0	1	1	1	1	ZNF202	zinc finger protein 202
hsa-miR-512-5p	1	0	1	1	1	1	STXBP6	syntaxin binding protein 6 (amisyn)
hsa-miR-512-5p	1	0	1	1	1	1	DNAJA4	DnaJ (Hsp40) homolog, subfamily A, member 4
hsa-miR-512-5p	1	0	1	1	1	1	C16orf70	chromosome 16 open reading frame 70
hsa-miR-512-5p	1	0	1	1	0	0	ECE2	endothelin converting enzyme 2
hsa-miR-512-5p	0	0	1	0	0	0	BPESC1	blepharophimosis, epicanthus inversus and ptosis, candidate 1 (non-protein coding)
hsa-miR-512-5p	0	0	1	1	1	1	SLCO2B1	solute carrier organic anion transporter family, member 2B1
hsa-miR-512-5p	0	0	1	1	1	1	CHRD	chordin
hsa-miR-512-5p	1	0	1	1	1	1	OGT	O-linked N-acetylglucosamine (GlcNAc) transferase
hsa-miR-512-5p	0	0	1	1	1	1	PGLYRP4	peptidoglycan recognition protein 4
hsa-miR-512-5p	0	0	1	1	0	0	TRIM41	tripartite motif containing 41
hsa-miR-512-5p	1	0	1	1	1	1	ABI2	abl-interactor 2
hsa-miR-512-5p	0	0	1	0	1	1	PRDM6	PR domain containing 6
hsa-miR-512-5p	1	0	1	1	1	1	CALN1	calneuron 1
hsa-miR-512-5p	0	0	1	1	1	1	TBC1D2	TBC1 domain family, member 2
hsa-miR-512-5p	1	0	1	1	1	1	VEGFA	vascular endothelial growth factor A
hsa-miR-512-5p	0	0	1	1	0	0	SLC4A9	solute carrier family 4, sodium bicarbonate cotransporter, member 9
hsa-miR-512-5p	0	0	1	1	0	0	MUC1	mucin 1, cell surface associated
hsa-miR-512-5p	1	0	1	1	1	1	NF2	neurofibromin 2 (merlin)
hsa-miR-512-5p	1	0	1	0	1	1	WIPF2	WAS/WASL interacting protein family, member 2
hsa-miR-512-5p	0	0	1	0	0	0	C17orf109	chromosome 17 open reading frame 109
hsa-miR-512-5p	0	0	1	0	0	0	CLRN1-AS1	CLRN1 antisense RNA 1
hsa-miR-512-5p	0	0	1	1	0	0	SNRPN	small nuclear ribonucleoprotein polypeptide N
hsa-miR-512-5p	0	0	1	1	0	0	ELP2	elongator acetyltransferase complex subunit 2
hsa-miR-512-5p	1	0	1	1	0	0	YTHDF2	YTH domain family, member 2
hsa-miR-512-5p	1	0	1	1	0	0	FOXP2	forkhead box P2
hsa-miR-512-5p	1	0	1	1	0	0	POLR2J3	polymerase (RNA) II (DNA directed) polypeptide J3
hsa-miR-512-5p	1	0	1	1	1	1	WAPAL	wings apart-like homolog (Drosophila)
hsa-miR-512-5p	0	0	1	1	0	0	MT1E	metallothionein 1E
hsa-miR-512-5p	1	0	1	1	1	1	TRIP10	thyroid hormone receptor interactor 10
hsa-miR-512-5p	0	0	1	1	1	1	ZNF638	zinc finger protein 638
hsa-miR-512-5p	1	0	1	1	1	1	AFF2	AF4/FMR2 family, member 2
hsa-miR-512-5p	1	0	1	1	1	1	FLNC	filamin C, gamma
hsa-miR-512-5p	0	0	1	1	1	1	MTHFR	methylenetetrahydrofolate reductase (NAD(P)H)
hsa-miR-512-5p	1	0	1	1	1	1	PFKFB3	6-phosphofructo-2-kinase/fructose-2,6-biphosphatase 3
hsa-miR-512-5p	0	0	1	1	1	1	CD28	CD28 molecule
hsa-miR-512-5p	0	0	1	1	1	1	TAF1	TAF1 RNA polymerase II, TATA box binding protein (TBP)-associated factor, 250kDa
hsa-miR-512-5p	0	0	1	1	1	1	PPARG	peroxisome proliferator-activated receptor gamma
hsa-miR-512-5p	1	0	1	1	1	1	ARL4C	ADP-ribosylation factor-like 4C
hsa-miR-512-5p	1	0	1	1	1	1	XIRP1	xin actin-binding repeat containing 1
hsa-miR-512-5p	1	0	1	1	1	1	PPP1R9A	protein phosphatase 1, regulatory subunit 9A
hsa-miR-512-5p	1	0	1	1	1	1	TANC1	tetratricopeptide repeat, ankyrin repeat and coiled-coil containing 1
hsa-miR-512-5p	0	0	1	1	1	1	PARP16	poly (ADP-ribose) polymerase family, member 16
hsa-miR-512-5p	0	0	1	0	0	0	TUG1	taurine upregulated 1 (non-protein coding)
hsa-miR-512-5p	0	0	1	1	1	1	PARPBP	PARP1 binding protein
hsa-miR-512-5p	0	0	1	1	1	1	OLFM4	olfactomedin 4
hsa-miR-512-5p	0	0	1	1	1	1	SMOX	spermine oxidase
hsa-miR-512-5p	0	0	1	1	0	0	ZCWPW1	zinc finger, CW type with PWWP domain 1
hsa-miR-512-5p	0	0	1	1	1	1	MCOLN3	mucolipin 3
hsa-miR-512-5p	1	0	1	1	1	1	ZNF395	zinc finger protein 395
hsa-miR-512-5p	0	0	1	0	0	0	C17orf72	chromosome 17 open reading frame 72
hsa-miR-512-5p	0	0	1	1	0	0	JMJD4	jumonji domain containing 4
hsa-miR-512-5p	1	0	1	1	1	1	POMT2	protein-O-mannosyltransferase 2
hsa-miR-512-5p	0	0	1	0	0	0	LOC284561	uncharacterized LOC284561
hsa-miR-512-5p	1	0	1	1	1	1	BAZ2A	bromodomain adjacent to zinc finger domain, 2A
hsa-miR-512-5p	1	0	1	0	1	1	C14orf101	chromosome 14 open reading frame 101
hsa-miR-512-5p	0	0	1	0	1	1	FLJ14186	uncharacterized LOC401149
hsa-miR-512-5p	0	0	1	1	1	1	METTL7A	methyltransferase like 7A
hsa-miR-512-5p	0	0	1	0	0	0	IFFO2	intermediate filament family orphan 2
hsa-miR-512-5p	0	0	1	1	0	0	SPON2	spondin 2, extracellular matrix protein
hsa-miR-512-5p	0	0	1	0	1	1	ATXN1L	ataxin 1-like
hsa-miR-512-5p	0	0	1	0	1	1	HEMK1	HemK methyltransferase family member 1
hsa-miR-512-5p	0	0	1	0	1	1	FLJ22447	uncharacterized LOC400221
hsa-miR-512-5p	1	0	1	1	0	0	MAGI3	membrane associated guanylate kinase, WW and PDZ domain containing 3
hsa-miR-512-5p	0	0	1	0	1	1	RASA4	RAS p21 protein activator 4
hsa-miR-512-5p	1	0	1	0	1	1	TOX3	TOX high mobility group box family member 3
hsa-miR-512-5p	1	0	1	1	1	1	LRP4	low density lipoprotein receptor-related protein 4
hsa-miR-512-5p	1	0	1	1	1	1	GORASP2	golgi reassembly stacking protein 2, 55kDa
hsa-miR-512-5p	1	0	1	1	1	1	FOXP1	forkhead box P1
hsa-miR-512-5p	1	0	1	0	1	1	CCNL2	cyclin L2
hsa-miR-512-5p	1	0	1	1	1	1	GPD2	glycerol-3-phosphate dehydrogenase 2 (mitochondrial)
hsa-miR-512-5p	0	0	1	1	1	1	PAQR4	progestin and adipoQ receptor family member IV
hsa-miR-512-5p	0	0	1	0	0	0	KIAA0664L3	KIAA0664-like 3
hsa-miR-512-5p	1	0	1	1	0	0	C15orf27	chromosome 15 open reading frame 27
hsa-miR-512-5p	1	0	1	1	1	1	C7orf43	chromosome 7 open reading frame 43
hsa-miR-512-5p	0	0	1	1	0	0	FAM153B	family with sequence similarity 153, member B
hsa-miR-512-5p	0	0	1	1	1	1	C8orf46	chromosome 8 open reading frame 46
hsa-miR-512-5p	0	0	1	0	0	0	CHST9-AS1	CHST9 antisense RNA 1
hsa-miR-512-5p	0	0	1	1	1	1	KLC4	kinesin light chain 4
hsa-miR-512-5p	1	0	1	1	0	0	SPEG	SPEG complex locus
hsa-miR-512-5p	0	0	1	0	0	0	FLJ30838	uncharacterized LOC400955
hsa-miR-512-5p	0	0	1	1	1	1	CCND3	cyclin D3
hsa-miR-512-5p	0	0	1	0	0	0	FLJ31104	uncharacterized LOC441072
hsa-miR-512-5p	0	0	1	0	0	0	LOC201617	uncharacterized LOC201617
hsa-miR-512-5p	0	0	1	1	1	1	ANKRD36B	ankyrin repeat domain 36B
hsa-miR-512-5p	1	0	1	0	1	1	PTPRE	protein tyrosine phosphatase, receptor type, E
hsa-miR-512-5p	0	0	1	1	0	0	STRA6	stimulated by retinoic acid gene 6 homolog (mouse)
hsa-miR-512-5p	1	0	1	1	1	1	LMNA	lamin A/C
hsa-miR-512-5p	1	0	1	1	1	1	PHF15	PHD finger protein 15
hsa-miR-512-5p	0	0	1	1	1	1	PTCD2	pentatricopeptide repeat domain 2
hsa-miR-512-5p	0	0	1	0	1	1	SNRNP48	small nuclear ribonucleoprotein 48kDa (U11/U12)
hsa-miR-512-5p	1	0	1	1	1	1	TPM3	tropomyosin 3
hsa-miR-512-5p	0	0	1	0	1	1	THAP6	THAP domain containing 6
hsa-miR-512-5p	0	0	1	1	0	0	COMMD4	COMM domain containing 4
hsa-miR-512-5p	0	0	1	0	1	1	CHURC1	churchill domain containing 1
hsa-miR-512-5p	0	0	1	1	1	1	FXC1	fracture callus 1 homolog (rat)
hsa-miR-512-5p	0	0	1	1	0	0	PRSS54	protease, serine, 54
hsa-miR-512-5p	0	0	1	0	1	1	UHMK1	U2AF homology motif (UHM) kinase 1
hsa-miR-512-5p	1	0	1	1	1	1	AKNA	AT-hook transcription factor
hsa-miR-512-5p	1	0	1	1	1	1	PEAR1	platelet endothelial aggregation receptor 1
hsa-miR-512-5p	1	0	1	1	1	1	BLCAP	bladder cancer associated protein
hsa-miR-512-5p	0	0	1	1	0	0	C6orf132	chromosome 6 open reading frame 132
hsa-miR-512-5p	0	0	1	1	0	0	ABHD1	abhydrolase domain containing 1
hsa-miR-512-5p	0	0	1	1	1	1	GALNT6	UDP-N-acetyl-alpha-D-galactosamine:polypeptide N-acetylgalactosaminyltransferase 6 (GalNAc-T6)
hsa-miR-512-5p	1	0	1	1	1	1	UBAP1	ubiquitin associated protein 1
hsa-miR-512-5p	1	0	1	1	0	0	B3GAT3	beta-1,3-glucuronyltransferase 3 (glucuronosyltransferase I)
hsa-miR-512-5p	0	0	1	1	0	0	PIGO	phosphatidylinositol glycan anchor biosynthesis, class O
hsa-miR-512-5p	0	0	1	1	1	1	MTR	5-methyltetrahydrofolate-homocysteine methyltransferase
hsa-miR-512-5p	0	0	1	0	0	0	LOC152225	uncharacterized LOC152225
hsa-miR-512-5p	0	0	1	0	0	0	LOC643837	uncharacterized LOC643837
hsa-miR-512-5p	0	0	1	1	0	0	ACOT11	acyl-CoA thioesterase 11
hsa-miR-512-5p	0	0	1	1	0	0	CTNNBL1	catenin, beta like 1
hsa-miR-512-5p	1	0	1	1	1	1	ARIH2	ariadne homolog 2 (Drosophila)
hsa-miR-512-5p	0	0	1	0	1	1	TBX5-AS1	TBX5 antisense RNA 1
hsa-miR-512-5p	0	0	1	0	0	0	LOC440910	uncharacterized LOC440910
hsa-miR-512-5p	1	0	1	1	1	1	FBXW2	F-box and WD repeat domain containing 2
hsa-miR-512-5p	1	0	1	0	1	1	ERC1	ELKS/RAB6-interacting/CAST family member 1
hsa-miR-512-5p	0	0	1	1	1	1	HNRNPH1	heterogeneous nuclear ribonucleoprotein H1 (H)
hsa-miR-512-5p	0	0	1	1	0	0	ABCF3	ATP-binding cassette, sub-family F (GCN20), member 3
hsa-miR-512-5p	0	0	1	1	0	0	CDC25B	cell division cycle 25 homolog B (S. pombe)
hsa-miR-512-5p	1	0	1	1	0	0	TOE1	target of EGR1, member 1 (nuclear)
hsa-miR-512-5p	0	0	1	0	0	0	LOC550112	uncharacterized LOC550112
hsa-miR-512-5p	1	0	1	1	1	1	MCMBP	minichromosome maintenance complex binding protein
hsa-miR-512-5p	0	0	1	0	0	0	CXXC1P1	CXXC finger protein 1 pseudogene 1
hsa-miR-512-5p	1	0	1	1	1	1	LRRC57	leucine rich repeat containing 57
hsa-miR-512-5p	1	0	1	1	1	1	MAP3K12	mitogen-activated protein kinase kinase kinase 12
hsa-miR-512-5p	0	0	1	1	1	1	SPOCK1	sparc/osteonectin, cwcv and kazal-like domains proteoglycan (testican) 1
hsa-miR-512-5p	1	0	1	0	1	1	GATAD2B	GATA zinc finger domain containing 2B
hsa-miR-512-5p	0	0	1	1	1	1	RBM25	RNA binding motif protein 25
hsa-miR-512-5p	0	0	1	0	1	1	AGBL4	ATP/GTP binding protein-like 4
hsa-miR-512-5p	0	0	1	1	1	1	AES	amino-terminal enhancer of split
hsa-miR-512-5p	0	0	1	1	1	1	MOBP	myelin-associated oligodendrocyte basic protein
hsa-miR-512-5p	1	0	1	0	1	1	UVRAG	UV radiation resistance associated gene
hsa-miR-512-5p	1	0	1	1	1	1	KCNIP3	Kv channel interacting protein 3, calsenilin
hsa-miR-512-5p	1	0	1	1	1	1	SPATS2	spermatogenesis associated, serine-rich 2
hsa-miR-512-5p	0	0	1	0	1	1	NBPF3	neuroblastoma breakpoint family, member 3
hsa-miR-512-5p	0	0	1	1	1	1	BBS1	Bardet-Biedl syndrome 1
hsa-miR-512-5p	0	0	1	1	1	1	CDK5RAP1	CDK5 regulatory subunit associated protein 1
hsa-miR-512-5p	0	0	1	0	1	1	HDAC9	histone deacetylase 9
hsa-miR-512-5p	1	0	1	0	1	1	STC2	stanniocalcin 2
hsa-miR-512-5p	1	0	1	1	1	1	PEA15	phosphoprotein enriched in astrocytes 15
hsa-miR-512-5p	1	0	1	1	1	1	SYNPO2L	synaptopodin 2-like
hsa-miR-512-5p	1	0	1	1	1	1	EPB41L4A	erythrocyte membrane protein band 4.1 like 4A
hsa-miR-512-5p	0	0	1	1	0	0	TRIM46	tripartite motif containing 46
hsa-miR-512-5p	1	0	1	1	1	1	FAM98A	family with sequence similarity 98, member A
hsa-miR-512-5p	0	0	1	0	0	0	FAM66C	family with sequence similarity 66, member C
hsa-miR-512-5p	1	0	1	1	0	0	FBRS	fibrosin
hsa-miR-512-5p	1	0	1	0	1	1	KIAA1737	KIAA1737
hsa-miR-512-5p	1	0	1	1	1	1	SNRNP70	small nuclear ribonucleoprotein 70kDa (U1)
hsa-miR-512-5p	0	0	1	0	0	0	LOC285505	uncharacterized LOC285505
hsa-miR-512-5p	1	0	1	1	1	1	SPARC	secreted protein, acidic, cysteine-rich (osteonectin)
hsa-miR-512-5p	0	0	1	1	1	1	ITGAD	integrin, alpha D
hsa-miR-512-5p	1	0	1	1	1	1	LCP1	lymphocyte cytosolic protein 1 (L-plastin)
hsa-miR-512-5p	0	0	1	0	0	0	LOC400680	uncharacterized LOC400680
hsa-miR-512-5p	0	0	1	0	0	0	THAP7-AS1	THAP7 antisense RNA 1
hsa-miR-512-5p	0	0	1	1	1	1	HCCS	holocytochrome c synthase
hsa-miR-512-5p	0	0	1	1	0	0	CORO1A	coronin, actin binding protein, 1A
hsa-miR-512-5p	0	0	1	1	0	0	FBXO16	F-box protein 16
hsa-miR-512-5p	0	0	1	1	1	1	ARFGAP2	ADP-ribosylation factor GTPase activating protein 2
hsa-miR-512-5p	1	0	1	1	1	1	THTPA	thiamine triphosphatase
hsa-miR-512-5p	0	0	1	0	1	1	MYLK4	myosin light chain kinase family, member 4
hsa-miR-512-5p	0	0	1	1	1	1	ABCC12	ATP-binding cassette, sub-family C (CFTR/MRP), member 12
hsa-miR-512-5p	1	0	1	1	1	1	DDX42	DEAD (Asp-Glu-Ala-Asp) box polypeptide 42
hsa-miR-512-5p	1	0	1	1	1	1	HBP1	HMG-box transcription factor 1
hsa-miR-512-5p	0	0	1	1	0	0	KIAA0146	KIAA0146
hsa-miR-512-5p	0	0	1	1	0	0	CFP	complement factor properdin
hsa-miR-512-5p	1	0	1	1	1	1	KALRN	kalirin, RhoGEF kinase
hsa-miR-512-5p	0	0	1	1	1	1	DNAJC24	DnaJ (Hsp40) homolog, subfamily C, member 24
hsa-miR-512-5p	1	0	1	0	1	1	KCNK2	potassium channel, subfamily K, member 2
hsa-miR-512-5p	0	0	1	1	1	1	FAM19A2	family with sequence similarity 19 (chemokine (C-C motif)-like), member A2
hsa-miR-512-5p	1	0	1	1	1	1	IPPK	inositol 1,3,4,5,6-pentakisphosphate 2-kinase
hsa-miR-512-5p	0	0	1	1	0	0	C16orf86	chromosome 16 open reading frame 86
hsa-miR-512-5p	1	0	1	1	1	1	MBTD1	mbt domain containing 1
hsa-miR-512-5p	0	0	1	0	0	0	EML6	echinoderm microtubule associated protein like 6
hsa-miR-512-5p	1	0	1	1	1	1	PLEKHH1	pleckstrin homology domain containing, family H (with MyTH4 domain) member 1
hsa-miR-512-5p	0	0	1	1	1	1	C2orf91	chromosome 2 open reading frame 91
hsa-miR-512-5p	1	0	1	1	1	1	FAM118A	family with sequence similarity 118, member A
hsa-miR-512-5p	1	0	1	1	1	1	METAP2	methionyl aminopeptidase 2
hsa-miR-512-5p	0	0	1	1	1	1	CCDC66	coiled-coil domain containing 66
hsa-miR-512-5p	0	0	1	0	0	0	LOC613266	uncharacterized LOC613266
hsa-miR-512-5p	1	0	1	1	1	1	KPNA1	karyopherin alpha 1 (importin alpha 5)
hsa-miR-512-5p	1	0	1	1	1	1	FAM122B	family with sequence similarity 122B
hsa-miR-512-5p	1	0	1	1	0	0	ATXN7L3	ataxin 7-like 3
hsa-miR-512-5p	1	0	1	1	1	1	DPY19L3	dpy-19-like 3 (C. elegans)
hsa-miR-512-5p	1	0	1	1	1	1	COPS7B	COP9 constitutive photomorphogenic homolog subunit 7B (Arabidopsis)
hsa-miR-512-5p	1	0	1	1	1	1	PIK3R1	phosphoinositide-3-kinase, regulatory subunit 1 (alpha)
hsa-miR-512-5p	0	0	1	0	0	0	MIR143HG	MIR143 host gene (non-protein coding)
hsa-miR-512-5p	0	0	1	1	0	0	CCDC88B	coiled-coil domain containing 88B
hsa-miR-512-5p	0	0	1	0	0	0	PLEKHD1	pleckstrin homology domain containing, family D (with coiled-coil domains) member 1
hsa-miR-512-5p	1	0	1	0	1	1	CLEC16A	C-type lectin domain family 16, member A
hsa-miR-512-5p	1	0	1	1	1	1	PHTF1	putative homeodomain transcription factor 1
hsa-miR-512-5p	0	0	1	0	0	0	HNRNPKP3	heterogeneous nuclear ribonucleoprotein K pseudogene 3
hsa-miR-512-5p	0	0	1	1	1	1	USP4	ubiquitin specific peptidase 4 (proto-oncogene)
hsa-miR-512-5p	1	0	1	1	1	1	FMNL3	formin-like 3
hsa-miR-512-5p	0	0	1	1	1	1	DOCK9	dedicator of cytokinesis 9
hsa-miR-512-5p	1	0	1	0	1	1	N4BP3	NEDD4 binding protein 3
hsa-miR-512-5p	1	0	1	1	1	1	ZDHHC23	zinc finger, DHHC-type containing 23
hsa-miR-512-5p	1	0	1	1	1	1	ENAH	enabled homolog (Drosophila)
hsa-miR-512-5p	1	0	1	1	1	1	RNF44	ring finger protein 44
hsa-miR-512-5p	1	0	1	1	1	1	PLA2G15	phospholipase A2, group XV
hsa-miR-512-5p	0	0	1	1	0	0	BPIFB1	BPI fold containing family B, member 1
hsa-miR-512-5p	0	0	1	1	0	0	TTC16	tetratricopeptide repeat domain 16
hsa-miR-512-5p	1	0	1	0	1	1	YOD1	YOD1 OTU deubiquinating enzyme 1 homolog (S. cerevisiae)
hsa-miR-512-5p	0	0	1	0	0	0	LRRC9	leucine rich repeat containing 9
hsa-miR-512-5p	1	0	1	1	1	1	NSUN4	NOP2/Sun domain family, member 4
hsa-miR-512-5p	1	0	1	1	0	0	MAN1B1	mannosidase, alpha, class 1B, member 1
hsa-miR-512-5p	1	0	1	0	1	1	KDM2A	lysine (K)-specific demethylase 2A
hsa-miR-512-5p	0	0	1	1	1	1	CD160	CD160 molecule
hsa-miR-512-5p	0	0	1	1	0	0	C17orf107	chromosome 17 open reading frame 107
hsa-miR-512-5p	1	0	1	0	1	1	KPNA6	karyopherin alpha 6 (importin alpha 7)
hsa-miR-512-5p	0	0	1	1	1	1	RAB13	RAB13, member RAS oncogene family
hsa-miR-512-5p	0	0	1	1	0	0	WFIKKN1	WAP, follistatin/kazal, immunoglobulin, kunitz and netrin domain containing 1
hsa-miR-512-5p	1	0	1	0	1	1	CYB561D1	cytochrome b-561 domain containing 1
hsa-miR-512-5p	1	0	1	1	1	1	PHC2	polyhomeotic homolog 2 (Drosophila)
hsa-miR-512-5p	0	0	1	1	0	0	HEATR8	HEAT repeat containing 8
hsa-miR-512-5p	0	0	1	1	1	1	ANXA6	annexin A6
hsa-miR-512-5p	1	0	1	1	1	1	SEC14L1	SEC14-like 1 (S. cerevisiae)
hsa-miR-512-5p	0	0	1	1	0	0	MAVS	mitochondrial antiviral signaling protein
hsa-miR-512-5p	0	0	1	1	1	1	TMEM202	transmembrane protein 202
hsa-miR-512-5p	1	0	1	0	0	0	ASXL3	additional sex combs like 3 (Drosophila)
hsa-miR-512-5p	0	0	1	1	1	1	ZNF346	zinc finger protein 346
hsa-miR-512-5p	0	0	1	1	0	0	DTHD1	death domain containing 1
hsa-miR-512-5p	0	0	1	1	0	0	DENND3	DENN/MADD domain containing 3
hsa-miR-512-5p	1	0	1	0	1	1	ZNF607	zinc finger protein 607
hsa-miR-512-5p	0	0	1	0	0	0	AGAP9	ArfGAP with GTPase domain, ankyrin repeat and PH domain 9
hsa-miR-512-5p	0	0	1	1	0	0	CPT1B	carnitine palmitoyltransferase 1B (muscle)
hsa-miR-512-5p	1	0	1	1	1	1	GATA6	GATA binding protein 6
hsa-miR-512-5p	0	0	1	0	1	1	PEX5	peroxisomal biogenesis factor 5
hsa-miR-512-5p	1	0	1	1	1	1	MEAF6	MYST/Esa1-associated factor 6
hsa-miR-512-5p	0	0	1	1	1	1	BTK	Bruton agammaglobulinemia tyrosine kinase
hsa-miR-512-5p	0	0	1	0	1	1	BCAS1	breast carcinoma amplified sequence 1
hsa-miR-512-5p	0	0	1	1	0	0	PCSK5	proprotein convertase subtilisin/kexin type 5
hsa-miR-512-5p	1	0	1	1	1	1	FGD3	FYVE, RhoGEF and PH domain containing 3
hsa-miR-512-5p	1	0	1	1	1	1	PHTF2	putative homeodomain transcription factor 2
hsa-miR-512-5p	1	0	1	1	1	1	SETX	senataxin
hsa-miR-512-5p	1	0	1	1	1	1	NOVA1	neuro-oncological ventral antigen 1
hsa-miR-512-5p	1	0	1	1	1	1	AHCYL1	adenosylhomocysteinase-like 1
hsa-miR-512-5p	1	0	1	1	1	1	MARCH7	membrane-associated ring finger (C3HC4) 7, E3 ubiquitin protein ligase
hsa-miR-512-5p	0	0	1	0	0	0	PART1	prostate androgen-regulated transcript 1 (non-protein coding)
hsa-miR-512-5p	1	0	1	1	1	1	NECAP1	NECAP endocytosis associated 1
hsa-miR-512-5p	0	0	1	1	0	0	CPNE6	copine VI (neuronal)
hsa-miR-512-5p	0	0	1	1	1	1	TFDP2	transcription factor Dp-2 (E2F dimerization partner 2)
hsa-miR-512-5p	0	0	1	1	1	1	PGAP2	post-GPI attachment to proteins 2
hsa-miR-512-5p	0	0	1	1	1	1	ENGASE	endo-beta-N-acetylglucosaminidase
hsa-miR-512-5p	0	0	1	0	0	0	POM121L9P	POM121 transmembrane nucleoporin-like 9, pseudogene
hsa-miR-512-5p	0	0	1	1	1	1	ARIH1	ariadne homolog, ubiquitin-conjugating enzyme E2 binding protein, 1 (Drosophila)
hsa-miR-512-5p	0	0	1	0	0	0	TPTE2P6	transmembrane phosphoinositide 3-phosphatase and tensin homolog 2 pseudogene 6
hsa-miR-512-5p	0	0	1	0	0	0	DNAJC5B	DnaJ (Hsp40) homolog, subfamily C, member 5 beta
hsa-miR-512-5p	0	0	1	1	0	0	PCIF1	PDX1 C-terminal inhibiting factor 1
hsa-miR-512-5p	0	0	1	1	1	1	TPCN2	two pore segment channel 2
hsa-miR-512-5p	0	0	1	1	0	0	DOPEY1	dopey family member 1
hsa-miR-512-5p	0	0	1	1	1	1	CD276	CD276 molecule
hsa-miR-512-5p	0	0	1	0	0	0	PSMG4	proteasome (prosome, macropain) assembly chaperone 4
hsa-miR-512-5p	0	0	1	0	0	0	FAM66D	family with sequence similarity 66, member D
hsa-miR-512-5p	0	0	1	1	1	1	HNRNPM	heterogeneous nuclear ribonucleoprotein M
hsa-miR-512-5p	1	0	1	1	0	0	FNIP2	folliculin interacting protein 2
hsa-miR-512-5p	1	0	1	0	0	0	SYNPO	synaptopodin
hsa-miR-512-5p	0	0	1	0	0	0	FAM225A	family with sequence similarity 225, member A (non-protein coding)
hsa-miR-512-5p	1	0	1	1	1	1	TMEM68	transmembrane protein 68
hsa-miR-512-5p	0	0	1	1	1	1	NARG2	NMDA receptor regulated 2
hsa-miR-512-5p	0	0	1	1	0	0	FCRL3	Fc receptor-like 3
hsa-miR-512-5p	0	0	1	1	1	1	TAF8	TAF8 RNA polymerase II, TATA box binding protein (TBP)-associated factor, 43kDa
hsa-miR-512-5p	0	0	1	1	1	1	NFE2L1	nuclear factor (erythroid-derived 2)-like 1
hsa-miR-512-5p	1	0	1	1	1	1	CEP164	centrosomal protein 164kDa
hsa-miR-512-5p	0	0	1	0	0	0	EPHA1-AS1	EPHA1 antisense RNA 1
hsa-miR-512-5p	1	0	1	0	0	0	NPEPL1	aminopeptidase-like 1
hsa-miR-512-5p	1	0	1	1	1	1	SLC24A4	solute carrier family 24 (sodium/potassium/calcium exchanger), member 4
hsa-miR-512-5p	1	0	1	1	1	1	MBD6	methyl-CpG binding domain protein 6
hsa-miR-512-5p	0	0	1	0	1	1	SYNPO2	synaptopodin 2
hsa-miR-512-5p	1	0	1	0	1	1	PATL1	protein associated with topoisomerase II homolog 1 (yeast)
hsa-miR-512-5p	1	0	1	1	1	1	RNF38	ring finger protein 38
hsa-miR-512-5p	0	0	1	1	0	0	TMEM134	transmembrane protein 134
hsa-miR-512-5p	1	0	1	1	1	1	IKZF2	IKAROS family zinc finger 2 (Helios)
hsa-miR-512-5p	1	0	1	1	1	1	CLIC5	chloride intracellular channel 5
hsa-miR-512-5p	1	0	1	1	1	1	DUSP16	dual specificity phosphatase 16
hsa-miR-512-5p	0	0	1	1	0	0	DHRS4	dehydrogenase/reductase (SDR family) member 4
hsa-miR-512-5p	1	0	1	1	1	1	SORCS1	sortilin-related VPS10 domain containing receptor 1
hsa-miR-512-5p	1	0	1	1	1	1	KIAA0907	KIAA0907
hsa-miR-512-5p	0	0	1	0	0	0	CR1L	complement component (3b/4b) receptor 1-like
hsa-miR-512-5p	0	0	1	1	1	1	CYP4B1	cytochrome P450, family 4, subfamily B, polypeptide 1
hsa-miR-512-5p	0	0	1	1	0	0	DNAH1	dynein, axonemal, heavy chain 1
hsa-miR-512-5p	1	0	1	1	1	1	PBRM1	polybromo 1
hsa-miR-512-5p	0	0	1	1	0	0	GLYCTK	glycerate kinase
hsa-miR-512-5p	0	0	1	1	1	1	RAD9B	RAD9 homolog B (S. pombe)
hsa-miR-512-5p	1	0	1	1	1	1	TAB3	TGF-beta activated kinase 1/MAP3K7 binding protein 3
hsa-miR-512-5p	1	0	1	1	1	1	TMCC2	transmembrane and coiled-coil domain family 2
hsa-miR-512-5p	0	0	1	1	1	1	ITGA10	integrin, alpha 10
hsa-miR-512-5p	0	0	1	1	1	1	PIGG	phosphatidylinositol glycan anchor biosynthesis, class G
hsa-miR-512-5p	1	0	1	1	1	1	SSX2IP	synovial sarcoma, X breakpoint 2 interacting protein
hsa-miR-512-5p	1	0	1	0	1	1	ANKRD28	ankyrin repeat domain 28
hsa-miR-512-5p	0	0	1	0	0	0	NPIPL3	nuclear pore complex interacting protein-like 3
hsa-miR-512-5p	0	0	1	0	1	1	XKR5	XK, Kell blood group complex subunit-related family, member 5
hsa-miR-512-5p	1	0	1	1	1	1	MECP2	methyl CpG binding protein 2 (Rett syndrome)
hsa-miR-512-5p	1	0	1	0	1	1	LRAT	lecithin retinol acyltransferase (phosphatidylcholine--retinol O-acyltransferase)
hsa-miR-512-5p	0	0	1	1	0	0	ARAP1	ArfGAP with RhoGAP domain, ankyrin repeat and PH domain 1
hsa-miR-512-5p	1	0	1	1	0	0	ADAM15	ADAM metallopeptidase domain 15
hsa-miR-512-5p	1	0	1	1	1	1	LAMP2	lysosomal-associated membrane protein 2
hsa-miR-512-5p	0	0	1	1	1	1	TMUB1	transmembrane and ubiquitin-like domain containing 1
hsa-miR-512-5p	1	0	1	1	1	1	PFKFB4	6-phosphofructo-2-kinase/fructose-2,6-biphosphatase 4
hsa-miR-512-5p	1	0	1	1	1	1	MYB	v-myb myeloblastosis viral oncogene homolog (avian)
hsa-miR-512-5p	0	0	1	1	1	1	NOLC1	nucleolar and coiled-body phosphoprotein 1
hsa-miR-512-5p	1	0	1	1	0	0	TAF4B	TAF4b RNA polymerase II, TATA box binding protein (TBP)-associated factor, 105kDa
hsa-miR-512-5p	0	0	1	1	0	0	NBPF8	neuroblastoma breakpoint family, member 8
hsa-miR-512-5p	0	0	1	1	0	0	NPSR1	neuropeptide S receptor 1
hsa-miR-512-5p	1	0	1	1	1	1	AMOT	angiomotin
hsa-miR-512-5p	0	0	1	0	0	0	GBAP1	glucosidase, beta, acid pseudogene 1
hsa-miR-512-5p	0	0	1	1	0	0	GFOD2	glucose-fructose oxidoreductase domain containing 2
hsa-miR-512-5p	1	0	1	1	1	1	ELOVL6	ELOVL fatty acid elongase 6
hsa-miR-512-5p	0	0	1	1	1	1	PAFAH1B2	platelet-activating factor acetylhydrolase 1b, catalytic subunit 2 (30kDa)
hsa-miR-512-5p	1	0	1	1	1	1	NRGN	neurogranin (protein kinase C substrate, RC3)
hsa-miR-512-5p	1	0	1	1	1	1	RIMS3	regulating synaptic membrane exocytosis 3
hsa-miR-512-5p	1	0	1	1	0	0	SLC10A3	solute carrier family 10 (sodium/bile acid cotransporter family), member 3
hsa-miR-512-5p	1	0	1	0	1	1	CGGBP1	CGG triplet repeat binding protein 1
hsa-miR-512-5p	0	0	1	0	0	0	LOC93622	Morf4 family associated protein 1-like 1 pseudogene
hsa-miR-512-5p	1	0	1	1	0	0	EIF4A1	eukaryotic translation initiation factor 4A1
hsa-miR-512-5p	0	0	1	1	1	1	ARPC1A	actin related protein 2/3 complex, subunit 1A, 41kDa
hsa-miR-512-5p	0	0	1	1	1	1	LZIC	leucine zipper and CTNNBIP1 domain containing
hsa-miR-512-5p	0	0	1	1	0	0	RBM14	RNA binding motif protein 14
hsa-miR-512-5p	1	0	1	1	1	1	CALM1	calmodulin 1 (phosphorylase kinase, delta)
hsa-miR-512-5p	1	0	1	1	1	1	HMGA1	high mobility group AT-hook 1
hsa-miR-512-5p	0	0	1	0	0	0	ATXN7L3B	ataxin 7-like 3B
hsa-miR-512-5p	1	0	1	1	1	1	RELL2	RELT-like 2
hsa-miR-512-5p	1	0	1	0	1	1	TMEM39A	transmembrane protein 39A
hsa-miR-512-5p	0	0	1	1	1	1	PWP1	PWP1 homolog (S. cerevisiae)
hsa-miR-512-5p	1	0	1	0	1	1	CNP	2',3'-cyclic nucleotide 3' phosphodiesterase
hsa-miR-512-5p	0	0	1	1	0	0	HDAC6	histone deacetylase 6
hsa-miR-512-5p	0	0	1	1	1	1	DEDD2	death effector domain containing 2
hsa-miR-512-5p	0	0	1	1	1	1	PTK7	PTK7 protein tyrosine kinase 7
hsa-miR-512-5p	0	0	1	1	1	1	TOMM40L	translocase of outer mitochondrial membrane 40 homolog (yeast)-like
hsa-miR-512-5p	0	0	1	1	1	1	C8orf33	chromosome 8 open reading frame 33
hsa-miR-512-5p	0	0	1	0	1	1	ZNF37A	zinc finger protein 37A
hsa-miR-512-5p	0	0	1	1	0	0	RBCK1	RanBP-type and C3HC4-type zinc finger containing 1
hsa-miR-512-5p	0	0	1	1	1	1	CMAS	cytidine monophosphate N-acetylneuraminic acid synthetase
hsa-miR-512-5p	0	0	1	1	1	1	FAM122C	family with sequence similarity 122C
hsa-miR-512-5p	1	0	1	0	1	1	CYBRD1	cytochrome b reductase 1
hsa-miR-512-5p	0	0	1	0	0	0	LOC441528	uncharacterized LOC441528
hsa-miR-512-5p	0	0	1	1	0	0	ZBTB32	zinc finger and BTB domain containing 32
hsa-miR-512-5p	0	0	1	0	0	0	TCP11L2	t-complex 11 (mouse)-like 2
hsa-miR-512-5p	0	0	1	1	1	1	GLIPR2	GLI pathogenesis-related 2
hsa-miR-512-5p	0	0	1	0	0	0	ZNF720	zinc finger protein 720
hsa-miR-512-5p	0	0	1	1	1	1	CENPL	centromere protein L
hsa-miR-512-5p	0	0	1	0	1	1	TP53RK	TP53 regulating kinase
hsa-miR-512-5p	0	0	1	1	0	0	PTPMT1	protein tyrosine phosphatase, mitochondrial 1
hsa-miR-512-5p	0	0	1	1	1	1	NELL2	NEL-like 2 (chicken)
hsa-miR-512-5p	0	0	1	0	0	0	TMEM208	transmembrane protein 208
hsa-miR-512-5p	1	0	1	1	0	0	TMEM63B	transmembrane protein 63B
hsa-miR-512-5p	0	0	1	1	0	0	SLC22A9	solute carrier family 22 (organic anion transporter), member 9
hsa-miR-512-5p	1	0	1	0	1	1	CDK19	cyclin-dependent kinase 19
hsa-miR-512-5p	0	0	1	0	0	0	SNX29P2	sorting nexin 29 pseudogene 2
hsa-miR-512-5p	1	0	1	1	1	1	FAM213A	family with sequence similarity 213, member A
hsa-miR-512-5p	1	0	1	1	1	1	ASPH	aspartate beta-hydroxylase
hsa-miR-512-5p	0	0	1	1	1	1	UCHL5	ubiquitin carboxyl-terminal hydrolase L5
hsa-miR-512-5p	0	0	1	1	0	0	TRO	trophinin
hsa-miR-512-5p	0	0	1	0	0	0	ZBED3-AS1	ZBED3 antisense RNA 1
hsa-miR-512-5p	0	0	1	1	1	1	MAP2	microtubule-associated protein 2
hsa-miR-512-5p	1	0	1	1	1	1	RSPO2	R-spondin 2
hsa-miR-512-5p	0	0	1	0	0	0	ANKRD19P	ankyrin repeat domain 19, pseudogene
hsa-miR-512-5p	0	0	1	0	0	0	LOC145837	uncharacterized LOC145837
hsa-miR-512-5p	1	0	1	1	1	1	GIGYF2	GRB10 interacting GYF protein 2
hsa-miR-512-5p	0	0	1	1	1	1	SEMA3D	sema domain, immunoglobulin domain (Ig), short basic domain, secreted, (semaphorin) 3D
hsa-miR-512-5p	1	0	1	1	1	1	PPARGC1A	peroxisome proliferator-activated receptor gamma, coactivator 1 alpha
hsa-miR-512-5p	0	0	1	1	1	1	TFAM	transcription factor A, mitochondrial
hsa-miR-512-5p	0	0	1	1	1	1	PIK3AP1	phosphoinositide-3-kinase adaptor protein 1
hsa-miR-512-5p	1	0	1	0	1	1	SV2B	synaptic vesicle glycoprotein 2B
hsa-miR-512-5p	0	0	1	1	1	1	PIP5K1B	phosphatidylinositol-4-phosphate 5-kinase, type I, beta
hsa-miR-512-5p	0	0	1	0	1	1	B3GALTL	beta 1,3-galactosyltransferase-like
hsa-miR-512-5p	0	0	1	0	0	0	LINC00593	long intergenic non-protein coding RNA 593
hsa-miR-512-5p	0	0	1	1	0	0	TTC12	tetratricopeptide repeat domain 12
hsa-miR-512-5p	0	0	1	1	1	1	UBXN1	UBX domain protein 1
hsa-miR-512-5p	1	0	1	1	1	1	FGF1	fibroblast growth factor 1 (acidic)
hsa-miR-512-5p	0	0	1	1	1	1	C5orf22	chromosome 5 open reading frame 22
hsa-miR-512-5p	1	0	1	1	1	1	SORL1	sortilin-related receptor, L(DLR class) A repeats containing
hsa-miR-512-5p	0	0	1	0	0	0	BCAS3	breast carcinoma amplified sequence 3
hsa-miR-512-5p	1	0	1	0	1	1	KIF5A	kinesin family member 5A
hsa-miR-512-5p	1	0	1	1	1	1	FBXL16	F-box and leucine-rich repeat protein 16
hsa-miR-512-5p	1	0	1	1	1	1	PML	promyelocytic leukemia
hsa-miR-512-5p	0	0	1	0	1	1	DKFZP434I0714	uncharacterized protein DKFZP434I0714
hsa-miR-512-5p	0	0	1	1	1	1	EDA2R	ectodysplasin A2 receptor
hsa-miR-512-5p	1	0	1	1	1	1	FAM120A	family with sequence similarity 120A
hsa-miR-512-5p	1	0	1	1	1	1	SEC31B	SEC31 homolog B (S. cerevisiae)
hsa-miR-512-5p	1	0	1	1	1	1	NKAIN2	Na+/K+ transporting ATPase interacting 2
hsa-miR-512-5p	0	0	1	1	0	0	PGS1	phosphatidylglycerophosphate synthase 1
hsa-miR-512-5p	1	0	1	1	0	0	INO80E	INO80 complex subunit E
hsa-miR-512-5p	1	0	1	1	1	1	CTDSPL2	CTD (carboxy-terminal domain, RNA polymerase II, polypeptide A) small phosphatase like 2
hsa-miR-512-5p	0	0	1	1	1	1	ARHGAP6	Rho GTPase activating protein 6
hsa-miR-512-5p	0	0	1	1	1	1	ATP1A4	ATPase, Na+/K+ transporting, alpha 4 polypeptide
hsa-miR-512-5p	0	0	1	0	0	0	LINC00642	long intergenic non-protein coding RNA 642
hsa-miR-512-5p	1	0	1	0	1	1	CLDN12	claudin 12
hsa-miR-512-5p	1	0	1	1	0	0	RASGEF1B	RasGEF domain family, member 1B
hsa-miR-512-5p	1	0	1	1	1	1	BNC2	basonuclin 2
hsa-miR-512-5p	0	0	1	0	0	0	CYP4F35P	cytochrome P450, family 4, subfamily F, polypeptide 35, pseudogene
hsa-miR-512-5p	0	0	1	1	1	1	FAM71D	family with sequence similarity 71, member D
hsa-miR-512-5p	0	0	1	1	1	1	EFCAB13	EF-hand calcium binding domain 13
hsa-miR-512-5p	0	0	1	0	0	0	INHBA-AS1	INHBA antisense RNA 1
hsa-miR-512-5p	1	0	1	1	1	1	DPP10	dipeptidyl-peptidase 10 (non-functional)
hsa-miR-512-5p	0	0	1	0	0	0	LOC100134868	uncharacterized LOC100134868
hsa-miR-512-5p	1	0	1	1	0	0	PROSAPIP1	ProSAPiP1 protein
hsa-miR-512-5p	0	0	1	1	0	0	ADAMTS13	ADAM metallopeptidase with thrombospondin type 1 motif, 13
hsa-miR-512-5p	1	0	1	0	1	1	GPR107	G protein-coupled receptor 107
hsa-miR-512-5p	0	0	1	0	1	1	MYO3B	myosin IIIB
hsa-miR-512-5p	0	0	1	0	1	1	LINC00634	long intergenic non-protein coding RNA 634
hsa-miR-512-5p	1	0	1	1	1	1	DACH2	dachshund homolog 2 (Drosophila)
hsa-miR-512-5p	0	0	1	1	0	0	CNGA4	cyclic nucleotide gated channel alpha 4
hsa-miR-512-5p	1	0	1	1	1	1	BVES	blood vessel epicardial substance
hsa-miR-512-5p	0	0	1	0	0	0	LOC339240	keratin 17 pseudogene
hsa-miR-512-5p	0	0	1	1	0	0	MTCH1	mitochondrial carrier 1
hsa-miR-512-5p	0	0	1	0	0	0	SLC7A11-AS1	SLC7A11 antisense RNA 1
hsa-miR-512-5p	1	0	1	0	1	1	KIAA0430	KIAA0430
hsa-miR-512-5p	0	0	1	0	1	1	METTL12	methyltransferase like 12
hsa-miR-512-5p	1	0	1	1	1	1	ARPP21	cAMP-regulated phosphoprotein, 21kDa
hsa-miR-512-5p	1	0	1	1	1	1	FAM123A	family with sequence similarity 123A
hsa-miR-512-5p	1	0	1	0	1	1	HSPA12A	heat shock 70kDa protein 12A
hsa-miR-512-5p	0	0	1	0	0	0	LOC154822	uncharacterized LOC154822
hsa-miR-512-5p	1	0	1	1	1	1	PRRG1	proline rich Gla (G-carboxyglutamic acid) 1
hsa-miR-512-5p	0	0	1	0	0	0	ALOX12P2	arachidonate 12-lipoxygenase pseudogene 2
hsa-miR-512-5p	0	0	1	0	0	0	LOC339260	uncharacterized LOC339260
hsa-miR-512-5p	1	0	1	1	1	1	HLTF	helicase-like transcription factor
hsa-miR-512-5p	1	0	1	0	1	1	PSD3	pleckstrin and Sec7 domain containing 3
hsa-miR-512-5p	1	0	1	1	1	1	MAMDC2	MAM domain containing 2
hsa-miR-512-5p	0	0	1	0	0	0	LOC283914	uncharacterized LOC283914
hsa-miR-512-5p	1	0	1	1	1	1	SLC35G1	solute carrier family 35, member G1
hsa-miR-512-5p	0	0	1	0	0	0	CLEC4GP1	C-type lectin domain family 4, member G pseudogene 1
hsa-miR-512-5p	1	0	1	1	1	1	RTKN2	rhotekin 2
hsa-miR-512-5p	0	0	1	0	1	1	ITGA1	integrin, alpha 1
hsa-miR-512-5p	1	0	1	1	1	1	RECK	reversion-inducing-cysteine-rich protein with kazal motifs
hsa-miR-512-5p	1	0	1	0	1	1	FAM131B	family with sequence similarity 131, member B
hsa-miR-512-5p	1	0	1	1	1	1	FNDC3A	fibronectin type III domain containing 3A
hsa-miR-512-5p	1	0	1	0	1	1	SEMA4G	sema domain, immunoglobulin domain (Ig), transmembrane domain (TM) and short cytoplasmic domain, (semaphorin) 4G
hsa-miR-512-5p	1	0	1	1	1	1	GATA2	GATA binding protein 2
hsa-miR-512-5p	0	0	1	1	1	1	LINC00086	long intergenic non-protein coding RNA 86
hsa-miR-512-5p	0	0	1	1	1	1	RHOT1	ras homolog family member T1
hsa-miR-512-5p	1	0	1	1	1	1	SCUBE3	signal peptide, CUB domain, EGF-like 3
hsa-miR-512-5p	0	0	1	0	0	0	LINC00265	long intergenic non-protein coding RNA 265
hsa-miR-512-5p	1	0	1	1	1	1	OLFML2A	olfactomedin-like 2A
hsa-miR-512-5p	0	0	1	1	1	1	MPP3	membrane protein, palmitoylated 3 (MAGUK p55 subfamily member 3)
hsa-miR-512-5p	0	0	1	1	0	0	HP	haptoglobin
hsa-miR-512-5p	0	0	1	1	0	0	WDR90	WD repeat domain 90
hsa-miR-512-5p	1	0	1	1	1	1	RANBP9	RAN binding protein 9
hsa-miR-512-5p	1	0	1	1	0	0	XRRA1	X-ray radiation resistance associated 1
hsa-miR-512-5p	1	0	1	1	1	1	ADCY6	adenylate cyclase 6
hsa-miR-512-5p	0	0	1	1	1	1	SH2D1B	SH2 domain containing 1B
hsa-miR-512-5p	1	0	1	1	1	1	NRSN1	neurensin 1
hsa-miR-512-5p	1	0	1	1	1	1	FTL	ferritin, light polypeptide
hsa-miR-512-5p	1	0	1	0	1	1	MAGIX	MAGI family member, X-linked
hsa-miR-512-5p	1	0	1	0	1	1	DCP2	DCP2 decapping enzyme homolog (S. cerevisiae)
hsa-miR-512-5p	1	0	1	1	1	1	MAPKAPK3	mitogen-activated protein kinase-activated protein kinase 3
hsa-miR-512-5p	1	0	1	1	1	1	PHACTR4	phosphatase and actin regulator 4
hsa-miR-512-5p	1	0	1	1	1	1	SRPK2	SRSF protein kinase 2
hsa-miR-512-5p	1	0	1	1	0	0	TMEM198	transmembrane protein 198
hsa-miR-512-5p	0	0	1	0	0	0	FOXN3-AS2	FOXN3 antisense RNA 2
hsa-miR-512-5p	1	0	1	1	0	0	CHTOP	chromatin target of PRMT1
hsa-miR-512-5p	1	0	1	1	1	1	DDR1	discoidin domain receptor tyrosine kinase 1
hsa-miR-512-5p	1	0	1	1	1	1	SCAF8	SR-related CTD-associated factor 8
hsa-miR-512-5p	1	0	1	0	1	1	TGFBR1	transforming growth factor, beta receptor 1
hsa-miR-512-5p	1	0	1	1	1	1	RARG	retinoic acid receptor, gamma
hsa-miR-512-5p	0	0	1	1	0	0	C8orf82	chromosome 8 open reading frame 82
hsa-miR-512-5p	1	0	1	0	1	1	AMMECR1L	AMME chromosomal region gene 1-like
hsa-miR-512-5p	0	0	1	0	0	0	LINC00537	long intergenic non-protein coding RNA 537
hsa-miR-512-5p	1	0	1	1	0	0	SLC45A4	solute carrier family 45, member 4
hsa-miR-512-5p	1	0	1	0	1	1	PIK3R3	phosphoinositide-3-kinase, regulatory subunit 3 (gamma)
hsa-miR-512-5p	1	0	1	1	1	1	ACVR2B	activin A receptor, type IIB
hsa-miR-512-5p	0	0	1	1	0	0	RPS9	ribosomal protein S9
hsa-miR-512-5p	0	0	1	1	1	1	R3HCC1L	R3H domain and coiled-coil containing 1-like
hsa-miR-512-5p	1	0	1	1	1	1	IL28RA	interleukin 28 receptor, alpha (interferon, lambda receptor)
hsa-miR-512-5p	0	0	1	0	0	0	C5orf49	chromosome 5 open reading frame 49
hsa-miR-512-5p	0	0	1	0	0	0	GUSBP9	glucuronidase, beta pseudogene 9
hsa-miR-512-5p	0	0	1	0	0	0	LOC283174	uncharacterized LOC283174
hsa-miR-512-5p	0	0	1	1	0	0	TRPV3	transient receptor potential cation channel, subfamily V, member 3
hsa-miR-512-5p	1	0	1	1	1	1	KLHL17	kelch-like 17 (Drosophila)
hsa-miR-512-5p	0	0	1	1	1	1	PCNP	PEST proteolytic signal containing nuclear protein
hsa-miR-512-5p	1	0	1	1	1	1	CERS6	ceramide synthase 6
hsa-miR-512-5p	0	0	1	1	0	0	SH2D6	SH2 domain containing 6
hsa-miR-512-5p	0	0	1	1	1	1	IL4R	interleukin 4 receptor
hsa-miR-512-5p	0	0	1	1	0	0	RELA	v-rel reticuloendotheliosis viral oncogene homolog A (avian)
hsa-miR-512-5p	0	0	1	1	1	1	SMTNL2	smoothelin-like 2
hsa-miR-512-5p	1	0	1	1	1	1	SLK	STE20-like kinase
hsa-miR-512-5p	0	0	1	0	0	0	LRRC37A11P	leucine rich repeat containing 37, member A11, pseudogene
hsa-miR-512-5p	0	0	1	1	1	1	UNC13B	unc-13 homolog B (C. elegans)
hsa-miR-512-5p	0	0	1	1	0	0	RNF123	ring finger protein 123
hsa-miR-512-5p	1	0	1	1	1	1	TMEM132B	transmembrane protein 132B
hsa-miR-512-5p	0	0	1	1	1	1	C14orf105	chromosome 14 open reading frame 105
hsa-miR-512-5p	0	0	1	1	0	0	RGSL1	regulator of G-protein signaling like 1
hsa-miR-512-5p	0	0	1	0	0	0	TUBA4B	tubulin, alpha 4b (pseudogene)
hsa-miR-512-5p	0	0	1	0	0	0	LINC00486	long intergenic non-protein coding RNA 486
hsa-miR-512-5p	0	0	1	0	0	0	LGALS17A	Charcot-Leyden crystal protein pseudogene
hsa-miR-512-5p	1	0	1	1	1	1	PIKFYVE	phosphoinositide kinase, FYVE finger containing
hsa-miR-512-5p	0	0	1	0	0	0	KRT8P12	keratin 8 pseudogene 12
hsa-miR-512-5p	0	0	1	0	1	1	C20orf202	chromosome 20 open reading frame 202
hsa-miR-512-5p	1	0	1	1	1	1	MACROD2	MACRO domain containing 2
hsa-miR-512-5p	0	0	1	1	1	1	HSF2	heat shock transcription factor 2
hsa-miR-512-5p	0	0	1	1	1	1	SLC22A23	solute carrier family 22, member 23
hsa-miR-512-5p	0	0	1	1	1	1	TPRN	taperin
hsa-miR-512-5p	0	0	1	0	0	0	FAM225B	family with sequence similarity 225, member B (non-protein coding)
hsa-miR-512-5p	0	0	1	0	0	0	SMA4	glucuronidase, beta pseudogene
hsa-miR-512-5p	0	0	1	0	0	0	MEG3	maternally expressed 3 (non-protein coding)
hsa-miR-512-5p	0	0	1	1	0	0	CHMP4A	charged multivesicular body protein 4A
hsa-miR-512-5p	1	0	1	0	1	1	HMGB3	high mobility group box 3
hsa-miR-512-5p	0	0	1	0	0	0	ADCY10P1	adenylate cyclase 10 (soluble) pseudogene 1
hsa-miR-512-5p	1	0	1	1	1	1	RAB7A	RAB7A, member RAS oncogene family
hsa-miR-512-5p	1	0	1	0	1	1	MTX3	metaxin 3
hsa-miR-512-5p	0	0	1	1	0	0	NHLRC2	NHL repeat containing 2
hsa-miR-512-5p	1	0	1	1	1	1	ETS1	v-ets erythroblastosis virus E26 oncogene homolog 1 (avian)
hsa-miR-512-5p	0	0	1	1	1	1	AIG1	androgen-induced 1
hsa-miR-512-5p	1	0	1	1	1	1	RAB30	RAB30, member RAS oncogene family
hsa-miR-512-5p	0	0	1	0	1	1	PRH2	proline-rich protein HaeIII subfamily 2
hsa-miR-512-5p	0	0	1	1	1	1	GRM6	glutamate receptor, metabotropic 6
hsa-miR-512-5p	0	0	1	1	1	1	PRR14L	proline rich 14-like
hsa-miR-512-5p	0	0	1	0	0	0	SMG1P1	smg-1 homolog, phosphatidylinositol 3-kinase-related kinase pseudogene 1
hsa-miR-512-5p	1	0	1	1	0	0	RBM27	RNA binding motif protein 27
hsa-miR-512-5p	1	0	1	1	0	0	CECR2	cat eye syndrome chromosome region, candidate 2
hsa-miR-512-5p	0	0	1	1	1	1	MLIP	muscular LMNA-interacting protein
hsa-miR-512-5p	1	0	1	1	1	1	GTDC1	glycosyltransferase-like domain containing 1
hsa-miR-512-5p	1	0	1	1	1	1	TSC22D3	TSC22 domain family, member 3
hsa-miR-512-5p	0	0	1	0	0	0	OVOS	ovostatin
hsa-miR-512-5p	1	0	1	1	1	1	HDAC1	histone deacetylase 1
hsa-miR-512-5p	0	0	1	1	1	1	CCNT2	cyclin T2
hsa-miR-512-5p	0	0	1	0	0	0	PLA2G4B	phospholipase A2, group IVB (cytosolic)
hsa-miR-512-5p	1	0	1	1	1	1	NAV1	neuron navigator 1
hsa-miR-512-5p	0	0	1	0	0	0	LOC286299	uncharacterized LOC286299
hsa-miR-512-5p	0	0	1	0	0	0	ZNRD1-AS1	ZNRD1 antisense RNA 1
hsa-miR-512-5p	1	0	1	1	1	1	EOGT	EGF domain-specific O-linked N-acetylglucosamine (GlcNAc) transferase
hsa-miR-512-5p	0	0	1	1	1	1	KIAA1328	KIAA1328
hsa-miR-512-5p	1	0	1	0	1	1	TBL1XR1	transducin (beta)-like 1 X-linked receptor 1
hsa-miR-512-5p	1	0	1	1	1	1	CREB3L2	cAMP responsive element binding protein 3-like 2
hsa-miR-512-5p	0	0	1	1	1	1	IPO11	importin 11
hsa-miR-512-5p	1	0	1	1	1	1	ARHGDIA	Rho GDP dissociation inhibitor (GDI) alpha
hsa-miR-512-5p	0	0	1	1	0	0	MRPL48	mitochondrial ribosomal protein L48
hsa-miR-512-5p	0	0	1	1	0	0	H2AFY2	H2A histone family, member Y2
hsa-miR-512-5p	1	0	1	1	1	1	FUT9	fucosyltransferase 9 (alpha (1,3) fucosyltransferase)
hsa-miR-512-5p	0	0	1	1	1	1	DGCR14	DiGeorge syndrome critical region gene 14
hsa-miR-512-5p	1	0	1	1	1	1	TARBP2	TAR (HIV-1) RNA binding protein 2
hsa-miR-512-5p	0	0	1	1	1	1	APH1A	anterior pharynx defective 1 homolog A (C. elegans)
hsa-miR-512-5p	1	0	1	0	1	1	SLCO2A1	solute carrier organic anion transporter family, member 2A1
hsa-miR-512-5p	0	0	1	1	1	1	CYTH2	cytohesin 2
hsa-miR-512-5p	1	0	1	1	1	1	SLC35D2	solute carrier family 35, member D2
hsa-miR-512-5p	1	0	1	1	1	1	RBM3	RNA binding motif (RNP1, RRM) protein 3
hsa-miR-512-5p	1	0	1	1	1	1	FGF11	fibroblast growth factor 11
hsa-miR-512-5p	0	0	1	1	1	1	CCDC132	coiled-coil domain containing 132
hsa-miR-512-5p	0	0	1	1	0	0	GTF2H4	general transcription factor IIH, polypeptide 4, 52kDa
hsa-miR-512-5p	0	0	1	1	1	1	TASP1	taspase, threonine aspartase, 1
hsa-miR-512-5p	1	0	1	1	1	1	CLTA	clathrin, light chain A
hsa-miR-512-5p	0	0	1	1	0	0	DNAJB2	DnaJ (Hsp40) homolog, subfamily B, member 2
hsa-miR-512-5p	1	0	1	0	1	1	EIF4H	eukaryotic translation initiation factor 4H
hsa-miR-512-5p	1	0	1	1	1	1	SMARCE1	SWI/SNF related, matrix associated, actin dependent regulator of chromatin, subfamily e, member 1
hsa-miR-512-5p	1	0	1	0	1	1	PTPLAD1	protein tyrosine phosphatase-like A domain containing 1
hsa-miR-512-5p	0	0	1	1	1	1	MTCP1	mature T-cell proliferation 1
hsa-miR-512-5p	0	0	1	0	1	1	CD99P1	CD99 molecule pseudogene 1
hsa-miR-512-5p	0	0	1	1	1	1	SORD	sorbitol dehydrogenase
hsa-miR-512-5p	1	0	1	1	1	1	HMGN1	high mobility group nucleosome binding domain 1
hsa-miR-512-5p	1	0	1	1	1	1	COPZ1	coatomer protein complex, subunit zeta 1
hsa-miR-512-5p	0	0	1	1	0	0	TUSC3	tumor suppressor candidate 3
hsa-miR-512-5p	0	0	1	1	0	0	KIAA0100	KIAA0100
hsa-miR-512-5p	0	0	1	1	0	0	PRMT7	protein arginine methyltransferase 7
hsa-miR-512-5p	0	0	1	0	0	0	LOC729678	uncharacterized LOC729678
hsa-miR-512-5p	1	0	1	1	1	1	LYPLA2	lysophospholipase II
hsa-miR-512-5p	1	0	1	1	1	1	MRPL19	mitochondrial ribosomal protein L19
hsa-miR-512-5p	0	0	1	1	0	0	ATRAID	all-trans retinoic acid-induced differentiation factor
hsa-miR-512-5p	1	0	1	1	1	1	WIPF1	WAS/WASL interacting protein family, member 1
hsa-miR-512-5p	0	0	1	1	1	1	TRIM38	tripartite motif containing 38
hsa-miR-512-5p	0	0	1	1	0	0	PSMD4	proteasome (prosome, macropain) 26S subunit, non-ATPase, 4
hsa-miR-512-5p	1	0	1	0	1	1	IP6K1	inositol hexakisphosphate kinase 1
hsa-miR-512-5p	0	0	1	1	0	0	NIT1	nitrilase 1
hsa-miR-512-5p	0	0	1	1	1	1	C1orf88	chromosome 1 open reading frame 88
hsa-miR-512-5p	0	0	1	1	0	0	NOX5	NADPH oxidase, EF-hand calcium binding domain 5
hsa-miR-512-5p	0	0	1	1	0	0	CCDC22	coiled-coil domain containing 22
hsa-miR-512-5p	1	0	1	1	1	1	EIF4A2	eukaryotic translation initiation factor 4A2
hsa-miR-512-5p	0	0	1	1	0	0	NARF	nuclear prelamin A recognition factor
hsa-miR-512-5p	0	0	1	1	1	1	BFAR	bifunctional apoptosis regulator
hsa-miR-512-5p	0	0	1	1	0	0	KCNK17	potassium channel, subfamily K, member 17
hsa-miR-512-5p	0	0	1	1	0	0	PHPT1	phosphohistidine phosphatase 1
hsa-miR-512-5p	1	0	1	0	1	1	GRAMD1A	GRAM domain containing 1A
hsa-miR-512-5p	1	0	1	1	1	1	F11R	F11 receptor
hsa-miR-512-5p	0	0	1	1	1	1	ZNF333	zinc finger protein 333
hsa-miR-512-5p	0	0	1	1	0	0	FXYD1	FXYD domain containing ion transport regulator 1
hsa-miR-512-5p	0	0	1	0	0	0	ZNF674-AS1	ZNF674 antisense RNA 1
hsa-miR-512-5p	1	0	1	1	1	1	CD40	CD40 molecule, TNF receptor superfamily member 5
hsa-miR-512-5p	0	0	1	1	0	0	OXA1L	oxidase (cytochrome c) assembly 1-like
hsa-miR-512-5p	1	0	1	1	1	1	GDA	guanine deaminase
hsa-miR-512-5p	0	0	1	1	0	0	ZNF276	zinc finger protein 276
hsa-miR-512-5p	0	0	1	0	0	0	CHEK2P2	checkpoint kinase 2 pseudogene 2
hsa-miR-512-5p	0	0	1	1	1	1	PTMA	prothymosin, alpha
hsa-miR-512-5p	1	0	1	1	1	1	MED1	mediator complex subunit 1
hsa-miR-512-5p	0	0	1	1	1	1	CIRBP	cold inducible RNA binding protein
hsa-miR-512-5p	0	0	1	1	1	1	C10orf2	chromosome 10 open reading frame 2
hsa-miR-512-5p	0	0	1	1	0	0	IL11RA	interleukin 11 receptor, alpha
hsa-miR-512-5p	1	0	1	1	1	1	RND3	Rho family GTPase 3
hsa-miR-512-5p	0	0	1	1	1	1	C9orf3	chromosome 9 open reading frame 3
hsa-miR-512-5p	0	0	1	1	1	1	VPS16	vacuolar protein sorting 16 homolog (S. cerevisiae)
hsa-miR-512-5p	0	0	1	1	1	1	CCP110	centriolar coiled coil protein 110kDa
hsa-miR-512-5p	1	0	1	1	1	1	FBXW7	F-box and WD repeat domain containing 7, E3 ubiquitin protein ligase
hsa-miR-512-5p	0	0	1	0	1	1	STARD8	StAR-related lipid transfer (START) domain containing 8
hsa-miR-512-5p	1	0	1	1	1	1	KIAA2018	KIAA2018
hsa-miR-512-5p	1	0	1	1	1	1	ANKS6	ankyrin repeat and sterile alpha motif domain containing 6
hsa-miR-512-5p	1	0	1	0	1	1	SLC7A6	solute carrier family 7 (amino acid transporter light chain, y+L system), member 6
hsa-miR-512-5p	0	0	1	0	0	0	MUC19	mucin 19, oligomeric
hsa-miR-512-5p	1	0	1	0	1	1	MCFD2	multiple coagulation factor deficiency 2
hsa-miR-512-5p	1	0	1	1	0	0	POMGNT1	protein O-linked mannose beta1,2-N-acetylglucosaminyltransferase
hsa-miR-512-5p	1	0	1	0	1	1	CNTNAP2	contactin associated protein-like 2
hsa-miR-512-5p	1	0	1	1	1	1	SLC30A7	solute carrier family 30 (zinc transporter), member 7
hsa-miR-512-5p	1	0	1	1	1	1	UBAP2L	ubiquitin associated protein 2-like
hsa-miR-512-5p	1	0	1	1	1	1	RBPMS	RNA binding protein with multiple splicing
hsa-miR-512-5p	1	0	1	1	1	1	RB1CC1	RB1-inducible coiled-coil 1
hsa-miR-512-5p	0	0	1	1	1	1	PTGS1	prostaglandin-endoperoxide synthase 1 (prostaglandin G/H synthase and cyclooxygenase)
hsa-miR-512-5p	1	0	1	1	1	1	ATP2B3	ATPase, Ca++ transporting, plasma membrane 3
hsa-miR-512-5p	0	0	1	1	1	1	CD274	CD274 molecule
hsa-miR-512-5p	1	0	1	1	1	1	QKI	QKI, KH domain containing, RNA binding
hsa-miR-512-5p	0	0	1	1	1	1	ALDH3B1	aldehyde dehydrogenase 3 family, member B1
hsa-miR-512-5p	0	0	1	0	1	1	ITGAM	integrin, alpha M (complement component 3 receptor 3 subunit)
hsa-miR-512-5p	1	0	1	1	1	1	ATP2B2	ATPase, Ca++ transporting, plasma membrane 2
hsa-miR-512-5p	0	0	1	0	0	0	HLA-DRB1	major histocompatibility complex, class II, DR beta 1
hsa-miR-512-5p	0	0	1	0	0	0	PVT1	Pvt1 oncogene (non-protein coding)
hsa-miR-512-5p	0	0	1	1	0	0	COL6A2	collagen, type VI, alpha 2
hsa-miR-512-5p	1	0	1	1	1	1	IGF1	insulin-like growth factor 1 (somatomedin C)
hsa-miR-512-5p	0	0	1	1	1	1	ELF1	E74-like factor 1 (ets domain transcription factor)
hsa-miR-512-5p	0	0	1	1	1	1	ALDOB	aldolase B, fructose-bisphosphate
hsa-miR-512-5p	1	0	1	1	1	1	DMD	dystrophin
hsa-miR-512-5p	1	0	1	0	1	1	EXT1	exostosin 1
hsa-miR-512-5p	0	0	1	0	1	1	MS4A2	membrane-spanning 4-domains, subfamily A, member 2
hsa-miR-512-5p	0	0	1	1	0	0	GBA	glucosidase, beta, acid
hsa-miR-512-5p	1	0	1	1	1	1	GJA1	gap junction protein, alpha 1, 43kDa
hsa-miR-512-5p	1	0	1	1	1	1	TBX5	T-box 5
hsa-miR-512-5p	1	0	1	0	1	1	ITGB3	integrin, beta 3 (platelet glycoprotein IIIa, antigen CD61)
hsa-miR-512-5p	1	0	1	1	1	1	KCNA1	potassium voltage-gated channel, shaker-related subfamily, member 1 (episodic ataxia with myokymia)
hsa-miR-512-5p	1	0	1	1	1	1	ATXN1	ataxin 1
hsa-miR-512-5p	1	0	1	1	1	1	TIMP3	TIMP metallopeptidase inhibitor 3
hsa-miR-512-5p	0	0	1	1	1	1	CASR	calcium-sensing receptor
hsa-miR-512-5p	0	0	1	1	1	1	LTBP2	latent transforming growth factor beta binding protein 2
hsa-miR-512-5p	1	0	1	0	1	1	PAFAH1B1	platelet-activating factor acetylhydrolase 1b, regulatory subunit 1 (45kDa)
hsa-miR-512-5p	1	0	1	1	0	0	NOTCH3	notch 3
hsa-miR-512-5p	0	0	1	1	1	1	OXCT1	3-oxoacid CoA transferase 1
hsa-miR-512-5p	1	0	1	0	1	1	PCSK1	proprotein convertase subtilisin/kexin type 1
hsa-miR-512-5p	1	0	1	1	1	1	RFX5	regulatory factor X, 5 (influences HLA class II expression)
hsa-miR-512-5p	1	0	1	1	1	1	ATRX	alpha thalassemia/mental retardation syndrome X-linked
hsa-miR-512-5p	0	0	1	1	0	0	C1QB	complement component 1, q subcomponent, B chain
hsa-miR-512-5p	1	0	1	1	1	1	DCX	doublecortin
hsa-miR-512-5p	1	0	1	1	1	1	TNF	tumor necrosis factor
hsa-miR-512-5p	0	0	1	1	1	1	IL6	interleukin 6 (interferon, beta 2)
hsa-miR-512-5p	1	0	1	1	1	1	CD44	CD44 molecule (Indian blood group)
hsa-miR-512-5p	0	0	1	1	1	1	SOD2	superoxide dismutase 2, mitochondrial
hsa-miR-512-5p	1	0	1	1	1	1	CHRM1	cholinergic receptor, muscarinic 1
hsa-miR-512-5p	0	0	1	1	0	0	CYP27A1	cytochrome P450, family 27, subfamily A, polypeptide 1
hsa-miR-512-5p	1	0	1	1	1	1	DIO2	deiodinase, iodothyronine, type II
hsa-miR-512-5p	0	0	1	1	1	1	GRM3	glutamate receptor, metabotropic 3
hsa-miR-512-5p	1	0	1	1	1	1	HTR4	5-hydroxytryptamine (serotonin) receptor 4, G protein-coupled
hsa-miR-512-5p	0	0	1	1	1	1	HTR7	5-hydroxytryptamine (serotonin) receptor 7, adenylate cyclase-coupled
hsa-miR-512-5p	1	0	1	1	1	1	IGF1R	insulin-like growth factor 1 receptor
hsa-miR-512-5p	0	0	1	1	1	1	BLOC1S2	biogenesis of lysosomal organelles complex-1, subunit 2
hsa-miR-512-5p	0	0	1	1	0	0	TSR3	TSR3, 20S rRNA accumulation, homolog (S. cerevisiae)
hsa-miR-512-5p	0	0	1	1	1	1	CC2D2B	coiled-coil and C2 domain containing 2B
hsa-miR-512-5p	1	0	1	1	1	1	C14orf37	chromosome 14 open reading frame 37
hsa-miR-512-5p	1	0	1	0	1	1	CLDN18	claudin 18
hsa-miR-512-5p	0	0	1	0	0	0	KLK2	kallikrein-related peptidase 2
hsa-miR-512-5p	1	0	1	1	1	1	LCLAT1	lysocardiolipin acyltransferase 1
hsa-miR-512-5p	1	0	1	1	1	1	KCTD11	potassium channel tetramerisation domain containing 11
hsa-miR-512-5p	1	0	1	1	1	1	ABLIM1	actin binding LIM protein 1
hsa-miR-512-5p	1	0	1	1	1	1	KLHL31	kelch-like 31 (Drosophila)
hsa-miR-512-5p	1	0	1	0	1	1	BMF	Bcl2 modifying factor
hsa-miR-512-5p	0	0	1	1	1	1	ZCCHC16	zinc finger, CCHC domain containing 16
hsa-miR-512-5p	0	0	1	1	1	1	DBX2	developing brain homeobox 2
hsa-miR-512-5p	1	0	1	0	1	1	LRRC55	leucine rich repeat containing 55
hsa-miR-512-5p	1	0	1	0	1	1	YPEL2	yippee-like 2 (Drosophila)
hsa-miR-512-5p	1	0	1	1	1	1	NFKBIZ	nuclear factor of kappa light polypeptide gene enhancer in B-cells inhibitor, zeta
hsa-miR-512-5p	0	0	1	1	1	1	MAPKAP1	mitogen-activated protein kinase associated protein 1
hsa-miR-512-5p	1	0	1	1	0	0	SDC1	syndecan 1
hsa-miR-512-5p	1	0	1	1	1	1	ATN1	atrophin 1
hsa-miR-512-5p	0	0	1	1	1	1	SCP2	sterol carrier protein 2
hsa-miR-512-5p	1	0	1	1	1	1	SPOP	speckle-type POZ protein
hsa-miR-512-5p	1	0	1	1	1	1	IGSF3	immunoglobulin superfamily, member 3
hsa-miR-512-5p	1	0	1	1	1	1	BRWD1	bromodomain and WD repeat domain containing 1
hsa-miR-512-5p	1	0	1	1	1	1	ZDHHC9	zinc finger, DHHC-type containing 9
hsa-miR-512-5p	1	0	1	0	1	1	C18orf25	chromosome 18 open reading frame 25
hsa-miR-512-5p	1	0	1	0	1	1	KIAA2022	KIAA2022
hsa-miR-512-5p	0	0	1	1	1	1	MXI1	MAX interactor 1
hsa-miR-512-5p	1	0	1	1	1	1	FNIP1	folliculin interacting protein 1
hsa-miR-512-5p	1	0	1	1	1	1	CUL4A	cullin 4A
hsa-miR-512-5p	0	0	1	1	1	1	SPIN3	spindlin family, member 3
hsa-miR-512-5p	0	0	1	1	1	1	MUC21	mucin 21, cell surface associated
hsa-miR-512-5p	1	0	1	1	1	1	FAM171A1	family with sequence similarity 171, member A1
hsa-miR-512-5p	1	0	1	0	1	1	FAM125B	family with sequence similarity 125, member B
hsa-miR-512-5p	0	0	1	1	0	0	PNLIPRP3	pancreatic lipase-related protein 3
hsa-miR-512-5p	1	0	1	1	1	1	CTNNBIP1	catenin, beta interacting protein 1
hsa-miR-512-5p	0	0	1	1	0	0	RGR	retinal G protein coupled receptor
hsa-miR-512-5p	0	0	1	1	0	0	VSIG8	V-set and immunoglobulin domain containing 8
hsa-miR-512-5p	0	0	1	0	1	1	LINC00268	long intergenic non-protein coding RNA 268
hsa-miR-512-5p	1	0	1	1	1	1	PHF6	PHD finger protein 6
hsa-miR-512-5p	1	0	1	1	1	1	TMCC1	transmembrane and coiled-coil domain family 1
hsa-miR-512-5p	0	0	1	1	1	1	USP1	ubiquitin specific peptidase 1
hsa-miR-512-5p	1	0	1	1	1	1	PFKFB2	6-phosphofructo-2-kinase/fructose-2,6-biphosphatase 2
hsa-miR-512-5p	1	0	1	1	1	1	NTRK2	neurotrophic tyrosine kinase, receptor, type 2
hsa-miR-512-5p	0	0	1	1	1	1	POLR2M	polymerase (RNA) II (DNA directed) polypeptide M
hsa-miR-512-5p	1	0	1	1	1	1	MAGI1	membrane associated guanylate kinase, WW and PDZ domain containing 1
hsa-miR-512-5p	1	0	1	1	1	1	ZNF704	zinc finger protein 704
hsa-miR-512-5p	0	0	1	1	1	1	ERP29	endoplasmic reticulum protein 29
hsa-miR-512-5p	1	0	1	1	1	1	SMOC1	SPARC related modular calcium binding 1
hsa-miR-512-5p	1	0	1	1	1	1	AGAP1	ArfGAP with GTPase domain, ankyrin repeat and PH domain 1
hsa-miR-512-5p	0	0	1	0	0	0	FER1L6	fer-1-like 6 (C. elegans)
hsa-miR-512-5p	0	0	1	1	1	1	ATAD3C	ATPase family, AAA domain containing 3C
hsa-miR-512-5p	1	0	1	1	1	1	KCNC4	potassium voltage-gated channel, Shaw-related subfamily, member 4
hsa-miR-512-5p	1	0	1	0	1	1	CREBZF	CREB/ATF bZIP transcription factor
hsa-miR-512-5p	1	0	1	1	1	1	C3orf65	chromosome 3 open reading frame 65
hsa-miR-512-5p	0	0	1	0	0	0	C19orf55	chromosome 19 open reading frame 55
hsa-miR-512-5p	1	0	1	1	1	1	CHN2	chimerin (chimaerin) 2
hsa-miR-512-5p	1	0	1	1	1	1	PPP4R1	protein phosphatase 4, regulatory subunit 1
hsa-miR-512-5p	1	0	1	1	1	1	ZC2HC1C	zinc finger, C2HC-type containing 1C
hsa-miR-512-5p	0	0	1	1	1	1	CARHSP1	calcium regulated heat stable protein 1, 24kDa
hsa-miR-512-5p	1	0	1	1	1	1	SLC9A6	solute carrier family 9, subfamily A (NHE6, cation proton antiporter 6), member 6
hsa-miR-512-5p	1	0	1	1	1	1	NSL1	NSL1, MIND kinetochore complex component, homolog (S. cerevisiae)
hsa-miR-512-5p	1	0	1	1	1	1	KDM5A	lysine (K)-specific demethylase 5A
hsa-miR-512-5p	1	0	1	1	1	1	RERE	arginine-glutamic acid dipeptide (RE) repeats
hsa-miR-512-5p	1	0	1	1	1	1	PDE11A	phosphodiesterase 11A
hsa-miR-512-5p	1	0	1	1	1	1	ATG9A	autophagy related 9A
hsa-miR-512-5p	1	0	1	1	1	1	PHF16	PHD finger protein 16
hsa-miR-512-5p	0	0	1	1	0	0	VPS37D	vacuolar protein sorting 37 homolog D (S. cerevisiae)
hsa-miR-512-5p	1	0	1	1	1	1	VAV3	vav 3 guanine nucleotide exchange factor
hsa-miR-512-5p	1	0	1	1	1	1	FAM155A	family with sequence similarity 155, member A
hsa-miR-512-5p	1	0	1	1	1	1	KIAA0368	KIAA0368
hsa-miR-512-5p	0	0	1	0	0	0	C16orf90	chromosome 16 open reading frame 90
hsa-miR-512-5p	0	0	1	1	1	1	SNTN	sentan, cilia apical structure protein
hsa-miR-512-5p	0	0	1	0	1	1	ISCA1P1	iron-sulfur cluster assembly 1 homolog (S. cerevisiae) pseudogene 1
hsa-miR-512-5p	0	0	1	1	1	1	PRAMEF12	PRAME family member 12
hsa-miR-512-5p	1	0	1	1	1	1	ADCY9	adenylate cyclase 9
hsa-miR-512-5p	1	0	1	1	1	1	ADCYAP1	adenylate cyclase activating polypeptide 1 (pituitary)
hsa-miR-512-5p	1	0	1	0	1	1	BMPR2	bone morphogenetic protein receptor, type II (serine/threonine kinase)
hsa-miR-512-5p	0	0	1	1	1	1	ENTPD3	ectonucleoside triphosphate diphosphohydrolase 3
hsa-miR-512-5p	1	0	1	0	1	1	CDK6	cyclin-dependent kinase 6
hsa-miR-512-5p	1	0	1	1	1	1	KLF6	Kruppel-like factor 6
hsa-miR-512-5p	1	0	1	1	1	1	DYRK1A	dual-specificity tyrosine-(Y)-phosphorylation regulated kinase 1A
hsa-miR-512-5p	1	0	1	1	1	1	CELSR3	cadherin, EGF LAG seven-pass G-type receptor 3 (flamingo homolog, Drosophila)
hsa-miR-512-5p	1	0	1	1	1	1	CELSR2	cadherin, EGF LAG seven-pass G-type receptor 2 (flamingo homolog, Drosophila)
hsa-miR-512-5p	1	0	1	1	1	1	ELAVL1	ELAV (embryonic lethal, abnormal vision, Drosophila)-like 1 (Hu antigen R)
hsa-miR-512-5p	0	0	1	0	1	1	ELF5	E74-like factor 5 (ets domain transcription factor)
hsa-miR-512-5p	1	0	1	1	1	1	FOXF2	forkhead box F2
hsa-miR-512-5p	1	0	1	1	1	1	NDST1	N-deacetylase/N-sulfotransferase (heparan glucosaminyl) 1
hsa-miR-512-5p	1	0	1	1	1	1	ADRBK1	adrenergic, beta, receptor kinase 1
hsa-miR-512-5p	0	0	1	1	1	1	AKR1B1	aldo-keto reductase family 1, member B1 (aldose reductase)
hsa-miR-512-5p	1	0	1	0	1	1	ARNT	aryl hydrocarbon receptor nuclear translocator
hsa-miR-512-5p	1	0	1	0	1	1	BMP8B	bone morphogenetic protein 8b
hsa-miR-512-5p	1	0	1	0	1	1	CCND2	cyclin D2
hsa-miR-512-5p	0	0	1	1	1	1	CD1D	CD1d molecule
hsa-miR-512-5p	0	0	1	1	1	1	CKS1B	CDC28 protein kinase regulatory subunit 1B
hsa-miR-512-5p	1	0	1	1	1	1	CTNNB1	catenin (cadherin-associated protein), beta 1, 88kDa
hsa-miR-512-5p	1	0	1	1	1	1	DR1	down-regulator of transcription 1, TBP-binding (negative cofactor 2)
hsa-miR-512-5p	1	0	1	1	1	1	GAB1	GRB2-associated binding protein 1
hsa-miR-512-5p	0	0	1	1	1	1	GFAP	glial fibrillary acidic protein
hsa-miR-512-5p	0	0	1	1	1	1	HOXA4	homeobox A4
hsa-miR-512-5p	0	0	1	1	1	1	HOXB5	homeobox B5
hsa-miR-512-5p	1	0	1	1	1	1	ITPR2	inositol 1,4,5-trisphosphate receptor, type 2
hsa-miR-512-5p	0	0	1	1	1	1	KCNJ15	potassium inwardly-rectifying channel, subfamily J, member 15
hsa-miR-512-5p	0	0	1	0	1	1	KCNN1	potassium intermediate/small conductance calcium-activated channel, subfamily N, member 1
hsa-miR-512-5p	1	0	1	0	1	1	KIF3C	kinesin family member 3C
hsa-miR-512-5p	1	0	1	1	1	1	LIMK1	LIM domain kinase 1
hsa-miR-512-5p	1	0	1	1	1	1	M6PR	mannose-6-phosphate receptor (cation dependent)
hsa-miR-512-5p	1	0	1	1	1	1	MN1	meningioma (disrupted in balanced translocation) 1
hsa-miR-512-5p	0	0	1	1	1	1	MRC1	mannose receptor, C type 1
hsa-miR-512-5p	1	0	1	1	1	1	MSN	moesin
hsa-miR-512-5p	1	0	1	1	1	1	PPP1R12B	protein phosphatase 1, regulatory subunit 12B
hsa-miR-512-5p	1	0	1	1	1	1	NGFR	nerve growth factor receptor
hsa-miR-512-5p	0	0	1	1	1	1	NID1	nidogen 1
hsa-miR-512-5p	1	0	1	1	1	1	NPTX1	neuronal pentraxin I
hsa-miR-512-5p	0	0	1	0	1	1	OAZ2	ornithine decarboxylase antizyme 2
hsa-miR-512-5p	0	0	1	0	1	1	OPHN1	oligophrenin 1
hsa-miR-512-5p	1	0	1	1	1	1	PLAGL2	pleiomorphic adenoma gene-like 2
hsa-miR-512-5p	0	0	1	0	0	0	PSMB10	proteasome (prosome, macropain) subunit, beta type, 10
hsa-miR-512-5p	0	0	1	1	1	1	PSMD10	proteasome (prosome, macropain) 26S subunit, non-ATPase, 10
hsa-miR-512-5p	1	0	1	1	1	1	PTPN9	protein tyrosine phosphatase, non-receptor type 9
hsa-miR-512-5p	0	0	1	1	1	1	PTPRM	protein tyrosine phosphatase, receptor type, M
hsa-miR-512-5p	1	0	1	1	1	1	PVRL1	poliovirus receptor-related 1 (herpesvirus entry mediator C)
hsa-miR-512-5p	0	0	1	0	1	1	RAB3B	RAB3B, member RAS oncogene family
hsa-miR-512-5p	1	0	1	1	1	1	CCL21	chemokine (C-C motif) ligand 21
hsa-miR-512-5p	1	0	1	0	1	1	CCL22	chemokine (C-C motif) ligand 22
hsa-miR-512-5p	0	0	1	0	1	1	CXCL5	chemokine (C-X-C motif) ligand 5
hsa-miR-512-5p	0	0	1	1	1	1	SDC4	syndecan 4
hsa-miR-512-5p	0	0	1	0	0	0	SEPW1	selenoprotein W, 1
hsa-miR-512-5p	1	0	1	1	1	1	SHB	Src homology 2 domain containing adaptor protein B
hsa-miR-512-5p	1	0	1	1	1	1	ST8SIA1	ST8 alpha-N-acetyl-neuraminide alpha-2,8-sialyltransferase 1
hsa-miR-512-5p	1	0	1	1	1	1	SMARCD1	SWI/SNF related, matrix associated, actin dependent regulator of chromatin, subfamily d, member 1
hsa-miR-512-5p	1	0	1	1	1	1	SRF	serum response factor (c-fos serum response element-binding transcription factor)
hsa-miR-512-5p	1	0	1	1	1	1	STAC	SH3 and cysteine rich domain
hsa-miR-512-5p	1	0	1	0	1	1	STC1	stanniocalcin 1
hsa-miR-512-5p	0	0	1	1	1	1	SULT2A1	sulfotransferase family, cytosolic, 2A, dehydroepiandrosterone (DHEA)-preferring, member 1
hsa-miR-512-5p	1	0	1	0	1	1	TAL1	T-cell acute lymphocytic leukemia 1
hsa-miR-512-5p	1	0	1	1	1	1	NR2E1	nuclear receptor subfamily 2, group E, member 1
hsa-miR-512-5p	1	0	1	1	1	1	UBE2B	ubiquitin-conjugating enzyme E2B
hsa-miR-512-5p	1	0	1	1	1	1	CUL5	cullin 5
hsa-miR-512-5p	0	0	1	1	1	1	SOAT2	sterol O-acyltransferase 2
hsa-miR-512-5p	0	0	1	1	0	0	SEMA7A	semaphorin 7A, GPI membrane anchor (John Milton Hagen blood group)
hsa-miR-512-5p	1	0	1	0	1	1	TNKS	tankyrase, TRF1-interacting ankyrin-related ADP-ribose polymerase
hsa-miR-512-5p	0	0	1	1	1	1	EIF3A	eukaryotic translation initiation factor 3, subunit A
hsa-miR-512-5p	0	0	1	1	1	1	TNFSF13	tumor necrosis factor (ligand) superfamily, member 13
hsa-miR-512-5p	1	0	1	0	1	1	ST13	suppression of tumorigenicity 13 (colon carcinoma) (Hsp70 interacting protein)
hsa-miR-512-5p	1	0	1	1	1	1	BCL2L2	BCL2-like 2
hsa-miR-512-5p	0	0	1	1	1	1	FEN1	flap structure-specific endonuclease 1
hsa-miR-512-5p	0	0	1	1	1	1	GZMB	granzyme B (granzyme 2, cytotoxic T-lymphocyte-associated serine esterase 1)
hsa-miR-512-5p	1	0	1	0	1	1	SLC1A2	solute carrier family 1 (glial high affinity glutamate transporter), member 2
hsa-miR-512-5p	0	0	1	0	1	1	SLC1A3	solute carrier family 1 (glial high affinity glutamate transporter), member 3
hsa-miR-512-5p	0	0	1	1	1	1	HOMER1	homer homolog 1 (Drosophila)
hsa-miR-512-5p	1	0	1	0	1	1	ACVR1B	activin A receptor, type IB
hsa-miR-512-5p	1	0	1	1	1	1	BNIP2	BCL2/adenovirus E1B 19kDa interacting protein 2
hsa-miR-512-5p	0	0	1	1	1	1	CEACAM5	carcinoembryonic antigen-related cell adhesion molecule 5
hsa-miR-512-5p	1	0	1	0	1	1	CEBPA	CCAAT/enhancer binding protein (C/EBP), alpha
hsa-miR-512-5p	1	0	1	1	1	1	DACH1	dachshund homolog 1 (Drosophila)
hsa-miR-512-5p	1	0	1	1	1	1	DAG1	dystroglycan 1 (dystrophin-associated glycoprotein 1)
hsa-miR-512-5p	1	0	1	1	1	1	ENSA	endosulfine alpha
hsa-miR-512-5p	1	0	1	1	1	1	EPHB3	EPH receptor B3
hsa-miR-512-5p	1	0	1	0	1	1	ETV5	ets variant 5
hsa-miR-512-5p	0	0	1	1	1	1	GPC5	glypican 5
hsa-miR-512-5p	1	0	1	1	1	1	FOXD2	forkhead box D2
hsa-miR-512-5p	1	0	1	0	1	1	ARHGAP35	Rho GTPase activating protein 35
hsa-miR-512-5p	1	0	1	1	1	1	WNT11	wingless-type MMTV integration site family, member 11
hsa-miR-512-5p	1	0	1	1	1	1	COIL	coilin
hsa-miR-512-5p	0	0	1	1	0	0	PRY	PTPN13-like, Y-linked
hsa-miR-512-5p	0	0	1	0	0	0	XKRY	XK, Kell blood group complex subunit-related, Y-linked
hsa-miR-512-5p	1	0	1	1	1	1	MTMR4	myotubularin related protein 4
hsa-miR-512-5p	0	0	1	1	1	1	SLC33A1	solute carrier family 33 (acetyl-CoA transporter), member 1
hsa-miR-512-5p	1	0	1	1	1	1	STK17A	serine/threonine kinase 17a
hsa-miR-512-5p	0	0	1	0	1	1	ADIPOQ	adiponectin, C1Q and collagen domain containing
hsa-miR-512-5p	1	0	1	0	1	1	CDYL	chromodomain protein, Y-like
hsa-miR-512-5p	1	0	1	1	1	1	ONECUT2	one cut homeobox 2
hsa-miR-512-5p	1	0	1	1	1	1	VPS4B	vacuolar protein sorting 4 homolog B (S. cerevisiae)
hsa-miR-512-5p	0	0	1	1	1	1	CD8B	CD8b molecule
hsa-miR-512-5p	0	0	1	1	1	1	GDF10	growth differentiation factor 10
hsa-miR-512-5p	1	0	1	1	0	0	MMP14	matrix metallopeptidase 14 (membrane-inserted)
hsa-miR-512-5p	1	0	1	0	1	1	SCD	stearoyl-CoA desaturase (delta-9-desaturase)
hsa-miR-512-5p	1	0	1	1	1	1	SFPQ	splicing factor proline/glutamine-rich
hsa-miR-512-5p	1	0	1	1	0	0	ZMYM3	zinc finger, MYM-type 3
hsa-miR-512-5p	1	0	1	1	1	1	SLC23A2	solute carrier family 23 (nucleobase transporters), member 2
hsa-miR-512-5p	1	0	1	0	1	1	NUP153	nucleoporin 153kDa
hsa-miR-512-5p	0	0	1	1	1	1	CLEC2B	C-type lectin domain family 2, member B
hsa-miR-512-5p	1	0	1	1	1	1	CRK	v-crk sarcoma virus CT10 oncogene homolog (avian)
hsa-miR-512-5p	1	0	1	1	1	1	DLX3	distal-less homeobox 3
hsa-miR-512-5p	0	0	1	1	1	1	PDIA3	protein disulfide isomerase family A, member 3
hsa-miR-512-5p	0	0	1	1	0	0	NCKAP1L	NCK-associated protein 1-like
hsa-miR-512-5p	1	0	1	1	1	1	HIP1	huntingtin interacting protein 1
hsa-miR-512-5p	1	0	1	1	1	1	PHF2	PHD finger protein 2
hsa-miR-512-5p	1	0	1	0	1	1	PRKAB2	protein kinase, AMP-activated, beta 2 non-catalytic subunit
hsa-miR-512-5p	1	0	1	0	1	1	PRKCE	protein kinase C, epsilon
hsa-miR-512-5p	0	0	1	1	1	1	NCOA4	nuclear receptor coactivator 4
hsa-miR-512-5p	1	0	1	1	1	1	RND2	Rho family GTPase 2
hsa-miR-512-5p	1	0	1	1	1	1	IRS1	insulin receptor substrate 1
hsa-miR-512-5p	1	0	1	1	1	1	RGS4	regulator of G-protein signaling 4
hsa-miR-512-5p	1	0	1	1	1	1	TMPRSS2	transmembrane protease, serine 2
hsa-miR-512-5p	0	0	1	1	1	1	SLC35A2	solute carrier family 35 (UDP-galactose transporter), member A2
hsa-miR-512-5p	1	0	1	1	1	1	DNAL4	dynein, axonemal, light chain 4
hsa-miR-512-5p	1	0	1	0	1	1	DCAF7	DDB1 and CUL4 associated factor 7
hsa-miR-512-5p	1	0	1	0	1	1	SPRY3	sprouty homolog 3 (Drosophila)
hsa-miR-512-5p	0	0	1	1	1	1	DSCR4	Down syndrome critical region gene 4
hsa-miR-512-5p	0	0	1	1	1	1	CD5L	CD5 molecule-like
hsa-miR-512-5p	1	0	1	0	1	1	MAP1B	microtubule-associated protein 1B
hsa-miR-512-5p	1	0	1	1	1	1	HS3ST4	heparan sulfate (glucosamine) 3-O-sulfotransferase 4
hsa-miR-512-5p	0	0	1	1	1	1	SMYD5	SMYD family member 5
hsa-miR-512-5p	0	0	1	1	1	1	TRIM22	tripartite motif containing 22
hsa-miR-512-5p	0	0	1	1	1	1	MICU1	mitochondrial calcium uptake 1
hsa-miR-512-5p	1	0	1	1	1	1	SEMA3A	sema domain, immunoglobulin domain (Ig), short basic domain, secreted, (semaphorin) 3A
hsa-miR-512-5p	0	0	1	1	0	0	WFDC2	WAP four-disulfide core domain 2
hsa-miR-512-5p	1	0	1	1	1	1	SPON1	spondin 1, extracellular matrix protein
hsa-miR-512-5p	1	0	1	1	1	1	DYNC1LI2	dynein, cytoplasmic 1, light intermediate chain 2
hsa-miR-512-5p	1	0	1	1	1	1	PRKAA1	protein kinase, AMP-activated, alpha 1 catalytic subunit
hsa-miR-512-5p	0	0	1	1	1	1	PRKG2	protein kinase, cGMP-dependent, type II
hsa-miR-512-5p	1	0	1	1	1	1	ITSN2	intersectin 2
hsa-miR-512-5p	1	0	1	1	1	1	ZER1	zer-1 homolog (C. elegans)
hsa-miR-512-5p	1	0	1	1	1	1	ZNF238	zinc finger protein 238
hsa-miR-512-5p	0	0	1	1	1	1	LRRC41	leucine rich repeat containing 41
hsa-miR-512-5p	1	0	1	1	1	1	NEBL	nebulette
hsa-miR-512-5p	0	0	1	0	1	1	SLC16A2	solute carrier family 16, member 2 (thyroid hormone transporter)
hsa-miR-512-5p	0	0	1	1	1	1	POLD3	polymerase (DNA-directed), delta 3, accessory subunit
hsa-miR-512-5p	0	0	1	1	1	1	CD300C	CD300c molecule
hsa-miR-512-5p	1	0	1	1	1	1	MMP24	matrix metallopeptidase 24 (membrane-inserted)
hsa-miR-512-5p	1	0	1	1	1	1	LAPTM5	lysosomal protein transmembrane 5
hsa-miR-512-5p	1	0	1	1	1	1	NR4A3	nuclear receptor subfamily 4, group A, member 3
hsa-miR-512-5p	1	0	1	0	1	1	PAPD7	PAP associated domain containing 7
hsa-miR-512-5p	0	0	1	1	1	1	RPP14	ribonuclease P/MRP 14kDa subunit
hsa-miR-512-5p	1	0	1	1	1	1	SOX21	SRY (sex determining region Y)-box 21
hsa-miR-512-5p	1	0	1	1	1	1	FSTL1	follistatin-like 1
hsa-miR-512-5p	1	0	1	1	1	1	UTRN	utrophin
hsa-miR-512-5p	1	0	1	1	1	1	ZNF81	zinc finger protein 81
hsa-miR-512-5p	1	0	1	1	1	1	KLF12	Kruppel-like factor 12
hsa-miR-512-5p	0	0	1	1	1	1	KLF8	Kruppel-like factor 8
hsa-miR-512-5p	0	0	1	0	0	0	PHB2	prohibitin 2
hsa-miR-512-5p	1	0	1	1	1	1	ZNF236	zinc finger protein 236
hsa-miR-512-5p	1	0	1	1	1	1	PHLDA1	pleckstrin homology-like domain, family A, member 1
hsa-miR-512-5p	0	0	1	1	1	1	MMRN1	multimerin 1
hsa-miR-512-5p	1	0	1	1	1	1	CASC3	cancer susceptibility candidate 3
hsa-miR-512-5p	1	0	1	1	1	1	TARDBP	TAR DNA binding protein
hsa-miR-512-5p	1	0	1	0	1	1	ZFPM2	zinc finger protein, multitype 2
hsa-miR-512-5p	0	0	1	1	1	1	GLUD2	glutamate dehydrogenase 2
hsa-miR-512-5p	0	0	1	1	1	1	EHF	ets homologous factor
hsa-miR-512-5p	1	0	1	1	1	1	RHOQ	ras homolog family member Q
hsa-miR-512-5p	1	0	1	1	1	1	KCND2	potassium voltage-gated channel, Shal-related subfamily, member 2
hsa-miR-512-5p	1	0	1	1	1	1	KCNH4	potassium voltage-gated channel, subfamily H (eag-related), member 4
hsa-miR-512-5p	1	0	1	0	1	1	RAPGEF5	Rap guanine nucleotide exchange factor (GEF) 5
hsa-miR-512-5p	1	0	1	1	1	1	TRPC5	transient receptor potential cation channel, subfamily C, member 5
hsa-miR-512-5p	0	0	1	1	1	1	N6AMT1	N-6 adenine-specific DNA methyltransferase 1 (putative)
hsa-miR-512-5p	1	0	1	0	1	1	TRHDE	thyrotropin-releasing hormone degrading enzyme
hsa-miR-512-5p	0	0	1	1	1	1	UBQLN1	ubiquilin 1
hsa-miR-512-5p	1	0	1	1	1	1	PAX8	paired box 8
hsa-miR-512-5p	1	0	1	1	0	0	DEXI	Dexi homolog (mouse)
hsa-miR-512-5p	1	0	1	1	1	1	WDR37	WD repeat domain 37
hsa-miR-512-5p	1	0	1	0	1	1	C16orf72	chromosome 16 open reading frame 72
hsa-miR-512-5p	0	0	1	1	1	1	ORMDL2	ORM1-like 2 (S. cerevisiae)
hsa-miR-512-5p	0	0	1	0	1	1	SCN8A	sodium channel, voltage gated, type VIII, alpha subunit
hsa-miR-512-5p	0	0	1	0	1	1	ADAMTS3	ADAM metallopeptidase with thrombospondin type 1 motif, 3
hsa-miR-512-5p	0	0	1	1	1	1	IL1RAPL1	interleukin 1 receptor accessory protein-like 1
hsa-miR-512-5p	1	0	1	1	1	1	LEMD3	LEM domain containing 3
hsa-miR-512-5p	0	0	1	1	1	1	DAPK2	death-associated protein kinase 2
hsa-miR-512-5p	1	0	1	1	1	1	LHX6	LIM homeobox 6
hsa-miR-512-5p	1	0	1	0	1	1	DIEXF	digestive organ expansion factor homolog (zebrafish)
hsa-miR-512-5p	1	0	1	1	1	1	CSDC2	cold shock domain containing C2, RNA binding
hsa-miR-512-5p	1	0	1	1	1	1	RND1	Rho family GTPase 1
hsa-miR-512-5p	0	0	1	1	0	0	APOBEC3C	apolipoprotein B mRNA editing enzyme, catalytic polypeptide-like 3C
hsa-miR-512-5p	0	0	1	1	1	1	TMOD2	tropomodulin 2 (neuronal)
hsa-miR-512-5p	1	0	1	1	1	1	SLC40A1	solute carrier family 40 (iron-regulated transporter), member 1
hsa-miR-512-5p	1	0	1	1	1	1	HERC3	HECT and RLD domain containing E3 ubiquitin protein ligase 3
hsa-miR-512-5p	0	0	1	1	0	0	HOXD4	homeobox D4
hsa-miR-512-5p	1	0	1	1	1	1	RALGPS1	Ral GEF with PH domain and SH3 binding motif 1
hsa-miR-512-5p	0	0	1	1	1	1	FAM53B	family with sequence similarity 53, member B
hsa-miR-512-5p	1	0	1	1	1	1	KDM4A	lysine (K)-specific demethylase 4A
hsa-miR-512-5p	0	0	1	1	1	1	ZNF536	zinc finger protein 536
hsa-miR-512-5p	1	0	1	1	1	1	TBKBP1	TBK1 binding protein 1
hsa-miR-512-5p	0	0	1	0	1	1	DHCR24	24-dehydrocholesterol reductase
hsa-miR-512-5p	1	0	1	1	1	1	KIAA0753	KIAA0753
hsa-miR-512-5p	1	0	1	0	1	1	TRIL	TLR4 interactor with leucine-rich repeats
hsa-miR-512-5p	1	0	1	1	1	1	TBC1D4	TBC1 domain family, member 4
hsa-miR-512-5p	1	0	1	1	1	1	JOSD1	Josephin domain containing 1
hsa-miR-512-5p	1	0	1	0	1	1	ICK	intestinal cell (MAK-like) kinase
hsa-miR-512-5p	0	0	1	1	0	0	RBM34	RNA binding motif protein 34
hsa-miR-512-5p	1	0	1	1	1	1	PHLPP2	PH domain and leucine rich repeat protein phosphatase 2
hsa-miR-512-5p	1	0	1	0	1	1	NMNAT2	nicotinamide nucleotide adenylyltransferase 2
hsa-miR-512-5p	1	0	1	0	1	1	ZNF609	zinc finger protein 609
hsa-miR-512-5p	1	0	1	1	1	1	PRRC2C	proline-rich coiled-coil 2C
hsa-miR-512-5p	1	0	1	1	1	1	MYO1D	myosin ID
hsa-miR-512-5p	1	0	1	1	1	1	NUDCD3	NudC domain containing 3
hsa-miR-512-5p	0	0	1	0	1	1	ZDHHC17	zinc finger, DHHC-type containing 17
hsa-miR-512-5p	1	0	1	1	1	1	RIMBP2	RIMS binding protein 2
hsa-miR-512-5p	1	0	1	1	1	1	DSTYK	dual serine/threonine and tyrosine protein kinase
hsa-miR-512-5p	1	0	1	1	1	1	MOB4	MOB family member 4, phocein
hsa-miR-512-5p	1	0	1	1	1	1	PARM1	prostate androgen-regulated mucin-like protein 1
hsa-miR-512-5p	1	0	1	1	1	1	LRRTM2	leucine rich repeat transmembrane neuronal 2
hsa-miR-512-5p	1	0	1	0	1	1	PPP1R16B	protein phosphatase 1, regulatory subunit 16B
hsa-miR-512-5p	1	0	1	1	1	1	TAF9B	TAF9B RNA polymerase II, TATA box binding protein (TBP)-associated factor, 31kDa
hsa-miR-512-5p	0	0	1	1	1	1	MRPS16	mitochondrial ribosomal protein S16
hsa-miR-512-5p	1	0	1	1	1	1	MPC1	mitochondrial pyruvate carrier 1
hsa-miR-512-5p	0	0	1	1	1	1	RAB10	RAB10, member RAS oncogene family
hsa-miR-512-5p	1	0	1	1	1	1	VGLL3	vestigial like 3 (Drosophila)
hsa-miR-512-5p	1	0	1	1	1	1	AKAP11	A kinase (PRKA) anchor protein 11
hsa-miR-512-5p	0	0	1	1	1	1	FBXO40	F-box protein 40
hsa-miR-512-5p	0	0	1	1	1	1	CENPF	centromere protein F, 350/400kDa (mitosin)
hsa-miR-512-5p	1	0	1	1	1	1	PHF20	PHD finger protein 20
hsa-miR-512-5p	0	0	1	1	0	0	RNF181	ring finger protein 181
hsa-miR-512-5p	0	0	1	1	0	0	IL23A	interleukin 23, alpha subunit p19
hsa-miR-512-5p	1	0	1	1	1	1	UFM1	ubiquitin-fold modifier 1
hsa-miR-512-5p	1	0	1	1	1	1	MEX3C	mex-3 homolog C (C. elegans)
hsa-miR-512-5p	1	0	1	1	1	1	SIX2	SIX homeobox 2
hsa-miR-512-5p	0	0	1	1	1	1	PRKAG3	protein kinase, AMP-activated, gamma 3 non-catalytic subunit
hsa-miR-512-5p	1	0	1	1	1	1	MDM1	Mdm1 nuclear protein homolog (mouse)
hsa-miR-512-5p	1	0	1	1	0	0	C17orf59	chromosome 17 open reading frame 59
hsa-miR-512-5p	1	0	1	0	1	1	EIF2C4	eukaryotic translation initiation factor 2C, 4
hsa-miR-512-5p	1	0	1	0	1	1	FAM46C	family with sequence similarity 46, member C
hsa-miR-512-5p	1	0	1	1	1	1	TBC1D8B	TBC1 domain family, member 8B (with GRAM domain)
hsa-miR-512-5p	1	0	1	1	0	0	INO80D	INO80 complex subunit D
hsa-miR-512-5p	1	0	1	1	1	1	UBE2R2	ubiquitin-conjugating enzyme E2R 2
hsa-miR-512-5p	1	0	1	1	1	1	IMPAD1	inositol monophosphatase domain containing 1
hsa-miR-512-5p	0	0	1	1	1	1	COMMD8	COMM domain containing 8
hsa-miR-512-5p	1	0	1	1	1	1	HIF1AN	hypoxia inducible factor 1, alpha subunit inhibitor
hsa-miR-512-5p	1	0	1	1	0	0	STX17	syntaxin 17
hsa-miR-512-5p	1	0	1	1	1	1	IFT57	intraflagellar transport 57 homolog (Chlamydomonas)
hsa-miR-512-5p	1	0	1	0	1	1	MSL2	male-specific lethal 2 homolog (Drosophila)
hsa-miR-512-5p	0	0	1	1	1	1	MRPS10	mitochondrial ribosomal protein S10
hsa-miR-512-5p	1	0	1	1	1	1	LRRC20	leucine rich repeat containing 20
hsa-miR-512-5p	0	0	1	1	1	1	RBM41	RNA binding motif protein 41
hsa-miR-512-5p	0	0	1	1	1	1	STK32B	serine/threonine kinase 32B
hsa-miR-512-5p	0	0	1	1	1	1	ECHDC1	enoyl CoA hydratase domain containing 1
hsa-miR-512-5p	1	0	1	1	1	1	ETNK1	ethanolamine kinase 1
hsa-miR-512-5p	1	0	1	1	1	1	HOXA10	homeobox A10
hsa-miR-512-5p	1	0	1	1	1	1	SASH3	SAM and SH3 domain containing 3
hsa-miR-512-5p	1	0	1	1	1	1	SEPT3	septin 3
hsa-miR-512-5p	1	0	1	1	1	1	EPB41L4B	erythrocyte membrane protein band 4.1 like 4B
hsa-miR-512-5p	1	0	1	0	1	1	UBFD1	ubiquitin family domain containing 1
hsa-miR-512-5p	1	0	1	0	1	1	SLAMF8	SLAM family member 8
hsa-miR-512-5p	1	0	1	1	1	1	C8orf4	chromosome 8 open reading frame 4
hsa-miR-512-5p	0	0	1	1	1	1	UBQLN4	ubiquilin 4
hsa-miR-512-5p	1	0	1	1	1	1	CCDC47	coiled-coil domain containing 47
hsa-miR-512-5p	1	0	1	1	1	1	C5orf15	chromosome 5 open reading frame 15
hsa-miR-512-5p	1	0	1	0	1	1	CNNM1	cyclin M1
hsa-miR-512-5p	0	0	1	1	1	1	PDSS2	prenyl (decaprenyl) diphosphate synthase, subunit 2
hsa-miR-512-5p	0	0	1	1	1	1	EPPIN	epididymal peptidase inhibitor
hsa-miR-512-5p	1	0	1	1	0	0	JPH2	junctophilin 2
hsa-miR-512-5p	0	0	1	1	1	1	KIAA1161	KIAA1161
hsa-miR-512-5p	1	0	1	1	1	1	SLC12A5	solute carrier family 12 (potassium/chloride transporter), member 5
hsa-miR-512-5p	0	0	1	1	1	1	SHROOM4	shroom family member 4
hsa-miR-512-5p	1	0	1	0	1	1	SYT4	synaptotagmin IV
hsa-miR-512-5p	0	0	1	1	1	1	ARRDC3	arrestin domain containing 3
hsa-miR-512-5p	1	0	1	1	1	1	RANBP10	RAN binding protein 10
hsa-miR-512-5p	1	0	1	1	1	1	ZFP14	zinc finger protein 14 homolog (mouse)
hsa-miR-512-5p	1	0	1	1	1	1	FAM160B1	family with sequence similarity 160, member B1
hsa-miR-512-5p	0	0	1	1	1	1	PRX	periaxin
hsa-miR-512-5p	0	0	1	0	0	0	HPR	haptoglobin-related protein
hsa-miR-512-5p	0	0	1	1	1	1	TLX3	T-cell leukemia homeobox 3
hsa-miR-512-5p	1	0	1	0	1	1	RAP2A	RAP2A, member of RAS oncogene family
hsa-miR-512-5p	0	0	1	1	0	0	MAGEA5	melanoma antigen family A, 5
hsa-miR-512-5p	1	0	1	1	1	1	NMB	neuromedin B
hsa-miR-512-5p	1	0	1	0	1	1	NMT1	N-myristoyltransferase 1
hsa-miR-512-5p	1	0	1	0	1	1	TP53INP2	tumor protein p53 inducible nuclear protein 2
hsa-miR-512-5p	1	0	1	1	1	1	FAM60A	family with sequence similarity 60, member A
hsa-miR-512-5p	1	0	1	1	1	1	DMRT3	doublesex and mab-3 related transcription factor 3
hsa-miR-512-5p	1	0	1	1	1	1	SNX6	sorting nexin 6
hsa-miR-512-5p	0	0	1	1	0	0	FCGR2A	Fc fragment of IgG, low affinity IIa, receptor (CD32)
hsa-miR-512-5p	1	0	1	1	1	1	TRIB2	tribbles homolog 2 (Drosophila)
hsa-miR-512-5p	0	0	1	1	1	1	DNAJC12	DnaJ (Hsp40) homolog, subfamily C, member 12
hsa-miR-512-5p	0	0	1	1	1	1	GABBR1	gamma-aminobutyric acid (GABA) B receptor, 1
hsa-miR-512-5p	0	0	1	1	1	1	RINT1	RAD50 interactor 1
hsa-miR-512-5p	1	0	1	1	1	1	FOXM1	forkhead box M1
hsa-miR-512-5p	1	0	1	1	0	0	HAND2	heart and neural crest derivatives expressed 2
hsa-miR-512-5p	1	0	1	1	1	1	EGLN1	egl nine homolog 1 (C. elegans)
hsa-miR-512-5p	0	0	1	1	0	0	ABHD4	abhydrolase domain containing 4
hsa-miR-512-5p	1	0	1	1	1	1	LRRC4	leucine rich repeat containing 4
hsa-miR-512-5p	1	0	1	1	1	1	XYLT2	xylosyltransferase II
hsa-miR-512-5p	0	0	1	1	1	1	TCTA	T-cell leukemia translocation altered
hsa-miR-512-5p	1	0	1	1	1	1	NEUROD6	neuronal differentiation 6
hsa-miR-512-5p	1	0	1	1	1	1	RFX7	regulatory factor X, 7
hsa-miR-512-5p	1	0	1	0	1	1	BCL11B	B-cell CLL/lymphoma 11B (zinc finger protein)
hsa-miR-512-5p	1	0	1	1	1	1	REEP1	receptor accessory protein 1
hsa-miR-512-5p	1	0	1	1	0	0	UBE2Z	ubiquitin-conjugating enzyme E2Z
hsa-miR-512-5p	1	0	1	1	1	1	C1orf116	chromosome 1 open reading frame 116
hsa-miR-512-5p	1	0	1	1	1	1	RASL11B	RAS-like, family 11, member B
hsa-miR-512-5p	0	0	1	0	1	1	KXD1	KxDL motif containing 1
hsa-miR-512-5p	0	0	1	0	1	1	TRPM8	transient receptor potential cation channel, subfamily M, member 8
hsa-miR-512-5p	0	0	1	1	1	1	DSC1	desmocollin 1
hsa-miR-512-5p	1	0	1	1	1	1	HOXD1	homeobox D1
hsa-miR-512-5p	1	0	1	1	1	1	C10orf76	chromosome 10 open reading frame 76
hsa-miR-512-5p	0	0	1	1	1	1	STEAP4	STEAP family member 4
hsa-miR-512-5p	0	0	1	0	1	1	C1orf115	chromosome 1 open reading frame 115
hsa-miR-512-5p	0	0	1	1	1	1	ARMC5	armadillo repeat containing 5
hsa-miR-512-5p	1	0	1	1	1	1	NIPAL2	NIPA-like domain containing 2
hsa-miR-512-5p	0	0	1	1	1	1	NHEJ1	nonhomologous end-joining factor 1
hsa-miR-512-5p	0	0	1	1	1	1	CCDC134	coiled-coil domain containing 134
hsa-miR-512-5p	1	0	1	1	1	1	NUP210	nucleoporin 210kDa
hsa-miR-512-5p	0	0	1	1	0	0	TMEM156	transmembrane protein 156
hsa-miR-512-5p	1	0	1	1	1	1	FBXO11	F-box protein 11
hsa-miR-512-5p	0	0	1	0	1	1	PDGFD	platelet derived growth factor D
hsa-miR-512-5p	0	0	1	1	1	1	ITIH5	inter-alpha-trypsin inhibitor heavy chain family, member 5
hsa-miR-512-5p	1	0	1	1	1	1	JHDM1D	jumonji C domain containing histone demethylase 1 homolog D (S. cerevisiae)
hsa-miR-512-5p	1	0	1	1	1	1	PTPRO	protein tyrosine phosphatase, receptor type, O
hsa-miR-512-5p	1	0	1	0	1	1	C1orf21	chromosome 1 open reading frame 21
hsa-miR-512-5p	0	0	1	1	1	1	ISCA1	iron-sulfur cluster assembly 1 homolog (S. cerevisiae)
hsa-miR-512-5p	1	0	1	1	1	1	PPP1R14C	protein phosphatase 1, regulatory (inhibitor) subunit 14C
hsa-miR-512-5p	1	0	1	1	1	1	TIGD6	tigger transposable element derived 6
hsa-miR-512-5p	1	0	1	1	1	1	RAB1B	RAB1B, member RAS oncogene family
hsa-miR-512-5p	0	0	1	1	1	1	COG3	component of oligomeric golgi complex 3
hsa-miR-512-5p	1	0	1	0	1	1	ITCH	itchy E3 ubiquitin protein ligase
hsa-miR-512-5p	1	0	1	0	1	1	FAM172A	family with sequence similarity 172, member A
hsa-miR-512-5p	1	0	1	1	1	1	FAM175B	family with sequence similarity 175, member B
hsa-miR-512-5p	1	0	1	1	1	1	ZDHHC18	zinc finger, DHHC-type containing 18
hsa-miR-512-5p	1	0	1	1	1	1	CAMKK1	calcium/calmodulin-dependent protein kinase kinase 1, alpha
hsa-miR-512-5p	1	0	1	1	1	1	HIATL1	hippocampus abundant transcript-like 1
hsa-miR-512-5p	1	0	1	1	1	1	PPP1R9B	protein phosphatase 1, regulatory subunit 9B
hsa-miR-512-5p	0	0	1	1	1	1	FAM136A	family with sequence similarity 136, member A
hsa-miR-512-5p	0	0	1	1	1	1	TMEM87B	transmembrane protein 87B
hsa-miR-512-5p	1	0	1	0	1	1	UBASH3B	ubiquitin associated and SH3 domain containing B
hsa-miR-512-5p	1	0	1	1	1	1	RBM17	RNA binding motif protein 17
hsa-miR-512-5p	0	0	1	1	1	1	GALP	galanin-like peptide
hsa-miR-512-5p	1	0	1	1	1	1	COL4A5	collagen, type IV, alpha 5
hsa-miR-512-5p	1	0	1	1	1	1	SSH2	slingshot homolog 2 (Drosophila)
hsa-miR-512-5p	0	0	1	1	1	1	ARHGAP18	Rho GTPase activating protein 18
hsa-miR-512-5p	1	0	1	1	1	1	RCSD1	RCSD domain containing 1
hsa-miR-512-5p	1	0	1	1	1	1	MAL2	mal, T-cell differentiation protein 2 (gene/pseudogene)
hsa-miR-512-5p	1	0	1	0	1	1	TMEM123	transmembrane protein 123
hsa-miR-512-5p	0	0	1	1	0	0	FAM165B	family with sequence similarity 165, member B
hsa-miR-512-5p	0	0	1	1	1	1	WNT7B	wingless-type MMTV integration site family, member 7B
hsa-miR-512-5p	0	0	1	1	1	1	MAG	myelin associated glycoprotein
hsa-miR-512-5p	0	0	1	1	1	1	TMEM129	transmembrane protein 129
hsa-miR-512-5p	0	0	1	1	1	1	MRAP2	melanocortin 2 receptor accessory protein 2
hsa-miR-512-5p	1	0	1	0	1	1	SP1	Sp1 transcription factor
hsa-miR-512-5p	0	0	1	1	0	0	MAGEE2	melanoma antigen family E, 2
hsa-miR-512-5p	0	0	1	0	1	1	SLC17A8	solute carrier family 17 (sodium-dependent inorganic phosphate cotransporter), member 8
hsa-miR-512-5p	0	0	1	1	1	1	SGK494	uncharacterized serine/threonine-protein kinase SgK494
hsa-miR-512-5p	0	0	1	1	1	1	SLFN5	schlafen family member 5
hsa-miR-512-5p	0	0	1	0	1	1	SPATA18	spermatogenesis associated 18
hsa-miR-512-5p	0	0	1	0	1	1	OSTCP1	oligosaccharyltransferase complex subunit pseudogene 1
hsa-miR-512-5p	0	0	1	1	0	0	TMEM217	transmembrane protein 217
hsa-miR-512-5p	1	0	1	0	1	1	SYT11	synaptotagmin XI
hsa-miR-512-5p	0	0	1	0	1	1	MAB21L3	mab-21-like 3 (C. elegans)
hsa-miR-512-5p	1	0	1	1	1	1	FAM123B	family with sequence similarity 123B
hsa-miR-512-5p	0	0	1	1	1	1	SLC35G3	solute carrier family 35, member G3
hsa-miR-512-5p	1	0	1	1	1	1	ZNF362	zinc finger protein 362
hsa-miR-512-5p	0	0	1	1	1	1	CNIH3	cornichon homolog 3 (Drosophila)
hsa-miR-512-5p	0	0	1	0	1	1	HORMAD2	HORMA domain containing 2
hsa-miR-512-5p	0	0	1	1	1	1	METTL15	methyltransferase like 15
hsa-miR-512-5p	0	0	1	1	1	1	DAND5	DAN domain family, member 5
hsa-miR-512-5p	0	0	1	1	1	1	GAPT	GRB2-binding adaptor protein, transmembrane
hsa-miR-512-5p	0	0	1	1	0	0	GPC2	glypican 2
hsa-miR-512-5p	1	0	1	1	1	1	NXPH1	neurexophilin 1
hsa-miR-512-5p	1	0	1	1	1	1	TCEANC2	transcription elongation factor A (SII) N-terminal and central domain containing 2
hsa-miR-512-5p	1	0	1	1	1	1	C15orf32	chromosome 15 open reading frame 32
hsa-miR-512-5p	1	0	1	0	1	1	ENPP6	ectonucleotide pyrophosphatase/phosphodiesterase 6
hsa-miR-512-5p	0	0	1	0	1	1	VGLL2	vestigial like 2 (Drosophila)
hsa-miR-512-5p	1	0	1	1	1	1	HS6ST3	heparan sulfate 6-O-sulfotransferase 3
hsa-miR-512-5p	1	0	1	1	0	0	FAM43A	family with sequence similarity 43, member A
hsa-miR-512-5p	1	0	1	1	1	1	FNDC5	fibronectin type III domain containing 5
hsa-miR-512-5p	0	0	1	1	1	1	C11orf31	chromosome 11 open reading frame 31
hsa-miR-512-5p	0	0	1	1	1	1	SALL3	sal-like 3 (Drosophila)
hsa-miR-512-5p	1	0	1	0	1	1	PLEKHH2	pleckstrin homology domain containing, family H (with MyTH4 domain) member 2
hsa-miR-512-5p	0	0	1	1	1	1	TNFSF12-TNFSF13	TNFSF12-TNFSF13 readthrough
hsa-miR-512-5p	0	0	1	1	1	1	IL29	interleukin 29 (interferon, lambda 1)
hsa-miR-512-5p	0	0	1	1	1	1	REXO1L1	REX1, RNA exonuclease 1 homolog (S. cerevisiae)-like 1
hsa-miR-512-5p	0	0	1	0	1	1	CTAGE1	cutaneous T-cell lymphoma-associated antigen 1
hsa-miR-512-5p	0	0	1	1	1	1	KCNH5	potassium voltage-gated channel, subfamily H (eag-related), member 5
hsa-miR-512-5p	1	0	1	1	1	1	SMG7	smg-7 homolog, nonsense mediated mRNA decay factor (C. elegans)
hsa-miR-512-5p	0	0	1	1	1	1	TPH2	tryptophan hydroxylase 2
hsa-miR-512-5p	1	0	1	1	1	1	MMGT1	membrane magnesium transporter 1
hsa-miR-512-5p	1	0	1	1	1	1	DCUN1D3	DCN1, defective in cullin neddylation 1, domain containing 3 (S. cerevisiae)
hsa-miR-512-5p	0	0	1	1	1	1	KLF17	Kruppel-like factor 17
hsa-miR-512-5p	1	0	1	1	1	1	ARL10	ADP-ribosylation factor-like 10
hsa-miR-512-5p	0	0	1	0	1	1	C5orf64	chromosome 5 open reading frame 64
hsa-miR-512-5p	1	0	1	1	1	1	XKR6	XK, Kell blood group complex subunit-related family, member 6
hsa-miR-512-5p	0	0	1	1	1	1	FAM133A	family with sequence similarity 133, member A
hsa-miR-512-5p	0	0	1	1	0	0	TIGIT	T cell immunoreceptor with Ig and ITIM domains
hsa-miR-512-5p	0	0	1	1	1	1	HARBI1	harbinger transposase derived 1
hsa-miR-512-5p	1	0	1	0	1	1	SREK1IP1	SREK1-interacting protein 1
hsa-miR-512-5p	0	0	1	1	1	1	C14orf79	chromosome 14 open reading frame 79
hsa-miR-512-5p	0	0	1	1	1	1	GIMAP8	GTPase, IMAP family member 8
hsa-miR-512-5p	0	0	1	1	1	1	KRTAP8-1	keratin associated protein 8-1
hsa-miR-512-5p	1	0	1	1	1	1	EXOC8	exocyst complex component 8
hsa-miR-512-5p	0	0	1	1	1	1	ODF3L1	outer dense fiber of sperm tails 3-like 1
hsa-miR-512-5p	0	0	1	1	1	1	BMP8A	bone morphogenetic protein 8a
hsa-miR-512-5p	1	0	1	1	1	1	BCL6B	B-cell CLL/lymphoma 6, member B
hsa-miR-512-5p	1	0	1	1	1	1	ZSCAN22	zinc finger and SCAN domain containing 22
hsa-miR-512-5p	1	0	1	1	1	1	TMEM229B	transmembrane protein 229B
hsa-miR-512-5p	1	0	1	1	1	1	BCL9L	B-cell CLL/lymphoma 9-like
hsa-miR-512-5p	0	0	1	1	0	0	GPX6	glutathione peroxidase 6 (olfactory)
hsa-miR-512-5p	1	0	1	1	1	1	RD3	retinal degeneration 3
hsa-miR-512-5p	1	0	1	1	1	1	KIF1B	kinesin family member 1B
hsa-miR-512-5p	1	0	1	0	1	1	HNRNPA3	heterogeneous nuclear ribonucleoprotein A3
hsa-miR-512-5p	0	0	1	1	1	1	ISCA2	iron-sulfur cluster assembly 2 homolog (S. cerevisiae)
hsa-miR-512-5p	1	0	1	1	1	1	E2F6	E2F transcription factor 6
hsa-miR-512-5p	0	0	1	1	1	1	APOOL	apolipoprotein O-like
hsa-miR-512-5p	1	0	1	0	1	1	NRK	Nik related kinase
hsa-miR-512-5p	0	0	1	0	0	0	IGFL1	IGF-like family member 1
hsa-miR-512-5p	1	0	1	1	0	0	ENHO	energy homeostasis associated
hsa-miR-512-5p	1	0	1	0	1	1	ZC3H6	zinc finger CCCH-type containing 6
hsa-miR-512-5p	0	0	1	0	1	1	GYPE	glycophorin E (MNS blood group)
hsa-miR-512-5p	1	0	1	0	0	0	RAB15	RAB15, member RAS oncogene family
hsa-miR-512-5p	1	0	1	1	1	1	PTGER3	prostaglandin E receptor 3 (subtype EP3)
hsa-miR-512-5p	0	0	1	1	1	1	TMEM189	transmembrane protein 189
hsa-miR-512-5p	0	0	1	1	1	1	COL18A1-AS1	COL18A1 antisense RNA 1
hsa-miR-512-5p	1	0	1	1	1	1	THRA	thyroid hormone receptor, alpha
hsa-miR-512-5p	1	0	1	1	0	0	KAZN	kazrin, periplakin interacting protein
hsa-miR-512-5p	1	0	1	1	1	1	FBXO33	F-box protein 33
hsa-miR-512-5p	0	0	1	1	0	0	IER5L	immediate early response 5-like
hsa-miR-512-5p	0	0	1	1	1	1	APOBEC4	apolipoprotein B mRNA editing enzyme, catalytic polypeptide-like 4 (putative)
hsa-miR-512-5p	0	0	1	0	1	1	NPSR1-AS1	NPSR1 antisense RNA 1
hsa-miR-512-5p	0	0	1	1	1	1	ZNF474	zinc finger protein 474
hsa-miR-512-5p	0	0	1	1	1	1	C10orf129	chromosome 10 open reading frame 129
hsa-miR-512-5p	1	0	1	1	0	0	CD164L2	CD164 sialomucin-like 2
hsa-miR-512-5p	0	0	1	1	1	1	C15orf53	chromosome 15 open reading frame 53
hsa-miR-512-5p	1	0	1	1	1	1	TEX19	testis expressed 19
hsa-miR-512-5p	0	0	1	0	1	1	TMEM215	transmembrane protein 215
hsa-miR-512-5p	0	0	1	0	0	0	MT1L	metallothionein 1L (gene/pseudogene)
hsa-miR-512-5p	0	0	1	0	0	0	TTTY2	testis-specific transcript, Y-linked 2 (non-protein coding)
hsa-miR-512-5p	0	0	1	0	0	0	TTTY15	testis-specific transcript, Y-linked 15 (non-protein coding)
hsa-miR-512-5p	0	0	1	0	0	0	GOLGA2P3Y	golgin A2 pseudogene 3, Y-linked
hsa-miR-512-5p	0	0	1	0	0	0	RPS26P11	ribosomal protein S26 pseudogene 11
hsa-miR-512-5p	0	0	1	0	0	0	SNORD96A	small nucleolar RNA, C/D box 96A
hsa-miR-512-5p	0	0	1	0	0	0	ATXN8OS	ATXN8 opposite strand (non-protein coding)
hsa-miR-512-5p	0	0	1	0	0	0	HNRNPA3P1	heterogeneous nuclear ribonucleoprotein A3 pseudogene 1
hsa-miR-512-5p	0	0	1	0	0	0	DGCR5	DiGeorge syndrome critical region gene 5 (non-protein coding)
hsa-miR-512-5p	0	0	1	0	0	0	SNORD53	small nucleolar RNA, C/D box 53
hsa-miR-512-5p	0	0	1	0	0	0	HTR7P1	5-hydroxytryptamine (serotonin) receptor 7 pseudogene 1
hsa-miR-512-5p	0	0	1	0	0	0	PER4	period homolog 3 (Drosophila) pseudogene
hsa-miR-512-5p	0	0	1	0	0	0	AQP7P1	aquaporin 7 pseudogene 1
hsa-miR-512-5p	0	0	1	0	0	0	MALAT1	metastasis associated lung adenocarcinoma transcript 1 (non-protein coding)
hsa-miR-512-5p	0	0	1	0	0	0	SNORA74A	small nucleolar RNA, H/ACA box 74A
hsa-miR-512-5p	0	0	1	0	0	0	LOC285359	phosducin-like 3 pseudogene
hsa-miR-512-5p	0	0	1	0	0	0	TCAM1P	testicular cell adhesion molecule 1 homolog (mouse), pseudogene
hsa-miR-512-5p	0	0	1	0	0	0	SCARNA1	small Cajal body-specific RNA 1
hsa-miR-512-5p	0	0	1	0	0	0	SNORD69	small nucleolar RNA, C/D box 69
hsa-miR-512-5p	0	0	1	0	0	0	LILRP2	leukocyte immunoglobulin-like receptor pseudogene 2
hsa-miR-512-5p	0	0	1	0	0	0	HSP90B3P	heat shock protein 90kDa beta (Grp94), member 3, pseudogene
hsa-miR-512-5p	0	0	1	0	0	0	GBP1P1	guanylate binding protein 1, interferon-inducible pseudogene 1
hsa-miR-512-5p	0	0	1	0	0	0	SNORD115-22	small nucleolar RNA, C/D box 115-22
hsa-miR-512-5p	1	0	1	1	0	0	KIAA1549L	KIAA1549-like
hsa-miR-512-5p	1	0	1	0	1	1	NFIX	nuclear factor I/X (CCAAT-binding transcription factor)
hsa-miR-512-5p	0	0	1	0	0	0	MST1P9	macrophage stimulating 1 (hepatocyte growth factor-like) pseudogene 9
hsa-miR-512-5p	1	0	1	1	1	1	TRIO	trio Rho guanine nucleotide exchange factor
hsa-miR-512-5p	0	0	1	1	0	0	EPX	eosinophil peroxidase
hsa-miR-512-5p	1	0	1	1	1	1	POU2F2	POU class 2 homeobox 2
hsa-miR-512-5p	1	0	1	1	1	1	HNRNPA1	heterogeneous nuclear ribonucleoprotein A1
hsa-miR-512-5p	1	0	1	1	0	0	FGFR3	fibroblast growth factor receptor 3
hsa-miR-512-5p	0	0	1	1	0	0	GPR17	G protein-coupled receptor 17
hsa-miR-512-5p	0	0	0	1	0	0	TRAPPC6A	trafficking protein particle complex 6A
hsa-miR-512-5p	0	0	0	1	0	0	SCTR	secretin receptor
hsa-miR-512-5p	0	0	1	1	0	0	FNDC8	fibronectin type III domain containing 8
hsa-miR-512-5p	0	0	0	1	0	0	MRPL28	mitochondrial ribosomal protein L28
hsa-miR-512-5p	1	0	1	1	1	1	ADAM11	ADAM metallopeptidase domain 11
hsa-miR-512-5p	1	0	1	1	1	1	PDPR	pyruvate dehydrogenase phosphatase regulatory subunit
hsa-miR-512-5p	0	0	0	1	0	0	TEKT2	tektin 2 (testicular)
hsa-miR-512-5p	0	0	0	1	0	0	FGF22	fibroblast growth factor 22
hsa-miR-512-5p	0	0	1	1	1	1	TIMM13	translocase of inner mitochondrial membrane 13 homolog (yeast)
hsa-miR-512-5p	0	0	0	1	1	1	GADD45B	growth arrest and DNA-damage-inducible, beta
hsa-miR-512-5p	0	0	1	1	1	1	SNRPD3	small nuclear ribonucleoprotein D3 polypeptide 18kDa
hsa-miR-512-5p	0	0	1	1	0	0	CBY1	chibby homolog 1 (Drosophila)
hsa-miR-512-5p	0	0	1	1	0	0	TTLL12	tubulin tyrosine ligase-like family, member 12
hsa-miR-512-5p	0	0	0	1	0	0	EIF3D	eukaryotic translation initiation factor 3, subunit D
hsa-miR-512-5p	0	0	1	1	0	0	GSTZ1	glutathione S-transferase zeta 1
hsa-miR-512-5p	0	0	1	1	1	1	AHSA1	AHA1, activator of heat shock 90kDa protein ATPase homolog 1 (yeast)
hsa-miR-512-5p	0	0	1	1	0	0	EEF1A2	eukaryotic translation elongation factor 1 alpha 2
hsa-miR-512-5p	0	0	1	1	0	0	PIGU	phosphatidylinositol glycan anchor biosynthesis, class U
hsa-miR-512-5p	0	0	0	1	0	0	ACP5	acid phosphatase 5, tartrate resistant
hsa-miR-512-5p	0	0	1	1	1	1	NUTF2	nuclear transport factor 2
hsa-miR-512-5p	0	0	1	1	0	0	STUB1	STIP1 homology and U-box containing protein 1, E3 ubiquitin protein ligase
hsa-miR-512-5p	0	0	1	1	0	0	CRYM	crystallin, mu
hsa-miR-512-5p	0	0	0	1	0	0	VPS18	vacuolar protein sorting 18 homolog (S. cerevisiae)
hsa-miR-512-5p	0	0	0	1	0	0	CACTIN	cactin, spliceosome C complex subunit
hsa-miR-512-5p	0	0	1	1	0	0	CCDC9	coiled-coil domain containing 9
hsa-miR-512-5p	0	0	1	1	1	1	GCDH	glutaryl-CoA dehydrogenase
hsa-miR-512-5p	0	0	1	1	1	1	ARRDC2	arrestin domain containing 2
hsa-miR-512-5p	0	0	0	1	0	0	ABHD11	abhydrolase domain containing 11
hsa-miR-512-5p	0	0	0	1	1	1	NOD1	nucleotide-binding oligomerization domain containing 1
hsa-miR-512-5p	0	0	0	1	0	0	SNX8	sorting nexin 8
hsa-miR-512-5p	0	0	1	1	0	0	BLNK	B-cell linker
hsa-miR-512-5p	0	0	1	1	0	0	AATF	apoptosis antagonizing transcription factor
hsa-miR-512-5p	0	0	0	1	0	0	ICAM2	intercellular adhesion molecule 2
hsa-miR-512-5p	0	0	1	1	1	1	MCM3	minichromosome maintenance complex component 3
hsa-miR-512-5p	0	0	0	1	0	0	CYB561D2	cytochrome b-561 domain containing 2
hsa-miR-512-5p	0	0	0	1	0	0	TNNC1	troponin C type 1 (slow)
hsa-miR-512-5p	0	0	0	1	1	1	DOK1	docking protein 1, 62kDa (downstream of tyrosine kinase 1)
hsa-miR-512-5p	0	0	0	1	0	0	REG1A	regenerating islet-derived 1 alpha
hsa-miR-512-5p	0	0	0	1	1	1	GGCX	gamma-glutamyl carboxylase
hsa-miR-512-5p	0	0	0	1	0	0	TPSG1	tryptase gamma 1
hsa-miR-512-5p	0	0	1	1	0	0	CMYA5	cardiomyopathy associated 5
hsa-miR-512-5p	0	0	0	1	0	0	IFI27L2	interferon, alpha-inducible protein 27-like 2
hsa-miR-512-5p	0	0	0	1	0	0	PCDHB8	protocadherin beta 8
hsa-miR-512-5p	0	0	1	1	0	0	SLC35B1	solute carrier family 35, member B1
hsa-miR-512-5p	1	0	1	1	1	1	FAM126A	family with sequence similarity 126, member A
hsa-miR-512-5p	0	0	1	1	0	0	WDR83	WD repeat domain 83
hsa-miR-512-5p	0	0	0	1	0	0	B9D2	B9 protein domain 2
hsa-miR-512-5p	0	0	1	1	0	0	SLC17A1	solute carrier family 17 (sodium phosphate), member 1
hsa-miR-512-5p	1	0	0	1	1	1	CLPP	ClpP caseinolytic peptidase, ATP-dependent, proteolytic subunit homolog (E. coli)
hsa-miR-512-5p	0	0	0	1	0	0	TNFSF14	tumor necrosis factor (ligand) superfamily, member 14
hsa-miR-512-5p	0	0	1	1	0	0	PLK1S1	polo-like kinase 1 substrate 1
hsa-miR-512-5p	0	0	1	1	1	1	AP5S1	adaptor-related protein complex 5, sigma 1 subunit
hsa-miR-512-5p	1	0	1	1	1	1	PITHD1	PITH (C-terminal proteasome-interacting domain of thioredoxin-like) domain containing 1
hsa-miR-512-5p	0	0	0	1	1	1	KRT9	keratin 9
hsa-miR-512-5p	0	0	0	1	0	0	SELO	selenoprotein O
hsa-miR-512-5p	0	0	1	1	1	1	APOBEC3A	apolipoprotein B mRNA editing enzyme, catalytic polypeptide-like 3A
hsa-miR-512-5p	1	0	1	1	1	1	DMXL2	Dmx-like 2
hsa-miR-512-5p	0	0	1	1	1	1	CLSPN	claspin
hsa-miR-512-5p	0	0	0	1	1	1	LILRA3	leukocyte immunoglobulin-like receptor, subfamily A (without TM domain), member 3
hsa-miR-512-5p	0	0	1	1	0	0	MAST1	microtubule associated serine/threonine kinase 1
hsa-miR-512-5p	0	0	1	1	1	1	RABGAP1L	RAB GTPase activating protein 1-like
hsa-miR-512-5p	0	0	0	1	0	0	PSMG3	proteasome (prosome, macropain) assembly chaperone 3
hsa-miR-512-5p	1	0	1	1	1	1	PVRL2	poliovirus receptor-related 2 (herpesvirus entry mediator B)
hsa-miR-512-5p	0	0	1	1	0	0	SAG	S-antigen; retina and pineal gland (arrestin)
hsa-miR-512-5p	0	0	0	1	1	1	ZNF426	zinc finger protein 426
hsa-miR-512-5p	0	0	1	1	0	0	PKDREJ	polycystic kidney disease (polycystin) and REJ homolog (sperm receptor for egg jelly homolog, sea urchin)
hsa-miR-512-5p	0	0	0	1	0	0	F12	coagulation factor XII (Hageman factor)
hsa-miR-512-5p	0	0	1	1	1	1	PSMC3IP	PSMC3 interacting protein
hsa-miR-512-5p	0	0	0	1	0	0	PODNL1	podocan-like 1
hsa-miR-512-5p	0	0	1	1	1	1	HSD17B7	hydroxysteroid (17-beta) dehydrogenase 7
hsa-miR-512-5p	0	0	1	1	0	0	SEC14L4	SEC14-like 4 (S. cerevisiae)
hsa-miR-512-5p	0	0	0	1	0	0	ERN2	endoplasmic reticulum to nucleus signaling 2
hsa-miR-512-5p	0	0	1	1	0	0	KRT84	keratin 84
hsa-miR-512-5p	0	0	0	1	0	0	FBXL8	F-box and leucine-rich repeat protein 8
hsa-miR-512-5p	0	0	0	1	0	0	CD72	CD72 molecule
hsa-miR-512-5p	0	0	1	1	1	1	MRPS18B	mitochondrial ribosomal protein S18B
hsa-miR-512-5p	0	0	1	1	0	0	PLCB2	phospholipase C, beta 2
hsa-miR-512-5p	0	0	1	1	1	1	SPECC1	sperm antigen with calponin homology and coiled-coil domains 1
hsa-miR-512-5p	0	0	1	1	1	1	P2RX7	purinergic receptor P2X, ligand-gated ion channel, 7
hsa-miR-512-5p	0	0	1	1	1	1	MYO5C	myosin VC
hsa-miR-512-5p	0	0	1	1	0	0	DNAH9	dynein, axonemal, heavy chain 9
hsa-miR-512-5p	0	0	0	1	0	0	CCDC124	coiled-coil domain containing 124
hsa-miR-512-5p	0	0	0	1	1	1	MAP2K2	mitogen-activated protein kinase kinase 2
hsa-miR-512-5p	0	0	0	1	0	0	ABCA7	ATP-binding cassette, sub-family A (ABC1), member 7
hsa-miR-512-5p	0	0	1	1	0	0	AP2S1	adaptor-related protein complex 2, sigma 1 subunit
hsa-miR-512-5p	0	0	1	1	0	0	TCF25	transcription factor 25 (basic helix-loop-helix)
hsa-miR-512-5p	0	0	1	1	0	0	KCNK6	potassium channel, subfamily K, member 6
hsa-miR-512-5p	0	0	1	1	1	1	IL27RA	interleukin 27 receptor, alpha
hsa-miR-512-5p	0	0	0	1	0	0	DBH	dopamine beta-hydroxylase (dopamine beta-monooxygenase)
hsa-miR-512-5p	1	0	1	1	1	1	EIF2AK4	eukaryotic translation initiation factor 2 alpha kinase 4
hsa-miR-512-5p	1	0	1	1	1	1	SYT7	synaptotagmin VII
hsa-miR-512-5p	1	0	1	1	1	1	KDR	kinase insert domain receptor (a type III receptor tyrosine kinase)
hsa-miR-512-5p	1	0	1	1	1	1	DDX6	DEAD (Asp-Glu-Ala-Asp) box helicase 6
hsa-miR-512-5p	0	0	1	1	0	0	IFT46	intraflagellar transport 46 homolog (Chlamydomonas)
hsa-miR-512-5p	0	0	1	1	0	0	UPK2	uroplakin 2
hsa-miR-512-5p	0	0	0	1	1	1	LCT	lactase
hsa-miR-512-5p	0	0	0	1	1	1	RAB17	RAB17, member RAS oncogene family
hsa-miR-512-5p	0	0	0	1	0	0	KLKB1	kallikrein B, plasma (Fletcher factor) 1
hsa-miR-512-5p	1	0	1	1	0	0	COL5A3	collagen, type V, alpha 3
hsa-miR-512-5p	1	0	1	1	1	1	FRAS1	Fraser syndrome 1
hsa-miR-512-5p	1	0	1	1	1	1	FBXW11	F-box and WD repeat domain containing 11
hsa-miR-512-5p	0	0	0	1	0	0	SIL1	SIL1 homolog, endoplasmic reticulum chaperone (S. cerevisiae)
hsa-miR-512-5p	0	0	1	1	0	0	OBSL1	obscurin-like 1
hsa-miR-512-5p	1	0	1	1	1	1	ST7	suppression of tumorigenicity 7
hsa-miR-512-5p	1	0	1	1	0	0	KCNC1	potassium voltage-gated channel, Shaw-related subfamily, member 1
hsa-miR-512-5p	0	0	1	1	1	1	MTFP1	mitochondrial fission process 1
hsa-miR-512-5p	0	0	0	1	0	0	FITM1	fat storage-inducing transmembrane protein 1
hsa-miR-512-5p	1	0	1	1	1	1	L2HGDH	L-2-hydroxyglutarate dehydrogenase
hsa-miR-512-5p	1	0	0	1	0	0	UNC45A	unc-45 homolog A (C. elegans)
hsa-miR-512-5p	0	0	1	1	0	0	NEK8	NIMA (never in mitosis gene a)- related kinase 8
hsa-miR-512-5p	0	0	1	1	0	0	B9D1	B9 protein domain 1
hsa-miR-512-5p	0	0	0	1	0	0	LRRC46	leucine rich repeat containing 46
hsa-miR-512-5p	0	0	1	1	0	0	NT5C3L	5'-nucleotidase, cytosolic III-like
hsa-miR-512-5p	0	0	1	1	1	1	CYP4F22	cytochrome P450, family 4, subfamily F, polypeptide 22
hsa-miR-512-5p	0	0	1	1	1	1	PGPEP1	pyroglutamyl-peptidase I
hsa-miR-512-5p	0	0	1	1	0	0	DMRTC2	DMRT-like family C2
hsa-miR-512-5p	0	0	1	1	0	0	TMEM91	transmembrane protein 91
hsa-miR-512-5p	0	0	0	1	0	0	BCKDHA	branched chain keto acid dehydrogenase E1, alpha polypeptide
hsa-miR-512-5p	0	0	1	1	0	0	LMTK3	lemur tyrosine kinase 3
hsa-miR-512-5p	0	0	1	1	0	0	KLHDC4	kelch domain containing 4
hsa-miR-512-5p	0	0	1	1	0	0	ALDH1L1	aldehyde dehydrogenase 1 family, member L1
hsa-miR-512-5p	0	0	1	1	1	1	UCN2	urocortin 2
hsa-miR-512-5p	1	0	1	1	0	0	EIF2B5	eukaryotic translation initiation factor 2B, subunit 5 epsilon, 82kDa
hsa-miR-512-5p	0	0	0	1	0	0	FERD3L	Fer3-like (Drosophila)
hsa-miR-512-5p	0	0	0	1	1	1	ZC3HAV1L	zinc finger CCCH-type, antiviral 1-like
hsa-miR-512-5p	0	0	0	1	0	0	DENND2A	DENN/MADD domain containing 2A
hsa-miR-512-5p	0	0	1	1	0	0	PRDM14	PR domain containing 14
hsa-miR-512-5p	0	0	0	1	0	0	PNPLA7	patatin-like phospholipase domain containing 7
hsa-miR-512-5p	0	0	0	1	0	0	C11orf52	chromosome 11 open reading frame 52
hsa-miR-512-5p	0	0	1	1	1	1	INCENP	inner centromere protein antigens 135/155kDa
hsa-miR-512-5p	0	0	0	1	0	0	MYL9	myosin, light chain 9, regulatory
hsa-miR-512-5p	0	0	0	1	0	0	DCP1B	DCP1 decapping enzyme homolog B (S. cerevisiae)
hsa-miR-512-5p	0	0	0	1	1	1	ACAD8	acyl-CoA dehydrogenase family, member 8
hsa-miR-512-5p	0	0	1	1	1	1	QDPR	quinoid dihydropteridine reductase
hsa-miR-512-5p	1	0	1	1	1	1	BARX2	BARX homeobox 2
hsa-miR-512-5p	0	0	1	1	1	1	TXNDC16	thioredoxin domain containing 16
hsa-miR-512-5p	0	0	0	1	1	1	FARSB	phenylalanyl-tRNA synthetase, beta subunit
hsa-miR-512-5p	0	0	1	1	1	1	DSPP	dentin sialophosphoprotein
hsa-miR-512-5p	0	0	0	1	0	0	CCNO	cyclin O
hsa-miR-512-5p	1	0	1	1	1	1	KCTD15	potassium channel tetramerisation domain containing 15
hsa-miR-512-5p	1	0	1	1	1	1	GDPD1	glycerophosphodiester phosphodiesterase domain containing 1
hsa-miR-512-5p	0	0	0	1	0	0	C16orf74	chromosome 16 open reading frame 74
hsa-miR-512-5p	0	0	0	1	0	0	OR8A1	olfactory receptor, family 8, subfamily A, member 1
hsa-miR-512-5p	1	0	1	1	1	1	L3MBTL4	l(3)mbt-like 4 (Drosophila)
hsa-miR-512-5p	0	0	1	1	0	0	ATP5J	ATP synthase, H+ transporting, mitochondrial Fo complex, subunit F6
hsa-miR-512-5p	0	0	0	1	0	0	CYP26C1	cytochrome P450, family 26, subfamily C, polypeptide 1
hsa-miR-512-5p	0	0	0	1	0	0	MED7	mediator complex subunit 7
hsa-miR-512-5p	0	0	1	1	1	1	KBTBD5	kelch repeat and BTB (POZ) domain containing 5
hsa-miR-512-5p	0	0	1	1	0	0	GPR153	G protein-coupled receptor 153
hsa-miR-512-5p	0	0	1	1	0	0	ACTR1B	ARP1 actin-related protein 1 homolog B, centractin beta (yeast)
hsa-miR-512-5p	0	0	1	1	0	0	CCDC142	coiled-coil domain containing 142
hsa-miR-512-5p	1	0	1	1	1	1	ALDH4A1	aldehyde dehydrogenase 4 family, member A1
hsa-miR-512-5p	0	0	1	1	0	0	TNFRSF13C	tumor necrosis factor receptor superfamily, member 13C
hsa-miR-512-5p	0	0	0	1	0	0	RSPH1	radial spoke head 1 homolog (Chlamydomonas)
hsa-miR-512-5p	0	0	0	1	0	0	PKN3	protein kinase N3
hsa-miR-512-5p	0	0	0	1	1	1	NLRP8	NLR family, pyrin domain containing 8
hsa-miR-512-5p	0	0	1	1	0	0	CCDC12	coiled-coil domain containing 12
hsa-miR-512-5p	0	0	0	1	0	0	TONSL	tonsoku-like, DNA repair protein
hsa-miR-512-5p	0	0	0	1	0	0	CCDC116	coiled-coil domain containing 116
hsa-miR-512-5p	0	0	0	1	0	0	CDK3	cyclin-dependent kinase 3
hsa-miR-512-5p	1	0	1	1	1	1	NAGS	N-acetylglutamate synthase
hsa-miR-512-5p	0	0	0	1	0	0	AQP5	aquaporin 5
hsa-miR-512-5p	0	0	1	1	0	0	SSRP1	structure specific recognition protein 1
hsa-miR-512-5p	0	0	0	1	0	0	ZG16B	zymogen granule protein 16 homolog B (rat)
hsa-miR-512-5p	0	0	0	1	0	0	C1orf159	chromosome 1 open reading frame 159
hsa-miR-512-5p	0	0	1	1	1	1	RBM15	RNA binding motif protein 15
hsa-miR-512-5p	0	0	0	1	0	0	KCNF1	potassium voltage-gated channel, subfamily F, member 1
hsa-miR-512-5p	1	0	1	1	0	0	INHBB	inhibin, beta B
hsa-miR-512-5p	0	0	1	1	1	1	ATP13A4	ATPase type 13A4
hsa-miR-512-5p	1	0	1	1	1	1	FBLN2	fibulin 2
hsa-miR-512-5p	0	0	0	1	1	1	CLRN1	clarin 1
hsa-miR-512-5p	0	0	1	1	1	1	POLR2H	polymerase (RNA) II (DNA directed) polypeptide H
hsa-miR-512-5p	0	0	0	1	1	1	TERT	telomerase reverse transcriptase
hsa-miR-512-5p	0	0	1	1	1	1	CHMP4C	charged multivesicular body protein 4C
hsa-miR-512-5p	0	0	1	1	0	0	PACSIN3	protein kinase C and casein kinase substrate in neurons 3
hsa-miR-512-5p	0	0	1	1	1	1	HEATR3	HEAT repeat containing 3
hsa-miR-512-5p	0	0	0	1	1	1	PCBD1	pterin-4 alpha-carbinolamine dehydratase/dimerization cofactor of hepatocyte nuclear factor 1 alpha
hsa-miR-512-5p	0	0	0	1	0	0	ZSCAN21	zinc finger and SCAN domain containing 21
hsa-miR-512-5p	0	0	1	1	1	1	TMED3	transmembrane emp24 protein transport domain containing 3
hsa-miR-512-5p	0	0	1	1	1	1	GALR1	galanin receptor 1
hsa-miR-512-5p	0	0	1	1	1	1	PLIN1	perilipin 1
hsa-miR-512-5p	0	0	0	1	0	0	COQ4	coenzyme Q4 homolog (S. cerevisiae)
hsa-miR-512-5p	0	0	1	1	1	1	NOD2	nucleotide-binding oligomerization domain containing 2
hsa-miR-512-5p	1	0	0	1	0	0	PGAP3	post-GPI attachment to proteins 3
hsa-miR-512-5p	0	0	0	1	0	0	TP53I13	tumor protein p53 inducible protein 13
hsa-miR-512-5p	0	0	0	1	1	1	SPINT2	serine peptidase inhibitor, Kunitz type, 2
hsa-miR-512-5p	0	0	0	1	0	0	PSCA	prostate stem cell antigen
hsa-miR-512-5p	0	0	0	1	0	0	LY6D	lymphocyte antigen 6 complex, locus D
hsa-miR-512-5p	0	0	0	1	0	0	DAPK3	death-associated protein kinase 3
hsa-miR-512-5p	1	0	1	1	0	0	KIFC2	kinesin family member C2
hsa-miR-512-5p	0	0	1	1	0	0	TMEM88	transmembrane protein 88
hsa-miR-512-5p	0	0	1	1	0	0	TMC8	transmembrane channel-like 8
hsa-miR-512-5p	0	0	0	1	0	0	TK1	thymidine kinase 1, soluble
hsa-miR-512-5p	0	0	0	1	0	0	SPSB3	splA/ryanodine receptor domain and SOCS box containing 3
hsa-miR-512-5p	0	0	0	1	1	1	FADD	Fas (TNFRSF6)-associated via death domain
hsa-miR-512-5p	0	0	1	1	0	0	C11orf85	chromosome 11 open reading frame 85
hsa-miR-512-5p	0	0	0	1	0	0	VPREB1	pre-B lymphocyte 1
hsa-miR-512-5p	0	0	0	1	0	0	AMDHD2	amidohydrolase domain containing 2
hsa-miR-512-5p	0	0	1	1	0	0	KCNK9	potassium channel, subfamily K, member 9
hsa-miR-512-5p	0	0	1	1	0	0	POP7	processing of precursor 7, ribonuclease P/MRP subunit (S. cerevisiae)
hsa-miR-512-5p	1	0	1	1	1	1	RNF139	ring finger protein 139
hsa-miR-512-5p	0	0	0	1	1	1	MRAP	melanocortin 2 receptor accessory protein
hsa-miR-512-5p	1	0	1	1	1	1	GPRIN1	G protein regulated inducer of neurite outgrowth 1
hsa-miR-512-5p	0	0	1	1	1	1	C15orf40	chromosome 15 open reading frame 40
hsa-miR-512-5p	0	0	0	1	0	0	ASL	argininosuccinate lyase
hsa-miR-512-5p	0	0	0	1	1	1	C22orf15	chromosome 22 open reading frame 15
hsa-miR-512-5p	0	0	0	1	0	0	OR10H2	olfactory receptor, family 10, subfamily H, member 2
hsa-miR-512-5p	0	0	1	1	1	1	ROBO4	roundabout, axon guidance receptor, homolog 4 (Drosophila)
hsa-miR-512-5p	0	0	1	1	1	1	RAC3	ras-related C3 botulinum toxin substrate 3 (rho family, small GTP binding protein Rac3)
hsa-miR-512-5p	0	0	0	1	0	0	OR10A2	olfactory receptor, family 10, subfamily A, member 2
hsa-miR-512-5p	0	0	0	1	0	0	OR52K1	olfactory receptor, family 52, subfamily K, member 1
hsa-miR-512-5p	0	0	1	1	0	0	FAM195A	family with sequence similarity 195, member A
hsa-miR-512-5p	0	0	1	1	1	1	HAVCR2	hepatitis A virus cellular receptor 2
hsa-miR-512-5p	0	0	1	1	1	1	PRKACA	protein kinase, cAMP-dependent, catalytic, alpha
hsa-miR-512-5p	0	0	0	1	0	0	PHYHD1	phytanoyl-CoA dioxygenase domain containing 1
hsa-miR-512-5p	0	0	1	1	1	1	OR13A1	olfactory receptor, family 13, subfamily A, member 1
hsa-miR-512-5p	0	0	1	1	0	0	TPT1	tumor protein, translationally-controlled 1
hsa-miR-512-5p	0	0	0	1	1	1	PRLR	prolactin receptor
hsa-miR-512-5p	0	0	1	1	1	1	TTLL3	tubulin tyrosine ligase-like family, member 3
hsa-miR-512-5p	0	0	1	1	0	0	ARPC4	actin related protein 2/3 complex, subunit 4, 20kDa
hsa-miR-512-5p	1	0	1	1	0	0	KY	kyphoscoliosis peptidase
hsa-miR-512-5p	0	0	1	1	0	0	ZNHIT2	zinc finger, HIT-type containing 2
hsa-miR-512-5p	0	0	1	1	1	1	TTLL9	tubulin tyrosine ligase-like family, member 9
hsa-miR-512-5p	0	0	0	1	0	0	GPR151	G protein-coupled receptor 151
hsa-miR-512-5p	1	0	1	1	1	1	AKT2	v-akt murine thymoma viral oncogene homolog 2
hsa-miR-512-5p	1	0	1	1	1	1	KIAA1033	KIAA1033
hsa-miR-512-5p	1	0	0	1	0	0	RNF26	ring finger protein 26
hsa-miR-512-5p	0	0	1	1	1	1	ATP5S	ATP synthase, H+ transporting, mitochondrial Fo complex, subunit s (factor B)
hsa-miR-512-5p	1	0	0	1	0	0	TRPV6	transient receptor potential cation channel, subfamily V, member 6
hsa-miR-512-5p	0	0	1	1	1	1	ZC3HC1	zinc finger, C3HC-type containing 1
hsa-miR-512-5p	0	0	0	1	0	0	NFE2	nuclear factor (erythroid-derived 2), 45kDa
hsa-miR-512-5p	0	0	0	1	1	1	FBLIM1	filamin binding LIM protein 1
hsa-miR-512-5p	1	0	1	1	0	0	TBC1D10C	TBC1 domain family, member 10C
hsa-miR-512-5p	0	0	0	1	0	0	DNAH7	dynein, axonemal, heavy chain 7
hsa-miR-512-5p	1	0	0	1	0	0	FBXL18	F-box and leucine-rich repeat protein 18
hsa-miR-512-5p	0	0	0	1	1	1	LAIR1	leukocyte-associated immunoglobulin-like receptor 1
hsa-miR-512-5p	0	0	1	1	0	0	RHBDF2	rhomboid 5 homolog 2 (Drosophila)
hsa-miR-512-5p	0	0	0	1	1	1	HMHA1	histocompatibility (minor) HA-1
hsa-miR-512-5p	0	0	1	1	0	0	SLC6A13	solute carrier family 6 (neurotransmitter transporter, GABA), member 13
hsa-miR-512-5p	0	0	1	1	1	1	C7	complement component 7
hsa-miR-512-5p	0	0	0	1	1	1	C15orf44	chromosome 15 open reading frame 44
hsa-miR-512-5p	0	0	1	1	0	0	DNAH17	dynein, axonemal, heavy chain 17
hsa-miR-512-5p	0	0	1	1	0	0	ANKRD18A	ankyrin repeat domain 18A
hsa-miR-512-5p	0	0	0	1	1	1	NOS2	nitric oxide synthase 2, inducible
hsa-miR-512-5p	0	0	1	1	0	0	MKS1	Meckel syndrome, type 1
hsa-miR-512-5p	0	0	0	1	0	0	FUT7	fucosyltransferase 7 (alpha (1,3) fucosyltransferase)
hsa-miR-512-5p	0	0	1	1	0	0	CDPF1	cysteine-rich, DPF motif domain containing 1
hsa-miR-512-5p	0	0	0	1	0	0	OR4K17	olfactory receptor, family 4, subfamily K, member 17
hsa-miR-512-5p	0	0	0	1	0	0	TMEM125	transmembrane protein 125
hsa-miR-512-5p	0	0	1	1	1	1	TUBAL3	tubulin, alpha-like 3
hsa-miR-512-5p	1	0	1	1	1	1	C3orf45	chromosome 3 open reading frame 45
hsa-miR-512-5p	0	0	1	1	1	1	ZNF187	zinc finger protein 187
hsa-miR-512-5p	0	0	1	1	1	1	BIN1	bridging integrator 1
hsa-miR-512-5p	0	0	1	1	0	0	STOML1	stomatin (EPB72)-like 1
hsa-miR-512-5p	0	0	0	1	1	1	DLGAP1-AS1	DLGAP1 antisense RNA 1
hsa-miR-512-5p	0	0	1	1	1	1	RECQL5	RecQ protein-like 5
hsa-miR-512-5p	0	0	0	1	0	0	OR2T12	olfactory receptor, family 2, subfamily T, member 12
hsa-miR-512-5p	0	0	1	1	1	1	CRAT	carnitine O-acetyltransferase
hsa-miR-512-5p	0	0	0	1	0	0	ZNF101	zinc finger protein 101
hsa-miR-512-5p	0	0	1	1	1	1	ZNF169	zinc finger protein 169
hsa-miR-512-5p	0	0	1	1	1	1	USP54	ubiquitin specific peptidase 54
hsa-miR-512-5p	0	0	0	1	0	0	SHROOM1	shroom family member 1
hsa-miR-512-5p	0	0	0	1	1	1	ZNF454	zinc finger protein 454
hsa-miR-512-5p	0	0	0	1	0	0	ZNF48	zinc finger protein 48
hsa-miR-512-5p	0	0	0	1	0	0	FGF8	fibroblast growth factor 8 (androgen-induced)
hsa-miR-512-5p	1	0	1	1	1	1	MAP4	microtubule-associated protein 4
hsa-miR-512-5p	0	0	1	1	0	0	CLPTM1L	CLPTM1-like
hsa-miR-512-5p	0	0	0	1	1	1	FOLR2	folate receptor 2 (fetal)
hsa-miR-512-5p	0	0	1	1	0	0	CD151	CD151 molecule (Raph blood group)
hsa-miR-512-5p	0	0	0	1	1	1	POLR2L	polymerase (RNA) II (DNA directed) polypeptide L, 7.6kDa
hsa-miR-512-5p	1	0	1	1	1	1	NCL	nucleolin
hsa-miR-512-5p	0	0	0	1	0	0	LRRC61	leucine rich repeat containing 61
hsa-miR-512-5p	0	0	1	1	0	0	GCAT	glycine C-acetyltransferase
hsa-miR-512-5p	0	0	1	1	0	0	TYMS	thymidylate synthetase
hsa-miR-512-5p	0	0	1	1	0	0	NLRP12	NLR family, pyrin domain containing 12
hsa-miR-512-5p	1	0	0	1	1	1	ANGPT2	angiopoietin 2
hsa-miR-512-5p	1	0	1	1	0	0	PACS2	phosphofurin acidic cluster sorting protein 2
hsa-miR-512-5p	0	0	0	1	1	1	EID2	EP300 interacting inhibitor of differentiation 2
hsa-miR-512-5p	1	0	0	1	1	1	PLEKHJ1	pleckstrin homology domain containing, family J member 1
hsa-miR-512-5p	0	0	0	1	0	0	SSX10	synovial sarcoma, X breakpoint 10
hsa-miR-512-5p	0	0	1	1	0	0	NR2F1	nuclear receptor subfamily 2, group F, member 1
hsa-miR-512-5p	0	0	1	1	1	1	CETN1	centrin, EF-hand protein, 1
hsa-miR-512-5p	0	0	0	1	1	1	BRF1	BRF1 homolog, subunit of RNA polymerase III transcription initiation factor IIIB (S. cerevisiae)
hsa-miR-512-5p	0	0	0	1	1	1	ELP6	elongator acetyltransferase complex subunit 6
hsa-miR-512-5p	0	0	1	1	0	0	GPR97	G protein-coupled receptor 97
hsa-miR-512-5p	0	0	0	1	0	0	CFD	complement factor D (adipsin)
hsa-miR-512-5p	1	0	0	1	1	1	SIRT7	sirtuin 7
hsa-miR-512-5p	0	0	0	1	0	0	TTTY8B	testis-specific transcript, Y-linked 8B (non-protein coding)
hsa-miR-512-5p	0	0	0	1	0	0	CLEC4G	C-type lectin domain family 4, member G
hsa-miR-512-5p	0	0	0	1	0	0	KLHL22	kelch-like 22 (Drosophila)
hsa-miR-512-5p	0	0	0	1	1	1	GALNT9	UDP-N-acetyl-alpha-D-galactosamine:polypeptide N-acetylgalactosaminyltransferase 9 (GalNAc-T9)
hsa-miR-512-5p	0	0	0	1	1	1	C17orf101	chromosome 17 open reading frame 101
hsa-miR-512-5p	0	0	0	1	0	0	GPR132	G protein-coupled receptor 132
hsa-miR-512-5p	0	0	1	1	0	0	KIAA2013	KIAA2013
hsa-miR-512-5p	0	0	1	1	0	0	TMEM44	transmembrane protein 44
hsa-miR-512-5p	0	0	0	1	0	0	TMEM89	transmembrane protein 89
hsa-miR-512-5p	0	0	1	1	0	0	DNAJA1	DnaJ (Hsp40) homolog, subfamily A, member 1
hsa-miR-512-5p	1	0	1	1	1	1	ACTG1	actin, gamma 1
hsa-miR-512-5p	0	0	0	1	1	1	ZBTB7C	zinc finger and BTB domain containing 7C
hsa-miR-512-5p	0	0	1	1	1	1	TCEB3B	transcription elongation factor B polypeptide 3B (elongin A2)
hsa-miR-512-5p	0	0	0	1	0	0	OR6A2	olfactory receptor, family 6, subfamily A, member 2
hsa-miR-512-5p	0	0	1	1	0	0	TSKU	tsukushi small leucine rich proteoglycan homolog (Xenopus laevis)
hsa-miR-512-5p	0	0	0	1	0	0	POLR2F	polymerase (RNA) II (DNA directed) polypeptide F
hsa-miR-512-5p	0	0	0	1	0	0	FER1L4	fer-1-like 4 (C. elegans) pseudogene
hsa-miR-512-5p	0	0	0	1	0	0	MUC2	mucin 2, oligomeric mucus/gel-forming
hsa-miR-512-5p	0	0	0	1	0	0	TH	tyrosine hydroxylase
hsa-miR-512-5p	1	0	1	1	1	1	ZSCAN2	zinc finger and SCAN domain containing 2
hsa-miR-512-5p	0	0	0	1	0	0	ZNF347	zinc finger protein 347
hsa-miR-512-5p	0	0	0	1	1	1	TTF1	transcription termination factor, RNA polymerase I
hsa-miR-512-5p	0	0	1	1	0	0	TPGS2	tubulin polyglutamylase complex subunit 2
hsa-miR-512-5p	0	0	0	1	0	0	NBPF6	neuroblastoma breakpoint family, member 6
hsa-miR-512-5p	0	0	0	1	0	0	HPDL	4-hydroxyphenylpyruvate dioxygenase-like
hsa-miR-512-5p	0	0	1	1	0	0	DHRS4L2	dehydrogenase/reductase (SDR family) member 4 like 2
hsa-miR-512-5p	0	0	0	1	0	0	PES1	pescadillo ribosomal biogenesis factor 1
hsa-miR-512-5p	0	0	0	1	0	0	TBX10	T-box 10
hsa-miR-512-5p	0	0	0	1	0	0	GRK1	G protein-coupled receptor kinase 1
hsa-miR-512-5p	0	0	1	1	0	0	WFDC6	WAP four-disulfide core domain 6
hsa-miR-512-5p	1	0	0	1	1	1	P2RX4	purinergic receptor P2X, ligand-gated ion channel, 4
hsa-miR-512-5p	0	0	1	1	0	0	AVPR2	arginine vasopressin receptor 2
hsa-miR-512-5p	1	0	1	1	0	0	ZFYVE27	zinc finger, FYVE domain containing 27
hsa-miR-512-5p	0	0	0	1	0	0	ZNF394	zinc finger protein 394
hsa-miR-512-5p	1	0	1	1	1	1	SPTLC1	serine palmitoyltransferase, long chain base subunit 1
hsa-miR-512-5p	0	0	1	1	1	1	CCDC157	coiled-coil domain containing 157
hsa-miR-512-5p	1	0	0	1	1	1	HNF4A	hepatocyte nuclear factor 4, alpha
hsa-miR-512-5p	0	0	0	1	0	0	TEKT3	tektin 3
hsa-miR-512-5p	0	0	1	1	1	1	MAOA	monoamine oxidase A
hsa-miR-512-5p	0	0	0	1	0	0	FAM90A27P	family with sequence similarity 90, member A27, pseudogene
hsa-miR-512-5p	0	0	0	1	0	0	SFN	stratifin
hsa-miR-512-5p	0	0	0	1	0	0	C11orf96	chromosome 11 open reading frame 96
hsa-miR-512-5p	1	0	1	1	1	1	SPAM1	sperm adhesion molecule 1 (PH-20 hyaluronidase, zona pellucida binding)
hsa-miR-512-5p	0	0	0	1	1	1	PNCK	pregnancy up-regulated non-ubiquitously expressed CaM kinase
hsa-miR-512-5p	0	0	1	1	1	1	ICAM4	intercellular adhesion molecule 4 (Landsteiner-Wiener blood group)
hsa-miR-512-5p	0	0	0	1	0	0	WDR86	WD repeat domain 86
hsa-miR-512-5p	0	0	1	1	1	1	MSANTD1	Myb/SANT-like DNA-binding domain containing 1
hsa-miR-512-5p	0	0	0	1	1	1	CTSL1	cathepsin L1
hsa-miR-512-5p	0	0	0	1	0	0	JMJD7-PLA2G4B	JMJD7-PLA2G4B readthrough
hsa-miR-512-5p	0	0	1	1	1	1	TTN	titin
hsa-miR-512-5p	0	0	0	1	0	0	PPAN	peter pan homolog (Drosophila)
hsa-miR-512-5p	0	0	0	1	0	0	P2RY11	purinergic receptor P2Y, G-protein coupled, 11
hsa-miR-512-5p	0	0	0	1	0	0	PPAN-P2RY11	PPAN-P2RY11 readthrough
hsa-miR-512-5p	0	0	1	1	0	0	MATN4	matrilin 4
hsa-miR-512-5p	0	0	1	1	0	0	CXorf67	chromosome X open reading frame 67
hsa-miR-512-5p	0	0	0	1	0	0	QRFP	pyroglutamylated RFamide peptide
hsa-miR-512-5p	0	0	0	1	1	1	KRTAP4-5	keratin associated protein 4-5
hsa-miR-512-5p	0	0	0	1	1	1	DOCK2	dedicator of cytokinesis 2
hsa-miR-512-5p	0	0	0	1	0	0	CDHR4	cadherin-related family member 4
hsa-miR-512-5p	0	0	0	1	0	0	ZNF669	zinc finger protein 669
hsa-miR-512-5p	0	0	1	1	0	0	THNSL2	threonine synthase-like 2 (S. cerevisiae)
hsa-miR-512-5p	0	0	1	1	1	1	MED22	mediator complex subunit 22
hsa-miR-512-5p	0	0	1	1	1	1	AQP3	aquaporin 3 (Gill blood group)
hsa-miR-512-5p	0	0	1	1	0	0	PPM1G	protein phosphatase, Mg2+/Mn2+ dependent, 1G
hsa-miR-512-5p	0	0	1	1	0	0	FZD9	frizzled family receptor 9
hsa-miR-512-5p	0	0	1	1	1	1	ZFP41	zinc finger protein 41 homolog (mouse)
hsa-miR-512-5p	0	0	0	1	0	0	GLI4	GLI family zinc finger 4
hsa-miR-512-5p	1	0	1	1	0	0	NR1H3	nuclear receptor subfamily 1, group H, member 3
hsa-miR-512-5p	0	0	1	1	1	1	GYG1	glycogenin 1
hsa-miR-512-5p	0	0	1	1	0	0	CDK5RAP2	CDK5 regulatory subunit associated protein 2
hsa-miR-512-5p	0	0	1	1	1	1	CASC5	cancer susceptibility candidate 5
hsa-miR-512-5p	0	0	1	1	0	0	EIF2B4	eukaryotic translation initiation factor 2B, subunit 4 delta, 67kDa
hsa-miR-512-5p	0	0	1	1	0	0	SLC28A2	solute carrier family 28 (sodium-coupled nucleoside transporter), member 2
hsa-miR-512-5p	0	0	1	1	1	1	TOX2	TOX high mobility group box family member 2
hsa-miR-512-5p	0	0	1	1	1	1	NXPH4	neurexophilin 4
hsa-miR-512-5p	0	0	0	1	0	0	ARHGAP4	Rho GTPase activating protein 4
hsa-miR-512-5p	0	0	1	1	0	0	C7orf25	chromosome 7 open reading frame 25
hsa-miR-512-5p	0	0	0	1	0	0	DDT	D-dopachrome tautomerase
hsa-miR-512-5p	1	0	1	1	1	1	FADS1	fatty acid desaturase 1
hsa-miR-512-5p	0	0	1	1	0	0	FADS3	fatty acid desaturase 3
hsa-miR-512-5p	0	0	0	1	1	1	CBS	cystathionine-beta-synthase
hsa-miR-512-5p	0	0	0	1	0	0	CCDC37	coiled-coil domain containing 37
hsa-miR-512-5p	0	0	1	1	0	0	ETFB	electron-transfer-flavoprotein, beta polypeptide
hsa-miR-512-5p	0	0	0	1	0	0	OSCP1	organic solute carrier partner 1
hsa-miR-512-5p	0	0	0	1	0	0	FGF16	fibroblast growth factor 16
hsa-miR-512-5p	0	0	1	1	0	0	CUL9	cullin 9
hsa-miR-512-5p	0	0	1	1	0	0	GPT	glutamic-pyruvate transaminase (alanine aminotransferase)
hsa-miR-512-5p	0	0	0	1	0	0	MYL4	myosin, light chain 4, alkali; atrial, embryonic
hsa-miR-512-5p	0	0	0	1	0	0	ENTPD2	ectonucleoside triphosphate diphosphohydrolase 2
hsa-miR-512-5p	0	0	0	1	1	1	SRP68	signal recognition particle 68kDa
hsa-miR-512-5p	1	0	1	1	0	0	GRK6	G protein-coupled receptor kinase 6
hsa-miR-512-5p	0	0	0	1	1	1	RPL23A	ribosomal protein L23a
hsa-miR-512-5p	0	0	0	1	0	0	ZGPAT	zinc finger, CCCH-type with G patch domain
hsa-miR-512-5p	0	0	1	1	0	0	CEP250	centrosomal protein 250kDa
hsa-miR-512-5p	0	0	0	1	0	0	AMICA1	adhesion molecule, interacts with CXADR antigen 1
hsa-miR-512-5p	1	0	1	1	1	1	SH3BP2	SH3-domain binding protein 2
hsa-miR-512-5p	0	0	0	1	0	0	LSS	lanosterol synthase (2,3-oxidosqualene-lanosterol cyclase)
hsa-miR-512-5p	0	0	0	1	1	1	PITPNM1	phosphatidylinositol transfer protein, membrane-associated 1
hsa-miR-512-5p	0	0	0	1	0	0	OR5H15	olfactory receptor, family 5, subfamily H, member 15
hsa-miR-512-5p	0	0	1	1	1	1	PEX14	peroxisomal biogenesis factor 14
hsa-miR-512-5p	0	0	1	1	1	1	TMEM67	transmembrane protein 67
hsa-miR-512-5p	0	0	1	1	1	1	ARC	activity-regulated cytoskeleton-associated protein
hsa-miR-512-5p	0	0	1	1	0	0	IL27	interleukin 27
hsa-miR-512-5p	0	0	1	1	0	0	DZANK1	double zinc ribbon and ankyrin repeat domains 1
hsa-miR-512-5p	0	0	0	1	0	0	DNAJC22	DnaJ (Hsp40) homolog, subfamily C, member 22
hsa-miR-512-5p	0	0	1	1	1	1	SEMA5B	sema domain, seven thrombospondin repeats (type 1 and type 1-like), transmembrane domain (TM) and short cytoplasmic domain, (semaphorin) 5B
hsa-miR-512-5p	0	0	1	1	1	1	TUSC1	tumor suppressor candidate 1
hsa-miR-512-5p	0	0	1	1	1	1	EXT2	exostosin 2
hsa-miR-512-5p	0	0	1	1	0	0	NSMCE1	non-SMC element 1 homolog (S. cerevisiae)
hsa-miR-512-5p	0	0	1	1	1	1	GTPBP3	GTP binding protein 3 (mitochondrial)
hsa-miR-512-5p	1	0	1	1	1	1	TRPM6	transient receptor potential cation channel, subfamily M, member 6
hsa-miR-512-5p	1	0	1	1	0	0	PDE3A	phosphodiesterase 3A, cGMP-inhibited
hsa-miR-512-5p	0	0	1	1	0	0	AADACL3	arylacetamide deacetylase-like 3
hsa-miR-512-5p	1	0	1	1	1	1	C6orf89	chromosome 6 open reading frame 89
hsa-miR-512-5p	1	0	1	1	1	1	NUMA1	nuclear mitotic apparatus protein 1
hsa-miR-512-5p	0	0	0	1	0	0	TEAD4	TEA domain family member 4
hsa-miR-512-5p	0	0	1	1	0	0	ART5	ADP-ribosyltransferase 5
hsa-miR-512-5p	0	0	1	1	0	0	CLDN7	claudin 7
hsa-miR-512-5p	0	0	0	1	0	0	ARTN	artemin
hsa-miR-512-5p	1	0	1	1	0	0	C15orf39	chromosome 15 open reading frame 39
hsa-miR-512-5p	0	0	1	1	1	1	GSTM3	glutathione S-transferase mu 3 (brain)
hsa-miR-512-5p	0	0	1	1	0	0	RNF208	ring finger protein 208
hsa-miR-512-5p	0	0	1	1	1	1	PECAM1	platelet/endothelial cell adhesion molecule 1
hsa-miR-512-5p	0	0	1	1	1	1	APOL3	apolipoprotein L, 3
hsa-miR-512-5p	0	0	1	1	0	0	WISP3	WNT1 inducible signaling pathway protein 3
hsa-miR-512-5p	0	0	1	1	1	1	METTL13	methyltransferase like 13
hsa-miR-512-5p	1	0	1	1	1	1	SCAMP5	secretory carrier membrane protein 5
hsa-miR-512-5p	0	0	0	1	0	0	SHISA4	shisa homolog 4 (Xenopus laevis)
hsa-miR-512-5p	0	0	0	1	0	0	OR2T4	olfactory receptor, family 2, subfamily T, member 4
hsa-miR-512-5p	0	0	0	1	1	1	TRIM58	tripartite motif containing 58
hsa-miR-512-5p	0	0	0	1	0	0	PRSS38	protease, serine, 38
hsa-miR-512-5p	0	0	0	1	0	0	TMEM63A	transmembrane protein 63A
hsa-miR-512-5p	0	0	0	1	1	1	RMND1	required for meiotic nuclear division 1 homolog (S. cerevisiae)
hsa-miR-512-5p	0	0	0	1	0	0	PHLDA3	pleckstrin homology-like domain, family A, member 3
hsa-miR-512-5p	0	0	0	1	1	1	DDX59	DEAD (Asp-Glu-Ala-Asp) box polypeptide 59
hsa-miR-512-5p	0	0	0	1	0	0	CFHR1	complement factor H-related 1
hsa-miR-512-5p	0	0	0	1	0	0	CFH	complement factor H
hsa-miR-512-5p	0	0	1	1	1	1	TSEN15	tRNA splicing endonuclease 15 homolog (S. cerevisiae)
hsa-miR-512-5p	0	0	1	1	1	1	C1orf129	chromosome 1 open reading frame 129
hsa-miR-512-5p	1	0	1	1	1	1	TBPL1	TBP-like 1
hsa-miR-512-5p	0	0	1	1	1	1	C1orf110	chromosome 1 open reading frame 110
hsa-miR-512-5p	0	0	1	1	1	1	MRPL24	mitochondrial ribosomal protein L24
hsa-miR-512-5p	0	0	0	1	0	0	TTC40	tetratricopeptide repeat domain 40
hsa-miR-512-5p	0	0	0	1	0	0	S100A4	S100 calcium binding protein A4
hsa-miR-512-5p	0	0	0	1	0	0	UROS	uroporphyrinogen III synthase
hsa-miR-512-5p	0	0	1	1	0	0	LCE3D	late cornified envelope 3D
hsa-miR-512-5p	0	0	1	1	1	1	QRSL1	glutaminyl-tRNA synthase (glutamine-hydrolyzing)-like 1
hsa-miR-512-5p	0	0	0	1	0	0	VWA2	von Willebrand factor A domain containing 2
hsa-miR-512-5p	1	0	1	1	1	1	RNGTT	RNA guanylyltransferase and 5'-phosphatase
hsa-miR-512-5p	0	0	1	1	0	0	EPS8L3	EPS8-like 3
hsa-miR-512-5p	1	0	0	1	0	0	SAMD10	sterile alpha motif domain containing 10
hsa-miR-512-5p	0	0	1	1	1	1	ELOVL3	ELOVL fatty acid elongase 3
hsa-miR-512-5p	0	0	1	1	0	0	NAA10	N(alpha)-acetyltransferase 10, NatA catalytic subunit
hsa-miR-512-5p	1	0	1	1	1	1	LZTS2	leucine zipper, putative tumor suppressor 2
hsa-miR-512-5p	0	0	0	1	0	0	BTBD8	BTB (POZ) domain containing 8
hsa-miR-512-5p	0	0	0	1	0	0	C6orf57	chromosome 6 open reading frame 57
hsa-miR-512-5p	0	0	0	1	0	0	LAMA5	laminin, alpha 5
hsa-miR-512-5p	0	0	1	1	1	1	GADD45A	growth arrest and DNA-damage-inducible, alpha
hsa-miR-512-5p	0	0	1	1	1	1	TTC4	tetratricopeptide repeat domain 4
hsa-miR-512-5p	0	0	0	1	0	0	FAM209A	family with sequence similarity 209, member A
hsa-miR-512-5p	1	0	1	1	1	1	NELF	nasal embryonic LHRH factor
hsa-miR-512-5p	0	0	0	1	0	0	LCN8	lipocalin 8
hsa-miR-512-5p	0	0	0	1	0	0	EGFL7	EGF-like-domain, multiple 7
hsa-miR-512-5p	0	0	0	1	0	0	INPP5E	inositol polyphosphate-5-phosphatase, 72 kDa
hsa-miR-512-5p	1	0	1	1	1	1	TTC39A	tetratricopeptide repeat domain 39A
hsa-miR-512-5p	0	0	1	1	0	0	PAEP	progestagen-associated endometrial protein
hsa-miR-512-5p	0	0	0	1	1	1	POLH	polymerase (DNA directed), eta
hsa-miR-512-5p	0	0	0	1	0	0	DMAP1	DNA methyltransferase 1 associated protein 1
hsa-miR-512-5p	0	0	0	1	0	0	CCDC24	coiled-coil domain containing 24
hsa-miR-512-5p	1	0	1	1	1	1	USP20	ubiquitin specific peptidase 20
hsa-miR-512-5p	0	0	1	1	0	0	DNTTIP1	deoxynucleotidyltransferase, terminal, interacting protein 1
hsa-miR-512-5p	1	0	1	1	1	1	NFYC	nuclear transcription factor Y, gamma
hsa-miR-512-5p	0	0	0	1	1	1	TBCC	tubulin folding cofactor C
hsa-miR-512-5p	0	0	1	1	1	1	TRUB2	TruB pseudouridine (psi) synthase homolog 2 (E. coli)
hsa-miR-512-5p	0	0	0	1	0	0	KCNK16	potassium channel, subfamily K, member 16
hsa-miR-512-5p	0	0	1	1	1	1	SLC2A8	solute carrier family 2 (facilitated glucose transporter), member 8
hsa-miR-512-5p	0	0	0	1	1	1	GJB3	gap junction protein, beta 3, 31kDa
hsa-miR-512-5p	0	0	1	1	1	1	TGM2	transglutaminase 2 (C polypeptide, protein-glutamine-gamma-glutamyltransferase)
hsa-miR-512-5p	1	0	1	1	0	0	CCDC167	coiled-coil domain containing 167
hsa-miR-512-5p	1	0	1	1	1	1	RABGAP1	RAB GTPase activating protein 1
hsa-miR-512-5p	0	0	1	1	1	1	MYPN	myopalladin
hsa-miR-512-5p	0	0	1	1	1	1	MAPK13	mitogen-activated protein kinase 13
hsa-miR-512-5p	0	0	0	1	0	0	FAM110D	family with sequence similarity 110, member D
hsa-miR-512-5p	0	0	1	1	0	0	PAQR7	progestin and adipoQ receptor family member VII
hsa-miR-512-5p	1	0	1	1	0	0	SVEP1	sushi, von Willebrand factor type A, EGF and pentraxin domain containing 1
hsa-miR-512-5p	0	0	1	1	0	0	CELA3A	chymotrypsin-like elastase family, member 3A
hsa-miR-512-5p	0	0	1	1	0	0	CELA3B	chymotrypsin-like elastase family, member 3B
hsa-miR-512-5p	1	0	1	1	1	1	SLC44A1	solute carrier family 44, member 1
hsa-miR-512-5p	0	0	1	1	0	0	C6orf10	chromosome 6 open reading frame 10
hsa-miR-512-5p	0	0	1	1	1	1	GALNT12	UDP-N-acetyl-alpha-D-galactosamine:polypeptide N-acetylgalactosaminyltransferase 12 (GalNAc-T12)
hsa-miR-512-5p	0	0	1	1	0	0	CDA	cytidine deaminase
hsa-miR-512-5p	0	0	0	1	0	0	XPA	xeroderma pigmentosum, complementation group A
hsa-miR-512-5p	0	0	1	1	0	0	CYP21A2	cytochrome P450, family 21, subfamily A, polypeptide 2
hsa-miR-512-5p	0	0	1	1	0	0	C2	complement component 2
hsa-miR-512-5p	0	0	1	1	0	0	F10	coagulation factor X
hsa-miR-512-5p	0	0	0	1	0	0	CLCNKB	chloride channel, voltage-sensitive Kb
hsa-miR-512-5p	0	0	1	1	1	1	CLCNKA	chloride channel, voltage-sensitive Ka
hsa-miR-512-5p	0	0	1	1	0	0	CSNK2B	casein kinase 2, beta polypeptide
hsa-miR-512-5p	0	0	0	1	1	1	LY6G5B	lymphocyte antigen 6 complex, locus G5B
hsa-miR-512-5p	0	0	0	1	0	0	APOM	apolipoprotein M
hsa-miR-512-5p	0	0	1	1	0	0	FOXS1	forkhead box S1
hsa-miR-512-5p	0	0	0	1	0	0	CCHCR1	coiled-coil alpha-helical rod protein 1
hsa-miR-512-5p	1	0	1	1	1	1	CLCN6	chloride channel, voltage-sensitive 6
hsa-miR-512-5p	0	0	1	1	1	1	CPT1A	carnitine palmitoyltransferase 1A (liver)
hsa-miR-512-5p	0	0	1	1	1	1	WAS	Wiskott-Aldrich syndrome
hsa-miR-512-5p	0	0	0	1	0	0	CBY3	chibby homolog 3 (Drosophila)
hsa-miR-512-5p	0	0	0	1	0	0	CST9L	cystatin 9-like
hsa-miR-512-5p	0	0	0	1	1	1	IL31	interleukin 31
hsa-miR-512-5p	0	0	1	1	1	1	APITD1	apoptosis-inducing, TAF9-like domain 1
hsa-miR-512-5p	0	0	1	1	1	1	CORT	cortistatin
hsa-miR-512-5p	0	0	1	1	1	1	FXN	frataxin
hsa-miR-512-5p	0	0	1	1	0	0	CCDC114	coiled-coil domain containing 114
hsa-miR-512-5p	1	0	1	1	0	0	AUP1	ancient ubiquitous protein 1
hsa-miR-512-5p	0	0	0	1	1	1	VIPR2	vasoactive intestinal peptide receptor 2
hsa-miR-512-5p	0	0	0	1	1	1	BORA	bora, aurora kinase A activator
hsa-miR-512-5p	0	0	1	1	1	1	SCGN	secretagogin, EF-hand calcium binding protein
hsa-miR-512-5p	1	0	1	1	1	1	CHD5	chromodomain helicase DNA binding protein 5
hsa-miR-512-5p	1	0	1	1	1	1	TXNRD1	thioredoxin reductase 1
hsa-miR-512-5p	1	0	1	1	1	1	ARHGEF39	Rho guanine nucleotide exchange factor (GEF) 39
hsa-miR-512-5p	0	0	0	1	0	0	LIG3	ligase III, DNA, ATP-dependent
hsa-miR-512-5p	0	0	0	1	0	0	C1orf222	chromosome 1 open reading frame 222
hsa-miR-512-5p	0	0	0	1	0	0	MMP23B	matrix metallopeptidase 23B
hsa-miR-512-5p	0	0	1	1	1	1	CAMK1D	calcium/calmodulin-dependent protein kinase ID
hsa-miR-512-5p	0	0	1	1	0	0	PRODH2	proline dehydrogenase (oxidase) 2
hsa-miR-512-5p	0	0	1	1	0	0	NPHS1	nephrosis 1, congenital, Finnish type (nephrin)
hsa-miR-512-5p	0	0	0	1	0	0	CKS1BP6	CDC28 protein kinase regulatory subunit 1B pseudogene 6
hsa-miR-512-5p	0	0	0	1	0	0	ZNF774	zinc finger protein 774
hsa-miR-512-5p	0	0	1	1	1	1	NFATC3	nuclear factor of activated T-cells, cytoplasmic, calcineurin-dependent 3
hsa-miR-512-5p	0	0	0	1	0	0	CCDC90A	coiled-coil domain containing 90A
hsa-miR-512-5p	0	0	0	1	0	0	PLEKHN1	pleckstrin homology domain containing, family N member 1
hsa-miR-512-5p	0	0	1	1	1	1	ADTRP	androgen-dependent TFPI-regulating protein
hsa-miR-512-5p	1	0	1	1	1	1	CAMK2D	calcium/calmodulin-dependent protein kinase II delta
hsa-miR-512-5p	0	0	1	1	0	0	MPV17	MpV17 mitochondrial inner membrane protein
hsa-miR-512-5p	0	0	1	1	1	1	ANKRD16	ankyrin repeat domain 16
hsa-miR-512-5p	1	0	1	1	1	1	TPM1	tropomyosin 1 (alpha)
hsa-miR-512-5p	0	0	0	1	0	0	OR51T1	olfactory receptor, family 51, subfamily T, member 1
hsa-miR-512-5p	0	0	1	1	1	1	BPHL	biphenyl hydrolase-like (serine hydrolase)
hsa-miR-512-5p	1	0	1	1	1	1	NFIB	nuclear factor I/B
hsa-miR-512-5p	0	0	1	1	1	1	CSF2RA	colony stimulating factor 2 receptor, alpha, low-affinity (granulocyte-macrophage)
hsa-miR-512-5p	0	0	1	1	1	1	LZTS1	leucine zipper, putative tumor suppressor 1
hsa-miR-512-5p	0	0	1	1	0	0	LIAS	lipoic acid synthetase
hsa-miR-512-5p	0	0	0	1	0	0	TPTE2P1	transmembrane phosphoinositide 3-phosphatase and tensin homolog 2 pseudogene 1
hsa-miR-512-5p	0	0	0	1	0	0	ANGPT4	angiopoietin 4
hsa-miR-512-5p	0	0	1	1	1	1	GPNMB	glycoprotein (transmembrane) nmb
hsa-miR-512-5p	1	0	1	1	1	1	SLC43A2	solute carrier family 43, member 2
hsa-miR-512-5p	1	0	1	1	1	1	ABR	active BCR-related
hsa-miR-512-5p	0	0	1	1	1	1	FGFBP1	fibroblast growth factor binding protein 1
hsa-miR-512-5p	0	0	0	1	1	1	ABCA3	ATP-binding cassette, sub-family A (ABC1), member 3
hsa-miR-512-5p	1	0	1	1	1	1	UNKL	unkempt homolog (Drosophila)-like
hsa-miR-512-5p	0	0	1	1	0	0	ZSCAN30	zinc finger and SCAN domain containing 30
hsa-miR-512-5p	1	0	1	1	1	1	CCDC149	coiled-coil domain containing 149
hsa-miR-512-5p	0	0	1	1	1	1	UVSSA	UV-stimulated scaffold protein A
hsa-miR-512-5p	0	0	0	1	0	0	ZC3H12D	zinc finger CCCH-type containing 12D
hsa-miR-512-5p	1	0	1	0	1	1	PKD2	polycystic kidney disease 2 (autosomal dominant)
hsa-miR-512-5p	0	0	1	1	1	1	MC2R	melanocortin 2 receptor (adrenocorticotropic hormone)
hsa-miR-512-5p	0	0	0	1	1	1	CYP4A11	cytochrome P450, family 4, subfamily A, polypeptide 11
hsa-miR-512-5p	0	0	0	1	1	1	METTL2A	methyltransferase like 2A
hsa-miR-512-5p	1	0	1	1	1	1	MOG	myelin oligodendrocyte glycoprotein
hsa-miR-512-5p	0	0	0	1	1	1	LURAP1	leucine rich adaptor protein 1
hsa-miR-512-5p	0	0	1	0	1	1	ZNF107	zinc finger protein 107
hsa-miR-512-5p	1	0	1	1	1	1	SH3PXD2B	SH3 and PX domains 2B
hsa-miR-512-5p	0	0	1	1	1	1	ZNF197	zinc finger protein 197
hsa-miR-512-5p	1	0	1	0	1	1	C2orf71	chromosome 2 open reading frame 71
hsa-miR-512-5p	0	0	1	1	1	1	C19orf12	chromosome 19 open reading frame 12
hsa-miR-512-5p	1	0	1	1	1	1	PPM1B	protein phosphatase, Mg2+/Mn2+ dependent, 1B
hsa-miR-512-5p	0	0	1	0	1	1	FER1L6-AS1	FER1L6 antisense RNA 1
hsa-miR-512-5p	0	0	1	1	1	1	MTL5	metallothionein-like 5, testis-specific (tesmin)
hsa-miR-512-5p	0	0	1	1	1	1	ZNF557	zinc finger protein 557
hsa-miR-512-5p	1	0	1	1	1	1	ECT2L	epithelial cell transforming sequence 2 oncogene-like
hsa-miR-512-5p	0	0	0	0	1	1	IL18	interleukin 18 (interferon-gamma-inducing factor)
hsa-miR-512-5p	0	0	1	1	1	1	CAMLG	calcium modulating ligand
hsa-miR-512-5p	1	0	1	1	1	1	GNAZ	guanine nucleotide binding protein (G protein), alpha z polypeptide
hsa-miR-512-5p	0	0	1	1	1	1	KCNJ13	potassium inwardly-rectifying channel, subfamily J, member 13
hsa-miR-512-5p	1	0	1	1	1	1	IPO5	importin 5
hsa-miR-512-5p	1	0	1	0	1	1	IRF4	interferon regulatory factor 4
hsa-miR-512-5p	0	0	0	1	1	1	TTF2	transcription termination factor, RNA polymerase II
hsa-miR-512-5p	0	0	1	0	1	1	DENR	density-regulated protein
hsa-miR-512-5p	1	0	0	1	1	1	CAPN5	calpain 5
hsa-miR-512-5p	0	0	1	1	1	1	SERPINB9	serpin peptidase inhibitor, clade B (ovalbumin), member 9
hsa-miR-512-5p	1	0	1	1	1	1	SPRY1	sprouty homolog 1, antagonist of FGF signaling (Drosophila)
hsa-miR-512-5p	0	0	1	1	1	1	SOX1	SRY (sex determining region Y)-box 1
hsa-miR-512-5p	0	0	1	1	1	1	DBF4	DBF4 homolog (S. cerevisiae)
hsa-miR-512-5p	0	0	1	1	1	1	LZTR1	leucine-zipper-like transcription regulator 1
hsa-miR-512-5p	1	0	1	1	1	1	TFDP1	transcription factor Dp-1
hsa-miR-512-5p	0	0	1	0	1	1	CDC42EP4	CDC42 effector protein (Rho GTPase binding) 4
hsa-miR-512-5p	1	0	1	1	1	1	MGEA5	meningioma expressed antigen 5 (hyaluronidase)
hsa-miR-512-5p	1	0	0	1	1	1	FAIM2	Fas apoptotic inhibitory molecule 2
hsa-miR-512-5p	0	0	1	1	1	1	TCL6	T-cell leukemia/lymphoma 6 (non-protein coding)
hsa-miR-512-5p	0	0	1	1	1	1	DUOX2	dual oxidase 2
hsa-miR-512-5p	1	0	1	1	1	1	MKRN2	makorin ring finger protein 2
hsa-miR-512-5p	1	0	1	1	1	1	ITPK1	inositol-tetrakisphosphate 1-kinase
hsa-miR-512-5p	1	0	1	0	1	1	SNX13	sorting nexin 13
hsa-miR-512-5p	1	0	1	0	1	1	NEDD4L	neural precursor cell expressed, developmentally down-regulated 4-like, E3 ubiquitin protein ligase
hsa-miR-512-5p	0	0	1	1	1	1	SLC39A14	solute carrier family 39 (zinc transporter), member 14
hsa-miR-512-5p	1	0	1	1	1	1	GPRC5B	G protein-coupled receptor, family C, group 5, member B
hsa-miR-512-5p	1	0	1	1	1	1	RNF138	ring finger protein 138, E3 ubiquitin protein ligase
hsa-miR-512-5p	1	0	0	1	1	1	CNNM3	cyclin M3
hsa-miR-512-5p	0	0	1	0	1	1	SHQ1	SHQ1 homolog (S. cerevisiae)
hsa-miR-512-5p	1	0	1	1	1	1	TBC1D13	TBC1 domain family, member 13
hsa-miR-512-5p	0	0	1	1	1	1	PCMTD2	protein-L-isoaspartate (D-aspartate) O-methyltransferase domain containing 2
hsa-miR-512-5p	1	0	0	1	1	1	SSH1	slingshot homolog 1 (Drosophila)
hsa-miR-512-5p	0	0	1	1	1	1	FAM35A	family with sequence similarity 35, member A
hsa-miR-512-5p	0	0	0	1	1	1	WDR5B	WD repeat domain 5B
hsa-miR-512-5p	1	0	1	1	1	1	AGPAT4	1-acylglycerol-3-phosphate O-acyltransferase 4 (lysophosphatidic acid acyltransferase, delta)
hsa-miR-512-5p	0	0	0	1	1	1	C12orf5	chromosome 12 open reading frame 5
hsa-miR-512-5p	1	0	1	1	1	1	SNTB1	syntrophin, beta 1 (dystrophin-associated protein A1, 59kDa, basic component 1)
hsa-miR-512-5p	0	0	0	0	1	1	ZNF649	zinc finger protein 649
hsa-miR-512-5p	0	0	1	0	1	1	FUNDC2	FUN14 domain containing 2
hsa-miR-512-5p	1	0	1	1	1	1	CEP97	centrosomal protein 97kDa
hsa-miR-512-5p	0	0	1	1	1	1	FN3KRP	fructosamine 3 kinase related protein
hsa-miR-512-5p	0	0	1	1	1	1	BBS10	Bardet-Biedl syndrome 10
hsa-miR-512-5p	0	0	1	1	1	1	SHCBP1	SHC SH2-domain binding protein 1
hsa-miR-512-5p	1	0	1	0	1	1	DCAF17	DDB1 and CUL4 associated factor 17
hsa-miR-512-5p	0	0	1	1	1	1	SLC19A3	solute carrier family 19, member 3
hsa-miR-512-5p	0	0	0	1	1	1	CCDC3	coiled-coil domain containing 3
hsa-miR-512-5p	1	0	1	1	1	1	MRO	maestro
hsa-miR-512-5p	1	0	1	0	1	1	SRSF8	serine/arginine-rich splicing factor 8
hsa-miR-512-5p	1	0	1	0	1	1	KRTAP4-4	keratin associated protein 4-4
hsa-miR-512-5p	0	0	1	1	1	1	BBS4	Bardet-Biedl syndrome 4
hsa-miR-512-5p	0	0	1	1	1	1	C3orf15	chromosome 3 open reading frame 15
hsa-miR-512-5p	0	0	1	1	1	1	ZNF300	zinc finger protein 300
hsa-miR-512-5p	0	0	1	1	1	1	VNN3	vanin 3
hsa-miR-512-5p	0	0	1	1	1	1	WDR36	WD repeat domain 36
hsa-miR-512-5p	0	0	0	1	1	1	METTL21A	methyltransferase like 21A
hsa-miR-512-5p	0	0	0	1	1	1	PQLC3	PQ loop repeat containing 3
hsa-miR-512-5p	0	0	1	1	1	1	DCAF4L2	DDB1 and CUL4 associated factor 4-like 2
hsa-miR-512-5p	1	0	1	1	1	1	CNST	consortin, connexin sorting protein
hsa-miR-512-5p	0	0	1	1	1	1	NANP	N-acetylneuraminic acid phosphatase
hsa-miR-512-5p	1	0	1	1	1	1	CPNE8	copine VIII
hsa-miR-512-5p	1	0	1	1	1	1	PIH1D3	PIH1 domain containing 3
hsa-miR-512-5p	0	0	1	1	1	1	ZNF100	zinc finger protein 100
hsa-miR-512-5p	0	0	1	1	1	1	UNC5CL	unc-5 homolog C (C. elegans)-like
hsa-miR-512-5p	0	0	1	0	1	1	FLJ40852	uncharacterized LOC285962
hsa-miR-512-5p	1	0	1	1	1	1	STX12	syntaxin 12
hsa-miR-512-5p	0	0	0	1	1	1	FAM83C	family with sequence similarity 83, member C
hsa-miR-512-5p	0	0	0	1	1	1	ZNF233	zinc finger protein 233
hsa-miR-512-5p	1	0	1	0	1	1	LOC90462	zinc finger protein 605-like
hsa-miR-512-5p	0	0	0	1	1	1	DENND2C	DENN/MADD domain containing 2C
hsa-miR-512-5p	1	0	0	1	1	1	EGFR	epidermal growth factor receptor
hsa-miR-512-5p	0	0	1	1	1	1	ZNF254	zinc finger protein 254
hsa-miR-512-5p	0	0	1	1	1	1	CMPK2	cytidine monophosphate (UMP-CMP) kinase 2, mitochondrial
hsa-miR-512-5p	0	0	1	0	1	1	DDX12P	DEAD/H (Asp-Glu-Ala-Asp/His) box polypeptide 12, pseudogene
hsa-miR-512-5p	0	0	0	0	1	1	LOC150519	uncharacterized LOC150519
