# Supplementary material for: Profiling of Selected MicroRNAs in Proliferative Eutopic Endometrium of Women with Ovarian Endometriosis
Source: Biomed Res Int. 2015 Aug 20;2015:760698. doi: 10.1155/2015/760698 (PMC4558423; doi:10.1155/2015/760698)
Supplement: Supplementary file 1 — Table I: The names of miRNAs significantly differentially expressed between eutopic endometrium of patients with endometriosis vs eutopic endometrium of patients without endometriosis. Table II: The associations between miRNA and mRNA, which presents detailed results of the search of six major databases i.e targetscan, tarbase, miranda, mirbase, mirtarget2 and pictar. [file 760698.f1.zip › 760698.f1/Table II/hsa-miR-513a-3p.tsv]

miR	targetscan	tarbase	miranda	mirbase	mirtarget2	pictar	GeneSymbol	GeneName
hsa-miR-513a-3p	1	0	1	1	1	1	PLAU	plasminogen activator, urokinase
hsa-miR-513a-3p	1	0	1	1	1	1	ZFYVE16	zinc finger, FYVE domain containing 16
hsa-miR-513a-3p	1	0	1	1	1	1	PRUNE2	prune homolog 2 (Drosophila)
hsa-miR-513a-3p	0	0	1	1	1	1	PPIP5K1	diphosphoinositol pentakisphosphate kinase 1
hsa-miR-513a-3p	0	0	1	1	1	1	HSPH1	heat shock 105kDa/110kDa protein 1
hsa-miR-513a-3p	1	0	1	0	1	1	PTPRT	protein tyrosine phosphatase, receptor type, T
hsa-miR-513a-3p	1	0	1	0	1	1	GAS7	growth arrest-specific 7
hsa-miR-513a-3p	1	0	1	0	1	1	KIAA0408	KIAA0408
hsa-miR-513a-3p	1	0	1	1	1	1	NUPL1	nucleoporin like 1
hsa-miR-513a-3p	1	0	1	0	1	1	MTSS1	metastasis suppressor 1
hsa-miR-513a-3p	1	0	1	1	1	1	ATMIN	ATM interactor
hsa-miR-513a-3p	1	0	1	1	1	1	PPIP5K2	diphosphoinositol pentakisphosphate kinase 2
hsa-miR-513a-3p	1	0	1	1	1	1	RNGTT	RNA guanylyltransferase and 5'-phosphatase
hsa-miR-513a-3p	1	0	1	1	0	0	SUSD5	sushi domain containing 5
hsa-miR-513a-3p	1	0	1	1	1	1	GPATCH8	G patch domain containing 8
hsa-miR-513a-3p	1	0	1	1	0	0	PCLO	piccolo (presynaptic cytomatrix protein)
hsa-miR-513a-3p	1	0	1	1	1	1	NRXN1	neurexin 1
hsa-miR-513a-3p	1	0	1	1	0	0	TBC1D12	TBC1 domain family, member 12
hsa-miR-513a-3p	1	0	1	1	1	1	SLC4A7	solute carrier family 4, sodium bicarbonate cotransporter, member 7
hsa-miR-513a-3p	1	0	1	1	1	1	HIPK1	homeodomain interacting protein kinase 1
hsa-miR-513a-3p	1	0	1	1	1	1	GIGYF2	GRB10 interacting GYF protein 2
hsa-miR-513a-3p	0	0	1	1	1	1	CLUAP1	clusterin associated protein 1
hsa-miR-513a-3p	0	0	1	1	0	0	ARHGEF2	Rho/Rac guanine nucleotide exchange factor (GEF) 2
hsa-miR-513a-3p	0	0	1	1	1	1	DZIP3	DAZ interacting protein 3, zinc finger
hsa-miR-513a-3p	1	0	1	1	1	1	ANKRD17	ankyrin repeat domain 17
hsa-miR-513a-3p	1	0	1	1	1	1	SMOC2	SPARC related modular calcium binding 2
hsa-miR-513a-3p	0	0	1	1	0	0	ATP10B	ATPase, class V, type 10B
hsa-miR-513a-3p	1	0	1	0	1	1	DOCK4	dedicator of cytokinesis 4
hsa-miR-513a-3p	1	0	1	1	1	1	MATR3	matrin 3
hsa-miR-513a-3p	1	0	1	0	1	1	RBM12	RNA binding motif protein 12
hsa-miR-513a-3p	1	0	1	0	1	1	LPHN3	latrophilin 3
hsa-miR-513a-3p	0	0	1	1	1	1	KDM4C	lysine (K)-specific demethylase 4C
hsa-miR-513a-3p	1	0	1	1	1	1	DNM3	dynamin 3
hsa-miR-513a-3p	1	0	1	1	1	1	UBE2K	ubiquitin-conjugating enzyme E2K
hsa-miR-513a-3p	0	0	1	1	1	1	MAN2B2	mannosidase, alpha, class 2B, member 2
hsa-miR-513a-3p	1	0	1	1	1	1	CPEB3	cytoplasmic polyadenylation element binding protein 3
hsa-miR-513a-3p	1	0	1	1	1	1	C11orf9	chromosome 11 open reading frame 9
hsa-miR-513a-3p	1	0	1	1	1	1	RGL1	ral guanine nucleotide dissociation stimulator-like 1
hsa-miR-513a-3p	1	0	1	1	1	1	NTNG1	netrin G1
hsa-miR-513a-3p	0	0	1	1	1	1	TBC1D30	TBC1 domain family, member 30
hsa-miR-513a-3p	1	0	1	1	1	1	PALLD	palladin, cytoskeletal associated protein
hsa-miR-513a-3p	1	0	1	1	1	1	RPGRIP1L	RPGRIP1-like
hsa-miR-513a-3p	1	0	1	1	0	0	STXBP5L	syntaxin binding protein 5-like
hsa-miR-513a-3p	1	0	1	1	0	0	FRMD4B	FERM domain containing 4B
hsa-miR-513a-3p	0	0	1	1	1	1	DBF4	DBF4 homolog (S. cerevisiae)
hsa-miR-513a-3p	0	0	1	1	1	1	AGTPBP1	ATP/GTP binding protein 1
hsa-miR-513a-3p	0	0	1	1	1	1	TTC28	tetratricopeptide repeat domain 28
hsa-miR-513a-3p	1	0	1	1	1	1	NLGN1	neuroligin 1
hsa-miR-513a-3p	1	0	1	0	1	1	ZNF507	zinc finger protein 507
hsa-miR-513a-3p	1	0	1	1	1	1	SMARCAD1	SWI/SNF-related, matrix-associated actin-dependent regulator of chromatin, subfamily a, containing DEAD/H box 1
hsa-miR-513a-3p	1	0	1	1	1	1	SPIRE1	spire homolog 1 (Drosophila)
hsa-miR-513a-3p	1	0	1	0	1	1	GPR158	G protein-coupled receptor 158
hsa-miR-513a-3p	1	0	1	1	0	0	PPM1H	protein phosphatase, Mg2+/Mn2+ dependent, 1H
hsa-miR-513a-3p	1	0	1	1	1	1	RALGAPB	Ral GTPase activating protein, beta subunit (non-catalytic)
hsa-miR-513a-3p	1	0	1	1	1	1	RIMKLB	ribosomal modification protein rimK-like family member B
hsa-miR-513a-3p	1	0	1	1	0	0	ATAD2B	ATPase family, AAA domain containing 2B
hsa-miR-513a-3p	1	0	1	1	1	1	MKL2	MKL/myocardin-like 2
hsa-miR-513a-3p	0	0	1	1	1	1	FSTL5	follistatin-like 5
hsa-miR-513a-3p	0	0	1	0	0	0	MTA3	metastasis associated 1 family, member 3
hsa-miR-513a-3p	1	0	1	0	1	1	INTS2	integrator complex subunit 2
hsa-miR-513a-3p	1	0	1	1	1	1	DKK2	dickkopf 2 homolog (Xenopus laevis)
hsa-miR-513a-3p	1	0	1	0	0	0	ODZ4	odz, odd Oz/ten-m homolog 4 (Drosophila)
hsa-miR-513a-3p	0	0	1	1	1	1	KLHL13	kelch-like 13 (Drosophila)
hsa-miR-513a-3p	1	0	1	1	1	1	PCDH19	protocadherin 19
hsa-miR-513a-3p	1	0	1	0	1	1	KCTD16	potassium channel tetramerisation domain containing 16
hsa-miR-513a-3p	1	0	1	1	1	1	LRRC7	leucine rich repeat containing 7
hsa-miR-513a-3p	0	0	1	1	1	1	IFT80	intraflagellar transport 80 homolog (Chlamydomonas)
hsa-miR-513a-3p	1	0	1	1	1	1	FAM135A	family with sequence similarity 135, member A
hsa-miR-513a-3p	0	0	1	1	0	0	POLR3E	polymerase (RNA) III (DNA directed) polypeptide E (80kD)
hsa-miR-513a-3p	0	0	1	0	1	1	KIAA1468	KIAA1468
hsa-miR-513a-3p	1	0	1	0	1	1	SEMA6D	sema domain, transmembrane domain (TM), and cytoplasmic domain, (semaphorin) 6D
hsa-miR-513a-3p	0	0	1	0	0	0	NYAP2	neuronal tyrosine-phosphorylated phosphoinositide-3-kinase adaptor 2
hsa-miR-513a-3p	1	0	1	0	1	1	ZNF295	zinc finger protein 295
hsa-miR-513a-3p	1	0	1	0	1	1	LMO3	LIM domain only 3 (rhombotin-like 2)
hsa-miR-513a-3p	1	0	1	1	1	1	PER3	period homolog 3 (Drosophila)
hsa-miR-513a-3p	0	0	1	1	1	1	BHLHB9	basic helix-loop-helix domain containing, class B, 9
hsa-miR-513a-3p	1	0	1	1	0	0	SEMA4C	sema domain, immunoglobulin domain (Ig), transmembrane domain (TM) and short cytoplasmic domain, (semaphorin) 4C
hsa-miR-513a-3p	0	0	1	0	1	1	SETD5	SET domain containing 5
hsa-miR-513a-3p	1	0	1	1	1	1	LCOR	ligand dependent nuclear receptor corepressor
hsa-miR-513a-3p	1	0	1	0	1	1	JPH4	junctophilin 4
hsa-miR-513a-3p	1	0	1	1	1	1	AHCTF1	AT hook containing transcription factor 1
hsa-miR-513a-3p	0	0	1	1	1	1	SLC11A2	solute carrier family 11 (proton-coupled divalent metal ion transporters), member 2
hsa-miR-513a-3p	1	0	1	1	1	1	CSMD3	CUB and Sushi multiple domains 3
hsa-miR-513a-3p	0	0	1	0	0	0	MYSM1	Myb-like, SWIRM and MPN domains 1
hsa-miR-513a-3p	0	0	1	1	0	0	SEC16B	SEC16 homolog B (S. cerevisiae)
hsa-miR-513a-3p	1	0	1	1	1	1	LSM14A	LSM14A, SCD6 homolog A (S. cerevisiae)
hsa-miR-513a-3p	1	0	1	1	1	1	MAT2B	methionine adenosyltransferase II, beta
hsa-miR-513a-3p	1	0	1	1	0	0	CDH8	cadherin 8, type 2
hsa-miR-513a-3p	1	0	1	1	1	1	POGZ	pogo transposable element with ZNF domain
hsa-miR-513a-3p	1	0	1	1	1	1	OXR1	oxidation resistance 1
hsa-miR-513a-3p	1	0	1	1	1	1	SH3TC2	SH3 domain and tetratricopeptide repeats 2
hsa-miR-513a-3p	1	0	1	1	1	1	PRDM16	PR domain containing 16
hsa-miR-513a-3p	1	0	1	1	1	1	CSGALNACT1	chondroitin sulfate N-acetylgalactosaminyltransferase 1
hsa-miR-513a-3p	1	0	1	0	1	1	RNF43	ring finger protein 43
hsa-miR-513a-3p	1	0	1	1	1	1	ACBD5	acyl-CoA binding domain containing 5
hsa-miR-513a-3p	0	0	1	1	1	1	DYNC2H1	dynein, cytoplasmic 2, heavy chain 1
hsa-miR-513a-3p	0	0	1	1	1	1	NELL1	NEL-like 1 (chicken)
hsa-miR-513a-3p	0	0	1	0	1	1	RASSF8	Ras association (RalGDS/AF-6) domain family (N-terminal) member 8
hsa-miR-513a-3p	1	0	1	1	1	1	SMEK1	SMEK homolog 1, suppressor of mek1 (Dictyostelium)
hsa-miR-513a-3p	1	0	1	0	0	0	ZC3H12C	zinc finger CCCH-type containing 12C
hsa-miR-513a-3p	1	0	1	1	1	1	C11orf57	chromosome 11 open reading frame 57
hsa-miR-513a-3p	0	0	1	1	1	1	IL7	interleukin 7
hsa-miR-513a-3p	0	0	1	1	1	1	ACPP	acid phosphatase, prostate
hsa-miR-513a-3p	1	0	1	1	1	1	PAN3	PAN3 poly(A) specific ribonuclease subunit homolog (S. cerevisiae)
hsa-miR-513a-3p	1	0	1	0	1	1	LIN54	lin-54 homolog (C. elegans)
hsa-miR-513a-3p	0	0	1	1	0	0	MARK2	MAP/microtubule affinity-regulating kinase 2
hsa-miR-513a-3p	0	0	1	1	1	1	DOCK8	dedicator of cytokinesis 8
hsa-miR-513a-3p	1	0	1	1	1	1	UBE3A	ubiquitin protein ligase E3A
hsa-miR-513a-3p	1	0	1	1	1	1	TRIM36	tripartite motif containing 36
hsa-miR-513a-3p	1	0	1	1	1	1	COL11A1	collagen, type XI, alpha 1
hsa-miR-513a-3p	0	0	1	0	1	1	ATR	ataxia telangiectasia and Rad3 related
hsa-miR-513a-3p	1	0	1	1	1	1	BACH2	BTB and CNC homology 1, basic leucine zipper transcription factor 2
hsa-miR-513a-3p	0	0	1	1	0	0	STON2	stonin 2
hsa-miR-513a-3p	1	0	1	1	1	1	HMGB1	high mobility group box 1
hsa-miR-513a-3p	0	0	1	1	1	1	DYNC1I2	dynein, cytoplasmic 1, intermediate chain 2
hsa-miR-513a-3p	1	0	1	1	1	1	PHC1	polyhomeotic homolog 1 (Drosophila)
hsa-miR-513a-3p	1	0	1	0	1	1	PLAG1	pleiomorphic adenoma gene 1
hsa-miR-513a-3p	0	0	1	1	0	0	CASP9	caspase 9, apoptosis-related cysteine peptidase
hsa-miR-513a-3p	1	0	1	1	0	0	TSPYL2	TSPY-like 2
hsa-miR-513a-3p	1	0	1	1	1	1	FMR1	fragile X mental retardation 1
hsa-miR-513a-3p	1	0	1	1	1	1	PRKACB	protein kinase, cAMP-dependent, catalytic, beta
hsa-miR-513a-3p	1	0	1	0	1	1	DPYSL2	dihydropyrimidinase-like 2
hsa-miR-513a-3p	0	0	1	0	1	1	NPY1R	neuropeptide Y receptor Y1
hsa-miR-513a-3p	0	0	1	1	1	1	TFRC	transferrin receptor (p90, CD71)
hsa-miR-513a-3p	1	0	1	1	1	1	ABI1	abl-interactor 1
hsa-miR-513a-3p	1	0	1	1	1	1	EPHA7	EPH receptor A7
hsa-miR-513a-3p	1	0	1	1	1	1	TWF1	twinfilin, actin-binding protein, homolog 1 (Drosophila)
hsa-miR-513a-3p	1	0	1	0	1	1	CHL1	cell adhesion molecule with homology to L1CAM (close homolog of L1)
hsa-miR-513a-3p	0	0	1	1	1	1	DGKE	diacylglycerol kinase, epsilon 64kDa
hsa-miR-513a-3p	1	0	1	1	1	1	SATB2	SATB homeobox 2
hsa-miR-513a-3p	1	0	1	1	1	1	AEBP2	AE binding protein 2
hsa-miR-513a-3p	1	0	1	0	1	1	CDON	Cdon homolog (mouse)
hsa-miR-513a-3p	1	0	1	1	1	1	ANK1	ankyrin 1, erythrocytic
hsa-miR-513a-3p	1	0	1	1	0	0	FGFR3	fibroblast growth factor receptor 3
hsa-miR-513a-3p	0	0	1	1	1	1	ACO1	aconitase 1, soluble
hsa-miR-513a-3p	0	0	1	1	0	0	IGFBP2	insulin-like growth factor binding protein 2, 36kDa
hsa-miR-513a-3p	1	0	1	1	1	1	LIMA1	LIM domain and actin binding 1
hsa-miR-513a-3p	1	0	1	1	1	1	PDLIM5	PDZ and LIM domain 5
hsa-miR-513a-3p	1	0	1	1	1	1	HNRNPK	heterogeneous nuclear ribonucleoprotein K
hsa-miR-513a-3p	1	0	1	1	1	1	IPO8	importin 8
hsa-miR-513a-3p	0	0	1	1	0	0	SREBF1	sterol regulatory element binding transcription factor 1
hsa-miR-513a-3p	0	0	1	1	1	1	HLA-DQA1	major histocompatibility complex, class II, DQ alpha 1
hsa-miR-513a-3p	0	0	1	1	1	1	PTPRA	protein tyrosine phosphatase, receptor type, A
hsa-miR-513a-3p	1	0	1	1	1	1	SLC6A8	solute carrier family 6 (neurotransmitter transporter, creatine), member 8
hsa-miR-513a-3p	0	0	1	1	1	1	KIF3A	kinesin family member 3A
hsa-miR-513a-3p	0	0	1	1	1	1	ELOVL5	ELOVL fatty acid elongase 5
hsa-miR-513a-3p	0	0	1	1	0	0	MSH5	mutS homolog 5 (E. coli)
hsa-miR-513a-3p	1	0	1	1	1	1	GULP1	GULP, engulfment adaptor PTB domain containing 1
hsa-miR-513a-3p	1	0	1	1	1	1	ZFX	zinc finger protein, X-linked
hsa-miR-513a-3p	0	0	1	1	1	1	PLD1	phospholipase D1, phosphatidylcholine-specific
hsa-miR-513a-3p	1	0	1	0	1	1	CAV1	caveolin 1, caveolae protein, 22kDa
hsa-miR-513a-3p	0	0	1	1	1	1	SPP1	secreted phosphoprotein 1
hsa-miR-513a-3p	1	0	1	0	1	1	PDE7B	phosphodiesterase 7B
hsa-miR-513a-3p	1	0	1	1	1	1	APC	adenomatous polyposis coli
hsa-miR-513a-3p	1	0	1	1	0	0	TNPO2	transportin 2
hsa-miR-513a-3p	0	0	1	1	1	1	EIF4G1	eukaryotic translation initiation factor 4 gamma, 1
hsa-miR-513a-3p	1	0	1	1	1	1	PICALM	phosphatidylinositol binding clathrin assembly protein
hsa-miR-513a-3p	0	0	1	1	1	1	ACLY	ATP citrate lyase
hsa-miR-513a-3p	0	0	1	1	1	1	CD55	CD55 molecule, decay accelerating factor for complement (Cromer blood group)
hsa-miR-513a-3p	1	0	1	1	1	1	SLC22A5	solute carrier family 22 (organic cation/carnitine transporter), member 5
hsa-miR-513a-3p	1	0	1	0	1	1	DDX3X	DEAD (Asp-Glu-Ala-Asp) box polypeptide 3, X-linked
hsa-miR-513a-3p	1	0	1	1	1	1	ADARB1	adenosine deaminase, RNA-specific, B1
hsa-miR-513a-3p	1	0	1	1	1	1	STX16	syntaxin 16
hsa-miR-513a-3p	1	0	1	0	1	1	MLL2	myeloid/lymphoid or mixed-lineage leukemia 2
hsa-miR-513a-3p	1	0	1	1	1	1	SLC4A4	solute carrier family 4, sodium bicarbonate cotransporter, member 4
hsa-miR-513a-3p	1	0	1	1	1	1	PCDH17	protocadherin 17
hsa-miR-513a-3p	0	0	1	0	0	0	ZNRD1-AS1	ZNRD1 antisense RNA 1
hsa-miR-513a-3p	1	0	1	1	1	1	MID1	midline 1 (Opitz/BBB syndrome)
hsa-miR-513a-3p	1	0	1	1	1	1	MYT1L	myelin transcription factor 1-like
hsa-miR-513a-3p	1	0	1	0	1	1	CELF2	CUGBP, Elav-like family member 2
hsa-miR-513a-3p	1	0	1	1	1	1	NEMF	nuclear export mediator factor
hsa-miR-513a-3p	1	0	1	0	0	0	MAP3K1	mitogen-activated protein kinase kinase kinase 1, E3 ubiquitin protein ligase
hsa-miR-513a-3p	1	0	1	1	1	1	MRAS	muscle RAS oncogene homolog
hsa-miR-513a-3p	0	0	1	1	0	0	BMX	BMX non-receptor tyrosine kinase
hsa-miR-513a-3p	0	0	1	1	1	1	CD84	CD84 molecule
hsa-miR-513a-3p	0	0	1	1	1	1	CYP4F3	cytochrome P450, family 4, subfamily F, polypeptide 3
hsa-miR-513a-3p	1	0	1	1	1	1	SHOC2	soc-2 suppressor of clear homolog (C. elegans)
hsa-miR-513a-3p	1	0	1	1	1	1	PFKFB3	6-phosphofructo-2-kinase/fructose-2,6-biphosphatase 3
hsa-miR-513a-3p	1	0	1	1	1	1	ZFAND6	zinc finger, AN1-type domain 6
hsa-miR-513a-3p	1	0	1	1	1	1	CTNND1	catenin (cadherin-associated protein), delta 1
hsa-miR-513a-3p	1	0	1	1	1	1	NUDT4	nudix (nucleoside diphosphate linked moiety X)-type motif 4
hsa-miR-513a-3p	0	0	1	1	1	1	SC5DL	sterol-C5-desaturase (ERG3 delta-5-desaturase homolog, S. cerevisiae)-like
hsa-miR-513a-3p	0	0	1	1	1	1	TEX30	testis expressed 30
hsa-miR-513a-3p	0	0	1	1	1	1	TMPRSS11A	transmembrane protease, serine 11A
hsa-miR-513a-3p	0	0	1	1	0	0	SGK223	homolog of rat pragma of Rnd2
hsa-miR-513a-3p	1	0	1	1	1	1	TP63	tumor protein p63
hsa-miR-513a-3p	0	0	1	1	1	1	LYPLA1	lysophospholipase I
hsa-miR-513a-3p	1	0	1	1	1	1	AKAP9	A kinase (PRKA) anchor protein (yotiao) 9
hsa-miR-513a-3p	1	0	1	1	1	1	WHSC1	Wolf-Hirschhorn syndrome candidate 1
hsa-miR-513a-3p	1	0	1	1	1	1	DMTF1	cyclin D binding myb-like transcription factor 1
hsa-miR-513a-3p	0	0	1	1	1	1	PLEKHB1	pleckstrin homology domain containing, family B (evectins) member 1
hsa-miR-513a-3p	0	0	1	1	1	1	FHL1	four and a half LIM domains 1
hsa-miR-513a-3p	0	0	1	1	1	1	SH2D1A	SH2 domain containing 1A
hsa-miR-513a-3p	1	0	1	0	1	1	CD164	CD164 molecule, sialomucin
hsa-miR-513a-3p	1	0	1	1	1	1	KAT6B	K(lysine) acetyltransferase 6B
hsa-miR-513a-3p	1	0	1	1	1	1	CEP63	centrosomal protein 63kDa
hsa-miR-513a-3p	0	0	1	1	1	1	MAP3K4	mitogen-activated protein kinase kinase kinase 4
hsa-miR-513a-3p	0	0	1	1	1	1	DCAF6	DDB1 and CUL4 associated factor 6
hsa-miR-513a-3p	1	0	1	0	1	1	FAM19A5	family with sequence similarity 19 (chemokine (C-C motif)-like), member A5
hsa-miR-513a-3p	1	0	1	1	1	1	CAB39	calcium binding protein 39
hsa-miR-513a-3p	1	0	1	0	1	1	BECN1	beclin 1, autophagy related
hsa-miR-513a-3p	0	0	1	0	1	1	CLEC5A	C-type lectin domain family 5, member A
hsa-miR-513a-3p	1	0	1	1	1	1	HMG20A	high mobility group 20A
hsa-miR-513a-3p	0	0	1	1	1	1	HEPH	hephaestin
hsa-miR-513a-3p	1	0	1	1	1	1	USP15	ubiquitin specific peptidase 15
hsa-miR-513a-3p	1	0	1	0	1	1	FOXJ2	forkhead box J2
hsa-miR-513a-3p	0	0	1	0	1	1	PDP1	pyruvate dehyrogenase phosphatase catalytic subunit 1
hsa-miR-513a-3p	1	0	1	1	1	1	TMEM242	transmembrane protein 242
hsa-miR-513a-3p	1	0	1	1	1	1	STXBP6	syntaxin binding protein 6 (amisyn)
hsa-miR-513a-3p	1	0	1	1	1	1	CHFR	checkpoint with forkhead and ring finger domains, E3 ubiquitin protein ligase
hsa-miR-513a-3p	1	0	1	1	1	1	DNAJA4	DnaJ (Hsp40) homolog, subfamily A, member 4
hsa-miR-513a-3p	0	0	1	1	1	1	FBXO25	F-box protein 25
hsa-miR-513a-3p	1	0	1	1	1	1	BCL2L13	BCL2-like 13 (apoptosis facilitator)
hsa-miR-513a-3p	1	0	1	1	1	1	SEPT9	septin 9
hsa-miR-513a-3p	0	0	1	0	0	0	BPESC1	blepharophimosis, epicanthus inversus and ptosis, candidate 1 (non-protein coding)
hsa-miR-513a-3p	1	0	1	1	1	1	TSC22D2	TSC22 domain family, member 2
hsa-miR-513a-3p	1	0	1	1	1	1	EIF4A2	eukaryotic translation initiation factor 4A2
hsa-miR-513a-3p	0	0	1	1	1	1	SLC30A5	solute carrier family 30 (zinc transporter), member 5
hsa-miR-513a-3p	0	0	1	1	1	1	EAF2	ELL associated factor 2
hsa-miR-513a-3p	0	0	1	1	1	1	CSNK1A1	casein kinase 1, alpha 1
hsa-miR-513a-3p	1	0	1	1	0	0	TDRKH	tudor and KH domain containing
hsa-miR-513a-3p	0	0	1	1	1	1	DONSON	downstream neighbor of SON
hsa-miR-513a-3p	1	0	1	1	1	1	CALD1	caldesmon 1
hsa-miR-513a-3p	0	0	1	1	1	1	DAZ2	deleted in azoospermia 2
hsa-miR-513a-3p	0	0	1	0	1	1	DAZ3	deleted in azoospermia 3
hsa-miR-513a-3p	1	0	1	1	1	1	ELF2	E74-like factor 2 (ets domain transcription factor)
hsa-miR-513a-3p	1	0	1	1	1	1	RBM47	RNA binding motif protein 47
hsa-miR-513a-3p	1	0	1	1	1	1	SH3GLB1	SH3-domain GRB2-like endophilin B1
hsa-miR-513a-3p	1	0	1	0	1	1	PARP11	poly (ADP-ribose) polymerase family, member 11
hsa-miR-513a-3p	0	0	1	1	1	1	GOLGA6A	golgin A6 family, member A
hsa-miR-513a-3p	1	0	1	0	1	1	TRPS1	trichorhinophalangeal syndrome I
hsa-miR-513a-3p	1	0	1	1	1	1	PUM2	pumilio homolog 2 (Drosophila)
hsa-miR-513a-3p	0	0	1	1	1	1	ZNF638	zinc finger protein 638
hsa-miR-513a-3p	0	0	1	0	1	1	ERBB2IP	erbb2 interacting protein
hsa-miR-513a-3p	1	0	1	1	1	1	PCDH11Y	protocadherin 11 Y-linked
hsa-miR-513a-3p	0	0	1	1	0	0	CDC25C	cell division cycle 25 homolog C (S. pombe)
hsa-miR-513a-3p	1	0	1	1	1	1	NRP1	neuropilin 1
hsa-miR-513a-3p	1	0	1	1	1	1	KLHL12	kelch-like 12 (Drosophila)
hsa-miR-513a-3p	0	0	1	1	1	1	PARP9	poly (ADP-ribose) polymerase family, member 9
hsa-miR-513a-3p	1	0	1	1	0	0	ZBTB37	zinc finger and BTB domain containing 37
hsa-miR-513a-3p	0	0	1	0	0	0	AFG3L1P	AFG3 ATPase family gene 3-like 1 (S. cerevisiae), pseudogene
hsa-miR-513a-3p	1	0	1	1	1	1	CHST9	carbohydrate (N-acetylgalactosamine 4-0) sulfotransferase 9
hsa-miR-513a-3p	0	0	1	1	1	1	RERG	RAS-like, estrogen-regulated, growth inhibitor
hsa-miR-513a-3p	1	0	1	1	1	1	CALU	calumenin
hsa-miR-513a-3p	1	0	1	1	1	1	BBC3	BCL2 binding component 3
hsa-miR-513a-3p	1	0	1	1	1	1	KCNIP2	Kv channel interacting protein 2
hsa-miR-513a-3p	0	0	1	1	1	1	U2AF1	U2 small nuclear RNA auxiliary factor 1
hsa-miR-513a-3p	1	0	1	1	1	1	CALCOCO1	calcium binding and coiled-coil domain 1
hsa-miR-513a-3p	1	0	1	1	1	1	LARP4	La ribonucleoprotein domain family, member 4
hsa-miR-513a-3p	0	0	1	1	1	1	CASP8	caspase 8, apoptosis-related cysteine peptidase
hsa-miR-513a-3p	0	0	1	1	1	1	PARK2	parkinson protein 2, E3 ubiquitin protein ligase (parkin)
hsa-miR-513a-3p	1	0	1	1	1	1	PDE8A	phosphodiesterase 8A
hsa-miR-513a-3p	0	0	1	1	1	1	ORMDL1	ORM1-like 1 (S. cerevisiae)
hsa-miR-513a-3p	0	0	1	1	1	1	OLFM3	olfactomedin 3
hsa-miR-513a-3p	1	0	1	1	1	1	RCAN1	regulator of calcineurin 1
hsa-miR-513a-3p	1	0	1	1	1	1	MAGI1	membrane associated guanylate kinase, WW and PDZ domain containing 1
hsa-miR-513a-3p	0	0	1	1	0	0	CNKSR2	connector enhancer of kinase suppressor of Ras 2
hsa-miR-513a-3p	1	0	1	1	0	0	YTHDF2	YTH domain family, member 2
hsa-miR-513a-3p	1	0	1	1	1	1	HNRNPU	heterogeneous nuclear ribonucleoprotein U (scaffold attachment factor A)
hsa-miR-513a-3p	1	0	1	1	1	1	CACNB2	calcium channel, voltage-dependent, beta 2 subunit
hsa-miR-513a-3p	1	0	1	1	1	1	CPNE4	copine IV
hsa-miR-513a-3p	0	0	1	1	1	1	LGI1	leucine-rich, glioma inactivated 1
hsa-miR-513a-3p	1	0	1	1	1	1	ZC3H14	zinc finger CCCH-type containing 14
hsa-miR-513a-3p	0	0	1	1	1	1	SAMD9L	sterile alpha motif domain containing 9-like
hsa-miR-513a-3p	0	0	1	1	1	1	CARD8	caspase recruitment domain family, member 8
hsa-miR-513a-3p	0	0	1	1	1	1	CHODL	chondrolectin
hsa-miR-513a-3p	0	0	1	1	0	0	SVIP	small VCP/p97-interacting protein
hsa-miR-513a-3p	1	0	1	1	1	1	VPS37A	vacuolar protein sorting 37 homolog A (S. cerevisiae)
hsa-miR-513a-3p	0	0	1	1	0	0	KLRD1	killer cell lectin-like receptor subfamily D, member 1
hsa-miR-513a-3p	1	0	1	1	1	1	AFF2	AF4/FMR2 family, member 2
hsa-miR-513a-3p	1	0	1	0	1	1	DICER1	dicer 1, ribonuclease type III
hsa-miR-513a-3p	0	0	1	0	0	0	ADAM5	ADAM metallopeptidase domain 5, pseudogene
hsa-miR-513a-3p	1	0	1	0	1	1	CACNA1C	calcium channel, voltage-dependent, L type, alpha 1C subunit
hsa-miR-513a-3p	1	0	1	1	1	1	SUCO	SUN domain containing ossification factor
hsa-miR-513a-3p	0	0	1	1	1	1	CLDND1	claudin domain containing 1
hsa-miR-513a-3p	0	0	1	1	1	1	TCFL5	transcription factor-like 5 (basic helix-loop-helix)
hsa-miR-513a-3p	1	0	1	1	1	1	ILF3	interleukin enhancer binding factor 3, 90kDa
hsa-miR-513a-3p	0	0	1	0	0	0	CACNA2D3	calcium channel, voltage-dependent, alpha 2/delta subunit 3
hsa-miR-513a-3p	0	0	1	1	1	1	WWTR1	WW domain containing transcription regulator 1
hsa-miR-513a-3p	1	0	1	1	1	1	PALM2	paralemmin 2
hsa-miR-513a-3p	0	0	1	0	0	0	TOMM6	translocase of outer mitochondrial membrane 6 homolog (yeast)
hsa-miR-513a-3p	1	0	1	1	1	1	NAV3	neuron navigator 3
hsa-miR-513a-3p	1	0	1	1	1	1	PPP3CB	protein phosphatase 3, catalytic subunit, beta isozyme
hsa-miR-513a-3p	0	0	1	1	1	1	TRDN	triadin
hsa-miR-513a-3p	0	0	1	1	1	1	TAF1	TAF1 RNA polymerase II, TATA box binding protein (TBP)-associated factor, 250kDa
hsa-miR-513a-3p	1	0	1	1	1	1	ARL4C	ADP-ribosylation factor-like 4C
hsa-miR-513a-3p	1	0	1	1	1	1	SYT14	synaptotagmin XIV
hsa-miR-513a-3p	0	0	1	1	1	1	PPARG	peroxisome proliferator-activated receptor gamma
hsa-miR-513a-3p	1	0	1	1	1	1	PPP1R9A	protein phosphatase 1, regulatory subunit 9A
hsa-miR-513a-3p	0	0	1	1	1	1	ESRP1	epithelial splicing regulatory protein 1
hsa-miR-513a-3p	1	0	1	0	1	1	NFAT5	nuclear factor of activated T-cells 5, tonicity-responsive
hsa-miR-513a-3p	0	0	1	1	0	0	ENY2	enhancer of yellow 2 homolog (Drosophila)
hsa-miR-513a-3p	0	0	1	1	1	1	PARP16	poly (ADP-ribose) polymerase family, member 16
hsa-miR-513a-3p	0	0	1	1	1	1	UBE2Q2	ubiquitin-conjugating enzyme E2Q family member 2
hsa-miR-513a-3p	0	0	1	0	0	0	TUG1	taurine upregulated 1 (non-protein coding)
hsa-miR-513a-3p	0	0	1	1	1	1	PARPBP	PARP1 binding protein
hsa-miR-513a-3p	0	0	1	1	1	1	OLFM4	olfactomedin 4
hsa-miR-513a-3p	1	0	1	0	1	1	PPFIBP1	PTPRF interacting protein, binding protein 1 (liprin beta 1)
hsa-miR-513a-3p	0	0	1	1	0	0	RADIL	Ras association and DIL domains
hsa-miR-513a-3p	1	0	1	1	0	0	SALL2	sal-like 2 (Drosophila)
hsa-miR-513a-3p	0	0	1	1	1	1	STOX2	storkhead box 2
hsa-miR-513a-3p	1	0	1	1	1	1	RIC8B	resistance to inhibitors of cholinesterase 8 homolog B (C. elegans)
hsa-miR-513a-3p	1	0	1	1	1	1	EIF2C1	eukaryotic translation initiation factor 2C, 1
hsa-miR-513a-3p	1	0	1	0	1	1	CLIC4	chloride intracellular channel 4
hsa-miR-513a-3p	1	0	1	1	1	1	SLC38A2	solute carrier family 38, member 2
hsa-miR-513a-3p	1	0	1	1	1	1	ARMC8	armadillo repeat containing 8
hsa-miR-513a-3p	0	0	1	1	1	1	LRIF1	ligand dependent nuclear receptor interacting factor 1
hsa-miR-513a-3p	1	0	1	1	1	1	MBD5	methyl-CpG binding domain protein 5
hsa-miR-513a-3p	1	0	1	1	1	1	LRRN3	leucine rich repeat neuronal 3
hsa-miR-513a-3p	1	0	1	1	1	1	MKLN1	muskelin 1, intracellular mediator containing kelch motifs
hsa-miR-513a-3p	1	0	1	1	1	1	ZNF395	zinc finger protein 395
hsa-miR-513a-3p	0	0	1	1	1	1	TCP11L1	t-complex 11 (mouse)-like 1
hsa-miR-513a-3p	1	0	1	1	1	1	INSIG2	insulin induced gene 2
hsa-miR-513a-3p	1	0	1	1	1	1	C12orf23	chromosome 12 open reading frame 23
hsa-miR-513a-3p	0	0	1	1	1	1	SNCAIP	synuclein, alpha interacting protein
hsa-miR-513a-3p	0	0	1	1	0	0	MTBP	Mdm2, transformed 3T3 cell double minute 2, p53 binding protein (mouse) binding protein, 104kDa
hsa-miR-513a-3p	0	0	1	1	1	1	CCPG1	cell cycle progression 1
hsa-miR-513a-3p	0	0	1	1	0	0	TRMT2B	tRNA methyltransferase 2 homolog B (S. cerevisiae)
hsa-miR-513a-3p	0	0	1	0	0	0	LOC149134	uncharacterized LOC149134
hsa-miR-513a-3p	0	0	1	0	0	0	SOX2-OT	SOX2 overlapping transcript (non-protein coding)
hsa-miR-513a-3p	0	0	1	0	0	0	DUXAP10	double homeobox A pseudogene 10
hsa-miR-513a-3p	1	0	1	1	1	1	S100PBP	S100P binding protein
hsa-miR-513a-3p	0	0	1	0	0	0	TDRD12	tudor domain containing 12
hsa-miR-513a-3p	1	0	1	1	1	1	SMEK2	SMEK homolog 2, suppressor of mek1 (Dictyostelium)
hsa-miR-513a-3p	1	0	1	0	1	1	DCAF17	DDB1 and CUL4 associated factor 17
hsa-miR-513a-3p	1	0	1	1	1	1	STARD7	StAR-related lipid transfer (START) domain containing 7
hsa-miR-513a-3p	0	0	1	0	1	1	ARHGAP42	Rho GTPase activating protein 42
hsa-miR-513a-3p	0	0	1	0	0	0	LOC284561	uncharacterized LOC284561
hsa-miR-513a-3p	1	0	1	0	1	1	C14orf101	chromosome 14 open reading frame 101
hsa-miR-513a-3p	0	0	1	0	1	1	ZNF766	zinc finger protein 766
hsa-miR-513a-3p	0	0	1	0	1	1	FLJ14186	uncharacterized LOC401149
hsa-miR-513a-3p	0	0	1	1	1	1	CXorf57	chromosome X open reading frame 57
hsa-miR-513a-3p	0	0	1	0	0	0	LOC286059	tumor necrosis factor receptor superfamily, member 10d, decoy with truncated death domain pseudogene
hsa-miR-513a-3p	1	0	1	0	0	0	ZDBF2	zinc finger, DBF-type containing 2
hsa-miR-513a-3p	1	0	1	1	1	1	DYRK2	dual-specificity tyrosine-(Y)-phosphorylation regulated kinase 2
hsa-miR-513a-3p	1	0	1	0	1	1	ATP2B1	ATPase, Ca++ transporting, plasma membrane 1
hsa-miR-513a-3p	1	0	1	0	1	1	MYO5B	myosin VB
hsa-miR-513a-3p	1	0	1	1	1	1	TNRC6A	trinucleotide repeat containing 6A
hsa-miR-513a-3p	1	0	1	1	1	1	YPEL5	yippee-like 5 (Drosophila)
hsa-miR-513a-3p	1	0	1	1	1	1	NAA30	N(alpha)-acetyltransferase 30, NatC catalytic subunit
hsa-miR-513a-3p	0	0	1	0	1	1	FLJ22447	uncharacterized LOC400221
hsa-miR-513a-3p	1	0	1	1	1	1	POLK	polymerase (DNA directed) kappa
hsa-miR-513a-3p	1	0	1	0	0	0	KIF26A	kinesin family member 26A
hsa-miR-513a-3p	0	0	1	0	1	1	FLJ22763	uncharacterized LOC401081
hsa-miR-513a-3p	1	0	1	1	0	0	UBXN7	UBX domain protein 7
hsa-miR-513a-3p	0	0	1	1	1	1	SUV39H2	suppressor of variegation 3-9 homolog 2 (Drosophila)
hsa-miR-513a-3p	0	0	1	0	0	0	LOC729852	uncharacterized LOC729852
hsa-miR-513a-3p	1	0	1	1	1	1	FOXP1	forkhead box P1
hsa-miR-513a-3p	0	0	1	1	1	1	SPRTN	SprT-like N-terminal domain
hsa-miR-513a-3p	0	0	1	1	1	1	RNF146	ring finger protein 146
hsa-miR-513a-3p	0	0	1	1	1	1	KDM2B	lysine (K)-specific demethylase 2B
hsa-miR-513a-3p	1	0	1	1	1	1	MARK1	MAP/microtubule affinity-regulating kinase 1
hsa-miR-513a-3p	0	0	1	1	1	1	NETO2	neuropilin (NRP) and tolloid (TLL)-like 2
hsa-miR-513a-3p	1	0	1	1	1	1	TMEM2	transmembrane protein 2
hsa-miR-513a-3p	1	0	1	1	1	1	GPD2	glycerol-3-phosphate dehydrogenase 2 (mitochondrial)
hsa-miR-513a-3p	1	0	1	1	1	1	SLAIN1	SLAIN motif family, member 1
hsa-miR-513a-3p	1	0	1	0	1	1	ZKSCAN1	zinc finger with KRAB and SCAN domains 1
hsa-miR-513a-3p	1	0	1	1	1	1	MAP4	microtubule-associated protein 4
hsa-miR-513a-3p	0	0	1	1	1	1	PRR5L	proline rich 5 like
hsa-miR-513a-3p	0	0	1	1	1	1	C8orf46	chromosome 8 open reading frame 46
hsa-miR-513a-3p	0	0	1	0	0	0	CHST9-AS1	CHST9 antisense RNA 1
hsa-miR-513a-3p	1	0	1	0	1	1	AP1G1	adaptor-related protein complex 1, gamma 1 subunit
hsa-miR-513a-3p	0	0	1	0	0	0	LOC154092	uncharacterized LOC154092
hsa-miR-513a-3p	0	0	1	0	0	0	CASC2	cancer susceptibility candidate 2 (non-protein coding)
hsa-miR-513a-3p	0	0	1	1	1	1	GABRP	gamma-aminobutyric acid (GABA) A receptor, pi
hsa-miR-513a-3p	0	0	1	0	1	1	HDX	highly divergent homeobox
hsa-miR-513a-3p	0	0	1	0	0	0	FLJ31104	uncharacterized LOC441072
hsa-miR-513a-3p	1	0	1	1	1	1	DIXDC1	DIX domain containing 1
hsa-miR-513a-3p	1	0	1	1	1	1	MAP3K7	mitogen-activated protein kinase kinase kinase 7
hsa-miR-513a-3p	1	0	1	0	0	0	PWWP2A	PWWP domain containing 2A
hsa-miR-513a-3p	1	0	1	0	1	1	RAB1A	RAB1A, member RAS oncogene family
hsa-miR-513a-3p	1	0	1	1	1	1	MEIS2	Meis homeobox 2
hsa-miR-513a-3p	1	0	1	1	1	1	TMTC1	transmembrane and tetratricopeptide repeat containing 1
hsa-miR-513a-3p	1	0	1	1	1	1	ZNF664	zinc finger protein 664
hsa-miR-513a-3p	0	0	1	0	0	0	RMST	rhabdomyosarcoma 2 associated transcript (non-protein coding)
hsa-miR-513a-3p	0	0	1	0	0	0	JPX	JPX transcript, XIST activator (non-protein coding)
hsa-miR-513a-3p	1	0	1	0	1	1	FSTL4	follistatin-like 4
hsa-miR-513a-3p	0	0	1	0	0	0	FLG-AS1	FLG antisense RNA 1
hsa-miR-513a-3p	0	0	1	1	1	1	BRD2	bromodomain containing 2
hsa-miR-513a-3p	1	0	1	1	1	1	CLCN5	chloride channel, voltage-sensitive 5
hsa-miR-513a-3p	1	0	1	1	1	1	SORBS2	sorbin and SH3 domain containing 2
hsa-miR-513a-3p	0	0	1	0	0	0	LOC157381	uncharacterized LOC157381
hsa-miR-513a-3p	1	0	1	1	1	1	PCMTD1	protein-L-isoaspartate (D-aspartate) O-methyltransferase domain containing 1
hsa-miR-513a-3p	0	0	1	0	0	0	FLJ32742	uncharacterized locus FLJ32742
hsa-miR-513a-3p	1	0	1	1	1	1	MPP7	membrane protein, palmitoylated 7 (MAGUK p55 subfamily member 7)
hsa-miR-513a-3p	0	0	1	1	0	0	NXF2	nuclear RNA export factor 2
hsa-miR-513a-3p	1	0	1	0	1	1	PLEKHA1	pleckstrin homology domain containing, family A (phosphoinositide binding specific) member 1
hsa-miR-513a-3p	1	0	1	0	1	1	NCAM1	neural cell adhesion molecule 1
hsa-miR-513a-3p	1	0	1	1	1	1	SEC22A	SEC22 vesicle trafficking protein homolog A (S. cerevisiae)
hsa-miR-513a-3p	0	0	1	1	1	1	ZBTB26	zinc finger and BTB domain containing 26
hsa-miR-513a-3p	0	0	1	0	1	1	CCDC68	coiled-coil domain containing 68
hsa-miR-513a-3p	1	0	1	1	0	0	HS6ST1	heparan sulfate 6-O-sulfotransferase 1
hsa-miR-513a-3p	0	0	1	0	0	0	LINC00301	long intergenic non-protein coding RNA 301
hsa-miR-513a-3p	0	0	1	1	1	1	HDAC8	histone deacetylase 8
hsa-miR-513a-3p	0	0	1	0	0	0	SDHAP2	succinate dehydrogenase complex, subunit A, flavoprotein pseudogene 2
hsa-miR-513a-3p	1	0	1	1	1	1	PAX6	paired box 6
hsa-miR-513a-3p	1	0	1	1	1	1	SEC61A1	Sec61 alpha 1 subunit (S. cerevisiae)
hsa-miR-513a-3p	1	0	1	0	1	1	SLC25A37	solute carrier family 25 (mitochondrial iron transporter), member 37
hsa-miR-513a-3p	1	0	1	1	1	1	STXBP5	syntaxin binding protein 5 (tomosyn)
hsa-miR-513a-3p	1	0	1	1	1	1	WDR20	WD repeat domain 20
hsa-miR-513a-3p	1	0	1	1	1	1	AMMECR1	Alport syndrome, mental retardation, midface hypoplasia and elliptocytosis chromosomal region gene 1
hsa-miR-513a-3p	1	0	1	1	1	1	SUPT16H	suppressor of Ty 16 homolog (S. cerevisiae)
hsa-miR-513a-3p	0	0	1	0	1	1	TBX5-AS1	TBX5 antisense RNA 1
hsa-miR-513a-3p	0	0	1	1	1	1	GPATCH1	G patch domain containing 1
hsa-miR-513a-3p	1	0	1	1	1	1	FBXW2	F-box and WD repeat domain containing 2
hsa-miR-513a-3p	0	0	1	1	1	1	CD34	CD34 molecule
hsa-miR-513a-3p	1	0	1	1	1	1	TSN	translin
hsa-miR-513a-3p	0	0	1	0	0	0	KIAA1430	KIAA1430
hsa-miR-513a-3p	1	0	1	1	1	1	LUC7L2	LUC7-like 2 (S. cerevisiae)
hsa-miR-513a-3p	0	0	1	1	1	1	NRCAM	neuronal cell adhesion molecule
hsa-miR-513a-3p	1	0	1	1	1	1	GNG2	guanine nucleotide binding protein (G protein), gamma 2
hsa-miR-513a-3p	0	0	1	1	0	0	APLP1	amyloid beta (A4) precursor-like protein 1
hsa-miR-513a-3p	1	0	1	1	1	1	MAFK	v-maf musculoaponeurotic fibrosarcoma oncogene homolog K (avian)
hsa-miR-513a-3p	0	0	1	0	1	1	SSPN	sarcospan
hsa-miR-513a-3p	0	0	1	1	1	1	STAMBPL1	STAM binding protein-like 1
hsa-miR-513a-3p	1	0	1	0	1	1	CRTAP	cartilage associated protein
hsa-miR-513a-3p	0	0	1	1	1	1	WT1	Wilms tumor 1
hsa-miR-513a-3p	1	0	1	1	1	1	GCFC1	GC-rich sequence DNA-binding factor 1
hsa-miR-513a-3p	0	0	1	1	1	1	LZTFL1	leucine zipper transcription factor-like 1
hsa-miR-513a-3p	0	0	1	1	1	1	SLC16A1	solute carrier family 16, member 1 (monocarboxylic acid transporter 1)
hsa-miR-513a-3p	0	0	1	1	0	0	WBP1	WW domain binding protein 1
hsa-miR-513a-3p	1	0	1	1	1	1	RCN1	reticulocalbin 1, EF-hand calcium binding domain
hsa-miR-513a-3p	1	0	1	1	1	1	DTX3	deltex homolog 3 (Drosophila)
hsa-miR-513a-3p	1	0	1	1	1	1	KCND1	potassium voltage-gated channel, Shal-related subfamily, member 1
hsa-miR-513a-3p	0	0	1	1	1	1	SPOCK1	sparc/osteonectin, cwcv and kazal-like domains proteoglycan (testican) 1
hsa-miR-513a-3p	0	0	1	1	0	0	CYHR1	cysteine/histidine-rich 1
hsa-miR-513a-3p	1	0	1	0	1	1	GATAD2B	GATA zinc finger domain containing 2B
hsa-miR-513a-3p	1	0	1	0	1	1	ARL6IP6	ADP-ribosylation-like factor 6 interacting protein 6
hsa-miR-513a-3p	0	0	1	1	1	1	RBM25	RNA binding motif protein 25
hsa-miR-513a-3p	0	0	1	0	0	0	LINC00340	long intergenic non-protein coding RNA 340
hsa-miR-513a-3p	0	0	1	1	1	1	METTL13	methyltransferase like 13
hsa-miR-513a-3p	0	0	1	0	1	1	AGBL4	ATP/GTP binding protein-like 4
hsa-miR-513a-3p	0	0	1	1	1	1	C9orf47	chromosome 9 open reading frame 47
hsa-miR-513a-3p	1	0	1	1	1	1	NMT2	N-myristoyltransferase 2
hsa-miR-513a-3p	0	0	1	1	1	1	TMEM170A	transmembrane protein 170A
hsa-miR-513a-3p	1	0	1	1	1	1	KANSL1	KAT8 regulatory NSL complex subunit 1
hsa-miR-513a-3p	1	0	1	0	1	1	IL1RAP	interleukin 1 receptor accessory protein
hsa-miR-513a-3p	1	0	1	1	1	1	TBC1D20	TBC1 domain family, member 20
hsa-miR-513a-3p	0	0	1	0	0	0	FLJ37798	uncharacterized LOC401264
hsa-miR-513a-3p	1	0	1	1	1	1	RASGEF1A	RasGEF domain family, member 1A
hsa-miR-513a-3p	0	0	1	1	1	1	MOBP	myelin-associated oligodendrocyte basic protein
hsa-miR-513a-3p	1	0	1	1	1	1	CUL2	cullin 2
hsa-miR-513a-3p	0	0	1	1	1	1	MYO6	myosin VI
hsa-miR-513a-3p	1	0	1	1	1	1	ATXN10	ataxin 10
hsa-miR-513a-3p	0	0	1	0	0	0	LOC730101	uncharacterized LOC730101
hsa-miR-513a-3p	0	0	1	1	1	1	LTBR	lymphotoxin beta receptor (TNFR superfamily, member 3)
hsa-miR-513a-3p	1	0	1	1	1	1	CNEP1R1	CTD nuclear envelope phosphatase 1 regulatory subunit 1
hsa-miR-513a-3p	1	0	1	1	1	1	SPATS2	spermatogenesis associated, serine-rich 2
hsa-miR-513a-3p	0	0	1	0	1	1	NBPF3	neuroblastoma breakpoint family, member 3
hsa-miR-513a-3p	0	0	1	0	1	1	HDAC9	histone deacetylase 9
hsa-miR-513a-3p	1	0	1	1	1	1	ZC3H11A	zinc finger CCCH-type containing 11A
hsa-miR-513a-3p	1	0	1	0	1	1	STC2	stanniocalcin 2
hsa-miR-513a-3p	0	0	1	1	1	1	P4HB	prolyl 4-hydroxylase, beta polypeptide
hsa-miR-513a-3p	0	0	1	1	1	1	AIMP1	aminoacyl tRNA synthetase complex-interacting multifunctional protein 1
hsa-miR-513a-3p	0	0	1	1	1	1	BAG1	BCL2-associated athanogene
hsa-miR-513a-3p	1	0	1	1	1	1	FAM98A	family with sequence similarity 98, member A
hsa-miR-513a-3p	0	0	1	1	1	1	RPE	ribulose-5-phosphate-3-epimerase
hsa-miR-513a-3p	1	0	1	1	1	1	GAPVD1	GTPase activating protein and VPS9 domains 1
hsa-miR-513a-3p	0	0	1	1	0	0	RPN2	ribophorin II
hsa-miR-513a-3p	0	0	1	0	0	0	ZNF815P	zinc finger protein 815, pseudogene
hsa-miR-513a-3p	0	0	1	0	0	0	FAM66C	family with sequence similarity 66, member C
hsa-miR-513a-3p	0	0	1	0	0	0	OTUD1	OTU domain containing 1
hsa-miR-513a-3p	0	0	1	0	1	1	FLJ39080	uncharacterized LOC441355
hsa-miR-513a-3p	0	0	1	0	0	0	METTL21CP1	methyltransferase like 21C pseudogene 1
hsa-miR-513a-3p	1	0	1	0	1	1	KIAA1737	KIAA1737
hsa-miR-513a-3p	1	0	1	0	1	1	THRB	thyroid hormone receptor, beta
hsa-miR-513a-3p	1	0	1	0	1	1	KBTBD8	kelch repeat and BTB (POZ) domain containing 8
hsa-miR-513a-3p	1	0	1	1	1	1	SLC30A6	solute carrier family 30 (zinc transporter), member 6
hsa-miR-513a-3p	0	0	1	1	0	0	NACA	nascent polypeptide-associated complex alpha subunit
hsa-miR-513a-3p	1	0	1	1	1	1	CCDC141	coiled-coil domain containing 141
hsa-miR-513a-3p	1	0	1	1	1	1	ETS2	v-ets erythroblastosis virus E26 oncogene homolog 2 (avian)
hsa-miR-513a-3p	1	0	1	1	1	1	CAPN2	calpain 2, (m/II) large subunit
hsa-miR-513a-3p	1	0	1	1	1	1	KL	klotho
hsa-miR-513a-3p	1	0	1	1	1	1	POU2F3	POU class 2 homeobox 3
hsa-miR-513a-3p	0	0	1	1	1	1	MED20	mediator complex subunit 20
hsa-miR-513a-3p	0	0	1	1	1	1	PPFIBP2	PTPRF interacting protein, binding protein 2 (liprin beta 2)
hsa-miR-513a-3p	1	0	1	0	1	1	AGFG1	ArfGAP with FG repeats 1
hsa-miR-513a-3p	0	0	1	0	0	0	LINC00293	long intergenic non-protein coding RNA 293
hsa-miR-513a-3p	0	0	1	0	0	0	LOC100128560	uncharacterized LOC100128560
hsa-miR-513a-3p	0	0	1	1	1	1	TEX35	testis expressed 35
hsa-miR-513a-3p	1	0	1	1	1	1	GOLGA8B	golgin A8 family, member B
hsa-miR-513a-3p	0	0	1	1	1	1	CBWD5	COBW domain containing 5
hsa-miR-513a-3p	1	0	1	1	1	1	VAV3	vav 3 guanine nucleotide exchange factor
hsa-miR-513a-3p	0	0	1	0	1	1	TNFAIP8	tumor necrosis factor, alpha-induced protein 8
hsa-miR-513a-3p	1	0	1	1	1	1	PIGA	phosphatidylinositol glycan anchor biosynthesis, class A
hsa-miR-513a-3p	1	0	1	1	1	1	ZCCHC2	zinc finger, CCHC domain containing 2
hsa-miR-513a-3p	0	0	1	1	0	0	ZNF283	zinc finger protein 283
hsa-miR-513a-3p	1	0	1	1	0	0	ENTPD1	ectonucleoside triphosphate diphosphohydrolase 1
hsa-miR-513a-3p	0	0	1	1	0	0	FBXO16	F-box protein 16
hsa-miR-513a-3p	1	0	1	1	1	1	IL20RA	interleukin 20 receptor, alpha
hsa-miR-513a-3p	1	0	1	1	1	1	LARP1B	La ribonucleoprotein domain family, member 1B
hsa-miR-513a-3p	0	0	1	1	1	1	GRPEL1	GrpE-like 1, mitochondrial (E. coli)
hsa-miR-513a-3p	0	0	1	1	1	1	TRPM7	transient receptor potential cation channel, subfamily M, member 7
hsa-miR-513a-3p	0	0	1	0	0	0	LOC338579	ankyrin repeat domain-containing protein 30B pseudogene
hsa-miR-513a-3p	0	0	1	1	0	0	CT45A4	cancer/testis antigen family 45, member A4
hsa-miR-513a-3p	0	0	1	0	0	0	LOC728095	uncharacterized LOC728095
hsa-miR-513a-3p	1	0	1	1	1	1	NDFIP2	Nedd4 family interacting protein 2
hsa-miR-513a-3p	0	0	1	1	0	0	GPR82	G protein-coupled receptor 82
hsa-miR-513a-3p	1	0	1	1	1	1	GLUD1	glutamate dehydrogenase 1
hsa-miR-513a-3p	0	0	1	1	1	1	UPP2	uridine phosphorylase 2
hsa-miR-513a-3p	1	0	1	1	1	1	HBP1	HMG-box transcription factor 1
hsa-miR-513a-3p	0	0	1	1	1	1	ZDHHC15	zinc finger, DHHC-type containing 15
hsa-miR-513a-3p	1	0	1	1	1	1	ZNF25	zinc finger protein 25
hsa-miR-513a-3p	1	0	1	1	1	1	ZBTB4	zinc finger and BTB domain containing 4
hsa-miR-513a-3p	0	0	1	1	1	1	RNF103	ring finger protein 103
hsa-miR-513a-3p	0	0	1	1	0	0	DCLK3	doublecortin-like kinase 3
hsa-miR-513a-3p	1	0	1	1	1	1	EGLN3	egl nine homolog 3 (C. elegans)
hsa-miR-513a-3p	0	0	1	1	0	0	TJAP1	tight junction associated protein 1 (peripheral)
hsa-miR-513a-3p	0	0	1	1	1	1	TMEM59	transmembrane protein 59
hsa-miR-513a-3p	0	0	1	1	1	1	FAM19A2	family with sequence similarity 19 (chemokine (C-C motif)-like), member A2
hsa-miR-513a-3p	1	0	1	1	1	1	IPPK	inositol 1,3,4,5,6-pentakisphosphate 2-kinase
hsa-miR-513a-3p	0	0	1	1	0	0	KRT37	keratin 37
hsa-miR-513a-3p	1	0	1	1	1	1	EPAS1	endothelial PAS domain protein 1
hsa-miR-513a-3p	0	0	1	0	0	0	LOC644248	uncharacterized LOC644248
hsa-miR-513a-3p	1	0	1	0	0	0	GPR137C	G protein-coupled receptor 137C
hsa-miR-513a-3p	1	0	1	1	1	1	OSBPL9	oxysterol binding protein-like 9
hsa-miR-513a-3p	0	0	1	1	1	1	ANKRD44	ankyrin repeat domain 44
hsa-miR-513a-3p	1	0	1	1	1	1	ESYT2	extended synaptotagmin-like protein 2
hsa-miR-513a-3p	0	0	1	1	1	1	PKP4	plakophilin 4
hsa-miR-513a-3p	0	0	1	1	0	0	NMI	N-myc (and STAT) interactor
hsa-miR-513a-3p	1	0	1	0	1	1	RHBDL3	rhomboid, veinlet-like 3 (Drosophila)
hsa-miR-513a-3p	0	0	1	1	1	1	IDS	iduronate 2-sulfatase
hsa-miR-513a-3p	1	0	1	1	1	1	KIF21A	kinesin family member 21A
hsa-miR-513a-3p	0	0	1	0	0	0	LINC00282	long intergenic non-protein coding RNA 282
hsa-miR-513a-3p	0	0	1	0	0	0	LOC728716	uncharacterized LOC728716
hsa-miR-513a-3p	1	0	1	1	1	1	XPO1	exportin 1 (CRM1 homolog, yeast)
hsa-miR-513a-3p	1	0	1	1	1	1	CELF6	CUGBP, Elav-like family member 6
hsa-miR-513a-3p	0	0	1	1	1	1	KANSL1L	KAT8 regulatory NSL complex subunit 1-like
hsa-miR-513a-3p	1	0	1	1	1	1	SGIP1	SH3-domain GRB2-like (endophilin) interacting protein 1
hsa-miR-513a-3p	0	0	1	0	0	0	TMEM232	transmembrane protein 232
hsa-miR-513a-3p	1	0	1	1	1	1	C11orf30	chromosome 11 open reading frame 30
hsa-miR-513a-3p	1	0	1	1	1	1	ATXN7	ataxin 7
hsa-miR-513a-3p	1	0	1	1	0	0	GXYLT1	glucoside xylosyltransferase 1
hsa-miR-513a-3p	1	0	1	1	1	1	METAP2	methionyl aminopeptidase 2
hsa-miR-513a-3p	1	0	1	1	1	1	DENND5B	DENN/MADD domain containing 5B
hsa-miR-513a-3p	0	0	1	1	1	1	CTPS2	CTP synthase 2
hsa-miR-513a-3p	0	0	1	1	1	1	MKX	mohawk homeobox
hsa-miR-513a-3p	1	0	1	1	1	1	DLGAP4	discs, large (Drosophila) homolog-associated protein 4
hsa-miR-513a-3p	0	0	1	0	0	0	LOC613266	uncharacterized LOC613266
hsa-miR-513a-3p	1	0	1	1	1	1	KPNA1	karyopherin alpha 1 (importin alpha 5)
hsa-miR-513a-3p	0	0	1	1	1	1	PLOD2	procollagen-lysine, 2-oxoglutarate 5-dioxygenase 2
hsa-miR-513a-3p	1	0	1	1	1	1	DCTN4	dynactin 4 (p62)
hsa-miR-513a-3p	1	0	1	1	1	1	FAM122B	family with sequence similarity 122B
hsa-miR-513a-3p	0	0	1	0	0	0	FER1L5	fer-1-like 5 (C. elegans)
hsa-miR-513a-3p	0	0	1	1	0	0	FSIP2	fibrous sheath interacting protein 2
hsa-miR-513a-3p	0	0	1	1	1	1	MORF4L2	mortality factor 4 like 2
hsa-miR-513a-3p	1	0	1	1	1	1	LIN9	lin-9 homolog (C. elegans)
hsa-miR-513a-3p	1	0	1	1	1	1	SIKE1	suppressor of IKBKE 1
hsa-miR-513a-3p	1	0	1	1	1	1	COPS7B	COP9 constitutive photomorphogenic homolog subunit 7B (Arabidopsis)
hsa-miR-513a-3p	1	0	1	1	1	1	PIK3R1	phosphoinositide-3-kinase, regulatory subunit 1 (alpha)
hsa-miR-513a-3p	0	0	1	1	1	1	CCDC132	coiled-coil domain containing 132
hsa-miR-513a-3p	0	0	1	1	1	1	C18orf54	chromosome 18 open reading frame 54
hsa-miR-513a-3p	0	0	1	1	0	0	ADAL	adenosine deaminase-like
hsa-miR-513a-3p	1	0	1	1	1	1	LRIG1	leucine-rich repeats and immunoglobulin-like domains 1
hsa-miR-513a-3p	1	0	1	0	1	1	CLEC16A	C-type lectin domain family 16, member A
hsa-miR-513a-3p	1	0	1	1	1	1	DLG2	discs, large homolog 2 (Drosophila)
hsa-miR-513a-3p	1	0	1	0	1	1	GPR180	G protein-coupled receptor 180
hsa-miR-513a-3p	0	0	1	0	0	0	HNRNPKP3	heterogeneous nuclear ribonucleoprotein K pseudogene 3
hsa-miR-513a-3p	1	0	1	1	1	1	ANK3	ankyrin 3, node of Ranvier (ankyrin G)
hsa-miR-513a-3p	0	0	1	1	1	1	SZT2	seizure threshold 2 homolog (mouse)
hsa-miR-513a-3p	1	0	1	1	1	1	CLIP1	CAP-GLY domain containing linker protein 1
hsa-miR-513a-3p	1	0	1	1	1	1	EIF4E3	eukaryotic translation initiation factor 4E family member 3
hsa-miR-513a-3p	0	0	1	0	0	0	RPL23AP53	ribosomal protein L23a pseudogene 53
hsa-miR-513a-3p	0	0	1	1	1	1	USP4	ubiquitin specific peptidase 4 (proto-oncogene)
hsa-miR-513a-3p	1	0	1	1	1	1	CLTC	clathrin, heavy chain (Hc)
hsa-miR-513a-3p	1	0	1	0	1	1	ADIPOR2	adiponectin receptor 2
hsa-miR-513a-3p	1	0	1	1	1	1	CTNNA2	catenin (cadherin-associated protein), alpha 2
hsa-miR-513a-3p	1	0	1	1	1	1	ZDHHC23	zinc finger, DHHC-type containing 23
hsa-miR-513a-3p	1	0	1	1	1	1	PHF17	PHD finger protein 17
hsa-miR-513a-3p	0	0	1	1	1	1	ERI2	ERI1 exoribonuclease family member 2
hsa-miR-513a-3p	0	0	1	0	0	0	LOC285812	uncharacterized LOC285812
hsa-miR-513a-3p	1	0	1	1	1	1	ENAH	enabled homolog (Drosophila)
hsa-miR-513a-3p	0	0	1	1	1	1	PIN4	protein (peptidylprolyl cis/trans isomerase) NIMA-interacting, 4 (parvulin)
hsa-miR-513a-3p	1	0	1	1	1	1	RALB	v-ral simian leukemia viral oncogene homolog B (ras related; GTP binding protein)
hsa-miR-513a-3p	1	0	1	1	1	1	CXorf23	chromosome X open reading frame 23
hsa-miR-513a-3p	1	0	1	1	1	1	CROT	carnitine O-octanoyltransferase
hsa-miR-513a-3p	0	0	1	0	0	0	TRAV20	T cell receptor alpha variable 20
hsa-miR-513a-3p	1	0	1	1	1	1	AFAP1	actin filament associated protein 1
hsa-miR-513a-3p	1	0	1	0	1	1	YOD1	YOD1 OTU deubiquinating enzyme 1 homolog (S. cerevisiae)
hsa-miR-513a-3p	0	0	1	1	1	1	MCU	mitochondrial calcium uniporter
hsa-miR-513a-3p	0	0	1	0	0	0	LRRC9	leucine rich repeat containing 9
hsa-miR-513a-3p	1	0	1	1	1	1	SLC12A6	solute carrier family 12 (potassium/chloride transporters), member 6
hsa-miR-513a-3p	0	0	1	0	0	0	FAM205B	transmembrane protein C9orf144B pseudogene
hsa-miR-513a-3p	1	0	1	0	1	1	KDM2A	lysine (K)-specific demethylase 2A
hsa-miR-513a-3p	1	0	1	1	1	1	KCTD12	potassium channel tetramerisation domain containing 12
hsa-miR-513a-3p	1	0	1	0	1	1	PLSCR4	phospholipid scramblase 4
hsa-miR-513a-3p	1	0	1	1	1	1	BCAT1	branched chain amino-acid transaminase 1, cytosolic
hsa-miR-513a-3p	1	0	1	1	0	0	NBEAL1	neurobeachin-like 1
hsa-miR-513a-3p	1	0	1	1	1	1	SDCBP	syndecan binding protein (syntenin)
hsa-miR-513a-3p	0	0	1	0	0	0	LOC100129940	uncharacterized LOC100129940
hsa-miR-513a-3p	1	0	1	1	1	1	CEP97	centrosomal protein 97kDa
hsa-miR-513a-3p	0	0	1	1	1	1	G3BP1	GTPase activating protein (SH3 domain) binding protein 1
hsa-miR-513a-3p	1	0	1	1	1	1	ARHGAP24	Rho GTPase activating protein 24
hsa-miR-513a-3p	0	0	1	0	0	0	LOC494141	mitochondrial carrier triple repeat 1 pseudogene
hsa-miR-513a-3p	1	0	1	0	1	1	ESRRG	estrogen-related receptor gamma
hsa-miR-513a-3p	0	0	1	0	1	1	GALNT13	UDP-N-acetyl-alpha-D-galactosamine:polypeptide N-acetylgalactosaminyltransferase 13 (GalNAc-T13)
hsa-miR-513a-3p	0	0	1	1	1	1	ZNF680	zinc finger protein 680
hsa-miR-513a-3p	1	0	1	1	0	0	FOXP2	forkhead box P2
hsa-miR-513a-3p	0	0	1	1	1	1	FBN3	fibrillin 3
hsa-miR-513a-3p	1	0	1	1	1	1	RNF111	ring finger protein 111
hsa-miR-513a-3p	1	0	1	0	1	1	STK3	serine/threonine kinase 3
hsa-miR-513a-3p	0	0	1	1	1	1	SYTL2	synaptotagmin-like 2
hsa-miR-513a-3p	1	0	1	1	1	1	WTAP	Wilms tumor 1 associated protein
hsa-miR-513a-3p	1	0	1	1	1	1	SMAD7	SMAD family member 7
hsa-miR-513a-3p	0	0	1	1	1	1	RNF19B	ring finger protein 19B
hsa-miR-513a-3p	1	0	1	1	1	1	RABGAP1	RAB GTPase activating protein 1
hsa-miR-513a-3p	0	0	1	1	0	0	ZNF730	zinc finger protein 730
hsa-miR-513a-3p	1	0	1	1	1	1	MAP2K4	mitogen-activated protein kinase kinase 4
hsa-miR-513a-3p	1	0	1	0	1	1	ZNF607	zinc finger protein 607
hsa-miR-513a-3p	0	0	1	0	0	0	AGAP9	ArfGAP with GTPase domain, ankyrin repeat and PH domain 9
hsa-miR-513a-3p	0	0	1	1	0	0	ZSCAN18	zinc finger and SCAN domain containing 18
hsa-miR-513a-3p	0	0	1	1	1	1	XRN2	5'-3' exoribonuclease 2
hsa-miR-513a-3p	0	0	1	1	1	1	AKTIP	AKT interacting protein
hsa-miR-513a-3p	1	0	1	1	1	1	RBBP4	retinoblastoma binding protein 4
hsa-miR-513a-3p	0	0	1	1	1	1	FANCC	Fanconi anemia, complementation group C
hsa-miR-513a-3p	1	0	1	0	1	1	TMEM106B	transmembrane protein 106B
hsa-miR-513a-3p	1	0	1	1	1	1	GATA6	GATA binding protein 6
hsa-miR-513a-3p	0	0	1	0	1	1	PEX5	peroxisomal biogenesis factor 5
hsa-miR-513a-3p	1	0	1	1	1	1	ATL2	atlastin GTPase 2
hsa-miR-513a-3p	0	0	1	1	0	0	FERMT1	fermitin family member 1
hsa-miR-513a-3p	0	0	1	1	1	1	C5orf28	chromosome 5 open reading frame 28
hsa-miR-513a-3p	1	0	1	1	1	1	MEAF6	MYST/Esa1-associated factor 6
hsa-miR-513a-3p	0	0	1	1	1	1	SERPINE2	serpin peptidase inhibitor, clade E (nexin, plasminogen activator inhibitor type 1), member 2
hsa-miR-513a-3p	1	0	1	1	1	1	HSDL2	hydroxysteroid dehydrogenase like 2
hsa-miR-513a-3p	1	0	1	1	1	1	LUC7L3	LUC7-like 3 (S. cerevisiae)
hsa-miR-513a-3p	1	0	1	1	1	1	NCOA1	nuclear receptor coactivator 1
hsa-miR-513a-3p	1	0	1	1	1	1	EDN1	endothelin 1
hsa-miR-513a-3p	1	0	1	1	1	1	NOVA1	neuro-oncological ventral antigen 1
hsa-miR-513a-3p	1	0	1	1	1	1	AHCYL1	adenosylhomocysteinase-like 1
hsa-miR-513a-3p	0	0	1	0	0	0	PART1	prostate androgen-regulated transcript 1 (non-protein coding)
hsa-miR-513a-3p	0	0	1	0	1	1	NEK1	NIMA (never in mitosis gene a)-related kinase 1
hsa-miR-513a-3p	0	0	1	1	0	0	NEK7	NIMA (never in mitosis gene a)-related kinase 7
hsa-miR-513a-3p	1	0	1	1	1	1	RIF1	RAP1 interacting factor homolog (yeast)
hsa-miR-513a-3p	0	0	1	1	1	1	TFDP2	transcription factor Dp-2 (E2F dimerization partner 2)
hsa-miR-513a-3p	0	0	1	1	0	0	PLK1S1	polo-like kinase 1 substrate 1
hsa-miR-513a-3p	1	0	1	1	1	1	TAB2	TGF-beta activated kinase 1/MAP3K7 binding protein 2
hsa-miR-513a-3p	1	0	1	1	1	1	ARF6	ADP-ribosylation factor 6
hsa-miR-513a-3p	0	0	1	1	1	1	ARIH1	ariadne homolog, ubiquitin-conjugating enzyme E2 binding protein, 1 (Drosophila)
hsa-miR-513a-3p	1	0	1	1	1	1	SMC6	structural maintenance of chromosomes 6
hsa-miR-513a-3p	0	0	1	1	1	1	ZNF280D	zinc finger protein 280D
hsa-miR-513a-3p	0	0	1	1	1	1	RHOT1	ras homolog family member T1
hsa-miR-513a-3p	1	0	1	0	1	1	DNAJC5	DnaJ (Hsp40) homolog, subfamily C, member 5
hsa-miR-513a-3p	1	0	1	1	1	1	ERI1	exoribonuclease 1
hsa-miR-513a-3p	1	0	1	1	1	1	GOLGA8A	golgin A8 family, member A
hsa-miR-513a-3p	1	0	1	1	1	1	NBEA	neurobeachin
hsa-miR-513a-3p	1	0	1	1	1	1	KIAA1033	KIAA1033
hsa-miR-513a-3p	1	0	1	0	1	1	GPR85	G protein-coupled receptor 85
hsa-miR-513a-3p	1	0	1	1	1	1	TFE3	transcription factor binding to IGHM enhancer 3
hsa-miR-513a-3p	0	0	1	1	0	0	DOPEY1	dopey family member 1
hsa-miR-513a-3p	1	0	1	1	1	1	CTTNBP2NL	CTTNBP2 N-terminal like
hsa-miR-513a-3p	0	0	1	1	1	1	SLC30A10	solute carrier family 30, member 10
hsa-miR-513a-3p	0	0	1	0	0	0	RPL23AP82	ribosomal protein L23a pseudogene 82
hsa-miR-513a-3p	1	0	1	0	1	1	FAM19A1	family with sequence similarity 19 (chemokine (C-C motif)-like), member A1
hsa-miR-513a-3p	1	0	1	0	0	0	BAHCC1	BAH domain and coiled-coil containing 1
hsa-miR-513a-3p	1	0	1	1	1	1	SLC30A8	solute carrier family 30 (zinc transporter), member 8
hsa-miR-513a-3p	1	0	1	1	1	1	YTHDF3	YTH domain family, member 3
hsa-miR-513a-3p	1	0	1	1	1	1	DENND1B	DENN/MADD domain containing 1B
hsa-miR-513a-3p	1	0	1	1	1	1	LIMCH1	LIM and calponin homology domains 1
hsa-miR-513a-3p	1	0	1	1	1	1	ZEB1	zinc finger E-box binding homeobox 1
hsa-miR-513a-3p	1	0	1	1	1	1	MIER1	mesoderm induction early response 1 homolog (Xenopus laevis)
hsa-miR-513a-3p	1	0	1	1	1	1	KDM6A	lysine (K)-specific demethylase 6A
hsa-miR-513a-3p	0	0	1	1	1	1	FILIP1	filamin A interacting protein 1
hsa-miR-513a-3p	0	0	1	1	1	1	ZCCHC6	zinc finger, CCHC domain containing 6
hsa-miR-513a-3p	0	0	1	0	1	1	GAB3	GRB2-associated binding protein 3
hsa-miR-513a-3p	1	0	1	1	1	1	MTMR10	myotubularin related protein 10
hsa-miR-513a-3p	1	0	1	1	1	1	LYPD3	LY6/PLAUR domain containing 3
hsa-miR-513a-3p	0	0	1	1	1	1	BEND7	BEN domain containing 7
hsa-miR-513a-3p	0	0	1	0	0	0	ZNF720	zinc finger protein 720
hsa-miR-513a-3p	0	0	1	0	0	0	SLC25A30	solute carrier family 25, member 30
hsa-miR-513a-3p	0	0	1	1	0	0	LETM2	leucine zipper-EF-hand containing transmembrane protein 2
hsa-miR-513a-3p	0	0	1	1	1	1	SRSF11	serine/arginine-rich splicing factor 11
hsa-miR-513a-3p	1	0	1	1	0	0	USP24	ubiquitin specific peptidase 24
hsa-miR-513a-3p	1	0	1	1	1	1	MLL3	myeloid/lymphoid or mixed-lineage leukemia 3
hsa-miR-513a-3p	0	0	1	1	1	1	TTC19	tetratricopeptide repeat domain 19
hsa-miR-513a-3p	1	0	1	1	1	1	RNF180	ring finger protein 180
hsa-miR-513a-3p	1	0	1	0	1	1	STYX	serine/threonine/tyrosine interacting protein
hsa-miR-513a-3p	0	0	1	1	1	1	YAP1	Yes-associated protein 1
hsa-miR-513a-3p	1	0	1	1	1	1	DNAJC10	DnaJ (Hsp40) homolog, subfamily C, member 10
hsa-miR-513a-3p	1	0	1	1	1	1	NABP1	nucleic acid binding protein 1
hsa-miR-513a-3p	0	0	1	1	1	1	METTL15	methyltransferase like 15
hsa-miR-513a-3p	1	0	1	1	0	0	PTAR1	protein prenyltransferase alpha subunit repeat containing 1
hsa-miR-513a-3p	1	0	1	1	0	0	ZBTB49	zinc finger and BTB domain containing 49
hsa-miR-513a-3p	0	0	1	1	1	1	USPL1	ubiquitin specific peptidase like 1
hsa-miR-513a-3p	1	0	1	1	1	1	FBXO3	F-box protein 3
hsa-miR-513a-3p	0	0	1	1	1	1	INPP5B	inositol polyphosphate-5-phosphatase, 75kDa
hsa-miR-513a-3p	1	0	1	1	1	1	LPP	LIM domain containing preferred translocation partner in lipoma
hsa-miR-513a-3p	1	0	1	0	1	1	MEF2C	myocyte enhancer factor 2C
hsa-miR-513a-3p	1	0	1	1	1	1	FAM126A	family with sequence similarity 126, member A
hsa-miR-513a-3p	0	0	1	1	1	1	CCDC66	coiled-coil domain containing 66
hsa-miR-513a-3p	1	0	1	0	1	1	CLINT1	clathrin interactor 1
hsa-miR-513a-3p	0	0	1	0	0	0	EPHA1-AS1	EPHA1 antisense RNA 1
hsa-miR-513a-3p	0	0	1	1	1	1	KIAA1841	KIAA1841
hsa-miR-513a-3p	1	0	1	1	1	1	FAM63B	family with sequence similarity 63, member B
hsa-miR-513a-3p	0	0	1	1	1	1	SOAT1	sterol O-acyltransferase 1
hsa-miR-513a-3p	1	0	1	0	1	1	CNOT7	CCR4-NOT transcription complex, subunit 7
hsa-miR-513a-3p	0	0	1	1	1	1	CAND1	cullin-associated and neddylation-dissociated 1
hsa-miR-513a-3p	1	0	1	1	1	1	IL17RD	interleukin 17 receptor D
hsa-miR-513a-3p	1	0	1	1	1	1	DIS3L2	DIS3 mitotic control homolog (S. cerevisiae)-like 2
hsa-miR-513a-3p	1	0	1	1	1	1	ANKRD12	ankyrin repeat domain 12
hsa-miR-513a-3p	1	0	1	1	1	1	RICTOR	RPTOR independent companion of MTOR, complex 2
hsa-miR-513a-3p	1	0	1	1	1	1	MSANTD4	Myb/SANT-like DNA-binding domain containing 4 with coiled-coils
hsa-miR-513a-3p	1	0	1	0	1	1	KIF21B	kinesin family member 21B
hsa-miR-513a-3p	1	0	1	0	1	1	NR3C1	nuclear receptor subfamily 3, group C, member 1 (glucocorticoid receptor)
hsa-miR-513a-3p	1	0	1	1	1	1	BOLL	bol, boule-like (Drosophila)
hsa-miR-513a-3p	0	0	1	1	1	1	LMAN2L	lectin, mannose-binding 2-like
hsa-miR-513a-3p	0	0	1	1	0	0	FIP1L1	FIP1 like 1 (S. cerevisiae)
hsa-miR-513a-3p	1	0	1	1	1	1	FAM76B	family with sequence similarity 76, member B
hsa-miR-513a-3p	1	0	1	0	1	1	PATL1	protein associated with topoisomerase II homolog 1 (yeast)
hsa-miR-513a-3p	1	0	1	0	1	1	PHYHIPL	phytanoyl-CoA 2-hydroxylase interacting protein-like
hsa-miR-513a-3p	1	0	1	1	0	0	LRRC58	leucine rich repeat containing 58
hsa-miR-513a-3p	0	0	1	0	1	1	PSG1	pregnancy specific beta-1-glycoprotein 1
hsa-miR-513a-3p	1	0	1	1	1	1	PPP3CA	protein phosphatase 3, catalytic subunit, alpha isozyme
hsa-miR-513a-3p	1	0	1	1	1	1	RNF38	ring finger protein 38
hsa-miR-513a-3p	0	0	1	1	1	1	MTMR14	myotubularin related protein 14
hsa-miR-513a-3p	0	0	1	1	0	0	TMEM134	transmembrane protein 134
hsa-miR-513a-3p	1	0	1	1	1	1	IKZF2	IKAROS family zinc finger 2 (Helios)
hsa-miR-513a-3p	0	0	1	0	0	0	PMCHL1	pro-melanin-concentrating hormone-like 1, pseudogene
hsa-miR-513a-3p	0	0	1	0	0	0	PMCHL2	pro-melanin-concentrating hormone-like 2, pseudogene
hsa-miR-513a-3p	1	0	1	1	1	1	CLIC5	chloride intracellular channel 5
hsa-miR-513a-3p	0	0	1	1	1	1	RUNDC3B	RUN domain containing 3B
hsa-miR-513a-3p	0	0	1	1	1	1	LGALS8	lectin, galactoside-binding, soluble, 8
hsa-miR-513a-3p	1	0	1	1	1	1	RBBP6	retinoblastoma binding protein 6
hsa-miR-513a-3p	0	0	1	0	0	0	KGFLP1	fibroblast growth factor 7 pseudogene
hsa-miR-513a-3p	1	0	1	1	1	1	KIAA0907	KIAA0907
hsa-miR-513a-3p	0	0	1	1	0	0	EVC2	Ellis van Creveld syndrome 2
hsa-miR-513a-3p	0	0	1	1	0	0	CMTM1	CKLF-like MARVEL transmembrane domain containing 1
hsa-miR-513a-3p	0	0	1	1	1	1	DNAJB14	DnaJ (Hsp40) homolog, subfamily B, member 14
hsa-miR-513a-3p	1	0	1	1	1	1	GCNT1	glucosaminyl (N-acetyl) transferase 1, core 2
hsa-miR-513a-3p	1	0	1	1	1	1	WDR26	WD repeat domain 26
hsa-miR-513a-3p	1	0	1	1	1	1	BCL11A	B-cell CLL/lymphoma 11A (zinc finger protein)
hsa-miR-513a-3p	1	0	1	0	1	1	NEDD4L	neural precursor cell expressed, developmentally down-regulated 4-like, E3 ubiquitin protein ligase
hsa-miR-513a-3p	0	0	1	1	1	1	IYD	iodotyrosine deiodinase
hsa-miR-513a-3p	1	0	1	1	1	1	PBRM1	polybromo 1
hsa-miR-513a-3p	1	0	1	1	1	1	PNRC1	proline-rich nuclear receptor coactivator 1
hsa-miR-513a-3p	1	0	1	1	1	1	OPRM1	opioid receptor, mu 1
hsa-miR-513a-3p	0	0	1	1	1	1	BCOR	BCL6 corepressor
hsa-miR-513a-3p	1	0	1	1	1	1	RAI14	retinoic acid induced 14
hsa-miR-513a-3p	1	0	1	1	1	1	NPL	N-acetylneuraminate pyruvate lyase (dihydrodipicolinate synthase)
hsa-miR-513a-3p	0	0	1	0	0	0	ZNFX1-AS1	ZNFX1 antisense RNA 1
hsa-miR-513a-3p	1	0	1	1	1	1	CAMTA1	calmodulin binding transcription activator 1
hsa-miR-513a-3p	1	0	1	1	1	1	IQGAP2	IQ motif containing GTPase activating protein 2
hsa-miR-513a-3p	1	0	1	0	1	1	DLEU7	deleted in lymphocytic leukemia, 7
hsa-miR-513a-3p	1	0	1	1	1	1	LRRTM3	leucine rich repeat transmembrane neuronal 3
hsa-miR-513a-3p	0	0	1	1	1	1	IL20	interleukin 20
hsa-miR-513a-3p	0	0	1	1	1	1	PIGG	phosphatidylinositol glycan anchor biosynthesis, class G
hsa-miR-513a-3p	1	0	1	1	1	1	NLGN4X	neuroligin 4, X-linked
hsa-miR-513a-3p	0	0	1	1	1	1	KDELC2	KDEL (Lys-Asp-Glu-Leu) containing 2
hsa-miR-513a-3p	1	0	1	1	1	1	SSX2IP	synovial sarcoma, X breakpoint 2 interacting protein
hsa-miR-513a-3p	1	0	1	0	1	1	ANKRD28	ankyrin repeat domain 28
hsa-miR-513a-3p	0	0	1	1	1	1	NYAP1	neuronal tyrosine-phosphorylated phosphoinositide-3-kinase adaptor 1
hsa-miR-513a-3p	1	0	1	1	1	1	ECT2	epithelial cell transforming sequence 2 oncogene
hsa-miR-513a-3p	0	0	1	1	1	1	TNFSF15	tumor necrosis factor (ligand) superfamily, member 15
hsa-miR-513a-3p	1	0	1	1	1	1	SP3	Sp3 transcription factor
hsa-miR-513a-3p	1	0	1	1	1	1	FAM120A	family with sequence similarity 120A
hsa-miR-513a-3p	1	0	1	0	1	1	NHS	Nance-Horan syndrome (congenital cataracts and dental anomalies)
hsa-miR-513a-3p	0	0	1	1	1	1	POTEG	POTE ankyrin domain family, member G
hsa-miR-513a-3p	0	0	1	1	1	1	DIDO1	death inducer-obliterator 1
hsa-miR-513a-3p	1	0	1	1	1	1	MECP2	methyl CpG binding protein 2 (Rett syndrome)
hsa-miR-513a-3p	0	0	1	1	0	0	PAOX	polyamine oxidase (exo-N4-amino)
hsa-miR-513a-3p	0	0	1	0	1	1	RAB18	RAB18, member RAS oncogene family
hsa-miR-513a-3p	1	0	1	1	1	1	PLCH1	phospholipase C, eta 1
hsa-miR-513a-3p	0	0	1	1	1	1	CEACAM1	carcinoembryonic antigen-related cell adhesion molecule 1 (biliary glycoprotein)
hsa-miR-513a-3p	1	0	1	1	1	1	QKI	QKI, KH domain containing, RNA binding
hsa-miR-513a-3p	1	0	1	1	1	1	MYB	v-myb myeloblastosis viral oncogene homolog (avian)
hsa-miR-513a-3p	0	0	1	1	1	1	DLEC1	deleted in lung and esophageal cancer 1
hsa-miR-513a-3p	0	0	1	1	1	1	NOLC1	nucleolar and coiled-body phosphoprotein 1
hsa-miR-513a-3p	1	0	1	1	1	1	PCDH11X	protocadherin 11 X-linked
hsa-miR-513a-3p	1	0	1	1	0	0	TAF4B	TAF4b RNA polymerase II, TATA box binding protein (TBP)-associated factor, 105kDa
hsa-miR-513a-3p	1	0	1	1	1	1	AMOT	angiomotin
hsa-miR-513a-3p	0	0	1	0	1	1	MIS12	MIS12, MIND kinetochore complex component, homolog (S. pombe)
hsa-miR-513a-3p	0	0	1	1	0	0	ISG20L2	interferon stimulated exonuclease gene 20kDa-like 2
hsa-miR-513a-3p	1	0	1	0	1	1	FAM46A	family with sequence similarity 46, member A
hsa-miR-513a-3p	1	0	1	1	1	1	PDLIM3	PDZ and LIM domain 3
hsa-miR-513a-3p	0	0	1	1	1	1	TFG	TRK-fused gene
hsa-miR-513a-3p	0	0	1	1	1	1	TMOD1	tropomodulin 1
hsa-miR-513a-3p	1	0	1	1	1	1	MYCN	v-myc myelocytomatosis viral related oncogene, neuroblastoma derived (avian)
hsa-miR-513a-3p	0	0	1	1	1	1	ATG3	autophagy related 3
hsa-miR-513a-3p	1	0	1	1	0	0	STX1A	syntaxin 1A (brain)
hsa-miR-513a-3p	1	0	1	0	0	0	VGLL4	vestigial like 4 (Drosophila)
hsa-miR-513a-3p	0	0	1	1	1	1	FTO	fat mass and obesity associated
hsa-miR-513a-3p	1	0	1	1	0	0	DHDDS	dehydrodolichyl diphosphate synthase
hsa-miR-513a-3p	1	0	1	0	1	1	CGGBP1	CGG triplet repeat binding protein 1
hsa-miR-513a-3p	1	0	1	0	0	0	TGFA	transforming growth factor, alpha
hsa-miR-513a-3p	0	0	1	1	1	1	PDXK	pyridoxal (pyridoxine, vitamin B6) kinase
hsa-miR-513a-3p	0	0	1	1	0	0	CD58	CD58 molecule
hsa-miR-513a-3p	1	0	1	1	1	1	POU2F2	POU class 2 homeobox 2
hsa-miR-513a-3p	0	0	1	1	1	1	FAM104B	family with sequence similarity 104, member B
hsa-miR-513a-3p	1	0	1	1	1	1	U2SURP	U2 snRNP-associated SURP domain containing
hsa-miR-513a-3p	1	0	1	0	1	1	VAMP4	vesicle-associated membrane protein 4
hsa-miR-513a-3p	0	0	1	1	1	1	UPP1	uridine phosphorylase 1
hsa-miR-513a-3p	1	0	1	1	1	1	SHOX2	short stature homeobox 2
hsa-miR-513a-3p	0	0	1	1	1	1	TMEM30A	transmembrane protein 30A
hsa-miR-513a-3p	0	0	1	1	1	1	MLIP	muscular LMNA-interacting protein
hsa-miR-513a-3p	0	0	1	1	0	0	PANK2	pantothenate kinase 2
hsa-miR-513a-3p	1	0	1	1	0	0	MARCH9	membrane-associated ring finger (C3HC4) 9
hsa-miR-513a-3p	1	0	1	1	1	1	GSPT1	G1 to S phase transition 1
hsa-miR-513a-3p	1	0	1	0	1	1	MINOS1	mitochondrial inner membrane organizing system 1
hsa-miR-513a-3p	1	0	1	1	1	1	B4GALT3	UDP-Gal:betaGlcNAc beta 1,4- galactosyltransferase, polypeptide 3
hsa-miR-513a-3p	0	0	1	1	1	1	RSRC1	arginine/serine-rich coiled-coil 1
hsa-miR-513a-3p	1	0	1	1	1	1	ZFAND5	zinc finger, AN1-type domain 5
hsa-miR-513a-3p	1	0	1	1	1	1	TRIM2	tripartite motif containing 2
hsa-miR-513a-3p	0	0	1	1	0	0	ORC1	origin recognition complex, subunit 1
hsa-miR-513a-3p	1	0	1	1	1	1	OTUD5	OTU domain containing 5
hsa-miR-513a-3p	0	0	1	1	1	1	HDHD2	haloacid dehalogenase-like hydrolase domain containing 2
hsa-miR-513a-3p	1	0	1	1	1	1	BTG3	BTG family, member 3
hsa-miR-513a-3p	1	0	1	1	1	1	IDH1	isocitrate dehydrogenase 1 (NADP+), soluble
hsa-miR-513a-3p	1	0	1	1	1	1	SNCA	synuclein, alpha (non A4 component of amyloid precursor)
hsa-miR-513a-3p	1	0	1	1	1	1	RBM7	RNA binding motif protein 7
hsa-miR-513a-3p	0	0	1	1	1	1	H2AFY	H2A histone family, member Y
hsa-miR-513a-3p	0	0	1	1	1	1	PCNP	PEST proteolytic signal containing nuclear protein
hsa-miR-513a-3p	0	0	1	0	0	0	HAUS5	HAUS augmin-like complex, subunit 5
hsa-miR-513a-3p	1	0	1	1	1	1	CAP1	CAP, adenylate cyclase-associated protein 1 (yeast)
hsa-miR-513a-3p	1	0	1	1	1	1	ETF1	eukaryotic translation termination factor 1
hsa-miR-513a-3p	0	0	1	1	0	0	C8orf44	chromosome 8 open reading frame 44
hsa-miR-513a-3p	1	0	1	1	0	0	FHL3	four and a half LIM domains 3
hsa-miR-513a-3p	0	0	1	1	1	1	C2orf65	chromosome 2 open reading frame 65
hsa-miR-513a-3p	0	0	1	1	1	1	GAL3ST1	galactose-3-O-sulfotransferase 1
hsa-miR-513a-3p	0	0	1	0	0	0	MGC21881	uncharacterized locus MGC21881
hsa-miR-513a-3p	0	0	1	0	0	0	KLHL15	kelch-like 15 (Drosophila)
hsa-miR-513a-3p	1	0	1	1	1	1	ZNF512	zinc finger protein 512
hsa-miR-513a-3p	0	0	1	0	1	1	ZNF37A	zinc finger protein 37A
hsa-miR-513a-3p	1	0	1	1	1	1	TMEM9B	TMEM9 domain family, member B
hsa-miR-513a-3p	1	0	1	1	0	0	ARMCX2	armadillo repeat containing, X-linked 2
hsa-miR-513a-3p	1	0	1	0	1	1	NR1D2	nuclear receptor subfamily 1, group D, member 2
hsa-miR-513a-3p	0	0	1	1	1	1	C1QTNF3	C1q and tumor necrosis factor related protein 3
hsa-miR-513a-3p	1	0	1	1	1	1	SCAMP1	secretory carrier membrane protein 1
hsa-miR-513a-3p	1	0	1	1	1	1	FAM199X	family with sequence similarity 199, X-linked
hsa-miR-513a-3p	1	0	1	0	1	1	CYBRD1	cytochrome b reductase 1
hsa-miR-513a-3p	1	0	1	1	1	1	NRF1	nuclear respiratory factor 1
hsa-miR-513a-3p	1	0	1	1	0	0	USP53	ubiquitin specific peptidase 53
hsa-miR-513a-3p	0	0	1	1	0	0	C1orf51	chromosome 1 open reading frame 51
hsa-miR-513a-3p	1	0	1	1	0	0	ATP6V0A1	ATPase, H+ transporting, lysosomal V0 subunit a1
hsa-miR-513a-3p	0	0	1	0	0	0	TCP11L2	t-complex 11 (mouse)-like 2
hsa-miR-513a-3p	0	0	1	1	1	1	GLIPR2	GLI pathogenesis-related 2
hsa-miR-513a-3p	1	0	1	1	1	1	ZNF131	zinc finger protein 131
hsa-miR-513a-3p	0	0	1	0	0	0	FAM200B	family with sequence similarity 200, member B
hsa-miR-513a-3p	0	0	1	1	0	0	GAGE2D	G antigen 2D
hsa-miR-513a-3p	0	0	1	1	0	0	GAGE2E	G antigen 2E
hsa-miR-513a-3p	1	0	1	1	1	1	ARHGEF9	Cdc42 guanine nucleotide exchange factor (GEF) 9
hsa-miR-513a-3p	1	0	1	1	1	1	SUZ12	suppressor of zeste 12 homolog (Drosophila)
hsa-miR-513a-3p	1	0	1	1	0	0	CSNK1G2	casein kinase 1, gamma 2
hsa-miR-513a-3p	0	0	1	1	1	1	PTCD2	pentatricopeptide repeat domain 2
hsa-miR-513a-3p	0	0	1	0	0	0	WDFY3-AS2	WDFY3 antisense RNA 2
hsa-miR-513a-3p	1	0	1	1	1	1	ZMAT4	zinc finger, matrin-type 4
hsa-miR-513a-3p	0	0	1	0	1	1	CD99P1	CD99 molecule pseudogene 1
hsa-miR-513a-3p	0	0	1	0	0	0	LOC283693	actin, alpha 2, smooth muscle, aorta pseudogene
hsa-miR-513a-3p	0	0	1	1	1	1	NELL2	NEL-like 2 (chicken)
hsa-miR-513a-3p	1	0	1	1	1	1	FAM188A	family with sequence similarity 188, member A
hsa-miR-513a-3p	0	0	1	1	0	0	PLRG1	pleiotropic regulator 1
hsa-miR-513a-3p	1	0	1	0	1	1	BTF3L4	basic transcription factor 3-like 4
hsa-miR-513a-3p	0	0	1	1	0	0	C6orf130	chromosome 6 open reading frame 130
hsa-miR-513a-3p	1	0	1	1	1	1	SCML4	sex comb on midleg-like 4 (Drosophila)
hsa-miR-513a-3p	0	0	1	0	0	0	NBR2	neighbor of BRCA1 gene 2 (non-protein coding)
hsa-miR-513a-3p	0	0	1	1	1	1	C18orf32	chromosome 18 open reading frame 32
hsa-miR-513a-3p	1	0	1	1	1	1	LIMS1	LIM and senescent cell antigen-like domains 1
hsa-miR-513a-3p	1	0	1	1	1	1	SPRYD7	SPRY domain containing 7
hsa-miR-513a-3p	0	0	1	1	1	1	PDE1C	phosphodiesterase 1C, calmodulin-dependent 70kDa
hsa-miR-513a-3p	0	0	1	0	0	0	LINC00488	long intergenic non-protein coding RNA 488
hsa-miR-513a-3p	1	0	1	1	1	1	RACGAP1	Rac GTPase activating protein 1
hsa-miR-513a-3p	1	0	1	0	1	1	CDK19	cyclin-dependent kinase 19
hsa-miR-513a-3p	1	0	1	1	1	1	ASPH	aspartate beta-hydroxylase
hsa-miR-513a-3p	0	0	1	1	1	1	UCHL5	ubiquitin carboxyl-terminal hydrolase L5
hsa-miR-513a-3p	1	0	1	1	1	1	VASP	vasodilator-stimulated phosphoprotein
hsa-miR-513a-3p	1	0	1	1	1	1	CNTN4	contactin 4
hsa-miR-513a-3p	1	0	1	1	1	1	SPG20	spastic paraplegia 20 (Troyer syndrome)
hsa-miR-513a-3p	0	0	1	0	0	0	ZBED3-AS1	ZBED3 antisense RNA 1
hsa-miR-513a-3p	0	0	1	1	1	1	MAP2	microtubule-associated protein 2
hsa-miR-513a-3p	0	0	1	1	1	1	ZNF589	zinc finger protein 589
hsa-miR-513a-3p	1	0	1	1	1	1	TMEM127	transmembrane protein 127
hsa-miR-513a-3p	1	0	1	1	1	1	SENP6	SUMO1/sentrin specific peptidase 6
hsa-miR-513a-3p	1	0	1	1	1	1	HTR2C	5-hydroxytryptamine (serotonin) receptor 2C, G protein-coupled
hsa-miR-513a-3p	1	0	1	0	0	0	KCNU1	potassium channel, subfamily U, member 1
hsa-miR-513a-3p	0	0	1	0	0	0	ANKRD19P	ankyrin repeat domain 19, pseudogene
hsa-miR-513a-3p	0	0	1	1	0	0	CPT1C	carnitine palmitoyltransferase 1C
hsa-miR-513a-3p	0	0	1	1	1	1	CCDC146	coiled-coil domain containing 146
hsa-miR-513a-3p	1	0	1	1	1	1	PPARGC1A	peroxisome proliferator-activated receptor gamma, coactivator 1 alpha
hsa-miR-513a-3p	1	0	1	0	1	1	TFEC	transcription factor EC
hsa-miR-513a-3p	0	0	1	1	1	1	LRRC27	leucine rich repeat containing 27
hsa-miR-513a-3p	0	0	1	1	1	1	PIK3AP1	phosphoinositide-3-kinase adaptor protein 1
hsa-miR-513a-3p	1	0	1	1	1	1	TIAL1	TIA1 cytotoxic granule-associated RNA binding protein-like 1
hsa-miR-513a-3p	0	0	1	1	0	0	TMEM251	transmembrane protein 251
hsa-miR-513a-3p	0	0	1	1	1	1	SH3TC1	SH3 domain and tetratricopeptide repeats 1
hsa-miR-513a-3p	0	0	1	1	1	1	LPAR1	lysophosphatidic acid receptor 1
hsa-miR-513a-3p	1	0	1	1	1	1	SULT4A1	sulfotransferase family 4A, member 1
hsa-miR-513a-3p	1	0	1	1	1	1	ELAVL2	ELAV (embryonic lethal, abnormal vision, Drosophila)-like 2 (Hu antigen B)
hsa-miR-513a-3p	1	0	1	1	1	1	GABRA1	gamma-aminobutyric acid (GABA) A receptor, alpha 1
hsa-miR-513a-3p	1	0	1	1	1	1	ZNF518A	zinc finger protein 518A
hsa-miR-513a-3p	0	0	1	1	1	1	IQCH	IQ motif containing H
hsa-miR-513a-3p	1	0	1	1	1	1	CEP57	centrosomal protein 57kDa
hsa-miR-513a-3p	1	0	1	1	1	1	PLS1	plastin 1
hsa-miR-513a-3p	0	0	1	0	0	0	LOC729307	uncharacterized LOC729307
hsa-miR-513a-3p	0	0	1	1	1	1	ZNF100	zinc finger protein 100
hsa-miR-513a-3p	1	0	1	1	1	1	ZPLD1	zona pellucida-like domain containing 1
hsa-miR-513a-3p	1	0	1	1	1	1	PITPNB	phosphatidylinositol transfer protein, beta
hsa-miR-513a-3p	1	0	1	1	1	1	RCOR3	REST corepressor 3
hsa-miR-513a-3p	1	0	1	0	1	1	RNF4	ring finger protein 4
hsa-miR-513a-3p	0	0	1	1	1	1	RMI1	RMI1, RecQ mediated genome instability 1, homolog (S. cerevisiae)
hsa-miR-513a-3p	0	0	1	0	0	0	LOC643648	uncharacterized LOC643648
hsa-miR-513a-3p	1	0	1	1	1	1	SF1	splicing factor 1
hsa-miR-513a-3p	1	0	1	1	1	1	FGF1	fibroblast growth factor 1 (acidic)
hsa-miR-513a-3p	0	0	1	1	1	1	SNAP47	synaptosomal-associated protein, 47kDa
hsa-miR-513a-3p	1	0	1	1	1	1	RHOBTB1	Rho-related BTB domain containing 1
hsa-miR-513a-3p	0	0	1	0	1	1	TTC23L	tetratricopeptide repeat domain 23-like
hsa-miR-513a-3p	1	0	1	1	1	1	SORL1	sortilin-related receptor, L(DLR class) A repeats containing
hsa-miR-513a-3p	0	0	1	0	0	0	BCAS3	breast carcinoma amplified sequence 3
hsa-miR-513a-3p	0	0	1	1	0	0	ADAP2	ArfGAP with dual PH domains 2
hsa-miR-513a-3p	0	0	1	1	0	0	TNMD	tenomodulin
hsa-miR-513a-3p	0	0	1	1	1	1	ZNF337	zinc finger protein 337
hsa-miR-513a-3p	1	0	1	1	1	1	LPGAT1	lysophosphatidylglycerol acyltransferase 1
hsa-miR-513a-3p	0	0	1	0	1	1	DKFZP434I0714	uncharacterized protein DKFZP434I0714
hsa-miR-513a-3p	0	0	1	1	1	1	EDA2R	ectodysplasin A2 receptor
hsa-miR-513a-3p	1	0	1	0	1	1	DDX3Y	DEAD (Asp-Glu-Ala-Asp) box polypeptide 3, Y-linked
hsa-miR-513a-3p	1	0	1	1	1	1	NKAIN2	Na+/K+ transporting ATPase interacting 2
hsa-miR-513a-3p	0	0	1	0	0	0	TMPRSS12	transmembrane (C-terminal) protease, serine 12
hsa-miR-513a-3p	1	0	1	0	1	1	ATP11A	ATPase, class VI, type 11A
hsa-miR-513a-3p	1	0	1	1	1	1	RAP2C	RAP2C, member of RAS oncogene family
hsa-miR-513a-3p	1	0	1	1	1	1	COL4A5	collagen, type IV, alpha 5
hsa-miR-513a-3p	1	0	1	1	1	1	CTDSPL2	CTD (carboxy-terminal domain, RNA polymerase II, polypeptide A) small phosphatase like 2
hsa-miR-513a-3p	0	0	1	1	1	1	ARHGAP6	Rho GTPase activating protein 6
hsa-miR-513a-3p	0	0	1	1	1	1	CBLN2	cerebellin 2 precursor
hsa-miR-513a-3p	0	0	1	0	0	0	LOC339862	uncharacterized LOC339862
hsa-miR-513a-3p	1	0	1	1	1	1	ZNF618	zinc finger protein 618
hsa-miR-513a-3p	1	0	1	1	1	1	IMPACT	Impact homolog (mouse)
hsa-miR-513a-3p	1	0	1	1	1	1	DMD	dystrophin
hsa-miR-513a-3p	1	0	1	1	1	1	PEX5L	peroxisomal biogenesis factor 5-like
hsa-miR-513a-3p	0	0	1	1	1	1	DUSP28	dual specificity phosphatase 28
hsa-miR-513a-3p	0	0	1	0	0	0	FAM201A	family with sequence similarity 201, member A
hsa-miR-513a-3p	1	0	1	1	1	1	SLC38A9	solute carrier family 38, member 9
hsa-miR-513a-3p	1	0	1	1	0	0	OLIG2	oligodendrocyte lineage transcription factor 2
hsa-miR-513a-3p	0	0	1	0	1	1	C9orf57	chromosome 9 open reading frame 57
hsa-miR-513a-3p	0	0	1	0	0	0	LOC284294	uncharacterized LOC284294
hsa-miR-513a-3p	1	0	1	1	1	1	LHX8	LIM homeobox 8
hsa-miR-513a-3p	1	0	1	1	1	1	ELMO2	engulfment and cell motility 2
hsa-miR-513a-3p	1	0	1	1	1	1	MEIS1	Meis homeobox 1
hsa-miR-513a-3p	0	0	1	0	0	0	LOC654433	uncharacterized LOC654433
hsa-miR-513a-3p	1	0	1	0	1	1	CLDN12	claudin 12
hsa-miR-513a-3p	1	0	1	1	1	1	RNMT	RNA (guanine-7-) methyltransferase
hsa-miR-513a-3p	0	0	1	0	0	0	SRGAP2C	SLIT-ROBO Rho GTPase activating protein 2C
hsa-miR-513a-3p	1	0	1	1	1	1	CEP128	centrosomal protein 128kDa
hsa-miR-513a-3p	1	0	1	1	1	1	BNC2	basonuclin 2
hsa-miR-513a-3p	1	0	1	0	1	1	RAG1	recombination activating gene 1
hsa-miR-513a-3p	1	0	1	0	1	1	YAF2	YY1 associated factor 2
hsa-miR-513a-3p	1	0	1	1	1	1	SOX6	SRY (sex determining region Y)-box 6
hsa-miR-513a-3p	1	0	1	1	1	1	UBXN2A	UBX domain protein 2A
hsa-miR-513a-3p	0	0	1	1	1	1	KIAA1328	KIAA1328
hsa-miR-513a-3p	1	0	1	1	1	1	FOXK1	forkhead box K1
hsa-miR-513a-3p	1	0	1	1	1	1	GALNT1	UDP-N-acetyl-alpha-D-galactosamine:polypeptide N-acetylgalactosaminyltransferase 1 (GalNAc-T1)
hsa-miR-513a-3p	1	0	1	1	1	1	DPP10	dipeptidyl-peptidase 10 (non-functional)
hsa-miR-513a-3p	0	0	1	1	1	1	TTC39B	tetratricopeptide repeat domain 39B
hsa-miR-513a-3p	1	0	1	0	1	1	CEP44	centrosomal protein 44kDa
hsa-miR-513a-3p	1	0	1	0	1	1	ARID2	AT rich interactive domain 2 (ARID, RFX-like)
hsa-miR-513a-3p	1	0	1	1	1	1	PRR16	proline rich 16
hsa-miR-513a-3p	0	0	1	1	0	0	H2AFZ	H2A histone family, member Z
hsa-miR-513a-3p	1	0	1	0	1	1	FBXO22	F-box protein 22
hsa-miR-513a-3p	0	0	1	0	0	0	FLJ36000	uncharacterized FLJ36000
hsa-miR-513a-3p	1	0	1	1	1	1	FGFR2	fibroblast growth factor receptor 2
hsa-miR-513a-3p	0	0	1	1	1	1	CACHD1	cache domain containing 1
hsa-miR-513a-3p	1	0	1	0	0	0	MSL1	male-specific lethal 1 homolog (Drosophila)
hsa-miR-513a-3p	1	0	1	1	1	1	MARCKS	myristoylated alanine-rich protein kinase C substrate
hsa-miR-513a-3p	0	0	1	0	0	0	LOC100132735	uncharacterized LOC100132735
hsa-miR-513a-3p	1	0	1	1	1	1	FOSB	FBJ murine osteosarcoma viral oncogene homolog B
hsa-miR-513a-3p	0	0	1	0	1	1	SRSF5	serine/arginine-rich splicing factor 5
hsa-miR-513a-3p	1	0	1	1	1	1	DACH2	dachshund homolog 2 (Drosophila)
hsa-miR-513a-3p	0	0	1	0	0	0	LOC339622	uncharacterized LOC339622
hsa-miR-513a-3p	1	0	1	1	1	1	FBXO8	F-box protein 8
hsa-miR-513a-3p	1	0	1	0	1	1	PCSK2	proprotein convertase subtilisin/kexin type 2
hsa-miR-513a-3p	0	0	1	0	1	1	TSLP	thymic stromal lymphopoietin
hsa-miR-513a-3p	0	0	1	1	1	1	LRRC3B	leucine rich repeat containing 3B
hsa-miR-513a-3p	1	0	1	1	0	0	ZNF292	zinc finger protein 292
hsa-miR-513a-3p	0	0	1	0	1	1	FAM13B	family with sequence similarity 13, member B
hsa-miR-513a-3p	0	0	1	1	0	0	TTLL6	tubulin tyrosine ligase-like family, member 6
hsa-miR-513a-3p	1	0	1	1	1	1	LRRC4C	leucine rich repeat containing 4C
hsa-miR-513a-3p	1	0	1	1	1	1	ARPP21	cAMP-regulated phosphoprotein, 21kDa
hsa-miR-513a-3p	1	0	1	1	1	1	FAM123A	family with sequence similarity 123A
hsa-miR-513a-3p	0	0	1	1	1	1	C17orf104	chromosome 17 open reading frame 104
hsa-miR-513a-3p	1	0	1	1	1	1	TNFSF4	tumor necrosis factor (ligand) superfamily, member 4
hsa-miR-513a-3p	1	0	1	0	1	1	TNFAIP3	tumor necrosis factor, alpha-induced protein 3
hsa-miR-513a-3p	1	0	1	1	1	1	ROCK1	Rho-associated, coiled-coil containing protein kinase 1
hsa-miR-513a-3p	0	0	1	1	1	1	GOLGA6L9	golgin A6 family-like 9
hsa-miR-513a-3p	1	0	1	1	1	1	CLOCK	clock homolog (mouse)
hsa-miR-513a-3p	0	0	1	1	1	1	MTHFD2L	methylenetetrahydrofolate dehydrogenase (NADP+ dependent) 2-like
hsa-miR-513a-3p	0	0	1	1	1	1	C4orf32	chromosome 4 open reading frame 32
hsa-miR-513a-3p	0	0	1	1	1	1	C3orf33	chromosome 3 open reading frame 33
hsa-miR-513a-3p	1	0	1	1	1	1	FKBP5	FK506 binding protein 5
hsa-miR-513a-3p	1	0	1	1	1	1	TXNRD1	thioredoxin reductase 1
hsa-miR-513a-3p	0	0	1	0	0	0	LOC401176	uncharacterized LOC401176
hsa-miR-513a-3p	0	0	1	1	1	1	DGKH	diacylglycerol kinase, eta
hsa-miR-513a-3p	0	0	1	0	0	0	MORF4L2-AS1	MORF4L2 antisense RNA 1
hsa-miR-513a-3p	0	0	1	0	0	0	LOC339166	uncharacterized LOC339166
hsa-miR-513a-3p	0	0	1	0	0	0	LOC646168	uncharacterized LOC646168
hsa-miR-513a-3p	1	0	1	1	1	1	RNF145	ring finger protein 145
hsa-miR-513a-3p	0	0	1	1	1	1	NADKD1	NAD kinase domain containing 1
hsa-miR-513a-3p	1	0	1	1	1	1	MAMDC2	MAM domain containing 2
hsa-miR-513a-3p	0	0	1	0	0	0	LOC283914	uncharacterized LOC283914
hsa-miR-513a-3p	1	0	1	1	1	1	SENP1	SUMO1/sentrin specific peptidase 1
hsa-miR-513a-3p	0	0	1	1	1	1	LOC100499484-C9ORF174	LOC100499484-C9orf174 readthrough
hsa-miR-513a-3p	0	0	1	0	1	1	FBXO42	F-box protein 42
hsa-miR-513a-3p	0	0	1	0	0	0	INHBA-AS1	INHBA antisense RNA 1
hsa-miR-513a-3p	0	0	1	0	0	0	LOC348120	uncharacterized LOC348120
hsa-miR-513a-3p	0	0	1	1	1	1	OLFML2B	olfactomedin-like 2B
hsa-miR-513a-3p	1	0	1	1	1	1	KIF2A	kinesin heavy chain member 2A
hsa-miR-513a-3p	1	0	1	0	1	1	ZNF800	zinc finger protein 800
hsa-miR-513a-3p	1	0	1	1	1	1	SLC39A9	solute carrier family 39 (zinc transporter), member 9
hsa-miR-513a-3p	1	0	1	1	1	1	RTKN2	rhotekin 2
hsa-miR-513a-3p	1	0	1	1	1	1	PTPRG	protein tyrosine phosphatase, receptor type, G
hsa-miR-513a-3p	1	0	1	0	1	1	ARHGAP5	Rho GTPase activating protein 5
hsa-miR-513a-3p	0	0	1	0	1	1	ITGA1	integrin, alpha 1
hsa-miR-513a-3p	1	0	1	0	1	1	CCNY	cyclin Y
hsa-miR-513a-3p	1	0	1	1	1	1	PTPDC1	protein tyrosine phosphatase domain containing 1
hsa-miR-513a-3p	1	0	1	1	1	1	ZFP91	zinc finger protein 91 homolog (mouse)
hsa-miR-513a-3p	1	0	1	1	0	0	STX17	syntaxin 17
hsa-miR-513a-3p	1	0	1	1	1	1	YWHAZ	tyrosine 3-monooxygenase/tryptophan 5-monooxygenase activation protein, zeta polypeptide
hsa-miR-513a-3p	1	0	1	1	1	1	PCGF5	polycomb group ring finger 5
hsa-miR-513a-3p	1	0	1	1	1	1	HP1BP3	heterochromatin protein 1, binding protein 3
hsa-miR-513a-3p	0	0	1	1	0	0	TTC9C	tetratricopeptide repeat domain 9C
hsa-miR-513a-3p	0	0	1	0	0	0	LINC00265	long intergenic non-protein coding RNA 265
hsa-miR-513a-3p	0	0	1	1	1	1	PEX14	peroxisomal biogenesis factor 14
hsa-miR-513a-3p	0	0	1	1	1	1	RPAP3	RNA polymerase II associated protein 3
hsa-miR-513a-3p	1	0	1	1	1	1	ATP8B4	ATPase, class I, type 8B, member 4
hsa-miR-513a-3p	1	0	1	1	1	1	KLHL28	kelch-like 28 (Drosophila)
hsa-miR-513a-3p	0	0	1	1	1	1	IDI1	isopentenyl-diphosphate delta isomerase 1
hsa-miR-513a-3p	1	0	1	0	1	1	LYSMD3	LysM, putative peptidoglycan-binding, domain containing 3
hsa-miR-513a-3p	0	0	1	1	1	1	ZBTB8OS	zinc finger and BTB domain containing 8 opposite strand
hsa-miR-513a-3p	0	0	1	1	1	1	MCOLN3	mucolipin 3
hsa-miR-513a-3p	1	0	1	1	1	1	SOX5	SRY (sex determining region Y)-box 5
hsa-miR-513a-3p	1	0	1	1	1	1	ZEB2	zinc finger E-box binding homeobox 2
hsa-miR-513a-3p	1	0	1	1	1	1	PRRG1	proline rich Gla (G-carboxyglutamic acid) 1
hsa-miR-513a-3p	0	0	1	0	0	0	LOC550643	uncharacterized LOC550643
hsa-miR-513a-3p	0	0	1	0	1	1	PPM1N	protein phosphatase, Mg2+/Mn2+ dependent, 1N (putative)
hsa-miR-513a-3p	1	0	1	1	1	1	ZSCAN29	zinc finger and SCAN domain containing 29
hsa-miR-513a-3p	0	0	1	0	1	1	ASAP2	ArfGAP with SH3 domain, ankyrin repeat and PH domain 2
hsa-miR-513a-3p	0	0	1	1	1	1	GPATCH2	G patch domain containing 2
hsa-miR-513a-3p	0	0	1	1	0	0	C8orf31	chromosome 8 open reading frame 31
hsa-miR-513a-3p	0	0	1	0	0	0	SCAND2	SCAN domain containing 2 pseudogene
hsa-miR-513a-3p	1	0	1	1	1	1	RANBP9	RAN binding protein 9
hsa-miR-513a-3p	0	0	1	1	1	1	ZNF333	zinc finger protein 333
hsa-miR-513a-3p	0	0	1	1	1	1	STAG1	stromal antigen 1
hsa-miR-513a-3p	0	0	1	1	1	1	GORAB	golgin, RAB6-interacting
hsa-miR-513a-3p	0	0	1	0	0	0	LOC158435	uncharacterized LOC158435
hsa-miR-513a-3p	1	0	1	1	1	1	ZNF449	zinc finger protein 449
hsa-miR-513a-3p	0	0	1	1	1	1	SH2D1B	SH2 domain containing 1B
hsa-miR-513a-3p	1	0	1	1	1	1	C18orf1	chromosome 18 open reading frame 1
hsa-miR-513a-3p	0	0	1	0	0	0	DPY19L2P1	dpy-19-like 2 pseudogene 1 (C. elegans)
hsa-miR-513a-3p	1	0	1	1	1	1	NRSN1	neurensin 1
hsa-miR-513a-3p	0	0	1	1	1	1	KCTD18	potassium channel tetramerisation domain containing 18
hsa-miR-513a-3p	0	0	1	0	0	0	ZNF66P	zinc finger protein 66, pseudogene
hsa-miR-513a-3p	0	0	1	0	0	0	PABPC1P2	poly(A) binding protein, cytoplasmic 1 pseudogene 2
hsa-miR-513a-3p	1	0	1	1	1	1	PDCD6IP	programmed cell death 6 interacting protein
hsa-miR-513a-3p	1	0	1	1	1	1	SLC26A7	solute carrier family 26, member 7
hsa-miR-513a-3p	0	0	1	0	0	0	PTGER4P2	prostaglandin E receptor 4 (subtype EP4) pseudogene 2
hsa-miR-513a-3p	0	0	1	0	0	0	SPDYE8P	speedy homolog E8 (Xenopus laevis), pseudogene
hsa-miR-513a-3p	0	0	1	0	0	0	GAGE7	G antigen 7
hsa-miR-513a-3p	0	0	1	1	0	0	GAGE12I	G antigen 12I
hsa-miR-513a-3p	0	0	1	1	0	0	GAGE12G	G antigen 12G
hsa-miR-513a-3p	0	0	1	1	0	0	GAGE12F	G antigen 12F
hsa-miR-513a-3p	0	0	1	1	0	0	GAGE2A	G antigen 2A
hsa-miR-513a-3p	0	0	1	1	0	0	CYP4F30P	cytochrome P450, family 4, subfamily F, polypeptide 30, pseudogene
hsa-miR-513a-3p	1	0	1	1	1	1	ANLN	anillin, actin binding protein
hsa-miR-513a-3p	0	0	1	1	1	1	MSTO1	misato homolog 1 (Drosophila)
hsa-miR-513a-3p	0	0	1	0	0	0	AQP7P2	aquaporin 7 pseudogene 2
hsa-miR-513a-3p	1	0	1	0	1	1	HMGB3	high mobility group box 3
hsa-miR-513a-3p	1	0	1	0	1	1	TGFBR1	transforming growth factor, beta receptor 1
hsa-miR-513a-3p	1	0	1	0	1	1	TMEM194A	transmembrane protein 194A
hsa-miR-513a-3p	0	0	1	0	0	0	LOC100147773	uncharacterized LOC100147773
hsa-miR-513a-3p	0	0	1	0	0	0	LOC440416	uncharacterized LOC440416
hsa-miR-513a-3p	1	0	1	1	1	1	WBP1L	WW domain binding protein 1-like
hsa-miR-513a-3p	1	0	1	1	1	1	OPCML	opioid binding protein/cell adhesion molecule-like
hsa-miR-513a-3p	1	0	1	1	1	1	NTRK2	neurotrophic tyrosine kinase, receptor, type 2
hsa-miR-513a-3p	1	0	1	0	1	1	AMMECR1L	AMME chromosomal region gene 1-like
hsa-miR-513a-3p	0	0	1	0	0	0	LOC554249	uncharacterized LOC554249
hsa-miR-513a-3p	1	0	1	1	1	1	ZMYND11	zinc finger, MYND-type containing 11
hsa-miR-513a-3p	0	0	1	0	0	0	TCEB1	transcription elongation factor B (SIII), polypeptide 1 (15kDa, elongin C)
hsa-miR-513a-3p	0	0	1	1	1	1	ZCWPW2	zinc finger, CW type with PWWP domain 2
hsa-miR-513a-3p	0	0	1	1	0	0	HERC2P3	hect domain and RLD 2 pseudogene 3
hsa-miR-513a-3p	0	0	1	1	1	1	R3HCC1L	R3H domain and coiled-coil containing 1-like
hsa-miR-513a-3p	1	0	1	0	1	1	LRRTM4	leucine rich repeat transmembrane neuronal 4
hsa-miR-513a-3p	1	0	1	1	1	1	KRIT1	KRIT1, ankyrin repeat containing
hsa-miR-513a-3p	1	0	1	1	1	1	GTF2I	general transcription factor IIi
hsa-miR-513a-3p	1	0	1	0	1	1	ARPP19	cAMP-regulated phosphoprotein, 19kDa
hsa-miR-513a-3p	0	0	1	1	1	1	FUT11	fucosyltransferase 11 (alpha (1,3) fucosyltransferase)
hsa-miR-513a-3p	0	0	1	0	1	1	TCAIM	T cell activation inhibitor, mitochondrial
hsa-miR-513a-3p	1	0	1	0	1	1	MYBL1	v-myb myeloblastosis viral oncogene homolog (avian)-like 1
hsa-miR-513a-3p	1	0	1	0	1	1	CPEB2	cytoplasmic polyadenylation element binding protein 2
hsa-miR-513a-3p	1	0	1	0	1	1	KCNT2	potassium channel, subfamily T, member 2
hsa-miR-513a-3p	0	0	1	1	1	1	TTLL9	tubulin tyrosine ligase-like family, member 9
hsa-miR-513a-3p	0	0	1	1	1	1	CCDC126	coiled-coil domain containing 126
hsa-miR-513a-3p	1	0	1	1	1	1	SLC35G1	solute carrier family 35, member G1
hsa-miR-513a-3p	1	0	1	1	1	1	GABRB2	gamma-aminobutyric acid (GABA) A receptor, beta 2
hsa-miR-513a-3p	0	0	1	1	0	0	GTF2H2C	general transcription factor IIH, polypeptide 2C
hsa-miR-513a-3p	1	0	1	1	1	1	NR2F2	nuclear receptor subfamily 2, group F, member 2
hsa-miR-513a-3p	1	0	1	1	1	1	PTPRD	protein tyrosine phosphatase, receptor type, D
hsa-miR-513a-3p	1	0	1	1	1	1	PNISR	PNN-interacting serine/arginine-rich protein
hsa-miR-513a-3p	1	0	1	1	1	1	USP34	ubiquitin specific peptidase 34
hsa-miR-513a-3p	0	0	1	1	0	0	TMEM126B	transmembrane protein 126B
hsa-miR-513a-3p	1	0	1	1	1	1	SUV420H1	suppressor of variegation 4-20 homolog 1 (Drosophila)
hsa-miR-513a-3p	0	0	1	0	0	0	LOC389765	kinesin family member 27 pseudogene
hsa-miR-513a-3p	0	0	1	1	0	0	SLC17A4	solute carrier family 17 (sodium phosphate), member 4
hsa-miR-513a-3p	0	0	1	1	1	1	MTRR	5-methyltetrahydrofolate-homocysteine methyltransferase reductase
hsa-miR-513a-3p	1	0	1	1	1	1	SP4	Sp4 transcription factor
hsa-miR-513a-3p	1	0	1	0	1	1	BTBD3	BTB (POZ) domain containing 3
hsa-miR-513a-3p	0	0	1	1	0	0	STK19	serine/threonine kinase 19
hsa-miR-513a-3p	0	0	1	1	1	1	STAU2	staufen, RNA binding protein, homolog 2 (Drosophila)
hsa-miR-513a-3p	1	0	1	1	1	1	SLK	STE20-like kinase
hsa-miR-513a-3p	1	0	1	1	1	1	NR3C2	nuclear receptor subfamily 3, group C, member 2
hsa-miR-513a-3p	0	0	1	1	0	0	C9orf84	chromosome 9 open reading frame 84
hsa-miR-513a-3p	0	0	1	1	1	1	FMN2	formin 2
hsa-miR-513a-3p	1	0	1	1	1	1	PPP6R1	protein phosphatase 6, regulatory subunit 1
hsa-miR-513a-3p	1	0	1	1	1	1	TMEM64	transmembrane protein 64
hsa-miR-513a-3p	0	0	1	1	0	0	THBS3	thrombospondin 3
hsa-miR-513a-3p	1	0	1	1	1	1	TRIP12	thyroid hormone receptor interactor 12
hsa-miR-513a-3p	1	0	1	1	0	0	MAPKBP1	mitogen-activated protein kinase binding protein 1
hsa-miR-513a-3p	1	0	1	1	1	1	KIAA1324L	KIAA1324-like
hsa-miR-513a-3p	0	0	1	0	0	0	FAM27E3	family with sequence similarity 27, member E3
hsa-miR-513a-3p	1	0	1	1	1	1	FKBP1A	FK506 binding protein 1A, 12kDa
hsa-miR-513a-3p	0	0	1	1	0	0	RGSL1	regulator of G-protein signaling like 1
hsa-miR-513a-3p	0	0	1	0	0	0	EEF1DP3	eukaryotic translation elongation factor 1 delta pseudogene 3
hsa-miR-513a-3p	0	0	1	0	1	1	GOLGA8G	golgin A8 family, member G
hsa-miR-513a-3p	1	0	1	0	1	1	LRCH2	leucine-rich repeats and calponin homology (CH) domain containing 2
hsa-miR-513a-3p	1	0	1	0	1	1	CAMSAP2	calmodulin regulated spectrin-associated protein family, member 2
hsa-miR-513a-3p	1	0	1	1	1	1	ANK2	ankyrin 2, neuronal
hsa-miR-513a-3p	0	0	1	1	1	1	RNF14	ring finger protein 14
hsa-miR-513a-3p	1	0	1	1	1	1	MEGF11	multiple EGF-like-domains 11
hsa-miR-513a-3p	1	0	1	1	1	1	JMJD1C	jumonji domain containing 1C
hsa-miR-513a-3p	1	0	1	1	1	1	TRAPPC8	trafficking protein particle complex 8
hsa-miR-513a-3p	1	0	1	1	1	1	ZMYM4	zinc finger, MYM-type 4
hsa-miR-513a-3p	1	0	1	1	1	1	CHIC1	cysteine-rich hydrophobic domain 1
hsa-miR-513a-3p	0	0	1	0	1	1	PIK3C2G	phosphatidylinositol-4-phosphate 3-kinase, catalytic subunit type 2 gamma
hsa-miR-513a-3p	0	0	1	0	0	0	FAM225B	family with sequence similarity 225, member B (non-protein coding)
hsa-miR-513a-3p	0	0	1	0	0	0	SMA4	glucuronidase, beta pseudogene
hsa-miR-513a-3p	0	0	1	1	0	0	TCHH	trichohyalin
hsa-miR-513a-3p	1	0	1	1	1	1	TMEM218	transmembrane protein 218
hsa-miR-513a-3p	0	0	1	0	0	0	FUT8-AS1	FUT8 antisense RNA 1
hsa-miR-513a-3p	0	0	1	1	1	1	DLGAP5	discs, large (Drosophila) homolog-associated protein 5
hsa-miR-513a-3p	0	0	1	1	1	1	CNIH	cornichon homolog (Drosophila)
hsa-miR-513a-3p	0	0	1	0	0	0	LINC00643	long intergenic non-protein coding RNA 643
hsa-miR-513a-3p	1	0	1	1	1	1	BTBD7	BTB (POZ) domain containing 7
hsa-miR-513a-3p	0	0	1	0	0	0	FLJ39632	uncharacterized LOC642477
hsa-miR-513a-3p	1	0	1	1	1	1	SASH1	SAM and SH3 domain containing 1
hsa-miR-513a-3p	0	0	1	0	0	0	DKFZp686D0853	uncharacterized LOC401613
hsa-miR-513a-3p	0	0	1	0	0	0	RGPD4	RANBP2-like and GRIP domain containing 4
hsa-miR-513a-3p	0	0	1	0	1	1	GPX8	glutathione peroxidase 8 (putative)
hsa-miR-513a-3p	0	0	1	1	0	0	EYS	eyes shut homolog (Drosophila)
hsa-miR-513a-3p	0	0	1	1	0	0	CCDC171	coiled-coil domain containing 171
hsa-miR-513a-3p	1	0	1	1	1	1	SGCD	sarcoglycan, delta (35kDa dystrophin-associated glycoprotein)
hsa-miR-513a-3p	0	0	1	1	1	1	ECM2	extracellular matrix protein 2, female organ and adipocyte specific
hsa-miR-513a-3p	1	0	1	0	1	1	MTX3	metaxin 3
hsa-miR-513a-3p	0	0	1	1	0	0	NHLRC2	NHL repeat containing 2
hsa-miR-513a-3p	0	0	1	1	1	1	DSG3	desmoglein 3
hsa-miR-513a-3p	1	0	1	1	1	1	ETS1	v-ets erythroblastosis virus E26 oncogene homolog 1 (avian)
hsa-miR-513a-3p	1	0	1	1	0	0	CCDC30	coiled-coil domain containing 30
hsa-miR-513a-3p	0	0	1	1	1	1	AIG1	androgen-induced 1
hsa-miR-513a-3p	1	0	1	1	1	1	SLC35F1	solute carrier family 35, member F1
hsa-miR-513a-3p	1	0	1	1	1	1	MLLT10	myeloid/lymphoid or mixed-lineage leukemia (trithorax homolog, Drosophila); translocated to, 10
hsa-miR-513a-3p	0	0	1	1	1	1	SLC26A3	solute carrier family 26, member 3
hsa-miR-513a-3p	1	0	1	1	1	1	SPPL3	signal peptide peptidase like 3
hsa-miR-513a-3p	1	0	1	1	1	1	C7orf31	chromosome 7 open reading frame 31
hsa-miR-513a-3p	0	0	1	1	1	1	GLIPR1L2	GLI pathogenesis-related 1 like 2
hsa-miR-513a-3p	0	0	1	1	1	1	COL6A3	collagen, type VI, alpha 3
hsa-miR-513a-3p	0	0	1	1	0	0	WDPCP	WD repeat containing planar cell polarity effector
hsa-miR-513a-3p	0	0	1	0	1	1	PRH2	proline-rich protein HaeIII subfamily 2
hsa-miR-513a-3p	0	0	1	1	1	1	GRM6	glutamate receptor, metabotropic 6
hsa-miR-513a-3p	1	0	1	1	1	1	MYCBP2	MYC binding protein 2, E3 ubiquitin protein ligase
hsa-miR-513a-3p	0	0	1	0	1	1	NHSL1	NHS-like 1
hsa-miR-513a-3p	0	0	1	1	1	1	IPCEF1	interaction protein for cytohesin exchange factors 1
hsa-miR-513a-3p	1	0	1	0	1	1	GALNT4	UDP-N-acetyl-alpha-D-galactosamine:polypeptide N-acetylgalactosaminyltransferase 4 (GalNAc-T4)
hsa-miR-513a-3p	0	0	1	1	1	1	PRR14L	proline rich 14-like
hsa-miR-513a-3p	1	0	1	1	0	0	RBM27	RNA binding motif protein 27
hsa-miR-513a-3p	0	0	1	0	1	1	GTF2H2D	general transcription factor IIH, polypeptide 2D
hsa-miR-513a-3p	0	0	1	1	1	1	ADH1B	alcohol dehydrogenase 1B (class I), beta polypeptide
hsa-miR-513a-3p	0	0	1	0	1	1	THAP6	THAP domain containing 6
hsa-miR-513a-3p	1	0	1	1	1	1	STARD13	StAR-related lipid transfer (START) domain containing 13
hsa-miR-513a-3p	1	0	1	1	1	1	GABPA	GA binding protein transcription factor, alpha subunit 60kDa
hsa-miR-513a-3p	0	0	1	1	1	1	ARMCX3	armadillo repeat containing, X-linked 3
hsa-miR-513a-3p	1	0	1	1	1	1	TC2N	tandem C2 domains, nuclear
hsa-miR-513a-3p	1	0	1	0	1	1	VPS36	vacuolar protein sorting 36 homolog (S. cerevisiae)
hsa-miR-513a-3p	1	0	1	1	1	1	TSC22D3	TSC22 domain family, member 3
hsa-miR-513a-3p	1	0	1	1	1	1	CYB5B	cytochrome b5 type B (outer mitochondrial membrane)
hsa-miR-513a-3p	0	0	1	0	1	1	B3GALTL	beta 1,3-galactosyltransferase-like
hsa-miR-513a-3p	1	0	1	1	1	1	DCAF5	DDB1 and CUL4 associated factor 5
hsa-miR-513a-3p	0	0	1	1	0	0	LRR1	leucine rich repeat protein 1
hsa-miR-513a-3p	1	0	1	1	1	1	ZNF711	zinc finger protein 711
hsa-miR-513a-3p	1	0	1	1	1	1	DDAH1	dimethylarginine dimethylaminohydrolase 1
hsa-miR-513a-3p	0	0	1	1	1	1	CCNT2	cyclin T2
hsa-miR-513a-3p	1	0	1	1	1	1	PHF3	PHD finger protein 3
hsa-miR-513a-3p	1	0	1	1	1	1	BCLAF1	BCL2-associated transcription factor 1
hsa-miR-513a-3p	1	0	1	1	1	1	AZI2	5-azacytidine induced 2
hsa-miR-513a-3p	1	0	1	1	1	1	C5orf24	chromosome 5 open reading frame 24
hsa-miR-513a-3p	0	0	1	1	0	0	SAMD7	sterile alpha motif domain containing 7
hsa-miR-513a-3p	0	0	1	1	1	1	RBM20	RNA binding motif protein 20
hsa-miR-513a-3p	0	0	1	1	1	1	DAZL	deleted in azoospermia-like
hsa-miR-513a-3p	1	0	1	1	1	1	PGAP1	post-GPI attachment to proteins 1
hsa-miR-513a-3p	1	0	1	1	1	1	RECK	reversion-inducing-cysteine-rich protein with kazal motifs
hsa-miR-513a-3p	1	0	1	1	1	1	TMEM135	transmembrane protein 135
hsa-miR-513a-3p	1	0	1	1	1	1	FAM179B	family with sequence similarity 179, member B
hsa-miR-513a-3p	1	0	1	1	1	1	HIF1A	hypoxia inducible factor 1, alpha subunit (basic helix-loop-helix transcription factor)
hsa-miR-513a-3p	1	0	1	1	1	1	EOGT	EGF domain-specific O-linked N-acetylglucosamine (GlcNAc) transferase
hsa-miR-513a-3p	1	0	1	0	1	1	TBL1XR1	transducin (beta)-like 1 X-linked receptor 1
hsa-miR-513a-3p	0	0	1	0	1	1	STT3A	STT3, subunit of the oligosaccharyltransferase complex, homolog A (S. cerevisiae)
hsa-miR-513a-3p	1	0	1	1	1	1	LYST	lysosomal trafficking regulator
hsa-miR-513a-3p	0	0	1	1	1	1	PLA2G4C	phospholipase A2, group IVC (cytosolic, calcium-independent)
hsa-miR-513a-3p	1	0	1	1	1	1	BSDC1	BSD domain containing 1
hsa-miR-513a-3p	0	0	1	1	1	1	TTLL5	tubulin tyrosine ligase-like family, member 5
hsa-miR-513a-3p	0	0	1	1	0	0	CA9	carbonic anhydrase IX
hsa-miR-513a-3p	0	0	1	1	1	1	CAT	catalase
hsa-miR-513a-3p	0	0	1	0	0	0	LOC401127	WD repeat domain 5 pseudogene
hsa-miR-513a-3p	1	0	1	1	1	1	FUT9	fucosyltransferase 9 (alpha (1,3) fucosyltransferase)
hsa-miR-513a-3p	0	0	1	1	1	1	CRISPLD2	cysteine-rich secretory protein LCCL domain containing 2
hsa-miR-513a-3p	0	0	1	1	0	0	NDUFS2	NADH dehydrogenase (ubiquinone) Fe-S protein 2, 49kDa (NADH-coenzyme Q reductase)
hsa-miR-513a-3p	1	0	1	1	1	1	EIF4B	eukaryotic translation initiation factor 4B
hsa-miR-513a-3p	1	0	1	0	1	1	OLA1	Obg-like ATPase 1
hsa-miR-513a-3p	0	0	1	1	1	1	APH1A	anterior pharynx defective 1 homolog A (C. elegans)
hsa-miR-513a-3p	0	0	1	1	0	0	PSG8	pregnancy specific beta-1-glycoprotein 8
hsa-miR-513a-3p	0	0	1	1	1	1	COPS8	COP9 constitutive photomorphogenic homolog subunit 8 (Arabidopsis)
hsa-miR-513a-3p	0	0	1	1	1	1	BTF3	basic transcription factor 3
hsa-miR-513a-3p	0	0	1	1	1	1	ADK	adenosine kinase
hsa-miR-513a-3p	0	0	1	1	0	0	CCNDBP1	cyclin D-type binding-protein 1
hsa-miR-513a-3p	1	0	1	0	1	1	BNIP3L	BCL2/adenovirus E1B 19kDa interacting protein 3-like
hsa-miR-513a-3p	1	0	1	1	1	1	ACTG1	actin, gamma 1
hsa-miR-513a-3p	1	0	1	1	1	1	CAAP1	caspase activity and apoptosis inhibitor 1
hsa-miR-513a-3p	1	0	1	1	1	1	HSPA9	heat shock 70kDa protein 9 (mortalin)
hsa-miR-513a-3p	0	0	1	0	0	0	MYCT1	myc target 1
hsa-miR-513a-3p	1	0	1	1	1	1	SSR1	signal sequence receptor, alpha
hsa-miR-513a-3p	1	0	1	1	1	1	HMGN3	high mobility group nucleosomal binding domain 3
hsa-miR-513a-3p	0	0	1	1	1	1	FBXO4	F-box protein 4
hsa-miR-513a-3p	0	0	1	1	1	1	MRPS36	mitochondrial ribosomal protein S36
hsa-miR-513a-3p	1	0	1	1	1	1	WDYHV1	WDYHV motif containing 1
hsa-miR-513a-3p	0	0	1	1	1	1	MTCP1	mature T-cell proliferation 1
hsa-miR-513a-3p	0	0	1	0	0	0	LOC643837	uncharacterized LOC643837
hsa-miR-513a-3p	0	0	1	1	1	1	LRMP	lymphoid-restricted membrane protein
hsa-miR-513a-3p	1	0	1	1	1	1	DCN	decorin
hsa-miR-513a-3p	1	0	1	1	1	1	DAZAP1	DAZ associated protein 1
hsa-miR-513a-3p	0	0	1	0	1	1	ANKS1B	ankyrin repeat and sterile alpha motif domain containing 1B
hsa-miR-513a-3p	0	0	1	0	0	0	TRIQK	triple QxxK/R motif containing
hsa-miR-513a-3p	1	0	1	1	1	1	DRAM2	DNA-damage regulated autophagy modulator 2
hsa-miR-513a-3p	1	0	1	1	1	1	NTM	neurotrimin
hsa-miR-513a-3p	0	0	1	1	1	1	GGPS1	geranylgeranyl diphosphate synthase 1
hsa-miR-513a-3p	0	0	1	1	1	1	CCDC115	coiled-coil domain containing 115
hsa-miR-513a-3p	1	0	1	1	1	1	BAI3	brain-specific angiogenesis inhibitor 3
hsa-miR-513a-3p	0	0	1	1	0	0	TUSC3	tumor suppressor candidate 3
hsa-miR-513a-3p	1	0	1	1	1	1	TFDP1	transcription factor Dp-1
hsa-miR-513a-3p	0	0	1	1	1	1	GRAP2	GRB2-related adaptor protein 2
hsa-miR-513a-3p	0	0	1	1	1	1	ACTR3B	ARP3 actin-related protein 3 homolog B (yeast)
hsa-miR-513a-3p	0	0	1	1	0	0	TMEM183A	transmembrane protein 183A
hsa-miR-513a-3p	1	0	1	0	1	1	RPS6KB1	ribosomal protein S6 kinase, 70kDa, polypeptide 1
hsa-miR-513a-3p	0	0	1	1	1	1	STON1	stonin 1
hsa-miR-513a-3p	1	0	1	1	1	1	TFAP2A	transcription factor AP-2 alpha (activating enhancer binding protein 2 alpha)
hsa-miR-513a-3p	0	0	1	1	1	1	XBP1	X-box binding protein 1
hsa-miR-513a-3p	1	0	1	1	1	1	STK38L	serine/threonine kinase 38 like
hsa-miR-513a-3p	0	0	1	1	0	0	IFT46	intraflagellar transport 46 homolog (Chlamydomonas)
hsa-miR-513a-3p	1	0	1	1	1	1	TMEM245	transmembrane protein 245
hsa-miR-513a-3p	0	0	1	1	1	1	SSB	Sjogren syndrome antigen B (autoantigen La)
hsa-miR-513a-3p	0	0	1	1	1	1	GLRX3	glutaredoxin 3
hsa-miR-513a-3p	0	0	1	1	1	1	UIMC1	ubiquitin interaction motif containing 1
hsa-miR-513a-3p	1	0	1	1	1	1	PTPN18	protein tyrosine phosphatase, non-receptor type 18 (brain-derived)
hsa-miR-513a-3p	1	0	1	1	1	1	BTBD10	BTB (POZ) domain containing 10
hsa-miR-513a-3p	0	0	1	1	0	0	NIT1	nitrilase 1
hsa-miR-513a-3p	1	0	1	1	1	1	KCNIP4	Kv channel interacting protein 4
hsa-miR-513a-3p	0	0	1	1	1	1	TFAM	transcription factor A, mitochondrial
hsa-miR-513a-3p	0	0	1	1	1	1	LDHB	lactate dehydrogenase B
hsa-miR-513a-3p	1	0	1	1	1	1	NT5DC1	5'-nucleotidase domain containing 1
hsa-miR-513a-3p	0	0	1	0	1	1	VSTM2A	V-set and transmembrane domain containing 2A
hsa-miR-513a-3p	1	0	1	1	0	0	DNAJC1	DnaJ (Hsp40) homolog, subfamily C, member 1
hsa-miR-513a-3p	1	0	1	1	1	1	FUBP3	far upstream element (FUSE) binding protein 3
hsa-miR-513a-3p	0	0	1	1	0	0	DDB2	damage-specific DNA binding protein 2, 48kDa
hsa-miR-513a-3p	1	0	1	1	1	1	ATAT1	alpha tubulin acetyltransferase 1
hsa-miR-513a-3p	1	0	1	1	1	1	KCNS3	potassium voltage-gated channel, delayed-rectifier, subfamily S, member 3
hsa-miR-513a-3p	0	0	1	1	0	0	TBC1D7	TBC1 domain family, member 7
hsa-miR-513a-3p	1	0	1	1	1	1	ZNF207	zinc finger protein 207
hsa-miR-513a-3p	0	0	1	1	1	1	CXADR	coxsackie virus and adenovirus receptor
hsa-miR-513a-3p	0	0	1	1	1	1	IL15	interleukin 15
hsa-miR-513a-3p	1	0	1	1	1	1	SNX1	sorting nexin 1
hsa-miR-513a-3p	0	0	1	1	1	1	FAM18B1	family with sequence similarity 18, member B1
hsa-miR-513a-3p	1	0	1	1	1	1	ITGA4	integrin, alpha 4 (antigen CD49D, alpha 4 subunit of VLA-4 receptor)
hsa-miR-513a-3p	1	0	1	1	1	1	RNF2	ring finger protein 2
hsa-miR-513a-3p	0	0	1	0	0	0	RNF115	ring finger protein 115
hsa-miR-513a-3p	1	0	1	1	1	1	HIGD1A	HIG1 hypoxia inducible domain family, member 1A
hsa-miR-513a-3p	1	0	1	1	1	1	VLDLR	very low density lipoprotein receptor
hsa-miR-513a-3p	0	0	1	1	0	0	MAP2K5	mitogen-activated protein kinase kinase 5
hsa-miR-513a-3p	1	0	1	0	1	1	CD47	CD47 molecule
hsa-miR-513a-3p	1	0	1	1	1	1	RUNX1	runt-related transcription factor 1
hsa-miR-513a-3p	0	0	1	1	1	1	SLC33A1	solute carrier family 33 (acetyl-CoA transporter), member 1
hsa-miR-513a-3p	1	0	1	1	1	1	PHF20L1	PHD finger protein 20-like 1
hsa-miR-513a-3p	0	0	1	1	1	1	PTMA	prothymosin, alpha
hsa-miR-513a-3p	0	0	1	1	1	1	MBNL3	muscleblind-like splicing regulator 3
hsa-miR-513a-3p	0	0	1	1	1	1	ZNF75D	zinc finger protein 75D
hsa-miR-513a-3p	1	0	1	1	1	1	MYT1	myelin transcription factor 1
hsa-miR-513a-3p	0	0	1	1	1	1	SUGT1	SGT1, suppressor of G2 allele of SKP1 (S. cerevisiae)
hsa-miR-513a-3p	1	0	1	1	1	1	TMEM66	transmembrane protein 66
hsa-miR-513a-3p	0	0	1	1	1	1	COPS4	COP9 constitutive photomorphogenic homolog subunit 4 (Arabidopsis)
hsa-miR-513a-3p	0	0	1	1	0	0	CD2BP2	CD2 (cytoplasmic tail) binding protein 2
hsa-miR-513a-3p	1	0	1	0	1	1	DNMT3A	DNA (cytosine-5-)-methyltransferase 3 alpha
hsa-miR-513a-3p	0	0	1	1	1	1	EPCAM	epithelial cell adhesion molecule
hsa-miR-513a-3p	0	0	1	1	1	1	C10orf2	chromosome 10 open reading frame 2
hsa-miR-513a-3p	0	0	1	0	0	0	LOC100132352	FSHD region gene 1 pseudogene
hsa-miR-513a-3p	0	0	1	0	0	0	FAM47E	family with sequence similarity 47, member E
hsa-miR-513a-3p	1	0	1	0	1	1	KDM1B	lysine (K)-specific demethylase 1B
hsa-miR-513a-3p	1	0	1	1	1	1	STAG2	stromal antigen 2
hsa-miR-513a-3p	1	0	1	1	1	1	FBXW7	F-box and WD repeat domain containing 7, E3 ubiquitin protein ligase
hsa-miR-513a-3p	0	0	1	1	1	1	SYNE2	spectrin repeat containing, nuclear envelope 2
hsa-miR-513a-3p	0	0	1	0	0	0	LINC00661	long intergenic non-protein coding RNA 661
hsa-miR-513a-3p	1	0	1	1	1	1	NKTR	natural killer-tumor recognition sequence
hsa-miR-513a-3p	1	0	1	0	1	1	MEGF10	multiple EGF-like-domains 10
hsa-miR-513a-3p	1	0	1	1	1	1	KIAA2018	KIAA2018
hsa-miR-513a-3p	1	0	1	0	1	1	PTP4A1	protein tyrosine phosphatase type IVA, member 1
hsa-miR-513a-3p	1	0	1	0	1	1	SLC7A6	solute carrier family 7 (amino acid transporter light chain, y+L system), member 6
hsa-miR-513a-3p	0	0	1	1	0	0	FMN1	formin 1
hsa-miR-513a-3p	0	0	1	0	1	1	USP10	ubiquitin specific peptidase 10
hsa-miR-513a-3p	0	0	1	0	0	0	MUC19	mucin 19, oligomeric
hsa-miR-513a-3p	1	0	1	0	1	1	XRN1	5'-3' exoribonuclease 1
hsa-miR-513a-3p	1	0	1	0	1	1	OSBPL8	oxysterol binding protein-like 8
hsa-miR-513a-3p	1	0	1	1	1	1	SNRK	SNF related kinase
hsa-miR-513a-3p	1	0	1	1	1	1	TIPARP	TCDD-inducible poly(ADP-ribose) polymerase
hsa-miR-513a-3p	1	0	1	1	1	1	SLC39A10	solute carrier family 39 (zinc transporter), member 10
hsa-miR-513a-3p	0	0	1	0	0	0	MIR143HG	MIR143 host gene (non-protein coding)
hsa-miR-513a-3p	1	0	1	0	1	1	CNTNAP2	contactin associated protein-like 2
hsa-miR-513a-3p	1	0	1	0	1	1	ZNF652	zinc finger protein 652
hsa-miR-513a-3p	0	0	1	1	1	1	RBM48	RNA binding motif protein 48
hsa-miR-513a-3p	1	0	1	0	1	1	KLHDC10	kelch domain containing 10
hsa-miR-513a-3p	0	0	1	1	1	1	MPV17L	MPV17 mitochondrial membrane protein-like
hsa-miR-513a-3p	0	0	1	1	1	1	GPR34	G protein-coupled receptor 34
hsa-miR-513a-3p	1	0	1	1	1	1	ATP2B3	ATPase, Ca++ transporting, plasma membrane 3
hsa-miR-513a-3p	1	0	1	1	1	1	GLIS3	GLIS family zinc finger 3
hsa-miR-513a-3p	1	0	1	1	1	1	ITSN1	intersectin 1 (SH3 domain protein)
hsa-miR-513a-3p	0	0	1	0	0	0	POM121L8P	POM121 transmembrane nucleoporin-like 8 pseudogene
hsa-miR-513a-3p	1	0	1	0	1	1	DAPP1	dual adaptor of phosphotyrosine and 3-phosphoinositides
hsa-miR-513a-3p	1	0	1	0	1	1	RBBP5	retinoblastoma binding protein 5
hsa-miR-513a-3p	1	0	1	0	1	1	DCBLD2	discoidin, CUB and LCCL domain containing 2
hsa-miR-513a-3p	1	0	1	0	1	1	KCNB1	potassium voltage-gated channel, Shab-related subfamily, member 1
hsa-miR-513a-3p	1	0	1	1	1	1	MLL	myeloid/lymphoid or mixed-lineage leukemia (trithorax homolog, Drosophila)
hsa-miR-513a-3p	0	0	1	1	1	1	RFC1	replication factor C (activator 1) 1, 145kDa
hsa-miR-513a-3p	1	0	1	1	1	1	AFF1	AF4/FMR2 family, member 1
hsa-miR-513a-3p	0	0	1	1	1	1	PCYT1A	phosphate cytidylyltransferase 1, choline, alpha
hsa-miR-513a-3p	1	0	1	0	1	1	STAT3	signal transducer and activator of transcription 3 (acute-phase response factor)
hsa-miR-513a-3p	1	0	1	0	1	1	BCL2	B-cell CLL/lymphoma 2
hsa-miR-513a-3p	1	0	1	0	1	1	YES1	v-yes-1 Yamaguchi sarcoma viral oncogene homolog 1
hsa-miR-513a-3p	1	0	1	1	1	1	ELK1	ELK1, member of ETS oncogene family
hsa-miR-513a-3p	1	0	1	1	1	1	IGF1	insulin-like growth factor 1 (somatomedin C)
hsa-miR-513a-3p	0	0	1	1	1	1	ELF1	E74-like factor 1 (ets domain transcription factor)
hsa-miR-513a-3p	0	0	1	1	1	1	CNGA1	cyclic nucleotide gated channel alpha 1
hsa-miR-513a-3p	1	0	1	0	1	1	ACVR2A	activin A receptor, type IIA
hsa-miR-513a-3p	0	0	1	1	1	1	APOH	apolipoprotein H (beta-2-glycoprotein I)
hsa-miR-513a-3p	1	0	1	0	1	1	ATM	ataxia telangiectasia mutated
hsa-miR-513a-3p	1	0	1	1	1	1	COL1A2	collagen, type I, alpha 2
hsa-miR-513a-3p	1	0	1	1	1	1	COL3A1	collagen, type III, alpha 1
hsa-miR-513a-3p	1	0	1	1	1	1	COL4A4	collagen, type IV, alpha 4
hsa-miR-513a-3p	1	0	1	1	1	1	DLD	dihydrolipoamide dehydrogenase
hsa-miR-513a-3p	0	0	1	1	1	1	DPYD	dihydropyrimidine dehydrogenase
hsa-miR-513a-3p	1	0	1	0	1	1	SLC26A2	solute carrier family 26 (sulfate transporter), member 2
hsa-miR-513a-3p	0	0	1	1	1	1	F8	coagulation factor VIII, procoagulant component
hsa-miR-513a-3p	1	0	1	1	1	1	FBN1	fibrillin 1
hsa-miR-513a-3p	0	0	1	0	1	1	MS4A2	membrane-spanning 4-domains, subfamily A, member 2
hsa-miR-513a-3p	1	0	1	1	1	1	FUCA1	fucosidase, alpha-L- 1, tissue
hsa-miR-513a-3p	1	0	1	1	1	1	GALC	galactosylceramidase
hsa-miR-513a-3p	1	0	1	0	1	1	GHR	growth hormone receptor
hsa-miR-513a-3p	1	0	1	1	1	1	HK2	hexokinase 2
hsa-miR-513a-3p	1	0	1	1	1	1	JAG1	jagged 1
hsa-miR-513a-3p	1	0	1	1	1	1	KCNA1	potassium voltage-gated channel, shaker-related subfamily, member 1 (episodic ataxia with myokymia)
hsa-miR-513a-3p	1	0	1	0	1	1	SGCB	sarcoglycan, beta (43kDa dystrophin-associated glycoprotein)
hsa-miR-513a-3p	1	0	1	1	1	1	MITF	microphthalmia-associated transcription factor
hsa-miR-513a-3p	0	0	1	1	1	1	MTM1	myotubularin 1
hsa-miR-513a-3p	1	0	1	1	1	1	NF1	neurofibromin 1
hsa-miR-513a-3p	1	0	1	1	1	1	NPC1	Niemann-Pick disease, type C1
hsa-miR-513a-3p	0	0	1	1	1	1	PAH	phenylalanine hydroxylase
hsa-miR-513a-3p	0	0	1	1	0	0	PCCA	propionyl CoA carboxylase, alpha polypeptide
hsa-miR-513a-3p	1	0	1	0	1	1	PTEN	phosphatase and tensin homolog
hsa-miR-513a-3p	1	0	1	1	1	1	ATXN1	ataxin 1
hsa-miR-513a-3p	0	0	1	1	1	1	SRD5A2	steroid-5-alpha-reductase, alpha polypeptide 2 (3-oxo-5 alpha-steroid delta 4-dehydrogenase alpha 2)
hsa-miR-513a-3p	0	0	1	1	1	1	THBD	thrombomodulin
hsa-miR-513a-3p	1	0	1	1	1	1	TIMP3	TIMP metallopeptidase inhibitor 3
hsa-miR-513a-3p	1	0	1	0	1	1	CYBB	cytochrome b-245, beta polypeptide
hsa-miR-513a-3p	1	0	1	0	1	1	PAFAH1B1	platelet-activating factor acetylhydrolase 1b, regulatory subunit 1 (45kDa)
hsa-miR-513a-3p	1	0	1	0	1	1	PCSK1	proprotein convertase subtilisin/kexin type 1
hsa-miR-513a-3p	0	0	1	0	1	1	SLC10A2	solute carrier family 10 (sodium/bile acid cotransporter family), member 2
hsa-miR-513a-3p	1	0	1	1	1	1	DCX	doublecortin
hsa-miR-513a-3p	0	0	1	1	1	1	C7	complement component 7
hsa-miR-513a-3p	0	0	1	1	1	1	HGF	hepatocyte growth factor (hepapoietin A; scatter factor)
hsa-miR-513a-3p	1	0	1	1	1	1	CD44	CD44 molecule (Indian blood group)
hsa-miR-513a-3p	0	0	1	1	1	1	GSR	glutathione reductase
hsa-miR-513a-3p	1	0	1	0	1	1	ADRB1	adrenoceptor beta 1
hsa-miR-513a-3p	1	0	1	0	1	1	CACNA1E	calcium channel, voltage-dependent, R type, alpha 1E subunit
hsa-miR-513a-3p	1	0	1	1	1	1	DIO2	deiodinase, iodothyronine, type II
hsa-miR-513a-3p	1	0	1	1	1	1	DRD1	dopamine receptor D1
hsa-miR-513a-3p	1	0	1	0	1	1	GABRA4	gamma-aminobutyric acid (GABA) A receptor, alpha 4
hsa-miR-513a-3p	0	0	1	1	1	1	GABRA5	gamma-aminobutyric acid (GABA) A receptor, alpha 5
hsa-miR-513a-3p	1	0	1	1	1	1	GABRG2	gamma-aminobutyric acid (GABA) A receptor, gamma 2
hsa-miR-513a-3p	1	0	1	1	1	1	GAD1	glutamate decarboxylase 1 (brain, 67kDa)
hsa-miR-513a-3p	1	0	1	1	1	1	GRIA4	glutamate receptor, ionotropic, AMPA 4
hsa-miR-513a-3p	1	0	1	1	1	1	GRM7	glutamate receptor, metabotropic 7
hsa-miR-513a-3p	1	0	1	1	1	1	IGF1R	insulin-like growth factor 1 receptor
hsa-miR-513a-3p	1	0	1	0	1	1	KCNJ2	potassium inwardly-rectifying channel, subfamily J, member 2
hsa-miR-513a-3p	0	0	1	1	1	1	MAOB	monoamine oxidase B
hsa-miR-513a-3p	0	0	1	1	1	1	NPY2R	neuropeptide Y receptor Y2
hsa-miR-513a-3p	0	0	1	1	1	1	P4HA1	prolyl 4-hydroxylase, alpha polypeptide I
hsa-miR-513a-3p	1	0	1	1	0	0	PDE3A	phosphodiesterase 3A, cGMP-inhibited
hsa-miR-513a-3p	1	0	1	1	1	1	PTGDR	prostaglandin D2 receptor (DP)
hsa-miR-513a-3p	1	0	1	1	1	1	PTGFR	prostaglandin F receptor (FP)
hsa-miR-513a-3p	1	0	1	1	1	1	RARB	retinoic acid receptor, beta
hsa-miR-513a-3p	0	0	1	1	1	1	SLC2A9	solute carrier family 2 (facilitated glucose transporter), member 9
hsa-miR-513a-3p	0	0	1	1	1	1	BLOC1S2	biogenesis of lysosomal organelles complex-1, subunit 2
hsa-miR-513a-3p	1	0	1	0	1	1	SMAD5	SMAD family member 5
hsa-miR-513a-3p	0	0	1	1	1	1	C16orf87	chromosome 16 open reading frame 87
hsa-miR-513a-3p	1	0	1	0	1	1	UBE2W	ubiquitin-conjugating enzyme E2W (putative)
hsa-miR-513a-3p	1	0	1	0	1	1	SPOPL	speckle-type POZ protein-like
hsa-miR-513a-3p	0	0	1	0	1	1	C9orf170	chromosome 9 open reading frame 170
hsa-miR-513a-3p	1	0	1	1	1	1	FARP1	FERM, RhoGEF (ARHGEF) and pleckstrin domain protein 1 (chondrocyte-derived)
hsa-miR-513a-3p	0	0	1	1	1	1	CC2D2B	coiled-coil and C2 domain containing 2B
hsa-miR-513a-3p	1	0	1	1	1	1	TPD52L3	tumor protein D52-like 3
hsa-miR-513a-3p	1	0	1	1	1	1	FAM13C	family with sequence similarity 13, member C
hsa-miR-513a-3p	1	0	1	1	1	1	AFTPH	aftiphilin
hsa-miR-513a-3p	1	0	1	1	1	1	WNK3	WNK lysine deficient protein kinase 3
hsa-miR-513a-3p	1	0	1	1	1	1	ABLIM1	actin binding LIM protein 1
hsa-miR-513a-3p	1	0	1	0	1	1	SMAD2	SMAD family member 2
hsa-miR-513a-3p	1	0	1	1	1	1	HMGXB4	HMG box domain containing 4
hsa-miR-513a-3p	0	0	1	1	1	1	SMAD1	SMAD family member 1
hsa-miR-513a-3p	1	0	1	1	1	1	KLHL31	kelch-like 31 (Drosophila)
hsa-miR-513a-3p	1	0	1	1	1	1	BICD2	bicaudal D homolog 2 (Drosophila)
hsa-miR-513a-3p	0	0	1	1	1	1	ALG11	asparagine-linked glycosylation 11, alpha-1,2-mannosyltransferase homolog (yeast)
hsa-miR-513a-3p	0	0	1	1	1	1	CCDC144NL	coiled-coil domain containing 144 family, N-terminal like
hsa-miR-513a-3p	0	0	1	1	1	1	ZCCHC16	zinc finger, CCHC domain containing 16
hsa-miR-513a-3p	0	0	1	0	1	1	ZNF705A	zinc finger protein 705A
hsa-miR-513a-3p	0	0	1	0	1	1	FLJ16124	FLJ16124 protein
hsa-miR-513a-3p	1	0	1	1	1	1	NCK2	NCK adaptor protein 2
hsa-miR-513a-3p	0	0	1	1	1	1	DAZ4	deleted in azoospermia 4
hsa-miR-513a-3p	1	0	1	1	1	1	EBF3	early B-cell factor 3
hsa-miR-513a-3p	1	0	1	1	1	1	PLCXD3	phosphatidylinositol-specific phospholipase C, X domain containing 3
hsa-miR-513a-3p	1	0	1	1	1	1	EDA	ectodysplasin A
hsa-miR-513a-3p	0	0	1	1	1	1	SUMO1	SMT3 suppressor of mif two 3 homolog 1 (S. cerevisiae)
hsa-miR-513a-3p	1	0	1	1	1	1	TCEAL8	transcription elongation factor A (SII)-like 8
hsa-miR-513a-3p	1	0	1	0	1	1	GOSR1	golgi SNAP receptor complex member 1
hsa-miR-513a-3p	0	0	1	0	1	1	C8orf22	chromosome 8 open reading frame 22
hsa-miR-513a-3p	0	0	1	0	1	1	GIMAP6	GTPase, IMAP family member 6
hsa-miR-513a-3p	1	0	1	1	1	1	IGF2BP2	insulin-like growth factor 2 mRNA binding protein 2
hsa-miR-513a-3p	1	0	1	1	1	1	SPOP	speckle-type POZ protein
hsa-miR-513a-3p	1	0	1	1	1	1	IGSF3	immunoglobulin superfamily, member 3
hsa-miR-513a-3p	1	0	1	1	1	1	EI24	etoposide induced 2.4 mRNA
hsa-miR-513a-3p	0	0	1	1	0	0	CT45A5	cancer/testis antigen family 45, member A5
hsa-miR-513a-3p	1	0	1	0	1	1	SS18	synovial sarcoma translocation, chromosome 18
hsa-miR-513a-3p	1	0	1	0	1	1	C18orf25	chromosome 18 open reading frame 25
hsa-miR-513a-3p	1	0	1	1	1	1	CTDSPL	CTD (carboxy-terminal domain, RNA polymerase II, polypeptide A) small phosphatase-like
hsa-miR-513a-3p	1	0	1	0	1	1	KIAA2022	KIAA2022
hsa-miR-513a-3p	0	0	1	1	1	1	MXI1	MAX interactor 1
hsa-miR-513a-3p	1	0	1	1	1	1	EML1	echinoderm microtubule associated protein like 1
hsa-miR-513a-3p	1	0	1	1	1	1	FNIP1	folliculin interacting protein 1
hsa-miR-513a-3p	0	0	1	1	1	1	FBXO47	F-box protein 47
hsa-miR-513a-3p	0	0	1	1	1	1	SLC35D3	solute carrier family 35, member D3
hsa-miR-513a-3p	1	0	1	1	1	1	LUZP2	leucine zipper protein 2
hsa-miR-513a-3p	1	0	1	0	1	1	RCHY1	ring finger and CHY zinc finger domain containing 1, E3 ubiquitin protein ligase
hsa-miR-513a-3p	0	0	1	0	1	1	ZNF648	zinc finger protein 648
hsa-miR-513a-3p	1	0	1	1	1	1	FAM168B	family with sequence similarity 168, member B
hsa-miR-513a-3p	0	0	1	0	1	1	LPPR5	lipid phosphate phosphatase-related protein type 5
hsa-miR-513a-3p	0	0	1	1	1	1	SPIN3	spindlin family, member 3
hsa-miR-513a-3p	0	0	1	0	1	1	THEMIS	thymocyte selection associated
hsa-miR-513a-3p	1	0	1	1	1	1	FAM171A1	family with sequence similarity 171, member A1
hsa-miR-513a-3p	0	0	1	1	1	1	SAMD13	sterile alpha motif domain containing 13
hsa-miR-513a-3p	1	0	1	1	1	1	ATP11C	ATPase, class VI, type 11C
hsa-miR-513a-3p	1	0	1	0	1	1	FYTTD1	forty-two-three domain containing 1
hsa-miR-513a-3p	1	0	1	1	0	0	RPL21P44	ribosomal protein L21 pseudogene 44
hsa-miR-513a-3p	1	0	1	0	1	1	BACH1	BTB and CNC homology 1, basic leucine zipper transcription factor 1
hsa-miR-513a-3p	0	0	1	1	1	1	DSTN	destrin (actin depolymerizing factor)
hsa-miR-513a-3p	1	0	1	1	1	1	PCGF6	polycomb group ring finger 6
hsa-miR-513a-3p	0	0	1	0	1	1	GOLGA8E	golgin A8 family, member E
hsa-miR-513a-3p	1	0	1	1	1	1	SLC25A53	solute carrier family 25, member 53
hsa-miR-513a-3p	1	0	1	1	1	1	DISC1	disrupted in schizophrenia 1
hsa-miR-513a-3p	0	0	1	1	1	1	SPIN4	spindlin family, member 4
hsa-miR-513a-3p	1	0	1	0	1	1	ZKSCAN2	zinc finger with KRAB and SCAN domains 2
hsa-miR-513a-3p	0	0	1	1	1	1	CCNC	cyclin C
hsa-miR-513a-3p	0	0	1	1	1	1	PAGE5	P antigen family, member 5 (prostate associated)
hsa-miR-513a-3p	0	0	1	1	1	1	C1orf192	chromosome 1 open reading frame 192
hsa-miR-513a-3p	1	0	1	1	1	1	C12orf68	chromosome 12 open reading frame 68
hsa-miR-513a-3p	0	0	1	1	1	1	C2orf68	chromosome 2 open reading frame 68
hsa-miR-513a-3p	1	0	1	0	1	1	SYT14L	synaptotagmin XIV-like
hsa-miR-513a-3p	1	0	1	1	1	1	KCNMA1	potassium large conductance calcium-activated channel, subfamily M, alpha member 1
hsa-miR-513a-3p	0	0	1	1	0	0	PAGE2B	P antigen family, member 2B
hsa-miR-513a-3p	1	0	1	1	1	1	PHF6	PHD finger protein 6
hsa-miR-513a-3p	1	0	1	0	1	1	GOPC	golgi-associated PDZ and coiled-coil motif containing
hsa-miR-513a-3p	0	0	1	1	1	1	USP1	ubiquitin specific peptidase 1
hsa-miR-513a-3p	0	0	1	1	0	0	CT45A1	cancer/testis antigen family 45, member A1
hsa-miR-513a-3p	0	0	1	1	0	0	ALDH18A1	aldehyde dehydrogenase 18 family, member A1
hsa-miR-513a-3p	1	0	1	0	1	1	KCNK2	potassium channel, subfamily K, member 2
hsa-miR-513a-3p	0	0	1	1	0	0	CT45A6	cancer/testis antigen family 45, member A6
hsa-miR-513a-3p	1	0	1	1	1	1	ZHX1	zinc fingers and homeoboxes 1
hsa-miR-513a-3p	1	0	1	1	1	1	DKK3	dickkopf 3 homolog (Xenopus laevis)
hsa-miR-513a-3p	0	0	1	1	1	1	NARG2	NMDA receptor regulated 2
hsa-miR-513a-3p	0	0	1	1	1	1	GCOM1	GRINL1A complex locus 1
hsa-miR-513a-3p	0	0	1	1	1	1	MURC	muscle-related coiled-coil protein
hsa-miR-513a-3p	0	0	1	1	0	0	FNTA	farnesyltransferase, CAAX box, alpha
hsa-miR-513a-3p	1	0	1	1	1	1	KALRN	kalirin, RhoGEF kinase
hsa-miR-513a-3p	1	0	1	1	1	1	SH3KBP1	SH3-domain kinase binding protein 1
hsa-miR-513a-3p	1	0	1	0	1	1	BCL7A	B-cell CLL/lymphoma 7A
hsa-miR-513a-3p	1	0	1	0	1	1	TNRC6B	trinucleotide repeat containing 6B
hsa-miR-513a-3p	0	0	1	1	1	1	WASF1	WAS protein family, member 1
hsa-miR-513a-3p	1	0	1	1	1	1	FNBP1L	formin binding protein 1-like
hsa-miR-513a-3p	1	0	1	1	1	1	AFF3	AF4/FMR2 family, member 3
hsa-miR-513a-3p	1	0	1	0	1	1	C3orf70	chromosome 3 open reading frame 70
hsa-miR-513a-3p	1	0	1	0	1	1	ANO6	anoctamin 6
hsa-miR-513a-3p	1	0	1	1	1	1	RGS7BP	regulator of G-protein signaling 7 binding protein
hsa-miR-513a-3p	1	0	1	1	1	1	KIAA0101	KIAA0101
hsa-miR-513a-3p	1	0	1	1	1	1	OPN5	opsin 5
hsa-miR-513a-3p	1	0	1	0	1	1	SAMD5	sterile alpha motif domain containing 5
hsa-miR-513a-3p	1	0	1	1	1	1	RUNX3	runt-related transcription factor 3
hsa-miR-513a-3p	0	0	1	1	1	1	TP53BP2	tumor protein p53 binding protein, 2
hsa-miR-513a-3p	0	0	1	1	1	1	PLAA	phospholipase A2-activating protein
hsa-miR-513a-3p	1	0	1	1	1	1	MAF	v-maf musculoaponeurotic fibrosarcoma oncogene homolog (avian)
hsa-miR-513a-3p	1	0	1	1	1	1	TMPO	thymopoietin
hsa-miR-513a-3p	1	0	1	1	1	1	UBE2V1	ubiquitin-conjugating enzyme E2 variant 1
hsa-miR-513a-3p	1	0	1	1	1	1	MYCL1	v-myc myelocytomatosis viral oncogene homolog 1, lung carcinoma derived (avian)
hsa-miR-513a-3p	1	0	1	0	1	1	SRGAP3	SLIT-ROBO Rho GTPase activating protein 3
hsa-miR-513a-3p	0	0	1	1	1	1	CSTF3	cleavage stimulation factor, 3' pre-RNA, subunit 3, 77kDa
hsa-miR-513a-3p	1	0	1	1	1	1	PPM1B	protein phosphatase, Mg2+/Mn2+ dependent, 1B
hsa-miR-513a-3p	0	0	1	1	1	1	KCNIP1	Kv channel interacting protein 1
hsa-miR-513a-3p	1	0	1	1	1	1	SMOC1	SPARC related modular calcium binding 1
hsa-miR-513a-3p	1	0	1	0	1	1	RYR2	ryanodine receptor 2 (cardiac)
hsa-miR-513a-3p	1	0	1	1	1	1	ACPL2	acid phosphatase-like 2
hsa-miR-513a-3p	0	0	1	1	1	1	DYNLL1	dynein, light chain, LC8-type 1
hsa-miR-513a-3p	0	0	1	1	1	1	REV1	REV1, polymerase (DNA directed)
hsa-miR-513a-3p	1	0	1	1	1	1	DLX1	distal-less homeobox 1
hsa-miR-513a-3p	1	1	1	1	1	1	TRIM71	tripartite motif containing 71, E3 ubiquitin protein ligase
hsa-miR-513a-3p	1	0	1	0	1	1	GK5	glycerol kinase 5 (putative)
hsa-miR-513a-3p	1	0	1	1	1	1	AP1S3	adaptor-related protein complex 1, sigma 3 subunit
hsa-miR-513a-3p	0	0	1	1	1	1	MAP9	microtubule-associated protein 9
hsa-miR-513a-3p	1	0	1	0	1	1	USP9X	ubiquitin specific peptidase 9, X-linked
hsa-miR-513a-3p	0	0	1	0	1	1	ZNF705D	zinc finger protein 705D
hsa-miR-513a-3p	1	0	1	0	1	1	CREBZF	CREB/ATF bZIP transcription factor
hsa-miR-513a-3p	1	0	1	1	1	1	ZNF384	zinc finger protein 384
hsa-miR-513a-3p	1	0	1	1	1	1	CHN2	chimerin (chimaerin) 2
hsa-miR-513a-3p	1	0	1	0	1	1	FAM133B	family with sequence similarity 133, member B
hsa-miR-513a-3p	0	0	1	1	1	1	MCHR2	melanin-concentrating hormone receptor 2
hsa-miR-513a-3p	1	0	1	1	1	1	PAPD5	PAP associated domain containing 5
hsa-miR-513a-3p	1	0	1	0	1	1	DCUN1D4	DCN1, defective in cullin neddylation 1, domain containing 4 (S. cerevisiae)
hsa-miR-513a-3p	0	0	1	1	1	1	MTHFD2	methylenetetrahydrofolate dehydrogenase (NADP+ dependent) 2, methenyltetrahydrofolate cyclohydrolase
hsa-miR-513a-3p	1	0	1	1	1	1	ZBTB8A	zinc finger and BTB domain containing 8A
hsa-miR-513a-3p	1	0	1	1	1	1	MTMR12	myotubularin related protein 12
hsa-miR-513a-3p	1	0	1	1	1	1	PRKAG2	protein kinase, AMP-activated, gamma 2 non-catalytic subunit
hsa-miR-513a-3p	0	0	1	1	0	0	GAGE1	G antigen 1
hsa-miR-513a-3p	0	0	1	0	1	1	STEAP2	STEAP family member 2, metalloreductase
hsa-miR-513a-3p	1	0	1	1	1	1	HEY1	hairy/enhancer-of-split related with YRPW motif 1
hsa-miR-513a-3p	1	0	1	1	1	1	GDAP1	ganglioside induced differentiation associated protein 1
hsa-miR-513a-3p	1	0	1	1	1	1	PPP4R1	protein phosphatase 4, regulatory subunit 1
hsa-miR-513a-3p	1	0	1	1	1	1	RUFY2	RUN and FYVE domain containing 2
hsa-miR-513a-3p	1	0	1	1	1	1	DIAPH3	diaphanous homolog 3 (Drosophila)
hsa-miR-513a-3p	1	0	1	1	1	1	SLC9A6	solute carrier family 9, subfamily A (NHE6, cation proton antiporter 6), member 6
hsa-miR-513a-3p	1	0	1	1	1	1	NSL1	NSL1, MIND kinetochore complex component, homolog (S. cerevisiae)
hsa-miR-513a-3p	1	0	1	1	1	1	CRTC3	CREB regulated transcription coactivator 3
hsa-miR-513a-3p	1	0	1	1	1	1	ERBB4	v-erb-a erythroblastic leukemia viral oncogene homolog 4 (avian)
hsa-miR-513a-3p	1	0	1	1	1	1	KDM5A	lysine (K)-specific demethylase 5A
hsa-miR-513a-3p	0	0	1	1	1	1	SEC24B	SEC24 family, member B (S. cerevisiae)
hsa-miR-513a-3p	1	0	1	0	1	1	TMEM237	transmembrane protein 237
hsa-miR-513a-3p	1	0	1	0	1	1	SLC12A2	solute carrier family 12 (sodium/potassium/chloride transporters), member 2
hsa-miR-513a-3p	1	0	1	1	1	1	NET1	neuroepithelial cell transforming 1
hsa-miR-513a-3p	1	0	1	1	1	1	C5orf43	chromosome 5 open reading frame 43
hsa-miR-513a-3p	0	0	1	0	1	1	SSTR1	somatostatin receptor 1
hsa-miR-513a-3p	0	0	1	1	1	1	TOP2B	topoisomerase (DNA) II beta 180kDa
hsa-miR-513a-3p	1	0	1	1	1	1	QSER1	glutamine and serine rich 1
hsa-miR-513a-3p	1	0	1	1	1	1	PDE11A	phosphodiesterase 11A
hsa-miR-513a-3p	1	0	1	1	1	1	IRF2BP2	interferon regulatory factor 2 binding protein 2
hsa-miR-513a-3p	1	0	1	0	1	1	UBXN2B	UBX domain protein 2B
hsa-miR-513a-3p	1	0	1	1	1	1	SRSF1	serine/arginine-rich splicing factor 1
hsa-miR-513a-3p	1	0	1	1	1	1	DACT1	dapper, antagonist of beta-catenin, homolog 1 (Xenopus laevis)
hsa-miR-513a-3p	0	0	1	1	1	1	FKTN	fukutin
hsa-miR-513a-3p	0	0	1	0	0	0	TMEM183B	transmembrane protein 183B
hsa-miR-513a-3p	1	0	1	1	1	1	CASZ1	castor zinc finger 1
hsa-miR-513a-3p	1	0	1	1	1	1	CREBBP	CREB binding protein
hsa-miR-513a-3p	1	0	1	1	1	1	FAM155A	family with sequence similarity 155, member A
hsa-miR-513a-3p	1	0	1	1	1	1	SHANK3	SH3 and multiple ankyrin repeat domains 3
hsa-miR-513a-3p	1	0	1	0	1	1	CCDC85A	coiled-coil domain containing 85A
hsa-miR-513a-3p	1	0	1	1	1	1	ZNF697	zinc finger protein 697
hsa-miR-513a-3p	1	0	1	0	1	1	ODZ3	odz, odd Oz/ten-m homolog 3 (Drosophila)
hsa-miR-513a-3p	1	0	1	1	1	1	MBOAT1	membrane bound O-acyltransferase domain containing 1
hsa-miR-513a-3p	1	0	1	0	1	1	MEGF9	multiple EGF-like-domains 9
hsa-miR-513a-3p	0	0	1	0	0	0	VWC2L	von Willebrand factor C domain containing protein 2-like
hsa-miR-513a-3p	0	0	1	0	1	1	RBM44	RNA binding motif protein 44
hsa-miR-513a-3p	0	0	1	1	1	1	TBX18	T-box 18
hsa-miR-513a-3p	1	0	1	1	1	1	MGA	MAX gene associated
hsa-miR-513a-3p	1	0	1	1	1	1	DGKG	diacylglycerol kinase, gamma 90kDa
hsa-miR-513a-3p	1	0	1	1	1	1	REPS2	RALBP1 associated Eps domain containing 2
hsa-miR-513a-3p	0	0	1	1	0	0	JMJD6	jumonji domain containing 6
hsa-miR-513a-3p	1	0	1	0	1	1	SCN3A	sodium channel, voltage-gated, type III, alpha subunit
hsa-miR-513a-3p	1	0	1	0	1	1	PDE5A	phosphodiesterase 5A, cGMP-specific
hsa-miR-513a-3p	1	0	1	1	1	1	ASIC1	acid-sensing (proton-gated) ion channel 1
hsa-miR-513a-3p	1	0	1	1	1	1	ADAM10	ADAM metallopeptidase domain 10
hsa-miR-513a-3p	1	0	1	0	1	1	XIAP	X-linked inhibitor of apoptosis
hsa-miR-513a-3p	1	0	1	0	0	0	NKX3-2	NK3 homeobox 2
hsa-miR-513a-3p	1	0	1	1	1	1	BMP2	bone morphogenetic protein 2
hsa-miR-513a-3p	1	0	1	0	1	1	BMPR2	bone morphogenetic protein receptor, type II (serine/threonine kinase)
hsa-miR-513a-3p	1	0	1	1	1	1	CAMK2D	calcium/calmodulin-dependent protein kinase II delta
hsa-miR-513a-3p	1	0	1	1	1	1	CASP10	caspase 10, apoptosis-related cysteine peptidase
hsa-miR-513a-3p	1	0	1	1	1	1	CDH13	cadherin 13, H-cadherin (heart)
hsa-miR-513a-3p	1	0	1	0	1	1	CDK6	cyclin-dependent kinase 6
hsa-miR-513a-3p	1	0	1	1	1	1	CDS1	CDP-diacylglycerol synthase (phosphatidate cytidylyltransferase) 1
hsa-miR-513a-3p	0	0	1	1	1	1	CLIC2	chloride intracellular channel 2
hsa-miR-513a-3p	1	0	1	0	1	1	CPD	carboxypeptidase D
hsa-miR-513a-3p	1	0	1	1	1	1	CREBL2	cAMP responsive element binding protein-like 2
hsa-miR-513a-3p	1	0	1	1	1	1	MAPK14	mitogen-activated protein kinase 14
hsa-miR-513a-3p	0	0	1	1	1	1	DARS	aspartyl-tRNA synthetase
hsa-miR-513a-3p	1	0	1	1	1	1	DUSP4	dual specificity phosphatase 4
hsa-miR-513a-3p	1	0	1	1	1	1	DYRK1A	dual-specificity tyrosine-(Y)-phosphorylation regulated kinase 1A
hsa-miR-513a-3p	1	0	1	1	1	1	S1PR1	sphingosine-1-phosphate receptor 1
hsa-miR-513a-3p	1	0	1	0	1	1	EFNB3	ephrin-B3
hsa-miR-513a-3p	1	0	1	1	1	1	ELAVL1	ELAV (embryonic lethal, abnormal vision, Drosophila)-like 1 (Hu antigen R)
hsa-miR-513a-3p	1	0	1	1	1	1	FOXF1	forkhead box F1
hsa-miR-513a-3p	1	0	1	1	1	1	FOXC1	forkhead box C1
hsa-miR-513a-3p	0	0	1	0	1	1	FMO2	flavin containing monooxygenase 2 (non-functional)
hsa-miR-513a-3p	0	0	1	1	0	0	GAGE2C	G antigen 2C
hsa-miR-513a-3p	1	0	1	0	1	1	GCNT2	glucosaminyl (N-acetyl) transferase 2, I-branching enzyme (I blood group)
hsa-miR-513a-3p	0	0	1	1	1	1	GTF2H2	general transcription factor IIH, polypeptide 2, 44kDa
hsa-miR-513a-3p	1	0	1	1	1	1	IFIT2	interferon-induced protein with tetratricopeptide repeats 2
hsa-miR-513a-3p	0	0	1	1	1	1	CXCL10	chemokine (C-X-C motif) ligand 10
hsa-miR-513a-3p	1	0	1	0	1	1	MPPED2	metallophosphoesterase domain containing 2
hsa-miR-513a-3p	1	0	1	1	1	1	ADD2	adducin 2 (beta)
hsa-miR-513a-3p	0	0	1	1	1	1	ARF4	ADP-ribosylation factor 4
hsa-miR-513a-3p	1	0	1	0	1	1	ARNT	aryl hydrocarbon receptor nuclear translocator
hsa-miR-513a-3p	0	0	1	1	1	1	ATP12A	ATPase, H+/K+ transporting, nongastric, alpha polypeptide
hsa-miR-513a-3p	1	0	1	1	1	1	ATP6V1A	ATPase, H+ transporting, lysosomal 70kDa, V1 subunit A
hsa-miR-513a-3p	0	0	1	1	1	1	DST	dystonin
hsa-miR-513a-3p	1	0	1	1	1	1	BTG1	B-cell translocation gene 1, anti-proliferative
hsa-miR-513a-3p	1	0	1	0	1	1	CCND2	cyclin D2
hsa-miR-513a-3p	0	0	1	1	1	1	CD1D	CD1d molecule
hsa-miR-513a-3p	1	0	1	1	1	1	CD69	CD69 molecule
hsa-miR-513a-3p	1	0	1	1	1	1	CDC25A	cell division cycle 25 homolog A (S. pombe)
hsa-miR-513a-3p	1	0	1	0	1	1	CHML	choroideremia-like (Rab escort protein 2)
hsa-miR-513a-3p	1	0	1	1	1	1	CNN3	calponin 3, acidic
hsa-miR-513a-3p	1	0	1	0	1	1	COL19A1	collagen, type XIX, alpha 1
hsa-miR-513a-3p	0	0	1	1	0	0	CPA3	carboxypeptidase A3 (mast cell)
hsa-miR-513a-3p	1	0	1	1	1	1	CREM	cAMP responsive element modulator
hsa-miR-513a-3p	0	0	1	1	1	1	CSN2	casein beta
hsa-miR-513a-3p	0	0	1	1	1	1	CTH	cystathionase (cystathionine gamma-lyase)
hsa-miR-513a-3p	1	0	1	1	1	1	CTNNB1	catenin (cadherin-associated protein), beta 1, 88kDa
hsa-miR-513a-3p	0	0	1	1	1	1	DLAT	dihydrolipoamide S-acetyltransferase
hsa-miR-513a-3p	1	0	1	1	1	1	DR1	down-regulator of transcription 1, TBP-binding (negative cofactor 2)
hsa-miR-513a-3p	1	0	1	1	1	1	DSC3	desmocollin 3
hsa-miR-513a-3p	0	0	1	1	1	1	DSG1	desmoglein 1
hsa-miR-513a-3p	1	0	1	1	1	1	DUSP6	dual specificity phosphatase 6
hsa-miR-513a-3p	1	0	1	1	1	1	E2F3	E2F transcription factor 3
hsa-miR-513a-3p	1	0	1	1	0	0	E2F4	E2F transcription factor 4, p107/p130-binding
hsa-miR-513a-3p	0	0	1	0	1	1	FGF2	fibroblast growth factor 2 (basic)
hsa-miR-513a-3p	1	0	1	1	1	1	FGF7	fibroblast growth factor 7
hsa-miR-513a-3p	1	0	1	0	1	1	FOXO1	forkhead box O1
hsa-miR-513a-3p	0	0	1	1	1	1	FLI1	Friend leukemia virus integration 1
hsa-miR-513a-3p	1	0	1	1	1	1	FRK	fyn-related kinase
hsa-miR-513a-3p	0	0	1	1	0	0	FTH1	ferritin, heavy polypeptide 1
hsa-miR-513a-3p	1	0	1	0	1	1	FUT4	fucosyltransferase 4 (alpha (1,3) fucosyltransferase, myeloid-specific)
hsa-miR-513a-3p	1	0	1	1	1	1	GAS1	growth arrest-specific 1
hsa-miR-513a-3p	0	0	1	0	1	1	GCG	glucagon
hsa-miR-513a-3p	1	0	1	1	1	1	GFPT1	glutamine--fructose-6-phosphate transaminase 1
hsa-miR-513a-3p	1	0	1	0	1	1	GNAI1	guanine nucleotide binding protein (G protein), alpha inhibiting activity polypeptide 1
hsa-miR-513a-3p	0	0	1	0	1	1	GYPA	glycophorin A (MNS blood group)
hsa-miR-513a-3p	1	0	1	1	1	1	HNRNPA2B1	heterogeneous nuclear ribonucleoprotein A2/B1
hsa-miR-513a-3p	1	0	1	1	1	1	HSPA4	heat shock 70kDa protein 4
hsa-miR-513a-3p	1	0	1	1	1	1	ISL1	ISL LIM homeobox 1
hsa-miR-513a-3p	0	0	1	0	1	1	ITGAV	integrin, alpha V
hsa-miR-513a-3p	1	0	1	1	1	1	ITGB8	integrin, beta 8
hsa-miR-513a-3p	1	0	1	1	1	1	JUN	jun proto-oncogene
hsa-miR-513a-3p	1	0	1	1	1	1	KCNA3	potassium voltage-gated channel, shaker-related subfamily, member 3
hsa-miR-513a-3p	1	0	1	1	1	1	KCNJ3	potassium inwardly-rectifying channel, subfamily J, member 3
hsa-miR-513a-3p	1	0	1	1	1	1	KCNJ10	potassium inwardly-rectifying channel, subfamily J, member 10
hsa-miR-513a-3p	0	0	1	1	0	0	KCNK3	potassium channel, subfamily K, member 3
hsa-miR-513a-3p	0	0	1	1	1	1	KLRC2	killer cell lectin-like receptor subfamily C, member 2
hsa-miR-513a-3p	1	0	1	1	1	1	IPO5	importin 5
hsa-miR-513a-3p	0	0	1	1	0	0	LECT2	leukocyte cell-derived chemotaxin 2
hsa-miR-513a-3p	1	0	1	1	1	1	LIFR	leukemia inhibitory factor receptor alpha
hsa-miR-513a-3p	0	0	1	1	1	1	LOX	lysyl oxidase
hsa-miR-513a-3p	0	0	1	1	1	1	LUM	lumican
hsa-miR-513a-3p	1	0	1	1	1	1	M6PR	mannose-6-phosphate receptor (cation dependent)
hsa-miR-513a-3p	1	0	1	0	1	1	MXD1	MAX dimerization protein 1
hsa-miR-513a-3p	0	0	1	1	1	1	MRC1	mannose receptor, C type 1
hsa-miR-513a-3p	0	0	1	1	1	1	MSH3	mutS homolog 3 (E. coli)
hsa-miR-513a-3p	1	0	1	1	1	1	MSN	moesin
hsa-miR-513a-3p	0	0	1	1	1	1	MSX1	msh homeobox 1
hsa-miR-513a-3p	0	0	1	1	1	1	NID1	nidogen 1
hsa-miR-513a-3p	1	0	1	1	1	1	NPAT	nuclear protein, ataxia-telangiectasia locus
hsa-miR-513a-3p	1	0	1	1	1	1	NPTX2	neuronal pentraxin II
hsa-miR-513a-3p	0	0	1	1	0	0	NTSR1	neurotensin receptor 1 (high affinity)
hsa-miR-513a-3p	0	0	1	0	1	1	OAZ2	ornithine decarboxylase antizyme 2
hsa-miR-513a-3p	1	0	1	0	1	1	PAK2	p21 protein (Cdc42/Rac)-activated kinase 2
hsa-miR-513a-3p	1	0	1	0	1	1	PAPPA	pregnancy-associated plasma protein A, pappalysin 1
hsa-miR-513a-3p	0	0	1	1	1	1	PBX1	pre-B-cell leukemia homeobox 1
hsa-miR-513a-3p	1	0	1	1	1	1	PBX2	pre-B-cell leukemia homeobox 2
hsa-miR-513a-3p	1	0	1	1	1	1	PCDH8	protocadherin 8
hsa-miR-513a-3p	0	0	1	1	1	1	PCK1	phosphoenolpyruvate carboxykinase 1 (soluble)
hsa-miR-513a-3p	1	0	1	0	1	1	CDK17	cyclin-dependent kinase 17
hsa-miR-513a-3p	0	0	1	1	1	1	PDE7A	phosphodiesterase 7A
hsa-miR-513a-3p	1	0	1	1	1	1	PHB	prohibitin
hsa-miR-513a-3p	1	0	1	1	1	1	PIGR	polymeric immunoglobulin receptor
hsa-miR-513a-3p	0	0	1	1	1	1	PIM1	pim-1 oncogene
hsa-miR-513a-3p	0	0	1	1	0	0	PIP	prolactin-induced protein
hsa-miR-513a-3p	1	0	1	1	1	1	PPP1CB	protein phosphatase 1, catalytic subunit, beta isozyme
hsa-miR-513a-3p	0	0	1	1	1	1	PPP1R3A	protein phosphatase 1, regulatory subunit 3A
hsa-miR-513a-3p	0	0	1	1	0	0	PPP1R8	protein phosphatase 1, regulatory subunit 8
hsa-miR-513a-3p	1	0	1	1	1	1	PPP2CA	protein phosphatase 2, catalytic subunit, alpha isozyme
hsa-miR-513a-3p	1	0	1	1	1	1	PPP6C	protein phosphatase 6, catalytic subunit
hsa-miR-513a-3p	0	0	1	1	1	1	SRGN	serglycin
hsa-miR-513a-3p	1	0	1	1	1	1	MAPK6	mitogen-activated protein kinase 6
hsa-miR-513a-3p	0	0	1	1	1	1	MAP2K1	mitogen-activated protein kinase kinase 1
hsa-miR-513a-3p	0	0	1	1	0	0	PSMC6	proteasome (prosome, macropain) 26S subunit, ATPase, 6
hsa-miR-513a-3p	0	0	1	1	0	0	PSMD11	proteasome (prosome, macropain) 26S subunit, non-ATPase, 11
hsa-miR-513a-3p	1	0	1	1	1	1	PTPN2	protein tyrosine phosphatase, non-receptor type 2
hsa-miR-513a-3p	1	0	1	1	1	1	PTPN4	protein tyrosine phosphatase, non-receptor type 4 (megakaryocyte)
hsa-miR-513a-3p	0	0	1	1	1	1	PTPN12	protein tyrosine phosphatase, non-receptor type 12
hsa-miR-513a-3p	0	0	1	1	1	1	PTPRC	protein tyrosine phosphatase, receptor type, C
hsa-miR-513a-3p	0	0	1	1	1	1	PTPRM	protein tyrosine phosphatase, receptor type, M
hsa-miR-513a-3p	1	0	1	1	1	1	RAD23B	RAD23 homolog B (S. cerevisiae)
hsa-miR-513a-3p	1	0	1	1	1	1	ARID4A	AT rich interactive domain 4A (RBP1-like)
hsa-miR-513a-3p	1	0	1	1	1	1	ROBO2	roundabout, axon guidance receptor, homolog 2 (Drosophila)
hsa-miR-513a-3p	0	0	1	1	1	1	SDC2	syndecan 2
hsa-miR-513a-3p	0	0	1	1	1	1	SDHD	succinate dehydrogenase complex, subunit D, integral membrane protein
hsa-miR-513a-3p	1	0	1	1	1	1	SRSF2	serine/arginine-rich splicing factor 2
hsa-miR-513a-3p	1	0	1	1	1	1	SLC9A2	solute carrier family 9, subfamily A (NHE2, cation proton antiporter 2), member 2
hsa-miR-513a-3p	0	0	1	1	1	1	SMARCA1	SWI/SNF related, matrix associated, actin dependent regulator of chromatin, subfamily a, member 1
hsa-miR-513a-3p	1	0	1	1	1	1	SMARCC1	SWI/SNF related, matrix associated, actin dependent regulator of chromatin, subfamily c, member 1
hsa-miR-513a-3p	1	0	1	1	1	1	SMARCD2	SWI/SNF related, matrix associated, actin dependent regulator of chromatin, subfamily d, member 2
hsa-miR-513a-3p	1	0	1	1	1	1	SOX2	SRY (sex determining region Y)-box 2
hsa-miR-513a-3p	1	0	1	0	1	1	SOX11	SRY (sex determining region Y)-box 11
hsa-miR-513a-3p	0	0	1	1	1	1	SP100	SP100 nuclear antigen
hsa-miR-513a-3p	0	0	1	1	1	1	UAP1	UDP-N-acteylglucosamine pyrophosphorylase 1
hsa-miR-513a-3p	0	0	1	1	1	1	SPIB	Spi-B transcription factor (Spi-1/PU.1 related)
hsa-miR-513a-3p	0	0	1	1	1	1	SPTA1	spectrin, alpha, erythrocytic 1 (elliptocytosis 2)
hsa-miR-513a-3p	1	0	1	1	1	1	SRF	serum response factor (c-fos serum response element-binding transcription factor)
hsa-miR-513a-3p	0	0	1	1	1	1	STAT5A	signal transducer and activator of transcription 5A
hsa-miR-513a-3p	1	0	1	1	1	1	SYN2	synapsin II
hsa-miR-513a-3p	0	0	1	1	1	1	TAF2	TAF2 RNA polymerase II, TATA box binding protein (TBP)-associated factor, 150kDa
hsa-miR-513a-3p	1	0	1	1	1	1	TAF4	TAF4 RNA polymerase II, TATA box binding protein (TBP)-associated factor, 135kDa
hsa-miR-513a-3p	1	0	1	0	1	1	TAL1	T-cell acute lymphocytic leukemia 1
hsa-miR-513a-3p	1	0	1	1	1	1	TFAP4	transcription factor AP-4 (activating enhancer binding protein 4)
hsa-miR-513a-3p	1	0	1	0	1	1	THBS1	thrombospondin 1
hsa-miR-513a-3p	1	0	1	0	1	1	SEC62	SEC62 homolog (S. cerevisiae)
hsa-miR-513a-3p	1	0	1	1	1	1	TRAPPC10	trafficking protein particle complex 10
hsa-miR-513a-3p	0	0	1	1	1	1	TPP2	tripeptidyl peptidase II
hsa-miR-513a-3p	1	0	1	1	1	1	HSP90B1	heat shock protein 90kDa beta (Grp94), member 1
hsa-miR-513a-3p	1	0	1	0	1	1	TSPYL1	TSPY-like 1
hsa-miR-513a-3p	0	0	1	1	0	0	HIRA	HIR histone cell cycle regulation defective homolog A (S. cerevisiae)
hsa-miR-513a-3p	1	0	1	0	1	1	UBE2D2	ubiquitin-conjugating enzyme E2D 2
hsa-miR-513a-3p	1	0	1	1	1	1	UBE2D3	ubiquitin-conjugating enzyme E2D 3
hsa-miR-513a-3p	0	0	1	1	1	1	UBE2E1	ubiquitin-conjugating enzyme E2E 1
hsa-miR-513a-3p	1	0	1	1	1	1	UBE2H	ubiquitin-conjugating enzyme E2H
hsa-miR-513a-3p	1	0	1	1	1	1	DEK	DEK oncogene
hsa-miR-513a-3p	0	0	1	1	1	1	STAM	signal transducing adaptor molecule (SH3 domain and ITAM motif) 1
hsa-miR-513a-3p	1	0	1	1	1	1	CUL5	cullin 5
hsa-miR-513a-3p	1	0	1	1	1	1	TAF15	TAF15 RNA polymerase II, TATA box binding protein (TBP)-associated factor, 68kDa
hsa-miR-513a-3p	1	0	1	1	1	1	AKAP1	A kinase (PRKA) anchor protein 1
hsa-miR-513a-3p	1	0	1	1	1	1	NRIP1	nuclear receptor interacting protein 1
hsa-miR-513a-3p	1	0	1	1	1	1	FZD1	frizzled family receptor 1
hsa-miR-513a-3p	1	0	1	1	1	1	FZD7	frizzled family receptor 7
hsa-miR-513a-3p	0	0	1	1	1	1	PIP5K1A	phosphatidylinositol-4-phosphate 5-kinase, type I, alpha
hsa-miR-513a-3p	0	0	1	1	1	1	PIP5K1B	phosphatidylinositol-4-phosphate 5-kinase, type I, beta
hsa-miR-513a-3p	0	0	1	1	1	1	NSMAF	neutral sphingomyelinase (N-SMase) activation associated factor
hsa-miR-513a-3p	0	0	1	1	0	0	DUSP11	dual specificity phosphatase 11 (RNA/RNP complex 1-interacting)
hsa-miR-513a-3p	1	0	1	0	1	1	CUL3	cullin 3
hsa-miR-513a-3p	0	0	1	1	1	1	TPST1	tyrosylprotein sulfotransferase 1
hsa-miR-513a-3p	1	0	1	1	1	1	SUPT3H	suppressor of Ty 3 homolog (S. cerevisiae)
hsa-miR-513a-3p	0	0	1	1	0	0	SMARCA5	SWI/SNF related, matrix associated, actin dependent regulator of chromatin, subfamily a, member 5
hsa-miR-513a-3p	0	0	1	1	1	1	RGS5	regulator of G-protein signaling 5
hsa-miR-513a-3p	1	0	1	1	1	1	PPM1D	protein phosphatase, Mg2+/Mn2+ dependent, 1D
hsa-miR-513a-3p	0	0	1	1	1	1	CHST1	carbohydrate (keratan sulfate Gal-6) sulfotransferase 1
hsa-miR-513a-3p	0	0	1	1	1	1	BLZF1	basic leucine zipper nuclear factor 1
hsa-miR-513a-3p	1	0	1	0	1	1	IRS2	insulin receptor substrate 2
hsa-miR-513a-3p	1	0	1	1	1	1	SRSF9	serine/arginine-rich splicing factor 9
hsa-miR-513a-3p	0	0	1	1	0	0	KRT36	keratin 36
hsa-miR-513a-3p	0	0	1	1	1	1	JRKL	jerky homolog-like (mouse)
hsa-miR-513a-3p	1	0	1	1	1	1	B3GALT2	UDP-Gal:betaGlcNAc beta 1,3-galactosyltransferase, polypeptide 2
hsa-miR-513a-3p	0	0	1	1	1	1	SNX4	sorting nexin 4
hsa-miR-513a-3p	1	0	1	1	1	1	NR5A2	nuclear receptor subfamily 5, group A, member 2
hsa-miR-513a-3p	1	0	1	1	1	1	RIOK3	RIO kinase 3 (yeast)
hsa-miR-513a-3p	0	0	1	1	1	1	TNFRSF11A	tumor necrosis factor receptor superfamily, member 11a, NFKB activator
hsa-miR-513a-3p	1	0	1	1	1	1	FUBP1	far upstream element (FUSE) binding protein 1
hsa-miR-513a-3p	0	0	1	1	1	1	PRPF4B	PRP4 pre-mRNA processing factor 4 homolog B (yeast)
hsa-miR-513a-3p	1	0	1	0	1	1	WASL	Wiskott-Aldrich syndrome-like
hsa-miR-513a-3p	0	0	1	1	1	1	MPZL1	myelin protein zero-like 1
hsa-miR-513a-3p	0	0	1	1	0	0	CCRL2	chemokine (C-C motif) receptor-like 2
hsa-miR-513a-3p	1	0	1	1	1	1	MAP7	microtubule-associated protein 7
hsa-miR-513a-3p	0	0	1	0	1	1	RHOB	ras homolog family member B
hsa-miR-513a-3p	1	0	1	1	1	1	BCL2L2	BCL2-like 2
hsa-miR-513a-3p	1	0	1	1	1	1	CDH12	cadherin 12, type 2 (N-cadherin 2)
hsa-miR-513a-3p	0	0	1	1	1	1	CDKN1B	cyclin-dependent kinase inhibitor 1B (p27, Kip1)
hsa-miR-513a-3p	1	0	1	0	1	1	DGKB	diacylglycerol kinase, beta 90kDa
hsa-miR-513a-3p	1	0	1	1	1	1	EFNB2	ephrin-B2
hsa-miR-513a-3p	1	0	1	1	1	1	EYA4	eyes absent homolog 4 (Drosophila)
hsa-miR-513a-3p	0	0	1	1	1	1	PTK2B	PTK2B protein tyrosine kinase 2 beta
hsa-miR-513a-3p	0	0	1	0	1	1	FASN	fatty acid synthase
hsa-miR-513a-3p	1	0	1	1	1	1	FGF12	fibroblast growth factor 12
hsa-miR-513a-3p	1	0	1	1	1	1	GMFB	glia maturation factor, beta
hsa-miR-513a-3p	0	0	1	1	1	1	GNG11	guanine nucleotide binding protein (G protein), gamma 11
hsa-miR-513a-3p	0	0	1	0	1	1	HABP2	hyaluronan binding protein 2
hsa-miR-513a-3p	1	0	1	1	1	1	PPP2CB	protein phosphatase 2, catalytic subunit, beta isozyme
hsa-miR-513a-3p	1	0	1	1	1	1	SHMT1	serine hydroxymethyltransferase 1 (soluble)
hsa-miR-513a-3p	0	0	1	1	1	1	SLC1A1	solute carrier family 1 (neuronal/epithelial high affinity glutamate transporter, system Xag), member 1
hsa-miR-513a-3p	1	0	1	0	1	1	SLC1A2	solute carrier family 1 (glial high affinity glutamate transporter), member 2
hsa-miR-513a-3p	1	0	1	1	1	1	STK17B	serine/threonine kinase 17b
hsa-miR-513a-3p	1	0	1	0	1	1	MED14	mediator complex subunit 14
hsa-miR-513a-3p	1	0	1	1	1	1	SOCS6	suppressor of cytokine signaling 6
hsa-miR-513a-3p	1	0	1	1	1	1	MED21	mediator complex subunit 21
hsa-miR-513a-3p	1	0	1	1	1	1	MED17	mediator complex subunit 17
hsa-miR-513a-3p	0	0	1	1	1	1	HOMER1	homer homolog 1 (Drosophila)
hsa-miR-513a-3p	1	0	1	1	1	1	SLC25A27	solute carrier family 25, member 27
hsa-miR-513a-3p	1	0	1	0	1	1	GTPBP1	GTP binding protein 1
hsa-miR-513a-3p	1	0	1	1	1	1	GDA	guanine deaminase
hsa-miR-513a-3p	1	0	1	0	1	1	RUNX1T1	runt-related transcription factor 1; translocated to, 1 (cyclin D-related)
hsa-miR-513a-3p	0	0	1	1	1	1	COPA	coatomer protein complex, subunit alpha
hsa-miR-513a-3p	0	0	1	1	0	0	CPT1B	carnitine palmitoyltransferase 1B (muscle)
hsa-miR-513a-3p	1	0	1	1	1	1	CREB1	cAMP responsive element binding protein 1
hsa-miR-513a-3p	1	0	1	1	1	1	ATF6B	activating transcription factor 6 beta
hsa-miR-513a-3p	1	0	1	1	1	1	DACH1	dachshund homolog 1 (Drosophila)
hsa-miR-513a-3p	1	0	1	1	1	1	DVL2	dishevelled, dsh homolog 2 (Drosophila)
hsa-miR-513a-3p	1	0	1	1	1	1	EGR3	early growth response 3
hsa-miR-513a-3p	1	0	1	1	1	1	EPHB2	EPH receptor B2
hsa-miR-513a-3p	1	0	1	1	1	1	EPS8	epidermal growth factor receptor pathway substrate 8
hsa-miR-513a-3p	1	0	1	1	1	1	ACSL3	acyl-CoA synthetase long-chain family member 3
hsa-miR-513a-3p	1	0	1	0	1	1	ACSL4	acyl-CoA synthetase long-chain family member 4
hsa-miR-513a-3p	1	0	1	0	1	1	FGF5	fibroblast growth factor 5
hsa-miR-513a-3p	0	0	1	1	1	1	GPC5	glypican 5
hsa-miR-513a-3p	0	0	1	1	1	1	GCSH	glycine cleavage system protein H (aminomethyl carrier)
hsa-miR-513a-3p	0	0	1	1	1	1	FOXA1	forkhead box A1
hsa-miR-513a-3p	1	0	1	1	1	1	FOXK2	forkhead box K2
hsa-miR-513a-3p	1	0	1	1	1	1	ILF2	interleukin enhancer binding factor 2, 45kDa
hsa-miR-513a-3p	1	0	1	0	1	1	PKNOX1	PBX/knotted 1 homeobox 1
hsa-miR-513a-3p	0	0	1	0	1	1	POU4F2	POU class 4 homeobox 2
hsa-miR-513a-3p	0	0	1	1	1	1	TK2	thymidine kinase 2, mitochondrial
hsa-miR-513a-3p	0	0	1	1	1	1	PABPN1	poly(A) binding protein, nuclear 1
hsa-miR-513a-3p	1	0	1	0	1	1	USP9Y	ubiquitin specific peptidase 9, Y-linked
hsa-miR-513a-3p	1	0	1	1	1	1	RAB11A	RAB11A, member RAS oncogene family
hsa-miR-513a-3p	0	0	1	0	1	1	BPY2	basic charge, Y-linked, 2
hsa-miR-513a-3p	0	0	1	1	0	0	RGN	regucalcin (senescence marker protein-30)
hsa-miR-513a-3p	0	0	1	1	1	1	LATS1	LATS, large tumor suppressor, homolog 1 (Drosophila)
hsa-miR-513a-3p	0	0	1	0	1	1	CXorf1	chromosome X open reading frame 1
hsa-miR-513a-3p	1	0	1	1	1	1	SCAF11	SR-related CTD-associated factor 11
hsa-miR-513a-3p	1	0	1	1	1	1	LARGE	like-glycosyltransferase
hsa-miR-513a-3p	0	0	1	1	1	1	GCM2	glial cells missing homolog 2 (Drosophila)
hsa-miR-513a-3p	1	0	1	1	1	1	RPS6KA5	ribosomal protein S6 kinase, 90kDa, polypeptide 5
hsa-miR-513a-3p	1	0	1	1	1	1	SNAP29	synaptosomal-associated protein, 29kDa
hsa-miR-513a-3p	0	0	1	0	1	1	ADIPOQ	adiponectin, C1Q and collagen domain containing
hsa-miR-513a-3p	0	0	1	1	1	1	TJP2	tight junction protein 2
hsa-miR-513a-3p	0	0	1	1	1	1	CYP7B1	cytochrome P450, family 7, subfamily B, polypeptide 1
hsa-miR-513a-3p	1	0	1	0	1	1	CDYL	chromodomain protein, Y-like
hsa-miR-513a-3p	1	0	1	1	1	1	ONECUT2	one cut homeobox 2
hsa-miR-513a-3p	0	0	1	1	1	1	CALB1	calbindin 1, 28kDa
hsa-miR-513a-3p	0	0	1	0	1	1	DSC2	desmocollin 2
hsa-miR-513a-3p	0	0	1	1	1	1	JAK2	Janus kinase 2
hsa-miR-513a-3p	1	0	1	1	1	1	JARID2	jumonji, AT rich interactive domain 2
hsa-miR-513a-3p	0	0	1	1	1	1	NDUFA5	NADH dehydrogenase (ubiquinone) 1 alpha subcomplex, 5, 13kDa
hsa-miR-513a-3p	0	0	1	1	0	0	NDUFB8	NADH dehydrogenase (ubiquinone) 1 beta subcomplex, 8, 19kDa
hsa-miR-513a-3p	0	0	1	1	1	1	PRCP	prolylcarboxypeptidase (angiotensinase C)
hsa-miR-513a-3p	1	0	1	1	1	1	RELN	reelin
hsa-miR-513a-3p	0	0	1	1	1	1	PSMD5	proteasome (prosome, macropain) 26S subunit, non-ATPase, 5
hsa-miR-513a-3p	0	0	1	1	1	1	RGPD5	RANBP2-like and GRIP domain containing 5
hsa-miR-513a-3p	0	0	1	1	1	1	SIM1	single-minded homolog 1 (Drosophila)
hsa-miR-513a-3p	1	0	1	1	1	1	MED13	mediator complex subunit 13
hsa-miR-513a-3p	1	0	1	0	1	1	NUP153	nucleoporin 153kDa
hsa-miR-513a-3p	0	0	1	1	1	1	GIF	gastric intrinsic factor (vitamin B synthesis)
hsa-miR-513a-3p	1	0	1	1	1	1	BMI1	BMI1 polycomb ring finger oncogene
hsa-miR-513a-3p	1	0	1	1	1	1	CBL	Cbl proto-oncogene, E3 ubiquitin protein ligase
hsa-miR-513a-3p	1	0	1	1	1	1	FOXN3	forkhead box N3
hsa-miR-513a-3p	1	0	1	1	1	1	ARID3A	AT rich interactive domain 3A (BRIGHT-like)
hsa-miR-513a-3p	1	0	1	1	1	1	ELK3	ELK3, ETS-domain protein (SRF accessory protein 2)
hsa-miR-513a-3p	0	0	1	0	1	1	EPHA3	EPH receptor A3
hsa-miR-513a-3p	1	0	1	1	1	1	GABPB1	GA binding protein transcription factor, beta subunit 1
hsa-miR-513a-3p	0	0	1	1	1	1	MSTN	myostatin
hsa-miR-513a-3p	1	0	1	1	1	1	GEM	GTP binding protein overexpressed in skeletal muscle
hsa-miR-513a-3p	1	0	1	1	1	1	GFRA1	GDNF family receptor alpha 1
hsa-miR-513a-3p	1	0	1	1	1	1	GJA5	gap junction protein, alpha 5, 40kDa
hsa-miR-513a-3p	0	0	1	1	0	0	GLI1	GLI family zinc finger 1
hsa-miR-513a-3p	1	0	1	1	1	1	GPM6A	glycoprotein M6A
hsa-miR-513a-3p	0	0	1	1	1	1	GRK5	G protein-coupled receptor kinase 5
hsa-miR-513a-3p	0	0	1	1	1	1	ITGAD	integrin, alpha D
hsa-miR-513a-3p	1	0	1	1	1	1	NEFM	neurofilament, medium polypeptide
hsa-miR-513a-3p	1	0	1	0	1	1	PRKCE	protein kinase C, epsilon
hsa-miR-513a-3p	1	0	1	1	1	1	RALA	v-ral simian leukemia viral oncogene homolog A (ras related)
hsa-miR-513a-3p	1	0	1	0	1	1	SRC	v-src sarcoma (Schmidt-Ruppin A-2) viral oncogene homolog (avian)
hsa-miR-513a-3p	0	0	1	1	1	1	MALL	mal, T-cell differentiation protein-like
hsa-miR-513a-3p	1	0	1	0	1	1	CCDC6	coiled-coil domain containing 6
hsa-miR-513a-3p	1	0	1	1	1	1	AKT3	v-akt murine thymoma viral oncogene homolog 3 (protein kinase B, gamma)
hsa-miR-513a-3p	1	0	1	1	1	1	KCNE3	potassium voltage-gated channel, Isk-related family, member 3
hsa-miR-513a-3p	0	0	1	1	1	1	INSL5	insulin-like 5
hsa-miR-513a-3p	1	0	1	1	1	1	PIGK	phosphatidylinositol glycan anchor biosynthesis, class K
hsa-miR-513a-3p	1	0	1	1	1	1	GTF2E1	general transcription factor IIE, polypeptide 1, alpha 56kDa
hsa-miR-513a-3p	1	0	1	1	1	1	HOXA1	homeobox A1
hsa-miR-513a-3p	0	0	1	1	1	1	HSD11B1	hydroxysteroid (11-beta) dehydrogenase 1
hsa-miR-513a-3p	1	0	1	1	1	1	IRS1	insulin receptor substrate 1
hsa-miR-513a-3p	0	0	1	1	1	1	LMAN1	lectin, mannose-binding, 1
hsa-miR-513a-3p	0	0	1	1	0	0	LMNB1	lamin B1
hsa-miR-513a-3p	1	0	1	1	1	1	MAB21L1	mab-21-like 1 (C. elegans)
hsa-miR-513a-3p	1	0	1	1	1	1	MYF5	myogenic factor 5
hsa-miR-513a-3p	0	0	1	0	1	1	POU3F2	POU class 3 homeobox 2
hsa-miR-513a-3p	0	0	1	1	1	1	SSX1	synovial sarcoma, X breakpoint 1
hsa-miR-513a-3p	0	0	1	1	0	0	VDAC3	voltage-dependent anion channel 3
hsa-miR-513a-3p	0	0	1	1	1	1	MKRN3	makorin ring finger protein 3
hsa-miR-513a-3p	1	0	1	1	1	1	ST8SIA4	ST8 alpha-N-acetyl-neuraminide alpha-2,8-sialyltransferase 4
hsa-miR-513a-3p	0	0	1	1	1	1	GPR52	G protein-coupled receptor 52
hsa-miR-513a-3p	0	0	1	1	1	1	ARPC3	actin related protein 2/3 complex, subunit 3, 21kDa
hsa-miR-513a-3p	0	0	1	1	1	1	ACTR3	ARP3 actin-related protein 3 homolog (yeast)
hsa-miR-513a-3p	1	0	1	1	1	1	ACTR1A	ARP1 actin-related protein 1 homolog A, centractin alpha (yeast)
hsa-miR-513a-3p	0	0	1	1	1	1	RNF41	ring finger protein 41
hsa-miR-513a-3p	0	0	1	1	1	1	NUTF2	nuclear transport factor 2
hsa-miR-513a-3p	1	0	1	1	1	1	PRKD3	protein kinase D3
hsa-miR-513a-3p	1	0	1	0	1	1	DCAF7	DDB1 and CUL4 associated factor 7
hsa-miR-513a-3p	0	0	1	0	1	1	STAM2	signal transducing adaptor molecule (SH3 domain and ITAM motif) 2
hsa-miR-513a-3p	1	0	1	1	1	1	PURA	purine-rich element binding protein A
hsa-miR-513a-3p	0	0	1	1	1	1	BCAS2	breast carcinoma amplified sequence 2
hsa-miR-513a-3p	1	0	1	1	1	1	GOLGA3	golgin A3
hsa-miR-513a-3p	1	0	1	1	1	1	MAP3K5	mitogen-activated protein kinase kinase kinase 5
hsa-miR-513a-3p	1	0	1	1	0	0	MLLT1	myeloid/lymphoid or mixed-lineage leukemia (trithorax homolog, Drosophila); translocated to, 1
hsa-miR-513a-3p	1	0	1	1	1	1	MMP16	matrix metallopeptidase 16 (membrane-inserted)
hsa-miR-513a-3p	0	0	1	1	1	1	MT1A	metallothionein 1A
hsa-miR-513a-3p	1	0	1	1	1	1	MTF1	metal-regulatory transcription factor 1
hsa-miR-513a-3p	1	0	1	0	1	1	NAB1	NGFI-A binding protein 1 (EGR1 binding protein 1)
hsa-miR-513a-3p	1	0	1	1	1	1	RNF6	ring finger protein (C3H2C3 type) 6
hsa-miR-513a-3p	0	0	1	1	1	1	STK10	serine/threonine kinase 10
hsa-miR-513a-3p	1	0	1	1	1	1	TBX3	T-box 3
hsa-miR-513a-3p	1	0	1	1	1	1	TSNAX	translin-associated factor X
hsa-miR-513a-3p	0	0	1	1	1	1	TSC22D1	TSC22 domain family, member 1
hsa-miR-513a-3p	1	0	1	0	1	1	HDAC4	histone deacetylase 4
hsa-miR-513a-3p	1	0	1	1	1	1	HS3ST4	heparan sulfate (glucosamine) 3-O-sulfotransferase 4
hsa-miR-513a-3p	0	0	1	1	0	0	PKDREJ	polycystic kidney disease (polycystin) and REJ homolog (sperm receptor for egg jelly homolog, sea urchin)
hsa-miR-513a-3p	1	0	1	1	1	1	CITED2	Cbp/p300-interacting transactivator, with Glu/Asp-rich carboxy-terminal domain, 2
hsa-miR-513a-3p	1	0	1	1	1	1	SEMA3A	sema domain, immunoglobulin domain (Ig), short basic domain, secreted, (semaphorin) 3A
hsa-miR-513a-3p	1	0	1	1	1	1	SPON1	spondin 1, extracellular matrix protein
hsa-miR-513a-3p	1	0	1	1	1	1	TMEM50B	transmembrane protein 50B
hsa-miR-513a-3p	1	0	1	1	1	1	CAPZA2	capping protein (actin filament) muscle Z-line, alpha 2
hsa-miR-513a-3p	0	0	1	1	1	1	CSF2RA	colony stimulating factor 2 receptor, alpha, low-affinity (granulocyte-macrophage)
hsa-miR-513a-3p	0	0	1	1	1	1	IRF6	interferon regulatory factor 6
hsa-miR-513a-3p	1	0	1	1	1	1	LASP1	LIM and SH3 protein 1
hsa-miR-513a-3p	0	0	1	1	0	0	PDE6H	phosphodiesterase 6H, cGMP-specific, cone, gamma
hsa-miR-513a-3p	1	0	1	1	1	1	PDGFRA	platelet-derived growth factor receptor, alpha polypeptide
hsa-miR-513a-3p	1	0	1	0	1	1	PPP1R2	protein phosphatase 1, regulatory (inhibitor) subunit 2
hsa-miR-513a-3p	0	0	1	1	1	1	PPP2R5A	protein phosphatase 2, regulatory subunit B', alpha
hsa-miR-513a-3p	1	0	1	1	1	1	PKN2	protein kinase N2
hsa-miR-513a-3p	0	0	1	1	1	1	PROP1	PROP paired-like homeobox 1
hsa-miR-513a-3p	1	0	1	0	1	1	SRSF6	serine/arginine-rich splicing factor 6
hsa-miR-513a-3p	1	0	1	1	1	1	STK4	serine/threonine kinase 4
hsa-miR-513a-3p	0	0	1	0	1	1	ZNF192	zinc finger protein 192
hsa-miR-513a-3p	1	0	1	1	1	1	NPEPPS	aminopeptidase puromycin sensitive
hsa-miR-513a-3p	0	0	1	1	0	0	RBM14	RNA binding motif protein 14
hsa-miR-513a-3p	1	0	1	1	1	1	TIMM17A	translocase of inner mitochondrial membrane 17 homolog A (yeast)
hsa-miR-513a-3p	1	0	1	1	1	1	ZER1	zer-1 homolog (C. elegans)
hsa-miR-513a-3p	0	0	1	1	1	1	SLC30A9	solute carrier family 30 (zinc transporter), member 9
hsa-miR-513a-3p	0	0	1	1	1	1	SLC25A17	solute carrier family 25 (mitochondrial carrier; peroxisomal membrane protein, 34kDa), member 17
hsa-miR-513a-3p	1	0	1	1	1	1	SEC23A	Sec23 homolog A (S. cerevisiae)
hsa-miR-513a-3p	1	0	1	0	1	1	APPBP2	amyloid beta precursor protein (cytoplasmic tail) binding protein 2
hsa-miR-513a-3p	0	0	1	1	0	0	CIB1	calcium and integrin binding 1 (calmyrin)
hsa-miR-513a-3p	1	0	1	1	1	1	NEBL	nebulette
hsa-miR-513a-3p	1	0	1	1	1	1	SLC35A1	solute carrier family 35 (CMP-sialic acid transporter), member A1
hsa-miR-513a-3p	1	0	1	0	1	1	ARFGEF2	ADP-ribosylation factor guanine nucleotide-exchange factor 2 (brefeldin A-inhibited)
hsa-miR-513a-3p	0	0	1	1	1	1	NPC2	Niemann-Pick disease, type C2
hsa-miR-513a-3p	0	0	1	1	0	0	STAMBP	STAM binding protein
hsa-miR-513a-3p	1	0	1	0	1	1	POLR3G	polymerase (RNA) III (DNA directed) polypeptide G (32kD)
hsa-miR-513a-3p	1	0	1	0	1	1	GNAI3	guanine nucleotide binding protein (G protein), alpha inhibiting activity polypeptide 3
hsa-miR-513a-3p	0	0	1	1	0	0	YEATS4	YEATS domain containing 4
hsa-miR-513a-3p	1	0	1	0	1	1	NCOA2	nuclear receptor coactivator 2
hsa-miR-513a-3p	1	0	1	0	1	1	IGF2BP1	insulin-like growth factor 2 mRNA binding protein 1
hsa-miR-513a-3p	0	0	1	1	1	1	CCT6B	chaperonin containing TCP1, subunit 6B (zeta 2)
hsa-miR-513a-3p	1	0	1	1	1	1	PHTF1	putative homeodomain transcription factor 1
hsa-miR-513a-3p	1	0	1	1	1	1	MAP3K2	mitogen-activated protein kinase kinase kinase 2
hsa-miR-513a-3p	1	0	1	1	1	1	ZBTB6	zinc finger and BTB domain containing 6
hsa-miR-513a-3p	0	0	1	1	1	1	SMR3B	submaxillary gland androgen regulated protein 3B
hsa-miR-513a-3p	1	0	1	1	1	1	MAN1A2	mannosidase, alpha, class 1A, member 2
hsa-miR-513a-3p	1	0	1	1	1	1	DIAPH2	diaphanous homolog 2 (Drosophila)
hsa-miR-513a-3p	1	0	1	1	1	1	PPP1R1A	protein phosphatase 1, regulatory (inhibitor) subunit 1A
hsa-miR-513a-3p	1	0	1	1	1	1	SNTB2	syntrophin, beta 2 (dystrophin-associated protein A1, 59kDa, basic component 2)
hsa-miR-513a-3p	0	0	1	1	1	1	SYPL1	synaptophysin-like 1
hsa-miR-513a-3p	1	0	1	1	1	1	BTG2	BTG family, member 2
hsa-miR-513a-3p	1	0	1	0	1	1	SYNGAP1	synaptic Ras GTPase activating protein 1
hsa-miR-513a-3p	0	0	1	1	1	1	INMT	indolethylamine N-methyltransferase
hsa-miR-513a-3p	1	0	1	1	1	1	ZBTB33	zinc finger and BTB domain containing 33
hsa-miR-513a-3p	1	0	1	1	1	1	PRDX3	peroxiredoxin 3
hsa-miR-513a-3p	1	0	1	1	1	1	SF3A3	splicing factor 3a, subunit 3, 60kDa
hsa-miR-513a-3p	0	0	1	1	0	0	HNRNPA0	heterogeneous nuclear ribonucleoprotein A0
hsa-miR-513a-3p	1	0	1	1	1	1	CBX1	chromobox homolog 1
hsa-miR-513a-3p	1	0	1	1	1	1	SEC61B	Sec61 beta subunit
hsa-miR-513a-3p	0	0	1	1	1	1	RAB40B	RAB40B, member RAS oncogene family
hsa-miR-513a-3p	0	0	1	1	1	1	TMED10	transmembrane emp24-like trafficking protein 10 (yeast)
hsa-miR-513a-3p	1	0	1	1	1	1	FERMT2	fermitin family member 2
hsa-miR-513a-3p	1	0	1	1	1	1	RIT1	Ras-like without CAAX 1
hsa-miR-513a-3p	1	0	1	1	0	0	RNF5	ring finger protein 5, E3 ubiquitin protein ligase
hsa-miR-513a-3p	1	0	1	1	1	1	RP2	retinitis pigmentosa 2 (X-linked recessive)
hsa-miR-513a-3p	1	0	1	1	1	1	SCN1A	sodium channel, voltage-gated, type I, alpha subunit
hsa-miR-513a-3p	1	0	1	0	1	1	SLC2A3	solute carrier family 2 (facilitated glucose transporter), member 3
hsa-miR-513a-3p	1	0	1	0	1	1	SLC5A3	solute carrier family 5 (sodium/myo-inositol cotransporter), member 3
hsa-miR-513a-3p	0	0	1	1	1	1	SNRPD1	small nuclear ribonucleoprotein D1 polypeptide 16kDa
hsa-miR-513a-3p	1	0	1	0	1	1	SOX12	SRY (sex determining region Y)-box 12
hsa-miR-513a-3p	0	0	1	1	1	1	TAF5	TAF5 RNA polymerase II, TATA box binding protein (TBP)-associated factor, 100kDa
hsa-miR-513a-3p	1	0	1	0	1	1	PAPD7	PAP associated domain containing 7
hsa-miR-513a-3p	1	0	1	1	1	1	SOX30	SRY (sex determining region Y)-box 30
hsa-miR-513a-3p	1	0	1	1	1	1	ESM1	endothelial cell-specific molecule 1
hsa-miR-513a-3p	1	0	1	1	1	1	ADAMTS5	ADAM metallopeptidase with thrombospondin type 1 motif, 5
hsa-miR-513a-3p	0	0	1	0	1	1	KRR1	KRR1, small subunit (SSU) processome component, homolog (yeast)
hsa-miR-513a-3p	1	0	1	1	1	1	UBL3	ubiquitin-like 3
hsa-miR-513a-3p	1	0	1	1	1	1	SSR3	signal sequence receptor, gamma (translocon-associated protein gamma)
hsa-miR-513a-3p	1	0	1	1	1	1	TMF1	TATA element modulatory factor 1
hsa-miR-513a-3p	1	0	1	1	1	1	UTRN	utrophin
hsa-miR-513a-3p	1	0	1	1	1	1	UTY	ubiquitously transcribed tetratricopeptide repeat gene, Y-linked
hsa-miR-513a-3p	1	0	1	1	1	1	ZNF81	zinc finger protein 81
hsa-miR-513a-3p	0	0	1	1	1	1	ZNF146	zinc finger protein 146
hsa-miR-513a-3p	1	0	1	1	1	1	VEZF1	vascular endothelial zinc finger 1
hsa-miR-513a-3p	0	0	1	0	1	1	ZXDB	zinc finger, X-linked, duplicated B
hsa-miR-513a-3p	1	0	1	1	1	1	ERLIN2	ER lipid raft associated 2
hsa-miR-513a-3p	0	0	1	1	1	1	WBP4	WW domain binding protein 4 (formin binding protein 21)
hsa-miR-513a-3p	0	0	1	1	1	1	SLC6A14	solute carrier family 6 (amino acid transporter), member 14
hsa-miR-513a-3p	0	0	1	1	1	1	XPOT	exportin, tRNA (nuclear export receptor for tRNAs)
hsa-miR-513a-3p	1	0	1	0	1	1	CHP1	calcineurin-like EF hand protein 1
hsa-miR-513a-3p	1	0	1	1	1	1	KLF12	Kruppel-like factor 12
hsa-miR-513a-3p	0	0	1	1	1	1	STXBP3	syntaxin binding protein 3
[truncated: 696 more rows]
