# Supplementary material for: Profiling of Selected MicroRNAs in Proliferative Eutopic Endometrium of Women with Ovarian Endometriosis
Source: Biomed Res Int. 2015 Aug 20;2015:760698. doi: 10.1155/2015/760698 (PMC4558423; doi:10.1155/2015/760698)
Supplement: Supplementary file 1 — Table I: The names of miRNAs significantly differentially expressed between eutopic endometrium of patients with endometriosis vs eutopic endometrium of patients without endometriosis. Table II: The associations between miRNA and mRNA, which presents detailed results of the search of six major databases i.e targetscan, tarbase, miranda, mirbase, mirtarget2 and pictar. [file 760698.f1.zip › 760698.f1/Table II/hsa-miR-515-3p.tsv]

miR	targetscan	tarbase	miranda	mirbase	mirtarget2	pictar	GeneSymbol	GeneName
hsa-miR-515-3p	1	0	1	1	1	1	CHD9	chromodomain helicase DNA binding protein 9
hsa-miR-515-3p	1	0	1	0	1	1	PTPRT	protein tyrosine phosphatase, receptor type, T
hsa-miR-515-3p	1	0	1	1	0	0	SEC14L5	SEC14-like 5 (S. cerevisiae)
hsa-miR-515-3p	1	0	1	0	1	1	NEDD4L	neural precursor cell expressed, developmentally down-regulated 4-like, E3 ubiquitin protein ligase
hsa-miR-515-3p	1	0	1	1	0	0	DENND4B	DENN/MADD domain containing 4B
hsa-miR-515-3p	1	0	1	0	1	1	CEP350	centrosomal protein 350kDa
hsa-miR-515-3p	1	0	1	1	1	1	HIPK1	homeodomain interacting protein kinase 1
hsa-miR-515-3p	1	0	1	0	1	1	DOCK4	dedicator of cytokinesis 4
hsa-miR-515-3p	1	0	1	1	0	0	RIMS2	regulating synaptic membrane exocytosis 2
hsa-miR-515-3p	0	0	1	1	1	1	GPR116	G protein-coupled receptor 116
hsa-miR-515-3p	1	0	1	1	1	1	LPHN2	latrophilin 2
hsa-miR-515-3p	1	0	1	1	1	1	WWC1	WW and C2 domain containing 1
hsa-miR-515-3p	1	0	1	1	1	1	UBR5	ubiquitin protein ligase E3 component n-recognin 5
hsa-miR-515-3p	1	0	1	1	1	1	ARHGEF15	Rho guanine nucleotide exchange factor (GEF) 15
hsa-miR-515-3p	1	0	1	1	1	1	CALCR	calcitonin receptor
hsa-miR-515-3p	0	0	1	1	1	1	MAN2B2	mannosidase, alpha, class 2B, member 2
hsa-miR-515-3p	1	0	1	0	0	0	DTX4	deltex homolog 4 (Drosophila)
hsa-miR-515-3p	1	0	1	1	1	1	CPEB3	cytoplasmic polyadenylation element binding protein 3
hsa-miR-515-3p	1	0	1	1	1	1	BAHD1	bromo adjacent homology domain containing 1
hsa-miR-515-3p	1	0	1	1	0	0	KIAA1045	KIAA1045
hsa-miR-515-3p	1	0	1	1	1	1	FAM208A	family with sequence similarity 208, member A
hsa-miR-515-3p	1	0	1	1	1	1	SMARCAD1	SWI/SNF-related, matrix-associated actin-dependent regulator of chromatin, subfamily a, containing DEAD/H box 1
hsa-miR-515-3p	1	0	1	1	0	0	ATAD2B	ATPase family, AAA domain containing 2B
hsa-miR-515-3p	1	0	1	1	1	1	MKL2	MKL/myocardin-like 2
hsa-miR-515-3p	1	0	1	1	1	1	PCDH19	protocadherin 19
hsa-miR-515-3p	1	0	1	1	0	0	CARNS1	carnosine synthase 1
hsa-miR-515-3p	1	0	1	1	1	1	FRAS1	Fraser syndrome 1
hsa-miR-515-3p	0	0	1	0	0	0	KRT19P2	keratin 19 pseudogene 2
hsa-miR-515-3p	0	0	1	0	1	1	ZSWIM6	zinc finger, SWIM-type containing 6
hsa-miR-515-3p	1	0	1	0	1	1	IGDCC4	immunoglobulin superfamily, DCC subclass, member 4
hsa-miR-515-3p	1	0	1	1	0	0	MAGI3	membrane associated guanylate kinase, WW and PDZ domain containing 3
hsa-miR-515-3p	1	0	1	1	1	1	IKZF4	IKAROS family zinc finger 4 (Eos)
hsa-miR-515-3p	1	0	1	1	1	1	CDK13	cyclin-dependent kinase 13
hsa-miR-515-3p	1	0	1	1	1	1	LCOR	ligand dependent nuclear receptor corepressor
hsa-miR-515-3p	1	0	1	0	1	1	JPH4	junctophilin 4
hsa-miR-515-3p	0	0	1	1	0	0	GOLT1A	golgi transport 1A
hsa-miR-515-3p	1	0	1	0	1	1	RNF43	ring finger protein 43
hsa-miR-515-3p	0	0	1	0	0	0	ARHGEF28	Rho guanine nucleotide exchange factor (GEF) 28
hsa-miR-515-3p	1	0	1	1	1	1	UBR3	ubiquitin protein ligase E3 component n-recognin 3 (putative)
hsa-miR-515-3p	1	0	1	0	0	0	ZC3H12C	zinc finger CCCH-type containing 12C
hsa-miR-515-3p	1	0	1	1	1	1	FAT2	FAT tumor suppressor homolog 2 (Drosophila)
hsa-miR-515-3p	0	0	1	1	1	1	GABBR1	gamma-aminobutyric acid (GABA) B receptor, 1
hsa-miR-515-3p	1	0	1	1	1	1	RPS6KA3	ribosomal protein S6 kinase, 90kDa, polypeptide 3
hsa-miR-515-3p	1	0	1	1	1	1	MEF2A	myocyte enhancer factor 2A
hsa-miR-515-3p	0	0	1	1	1	1	NME7	NME/NM23 family member 7
hsa-miR-515-3p	1	0	1	1	1	1	PHC1	polyhomeotic homolog 1 (Drosophila)
hsa-miR-515-3p	1	0	1	1	1	1	SLC8A1	solute carrier family 8 (sodium/calcium exchanger), member 1
hsa-miR-515-3p	1	0	1	0	1	1	MPPED2	metallophosphoesterase domain containing 2
hsa-miR-515-3p	1	0	1	1	0	0	TSPYL2	TSPY-like 2
hsa-miR-515-3p	1	0	1	1	1	1	FMR1	fragile X mental retardation 1
hsa-miR-515-3p	1	0	1	1	1	1	DMTF1	cyclin D binding myb-like transcription factor 1
hsa-miR-515-3p	1	0	1	1	1	1	EPHA7	EPH receptor A7
hsa-miR-515-3p	1	0	1	1	1	1	SPTB	spectrin, beta, erythrocytic
hsa-miR-515-3p	0	0	1	1	0	0	ASIC3	acid-sensing (proton-gated) ion channel 3
hsa-miR-515-3p	0	0	1	1	0	0	IFT27	intraflagellar transport 27 homolog (Chlamydomonas)
hsa-miR-515-3p	1	0	1	1	1	1	MYO5A	myosin VA (heavy chain 12, myoxin)
hsa-miR-515-3p	0	0	1	1	0	0	EIF2B4	eukaryotic translation initiation factor 2B, subunit 4 delta, 67kDa
hsa-miR-515-3p	0	0	1	1	0	0	BMP1	bone morphogenetic protein 1
hsa-miR-515-3p	1	0	1	1	1	1	EPB41	erythrocyte membrane protein band 4.1 (elliptocytosis 1, RH-linked)
hsa-miR-515-3p	1	0	1	1	1	1	COL24A1	collagen, type XXIV, alpha 1
hsa-miR-515-3p	0	0	1	1	0	0	MBD1	methyl-CpG binding domain protein 1
hsa-miR-515-3p	1	0	1	1	1	1	HMGA2	high mobility group AT-hook 2
hsa-miR-515-3p	1	0	1	1	1	1	NCOA3	nuclear receptor coactivator 3
hsa-miR-515-3p	0	0	1	1	1	1	SGSH	N-sulfoglucosamine sulfohydrolase
hsa-miR-515-3p	0	0	1	1	1	1	PLD1	phospholipase D1, phosphatidylcholine-specific
hsa-miR-515-3p	1	0	1	1	1	1	MYO9B	myosin IXB
hsa-miR-515-3p	1	0	1	1	1	1	APC	adenomatous polyposis coli
hsa-miR-515-3p	0	0	1	0	0	0	MIAT	myocardial infarction associated transcript (non-protein coding)
hsa-miR-515-3p	1	0	1	1	1	1	STX16	syntaxin 16
hsa-miR-515-3p	1	0	1	0	1	1	PDE4D	phosphodiesterase 4D, cAMP-specific
hsa-miR-515-3p	1	0	1	1	1	1	PCDH17	protocadherin 17
hsa-miR-515-3p	1	0	1	1	1	1	TMBIM6	transmembrane BAX inhibitor motif containing 6
hsa-miR-515-3p	0	0	1	1	1	1	SESN1	sestrin 1
hsa-miR-515-3p	1	0	1	1	1	1	LDB2	LIM domain binding 2
hsa-miR-515-3p	0	0	1	1	1	1	NOL3	nucleolar protein 3 (apoptosis repressor with CARD domain)
hsa-miR-515-3p	0	0	1	1	1	1	SC5DL	sterol-C5-desaturase (ERG3 delta-5-desaturase homolog, S. cerevisiae)-like
hsa-miR-515-3p	1	0	1	1	0	0	ASPHD1	aspartate beta-hydroxylase domain containing 1
hsa-miR-515-3p	0	0	1	1	1	1	ERAL1	Era G-protein-like 1 (E. coli)
hsa-miR-515-3p	0	0	1	1	1	1	PCBP4	poly(rC) binding protein 4
hsa-miR-515-3p	1	0	1	1	1	1	GLS	glutaminase
hsa-miR-515-3p	0	0	1	1	1	1	IL18BP	interleukin 18 binding protein
hsa-miR-515-3p	1	0	1	1	1	1	LRRFIP1	leucine rich repeat (in FLII) interacting protein 1
hsa-miR-515-3p	0	0	1	1	0	0	CALHM2	calcium homeostasis modulator 2
hsa-miR-515-3p	1	0	1	1	1	1	CAB39	calcium binding protein 39
hsa-miR-515-3p	1	0	1	1	1	1	AASDHPPT	aminoadipate-semialdehyde dehydrogenase-phosphopantetheinyl transferase
hsa-miR-515-3p	1	0	1	1	1	1	MYNN	myoneurin
hsa-miR-515-3p	1	0	1	1	1	1	ZNF202	zinc finger protein 202
hsa-miR-515-3p	0	0	1	1	1	1	SAP30L	SAP30-like
hsa-miR-515-3p	1	0	1	1	1	1	STXBP6	syntaxin binding protein 6 (amisyn)
hsa-miR-515-3p	1	0	1	1	1	1	TLK2	tousled-like kinase 2
hsa-miR-515-3p	1	0	1	1	1	1	C16orf70	chromosome 16 open reading frame 70
hsa-miR-515-3p	1	0	1	1	0	0	VKORC1	vitamin K epoxide reductase complex, subunit 1
hsa-miR-515-3p	0	0	1	1	1	1	SLC39A8	solute carrier family 39 (zinc transporter), member 8
hsa-miR-515-3p	1	0	1	1	1	1	DESI2	desumoylating isopeptidase 2
hsa-miR-515-3p	1	0	1	1	0	0	LMO2	LIM domain only 2 (rhombotin-like 1)
hsa-miR-515-3p	1	0	1	0	1	1	TRPS1	trichorhinophalangeal syndrome I
hsa-miR-515-3p	0	0	1	1	1	1	RANGRF	RAN guanine nucleotide release factor
hsa-miR-515-3p	1	0	1	1	1	1	NRP1	neuropilin 1
hsa-miR-515-3p	0	0	1	1	1	1	LRTOMT	leucine rich transmembrane and 0-methyltransferase domain containing
hsa-miR-515-3p	1	0	1	0	1	1	GLYR1	glyoxylate reductase 1 homolog (Arabidopsis)
hsa-miR-515-3p	1	0	1	1	1	1	CPEB1	cytoplasmic polyadenylation element binding protein 1
hsa-miR-515-3p	0	0	1	1	0	0	TTTY7	testis-specific transcript, Y-linked 7 (non-protein coding)
hsa-miR-515-3p	1	0	1	1	1	1	CHST9	carbohydrate (N-acetylgalactosamine 4-0) sulfotransferase 9
hsa-miR-515-3p	0	0	1	1	0	0	ZAN	zonadhesin
hsa-miR-515-3p	0	0	1	1	1	1	SLC6A15	solute carrier family 6 (neutral amino acid transporter), member 15
hsa-miR-515-3p	0	0	1	0	0	0	MYO15B	myosin XVB pseudogene
hsa-miR-515-3p	1	0	1	1	1	1	F3	coagulation factor III (thromboplastin, tissue factor)
hsa-miR-515-3p	0	0	1	1	1	1	CARD8	caspase recruitment domain family, member 8
hsa-miR-515-3p	1	0	1	1	1	1	PTBP2	polypyrimidine tract binding protein 2
hsa-miR-515-3p	1	0	1	0	1	1	IL1RAP	interleukin 1 receptor accessory protein
hsa-miR-515-3p	1	0	1	1	1	1	AFF2	AF4/FMR2 family, member 2
hsa-miR-515-3p	1	0	1	0	1	1	DICER1	dicer 1, ribonuclease type III
hsa-miR-515-3p	1	0	1	0	1	1	CACNA1C	calcium channel, voltage-dependent, L type, alpha 1C subunit
hsa-miR-515-3p	0	0	1	0	0	0	CASC2	cancer susceptibility candidate 2 (non-protein coding)
hsa-miR-515-3p	1	0	1	1	1	1	PDE1B	phosphodiesterase 1B, calmodulin-dependent
hsa-miR-515-3p	1	0	1	1	1	1	NAV3	neuron navigator 3
hsa-miR-515-3p	1	0	1	1	1	1	ARL4C	ADP-ribosylation factor-like 4C
hsa-miR-515-3p	1	0	1	1	1	1	SYNM	synemin, intermediate filament protein
hsa-miR-515-3p	1	0	1	1	1	1	PPP1R9A	protein phosphatase 1, regulatory subunit 9A
hsa-miR-515-3p	1	0	1	0	1	1	NFAT5	nuclear factor of activated T-cells 5, tonicity-responsive
hsa-miR-515-3p	0	0	1	0	1	1	TRMT10A	tRNA methyltransferase 10 homolog A (S. cerevisiae)
hsa-miR-515-3p	0	0	1	1	0	0	RTEL1	regulator of telomere elongation helicase 1
hsa-miR-515-3p	0	0	1	1	1	1	UBE2Q2	ubiquitin-conjugating enzyme E2Q family member 2
hsa-miR-515-3p	0	0	1	1	0	0	LOC100128398	uncharacterized LOC100128398
hsa-miR-515-3p	0	0	1	1	1	1	RNF220	ring finger protein 220
hsa-miR-515-3p	1	0	1	1	1	1	CADM3	cell adhesion molecule 3
hsa-miR-515-3p	1	0	1	1	1	1	EIF2C1	eukaryotic translation initiation factor 2C, 1
hsa-miR-515-3p	1	0	1	1	1	1	ARMC8	armadillo repeat containing 8
hsa-miR-515-3p	1	0	1	1	1	1	KLHDC8B	kelch domain containing 8B
hsa-miR-515-3p	1	0	1	1	1	1	HNRNPUL1	heterogeneous nuclear ribonucleoprotein U-like 1
hsa-miR-515-3p	1	0	1	1	1	1	PHF20L1	PHD finger protein 20-like 1
hsa-miR-515-3p	0	0	1	1	0	0	KIRREL	kin of IRRE like (Drosophila)
hsa-miR-515-3p	0	0	1	0	0	0	DUXAP10	double homeobox A pseudogene 10
hsa-miR-515-3p	1	0	1	1	1	1	S100PBP	S100P binding protein
hsa-miR-515-3p	0	0	1	1	1	1	ARMC5	armadillo repeat containing 5
hsa-miR-515-3p	1	0	1	0	1	1	DCAF17	DDB1 and CUL4 associated factor 17
hsa-miR-515-3p	0	0	1	1	1	1	VPRBP	Vpr (HIV-1) binding protein
hsa-miR-515-3p	1	0	1	1	1	1	BAZ2A	bromodomain adjacent to zinc finger domain, 2A
hsa-miR-515-3p	1	0	1	1	1	1	COPS7B	COP9 constitutive photomorphogenic homolog subunit 7B (Arabidopsis)
hsa-miR-515-3p	0	0	1	0	0	0	IFFO2	intermediate filament family orphan 2
hsa-miR-515-3p	1	0	1	1	1	1	DYRK2	dual-specificity tyrosine-(Y)-phosphorylation regulated kinase 2
hsa-miR-515-3p	0	0	1	1	1	1	PDE4DIP	phosphodiesterase 4D interacting protein
hsa-miR-515-3p	1	0	1	1	1	1	SLC35A3	solute carrier family 35 (UDP-N-acetylglucosamine (UDP-GlcNAc) transporter), member A3
hsa-miR-515-3p	0	0	1	0	0	0	KIAA1671	KIAA1671
hsa-miR-515-3p	1	0	1	1	1	1	NAA30	N(alpha)-acetyltransferase 30, NatC catalytic subunit
hsa-miR-515-3p	1	0	1	0	1	1	ZCCHC3	zinc finger, CCHC domain containing 3
hsa-miR-515-3p	0	0	1	1	0	0	PIF1	PIF1 5'-to-3' DNA helicase homolog (S. cerevisiae)
hsa-miR-515-3p	0	0	1	0	1	1	FLJ22763	uncharacterized LOC401081
hsa-miR-515-3p	1	0	1	1	1	1	RNF185	ring finger protein 185
hsa-miR-515-3p	1	0	1	1	1	1	GORASP2	golgi reassembly stacking protein 2, 55kDa
hsa-miR-515-3p	1	0	1	1	1	1	FAM53C	family with sequence similarity 53, member C
hsa-miR-515-3p	1	0	1	1	1	1	NFASC	neurofascin
hsa-miR-515-3p	0	0	1	0	0	0	JAKMIP2-AS1	JAKMIP2 antisense RNA 1
hsa-miR-515-3p	1	0	1	1	1	1	SLC38A1	solute carrier family 38, member 1
hsa-miR-515-3p	0	0	1	0	0	0	NBLA00301	Nbla00301
hsa-miR-515-3p	0	0	1	0	0	0	LOC283508	uncharacterized LOC283508
hsa-miR-515-3p	0	0	1	1	1	1	C8orf46	chromosome 8 open reading frame 46
hsa-miR-515-3p	1	0	1	0	1	1	AP1G1	adaptor-related protein complex 1, gamma 1 subunit
hsa-miR-515-3p	0	0	1	1	1	1	TOX2	TOX high mobility group box family member 2
hsa-miR-515-3p	0	0	1	1	1	1	FANCI	Fanconi anemia, complementation group I
hsa-miR-515-3p	0	0	1	1	1	1	FLYWCH1	FLYWCH-type zinc finger 1
hsa-miR-515-3p	1	0	1	1	1	1	DHX15	DEAH (Asp-Glu-Ala-His) box polypeptide 15
hsa-miR-515-3p	1	0	1	0	1	1	RNF165	ring finger protein 165
hsa-miR-515-3p	1	0	1	1	1	1	ZNF664	zinc finger protein 664
hsa-miR-515-3p	0	0	1	1	1	1	PDE1C	phosphodiesterase 1C, calmodulin-dependent 70kDa
hsa-miR-515-3p	1	0	1	1	1	1	RAI2	retinoic acid induced 2
hsa-miR-515-3p	0	0	1	1	0	0	CHRM3	cholinergic receptor, muscarinic 3
hsa-miR-515-3p	1	0	1	1	1	1	SCAMP5	secretory carrier membrane protein 5
hsa-miR-515-3p	1	0	1	1	1	1	SORBS2	sorbin and SH3 domain containing 2
hsa-miR-515-3p	0	0	1	1	1	1	PTCD2	pentatricopeptide repeat domain 2
hsa-miR-515-3p	0	0	1	0	1	1	THAP6	THAP domain containing 6
hsa-miR-515-3p	1	0	1	1	1	1	TBC1D14	TBC1 domain family, member 14
hsa-miR-515-3p	0	0	1	1	0	0	COMMD4	COMM domain containing 4
hsa-miR-515-3p	0	0	1	1	1	1	PSME3	proteasome (prosome, macropain) activator subunit 3 (PA28 gamma; Ki)
hsa-miR-515-3p	0	0	1	0	0	0	FLJ32742	uncharacterized locus FLJ32742
hsa-miR-515-3p	1	0	1	0	1	1	NCAM1	neural cell adhesion molecule 1
hsa-miR-515-3p	0	0	1	0	1	1	CHURC1	churchill domain containing 1
hsa-miR-515-3p	0	0	1	0	0	0	INTS4L1	integrator complex subunit 4-like 1
hsa-miR-515-3p	1	0	1	1	1	1	ANKRD29	ankyrin repeat domain 29
hsa-miR-515-3p	0	0	1	1	0	0	CERS5	ceramide synthase 5
hsa-miR-515-3p	0	0	1	0	0	0	LINC00301	long intergenic non-protein coding RNA 301
hsa-miR-515-3p	0	0	1	0	0	0	C8orf48	chromosome 8 open reading frame 48
hsa-miR-515-3p	0	0	1	0	1	1	UHMK1	U2AF homology motif (UHM) kinase 1
hsa-miR-515-3p	0	0	1	1	0	0	RHBDF2	rhomboid 5 homolog 2 (Drosophila)
hsa-miR-515-3p	1	0	1	1	1	1	PEAR1	platelet endothelial aggregation receptor 1
hsa-miR-515-3p	0	0	1	1	0	0	GRIP2	glutamate receptor interacting protein 2
hsa-miR-515-3p	0	0	1	1	1	1	PKIB	protein kinase (cAMP-dependent, catalytic) inhibitor beta
hsa-miR-515-3p	1	0	1	1	1	1	CNOT4	CCR4-NOT transcription complex, subunit 4
hsa-miR-515-3p	0	0	1	0	0	0	SDHAP2	succinate dehydrogenase complex, subunit A, flavoprotein pseudogene 2
hsa-miR-515-3p	1	0	1	1	1	1	SIRT1	sirtuin 1
hsa-miR-515-3p	1	0	1	1	0	0	APBB3	amyloid beta (A4) precursor protein-binding, family B, member 3
hsa-miR-515-3p	1	0	1	1	1	1	MYO1B	myosin IB
hsa-miR-515-3p	0	0	1	0	1	1	CADM1	cell adhesion molecule 1
hsa-miR-515-3p	1	0	1	1	1	1	TLK1	tousled-like kinase 1
hsa-miR-515-3p	0	0	1	1	1	1	STBD1	starch binding domain 1
hsa-miR-515-3p	0	0	1	0	0	0	LOC643837	uncharacterized LOC643837
hsa-miR-515-3p	0	0	1	0	1	1	TBX5-AS1	TBX5 antisense RNA 1
hsa-miR-515-3p	1	0	1	0	1	1	CRTAP	cartilage associated protein
hsa-miR-515-3p	1	0	1	1	1	1	DZIP1	DAZ interacting protein 1
hsa-miR-515-3p	0	0	1	1	1	1	CYP11B1	cytochrome P450, family 11, subfamily B, polypeptide 1
hsa-miR-515-3p	0	0	1	0	0	0	PART1	prostate androgen-regulated transcript 1 (non-protein coding)
hsa-miR-515-3p	0	0	1	0	0	0	ZNF806	zinc finger protein 806
hsa-miR-515-3p	1	0	1	1	1	1	SYT1	synaptotagmin I
hsa-miR-515-3p	1	0	1	1	1	1	SIAH1	siah E3 ubiquitin protein ligase 1
hsa-miR-515-3p	1	0	1	0	1	1	GATAD2B	GATA zinc finger domain containing 2B
hsa-miR-515-3p	0	0	1	0	1	1	AGBL4	ATP/GTP binding protein-like 4
hsa-miR-515-3p	1	0	1	1	1	1	LPPR2	lipid phosphate phosphatase-related protein type 2
hsa-miR-515-3p	1	0	1	1	1	1	GCLC	glutamate-cysteine ligase, catalytic subunit
hsa-miR-515-3p	1	0	1	1	1	1	ARHGEF7	Rho guanine nucleotide exchange factor (GEF) 7
hsa-miR-515-3p	0	0	1	1	0	0	ZNF185	zinc finger protein 185 (LIM domain)
hsa-miR-515-3p	0	0	1	1	1	1	MYO6	myosin VI
hsa-miR-515-3p	0	0	1	1	1	1	CCDC66	coiled-coil domain containing 66
hsa-miR-515-3p	0	0	1	0	1	1	HDAC9	histone deacetylase 9
hsa-miR-515-3p	1	0	1	1	1	1	CS	citrate synthase
hsa-miR-515-3p	0	0	1	1	1	1	VDAC1	voltage-dependent anion channel 1
hsa-miR-515-3p	0	0	1	1	1	1	BAG1	BCL2-associated athanogene
hsa-miR-515-3p	1	0	1	1	1	1	EPB41L4A	erythrocyte membrane protein band 4.1 like 4A
hsa-miR-515-3p	1	0	1	1	1	1	LRP8	low density lipoprotein receptor-related protein 8, apolipoprotein e receptor
hsa-miR-515-3p	1	0	1	0	1	1	KBTBD8	kelch repeat and BTB (POZ) domain containing 8
hsa-miR-515-3p	0	0	1	0	0	0	FLJ39534	uncharacterized FLJ39534
hsa-miR-515-3p	0	0	1	1	1	1	EXTL2	exostoses (multiple)-like 2
hsa-miR-515-3p	0	0	1	1	1	1	ZNF513	zinc finger protein 513
hsa-miR-515-3p	0	0	1	0	1	1	TNFAIP8	tumor necrosis factor, alpha-induced protein 8
hsa-miR-515-3p	1	0	1	1	1	1	EBF3	early B-cell factor 3
hsa-miR-515-3p	0	0	1	0	0	0	LOC400680	uncharacterized LOC400680
hsa-miR-515-3p	0	0	1	1	1	1	FAM217A	family with sequence similarity 217, member A
hsa-miR-515-3p	0	0	1	0	0	0	LINC00293	long intergenic non-protein coding RNA 293
hsa-miR-515-3p	0	0	1	1	0	0	PSAPL1	prosaposin-like 1 (gene/pseudogene)
hsa-miR-515-3p	0	0	1	0	0	0	THAP7-AS1	THAP7 antisense RNA 1
hsa-miR-515-3p	0	0	1	1	0	0	STXBP2	syntaxin binding protein 2
hsa-miR-515-3p	0	0	1	0	0	0	HLA-DQB2	major histocompatibility complex, class II, DQ beta 2
hsa-miR-515-3p	0	0	1	0	0	0	CECR7	cat eye syndrome chromosome region, candidate 7 (non-protein coding)
hsa-miR-515-3p	1	0	1	1	1	1	PIGA	phosphatidylinositol glycan anchor biosynthesis, class A
hsa-miR-515-3p	0	0	1	0	0	0	LOC728095	uncharacterized LOC728095
hsa-miR-515-3p	0	0	1	1	0	0	GPR82	G protein-coupled receptor 82
hsa-miR-515-3p	0	0	1	1	1	1	UPP2	uridine phosphorylase 2
hsa-miR-515-3p	1	0	1	1	1	1	HBP1	HMG-box transcription factor 1
hsa-miR-515-3p	0	0	1	1	0	0	KIAA0146	KIAA0146
hsa-miR-515-3p	0	0	1	1	1	1	GGA1	golgi-associated, gamma adaptin ear containing, ARF binding protein 1
hsa-miR-515-3p	0	0	1	1	1	1	WDR64	WD repeat domain 64
hsa-miR-515-3p	0	0	1	1	0	0	CFP	complement factor properdin
hsa-miR-515-3p	0	0	1	0	0	0	CLEC4GP1	C-type lectin domain family 4, member G pseudogene 1
hsa-miR-515-3p	0	0	1	1	1	1	IGSF21	immunoglobin superfamily, member 21
hsa-miR-515-3p	0	0	1	0	1	1	FLJ41200	uncharacterized LOC401492
hsa-miR-515-3p	1	0	1	1	1	1	PLEKHH1	pleckstrin homology domain containing, family H (with MyTH4 domain) member 1
hsa-miR-515-3p	1	0	1	1	1	1	MDGA2	MAM domain containing glycosylphosphatidylinositol anchor 2
hsa-miR-515-3p	0	0	1	0	0	0	TMPRSS11BNL	TMPRSS11B N terminal-like
hsa-miR-515-3p	0	0	1	1	1	1	FAM19A2	family with sequence similarity 19 (chemokine (C-C motif)-like), member A2
hsa-miR-515-3p	0	0	1	1	1	1	SLC27A2	solute carrier family 27 (fatty acid transporter), member 2
hsa-miR-515-3p	0	0	1	0	0	0	LOC285043	uncharacterized LOC285043
hsa-miR-515-3p	1	0	1	0	0	0	GPR137C	G protein-coupled receptor 137C
hsa-miR-515-3p	1	0	1	1	1	1	SMAP1	small ArfGAP 1
hsa-miR-515-3p	1	0	1	1	1	1	FAM122B	family with sequence similarity 122B
hsa-miR-515-3p	1	0	1	1	1	1	ERBB3	v-erb-b2 erythroblastic leukemia viral oncogene homolog 3 (avian)
hsa-miR-515-3p	1	0	1	1	1	1	XPO1	exportin 1 (CRM1 homolog, yeast)
hsa-miR-515-3p	0	0	1	1	1	1	C3orf67	chromosome 3 open reading frame 67
hsa-miR-515-3p	1	0	1	1	1	1	C11orf30	chromosome 11 open reading frame 30
hsa-miR-515-3p	1	0	1	1	1	1	KTN1	kinectin 1 (kinesin receptor)
hsa-miR-515-3p	1	0	1	0	1	1	HECTD1	HECT domain containing E3 ubiquitin protein ligase 1
hsa-miR-515-3p	0	0	1	0	1	1	C17orf105	chromosome 17 open reading frame 105
hsa-miR-515-3p	0	0	1	1	0	0	RPRD2	regulation of nuclear pre-mRNA domain containing 2
hsa-miR-515-3p	1	0	1	1	0	0	UBN2	ubinuclein 2
hsa-miR-515-3p	1	0	1	1	1	1	CSRNP3	cysteine-serine-rich nuclear protein 3
hsa-miR-515-3p	1	0	1	1	1	1	LIN9	lin-9 homolog (C. elegans)
hsa-miR-515-3p	1	0	1	1	0	0	SMCHD1	structural maintenance of chromosomes flexible hinge domain containing 1
hsa-miR-515-3p	1	0	1	1	1	1	PIK3R1	phosphoinositide-3-kinase, regulatory subunit 1 (alpha)
hsa-miR-515-3p	1	0	1	1	1	1	ATP1A2	ATPase, Na+/K+ transporting, alpha 2 polypeptide
hsa-miR-515-3p	1	0	1	1	1	1	DLG2	discs, large homolog 2 (Drosophila)
hsa-miR-515-3p	0	0	1	1	0	0	TMEM151B	transmembrane protein 151B
hsa-miR-515-3p	0	0	1	0	0	0	RPL23AP53	ribosomal protein L23a pseudogene 53
hsa-miR-515-3p	0	0	1	1	1	1	KLC4	kinesin light chain 4
hsa-miR-515-3p	1	0	1	1	1	1	MKRN1	makorin ring finger protein 1
hsa-miR-515-3p	1	0	1	1	1	1	FMNL3	formin-like 3
hsa-miR-515-3p	1	0	1	1	1	1	ENAH	enabled homolog (Drosophila)
hsa-miR-515-3p	1	0	1	1	1	1	CXorf23	chromosome X open reading frame 23
hsa-miR-515-3p	0	0	1	1	0	0	AADACL3	arylacetamide deacetylase-like 3
hsa-miR-515-3p	1	0	1	0	1	1	CAPRIN1	cell cycle associated protein 1
hsa-miR-515-3p	0	0	1	0	0	0	LRRC9	leucine rich repeat containing 9
hsa-miR-515-3p	0	0	1	1	0	0	TRIM46	tripartite motif containing 46
hsa-miR-515-3p	0	0	1	0	0	0	FAM205B	transmembrane protein C9orf144B pseudogene
hsa-miR-515-3p	1	0	1	1	1	1	KALRN	kalirin, RhoGEF kinase
hsa-miR-515-3p	1	0	1	0	1	1	PLSCR4	phospholipid scramblase 4
hsa-miR-515-3p	1	0	1	1	1	1	FRYL	FRY-like
hsa-miR-515-3p	1	0	1	0	0	0	SP7	Sp7 transcription factor
hsa-miR-515-3p	1	0	1	1	1	1	ADAMTSL1	ADAMTS-like 1
hsa-miR-515-3p	0	0	1	1	0	0	GSG1L	GSG1-like
hsa-miR-515-3p	1	0	1	0	1	1	CYB561D1	cytochrome b-561 domain containing 1
hsa-miR-515-3p	1	0	1	1	1	1	SYDE1	synapse defective 1, Rho GTPase, homolog 1 (C. elegans)
hsa-miR-515-3p	0	0	1	1	1	1	LYPD1	LY6/PLAUR domain containing 1
hsa-miR-515-3p	1	0	1	0	1	1	GPC6	glypican 6
hsa-miR-515-3p	0	0	1	1	0	0	HEATR8	HEAT repeat containing 8
hsa-miR-515-3p	0	0	1	0	0	0	LOC494141	mitochondrial carrier triple repeat 1 pseudogene
hsa-miR-515-3p	0	0	1	0	0	0	LOC390660	FLJ00317 protein
hsa-miR-515-3p	0	0	1	0	1	1	RUFY4	RUN and FYVE domain containing 4
hsa-miR-515-3p	0	0	1	0	0	0	LOC100133315	transient receptor potential cation channel, subfamily C, member 2-like
hsa-miR-515-3p	1	0	1	1	1	1	RABGAP1	RAB GTPase activating protein 1
hsa-miR-515-3p	0	0	1	1	1	1	ZNF346	zinc finger protein 346
hsa-miR-515-3p	1	0	1	1	1	1	SYS1	SYS1 Golgi-localized integral membrane protein homolog (S. cerevisiae)
hsa-miR-515-3p	0	0	1	1	1	1	KAZALD1	Kazal-type serine peptidase inhibitor domain 1
hsa-miR-515-3p	0	0	1	1	1	1	FANCC	Fanconi anemia, complementation group C
hsa-miR-515-3p	1	0	1	1	1	1	CAMK2G	calcium/calmodulin-dependent protein kinase II gamma
hsa-miR-515-3p	1	0	1	1	1	1	LUC7L3	LUC7-like 3 (S. cerevisiae)
hsa-miR-515-3p	0	0	1	1	1	1	PRSS16	protease, serine, 16 (thymus)
hsa-miR-515-3p	1	0	1	1	1	1	APBB2	amyloid beta (A4) precursor protein-binding, family B, member 2
hsa-miR-515-3p	0	0	1	1	0	0	MPC2	mitochondrial pyruvate carrier 2
hsa-miR-515-3p	0	0	1	1	1	1	SRP9	signal recognition particle 9kDa
hsa-miR-515-3p	0	0	1	1	0	0	FAAH	fatty acid amide hydrolase
hsa-miR-515-3p	0	0	1	1	1	1	ARIH1	ariadne homolog, ubiquitin-conjugating enzyme E2 binding protein, 1 (Drosophila)
hsa-miR-515-3p	1	0	1	1	1	1	SMAP2	small ArfGAP2
hsa-miR-515-3p	1	0	1	1	1	1	FBXL17	F-box and leucine-rich repeat protein 17
hsa-miR-515-3p	0	0	1	1	0	0	ODF3	outer dense fiber of sperm tails 3
hsa-miR-515-3p	0	0	1	0	0	0	KIAA0913	KIAA0913
hsa-miR-515-3p	0	0	1	0	0	0	JAKMIP3	Janus kinase and microtubule interacting protein 3
hsa-miR-515-3p	1	0	1	1	1	1	EZR	ezrin
hsa-miR-515-3p	0	0	1	1	1	1	SLC30A10	solute carrier family 30, member 10
hsa-miR-515-3p	1	0	1	0	1	1	BRPF1	bromodomain and PHD finger containing, 1
hsa-miR-515-3p	1	0	1	0	0	0	BAHCC1	BAH domain and coiled-coil containing 1
hsa-miR-515-3p	1	0	1	1	1	1	SLC30A8	solute carrier family 30 (zinc transporter), member 8
hsa-miR-515-3p	1	0	1	1	1	1	DENND1B	DENN/MADD domain containing 1B
hsa-miR-515-3p	0	0	1	0	1	1	GAB3	GRB2-associated binding protein 3
hsa-miR-515-3p	1	0	1	1	1	1	FAM126B	family with sequence similarity 126, member B
hsa-miR-515-3p	0	0	1	0	0	0	FAM225A	family with sequence similarity 225, member A (non-protein coding)
hsa-miR-515-3p	0	0	1	1	1	1	VWA3B	von Willebrand factor A domain containing 3B
hsa-miR-515-3p	0	0	1	1	1	1	TMEM138	transmembrane protein 138
hsa-miR-515-3p	0	0	1	1	1	1	INPP5B	inositol polyphosphate-5-phosphatase, 75kDa
hsa-miR-515-3p	1	0	1	1	1	1	SOX6	SRY (sex determining region Y)-box 6
hsa-miR-515-3p	0	0	1	1	0	0	TMEM116	transmembrane protein 116
hsa-miR-515-3p	0	0	1	0	0	0	LOC286135	uncharacterized LOC286135
hsa-miR-515-3p	0	0	1	1	1	1	NFE2L1	nuclear factor (erythroid-derived 2)-like 1
hsa-miR-515-3p	0	0	1	1	1	1	KIAA1841	KIAA1841
hsa-miR-515-3p	0	0	1	1	0	0	CD37	CD37 molecule
hsa-miR-515-3p	0	0	1	1	1	1	PCDH20	protocadherin 20
hsa-miR-515-3p	1	0	1	1	1	1	IL17RD	interleukin 17 receptor D
hsa-miR-515-3p	0	0	1	1	1	1	BRD9	bromodomain containing 9
hsa-miR-515-3p	1	0	1	0	0	0	NPEPL1	aminopeptidase-like 1
hsa-miR-515-3p	0	0	1	0	1	1	SRR	serine racemase
hsa-miR-515-3p	0	0	1	1	0	0	TMEM134	transmembrane protein 134
hsa-miR-515-3p	1	0	1	1	1	1	IKZF2	IKAROS family zinc finger 2 (Helios)
hsa-miR-515-3p	1	0	1	1	1	1	GAL3ST3	galactose-3-O-sulfotransferase 3
hsa-miR-515-3p	0	0	1	0	0	0	KGFLP1	fibroblast growth factor 7 pseudogene
hsa-miR-515-3p	0	0	1	1	0	0	CRB3	crumbs homolog 3 (Drosophila)
hsa-miR-515-3p	0	0	1	1	0	0	CMTM1	CKLF-like MARVEL transmembrane domain containing 1
hsa-miR-515-3p	0	0	1	1	0	0	DNAH1	dynein, axonemal, heavy chain 1
hsa-miR-515-3p	1	0	1	1	0	0	DSG4	desmoglein 4
hsa-miR-515-3p	1	0	1	1	1	1	BCL11A	B-cell CLL/lymphoma 11A (zinc finger protein)
hsa-miR-515-3p	0	0	1	1	0	0	GLYCTK	glycerate kinase
hsa-miR-515-3p	0	0	1	1	1	1	BCOR	BCL6 corepressor
hsa-miR-515-3p	0	0	1	1	1	1	GCOM1	GRINL1A complex locus 1
hsa-miR-515-3p	0	0	1	1	0	0	LRRC28	leucine rich repeat containing 28
hsa-miR-515-3p	0	0	1	1	1	1	LHFPL1	lipoma HMGIC fusion partner-like 1
hsa-miR-515-3p	0	0	1	1	1	1	GPR114	G protein-coupled receptor 114
hsa-miR-515-3p	1	0	1	0	1	1	CHRM2	cholinergic receptor, muscarinic 2
hsa-miR-515-3p	1	0	1	1	1	1	ARHGAP20	Rho GTPase activating protein 20
hsa-miR-515-3p	0	0	1	1	0	0	SH2D6	SH2 domain containing 6
hsa-miR-515-3p	1	0	1	1	1	1	RBM24	RNA binding motif protein 24
hsa-miR-515-3p	1	0	1	1	0	0	ADAM15	ADAM metallopeptidase domain 15
hsa-miR-515-3p	1	0	1	1	0	0	ZCCHC4	zinc finger, CCHC domain containing 4
hsa-miR-515-3p	1	0	1	1	1	1	NIPA2	non imprinted in Prader-Willi/Angelman syndrome 2
hsa-miR-515-3p	0	0	1	1	1	1	RHD	Rh blood group, D antigen
hsa-miR-515-3p	1	0	1	1	1	1	PFKFB4	6-phosphofructo-2-kinase/fructose-2,6-biphosphatase 4
hsa-miR-515-3p	0	0	1	1	1	1	KCNJ13	potassium inwardly-rectifying channel, subfamily J, member 13
hsa-miR-515-3p	1	0	1	1	1	1	NTNG1	netrin G1
hsa-miR-515-3p	1	0	1	1	1	1	QKI	QKI, KH domain containing, RNA binding
hsa-miR-515-3p	1	0	1	1	1	1	CD109	CD109 molecule
hsa-miR-515-3p	1	0	1	1	1	1	SAT1	spermidine/spermine N1-acetyltransferase 1
hsa-miR-515-3p	0	0	1	1	1	1	STOX1	storkhead box 1
hsa-miR-515-3p	0	0	1	1	0	0	NBPF8	neuroblastoma breakpoint family, member 8
hsa-miR-515-3p	0	0	1	0	0	0	GBAP1	glucosidase, beta, acid pseudogene 1
hsa-miR-515-3p	0	0	1	1	1	1	PTDSS1	phosphatidylserine synthase 1
hsa-miR-515-3p	0	0	1	1	1	1	RAB7L1	RAB7, member RAS oncogene family-like 1
hsa-miR-515-3p	1	0	1	0	1	1	DPYSL5	dihydropyrimidinase-like 5
hsa-miR-515-3p	0	0	1	1	1	1	TUFT1	tuftelin 1
hsa-miR-515-3p	0	0	1	1	0	0	SNRPB	small nuclear ribonucleoprotein polypeptides B and B1
hsa-miR-515-3p	1	0	1	1	0	0	POLR3D	polymerase (RNA) III (DNA directed) polypeptide D, 44kDa
hsa-miR-515-3p	0	0	1	1	1	1	RABL5	RAB, member RAS oncogene family-like 5
hsa-miR-515-3p	0	0	1	1	1	1	ICA1	islet cell autoantigen 1, 69kDa
hsa-miR-515-3p	1	0	1	1	1	1	SHOX2	short stature homeobox 2
hsa-miR-515-3p	0	0	1	0	0	0	HIST1H2BN	histone cluster 1, H2bn
hsa-miR-515-3p	1	0	1	1	1	1	ZFAND5	zinc finger, AN1-type domain 5
hsa-miR-515-3p	1	0	1	1	1	1	DPH1	DPH1 homolog (S. cerevisiae)
hsa-miR-515-3p	1	0	1	1	1	1	GAS2	growth arrest-specific 2
hsa-miR-515-3p	1	0	1	1	1	1	ETF1	eukaryotic translation termination factor 1
hsa-miR-515-3p	0	0	1	1	0	0	MCCC2	methylcrotonoyl-CoA carboxylase 2 (beta)
hsa-miR-515-3p	0	0	1	0	1	1	AHI1	Abelson helper integration site 1
hsa-miR-515-3p	0	0	1	1	0	0	CCDC36	coiled-coil domain containing 36
hsa-miR-515-3p	0	0	1	0	0	0	MGC21881	uncharacterized locus MGC21881
hsa-miR-515-3p	1	0	1	1	1	1	ZBTB38	zinc finger and BTB domain containing 38
hsa-miR-515-3p	0	0	1	0	1	1	ZNF37A	zinc finger protein 37A
hsa-miR-515-3p	1	0	1	0	1	1	ZNF24	zinc finger protein 24
hsa-miR-515-3p	1	0	1	0	1	1	CYBRD1	cytochrome b reductase 1
hsa-miR-515-3p	0	0	1	1	0	0	PREB	prolactin regulatory element binding
hsa-miR-515-3p	1	0	1	1	0	0	UBR7	ubiquitin protein ligase E3 component n-recognin 7 (putative)
hsa-miR-515-3p	0	0	1	1	0	0	ZBTB32	zinc finger and BTB domain containing 32
hsa-miR-515-3p	0	0	1	0	0	0	LOC100144602	uncharacterized LOC100144602
hsa-miR-515-3p	0	0	1	1	0	0	LRRC36	leucine rich repeat containing 36
hsa-miR-515-3p	0	0	1	1	0	0	GAGE2D	G antigen 2D
hsa-miR-515-3p	0	0	1	1	0	0	GAGE2E	G antigen 2E
hsa-miR-515-3p	1	0	1	1	1	1	SUZ12	suppressor of zeste 12 homolog (Drosophila)
hsa-miR-515-3p	1	0	1	1	1	1	WHSC1	Wolf-Hirschhorn syndrome candidate 1
hsa-miR-515-3p	0	0	1	1	0	0	CA5BP1	carbonic anhydrase VB pseudogene 1
hsa-miR-515-3p	0	0	1	0	0	0	LOC284260	uncharacterized LOC284260
hsa-miR-515-3p	0	0	1	0	0	0	LINC00488	long intergenic non-protein coding RNA 488
hsa-miR-515-3p	0	0	1	0	0	0	TRAV20	T cell receptor alpha variable 20
hsa-miR-515-3p	0	0	1	1	1	1	MAP2	microtubule-associated protein 2
hsa-miR-515-3p	1	0	1	1	1	1	RSPO2	R-spondin 2
hsa-miR-515-3p	1	0	1	1	1	1	B3GNT5	UDP-GlcNAc:betaGal beta-1,3-N-acetylglucosaminyltransferase 5
hsa-miR-515-3p	1	0	1	1	1	1	U2SURP	U2 snRNP-associated SURP domain containing
hsa-miR-515-3p	1	0	1	1	1	1	TMEM127	transmembrane protein 127
hsa-miR-515-3p	1	0	1	1	1	1	HTR2C	5-hydroxytryptamine (serotonin) receptor 2C, G protein-coupled
hsa-miR-515-3p	0	0	1	0	0	0	LOC145837	uncharacterized LOC145837
hsa-miR-515-3p	0	0	1	1	1	1	LRMP	lymphoid-restricted membrane protein
hsa-miR-515-3p	0	0	1	1	1	1	PIP5K1B	phosphatidylinositol-4-phosphate 5-kinase, type I, beta
hsa-miR-515-3p	0	0	1	1	1	1	RBBP8	retinoblastoma binding protein 8
hsa-miR-515-3p	1	0	1	1	1	1	ELAVL2	ELAV (embryonic lethal, abnormal vision, Drosophila)-like 2 (Hu antigen B)
hsa-miR-515-3p	0	0	1	1	1	1	TMEM67	transmembrane protein 67
hsa-miR-515-3p	0	0	1	0	0	0	CFL1P1	cofilin 1 (non-muscle) pseudogene 1
hsa-miR-515-3p	0	0	1	1	0	0	KIAA1324	KIAA1324
hsa-miR-515-3p	0	0	1	1	1	1	C7orf53	chromosome 7 open reading frame 53
hsa-miR-515-3p	1	0	1	1	1	1	FGF1	fibroblast growth factor 1 (acidic)
hsa-miR-515-3p	0	0	1	1	1	1	XAF1	XIAP associated factor 1
hsa-miR-515-3p	0	0	1	1	0	0	WASIR2	WASH and IL9R antisense RNA 2
hsa-miR-515-3p	1	0	1	1	1	1	SECISBP2L	SECIS binding protein 2-like
hsa-miR-515-3p	1	0	1	1	1	1	FAM13A	family with sequence similarity 13, member A
hsa-miR-515-3p	1	0	1	0	1	1	KCTD2	potassium channel tetramerisation domain containing 2
hsa-miR-515-3p	0	0	1	0	0	0	LINC00238	long intergenic non-protein coding RNA 238
hsa-miR-515-3p	0	0	1	0	0	0	NBR2	neighbor of BRCA1 gene 2 (non-protein coding)
hsa-miR-515-3p	0	0	1	0	1	1	DKFZP434I0714	uncharacterized protein DKFZP434I0714
hsa-miR-515-3p	1	0	1	0	1	1	DDX3Y	DEAD (Asp-Glu-Ala-Asp) box polypeptide 3, Y-linked
hsa-miR-515-3p	0	0	1	0	0	0	LINC00486	long intergenic non-protein coding RNA 486
hsa-miR-515-3p	0	0	1	0	0	0	LOC339862	uncharacterized LOC339862
hsa-miR-515-3p	0	0	1	0	0	0	C12orf77	chromosome 12 open reading frame 77
hsa-miR-515-3p	0	0	1	1	1	1	CLEC12B	C-type lectin domain family 12, member B
hsa-miR-515-3p	1	0	1	1	0	0	EGLN2	egl nine homolog 2 (C. elegans)
hsa-miR-515-3p	1	0	1	1	1	1	LMO7	LIM domain 7
hsa-miR-515-3p	0	0	1	1	1	1	TADA1	transcriptional adaptor 1
hsa-miR-515-3p	1	0	1	1	1	1	ACVR1	activin A receptor, type I
hsa-miR-515-3p	0	0	1	0	0	0	SRGAP2C	SLIT-ROBO Rho GTPase activating protein 2C
hsa-miR-515-3p	1	0	1	0	1	1	CPEB4	cytoplasmic polyadenylation element binding protein 4
hsa-miR-515-3p	1	0	1	1	1	1	BNC2	basonuclin 2
hsa-miR-515-3p	0	0	1	0	0	0	CYP4F35P	cytochrome P450, family 4, subfamily F, polypeptide 35, pseudogene
hsa-miR-515-3p	1	0	1	1	1	1	FAM135B	family with sequence similarity 135, member B
hsa-miR-515-3p	0	0	1	0	0	0	LOC286184	uncharacterized LOC286184
hsa-miR-515-3p	0	0	1	1	0	0	VMO1	vitelline membrane outer layer 1 homolog (chicken)
hsa-miR-515-3p	1	0	1	1	1	1	DPP10	dipeptidyl-peptidase 10 (non-functional)
hsa-miR-515-3p	0	0	1	0	0	0	LINC00264	long intergenic non-protein coding RNA 264
hsa-miR-515-3p	0	0	1	0	0	0	LOC100134868	uncharacterized LOC100134868
hsa-miR-515-3p	1	0	1	1	0	0	PROSAPIP1	ProSAPiP1 protein
hsa-miR-515-3p	1	0	1	1	1	1	PLS3	plastin 3
hsa-miR-515-3p	0	0	1	0	0	0	LINC00326	long intergenic non-protein coding RNA 326
hsa-miR-515-3p	0	0	1	1	1	1	SLTM	SAFB-like, transcription modulator
hsa-miR-515-3p	0	0	1	0	0	0	C4orf52	chromosome 4 open reading frame 52
hsa-miR-515-3p	0	0	1	0	0	0	SNHG11	small nucleolar RNA host gene 11 (non-protein coding)
hsa-miR-515-3p	0	0	1	1	1	1	ZFP90	zinc finger protein 90 homolog (mouse)
hsa-miR-515-3p	1	0	1	1	1	1	LEF1	lymphoid enhancer-binding factor 1
hsa-miR-515-3p	1	0	1	1	1	1	KCNJ11	potassium inwardly-rectifying channel, subfamily J, member 11
hsa-miR-515-3p	0	0	1	0	0	0	FAM86JP	family with sequence similarity 86, member A pseudogene
hsa-miR-515-3p	0	0	1	0	1	1	FAM13B	family with sequence similarity 13, member B
hsa-miR-515-3p	1	0	1	1	1	1	TNFSF4	tumor necrosis factor (ligand) superfamily, member 4
hsa-miR-515-3p	0	0	1	1	1	1	GOLGA6L9	golgin A6 family-like 9
hsa-miR-515-3p	1	0	1	1	1	1	CLOCK	clock homolog (mouse)
hsa-miR-515-3p	0	0	1	1	0	0	PTOV1	prostate tumor overexpressed 1
hsa-miR-515-3p	0	0	1	0	0	0	LOC338579	ankyrin repeat domain-containing protein 30B pseudogene
hsa-miR-515-3p	1	0	1	1	1	1	ARHGAP30	Rho GTPase activating protein 30
hsa-miR-515-3p	0	0	1	1	1	1	C14orf45	chromosome 14 open reading frame 45
hsa-miR-515-3p	1	0	1	0	1	1	PSD3	pleckstrin and Sec7 domain containing 3
hsa-miR-515-3p	1	0	1	1	1	1	MAMDC2	MAM domain containing 2
hsa-miR-515-3p	1	0	1	1	1	1	ZFAND4	zinc finger, AN1-type domain 4
hsa-miR-515-3p	1	0	1	1	1	1	SUPT7L	suppressor of Ty 7 (S. cerevisiae)-like
hsa-miR-515-3p	0	0	1	1	1	1	EBP	emopamil binding protein (sterol isomerase)
hsa-miR-515-3p	0	0	1	0	0	0	LOC339529	uncharacterized LOC339529
hsa-miR-515-3p	0	0	1	0	0	0	MDP1	magnesium-dependent phosphatase 1
hsa-miR-515-3p	1	0	1	0	1	1	LYPD6	LY6/PLAUR domain containing 6
hsa-miR-515-3p	1	0	1	0	1	1	KDM2A	lysine (K)-specific demethylase 2A
hsa-miR-515-3p	1	0	1	0	1	1	ZNF800	zinc finger protein 800
hsa-miR-515-3p	0	0	1	1	0	0	MT3	metallothionein 3
hsa-miR-515-3p	1	0	1	1	1	1	RTKN2	rhotekin 2
hsa-miR-515-3p	0	0	1	1	1	1	CDADC1	cytidine and dCMP deaminase domain containing 1
hsa-miR-515-3p	0	0	1	1	1	1	ZNF589	zinc finger protein 589
hsa-miR-515-3p	1	0	1	0	1	1	RNF182	ring finger protein 182
hsa-miR-515-3p	0	0	1	0	1	1	ITGA1	integrin, alpha 1
hsa-miR-515-3p	1	0	1	1	1	1	RECK	reversion-inducing-cysteine-rich protein with kazal motifs
hsa-miR-515-3p	1	0	1	1	1	1	FNDC3A	fibronectin type III domain containing 3A
hsa-miR-515-3p	0	0	1	1	1	1	PPP1R7	protein phosphatase 1, regulatory subunit 7
hsa-miR-515-3p	1	0	1	1	1	1	ZFP91	zinc finger protein 91 homolog (mouse)
hsa-miR-515-3p	1	0	1	1	1	1	LIMD2	LIM domain containing 2
hsa-miR-515-3p	0	0	1	0	1	1	GUCY1B3	guanylate cyclase 1, soluble, beta 3
hsa-miR-515-3p	1	0	1	1	1	1	PDGFRA	platelet-derived growth factor receptor, alpha polypeptide
hsa-miR-515-3p	0	0	1	1	1	1	ZNF333	zinc finger protein 333
hsa-miR-515-3p	1	0	1	1	1	1	ADCY6	adenylate cyclase 6
hsa-miR-515-3p	0	0	1	0	0	0	LOC158435	uncharacterized LOC158435
hsa-miR-515-3p	0	0	1	1	1	1	ZNF189	zinc finger protein 189
hsa-miR-515-3p	0	0	1	1	1	1	METTL15	methyltransferase like 15
hsa-miR-515-3p	0	0	1	1	1	1	KCTD18	potassium channel tetramerisation domain containing 18
hsa-miR-515-3p	1	0	1	1	1	1	PDCD6IP	programmed cell death 6 interacting protein
hsa-miR-515-3p	1	0	1	1	1	1	SLC26A7	solute carrier family 26, member 7
hsa-miR-515-3p	1	0	1	1	1	1	MAPKAPK3	mitogen-activated protein kinase-activated protein kinase 3
hsa-miR-515-3p	1	0	1	1	1	1	PHACTR4	phosphatase and actin regulator 4
hsa-miR-515-3p	0	0	1	0	0	0	PTGER4P2	prostaglandin E receptor 4 (subtype EP4) pseudogene 2
hsa-miR-515-3p	0	0	1	0	0	0	GAGE7	G antigen 7
hsa-miR-515-3p	0	0	1	1	0	0	GAGE12I	G antigen 12I
hsa-miR-515-3p	0	0	1	1	0	0	GAGE12G	G antigen 12G
hsa-miR-515-3p	0	0	1	1	0	0	GAGE12F	G antigen 12F
hsa-miR-515-3p	0	0	1	1	0	0	GAGE2A	G antigen 2A
hsa-miR-515-3p	0	0	1	1	1	1	C21orf62	chromosome 21 open reading frame 62
hsa-miR-515-3p	1	0	1	0	1	1	HMGB3	high mobility group box 3
hsa-miR-515-3p	0	0	1	1	1	1	PCDH18	protocadherin 18
hsa-miR-515-3p	0	0	1	0	0	0	JPX	JPX transcript, XIST activator (non-protein coding)
hsa-miR-515-3p	1	0	1	1	1	1	CTBP1	C-terminal binding protein 1
hsa-miR-515-3p	1	0	1	1	1	1	OPCML	opioid binding protein/cell adhesion molecule-like
hsa-miR-515-3p	1	0	1	1	1	1	NTRK2	neurotrophic tyrosine kinase, receptor, type 2
hsa-miR-515-3p	1	0	1	0	1	1	AMMECR1L	AMME chromosomal region gene 1-like
hsa-miR-515-3p	1	0	1	1	1	1	ZBTB7A	zinc finger and BTB domain containing 7A
hsa-miR-515-3p	1	0	1	1	1	1	SYNE1	spectrin repeat containing, nuclear envelope 1
hsa-miR-515-3p	0	0	1	1	0	0	DNASE1	deoxyribonuclease I
hsa-miR-515-3p	1	0	1	1	1	1	WNT10B	wingless-type MMTV integration site family, member 10B
hsa-miR-515-3p	0	0	1	0	0	0	ABCA11P	ATP-binding cassette, sub-family A (ABC1), member 11, pseudogene
hsa-miR-515-3p	0	0	1	0	0	0	LOC441493	uncharacterized LOC441493
hsa-miR-515-3p	0	0	1	0	0	0	LSAMP-AS3	LSAMP antisense RNA 3
hsa-miR-515-3p	1	0	1	0	0	0	PWWP2A	PWWP domain containing 2A
hsa-miR-515-3p	0	0	1	0	1	1	C9orf91	chromosome 9 open reading frame 91
hsa-miR-515-3p	1	0	1	0	1	1	BTBD3	BTB (POZ) domain containing 3
hsa-miR-515-3p	1	0	1	1	1	1	SLK	STE20-like kinase
hsa-miR-515-3p	0	0	1	1	1	1	UNC13B	unc-13 homolog B (C. elegans)
hsa-miR-515-3p	1	0	1	0	1	1	ROBO1	roundabout, axon guidance receptor, homolog 1 (Drosophila)
hsa-miR-515-3p	0	0	1	1	1	1	LOC100499484-C9ORF174	LOC100499484-C9orf174 readthrough
hsa-miR-515-3p	0	0	1	0	0	0	FAM27E3	family with sequence similarity 27, member E3
hsa-miR-515-3p	0	0	1	1	0	0	HOXD12	homeobox D12
hsa-miR-515-3p	0	0	1	0	0	0	LGALS17A	Charcot-Leyden crystal protein pseudogene
hsa-miR-515-3p	0	0	1	0	0	0	CCT6P1	chaperonin containing TCP1, subunit 6 (zeta) pseudogene 1
hsa-miR-515-3p	1	0	1	1	1	1	ANK2	ankyrin 2, neuronal
hsa-miR-515-3p	1	0	1	1	1	1	ZMYM4	zinc finger, MYM-type 4
hsa-miR-515-3p	0	0	1	1	0	0	TTC21A	tetratricopeptide repeat domain 21A
hsa-miR-515-3p	0	0	1	0	0	0	FAM225B	family with sequence similarity 225, member B (non-protein coding)
hsa-miR-515-3p	1	0	1	1	1	1	TMEM218	transmembrane protein 218
hsa-miR-515-3p	1	0	1	0	0	0	SDR39U1	short chain dehydrogenase/reductase family 39U, member 1
hsa-miR-515-3p	0	0	1	0	0	0	FUT8-AS1	FUT8 antisense RNA 1
hsa-miR-515-3p	0	0	1	0	0	0	MEG3	maternally expressed 3 (non-protein coding)
hsa-miR-515-3p	0	0	1	1	1	1	HAUS4	HAUS augmin-like complex, subunit 4
hsa-miR-515-3p	0	0	1	0	0	0	LINC00643	long intergenic non-protein coding RNA 643
hsa-miR-515-3p	0	0	1	1	1	1	C10orf82	chromosome 10 open reading frame 82
hsa-miR-515-3p	1	0	1	1	1	1	RBL2	retinoblastoma-like 2 (p130)
hsa-miR-515-3p	1	0	1	1	1	1	RAB7A	RAB7A, member RAS oncogene family
hsa-miR-515-3p	0	0	1	0	0	0	POLR2J4	polymerase (RNA) II (DNA directed) polypeptide J4, pseudogene
hsa-miR-515-3p	1	0	1	1	1	1	SLC35F1	solute carrier family 35, member F1
hsa-miR-515-3p	0	0	1	1	1	1	DEPDC5	DEP domain containing 5
hsa-miR-515-3p	0	0	1	1	0	0	CDK5RAP2	CDK5 regulatory subunit associated protein 2
hsa-miR-515-3p	0	0	1	1	1	1	THSD4	thrombospondin, type I, domain containing 4
hsa-miR-515-3p	1	0	1	1	1	1	RAB30	RAB30, member RAS oncogene family
hsa-miR-515-3p	0	0	1	1	1	1	GTF3C2	general transcription factor IIIC, polypeptide 2, beta 110kDa
hsa-miR-515-3p	1	0	1	1	1	1	PRDM2	PR domain containing 2, with ZNF domain
hsa-miR-515-3p	1	0	1	1	1	1	TLN2	talin 2
hsa-miR-515-3p	1	0	1	1	1	1	EPS15	epidermal growth factor receptor pathway substrate 15
hsa-miR-515-3p	1	0	1	1	1	1	GABPA	GA binding protein transcription factor, alpha subunit 60kDa
hsa-miR-515-3p	1	0	1	1	1	1	TC2N	tandem C2 domains, nuclear
hsa-miR-515-3p	0	0	1	0	0	0	OVOS	ovostatin
hsa-miR-515-3p	1	0	1	1	1	1	DCAF5	DDB1 and CUL4 associated factor 5
hsa-miR-515-3p	0	0	1	1	1	1	CCNT2	cyclin T2
hsa-miR-515-3p	1	0	1	1	1	1	PTPN3	protein tyrosine phosphatase, non-receptor type 3
hsa-miR-515-3p	1	0	1	1	1	1	NFIB	nuclear factor I/B
hsa-miR-515-3p	1	0	1	1	1	1	NAV1	neuron navigator 1
hsa-miR-515-3p	0	0	1	1	0	0	UFD1L	ubiquitin fusion degradation 1 like (yeast)
hsa-miR-515-3p	1	0	1	1	1	1	EDIL3	EGF-like repeats and discoidin I-like domains 3
hsa-miR-515-3p	0	0	1	1	1	1	ABCD3	ATP-binding cassette, sub-family D (ALD), member 3
hsa-miR-515-3p	1	0	1	1	1	1	EOGT	EGF domain-specific O-linked N-acetylglucosamine (GlcNAc) transferase
hsa-miR-515-3p	0	0	1	1	1	1	SSFA2	sperm specific antigen 2
hsa-miR-515-3p	1	0	1	0	1	1	TTL	tubulin tyrosine ligase
hsa-miR-515-3p	1	0	1	1	1	1	BSDC1	BSD domain containing 1
hsa-miR-515-3p	1	0	1	1	1	1	MDK	midkine (neurite growth-promoting factor 2)
hsa-miR-515-3p	1	0	1	1	1	1	PCMT1	protein-L-isoaspartate (D-aspartate) O-methyltransferase
hsa-miR-515-3p	1	0	1	1	0	0	SMARCA2	SWI/SNF related, matrix associated, actin dependent regulator of chromatin, subfamily a, member 2
hsa-miR-515-3p	0	0	1	1	0	0	SLC39A7	solute carrier family 39 (zinc transporter), member 7
hsa-miR-515-3p	0	0	1	0	0	0	LOC100128988	uncharacterized LOC100128988
hsa-miR-515-3p	1	0	1	1	1	1	FUT9	fucosyltransferase 9 (alpha (1,3) fucosyltransferase)
hsa-miR-515-3p	1	0	1	1	1	1	FAM192A	family with sequence similarity 192, member A
hsa-miR-515-3p	0	0	1	0	0	0	AKR1A1	aldo-keto reductase family 1, member A1 (aldehyde reductase)
hsa-miR-515-3p	1	0	1	1	1	1	ERI3	ERI1 exoribonuclease family member 3
hsa-miR-515-3p	1	0	1	1	0	0	PHGDH	phosphoglycerate dehydrogenase
hsa-miR-515-3p	1	0	1	1	1	1	NME4	NME/NM23 nucleoside diphosphate kinase 4
hsa-miR-515-3p	1	0	1	0	1	1	SLCO2A1	solute carrier organic anion transporter family, member 2A1
hsa-miR-515-3p	0	0	1	1	1	1	C1orf85	chromosome 1 open reading frame 85
hsa-miR-515-3p	0	0	1	1	0	0	FCGRT	Fc fragment of IgG, receptor, transporter, alpha
hsa-miR-515-3p	1	0	1	1	1	1	AP3S1	adaptor-related protein complex 3, sigma 1 subunit
hsa-miR-515-3p	0	0	1	0	0	0	ARRDC1	arrestin domain containing 1
hsa-miR-515-3p	0	0	1	1	0	0	CCNDBP1	cyclin D-type binding-protein 1
hsa-miR-515-3p	1	0	1	0	1	1	BNIP3L	BCL2/adenovirus E1B 19kDa interacting protein 3-like
hsa-miR-515-3p	1	0	1	1	1	1	CD9	CD9 molecule
hsa-miR-515-3p	1	0	1	1	0	0	STX5	syntaxin 5
hsa-miR-515-3p	0	0	1	1	1	1	CD99	CD99 molecule
hsa-miR-515-3p	1	0	1	1	1	1	CHTF8	CTF8, chromosome transmission fidelity factor 8 homolog (S. cerevisiae)
hsa-miR-515-3p	0	0	1	1	1	1	MTCP1	mature T-cell proliferation 1
hsa-miR-515-3p	0	0	1	1	0	0	RPL7L1	ribosomal protein L7-like 1
hsa-miR-515-3p	1	0	1	1	1	1	NTM	neurotrimin
hsa-miR-515-3p	0	0	1	1	0	0	IKBKG	inhibitor of kappa light polypeptide gene enhancer in B-cells, kinase gamma
hsa-miR-515-3p	0	0	1	1	1	1	GRAP2	GRB2-related adaptor protein 2
hsa-miR-515-3p	1	0	1	1	1	1	TMEM248	transmembrane protein 248
hsa-miR-515-3p	1	0	1	1	1	1	STK38L	serine/threonine kinase 38 like
hsa-miR-515-3p	1	0	1	1	1	1	MTCH2	mitochondrial carrier 2
hsa-miR-515-3p	0	0	1	1	1	1	STXBP3	syntaxin binding protein 3
hsa-miR-515-3p	1	0	1	1	1	1	TMEM245	transmembrane protein 245
hsa-miR-515-3p	0	0	1	0	0	0	LOC150568	uncharacterized LOC150568
hsa-miR-515-3p	0	0	1	1	1	1	BMPR1A	bone morphogenetic protein receptor, type IA
hsa-miR-515-3p	0	0	1	1	0	0	MAST1	microtubule associated serine/threonine kinase 1
hsa-miR-515-3p	1	0	1	1	0	0	TBC1D17	TBC1 domain family, member 17
hsa-miR-515-3p	1	0	1	1	1	1	MMP2	matrix metallopeptidase 2 (gelatinase A, 72kDa gelatinase, 72kDa type IV collagenase)
hsa-miR-515-3p	0	0	1	1	1	1	CPZ	carboxypeptidase Z
hsa-miR-515-3p	0	0	1	1	1	1	TFAM	transcription factor A, mitochondrial
hsa-miR-515-3p	0	0	1	1	1	1	PEX19	peroxisomal biogenesis factor 19
hsa-miR-515-3p	1	0	1	1	1	1	BIN3	bridging integrator 3
hsa-miR-515-3p	0	0	1	1	0	0	EXOSC8	exosome component 8
hsa-miR-515-3p	0	0	1	1	0	0	RGS9	regulator of G-protein signaling 9
hsa-miR-515-3p	1	0	1	1	1	1	FUBP3	far upstream element (FUSE) binding protein 3
hsa-miR-515-3p	1	0	1	1	1	1	ARL4A	ADP-ribosylation factor-like 4A
hsa-miR-515-3p	1	0	1	1	1	1	RBBP7	retinoblastoma binding protein 7
hsa-miR-515-3p	0	0	1	1	0	0	AHSG	alpha-2-HS-glycoprotein
hsa-miR-515-3p	0	0	1	0	0	0	LOC100130954	uncharacterized LOC100130954
hsa-miR-515-3p	0	0	1	1	1	1	PSMD9	proteasome (prosome, macropain) 26S subunit, non-ATPase, 9
hsa-miR-515-3p	1	0	1	1	1	1	MED1	mediator complex subunit 1
hsa-miR-515-3p	0	0	1	1	1	1	COMMD3	COMM domain containing 3
hsa-miR-515-3p	1	0	1	1	1	1	LGALSL	lectin, galactoside-binding-like
hsa-miR-515-3p	0	0	1	1	0	0	INO80B	INO80 complex subunit B
hsa-miR-515-3p	1	0	1	1	1	1	DNAJC16	DnaJ (Hsp40) homolog, subfamily C, member 16
hsa-miR-515-3p	1	0	1	1	1	1	PTPRG	protein tyrosine phosphatase, receptor type, G
hsa-miR-515-3p	0	0	1	1	1	1	ISX	intestine-specific homeobox
hsa-miR-515-3p	0	0	1	0	0	0	LINC00661	long intergenic non-protein coding RNA 661
hsa-miR-515-3p	0	0	1	0	1	1	STARD8	StAR-related lipid transfer (START) domain containing 8
hsa-miR-515-3p	0	0	1	0	0	0	MUC19	mucin 19, oligomeric
hsa-miR-515-3p	1	0	1	0	1	1	XRN1	5'-3' exoribonuclease 1
hsa-miR-515-3p	1	0	1	1	1	1	MAPK8IP3	mitogen-activated protein kinase 8 interacting protein 3
hsa-miR-515-3p	1	0	1	0	1	1	CNTNAP2	contactin associated protein-like 2
hsa-miR-515-3p	1	0	1	1	1	1	METAP1	methionyl aminopeptidase 1
hsa-miR-515-3p	1	0	1	1	1	1	NAPEPLD	N-acyl phosphatidylethanolamine phospholipase D
hsa-miR-515-3p	1	0	1	1	1	1	ADD1	adducin 1 (alpha)
hsa-miR-515-3p	0	0	1	1	0	0	TENC1	tensin like C1 domain containing phosphatase (tensin 2)
hsa-miR-515-3p	1	0	1	1	1	1	SLC30A7	solute carrier family 30 (zinc transporter), member 7
hsa-miR-515-3p	1	0	1	1	1	1	ZFHX3	zinc finger homeobox 3
hsa-miR-515-3p	1	0	1	0	1	1	CBX7	chromobox homolog 7
hsa-miR-515-3p	0	0	1	1	1	1	PTGS1	prostaglandin-endoperoxide synthase 1 (prostaglandin G/H synthase and cyclooxygenase)
hsa-miR-515-3p	1	0	1	1	1	1	TRIOBP	TRIO and F-actin binding protein
hsa-miR-515-3p	0	0	1	1	0	0	SPATA20	spermatogenesis associated 20
hsa-miR-515-3p	1	0	1	1	1	1	ANKRD42	ankyrin repeat domain 42
hsa-miR-515-3p	0	0	1	1	1	1	MARVELD2	MARVEL domain containing 2
hsa-miR-515-3p	0	0	1	0	0	0	PILRB	paired immunoglobin-like type 2 receptor beta
hsa-miR-515-3p	0	0	1	1	1	1	MORC4	MORC family CW-type zinc finger 4
hsa-miR-515-3p	0	0	1	1	1	1	AKAP17A	A kinase (PRKA) anchor protein 17A
hsa-miR-515-3p	0	0	1	1	1	1	ADPRH	ADP-ribosylarginine hydrolase
hsa-miR-515-3p	1	0	1	1	1	1	AFF1	AF4/FMR2 family, member 1
hsa-miR-515-3p	0	0	1	1	0	0	INHBA	inhibin, beta A
hsa-miR-515-3p	1	0	1	1	1	1	IGF1	insulin-like growth factor 1 (somatomedin C)
hsa-miR-515-3p	1	0	1	1	1	1	COL4A3	collagen, type IV, alpha 3 (Goodpasture antigen)
hsa-miR-515-3p	1	0	1	1	1	1	COL4A4	collagen, type IV, alpha 4
hsa-miR-515-3p	0	0	1	1	0	0	GBA	glucosidase, beta, acid
hsa-miR-515-3p	1	0	1	1	1	1	HK2	hexokinase 2
hsa-miR-515-3p	1	0	1	1	1	1	KCNA1	potassium voltage-gated channel, shaker-related subfamily, member 1 (episodic ataxia with myokymia)
hsa-miR-515-3p	0	0	1	1	0	0	MPO	myeloperoxidase
hsa-miR-515-3p	0	0	1	1	1	1	MTR	5-methyltetrahydrofolate-homocysteine methyltransferase
hsa-miR-515-3p	1	0	1	1	1	1	RB1	retinoblastoma 1
hsa-miR-515-3p	1	0	1	1	1	1	ATXN1	ataxin 1
hsa-miR-515-3p	0	0	1	1	1	1	SLC25A20	solute carrier family 25 (carnitine/acylcarnitine translocase), member 20
hsa-miR-515-3p	0	0	1	1	1	1	LTBP2	latent transforming growth factor beta binding protein 2
hsa-miR-515-3p	1	0	1	0	1	1	PAFAH1B1	platelet-activating factor acetylhydrolase 1b, regulatory subunit 1 (45kDa)
hsa-miR-515-3p	1	0	1	1	1	1	DCX	doublecortin
hsa-miR-515-3p	1	0	1	0	1	1	CACNA1E	calcium channel, voltage-dependent, R type, alpha 1E subunit
hsa-miR-515-3p	1	0	1	1	1	1	GABRB3	gamma-aminobutyric acid (GABA) A receptor, beta 3
hsa-miR-515-3p	0	0	1	1	1	1	GAD2	glutamate decarboxylase 2 (pancreatic islets and brain, 65kDa)
hsa-miR-515-3p	1	0	1	1	1	1	GRIA4	glutamate receptor, ionotropic, AMPA 4
hsa-miR-515-3p	1	0	1	1	0	0	GRIN2A	glutamate receptor, ionotropic, N-methyl D-aspartate 2A
hsa-miR-515-3p	0	0	1	1	1	1	HTR7	5-hydroxytryptamine (serotonin) receptor 7, adenylate cyclase-coupled
hsa-miR-515-3p	1	0	1	1	1	1	PTGER2	prostaglandin E receptor 2 (subtype EP2), 53kDa
hsa-miR-515-3p	1	0	1	0	1	1	UBE2W	ubiquitin-conjugating enzyme E2W (putative)
hsa-miR-515-3p	1	0	1	1	1	1	UGP2	UDP-glucose pyrophosphorylase 2
hsa-miR-515-3p	0	0	1	0	0	0	KLK2	kallikrein-related peptidase 2
hsa-miR-515-3p	0	0	1	1	1	1	STAG3L1	stromal antigen 3-like 1
hsa-miR-515-3p	1	0	1	1	1	1	KLHL31	kelch-like 31 (Drosophila)
hsa-miR-515-3p	1	0	1	1	1	1	BICD2	bicaudal D homolog 2 (Drosophila)
hsa-miR-515-3p	0	0	1	1	1	1	ZCCHC16	zinc finger, CCHC domain containing 16
hsa-miR-515-3p	0	0	1	1	1	1	CLEC2D	C-type lectin domain family 2, member D
hsa-miR-515-3p	1	0	1	0	1	1	LRRC55	leucine rich repeat containing 55
hsa-miR-515-3p	1	0	1	1	1	1	ACTR2	ARP2 actin-related protein 2 homolog (yeast)
hsa-miR-515-3p	1	0	1	1	1	1	PLCXD3	phosphatidylinositol-specific phospholipase C, X domain containing 3
hsa-miR-515-3p	0	0	1	1	1	1	SUMO1	SMT3 suppressor of mif two 3 homolog 1 (S. cerevisiae)
hsa-miR-515-3p	1	0	1	0	1	1	PDPN	podoplanin
hsa-miR-515-3p	0	0	1	0	1	1	GIMAP6	GTPase, IMAP family member 6
hsa-miR-515-3p	1	0	1	1	1	1	LMBRD2	LMBR1 domain containing 2
hsa-miR-515-3p	0	0	1	1	1	1	FAM154B	family with sequence similarity 154, member B
hsa-miR-515-3p	1	0	1	0	1	1	C18orf25	chromosome 18 open reading frame 25
hsa-miR-515-3p	1	0	1	0	1	1	KIAA2022	KIAA2022
hsa-miR-515-3p	0	0	1	1	1	1	CXCR4	chemokine (C-X-C motif) receptor 4
hsa-miR-515-3p	1	0	1	1	1	1	NUPL1	nucleoporin like 1
hsa-miR-515-3p	0	0	1	1	1	1	SPIN3	spindlin family, member 3
hsa-miR-515-3p	1	0	1	1	1	1	BCL2L15	BCL2-like 15
hsa-miR-515-3p	1	0	1	0	1	1	CREB5	cAMP responsive element binding protein 5
hsa-miR-515-3p	0	0	1	0	1	1	ARGFX	arginine-fifty homeobox
hsa-miR-515-3p	1	0	1	1	1	1	SLC25A53	solute carrier family 25, member 53
hsa-miR-515-3p	1	0	1	0	1	1	ZKSCAN2	zinc finger with KRAB and SCAN domains 2
hsa-miR-515-3p	1	0	1	1	1	1	SORCS1	sortilin-related VPS10 domain containing receptor 1
hsa-miR-515-3p	0	0	1	1	1	1	C2orf68	chromosome 2 open reading frame 68
hsa-miR-515-3p	0	0	1	0	0	0	LOC441956	uncharacterized LOC441956
hsa-miR-515-3p	1	0	1	1	1	1	NLE1	notchless homolog 1 (Drosophila)
hsa-miR-515-3p	1	0	1	1	1	1	NCDN	neurochondrin
hsa-miR-515-3p	1	0	1	1	1	1	RUNX2	runt-related transcription factor 2
hsa-miR-515-3p	0	0	1	1	1	1	PURG	purine-rich element binding protein G
hsa-miR-515-3p	0	0	1	1	1	1	USP1	ubiquitin specific peptidase 1
hsa-miR-515-3p	1	0	1	0	1	1	KCNK2	potassium channel, subfamily K, member 2
hsa-miR-515-3p	1	0	1	1	1	1	SH3PXD2B	SH3 and PX domains 2B
hsa-miR-515-3p	0	0	1	1	0	0	POLR3H	polymerase (RNA) III (DNA directed) polypeptide H (22.9kD)
hsa-miR-515-3p	1	0	1	0	1	1	BCL7A	B-cell CLL/lymphoma 7A
hsa-miR-515-3p	1	0	1	0	1	1	TNRC6B	trinucleotide repeat containing 6B
hsa-miR-515-3p	1	0	1	1	1	1	TGFBR2	transforming growth factor, beta receptor II (70/80kDa)
hsa-miR-515-3p	1	0	1	1	1	1	FNBP1L	formin binding protein 1-like
hsa-miR-515-3p	1	0	1	1	1	1	ARPP21	cAMP-regulated phosphoprotein, 21kDa
hsa-miR-515-3p	1	0	1	1	1	1	RGS7BP	regulator of G-protein signaling 7 binding protein
hsa-miR-515-3p	0	0	1	1	0	0	KLK3	kallikrein-related peptidase 3
hsa-miR-515-3p	1	0	1	0	1	1	CYB5RL	cytochrome b5 reductase-like
hsa-miR-515-3p	1	0	1	1	1	1	MAF	v-maf musculoaponeurotic fibrosarcoma oncogene homolog (avian)
hsa-miR-515-3p	1	0	1	0	1	1	NPNT	nephronectin
hsa-miR-515-3p	1	0	1	0	1	1	SRGAP3	SLIT-ROBO Rho GTPase activating protein 3
hsa-miR-515-3p	1	0	1	1	1	1	ZNF704	zinc finger protein 704
hsa-miR-515-3p	1	0	1	1	1	1	ACPL2	acid phosphatase-like 2
hsa-miR-515-3p	1	0	1	0	1	1	CDC42SE1	CDC42 small effector 1
hsa-miR-515-3p	0	0	1	0	0	0	FER1L6	fer-1-like 6 (C. elegans)
hsa-miR-515-3p	0	0	1	1	1	1	HEPACAM2	HEPACAM family member 2
hsa-miR-515-3p	1	0	1	0	1	1	USP9X	ubiquitin specific peptidase 9, X-linked
hsa-miR-515-3p	1	0	1	1	1	1	MLLT4	myeloid/lymphoid or mixed-lineage leukemia (trithorax homolog, Drosophila); translocated to, 4
hsa-miR-515-3p	1	0	1	1	1	1	GDAP1	ganglioside induced differentiation associated protein 1
hsa-miR-515-3p	1	0	1	1	1	1	FRS2	fibroblast growth factor receptor substrate 2
hsa-miR-515-3p	1	0	1	1	1	1	ERBB4	v-erb-a erythroblastic leukemia viral oncogene homolog 4 (avian)
hsa-miR-515-3p	0	0	1	1	1	1	TTC14	tetratricopeptide repeat domain 14
hsa-miR-515-3p	0	0	1	1	1	1	SEC24B	SEC24 family, member B (S. cerevisiae)
hsa-miR-515-3p	1	0	1	0	1	1	SRGAP2	SLIT-ROBO Rho GTPase activating protein 2
hsa-miR-515-3p	0	0	1	1	1	1	PRAMEF16	PRAME family member 16
hsa-miR-515-3p	0	0	1	1	1	1	RCC1	regulator of chromosome condensation 1
hsa-miR-515-3p	0	0	1	0	1	1	SSTR1	somatostatin receptor 1
hsa-miR-515-3p	1	0	1	1	1	1	UBTF	upstream binding transcription factor, RNA polymerase I
hsa-miR-515-3p	1	0	1	1	1	1	IRF2BP2	interferon regulatory factor 2 binding protein 2
hsa-miR-515-3p	0	0	1	1	1	1	KLK10	kallikrein-related peptidase 10
hsa-miR-515-3p	0	0	1	1	1	1	XIRP2	xin actin-binding repeat containing 2
hsa-miR-515-3p	1	0	1	1	1	1	DMP1	dentin matrix acidic phosphoprotein 1
hsa-miR-515-3p	1	0	1	1	1	1	LDB3	LIM domain binding 3
hsa-miR-515-3p	1	0	1	0	1	1	FBXO41	F-box protein 41
hsa-miR-515-3p	0	0	1	1	1	1	HSF5	heat shock transcription factor family member 5
hsa-miR-515-3p	1	0	1	1	1	1	MGA	MAX gene associated
hsa-miR-515-3p	1	0	1	1	1	1	DGKG	diacylglycerol kinase, gamma 90kDa
hsa-miR-515-3p	1	0	1	1	1	1	MYO1C	myosin IC
hsa-miR-515-3p	1	0	1	1	1	1	REPS2	RALBP1 associated Eps domain containing 2
hsa-miR-515-3p	1	0	1	1	1	1	ADCYAP1	adenylate cyclase activating polypeptide 1 (pituitary)
hsa-miR-515-3p	0	0	1	1	0	0	ARG2	arginase, type II
hsa-miR-515-3p	1	0	1	0	1	1	BMPR2	bone morphogenetic protein receptor, type II (serine/threonine kinase)
hsa-miR-515-3p	0	0	1	0	1	1	CASQ2	calsequestrin 2 (cardiac muscle)
hsa-miR-515-3p	1	0	1	1	1	1	CHKA	choline kinase alpha
hsa-miR-515-3p	0	0	1	1	1	1	CLIC2	chloride intracellular channel 2
hsa-miR-515-3p	1	0	1	1	1	1	CNN1	calponin 1, basic, smooth muscle
hsa-miR-515-3p	1	0	1	1	1	1	CREBL2	cAMP responsive element binding protein-like 2
hsa-miR-515-3p	1	0	1	1	1	1	CTNND2	catenin (cadherin-associated protein), delta 2
hsa-miR-515-3p	1	0	1	1	1	1	DYRK1A	dual-specificity tyrosine-(Y)-phosphorylation regulated kinase 1A
hsa-miR-515-3p	0	0	1	0	1	1	ELF5	E74-like factor 5 (ets domain transcription factor)
hsa-miR-515-3p	1	0	1	1	1	1	EXTL3	exostoses (multiple)-like 3
hsa-miR-515-3p	0	0	1	1	0	0	GAGE2C	G antigen 2C
hsa-miR-515-3p	1	0	1	0	1	1	B4GALT1	UDP-Gal:betaGlcNAc beta 1,4- galactosyltransferase, polypeptide 1
hsa-miR-515-3p	0	0	1	1	1	1	CXCL10	chemokine (C-X-C motif) ligand 10
hsa-miR-515-3p	1	0	1	1	1	1	ADD2	adducin 2 (beta)
hsa-miR-515-3p	1	0	1	1	1	1	AQP4	aquaporin 4
hsa-miR-515-3p	1	0	1	1	1	1	BAAT	bile acid CoA: amino acid N-acyltransferase (glycine N-choloyltransferase)
hsa-miR-515-3p	0	0	1	1	0	0	CXCR5	chemokine (C-X-C motif) receptor 5
hsa-miR-515-3p	0	0	1	1	1	1	CD22	CD22 molecule
hsa-miR-515-3p	1	0	1	1	1	1	CLCN4	chloride channel, voltage-sensitive 4
hsa-miR-515-3p	1	0	1	0	1	1	COL19A1	collagen, type XIX, alpha 1
hsa-miR-515-3p	0	0	1	1	1	1	SLC31A2	solute carrier family 31 (copper transporters), member 2
hsa-miR-515-3p	1	0	1	1	0	0	DES	desmin
hsa-miR-515-3p	1	0	1	1	1	1	DSC3	desmocollin 3
hsa-miR-515-3p	0	0	1	1	1	1	GTF2E2	general transcription factor IIE, polypeptide 2, beta 34kDa
hsa-miR-515-3p	1	0	1	1	1	1	ITGB8	integrin, beta 8
hsa-miR-515-3p	1	0	1	1	1	1	KCNA6	potassium voltage-gated channel, shaker-related subfamily, member 6
hsa-miR-515-3p	0	0	1	0	1	1	KCNN1	potassium intermediate/small conductance calcium-activated channel, subfamily N, member 1
hsa-miR-515-3p	1	0	1	0	1	1	MXD1	MAX dimerization protein 1
hsa-miR-515-3p	1	0	1	1	1	1	ADAM11	ADAM metallopeptidase domain 11
hsa-miR-515-3p	1	0	1	1	1	1	MYH9	myosin, heavy chain 9, non-muscle
hsa-miR-515-3p	0	0	1	1	1	1	MYOD1	myogenic differentiation 1
hsa-miR-515-3p	1	0	1	1	1	1	NPAS2	neuronal PAS domain protein 2
hsa-miR-515-3p	1	0	1	1	1	1	TNFRSF11B	tumor necrosis factor receptor superfamily, member 11b
hsa-miR-515-3p	1	0	1	1	1	1	OSBP	oxysterol binding protein
hsa-miR-515-3p	1	0	1	1	1	1	PCSK6	proprotein convertase subtilisin/kexin type 6
hsa-miR-515-3p	0	0	1	1	1	1	PAFAH1B2	platelet-activating factor acetylhydrolase 1b, catalytic subunit 2 (30kDa)
hsa-miR-515-3p	1	0	1	0	1	1	PAK2	p21 protein (Cdc42/Rac)-activated kinase 2
hsa-miR-515-3p	1	0	1	0	1	1	PAPPA	pregnancy-associated plasma protein A, pappalysin 1
hsa-miR-515-3p	1	0	1	1	0	0	PDGFB	platelet-derived growth factor beta polypeptide
hsa-miR-515-3p	0	0	1	1	0	0	PGM1	phosphoglucomutase 1
hsa-miR-515-3p	0	0	1	1	1	1	PPP1R3A	protein phosphatase 1, regulatory subunit 3A
hsa-miR-515-3p	1	0	1	1	1	1	PRKAR2B	protein kinase, cAMP-dependent, regulatory, type II, beta
hsa-miR-515-3p	1	0	1	1	1	1	PTPRJ	protein tyrosine phosphatase, receptor type, J
hsa-miR-515-3p	1	0	1	0	1	1	RAB6A	RAB6A, member RAS oncogene family
hsa-miR-515-3p	1	0	1	0	1	1	CCL22	chemokine (C-C motif) ligand 22
hsa-miR-515-3p	1	0	1	1	1	1	SRSF3	serine/arginine-rich splicing factor 3
hsa-miR-515-3p	0	0	1	1	0	0	SLIT1	slit homolog 1 (Drosophila)
hsa-miR-515-3p	1	0	1	0	1	1	SOX4	SRY (sex determining region Y)-box 4
hsa-miR-515-3p	1	0	1	0	1	1	SOX11	SRY (sex determining region Y)-box 11
hsa-miR-515-3p	0	0	1	1	1	1	STAT5A	signal transducer and activator of transcription 5A
hsa-miR-515-3p	1	0	1	1	1	1	SUV39H1	suppressor of variegation 3-9 homolog 1 (Drosophila)
hsa-miR-515-3p	1	0	1	1	1	1	TEC	tec protein tyrosine kinase
hsa-miR-515-3p	1	0	1	1	1	1	TFAP2B	transcription factor AP-2 beta (activating enhancer binding protein 2 beta)
hsa-miR-515-3p	1	0	1	1	1	1	TGFB3	transforming growth factor, beta 3
hsa-miR-515-3p	1	0	1	0	1	1	THBS1	thrombospondin 1
hsa-miR-515-3p	0	0	1	1	0	0	UBA7	ubiquitin-like modifier activating enzyme 7
hsa-miR-515-3p	0	0	1	1	1	1	UBE2V2	ubiquitin-conjugating enzyme E2 variant 2
hsa-miR-515-3p	1	0	1	1	1	1	NRIP1	nuclear receptor interacting protein 1
hsa-miR-515-3p	1	0	1	0	1	1	SNN	stannin
hsa-miR-515-3p	1	0	1	1	1	1	BHLHE40	basic helix-loop-helix family, member e40
hsa-miR-515-3p	1	0	1	1	1	1	CDC14A	CDC14 cell division cycle 14 homolog A (S. cerevisiae)
hsa-miR-515-3p	1	0	1	1	1	1	EXO1	exonuclease 1
hsa-miR-515-3p	1	0	1	0	1	1	TNKS	tankyrase, TRF1-interacting ankyrin-related ADP-ribose polymerase
hsa-miR-515-3p	1	0	1	0	1	1	IRS2	insulin receptor substrate 2
hsa-miR-515-3p	1	0	1	1	1	1	URI1	URI1, prefoldin-like chaperone
hsa-miR-515-3p	0	0	1	1	1	1	TNFSF12	tumor necrosis factor (ligand) superfamily, member 12
hsa-miR-515-3p	0	0	1	1	1	1	SUCLA2	succinate-CoA ligase, ADP-forming, beta subunit
hsa-miR-515-3p	0	0	1	1	1	1	TRIM24	tripartite motif containing 24
hsa-miR-515-3p	1	0	1	1	1	1	NRP2	neuropilin 2
hsa-miR-515-3p	0	0	1	1	1	1	PRPF4B	PRP4 pre-mRNA processing factor 4 homolog B (yeast)
hsa-miR-515-3p	1	0	1	1	1	1	PHOX2B	paired-like homeobox 2b
hsa-miR-515-3p	0	0	1	1	1	1	RNF8	ring finger protein 8, E3 ubiquitin protein ligase
hsa-miR-515-3p	1	0	1	0	1	1	SEMA5A	sema domain, seven thrombospondin repeats (type 1 and type 1-like), transmembrane domain (TM) and short cytoplasmic domain, (semaphorin) 5A
hsa-miR-515-3p	1	0	1	1	1	1	EFNB2	ephrin-B2
hsa-miR-515-3p	1	0	1	1	1	1	FGF12	fibroblast growth factor 12
hsa-miR-515-3p	0	0	1	1	1	1	LBP	lipopolysaccharide binding protein
hsa-miR-515-3p	1	0	1	1	1	1	SOCS6	suppressor of cytokine signaling 6
hsa-miR-515-3p	1	0	1	0	1	1	AKAP6	A kinase (PRKA) anchor protein 6
hsa-miR-515-3p	1	0	1	0	1	1	GTPBP1	GTP binding protein 1
hsa-miR-515-3p	1	0	1	1	1	1	GDA	guanine deaminase
hsa-miR-515-3p	0	0	1	1	1	1	COL12A1	collagen, type XII, alpha 1
hsa-miR-515-3p	1	0	1	1	1	1	COX11	COX11 cytochrome c oxidase assembly homolog (yeast)
hsa-miR-515-3p	1	0	1	1	1	1	DAG1	dystroglycan 1 (dystrophin-associated glycoprotein 1)
hsa-miR-515-3p	1	0	1	1	1	1	EFNB1	ephrin-B1
hsa-miR-515-3p	1	0	1	1	1	1	EPHA4	EPH receptor A4
hsa-miR-515-3p	1	0	1	1	1	1	EPHB2	EPH receptor B2
hsa-miR-515-3p	1	0	1	0	1	1	SCN2B	sodium channel, voltage-gated, type II, beta subunit
hsa-miR-515-3p	1	0	1	1	1	1	BAP1	BRCA1 associated protein-1 (ubiquitin carboxy-terminal hydrolase)
hsa-miR-515-3p	0	0	1	1	0	0	PRY	PTPN13-like, Y-linked
hsa-miR-515-3p	1	0	1	1	1	1	MTMR4	myotubularin related protein 4
hsa-miR-515-3p	1	0	1	1	1	1	XPR1	xenotropic and polytropic retrovirus receptor 1
hsa-miR-515-3p	1	0	1	0	1	1	MAPKAPK2	mitogen-activated protein kinase-activated protein kinase 2
hsa-miR-515-3p	1	0	1	1	1	1	STK17A	serine/threonine kinase 17a
hsa-miR-515-3p	1	0	1	1	1	1	KIF3B	kinesin family member 3B
hsa-miR-515-3p	1	0	1	0	1	1	CDYL	chromodomain protein, Y-like
hsa-miR-515-3p	1	0	1	0	1	1	ROCK2	Rho-associated, coiled-coil containing protein kinase 2
hsa-miR-515-3p	1	0	1	0	1	1	SEC22B	SEC22 vesicle trafficking protein homolog B (S. cerevisiae) (gene/pseudogene)
hsa-miR-515-3p	1	0	1	1	1	1	GABRE	gamma-aminobutyric acid (GABA) A receptor, epsilon
hsa-miR-515-3p	1	0	1	0	1	1	KRAS	v-Ki-ras2 Kirsten rat sarcoma viral oncogene homolog
hsa-miR-515-3p	1	0	1	0	1	1	SEL1L	sel-1 suppressor of lin-12-like (C. elegans)
hsa-miR-515-3p	0	0	1	1	1	1	TRIM25	tripartite motif containing 25
hsa-miR-515-3p	0	0	1	1	1	1	XYLB	xylulokinase homolog (H. influenzae)
hsa-miR-515-3p	1	0	1	1	1	1	MED13	mediator complex subunit 13
hsa-miR-515-3p	0	0	1	1	1	1	CLEC2B	C-type lectin domain family 2, member B
hsa-miR-515-3p	1	0	1	1	1	1	BMI1	BMI1 polycomb ring finger oncogene
hsa-miR-515-3p	0	0	1	0	1	1	CD80	CD80 molecule
hsa-miR-515-3p	1	0	1	1	1	1	GABPB1	GA binding protein transcription factor, beta subunit 1
hsa-miR-515-3p	1	0	1	1	1	1	GABBR2	gamma-aminobutyric acid (GABA) B receptor, 2
hsa-miR-515-3p	1	0	1	1	1	1	KCNE3	potassium voltage-gated channel, Isk-related family, member 3
hsa-miR-515-3p	1	0	1	1	1	1	LAMP1	lysosomal-associated membrane protein 1
hsa-miR-515-3p	1	0	1	1	1	1	LAMC2	laminin, gamma 2
hsa-miR-515-3p	1	0	1	1	0	0	LOXL1	lysyl oxidase-like 1
hsa-miR-515-3p	1	0	1	1	1	1	DLL1	delta-like 1 (Drosophila)
hsa-miR-515-3p	1	0	1	1	1	1	ST8SIA4	ST8 alpha-N-acetyl-neuraminide alpha-2,8-sialyltransferase 4
hsa-miR-515-3p	0	0	1	1	0	0	SNURF	SNRPN upstream reading frame
hsa-miR-515-3p	1	0	1	1	1	1	UST	uronyl-2-sulfotransferase
hsa-miR-515-3p	0	0	1	1	1	1	ACTR3	ARP3 actin-related protein 3 homolog (yeast)
hsa-miR-515-3p	1	0	1	0	1	1	TSPAN2	tetraspanin 2
hsa-miR-515-3p	1	0	1	1	1	1	NAMPT	nicotinamide phosphoribosyltransferase
hsa-miR-515-3p	0	0	1	1	1	1	NUTF2	nuclear transport factor 2
hsa-miR-515-3p	1	0	1	1	1	1	PRKD3	protein kinase D3
hsa-miR-515-3p	1	0	1	0	1	1	SPRY3	sprouty homolog 3 (Drosophila)
hsa-miR-515-3p	1	0	1	1	1	1	PURA	purine-rich element binding protein A
hsa-miR-515-3p	1	0	1	1	1	1	EFS	embryonal Fyn-associated substrate
hsa-miR-515-3p	1	0	1	0	1	1	MAP1B	microtubule-associated protein 1B
hsa-miR-515-3p	1	0	1	1	1	1	MAT2A	methionine adenosyltransferase II, alpha
hsa-miR-515-3p	1	0	1	1	1	1	MEOX2	mesenchyme homeobox 2
hsa-miR-515-3p	1	0	1	1	1	1	DAGLA	diacylglycerol lipase, alpha
hsa-miR-515-3p	1	0	1	1	1	1	NR4A2	nuclear receptor subfamily 4, group A, member 2
hsa-miR-515-3p	1	0	1	1	1	1	PFKFB2	6-phosphofructo-2-kinase/fructose-2,6-biphosphatase 2
hsa-miR-515-3p	1	0	1	0	1	1	PITPNA	phosphatidylinositol transfer protein, alpha
hsa-miR-515-3p	1	0	1	1	1	1	PPP2R5E	protein phosphatase 2, regulatory subunit B', epsilon isoform
hsa-miR-515-3p	1	0	1	1	1	1	STK4	serine/threonine kinase 4
hsa-miR-515-3p	0	0	1	0	1	1	ZNF192	zinc finger protein 192
hsa-miR-515-3p	1	0	1	1	1	1	SMC1A	structural maintenance of chromosomes 1A
hsa-miR-515-3p	0	0	1	1	1	1	SLC30A9	solute carrier family 30 (zinc transporter), member 9
hsa-miR-515-3p	0	0	1	1	1	1	CAP2	CAP, adenylate cyclase-associated protein, 2 (yeast)
hsa-miR-515-3p	0	0	1	1	1	1	LRRC41	leucine rich repeat containing 41
hsa-miR-515-3p	1	0	1	1	1	1	NEBL	nebulette
hsa-miR-515-3p	0	0	1	1	1	1	HBXIP	hepatitis B virus x interacting protein
hsa-miR-515-3p	1	0	1	0	1	1	ARFGEF2	ADP-ribosylation factor guanine nucleotide-exchange factor 2 (brefeldin A-inhibited)
hsa-miR-515-3p	0	0	1	0	0	0	RELB	v-rel reticuloendotheliosis viral oncogene homolog B
hsa-miR-515-3p	0	0	1	0	1	1	SLC16A2	solute carrier family 16, member 2 (thyroid hormone transporter)
hsa-miR-515-3p	0	0	1	1	1	1	CACNG3	calcium channel, voltage-dependent, gamma subunit 3
hsa-miR-515-3p	1	0	1	0	1	1	NCOA2	nuclear receptor coactivator 2
hsa-miR-515-3p	1	0	1	0	1	1	IGF2BP1	insulin-like growth factor 2 mRNA binding protein 1
hsa-miR-515-3p	0	0	1	1	1	1	LYVE1	lymphatic vessel endothelial hyaluronan receptor 1
hsa-miR-515-3p	0	0	1	1	1	1	GLO1	glyoxalase I
hsa-miR-515-3p	1	0	1	1	1	1	DIAPH2	diaphanous homolog 2 (Drosophila)
hsa-miR-515-3p	1	0	1	1	1	1	KAT6A	K(lysine) acetyltransferase 6A
hsa-miR-515-3p	0	0	1	1	1	1	RAB40B	RAB40B, member RAS oncogene family
hsa-miR-515-3p	0	0	1	1	0	0	COPS6	COP9 constitutive photomorphogenic homolog subunit 6 (Arabidopsis)
hsa-miR-515-3p	1	0	1	1	0	0	CCDC85B	coiled-coil domain containing 85B
hsa-miR-515-3p	0	0	1	1	1	1	HOXA7	homeobox A7
hsa-miR-515-3p	1	0	1	1	1	1	PRRX1	paired related homeobox 1
hsa-miR-515-3p	1	0	1	1	1	1	RIT1	Ras-like without CAAX 1
hsa-miR-515-3p	1	0	1	1	1	1	RP2	retinitis pigmentosa 2 (X-linked recessive)
hsa-miR-515-3p	1	0	1	0	1	1	SOX12	SRY (sex determining region Y)-box 12
hsa-miR-515-3p	0	0	1	1	1	1	RTN4	reticulon 4
hsa-miR-515-3p	1	0	1	1	1	1	ABHD2	abhydrolase domain containing 2
hsa-miR-515-3p	0	0	1	1	1	1	DNAJB4	DnaJ (Hsp40) homolog, subfamily B, member 4
hsa-miR-515-3p	1	0	1	1	1	1	ESM1	endothelial cell-specific molecule 1
hsa-miR-515-3p	1	0	1	1	1	1	VCP	valosin containing protein
hsa-miR-515-3p	1	0	1	1	1	1	ZNF81	zinc finger protein 81
hsa-miR-515-3p	1	0	1	1	1	1	VEZF1	vascular endothelial zinc finger 1
hsa-miR-515-3p	1	0	1	0	1	1	PRSS23	protease, serine, 23
hsa-miR-515-3p	1	0	1	0	1	1	CHP1	calcineurin-like EF hand protein 1
hsa-miR-515-3p	1	0	1	1	1	1	KLF12	Kruppel-like factor 12
hsa-miR-515-3p	1	0	1	1	1	1	CASC3	cancer susceptibility candidate 3
hsa-miR-515-3p	1	0	1	1	1	1	ICOS	inducible T-cell co-stimulator
hsa-miR-515-3p	1	0	1	1	1	1	FBXL2	F-box and leucine-rich repeat protein 2
hsa-miR-515-3p	1	0	1	1	1	1	FBXL3	F-box and leucine-rich repeat protein 3
hsa-miR-515-3p	0	0	1	1	0	0	GAGE8	G antigen 8
hsa-miR-515-3p	1	0	1	1	1	1	HEY2	hairy/enhancer-of-split related with YRPW motif 2
hsa-miR-515-3p	1	0	1	0	1	1	ACAP2	ArfGAP with coiled-coil, ankyrin repeat and PH domains 2
hsa-miR-515-3p	1	0	1	0	1	1	PXDN	peroxidasin homolog (Drosophila)
hsa-miR-515-3p	1	0	1	1	1	1	TLL2	tolloid-like 2
hsa-miR-515-3p	0	0	1	1	1	1	UCK2	uridine-cytidine kinase 2
hsa-miR-515-3p	0	0	1	1	1	1	CD24	CD24 molecule
hsa-miR-515-3p	1	0	1	0	1	1	FLRT2	fibronectin leucine rich transmembrane protein 2
hsa-miR-515-3p	0	0	1	1	1	1	DNAJC15	DnaJ (Hsp40) homolog, subfamily C, member 15
hsa-miR-515-3p	1	0	1	0	1	1	VPS4A	vacuolar protein sorting 4 homolog A (S. cerevisiae)
hsa-miR-515-3p	0	0	1	1	0	0	SLCO3A1	solute carrier organic anion transporter family, member 3A1
hsa-miR-515-3p	1	0	1	1	1	1	TMEM2	transmembrane protein 2
hsa-miR-515-3p	1	0	1	1	1	1	SOCS5	suppressor of cytokine signaling 5
hsa-miR-515-3p	0	0	1	1	0	0	MCTS1	malignant T cell amplified sequence 1
hsa-miR-515-3p	0	0	1	1	1	1	CCDC113	coiled-coil domain containing 113
hsa-miR-515-3p	0	0	1	1	1	1	ORMDL2	ORM1-like 2 (S. cerevisiae)
hsa-miR-515-3p	0	0	1	1	1	1	UBL4A	ubiquitin-like 4A
hsa-miR-515-3p	0	0	1	1	1	1	HSPA4L	heat shock 70kDa protein 4-like
hsa-miR-515-3p	0	0	1	1	1	1	C22orf28	chromosome 22 open reading frame 28
hsa-miR-515-3p	0	0	1	1	0	0	CLEC4E	C-type lectin domain family 4, member E
hsa-miR-515-3p	1	0	1	1	1	1	LHX6	LIM homeobox 6
hsa-miR-515-3p	1	0	1	1	0	0	SND1	staphylococcal nuclease and tudor domain containing 1
hsa-miR-515-3p	0	0	1	0	0	0	SND1-IT1	SND1 intronic transcript 1 (non-protein coding)
hsa-miR-515-3p	1	0	1	1	1	1	AFF4	AF4/FMR2 family, member 4
hsa-miR-515-3p	1	0	1	1	1	1	SERP1	stress-associated endoplasmic reticulum protein 1
hsa-miR-515-3p	1	0	1	1	1	1	RND1	Rho family GTPase 1
hsa-miR-515-3p	0	0	1	1	0	0	MEA1	male-enhanced antigen 1
hsa-miR-515-3p	1	0	1	1	1	1	ZNF592	zinc finger protein 592
hsa-miR-515-3p	1	0	1	0	1	1	SH3PXD2A	SH3 and PX domains 2A
hsa-miR-515-3p	1	0	1	1	1	1	RALGPS1	Ral GEF with PH domain and SH3 binding motif 1
hsa-miR-515-3p	1	0	1	1	1	1	RASSF2	Ras association (RalGDS/AF-6) domain family member 2
hsa-miR-515-3p	1	0	1	1	1	1	DAZAP2	DAZ associated protein 2
hsa-miR-515-3p	0	0	1	1	0	0	PCNXL2	pecanex-like 2 (Drosophila)
hsa-miR-515-3p	0	0	1	0	1	1	EPM2AIP1	EPM2A (laforin) interacting protein 1
hsa-miR-515-3p	0	0	1	1	1	1	ZBED4	zinc finger, BED-type containing 4
hsa-miR-515-3p	1	0	1	0	1	1	SV2B	synaptic vesicle glycoprotein 2B
hsa-miR-515-3p	0	0	1	0	1	1	KIF14	kinesin family member 14
hsa-miR-515-3p	1	0	1	0	1	1	WDFY3	WD repeat and FYVE domain containing 3
hsa-miR-515-3p	1	0	1	1	1	1	RAB21	RAB21, member RAS oncogene family
hsa-miR-515-3p	1	0	1	1	1	1	FBXO21	F-box protein 21
hsa-miR-515-3p	0	0	1	1	1	1	FTSJD2	FtsJ methyltransferase domain containing 2
hsa-miR-515-3p	1	0	1	0	1	1	LARP4B	La ribonucleoprotein domain family, member 4B
hsa-miR-515-3p	1	0	1	0	1	1	KIAA1024	KIAA1024
hsa-miR-515-3p	1	0	1	1	1	1	NUP160	nucleoporin 160kDa
hsa-miR-515-3p	1	0	1	1	1	1	CUX2	cut-like homeobox 2
hsa-miR-515-3p	1	0	1	1	1	1	PHF15	PHD finger protein 15
hsa-miR-515-3p	1	0	1	0	1	1	LARP1	La ribonucleoprotein domain family, member 1
hsa-miR-515-3p	1	0	1	1	1	1	ASXL1	additional sex combs like 1 (Drosophila)
hsa-miR-515-3p	1	0	1	1	1	1	ZFYVE26	zinc finger, FYVE domain containing 26
hsa-miR-515-3p	1	0	1	1	1	1	PARM1	prostate androgen-regulated mucin-like protein 1
hsa-miR-515-3p	1	0	1	1	1	1	DCAF12	DDB1 and CUL4 associated factor 12
hsa-miR-515-3p	1	0	1	1	1	1	LRRTM2	leucine rich repeat transmembrane neuronal 2
hsa-miR-515-3p	1	0	1	1	1	1	SLITRK5	SLIT and NTRK-like family, member 5
hsa-miR-515-3p	1	0	1	0	1	1	PPP1R16B	protein phosphatase 1, regulatory subunit 16B
hsa-miR-515-3p	0	0	1	1	1	1	TES	testis derived transcript (3 LIM domains)
hsa-miR-515-3p	1	0	1	1	1	1	PHF19	PHD finger protein 19
hsa-miR-515-3p	1	0	1	1	1	1	FAM155B	family with sequence similarity 155, member B
hsa-miR-515-3p	1	0	1	1	1	1	FGFR1	fibroblast growth factor receptor 1
hsa-miR-515-3p	1	0	1	0	1	1	TRIM33	tripartite motif containing 33
hsa-miR-515-3p	0	0	1	1	0	0	HEBP1	heme binding protein 1
hsa-miR-515-3p	1	0	1	1	1	1	UBE2J1	ubiquitin-conjugating enzyme E2, J1
hsa-miR-515-3p	0	0	1	1	1	1	MED31	mediator complex subunit 31
hsa-miR-515-3p	0	0	1	1	1	1	HDGFRP3	hepatoma-derived growth factor, related protein 3
hsa-miR-515-3p	0	0	1	1	0	0	PKD2L1	polycystic kidney disease 2-like 1
hsa-miR-515-3p	1	0	1	1	1	1	NLK	nemo-like kinase
hsa-miR-515-3p	1	0	1	0	1	1	HPCAL4	hippocalcin like 4
hsa-miR-515-3p	1	0	1	1	1	1	TOB2	transducer of ERBB2, 2
hsa-miR-515-3p	0	0	1	1	1	1	CENPF	centromere protein F, 350/400kDa (mitosin)
hsa-miR-515-3p	1	0	1	1	1	1	PHF20	PHD finger protein 20
hsa-miR-515-3p	0	0	1	0	1	1	ERAP1	endoplasmic reticulum aminopeptidase 1
hsa-miR-515-3p	1	0	1	1	1	1	VTA1	Vps20-associated 1 homolog (S. cerevisiae)
hsa-miR-515-3p	0	0	1	1	1	1	AMBN	ameloblastin (enamel matrix protein)
hsa-miR-515-3p	1	0	1	1	1	1	WAC	WW domain containing adaptor with coiled-coil
hsa-miR-515-3p	0	0	1	1	1	1	PRKAG3	protein kinase, AMP-activated, gamma 3 non-catalytic subunit
hsa-miR-515-3p	0	0	1	1	0	0	BTG4	B-cell translocation gene 4
hsa-miR-515-3p	1	0	1	1	1	1	TET2	tet methylcytosine dioxygenase 2
hsa-miR-515-3p	1	0	1	0	1	1	FAM46C	family with sequence similarity 46, member C
hsa-miR-515-3p	1	0	1	1	1	1	TBC1D8B	TBC1 domain family, member 8B (with GRAM domain)
hsa-miR-515-3p	0	0	1	1	1	1	C2orf42	chromosome 2 open reading frame 42
hsa-miR-515-3p	0	0	1	1	1	1	SCYL2	SCY1-like 2 (S. cerevisiae)
hsa-miR-515-3p	1	0	1	1	1	1	C9orf40	chromosome 9 open reading frame 40
hsa-miR-515-3p	0	0	1	1	1	1	RBM22	RNA binding motif protein 22
hsa-miR-515-3p	0	0	1	1	1	1	NECAP2	NECAP endocytosis associated 2
hsa-miR-515-3p	1	0	1	1	1	1	FAM178A	family with sequence similarity 178, member A
hsa-miR-515-3p	0	0	1	1	1	1	NUDT11	nudix (nucleoside diphosphate linked moiety X)-type motif 11
hsa-miR-515-3p	1	0	1	1	1	1	LRRC20	leucine rich repeat containing 20
hsa-miR-515-3p	1	0	1	1	1	1	UBA6	ubiquitin-like modifier activating enzyme 6
hsa-miR-515-3p	0	0	1	1	1	1	AP5M1	adaptor-related protein complex 5, mu 1 subunit
hsa-miR-515-3p	0	0	1	1	1	1	STK32B	serine/threonine kinase 32B
hsa-miR-515-3p	0	0	1	1	1	1	BDP1	B double prime 1, subunit of RNA polymerase III transcription initiation factor IIIB
hsa-miR-515-3p	1	0	1	1	1	1	PAG1	phosphoprotein associated with glycosphingolipid microdomains 1
hsa-miR-515-3p	1	0	1	1	1	1	SVOP	SV2 related protein homolog (rat)
hsa-miR-515-3p	1	0	1	1	1	1	CDCA7L	cell division cycle associated 7-like
hsa-miR-515-3p	1	0	1	0	1	1	KLHL9	kelch-like 9 (Drosophila)
hsa-miR-515-3p	0	0	1	1	1	1	ERRFI1	ERBB receptor feedback inhibitor 1
hsa-miR-515-3p	1	0	1	0	1	1	TMX3	thioredoxin-related transmembrane protein 3
hsa-miR-515-3p	0	0	1	1	1	1	GNL3L	guanine nucleotide binding protein-like 3 (nucleolar)-like
hsa-miR-515-3p	1	0	1	1	1	1	EPB41L4B	erythrocyte membrane protein band 4.1 like 4B
hsa-miR-515-3p	0	0	1	1	1	1	KLHL4	kelch-like 4 (Drosophila)
hsa-miR-515-3p	1	0	1	1	1	1	LRRC8A	leucine rich repeat containing 8 family, member A
hsa-miR-515-3p	0	0	1	1	0	0	BARHL2	BarH-like homeobox 2
hsa-miR-515-3p	1	0	1	0	1	1	SLAMF8	SLAM family member 8
hsa-miR-515-3p	1	0	1	0	1	1	PAPOLB	poly(A) polymerase beta (testis specific)
hsa-miR-515-3p	1	0	1	1	1	1	ATP8B2	ATPase, aminophospholipid transporter, class I, type 8B, member 2
hsa-miR-515-3p	1	0	1	1	1	1	LYRM2	LYR motif containing 2
hsa-miR-515-3p	1	0	1	0	1	1	DCUN1D1	DCN1, defective in cullin neddylation 1, domain containing 1 (S. cerevisiae)
hsa-miR-515-3p	1	0	1	1	1	1	DLG3	discs, large homolog 3 (Drosophila)
hsa-miR-515-3p	1	0	1	1	1	1	ARHGAP31	Rho GTPase activating protein 31
hsa-miR-515-3p	1	0	1	0	1	1	KLHDC5	kelch domain containing 5
hsa-miR-515-3p	1	0	1	1	1	1	KLHL14	kelch-like 14 (Drosophila)
hsa-miR-515-3p	1	0	1	1	1	1	ALS2	amyotrophic lateral sclerosis 2 (juvenile)
hsa-miR-515-3p	1	0	1	1	1	1	FAM160B1	family with sequence similarity 160, member B1
hsa-miR-515-3p	0	0	1	1	1	1	PRX	periaxin
hsa-miR-515-3p	0	0	1	1	1	1	AQP9	aquaporin 9
hsa-miR-515-3p	1	0	1	1	1	1	ZNFX1	zinc finger, NFX1-type containing 1
hsa-miR-515-3p	1	0	1	1	1	1	NEFH	neurofilament, heavy polypeptide
hsa-miR-515-3p	0	0	1	1	1	1	CHST6	carbohydrate (N-acetylglucosamine 6-O) sulfotransferase 6
hsa-miR-515-3p	1	0	1	1	1	1	CLCN6	chloride channel, voltage-sensitive 6
hsa-miR-515-3p	1	0	1	1	1	1	DHX35	DEAH (Asp-Glu-Ala-His) box polypeptide 35
hsa-miR-515-3p	1	0	1	1	0	0	HLX	H2.0-like homeobox
hsa-miR-515-3p	1	0	1	1	1	1	SEC24A	SEC24 family, member A (S. cerevisiae)
hsa-miR-515-3p	1	0	1	1	1	1	TIA1	TIA1 cytotoxic granule-associated RNA binding protein
hsa-miR-515-3p	1	0	1	0	1	1	GAN	gigaxonin
hsa-miR-515-3p	1	0	1	0	1	1	CSNK1G1	casein kinase 1, gamma 1
hsa-miR-515-3p	0	0	1	1	0	0	POPDC2	popeye domain containing 2
hsa-miR-515-3p	1	0	1	1	1	1	ABCG4	ATP-binding cassette, sub-family G (WHITE), member 4
hsa-miR-515-3p	0	0	1	1	1	1	TCTA	T-cell leukemia translocation altered
hsa-miR-515-3p	1	0	1	1	1	1	HIF3A	hypoxia inducible factor 3, alpha subunit
hsa-miR-515-3p	0	0	1	1	1	1	HHIP	hedgehog interacting protein
hsa-miR-515-3p	1	0	1	1	1	1	TMEM168	transmembrane protein 168
hsa-miR-515-3p	1	0	1	1	1	1	GIGYF1	GRB10 interacting GYF protein 1
hsa-miR-515-3p	0	0	1	1	1	1	ACBD3	acyl-CoA binding domain containing 3
hsa-miR-515-3p	1	0	1	1	1	1	FAM160B2	family with sequence similarity 160, member B2
hsa-miR-515-3p	0	0	1	1	1	1	OSBPL11	oxysterol binding protein-like 11
hsa-miR-515-3p	1	0	1	0	1	1	USP46	ubiquitin specific peptidase 46
hsa-miR-515-3p	1	0	1	0	1	1	BCL11B	B-cell CLL/lymphoma 11B (zinc finger protein)
hsa-miR-515-3p	0	0	1	1	0	0	PRAMEF2	PRAME family member 2
hsa-miR-515-3p	1	0	1	1	0	0	UBE2Z	ubiquitin-conjugating enzyme E2Z
hsa-miR-515-3p	0	0	1	1	1	1	HTR5A	5-hydroxytryptamine (serotonin) receptor 5A, G protein-coupled
hsa-miR-515-3p	0	0	1	1	0	0	CUEDC2	CUE domain containing 2
hsa-miR-515-3p	0	0	1	0	1	1	TRPM8	transient receptor potential cation channel, subfamily M, member 8
hsa-miR-515-3p	1	0	1	1	1	1	FAM134A	family with sequence similarity 134, member A
hsa-miR-515-3p	1	0	1	1	1	1	C10orf76	chromosome 10 open reading frame 76
hsa-miR-515-3p	0	0	1	1	0	0	TNFAIP8L2	tumor necrosis factor, alpha-induced protein 8-like 2
hsa-miR-515-3p	0	0	1	0	1	1	EFCAB1	EF-hand calcium binding domain 1
hsa-miR-515-3p	0	0	1	1	1	1	STEAP4	STEAP family member 4
hsa-miR-515-3p	0	0	1	1	1	1	GLT25D1	glycosyltransferase 25 domain containing 1
hsa-miR-515-3p	0	0	1	1	1	1	NSUN7	NOP2/Sun domain family, member 7
hsa-miR-515-3p	0	0	1	1	0	0	NARS2	asparaginyl-tRNA synthetase 2, mitochondrial (putative)
hsa-miR-515-3p	0	0	1	0	1	1	C1orf115	chromosome 1 open reading frame 115
hsa-miR-515-3p	0	0	1	1	1	1	PLBD1	phospholipase B domain containing 1
hsa-miR-515-3p	1	0	1	0	1	1	MAGIX	MAGI family member, X-linked
hsa-miR-515-3p	1	0	1	1	0	0	SYNDIG1	synapse differentiation inducing 1
hsa-miR-515-3p	0	0	1	1	1	1	ZNF606	zinc finger protein 606
hsa-miR-515-3p	1	0	1	1	1	1	CYB5B	cytochrome b5 type B (outer mitochondrial membrane)
hsa-miR-515-3p	1	0	1	1	1	1	JHDM1D	jumonji C domain containing histone demethylase 1 homolog D (S. cerevisiae)
hsa-miR-515-3p	0	0	1	1	1	1	SLC25A32	solute carrier family 25 (mitochondrial folate carrier) , member 32
hsa-miR-515-3p	1	0	1	0	1	1	CSRNP2	cysteine-serine-rich nuclear protein 2
hsa-miR-515-3p	1	0	1	1	1	1	PDRG1	p53 and DNA-damage regulated 1
hsa-miR-515-3p	1	0	1	1	1	1	SNX27	sorting nexin family member 27
hsa-miR-515-3p	1	0	1	0	1	1	SPRY4	sprouty homolog 4 (Drosophila)
hsa-miR-515-3p	1	0	1	1	1	1	CABLES2	Cdk5 and Abl enzyme substrate 2
hsa-miR-515-3p	1	0	1	0	1	1	THAP2	THAP domain containing, apoptosis associated protein 2
hsa-miR-515-3p	1	0	1	0	1	1	TMEM47	transmembrane protein 47
hsa-miR-515-3p	0	0	1	1	1	1	TEX101	testis expressed 101
hsa-miR-515-3p	1	0	1	1	1	1	SESN2	sestrin 2
hsa-miR-515-3p	0	0	1	1	1	1	INHBE	inhibin, beta E
hsa-miR-515-3p	1	0	1	1	0	0	SPATA16	spermatogenesis associated 16
hsa-miR-515-3p	1	0	1	1	1	1	DSEL	dermatan sulfate epimerase-like
hsa-miR-515-3p	1	0	1	1	1	1	ZNRF1	zinc and ring finger 1, E3 ubiquitin protein ligase
hsa-miR-515-3p	0	0	1	1	1	1	MAML2	mastermind-like 2 (Drosophila)
hsa-miR-515-3p	1	0	1	1	1	1	USP38	ubiquitin specific peptidase 38
hsa-miR-515-3p	1	0	1	1	1	1	HIATL1	hippocampus abundant transcript-like 1
hsa-miR-515-3p	1	0	1	1	1	1	TRIM63	tripartite motif containing 63, E3 ubiquitin protein ligase
hsa-miR-515-3p	0	0	1	0	1	1	CBR4	carbonyl reductase 4
hsa-miR-515-3p	1	0	1	0	1	1	UBASH3B	ubiquitin associated and SH3 domain containing B
hsa-miR-515-3p	0	0	1	1	1	1	POLR2J2	polymerase (RNA) II (DNA directed) polypeptide J2
hsa-miR-515-3p	0	0	1	1	0	0	MUC13	mucin 13, cell surface associated
hsa-miR-515-3p	1	0	1	1	1	1	TRIM55	tripartite motif containing 55
hsa-miR-515-3p	1	0	1	1	0	0	DMRTB1	DMRT-like family B with proline-rich C-terminal, 1
hsa-miR-515-3p	1	0	1	0	1	1	PURB	purine-rich element binding protein B
hsa-miR-515-3p	1	0	1	1	1	1	TP53INP1	tumor protein p53 inducible nuclear protein 1
hsa-miR-515-3p	1	0	1	1	1	1	CASP7	caspase 7, apoptosis-related cysteine peptidase
hsa-miR-515-3p	1	0	1	1	1	1	EPT1	ethanolaminephosphotransferase 1 (CDP-ethanolamine-specific)
hsa-miR-515-3p	0	0	1	1	1	1	PLEKHG4B	pleckstrin homology domain containing, family G (with RhoGef domain) member 4B
hsa-miR-515-3p	0	0	1	1	0	0	TNFRSF13C	tumor necrosis factor receptor superfamily, member 13C
hsa-miR-515-3p	0	0	1	0	0	0	TSSK2	testis-specific serine kinase 2
hsa-miR-515-3p	1	0	1	0	1	1	CCND1	cyclin D1
hsa-miR-515-3p	1	0	1	1	1	1	GCFC1	GC-rich sequence DNA-binding factor 1
hsa-miR-515-3p	0	0	1	1	0	0	S100A16	S100 calcium binding protein A16
hsa-miR-515-3p	1	0	1	1	1	1	C20orf112	chromosome 20 open reading frame 112
hsa-miR-515-3p	1	0	1	1	1	1	ZNF280B	zinc finger protein 280B
hsa-miR-515-3p	0	0	1	1	1	1	KCNG3	potassium voltage-gated channel, subfamily G, member 3
hsa-miR-515-3p	0	0	1	0	1	1	PAQR8	progestin and adipoQ receptor family member VIII
hsa-miR-515-3p	1	0	1	0	1	1	SP1	Sp1 transcription factor
hsa-miR-515-3p	0	0	1	1	1	1	C1orf213	chromosome 1 open reading frame 213
hsa-miR-515-3p	0	0	1	1	1	1	ALKBH8	alkB, alkylation repair homolog 8 (E. coli)
hsa-miR-515-3p	1	0	1	1	1	1	MBOAT2	membrane bound O-acyltransferase domain containing 2
hsa-miR-515-3p	0	0	1	1	1	1	KCNC2	potassium voltage-gated channel, Shaw-related subfamily, member 2
hsa-miR-515-3p	1	0	1	0	1	1	CNOT6L	CCR4-NOT transcription complex, subunit 6-like
hsa-miR-515-3p	1	0	1	1	1	1	MAPK1IP1L	mitogen-activated protein kinase 1 interacting protein 1-like
hsa-miR-515-3p	0	0	1	0	1	1	TTC23L	tetratricopeptide repeat domain 23-like
hsa-miR-515-3p	1	0	1	1	1	1	YPEL4	yippee-like 4 (Drosophila)
hsa-miR-515-3p	1	0	1	1	1	1	UBQLNL	ubiquilin-like
hsa-miR-515-3p	0	0	1	0	1	1	SPATA18	spermatogenesis associated 18
hsa-miR-515-3p	0	0	1	1	1	1	APOBEC3F	apolipoprotein B mRNA editing enzyme, catalytic polypeptide-like 3F
hsa-miR-515-3p	1	0	1	1	1	1	MAP3K7	mitogen-activated protein kinase kinase kinase 7
hsa-miR-515-3p	0	0	1	1	1	1	TIGD2	tigger transposable element derived 2
hsa-miR-515-3p	1	0	1	1	1	1	ABTB2	ankyrin repeat and BTB (POZ) domain containing 2
hsa-miR-515-3p	1	0	1	0	1	1	MTPN	myotrophin
hsa-miR-515-3p	1	0	1	1	1	1	FAM110B	family with sequence similarity 110, member B
hsa-miR-515-3p	1	0	1	1	1	1	UBTD2	ubiquitin domain containing 2
hsa-miR-515-3p	1	0	1	0	1	1	SYT11	synaptotagmin XI
hsa-miR-515-3p	0	0	1	1	1	1	ERP27	endoplasmic reticulum protein 27
hsa-miR-515-3p	1	0	1	1	1	1	LSM12	LSM12 homolog (S. cerevisiae)
hsa-miR-515-3p	0	0	1	1	1	1	C17orf76-AS1	C17orf76 antisense RNA 1
hsa-miR-515-3p	1	0	1	1	1	1	BHLHE22	basic helix-loop-helix family, member e22
hsa-miR-515-3p	0	0	1	1	1	1	C1orf74	chromosome 1 open reading frame 74
hsa-miR-515-3p	1	0	1	1	1	1	SLC16A14	solute carrier family 16, member 14 (monocarboxylic acid transporter 14)
hsa-miR-515-3p	0	0	1	1	1	1	DNAJC18	DnaJ (Hsp40) homolog, subfamily C, member 18
hsa-miR-515-3p	0	0	1	1	1	1	GAPT	GRB2-binding adaptor protein, transmembrane
hsa-miR-515-3p	0	0	1	1	1	1	ZFP3	zinc finger protein 3 homolog (mouse)
hsa-miR-515-3p	1	0	1	1	1	1	TXLNB	taxilin beta
hsa-miR-515-3p	0	0	1	1	0	0	SCARF2	scavenger receptor class F, member 2
hsa-miR-515-3p	1	0	1	0	1	1	ZCCHC24	zinc finger, CCHC domain containing 24
hsa-miR-515-3p	1	0	1	1	1	1	HS6ST3	heparan sulfate 6-O-sulfotransferase 3
hsa-miR-515-3p	1	0	1	0	1	1	MDGA1	MAM domain containing glycosylphosphatidylinositol anchor 1
hsa-miR-515-3p	1	0	1	1	1	1	CREBRF	CREB3 regulatory factor
hsa-miR-515-3p	1	0	1	0	1	1	SEMA6D	sema domain, transmembrane domain (TM), and cytoplasmic domain, (semaphorin) 6D
hsa-miR-515-3p	1	0	1	1	1	1	PHF13	PHD finger protein 13
hsa-miR-515-3p	0	0	1	1	1	1	TAPBP	TAP binding protein (tapasin)
hsa-miR-515-3p	1	0	1	1	1	1	IL16	interleukin 16
hsa-miR-515-3p	0	0	1	0	1	1	TUSC5	tumor suppressor candidate 5
hsa-miR-515-3p	1	0	1	1	1	1	L3MBTL4	l(3)mbt-like 4 (Drosophila)
hsa-miR-515-3p	1	0	1	1	1	1	DCUN1D3	DCN1, defective in cullin neddylation 1, domain containing 3 (S. cerevisiae)
hsa-miR-515-3p	1	0	1	1	1	1	SLC41A1	solute carrier family 41, member 1
hsa-miR-515-3p	1	0	1	0	1	1	FAM84B	family with sequence similarity 84, member B
hsa-miR-515-3p	1	0	1	1	1	1	UBR1	ubiquitin protein ligase E3 component n-recognin 1
hsa-miR-515-3p	0	0	1	1	1	1	ZDHHC22	zinc finger, DHHC-type containing 22
hsa-miR-515-3p	0	0	1	1	1	1	SESTD1	SEC14 and spectrin domains 1
hsa-miR-515-3p	0	0	1	1	1	1	GPIHBP1	glycosylphosphatidylinositol anchored high density lipoprotein binding protein 1
hsa-miR-515-3p	1	0	1	1	1	1	MB21D2	Mab-21 domain containing 2
hsa-miR-515-3p	1	0	1	1	1	1	MTDH	metadherin
hsa-miR-515-3p	0	0	1	1	0	0	KRT25	keratin 25
hsa-miR-515-3p	1	0	1	1	1	1	NF2	neurofibromin 2 (merlin)
hsa-miR-515-3p	0	0	1	1	1	1	C2orf48	chromosome 2 open reading frame 48
hsa-miR-515-3p	0	0	1	0	1	1	C16orf82	chromosome 16 open reading frame 82
hsa-miR-515-3p	1	0	1	1	1	1	SPTY2D1	SPT2, Suppressor of Ty, domain containing 1 (S. cerevisiae)
hsa-miR-515-3p	1	0	1	0	1	1	SRRM4	serine/arginine repetitive matrix 4
hsa-miR-515-3p	1	0	1	0	1	1	SLC16A9	solute carrier family 16, member 9 (monocarboxylic acid transporter 9)
hsa-miR-515-3p	1	0	1	0	1	1	NRK	Nik related kinase
hsa-miR-515-3p	1	0	1	1	1	1	PTGER3	prostaglandin E receptor 3 (subtype EP3)
hsa-miR-515-3p	0	0	1	1	1	1	ZPBP2	zona pellucida binding protein 2
hsa-miR-515-3p	1	0	1	0	1	1	PRICKLE2	prickle homolog 2 (Drosophila)
hsa-miR-515-3p	0	0	1	1	1	1	MKNK1	MAP kinase interacting serine/threonine kinase 1
hsa-miR-515-3p	0	0	1	1	0	0	C9orf169	chromosome 9 open reading frame 169
hsa-miR-515-3p	0	0	1	0	1	1	WASH3P	WAS protein family homolog 3 pseudogene
hsa-miR-515-3p	1	0	1	1	1	1	CXCL12	chemokine (C-X-C motif) ligand 12
hsa-miR-515-3p	0	0	1	1	1	1	ARHGAP27	Rho GTPase activating protein 27
hsa-miR-515-3p	0	0	1	1	1	1	SFT2D2	SFT2 domain containing 2
hsa-miR-515-3p	0	0	1	1	1	1	PFN4	profilin family, member 4
hsa-miR-515-3p	0	0	1	1	0	0	C9orf50	chromosome 9 open reading frame 50
hsa-miR-515-3p	1	0	1	1	1	1	BLOC1S5	biogenesis of lysosomal organelles complex-1, subunit 5, muted
hsa-miR-515-3p	1	0	1	1	1	1	GLYAT	glycine-N-acyltransferase
hsa-miR-515-3p	1	0	1	1	1	1	E2F7	E2F transcription factor 7
hsa-miR-515-3p	1	0	1	0	1	1	MBLAC2	metallo-beta-lactamase domain containing 2
hsa-miR-515-3p	0	0	1	1	0	0	IQCF2	IQ motif containing F2
hsa-miR-515-3p	0	0	1	1	0	0	IER5L	immediate early response 5-like
hsa-miR-515-3p	0	0	1	1	1	1	SERTM1	serine-rich and transmembrane domain containing 1
hsa-miR-515-3p	1	0	1	1	1	1	IGSF1	immunoglobulin superfamily, member 1
hsa-miR-515-3p	1	0	1	1	1	1	CYP4V2	cytochrome P450, family 4, subfamily V, polypeptide 2
hsa-miR-515-3p	1	0	1	1	1	1	SKIDA1	SKI/DACH domain containing 1
hsa-miR-515-3p	1	0	1	1	1	1	C11orf87	chromosome 11 open reading frame 87
hsa-miR-515-3p	0	0	1	0	0	0	PCDHB19P	protocadherin beta 19 pseudogene
hsa-miR-515-3p	0	0	1	0	0	0	TFAMP1	transcription factor A, mitochondrial pseudogene 1
hsa-miR-515-3p	0	0	1	0	0	0	MIR155HG	MIR155 host gene (non-protein coding)
hsa-miR-515-3p	0	0	1	0	0	0	TTTY1	testis-specific transcript, Y-linked 1 (non-protein coding)
hsa-miR-515-3p	0	0	1	0	0	0	VENTXP1	VENT homeobox pseudogene 1
hsa-miR-515-3p	0	0	1	0	0	0	RNY5	RNA, Ro-associated Y5
hsa-miR-515-3p	0	0	1	0	0	0	TTTY4B	testis-specific transcript, Y-linked 4B (non-protein coding)
hsa-miR-515-3p	0	0	1	0	0	0	SUMO1P3	SUMO1 pseudogene 3
hsa-miR-515-3p	0	0	1	0	0	0	CDH12P2	cadherin 12 (N-cadherin 2) pseudogene 2
hsa-miR-515-3p	0	0	1	0	0	0	PDIA3P	protein disulfide isomerase family A, member 3 pseudogene
hsa-miR-515-3p	0	0	1	0	0	0	SNORA4	small nucleolar RNA, H/ACA box 4
hsa-miR-515-3p	0	0	1	0	0	0	GABPAP	GA binding protein transcription factor, alpha subunit pseudogene
hsa-miR-515-3p	0	0	1	0	0	0	MALAT1	metastasis associated lung adenocarcinoma transcript 1 (non-protein coding)
hsa-miR-515-3p	0	0	1	0	0	0	SIGLEC16	sialic acid binding Ig-like lectin 16 (gene/pseudogene)
hsa-miR-515-3p	0	0	1	0	0	0	LOC284441	actin-related protein 2 pseudogene
hsa-miR-515-3p	1	0	1	1	0	0	KIAA1549L	KIAA1549-like
hsa-miR-515-3p	0	0	1	0	0	0	GAGE3	G antigen 3
hsa-miR-515-3p	0	0	1	0	0	0	GAGE5	G antigen 5
hsa-miR-515-3p	1	0	1	1	1	1	PAM	peptidylglycine alpha-amidating monooxygenase
hsa-miR-515-3p	1	0	1	1	1	1	AKAP1	A kinase (PRKA) anchor protein 1
hsa-miR-515-3p	1	0	1	1	1	1	HS3ST1	heparan sulfate (glucosamine) 3-O-sulfotransferase 1
hsa-miR-515-3p	0	0	0	1	0	0	SCTR	secretin receptor
hsa-miR-515-3p	0	0	0	1	0	0	ADCK2	aarF domain containing kinase 2
hsa-miR-515-3p	0	0	1	1	0	0	KLK13	kallikrein-related peptidase 13
hsa-miR-515-3p	0	0	0	1	1	1	KRT13	keratin 13
hsa-miR-515-3p	0	0	1	1	0	0	NOX3	NADPH oxidase 3
hsa-miR-515-3p	0	0	0	1	1	1	KRT20	keratin 20
hsa-miR-515-3p	0	0	0	1	0	0	RAPGEF3	Rap guanine nucleotide exchange factor (GEF) 3
hsa-miR-515-3p	0	0	1	1	0	0	MAP2K5	mitogen-activated protein kinase kinase 5
hsa-miR-515-3p	0	0	1	1	1	1	IMPG2	interphotoreceptor matrix proteoglycan 2
hsa-miR-515-3p	0	0	0	1	0	0	IGSF9	immunoglobulin superfamily, member 9
hsa-miR-515-3p	1	0	1	1	0	0	KHSRP	KH-type splicing regulatory protein
hsa-miR-515-3p	0	0	0	1	1	1	SLC24A6	solute carrier family 24 (sodium/lithium/calcium exchanger), member 6
hsa-miR-515-3p	0	0	0	1	0	0	TMED1	transmembrane emp24 protein transport domain containing 1
hsa-miR-515-3p	0	0	0	1	0	0	LMF2	lipase maturation factor 2
hsa-miR-515-3p	0	0	1	1	0	0	MCM5	minichromosome maintenance complex component 5
hsa-miR-515-3p	0	0	0	1	0	0	RIN3	Ras and Rab interactor 3
hsa-miR-515-3p	0	0	1	1	1	1	PCK2	phosphoenolpyruvate carboxykinase 2 (mitochondrial)
hsa-miR-515-3p	0	0	1	1	1	1	SLCO4A1	solute carrier organic anion transporter family, member 4A1
hsa-miR-515-3p	0	0	1	1	0	0	BIRC7	baculoviral IAP repeat containing 7
hsa-miR-515-3p	0	0	1	1	0	0	PRSS54	protease, serine, 54
hsa-miR-515-3p	0	0	0	1	1	1	TSC2	tuberous sclerosis 2
hsa-miR-515-3p	1	0	0	1	1	1	EHD4	EH-domain containing 4
hsa-miR-515-3p	1	0	1	1	1	1	BRF2	BRF2, subunit of RNA polymerase III transcription initiation factor, BRF1-like
hsa-miR-515-3p	0	0	1	1	0	0	EMC2	ER membrane protein complex subunit 2
hsa-miR-515-3p	0	0	1	1	0	0	PPP1R37	protein phosphatase 1, regulatory subunit 37
hsa-miR-515-3p	1	0	1	1	0	0	FSD1	fibronectin type III and SPRY domain containing 1
hsa-miR-515-3p	0	0	0	1	0	0	CACTIN	cactin, spliceosome C complex subunit
hsa-miR-515-3p	0	0	0	1	1	1	TGFB1	transforming growth factor, beta 1
hsa-miR-515-3p	0	0	0	1	0	0	CAPS	calcyphosine
hsa-miR-515-3p	0	0	1	1	1	1	MPP6	membrane protein, palmitoylated 6 (MAGUK p55 subfamily member 6)
hsa-miR-515-3p	0	0	0	1	0	0	ABHD11	abhydrolase domain containing 11
hsa-miR-515-3p	0	0	0	1	0	0	MOGAT3	monoacylglycerol O-acyltransferase 3
hsa-miR-515-3p	0	0	0	1	0	0	RBP3	retinol binding protein 3, interstitial
hsa-miR-515-3p	0	0	0	1	1	1	ST6GALNAC2	ST6 (alpha-N-acetyl-neuraminyl-2,3-beta-galactosyl-1,3)-N-acetylgalactosaminide alpha-2,6-sialyltransferase 2
hsa-miR-515-3p	0	0	1	1	0	0	ANAPC15	anaphase promoting complex subunit 15
hsa-miR-515-3p	0	0	1	1	1	1	CDKN1B	cyclin-dependent kinase inhibitor 1B (p27, Kip1)
hsa-miR-515-3p	0	0	1	1	0	0	MGP	matrix Gla protein
hsa-miR-515-3p	0	0	0	1	0	0	SPSB2	splA/ryanodine receptor domain and SOCS box containing 2
hsa-miR-515-3p	0	0	1	1	0	0	MEP1A	meprin A, alpha (PABA peptide hydrolase)
hsa-miR-515-3p	0	0	1	1	1	1	FAM162A	family with sequence similarity 162, member A
hsa-miR-515-3p	0	0	0	1	0	0	CYB561D2	cytochrome b-561 domain containing 2
hsa-miR-515-3p	0	0	0	1	1	1	AADAC	arylacetamide deacetylase
hsa-miR-515-3p	1	0	1	1	0	0	TMSB10	thymosin beta 10
hsa-miR-515-3p	0	0	0	1	1	1	WNT6	wingless-type MMTV integration site family, member 6
hsa-miR-515-3p	1	0	1	1	1	1	ADPRHL2	ADP-ribosylhydrolase like 2
hsa-miR-515-3p	0	0	0	1	0	0	NT5C1A	5'-nucleotidase, cytosolic IA
hsa-miR-515-3p	0	0	0	1	0	0	AKR7A2	aldo-keto reductase family 7, member A2 (aflatoxin aldehyde reductase)
hsa-miR-515-3p	0	0	1	1	1	1	ATP6V0B	ATPase, H+ transporting, lysosomal 21kDa, V0 subunit b
hsa-miR-515-3p	0	0	1	1	1	1	TTR	transthyretin
hsa-miR-515-3p	0	0	1	1	1	1	NPC2	Niemann-Pick disease, type C2
hsa-miR-515-3p	0	0	1	1	0	0	HOXB1	homeobox B1
hsa-miR-515-3p	1	0	1	1	0	0	ST3GAL4	ST3 beta-galactoside alpha-2,3-sialyltransferase 4
hsa-miR-515-3p	0	0	1	1	1	1	CCDC77	coiled-coil domain containing 77
hsa-miR-515-3p	1	0	1	1	1	1	AHR	aryl hydrocarbon receptor
hsa-miR-515-3p	0	0	0	1	0	0	LAMA4	laminin, alpha 4
hsa-miR-515-3p	0	0	0	1	0	0	OR2B6	olfactory receptor, family 2, subfamily B, member 6
hsa-miR-515-3p	0	0	1	1	1	1	SH3TC1	SH3 domain and tetratricopeptide repeats 1
hsa-miR-515-3p	0	0	1	1	0	0	MYH2	myosin, heavy chain 2, skeletal muscle, adult
hsa-miR-515-3p	1	0	1	1	1	1	GGA3	golgi-associated, gamma adaptin ear containing, ARF binding protein 3
hsa-miR-515-3p	0	0	1	1	0	0	CD70	CD70 molecule
hsa-miR-515-3p	0	0	0	1	0	0	SLURP1	secreted LY6/PLAUR domain containing 1
hsa-miR-515-3p	0	0	1	1	0	0	DDX49	DEAD (Asp-Glu-Ala-Asp) box polypeptide 49
hsa-miR-515-3p	0	0	1	1	0	0	CTAG2	cancer/testis antigen 2
hsa-miR-515-3p	1	0	1	1	1	1	HIVEP3	human immunodeficiency virus type I enhancer binding protein 3
hsa-miR-515-3p	0	0	0	1	0	0	TAS2R4	taste receptor, type 2, member 4
hsa-miR-515-3p	0	0	0	1	0	0	OR7C1	olfactory receptor, family 7, subfamily C, member 1
hsa-miR-515-3p	0	0	1	1	0	0	GCAT	glycine C-acetyltransferase
hsa-miR-515-3p	0	0	1	1	0	0	HOXD11	homeobox D11
hsa-miR-515-3p	1	0	1	1	1	1	IVD	isovaleryl-CoA dehydrogenase
hsa-miR-515-3p	0	0	1	1	0	0	CD68	CD68 molecule
hsa-miR-515-3p	0	0	1	1	1	1	RAF1	v-raf-1 murine leukemia viral oncogene homolog 1
hsa-miR-515-3p	0	0	0	1	0	0	MYH8	myosin, heavy chain 8, skeletal muscle, perinatal
hsa-miR-515-3p	1	0	0	1	0	0	SAFB2	scaffold attachment factor B2
hsa-miR-515-3p	0	0	1	1	1	1	C12orf65	chromosome 12 open reading frame 65
hsa-miR-515-3p	1	0	1	1	1	1	SLC35D2	solute carrier family 35, member D2
hsa-miR-515-3p	0	0	1	1	0	0	POLN	polymerase (DNA directed) nu
hsa-miR-515-3p	0	0	0	1	0	0	GINS2	GINS complex subunit 2 (Psf2 homolog)
hsa-miR-515-3p	1	0	1	1	0	0	RFX1	regulatory factor X, 1 (influences HLA class II expression)
hsa-miR-515-3p	1	0	1	1	0	0	EEFSEC	eukaryotic elongation factor, selenocysteine-tRNA-specific
hsa-miR-515-3p	0	0	0	1	0	0	PEMT	phosphatidylethanolamine N-methyltransferase
hsa-miR-515-3p	0	0	0	1	0	0	MYBPH	myosin binding protein H
hsa-miR-515-3p	0	0	1	1	0	0	CCNA1	cyclin A1
hsa-miR-515-3p	0	0	1	1	0	0	HSPBP1	HSPA (heat shock 70kDa) binding protein, cytoplasmic cochaperone 1
hsa-miR-515-3p	0	0	1	1	0	0	LGALS12	lectin, galactoside-binding, soluble, 12
hsa-miR-515-3p	1	0	1	1	1	1	C14orf1	chromosome 14 open reading frame 1
hsa-miR-515-3p	0	0	1	1	1	1	CMPK2	cytidine monophosphate (UMP-CMP) kinase 2, mitochondrial
hsa-miR-515-3p	0	0	1	1	0	0	DDB2	damage-specific DNA binding protein 2, 48kDa
hsa-miR-515-3p	0	0	1	1	0	0	GPR77	G protein-coupled receptor 77
hsa-miR-515-3p	0	0	1	1	1	1	EGR4	early growth response 4
hsa-miR-515-3p	1	0	1	1	1	1	NPL	N-acetylneuraminate pyruvate lyase (dihydrodipicolinate synthase)
hsa-miR-515-3p	0	0	1	1	0	0	WNT10A	wingless-type MMTV integration site family, member 10A
hsa-miR-515-3p	0	0	1	1	1	1	USP12	ubiquitin specific peptidase 12
hsa-miR-515-3p	0	0	0	1	0	0	ZFHX2	zinc finger homeobox 2
hsa-miR-515-3p	0	0	1	1	0	0	ADAMTS7	ADAM metallopeptidase with thrombospondin type 1 motif, 7
hsa-miR-515-3p	0	0	1	1	1	1	IFNA14	interferon, alpha 14
hsa-miR-515-3p	0	0	0	1	0	0	GMPR	guanosine monophosphate reductase
hsa-miR-515-3p	0	0	0	1	0	0	GCHFR	GTP cyclohydrolase I feedback regulator
hsa-miR-515-3p	0	0	0	1	0	0	TNFRSF13B	tumor necrosis factor receptor superfamily, member 13B
hsa-miR-515-3p	0	0	1	1	1	1	FLT4	fms-related tyrosine kinase 4
hsa-miR-515-3p	1	0	1	1	1	1	MCF2L	MCF.2 cell line derived transforming sequence-like
hsa-miR-515-3p	0	0	1	1	1	1	RAB27B	RAB27B, member RAS oncogene family
hsa-miR-515-3p	0	0	0	1	1	1	LPCAT2	lysophosphatidylcholine acyltransferase 2
hsa-miR-515-3p	0	0	1	1	0	0	KCNH2	potassium voltage-gated channel, subfamily H (eag-related), member 2
hsa-miR-515-3p	0	0	1	1	0	0	CNTLN	centlein, centrosomal protein
hsa-miR-515-3p	1	0	1	1	1	1	TRAF4	TNF receptor-associated factor 4
hsa-miR-515-3p	1	0	1	1	1	1	FOXF1	forkhead box F1
hsa-miR-515-3p	1	0	1	1	1	1	CCNE1	cyclin E1
hsa-miR-515-3p	0	0	0	1	0	0	CCDC124	coiled-coil domain containing 124
hsa-miR-515-3p	0	0	0	1	0	0	XRCC1	X-ray repair complementing defective repair in Chinese hamster cells 1
hsa-miR-515-3p	0	0	1	1	0	0	KCNN4	potassium intermediate/small conductance calcium-activated channel, subfamily N, member 4
hsa-miR-515-3p	1	0	1	1	1	1	DPP9	dipeptidyl-peptidase 9
hsa-miR-515-3p	0	0	1	1	1	1	SCARF1	scavenger receptor class F, member 1
hsa-miR-515-3p	0	0	1	1	1	1	GIPR	gastric inhibitory polypeptide receptor
hsa-miR-515-3p	1	0	0	1	1	1	ASF1B	ASF1 anti-silencing function 1 homolog B (S. cerevisiae)
hsa-miR-515-3p	1	0	1	1	0	0	HIPK2	homeodomain interacting protein kinase 2
hsa-miR-515-3p	0	0	1	1	1	1	SIAE	sialic acid acetylesterase
hsa-miR-515-3p	0	0	1	1	0	0	LTK	leukocyte receptor tyrosine kinase
hsa-miR-515-3p	1	0	0	1	0	0	SOS1	son of sevenless homolog 1 (Drosophila)
hsa-miR-515-3p	0	0	0	1	0	0	LCAT	lecithin-cholesterol acyltransferase
hsa-miR-515-3p	0	0	0	1	0	0	TECTA	tectorin alpha
hsa-miR-515-3p	1	0	0	1	0	0	ECE1	endothelin converting enzyme 1
hsa-miR-515-3p	0	0	1	1	0	0	UBE2S	ubiquitin-conjugating enzyme E2S
hsa-miR-515-3p	0	0	0	1	1	1	RAB17	RAB17, member RAS oncogene family
hsa-miR-515-3p	1	0	1	1	1	1	THRA	thyroid hormone receptor, alpha
hsa-miR-515-3p	1	0	1	1	1	1	C3orf52	chromosome 3 open reading frame 52
hsa-miR-515-3p	1	0	1	1	1	1	SIDT1	SID1 transmembrane family, member 1
hsa-miR-515-3p	0	0	1	1	1	1	RIOK1	RIO kinase 1 (yeast)
hsa-miR-515-3p	1	0	1	1	1	1	MGAT4A	mannosyl (alpha-1,3-)-glycoprotein beta-1,4-N-acetylglucosaminyltransferase, isozyme A
hsa-miR-515-3p	0	0	1	1	1	1	UBXN8	UBX domain protein 8
hsa-miR-515-3p	0	0	0	1	1	1	WBSCR22	Williams Beuren syndrome chromosome region 22
hsa-miR-515-3p	0	0	1	1	1	1	MYO3A	myosin IIIA
hsa-miR-515-3p	0	0	1	1	1	1	DIDO1	death inducer-obliterator 1
hsa-miR-515-3p	0	0	0	1	0	0	TTLL1	tubulin tyrosine ligase-like family, member 1
hsa-miR-515-3p	1	0	0	1	1	1	SLC46A3	solute carrier family 46, member 3
hsa-miR-515-3p	1	0	1	1	1	1	TARBP2	TAR (HIV-1) RNA binding protein 2
hsa-miR-515-3p	0	0	0	1	0	0	KRT71	keratin 71
hsa-miR-515-3p	0	0	1	1	0	0	UQCRC2	ubiquinol-cytochrome c reductase core protein II
hsa-miR-515-3p	0	0	1	1	0	0	NT5C3L	5'-nucleotidase, cytosolic III-like
hsa-miR-515-3p	0	0	0	1	0	0	PPAP2C	phosphatidic acid phosphatase type 2C
hsa-miR-515-3p	1	0	1	1	0	0	GEMIN7	gem (nuclear organelle) associated protein 7
hsa-miR-515-3p	0	0	1	1	0	0	WDR62	WD repeat domain 62
hsa-miR-515-3p	0	0	0	1	0	0	CACNG8	calcium channel, voltage-dependent, gamma subunit 8
hsa-miR-515-3p	0	0	0	1	0	0	ZNF787	zinc finger protein 787
hsa-miR-515-3p	0	0	0	1	0	0	FAM176B	family with sequence similarity 176, member B
hsa-miR-515-3p	1	0	0	1	0	0	SF3B4	splicing factor 3b, subunit 4, 49kDa
hsa-miR-515-3p	0	0	0	1	0	0	SLC27A3	solute carrier family 27 (fatty acid transporter), member 3
hsa-miR-515-3p	0	0	1	1	1	1	FAM171B	family with sequence similarity 171, member B
hsa-miR-515-3p	0	0	0	1	0	0	ANKMY1	ankyrin repeat and MYND domain containing 1
hsa-miR-515-3p	0	0	0	1	1	1	SLC25A38	solute carrier family 25, member 38
hsa-miR-515-3p	0	0	0	1	1	1	EPHA1	EPH receptor A1
hsa-miR-515-3p	0	0	0	1	1	1	IDI2	isopentenyl-diphosphate delta isomerase 2
hsa-miR-515-3p	0	0	1	1	0	0	FUOM	fucose mutarotase
hsa-miR-515-3p	1	0	0	1	1	1	PPRC1	peroxisome proliferator-activated receptor gamma, coactivator-related 1
hsa-miR-515-3p	0	0	0	1	1	1	APIP	APAF1 interacting protein
hsa-miR-515-3p	0	0	0	1	0	0	C11orf52	chromosome 11 open reading frame 52
hsa-miR-515-3p	0	0	1	1	1	1	COMMD7	COMM domain containing 7
hsa-miR-515-3p	0	0	1	1	0	0	PIGT	phosphatidylinositol glycan anchor biosynthesis, class T
hsa-miR-515-3p	0	0	0	1	0	0	FERMT3	fermitin family member 3
hsa-miR-515-3p	0	0	1	1	1	1	MRPL49	mitochondrial ribosomal protein L49
hsa-miR-515-3p	1	0	1	1	0	0	PPP4C	protein phosphatase 4, catalytic subunit
hsa-miR-515-3p	0	0	0	1	0	0	SPATA4	spermatogenesis associated 4
hsa-miR-515-3p	0	0	1	1	1	1	ANKRD44	ankyrin repeat domain 44
hsa-miR-515-3p	0	0	0	1	0	0	IGSF10	immunoglobulin superfamily, member 10
hsa-miR-515-3p	0	0	1	1	0	0	NUBP1	nucleotide binding protein 1
hsa-miR-515-3p	0	0	0	1	0	0	SPACA7	sperm acrosome associated 7
hsa-miR-515-3p	1	0	1	1	1	1	GDPD1	glycerophosphodiester phosphodiesterase domain containing 1
hsa-miR-515-3p	0	0	1	1	0	0	ABCA6	ATP-binding cassette, sub-family A (ABC1), member 6
hsa-miR-515-3p	0	0	0	1	1	1	UCHL1	ubiquitin carboxyl-terminal esterase L1 (ubiquitin thiolesterase)
hsa-miR-515-3p	1	0	1	1	1	1	PIEZO2	piezo-type mechanosensitive ion channel component 2
hsa-miR-515-3p	0	0	0	1	0	0	CYP26C1	cytochrome P450, family 26, subfamily C, polypeptide 1
hsa-miR-515-3p	0	0	1	1	1	1	PPIL3	peptidylprolyl isomerase (cyclophilin)-like 3
hsa-miR-515-3p	0	0	1	1	0	0	RASA2	RAS p21 protein activator 2
hsa-miR-515-3p	0	0	0	1	1	1	NAT2	N-acetyltransferase 2 (arylamine N-acetyltransferase)
hsa-miR-515-3p	0	0	1	1	0	0	C14orf2	chromosome 14 open reading frame 2
hsa-miR-515-3p	1	0	1	1	1	1	ZNF689	zinc finger protein 689
hsa-miR-515-3p	0	0	0	1	1	1	LYZL4	lysozyme-like 4
hsa-miR-515-3p	1	0	1	1	1	1	PRKAG2	protein kinase, AMP-activated, gamma 2 non-catalytic subunit
hsa-miR-515-3p	1	0	1	1	1	1	CACNA1D	calcium channel, voltage-dependent, L type, alpha 1D subunit
hsa-miR-515-3p	1	0	1	1	1	1	ZNF618	zinc finger protein 618
hsa-miR-515-3p	0	0	0	1	1	1	WDR66	WD repeat domain 66
hsa-miR-515-3p	0	0	1	1	0	0	SCRN2	secernin 2
hsa-miR-515-3p	0	0	0	1	0	0	PWP2	PWP2 periodic tryptophan protein homolog (yeast)
hsa-miR-515-3p	0	0	1	1	1	1	C5orf45	chromosome 5 open reading frame 45
hsa-miR-515-3p	0	0	1	1	0	0	LTC4S	leukotriene C4 synthase
hsa-miR-515-3p	0	0	0	1	0	0	CDK3	cyclin-dependent kinase 3
hsa-miR-515-3p	1	0	1	1	1	1	NAGS	N-acetylglutamate synthase
hsa-miR-515-3p	0	0	1	1	1	1	ZNF653	zinc finger protein 653
hsa-miR-515-3p	0	0	0	1	0	0	TAF6L	TAF6-like RNA polymerase II, p300/CBP-associated factor (PCAF)-associated factor, 65kDa
hsa-miR-515-3p	1	0	1	1	1	1	NXF1	nuclear RNA export factor 1
hsa-miR-515-3p	1	0	1	1	0	0	C11orf84	chromosome 11 open reading frame 84
hsa-miR-515-3p	0	0	1	1	1	1	C2orf47	chromosome 2 open reading frame 47
hsa-miR-515-3p	0	0	0	1	1	1	CHAC2	ChaC, cation transport regulator homolog 2 (E. coli)
hsa-miR-515-3p	0	0	0	1	0	0	RNPEP	arginyl aminopeptidase (aminopeptidase B)
hsa-miR-515-3p	1	0	1	1	1	1	SSR2	signal sequence receptor, beta (translocon-associated protein beta)
hsa-miR-515-3p	0	0	1	1	0	0	TGM4	transglutaminase 4 (prostate)
hsa-miR-515-3p	0	0	0	1	0	0	ITGB5	integrin, beta 5
hsa-miR-515-3p	0	0	1	1	0	0	TMEM174	transmembrane protein 174
hsa-miR-515-3p	0	0	1	1	0	0	TMC1	transmembrane channel-like 1
hsa-miR-515-3p	0	0	0	1	0	0	OR1Q1	olfactory receptor, family 1, subfamily Q, member 1
hsa-miR-515-3p	0	0	1	1	1	1	TRMT10B	tRNA methyltransferase 10 homolog B (S. cerevisiae)
hsa-miR-515-3p	0	0	1	1	1	1	AKR1E2	aldo-keto reductase family 1, member E2
hsa-miR-515-3p	0	0	1	1	1	1	ITIH5	inter-alpha-trypsin inhibitor heavy chain family, member 5
hsa-miR-515-3p	0	0	0	1	0	0	SERPINA4	serpin peptidase inhibitor, clade A (alpha-1 antiproteinase, antitrypsin), member 4
hsa-miR-515-3p	0	0	0	1	0	0	C12orf55	chromosome 12 open reading frame 55
hsa-miR-515-3p	0	0	1	1	1	1	GALR1	galanin receptor 1
hsa-miR-515-3p	0	0	1	1	1	1	MMP3	matrix metallopeptidase 3 (stromelysin 1, progelatinase)
hsa-miR-515-3p	0	0	1	1	0	0	MESP1	mesoderm posterior 1 homolog (mouse)
hsa-miR-515-3p	0	0	0	1	0	0	GPR182	G protein-coupled receptor 182
hsa-miR-515-3p	0	0	1	1	1	1	INTS10	integrator complex subunit 10
hsa-miR-515-3p	0	0	0	1	0	0	PCSK4	proprotein convertase subtilisin/kexin type 4
hsa-miR-515-3p	0	0	0	1	0	0	PIEZO1	piezo-type mechanosensitive ion channel component 1
hsa-miR-515-3p	0	0	0	1	0	0	PSCA	prostate stem cell antigen
hsa-miR-515-3p	0	0	0	1	0	0	ICT1	immature colon carcinoma transcript 1
hsa-miR-515-3p	0	0	0	1	0	0	ECI1	enoyl-CoA delta isomerase 1
hsa-miR-515-3p	0	0	1	1	0	0	SRRM2	serine/arginine repetitive matrix 2
hsa-miR-515-3p	0	0	1	1	1	1	SDHAF2	succinate dehydrogenase complex assembly factor 2
hsa-miR-515-3p	0	0	0	1	0	0	ULK4	unc-51-like kinase 4 (C. elegans)
hsa-miR-515-3p	0	0	1	1	0	0	PNOC	prepronociceptin
hsa-miR-515-3p	0	0	1	1	0	0	ZNF280A	zinc finger protein 280A
hsa-miR-515-3p	0	0	1	1	1	1	NUDT9	nudix (nucleoside diphosphate linked moiety X)-type motif 9
hsa-miR-515-3p	0	0	0	1	0	0	IARS2	isoleucyl-tRNA synthetase 2, mitochondrial
hsa-miR-515-3p	0	0	0	1	0	0	ALKBH3	alkB, alkylation repair homolog 3 (E. coli)
hsa-miR-515-3p	0	0	0	1	0	0	TTC36	tetratricopeptide repeat domain 36
hsa-miR-515-3p	0	0	0	1	1	1	C17orf65	chromosome 17 open reading frame 65
hsa-miR-515-3p	0	0	1	1	1	1	SHCBP1	SHC SH2-domain binding protein 1
hsa-miR-515-3p	0	0	1	1	0	0	PRKCDBP	protein kinase C, delta binding protein
hsa-miR-515-3p	0	0	1	1	1	1	SEC61A2	Sec61 alpha 2 subunit (S. cerevisiae)
hsa-miR-515-3p	1	0	1	1	0	0	PCNX	pecanex homolog (Drosophila)
hsa-miR-515-3p	0	0	0	1	0	0	OR4K15	olfactory receptor, family 4, subfamily K, member 15
hsa-miR-515-3p	0	0	0	1	1	1	NINJ2	ninjurin 2
hsa-miR-515-3p	0	0	0	1	1	1	NECAB2	N-terminal EF-hand calcium binding protein 2
hsa-miR-515-3p	0	0	0	1	0	0	OR1M1	olfactory receptor, family 1, subfamily M, member 1
hsa-miR-515-3p	0	0	1	1	0	0	CD2BP2	CD2 (cytoplasmic tail) binding protein 2
hsa-miR-515-3p	0	0	1	1	1	1	MUC17	mucin 17, cell surface associated
hsa-miR-515-3p	1	0	1	1	0	0	ADRA1B	adrenoceptor alpha 1B
hsa-miR-515-3p	0	0	1	1	1	1	ANKMY2	ankyrin repeat and MYND domain containing 2
hsa-miR-515-3p	1	0	1	1	1	1	SUCLG2	succinate-CoA ligase, GDP-forming, beta subunit
hsa-miR-515-3p	0	0	1	1	1	1	HTRA3	HtrA serine peptidase 3
hsa-miR-515-3p	0	0	0	1	1	1	CCDC110	coiled-coil domain containing 110
hsa-miR-515-3p	0	0	1	1	0	0	FAM195A	family with sequence similarity 195, member A
hsa-miR-515-3p	0	0	0	1	0	0	METTL7B	methyltransferase like 7B
hsa-miR-515-3p	0	0	0	1	1	1	ZWILCH	Zwilch, kinetochore associated, homolog (Drosophila)
hsa-miR-515-3p	0	0	1	1	1	1	MRPS12	mitochondrial ribosomal protein S12
hsa-miR-515-3p	0	0	1	1	1	1	PRKACA	protein kinase, cAMP-dependent, catalytic, alpha
hsa-miR-515-3p	0	0	1	1	1	1	BTK	Bruton agammaglobulinemia tyrosine kinase
hsa-miR-515-3p	0	0	0	1	0	0	ADCK5	aarF domain containing kinase 5
hsa-miR-515-3p	0	0	1	1	0	0	CYP2W1	cytochrome P450, family 2, subfamily W, polypeptide 1
hsa-miR-515-3p	0	0	1	1	1	1	ACAD9	acyl-CoA dehydrogenase family, member 9
hsa-miR-515-3p	0	0	1	1	1	1	OR13A1	olfactory receptor, family 13, subfamily A, member 1
hsa-miR-515-3p	1	0	1	1	1	1	IQCA1	IQ motif containing with AAA domain 1
hsa-miR-515-3p	0	0	1	1	1	1	CHST2	carbohydrate (N-acetylglucosamine-6-O) sulfotransferase 2
hsa-miR-515-3p	0	0	1	1	0	0	TIGD3	tigger transposable element derived 3
hsa-miR-515-3p	0	0	1	1	0	0	SPTBN2	spectrin, beta, non-erythrocytic 2
hsa-miR-515-3p	1	0	0	1	1	1	CTSF	cathepsin F
hsa-miR-515-3p	1	0	0	1	0	0	RNF26	ring finger protein 26
hsa-miR-515-3p	0	0	0	1	0	0	DAK	dihydroxyacetone kinase 2 homolog (S. cerevisiae)
hsa-miR-515-3p	1	0	1	1	0	0	RABL6	RAB, member RAS oncogene family-like 6
hsa-miR-515-3p	0	0	0	1	1	1	IL1RL1	interleukin 1 receptor-like 1
hsa-miR-515-3p	0	0	0	1	0	0	ZNF408	zinc finger protein 408
hsa-miR-515-3p	0	0	0	1	0	0	CST6	cystatin E/M
hsa-miR-515-3p	0	0	0	1	0	0	NFE2	nuclear factor (erythroid-derived 2), 45kDa
hsa-miR-515-3p	1	0	1	1	0	0	TBC1D10C	TBC1 domain family, member 10C
hsa-miR-515-3p	0	0	0	1	0	0	ZNF585B	zinc finger protein 585B
hsa-miR-515-3p	0	0	1	1	0	0	DOK3	docking protein 3
hsa-miR-515-3p	0	0	0	1	0	0	UTS2R	urotensin 2 receptor
hsa-miR-515-3p	0	0	1	1	1	1	C7	complement component 7
hsa-miR-515-3p	1	0	1	1	1	1	GALE	UDP-galactose-4-epimerase
hsa-miR-515-3p	0	0	1	1	0	0	C8orf82	chromosome 8 open reading frame 82
hsa-miR-515-3p	0	0	1	1	0	0	AP4S1	adaptor-related protein complex 4, sigma 1 subunit
hsa-miR-515-3p	0	0	1	1	0	0	CIRH1A	cirrhosis, autosomal recessive 1A (cirhin)
hsa-miR-515-3p	0	0	1	1	1	1	TSEN2	tRNA splicing endonuclease 2 homolog (S. cerevisiae)
hsa-miR-515-3p	0	0	0	1	0	0	LINC00521	long intergenic non-protein coding RNA 521
hsa-miR-515-3p	0	0	1	1	0	0	TTC12	tetratricopeptide repeat domain 12
hsa-miR-515-3p	0	0	1	1	0	0	CPNE9	copine family member IX
hsa-miR-515-3p	1	0	1	1	1	1	RHOT2	ras homolog family member T2
hsa-miR-515-3p	1	0	0	1	1	1	RBAK	RB-associated KRAB zinc finger
hsa-miR-515-3p	0	0	0	1	1	1	ZNF354C	zinc finger protein 354C
hsa-miR-515-3p	0	0	0	1	0	0	MATK	megakaryocyte-associated tyrosine kinase
hsa-miR-515-3p	1	0	1	1	1	1	CLK4	CDC-like kinase 4
hsa-miR-515-3p	0	0	1	1	1	1	LRRC31	leucine rich repeat containing 31
hsa-miR-515-3p	0	0	0	1	1	1	RHOJ	ras homolog family member J
hsa-miR-515-3p	0	0	0	1	0	0	ISYNA1	inositol-3-phosphate synthase 1
hsa-miR-515-3p	0	0	0	1	0	0	ZNF554	zinc finger protein 554
hsa-miR-515-3p	0	0	0	1	0	0	S1PR2	sphingosine-1-phosphate receptor 2
hsa-miR-515-3p	0	0	1	1	1	1	TTC27	tetratricopeptide repeat domain 27
hsa-miR-515-3p	0	0	1	1	0	0	DGKZ	diacylglycerol kinase, zeta
hsa-miR-515-3p	0	0	1	1	1	1	MRPL43	mitochondrial ribosomal protein L43
hsa-miR-515-3p	0	0	1	1	1	1	MBIP	MAP3K12 binding inhibitory protein 1
hsa-miR-515-3p	0	0	0	1	1	1	ETV4	ets variant 4
hsa-miR-515-3p	1	0	1	1	1	1	LCLAT1	lysocardiolipin acyltransferase 1
hsa-miR-515-3p	0	0	0	1	0	0	OR4X1	olfactory receptor, family 4, subfamily X, member 1
hsa-miR-515-3p	0	0	1	1	1	1	CASC1	cancer susceptibility candidate 1
hsa-miR-515-3p	0	0	1	1	1	1	APITD1	apoptosis-inducing, TAF9-like domain 1
hsa-miR-515-3p	0	0	1	1	1	1	CORT	cortistatin
hsa-miR-515-3p	0	0	1	1	0	0	MUC20	mucin 20, cell surface associated
hsa-miR-515-3p	0	0	0	1	1	1	VN1R1	vomeronasal 1 receptor 1
hsa-miR-515-3p	0	0	1	1	1	1	PINK1	PTEN induced putative kinase 1
hsa-miR-515-3p	0	0	0	1	0	0	P2RY11	purinergic receptor P2Y, G-protein coupled, 11
hsa-miR-515-3p	0	0	0	1	0	0	PPAN	peter pan homolog (Drosophila)
hsa-miR-515-3p	0	0	0	1	0	0	PPAN-P2RY11	PPAN-P2RY11 readthrough
hsa-miR-515-3p	0	0	1	1	0	0	TMEM108	transmembrane protein 108
hsa-miR-515-3p	0	0	0	1	1	1	POLR2L	polymerase (RNA) II (DNA directed) polypeptide L, 7.6kDa
hsa-miR-515-3p	1	0	1	1	1	1	WDR20	WD repeat domain 20
hsa-miR-515-3p	0	0	1	1	1	1	MMP19	matrix metallopeptidase 19
hsa-miR-515-3p	0	0	1	1	0	0	DUOXA2	dual oxidase maturation factor 2
hsa-miR-515-3p	0	0	1	1	1	1	SNRNP200	small nuclear ribonucleoprotein 200kDa (U5)
hsa-miR-515-3p	0	0	1	1	1	1	LGALS8	lectin, galactoside-binding, soluble, 8
hsa-miR-515-3p	0	0	1	1	0	0	STRA6	stimulated by retinoic acid gene 6 homolog (mouse)
hsa-miR-515-3p	0	0	0	1	0	0	H1FOO	H1 histone family, member O, oocyte-specific
hsa-miR-515-3p	0	0	1	1	1	1	LRIF1	ligand dependent nuclear receptor interacting factor 1
hsa-miR-515-3p	0	0	1	1	0	0	CPQ	carboxypeptidase Q
hsa-miR-515-3p	0	0	1	1	1	1	KLHDC7A	kelch domain containing 7A
hsa-miR-515-3p	0	0	1	1	0	0	CYP4F8	cytochrome P450, family 4, subfamily F, polypeptide 8
hsa-miR-515-3p	1	0	1	1	1	1	PDXDC1	pyridoxal-dependent decarboxylase domain containing 1
hsa-miR-515-3p	0	0	1	1	1	1	PIBF1	progesterone immunomodulatory binding factor 1
hsa-miR-515-3p	0	0	1	1	1	1	ZSCAN20	zinc finger and SCAN domain containing 20
hsa-miR-515-3p	1	0	1	1	1	1	SSBP3	single stranded DNA binding protein 3
hsa-miR-515-3p	1	0	1	1	0	0	C17orf70	chromosome 17 open reading frame 70
hsa-miR-515-3p	0	0	0	1	0	0	ZAR1	zygote arrest 1
hsa-miR-515-3p	0	0	1	1	0	0	PRSS55	protease, serine, 55
hsa-miR-515-3p	0	0	0	1	1	1	C1S	complement component 1, s subcomponent
hsa-miR-515-3p	0	0	0	1	0	0	SPPL2C	signal peptide peptidase like 2C
hsa-miR-515-3p	0	0	0	1	0	0	PTCHD3	patched domain containing 3
hsa-miR-515-3p	0	0	1	1	0	0	GPR39	G protein-coupled receptor 39
hsa-miR-515-3p	1	0	1	1	1	1	SETD3	SET domain containing 3
hsa-miR-515-3p	1	0	1	1	1	1	IL25	interleukin 25
hsa-miR-515-3p	0	0	1	1	1	1	HOXB2	homeobox B2
hsa-miR-515-3p	1	0	1	1	0	0	FAT4	FAT tumor suppressor homolog 4 (Drosophila)
hsa-miR-515-3p	0	0	0	1	0	0	ANP32C	acidic (leucine-rich) nuclear phosphoprotein 32 family, member C
hsa-miR-515-3p	0	0	0	1	0	0	ACTL10	actin-like 10
hsa-miR-515-3p	0	0	1	1	1	1	ADAMTSL5	ADAMTS-like 5
hsa-miR-515-3p	0	0	1	1	1	1	BEST3	bestrophin 3
hsa-miR-515-3p	0	0	1	1	0	0	EPGN	epithelial mitogen homolog (mouse)
hsa-miR-515-3p	0	0	1	1	0	0	PLA2G6	phospholipase A2, group VI (cytosolic, calcium-independent)
hsa-miR-515-3p	0	0	0	1	0	0	OR6A2	olfactory receptor, family 6, subfamily A, member 2
hsa-miR-515-3p	0	0	1	1	0	0	CKLF	chemokine-like factor
hsa-miR-515-3p	0	0	0	1	0	0	ACAA1	acetyl-CoA acyltransferase 1
hsa-miR-515-3p	0	0	1	1	1	1	WBSCR17	Williams-Beuren syndrome chromosome region 17
hsa-miR-515-3p	0	0	0	1	0	0	PRODH	proline dehydrogenase (oxidase) 1
hsa-miR-515-3p	0	0	0	1	0	0	FGF3	fibroblast growth factor 3
hsa-miR-515-3p	0	0	1	1	0	0	SYNE3	spectrin repeat containing, nuclear envelope family member 3
hsa-miR-515-3p	0	0	0	1	0	0	KCNK18	potassium channel, subfamily K, member 18
hsa-miR-515-3p	0	0	1	1	1	1	KLC1	kinesin light chain 1
hsa-miR-515-3p	0	0	0	1	0	0	TAC4	tachykinin 4 (hemokinin)
hsa-miR-515-3p	0	0	0	1	1	1	HSP90AA1	heat shock protein 90kDa alpha (cytosolic), class A member 1
hsa-miR-515-3p	0	0	1	1	1	1	SPIN4	spindlin family, member 4
hsa-miR-515-3p	0	0	1	1	0	0	IGFN1	immunoglobulin-like and fibronectin type III domain containing 1
hsa-miR-515-3p	0	0	0	1	1	1	VSTM2B	V-set and transmembrane domain containing 2B
hsa-miR-515-3p	0	0	1	1	0	0	HM13	histocompatibility (minor) 13
hsa-miR-515-3p	0	0	0	1	0	0	LCE3A	late cornified envelope 3A
hsa-miR-515-3p	0	0	1	1	1	1	APOBEC3B	apolipoprotein B mRNA editing enzyme, catalytic polypeptide-like 3B
hsa-miR-515-3p	0	0	1	1	1	1	SLC6A16	solute carrier family 6, member 16
hsa-miR-515-3p	0	0	1	1	1	1	IFRD2	interferon-related developmental regulator 2
hsa-miR-515-3p	0	0	1	1	0	0	RGN	regucalcin (senescence marker protein-30)
hsa-miR-515-3p	0	0	1	1	1	1	STRADA	STE20-related kinase adaptor alpha
hsa-miR-515-3p	0	0	1	1	0	0	RGS12	regulator of G-protein signaling 12
hsa-miR-515-3p	0	0	0	1	0	0	SEC13	SEC13 homolog (S. cerevisiae)
hsa-miR-515-3p	0	0	0	1	0	0	DOM3Z	dom-3 homolog Z (C. elegans)
hsa-miR-515-3p	0	0	1	1	0	0	APOBEC3G	apolipoprotein B mRNA editing enzyme, catalytic polypeptide-like 3G
hsa-miR-515-3p	0	0	1	1	0	0	DCBLD1	discoidin, CUB and LCCL domain containing 1
hsa-miR-515-3p	0	0	0	1	1	1	ANKRD20A5P	ankyrin repeat domain 20 family, member A5, pseudogene
hsa-miR-515-3p	1	0	1	1	1	1	RUNX3	runt-related transcription factor 3
hsa-miR-515-3p	0	0	0	1	0	0	NCR3LG1	natural killer cell cytotoxicity receptor 3 ligand 1
hsa-miR-515-3p	0	0	1	1	1	1	CCDC41	coiled-coil domain containing 41
hsa-miR-515-3p	0	0	0	1	0	0	NAALADL1	N-acetylated alpha-linked acidic dipeptidase-like 1
hsa-miR-515-3p	0	0	0	1	1	1	MRAP	melanocortin 2 receptor accessory protein
hsa-miR-515-3p	0	0	0	1	0	0	GLI4	GLI family zinc finger 4
hsa-miR-515-3p	0	0	1	1	1	1	ZFP41	zinc finger protein 41 homolog (mouse)
hsa-miR-515-3p	0	0	1	1	0	0	SPAG8	sperm associated antigen 8
hsa-miR-515-3p	1	0	1	1	1	1	DOCK7	dedicator of cytokinesis 7
hsa-miR-515-3p	1	0	0	1	1	1	CPSF7	cleavage and polyadenylation specific factor 7, 59kDa
hsa-miR-515-3p	0	0	1	1	1	1	GTF2F2	general transcription factor IIF, polypeptide 2, 30kDa
hsa-miR-515-3p	0	0	0	1	0	0	OBP2A	odorant binding protein 2A
hsa-miR-515-3p	1	0	1	1	1	1	KLHL6	kelch-like 6 (Drosophila)
hsa-miR-515-3p	0	0	0	1	1	1	DCAKD	dephospho-CoA kinase domain containing
hsa-miR-515-3p	0	0	1	1	1	1	TSHR	thyroid stimulating hormone receptor
hsa-miR-515-3p	0	0	0	1	0	0	FAM90A14P	putative protein FAM90A14
hsa-miR-515-3p	0	0	1	1	0	0	MATN4	matrilin 4
hsa-miR-515-3p	0	0	1	1	1	1	NEXN	nexilin (F actin binding protein)
hsa-miR-515-3p	0	0	0	1	1	1	PROZ	protein Z, vitamin K-dependent plasma glycoprotein
hsa-miR-515-3p	0	0	0	1	0	0	BTBD8	BTB (POZ) domain containing 8
hsa-miR-515-3p	0	0	0	1	0	0	ZBP1	Z-DNA binding protein 1
hsa-miR-515-3p	1	0	1	1	0	0	TH1L	TH1-like (Drosophila)
hsa-miR-515-3p	0	0	1	1	1	1	CEACAM1	carcinoembryonic antigen-related cell adhesion molecule 1 (biliary glycoprotein)
hsa-miR-515-3p	0	0	1	1	0	0	EVC2	Ellis van Creveld syndrome 2
hsa-miR-515-3p	0	0	1	1	1	1	C14orf79	chromosome 14 open reading frame 79
hsa-miR-515-3p	0	0	0	1	0	0	TNNI3	troponin I type 3 (cardiac)
hsa-miR-515-3p	0	0	1	1	1	1	CR2	complement component (3d/Epstein Barr virus) receptor 2
hsa-miR-515-3p	0	0	1	1	1	1	CNTN1	contactin 1
hsa-miR-515-3p	0	0	1	1	1	1	GMPR2	guanosine monophosphate reductase 2
hsa-miR-515-3p	1	0	0	1	1	1	DNAJC11	DnaJ (Hsp40) homolog, subfamily C, member 11
hsa-miR-515-3p	0	0	1	1	0	0	P2RY6	pyrimidinergic receptor P2Y, G-protein coupled, 6
hsa-miR-515-3p	0	0	1	1	1	1	NMD3	NMD3 homolog (S. cerevisiae)
hsa-miR-515-3p	0	0	1	1	0	0	ASS1	argininosuccinate synthase 1
hsa-miR-515-3p	1	0	1	1	1	1	ANKS6	ankyrin repeat and sterile alpha motif domain containing 6
hsa-miR-515-3p	1	0	1	1	1	1	MACROD2	MACRO domain containing 2
hsa-miR-515-3p	1	0	1	1	1	1	DMPK	dystrophia myotonica-protein kinase
hsa-miR-515-3p	0	0	0	1	0	0	ZNF774	zinc finger protein 774
hsa-miR-515-3p	1	0	1	1	1	1	MAK	male germ cell-associated kinase
hsa-miR-515-3p	1	0	1	1	1	1	FILIP1L	filamin A interacting protein 1-like
hsa-miR-515-3p	1	0	1	1	1	1	IGSF11	immunoglobulin superfamily, member 11
hsa-miR-515-3p	0	0	0	1	0	0	CRYBA4	crystallin, beta A4
hsa-miR-515-3p	0	0	0	1	0	0	MOV10L1	Mov10l1, Moloney leukemia virus 10-like 1, homolog (mouse)
hsa-miR-515-3p	0	0	0	1	0	0	INCA1	inhibitor of CDK, cyclin A1 interacting protein 1
hsa-miR-515-3p	0	0	0	1	1	1	ARSG	arylsulfatase G
hsa-miR-515-3p	0	0	1	1	1	1	CATSPER2	cation channel, sperm associated 2
hsa-miR-515-3p	1	0	1	1	1	1	VAMP1	vesicle-associated membrane protein 1 (synaptobrevin 1)
hsa-miR-515-3p	1	0	0	1	0	0	LMX1B	LIM homeobox transcription factor 1, beta
hsa-miR-515-3p	0	0	0	1	1	1	ZNF585A	zinc finger protein 585A
hsa-miR-515-3p	1	0	1	1	0	0	DNM2	dynamin 2
hsa-miR-515-3p	1	0	1	1	1	1	SH3BP2	SH3-domain binding protein 2
hsa-miR-515-3p	0	0	1	1	0	0	ACOX3	acyl-CoA oxidase 3, pristanoyl
hsa-miR-515-3p	1	0	1	1	1	1	PTPRD	protein tyrosine phosphatase, receptor type, D
hsa-miR-515-3p	0	0	1	1	0	0	TSGA13	testis specific, 13
hsa-miR-515-3p	0	0	0	1	1	1	ZNF790	zinc finger protein 790
hsa-miR-515-3p	0	0	0	1	0	0	HVCN1	hydrogen voltage-gated channel 1
hsa-miR-515-3p	0	0	0	1	1	1	PIK3R4	phosphoinositide-3-kinase, regulatory subunit 4
hsa-miR-515-3p	1	0	1	1	0	0	C10orf137	chromosome 10 open reading frame 137
hsa-miR-515-3p	0	0	1	1	0	0	AHSA2	AHA1, activator of heat shock 90kDa protein ATPase homolog 2 (yeast)
hsa-miR-515-3p	0	0	1	1	0	0	ASNA1	arsA arsenite transporter, ATP-binding, homolog 1 (bacterial)
hsa-miR-515-3p	0	0	0	1	0	0	ARID5A	AT rich interactive domain 5A (MRF1-like)
hsa-miR-515-3p	1	0	1	1	1	1	TAC3	tachykinin 3
hsa-miR-515-3p	0	0	0	1	0	0	HIST1H3A	histone cluster 1, H3a
hsa-miR-515-3p	0	0	1	1	0	0	RAD51D	RAD51 homolog D (S. cerevisiae)
hsa-miR-515-3p	1	0	1	1	1	1	DLGAP2	discs, large (Drosophila) homolog-associated protein 2
hsa-miR-515-3p	0	0	0	1	0	0	OR5AC2	olfactory receptor, family 5, subfamily AC, member 2
hsa-miR-515-3p	0	0	1	1	0	0	FANCG	Fanconi anemia, complementation group G
hsa-miR-515-3p	1	0	1	1	1	1	ANKRD46	ankyrin repeat domain 46
hsa-miR-515-3p	0	0	0	1	0	0	SAPCD2	suppressor APC domain containing 2
hsa-miR-515-3p	0	0	1	1	1	1	PIK3CG	phosphatidylinositol-4,5-bisphosphate 3-kinase, catalytic subunit gamma
hsa-miR-515-3p	0	0	0	1	1	1	ARSF	arylsulfatase F
hsa-miR-515-3p	1	0	1	1	1	1	LFNG	LFNG O-fucosylpeptide 3-beta-N-acetylglucosaminyltransferase
hsa-miR-515-3p	0	0	0	1	0	0	OR13G1	olfactory receptor, family 13, subfamily G, member 1
hsa-miR-515-3p	0	0	0	1	0	0	KIAA1683	KIAA1683
hsa-miR-515-3p	0	0	0	1	0	0	FAM90A20P	putative protein FAM90A20
hsa-miR-515-3p	0	0	0	1	0	0	OR52M1	olfactory receptor, family 52, subfamily M, member 1
hsa-miR-515-3p	0	0	0	1	0	0	OR5B21	olfactory receptor, family 5, subfamily B, member 21
hsa-miR-515-3p	0	0	0	1	0	0	SYTL3	synaptotagmin-like 3
hsa-miR-515-3p	0	0	0	1	0	0	FABP12	fatty acid binding protein 12
hsa-miR-515-3p	0	0	1	1	1	1	CDH4	cadherin 4, type 1, R-cadherin (retinal)
hsa-miR-515-3p	1	0	1	1	1	1	NMB	neuromedin B
hsa-miR-515-3p	0	0	0	1	0	0	MMP17	matrix metallopeptidase 17 (membrane-inserted)
hsa-miR-515-3p	0	0	1	1	0	0	NPSR1	neuropeptide S receptor 1
hsa-miR-515-3p	0	0	1	1	0	0	TWF2	twinfilin, actin-binding protein, homolog 2 (Drosophila)
hsa-miR-515-3p	0	0	0	1	0	0	TLR9	toll-like receptor 9
hsa-miR-515-3p	0	0	1	1	1	1	GSTM3	glutathione S-transferase mu 3 (brain)
hsa-miR-515-3p	0	0	0	1	0	0	SHARPIN	SHANK-associated RH domain interactor
hsa-miR-515-3p	0	0	1	1	1	1	PTPLA	protein tyrosine phosphatase-like (proline instead of catalytic arginine), member A
hsa-miR-515-3p	1	0	1	1	1	1	GPX7	glutathione peroxidase 7
hsa-miR-515-3p	0	0	1	1	0	0	UBL7	ubiquitin-like 7 (bone marrow stromal cell-derived)
hsa-miR-515-3p	0	0	0	1	1	1	MAGEE1	melanoma antigen family E, 1
hsa-miR-515-3p	0	0	1	1	0	0	TXNRD2	thioredoxin reductase 2
hsa-miR-515-3p	1	0	1	1	1	1	SORBS1	sorbin and SH3 domain containing 1
hsa-miR-515-3p	1	0	1	1	0	0	PLXNB3	plexin B3
hsa-miR-515-3p	1	0	1	1	1	1	NTPCR	nucleoside-triphosphatase, cancer-related
hsa-miR-515-3p	1	0	0	1	1	1	TRIM67	tripartite motif containing 67
hsa-miR-515-3p	0	0	0	1	0	0	GUK1	guanylate kinase 1
hsa-miR-515-3p	0	0	0	1	1	1	C1orf35	chromosome 1 open reading frame 35
hsa-miR-515-3p	1	0	1	1	1	1	AGPAT4	1-acylglycerol-3-phosphate O-acyltransferase 4 (lysophosphatidic acid acyltransferase, delta)
hsa-miR-515-3p	1	0	1	1	1	1	CR1	complement component (3b/4b) receptor 1 (Knops blood group)
hsa-miR-515-3p	0	0	1	1	1	1	PM20D1	peptidase M20 domain containing 1
hsa-miR-515-3p	0	0	0	1	0	0	TFB1M	transcription factor B1, mitochondrial
hsa-miR-515-3p	0	0	0	1	1	1	LGR6	leucine-rich repeat containing G protein-coupled receptor 6
hsa-miR-515-3p	0	0	1	1	1	1	C6orf211	chromosome 6 open reading frame 211
hsa-miR-515-3p	0	0	0	1	0	0	PHLDA3	pleckstrin homology-like domain, family A, member 3
hsa-miR-515-3p	0	0	0	1	1	1	NUP43	nucleoporin 43kDa
hsa-miR-515-3p	0	0	0	1	0	0	SF3B5	splicing factor 3b, subunit 5, 10kDa
hsa-miR-515-3p	0	0	0	1	1	1	LTV1	LTV1 homolog (S. cerevisiae)
hsa-miR-515-3p	1	0	1	1	1	1	TBPL1	TBP-like 1
hsa-miR-515-3p	0	0	1	1	1	1	HSD17B7	hydroxysteroid (17-beta) dehydrogenase 7
hsa-miR-515-3p	0	0	1	1	1	1	UFC1	ubiquitin-fold modifier conjugating enzyme 1
hsa-miR-515-3p	0	0	1	1	1	1	ATP1A4	ATPase, Na+/K+ transporting, alpha 4 polypeptide
hsa-miR-515-3p	0	0	1	1	0	0	SLAMF9	SLAM family member 9
hsa-miR-515-3p	0	0	1	1	0	0	VSIG8	V-set and immunoglobulin domain containing 8
hsa-miR-515-3p	0	0	1	1	0	0	PYHIN1	pyrin and HIN domain family, member 1
hsa-miR-515-3p	0	0	1	1	1	1	MRPL24	mitochondrial ribosomal protein L24
hsa-miR-515-3p	0	0	0	1	0	0	RHBG	Rh family, B glycoprotein (gene/pseudogene)
hsa-miR-515-3p	0	0	0	1	0	0	TSACC	TSSK6 activating co-chaperone
hsa-miR-515-3p	0	0	1	1	1	1	ECHDC1	enoyl CoA hydratase domain containing 1
hsa-miR-515-3p	0	0	0	1	1	1	ZNF684	zinc finger protein 684
hsa-miR-515-3p	0	0	1	1	0	0	THBS3	thrombospondin 3
hsa-miR-515-3p	1	0	1	1	1	1	EFNA1	ephrin-A1
hsa-miR-515-3p	0	0	0	1	0	0	DPYSL4	dihydropyrimidinase-like 4
hsa-miR-515-3p	0	0	0	1	0	0	UROS	uroporphyrinogen III synthase
hsa-miR-515-3p	0	0	0	1	0	0	C1orf68	chromosome 1 open reading frame 68
hsa-miR-515-3p	0	0	1	1	0	0	LCE3D	late cornified envelope 3D
hsa-miR-515-3p	0	0	1	1	1	1	LCE3E	late cornified envelope 3E
hsa-miR-515-3p	0	0	1	1	1	1	THEM5	thioesterase superfamily member 5
hsa-miR-515-3p	0	0	1	1	1	1	LHPP	phospholysine phosphohistidine inorganic pyrophosphate phosphatase
hsa-miR-515-3p	0	0	0	1	0	0	SCNM1	sodium channel modifier 1
hsa-miR-515-3p	0	0	1	1	0	0	ECM1	extracellular matrix protein 1
hsa-miR-515-3p	0	0	1	1	0	0	HIST2H3C	histone cluster 2, H3c
hsa-miR-515-3p	0	0	0	1	0	0	HIST1H3H	histone cluster 1, H3h
hsa-miR-515-3p	0	0	1	1	0	0	FAM72B	family with sequence similarity 72, member B
hsa-miR-515-3p	1	0	1	1	1	1	GDAP2	ganglioside induced differentiation associated protein 2
hsa-miR-515-3p	0	0	0	1	0	0	UCKL1-AS1	UCKL1 antisense RNA 1
hsa-miR-515-3p	0	0	1	1	1	1	RTCA	RNA 3'-terminal phosphate cyclase
hsa-miR-515-3p	0	0	0	1	1	1	PASD1	PAS domain containing 1
hsa-miR-515-3p	1	0	0	1	1	1	COL9A1	collagen, type IX, alpha 1
hsa-miR-515-3p	0	0	1	1	0	0	AVPI1	arginine vasopressin-induced 1
hsa-miR-515-3p	0	0	1	1	1	1	TYW3	tRNA-yW synthesizing protein 3 homolog (S. cerevisiae)
hsa-miR-515-3p	0	0	0	1	0	0	UTP14A	UTP14, U3 small nucleolar ribonucleoprotein, homolog A (yeast)
hsa-miR-515-3p	1	0	1	1	0	0	EFHC1	EF-hand domain (C-terminal) containing 1
hsa-miR-515-3p	0	0	1	1	0	0	C1orf87	chromosome 1 open reading frame 87
hsa-miR-515-3p	0	0	0	1	0	0	TMEM61	transmembrane protein 61
hsa-miR-515-3p	0	0	0	1	0	0	C9orf37	chromosome 9 open reading frame 37
hsa-miR-515-3p	1	0	1	1	1	1	NELF	nasal embryonic LHRH factor
hsa-miR-515-3p	0	0	0	1	0	0	ECHDC2	enoyl CoA hydratase domain containing 2
hsa-miR-515-3p	0	0	1	1	0	0	NFATC2	nuclear factor of activated T-cells, cytoplasmic, calcineurin-dependent 2
hsa-miR-515-3p	0	0	1	1	0	0	PTGDS	prostaglandin D2 synthase 21kDa (brain)
hsa-miR-515-3p	0	0	1	1	1	1	IL13RA1	interleukin 13 receptor, alpha 1
hsa-miR-515-3p	0	0	1	1	1	1	CYP4B1	cytochrome P450, family 4, subfamily B, polypeptide 1
hsa-miR-515-3p	0	0	0	1	1	1	TSPAN1	tetraspanin 1
hsa-miR-515-3p	0	0	0	1	0	0	GTF3C4	general transcription factor IIIC, polypeptide 4, 90kDa
hsa-miR-515-3p	0	0	0	1	0	0	DMAP1	DNA methyltransferase 1 associated protein 1
hsa-miR-515-3p	0	0	0	1	1	1	ABL1	c-abl oncogene 1, non-receptor tyrosine kinase
hsa-miR-515-3p	0	0	1	1	0	0	PTPRF	protein tyrosine phosphatase, receptor type, F
hsa-miR-515-3p	0	0	1	1	0	0	PLTP	phospholipid transfer protein
hsa-miR-515-3p	1	0	1	1	0	0	LRRC73	leucine rich repeat containing 73
hsa-miR-515-3p	0	0	1	1	1	1	CRIP3	cysteine-rich protein 3
hsa-miR-515-3p	0	0	1	1	0	0	IL1RAPL2	interleukin 1 receptor accessory protein-like 2
hsa-miR-515-3p	0	0	0	1	1	1	WFDC12	WAP four-disulfide core domain 12
hsa-miR-515-3p	0	0	1	1	0	0	GNMT	glycine N-methyltransferase
hsa-miR-515-3p	0	0	1	1	1	1	CNPY3	canopy 3 homolog (zebrafish)
hsa-miR-515-3p	0	0	1	1	0	0	WISP2	WNT1 inducible signaling pathway protein 2
hsa-miR-515-3p	0	0	1	1	0	0	C9orf16	chromosome 9 open reading frame 16
hsa-miR-515-3p	1	0	1	1	1	1	TSPAN6	tetraspanin 6
hsa-miR-515-3p	1	0	1	1	0	0	MDFI	MyoD family inhibitor
hsa-miR-515-3p	1	0	1	1	1	1	CDK9	cyclin-dependent kinase 9
hsa-miR-515-3p	0	0	1	1	1	1	KIAA1755	KIAA1755
hsa-miR-515-3p	0	0	1	1	1	1	TGM2	transglutaminase 2 (C polypeptide, protein-glutamine-gamma-glutamyltransferase)
hsa-miR-515-3p	1	0	1	1	0	0	CCDC167	coiled-coil domain containing 167
hsa-miR-515-3p	0	0	1	1	1	1	HDAC8	histone deacetylase 8
hsa-miR-515-3p	1	0	1	1	1	1	COL16A1	collagen, type XVI, alpha 1
hsa-miR-515-3p	0	0	1	1	0	0	GSN	gelsolin
hsa-miR-515-3p	0	0	1	1	1	1	TRNAU1AP	tRNA selenocysteine 1 associated protein 1
hsa-miR-515-3p	0	0	1	1	1	1	PSMD5	proteasome (prosome, macropain) 26S subunit, non-ATPase, 5
hsa-miR-515-3p	1	0	1	1	1	1	DBC1	deleted in bladder cancer 1
hsa-miR-515-3p	0	0	1	1	0	0	SCAND1	SCAN domain containing 1
hsa-miR-515-3p	1	0	1	1	0	0	CD164L2	CD164 sialomucin-like 2
hsa-miR-515-3p	0	0	0	1	1	1	C10orf71	chromosome 10 open reading frame 71
hsa-miR-515-3p	0	0	1	1	0	0	C10orf128	chromosome 10 open reading frame 128
hsa-miR-515-3p	1	0	1	1	0	0	DHDDS	dehydrodolichyl diphosphate synthase
hsa-miR-515-3p	0	0	0	1	0	0	OR2K2	olfactory receptor, family 2, subfamily K, member 2
hsa-miR-515-3p	1	0	1	1	1	1	SLC44A1	solute carrier family 44, member 1
hsa-miR-515-3p	0	0	1	1	0	0	PARD3	par-3 partitioning defective 3 homolog (C. elegans)
hsa-miR-515-3p	1	0	1	1	1	1	MGAT5B	mannosyl (alpha-1,6-)-glycoprotein beta-1,6-N-acetyl-glucosaminyltransferase, isozyme B
hsa-miR-515-3p	0	0	1	1	1	1	TBC1D2	TBC1 domain family, member 2
hsa-miR-515-3p	1	0	1	1	1	1	TSTD2	thiosulfate sulfurtransferase (rhodanese)-like domain containing 2
hsa-miR-515-3p	0	0	1	1	0	0	GALK1	galactokinase 1
hsa-miR-515-3p	0	0	1	1	1	1	ZNF341	zinc finger protein 341
hsa-miR-515-3p	1	0	1	1	1	1	CEP164	centrosomal protein 164kDa
hsa-miR-515-3p	0	0	1	1	0	0	FBP1	fructose-1,6-bisphosphatase 1
hsa-miR-515-3p	0	0	0	1	0	0	ACTL8	actin-like 8
hsa-miR-515-3p	0	0	0	1	0	0	C9orf129	chromosome 9 open reading frame 129
hsa-miR-515-3p	0	0	1	1	0	0	CFB	complement factor B
hsa-miR-515-3p	0	0	1	1	1	1	NXPE4	neurexophilin and PC-esterase domain family, member 4
hsa-miR-515-3p	0	0	1	1	0	0	CROCC	ciliary rootlet coiled-coil, rootletin
hsa-miR-515-3p	0	0	1	1	1	1	C6orf48	chromosome 6 open reading frame 48
hsa-miR-515-3p	0	0	1	1	1	1	KDELC2	KDEL (Lys-Asp-Glu-Leu) containing 2
hsa-miR-515-3p	0	0	0	1	0	0	CLCNKB	chloride channel, voltage-sensitive Kb
hsa-miR-515-3p	0	0	1	1	0	0	ABHD16A	abhydrolase domain containing 16A
hsa-miR-515-3p	0	0	0	1	0	0	PRAMEF17	PRAME family member 17
hsa-miR-515-3p	0	0	0	1	0	0	PRAMEF19	PRAME family member 19
hsa-miR-515-3p	1	0	1	1	1	1	ID1	inhibitor of DNA binding 1, dominant negative helix-loop-helix protein
hsa-miR-515-3p	0	0	0	1	0	0	PRAMEF18	PRAME family member 18
hsa-miR-515-3p	0	0	0	1	1	1	PRAMEF3	PRAME family member 3
hsa-miR-515-3p	0	0	0	1	0	0	PRICKLE3	prickle homolog 3 (Drosophila)
hsa-miR-515-3p	1	0	0	1	1	1	PRAF2	PRA1 domain family, member 2
hsa-miR-515-3p	0	0	0	1	1	1	GPR183	G protein-coupled receptor 183
hsa-miR-515-3p	0	0	1	1	1	1	TRIM10	tripartite motif containing 10
hsa-miR-515-3p	0	0	0	1	0	0	FBXO6	F-box protein 6
hsa-miR-515-3p	0	0	1	1	0	0	UXT	ubiquitously-expressed, prefoldin-like chaperone
hsa-miR-515-3p	0	0	0	1	0	0	C1orf127	chromosome 1 open reading frame 127
hsa-miR-515-3p	1	0	1	1	1	1	CASZ1	castor zinc finger 1
hsa-miR-515-3p	0	0	0	1	0	0	OR14J1	olfactory receptor, family 14, subfamily J, member 1
hsa-miR-515-3p	0	0	0	1	1	1	NMNAT1	nicotinamide nucleotide adenylyltransferase 1
hsa-miR-515-3p	0	0	0	1	0	0	POM121L2	POM121 transmembrane nucleoporin-like 2
hsa-miR-515-3p	0	0	0	1	0	0	LOC100132874	uncharacterized LOC100132874
hsa-miR-515-3p	0	0	0	1	1	1	BORA	bora, aurora kinase A activator
hsa-miR-515-3p	1	0	1	1	1	1	RSU1	Ras suppressor protein 1
hsa-miR-515-3p	0	0	0	1	0	0	RPL23	ribosomal protein L23
hsa-miR-515-3p	0	0	1	1	0	0	KCNAB2	potassium voltage-gated channel, shaker-related subfamily, beta member 2
hsa-miR-515-3p	0	0	0	1	0	0	GSTK1	glutathione S-transferase kappa 1
hsa-miR-515-3p	1	0	1	1	1	1	CREB3L2	cAMP responsive element binding protein 3-like 2
hsa-miR-515-3p	0	0	1	1	0	0	CDNF	cerebral dopamine neurotrophic factor
hsa-miR-515-3p	0	0	1	1	1	1	RPGR	retinitis pigmentosa GTPase regulator
hsa-miR-515-3p	1	0	1	1	0	0	SEPT8	septin 8
hsa-miR-515-3p	0	0	0	1	0	0	ARID3C	AT rich interactive domain 3C (BRIGHT-like)
hsa-miR-515-3p	0	0	1	1	1	1	CHGB	chromogranin B (secretogranin 1)
hsa-miR-515-3p	0	0	1	1	1	1	ARHGEF25	Rho guanine nucleotide exchange factor (GEF) 25
hsa-miR-515-3p	0	0	1	1	0	0	SLC26A10	solute carrier family 26, member 10
hsa-miR-515-3p	0	0	1	1	0	0	FAM65A	family with sequence similarity 65, member A
hsa-miR-515-3p	0	0	0	1	0	0	C6orf52	chromosome 6 open reading frame 52
hsa-miR-515-3p	1	0	1	1	1	1	UFM1	ubiquitin-fold modifier 1
hsa-miR-515-3p	1	0	1	1	1	1	CPNE2	copine II
hsa-miR-515-3p	0	0	1	1	0	0	MPV17	MpV17 mitochondrial inner membrane protein
hsa-miR-515-3p	0	0	1	1	0	0	EXOC3L4	exocyst complex component 3-like 4
hsa-miR-515-3p	0	0	0	1	1	1	IFNA2	interferon, alpha 2
hsa-miR-515-3p	0	0	0	1	0	0	IFNA17	interferon, alpha 17
hsa-miR-515-3p	0	0	0	1	0	0	IFNA16	interferon, alpha 16
hsa-miR-515-3p	0	0	0	1	0	0	IFNA4	interferon, alpha 4
hsa-miR-515-3p	0	0	1	1	1	1	IFNA21	interferon, alpha 21
hsa-miR-515-3p	0	0	1	1	0	0	PIR	pirin (iron-binding nuclear protein)
hsa-miR-515-3p	0	0	1	1	1	1	IGSF5	immunoglobulin superfamily, member 5
hsa-miR-515-3p	0	0	1	1	0	0	CPXM1	carboxypeptidase X (M14 family), member 1
hsa-miR-515-3p	0	0	1	1	0	0	PLSCR3	phospholipid scramblase 3
hsa-miR-515-3p	1	0	1	1	1	1	PSIP1	PC4 and SFRS1 interacting protein 1
hsa-miR-515-3p	0	0	1	1	1	1	IL4R	interleukin 4 receptor
hsa-miR-515-3p	0	0	1	1	1	1	TECRL	trans-2,3-enoyl-CoA reductase-like
hsa-miR-515-3p	0	0	1	1	1	1	CSF2RA	colony stimulating factor 2 receptor, alpha, low-affinity (granulocyte-macrophage)
hsa-miR-515-3p	0	0	1	1	1	1	CRYZL1	crystallin, zeta (quinone reductase)-like 1
hsa-miR-515-3p	1	0	1	1	1	1	GABRB1	gamma-aminobutyric acid (GABA) A receptor, beta 1
hsa-miR-515-3p	0	0	0	1	0	0	CYS1	cystin 1
hsa-miR-515-3p	0	0	0	1	0	0	SYT8	synaptotagmin VIII
hsa-miR-515-3p	1	0	1	1	1	1	SLC43A2	solute carrier family 43, member 2
hsa-miR-515-3p	0	0	0	1	0	0	ZNF205	zinc finger protein 205
hsa-miR-515-3p	0	0	0	1	0	0	DEFB135	defensin, beta 135
hsa-miR-515-3p	0	0	1	1	1	1	TOLLIP	toll interacting protein
hsa-miR-515-3p	0	0	0	1	0	0	PSMD13	proteasome (prosome, macropain) 26S subunit, non-ATPase, 13
hsa-miR-515-3p	0	0	0	1	0	0	MSLN	mesothelin
hsa-miR-515-3p	0	0	0	1	0	0	OR5H14	olfactory receptor, family 5, subfamily H, member 14
hsa-miR-515-3p	0	0	1	1	0	0	SDK2	sidekick cell adhesion molecule 2
hsa-miR-515-3p	1	0	1	1	1	1	ATXN7L1	ataxin 7-like 1
hsa-miR-515-3p	0	0	1	1	1	1	C11orf31	chromosome 11 open reading frame 31
hsa-miR-515-3p	0	0	0	1	0	0	CCL25	chemokine (C-C motif) ligand 25
hsa-miR-515-3p	1	0	1	1	1	1	ARSB	arylsulfatase B
hsa-miR-515-3p	0	0	1	1	1	1	STS	steroid sulfatase (microsomal), isozyme S
hsa-miR-515-3p	1	0	1	1	1	1	SFR1	SWI5-dependent recombination repair 1
hsa-miR-515-3p	0	0	1	1	1	1	SHISA2	shisa homolog 2 (Xenopus laevis)
hsa-miR-515-3p	1	0	1	1	1	1	ZNF2	zinc finger protein 2
hsa-miR-515-3p	1	0	1	0	1	1	SAMD5	sterile alpha motif domain containing 5
hsa-miR-515-3p	0	0	1	0	1	1	GPR155	G protein-coupled receptor 155
hsa-miR-515-3p	1	0	1	1	1	1	GJC1	gap junction protein, gamma 1, 45kDa
hsa-miR-515-3p	1	0	1	0	1	1	ODZ3	odz, odd Oz/ten-m homolog 3 (Drosophila)
hsa-miR-515-3p	1	0	1	1	1	1	ANK3	ankyrin 3, node of Ranvier (ankyrin G)
hsa-miR-515-3p	0	0	1	1	1	1	RCBTB2	regulator of chromosome condensation (RCC1) and BTB (POZ) domain containing protein 2
hsa-miR-515-3p	0	0	1	1	1	1	CXADR	coxsackie virus and adenovirus receptor
hsa-miR-515-3p	0	0	1	1	1	1	AXL	AXL receptor tyrosine kinase
hsa-miR-515-3p	0	0	1	1	1	1	BPGM	2,3-bisphosphoglycerate mutase
hsa-miR-515-3p	1	0	1	1	1	1	ITPR2	inositol 1,4,5-trisphosphate receptor, type 2
hsa-miR-515-3p	0	0	1	0	1	1	PLN	phospholamban
hsa-miR-515-3p	1	0	1	0	1	1	ZKSCAN1	zinc finger with KRAB and SCAN domains 1
hsa-miR-515-3p	0	0	0	1	1	1	DNALI1	dynein, axonemal, light intermediate chain 1
hsa-miR-515-3p	1	0	1	1	1	1	FOXK2	forkhead box K2
hsa-miR-515-3p	1	0	1	1	1	1	KL	klotho
hsa-miR-515-3p	1	0	1	0	1	1	NR1D2	nuclear receptor subfamily 1, group D, member 2
hsa-miR-515-3p	1	0	1	1	1	1	PTBP3	polypyrimidine tract binding protein 3
hsa-miR-515-3p	0	0	1	1	1	1	TRIM22	tripartite motif containing 22
hsa-miR-515-3p	0	0	1	1	1	1	USH2A	Usher syndrome 2A (autosomal recessive, mild)
hsa-miR-515-3p	1	0	0	1	1	1	CAPN7	calpain 7
hsa-miR-515-3p	0	0	1	1	1	1	DAPK2	death-associated protein kinase 2
hsa-miR-515-3p	1	0	1	1	1	1	RHOBTB3	Rho-related BTB domain containing 3
hsa-miR-515-3p	1	0	1	0	1	1	ARHGAP26	Rho GTPase activating protein 26
hsa-miR-515-3p	1	0	1	0	1	1	ANKRD28	ankyrin repeat domain 28
hsa-miR-515-3p	1	0	1	1	1	1	ST8SIA3	ST8 alpha-N-acetyl-neuraminide alpha-2,8-sialyltransferase 3
hsa-miR-515-3p	1	0	1	1	1	1	IMPAD1	inositol monophosphatase domain containing 1
hsa-miR-515-3p	1	0	1	1	1	1	CCDC25	coiled-coil domain containing 25
hsa-miR-515-3p	1	0	1	1	1	1	FTSJD1	FtsJ methyltransferase domain containing 1
hsa-miR-515-3p	1	0	1	0	1	1	FAM40B	family with sequence similarity 40, member B
hsa-miR-515-3p	1	0	1	1	1	1	ADCY1	adenylate cyclase 1 (brain)
hsa-miR-515-3p	0	0	1	1	1	1	DGCR14	DiGeorge syndrome critical region gene 14
hsa-miR-515-3p	1	0	1	1	1	1	PANK3	pantothenate kinase 3
hsa-miR-515-3p	1	0	1	0	1	1	PLEKHF2	pleckstrin homology domain containing, family F (with FYVE domain) member 2
hsa-miR-515-3p	1	0	1	1	1	1	FAM188A	family with sequence similarity 188, member A
hsa-miR-515-3p	1	0	1	1	1	1	NUBPL	nucleotide binding protein-like
hsa-miR-515-3p	1	0	1	1	1	1	SUN1	Sad1 and UNC84 domain containing 1
hsa-miR-515-3p	1	0	1	0	1	1	KIAA1715	KIAA1715
hsa-miR-515-3p	0	0	0	1	1	1	TMEM203	transmembrane protein 203
hsa-miR-515-3p	0	0	0	0	1	1	TOR1AIP2	torsin A interacting protein 2
hsa-miR-515-3p	0	0	1	1	1	1	SLC36A4	solute carrier family 36 (proton/amino acid symporter), member 4
hsa-miR-515-3p	0	0	1	1	1	1	PTGR2	prostaglandin reductase 2
hsa-miR-515-3p	0	0	0	0	1	1	FAM26E	family with sequence similarity 26, member E
hsa-miR-515-3p	0	0	0	1	1	1	OR7D2	olfactory receptor, family 7, subfamily D, member 2
hsa-miR-515-3p	0	0	0	1	1	1	ZNF678	zinc finger protein 678
hsa-miR-515-3p	1	0	1	1	1	1	NSUN4	NOP2/Sun domain family, member 4
hsa-miR-515-3p	0	0	0	1	1	1	LINC00610	long intergenic non-protein coding RNA 610
hsa-miR-515-3p	0	0	1	1	1	1	C15orf54	chromosome 15 open reading frame 54
hsa-miR-515-3p	0	0	0	1	1	1	TBC1D3	TBC1 domain family, member 3
hsa-miR-515-3p	0	0	0	1	1	1	TBC1D3H	TBC1 domain family, member 3H
hsa-miR-515-3p	0	0	0	0	1	1	LOC730256	uncharacterized LOC730256
hsa-miR-515-3p	0	0	1	0	1	1	DNAH14	dynein, axonemal, heavy chain 14
hsa-miR-515-3p	0	0	0	0	1	1	SUCLG2P2	succinate-CoA ligase, GDP-forming, beta subunit pseudogene 2
hsa-miR-515-3p	0	0	0	1	1	1	SRP9P1	signal recognition particle 9 pseudogene 1
hsa-miR-515-3p	0	0	0	0	1	1	LOC653380	TBC1 domain family member 3C-like protein ENSP00000341742
