# Supplementary material for: Profiling of Selected MicroRNAs in Proliferative Eutopic Endometrium of Women with Ovarian Endometriosis
Source: Biomed Res Int. 2015 Aug 20;2015:760698. doi: 10.1155/2015/760698 (PMC4558423; doi:10.1155/2015/760698)
Supplement: Supplementary file 1 — Table I: The names of miRNAs significantly differentially expressed between eutopic endometrium of patients with endometriosis vs eutopic endometrium of patients without endometriosis. Table II: The associations between miRNA and mRNA, which presents detailed results of the search of six major databases i.e targetscan, tarbase, miranda, mirbase, mirtarget2 and pictar. [file 760698.f1.zip › 760698.f1/Table II/hsa-miR-515-5p.tsv]

miR	targetscan	tarbase	miranda	mirbase	mirtarget2	pictar	GeneSymbol	GeneName
hsa-miR-515-5p	1	0	1	1	1	1	CHD9	chromodomain helicase DNA binding protein 9
hsa-miR-515-5p	0	0	1	1	1	1	KIAA0391	KIAA0391
hsa-miR-515-5p	0	0	1	1	1	1	HSPH1	heat shock 105kDa/110kDa protein 1
hsa-miR-515-5p	1	0	1	0	1	1	PTPRT	protein tyrosine phosphatase, receptor type, T
hsa-miR-515-5p	0	0	1	1	1	1	PEG3	paternally expressed 3
hsa-miR-515-5p	1	0	1	1	1	1	AUTS2	autism susceptibility candidate 2
hsa-miR-515-5p	1	0	1	1	1	1	NRXN1	neurexin 1
hsa-miR-515-5p	1	0	1	1	0	0	TBC1D12	TBC1 domain family, member 12
hsa-miR-515-5p	1	0	1	1	1	1	SLC4A7	solute carrier family 4, sodium bicarbonate cotransporter, member 7
hsa-miR-515-5p	1	0	1	1	1	1	HIPK1	homeodomain interacting protein kinase 1
hsa-miR-515-5p	1	0	1	1	1	1	GIGYF2	GRB10 interacting GYF protein 2
hsa-miR-515-5p	0	0	1	1	0	0	ARHGEF2	Rho/Rac guanine nucleotide exchange factor (GEF) 2
hsa-miR-515-5p	1	0	1	1	1	1	ANKRD17	ankyrin repeat domain 17
hsa-miR-515-5p	1	0	1	0	1	1	SNX13	sorting nexin 13
hsa-miR-515-5p	0	0	1	1	0	0	ATP10B	ATPase, class V, type 10B
hsa-miR-515-5p	1	0	1	0	1	1	DOCK4	dedicator of cytokinesis 4
hsa-miR-515-5p	1	0	1	1	1	1	MATR3	matrin 3
hsa-miR-515-5p	1	0	1	0	1	1	RBM12	RNA binding motif protein 12
hsa-miR-515-5p	1	0	1	0	0	0	MICAL3	microtubule associated monoxygenase, calponin and LIM domain containing 3
hsa-miR-515-5p	1	0	1	1	1	1	DNM3	dynamin 3
hsa-miR-515-5p	1	0	1	1	1	1	ARHGEF15	Rho guanine nucleotide exchange factor (GEF) 15
hsa-miR-515-5p	1	0	1	1	1	1	UBE2K	ubiquitin-conjugating enzyme E2K
hsa-miR-515-5p	0	0	1	1	1	1	MAN2B2	mannosidase, alpha, class 2B, member 2
hsa-miR-515-5p	1	0	1	0	0	0	DTX4	deltex homolog 4 (Drosophila)
hsa-miR-515-5p	1	0	1	1	1	1	C11orf9	chromosome 11 open reading frame 9
hsa-miR-515-5p	1	0	1	1	1	1	NTNG1	netrin G1
hsa-miR-515-5p	0	0	1	1	1	1	TBC1D30	TBC1 domain family, member 30
hsa-miR-515-5p	1	0	1	1	0	0	FRMD4B	FERM domain containing 4B
hsa-miR-515-5p	0	0	1	0	1	1	TP53TG3	TP53 target 3
hsa-miR-515-5p	0	0	1	0	0	0	TP53TG3B	TP53 target 3B
hsa-miR-515-5p	1	0	1	1	1	1	NLGN1	neuroligin 1
hsa-miR-515-5p	1	0	1	1	1	1	PLCL2	phospholipase C-like 2
hsa-miR-515-5p	1	0	1	1	1	1	PHF8	PHD finger protein 8
hsa-miR-515-5p	0	0	1	1	0	0	MUTYH	mutY homolog (E. coli)
hsa-miR-515-5p	1	0	1	0	1	1	ODZ2	odz, odd Oz/ten-m homolog 2 (Drosophila)
hsa-miR-515-5p	1	0	1	0	1	1	GPR158	G protein-coupled receptor 158
hsa-miR-515-5p	1	0	1	1	0	0	PPM1H	protein phosphatase, Mg2+/Mn2+ dependent, 1H
hsa-miR-515-5p	1	0	1	1	1	1	RALGAPB	Ral GTPase activating protein, beta subunit (non-catalytic)
hsa-miR-515-5p	1	0	1	1	1	1	RIMKLB	ribosomal modification protein rimK-like family member B
hsa-miR-515-5p	1	0	1	1	0	0	ATAD2B	ATPase family, AAA domain containing 2B
hsa-miR-515-5p	1	0	1	0	1	1	ANKFY1	ankyrin repeat and FYVE domain containing 1
hsa-miR-515-5p	0	0	1	1	1	1	KIF20B	kinesin family member 20B
hsa-miR-515-5p	0	0	1	1	0	0	TNFRSF12A	tumor necrosis factor receptor superfamily, member 12A
hsa-miR-515-5p	1	0	1	0	0	0	NYNRIN	NYN domain and retroviral integrase containing
hsa-miR-515-5p	1	0	1	1	1	1	PCDH19	protocadherin 19
hsa-miR-515-5p	1	0	1	1	0	0	KIAA1462	KIAA1462
hsa-miR-515-5p	0	0	1	0	0	0	NYAP2	neuronal tyrosine-phosphorylated phosphoinositide-3-kinase adaptor 2
hsa-miR-515-5p	1	0	1	1	1	1	FRAS1	Fraser syndrome 1
hsa-miR-515-5p	1	0	1	1	1	1	INADL	InaD-like (Drosophila)
hsa-miR-515-5p	1	0	1	1	1	1	TOPORS	topoisomerase I binding, arginine/serine-rich, E3 ubiquitin protein ligase
hsa-miR-515-5p	0	0	1	0	1	1	SETD5	SET domain containing 5
hsa-miR-515-5p	1	0	1	0	1	1	RIMS1	regulating synaptic membrane exocytosis 1
hsa-miR-515-5p	1	0	1	1	1	1	LCOR	ligand dependent nuclear receptor corepressor
hsa-miR-515-5p	0	0	1	1	1	1	UNC80	unc-80 homolog (C. elegans)
hsa-miR-515-5p	1	0	1	1	1	1	NAV2	neuron navigator 2
hsa-miR-515-5p	1	0	1	1	1	1	HNRPDL	heterogeneous nuclear ribonucleoprotein D-like
hsa-miR-515-5p	0	0	1	1	0	0	FAM65A	family with sequence similarity 65, member A
hsa-miR-515-5p	1	0	1	1	1	1	LSM14A	LSM14A, SCD6 homolog A (S. cerevisiae)
hsa-miR-515-5p	1	0	1	1	1	1	BCL2L11	BCL2-like 11 (apoptosis facilitator)
hsa-miR-515-5p	1	0	1	1	1	1	SSH3	slingshot homolog 3 (Drosophila)
hsa-miR-515-5p	1	0	1	1	1	1	MAT2B	methionine adenosyltransferase II, beta
hsa-miR-515-5p	0	0	1	0	0	0	NBLA00301	Nbla00301
hsa-miR-515-5p	1	0	1	1	1	1	SH3TC2	SH3 domain and tetratricopeptide repeats 2
hsa-miR-515-5p	0	0	1	1	0	0	CIRH1A	cirrhosis, autosomal recessive 1A (cirhin)
hsa-miR-515-5p	1	0	1	0	0	0	FAT3	FAT tumor suppressor homolog 3 (Drosophila)
hsa-miR-515-5p	1	0	1	0	0	0	RNF169	ring finger protein 169
hsa-miR-515-5p	1	0	1	1	1	1	RFX4	regulatory factor X, 4 (influences HLA class II expression)
hsa-miR-515-5p	1	0	1	1	1	1	SMEK1	SMEK homolog 1, suppressor of mek1 (Dictyostelium)
hsa-miR-515-5p	0	0	1	1	1	1	SHPRH	SNF2 histone linker PHD RING helicase, E3 ubiquitin protein ligase
hsa-miR-515-5p	1	0	1	1	1	1	UBR3	ubiquitin protein ligase E3 component n-recognin 3 (putative)
hsa-miR-515-5p	1	0	1	0	0	0	ZC3H12C	zinc finger CCCH-type containing 12C
hsa-miR-515-5p	1	0	1	1	1	1	C11orf57	chromosome 11 open reading frame 57
hsa-miR-515-5p	1	0	1	1	1	1	PAN3	PAN3 poly(A) specific ribonuclease subunit homolog (S. cerevisiae)
hsa-miR-515-5p	1	0	1	0	1	1	BEND4	BEN domain containing 4
hsa-miR-515-5p	1	0	1	1	1	1	UBE3A	ubiquitin protein ligase E3A
hsa-miR-515-5p	0	0	1	1	1	1	GABBR1	gamma-aminobutyric acid (GABA) B receptor, 1
hsa-miR-515-5p	0	0	1	1	0	0	DBP	D site of albumin promoter (albumin D-box) binding protein
hsa-miR-515-5p	1	0	1	1	1	1	CLIP4	CAP-GLY domain containing linker protein family, member 4
hsa-miR-515-5p	1	0	1	1	1	1	PML	promyelocytic leukemia
hsa-miR-515-5p	1	0	1	1	1	1	DTNA	dystrobrevin, alpha
hsa-miR-515-5p	1	0	1	0	1	1	PLAG1	pleiomorphic adenoma gene 1
hsa-miR-515-5p	0	0	1	1	0	0	RPS10	ribosomal protein S10
hsa-miR-515-5p	1	0	1	1	0	0	TSPYL2	TSPY-like 2
hsa-miR-515-5p	1	0	1	1	1	1	FMR1	fragile X mental retardation 1
hsa-miR-515-5p	0	0	1	1	0	0	PPM1G	protein phosphatase, Mg2+/Mn2+ dependent, 1G
hsa-miR-515-5p	1	0	1	0	1	1	ETV1	ets variant 1
hsa-miR-515-5p	0	0	1	1	1	1	DDX39B	DEAD (Asp-Glu-Ala-Asp) box polypeptide 39B
hsa-miR-515-5p	1	0	1	1	1	1	DMTF1	cyclin D binding myb-like transcription factor 1
hsa-miR-515-5p	0	0	1	0	1	1	NPY1R	neuropeptide Y receptor Y1
hsa-miR-515-5p	0	0	1	1	1	1	TFRC	transferrin receptor (p90, CD71)
hsa-miR-515-5p	1	0	1	1	1	1	ARFGEF1	ADP-ribosylation factor guanine nucleotide-exchange factor 1 (brefeldin A-inhibited)
hsa-miR-515-5p	0	0	1	1	1	1	DGKE	diacylglycerol kinase, epsilon 64kDa
hsa-miR-515-5p	1	0	1	0	1	1	CDON	Cdon homolog (mouse)
hsa-miR-515-5p	0	0	1	1	0	0	IFT27	intraflagellar transport 27 homolog (Chlamydomonas)
hsa-miR-515-5p	0	0	1	1	0	0	EIF4E2	eukaryotic translation initiation factor 4E family member 2
hsa-miR-515-5p	0	0	1	1	1	1	RCBTB2	regulator of chromosome condensation (RCC1) and BTB (POZ) domain containing protein 2
hsa-miR-515-5p	1	0	1	1	1	1	HNRNPK	heterogeneous nuclear ribonucleoprotein K
hsa-miR-515-5p	0	0	1	1	1	1	IL10RA	interleukin 10 receptor, alpha
hsa-miR-515-5p	0	0	1	1	1	1	HLA-DQA1	major histocompatibility complex, class II, DQ alpha 1
hsa-miR-515-5p	1	0	1	1	1	1	ARHGEF3	Rho guanine nucleotide exchange factor (GEF) 3
hsa-miR-515-5p	1	0	1	1	1	1	SATB1	SATB homeobox 1
hsa-miR-515-5p	0	0	1	1	1	1	MYO9A	myosin IXA
hsa-miR-515-5p	1	0	1	1	1	1	TEAD1	TEA domain family member 1 (SV40 transcriptional enhancer factor)
hsa-miR-515-5p	0	0	1	1	0	0	TRIM27	tripartite motif containing 27
hsa-miR-515-5p	1	0	1	0	1	1	CAV1	caveolin 1, caveolae protein, 22kDa
hsa-miR-515-5p	1	0	1	1	1	1	MEF2D	myocyte enhancer factor 2D
hsa-miR-515-5p	0	0	1	0	1	1	MS4A4E	membrane-spanning 4-domains, subfamily A, member 4E
hsa-miR-515-5p	0	0	1	1	1	1	CD55	CD55 molecule, decay accelerating factor for complement (Cromer blood group)
hsa-miR-515-5p	0	0	1	0	1	1	PARG	poly (ADP-ribose) glycohydrolase
hsa-miR-515-5p	1	0	1	1	1	1	DLGAP2	discs, large (Drosophila) homolog-associated protein 2
hsa-miR-515-5p	1	0	1	1	1	1	SLC4A4	solute carrier family 4, sodium bicarbonate cotransporter, member 4
hsa-miR-515-5p	1	0	1	0	0	0	MAP3K1	mitogen-activated protein kinase kinase kinase 1, E3 ubiquitin protein ligase
hsa-miR-515-5p	0	0	1	1	1	1	CD84	CD84 molecule
hsa-miR-515-5p	0	0	1	0	1	1	GPR98	G protein-coupled receptor 98
hsa-miR-515-5p	1	0	1	1	1	1	ZFAND6	zinc finger, AN1-type domain 6
hsa-miR-515-5p	1	0	1	1	1	1	CTNND1	catenin (cadherin-associated protein), delta 1
hsa-miR-515-5p	1	0	1	1	1	1	CBFA2T2	core-binding factor, runt domain, alpha subunit 2; translocated to, 2
hsa-miR-515-5p	1	0	1	1	1	1	TP63	tumor protein p63
hsa-miR-515-5p	0	0	1	0	0	0	LOC400590	uncharacterized LOC400590
hsa-miR-515-5p	1	0	1	1	1	1	VAPB	VAMP (vesicle-associated membrane protein)-associated protein B and C
hsa-miR-515-5p	0	0	1	1	1	1	PLEKHB1	pleckstrin homology domain containing, family B (evectins) member 1
hsa-miR-515-5p	1	0	1	0	1	1	MAP4K4	mitogen-activated protein kinase kinase kinase kinase 4
hsa-miR-515-5p	0	0	1	1	1	1	EIF2A	eukaryotic translation initiation factor 2A, 65kDa
hsa-miR-515-5p	1	0	1	1	1	1	KAT6B	K(lysine) acetyltransferase 6B
hsa-miR-515-5p	1	0	1	1	1	1	HP1BP3	heterochromatin protein 1, binding protein 3
hsa-miR-515-5p	0	0	1	1	1	1	DCAF6	DDB1 and CUL4 associated factor 6
hsa-miR-515-5p	1	0	1	1	1	1	PKN2	protein kinase N2
hsa-miR-515-5p	1	0	1	0	1	1	CDK14	cyclin-dependent kinase 14
hsa-miR-515-5p	1	0	1	1	1	1	PRUNE	prune homolog (Drosophila)
hsa-miR-515-5p	0	0	1	1	1	1	DMRT2	doublesex and mab-3 related transcription factor 2
hsa-miR-515-5p	1	0	1	0	1	1	WDR82	WD repeat domain 82
hsa-miR-515-5p	1	0	1	1	1	1	CAB39	calcium binding protein 39
hsa-miR-515-5p	1	0	1	1	1	1	TAOK3	TAO kinase 3
hsa-miR-515-5p	1	0	1	1	1	1	SORBS1	sorbin and SH3 domain containing 1
hsa-miR-515-5p	0	0	1	0	1	1	CLEC5A	C-type lectin domain family 5, member A
hsa-miR-515-5p	1	0	1	0	1	1	SLC34A2	solute carrier family 34 (sodium phosphate), member 2
hsa-miR-515-5p	1	0	1	1	1	1	MYNN	myoneurin
hsa-miR-515-5p	1	0	1	1	1	1	ZNF202	zinc finger protein 202
hsa-miR-515-5p	1	0	1	1	1	1	ANKRD13A	ankyrin repeat domain 13A
hsa-miR-515-5p	0	0	1	0	1	1	PDP1	pyruvate dehyrogenase phosphatase catalytic subunit 1
hsa-miR-515-5p	0	0	1	1	1	1	NBPF14	neuroblastoma breakpoint family, member 14
hsa-miR-515-5p	0	0	1	0	1	1	CLDN2	claudin 2
hsa-miR-515-5p	0	0	1	0	0	0	ARL17A	ADP-ribosylation factor-like 17A
hsa-miR-515-5p	0	0	1	1	1	1	CHRD	chordin
hsa-miR-515-5p	1	0	1	1	1	1	SYDE1	synapse defective 1, Rho GTPase, homolog 1 (C. elegans)
hsa-miR-515-5p	1	0	1	1	1	1	NXT2	nuclear transport factor 2-like export factor 2
hsa-miR-515-5p	0	0	1	1	1	1	SLC30A5	solute carrier family 30 (zinc transporter), member 5
hsa-miR-515-5p	1	0	1	0	1	1	CSNK1G1	casein kinase 1, gamma 1
hsa-miR-515-5p	1	0	1	1	1	1	OGT	O-linked N-acetylglucosamine (GlcNAc) transferase
hsa-miR-515-5p	1	0	1	1	0	0	TDRKH	tudor and KH domain containing
hsa-miR-515-5p	1	0	1	1	1	1	RSF1	remodeling and spacing factor 1
hsa-miR-515-5p	0	0	1	1	1	1	CELF1	CUGBP, Elav-like family member 1
hsa-miR-515-5p	0	0	1	1	1	1	NKX3-1	NK3 homeobox 1
hsa-miR-515-5p	0	0	1	0	0	0	TIGD7	tigger transposable element derived 7
hsa-miR-515-5p	1	0	1	1	0	0	REPS1	RALBP1 associated Eps domain containing 1
hsa-miR-515-5p	1	0	1	1	1	1	ABI2	abl-interactor 2
hsa-miR-515-5p	1	0	1	1	1	1	RBM47	RNA binding motif protein 47
hsa-miR-515-5p	0	0	1	1	1	1	GOLGA6A	golgin A6 family, member A
hsa-miR-515-5p	1	0	1	1	1	1	ERGIC1	endoplasmic reticulum-golgi intermediate compartment (ERGIC) 1
hsa-miR-515-5p	0	0	1	1	0	0	CSAG2	CSAG family, member 2
hsa-miR-515-5p	0	0	1	0	0	0	CSAG3	CSAG family, member 3
hsa-miR-515-5p	0	0	1	1	1	1	C21orf7	chromosome 21 open reading frame 7
hsa-miR-515-5p	1	0	1	1	1	1	PUM2	pumilio homolog 2 (Drosophila)
hsa-miR-515-5p	1	0	1	1	1	1	DCLRE1B	DNA cross-link repair 1B
hsa-miR-515-5p	0	0	1	1	1	1	FCRL1	Fc receptor-like 1
hsa-miR-515-5p	1	0	1	1	1	1	CALU	calumenin
hsa-miR-515-5p	0	0	1	1	0	0	TRO	trophinin
hsa-miR-515-5p	1	0	1	0	1	1	WIPF2	WAS/WASL interacting protein family, member 2
hsa-miR-515-5p	1	0	1	1	1	1	CALCOCO1	calcium binding and coiled-coil domain 1
hsa-miR-515-5p	1	0	1	1	1	1	LARP4	La ribonucleoprotein domain family, member 4
hsa-miR-515-5p	0	0	1	0	0	0	NBPF10	neuroblastoma breakpoint family, member 10
hsa-miR-515-5p	0	0	1	1	1	1	PARK2	parkinson protein 2, E3 ubiquitin protein ligase (parkin)
hsa-miR-515-5p	0	0	1	0	1	1	MYO3B	myosin IIIB
hsa-miR-515-5p	0	0	1	1	1	1	ORMDL1	ORM1-like 1 (S. cerevisiae)
hsa-miR-515-5p	0	0	1	1	1	1	PPIL3	peptidylprolyl isomerase (cyclophilin)-like 3
hsa-miR-515-5p	0	0	1	1	0	0	CNKSR2	connector enhancer of kinase suppressor of Ras 2
hsa-miR-515-5p	0	0	1	0	0	0	MYO15B	myosin XVB pseudogene
hsa-miR-515-5p	0	0	1	0	1	1	NBPF15	neuroblastoma breakpoint family, member 15
hsa-miR-515-5p	1	0	1	1	1	1	ST3GAL3	ST3 beta-galactoside alpha-2,3-sialyltransferase 3
hsa-miR-515-5p	1	0	1	1	0	0	YTHDF2	YTH domain family, member 2
hsa-miR-515-5p	1	0	1	1	0	0	XRRA1	X-ray radiation resistance associated 1
hsa-miR-515-5p	0	0	1	1	1	1	PSRC1	proline/serine-rich coiled-coil 1
hsa-miR-515-5p	1	0	1	0	1	1	PPP1R12A	protein phosphatase 1, regulatory subunit 12A
hsa-miR-515-5p	1	0	1	1	1	1	ADARB1	adenosine deaminase, RNA-specific, B1
hsa-miR-515-5p	0	0	1	1	1	1	ZNF638	zinc finger protein 638
hsa-miR-515-5p	1	0	1	0	1	1	IL1RAP	interleukin 1 receptor accessory protein
hsa-miR-515-5p	1	0	1	1	1	1	GPR64	G protein-coupled receptor 64
hsa-miR-515-5p	1	0	1	1	0	0	ENTPD1	ectonucleoside triphosphate diphosphohydrolase 1
hsa-miR-515-5p	1	0	1	0	1	1	CACNA1C	calcium channel, voltage-dependent, L type, alpha 1C subunit
hsa-miR-515-5p	0	0	1	1	1	1	TCFL5	transcription factor-like 5 (basic helix-loop-helix)
hsa-miR-515-5p	0	0	1	1	1	1	CHST11	carbohydrate (chondroitin 4) sulfotransferase 11
hsa-miR-515-5p	1	0	1	1	1	1	VAMP7	vesicle-associated membrane protein 7
hsa-miR-515-5p	1	0	1	1	1	1	SLAMF6	SLAM family member 6
hsa-miR-515-5p	1	0	1	1	1	1	NRXN3	neurexin 3
hsa-miR-515-5p	0	0	1	1	1	1	PDE1A	phosphodiesterase 1A, calmodulin-dependent
hsa-miR-515-5p	1	0	1	1	1	1	NAV3	neuron navigator 3
hsa-miR-515-5p	0	0	1	1	1	1	ZNF248	zinc finger protein 248
hsa-miR-515-5p	0	0	1	0	0	0	LINC00271	long intergenic non-protein coding RNA 271
hsa-miR-515-5p	1	0	1	1	1	1	SYT14	synaptotagmin XIV
hsa-miR-515-5p	0	0	1	1	1	1	SLC8A3	solute carrier family 8 (sodium/calcium exchanger), member 3
hsa-miR-515-5p	1	0	1	1	1	1	AKAP2	A kinase (PRKA) anchor protein 2
hsa-miR-515-5p	1	0	1	0	1	1	NFAT5	nuclear factor of activated T-cells 5, tonicity-responsive
hsa-miR-515-5p	0	0	1	1	0	0	RTEL1	regulator of telomere elongation helicase 1
hsa-miR-515-5p	0	0	1	0	0	0	TUG1	taurine upregulated 1 (non-protein coding)
hsa-miR-515-5p	0	0	1	1	1	1	OLFM4	olfactomedin 4
hsa-miR-515-5p	1	0	1	1	1	1	ZNF691	zinc finger protein 691
hsa-miR-515-5p	0	0	1	0	1	1	EBF2	early B-cell factor 2
hsa-miR-515-5p	0	0	1	1	1	1	TAX1BP3	Tax1 (human T-cell leukemia virus type I) binding protein 3
hsa-miR-515-5p	1	0	1	1	1	1	HNRNPF	heterogeneous nuclear ribonucleoprotein F
hsa-miR-515-5p	0	0	1	1	1	1	PGM3	phosphoglucomutase 3
hsa-miR-515-5p	0	0	1	1	1	1	STOX2	storkhead box 2
hsa-miR-515-5p	1	0	1	0	1	1	VPS13D	vacuolar protein sorting 13 homolog D (S. cerevisiae)
hsa-miR-515-5p	1	0	1	1	1	1	RIC8B	resistance to inhibitors of cholinesterase 8 homolog B (C. elegans)
hsa-miR-515-5p	1	0	1	1	1	1	CADM3	cell adhesion molecule 3
hsa-miR-515-5p	1	0	1	1	1	1	EIF2C1	eukaryotic translation initiation factor 2C, 1
hsa-miR-515-5p	0	0	1	1	1	1	THUMPD3	THUMP domain containing 3
hsa-miR-515-5p	1	0	1	1	1	1	PTBP3	polypyrimidine tract binding protein 3
hsa-miR-515-5p	1	0	1	1	0	0	SMUG1	single-strand-selective monofunctional uracil-DNA glycosylase 1
hsa-miR-515-5p	1	0	1	1	1	1	ZNF395	zinc finger protein 395
hsa-miR-515-5p	0	0	1	1	1	1	MBNL3	muscleblind-like splicing regulator 3
hsa-miR-515-5p	0	0	1	1	1	1	TCP11L1	t-complex 11 (mouse)-like 1
hsa-miR-515-5p	1	0	1	1	1	1	HNRNPUL1	heterogeneous nuclear ribonucleoprotein U-like 1
hsa-miR-515-5p	1	0	1	1	1	1	C12orf23	chromosome 12 open reading frame 23
hsa-miR-515-5p	1	0	1	1	1	1	PHF20L1	PHD finger protein 20-like 1
hsa-miR-515-5p	0	0	1	1	1	1	SFXN1	sideroflexin 1
hsa-miR-515-5p	1	0	1	1	1	1	MON2	MON2 homolog (S. cerevisiae)
hsa-miR-515-5p	1	0	1	1	0	0	HAUS2	HAUS augmin-like complex, subunit 2
hsa-miR-515-5p	1	0	1	1	1	1	S100PBP	S100P binding protein
hsa-miR-515-5p	1	0	1	1	1	1	SMEK2	SMEK homolog 2, suppressor of mek1 (Dictyostelium)
hsa-miR-515-5p	1	0	1	0	1	1	DCAF17	DDB1 and CUL4 associated factor 17
hsa-miR-515-5p	1	0	1	0	1	1	UBP1	upstream binding protein 1 (LBP-1a)
hsa-miR-515-5p	1	0	1	1	1	1	USP33	ubiquitin specific peptidase 33
hsa-miR-515-5p	1	0	1	1	1	1	DERL1	derlin 1
hsa-miR-515-5p	0	0	1	1	1	1	CWF19L1	CWF19-like 1, cell cycle control (S. pombe)
hsa-miR-515-5p	0	0	1	1	0	0	PFDN5	prefoldin subunit 5
hsa-miR-515-5p	0	0	1	0	1	1	FLJ14186	uncharacterized LOC401149
hsa-miR-515-5p	1	0	1	1	1	1	FAM131A	family with sequence similarity 131, member A
hsa-miR-515-5p	1	0	1	1	1	1	ZNF385A	zinc finger protein 385A
hsa-miR-515-5p	1	0	1	0	1	1	ATP2B1	ATPase, Ca++ transporting, plasma membrane 1
hsa-miR-515-5p	1	0	1	1	1	1	SLC35A3	solute carrier family 35 (UDP-N-acetylglucosamine (UDP-GlcNAc) transporter), member A3
hsa-miR-515-5p	0	0	1	1	0	0	EIF4ENIF1	eukaryotic translation initiation factor 4E nuclear import factor 1
hsa-miR-515-5p	1	0	1	1	1	1	GBF1	golgi brefeldin A resistant guanine nucleotide exchange factor 1
hsa-miR-515-5p	1	0	1	1	1	1	TNRC6A	trinucleotide repeat containing 6A
hsa-miR-515-5p	1	0	1	1	1	1	YPEL5	yippee-like 5 (Drosophila)
hsa-miR-515-5p	1	0	1	1	1	1	NAA30	N(alpha)-acetyltransferase 30, NatC catalytic subunit
hsa-miR-515-5p	1	0	1	0	1	1	ZCCHC3	zinc finger, CCHC domain containing 3
hsa-miR-515-5p	0	0	1	0	1	1	HEMK1	HemK methyltransferase family member 1
hsa-miR-515-5p	1	0	1	1	0	0	PRRC2B	proline-rich coiled-coil 2B
hsa-miR-515-5p	0	0	1	1	0	0	NUDT7	nudix (nucleoside diphosphate linked moiety X)-type motif 7
hsa-miR-515-5p	0	0	1	1	1	1	GTF2H1	general transcription factor IIH, polypeptide 1, 62kDa
hsa-miR-515-5p	1	0	1	1	1	1	RNF185	ring finger protein 185
hsa-miR-515-5p	1	0	1	1	1	1	LRP4	low density lipoprotein receptor-related protein 4
hsa-miR-515-5p	0	0	1	1	1	1	MINA	MYC induced nuclear antigen
hsa-miR-515-5p	0	0	1	1	1	1	VWDE	von Willebrand factor D and EGF domains
hsa-miR-515-5p	1	0	1	1	1	1	KCTD15	potassium channel tetramerisation domain containing 15
hsa-miR-515-5p	0	0	1	0	0	0	KIAA0664L3	KIAA0664-like 3
hsa-miR-515-5p	0	0	1	0	0	0	LOC254559	uncharacterized LOC254559
hsa-miR-515-5p	0	0	1	1	1	1	C8orf46	chromosome 8 open reading frame 46
hsa-miR-515-5p	0	0	1	0	0	0	FLJ30838	uncharacterized LOC400955
hsa-miR-515-5p	0	0	1	0	0	0	SNHG11	small nucleolar RNA host gene 11 (non-protein coding)
hsa-miR-515-5p	0	0	1	0	1	1	C17orf108	chromosome 17 open reading frame 108
hsa-miR-515-5p	0	0	1	0	0	0	LOC201617	uncharacterized LOC201617
hsa-miR-515-5p	1	0	1	1	1	1	DIXDC1	DIX domain containing 1
hsa-miR-515-5p	1	0	1	0	0	0	PWWP2A	PWWP domain containing 2A
hsa-miR-515-5p	1	0	1	0	1	1	RAB1A	RAB1A, member RAS oncogene family
hsa-miR-515-5p	1	0	1	0	1	1	RNF165	ring finger protein 165
hsa-miR-515-5p	0	0	1	0	0	0	JPX	JPX transcript, XIST activator (non-protein coding)
hsa-miR-515-5p	1	0	1	1	1	1	RAI2	retinoic acid induced 2
hsa-miR-515-5p	1	0	1	1	1	1	SHISA5	shisa homolog 5 (Xenopus laevis)
hsa-miR-515-5p	0	0	1	1	0	0	CHRM3	cholinergic receptor, muscarinic 3
hsa-miR-515-5p	0	0	1	1	1	1	BRD2	bromodomain containing 2
hsa-miR-515-5p	0	0	1	1	0	0	DNAH3	dynein, axonemal, heavy chain 3
hsa-miR-515-5p	0	0	1	1	1	1	XAF1	XIAP associated factor 1
hsa-miR-515-5p	0	0	1	1	0	0	NXF2	nuclear RNA export factor 2
hsa-miR-515-5p	0	0	1	1	0	0	DMRTC2	DMRT-like family C2
hsa-miR-515-5p	1	0	1	0	1	1	PLEKHA1	pleckstrin homology domain containing, family A (phosphoinositide binding specific) member 1
hsa-miR-515-5p	0	0	1	1	1	1	RANBP17	RAN binding protein 17
hsa-miR-515-5p	1	0	1	0	1	1	NCAM1	neural cell adhesion molecule 1
hsa-miR-515-5p	0	0	1	1	1	1	SEC61A2	Sec61 alpha 2 subunit (S. cerevisiae)
hsa-miR-515-5p	1	0	1	1	1	1	IST1	increased sodium tolerance 1 homolog (yeast)
hsa-miR-515-5p	0	0	1	1	1	1	SPICE1	spindle and centriole associated protein 1
hsa-miR-515-5p	0	0	1	1	1	1	ZNF385B	zinc finger protein 385B
hsa-miR-515-5p	0	0	1	1	1	1	ZBTB26	zinc finger and BTB domain containing 26
hsa-miR-515-5p	1	0	1	1	1	1	FAM102A	family with sequence similarity 102, member A
hsa-miR-515-5p	1	0	1	1	1	1	BLCAP	bladder cancer associated protein
hsa-miR-515-5p	0	0	1	1	0	0	C6orf132	chromosome 6 open reading frame 132
hsa-miR-515-5p	0	0	1	1	0	0	PVRL3	poliovirus receptor-related 3
hsa-miR-515-5p	1	0	1	1	1	1	CLIC5	chloride intracellular channel 5
hsa-miR-515-5p	1	0	1	1	0	0	B3GAT3	beta-1,3-glucuronyltransferase 3 (glucuronosyltransferase I)
hsa-miR-515-5p	1	0	1	1	1	1	TTC13	tetratricopeptide repeat domain 13
hsa-miR-515-5p	0	0	1	1	0	0	PIGO	phosphatidylinositol glycan anchor biosynthesis, class O
hsa-miR-515-5p	1	0	1	1	1	1	BOC	Boc homolog (mouse)
hsa-miR-515-5p	0	0	1	1	1	1	MTR	5-methyltetrahydrofolate-homocysteine methyltransferase
hsa-miR-515-5p	0	0	1	1	0	0	PPP2R1A	protein phosphatase 2, regulatory subunit A, alpha
hsa-miR-515-5p	0	0	1	1	1	1	PIK3C3	phosphatidylinositol 3-kinase, catalytic subunit type 3
hsa-miR-515-5p	0	0	1	0	0	0	LOC643837	uncharacterized LOC643837
hsa-miR-515-5p	1	0	1	1	1	1	AMMECR1	Alport syndrome, mental retardation, midface hypoplasia and elliptocytosis chromosomal region gene 1
hsa-miR-515-5p	0	0	1	1	1	1	POU2F1	POU class 2 homeobox 1
hsa-miR-515-5p	0	0	1	0	0	0	LOC440910	uncharacterized LOC440910
hsa-miR-515-5p	1	0	1	1	1	1	FBXW2	F-box and WD repeat domain containing 2
hsa-miR-515-5p	1	0	1	0	1	1	TEF	thyrotrophic embryonic factor
hsa-miR-515-5p	0	0	1	1	1	1	PTGR1	prostaglandin reductase 1
hsa-miR-515-5p	0	0	1	0	0	0	KIAA1430	KIAA1430
hsa-miR-515-5p	1	0	1	1	1	1	HDAC2	histone deacetylase 2
hsa-miR-515-5p	1	0	1	0	1	1	ERC1	ELKS/RAB6-interacting/CAST family member 1
hsa-miR-515-5p	1	0	1	1	1	1	NASP	nuclear autoantigenic sperm protein (histone-binding)
hsa-miR-515-5p	0	0	1	1	1	1	RASGRP2	RAS guanyl releasing protein 2 (calcium and DAG-regulated)
hsa-miR-515-5p	1	0	1	1	1	1	CLGN	calmegin
hsa-miR-515-5p	1	0	1	1	1	1	GPD2	glycerol-3-phosphate dehydrogenase 2 (mitochondrial)
hsa-miR-515-5p	0	0	1	1	0	0	FNTB	farnesyltransferase, CAAX box, beta
hsa-miR-515-5p	0	0	1	0	0	0	LOC283887	uncharacterized LOC283887
hsa-miR-515-5p	0	0	1	1	1	1	CYP11B1	cytochrome P450, family 11, subfamily B, polypeptide 1
hsa-miR-515-5p	0	0	1	1	0	0	WBP1	WW domain binding protein 1
hsa-miR-515-5p	1	0	1	1	1	1	KCND1	potassium voltage-gated channel, Shal-related subfamily, member 1
hsa-miR-515-5p	0	0	1	1	1	1	SPOCK1	sparc/osteonectin, cwcv and kazal-like domains proteoglycan (testican) 1
hsa-miR-515-5p	0	0	1	0	0	0	PART1	prostate androgen-regulated transcript 1 (non-protein coding)
hsa-miR-515-5p	1	0	1	1	1	1	SNAP25	synaptosomal-associated protein, 25kDa
hsa-miR-515-5p	0	0	1	1	1	1	RBM25	RNA binding motif protein 25
hsa-miR-515-5p	0	0	1	0	1	1	AGBL4	ATP/GTP binding protein-like 4
hsa-miR-515-5p	1	0	1	1	1	1	RASGEF1A	RasGEF domain family, member 1A
hsa-miR-515-5p	0	0	1	1	1	1	MOBP	myelin-associated oligodendrocyte basic protein
hsa-miR-515-5p	1	0	1	0	1	1	SLC39A11	solute carrier family 39 (metal ion transporter), member 11
hsa-miR-515-5p	1	0	1	1	1	1	ANKRD46	ankyrin repeat domain 46
hsa-miR-515-5p	1	0	1	1	1	1	EPHB1	EPH receptor B1
hsa-miR-515-5p	0	0	1	1	1	1	GPR115	G protein-coupled receptor 115
hsa-miR-515-5p	0	0	1	1	1	1	SIRPB2	signal-regulatory protein beta 2
hsa-miR-515-5p	1	0	1	1	1	1	SPATS2	spermatogenesis associated, serine-rich 2
hsa-miR-515-5p	0	0	1	0	0	0	LOC284577	uncharacterized LOC284577
hsa-miR-515-5p	1	0	1	1	1	1	ANKRD10	ankyrin repeat domain 10
hsa-miR-515-5p	1	0	1	0	1	1	CLIC4	chloride intracellular channel 4
hsa-miR-515-5p	0	0	1	1	0	0	C11orf74	chromosome 11 open reading frame 74
hsa-miR-515-5p	0	0	1	1	1	1	BAG1	BCL2-associated athanogene
hsa-miR-515-5p	0	0	1	0	0	0	CCDC150	coiled-coil domain containing 150
hsa-miR-515-5p	1	0	1	1	1	1	FADS1	fatty acid desaturase 1
hsa-miR-515-5p	0	0	1	0	0	0	ZNF815P	zinc finger protein 815, pseudogene
hsa-miR-515-5p	0	0	1	0	0	0	FAM66C	family with sequence similarity 66, member C
hsa-miR-515-5p	0	0	1	0	0	0	METTL21CP1	methyltransferase like 21C pseudogene 1
hsa-miR-515-5p	0	0	1	1	0	0	ERGIC3	ERGIC and golgi 3
hsa-miR-515-5p	0	0	1	0	0	0	LOC643327	uncharacterized LOC643327
hsa-miR-515-5p	1	0	1	0	1	1	KIAA1737	KIAA1737
hsa-miR-515-5p	1	0	1	0	1	1	THRB	thyroid hormone receptor, beta
hsa-miR-515-5p	1	0	1	1	1	1	SYT6	synaptotagmin VI
hsa-miR-515-5p	0	0	1	0	0	0	LOC285505	uncharacterized LOC285505
hsa-miR-515-5p	0	0	1	1	1	1	IL17RE	interleukin 17 receptor E
hsa-miR-515-5p	1	0	1	1	1	1	CDV3	CDV3 homolog (mouse)
hsa-miR-515-5p	1	0	1	0	1	1	YPEL2	yippee-like 2 (Drosophila)
hsa-miR-515-5p	0	0	1	1	1	1	PPFIBP2	PTPRF interacting protein, binding protein 2 (liprin beta 2)
hsa-miR-515-5p	0	0	1	1	1	1	CBWD5	COBW domain containing 5
hsa-miR-515-5p	0	0	1	1	1	1	PRSS16	protease, serine, 16 (thymus)
hsa-miR-515-5p	0	0	1	1	0	0	LUC7L	LUC7-like (S. cerevisiae)
hsa-miR-515-5p	1	0	1	1	1	1	LZTS2	leucine zipper, putative tumor suppressor 2
hsa-miR-515-5p	1	0	1	1	1	1	PIGA	phosphatidylinositol glycan anchor biosynthesis, class A
hsa-miR-515-5p	1	0	1	1	1	1	ZCCHC2	zinc finger, CCHC domain containing 2
hsa-miR-515-5p	0	0	1	1	1	1	RP1	retinitis pigmentosa 1 (autosomal dominant)
hsa-miR-515-5p	0	0	1	1	0	0	DCBLD1	discoidin, CUB and LCCL domain containing 1
hsa-miR-515-5p	0	0	1	1	0	0	FBXO16	F-box protein 16
hsa-miR-515-5p	0	0	1	1	1	1	VIPAS39	VPS33B interacting protein, apical-basolateral polarity regulator, spe-39 homolog
hsa-miR-515-5p	0	0	1	0	0	0	VWA3A	von Willebrand factor A domain containing 3A
hsa-miR-515-5p	0	0	1	1	1	1	FAM76A	family with sequence similarity 76, member A
hsa-miR-515-5p	1	0	1	1	1	1	LARP1B	La ribonucleoprotein domain family, member 1B
hsa-miR-515-5p	1	0	1	1	1	1	SLC39A13	solute carrier family 39 (zinc transporter), member 13
hsa-miR-515-5p	0	0	1	0	0	0	LOC728095	uncharacterized LOC728095
hsa-miR-515-5p	1	0	1	1	1	1	DDX42	DEAD (Asp-Glu-Ala-Asp) box polypeptide 42
hsa-miR-515-5p	1	0	1	1	1	1	LMX1A	LIM homeobox transcription factor 1, alpha
hsa-miR-515-5p	0	0	1	1	0	0	KIAA0146	KIAA0146
hsa-miR-515-5p	1	0	1	1	0	0	CACNB3	calcium channel, voltage-dependent, beta 3 subunit
hsa-miR-515-5p	0	0	1	1	0	0	MARCH10	membrane-associated ring finger (C3HC4) 10, E3 ubiquitin protein ligase
hsa-miR-515-5p	1	0	1	1	1	1	ZBTB4	zinc finger and BTB domain containing 4
hsa-miR-515-5p	1	0	1	1	1	1	ABHD6	abhydrolase domain containing 6
hsa-miR-515-5p	0	0	1	1	0	0	GPR113	G protein-coupled receptor 113
hsa-miR-515-5p	0	0	1	1	1	1	ARHGEF26	Rho guanine nucleotide exchange factor (GEF) 26
hsa-miR-515-5p	0	0	1	1	1	1	TPCN2	two pore segment channel 2
hsa-miR-515-5p	1	0	1	1	0	0	KCNC1	potassium voltage-gated channel, Shaw-related subfamily, member 1
hsa-miR-515-5p	1	0	1	0	1	1	KCNK2	potassium channel, subfamily K, member 2
hsa-miR-515-5p	1	0	1	1	1	1	ARHGEF10L	Rho guanine nucleotide exchange factor (GEF) 10-like
hsa-miR-515-5p	0	0	1	0	0	0	LGALS17A	Charcot-Leyden crystal protein pseudogene
hsa-miR-515-5p	1	0	1	1	1	1	IPPK	inositol 1,3,4,5,6-pentakisphosphate 2-kinase
hsa-miR-515-5p	1	0	1	1	1	1	ADAMTS8	ADAM metallopeptidase with thrombospondin type 1 motif, 8
hsa-miR-515-5p	1	0	1	0	0	0	GPR137C	G protein-coupled receptor 137C
hsa-miR-515-5p	0	0	1	1	0	0	PMF1	polyamine-modulated factor 1
hsa-miR-515-5p	1	0	1	1	0	0	BCORL1	BCL6 corepressor-like 1
hsa-miR-515-5p	0	0	1	1	0	0	LOC100128239	uncharacterized LOC100128239
hsa-miR-515-5p	1	0	1	1	1	1	ATP11C	ATPase, class VI, type 11C
hsa-miR-515-5p	1	0	1	1	1	1	KPNA1	karyopherin alpha 1 (importin alpha 5)
hsa-miR-515-5p	0	0	1	1	1	1	C11orf45	chromosome 11 open reading frame 45
hsa-miR-515-5p	1	0	1	1	1	1	DPY19L3	dpy-19-like 3 (C. elegans)
hsa-miR-515-5p	1	0	1	1	0	0	UBN2	ubinuclein 2
hsa-miR-515-5p	0	0	1	1	0	0	FSIP2	fibrous sheath interacting protein 2
hsa-miR-515-5p	1	0	1	1	1	1	CPNE2	copine II
hsa-miR-515-5p	1	0	1	1	1	1	LIN9	lin-9 homolog (C. elegans)
hsa-miR-515-5p	0	0	1	1	1	1	PLEKHS1	pleckstrin homology domain containing, family S member 1
hsa-miR-515-5p	0	0	1	1	1	1	C18orf54	chromosome 18 open reading frame 54
hsa-miR-515-5p	0	0	1	1	1	1	TGM2	transglutaminase 2 (C polypeptide, protein-glutamine-gamma-glutamyltransferase)
hsa-miR-515-5p	1	0	1	1	1	1	ATP1A2	ATPase, Na+/K+ transporting, alpha 2 polypeptide
hsa-miR-515-5p	0	0	1	1	1	1	ZFYVE28	zinc finger, FYVE domain containing 28
hsa-miR-515-5p	1	0	1	1	1	1	MTOR	mechanistic target of rapamycin (serine/threonine kinase)
hsa-miR-515-5p	1	0	1	1	1	1	DLG2	discs, large homolog 2 (Drosophila)
hsa-miR-515-5p	1	0	1	1	1	1	CLIP1	CAP-GLY domain containing linker protein 1
hsa-miR-515-5p	1	0	1	1	1	1	EIF4E3	eukaryotic translation initiation factor 4E family member 3
hsa-miR-515-5p	0	0	1	0	0	0	RPL23AP53	ribosomal protein L23a pseudogene 53
hsa-miR-515-5p	0	0	1	1	1	1	LARS	leucyl-tRNA synthetase
hsa-miR-515-5p	0	0	1	1	1	1	MAP7D2	MAP7 domain containing 2
hsa-miR-515-5p	0	0	1	1	1	1	RAB37	RAB37, member RAS oncogene family
hsa-miR-515-5p	0	0	1	1	0	0	FAM54B	family with sequence similarity 54, member B
hsa-miR-515-5p	1	0	1	0	1	1	ADIPOR2	adiponectin receptor 2
hsa-miR-515-5p	1	0	1	1	1	1	FMNL3	formin-like 3
hsa-miR-515-5p	1	0	1	1	0	0	MRVI1	murine retrovirus integration site 1 homolog
hsa-miR-515-5p	0	0	1	1	1	1	RALGAPA2	Ral GTPase activating protein, alpha subunit 2 (catalytic)
hsa-miR-515-5p	1	0	1	1	1	1	ZDHHC23	zinc finger, DHHC-type containing 23
hsa-miR-515-5p	1	0	1	1	0	0	PTPN5	protein tyrosine phosphatase, non-receptor type 5 (striatum-enriched)
hsa-miR-515-5p	1	0	1	1	1	1	RALGDS	ral guanine nucleotide dissociation stimulator
hsa-miR-515-5p	0	0	1	1	0	0	AADACL3	arylacetamide deacetylase-like 3
hsa-miR-515-5p	0	0	1	0	0	0	LRRC9	leucine rich repeat containing 9
hsa-miR-515-5p	0	0	1	1	0	0	TMEM136	transmembrane protein 136
hsa-miR-515-5p	1	0	1	1	1	1	SLC12A6	solute carrier family 12 (potassium/chloride transporters), member 6
hsa-miR-515-5p	0	0	1	1	1	1	CD160	CD160 molecule
hsa-miR-515-5p	1	0	1	0	1	1	NBR1	neighbor of BRCA1 gene 1
hsa-miR-515-5p	1	0	1	0	0	0	SP7	Sp7 transcription factor
hsa-miR-515-5p	1	0	1	0	1	1	USP37	ubiquitin specific peptidase 37
hsa-miR-515-5p	0	0	1	1	1	1	ZNF662	zinc finger protein 662
hsa-miR-515-5p	1	0	1	1	1	1	CHMP3	charged multivesicular body protein 3
hsa-miR-515-5p	1	0	1	1	1	1	MRFAP1	Morf4 family associated protein 1
hsa-miR-515-5p	0	0	1	1	1	1	G3BP1	GTPase activating protein (SH3 domain) binding protein 1
hsa-miR-515-5p	1	0	1	0	1	1	GPC6	glypican 6
hsa-miR-515-5p	0	0	1	1	0	0	HEATR8	HEAT repeat containing 8
hsa-miR-515-5p	0	0	1	0	0	0	LOC494141	mitochondrial carrier triple repeat 1 pseudogene
hsa-miR-515-5p	0	0	1	1	1	1	FBN3	fibrillin 3
hsa-miR-515-5p	0	0	1	0	0	0	LOC100133315	transient receptor potential cation channel, subfamily C, member 2-like
hsa-miR-515-5p	0	0	1	1	1	1	RAD51	RAD51 homolog (S. cerevisiae)
hsa-miR-515-5p	1	0	1	1	1	1	RNF111	ring finger protein 111
hsa-miR-515-5p	1	0	1	0	1	1	ZNF607	zinc finger protein 607
hsa-miR-515-5p	0	0	1	0	0	0	AGAP9	ArfGAP with GTPase domain, ankyrin repeat and PH domain 9
hsa-miR-515-5p	1	0	1	1	1	1	TAP2	transporter 2, ATP-binding cassette, sub-family B (MDR/TAP)
hsa-miR-515-5p	1	0	1	1	1	1	TOM1L1	target of myb1 (chicken)-like 1
hsa-miR-515-5p	1	0	1	1	0	0	ABLIM3	actin binding LIM protein family, member 3
hsa-miR-515-5p	0	0	1	1	1	1	PSMG2	proteasome (prosome, macropain) assembly chaperone 2
hsa-miR-515-5p	0	0	1	1	1	1	PUS7L	pseudouridylate synthase 7 homolog (S. cerevisiae)-like
hsa-miR-515-5p	1	0	1	1	1	1	ZNF655	zinc finger protein 655
hsa-miR-515-5p	0	0	1	1	1	1	CCKBR	cholecystokinin B receptor
hsa-miR-515-5p	1	0	1	1	1	1	NCOA1	nuclear receptor coactivator 1
hsa-miR-515-5p	0	0	1	1	1	1	ENPP3	ectonucleotide pyrophosphatase/phosphodiesterase 3
hsa-miR-515-5p	1	0	1	1	1	1	DUSP3	dual specificity phosphatase 3
hsa-miR-515-5p	0	0	1	1	1	1	PTPN20B	protein tyrosine phosphatase, non-receptor type 20B
hsa-miR-515-5p	0	0	1	1	1	1	PTPN20A	protein tyrosine phosphatase, non-receptor type 20A
hsa-miR-515-5p	1	0	1	1	1	1	NECAP1	NECAP endocytosis associated 1
hsa-miR-515-5p	1	0	1	1	1	1	RIF1	RAP1 interacting factor homolog (yeast)
hsa-miR-515-5p	0	0	1	1	0	0	PLK1S1	polo-like kinase 1 substrate 1
hsa-miR-515-5p	1	0	1	0	1	1	DCDC2	doublecortin domain containing 2
hsa-miR-515-5p	1	0	1	1	1	1	MLLT6	myeloid/lymphoid or mixed-lineage leukemia (trithorax homolog, Drosophila); translocated to, 6
hsa-miR-515-5p	0	0	1	0	0	0	KIAA0913	KIAA0913
hsa-miR-515-5p	0	0	1	1	1	1	ZNF280D	zinc finger protein 280D
hsa-miR-515-5p	0	0	1	1	1	1	PPA2	pyrophosphatase (inorganic) 2
hsa-miR-515-5p	1	0	1	1	1	1	ERI1	exoribonuclease 1
hsa-miR-515-5p	1	0	1	0	1	1	CEP170	centrosomal protein 170kDa
hsa-miR-515-5p	1	0	1	1	1	1	TFE3	transcription factor binding to IGHM enhancer 3
hsa-miR-515-5p	1	0	1	1	1	1	PKNOX2	PBX/knotted 1 homeobox 2
hsa-miR-515-5p	1	0	1	1	1	1	TMEFF1	transmembrane protein with EGF-like and two follistatin-like domains 1
hsa-miR-515-5p	1	0	1	1	1	1	LIMCH1	LIM and calponin homology domains 1
hsa-miR-515-5p	1	0	1	1	1	1	MIER1	mesoderm induction early response 1 homolog (Xenopus laevis)
hsa-miR-515-5p	0	0	1	0	1	1	GAB3	GRB2-associated binding protein 3
hsa-miR-515-5p	0	0	1	1	1	1	BEND7	BEN domain containing 7
hsa-miR-515-5p	1	0	1	1	0	0	USP24	ubiquitin specific peptidase 24
hsa-miR-515-5p	1	0	1	0	1	1	MPP5	membrane protein, palmitoylated 5 (MAGUK p55 subfamily member 5)
hsa-miR-515-5p	1	0	1	0	1	1	STYX	serine/threonine/tyrosine interacting protein
hsa-miR-515-5p	0	0	1	1	1	1	SYTL4	synaptotagmin-like 4
hsa-miR-515-5p	0	0	1	1	1	1	YAP1	Yes-associated protein 1
hsa-miR-515-5p	0	0	1	1	1	1	NEK9	NIMA (never in mitosis gene a)- related kinase 9
hsa-miR-515-5p	0	0	1	1	1	1	VWA3B	von Willebrand factor A domain containing 3B
hsa-miR-515-5p	0	0	1	1	1	1	CCDC125	coiled-coil domain containing 125
hsa-miR-515-5p	1	0	1	1	0	0	PTAR1	protein prenyltransferase alpha subunit repeat containing 1
hsa-miR-515-5p	1	0	1	1	1	1	TMEM182	transmembrane protein 182
hsa-miR-515-5p	0	0	1	1	1	1	INPP5B	inositol polyphosphate-5-phosphatase, 75kDa
hsa-miR-515-5p	0	0	1	1	1	1	CCDC132	coiled-coil domain containing 132
hsa-miR-515-5p	1	0	1	0	1	1	MEF2C	myocyte enhancer factor 2C
hsa-miR-515-5p	1	0	1	1	1	1	UNC45B	unc-45 homolog B (C. elegans)
hsa-miR-515-5p	0	0	1	1	1	1	CCDC66	coiled-coil domain containing 66
hsa-miR-515-5p	0	0	1	1	1	1	C12orf50	chromosome 12 open reading frame 50
hsa-miR-515-5p	0	0	1	1	0	0	PPIE	peptidylprolyl isomerase E (cyclophilin E)
hsa-miR-515-5p	0	0	1	0	0	0	EPHA1-AS1	EPHA1 antisense RNA 1
hsa-miR-515-5p	0	0	1	1	1	1	KIAA1841	KIAA1841
hsa-miR-515-5p	1	0	1	1	1	1	FAM63B	family with sequence similarity 63, member B
hsa-miR-515-5p	1	0	1	1	1	1	IL17RD	interleukin 17 receptor D
hsa-miR-515-5p	1	0	1	1	1	1	DIS3L2	DIS3 mitotic control homolog (S. cerevisiae)-like 2
hsa-miR-515-5p	1	0	1	1	1	1	RICTOR	RPTOR independent companion of MTOR, complex 2
hsa-miR-515-5p	1	0	1	0	1	1	COX18	COX18 cytochrome c oxidase assembly homolog (S. cerevisiae)
hsa-miR-515-5p	1	0	1	0	1	1	KIF21B	kinesin family member 21B
hsa-miR-515-5p	1	0	1	0	1	1	NR3C1	nuclear receptor subfamily 3, group C, member 1 (glucocorticoid receptor)
hsa-miR-515-5p	0	0	1	1	1	1	AMOTL1	angiomotin like 1
hsa-miR-515-5p	1	0	1	1	1	1	IKZF2	IKAROS family zinc finger 2 (Helios)
hsa-miR-515-5p	1	0	1	1	1	1	GAL3ST3	galactose-3-O-sulfotransferase 3
hsa-miR-515-5p	0	0	1	1	1	1	RUNDC3B	RUN domain containing 3B
hsa-miR-515-5p	1	0	1	1	1	1	SYNCRIP	synaptotagmin binding, cytoplasmic RNA interacting protein
hsa-miR-515-5p	1	0	1	1	1	1	DUSP16	dual specificity phosphatase 16
hsa-miR-515-5p	0	0	1	1	1	1	CD209	CD209 molecule
hsa-miR-515-5p	1	0	1	1	1	1	SORCS1	sortilin-related VPS10 domain containing receptor 1
hsa-miR-515-5p	1	0	1	1	1	1	ANGPT1	angiopoietin 1
hsa-miR-515-5p	1	0	1	1	1	1	ITSN1	intersectin 1 (SH3 domain protein)
hsa-miR-515-5p	0	0	1	1	1	1	KLC1	kinesin light chain 1
hsa-miR-515-5p	0	0	1	1	0	0	NIF3L1	NIF3 NGG1 interacting factor 3-like 1 (S. cerevisiae)
hsa-miR-515-5p	1	0	1	1	1	1	PBRM1	polybromo 1
hsa-miR-515-5p	1	0	1	1	1	1	RAI14	retinoic acid induced 14
hsa-miR-515-5p	0	0	1	1	1	1	GCOM1	GRINL1A complex locus 1
hsa-miR-515-5p	0	0	1	1	1	1	ATF7IP	activating transcription factor 7 interacting protein
hsa-miR-515-5p	0	0	1	1	1	1	PROK2	prokineticin 2
hsa-miR-515-5p	0	0	1	1	0	0	LRRC28	leucine rich repeat containing 28
hsa-miR-515-5p	0	0	1	1	1	1	LHFPL1	lipoma HMGIC fusion partner-like 1
hsa-miR-515-5p	1	0	1	0	1	1	ST6GALNAC3	ST6 (alpha-N-acetyl-neuraminyl-2,3-beta-galactosyl-1,3)-N-acetylgalactosaminide alpha-2,6-sialyltransferase 3
hsa-miR-515-5p	1	0	1	1	1	1	NLGN4X	neuroligin 4, X-linked
hsa-miR-515-5p	0	0	1	1	1	1	TNFRSF19	tumor necrosis factor receptor superfamily, member 19
hsa-miR-515-5p	0	0	1	1	1	1	VWA5A	von Willebrand factor A domain containing 5A
hsa-miR-515-5p	1	0	1	1	1	1	VPS45	vacuolar protein sorting 45 homolog (S. cerevisiae)
hsa-miR-515-5p	0	0	1	1	1	1	PLD5	phospholipase D family, member 5
hsa-miR-515-5p	0	0	1	1	1	1	POTEG	POTE ankyrin domain family, member G
hsa-miR-515-5p	0	0	1	1	0	0	SH2D6	SH2 domain containing 6
hsa-miR-515-5p	0	0	1	1	1	1	EHBP1	EH domain binding protein 1
hsa-miR-515-5p	0	0	1	0	1	1	XKR5	XK, Kell blood group complex subunit-related family, member 5
hsa-miR-515-5p	0	0	1	1	1	1	AICDA	activation-induced cytidine deaminase
hsa-miR-515-5p	0	0	1	1	0	0	ARAP1	ArfGAP with RhoGAP domain, ankyrin repeat and PH domain 1
hsa-miR-515-5p	0	0	1	0	1	1	RAB18	RAB18, member RAS oncogene family
hsa-miR-515-5p	1	0	1	1	1	1	HMGA2	high mobility group AT-hook 2
hsa-miR-515-5p	1	0	1	1	1	1	BHLHE41	basic helix-loop-helix family, member e41
hsa-miR-515-5p	1	0	1	1	1	1	PLCH1	phospholipase C, eta 1
hsa-miR-515-5p	0	0	1	0	0	0	LOC646743	uncharacterized LOC646743
hsa-miR-515-5p	1	0	1	1	1	1	QKI	QKI, KH domain containing, RNA binding
hsa-miR-515-5p	1	0	1	1	1	1	SAT1	spermidine/spermine N1-acetyltransferase 1
hsa-miR-515-5p	1	0	1	1	0	0	TAF4B	TAF4b RNA polymerase II, TATA box binding protein (TBP)-associated factor, 105kDa
hsa-miR-515-5p	0	0	1	1	0	0	NBPF8	neuroblastoma breakpoint family, member 8
hsa-miR-515-5p	0	0	1	1	1	1	IL23R	interleukin 23 receptor
hsa-miR-515-5p	1	0	1	1	1	1	AMOT	angiomotin
hsa-miR-515-5p	0	0	1	1	0	0	C17orf53	chromosome 17 open reading frame 53
hsa-miR-515-5p	1	0	1	0	1	1	FAM46A	family with sequence similarity 46, member A
hsa-miR-515-5p	0	0	1	1	1	1	SNX11	sorting nexin 11
hsa-miR-515-5p	0	0	1	1	0	0	AAR2	AAR2 splicing factor homolog (S. cerevisiae)
hsa-miR-515-5p	0	0	1	1	1	1	PAFAH1B2	platelet-activating factor acetylhydrolase 1b, catalytic subunit 2 (30kDa)
hsa-miR-515-5p	0	0	1	1	1	1	TTLL5	tubulin tyrosine ligase-like family, member 5
hsa-miR-515-5p	0	0	1	1	1	1	TUFT1	tuftelin 1
hsa-miR-515-5p	0	0	1	1	0	0	ZNF576	zinc finger protein 576
hsa-miR-515-5p	1	0	1	1	1	1	DUS1L	dihydrouridine synthase 1-like (S. cerevisiae)
hsa-miR-515-5p	1	0	1	1	1	1	GABPB1	GA binding protein transcription factor, beta subunit 1
hsa-miR-515-5p	1	0	1	1	1	1	ZNF410	zinc finger protein 410
hsa-miR-515-5p	1	0	1	0	1	1	CGGBP1	CGG triplet repeat binding protein 1
hsa-miR-515-5p	1	0	1	1	1	1	MBNL1	muscleblind-like splicing regulator 1
hsa-miR-515-5p	0	0	1	1	1	1	NUPL2	nucleoporin like 2
hsa-miR-515-5p	1	0	1	1	1	1	U2SURP	U2 snRNP-associated SURP domain containing
hsa-miR-515-5p	0	0	1	1	0	0	RBM14	RNA binding motif protein 14
hsa-miR-515-5p	1	0	1	0	1	1	DDX3X	DEAD (Asp-Glu-Ala-Asp) box polypeptide 3, X-linked
hsa-miR-515-5p	1	0	1	1	1	1	CALM1	calmodulin 1 (phosphorylase kinase, delta)
hsa-miR-515-5p	0	0	1	1	1	1	DPYD	dihydropyrimidine dehydrogenase
hsa-miR-515-5p	1	0	1	1	1	1	HMGA1	high mobility group AT-hook 1
hsa-miR-515-5p	0	0	1	0	0	0	ATXN7L3B	ataxin 7-like 3B
hsa-miR-515-5p	1	0	1	1	1	1	SLC50A1	solute carrier family 50 (sugar transporter), member 1
hsa-miR-515-5p	1	0	1	1	0	0	SIGMAR1	sigma non-opioid intracellular receptor 1
hsa-miR-515-5p	0	0	1	1	1	1	GNL3L	guanine nucleotide binding protein-like 3 (nucleolar)-like
hsa-miR-515-5p	0	0	1	1	1	1	TAF12	TAF12 RNA polymerase II, TATA box binding protein (TBP)-associated factor, 20kDa
hsa-miR-515-5p	1	0	1	1	1	1	DPH1	DPH1 homolog (S. cerevisiae)
hsa-miR-515-5p	0	0	1	1	1	1	RNF170	ring finger protein 170
hsa-miR-515-5p	1	0	1	1	1	1	ETF1	eukaryotic translation termination factor 1
hsa-miR-515-5p	0	0	1	1	0	0	STAP1	signal transducing adaptor family member 1
hsa-miR-515-5p	0	0	1	0	0	0	MGC21881	uncharacterized locus MGC21881
hsa-miR-515-5p	0	0	1	1	1	1	C8orf33	chromosome 8 open reading frame 33
hsa-miR-515-5p	0	0	1	0	0	0	KLHL15	kelch-like 15 (Drosophila)
hsa-miR-515-5p	1	0	1	1	1	1	ZBTB38	zinc finger and BTB domain containing 38
hsa-miR-515-5p	1	0	1	1	1	1	FAM176A	family with sequence similarity 176, member A
hsa-miR-515-5p	0	0	1	1	1	1	FAM122C	family with sequence similarity 122C
hsa-miR-515-5p	1	0	1	0	1	1	ZNF24	zinc finger protein 24
hsa-miR-515-5p	1	0	1	1	1	1	ELF4	E74-like factor 4 (ets domain transcription factor)
hsa-miR-515-5p	1	0	1	1	0	0	USP53	ubiquitin specific peptidase 53
hsa-miR-515-5p	1	0	1	1	1	1	ARHGEF9	Cdc42 guanine nucleotide exchange factor (GEF) 9
hsa-miR-515-5p	0	0	1	0	0	0	ZNF720	zinc finger protein 720
hsa-miR-515-5p	1	0	1	1	1	1	SUZ12	suppressor of zeste 12 homolog (Drosophila)
hsa-miR-515-5p	1	0	1	1	1	1	SLC25A22	solute carrier family 25 (mitochondrial carrier: glutamate), member 22
hsa-miR-515-5p	0	0	1	1	0	0	PTPMT1	protein tyrosine phosphatase, mitochondrial 1
hsa-miR-515-5p	0	0	1	0	1	1	ZNF718	zinc finger protein 718
hsa-miR-515-5p	1	0	1	1	1	1	TM9SF4	transmembrane 9 superfamily protein member 4
hsa-miR-515-5p	0	0	1	0	0	0	LOC284260	uncharacterized LOC284260
hsa-miR-515-5p	0	0	1	0	0	0	AZGP1P1	alpha-2-glycoprotein 1, zinc-binding pseudogene 1
hsa-miR-515-5p	0	0	1	1	0	0	TPT1	tumor protein, translationally-controlled 1
hsa-miR-515-5p	0	0	1	1	1	1	ZCCHC10	zinc finger, CCHC domain containing 10
hsa-miR-515-5p	1	0	1	1	1	1	BEND6	BEN domain containing 6
hsa-miR-515-5p	0	0	1	1	1	1	CDC42SE2	CDC42 small effector 2
hsa-miR-515-5p	0	0	1	0	0	0	SNX29P2	sorting nexin 29 pseudogene 2
hsa-miR-515-5p	0	0	1	1	1	1	FAM221A	family with sequence similarity 221, member A
hsa-miR-515-5p	1	0	1	1	1	1	RSPO2	R-spondin 2
hsa-miR-515-5p	0	0	1	1	1	1	C14orf105	chromosome 14 open reading frame 105
hsa-miR-515-5p	1	0	1	1	1	1	TMEM127	transmembrane protein 127
hsa-miR-515-5p	1	0	1	0	0	0	KCNU1	potassium channel, subfamily U, member 1
hsa-miR-515-5p	0	0	1	1	1	1	SEMA3D	sema domain, immunoglobulin domain (Ig), short basic domain, secreted, (semaphorin) 3D
hsa-miR-515-5p	1	0	1	1	1	1	SYT9	synaptotagmin IX
hsa-miR-515-5p	0	0	1	1	0	0	TSPAN16	tetraspanin 16
hsa-miR-515-5p	1	0	1	1	1	1	TIAL1	TIA1 cytotoxic granule-associated RNA binding protein-like 1
hsa-miR-515-5p	0	0	1	1	0	0	TMEM251	transmembrane protein 251
hsa-miR-515-5p	0	0	1	1	1	1	TMEM117	transmembrane protein 117
hsa-miR-515-5p	1	0	1	1	1	1	MLLT3	myeloid/lymphoid or mixed-lineage leukemia (trithorax homolog, Drosophila); translocated to, 3
hsa-miR-515-5p	1	0	1	1	1	1	EYA4	eyes absent homolog 4 (Drosophila)
hsa-miR-515-5p	1	0	1	1	1	1	ELAVL2	ELAV (embryonic lethal, abnormal vision, Drosophila)-like 2 (Hu antigen B)
hsa-miR-515-5p	0	0	1	0	1	1	ERAP1	endoplasmic reticulum aminopeptidase 1
hsa-miR-515-5p	1	0	1	1	1	1	FAM160A2	family with sequence similarity 160, member A2
hsa-miR-515-5p	0	0	1	1	1	1	IQCH	IQ motif containing H
hsa-miR-515-5p	1	0	1	1	1	1	MUM1L1	melanoma associated antigen (mutated) 1-like 1
hsa-miR-515-5p	0	0	1	0	0	0	CFL1P1	cofilin 1 (non-muscle) pseudogene 1
hsa-miR-515-5p	1	0	1	1	1	1	PHF17	PHD finger protein 17
hsa-miR-515-5p	0	0	1	0	1	1	PLEKHM1P	pleckstrin homology domain containing, family M (with RUN domain) member 1 pseudogene
hsa-miR-515-5p	1	0	1	1	1	1	RHOBTB1	Rho-related BTB domain containing 1
hsa-miR-515-5p	0	0	1	0	1	1	TTC23L	tetratricopeptide repeat domain 23-like
hsa-miR-515-5p	0	0	1	1	1	1	CDADC1	cytidine and dCMP deaminase domain containing 1
hsa-miR-515-5p	1	0	1	1	1	1	CRKL	v-crk sarcoma virus CT10 oncogene homolog (avian)-like
hsa-miR-515-5p	0	0	1	1	1	1	IL20RB	interleukin 20 receptor beta
hsa-miR-515-5p	1	0	1	0	1	1	KCTD2	potassium channel tetramerisation domain containing 2
hsa-miR-515-5p	1	0	1	1	0	0	FAM150B	family with sequence similarity 150, member B
hsa-miR-515-5p	0	0	1	1	0	0	TRIM74	tripartite motif containing 74
hsa-miR-515-5p	0	0	1	1	1	1	ZNF337	zinc finger protein 337
hsa-miR-515-5p	1	0	1	1	1	1	LPGAT1	lysophosphatidylglycerol acyltransferase 1
hsa-miR-515-5p	0	0	1	0	1	1	DKFZP434I0714	uncharacterized protein DKFZP434I0714
hsa-miR-515-5p	1	0	1	0	1	1	DDX3Y	DEAD (Asp-Glu-Ala-Asp) box polypeptide 3, Y-linked
hsa-miR-515-5p	0	0	1	1	1	1	KIF16B	kinesin family member 16B
hsa-miR-515-5p	1	0	1	1	1	1	RAP2C	RAP2C, member of RAS oncogene family
hsa-miR-515-5p	0	0	1	0	1	1	TMSB15B	thymosin beta 15B
hsa-miR-515-5p	0	0	1	0	1	1	FAM72A	family with sequence similarity 72, member A
hsa-miR-515-5p	0	0	1	0	0	0	LOC339862	uncharacterized LOC339862
hsa-miR-515-5p	0	0	1	1	1	1	TARSL2	threonyl-tRNA synthetase-like 2
hsa-miR-515-5p	0	0	1	0	0	0	C12orf77	chromosome 12 open reading frame 77
hsa-miR-515-5p	1	0	1	1	1	1	IMPACT	Impact homolog (mouse)
hsa-miR-515-5p	0	0	1	1	1	1	DUSP28	dual specificity phosphatase 28
hsa-miR-515-5p	0	0	1	0	0	0	SPATA3	spermatogenesis associated 3
hsa-miR-515-5p	1	0	1	1	1	1	LMO7	LIM domain 7
hsa-miR-515-5p	1	0	1	1	1	1	HECTD2	HECT domain containing E3 ubiquitin protein ligase 2
hsa-miR-515-5p	1	0	1	0	1	1	CLDN12	claudin 12
hsa-miR-515-5p	0	0	1	0	0	0	SRGAP2C	SLIT-ROBO Rho GTPase activating protein 2C
hsa-miR-515-5p	1	0	1	1	1	1	BNC2	basonuclin 2
hsa-miR-515-5p	1	0	1	1	1	1	FAM135B	family with sequence similarity 135, member B
hsa-miR-515-5p	0	0	1	1	1	1	FAM71D	family with sequence similarity 71, member D
hsa-miR-515-5p	1	0	1	1	0	0	EBF4	early B-cell factor 4
hsa-miR-515-5p	0	0	1	0	0	0	MGC42157	uncharacterized locus MGC42157
hsa-miR-515-5p	1	0	1	1	1	1	GALNT1	UDP-N-acetyl-alpha-D-galactosamine:polypeptide N-acetylgalactosaminyltransferase 1 (GalNAc-T1)
hsa-miR-515-5p	0	0	1	1	0	0	VMO1	vitelline membrane outer layer 1 homolog (chicken)
hsa-miR-515-5p	1	0	1	0	1	1	CEP44	centrosomal protein 44kDa
hsa-miR-515-5p	1	0	1	0	1	1	ARID2	AT rich interactive domain 2 (ARID, RFX-like)
hsa-miR-515-5p	1	0	1	1	1	1	FGFR2	fibroblast growth factor receptor 2
hsa-miR-515-5p	1	0	1	1	1	1	MARCKS	myristoylated alanine-rich protein kinase C substrate
hsa-miR-515-5p	0	0	1	0	0	0	LOC255130	uncharacterized LOC255130
hsa-miR-515-5p	0	0	1	1	1	1	FBXL4	F-box and leucine-rich repeat protein 4
hsa-miR-515-5p	0	0	1	1	1	1	SLTM	SAFB-like, transcription modulator
hsa-miR-515-5p	1	0	1	1	1	1	FOSB	FBJ murine osteosarcoma viral oncogene homolog B
hsa-miR-515-5p	0	0	1	1	1	1	TMEM45A	transmembrane protein 45A
hsa-miR-515-5p	1	0	1	1	1	1	FBXO8	F-box protein 8
hsa-miR-515-5p	1	0	1	1	1	1	SLITRK3	SLIT and NTRK-like family, member 3
hsa-miR-515-5p	1	0	1	1	1	1	BVES	blood vessel epicardial substance
hsa-miR-515-5p	1	0	1	1	1	1	INTS6	integrator complex subunit 6
hsa-miR-515-5p	0	0	1	0	0	0	LOC339240	keratin 17 pseudogene
hsa-miR-515-5p	0	0	1	0	0	0	A1BG-AS1	A1BG antisense RNA 1
hsa-miR-515-5p	0	0	1	0	0	0	FAM86JP	family with sequence similarity 86, member A pseudogene
hsa-miR-515-5p	1	0	1	0	1	1	KIAA0430	KIAA0430
hsa-miR-515-5p	1	0	1	1	1	1	FAM123A	family with sequence similarity 123A
hsa-miR-515-5p	0	0	1	0	0	0	LOC154822	uncharacterized LOC154822
hsa-miR-515-5p	0	0	1	1	0	0	FAM159A	family with sequence similarity 159, member A
hsa-miR-515-5p	0	0	1	0	1	1	PDGFC	platelet derived growth factor C
hsa-miR-515-5p	0	0	1	1	1	1	GOLGA6L9	golgin A6 family-like 9
hsa-miR-515-5p	0	0	1	1	1	1	RABGAP1L	RAB GTPase activating protein 1-like
hsa-miR-515-5p	0	0	1	1	1	1	C4orf32	chromosome 4 open reading frame 32
hsa-miR-515-5p	1	0	1	1	1	1	MEIS3	Meis homeobox 3
hsa-miR-515-5p	1	0	1	0	1	1	USP6NL	USP6 N-terminal like
hsa-miR-515-5p	0	0	1	0	1	1	C12orf74	chromosome 12 open reading frame 74
hsa-miR-515-5p	0	0	1	0	0	0	MORF4L2-AS1	MORF4L2 antisense RNA 1
hsa-miR-515-5p	0	0	1	0	0	0	LOC646168	uncharacterized LOC646168
hsa-miR-515-5p	1	0	1	0	1	1	PSD3	pleckstrin and Sec7 domain containing 3
hsa-miR-515-5p	0	0	1	0	0	0	LOC283914	uncharacterized LOC283914
hsa-miR-515-5p	1	0	1	1	1	1	ZFAND4	zinc finger, AN1-type domain 4
hsa-miR-515-5p	1	0	1	1	1	1	SENP1	SUMO1/sentrin specific peptidase 1
hsa-miR-515-5p	0	0	1	1	0	0	FAM72B	family with sequence similarity 72, member B
hsa-miR-515-5p	1	0	1	0	1	1	LYPD6	LY6/PLAUR domain containing 6
hsa-miR-515-5p	0	0	1	0	0	0	LOC348120	uncharacterized LOC348120
hsa-miR-515-5p	0	0	1	1	1	1	OLFML2B	olfactomedin-like 2B
hsa-miR-515-5p	1	0	1	0	1	1	KDM2A	lysine (K)-specific demethylase 2A
hsa-miR-515-5p	1	0	1	1	1	1	BRD1	bromodomain containing 1
hsa-miR-515-5p	1	0	1	1	1	1	KIF2A	kinesin heavy chain member 2A
hsa-miR-515-5p	1	0	1	1	1	1	RTKN2	rhotekin 2
hsa-miR-515-5p	0	0	1	1	1	1	ZNF589	zinc finger protein 589
hsa-miR-515-5p	1	0	1	1	1	1	PTPRG	protein tyrosine phosphatase, receptor type, G
hsa-miR-515-5p	1	0	1	1	1	1	CLVS1	clavesin 1
hsa-miR-515-5p	1	0	1	1	1	1	PELI1	pellino E3 ubiquitin protein ligase 1
hsa-miR-515-5p	0	0	1	0	1	1	ITGA1	integrin, alpha 1
hsa-miR-515-5p	0	0	1	1	0	0	NLRC5	NLR family, CARD domain containing 5
hsa-miR-515-5p	1	0	1	0	1	1	FAM131B	family with sequence similarity 131, member B
hsa-miR-515-5p	1	0	1	1	1	1	FNDC3A	fibronectin type III domain containing 3A
hsa-miR-515-5p	1	0	1	1	1	1	GATA2	GATA binding protein 2
hsa-miR-515-5p	1	0	1	1	1	1	ZFP91	zinc finger protein 91 homolog (mouse)
hsa-miR-515-5p	1	0	1	1	1	1	MKRN1	makorin ring finger protein 1
hsa-miR-515-5p	1	0	1	1	1	1	PCGF5	polycomb group ring finger 5
hsa-miR-515-5p	1	0	1	1	1	1	SCUBE3	signal peptide, CUB domain, EGF-like 3
hsa-miR-515-5p	1	0	1	0	1	1	C14orf43	chromosome 14 open reading frame 43
hsa-miR-515-5p	1	0	1	1	1	1	PPP2R5E	protein phosphatase 2, regulatory subunit B', epsilon isoform
hsa-miR-515-5p	0	0	1	1	1	1	ZNF254	zinc finger protein 254
hsa-miR-515-5p	1	0	1	1	1	1	ATP8B4	ATPase, class I, type 8B, member 4
hsa-miR-515-5p	0	0	1	1	1	1	ZNF365	zinc finger protein 365
hsa-miR-515-5p	1	0	1	1	1	1	PRRG1	proline rich Gla (G-carboxyglutamic acid) 1
hsa-miR-515-5p	0	0	1	1	1	1	ELL3	elongation factor RNA polymerase II-like 3
hsa-miR-515-5p	0	0	1	0	1	1	PPM1N	protein phosphatase, Mg2+/Mn2+ dependent, 1N (putative)
hsa-miR-515-5p	0	0	1	1	1	1	MTRR	5-methyltetrahydrofolate-homocysteine methyltransferase reductase
hsa-miR-515-5p	1	0	1	1	1	1	C14orf37	chromosome 14 open reading frame 37
hsa-miR-515-5p	1	0	1	1	1	1	ADCY6	adenylate cyclase 6
hsa-miR-515-5p	0	0	1	1	0	0	PLB1	phospholipase B1
hsa-miR-515-5p	0	0	1	0	0	0	UBE2Q2P2	ubiquitin-conjugating enzyme E2Q family member 2 pseudogene 2
hsa-miR-515-5p	1	0	1	0	1	1	MAGIX	MAGI family member, X-linked
hsa-miR-515-5p	0	0	1	0	0	0	ZNF66P	zinc finger protein 66, pseudogene
hsa-miR-515-5p	0	0	1	0	0	0	ADAM5	ADAM metallopeptidase domain 5, pseudogene
hsa-miR-515-5p	0	0	1	0	0	0	LINC00442	long intergenic non-protein coding RNA 442
hsa-miR-515-5p	0	0	1	1	0	0	SRA1	steroid receptor RNA activator 1
hsa-miR-515-5p	1	0	1	1	1	1	PDCD6IP	programmed cell death 6 interacting protein
hsa-miR-515-5p	1	0	1	1	1	1	SLC26A7	solute carrier family 26, member 7
hsa-miR-515-5p	1	0	1	1	1	1	SRPK2	SRSF protein kinase 2
hsa-miR-515-5p	0	0	1	1	0	0	RELA	v-rel reticuloendotheliosis viral oncogene homolog A (avian)
hsa-miR-515-5p	1	0	1	1	1	1	SOCS2	suppressor of cytokine signaling 2
hsa-miR-515-5p	0	0	1	1	0	0	KCTD19	potassium channel tetramerisation domain containing 19
hsa-miR-515-5p	0	0	1	1	0	0	TMEM107	transmembrane protein 107
hsa-miR-515-5p	1	0	1	0	1	1	TGFBR1	transforming growth factor, beta receptor 1
hsa-miR-515-5p	1	0	1	0	1	1	TMEM194A	transmembrane protein 194A
hsa-miR-515-5p	0	0	1	1	1	1	CTXN3	cortexin 3
hsa-miR-515-5p	1	0	1	1	1	1	LOXL3	lysyl oxidase-like 3
hsa-miR-515-5p	0	0	1	0	1	1	TNFRSF8	tumor necrosis factor receptor superfamily, member 8
hsa-miR-515-5p	0	0	1	0	1	1	SH3RF2	SH3 domain containing ring finger 2
hsa-miR-515-5p	1	0	1	1	1	1	OPCML	opioid binding protein/cell adhesion molecule-like
hsa-miR-515-5p	1	0	1	1	1	1	WNT5A	wingless-type MMTV integration site family, member 5A
hsa-miR-515-5p	1	0	1	1	1	1	GRAMD4	GRAM domain containing 4
hsa-miR-515-5p	0	0	1	0	0	0	LOC554249	uncharacterized LOC554249
hsa-miR-515-5p	1	0	1	1	1	1	HNRNPC	heterogeneous nuclear ribonucleoprotein C (C1/C2)
hsa-miR-515-5p	1	0	1	1	1	1	NOTCH2NL	notch 2 N-terminal like
hsa-miR-515-5p	1	0	1	1	1	1	ESRRA	estrogen-related receptor alpha
hsa-miR-515-5p	1	0	1	1	1	1	STK38	serine/threonine kinase 38
hsa-miR-515-5p	1	0	1	1	1	1	ST8SIA2	ST8 alpha-N-acetyl-neuraminide alpha-2,8-sialyltransferase 2
hsa-miR-515-5p	1	0	1	1	1	1	ACVR2B	activin A receptor, type IIB
hsa-miR-515-5p	0	0	1	1	1	1	R3HCC1L	R3H domain and coiled-coil containing 1-like
hsa-miR-515-5p	0	0	1	1	1	1	SLC39A2	solute carrier family 39 (zinc transporter), member 2
hsa-miR-515-5p	0	0	1	0	0	0	FAM106A	family with sequence similarity 106, member A
hsa-miR-515-5p	1	0	1	1	1	1	SYNJ1	synaptojanin 1
hsa-miR-515-5p	1	0	1	0	1	1	ARPP19	cAMP-regulated phosphoprotein, 19kDa
hsa-miR-515-5p	0	0	1	1	1	1	C10orf118	chromosome 10 open reading frame 118
hsa-miR-515-5p	1	0	1	0	1	1	VANGL2	vang-like 2 (van gogh, Drosophila)
hsa-miR-515-5p	1	0	1	0	1	1	CPEB2	cytoplasmic polyadenylation element binding protein 2
hsa-miR-515-5p	0	0	1	1	0	0	TMC1	transmembrane channel-like 1
hsa-miR-515-5p	0	0	1	0	0	0	LOC441493	uncharacterized LOC441493
hsa-miR-515-5p	0	0	1	0	0	0	LSAMP-AS3	LSAMP antisense RNA 3
hsa-miR-515-5p	0	0	1	0	0	0	C5orf49	chromosome 5 open reading frame 49
hsa-miR-515-5p	0	0	1	1	1	1	CCDC126	coiled-coil domain containing 126
hsa-miR-515-5p	0	0	1	1	0	0	ZNHIT3	zinc finger, HIT-type containing 3
hsa-miR-515-5p	0	0	1	1	1	1	MUC21	mucin 21, cell surface associated
hsa-miR-515-5p	1	0	1	1	1	1	PTPRD	protein tyrosine phosphatase, receptor type, D
hsa-miR-515-5p	0	0	1	1	1	1	TTN	titin
hsa-miR-515-5p	0	0	1	1	1	1	ATG16L2	autophagy related 16-like 2 (S. cerevisiae)
hsa-miR-515-5p	0	0	1	0	0	0	LOC389765	kinesin family member 27 pseudogene
hsa-miR-515-5p	1	0	1	0	1	1	DNAJC6	DnaJ (Hsp40) homolog, subfamily C, member 6
hsa-miR-515-5p	1	0	1	1	1	1	CERS6	ceramide synthase 6
hsa-miR-515-5p	1	0	1	1	1	1	SP4	Sp4 transcription factor
hsa-miR-515-5p	1	0	1	0	1	1	BTBD3	BTB (POZ) domain containing 3
hsa-miR-515-5p	0	0	1	1	1	1	STAU2	staufen, RNA binding protein, homolog 2 (Drosophila)
hsa-miR-515-5p	0	0	1	1	1	1	SMTNL2	smoothelin-like 2
hsa-miR-515-5p	1	0	1	1	1	1	SLK	STE20-like kinase
hsa-miR-515-5p	1	0	1	1	1	1	NR3C2	nuclear receptor subfamily 3, group C, member 2
hsa-miR-515-5p	1	0	1	0	1	1	ROBO1	roundabout, axon guidance receptor, homolog 1 (Drosophila)
hsa-miR-515-5p	1	0	1	1	1	1	TMEM132B	transmembrane protein 132B
hsa-miR-515-5p	0	0	1	1	1	1	FSHB	follicle stimulating hormone, beta polypeptide
hsa-miR-515-5p	1	0	1	1	1	1	KIAA0528	KIAA0528
hsa-miR-515-5p	0	0	1	1	1	1	LRCH1	leucine-rich repeats and calponin homology (CH) domain containing 1
hsa-miR-515-5p	1	0	1	1	1	1	OTUD4	OTU domain containing 4
hsa-miR-515-5p	0	0	1	1	0	0	HOXD12	homeobox D12
hsa-miR-515-5p	1	0	1	1	1	1	ANK2	ankyrin 2, neuronal
hsa-miR-515-5p	0	0	1	1	1	1	RNF14	ring finger protein 14
hsa-miR-515-5p	1	0	1	1	1	1	MEGF11	multiple EGF-like-domains 11
hsa-miR-515-5p	0	0	1	1	1	1	SLC22A23	solute carrier family 22, member 23
hsa-miR-515-5p	1	0	1	1	1	1	MLLT10	myeloid/lymphoid or mixed-lineage leukemia (trithorax homolog, Drosophila); translocated to, 10
hsa-miR-515-5p	0	0	1	0	0	0	FAM225B	family with sequence similarity 225, member B (non-protein coding)
hsa-miR-515-5p	0	0	1	1	0	0	CCDC144A	coiled-coil domain containing 144A
hsa-miR-515-5p	0	0	1	1	1	1	PRKAR2A	protein kinase, cAMP-dependent, regulatory, type II, alpha
hsa-miR-515-5p	0	0	1	0	1	1	C14orf23	chromosome 14 open reading frame 23
hsa-miR-515-5p	0	0	1	1	1	1	DLGAP5	discs, large (Drosophila) homolog-associated protein 5
hsa-miR-515-5p	0	0	1	0	0	0	TMED8	transmembrane emp24 protein transport domain containing 8
hsa-miR-515-5p	0	0	1	0	0	0	LINC00643	long intergenic non-protein coding RNA 643
hsa-miR-515-5p	1	0	1	1	1	1	EIF5	eukaryotic translation initiation factor 5
hsa-miR-515-5p	0	0	1	1	1	1	PSPH	phosphoserine phosphatase
hsa-miR-515-5p	1	0	1	0	1	1	HMGB3	high mobility group box 3
hsa-miR-515-5p	1	0	1	1	0	0	KRT80	keratin 80
hsa-miR-515-5p	0	0	1	1	1	1	FUCA2	fucosidase, alpha-L- 2, plasma
hsa-miR-515-5p	0	0	1	0	0	0	DKFZp686D0853	uncharacterized LOC401613
hsa-miR-515-5p	1	0	1	1	1	1	ATP2B4	ATPase, Ca++ transporting, plasma membrane 4
hsa-miR-515-5p	1	0	1	1	1	1	RBL2	retinoblastoma-like 2 (p130)
hsa-miR-515-5p	0	0	1	1	0	0	CCDC171	coiled-coil domain containing 171
hsa-miR-515-5p	0	0	1	1	1	1	NUP54	nucleoporin 54kDa
hsa-miR-515-5p	0	0	1	1	1	1	SLC12A8	solute carrier family 12 (potassium/chloride transporters), member 8
hsa-miR-515-5p	1	0	1	0	1	1	MTX3	metaxin 3
hsa-miR-515-5p	1	0	1	1	1	1	ETS1	v-ets erythroblastosis virus E26 oncogene homolog 1 (avian)
hsa-miR-515-5p	1	0	1	1	1	1	SLC35F1	solute carrier family 35, member F1
hsa-miR-515-5p	1	0	1	1	1	1	NFASC	neurofascin
hsa-miR-515-5p	1	0	1	0	1	1	FAM73A	family with sequence similarity 73, member A
hsa-miR-515-5p	1	0	1	0	1	1	GALNT4	UDP-N-acetyl-alpha-D-galactosamine:polypeptide N-acetylgalactosaminyltransferase 4 (GalNAc-T4)
hsa-miR-515-5p	1	0	1	1	1	1	PRDM2	PR domain containing 2, with ZNF domain
hsa-miR-515-5p	1	0	1	1	1	1	CGN	cingulin
hsa-miR-515-5p	1	0	1	1	0	0	RBM27	RNA binding motif protein 27
hsa-miR-515-5p	0	0	1	0	1	1	THAP6	THAP domain containing 6
hsa-miR-515-5p	0	0	1	1	1	1	FAM9C	family with sequence similarity 9, member C
hsa-miR-515-5p	1	0	1	1	1	1	STARD13	StAR-related lipid transfer (START) domain containing 13
hsa-miR-515-5p	1	0	1	0	1	1	EML4	echinoderm microtubule associated protein like 4
hsa-miR-515-5p	0	0	1	1	1	1	ARMCX3	armadillo repeat containing, X-linked 3
hsa-miR-515-5p	0	0	1	1	1	1	DUSP19	dual specificity phosphatase 19
hsa-miR-515-5p	1	0	1	1	1	1	TC2N	tandem C2 domains, nuclear
hsa-miR-515-5p	0	0	1	0	0	0	OVOS	ovostatin
hsa-miR-515-5p	0	0	1	1	0	0	LRR1	leucine rich repeat protein 1
hsa-miR-515-5p	1	0	1	1	1	1	NEDD9	neural precursor cell expressed, developmentally down-regulated 9
hsa-miR-515-5p	1	0	1	1	1	1	LCA5	Leber congenital amaurosis 5
hsa-miR-515-5p	1	0	1	1	1	1	NFIB	nuclear factor I/B
hsa-miR-515-5p	1	0	1	1	1	1	NAV1	neuron navigator 1
hsa-miR-515-5p	1	0	1	1	1	1	POLA1	polymerase (DNA directed), alpha 1, catalytic subunit
hsa-miR-515-5p	0	0	1	1	1	1	MPP4	membrane protein, palmitoylated 4 (MAGUK p55 subfamily member 4)
hsa-miR-515-5p	1	0	1	1	1	1	RDX	radixin
hsa-miR-515-5p	0	0	1	1	1	1	DAZL	deleted in azoospermia-like
hsa-miR-515-5p	1	0	1	1	1	1	PGAP1	post-GPI attachment to proteins 1
hsa-miR-515-5p	1	0	1	1	1	1	RECK	reversion-inducing-cysteine-rich protein with kazal motifs
hsa-miR-515-5p	1	0	1	1	1	1	TMEM135	transmembrane protein 135
hsa-miR-515-5p	0	0	1	1	1	1	THSD4	thrombospondin, type I, domain containing 4
hsa-miR-515-5p	0	0	1	1	0	0	ALS2CR11	amyotrophic lateral sclerosis 2 (juvenile) chromosome region, candidate 11
hsa-miR-515-5p	1	0	1	1	1	1	WLS	wntless homolog (Drosophila)
hsa-miR-515-5p	0	0	1	1	1	1	KIAA1328	KIAA1328
hsa-miR-515-5p	0	0	1	1	1	1	SSFA2	sperm specific antigen 2
hsa-miR-515-5p	1	0	1	0	1	1	TBL1XR1	transducin (beta)-like 1 X-linked receptor 1
hsa-miR-515-5p	0	0	1	0	0	0	DKFZp686K1684	uncharacterized LOC440034
hsa-miR-515-5p	1	0	1	1	1	1	CREB3L2	cAMP responsive element binding protein 3-like 2
hsa-miR-515-5p	0	0	1	0	1	1	GINS3	GINS complex subunit 3 (Psf3 homolog)
hsa-miR-515-5p	0	0	1	1	0	0	CA9	carbonic anhydrase IX
hsa-miR-515-5p	0	0	1	1	1	1	HEXA	hexosaminidase A (alpha polypeptide)
hsa-miR-515-5p	1	0	1	0	1	1	STX6	syntaxin 6
hsa-miR-515-5p	0	0	1	0	0	0	LOC100128988	uncharacterized LOC100128988
hsa-miR-515-5p	1	0	1	1	1	1	FUT9	fucosyltransferase 9 (alpha (1,3) fucosyltransferase)
hsa-miR-515-5p	0	0	1	1	1	1	UMPS	uridine monophosphate synthetase
hsa-miR-515-5p	0	0	1	0	0	0	AKR1A1	aldo-keto reductase family 1, member A1 (aldehyde reductase)
hsa-miR-515-5p	0	0	1	1	1	1	CRISPLD2	cysteine-rich secretory protein LCCL domain containing 2
hsa-miR-515-5p	0	0	1	1	1	1	UPRT	uracil phosphoribosyltransferase (FUR1) homolog (S. cerevisiae)
hsa-miR-515-5p	0	0	1	1	1	1	DGCR14	DiGeorge syndrome critical region gene 14
hsa-miR-515-5p	0	0	1	1	0	0	NDUFS2	NADH dehydrogenase (ubiquinone) Fe-S protein 2, 49kDa (NADH-coenzyme Q reductase)
hsa-miR-515-5p	0	0	1	1	0	0	TMEM62	transmembrane protein 62
hsa-miR-515-5p	0	0	1	1	1	1	ATP1B3	ATPase, Na+/K+ transporting, beta 3 polypeptide
hsa-miR-515-5p	0	0	1	1	1	1	COPS8	COP9 constitutive photomorphogenic homolog subunit 8 (Arabidopsis)
hsa-miR-515-5p	1	0	1	1	1	1	ARL1	ADP-ribosylation factor-like 1
hsa-miR-515-5p	1	0	1	1	1	1	SLC35D2	solute carrier family 35, member D2
hsa-miR-515-5p	1	0	1	0	1	1	SLCO2A1	solute carrier organic anion transporter family, member 2A1
hsa-miR-515-5p	0	0	1	1	0	0	FCGRT	Fc fragment of IgG, receptor, transporter, alpha
hsa-miR-515-5p	1	0	1	1	1	1	AP3S1	adaptor-related protein complex 3, sigma 1 subunit
hsa-miR-515-5p	1	1	1	1	0	0	EFNA3	ephrin-A3
hsa-miR-515-5p	0	0	1	1	1	1	HSPB8	heat shock 22kDa protein 8
hsa-miR-515-5p	1	0	1	0	1	1	BNIP3L	BCL2/adenovirus E1B 19kDa interacting protein 3-like
hsa-miR-515-5p	0	0	1	1	1	1	COPS7A	COP9 constitutive photomorphogenic homolog subunit 7A (Arabidopsis)
hsa-miR-515-5p	0	0	1	1	1	1	FBXO4	F-box protein 4
hsa-miR-515-5p	1	0	1	1	1	1	SMARCE1	SWI/SNF related, matrix associated, actin dependent regulator of chromatin, subfamily e, member 1
hsa-miR-515-5p	1	0	1	1	1	1	CHTF8	CTF8, chromosome transmission fidelity factor 8 homolog (S. cerevisiae)
hsa-miR-515-5p	0	0	1	1	1	1	CCDC115	coiled-coil domain containing 115
hsa-miR-515-5p	1	0	1	1	1	1	DAZAP1	DAZ associated protein 1
hsa-miR-515-5p	0	0	1	1	1	1	GRAP2	GRB2-related adaptor protein 2
hsa-miR-515-5p	0	0	1	1	1	1	ACTR3B	ARP3 actin-related protein 3 homolog B (yeast)
hsa-miR-515-5p	0	0	1	1	1	1	STON1	stonin 1
hsa-miR-515-5p	1	0	1	1	1	1	PCTP	phosphatidylcholine transfer protein
hsa-miR-515-5p	0	0	1	0	1	1	WASH3P	WAS protein family homolog 3 pseudogene
hsa-miR-515-5p	1	0	1	1	1	1	STK38L	serine/threonine kinase 38 like
hsa-miR-515-5p	0	0	1	1	0	0	DOK5	docking protein 5
hsa-miR-515-5p	0	0	1	0	0	0	LOC150568	uncharacterized LOC150568
hsa-miR-515-5p	0	0	1	1	1	1	NFATC4	nuclear factor of activated T-cells, cytoplasmic, calcineurin-dependent 4
hsa-miR-515-5p	1	0	1	1	1	1	PEX2	peroxisomal biogenesis factor 2
hsa-miR-515-5p	0	0	1	1	0	0	NIT1	nitrilase 1
hsa-miR-515-5p	0	0	1	0	0	0	LOC645513	uncharacterized LOC645513
hsa-miR-515-5p	1	0	1	1	1	1	NRN1	neuritin 1
hsa-miR-515-5p	1	0	1	1	1	1	ARNTL	aryl hydrocarbon receptor nuclear translocator-like
hsa-miR-515-5p	0	0	1	1	0	0	C11orf48	chromosome 11 open reading frame 48
hsa-miR-515-5p	1	0	1	1	1	1	HN1	hematological and neurological expressed 1
hsa-miR-515-5p	1	0	1	1	1	1	SLC39A1	solute carrier family 39 (zinc transporter), member 1
hsa-miR-515-5p	0	0	1	1	1	1	WIBG	within bgcn homolog (Drosophila)
hsa-miR-515-5p	0	0	1	0	1	1	RPL10	ribosomal protein L10
hsa-miR-515-5p	1	0	1	1	1	1	TIMP3	TIMP metallopeptidase inhibitor 3
hsa-miR-515-5p	1	0	1	1	1	1	FUBP3	far upstream element (FUSE) binding protein 3
hsa-miR-515-5p	0	0	1	0	1	1	SUMO2	SMT3 suppressor of mif two 3 homolog 2 (S. cerevisiae)
hsa-miR-515-5p	0	0	1	1	1	1	MAEL	maelstrom homolog (Drosophila)
hsa-miR-515-5p	0	0	1	1	1	1	ZNF639	zinc finger protein 639
hsa-miR-515-5p	1	0	1	1	1	1	ARL4A	ADP-ribosylation factor-like 4A
hsa-miR-515-5p	0	0	1	1	1	1	ACSF3	acyl-CoA synthetase family member 3
hsa-miR-515-5p	0	0	1	0	0	0	LOC93622	Morf4 family associated protein 1-like 1 pseudogene
hsa-miR-515-5p	1	0	1	1	1	1	ZNF207	zinc finger protein 207
hsa-miR-515-5p	0	0	1	1	1	1	NGLY1	N-glycanase 1
hsa-miR-515-5p	0	0	1	1	1	1	FAM18B1	family with sequence similarity 18, member B1
hsa-miR-515-5p	1	0	1	1	1	1	RNF2	ring finger protein 2
hsa-miR-515-5p	0	0	1	0	0	0	ZNF674-AS1	ZNF674 antisense RNA 1
hsa-miR-515-5p	1	0	1	1	0	0	PACS2	phosphofurin acidic cluster sorting protein 2
hsa-miR-515-5p	1	0	1	1	1	1	HSPD1	heat shock 60kDa protein 1 (chaperonin)
hsa-miR-515-5p	0	0	1	1	0	0	STT3B	STT3, subunit of the oligosaccharyltransferase complex, homolog B (S. cerevisiae)
hsa-miR-515-5p	0	0	1	1	0	0	GPC3	glypican 3
hsa-miR-515-5p	1	0	1	1	1	1	HIGD1A	HIG1 hypoxia inducible domain family, member 1A
hsa-miR-515-5p	1	0	1	1	0	0	STAG3L4	stromal antigen 3-like 4
hsa-miR-515-5p	0	0	1	1	1	1	PLAC8	placenta-specific 8
hsa-miR-515-5p	1	0	1	0	1	1	CD47	CD47 molecule
hsa-miR-515-5p	1	0	1	1	1	1	RUNX1	runt-related transcription factor 1
hsa-miR-515-5p	0	0	1	1	0	0	HP	haptoglobin
hsa-miR-515-5p	0	0	1	1	0	0	RPS6KB2	ribosomal protein S6 kinase, 70kDa, polypeptide 2
hsa-miR-515-5p	0	0	1	1	0	0	TUBG2	tubulin, gamma 2
hsa-miR-515-5p	1	0	1	1	1	1	TIPRL	TIP41, TOR signaling pathway regulator-like (S. cerevisiae)
hsa-miR-515-5p	0	0	1	0	0	0	LOC100132984	uncharacterized LOC100132984
hsa-miR-515-5p	1	0	1	1	1	1	MAN1C1	mannosidase, alpha, class 1C, member 1
hsa-miR-515-5p	0	0	1	1	1	1	COPS4	COP9 constitutive photomorphogenic homolog subunit 4 (Arabidopsis)
hsa-miR-515-5p	0	0	1	1	1	1	CIRBP	cold inducible RNA binding protein
hsa-miR-515-5p	1	0	1	0	1	1	KIAA0240	KIAA0240
hsa-miR-515-5p	1	0	1	0	1	1	KDM1B	lysine (K)-specific demethylase 1B
hsa-miR-515-5p	1	0	1	0	1	1	KIAA0664	KIAA0664
hsa-miR-515-5p	0	0	1	1	1	1	CCP110	centriolar coiled coil protein 110kDa
hsa-miR-515-5p	0	0	1	1	1	1	BDP1	B double prime 1, subunit of RNA polymerase III transcription initiation factor IIIB
hsa-miR-515-5p	0	0	1	1	1	1	SYNE2	spectrin repeat containing, nuclear envelope 2
hsa-miR-515-5p	0	0	1	0	0	0	LINC00661	long intergenic non-protein coding RNA 661
hsa-miR-515-5p	1	0	1	1	1	1	HECW2	HECT, C2 and WW domain containing E3 ubiquitin protein ligase 2
hsa-miR-515-5p	1	0	1	0	1	1	MEGF10	multiple EGF-like-domains 10
hsa-miR-515-5p	1	0	1	1	1	1	ANKS6	ankyrin repeat and sterile alpha motif domain containing 6
hsa-miR-515-5p	0	0	1	0	1	1	HDAC9	histone deacetylase 9
hsa-miR-515-5p	1	0	1	1	0	0	POMGNT1	protein O-linked mannose beta1,2-N-acetylglucosaminyltransferase
hsa-miR-515-5p	1	0	1	1	1	1	SLC39A10	solute carrier family 39 (zinc transporter), member 10
hsa-miR-515-5p	0	0	1	0	1	1	ZNF28	zinc finger protein 28
hsa-miR-515-5p	1	0	1	1	1	1	SLC16A12	solute carrier family 16, member 12 (monocarboxylic acid transporter 12)
hsa-miR-515-5p	0	0	1	0	1	1	SYNPR	synaptoporin
hsa-miR-515-5p	1	0	1	1	1	1	SLC30A7	solute carrier family 30 (zinc transporter), member 7
hsa-miR-515-5p	1	0	1	1	1	1	ZFHX3	zinc finger homeobox 3
hsa-miR-515-5p	1	0	1	1	1	1	PI15	peptidase inhibitor 15
hsa-miR-515-5p	1	0	1	1	1	1	MAN2A2	mannosidase, alpha, class 2A, member 2
hsa-miR-515-5p	0	0	1	1	0	0	CFDP1	craniofacial development protein 1
hsa-miR-515-5p	0	0	1	0	0	0	61E3.4	nuclear pore complex interacting protein-like
hsa-miR-515-5p	1	0	1	0	1	1	KLHDC10	kelch domain containing 10
hsa-miR-515-5p	0	0	1	1	1	1	LTA	lymphotoxin alpha (TNF superfamily, member 1)
hsa-miR-515-5p	0	0	1	1	0	0	PXK	PX domain containing serine/threonine kinase
hsa-miR-515-5p	1	0	1	1	1	1	TMEFF2	transmembrane protein with EGF-like and two follistatin-like domains 2
hsa-miR-515-5p	1	0	1	1	1	1	RSPO1	R-spondin 1
hsa-miR-515-5p	0	0	1	1	1	1	CD274	CD274 molecule
hsa-miR-515-5p	1	0	1	0	1	1	MAP2K7	mitogen-activated protein kinase kinase 7
hsa-miR-515-5p	1	0	1	1	0	0	LGSN	lengsin, lens protein with glutamine synthetase domain
hsa-miR-515-5p	0	0	1	0	0	0	POM121L8P	POM121 transmembrane nucleoporin-like 8 pseudogene
hsa-miR-515-5p	0	0	1	1	0	0	NBPF9	neuroblastoma breakpoint family, member 9
hsa-miR-515-5p	0	0	1	0	0	0	FAM226A	family with sequence similarity 226, member A (non-protein coding)
hsa-miR-515-5p	1	0	1	0	1	1	DCBLD2	discoidin, CUB and LCCL domain containing 2
hsa-miR-515-5p	0	0	1	0	0	0	C1orf81	chromosome 1 open reading frame 81
hsa-miR-515-5p	1	0	1	1	1	1	AFF1	AF4/FMR2 family, member 1
hsa-miR-515-5p	1	0	1	0	1	1	BCL2	B-cell CLL/lymphoma 2
hsa-miR-515-5p	1	0	1	0	1	1	YES1	v-yes-1 Yamaguchi sarcoma viral oncogene homolog 1
hsa-miR-515-5p	1	0	1	0	1	1	ACVR2A	activin A receptor, type IIA
hsa-miR-515-5p	1	0	1	1	1	1	FAS	Fas (TNF receptor superfamily, member 6)
hsa-miR-515-5p	1	0	1	1	1	1	CYP19A1	cytochrome P450, family 19, subfamily A, polypeptide 1
hsa-miR-515-5p	1	0	1	1	1	1	DMD	dystrophin
hsa-miR-515-5p	1	0	1	0	1	1	SLC26A2	solute carrier family 26 (sulfate transporter), member 2
hsa-miR-515-5p	1	0	1	1	1	1	FUT1	fucosyltransferase 1 (galactoside 2-alpha-L-fucosyltransferase, H blood group)
hsa-miR-515-5p	0	0	1	1	0	0	GBA	glucosidase, beta, acid
hsa-miR-515-5p	1	0	1	1	1	1	GJA1	gap junction protein, alpha 1, 43kDa
hsa-miR-515-5p	0	0	1	1	1	1	HSD11B2	hydroxysteroid (11-beta) dehydrogenase 2
hsa-miR-515-5p	1	0	1	0	1	1	KIT	v-kit Hardy-Zuckerman 4 feline sarcoma viral oncogene homolog
hsa-miR-515-5p	1	0	1	1	1	1	MITF	microphthalmia-associated transcription factor
hsa-miR-515-5p	0	0	1	1	1	1	THBD	thrombomodulin
hsa-miR-515-5p	0	0	1	1	1	1	XDH	xanthine dehydrogenase
hsa-miR-515-5p	0	0	1	0	1	1	GNRHR	gonadotropin-releasing hormone receptor
hsa-miR-515-5p	0	0	1	1	1	1	UGT1A1	UDP glucuronosyltransferase 1 family, polypeptide A1
hsa-miR-515-5p	1	0	1	1	1	1	ATRX	alpha thalassemia/mental retardation syndrome X-linked
hsa-miR-515-5p	0	0	1	1	0	0	SAG	S-antigen; retina and pineal gland (arrestin)
hsa-miR-515-5p	1	0	1	1	1	1	DCX	doublecortin
hsa-miR-515-5p	0	0	1	1	1	1	FCGR1A	Fc fragment of IgG, high affinity Ia, receptor (CD64)
hsa-miR-515-5p	1	0	1	1	1	1	IL10	interleukin 10
hsa-miR-515-5p	0	0	1	1	1	1	IL1RN	interleukin 1 receptor antagonist
hsa-miR-515-5p	1	0	1	1	1	1	TNF	tumor necrosis factor
hsa-miR-515-5p	0	0	1	1	1	1	IGF2	insulin-like growth factor 2 (somatomedin A)
hsa-miR-515-5p	0	0	1	1	1	1	CNTF	ciliary neurotrophic factor
hsa-miR-515-5p	1	0	1	1	1	1	FASLG	Fas ligand (TNF superfamily, member 6)
hsa-miR-515-5p	1	0	1	1	1	1	ADRA1A	adrenoceptor alpha 1A
hsa-miR-515-5p	1	0	1	1	1	1	GABRB3	gamma-aminobutyric acid (GABA) A receptor, beta 3
hsa-miR-515-5p	1	0	1	1	1	1	GRIA4	glutamate receptor, ionotropic, AMPA 4
hsa-miR-515-5p	1	0	1	1	1	1	GRM1	glutamate receptor, metabotropic 1
hsa-miR-515-5p	0	0	1	1	1	1	HTR1D	5-hydroxytryptamine (serotonin) receptor 1D, G protein-coupled
hsa-miR-515-5p	1	0	1	1	1	1	IGF1R	insulin-like growth factor 1 receptor
hsa-miR-515-5p	1	0	1	0	1	1	KCNJ2	potassium inwardly-rectifying channel, subfamily J, member 2
hsa-miR-515-5p	1	0	1	1	1	1	PDE3B	phosphodiesterase 3B, cGMP-inhibited
hsa-miR-515-5p	1	0	1	1	1	1	PPP3R1	protein phosphatase 3, regulatory subunit B, alpha
hsa-miR-515-5p	1	0	1	1	1	1	PTGDR	prostaglandin D2 receptor (DP)
hsa-miR-515-5p	1	0	1	1	1	1	PTGER2	prostaglandin E receptor 2 (subtype EP2), 53kDa
hsa-miR-515-5p	1	0	1	1	1	1	PTGER4	prostaglandin E receptor 4 (subtype EP4)
hsa-miR-515-5p	1	0	1	0	1	1	SMAD5	SMAD family member 5
hsa-miR-515-5p	0	0	1	0	1	1	ZDHHC13	zinc finger, DHHC-type containing 13
hsa-miR-515-5p	1	0	1	0	1	1	SPOPL	speckle-type POZ protein-like
hsa-miR-515-5p	0	0	1	0	0	0	C10orf55	chromosome 10 open reading frame 55
hsa-miR-515-5p	1	0	1	0	1	1	CLDN18	claudin 18
hsa-miR-515-5p	1	0	1	1	1	1	LCLAT1	lysocardiolipin acyltransferase 1
hsa-miR-515-5p	1	0	1	1	1	1	ABLIM1	actin binding LIM protein 1
hsa-miR-515-5p	1	0	1	1	1	1	KLHL31	kelch-like 31 (Drosophila)
hsa-miR-515-5p	1	0	1	1	1	1	RBMS3	RNA binding motif, single stranded interacting protein 3
hsa-miR-515-5p	1	0	1	0	1	1	ZNF740	zinc finger protein 740
hsa-miR-515-5p	1	0	1	0	1	1	LIN28B	lin-28 homolog B (C. elegans)
hsa-miR-515-5p	0	0	1	0	1	1	ZNF705A	zinc finger protein 705A
hsa-miR-515-5p	1	0	1	1	1	1	NCK2	NCK adaptor protein 2
hsa-miR-515-5p	1	0	1	1	1	1	SFMBT1	Scm-like with four mbt domains 1
hsa-miR-515-5p	1	0	1	0	1	1	LRRC55	leucine rich repeat containing 55
hsa-miR-515-5p	0	0	1	1	1	1	HMGN2P46	high mobility group nucleosomal binding domain 2 pseudogene 46
hsa-miR-515-5p	0	0	1	1	1	1	PRR13	proline rich 13
hsa-miR-515-5p	1	0	1	1	1	1	PLCXD3	phosphatidylinositol-specific phospholipase C, X domain containing 3
hsa-miR-515-5p	0	0	1	1	1	1	SCP2	sterol carrier protein 2
hsa-miR-515-5p	0	0	1	0	1	1	C8orf22	chromosome 8 open reading frame 22
hsa-miR-515-5p	1	0	1	1	1	1	IGF2BP2	insulin-like growth factor 2 mRNA binding protein 2
hsa-miR-515-5p	1	0	1	1	1	1	IGSF3	immunoglobulin superfamily, member 3
hsa-miR-515-5p	1	0	1	0	1	1	CPLX2	complexin 2
hsa-miR-515-5p	0	0	1	1	1	1	UACA	uveal autoantigen with coiled-coil domains and ankyrin repeats
hsa-miR-515-5p	1	0	1	0	1	1	C18orf25	chromosome 18 open reading frame 25
hsa-miR-515-5p	1	0	1	1	1	1	CTDSPL	CTD (carboxy-terminal domain, RNA polymerase II, polypeptide A) small phosphatase-like
hsa-miR-515-5p	1	0	1	0	1	1	KIAA2022	KIAA2022
hsa-miR-515-5p	0	0	1	1	1	1	MXI1	MAX interactor 1
hsa-miR-515-5p	1	0	1	1	1	1	EML1	echinoderm microtubule associated protein like 1
hsa-miR-515-5p	0	0	1	1	1	1	FBXO47	F-box protein 47
hsa-miR-515-5p	1	0	1	1	1	1	ZNF468	zinc finger protein 468
hsa-miR-515-5p	0	0	1	1	1	1	HRNR	hornerin
hsa-miR-515-5p	0	0	1	0	1	1	ZNF648	zinc finger protein 648
hsa-miR-515-5p	1	0	1	0	1	1	PM20D2	peptidase M20 domain containing 2
hsa-miR-515-5p	1	0	1	0	1	1	FAM102B	family with sequence similarity 102, member B
hsa-miR-515-5p	0	0	1	1	1	1	HGF	hepatocyte growth factor (hepapoietin A; scatter factor)
hsa-miR-515-5p	0	0	1	1	1	1	NCMAP	noncompact myelin associated protein
hsa-miR-515-5p	1	0	1	1	0	0	RPL21P44	ribosomal protein L21 pseudogene 44
hsa-miR-515-5p	1	0	1	0	1	1	CREB5	cAMP responsive element binding protein 5
hsa-miR-515-5p	1	0	1	1	1	1	CTNNBIP1	catenin, beta interacting protein 1
hsa-miR-515-5p	0	0	1	1	0	0	SOHLH1	spermatogenesis and oogenesis specific basic helix-loop-helix 1
hsa-miR-515-5p	0	0	1	1	1	1	BEX5	brain expressed, X-linked 5
hsa-miR-515-5p	0	0	1	1	1	1	LDLRAD2	low density lipoprotein receptor class A domain containing 2
hsa-miR-515-5p	0	0	1	0	1	1	LINC00268	long intergenic non-protein coding RNA 268
hsa-miR-515-5p	1	0	1	0	1	1	SYT14L	synaptotagmin XIV-like
hsa-miR-515-5p	0	0	1	1	0	0	LAT	linker for activation of T cells
hsa-miR-515-5p	1	0	1	1	1	1	RUNX2	runt-related transcription factor 2
hsa-miR-515-5p	0	0	1	1	1	1	BTBD11	BTB (POZ) domain containing 11
hsa-miR-515-5p	0	0	1	1	1	1	KIAA2026	KIAA2026
hsa-miR-515-5p	0	0	1	1	0	0	POLR3H	polymerase (RNA) III (DNA directed) polypeptide H (22.9kD)
hsa-miR-515-5p	1	0	1	1	1	1	PFKFB2	6-phosphofructo-2-kinase/fructose-2,6-biphosphatase 2
hsa-miR-515-5p	1	0	1	1	1	1	SERBP1	SERPINE1 mRNA binding protein 1
hsa-miR-515-5p	0	0	1	1	1	1	NARG2	NMDA receptor regulated 2
hsa-miR-515-5p	0	0	1	1	1	1	MURC	muscle-related coiled-coil protein
hsa-miR-515-5p	0	0	1	1	1	1	ZNF187	zinc finger protein 187
hsa-miR-515-5p	1	0	1	1	1	1	ABCC5	ATP-binding cassette, sub-family C (CFTR/MRP), member 5
hsa-miR-515-5p	1	0	1	1	1	1	KALRN	kalirin, RhoGEF kinase
hsa-miR-515-5p	1	0	1	1	1	1	TGFBR2	transforming growth factor, beta receptor II (70/80kDa)
hsa-miR-515-5p	1	0	1	1	1	1	ARPP21	cAMP-regulated phosphoprotein, 21kDa
hsa-miR-515-5p	1	0	1	0	1	1	CELF2	CUGBP, Elav-like family member 2
hsa-miR-515-5p	0	0	1	1	0	0	ABCF1	ATP-binding cassette, sub-family F (GCN20), member 1
hsa-miR-515-5p	1	0	1	0	1	1	ADAR	adenosine deaminase, RNA-specific
hsa-miR-515-5p	0	0	1	1	0	0	KPRP	keratinocyte proline-rich protein
hsa-miR-515-5p	1	0	1	0	1	1	RAB12	RAB12, member RAS oncogene family
hsa-miR-515-5p	1	0	1	1	1	1	VEGFA	vascular endothelial growth factor A
hsa-miR-515-5p	1	0	1	1	1	1	RGS7BP	regulator of G-protein signaling 7 binding protein
hsa-miR-515-5p	1	0	1	0	1	1	SAMD5	sterile alpha motif domain containing 5
hsa-miR-515-5p	0	0	1	1	1	1	ATF3	activating transcription factor 3
hsa-miR-515-5p	1	0	1	1	1	1	NEK10	NIMA (never in mitosis gene a)- related kinase 10
hsa-miR-515-5p	1	0	1	1	1	1	CSNK1G3	casein kinase 1, gamma 3
hsa-miR-515-5p	1	0	1	1	1	1	TFAP2A	transcription factor AP-2 alpha (activating enhancer binding protein 2 alpha)
hsa-miR-515-5p	1	0	1	1	1	1	KLF10	Kruppel-like factor 10
hsa-miR-515-5p	1	0	1	1	1	1	UBE2V1	ubiquitin-conjugating enzyme E2 variant 1
hsa-miR-515-5p	0	0	1	1	1	1	SLC35A2	solute carrier family 35 (UDP-galactose transporter), member A2
hsa-miR-515-5p	0	0	1	1	1	1	HAT1	histone acetyltransferase 1
hsa-miR-515-5p	1	0	1	0	1	1	SRGAP3	SLIT-ROBO Rho GTPase activating protein 3
hsa-miR-515-5p	0	0	1	1	1	1	CSTF3	cleavage stimulation factor, 3' pre-RNA, subunit 3, 77kDa
hsa-miR-515-5p	0	0	1	1	1	1	SPECC1	sperm antigen with calponin homology and coiled-coil domains 1
hsa-miR-515-5p	1	0	1	1	1	1	GALNTL6	UDP-N-acetyl-alpha-D-galactosamine:polypeptide N-acetylgalactosaminyltransferase-like 6
hsa-miR-515-5p	0	0	1	1	1	1	FAM134B	family with sequence similarity 134, member B
hsa-miR-515-5p	1	0	1	1	1	1	SCN1B	sodium channel, voltage-gated, type I, beta subunit
hsa-miR-515-5p	0	0	1	1	1	1	FAM220A	family with sequence similarity 220, member A
hsa-miR-515-5p	0	0	1	0	0	0	PRSS53	protease, serine, 53
hsa-miR-515-5p	0	0	1	1	1	1	SKA1	spindle and kinetochore associated complex subunit 1
hsa-miR-515-5p	0	0	1	0	1	1	ZNF705D	zinc finger protein 705D
hsa-miR-515-5p	1	0	1	0	1	1	CREBZF	CREB/ATF bZIP transcription factor
hsa-miR-515-5p	0	0	1	0	1	1	OPALIN	oligodendrocytic myelin paranodal and inner loop protein
hsa-miR-515-5p	1	0	1	1	1	1	SCN2A	sodium channel, voltage-gated, type II, alpha subunit
hsa-miR-515-5p	1	0	1	0	1	1	CD83	CD83 molecule
hsa-miR-515-5p	1	0	1	0	1	1	DCUN1D4	DCN1, defective in cullin neddylation 1, domain containing 4 (S. cerevisiae)
hsa-miR-515-5p	0	0	1	1	1	1	CCDC41	coiled-coil domain containing 41
hsa-miR-515-5p	1	0	1	1	1	1	GLIS3	GLIS family zinc finger 3
hsa-miR-515-5p	0	0	1	1	1	1	MST4	serine/threonine protein kinase MST4
hsa-miR-515-5p	1	0	1	1	1	1	NSL1	NSL1, MIND kinetochore complex component, homolog (S. cerevisiae)
hsa-miR-515-5p	1	0	1	1	1	1	FRS2	fibroblast growth factor receptor substrate 2
hsa-miR-515-5p	0	0	1	1	1	1	TMEM8B	transmembrane protein 8B
hsa-miR-515-5p	1	0	1	1	1	1	KDM5A	lysine (K)-specific demethylase 5A
hsa-miR-515-5p	0	0	1	1	1	1	TRAK1	trafficking protein, kinesin binding 1
hsa-miR-515-5p	1	0	1	1	1	1	RERE	arginine-glutamic acid dipeptide (RE) repeats
hsa-miR-515-5p	1	0	1	0	1	1	SRGAP2	SLIT-ROBO Rho GTPase activating protein 2
hsa-miR-515-5p	1	0	1	0	1	1	TMEM237	transmembrane protein 237
hsa-miR-515-5p	0	0	1	1	1	1	FAM22G	family with sequence similarity 22, member G
hsa-miR-515-5p	1	0	1	1	1	1	SLA	Src-like-adaptor
hsa-miR-515-5p	0	0	1	1	1	1	UGT1A6	UDP glucuronosyltransferase 1 family, polypeptide A6
hsa-miR-515-5p	1	0	1	0	1	1	SLC7A6	solute carrier family 7 (amino acid transporter light chain, y+L system), member 6
hsa-miR-515-5p	1	0	1	1	1	1	METTL9	methyltransferase like 9
hsa-miR-515-5p	1	0	1	1	1	1	HS6ST2	heparan sulfate 6-O-sulfotransferase 2
hsa-miR-515-5p	1	0	1	1	1	1	ZNF436	zinc finger protein 436
hsa-miR-515-5p	1	0	1	1	1	1	PDE11A	phosphodiesterase 11A
hsa-miR-515-5p	1	0	1	1	1	1	IRF2BP2	interferon regulatory factor 2 binding protein 2
hsa-miR-515-5p	1	0	1	1	1	1	PHF16	PHD finger protein 16
hsa-miR-515-5p	0	0	1	1	1	1	PPCS	phosphopantothenoylcysteine synthetase
hsa-miR-515-5p	1	0	1	1	1	1	PRR3	proline rich 3
hsa-miR-515-5p	0	0	1	1	1	1	NXPE4	neurexophilin and PC-esterase domain family, member 4
hsa-miR-515-5p	1	0	1	1	1	1	ALG9	asparagine-linked glycosylation 9, alpha-1,2-mannosyltransferase homolog (S. cerevisiae)
hsa-miR-515-5p	1	0	1	1	1	1	SRSF1	serine/arginine-rich splicing factor 1
hsa-miR-515-5p	1	0	1	0	1	1	FAM127C	family with sequence similarity 127, member C
hsa-miR-515-5p	1	0	1	0	1	1	TRAPPC6B	trafficking protein particle complex 6B
hsa-miR-515-5p	0	0	1	1	1	1	FKTN	fukutin
hsa-miR-515-5p	1	0	1	1	1	1	ITGA6	integrin, alpha 6
hsa-miR-515-5p	1	0	1	1	1	1	DMP1	dentin matrix acidic phosphoprotein 1
hsa-miR-515-5p	1	0	1	1	1	1	FAM155A	family with sequence similarity 155, member A
hsa-miR-515-5p	1	0	1	0	1	1	THSD7B	thrombospondin, type I, domain containing 7B
hsa-miR-515-5p	1	0	1	1	1	1	MBOAT1	membrane bound O-acyltransferase domain containing 1
hsa-miR-515-5p	1	0	1	0	1	1	MEGF9	multiple EGF-like-domains 9
hsa-miR-515-5p	1	0	1	1	1	1	MGA	MAX gene associated
hsa-miR-515-5p	0	0	1	1	1	1	C15orf57	chromosome 15 open reading frame 57
hsa-miR-515-5p	1	0	1	1	1	1	ADAM10	ADAM metallopeptidase domain 10
hsa-miR-515-5p	1	0	1	1	1	1	SLC25A5	solute carrier family 25 (mitochondrial carrier; adenine nucleotide translocator), member 5
hsa-miR-515-5p	1	0	1	0	1	1	XIAP	X-linked inhibitor of apoptosis
hsa-miR-515-5p	0	0	1	1	1	1	ARHGDIB	Rho GDP dissociation inhibitor (GDI) beta
hsa-miR-515-5p	1	0	1	0	1	1	BMPR2	bone morphogenetic protein receptor, type II (serine/threonine kinase)
hsa-miR-515-5p	1	0	1	0	1	1	KLF9	Kruppel-like factor 9
hsa-miR-515-5p	1	0	1	1	1	1	CAMK2D	calcium/calmodulin-dependent protein kinase II delta
hsa-miR-515-5p	0	0	1	1	1	1	ENTPD3	ectonucleoside triphosphate diphosphohydrolase 3
hsa-miR-515-5p	1	0	1	1	1	1	CDK9	cyclin-dependent kinase 9
hsa-miR-515-5p	1	0	1	1	1	1	CDS1	CDP-diacylglycerol synthase (phosphatidate cytidylyltransferase) 1
hsa-miR-515-5p	0	0	1	1	1	1	CHUK	conserved helix-loop-helix ubiquitous kinase
hsa-miR-515-5p	1	0	1	1	1	1	CNN1	calponin 1, basic, smooth muscle
hsa-miR-515-5p	1	0	1	1	1	1	CREBL2	cAMP responsive element binding protein-like 2
hsa-miR-515-5p	1	0	1	1	1	1	MAPK14	mitogen-activated protein kinase 14
hsa-miR-515-5p	0	0	1	1	1	1	DARS	aspartyl-tRNA synthetase
hsa-miR-515-5p	1	0	1	0	0	0	DLG4	discs, large homolog 4 (Drosophila)
hsa-miR-515-5p	0	0	1	1	0	0	DNAH9	dynein, axonemal, heavy chain 9
hsa-miR-515-5p	1	0	1	1	1	1	ELAVL1	ELAV (embryonic lethal, abnormal vision, Drosophila)-like 1 (Hu antigen R)
hsa-miR-515-5p	0	0	1	0	1	1	EMP1	epithelial membrane protein 1
hsa-miR-515-5p	1	0	1	1	1	1	FOXC1	forkhead box C1
hsa-miR-515-5p	1	0	1	1	0	0	GDI1	GDP dissociation inhibitor 1
hsa-miR-515-5p	0	0	1	1	1	1	IL13RA1	interleukin 13 receptor, alpha 1
hsa-miR-515-5p	1	0	1	1	1	1	ARL4D	ADP-ribosylation factor-like 4D
hsa-miR-515-5p	1	0	1	0	1	1	ARNT	aryl hydrocarbon receptor nuclear translocator
hsa-miR-515-5p	0	0	1	1	0	0	ATP5O	ATP synthase, H+ transporting, mitochondrial F1 complex, O subunit
hsa-miR-515-5p	1	0	1	0	1	1	BMP8B	bone morphogenetic protein 8b
hsa-miR-515-5p	1	0	1	1	1	1	KLF5	Kruppel-like factor 5 (intestinal)
hsa-miR-515-5p	1	0	1	1	1	1	BTG1	B-cell translocation gene 1, anti-proliferative
hsa-miR-515-5p	1	0	1	1	1	1	CBFB	core-binding factor, beta subunit
hsa-miR-515-5p	0	0	1	1	1	1	CD1D	CD1d molecule
hsa-miR-515-5p	1	0	1	1	1	1	CDC25A	cell division cycle 25 homolog A (S. pombe)
hsa-miR-515-5p	1	0	1	1	1	1	CDH2	cadherin 2, type 1, N-cadherin (neuronal)
hsa-miR-515-5p	1	0	1	1	1	1	CLCN4	chloride channel, voltage-sensitive 4
hsa-miR-515-5p	1	0	1	0	1	1	COL19A1	collagen, type XIX, alpha 1
hsa-miR-515-5p	1	0	1	1	1	1	SLC31A1	solute carrier family 31 (copper transporters), member 1
hsa-miR-515-5p	0	0	1	1	0	0	COX7A2	cytochrome c oxidase subunit VIIa polypeptide 2 (liver)
hsa-miR-515-5p	1	0	1	1	1	1	DBT	dihydrolipoamide branched chain transacylase E2
hsa-miR-515-5p	1	0	1	1	1	1	DR1	down-regulator of transcription 1, TBP-binding (negative cofactor 2)
hsa-miR-515-5p	0	0	1	1	1	1	FLI1	Friend leukemia virus integration 1
hsa-miR-515-5p	1	0	1	1	1	1	FRK	fyn-related kinase
hsa-miR-515-5p	1	0	1	0	1	1	FUT4	fucosyltransferase 4 (alpha (1,3) fucosyltransferase, myeloid-specific)
hsa-miR-515-5p	1	0	1	0	1	1	GNAI1	guanine nucleotide binding protein (G protein), alpha inhibiting activity polypeptide 1
hsa-miR-515-5p	0	0	1	1	1	1	HMGCS1	3-hydroxy-3-methylglutaryl-CoA synthase 1 (soluble)
hsa-miR-515-5p	1	0	1	1	1	1	HOXB3	homeobox B3
hsa-miR-515-5p	1	0	1	1	1	1	HOXD10	homeobox D10
hsa-miR-515-5p	0	0	1	1	0	0	ID3	inhibitor of DNA binding 3, dominant negative helix-loop-helix protein
hsa-miR-515-5p	1	0	1	1	1	1	IL13	interleukin 13
hsa-miR-515-5p	1	0	1	1	1	1	ISL1	ISL LIM homeobox 1
hsa-miR-515-5p	1	0	1	1	1	1	ITGA5	integrin, alpha 5 (fibronectin receptor, alpha polypeptide)
hsa-miR-515-5p	1	0	1	1	1	1	ITGA9	integrin, alpha 9
hsa-miR-515-5p	0	0	1	1	1	1	ITGAE	integrin, alpha E (antigen CD103, human mucosal lymphocyte antigen 1; alpha polypeptide)
hsa-miR-515-5p	0	0	1	0	1	1	ITGAV	integrin, alpha V
hsa-miR-515-5p	1	0	1	1	1	1	ITGB8	integrin, beta 8
hsa-miR-515-5p	1	0	1	1	1	1	KCNA4	potassium voltage-gated channel, shaker-related subfamily, member 4
hsa-miR-515-5p	0	0	1	1	1	1	KCNK1	potassium channel, subfamily K, member 1
hsa-miR-515-5p	1	0	1	0	1	1	KIF3C	kinesin family member 3C
hsa-miR-515-5p	1	0	1	0	0	0	TNPO1	transportin 1
hsa-miR-515-5p	1	0	1	1	1	1	LBR	lamin B receptor
hsa-miR-515-5p	0	0	1	1	1	1	MAGEB4	melanoma antigen family B, 4
hsa-miR-515-5p	1	0	1	1	1	1	ME1	malic enzyme 1, NADP(+)-dependent, cytosolic
hsa-miR-515-5p	0	0	1	0	1	1	MFNG	MFNG O-fucosylpeptide 3-beta-N-acetylglucosaminyltransferase
hsa-miR-515-5p	0	0	1	0	1	1	CXCL9	chemokine (C-X-C motif) ligand 9
hsa-miR-515-5p	1	0	1	1	1	1	MSN	moesin
hsa-miR-515-5p	0	0	1	1	0	0	MYBL2	v-myb myeloblastosis viral oncogene homolog (avian)-like 2
hsa-miR-515-5p	1	0	1	1	1	1	NDUFA4	NADH dehydrogenase (ubiquinone) 1 alpha subcomplex, 4, 9kDa
hsa-miR-515-5p	1	0	1	1	1	1	NPAS2	neuronal PAS domain protein 2
hsa-miR-515-5p	1	0	1	1	1	1	NPAT	nuclear protein, ataxia-telangiectasia locus
hsa-miR-515-5p	0	0	1	0	1	1	OPHN1	oligophrenin 1
hsa-miR-515-5p	1	0	1	0	1	1	PAPPA	pregnancy-associated plasma protein A, pappalysin 1
hsa-miR-515-5p	1	0	1	0	1	1	CDK17	cyclin-dependent kinase 17
hsa-miR-515-5p	0	0	1	1	0	0	PER1	period homolog 1 (Drosophila)
hsa-miR-515-5p	0	0	1	1	1	1	PIK3C2B	phosphatidylinositol-4-phosphate 3-kinase, catalytic subunit type 2 beta
hsa-miR-515-5p	1	0	1	1	1	1	PLAGL2	pleiomorphic adenoma gene-like 2
hsa-miR-515-5p	1	0	1	1	1	1	PLCG1	phospholipase C, gamma 1
hsa-miR-515-5p	0	0	1	1	0	0	PLP2	proteolipid protein 2 (colonic epithelium-enriched)
hsa-miR-515-5p	1	0	1	1	1	1	PPP1CC	protein phosphatase 1, catalytic subunit, gamma isozyme
hsa-miR-515-5p	1	0	1	1	1	1	MAPK6	mitogen-activated protein kinase 6
hsa-miR-515-5p	0	0	1	1	0	0	PSMD11	proteasome (prosome, macropain) 26S subunit, non-ATPase, 11
hsa-miR-515-5p	1	0	1	1	1	1	PTPN1	protein tyrosine phosphatase, non-receptor type 1
hsa-miR-515-5p	1	0	1	1	1	1	RAB2A	RAB2A, member RAS oncogene family
hsa-miR-515-5p	1	0	1	1	1	1	RAD23B	RAD23 homolog B (S. cerevisiae)
hsa-miR-515-5p	1	0	1	0	1	1	RAP2B	RAP2B, member of RAS oncogene family
hsa-miR-515-5p	1	0	1	1	1	1	RASA1	RAS p21 protein activator (GTPase activating protein) 1
hsa-miR-515-5p	0	0	1	1	1	1	RING1	ring finger protein 1
hsa-miR-515-5p	0	0	1	1	1	1	CXCL6	chemokine (C-X-C motif) ligand 6 (granulocyte chemotactic protein 2)
hsa-miR-515-5p	1	0	1	1	1	1	SRSF2	serine/arginine-rich splicing factor 2
hsa-miR-515-5p	1	0	1	0	1	1	ST6GAL1	ST6 beta-galactosamide alpha-2,6-sialyltranferase 1
hsa-miR-515-5p	1	0	1	1	1	1	SMARCC1	SWI/SNF related, matrix associated, actin dependent regulator of chromatin, subfamily c, member 1
hsa-miR-515-5p	1	0	1	1	1	1	SMARCD1	SWI/SNF related, matrix associated, actin dependent regulator of chromatin, subfamily d, member 1
hsa-miR-515-5p	1	0	1	1	1	1	SMARCD2	SWI/SNF related, matrix associated, actin dependent regulator of chromatin, subfamily d, member 2
hsa-miR-515-5p	0	0	1	1	0	0	SNRPC	small nuclear ribonucleoprotein polypeptide C
hsa-miR-515-5p	1	0	1	0	1	1	SOX11	SRY (sex determining region Y)-box 11
hsa-miR-515-5p	1	0	1	1	1	1	SRF	serum response factor (c-fos serum response element-binding transcription factor)
hsa-miR-515-5p	1	0	1	1	1	1	SSR2	signal sequence receptor, beta (translocon-associated protein beta)
hsa-miR-515-5p	0	0	1	1	0	0	SSRP1	structure specific recognition protein 1
hsa-miR-515-5p	1	0	1	1	1	1	STAC	SH3 and cysteine rich domain
hsa-miR-515-5p	0	0	1	1	1	1	TAF2	TAF2 RNA polymerase II, TATA box binding protein (TBP)-associated factor, 150kDa
hsa-miR-515-5p	0	0	1	0	1	1	TCEA3	transcription elongation factor A (SII), 3
hsa-miR-515-5p	0	0	1	0	1	1	TDGF1	teratocarcinoma-derived growth factor 1
hsa-miR-515-5p	1	0	1	1	1	1	TFAP2B	transcription factor AP-2 beta (activating enhancer binding protein 2 beta)
hsa-miR-515-5p	1	0	1	1	1	1	TIAM1	T-cell lymphoma invasion and metastasis 1
hsa-miR-515-5p	1	0	1	1	1	1	NR2E1	nuclear receptor subfamily 2, group E, member 1
hsa-miR-515-5p	1	0	1	0	1	1	TUB	tubby homolog (mouse)
hsa-miR-515-5p	1	0	1	1	1	1	UBE2B	ubiquitin-conjugating enzyme E2B
hsa-miR-515-5p	1	0	1	0	1	1	UBE2D2	ubiquitin-conjugating enzyme E2D 2
hsa-miR-515-5p	1	0	1	1	1	1	UBE2H	ubiquitin-conjugating enzyme E2H
hsa-miR-515-5p	1	0	1	0	1	1	UBE2L3	ubiquitin-conjugating enzyme E2L 3
hsa-miR-515-5p	1	0	1	1	1	1	UCP3	uncoupling protein 3 (mitochondrial, proton carrier)
hsa-miR-515-5p	1	0	1	1	1	1	YY1	YY1 transcription factor
hsa-miR-515-5p	1	0	1	1	1	1	YWHAH	tyrosine 3-monooxygenase/tryptophan 5-monooxygenase activation protein, eta polypeptide
hsa-miR-515-5p	1	0	1	1	1	1	ZIC3	Zic family member 3
hsa-miR-515-5p	1	0	1	0	1	1	BSN	bassoon (presynaptic cytomatrix protein)
hsa-miR-515-5p	1	0	1	1	1	1	FZD5	frizzled family receptor 5
hsa-miR-515-5p	1	0	1	1	1	1	ADAM12	ADAM metallopeptidase domain 12
hsa-miR-515-5p	1	0	1	1	1	1	CUL5	cullin 5
hsa-miR-515-5p	1	0	1	1	1	1	NRIP1	nuclear receptor interacting protein 1
hsa-miR-515-5p	1	0	1	0	1	1	VAPA	VAMP (vesicle-associated membrane protein)-associated protein A, 33kDa
hsa-miR-515-5p	0	0	1	1	1	1	AGPS	alkylglycerone phosphate synthase
hsa-miR-515-5p	1	0	1	1	1	1	BHLHE40	basic helix-loop-helix family, member e40
hsa-miR-515-5p	0	0	1	1	1	1	UNC5C	unc-5 homolog C (C. elegans)
hsa-miR-515-5p	1	0	1	0	1	1	TNKS	tankyrase, TRF1-interacting ankyrin-related ADP-ribose polymerase
hsa-miR-515-5p	1	0	1	0	1	1	IRS2	insulin receptor substrate 2
hsa-miR-515-5p	0	0	1	1	1	1	EIF3A	eukaryotic translation initiation factor 3, subunit A
hsa-miR-515-5p	0	0	1	1	0	0	ADAM23	ADAM metallopeptidase domain 23
hsa-miR-515-5p	1	0	1	1	1	1	SNAP23	synaptosomal-associated protein, 23kDa
hsa-miR-515-5p	0	0	1	1	1	1	PRPF4B	PRP4 pre-mRNA processing factor 4 homolog B (yeast)
hsa-miR-515-5p	0	0	1	1	1	1	MPZL1	myelin protein zero-like 1
hsa-miR-515-5p	0	0	1	1	1	1	RNF8	ring finger protein 8, E3 ubiquitin protein ligase
hsa-miR-515-5p	1	0	1	1	1	1	BCL2L2	BCL2-like 2
hsa-miR-515-5p	0	0	1	1	1	1	ECHS1	enoyl CoA hydratase, short chain, 1, mitochondrial
hsa-miR-515-5p	0	0	1	0	1	1	EIF4EBP2	eukaryotic translation initiation factor 4E binding protein 2
hsa-miR-515-5p	0	0	1	1	1	1	PTK2B	PTK2B protein tyrosine kinase 2 beta
hsa-miR-515-5p	1	0	1	1	1	1	FGF12	fibroblast growth factor 12
hsa-miR-515-5p	0	0	1	1	1	1	SNRPD3	small nuclear ribonucleoprotein D3 polypeptide 18kDa
hsa-miR-515-5p	1	0	1	1	1	1	SEMA3F	sema domain, immunoglobulin domain (Ig), short basic domain, secreted, (semaphorin) 3F
hsa-miR-515-5p	1	0	1	0	1	1	MED14	mediator complex subunit 14
hsa-miR-515-5p	1	0	1	1	1	1	TRIP11	thyroid hormone receptor interactor 11
hsa-miR-515-5p	0	0	1	1	0	0	BAG3	BCL2-associated athanogene 3
hsa-miR-515-5p	1	0	1	1	1	1	GDA	guanine deaminase
hsa-miR-515-5p	1	0	1	1	1	1	ARL3	ADP-ribosylation factor-like 3
hsa-miR-515-5p	0	0	1	1	1	1	ASCL1	achaete-scute complex homolog 1 (Drosophila)
hsa-miR-515-5p	1	0	1	0	1	1	CEBPA	CCAAT/enhancer binding protein (C/EBP), alpha
hsa-miR-515-5p	1	0	1	1	1	1	ATF6B	activating transcription factor 6 beta
hsa-miR-515-5p	1	0	1	0	1	1	ACSL4	acyl-CoA synthetase long-chain family member 4
hsa-miR-515-5p	1	0	1	1	1	1	ONECUT1	one cut homeobox 1
hsa-miR-515-5p	0	0	1	1	1	1	NDUFC2	NADH dehydrogenase (ubiquinone) 1, subcomplex unknown, 2, 14.5kDa
hsa-miR-515-5p	0	0	1	0	1	1	POU4F2	POU class 4 homeobox 2
hsa-miR-515-5p	0	0	1	1	1	1	TK2	thymidine kinase 2, mitochondrial
hsa-miR-515-5p	0	0	1	1	1	1	PABPN1	poly(A) binding protein, nuclear 1
hsa-miR-515-5p	1	0	1	1	0	0	PIAS2	protein inhibitor of activated STAT, 2
hsa-miR-515-5p	0	0	1	0	0	0	XKRY	XK, Kell blood group complex subunit-related, Y-linked
hsa-miR-515-5p	1	0	1	1	1	1	MTMR7	myotubularin related protein 7
hsa-miR-515-5p	1	0	1	1	1	1	MTMR4	myotubularin related protein 4
hsa-miR-515-5p	1	0	1	1	1	1	B4GALT6	UDP-Gal:betaGlcNAc beta 1,4- galactosyltransferase, polypeptide 6
hsa-miR-515-5p	0	0	1	0	1	1	ADIPOQ	adiponectin, C1Q and collagen domain containing
hsa-miR-515-5p	0	0	1	1	1	1	EIF2AK3	eukaryotic translation initiation factor 2-alpha kinase 3
hsa-miR-515-5p	1	0	1	0	1	1	ARHGEF6	Rac/Cdc42 guanine nucleotide exchange factor (GEF) 6
hsa-miR-515-5p	1	0	1	1	1	1	ONECUT2	one cut homeobox 2
hsa-miR-515-5p	0	0	1	1	1	1	ATP6V1G1	ATPase, H+ transporting, lysosomal 13kDa, V1 subunit G1
hsa-miR-515-5p	1	0	1	1	1	1	ZFP36L1	zinc finger protein 36, C3H type-like 1
hsa-miR-515-5p	0	0	1	1	1	1	CDH6	cadherin 6, type 2, K-cadherin (fetal kidney)
hsa-miR-515-5p	1	0	1	0	1	1	DOCK3	dedicator of cytokinesis 3
hsa-miR-515-5p	0	0	1	0	1	1	DSC2	desmocollin 2
hsa-miR-515-5p	1	0	1	1	1	1	GABRE	gamma-aminobutyric acid (GABA) A receptor, epsilon
hsa-miR-515-5p	1	0	1	1	1	1	JARID2	jumonji, AT rich interactive domain 2
hsa-miR-515-5p	0	0	1	1	0	0	MMP9	matrix metallopeptidase 9 (gelatinase B, 92kDa gelatinase, 92kDa type IV collagenase)
hsa-miR-515-5p	1	0	1	0	1	1	SCD	stearoyl-CoA desaturase (delta-9-desaturase)
hsa-miR-515-5p	1	0	1	1	0	0	ADAMTS4	ADAM metallopeptidase with thrombospondin type 1 motif, 4
hsa-miR-515-5p	0	0	1	1	1	1	XYLB	xylulokinase homolog (H. influenzae)
hsa-miR-515-5p	1	0	1	1	1	1	HS3ST1	heparan sulfate (glucosamine) 3-O-sulfotransferase 1
hsa-miR-515-5p	1	0	1	1	1	1	MED13	mediator complex subunit 13
hsa-miR-515-5p	0	0	1	1	0	0	HR	hairless homolog (mouse)
hsa-miR-515-5p	1	0	1	1	1	1	ACTC1	actin, alpha, cardiac muscle 1
hsa-miR-515-5p	1	0	1	1	1	1	APLNR	apelin receptor
hsa-miR-515-5p	0	0	1	1	0	0	ASCL2	achaete-scute complex homolog 2 (Drosophila)
hsa-miR-515-5p	1	0	1	1	1	1	FOXN3	forkhead box N3
hsa-miR-515-5p	0	0	1	0	1	1	FOSL2	FOS-like antigen 2
hsa-miR-515-5p	1	0	1	1	1	1	GAS2	growth arrest-specific 2
hsa-miR-515-5p	0	0	1	1	1	1	MSTN	myostatin
hsa-miR-515-5p	1	0	1	1	1	1	RAB8A	RAB8A, member RAS oncogene family
hsa-miR-515-5p	0	0	1	1	1	1	PPP1R3C	protein phosphatase 1, regulatory subunit 3C
hsa-miR-515-5p	1	0	1	0	1	1	PRKAB2	protein kinase, AMP-activated, beta 2 non-catalytic subunit
hsa-miR-515-5p	1	0	1	1	1	1	RALA	v-ral simian leukemia viral oncogene homolog A (ras related)
hsa-miR-515-5p	1	0	1	0	1	1	CCDC6	coiled-coil domain containing 6
hsa-miR-515-5p	1	0	1	1	1	1	RND2	Rho family GTPase 2
hsa-miR-515-5p	0	0	1	1	1	1	HES1	hairy and enhancer of split 1, (Drosophila)
hsa-miR-515-5p	1	0	1	1	1	1	LPP	LIM domain containing preferred translocation partner in lipoma
hsa-miR-515-5p	1	0	1	1	1	1	SYT1	synaptotagmin I
hsa-miR-515-5p	1	0	1	1	1	1	TERF2	telomeric repeat binding factor 2
hsa-miR-515-5p	1	0	1	1	1	1	ARPC5	actin related protein 2/3 complex, subunit 5, 16kDa
hsa-miR-515-5p	1	0	1	1	1	1	ACTR1A	ARP1 actin-related protein 1 homolog A, centractin alpha (yeast)
hsa-miR-515-5p	1	0	1	1	1	1	LHFPL2	lipoma HMGIC fusion partner-like 2
hsa-miR-515-5p	1	0	1	1	1	1	LHFP	lipoma HMGIC fusion partner
hsa-miR-515-5p	0	0	1	1	1	1	RNF41	ring finger protein 41
hsa-miR-515-5p	0	0	1	0	1	1	CD96	CD96 molecule
hsa-miR-515-5p	0	0	1	1	1	1	LRRC17	leucine rich repeat containing 17
hsa-miR-515-5p	1	0	1	0	1	1	SPRY3	sprouty homolog 3 (Drosophila)
hsa-miR-515-5p	0	0	1	1	1	1	SAP18	Sin3A-associated protein, 18kDa
hsa-miR-515-5p	1	0	1	1	1	1	MAT2A	methionine adenosyltransferase II, alpha
hsa-miR-515-5p	1	0	1	1	1	1	MMP16	matrix metallopeptidase 16 (membrane-inserted)
hsa-miR-515-5p	1	0	1	1	1	1	MTF1	metal-regulatory transcription factor 1
hsa-miR-515-5p	0	0	1	1	1	1	MYH1	myosin, heavy chain 1, skeletal muscle, adult
hsa-miR-515-5p	0	0	1	1	1	1	TSC22D1	TSC22 domain family, member 1
hsa-miR-515-5p	0	0	1	1	1	1	HS3ST2	heparan sulfate (glucosamine) 3-O-sulfotransferase 2
hsa-miR-515-5p	0	0	1	1	1	1	TRDN	triadin
hsa-miR-515-5p	1	0	1	1	1	1	SPON1	spondin 1, extracellular matrix protein
hsa-miR-515-5p	1	0	1	1	1	1	TMEM50B	transmembrane protein 50B
hsa-miR-515-5p	1	0	1	1	1	1	CAPZA1	capping protein (actin filament) muscle Z-line, alpha 1
hsa-miR-515-5p	1	0	1	1	1	1	CAPZA2	capping protein (actin filament) muscle Z-line, alpha 2
hsa-miR-515-5p	1	0	1	1	1	1	DYNC1LI2	dynein, cytoplasmic 1, light intermediate chain 2
hsa-miR-515-5p	1	0	1	1	1	1	NCK1	NCK adaptor protein 1
hsa-miR-515-5p	1	0	1	1	1	1	ORC2	origin recognition complex, subunit 2
hsa-miR-515-5p	1	0	1	1	1	1	PDGFRA	platelet-derived growth factor receptor, alpha polypeptide
hsa-miR-515-5p	1	0	1	0	1	1	PITPNA	phosphatidylinositol transfer protein, alpha
hsa-miR-515-5p	0	0	1	1	1	1	PRKG2	protein kinase, cGMP-dependent, type II
hsa-miR-515-5p	1	0	1	1	1	1	SMC1A	structural maintenance of chromosomes 1A
hsa-miR-515-5p	0	0	1	1	1	1	PIBF1	progesterone immunomodulatory binding factor 1
hsa-miR-515-5p	1	0	1	1	1	1	ZNF238	zinc finger protein 238
hsa-miR-515-5p	0	0	1	1	1	1	UBE2E3	ubiquitin-conjugating enzyme E2E 3
hsa-miR-515-5p	0	0	1	1	1	1	SLC25A17	solute carrier family 25 (mitochondrial carrier; peroxisomal membrane protein, 34kDa), member 17
hsa-miR-515-5p	1	0	1	1	1	1	SEC23A	Sec23 homolog A (S. cerevisiae)
hsa-miR-515-5p	1	0	1	1	1	1	HEXIM1	hexamethylene bis-acetamide inducible 1
hsa-miR-515-5p	1	0	1	0	1	1	PTPRE	protein tyrosine phosphatase, receptor type, E
hsa-miR-515-5p	0	0	1	0	1	1	SLC16A2	solute carrier family 16, member 2 (thyroid hormone transporter)
hsa-miR-515-5p	1	0	1	1	1	1	DYNLT3	dynein, light chain, Tctex-type 3
hsa-miR-515-5p	1	0	1	0	1	1	IGF2BP1	insulin-like growth factor 2 mRNA binding protein 1
hsa-miR-515-5p	1	0	1	1	1	1	CORIN	corin, serine peptidase
hsa-miR-515-5p	1	0	1	0	1	1	API5	apoptosis inhibitor 5
hsa-miR-515-5p	1	0	1	1	1	1	ZBTB6	zinc finger and BTB domain containing 6
hsa-miR-515-5p	0	0	1	1	1	1	SMR3B	submaxillary gland androgen regulated protein 3B
hsa-miR-515-5p	1	0	1	1	1	1	DIAPH2	diaphanous homolog 2 (Drosophila)
hsa-miR-515-5p	1	0	1	1	1	1	PPP1R1A	protein phosphatase 1, regulatory (inhibitor) subunit 1A
hsa-miR-515-5p	1	0	1	1	0	0	PSKH1	protein serine kinase H1
hsa-miR-515-5p	1	0	1	0	1	1	TCEA1	transcription elongation factor A (SII), 1
hsa-miR-515-5p	1	0	1	1	1	1	BTG2	BTG family, member 2
hsa-miR-515-5p	1	0	1	1	1	1	ZBTB33	zinc finger and BTB domain containing 33
hsa-miR-515-5p	0	0	1	1	1	1	MSL3	male-specific lethal 3 homolog (Drosophila)
hsa-miR-515-5p	1	0	1	1	1	1	CBX1	chromobox homolog 1
hsa-miR-515-5p	0	0	1	1	1	1	PKIA	protein kinase (cAMP-dependent, catalytic) inhibitor alpha
hsa-miR-515-5p	1	0	1	1	1	1	RAB35	RAB35, member RAS oncogene family
hsa-miR-515-5p	0	0	1	1	1	1	HOXD3	homeobox D3
hsa-miR-515-5p	1	0	1	1	1	1	PRRX1	paired related homeobox 1
hsa-miR-515-5p	1	0	1	0	1	1	SLC2A3	solute carrier family 2 (facilitated glucose transporter), member 3
hsa-miR-515-5p	1	0	1	0	1	1	SLC5A3	solute carrier family 5 (sodium/myo-inositol cotransporter), member 3
hsa-miR-515-5p	1	0	1	0	1	1	SOX12	SRY (sex determining region Y)-box 12
hsa-miR-515-5p	1	0	1	1	1	1	HSPA13	heat shock protein 70kDa family, member 13
hsa-miR-515-5p	1	0	1	1	1	1	SYN1	synapsin I
hsa-miR-515-5p	1	0	1	1	1	1	NR4A3	nuclear receptor subfamily 4, group A, member 3
hsa-miR-515-5p	1	0	1	1	1	1	WWP1	WW domain containing E3 ubiquitin protein ligase 1
hsa-miR-515-5p	1	0	1	1	1	1	SOX30	SRY (sex determining region Y)-box 30
hsa-miR-515-5p	1	0	1	1	1	1	PTPN21	protein tyrosine phosphatase, non-receptor type 21
hsa-miR-515-5p	0	0	1	1	1	1	RPP14	ribonuclease P/MRP 14kDa subunit
hsa-miR-515-5p	1	0	1	1	1	1	UBL3	ubiquitin-like 3
hsa-miR-515-5p	0	0	1	1	1	1	UGT1A4	UDP glucuronosyltransferase 1 family, polypeptide A4
hsa-miR-515-5p	0	0	1	1	1	1	USH2A	Usher syndrome 2A (autosomal recessive, mild)
hsa-miR-515-5p	1	0	1	1	1	1	VEZF1	vascular endothelial zinc finger 1
hsa-miR-515-5p	0	0	1	0	0	0	ZXDA	zinc finger, X-linked, duplicated A
hsa-miR-515-5p	0	0	1	0	1	1	ZXDB	zinc finger, X-linked, duplicated B
hsa-miR-515-5p	1	0	1	1	1	1	ABCF2	ATP-binding cassette, sub-family F (GCN20), member 2
hsa-miR-515-5p	1	0	1	1	1	1	PALM2-AKAP2	PALM2-AKAP2 readthrough
hsa-miR-515-5p	1	0	1	1	1	1	DUSP10	dual specificity phosphatase 10
hsa-miR-515-5p	0	0	1	1	1	1	SLC6A14	solute carrier family 6 (amino acid transporter), member 14
hsa-miR-515-5p	1	0	1	1	1	1	KLF12	Kruppel-like factor 12
hsa-miR-515-5p	0	0	1	1	1	1	STXBP3	syntaxin binding protein 3
hsa-miR-515-5p	1	0	1	1	1	1	ZNF236	zinc finger protein 236
hsa-miR-515-5p	0	0	1	0	1	1	AP4E1	adaptor-related protein complex 4, epsilon 1 subunit
hsa-miR-515-5p	1	0	1	1	1	1	PHLDA1	pleckstrin homology-like domain, family A, member 1
hsa-miR-515-5p	1	0	1	1	1	1	MTF2	metal response element binding transcription factor 2
hsa-miR-515-5p	1	0	1	1	1	1	CASC3	cancer susceptibility candidate 3
hsa-miR-515-5p	0	0	1	1	1	1	ATF5	activating transcription factor 5
hsa-miR-515-5p	1	0	1	1	1	1	ELL2	elongation factor, RNA polymerase II, 2
hsa-miR-515-5p	1	0	1	0	1	1	ZFPM2	zinc finger protein, multitype 2
hsa-miR-515-5p	1	0	1	1	1	1	ICOS	inducible T-cell co-stimulator
hsa-miR-515-5p	1	0	1	1	1	1	APPL1	adaptor protein, phosphotyrosine interaction, PH domain and leucine zipper containing 1
hsa-miR-515-5p	0	0	1	1	1	1	LMOD1	leiomodin 1 (smooth muscle)
hsa-miR-515-5p	1	0	1	1	1	1	RYBP	RING1 and YY1 binding protein
hsa-miR-515-5p	0	0	1	1	0	0	SNW1	SNW domain containing 1
hsa-miR-515-5p	1	0	1	1	1	1	RHOQ	ras homolog family member Q
hsa-miR-515-5p	0	0	1	1	1	1	ZNF212	zinc finger protein 212
hsa-miR-515-5p	1	0	1	1	1	1	HS2ST1	heparan sulfate 2-O-sulfotransferase 1
hsa-miR-515-5p	1	0	1	1	1	1	KCND2	potassium voltage-gated channel, Shal-related subfamily, member 2
hsa-miR-515-5p	1	0	1	0	1	1	G3BP2	GTPase activating protein (SH3 domain) binding protein 2
hsa-miR-515-5p	1	0	1	0	1	1	FBXL7	F-box and leucine-rich repeat protein 7
hsa-miR-515-5p	0	0	1	1	1	1	SLC39A6	solute carrier family 39 (zinc transporter), member 6
hsa-miR-515-5p	1	0	1	1	1	1	LSM5	LSM5 homolog, U6 small nuclear RNA associated (S. cerevisiae)
hsa-miR-515-5p	1	0	1	1	1	1	MAPRE1	microtubule-associated protein, RP/EB family, member 1
hsa-miR-515-5p	1	0	1	0	1	1	MYCBP	c-myc binding protein
hsa-miR-515-5p	1	0	1	0	1	1	MYO10	myosin X
hsa-miR-515-5p	1	0	1	0	1	1	BLOC1S6	biogenesis of lysosomal organelles complex-1, subunit 6, pallidin
hsa-miR-515-5p	1	0	1	1	1	1	RANBP6	RAN binding protein 6
hsa-miR-515-5p	1	0	1	1	1	1	RGS17	regulator of G-protein signaling 17
hsa-miR-515-5p	1	0	1	1	1	1	SF3B1	splicing factor 3b, subunit 1, 155kDa
hsa-miR-515-5p	0	0	1	0	1	1	TLL1	tolloid-like 1
hsa-miR-515-5p	1	0	1	1	1	1	YWHAG	tyrosine 3-monooxygenase/tryptophan 5-monooxygenase activation protein, gamma polypeptide
hsa-miR-515-5p	0	0	1	1	1	1	DNAJC15	DnaJ (Hsp40) homolog, subfamily C, member 15
hsa-miR-515-5p	0	0	1	1	1	1	N6AMT1	N-6 adenine-specific DNA methyltransferase 1 (putative)
hsa-miR-515-5p	1	0	1	1	1	1	CLCF1	cardiotrophin-like cytokine factor 1
hsa-miR-515-5p	0	0	1	1	0	0	TBX21	T-box 21
hsa-miR-515-5p	0	0	1	1	1	1	SERTAD1	SERTA domain containing 1
hsa-miR-515-5p	1	0	1	1	1	1	TMEM2	transmembrane protein 2
hsa-miR-515-5p	0	0	1	0	1	1	EMR2	egf-like module containing, mucin-like, hormone receptor-like 2
hsa-miR-515-5p	1	0	1	1	1	1	WDR37	WD repeat domain 37
hsa-miR-515-5p	1	0	1	0	1	1	OSTM1	osteopetrosis associated transmembrane protein 1
hsa-miR-515-5p	1	0	1	1	1	1	ASF1A	ASF1 anti-silencing function 1 homolog A (S. cerevisiae)
hsa-miR-515-5p	1	0	1	1	1	1	ZBTB44	zinc finger and BTB domain containing 44
hsa-miR-515-5p	0	0	1	0	1	1	SCN8A	sodium channel, voltage gated, type VIII, alpha subunit
hsa-miR-515-5p	1	0	1	0	1	1	VAMP2	vesicle-associated membrane protein 2 (synaptobrevin 2)
hsa-miR-515-5p	0	0	1	1	1	1	UBL4A	ubiquitin-like 4A
hsa-miR-515-5p	1	0	1	0	1	1	ODZ1	odz, odd Oz/ten-m homolog 1 (Drosophila)
hsa-miR-515-5p	1	0	1	1	1	1	MAPRE2	microtubule-associated protein, RP/EB family, member 2
hsa-miR-515-5p	0	0	1	1	1	1	TRAM1	translocation associated membrane protein 1
hsa-miR-515-5p	0	0	1	1	1	1	OPN3	opsin 3
hsa-miR-515-5p	0	0	1	0	1	1	EID1	EP300 interacting inhibitor of differentiation 1
hsa-miR-515-5p	1	0	1	1	0	0	SND1	staphylococcal nuclease and tudor domain containing 1
hsa-miR-515-5p	1	0	1	1	1	1	AFF4	AF4/FMR2 family, member 4
hsa-miR-515-5p	1	0	1	1	1	1	RND1	Rho family GTPase 1
hsa-miR-515-5p	0	0	1	1	1	1	TMOD2	tropomodulin 2 (neuronal)
hsa-miR-515-5p	1	0	1	0	1	1	HUNK	hormonally up-regulated Neu-associated kinase
hsa-miR-515-5p	1	0	1	1	1	1	DBC1	deleted in bladder cancer 1
hsa-miR-515-5p	1	0	1	1	1	1	ZNF592	zinc finger protein 592
hsa-miR-515-5p	1	0	1	0	1	1	SH3PXD2A	SH3 and PX domains 2A
hsa-miR-515-5p	1	0	1	1	1	1	ULK2	unc-51-like kinase 2 (C. elegans)
hsa-miR-515-5p	0	0	1	1	1	1	FRMPD4	FERM and PDZ domain containing 4
hsa-miR-515-5p	1	0	1	0	1	1	MLEC	malectin
hsa-miR-515-5p	1	0	1	0	1	1	SERTAD2	SERTA domain containing 2
hsa-miR-515-5p	1	0	1	1	1	1	MRPL19	mitochondrial ribosomal protein L19
hsa-miR-515-5p	1	0	1	0	1	1	KIAA0494	KIAA0494
hsa-miR-515-5p	0	0	1	0	1	1	EPM2AIP1	EPM2A (laforin) interacting protein 1
hsa-miR-515-5p	1	0	1	0	1	1	TRIL	TLR4 interactor with leucine-rich repeats
hsa-miR-515-5p	1	0	1	0	1	1	LPPR4	lipid phosphate phosphatase-related protein type 4
hsa-miR-515-5p	1	0	1	0	1	1	ZBTB40	zinc finger and BTB domain containing 40
hsa-miR-515-5p	1	0	1	1	1	1	CHSY1	chondroitin sulfate synthase 1
hsa-miR-515-5p	1	0	1	0	1	1	ICK	intestinal cell (MAK-like) kinase
hsa-miR-515-5p	0	0	1	1	0	0	MORC2	MORC family CW-type zinc finger 2
hsa-miR-515-5p	1	0	1	0	1	1	ZBTB1	zinc finger and BTB domain containing 1
hsa-miR-515-5p	1	0	1	1	1	1	SPEN	spen homolog, transcriptional regulator (Drosophila)
hsa-miR-515-5p	1	0	1	1	1	1	PHLPP2	PH domain and leucine rich repeat protein phosphatase 2
hsa-miR-515-5p	1	0	1	0	1	1	PDS5B	PDS5, regulator of cohesion maintenance, homolog B (S. cerevisiae)
hsa-miR-515-5p	1	0	1	0	1	1	NMNAT2	nicotinamide nucleotide adenylyltransferase 2
hsa-miR-515-5p	1	0	1	1	1	1	PIKFYVE	phosphoinositide kinase, FYVE finger containing
hsa-miR-515-5p	1	0	1	0	1	1	ZNF609	zinc finger protein 609
hsa-miR-515-5p	1	0	1	1	1	1	SMG1	smg-1 homolog, phosphatidylinositol 3-kinase-related kinase (C. elegans)
hsa-miR-515-5p	1	0	1	1	1	1	TAB2	TGF-beta activated kinase 1/MAP3K7 binding protein 2
hsa-miR-515-5p	1	0	1	1	1	1	RTF1	Rtf1, Paf1/RNA polymerase II complex component, homolog (S. cerevisiae)
hsa-miR-515-5p	1	0	1	1	0	0	RFTN1	raftlin, lipid raft linker 1
hsa-miR-515-5p	1	0	1	1	1	1	PRRC2C	proline-rich coiled-coil 2C
hsa-miR-515-5p	1	0	1	1	1	1	PLCB1	phospholipase C, beta 1 (phosphoinositide-specific)
hsa-miR-515-5p	1	0	1	1	0	0	KIAA0556	KIAA0556
hsa-miR-515-5p	1	0	1	1	1	1	NUP160	nucleoporin 160kDa
hsa-miR-515-5p	1	0	1	1	1	1	PHF15	PHD finger protein 15
hsa-miR-515-5p	1	0	1	0	1	1	KHNYN	KH and NYN domain containing
hsa-miR-515-5p	1	0	1	0	1	1	LARP1	La ribonucleoprotein domain family, member 1
hsa-miR-515-5p	1	0	1	1	0	0	SMG5	smg-5 homolog, nonsense mediated mRNA decay factor (C. elegans)
hsa-miR-515-5p	0	0	1	1	1	1	ADNP	activity-dependent neuroprotector homeobox
hsa-miR-515-5p	0	0	1	1	1	1	LEPROTL1	leptin receptor overlapping transcript-like 1
hsa-miR-515-5p	1	0	1	1	1	1	MAGI1	membrane associated guanylate kinase, WW and PDZ domain containing 1
hsa-miR-515-5p	1	0	1	0	1	1	ERC2	ELKS/RAB6-interacting/CAST family member 2
hsa-miR-515-5p	1	0	1	1	1	1	EPC2	enhancer of polycomb homolog 2 (Drosophila)
hsa-miR-515-5p	1	0	1	1	1	1	FAM155B	family with sequence similarity 155, member B
hsa-miR-515-5p	1	0	1	1	1	1	PLA2G3	phospholipase A2, group III
hsa-miR-515-5p	0	0	1	1	1	1	KRT76	keratin 76
hsa-miR-515-5p	1	0	1	1	1	1	ST8SIA3	ST8 alpha-N-acetyl-neuraminide alpha-2,8-sialyltransferase 3
hsa-miR-515-5p	1	0	1	1	1	1	TXNDC12	thioredoxin domain containing 12 (endoplasmic reticulum)
hsa-miR-515-5p	0	0	1	0	0	0	TMA7	translational machinery associated 7 homolog (S. cerevisiae)
hsa-miR-515-5p	1	0	1	1	1	1	GOLT1B	golgi transport 1B
hsa-miR-515-5p	0	0	1	1	1	1	HDGFRP3	hepatoma-derived growth factor, related protein 3
hsa-miR-515-5p	1	0	1	0	1	1	WNT16	wingless-type MMTV integration site family, member 16
hsa-miR-515-5p	0	0	1	1	1	1	RAB10	RAB10, member RAS oncogene family
hsa-miR-515-5p	1	0	1	1	1	1	AKAP11	A kinase (PRKA) anchor protein 11
hsa-miR-515-5p	1	0	1	1	1	1	BIRC6	baculoviral IAP repeat containing 6
hsa-miR-515-5p	0	0	1	1	1	1	RSL24D1	ribosomal L24 domain containing 1
hsa-miR-515-5p	1	0	1	1	1	1	RAB14	RAB14, member RAS oncogene family
hsa-miR-515-5p	0	0	1	1	1	1	TCEB3B	transcription elongation factor B polypeptide 3B (elongin A2)
hsa-miR-515-5p	1	0	1	1	1	1	GLTP	glycolipid transfer protein
hsa-miR-515-5p	1	0	1	1	1	1	PHF20	PHD finger protein 20
hsa-miR-515-5p	0	0	1	1	0	0	NCKIPSD	NCK interacting protein with SH3 domain
hsa-miR-515-5p	0	0	1	1	0	0	FAM203A	family with sequence similarity 203, member A
hsa-miR-515-5p	0	0	1	1	1	1	KDM3B	lysine (K)-specific demethylase 3B
hsa-miR-515-5p	1	0	1	1	1	1	GALNT7	UDP-N-acetyl-alpha-D-galactosamine:polypeptide N-acetylgalactosaminyltransferase 7 (GalNAc-T7)
hsa-miR-515-5p	0	0	1	0	1	1	TRIM44	tripartite motif containing 44
hsa-miR-515-5p	0	0	1	1	1	1	BHMT2	betaine--homocysteine S-methyltransferase 2
hsa-miR-515-5p	1	0	1	1	0	0	C17orf59	chromosome 17 open reading frame 59
hsa-miR-515-5p	1	0	1	0	1	1	EIF2C4	eukaryotic translation initiation factor 2C, 4
hsa-miR-515-5p	0	0	1	1	1	1	LRRC16A	leucine rich repeat containing 16A
hsa-miR-515-5p	1	0	1	1	1	1	CNNM2	cyclin M2
hsa-miR-515-5p	0	0	1	1	1	1	DYM	dymeclin
hsa-miR-515-5p	0	0	1	0	1	1	GIPC2	GIPC PDZ domain containing family, member 2
hsa-miR-515-5p	1	0	1	0	1	1	FAM46C	family with sequence similarity 46, member C
hsa-miR-515-5p	1	0	1	1	1	1	TBC1D8B	TBC1 domain family, member 8B (with GRAM domain)
hsa-miR-515-5p	1	0	1	0	1	1	CMTM6	CKLF-like MARVEL transmembrane domain containing 6
hsa-miR-515-5p	0	0	1	1	1	1	RHBDL2	rhomboid, veinlet-like 2 (Drosophila)
hsa-miR-515-5p	1	0	1	0	1	1	MARCH5	membrane-associated ring finger (C3HC4) 5
hsa-miR-515-5p	1	0	1	1	1	1	RNF125	ring finger protein 125, E3 ubiquitin protein ligase
hsa-miR-515-5p	0	0	1	1	1	1	COMMD8	COMM domain containing 8
hsa-miR-515-5p	0	0	1	1	1	1	C2orf42	chromosome 2 open reading frame 42
hsa-miR-515-5p	1	0	1	1	1	1	HIF1AN	hypoxia inducible factor 1, alpha subunit inhibitor
hsa-miR-515-5p	1	0	1	1	1	1	ZNHIT6	zinc finger, HIT-type containing 6
hsa-miR-515-5p	0	0	1	1	1	1	IWS1	IWS1 homolog (S. cerevisiae)
hsa-miR-515-5p	0	0	1	1	1	1	WIPI1	WD repeat domain, phosphoinositide interacting 1
hsa-miR-515-5p	1	0	1	1	1	1	BCL11A	B-cell CLL/lymphoma 11A (zinc finger protein)
hsa-miR-515-5p	1	0	1	1	1	1	LRRC8D	leucine rich repeat containing 8 family, member D
hsa-miR-515-5p	0	0	1	1	1	1	THAP1	THAP domain containing, apoptosis associated protein 1
hsa-miR-515-5p	1	0	1	0	1	1	ARMC1	armadillo repeat containing 1
hsa-miR-515-5p	1	0	1	1	1	1	FAM178A	family with sequence similarity 178, member A
hsa-miR-515-5p	0	0	1	1	1	1	NUDT11	nudix (nucleoside diphosphate linked moiety X)-type motif 11
hsa-miR-515-5p	0	0	1	1	1	1	TMLHE	trimethyllysine hydroxylase, epsilon
hsa-miR-515-5p	1	0	1	1	1	1	TMEM143	transmembrane protein 143
hsa-miR-515-5p	1	0	1	1	1	1	ZNF654	zinc finger protein 654
hsa-miR-515-5p	0	0	1	1	1	1	RBM41	RNA binding motif protein 41
hsa-miR-515-5p	1	0	1	1	1	1	KIAA1598	KIAA1598
hsa-miR-515-5p	1	0	1	1	1	1	RSBN1	round spermatid basic protein 1
hsa-miR-515-5p	1	0	1	0	1	1	FOXJ2	forkhead box J2
hsa-miR-515-5p	0	0	1	1	1	1	SLC22A15	solute carrier family 22, member 15
hsa-miR-515-5p	1	0	1	1	1	1	PAG1	phosphoprotein associated with glycosphingolipid microdomains 1
hsa-miR-515-5p	1	0	1	0	1	1	BRK1	BRICK1, SCAR/WAVE actin-nucleating complex subunit
hsa-miR-515-5p	1	0	1	1	1	1	NRP2	neuropilin 2
hsa-miR-515-5p	1	0	1	1	1	1	CSGALNACT2	chondroitin sulfate N-acetylgalactosaminyltransferase 2
hsa-miR-515-5p	1	0	1	1	1	1	ETNK1	ethanolamine kinase 1
hsa-miR-515-5p	0	0	1	1	1	1	GOLGA6B	golgin A6 family, member B
hsa-miR-515-5p	1	0	1	0	1	1	TMEM55A	transmembrane protein 55A
hsa-miR-515-5p	1	0	1	0	1	1	KLHL9	kelch-like 9 (Drosophila)
hsa-miR-515-5p	0	0	1	1	1	1	TERF2IP	telomeric repeat binding factor 2, interacting protein
hsa-miR-515-5p	0	0	1	1	1	1	YIPF1	Yip1 domain family, member 1
hsa-miR-515-5p	1	0	1	0	1	1	FAM190B	family with sequence similarity 190, member B
hsa-miR-515-5p	1	0	1	0	1	1	CCDC93	coiled-coil domain containing 93
hsa-miR-515-5p	1	0	1	1	1	1	DLL4	delta-like 4 (Drosophila)
hsa-miR-515-5p	0	0	1	1	1	1	UGT1A10	UDP glucuronosyltransferase 1 family, polypeptide A10
hsa-miR-515-5p	0	0	1	1	1	1	UGT1A8	UDP glucuronosyltransferase 1 family, polypeptide A8
hsa-miR-515-5p	0	0	1	1	1	1	UGT1A7	UDP glucuronosyltransferase 1 family, polypeptide A7
hsa-miR-515-5p	0	0	1	1	1	1	UGT1A5	UDP glucuronosyltransferase 1 family, polypeptide A5
hsa-miR-515-5p	1	0	1	0	1	1	CCNJ	cyclin J
hsa-miR-515-5p	0	0	1	0	1	1	VSIG10	V-set and immunoglobulin domain containing 10
hsa-miR-515-5p	0	0	1	1	1	1	UGT1A3	UDP glucuronosyltransferase 1 family, polypeptide A3
hsa-miR-515-5p	1	0	1	1	1	1	EPB41L4B	erythrocyte membrane protein band 4.1 like 4B
hsa-miR-515-5p	0	0	1	1	1	1	RNF20	ring finger protein 20, E3 ubiquitin protein ligase
hsa-miR-515-5p	1	0	1	1	1	1	MDM1	Mdm1 nuclear protein homolog (mouse)
hsa-miR-515-5p	0	0	1	1	1	1	TMEM167B	transmembrane protein 167B
hsa-miR-515-5p	1	0	1	1	1	1	SAR1A	SAR1 homolog A (S. cerevisiae)
hsa-miR-515-5p	1	0	1	0	1	1	OTUD7B	OTU domain containing 7B
hsa-miR-515-5p	1	0	1	1	1	1	ANKRD50	ankyrin repeat domain 50
hsa-miR-515-5p	1	0	1	1	1	1	PITHD1	PITH (C-terminal proteasome-interacting domain of thioredoxin-like) domain containing 1
hsa-miR-515-5p	1	0	1	0	1	1	EIF5A2	eukaryotic translation initiation factor 5A2
hsa-miR-515-5p	0	0	1	1	1	1	PLXDC1	plexin domain containing 1
hsa-miR-515-5p	1	0	1	0	1	1	DCUN1D1	DCN1, defective in cullin neddylation 1, domain containing 1 (S. cerevisiae)
hsa-miR-515-5p	1	0	1	1	1	1	JPH1	junctophilin 1
hsa-miR-515-5p	1	0	1	0	1	1	FAM40B	family with sequence similarity 40, member B
hsa-miR-515-5p	0	0	1	1	1	1	SHROOM4	shroom family member 4
hsa-miR-515-5p	1	0	1	1	1	1	USP31	ubiquitin specific peptidase 31
hsa-miR-515-5p	1	0	1	1	1	1	MIB1	mindbomb E3 ubiquitin protein ligase 1
hsa-miR-515-5p	1	0	1	0	1	1	KLHDC5	kelch domain containing 5
hsa-miR-515-5p	1	0	1	0	1	1	SYT4	synaptotagmin IV
hsa-miR-515-5p	0	0	1	1	1	1	ARRDC3	arrestin domain containing 3
hsa-miR-515-5p	1	0	1	1	1	1	SIPA1L2	signal-induced proliferation-associated 1 like 2
hsa-miR-515-5p	1	0	1	0	1	1	WDFY1	WD repeat and FYVE domain containing 1
hsa-miR-515-5p	1	0	1	1	1	1	HOMEZ	homeobox and leucine zipper encoding
hsa-miR-515-5p	1	0	1	0	1	1	KIAA1456	KIAA1456
hsa-miR-515-5p	1	0	1	1	1	1	RANBP10	RAN binding protein 10
hsa-miR-515-5p	1	0	1	1	1	1	KIAA1467	KIAA1467
hsa-miR-515-5p	1	0	1	1	1	1	CNTN3	contactin 3 (plasmacytoma associated)
hsa-miR-515-5p	1	0	1	1	1	1	ZFP14	zinc finger protein 14 homolog (mouse)
hsa-miR-515-5p	1	0	1	1	1	1	NIN	ninein (GSK3B interacting protein)
hsa-miR-515-5p	0	0	1	1	1	1	PRX	periaxin
hsa-miR-515-5p	0	0	1	1	1	1	PPP4R4	protein phosphatase 4, regulatory subunit 4
hsa-miR-515-5p	0	0	1	1	1	1	UGT1A9	UDP glucuronosyltransferase 1 family, polypeptide A9
hsa-miR-515-5p	1	0	1	1	1	1	MTMR3	myotubularin related protein 3
hsa-miR-515-5p	1	0	1	1	0	0	SLC5A6	solute carrier family 5 (sodium-dependent vitamin transporter), member 6
hsa-miR-515-5p	1	0	1	0	1	1	TMX4	thioredoxin-related transmembrane protein 4
hsa-miR-515-5p	0	0	1	1	1	1	LSM2	LSM2 homolog, U6 small nuclear RNA associated (S. cerevisiae)
hsa-miR-515-5p	1	0	1	1	1	1	C6orf47	chromosome 6 open reading frame 47
hsa-miR-515-5p	1	0	1	0	1	1	TP53INP2	tumor protein p53 inducible nuclear protein 2
hsa-miR-515-5p	0	0	1	1	1	1	OSTC	oligosaccharyltransferase complex subunit
hsa-miR-515-5p	1	0	1	1	1	1	NTN4	netrin 4
hsa-miR-515-5p	1	0	1	1	1	1	FAM60A	family with sequence similarity 60, member A
hsa-miR-515-5p	0	0	1	1	0	0	MYOZ1	myozenin 1
hsa-miR-515-5p	1	0	1	1	1	1	SNX6	sorting nexin 6
hsa-miR-515-5p	1	0	1	1	1	1	TMEM35	transmembrane protein 35
hsa-miR-515-5p	0	0	1	1	1	1	PGM5	phosphoglucomutase 5
hsa-miR-515-5p	1	0	1	1	1	1	SEC24A	SEC24 family, member A (S. cerevisiae)
hsa-miR-515-5p	0	0	1	1	1	1	FAM204A	family with sequence similarity 204, member A
hsa-miR-515-5p	0	0	1	1	1	1	ANKRD5	ankyrin repeat domain 5
hsa-miR-515-5p	1	0	1	1	1	1	ABCG4	ATP-binding cassette, sub-family G (WHITE), member 4
hsa-miR-515-5p	1	0	1	1	1	1	XPO4	exportin 4
hsa-miR-515-5p	1	0	1	1	1	1	HIF3A	hypoxia inducible factor 3, alpha subunit
hsa-miR-515-5p	1	0	1	1	1	1	ALDH8A1	aldehyde dehydrogenase 8 family, member A1
hsa-miR-515-5p	1	0	1	1	1	1	MARCH7	membrane-associated ring finger (C3HC4) 7, E3 ubiquitin protein ligase
hsa-miR-515-5p	1	0	1	1	1	1	YTHDC2	YTH domain containing 2
hsa-miR-515-5p	1	0	1	0	1	1	BCL11B	B-cell CLL/lymphoma 11B (zinc finger protein)
hsa-miR-515-5p	1	0	1	0	1	1	NOTCH2	notch 2
hsa-miR-515-5p	0	0	1	1	1	1	PDYN	prodynorphin
hsa-miR-515-5p	1	0	1	1	1	1	HIVEP3	human immunodeficiency virus type I enhancer binding protein 3
hsa-miR-515-5p	0	0	1	1	0	0	ZBED2	zinc finger, BED-type containing 2
hsa-miR-515-5p	1	0	1	1	1	1	LRRC2	leucine rich repeat containing 2
hsa-miR-515-5p	1	0	1	1	1	1	C10orf76	chromosome 10 open reading frame 76
hsa-miR-515-5p	1	0	1	1	1	1	CCNJL	cyclin J-like
hsa-miR-515-5p	0	0	1	1	1	1	AKIRIN1	akirin 1
hsa-miR-515-5p	0	0	1	1	1	1	ZDHHC14	zinc finger, DHHC-type containing 14
hsa-miR-515-5p	0	0	1	1	1	1	GLT25D1	glycosyltransferase 25 domain containing 1
hsa-miR-515-5p	0	0	1	1	1	1	E2F8	E2F transcription factor 8
hsa-miR-515-5p	0	0	1	1	1	1	SNIP1	Smad nuclear interacting protein 1
hsa-miR-515-5p	1	0	1	0	1	1	VCPIP1	valosin containing protein (p97)/p47 complex interacting protein 1
hsa-miR-515-5p	0	0	1	1	1	1	CCDC170	coiled-coil domain containing 170
hsa-miR-515-5p	1	0	1	1	1	1	HKDC1	hexokinase domain containing 1
hsa-miR-515-5p	1	0	1	1	1	1	PROSER1	proline and serine rich 1
hsa-miR-515-5p	1	0	1	1	1	1	NAA50	N(alpha)-acetyltransferase 50, NatE catalytic subunit
hsa-miR-515-5p	1	0	1	0	1	1	EDEM3	ER degradation enhancer, mannosidase alpha-like 3
hsa-miR-515-5p	1	0	1	1	1	1	TNKS2	tankyrase, TRF1-interacting ankyrin-related ADP-ribose polymerase 2
hsa-miR-515-5p	1	0	1	1	1	1	CYB5B	cytochrome b5 type B (outer mitochondrial membrane)
hsa-miR-515-5p	1	0	1	1	1	1	JHDM1D	jumonji C domain containing histone demethylase 1 homolog D (S. cerevisiae)
hsa-miR-515-5p	0	0	1	1	1	1	BCL2L14	BCL2-like 14 (apoptosis facilitator)
hsa-miR-515-5p	1	0	1	1	1	1	SGPP1	sphingosine-1-phosphate phosphatase 1
hsa-miR-515-5p	1	0	1	0	1	1	C1orf21	chromosome 1 open reading frame 21
hsa-miR-515-5p	1	0	1	1	1	1	C6orf62	chromosome 6 open reading frame 62
hsa-miR-515-5p	1	0	1	1	1	1	GABARAPL1	GABA(A) receptor-associated protein like 1
hsa-miR-515-5p	1	0	1	1	1	1	ANO3	anoctamin 3
hsa-miR-515-5p	0	0	1	0	1	1	MFRP	membrane frizzled-related protein
hsa-miR-515-5p	1	0	1	0	1	1	TMEM47	transmembrane protein 47
hsa-miR-515-5p	0	0	1	1	1	1	RIOK1	RIO kinase 1 (yeast)
hsa-miR-515-5p	1	0	1	1	1	1	GPR61	G protein-coupled receptor 61
hsa-miR-515-5p	0	0	1	0	0	0	KRTAP3-1	keratin associated protein 3-1
hsa-miR-515-5p	1	0	1	0	1	1	ATP11A	ATPase, class VI, type 11A
hsa-miR-515-5p	0	0	1	1	1	1	RNASEH2C	ribonuclease H2, subunit C
hsa-miR-515-5p	1	0	1	1	1	1	ARID5B	AT rich interactive domain 5B (MRF1-like)
hsa-miR-515-5p	1	0	1	0	1	1	PSD2	pleckstrin and Sec7 domain containing 2
hsa-miR-515-5p	1	0	1	1	1	1	CAMKK1	calcium/calmodulin-dependent protein kinase kinase 1, alpha
hsa-miR-515-5p	0	0	1	1	0	0	NICN1	nicolin 1
hsa-miR-515-5p	1	0	1	1	1	1	PRADC1	protease-associated domain containing 1
hsa-miR-515-5p	0	0	1	1	1	1	C5orf4	chromosome 5 open reading frame 4
hsa-miR-515-5p	1	0	1	1	1	1	HOOK3	hook homolog 3 (Drosophila)
hsa-miR-515-5p	1	0	1	1	1	1	SYVN1	synovial apoptosis inhibitor 1, synoviolin
hsa-miR-515-5p	0	0	1	1	0	0	LYZL1	lysozyme-like 1
hsa-miR-515-5p	0	0	1	1	1	1	EMR3	egf-like module containing, mucin-like, hormone receptor-like 3
hsa-miR-515-5p	1	0	1	1	1	1	PPP1R9B	protein phosphatase 1, regulatory subunit 9B
hsa-miR-515-5p	0	0	1	0	1	1	TRIM52	tripartite motif containing 52
hsa-miR-515-5p	1	0	1	1	1	1	RSPO3	R-spondin 3
hsa-miR-515-5p	1	0	1	0	1	1	ADO	2-aminoethanethiol (cysteamine) dioxygenase
hsa-miR-515-5p	1	0	1	0	1	1	UBASH3B	ubiquitin associated and SH3 domain containing B
hsa-miR-515-5p	0	0	1	1	1	1	FBXL20	F-box and leucine-rich repeat protein 20
hsa-miR-515-5p	1	0	1	0	1	1	C5orf62	chromosome 5 open reading frame 62
hsa-miR-515-5p	1	0	1	0	1	1	EAF1	ELL associated factor 1
hsa-miR-515-5p	1	0	1	1	1	1	SURF4	surfeit 4
hsa-miR-515-5p	1	0	1	1	1	1	C5orf30	chromosome 5 open reading frame 30
hsa-miR-515-5p	1	0	1	0	1	1	PURB	purine-rich element binding protein B
hsa-miR-515-5p	0	0	1	1	1	1	MRPS36	mitochondrial ribosomal protein S36
hsa-miR-515-5p	1	0	1	1	1	1	SSH2	slingshot homolog 2 (Drosophila)
hsa-miR-515-5p	1	0	1	1	0	0	FCHSD1	FCH and double SH3 domains 1
hsa-miR-515-5p	1	0	1	1	1	1	EPT1	ethanolaminephosphotransferase 1 (CDP-ethanolamine-specific)
hsa-miR-515-5p	1	0	1	1	1	1	SYS1	SYS1 Golgi-localized integral membrane protein homolog (S. cerevisiae)
hsa-miR-515-5p	1	0	1	1	1	1	BRWD1	bromodomain and WD repeat domain containing 1
hsa-miR-515-5p	1	0	1	1	1	1	CDC42	cell division cycle 42 (GTP binding protein, 25kDa)
hsa-miR-515-5p	1	0	1	1	1	1	MAL2	mal, T-cell differentiation protein 2 (gene/pseudogene)
hsa-miR-515-5p	0	0	1	0	1	1	CLNK	cytokine-dependent hematopoietic cell linker
hsa-miR-515-5p	0	0	1	1	1	1	PRDM7	PR domain containing 7
hsa-miR-515-5p	0	0	1	1	1	1	ANKRD30A	ankyrin repeat domain 30A
hsa-miR-515-5p	1	0	1	1	1	1	GCFC1	GC-rich sequence DNA-binding factor 1
hsa-miR-515-5p	1	0	1	1	1	1	BTN2A1	butyrophilin, subfamily 2, member A1
hsa-miR-515-5p	0	0	1	1	1	1	C20orf118	chromosome 20 open reading frame 118
hsa-miR-515-5p	0	0	1	1	1	1	CCDC34	coiled-coil domain containing 34
hsa-miR-515-5p	1	0	1	1	1	1	ZNF280B	zinc finger protein 280B
hsa-miR-515-5p	0	0	1	1	1	1	PABPC5	poly(A) binding protein, cytoplasmic 5
hsa-miR-515-5p	0	0	1	1	1	1	KCNG3	potassium voltage-gated channel, subfamily G, member 3
hsa-miR-515-5p	1	0	1	1	1	1	BMPER	BMP binding endothelial regulator
hsa-miR-515-5p	0	0	1	1	1	1	RAD51B	RAD51 homolog B (S. cerevisiae)
hsa-miR-515-5p	0	0	1	1	1	1	PATE1	prostate and testis expressed 1
hsa-miR-515-5p	1	0	1	1	1	1	FAM105B	family with sequence similarity 105, member B
hsa-miR-515-5p	0	0	1	0	1	1	SP140L	SP140 nuclear body protein-like
hsa-miR-515-5p	1	0	1	1	1	1	GLCCI1	glucocorticoid induced transcript 1
hsa-miR-515-5p	1	0	1	0	1	1	NUS1	nuclear undecaprenyl pyrophosphate synthase 1 homolog (S. cerevisiae)
hsa-miR-515-5p	1	0	1	1	1	1	ICA1L	islet cell autoantigen 1,69kDa-like
hsa-miR-515-5p	1	0	1	0	1	1	SP1	Sp1 transcription factor
hsa-miR-515-5p	0	0	1	1	1	1	C1orf213	chromosome 1 open reading frame 213
hsa-miR-515-5p	0	0	1	1	1	1	KLF14	Kruppel-like factor 14
hsa-miR-515-5p	0	0	1	1	1	1	SDR16C5	short chain dehydrogenase/reductase family 16C, member 5
hsa-miR-515-5p	0	0	1	1	0	0	RHOXF1	Rhox homeobox family, member 1
hsa-miR-515-5p	0	0	1	1	1	1	CASC5	cancer susceptibility candidate 5
hsa-miR-515-5p	1	0	1	0	1	1	CNOT6L	CCR4-NOT transcription complex, subunit 6-like
hsa-miR-515-5p	0	0	1	1	0	0	LSM14B	LSM14B, SCD6 homolog B (S. cerevisiae)
hsa-miR-515-5p	1	0	1	0	1	1	CENPBD1	CENPB DNA-binding domains containing 1
hsa-miR-515-5p	1	0	1	1	1	1	MRPL30	mitochondrial ribosomal protein L30
hsa-miR-515-5p	0	0	1	1	1	1	HFE2	hemochromatosis type 2 (juvenile)
hsa-miR-515-5p	0	0	1	0	1	1	OSTCP1	oligosaccharyltransferase complex subunit pseudogene 1
hsa-miR-515-5p	1	0	1	0	1	1	MTPN	myotrophin
hsa-miR-515-5p	0	0	1	1	1	1	TTC30A	tetratricopeptide repeat domain 30A
hsa-miR-515-5p	0	0	1	1	1	1	MRFAP1L1	Morf4 family associated protein 1-like 1
hsa-miR-515-5p	0	0	1	1	0	0	C3orf30	chromosome 3 open reading frame 30
hsa-miR-515-5p	1	0	1	0	1	1	MOSPD2	motile sperm domain containing 2
hsa-miR-515-5p	1	0	1	1	1	1	SPRED1	sprouty-related, EVH1 domain containing 1
hsa-miR-515-5p	1	0	1	0	1	1	DCP2	DCP2 decapping enzyme homolog (S. cerevisiae)
hsa-miR-515-5p	0	0	1	1	1	1	SNX31	sorting nexin 31
hsa-miR-515-5p	1	0	1	0	1	1	RWDD4	RWD domain containing 4
hsa-miR-515-5p	1	0	1	0	1	1	C7orf41	chromosome 7 open reading frame 41
hsa-miR-515-5p	1	0	1	1	1	1	WTAP	Wilms tumor 1 associated protein
hsa-miR-515-5p	0	0	1	1	1	1	TMEM74	transmembrane protein 74
hsa-miR-515-5p	0	0	1	0	1	1	KCTD7	potassium channel tetramerisation domain containing 7
hsa-miR-515-5p	1	0	1	1	1	1	TCEANC2	transcription elongation factor A (SII) N-terminal and central domain containing 2
hsa-miR-515-5p	1	0	1	1	1	1	C15orf32	chromosome 15 open reading frame 32
hsa-miR-515-5p	1	0	1	1	1	1	AEBP2	AE binding protein 2
hsa-miR-515-5p	1	0	1	1	0	0	TMEM86A	transmembrane protein 86A
hsa-miR-515-5p	1	0	1	0	1	1	ZCCHC24	zinc finger, CCHC domain containing 24
hsa-miR-515-5p	0	0	1	0	1	1	LNX2	ligand of numb-protein X 2
hsa-miR-515-5p	1	0	1	1	1	1	CREBRF	CREB3 regulatory factor
hsa-miR-515-5p	1	0	1	0	1	1	SEMA6D	sema domain, transmembrane domain (TM), and cytoplasmic domain, (semaphorin) 6D
hsa-miR-515-5p	1	0	1	1	1	1	HOXA1	homeobox A1
hsa-miR-515-5p	1	0	1	1	1	1	CACUL1	CDK2-associated, cullin domain 1
hsa-miR-515-5p	0	0	1	1	1	1	CD46	CD46 molecule, complement regulatory protein
hsa-miR-515-5p	1	0	1	1	1	1	MSI2	musashi homolog 2 (Drosophila)
hsa-miR-515-5p	1	0	1	1	1	1	POM121	POM121 transmembrane nucleoporin
hsa-miR-515-5p	0	0	1	1	0	0	KCNE2	potassium voltage-gated channel, Isk-related family, member 2
hsa-miR-515-5p	0	0	1	1	1	1	KCNH5	potassium voltage-gated channel, subfamily H (eag-related), member 5
hsa-miR-515-5p	1	0	1	1	1	1	SMG7	smg-7 homolog, nonsense mediated mRNA decay factor (C. elegans)
hsa-miR-515-5p	1	0	1	1	1	1	DCUN1D3	DCN1, defective in cullin neddylation 1, domain containing 3 (S. cerevisiae)
hsa-miR-515-5p	1	0	1	1	1	1	CCDC117	coiled-coil domain containing 117
hsa-miR-515-5p	1	0	1	1	1	1	FAM117B	family with sequence similarity 117, member B
hsa-miR-515-5p	0	0	1	1	1	1	FNDC7	fibronectin type III domain containing 7
hsa-miR-515-5p	1	0	1	0	1	1	C3orf58	chromosome 3 open reading frame 58
hsa-miR-515-5p	1	0	1	0	1	1	RNF152	ring finger protein 152
hsa-miR-515-5p	1	0	1	0	1	1	PGM2L1	phosphoglucomutase 2-like 1
hsa-miR-515-5p	1	0	1	1	1	1	IGSF22	immunoglobulin superfamily, member 22
hsa-miR-515-5p	1	0	1	0	1	1	KSR2	kinase suppressor of ras 2
hsa-miR-515-5p	0	0	1	0	1	1	KRT18P55	keratin 18 pseudogene 55
hsa-miR-515-5p	0	0	1	1	1	1	C17orf78	chromosome 17 open reading frame 78
hsa-miR-515-5p	1	0	1	1	1	1	RNF149	ring finger protein 149
hsa-miR-515-5p	1	0	1	1	1	1	SLC9A9	solute carrier family 9, subfamily A (NHE9, cation proton antiporter 9), member 9
hsa-miR-515-5p	1	0	1	1	1	1	ARL10	ADP-ribosylation factor-like 10
hsa-miR-515-5p	0	0	1	1	1	1	MAGEB18	melanoma antigen family B, 18
hsa-miR-515-5p	0	0	1	1	1	1	ZCCHC12	zinc finger, CCHC domain containing 12
hsa-miR-515-5p	0	0	1	1	1	1	SCARA5	scavenger receptor class A, member 5 (putative)
hsa-miR-515-5p	0	0	1	1	1	1	YIPF6	Yip1 domain family, member 6
hsa-miR-515-5p	0	0	1	1	1	1	CLEC14A	C-type lectin domain family 14, member A
hsa-miR-515-5p	0	0	1	1	1	1	GRIK1	glutamate receptor, ionotropic, kainate 1
hsa-miR-515-5p	1	0	1	1	1	1	RAB3IP	RAB3A interacting protein (rabin3)
hsa-miR-515-5p	1	0	1	1	1	1	EXOC8	exocyst complex component 8
hsa-miR-515-5p	1	0	1	0	1	1	C5orf51	chromosome 5 open reading frame 51
hsa-miR-515-5p	1	0	1	1	1	1	PKHD1L1	polycystic kidney and hepatic disease 1 (autosomal recessive)-like 1
hsa-miR-515-5p	1	0	1	1	1	1	LRRTM3	leucine rich repeat transmembrane neuronal 3
hsa-miR-515-5p	1	0	1	1	1	1	FAM134C	family with sequence similarity 134, member C
hsa-miR-515-5p	0	0	1	1	1	1	ZNF831	zinc finger protein 831
hsa-miR-515-5p	0	0	1	1	1	1	KRTAP13-1	keratin associated protein 13-1
hsa-miR-515-5p	0	0	1	1	0	0	BCDIN3D	BCDIN3 domain containing
hsa-miR-515-5p	1	0	1	1	1	1	UBXN2A	UBX domain protein 2A
hsa-miR-515-5p	0	0	1	1	0	0	DCDC1	doublecortin domain containing 1
hsa-miR-515-5p	0	0	1	1	1	1	THEM5	thioesterase superfamily member 5
hsa-miR-515-5p	1	0	1	1	1	1	SUMF1	sulfatase modifying factor 1
hsa-miR-515-5p	1	0	1	0	1	1	RIMS4	regulating synaptic membrane exocytosis 4
hsa-miR-515-5p	0	0	1	1	0	0	LYZL2	lysozyme-like 2
hsa-miR-515-5p	1	0	1	1	1	1	SPTY2D1	SPT2, Suppressor of Ty, domain containing 1 (S. cerevisiae)
hsa-miR-515-5p	1	0	1	1	1	1	ADAMTS6	ADAM metallopeptidase with thrombospondin type 1 motif, 6
hsa-miR-515-5p	1	0	1	1	1	1	ASB7	ankyrin repeat and SOCS box containing 7
hsa-miR-515-5p	1	0	1	0	1	1	ZC3H6	zinc finger CCCH-type containing 6
hsa-miR-515-5p	1	0	1	1	1	1	NHLRC1	NHL repeat containing 1
hsa-miR-515-5p	1	0	1	1	1	1	PTGER3	prostaglandin E receptor 3 (subtype EP3)
hsa-miR-515-5p	0	0	1	1	0	0	TRIM73	tripartite motif containing 73
hsa-miR-515-5p	1	0	1	1	1	1	NSUN4	NOP2/Sun domain family, member 4
hsa-miR-515-5p	1	0	1	1	1	1	TMEM189-UBE2V1	TMEM189-UBE2V1 readthrough
hsa-miR-515-5p	0	0	1	1	1	1	SERTM1	serine-rich and transmembrane domain containing 1
hsa-miR-515-5p	0	0	1	1	1	1	FAM180A	family with sequence similarity 180, member A
hsa-miR-515-5p	1	0	1	1	1	1	ATRNL1	attractin-like 1
hsa-miR-515-5p	0	0	1	1	1	1	LCTL	lactase-like
hsa-miR-515-5p	1	0	1	1	1	1	GADL1	glutamate decarboxylase-like 1
hsa-miR-515-5p	0	0	1	0	0	0	C16orf47	chromosome 16 open reading frame 47
hsa-miR-515-5p	0	0	1	1	1	1	C8orf86	chromosome 8 open reading frame 86
hsa-miR-515-5p	1	0	1	1	1	1	SAMD12	sterile alpha motif domain containing 12
hsa-miR-515-5p	1	0	1	1	1	1	ADAMTSL3	ADAMTS-like 3
hsa-miR-515-5p	1	0	1	1	1	1	CAPN3	calpain 3, (p94)
hsa-miR-515-5p	0	0	1	0	1	1	TMEM215	transmembrane protein 215
hsa-miR-515-5p	0	0	1	0	0	0	SNORD55	small nucleolar RNA, C/D box 55
hsa-miR-515-5p	0	0	1	0	0	0	ESRRAP2	estrogen-related receptor alpha pseudogene 2
hsa-miR-515-5p	0	0	1	0	0	0	RAB9BP1	RAB9B, member RAS oncogene family pseudogene 1
hsa-miR-515-5p	0	0	1	0	0	0	TTTY21	testis-specific transcript, Y-linked 21 (non-protein coding)
hsa-miR-515-5p	0	0	1	0	0	0	TTTY15	testis-specific transcript, Y-linked 15 (non-protein coding)
hsa-miR-515-5p	0	0	1	0	0	0	CYCSP52	cytochrome c, somatic pseudogene 52
hsa-miR-515-5p	0	0	1	0	0	0	TPI1P2	triosephosphate isomerase 1 pseudogene 2
hsa-miR-515-5p	0	0	1	0	0	0	FTH1P2	ferritin, heavy polypeptide 1 pseudogene 2
hsa-miR-515-5p	0	0	1	0	0	0	FTH1P7	ferritin, heavy polypeptide 1 pseudogene 7
hsa-miR-515-5p	0	0	1	0	0	0	FTH1P8	ferritin, heavy polypeptide 1 pseudogene 8
hsa-miR-515-5p	0	0	1	0	0	0	MEIS3P1	Meis homeobox 3 pseudogene 1
hsa-miR-515-5p	0	0	1	0	0	0	HYALP1	hyaluronoglucosaminidase pseudogene 1
hsa-miR-515-5p	0	0	1	0	0	0	AKIRIN2-AS1	AKIRIN2 antisense RNA 1
hsa-miR-515-5p	0	0	1	0	0	0	NUDT9P1	nudix (nucleoside diphosphate linked moiety X)-type motif 9 pseudogene 1
hsa-miR-515-5p	0	0	1	0	0	0	SEPHS1P1	selenophosphate synthetase 1 pseudogene 1
hsa-miR-515-5p	0	0	1	0	0	0	HOXA11-AS	HOXA11 antisense RNA
hsa-miR-515-5p	0	0	1	0	0	0	LOC256880	uncharacterized LOC256880
hsa-miR-515-5p	0	0	1	0	0	0	HCG26	HLA complex group 26 (non-protein coding)
hsa-miR-515-5p	0	0	1	0	0	0	TPTE2P6	transmembrane phosphoinositide 3-phosphatase and tensin homolog 2 pseudogene 6
hsa-miR-515-5p	0	0	1	0	0	0	AQP7P1	aquaporin 7 pseudogene 1
hsa-miR-515-5p	0	0	1	0	0	0	RNF126P1	ring finger protein 126 pseudogene 1
hsa-miR-515-5p	0	0	1	0	0	0	MALAT1	metastasis associated lung adenocarcinoma transcript 1 (non-protein coding)
hsa-miR-515-5p	0	0	1	0	0	0	LOC285359	phosducin-like 3 pseudogene
hsa-miR-515-5p	0	0	1	0	0	0	TCAM1P	testicular cell adhesion molecule 1 homolog (mouse), pseudogene
hsa-miR-515-5p	0	0	1	0	0	0	SNORA39	small nucleolar RNA, H/ACA box 39
hsa-miR-515-5p	0	0	1	0	0	0	SNORA60	small nucleolar RNA, H/ACA box 60
hsa-miR-515-5p	0	0	1	0	0	0	SNORD45C	small nucleolar RNA, C/D box 45C
hsa-miR-515-5p	0	0	1	0	0	0	HSP90AB2P	heat shock protein 90kDa alpha (cytosolic), class B member 2, pseudogene
hsa-miR-515-5p	0	0	1	0	0	0	LOC729603	calcium binding protein P22 pseudogene
hsa-miR-515-5p	0	0	1	0	0	0	SNORD116-28	small nucleolar RNA, C/D box 116-28
hsa-miR-515-5p	0	0	1	1	0	0	SNRPN	small nuclear ribonucleoprotein polypeptide N
hsa-miR-515-5p	1	0	1	1	0	0	KIAA1549L	KIAA1549-like
hsa-miR-515-5p	0	0	1	1	1	1	CAST	calpastatin
hsa-miR-515-5p	0	0	1	1	0	0	EPX	eosinophil peroxidase
hsa-miR-515-5p	1	0	1	1	1	1	HNRNPA1	heterogeneous nuclear ribonucleoprotein A1
hsa-miR-515-5p	0	0	1	1	0	0	ERCC1	excision repair cross-complementing rodent repair deficiency, complementation group 1 (includes overlapping antisense sequence)
hsa-miR-515-5p	1	0	1	1	1	1	SLC39A9	solute carrier family 39 (zinc transporter), member 9
hsa-miR-515-5p	0	0	1	1	0	0	OTC	ornithine carbamoyltransferase
hsa-miR-515-5p	1	0	1	1	1	1	QSER1	glutamine and serine rich 1
hsa-miR-515-5p	0	0	0	1	1	1	KRT13	keratin 13
hsa-miR-515-5p	0	0	0	1	0	0	TMEM38A	transmembrane protein 38A
hsa-miR-515-5p	0	0	1	1	0	0	NME8	NME/NM23 family member 8
hsa-miR-515-5p	0	0	1	1	0	0	MT3	metallothionein 3
hsa-miR-515-5p	0	0	1	1	1	1	TMEM101	transmembrane protein 101
hsa-miR-515-5p	0	0	0	1	0	0	PMM1	phosphomannomutase 1
hsa-miR-515-5p	0	0	0	1	1	1	PLEK2	pleckstrin 2
hsa-miR-515-5p	1	0	1	1	1	1	ZFYVE21	zinc finger, FYVE domain containing 21
hsa-miR-515-5p	1	0	1	1	1	1	NFKBIA	nuclear factor of kappa light polypeptide gene enhancer in B-cells inhibitor, alpha
hsa-miR-515-5p	0	0	1	1	0	0	CHMP4A	charged multivesicular body protein 4A
hsa-miR-515-5p	0	0	0	1	0	0	R3HDML	R3H domain containing-like
hsa-miR-515-5p	0	0	0	1	0	0	METRN	meteorin, glial cell differentiation regulator
hsa-miR-515-5p	0	0	1	1	1	1	EIF3E	eukaryotic translation initiation factor 3, subunit E
hsa-miR-515-5p	0	0	1	1	0	0	CNOT3	CCR4-NOT transcription complex, subunit 3
hsa-miR-515-5p	0	0	1	1	0	0	GALNTL4	UDP-N-acetyl-alpha-D-galactosamine:polypeptide N-acetylgalactosaminyltransferase-like 4
hsa-miR-515-5p	0	0	0	1	1	1	RERGL	RERG/RAS-like
hsa-miR-515-5p	0	0	1	1	1	1	TIMELESS	timeless homolog (Drosophila)
hsa-miR-515-5p	0	0	1	1	1	1	HARS2	histidyl-tRNA synthetase 2, mitochondrial
hsa-miR-515-5p	1	0	1	1	1	1	SPARC	secreted protein, acidic, cysteine-rich (osteonectin)
hsa-miR-515-5p	1	0	0	1	0	0	PCDHB6	protocadherin beta 6
hsa-miR-515-5p	0	0	1	1	1	1	IL5	interleukin 5 (colony-stimulating factor, eosinophil)
hsa-miR-515-5p	0	0	1	1	0	0	PCDH12	protocadherin 12
hsa-miR-515-5p	0	0	1	1	1	1	FAM162A	family with sequence similarity 162, member A
hsa-miR-515-5p	0	0	0	1	0	0	CYB561D2	cytochrome b-561 domain containing 2
hsa-miR-515-5p	1	0	1	1	1	1	GNB4	guanine nucleotide binding protein (G protein), beta polypeptide 4
hsa-miR-515-5p	1	0	0	1	0	0	ABTB1	ankyrin repeat and BTB (POZ) domain containing 1
hsa-miR-515-5p	0	0	0	1	1	1	PASK	PAS domain containing serine/threonine kinase
hsa-miR-515-5p	1	0	1	1	1	1	ADPRHL2	ADP-ribosylhydrolase like 2
hsa-miR-515-5p	0	0	1	1	1	1	ATP6V0B	ATPase, H+ transporting, lysosomal 21kDa, V0 subunit b
hsa-miR-515-5p	0	0	1	1	1	1	STBD1	starch binding domain 1
hsa-miR-515-5p	0	0	0	1	0	0	SERPINB10	serpin peptidase inhibitor, clade B (ovalbumin), member 10
hsa-miR-515-5p	0	0	0	1	0	0	ADCK1	aarF domain containing kinase 1
hsa-miR-515-5p	0	0	0	1	0	0	SLIRP	SRA stem-loop interacting RNA binding protein
hsa-miR-515-5p	0	0	1	1	0	0	CHRNA2	cholinergic receptor, nicotinic, alpha 2 (neuronal)
hsa-miR-515-5p	1	0	1	1	1	1	TBX4	T-box 4
hsa-miR-515-5p	0	0	1	1	1	1	CDH26	cadherin 26
hsa-miR-515-5p	0	0	1	1	0	0	PEX6	peroxisomal biogenesis factor 6
hsa-miR-515-5p	0	0	0	1	0	0	KATNAL2	katanin p60 subunit A-like 2
hsa-miR-515-5p	0	0	1	1	0	0	MBOAT7	membrane bound O-acyltransferase domain containing 7
hsa-miR-515-5p	1	0	1	1	1	1	EML2	echinoderm microtubule associated protein like 2
hsa-miR-515-5p	0	0	0	1	0	0	HELB	helicase (DNA) B
hsa-miR-515-5p	0	0	1	1	0	0	SIRT2	sirtuin 2
hsa-miR-515-5p	0	0	1	1	0	0	FAM64A	family with sequence similarity 64, member A
hsa-miR-515-5p	0	0	1	1	0	0	CHRNA10	cholinergic receptor, nicotinic, alpha 10 (neuronal)
hsa-miR-515-5p	1	0	1	1	1	1	KLF16	Kruppel-like factor 16
hsa-miR-515-5p	0	0	1	1	0	0	NXPE1	neurexophilin and PC-esterase domain family, member 1
hsa-miR-515-5p	0	0	1	1	0	0	TMCO6	transmembrane and coiled-coil domains 6
hsa-miR-515-5p	0	0	0	1	1	1	ACSBG2	acyl-CoA synthetase bubblegum family member 2
hsa-miR-515-5p	0	0	0	1	0	0	GDF15	growth differentiation factor 15
hsa-miR-515-5p	1	0	0	1	1	1	PRIC285	peroxisomal proliferator-activated receptor A interacting complex 285
hsa-miR-515-5p	0	0	0	1	0	0	GINS2	GINS complex subunit 2 (Psf2 homolog)
hsa-miR-515-5p	0	0	1	1	0	0	DPH2	DPH2 homolog (S. cerevisiae)
hsa-miR-515-5p	0	0	0	1	0	0	PEMT	phosphatidylethanolamine N-methyltransferase
hsa-miR-515-5p	0	0	1	1	0	0	HSPBP1	HSPA (heat shock 70kDa) binding protein, cytoplasmic cochaperone 1
hsa-miR-515-5p	0	0	0	1	1	1	VRTN	vertebrae development homolog (pig)
hsa-miR-515-5p	0	0	1	1	1	1	NARS	asparaginyl-tRNA synthetase
hsa-miR-515-5p	1	0	1	1	1	1	PUM1	pumilio homolog 1 (Drosophila)
hsa-miR-515-5p	0	0	1	1	1	1	HRK	harakiri, BCL2 interacting protein (contains only BH3 domain)
hsa-miR-515-5p	0	0	1	1	0	0	GDF11	growth differentiation factor 11
hsa-miR-515-5p	0	0	0	1	0	0	CAMK2B	calcium/calmodulin-dependent protein kinase II beta
hsa-miR-515-5p	0	0	0	1	0	0	CHAD	chondroadherin
hsa-miR-515-5p	0	0	1	1	1	1	ACTL6A	actin-like 6A
hsa-miR-515-5p	0	0	0	1	1	1	PSMC1	proteasome (prosome, macropain) 26S subunit, ATPase, 1
hsa-miR-515-5p	0	0	0	1	1	1	EMG1	EMG1 nucleolar protein homolog (S. cerevisiae)
hsa-miR-515-5p	0	0	0	1	1	1	PALB2	partner and localizer of BRCA2
hsa-miR-515-5p	0	0	0	1	0	0	TNFRSF13B	tumor necrosis factor receptor superfamily, member 13B
hsa-miR-515-5p	1	0	1	1	1	1	TAOK1	TAO kinase 1
hsa-miR-515-5p	0	0	1	1	1	1	CSNK1A1	casein kinase 1, alpha 1
hsa-miR-515-5p	0	0	1	1	1	1	PSMD9	proteasome (prosome, macropain) 26S subunit, non-ATPase, 9
hsa-miR-515-5p	0	0	1	1	0	0	SPG11	spastic paraplegia 11 (autosomal recessive)
hsa-miR-515-5p	0	0	1	1	0	0	RBMS2	RNA binding motif, single stranded interacting protein 2
hsa-miR-515-5p	0	0	0	1	0	0	MYOM2	myomesin (M-protein) 2, 165kDa
hsa-miR-515-5p	0	0	1	1	0	0	CD33	CD33 molecule
hsa-miR-515-5p	0	0	0	1	1	1	ALG1	asparagine-linked glycosylation 1, beta-1,4-mannosyltransferase homolog (S. cerevisiae)
hsa-miR-515-5p	1	0	1	1	1	1	WSB1	WD repeat and SOCS box containing 1
hsa-miR-515-5p	1	0	1	1	1	1	TRAF4	TNF receptor-associated factor 4
hsa-miR-515-5p	1	0	1	1	0	0	ZC3H3	zinc finger CCCH-type containing 3
hsa-miR-515-5p	0	0	1	1	0	0	EFCAB6	EF-hand calcium binding domain 6
hsa-miR-515-5p	1	0	1	1	1	1	ZMYND8	zinc finger, MYND-type containing 8
hsa-miR-515-5p	1	0	1	1	1	1	OVCA2	ovarian tumor suppressor candidate 2
hsa-miR-515-5p	1	0	0	1	0	0	MED15	mediator complex subunit 15
hsa-miR-515-5p	0	0	1	1	0	0	FAM83E	family with sequence similarity 83, member E
hsa-miR-515-5p	0	0	1	1	1	1	GIPR	gastric inhibitory polypeptide receptor
hsa-miR-515-5p	0	0	0	1	0	0	CCDC61	coiled-coil domain containing 61
hsa-miR-515-5p	0	0	0	1	1	1	SGOL1	shugoshin-like 1 (S. pombe)
hsa-miR-515-5p	1	0	1	1	1	1	LRP2	low density lipoprotein receptor-related protein 2
hsa-miR-515-5p	1	0	0	1	0	0	ECE1	endothelin converting enzyme 1
hsa-miR-515-5p	1	0	1	1	1	1	NNT	nicotinamide nucleotide transhydrogenase
hsa-miR-515-5p	0	0	1	1	0	0	RPL24	ribosomal protein L24
hsa-miR-515-5p	0	0	0	1	0	0	ABCB6	ATP-binding cassette, sub-family B (MDR/TAP), member 6
hsa-miR-515-5p	0	0	1	1	1	1	CPVL	carboxypeptidase, vitellogenic-like
hsa-miR-515-5p	0	0	0	1	1	1	POLA2	polymerase (DNA directed), alpha 2, accessory subunit
hsa-miR-515-5p	0	0	1	1	0	0	MCCC1	methylcrotonoyl-CoA carboxylase 1 (alpha)
hsa-miR-515-5p	0	0	1	1	1	1	CPT1A	carnitine palmitoyltransferase 1A (liver)
hsa-miR-515-5p	1	0	1	1	0	0	KIAA1644	KIAA1644
hsa-miR-515-5p	0	0	0	1	0	0	ITGB7	integrin, beta 7
hsa-miR-515-5p	0	0	1	1	1	1	AK7	adenylate kinase 7
hsa-miR-515-5p	0	0	1	1	1	1	SLC27A2	solute carrier family 27 (fatty acid transporter), member 2
hsa-miR-515-5p	0	0	0	1	0	0	RHCG	Rh family, C glycoprotein
hsa-miR-515-5p	0	0	1	1	1	1	NCOR1	nuclear receptor corepressor 1
hsa-miR-515-5p	0	0	0	1	0	0	LOC113230	uncharacterized LOC113230
hsa-miR-515-5p	0	0	0	1	0	0	PPAP2C	phosphatidic acid phosphatase type 2C
hsa-miR-515-5p	0	0	1	1	0	0	RPL13A	ribosomal protein L13a
hsa-miR-515-5p	0	0	0	1	0	0	KIAA1751	KIAA1751
hsa-miR-515-5p	0	0	0	1	0	0	EPHX1	epoxide hydrolase 1, microsomal (xenobiotic)
hsa-miR-515-5p	0	0	1	1	1	1	DQX1	DEAQ box RNA-dependent ATPase 1
hsa-miR-515-5p	1	0	1	1	1	1	POLR2D	polymerase (RNA) II (DNA directed) polypeptide D
hsa-miR-515-5p	0	0	0	1	0	0	KLHL23	kelch-like 23 (Drosophila)
hsa-miR-515-5p	0	0	0	1	0	0	SLC10A6	solute carrier family 10 (sodium/bile acid cotransporter family), member 6
hsa-miR-515-5p	0	0	0	1	1	1	SUMF2	sulfatase modifying factor 2
hsa-miR-515-5p	1	0	1	1	1	1	BIN3	bridging integrator 3
hsa-miR-515-5p	0	0	1	1	0	0	PAOX	polyamine oxidase (exo-N4-amino)
hsa-miR-515-5p	1	0	0	1	1	1	PPRC1	peroxisome proliferator-activated receptor gamma, coactivator-related 1
hsa-miR-515-5p	0	0	1	1	0	0	TTC12	tetratricopeptide repeat domain 12
hsa-miR-515-5p	0	0	0	1	0	0	C11orf52	chromosome 11 open reading frame 52
hsa-miR-515-5p	0	0	0	1	1	1	CSRP2BP	CSRP2 binding protein
hsa-miR-515-5p	1	0	1	1	1	1	SIDT2	SID1 transmembrane family, member 2
hsa-miR-515-5p	1	0	1	1	1	1	TMEM218	transmembrane protein 218
hsa-miR-515-5p	0	0	0	1	1	1	LDHC	lactate dehydrogenase C
hsa-miR-515-5p	1	0	1	1	1	1	MFSD6	major facilitator superfamily domain containing 6
hsa-miR-515-5p	1	0	1	1	1	1	BARX2	BARX homeobox 2
hsa-miR-515-5p	0	0	1	1	1	1	ANKRD44	ankyrin repeat domain 44
hsa-miR-515-5p	0	0	1	1	1	1	NADKD1	NAD kinase domain containing 1
hsa-miR-515-5p	0	0	0	1	0	0	SLC7A7	solute carrier family 7 (amino acid transporter light chain, y+L system), member 7
hsa-miR-515-5p	0	0	0	1	0	0	MED7	mediator complex subunit 7
hsa-miR-515-5p	0	0	1	1	0	0	SLC26A10	solute carrier family 26, member 10
hsa-miR-515-5p	0	0	1	1	1	1	ARHGEF25	Rho guanine nucleotide exchange factor (GEF) 25
hsa-miR-515-5p	0	0	1	1	0	0	NODAL	nodal homolog (mouse)
hsa-miR-515-5p	0	0	1	1	1	1	PDE6D	phosphodiesterase 6D, cGMP-specific, rod, delta
hsa-miR-515-5p	0	0	1	1	0	0	GPR153	G protein-coupled receptor 153
hsa-miR-515-5p	1	0	1	1	1	1	PPP1R9A	protein phosphatase 1, regulatory subunit 9A
hsa-miR-515-5p	0	0	1	1	0	0	SCRN2	secernin 2
hsa-miR-515-5p	0	0	1	1	1	1	SNF8	SNF8, ESCRT-II complex subunit, homolog (S. cerevisiae)
hsa-miR-515-5p	0	0	0	1	0	0	GJD2	gap junction protein, delta 2, 36kDa
hsa-miR-515-5p	0	0	1	1	0	0	SCUBE1	signal peptide, CUB domain, EGF-like 1
hsa-miR-515-5p	0	0	1	1	1	1	CES5A	carboxylesterase 5A
hsa-miR-515-5p	0	0	1	1	1	1	MED8	mediator complex subunit 8
hsa-miR-515-5p	0	0	0	1	0	0	CLDND2	claudin domain containing 2
hsa-miR-515-5p	0	0	1	1	1	1	CD3G	CD3g molecule, gamma (CD3-TCR complex)
hsa-miR-515-5p	0	0	1	1	0	0	AZGP1	alpha-2-glycoprotein 1, zinc-binding
hsa-miR-515-5p	0	0	0	1	1	1	ALKBH4	alkB, alkylation repair homolog 4 (E. coli)
hsa-miR-515-5p	1	0	1	1	1	1	ZNF563	zinc finger protein 563
hsa-miR-515-5p	0	0	0	1	0	0	WDR63	WD repeat domain 63
hsa-miR-515-5p	0	0	0	1	1	1	LHCGR	luteinizing hormone/choriogonadotropin receptor
hsa-miR-515-5p	0	0	1	1	1	1	ARHGAP25	Rho GTPase activating protein 25
hsa-miR-515-5p	1	0	1	1	1	1	GNPDA2	glucosamine-6-phosphate deaminase 2
hsa-miR-515-5p	0	0	1	1	1	1	ATP13A4	ATPase type 13A4
hsa-miR-515-5p	0	0	0	1	1	1	LOC375295	uncharacterized LOC375295
hsa-miR-515-5p	0	0	0	1	1	1	KIAA1524	KIAA1524
hsa-miR-515-5p	0	0	1	1	0	0	LEPRE1	leucine proline-enriched proteoglycan (leprecan) 1
hsa-miR-515-5p	0	0	1	1	0	0	RAD54L2	RAD54-like 2 (S. cerevisiae)
hsa-miR-515-5p	0	0	0	1	1	1	GFM2	G elongation factor, mitochondrial 2
hsa-miR-515-5p	0	0	1	1	1	1	AKR1D1	aldo-keto reductase family 1, member D1 (delta 4-3-ketosteroid-5-beta-reductase)
hsa-miR-515-5p	0	0	0	1	0	0	ALDH7A1	aldehyde dehydrogenase 7 family, member A1
hsa-miR-515-5p	0	0	1	1	1	1	KIF27	kinesin family member 27
hsa-miR-515-5p	1	0	1	1	1	1	NLGN4Y	neuroligin 4, Y-linked
hsa-miR-515-5p	0	0	1	1	1	1	STOX1	storkhead box 1
hsa-miR-515-5p	0	0	0	1	0	0	SERPINA4	serpin peptidase inhibitor, clade A (alpha-1 antiproteinase, antitrypsin), member 4
hsa-miR-515-5p	0	0	0	1	0	0	C12orf70	chromosome 12 open reading frame 70
hsa-miR-515-5p	1	0	1	1	1	1	SLC24A4	solute carrier family 24 (sodium/potassium/calcium exchanger), member 4
hsa-miR-515-5p	0	0	0	1	0	0	IFI27L1	interferon, alpha-inducible protein 27-like 1
hsa-miR-515-5p	0	0	1	1	0	0	LOC643923	uncharacterized LOC643923
hsa-miR-515-5p	0	0	1	1	0	0	CYB5R2	cytochrome b5 reductase 2
hsa-miR-515-5p	0	0	1	1	1	1	CDYL2	chromodomain protein, Y-like 2
hsa-miR-515-5p	0	0	1	1	1	1	TMEM41B	transmembrane protein 41B
hsa-miR-515-5p	0	0	1	1	0	0	PEX11A	peroxisomal biogenesis factor 11 alpha
hsa-miR-515-5p	0	0	1	1	1	1	PDIA3	protein disulfide isomerase family A, member 3
hsa-miR-515-5p	0	0	1	1	0	0	MEI1	meiosis inhibitor 1
hsa-miR-515-5p	0	0	1	1	1	1	ZNF428	zinc finger protein 428
hsa-miR-515-5p	0	0	0	1	0	0	MVD	mevalonate (diphospho) decarboxylase
hsa-miR-515-5p	0	0	0	1	1	1	ZNF582	zinc finger protein 582
hsa-miR-515-5p	0	0	0	1	1	1	ZNF577	zinc finger protein 577
hsa-miR-515-5p	0	0	1	1	1	1	NTF4	neurotrophin 4
hsa-miR-515-5p	0	0	0	1	0	0	VPREB1	pre-B lymphocyte 1
hsa-miR-515-5p	0	0	1	1	1	1	MPHOSPH9	M-phase phosphoprotein 9
hsa-miR-515-5p	0	0	0	1	0	0	HTRA4	HtrA serine peptidase 4
hsa-miR-515-5p	0	0	1	1	0	0	CCDC11	coiled-coil domain containing 11
hsa-miR-515-5p	0	0	1	1	1	1	DTWD2	DTW domain containing 2
hsa-miR-515-5p	1	0	1	1	1	1	AFAP1L2	actin filament associated protein 1-like 2
hsa-miR-515-5p	0	0	0	1	0	0	ANKS3	ankyrin repeat and sterile alpha motif domain containing 3
hsa-miR-515-5p	1	0	1	1	1	1	RNASE6	ribonuclease, RNase A family, k6
hsa-miR-515-5p	0	0	1	1	1	1	YEATS2	YEATS domain containing 2
hsa-miR-515-5p	0	0	1	1	1	1	FEN1	flap structure-specific endonuclease 1
hsa-miR-515-5p	0	0	1	1	0	0	RNF181	ring finger protein 181
hsa-miR-515-5p	0	0	1	1	0	0	ATP6V1E2	ATPase, H+ transporting, lysosomal 31kDa, V1 subunit E2
hsa-miR-515-5p	1	0	1	1	1	1	CDCA7	cell division cycle associated 7
hsa-miR-515-5p	1	0	1	1	1	1	SUCLG2	succinate-CoA ligase, GDP-forming, beta subunit
hsa-miR-515-5p	1	0	1	1	1	1	RBM33	RNA binding motif protein 33
hsa-miR-515-5p	0	0	1	1	0	0	BAD	BCL2-associated agonist of cell death
hsa-miR-515-5p	0	0	1	1	1	1	OR13A1	olfactory receptor, family 13, subfamily A, member 1
hsa-miR-515-5p	0	0	0	1	1	1	UGT2B15	UDP glucuronosyltransferase 2 family, polypeptide B15
hsa-miR-515-5p	0	0	0	1	1	1	FAM86B2	family with sequence similarity 86, member B2
[truncated: 474 more rows]
