# Supplementary material for: Profiling of Selected MicroRNAs in Proliferative Eutopic Endometrium of Women with Ovarian Endometriosis
Source: Biomed Res Int. 2015 Aug 20;2015:760698. doi: 10.1155/2015/760698 (PMC4558423; doi:10.1155/2015/760698)
Supplement: Supplementary file 1 — Table I: The names of miRNAs significantly differentially expressed between eutopic endometrium of patients with endometriosis vs eutopic endometrium of patients without endometriosis. Table II: The associations between miRNA and mRNA, which presents detailed results of the search of six major databases i.e targetscan, tarbase, miranda, mirbase, mirtarget2 and pictar. [file 760698.f1.zip › 760698.f1/Table II/hsa-miR-516a-5p.tsv]

miR	targetscan	tarbase	miranda	mirbase	mirtarget2	pictar	GeneSymbol	GeneName
hsa-miR-516a-5p	0	0	1	1	0	0	ATP10B	ATPase, class V, type 10B
hsa-miR-516a-5p	1	0	1	0	1	1	LPHN3	latrophilin 3
hsa-miR-516a-5p	1	0	1	1	0	0	SEZ6L	seizure related 6 homolog (mouse)-like
hsa-miR-516a-5p	1	0	1	1	1	1	CIT	citron (rho-interacting, serine/threonine kinase 21)
hsa-miR-516a-5p	0	0	1	1	0	0	FAM149B1	family with sequence similarity 149, member B1
hsa-miR-516a-5p	1	0	1	1	0	0	KIAA1045	KIAA1045
hsa-miR-516a-5p	1	0	1	0	1	1	GPR158	G protein-coupled receptor 158
hsa-miR-516a-5p	1	0	1	1	0	0	PPM1H	protein phosphatase, Mg2+/Mn2+ dependent, 1H
hsa-miR-516a-5p	1	0	1	0	0	0	HEG1	HEG homolog 1 (zebrafish)
hsa-miR-516a-5p	1	0	1	1	1	1	RIMKLB	ribosomal modification protein rimK-like family member B
hsa-miR-516a-5p	1	0	1	1	1	1	UPF2	UPF2 regulator of nonsense transcripts homolog (yeast)
hsa-miR-516a-5p	1	0	1	1	1	1	FRAS1	Fraser syndrome 1
hsa-miR-516a-5p	1	0	1	1	1	1	IKZF4	IKAROS family zinc finger 4 (Eos)
hsa-miR-516a-5p	0	0	1	1	1	1	C3orf15	chromosome 3 open reading frame 15
hsa-miR-516a-5p	1	0	1	1	1	1	MAT2B	methionine adenosyltransferase II, beta
hsa-miR-516a-5p	1	0	1	1	1	1	SH3TC2	SH3 domain and tetratricopeptide repeats 2
hsa-miR-516a-5p	1	0	1	1	1	1	ACBD5	acyl-CoA binding domain containing 5
hsa-miR-516a-5p	1	0	1	1	1	1	PAN3	PAN3 poly(A) specific ribonuclease subunit homolog (S. cerevisiae)
hsa-miR-516a-5p	1	0	1	0	1	1	CCDC88A	coiled-coil domain containing 88A
hsa-miR-516a-5p	1	0	1	1	1	1	BACH2	BTB and CNC homology 1, basic leucine zipper transcription factor 2
hsa-miR-516a-5p	0	0	1	1	1	1	TFRC	transferrin receptor (p90, CD71)
hsa-miR-516a-5p	1	0	1	1	1	1	REV3L	REV3-like, polymerase (DNA directed), zeta, catalytic subunit
hsa-miR-516a-5p	0	0	1	1	0	0	PSMB2	proteasome (prosome, macropain) subunit, beta type, 2
hsa-miR-516a-5p	1	0	1	1	1	1	PDLIM5	PDZ and LIM domain 5
hsa-miR-516a-5p	0	0	1	1	1	1	HLA-DQA1	major histocompatibility complex, class II, DQ alpha 1
hsa-miR-516a-5p	0	0	1	1	1	1	ELOVL5	ELOVL fatty acid elongase 5
hsa-miR-516a-5p	1	0	1	0	1	1	PDE7B	phosphodiesterase 7B
hsa-miR-516a-5p	1	0	1	1	1	1	MEF2D	myocyte enhancer factor 2D
hsa-miR-516a-5p	1	0	1	1	1	1	PCDH17	protocadherin 17
hsa-miR-516a-5p	1	0	1	1	1	1	TMBIM6	transmembrane BAX inhibitor motif containing 6
hsa-miR-516a-5p	1	0	1	1	1	1	LDB2	LIM domain binding 2
hsa-miR-516a-5p	1	0	1	1	1	1	MBNL2	muscleblind-like splicing regulator 2
hsa-miR-516a-5p	1	0	1	1	1	1	ERLIN1	ER lipid raft associated 1
hsa-miR-516a-5p	1	0	1	1	1	1	CBFA2T2	core-binding factor, runt domain, alpha subunit 2; translocated to, 2
hsa-miR-516a-5p	0	0	1	1	1	1	RER1	RER1 retention in endoplasmic reticulum 1 homolog (S. cerevisiae)
hsa-miR-516a-5p	0	0	1	1	0	0	RBM5	RNA binding motif protein 5
hsa-miR-516a-5p	1	0	1	0	0	0	PPME1	protein phosphatase methylesterase 1
hsa-miR-516a-5p	1	0	1	1	1	1	HP1BP3	heterochromatin protein 1, binding protein 3
hsa-miR-516a-5p	0	0	1	1	0	0	THAP4	THAP domain containing 4
hsa-miR-516a-5p	1	0	1	1	1	1	CAB39	calcium binding protein 39
hsa-miR-516a-5p	1	0	1	1	1	1	AASDHPPT	aminoadipate-semialdehyde dehydrogenase-phosphopantetheinyl transferase
hsa-miR-516a-5p	1	0	1	1	1	1	EIF4A2	eukaryotic translation initiation factor 4A2
hsa-miR-516a-5p	1	0	1	1	1	1	OGT	O-linked N-acetylglucosamine (GlcNAc) transferase
hsa-miR-516a-5p	1	0	1	1	1	1	DCLRE1B	DNA cross-link repair 1B
hsa-miR-516a-5p	1	0	1	1	1	1	PBX3	pre-B-cell leukemia homeobox 3
hsa-miR-516a-5p	1	0	1	1	1	1	RCAN1	regulator of calcineurin 1
hsa-miR-516a-5p	0	0	1	1	1	1	C10orf90	chromosome 10 open reading frame 90
hsa-miR-516a-5p	0	0	1	1	0	0	RASGEF1C	RasGEF domain family, member 1C
hsa-miR-516a-5p	0	0	1	1	1	1	CHODL	chondrolectin
hsa-miR-516a-5p	0	0	1	1	1	1	PTK7	PTK7 protein tyrosine kinase 7
hsa-miR-516a-5p	1	0	1	0	1	1	IL1RAP	interleukin 1 receptor accessory protein
hsa-miR-516a-5p	1	0	1	0	1	1	CACNA1C	calcium channel, voltage-dependent, L type, alpha 1C subunit
hsa-miR-516a-5p	0	0	1	1	1	1	MTHFR	methylenetetrahydrofolate reductase (NAD(P)H)
hsa-miR-516a-5p	1	0	1	1	1	1	ILF3	interleukin enhancer binding factor 3, 90kDa
hsa-miR-516a-5p	1	0	1	1	1	1	PFKFB3	6-phosphofructo-2-kinase/fructose-2,6-biphosphatase 3
hsa-miR-516a-5p	0	0	1	1	1	1	RANBP17	RAN binding protein 17
hsa-miR-516a-5p	1	0	1	1	1	1	NRXN3	neurexin 3
hsa-miR-516a-5p	1	0	1	1	1	1	EMID2	EMI domain containing 2
hsa-miR-516a-5p	1	0	1	1	1	1	AKAP2	A kinase (PRKA) anchor protein 2
hsa-miR-516a-5p	0	0	1	1	1	1	PARP16	poly (ADP-ribose) polymerase family, member 16
hsa-miR-516a-5p	1	0	1	1	1	1	EIF2C1	eukaryotic translation initiation factor 2C, 1
hsa-miR-516a-5p	0	0	1	1	1	1	STAU2	staufen, RNA binding protein, homolog 2 (Drosophila)
hsa-miR-516a-5p	1	0	1	1	1	1	C16orf70	chromosome 16 open reading frame 70
hsa-miR-516a-5p	1	0	1	1	1	1	MAEA	macrophage erythroblast attacher
hsa-miR-516a-5p	1	0	1	1	1	1	S100PBP	S100P binding protein
hsa-miR-516a-5p	1	0	1	1	0	0	FASTK	Fas-activated serine/threonine kinase
hsa-miR-516a-5p	0	0	1	0	1	1	FLJ14186	uncharacterized LOC401149
hsa-miR-516a-5p	0	0	1	1	1	1	HDAC7	histone deacetylase 7
hsa-miR-516a-5p	0	0	1	0	0	0	IFFO2	intermediate filament family orphan 2
hsa-miR-516a-5p	1	0	1	0	1	1	ATP2B1	ATPase, Ca++ transporting, plasma membrane 1
hsa-miR-516a-5p	0	0	1	1	1	1	WDR67	WD repeat domain 67
hsa-miR-516a-5p	0	0	1	0	1	1	FLJ22447	uncharacterized LOC400221
hsa-miR-516a-5p	1	0	1	1	0	0	NIPAL4	NIPA-like domain containing 4
hsa-miR-516a-5p	0	0	1	1	1	1	USP48	ubiquitin specific peptidase 48
hsa-miR-516a-5p	1	0	1	1	1	1	RNF185	ring finger protein 185
hsa-miR-516a-5p	1	0	1	1	1	1	FOXP1	forkhead box P1
hsa-miR-516a-5p	0	0	1	1	1	1	MINA	MYC induced nuclear antigen
hsa-miR-516a-5p	0	0	1	0	0	0	JAKMIP2-AS1	JAKMIP2 antisense RNA 1
hsa-miR-516a-5p	1	0	1	1	1	1	FAM40A	family with sequence similarity 40, member A
hsa-miR-516a-5p	0	0	1	0	0	0	KIAA0664L3	KIAA0664-like 3
hsa-miR-516a-5p	0	0	1	1	1	1	RAB37	RAB37, member RAS oncogene family
hsa-miR-516a-5p	0	0	1	1	1	1	FANCI	Fanconi anemia, complementation group I
hsa-miR-516a-5p	1	0	1	1	1	1	TPM1	tropomyosin 1 (alpha)
hsa-miR-516a-5p	0	0	1	0	0	0	FLJ30838	uncharacterized LOC400955
hsa-miR-516a-5p	0	0	1	1	1	1	AGXT2	alanine--glyoxylate aminotransferase 2
hsa-miR-516a-5p	1	0	1	0	1	1	PTPRE	protein tyrosine phosphatase, receptor type, E
hsa-miR-516a-5p	1	0	1	1	1	1	CLCN5	chloride channel, voltage-sensitive 5
hsa-miR-516a-5p	0	0	1	0	0	0	LOC255187	hCG1980447
hsa-miR-516a-5p	1	0	1	0	1	1	RABGEF1	RAB guanine nucleotide exchange factor (GEF) 1
hsa-miR-516a-5p	0	0	1	1	1	1	TAF8	TAF8 RNA polymerase II, TATA box binding protein (TBP)-associated factor, 43kDa
hsa-miR-516a-5p	0	0	1	1	0	0	PIGO	phosphatidylinositol glycan anchor biosynthesis, class O
hsa-miR-516a-5p	0	0	1	1	1	1	HDAC8	histone deacetylase 8
hsa-miR-516a-5p	0	0	1	1	1	1	PKIB	protein kinase (cAMP-dependent, catalytic) inhibitor beta
hsa-miR-516a-5p	1	0	1	0	1	1	TPBG	trophoblast glycoprotein
hsa-miR-516a-5p	0	0	1	1	1	1	ALG2	asparagine-linked glycosylation 2, alpha-1,3-mannosyltransferase homolog (S. cerevisiae)
hsa-miR-516a-5p	0	0	1	1	1	1	MTR	5-methyltetrahydrofolate-homocysteine methyltransferase
hsa-miR-516a-5p	1	0	1	1	1	1	TLK1	tousled-like kinase 1
hsa-miR-516a-5p	1	0	1	1	1	1	TSN	translin
hsa-miR-516a-5p	1	0	1	1	1	1	LUC7L2	LUC7-like 2 (S. cerevisiae)
hsa-miR-516a-5p	1	0	1	1	1	1	GNG2	guanine nucleotide binding protein (G protein), gamma 2
hsa-miR-516a-5p	0	0	1	1	1	1	AP5S1	adaptor-related protein complex 5, sigma 1 subunit
hsa-miR-516a-5p	0	0	1	1	1	1	SLC16A1	solute carrier family 16, member 1 (monocarboxylic acid transporter 1)
hsa-miR-516a-5p	0	0	1	1	1	1	AQP3	aquaporin 3 (Gill blood group)
hsa-miR-516a-5p	0	0	1	1	1	1	BBS1	Bardet-Biedl syndrome 1
hsa-miR-516a-5p	0	0	1	0	0	0	ZNF815P	zinc finger protein 815, pseudogene
hsa-miR-516a-5p	1	0	1	1	1	1	SNRNP70	small nuclear ribonucleoprotein 70kDa (U1)
hsa-miR-516a-5p	0	0	1	1	1	1	IL17RE	interleukin 17 receptor E
hsa-miR-516a-5p	0	0	1	1	1	1	EXTL2	exostoses (multiple)-like 2
hsa-miR-516a-5p	0	0	1	1	1	1	ADGB	androglobin
hsa-miR-516a-5p	0	0	1	1	0	0	HNRNPL	heterogeneous nuclear ribonucleoprotein L
hsa-miR-516a-5p	0	0	1	0	0	0	CECR7	cat eye syndrome chromosome region, candidate 7 (non-protein coding)
hsa-miR-516a-5p	0	0	1	1	1	1	TRPM7	transient receptor potential cation channel, subfamily M, member 7
hsa-miR-516a-5p	1	0	1	1	0	0	FBXL19	F-box and leucine-rich repeat protein 19
hsa-miR-516a-5p	1	0	1	0	1	1	UNC5D	unc-5 homolog D (C. elegans)
hsa-miR-516a-5p	0	0	1	1	0	0	KIAA0146	KIAA0146
hsa-miR-516a-5p	0	0	1	1	1	1	NFKB1	nuclear factor of kappa light polypeptide gene enhancer in B-cells 1
hsa-miR-516a-5p	1	0	1	1	1	1	SH2D4B	SH2 domain containing 4B
hsa-miR-516a-5p	1	0	1	1	1	1	OSBPL9	oxysterol binding protein-like 9
hsa-miR-516a-5p	0	0	1	1	0	0	DOCK11	dedicator of cytokinesis 11
hsa-miR-516a-5p	0	0	1	1	1	1	CTPS2	CTP synthase 2
hsa-miR-516a-5p	0	0	1	1	0	0	RPRD2	regulation of nuclear pre-mRNA domain containing 2
hsa-miR-516a-5p	1	0	1	1	1	1	FAM122B	family with sequence similarity 122B
hsa-miR-516a-5p	0	0	1	1	0	0	FSIP2	fibrous sheath interacting protein 2
hsa-miR-516a-5p	0	0	1	0	0	0	ADCY10P1	adenylate cyclase 10 (soluble) pseudogene 1
hsa-miR-516a-5p	0	0	1	1	1	1	RBM39	RNA binding motif protein 39
hsa-miR-516a-5p	0	0	1	0	1	1	LOC388942	uncharacterized LOC388942
hsa-miR-516a-5p	1	0	1	0	1	1	CLEC16A	C-type lectin domain family 16, member A
hsa-miR-516a-5p	1	0	1	1	1	1	DLG2	discs, large homolog 2 (Drosophila)
hsa-miR-516a-5p	0	0	1	1	1	1	DOCK9	dedicator of cytokinesis 9
hsa-miR-516a-5p	1	0	1	1	1	1	ENAH	enabled homolog (Drosophila)
hsa-miR-516a-5p	1	0	1	0	1	1	YOD1	YOD1 OTU deubiquinating enzyme 1 homolog (S. cerevisiae)
hsa-miR-516a-5p	1	0	1	1	1	1	KALRN	kalirin, RhoGEF kinase
hsa-miR-516a-5p	0	0	1	1	1	1	ZNF662	zinc finger protein 662
hsa-miR-516a-5p	0	0	1	1	1	1	G3BP1	GTPase activating protein (SH3 domain) binding protein 1
hsa-miR-516a-5p	0	0	1	0	0	0	LOC100124692	maltase-glucoamylase (alpha-glucosidase) pseudogene
hsa-miR-516a-5p	1	0	1	1	1	1	PPP2R5C	protein phosphatase 2, regulatory subunit B', gamma
hsa-miR-516a-5p	0	0	1	1	0	0	ZNF730	zinc finger protein 730
hsa-miR-516a-5p	1	0	1	1	1	1	MAP2K4	mitogen-activated protein kinase kinase 4
hsa-miR-516a-5p	0	0	1	0	0	0	LOC619207	scavenger receptor protein family member
hsa-miR-516a-5p	0	0	1	0	0	0	AGAP9	ArfGAP with GTPase domain, ankyrin repeat and PH domain 9
hsa-miR-516a-5p	1	0	1	1	0	0	ATP13A3	ATPase type 13A3
hsa-miR-516a-5p	1	0	1	1	1	1	ZNF655	zinc finger protein 655
hsa-miR-516a-5p	1	0	1	1	1	1	LUC7L3	LUC7-like 3 (S. cerevisiae)
hsa-miR-516a-5p	0	0	1	1	1	1	TBC1D3G	TBC1 domain family, member 3G
hsa-miR-516a-5p	0	0	1	1	1	1	ENPP3	ectonucleotide pyrophosphatase/phosphodiesterase 3
hsa-miR-516a-5p	1	0	1	1	1	1	NOVA1	neuro-oncological ventral antigen 1
hsa-miR-516a-5p	1	0	1	1	1	1	DUSP3	dual specificity phosphatase 3
hsa-miR-516a-5p	1	0	1	1	1	1	AHCYL1	adenosylhomocysteinase-like 1
hsa-miR-516a-5p	1	0	1	1	1	1	NECAP1	NECAP endocytosis associated 1
hsa-miR-516a-5p	1	0	1	1	1	1	ARF6	ADP-ribosylation factor 6
hsa-miR-516a-5p	0	0	1	0	1	1	TBC1D3F	TBC1 domain family, member 3F
hsa-miR-516a-5p	1	0	1	1	1	1	NBEA	neurobeachin
hsa-miR-516a-5p	0	0	1	1	1	1	IDH3A	isocitrate dehydrogenase 3 (NAD+) alpha
hsa-miR-516a-5p	1	0	1	1	1	1	TRIOBP	TRIO and F-actin binding protein
hsa-miR-516a-5p	0	0	1	0	0	0	ZNF720	zinc finger protein 720
hsa-miR-516a-5p	1	0	1	1	1	1	TMEM182	transmembrane protein 182
hsa-miR-516a-5p	0	0	1	1	0	0	TMEM44	transmembrane protein 44
hsa-miR-516a-5p	0	0	1	0	0	0	EPHA1-AS1	EPHA1 antisense RNA 1
hsa-miR-516a-5p	1	0	1	1	1	1	SMCR7L	Smith-Magenis syndrome chromosome region, candidate 7-like
hsa-miR-516a-5p	0	0	1	1	1	1	TEX2	testis expressed 2
hsa-miR-516a-5p	1	0	1	1	1	1	BOLL	bol, boule-like (Drosophila)
hsa-miR-516a-5p	1	0	1	1	1	1	CLIC5	chloride intracellular channel 5
hsa-miR-516a-5p	1	0	1	1	1	1	SYNCRIP	synaptotagmin binding, cytoplasmic RNA interacting protein
hsa-miR-516a-5p	0	0	1	1	1	1	CYP4B1	cytochrome P450, family 4, subfamily B, polypeptide 1
hsa-miR-516a-5p	0	0	1	1	0	0	CMTM1	CKLF-like MARVEL transmembrane domain containing 1
hsa-miR-516a-5p	1	0	1	1	1	1	NRG1	neuregulin 1
hsa-miR-516a-5p	0	0	1	1	0	0	NIF3L1	NIF3 NGG1 interacting factor 3-like 1 (S. cerevisiae)
hsa-miR-516a-5p	1	0	1	1	1	1	LAMA3	laminin, alpha 3
hsa-miR-516a-5p	0	0	1	0	1	1	ANKS1B	ankyrin repeat and sterile alpha motif domain containing 1B
hsa-miR-516a-5p	1	0	1	1	0	0	CLASRP	CLK4-associating serine/arginine rich protein
hsa-miR-516a-5p	0	0	1	1	0	0	KRTCAP3	keratinocyte associated protein 3
hsa-miR-516a-5p	0	0	1	0	0	0	ZNFX1-AS1	ZNFX1 antisense RNA 1
hsa-miR-516a-5p	0	0	1	1	0	0	DHRS4	dehydrogenase/reductase (SDR family) member 4
hsa-miR-516a-5p	0	0	1	1	1	1	SMPD1	sphingomyelin phosphodiesterase 1, acid lysosomal
hsa-miR-516a-5p	0	0	1	1	1	1	ZCCHC17	zinc finger, CCHC domain containing 17
hsa-miR-516a-5p	1	0	1	1	1	1	POU2F2	POU class 2 homeobox 2
hsa-miR-516a-5p	0	0	1	0	0	0	MGC13053	uncharacterized MGC13053
hsa-miR-516a-5p	1	0	1	1	1	1	PCGF5	polycomb group ring finger 5
hsa-miR-516a-5p	0	0	1	1	1	1	PRPF4B	PRP4 pre-mRNA processing factor 4 homolog B (yeast)
hsa-miR-516a-5p	0	0	1	0	0	0	LOC154761	family with sequence similarity 115, member C pseudogene
hsa-miR-516a-5p	1	0	1	1	1	1	SNCA	synuclein, alpha (non A4 component of amyloid precursor)
hsa-miR-516a-5p	1	0	1	1	1	1	CAP1	CAP, adenylate cyclase-associated protein 1 (yeast)
hsa-miR-516a-5p	0	0	1	0	0	0	KLHL15	kelch-like 15 (Drosophila)
hsa-miR-516a-5p	0	0	1	1	1	1	FAM122C	family with sequence similarity 122C
hsa-miR-516a-5p	0	0	1	1	1	1	PEX14	peroxisomal biogenesis factor 14
hsa-miR-516a-5p	0	0	1	0	0	0	FAM200B	family with sequence similarity 200, member B
hsa-miR-516a-5p	0	0	1	1	1	1	FGF21	fibroblast growth factor 21
hsa-miR-516a-5p	0	0	1	0	0	0	SNX29P2	sorting nexin 29 pseudogene 2
hsa-miR-516a-5p	0	0	1	1	1	1	SEMA3D	sema domain, immunoglobulin domain (Ig), short basic domain, secreted, (semaphorin) 3D
hsa-miR-516a-5p	1	0	1	0	1	1	SV2B	synaptic vesicle glycoprotein 2B
hsa-miR-516a-5p	0	0	1	1	1	1	CD48	CD48 molecule
hsa-miR-516a-5p	0	0	1	0	1	1	PLEKHM1P	pleckstrin homology domain containing, family M (with RUN domain) member 1 pseudogene
hsa-miR-516a-5p	1	0	1	1	1	1	RAB5B	RAB5B, member RAS oncogene family
hsa-miR-516a-5p	0	0	1	0	0	0	FAM86JP	family with sequence similarity 86, member A pseudogene
hsa-miR-516a-5p	0	0	1	1	1	1	RPTOR	regulatory associated protein of MTOR, complex 1
hsa-miR-516a-5p	1	0	1	1	1	1	FAM120A	family with sequence similarity 120A
hsa-miR-516a-5p	0	0	1	1	0	0	TSNAXIP1	translin-associated factor X interacting protein 1
hsa-miR-516a-5p	0	0	1	0	1	1	TMSB15B	thymosin beta 15B
hsa-miR-516a-5p	0	0	1	0	0	0	SPATA3	spermatogenesis associated 3
hsa-miR-516a-5p	1	0	1	0	1	1	CLDN12	claudin 12
hsa-miR-516a-5p	1	0	1	1	1	1	PLS3	plastin 3
hsa-miR-516a-5p	0	0	1	0	0	0	FLJ36000	uncharacterized FLJ36000
hsa-miR-516a-5p	0	0	1	0	0	0	USP32P1	ubiquitin specific peptidase 32 pseudogene 1
hsa-miR-516a-5p	1	0	1	1	1	1	IL16	interleukin 16
hsa-miR-516a-5p	0	0	1	1	1	1	C4orf32	chromosome 4 open reading frame 32
hsa-miR-516a-5p	0	0	1	1	1	1	COL22A1	collagen, type XXII, alpha 1
hsa-miR-516a-5p	0	0	1	0	0	0	FAM27E3	family with sequence similarity 27, member E3
hsa-miR-516a-5p	0	0	1	0	0	0	LOC283914	uncharacterized LOC283914
hsa-miR-516a-5p	1	0	1	0	1	1	LYPD6	LY6/PLAUR domain containing 6
hsa-miR-516a-5p	0	0	1	0	0	0	INHBA-AS1	INHBA antisense RNA 1
hsa-miR-516a-5p	0	0	1	0	0	0	LOC348120	uncharacterized LOC348120
hsa-miR-516a-5p	0	0	1	0	0	0	LINC00265	long intergenic non-protein coding RNA 265
hsa-miR-516a-5p	1	0	1	1	1	1	PDGFRA	platelet-derived growth factor receptor, alpha polypeptide
hsa-miR-516a-5p	1	0	1	1	0	0	MANEAL	mannosidase, endo-alpha-like
hsa-miR-516a-5p	1	0	1	1	0	0	XRRA1	X-ray radiation resistance associated 1
hsa-miR-516a-5p	0	0	1	1	1	1	VNN2	vanin 2
hsa-miR-516a-5p	0	0	1	1	1	1	ZNF33B	zinc finger protein 33B
hsa-miR-516a-5p	0	0	1	1	0	0	TSNARE1	t-SNARE domain containing 1
hsa-miR-516a-5p	1	0	1	1	1	1	ZNF449	zinc finger protein 449
hsa-miR-516a-5p	0	0	1	0	0	0	JPX	JPX transcript, XIST activator (non-protein coding)
hsa-miR-516a-5p	0	0	1	1	0	0	C8orf82	chromosome 8 open reading frame 82
hsa-miR-516a-5p	1	0	1	0	1	1	AMMECR1L	AMME chromosomal region gene 1-like
hsa-miR-516a-5p	0	0	1	1	0	0	TMC1	transmembrane channel-like 1
hsa-miR-516a-5p	0	0	1	0	0	0	LOC150577	uncharacterized LOC150577
hsa-miR-516a-5p	1	0	1	1	1	1	PNISR	PNN-interacting serine/arginine-rich protein
hsa-miR-516a-5p	1	0	1	0	1	1	KIF5C	kinesin family member 5C
hsa-miR-516a-5p	1	0	1	1	1	1	NR3C2	nuclear receptor subfamily 3, group C, member 2
hsa-miR-516a-5p	0	0	1	1	0	0	RGS9	regulator of G-protein signaling 9
hsa-miR-516a-5p	1	0	1	1	1	1	KIAA1324L	KIAA1324-like
hsa-miR-516a-5p	1	0	1	1	1	1	OTUD4	OTU domain containing 4
hsa-miR-516a-5p	0	0	1	1	0	0	RGSL1	regulator of G-protein signaling like 1
hsa-miR-516a-5p	1	0	1	1	1	1	MEGF11	multiple EGF-like-domains 11
hsa-miR-516a-5p	0	0	1	0	0	0	FAM225B	family with sequence similarity 225, member B (non-protein coding)
hsa-miR-516a-5p	0	0	1	0	0	0	DKFZp686D0853	uncharacterized LOC401613
hsa-miR-516a-5p	1	0	1	1	1	1	FAM184A	family with sequence similarity 184, member A
hsa-miR-516a-5p	1	0	1	1	1	1	SPPL3	signal peptide peptidase like 3
hsa-miR-516a-5p	1	0	1	1	1	1	TGOLN2	trans-golgi network protein 2
hsa-miR-516a-5p	0	0	1	1	1	1	VCAN	versican
hsa-miR-516a-5p	0	0	1	1	1	1	IPCEF1	interaction protein for cytohesin exchange factors 1
hsa-miR-516a-5p	0	0	1	1	1	1	CC2D2A	coiled-coil and C2 domain containing 2A
hsa-miR-516a-5p	0	0	1	1	1	1	PPP1R1C	protein phosphatase 1, regulatory (inhibitor) subunit 1C
hsa-miR-516a-5p	1	0	1	1	1	1	TSC22D3	TSC22 domain family, member 3
hsa-miR-516a-5p	1	0	1	1	1	1	MGA	MAX gene associated
hsa-miR-516a-5p	1	0	1	1	1	1	BCLAF1	BCL2-associated transcription factor 1
hsa-miR-516a-5p	1	0	1	0	1	1	KLHL24	kelch-like 24 (Drosophila)
hsa-miR-516a-5p	1	0	1	1	1	1	PGAP1	post-GPI attachment to proteins 1
hsa-miR-516a-5p	1	0	1	1	1	1	CREB3L2	cAMP responsive element binding protein 3-like 2
hsa-miR-516a-5p	1	0	1	1	1	1	ARF1	ADP-ribosylation factor 1
hsa-miR-516a-5p	0	0	1	1	1	1	APH1A	anterior pharynx defective 1 homolog A (C. elegans)
hsa-miR-516a-5p	1	0	1	1	1	1	C8orf58	chromosome 8 open reading frame 58
hsa-miR-516a-5p	1	0	1	1	1	1	SLC35D2	solute carrier family 35, member D2
hsa-miR-516a-5p	0	0	1	1	1	1	PTGES3	prostaglandin E synthase 3 (cytosolic)
hsa-miR-516a-5p	0	0	1	1	0	0	CCNDBP1	cyclin D-type binding-protein 1
hsa-miR-516a-5p	1	0	1	0	1	1	BNIP3L	BCL2/adenovirus E1B 19kDa interacting protein 3-like
hsa-miR-516a-5p	0	0	1	1	1	1	CHCHD4	coiled-coil-helix-coiled-coil-helix domain containing 4
hsa-miR-516a-5p	0	0	1	1	1	1	TASP1	taspase, threonine aspartase, 1
hsa-miR-516a-5p	0	0	1	0	0	0	TRIQK	triple QxxK/R motif containing
hsa-miR-516a-5p	0	0	1	1	1	1	STON1	stonin 1
hsa-miR-516a-5p	1	0	1	1	1	1	CCDC25	coiled-coil domain containing 25
hsa-miR-516a-5p	0	0	1	1	0	0	BRE	brain and reproductive organ-expressed (TNFRSF1A modulator)
hsa-miR-516a-5p	0	0	1	1	0	0	ATRAID	all-trans retinoic acid-induced differentiation factor
hsa-miR-516a-5p	0	0	1	0	0	0	ARRDC1	arrestin domain containing 1
hsa-miR-516a-5p	0	0	1	1	1	1	GNAS	GNAS complex locus
hsa-miR-516a-5p	1	0	1	1	1	1	GPR137B	G protein-coupled receptor 137B
hsa-miR-516a-5p	0	0	1	1	1	1	P2RX5	purinergic receptor P2X, ligand-gated ion channel, 5
hsa-miR-516a-5p	0	0	1	0	1	1	SUMO2	SMT3 suppressor of mif two 3 homolog 2 (S. cerevisiae)
hsa-miR-516a-5p	0	0	1	1	1	1	MAEL	maelstrom homolog (Drosophila)
hsa-miR-516a-5p	1	0	1	1	1	1	NFYB	nuclear transcription factor Y, beta
hsa-miR-516a-5p	1	0	1	1	0	0	ATP6V1B2	ATPase, H+ transporting, lysosomal 56/58kDa, V1 subunit B2
hsa-miR-516a-5p	0	0	1	1	1	1	IL15	interleukin 15
hsa-miR-516a-5p	0	0	1	1	1	1	ZNF333	zinc finger protein 333
hsa-miR-516a-5p	0	0	1	0	0	0	ZNF674-AS1	ZNF674 antisense RNA 1
hsa-miR-516a-5p	0	0	1	1	0	0	OXA1L	oxidase (cytochrome c) assembly 1-like
hsa-miR-516a-5p	0	0	1	1	0	0	GLTSCR2	glioma tumor suppressor candidate region gene 2
hsa-miR-516a-5p	1	0	1	1	1	1	RALY	RNA binding protein, autoantigenic (hnRNP-associated with lethal yellow homolog (mouse))
hsa-miR-516a-5p	1	0	1	1	0	0	STAG3L4	stromal antigen 3-like 4
hsa-miR-516a-5p	1	0	1	1	1	1	RUNX1	runt-related transcription factor 1
hsa-miR-516a-5p	1	0	1	1	1	1	YWHAE	tyrosine 3-monooxygenase/tryptophan 5-monooxygenase activation protein, epsilon polypeptide
hsa-miR-516a-5p	0	0	1	1	0	0	TUBG2	tubulin, gamma 2
hsa-miR-516a-5p	0	0	1	1	1	1	NUDT21	nudix (nucleoside diphosphate linked moiety X)-type motif 21
hsa-miR-516a-5p	1	0	1	1	1	1	JUNB	jun B proto-oncogene
hsa-miR-516a-5p	1	0	1	1	1	1	LGALSL	lectin, galactoside-binding-like
hsa-miR-516a-5p	0	0	1	0	0	0	LOC731789	uncharacterized LOC731789
hsa-miR-516a-5p	0	0	1	0	1	1	STARD8	StAR-related lipid transfer (START) domain containing 8
hsa-miR-516a-5p	0	0	1	0	0	0	MUC19	mucin 19, oligomeric
hsa-miR-516a-5p	1	0	1	0	1	1	CNTNAP2	contactin associated protein-like 2
hsa-miR-516a-5p	1	0	1	1	1	1	ZFHX3	zinc finger homeobox 3
hsa-miR-516a-5p	0	0	1	1	1	1	PTGS1	prostaglandin-endoperoxide synthase 1 (prostaglandin G/H synthase and cyclooxygenase)
hsa-miR-516a-5p	1	0	1	0	1	1	DAPP1	dual adaptor of phosphotyrosine and 3-phosphoinositides
hsa-miR-516a-5p	1	0	1	0	1	1	DCBLD2	discoidin, CUB and LCCL domain containing 2
hsa-miR-516a-5p	1	0	1	1	1	1	MLL	myeloid/lymphoid or mixed-lineage leukemia (trithorax homolog, Drosophila)
hsa-miR-516a-5p	0	0	1	1	0	0	GBA	glucosidase, beta, acid
hsa-miR-516a-5p	1	0	1	1	1	1	KCNA1	potassium voltage-gated channel, shaker-related subfamily, member 1 (episodic ataxia with myokymia)
hsa-miR-516a-5p	1	0	1	1	1	1	SLC26A4	solute carrier family 26, member 4
hsa-miR-516a-5p	1	0	1	0	1	1	IL6R	interleukin 6 receptor
hsa-miR-516a-5p	0	0	1	1	1	1	GPX1	glutathione peroxidase 1
hsa-miR-516a-5p	0	0	1	1	0	0	IL3	interleukin 3 (colony-stimulating factor, multiple)
hsa-miR-516a-5p	1	0	1	1	1	1	TNF	tumor necrosis factor
hsa-miR-516a-5p	1	0	1	1	1	1	HTR4	5-hydroxytryptamine (serotonin) receptor 4, G protein-coupled
hsa-miR-516a-5p	1	0	1	1	1	1	PPP3R1	protein phosphatase 3, regulatory subunit B, alpha
hsa-miR-516a-5p	0	0	1	0	0	0	PRIM1	primase, DNA, polypeptide 1 (49kDa)
hsa-miR-516a-5p	0	0	1	1	1	1	TBC1D3C	TBC1 domain family, member 3C
hsa-miR-516a-5p	1	0	1	0	1	1	SPOPL	speckle-type POZ protein-like
hsa-miR-516a-5p	0	0	1	1	1	1	CC2D2B	coiled-coil and C2 domain containing 2B
hsa-miR-516a-5p	0	0	1	1	1	1	SUMO4	SMT3 suppressor of mif two 3 homolog 4 (S. cerevisiae)
hsa-miR-516a-5p	1	0	1	1	1	1	ABLIM1	actin binding LIM protein 1
hsa-miR-516a-5p	1	0	1	0	1	1	BMF	Bcl2 modifying factor
hsa-miR-516a-5p	1	0	1	0	1	1	PKP2	plakophilin 2
hsa-miR-516a-5p	1	0	1	0	1	1	YPEL2	yippee-like 2 (Drosophila)
hsa-miR-516a-5p	1	0	1	1	1	1	PLCXD3	phosphatidylinositol-specific phospholipase C, X domain containing 3
hsa-miR-516a-5p	1	0	1	1	1	1	EDA	ectodysplasin A
hsa-miR-516a-5p	1	0	1	1	1	1	FAM168B	family with sequence similarity 168, member B
hsa-miR-516a-5p	1	0	1	1	1	1	ARHGAP28	Rho GTPase activating protein 28
hsa-miR-516a-5p	1	0	1	1	1	1	SHE	Src homology 2 domain containing E
hsa-miR-516a-5p	0	0	1	1	1	1	C2orf68	chromosome 2 open reading frame 68
hsa-miR-516a-5p	1	0	1	1	1	1	RUNX2	runt-related transcription factor 2
hsa-miR-516a-5p	1	0	1	1	1	1	ZHX1	zinc fingers and homeoboxes 1
hsa-miR-516a-5p	1	0	1	1	1	1	NTRK2	neurotrophic tyrosine kinase, receptor, type 2
hsa-miR-516a-5p	1	0	1	1	1	1	ABCC5	ATP-binding cassette, sub-family C (CFTR/MRP), member 5
hsa-miR-516a-5p	1	0	1	1	1	1	VEGFA	vascular endothelial growth factor A
hsa-miR-516a-5p	1	0	1	1	1	1	KCTD21	potassium channel tetramerisation domain containing 21
hsa-miR-516a-5p	1	0	1	0	1	1	SAMD5	sterile alpha motif domain containing 5
hsa-miR-516a-5p	1	0	1	1	1	1	CSNK1G3	casein kinase 1, gamma 3
hsa-miR-516a-5p	1	0	1	1	1	1	KLF10	Kruppel-like factor 10
hsa-miR-516a-5p	1	0	1	1	1	1	ZNF704	zinc finger protein 704
hsa-miR-516a-5p	1	0	1	1	1	1	CXCL12	chemokine (C-X-C motif) ligand 12
hsa-miR-516a-5p	0	0	1	1	1	1	KCNIP1	Kv channel interacting protein 1
hsa-miR-516a-5p	1	0	1	1	1	1	GALNTL6	UDP-N-acetyl-alpha-D-galactosamine:polypeptide N-acetylgalactosaminyltransferase-like 6
hsa-miR-516a-5p	0	0	1	1	1	1	C18orf62	chromosome 18 open reading frame 62
hsa-miR-516a-5p	1	0	1	1	1	1	ATP6V1C2	ATPase, H+ transporting, lysosomal 42kDa, V1 subunit C2
hsa-miR-516a-5p	1	0	1	1	1	1	CRCP	CGRP receptor component
hsa-miR-516a-5p	1	0	1	1	0	0	KIAA0895L	KIAA0895-like
hsa-miR-516a-5p	1	0	1	1	1	1	ZC2HC1C	zinc finger, C2HC-type containing 1C
hsa-miR-516a-5p	1	0	1	1	1	1	SLC9A6	solute carrier family 9, subfamily A (NHE6, cation proton antiporter 6), member 6
hsa-miR-516a-5p	1	0	1	1	1	1	RERE	arginine-glutamic acid dipeptide (RE) repeats
hsa-miR-516a-5p	1	0	1	0	1	1	SLC7A6	solute carrier family 7 (amino acid transporter light chain, y+L system), member 6
hsa-miR-516a-5p	1	0	1	1	1	1	ZNF436	zinc finger protein 436
hsa-miR-516a-5p	0	0	1	1	1	1	VCAM1	vascular cell adhesion molecule 1
hsa-miR-516a-5p	1	0	1	1	1	1	CREBBP	CREB binding protein
hsa-miR-516a-5p	1	0	1	1	1	1	ZNF697	zinc finger protein 697
hsa-miR-516a-5p	1	0	1	0	1	1	KLF9	Kruppel-like factor 9
hsa-miR-516a-5p	1	0	1	1	1	1	ELAVL1	ELAV (embryonic lethal, abnormal vision, Drosophila)-like 1 (Hu antigen R)
hsa-miR-516a-5p	1	0	1	1	0	0	EMP2	epithelial membrane protein 2
hsa-miR-516a-5p	1	0	1	1	1	1	EXTL3	exostoses (multiple)-like 3
hsa-miR-516a-5p	1	0	1	1	1	1	GCNT1	glucosaminyl (N-acetyl) transferase 1, core 2
hsa-miR-516a-5p	1	0	1	1	1	1	ATP6V1A	ATPase, H+ transporting, lysosomal 70kDa, V1 subunit A
hsa-miR-516a-5p	0	0	1	1	1	1	CD1D	CD1d molecule
hsa-miR-516a-5p	0	0	1	1	0	0	EDN2	endothelin 2
hsa-miR-516a-5p	0	0	1	0	1	1	STX2	syntaxin 2
hsa-miR-516a-5p	1	0	1	1	1	1	GLRA2	glycine receptor, alpha 2
hsa-miR-516a-5p	1	0	1	0	1	1	GNAI1	guanine nucleotide binding protein (G protein), alpha inhibiting activity polypeptide 1
hsa-miR-516a-5p	0	0	1	1	1	1	MMP19	matrix metallopeptidase 19
hsa-miR-516a-5p	1	0	1	1	1	1	MN1	meningioma (disrupted in balanced translocation) 1
hsa-miR-516a-5p	0	0	1	1	1	1	NID1	nidogen 1
hsa-miR-516a-5p	1	0	1	1	1	1	FURIN	furin (paired basic amino acid cleaving enzyme)
hsa-miR-516a-5p	0	0	1	1	1	1	PIK3C2B	phosphatidylinositol-4-phosphate 3-kinase, catalytic subunit type 2 beta
hsa-miR-516a-5p	0	0	1	1	1	1	PPP1R3A	protein phosphatase 1, regulatory subunit 3A
hsa-miR-516a-5p	1	0	1	0	1	1	VCL	vinculin
hsa-miR-516a-5p	1	0	1	1	1	1	AKAP1	A kinase (PRKA) anchor protein 1
hsa-miR-516a-5p	1	0	1	1	1	1	NRIP1	nuclear receptor interacting protein 1
hsa-miR-516a-5p	1	0	1	0	1	1	TNKS	tankyrase, TRF1-interacting ankyrin-related ADP-ribose polymerase
hsa-miR-516a-5p	1	0	1	1	1	1	CDKL2	cyclin-dependent kinase-like 2 (CDC2-related kinase)
hsa-miR-516a-5p	1	0	1	1	1	1	BCL2L2	BCL2-like 2
hsa-miR-516a-5p	0	0	1	1	1	1	DNAJC25-GNG10	DNAJC25-GNG10 readthrough
hsa-miR-516a-5p	1	0	1	1	1	1	BCL9	B-cell CLL/lymphoma 9
hsa-miR-516a-5p	1	0	1	1	1	1	CALR	calreticulin
hsa-miR-516a-5p	1	0	1	1	1	1	DUSP1	dual specificity phosphatase 1
hsa-miR-516a-5p	1	0	1	1	1	1	EGR3	early growth response 3
hsa-miR-516a-5p	1	0	1	0	1	1	ACSL4	acyl-CoA synthetase long-chain family member 4
hsa-miR-516a-5p	0	0	1	0	1	1	FOXE1	forkhead box E1 (thyroid transcription factor 2)
hsa-miR-516a-5p	0	0	1	1	1	1	MTA2	metastasis associated 1 family, member 2
hsa-miR-516a-5p	1	0	1	1	1	1	RPS6KA5	ribosomal protein S6 kinase, 90kDa, polypeptide 5
hsa-miR-516a-5p	1	0	1	1	1	1	KIF3B	kinesin family member 3B
hsa-miR-516a-5p	1	0	1	1	1	1	BMI1	BMI1 polycomb ring finger oncogene
hsa-miR-516a-5p	1	0	1	1	1	1	FOXN3	forkhead box N3
hsa-miR-516a-5p	0	0	1	0	1	1	FOSL2	FOS-like antigen 2
hsa-miR-516a-5p	1	0	1	1	1	1	RND2	Rho family GTPase 2
hsa-miR-516a-5p	1	0	1	1	1	1	GABBR2	gamma-aminobutyric acid (GABA) B receptor, 2
hsa-miR-516a-5p	1	0	1	1	1	1	SCARB2	scavenger receptor class B, member 2
hsa-miR-516a-5p	1	0	1	1	1	1	RGS4	regulator of G-protein signaling 4
hsa-miR-516a-5p	1	0	1	1	1	1	ARPC5	actin related protein 2/3 complex, subunit 5, 16kDa
hsa-miR-516a-5p	1	0	1	1	1	1	MMP16	matrix metallopeptidase 16 (membrane-inserted)
hsa-miR-516a-5p	0	0	1	1	1	1	SOX1	SRY (sex determining region Y)-box 1
hsa-miR-516a-5p	1	0	1	0	1	1	HDAC4	histone deacetylase 4
hsa-miR-516a-5p	0	0	1	1	1	1	NKX3-1	NK3 homeobox 1
hsa-miR-516a-5p	1	0	1	1	1	1	NR4A2	nuclear receptor subfamily 4, group A, member 2
hsa-miR-516a-5p	1	0	1	1	1	1	PAIP1	poly(A) binding protein interacting protein 1
hsa-miR-516a-5p	1	0	1	1	1	1	PLK2	polo-like kinase 2
hsa-miR-516a-5p	1	0	1	1	1	1	ZBTB6	zinc finger and BTB domain containing 6
hsa-miR-516a-5p	0	0	1	1	0	0	DNAJB2	DnaJ (Hsp40) homolog, subfamily B, member 2
hsa-miR-516a-5p	0	0	1	1	0	0	COPS6	COP9 constitutive photomorphogenic homolog subunit 6 (Arabidopsis)
hsa-miR-516a-5p	1	0	1	1	1	1	VEZF1	vascular endothelial zinc finger 1
hsa-miR-516a-5p	1	0	1	1	1	1	PALM2-AKAP2	PALM2-AKAP2 readthrough
hsa-miR-516a-5p	1	0	1	1	1	1	PHLDA1	pleckstrin homology-like domain, family A, member 1
hsa-miR-516a-5p	1	0	1	1	1	1	FBXL3	F-box and leucine-rich repeat protein 3
hsa-miR-516a-5p	0	0	1	1	1	1	SNX10	sorting nexin 10
hsa-miR-516a-5p	1	0	1	1	1	1	ASF1A	ASF1 anti-silencing function 1 homolog A (S. cerevisiae)
hsa-miR-516a-5p	1	0	1	1	1	1	SLC25A15	solute carrier family 25 (mitochondrial carrier; ornithine transporter) member 15
hsa-miR-516a-5p	0	0	1	1	1	1	ZNF318	zinc finger protein 318
hsa-miR-516a-5p	1	0	1	1	1	1	GHITM	growth hormone inducible transmembrane protein
hsa-miR-516a-5p	1	0	1	1	1	1	CACNG4	calcium channel, voltage-dependent, gamma subunit 4
hsa-miR-516a-5p	1	0	1	0	1	1	MLEC	malectin
hsa-miR-516a-5p	0	0	1	1	1	1	KIAA0141	KIAA0141
hsa-miR-516a-5p	1	0	1	0	1	1	PDAP1	PDGFA associated protein 1
hsa-miR-516a-5p	0	0	1	1	0	0	SPEF1	sperm flagellar 1
hsa-miR-516a-5p	1	0	1	1	1	1	CHD5	chromodomain helicase DNA binding protein 5
hsa-miR-516a-5p	1	0	1	0	1	1	ERC2	ELKS/RAB6-interacting/CAST family member 2
hsa-miR-516a-5p	1	0	1	1	0	0	SENP3	SUMO1/sentrin/SMT3 specific peptidase 3
hsa-miR-516a-5p	1	0	1	1	1	1	FAM155B	family with sequence similarity 155, member B
hsa-miR-516a-5p	1	0	1	1	0	0	YBX2	Y box binding protein 2
hsa-miR-516a-5p	1	0	1	1	1	1	VGLL3	vestigial like 3 (Drosophila)
hsa-miR-516a-5p	1	0	1	1	1	1	RAB6B	RAB6B, member RAS oncogene family
hsa-miR-516a-5p	1	0	1	1	1	1	HAUS6	HAUS augmin-like complex, subunit 6
hsa-miR-516a-5p	1	0	1	1	1	1	RNF125	ring finger protein 125, E3 ubiquitin protein ligase
hsa-miR-516a-5p	1	0	1	1	1	1	ARGLU1	arginine and glutamate rich 1
hsa-miR-516a-5p	1	0	1	1	1	1	FIGN	fidgetin
hsa-miR-516a-5p	1	0	1	1	1	1	TBC1D13	TBC1 domain family, member 13
hsa-miR-516a-5p	1	0	1	0	1	1	PARVA	parvin, alpha
hsa-miR-516a-5p	1	0	1	0	1	1	LIN7C	lin-7 homolog C (C. elegans)
hsa-miR-516a-5p	1	0	1	0	1	1	LRP1B	low density lipoprotein receptor-related protein 1B
hsa-miR-516a-5p	0	0	1	1	1	1	GNL3L	guanine nucleotide binding protein-like 3 (nucleolar)-like
hsa-miR-516a-5p	1	0	1	0	1	1	CCNJ	cyclin J
hsa-miR-516a-5p	1	0	1	1	1	1	PLEKHA3	pleckstrin homology domain containing, family A (phosphoinositide binding specific) member 3
hsa-miR-516a-5p	1	0	1	0	1	1	UBFD1	ubiquitin family domain containing 1
hsa-miR-516a-5p	0	0	1	1	1	1	RNF20	ring finger protein 20, E3 ubiquitin protein ligase
hsa-miR-516a-5p	0	0	1	1	1	1	TMEM167B	transmembrane protein 167B
hsa-miR-516a-5p	1	0	1	1	1	1	SAR1A	SAR1 homolog A (S. cerevisiae)
hsa-miR-516a-5p	1	0	1	1	1	1	ANKRD50	ankyrin repeat domain 50
hsa-miR-516a-5p	1	0	1	1	1	1	NCEH1	neutral cholesterol ester hydrolase 1
hsa-miR-516a-5p	1	0	1	1	1	1	ARHGAP21	Rho GTPase activating protein 21
hsa-miR-516a-5p	0	0	1	1	1	1	ZFP28	zinc finger protein 28 homolog (mouse)
hsa-miR-516a-5p	1	0	1	0	1	1	WDFY1	WD repeat and FYVE domain containing 1
hsa-miR-516a-5p	0	0	1	1	0	0	DNAH2	dynein, axonemal, heavy chain 2
hsa-miR-516a-5p	1	0	1	1	1	1	CLCN6	chloride channel, voltage-sensitive 6
hsa-miR-516a-5p	0	0	1	1	1	1	ADAM30	ADAM metallopeptidase domain 30
hsa-miR-516a-5p	1	0	1	1	1	1	PPP1R11	protein phosphatase 1, regulatory (inhibitor) subunit 11
hsa-miR-516a-5p	1	0	1	1	1	1	SLC22A3	solute carrier family 22 (extraneuronal monoamine transporter), member 3
hsa-miR-516a-5p	0	0	1	1	1	1	ACBD3	acyl-CoA binding domain containing 3
hsa-miR-516a-5p	1	0	1	1	1	1	C6orf106	chromosome 6 open reading frame 106
hsa-miR-516a-5p	1	0	1	1	1	1	YTHDC2	YTH domain containing 2
hsa-miR-516a-5p	1	0	1	1	0	0	UBE2Z	ubiquitin-conjugating enzyme E2Z
hsa-miR-516a-5p	1	0	1	1	1	1	C10orf76	chromosome 10 open reading frame 76
hsa-miR-516a-5p	0	0	1	1	1	1	SNIP1	Smad nuclear interacting protein 1
hsa-miR-516a-5p	1	0	1	0	1	1	ZFHX4	zinc finger homeobox 4
hsa-miR-516a-5p	0	0	1	1	1	1	NHEJ1	nonhomologous end-joining factor 1
hsa-miR-516a-5p	1	0	1	0	1	1	VCPIP1	valosin containing protein (p97)/p47 complex interacting protein 1
hsa-miR-516a-5p	0	0	1	1	1	1	SLC25A21	solute carrier family 25 (mitochondrial oxoadipate carrier), member 21
hsa-miR-516a-5p	1	0	1	1	1	1	CRISPLD1	cysteine-rich secretory protein LCCL domain containing 1
hsa-miR-516a-5p	1	0	1	1	1	1	PATZ1	POZ (BTB) and AT hook containing zinc finger 1
hsa-miR-516a-5p	0	0	1	1	0	0	TRIM54	tripartite motif containing 54
hsa-miR-516a-5p	1	0	1	1	1	1	HIATL1	hippocampus abundant transcript-like 1
hsa-miR-516a-5p	1	0	1	1	1	1	PPP1R9B	protein phosphatase 1, regulatory subunit 9B
hsa-miR-516a-5p	1	0	1	0	1	1	PURB	purine-rich element binding protein B
hsa-miR-516a-5p	1	0	1	1	1	1	EPT1	ethanolaminephosphotransferase 1 (CDP-ethanolamine-specific)
hsa-miR-516a-5p	1	0	1	1	0	0	CCDC120	coiled-coil domain containing 120
hsa-miR-516a-5p	1	0	1	1	1	1	STX1B	syntaxin 1B
hsa-miR-516a-5p	1	0	1	0	1	1	TMEM123	transmembrane protein 123
hsa-miR-516a-5p	0	0	1	1	1	1	CLEC4D	C-type lectin domain family 4, member D
hsa-miR-516a-5p	0	0	1	1	1	1	CTCFL	CCCTC-binding factor (zinc finger protein)-like
hsa-miR-516a-5p	1	0	1	1	0	0	MADD	MAP-kinase activating death domain
hsa-miR-516a-5p	0	0	1	1	1	1	KCNG3	potassium voltage-gated channel, subfamily G, member 3
hsa-miR-516a-5p	0	0	1	1	0	0	CITED4	Cbp/p300-interacting transactivator, with Glu/Asp-rich carboxy-terminal domain, 4
hsa-miR-516a-5p	1	0	1	1	1	1	KCTD12	potassium channel tetramerisation domain containing 12
hsa-miR-516a-5p	1	0	1	0	1	1	NUS1	nuclear undecaprenyl pyrophosphate synthase 1 homolog (S. cerevisiae)
hsa-miR-516a-5p	1	0	1	1	1	1	PPTC7	PTC7 protein phosphatase homolog (S. cerevisiae)
hsa-miR-516a-5p	0	0	1	1	1	1	IGJ	immunoglobulin J polypeptide, linker protein for immunoglobulin alpha and mu polypeptides
hsa-miR-516a-5p	1	0	1	1	1	1	FAM91A1	family with sequence similarity 91, member A1
hsa-miR-516a-5p	0	0	1	1	0	0	TCEB3C	transcription elongation factor B polypeptide 3C (elongin A3)
hsa-miR-516a-5p	1	0	1	1	1	1	SGMS1	sphingomyelin synthase 1
hsa-miR-516a-5p	0	0	1	1	0	0	HSFY1	heat shock transcription factor, Y-linked 1
hsa-miR-516a-5p	1	0	1	0	1	1	DCP2	DCP2 decapping enzyme homolog (S. cerevisiae)
hsa-miR-516a-5p	0	0	1	1	1	1	DAND5	DAN domain family, member 5
hsa-miR-516a-5p	1	0	1	0	1	1	TMEM154	transmembrane protein 154
hsa-miR-516a-5p	1	0	1	1	1	1	ZCCHC5	zinc finger, CCHC domain containing 5
hsa-miR-516a-5p	1	0	1	0	1	1	N4BP1	NEDD4 binding protein 1
hsa-miR-516a-5p	0	0	1	0	0	0	FLJ32955	uncharacterized protein FLJ32955
hsa-miR-516a-5p	0	0	1	1	1	1	SLC22A7	solute carrier family 22 (organic anion transporter), member 7
hsa-miR-516a-5p	1	0	1	0	1	1	ZCCHC24	zinc finger, CCHC domain containing 24
hsa-miR-516a-5p	1	0	1	1	1	1	MSI2	musashi homolog 2 (Drosophila)
hsa-miR-516a-5p	1	0	1	0	1	1	PLEKHH2	pleckstrin homology domain containing, family H (with MyTH4 domain) member 2
hsa-miR-516a-5p	1	0	1	1	1	1	MMGT1	membrane magnesium transporter 1
hsa-miR-516a-5p	1	0	1	1	1	1	OLIG3	oligodendrocyte transcription factor 3
hsa-miR-516a-5p	0	0	1	1	1	1	LYNX1	Ly6/neurotoxin 1
hsa-miR-516a-5p	0	0	1	1	1	1	STXBP4	syntaxin binding protein 4
hsa-miR-516a-5p	0	0	1	0	1	1	HCG27	HLA complex group 27 (non-protein coding)
hsa-miR-516a-5p	0	0	1	1	1	1	LRP5L	low density lipoprotein receptor-related protein 5-like
hsa-miR-516a-5p	0	0	1	0	1	1	TMED4	transmembrane emp24 protein transport domain containing 4
hsa-miR-516a-5p	1	0	1	1	1	1	BCL9L	B-cell CLL/lymphoma 9-like
hsa-miR-516a-5p	1	0	1	0	1	1	C12orf36	chromosome 12 open reading frame 36
hsa-miR-516a-5p	1	0	1	1	1	1	PLCB1	phospholipase C, beta 1 (phosphoinositide-specific)
hsa-miR-516a-5p	1	0	1	0	1	1	RNF144B	ring finger protein 144B
hsa-miR-516a-5p	0	0	1	1	1	1	ZNF169	zinc finger protein 169
hsa-miR-516a-5p	0	0	1	1	0	0	DHRS4L2	dehydrogenase/reductase (SDR family) member 4 like 2
hsa-miR-516a-5p	1	0	1	1	1	1	GPRIN3	GPRIN family member 3
hsa-miR-516a-5p	0	0	1	1	1	1	APOOL	apolipoprotein O-like
hsa-miR-516a-5p	1	0	1	1	1	1	NHLRC1	NHL repeat containing 1
hsa-miR-516a-5p	1	0	1	0	1	1	PRICKLE2	prickle homolog 2 (Drosophila)
hsa-miR-516a-5p	0	0	1	1	1	1	MDFIC	MyoD family inhibitor domain containing
hsa-miR-516a-5p	0	0	1	1	1	1	FAM173B	family with sequence similarity 173, member B
hsa-miR-516a-5p	1	0	1	1	1	1	VAMP1	vesicle-associated membrane protein 1 (synaptobrevin 1)
hsa-miR-516a-5p	0	0	1	1	1	1	SLC25A35	solute carrier family 25, member 35
hsa-miR-516a-5p	1	0	1	1	0	0	CD164L2	CD164 sialomucin-like 2
hsa-miR-516a-5p	0	0	1	0	0	0	TTTY2	testis-specific transcript, Y-linked 2 (non-protein coding)
hsa-miR-516a-5p	0	0	1	0	0	0	SUMO1P1	SUMO1 pseudogene 1
hsa-miR-516a-5p	0	0	1	0	0	0	NXF4	nuclear RNA export factor 4 pseudogene
hsa-miR-516a-5p	0	0	1	0	0	0	SNORA4	small nucleolar RNA, H/ACA box 4
hsa-miR-516a-5p	0	0	1	0	0	0	SNORD96A	small nucleolar RNA, C/D box 96A
hsa-miR-516a-5p	0	0	1	0	0	0	AQP7P1	aquaporin 7 pseudogene 1
hsa-miR-516a-5p	0	0	1	0	0	0	HAS2-AS1	HAS2 antisense RNA 1
hsa-miR-516a-5p	1	0	1	1	0	0	HOXC5	homeobox C5
hsa-miR-516a-5p	0	0	1	0	0	0	HSP90B3P	heat shock protein 90kDa beta (Grp94), member 3, pseudogene
hsa-miR-516a-5p	1	0	1	1	1	1	HS3ST1	heparan sulfate (glucosamine) 3-O-sulfotransferase 1
hsa-miR-516a-5p	0	0	1	1	0	0	USH1C	Usher syndrome 1C (autosomal recessive, severe)
hsa-miR-516a-5p	0	0	1	1	1	1	GGCT	gamma-glutamylcyclotransferase
hsa-miR-516a-5p	0	0	1	1	1	1	RPAP3	RNA polymerase II associated protein 3
hsa-miR-516a-5p	0	0	1	1	1	1	SPRTN	SprT-like N-terminal domain
hsa-miR-516a-5p	0	0	1	1	0	0	HEBP1	heme binding protein 1
hsa-miR-516a-5p	0	0	1	1	1	1	KLRAP1	killer cell lectin-like receptor subfamily A pseudogene 1
hsa-miR-516a-5p	0	0	1	1	1	1	GRN	granulin
hsa-miR-516a-5p	1	0	1	1	1	1	QSER1	glutamine and serine rich 1
hsa-miR-516a-5p	0	0	0	1	0	0	GSC2	goosecoid homeobox 2
hsa-miR-516a-5p	0	0	1	1	0	0	LLGL2	lethal giant larvae homolog 2 (Drosophila)
hsa-miR-516a-5p	0	0	1	1	0	0	HSD17B10	hydroxysteroid (17-beta) dehydrogenase 10
hsa-miR-516a-5p	1	0	1	1	1	1	FGF4	fibroblast growth factor 4
hsa-miR-516a-5p	0	0	1	1	0	0	ALPK1	alpha-kinase 1
hsa-miR-516a-5p	0	0	1	1	1	1	SLC9A3R2	solute carrier family 9, subfamily A (NHE3, cation proton antiporter 3), member 3 regulator 2
hsa-miR-516a-5p	0	0	0	1	0	0	GSTP1	glutathione S-transferase pi 1
hsa-miR-516a-5p	1	0	1	1	1	1	DIMT1	DIM1 dimethyladenosine transferase 1 homolog (S. cerevisiae)
hsa-miR-516a-5p	1	0	1	1	1	1	PTBP3	polypyrimidine tract binding protein 3
hsa-miR-516a-5p	1	0	1	1	1	1	PPP6R2	protein phosphatase 6, regulatory subunit 2
hsa-miR-516a-5p	0	0	1	1	0	0	C22orf31	chromosome 22 open reading frame 31
hsa-miR-516a-5p	0	0	0	1	1	1	HMOX1	heme oxygenase (decycling) 1
hsa-miR-516a-5p	0	0	0	1	1	1	ADSL	adenylosuccinate lyase
hsa-miR-516a-5p	1	0	1	1	1	1	PHF5A	PHD finger protein 5A
hsa-miR-516a-5p	0	0	0	1	1	1	RIPK3	receptor-interacting serine-threonine kinase 3
hsa-miR-516a-5p	0	0	1	1	0	0	CTSG	cathepsin G
hsa-miR-516a-5p	0	0	1	1	1	1	GSS	glutathione synthetase
hsa-miR-516a-5p	0	0	1	1	1	1	CSTF1	cleavage stimulation factor, 3' pre-RNA, subunit 1, 50kDa
hsa-miR-516a-5p	0	0	1	1	0	0	BIRC7	baculoviral IAP repeat containing 7
hsa-miR-516a-5p	1	0	1	1	1	1	MACROD2	MACRO domain containing 2
hsa-miR-516a-5p	0	0	1	1	0	0	CHMP4B	charged multivesicular body protein 4B
hsa-miR-516a-5p	0	0	0	1	1	1	H2BFWT	H2B histone family, member W, testis-specific
hsa-miR-516a-5p	1	0	1	1	1	1	FBXO31	F-box protein 31
hsa-miR-516a-5p	0	0	1	1	1	1	AQP8	aquaporin 8
hsa-miR-516a-5p	0	0	1	1	0	0	FCGRT	Fc fragment of IgG, receptor, transporter, alpha
hsa-miR-516a-5p	0	0	0	1	1	1	PEX11G	peroxisomal biogenesis factor 11 gamma
hsa-miR-516a-5p	0	0	1	1	0	0	SNAPC2	small nuclear RNA activating complex, polypeptide 2, 45kDa
hsa-miR-516a-5p	1	0	1	1	0	0	ZNF579	zinc finger protein 579
hsa-miR-516a-5p	0	0	1	1	0	0	FIZ1	FLT3-interacting zinc finger 1
hsa-miR-516a-5p	0	0	0	1	1	1	FZR1	fizzy/cell division cycle 20 related 1 (Drosophila)
hsa-miR-516a-5p	0	0	0	1	0	0	NKG7	natural killer cell group 7 sequence
hsa-miR-516a-5p	1	0	1	1	0	0	RASIP1	Ras interacting protein 1
hsa-miR-516a-5p	0	0	1	1	0	0	WDR83OS	WD repeat domain 83 opposite strand
hsa-miR-516a-5p	0	0	0	1	1	1	CACNG7	calcium channel, voltage-dependent, gamma subunit 7
hsa-miR-516a-5p	0	0	1	1	1	1	GCDH	glutaryl-CoA dehydrogenase
hsa-miR-516a-5p	0	0	0	1	1	1	DNASE2	deoxyribonuclease II, lysosomal
hsa-miR-516a-5p	1	0	1	1	1	1	TSPAN12	tetraspanin 12
hsa-miR-516a-5p	0	0	1	1	0	0	TFR2	transferrin receptor 2
hsa-miR-516a-5p	0	0	1	1	0	0	BLNK	B-cell linker
hsa-miR-516a-5p	0	0	1	1	1	1	CCDC86	coiled-coil domain containing 86
hsa-miR-516a-5p	0	0	1	1	0	0	GLI1	GLI family zinc finger 1
hsa-miR-516a-5p	0	0	1	1	1	1	ARPC3	actin related protein 2/3 complex, subunit 3, 21kDa
hsa-miR-516a-5p	1	0	1	1	0	0	ACRBP	acrosin binding protein
hsa-miR-516a-5p	1	0	1	1	1	1	ZNF76	zinc finger protein 76
hsa-miR-516a-5p	0	0	1	1	1	1	ADTRP	androgen-dependent TFPI-regulating protein
hsa-miR-516a-5p	0	0	1	1	1	1	LOX	lysyl oxidase
hsa-miR-516a-5p	0	0	0	1	1	1	PCDHB5	protocadherin beta 5
hsa-miR-516a-5p	0	0	1	1	0	0	RBP2	retinol binding protein 2, cellular
hsa-miR-516a-5p	0	0	1	1	1	1	HES1	hairy and enhancer of split 1, (Drosophila)
hsa-miR-516a-5p	0	0	1	1	1	1	UMPS	uridine monophosphate synthetase
hsa-miR-516a-5p	1	0	1	1	0	0	TMSB10	thymosin beta 10
hsa-miR-516a-5p	0	0	0	1	0	0	NEU2	sialidase 2 (cytosolic sialidase)
hsa-miR-516a-5p	0	0	0	1	0	0	PRTN3	proteinase 3
hsa-miR-516a-5p	0	0	0	1	0	0	KISS1R	KISS1 receptor
hsa-miR-516a-5p	0	0	1	1	0	0	MASP2	mannan-binding lectin serine peptidase 2
hsa-miR-516a-5p	0	0	0	1	0	0	TPSG1	tryptase gamma 1
hsa-miR-516a-5p	0	0	0	1	1	1	OPRD1	opioid receptor, delta 1
hsa-miR-516a-5p	0	0	0	1	0	0	PRAMEF4	PRAME family member 4
hsa-miR-516a-5p	1	0	0	1	1	1	SLC5A9	solute carrier family 5 (sodium/glucose cotransporter), member 9
hsa-miR-516a-5p	0	0	1	1	0	0	ADH6	alcohol dehydrogenase 6 (class V)
hsa-miR-516a-5p	0	0	0	1	1	1	TTLL2	tubulin tyrosine ligase-like family, member 2
hsa-miR-516a-5p	0	0	0	1	0	0	ACADS	acyl-CoA dehydrogenase, C-2 to C-3 short chain
hsa-miR-516a-5p	1	0	1	1	0	0	C19orf43	chromosome 19 open reading frame 43
hsa-miR-516a-5p	0	0	0	1	1	1	ZNF415	zinc finger protein 415
hsa-miR-516a-5p	0	0	1	1	1	1	MPHOSPH10	M-phase phosphoprotein 10 (U3 small nucleolar ribonucleoprotein)
hsa-miR-516a-5p	1	0	1	1	1	1	LYPD3	LY6/PLAUR domain containing 3
hsa-miR-516a-5p	0	0	0	1	0	0	HIST1H1A	histone cluster 1, H1a
hsa-miR-516a-5p	0	0	0	1	1	1	APOBEC2	apolipoprotein B mRNA editing enzyme, catalytic polypeptide-like 2
hsa-miR-516a-5p	0	0	1	1	1	1	BMP4	bone morphogenetic protein 4
hsa-miR-516a-5p	0	0	1	1	1	1	MRPS7	mitochondrial ribosomal protein S7
hsa-miR-516a-5p	1	0	1	1	1	1	EML2	echinoderm microtubule associated protein like 2
hsa-miR-516a-5p	0	0	1	1	1	1	ARMCX5	armadillo repeat containing, X-linked 5
hsa-miR-516a-5p	1	0	0	1	1	1	SLC35E1	solute carrier family 35, member E1
hsa-miR-516a-5p	0	0	1	1	1	1	GNG11	guanine nucleotide binding protein (G protein), gamma 11
hsa-miR-516a-5p	0	0	1	1	0	0	SPINK2	serine peptidase inhibitor, Kazal type 2 (acrosin-trypsin inhibitor)
hsa-miR-516a-5p	0	0	1	1	1	1	A4GALT	alpha 1,4-galactosyltransferase
hsa-miR-516a-5p	0	0	1	1	1	1	NAA38	N(alpha)-acetyltransferase 38, NatC auxiliary subunit
hsa-miR-516a-5p	0	0	0	1	1	1	MTX2	metaxin 2
hsa-miR-516a-5p	0	0	1	1	1	1	MBD4	methyl-CpG binding domain protein 4
hsa-miR-516a-5p	1	0	1	1	1	1	ERI1	exoribonuclease 1
hsa-miR-516a-5p	1	0	1	1	1	1	CAPRIN2	caprin family member 2
hsa-miR-516a-5p	0	0	0	1	0	0	PBX4	pre-B-cell leukemia homeobox 4
hsa-miR-516a-5p	0	0	1	1	1	1	KIF16B	kinesin family member 16B
hsa-miR-516a-5p	0	0	1	1	1	1	ALG13	asparagine-linked glycosylation 13 homolog (S. cerevisiae)
hsa-miR-516a-5p	0	0	0	1	1	1	ZNF193	zinc finger protein 193
hsa-miR-516a-5p	0	0	1	1	0	0	KRT5	keratin 5
hsa-miR-516a-5p	0	0	0	1	1	1	BST2	bone marrow stromal cell antigen 2
hsa-miR-516a-5p	1	0	1	1	0	0	TRPM4	transient receptor potential cation channel, subfamily M, member 4
hsa-miR-516a-5p	1	0	0	1	1	1	YIPF2	Yip1 domain family, member 2
hsa-miR-516a-5p	0	0	1	1	0	0	GRWD1	glutamate-rich WD repeat containing 1
hsa-miR-516a-5p	0	0	1	1	0	0	PKDREJ	polycystic kidney disease (polycystin) and REJ homolog (sperm receptor for egg jelly homolog, sea urchin)
hsa-miR-516a-5p	0	0	1	1	1	1	CHD1L	chromodomain helicase DNA binding protein 1-like
hsa-miR-516a-5p	0	0	1	1	1	1	FUS	fused in sarcoma
hsa-miR-516a-5p	0	0	1	1	1	1	NR0B2	nuclear receptor subfamily 0, group B, member 2
hsa-miR-516a-5p	0	0	1	1	0	0	RAMP1	receptor (G protein-coupled) activity modifying protein 1
hsa-miR-516a-5p	0	0	0	1	1	1	CARD6	caspase recruitment domain family, member 6
hsa-miR-516a-5p	0	0	0	1	1	1	DMGDH	dimethylglycine dehydrogenase
hsa-miR-516a-5p	0	0	1	1	1	1	PDE6A	phosphodiesterase 6A, cGMP-specific, rod, alpha
hsa-miR-516a-5p	0	0	1	1	1	1	GIMAP4	GTPase, IMAP family member 4
hsa-miR-516a-5p	0	0	1	1	0	0	GSTM5	glutathione S-transferase mu 5
hsa-miR-516a-5p	0	0	1	1	1	1	HRH4	histamine receptor H4
hsa-miR-516a-5p	0	0	1	1	0	0	ACP2	acid phosphatase 2, lysosomal
hsa-miR-516a-5p	0	0	1	1	1	1	HRK	harakiri, BCL2 interacting protein (contains only BH3 domain)
hsa-miR-516a-5p	0	0	0	1	0	0	RNFT2	ring finger protein, transmembrane 2
hsa-miR-516a-5p	0	0	1	1	0	0	ORC3	origin recognition complex, subunit 3
hsa-miR-516a-5p	0	0	1	1	0	0	ITGA7	integrin, alpha 7
hsa-miR-516a-5p	0	0	0	1	1	1	KRT82	keratin 82
hsa-miR-516a-5p	0	0	0	1	1	1	EPB41L2	erythrocyte membrane protein band 4.1-like 2
hsa-miR-516a-5p	0	0	1	1	1	1	DOCK10	dedicator of cytokinesis 10
hsa-miR-516a-5p	0	0	1	1	0	0	CYP27A1	cytochrome P450, family 27, subfamily A, polypeptide 1
hsa-miR-516a-5p	1	0	0	1	1	1	USP44	ubiquitin specific peptidase 44
hsa-miR-516a-5p	0	0	1	1	0	0	PLXNC1	plexin C1
hsa-miR-516a-5p	0	0	0	1	0	0	CIDEB	cell death-inducing DFFA-like effector b
hsa-miR-516a-5p	0	0	0	1	1	1	BRIP1	BRCA1 interacting protein C-terminal helicase 1
hsa-miR-516a-5p	0	0	1	1	1	1	ARPC5L	actin related protein 2/3 complex, subunit 5-like
hsa-miR-516a-5p	0	0	1	1	0	0	YIPF3	Yip1 domain family, member 3
hsa-miR-516a-5p	0	0	1	1	1	1	SQRDL	sulfide quinone reductase-like (yeast)
hsa-miR-516a-5p	0	0	1	1	0	0	ITPKA	inositol-trisphosphate 3-kinase A
hsa-miR-516a-5p	0	0	1	1	1	1	TTLL7	tubulin tyrosine ligase-like family, member 7
hsa-miR-516a-5p	0	0	1	1	1	1	THUMPD2	THUMP domain containing 2
hsa-miR-516a-5p	0	0	1	1	0	0	TSPAN11	tetraspanin 11
hsa-miR-516a-5p	0	0	0	1	1	1	PALB2	partner and localizer of BRCA2
hsa-miR-516a-5p	1	0	1	1	1	1	HERC2	HECT and RLD domain containing E3 ubiquitin protein ligase 2
hsa-miR-516a-5p	0	0	0	1	0	0	TNFRSF13B	tumor necrosis factor receptor superfamily, member 13B
hsa-miR-516a-5p	0	0	0	1	0	0	C14orf166	chromosome 14 open reading frame 166
hsa-miR-516a-5p	0	0	1	1	1	1	UTP6	UTP6, small subunit (SSU) processome component, homolog (yeast)
hsa-miR-516a-5p	0	0	1	1	0	0	PKMYT1	protein kinase, membrane associated tyrosine/threonine 1
hsa-miR-516a-5p	1	0	1	1	1	1	TRAF4	TNF receptor-associated factor 4
hsa-miR-516a-5p	1	0	1	1	1	1	FOXF1	forkhead box F1
hsa-miR-516a-5p	0	0	1	1	1	1	INVS	inversin
hsa-miR-516a-5p	0	0	0	1	0	0	ATP4A	ATPase, H+/K+ exchanging, alpha polypeptide
hsa-miR-516a-5p	0	0	0	1	0	0	QRICH2	glutamine rich 2
hsa-miR-516a-5p	0	0	0	1	1	1	LGALS3BP	lectin, galactoside-binding, soluble, 3 binding protein
hsa-miR-516a-5p	1	0	1	1	1	1	OVCA2	ovarian tumor suppressor candidate 2
hsa-miR-516a-5p	0	0	1	1	0	0	NOVA2	neuro-oncological ventral antigen 2
hsa-miR-516a-5p	0	0	0	1	1	1	CLNS1A	chloride channel, nucleotide-sensitive, 1A
hsa-miR-516a-5p	0	0	1	1	1	1	PPP1R12C	protein phosphatase 1, regulatory subunit 12C
hsa-miR-516a-5p	1	0	1	1	1	1	SNRNP40	small nuclear ribonucleoprotein 40kDa (U5)
hsa-miR-516a-5p	1	0	1	1	1	1	MUL1	mitochondrial E3 ubiquitin protein ligase 1
hsa-miR-516a-5p	1	0	1	1	1	1	GRIA2	glutamate receptor, ionotropic, AMPA 2
hsa-miR-516a-5p	0	0	1	1	0	0	ALMS1	Alstrom syndrome 1
hsa-miR-516a-5p	0	0	0	1	0	0	NEIL3	nei endonuclease VIII-like 3 (E. coli)
hsa-miR-516a-5p	0	0	0	1	0	0	LYL1	lymphoblastic leukemia derived sequence 1
hsa-miR-516a-5p	0	0	1	1	1	1	HOOK2	hook homolog 2 (Drosophila)
hsa-miR-516a-5p	0	0	0	1	0	0	SIL1	SIL1 homolog, endoplasmic reticulum chaperone (S. cerevisiae)
hsa-miR-516a-5p	0	0	1	1	1	1	PITX1	paired-like homeodomain 1
hsa-miR-516a-5p	0	0	1	1	1	1	SH2D4A	SH2 domain containing 4A
hsa-miR-516a-5p	0	0	1	1	1	1	EXPH5	exophilin 5
hsa-miR-516a-5p	0	0	0	1	1	1	CSRP3	cysteine and glycine-rich protein 3 (cardiac LIM protein)
hsa-miR-516a-5p	0	0	0	1	0	0	DAXX	death-domain associated protein
hsa-miR-516a-5p	0	0	1	1	0	0	FBXO7	F-box protein 7
hsa-miR-516a-5p	0	0	1	1	1	1	ERP27	endoplasmic reticulum protein 27
hsa-miR-516a-5p	0	0	0	1	0	0	CD27	CD27 molecule
hsa-miR-516a-5p	0	0	1	1	1	1	KERA	keratocan
hsa-miR-516a-5p	0	0	1	1	0	0	STON2	stonin 2
hsa-miR-516a-5p	0	0	1	1	0	0	GTF2A2	general transcription factor IIA, 2, 12kDa
hsa-miR-516a-5p	1	0	1	1	1	1	ARRDC4	arrestin domain containing 4
hsa-miR-516a-5p	0	0	1	1	1	1	BBS4	Bardet-Biedl syndrome 4
hsa-miR-516a-5p	1	0	1	1	1	1	CBX2	chromobox homolog 2
hsa-miR-516a-5p	0	0	1	1	1	1	SAE1	SUMO1 activating enzyme subunit 1
hsa-miR-516a-5p	0	0	0	1	0	0	ZNF787	zinc finger protein 787
hsa-miR-516a-5p	0	0	0	1	0	0	ADAMTSL4	ADAMTS-like 4
hsa-miR-516a-5p	1	0	1	1	1	1	TPM3	tropomyosin 3
hsa-miR-516a-5p	0	0	1	1	1	1	CNIH3	cornichon homolog 3 (Drosophila)
hsa-miR-516a-5p	0	0	1	1	0	0	REG3G	regenerating islet-derived 3 gamma
hsa-miR-516a-5p	1	0	1	1	1	1	RBMS3	RNA binding motif, single stranded interacting protein 3
hsa-miR-516a-5p	1	0	1	1	1	1	FGF18	fibroblast growth factor 18
hsa-miR-516a-5p	0	0	0	1	0	0	PLA2G7	phospholipase A2, group VII (platelet-activating factor acetylhydrolase, plasma)
hsa-miR-516a-5p	1	0	1	1	1	1	CYP39A1	cytochrome P450, family 39, subfamily A, polypeptide 1
hsa-miR-516a-5p	0	0	1	1	0	0	IL2RG	interleukin 2 receptor, gamma
hsa-miR-516a-5p	0	0	1	1	0	0	FAM58A	family with sequence similarity 58, member A
hsa-miR-516a-5p	1	0	1	1	1	1	FAM135B	family with sequence similarity 135, member B
hsa-miR-516a-5p	0	0	0	1	1	1	ZNF16	zinc finger protein 16
hsa-miR-516a-5p	0	0	0	1	0	0	OR5F1	olfactory receptor, family 5, subfamily F, member 1
hsa-miR-516a-5p	1	0	0	1	1	1	HMBS	hydroxymethylbilane synthase
hsa-miR-516a-5p	1	0	1	1	1	1	CEP164	centrosomal protein 164kDa
hsa-miR-516a-5p	1	0	1	1	0	0	PPP4C	protein phosphatase 4, catalytic subunit
hsa-miR-516a-5p	0	0	0	1	1	1	C11orf53	chromosome 11 open reading frame 53
hsa-miR-516a-5p	0	0	1	1	1	1	PTS	6-pyruvoyltetrahydropterin synthase
hsa-miR-516a-5p	0	0	0	1	0	0	C12orf45	chromosome 12 open reading frame 45
hsa-miR-516a-5p	1	0	1	1	0	0	GXYLT1	glucoside xylosyltransferase 1
hsa-miR-516a-5p	0	0	1	1	1	1	DST	dystonin
hsa-miR-516a-5p	0	0	1	1	0	0	TMEM163	transmembrane protein 163
hsa-miR-516a-5p	1	0	1	1	1	1	CAMK4	calcium/calmodulin-dependent protein kinase IV
hsa-miR-516a-5p	0	0	1	1	1	1	CCDC148	coiled-coil domain containing 148
hsa-miR-516a-5p	0	0	0	1	0	0	OR8A1	olfactory receptor, family 8, subfamily A, member 1
hsa-miR-516a-5p	0	0	0	1	1	1	UCHL1	ubiquitin carboxyl-terminal esterase L1 (ubiquitin thiolesterase)
hsa-miR-516a-5p	0	0	1	1	0	0	CCDC173	coiled-coil domain containing 173
hsa-miR-516a-5p	0	0	1	1	1	1	CXADR	coxsackie virus and adenovirus receptor
hsa-miR-516a-5p	1	0	1	1	1	1	FGD5	FYVE, RhoGEF and PH domain containing 5
hsa-miR-516a-5p	0	0	1	1	0	0	TRMT44	tRNA methyltransferase 44 homolog (S. cerevisiae)
hsa-miR-516a-5p	0	0	0	1	0	0	RBM45	RNA binding motif protein 45
hsa-miR-516a-5p	0	0	0	1	1	1	ALS2CR12	amyotrophic lateral sclerosis 2 (juvenile) chromosome region, candidate 12
hsa-miR-516a-5p	0	0	1	1	0	0	RASA2	RAS p21 protein activator 2
hsa-miR-516a-5p	0	0	0	1	0	0	MAGEA8	melanoma antigen family A, 8
hsa-miR-516a-5p	0	0	1	1	0	0	BATF	basic leucine zipper transcription factor, ATF-like
hsa-miR-516a-5p	1	0	1	1	1	1	ADAMTSL3	ADAMTS-like 3
hsa-miR-516a-5p	0	0	0	1	0	0	NAA11	N(alpha)-acetyltransferase 11, NatA catalytic subunit
hsa-miR-516a-5p	1	0	1	1	1	1	CD109	CD109 molecule
hsa-miR-516a-5p	0	0	1	1	0	0	KNG1	kininogen 1
hsa-miR-516a-5p	0	0	0	1	0	0	IL34	interleukin 34
hsa-miR-516a-5p	0	0	1	1	1	1	SVOPL	SVOP-like
hsa-miR-516a-5p	0	0	0	1	0	0	PSMG3	proteasome (prosome, macropain) assembly chaperone 3
hsa-miR-516a-5p	1	0	1	1	1	1	SMAD6	SMAD family member 6
hsa-miR-516a-5p	0	0	1	1	1	1	CIB4	calcium and integrin binding family member 4
hsa-miR-516a-5p	1	0	1	1	1	1	NCOA5	nuclear receptor coactivator 5
hsa-miR-516a-5p	0	0	0	1	1	1	PLA2G4D	phospholipase A2, group IVD (cytosolic)
hsa-miR-516a-5p	0	0	1	1	0	0	PGLYRP3	peptidoglycan recognition protein 3
hsa-miR-516a-5p	0	0	1	1	0	0	ATP6V0D1	ATPase, H+ transporting, lysosomal 38kDa, V0 subunit d1
hsa-miR-516a-5p	1	0	1	1	1	1	NR2F6	nuclear receptor subfamily 2, group F, member 6
hsa-miR-516a-5p	0	0	0	1	0	0	CILP2	cartilage intermediate layer protein 2
hsa-miR-516a-5p	0	0	0	1	0	0	RSPH1	radial spoke head 1 homolog (Chlamydomonas)
hsa-miR-516a-5p	0	0	0	1	1	1	HSF2BP	heat shock transcription factor 2 binding protein
hsa-miR-516a-5p	1	0	0	1	1	1	G6PD	glucose-6-phosphate dehydrogenase
hsa-miR-516a-5p	0	0	1	1	0	0	HBE1	hemoglobin, epsilon 1
hsa-miR-516a-5p	0	0	0	1	0	0	RDM1	RAD52 motif 1
hsa-miR-516a-5p	0	0	1	1	0	0	ASB16	ankyrin repeat and SOCS box containing 16
hsa-miR-516a-5p	0	0	1	1	1	1	TNFSF13	tumor necrosis factor (ligand) superfamily, member 13
hsa-miR-516a-5p	0	0	1	1	1	1	TNFSF12	tumor necrosis factor (ligand) superfamily, member 12
hsa-miR-516a-5p	0	0	1	1	1	1	TNFSF12-TNFSF13	TNFSF12-TNFSF13 readthrough
hsa-miR-516a-5p	0	0	0	1	0	0	PRSS33	protease, serine, 33
hsa-miR-516a-5p	1	0	1	1	1	1	ZNF281	zinc finger protein 281
hsa-miR-516a-5p	0	0	0	1	1	1	C2orf61	chromosome 2 open reading frame 61
hsa-miR-516a-5p	0	0	0	1	1	1	HPGDS	hematopoietic prostaglandin D synthase
hsa-miR-516a-5p	1	0	1	1	1	1	GABRB1	gamma-aminobutyric acid (GABA) A receptor, beta 1
hsa-miR-516a-5p	0	0	0	1	0	0	HDAC11	histone deacetylase 11
hsa-miR-516a-5p	0	0	1	1	1	1	THOC7	THO complex 7 homolog (Drosophila)
hsa-miR-516a-5p	0	0	0	1	1	1	ZNF502	zinc finger protein 502
hsa-miR-516a-5p	1	0	1	1	1	1	KLF15	Kruppel-like factor 15
hsa-miR-516a-5p	0	0	1	1	0	0	RAD54L2	RAD54-like 2 (S. cerevisiae)
hsa-miR-516a-5p	0	0	0	1	0	0	AGXT2L1	alanine-glyoxylate aminotransferase 2-like 1
hsa-miR-516a-5p	0	0	1	1	0	0	SCRG1	stimulator of chondrogenesis 1
hsa-miR-516a-5p	0	0	0	1	1	1	CCDC127	coiled-coil domain containing 127
hsa-miR-516a-5p	0	0	1	1	1	1	LEAP2	liver expressed antimicrobial peptide 2
hsa-miR-516a-5p	0	0	0	1	0	0	GBX1	gastrulation brain homeobox 1
hsa-miR-516a-5p	0	0	1	1	0	0	DCAF13	DDB1 and CUL4 associated factor 13
hsa-miR-516a-5p	0	0	1	1	1	1	CXorf22	chromosome X open reading frame 22
hsa-miR-516a-5p	0	0	1	1	1	1	TRMT10B	tRNA methyltransferase 10 homolog B (S. cerevisiae)
hsa-miR-516a-5p	0	0	0	1	0	0	STK32C	serine/threonine kinase 32C
hsa-miR-516a-5p	1	0	1	1	1	1	ILK	integrin-linked kinase
hsa-miR-516a-5p	0	0	1	1	1	1	SALL3	sal-like 3 (Drosophila)
hsa-miR-516a-5p	0	0	0	1	0	0	WDR16	WD repeat domain 16
hsa-miR-516a-5p	0	0	1	1	1	1	ERI2	ERI1 exoribonuclease family member 2
hsa-miR-516a-5p	0	0	1	1	1	1	NYAP1	neuronal tyrosine-phosphorylated phosphoinositide-3-kinase adaptor 1
hsa-miR-516a-5p	0	0	0	1	0	0	BPIFC	BPI fold containing family C
hsa-miR-516a-5p	0	0	0	1	1	1	ENTHD2	ENTH domain containing 2
hsa-miR-516a-5p	1	0	1	1	0	0	RAB34	RAB34, member RAS oncogene family
hsa-miR-516a-5p	1	0	1	1	1	1	WNT10B	wingless-type MMTV integration site family, member 10B
hsa-miR-516a-5p	0	0	1	1	0	0	ANKRD33	ankyrin repeat domain 33
hsa-miR-516a-5p	1	0	1	1	1	1	SPRYD3	SPRY domain containing 3
hsa-miR-516a-5p	0	0	0	1	1	1	PYDC1	PYD (pyrin domain) containing 1
hsa-miR-516a-5p	1	0	1	1	1	1	BRD3	bromodomain containing 3
hsa-miR-516a-5p	0	0	0	1	0	0	GPR27	G protein-coupled receptor 27
hsa-miR-516a-5p	0	0	0	1	0	0	PTCRA	pre T-cell antigen receptor alpha
hsa-miR-516a-5p	1	0	1	1	1	1	RNASE6	ribonuclease, RNase A family, k6
hsa-miR-516a-5p	0	0	1	1	1	1	GGNBP2	gametogenetin binding protein 2
hsa-miR-516a-5p	0	0	0	1	0	0	OR1L8	olfactory receptor, family 1, subfamily L, member 8
hsa-miR-516a-5p	0	0	1	1	0	0	ARMC4	armadillo repeat containing 4
hsa-miR-516a-5p	1	0	0	1	1	1	TACR1	tachykinin receptor 1
hsa-miR-516a-5p	0	0	0	1	1	1	TBL2	transducin (beta)-like 2
hsa-miR-516a-5p	1	0	1	1	1	1	ADRB2	adrenoceptor beta 2, surface
hsa-miR-516a-5p	0	0	0	1	0	0	ATOH1	atonal homolog 1 (Drosophila)
hsa-miR-516a-5p	0	0	1	1	1	1	TRMT61B	tRNA methyltransferase 61 homolog B (S. cerevisiae)
hsa-miR-516a-5p	1	0	1	1	1	1	CHTF8	CTF8, chromosome transmission fidelity factor 8 homolog (S. cerevisiae)
hsa-miR-516a-5p	0	0	1	1	0	0	ZNF692	zinc finger protein 692
hsa-miR-516a-5p	0	0	0	1	1	1	CCDC110	coiled-coil domain containing 110
hsa-miR-516a-5p	0	0	1	1	1	1	PPID	peptidylprolyl isomerase D
hsa-miR-516a-5p	0	0	1	1	0	0	SNTG2	syntrophin, gamma 2
hsa-miR-516a-5p	0	0	0	1	0	0	ATAD3B	ATPase family, AAA domain containing 3B
hsa-miR-516a-5p	0	0	0	1	0	0	LOC645139	poly(A) binding protein interacting protein 1 pseudogene
hsa-miR-516a-5p	0	0	1	1	1	1	CKS1B	CDC28 protein kinase regulatory subunit 1B
hsa-miR-516a-5p	1	0	1	1	1	1	MAP3K11	mitogen-activated protein kinase kinase kinase 11
hsa-miR-516a-5p	0	0	1	1	1	1	SH3YL1	SH3 domain containing, Ysc84-like 1 (S. cerevisiae)
hsa-miR-516a-5p	1	0	1	1	0	0	PPARGC1B	peroxisome proliferator-activated receptor gamma, coactivator 1 beta
hsa-miR-516a-5p	1	0	1	1	1	1	AKIP1	A kinase (PRKA) interacting protein 1
hsa-miR-516a-5p	0	0	0	1	0	0	LIME1	Lck interacting transmembrane adaptor 1
hsa-miR-516a-5p	0	0	1	1	1	1	INHBC	inhibin, beta C
hsa-miR-516a-5p	0	0	1	1	1	1	ZNF680	zinc finger protein 680
hsa-miR-516a-5p	0	0	1	1	0	0	MAP7D1	MAP7 domain containing 1
hsa-miR-516a-5p	0	0	0	1	0	0	MAL	mal, T-cell differentiation protein
hsa-miR-516a-5p	0	0	1	1	1	1	TSPAN17	tetraspanin 17
hsa-miR-516a-5p	0	0	1	1	0	0	SNCB	synuclein, beta
hsa-miR-516a-5p	1	0	0	1	1	1	XXYLT1	xyloside xylosyltransferase 1
hsa-miR-516a-5p	0	0	0	1	0	0	GPR151	G protein-coupled receptor 151
hsa-miR-516a-5p	0	0	1	1	1	1	LPL	lipoprotein lipase
hsa-miR-516a-5p	0	0	1	1	0	0	UBQLN3	ubiquilin 3
hsa-miR-516a-5p	0	0	0	1	1	1	IL1RL1	interleukin 1 receptor-like 1
hsa-miR-516a-5p	0	0	0	1	0	0	PTRH2	peptidyl-tRNA hydrolase 2
hsa-miR-516a-5p	1	0	1	1	1	1	TAF15	TAF15 RNA polymerase II, TATA box binding protein (TBP)-associated factor, 68kDa
hsa-miR-516a-5p	0	0	0	1	0	0	NFE2	nuclear factor (erythroid-derived 2), 45kDa
hsa-miR-516a-5p	1	0	1	1	1	1	CAMSAP1	calmodulin regulated spectrin-associated protein 1
hsa-miR-516a-5p	1	0	1	1	1	1	KIAA1551	KIAA1551
hsa-miR-516a-5p	1	0	1	1	0	0	CCDC85B	coiled-coil domain containing 85B
hsa-miR-516a-5p	0	0	1	1	0	0	KRI1	KRI1 homolog (S. cerevisiae)
hsa-miR-516a-5p	0	0	0	1	1	1	CDK4	cyclin-dependent kinase 4
hsa-miR-516a-5p	0	0	1	1	1	1	HOXD8	homeobox D8
hsa-miR-516a-5p	0	0	0	1	1	1	C15orf44	chromosome 15 open reading frame 44
hsa-miR-516a-5p	0	0	1	1	1	1	DNAJC25	DnaJ (Hsp40) homolog, subfamily C , member 25
hsa-miR-516a-5p	0	0	1	1	1	1	GNG10	guanine nucleotide binding protein (G protein), gamma 10
hsa-miR-516a-5p	1	0	1	1	1	1	AQP11	aquaporin 11
hsa-miR-516a-5p	1	0	1	1	0	0	GPR89A	G protein-coupled receptor 89A
hsa-miR-516a-5p	0	0	1	1	1	1	IFT43	intraflagellar transport 43 homolog (Chlamydomonas)
hsa-miR-516a-5p	0	0	1	1	1	1	GPR89B	G protein-coupled receptor 89B
hsa-miR-516a-5p	0	0	0	1	0	0	OR4C6	olfactory receptor, family 4, subfamily C, member 6
hsa-miR-516a-5p	0	0	1	1	1	1	NSUN3	NOP2/Sun domain family, member 3
hsa-miR-516a-5p	0	0	1	1	0	0	CLEC1A	C-type lectin domain family 1, member A
hsa-miR-516a-5p	0	0	1	1	1	1	CALML4	calmodulin-like 4
hsa-miR-516a-5p	0	0	1	1	0	0	RPUSD2	RNA pseudouridylate synthase domain containing 2
hsa-miR-516a-5p	0	0	1	1	1	1	CYP8B1	cytochrome P450, family 8, subfamily B, polypeptide 1
hsa-miR-516a-5p	0	0	0	1	1	1	MCM9	minichromosome maintenance complex component 9
hsa-miR-516a-5p	0	0	1	1	1	1	SYTL2	synaptotagmin-like 2
hsa-miR-516a-5p	0	0	1	1	0	0	TTC9C	tetratricopeptide repeat domain 9C
hsa-miR-516a-5p	0	0	0	1	0	0	DEF6	differentially expressed in FDCP 6 homolog (mouse)
hsa-miR-516a-5p	0	0	1	1	0	0	NADSYN1	NAD synthetase 1
hsa-miR-516a-5p	1	0	0	1	1	1	TTC7A	tetratricopeptide repeat domain 7A
hsa-miR-516a-5p	0	0	1	1	1	1	ZNF273	zinc finger protein 273
hsa-miR-516a-5p	0	0	0	1	0	0	SHROOM1	shroom family member 1
hsa-miR-516a-5p	0	0	0	1	0	0	AMIGO3	adhesion molecule with Ig-like domain 3
hsa-miR-516a-5p	0	0	0	1	1	1	CCDC65	coiled-coil domain containing 65
hsa-miR-516a-5p	0	0	1	1	0	0	KIF1C	kinesin family member 1C
hsa-miR-516a-5p	0	0	1	1	0	0	AAR2	AAR2 splicing factor homolog (S. cerevisiae)
hsa-miR-516a-5p	0	0	1	1	1	1	ATG16L2	autophagy related 16-like 2 (S. cerevisiae)
hsa-miR-516a-5p	1	0	1	1	1	1	PGBD5	piggyBac transposable element derived 5
hsa-miR-516a-5p	0	0	0	1	0	0	SLC25A41	solute carrier family 25, member 41
hsa-miR-516a-5p	0	0	1	1	0	0	VARS2	valyl-tRNA synthetase 2, mitochondrial (putative)
hsa-miR-516a-5p	0	0	0	1	1	1	TPRX1	tetra-peptide repeat homeobox 1
hsa-miR-516a-5p	0	0	1	1	1	1	HORMAD1	HORMA domain containing 1
hsa-miR-516a-5p	0	0	1	1	0	0	POLR2A	polymerase (RNA) II (DNA directed) polypeptide A, 220kDa
hsa-miR-516a-5p	0	0	1	1	0	0	PLA2G16	phospholipase A2, group XVI
hsa-miR-516a-5p	0	0	1	1	0	0	STRA6	stimulated by retinoic acid gene 6 homolog (mouse)
hsa-miR-516a-5p	0	0	1	1	1	1	CSTF3	cleavage stimulation factor, 3' pre-RNA, subunit 3, 77kDa
hsa-miR-516a-5p	0	0	1	1	1	1	SERPINF2	serpin peptidase inhibitor, clade F (alpha-2 antiplasmin, pigment epithelium derived factor), member 2
hsa-miR-516a-5p	0	0	0	1	0	0	ANO5	anoctamin 5
hsa-miR-516a-5p	1	0	1	1	1	1	VPS37A	vacuolar protein sorting 37 homolog A (S. cerevisiae)
hsa-miR-516a-5p	0	0	1	1	1	1	ENTHD1	ENTH domain containing 1
hsa-miR-516a-5p	0	0	1	1	1	1	WFDC9	WAP four-disulfide core domain 9
hsa-miR-516a-5p	0	0	1	1	0	0	TMEM150B	transmembrane protein 150B
hsa-miR-516a-5p	1	0	1	1	1	1	PTPN2	protein tyrosine phosphatase, non-receptor type 2
hsa-miR-516a-5p	1	0	0	1	1	1	SLC25A18	solute carrier family 25 (glutamate carrier), member 18
hsa-miR-516a-5p	0	0	0	1	1	1	TBC1D3	TBC1 domain family, member 3
hsa-miR-516a-5p	0	0	0	1	1	1	BTBD6	BTB (POZ) domain containing 6
hsa-miR-516a-5p	1	0	1	1	1	1	USP45	ubiquitin specific peptidase 45
hsa-miR-516a-5p	0	0	1	1	0	0	AFMID	arylformamidase
hsa-miR-516a-5p	0	0	0	1	0	0	OR6X1	olfactory receptor, family 6, subfamily X, member 1
hsa-miR-516a-5p	0	0	0	1	0	0	OR6M1	olfactory receptor, family 6, subfamily M, member 1
hsa-miR-516a-5p	0	0	0	1	0	0	COA3	cytochrome C oxidase assembly factor 3
hsa-miR-516a-5p	0	0	1	1	0	0	HIST1H3I	histone cluster 1, H3i
hsa-miR-516a-5p	0	0	1	1	1	1	IP6K2	inositol hexakisphosphate kinase 2
hsa-miR-516a-5p	1	0	0	1	1	1	SIRT7	sirtuin 7
hsa-miR-516a-5p	0	0	0	1	1	1	C17orf101	chromosome 17 open reading frame 101
hsa-miR-516a-5p	0	0	0	1	0	0	OR5P2	olfactory receptor, family 5, subfamily P, member 2
hsa-miR-516a-5p	0	0	1	1	1	1	DHX36	DEAH (Asp-Glu-Ala-His) box polypeptide 36
hsa-miR-516a-5p	0	0	0	1	1	1	C14orf80	chromosome 14 open reading frame 80
hsa-miR-516a-5p	1	0	1	1	1	1	ATAT1	alpha tubulin acetyltransferase 1
hsa-miR-516a-5p	0	0	0	1	0	0	PRAMEF15	PRAME family member 15
hsa-miR-516a-5p	1	0	1	1	1	1	ATP6V0A2	ATPase, H+ transporting, lysosomal V0 subunit a2
hsa-miR-516a-5p	1	0	0	1	0	0	MAPK11	mitogen-activated protein kinase 11
hsa-miR-516a-5p	1	0	1	1	1	1	ANKRD11	ankyrin repeat domain 11
hsa-miR-516a-5p	0	0	0	1	0	0	OR2T11	olfactory receptor, family 2, subfamily T, member 11
hsa-miR-516a-5p	0	0	0	1	1	1	MAGEA2B	melanoma antigen family A, 2B
hsa-miR-516a-5p	0	0	0	1	1	1	MAGEA6	melanoma antigen family A, 6
hsa-miR-516a-5p	1	0	1	1	1	1	DUSP8	dual specificity phosphatase 8
hsa-miR-516a-5p	0	0	1	1	1	1	ACSM5	acyl-CoA synthetase medium-chain family member 5
hsa-miR-516a-5p	0	0	1	1	1	1	SPRR3	small proline-rich protein 3
hsa-miR-516a-5p	0	0	0	1	1	1	MAGEA2	melanoma antigen family A, 2
hsa-miR-516a-5p	0	0	0	1	1	1	ZNF501	zinc finger protein 501
hsa-miR-516a-5p	0	0	1	1	0	0	GPR113	G protein-coupled receptor 113
hsa-miR-516a-5p	1	0	1	1	1	1	PALLD	palladin, cytoskeletal associated protein
hsa-miR-516a-5p	0	0	1	1	0	0	ACTL7A	actin-like 7A
hsa-miR-516a-5p	0	0	0	1	1	1	TTF1	transcription termination factor, RNA polymerase I
hsa-miR-516a-5p	0	0	1	1	1	1	TCP11L1	t-complex 11 (mouse)-like 1
hsa-miR-516a-5p	1	0	1	1	1	1	BTLA	B and T lymphocyte associated
hsa-miR-516a-5p	0	0	1	1	0	0	RPS19BP1	ribosomal protein S19 binding protein 1
hsa-miR-516a-5p	0	0	0	1	0	0	JMJD7-PLA2G4B	JMJD7-PLA2G4B readthrough
hsa-miR-516a-5p	0	0	0	1	0	0	WDR25	WD repeat domain 25
hsa-miR-516a-5p	0	0	0	1	0	0	VWCE	von Willebrand factor C and EGF domains
hsa-miR-516a-5p	0	0	1	1	1	1	IQCH	IQ motif containing H
hsa-miR-516a-5p	0	0	1	1	0	0	ZFYVE19	zinc finger, FYVE domain containing 19
hsa-miR-516a-5p	0	0	1	1	1	1	SCARA3	scavenger receptor class A, member 3
hsa-miR-516a-5p	1	0	1	1	0	0	C10orf137	chromosome 10 open reading frame 137
hsa-miR-516a-5p	0	0	1	1	1	1	AIF1	allograft inflammatory factor 1
hsa-miR-516a-5p	0	0	1	1	0	0	ALDOA	aldolase A, fructose-bisphosphate
hsa-miR-516a-5p	0	0	1	1	1	1	QPCT	glutaminyl-peptide cyclotransferase
hsa-miR-516a-5p	1	0	1	1	1	1	ACACB	acetyl-CoA carboxylase beta
hsa-miR-516a-5p	0	0	0	1	1	1	SERPINA13	serpin peptidase inhibitor, clade A (alpha-1 antiproteinase, antitrypsin), member 13 (pseudogene)
hsa-miR-516a-5p	0	0	1	1	0	0	KRTDAP	keratinocyte differentiation-associated protein
hsa-miR-516a-5p	1	0	1	1	1	1	SPTBN4	spectrin, beta, non-erythrocytic 4
hsa-miR-516a-5p	0	0	0	1	0	0	ATAD3A	ATPase family, AAA domain containing 3A
hsa-miR-516a-5p	1	0	1	1	1	1	PHKA1	phosphorylase kinase, alpha 1 (muscle)
hsa-miR-516a-5p	0	0	0	1	0	0	GLRA4	glycine receptor, alpha 4
hsa-miR-516a-5p	0	0	0	1	0	0	ALG1L	asparagine-linked glycosylation 1-like
hsa-miR-516a-5p	0	0	0	1	1	1	GFRAL	GDNF family receptor alpha like
hsa-miR-516a-5p	0	0	1	1	0	0	ALKBH6	alkB, alkylation repair homolog 6 (E. coli)
hsa-miR-516a-5p	0	0	1	1	0	0	SYNE4	spectrin repeat containing, nuclear envelope family member 4
hsa-miR-516a-5p	1	0	1	1	0	0	RANBP3	RAN binding protein 3
hsa-miR-516a-5p	0	0	1	1	1	1	GPR18	G protein-coupled receptor 18
hsa-miR-516a-5p	0	0	0	1	1	1	POMT1	protein-O-mannosyltransferase 1
hsa-miR-516a-5p	0	0	0	1	1	1	SERPINB3	serpin peptidase inhibitor, clade B (ovalbumin), member 3
hsa-miR-516a-5p	1	0	1	1	1	1	FAM222B	family with sequence similarity 222, member B
hsa-miR-516a-5p	0	0	0	1	0	0	TPTE2	transmembrane phosphoinositide 3-phosphatase and tensin homolog 2
hsa-miR-516a-5p	0	0	0	1	0	0	WDR86	WD repeat domain 86
hsa-miR-516a-5p	1	0	1	1	1	1	ATP8B2	ATPase, aminophospholipid transporter, class I, type 8B, member 2
hsa-miR-516a-5p	0	0	1	1	0	0	SLC24A2	solute carrier family 24 (sodium/potassium/calcium exchanger), member 2
hsa-miR-516a-5p	0	0	0	1	1	1	GPR179	G protein-coupled receptor 179
hsa-miR-516a-5p	0	0	0	1	0	0	THEG	theg spermatid protein
hsa-miR-516a-5p	0	0	0	1	1	1	TBC1D3B	TBC1 domain family, member 3B
hsa-miR-516a-5p	0	0	1	1	0	0	CFLAR	CASP8 and FADD-like apoptosis regulator
hsa-miR-516a-5p	1	0	1	1	1	1	DMPK	dystrophia myotonica-protein kinase
hsa-miR-516a-5p	1	0	1	1	1	1	PAQR3	progestin and adipoQ receptor family member III
hsa-miR-516a-5p	0	0	1	1	0	0	CXorf67	chromosome X open reading frame 67
hsa-miR-516a-5p	0	0	1	1	1	1	C9orf171	chromosome 9 open reading frame 171
hsa-miR-516a-5p	0	0	1	1	1	1	CASP8	caspase 8, apoptosis-related cysteine peptidase
hsa-miR-516a-5p	0	0	0	1	0	0	NKAPL	NFKB activating protein-like
hsa-miR-516a-5p	0	0	1	1	1	1	C20orf132	chromosome 20 open reading frame 132
hsa-miR-516a-5p	0	0	0	1	0	0	RNF222	ring finger protein 222
hsa-miR-516a-5p	0	0	1	1	1	1	PEX3	peroxisomal biogenesis factor 3
hsa-miR-516a-5p	1	0	0	1	0	0	C7orf26	chromosome 7 open reading frame 26
hsa-miR-516a-5p	1	0	1	1	1	1	ZNF395	zinc finger protein 395
hsa-miR-516a-5p	0	0	0	1	0	0	LARP7	La ribonucleoprotein domain family, member 7
hsa-miR-516a-5p	0	0	1	1	0	0	FZD9	frizzled family receptor 9
hsa-miR-516a-5p	0	0	1	1	0	0	NKX2-3	NK2 homeobox 3
hsa-miR-516a-5p	0	0	0	1	0	0	GTDC2	glycosyltransferase-like domain containing 2
hsa-miR-516a-5p	0	0	1	1	0	0	SYNGR4	synaptogyrin 4
hsa-miR-516a-5p	0	0	0	1	0	0	ACTG2	actin, gamma 2, smooth muscle, enteric
hsa-miR-516a-5p	0	0	0	1	0	0	C19orf57	chromosome 19 open reading frame 57
hsa-miR-516a-5p	0	0	1	1	1	1	CAB39L	calcium binding protein 39-like
hsa-miR-516a-5p	0	0	1	1	1	1	TRAF6	TNF receptor-associated factor 6, E3 ubiquitin protein ligase
hsa-miR-516a-5p	0	0	1	1	0	0	THSD1	thrombospondin, type I, domain containing 1
hsa-miR-516a-5p	0	0	1	1	1	1	TRIM38	tripartite motif containing 38
hsa-miR-516a-5p	0	0	1	1	0	0	P2RY6	pyrimidinergic receptor P2Y, G-protein coupled, 6
hsa-miR-516a-5p	0	0	0	1	0	0	SAMM50	sorting and assembly machinery component 50 homolog (S. cerevisiae)
hsa-miR-516a-5p	1	0	0	1	0	0	NKX2-4	NK2 homeobox 4
hsa-miR-516a-5p	0	0	1	1	1	1	SEC61G	Sec61 gamma subunit
hsa-miR-516a-5p	0	0	1	1	1	1	NUP214	nucleoporin 214kDa
hsa-miR-516a-5p	0	0	0	1	0	0	ATG7	autophagy related 7
hsa-miR-516a-5p	1	0	1	1	1	1	HMGA2	high mobility group AT-hook 2
hsa-miR-516a-5p	0	0	0	1	1	1	TBC1D3H	TBC1 domain family, member 3H
hsa-miR-516a-5p	0	0	0	1	0	0	INCA1	inhibitor of CDK, cyclin A1 interacting protein 1
hsa-miR-516a-5p	0	0	0	1	0	0	ENTPD2	ectonucleoside triphosphate diphosphohydrolase 2
hsa-miR-516a-5p	0	0	0	1	1	1	SRP68	signal recognition particle 68kDa
hsa-miR-516a-5p	0	0	1	1	0	0	MORN3	MORN repeat containing 3
hsa-miR-516a-5p	0	0	1	1	0	0	ADORA3	adenosine A3 receptor
hsa-miR-516a-5p	1	0	1	1	1	1	RBPJ	recombination signal binding protein for immunoglobulin kappa J region
hsa-miR-516a-5p	1	0	0	1	0	0	CARD11	caspase recruitment domain family, member 11
hsa-miR-516a-5p	0	0	0	1	0	0	SPNS3	spinster homolog 3 (Drosophila)
hsa-miR-516a-5p	0	0	1	1	0	0	ZNF253	zinc finger protein 253
hsa-miR-516a-5p	0	0	0	1	0	0	OR11L1	olfactory receptor, family 11, subfamily L, member 1
hsa-miR-516a-5p	0	0	0	1	0	0	GPR89C	G protein-coupled receptor 89C
hsa-miR-516a-5p	0	0	1	1	0	0	PXK	PX domain containing serine/threonine kinase
hsa-miR-516a-5p	1	0	0	1	1	1	ZNF614	zinc finger protein 614
hsa-miR-516a-5p	0	0	0	1	0	0	ZNF432	zinc finger protein 432
hsa-miR-516a-5p	0	0	1	1	0	0	FAM149A	family with sequence similarity 149, member A
hsa-miR-516a-5p	1	0	1	1	1	1	PTPRD	protein tyrosine phosphatase, receptor type, D
hsa-miR-516a-5p	0	0	0	1	0	0	HYLS1	hydrolethalus syndrome 1
hsa-miR-516a-5p	0	0	1	1	1	1	KIAA1841	KIAA1841
hsa-miR-516a-5p	0	0	0	1	1	1	ZNF790	zinc finger protein 790
hsa-miR-516a-5p	0	0	0	1	1	1	PIK3R4	phosphoinositide-3-kinase, regulatory subunit 4
hsa-miR-516a-5p	0	0	1	1	1	1	ZNF254	zinc finger protein 254
hsa-miR-516a-5p	0	0	1	1	0	0	WDR96	WD repeat domain 96
hsa-miR-516a-5p	0	0	0	1	0	0	DCHS2	dachsous 2 (Drosophila)
hsa-miR-516a-5p	0	0	1	1	0	0	DZANK1	double zinc ribbon and ankyrin repeat domains 1
hsa-miR-516a-5p	0	0	1	1	1	1	GALP	galanin-like peptide
hsa-miR-516a-5p	0	0	1	1	0	0	SIGLEC11	sialic acid binding Ig-like lectin 11
hsa-miR-516a-5p	0	0	1	1	1	1	BRCA1	breast cancer 1, early onset
hsa-miR-516a-5p	0	0	1	1	0	0	APOA4	apolipoprotein A-IV
hsa-miR-516a-5p	1	0	0	1	1	1	C14orf102	chromosome 14 open reading frame 102
hsa-miR-516a-5p	0	0	1	1	0	0	RTP2	receptor (chemosensory) transporter protein 2
hsa-miR-516a-5p	0	0	1	1	1	1	ZNF100	zinc finger protein 100
hsa-miR-516a-5p	0	0	1	1	1	1	CNGA1	cyclic nucleotide gated channel alpha 1
hsa-miR-516a-5p	1	0	1	1	1	1	CELSR3	cadherin, EGF LAG seven-pass G-type receptor 3 (flamingo homolog, Drosophila)
hsa-miR-516a-5p	1	0	1	1	0	0	SLC26A6	solute carrier family 26, member 6
hsa-miR-516a-5p	1	0	1	1	1	1	MRPL19	mitochondrial ribosomal protein L19
hsa-miR-516a-5p	0	0	1	1	0	0	AVPR2	arginine vasopressin receptor 2
hsa-miR-516a-5p	0	0	1	1	1	1	GGPS1	geranylgeranyl diphosphate synthase 1
hsa-miR-516a-5p	1	0	1	1	0	0	BCORL1	BCL6 corepressor-like 1
hsa-miR-516a-5p	0	0	1	1	0	0	XRCC6	X-ray repair complementing defective repair in Chinese hamster cells 6
hsa-miR-516a-5p	0	0	1	1	0	0	ZNF630	zinc finger protein 630
hsa-miR-516a-5p	0	0	1	1	1	1	ZNF182	zinc finger protein 182
hsa-miR-516a-5p	0	0	1	1	0	0	BRMS1	breast cancer metastasis suppressor 1
hsa-miR-516a-5p	0	0	1	1	0	0	AGBL5	ATP/GTP binding protein-like 5
hsa-miR-516a-5p	0	0	0	1	0	0	ZMYND10	zinc finger, MYND-type containing 10
hsa-miR-516a-5p	0	0	1	1	0	0	CUEDC1	CUE domain containing 1
hsa-miR-516a-5p	0	0	1	1	0	0	ELMO3	engulfment and cell motility 3
hsa-miR-516a-5p	0	0	0	1	0	0	TSSK6	testis-specific serine kinase 6
hsa-miR-516a-5p	0	0	0	1	0	0	ABP1	amiloride binding protein 1 (amine oxidase (copper-containing))
hsa-miR-516a-5p	0	0	1	1	0	0	ZCWPW1	zinc finger, CW type with PWWP domain 1
hsa-miR-516a-5p	0	0	0	1	0	0	SHARPIN	SHANK-associated RH domain interactor
hsa-miR-516a-5p	1	0	1	1	1	1	PTGER3	prostaglandin E receptor 3 (subtype EP3)
hsa-miR-516a-5p	0	0	1	1	0	0	UBL7	ubiquitin-like 7 (bone marrow stromal cell-derived)
hsa-miR-516a-5p	0	0	1	1	0	0	NSMCE1	non-SMC element 1 homolog (S. cerevisiae)
hsa-miR-516a-5p	0	0	1	1	0	0	PSMB5	proteasome (prosome, macropain) subunit, beta type, 5
hsa-miR-516a-5p	0	0	0	1	1	1	TIFA	TRAF-interacting protein with forkhead-associated domain
hsa-miR-516a-5p	0	0	1	1	1	1	ZNF830	zinc finger protein 830
hsa-miR-516a-5p	0	0	0	1	1	1	KIAA1279	KIAA1279
hsa-miR-516a-5p	1	0	1	1	0	0	DFNB31	deafness, autosomal recessive 31
hsa-miR-516a-5p	0	0	1	1	0	0	HIST3H2A	histone cluster 3, H2a
hsa-miR-516a-5p	0	0	0	1	0	0	C4BPA	complement component 4 binding protein, alpha
hsa-miR-516a-5p	0	0	1	1	1	1	SYNJ2	synaptojanin 2
hsa-miR-516a-5p	0	0	0	1	0	0	LEMD1	LEM domain containing 1
hsa-miR-516a-5p	1	0	1	1	1	1	NFASC	neurofascin
hsa-miR-516a-5p	0	0	1	1	0	0	LRRN2	leucine rich repeat neuronal 2
hsa-miR-516a-5p	0	0	1	1	0	0	TMEM9	transmembrane protein 9
hsa-miR-516a-5p	1	0	1	1	1	1	PCMT1	protein-L-isoaspartate (D-aspartate) O-methyltransferase
hsa-miR-516a-5p	1	0	0	1	1	1	SWT1	SWT1 RNA endoribonuclease homolog (S. cerevisiae)
hsa-miR-516a-5p	1	0	1	1	1	1	PLAGL1	pleiomorphic adenoma gene-like 1
hsa-miR-516a-5p	1	0	1	1	1	1	RC3H1	ring finger and CCCH-type domains 1
hsa-miR-516a-5p	0	0	0	1	1	1	GPA33	glycoprotein A33 (transmembrane)
hsa-miR-516a-5p	0	0	1	1	1	1	C1orf110	chromosome 1 open reading frame 110
hsa-miR-516a-5p	0	0	1	1	1	1	UFC1	ubiquitin-fold modifier conjugating enzyme 1
hsa-miR-516a-5p	0	0	1	1	1	1	CD244	CD244 molecule, natural killer cell receptor 2B4
hsa-miR-516a-5p	0	0	1	1	1	1	MED23	mediator complex subunit 23
hsa-miR-516a-5p	0	0	1	1	0	0	SLAMF9	SLAM family member 9
hsa-miR-516a-5p	1	0	1	1	1	1	PTPRK	protein tyrosine phosphatase, receptor type, K
hsa-miR-516a-5p	0	0	1	1	0	0	RRNAD1	ribosomal RNA adenine dimethylase domain containing 1
hsa-miR-516a-5p	0	0	0	1	0	0	TTC24	tetratricopeptide repeat domain 24
hsa-miR-516a-5p	0	0	0	1	0	0	TSACC	TSSK6 activating co-chaperone
hsa-miR-516a-5p	0	0	1	1	1	1	UBQLN4	ubiquilin 4
hsa-miR-516a-5p	0	0	1	1	1	1	GON4L	gon-4-like (C. elegans)
hsa-miR-516a-5p	0	0	0	1	1	1	ZNF684	zinc finger protein 684
hsa-miR-516a-5p	0	0	0	1	1	1	NUP210L	nucleoporin 210kDa-like
hsa-miR-516a-5p	0	0	0	1	0	0	ADAM8	ADAM metallopeptidase domain 8
hsa-miR-516a-5p	1	0	1	1	1	1	ILF2	interleukin enhancer binding factor 2, 45kDa
hsa-miR-516a-5p	0	0	1	1	1	1	S100A3	S100 calcium binding protein A3
hsa-miR-516a-5p	0	0	0	1	0	0	UROS	uroporphyrinogen III synthase
hsa-miR-516a-5p	0	0	0	1	0	0	RPF2	ribosome production factor 2 homolog (S. cerevisiae)
hsa-miR-516a-5p	0	0	1	1	0	0	BAG3	BCL2-associated athanogene 3
hsa-miR-516a-5p	0	0	1	1	1	1	PRDM13	PR domain containing 13
hsa-miR-516a-5p	0	0	1	1	1	1	POLR3GL	polymerase (RNA) III (DNA directed) polypeptide G (32kD)-like
hsa-miR-516a-5p	0	0	0	1	0	0	NRAP	nebulin-related anchoring protein
hsa-miR-516a-5p	0	0	1	1	0	0	GSTO2	glutathione S-transferase omega 2
hsa-miR-516a-5p	1	0	1	1	0	0	GDI1	GDP dissociation inhibitor 1
hsa-miR-516a-5p	0	0	0	1	0	0	FLNA	filamin A, alpha
hsa-miR-516a-5p	0	0	1	1	0	0	KIAA1324	KIAA1324
hsa-miR-516a-5p	0	0	0	1	0	0	C1orf194	chromosome 1 open reading frame 194
hsa-miR-516a-5p	0	0	0	1	1	1	HENMT1	HEN1 methyltransferase homolog 1 (Arabidopsis)
hsa-miR-516a-5p	0	0	0	1	0	0	HAUS7	HAUS augmin-like complex, subunit 7
hsa-miR-516a-5p	1	0	1	1	1	1	YTHDF1	YTH domain family, member 1
hsa-miR-516a-5p	0	0	1	1	1	1	GPR112	G protein-coupled receptor 112
hsa-miR-516a-5p	1	0	1	1	0	0	LGSN	lengsin, lens protein with glutamine synthetase domain
hsa-miR-516a-5p	0	0	1	1	0	0	GPC3	glypican 3
hsa-miR-516a-5p	0	0	0	1	0	0	USP26	ubiquitin specific peptidase 26
hsa-miR-516a-5p	0	0	1	1	0	0	LSM14B	LSM14B, SCD6 homolog B (S. cerevisiae)
hsa-miR-516a-5p	0	0	0	1	1	1	C20orf85	chromosome 20 open reading frame 85
hsa-miR-516a-5p	0	0	1	1	0	0	ORC1	origin recognition complex, subunit 1
hsa-miR-516a-5p	0	0	1	1	1	1	KTI12	KTI12 homolog, chromatin associated (S. cerevisiae)
hsa-miR-516a-5p	0	0	0	1	0	0	EGFL7	EGF-like-domain, multiple 7
hsa-miR-516a-5p	0	0	0	1	0	0	INPP5E	inositol polyphosphate-5-phosphatase, 72 kDa
hsa-miR-516a-5p	0	0	1	1	0	0	PMPCA	peptidase (mitochondrial processing) alpha
hsa-miR-516a-5p	0	0	0	1	0	0	SARDH	sarcosine dehydrogenase
hsa-miR-516a-5p	0	0	1	1	0	0	MRPS18A	mitochondrial ribosomal protein S18A
hsa-miR-516a-5p	0	0	0	1	0	0	PRRX2	paired related homeobox 2
hsa-miR-516a-5p	1	0	1	1	1	1	ZNF691	zinc finger protein 691
hsa-miR-516a-5p	0	0	1	1	0	0	ABCC10	ATP-binding cassette, sub-family C (CFTR/MRP), member 10
hsa-miR-516a-5p	0	0	1	1	0	0	CCDC23	coiled-coil domain containing 23
hsa-miR-516a-5p	1	0	0	1	0	0	C1orf50	chromosome 1 open reading frame 50
hsa-miR-516a-5p	0	0	1	1	1	1	PPIH	peptidylprolyl isomerase H (cyclophilin H)
hsa-miR-516a-5p	0	0	0	1	0	0	ZNF642	zinc finger protein 642
hsa-miR-516a-5p	1	0	1	1	1	1	ODF2	outer dense fiber of sperm tails 2
hsa-miR-516a-5p	1	0	1	1	1	1	MYCL1	v-myc myelocytomatosis viral oncogene homolog 1, lung carcinoma derived (avian)
hsa-miR-516a-5p	1	0	0	1	1	1	HNF4A	hepatocyte nuclear factor 4, alpha
hsa-miR-516a-5p	0	0	1	1	1	1	DNAJC9	DnaJ (Hsp40) homolog, subfamily C, member 9
hsa-miR-516a-5p	0	0	1	1	1	1	INPP5B	inositol polyphosphate-5-phosphatase, 75kDa
hsa-miR-516a-5p	0	0	1	1	1	1	KLHL4	kelch-like 4 (Drosophila)
hsa-miR-516a-5p	1	0	1	1	1	1	TRAPPC3	trafficking protein particle complex 3
hsa-miR-516a-5p	0	0	1	1	1	1	TOR2A	torsin family 2, member A
hsa-miR-516a-5p	0	0	0	1	0	0	GPR35	G protein-coupled receptor 35
hsa-miR-516a-5p	0	0	0	1	0	0	HJURP	Holliday junction recognition protein
hsa-miR-516a-5p	0	0	1	1	0	0	TMEM54	transmembrane protein 54
hsa-miR-516a-5p	0	0	0	1	0	0	ATOH7	atonal homolog 7 (Drosophila)
hsa-miR-516a-5p	0	0	1	1	0	0	NHSL2	NHS-like 2
hsa-miR-516a-5p	0	0	1	1	1	1	MAPK13	mitogen-activated protein kinase 13
hsa-miR-516a-5p	0	0	1	1	0	0	C9orf43	chromosome 9 open reading frame 43
hsa-miR-516a-5p	0	0	0	1	0	0	UBXN11	UBX domain protein 11
hsa-miR-516a-5p	1	0	1	1	1	1	LYPLA2	lysophospholipase II
hsa-miR-516a-5p	0	0	1	1	1	1	CTNNAL1	catenin (cadherin-associated protein), alpha-like 1
hsa-miR-516a-5p	0	0	0	1	1	1	FAM206A	family with sequence similarity 206, member A
hsa-miR-516a-5p	0	0	0	1	1	1	PSMB9	proteasome (prosome, macropain) subunit, beta type, 9 (large multifunctional peptidase 2)
hsa-miR-516a-5p	0	0	1	1	0	0	TMEM136	transmembrane protein 136
hsa-miR-516a-5p	0	0	1	1	1	1	TRIM14	tripartite motif containing 14
hsa-miR-516a-5p	0	0	0	1	0	0	PLA2G2E	phospholipase A2, group IIE
hsa-miR-516a-5p	0	0	0	1	1	1	TBXA2R	thromboxane A2 receptor
hsa-miR-516a-5p	0	0	1	1	0	0	UBR4	ubiquitin protein ligase E3 component n-recognin 4
hsa-miR-516a-5p	0	0	1	1	0	0	FBP1	fructose-1,6-bisphosphatase 1
hsa-miR-516a-5p	1	0	1	1	1	1	IQSEC2	IQ motif and Sec7 domain 2
hsa-miR-516a-5p	1	0	1	1	1	1	ARHGEF10L	Rho guanine nucleotide exchange factor (GEF) 10-like
hsa-miR-516a-5p	0	0	0	1	1	1	SUSD3	sushi domain containing 3
hsa-miR-516a-5p	0	0	1	1	1	1	ZBTB12	zinc finger and BTB domain containing 12
hsa-miR-516a-5p	0	0	1	1	0	0	CROCC	ciliary rootlet coiled-coil, rootletin
hsa-miR-516a-5p	0	0	1	1	1	1	LSM2	LSM2 homolog, U6 small nuclear RNA associated (S. cerevisiae)
hsa-miR-516a-5p	1	0	1	1	1	1	ASXL1	additional sex combs like 1 (Drosophila)
hsa-miR-516a-5p	0	0	0	1	0	0	ZBTB17	zinc finger and BTB domain containing 17
hsa-miR-516a-5p	0	0	1	1	0	0	MSH5	mutS homolog 5 (E. coli)
hsa-miR-516a-5p	0	0	1	1	0	0	PRAMEF9	PRAME family member 9
hsa-miR-516a-5p	0	0	1	1	1	1	PRAMEF5	PRAME family member 5
hsa-miR-516a-5p	0	0	0	1	1	1	PRAMEF23	PRAME family member 23
hsa-miR-516a-5p	0	0	0	1	0	0	PRAMEF6	PRAME family member 6
hsa-miR-516a-5p	0	0	0	1	1	1	GDPD4	glycerophosphodiester phosphodiesterase domain containing 4
hsa-miR-516a-5p	0	0	1	1	0	0	PCCA	propionyl CoA carboxylase, alpha polypeptide
hsa-miR-516a-5p	1	0	1	1	0	0	DGAT2	diacylglycerol O-acyltransferase 2
hsa-miR-516a-5p	1	0	1	1	1	1	MFN2	mitofusin 2
hsa-miR-516a-5p	0	0	1	1	1	1	PRTFDC1	phosphoribosyl transferase domain containing 1
hsa-miR-516a-5p	0	0	0	1	0	0	LOC100130238	uncharacterized LOC100130238
hsa-miR-516a-5p	0	0	1	1	0	0	UGGT2	UDP-glucose glycoprotein glucosyltransferase 2
hsa-miR-516a-5p	0	0	0	1	0	0	UBIAD1	UbiA prenyltransferase domain containing 1
hsa-miR-516a-5p	0	0	0	1	0	0	NMS	neuromedin S
hsa-miR-516a-5p	1	0	1	1	1	1	MOG	myelin oligodendrocyte glycoprotein
hsa-miR-516a-5p	0	0	0	1	0	0	C1orf127	chromosome 1 open reading frame 127
hsa-miR-516a-5p	0	0	1	1	0	0	TIMP1	TIMP metallopeptidase inhibitor 1
hsa-miR-516a-5p	0	0	0	1	0	0	IRF3	interferon regulatory factor 3
hsa-miR-516a-5p	0	0	0	1	0	0	OR2B3	olfactory receptor, family 2, subfamily B, member 3
hsa-miR-516a-5p	0	0	0	1	0	0	CA6	carbonic anhydrase VI
hsa-miR-516a-5p	0	0	1	1	1	1	SLC22A12	solute carrier family 22 (organic anion/urate transporter), member 12
hsa-miR-516a-5p	0	0	0	1	1	1	ST8SIA6	ST8 alpha-N-acetyl-neuraminide alpha-2,8-sialyltransferase 6
hsa-miR-516a-5p	0	0	1	1	1	1	TMEM8B	transmembrane protein 8B
hsa-miR-516a-5p	0	0	1	1	1	1	CEACAM1	carcinoembryonic antigen-related cell adhesion molecule 1 (biliary glycoprotein)
hsa-miR-516a-5p	0	0	0	1	1	1	ARHGEF35	Rho guanine nucleotide exchange factor (GEF) 35
hsa-miR-516a-5p	1	0	1	1	1	1	AJAP1	adherens junctions associated protein 1
hsa-miR-516a-5p	1	0	1	1	1	1	VCP	valosin containing protein
hsa-miR-516a-5p	0	0	1	1	0	0	FANCG	Fanconi anemia, complementation group G
hsa-miR-516a-5p	0	0	1	1	1	1	EFCAB5	EF-hand calcium binding domain 5
hsa-miR-516a-5p	0	0	1	1	0	0	KIF13A	kinesin family member 13A
hsa-miR-516a-5p	0	0	0	1	0	0	C4orf47	chromosome 4 open reading frame 47
hsa-miR-516a-5p	0	0	0	1	0	0	LOC100130976	uncharacterized LOC100130976
hsa-miR-516a-5p	0	0	0	1	0	0	CKS1BP6	CDC28 protein kinase regulatory subunit 1B pseudogene 6
hsa-miR-516a-5p	0	0	1	1	1	1	MAGEB2	melanoma antigen family B, 2
hsa-miR-516a-5p	0	0	1	1	1	1	DNAJC15	DnaJ (Hsp40) homolog, subfamily C, member 15
hsa-miR-516a-5p	0	0	1	1	0	0	TM6SF1	transmembrane 6 superfamily member 1
hsa-miR-516a-5p	1	0	1	1	1	1	INSC	inscuteable homolog (Drosophila)
hsa-miR-516a-5p	0	0	0	1	0	0	OR6C3	olfactory receptor, family 6, subfamily C, member 3
hsa-miR-516a-5p	0	0	1	1	0	0	SFMBT2	Scm-like with four mbt domains 2
hsa-miR-516a-5p	0	0	1	1	0	0	EXOC3L4	exocyst complex component 3-like 4
hsa-miR-516a-5p	0	0	1	1	1	1	ALOX5AP	arachidonate 5-lipoxygenase-activating protein
hsa-miR-516a-5p	1	0	1	1	1	1	BNC2	basonuclin 2
hsa-miR-516a-5p	0	0	1	1	1	1	SHROOM3	shroom family member 3
hsa-miR-516a-5p	0	0	0	1	1	1	ASGR1	asialoglycoprotein receptor 1
hsa-miR-516a-5p	0	0	1	1	0	0	CEP152	centrosomal protein 152kDa
hsa-miR-516a-5p	0	0	1	1	0	0	LCMT1	leucine carboxyl methyltransferase 1
hsa-miR-516a-5p	0	0	0	1	1	1	TTC38	tetratricopeptide repeat domain 38
hsa-miR-516a-5p	1	0	1	1	0	0	CCM2	cerebral cavernous malformation 2
hsa-miR-516a-5p	0	0	1	1	1	1	XG	Xg blood group
hsa-miR-516a-5p	0	0	1	1	0	0	SCUBE1	signal peptide, CUB domain, EGF-like 1
hsa-miR-516a-5p	0	0	0	1	0	0	CLEC4G	C-type lectin domain family 4, member G
hsa-miR-516a-5p	0	0	1	1	0	0	SLC25A6	solute carrier family 25 (mitochondrial carrier; adenine nucleotide translocator), member 6
hsa-miR-516a-5p	0	0	1	1	1	1	KIAA2026	KIAA2026
hsa-miR-516a-5p	0	0	1	1	0	0	FAM188B	family with sequence similarity 188, member B
hsa-miR-516a-5p	0	0	1	1	1	1	TSSC1	tumor suppressing subtransferable candidate 1
hsa-miR-516a-5p	0	0	0	1	0	0	ZNF205	zinc finger protein 205
hsa-miR-516a-5p	0	0	0	1	0	0	ONECUT3	one cut homeobox 3
hsa-miR-516a-5p	0	0	1	1	0	0	OTUD7A	OTU domain containing 7A
hsa-miR-516a-5p	0	0	1	1	0	0	LNP1	leukemia NUP98 fusion partner 1
hsa-miR-516a-5p	1	1	1	1	1	1	TRIM71	tripartite motif containing 71, E3 ubiquitin protein ligase
hsa-miR-516a-5p	0	0	1	1	1	1	ZCWPW2	zinc finger, CW type with PWWP domain 2
hsa-miR-516a-5p	0	0	0	1	0	0	OR10J5	olfactory receptor, family 10, subfamily J, member 5
hsa-miR-516a-5p	0	0	0	1	0	0	PLEKHM3	pleckstrin homology domain containing, family M, member 3
hsa-miR-516a-5p	1	0	1	1	1	1	PRTG	protogenin
hsa-miR-516a-5p	1	0	1	1	1	1	SHOX2	short stature homeobox 2
hsa-miR-516a-5p	1	0	1	1	0	0	KIAA1549L	KIAA1549-like
hsa-miR-516a-5p	0	0	1	1	0	0	SNRPN	small nuclear ribonucleoprotein polypeptide N
hsa-miR-516a-5p	0	0	1	1	1	1	FAM220A	family with sequence similarity 220, member A
hsa-miR-516a-5p	0	0	1	1	1	1	STIL	SCL/TAL1 interrupting locus
hsa-miR-516a-5p	0	0	0	1	1	1	EXOSC2	exosome component 2
hsa-miR-516a-5p	1	0	1	0	1	1	TRIL	TLR4 interactor with leucine-rich repeats
hsa-miR-516a-5p	0	0	0	1	1	1	APIP	APAF1 interacting protein
hsa-miR-516a-5p	0	0	0	0	1	1	SCFD2	sec1 family domain containing 2
hsa-miR-516a-5p	0	0	0	0	1	1	LOC649133	uncharacterized LOC649133
