# Supplementary material for: Profiling of Selected MicroRNAs in Proliferative Eutopic Endometrium of Women with Ovarian Endometriosis
Source: Biomed Res Int. 2015 Aug 20;2015:760698. doi: 10.1155/2015/760698 (PMC4558423; doi:10.1155/2015/760698)
Supplement: Supplementary file 1 — Table I: The names of miRNAs significantly differentially expressed between eutopic endometrium of patients with endometriosis vs eutopic endometrium of patients without endometriosis. Table II: The associations between miRNA and mRNA, which presents detailed results of the search of six major databases i.e targetscan, tarbase, miranda, mirbase, mirtarget2 and pictar. [file 760698.f1.zip › 760698.f1/Table II/hsa-miR-518a-3p.tsv]

miR	targetscan	tarbase	miranda	mirbase	mirtarget2	pictar	GeneSymbol	GeneName
hsa-miR-518a-3p	1	0	1	0	1	1	MTSS1	metastasis suppressor 1
hsa-miR-518a-3p	1	0	1	1	1	1	NRXN1	neurexin 1
hsa-miR-518a-3p	1	0	1	1	0	0	TBC1D12	TBC1 domain family, member 12
hsa-miR-518a-3p	1	0	1	1	1	1	HIPK1	homeodomain interacting protein kinase 1
hsa-miR-518a-3p	0	0	1	1	1	1	MAN2B2	mannosidase, alpha, class 2B, member 2
hsa-miR-518a-3p	1	0	1	1	1	1	NLGN4Y	neuroligin 4, Y-linked
hsa-miR-518a-3p	1	0	1	1	1	1	SPIRE1	spire homolog 1 (Drosophila)
hsa-miR-518a-3p	1	0	1	1	1	1	MKL2	MKL/myocardin-like 2
hsa-miR-518a-3p	0	0	1	1	1	1	FSTL5	follistatin-like 5
hsa-miR-518a-3p	0	0	1	1	1	1	TCF7L2	transcription factor 7-like 2 (T-cell specific, HMG-box)
hsa-miR-518a-3p	1	0	1	0	0	0	ODZ4	odz, odd Oz/ten-m homolog 4 (Drosophila)
hsa-miR-518a-3p	0	0	1	1	0	0	ISLR2	immunoglobulin superfamily containing leucine-rich repeat 2
hsa-miR-518a-3p	0	0	1	1	1	1	SPEF2	sperm flagellar 2
hsa-miR-518a-3p	1	0	1	1	1	1	AHCTF1	AT hook containing transcription factor 1
hsa-miR-518a-3p	1	0	1	1	1	1	PAN3	PAN3 poly(A) specific ribonuclease subunit homolog (S. cerevisiae)
hsa-miR-518a-3p	1	0	1	0	1	1	PCDHA13	protocadherin alpha 13
hsa-miR-518a-3p	1	0	1	1	1	1	PCDHA4	protocadherin alpha 4
hsa-miR-518a-3p	1	0	1	1	0	0	ELN	elastin
hsa-miR-518a-3p	0	0	1	1	1	1	PTK2	PTK2 protein tyrosine kinase 2
hsa-miR-518a-3p	1	0	1	1	0	0	CACNB1	calcium channel, voltage-dependent, beta 1 subunit
hsa-miR-518a-3p	0	0	1	1	0	0	IFT27	intraflagellar transport 27 homolog (Chlamydomonas)
hsa-miR-518a-3p	0	0	1	1	0	0	EIF4E2	eukaryotic translation initiation factor 4E family member 2
hsa-miR-518a-3p	1	0	1	0	1	1	TBL1X	transducin (beta)-like 1X-linked
hsa-miR-518a-3p	0	0	1	1	1	1	SGSH	N-sulfoglucosamine sulfohydrolase
hsa-miR-518a-3p	0	0	1	0	0	0	MIAT	myocardial infarction associated transcript (non-protein coding)
hsa-miR-518a-3p	1	0	1	1	1	1	SOCS2	suppressor of cytokine signaling 2
hsa-miR-518a-3p	1	0	1	1	1	1	VAPB	VAMP (vesicle-associated membrane protein)-associated protein B and C
hsa-miR-518a-3p	0	0	1	1	1	1	FHL1	four and a half LIM domains 1
hsa-miR-518a-3p	1	0	1	1	1	1	HNRNPH3	heterogeneous nuclear ribonucleoprotein H3 (2H9)
hsa-miR-518a-3p	0	0	1	1	0	0	ANGPTL4	angiopoietin-like 4
hsa-miR-518a-3p	1	0	1	1	1	1	ANKRD13A	ankyrin repeat domain 13A
hsa-miR-518a-3p	0	0	1	0	1	1	ZDHHC17	zinc finger, DHHC-type containing 17
hsa-miR-518a-3p	0	0	1	1	1	1	HERPUD1	homocysteine-inducible, endoplasmic reticulum stress-inducible, ubiquitin-like domain member 1
hsa-miR-518a-3p	1	0	1	1	1	1	DESI2	desumoylating isopeptidase 2
hsa-miR-518a-3p	1	0	1	0	1	1	PARP11	poly (ADP-ribose) polymerase family, member 11
hsa-miR-518a-3p	1	0	1	1	1	1	PUM2	pumilio homolog 2 (Drosophila)
hsa-miR-518a-3p	1	0	1	1	1	1	CPEB1	cytoplasmic polyadenylation element binding protein 1
hsa-miR-518a-3p	1	0	1	1	1	1	PBX3	pre-B-cell leukemia homeobox 3
hsa-miR-518a-3p	1	0	1	1	1	1	CALCOCO1	calcium binding and coiled-coil domain 1
hsa-miR-518a-3p	0	0	1	1	1	1	CASP8	caspase 8, apoptosis-related cysteine peptidase
hsa-miR-518a-3p	1	0	1	1	0	0	SEPT8	septin 8
hsa-miR-518a-3p	0	0	1	0	0	0	CACNA2D3	calcium channel, voltage-dependent, alpha 2/delta subunit 3
hsa-miR-518a-3p	0	0	1	1	0	0	C22orf24	chromosome 22 open reading frame 24
hsa-miR-518a-3p	1	0	1	1	1	1	HNRNPF	heterogeneous nuclear ribonucleoprotein F
hsa-miR-518a-3p	1	0	1	0	1	1	SPATS2L	spermatogenesis associated, serine-rich 2-like
hsa-miR-518a-3p	1	0	1	1	1	1	HNRNPUL1	heterogeneous nuclear ribonucleoprotein U-like 1
hsa-miR-518a-3p	0	0	1	1	1	1	CCPG1	cell cycle progression 1
hsa-miR-518a-3p	1	0	1	0	1	1	LIN28A	lin-28 homolog A (C. elegans)
hsa-miR-518a-3p	0	0	1	1	0	0	KIRREL	kin of IRRE like (Drosophila)
hsa-miR-518a-3p	1	0	1	1	1	1	STARD7	StAR-related lipid transfer (START) domain containing 7
hsa-miR-518a-3p	1	0	1	1	1	1	ZNF385A	zinc finger protein 385A
hsa-miR-518a-3p	0	0	1	1	1	1	METTL7A	methyltransferase like 7A
hsa-miR-518a-3p	1	0	1	1	1	1	LRP4	low density lipoprotein receptor-related protein 4
hsa-miR-518a-3p	1	0	1	1	1	1	TMEM2	transmembrane protein 2
hsa-miR-518a-3p	0	0	1	0	0	0	LOC254559	uncharacterized LOC254559
hsa-miR-518a-3p	1	0	1	0	1	1	AP1G1	adaptor-related protein complex 1, gamma 1 subunit
hsa-miR-518a-3p	1	0	1	1	1	1	FRMD6	FERM domain containing 6
hsa-miR-518a-3p	1	0	1	1	1	1	ZNF664	zinc finger protein 664
hsa-miR-518a-3p	1	0	1	1	1	1	LMNA	lamin A/C
hsa-miR-518a-3p	1	0	1	1	1	1	FOPNL	FGFR1OP N-terminal like
hsa-miR-518a-3p	0	0	1	1	0	0	AARSD1	alanyl-tRNA synthetase domain containing 1
hsa-miR-518a-3p	0	0	1	1	1	1	PSME3	proteasome (prosome, macropain) activator subunit 3 (PA28 gamma; Ki)
hsa-miR-518a-3p	0	0	1	1	1	1	RANBP17	RAN binding protein 17
hsa-miR-518a-3p	0	0	1	1	0	0	TRIM41	tripartite motif containing 41
hsa-miR-518a-3p	1	0	1	1	1	1	ZNF449	zinc finger protein 449
hsa-miR-518a-3p	1	0	1	0	1	1	RNF165	ring finger protein 165
hsa-miR-518a-3p	0	0	1	1	0	0	NISCH	nischarin
hsa-miR-518a-3p	1	0	1	1	1	1	FBXW2	F-box and WD repeat domain containing 2
hsa-miR-518a-3p	1	0	1	1	1	1	TSN	translin
hsa-miR-518a-3p	0	0	1	1	0	0	CDC25B	cell division cycle 25 homolog B (S. pombe)
hsa-miR-518a-3p	1	0	1	1	1	1	NASP	nuclear autoantigenic sperm protein (histone-binding)
hsa-miR-518a-3p	1	0	1	1	1	1	SLBP	stem-loop binding protein
hsa-miR-518a-3p	1	0	1	1	1	1	PTPRU	protein tyrosine phosphatase, receptor type, U
hsa-miR-518a-3p	0	0	1	1	0	0	ZNF185	zinc finger protein 185 (LIM domain)
hsa-miR-518a-3p	1	0	1	1	1	1	SPATS2	spermatogenesis associated, serine-rich 2
hsa-miR-518a-3p	0	0	1	0	0	0	ZNF815P	zinc finger protein 815, pseudogene
hsa-miR-518a-3p	0	0	1	0	0	0	OTUD1	OTU domain containing 1
hsa-miR-518a-3p	1	0	1	0	1	1	COL21A1	collagen, type XXI, alpha 1
hsa-miR-518a-3p	1	0	1	1	1	1	STIM2	stromal interaction molecule 2
hsa-miR-518a-3p	1	0	1	1	1	1	CDV3	CDV3 homolog (mouse)
hsa-miR-518a-3p	0	0	1	1	1	1	PPFIBP2	PTPRF interacting protein, binding protein 2 (liprin beta 2)
hsa-miR-518a-3p	1	0	1	1	1	1	CHD6	chromodomain helicase DNA binding protein 6
hsa-miR-518a-3p	0	0	1	1	0	0	MARS	methionyl-tRNA synthetase
hsa-miR-518a-3p	0	0	1	0	1	1	FLJ41200	uncharacterized LOC401492
hsa-miR-518a-3p	0	0	1	0	0	0	LOC650368	asparagine-linked glycosylation 1-like pseudogene
hsa-miR-518a-3p	0	0	1	1	1	1	ANKRD44	ankyrin repeat domain 44
hsa-miR-518a-3p	1	0	1	1	1	1	FAM122B	family with sequence similarity 122B
hsa-miR-518a-3p	1	0	1	1	1	1	XPO1	exportin 1 (CRM1 homolog, yeast)
hsa-miR-518a-3p	1	0	1	1	1	1	RGMA	RGM domain family, member A
hsa-miR-518a-3p	1	0	1	1	0	0	ATXN7L3	ataxin 7-like 3
hsa-miR-518a-3p	0	0	1	1	1	1	MOBP	myelin-associated oligodendrocyte basic protein
hsa-miR-518a-3p	1	0	1	1	1	1	ZDHHC23	zinc finger, DHHC-type containing 23
hsa-miR-518a-3p	1	0	1	1	1	1	ENAH	enabled homolog (Drosophila)
hsa-miR-518a-3p	0	0	1	1	1	1	MCU	mitochondrial calcium uniporter
hsa-miR-518a-3p	1	0	1	1	1	1	ZNF655	zinc finger protein 655
hsa-miR-518a-3p	0	0	1	1	1	1	CD160	CD160 molecule
hsa-miR-518a-3p	1	0	1	1	1	1	UPF1	UPF1 regulator of nonsense transcripts homolog (yeast)
hsa-miR-518a-3p	1	0	1	1	1	1	PHC2	polyhomeotic homolog 2 (Drosophila)
hsa-miR-518a-3p	1	0	1	0	1	1	FMNL2	formin-like 2
hsa-miR-518a-3p	0	0	1	1	1	1	IMMT	inner membrane protein, mitochondrial
hsa-miR-518a-3p	1	0	1	0	1	1	TEAD3	TEA domain family member 3
hsa-miR-518a-3p	1	0	1	1	1	1	NECAP1	NECAP endocytosis associated 1
hsa-miR-518a-3p	0	0	1	0	0	0	POM121L9P	POM121 transmembrane nucleoporin-like 9, pseudogene
hsa-miR-518a-3p	0	0	1	1	0	0	TBC1D10B	TBC1 domain family, member 10B
hsa-miR-518a-3p	0	0	1	1	1	1	ARIH1	ariadne homolog, ubiquitin-conjugating enzyme E2 binding protein, 1 (Drosophila)
hsa-miR-518a-3p	1	0	1	1	1	1	KIAA1033	KIAA1033
hsa-miR-518a-3p	1	0	1	1	1	1	TFE3	transcription factor binding to IGHM enhancer 3
hsa-miR-518a-3p	0	0	1	0	0	0	FAM66D	family with sequence similarity 66, member D
hsa-miR-518a-3p	1	0	1	1	1	1	DENND1B	DENN/MADD domain containing 1B
hsa-miR-518a-3p	1	0	1	1	1	1	FAM126B	family with sequence similarity 126, member B
hsa-miR-518a-3p	0	0	1	1	1	1	MYPN	myopalladin
hsa-miR-518a-3p	0	0	1	1	1	1	YAP1	Yes-associated protein 1
hsa-miR-518a-3p	0	0	1	1	1	1	BRD2	bromodomain containing 2
hsa-miR-518a-3p	1	0	1	1	1	1	FBXO3	F-box protein 3
hsa-miR-518a-3p	0	0	1	1	1	1	NFE2L1	nuclear factor (erythroid-derived 2)-like 1
hsa-miR-518a-3p	1	0	1	1	1	1	DIS3L2	DIS3 mitotic control homolog (S. cerevisiae)-like 2
hsa-miR-518a-3p	0	0	1	1	0	0	FAM176C	family with sequence similarity 176, member C
hsa-miR-518a-3p	1	0	1	1	1	1	PBRM1	polybromo 1
hsa-miR-518a-3p	1	0	1	1	1	1	TAB3	TGF-beta activated kinase 1/MAP3K7 binding protein 3
hsa-miR-518a-3p	1	0	1	0	1	1	MEGF9	multiple EGF-like-domains 9
hsa-miR-518a-3p	1	0	1	1	1	1	NLGN4X	neuroligin 4, X-linked
hsa-miR-518a-3p	0	0	1	0	1	1	FAM198B	family with sequence similarity 198, member B
hsa-miR-518a-3p	0	0	1	1	0	0	ARAP1	ArfGAP with RhoGAP domain, ankyrin repeat and PH domain 1
hsa-miR-518a-3p	0	0	1	1	1	1	IL24	interleukin 24
hsa-miR-518a-3p	1	0	1	1	1	1	CYFIP1	cytoplasmic FMR1 interacting protein 1
hsa-miR-518a-3p	1	0	1	1	1	1	QKI	QKI, KH domain containing, RNA binding
hsa-miR-518a-3p	0	0	1	1	0	0	CXorf26	chromosome X open reading frame 26
hsa-miR-518a-3p	1	0	1	1	1	1	ELOVL6	ELOVL fatty acid elongase 6
hsa-miR-518a-3p	0	0	1	1	1	1	PAFAH1B2	platelet-activating factor acetylhydrolase 1b, catalytic subunit 2 (30kDa)
hsa-miR-518a-3p	0	0	1	0	0	0	LOC254896	uncharacterized LOC254896
hsa-miR-518a-3p	1	0	1	1	1	1	DNAJB5	DnaJ (Hsp40) homolog, subfamily B, member 5
hsa-miR-518a-3p	1	0	1	1	1	1	PRDM2	PR domain containing 2, with ZNF domain
hsa-miR-518a-3p	0	0	1	0	0	0	NUDT16P1	nudix (nucleoside diphosphate linked moiety X)-type motif 16 pseudogene 1
hsa-miR-518a-3p	0	0	1	1	1	1	FAM122C	family with sequence similarity 122C
hsa-miR-518a-3p	1	0	1	1	1	1	ADPGK	ADP-dependent glucokinase
hsa-miR-518a-3p	1	0	1	0	1	1	CDK19	cyclin-dependent kinase 19
hsa-miR-518a-3p	0	0	1	0	0	0	ZBED3-AS1	ZBED3 antisense RNA 1
hsa-miR-518a-3p	0	0	1	1	1	1	RBBP8	retinoblastoma binding protein 8
hsa-miR-518a-3p	1	0	1	1	1	1	MUM1L1	melanoma associated antigen (mutated) 1-like 1
hsa-miR-518a-3p	0	0	1	1	1	1	SNX17	sorting nexin 17
hsa-miR-518a-3p	1	0	1	1	1	1	TTC39C	tetratricopeptide repeat domain 39C
hsa-miR-518a-3p	1	0	1	1	1	1	SIRPA	signal-regulatory protein alpha
hsa-miR-518a-3p	1	0	1	1	1	1	PCDHA5	protocadherin alpha 5
hsa-miR-518a-3p	1	0	1	1	1	1	NKAIN2	Na+/K+ transporting ATPase interacting 2
hsa-miR-518a-3p	0	0	1	0	1	1	KSR1	kinase suppressor of ras 1
hsa-miR-518a-3p	0	0	1	1	1	1	CBLN2	cerebellin 2 precursor
hsa-miR-518a-3p	0	0	1	1	1	1	SNAPC3	small nuclear RNA activating complex, polypeptide 3, 50kDa
hsa-miR-518a-3p	1	0	1	1	1	1	ZNF618	zinc finger protein 618
hsa-miR-518a-3p	1	0	1	0	1	1	CPEB4	cytoplasmic polyadenylation element binding protein 4
hsa-miR-518a-3p	1	0	1	1	1	1	BNC2	basonuclin 2
hsa-miR-518a-3p	1	0	1	1	1	1	FAM135B	family with sequence similarity 135, member B
hsa-miR-518a-3p	1	0	1	1	1	1	GALNT1	UDP-N-acetyl-alpha-D-galactosamine:polypeptide N-acetylgalactosaminyltransferase 1 (GalNAc-T1)
hsa-miR-518a-3p	0	0	1	0	0	0	LOC100134868	uncharacterized LOC100134868
hsa-miR-518a-3p	1	0	1	0	1	1	LPHN3	latrophilin 3
hsa-miR-518a-3p	0	0	1	0	0	0	LOC401074	uncharacterized LOC401074
hsa-miR-518a-3p	1	0	1	0	1	1	HSPA12A	heat shock 70kDa protein 12A
hsa-miR-518a-3p	0	0	1	0	0	0	LOC338739	uncharacterized LOC338739
hsa-miR-518a-3p	1	0	1	1	1	1	SOLH	small optic lobes homolog (Drosophila)
hsa-miR-518a-3p	1	0	1	1	1	1	AGAP3	ArfGAP with GTPase domain, ankyrin repeat and PH domain 3
hsa-miR-518a-3p	1	0	1	1	1	1	RNF145	ring finger protein 145
hsa-miR-518a-3p	1	0	1	1	1	1	SON	SON DNA binding protein
hsa-miR-518a-3p	0	0	1	1	0	0	FAM72B	family with sequence similarity 72, member B
hsa-miR-518a-3p	0	0	1	0	0	0	LOC348120	uncharacterized LOC348120
hsa-miR-518a-3p	1	0	1	1	1	1	RMND5A	required for meiotic nuclear division 5 homolog A (S. cerevisiae)
hsa-miR-518a-3p	1	0	1	1	1	1	WSB1	WD repeat and SOCS box containing 1
hsa-miR-518a-3p	1	0	1	1	1	1	ANKRD46	ankyrin repeat domain 46
hsa-miR-518a-3p	1	0	1	0	1	1	SEMA4G	sema domain, immunoglobulin domain (Ig), transmembrane domain (TM) and short cytoplasmic domain, (semaphorin) 4G
hsa-miR-518a-3p	0	0	1	1	1	1	LINC00086	long intergenic non-protein coding RNA 86
hsa-miR-518a-3p	0	0	1	0	0	0	AQP7P1	aquaporin 7 pseudogene 1
hsa-miR-518a-3p	0	0	1	1	0	0	HIST1H3E	histone cluster 1, H3e
hsa-miR-518a-3p	0	0	1	0	0	0	LOC388436	uncharacterized LOC388436
hsa-miR-518a-3p	1	0	1	0	1	1	LYSMD3	LysM, putative peptidoglycan-binding, domain containing 3
hsa-miR-518a-3p	0	0	1	0	0	0	LOC727751	uncharacterized LOC727751
hsa-miR-518a-3p	0	0	1	0	0	0	AGSK1	golgin subfamily A member 2-like
hsa-miR-518a-3p	0	0	1	0	0	0	LOC727849	golgin A2 pseudogene
hsa-miR-518a-3p	0	0	1	1	1	1	SLAMF1	signaling lymphocytic activation molecule family member 1
hsa-miR-518a-3p	0	0	1	1	0	0	TRIM46	tripartite motif containing 46
hsa-miR-518a-3p	0	0	1	1	1	1	CTXN3	cortexin 3
hsa-miR-518a-3p	0	0	1	0	0	0	LINC00537	long intergenic non-protein coding RNA 537
hsa-miR-518a-3p	1	0	1	1	1	1	ZBTB7A	zinc finger and BTB domain containing 7A
hsa-miR-518a-3p	1	0	1	1	1	1	ESRRA	estrogen-related receptor alpha
hsa-miR-518a-3p	1	0	1	1	1	1	GBF1	golgi brefeldin A resistant guanine nucleotide exchange factor 1
hsa-miR-518a-3p	0	0	1	0	1	1	TGFB2	transforming growth factor, beta 2
hsa-miR-518a-3p	1	0	1	1	1	1	ACVR2B	activin A receptor, type IIB
hsa-miR-518a-3p	0	0	1	0	0	0	LBX2-AS1	LBX2 antisense RNA 1
hsa-miR-518a-3p	1	0	1	0	1	1	ROBO1	roundabout, axon guidance receptor, homolog 1 (Drosophila)
hsa-miR-518a-3p	0	0	1	1	1	1	LRCH1	leucine-rich repeats and calponin homology (CH) domain containing 1
hsa-miR-518a-3p	1	0	1	1	1	1	GRIA3	glutamate receptor, ionotropic, AMPA 3
hsa-miR-518a-3p	0	0	1	0	0	0	TUBA4B	tubulin, alpha 4b (pseudogene)
hsa-miR-518a-3p	0	0	1	0	0	0	FUT8-AS1	FUT8 antisense RNA 1
hsa-miR-518a-3p	0	0	1	0	0	0	LINC00643	long intergenic non-protein coding RNA 643
hsa-miR-518a-3p	1	0	1	0	1	1	MTX3	metaxin 3
hsa-miR-518a-3p	0	0	1	1	1	1	AIG1	androgen-induced 1
hsa-miR-518a-3p	1	0	1	1	1	1	CSGALNACT2	chondroitin sulfate N-acetylgalactosaminyltransferase 2
hsa-miR-518a-3p	0	0	1	0	0	0	MGC23284	uncharacterized LOC197187
hsa-miR-518a-3p	0	0	1	1	1	1	CCNT2	cyclin T2
hsa-miR-518a-3p	1	0	1	1	1	1	EOGT	EGF domain-specific O-linked N-acetylglucosamine (GlcNAc) transferase
hsa-miR-518a-3p	1	0	1	1	1	1	HIC2	hypermethylated in cancer 2
hsa-miR-518a-3p	0	0	1	0	0	0	ABCB5	ATP-binding cassette, sub-family B (MDR/TAP), member 5
hsa-miR-518a-3p	0	0	1	0	0	0	SBDSP1	Shwachman-Bodian-Diamond syndrome pseudogene 1
hsa-miR-518a-3p	1	0	1	1	1	1	COPS2	COP9 constitutive photomorphogenic homolog subunit 2 (Arabidopsis)
hsa-miR-518a-3p	1	0	1	1	1	1	COPZ1	coatomer protein complex, subunit zeta 1
hsa-miR-518a-3p	0	0	1	1	1	1	GGPS1	geranylgeranyl diphosphate synthase 1
hsa-miR-518a-3p	0	0	1	0	0	0	LOC654433	uncharacterized LOC654433
hsa-miR-518a-3p	1	0	1	1	1	1	TFDP1	transcription factor Dp-1
hsa-miR-518a-3p	1	0	1	1	1	1	LYPLA2	lysophospholipase II
hsa-miR-518a-3p	1	0	1	0	1	1	DCAF7	DDB1 and CUL4 associated factor 7
hsa-miR-518a-3p	1	0	1	1	1	1	MTCH2	mitochondrial carrier 2
hsa-miR-518a-3p	0	0	1	1	1	1	STXBP3	syntaxin binding protein 3
hsa-miR-518a-3p	0	0	1	1	0	0	NOX5	NADPH oxidase, EF-hand calcium binding domain 5
hsa-miR-518a-3p	0	0	1	1	1	1	PEX19	peroxisomal biogenesis factor 19
hsa-miR-518a-3p	1	0	1	1	1	1	HN1	hematological and neurological expressed 1
hsa-miR-518a-3p	0	0	1	1	1	1	TMCO1	transmembrane and coiled-coil domains 1
hsa-miR-518a-3p	0	0	1	1	0	0	FAM57B	family with sequence similarity 57, member B
hsa-miR-518a-3p	1	0	1	1	1	1	ANAPC16	anaphase promoting complex subunit 16
hsa-miR-518a-3p	1	0	1	1	0	0	ATP6V1B2	ATPase, H+ transporting, lysosomal 56/58kDa, V1 subunit B2
hsa-miR-518a-3p	1	0	1	0	1	1	MAP1B	microtubule-associated protein 1B
hsa-miR-518a-3p	1	0	1	1	1	1	UBE2K	ubiquitin-conjugating enzyme E2K
hsa-miR-518a-3p	0	0	1	1	1	1	LGI1	leucine-rich, glioma inactivated 1
hsa-miR-518a-3p	1	0	1	0	1	1	EIF2S2	eukaryotic translation initiation factor 2, subunit 2 beta, 38kDa
hsa-miR-518a-3p	1	0	1	0	1	1	CD47	CD47 molecule
hsa-miR-518a-3p	1	0	1	1	1	1	ID2	inhibitor of DNA binding 2, dominant negative helix-loop-helix protein
hsa-miR-518a-3p	0	0	1	1	0	0	FES	feline sarcoma oncogene
hsa-miR-518a-3p	1	0	1	0	1	1	DNMT3A	DNA (cytosine-5-)-methyltransferase 3 alpha
hsa-miR-518a-3p	0	0	1	1	1	1	BDP1	B double prime 1, subunit of RNA polymerase III transcription initiation factor IIIB
hsa-miR-518a-3p	0	0	1	0	1	1	HDAC9	histone deacetylase 9
hsa-miR-518a-3p	0	0	1	0	0	0	MIR143HG	MIR143 host gene (non-protein coding)
hsa-miR-518a-3p	0	0	1	0	0	0	DNAJC27-AS1	DNAJC27 antisense RNA 1
hsa-miR-518a-3p	1	0	1	1	0	0	KIAA0226	KIAA0226
hsa-miR-518a-3p	1	0	1	0	1	1	CBX7	chromobox homolog 7
hsa-miR-518a-3p	0	0	1	1	1	1	MARVELD2	MARVEL domain containing 2
hsa-miR-518a-3p	1	0	1	1	1	1	FBN1	fibrillin 1
hsa-miR-518a-3p	1	0	1	1	1	1	RB1	retinoblastoma 1
hsa-miR-518a-3p	1	0	1	0	1	1	PCSK1	proprotein convertase subtilisin/kexin type 1
hsa-miR-518a-3p	1	0	1	1	1	1	PTGFR	prostaglandin F receptor (FP)
hsa-miR-518a-3p	1	0	1	0	1	1	ARHGEF37	Rho guanine nucleotide exchange factor (GEF) 37
hsa-miR-518a-3p	1	0	1	1	1	1	RBMS3	RNA binding motif, single stranded interacting protein 3
hsa-miR-518a-3p	1	0	1	1	1	1	BICD2	bicaudal D homolog 2 (Drosophila)
hsa-miR-518a-3p	1	0	1	1	1	1	EDA	ectodysplasin A
hsa-miR-518a-3p	1	0	1	1	1	1	RBM33	RNA binding motif protein 33
hsa-miR-518a-3p	1	0	1	0	1	1	KIAA2022	KIAA2022
hsa-miR-518a-3p	0	0	1	1	0	0	ARMCX6	armadillo repeat containing, X-linked 6
hsa-miR-518a-3p	1	0	1	0	1	1	ZC3H12B	zinc finger CCCH-type containing 12B
hsa-miR-518a-3p	0	0	1	1	1	1	MUC21	mucin 21, cell surface associated
hsa-miR-518a-3p	1	0	1	0	1	1	FYTTD1	forty-two-three domain containing 1
hsa-miR-518a-3p	1	0	1	1	1	1	CTNNBIP1	catenin, beta interacting protein 1
hsa-miR-518a-3p	1	0	1	1	1	1	C12orf68	chromosome 12 open reading frame 68
hsa-miR-518a-3p	1	0	1	1	1	1	ZHX1	zinc fingers and homeoboxes 1
hsa-miR-518a-3p	1	0	1	0	1	1	TNRC6B	trinucleotide repeat containing 6B
hsa-miR-518a-3p	1	0	1	1	1	1	SLC35F1	solute carrier family 35, member F1
hsa-miR-518a-3p	0	0	1	1	1	1	ATF3	activating transcription factor 3
hsa-miR-518a-3p	0	0	1	1	1	1	LYPD5	LY6/PLAUR domain containing 5
hsa-miR-518a-3p	1	0	1	1	1	1	AMD1	adenosylmethionine decarboxylase 1
hsa-miR-518a-3p	0	0	1	1	1	1	ATAD3C	ATPase family, AAA domain containing 3C
hsa-miR-518a-3p	1	0	1	0	1	1	CCNL2	cyclin L2
hsa-miR-518a-3p	0	0	1	1	1	1	FAM22G	family with sequence similarity 22, member G
hsa-miR-518a-3p	1	0	1	1	1	1	CDC14B	CDC14 cell division cycle 14 homolog B (S. cerevisiae)
hsa-miR-518a-3p	1	0	1	1	1	1	HS6ST2	heparan sulfate 6-O-sulfotransferase 2
hsa-miR-518a-3p	1	0	1	1	1	1	PRR3	proline rich 3
hsa-miR-518a-3p	0	0	1	1	1	1	LRRC4B	leucine rich repeat containing 4B
hsa-miR-518a-3p	1	0	1	1	1	1	UNC119B	unc-119 homolog B (C. elegans)
hsa-miR-518a-3p	0	0	1	1	0	0	ATP6AP1	ATPase, H+ transporting, lysosomal accessory protein 1
hsa-miR-518a-3p	1	0	1	0	1	1	KLF9	Kruppel-like factor 9
hsa-miR-518a-3p	0	0	1	1	1	1	CHI3L1	chitinase 3-like 1 (cartilage glycoprotein-39)
hsa-miR-518a-3p	1	0	1	1	1	1	CTNND2	catenin (cadherin-associated protein), delta 2
hsa-miR-518a-3p	1	0	1	1	1	1	CELSR2	cadherin, EGF LAG seven-pass G-type receptor 2 (flamingo homolog, Drosophila)
hsa-miR-518a-3p	0	0	1	1	1	1	IL13RA1	interleukin 13 receptor, alpha 1
hsa-miR-518a-3p	1	0	1	1	1	1	BAAT	bile acid CoA: amino acid N-acyltransferase (glycine N-choloyltransferase)
hsa-miR-518a-3p	1	0	1	1	1	1	CBFB	core-binding factor, beta subunit
hsa-miR-518a-3p	1	0	1	1	1	1	EGR1	early growth response 1
hsa-miR-518a-3p	1	0	1	0	1	1	MXD1	MAX dimerization protein 1
hsa-miR-518a-3p	0	0	1	0	1	1	CXCL9	chemokine (C-X-C motif) ligand 9
hsa-miR-518a-3p	1	0	1	1	1	1	MN1	meningioma (disrupted in balanced translocation) 1
hsa-miR-518a-3p	1	0	1	1	1	1	ORC5	origin recognition complex, subunit 5
hsa-miR-518a-3p	0	0	1	1	1	1	PDE2A	phosphodiesterase 2A, cGMP-stimulated
hsa-miR-518a-3p	1	0	1	0	1	1	SOX11	SRY (sex determining region Y)-box 11
hsa-miR-518a-3p	1	0	1	1	1	1	SSR2	signal sequence receptor, beta (translocon-associated protein beta)
hsa-miR-518a-3p	1	0	1	1	1	1	NR2E1	nuclear receptor subfamily 2, group E, member 1
hsa-miR-518a-3p	1	0	1	1	1	1	FZD5	frizzled family receptor 5
hsa-miR-518a-3p	1	0	1	1	1	1	CUL5	cullin 5
hsa-miR-518a-3p	1	0	1	1	1	1	NRIP1	nuclear receptor interacting protein 1
hsa-miR-518a-3p	1	0	1	0	1	1	SNN	stannin
hsa-miR-518a-3p	1	0	1	0	1	1	TNKS	tankyrase, TRF1-interacting ankyrin-related ADP-ribose polymerase
hsa-miR-518a-3p	1	0	1	0	1	1	IRS2	insulin receptor substrate 2
hsa-miR-518a-3p	1	0	1	1	1	1	KAT2B	K(lysine) acetyltransferase 2B
hsa-miR-518a-3p	1	0	1	0	1	1	EIF2S1	eukaryotic translation initiation factor 2, subunit 1 alpha, 35kDa
hsa-miR-518a-3p	0	0	1	1	0	0	ATP6V1F	ATPase, H+ transporting, lysosomal 14kDa, V1 subunit F
hsa-miR-518a-3p	1	0	1	1	1	1	SOCS6	suppressor of cytokine signaling 6
hsa-miR-518a-3p	1	0	1	1	1	1	MED17	mediator complex subunit 17
hsa-miR-518a-3p	1	0	1	0	1	1	ACVR1B	activin A receptor, type IB
hsa-miR-518a-3p	1	0	1	1	1	1	DTX1	deltex homolog 1 (Drosophila)
hsa-miR-518a-3p	1	0	1	1	1	1	EPHB2	EPH receptor B2
hsa-miR-518a-3p	1	0	1	0	1	1	SCN2B	sodium channel, voltage-gated, type II, beta subunit
hsa-miR-518a-3p	0	0	1	1	1	1	NRG2	neuregulin 2
hsa-miR-518a-3p	0	0	1	1	1	1	CALB1	calbindin 1, 28kDa
hsa-miR-518a-3p	1	0	1	1	1	1	WDR1	WD repeat domain 1
hsa-miR-518a-3p	1	0	1	1	1	1	BMI1	BMI1 polycomb ring finger oncogene
hsa-miR-518a-3p	1	0	1	0	1	1	DLX6	distal-less homeobox 6
hsa-miR-518a-3p	1	0	1	1	1	1	ETS1	v-ets erythroblastosis virus E26 oncogene homolog 1 (avian)
hsa-miR-518a-3p	1	0	1	1	1	1	GPM6A	glycoprotein M6A
hsa-miR-518a-3p	0	0	1	1	1	1	ST5	suppression of tumorigenicity 5
hsa-miR-518a-3p	1	0	1	0	1	1	SPRY3	sprouty homolog 3 (Drosophila)
hsa-miR-518a-3p	1	0	1	1	1	1	SPRY1	sprouty homolog 1, antagonist of FGF signaling (Drosophila)
hsa-miR-518a-3p	1	0	1	1	1	1	MAT2A	methionine adenosyltransferase II, alpha
hsa-miR-518a-3p	0	0	1	1	0	0	PPYR1	pancreatic polypeptide receptor 1
hsa-miR-518a-3p	0	0	1	1	1	1	SOX1	SRY (sex determining region Y)-box 1
hsa-miR-518a-3p	1	0	1	1	1	1	PRKAA1	protein kinase, AMP-activated, alpha 1 catalytic subunit
hsa-miR-518a-3p	1	0	1	1	1	1	STK4	serine/threonine kinase 4
hsa-miR-518a-3p	1	0	1	1	1	1	ZNF238	zinc finger protein 238
hsa-miR-518a-3p	1	0	1	1	1	1	SEMA3C	sema domain, immunoglobulin domain (Ig), short basic domain, secreted, (semaphorin) 3C
hsa-miR-518a-3p	1	0	1	0	1	1	APPBP2	amyloid beta precursor protein (cytoplasmic tail) binding protein 2
hsa-miR-518a-3p	1	0	1	1	1	1	PGRMC1	progesterone receptor membrane component 1
hsa-miR-518a-3p	1	0	1	1	1	1	CBX1	chromobox homolog 1
hsa-miR-518a-3p	1	0	1	1	1	1	RAC1	ras-related C3 botulinum toxin substrate 1 (rho family, small GTP binding protein Rac1)
hsa-miR-518a-3p	1	0	1	1	1	1	SCN1A	sodium channel, voltage-gated, type I, alpha subunit
hsa-miR-518a-3p	0	0	1	1	1	1	FRAT2	frequently rearranged in advanced T-cell lymphomas 2
hsa-miR-518a-3p	1	0	1	1	1	1	HS2ST1	heparan sulfate 2-O-sulfotransferase 1
hsa-miR-518a-3p	0	0	1	1	1	1	N6AMT1	N-6 adenine-specific DNA methyltransferase 1 (putative)
hsa-miR-518a-3p	1	0	1	1	1	1	LRP12	low density lipoprotein receptor-related protein 12
hsa-miR-518a-3p	0	0	1	1	1	1	UBQLN2	ubiquilin 2
hsa-miR-518a-3p	1	0	1	1	1	1	SOCS5	suppressor of cytokine signaling 5
hsa-miR-518a-3p	1	0	1	1	1	1	RGCC	regulator of cell cycle
hsa-miR-518a-3p	1	0	1	0	1	1	MLEC	malectin
hsa-miR-518a-3p	1	0	1	0	1	1	KIAA0232	KIAA0232
hsa-miR-518a-3p	1	0	1	0	1	1	SERTAD2	SERTA domain containing 2
hsa-miR-518a-3p	0	0	1	0	1	1	PPM1E	protein phosphatase, Mg2+/Mn2+ dependent, 1E
hsa-miR-518a-3p	1	0	1	1	1	1	SMG1	smg-1 homolog, phosphatidylinositol 3-kinase-related kinase (C. elegans)
hsa-miR-518a-3p	1	0	1	1	0	0	KIAA0556	KIAA0556
hsa-miR-518a-3p	0	0	1	1	1	1	LEPROTL1	leptin receptor overlapping transcript-like 1
hsa-miR-518a-3p	1	0	1	1	1	1	FAM155B	family with sequence similarity 155, member B
hsa-miR-518a-3p	0	0	1	1	1	1	HMP19	HMP19 protein
hsa-miR-518a-3p	1	0	1	1	1	1	NLK	nemo-like kinase
hsa-miR-518a-3p	1	0	1	1	1	1	AKAP11	A kinase (PRKA) anchor protein 11
hsa-miR-518a-3p	0	0	1	1	1	1	FBXO40	F-box protein 40
hsa-miR-518a-3p	0	0	1	1	1	1	BET1L	blocked early in transport 1 homolog (S. cerevisiae)-like
hsa-miR-518a-3p	0	0	1	1	1	1	POLE3	polymerase (DNA directed), epsilon 3, accessory subunit
hsa-miR-518a-3p	1	0	1	0	1	1	ZRANB1	zinc finger, RAN-binding domain containing 1
hsa-miR-518a-3p	1	0	1	0	1	1	LGI2	leucine-rich repeat LGI family, member 2
hsa-miR-518a-3p	1	0	1	0	1	1	SEPT11	septin 11
hsa-miR-518a-3p	0	0	1	1	1	1	LAPTM4B	lysosomal protein transmembrane 4 beta
hsa-miR-518a-3p	1	0	1	0	1	1	PCDHAC1	protocadherin alpha subfamily C, 1
hsa-miR-518a-3p	1	0	1	0	1	1	PCDHAC2	protocadherin alpha subfamily C, 2
hsa-miR-518a-3p	1	0	1	1	1	1	PCDHA1	protocadherin alpha 1
hsa-miR-518a-3p	1	0	1	0	1	1	PCDHA10	protocadherin alpha 10
hsa-miR-518a-3p	1	0	1	0	1	1	PCDHA11	protocadherin alpha 11
hsa-miR-518a-3p	1	0	1	0	1	1	PCDHA12	protocadherin alpha 12
hsa-miR-518a-3p	1	0	1	1	1	1	PCDHA2	protocadherin alpha 2
hsa-miR-518a-3p	1	0	1	1	1	1	PCDHA3	protocadherin alpha 3
hsa-miR-518a-3p	1	0	1	1	1	1	PCDHA6	protocadherin alpha 6
hsa-miR-518a-3p	1	0	1	0	1	1	PCDHA7	protocadherin alpha 7
hsa-miR-518a-3p	1	0	1	1	1	1	PCDHA8	protocadherin alpha 8
hsa-miR-518a-3p	1	0	1	0	1	1	FAM190B	family with sequence similarity 190, member B
hsa-miR-518a-3p	1	0	1	1	1	1	DLL4	delta-like 4 (Drosophila)
hsa-miR-518a-3p	1	0	1	1	1	1	EPB41L4B	erythrocyte membrane protein band 4.1 like 4B
hsa-miR-518a-3p	1	0	1	0	1	1	UBFD1	ubiquitin family domain containing 1
hsa-miR-518a-3p	1	0	1	1	1	1	FEM1C	fem-1 homolog c (C. elegans)
hsa-miR-518a-3p	1	0	1	1	1	1	C5orf15	chromosome 5 open reading frame 15
hsa-miR-518a-3p	0	0	1	1	1	1	PRTFDC1	phosphoribosyl transferase domain containing 1
hsa-miR-518a-3p	0	0	1	1	1	1	RALGAPA2	Ral GTPase activating protein, alpha subunit 2 (catalytic)
hsa-miR-518a-3p	1	0	1	0	1	1	EIF5A2	eukaryotic translation initiation factor 5A2
hsa-miR-518a-3p	1	0	1	1	1	1	JPH1	junctophilin 1
hsa-miR-518a-3p	1	0	1	0	1	1	KCNS2	potassium voltage-gated channel, delayed-rectifier, subfamily S, member 2
hsa-miR-518a-3p	1	0	1	1	1	1	ZNF608	zinc finger protein 608
hsa-miR-518a-3p	1	0	1	1	1	1	NCEH1	neutral cholesterol ester hydrolase 1
hsa-miR-518a-3p	1	0	1	1	1	1	NLGN2	neuroligin 2
hsa-miR-518a-3p	1	0	1	1	1	1	ARHGAP21	Rho GTPase activating protein 21
hsa-miR-518a-3p	1	0	1	1	1	1	CNTN3	contactin 3 (plasmacytoma associated)
hsa-miR-518a-3p	0	0	1	1	1	1	EPG5	ectopic P-granules autophagy protein 5 homolog (C. elegans)
hsa-miR-518a-3p	1	0	1	0	1	1	RAP2A	RAP2A, member of RAS oncogene family
hsa-miR-518a-3p	1	0	1	1	1	1	SNX16	sorting nexin 16
hsa-miR-518a-3p	0	0	1	1	1	1	RHBDF1	rhomboid 5 homolog 1 (Drosophila)
hsa-miR-518a-3p	1	0	1	0	1	1	HOXC8	homeobox C8
hsa-miR-518a-3p	1	0	1	1	1	1	REEP1	receptor accessory protein 1
hsa-miR-518a-3p	1	0	1	1	1	1	NEUROG2	neurogenin 2
hsa-miR-518a-3p	1	0	1	1	1	1	KCTD15	potassium channel tetramerisation domain containing 15
hsa-miR-518a-3p	1	0	1	1	1	1	LRRC2	leucine rich repeat containing 2
hsa-miR-518a-3p	1	0	1	1	1	1	MCF2L	MCF.2 cell line derived transforming sequence-like
hsa-miR-518a-3p	1	0	1	0	1	1	VCPIP1	valosin containing protein (p97)/p47 complex interacting protein 1
hsa-miR-518a-3p	1	0	1	1	1	1	JHDM1D	jumonji C domain containing histone demethylase 1 homolog D (S. cerevisiae)
hsa-miR-518a-3p	1	0	1	1	1	1	HOXA3	homeobox A3
hsa-miR-518a-3p	0	0	1	1	1	1	TEX15	testis expressed 15
hsa-miR-518a-3p	1	0	1	1	1	1	PCDHA9	protocadherin alpha 9
hsa-miR-518a-3p	1	0	1	1	1	1	KLF16	Kruppel-like factor 16
hsa-miR-518a-3p	1	0	1	1	1	1	OTP	orthopedia homeobox
hsa-miR-518a-3p	0	0	1	1	0	0	C19orf44	chromosome 19 open reading frame 44
hsa-miR-518a-3p	1	0	1	1	1	1	FAM104A	family with sequence similarity 104, member A
hsa-miR-518a-3p	0	0	1	1	1	1	ZIC5	Zic family member 5
hsa-miR-518a-3p	1	0	1	0	1	1	FGF5	fibroblast growth factor 5
hsa-miR-518a-3p	1	0	1	1	0	0	KCNH7	potassium voltage-gated channel, subfamily H (eag-related), member 7
hsa-miR-518a-3p	1	0	1	1	1	1	TP53INP1	tumor protein p53 inducible nuclear protein 1
hsa-miR-518a-3p	1	0	1	1	0	0	FCHSD1	FCH and double SH3 domains 1
hsa-miR-518a-3p	1	0	1	0	0	0	ANKRD40	ankyrin repeat domain 40
hsa-miR-518a-3p	1	0	1	0	1	1	SOCS4	suppressor of cytokine signaling 4
hsa-miR-518a-3p	1	0	1	1	1	1	GLCCI1	glucocorticoid induced transcript 1
hsa-miR-518a-3p	0	0	1	1	1	1	SLC25A46	solute carrier family 25, member 46
hsa-miR-518a-3p	0	0	1	1	1	1	SDR16C5	short chain dehydrogenase/reductase family 16C, member 5
hsa-miR-518a-3p	0	0	1	1	0	0	TCEB3C	transcription elongation factor B polypeptide 3C (elongin A3)
hsa-miR-518a-3p	1	0	1	1	1	1	SEPT6	septin 6
hsa-miR-518a-3p	0	0	1	0	1	1	CHKB	choline kinase beta
hsa-miR-518a-3p	1	0	1	1	1	1	TMEM178A	transmembrane protein 178A
hsa-miR-518a-3p	1	0	1	1	1	1	C7orf60	chromosome 7 open reading frame 60
hsa-miR-518a-3p	0	0	1	1	0	0	RNF168	ring finger protein 168, E3 ubiquitin protein ligase
hsa-miR-518a-3p	1	0	1	1	1	1	ABCA13	ATP-binding cassette, sub-family A (ABC1), member 13
hsa-miR-518a-3p	1	0	1	0	1	1	PLEKHH2	pleckstrin homology domain containing, family H (with MyTH4 domain) member 2
hsa-miR-518a-3p	1	0	1	1	1	1	MMGT1	membrane magnesium transporter 1
hsa-miR-518a-3p	1	0	1	1	1	1	TTBK2	tau tubulin kinase 2
hsa-miR-518a-3p	1	0	1	1	1	1	FAM117B	family with sequence similarity 117, member B
hsa-miR-518a-3p	1	0	1	1	1	1	RFX6	regulatory factor X, 6
hsa-miR-518a-3p	1	0	1	1	1	1	SWSAP1	SWIM-type zinc finger 7 associated protein 1
hsa-miR-518a-3p	1	0	1	1	1	1	PPM1B	protein phosphatase, Mg2+/Mn2+ dependent, 1B
hsa-miR-518a-3p	1	0	1	1	1	1	MTDH	metadherin
hsa-miR-518a-3p	0	0	1	0	1	1	SLCO4C1	solute carrier organic anion transporter family, member 4C1
hsa-miR-518a-3p	1	0	1	1	1	1	BCL9L	B-cell CLL/lymphoma 9-like
hsa-miR-518a-3p	1	0	1	1	1	1	SP8	Sp8 transcription factor
hsa-miR-518a-3p	1	0	1	1	1	1	ADAMTS6	ADAM metallopeptidase with thrombospondin type 1 motif, 6
hsa-miR-518a-3p	0	0	1	1	1	1	COL18A1-AS1	COL18A1 antisense RNA 1
hsa-miR-518a-3p	1	0	1	1	1	1	E2F7	E2F transcription factor 7
hsa-miR-518a-3p	1	0	1	1	1	1	PPAPDC2	phosphatidic acid phosphatase type 2 domain containing 2
hsa-miR-518a-3p	0	0	1	1	1	1	C5orf46	chromosome 5 open reading frame 46
hsa-miR-518a-3p	0	0	1	0	1	1	C1orf229	chromosome 1 open reading frame 229
hsa-miR-518a-3p	0	0	1	0	0	0	PPIAP29	peptidylprolyl isomerase A (cyclophilin A) pseudogene 29
hsa-miR-518a-3p	0	0	1	0	0	0	ESRRAP2	estrogen-related receptor alpha pseudogene 2
hsa-miR-518a-3p	0	0	1	0	0	0	LYPLA2P1	lysophospholipase II pseudogene 1
hsa-miR-518a-3p	0	0	1	0	0	0	MIR155HG	MIR155 host gene (non-protein coding)
hsa-miR-518a-3p	0	0	1	0	0	0	TTTY15	testis-specific transcript, Y-linked 15 (non-protein coding)
hsa-miR-518a-3p	0	0	1	0	0	0	DKFZP586I1420	uncharacterized protein DKFZp586I1420
hsa-miR-518a-3p	0	0	1	0	0	0	DGCR5	DiGeorge syndrome critical region gene 5 (non-protein coding)
hsa-miR-518a-3p	0	0	1	0	0	0	RPL29P2	ribosomal protein L29 pseudogene 2
hsa-miR-518a-3p	0	0	1	0	0	0	HOXA11-AS	HOXA11 antisense RNA
hsa-miR-518a-3p	0	0	1	0	0	0	RNASEH2CP1	ribonuclease H2, subunit C pseudogene 1
hsa-miR-518a-3p	0	0	1	0	0	0	SNX29P2	sorting nexin 29 pseudogene 2
hsa-miR-518a-3p	0	0	1	0	0	0	SNORA60	small nucleolar RNA, H/ACA box 60
hsa-miR-518a-3p	0	0	1	0	0	0	SCARNA17	small Cajal body-specific RNA 17
hsa-miR-518a-3p	0	0	1	0	0	0	SNORA77	small nucleolar RNA, H/ACA box 77
hsa-miR-518a-3p	0	0	1	0	0	0	GBP1P1	guanylate binding protein 1, interferon-inducible pseudogene 1
hsa-miR-518a-3p	0	0	1	1	1	1	RPAP3	RNA polymerase II associated protein 3
hsa-miR-518a-3p	0	0	0	1	0	0	RPS20	ribosomal protein S20
hsa-miR-518a-3p	0	0	0	1	0	0	FAM65C	family with sequence similarity 65, member C
hsa-miR-518a-3p	0	0	1	1	1	1	GRN	granulin
hsa-miR-518a-3p	0	0	1	1	0	0	GNA11	guanine nucleotide binding protein (G protein), alpha 11 (Gq class)
hsa-miR-518a-3p	0	0	0	1	0	0	KLK14	kallikrein-related peptidase 14
hsa-miR-518a-3p	0	0	1	1	0	0	LMCD1	LIM and cysteine-rich domains 1
hsa-miR-518a-3p	0	0	1	1	0	0	NOX3	NADPH oxidase 3
hsa-miR-518a-3p	1	0	1	1	1	1	PRSS22	protease, serine, 22
hsa-miR-518a-3p	0	0	0	1	0	0	DRD4	dopamine receptor D4
hsa-miR-518a-3p	1	0	1	1	1	1	RRP15	ribosomal RNA processing 15 homolog (S. cerevisiae)
hsa-miR-518a-3p	1	0	1	1	1	1	STRADB	STE20-related kinase adaptor beta
hsa-miR-518a-3p	1	0	1	1	0	0	KHSRP	KH-type splicing regulatory protein
hsa-miR-518a-3p	1	0	1	1	1	1	PPP1R13B	protein phosphatase 1, regulatory subunit 13B
hsa-miR-518a-3p	0	0	0	1	0	0	GMIP	GEM interacting protein
hsa-miR-518a-3p	0	0	0	1	0	0	GSTA3	glutathione S-transferase alpha 3
hsa-miR-518a-3p	0	0	1	1	1	1	CRISP2	cysteine-rich secretory protein 2
hsa-miR-518a-3p	0	0	1	1	1	1	AMELY	amelogenin, Y-linked
hsa-miR-518a-3p	0	0	1	1	0	0	MARCH2	membrane-associated ring finger (C3HC4) 2, E3 ubiquitin protein ligase
hsa-miR-518a-3p	0	0	1	1	0	0	MCM5	minichromosome maintenance complex component 5
hsa-miR-518a-3p	0	0	0	1	1	1	FOXRED2	FAD-dependent oxidoreductase domain containing 2
hsa-miR-518a-3p	0	0	0	1	1	1	ADSL	adenylosuccinate lyase
hsa-miR-518a-3p	0	0	1	1	1	1	CSTF1	cleavage stimulation factor, 3' pre-RNA, subunit 1, 50kDa
hsa-miR-518a-3p	0	0	1	1	0	0	PIGU	phosphatidylinositol glycan anchor biosynthesis, class U
hsa-miR-518a-3p	1	0	0	1	1	1	SGCG	sarcoglycan, gamma (35kDa dystrophin-associated glycoprotein)
hsa-miR-518a-3p	0	0	1	1	1	1	SETD6	SET domain containing 6
hsa-miR-518a-3p	0	0	1	1	1	1	DECR2	2,4-dienoyl CoA reductase 2, peroxisomal
hsa-miR-518a-3p	0	0	1	1	0	0	CPQ	carboxypeptidase Q
hsa-miR-518a-3p	0	0	1	1	1	1	FGL1	fibrinogen-like 1
hsa-miR-518a-3p	0	0	1	1	0	0	CKM	creatine kinase, muscle
hsa-miR-518a-3p	0	0	0	1	1	1	EPHX3	epoxide hydrolase 3
hsa-miR-518a-3p	1	0	1	1	0	0	FSD1	fibronectin type III and SPRY domain containing 1
hsa-miR-518a-3p	0	0	1	1	0	0	HAS1	hyaluronan synthase 1
hsa-miR-518a-3p	0	0	1	1	1	1	PON2	paraoxonase 2
hsa-miR-518a-3p	0	0	0	1	0	0	HOXA6	homeobox A6
hsa-miR-518a-3p	1	0	1	1	1	1	SPAM1	sperm adhesion molecule 1 (PH-20 hyaluronidase, zona pellucida binding)
hsa-miR-518a-3p	1	0	1	1	1	1	LSM5	LSM5 homolog, U6 small nuclear RNA associated (S. cerevisiae)
hsa-miR-518a-3p	0	0	1	1	1	1	BCL7B	B-cell CLL/lymphoma 7B
hsa-miR-518a-3p	1	0	0	1	1	1	WNT3	wingless-type MMTV integration site family, member 3
hsa-miR-518a-3p	0	0	1	1	1	1	C1QBP	complement component 1, q subcomponent binding protein
hsa-miR-518a-3p	0	0	1	1	1	1	MED31	mediator complex subunit 31
hsa-miR-518a-3p	1	0	1	1	1	1	SYNGR2	synaptogyrin 2
hsa-miR-518a-3p	1	0	1	1	1	1	DDX5	DEAD (Asp-Glu-Ala-Asp) box helicase 5
hsa-miR-518a-3p	0	0	1	1	1	1	CCL8	chemokine (C-C motif) ligand 8
hsa-miR-518a-3p	0	0	1	1	1	1	CCL13	chemokine (C-C motif) ligand 13
hsa-miR-518a-3p	0	0	0	1	0	0	HSD17B1	hydroxysteroid (17-beta) dehydrogenase 1
hsa-miR-518a-3p	0	0	1	1	0	0	FOXN1	forkhead box N1
hsa-miR-518a-3p	0	0	0	1	1	1	MANBA	mannosidase, beta A, lysosomal
hsa-miR-518a-3p	0	0	1	1	1	1	GAR1	GAR1 ribonucleoprotein homolog (yeast)
hsa-miR-518a-3p	0	0	1	1	0	0	ITFG2	integrin alpha FG-GAP repeat containing 2
hsa-miR-518a-3p	0	0	1	1	1	1	ARPC3	actin related protein 2/3 complex, subunit 3, 21kDa
hsa-miR-518a-3p	1	0	1	1	1	1	FZD10	frizzled family receptor 10
hsa-miR-518a-3p	0	0	1	1	1	1	IFNG	interferon, gamma
hsa-miR-518a-3p	0	0	1	1	1	1	CMAS	cytidine monophosphate N-acetylneuraminic acid synthetase
hsa-miR-518a-3p	0	0	1	1	1	1	RHAG	Rh-associated glycoprotein
hsa-miR-518a-3p	0	0	1	1	1	1	GPR63	G protein-coupled receptor 63
hsa-miR-518a-3p	1	0	0	1	0	0	ABTB1	ankyrin repeat and BTB (POZ) domain containing 1
hsa-miR-518a-3p	1	0	1	1	1	1	DAZAP1	DAZ associated protein 1
hsa-miR-518a-3p	1	0	1	1	0	0	INO80D	INO80 complex subunit D
hsa-miR-518a-3p	0	0	1	1	0	0	IGFBP2	insulin-like growth factor binding protein 2, 36kDa
hsa-miR-518a-3p	0	0	1	1	1	1	PRKAG3	protein kinase, AMP-activated, gamma 3 non-catalytic subunit
hsa-miR-518a-3p	0	0	0	1	0	0	KISS1R	KISS1 receptor
hsa-miR-518a-3p	0	0	1	1	1	1	WDR77	WD repeat domain 77
hsa-miR-518a-3p	1	0	1	1	1	1	WARS2	tryptophanyl tRNA synthetase 2, mitochondrial
hsa-miR-518a-3p	0	0	1	1	1	1	TTR	transthyretin
hsa-miR-518a-3p	0	0	0	1	0	0	ADCK1	aarF domain containing kinase 1
hsa-miR-518a-3p	0	0	1	1	1	1	YIPF4	Yip1 domain family, member 4
hsa-miR-518a-3p	0	0	1	1	0	0	CHRNA2	cholinergic receptor, nicotinic, alpha 2 (neuronal)
hsa-miR-518a-3p	0	0	1	1	1	1	NCAPH	non-SMC condensin I complex, subunit H
hsa-miR-518a-3p	1	0	1	1	1	1	LRP1	low density lipoprotein receptor-related protein 1
hsa-miR-518a-3p	0	0	1	1	1	1	COL10A1	collagen, type X, alpha 1
hsa-miR-518a-3p	0	0	0	1	1	1	TTC21B	tetratricopeptide repeat domain 21B
hsa-miR-518a-3p	0	0	1	1	0	0	HIST1H1D	histone cluster 1, H1d
hsa-miR-518a-3p	0	0	0	1	1	1	APOBEC2	apolipoprotein B mRNA editing enzyme, catalytic polypeptide-like 2
hsa-miR-518a-3p	0	0	1	1	0	0	CD70	CD70 molecule
hsa-miR-518a-3p	0	0	0	1	0	0	SYMPK	symplekin
hsa-miR-518a-3p	0	0	1	1	1	1	CST8	cystatin 8 (cystatin-related epididymal specific)
hsa-miR-518a-3p	1	0	1	1	1	1	LAMP5	lysosomal-associated membrane protein family, member 5
hsa-miR-518a-3p	1	0	1	1	0	0	BCL2L12	BCL2-like 12 (proline rich)
hsa-miR-518a-3p	0	0	1	1	0	0	DDX49	DEAD (Asp-Glu-Ala-Asp) box polypeptide 49
hsa-miR-518a-3p	0	0	0	1	1	1	SDF2	stromal cell-derived factor 2
hsa-miR-518a-3p	0	0	1	1	0	0	AHDC1	AT hook, DNA binding motif, containing 1
hsa-miR-518a-3p	0	0	1	1	1	1	L3HYPDH	L-3-hydroxyproline dehydratase (trans-)
hsa-miR-518a-3p	0	0	1	1	0	0	CTAG2	cancer/testis antigen 2
hsa-miR-518a-3p	0	0	0	1	0	0	TAS2R5	taste receptor, type 2, member 5
hsa-miR-518a-3p	1	0	1	1	1	1	CCDC117	coiled-coil domain containing 117
hsa-miR-518a-3p	0	0	0	1	1	1	MTX2	metaxin 2
hsa-miR-518a-3p	0	0	1	1	0	0	HOXD11	homeobox D11
hsa-miR-518a-3p	0	0	0	1	1	1	ARHGAP22	Rho GTPase activating protein 22
hsa-miR-518a-3p	0	0	1	1	1	1	MBD4	methyl-CpG binding domain protein 4
hsa-miR-518a-3p	0	0	1	1	1	1	MYOD1	myogenic differentiation 1
hsa-miR-518a-3p	0	0	1	1	1	1	KIAA0391	KIAA0391
hsa-miR-518a-3p	1	0	1	1	1	1	RAP1B	RAP1B, member of RAS oncogene family
hsa-miR-518a-3p	0	0	0	1	0	0	ART1	ADP-ribosyltransferase 1
hsa-miR-518a-3p	1	0	1	1	1	1	MKNK2	MAP kinase interacting serine/threonine kinase 2
hsa-miR-518a-3p	1	0	1	1	1	1	DOCK7	dedicator of cytokinesis 7
hsa-miR-518a-3p	0	0	1	1	0	0	DTWD1	DTW domain containing 1
hsa-miR-518a-3p	0	0	0	1	0	0	PDGFRL	platelet-derived growth factor receptor-like
hsa-miR-518a-3p	0	0	1	1	0	0	ADRM1	adhesion regulating molecule 1
hsa-miR-518a-3p	1	0	0	1	1	1	YIPF2	Yip1 domain family, member 2
hsa-miR-518a-3p	1	0	1	1	1	1	SLC7A10	solute carrier family 7 (neutral amino acid transporter light chain, asc system), member 10
hsa-miR-518a-3p	0	0	1	1	1	1	NOL11	nucleolar protein 11
hsa-miR-518a-3p	0	0	1	1	1	1	LATS1	LATS, large tumor suppressor, homolog 1 (Drosophila)
hsa-miR-518a-3p	0	0	1	1	1	1	RBM39	RNA binding motif protein 39
hsa-miR-518a-3p	0	0	0	1	0	0	F12	coagulation factor XII (Hageman factor)
hsa-miR-518a-3p	1	0	0	1	1	1	HAUS8	HAUS augmin-like complex, subunit 8
hsa-miR-518a-3p	1	0	1	1	1	1	NDFIP1	Nedd4 family interacting protein 1
hsa-miR-518a-3p	0	0	1	1	1	1	PPP1R1B	protein phosphatase 1, regulatory (inhibitor) subunit 1B
hsa-miR-518a-3p	0	0	1	1	1	1	FUS	fused in sarcoma
hsa-miR-518a-3p	0	0	0	1	0	0	PODNL1	podocan-like 1
hsa-miR-518a-3p	0	0	0	1	1	1	SLC52A1	solute carrier family 52, riboflavin transporter, member 1
hsa-miR-518a-3p	0	0	0	1	0	0	ZBED3	zinc finger, BED-type containing 3
hsa-miR-518a-3p	0	0	1	1	0	0	ZNF414	zinc finger protein 414
hsa-miR-518a-3p	0	0	1	1	0	0	DDB2	damage-specific DNA binding protein 2, 48kDa
hsa-miR-518a-3p	1	0	1	1	0	0	TIMM10	translocase of inner mitochondrial membrane 10 homolog (yeast)
hsa-miR-518a-3p	0	0	1	1	1	1	OASL	2'-5'-oligoadenylate synthetase-like
hsa-miR-518a-3p	0	0	1	1	1	1	HRK	harakiri, BCL2 interacting protein (contains only BH3 domain)
hsa-miR-518a-3p	0	0	1	1	0	0	UPK3B	uroplakin 3B
hsa-miR-518a-3p	1	0	0	1	0	0	KCNH3	potassium voltage-gated channel, subfamily H (eag-related), member 3
hsa-miR-518a-3p	0	0	0	1	0	0	SMPD2	sphingomyelin phosphodiesterase 2, neutral membrane (neutral sphingomyelinase)
hsa-miR-518a-3p	1	0	1	1	0	0	REPS1	RALBP1 associated Eps domain containing 1
hsa-miR-518a-3p	0	0	1	1	1	1	EGR4	early growth response 4
hsa-miR-518a-3p	0	0	0	1	0	0	FBXL8	F-box and leucine-rich repeat protein 8
hsa-miR-518a-3p	0	0	1	1	1	1	REV1	REV1, polymerase (DNA directed)
hsa-miR-518a-3p	0	0	1	1	1	1	AOAH	acyloxyacyl hydrolase (neutrophil)
hsa-miR-518a-3p	0	0	0	1	0	0	DDX56	DEAD (Asp-Glu-Ala-Asp) box helicase 56
hsa-miR-518a-3p	0	0	1	1	1	1	MTHFS	5,10-methenyltetrahydrofolate synthetase (5-formyltetrahydrofolate cyclo-ligase)
hsa-miR-518a-3p	0	0	0	1	0	0	CHAD	chondroadherin
hsa-miR-518a-3p	0	0	1	1	1	1	ACTL6A	actin-like 6A
hsa-miR-518a-3p	0	0	1	1	1	1	NDUFB5	NADH dehydrogenase (ubiquinone) 1 beta subcomplex, 5, 16kDa
hsa-miR-518a-3p	0	0	0	1	0	0	OR1J1	olfactory receptor, family 1, subfamily J, member 1
hsa-miR-518a-3p	1	0	1	1	1	1	DERL1	derlin 1
hsa-miR-518a-3p	0	0	0	1	0	0	CAPN11	calpain 11
hsa-miR-518a-3p	0	0	1	1	1	1	CCDC90B	coiled-coil domain containing 90B
hsa-miR-518a-3p	1	0	1	1	1	1	RAB30	RAB30, member RAS oncogene family
hsa-miR-518a-3p	0	0	1	1	1	1	USP2	ubiquitin specific peptidase 2
hsa-miR-518a-3p	0	0	0	1	0	0	HTR3B	5-hydroxytryptamine (serotonin) receptor 3B, ionotropic
hsa-miR-518a-3p	0	0	1	1	0	0	TMEM62	transmembrane protein 62
hsa-miR-518a-3p	0	0	1	1	1	1	CHRNA1	cholinergic receptor, nicotinic, alpha 1 (muscle)
hsa-miR-518a-3p	0	0	0	1	1	1	PSMC1	proteasome (prosome, macropain) 26S subunit, ATPase, 1
hsa-miR-518a-3p	0	0	0	1	1	1	PALB2	partner and localizer of BRCA2
hsa-miR-518a-3p	0	0	1	1	1	1	AACS	acetoacetyl-CoA synthetase
hsa-miR-518a-3p	0	0	1	1	0	0	AARS	alanyl-tRNA synthetase
hsa-miR-518a-3p	0	0	1	1	0	0	PDGFRB	platelet-derived growth factor receptor, beta polypeptide
hsa-miR-518a-3p	1	0	1	1	1	1	GNB5	guanine nucleotide binding protein (G protein), beta 5
hsa-miR-518a-3p	1	0	1	1	1	1	EIF4B	eukaryotic translation initiation factor 4B
hsa-miR-518a-3p	0	0	0	1	0	0	MYOM2	myomesin (M-protein) 2, 165kDa
hsa-miR-518a-3p	0	0	1	1	1	1	SEH1L	SEH1-like (S. cerevisiae)
hsa-miR-518a-3p	0	0	1	1	1	1	WDR59	WD repeat domain 59
hsa-miR-518a-3p	1	0	0	1	1	1	FAM86A	family with sequence similarity 86, member A
hsa-miR-518a-3p	1	0	1	1	1	1	ZNF423	zinc finger protein 423
hsa-miR-518a-3p	0	0	0	1	0	0	PITPNM3	PITPNM family member 3
hsa-miR-518a-3p	1	0	1	1	1	1	SEC23B	Sec23 homolog B (S. cerevisiae)
hsa-miR-518a-3p	1	0	1	1	0	0	ZC3H3	zinc finger CCCH-type containing 3
hsa-miR-518a-3p	0	0	0	1	0	0	GSDMD	gasdermin D
hsa-miR-518a-3p	0	0	1	1	0	0	HPN	hepsin
hsa-miR-518a-3p	1	0	1	1	1	1	CCNE1	cyclin E1
hsa-miR-518a-3p	1	0	0	1	0	0	MAST3	microtubule associated serine/threonine kinase 3
hsa-miR-518a-3p	0	0	1	1	1	1	ZNF330	zinc finger protein 330
hsa-miR-518a-3p	1	0	1	1	1	1	BICC1	bicaudal C homolog 1 (Drosophila)
hsa-miR-518a-3p	0	0	0	1	0	0	DBH	dopamine beta-hydroxylase (dopamine beta-monooxygenase)
hsa-miR-518a-3p	0	0	0	1	1	1	SGOL1	shugoshin-like 1 (S. pombe)
hsa-miR-518a-3p	0	0	1	1	1	1	RWDD3	RWD domain containing 3
hsa-miR-518a-3p	1	0	1	1	1	1	STK17B	serine/threonine kinase 17b
hsa-miR-518a-3p	0	0	1	1	1	1	NOP58	NOP58 ribonucleoprotein homolog (yeast)
hsa-miR-518a-3p	1	0	1	1	0	0	KIAA1109	KIAA1109
hsa-miR-518a-3p	0	0	0	1	1	1	MLPH	melanophilin
hsa-miR-518a-3p	0	0	0	1	0	0	NSUN2	NOP2/Sun RNA methyltransferase family, member 2
hsa-miR-518a-3p	1	0	1	1	1	1	MECOM	MDS1 and EVI1 complex locus
hsa-miR-518a-3p	0	0	1	1	1	1	FGFRL1	fibroblast growth factor receptor-like 1
hsa-miR-518a-3p	0	0	1	1	1	1	HOOK2	hook homolog 2 (Drosophila)
hsa-miR-518a-3p	0	0	1	1	1	1	ATP6V0E1	ATPase, H+ transporting, lysosomal 9kDa, V0 subunit e1
hsa-miR-518a-3p	1	0	1	1	1	1	JAKMIP2	janus kinase and microtubule interacting protein 2
hsa-miR-518a-3p	0	0	1	1	0	0	POR	P450 (cytochrome) oxidoreductase
hsa-miR-518a-3p	0	0	1	1	0	0	EXOSC7	exosome component 7
hsa-miR-518a-3p	0	0	0	1	1	1	DUS4L	dihydrouridine synthase 4-like (S. cerevisiae)
hsa-miR-518a-3p	0	0	1	1	0	0	GLT8D1	glycosyltransferase 8 domain containing 1
hsa-miR-518a-3p	0	0	1	1	1	1	HYAL1	hyaluronoglucosaminidase 1
hsa-miR-518a-3p	0	0	1	1	0	0	PDE6H	phosphodiesterase 6H, cGMP-specific, cone, gamma
hsa-miR-518a-3p	0	0	1	1	1	1	ASCL1	achaete-scute complex homolog 1 (Drosophila)
hsa-miR-518a-3p	1	0	1	1	1	1	CHFR	checkpoint with forkhead and ring finger domains, E3 ubiquitin protein ligase
hsa-miR-518a-3p	0	0	1	1	0	0	GPR84	G protein-coupled receptor 84
hsa-miR-518a-3p	1	0	1	1	1	1	DIAPH3	diaphanous homolog 3 (Drosophila)
hsa-miR-518a-3p	0	0	1	1	0	0	GPR65	G protein-coupled receptor 65
hsa-miR-518a-3p	0	0	1	1	0	0	SRP14	signal recognition particle 14kDa (homologous Alu RNA binding protein)
hsa-miR-518a-3p	1	0	1	1	0	0	DISP2	dispatched homolog 2 (Drosophila)
hsa-miR-518a-3p	0	0	1	1	0	0	POLG	polymerase (DNA directed), gamma
hsa-miR-518a-3p	0	0	0	1	1	1	TICRR	TOPBP1-interacting checkpoint and replication regulator
hsa-miR-518a-3p	0	0	0	1	0	0	SEPT12	septin 12
hsa-miR-518a-3p	1	0	0	1	0	0	PMM2	phosphomannomutase 2
hsa-miR-518a-3p	1	0	1	1	1	1	NKD1	naked cuticle homolog 1 (Drosophila)
hsa-miR-518a-3p	0	0	1	1	1	1	IRF8	interferon regulatory factor 8
hsa-miR-518a-3p	0	0	1	1	0	0	COPS3	COP9 constitutive photomorphogenic homolog subunit 3 (Arabidopsis)
hsa-miR-518a-3p	0	0	0	1	0	0	ZNF287	zinc finger protein 287
hsa-miR-518a-3p	0	0	1	1	0	0	NEK8	NIMA (never in mitosis gene a)- related kinase 8
hsa-miR-518a-3p	0	0	1	1	0	0	B9D1	B9 protein domain 1
hsa-miR-518a-3p	1	0	1	1	1	1	CSNK1D	casein kinase 1, delta
hsa-miR-518a-3p	0	0	0	1	1	1	TXNL4A	thioredoxin-like 4A
hsa-miR-518a-3p	0	0	0	1	0	0	ARMC6	armadillo repeat containing 6
hsa-miR-518a-3p	0	0	0	1	0	0	SSBP4	single stranded DNA binding protein 4
hsa-miR-518a-3p	0	0	1	1	1	1	DOPEY2	dopey family member 2
hsa-miR-518a-3p	0	0	0	1	1	1	LILRA6	leukocyte immunoglobulin-like receptor, subfamily A (with TM domain), member 6
hsa-miR-518a-3p	0	0	0	1	0	0	ECSIT	ECSIT homolog (Drosophila)
hsa-miR-518a-3p	1	0	1	1	1	1	PRUNE	prune homolog (Drosophila)
hsa-miR-518a-3p	1	0	1	1	0	0	ADAM15	ADAM metallopeptidase domain 15
hsa-miR-518a-3p	0	0	0	1	0	0	TUBB8	tubulin, beta 8 class VIII
hsa-miR-518a-3p	1	0	1	1	1	1	LBR	lamin B receptor
hsa-miR-518a-3p	0	0	0	1	1	1	METTL21A	methyltransferase like 21A
hsa-miR-518a-3p	0	0	0	1	1	1	SLC25A38	solute carrier family 25, member 38
hsa-miR-518a-3p	0	0	1	1	0	0	PLA1A	phospholipase A1 member A
hsa-miR-518a-3p	0	0	1	1	1	1	MANF	mesencephalic astrocyte-derived neurotrophic factor
hsa-miR-518a-3p	0	0	1	1	1	1	TM4SF19	transmembrane 4 L six family member 19
hsa-miR-518a-3p	1	0	1	1	1	1	C1QTNF2	C1q and tumor necrosis factor related protein 2
hsa-miR-518a-3p	1	0	1	1	1	1	HMGN3	high mobility group nucleosomal binding domain 3
hsa-miR-518a-3p	0	0	1	1	1	1	PLIN2	perilipin 2
hsa-miR-518a-3p	1	0	1	1	1	1	ZNF462	zinc finger protein 462
hsa-miR-518a-3p	0	0	0	1	0	0	WDR85	WD repeat domain 85
hsa-miR-518a-3p	0	0	1	1	0	0	FUOM	fucose mutarotase
hsa-miR-518a-3p	0	0	1	1	0	0	WDR96	WD repeat domain 96
hsa-miR-518a-3p	0	0	1	1	1	1	TRIM34	tripartite motif containing 34
hsa-miR-518a-3p	0	0	1	1	1	1	TRIM6	tripartite motif containing 6
hsa-miR-518a-3p	0	0	1	1	1	1	TRIM6-TRIM34	TRIM6-TRIM34 readthrough
hsa-miR-518a-3p	0	0	1	1	0	0	SERPING1	serpin peptidase inhibitor, clade G (C1 inhibitor), member 1
hsa-miR-518a-3p	0	0	1	1	1	1	SESN3	sestrin 3
hsa-miR-518a-3p	1	0	1	1	1	1	NINL	ninein-like
hsa-miR-518a-3p	0	0	1	1	1	1	FEZ1	fasciculation and elongation protein zeta 1 (zygin I)
hsa-miR-518a-3p	1	0	1	1	1	1	SIDT2	SID1 transmembrane family, member 2
hsa-miR-518a-3p	0	0	0	1	0	0	DUSP15	dual specificity phosphatase 15
hsa-miR-518a-3p	0	0	1	1	1	1	HIRIP3	HIRA interacting protein 3
hsa-miR-518a-3p	0	0	0	1	0	0	TMCO3	transmembrane and coiled-coil domains 3
hsa-miR-518a-3p	0	0	0	1	0	0	C12orf45	chromosome 12 open reading frame 45
hsa-miR-518a-3p	0	0	1	1	1	1	NDUFC2	NADH dehydrogenase (ubiquinone) 1, subcomplex unknown, 2, 14.5kDa
hsa-miR-518a-3p	1	0	0	1	1	1	NCAPD3	non-SMC condensin II complex, subunit D3
hsa-miR-518a-3p	1	0	1	1	1	1	BARX2	BARX homeobox 2
hsa-miR-518a-3p	1	0	1	1	1	1	WWC2	WW and C2 domain containing 2
hsa-miR-518a-3p	0	0	1	1	0	0	TMEM163	transmembrane protein 163
hsa-miR-518a-3p	0	0	0	1	0	0	FRMD1	FERM domain containing 1
hsa-miR-518a-3p	1	0	1	1	1	1	MSI2	musashi homolog 2 (Drosophila)
hsa-miR-518a-3p	1	0	1	1	1	1	NRGN	neurogranin (protein kinase C substrate, RC3)
hsa-miR-518a-3p	0	0	0	1	0	0	GSTA5	glutathione S-transferase alpha 5
hsa-miR-518a-3p	0	0	1	1	1	1	CXADR	coxsackie virus and adenovirus receptor
hsa-miR-518a-3p	0	0	1	1	1	1	PDE1C	phosphodiesterase 1C, calmodulin-dependent 70kDa
hsa-miR-518a-3p	0	0	0	1	0	0	MKI67IP	MKI67 (FHA domain) interacting nucleolar phosphoprotein
hsa-miR-518a-3p	0	0	1	1	1	1	AKR1B1	aldo-keto reductase family 1, member B1 (aldose reductase)
hsa-miR-518a-3p	0	0	1	1	1	1	SETD9	SET domain containing 9
hsa-miR-518a-3p	0	0	0	1	0	0	MED7	mediator complex subunit 7
hsa-miR-518a-3p	0	0	1	1	0	0	BATF	basic leucine zipper transcription factor, ATF-like
hsa-miR-518a-3p	0	0	1	1	1	1	TDRD9	tudor domain containing 9
hsa-miR-518a-3p	0	0	1	1	1	1	WDR67	WD repeat domain 67
hsa-miR-518a-3p	0	0	0	1	1	1	LYZL4	lysozyme-like 4
hsa-miR-518a-3p	0	0	1	1	1	1	KBTBD5	kelch repeat and BTB (POZ) domain containing 5
hsa-miR-518a-3p	0	0	0	1	1	1	PEX10	peroxisomal biogenesis factor 10
hsa-miR-518a-3p	0	0	0	1	1	1	WDR66	WD repeat domain 66
hsa-miR-518a-3p	1	0	1	1	1	1	MRAS	muscle RAS oncogene homolog
hsa-miR-518a-3p	0	0	1	1	1	1	SHROOM4	shroom family member 4
hsa-miR-518a-3p	0	0	1	1	1	1	C2orf62	chromosome 2 open reading frame 62
hsa-miR-518a-3p	0	0	1	1	0	0	OBSL1	obscurin-like 1
hsa-miR-518a-3p	0	0	1	1	0	0	MIS18A	MIS18 kinetochore protein homolog A (S. pombe)
hsa-miR-518a-3p	0	0	1	1	0	0	GFRA4	GDNF family receptor alpha 4
hsa-miR-518a-3p	0	0	1	1	1	1	MCAT	malonyl CoA:ACP acyltransferase (mitochondrial)
hsa-miR-518a-3p	0	0	1	1	1	1	CES5A	carboxylesterase 5A
hsa-miR-518a-3p	0	0	0	1	0	0	TGM7	transglutaminase 7
hsa-miR-518a-3p	0	0	0	1	1	1	ZNF235	zinc finger protein 235
hsa-miR-518a-3p	0	0	1	1	0	0	CCDC58	coiled-coil domain containing 58
hsa-miR-518a-3p	0	0	0	1	0	0	TFF3	trefoil factor 3 (intestinal)
hsa-miR-518a-3p	0	0	0	1	1	1	HSF2BP	heat shock transcription factor 2 binding protein
hsa-miR-518a-3p	0	0	0	1	0	0	LILRA4	leukocyte immunoglobulin-like receptor, subfamily A (with TM domain), member 4
hsa-miR-518a-3p	0	0	1	1	1	1	ZNF714	zinc finger protein 714
hsa-miR-518a-3p	0	0	1	1	0	0	FGFR4	fibroblast growth factor receptor 4
hsa-miR-518a-3p	0	0	0	1	1	1	CABP5	calcium binding protein 5
hsa-miR-518a-3p	0	0	1	1	1	1	CD300LG	CD300 molecule-like family member g
hsa-miR-518a-3p	0	0	0	1	0	0	ZNF613	zinc finger protein 613
hsa-miR-518a-3p	0	0	0	1	0	0	TAF6L	TAF6-like RNA polymerase II, p300/CBP-associated factor (PCAF)-associated factor, 65kDa
hsa-miR-518a-3p	1	0	1	1	1	1	NXF1	nuclear RNA export factor 1
hsa-miR-518a-3p	0	0	0	1	0	0	WDR63	WD repeat domain 63
hsa-miR-518a-3p	1	0	1	1	1	1	NUP35	nucleoporin 35kDa
hsa-miR-518a-3p	0	0	0	1	1	1	BNIPL	BCL2/adenovirus E1B 19kD interacting protein like
hsa-miR-518a-3p	0	0	1	1	1	1	CHN1	chimerin (chimaerin) 1
hsa-miR-518a-3p	0	0	0	1	0	0	YY1AP1	YY1 associated protein 1
hsa-miR-518a-3p	0	0	1	1	0	0	IGFN1	immunoglobulin-like and fibronectin type III domain containing 1
hsa-miR-518a-3p	0	0	1	1	0	0	DPPA2	developmental pluripotency associated 2
hsa-miR-518a-3p	0	0	1	1	1	1	PCOLCE2	procollagen C-endopeptidase enhancer 2
hsa-miR-518a-3p	0	0	0	1	0	0	TCF23	transcription factor 23
hsa-miR-518a-3p	0	0	1	1	1	1	SLC51A	solute carrier family 51, alpha subunit
hsa-miR-518a-3p	0	0	1	1	0	0	MON1A	MON1 homolog A (yeast)
hsa-miR-518a-3p	0	0	1	1	0	0	ANXA5	annexin A5
hsa-miR-518a-3p	0	0	0	1	1	1	LSM6	LSM6 homolog, U6 small nuclear RNA associated (S. cerevisiae)
hsa-miR-518a-3p	0	0	0	1	0	0	ANKRD33B	ankyrin repeat domain 33B
hsa-miR-518a-3p	0	0	1	1	1	1	CARTPT	CART prepropeptide
hsa-miR-518a-3p	1	0	1	1	1	1	TMEM65	transmembrane protein 65
hsa-miR-518a-3p	0	0	1	1	1	1	TRMT10B	tRNA methyltransferase 10 homolog B (S. cerevisiae)
hsa-miR-518a-3p	0	0	1	1	0	0	SSX7	synovial sarcoma, X breakpoint 7
hsa-miR-518a-3p	0	0	0	1	0	0	PHOX2A	paired-like homeobox 2a
hsa-miR-518a-3p	0	0	1	1	0	0	CLEC1B	C-type lectin domain family 1, member B
hsa-miR-518a-3p	0	0	0	1	0	0	SNAPC4	small nuclear RNA activating complex, polypeptide 4, 190kDa
hsa-miR-518a-3p	0	0	0	1	0	0	SERPINA4	serpin peptidase inhibitor, clade A (alpha-1 antiproteinase, antitrypsin), member 4
hsa-miR-518a-3p	0	0	1	1	0	0	LOC643923	uncharacterized LOC643923
hsa-miR-518a-3p	0	0	1	1	1	1	FAM227B	family with sequence similarity 227, member B
hsa-miR-518a-3p	0	0	1	1	0	0	CTDP1	CTD (carboxy-terminal domain, RNA polymerase II, polypeptide A) phosphatase, subunit 1
hsa-miR-518a-3p	0	0	1	1	0	0	SAAL1	serum amyloid A-like 1
hsa-miR-518a-3p	0	0	1	1	1	1	KIF7	kinesin family member 7
hsa-miR-518a-3p	0	0	1	1	1	1	ENGASE	endo-beta-N-acetylglucosaminidase
hsa-miR-518a-3p	0	0	1	1	1	1	ATP5L	ATP synthase, H+ transporting, mitochondrial Fo complex, subunit G
hsa-miR-518a-3p	0	0	1	1	0	0	ZNF646	zinc finger protein 646
hsa-miR-518a-3p	0	0	0	1	0	0	MVD	mevalonate (diphospho) decarboxylase
hsa-miR-518a-3p	0	0	0	1	0	0	DAPK3	death-associated protein kinase 3
hsa-miR-518a-3p	1	0	0	1	0	0	ITFG3	integrin alpha FG-GAP repeat containing 3
hsa-miR-518a-3p	1	0	0	1	0	0	ZNF597	zinc finger protein 597
hsa-miR-518a-3p	0	0	0	1	0	0	PYGO1	pygopus homolog 1 (Drosophila)
hsa-miR-518a-3p	0	0	0	1	0	0	OR6F1	olfactory receptor, family 6, subfamily F, member 1
hsa-miR-518a-3p	1	0	1	1	1	1	TRIAP1	TP53 regulated inhibitor of apoptosis 1
hsa-miR-518a-3p	0	0	1	1	1	1	CKAP2L	cytoskeleton associated protein 2-like
hsa-miR-518a-3p	1	0	1	1	1	1	NEUROD2	neuronal differentiation 2
hsa-miR-518a-3p	0	0	0	1	0	0	P2RY12	purinergic receptor P2Y, G-protein coupled, 12
hsa-miR-518a-3p	0	0	1	1	0	0	RPS9	ribosomal protein S9
hsa-miR-518a-3p	0	0	1	1	0	0	C20orf196	chromosome 20 open reading frame 196
hsa-miR-518a-3p	0	0	1	1	0	0	PRELID1	PRELI domain containing 1
hsa-miR-518a-3p	0	0	1	1	0	0	ZNF30	zinc finger protein 30
hsa-miR-518a-3p	0	0	1	1	0	0	PRY	PTPN13-like, Y-linked
hsa-miR-518a-3p	0	0	1	1	0	0	HIST1H2AE	histone cluster 1, H2ae
hsa-miR-518a-3p	0	0	1	1	0	0	PRKCDBP	protein kinase C, delta binding protein
hsa-miR-518a-3p	0	0	0	1	0	0	ADCYAP1R1	adenylate cyclase activating polypeptide 1 (pituitary) receptor type I
hsa-miR-518a-3p	0	0	0	1	0	0	GPR27	G protein-coupled receptor 27
hsa-miR-518a-3p	0	0	1	1	1	1	INSL5	insulin-like 5
hsa-miR-518a-3p	1	0	0	1	1	1	C1GALT1C1	C1GALT1-specific chaperone 1
hsa-miR-518a-3p	0	0	1	1	0	0	GSG1L	GSG1-like
hsa-miR-518a-3p	0	0	1	1	1	1	ADH1B	alcohol dehydrogenase 1B (class I), beta polypeptide
hsa-miR-518a-3p	1	0	1	1	1	1	GRM5	glutamate receptor, metabotropic 5
hsa-miR-518a-3p	0	0	1	1	1	1	FRMPD2	FERM and PDZ domain containing 2
hsa-miR-518a-3p	1	0	1	1	0	0	TET3	tet methylcytosine dioxygenase 3
hsa-miR-518a-3p	1	0	1	1	1	1	BCR	breakpoint cluster region
hsa-miR-518a-3p	0	0	1	1	1	1	C2orf68	chromosome 2 open reading frame 68
hsa-miR-518a-3p	0	0	0	1	1	1	PPIC	peptidylprolyl isomerase C (cyclophilin C)
hsa-miR-518a-3p	1	0	1	1	1	1	CHTF8	CTF8, chromosome transmission fidelity factor 8 homolog (S. cerevisiae)
hsa-miR-518a-3p	1	0	1	1	0	0	ADRA1B	adrenoceptor alpha 1B
hsa-miR-518a-3p	0	0	1	1	1	1	USP8	ubiquitin specific peptidase 8
hsa-miR-518a-3p	0	0	0	1	1	1	ZIK1	zinc finger protein interacting with K protein 1 homolog (mouse)
hsa-miR-518a-3p	0	0	0	1	0	0	AGXT	alanine-glyoxylate aminotransferase
hsa-miR-518a-3p	1	0	1	1	1	1	KIAA1217	KIAA1217
hsa-miR-518a-3p	0	0	0	1	0	0	THOP1	thimet oligopeptidase 1
hsa-miR-518a-3p	1	0	1	1	0	0	CARNS1	carnosine synthase 1
hsa-miR-518a-3p	0	0	1	1	1	1	MRPS12	mitochondrial ribosomal protein S12
hsa-miR-518a-3p	0	0	0	1	1	1	PSMA8	proteasome (prosome, macropain) subunit, alpha type, 8
hsa-miR-518a-3p	1	0	0	1	0	0	INPP4B	inositol polyphosphate-4-phosphatase, type II, 105kDa
hsa-miR-518a-3p	0	0	0	1	0	0	EVX2	even-skipped homeobox 2
hsa-miR-518a-3p	1	0	0	1	0	0	AP1G2	adaptor-related protein complex 1, gamma 2 subunit
hsa-miR-518a-3p	0	0	1	1	1	1	BTK	Bruton agammaglobulinemia tyrosine kinase
hsa-miR-518a-3p	0	0	0	1	0	0	ADCK5	aarF domain containing kinase 5
hsa-miR-518a-3p	1	0	1	1	1	1	LEP	leptin
hsa-miR-518a-3p	1	0	1	1	1	1	SIPA1L2	signal-induced proliferation-associated 1 like 2
hsa-miR-518a-3p	0	0	1	1	1	1	APITD1	apoptosis-inducing, TAF9-like domain 1
hsa-miR-518a-3p	0	0	1	1	1	1	CORT	cortistatin
hsa-miR-518a-3p	0	0	0	1	0	0	SSSCA1	Sjogren syndrome/scleroderma autoantigen 1
hsa-miR-518a-3p	0	0	1	1	1	1	HADH	hydroxyacyl-CoA dehydrogenase
hsa-miR-518a-3p	1	0	1	1	0	0	LRFN4	leucine rich repeat and fibronectin type III domain containing 4
hsa-miR-518a-3p	1	0	0	1	1	1	TMEM234	transmembrane protein 234
hsa-miR-518a-3p	0	0	0	1	0	0	CA5A	carbonic anhydrase VA, mitochondrial
hsa-miR-518a-3p	1	0	1	1	1	1	CDK13	cyclin-dependent kinase 13
hsa-miR-518a-3p	0	0	1	1	1	1	CCS	copper chaperone for superoxide dismutase
hsa-miR-518a-3p	0	0	1	1	0	0	SLC4A2	solute carrier family 4, anion exchanger, member 2 (erythrocyte membrane protein band 3-like 1)
hsa-miR-518a-3p	0	0	1	1	0	0	ANKHD1-EIF4EBP3	ANKHD1-EIF4EBP3 readthrough
hsa-miR-518a-3p	0	0	1	1	0	0	EIF4EBP3	eukaryotic translation initiation factor 4E binding protein 3
hsa-miR-518a-3p	0	0	1	1	1	1	ANKHD1	ankyrin repeat and KH domain containing 1
hsa-miR-518a-3p	1	0	1	1	1	1	TBC1D8B	TBC1 domain family, member 8B (with GRAM domain)
hsa-miR-518a-3p	1	0	1	1	1	1	PPP1R3B	protein phosphatase 1, regulatory subunit 3B
hsa-miR-518a-3p	0	0	0	1	0	0	OR52W1	olfactory receptor, family 52, subfamily W, member 1
hsa-miR-518a-3p	0	0	1	1	0	0	C6orf203	chromosome 6 open reading frame 203
hsa-miR-518a-3p	0	0	0	1	0	0	ZNF408	zinc finger protein 408
hsa-miR-518a-3p	0	0	1	1	0	0	FAM170B	family with sequence similarity 170, member B
hsa-miR-518a-3p	0	0	1	1	0	0	SSX5	synovial sarcoma, X breakpoint 5
hsa-miR-518a-3p	0	0	1	1	1	1	MRPL52	mitochondrial ribosomal protein L52
hsa-miR-518a-3p	0	0	1	1	0	0	GLS2	glutaminase 2 (liver, mitochondrial)
hsa-miR-518a-3p	1	0	1	1	1	1	TAF15	TAF15 RNA polymerase II, TATA box binding protein (TBP)-associated factor, 68kDa
hsa-miR-518a-3p	0	0	0	1	1	1	USP36	ubiquitin specific peptidase 36
hsa-miR-518a-3p	0	0	1	1	0	0	POLD4	polymerase (DNA-directed), delta 4, accessory subunit
hsa-miR-518a-3p	1	0	1	1	0	0	HOXC5	homeobox C5
hsa-miR-518a-3p	0	0	0	1	1	1	C15orf44	chromosome 15 open reading frame 44
hsa-miR-518a-3p	1	0	1	1	1	1	CDKN1C	cyclin-dependent kinase inhibitor 1C (p57, Kip2)
hsa-miR-518a-3p	0	0	0	1	1	1	DSCC1	defective in sister chromatid cohesion 1 homolog (S. cerevisiae)
hsa-miR-518a-3p	0	0	1	1	1	1	TIMM50	translocase of inner mitochondrial membrane 50 homolog (S. cerevisiae)
hsa-miR-518a-3p	0	0	1	1	1	1	MKRN3	makorin ring finger protein 3
hsa-miR-518a-3p	0	0	1	1	1	1	PINX1	PIN2/TERF1 interacting, telomerase inhibitor 1
hsa-miR-518a-3p	1	0	1	1	0	0	LPCAT4	lysophosphatidylcholine acyltransferase 4
hsa-miR-518a-3p	0	0	1	1	1	1	MMP1	matrix metallopeptidase 1 (interstitial collagenase)
hsa-miR-518a-3p	0	0	1	1	0	0	FZD2	frizzled family receptor 2
hsa-miR-518a-3p	0	0	0	1	1	1	ZNF843	zinc finger protein 843
hsa-miR-518a-3p	1	0	1	1	1	1	FBXO11	F-box protein 11
hsa-miR-518a-3p	0	0	1	1	0	0	CDK1	cyclin-dependent kinase 1
hsa-miR-518a-3p	1	0	1	1	1	1	ARHGAP19	Rho GTPase activating protein 19
hsa-miR-518a-3p	1	0	1	1	1	1	SLC7A8	solute carrier family 7 (amino acid transporter light chain, L system), member 8
hsa-miR-518a-3p	1	0	1	1	1	1	TMEM185A	transmembrane protein 185A
hsa-miR-518a-3p	0	0	0	1	0	0	OR52E4	olfactory receptor, family 52, subfamily E, member 4
hsa-miR-518a-3p	0	0	0	1	0	0	PGAM5	phosphoglycerate mutase family member 5
hsa-miR-518a-3p	1	0	0	1	1	1	PLEKHA5	pleckstrin homology domain containing, family A member 5
hsa-miR-518a-3p	0	0	1	1	0	0	TMEM11	transmembrane protein 11
hsa-miR-518a-3p	1	0	1	1	1	1	SERF2	small EDRK-rich factor 2
hsa-miR-518a-3p	1	0	1	1	1	1	C15orf63	chromosome 15 open reading frame 63
hsa-miR-518a-3p	0	0	1	1	1	1	TTC27	tetratricopeptide repeat domain 27
hsa-miR-518a-3p	0	0	1	1	1	1	ZNF318	zinc finger protein 318
hsa-miR-518a-3p	0	0	1	1	0	0	DGKZ	diacylglycerol kinase, zeta
hsa-miR-518a-3p	1	0	1	1	1	1	BANP	BTG3 associated nuclear protein
hsa-miR-518a-3p	1	0	1	1	1	1	SLC25A42	solute carrier family 25, member 42
hsa-miR-518a-3p	0	0	1	1	1	1	SEPHS2	selenophosphate synthetase 2
hsa-miR-518a-3p	0	0	1	1	0	0	INTS3	integrator complex subunit 3
hsa-miR-518a-3p	0	0	1	1	0	0	TALDO1	transaldolase 1
hsa-miR-518a-3p	0	0	1	1	1	1	C14orf119	chromosome 14 open reading frame 119
hsa-miR-518a-3p	0	0	1	1	1	1	ZNF771	zinc finger protein 771
hsa-miR-518a-3p	0	0	1	1	1	1	GALNT11	UDP-N-acetyl-alpha-D-galactosamine:polypeptide N-acetylgalactosaminyltransferase 11 (GalNAc-T11)
hsa-miR-518a-3p	0	0	0	1	1	1	C16orf53	chromosome 16 open reading frame 53
hsa-miR-518a-3p	1	0	1	1	1	1	EZH2	enhancer of zeste homolog 2 (Drosophila)
hsa-miR-518a-3p	1	0	0	1	0	0	AKAP5	A kinase (PRKA) anchor protein 5
hsa-miR-518a-3p	1	0	1	1	1	1	UEVLD	UEV and lactate/malate dehyrogenase domains
hsa-miR-518a-3p	0	0	1	1	0	0	CLPTM1L	CLPTM1-like
hsa-miR-518a-3p	0	0	0	1	0	0	LINC00476	long intergenic non-protein coding RNA 476
hsa-miR-518a-3p	0	0	1	1	1	1	FBXO39	F-box protein 39
hsa-miR-518a-3p	1	0	1	1	0	0	CASKIN2	CASK interacting protein 2
hsa-miR-518a-3p	0	0	0	1	0	0	RPRML	reprimo-like
hsa-miR-518a-3p	1	0	1	1	1	1	WDR20	WD repeat domain 20
hsa-miR-518a-3p	0	0	0	1	0	0	UFSP1	UFM1-specific peptidase 1 (non-functional)
hsa-miR-518a-3p	0	0	1	1	0	0	RUVBL1	RuvB-like 1 (E. coli)
hsa-miR-518a-3p	0	0	0	1	1	1	ZNF18	zinc finger protein 18
hsa-miR-518a-3p	0	0	1	1	1	1	ZCCHC7	zinc finger, CCHC domain containing 7
hsa-miR-518a-3p	0	0	1	1	0	0	ZNF584	zinc finger protein 584
hsa-miR-518a-3p	0	0	0	1	0	0	ZNF324B	zinc finger protein 324B
hsa-miR-518a-3p	0	0	0	1	1	1	MTHFSD	methenyltetrahydrofolate synthetase domain containing
hsa-miR-518a-3p	1	0	1	1	0	0	WDR45	WD repeat domain 45
hsa-miR-518a-3p	1	0	1	1	0	0	SMCR7	Smith-Magenis syndrome chromosome region, candidate 7
hsa-miR-518a-3p	0	0	1	1	0	0	DUOXA2	dual oxidase maturation factor 2
hsa-miR-518a-3p	0	0	1	1	1	1	ZNF513	zinc finger protein 513
hsa-miR-518a-3p	0	0	1	1	0	0	CD37	CD37 molecule
hsa-miR-518a-3p	0	0	1	1	1	1	SERPINF2	serpin peptidase inhibitor, clade F (alpha-2 antiplasmin, pigment epithelium derived factor), member 2
hsa-miR-518a-3p	0	0	1	1	0	0	HKR1	HKR1, GLI-Kruppel zinc finger family member
hsa-miR-518a-3p	0	0	1	1	1	1	C12orf40	chromosome 12 open reading frame 40
hsa-miR-518a-3p	0	0	0	1	0	0	CRIPAK	cysteine-rich PAK1 inhibitor
hsa-miR-518a-3p	0	0	1	1	0	0	BBX	bobby sox homolog (Drosophila)
hsa-miR-518a-3p	0	0	0	1	0	0	KLHL38	kelch-like 38 (Drosophila)
hsa-miR-518a-3p	1	0	0	1	1	1	SSH1	slingshot homolog 1 (Drosophila)
hsa-miR-518a-3p	0	0	1	1	0	0	EDDM3B	epididymal protein 3B
hsa-miR-518a-3p	0	0	0	1	1	1	FLII	flightless I homolog (Drosophila)
hsa-miR-518a-3p	0	0	1	1	0	0	TIMM22	translocase of inner mitochondrial membrane 22 homolog (yeast)
hsa-miR-518a-3p	1	0	1	1	1	1	PTPN2	protein tyrosine phosphatase, non-receptor type 2
hsa-miR-518a-3p	1	0	1	1	1	1	EYA2	eyes absent homolog 2 (Drosophila)
hsa-miR-518a-3p	0	0	1	1	1	1	TRAK1	trafficking protein, kinesin binding 1
hsa-miR-518a-3p	0	0	1	1	0	0	GAS6	growth arrest-specific 6
hsa-miR-518a-3p	0	0	0	1	1	1	KCNK12	potassium channel, subfamily K, member 12
hsa-miR-518a-3p	0	0	1	1	0	0	PHF7	PHD finger protein 7
hsa-miR-518a-3p	0	0	0	1	0	0	ZAR1	zygote arrest 1
hsa-miR-518a-3p	0	0	0	1	0	0	HEXDC	hexosaminidase (glycosyl hydrolase family 20, catalytic domain) containing
hsa-miR-518a-3p	0	0	1	1	0	0	ZNF71	zinc finger protein 71
hsa-miR-518a-3p	0	0	0	1	0	0	IFITM1	interferon induced transmembrane protein 1
hsa-miR-518a-3p	0	0	0	1	1	1	PIGW	phosphatidylinositol glycan anchor biosynthesis, class W
hsa-miR-518a-3p	1	0	1	1	1	1	BACE2	beta-site APP-cleaving enzyme 2
hsa-miR-518a-3p	1	0	1	1	1	1	PTPN21	protein tyrosine phosphatase, non-receptor type 21
hsa-miR-518a-3p	0	0	0	1	0	0	TOP1MT	topoisomerase (DNA) I, mitochondrial
hsa-miR-518a-3p	0	0	1	1	1	1	HNMT	histamine N-methyltransferase
hsa-miR-518a-3p	0	0	1	1	0	0	IDH2	isocitrate dehydrogenase 2 (NADP+), mitochondrial
hsa-miR-518a-3p	1	0	1	1	0	0	ORAI1	ORAI calcium release-activated calcium modulator 1
hsa-miR-518a-3p	0	0	0	1	0	0	LOC391742	TAF11 RNA polymerase II, TATA box binding protein (TBP)-associated factor, 28kDa pseudogene
hsa-miR-518a-3p	0	0	1	1	0	0	HIST1H2AK	histone cluster 1, H2ak
hsa-miR-518a-3p	1	0	1	1	1	1	FOXL2	forkhead box L2
hsa-miR-518a-3p	1	0	1	1	0	0	HDDC3	HD domain containing 3
hsa-miR-518a-3p	0	0	1	1	1	1	KRT79	keratin 79
hsa-miR-518a-3p	0	0	0	1	0	0	OR56A4	olfactory receptor, family 56, subfamily A, member 4
hsa-miR-518a-3p	0	0	1	1	0	0	ALYREF	Aly/REF export factor
hsa-miR-518a-3p	0	0	0	1	0	0	NPBWR1	neuropeptides B/W receptor 1
hsa-miR-518a-3p	1	0	1	1	1	1	MORF4L1	mortality factor 4 like 1
hsa-miR-518a-3p	1	0	1	1	1	1	RAI2	retinoic acid induced 2
hsa-miR-518a-3p	0	0	1	1	0	0	CALCA	calcitonin-related polypeptide alpha
hsa-miR-518a-3p	1	0	1	1	1	1	DUSP8	dual specificity phosphatase 8
hsa-miR-518a-3p	1	0	1	1	1	1	KCNJ12	potassium inwardly-rectifying channel, subfamily J, member 12
hsa-miR-518a-3p	0	0	1	1	1	1	LRRC16A	leucine rich repeat containing 16A
hsa-miR-518a-3p	0	0	1	1	0	0	GPRASP2	G protein-coupled receptor associated sorting protein 2
hsa-miR-518a-3p	0	0	0	1	1	1	SLC25A45	solute carrier family 25, member 45
hsa-miR-518a-3p	0	0	0	1	1	1	MACC1	metastasis associated in colon cancer 1
hsa-miR-518a-3p	0	0	0	1	1	1	OLIG1	oligodendrocyte transcription factor 1
hsa-miR-518a-3p	0	0	0	1	1	1	COPB2	coatomer protein complex, subunit beta 2 (beta prime)
hsa-miR-518a-3p	0	0	1	1	1	1	TM2D3	TM2 domain containing 3
hsa-miR-518a-3p	0	0	0	1	1	1	SH3BGR	SH3 domain binding glutamic acid-rich protein
hsa-miR-518a-3p	0	0	0	1	0	0	H1FX	H1 histone family, member X
hsa-miR-518a-3p	0	0	0	1	0	0	C5orf38	chromosome 5 open reading frame 38
hsa-miR-518a-3p	0	0	0	1	1	1	ZNF761	zinc finger protein 761
hsa-miR-518a-3p	0	0	1	1	0	0	TPGS2	tubulin polyglutamylase complex subunit 2
hsa-miR-518a-3p	0	0	0	1	0	0	DEFB128	defensin, beta 128
hsa-miR-518a-3p	0	0	1	1	1	1	ERCC6L	excision repair cross-complementing rodent repair deficiency, complementation group 6-like
hsa-miR-518a-3p	0	0	1	1	0	0	PRMT2	protein arginine methyltransferase 2
hsa-miR-518a-3p	0	0	1	1	1	1	CCDC73	coiled-coil domain containing 73
hsa-miR-518a-3p	0	0	0	1	1	1	INTU	inturned planar cell polarity effector homolog (Drosophila)
hsa-miR-518a-3p	1	0	0	1	1	1	ZNF354A	zinc finger protein 354A
hsa-miR-518a-3p	1	0	1	1	1	1	GGT7	gamma-glutamyltransferase 7
hsa-miR-518a-3p	1	0	0	1	1	1	IFFO1	intermediate filament family orphan 1
hsa-miR-518a-3p	0	0	1	1	0	0	RNASEH2B	ribonuclease H2, subunit B
hsa-miR-518a-3p	0	0	0	1	0	0	NCF4	neutrophil cytosolic factor 4, 40kDa
hsa-miR-518a-3p	0	0	0	1	1	1	PCID2	PCI domain containing 2
hsa-miR-518a-3p	0	0	1	1	0	0	SIRT6	sirtuin 6
hsa-miR-518a-3p	0	0	0	1	0	0	TSPO	translocator protein (18kDa)
hsa-miR-518a-3p	0	0	1	1	0	0	IL1F10	interleukin 1 family, member 10 (theta)
hsa-miR-518a-3p	1	0	1	1	0	0	SMUG1	single-strand-selective monofunctional uracil-DNA glycosylase 1
hsa-miR-518a-3p	1	0	1	1	1	1	ERAS	ES cell expressed Ras
hsa-miR-518a-3p	0	0	0	1	1	1	C11orf95	chromosome 11 open reading frame 95
hsa-miR-518a-3p	0	0	1	1	0	0	DCBLD1	discoidin, CUB and LCCL domain containing 1
hsa-miR-518a-3p	0	0	0	1	0	0	HELT	helt bHLH transcription factor
hsa-miR-518a-3p	0	0	0	1	1	1	CLEC12A	C-type lectin domain family 12, member A
hsa-miR-518a-3p	0	0	1	1	1	1	CLEC12B	C-type lectin domain family 12, member B
hsa-miR-518a-3p	0	0	0	1	0	0	C11orf96	chromosome 11 open reading frame 96
hsa-miR-518a-3p	1	0	1	1	1	1	PHKA1	phosphorylase kinase, alpha 1 (muscle)
hsa-miR-518a-3p	0	0	1	1	0	0	RNF17	ring finger protein 17
hsa-miR-518a-3p	0	0	1	1	0	0	SLC35F4	solute carrier family 35, member F4
hsa-miR-518a-3p	0	0	0	1	0	0	HIST1H2BG	histone cluster 1, H2bg
hsa-miR-518a-3p	0	0	1	1	1	1	MIOS	missing oocyte, meiosis regulator, homolog (Drosophila)
hsa-miR-518a-3p	1	0	1	1	1	1	C20orf26	chromosome 20 open reading frame 26
hsa-miR-518a-3p	0	0	1	1	1	1	PRDX6	peroxiredoxin 6
hsa-miR-518a-3p	0	0	1	1	0	0	VWC2	von Willebrand factor C domain containing 2
hsa-miR-518a-3p	0	0	0	1	1	1	PLEKHG5	pleckstrin homology domain containing, family G (with RhoGef domain) member 5
hsa-miR-518a-3p	0	0	0	1	0	0	ZNF780A	zinc finger protein 780A
hsa-miR-518a-3p	0	0	1	1	0	0	TRAF3IP3	TRAF3 interacting protein 3
hsa-miR-518a-3p	1	0	1	1	1	1	TMEM248	transmembrane protein 248
hsa-miR-518a-3p	0	0	1	1	0	0	BRE	brain and reproductive organ-expressed (TNFRSF1A modulator)
hsa-miR-518a-3p	0	0	1	1	1	1	COX8C	cytochrome c oxidase subunit VIIIC
hsa-miR-518a-3p	0	0	0	1	0	0	PODXL2	podocalyxin-like 2
hsa-miR-518a-3p	1	0	1	1	1	1	ANKRD42	ankyrin repeat domain 42
hsa-miR-518a-3p	0	0	1	1	0	0	SNRPD2	small nuclear ribonucleoprotein D2 polypeptide 16.5kDa
hsa-miR-518a-3p	0	0	1	1	1	1	ATP13A4	ATPase type 13A4
hsa-miR-518a-3p	0	0	0	1	0	0	BTBD8	BTB (POZ) domain containing 8
hsa-miR-518a-3p	0	0	0	1	1	1	CIDEA	cell death-inducing DFFA-like effector a
hsa-miR-518a-3p	0	0	1	1	1	1	C9orf171	chromosome 9 open reading frame 171
hsa-miR-518a-3p	0	0	1	1	0	0	INTS8	integrator complex subunit 8
hsa-miR-518a-3p	0	0	1	1	1	1	TRIM24	tripartite motif containing 24
hsa-miR-518a-3p	1	0	1	1	1	1	UBAP2L	ubiquitin associated protein 2-like
hsa-miR-518a-3p	0	0	0	1	0	0	SOWAHD	sosondowah ankyrin repeat domain family member D
hsa-miR-518a-3p	0	0	0	1	1	1	FAM69C	family with sequence similarity 69, member C
hsa-miR-518a-3p	0	0	1	1	1	1	FHL2	four and a half LIM domains 2
hsa-miR-518a-3p	0	0	1	1	1	1	XBP1	X-box binding protein 1
hsa-miR-518a-3p	1	0	1	1	1	1	NOVA1	neuro-oncological ventral antigen 1
hsa-miR-518a-3p	0	0	0	1	0	0	LARP7	La ribonucleoprotein domain family, member 7
hsa-miR-518a-3p	0	0	1	1	0	0	DHRS2	dehydrogenase/reductase (SDR family) member 2
hsa-miR-518a-3p	0	0	1	1	0	0	KLRD1	killer cell lectin-like receptor subfamily D, member 1
hsa-miR-518a-3p	0	0	1	1	0	0	BSPH1	binder of sperm protein homolog 1
hsa-miR-518a-3p	0	0	1	1	0	0	PRICKLE1	prickle homolog 1 (Drosophila)
hsa-miR-518a-3p	0	0	0	1	0	0	LTB4R	leukotriene B4 receptor
hsa-miR-518a-3p	0	0	1	1	1	1	NFATC3	nuclear factor of activated T-cells, cytoplasmic, calcineurin-dependent 3
hsa-miR-518a-3p	0	0	1	1	1	1	CD5	CD5 molecule
hsa-miR-518a-3p	1	0	1	1	1	1	ELFN2	extracellular leucine-rich repeat and fibronectin type III domain containing 2
hsa-miR-518a-3p	0	0	1	1	1	1	C1orf43	chromosome 1 open reading frame 43
hsa-miR-518a-3p	0	0	1	1	0	0	RHOG	ras homolog family member G
hsa-miR-518a-3p	0	0	0	1	0	0	PSMD13	proteasome (prosome, macropain) 26S subunit, non-ATPase, 13
hsa-miR-518a-3p	0	0	0	1	1	1	CPNE1	copine I
hsa-miR-518a-3p	0	0	0	1	0	0	PRAMEF19	PRAME family member 19
hsa-miR-518a-3p	1	0	1	1	1	1	DMPK	dystrophia myotonica-protein kinase
hsa-miR-518a-3p	0	0	0	1	1	1	NDUFV3	NADH dehydrogenase (ubiquinone) flavoprotein 3, 10kDa
hsa-miR-518a-3p	1	0	1	1	0	0	ADAMTSL2	ADAMTS-like 2
hsa-miR-518a-3p	1	0	1	1	1	1	PDGFA	platelet-derived growth factor alpha polypeptide
hsa-miR-518a-3p	1	0	0	1	0	0	ARHGEF1	Rho guanine nucleotide exchange factor (GEF) 1
hsa-miR-518a-3p	0	0	1	1	1	1	FYN	FYN oncogene related to SRC, FGR, YES
hsa-miR-518a-3p	1	0	1	1	0	0	SND1	staphylococcal nuclease and tudor domain containing 1
hsa-miR-518a-3p	0	0	1	1	0	0	CCDC81	coiled-coil domain containing 81
hsa-miR-518a-3p	0	0	0	1	0	0	CRYBA4	crystallin, beta A4
hsa-miR-518a-3p	0	0	1	1	1	1	TSGA10	testis specific, 10
hsa-miR-518a-3p	0	0	0	1	0	0	CXorf40B	chromosome X open reading frame 40B
hsa-miR-518a-3p	1	0	1	1	1	1	ANO1	anoctamin 1, calcium activated chloride channel
hsa-miR-518a-3p	0	0	0	1	0	0	SHROOM1	shroom family member 1
hsa-miR-518a-3p	1	0	1	1	1	1	GFRA1	GDNF family receptor alpha 1
hsa-miR-518a-3p	0	0	1	1	0	0	CLK2	CDC-like kinase 2
hsa-miR-518a-3p	0	0	1	1	0	0	ADAMTS13	ADAM metallopeptidase with thrombospondin type 1 motif, 13
hsa-miR-518a-3p	0	0	1	1	1	1	C3orf27	chromosome 3 open reading frame 27
hsa-miR-518a-3p	0	0	0	1	0	0	MYOCD	myocardin
hsa-miR-518a-3p	0	0	0	1	1	1	GTF3C1	general transcription factor IIIC, polypeptide 1, alpha 220kDa
hsa-miR-518a-3p	0	0	1	1	1	1	GALNT6	UDP-N-acetyl-alpha-D-galactosamine:polypeptide N-acetylgalactosaminyltransferase 6 (GalNAc-T6)
hsa-miR-518a-3p	1	0	1	1	1	1	ARIH2	ariadne homolog 2 (Drosophila)
hsa-miR-518a-3p	0	0	0	1	1	1	MYOM1	myomesin 1, 185kDa
hsa-miR-518a-3p	1	0	1	1	0	0	GPI	glucose-6-phosphate isomerase
hsa-miR-518a-3p	1	0	1	1	1	1	TMEM71	transmembrane protein 71
hsa-miR-518a-3p	0	0	1	1	0	0	GUCA2A	guanylate cyclase activator 2A (guanylin)
hsa-miR-518a-3p	0	0	1	1	0	0	ANKRD18A	ankyrin repeat domain 18A
hsa-miR-518a-3p	1	0	1	1	1	1	DLK2	delta-like 2 homolog (Drosophila)
hsa-miR-518a-3p	0	0	0	1	0	0	OR11G2	olfactory receptor, family 11, subfamily G, member 2
hsa-miR-518a-3p	0	0	1	1	1	1	RABGAP1L	RAB GTPase activating protein 1-like
hsa-miR-518a-3p	1	0	1	1	1	1	PAPD5	PAP associated domain containing 5
hsa-miR-518a-3p	0	0	1	1	1	1	TMEM170A	transmembrane protein 170A
hsa-miR-518a-3p	0	0	1	1	1	1	CCDC147	coiled-coil domain containing 147
hsa-miR-518a-3p	1	0	1	1	1	1	DLGAP2	discs, large (Drosophila) homolog-associated protein 2
hsa-miR-518a-3p	0	0	1	1	1	1	ZNF100	zinc finger protein 100
hsa-miR-518a-3p	0	0	0	1	1	1	RPS6KL1	ribosomal protein S6 kinase-like 1
hsa-miR-518a-3p	0	0	1	1	1	1	CNGA1	cyclic nucleotide gated channel alpha 1
hsa-miR-518a-3p	0	0	1	1	0	0	SMTN	smoothelin
hsa-miR-518a-3p	0	0	1	1	0	0	FAM3D	family with sequence similarity 3, member D
hsa-miR-518a-3p	0	0	1	1	1	1	TFEB	transcription factor EB
hsa-miR-518a-3p	0	0	1	1	0	0	FANCG	Fanconi anemia, complementation group G
hsa-miR-518a-3p	1	0	1	1	1	1	VCP	valosin containing protein
hsa-miR-518a-3p	1	0	1	1	0	0	USP21	ubiquitin specific peptidase 21
hsa-miR-518a-3p	0	0	1	1	1	1	ST6GALNAC1	ST6 (alpha-N-acetyl-neuraminyl-2,3-beta-galactosyl-1,3)-N-acetylgalactosaminide alpha-2,6-sialyltransferase 1
hsa-miR-518a-3p	1	0	1	1	1	1	C6orf89	chromosome 6 open reading frame 89
hsa-miR-518a-3p	0	0	0	1	1	1	ARSF	arylsulfatase F
hsa-miR-518a-3p	0	0	1	1	1	1	PCBP2	poly(rC) binding protein 2
hsa-miR-518a-3p	1	0	1	1	1	1	LFNG	LFNG O-fucosylpeptide 3-beta-N-acetylglucosaminyltransferase
hsa-miR-518a-3p	1	0	1	1	1	1	NUMA1	nuclear mitotic apparatus protein 1
hsa-miR-518a-3p	1	0	1	1	0	0	EFNA4	ephrin-A4
hsa-miR-518a-3p	0	0	1	1	1	1	MPDU1	mannose-P-dolichol utilization defect 1
hsa-miR-518a-3p	0	0	1	1	0	0	CTAG1B	cancer/testis antigen 1B
hsa-miR-518a-3p	0	0	0	1	0	0	CYP2D6	cytochrome P450, family 2, subfamily D, polypeptide 6
hsa-miR-518a-3p	1	0	0	1	0	0	TSTA3	tissue specific transplantation antigen P35B
hsa-miR-518a-3p	1	0	1	1	1	1	CD44	CD44 molecule (Indian blood group)
hsa-miR-518a-3p	0	0	0	1	1	1	ZNF860	zinc finger protein 860
hsa-miR-518a-3p	0	0	1	1	0	0	CLDN7	claudin 7
hsa-miR-518a-3p	0	0	1	1	1	1	PARP9	poly (ADP-ribose) polymerase family, member 9
hsa-miR-518a-3p	0	0	0	1	0	0	CTAG1A	cancer/testis antigen 1A
hsa-miR-518a-3p	0	0	0	1	0	0	CLPSL2	colipase-like 2
hsa-miR-518a-3p	0	0	1	1	1	1	TTN	titin
hsa-miR-518a-3p	0	0	1	1	0	0	ZSCAN30	zinc finger and SCAN domain containing 30
hsa-miR-518a-3p	1	0	1	1	0	0	ZNF219	zinc finger protein 219
hsa-miR-518a-3p	0	0	1	1	1	1	CPZ	carboxypeptidase Z
hsa-miR-518a-3p	0	0	1	1	1	1	PTPLA	protein tyrosine phosphatase-like (proline instead of catalytic arginine), member A
hsa-miR-518a-3p	0	0	1	1	1	1	TAF11	TAF11 RNA polymerase II, TATA box binding protein (TBP)-associated factor, 28kDa
hsa-miR-518a-3p	0	0	0	1	1	1	ZNF438	zinc finger protein 438
hsa-miR-518a-3p	1	0	1	1	1	1	KIAA0922	KIAA0922
hsa-miR-518a-3p	0	0	1	1	0	0	NCAPH2	non-SMC condensin II complex, subunit H2
hsa-miR-518a-3p	1	0	1	1	1	1	BCL2L11	BCL2-like 11 (apoptosis facilitator)
hsa-miR-518a-3p	1	0	1	1	1	1	ULK2	unc-51-like kinase 2 (C. elegans)
hsa-miR-518a-3p	0	0	0	1	1	1	HHLA3	HERV-H LTR-associating 3
hsa-miR-518a-3p	0	0	0	1	1	1	KRTAP5-9	keratin associated protein 5-9
hsa-miR-518a-3p	1	0	1	1	1	1	CELF4	CUGBP, Elav-like family member 4
hsa-miR-518a-3p	1	0	1	1	0	0	PLXNB3	plexin B3
hsa-miR-518a-3p	0	0	0	1	0	0	C1orf68	chromosome 1 open reading frame 68
hsa-miR-518a-3p	0	0	1	1	1	1	COG2	component of oligomeric golgi complex 2
hsa-miR-518a-3p	1	0	1	1	1	1	DLL1	delta-like 1 (Drosophila)
hsa-miR-518a-3p	0	0	0	1	1	1	ADCK3	aarF domain containing kinase 3
hsa-miR-518a-3p	0	0	1	1	1	1	THBS2	thrombospondin 2
hsa-miR-518a-3p	0	0	0	1	1	1	DACT2	dapper, antagonist of beta-catenin, homolog 2 (Xenopus laevis)
hsa-miR-518a-3p	0	0	0	1	1	1	H3F3A	H3 histone, family 3A
hsa-miR-518a-3p	1	0	1	1	1	1	WDR26	WD repeat domain 26
hsa-miR-518a-3p	0	0	0	1	0	0	C4BPA	complement component 4 binding protein, alpha
hsa-miR-518a-3p	0	0	1	1	1	1	FAM5C	family with sequence similarity 5, member C
hsa-miR-518a-3p	0	0	0	1	0	0	SF3B5	splicing factor 3b, subunit 5, 10kDa
hsa-miR-518a-3p	0	0	0	1	1	1	LTV1	LTV1 homolog (S. cerevisiae)
hsa-miR-518a-3p	0	0	1	1	0	0	MR1	major histocompatibility complex, class I-related
hsa-miR-518a-3p	1	0	1	1	1	1	ADAT2	adenosine deaminase, tRNA-specific 2
hsa-miR-518a-3p	0	0	1	1	1	1	PEX7	peroxisomal biogenesis factor 7
hsa-miR-518a-3p	0	0	1	1	1	1	BLZF1	basic leucine zipper nuclear factor 1
hsa-miR-518a-3p	0	0	1	1	1	1	RXRG	retinoid X receptor, gamma
hsa-miR-518a-3p	1	0	1	1	1	1	RGS4	regulator of G-protein signaling 4
hsa-miR-518a-3p	0	0	1	1	1	1	DUSP12	dual specificity phosphatase 12
hsa-miR-518a-3p	0	0	1	1	0	0	NDUFS2	NADH dehydrogenase (ubiquinone) Fe-S protein 2, 49kDa (NADH-coenzyme Q reductase)
hsa-miR-518a-3p	0	0	1	1	0	0	SLAMF9	SLAM family member 9
hsa-miR-518a-3p	0	0	1	1	1	1	CRP	C-reactive protein, pentraxin-related
hsa-miR-518a-3p	0	0	0	1	1	1	MNDA	myeloid cell nuclear differentiation antigen
hsa-miR-518a-3p	0	0	1	1	1	1	FCRL1	Fc receptor-like 1
hsa-miR-518a-3p	0	0	1	1	0	0	PMF1	polyamine-modulated factor 1
hsa-miR-518a-3p	0	0	0	1	0	0	BGLAP	bone gamma-carboxyglutamate (gla) protein
hsa-miR-518a-3p	0	0	1	1	0	0	S100A16	S100 calcium binding protein A16
hsa-miR-518a-3p	1	0	1	1	0	0	LOR	loricrin
hsa-miR-518a-3p	0	0	1	1	0	0	LCE3D	late cornified envelope 3D
hsa-miR-518a-3p	1	0	1	1	1	1	CRCT1	cysteine-rich C-terminal 1
hsa-miR-518a-3p	0	0	0	1	1	1	PSTK	phosphoseryl-tRNA kinase
hsa-miR-518a-3p	0	0	1	1	1	1	HTRA1	HtrA serine peptidase 1
hsa-miR-518a-3p	0	0	1	1	1	1	PDSS2	prenyl (decaprenyl) diphosphate synthase, subunit 2
hsa-miR-518a-3p	0	0	1	1	0	0	ECM1	extracellular matrix protein 1
hsa-miR-518a-3p	1	0	1	1	1	1	RGS10	regulator of G-protein signaling 10
hsa-miR-518a-3p	1	0	1	1	1	1	ABLIM1	actin binding LIM protein 1
hsa-miR-518a-3p	1	0	1	1	1	1	TBX15	T-box 15
hsa-miR-518a-3p	0	0	0	1	1	1	GABRR1	gamma-aminobutyric acid (GABA) A receptor, rho 1
hsa-miR-518a-3p	1	0	1	1	1	1	MPP1	membrane protein, palmitoylated 1, 55kDa
hsa-miR-518a-3p	0	0	1	1	0	0	IKBKG	inhibitor of kappa light polypeptide gene enhancer in B-cells, kinase gamma
hsa-miR-518a-3p	0	0	0	1	0	0	CALHM3	calcium homeostasis modulator 3
hsa-miR-518a-3p	0	0	1	1	0	0	EMD	emerin
hsa-miR-518a-3p	0	0	1	1	0	0	NAA10	N(alpha)-acetyltransferase 10, NatA catalytic subunit
hsa-miR-518a-3p	0	0	0	1	1	1	HENMT1	HEN1 methyltransferase homolog 1 (Arabidopsis)
hsa-miR-518a-3p	0	0	1	1	0	0	AVPR2	arginine vasopressin receptor 2
hsa-miR-518a-3p	0	0	0	1	0	0	SRPK3	SRSF protein kinase 3
hsa-miR-518a-3p	0	0	1	1	0	0	EPHX4	epoxide hydrolase 4
hsa-miR-518a-3p	0	0	1	1	1	1	PRIM2	primase, DNA, polypeptide 2 (58kDa)
hsa-miR-518a-3p	0	0	1	1	0	0	IFI44	interferon-induced protein 44
hsa-miR-518a-3p	1	0	1	1	1	1	DDX26B	DEAD/H (Asp-Glu-Ala-Asp/His) box polypeptide 26B
hsa-miR-518a-3p	0	0	1	1	0	0	GPC3	glypican 3
hsa-miR-518a-3p	1	0	1	1	1	1	LRRC1	leucine rich repeat containing 1
hsa-miR-518a-3p	0	0	0	1	0	0	GSTA2	glutathione S-transferase alpha 2
hsa-miR-518a-3p	0	0	1	1	0	0	HEATR8	HEAT repeat containing 8
hsa-miR-518a-3p	0	0	1	1	1	1	TTC4	tetratricopeptide repeat domain 4
hsa-miR-518a-3p	0	0	0	1	0	0	PNPLA7	patatin-like phospholipase domain containing 7
hsa-miR-518a-3p	0	0	0	1	1	1	RBP4	retinol binding protein 4, plasma
hsa-miR-518a-3p	0	0	1	1	1	1	ZCCHC11	zinc finger, CCHC domain containing 11
hsa-miR-518a-3p	0	0	0	1	0	0	NPDC1	neural proliferation, differentiation and control, 1
hsa-miR-518a-3p	0	0	1	1	1	1	SLC25A43	solute carrier family 25, member 43
hsa-miR-518a-3p	0	0	0	1	0	0	LCN8	lipocalin 8
hsa-miR-518a-3p	1	0	1	1	1	1	DCX	doublecortin
hsa-miR-518a-3p	0	0	1	1	1	1	MED22	mediator complex subunit 22
hsa-miR-518a-3p	0	0	1	1	0	0	MRPS18A	mitochondrial ribosomal protein S18A
hsa-miR-518a-3p	0	0	1	1	0	0	PPAPDC3	phosphatidic acid phosphatase type 2 domain containing 3
hsa-miR-518a-3p	0	0	0	1	0	0	SFTPD	surfactant protein D
hsa-miR-518a-3p	0	0	1	1	0	0	TCEAL4	transcription elongation factor A (SII)-like 4
hsa-miR-518a-3p	0	0	0	1	1	1	ZDHHC12	zinc finger, DHHC-type containing 12
hsa-miR-518a-3p	0	0	1	1	0	0	TCEAL5	transcription elongation factor A (SII)-like 5
hsa-miR-518a-3p	0	0	0	1	0	0	ZNF642	zinc finger protein 642
hsa-miR-518a-3p	1	0	1	1	1	1	CAMK2G	calcium/calmodulin-dependent protein kinase II gamma
hsa-miR-518a-3p	1	0	1	1	1	1	RLF	rearranged L-myc fusion
hsa-miR-518a-3p	0	0	1	1	0	0	TCEAL2	transcription elongation factor A (SII)-like 2
hsa-miR-518a-3p	0	0	1	1	0	0	WISP2	WNT1 inducible signaling pathway protein 2
hsa-miR-518a-3p	0	0	1	1	1	1	ANXA7	annexin A7
hsa-miR-518a-3p	0	0	1	1	0	0	GUCA1A	guanylate cyclase activator 1A (retina)
hsa-miR-518a-3p	0	0	1	1	1	1	SGK2	serum/glucocorticoid regulated kinase 2
hsa-miR-518a-3p	0	0	1	1	1	1	PPA1	pyrophosphatase (inorganic) 1
hsa-miR-518a-3p	0	0	1	1	0	0	FPGS	folylpolyglutamate synthase
hsa-miR-518a-3p	0	0	1	1	1	1	TOR2A	torsin family 2, member A
hsa-miR-518a-3p	0	0	0	1	1	1	TRAF3IP1	TNF receptor-associated factor 3 interacting protein 1
hsa-miR-518a-3p	0	0	1	1	1	1	SLC2A8	solute carrier family 2 (facilitated glucose transporter), member 8
hsa-miR-518a-3p	0	0	1	1	0	0	TSSK3	testis-specific serine kinase 3
hsa-miR-518a-3p	0	0	1	1	1	1	FGD2	FYVE, RhoGEF and PH domain containing 2
hsa-miR-518a-3p	0	0	0	1	0	0	ATOH7	atonal homolog 7 (Drosophila)
hsa-miR-518a-3p	0	0	1	1	1	1	MAPK13	mitogen-activated protein kinase 13
hsa-miR-518a-3p	1	0	0	1	1	1	CNTRL	centriolin
hsa-miR-518a-3p	1	0	1	1	1	1	EPB41L1	erythrocyte membrane protein band 4.1-like 1
hsa-miR-518a-3p	0	0	1	1	1	1	STMN1	stathmin 1
hsa-miR-518a-3p	0	0	1	1	1	1	FRMPDP2	FERM and PDZ domain containing 2 pseudogene 2
hsa-miR-518a-3p	0	0	1	1	1	1	FAM21C	family with sequence similarity 21, member C
hsa-miR-518a-3p	0	0	1	1	0	0	GDF5	growth differentiation factor 5
hsa-miR-518a-3p	0	0	1	1	0	0	GDPD2	glycerophosphodiester phosphodiesterase domain containing 2
hsa-miR-518a-3p	1	0	1	1	1	1	CXCL12	chemokine (C-X-C motif) ligand 12
hsa-miR-518a-3p	1	0	1	1	1	1	FUCA1	fucosidase, alpha-L- 1, tissue
hsa-miR-518a-3p	0	0	0	1	0	0	ARR3	arrestin 3, retinal (X-arrestin)
hsa-miR-518a-3p	0	0	0	1	0	0	KIFC1	kinesin family member C1
hsa-miR-518a-3p	0	0	1	1	0	0	FRRS1L	ferric-chelate reductase 1-like
hsa-miR-518a-3p	1	0	1	1	1	1	HNRNPR	heterogeneous nuclear ribonucleoprotein R
hsa-miR-518a-3p	0	0	1	1	0	0	WDR46	WD repeat domain 46
hsa-miR-518a-3p	0	0	0	1	0	0	C1QA	complement component 1, q subcomponent, A chain
hsa-miR-518a-3p	0	0	1	1	1	1	RING1	ring finger protein 1
hsa-miR-518a-3p	1	0	1	1	1	1	NRP1	neuropilin 1
hsa-miR-518a-3p	0	0	0	1	1	1	PSMB9	proteasome (prosome, macropain) subunit, beta type, 9 (large multifunctional peptidase 2)
hsa-miR-518a-3p	0	0	1	1	0	0	DNAH17	dynein, axonemal, heavy chain 17
hsa-miR-518a-3p	0	0	0	1	0	0	ASIP	agouti signaling protein
hsa-miR-518a-3p	0	0	1	1	0	0	XAGE1D	X antigen family, member 1D
hsa-miR-518a-3p	0	0	1	1	1	1	NOTCH4	notch 4
hsa-miR-518a-3p	0	0	1	1	1	1	TRIM14	tripartite motif containing 14
hsa-miR-518a-3p	0	0	0	1	0	0	FKBPL	FK506 binding protein like
hsa-miR-518a-3p	0	0	1	1	0	0	SSX4	synovial sarcoma, X breakpoint 4
hsa-miR-518a-3p	1	0	1	1	1	1	BAMBI	BMP and activin membrane-bound inhibitor homolog (Xenopus laevis)
hsa-miR-518a-3p	0	0	0	1	1	1	MFAP2	microfibrillar-associated protein 2
hsa-miR-518a-3p	0	0	0	1	0	0	RSG1	REM2 and RAB-like small GTPase 1
hsa-miR-518a-3p	1	0	1	1	1	1	C20orf112	chromosome 20 open reading frame 112
hsa-miR-518a-3p	0	0	1	1	1	1	KYNU	kynureninase
hsa-miR-518a-3p	1	0	1	1	1	1	FAM155A	family with sequence similarity 155, member A
hsa-miR-518a-3p	0	0	1	1	0	0	TMEM51	transmembrane protein 51
hsa-miR-518a-3p	0	0	1	1	1	1	TEX30	testis expressed 30
hsa-miR-518a-3p	0	0	0	1	0	0	PRAMEF18	PRAME family member 18
hsa-miR-518a-3p	0	0	0	1	1	1	PRAMEF3	PRAME family member 3
hsa-miR-518a-3p	0	0	0	1	0	0	PRAMEF22	PRAME family member 22
hsa-miR-518a-3p	0	0	1	1	1	1	AADACL4	arylacetamide deacetylase-like 4
hsa-miR-518a-3p	1	0	0	1	0	0	THNSL1	threonine synthase-like 1 (S. cerevisiae)
hsa-miR-518a-3p	0	0	0	1	1	1	GPR183	G protein-coupled receptor 183
hsa-miR-518a-3p	0	0	0	1	1	1	RABL2A	RAB, member of RAS oncogene family-like 2A
hsa-miR-518a-3p	0	0	1	1	1	1	SLC15A4	solute carrier family 15, member 4
hsa-miR-518a-3p	0	0	0	1	1	1	BTNL9	butyrophilin-like 9
hsa-miR-518a-3p	0	0	1	1	0	0	SSX4B	synovial sarcoma, X breakpoint 4B
hsa-miR-518a-3p	0	0	0	1	0	0	POLD1	polymerase (DNA directed), delta 1, catalytic subunit
hsa-miR-518a-3p	0	0	1	1	1	1	GFAP	glial fibrillary acidic protein
hsa-miR-518a-3p	1	0	1	1	1	1	TGOLN2	trans-golgi network protein 2
hsa-miR-518a-3p	1	0	1	1	1	1	KLF12	Kruppel-like factor 12
hsa-miR-518a-3p	1	0	1	1	1	1	SHB	Src homology 2 domain containing adaptor protein B
hsa-miR-518a-3p	0	0	1	1	0	0	POLR1E	polymerase (RNA) I polypeptide E, 53kDa
hsa-miR-518a-3p	0	0	0	1	0	0	ACOT7	acyl-CoA thioesterase 7
hsa-miR-518a-3p	0	0	1	1	1	1	TDRD3	tudor domain containing 3
hsa-miR-518a-3p	0	0	1	1	0	0	SLC3A2	solute carrier family 3 (activators of dibasic and neutral amino acid transport), member 2
hsa-miR-518a-3p	0	0	1	1	0	0	C11orf83	chromosome 11 open reading frame 83
hsa-miR-518a-3p	1	0	1	1	0	0	MEGF8	multiple EGF-like-domains 8
hsa-miR-518a-3p	1	0	0	1	0	0	CTU2	cytosolic thiouridylase subunit 2 homolog (S. pombe)
hsa-miR-518a-3p	0	0	1	1	0	0	HES5	hairy and enhancer of split 5 (Drosophila)
hsa-miR-518a-3p	0	0	0	1	0	0	PANK4	pantothenate kinase 4
hsa-miR-518a-3p	0	0	1	1	0	0	PLCH2	phospholipase C, eta 2
hsa-miR-518a-3p	0	0	1	1	0	0	MORN1	MORN repeat containing 1
hsa-miR-518a-3p	0	0	0	1	0	0	CDK11B	cyclin-dependent kinase 11B
hsa-miR-518a-3p	0	0	1	1	1	1	CAMK1D	calcium/calmodulin-dependent protein kinase ID
hsa-miR-518a-3p	0	0	0	1	0	0	SCNN1D	sodium channel, non-voltage-gated 1, delta subunit
hsa-miR-518a-3p	1	0	0	1	1	1	C10orf47	chromosome 10 open reading frame 47
hsa-miR-518a-3p	0	0	1	1	1	1	NAE1	NEDD8 activating enzyme E1 subunit 1
hsa-miR-518a-3p	1	0	1	1	1	1	SMPX	small muscle protein, X-linked
hsa-miR-518a-3p	0	0	0	1	1	1	PAK1IP1	PAK1 interacting protein 1
hsa-miR-518a-3p	0	0	1	1	1	1	EXOSC9	exosome component 9
hsa-miR-518a-3p	0	0	1	1	0	0	TRPC4	transient receptor potential cation channel, subfamily C, member 4
hsa-miR-518a-3p	0	0	1	1	0	0	SPEF1	sperm flagellar 1
hsa-miR-518a-3p	1	0	1	1	1	1	CAMK2D	calcium/calmodulin-dependent protein kinase II delta
hsa-miR-518a-3p	0	0	1	1	0	0	ADAM18	ADAM metallopeptidase domain 18
hsa-miR-518a-3p	0	0	1	1	0	0	SGCE	sarcoglycan, epsilon
hsa-miR-518a-3p	0	0	1	1	1	1	LINGO2	leucine rich repeat and Ig domain containing 2
hsa-miR-518a-3p	0	0	1	1	0	0	EXOC3L4	exocyst complex component 3-like 4
hsa-miR-518a-3p	0	0	0	1	1	1	IFNA8	interferon, alpha 8
hsa-miR-518a-3p	0	0	1	1	1	1	ALOX5AP	arachidonate 5-lipoxygenase-activating protein
hsa-miR-518a-3p	0	0	1	1	1	1	PTCD2	pentatricopeptide repeat domain 2
hsa-miR-518a-3p	1	0	0	1	1	1	SLC46A3	solute carrier family 46, member 3
hsa-miR-518a-3p	0	0	0	1	1	1	ASGR1	asialoglycoprotein receptor 1
hsa-miR-518a-3p	0	0	1	1	1	1	CD99	CD99 molecule
hsa-miR-518a-3p	0	0	0	1	0	0	GP2	glycoprotein 2 (zymogen granule membrane)
hsa-miR-518a-3p	0	0	1	1	0	0	SLC25A6	solute carrier family 25 (mitochondrial carrier; adenine nucleotide translocator), member 6
hsa-miR-518a-3p	0	0	1	1	0	0	EIF3L	eukaryotic translation initiation factor 3, subunit L
hsa-miR-518a-3p	0	0	0	1	0	0	LOC100131094	uncharacterized LOC100131094
hsa-miR-518a-3p	1	0	1	1	1	1	GLIS3	GLIS family zinc finger 3
hsa-miR-518a-3p	0	0	1	1	0	0	SEC14L4	SEC14-like 4 (S. cerevisiae)
hsa-miR-518a-3p	0	0	0	1	0	0	TPI1	triosephosphate isomerase 1
hsa-miR-518a-3p	0	0	1	1	0	0	TPSD1	tryptase delta 1
hsa-miR-518a-3p	1	0	1	1	1	1	SLMAP	sarcolemma associated protein
hsa-miR-518a-3p	0	0	0	1	0	0	TMEM42	transmembrane protein 42
hsa-miR-518a-3p	0	0	0	1	0	0	PLEKHM3	pleckstrin homology domain containing, family M, member 3
hsa-miR-518a-3p	0	0	1	1	0	0	C7orf63	chromosome 7 open reading frame 63
hsa-miR-518a-3p	0	0	1	1	1	1	EP400	E1A binding protein p400
hsa-miR-518a-3p	0	0	0	1	0	0	ZC3H12D	zinc finger CCCH-type containing 12D
hsa-miR-518a-3p	0	0	0	1	0	0	TAS2R14	taste receptor, type 2, member 14
hsa-miR-518a-3p	1	0	1	1	1	1	ZNF282	zinc finger protein 282
hsa-miR-518a-3p	1	0	1	0	1	1	PKNOX1	PBX/knotted 1 homeobox 1
hsa-miR-518a-3p	0	0	0	1	1	1	C21orf2	chromosome 21 open reading frame 2
hsa-miR-518a-3p	0	0	1	1	1	1	RBM8A	RNA binding motif protein 8A
hsa-miR-518a-3p	0	0	1	1	1	1	TOLLIP	toll interacting protein
hsa-miR-518a-3p	1	0	1	1	1	1	RNF150	ring finger protein 150
hsa-miR-518a-3p	0	0	0	1	1	1	DGCR8	DiGeorge syndrome critical region gene 8
hsa-miR-518a-3p	1	0	1	1	1	1	LPIN1	lipin 1
hsa-miR-518a-3p	1	0	1	1	1	1	ZNF827	zinc finger protein 827
hsa-miR-518a-3p	0	0	1	1	1	1	C15orf54	chromosome 15 open reading frame 54
