# Supplementary material for: Profiling of Selected MicroRNAs in Proliferative Eutopic Endometrium of Women with Ovarian Endometriosis
Source: Biomed Res Int. 2015 Aug 20;2015:760698. doi: 10.1155/2015/760698 (PMC4558423; doi:10.1155/2015/760698)
Supplement: Supplementary file 1 — Table I: The names of miRNAs significantly differentially expressed between eutopic endometrium of patients with endometriosis vs eutopic endometrium of patients without endometriosis. Table II: The associations between miRNA and mRNA, which presents detailed results of the search of six major databases i.e targetscan, tarbase, miranda, mirbase, mirtarget2 and pictar. [file 760698.f1.zip › 760698.f1/Table II/hsa-miR-518d-3p.tsv]

miR	targetscan	tarbase	miranda	mirbase	mirtarget2	pictar	GeneSymbol	GeneName
hsa-miR-518d-3p	1	0	1	1	1	1	NRXN1	neurexin 1
hsa-miR-518d-3p	1	0	1	1	0	0	TBC1D12	TBC1 domain family, member 12
hsa-miR-518d-3p	1	0	1	1	1	1	HIPK1	homeodomain interacting protein kinase 1
hsa-miR-518d-3p	1	0	1	1	1	1	CIT	citron (rho-interacting, serine/threonine kinase 21)
hsa-miR-518d-3p	1	0	1	1	1	1	SPIRE1	spire homolog 1 (Drosophila)
hsa-miR-518d-3p	1	0	1	1	1	1	MKL2	MKL/myocardin-like 2
hsa-miR-518d-3p	0	0	1	1	1	1	FSTL5	follistatin-like 5
hsa-miR-518d-3p	0	0	1	1	1	1	TCF7L2	transcription factor 7-like 2 (T-cell specific, HMG-box)
hsa-miR-518d-3p	1	0	1	0	0	0	ODZ4	odz, odd Oz/ten-m homolog 4 (Drosophila)
hsa-miR-518d-3p	0	0	1	1	0	0	ISLR2	immunoglobulin superfamily containing leucine-rich repeat 2
hsa-miR-518d-3p	0	0	1	1	1	1	SPEF2	sperm flagellar 2
hsa-miR-518d-3p	1	0	1	1	1	1	PAN3	PAN3 poly(A) specific ribonuclease subunit homolog (S. cerevisiae)
hsa-miR-518d-3p	1	0	1	0	1	1	PCDHA13	protocadherin alpha 13
hsa-miR-518d-3p	1	0	1	1	1	1	PCDHA4	protocadherin alpha 4
hsa-miR-518d-3p	1	0	1	1	0	0	ELN	elastin
hsa-miR-518d-3p	0	0	1	1	1	1	PTK2	PTK2 protein tyrosine kinase 2
hsa-miR-518d-3p	1	0	1	1	0	0	CACNB1	calcium channel, voltage-dependent, beta 1 subunit
hsa-miR-518d-3p	0	0	1	1	0	0	EIF4E2	eukaryotic translation initiation factor 4E family member 2
hsa-miR-518d-3p	1	0	1	1	1	1	ZFX	zinc finger protein, X-linked
hsa-miR-518d-3p	0	0	1	1	1	1	SGSH	N-sulfoglucosamine sulfohydrolase
hsa-miR-518d-3p	0	0	1	0	0	0	MIAT	myocardial infarction associated transcript (non-protein coding)
hsa-miR-518d-3p	1	0	1	1	1	1	VAPB	VAMP (vesicle-associated membrane protein)-associated protein B and C
hsa-miR-518d-3p	0	0	1	1	1	1	FHL1	four and a half LIM domains 1
hsa-miR-518d-3p	1	0	1	1	1	1	HNRNPH3	heterogeneous nuclear ribonucleoprotein H3 (2H9)
hsa-miR-518d-3p	0	0	1	1	0	0	ANGPTL4	angiopoietin-like 4
hsa-miR-518d-3p	0	0	1	1	1	1	HERPUD1	homocysteine-inducible, endoplasmic reticulum stress-inducible, ubiquitin-like domain member 1
hsa-miR-518d-3p	1	0	1	1	1	1	DESI2	desumoylating isopeptidase 2
hsa-miR-518d-3p	1	0	1	0	1	1	PARP11	poly (ADP-ribose) polymerase family, member 11
hsa-miR-518d-3p	1	0	1	1	1	1	PUM2	pumilio homolog 2 (Drosophila)
hsa-miR-518d-3p	1	0	1	1	1	1	CPEB1	cytoplasmic polyadenylation element binding protein 1
hsa-miR-518d-3p	1	0	1	1	1	1	PBX3	pre-B-cell leukemia homeobox 3
hsa-miR-518d-3p	1	0	1	1	1	1	CALCOCO1	calcium binding and coiled-coil domain 1
hsa-miR-518d-3p	0	0	1	1	1	1	CASP8	caspase 8, apoptosis-related cysteine peptidase
hsa-miR-518d-3p	0	0	1	1	0	0	BRE	brain and reproductive organ-expressed (TNFRSF1A modulator)
hsa-miR-518d-3p	1	0	1	1	0	0	SEPT8	septin 8
hsa-miR-518d-3p	1	0	1	0	1	1	CACNA1C	calcium channel, voltage-dependent, L type, alpha 1C subunit
hsa-miR-518d-3p	0	0	1	0	0	0	CACNA2D3	calcium channel, voltage-dependent, alpha 2/delta subunit 3
hsa-miR-518d-3p	0	0	1	0	0	0	RNF31	ring finger protein 31
hsa-miR-518d-3p	0	0	1	0	1	1	EBF2	early B-cell factor 2
hsa-miR-518d-3p	1	0	1	1	1	1	HNRNPF	heterogeneous nuclear ribonucleoprotein F
hsa-miR-518d-3p	1	0	1	0	1	1	SPATS2L	spermatogenesis associated, serine-rich 2-like
hsa-miR-518d-3p	1	0	1	1	1	1	HNRNPUL1	heterogeneous nuclear ribonucleoprotein U-like 1
hsa-miR-518d-3p	0	0	1	1	1	1	CCPG1	cell cycle progression 1
hsa-miR-518d-3p	0	0	1	1	0	0	KIRREL	kin of IRRE like (Drosophila)
hsa-miR-518d-3p	1	0	1	1	1	1	STARD7	StAR-related lipid transfer (START) domain containing 7
hsa-miR-518d-3p	1	0	1	1	1	1	ZNF385A	zinc finger protein 385A
hsa-miR-518d-3p	0	0	1	1	1	1	METTL7A	methyltransferase like 7A
hsa-miR-518d-3p	1	0	1	0	1	1	ATP2B1	ATPase, Ca++ transporting, plasma membrane 1
hsa-miR-518d-3p	1	0	1	1	1	1	TMEM2	transmembrane protein 2
hsa-miR-518d-3p	0	0	1	1	1	1	OPTN	optineurin
hsa-miR-518d-3p	1	0	1	1	1	1	FRMD6	FERM domain containing 6
hsa-miR-518d-3p	1	0	1	1	1	1	LMNA	lamin A/C
hsa-miR-518d-3p	1	0	1	1	1	1	FOPNL	FGFR1OP N-terminal like
hsa-miR-518d-3p	0	0	1	1	0	0	AARSD1	alanyl-tRNA synthetase domain containing 1
hsa-miR-518d-3p	0	0	1	1	1	1	PSME3	proteasome (prosome, macropain) activator subunit 3 (PA28 gamma; Ki)
hsa-miR-518d-3p	0	0	1	1	0	0	TRIM41	tripartite motif containing 41
hsa-miR-518d-3p	1	0	1	0	1	1	RNF165	ring finger protein 165
hsa-miR-518d-3p	0	0	1	1	0	0	NISCH	nischarin
hsa-miR-518d-3p	1	0	1	1	1	1	FBXW2	F-box and WD repeat domain containing 2
hsa-miR-518d-3p	1	0	1	1	1	1	TSN	translin
hsa-miR-518d-3p	0	0	1	1	0	0	CDC25B	cell division cycle 25 homolog B (S. pombe)
hsa-miR-518d-3p	1	0	1	1	1	1	NASP	nuclear autoantigenic sperm protein (histone-binding)
hsa-miR-518d-3p	0	0	1	1	1	1	PRKRA	protein kinase, interferon-inducible double stranded RNA dependent activator
hsa-miR-518d-3p	1	0	1	1	1	1	PTPRU	protein tyrosine phosphatase, receptor type, U
hsa-miR-518d-3p	0	0	1	1	0	0	ZNF185	zinc finger protein 185 (LIM domain)
hsa-miR-518d-3p	0	0	1	0	0	0	ZNF815P	zinc finger protein 815, pseudogene
hsa-miR-518d-3p	0	0	1	0	0	0	OTUD1	OTU domain containing 1
hsa-miR-518d-3p	1	0	1	1	1	1	STIM2	stromal interaction molecule 2
hsa-miR-518d-3p	1	0	1	1	1	1	EPB41L1	erythrocyte membrane protein band 4.1-like 1
hsa-miR-518d-3p	1	0	1	1	1	1	CDV3	CDV3 homolog (mouse)
hsa-miR-518d-3p	0	0	1	1	1	1	PRSS16	protease, serine, 16 (thymus)
hsa-miR-518d-3p	1	0	1	1	0	0	DNM2	dynamin 2
hsa-miR-518d-3p	0	0	1	0	0	0	CECR7	cat eye syndrome chromosome region, candidate 7 (non-protein coding)
hsa-miR-518d-3p	1	0	1	1	1	1	CHD6	chromodomain helicase DNA binding protein 6
hsa-miR-518d-3p	0	0	1	1	1	1	VWA3B	von Willebrand factor A domain containing 3B
hsa-miR-518d-3p	0	0	1	1	0	0	MARS	methionyl-tRNA synthetase
hsa-miR-518d-3p	0	0	1	0	1	1	FLJ41200	uncharacterized LOC401492
hsa-miR-518d-3p	0	0	1	1	1	1	ANKRD44	ankyrin repeat domain 44
hsa-miR-518d-3p	1	0	1	1	1	1	XPO1	exportin 1 (CRM1 homolog, yeast)
hsa-miR-518d-3p	1	0	1	1	1	1	RGMA	RGM domain family, member A
hsa-miR-518d-3p	1	0	1	0	0	0	ANKRD52	ankyrin repeat domain 52
hsa-miR-518d-3p	1	0	1	1	0	0	ATXN7L3	ataxin 7-like 3
hsa-miR-518d-3p	0	0	1	1	1	1	MOBP	myelin-associated oligodendrocyte basic protein
hsa-miR-518d-3p	1	0	1	1	1	1	ZDHHC23	zinc finger, DHHC-type containing 23
hsa-miR-518d-3p	1	0	1	1	1	1	ENAH	enabled homolog (Drosophila)
hsa-miR-518d-3p	1	0	1	0	1	1	FNDC3B	fibronectin type III domain containing 3B
hsa-miR-518d-3p	1	0	1	0	1	1	PLSCR4	phospholipid scramblase 4
hsa-miR-518d-3p	1	0	1	1	1	1	UPF1	UPF1 regulator of nonsense transcripts homolog (yeast)
hsa-miR-518d-3p	1	0	1	0	1	1	FMNL2	formin-like 2
hsa-miR-518d-3p	1	0	1	0	1	1	TEAD3	TEA domain family member 3
hsa-miR-518d-3p	1	0	1	1	1	1	NECAP1	NECAP endocytosis associated 1
hsa-miR-518d-3p	0	0	1	1	1	1	TFDP2	transcription factor Dp-2 (E2F dimerization partner 2)
hsa-miR-518d-3p	0	0	1	0	0	0	POM121L9P	POM121 transmembrane nucleoporin-like 9, pseudogene
hsa-miR-518d-3p	0	0	1	1	0	0	TBC1D10B	TBC1 domain family, member 10B
hsa-miR-518d-3p	0	0	1	1	1	1	ARIH1	ariadne homolog, ubiquitin-conjugating enzyme E2 binding protein, 1 (Drosophila)
hsa-miR-518d-3p	1	0	1	1	1	1	KIAA1033	KIAA1033
hsa-miR-518d-3p	1	0	1	1	1	1	TFE3	transcription factor binding to IGHM enhancer 3
hsa-miR-518d-3p	1	0	1	1	1	1	TRIOBP	TRIO and F-actin binding protein
hsa-miR-518d-3p	1	0	1	1	1	1	DENND1B	DENN/MADD domain containing 1B
hsa-miR-518d-3p	0	0	1	1	1	1	YAP1	Yes-associated protein 1
hsa-miR-518d-3p	0	0	1	1	1	1	BRD2	bromodomain containing 2
hsa-miR-518d-3p	1	0	1	1	1	1	FBXO3	F-box protein 3
hsa-miR-518d-3p	0	0	1	1	1	1	NFE2L1	nuclear factor (erythroid-derived 2)-like 1
hsa-miR-518d-3p	1	0	1	1	1	1	DIS3L2	DIS3 mitotic control homolog (S. cerevisiae)-like 2
hsa-miR-518d-3p	0	0	1	1	0	0	FAM176C	family with sequence similarity 176, member C
hsa-miR-518d-3p	1	0	1	1	1	1	PBRM1	polybromo 1
hsa-miR-518d-3p	1	0	1	1	1	1	TAB3	TGF-beta activated kinase 1/MAP3K7 binding protein 3
hsa-miR-518d-3p	1	0	1	0	1	1	MEGF9	multiple EGF-like-domains 9
hsa-miR-518d-3p	0	0	1	0	1	1	FAM198B	family with sequence similarity 198, member B
hsa-miR-518d-3p	0	0	1	1	0	0	ARAP1	ArfGAP with RhoGAP domain, ankyrin repeat and PH domain 1
hsa-miR-518d-3p	1	0	1	1	1	1	CYFIP1	cytoplasmic FMR1 interacting protein 1
hsa-miR-518d-3p	1	0	1	1	1	1	QKI	QKI, KH domain containing, RNA binding
hsa-miR-518d-3p	0	0	1	1	0	0	CXorf26	chromosome X open reading frame 26
hsa-miR-518d-3p	0	0	1	1	1	1	SNX11	sorting nexin 11
hsa-miR-518d-3p	0	0	1	1	1	1	PAFAH1B2	platelet-activating factor acetylhydrolase 1b, catalytic subunit 2 (30kDa)
hsa-miR-518d-3p	0	0	1	1	0	0	SLC4A2	solute carrier family 4, anion exchanger, member 2 (erythrocyte membrane protein band 3-like 1)
hsa-miR-518d-3p	1	0	1	1	1	1	PRDM2	PR domain containing 2, with ZNF domain
hsa-miR-518d-3p	0	0	1	0	0	0	NUDT16P1	nudix (nucleoside diphosphate linked moiety X)-type motif 16 pseudogene 1
hsa-miR-518d-3p	0	0	1	1	1	1	FAM122C	family with sequence similarity 122C
hsa-miR-518d-3p	0	0	1	1	1	1	RBBP8	retinoblastoma binding protein 8
hsa-miR-518d-3p	1	0	1	1	1	1	MUM1L1	melanoma associated antigen (mutated) 1-like 1
hsa-miR-518d-3p	0	0	1	1	1	1	SNX17	sorting nexin 17
hsa-miR-518d-3p	1	0	1	1	1	1	SPATS2	spermatogenesis associated, serine-rich 2
hsa-miR-518d-3p	1	0	1	1	1	1	TTC39C	tetratricopeptide repeat domain 39C
hsa-miR-518d-3p	1	0	1	1	1	1	SIRPA	signal-regulatory protein alpha
hsa-miR-518d-3p	1	0	1	1	1	1	PCDHA5	protocadherin alpha 5
hsa-miR-518d-3p	0	0	1	0	1	1	KSR1	kinase suppressor of ras 1
hsa-miR-518d-3p	0	0	1	1	1	1	SNAPC3	small nuclear RNA activating complex, polypeptide 3, 50kDa
hsa-miR-518d-3p	1	0	1	1	1	1	ZNF618	zinc finger protein 618
hsa-miR-518d-3p	0	0	1	0	0	0	FAM201A	family with sequence similarity 201, member A
hsa-miR-518d-3p	1	0	1	0	1	1	CPEB4	cytoplasmic polyadenylation element binding protein 4
hsa-miR-518d-3p	1	0	1	1	1	1	BNC2	basonuclin 2
hsa-miR-518d-3p	1	0	1	1	1	1	GALNT1	UDP-N-acetyl-alpha-D-galactosamine:polypeptide N-acetylgalactosaminyltransferase 1 (GalNAc-T1)
hsa-miR-518d-3p	0	0	1	0	0	0	LOC100134868	uncharacterized LOC100134868
hsa-miR-518d-3p	1	0	1	0	1	1	LPHN3	latrophilin 3
hsa-miR-518d-3p	0	0	1	0	0	0	LOC401074	uncharacterized LOC401074
hsa-miR-518d-3p	1	0	1	0	1	1	HSPA12A	heat shock 70kDa protein 12A
hsa-miR-518d-3p	0	0	1	0	0	0	LOC338739	uncharacterized LOC338739
hsa-miR-518d-3p	1	0	1	1	1	1	SOLH	small optic lobes homolog (Drosophila)
hsa-miR-518d-3p	1	0	1	1	1	1	AGAP3	ArfGAP with GTPase domain, ankyrin repeat and PH domain 3
hsa-miR-518d-3p	1	0	1	1	1	1	RNF145	ring finger protein 145
hsa-miR-518d-3p	1	0	1	1	1	1	SON	SON DNA binding protein
hsa-miR-518d-3p	0	0	1	0	0	0	LOC348120	uncharacterized LOC348120
hsa-miR-518d-3p	1	0	1	1	1	1	RMND5A	required for meiotic nuclear division 5 homolog A (S. cerevisiae)
hsa-miR-518d-3p	1	0	1	1	1	1	WSB1	WD repeat and SOCS box containing 1
hsa-miR-518d-3p	1	0	1	0	1	1	SEMA4G	sema domain, immunoglobulin domain (Ig), transmembrane domain (TM) and short cytoplasmic domain, (semaphorin) 4G
hsa-miR-518d-3p	0	0	1	1	1	1	LINC00086	long intergenic non-protein coding RNA 86
hsa-miR-518d-3p	0	0	1	0	0	0	AQP7P1	aquaporin 7 pseudogene 1
hsa-miR-518d-3p	0	0	1	1	0	0	HIST1H3E	histone cluster 1, H3e
hsa-miR-518d-3p	1	0	1	1	1	1	ZNF449	zinc finger protein 449
hsa-miR-518d-3p	0	0	1	1	1	1	SLAMF1	signaling lymphocytic activation molecule family member 1
hsa-miR-518d-3p	0	0	1	1	0	0	TRIM46	tripartite motif containing 46
hsa-miR-518d-3p	0	0	1	1	1	1	CTXN3	cortexin 3
hsa-miR-518d-3p	1	0	1	1	1	1	NTRK2	neurotrophic tyrosine kinase, receptor, type 2
hsa-miR-518d-3p	1	0	1	1	1	1	ZBTB7A	zinc finger and BTB domain containing 7A
hsa-miR-518d-3p	1	0	1	1	1	1	GBF1	golgi brefeldin A resistant guanine nucleotide exchange factor 1
hsa-miR-518d-3p	0	0	1	0	1	1	TGFB2	transforming growth factor, beta 2
hsa-miR-518d-3p	1	0	1	1	1	1	ACVR2B	activin A receptor, type IIB
hsa-miR-518d-3p	0	0	1	0	0	0	LBX2-AS1	LBX2 antisense RNA 1
hsa-miR-518d-3p	0	0	1	0	0	0	INTS4L1	integrator complex subunit 4-like 1
hsa-miR-518d-3p	1	0	1	0	1	1	ROBO1	roundabout, axon guidance receptor, homolog 1 (Drosophila)
hsa-miR-518d-3p	0	0	1	0	0	0	TUBA4B	tubulin, alpha 4b (pseudogene)
hsa-miR-518d-3p	0	0	1	0	0	0	FUT8-AS1	FUT8 antisense RNA 1
hsa-miR-518d-3p	0	0	1	0	0	0	LINC00643	long intergenic non-protein coding RNA 643
hsa-miR-518d-3p	1	0	1	0	1	1	MTX3	metaxin 3
hsa-miR-518d-3p	0	0	1	0	0	0	MGC23284	uncharacterized LOC197187
hsa-miR-518d-3p	0	0	1	1	1	1	CCNT2	cyclin T2
hsa-miR-518d-3p	1	0	1	1	1	1	EOGT	EGF domain-specific O-linked N-acetylglucosamine (GlcNAc) transferase
hsa-miR-518d-3p	1	0	1	1	1	1	HIC2	hypermethylated in cancer 2
hsa-miR-518d-3p	0	0	1	0	0	0	SBDSP1	Shwachman-Bodian-Diamond syndrome pseudogene 1
hsa-miR-518d-3p	1	0	1	1	1	1	COPZ1	coatomer protein complex, subunit zeta 1
hsa-miR-518d-3p	0	0	1	1	1	1	GGPS1	geranylgeranyl diphosphate synthase 1
hsa-miR-518d-3p	1	0	1	1	1	1	TFDP1	transcription factor Dp-1
hsa-miR-518d-3p	0	0	1	1	1	1	STON1	stonin 1
hsa-miR-518d-3p	1	0	1	1	1	1	TMEM248	transmembrane protein 248
hsa-miR-518d-3p	1	0	1	0	1	1	DCAF7	DDB1 and CUL4 associated factor 7
hsa-miR-518d-3p	1	0	1	1	1	1	MTCH2	mitochondrial carrier 2
hsa-miR-518d-3p	0	0	1	1	0	0	NOX5	NADPH oxidase, EF-hand calcium binding domain 5
hsa-miR-518d-3p	0	0	1	1	1	1	PEX19	peroxisomal biogenesis factor 19
hsa-miR-518d-3p	0	0	1	1	0	0	NEK7	NIMA (never in mitosis gene a)-related kinase 7
hsa-miR-518d-3p	0	0	1	1	0	0	FAM57B	family with sequence similarity 57, member B
hsa-miR-518d-3p	1	0	1	1	1	1	ANAPC16	anaphase promoting complex subunit 16
hsa-miR-518d-3p	0	0	1	1	1	1	LGI1	leucine-rich, glioma inactivated 1
hsa-miR-518d-3p	1	0	1	0	1	1	EIF2S2	eukaryotic translation initiation factor 2, subunit 2 beta, 38kDa
hsa-miR-518d-3p	1	0	1	1	1	1	ID2	inhibitor of DNA binding 2, dominant negative helix-loop-helix protein
hsa-miR-518d-3p	1	0	1	0	1	1	DNMT3A	DNA (cytosine-5-)-methyltransferase 3 alpha
hsa-miR-518d-3p	0	0	1	0	1	1	STARD8	StAR-related lipid transfer (START) domain containing 8
hsa-miR-518d-3p	0	0	1	0	1	1	HDAC9	histone deacetylase 9
hsa-miR-518d-3p	0	0	1	0	0	0	MIR143HG	MIR143 host gene (non-protein coding)
hsa-miR-518d-3p	0	0	1	0	0	0	DNAJC27-AS1	DNAJC27 antisense RNA 1
hsa-miR-518d-3p	1	0	1	1	1	1	GRM5	glutamate receptor, metabotropic 5
hsa-miR-518d-3p	0	0	1	1	1	1	MARVELD2	MARVEL domain containing 2
hsa-miR-518d-3p	0	0	1	1	1	1	CNGA1	cyclic nucleotide gated channel alpha 1
hsa-miR-518d-3p	1	0	1	1	1	1	FBN1	fibrillin 1
hsa-miR-518d-3p	1	0	1	1	1	1	OCRL	oculocerebrorenal syndrome of Lowe
hsa-miR-518d-3p	1	0	1	0	1	1	PTEN	phosphatase and tensin homolog
hsa-miR-518d-3p	1	0	1	1	1	1	RB1	retinoblastoma 1
hsa-miR-518d-3p	1	0	1	1	1	1	DCX	doublecortin
hsa-miR-518d-3p	1	0	1	0	1	1	ARHGEF37	Rho guanine nucleotide exchange factor (GEF) 37
hsa-miR-518d-3p	0	0	1	1	1	1	FAM109B	family with sequence similarity 109, member B
hsa-miR-518d-3p	0	0	1	0	0	0	KLK2	kallikrein-related peptidase 2
hsa-miR-518d-3p	1	0	1	1	1	1	RBMS3	RNA binding motif, single stranded interacting protein 3
hsa-miR-518d-3p	1	0	1	1	1	1	BICD2	bicaudal D homolog 2 (Drosophila)
hsa-miR-518d-3p	1	0	1	1	1	1	EDA	ectodysplasin A
hsa-miR-518d-3p	0	0	1	1	1	1	LINC00478	long intergenic non-protein coding RNA 478
hsa-miR-518d-3p	0	0	1	1	1	1	TRIM13	tripartite motif containing 13
hsa-miR-518d-3p	1	0	1	1	1	1	RBM33	RNA binding motif protein 33
hsa-miR-518d-3p	1	0	1	0	1	1	KIAA2022	KIAA2022
hsa-miR-518d-3p	0	0	1	1	0	0	ARMCX6	armadillo repeat containing, X-linked 6
hsa-miR-518d-3p	1	0	1	0	1	1	ZC3H12B	zinc finger CCCH-type containing 12B
hsa-miR-518d-3p	0	0	1	1	1	1	MUC21	mucin 21, cell surface associated
hsa-miR-518d-3p	1	0	1	0	1	1	FYTTD1	forty-two-three domain containing 1
hsa-miR-518d-3p	1	0	1	1	1	1	PCGF6	polycomb group ring finger 6
hsa-miR-518d-3p	1	0	1	1	1	1	CTNNBIP1	catenin, beta interacting protein 1
hsa-miR-518d-3p	1	0	1	1	1	1	DISC1	disrupted in schizophrenia 1
hsa-miR-518d-3p	1	0	1	1	1	1	C12orf68	chromosome 12 open reading frame 68
hsa-miR-518d-3p	1	0	1	1	1	1	ZHX1	zinc fingers and homeoboxes 1
hsa-miR-518d-3p	1	0	1	1	1	1	DKK3	dickkopf 3 homolog (Xenopus laevis)
hsa-miR-518d-3p	1	0	1	0	1	1	TNRC6B	trinucleotide repeat containing 6B
hsa-miR-518d-3p	1	0	1	1	1	1	CSNK1G3	casein kinase 1, gamma 3
hsa-miR-518d-3p	1	0	1	1	1	1	AMD1	adenosylmethionine decarboxylase 1
hsa-miR-518d-3p	0	0	1	1	1	1	ATAD3C	ATPase family, AAA domain containing 3C
hsa-miR-518d-3p	1	0	1	0	1	1	CCNL2	cyclin L2
hsa-miR-518d-3p	1	0	1	1	1	1	CDC14B	CDC14 cell division cycle 14 homolog B (S. cerevisiae)
hsa-miR-518d-3p	1	0	1	1	1	1	HS6ST2	heparan sulfate 6-O-sulfotransferase 2
hsa-miR-518d-3p	1	0	1	1	1	1	PDE11A	phosphodiesterase 11A
hsa-miR-518d-3p	1	0	1	1	1	1	PRR3	proline rich 3
hsa-miR-518d-3p	1	0	1	1	1	1	UNC119B	unc-119 homolog B (C. elegans)
hsa-miR-518d-3p	1	0	1	0	1	1	KLF9	Kruppel-like factor 9
hsa-miR-518d-3p	0	0	1	1	1	1	CHI3L1	chitinase 3-like 1 (cartilage glycoprotein-39)
hsa-miR-518d-3p	0	0	1	1	1	1	CLIC2	chloride intracellular channel 2
hsa-miR-518d-3p	1	0	1	1	1	1	CTNND2	catenin (cadherin-associated protein), delta 2
hsa-miR-518d-3p	0	0	1	1	0	0	DIO3	deiodinase, iodothyronine, type III
hsa-miR-518d-3p	1	0	1	1	1	1	CELSR2	cadherin, EGF LAG seven-pass G-type receptor 2 (flamingo homolog, Drosophila)
hsa-miR-518d-3p	0	0	1	1	1	1	IL13RA1	interleukin 13 receptor, alpha 1
hsa-miR-518d-3p	1	0	1	1	1	1	BAAT	bile acid CoA: amino acid N-acyltransferase (glycine N-choloyltransferase)
hsa-miR-518d-3p	1	0	1	1	1	1	CBFB	core-binding factor, beta subunit
hsa-miR-518d-3p	1	0	1	1	1	1	EGR1	early growth response 1
hsa-miR-518d-3p	1	0	1	0	1	1	MXD1	MAX dimerization protein 1
hsa-miR-518d-3p	0	0	1	0	1	1	CXCL9	chemokine (C-X-C motif) ligand 9
hsa-miR-518d-3p	1	0	1	1	1	1	ORC5	origin recognition complex, subunit 5
hsa-miR-518d-3p	0	0	1	1	1	1	PDE2A	phosphodiesterase 2A, cGMP-stimulated
hsa-miR-518d-3p	1	0	1	0	1	1	SOX11	SRY (sex determining region Y)-box 11
hsa-miR-518d-3p	1	0	1	1	1	1	NR2E1	nuclear receptor subfamily 2, group E, member 1
hsa-miR-518d-3p	1	0	1	1	1	1	FZD5	frizzled family receptor 5
hsa-miR-518d-3p	1	0	1	1	1	1	CUL5	cullin 5
hsa-miR-518d-3p	1	0	1	0	1	1	SNN	stannin
hsa-miR-518d-3p	1	0	1	1	1	1	CDC14A	CDC14 cell division cycle 14 homolog A (S. cerevisiae)
hsa-miR-518d-3p	1	0	1	0	1	1	TNKS	tankyrase, TRF1-interacting ankyrin-related ADP-ribose polymerase
hsa-miR-518d-3p	1	0	1	0	1	1	IRS2	insulin receptor substrate 2
hsa-miR-518d-3p	1	0	1	1	1	1	KAT2B	K(lysine) acetyltransferase 2B
hsa-miR-518d-3p	0	0	1	1	1	1	PRPF4B	PRP4 pre-mRNA processing factor 4 homolog B (yeast)
hsa-miR-518d-3p	1	0	1	0	1	1	EIF2S1	eukaryotic translation initiation factor 2, subunit 1 alpha, 35kDa
hsa-miR-518d-3p	1	0	1	0	1	1	SLC1A2	solute carrier family 1 (glial high affinity glutamate transporter), member 2
hsa-miR-518d-3p	0	0	1	1	0	0	ATP6V1F	ATPase, H+ transporting, lysosomal 14kDa, V1 subunit F
hsa-miR-518d-3p	1	0	1	1	1	1	SOCS6	suppressor of cytokine signaling 6
hsa-miR-518d-3p	1	0	1	1	1	1	MED17	mediator complex subunit 17
hsa-miR-518d-3p	1	0	1	0	1	1	ACVR1B	activin A receptor, type IB
hsa-miR-518d-3p	1	0	1	1	1	1	ASTN1	astrotactin 1
hsa-miR-518d-3p	1	0	1	1	1	1	DTX1	deltex homolog 1 (Drosophila)
hsa-miR-518d-3p	1	0	1	1	1	1	EPHB2	EPH receptor B2
hsa-miR-518d-3p	1	0	1	0	1	1	SCN2B	sodium channel, voltage-gated, type II, beta subunit
hsa-miR-518d-3p	1	0	1	1	0	0	COX7A2L	cytochrome c oxidase subunit VIIa polypeptide 2 like
hsa-miR-518d-3p	0	0	1	1	1	1	NRG2	neuregulin 2
hsa-miR-518d-3p	0	0	1	1	1	1	CALB1	calbindin 1, 28kDa
hsa-miR-518d-3p	1	0	1	1	1	1	WDR1	WD repeat domain 1
hsa-miR-518d-3p	1	0	1	1	1	1	MED13	mediator complex subunit 13
hsa-miR-518d-3p	1	0	1	0	1	1	DLX6	distal-less homeobox 6
hsa-miR-518d-3p	1	0	1	1	1	1	ETS1	v-ets erythroblastosis virus E26 oncogene homolog 1 (avian)
hsa-miR-518d-3p	0	0	1	1	1	1	ST5	suppression of tumorigenicity 5
hsa-miR-518d-3p	1	0	1	0	1	1	SPRY3	sprouty homolog 3 (Drosophila)
hsa-miR-518d-3p	1	0	1	1	1	1	SPRY1	sprouty homolog 1, antagonist of FGF signaling (Drosophila)
hsa-miR-518d-3p	1	0	1	1	1	1	MAT2A	methionine adenosyltransferase II, alpha
hsa-miR-518d-3p	0	0	1	1	1	1	SOX1	SRY (sex determining region Y)-box 1
hsa-miR-518d-3p	1	0	1	1	1	1	IRF9	interferon regulatory factor 9
hsa-miR-518d-3p	1	0	1	1	1	1	PRKAA1	protein kinase, AMP-activated, alpha 1 catalytic subunit
hsa-miR-518d-3p	1	0	1	1	1	1	STK4	serine/threonine kinase 4
hsa-miR-518d-3p	1	0	1	1	1	1	NXF1	nuclear RNA export factor 1
hsa-miR-518d-3p	1	0	1	0	1	1	APPBP2	amyloid beta precursor protein (cytoplasmic tail) binding protein 2
hsa-miR-518d-3p	1	0	1	1	1	1	PGRMC1	progesterone receptor membrane component 1
hsa-miR-518d-3p	1	0	1	1	1	1	MORF4L1	mortality factor 4 like 1
hsa-miR-518d-3p	1	0	1	1	1	1	SCN1A	sodium channel, voltage-gated, type I, alpha subunit
hsa-miR-518d-3p	0	0	1	1	1	1	FRAT2	frequently rearranged in advanced T-cell lymphomas 2
hsa-miR-518d-3p	1	0	1	1	1	1	HS2ST1	heparan sulfate 2-O-sulfotransferase 1
hsa-miR-518d-3p	0	0	1	1	1	1	UBQLN2	ubiquilin 2
hsa-miR-518d-3p	1	0	1	1	1	1	SOCS5	suppressor of cytokine signaling 5
hsa-miR-518d-3p	0	0	1	1	1	1	TRAM1	translocation associated membrane protein 1
hsa-miR-518d-3p	0	0	1	1	1	1	ZNF330	zinc finger protein 330
hsa-miR-518d-3p	1	0	1	0	1	1	MLEC	malectin
hsa-miR-518d-3p	1	0	1	0	1	1	KIAA0232	KIAA0232
hsa-miR-518d-3p	1	0	1	0	1	1	SERTAD2	SERTA domain containing 2
hsa-miR-518d-3p	1	0	1	1	1	1	SMG1	smg-1 homolog, phosphatidylinositol 3-kinase-related kinase (C. elegans)
hsa-miR-518d-3p	1	0	1	1	0	0	KIAA0556	KIAA0556
hsa-miR-518d-3p	0	0	1	1	1	1	LEPROTL1	leptin receptor overlapping transcript-like 1
hsa-miR-518d-3p	1	0	1	1	1	1	ABCA12	ATP-binding cassette, sub-family A (ABC1), member 12
hsa-miR-518d-3p	0	0	1	1	1	1	HMP19	HMP19 protein
hsa-miR-518d-3p	1	0	1	1	1	1	NLK	nemo-like kinase
hsa-miR-518d-3p	1	0	1	1	1	1	AKAP11	A kinase (PRKA) anchor protein 11
hsa-miR-518d-3p	1	0	1	0	1	1	CRIM1	cysteine rich transmembrane BMP regulator 1 (chordin-like)
hsa-miR-518d-3p	0	0	1	1	1	1	BET1L	blocked early in transport 1 homolog (S. cerevisiae)-like
hsa-miR-518d-3p	0	0	1	1	1	1	POLE3	polymerase (DNA directed), epsilon 3, accessory subunit
hsa-miR-518d-3p	0	0	1	1	0	0	THG1L	tRNA-histidine guanylyltransferase 1-like (S. cerevisiae)
hsa-miR-518d-3p	1	0	1	1	1	1	RFWD3	ring finger and WD repeat domain 3
hsa-miR-518d-3p	1	0	1	0	1	1	LGI2	leucine-rich repeat LGI family, member 2
hsa-miR-518d-3p	1	0	1	0	1	1	SEPT11	septin 11
hsa-miR-518d-3p	0	0	1	1	1	1	LAPTM4B	lysosomal protein transmembrane 4 beta
hsa-miR-518d-3p	1	0	1	0	1	1	PCDHAC1	protocadherin alpha subfamily C, 1
hsa-miR-518d-3p	1	0	1	0	1	1	PCDHAC2	protocadherin alpha subfamily C, 2
hsa-miR-518d-3p	1	0	1	1	1	1	PCDHA1	protocadherin alpha 1
hsa-miR-518d-3p	1	0	1	0	1	1	PCDHA10	protocadherin alpha 10
hsa-miR-518d-3p	1	0	1	0	1	1	PCDHA11	protocadherin alpha 11
hsa-miR-518d-3p	1	0	1	0	1	1	PCDHA12	protocadherin alpha 12
hsa-miR-518d-3p	1	0	1	1	1	1	PCDHA2	protocadherin alpha 2
hsa-miR-518d-3p	1	0	1	1	1	1	PCDHA3	protocadherin alpha 3
hsa-miR-518d-3p	1	0	1	1	1	1	PCDHA6	protocadherin alpha 6
hsa-miR-518d-3p	1	0	1	0	1	1	PCDHA7	protocadherin alpha 7
hsa-miR-518d-3p	1	0	1	1	1	1	PCDHA8	protocadherin alpha 8
hsa-miR-518d-3p	1	0	1	1	1	1	DLL4	delta-like 4 (Drosophila)
hsa-miR-518d-3p	1	0	1	1	1	1	C5orf15	chromosome 5 open reading frame 15
hsa-miR-518d-3p	0	0	1	1	1	1	PRTFDC1	phosphoribosyl transferase domain containing 1
hsa-miR-518d-3p	0	0	1	1	1	1	RALGAPA2	Ral GTPase activating protein, alpha subunit 2 (catalytic)
hsa-miR-518d-3p	1	0	1	0	1	1	EIF5A2	eukaryotic translation initiation factor 5A2
hsa-miR-518d-3p	1	0	1	1	1	1	JPH1	junctophilin 1
hsa-miR-518d-3p	1	0	1	1	1	1	DLG3	discs, large homolog 3 (Drosophila)
hsa-miR-518d-3p	1	0	1	1	1	1	ZNF608	zinc finger protein 608
hsa-miR-518d-3p	1	0	1	1	1	1	NCEH1	neutral cholesterol ester hydrolase 1
hsa-miR-518d-3p	1	0	1	1	1	1	NLGN2	neuroligin 2
hsa-miR-518d-3p	1	0	1	1	1	1	ARHGAP21	Rho GTPase activating protein 21
hsa-miR-518d-3p	1	0	1	1	1	1	CNTN3	contactin 3 (plasmacytoma associated)
hsa-miR-518d-3p	1	0	1	0	1	1	RAP2A	RAP2A, member of RAS oncogene family
hsa-miR-518d-3p	1	0	1	1	1	1	SEC24A	SEC24 family, member A (S. cerevisiae)
hsa-miR-518d-3p	0	0	1	1	1	1	RHBDF1	rhomboid 5 homolog 1 (Drosophila)
hsa-miR-518d-3p	0	0	1	1	0	0	POLR1E	polymerase (RNA) I polypeptide E, 53kDa
hsa-miR-518d-3p	1	0	1	0	1	1	HOXC8	homeobox C8
hsa-miR-518d-3p	1	0	1	1	1	1	REEP1	receptor accessory protein 1
hsa-miR-518d-3p	1	0	1	1	1	1	NEUROG2	neurogenin 2
hsa-miR-518d-3p	1	0	1	1	1	1	LRRC2	leucine rich repeat containing 2
hsa-miR-518d-3p	1	0	1	1	1	1	MCF2L	MCF.2 cell line derived transforming sequence-like
hsa-miR-518d-3p	1	0	1	0	1	1	VCPIP1	valosin containing protein (p97)/p47 complex interacting protein 1
hsa-miR-518d-3p	1	0	1	1	1	1	HOXA3	homeobox A3
hsa-miR-518d-3p	1	0	1	1	1	1	PCDHA9	protocadherin alpha 9
hsa-miR-518d-3p	1	0	1	1	1	1	KLF16	Kruppel-like factor 16
hsa-miR-518d-3p	1	0	1	1	1	1	OTP	orthopedia homeobox
hsa-miR-518d-3p	0	0	1	1	0	0	C19orf44	chromosome 19 open reading frame 44
hsa-miR-518d-3p	1	0	1	0	1	1	PPP1R15B	protein phosphatase 1, regulatory subunit 15B
hsa-miR-518d-3p	0	0	1	1	1	1	ZIC5	Zic family member 5
hsa-miR-518d-3p	1	0	1	0	1	1	FGF5	fibroblast growth factor 5
hsa-miR-518d-3p	1	0	1	1	0	0	KCNH7	potassium voltage-gated channel, subfamily H (eag-related), member 7
hsa-miR-518d-3p	1	0	1	1	1	1	ADAM19	ADAM metallopeptidase domain 19
hsa-miR-518d-3p	1	0	1	1	1	1	TP53INP1	tumor protein p53 inducible nuclear protein 1
hsa-miR-518d-3p	1	0	1	1	0	0	CCDC120	coiled-coil domain containing 120
hsa-miR-518d-3p	1	0	1	0	0	0	ANKRD40	ankyrin repeat domain 40
hsa-miR-518d-3p	1	0	1	1	1	1	SLITRK1	SLIT and NTRK-like family, member 1
hsa-miR-518d-3p	1	0	1	0	1	1	SOCS4	suppressor of cytokine signaling 4
hsa-miR-518d-3p	1	0	1	1	1	1	GLCCI1	glucocorticoid induced transcript 1
hsa-miR-518d-3p	0	0	1	1	1	1	SLC25A46	solute carrier family 25, member 46
hsa-miR-518d-3p	0	0	1	1	1	1	SDR16C5	short chain dehydrogenase/reductase family 16C, member 5
hsa-miR-518d-3p	1	0	1	0	1	1	CNOT6L	CCR4-NOT transcription complex, subunit 6-like
hsa-miR-518d-3p	0	0	1	1	0	0	TCEB3C	transcription elongation factor B polypeptide 3C (elongin A3)
hsa-miR-518d-3p	0	0	1	0	1	1	CHKB	choline kinase beta
hsa-miR-518d-3p	1	0	1	1	1	1	C7orf60	chromosome 7 open reading frame 60
hsa-miR-518d-3p	1	0	1	0	1	1	TMTC2	transmembrane and tetratricopeptide repeat containing 2
hsa-miR-518d-3p	0	0	1	1	0	0	RNF168	ring finger protein 168, E3 ubiquitin protein ligase
hsa-miR-518d-3p	1	0	1	1	1	1	ABCA13	ATP-binding cassette, sub-family A (ABC1), member 13
hsa-miR-518d-3p	1	0	1	0	1	1	PLEKHH2	pleckstrin homology domain containing, family H (with MyTH4 domain) member 2
hsa-miR-518d-3p	1	0	1	1	1	1	MMGT1	membrane magnesium transporter 1
hsa-miR-518d-3p	1	0	1	1	1	1	FAM117B	family with sequence similarity 117, member B
hsa-miR-518d-3p	1	0	1	1	1	1	SWSAP1	SWIM-type zinc finger 7 associated protein 1
hsa-miR-518d-3p	1	0	1	1	1	1	STX12	syntaxin 12
hsa-miR-518d-3p	1	0	1	1	1	1	MTDH	metadherin
hsa-miR-518d-3p	0	0	1	0	1	1	SLCO4C1	solute carrier organic anion transporter family, member 4C1
hsa-miR-518d-3p	1	0	1	1	1	1	BCL9L	B-cell CLL/lymphoma 9-like
hsa-miR-518d-3p	1	0	1	1	1	1	SP8	Sp8 transcription factor
hsa-miR-518d-3p	1	0	1	1	1	1	ADAMTS6	ADAM metallopeptidase with thrombospondin type 1 motif, 6
hsa-miR-518d-3p	0	0	1	1	1	1	COL18A1-AS1	COL18A1 antisense RNA 1
hsa-miR-518d-3p	1	0	1	1	1	1	E2F7	E2F transcription factor 7
hsa-miR-518d-3p	1	0	1	1	1	1	PPAPDC2	phosphatidic acid phosphatase type 2 domain containing 2
hsa-miR-518d-3p	0	0	1	1	1	1	C5orf46	chromosome 5 open reading frame 46
hsa-miR-518d-3p	0	0	1	0	0	0	PPIAP29	peptidylprolyl isomerase A (cyclophilin A) pseudogene 29
hsa-miR-518d-3p	0	0	1	0	0	0	MIR155HG	MIR155 host gene (non-protein coding)
hsa-miR-518d-3p	0	0	1	0	0	0	TTTY15	testis-specific transcript, Y-linked 15 (non-protein coding)
hsa-miR-518d-3p	0	0	1	0	0	0	DKFZP586I1420	uncharacterized protein DKFZp586I1420
hsa-miR-518d-3p	0	0	1	0	0	0	DGCR5	DiGeorge syndrome critical region gene 5 (non-protein coding)
hsa-miR-518d-3p	0	0	1	0	0	0	RPL29P2	ribosomal protein L29 pseudogene 2
hsa-miR-518d-3p	0	0	1	0	0	0	HOXA11-AS	HOXA11 antisense RNA
hsa-miR-518d-3p	0	0	1	0	0	0	SNORA60	small nucleolar RNA, H/ACA box 60
hsa-miR-518d-3p	0	0	1	0	0	0	SCARNA17	small Cajal body-specific RNA 17
hsa-miR-518d-3p	0	0	1	0	0	0	SNORA77	small nucleolar RNA, H/ACA box 77
hsa-miR-518d-3p	1	0	1	1	1	1	ESRRA	estrogen-related receptor alpha
hsa-miR-518d-3p	0	0	1	1	0	0	STPG1	sperm-tail PG-rich repeat containing 1
hsa-miR-518d-3p	0	0	1	1	1	1	RPAP3	RNA polymerase II associated protein 3
hsa-miR-518d-3p	1	0	1	1	1	1	NDUFAB1	NADH dehydrogenase (ubiquinone) 1, alpha/beta subcomplex, 1, 8kDa
hsa-miR-518d-3p	0	0	0	1	0	0	RPS20	ribosomal protein S20
hsa-miR-518d-3p	0	0	1	1	1	1	KLRAP1	killer cell lectin-like receptor subfamily A pseudogene 1
hsa-miR-518d-3p	0	0	1	1	1	1	GRN	granulin
hsa-miR-518d-3p	0	0	0	1	0	0	KLK14	kallikrein-related peptidase 14
hsa-miR-518d-3p	0	0	1	1	0	0	LMCD1	LIM and cysteine-rich domains 1
hsa-miR-518d-3p	1	0	1	1	0	0	ANO8	anoctamin 8
hsa-miR-518d-3p	1	0	1	1	1	1	PRSS22	protease, serine, 22
hsa-miR-518d-3p	0	0	0	1	0	0	DRD4	dopamine receptor D4
hsa-miR-518d-3p	0	0	1	1	1	1	HEATR6	HEAT repeat containing 6
hsa-miR-518d-3p	0	0	0	1	1	1	FAP	fibroblast activation protein, alpha
hsa-miR-518d-3p	1	0	1	1	1	1	STRADB	STE20-related kinase adaptor beta
hsa-miR-518d-3p	0	0	0	1	0	0	GMIP	GEM interacting protein
hsa-miR-518d-3p	0	0	1	1	1	1	NDUFB2	NADH dehydrogenase (ubiquinone) 1 beta subcomplex, 2, 8kDa
hsa-miR-518d-3p	1	0	1	1	1	1	EFNB1	ephrin-B1
hsa-miR-518d-3p	0	0	0	1	0	0	GSTA3	glutathione S-transferase alpha 3
hsa-miR-518d-3p	0	0	1	1	1	1	CRISP2	cysteine-rich secretory protein 2
hsa-miR-518d-3p	0	0	1	1	1	1	C22orf28	chromosome 22 open reading frame 28
hsa-miR-518d-3p	0	0	1	1	0	0	MCM5	minichromosome maintenance complex component 5
hsa-miR-518d-3p	0	0	1	1	0	0	TTLL12	tubulin tyrosine ligase-like family, member 12
hsa-miR-518d-3p	0	0	0	1	1	1	FOXRED2	FAD-dependent oxidoreductase domain containing 2
hsa-miR-518d-3p	0	0	0	1	0	0	RIN3	Ras and Rab interactor 3
hsa-miR-518d-3p	0	0	1	1	0	0	PIGU	phosphatidylinositol glycan anchor biosynthesis, class U
hsa-miR-518d-3p	0	0	0	1	1	1	NME3	NME/NM23 nucleoside diphosphate kinase 3
hsa-miR-518d-3p	0	0	0	1	0	0	PDIA2	protein disulfide isomerase family A, member 2
hsa-miR-518d-3p	0	0	1	1	1	1	DECR2	2,4-dienoyl CoA reductase 2, peroxisomal
hsa-miR-518d-3p	0	0	0	1	1	1	PLAT	plasminogen activator, tissue
hsa-miR-518d-3p	0	0	1	1	1	1	FGL1	fibrinogen-like 1
hsa-miR-518d-3p	0	0	1	1	0	0	CKM	creatine kinase, muscle
hsa-miR-518d-3p	0	0	0	1	1	1	EPHX3	epoxide hydrolase 3
hsa-miR-518d-3p	1	0	1	1	0	0	FSD1	fibronectin type III and SPRY domain containing 1
hsa-miR-518d-3p	0	0	0	1	0	0	CACTIN	cactin, spliceosome C complex subunit
hsa-miR-518d-3p	0	0	0	1	0	0	HOXA6	homeobox A6
hsa-miR-518d-3p	1	0	1	1	1	1	LSM5	LSM5 homolog, U6 small nuclear RNA associated (S. cerevisiae)
hsa-miR-518d-3p	0	0	1	1	1	1	BCL7B	B-cell CLL/lymphoma 7B
hsa-miR-518d-3p	0	0	1	1	0	0	FBXL15	F-box and leucine-rich repeat protein 15
hsa-miR-518d-3p	1	0	0	1	1	1	WNT3	wingless-type MMTV integration site family, member 3
hsa-miR-518d-3p	0	0	0	1	0	0	NUP88	nucleoporin 88kDa
hsa-miR-518d-3p	0	0	1	1	1	1	C1QBP	complement component 1, q subcomponent binding protein
hsa-miR-518d-3p	0	0	1	1	1	1	MED31	mediator complex subunit 31
hsa-miR-518d-3p	1	0	1	1	1	1	SYNGR2	synaptogyrin 2
hsa-miR-518d-3p	1	0	1	1	1	1	DDX5	DEAD (Asp-Glu-Ala-Asp) box helicase 5
hsa-miR-518d-3p	0	0	1	1	1	1	CCL8	chemokine (C-C motif) ligand 8
hsa-miR-518d-3p	0	0	1	1	1	1	CCL13	chemokine (C-C motif) ligand 13
hsa-miR-518d-3p	0	0	0	1	0	0	HSD17B1	hydroxysteroid (17-beta) dehydrogenase 1
hsa-miR-518d-3p	0	0	1	1	0	0	FOXN1	forkhead box N1
hsa-miR-518d-3p	0	0	0	1	1	1	MANBA	mannosidase, beta A, lysosomal
hsa-miR-518d-3p	0	0	1	1	1	1	GAR1	GAR1 ribonucleoprotein homolog (yeast)
hsa-miR-518d-3p	0	0	1	1	0	0	FRG1	FSHD region gene 1
hsa-miR-518d-3p	0	0	0	1	0	0	DBX1	developing brain homeobox 1
hsa-miR-518d-3p	0	0	1	1	1	1	CCDC86	coiled-coil domain containing 86
hsa-miR-518d-3p	0	0	1	1	0	0	GALNTL4	UDP-N-acetyl-alpha-D-galactosamine:polypeptide N-acetylgalactosaminyltransferase-like 4
hsa-miR-518d-3p	1	0	1	1	0	0	RPS13	ribosomal protein S13
hsa-miR-518d-3p	0	0	1	1	1	1	ARPC3	actin related protein 2/3 complex, subunit 3, 21kDa
hsa-miR-518d-3p	1	0	1	1	1	1	FZD10	frizzled family receptor 10
hsa-miR-518d-3p	0	0	1	1	1	1	RHAG	Rh-associated glycoprotein
hsa-miR-518d-3p	0	0	1	1	1	1	GPR63	G protein-coupled receptor 63
hsa-miR-518d-3p	1	0	1	1	1	1	SNX3	sorting nexin 3
hsa-miR-518d-3p	0	0	1	1	0	0	IGFBP2	insulin-like growth factor binding protein 2, 36kDa
hsa-miR-518d-3p	0	0	0	1	0	0	PROC	protein C (inactivator of coagulation factors Va and VIIIa)
hsa-miR-518d-3p	1	0	1	1	1	1	WARS2	tryptophanyl tRNA synthetase 2, mitochondrial
hsa-miR-518d-3p	0	0	0	1	0	0	AKR7A2	aldo-keto reductase family 7, member A2 (aflatoxin aldehyde reductase)
hsa-miR-518d-3p	1	0	1	1	0	0	TNP1	transition protein 1 (during histone to protamine replacement)
hsa-miR-518d-3p	0	0	1	1	1	1	TTR	transthyretin
hsa-miR-518d-3p	0	0	1	1	1	1	YIPF4	Yip1 domain family, member 4
hsa-miR-518d-3p	0	0	1	1	0	0	CHRNA2	cholinergic receptor, nicotinic, alpha 2 (neuronal)
hsa-miR-518d-3p	0	0	1	1	0	0	PPP3CC	protein phosphatase 3, catalytic subunit, gamma isozyme
hsa-miR-518d-3p	0	0	1	1	1	1	NCAPH	non-SMC condensin I complex, subunit H
hsa-miR-518d-3p	0	0	1	1	0	0	ZSCAN18	zinc finger and SCAN domain containing 18
hsa-miR-518d-3p	0	0	1	1	1	1	TFG	TRK-fused gene
hsa-miR-518d-3p	0	0	0	1	0	0	LAMA4	laminin, alpha 4
hsa-miR-518d-3p	0	0	0	1	1	1	TTC21B	tetratricopeptide repeat domain 21B
hsa-miR-518d-3p	0	0	0	1	0	0	MC3R	melanocortin 3 receptor
hsa-miR-518d-3p	1	0	1	1	1	1	SLC12A5	solute carrier family 12 (potassium/chloride transporter), member 5
hsa-miR-518d-3p	1	0	1	1	1	1	RAB22A	RAB22A, member RAS oncogene family
hsa-miR-518d-3p	0	0	1	1	1	1	UNC5CL	unc-5 homolog C (C. elegans)-like
hsa-miR-518d-3p	0	0	0	1	1	1	APOBEC2	apolipoprotein B mRNA editing enzyme, catalytic polypeptide-like 2
hsa-miR-518d-3p	0	0	1	1	1	1	SH3TC1	SH3 domain and tetratricopeptide repeats 1
hsa-miR-518d-3p	1	0	1	1	1	1	THOC2	THO complex 2
hsa-miR-518d-3p	0	0	0	1	0	0	SYMPK	symplekin
hsa-miR-518d-3p	0	0	1	1	1	1	CST8	cystatin 8 (cystatin-related epididymal specific)
hsa-miR-518d-3p	1	0	1	1	1	1	LAMP5	lysosomal-associated membrane protein family, member 5
hsa-miR-518d-3p	0	0	0	1	0	0	SLC35E2	solute carrier family 35, member E2
hsa-miR-518d-3p	1	0	1	1	0	0	BCL2L12	BCL2-like 12 (proline rich)
hsa-miR-518d-3p	0	0	1	1	0	0	AHDC1	AT hook, DNA binding motif, containing 1
hsa-miR-518d-3p	0	0	1	1	0	0	CTAG2	cancer/testis antigen 2
hsa-miR-518d-3p	1	0	1	1	0	0	ABHD8	abhydrolase domain containing 8
hsa-miR-518d-3p	0	0	0	1	0	0	TAS2R5	taste receptor, type 2, member 5
hsa-miR-518d-3p	0	0	1	1	0	0	GCAT	glycine C-acetyltransferase
hsa-miR-518d-3p	0	0	0	1	1	1	MTX2	metaxin 2
hsa-miR-518d-3p	0	0	1	1	0	0	HOXD11	homeobox D11
hsa-miR-518d-3p	0	0	0	1	1	1	ARHGAP22	Rho GTPase activating protein 22
hsa-miR-518d-3p	0	0	1	1	1	1	MBD4	methyl-CpG binding domain protein 4
hsa-miR-518d-3p	0	0	1	1	1	1	MYOD1	myogenic differentiation 1
hsa-miR-518d-3p	0	0	1	1	0	0	DHRS2	dehydrogenase/reductase (SDR family) member 2
hsa-miR-518d-3p	1	0	1	1	1	1	RAP1B	RAP1B, member of RAS oncogene family
hsa-miR-518d-3p	0	0	0	1	0	0	ART1	ADP-ribosyltransferase 1
hsa-miR-518d-3p	0	0	1	1	0	0	DTWD1	DTW domain containing 1
hsa-miR-518d-3p	0	0	0	1	0	0	PDGFRL	platelet-derived growth factor receptor-like
hsa-miR-518d-3p	0	0	1	1	1	1	ZNF557	zinc finger protein 557
hsa-miR-518d-3p	1	0	1	1	1	1	MNX1	motor neuron and pancreas homeobox 1
hsa-miR-518d-3p	0	0	1	1	0	0	ADRM1	adhesion regulating molecule 1
hsa-miR-518d-3p	1	0	1	1	1	1	SLC7A10	solute carrier family 7 (neutral amino acid transporter light chain, asc system), member 10
hsa-miR-518d-3p	0	0	1	1	1	1	NOL11	nucleolar protein 11
hsa-miR-518d-3p	0	0	1	1	1	1	LATS1	LATS, large tumor suppressor, homolog 1 (Drosophila)
hsa-miR-518d-3p	0	0	0	1	0	0	F12	coagulation factor XII (Hageman factor)
hsa-miR-518d-3p	0	0	1	1	1	1	PPP1R1B	protein phosphatase 1, regulatory (inhibitor) subunit 1B
hsa-miR-518d-3p	0	0	1	1	1	1	CHD1L	chromodomain helicase DNA binding protein 1-like
hsa-miR-518d-3p	1	0	0	1	1	1	ADCY7	adenylate cyclase 7
hsa-miR-518d-3p	0	0	0	1	0	0	PODNL1	podocan-like 1
hsa-miR-518d-3p	0	0	1	1	1	1	IMMT	inner membrane protein, mitochondrial
hsa-miR-518d-3p	0	0	1	1	1	1	PABPC1L	poly(A) binding protein, cytoplasmic 1-like
hsa-miR-518d-3p	0	0	0	1	0	0	ZBED3	zinc finger, BED-type containing 3
hsa-miR-518d-3p	0	0	1	1	0	0	CCNA1	cyclin A1
hsa-miR-518d-3p	0	0	1	1	0	0	ZNF414	zinc finger protein 414
hsa-miR-518d-3p	1	0	1	1	1	1	ARNTL	aryl hydrocarbon receptor nuclear translocator-like
hsa-miR-518d-3p	0	0	0	1	1	1	VRTN	vertebrae development homolog (pig)
hsa-miR-518d-3p	1	0	1	1	0	0	TIMM10	translocase of inner mitochondrial membrane 10 homolog (yeast)
hsa-miR-518d-3p	0	0	1	1	1	1	OASL	2'-5'-oligoadenylate synthetase-like
hsa-miR-518d-3p	0	0	1	1	1	1	HRK	harakiri, BCL2 interacting protein (contains only BH3 domain)
hsa-miR-518d-3p	0	0	1	1	0	0	UPK3B	uroplakin 3B
hsa-miR-518d-3p	0	0	1	1	1	1	ARHGEF25	Rho guanine nucleotide exchange factor (GEF) 25
hsa-miR-518d-3p	0	0	1	1	0	0	SLC26A10	solute carrier family 26, member 10
hsa-miR-518d-3p	1	0	0	1	0	0	KCNH3	potassium voltage-gated channel, subfamily H (eag-related), member 3
hsa-miR-518d-3p	0	0	0	1	0	0	SMPD2	sphingomyelin phosphodiesterase 2, neutral membrane (neutral sphingomyelinase)
hsa-miR-518d-3p	0	0	1	1	1	1	EGR4	early growth response 4
hsa-miR-518d-3p	0	0	0	1	1	1	BCMO1	beta-carotene 15,15'-monooxygenase 1
hsa-miR-518d-3p	0	0	0	1	0	0	FBXL8	F-box and leucine-rich repeat protein 8
hsa-miR-518d-3p	0	0	1	1	1	1	REV1	REV1, polymerase (DNA directed)
hsa-miR-518d-3p	1	0	1	1	1	1	EPC2	enhancer of polycomb homolog 2 (Drosophila)
hsa-miR-518d-3p	0	0	1	1	1	1	AOAH	acyloxyacyl hydrolase (neutrophil)
hsa-miR-518d-3p	0	0	0	1	0	0	CHAD	chondroadherin
hsa-miR-518d-3p	0	0	1	1	1	1	NDUFB5	NADH dehydrogenase (ubiquinone) 1 beta subcomplex, 5, 16kDa
hsa-miR-518d-3p	1	0	1	1	1	1	TRA2B	transformer 2 beta homolog (Drosophila)
hsa-miR-518d-3p	0	0	1	1	0	0	GTF2H4	general transcription factor IIH, polypeptide 4, 52kDa
hsa-miR-518d-3p	0	0	1	1	1	1	CCDC90B	coiled-coil domain containing 90B
hsa-miR-518d-3p	0	0	0	1	0	0	HTR3B	5-hydroxytryptamine (serotonin) receptor 3B, ionotropic
hsa-miR-518d-3p	1	0	1	1	1	1	SORL1	sortilin-related receptor, L(DLR class) A repeats containing
hsa-miR-518d-3p	1	0	1	1	1	1	ARHGAP20	Rho GTPase activating protein 20
hsa-miR-518d-3p	0	0	1	1	0	0	TMEM62	transmembrane protein 62
hsa-miR-518d-3p	0	0	1	1	1	1	CHRNA1	cholinergic receptor, nicotinic, alpha 1 (muscle)
hsa-miR-518d-3p	1	0	1	1	1	1	ABI2	abl-interactor 2
hsa-miR-518d-3p	0	0	0	1	1	1	PALB2	partner and localizer of BRCA2
hsa-miR-518d-3p	1	0	1	1	1	1	BLMH	bleomycin hydrolase
hsa-miR-518d-3p	0	0	1	1	1	1	CSNK1A1	casein kinase 1, alpha 1
hsa-miR-518d-3p	0	0	1	1	0	0	PDGFRB	platelet-derived growth factor receptor, beta polypeptide
hsa-miR-518d-3p	0	0	1	1	1	1	P2RX7	purinergic receptor P2X, ligand-gated ion channel, 7
hsa-miR-518d-3p	1	0	1	1	1	1	GNB5	guanine nucleotide binding protein (G protein), beta 5
hsa-miR-518d-3p	1	0	1	1	1	1	EIF4B	eukaryotic translation initiation factor 4B
hsa-miR-518d-3p	0	0	0	1	0	0	MYOM2	myomesin (M-protein) 2, 165kDa
hsa-miR-518d-3p	0	0	1	1	1	1	SEH1L	SEH1-like (S. cerevisiae)
hsa-miR-518d-3p	0	0	1	1	1	1	WDR59	WD repeat domain 59
hsa-miR-518d-3p	1	0	1	1	0	0	ZC3H3	zinc finger CCCH-type containing 3
hsa-miR-518d-3p	0	0	1	1	0	0	HPN	hepsin
hsa-miR-518d-3p	1	0	1	1	1	1	CCNE1	cyclin E1
hsa-miR-518d-3p	1	0	0	1	0	0	MAST3	microtubule associated serine/threonine kinase 3
hsa-miR-518d-3p	0	0	0	1	0	0	PIAS4	protein inhibitor of activated STAT, 4
hsa-miR-518d-3p	1	0	1	1	1	1	BICC1	bicaudal C homolog 1 (Drosophila)
hsa-miR-518d-3p	0	0	1	1	1	1	LHX4	LIM homeobox 4
hsa-miR-518d-3p	1	0	1	1	1	1	STK17B	serine/threonine kinase 17b
hsa-miR-518d-3p	0	0	0	1	0	0	SHC2	SHC (Src homology 2 domain containing) transforming protein 2
hsa-miR-518d-3p	0	0	1	1	1	1	SHROOM3	shroom family member 3
hsa-miR-518d-3p	0	0	0	1	1	1	ANXA3	annexin A3
hsa-miR-518d-3p	0	0	1	1	0	0	MCM2	minichromosome maintenance complex component 2
hsa-miR-518d-3p	0	0	1	1	0	0	POR	P450 (cytochrome) oxidoreductase
hsa-miR-518d-3p	0	0	1	1	0	0	KIF9	kinesin family member 9
hsa-miR-518d-3p	0	0	1	1	0	0	EXOSC7	exosome component 7
hsa-miR-518d-3p	0	0	0	1	1	1	DUS4L	dihydrouridine synthase 4-like (S. cerevisiae)
hsa-miR-518d-3p	0	0	1	1	1	1	GTF2H1	general transcription factor IIH, polypeptide 1, 62kDa
hsa-miR-518d-3p	0	0	1	1	1	1	HYAL1	hyaluronoglucosaminidase 1
hsa-miR-518d-3p	1	0	1	1	1	1	GID8	GID complex subunit 8 homolog (S. cerevisiae)
hsa-miR-518d-3p	0	0	0	1	1	1	ZCRB1	zinc finger CCHC-type and RNA binding motif 1
hsa-miR-518d-3p	0	0	1	1	0	0	TAPBPL	TAP binding protein-like
hsa-miR-518d-3p	0	0	1	1	0	0	GPR84	G protein-coupled receptor 84
hsa-miR-518d-3p	1	0	1	1	1	1	DIAPH3	diaphanous homolog 3 (Drosophila)
hsa-miR-518d-3p	1	0	1	1	0	0	CDH24	cadherin 24, type 2
hsa-miR-518d-3p	0	0	1	1	0	0	GPR65	G protein-coupled receptor 65
hsa-miR-518d-3p	0	0	0	1	1	1	TICRR	TOPBP1-interacting checkpoint and replication regulator
hsa-miR-518d-3p	0	0	0	1	0	0	SEPT12	septin 12
hsa-miR-518d-3p	1	0	0	1	0	0	PMM2	phosphomannomutase 2
hsa-miR-518d-3p	0	0	1	1	0	0	COPS3	COP9 constitutive photomorphogenic homolog subunit 3 (Arabidopsis)
hsa-miR-518d-3p	0	0	0	1	0	0	ZNF287	zinc finger protein 287
hsa-miR-518d-3p	0	0	1	1	0	0	NEK8	NIMA (never in mitosis gene a)- related kinase 8
hsa-miR-518d-3p	1	0	1	1	1	1	CBX2	chromobox homolog 2
hsa-miR-518d-3p	0	0	0	1	0	0	ARMC6	armadillo repeat containing 6
hsa-miR-518d-3p	0	0	0	1	0	0	SSBP4	single stranded DNA binding protein 4
hsa-miR-518d-3p	0	0	1	1	1	1	DOPEY2	dopey family member 2
hsa-miR-518d-3p	0	0	0	1	1	1	LILRA6	leukocyte immunoglobulin-like receptor, subfamily A (with TM domain), member 6
hsa-miR-518d-3p	0	0	0	1	0	0	ECSIT	ECSIT homolog (Drosophila)
hsa-miR-518d-3p	1	0	1	1	1	1	PRUNE	prune homolog (Drosophila)
hsa-miR-518d-3p	0	0	0	1	0	0	TUBB8	tubulin, beta 8 class VIII
hsa-miR-518d-3p	0	0	0	1	1	1	METTL21A	methyltransferase like 21A
hsa-miR-518d-3p	0	0	0	1	0	0	RQCD1	RCD1 required for cell differentiation1 homolog (S. pombe)
hsa-miR-518d-3p	0	0	1	1	0	0	PLA1A	phospholipase A1 member A
hsa-miR-518d-3p	0	0	1	1	1	1	TM4SF19	transmembrane 4 L six family member 19
hsa-miR-518d-3p	1	0	1	1	1	1	C1QTNF2	C1q and tumor necrosis factor related protein 2
hsa-miR-518d-3p	0	0	1	1	0	0	NFKBIE	nuclear factor of kappa light polypeptide gene enhancer in B-cells inhibitor, epsilon
hsa-miR-518d-3p	1	0	1	1	1	1	FAM135B	family with sequence similarity 135, member B
hsa-miR-518d-3p	1	0	1	1	1	1	ZNF462	zinc finger protein 462
hsa-miR-518d-3p	0	0	1	1	0	0	FUOM	fucose mutarotase
hsa-miR-518d-3p	0	0	1	1	0	0	WDR96	WD repeat domain 96
hsa-miR-518d-3p	1	0	1	1	1	1	NINL	ninein-like
hsa-miR-518d-3p	0	0	1	1	1	1	FEZ1	fasciculation and elongation protein zeta 1 (zygin I)
hsa-miR-518d-3p	0	0	0	1	0	0	DUSP15	dual specificity phosphatase 15
hsa-miR-518d-3p	0	0	1	1	1	1	HIRIP3	HIRA interacting protein 3
hsa-miR-518d-3p	0	0	1	1	1	1	FRMPDP2	FERM and PDZ domain containing 2 pseudogene 2
hsa-miR-518d-3p	1	0	0	1	1	1	NCAPD3	non-SMC condensin II complex, subunit D3
hsa-miR-518d-3p	1	0	1	1	1	1	ZNF827	zinc finger protein 827
hsa-miR-518d-3p	1	0	1	1	1	1	BARX2	BARX homeobox 2
hsa-miR-518d-3p	1	0	1	1	1	1	WWC2	WW and C2 domain containing 2
hsa-miR-518d-3p	0	0	1	1	0	0	TMEM163	transmembrane protein 163
hsa-miR-518d-3p	1	0	1	1	1	1	TMEM178A	transmembrane protein 178A
hsa-miR-518d-3p	1	0	1	1	1	1	MSI2	musashi homolog 2 (Drosophila)
hsa-miR-518d-3p	1	0	1	1	1	1	NRGN	neurogranin (protein kinase C substrate, RC3)
hsa-miR-518d-3p	0	0	0	1	0	0	GSTA5	glutathione S-transferase alpha 5
hsa-miR-518d-3p	0	0	1	1	1	1	CXADR	coxsackie virus and adenovirus receptor
hsa-miR-518d-3p	0	0	1	1	1	1	CA2	carbonic anhydrase II
hsa-miR-518d-3p	0	0	0	1	0	0	MKI67IP	MKI67 (FHA domain) interacting nucleolar phosphoprotein
hsa-miR-518d-3p	0	0	1	1	1	1	AKR1B1	aldo-keto reductase family 1, member B1 (aldose reductase)
hsa-miR-518d-3p	0	0	0	1	0	0	MED7	mediator complex subunit 7
hsa-miR-518d-3p	0	0	1	1	1	1	TDRD9	tudor domain containing 9
hsa-miR-518d-3p	0	0	1	1	1	1	WDR67	WD repeat domain 67
hsa-miR-518d-3p	0	0	0	1	1	1	LYZL4	lysozyme-like 4
hsa-miR-518d-3p	0	0	1	1	1	1	KCNJ6	potassium inwardly-rectifying channel, subfamily J, member 6
hsa-miR-518d-3p	0	0	0	1	1	1	PEX10	peroxisomal biogenesis factor 10
hsa-miR-518d-3p	1	0	1	1	1	1	MRAS	muscle RAS oncogene homolog
hsa-miR-518d-3p	0	0	1	1	1	1	C2orf62	chromosome 2 open reading frame 62
hsa-miR-518d-3p	0	0	1	1	0	0	OBSL1	obscurin-like 1
hsa-miR-518d-3p	0	0	0	1	0	0	HTR6	5-hydroxytryptamine (serotonin) receptor 6, G protein-coupled
hsa-miR-518d-3p	0	0	0	1	0	0	CHRNB3	cholinergic receptor, nicotinic, beta 3 (neuronal)
hsa-miR-518d-3p	1	0	1	1	1	1	C8orf58	chromosome 8 open reading frame 58
hsa-miR-518d-3p	0	0	1	1	0	0	MIS18A	MIS18 kinetochore protein homolog A (S. pombe)
hsa-miR-518d-3p	0	0	1	1	1	1	MCAT	malonyl CoA:ACP acyltransferase (mitochondrial)
hsa-miR-518d-3p	0	0	0	1	0	0	TGM7	transglutaminase 7
hsa-miR-518d-3p	0	0	0	1	1	1	ZNF235	zinc finger protein 235
hsa-miR-518d-3p	0	0	0	1	0	0	TFF3	trefoil factor 3 (intestinal)
hsa-miR-518d-3p	0	0	0	1	1	1	CSTB	cystatin B (stefin B)
hsa-miR-518d-3p	0	0	0	1	0	0	LILRA4	leukocyte immunoglobulin-like receptor, subfamily A (with TM domain), member 4
hsa-miR-518d-3p	0	0	1	1	0	0	LTC4S	leukotriene C4 synthase
hsa-miR-518d-3p	0	0	1	1	1	1	CD300LG	CD300 molecule-like family member g
hsa-miR-518d-3p	0	0	0	1	0	0	TAF6L	TAF6-like RNA polymerase II, p300/CBP-associated factor (PCAF)-associated factor, 65kDa
hsa-miR-518d-3p	0	0	0	1	1	1	SLC25A45	solute carrier family 25, member 45
hsa-miR-518d-3p	0	0	0	1	0	0	WDR63	WD repeat domain 63
hsa-miR-518d-3p	0	0	0	1	1	1	BNIPL	BCL2/adenovirus E1B 19kD interacting protein like
hsa-miR-518d-3p	0	0	0	1	0	0	YY1AP1	YY1 associated protein 1
hsa-miR-518d-3p	0	0	0	1	0	0	FAM19A4	family with sequence similarity 19 (chemokine (C-C motif)-like), member A4
hsa-miR-518d-3p	1	0	1	1	1	1	SSR2	signal sequence receptor, beta (translocon-associated protein beta)
hsa-miR-518d-3p	0	0	1	1	1	1	PCOLCE2	procollagen C-endopeptidase enhancer 2
hsa-miR-518d-3p	0	0	0	1	0	0	TCF23	transcription factor 23
hsa-miR-518d-3p	0	0	1	1	1	1	TPRA1	transmembrane protein, adipocyte asscociated 1
hsa-miR-518d-3p	0	0	1	1	1	1	SLC51A	solute carrier family 51, alpha subunit
hsa-miR-518d-3p	0	0	1	1	0	0	MON1A	MON1 homolog A (yeast)
hsa-miR-518d-3p	0	0	1	1	0	0	ANXA5	annexin A5
hsa-miR-518d-3p	1	0	1	1	1	1	OTUD4	OTU domain containing 4
hsa-miR-518d-3p	0	0	0	1	1	1	LSM6	LSM6 homolog, U6 small nuclear RNA associated (S. cerevisiae)
hsa-miR-518d-3p	0	0	1	1	1	1	CARTPT	CART prepropeptide
hsa-miR-518d-3p	0	0	0	1	1	1	GFM2	G elongation factor, mitochondrial 2
hsa-miR-518d-3p	0	0	1	1	1	1	SAMD3	sterile alpha motif domain containing 3
hsa-miR-518d-3p	1	0	1	1	1	1	BAALC	brain and acute leukemia, cytoplasmic
hsa-miR-518d-3p	0	0	1	1	1	1	TRMT10B	tRNA methyltransferase 10 homolog B (S. cerevisiae)
hsa-miR-518d-3p	0	0	1	1	0	0	SSX7	synovial sarcoma, X breakpoint 7
hsa-miR-518d-3p	0	0	1	1	0	0	CLEC1B	C-type lectin domain family 1, member B
hsa-miR-518d-3p	1	0	1	1	1	1	COPS2	COP9 constitutive photomorphogenic homolog subunit 2 (Arabidopsis)
hsa-miR-518d-3p	0	0	0	1	0	0	ACAT1	acetyl-CoA acetyltransferase 1
hsa-miR-518d-3p	0	0	0	1	0	0	SLC38A8	solute carrier family 38, member 8
hsa-miR-518d-3p	0	0	1	1	0	0	CENPV	centromere protein V
hsa-miR-518d-3p	0	0	1	1	0	0	RRAD	Ras-related associated with diabetes
hsa-miR-518d-3p	0	0	0	1	0	0	NNMT	nicotinamide N-methyltransferase
hsa-miR-518d-3p	0	0	1	1	0	0	SAAL1	serum amyloid A-like 1
hsa-miR-518d-3p	0	0	1	1	1	1	KIF7	kinesin family member 7
hsa-miR-518d-3p	0	0	1	1	1	1	PLIN1	perilipin 1
hsa-miR-518d-3p	1	0	1	1	1	1	TAC3	tachykinin 3
hsa-miR-518d-3p	0	0	0	1	0	0	FER1L4	fer-1-like 4 (C. elegans) pseudogene
hsa-miR-518d-3p	0	0	1	1	0	0	ZNF646	zinc finger protein 646
hsa-miR-518d-3p	0	0	1	1	0	0	SMG8	smg-8 homolog, nonsense mediated mRNA decay factor (C. elegans)
hsa-miR-518d-3p	0	0	0	1	0	0	MVD	mevalonate (diphospho) decarboxylase
hsa-miR-518d-3p	1	0	1	1	1	1	WNT10B	wingless-type MMTV integration site family, member 10B
hsa-miR-518d-3p	0	0	0	1	0	0	DAPK3	death-associated protein kinase 3
hsa-miR-518d-3p	1	0	0	1	0	0	ITFG3	integrin alpha FG-GAP repeat containing 3
hsa-miR-518d-3p	0	0	0	1	0	0	ECI1	enoyl-CoA delta isomerase 1
hsa-miR-518d-3p	1	0	1	1	1	1	KCTD5	potassium channel tetramerisation domain containing 5
hsa-miR-518d-3p	0	0	0	1	0	0	PYGO1	pygopus homolog 1 (Drosophila)
hsa-miR-518d-3p	0	0	1	1	1	1	OGG1	8-oxoguanine DNA glycosylase
hsa-miR-518d-3p	0	0	0	1	0	0	OR6F1	olfactory receptor, family 6, subfamily F, member 1
hsa-miR-518d-3p	0	0	0	1	0	0	P2RY12	purinergic receptor P2Y, G-protein coupled, 12
hsa-miR-518d-3p	0	0	1	1	0	0	RPS9	ribosomal protein S9
hsa-miR-518d-3p	0	0	1	1	0	0	C20orf196	chromosome 20 open reading frame 196
hsa-miR-518d-3p	0	0	1	1	0	0	PRELID1	PRELI domain containing 1
hsa-miR-518d-3p	0	0	1	1	0	0	ZNF30	zinc finger protein 30
hsa-miR-518d-3p	0	0	1	1	0	0	TMEM51	transmembrane protein 51
hsa-miR-518d-3p	0	0	1	1	0	0	PRKCDBP	protein kinase C, delta binding protein
hsa-miR-518d-3p	0	0	1	1	1	1	KBTBD2	kelch repeat and BTB (POZ) domain containing 2
hsa-miR-518d-3p	0	0	1	1	1	1	PPP4R4	protein phosphatase 4, regulatory subunit 4
hsa-miR-518d-3p	0	0	0	1	0	0	RNMTL1	RNA methyltransferase like 1
hsa-miR-518d-3p	0	0	1	1	0	0	RNASE2	ribonuclease, RNase A family, 2 (liver, eosinophil-derived neurotoxin)
hsa-miR-518d-3p	1	0	0	1	1	1	C1GALT1C1	C1GALT1-specific chaperone 1
hsa-miR-518d-3p	0	0	1	1	0	0	GSG1L	GSG1-like
hsa-miR-518d-3p	0	0	1	1	1	1	FRMPD2	FERM and PDZ domain containing 2
hsa-miR-518d-3p	0	0	1	1	1	1	PATE1	prostate and testis expressed 1
hsa-miR-518d-3p	1	0	1	1	0	0	TET3	tet methylcytosine dioxygenase 3
hsa-miR-518d-3p	0	0	0	1	0	0	OR10H2	olfactory receptor, family 10, subfamily H, member 2
hsa-miR-518d-3p	0	0	0	1	1	1	TMEM43	transmembrane protein 43
hsa-miR-518d-3p	0	0	1	1	1	1	C2orf68	chromosome 2 open reading frame 68
hsa-miR-518d-3p	0	0	0	1	1	1	PPIC	peptidylprolyl isomerase C (cyclophilin C)
hsa-miR-518d-3p	1	0	1	1	0	0	ADRA1B	adrenoceptor alpha 1B
hsa-miR-518d-3p	0	0	1	1	0	0	NTSR2	neurotensin receptor 2
hsa-miR-518d-3p	1	0	1	1	1	1	KIAA1217	KIAA1217
hsa-miR-518d-3p	0	0	0	1	1	1	CCDC110	coiled-coil domain containing 110
hsa-miR-518d-3p	0	0	0	1	0	0	ZRSR2	zinc finger (CCCH type), RNA-binding motif and serine/arginine rich 2
hsa-miR-518d-3p	1	0	1	1	0	0	CARNS1	carnosine synthase 1
hsa-miR-518d-3p	0	0	0	1	0	0	THAP3	THAP domain containing, apoptosis associated protein 3
hsa-miR-518d-3p	0	0	0	1	0	0	EVX2	even-skipped homeobox 2
hsa-miR-518d-3p	1	0	0	1	0	0	ZNF699	zinc finger protein 699
hsa-miR-518d-3p	1	0	0	1	0	0	AP1G2	adaptor-related protein complex 1, gamma 2 subunit
hsa-miR-518d-3p	0	0	1	1	1	1	BTK	Bruton agammaglobulinemia tyrosine kinase
hsa-miR-518d-3p	0	0	1	1	1	1	APITD1	apoptosis-inducing, TAF9-like domain 1
hsa-miR-518d-3p	0	0	1	1	1	1	CORT	cortistatin
hsa-miR-518d-3p	0	0	0	1	0	0	SSSCA1	Sjogren syndrome/scleroderma autoantigen 1
hsa-miR-518d-3p	0	0	1	1	1	1	HADH	hydroxyacyl-CoA dehydrogenase
hsa-miR-518d-3p	0	0	0	1	0	0	OR10P1	olfactory receptor, family 10, subfamily P, member 1
hsa-miR-518d-3p	1	0	0	1	1	1	TMEM234	transmembrane protein 234
hsa-miR-518d-3p	1	0	1	1	1	1	CDK13	cyclin-dependent kinase 13
hsa-miR-518d-3p	0	0	1	1	1	1	CCS	copper chaperone for superoxide dismutase
hsa-miR-518d-3p	0	0	1	1	0	0	ANKHD1-EIF4EBP3	ANKHD1-EIF4EBP3 readthrough
hsa-miR-518d-3p	0	0	1	1	0	0	EIF4EBP3	eukaryotic translation initiation factor 4E binding protein 3
hsa-miR-518d-3p	0	0	1	1	1	1	ANKHD1	ankyrin repeat and KH domain containing 1
hsa-miR-518d-3p	1	0	1	1	1	1	TBC1D8B	TBC1 domain family, member 8B (with GRAM domain)
hsa-miR-518d-3p	0	0	1	1	0	0	RFNG	RFNG O-fucosylpeptide 3-beta-N-acetylglucosaminyltransferase
hsa-miR-518d-3p	0	0	1	1	0	0	MRPL48	mitochondrial ribosomal protein L48
hsa-miR-518d-3p	0	0	1	1	0	0	NEURL3	neuralized homolog 3 (Drosophila) pseudogene
hsa-miR-518d-3p	1	0	1	1	1	1	C10orf76	chromosome 10 open reading frame 76
hsa-miR-518d-3p	0	0	0	1	0	0	OR52W1	olfactory receptor, family 52, subfamily W, member 1
hsa-miR-518d-3p	0	0	0	1	0	0	ZNF408	zinc finger protein 408
hsa-miR-518d-3p	0	0	1	1	0	0	FAM170B	family with sequence similarity 170, member B
hsa-miR-518d-3p	0	0	1	1	0	0	SSX5	synovial sarcoma, X breakpoint 5
hsa-miR-518d-3p	0	0	1	1	0	0	GLS2	glutaminase 2 (liver, mitochondrial)
hsa-miR-518d-3p	1	0	1	1	1	1	TAF15	TAF15 RNA polymerase II, TATA box binding protein (TBP)-associated factor, 68kDa
hsa-miR-518d-3p	0	0	0	1	1	1	USP36	ubiquitin specific peptidase 36
hsa-miR-518d-3p	0	0	1	1	0	0	POLD4	polymerase (DNA-directed), delta 4, accessory subunit
hsa-miR-518d-3p	1	0	1	1	1	1	CLCF1	cardiotrophin-like cytokine factor 1
hsa-miR-518d-3p	1	0	1	1	0	0	HOXC5	homeobox C5
hsa-miR-518d-3p	0	0	1	1	0	0	BIRC8	baculoviral IAP repeat containing 8
hsa-miR-518d-3p	0	0	1	1	1	1	KCNRG	potassium channel regulator
hsa-miR-518d-3p	0	0	1	1	1	1	HEATR2	HEAT repeat containing 2
hsa-miR-518d-3p	0	0	1	1	1	1	HOXD8	homeobox D8
hsa-miR-518d-3p	0	0	0	1	1	1	C15orf44	chromosome 15 open reading frame 44
hsa-miR-518d-3p	1	0	1	1	1	1	CDKN1C	cyclin-dependent kinase inhibitor 1C (p57, Kip2)
hsa-miR-518d-3p	0	0	1	1	1	1	CD6	CD6 molecule
hsa-miR-518d-3p	0	0	0	1	1	1	DSCC1	defective in sister chromatid cohesion 1 homolog (S. cerevisiae)
hsa-miR-518d-3p	1	0	1	1	1	1	FBXO34	F-box protein 34
hsa-miR-518d-3p	1	0	1	1	1	1	UPF2	UPF2 regulator of nonsense transcripts homolog (yeast)
hsa-miR-518d-3p	0	0	1	1	1	1	TIMM50	translocase of inner mitochondrial membrane 50 homolog (S. cerevisiae)
hsa-miR-518d-3p	0	0	1	1	1	1	MKRN3	makorin ring finger protein 3
hsa-miR-518d-3p	1	0	1	1	1	1	SAMD12	sterile alpha motif domain containing 12
hsa-miR-518d-3p	0	0	1	1	1	1	PINX1	PIN2/TERF1 interacting, telomerase inhibitor 1
hsa-miR-518d-3p	1	0	1	1	0	0	LPCAT4	lysophosphatidylcholine acyltransferase 4
hsa-miR-518d-3p	1	0	1	1	1	1	RHOT2	ras homolog family member T2
hsa-miR-518d-3p	0	0	1	1	1	1	MMP1	matrix metallopeptidase 1 (interstitial collagenase)
hsa-miR-518d-3p	0	0	1	1	0	0	FZD2	frizzled family receptor 2
hsa-miR-518d-3p	0	0	0	1	1	1	ZNF843	zinc finger protein 843
hsa-miR-518d-3p	0	0	1	1	0	0	ARPC2	actin related protein 2/3 complex, subunit 2, 34kDa
hsa-miR-518d-3p	0	0	0	1	1	1	ASB2	ankyrin repeat and SOCS box containing 2
hsa-miR-518d-3p	1	0	1	1	1	1	PDCD6	programmed cell death 6
hsa-miR-518d-3p	1	0	1	1	1	1	AHRR	aryl-hydrocarbon receptor repressor
hsa-miR-518d-3p	1	0	1	1	1	1	ARHGAP19	Rho GTPase activating protein 19
hsa-miR-518d-3p	0	0	1	1	1	1	VRK3	vaccinia related kinase 3
hsa-miR-518d-3p	0	0	0	1	0	0	OR10Q1	olfactory receptor, family 10, subfamily Q, member 1
hsa-miR-518d-3p	1	0	1	1	1	1	AP3S1	adaptor-related protein complex 3, sigma 1 subunit
hsa-miR-518d-3p	0	0	0	1	0	0	OR52E4	olfactory receptor, family 52, subfamily E, member 4
hsa-miR-518d-3p	0	0	1	1	1	1	ICA1	islet cell autoantigen 1, 69kDa
hsa-miR-518d-3p	0	0	1	1	0	0	LRRN4CL	LRRN4 C-terminal like
hsa-miR-518d-3p	0	0	0	1	0	0	PGAM5	phosphoglycerate mutase family member 5
hsa-miR-518d-3p	0	0	1	1	0	0	TMEM11	transmembrane protein 11
hsa-miR-518d-3p	1	0	1	1	1	1	SERF2	small EDRK-rich factor 2
hsa-miR-518d-3p	1	0	1	1	1	1	C15orf63	chromosome 15 open reading frame 63
hsa-miR-518d-3p	0	0	1	1	1	1	TTC27	tetratricopeptide repeat domain 27
hsa-miR-518d-3p	0	0	1	1	1	1	ZNF318	zinc finger protein 318
hsa-miR-518d-3p	1	0	1	1	1	1	BANP	BTG3 associated nuclear protein
hsa-miR-518d-3p	1	0	1	1	1	1	IFNAR2	interferon (alpha, beta and omega) receptor 2
hsa-miR-518d-3p	0	0	1	1	1	1	C15orf54	chromosome 15 open reading frame 54
hsa-miR-518d-3p	1	0	1	1	1	1	YBX1	Y box binding protein 1
hsa-miR-518d-3p	0	0	1	1	0	0	TALDO1	transaldolase 1
hsa-miR-518d-3p	0	0	1	1	0	0	PSAPL1	prosaposin-like 1 (gene/pseudogene)
hsa-miR-518d-3p	0	0	1	1	1	1	ZNF771	zinc finger protein 771
hsa-miR-518d-3p	0	0	1	1	1	1	GALNT11	UDP-N-acetyl-alpha-D-galactosamine:polypeptide N-acetylgalactosaminyltransferase 11 (GalNAc-T11)
hsa-miR-518d-3p	1	0	1	1	1	1	EZH2	enhancer of zeste homolog 2 (Drosophila)
hsa-miR-518d-3p	1	0	0	1	0	0	AKAP5	A kinase (PRKA) anchor protein 5
hsa-miR-518d-3p	0	0	1	1	0	0	CLPTM1L	CLPTM1-like
hsa-miR-518d-3p	0	0	1	1	1	1	PDE1C	phosphodiesterase 1C, calmodulin-dependent 70kDa
hsa-miR-518d-3p	0	0	1	1	1	1	FBXO39	F-box protein 39
hsa-miR-518d-3p	1	0	1	1	0	0	CASKIN2	CASK interacting protein 2
hsa-miR-518d-3p	0	0	0	1	0	0	UFSP1	UFM1-specific peptidase 1 (non-functional)
hsa-miR-518d-3p	0	0	1	1	0	0	RUVBL1	RuvB-like 1 (E. coli)
hsa-miR-518d-3p	0	0	0	1	1	1	ZNF18	zinc finger protein 18
hsa-miR-518d-3p	0	0	1	1	1	1	ZCCHC7	zinc finger, CCHC domain containing 7
hsa-miR-518d-3p	0	0	0	1	1	1	MTHFSD	methenyltetrahydrofolate synthetase domain containing
hsa-miR-518d-3p	1	0	1	1	0	0	WDR45	WD repeat domain 45
hsa-miR-518d-3p	1	0	1	1	0	0	SMCR7	Smith-Magenis syndrome chromosome region, candidate 7
hsa-miR-518d-3p	1	0	1	1	1	1	SMARCD2	SWI/SNF related, matrix associated, actin dependent regulator of chromatin, subfamily d, member 2
hsa-miR-518d-3p	0	0	0	1	0	0	HTR1A	5-hydroxytryptamine (serotonin) receptor 1A, G protein-coupled
hsa-miR-518d-3p	0	0	1	1	0	0	CD37	CD37 molecule
hsa-miR-518d-3p	0	0	1	1	1	1	CSTF3	cleavage stimulation factor, 3' pre-RNA, subunit 3, 77kDa
hsa-miR-518d-3p	0	0	1	1	1	1	SERPINF2	serpin peptidase inhibitor, clade F (alpha-2 antiplasmin, pigment epithelium derived factor), member 2
hsa-miR-518d-3p	1	0	1	1	1	1	LSM14A	LSM14A, SCD6 homolog A (S. cerevisiae)
hsa-miR-518d-3p	0	0	1	1	1	1	DDX39A	DEAD (Asp-Glu-Ala-Asp) box polypeptide 39A
hsa-miR-518d-3p	0	0	1	1	0	0	HKR1	HKR1, GLI-Kruppel zinc finger family member
hsa-miR-518d-3p	1	0	1	1	1	1	GALNT14	UDP-N-acetyl-alpha-D-galactosamine:polypeptide N-acetylgalactosaminyltransferase 14 (GalNAc-T14)
hsa-miR-518d-3p	0	0	1	1	1	1	C12orf40	chromosome 12 open reading frame 40
hsa-miR-518d-3p	0	0	0	1	0	0	CRIPAK	cysteine-rich PAK1 inhibitor
hsa-miR-518d-3p	0	0	0	1	1	1	C21orf2	chromosome 21 open reading frame 2
hsa-miR-518d-3p	0	0	1	1	0	0	BBX	bobby sox homolog (Drosophila)
hsa-miR-518d-3p	0	0	1	1	1	1	RPRM	reprimo, TP53 dependent G2 arrest mediator candidate
hsa-miR-518d-3p	1	0	0	1	1	1	SSH1	slingshot homolog 1 (Drosophila)
hsa-miR-518d-3p	0	0	1	1	1	1	SEC31A	SEC31 homolog A (S. cerevisiae)
hsa-miR-518d-3p	1	0	1	1	1	1	EYA2	eyes absent homolog 2 (Drosophila)
hsa-miR-518d-3p	0	0	0	1	1	1	BTNL9	butyrophilin-like 9
hsa-miR-518d-3p	0	0	1	1	0	0	GAS6	growth arrest-specific 6
hsa-miR-518d-3p	0	0	0	1	1	1	KCNK12	potassium channel, subfamily K, member 12
hsa-miR-518d-3p	0	0	0	1	0	0	HEXDC	hexosaminidase (glycosyl hydrolase family 20, catalytic domain) containing
hsa-miR-518d-3p	0	0	1	1	0	0	ZNF71	zinc finger protein 71
hsa-miR-518d-3p	1	0	1	1	1	1	KCNA4	potassium voltage-gated channel, shaker-related subfamily, member 4
hsa-miR-518d-3p	0	0	1	1	0	0	PHKG2	phosphorylase kinase, gamma 2 (testis)
hsa-miR-518d-3p	1	0	1	1	1	1	BACE2	beta-site APP-cleaving enzyme 2
hsa-miR-518d-3p	0	0	1	1	1	1	LRRC16A	leucine rich repeat containing 16A
hsa-miR-518d-3p	0	0	1	1	1	1	NFATC3	nuclear factor of activated T-cells, cytoplasmic, calcineurin-dependent 3
hsa-miR-518d-3p	1	0	1	1	0	0	FAM43A	family with sequence similarity 43, member A
hsa-miR-518d-3p	1	0	1	1	1	1	C14orf129	chromosome 14 open reading frame 129
hsa-miR-518d-3p	0	0	0	1	0	0	B4GALNT4	beta-1,4-N-acetyl-galactosaminyl transferase 4
hsa-miR-518d-3p	0	0	1	1	0	0	IDH2	isocitrate dehydrogenase 2 (NADP+), mitochondrial
hsa-miR-518d-3p	1	0	1	1	0	0	ORAI1	ORAI calcium release-activated calcium modulator 1
hsa-miR-518d-3p	1	0	1	1	0	0	HDDC3	HD domain containing 3
hsa-miR-518d-3p	1	0	1	1	1	1	GJC1	gap junction protein, gamma 1, 45kDa
hsa-miR-518d-3p	0	0	0	1	0	0	OR56A4	olfactory receptor, family 56, subfamily A, member 4
hsa-miR-518d-3p	0	0	0	1	0	0	GLTPD2	glycolipid transfer protein domain containing 2
hsa-miR-518d-3p	1	0	1	1	1	1	PURA	purine-rich element binding protein A
hsa-miR-518d-3p	0	0	1	1	1	1	BEST3	bestrophin 3
hsa-miR-518d-3p	1	0	1	1	1	1	RAI2	retinoic acid induced 2
hsa-miR-518d-3p	1	0	1	1	1	1	KCNJ12	potassium inwardly-rectifying channel, subfamily J, member 12
hsa-miR-518d-3p	1	0	1	1	1	1	ACTG1	actin, gamma 1
hsa-miR-518d-3p	1	0	1	1	1	1	CEP63	centrosomal protein 63kDa
hsa-miR-518d-3p	0	0	0	1	0	0	PRAMEF21	PRAME family member 21
hsa-miR-518d-3p	0	0	1	1	0	0	GPRASP2	G protein-coupled receptor associated sorting protein 2
hsa-miR-518d-3p	0	0	1	1	0	0	GPR19	G protein-coupled receptor 19
hsa-miR-518d-3p	0	0	0	1	1	1	MACC1	metastasis associated in colon cancer 1
hsa-miR-518d-3p	0	0	0	1	1	1	OLIG1	oligodendrocyte transcription factor 1
hsa-miR-518d-3p	0	0	1	1	0	0	SMTN	smoothelin
hsa-miR-518d-3p	0	0	0	1	1	1	COPB2	coatomer protein complex, subunit beta 2 (beta prime)
hsa-miR-518d-3p	0	0	1	1	1	1	TM2D3	TM2 domain containing 3
hsa-miR-518d-3p	0	0	0	1	1	1	SH3BGR	SH3 domain binding glutamic acid-rich protein
hsa-miR-518d-3p	0	0	0	1	0	0	C15orf55	chromosome 15 open reading frame 55
hsa-miR-518d-3p	0	0	0	1	0	0	H1FX	H1 histone family, member X
hsa-miR-518d-3p	0	0	0	1	0	0	TAS2R38	taste receptor, type 2, member 38
hsa-miR-518d-3p	0	0	0	1	1	1	ZNF761	zinc finger protein 761
hsa-miR-518d-3p	0	0	1	1	0	0	TPGS2	tubulin polyglutamylase complex subunit 2
hsa-miR-518d-3p	0	0	1	1	1	1	CCDC73	coiled-coil domain containing 73
hsa-miR-518d-3p	0	0	0	1	1	1	TESC	tescalcin
hsa-miR-518d-3p	0	0	0	1	1	1	INTU	inturned planar cell polarity effector homolog (Drosophila)
hsa-miR-518d-3p	1	0	1	1	1	1	NPAS2	neuronal PAS domain protein 2
hsa-miR-518d-3p	1	0	0	1	1	1	ZNF354A	zinc finger protein 354A
hsa-miR-518d-3p	0	0	1	1	0	0	SARNP	SAP domain containing ribonucleoprotein
hsa-miR-518d-3p	0	0	1	1	1	1	ZXDC	ZXD family zinc finger C
hsa-miR-518d-3p	0	0	0	1	1	1	GCK	glucokinase (hexokinase 4)
hsa-miR-518d-3p	0	0	0	1	1	1	OPRL1	opiate receptor-like 1
hsa-miR-518d-3p	0	0	0	1	0	0	NCF4	neutrophil cytosolic factor 4, 40kDa
hsa-miR-518d-3p	1	0	0	1	1	1	P2RX4	purinergic receptor P2X, ligand-gated ion channel, 4
hsa-miR-518d-3p	0	0	0	1	1	1	PCID2	PCI domain containing 2
hsa-miR-518d-3p	0	0	0	1	0	0	TSPO	translocator protein (18kDa)
hsa-miR-518d-3p	0	0	1	1	0	0	IL1F10	interleukin 1 family, member 10 (theta)
hsa-miR-518d-3p	1	0	1	1	0	0	SMUG1	single-strand-selective monofunctional uracil-DNA glycosylase 1
hsa-miR-518d-3p	1	0	1	1	1	1	SPRYD4	SPRY domain containing 4
hsa-miR-518d-3p	0	0	1	1	1	1	SLC28A1	solute carrier family 28 (sodium-coupled nucleoside transporter), member 1
hsa-miR-518d-3p	1	0	0	1	0	0	RAP1BL	RAP1B, member of RAS oncogene family pseudogene
hsa-miR-518d-3p	0	0	1	1	0	0	DCBLD1	discoidin, CUB and LCCL domain containing 1
hsa-miR-518d-3p	0	0	1	1	1	1	OLFM3	olfactomedin 3
hsa-miR-518d-3p	0	0	0	1	0	0	HELT	helt bHLH transcription factor
hsa-miR-518d-3p	0	0	0	1	1	1	CLEC12A	C-type lectin domain family 12, member A
hsa-miR-518d-3p	0	0	1	1	1	1	CLEC12B	C-type lectin domain family 12, member B
hsa-miR-518d-3p	0	0	1	1	0	0	RNF17	ring finger protein 17
hsa-miR-518d-3p	0	0	1	1	0	0	SLC35F4	solute carrier family 35, member F4
hsa-miR-518d-3p	0	0	1	1	1	1	MIOS	missing oocyte, meiosis regulator, homolog (Drosophila)
hsa-miR-518d-3p	0	0	0	1	1	1	DDC	dopa decarboxylase (aromatic L-amino acid decarboxylase)
hsa-miR-518d-3p	1	0	1	1	1	1	C20orf26	chromosome 20 open reading frame 26
hsa-miR-518d-3p	0	0	1	1	1	1	PRDX6	peroxiredoxin 6
hsa-miR-518d-3p	1	0	0	1	1	1	CPSF7	cleavage and polyadenylation specific factor 7, 59kDa
hsa-miR-518d-3p	1	0	1	1	1	1	SLC26A9	solute carrier family 26, member 9
hsa-miR-518d-3p	0	0	0	1	1	1	PLEKHG5	pleckstrin homology domain containing, family G (with RhoGef domain) member 5
hsa-miR-518d-3p	0	0	1	1	1	1	IDS	iduronate 2-sulfatase
hsa-miR-518d-3p	1	0	1	1	1	1	SUN1	Sad1 and UNC84 domain containing 1
hsa-miR-518d-3p	0	0	0	1	1	1	TRIM60	tripartite motif containing 60
hsa-miR-518d-3p	1	0	1	1	1	1	KLHL6	kelch-like 6 (Drosophila)
hsa-miR-518d-3p	0	0	1	1	1	1	ZDHHC14	zinc finger, DHHC-type containing 14
hsa-miR-518d-3p	0	0	1	1	1	1	OAS2	2'-5'-oligoadenylate synthetase 2, 69/71kDa
hsa-miR-518d-3p	0	0	0	1	0	0	PODXL2	podocalyxin-like 2
hsa-miR-518d-3p	1	0	1	1	1	1	ANKRD42	ankyrin repeat domain 42
hsa-miR-518d-3p	0	0	1	1	1	1	ATP13A4	ATPase type 13A4
hsa-miR-518d-3p	0	0	0	1	0	0	BTBD8	BTB (POZ) domain containing 8
hsa-miR-518d-3p	0	0	1	1	1	1	C9orf171	chromosome 9 open reading frame 171
hsa-miR-518d-3p	0	0	0	1	1	1	FAM111B	family with sequence similarity 111, member B
hsa-miR-518d-3p	1	0	1	1	1	1	UBAP2L	ubiquitin associated protein 2-like
hsa-miR-518d-3p	0	0	0	1	0	0	SOWAHD	sosondowah ankyrin repeat domain family member D
hsa-miR-518d-3p	0	0	0	1	1	1	FAM69C	family with sequence similarity 69, member C
hsa-miR-518d-3p	0	0	0	1	0	0	SBK2	SH3-binding domain kinase family, member 2
hsa-miR-518d-3p	0	0	1	1	1	1	FHL2	four and a half LIM domains 2
hsa-miR-518d-3p	0	0	1	1	1	1	XBP1	X-box binding protein 1
hsa-miR-518d-3p	1	0	0	1	0	0	ZNF385C	zinc finger protein 385C
hsa-miR-518d-3p	1	0	1	1	1	1	NOVA1	neuro-oncological ventral antigen 1
hsa-miR-518d-3p	0	0	0	1	0	0	LARP7	La ribonucleoprotein domain family, member 7
hsa-miR-518d-3p	0	0	1	1	1	1	ABCB10	ATP-binding cassette, sub-family B (MDR/TAP), member 10
hsa-miR-518d-3p	1	0	1	1	1	1	HMGN3	high mobility group nucleosomal binding domain 3
hsa-miR-518d-3p	0	0	1	1	0	0	BSPH1	binder of sperm protein homolog 1
hsa-miR-518d-3p	1	0	1	1	1	1	HSPD1	heat shock 60kDa protein 1 (chaperonin)
hsa-miR-518d-3p	0	0	0	1	1	1	CORO6	coronin 6
hsa-miR-518d-3p	0	0	1	1	0	0	PRICKLE1	prickle homolog 1 (Drosophila)
hsa-miR-518d-3p	1	0	1	1	1	1	PAX6	paired box 6
hsa-miR-518d-3p	0	0	1	1	1	1	CD5	CD5 molecule
hsa-miR-518d-3p	0	0	1	1	0	0	THSD1	thrombospondin, type I, domain containing 1
hsa-miR-518d-3p	1	0	1	1	1	1	ELFN2	extracellular leucine-rich repeat and fibronectin type III domain containing 2
hsa-miR-518d-3p	0	0	1	1	1	1	C1orf43	chromosome 1 open reading frame 43
hsa-miR-518d-3p	0	0	1	1	0	0	RHOG	ras homolog family member G
hsa-miR-518d-3p	0	0	0	1	0	0	PSMD13	proteasome (prosome, macropain) 26S subunit, non-ATPase, 13
hsa-miR-518d-3p	0	0	0	1	1	1	CPNE1	copine I
hsa-miR-518d-3p	1	0	1	1	1	1	ZC3H14	zinc finger CCCH-type containing 14
hsa-miR-518d-3p	0	0	1	1	1	1	KCTD14	potassium channel tetramerisation domain containing 14
hsa-miR-518d-3p	1	0	1	1	1	1	DMPK	dystrophia myotonica-protein kinase
hsa-miR-518d-3p	0	0	0	1	1	1	NDUFV3	NADH dehydrogenase (ubiquinone) flavoprotein 3, 10kDa
hsa-miR-518d-3p	0	0	1	1	1	1	DDX55	DEAD (Asp-Glu-Ala-Asp) box polypeptide 55
hsa-miR-518d-3p	0	0	1	1	0	0	ANAPC7	anaphase promoting complex subunit 7
hsa-miR-518d-3p	1	0	1	1	0	0	ADAMTSL2	ADAMTS-like 2
hsa-miR-518d-3p	1	0	1	1	1	1	PDGFA	platelet-derived growth factor alpha polypeptide
hsa-miR-518d-3p	1	0	1	1	0	0	SND1	staphylococcal nuclease and tudor domain containing 1
hsa-miR-518d-3p	0	0	1	1	0	0	CCDC81	coiled-coil domain containing 81
hsa-miR-518d-3p	0	0	0	1	0	0	CRYBA4	crystallin, beta A4
hsa-miR-518d-3p	0	0	0	1	0	0	MOV10L1	Mov10l1, Moloney leukemia virus 10-like 1, homolog (mouse)
hsa-miR-518d-3p	0	0	1	1	1	1	TSGA10	testis specific, 10
hsa-miR-518d-3p	1	0	1	1	1	1	KCTD6	potassium channel tetramerisation domain containing 6
hsa-miR-518d-3p	1	0	1	1	1	1	ANO1	anoctamin 1, calcium activated chloride channel
hsa-miR-518d-3p	0	0	0	1	0	0	SHROOM1	shroom family member 1
hsa-miR-518d-3p	1	0	1	1	1	1	MEX3D	mex-3 homolog D (C. elegans)
hsa-miR-518d-3p	0	0	1	1	0	0	ADAMTS13	ADAM metallopeptidase with thrombospondin type 1 motif, 13
hsa-miR-518d-3p	0	0	1	1	1	1	C3orf27	chromosome 3 open reading frame 27
hsa-miR-518d-3p	0	0	0	1	0	0	MYOCD	myocardin
hsa-miR-518d-3p	0	0	0	1	1	1	GTF3C1	general transcription factor IIIC, polypeptide 1, alpha 220kDa
hsa-miR-518d-3p	0	0	1	1	1	1	GALNT6	UDP-N-acetyl-alpha-D-galactosamine:polypeptide N-acetylgalactosaminyltransferase 6 (GalNAc-T6)
hsa-miR-518d-3p	1	0	1	1	1	1	ARIH2	ariadne homolog 2 (Drosophila)
hsa-miR-518d-3p	0	0	0	1	1	1	MYOM1	myomesin 1, 185kDa
hsa-miR-518d-3p	1	0	1	1	0	0	GPI	glucose-6-phosphate isomerase
hsa-miR-518d-3p	0	0	1	1	1	1	TMEM67	transmembrane protein 67
hsa-miR-518d-3p	0	0	1	1	0	0	PPP2R2B	protein phosphatase 2, regulatory subunit B, beta
hsa-miR-518d-3p	0	0	1	1	0	0	GUCA2A	guanylate cyclase activator 2A (guanylin)
hsa-miR-518d-3p	0	0	1	1	0	0	ANKRD18A	ankyrin repeat domain 18A
hsa-miR-518d-3p	0	0	1	1	0	0	FAM115C	family with sequence similarity 115, member C
hsa-miR-518d-3p	0	0	0	1	0	0	OR11G2	olfactory receptor, family 11, subfamily G, member 2
hsa-miR-518d-3p	0	0	1	1	1	1	CCR3	chemokine (C-C motif) receptor 3
hsa-miR-518d-3p	0	0	1	1	1	1	RABGAP1L	RAB GTPase activating protein 1-like
hsa-miR-518d-3p	1	0	1	1	1	1	PAPD5	PAP associated domain containing 5
hsa-miR-518d-3p	0	0	0	1	0	0	C1QTNF5	C1q and tumor necrosis factor related protein 5
hsa-miR-518d-3p	0	0	0	1	1	1	TOR4A	torsin family 4, member A
hsa-miR-518d-3p	0	0	0	1	0	0	LCA10	lung carcinoma-associated protein 10
hsa-miR-518d-3p	0	0	1	1	1	1	TMEM170A	transmembrane protein 170A
hsa-miR-518d-3p	0	0	0	1	0	0	HIST1H3A	histone cluster 1, H3a
hsa-miR-518d-3p	0	0	1	1	1	1	CCDC147	coiled-coil domain containing 147
hsa-miR-518d-3p	0	0	1	1	1	1	ZNF100	zinc finger protein 100
hsa-miR-518d-3p	0	0	0	1	1	1	RPS6KL1	ribosomal protein S6 kinase-like 1
hsa-miR-518d-3p	0	0	0	1	0	0	LONP1	lon peptidase 1, mitochondrial
hsa-miR-518d-3p	0	0	1	1	1	1	NLGN3	neuroligin 3
hsa-miR-518d-3p	1	0	1	1	0	0	SYN3	synapsin III
hsa-miR-518d-3p	0	0	1	1	0	0	FAM3D	family with sequence similarity 3, member D
hsa-miR-518d-3p	1	0	1	1	0	0	DUS2L	dihydrouridine synthase 2-like, SMM1 homolog (S. cerevisiae)
hsa-miR-518d-3p	1	0	1	1	1	1	ANKRD46	ankyrin repeat domain 46
hsa-miR-518d-3p	0	0	1	1	1	1	ST6GALNAC1	ST6 (alpha-N-acetyl-neuraminyl-2,3-beta-galactosyl-1,3)-N-acetylgalactosaminide alpha-2,6-sialyltransferase 1
hsa-miR-518d-3p	1	0	1	1	1	1	C6orf89	chromosome 6 open reading frame 89
hsa-miR-518d-3p	0	0	1	1	1	1	PCBP2	poly(rC) binding protein 2
hsa-miR-518d-3p	1	0	1	1	1	1	LFNG	LFNG O-fucosylpeptide 3-beta-N-acetylglucosaminyltransferase
hsa-miR-518d-3p	1	0	1	1	0	0	DSG4	desmoglein 4
hsa-miR-518d-3p	1	0	1	1	0	0	EFNA4	ephrin-A4
hsa-miR-518d-3p	0	0	1	1	1	1	MPDU1	mannose-P-dolichol utilization defect 1
hsa-miR-518d-3p	0	0	1	1	0	0	CTAG1B	cancer/testis antigen 1B
hsa-miR-518d-3p	0	0	0	1	0	0	CYP2D6	cytochrome P450, family 2, subfamily D, polypeptide 6
hsa-miR-518d-3p	1	0	0	1	0	0	TSTA3	tissue specific transplantation antigen P35B
hsa-miR-518d-3p	1	0	1	1	1	1	CD44	CD44 molecule (Indian blood group)
hsa-miR-518d-3p	0	0	0	1	1	1	ZNF860	zinc finger protein 860
hsa-miR-518d-3p	0	0	1	1	0	0	CLDN7	claudin 7
hsa-miR-518d-3p	0	0	1	1	1	1	PARP9	poly (ADP-ribose) polymerase family, member 9
hsa-miR-518d-3p	0	0	0	1	0	0	CTAG1A	cancer/testis antigen 1A
hsa-miR-518d-3p	1	0	1	1	1	1	DAP	death-associated protein
hsa-miR-518d-3p	0	0	1	1	0	0	CCDC144A	coiled-coil domain containing 144A
hsa-miR-518d-3p	0	0	1	1	1	1	FRMPD2P1	FERM and PDZ domain containing 2 pseudogene 1
hsa-miR-518d-3p	0	0	1	1	0	0	KRTAP26-1	keratin associated protein 26-1
hsa-miR-518d-3p	1	0	1	1	1	1	TPPP	tubulin polymerization promoting protein
hsa-miR-518d-3p	0	0	1	1	1	1	TTN	titin
hsa-miR-518d-3p	0	0	1	1	1	1	CPZ	carboxypeptidase Z
hsa-miR-518d-3p	0	0	1	1	1	1	PTPLA	protein tyrosine phosphatase-like (proline instead of catalytic arginine), member A
hsa-miR-518d-3p	0	0	0	1	1	1	ZNF438	zinc finger protein 438
hsa-miR-518d-3p	1	0	1	1	1	1	KIAA0922	KIAA0922
hsa-miR-518d-3p	0	0	0	1	0	0	MPHOSPH8	M-phase phosphoprotein 8
hsa-miR-518d-3p	1	0	1	1	1	1	BCL2L11	BCL2-like 11 (apoptosis facilitator)
hsa-miR-518d-3p	1	0	1	1	1	1	ULK2	unc-51-like kinase 2 (C. elegans)
hsa-miR-518d-3p	1	0	1	1	1	1	CELF4	CUGBP, Elav-like family member 4
hsa-miR-518d-3p	0	0	0	1	1	1	GPR161	G protein-coupled receptor 161
hsa-miR-518d-3p	0	0	0	1	1	1	HHLA3	HERV-H LTR-associating 3
hsa-miR-518d-3p	0	0	0	1	1	1	KRTAP5-9	keratin associated protein 5-9
hsa-miR-518d-3p	1	0	1	1	0	0	SMG5	smg-5 homolog, nonsense mediated mRNA decay factor (C. elegans)
hsa-miR-518d-3p	0	0	1	1	1	1	HORMAD1	HORMA domain containing 1
hsa-miR-518d-3p	0	0	0	1	0	0	C1orf68	chromosome 1 open reading frame 68
hsa-miR-518d-3p	0	0	1	1	1	1	FAM9B	family with sequence similarity 9, member B
hsa-miR-518d-3p	1	0	1	1	1	1	SLC35F3	solute carrier family 35, member F3
hsa-miR-518d-3p	0	0	0	1	1	1	OBSCN	obscurin, cytoskeletal calmodulin and titin-interacting RhoGEF
hsa-miR-518d-3p	1	0	1	1	1	1	DLL1	delta-like 1 (Drosophila)
hsa-miR-518d-3p	0	0	0	1	1	1	ADCK3	aarF domain containing kinase 3
hsa-miR-518d-3p	0	0	1	1	1	1	THBS2	thrombospondin 2
hsa-miR-518d-3p	0	0	0	1	1	1	DACT2	dapper, antagonist of beta-catenin, homolog 2 (Xenopus laevis)
hsa-miR-518d-3p	1	0	1	1	1	1	WDR26	WD repeat domain 26
hsa-miR-518d-3p	1	0	1	1	1	1	PACRG	PARK2 co-regulated
hsa-miR-518d-3p	0	0	0	1	0	0	C4BPA	complement component 4 binding protein, alpha
hsa-miR-518d-3p	0	0	1	1	1	1	IL24	interleukin 24
hsa-miR-518d-3p	0	0	1	1	1	1	PIK3C2B	phosphatidylinositol-4-phosphate 3-kinase, catalytic subunit type 2 beta
hsa-miR-518d-3p	0	0	1	1	1	1	FAM5C	family with sequence similarity 5, member C
hsa-miR-518d-3p	0	0	0	1	0	0	SF3B5	splicing factor 3b, subunit 5, 10kDa
hsa-miR-518d-3p	0	0	0	1	1	1	LTV1	LTV1 homolog (S. cerevisiae)
hsa-miR-518d-3p	0	0	1	1	0	0	MR1	major histocompatibility complex, class I-related
hsa-miR-518d-3p	0	0	1	1	1	1	AIG1	androgen-induced 1
hsa-miR-518d-3p	1	0	1	1	0	0	REPS1	RALBP1 associated Eps domain containing 1
hsa-miR-518d-3p	0	0	1	1	1	1	PEX7	peroxisomal biogenesis factor 7
hsa-miR-518d-3p	0	0	0	1	0	0	METTL11B	methyltransferase like 11B
hsa-miR-518d-3p	0	0	1	1	1	1	BLZF1	basic leucine zipper nuclear factor 1
hsa-miR-518d-3p	0	0	1	1	1	1	SFT2D2	SFT2 domain containing 2
hsa-miR-518d-3p	0	0	1	1	1	1	RXRG	retinoid X receptor, gamma
hsa-miR-518d-3p	1	0	1	1	1	1	RGS4	regulator of G-protein signaling 4
hsa-miR-518d-3p	0	0	1	1	1	1	DUSP12	dual specificity phosphatase 12
hsa-miR-518d-3p	0	0	1	1	0	0	NDUFS2	NADH dehydrogenase (ubiquinone) Fe-S protein 2, 49kDa (NADH-coenzyme Q reductase)
hsa-miR-518d-3p	0	0	1	1	1	1	CRP	C-reactive protein, pentraxin-related
hsa-miR-518d-3p	0	0	0	1	1	1	EPB41L2	erythrocyte membrane protein band 4.1-like 2
hsa-miR-518d-3p	0	0	1	1	0	0	RRNAD1	ribosomal RNA adenine dimethylase domain containing 1
hsa-miR-518d-3p	0	0	1	1	0	0	CLK2	CDC-like kinase 2
hsa-miR-518d-3p	0	0	0	1	0	0	NKX6-2	NK6 homeobox 2
hsa-miR-518d-3p	0	0	1	1	1	1	FYN	FYN oncogene related to SRC, FGR, YES
hsa-miR-518d-3p	0	0	1	1	0	0	S100A16	S100 calcium binding protein A16
hsa-miR-518d-3p	0	0	1	1	1	1	S100A3	S100 calcium binding protein A3
hsa-miR-518d-3p	1	0	1	1	0	0	LOR	loricrin
hsa-miR-518d-3p	0	0	1	1	0	0	LCE2A	late cornified envelope 2A
hsa-miR-518d-3p	0	0	1	1	0	0	LCE3D	late cornified envelope 3D
hsa-miR-518d-3p	1	0	1	1	1	1	CRCT1	cysteine-rich C-terminal 1
hsa-miR-518d-3p	0	0	1	1	1	1	OAT	ornithine aminotransferase
hsa-miR-518d-3p	0	0	0	1	1	1	PSTK	phosphoseryl-tRNA kinase
hsa-miR-518d-3p	0	0	0	1	1	1	MICAL1	microtubule associated monoxygenase, calponin and LIM domain containing 1
hsa-miR-518d-3p	1	0	1	1	1	1	TACC2	transforming, acidic coiled-coil containing protein 2
hsa-miR-518d-3p	0	0	1	1	1	1	PDSS2	prenyl (decaprenyl) diphosphate synthase, subunit 2
hsa-miR-518d-3p	0	0	1	1	0	0	ECM1	extracellular matrix protein 1
hsa-miR-518d-3p	0	0	1	1	0	0	RPRD2	regulation of nuclear pre-mRNA domain containing 2
hsa-miR-518d-3p	0	0	1	1	0	0	BAG3	BCL2-associated athanogene 3
hsa-miR-518d-3p	1	0	1	1	1	1	RGS10	regulator of G-protein signaling 10
hsa-miR-518d-3p	0	0	1	1	1	1	GRK5	G protein-coupled receptor kinase 5
hsa-miR-518d-3p	1	0	1	1	1	1	SV2A	synaptic vesicle glycoprotein 2A
hsa-miR-518d-3p	1	0	1	1	1	1	ABLIM1	actin binding LIM protein 1
hsa-miR-518d-3p	0	0	1	1	1	1	POLR3GL	polymerase (RNA) III (DNA directed) polypeptide G (32kD)-like
hsa-miR-518d-3p	0	0	1	1	0	0	FAM72B	family with sequence similarity 72, member B
hsa-miR-518d-3p	0	0	0	1	1	1	GABRR1	gamma-aminobutyric acid (GABA) A receptor, rho 1
hsa-miR-518d-3p	1	0	1	1	1	1	MPP1	membrane protein, palmitoylated 1, 55kDa
hsa-miR-518d-3p	0	0	1	1	0	0	IKBKG	inhibitor of kappa light polypeptide gene enhancer in B-cells, kinase gamma
hsa-miR-518d-3p	0	0	1	1	0	0	ATP6AP1	ATPase, H+ transporting, lysosomal accessory protein 1
hsa-miR-518d-3p	0	0	0	1	0	0	CALHM3	calcium homeostasis modulator 3
hsa-miR-518d-3p	0	0	1	1	1	1	STXBP3	syntaxin binding protein 3
hsa-miR-518d-3p	0	0	1	1	0	0	NAA10	N(alpha)-acetyltransferase 10, NatA catalytic subunit
hsa-miR-518d-3p	0	0	0	1	1	1	HENMT1	HEN1 methyltransferase homolog 1 (Arabidopsis)
hsa-miR-518d-3p	0	0	1	1	0	0	AVPR2	arginine vasopressin receptor 2
hsa-miR-518d-3p	0	0	0	1	0	0	SRPK3	SRSF protein kinase 3
hsa-miR-518d-3p	0	0	1	1	1	1	RWDD3	RWD domain containing 3
hsa-miR-518d-3p	1	0	1	1	1	1	SEC31B	SEC31 homolog B (S. cerevisiae)
hsa-miR-518d-3p	0	0	1	1	0	0	EPHX4	epoxide hydrolase 4
hsa-miR-518d-3p	0	0	1	1	0	0	IFI44	interferon-induced protein 44
hsa-miR-518d-3p	0	0	0	1	0	0	RRP12	ribosomal RNA processing 12 homolog (S. cerevisiae)
hsa-miR-518d-3p	0	0	0	1	0	0	GSTA2	glutathione S-transferase alpha 2
hsa-miR-518d-3p	0	0	1	1	0	0	APCDD1L	adenomatosis polyposis coli down-regulated 1-like
hsa-miR-518d-3p	0	0	1	1	1	1	C1orf177	chromosome 1 open reading frame 177
hsa-miR-518d-3p	0	0	0	1	0	0	C9orf37	chromosome 9 open reading frame 37
hsa-miR-518d-3p	0	0	0	1	0	0	PNPLA7	patatin-like phospholipase domain containing 7
hsa-miR-518d-3p	0	0	0	1	1	1	RBP4	retinol binding protein 4, plasma
hsa-miR-518d-3p	1	0	1	1	1	1	ZNF217	zinc finger protein 217
hsa-miR-518d-3p	0	0	0	1	0	0	NPDC1	neural proliferation, differentiation and control, 1
hsa-miR-518d-3p	0	0	1	1	1	1	SLC25A43	solute carrier family 25, member 43
hsa-miR-518d-3p	0	0	0	1	0	0	LCN8	lipocalin 8
hsa-miR-518d-3p	0	0	1	1	1	1	CYP4B1	cytochrome P450, family 4, subfamily B, polypeptide 1
hsa-miR-518d-3p	0	0	1	1	1	1	MED22	mediator complex subunit 22
hsa-miR-518d-3p	0	0	1	1	0	0	MRPS18A	mitochondrial ribosomal protein S18A
hsa-miR-518d-3p	0	0	0	1	0	0	PLAC9	placenta-specific 9
hsa-miR-518d-3p	0	0	0	1	0	0	SFTPD	surfactant protein D
hsa-miR-518d-3p	1	0	1	1	1	1	DLK2	delta-like 2 homolog (Drosophila)
hsa-miR-518d-3p	0	0	1	1	0	0	TCEAL4	transcription elongation factor A (SII)-like 4
hsa-miR-518d-3p	0	0	1	1	0	0	TCEAL5	transcription elongation factor A (SII)-like 5
hsa-miR-518d-3p	0	0	0	1	0	0	ZNF642	zinc finger protein 642
hsa-miR-518d-3p	1	0	1	1	1	1	CAMK2G	calcium/calmodulin-dependent protein kinase II gamma
hsa-miR-518d-3p	1	0	1	1	1	1	RLF	rearranged L-myc fusion
hsa-miR-518d-3p	0	0	1	1	0	0	TCEAL2	transcription elongation factor A (SII)-like 2
hsa-miR-518d-3p	1	0	1	1	1	1	ODF2	outer dense fiber of sperm tails 2
hsa-miR-518d-3p	0	0	1	1	0	0	GUCA1A	guanylate cyclase activator 1A (retina)
hsa-miR-518d-3p	0	0	1	1	0	0	C1orf122	chromosome 1 open reading frame 122
hsa-miR-518d-3p	0	0	1	1	1	1	SGK2	serum/glucocorticoid regulated kinase 2
hsa-miR-518d-3p	0	0	1	1	1	1	PPA1	pyrophosphatase (inorganic) 1
hsa-miR-518d-3p	0	0	1	1	0	0	FPGS	folylpolyglutamate synthase
hsa-miR-518d-3p	0	0	1	1	1	1	SLC2A8	solute carrier family 2 (facilitated glucose transporter), member 8
hsa-miR-518d-3p	0	0	1	1	1	1	FGD2	FYVE, RhoGEF and PH domain containing 2
hsa-miR-518d-3p	1	0	1	1	1	1	SAMHD1	SAM domain and HD domain 1
hsa-miR-518d-3p	1	0	0	1	1	1	CNTRL	centriolin
hsa-miR-518d-3p	0	0	1	1	0	0	SCAND1	SCAN domain containing 1
hsa-miR-518d-3p	0	0	1	1	0	0	PPYR1	pancreatic polypeptide receptor 1
hsa-miR-518d-3p	0	0	1	1	1	1	FAM21C	family with sequence similarity 21, member C
hsa-miR-518d-3p	0	0	1	1	0	0	GDF5	growth differentiation factor 5
hsa-miR-518d-3p	0	0	1	1	0	0	GDPD2	glycerophosphodiester phosphodiesterase domain containing 2
hsa-miR-518d-3p	1	0	1	1	1	1	CXCL12	chemokine (C-X-C motif) ligand 12
hsa-miR-518d-3p	1	0	1	1	1	1	FUCA1	fucosidase, alpha-L- 1, tissue
hsa-miR-518d-3p	0	0	0	1	0	0	ARR3	arrestin 3, retinal (X-arrestin)
hsa-miR-518d-3p	0	0	0	1	0	0	KIFC1	kinesin family member C1
hsa-miR-518d-3p	0	0	1	1	0	0	FRRS1L	ferric-chelate reductase 1-like
hsa-miR-518d-3p	1	0	1	1	1	1	HNRNPR	heterogeneous nuclear ribonucleoprotein R
hsa-miR-518d-3p	0	0	1	1	0	0	WDR46	WD repeat domain 46
hsa-miR-518d-3p	0	0	0	1	0	0	C1QA	complement component 1, q subcomponent, A chain
hsa-miR-518d-3p	0	0	0	1	1	1	PSMB9	proteasome (prosome, macropain) subunit, beta type, 9 (large multifunctional peptidase 2)
hsa-miR-518d-3p	1	0	1	1	1	1	ARHGEF9	Cdc42 guanine nucleotide exchange factor (GEF) 9
hsa-miR-518d-3p	0	0	1	1	0	0	DNAH17	dynein, axonemal, heavy chain 17
hsa-miR-518d-3p	0	0	0	1	0	0	ASIP	agouti signaling protein
hsa-miR-518d-3p	1	0	1	1	1	1	MSANTD2	Myb/SANT-like DNA-binding domain containing 2
hsa-miR-518d-3p	0	0	1	1	1	1	NOTCH4	notch 4
hsa-miR-518d-3p	0	0	1	1	1	1	TRIM14	tripartite motif containing 14
hsa-miR-518d-3p	0	0	1	1	1	1	CAPZB	capping protein (actin filament) muscle Z-line, beta
hsa-miR-518d-3p	0	0	0	1	0	0	FKBPL	FK506 binding protein like
hsa-miR-518d-3p	0	0	1	1	0	0	SSX4	synovial sarcoma, X breakpoint 4
hsa-miR-518d-3p	0	0	0	1	0	0	RSG1	REM2 and RAB-like small GTPase 1
hsa-miR-518d-3p	1	0	1	1	1	1	C20orf112	chromosome 20 open reading frame 112
hsa-miR-518d-3p	0	0	1	1	1	1	KYNU	kynureninase
hsa-miR-518d-3p	1	0	1	1	1	1	FAM155A	family with sequence similarity 155, member A
hsa-miR-518d-3p	0	0	1	1	1	1	SHROOM4	shroom family member 4
hsa-miR-518d-3p	0	0	1	1	1	1	TEX30	testis expressed 30
hsa-miR-518d-3p	0	0	0	1	0	0	PRAMEF19	PRAME family member 19
hsa-miR-518d-3p	1	0	1	1	1	1	ID1	inhibitor of DNA binding 1, dominant negative helix-loop-helix protein
hsa-miR-518d-3p	0	0	0	1	0	0	PRAMEF18	PRAME family member 18
hsa-miR-518d-3p	0	0	0	1	1	1	PRAMEF3	PRAME family member 3
hsa-miR-518d-3p	0	0	1	1	1	1	AADACL4	arylacetamide deacetylase-like 4
hsa-miR-518d-3p	0	0	0	1	1	1	GPR183	G protein-coupled receptor 183
hsa-miR-518d-3p	1	0	1	1	1	1	TLE4	transducin-like enhancer of split 4 (E(sp1) homolog, Drosophila)
hsa-miR-518d-3p	0	0	1	1	0	0	SSX4B	synovial sarcoma, X breakpoint 4B
hsa-miR-518d-3p	0	0	1	1	0	0	YIF1A	Yip1 interacting factor homolog A (S. cerevisiae)
hsa-miR-518d-3p	0	0	0	1	0	0	POLD1	polymerase (DNA directed), delta 1, catalytic subunit
hsa-miR-518d-3p	0	0	1	1	1	1	CNGA3	cyclic nucleotide gated channel alpha 3
hsa-miR-518d-3p	0	0	1	1	1	1	GFAP	glial fibrillary acidic protein
hsa-miR-518d-3p	1	0	1	1	1	1	TGOLN2	trans-golgi network protein 2
hsa-miR-518d-3p	1	0	1	1	1	1	KLF12	Kruppel-like factor 12
hsa-miR-518d-3p	1	0	1	1	1	1	SHB	Src homology 2 domain containing adaptor protein B
hsa-miR-518d-3p	0	0	1	1	1	1	KRT40	keratin 40
hsa-miR-518d-3p	0	0	0	1	0	0	ACOT7	acyl-CoA thioesterase 7
hsa-miR-518d-3p	0	0	1	1	0	0	SLC3A2	solute carrier family 3 (activators of dibasic and neutral amino acid transport), member 2
hsa-miR-518d-3p	1	0	1	1	1	1	ACTR2	ARP2 actin-related protein 2 homolog (yeast)
hsa-miR-518d-3p	0	0	1	1	1	1	ANKRD5	ankyrin repeat domain 5
hsa-miR-518d-3p	0	0	1	1	0	0	HES5	hairy and enhancer of split 5 (Drosophila)
hsa-miR-518d-3p	0	0	0	1	0	0	PANK4	pantothenate kinase 4
hsa-miR-518d-3p	0	0	1	1	0	0	PLCH2	phospholipase C, eta 2
hsa-miR-518d-3p	0	0	1	1	0	0	MORN1	MORN repeat containing 1
hsa-miR-518d-3p	1	0	1	1	1	1	AFF4	AF4/FMR2 family, member 4
hsa-miR-518d-3p	0	0	0	1	0	0	CDK11B	cyclin-dependent kinase 11B
hsa-miR-518d-3p	1	0	1	1	1	1	VCP	valosin containing protein
hsa-miR-518d-3p	0	0	1	1	0	0	FANCG	Fanconi anemia, complementation group G
hsa-miR-518d-3p	0	0	1	1	0	0	DGKZ	diacylglycerol kinase, zeta
hsa-miR-518d-3p	0	0	1	1	1	1	CAMK1D	calcium/calmodulin-dependent protein kinase ID
hsa-miR-518d-3p	0	0	1	1	1	1	KIAA1161	KIAA1161
hsa-miR-518d-3p	0	0	1	1	0	0	ZNF584	zinc finger protein 584
hsa-miR-518d-3p	0	0	0	1	0	0	ZNF324B	zinc finger protein 324B
hsa-miR-518d-3p	0	0	1	1	0	0	UBAP2	ubiquitin associated protein 2
hsa-miR-518d-3p	1	0	1	1	1	1	RGCC	regulator of cell cycle
hsa-miR-518d-3p	0	0	1	1	1	1	NAE1	NEDD8 activating enzyme E1 subunit 1
hsa-miR-518d-3p	1	0	1	1	1	1	SMPX	small muscle protein, X-linked
hsa-miR-518d-3p	0	0	0	1	1	1	PAK1IP1	PAK1 interacting protein 1
hsa-miR-518d-3p	0	0	1	1	1	1	EXOSC9	exosome component 9
hsa-miR-518d-3p	0	0	1	1	0	0	TRPC4	transient receptor potential cation channel, subfamily C, member 4
hsa-miR-518d-3p	1	0	1	1	1	1	CAMK2D	calcium/calmodulin-dependent protein kinase II delta
hsa-miR-518d-3p	0	0	1	1	0	0	ADAM18	ADAM metallopeptidase domain 18
hsa-miR-518d-3p	0	0	1	1	1	1	ACO1	aconitase 1, soluble
hsa-miR-518d-3p	1	0	1	1	1	1	RHOBTB3	Rho-related BTB domain containing 3
hsa-miR-518d-3p	0	0	1	1	1	1	LINGO2	leucine rich repeat and Ig domain containing 2
hsa-miR-518d-3p	0	0	1	1	0	0	EXOC3L4	exocyst complex component 3-like 4
hsa-miR-518d-3p	0	0	1	1	1	1	TRIM34	tripartite motif containing 34
hsa-miR-518d-3p	0	0	1	1	1	1	TRIM6	tripartite motif containing 6
hsa-miR-518d-3p	0	0	1	1	1	1	TRIM6-TRIM34	TRIM6-TRIM34 readthrough
hsa-miR-518d-3p	0	0	0	1	1	1	IFNA8	interferon, alpha 8
hsa-miR-518d-3p	0	0	1	1	0	0	FOCAD	focadhesin
hsa-miR-518d-3p	0	0	0	1	0	0	HADHA	hydroxyacyl-CoA dehydrogenase/3-ketoacyl-CoA thiolase/enoyl-CoA hydratase (trifunctional protein), alpha subunit
hsa-miR-518d-3p	1	0	0	1	1	1	SLC46A3	solute carrier family 46, member 3
hsa-miR-518d-3p	0	0	0	1	1	1	GMDS	GDP-mannose 4,6-dehydratase
hsa-miR-518d-3p	0	0	0	1	1	1	ASGR1	asialoglycoprotein receptor 1
hsa-miR-518d-3p	0	0	1	1	1	1	FLT3	fms-related tyrosine kinase 3
hsa-miR-518d-3p	0	0	0	1	1	1	ARSF	arylsulfatase F
hsa-miR-518d-3p	0	0	1	1	1	1	CD99	CD99 molecule
hsa-miR-518d-3p	0	0	1	1	0	0	SLC25A6	solute carrier family 25 (mitochondrial carrier; adenine nucleotide translocator), member 6
hsa-miR-518d-3p	0	0	1	1	0	0	EIF3L	eukaryotic translation initiation factor 3, subunit L
hsa-miR-518d-3p	0	0	1	1	0	0	FAM110A	family with sequence similarity 110, member A
hsa-miR-518d-3p	1	0	1	1	1	1	GLIS3	GLIS family zinc finger 3
hsa-miR-518d-3p	0	0	1	1	0	0	SEC14L4	SEC14-like 4 (S. cerevisiae)
hsa-miR-518d-3p	0	0	1	1	1	1	TOLLIP	toll interacting protein
hsa-miR-518d-3p	0	0	1	1	1	1	TM4SF1	transmembrane 4 L six family member 1
hsa-miR-518d-3p	0	0	0	1	0	0	TMEM42	transmembrane protein 42
hsa-miR-518d-3p	1	0	1	1	1	1	CNEP1R1	CTD nuclear envelope phosphatase 1 regulatory subunit 1
hsa-miR-518d-3p	1	0	1	1	1	1	PRTG	protogenin
hsa-miR-518d-3p	0	0	1	1	0	0	C7orf63	chromosome 7 open reading frame 63
hsa-miR-518d-3p	0	0	1	1	1	1	EP400	E1A binding protein p400
hsa-miR-518d-3p	0	0	0	1	0	0	ESYT3	extended synaptotagmin-like protein 3
hsa-miR-518d-3p	1	0	1	1	0	0	KIAA0226	KIAA0226
hsa-miR-518d-3p	0	0	0	1	0	0	ZC3H12D	zinc finger CCCH-type containing 12D
hsa-miR-518d-3p	1	0	0	1	1	1	ZNF264	zinc finger protein 264
hsa-miR-518d-3p	1	0	1	1	1	1	ZNF282	zinc finger protein 282
hsa-miR-518d-3p	1	0	1	0	1	1	PKNOX1	PBX/knotted 1 homeobox 1
hsa-miR-518d-3p	0	0	1	1	1	1	RBM8A	RNA binding motif protein 8A
hsa-miR-518d-3p	0	0	1	1	1	1	CCDC69	coiled-coil domain containing 69
hsa-miR-518d-3p	1	0	1	1	1	1	RNF150	ring finger protein 150
hsa-miR-518d-3p	0	0	0	1	1	1	DGCR8	DiGeorge syndrome critical region gene 8
hsa-miR-518d-3p	1	0	1	1	1	1	LPIN1	lipin 1
hsa-miR-518d-3p	0	0	1	0	1	1	DKFZP434I0714	uncharacterized protein DKFZP434I0714
