# Supplementary material for: Profiling of Selected MicroRNAs in Proliferative Eutopic Endometrium of Women with Ovarian Endometriosis
Source: Biomed Res Int. 2015 Aug 20;2015:760698. doi: 10.1155/2015/760698 (PMC4558423; doi:10.1155/2015/760698)
Supplement: Supplementary file 1 — Table I: The names of miRNAs significantly differentially expressed between eutopic endometrium of patients with endometriosis vs eutopic endometrium of patients without endometriosis. Table II: The associations between miRNA and mRNA, which presents detailed results of the search of six major databases i.e targetscan, tarbase, miranda, mirbase, mirtarget2 and pictar. [file 760698.f1.zip › 760698.f1/Table II/hsa-miR-519b-3p.tsv]

miR	targetscan	tarbase	miranda	mirbase	mirtarget2	pictar	GeneSymbol	GeneName
hsa-miR-519b-3p	1	0	1	1	1	1	ZFYVE16	zinc finger, FYVE domain containing 16
hsa-miR-519b-3p	1	0	1	1	1	1	CHD9	chromodomain helicase DNA binding protein 9
hsa-miR-519b-3p	1	0	1	1	0	0	RAPGEF2	Rap guanine nucleotide exchange factor (GEF) 2
hsa-miR-519b-3p	1	0	1	0	1	1	PTPRT	protein tyrosine phosphatase, receptor type, T
hsa-miR-519b-3p	1	0	1	0	1	1	KIAA0408	KIAA0408
hsa-miR-519b-3p	1	0	1	1	0	0	OTUD3	OTU domain containing 3
hsa-miR-519b-3p	1	0	1	1	1	1	IQSEC2	IQ motif and Sec7 domain 2
hsa-miR-519b-3p	1	0	1	1	0	0	TBC1D12	TBC1 domain family, member 12
hsa-miR-519b-3p	1	0	1	1	1	1	SLC4A7	solute carrier family 4, sodium bicarbonate cotransporter, member 7
hsa-miR-519b-3p	0	0	1	1	1	1	L3MBTL1	l(3)mbt-like 1 (Drosophila)
hsa-miR-519b-3p	1	0	1	1	1	1	SMOC2	SPARC related modular calcium binding 2
hsa-miR-519b-3p	1	0	1	1	1	1	UBR5	ubiquitin protein ligase E3 component n-recognin 5
hsa-miR-519b-3p	1	0	1	1	1	1	CDK12	cyclin-dependent kinase 12
hsa-miR-519b-3p	1	0	1	1	1	1	CPEB3	cytoplasmic polyadenylation element binding protein 3
hsa-miR-519b-3p	1	0	1	1	1	1	BAHD1	bromo adjacent homology domain containing 1
hsa-miR-519b-3p	1	0	1	1	1	1	CIT	citron (rho-interacting, serine/threonine kinase 21)
hsa-miR-519b-3p	1	0	1	1	1	1	C11orf9	chromosome 11 open reading frame 9
hsa-miR-519b-3p	0	0	1	1	1	1	FASTKD2	FAST kinase domains 2
hsa-miR-519b-3p	1	0	1	1	0	0	STXBP5L	syntaxin binding protein 5-like
hsa-miR-519b-3p	1	0	1	1	1	1	CNOT1	CCR4-NOT transcription complex, subunit 1
hsa-miR-519b-3p	0	0	1	1	1	1	AGTPBP1	ATP/GTP binding protein 1
hsa-miR-519b-3p	1	0	1	1	1	1	FOXJ3	forkhead box J3
hsa-miR-519b-3p	1	0	1	1	0	0	ZC3H4	zinc finger CCCH-type containing 4
hsa-miR-519b-3p	1	0	1	1	1	1	PHF8	PHD finger protein 8
hsa-miR-519b-3p	1	0	1	0	1	1	GPR158	G protein-coupled receptor 158
hsa-miR-519b-3p	1	0	1	1	1	1	ATXN7L1	ataxin 7-like 1
hsa-miR-519b-3p	1	0	1	1	1	1	RALGAPB	Ral GTPase activating protein, beta subunit (non-catalytic)
hsa-miR-519b-3p	1	0	1	0	1	1	PPFIBP1	PTPRF interacting protein, binding protein 1 (liprin beta 1)
hsa-miR-519b-3p	1	0	1	0	0	0	HEG1	HEG homolog 1 (zebrafish)
hsa-miR-519b-3p	1	0	1	1	1	1	MKL2	MKL/myocardin-like 2
hsa-miR-519b-3p	1	0	1	1	1	1	ASAP1	ArfGAP with SH3 domain, ankyrin repeat and PH domain 1
hsa-miR-519b-3p	1	0	1	0	1	1	ANKFY1	ankyrin repeat and FYVE domain containing 1
hsa-miR-519b-3p	0	0	1	1	1	1	FSTL5	follistatin-like 5
hsa-miR-519b-3p	0	0	1	1	1	1	CA10	carbonic anhydrase X
hsa-miR-519b-3p	1	0	1	1	1	1	PCDH19	protocadherin 19
hsa-miR-519b-3p	1	0	1	0	1	1	KCTD16	potassium channel tetramerisation domain containing 16
hsa-miR-519b-3p	1	0	1	1	1	1	ATP2C1	ATPase, Ca++ transporting, type 2C, member 1
hsa-miR-519b-3p	0	0	1	0	0	0	KIAA1383	KIAA1383
hsa-miR-519b-3p	1	0	1	0	1	1	SEMA6D	sema domain, transmembrane domain (TM), and cytoplasmic domain, (semaphorin) 6D
hsa-miR-519b-3p	0	0	1	0	0	0	NYAP2	neuronal tyrosine-phosphorylated phosphoinositide-3-kinase adaptor 2
hsa-miR-519b-3p	1	0	1	1	0	0	ZSWIM5	zinc finger, SWIM-type containing 5
hsa-miR-519b-3p	1	0	1	1	1	1	USP28	ubiquitin specific peptidase 28
hsa-miR-519b-3p	1	0	1	0	1	1	LMO3	LIM domain only 3 (rhombotin-like 2)
hsa-miR-519b-3p	1	0	1	1	1	1	PPP6R3	protein phosphatase 6, regulatory subunit 3
hsa-miR-519b-3p	1	0	1	0	0	0	TANC2	tetratricopeptide repeat, ankyrin repeat and coiled-coil containing 2
hsa-miR-519b-3p	0	0	1	0	1	1	SETD5	SET domain containing 5
hsa-miR-519b-3p	1	0	1	1	1	1	DOCK7	dedicator of cytokinesis 7
hsa-miR-519b-3p	1	0	1	0	1	1	RIMS1	regulating synaptic membrane exocytosis 1
hsa-miR-519b-3p	1	0	1	1	1	1	IKZF4	IKAROS family zinc finger 4 (Eos)
hsa-miR-519b-3p	1	0	1	1	1	1	CDK13	cyclin-dependent kinase 13
hsa-miR-519b-3p	1	0	1	1	1	1	LCOR	ligand dependent nuclear receptor corepressor
hsa-miR-519b-3p	1	0	1	1	1	1	AHCTF1	AT hook containing transcription factor 1
hsa-miR-519b-3p	1	0	1	1	1	1	NAV2	neuron navigator 2
hsa-miR-519b-3p	1	0	1	1	1	1	CSRNP1	cysteine-serine-rich nuclear protein 1
hsa-miR-519b-3p	1	0	1	1	1	1	CSMD3	CUB and Sushi multiple domains 3
hsa-miR-519b-3p	1	0	1	0	1	1	SLC25A25	solute carrier family 25 (mitochondrial carrier; phosphate carrier), member 25
hsa-miR-519b-3p	0	0	1	0	0	0	KIAA1908	uncharacterized LOC114796
hsa-miR-519b-3p	1	0	1	1	1	1	POGZ	pogo transposable element with ZNF domain
hsa-miR-519b-3p	1	0	1	1	1	1	SH3TC2	SH3 domain and tetratricopeptide repeats 2
hsa-miR-519b-3p	0	0	1	1	0	0	CIRH1A	cirrhosis, autosomal recessive 1A (cirhin)
hsa-miR-519b-3p	1	0	1	0	0	0	FAT3	FAT tumor suppressor homolog 3 (Drosophila)
hsa-miR-519b-3p	1	0	1	1	1	1	PRDM16	PR domain containing 16
hsa-miR-519b-3p	1	0	1	1	1	1	CSGALNACT1	chondroitin sulfate N-acetylgalactosaminyltransferase 1
hsa-miR-519b-3p	1	0	1	0	0	0	ZBTB34	zinc finger and BTB domain containing 34
hsa-miR-519b-3p	0	0	1	1	1	1	NELL1	NEL-like 1 (chicken)
hsa-miR-519b-3p	0	0	1	0	1	1	RASSF8	Ras association (RalGDS/AF-6) domain family (N-terminal) member 8
hsa-miR-519b-3p	1	0	1	1	1	1	PAN3	PAN3 poly(A) specific ribonuclease subunit homolog (S. cerevisiae)
hsa-miR-519b-3p	1	0	1	1	1	1	KCNMA1	potassium large conductance calcium-activated channel, subfamily M, alpha member 1
hsa-miR-519b-3p	1	0	1	0	1	1	BEND4	BEN domain containing 4
hsa-miR-519b-3p	0	0	1	1	1	1	ZFAT	zinc finger and AT hook domain containing
hsa-miR-519b-3p	1	1	1	1	1	1	BACE1	beta-site APP-cleaving enzyme 1
hsa-miR-519b-3p	1	0	1	1	1	1	UBE3A	ubiquitin protein ligase E3A
hsa-miR-519b-3p	1	0	1	1	1	1	ADARB1	adenosine deaminase, RNA-specific, B1
hsa-miR-519b-3p	0	0	1	1	1	1	SYBU	syntabulin (syntaxin-interacting)
hsa-miR-519b-3p	1	0	1	0	1	1	CCDC88A	coiled-coil domain containing 88A
hsa-miR-519b-3p	0	0	1	1	0	0	HFM1	HFM1, ATP-dependent DNA helicase homolog (S. cerevisiae)
hsa-miR-519b-3p	0	0	1	1	1	1	CAST	calpastatin
hsa-miR-519b-3p	0	0	1	0	1	1	ITPR1	inositol 1,4,5-trisphosphate receptor, type 1
hsa-miR-519b-3p	1	0	1	0	1	1	PCDHA13	protocadherin alpha 13
hsa-miR-519b-3p	1	0	1	1	1	1	PCDHA4	protocadherin alpha 4
hsa-miR-519b-3p	1	0	1	1	1	1	RPS6KA3	ribosomal protein S6 kinase, 90kDa, polypeptide 3
hsa-miR-519b-3p	0	0	1	1	0	0	SMARCC2	SWI/SNF related, matrix associated, actin dependent regulator of chromatin, subfamily c, member 2
hsa-miR-519b-3p	1	0	1	1	1	1	SLC8A1	solute carrier family 8 (sodium/calcium exchanger), member 1
hsa-miR-519b-3p	1	0	1	0	1	1	PLAG1	pleiomorphic adenoma gene 1
hsa-miR-519b-3p	1	0	1	1	1	1	RASSF5	Ras association (RalGDS/AF-6) domain family member 5
hsa-miR-519b-3p	1	0	1	1	0	0	CACNB1	calcium channel, voltage-dependent, beta 1 subunit
hsa-miR-519b-3p	1	0	1	1	0	0	TSPYL2	TSPY-like 2
hsa-miR-519b-3p	1	0	1	1	1	1	FMR1	fragile X mental retardation 1
hsa-miR-519b-3p	1	0	1	0	1	1	DPYSL2	dihydropyrimidinase-like 2
hsa-miR-519b-3p	1	0	1	0	1	1	ETV1	ets variant 1
hsa-miR-519b-3p	0	0	1	0	1	1	NPY1R	neuropeptide Y receptor Y1
hsa-miR-519b-3p	0	0	1	1	1	1	TFRC	transferrin receptor (p90, CD71)
hsa-miR-519b-3p	1	0	1	1	1	1	TWF1	twinfilin, actin-binding protein, homolog 1 (Drosophila)
hsa-miR-519b-3p	1	0	1	1	1	1	SATB2	SATB homeobox 2
hsa-miR-519b-3p	1	0	1	1	1	1	MAP4	microtubule-associated protein 4
hsa-miR-519b-3p	1	0	1	1	1	1	SPTB	spectrin, beta, erythrocytic
hsa-miR-519b-3p	0	0	1	1	0	0	IFT27	intraflagellar transport 27 homolog (Chlamydomonas)
hsa-miR-519b-3p	0	0	1	1	1	1	RYR1	ryanodine receptor 1 (skeletal)
hsa-miR-519b-3p	1	0	1	1	1	1	LIMA1	LIM domain and actin binding 1
hsa-miR-519b-3p	0	0	1	1	0	0	EIF4E2	eukaryotic translation initiation factor 4E family member 2
hsa-miR-519b-3p	1	0	1	1	1	1	PDLIM5	PDZ and LIM domain 5
hsa-miR-519b-3p	1	0	1	1	1	1	IPO8	importin 8
hsa-miR-519b-3p	1	0	1	0	1	1	TBL1X	transducin (beta)-like 1X-linked
hsa-miR-519b-3p	1	0	1	1	1	1	ARHGEF3	Rho guanine nucleotide exchange factor (GEF) 3
hsa-miR-519b-3p	1	0	1	1	1	1	SLC6A8	solute carrier family 6 (neurotransmitter transporter, creatine), member 8
hsa-miR-519b-3p	0	0	1	1	0	0	CDK10	cyclin-dependent kinase 10
hsa-miR-519b-3p	1	0	1	1	1	1	HMGA2	high mobility group AT-hook 2
hsa-miR-519b-3p	1	0	1	1	1	1	NCOA3	nuclear receptor coactivator 3
hsa-miR-519b-3p	1	0	1	0	1	1	PDE7B	phosphodiesterase 7B
hsa-miR-519b-3p	1	0	1	1	1	1	MEF2D	myocyte enhancer factor 2D
hsa-miR-519b-3p	1	0	1	1	1	1	MYH10	myosin, heavy chain 10, non-muscle
hsa-miR-519b-3p	1	0	1	0	1	1	PDE4D	phosphodiesterase 4D, cAMP-specific
hsa-miR-519b-3p	1	0	1	1	1	1	MYT1L	myelin transcription factor 1-like
hsa-miR-519b-3p	1	0	1	0	0	0	MAP3K1	mitogen-activated protein kinase kinase kinase 1, E3 ubiquitin protein ligase
hsa-miR-519b-3p	1	0	1	1	1	1	LDB2	LIM domain binding 2
hsa-miR-519b-3p	1	0	1	1	1	1	POLQ	polymerase (DNA directed), theta
hsa-miR-519b-3p	1	0	1	1	1	1	SHOC2	soc-2 suppressor of clear homolog (C. elegans)
hsa-miR-519b-3p	0	0	1	1	1	1	SC5DL	sterol-C5-desaturase (ERG3 delta-5-desaturase homolog, S. cerevisiae)-like
hsa-miR-519b-3p	1	0	1	1	1	1	TMEM159	transmembrane protein 159
hsa-miR-519b-3p	1	0	1	1	1	1	TP63	tumor protein p63
hsa-miR-519b-3p	1	0	1	1	1	1	USP3	ubiquitin specific peptidase 3
hsa-miR-519b-3p	1	0	1	1	1	1	AKAP9	A kinase (PRKA) anchor protein (yotiao) 9
hsa-miR-519b-3p	1	0	1	0	1	1	MAP4K4	mitogen-activated protein kinase kinase kinase kinase 4
hsa-miR-519b-3p	1	0	1	1	1	1	GLS	glutaminase
hsa-miR-519b-3p	1	0	1	1	1	1	RABEP1	rabaptin, RAB GTPase binding effector protein 1
hsa-miR-519b-3p	0	0	1	1	1	1	THOC7	THO complex 7 homolog (Drosophila)
hsa-miR-519b-3p	0	0	1	1	1	1	MSTO1	misato homolog 1 (Drosophila)
hsa-miR-519b-3p	1	0	1	1	1	1	LRRFIP1	leucine rich repeat (in FLII) interacting protein 1
hsa-miR-519b-3p	1	0	1	0	1	1	CDK14	cyclin-dependent kinase 14
hsa-miR-519b-3p	1	0	1	0	1	1	WDR82	WD repeat domain 82
hsa-miR-519b-3p	1	0	1	1	1	1	CAB39	calcium binding protein 39
hsa-miR-519b-3p	1	0	1	1	1	1	TAOK3	TAO kinase 3
hsa-miR-519b-3p	1	0	1	0	1	1	BECN1	beclin 1, autophagy related
hsa-miR-519b-3p	1	0	1	1	1	1	MYNN	myoneurin
hsa-miR-519b-3p	0	0	1	1	1	1	AIG1	androgen-induced 1
hsa-miR-519b-3p	1	0	1	1	1	1	USP15	ubiquitin specific peptidase 15
hsa-miR-519b-3p	1	0	1	1	1	1	ZNF202	zinc finger protein 202
hsa-miR-519b-3p	1	0	1	0	1	1	AMOTL2	angiomotin like 2
hsa-miR-519b-3p	1	0	1	1	1	1	C3orf18	chromosome 3 open reading frame 18
hsa-miR-519b-3p	1	0	1	1	1	1	NXT2	nuclear transport factor 2-like export factor 2
hsa-miR-519b-3p	1	0	1	1	1	1	OGT	O-linked N-acetylglucosamine (GlcNAc) transferase
hsa-miR-519b-3p	0	0	1	1	1	1	MFF	mitochondrial fission factor
hsa-miR-519b-3p	0	0	1	1	1	1	DAZ2	deleted in azoospermia 2
hsa-miR-519b-3p	0	0	1	0	1	1	DAZ3	deleted in azoospermia 3
hsa-miR-519b-3p	0	0	1	0	0	0	TIGD7	tigger transposable element derived 7
hsa-miR-519b-3p	1	0	1	1	1	1	RBM47	RNA binding motif protein 47
hsa-miR-519b-3p	0	0	1	1	1	1	C21orf7	chromosome 21 open reading frame 7
hsa-miR-519b-3p	0	0	1	0	1	1	PRDM6	PR domain containing 6
hsa-miR-519b-3p	0	0	1	0	1	1	ERBB2IP	erbb2 interacting protein
hsa-miR-519b-3p	1	0	1	1	1	1	CALN1	calneuron 1
hsa-miR-519b-3p	0	0	1	1	1	1	SLC4A5	solute carrier family 4, sodium bicarbonate cotransporter, member 5
hsa-miR-519b-3p	1	0	1	1	1	1	TAGLN3	transgelin 3
hsa-miR-519b-3p	1	0	1	1	1	1	CPEB1	cytoplasmic polyadenylation element binding protein 1
hsa-miR-519b-3p	0	0	1	0	1	1	C1QTNF7	C1q and tumor necrosis factor related protein 7
hsa-miR-519b-3p	0	0	1	1	0	0	ZAN	zonadhesin
hsa-miR-519b-3p	1	0	1	1	1	1	CALU	calumenin
hsa-miR-519b-3p	1	0	1	1	1	1	PBX3	pre-B-cell leukemia homeobox 3
hsa-miR-519b-3p	1	0	1	1	1	1	CASD1	CAS1 domain containing 1
hsa-miR-519b-3p	1	0	1	1	1	1	LARP4	La ribonucleoprotein domain family, member 4
hsa-miR-519b-3p	1	0	1	1	1	1	NTRK2	neurotrophic tyrosine kinase, receptor, type 2
hsa-miR-519b-3p	1	0	1	1	0	0	YTHDF2	YTH domain family, member 2
hsa-miR-519b-3p	1	0	1	1	0	0	XRRA1	X-ray radiation resistance associated 1
hsa-miR-519b-3p	1	0	1	1	1	1	ZAK	sterile alpha motif and leucine zipper containing kinase AZK
hsa-miR-519b-3p	1	0	1	1	1	1	F3	coagulation factor III (thromboplastin, tissue factor)
hsa-miR-519b-3p	1	0	1	1	1	1	TRIP10	thyroid hormone receptor interactor 10
hsa-miR-519b-3p	0	0	1	1	1	1	TTLL11	tubulin tyrosine ligase-like family, member 11
hsa-miR-519b-3p	1	0	1	1	1	1	PTBP2	polypyrimidine tract binding protein 2
hsa-miR-519b-3p	0	0	1	1	1	1	ZNF638	zinc finger protein 638
hsa-miR-519b-3p	1	0	1	0	1	1	IL1RAP	interleukin 1 receptor accessory protein
hsa-miR-519b-3p	1	0	1	1	1	1	PLAGL1	pleiomorphic adenoma gene-like 1
hsa-miR-519b-3p	1	0	1	0	1	1	DICER1	dicer 1, ribonuclease type III
hsa-miR-519b-3p	1	0	1	0	1	1	CACNA1C	calcium channel, voltage-dependent, L type, alpha 1C subunit
hsa-miR-519b-3p	1	0	1	1	0	0	NAGK	N-acetylglucosamine kinase
hsa-miR-519b-3p	1	0	1	1	1	1	UBAP2L	ubiquitin associated protein 2-like
hsa-miR-519b-3p	1	0	1	0	1	1	GRB10	growth factor receptor-bound protein 10
hsa-miR-519b-3p	0	0	1	1	1	1	RANBP17	RAN binding protein 17
hsa-miR-519b-3p	0	0	1	1	0	0	KIF13A	kinesin family member 13A
hsa-miR-519b-3p	0	0	1	1	1	1	STK33	serine/threonine kinase 33
hsa-miR-519b-3p	0	0	1	0	0	0	CD177	CD177 molecule
hsa-miR-519b-3p	1	0	1	1	1	1	RAB3IP	RAB3A interacting protein (rabin3)
hsa-miR-519b-3p	0	0	1	0	1	1	SRPK1	SRSF protein kinase 1
hsa-miR-519b-3p	1	0	1	1	1	1	PNISR	PNN-interacting serine/arginine-rich protein
hsa-miR-519b-3p	0	0	1	1	1	1	TRDN	triadin
hsa-miR-519b-3p	0	0	1	1	0	0	MBD1	methyl-CpG binding domain protein 1
hsa-miR-519b-3p	1	0	1	1	1	1	ARL4C	ADP-ribosylation factor-like 4C
hsa-miR-519b-3p	0	0	1	0	0	0	LINC00271	long intergenic non-protein coding RNA 271
hsa-miR-519b-3p	1	0	1	1	1	1	PPP1R9A	protein phosphatase 1, regulatory subunit 9A
hsa-miR-519b-3p	0	0	1	1	0	0	NHLRC2	NHL repeat containing 2
hsa-miR-519b-3p	0	0	1	1	0	0	ACSS2	acyl-CoA synthetase short-chain family member 2
hsa-miR-519b-3p	1	0	1	0	1	1	NFAT5	nuclear factor of activated T-cells 5, tonicity-responsive
hsa-miR-519b-3p	1	0	1	1	1	1	SIK2	salt-inducible kinase 2
hsa-miR-519b-3p	0	0	1	0	0	0	FLJ20518	FSHD region gene 2 family, member C pseudogene
hsa-miR-519b-3p	0	0	1	0	0	0	TUG1	taurine upregulated 1 (non-protein coding)
hsa-miR-519b-3p	0	0	1	1	1	1	BANK1	B-cell scaffold protein with ankyrin repeats 1
hsa-miR-519b-3p	1	0	1	1	1	1	ARHGAP12	Rho GTPase activating protein 12
hsa-miR-519b-3p	1	0	1	1	1	1	BCAP29	B-cell receptor-associated protein 29
hsa-miR-519b-3p	1	0	1	1	1	1	EIF2C1	eukaryotic translation initiation factor 2C, 1
hsa-miR-519b-3p	0	0	1	1	1	1	THUMPD3	THUMP domain containing 3
hsa-miR-519b-3p	1	0	1	1	1	1	PTBP3	polypyrimidine tract binding protein 3
hsa-miR-519b-3p	1	0	1	1	1	1	MKLN1	muskelin 1, intracellular mediator containing kelch motifs
hsa-miR-519b-3p	0	0	1	1	1	1	STAU2	staufen, RNA binding protein, homolog 2 (Drosophila)
hsa-miR-519b-3p	1	0	1	1	1	1	HNRNPUL1	heterogeneous nuclear ribonucleoprotein U-like 1
hsa-miR-519b-3p	1	0	1	1	1	1	VASH2	vasohibin 2
hsa-miR-519b-3p	1	0	1	1	1	1	MON2	MON2 homolog (S. cerevisiae)
hsa-miR-519b-3p	0	0	1	1	1	1	ARMC5	armadillo repeat containing 5
hsa-miR-519b-3p	1	0	1	1	0	0	FASTK	Fas-activated serine/threonine kinase
hsa-miR-519b-3p	0	0	1	1	0	0	TTC17	tetratricopeptide repeat domain 17
hsa-miR-519b-3p	0	0	1	1	1	1	VPRBP	Vpr (HIV-1) binding protein
hsa-miR-519b-3p	1	0	1	1	1	1	CC2D1A	coiled-coil and C2 domain containing 1A
hsa-miR-519b-3p	1	0	1	1	1	1	DERL1	derlin 1
hsa-miR-519b-3p	0	0	1	1	1	1	CXorf57	chromosome X open reading frame 57
hsa-miR-519b-3p	1	0	1	1	1	1	CLIP4	CAP-GLY domain containing linker protein family, member 4
hsa-miR-519b-3p	1	0	1	1	1	1	DYRK2	dual-specificity tyrosine-(Y)-phosphorylation regulated kinase 2
hsa-miR-519b-3p	1	0	1	0	1	1	ATP2B1	ATPase, Ca++ transporting, plasma membrane 1
hsa-miR-519b-3p	1	0	1	1	1	1	ABHD3	abhydrolase domain containing 3
hsa-miR-519b-3p	1	0	1	1	1	1	GBF1	golgi brefeldin A resistant guanine nucleotide exchange factor 1
hsa-miR-519b-3p	1	0	1	0	1	1	MYO5B	myosin VB
hsa-miR-519b-3p	0	0	1	0	1	1	ATXN1L	ataxin 1-like
hsa-miR-519b-3p	1	0	1	1	1	1	TNRC6A	trinucleotide repeat containing 6A
hsa-miR-519b-3p	1	0	1	1	1	1	DENND4C	DENN/MADD domain containing 4C
hsa-miR-519b-3p	1	0	1	1	1	1	NAA30	N(alpha)-acetyltransferase 30, NatC catalytic subunit
hsa-miR-519b-3p	1	0	1	0	1	1	ZCCHC3	zinc finger, CCHC domain containing 3
hsa-miR-519b-3p	0	0	1	0	1	1	FLJ22763	uncharacterized LOC401081
hsa-miR-519b-3p	1	0	1	1	0	0	UBXN7	UBX domain protein 7
hsa-miR-519b-3p	1	0	1	1	1	1	DCAF8	DDB1 and CUL4 associated factor 8
hsa-miR-519b-3p	0	0	1	0	0	0	NEURL1B	neuralized homolog 1B (Drosophila)
hsa-miR-519b-3p	1	0	1	1	1	1	ITGA9	integrin, alpha 9
hsa-miR-519b-3p	0	0	1	1	1	1	GTF2H1	general transcription factor IIH, polypeptide 1, 62kDa
hsa-miR-519b-3p	1	0	1	0	1	1	TOX3	TOX high mobility group box family member 3
hsa-miR-519b-3p	1	0	1	1	1	1	LRP4	low density lipoprotein receptor-related protein 4
hsa-miR-519b-3p	1	0	1	1	1	1	GORASP2	golgi reassembly stacking protein 2, 55kDa
hsa-miR-519b-3p	1	0	1	1	1	1	FOXP1	forkhead box P1
hsa-miR-519b-3p	1	0	1	1	1	1	SEC63	SEC63 homolog (S. cerevisiae)
hsa-miR-519b-3p	0	0	1	1	1	1	KDM2B	lysine (K)-specific demethylase 2B
hsa-miR-519b-3p	0	0	1	0	1	1	TWSG1	twisted gastrulation homolog 1 (Drosophila)
hsa-miR-519b-3p	0	0	1	1	1	1	NETO2	neuropilin (NRP) and tolloid (TLL)-like 2
hsa-miR-519b-3p	1	0	1	0	1	1	CCNL2	cyclin L2
hsa-miR-519b-3p	1	0	1	1	1	1	TMEM2	transmembrane protein 2
hsa-miR-519b-3p	1	0	1	1	1	1	GPD2	glycerol-3-phosphate dehydrogenase 2 (mitochondrial)
hsa-miR-519b-3p	0	0	1	1	0	0	RTN4R	reticulon 4 receptor
hsa-miR-519b-3p	1	0	1	1	1	1	SLAIN1	SLAIN motif family, member 1
hsa-miR-519b-3p	0	0	1	0	0	0	KIAA0664L3	KIAA0664-like 3
hsa-miR-519b-3p	0	0	1	0	0	0	LOC283508	uncharacterized LOC283508
hsa-miR-519b-3p	1	0	1	0	1	1	AP1G1	adaptor-related protein complex 1, gamma 1 subunit
hsa-miR-519b-3p	0	0	1	0	1	1	HDX	highly divergent homeobox
hsa-miR-519b-3p	1	0	1	1	1	1	FRMD6	FERM domain containing 6
hsa-miR-519b-3p	0	0	1	0	0	0	LOC201617	uncharacterized LOC201617
hsa-miR-519b-3p	1	0	1	1	1	1	DIXDC1	DIX domain containing 1
hsa-miR-519b-3p	1	0	1	1	1	1	TMTC1	transmembrane and tetratricopeptide repeat containing 1
hsa-miR-519b-3p	1	0	1	0	1	1	RNF165	ring finger protein 165
hsa-miR-519b-3p	1	0	1	1	1	1	SCAMP5	secretory carrier membrane protein 5
hsa-miR-519b-3p	0	0	1	0	0	0	LOC284600	uncharacterized LOC284600
hsa-miR-519b-3p	1	0	1	1	1	1	CLCN5	chloride channel, voltage-sensitive 5
hsa-miR-519b-3p	0	0	1	1	0	0	ACOT8	acyl-CoA thioesterase 8
hsa-miR-519b-3p	0	0	1	0	0	0	LOC255187	hCG1980447
hsa-miR-519b-3p	0	0	1	1	1	1	DST	dystonin
hsa-miR-519b-3p	1	0	1	0	1	1	RABGEF1	RAB guanine nucleotide exchange factor (GEF) 1
hsa-miR-519b-3p	0	0	1	1	1	1	XAF1	XIAP associated factor 1
hsa-miR-519b-3p	1	0	1	1	1	1	ZBTB10	zinc finger and BTB domain containing 10
hsa-miR-519b-3p	1	0	1	1	1	1	MGAT1	mannosyl (alpha-1,3-)-glycoprotein beta-1,2-N-acetylglucosaminyltransferase
hsa-miR-519b-3p	0	0	1	0	0	0	FLJ32742	uncharacterized locus FLJ32742
hsa-miR-519b-3p	1	0	1	1	1	1	MPP7	membrane protein, palmitoylated 7 (MAGUK p55 subfamily member 7)
hsa-miR-519b-3p	1	0	1	1	1	1	ANKRD29	ankyrin repeat domain 29
hsa-miR-519b-3p	0	0	1	1	0	0	PTOV1	prostate tumor overexpressed 1
hsa-miR-519b-3p	0	0	1	1	0	0	SYTL1	synaptotagmin-like 1
hsa-miR-519b-3p	1	0	1	1	1	1	HLF	hepatic leukemia factor
hsa-miR-519b-3p	0	0	1	1	1	1	HDAC8	histone deacetylase 8
hsa-miR-519b-3p	1	0	1	1	1	1	BLCAP	bladder cancer associated protein
hsa-miR-519b-3p	0	0	1	1	1	1	SEC16A	SEC16 homolog A (S. cerevisiae)
hsa-miR-519b-3p	1	0	1	1	1	1	PRRT2	proline-rich transmembrane protein 2
hsa-miR-519b-3p	1	0	1	0	1	1	GRAMD1A	GRAM domain containing 1A
hsa-miR-519b-3p	1	0	1	1	1	1	PAX6	paired box 6
hsa-miR-519b-3p	1	0	1	1	1	1	UBAP1	ubiquitin associated protein 1
hsa-miR-519b-3p	0	0	1	1	0	0	CPAMD8	C3 and PZP-like, alpha-2-macroglobulin domain containing 8
hsa-miR-519b-3p	1	0	1	1	1	1	UXS1	UDP-glucuronate decarboxylase 1
hsa-miR-519b-3p	0	0	1	0	1	1	CADM1	cell adhesion molecule 1
hsa-miR-519b-3p	1	0	1	1	1	1	PIP4K2C	phosphatidylinositol-5-phosphate 4-kinase, type II, gamma
hsa-miR-519b-3p	1	0	1	1	1	1	BOC	Boc homolog (mouse)
hsa-miR-519b-3p	0	0	1	0	0	0	LOC152225	uncharacterized LOC152225
hsa-miR-519b-3p	0	0	1	0	1	1	TMSB15B	thymosin beta 15B
hsa-miR-519b-3p	1	0	1	1	1	1	EGR2	early growth response 2
hsa-miR-519b-3p	1	0	1	1	1	1	FBXW2	F-box and WD repeat domain containing 2
hsa-miR-519b-3p	0	0	1	0	0	0	KIAA1430	KIAA1430
hsa-miR-519b-3p	1	0	1	1	1	1	HDAC2	histone deacetylase 2
hsa-miR-519b-3p	0	0	1	1	1	1	HNRNPH1	heterogeneous nuclear ribonucleoprotein H1 (H)
hsa-miR-519b-3p	1	0	1	1	1	1	GNG2	guanine nucleotide binding protein (G protein), gamma 2
hsa-miR-519b-3p	0	0	1	1	1	1	NRBP1	nuclear receptor binding protein 1
hsa-miR-519b-3p	0	0	1	1	1	1	WT1	Wilms tumor 1
hsa-miR-519b-3p	1	0	1	1	1	1	SLBP	stem-loop binding protein
hsa-miR-519b-3p	0	0	1	1	1	1	LZTFL1	leucine zipper transcription factor-like 1
hsa-miR-519b-3p	1	0	1	1	1	1	SPTBN1	spectrin, beta, non-erythrocytic 1
hsa-miR-519b-3p	0	0	1	1	1	1	SLC16A1	solute carrier family 16, member 1 (monocarboxylic acid transporter 1)
hsa-miR-519b-3p	1	0	1	1	1	1	LRRC57	leucine rich repeat containing 57
hsa-miR-519b-3p	1	0	1	1	1	1	BANP	BTG3 associated nuclear protein
hsa-miR-519b-3p	1	0	1	1	1	1	MAP3K12	mitogen-activated protein kinase kinase kinase 12
hsa-miR-519b-3p	0	0	1	1	1	1	SPOCK1	sparc/osteonectin, cwcv and kazal-like domains proteoglycan (testican) 1
hsa-miR-519b-3p	0	0	1	0	0	0	PART1	prostate androgen-regulated transcript 1 (non-protein coding)
hsa-miR-519b-3p	1	0	1	0	1	1	GATAD2B	GATA zinc finger domain containing 2B
hsa-miR-519b-3p	0	0	1	1	1	1	RBM25	RNA binding motif protein 25
hsa-miR-519b-3p	0	0	1	0	1	1	AGBL4	ATP/GTP binding protein-like 4
hsa-miR-519b-3p	0	0	1	0	0	0	LOC285500	uncharacterized LOC285500
hsa-miR-519b-3p	1	0	1	1	1	1	ARHGEF7	Rho guanine nucleotide exchange factor (GEF) 7
hsa-miR-519b-3p	0	0	1	1	1	1	LRRC34	leucine rich repeat containing 34
hsa-miR-519b-3p	1	0	1	1	1	1	RASGEF1A	RasGEF domain family, member 1A
hsa-miR-519b-3p	1	0	1	1	1	1	NDEL1	nudE nuclear distribution E homolog (A. nidulans)-like 1
hsa-miR-519b-3p	0	0	1	1	1	1	MYO6	myosin VI
hsa-miR-519b-3p	1	0	1	1	1	1	EPHB1	EPH receptor B1
hsa-miR-519b-3p	1	0	1	0	1	1	UVRAG	UV radiation resistance associated gene
hsa-miR-519b-3p	1	0	1	1	1	1	FAM222B	family with sequence similarity 222, member B
hsa-miR-519b-3p	1	0	1	1	1	1	PEA15	phosphoprotein enriched in astrocytes 15
hsa-miR-519b-3p	1	0	1	1	1	1	ACSL1	acyl-CoA synthetase long-chain family member 1
hsa-miR-519b-3p	1	0	1	1	1	1	GAPVD1	GTPase activating protein and VPS9 domains 1
hsa-miR-519b-3p	1	0	1	1	1	1	LRP8	low density lipoprotein receptor-related protein 8, apolipoprotein e receptor
hsa-miR-519b-3p	0	0	1	1	0	0	DHX9	DEAH (Asp-Glu-Ala-His) box polypeptide 9
hsa-miR-519b-3p	1	0	1	0	1	1	THRB	thyroid hormone receptor, beta
hsa-miR-519b-3p	1	0	1	0	0	0	PID1	phosphotyrosine interaction domain containing 1
hsa-miR-519b-3p	1	0	1	1	1	1	SYT6	synaptotagmin VI
hsa-miR-519b-3p	1	0	1	1	1	1	ETS2	v-ets erythroblastosis virus E26 oncogene homolog 2 (avian)
hsa-miR-519b-3p	0	0	1	1	0	0	CHCHD5	coiled-coil-helix-coiled-coil-helix domain containing 5
hsa-miR-519b-3p	1	0	1	1	0	0	UBC	ubiquitin C
hsa-miR-519b-3p	1	0	1	1	1	1	RAB11FIP4	RAB11 family interacting protein 4 (class II)
hsa-miR-519b-3p	0	0	1	0	0	0	LINC00293	long intergenic non-protein coding RNA 293
hsa-miR-519b-3p	0	0	1	0	0	0	LOC100128560	uncharacterized LOC100128560
hsa-miR-519b-3p	1	0	1	1	1	1	GOLGA8B	golgin A8 family, member B
hsa-miR-519b-3p	0	0	1	0	0	0	LOC284385	uncharacterized LOC284385
hsa-miR-519b-3p	1	0	1	1	1	1	HOOK1	hook homolog 1 (Drosophila)
hsa-miR-519b-3p	1	0	1	1	1	1	PIGA	phosphatidylinositol glycan anchor biosynthesis, class A
hsa-miR-519b-3p	1	0	1	1	1	1	ZCCHC2	zinc finger, CCHC domain containing 2
hsa-miR-519b-3p	1	0	1	1	1	1	THTPA	thiamine triphosphatase
hsa-miR-519b-3p	0	0	1	0	0	0	LOC338579	ankyrin repeat domain-containing protein 30B pseudogene
hsa-miR-519b-3p	1	0	1	0	1	1	UNC5D	unc-5 homolog D (C. elegans)
hsa-miR-519b-3p	1	0	1	1	1	1	HBP1	HMG-box transcription factor 1
hsa-miR-519b-3p	1	0	1	1	1	1	LMX1A	LIM homeobox transcription factor 1, alpha
hsa-miR-519b-3p	0	0	1	1	1	1	RNF217	ring finger protein 217
hsa-miR-519b-3p	0	0	1	1	0	0	KIAA0146	KIAA0146
hsa-miR-519b-3p	1	0	1	1	1	1	WEE1	WEE1 homolog (S. pombe)
hsa-miR-519b-3p	1	0	1	1	1	1	PPP1R21	protein phosphatase 1, regulatory subunit 21
hsa-miR-519b-3p	1	0	1	1	1	1	ZBTB4	zinc finger and BTB domain containing 4
hsa-miR-519b-3p	1	0	1	1	1	1	MDGA2	MAM domain containing glycosylphosphatidylinositol anchor 2
hsa-miR-519b-3p	0	0	1	1	1	1	FAM5B	family with sequence similarity 5, member B
hsa-miR-519b-3p	1	0	1	1	1	1	EGLN3	egl nine homolog 3 (C. elegans)
hsa-miR-519b-3p	0	0	1	1	1	1	FAM19A2	family with sequence similarity 19 (chemokine (C-C motif)-like), member A2
hsa-miR-519b-3p	1	0	1	1	1	1	ADAMTS8	ADAM metallopeptidase with thrombospondin type 1 motif, 8
hsa-miR-519b-3p	1	0	1	0	0	0	GPR137C	G protein-coupled receptor 137C
hsa-miR-519b-3p	0	0	1	1	0	0	C20orf27	chromosome 20 open reading frame 27
hsa-miR-519b-3p	0	0	1	1	1	1	QDPR	quinoid dihydropteridine reductase
hsa-miR-519b-3p	0	0	1	1	0	0	NPIP	nuclear pore complex interacting protein
hsa-miR-519b-3p	1	0	1	1	1	1	ERBB3	v-erb-b2 erythroblastic leukemia viral oncogene homolog 3 (avian)
hsa-miR-519b-3p	0	0	1	1	0	0	JAKMIP1	janus kinase and microtubule interacting protein 1
hsa-miR-519b-3p	1	0	1	1	1	1	HARS	histidyl-tRNA synthetase
hsa-miR-519b-3p	0	0	1	1	1	1	ATPBD4	ATP binding domain 4
hsa-miR-519b-3p	1	0	1	1	1	1	SGIP1	SH3-domain GRB2-like (endophilin) interacting protein 1
hsa-miR-519b-3p	1	0	1	1	1	1	C11orf30	chromosome 11 open reading frame 30
hsa-miR-519b-3p	0	0	1	1	0	0	GABRA2	gamma-aminobutyric acid (GABA) A receptor, alpha 2
hsa-miR-519b-3p	1	0	1	1	1	1	SACS	spastic ataxia of Charlevoix-Saguenay (sacsin)
hsa-miR-519b-3p	0	0	1	1	1	1	SRPX	sushi-repeat containing protein, X-linked
hsa-miR-519b-3p	0	0	1	0	1	1	RASGRP3	RAS guanyl releasing protein 3 (calcium and DAG-regulated)
hsa-miR-519b-3p	0	0	1	1	0	0	LOC442075	uncharacterized LOC442075
hsa-miR-519b-3p	1	0	1	1	1	1	KPNA1	karyopherin alpha 1 (importin alpha 5)
hsa-miR-519b-3p	0	0	1	1	1	1	FAM54A	family with sequence similarity 54, member A
hsa-miR-519b-3p	0	0	1	1	0	0	RPRD2	regulation of nuclear pre-mRNA domain containing 2
hsa-miR-519b-3p	1	0	1	1	1	1	MACROD2	MACRO domain containing 2
hsa-miR-519b-3p	1	0	1	1	0	0	UBN2	ubinuclein 2
hsa-miR-519b-3p	1	0	1	1	1	1	CHD5	chromodomain helicase DNA binding protein 5
hsa-miR-519b-3p	0	0	1	1	1	1	EPPIN	epididymal peptidase inhibitor
hsa-miR-519b-3p	0	0	1	1	1	1	MORF4L2	mortality factor 4 like 2
hsa-miR-519b-3p	1	0	1	1	1	1	CSRNP3	cysteine-serine-rich nuclear protein 3
hsa-miR-519b-3p	1	0	1	1	1	1	COPS7B	COP9 constitutive photomorphogenic homolog subunit 7B (Arabidopsis)
hsa-miR-519b-3p	1	0	1	1	1	1	SACM1L	SAC1 suppressor of actin mutations 1-like (yeast)
hsa-miR-519b-3p	0	0	1	1	1	1	CCDC132	coiled-coil domain containing 132
hsa-miR-519b-3p	1	0	1	1	1	1	PHTF1	putative homeodomain transcription factor 1
hsa-miR-519b-3p	1	0	1	1	1	1	DLG2	discs, large homolog 2 (Drosophila)
hsa-miR-519b-3p	1	0	1	1	1	1	ODF2	outer dense fiber of sperm tails 2
hsa-miR-519b-3p	0	0	1	1	0	0	HS3ST5	heparan sulfate (glucosamine) 3-O-sulfotransferase 5
hsa-miR-519b-3p	1	0	1	1	1	1	EIF4E3	eukaryotic translation initiation factor 4E family member 3
hsa-miR-519b-3p	1	0	1	1	1	1	MKRN1	makorin ring finger protein 1
hsa-miR-519b-3p	1	0	1	1	1	1	CLTC	clathrin, heavy chain (Hc)
hsa-miR-519b-3p	1	0	1	1	1	1	MFSD6	major facilitator superfamily domain containing 6
hsa-miR-519b-3p	1	0	1	0	1	1	ADIPOR2	adiponectin receptor 2
hsa-miR-519b-3p	0	0	1	0	0	0	LOC100128262	uncharacterized LOC100128262
hsa-miR-519b-3p	1	0	1	1	1	1	R3HDM1	R3H domain containing 1
hsa-miR-519b-3p	1	0	1	0	1	1	CAPRIN1	cell cycle associated protein 1
hsa-miR-519b-3p	1	0	1	1	1	1	AHRR	aryl-hydrocarbon receptor repressor
hsa-miR-519b-3p	0	0	1	0	1	1	LOC401321	uncharacterized LOC401321
hsa-miR-519b-3p	0	0	1	1	1	1	MCU	mitochondrial calcium uniporter
hsa-miR-519b-3p	1	0	1	1	0	0	MAN1B1	mannosidase, alpha, class 1B, member 1
hsa-miR-519b-3p	1	0	1	0	1	1	KDM2A	lysine (K)-specific demethylase 2A
hsa-miR-519b-3p	1	0	1	1	1	1	KCTD12	potassium channel tetramerisation domain containing 12
hsa-miR-519b-3p	1	0	1	1	1	1	PDZD2	PDZ domain containing 2
hsa-miR-519b-3p	0	0	1	0	0	0	IDO2	indoleamine 2,3-dioxygenase 2
hsa-miR-519b-3p	1	0	1	1	1	1	ADAMTSL1	ADAMTS-like 1
hsa-miR-519b-3p	0	0	1	1	1	1	TBX19	T-box 19
hsa-miR-519b-3p	1	0	1	1	1	1	GPD1	glycerol-3-phosphate dehydrogenase 1 (soluble)
hsa-miR-519b-3p	0	0	1	0	1	1	KIF1A	kinesin family member 1A
hsa-miR-519b-3p	0	0	1	0	0	0	LOC494141	mitochondrial carrier triple repeat 1 pseudogene
hsa-miR-519b-3p	0	0	1	0	1	1	GALNT13	UDP-N-acetyl-alpha-D-galactosamine:polypeptide N-acetylgalactosaminyltransferase 13 (GalNAc-T13)
hsa-miR-519b-3p	1	0	1	1	1	1	RNF111	ring finger protein 111
hsa-miR-519b-3p	1	0	1	1	1	1	SMAD7	SMAD family member 7
hsa-miR-519b-3p	0	0	1	1	1	1	ZSCAN20	zinc finger and SCAN domain containing 20
hsa-miR-519b-3p	0	0	1	1	0	0	ANAPC15	anaphase promoting complex subunit 15
hsa-miR-519b-3p	0	0	1	1	1	1	AKTIP	AKT interacting protein
hsa-miR-519b-3p	0	0	1	1	1	1	CEACAM5	carcinoembryonic antigen-related cell adhesion molecule 5
hsa-miR-519b-3p	1	0	1	1	0	0	TDRKH	tudor and KH domain containing
hsa-miR-519b-3p	1	0	1	1	1	1	TBC1D15	TBC1 domain family, member 15
hsa-miR-519b-3p	1	0	1	0	1	1	MAP3K3	mitogen-activated protein kinase kinase kinase 3
hsa-miR-519b-3p	1	0	1	1	1	1	COBLL1	COBL-like 1
hsa-miR-519b-3p	1	0	1	1	1	1	WDR20	WD repeat domain 20
hsa-miR-519b-3p	1	0	1	1	1	1	PHTF2	putative homeodomain transcription factor 2
hsa-miR-519b-3p	0	0	1	1	1	1	PSMG2	proteasome (prosome, macropain) assembly chaperone 2
hsa-miR-519b-3p	1	0	1	1	1	1	HSDL2	hydroxysteroid dehydrogenase like 2
hsa-miR-519b-3p	1	0	1	1	1	1	LUC7L3	LUC7-like 3 (S. cerevisiae)
hsa-miR-519b-3p	1	0	1	1	1	1	NOVA1	neuro-oncological ventral antigen 1
hsa-miR-519b-3p	1	0	1	1	1	1	MARCH7	membrane-associated ring finger (C3HC4) 7, E3 ubiquitin protein ligase
hsa-miR-519b-3p	0	0	1	1	1	1	TFDP2	transcription factor Dp-2 (E2F dimerization partner 2)
hsa-miR-519b-3p	0	0	1	1	0	0	TBC1D10B	TBC1 domain family, member 10B
hsa-miR-519b-3p	1	0	1	1	1	1	ARF6	ADP-ribosylation factor 6
hsa-miR-519b-3p	0	0	1	1	1	1	ARIH1	ariadne homolog, ubiquitin-conjugating enzyme E2 binding protein, 1 (Drosophila)
hsa-miR-519b-3p	0	0	1	1	1	1	KIDINS220	kinase D-interacting substrate, 220kDa
hsa-miR-519b-3p	0	0	1	1	1	1	ZNF280D	zinc finger protein 280D
hsa-miR-519b-3p	1	0	1	1	1	1	SLC25A36	solute carrier family 25 (pyrimidine nucleotide carrier ), member 36
hsa-miR-519b-3p	0	0	1	1	1	1	MIOS	missing oocyte, meiosis regulator, homolog (Drosophila)
hsa-miR-519b-3p	0	0	1	1	0	0	BAG3	BCL2-associated athanogene 3
hsa-miR-519b-3p	1	0	1	1	1	1	GOLGA8A	golgin A8 family, member A
hsa-miR-519b-3p	1	0	1	1	1	1	NBEA	neurobeachin
hsa-miR-519b-3p	1	0	1	0	1	1	GPR85	G protein-coupled receptor 85
hsa-miR-519b-3p	1	0	1	0	1	1	GRIN3A	glutamate receptor, ionotropic, N-methyl-D-aspartate 3A
hsa-miR-519b-3p	1	0	1	0	1	1	FAM19A1	family with sequence similarity 19 (chemokine (C-C motif)-like), member A1
hsa-miR-519b-3p	1	0	1	1	1	1	SLC30A8	solute carrier family 30 (zinc transporter), member 8
hsa-miR-519b-3p	1	0	1	1	1	1	YTHDF3	YTH domain family, member 3
hsa-miR-519b-3p	1	0	1	1	1	1	MIER1	mesoderm induction early response 1 homolog (Xenopus laevis)
hsa-miR-519b-3p	0	0	1	1	1	1	BEND7	BEN domain containing 7
hsa-miR-519b-3p	1	0	1	1	1	1	FAM126B	family with sequence similarity 126, member B
hsa-miR-519b-3p	0	0	1	1	1	1	SRSF11	serine/arginine-rich splicing factor 11
hsa-miR-519b-3p	1	0	1	1	1	1	NFX1	nuclear transcription factor, X-box binding 1
hsa-miR-519b-3p	0	0	1	1	1	1	MYPN	myopalladin
hsa-miR-519b-3p	1	0	1	0	1	1	MPP5	membrane protein, palmitoylated 5 (MAGUK p55 subfamily member 5)
hsa-miR-519b-3p	1	0	1	0	1	1	STYX	serine/threonine/tyrosine interacting protein
hsa-miR-519b-3p	0	0	1	1	1	1	VWA3B	von Willebrand factor A domain containing 3B
hsa-miR-519b-3p	1	0	1	1	1	1	NABP1	nucleic acid binding protein 1
hsa-miR-519b-3p	0	0	1	0	0	0	FAM225A	family with sequence similarity 225, member A (non-protein coding)
hsa-miR-519b-3p	1	0	1	1	1	1	FBXO3	F-box protein 3
hsa-miR-519b-3p	1	0	1	0	1	1	GPCPD1	glycerophosphocholine phosphodiesterase GDE1 homolog (S. cerevisiae)
hsa-miR-519b-3p	0	0	1	0	1	1	PAPD4	PAP associated domain containing 4
hsa-miR-519b-3p	0	0	1	1	1	1	C12orf50	chromosome 12 open reading frame 50
hsa-miR-519b-3p	0	0	1	1	0	0	TMEM116	transmembrane protein 116
hsa-miR-519b-3p	1	0	1	0	1	1	CNOT7	CCR4-NOT transcription complex, subunit 7
hsa-miR-519b-3p	1	0	1	1	1	1	ANP32E	acidic (leucine-rich) nuclear phosphoprotein 32 family, member E
hsa-miR-519b-3p	0	0	1	1	1	1	PCDH20	protocadherin 20
hsa-miR-519b-3p	1	0	1	0	0	0	NPEPL1	aminopeptidase-like 1
hsa-miR-519b-3p	1	0	1	1	1	1	ANKRD12	ankyrin repeat domain 12
hsa-miR-519b-3p	1	0	1	1	1	1	CAPRIN2	caprin family member 2
hsa-miR-519b-3p	1	0	1	1	1	1	SLC24A4	solute carrier family 24 (sodium/potassium/calcium exchanger), member 4
hsa-miR-519b-3p	0	0	1	1	1	1	TEX2	testis expressed 2
hsa-miR-519b-3p	0	0	1	1	1	1	C8orf34	chromosome 8 open reading frame 34
hsa-miR-519b-3p	1	0	1	1	1	1	RICTOR	RPTOR independent companion of MTOR, complex 2
hsa-miR-519b-3p	0	0	1	1	1	1	INTS7	integrator complex subunit 7
hsa-miR-519b-3p	1	0	1	1	1	1	FAM76B	family with sequence similarity 76, member B
hsa-miR-519b-3p	1	0	1	0	1	1	PHYHIPL	phytanoyl-CoA 2-hydroxylase interacting protein-like
hsa-miR-519b-3p	0	0	1	1	1	1	SLAMF7	SLAM family member 7
hsa-miR-519b-3p	1	0	1	0	1	1	APOLD1	apolipoprotein L domain containing 1
hsa-miR-519b-3p	1	0	1	1	1	1	FBXL5	F-box and leucine-rich repeat protein 5
hsa-miR-519b-3p	1	0	1	1	1	1	PPP3CA	protein phosphatase 3, catalytic subunit, alpha isozyme
hsa-miR-519b-3p	1	0	1	1	1	1	IKZF2	IKAROS family zinc finger 2 (Helios)
hsa-miR-519b-3p	1	0	1	1	1	1	CLIC5	chloride intracellular channel 5
hsa-miR-519b-3p	0	0	1	1	1	1	OSR2	odd-skipped related 2 (Drosophila)
hsa-miR-519b-3p	1	0	1	1	1	1	DUSP16	dual specificity phosphatase 16
hsa-miR-519b-3p	0	0	1	1	0	0	FAM176C	family with sequence similarity 176, member C
hsa-miR-519b-3p	0	0	1	1	0	0	TP73	tumor protein p73
hsa-miR-519b-3p	1	0	1	1	1	1	MIPOL1	mirror-image polydactyly 1
hsa-miR-519b-3p	1	0	1	1	1	1	RBBP6	retinoblastoma binding protein 6
hsa-miR-519b-3p	1	0	1	1	1	1	SORCS1	sortilin-related VPS10 domain containing receptor 1
hsa-miR-519b-3p	1	0	1	1	1	1	BCL11A	B-cell CLL/lymphoma 11A (zinc finger protein)
hsa-miR-519b-3p	1	0	1	1	1	1	ILF3	interleukin enhancer binding factor 3, 90kDa
hsa-miR-519b-3p	1	0	1	1	1	1	TAB3	TGF-beta activated kinase 1/MAP3K7 binding protein 3
hsa-miR-519b-3p	1	0	1	0	1	1	AP2B1	adaptor-related protein complex 2, beta 1 subunit
hsa-miR-519b-3p	0	0	1	0	0	0	FAM138C	family with sequence similarity 138, member C
hsa-miR-519b-3p	1	0	1	1	1	1	CAMTA1	calmodulin binding transcription activator 1
hsa-miR-519b-3p	1	0	1	1	1	1	IQGAP2	IQ motif containing GTPase activating protein 2
hsa-miR-519b-3p	0	0	1	1	0	0	PDZD11	PDZ domain containing 11
hsa-miR-519b-3p	0	0	1	1	1	1	PAQR5	progestin and adipoQ receptor family member V
hsa-miR-519b-3p	1	0	1	1	1	1	SP3	Sp3 transcription factor
hsa-miR-519b-3p	1	0	1	1	1	1	MECP2	methyl CpG binding protein 2 (Rett syndrome)
hsa-miR-519b-3p	1	0	1	1	1	1	MOG	myelin oligodendrocyte glycoprotein
hsa-miR-519b-3p	0	0	1	0	1	1	RAB18	RAB18, member RAS oncogene family
hsa-miR-519b-3p	1	0	1	1	1	1	ALCAM	activated leukocyte cell adhesion molecule
hsa-miR-519b-3p	0	0	1	1	1	1	KLK7	kallikrein-related peptidase 7
hsa-miR-519b-3p	1	0	1	1	1	1	BHLHE41	basic helix-loop-helix family, member e41
hsa-miR-519b-3p	1	0	1	1	1	1	NIPA2	non imprinted in Prader-Willi/Angelman syndrome 2
hsa-miR-519b-3p	1	0	1	1	1	1	RTN3	reticulon 3
hsa-miR-519b-3p	1	0	1	1	1	1	QKI	QKI, KH domain containing, RNA binding
hsa-miR-519b-3p	1	0	1	1	1	1	MYB	v-myb myeloblastosis viral oncogene homolog (avian)
hsa-miR-519b-3p	1	0	1	1	1	1	SAT1	spermidine/spermine N1-acetyltransferase 1
hsa-miR-519b-3p	0	0	1	1	1	1	IYD	iodotyrosine deiodinase
hsa-miR-519b-3p	0	0	1	1	1	1	SLC6A2	solute carrier family 6 (neurotransmitter transporter, noradrenalin), member 2
hsa-miR-519b-3p	1	0	1	0	1	1	FAM46A	family with sequence similarity 46, member A
hsa-miR-519b-3p	0	0	1	1	1	1	PAFAH1B2	platelet-activating factor acetylhydrolase 1b, catalytic subunit 2 (30kDa)
hsa-miR-519b-3p	1	0	1	0	1	1	DPYSL5	dihydropyrimidinase-like 5
hsa-miR-519b-3p	0	0	1	1	1	1	FTO	fat mass and obesity associated
hsa-miR-519b-3p	1	0	1	1	1	1	NUMA1	nuclear mitotic apparatus protein 1
hsa-miR-519b-3p	1	0	1	1	1	1	KIAA1191	KIAA1191
hsa-miR-519b-3p	1	0	1	1	1	1	U2SURP	U2 snRNP-associated SURP domain containing
hsa-miR-519b-3p	1	0	1	0	1	1	ATM	ataxia telangiectasia mutated
hsa-miR-519b-3p	1	0	1	1	1	1	COL2A1	collagen, type II, alpha 1
hsa-miR-519b-3p	1	0	1	0	1	1	DDX3X	DEAD (Asp-Glu-Ala-Asp) box polypeptide 3, X-linked
hsa-miR-519b-3p	1	0	1	1	1	1	CALM1	calmodulin 1 (phosphorylase kinase, delta)
hsa-miR-519b-3p	0	0	1	1	1	1	TMEM30A	transmembrane protein 30A
hsa-miR-519b-3p	1	0	1	1	1	1	MASTL	microtubule associated serine/threonine kinase-like
hsa-miR-519b-3p	1	0	1	1	1	1	ATP6AP2	ATPase, H+ transporting, lysosomal accessory protein 2
hsa-miR-519b-3p	0	0	1	1	0	0	TCN2	transcobalamin II
hsa-miR-519b-3p	1	0	1	1	0	0	SLC29A2	solute carrier family 29 (nucleoside transporters), member 2
hsa-miR-519b-3p	0	0	1	1	1	1	HDHD2	haloacid dehalogenase-like hydrolase domain containing 2
hsa-miR-519b-3p	1	0	1	1	1	1	BTG3	BTG family, member 3
hsa-miR-519b-3p	0	0	1	0	0	0	GRAMD1B	GRAM domain containing 1B
hsa-miR-519b-3p	0	0	1	0	0	0	TPTEP1	transmembrane phosphatase with tensin homology pseudogene 1
hsa-miR-519b-3p	0	0	1	1	0	0	MRPS11	mitochondrial ribosomal protein S11
hsa-miR-519b-3p	0	0	1	1	1	1	PCNP	PEST proteolytic signal containing nuclear protein
hsa-miR-519b-3p	1	0	1	1	1	1	ETF1	eukaryotic translation termination factor 1
hsa-miR-519b-3p	1	0	1	1	1	1	PRDM2	PR domain containing 2, with ZNF domain
hsa-miR-519b-3p	0	0	1	1	1	1	PTK7	PTK7 protein tyrosine kinase 7
hsa-miR-519b-3p	0	0	1	1	0	0	ACAD10	acyl-CoA dehydrogenase family, member 10
hsa-miR-519b-3p	1	0	1	1	1	1	PAPOLA	poly(A) polymerase alpha
hsa-miR-519b-3p	0	0	1	1	0	0	BEST1	bestrophin 1
hsa-miR-519b-3p	0	0	1	0	0	0	KLHL15	kelch-like 15 (Drosophila)
hsa-miR-519b-3p	0	0	1	0	0	0	NUDT16P1	nudix (nucleoside diphosphate linked moiety X)-type motif 16 pseudogene 1
hsa-miR-519b-3p	0	0	1	1	0	0	MAST2	microtubule associated serine/threonine kinase 2
hsa-miR-519b-3p	1	0	1	1	1	1	TMEM9B	TMEM9 domain family, member B
hsa-miR-519b-3p	0	0	1	0	0	0	ABCC6P2	ATP-binding cassette, sub-family C, member 6 pseudogene 2
hsa-miR-519b-3p	1	0	1	0	1	1	CYBRD1	cytochrome b reductase 1
hsa-miR-519b-3p	0	0	1	1	1	1	RECQL5	RecQ protein-like 5
hsa-miR-519b-3p	1	0	1	0	1	1	ICMT	isoprenylcysteine carboxyl methyltransferase
hsa-miR-519b-3p	0	0	1	1	0	0	C1orf51	chromosome 1 open reading frame 51
hsa-miR-519b-3p	0	0	1	1	1	1	CSDE1	cold shock domain containing E1, RNA-binding
hsa-miR-519b-3p	0	0	1	1	1	1	PLA2G4C	phospholipase A2, group IVC (cytosolic, calcium-independent)
hsa-miR-519b-3p	1	0	1	1	1	1	WWC2	WW and C2 domain containing 2
hsa-miR-519b-3p	1	0	1	1	1	1	SUZ12	suppressor of zeste 12 homolog (Drosophila)
hsa-miR-519b-3p	0	0	1	0	1	1	CD99P1	CD99 molecule pseudogene 1
hsa-miR-519b-3p	0	0	1	1	1	1	NELL2	NEL-like 2 (chicken)
hsa-miR-519b-3p	1	0	1	1	1	1	WHSC1	Wolf-Hirschhorn syndrome candidate 1
hsa-miR-519b-3p	1	0	1	0	1	1	BTF3L4	basic transcription factor 3-like 4
hsa-miR-519b-3p	0	0	1	1	0	0	SLC22A9	solute carrier family 22 (organic anion transporter), member 9
hsa-miR-519b-3p	0	0	1	1	0	0	TPT1	tumor protein, translationally-controlled 1
hsa-miR-519b-3p	0	0	1	1	0	0	IMMP1L	IMP1 inner mitochondrial membrane peptidase-like (S. cerevisiae)
hsa-miR-519b-3p	1	0	1	1	1	1	RACGAP1	Rac GTPase activating protein 1
hsa-miR-519b-3p	0	0	1	1	0	0	KRBA2	KRAB-A domain containing 2
hsa-miR-519b-3p	1	0	1	1	1	1	CNTN4	contactin 4
hsa-miR-519b-3p	1	0	1	1	1	1	SPG20	spastic paraplegia 20 (Troyer syndrome)
hsa-miR-519b-3p	1	0	1	1	1	1	EPHA4	EPH receptor A4
hsa-miR-519b-3p	0	0	1	1	1	1	MAP2	microtubule-associated protein 2
hsa-miR-519b-3p	1	0	1	1	1	1	RSPO2	R-spondin 2
hsa-miR-519b-3p	1	0	1	1	1	1	TMEM127	transmembrane protein 127
hsa-miR-519b-3p	1	0	1	1	1	1	GIGYF2	GRB10 interacting GYF protein 2
hsa-miR-519b-3p	0	0	1	1	1	1	CCDC146	coiled-coil domain containing 146
hsa-miR-519b-3p	1	0	1	1	1	1	ATRNL1	attractin-like 1
hsa-miR-519b-3p	0	0	1	1	1	1	PIK3AP1	phosphoinositide-3-kinase adaptor protein 1
hsa-miR-519b-3p	1	0	1	1	1	1	ELAVL2	ELAV (embryonic lethal, abnormal vision, Drosophila)-like 2 (Hu antigen B)
hsa-miR-519b-3p	1	0	1	1	1	1	GABRA1	gamma-aminobutyric acid (GABA) A receptor, alpha 1
hsa-miR-519b-3p	1	0	1	1	1	1	ZNF518A	zinc finger protein 518A
hsa-miR-519b-3p	0	0	1	1	1	1	IQCH	IQ motif containing H
hsa-miR-519b-3p	0	0	1	0	0	0	LOC729307	uncharacterized LOC729307
hsa-miR-519b-3p	1	0	1	1	1	1	ZPLD1	zona pellucida-like domain containing 1
hsa-miR-519b-3p	0	0	1	1	0	0	TRIM69	tripartite motif containing 69
hsa-miR-519b-3p	1	0	1	1	1	1	GLUL	glutamate-ammonia ligase
hsa-miR-519b-3p	0	0	1	1	1	1	C7orf53	chromosome 7 open reading frame 53
hsa-miR-519b-3p	0	0	1	1	1	1	SNX17	sorting nexin 17
hsa-miR-519b-3p	1	0	1	1	1	1	PHF17	PHD finger protein 17
hsa-miR-519b-3p	1	0	1	1	1	1	RAB5B	RAB5B, member RAS oncogene family
hsa-miR-519b-3p	1	0	1	1	1	1	MAK	male germ cell-associated kinase
hsa-miR-519b-3p	1	0	1	1	1	1	FAM13A	family with sequence similarity 13, member A
hsa-miR-519b-3p	0	0	1	0	0	0	WDFY3-AS2	WDFY3 antisense RNA 2
hsa-miR-519b-3p	0	0	1	0	0	0	BCAS3	breast carcinoma amplified sequence 3
hsa-miR-519b-3p	1	0	1	1	1	1	PCDHA5	protocadherin alpha 5
hsa-miR-519b-3p	0	0	1	1	0	0	ADAP2	ArfGAP with dual PH domains 2
hsa-miR-519b-3p	1	0	1	1	1	1	ATF7IP2	activating transcription factor 7 interacting protein 2
hsa-miR-519b-3p	1	0	1	0	1	1	KIF5A	kinesin family member 5A
hsa-miR-519b-3p	0	0	1	1	1	1	EDA2R	ectodysplasin A2 receptor
hsa-miR-519b-3p	1	0	1	0	1	1	DDX3Y	DEAD (Asp-Glu-Ala-Asp) box polypeptide 3, Y-linked
hsa-miR-519b-3p	0	0	1	1	1	1	KIF16B	kinesin family member 16B
hsa-miR-519b-3p	0	0	1	1	0	0	HCRTR1	hypocretin (orexin) receptor 1
hsa-miR-519b-3p	1	0	1	1	1	1	ZEB2	zinc finger E-box binding homeobox 2
hsa-miR-519b-3p	1	0	1	1	1	1	CTDSPL2	CTD (carboxy-terminal domain, RNA polymerase II, polypeptide A) small phosphatase like 2
hsa-miR-519b-3p	0	0	1	0	0	0	HOXA-AS2	HOXA cluster antisense RNA 2
hsa-miR-519b-3p	0	0	1	1	1	1	CLEC12B	C-type lectin domain family 12, member B
hsa-miR-519b-3p	1	0	1	1	1	1	PEX5L	peroxisomal biogenesis factor 5-like
hsa-miR-519b-3p	0	0	1	1	1	1	FAM171B	family with sequence similarity 171, member B
hsa-miR-519b-3p	1	0	1	1	1	1	HECTD2	HECT domain containing E3 ubiquitin protein ligase 2
hsa-miR-519b-3p	1	0	1	1	1	1	ACVR1	activin A receptor, type I
hsa-miR-519b-3p	1	0	1	0	1	1	CLDN12	claudin 12
hsa-miR-519b-3p	1	0	1	0	1	1	NEGR1	neuronal growth regulator 1
hsa-miR-519b-3p	1	0	1	0	1	1	CPEB4	cytoplasmic polyadenylation element binding protein 4
hsa-miR-519b-3p	1	0	1	1	1	1	BNC2	basonuclin 2
hsa-miR-519b-3p	0	0	1	0	0	0	CYP4F35P	cytochrome P450, family 4, subfamily F, polypeptide 35, pseudogene
hsa-miR-519b-3p	0	0	1	0	0	0	LOC286184	uncharacterized LOC286184
hsa-miR-519b-3p	1	0	1	0	1	1	FAM78A	family with sequence similarity 78, member A
hsa-miR-519b-3p	1	0	1	1	1	1	SOX6	SRY (sex determining region Y)-box 6
hsa-miR-519b-3p	1	0	1	1	1	1	SLC35F3	solute carrier family 35, member F3
hsa-miR-519b-3p	1	0	1	1	1	1	UBXN2A	UBX domain protein 2A
hsa-miR-519b-3p	1	0	1	1	1	1	GALNT1	UDP-N-acetyl-alpha-D-galactosamine:polypeptide N-acetylgalactosaminyltransferase 1 (GalNAc-T1)
hsa-miR-519b-3p	1	0	1	1	1	1	DPP10	dipeptidyl-peptidase 10 (non-functional)
hsa-miR-519b-3p	0	0	1	1	0	0	BLK	B lymphoid tyrosine kinase
hsa-miR-519b-3p	0	0	1	0	0	0	FLJ36000	uncharacterized FLJ36000
hsa-miR-519b-3p	1	0	1	1	1	1	PSD	pleckstrin and Sec7 domain containing
hsa-miR-519b-3p	1	0	1	1	1	1	TIMP2	TIMP metallopeptidase inhibitor 2
hsa-miR-519b-3p	0	0	1	1	1	1	SLTM	SAFB-like, transcription modulator
hsa-miR-519b-3p	1	0	1	1	1	1	DACH2	dachshund homolog 2 (Drosophila)
hsa-miR-519b-3p	1	0	1	1	1	1	FBXO8	F-box protein 8
hsa-miR-519b-3p	0	0	1	1	1	1	ZFP90	zinc finger protein 90 homolog (mouse)
hsa-miR-519b-3p	1	0	1	1	1	1	SLITRK3	SLIT and NTRK-like family, member 3
hsa-miR-519b-3p	0	0	1	1	1	1	MDFIC	MyoD family inhibitor domain containing
hsa-miR-519b-3p	0	0	1	1	1	1	PCMTD2	protein-L-isoaspartate (D-aspartate) O-methyltransferase domain containing 2
hsa-miR-519b-3p	0	0	1	1	1	1	SIAE	sialic acid acetylesterase
hsa-miR-519b-3p	0	0	1	1	1	1	C4orf32	chromosome 4 open reading frame 32
hsa-miR-519b-3p	1	0	1	1	1	1	TNFRSF1B	tumor necrosis factor receptor superfamily, member 1B
hsa-miR-519b-3p	1	0	1	1	1	1	FKBP5	FK506 binding protein 5
hsa-miR-519b-3p	0	0	1	1	1	1	LDLRAD2	low density lipoprotein receptor class A domain containing 2
hsa-miR-519b-3p	0	0	1	0	1	1	C12orf74	chromosome 12 open reading frame 74
hsa-miR-519b-3p	0	0	1	1	1	1	CBWD5	COBW domain containing 5
hsa-miR-519b-3p	0	0	1	0	0	0	LOC339260	uncharacterized LOC339260
hsa-miR-519b-3p	1	0	1	1	1	1	RNF145	ring finger protein 145
hsa-miR-519b-3p	0	0	1	1	1	1	MYO3A	myosin IIIA
hsa-miR-519b-3p	1	0	1	1	1	1	MAMDC2	MAM domain containing 2
hsa-miR-519b-3p	1	0	1	1	1	1	ZFAND4	zinc finger, AN1-type domain 4
hsa-miR-519b-3p	1	0	1	1	1	1	SUPT7L	suppressor of Ty 7 (S. cerevisiae)-like
hsa-miR-519b-3p	0	0	1	1	1	1	ANGEL2	angel homolog 2 (Drosophila)
hsa-miR-519b-3p	0	0	1	1	1	1	ANKDD1A	ankyrin repeat and death domain containing 1A
hsa-miR-519b-3p	0	0	1	1	0	0	PLA1A	phospholipase A1 member A
hsa-miR-519b-3p	0	0	1	1	1	1	ZNF74	zinc finger protein 74
hsa-miR-519b-3p	1	0	1	1	1	1	PTPRG	protein tyrosine phosphatase, receptor type, G
hsa-miR-519b-3p	1	0	1	1	1	1	MBNL1	muscleblind-like splicing regulator 1
hsa-miR-519b-3p	1	0	1	1	0	0	CCDC138	coiled-coil domain containing 138
hsa-miR-519b-3p	1	0	1	0	1	1	SMURF2	SMAD specific E3 ubiquitin protein ligase 2
hsa-miR-519b-3p	1	0	1	1	1	1	ZFP91	zinc finger protein 91 homolog (mouse)
hsa-miR-519b-3p	1	0	1	1	1	1	SCUBE3	signal peptide, CUB domain, EGF-like 3
hsa-miR-519b-3p	1	0	1	0	1	1	C14orf43	chromosome 14 open reading frame 43
hsa-miR-519b-3p	1	0	1	1	1	1	HP1BP3	heterochromatin protein 1, binding protein 3
hsa-miR-519b-3p	0	0	1	0	0	0	LINC00265	long intergenic non-protein coding RNA 265
hsa-miR-519b-3p	0	0	1	0	1	1	SLC1A3	solute carrier family 1 (glial high affinity glutamate transporter), member 3
hsa-miR-519b-3p	1	0	1	1	1	1	ATP8B4	ATPase, class I, type 8B, member 4
hsa-miR-519b-3p	1	0	1	1	1	1	ZFP161	zinc finger protein 161 homolog (mouse)
hsa-miR-519b-3p	0	0	1	1	0	0	IFT88	intraflagellar transport 88 homolog (Chlamydomonas)
hsa-miR-519b-3p	1	0	1	1	1	1	SOX5	SRY (sex determining region Y)-box 5
hsa-miR-519b-3p	1	0	1	1	1	1	PRRG1	proline rich Gla (G-carboxyglutamic acid) 1
hsa-miR-519b-3p	1	0	1	0	1	1	C7orf41	chromosome 7 open reading frame 41
hsa-miR-519b-3p	1	0	1	1	0	0	ANKRD13B	ankyrin repeat domain 13B
hsa-miR-519b-3p	0	0	1	1	1	1	SNX5	sorting nexin 5
hsa-miR-519b-3p	1	0	1	1	1	1	MTMR10	myotubularin related protein 10
hsa-miR-519b-3p	0	0	1	1	1	1	CAMLG	calcium modulating ligand
hsa-miR-519b-3p	1	0	1	1	1	1	ANXA4	annexin A4
hsa-miR-519b-3p	0	0	1	0	0	0	GNN	Grp94 neighboring nucleotidase pseudogene
hsa-miR-519b-3p	1	0	1	1	1	1	UEVLD	UEV and lactate/malate dehyrogenase domains
hsa-miR-519b-3p	0	0	1	1	1	1	STAG1	stromal antigen 1
hsa-miR-519b-3p	1	0	1	1	1	1	EIF4G2	eukaryotic translation initiation factor 4 gamma, 2
hsa-miR-519b-3p	0	0	1	1	1	1	ZNF189	zinc finger protein 189
hsa-miR-519b-3p	1	0	1	1	1	1	C18orf1	chromosome 18 open reading frame 1
hsa-miR-519b-3p	1	0	1	1	1	1	NRSN1	neurensin 1
hsa-miR-519b-3p	0	0	1	1	1	1	SLAMF1	signaling lymphocytic activation molecule family member 1
hsa-miR-519b-3p	0	0	1	0	0	0	LINC00442	long intergenic non-protein coding RNA 442
hsa-miR-519b-3p	1	0	1	1	0	0	CHTOP	chromatin target of PRMT1
hsa-miR-519b-3p	1	0	1	0	1	1	HMGB3	high mobility group box 3
hsa-miR-519b-3p	0	0	1	1	1	1	SLC11A1	solute carrier family 11 (proton-coupled divalent metal ion transporters), member 1
hsa-miR-519b-3p	0	0	1	0	0	0	ULK4P1	unc-51-like kinase 4 (C. elegans) pseudogene 1
hsa-miR-519b-3p	0	0	1	0	0	0	ULK4P3	unc-51-like kinase 4 (C. elegans) pseudogene 3
hsa-miR-519b-3p	0	0	1	0	1	1	TNFRSF8	tumor necrosis factor receptor superfamily, member 8
hsa-miR-519b-3p	1	0	1	1	1	1	C1orf173	chromosome 1 open reading frame 173
hsa-miR-519b-3p	1	0	1	1	1	1	OPCML	opioid binding protein/cell adhesion molecule-like
hsa-miR-519b-3p	0	0	1	0	0	0	LINC00537	long intergenic non-protein coding RNA 537
hsa-miR-519b-3p	1	0	1	1	1	1	HNRNPC	heterogeneous nuclear ribonucleoprotein C (C1/C2)
hsa-miR-519b-3p	0	0	1	1	1	1	HOXD8	homeobox D8
hsa-miR-519b-3p	1	0	1	1	1	1	ST8SIA2	ST8 alpha-N-acetyl-neuraminide alpha-2,8-sialyltransferase 2
hsa-miR-519b-3p	0	0	1	0	1	1	TGFB2	transforming growth factor, beta 2
hsa-miR-519b-3p	1	0	1	1	1	1	ACVR2B	activin A receptor, type IIB
hsa-miR-519b-3p	1	0	1	1	1	1	WNT10B	wingless-type MMTV integration site family, member 10B
hsa-miR-519b-3p	0	0	1	1	1	1	RAB3GAP2	RAB3 GTPase activating protein subunit 2 (non-catalytic)
hsa-miR-519b-3p	0	0	1	1	1	1	COL8A2	collagen, type VIII, alpha 2
hsa-miR-519b-3p	0	0	1	1	1	1	HMGB2	high mobility group box 2
hsa-miR-519b-3p	0	0	1	1	1	1	XG	Xg blood group
hsa-miR-519b-3p	0	0	1	1	0	0	MTMR11	myotubularin related protein 11
hsa-miR-519b-3p	0	0	1	1	1	1	CYP3A43	cytochrome P450, family 3, subfamily A, polypeptide 43
hsa-miR-519b-3p	1	0	1	0	1	1	MYBL1	v-myb myeloblastosis viral oncogene homolog (avian)-like 1
hsa-miR-519b-3p	1	0	1	1	0	0	HAND2	heart and neural crest derivatives expressed 2
hsa-miR-519b-3p	1	0	1	1	1	1	ARFIP1	ADP-ribosylation factor interacting protein 1
hsa-miR-519b-3p	1	0	1	0	1	1	CPEB2	cytoplasmic polyadenylation element binding protein 2
hsa-miR-519b-3p	0	0	1	0	0	0	GUSBP9	glucuronidase, beta pseudogene 9
hsa-miR-519b-3p	1	0	1	1	1	1	NR2F2	nuclear receptor subfamily 2, group F, member 2
hsa-miR-519b-3p	1	0	1	1	1	1	PTPRD	protein tyrosine phosphatase, receptor type, D
hsa-miR-519b-3p	0	0	1	1	0	0	TMEM95	transmembrane protein 95
hsa-miR-519b-3p	1	0	1	1	1	1	USP34	ubiquitin specific peptidase 34
hsa-miR-519b-3p	1	0	1	1	1	1	SUV420H1	suppressor of variegation 4-20 homolog 1 (Drosophila)
hsa-miR-519b-3p	1	0	1	1	1	1	CERS6	ceramide synthase 6
hsa-miR-519b-3p	1	0	1	1	1	1	SP4	Sp4 transcription factor
hsa-miR-519b-3p	1	0	1	0	1	1	KIF5C	kinesin family member 5C
hsa-miR-519b-3p	1	0	1	1	1	1	LARP1B	La ribonucleoprotein domain family, member 1B
hsa-miR-519b-3p	1	0	1	0	1	1	KIAA1715	KIAA1715
hsa-miR-519b-3p	1	0	1	0	1	1	MAP3K9	mitogen-activated protein kinase kinase kinase 9
hsa-miR-519b-3p	1	0	1	1	1	1	NR3C2	nuclear receptor subfamily 3, group C, member 2
hsa-miR-519b-3p	1	0	1	1	1	1	TMEM64	transmembrane protein 64
hsa-miR-519b-3p	1	0	1	1	1	1	SHANK2	SH3 and multiple ankyrin repeat domains 2
hsa-miR-519b-3p	1	0	1	1	0	0	MAPKBP1	mitogen-activated protein kinase binding protein 1
hsa-miR-519b-3p	1	0	1	1	1	1	ST18	suppression of tumorigenicity 18 (breast carcinoma) (zinc finger protein)
hsa-miR-519b-3p	0	0	1	0	0	0	FAM74A1	family with sequence similarity 74, member A1
hsa-miR-519b-3p	1	0	1	1	1	1	OTUD4	OTU domain containing 4
hsa-miR-519b-3p	1	0	1	1	0	0	ITGB4	integrin, beta 4
hsa-miR-519b-3p	0	0	1	0	0	0	FAM74A4	family with sequence similarity 74, member A4
hsa-miR-519b-3p	1	0	1	0	1	1	FBXO10	F-box protein 10
hsa-miR-519b-3p	1	0	1	0	1	1	LRCH2	leucine-rich repeats and calponin homology (CH) domain containing 2
hsa-miR-519b-3p	1	0	1	0	1	1	CAMSAP2	calmodulin regulated spectrin-associated protein family, member 2
hsa-miR-519b-3p	1	0	1	1	1	1	ANK2	ankyrin 2, neuronal
hsa-miR-519b-3p	0	0	1	1	0	0	TRIM46	tripartite motif containing 46
hsa-miR-519b-3p	1	0	1	1	1	1	JMJD1C	jumonji domain containing 1C
hsa-miR-519b-3p	1	0	1	1	1	1	ZMYM4	zinc finger, MYM-type 4
hsa-miR-519b-3p	1	0	1	1	1	1	CHIC1	cysteine-rich hydrophobic domain 1
hsa-miR-519b-3p	0	0	1	0	0	0	FAM225B	family with sequence similarity 225, member B (non-protein coding)
hsa-miR-519b-3p	0	0	1	0	0	0	SMA4	glucuronidase, beta pseudogene
hsa-miR-519b-3p	0	0	1	0	0	0	FUT8-AS1	FUT8 antisense RNA 1
hsa-miR-519b-3p	0	0	1	1	1	1	CNIH	cornichon homolog (Drosophila)
hsa-miR-519b-3p	1	0	1	1	1	1	GOLGA5	golgin A5
hsa-miR-519b-3p	0	0	1	0	0	0	LINC00643	long intergenic non-protein coding RNA 643
hsa-miR-519b-3p	1	0	1	1	1	1	BTBD7	BTB (POZ) domain containing 7
hsa-miR-519b-3p	0	0	1	0	0	0	FLJ39632	uncharacterized LOC642477
hsa-miR-519b-3p	1	0	1	0	1	1	GNS	glucosamine (N-acetyl)-6-sulfatase
hsa-miR-519b-3p	1	0	1	1	1	1	EIF5	eukaryotic translation initiation factor 5
hsa-miR-519b-3p	1	0	1	1	1	1	SASH1	SAM and SH3 domain containing 1
hsa-miR-519b-3p	1	0	1	0	1	1	SEMA4B	sema domain, immunoglobulin domain (Ig), transmembrane domain (TM) and short cytoplasmic domain, (semaphorin) 4B
hsa-miR-519b-3p	1	0	1	1	1	1	JPH1	junctophilin 1
hsa-miR-519b-3p	0	0	1	0	1	1	FEZ2	fasciculation and elongation protein zeta 2 (zygin II)
hsa-miR-519b-3p	1	0	1	1	1	1	MIER3	mesoderm induction early response 1, family member 3
hsa-miR-519b-3p	0	0	1	0	0	0	RGPD4	RANBP2-like and GRIP domain containing 4
hsa-miR-519b-3p	1	0	1	1	1	1	EPHA5	EPH receptor A5
hsa-miR-519b-3p	1	0	1	1	1	1	SGCD	sarcoglycan, delta (35kDa dystrophin-associated glycoprotein)
hsa-miR-519b-3p	1	0	1	1	1	1	TRIM37	tripartite motif containing 37
hsa-miR-519b-3p	0	0	1	1	1	1	SLC12A8	solute carrier family 12 (potassium/chloride transporters), member 8
hsa-miR-519b-3p	0	0	1	1	1	1	SERPINB9	serpin peptidase inhibitor, clade B (ovalbumin), member 9
hsa-miR-519b-3p	1	0	1	1	1	1	FZD6	frizzled family receptor 6
hsa-miR-519b-3p	1	0	1	1	1	1	ETS1	v-ets erythroblastosis virus E26 oncogene homolog 1 (avian)
hsa-miR-519b-3p	0	0	1	0	1	1	ZNF498	zinc finger protein 498
hsa-miR-519b-3p	1	0	1	1	1	1	TGOLN2	trans-golgi network protein 2
hsa-miR-519b-3p	1	0	1	1	1	1	TJP1	tight junction protein 1
hsa-miR-519b-3p	1	0	1	1	1	1	RORB	RAR-related orphan receptor B
hsa-miR-519b-3p	0	0	1	1	1	1	TSGA10	testis specific, 10
hsa-miR-519b-3p	1	0	1	0	1	1	GALNT4	UDP-N-acetyl-alpha-D-galactosamine:polypeptide N-acetylgalactosaminyltransferase 4 (GalNAc-T4)
hsa-miR-519b-3p	0	0	1	1	1	1	PRR14L	proline rich 14-like
hsa-miR-519b-3p	0	0	1	1	1	1	UHRF1BP1L	UHRF1 binding protein 1-like
hsa-miR-519b-3p	1	0	1	1	1	1	RREB1	ras responsive element binding protein 1
hsa-miR-519b-3p	1	0	1	1	1	1	KLHL2	kelch-like 2, Mayven (Drosophila)
hsa-miR-519b-3p	1	0	1	1	1	1	NEDD9	neural precursor cell expressed, developmentally down-regulated 9
hsa-miR-519b-3p	1	0	1	1	1	1	ZNF711	zinc finger protein 711
hsa-miR-519b-3p	1	0	1	1	1	1	PTPN3	protein tyrosine phosphatase, non-receptor type 3
hsa-miR-519b-3p	1	0	1	1	1	1	NFIB	nuclear factor I/B
hsa-miR-519b-3p	1	0	1	0	1	1	IGF2BP3	insulin-like growth factor 2 mRNA binding protein 3
hsa-miR-519b-3p	0	0	1	1	1	1	DAZL	deleted in azoospermia-like
hsa-miR-519b-3p	1	0	1	1	1	1	PGAP1	post-GPI attachment to proteins 1
hsa-miR-519b-3p	1	0	1	1	1	1	RECK	reversion-inducing-cysteine-rich protein with kazal motifs
hsa-miR-519b-3p	0	0	1	1	1	1	ABCD3	ATP-binding cassette, sub-family D (ALD), member 3
hsa-miR-519b-3p	1	0	1	1	1	1	FAM179B	family with sequence similarity 179, member B
hsa-miR-519b-3p	1	0	1	1	1	1	HIF1A	hypoxia inducible factor 1, alpha subunit (basic helix-loop-helix transcription factor)
hsa-miR-519b-3p	1	0	1	1	1	1	CALD1	caldesmon 1
hsa-miR-519b-3p	1	0	1	1	1	1	EOGT	EGF domain-specific O-linked N-acetylglucosamine (GlcNAc) transferase
hsa-miR-519b-3p	0	0	1	1	1	1	SSFA2	sperm specific antigen 2
hsa-miR-519b-3p	1	0	1	0	1	1	TBL1XR1	transducin (beta)-like 1 X-linked receptor 1
hsa-miR-519b-3p	1	0	1	1	1	1	CREB3L2	cAMP responsive element binding protein 3-like 2
hsa-miR-519b-3p	0	0	1	1	1	1	IPO11	importin 11
hsa-miR-519b-3p	0	0	1	0	0	0	LINC00341	long intergenic non-protein coding RNA 341
hsa-miR-519b-3p	0	0	1	1	1	1	HPGD	hydroxyprostaglandin dehydrogenase 15-(NAD)
hsa-miR-519b-3p	0	0	1	1	0	0	CRIP2	cysteine-rich protein 2
hsa-miR-519b-3p	1	0	1	0	1	1	RNF144A	ring finger protein 144A
hsa-miR-519b-3p	1	0	1	0	1	1	STX6	syntaxin 6
hsa-miR-519b-3p	0	0	1	1	1	1	DUSP26	dual specificity phosphatase 26 (putative)
hsa-miR-519b-3p	0	0	1	1	0	0	EMX1	empty spiracles homeobox 1
hsa-miR-519b-3p	1	0	1	1	1	1	VIM	vimentin
hsa-miR-519b-3p	1	0	1	1	1	1	MMAB	methylmalonic aciduria (cobalamin deficiency) cblB type
hsa-miR-519b-3p	0	0	1	0	0	0	LOC100009676	uncharacterized LOC100009676
hsa-miR-519b-3p	1	0	1	1	1	1	RASL12	RAS-like, family 12
hsa-miR-519b-3p	1	0	1	1	1	1	CAAP1	caspase activity and apoptosis inhibitor 1
hsa-miR-519b-3p	1	0	1	1	1	1	HMGN3	high mobility group nucleosomal binding domain 3
hsa-miR-519b-3p	0	0	1	1	0	0	CGRRF1	cell growth regulator with ring finger domain 1
hsa-miR-519b-3p	0	0	1	1	1	1	ZNF263	zinc finger protein 263
hsa-miR-519b-3p	0	0	1	0	1	1	EMX2	empty spiracles homeobox 2
hsa-miR-519b-3p	0	0	1	1	1	1	GGPS1	geranylgeranyl diphosphate synthase 1
hsa-miR-519b-3p	1	0	1	1	1	1	PLEKHB2	pleckstrin homology domain containing, family B (evectins) member 2
hsa-miR-519b-3p	1	0	1	1	1	1	NFKBIA	nuclear factor of kappa light polypeptide gene enhancer in B-cells inhibitor, alpha
hsa-miR-519b-3p	0	0	1	1	0	0	TMEM183A	transmembrane protein 183A
hsa-miR-519b-3p	0	0	1	1	0	0	TRMT44	tRNA methyltransferase 44 homolog (S. cerevisiae)
hsa-miR-519b-3p	0	0	1	1	1	1	STON1	stonin 1
hsa-miR-519b-3p	1	0	1	1	1	1	PCTP	phosphatidylcholine transfer protein
hsa-miR-519b-3p	1	0	1	1	1	1	DDR1	discoidin domain receptor tyrosine kinase 1
hsa-miR-519b-3p	0	0	1	1	1	1	XBP1	X-box binding protein 1
hsa-miR-519b-3p	1	0	1	1	1	1	NAP1L1	nucleosome assembly protein 1-like 1
hsa-miR-519b-3p	1	0	1	1	0	0	SLC25A39	solute carrier family 25, member 39
hsa-miR-519b-3p	0	0	1	1	0	0	DOK5	docking protein 5
hsa-miR-519b-3p	0	0	1	0	1	1	TMEM155	transmembrane protein 155
hsa-miR-519b-3p	0	0	1	1	1	1	HADHB	hydroxyacyl-CoA dehydrogenase/3-ketoacyl-CoA thiolase/enoyl-CoA hydratase (trifunctional protein), beta subunit
hsa-miR-519b-3p	1	0	1	1	1	1	PEX2	peroxisomal biogenesis factor 2
hsa-miR-519b-3p	1	0	1	1	1	1	BTBD10	BTB (POZ) domain containing 10
hsa-miR-519b-3p	1	0	1	1	1	1	MMP2	matrix metallopeptidase 2 (gelatinase A, 72kDa gelatinase, 72kDa type IV collagenase)
hsa-miR-519b-3p	0	0	1	0	0	0	LOC645513	uncharacterized LOC645513
hsa-miR-519b-3p	0	0	1	0	1	1	SRSF5	serine/arginine-rich splicing factor 5
hsa-miR-519b-3p	1	0	1	1	1	1	GPR137B	G protein-coupled receptor 137B
hsa-miR-519b-3p	0	0	1	1	1	1	PEX19	peroxisomal biogenesis factor 19
hsa-miR-519b-3p	1	0	1	1	1	1	TLE1	transducin-like enhancer of split 1 (E(sp1) homolog, Drosophila)
hsa-miR-519b-3p	0	0	1	1	1	1	TRMT61B	tRNA methyltransferase 61 homolog B (S. cerevisiae)
hsa-miR-519b-3p	0	0	1	1	1	1	DEDD	death effector domain containing
hsa-miR-519b-3p	0	0	1	1	0	0	FABP1	fatty acid binding protein 1, liver
hsa-miR-519b-3p	1	0	1	1	1	1	PPP3CB	protein phosphatase 3, catalytic subunit, beta isozyme
hsa-miR-519b-3p	1	0	1	1	1	1	HN1	hematological and neurological expressed 1
hsa-miR-519b-3p	1	0	1	0	1	1	NLN	neurolysin (metallopeptidase M3 family)
hsa-miR-519b-3p	0	0	1	1	1	1	DUT	deoxyuridine triphosphatase
hsa-miR-519b-3p	0	0	1	1	1	1	RFT1	RFT1 homolog (S. cerevisiae)
hsa-miR-519b-3p	0	0	1	1	1	1	CTSK	cathepsin K
hsa-miR-519b-3p	1	0	1	1	1	1	ARL4A	ADP-ribosylation factor-like 4A
hsa-miR-519b-3p	1	0	1	1	1	1	SYAP1	synapse associated protein 1
hsa-miR-519b-3p	1	0	1	1	1	1	PFN2	profilin 2
hsa-miR-519b-3p	1	0	1	1	1	1	NFYB	nuclear transcription factor Y, beta
hsa-miR-519b-3p	0	0	1	1	0	0	AHSG	alpha-2-HS-glycoprotein
hsa-miR-519b-3p	1	0	1	1	1	1	ARMC8	armadillo repeat containing 8
hsa-miR-519b-3p	1	0	1	1	1	1	LAPTM4A	lysosomal protein transmembrane 4 alpha
hsa-miR-519b-3p	0	0	1	1	1	1	FAM18B1	family with sequence similarity 18, member B1
hsa-miR-519b-3p	1	0	1	1	1	1	AZI2	5-azacytidine induced 2
hsa-miR-519b-3p	1	0	1	1	1	1	RNF2	ring finger protein 2
hsa-miR-519b-3p	1	0	1	1	1	1	RBFOX2	RNA binding protein, fox-1 homolog (C. elegans) 2
hsa-miR-519b-3p	1	0	1	0	1	1	MAP1B	microtubule-associated protein 1B
hsa-miR-519b-3p	1	0	1	1	1	1	TMEM55B	transmembrane protein 55B
hsa-miR-519b-3p	0	0	1	1	1	1	HS3ST2	heparan sulfate (glucosamine) 3-O-sulfotransferase 2
hsa-miR-519b-3p	1	0	1	1	1	1	VLDLR	very low density lipoprotein receptor
hsa-miR-519b-3p	0	0	1	1	1	1	PTGES	prostaglandin E synthase
hsa-miR-519b-3p	1	0	1	1	1	1	SRSF2	serine/arginine-rich splicing factor 2
hsa-miR-519b-3p	0	0	1	1	0	0	OLFM1	olfactomedin 1
hsa-miR-519b-3p	0	0	1	1	1	1	PLAC8	placenta-specific 8
hsa-miR-519b-3p	0	0	1	0	0	0	PRMT1	protein arginine methyltransferase 1
hsa-miR-519b-3p	1	0	1	1	0	0	RUNDC3A	RUN domain containing 3A
hsa-miR-519b-3p	0	0	1	1	1	1	ZNF397	zinc finger protein 397
hsa-miR-519b-3p	1	0	1	1	1	1	ID2	inhibitor of DNA binding 2, dominant negative helix-loop-helix protein
hsa-miR-519b-3p	0	0	1	1	1	1	PTMA	prothymosin, alpha
hsa-miR-519b-3p	1	0	1	1	1	1	MYT1	myelin transcription factor 1
hsa-miR-519b-3p	0	0	1	1	0	0	UCP2	uncoupling protein 2 (mitochondrial, proton carrier)
hsa-miR-519b-3p	1	0	1	1	1	1	MAN1C1	mannosidase, alpha, class 1C, member 1
hsa-miR-519b-3p	1	0	1	1	1	1	LHX9	LIM homeobox 9
hsa-miR-519b-3p	1	0	1	1	1	1	LGALSL	lectin, galactoside-binding-like
hsa-miR-519b-3p	0	0	1	1	0	0	C18orf8	chromosome 18 open reading frame 8
hsa-miR-519b-3p	1	0	1	1	1	1	RND3	Rho family GTPase 3
hsa-miR-519b-3p	1	0	1	1	1	1	SLMAP	sarcolemma associated protein
hsa-miR-519b-3p	0	0	1	1	1	1	CCP110	centriolar coiled coil protein 110kDa
hsa-miR-519b-3p	1	0	1	1	1	1	DNAJC16	DnaJ (Hsp40) homolog, subfamily C, member 16
hsa-miR-519b-3p	1	0	1	1	1	1	FBXW7	F-box and WD repeat domain containing 7, E3 ubiquitin protein ligase
hsa-miR-519b-3p	0	0	1	1	1	1	ATG5	autophagy related 5
hsa-miR-519b-3p	1	0	1	0	1	1	MEGF10	multiple EGF-like-domains 10
hsa-miR-519b-3p	1	0	1	1	1	1	KIAA2018	KIAA2018
hsa-miR-519b-3p	0	0	1	0	0	0	MUC19	mucin 19, oligomeric
hsa-miR-519b-3p	1	0	1	1	1	1	SNRK	SNF related kinase
hsa-miR-519b-3p	1	0	1	1	1	1	SLC39A10	solute carrier family 39 (zinc transporter), member 10
hsa-miR-519b-3p	1	0	1	1	1	1	ZFHX3	zinc finger homeobox 3
hsa-miR-519b-3p	1	0	1	1	1	1	SP2	Sp2 transcription factor
hsa-miR-519b-3p	1	0	1	1	1	1	PI15	peptidase inhibitor 15
hsa-miR-519b-3p	0	0	1	1	1	1	MPV17L	MPV17 mitochondrial membrane protein-like
hsa-miR-519b-3p	1	0	1	1	1	1	ITSN1	intersectin 1 (SH3 domain protein)
hsa-miR-519b-3p	0	0	1	1	1	1	TNFSF10	tumor necrosis factor (ligand) superfamily, member 10
hsa-miR-519b-3p	0	0	1	1	0	0	CCNA1	cyclin A1
hsa-miR-519b-3p	1	0	1	0	1	1	DCBLD2	discoidin, CUB and LCCL domain containing 2
hsa-miR-519b-3p	1	0	1	0	1	1	EPDR1	ependymin related protein 1 (zebrafish)
hsa-miR-519b-3p	0	0	1	0	0	0	GPR144	G protein-coupled receptor 144
hsa-miR-519b-3p	1	0	1	1	1	1	MLL	myeloid/lymphoid or mixed-lineage leukemia (trithorax homolog, Drosophila)
hsa-miR-519b-3p	1	0	1	1	1	1	AFF1	AF4/FMR2 family, member 1
hsa-miR-519b-3p	1	0	1	0	1	1	STAT3	signal transducer and activator of transcription 3 (acute-phase response factor)
hsa-miR-519b-3p	1	0	1	0	1	1	BCL2	B-cell CLL/lymphoma 2
hsa-miR-519b-3p	1	0	1	0	1	1	YES1	v-yes-1 Yamaguchi sarcoma viral oncogene homolog 1
hsa-miR-519b-3p	1	0	1	1	1	1	IGF1	insulin-like growth factor 1 (somatomedin C)
hsa-miR-519b-3p	0	0	1	1	1	1	AGA	aspartylglucosaminidase
hsa-miR-519b-3p	0	0	1	1	1	1	CD3G	CD3g molecule, gamma (CD3-TCR complex)
hsa-miR-519b-3p	1	0	1	1	1	1	COL4A3	collagen, type IV, alpha 3 (Goodpasture antigen)
hsa-miR-519b-3p	1	0	1	1	1	1	COL4A4	collagen, type IV, alpha 4
hsa-miR-519b-3p	1	0	1	1	1	1	CPOX	coproporphyrinogen oxidase
hsa-miR-519b-3p	1	0	1	1	1	1	ESR1	estrogen receptor 1
hsa-miR-519b-3p	1	0	1	1	1	1	F13A1	coagulation factor XIII, A1 polypeptide
hsa-miR-519b-3p	1	0	1	1	1	1	GJA1	gap junction protein, alpha 1, 43kDa
hsa-miR-519b-3p	1	0	1	1	1	1	TBX5	T-box 5
hsa-miR-519b-3p	1	0	1	1	1	1	KCNA1	potassium voltage-gated channel, shaker-related subfamily, member 1 (episodic ataxia with myokymia)
hsa-miR-519b-3p	1	0	1	1	1	1	LEP	leptin
hsa-miR-519b-3p	1	0	1	0	1	1	SGCB	sarcoglycan, beta (43kDa dystrophin-associated glycoprotein)
hsa-miR-519b-3p	1	0	1	1	1	1	MET	met proto-oncogene (hepatocyte growth factor receptor)
hsa-miR-519b-3p	1	0	1	1	1	1	MITF	microphthalmia-associated transcription factor
hsa-miR-519b-3p	1	0	1	1	1	1	NF1	neurofibromin 1
hsa-miR-519b-3p	1	0	1	1	1	1	OCRL	oculocerebrorenal syndrome of Lowe
hsa-miR-519b-3p	1	0	1	0	1	1	PKD2	polycystic kidney disease 2 (autosomal dominant)
hsa-miR-519b-3p	0	0	1	1	1	1	PKP1	plakophilin 1 (ectodermal dysplasia/skin fragility syndrome)
hsa-miR-519b-3p	0	0	1	1	1	1	PRNP	prion protein
hsa-miR-519b-3p	1	0	1	0	1	1	PTEN	phosphatase and tensin homolog
hsa-miR-519b-3p	1	0	1	1	1	1	PTH	parathyroid hormone
hsa-miR-519b-3p	1	0	1	1	1	1	RB1	retinoblastoma 1
hsa-miR-519b-3p	1	0	1	1	1	1	ATXN1	ataxin 1
hsa-miR-519b-3p	0	0	1	1	1	1	SRD5A2	steroid-5-alpha-reductase, alpha polypeptide 2 (3-oxo-5 alpha-steroid delta 4-dehydrogenase alpha 2)
hsa-miR-519b-3p	1	0	1	1	1	1	TIMP3	TIMP metallopeptidase inhibitor 3
hsa-miR-519b-3p	1	1	1	1	1	1	CDKN1A	cyclin-dependent kinase inhibitor 1A (p21, Cip1)
hsa-miR-519b-3p	1	0	1	0	1	1	PAFAH1B1	platelet-activating factor acetylhydrolase 1b, regulatory subunit 1 (45kDa)
hsa-miR-519b-3p	0	0	1	1	1	1	PECAM1	platelet/endothelial cell adhesion molecule 1
hsa-miR-519b-3p	1	0	1	1	1	1	RFX5	regulatory factor X, 5 (influences HLA class II expression)
hsa-miR-519b-3p	1	0	1	1	1	1	ATRX	alpha thalassemia/mental retardation syndrome X-linked
hsa-miR-519b-3p	1	0	1	1	1	1	MPZ	myelin protein zero
hsa-miR-519b-3p	1	0	1	1	1	1	PLP1	proteolipid protein 1
hsa-miR-519b-3p	0	0	1	1	1	1	VHL	von Hippel-Lindau tumor suppressor, E3 ubiquitin protein ligase
hsa-miR-519b-3p	0	0	1	1	1	1	IL2	interleukin 2
hsa-miR-519b-3p	1	0	1	1	1	1	TNF	tumor necrosis factor
hsa-miR-519b-3p	1	0	1	1	1	1	CXCL12	chemokine (C-X-C motif) ligand 12
hsa-miR-519b-3p	0	0	1	0	1	1	IFNAR1	interferon (alpha, beta and omega) receptor 1
hsa-miR-519b-3p	0	0	1	1	1	1	AGTR1	angiotensin II receptor, type 1
hsa-miR-519b-3p	0	0	1	1	1	1	ALDH1B1	aldehyde dehydrogenase 1 family, member B1
hsa-miR-519b-3p	1	0	1	0	1	1	CACNA1E	calcium channel, voltage-dependent, R type, alpha 1E subunit
hsa-miR-519b-3p	0	0	1	1	1	1	CRH	corticotropin releasing hormone
hsa-miR-519b-3p	1	0	1	0	1	1	GABRA4	gamma-aminobutyric acid (GABA) A receptor, alpha 4
hsa-miR-519b-3p	1	0	1	1	1	1	GAD1	glutamate decarboxylase 1 (brain, 67kDa)
hsa-miR-519b-3p	1	0	1	1	1	1	GRM7	glutamate receptor, metabotropic 7
hsa-miR-519b-3p	1	0	1	1	1	1	MME	membrane metallo-endopeptidase
hsa-miR-519b-3p	1	0	1	1	1	1	PDE3B	phosphodiesterase 3B, cGMP-inhibited
hsa-miR-519b-3p	1	0	1	1	1	1	PTGER2	prostaglandin E receptor 2 (subtype EP2), 53kDa
hsa-miR-519b-3p	1	0	1	0	1	1	SMAD5	SMAD family member 5
hsa-miR-519b-3p	1	0	1	1	1	1	RORC	RAR-related orphan receptor C
hsa-miR-519b-3p	1	0	1	0	1	1	SPOPL	speckle-type POZ protein-like
hsa-miR-519b-3p	1	0	1	0	1	1	ARHGEF37	Rho guanine nucleotide exchange factor (GEF) 37
hsa-miR-519b-3p	0	0	1	1	1	1	C4orf3	chromosome 4 open reading frame 3
hsa-miR-519b-3p	1	0	1	1	1	1	FAM13C	family with sequence similarity 13, member C
hsa-miR-519b-3p	1	0	1	1	1	1	LCLAT1	lysocardiolipin acyltransferase 1
hsa-miR-519b-3p	1	0	1	1	1	1	WNK3	WNK lysine deficient protein kinase 3
hsa-miR-519b-3p	1	0	1	1	1	1	ABLIM1	actin binding LIM protein 1
hsa-miR-519b-3p	1	0	1	1	1	1	HMGXB4	HMG box domain containing 4
hsa-miR-519b-3p	1	0	1	1	1	1	RBMS3	RNA binding motif, single stranded interacting protein 3
hsa-miR-519b-3p	1	0	1	1	1	1	BICD2	bicaudal D homolog 2 (Drosophila)
hsa-miR-519b-3p	0	0	1	1	1	1	ANXA13	annexin A13
hsa-miR-519b-3p	1	0	1	0	1	1	ZNF740	zinc finger protein 740
hsa-miR-519b-3p	0	0	1	1	1	1	CCDC144NL	coiled-coil domain containing 144 family, N-terminal like
hsa-miR-519b-3p	0	0	1	1	1	1	DBX2	developing brain homeobox 2
hsa-miR-519b-3p	0	0	1	0	1	1	SPDYE3	speedy homolog E3 (Xenopus laevis)
hsa-miR-519b-3p	0	0	1	1	1	1	OR9Q1	olfactory receptor, family 9, subfamily Q, member 1
hsa-miR-519b-3p	0	0	1	1	1	1	FRG2	FSHD region gene 2
hsa-miR-519b-3p	0	0	1	1	1	1	PRR13	proline rich 13
hsa-miR-519b-3p	0	0	1	1	1	1	DAZ4	deleted in azoospermia 4
hsa-miR-519b-3p	0	0	1	1	0	0	MARCH2	membrane-associated ring finger (C3HC4) 2, E3 ubiquitin protein ligase
hsa-miR-519b-3p	1	0	1	1	1	1	PLCXD3	phosphatidylinositol-specific phospholipase C, X domain containing 3
hsa-miR-519b-3p	0	0	1	1	1	1	MAPKAP1	mitogen-activated protein kinase associated protein 1
hsa-miR-519b-3p	0	0	1	1	1	1	CR2	complement component (3d/Epstein Barr virus) receptor 2
hsa-miR-519b-3p	0	0	1	1	1	1	APOBEC3F	apolipoprotein B mRNA editing enzyme, catalytic polypeptide-like 3F
hsa-miR-519b-3p	1	0	1	0	1	1	GOSR1	golgi SNAP receptor complex member 1
hsa-miR-519b-3p	0	0	1	1	1	1	SCP2	sterol carrier protein 2
hsa-miR-519b-3p	1	0	1	1	1	1	L3MBTL3	l(3)mbt-like 3 (Drosophila)
hsa-miR-519b-3p	1	0	1	1	1	1	IGSF3	immunoglobulin superfamily, member 3
hsa-miR-519b-3p	1	0	1	1	1	1	ZDHHC9	zinc finger, DHHC-type containing 9
hsa-miR-519b-3p	1	0	1	1	1	1	CNOT4	CCR4-NOT transcription complex, subunit 4
hsa-miR-519b-3p	1	0	1	0	1	1	C18orf25	chromosome 18 open reading frame 25
hsa-miR-519b-3p	1	0	1	1	1	1	CTDSPL	CTD (carboxy-terminal domain, RNA polymerase II, polypeptide A) small phosphatase-like
hsa-miR-519b-3p	1	0	1	1	1	1	RBM33	RNA binding motif protein 33
hsa-miR-519b-3p	0	0	1	1	1	1	MXI1	MAX interactor 1
hsa-miR-519b-3p	1	0	1	1	1	1	NUPL1	nucleoporin like 1
hsa-miR-519b-3p	0	0	1	1	1	1	FBXO47	F-box protein 47
hsa-miR-519b-3p	0	0	1	1	1	1	SLC35D3	solute carrier family 35, member D3
hsa-miR-519b-3p	0	0	1	1	0	0	ARMCX6	armadillo repeat containing, X-linked 6
hsa-miR-519b-3p	1	0	1	0	1	1	RCHY1	ring finger and CHY zinc finger domain containing 1, E3 ubiquitin protein ligase
hsa-miR-519b-3p	1	0	1	0	1	1	CREB5	cAMP responsive element binding protein 5
hsa-miR-519b-3p	1	0	1	1	1	1	CTNNBIP1	catenin, beta interacting protein 1
hsa-miR-519b-3p	0	0	1	1	1	1	SPIN4	spindlin family, member 4
hsa-miR-519b-3p	0	0	1	1	0	0	SATL1	spermidine/spermine N1-acetyl transferase-like 1
hsa-miR-519b-3p	1	0	1	0	1	1	ZKSCAN2	zinc finger with KRAB and SCAN domains 2
hsa-miR-519b-3p	0	0	1	1	1	1	FAM53A	family with sequence similarity 53, member A
hsa-miR-519b-3p	1	0	1	0	1	1	SYT14L	synaptotagmin XIV-like
hsa-miR-519b-3p	1	0	1	1	1	1	KATNAL1	katanin p60 subunit A-like 1
hsa-miR-519b-3p	1	0	1	1	1	1	RUNX2	runt-related transcription factor 2
hsa-miR-519b-3p	1	0	1	1	1	1	PHF6	PHD finger protein 6
hsa-miR-519b-3p	1	0	1	1	1	1	MSMO1	methylsterol monooxygenase 1
hsa-miR-519b-3p	1	0	1	1	1	1	TMCC1	transmembrane and coiled-coil domain family 1
hsa-miR-519b-3p	1	0	1	0	1	1	GOPC	golgi-associated PDZ and coiled-coil motif containing
hsa-miR-519b-3p	0	0	1	1	1	1	BTBD11	BTB (POZ) domain containing 11
hsa-miR-519b-3p	0	0	1	1	0	0	DAPL1	death associated protein-like 1
hsa-miR-519b-3p	1	0	1	1	1	1	ZHX1	zinc fingers and homeoboxes 1
hsa-miR-519b-3p	0	0	1	1	0	0	POLR3H	polymerase (RNA) III (DNA directed) polypeptide H (22.9kD)
hsa-miR-519b-3p	1	0	1	1	1	1	PFKFB2	6-phosphofructo-2-kinase/fructose-2,6-biphosphatase 2
hsa-miR-519b-3p	1	0	1	0	1	1	GCH1	GTP cyclohydrolase 1
hsa-miR-519b-3p	0	0	1	0	1	1	TM2D2	TM2 domain containing 2
hsa-miR-519b-3p	1	0	1	1	1	1	KALRN	kalirin, RhoGEF kinase
hsa-miR-519b-3p	1	0	1	0	1	1	BCL7A	B-cell CLL/lymphoma 7A
hsa-miR-519b-3p	1	0	1	0	1	1	TNRC6B	trinucleotide repeat containing 6B
hsa-miR-519b-3p	1	0	1	1	1	1	TGFBR2	transforming growth factor, beta receptor II (70/80kDa)
hsa-miR-519b-3p	1	0	1	1	1	1	FNBP1L	formin binding protein 1-like
hsa-miR-519b-3p	1	0	1	1	1	1	ARPP21	cAMP-regulated phosphoprotein, 21kDa
hsa-miR-519b-3p	1	0	1	0	1	1	CELF2	CUGBP, Elav-like family member 2
hsa-miR-519b-3p	1	0	1	0	1	1	RAB12	RAB12, member RAS oncogene family
hsa-miR-519b-3p	1	0	1	1	1	1	ARHGAP24	Rho GTPase activating protein 24
hsa-miR-519b-3p	1	0	1	1	1	1	RGS7BP	regulator of G-protein signaling 7 binding protein
hsa-miR-519b-3p	1	0	1	1	1	1	SLC10A7	solute carrier family 10 (sodium/bile acid cotransporter family), member 7
hsa-miR-519b-3p	0	0	1	1	1	1	SUN3	Sad1 and UNC84 domain containing 3
hsa-miR-519b-3p	1	0	1	0	1	1	SAMD5	sterile alpha motif domain containing 5
hsa-miR-519b-3p	1	0	1	0	1	1	MSRB3	methionine sulfoxide reductase B3
hsa-miR-519b-3p	1	0	1	1	1	1	SRSF7	serine/arginine-rich splicing factor 7
hsa-miR-519b-3p	0	0	1	1	1	1	CALML4	calmodulin-like 4
hsa-miR-519b-3p	1	0	1	1	1	1	MAF	v-maf musculoaponeurotic fibrosarcoma oncogene homolog (avian)
hsa-miR-519b-3p	1	0	1	1	1	1	KLF10	Kruppel-like factor 10
hsa-miR-519b-3p	1	0	1	0	1	1	SRGAP3	SLIT-ROBO Rho GTPase activating protein 3
hsa-miR-519b-3p	1	0	1	1	1	1	ZNF704	zinc finger protein 704
hsa-miR-519b-3p	1	0	1	1	1	1	SMOC1	SPARC related modular calcium binding 1
hsa-miR-519b-3p	1	0	1	0	1	1	RYR2	ryanodine receptor 2 (cardiac)
hsa-miR-519b-3p	1	0	1	0	1	1	RYR3	ryanodine receptor 3
hsa-miR-519b-3p	1	0	1	1	1	1	SCD5	stearoyl-CoA desaturase 5
hsa-miR-519b-3p	1	1	1	1	1	1	TRIM71	tripartite motif containing 71, E3 ubiquitin protein ligase
hsa-miR-519b-3p	0	0	1	1	1	1	ATAD3C	ATPase family, AAA domain containing 3C
hsa-miR-519b-3p	1	0	1	1	1	1	ELMO1	engulfment and cell motility 1
hsa-miR-519b-3p	0	0	1	1	1	1	MAP9	microtubule-associated protein 9
hsa-miR-519b-3p	1	0	1	0	1	1	USP9X	ubiquitin specific peptidase 9, X-linked
hsa-miR-519b-3p	1	0	1	0	1	1	CREBZF	CREB/ATF bZIP transcription factor
hsa-miR-519b-3p	0	0	1	1	1	1	MDH1B	malate dehydrogenase 1B, NAD (soluble)
hsa-miR-519b-3p	1	0	1	1	1	1	SCN2A	sodium channel, voltage-gated, type II, alpha subunit
hsa-miR-519b-3p	0	0	1	1	1	1	SPOCK3	sparc/osteonectin, cwcv and kazal-like domains proteoglycan (testican) 3
hsa-miR-519b-3p	0	0	1	1	1	1	MCHR2	melanin-concentrating hormone receptor 2
hsa-miR-519b-3p	1	0	1	0	1	1	DCUN1D4	DCN1, defective in cullin neddylation 1, domain containing 4 (S. cerevisiae)
hsa-miR-519b-3p	0	0	1	1	1	1	MTHFD2	methylenetetrahydrofolate dehydrogenase (NADP+ dependent) 2, methenyltetrahydrofolate cyclohydrolase
hsa-miR-519b-3p	1	0	1	1	1	1	ZBTB8A	zinc finger and BTB domain containing 8A
hsa-miR-519b-3p	1	0	1	1	1	1	FAM63B	family with sequence similarity 63, member B
hsa-miR-519b-3p	0	0	1	0	1	1	ABCE1	ATP-binding cassette, sub-family E (OABP), member 1
hsa-miR-519b-3p	0	0	1	1	1	1	SI	sucrase-isomaltase (alpha-glucosidase)
hsa-miR-519b-3p	0	0	1	1	0	0	FAM110A	family with sequence similarity 110, member A
hsa-miR-519b-3p	1	0	1	1	1	1	GLIS3	GLIS family zinc finger 3
hsa-miR-519b-3p	1	0	1	1	1	1	RUFY2	RUN and FYVE domain containing 2
hsa-miR-519b-3p	0	0	1	1	0	0	TGFB1I1	transforming growth factor beta 1 induced transcript 1
hsa-miR-519b-3p	1	0	1	1	1	1	FILIP1L	filamin A interacting protein 1-like
hsa-miR-519b-3p	1	0	1	1	1	1	CEP85L	centrosomal protein 85kDa-like
hsa-miR-519b-3p	1	0	1	1	1	1	C2orf88	chromosome 2 open reading frame 88
hsa-miR-519b-3p	1	0	1	1	1	1	SLC9A6	solute carrier family 9, subfamily A (NHE6, cation proton antiporter 6), member 6
hsa-miR-519b-3p	1	0	1	1	1	1	FRS2	fibroblast growth factor receptor substrate 2
hsa-miR-519b-3p	1	0	1	1	1	1	ERBB4	v-erb-a erythroblastic leukemia viral oncogene homolog 4 (avian)
hsa-miR-519b-3p	0	0	1	1	1	1	TTC14	tetratricopeptide repeat domain 14
hsa-miR-519b-3p	1	0	1	0	1	1	SRGAP2	SLIT-ROBO Rho GTPase activating protein 2
hsa-miR-519b-3p	1	0	1	0	1	1	TMEM237	transmembrane protein 237
hsa-miR-519b-3p	0	0	1	1	1	1	FAM22G	family with sequence similarity 22, member G
hsa-miR-519b-3p	0	0	1	1	0	0	REC8	REC8 homolog (yeast)
hsa-miR-519b-3p	0	0	1	1	1	1	SSTR2	somatostatin receptor 2
hsa-miR-519b-3p	1	0	1	1	1	1	PDE11A	phosphodiesterase 11A
hsa-miR-519b-3p	1	0	1	1	1	1	SREK1	splicing regulatory glutamine/lysine-rich protein 1
hsa-miR-519b-3p	1	0	1	1	1	1	IRF2BP2	interferon regulatory factor 2 binding protein 2
hsa-miR-519b-3p	1	0	1	0	1	1	UBXN2B	UBX domain protein 2B
hsa-miR-519b-3p	0	0	1	0	0	0	TMEM183B	transmembrane protein 183B
hsa-miR-519b-3p	0	0	1	1	1	1	DIAPH1	diaphanous homolog 1 (Drosophila)
hsa-miR-519b-3p	1	0	1	1	1	1	VAV3	vav 3 guanine nucleotide exchange factor
hsa-miR-519b-3p	1	0	1	1	1	1	FAM155A	family with sequence similarity 155, member A
hsa-miR-519b-3p	1	0	1	1	1	1	KDM6B	lysine (K)-specific demethylase 6B
hsa-miR-519b-3p	1	0	1	0	1	1	CCDC85A	coiled-coil domain containing 85A
hsa-miR-519b-3p	1	0	1	0	1	1	ODZ3	odz, odd Oz/ten-m homolog 3 (Drosophila)
hsa-miR-519b-3p	0	0	1	1	1	1	TBX18	T-box 18
hsa-miR-519b-3p	1	0	1	1	1	1	MGA	MAX gene associated
hsa-miR-519b-3p	1	0	1	1	1	1	DGKG	diacylglycerol kinase, gamma 90kDa
hsa-miR-519b-3p	1	0	1	1	1	1	REPS2	RALBP1 associated Eps domain containing 2
hsa-miR-519b-3p	1	0	1	0	1	1	SCN3A	sodium channel, voltage-gated, type III, alpha subunit
hsa-miR-519b-3p	1	0	1	0	1	1	PDE5A	phosphodiesterase 5A, cGMP-specific
hsa-miR-519b-3p	1	0	1	0	1	1	BMPR2	bone morphogenetic protein receptor, type II (serine/threonine kinase)
hsa-miR-519b-3p	1	0	1	0	1	1	KLF9	Kruppel-like factor 9
hsa-miR-519b-3p	1	0	1	1	1	1	CDH13	cadherin 13, H-cadherin (heart)
hsa-miR-519b-3p	1	0	1	0	1	1	CDK6	cyclin-dependent kinase 6
hsa-miR-519b-3p	1	0	1	1	1	1	CDS1	CDP-diacylglycerol synthase (phosphatidate cytidylyltransferase) 1
hsa-miR-519b-3p	1	0	1	1	1	1	CHD2	chromodomain helicase DNA binding protein 2
hsa-miR-519b-3p	0	0	1	1	1	1	CHUK	conserved helix-loop-helix ubiquitous kinase
hsa-miR-519b-3p	1	0	1	0	1	1	CPD	carboxypeptidase D
hsa-miR-519b-3p	1	0	1	1	1	1	CREBL2	cAMP responsive element binding protein-like 2
hsa-miR-519b-3p	0	0	1	1	1	1	DAD1	defender against cell death 1
hsa-miR-519b-3p	0	0	1	1	1	1	DARS	aspartyl-tRNA synthetase
hsa-miR-519b-3p	1	0	1	1	1	1	DYRK1A	dual-specificity tyrosine-(Y)-phosphorylation regulated kinase 1A
hsa-miR-519b-3p	1	0	1	1	1	1	S1PR1	sphingosine-1-phosphate receptor 1
hsa-miR-519b-3p	1	0	1	1	1	1	CELSR2	cadherin, EGF LAG seven-pass G-type receptor 2 (flamingo homolog, Drosophila)
hsa-miR-519b-3p	1	0	1	1	1	1	EREG	epiregulin
hsa-miR-519b-3p	1	0	1	1	1	1	FOXF2	forkhead box F2
hsa-miR-519b-3p	1	0	1	1	1	1	NR6A1	nuclear receptor subfamily 6, group A, member 1
hsa-miR-519b-3p	1	0	1	1	1	1	ING2	inhibitor of growth family, member 2
hsa-miR-519b-3p	1	0	1	1	1	1	IRAK2	interleukin-1 receptor-associated kinase 2
hsa-miR-519b-3p	0	0	1	1	0	0	ACP2	acid phosphatase 2, lysosomal
hsa-miR-519b-3p	0	0	1	1	1	1	PARP1	poly (ADP-ribose) polymerase 1
hsa-miR-519b-3p	1	0	1	1	1	1	AHR	aryl hydrocarbon receptor
hsa-miR-519b-3p	0	0	1	1	1	1	ATP12A	ATPase, H+/K+ transporting, nongastric, alpha polypeptide
hsa-miR-519b-3p	1	0	1	1	1	1	BNC1	basonuclin 1
hsa-miR-519b-3p	0	0	1	1	0	0	BMP6	bone morphogenetic protein 6
hsa-miR-519b-3p	0	0	1	1	0	0	C5	complement component 5
hsa-miR-519b-3p	1	0	1	1	1	1	CALM2	calmodulin 2 (phosphorylase kinase, delta)
hsa-miR-519b-3p	1	0	1	1	1	1	CBFB	core-binding factor, beta subunit
hsa-miR-519b-3p	1	0	1	1	1	1	CD69	CD69 molecule
hsa-miR-519b-3p	1	0	1	1	1	1	CDH11	cadherin 11, type 2, OB-cadherin (osteoblast)
hsa-miR-519b-3p	1	0	1	1	1	1	CDK2	cyclin-dependent kinase 2
hsa-miR-519b-3p	1	0	1	1	1	1	CLCN4	chloride channel, voltage-sensitive 4
hsa-miR-519b-3p	1	0	1	0	1	1	COL19A1	collagen, type XIX, alpha 1
hsa-miR-519b-3p	1	0	1	1	1	1	SLC31A1	solute carrier family 31 (copper transporters), member 1
hsa-miR-519b-3p	1	0	1	1	1	1	MASP1	mannan-binding lectin serine peptidase 1 (C4/C2 activating component of Ra-reactive factor)
hsa-miR-519b-3p	1	0	1	1	1	1	DR1	down-regulator of transcription 1, TBP-binding (negative cofactor 2)
hsa-miR-519b-3p	1	0	1	1	1	1	DUSP6	dual specificity phosphatase 6
hsa-miR-519b-3p	1	0	1	1	1	1	E2F3	E2F transcription factor 3
hsa-miR-519b-3p	0	0	1	0	1	1	STX2	syntaxin 2
hsa-miR-519b-3p	1	0	1	1	1	1	FBN2	fibrillin 2
hsa-miR-519b-3p	1	0	1	1	1	1	FGF9	fibroblast growth factor 9 (glia-activating factor)
hsa-miR-519b-3p	1	0	1	0	1	1	FUT4	fucosyltransferase 4 (alpha (1,3) fucosyltransferase, myeloid-specific)
hsa-miR-519b-3p	1	0	1	1	1	1	GAB1	GRB2-associated binding protein 1
hsa-miR-519b-3p	0	0	1	1	1	1	GFAP	glial fibrillary acidic protein
hsa-miR-519b-3p	1	0	1	1	1	1	GLRA2	glycine receptor, alpha 2
hsa-miR-519b-3p	1	0	1	1	1	1	GOLGA1	golgin A1
hsa-miR-519b-3p	0	0	1	1	1	1	GZMK	granzyme K (granzyme 3; tryptase II)
hsa-miR-519b-3p	0	0	1	1	1	1	HLA-DPB1	major histocompatibility complex, class II, DP beta 1
hsa-miR-519b-3p	1	0	1	1	1	1	HOXB3	homeobox B3
hsa-miR-519b-3p	1	0	1	1	1	1	JAG2	jagged 2
hsa-miR-519b-3p	1	0	1	1	1	1	JAK1	Janus kinase 1
hsa-miR-519b-3p	1	0	1	1	1	1	KCNJ10	potassium inwardly-rectifying channel, subfamily J, member 10
hsa-miR-519b-3p	1	0	1	1	1	1	KPNA3	karyopherin alpha 3 (importin alpha 4)
hsa-miR-519b-3p	1	0	1	0	1	1	LAMC1	laminin, gamma 1 (formerly LAMB2)
hsa-miR-519b-3p	1	0	1	1	1	1	LIMK1	LIM domain kinase 1
hsa-miR-519b-3p	1	0	1	1	1	1	M6PR	mannose-6-phosphate receptor (cation dependent)
hsa-miR-519b-3p	1	0	1	0	1	1	MXD1	MAX dimerization protein 1
hsa-miR-519b-3p	0	0	1	1	1	1	MRC1	mannose receptor, C type 1
hsa-miR-519b-3p	0	0	1	1	1	1	NOV	nephroblastoma overexpressed
hsa-miR-519b-3p	1	0	1	1	1	1	NPAS2	neuronal PAS domain protein 2
hsa-miR-519b-3p	1	0	1	1	1	1	NPAT	nuclear protein, ataxia-telangiectasia locus
hsa-miR-519b-3p	1	0	1	1	1	1	NPTX1	neuronal pentraxin I
hsa-miR-519b-3p	0	0	1	0	1	1	OPHN1	oligophrenin 1
hsa-miR-519b-3p	1	0	1	0	1	1	PAPPA	pregnancy-associated plasma protein A, pappalysin 1
hsa-miR-519b-3p	0	0	1	1	1	1	PDE2A	phosphodiesterase 2A, cGMP-stimulated
hsa-miR-519b-3p	1	0	1	1	0	0	PDGFB	platelet-derived growth factor beta polypeptide
hsa-miR-519b-3p	0	0	1	1	0	0	PER1	period homolog 1 (Drosophila)
hsa-miR-519b-3p	0	0	1	1	1	1	PF4V1	platelet factor 4 variant 1
hsa-miR-519b-3p	1	0	1	1	1	1	PPP1CB	protein phosphatase 1, catalytic subunit, beta isozyme
hsa-miR-519b-3p	1	0	1	0	0	0	PPP1R10	protein phosphatase 1, regulatory subunit 10
hsa-miR-519b-3p	1	0	1	1	1	1	MAPK6	mitogen-activated protein kinase 6
hsa-miR-519b-3p	1	0	1	1	1	1	PTPN2	protein tyrosine phosphatase, non-receptor type 2
hsa-miR-519b-3p	1	0	1	1	1	1	PTPN4	protein tyrosine phosphatase, non-receptor type 4 (megakaryocyte)
hsa-miR-519b-3p	1	0	1	1	1	1	PTPN9	protein tyrosine phosphatase, non-receptor type 9
hsa-miR-519b-3p	0	0	1	1	1	1	PTPRM	protein tyrosine phosphatase, receptor type, M
hsa-miR-519b-3p	0	0	1	1	1	1	PTPRR	protein tyrosine phosphatase, receptor type, R
hsa-miR-519b-3p	1	0	1	1	1	1	PVRL1	poliovirus receptor-related 1 (herpesvirus entry mediator C)
hsa-miR-519b-3p	1	0	1	1	1	1	ARID4A	AT rich interactive domain 4A (RBP1-like)
hsa-miR-519b-3p	1	0	1	1	1	1	RCN1	reticulocalbin 1, EF-hand calcium binding domain
hsa-miR-519b-3p	1	0	1	0	1	1	SORT1	sortilin 1
hsa-miR-519b-3p	1	0	1	1	1	1	SALL1	sal-like 1 (Drosophila)
hsa-miR-519b-3p	1	0	1	1	1	1	CCL1	chemokine (C-C motif) ligand 1
hsa-miR-519b-3p	0	0	1	1	1	1	SDC2	syndecan 2
hsa-miR-519b-3p	1	0	1	1	1	1	ST8SIA1	ST8 alpha-N-acetyl-neuraminide alpha-2,8-sialyltransferase 1
hsa-miR-519b-3p	1	0	1	0	1	1	SLC6A1	solute carrier family 6 (neurotransmitter transporter, GABA), member 1
hsa-miR-519b-3p	1	0	1	1	1	1	SNAI2	snail homolog 2 (Drosophila)
hsa-miR-519b-3p	1	0	1	1	1	1	SORL1	sortilin-related receptor, L(DLR class) A repeats containing
hsa-miR-519b-3p	1	0	1	0	1	1	SOX4	SRY (sex determining region Y)-box 4
hsa-miR-519b-3p	1	0	1	0	1	1	SOX11	SRY (sex determining region Y)-box 11
hsa-miR-519b-3p	1	0	1	1	1	1	STAC	SH3 and cysteine rich domain
hsa-miR-519b-3p	1	0	1	0	1	1	STC1	stanniocalcin 1
hsa-miR-519b-3p	1	0	1	1	1	1	SUV39H1	suppressor of variegation 3-9 homolog 1 (Drosophila)
hsa-miR-519b-3p	1	0	1	1	1	1	SYN2	synapsin II
hsa-miR-519b-3p	1	0	1	1	1	1	TAF4	TAF4 RNA polymerase II, TATA box binding protein (TBP)-associated factor, 135kDa
hsa-miR-519b-3p	1	0	1	1	1	1	TFAP2B	transcription factor AP-2 beta (activating enhancer binding protein 2 beta)
hsa-miR-519b-3p	1	0	1	1	1	1	TFAP2C	transcription factor AP-2 gamma (activating enhancer binding protein 2 gamma)
hsa-miR-519b-3p	1	0	1	0	1	1	SEC62	SEC62 homolog (S. cerevisiae)
hsa-miR-519b-3p	1	0	1	1	1	1	NR2E1	nuclear receptor subfamily 2, group E, member 1
hsa-miR-519b-3p	1	0	1	1	1	1	TRAPPC10	trafficking protein particle complex 10
hsa-miR-519b-3p	1	0	1	1	1	1	TRPC1	transient receptor potential cation channel, subfamily C, member 1
hsa-miR-519b-3p	1	0	1	0	1	1	UBE2D2	ubiquitin-conjugating enzyme E2D 2
hsa-miR-519b-3p	0	0	1	1	1	1	UBE2V2	ubiquitin-conjugating enzyme E2 variant 2
hsa-miR-519b-3p	1	0	1	0	1	1	VCL	vinculin
hsa-miR-519b-3p	1	0	1	1	1	1	DEK	DEK oncogene
hsa-miR-519b-3p	1	0	1	1	1	1	CUL5	cullin 5
hsa-miR-519b-3p	1	0	1	1	1	1	NRIP1	nuclear receptor interacting protein 1
hsa-miR-519b-3p	1	0	1	1	1	1	FZD1	frizzled family receptor 1
hsa-miR-519b-3p	1	0	1	1	1	1	FZD7	frizzled family receptor 7
hsa-miR-519b-3p	1	0	1	1	1	1	EEA1	early endosome antigen 1
hsa-miR-519b-3p	1	0	1	0	1	1	CUL3	cullin 3
hsa-miR-519b-3p	0	0	1	1	1	1	CHST1	carbohydrate (keratan sulfate Gal-6) sulfotransferase 1
hsa-miR-519b-3p	1	0	1	1	1	1	BHLHE40	basic helix-loop-helix family, member e40
hsa-miR-519b-3p	0	0	1	1	1	1	KMO	kynurenine 3-monooxygenase (kynurenine 3-hydroxylase)
hsa-miR-519b-3p	1	0	1	1	1	1	TNFSF11	tumor necrosis factor (ligand) superfamily, member 11
hsa-miR-519b-3p	0	0	1	1	1	1	SLC25A12	solute carrier family 25 (aspartate/glutamate carrier), member 12
hsa-miR-519b-3p	1	0	1	1	1	1	NRP2	neuropilin 2
hsa-miR-519b-3p	1	0	1	0	1	1	WASL	Wiskott-Aldrich syndrome-like
hsa-miR-519b-3p	1	0	1	1	1	1	CDKL2	cyclin-dependent kinase-like 2 (CDC2-related kinase)
hsa-miR-519b-3p	1	0	1	1	1	1	MAP7	microtubule-associated protein 7
hsa-miR-519b-3p	1	0	1	1	1	1	BCL2L2	BCL2-like 2
hsa-miR-519b-3p	1	0	1	0	1	1	E2F2	E2F transcription factor 2
hsa-miR-519b-3p	1	0	1	1	1	1	EYA4	eyes absent homolog 4 (Drosophila)
hsa-miR-519b-3p	1	0	1	1	1	1	GMFB	glia maturation factor, beta
hsa-miR-519b-3p	1	0	1	0	1	1	SLC1A2	solute carrier family 1 (glial high affinity glutamate transporter), member 2
hsa-miR-519b-3p	0	0	1	1	0	0	NEURL	neuralized homolog (Drosophila)
hsa-miR-519b-3p	1	0	1	1	1	1	STK17B	serine/threonine kinase 17b
hsa-miR-519b-3p	1	0	1	0	1	1	MED14	mediator complex subunit 14
hsa-miR-519b-3p	1	0	1	1	1	1	SOCS6	suppressor of cytokine signaling 6
hsa-miR-519b-3p	1	0	1	1	1	1	TRIP11	thyroid hormone receptor interactor 11
hsa-miR-519b-3p	0	0	1	1	1	1	SEP15	15 kDa selenoprotein
hsa-miR-519b-3p	0	0	1	1	1	1	HOMER1	homer homolog 1 (Drosophila)
hsa-miR-519b-3p	1	0	1	1	1	1	SLC25A27	solute carrier family 25, member 27
hsa-miR-519b-3p	1	0	1	1	1	1	GDA	guanine deaminase
hsa-miR-519b-3p	0	0	1	1	1	1	ACTL6A	actin-like 6A
hsa-miR-519b-3p	0	0	1	1	1	1	CDH1	cadherin 1, type 1, E-cadherin (epithelial)
hsa-miR-519b-3p	1	0	1	1	1	1	CREB1	cAMP responsive element binding protein 1
hsa-miR-519b-3p	1	0	1	1	1	1	DAP	death-associated protein
hsa-miR-519b-3p	1	0	1	1	1	1	DDX5	DEAD (Asp-Glu-Ala-Asp) box helicase 5
hsa-miR-519b-3p	1	0	1	1	1	1	DUSP8	dual specificity phosphatase 8
hsa-miR-519b-3p	1	0	1	1	1	1	EFNB1	ephrin-B1
hsa-miR-519b-3p	1	0	1	0	1	1	ACSL4	acyl-CoA synthetase long-chain family member 4
hsa-miR-519b-3p	1	0	1	0	1	1	GALNT2	UDP-N-acetyl-alpha-D-galactosamine:polypeptide N-acetylgalactosaminyltransferase 2 (GalNAc-T2)
hsa-miR-519b-3p	1	0	1	0	1	1	ARHGAP35	Rho GTPase activating protein 35
hsa-miR-519b-3p	0	0	1	1	1	1	FOXA1	forkhead box A1
hsa-miR-519b-3p	1	0	1	0	1	1	PKNOX1	PBX/knotted 1 homeobox 1
hsa-miR-519b-3p	1	0	1	0	1	1	SCN2B	sodium channel, voltage-gated, type II, beta subunit
hsa-miR-519b-3p	0	0	1	1	1	1	PABPN1	poly(A) binding protein, nuclear 1
hsa-miR-519b-3p	1	0	1	0	1	1	USP9Y	ubiquitin specific peptidase 9, Y-linked
hsa-miR-519b-3p	1	0	1	1	1	1	RAB11A	RAB11A, member RAS oncogene family
hsa-miR-519b-3p	1	0	1	1	1	1	SPARCL1	SPARC-like 1 (hevin)
hsa-miR-519b-3p	1	0	1	1	1	1	MTMR4	myotubularin related protein 4
hsa-miR-519b-3p	0	0	1	0	1	1	CXorf1	chromosome X open reading frame 1
hsa-miR-519b-3p	1	0	1	1	1	1	SYNGR1	synaptogyrin 1
hsa-miR-519b-3p	1	0	1	1	0	0	COX7A2L	cytochrome c oxidase subunit VIIa polypeptide 2 like
hsa-miR-519b-3p	1	0	1	1	1	1	RPS6KA5	ribosomal protein S6 kinase, 90kDa, polypeptide 5
hsa-miR-519b-3p	1	0	1	1	1	1	NREP	neuronal regeneration related protein homolog (rat)
hsa-miR-519b-3p	1	0	1	1	1	1	ZFYVE9	zinc finger, FYVE domain containing 9
hsa-miR-519b-3p	1	0	1	0	1	1	ROCK2	Rho-associated, coiled-coil containing protein kinase 2
hsa-miR-519b-3p	1	0	1	1	1	1	ONECUT2	one cut homeobox 2
hsa-miR-519b-3p	1	0	1	1	1	1	KIF23	kinesin family member 23
hsa-miR-519b-3p	0	0	1	1	1	1	CDKN2B	cyclin-dependent kinase inhibitor 2B (p15, inhibits CDK4)
hsa-miR-519b-3p	1	0	1	1	0	0	MMP14	matrix metallopeptidase 14 (membrane-inserted)
hsa-miR-519b-3p	1	0	1	1	1	1	MYO1E	myosin IE
hsa-miR-519b-3p	1	0	1	1	1	1	RELN	reelin
hsa-miR-519b-3p	0	0	1	1	1	1	PTH2R	parathyroid hormone 2 receptor
hsa-miR-519b-3p	0	0	1	1	1	1	RGPD5	RANBP2-like and GRIP domain containing 5
hsa-miR-519b-3p	1	0	1	0	1	1	SEL1L	sel-1 suppressor of lin-12-like (C. elegans)
hsa-miR-519b-3p	1	0	1	1	1	1	SFPQ	splicing factor proline/glutamine-rich
hsa-miR-519b-3p	1	0	1	1	1	1	WDR1	WD repeat domain 1
hsa-miR-519b-3p	0	0	1	1	1	1	ABCD2	ATP-binding cassette, sub-family D (ALD), member 2
hsa-miR-519b-3p	1	0	1	1	1	1	FOXN3	forkhead box N3
hsa-miR-519b-3p	1	0	1	1	1	1	DCC	deleted in colorectal carcinoma
hsa-miR-519b-3p	1	0	1	1	1	1	DLX3	distal-less homeobox 3
hsa-miR-519b-3p	1	0	1	0	1	1	E2F1	E2F transcription factor 1
hsa-miR-519b-3p	1	0	1	1	1	1	ELK3	ELK3, ETS-domain protein (SRF accessory protein 2)
hsa-miR-519b-3p	1	0	1	1	1	1	FOXG1	forkhead box G1
hsa-miR-519b-3p	0	0	1	1	1	1	MSTN	myostatin
hsa-miR-519b-3p	0	0	1	1	1	1	LPAR4	lysophosphatidic acid receptor 4
hsa-miR-519b-3p	0	0	1	1	1	1	H1F0	H1 histone family, member 0
hsa-miR-519b-3p	1	0	1	1	1	1	H3F3B	H3 histone, family 3B (H3.3B)
hsa-miR-519b-3p	1	0	1	1	1	1	HAS2	hyaluronan synthase 2
hsa-miR-519b-3p	1	0	1	1	1	1	HAS3	hyaluronan synthase 3
hsa-miR-519b-3p	1	0	1	1	1	1	RAB8A	RAB8A, member RAS oncogene family
hsa-miR-519b-3p	1	0	1	1	1	1	PDCL	phosducin-like
hsa-miR-519b-3p	1	0	1	1	1	1	MLF2	myeloid leukemia factor 2
hsa-miR-519b-3p	1	0	1	1	1	1	RND2	Rho family GTPase 2
hsa-miR-519b-3p	1	0	1	1	0	0	ZBTB22	zinc finger and BTB domain containing 22
hsa-miR-519b-3p	1	0	1	1	1	1	GABBR2	gamma-aminobutyric acid (GABA) B receptor, 2
hsa-miR-519b-3p	1	0	1	1	1	1	MAFB	v-maf musculoaponeurotic fibrosarcoma oncogene homolog B (avian)
hsa-miR-519b-3p	1	0	1	1	1	1	AKT3	v-akt murine thymoma viral oncogene homolog 3 (protein kinase B, gamma)
hsa-miR-519b-3p	1	0	1	1	1	1	MED6	mediator complex subunit 6
hsa-miR-519b-3p	1	0	1	1	1	1	PIGK	phosphatidylinositol glycan anchor biosynthesis, class K
hsa-miR-519b-3p	0	0	1	1	1	1	DNAJB6	DnaJ (Hsp40) homolog, subfamily B, member 6
hsa-miR-519b-3p	1	0	1	1	1	1	TLX1	T-cell leukemia homeobox 1
hsa-miR-519b-3p	1	0	1	1	1	1	HOXA1	homeobox A1
hsa-miR-519b-3p	0	0	1	1	1	1	IMPA1	inositol(myo)-1(or 4)-monophosphatase 1
hsa-miR-519b-3p	0	0	1	1	1	1	ING1	inhibitor of growth family, member 1
hsa-miR-519b-3p	1	0	1	1	1	1	LNPEP	leucyl/cystinyl aminopeptidase
hsa-miR-519b-3p	0	0	1	1	1	1	LPA	lipoprotein, Lp(a)
hsa-miR-519b-3p	1	0	1	1	1	1	MAB21L1	mab-21-like 1 (C. elegans)
hsa-miR-519b-3p	1	0	1	1	1	1	NHLH1	nescient helix loop helix 1
hsa-miR-519b-3p	1	0	1	1	1	1	NHLH2	nescient helix loop helix 2
hsa-miR-519b-3p	1	0	1	1	1	1	DLL1	delta-like 1 (Drosophila)
hsa-miR-519b-3p	0	0	1	1	0	0	RTN2	reticulon 2
hsa-miR-519b-3p	1	0	1	1	1	1	SYT1	synaptotagmin I
hsa-miR-519b-3p	0	0	1	1	1	1	MKRN3	makorin ring finger protein 3
hsa-miR-519b-3p	1	0	1	1	1	1	NAMPT	nicotinamide phosphoribosyltransferase
hsa-miR-519b-3p	1	0	1	1	1	1	PURA	purine-rich element binding protein A
hsa-miR-519b-3p	1	0	1	1	1	1	MAP3K5	mitogen-activated protein kinase kinase kinase 5
hsa-miR-519b-3p	1	0	1	1	1	1	MTF1	metal-regulatory transcription factor 1
hsa-miR-519b-3p	1	0	1	0	1	1	NAB1	NGFI-A binding protein 1 (EGR1 binding protein 1)
hsa-miR-519b-3p	0	0	1	1	1	1	TSC22D1	TSC22 domain family, member 1
hsa-miR-519b-3p	0	0	1	1	1	1	PNMA1	paraneoplastic Ma antigen 1
hsa-miR-519b-3p	1	0	1	0	1	1	HDAC4	histone deacetylase 4
hsa-miR-519b-3p	1	0	1	1	1	1	HS3ST4	heparan sulfate (glucosamine) 3-O-sulfotransferase 4
hsa-miR-519b-3p	1	0	1	1	0	0	AGFG2	ArfGAP with FG repeats 2
hsa-miR-519b-3p	1	0	1	1	1	1	CITED2	Cbp/p300-interacting transactivator, with Glu/Asp-rich carboxy-terminal domain, 2
hsa-miR-519b-3p	1	0	1	1	1	1	IRF9	interferon regulatory factor 9
hsa-miR-519b-3p	1	0	1	1	1	1	TMEM50B	transmembrane protein 50B
hsa-miR-519b-3p	0	0	1	1	1	1	CD28	CD28 molecule
hsa-miR-519b-3p	1	0	1	1	1	1	DYNC1LI2	dynein, cytoplasmic 1, light intermediate chain 2
hsa-miR-519b-3p	1	0	1	1	1	1	LASP1	LIM and SH3 protein 1
hsa-miR-519b-3p	1	0	1	1	1	1	NEUROD2	neuronal differentiation 2
hsa-miR-519b-3p	1	0	1	1	1	1	NEUROG1	neurogenin 1
hsa-miR-519b-3p	0	0	1	1	1	1	NKX3-1	NK3 homeobox 1
hsa-miR-519b-3p	0	0	1	1	0	0	PDE6H	phosphodiesterase 6H, cGMP-specific, cone, gamma
hsa-miR-519b-3p	1	0	1	1	1	1	PDGFRA	platelet-derived growth factor receptor, alpha polypeptide
hsa-miR-519b-3p	1	0	1	0	1	1	PITPNA	phosphatidylinositol transfer protein, alpha
hsa-miR-519b-3p	1	0	1	1	1	1	PRKAA1	protein kinase, AMP-activated, alpha 1 catalytic subunit
hsa-miR-519b-3p	1	0	1	1	1	1	STK4	serine/threonine kinase 4
hsa-miR-519b-3p	1	0	1	1	1	1	TSG101	tumor susceptibility gene 101
hsa-miR-519b-3p	0	0	1	1	1	1	SLC30A9	solute carrier family 30 (zinc transporter), member 9
hsa-miR-519b-3p	1	0	1	1	1	1	ZNF238	zinc finger protein 238
hsa-miR-519b-3p	1	0	1	1	1	1	NXF1	nuclear RNA export factor 1
hsa-miR-519b-3p	1	0	1	1	1	1	SEMA3C	sema domain, immunoglobulin domain (Ig), short basic domain, secreted, (semaphorin) 3C
hsa-miR-519b-3p	1	0	1	1	1	1	NEBL	nebulette
hsa-miR-519b-3p	1	0	1	1	1	1	TRIM3	tripartite motif containing 3
hsa-miR-519b-3p	1	0	1	0	1	1	GNAI3	guanine nucleotide binding protein (G protein), alpha inhibiting activity polypeptide 3
hsa-miR-519b-3p	1	0	1	0	1	1	IGF2BP1	insulin-like growth factor 2 mRNA binding protein 1
hsa-miR-519b-3p	1	0	1	1	1	1	CTCF	CCCTC-binding factor (zinc finger protein)
hsa-miR-519b-3p	1	0	1	0	1	1	API5	apoptosis inhibitor 5
hsa-miR-519b-3p	1	0	1	1	1	1	MAP3K2	mitogen-activated protein kinase kinase kinase 2
hsa-miR-519b-3p	1	0	1	1	1	1	KDM5B	lysine (K)-specific demethylase 5B
hsa-miR-519b-3p	0	0	1	1	0	0	VAMP5	vesicle-associated membrane protein 5 (myobrevin)
hsa-miR-519b-3p	1	0	1	1	1	1	TSPAN9	tetraspanin 9
hsa-miR-519b-3p	0	0	1	1	1	1	FGL2	fibrinogen-like 2
hsa-miR-519b-3p	0	0	1	1	1	1	GLO1	glyoxalase I
hsa-miR-519b-3p	1	0	1	1	1	1	DIAPH2	diaphanous homolog 2 (Drosophila)
hsa-miR-519b-3p	1	0	1	1	1	1	HIVEP2	human immunodeficiency virus type I enhancer binding protein 2
hsa-miR-519b-3p	1	0	1	1	1	1	CBX1	chromobox homolog 1
hsa-miR-519b-3p	0	0	1	1	1	1	PKIA	protein kinase (cAMP-dependent, catalytic) inhibitor alpha
hsa-miR-519b-3p	1	0	1	1	1	1	FERMT2	fermitin family member 2
hsa-miR-519b-3p	1	0	1	1	1	1	PRRX1	paired related homeobox 1
hsa-miR-519b-3p	0	0	1	0	1	1	PSG1	pregnancy specific beta-1-glycoprotein 1
hsa-miR-519b-3p	1	0	1	1	1	1	RIT1	Ras-like without CAAX 1
hsa-miR-519b-3p	1	0	1	1	1	1	SCN1A	sodium channel, voltage-gated, type I, alpha subunit
hsa-miR-519b-3p	1	0	1	1	1	1	HSPA13	heat shock protein 70kDa family, member 13
hsa-miR-519b-3p	1	0	1	1	1	1	NR4A3	nuclear receptor subfamily 4, group A, member 3
hsa-miR-519b-3p	1	0	1	1	1	1	CLDN10	claudin 10
hsa-miR-519b-3p	1	0	1	1	1	1	ABHD2	abhydrolase domain containing 2
hsa-miR-519b-3p	1	0	1	1	1	1	RAPGEF4	Rap guanine nucleotide exchange factor (GEF) 4
hsa-miR-519b-3p	1	0	1	1	1	1	ADAMTS5	ADAM metallopeptidase with thrombospondin type 1 motif, 5
hsa-miR-519b-3p	1	0	1	1	1	1	SOX21	SRY (sex determining region Y)-box 21
hsa-miR-519b-3p	1	0	1	1	1	1	UTY	ubiquitously transcribed tetratricopeptide repeat gene, Y-linked
hsa-miR-519b-3p	1	0	1	1	1	1	VCP	valosin containing protein
hsa-miR-519b-3p	1	0	1	1	1	1	ZNF81	zinc finger protein 81
hsa-miR-519b-3p	1	0	1	1	1	1	VEZF1	vascular endothelial zinc finger 1
hsa-miR-519b-3p	0	0	1	0	1	1	ZNF208	zinc finger protein 208
hsa-miR-519b-3p	0	0	1	0	1	1	ZXDB	zinc finger, X-linked, duplicated B
hsa-miR-519b-3p	1	0	1	1	1	1	TESK2	testis-specific kinase 2
hsa-miR-519b-3p	1	0	1	0	1	1	PRSS23	protease, serine, 23
hsa-miR-519b-3p	1	0	1	1	1	1	HPS5	Hermansky-Pudlak syndrome 5
hsa-miR-519b-3p	1	0	1	1	1	1	PDCD10	programmed cell death 10
hsa-miR-519b-3p	1	0	1	1	1	1	CA5B	carbonic anhydrase VB, mitochondrial
hsa-miR-519b-3p	0	0	1	1	1	1	XPOT	exportin, tRNA (nuclear export receptor for tRNAs)
hsa-miR-519b-3p	1	0	1	1	1	1	KLF12	Kruppel-like factor 12
hsa-miR-519b-3p	0	0	1	1	1	1	GABARAPL2	GABA(A) receptor-associated protein-like 2
hsa-miR-519b-3p	1	0	1	1	1	1	ZNF236	zinc finger protein 236
hsa-miR-519b-3p	0	0	1	0	1	1	AP4E1	adaptor-related protein complex 4, epsilon 1 subunit
hsa-miR-519b-3p	0	0	1	0	1	1	PAXIP1	PAX interacting (with transcription-activation domain) protein 1
hsa-miR-519b-3p	0	0	1	1	1	1	C3orf27	chromosome 3 open reading frame 27
hsa-miR-519b-3p	0	0	1	0	1	1	CD93	CD93 molecule
hsa-miR-519b-3p	1	0	1	0	1	1	ZFPM2	zinc finger protein, multitype 2
hsa-miR-519b-3p	0	0	1	1	1	1	CHIC2	cysteine-rich hydrophobic domain 2
hsa-miR-519b-3p	1	0	1	0	1	1	FZD4	frizzled family receptor 4
hsa-miR-519b-3p	1	0	1	1	1	1	RYBP	RING1 and YY1 binding protein
hsa-miR-519b-3p	1	0	1	1	1	1	DKK1	dickkopf 1 homolog (Xenopus laevis)
hsa-miR-519b-3p	1	0	1	1	1	1	HEY2	hairy/enhancer-of-split related with YRPW motif 2
hsa-miR-519b-3p	1	0	1	1	1	1	HS2ST1	heparan sulfate 2-O-sulfotransferase 1
hsa-miR-519b-3p	1	0	1	1	1	1	KCND2	potassium voltage-gated channel, Shal-related subfamily, member 2
hsa-miR-519b-3p	1	0	1	0	1	1	PXDN	peroxidasin homolog (Drosophila)
hsa-miR-519b-3p	1	0	1	0	1	1	G3BP2	GTPase activating protein (SH3 domain) binding protein 2
hsa-miR-519b-3p	1	0	1	1	1	1	FBXW11	F-box and WD repeat domain containing 11
hsa-miR-519b-3p	1	0	1	1	1	1	LSM5	LSM5 homolog, U6 small nuclear RNA associated (S. cerevisiae)
hsa-miR-519b-3p	1	0	1	1	1	1	MAPRE1	microtubule-associated protein, RP/EB family, member 1
hsa-miR-519b-3p	1	0	1	1	1	1	DNAJB9	DnaJ (Hsp40) homolog, subfamily B, member 9
hsa-miR-519b-3p	1	0	1	0	1	1	MYO10	myosin X
hsa-miR-519b-3p	0	0	1	1	1	1	TTC33	tetratricopeptide repeat domain 33
hsa-miR-519b-3p	1	0	1	1	1	1	NPTN	neuroplastin
hsa-miR-519b-3p	0	0	1	0	1	1	TLL1	tolloid-like 1
hsa-miR-519b-3p	1	0	1	1	1	1	YWHAG	tyrosine 3-monooxygenase/tryptophan 5-monooxygenase activation protein, gamma polypeptide
hsa-miR-519b-3p	1	0	1	0	1	1	FLRT2	fibronectin leucine rich transmembrane protein 2
hsa-miR-519b-3p	0	0	1	1	1	1	ABT1	activator of basal transcription 1
hsa-miR-519b-3p	1	0	1	1	1	1	LRP12	low density lipoprotein receptor-related protein 12
hsa-miR-519b-3p	0	0	1	1	1	1	UBQLN1	ubiquilin 1
hsa-miR-519b-3p	0	0	1	1	1	1	UBQLN2	ubiquilin 2
hsa-miR-519b-3p	1	0	1	1	1	1	NRG1	neuregulin 1
hsa-miR-519b-3p	1	0	1	1	1	1	ZBTB43	zinc finger and BTB domain containing 43
hsa-miR-519b-3p	1	0	1	1	1	1	WDR37	WD repeat domain 37
hsa-miR-519b-3p	1	0	1	1	1	1	ASF1A	ASF1 anti-silencing function 1 homolog A (S. cerevisiae)
hsa-miR-519b-3p	0	0	1	1	1	1	SNX24	sorting nexin 24
hsa-miR-519b-3p	0	0	1	1	0	0	MCTS1	malignant T cell amplified sequence 1
hsa-miR-519b-3p	1	0	1	1	1	1	CRIPT	cysteine-rich PDZ-binding protein
hsa-miR-519b-3p	1	0	1	0	1	1	ODZ1	odz, odd Oz/ten-m homolog 1 (Drosophila)
hsa-miR-519b-3p	1	0	1	1	1	1	YME1L1	YME1-like 1 (S. cerevisiae)
hsa-miR-519b-3p	0	0	1	1	1	1	HSPA4L	heat shock 70kDa protein 4-like
hsa-miR-519b-3p	1	0	1	1	1	1	TDRD7	tudor domain containing 7
hsa-miR-519b-3p	1	0	1	0	1	1	FJX1	four jointed box 1 (Drosophila)
hsa-miR-519b-3p	0	0	1	1	1	1	LAMP3	lysosomal-associated membrane protein 3
hsa-miR-519b-3p	0	0	1	1	1	1	TSPAN13	tetraspanin 13
hsa-miR-519b-3p	0	0	1	1	1	1	TAF5L	TAF5-like RNA polymerase II, p300/CBP-associated factor (PCAF)-associated factor, 65kDa
hsa-miR-519b-3p	0	0	1	1	1	1	CLUL1	clusterin-like 1 (retinal)
hsa-miR-519b-3p	1	0	1	1	1	1	TNFRSF21	tumor necrosis factor receptor superfamily, member 21
hsa-miR-519b-3p	1	0	1	1	1	1	KLHL20	kelch-like 20 (Drosophila)
hsa-miR-519b-3p	1	0	1	1	1	1	SLC40A1	solute carrier family 40 (iron-regulated transporter), member 1
hsa-miR-519b-3p	1	0	1	0	1	1	HUNK	hormonally up-regulated Neu-associated kinase
hsa-miR-519b-3p	1	0	1	1	1	1	HERC3	HECT and RLD domain containing E3 ubiquitin protein ligase 3
hsa-miR-519b-3p	0	0	1	1	1	1	PSME4	proteasome (prosome, macropain) activator subunit 4
hsa-miR-519b-3p	1	0	1	0	1	1	SH3PXD2A	SH3 and PX domains 2A
hsa-miR-519b-3p	1	0	1	1	1	1	GCC2	GRIP and coiled-coil domain containing 2
hsa-miR-519b-3p	1	0	1	1	1	1	RALGPS1	Ral GEF with PH domain and SH3 binding motif 1
hsa-miR-519b-3p	0	0	1	1	1	1	PHF14	PHD finger protein 14
hsa-miR-519b-3p	1	0	1	1	1	1	MLL4	myeloid/lymphoid or mixed-lineage leukemia 4
hsa-miR-519b-3p	0	0	1	1	1	1	FRMPD4	FERM and PDZ domain containing 4
hsa-miR-519b-3p	1	0	1	1	1	1	RASSF2	Ras association (RalGDS/AF-6) domain family member 2
hsa-miR-519b-3p	1	0	1	0	1	1	SERTAD2	SERTA domain containing 2
hsa-miR-519b-3p	1	0	1	1	1	1	DAZAP2	DAZ associated protein 2
hsa-miR-519b-3p	1	0	1	0	1	1	KIAA0494	KIAA0494
hsa-miR-519b-3p	1	0	1	1	1	1	ZBTB5	zinc finger and BTB domain containing 5
hsa-miR-519b-3p	1	0	1	1	1	1	JOSD1	Josephin domain containing 1
hsa-miR-519b-3p	0	0	1	1	1	1	N4BP2L2	NEDD4 binding protein 2-like 2
hsa-miR-519b-3p	1	0	1	0	1	1	RAB11FIP2	RAB11 family interacting protein 2 (class I)
hsa-miR-519b-3p	0	0	1	0	1	1	PPM1E	protein phosphatase, Mg2+/Mn2+ dependent, 1E
hsa-miR-519b-3p	0	0	1	1	1	1	ADNP2	ADNP homeobox 2
hsa-miR-519b-3p	1	0	1	0	1	1	WDFY3	WD repeat and FYVE domain containing 3
hsa-miR-519b-3p	1	0	1	1	1	1	PHLPP2	PH domain and leucine rich repeat protein phosphatase 2
hsa-miR-519b-3p	1	0	1	1	1	1	PIKFYVE	phosphoinositide kinase, FYVE finger containing
hsa-miR-519b-3p	1	0	1	0	1	1	ZNF609	zinc finger protein 609
hsa-miR-519b-3p	1	0	1	0	1	1	PEG10	paternally expressed 10
hsa-miR-519b-3p	1	0	1	1	1	1	SMG1	smg-1 homolog, phosphatidylinositol 3-kinase-related kinase (C. elegans)
hsa-miR-519b-3p	1	0	1	1	1	1	TAB2	TGF-beta activated kinase 1/MAP3K7 binding protein 2
hsa-miR-519b-3p	1	0	1	1	0	0	CIC	capicua homolog (Drosophila)
hsa-miR-519b-3p	1	0	1	1	1	1	TBC1D9	TBC1 domain family, member 9 (with GRAM domain)
hsa-miR-519b-3p	0	0	1	0	0	0	SLC35D1	solute carrier family 35 (UDP-glucuronic acid/UDP-N-acetylgalactosamine dual transporter), member D1
hsa-miR-519b-3p	1	0	1	1	1	1	ZCCHC14	zinc finger, CCHC domain containing 14
hsa-miR-519b-3p	1	0	1	0	1	1	LARP4B	La ribonucleoprotein domain family, member 4B
hsa-miR-519b-3p	0	0	1	1	1	1	ARL6IP1	ADP-ribosylation factor-like 6 interacting protein 1
hsa-miR-519b-3p	1	0	1	1	1	1	PRRC2C	proline-rich coiled-coil 2C
hsa-miR-519b-3p	1	0	1	1	1	1	PLCB1	phospholipase C, beta 1 (phosphoinositide-specific)
hsa-miR-519b-3p	1	0	1	1	1	1	PDS5A	PDS5, regulator of cohesion maintenance, homolog A (S. cerevisiae)
hsa-miR-519b-3p	1	0	1	0	1	1	KIAA1024	KIAA1024
hsa-miR-519b-3p	1	0	1	1	1	1	ARAP2	ArfGAP with RhoGAP domain, ankyrin repeat and PH domain 2
hsa-miR-519b-3p	1	0	1	0	1	1	KHNYN	KH and NYN domain containing
hsa-miR-519b-3p	0	0	1	0	1	1	ZDHHC17	zinc finger, DHHC-type containing 17
hsa-miR-519b-3p	1	0	1	1	1	1	ZFYVE26	zinc finger, FYVE domain containing 26
hsa-miR-519b-3p	1	0	1	1	1	1	RIMBP2	RIMS binding protein 2
hsa-miR-519b-3p	1	0	1	1	1	1	CNOT6	CCR4-NOT transcription complex, subunit 6
hsa-miR-519b-3p	1	0	1	1	1	1	ATL3	atlastin GTPase 3
hsa-miR-519b-3p	0	0	1	1	1	1	KBTBD2	kelch repeat and BTB (POZ) domain containing 2
hsa-miR-519b-3p	1	0	1	1	1	1	PNKD	paroxysmal nonkinesigenic dyskinesia
hsa-miR-519b-3p	0	0	1	1	0	0	TSKU	tsukushi small leucine rich proteoglycan homolog (Xenopus laevis)
hsa-miR-519b-3p	1	0	1	0	1	1	GLCE	glucuronic acid epimerase
hsa-miR-519b-3p	1	0	1	1	1	1	SLITRK5	SLIT and NTRK-like family, member 5
hsa-miR-519b-3p	1	0	1	1	1	1	EPC2	enhancer of polycomb homolog 2 (Drosophila)
hsa-miR-519b-3p	0	0	1	1	1	1	KRT76	keratin 76
hsa-miR-519b-3p	1	0	1	1	1	1	AZIN1	antizyme inhibitor 1
hsa-miR-519b-3p	0	0	1	1	1	1	LAP3	leucine aminopeptidase 3
hsa-miR-519b-3p	0	0	1	1	1	1	SCCPDH	saccharopine dehydrogenase (putative)
hsa-miR-519b-3p	1	0	1	1	1	1	PHF20L1	PHD finger protein 20-like 1
hsa-miR-519b-3p	0	0	1	1	1	1	APH1A	anterior pharynx defective 1 homolog A (C. elegans)
hsa-miR-519b-3p	0	0	1	1	1	1	HDDC2	HD domain containing 2
hsa-miR-519b-3p	1	0	1	1	1	1	GOLT1B	golgi transport 1B
hsa-miR-519b-3p	1	0	1	0	1	1	CNR1	cannabinoid receptor 1 (brain)
hsa-miR-519b-3p	1	0	1	0	1	1	WNT16	wingless-type MMTV integration site family, member 16
hsa-miR-519b-3p	1	0	1	1	1	1	IER3IP1	immediate early response 3 interacting protein 1
hsa-miR-519b-3p	0	0	1	1	1	1	RAB10	RAB10, member RAS oncogene family
hsa-miR-519b-3p	1	0	1	1	1	1	VGLL3	vestigial like 3 (Drosophila)
hsa-miR-519b-3p	1	0	1	0	1	1	HECA	headcase homolog (Drosophila)
hsa-miR-519b-3p	1	0	1	1	1	1	AKAP11	A kinase (PRKA) anchor protein 11
hsa-miR-519b-3p	1	0	1	1	1	1	BIRC6	baculoviral IAP repeat containing 6
hsa-miR-519b-3p	0	0	1	1	1	1	RSL24D1	ribosomal L24 domain containing 1
hsa-miR-519b-3p	1	0	1	1	1	1	CMPK1	cytidine monophosphate (UMP-CMP) kinase 1, cytosolic
hsa-miR-519b-3p	1	0	1	1	1	1	RAB14	RAB14, member RAS oncogene family
hsa-miR-519b-3p	1	0	1	1	1	1	ARID4B	AT rich interactive domain 4B (RBP1-like)
hsa-miR-519b-3p	0	0	1	1	1	1	CD244	CD244 molecule, natural killer cell receptor 2B4
hsa-miR-519b-3p	1	0	1	0	1	1	CRIM1	cysteine rich transmembrane BMP regulator 1 (chordin-like)
hsa-miR-519b-3p	1	0	1	0	1	1	RAB8B	RAB8B, member RAS oncogene family
hsa-miR-519b-3p	1	0	1	1	1	1	ZNF644	zinc finger protein 644
hsa-miR-519b-3p	1	0	1	0	1	1	FZD3	frizzled family receptor 3
hsa-miR-519b-3p	1	0	1	0	1	1	KLHL3	kelch-like 3 (Drosophila)
hsa-miR-519b-3p	1	0	1	1	1	1	SIX4	SIX homeobox 4
hsa-miR-519b-3p	1	0	1	1	1	1	ZC3H7B	zinc finger CCCH-type containing 7B
hsa-miR-519b-3p	1	0	1	1	1	1	HAUS6	HAUS augmin-like complex, subunit 6
hsa-miR-519b-3p	1	0	1	1	1	1	ZNF280C	zinc finger protein 280C
hsa-miR-519b-3p	1	0	1	1	1	1	VPS13C	vacuolar protein sorting 13 homolog C (S. cerevisiae)
hsa-miR-519b-3p	1	0	1	0	1	1	FAM46C	family with sequence similarity 46, member C
hsa-miR-519b-3p	1	0	1	1	1	1	LPPR1	lipid phosphate phosphatase-related protein type 1
hsa-miR-519b-3p	0	0	1	1	1	1	WHSC1L1	Wolf-Hirschhorn syndrome candidate 1-like 1
hsa-miR-519b-3p	1	0	1	0	1	1	MARCH5	membrane-associated ring finger (C3HC4) 5
hsa-miR-519b-3p	0	0	1	1	1	1	SOHLH2	spermatogenesis and oogenesis specific basic helix-loop-helix 2
hsa-miR-519b-3p	0	0	1	1	1	1	SDHAF2	succinate dehydrogenase complex assembly factor 2
hsa-miR-519b-3p	1	0	1	1	1	1	HIF1AN	hypoxia inducible factor 1, alpha subunit inhibitor
hsa-miR-519b-3p	1	0	1	1	1	1	CDC37L1	cell division cycle 37 homolog (S. cerevisiae)-like 1
hsa-miR-519b-3p	0	0	1	1	1	1	WIPI1	WD repeat domain, phosphoinositide interacting 1
hsa-miR-519b-3p	0	0	1	0	1	1	MREG	melanoregulin
hsa-miR-519b-3p	1	0	1	1	1	1	IFT57	intraflagellar transport 57 homolog (Chlamydomonas)
hsa-miR-519b-3p	1	0	1	1	1	1	ARGLU1	arginine and glutamate rich 1
hsa-miR-519b-3p	1	0	1	1	1	1	SOBP	sine oculis binding protein homolog (Drosophila)
hsa-miR-519b-3p	1	0	1	1	1	1	ATG2B	autophagy related 2B
hsa-miR-519b-3p	0	0	1	1	1	1	GPATCH2	G patch domain containing 2
hsa-miR-519b-3p	0	0	1	1	1	1	THAP1	THAP domain containing, apoptosis associated protein 1
hsa-miR-519b-3p	1	0	1	1	1	1	FAM178A	family with sequence similarity 178, member A
hsa-miR-519b-3p	1	0	1	0	1	1	MSL2	male-specific lethal 2 homolog (Drosophila)
hsa-miR-519b-3p	1	0	1	0	1	1	LGI2	leucine-rich repeat LGI family, member 2
hsa-miR-519b-3p	1	0	1	0	1	1	ARL8B	ADP-ribosylation factor-like 8B
hsa-miR-519b-3p	0	0	1	1	1	1	TRIM62	tripartite motif containing 62
hsa-miR-519b-3p	1	0	1	1	1	1	UBA6	ubiquitin-like modifier activating enzyme 6
hsa-miR-519b-3p	1	0	1	0	1	1	SEPT11	septin 11
hsa-miR-519b-3p	1	0	1	1	1	1	ASXL2	additional sex combs like 2 (Drosophila)
hsa-miR-519b-3p	1	0	1	1	1	1	PI4K2B	phosphatidylinositol 4-kinase type 2 beta
hsa-miR-519b-3p	1	0	1	1	1	1	KIAA1598	KIAA1598
hsa-miR-519b-3p	0	0	1	1	1	1	TMEM144	transmembrane protein 144
hsa-miR-519b-3p	1	0	1	1	1	1	AGPAT5	1-acylglycerol-3-phosphate O-acyltransferase 5 (lysophosphatidic acid acyltransferase, epsilon)
hsa-miR-519b-3p	0	0	1	0	0	0	CACNA2D3	calcium channel, voltage-dependent, alpha 2/delta subunit 3
hsa-miR-519b-3p	0	0	1	1	1	1	STK32B	serine/threonine kinase 32B
hsa-miR-519b-3p	1	0	1	1	1	1	RRN3	RRN3 RNA polymerase I transcription factor homolog (S. cerevisiae)
hsa-miR-519b-3p	0	0	1	0	0	0	FAM45B	family with sequence similarity 45, member A pseudogene
hsa-miR-519b-3p	1	0	1	0	1	1	LRP1B	low density lipoprotein receptor-related protein 1B
hsa-miR-519b-3p	1	0	1	1	1	1	CAMK2N1	calcium/calmodulin-dependent protein kinase II inhibitor 1
hsa-miR-519b-3p	1	0	1	1	1	1	ETNK1	ethanolamine kinase 1
hsa-miR-519b-3p	1	0	1	0	1	1	RNF114	ring finger protein 114
hsa-miR-519b-3p	1	0	1	1	1	1	KIAA1199	KIAA1199
hsa-miR-519b-3p	1	0	1	0	1	1	TMEM55A	transmembrane protein 55A
hsa-miR-519b-3p	1	0	1	0	1	1	MAML3	mastermind-like 3 (Drosophila)
hsa-miR-519b-3p	0	0	1	1	1	1	MYO5C	myosin VC
hsa-miR-519b-3p	1	0	1	1	1	1	GNG12	guanine nucleotide binding protein (G protein), gamma 12
hsa-miR-519b-3p	1	0	1	0	1	1	PCDHAC1	protocadherin alpha subfamily C, 1
hsa-miR-519b-3p	1	0	1	0	1	1	PCDHAC2	protocadherin alpha subfamily C, 2
hsa-miR-519b-3p	1	0	1	1	1	1	PCDHA1	protocadherin alpha 1
hsa-miR-519b-3p	1	0	1	0	1	1	PCDHA10	protocadherin alpha 10
hsa-miR-519b-3p	1	0	1	0	1	1	PCDHA11	protocadherin alpha 11
hsa-miR-519b-3p	1	0	1	0	1	1	PCDHA12	protocadherin alpha 12
hsa-miR-519b-3p	1	0	1	1	1	1	PCDHA2	protocadherin alpha 2
hsa-miR-519b-3p	1	0	1	1	1	1	PCDHA3	protocadherin alpha 3
hsa-miR-519b-3p	1	0	1	1	1	1	PCDHA6	protocadherin alpha 6
hsa-miR-519b-3p	1	0	1	0	1	1	PCDHA7	protocadherin alpha 7
hsa-miR-519b-3p	1	0	1	1	1	1	PCDHA8	protocadherin alpha 8
hsa-miR-519b-3p	0	0	1	1	1	1	ERRFI1	ERBB receptor feedback inhibitor 1
hsa-miR-519b-3p	0	0	1	1	1	1	NPAP1	nuclear pore associated protein 1
hsa-miR-519b-3p	0	0	1	1	1	1	RIN2	Ras and Rab interactor 2
hsa-miR-519b-3p	1	0	1	0	1	1	FAM190B	family with sequence similarity 190, member B
hsa-miR-519b-3p	1	0	1	1	1	1	CRCT1	cysteine-rich C-terminal 1
hsa-miR-519b-3p	0	0	1	1	0	0	RNF186	ring finger protein 186
hsa-miR-519b-3p	1	0	1	0	1	1	CCNJ	cyclin J
hsa-miR-519b-3p	1	0	1	1	1	1	PLEKHA3	pleckstrin homology domain containing, family A (phosphoinositide binding specific) member 3
hsa-miR-519b-3p	1	0	1	0	1	1	CNGB3	cyclic nucleotide gated channel beta 3
hsa-miR-519b-3p	1	0	1	1	1	1	EPB41L4B	erythrocyte membrane protein band 4.1 like 4B
hsa-miR-519b-3p	1	0	1	0	1	1	UBFD1	ubiquitin family domain containing 1
hsa-miR-519b-3p	1	0	1	1	1	1	POLE4	polymerase (DNA-directed), epsilon 4, accessory subunit
hsa-miR-519b-3p	1	0	1	1	1	1	MDM1	Mdm1 nuclear protein homolog (mouse)
hsa-miR-519b-3p	1	0	1	1	1	1	C8orf4	chromosome 8 open reading frame 4
hsa-miR-519b-3p	0	0	1	1	1	1	TMEM167B	transmembrane protein 167B
hsa-miR-519b-3p	1	0	1	1	1	1	C1GALT1	core 1 synthase, glycoprotein-N-acetylgalactosamine 3-beta-galactosyltransferase, 1
hsa-miR-519b-3p	1	0	1	1	0	0	C11orf75	chromosome 11 open reading frame 75
hsa-miR-519b-3p	1	0	1	1	0	0	SLC17A7	solute carrier family 17 (sodium-dependent inorganic phosphate cotransporter), member 7
hsa-miR-519b-3p	1	0	1	1	1	1	C1orf63	chromosome 1 open reading frame 63
hsa-miR-519b-3p	1	0	1	1	1	1	KIAA1244	KIAA1244
hsa-miR-519b-3p	1	0	1	0	1	1	SLC17A6	solute carrier family 17 (sodium-dependent inorganic phosphate cotransporter), member 6
hsa-miR-519b-3p	1	0	1	0	1	1	EIF5A2	eukaryotic translation initiation factor 5A2
hsa-miR-519b-3p	0	0	1	1	1	1	IL22	interleukin 22
hsa-miR-519b-3p	1	0	1	0	1	1	ADCY2	adenylate cyclase 2 (brain)
hsa-miR-519b-3p	1	0	1	0	1	1	DCUN1D1	DCN1, defective in cullin neddylation 1, domain containing 1 (S. cerevisiae)
hsa-miR-519b-3p	1	0	1	1	1	1	USP31	ubiquitin specific peptidase 31
hsa-miR-519b-3p	1	0	1	1	1	1	ARHGAP31	Rho GTPase activating protein 31
hsa-miR-519b-3p	1	0	1	1	1	1	MIB1	mindbomb E3 ubiquitin protein ligase 1
hsa-miR-519b-3p	1	0	1	0	1	1	KLHDC5	kelch domain containing 5
hsa-miR-519b-3p	1	0	1	0	1	1	SYT4	synaptotagmin IV
hsa-miR-519b-3p	1	0	1	1	1	1	NCEH1	neutral cholesterol ester hydrolase 1
hsa-miR-519b-3p	1	0	1	0	1	1	WDFY1	WD repeat and FYVE domain containing 1
hsa-miR-519b-3p	0	0	1	1	1	1	KLHL1	kelch-like 1 (Drosophila)
hsa-miR-519b-3p	1	0	1	1	1	1	CNTN3	contactin 3 (plasmacytoma associated)
hsa-miR-519b-3p	1	0	1	0	1	1	GPAM	glycerol-3-phosphate acyltransferase, mitochondrial
hsa-miR-519b-3p	1	0	1	1	1	1	NIN	ninein (GSK3B interacting protein)
hsa-miR-519b-3p	1	0	1	1	1	1	KCNJ12	potassium inwardly-rectifying channel, subfamily J, member 12
hsa-miR-519b-3p	1	0	1	1	1	1	ZNFX1	zinc finger, NFX1-type containing 1
hsa-miR-519b-3p	1	0	1	1	1	1	HCN1	hyperpolarization activated cyclic nucleotide-gated potassium channel 1
hsa-miR-519b-3p	1	0	1	1	1	1	NEFH	neurofilament, heavy polypeptide
hsa-miR-519b-3p	1	0	1	1	1	1	MTMR3	myotubularin related protein 3
hsa-miR-519b-3p	1	0	1	1	1	1	CRY2	cryptochrome 2 (photolyase-like)
hsa-miR-519b-3p	1	0	1	1	1	1	RTN1	reticulon 1
hsa-miR-519b-3p	0	0	1	1	0	0	HOXD11	homeobox D11
hsa-miR-519b-3p	0	0	1	0	1	1	MS4A7	membrane-spanning 4-domains, subfamily A, member 7
hsa-miR-519b-3p	1	0	1	1	1	1	NTN4	netrin 4
hsa-miR-519b-3p	1	0	1	1	1	1	FAM60A	family with sequence similarity 60, member A
hsa-miR-519b-3p	1	0	1	1	1	1	DMRT3	doublesex and mab-3 related transcription factor 3
hsa-miR-519b-3p	0	0	1	1	1	1	KCNN2	potassium intermediate/small conductance calcium-activated channel, subfamily N, member 2
hsa-miR-519b-3p	0	0	1	1	1	1	NR1D1	nuclear receptor subfamily 1, group D, member 1
hsa-miR-519b-3p	1	0	1	1	1	1	BACH2	BTB and CNC homology 1, basic leucine zipper transcription factor 2
hsa-miR-519b-3p	0	0	1	0	1	1	CFL2	cofilin 2 (muscle)
hsa-miR-519b-3p	0	0	1	0	1	1	SPCS3	signal peptidase complex subunit 3 homolog (S. cerevisiae)
hsa-miR-519b-3p	0	0	1	1	0	0	C12orf44	chromosome 12 open reading frame 44
hsa-miR-519b-3p	1	0	1	0	1	1	MCL1	myeloid cell leukemia sequence 1 (BCL2-related)
hsa-miR-519b-3p	0	0	1	1	1	1	PGM5	phosphoglucomutase 5
hsa-miR-519b-3p	1	0	1	0	1	1	GAN	gigaxonin
hsa-miR-519b-3p	1	0	1	0	1	1	CSNK1G1	casein kinase 1, gamma 1
hsa-miR-519b-3p	0	0	1	1	1	1	NXF3	nuclear RNA export factor 3
hsa-miR-519b-3p	1	0	1	1	1	1	SNX16	sorting nexin 16
hsa-miR-519b-3p	1	0	1	1	1	1	ABCG4	ATP-binding cassette, sub-family G (WHITE), member 4
hsa-miR-519b-3p	0	0	1	0	1	1	SLC13A1	solute carrier family 13 (sodium/sulfate symporters), member 1
hsa-miR-519b-3p	1	0	1	1	1	1	HIF3A	hypoxia inducible factor 3, alpha subunit
hsa-miR-519b-3p	1	0	1	1	1	1	TMEM168	transmembrane protein 168
hsa-miR-519b-3p	0	0	1	1	1	1	SUSD1	sushi domain containing 1
hsa-miR-519b-3p	1	0	1	1	1	1	FNDC4	fibronectin type III domain containing 4
hsa-miR-519b-3p	1	0	1	1	1	1	YTHDC2	YTH domain containing 2
hsa-miR-519b-3p	1	0	1	0	1	1	USP46	ubiquitin specific peptidase 46
hsa-miR-519b-3p	1	0	1	1	1	1	REEP1	receptor accessory protein 1
hsa-miR-519b-3p	1	0	1	1	1	1	RASL11B	RAS-like, family 11, member B
hsa-miR-519b-3p	1	0	1	1	1	1	NEUROG2	neurogenin 2
hsa-miR-519b-3p	1	0	1	1	1	1	FAM134A	family with sequence similarity 134, member A
hsa-miR-519b-3p	1	0	1	1	0	0	PHF23	PHD finger protein 23
hsa-miR-519b-3p	1	0	1	0	1	1	NOTCH2	notch 2
hsa-miR-519b-3p	0	0	1	1	1	1	CEP70	centrosomal protein 70kDa
hsa-miR-519b-3p	1	0	1	1	1	1	FYCO1	FYVE and coiled-coil domain containing 1
hsa-miR-519b-3p	1	0	1	1	1	1	NKAIN1	Na+/K+ transporting ATPase interacting 1
hsa-miR-519b-3p	1	0	1	1	1	1	RNF128	ring finger protein 128, E3 ubiquitin protein ligase
hsa-miR-519b-3p	0	0	1	1	1	1	NAA16	N(alpha)-acetyltransferase 16, NatA auxiliary subunit
hsa-miR-519b-3p	0	0	1	1	1	1	ZDHHC14	zinc finger, DHHC-type containing 14
hsa-miR-519b-3p	0	0	1	1	1	1	SNIP1	Smad nuclear interacting protein 1
hsa-miR-519b-3p	1	0	1	0	1	1	ZFHX4	zinc finger homeobox 4
hsa-miR-519b-3p	1	0	1	0	1	1	MOB3B	MOB kinase activator 3B
hsa-miR-519b-3p	0	0	1	1	1	1	NHEJ1	nonhomologous end-joining factor 1
hsa-miR-519b-3p	1	0	1	1	1	1	L2HGDH	L-2-hydroxyglutarate dehydrogenase
hsa-miR-519b-3p	1	0	1	1	1	1	MCF2L	MCF.2 cell line derived transforming sequence-like
hsa-miR-519b-3p	0	0	1	1	1	1	GPR110	G protein-coupled receptor 110
hsa-miR-519b-3p	1	0	1	0	1	1	VCPIP1	valosin containing protein (p97)/p47 complex interacting protein 1
hsa-miR-519b-3p	1	0	1	1	1	1	FBXO11	F-box protein 11
hsa-miR-519b-3p	1	0	1	1	1	1	NAA50	N(alpha)-acetyltransferase 50, NatE catalytic subunit
hsa-miR-519b-3p	0	0	1	1	1	1	ANKRD36B	ankyrin repeat domain 36B
hsa-miR-519b-3p	0	0	1	0	1	1	PDGFD	platelet derived growth factor D
hsa-miR-519b-3p	1	0	1	1	1	1	ZBTB46	zinc finger and BTB domain containing 46
hsa-miR-519b-3p	1	0	1	0	1	1	SRCIN1	SRC kinase signaling inhibitor 1
hsa-miR-519b-3p	1	0	1	1	1	1	CYB5B	cytochrome b5 type B (outer mitochondrial membrane)
hsa-miR-519b-3p	1	0	1	1	1	1	HOXA3	homeobox A3
hsa-miR-519b-3p	1	0	1	1	1	1	NRBF2	nuclear receptor binding factor 2
hsa-miR-519b-3p	1	0	1	0	1	1	C1orf21	chromosome 1 open reading frame 21
hsa-miR-519b-3p	1	0	1	1	1	1	ANKRD13C	ankyrin repeat domain 13C
hsa-miR-519b-3p	0	0	1	1	1	1	CDADC1	cytidine and dCMP deaminase domain containing 1
hsa-miR-519b-3p	1	0	1	0	1	1	SPRY4	sprouty homolog 4 (Drosophila)
hsa-miR-519b-3p	0	0	1	1	1	1	SEH1L	SEH1-like (S. cerevisiae)
hsa-miR-519b-3p	1	0	1	1	0	0	SCRT1	scratch homolog 1, zinc finger protein (Drosophila)
hsa-miR-519b-3p	1	0	1	1	1	1	CRISPLD1	cysteine-rich secretory protein LCCL domain containing 1
hsa-miR-519b-3p	1	0	1	0	1	1	SH3BGRL2	SH3 domain binding glutamic acid-rich protein like 2
hsa-miR-519b-3p	1	0	1	1	1	1	PCDHA9	protocadherin alpha 9
hsa-miR-519b-3p	1	0	1	1	1	1	TMEM133	transmembrane protein 133
hsa-miR-519b-3p	1	0	1	0	1	1	SRSF8	serine/arginine-rich splicing factor 8
hsa-miR-519b-3p	0	0	1	1	1	1	KBTBD7	kelch repeat and BTB (POZ) domain containing 7
hsa-miR-519b-3p	1	0	1	1	1	1	FAM175B	family with sequence similarity 175, member B
hsa-miR-519b-3p	1	0	1	0	1	1	FAR1	fatty acyl CoA reductase 1
hsa-miR-519b-3p	1	0	1	1	1	1	SLITRK6	SLIT and NTRK-like family, member 6
hsa-miR-519b-3p	1	0	1	1	1	1	SETD3	SET domain containing 3
hsa-miR-519b-3p	0	0	1	1	0	0	DCUN1D5	DCN1, defective in cullin neddylation 1, domain containing 5 (S. cerevisiae)
hsa-miR-519b-3p	0	0	1	0	1	1	TMEM246	transmembrane protein 246
hsa-miR-519b-3p	1	0	1	1	1	1	BRMS1L	breast cancer metastasis-suppressor 1-like
hsa-miR-519b-3p	0	0	1	1	1	1	ZNF333	zinc finger protein 333
hsa-miR-519b-3p	1	0	1	1	0	0	ORAI1	ORAI calcium release-activated calcium modulator 1
hsa-miR-519b-3p	1	0	1	0	1	1	PPP1R15B	protein phosphatase 1, regulatory subunit 15B
hsa-miR-519b-3p	0	0	1	1	1	1	MICALCL	MICAL C-terminal like
hsa-miR-519b-3p	1	0	1	0	1	1	UBASH3B	ubiquitin associated and SH3 domain containing B
hsa-miR-519b-3p	0	0	1	1	1	1	TRIM4	tripartite motif containing 4
hsa-miR-519b-3p	0	0	1	1	0	0	MUC13	mucin 13, cell surface associated
hsa-miR-519b-3p	1	0	1	1	1	1	HIAT1	hippocampus abundant transcript 1
hsa-miR-519b-3p	1	0	1	1	1	1	C5orf30	chromosome 5 open reading frame 30
hsa-miR-519b-3p	1	0	1	0	1	1	PURB	purine-rich element binding protein B
hsa-miR-519b-3p	1	0	1	1	0	0	CAMK2N2	calcium/calmodulin-dependent protein kinase II inhibitor 2
hsa-miR-519b-3p	1	0	1	1	1	1	SSH2	slingshot homolog 2 (Drosophila)
hsa-miR-519b-3p	1	0	1	1	1	1	EPT1	ethanolaminephosphotransferase 1 (CDP-ethanolamine-specific)
hsa-miR-519b-3p	1	0	1	1	1	1	SYS1	SYS1 Golgi-localized integral membrane protein homolog (S. cerevisiae)
hsa-miR-519b-3p	1	0	1	1	1	1	BRWD1	bromodomain and WD repeat domain containing 1
hsa-miR-519b-3p	0	0	1	1	1	1	ZNF300	zinc finger protein 300
hsa-miR-519b-3p	0	0	1	1	0	0	STK11IP	serine/threonine kinase 11 interacting protein
hsa-miR-519b-3p	0	0	1	1	1	1	PLEKHG4B	pleckstrin homology domain containing, family G (with RhoGef domain) member 4B
hsa-miR-519b-3p	1	0	1	1	1	1	ESCO1	establishment of cohesion 1 homolog 1 (S. cerevisiae)
hsa-miR-519b-3p	0	0	1	0	1	1	ZNF518B	zinc finger protein 518B
hsa-miR-519b-3p	1	0	1	0	1	1	CCND1	cyclin D1
hsa-miR-519b-3p	0	0	1	1	1	1	LOH12CR1	loss of heterozygosity, 12, chromosomal region 1
hsa-miR-519b-3p	0	0	1	0	1	1	SCAMP4	secretory carrier membrane protein 4
hsa-miR-519b-3p	0	0	1	1	1	1	ABCA9	ATP-binding cassette, sub-family A (ABC1), member 9
hsa-miR-519b-3p	0	0	1	1	1	1	CTCFL	CCCTC-binding factor (zinc finger protein)-like
hsa-miR-519b-3p	0	0	1	1	1	1	CDKN2AIPNL	CDKN2A interacting protein N-terminal like
hsa-miR-519b-3p	0	0	1	1	1	1	CHST14	carbohydrate (N-acetylgalactosamine 4-0) sulfotransferase 14
hsa-miR-519b-3p	1	0	1	1	1	1	BMPER	BMP binding endothelial regulator
hsa-miR-519b-3p	0	0	1	1	1	1	RAD51B	RAD51 homolog B (S. cerevisiae)
hsa-miR-519b-3p	0	0	1	1	1	1	RFX3	regulatory factor X, 3 (influences HLA class II expression)
hsa-miR-519b-3p	0	0	1	1	1	1	DTX3L	deltex 3-like (Drosophila)
hsa-miR-519b-3p	1	0	1	1	1	1	FAM122A	family with sequence similarity 122A
hsa-miR-519b-3p	0	0	1	1	1	1	MRAP2	melanocortin 2 receptor accessory protein 2
hsa-miR-519b-3p	1	0	1	1	1	1	ICA1L	islet cell autoantigen 1,69kDa-like
hsa-miR-519b-3p	1	0	1	0	1	1	SP1	Sp1 transcription factor
hsa-miR-519b-3p	1	0	1	1	1	1	TRIOBP	TRIO and F-actin binding protein
hsa-miR-519b-3p	1	0	1	1	1	1	PKHD1	polycystic kidney and hepatic disease 1 (autosomal recessive)
hsa-miR-519b-3p	1	0	1	1	1	1	MSR1	macrophage scavenger receptor 1
hsa-miR-519b-3p	0	0	1	1	1	1	SLC25A46	solute carrier family 25, member 46
hsa-miR-519b-3p	1	0	1	0	1	1	FCHO2	FCH domain only 2
hsa-miR-519b-3p	1	0	1	1	1	1	VANGL1	vang-like 1 (van gogh, Drosophila)
hsa-miR-519b-3p	0	0	1	1	1	1	KCNC2	potassium voltage-gated channel, Shaw-related subfamily, member 2
hsa-miR-519b-3p	0	0	1	1	0	0	RHOXF1	Rhox homeobox family, member 1
hsa-miR-519b-3p	1	0	1	1	1	1	PPTC7	PTC7 protein phosphatase homolog (S. cerevisiae)
hsa-miR-519b-3p	1	0	1	1	1	1	ATRN	attractin
hsa-miR-519b-3p	0	0	1	1	1	1	CASC5	cancer susceptibility candidate 5
hsa-miR-519b-3p	1	0	1	0	1	1	CNOT6L	CCR4-NOT transcription complex, subunit 6-like
hsa-miR-519b-3p	1	0	1	1	1	1	TMEM182	transmembrane protein 182
hsa-miR-519b-3p	1	0	1	1	1	1	KCNH8	potassium voltage-gated channel, subfamily H (eag-related), member 8
hsa-miR-519b-3p	1	0	1	1	1	1	FAM91A1	family with sequence similarity 91, member A1
hsa-miR-519b-3p	0	0	1	1	1	1	ZFC3H1	zinc finger, C3H1-type containing
hsa-miR-519b-3p	0	0	1	0	1	1	PIGM	phosphatidylinositol glycan anchor biosynthesis, class M
hsa-miR-519b-3p	1	0	1	1	1	1	FAM84A	family with sequence similarity 84, member A
hsa-miR-519b-3p	0	0	1	1	0	0	TMEM217	transmembrane protein 217
hsa-miR-519b-3p	1	0	1	1	1	1	SGMS1	sphingomyelin synthase 1
hsa-miR-519b-3p	0	0	1	1	1	1	TTC30A	tetratricopeptide repeat domain 30A
hsa-miR-519b-3p	0	0	1	1	1	1	TCEAL7	transcription elongation factor A (SII)-like 7
hsa-miR-519b-3p	1	0	1	0	1	1	SYT11	synaptotagmin XI
hsa-miR-519b-3p	0	0	1	1	1	1	CHMP4C	charged multivesicular body protein 4C
hsa-miR-519b-3p	1	0	1	1	1	1	BHLHE22	basic helix-loop-helix family, member e22
hsa-miR-519b-3p	1	0	1	1	1	1	FAM81A	family with sequence similarity 81, member A
hsa-miR-519b-3p	1	0	1	1	1	1	ZNF583	zinc finger protein 583
hsa-miR-519b-3p	1	0	1	1	1	1	SLC16A14	solute carrier family 16, member 14 (monocarboxylic acid transporter 14)
hsa-miR-519b-3p	1	0	1	1	1	1	C7orf60	chromosome 7 open reading frame 60
hsa-miR-519b-3p	1	0	1	0	1	1	TMTC2	transmembrane and tetratricopeptide repeat containing 2
hsa-miR-519b-3p	1	0	1	0	1	1	DCP2	DCP2 decapping enzyme homolog (S. cerevisiae)
hsa-miR-519b-3p	1	0	1	1	1	1	TCTEX1D1	Tctex1 domain containing 1
hsa-miR-519b-3p	1	0	1	0	1	1	FAM116A	family with sequence similarity 116, member A
hsa-miR-519b-3p	1	0	1	0	1	1	TMEM154	transmembrane protein 154
hsa-miR-519b-3p	0	0	1	1	1	1	CNPY4	canopy 4 homolog (zebrafish)
hsa-miR-519b-3p	1	0	1	1	1	1	PDIK1L	PDLIM1 interacting kinase 1 like
hsa-miR-519b-3p	1	0	1	1	1	1	UHRF2	ubiquitin-like with PHD and ring finger domains 2, E3 ubiquitin protein ligase
hsa-miR-519b-3p	0	0	1	0	1	1	KBTBD6	kelch repeat and BTB (POZ) domain containing 6
hsa-miR-519b-3p	1	0	1	1	1	1	APCDD1	adenomatosis polyposis coli down-regulated 1
hsa-miR-519b-3p	1	0	1	0	1	1	N4BP1	NEDD4 binding protein 1
hsa-miR-519b-3p	1	0	1	1	1	1	CEP120	centrosomal protein 120kDa
hsa-miR-519b-3p	1	0	1	1	1	1	CRYBG3	beta-gamma crystallin domain containing 3
hsa-miR-519b-3p	1	0	1	1	1	1	CREBRF	CREB3 regulatory factor
hsa-miR-519b-3p	1	0	1	1	1	1	ZNF367	zinc finger protein 367
hsa-miR-519b-3p	1	0	1	1	1	1	CACUL1	CDK2-associated, cullin domain 1
hsa-miR-519b-3p	0	0	1	1	1	1	CREG2	cellular repressor of E1A-stimulated genes 2
hsa-miR-519b-3p	1	0	1	1	1	1	CSF1	colony stimulating factor 1 (macrophage)
hsa-miR-519b-3p	1	0	1	1	1	1	LSM11	LSM11, U7 small nuclear RNA associated
hsa-miR-519b-3p	1	0	1	1	1	1	FAM117B	family with sequence similarity 117, member B
hsa-miR-519b-3p	1	0	1	0	1	1	PGM2L1	phosphoglucomutase 2-like 1
hsa-miR-519b-3p	0	0	1	1	1	1	OTOGL	otogelin-like
hsa-miR-519b-3p	0	0	1	0	1	1	KRT18P55	keratin 18 pseudogene 55
hsa-miR-519b-3p	0	0	1	1	0	0	TIGIT	T cell immunoreceptor with Ig and ITIM domains
hsa-miR-519b-3p	1	0	1	0	1	1	SREK1IP1	SREK1-interacting protein 1
hsa-miR-519b-3p	1	0	1	1	1	1	LDLRAD3	low density lipoprotein receptor class A domain containing 3
hsa-miR-519b-3p	1	0	1	1	1	1	UBR1	ubiquitin protein ligase E3 component n-recognin 1
hsa-miR-519b-3p	1	0	1	1	1	1	C4orf34	chromosome 4 open reading frame 34
hsa-miR-519b-3p	0	0	1	1	1	1	FRMD3	FERM domain containing 3
hsa-miR-519b-3p	1	0	1	0	1	1	CCDC71L	coiled-coil domain containing 71-like
hsa-miR-519b-3p	1	0	1	1	1	1	ZADH2	zinc binding alcohol dehydrogenase domain containing 2
hsa-miR-519b-3p	0	0	1	1	1	1	NLRP9	NLR family, pyrin domain containing 9
hsa-miR-519b-3p	1	0	1	1	1	1	STX12	syntaxin 12
hsa-miR-519b-3p	1	0	1	1	1	1	ASB6	ankyrin repeat and SOCS box containing 6
hsa-miR-519b-3p	1	0	1	1	1	1	LRRTM3	leucine rich repeat transmembrane neuronal 3
hsa-miR-519b-3p	0	0	1	1	1	1	ZNF831	zinc finger protein 831
hsa-miR-519b-3p	1	0	1	1	1	1	DCAF12L1	DDB1 and CUL4 associated factor 12-like 1
hsa-miR-519b-3p	1	0	1	1	1	1	TMEM26	transmembrane protein 26
hsa-miR-519b-3p	0	0	1	0	1	1	GATS	GATS, stromal antigen 3 opposite strand
hsa-miR-519b-3p	0	0	1	0	1	1	ZNF445	zinc finger protein 445
hsa-miR-519b-3p	1	0	1	1	1	1	CREM	cAMP responsive element modulator
hsa-miR-519b-3p	1	0	1	1	1	1	PPP2R1B	protein phosphatase 2, regulatory subunit A, beta
hsa-miR-519b-3p	0	0	1	0	1	1	HCG27	HLA complex group 27 (non-protein coding)
hsa-miR-519b-3p	1	0	1	1	1	1	TMED7	transmembrane emp24 protein transport domain containing 7
hsa-miR-519b-3p	1	0	1	1	1	1	FAM216B	family with sequence similarity 216, member B
hsa-miR-519b-3p	1	0	1	1	1	1	ISM2	isthmin 2 homolog (zebrafish)
hsa-miR-519b-3p	1	0	1	1	1	1	DDX26B	DEAD/H (Asp-Glu-Ala-Asp/His) box polypeptide 26B
hsa-miR-519b-3p	1	0	1	1	1	1	BCL9L	B-cell CLL/lymphoma 9-like
hsa-miR-519b-3p	1	0	1	1	1	1	SP8	Sp8 transcription factor
hsa-miR-519b-3p	1	0	1	1	1	1	SUMF1	sulfatase modifying factor 1
hsa-miR-519b-3p	0	0	1	1	1	1	COX8C	cytochrome c oxidase subunit VIIIC
hsa-miR-519b-3p	1	0	1	1	1	1	ARRDC4	arrestin domain containing 4
hsa-miR-519b-3p	1	0	1	1	1	1	SPTY2D1	SPT2, Suppressor of Ty, domain containing 1 (S. cerevisiae)
hsa-miR-519b-3p	1	0	1	1	1	1	RALGAPA1	Ral GTPase activating protein, alpha subunit 1 (catalytic)
hsa-miR-519b-3p	1	0	1	1	1	1	ZBTB41	zinc finger and BTB domain containing 41
hsa-miR-519b-3p	1	0	1	1	1	1	ASB7	ankyrin repeat and SOCS box containing 7
hsa-miR-519b-3p	1	0	1	0	1	1	LYSMD3	LysM, putative peptidoglycan-binding, domain containing 3
hsa-miR-519b-3p	1	0	1	0	1	1	PTPLB	protein tyrosine phosphatase-like (proline instead of catalytic arginine), member b
hsa-miR-519b-3p	0	0	1	0	0	0	IGFL1	IGF-like family member 1
hsa-miR-519b-3p	1	0	1	0	1	1	FAM73A	family with sequence similarity 73, member A
hsa-miR-519b-3p	1	0	1	1	1	1	MIA3	melanoma inhibitory activity family, member 3
hsa-miR-519b-3p	1	0	1	0	1	1	ZC3H6	zinc finger CCCH-type containing 6
hsa-miR-519b-3p	1	0	1	1	1	1	NHLRC1	NHL repeat containing 1
hsa-miR-519b-3p	1	0	1	1	1	1	PTGER3	prostaglandin E receptor 3 (subtype EP3)
hsa-miR-519b-3p	0	0	1	1	1	1	ZPBP2	zona pellucida binding protein 2
hsa-miR-519b-3p	0	0	1	1	0	0	PYHIN1	pyrin and HIN domain family, member 1
hsa-miR-519b-3p	0	0	1	1	1	1	PTHLH	parathyroid hormone-like hormone
hsa-miR-519b-3p	0	0	1	1	0	0	LIPI	lipase, member I
hsa-miR-519b-3p	0	0	1	1	0	0	FOXD4L4	forkhead box D4-like 4
hsa-miR-519b-3p	1	0	1	1	1	1	THRA	thyroid hormone receptor, alpha
hsa-miR-519b-3p	1	0	1	1	1	1	BLOC1S5	biogenesis of lysosomal organelles complex-1, subunit 5, muted
hsa-miR-519b-3p	1	0	1	1	1	1	FBXO33	F-box protein 33
hsa-miR-519b-3p	1	0	1	1	1	1	E2F7	E2F transcription factor 7
hsa-miR-519b-3p	0	0	1	1	1	1	APOBEC4	apolipoprotein B mRNA editing enzyme, catalytic polypeptide-like 4 (putative)
hsa-miR-519b-3p	1	0	1	1	1	1	ENSA	endosulfine alpha
hsa-miR-519b-3p	0	0	1	1	1	1	CMPK2	cytidine monophosphate (UMP-CMP) kinase 2, mitochondrial
hsa-miR-519b-3p	1	0	1	0	1	1	NCKAP5	NCK-associated protein 5
hsa-miR-519b-3p	1	0	1	1	1	1	SKIDA1	SKI/DACH domain containing 1
hsa-miR-519b-3p	1	0	1	1	0	0	CD164L2	CD164 sialomucin-like 2
hsa-miR-519b-3p	0	0	1	0	1	1	FLJ44635	TPT1-like protein
hsa-miR-519b-3p	1	0	1	1	1	1	MAP6	microtubule-associated protein 6
hsa-miR-519b-3p	0	0	1	0	1	1	TMEM215	transmembrane protein 215
hsa-miR-519b-3p	0	0	1	0	0	0	PCDHB19P	protocadherin beta 19 pseudogene
hsa-miR-519b-3p	0	0	1	0	0	0	SNORD107	small nucleolar RNA, C/D box 107
hsa-miR-519b-3p	0	0	1	1	0	0	SNRPN	small nuclear ribonucleoprotein polypeptide N
hsa-miR-519b-3p	0	0	1	0	0	0	MIR155HG	MIR155 host gene (non-protein coding)
hsa-miR-519b-3p	0	0	1	0	0	0	TTTY2	testis-specific transcript, Y-linked 2 (non-protein coding)
hsa-miR-519b-3p	0	0	1	0	0	0	TTTY23	testis-specific transcript, Y-linked 23 (non-protein coding)
hsa-miR-519b-3p	0	0	1	0	0	0	FTH1P2	ferritin, heavy polypeptide 1 pseudogene 2
hsa-miR-519b-3p	0	0	1	0	0	0	HNRNPA3P1	heterogeneous nuclear ribonucleoprotein A3 pseudogene 1
hsa-miR-519b-3p	0	0	1	0	0	0	TPTE2P6	transmembrane phosphoinositide 3-phosphatase and tensin homolog 2 pseudogene 6
hsa-miR-519b-3p	0	0	1	0	0	0	AQP7P1	aquaporin 7 pseudogene 1
hsa-miR-519b-3p	0	0	1	0	0	0	SNORA40	small nucleolar RNA, H/ACA box 40
hsa-miR-519b-3p	0	0	1	0	0	0	MYADML	myeloid-associated differentiation marker-like (pseudogene)
hsa-miR-519b-3p	0	0	1	0	0	0	SNORD116-28	small nucleolar RNA, C/D box 116-28
hsa-miR-519b-3p	1	0	1	0	1	1	NFIX	nuclear factor I/X (CCAAT-binding transcription factor)
hsa-miR-519b-3p	0	0	0	1	1	1	MGST1	microsomal glutathione S-transferase 1
hsa-miR-519b-3p	1	0	1	1	1	1	PPP5C	protein phosphatase 5, catalytic subunit
hsa-miR-519b-3p	0	0	1	1	0	0	VDAC3	voltage-dependent anion channel 3
hsa-miR-519b-3p	0	0	1	1	1	1	KLRAP1	killer cell lectin-like receptor subfamily A pseudogene 1
hsa-miR-519b-3p	0	0	1	1	0	0	C20orf43	chromosome 20 open reading frame 43
hsa-miR-519b-3p	0	0	1	1	0	0	OTC	ornithine carbamoyltransferase
hsa-miR-519b-3p	0	0	1	1	0	0	TNFRSF17	tumor necrosis factor receptor superfamily, member 17
hsa-miR-519b-3p	1	0	1	1	0	0	ANO8	anoctamin 8
hsa-miR-519b-3p	1	0	1	1	1	1	FGF4	fibroblast growth factor 4
hsa-miR-519b-3p	0	0	0	1	0	0	TSPAN32	tetraspanin 32
hsa-miR-519b-3p	0	0	1	1	0	0	ACTR6	ARP6 actin-related protein 6 homolog (yeast)
hsa-miR-519b-3p	0	0	0	1	1	1	FAP	fibroblast activation protein, alpha
hsa-miR-519b-3p	0	0	0	1	1	1	PCDHB4	protocadherin beta 4
hsa-miR-519b-3p	1	0	1	1	1	1	TRMT6	tRNA methyltransferase 6 homolog (S. cerevisiae)
hsa-miR-519b-3p	0	0	1	1	1	1	RGS1	regulator of G-protein signaling 1
hsa-miR-519b-3p	0	0	0	1	0	0	OR1I1	olfactory receptor, family 1, subfamily I, member 1
hsa-miR-519b-3p	0	0	1	1	1	1	KRT23	keratin 23 (histone deacetylase inducible)
hsa-miR-519b-3p	0	0	0	1	0	0	IGFALS	insulin-like growth factor binding protein, acid labile subunit
hsa-miR-519b-3p	1	0	1	1	1	1	OSM	oncostatin M
hsa-miR-519b-3p	1	0	1	1	1	1	ANKRD54	ankyrin repeat domain 54
hsa-miR-519b-3p	1	0	0	1	0	0	MICALL1	MICAL-like 1
hsa-miR-519b-3p	0	0	1	1	0	0	MCM5	minichromosome maintenance complex component 5
hsa-miR-519b-3p	0	0	1	1	1	1	L3MBTL2	l(3)mbt-like 2 (Drosophila)
hsa-miR-519b-3p	1	0	0	1	1	1	NID2	nidogen 2 (osteonidogen)
hsa-miR-519b-3p	0	0	1	1	0	0	PSMC6	proteasome (prosome, macropain) 26S subunit, ATPase, 6
hsa-miR-519b-3p	0	0	1	1	1	1	LBP	lipopolysaccharide binding protein
hsa-miR-519b-3p	0	0	0	1	1	1	ARSD	arylsulfatase D
hsa-miR-519b-3p	1	0	1	1	1	1	LYRM1	LYR motif containing 1
hsa-miR-519b-3p	0	0	0	1	1	1	PLAT	plasminogen activator, tissue
hsa-miR-519b-3p	0	0	1	1	0	0	CKM	creatine kinase, muscle
hsa-miR-519b-3p	0	0	1	1	0	0	RNASEH2A	ribonuclease H2, subunit A
hsa-miR-519b-3p	0	0	0	1	0	0	C19orf53	chromosome 19 open reading frame 53
hsa-miR-519b-3p	0	0	1	1	0	0	DLX5	distal-less homeobox 5
hsa-miR-519b-3p	0	0	0	1	0	0	AIMP2	aminoacyl tRNA synthetase complex-interacting multifunctional protein 2
hsa-miR-519b-3p	0	0	0	1	1	1	MRPL32	mitochondrial ribosomal protein L32
hsa-miR-519b-3p	0	0	0	1	0	0	EDF1	endothelial differentiation-related factor 1
hsa-miR-519b-3p	0	0	1	1	0	0	KRT37	keratin 37
hsa-miR-519b-3p	1	0	1	1	1	1	RASD1	RAS, dexamethasone-induced 1
hsa-miR-519b-3p	0	0	1	1	1	1	CCL13	chemokine (C-C motif) ligand 13
hsa-miR-519b-3p	0	0	0	1	1	1	FAM20A	family with sequence similarity 20, member A
hsa-miR-519b-3p	0	0	1	1	0	0	CRYAB	crystallin, alpha B
hsa-miR-519b-3p	1	0	1	1	1	1	HSPA8	heat shock 70kDa protein 8
hsa-miR-519b-3p	1	0	1	1	0	0	ATG2A	autophagy related 2A
hsa-miR-519b-3p	0	0	1	1	1	1	PUS3	pseudouridylate synthase 3
hsa-miR-519b-3p	0	0	1	1	0	0	MVK	mevalonate kinase
hsa-miR-519b-3p	0	0	1	1	0	0	IL23A	interleukin 23, alpha subunit p19
hsa-miR-519b-3p	0	0	1	1	0	0	CYP27B1	cytochrome P450, family 27, subfamily B, polypeptide 1
hsa-miR-519b-3p	0	0	1	1	0	0	NUP107	nucleoporin 107kDa
hsa-miR-519b-3p	0	0	0	1	0	0	MRPL51	mitochondrial ribosomal protein L51
hsa-miR-519b-3p	1	0	1	1	1	1	FAM65B	family with sequence similarity 65, member B
hsa-miR-519b-3p	1	0	1	1	1	1	STK38	serine/threonine kinase 38
hsa-miR-519b-3p	0	0	1	1	1	1	C6orf118	chromosome 6 open reading frame 118
hsa-miR-519b-3p	0	0	0	1	1	1	AADAC	arylacetamide deacetylase
hsa-miR-519b-3p	1	0	1	1	1	1	GCA	grancalcin, EF-hand calcium binding protein
hsa-miR-519b-3p	0	0	1	1	1	1	PRKAG3	protein kinase, AMP-activated, gamma 3 non-catalytic subunit
hsa-miR-519b-3p	0	0	1	1	0	0	CLCA1	chloride channel accessory 1
hsa-miR-519b-3p	1	0	1	1	1	1	ANGPTL1	angiopoietin-like 1
hsa-miR-519b-3p	0	0	0	1	0	0	NT5C1A	5'-nucleotidase, cytosolic IA
hsa-miR-519b-3p	0	0	1	1	1	1	GBP3	guanylate binding protein 3
hsa-miR-519b-3p	0	0	0	1	0	0	A4GNT	alpha-1,4-N-acetylglucosaminyltransferase
hsa-miR-519b-3p	1	0	1	1	0	0	TNP1	transition protein 1 (during histone to protamine replacement)
hsa-miR-519b-3p	1	0	1	1	1	1	TBPL1	TBP-like 1
hsa-miR-519b-3p	0	0	1	1	1	1	ARMC2	armadillo repeat containing 2
hsa-miR-519b-3p	1	0	0	1	1	1	CNTRL	centriolin
hsa-miR-519b-3p	0	0	1	1	0	0	PPP3CC	protein phosphatase 3, catalytic subunit, gamma isozyme
hsa-miR-519b-3p	0	0	1	1	0	0	SLC35B1	solute carrier family 35, member B1
hsa-miR-519b-3p	0	0	1	1	1	1	TFG	TRK-fused gene
hsa-miR-519b-3p	0	0	1	1	0	0	STX10	syntaxin 10
hsa-miR-519b-3p	1	0	1	1	1	1	PDE1B	phosphodiesterase 1B, calmodulin-dependent
hsa-miR-519b-3p	0	0	1	1	0	0	NMI	N-myc (and STAT) interactor
hsa-miR-519b-3p	0	0	1	1	0	0	UBE2C	ubiquitin-conjugating enzyme E2C
hsa-miR-519b-3p	0	0	0	1	0	0	HIST1H1A	histone cluster 1, H1a
hsa-miR-519b-3p	0	0	0	1	1	1	APOBEC2	apolipoprotein B mRNA editing enzyme, catalytic polypeptide-like 2
hsa-miR-519b-3p	0	0	0	1	0	0	EMC3	ER membrane protein complex subunit 3
hsa-miR-519b-3p	0	0	0	1	1	1	BBS2	Bardet-Biedl syndrome 2
hsa-miR-519b-3p	0	0	0	1	0	0	FFAR1	free fatty acid receptor 1
hsa-miR-519b-3p	0	0	1	1	0	0	AHDC1	AT hook, DNA binding motif, containing 1
hsa-miR-519b-3p	0	0	1	1	0	0	SIX1	SIX homeobox 1
hsa-miR-519b-3p	0	0	1	1	1	1	DLGAP5	discs, large (Drosophila) homolog-associated protein 5
hsa-miR-519b-3p	1	0	1	1	1	1	EVI2A	ecotropic viral integration site 2A
hsa-miR-519b-3p	0	0	1	1	0	0	YEATS4	YEATS domain containing 4
hsa-miR-519b-3p	0	0	1	1	0	0	SHFM1	split hand/foot malformation (ectrodactyly) type 1
hsa-miR-519b-3p	0	0	0	1	1	1	MTX2	metaxin 2
hsa-miR-519b-3p	0	0	1	1	0	0	PARP2	poly (ADP-ribose) polymerase 2
hsa-miR-519b-3p	1	0	1	1	1	1	KLF16	Kruppel-like factor 16
hsa-miR-519b-3p	0	0	0	1	1	1	AOC2	amine oxidase, copper containing 2 (retina-specific)
hsa-miR-519b-3p	0	0	1	1	1	1	HSD17B7	hydroxysteroid (17-beta) dehydrogenase 7
hsa-miR-519b-3p	1	0	1	1	1	1	RAN	RAN, member RAS oncogene family
hsa-miR-519b-3p	0	0	1	1	0	0	BRD8	bromodomain containing 8
hsa-miR-519b-3p	1	0	1	1	1	1	C20orf111	chromosome 20 open reading frame 111
hsa-miR-519b-3p	1	0	1	1	1	1	NMUR2	neuromedin U receptor 2
hsa-miR-519b-3p	1	0	1	1	1	1	AMPD3	adenosine monophosphate deaminase 3
hsa-miR-519b-3p	0	0	1	1	1	1	GRP	gastrin-releasing peptide
hsa-miR-519b-3p	1	0	1	1	1	1	CABLES1	Cdk5 and Abl enzyme substrate 1
hsa-miR-519b-3p	0	0	1	1	0	0	GPR77	G protein-coupled receptor 77
hsa-miR-519b-3p	0	0	0	1	0	0	CCT7	chaperonin containing TCP1, subunit 7 (eta)
hsa-miR-519b-3p	1	0	1	1	1	1	NPL	N-acetylneuraminate pyruvate lyase (dihydrodipicolinate synthase)
hsa-miR-519b-3p	1	0	1	1	1	1	PAX3	paired box 3
hsa-miR-519b-3p	0	0	1	1	0	0	GPR45	G protein-coupled receptor 45
hsa-miR-519b-3p	0	0	1	1	1	1	AOAH	acyloxyacyl hydrolase (neutrophil)
hsa-miR-519b-3p	0	0	1	1	1	1	MTHFS	5,10-methenyltetrahydrofolate synthetase (5-formyltetrahydrofolate cyclo-ligase)
hsa-miR-519b-3p	0	0	1	1	1	1	SKIL	SKI-like oncogene
hsa-miR-519b-3p	0	0	0	1	1	1	PGBD1	piggyBac transposable element derived 1
hsa-miR-519b-3p	0	0	1	1	1	1	FGFBP1	fibroblast growth factor binding protein 1
hsa-miR-519b-3p	1	0	0	1	1	1	CENPO	centromere protein O
hsa-miR-519b-3p	1	0	1	1	1	1	ABI2	abl-interactor 2
hsa-miR-519b-3p	0	0	1	1	1	1	GUCA1C	guanylate cyclase activator 1C
hsa-miR-519b-3p	1	0	1	1	1	1	PTPRB	protein tyrosine phosphatase, receptor type, B
hsa-miR-519b-3p	0	0	1	1	0	0	PPWD1	peptidylprolyl isomerase domain and WD repeat containing 1
hsa-miR-519b-3p	0	0	0	1	0	0	PZP	pregnancy-zone protein
hsa-miR-519b-3p	0	0	0	1	0	0	TNFRSF13B	tumor necrosis factor receptor superfamily, member 13B
hsa-miR-519b-3p	0	0	1	1	1	1	CSNK1A1	casein kinase 1, alpha 1
hsa-miR-519b-3p	0	0	1	1	0	0	ANAPC5	anaphase promoting complex subunit 5
hsa-miR-519b-3p	0	0	1	1	1	1	THSD4	thrombospondin, type I, domain containing 4
hsa-miR-519b-3p	0	0	0	1	1	1	SLC24A1	solute carrier family 24 (sodium/potassium/calcium exchanger), member 1
hsa-miR-519b-3p	0	0	1	1	0	0	PKMYT1	protein kinase, membrane associated tyrosine/threonine 1
hsa-miR-519b-3p	0	0	1	1	1	1	SLC27A6	solute carrier family 27 (fatty acid transporter), member 6
hsa-miR-519b-3p	0	0	1	1	0	0	HPN	hepsin
hsa-miR-519b-3p	1	0	0	1	0	0	MAST3	microtubule associated serine/threonine kinase 3
hsa-miR-519b-3p	0	0	0	1	0	0	XRCC1	X-ray repair complementing defective repair in Chinese hamster cells 1
hsa-miR-519b-3p	0	0	0	1	0	0	TFIP11	tuftelin interacting protein 11
hsa-miR-519b-3p	0	0	1	1	0	0	UFD1L	ubiquitin fusion degradation 1 like (yeast)
hsa-miR-519b-3p	0	0	1	1	0	0	FAM83E	family with sequence similarity 83, member E
hsa-miR-519b-3p	0	0	0	1	1	1	DCPS	decapping enzyme, scavenger
hsa-miR-519b-3p	0	0	0	1	1	1	SGOL1	shugoshin-like 1 (S. pombe)
hsa-miR-519b-3p	0	0	0	1	0	0	WDR76	WD repeat domain 76
hsa-miR-519b-3p	0	0	1	1	0	0	LTK	leukocyte receptor tyrosine kinase
hsa-miR-519b-3p	1	0	0	1	0	0	SOS1	son of sevenless homolog 1 (Drosophila)
hsa-miR-519b-3p	0	0	0	1	0	0	GRB14	growth factor receptor-bound protein 14
hsa-miR-519b-3p	0	0	1	1	0	0	TMEM9	transmembrane protein 9
hsa-miR-519b-3p	0	0	0	1	1	1	GPSM2	G-protein signaling modulator 2
hsa-miR-519b-3p	1	0	1	1	0	0	KIAA1211	KIAA1211
hsa-miR-519b-3p	0	0	1	1	1	1	FASTKD3	FAST kinase domains 3
hsa-miR-519b-3p	0	0	0	1	0	0	NSUN2	NOP2/Sun RNA methyltransferase family, member 2
hsa-miR-519b-3p	0	0	1	1	0	0	SERPINI2	serpin peptidase inhibitor, clade I (pancpin), member 2
hsa-miR-519b-3p	1	0	1	1	0	0	COL5A3	collagen, type V, alpha 3
hsa-miR-519b-3p	0	0	1	1	1	1	BST1	bone marrow stromal cell antigen 1
hsa-miR-519b-3p	0	0	1	1	1	1	ATP6V0E1	ATPase, H+ transporting, lysosomal 9kDa, V0 subunit e1
hsa-miR-519b-3p	0	0	0	1	1	1	TARS	threonyl-tRNA synthetase
hsa-miR-519b-3p	0	0	0	1	1	1	NME5	NME/NM23 family member 5
hsa-miR-519b-3p	0	0	0	1	1	1	ANKRD7	ankyrin repeat domain 7
hsa-miR-519b-3p	0	0	1	1	0	0	MCCC1	methylcrotonoyl-CoA carboxylase 1 (alpha)
hsa-miR-519b-3p	0	0	1	1	0	0	ADAM18	ADAM metallopeptidase domain 18
hsa-miR-519b-3p	0	0	0	1	1	1	WBSCR22	Williams Beuren syndrome chromosome region 22
hsa-miR-519b-3p	0	0	1	1	1	1	REXO2	REX2, RNA exonuclease 2 homolog (S. cerevisiae)
hsa-miR-519b-3p	1	0	1	1	1	1	SLC2A4RG	SLC2A4 regulator
hsa-miR-519b-3p	0	0	1	1	0	0	FBXO7	F-box protein 7
hsa-miR-519b-3p	0	0	1	1	1	1	SLC5A1	solute carrier family 5 (sodium/glucose cotransporter), member 1
hsa-miR-519b-3p	0	0	1	1	1	1	DNM1L	dynamin 1-like
hsa-miR-519b-3p	1	0	1	1	1	1	GLIPR1	GLI pathogenesis-related 1
hsa-miR-519b-3p	0	0	1	1	1	1	AMDHD1	amidohydrolase domain containing 1
hsa-miR-519b-3p	0	0	0	1	1	1	RNF113B	ring finger protein 113B
hsa-miR-519b-3p	1	0	1	1	1	1	ANKRD10	ankyrin repeat domain 10
hsa-miR-519b-3p	0	0	0	1	1	1	FANCM	Fanconi anemia, complementation group M
hsa-miR-519b-3p	0	0	1	1	1	1	HDC	histidine decarboxylase
hsa-miR-519b-3p	1	0	1	1	0	0	SCAMP2	secretory carrier membrane protein 2
hsa-miR-519b-3p	0	0	1	1	1	1	RLBP1	retinaldehyde binding protein 1
hsa-miR-519b-3p	0	0	0	1	0	0	SEPT12	septin 12
hsa-miR-519b-3p	0	0	1	1	0	0	CMTM2	CKLF-like MARVEL transmembrane domain containing 2
hsa-miR-519b-3p	0	0	0	1	1	1	ZNF174	zinc finger protein 174
hsa-miR-519b-3p	0	0	1	1	0	0	FXYD1	FXYD domain containing ion transport regulator 1
hsa-miR-519b-3p	0	0	1	1	0	0	FXYD7	FXYD domain containing ion transport regulator 7
hsa-miR-519b-3p	0	0	0	1	0	0	SLC2A7	solute carrier family 2 (facilitated glucose transporter), member 7
hsa-miR-519b-3p	1	0	1	1	1	1	ZNF697	zinc finger protein 697
hsa-miR-519b-3p	0	0	1	1	1	1	PSMA5	proteasome (prosome, macropain) subunit, alpha type, 5
hsa-miR-519b-3p	0	0	1	1	1	1	SULT1C4	sulfotransferase family, cytosolic, 1C, member 4
hsa-miR-519b-3p	0	0	1	1	1	1	TMEM177	transmembrane protein 177
hsa-miR-519b-3p	0	0	0	1	1	1	SCRN3	secernin 3
hsa-miR-519b-3p	0	0	0	1	1	1	SLC25A38	solute carrier family 25, member 38
hsa-miR-519b-3p	0	0	1	1	1	1	GPR128	G protein-coupled receptor 128
hsa-miR-519b-3p	0	0	1	1	1	1	ABHD10	abhydrolase domain containing 10
hsa-miR-519b-3p	0	0	1	1	1	1	ILDR1	immunoglobulin-like domain containing receptor 1
hsa-miR-519b-3p	1	0	1	1	1	1	TBCK	TBC1 domain containing kinase
hsa-miR-519b-3p	0	0	0	1	1	1	METTL14	methyltransferase like 14
hsa-miR-519b-3p	0	0	1	1	1	1	LARS	leucyl-tRNA synthetase
hsa-miR-519b-3p	0	0	0	1	1	1	HIGD2A	HIG1 hypoxia inducible domain family, member 2A
hsa-miR-519b-3p	0	0	0	1	0	0	TAAR6	trace amine associated receptor 6
hsa-miR-519b-3p	1	0	1	1	1	1	SLC18B1	solute carrier family 18, subfamily B, member 1
hsa-miR-519b-3p	0	0	0	1	0	0	GPR174	G protein-coupled receptor 174
hsa-miR-519b-3p	0	0	0	1	0	0	LYN	v-yes-1 Yamaguchi sarcoma viral related oncogene homolog
hsa-miR-519b-3p	0	0	1	1	1	1	TERF1	telomeric repeat binding factor (NIMA-interacting) 1
hsa-miR-519b-3p	0	0	0	1	0	0	NDUFB9	NADH dehydrogenase (ubiquinone) 1 beta subcomplex, 9, 22kDa
hsa-miR-519b-3p	0	0	0	1	1	1	ZNF16	zinc finger protein 16
hsa-miR-519b-3p	0	0	1	1	1	1	PLIN2	perilipin 2
hsa-miR-519b-3p	0	0	0	1	1	1	IDI2	isopentenyl-diphosphate delta isomerase 2
hsa-miR-519b-3p	1	0	1	1	1	1	CEP164	centrosomal protein 164kDa
hsa-miR-519b-3p	0	0	1	1	0	0	LSM14B	LSM14B, SCD6 homolog B (S. cerevisiae)
hsa-miR-519b-3p	0	0	1	1	0	0	TM7SF2	transmembrane 7 superfamily member 2
hsa-miR-519b-3p	0	0	0	1	0	0	MMP10	matrix metallopeptidase 10 (stromelysin 2)
hsa-miR-519b-3p	0	0	0	1	0	0	SPATA4	spermatogenesis associated 4
hsa-miR-519b-3p	0	0	1	1	1	1	CCT5	chaperonin containing TCP1, subunit 5 (epsilon)
hsa-miR-519b-3p	0	0	1	1	0	0	HAUS1	HAUS augmin-like complex, subunit 1
hsa-miR-519b-3p	0	0	1	1	1	1	FAM151B	family with sequence similarity 151, member B
hsa-miR-519b-3p	0	0	1	1	1	1	ANKRD44	ankyrin repeat domain 44
hsa-miR-519b-3p	1	0	0	1	1	1	FLT1	fms-related tyrosine kinase 1 (vascular endothelial growth factor/vascular permeability factor receptor)
hsa-miR-519b-3p	0	0	0	1	1	1	CAPSL	calcyphosine-like
hsa-miR-519b-3p	0	0	0	1	0	0	SPACA7	sperm acrosome associated 7
hsa-miR-519b-3p	1	0	1	1	1	1	GTF2E1	general transcription factor IIE, polypeptide 1, alpha 56kDa
hsa-miR-519b-3p	1	0	1	1	1	1	GDPD1	glycerophosphodiester phosphodiesterase domain containing 1
hsa-miR-519b-3p	1	0	1	1	1	1	C21orf91	chromosome 21 open reading frame 91
hsa-miR-519b-3p	0	0	1	1	1	1	PDE1C	phosphodiesterase 1C, calmodulin-dependent 70kDa
hsa-miR-519b-3p	0	0	1	1	0	0	ATP5J	ATP synthase, H+ transporting, mitochondrial Fo complex, subunit F6
hsa-miR-519b-3p	0	0	1	1	1	1	ACAA2	acetyl-CoA acyltransferase 2
hsa-miR-519b-3p	1	0	1	1	1	1	PIEZO2	piezo-type mechanosensitive ion channel component 2
hsa-miR-519b-3p	0	0	1	1	0	0	FRRS1	ferric-chelate reductase 1
hsa-miR-519b-3p	0	0	0	1	0	0	MALSU1	mitochondrial assembly of ribosomal large subunit 1
hsa-miR-519b-3p	0	0	0	1	0	0	CCNB2	cyclin B2
hsa-miR-519b-3p	1	0	1	1	1	1	TPM1	tropomyosin 1 (alpha)
hsa-miR-519b-3p	0	0	1	1	1	1	SVOPL	SVOP-like
hsa-miR-519b-3p	0	0	0	1	1	1	COQ5	coenzyme Q5 homolog, methyltransferase (S. cerevisiae)
hsa-miR-519b-3p	0	0	1	1	1	1	HIST1H2BD	histone cluster 1, H2bd
hsa-miR-519b-3p	0	0	1	1	1	1	C2orf62	chromosome 2 open reading frame 62
hsa-miR-519b-3p	0	0	1	1	1	1	MED8	mediator complex subunit 8
hsa-miR-519b-3p	1	0	1	1	1	1	CPNE2	copine II
hsa-miR-519b-3p	0	0	0	1	0	0	MYL3	myosin, light chain 3, alkali; ventricular, skeletal, slow
hsa-miR-519b-3p	0	0	1	1	1	1	CD300LG	CD300 molecule-like family member g
hsa-miR-519b-3p	0	0	0	1	1	1	MEIOB	meiosis specific with OB domains
hsa-miR-519b-3p	1	0	1	1	1	1	FUBP1	far upstream element (FUSE) binding protein 1
hsa-miR-519b-3p	0	0	1	1	1	1	SLC9A4	solute carrier family 9, subfamily A (NHE4, cation proton antiporter 4), member 4
hsa-miR-519b-3p	0	0	1	1	1	1	IWS1	IWS1 homolog (S. cerevisiae)
hsa-miR-519b-3p	0	0	1	1	0	0	DPPA2	developmental pluripotency associated 2
[truncated: 488 more rows]
