# Supplementary material for: Profiling of Selected MicroRNAs in Proliferative Eutopic Endometrium of Women with Ovarian Endometriosis
Source: Biomed Res Int. 2015 Aug 20;2015:760698. doi: 10.1155/2015/760698 (PMC4558423; doi:10.1155/2015/760698)
Supplement: Supplementary file 1 — Table I: The names of miRNAs significantly differentially expressed between eutopic endometrium of patients with endometriosis vs eutopic endometrium of patients without endometriosis. Table II: The associations between miRNA and mRNA, which presents detailed results of the search of six major databases i.e targetscan, tarbase, miranda, mirbase, mirtarget2 and pictar. [file 760698.f1.zip › 760698.f1/Table II/hsa-miR-519d.tsv]

miR	targetscan	tarbase	miranda	mirbase	mirtarget2	pictar	GeneSymbol	GeneName
hsa-miR-519d	1	0	1	1	1	1	ABHD2	abhydrolase domain containing 2
hsa-miR-519d	1	0	1	1	1	1	MKL2	MKL/myocardin-like 2
hsa-miR-519d	1	0	1	1	1	1	ELK3	ELK3, ETS-domain protein (SRF accessory protein 2)
hsa-miR-519d	1	0	1	0	1	1	CYBRD1	cytochrome b reductase 1
hsa-miR-519d	1	0	1	1	1	1	EFNB1	ephrin-B1
hsa-miR-519d	1	0	1	1	1	1	ZNF512B	zinc finger protein 512B
hsa-miR-519d	1	0	1	1	1	1	EPB41L5	erythrocyte membrane protein band 4.1 like 5
hsa-miR-519d	1	0	1	1	1	1	HLF	hepatic leukemia factor
hsa-miR-519d	1	0	1	1	1	1	TWF1	twinfilin, actin-binding protein, homolog 1 (Drosophila)
hsa-miR-519d	1	0	1	1	1	1	CEP57	centrosomal protein 57kDa
hsa-miR-519d	1	0	1	0	1	1	SLC1A2	solute carrier family 1 (glial high affinity glutamate transporter), member 2
hsa-miR-519d	1	0	1	0	1	1	WDFY3	WD repeat and FYVE domain containing 3
hsa-miR-519d	1	0	1	1	1	1	ARAP2	ArfGAP with RhoGAP domain, ankyrin repeat and PH domain 2
hsa-miR-519d	1	0	1	0	1	1	NPLOC4	nuclear protein localization 4 homolog (S. cerevisiae)
hsa-miR-519d	1	0	0	1	1	1	HAUS8	HAUS augmin-like complex, subunit 8
hsa-miR-519d	1	0	1	1	1	1	RAB11FIP4	RAB11 family interacting protein 4 (class II)
hsa-miR-519d	1	0	1	1	1	1	TP53INP1	tumor protein p53 inducible nuclear protein 1
hsa-miR-519d	1	0	1	0	1	1	CREB5	cAMP responsive element binding protein 5
hsa-miR-519d	1	0	1	0	0	0	ZC3H12C	zinc finger CCCH-type containing 12C
hsa-miR-519d	1	0	1	1	1	1	MTSS1L	metastasis suppressor 1-like
hsa-miR-519d	1	0	1	1	1	1	ARHGEF10	Rho guanine nucleotide exchange factor (GEF) 10
hsa-miR-519d	1	0	1	1	1	1	F3	coagulation factor III (thromboplastin, tissue factor)
hsa-miR-519d	1	0	1	1	1	1	MBTPS1	membrane-bound transcription factor peptidase, site 1
hsa-miR-519d	1	0	1	1	1	1	NR4A3	nuclear receptor subfamily 4, group A, member 3
hsa-miR-519d	1	0	1	1	1	1	EZH1	enhancer of zeste homolog 1 (Drosophila)
hsa-miR-519d	1	0	1	1	0	0	UBASH3A	ubiquitin associated and SH3 domain containing A
hsa-miR-519d	1	0	1	0	1	1	PCDHAC1	protocadherin alpha subfamily C, 1
hsa-miR-519d	1	0	1	0	1	1	HECA	headcase homolog (Drosophila)
hsa-miR-519d	1	0	1	0	1	1	KIF5A	kinesin family member 5A
hsa-miR-519d	1	0	1	0	1	1	CRIM1	cysteine rich transmembrane BMP regulator 1 (chordin-like)
hsa-miR-519d	1	0	1	1	1	1	DDX5	DEAD (Asp-Glu-Ala-Asp) box helicase 5
hsa-miR-519d	1	0	0	1	1	1	ATG16L1	autophagy related 16-like 1 (S. cerevisiae)
hsa-miR-519d	1	0	1	1	1	1	ENPP5	ectonucleotide pyrophosphatase/phosphodiesterase 5 (putative)
hsa-miR-519d	1	0	1	1	1	1	CROT	carnitine O-octanoyltransferase
hsa-miR-519d	1	0	1	1	0	0	INO80D	INO80 complex subunit D
hsa-miR-519d	1	0	1	1	1	1	SNX9	sorting nexin 9
hsa-miR-519d	1	0	1	0	1	1	EIF4H	eukaryotic translation initiation factor 4H
hsa-miR-519d	1	0	1	1	1	1	ARHGAP12	Rho GTPase activating protein 12
hsa-miR-519d	1	0	1	1	1	1	ZFP91	zinc finger protein 91 homolog (mouse)
hsa-miR-519d	1	0	1	1	1	1	NCOA3	nuclear receptor coactivator 3
hsa-miR-519d	1	0	1	0	1	1	CEP170	centrosomal protein 170kDa
hsa-miR-519d	1	0	1	1	0	0	CAMK2N2	calcium/calmodulin-dependent protein kinase II inhibitor 2
hsa-miR-519d	1	0	1	1	1	1	ZNF202	zinc finger protein 202
hsa-miR-519d	1	0	1	0	1	1	RNF4	ring finger protein 4
hsa-miR-519d	1	0	1	1	1	1	TMEM100	transmembrane protein 100
hsa-miR-519d	1	0	1	1	1	1	VANGL1	vang-like 1 (van gogh, Drosophila)
hsa-miR-519d	1	0	1	1	0	0	RELL1	RELT-like 1
hsa-miR-519d	1	0	1	1	1	1	GPR6	G protein-coupled receptor 6
hsa-miR-519d	1	0	1	1	1	1	ABCG4	ATP-binding cassette, sub-family G (WHITE), member 4
hsa-miR-519d	1	0	1	1	1	1	GIGYF1	GRB10 interacting GYF protein 1
hsa-miR-519d	1	0	1	0	1	1	BCL11B	B-cell CLL/lymphoma 11B (zinc finger protein)
hsa-miR-519d	1	0	1	1	1	1	ZNF385A	zinc finger protein 385A
hsa-miR-519d	1	0	1	0	1	1	IL1RAP	interleukin 1 receptor accessory protein
hsa-miR-519d	1	0	1	1	1	1	FAM117B	family with sequence similarity 117, member B
hsa-miR-519d	1	0	1	1	1	1	MTMR3	myotubularin related protein 3
hsa-miR-519d	1	0	1	1	1	1	IL25	interleukin 25
hsa-miR-519d	1	0	1	1	1	1	CHD5	chromodomain helicase DNA binding protein 5
hsa-miR-519d	1	0	1	0	1	1	SMAD5	SMAD family member 5
hsa-miR-519d	1	0	1	1	1	1	PPP6R1	protein phosphatase 6, regulatory subunit 1
hsa-miR-519d	1	0	1	0	1	1	YOD1	YOD1 OTU deubiquinating enzyme 1 homolog (S. cerevisiae)
hsa-miR-519d	1	0	1	1	1	1	MYO1D	myosin ID
hsa-miR-519d	1	0	1	1	1	1	TXNIP	thioredoxin interacting protein
hsa-miR-519d	1	0	1	1	1	1	WFS1	Wolfram syndrome 1 (wolframin)
hsa-miR-519d	1	0	1	1	1	1	CMPK1	cytidine monophosphate (UMP-CMP) kinase 1, cytosolic
hsa-miR-519d	1	0	0	0	1	1	YPEL1	yippee-like 1 (Drosophila)
hsa-miR-519d	1	0	1	0	1	1	KDM2A	lysine (K)-specific demethylase 2A
hsa-miR-519d	1	0	1	0	1	1	KIF26B	kinesin family member 26B
hsa-miR-519d	1	0	1	0	1	1	PRDM10	PR domain containing 10
hsa-miR-519d	1	0	1	0	1	1	MAP3K9	mitogen-activated protein kinase kinase kinase 9
hsa-miR-519d	1	0	1	1	1	1	EPHB4	EPH receptor B4
hsa-miR-519d	1	0	1	1	1	1	TANC1	tetratricopeptide repeat, ankyrin repeat and coiled-coil containing 1
hsa-miR-519d	1	0	1	1	1	1	FURIN	furin (paired basic amino acid cleaving enzyme)
hsa-miR-519d	1	0	1	1	1	1	PLCB1	phospholipase C, beta 1 (phosphoinositide-specific)
hsa-miR-519d	1	0	1	1	1	1	TBC1D9	TBC1 domain family, member 9 (with GRAM domain)
hsa-miR-519d	1	0	1	1	1	1	BCL2L11	BCL2-like 11 (apoptosis facilitator)
hsa-miR-519d	1	1	1	1	1	1	MAP3K8	mitogen-activated protein kinase kinase kinase 8
hsa-miR-519d	1	0	1	1	1	1	SASH1	SAM and SH3 domain containing 1
hsa-miR-519d	1	0	1	1	1	1	CERS6	ceramide synthase 6
hsa-miR-519d	1	0	1	1	1	1	LASP1	LIM and SH3 protein 1
hsa-miR-519d	1	0	1	1	1	1	MLLT6	myeloid/lymphoid or mixed-lineage leukemia (trithorax homolog, Drosophila); translocated to, 6
hsa-miR-519d	1	0	1	1	1	1	ARID4B	AT rich interactive domain 4B (RBP1-like)
hsa-miR-519d	1	0	1	1	1	1	KPNA3	karyopherin alpha 3 (importin alpha 4)
hsa-miR-519d	1	0	1	1	1	1	EPHA7	EPH receptor A7
hsa-miR-519d	1	0	1	1	1	1	FGF4	fibroblast growth factor 4
hsa-miR-519d	1	0	1	1	1	1	AEBP2	AE binding protein 2
hsa-miR-519d	1	0	1	1	1	1	SLC24A4	solute carrier family 24 (sodium/potassium/calcium exchanger), member 4
hsa-miR-519d	1	0	1	1	1	1	BCL2L2	BCL2-like 2
hsa-miR-519d	1	0	1	1	1	1	PLEKHG1	pleckstrin homology domain containing, family G (with RhoGef domain) member 1
hsa-miR-519d	1	0	1	0	1	1	SCRT2	scratch homolog 2, zinc finger protein (Drosophila)
hsa-miR-519d	1	0	1	1	1	1	RANBP6	RAN binding protein 6
hsa-miR-519d	1	0	1	0	1	1	DPYSL5	dihydropyrimidinase-like 5
hsa-miR-519d	1	0	1	1	1	1	BNC2	basonuclin 2
hsa-miR-519d	1	0	1	0	1	1	ETV1	ets variant 1
hsa-miR-519d	1	0	1	0	1	1	FSTL4	follistatin-like 4
hsa-miR-519d	1	0	1	1	1	1	AJUBA	ajuba LIM protein
hsa-miR-519d	1	0	1	1	1	1	PLEKHA3	pleckstrin homology domain containing, family A (phosphoinositide binding specific) member 3
hsa-miR-519d	1	0	1	1	1	1	CRYBG3	beta-gamma crystallin domain containing 3
hsa-miR-519d	1	0	1	1	1	1	PPP2R3A	protein phosphatase 2, regulatory subunit B'', alpha
hsa-miR-519d	1	0	1	1	1	1	ATXN1	ataxin 1
hsa-miR-519d	1	0	1	1	1	1	ATXN7L1	ataxin 7-like 1
hsa-miR-519d	1	0	1	1	1	1	ANKRD13C	ankyrin repeat domain 13C
hsa-miR-519d	1	0	1	1	1	1	NDEL1	nudE nuclear distribution E homolog (A. nidulans)-like 1
hsa-miR-519d	1	0	1	1	1	1	MINK1	misshapen-like kinase 1
hsa-miR-519d	1	0	1	1	1	1	ZNF532	zinc finger protein 532
hsa-miR-519d	1	0	0	1	1	1	CENPO	centromere protein O
hsa-miR-519d	1	0	1	1	1	1	U2SURP	U2 snRNP-associated SURP domain containing
hsa-miR-519d	1	0	1	1	0	0	OTUD3	OTU domain containing 3
hsa-miR-519d	1	0	1	1	1	1	MYT1L	myelin transcription factor 1-like
hsa-miR-519d	1	0	1	1	1	1	USP3	ubiquitin specific peptidase 3
hsa-miR-519d	1	0	1	1	1	1	ZC3H7B	zinc finger CCCH-type containing 7B
hsa-miR-519d	1	0	1	1	1	1	FAM126B	family with sequence similarity 126, member B
hsa-miR-519d	1	0	1	1	1	1	UBE2J1	ubiquitin-conjugating enzyme E2, J1
hsa-miR-519d	1	0	1	1	1	1	PTPRD	protein tyrosine phosphatase, receptor type, D
hsa-miR-519d	1	0	1	1	1	1	TIMM17A	translocase of inner mitochondrial membrane 17 homolog A (yeast)
hsa-miR-519d	1	0	1	1	1	1	ZFYVE26	zinc finger, FYVE domain containing 26
hsa-miR-519d	1	0	1	1	1	1	FGD4	FYVE, RhoGEF and PH domain containing 4
hsa-miR-519d	1	0	1	0	1	1	KIAA0494	KIAA0494
hsa-miR-519d	1	0	1	1	1	1	ANKRD29	ankyrin repeat domain 29
hsa-miR-519d	1	0	1	1	1	1	RAB5B	RAB5B, member RAS oncogene family
hsa-miR-519d	1	0	1	1	1	1	ZBTB33	zinc finger and BTB domain containing 33
hsa-miR-519d	1	0	1	0	1	1	NEDD4L	neural precursor cell expressed, developmentally down-regulated 4-like, E3 ubiquitin protein ligase
hsa-miR-519d	1	0	1	0	1	1	ADIPOR2	adiponectin receptor 2
hsa-miR-519d	1	0	1	1	1	1	PALLD	palladin, cytoskeletal associated protein
hsa-miR-519d	1	0	1	1	1	1	GABBR2	gamma-aminobutyric acid (GABA) B receptor, 2
hsa-miR-519d	1	0	1	1	1	1	NEUROD2	neuronal differentiation 2
hsa-miR-519d	1	0	1	1	0	0	WNK1	WNK lysine deficient protein kinase 1
hsa-miR-519d	1	0	1	0	1	1	COL19A1	collagen, type XIX, alpha 1
hsa-miR-519d	1	0	1	1	1	1	KDM6B	lysine (K)-specific demethylase 6B
hsa-miR-519d	1	0	1	1	1	1	APBB2	amyloid beta (A4) precursor protein-binding, family B, member 2
hsa-miR-519d	1	0	0	1	1	1	ZFYVE20	zinc finger, FYVE domain containing 20
hsa-miR-519d	1	0	1	1	1	1	SLC4A4	solute carrier family 4, sodium bicarbonate cotransporter, member 4
hsa-miR-519d	1	0	1	1	1	1	CYLD	cylindromatosis (turban tumor syndrome)
hsa-miR-519d	1	0	1	1	1	1	CRIPT	cysteine-rich PDZ-binding protein
hsa-miR-519d	1	0	1	1	1	1	CEP120	centrosomal protein 120kDa
hsa-miR-519d	1	0	1	1	1	1	ERI1	exoribonuclease 1
hsa-miR-519d	1	0	1	1	0	0	COX7A2L	cytochrome c oxidase subunit VIIa polypeptide 2 like
hsa-miR-519d	1	0	1	0	1	1	BMPR2	bone morphogenetic protein receptor, type II (serine/threonine kinase)
hsa-miR-519d	1	0	1	1	1	1	LITAF	lipopolysaccharide-induced TNF factor
hsa-miR-519d	1	0	1	1	1	1	KIAA2018	KIAA2018
hsa-miR-519d	1	0	1	1	1	1	FGD5	FYVE, RhoGEF and PH domain containing 5
hsa-miR-519d	1	0	1	1	1	1	PARD6B	par-6 partitioning defective 6 homolog beta (C. elegans)
hsa-miR-519d	1	0	1	1	1	1	DSTYK	dual serine/threonine and tyrosine protein kinase
hsa-miR-519d	1	0	1	1	1	1	ZNF238	zinc finger protein 238
hsa-miR-519d	1	0	1	1	1	1	TSC22D2	TSC22 domain family, member 2
hsa-miR-519d	1	0	1	1	1	1	SUMF1	sulfatase modifying factor 1
hsa-miR-519d	1	0	1	0	1	1	ARHGAP26	Rho GTPase activating protein 26
hsa-miR-519d	1	0	1	1	0	0	XRRA1	X-ray radiation resistance associated 1
hsa-miR-519d	1	0	1	0	1	1	PCDHA13	protocadherin alpha 13
hsa-miR-519d	1	0	1	1	1	1	ATAD2	ATPase family, AAA domain containing 2
hsa-miR-519d	1	0	1	1	1	1	PCDHA1	protocadherin alpha 1
hsa-miR-519d	1	0	1	1	1	1	BMP2	bone morphogenetic protein 2
hsa-miR-519d	1	0	1	1	1	1	BTBD10	BTB (POZ) domain containing 10
hsa-miR-519d	1	0	0	1	1	1	TAGAP	T-cell activation RhoGTPase activating protein
hsa-miR-519d	1	0	1	1	1	1	NTRK3	neurotrophic tyrosine kinase, receptor, type 3
hsa-miR-519d	1	0	1	1	1	1	DNAJC16	DnaJ (Hsp40) homolog, subfamily C, member 16
hsa-miR-519d	1	0	1	1	0	0	KIAA1462	KIAA1462
hsa-miR-519d	1	0	1	1	1	1	CCNG2	cyclin G2
hsa-miR-519d	1	0	1	0	1	1	BECN1	beclin 1, autophagy related
hsa-miR-519d	1	0	1	1	1	1	DCUN1D3	DCN1, defective in cullin neddylation 1, domain containing 3 (S. cerevisiae)
hsa-miR-519d	1	0	1	1	1	1	TNKS1BP1	tankyrase 1 binding protein 1, 182kDa
hsa-miR-519d	1	0	1	1	1	1	DYNC1LI2	dynein, cytoplasmic 1, light intermediate chain 2
hsa-miR-519d	1	0	1	1	1	1	SSH2	slingshot homolog 2 (Drosophila)
hsa-miR-519d	1	0	1	1	1	1	FAM60A	family with sequence similarity 60, member A
hsa-miR-519d	1	0	1	0	0	0	RRAGD	Ras-related GTP binding D
hsa-miR-519d	1	0	1	1	1	1	BCR	breakpoint cluster region
hsa-miR-519d	1	0	1	1	1	1	VPS13C	vacuolar protein sorting 13 homolog C (S. cerevisiae)
hsa-miR-519d	1	0	1	1	1	1	ZBTB8A	zinc finger and BTB domain containing 8A
hsa-miR-519d	1	0	1	1	1	1	FOXF1	forkhead box F1
hsa-miR-519d	1	0	1	1	1	1	ZNF217	zinc finger protein 217
hsa-miR-519d	1	0	1	1	1	1	ZNF2	zinc finger protein 2
hsa-miR-519d	1	0	1	0	1	1	ZNF800	zinc finger protein 800
hsa-miR-519d	1	0	0	0	0	0	AAK1	AP2 associated kinase 1
hsa-miR-519d	1	0	1	1	1	1	AMPD3	adenosine monophosphate deaminase 3
hsa-miR-519d	1	0	1	1	1	1	RPS6KA4	ribosomal protein S6 kinase, 90kDa, polypeptide 4
hsa-miR-519d	1	0	1	1	1	1	MYCL1	v-myc myelocytomatosis viral oncogene homolog 1, lung carcinoma derived (avian)
hsa-miR-519d	1	0	1	1	1	1	FGD1	FYVE, RhoGEF and PH domain containing 1
hsa-miR-519d	1	0	1	1	1	1	NR2C2	nuclear receptor subfamily 2, group C, member 2
hsa-miR-519d	1	0	1	1	1	1	FAM102A	family with sequence similarity 102, member A
hsa-miR-519d	1	0	1	1	1	1	RAPGEF4	Rap guanine nucleotide exchange factor (GEF) 4
hsa-miR-519d	1	0	1	0	1	1	FCHO2	FCH domain only 2
hsa-miR-519d	1	0	1	1	1	1	MKRN1	makorin ring finger protein 1
hsa-miR-519d	1	0	1	1	1	1	MASTL	microtubule associated serine/threonine kinase-like
hsa-miR-519d	1	0	1	1	1	1	SLC2A4	solute carrier family 2 (facilitated glucose transporter), member 4
hsa-miR-519d	1	0	1	0	1	1	SS18L1	synovial sarcoma translocation gene on chromosome 18-like 1
hsa-miR-519d	1	0	1	1	1	1	TMEM50B	transmembrane protein 50B
hsa-miR-519d	1	0	1	1	1	1	LRFN5	leucine rich repeat and fibronectin type III domain containing 5
hsa-miR-519d	1	0	1	1	0	0	ITPRIPL2	inositol 1,4,5-trisphosphate receptor interacting protein-like 2
hsa-miR-519d	1	0	1	1	1	1	FAM160B1	family with sequence similarity 160, member B1
hsa-miR-519d	1	0	1	1	0	0	AGFG2	ArfGAP with FG repeats 2
hsa-miR-519d	1	0	1	1	1	1	CDC40	cell division cycle 40 homolog (S. cerevisiae)
hsa-miR-519d	1	0	1	1	1	1	CREBRF	CREB3 regulatory factor
hsa-miR-519d	1	0	1	1	1	1	DENND5B	DENN/MADD domain containing 5B
hsa-miR-519d	1	0	1	0	1	1	TXLNA	taxilin alpha
hsa-miR-519d	1	0	1	1	1	1	M6PR	mannose-6-phosphate receptor (cation dependent)
hsa-miR-519d	1	0	1	1	1	1	MORF4L1	mortality factor 4 like 1
hsa-miR-519d	1	0	1	1	1	1	GTDC1	glycosyltransferase-like domain containing 1
hsa-miR-519d	1	0	1	1	0	0	CIC	capicua homolog (Drosophila)
hsa-miR-519d	1	0	1	0	1	1	YES1	v-yes-1 Yamaguchi sarcoma viral oncogene homolog 1
hsa-miR-519d	1	0	1	1	1	1	PIK3R1	phosphoinositide-3-kinase, regulatory subunit 1 (alpha)
hsa-miR-519d	1	0	1	1	1	1	ARL4A	ADP-ribosylation factor-like 4A
hsa-miR-519d	1	0	1	0	1	1	GIT2	G protein-coupled receptor kinase interacting ArfGAP 2
hsa-miR-519d	1	0	1	1	1	1	RIMKLA	ribosomal modification protein rimK-like family member A
hsa-miR-519d	1	0	1	1	1	1	MAPK1	mitogen-activated protein kinase 1
hsa-miR-519d	1	0	1	1	1	1	SLC25A36	solute carrier family 25 (pyrimidine nucleotide carrier ), member 36
hsa-miR-519d	1	0	1	1	1	1	FEM1C	fem-1 homolog c (C. elegans)
hsa-miR-519d	1	0	1	1	1	1	RAB22A	RAB22A, member RAS oncogene family
hsa-miR-519d	1	0	1	1	1	1	STK38	serine/threonine kinase 38
hsa-miR-519d	1	0	0	1	1	1	RHOC	ras homolog family member C
hsa-miR-519d	1	0	1	1	1	1	RUNX1	runt-related transcription factor 1
hsa-miR-519d	1	0	1	0	1	1	SRGAP3	SLIT-ROBO Rho GTPase activating protein 3
hsa-miR-519d	1	0	1	1	1	1	FAM123A	family with sequence similarity 123A
hsa-miR-519d	1	0	1	1	1	1	MEX3D	mex-3 homolog D (C. elegans)
hsa-miR-519d	1	0	1	1	1	1	BAHD1	bromo adjacent homology domain containing 1
hsa-miR-519d	1	0	1	0	1	1	FAM46C	family with sequence similarity 46, member C
hsa-miR-519d	1	0	1	1	1	1	INO80	INO80 homolog (S. cerevisiae)
hsa-miR-519d	1	0	1	0	0	0	NKX3-2	NK3 homeobox 2
hsa-miR-519d	1	0	0	1	0	0	TRPV6	transient receptor potential cation channel, subfamily V, member 6
hsa-miR-519d	1	0	1	1	1	1	ZNF704	zinc finger protein 704
hsa-miR-519d	1	0	1	1	1	1	GID4	GID complex subunit 4, VID24 homolog (S. cerevisiae)
hsa-miR-519d	1	0	1	0	1	1	FBXO41	F-box protein 41
hsa-miR-519d	1	0	1	1	1	1	NAV2	neuron navigator 2
hsa-miR-519d	1	0	1	1	1	1	SP8	Sp8 transcription factor
hsa-miR-519d	1	0	1	1	1	1	ERBB3	v-erb-b2 erythroblastic leukemia viral oncogene homolog 3 (avian)
hsa-miR-519d	1	0	1	1	1	1	PKN2	protein kinase N2
hsa-miR-519d	1	0	1	0	1	1	C7orf41	chromosome 7 open reading frame 41
hsa-miR-519d	1	0	1	0	1	1	SEMA4B	sema domain, immunoglobulin domain (Ig), transmembrane domain (TM) and short cytoplasmic domain, (semaphorin) 4B
hsa-miR-519d	1	0	1	1	1	1	KLF12	Kruppel-like factor 12
hsa-miR-519d	1	0	1	0	1	1	RAB12	RAB12, member RAS oncogene family
hsa-miR-519d	1	0	1	1	1	1	SPG20	spastic paraplegia 20 (Troyer syndrome)
hsa-miR-519d	1	0	1	1	1	1	EPHA4	EPH receptor A4
hsa-miR-519d	1	0	1	1	1	1	PFN2	profilin 2
hsa-miR-519d	1	0	1	0	1	1	E2F2	E2F transcription factor 2
hsa-miR-519d	1	0	1	1	1	1	FAM13C	family with sequence similarity 13, member C
hsa-miR-519d	1	0	1	1	1	1	UCP3	uncoupling protein 3 (mitochondrial, proton carrier)
hsa-miR-519d	1	0	1	1	1	1	IL17RD	interleukin 17 receptor D
hsa-miR-519d	1	0	0	1	0	0	ZNF597	zinc finger protein 597
hsa-miR-519d	1	0	1	1	0	0	NAGK	N-acetylglucosamine kinase
hsa-miR-519d	1	0	1	0	1	1	PCDHA7	protocadherin alpha 7
hsa-miR-519d	1	0	1	1	1	1	ZDHHC9	zinc finger, DHHC-type containing 9
hsa-miR-519d	1	0	1	1	1	1	UBE3C	ubiquitin protein ligase E3C
hsa-miR-519d	1	0	1	1	1	1	C7orf60	chromosome 7 open reading frame 60
hsa-miR-519d	1	0	1	1	1	1	PDGFRA	platelet-derived growth factor receptor, alpha polypeptide
hsa-miR-519d	1	0	0	1	1	1	ZHX2	zinc fingers and homeoboxes 2
hsa-miR-519d	1	0	1	1	1	1	TBC1D20	TBC1 domain family, member 20
hsa-miR-519d	1	0	1	0	1	1	EIF5A2	eukaryotic translation initiation factor 5A2
hsa-miR-519d	1	0	1	1	1	1	CRTC3	CREB regulated transcription coactivator 3
hsa-miR-519d	1	0	1	1	1	1	SLC6A9	solute carrier family 6 (neurotransmitter transporter, glycine), member 9
hsa-miR-519d	1	0	1	1	1	1	SCN2A	sodium channel, voltage-gated, type II, alpha subunit
hsa-miR-519d	1	0	1	1	1	1	PCDHA3	protocadherin alpha 3
hsa-miR-519d	1	0	1	0	1	1	GRAMD1A	GRAM domain containing 1A
hsa-miR-519d	1	0	1	1	1	1	SSX2IP	synovial sarcoma, X breakpoint 2 interacting protein
hsa-miR-519d	1	0	1	1	1	1	ITGB8	integrin, beta 8
hsa-miR-519d	1	0	1	1	1	1	DIP2A	DIP2 disco-interacting protein 2 homolog A (Drosophila)
hsa-miR-519d	1	0	1	1	1	1	ZBTB6	zinc finger and BTB domain containing 6
hsa-miR-519d	1	0	1	1	0	0	TCF7L1	transcription factor 7-like 1 (T-cell specific, HMG-box)
hsa-miR-519d	1	0	1	1	1	1	LAMA3	laminin, alpha 3
hsa-miR-519d	1	0	1	1	1	1	SLC16A12	solute carrier family 16, member 12 (monocarboxylic acid transporter 12)
hsa-miR-519d	1	0	1	1	1	1	SIPA1L3	signal-induced proliferation-associated 1 like 3
hsa-miR-519d	1	0	1	1	0	0	ATG2A	autophagy related 2A
hsa-miR-519d	1	0	1	0	1	1	DOCK4	dedicator of cytokinesis 4
hsa-miR-519d	1	0	1	1	1	1	RAP2C	RAP2C, member of RAS oncogene family
hsa-miR-519d	1	0	1	0	0	0	ANKRD52	ankyrin repeat domain 52
hsa-miR-519d	1	0	1	0	1	1	CNOT6L	CCR4-NOT transcription complex, subunit 6-like
hsa-miR-519d	1	0	1	1	1	1	CLOCK	clock homolog (mouse)
hsa-miR-519d	1	0	1	0	0	0	FAM189A1	family with sequence similarity 189, member A1
hsa-miR-519d	1	0	1	1	1	1	ABCA1	ATP-binding cassette, sub-family A (ABC1), member 1
hsa-miR-519d	1	0	1	1	1	1	RGL1	ral guanine nucleotide dissociation stimulator-like 1
hsa-miR-519d	1	0	1	1	1	1	IL8	interleukin 8
hsa-miR-519d	1	0	1	1	1	1	MLL3	myeloid/lymphoid or mixed-lineage leukemia 3
hsa-miR-519d	1	0	1	0	1	1	PGM2L1	phosphoglucomutase 2-like 1
hsa-miR-519d	1	0	1	1	0	0	NBEAL1	neurobeachin-like 1
hsa-miR-519d	1	0	0	1	1	1	FAM219B	family with sequence similarity 219, member B
hsa-miR-519d	1	0	1	1	1	1	CC2D1A	coiled-coil and C2 domain containing 1A
hsa-miR-519d	1	0	1	1	1	1	NEUROG1	neurogenin 1
hsa-miR-519d	1	0	0	0	1	1	STK11	serine/threonine kinase 11
hsa-miR-519d	1	0	1	1	1	1	PLEKHM1	pleckstrin homology domain containing, family M (with RUN domain) member 1
hsa-miR-519d	1	0	1	0	1	1	XRN1	5'-3' exoribonuclease 1
hsa-miR-519d	1	1	1	1	1	1	CDKN1A	cyclin-dependent kinase inhibitor 1A (p21, Cip1)
hsa-miR-519d	1	0	1	1	1	1	ARHGEF3	Rho guanine nucleotide exchange factor (GEF) 3
hsa-miR-519d	1	0	1	1	1	1	PPP1R12B	protein phosphatase 1, regulatory subunit 12B
hsa-miR-519d	1	0	1	0	1	1	UBE2W	ubiquitin-conjugating enzyme E2W (putative)
hsa-miR-519d	1	0	1	1	1	1	RBL1	retinoblastoma-like 1 (p107)
hsa-miR-519d	1	0	0	1	1	1	CNNM3	cyclin M3
hsa-miR-519d	1	0	1	1	1	1	PTGDR	prostaglandin D2 receptor (DP)
hsa-miR-519d	1	0	0	1	0	0	SOS1	son of sevenless homolog 1 (Drosophila)
hsa-miR-519d	1	0	1	0	1	1	PCDHA11	protocadherin alpha 11
hsa-miR-519d	1	0	1	1	1	1	FTSJD1	FtsJ methyltransferase domain containing 1
hsa-miR-519d	1	0	1	1	1	1	TGOLN2	trans-golgi network protein 2
hsa-miR-519d	1	0	1	1	0	0	USP53	ubiquitin specific peptidase 53
hsa-miR-519d	1	0	1	0	1	1	LYPD6	LY6/PLAUR domain containing 6
hsa-miR-519d	1	0	1	0	1	1	RGMB	RGM domain family, member B
hsa-miR-519d	1	0	1	1	1	1	SOWAHC	sosondowah ankyrin repeat domain family member C
hsa-miR-519d	1	0	1	1	1	1	NFIB	nuclear factor I/B
hsa-miR-519d	1	0	1	1	1	1	LRIG1	leucine-rich repeats and immunoglobulin-like domains 1
hsa-miR-519d	1	0	1	0	1	1	CCNJ	cyclin J
hsa-miR-519d	1	0	1	1	1	1	PPP2CA	protein phosphatase 2, catalytic subunit, alpha isozyme
hsa-miR-519d	1	0	1	1	1	1	B4GALT6	UDP-Gal:betaGlcNAc beta 1,4- galactosyltransferase, polypeptide 6
hsa-miR-519d	1	0	1	1	0	0	PPARD	peroxisome proliferator-activated receptor delta
hsa-miR-519d	1	0	0	1	0	0	MAST3	microtubule associated serine/threonine kinase 3
hsa-miR-519d	1	0	0	1	1	1	SIRT7	sirtuin 7
hsa-miR-519d	1	0	1	1	1	1	GRHL2	grainyhead-like 2 (Drosophila)
hsa-miR-519d	1	0	1	1	1	1	ATP1A2	ATPase, Na+/K+ transporting, alpha 2 polypeptide
hsa-miR-519d	1	0	1	1	1	1	MYCN	v-myc myelocytomatosis viral related oncogene, neuroblastoma derived (avian)
hsa-miR-519d	1	0	1	1	1	1	AKAP11	A kinase (PRKA) anchor protein 11
hsa-miR-519d	1	0	1	1	1	1	GPR137B	G protein-coupled receptor 137B
hsa-miR-519d	1	0	1	1	1	1	ATG2B	autophagy related 2B
hsa-miR-519d	1	0	1	0	1	1	SRCIN1	SRC kinase signaling inhibitor 1
hsa-miR-519d	1	0	1	1	1	1	DNAL1	dynein, axonemal, light chain 1
hsa-miR-519d	1	0	1	1	1	1	TNKS2	tankyrase, TRF1-interacting ankyrin-related ADP-ribose polymerase 2
hsa-miR-519d	1	0	1	1	1	1	FZD7	frizzled family receptor 7
hsa-miR-519d	1	0	1	0	1	1	C16orf72	chromosome 16 open reading frame 72
hsa-miR-519d	1	0	1	1	1	1	CYP26B1	cytochrome P450, family 26, subfamily B, polypeptide 1
hsa-miR-519d	1	0	1	1	0	0	SFXN5	sideroflexin 5
hsa-miR-519d	1	0	1	1	1	1	CIT	citron (rho-interacting, serine/threonine kinase 21)
hsa-miR-519d	1	0	1	1	1	1	FOXQ1	forkhead box Q1
hsa-miR-519d	1	0	1	0	1	1	ANKFY1	ankyrin repeat and FYVE domain containing 1
hsa-miR-519d	1	0	1	1	1	1	SERP1	stress-associated endoplasmic reticulum protein 1
hsa-miR-519d	1	0	1	0	1	1	THRB	thyroid hormone receptor, beta
hsa-miR-519d	1	0	1	0	1	1	FBXO10	F-box protein 10
hsa-miR-519d	1	0	1	1	1	1	PRR16	proline rich 16
hsa-miR-519d	1	0	1	1	1	1	PLCXD3	phosphatidylinositol-specific phospholipase C, X domain containing 3
hsa-miR-519d	1	0	1	1	1	1	STK17B	serine/threonine kinase 17b
hsa-miR-519d	1	0	1	0	1	1	MYO5B	myosin VB
hsa-miR-519d	1	0	1	1	1	1	MYLIP	myosin regulatory light chain interacting protein
hsa-miR-519d	1	0	1	1	1	1	C2CD2	C2 calcium-dependent domain containing 2
hsa-miR-519d	1	0	1	0	1	1	GUCY1A3	guanylate cyclase 1, soluble, alpha 3
hsa-miR-519d	1	0	1	1	1	1	MARCH6	membrane-associated ring finger (C3HC4) 6, E3 ubiquitin protein ligase
hsa-miR-519d	1	0	1	1	1	1	TRIM8	tripartite motif containing 8
hsa-miR-519d	1	0	1	1	1	1	RAD23B	RAD23 homolog B (S. cerevisiae)
hsa-miR-519d	1	0	1	1	1	1	CADM2	cell adhesion molecule 2
hsa-miR-519d	1	0	1	1	1	1	MGEA5	meningioma expressed antigen 5 (hyaluronidase)
hsa-miR-519d	1	0	1	0	1	1	SV2B	synaptic vesicle glycoprotein 2B
hsa-miR-519d	1	0	1	1	1	1	RUNX3	runt-related transcription factor 3
hsa-miR-519d	1	0	1	1	1	1	SGTB	small glutamine-rich tetratricopeptide repeat (TPR)-containing, beta
hsa-miR-519d	1	0	1	1	1	1	PHF1	PHD finger protein 1
hsa-miR-519d	1	0	1	1	0	0	KIAA0226	KIAA0226
hsa-miR-519d	1	0	1	1	1	1	NABP1	nucleic acid binding protein 1
hsa-miR-519d	1	0	1	1	1	1	SLC40A1	solute carrier family 40 (iron-regulated transporter), member 1
hsa-miR-519d	1	0	1	0	1	1	NHLRC3	NHL repeat containing 3
hsa-miR-519d	1	0	1	1	1	1	TMBIM6	transmembrane BAX inhibitor motif containing 6
hsa-miR-519d	1	0	1	1	1	1	HN1	hematological and neurological expressed 1
hsa-miR-519d	1	0	1	1	1	1	DUSP8	dual specificity phosphatase 8
hsa-miR-519d	1	0	0	1	1	1	SLC46A3	solute carrier family 46, member 3
hsa-miR-519d	1	0	1	1	1	1	ADAM9	ADAM metallopeptidase domain 9
hsa-miR-519d	1	0	1	1	1	1	PCDHA6	protocadherin alpha 6
hsa-miR-519d	1	0	1	0	1	1	RAB11FIP1	RAB11 family interacting protein 1 (class I)
hsa-miR-519d	1	0	1	1	1	1	UNKL	unkempt homolog (Drosophila)-like
hsa-miR-519d	1	0	1	1	1	1	RB1	retinoblastoma 1
hsa-miR-519d	1	0	1	1	1	1	PGBD5	piggyBac transposable element derived 5
hsa-miR-519d	1	0	1	0	1	1	MAP3K3	mitogen-activated protein kinase kinase kinase 3
hsa-miR-519d	1	0	1	1	1	1	MYF5	myogenic factor 5
hsa-miR-519d	1	0	1	1	1	1	PCMTD1	protein-L-isoaspartate (D-aspartate) O-methyltransferase domain containing 1
hsa-miR-519d	1	0	1	0	1	1	CCDC71L	coiled-coil domain containing 71-like
hsa-miR-519d	1	0	1	1	1	1	ZNF367	zinc finger protein 367
hsa-miR-519d	1	0	1	1	0	0	MLLT1	myeloid/lymphoid or mixed-lineage leukemia (trithorax homolog, Drosophila); translocated to, 1
hsa-miR-519d	1	0	1	0	1	1	FNDC3B	fibronectin type III domain containing 3B
hsa-miR-519d	1	0	1	1	0	0	CANT1	calcium activated nucleotidase 1
hsa-miR-519d	1	0	1	1	1	1	F2R	coagulation factor II (thrombin) receptor
hsa-miR-519d	1	0	1	1	1	1	SORL1	sortilin-related receptor, L(DLR class) A repeats containing
hsa-miR-519d	1	0	1	0	1	1	PCDHAC2	protocadherin alpha subfamily C, 2
hsa-miR-519d	1	0	1	1	1	1	PPP3R1	protein phosphatase 3, regulatory subunit B, alpha
hsa-miR-519d	1	0	1	1	0	0	ORAI1	ORAI calcium release-activated calcium modulator 1
hsa-miR-519d	1	0	1	1	1	1	TRIM3	tripartite motif containing 3
hsa-miR-519d	1	0	1	1	1	1	RAPGEFL1	Rap guanine nucleotide exchange factor (GEF)-like 1
hsa-miR-519d	1	0	1	1	1	1	PLS1	plastin 1
hsa-miR-519d	1	0	1	1	1	1	NBEA	neurobeachin
hsa-miR-519d	1	0	1	1	1	1	PHTF2	putative homeodomain transcription factor 2
hsa-miR-519d	1	0	1	1	1	1	C1orf63	chromosome 1 open reading frame 63
hsa-miR-519d	1	0	1	1	1	1	ULK1	unc-51-like kinase 1 (C. elegans)
hsa-miR-519d	1	0	1	1	1	1	MAP3K12	mitogen-activated protein kinase kinase kinase 12
hsa-miR-519d	1	0	1	1	1	1	MGLL	monoglyceride lipase
hsa-miR-519d	1	0	1	1	1	1	TCTEX1D1	Tctex1 domain containing 1
hsa-miR-519d	1	0	1	1	1	1	FYCO1	FYVE and coiled-coil domain containing 1
hsa-miR-519d	1	0	1	0	1	1	STX6	syntaxin 6
hsa-miR-519d	1	0	1	1	1	1	PLAGL2	pleiomorphic adenoma gene-like 2
hsa-miR-519d	1	0	1	1	1	1	TMUB2	transmembrane and ubiquitin-like domain containing 2
hsa-miR-519d	1	0	1	1	1	1	FMNL3	formin-like 3
hsa-miR-519d	1	0	1	0	1	1	TET1	tet methylcytosine dioxygenase 1
hsa-miR-519d	1	0	1	1	1	1	LHX6	LIM homeobox 6
hsa-miR-519d	1	0	1	1	0	0	PEAK1	NKF3 kinase family member
hsa-miR-519d	1	0	1	1	1	1	CEP128	centrosomal protein 128kDa
hsa-miR-519d	1	0	1	1	1	1	SNTB2	syntrophin, beta 2 (dystrophin-associated protein A1, 59kDa, basic component 2)
hsa-miR-519d	1	0	1	0	0	0	GPR137C	G protein-coupled receptor 137C
hsa-miR-519d	1	0	1	1	1	1	MCF2L	MCF.2 cell line derived transforming sequence-like
hsa-miR-519d	1	0	1	1	1	1	REPS2	RALBP1 associated Eps domain containing 2
hsa-miR-519d	1	0	1	1	1	1	SLC4A7	solute carrier family 4, sodium bicarbonate cotransporter, member 7
hsa-miR-519d	1	0	1	1	1	1	DAB2	disabled homolog 2, mitogen-responsive phosphoprotein (Drosophila)
hsa-miR-519d	1	0	1	1	1	1	SAMD12	sterile alpha motif domain containing 12
hsa-miR-519d	1	0	1	1	1	1	TGFBR2	transforming growth factor, beta receptor II (70/80kDa)
hsa-miR-519d	1	0	0	1	1	1	CHAF1A	chromatin assembly factor 1, subunit A (p150)
hsa-miR-519d	1	0	1	1	1	1	EGR2	early growth response 2
hsa-miR-519d	1	0	1	1	1	1	IRF2BP2	interferon regulatory factor 2 binding protein 2
hsa-miR-519d	1	0	1	1	1	1	MAPRE1	microtubule-associated protein, RP/EB family, member 1
hsa-miR-519d	1	0	1	1	1	1	PPP1R21	protein phosphatase 1, regulatory subunit 21
hsa-miR-519d	1	0	1	0	1	1	MXD1	MAX dimerization protein 1
hsa-miR-519d	1	0	1	1	0	0	OSBPL5	oxysterol binding protein-like 5
hsa-miR-519d	1	0	1	0	1	1	SQSTM1	sequestosome 1
hsa-miR-519d	1	0	1	1	1	1	AHRR	aryl-hydrocarbon receptor repressor
hsa-miR-519d	1	0	1	1	1	1	MAP3K2	mitogen-activated protein kinase kinase kinase 2
hsa-miR-519d	1	0	1	1	1	1	KIAA1522	KIAA1522
hsa-miR-519d	1	0	1	1	1	1	RASL11B	RAS-like, family 11, member B
hsa-miR-519d	1	0	1	1	1	1	MAPRE3	microtubule-associated protein, RP/EB family, member 3
hsa-miR-519d	1	0	1	1	1	1	OTUD4	OTU domain containing 4
hsa-miR-519d	1	0	1	0	1	1	YPEL2	yippee-like 2 (Drosophila)
hsa-miR-519d	1	0	1	1	1	1	USP6	ubiquitin specific peptidase 6 (Tre-2 oncogene)
hsa-miR-519d	1	0	1	0	1	1	FAM129A	family with sequence similarity 129, member A
hsa-miR-519d	1	0	1	1	1	1	PTBP1	polypyrimidine tract binding protein 1
hsa-miR-519d	1	0	1	1	1	1	KIAA0922	KIAA0922
hsa-miR-519d	1	0	1	0	1	1	PPP1R15B	protein phosphatase 1, regulatory subunit 15B
hsa-miR-519d	1	0	0	1	1	1	FAM210A	family with sequence similarity 210, member A
hsa-miR-519d	1	0	1	1	1	1	APP	amyloid beta (A4) precursor protein
hsa-miR-519d	1	0	0	1	0	0	ISM1	isthmin 1 homolog (zebrafish)
hsa-miR-519d	1	0	1	0	1	1	SOX4	SRY (sex determining region Y)-box 4
hsa-miR-519d	1	0	1	1	1	1	SYNE1	spectrin repeat containing, nuclear envelope 1
hsa-miR-519d	1	0	1	1	1	1	ZBTB41	zinc finger and BTB domain containing 41
hsa-miR-519d	1	0	1	1	1	1	CDC37L1	cell division cycle 37 homolog (S. cerevisiae)-like 1
hsa-miR-519d	1	0	1	1	1	1	MECP2	methyl CpG binding protein 2 (Rett syndrome)
hsa-miR-519d	1	0	1	1	0	0	FAT4	FAT tumor suppressor homolog 4 (Drosophila)
hsa-miR-519d	1	0	1	1	1	1	OXR1	oxidation resistance 1
hsa-miR-519d	1	0	1	0	1	1	ZIC1	Zic family member 1
hsa-miR-519d	1	0	1	1	1	1	ARID4A	AT rich interactive domain 4A (RBP1-like)
hsa-miR-519d	1	0	1	1	1	1	SLITRK3	SLIT and NTRK-like family, member 3
hsa-miR-519d	1	0	1	1	1	1	UXS1	UDP-glucuronate decarboxylase 1
hsa-miR-519d	1	0	1	1	1	1	SAR1B	SAR1 homolog B (S. cerevisiae)
hsa-miR-519d	1	0	0	1	1	1	PKD1	polycystic kidney disease 1 (autosomal dominant)
hsa-miR-519d	1	0	1	1	1	1	DNAJC27	DnaJ (Hsp40) homolog, subfamily C, member 27
hsa-miR-519d	1	0	1	0	1	1	JAZF1	JAZF zinc finger 1
hsa-miR-519d	1	0	1	1	1	1	MED17	mediator complex subunit 17
hsa-miR-519d	1	0	1	1	1	1	ZADH2	zinc binding alcohol dehydrogenase domain containing 2
hsa-miR-519d	1	0	0	1	1	1	LACE1	lactation elevated 1
hsa-miR-519d	1	0	1	0	1	1	FAM40B	family with sequence similarity 40, member B
hsa-miR-519d	1	0	1	0	1	1	RUNDC1	RUN domain containing 1
hsa-miR-519d	1	0	1	1	0	0	DNM2	dynamin 2
hsa-miR-519d	1	0	1	1	0	0	RAPGEF2	Rap guanine nucleotide exchange factor (GEF) 2
hsa-miR-519d	1	0	1	1	1	1	PAFAH2	platelet-activating factor acetylhydrolase 2, 40kDa
hsa-miR-519d	1	0	1	1	1	1	CPEB3	cytoplasmic polyadenylation element binding protein 3
hsa-miR-519d	1	0	1	1	1	1	ATL3	atlastin GTPase 3
hsa-miR-519d	1	0	1	1	1	1	SACS	spastic ataxia of Charlevoix-Saguenay (sacsin)
hsa-miR-519d	1	0	1	1	1	1	LDLR	low density lipoprotein receptor
hsa-miR-519d	1	0	1	1	1	1	CAMTA1	calmodulin binding transcription activator 1
hsa-miR-519d	1	0	1	0	1	1	PLAG1	pleiomorphic adenoma gene 1
hsa-miR-519d	1	0	1	0	0	0	HEG1	HEG homolog 1 (zebrafish)
hsa-miR-519d	1	0	1	1	1	1	VSX1	visual system homeobox 1
hsa-miR-519d	1	0	1	0	1	1	GOSR1	golgi SNAP receptor complex member 1
hsa-miR-519d	1	0	1	1	1	1	KPNA2	karyopherin alpha 2 (RAG cohort 1, importin alpha 1)
hsa-miR-519d	1	0	1	0	1	1	CCND2	cyclin D2
hsa-miR-519d	1	0	1	1	1	1	MMP24	matrix metallopeptidase 24 (membrane-inserted)
hsa-miR-519d	1	0	1	0	1	1	STAT3	signal transducer and activator of transcription 3 (acute-phase response factor)
hsa-miR-519d	1	0	1	1	1	1	SPTY2D1	SPT2, Suppressor of Ty, domain containing 1 (S. cerevisiae)
hsa-miR-519d	1	0	1	1	1	1	FAM134A	family with sequence similarity 134, member A
hsa-miR-519d	1	0	1	0	1	1	PCDHA12	protocadherin alpha 12
hsa-miR-519d	1	0	1	1	1	1	NRSN1	neurensin 1
hsa-miR-519d	1	0	1	1	1	1	AFF2	AF4/FMR2 family, member 2
hsa-miR-519d	1	0	1	1	1	1	PTPDC1	protein tyrosine phosphatase domain containing 1
hsa-miR-519d	1	0	1	1	1	1	CCL1	chemokine (C-C motif) ligand 1
hsa-miR-519d	1	0	1	1	1	1	ZBTB4	zinc finger and BTB domain containing 4
hsa-miR-519d	1	0	1	1	1	1	VLDLR	very low density lipoprotein receptor
hsa-miR-519d	1	0	1	1	1	1	KLF11	Kruppel-like factor 11
hsa-miR-519d	1	0	1	1	1	1	MYNN	myoneurin
hsa-miR-519d	1	0	1	1	1	1	FBXW11	F-box and WD repeat domain containing 11
hsa-miR-519d	1	0	1	1	1	1	PFKFB3	6-phosphofructo-2-kinase/fructose-2,6-biphosphatase 3
hsa-miR-519d	1	0	0	1	0	0	DMRTA2	DMRT-like family A2
hsa-miR-519d	1	0	1	1	1	1	ACTR1A	ARP1 actin-related protein 1 homolog A, centractin alpha (yeast)
hsa-miR-519d	1	0	1	1	1	1	CEP97	centrosomal protein 97kDa
hsa-miR-519d	1	0	1	1	1	1	NPAS2	neuronal PAS domain protein 2
hsa-miR-519d	1	0	1	1	1	1	EEA1	early endosome antigen 1
hsa-miR-519d	1	0	1	1	0	0	SCAMP2	secretory carrier membrane protein 2
hsa-miR-519d	1	0	1	0	1	1	OSTM1	osteopetrosis associated transmembrane protein 1
hsa-miR-519d	1	0	1	0	1	1	CSNK1G1	casein kinase 1, gamma 1
hsa-miR-519d	1	0	1	0	1	1	CYB561D1	cytochrome b-561 domain containing 1
hsa-miR-519d	1	0	1	1	1	1	VAV2	vav 2 guanine nucleotide exchange factor
hsa-miR-519d	1	0	1	1	1	1	PTGER3	prostaglandin E receptor 3 (subtype EP3)
hsa-miR-519d	1	0	1	1	1	1	PPP1R3B	protein phosphatase 1, regulatory subunit 3B
hsa-miR-519d	1	0	1	1	1	1	FAF2	Fas associated factor family member 2
hsa-miR-519d	1	0	1	1	1	1	RND3	Rho family GTPase 3
hsa-miR-519d	1	0	1	1	1	1	CORO2B	coronin, actin binding protein, 2B
hsa-miR-519d	1	0	1	1	1	1	BHLHE41	basic helix-loop-helix family, member e41
hsa-miR-519d	1	0	1	0	1	1	CCND1	cyclin D1
hsa-miR-519d	1	0	1	1	1	1	CDCA7	cell division cycle associated 7
hsa-miR-519d	1	0	1	1	1	1	LDLRAD3	low density lipoprotein receptor class A domain containing 3
hsa-miR-519d	1	0	1	1	1	1	POLQ	polymerase (DNA directed), theta
hsa-miR-519d	1	0	1	1	1	1	TMCC1	transmembrane and coiled-coil domain family 1
hsa-miR-519d	1	0	1	1	1	1	ST8SIA2	ST8 alpha-N-acetyl-neuraminide alpha-2,8-sialyltransferase 2
hsa-miR-519d	1	0	1	1	1	1	TMEM127	transmembrane protein 127
hsa-miR-519d	1	0	1	0	1	1	RAB8B	RAB8B, member RAS oncogene family
hsa-miR-519d	1	0	1	0	1	1	ZFPM2	zinc finger protein, multitype 2
hsa-miR-519d	1	0	1	0	1	1	ANKH	ankylosis, progressive homolog (mouse)
hsa-miR-519d	1	0	1	0	1	1	FAM116A	family with sequence similarity 116, member A
hsa-miR-519d	1	0	0	1	1	1	CENPQ	centromere protein Q
hsa-miR-519d	1	0	1	1	1	1	SIRPA	signal-regulatory protein alpha
hsa-miR-519d	1	0	1	1	1	1	SIK1	salt-inducible kinase 1
hsa-miR-519d	1	0	1	1	1	1	TLE4	transducin-like enhancer of split 4 (E(sp1) homolog, Drosophila)
hsa-miR-519d	1	0	1	1	1	1	OSM	oncostatin M
hsa-miR-519d	1	0	0	1	0	0	NBL1	neuroblastoma, suppression of tumorigenicity 1
hsa-miR-519d	1	0	1	1	1	1	SPTBN1	spectrin, beta, non-erythrocytic 1
hsa-miR-519d	1	0	1	1	1	1	CRK	v-crk sarcoma virus CT10 oncogene homolog (avian)
hsa-miR-519d	1	0	1	1	1	1	EIF4G2	eukaryotic translation initiation factor 4 gamma, 2
hsa-miR-519d	1	0	1	1	1	1	CDC23	cell division cycle 23 homolog (S. cerevisiae)
hsa-miR-519d	1	0	1	1	1	1	RSBN1	round spermatid basic protein 1
hsa-miR-519d	1	0	1	1	1	1	OCRL	oculocerebrorenal syndrome of Lowe
hsa-miR-519d	1	0	1	1	1	1	PHF6	PHD finger protein 6
hsa-miR-519d	1	0	1	1	1	1	NAA30	N(alpha)-acetyltransferase 30, NatC catalytic subunit
hsa-miR-519d	1	0	1	1	1	1	SCD5	stearoyl-CoA desaturase 5
hsa-miR-519d	1	0	1	1	1	1	BNIP2	BCL2/adenovirus E1B 19kDa interacting protein 2
hsa-miR-519d	1	0	1	1	1	1	WDR37	WD repeat domain 37
hsa-miR-519d	1	0	1	1	1	1	SHOC2	soc-2 suppressor of clear homolog (C. elegans)
hsa-miR-519d	1	0	1	1	1	1	PTPN3	protein tyrosine phosphatase, non-receptor type 3
hsa-miR-519d	1	0	1	0	1	1	TTPAL	tocopherol (alpha) transfer protein-like
hsa-miR-519d	1	0	1	1	1	1	IQSEC2	IQ motif and Sec7 domain 2
hsa-miR-519d	1	0	1	1	1	1	ZFP161	zinc finger protein 161 homolog (mouse)
hsa-miR-519d	1	0	1	1	1	1	ZNF280B	zinc finger protein 280B
hsa-miR-519d	1	0	1	1	1	1	YTHDF3	YTH domain family, member 3
hsa-miR-519d	1	0	1	1	1	1	INTS6	integrator complex subunit 6
hsa-miR-519d	1	0	1	1	1	1	DAZAP2	DAZ associated protein 2
hsa-miR-519d	1	0	0	1	0	0	ANKRD9	ankyrin repeat domain 9
hsa-miR-519d	1	0	1	1	1	1	FIBIN	fin bud initiation factor homolog (zebrafish)
hsa-miR-519d	1	0	1	0	0	0	NTN1	netrin 1
hsa-miR-519d	1	0	1	0	1	1	CAPRIN1	cell cycle associated protein 1
hsa-miR-519d	1	0	1	1	0	0	AEN	apoptosis enhancing nuclease
hsa-miR-519d	1	0	1	0	1	1	ITCH	itchy E3 ubiquitin protein ligase
hsa-miR-519d	1	0	1	1	1	1	PANK3	pantothenate kinase 3
hsa-miR-519d	1	0	1	0	1	1	FZD4	frizzled family receptor 4
hsa-miR-519d	1	0	1	1	1	1	C14orf28	chromosome 14 open reading frame 28
hsa-miR-519d	1	0	1	0	1	1	HMGB3	high mobility group box 3
hsa-miR-519d	1	0	1	0	1	1	ZNF295	zinc finger protein 295
hsa-miR-519d	1	0	1	1	1	1	C11orf30	chromosome 11 open reading frame 30
hsa-miR-519d	1	0	1	1	1	1	CABLES1	Cdk5 and Abl enzyme substrate 1
hsa-miR-519d	1	0	1	1	1	1	RACGAP1	Rac GTPase activating protein 1
hsa-miR-519d	1	0	1	1	1	1	JAK1	Janus kinase 1
hsa-miR-519d	1	0	1	1	1	1	CAPRIN2	caprin family member 2
hsa-miR-519d	1	0	1	1	1	1	FAM168A	family with sequence similarity 168, member A
hsa-miR-519d	1	0	1	1	1	1	FOXL2	forkhead box L2
hsa-miR-519d	1	0	1	1	1	1	GLIS3	GLIS family zinc finger 3
hsa-miR-519d	1	0	1	0	0	0	ALX4	ALX homeobox 4
hsa-miR-519d	1	0	1	1	1	1	L3MBTL3	l(3)mbt-like 3 (Drosophila)
hsa-miR-519d	1	0	1	1	1	1	FAM117A	family with sequence similarity 117, member A
hsa-miR-519d	1	0	1	0	1	1	FAM190B	family with sequence similarity 190, member B
hsa-miR-519d	1	0	1	0	1	1	IGF2BP1	insulin-like growth factor 2 mRNA binding protein 1
hsa-miR-519d	1	0	1	1	1	1	FAM134C	family with sequence similarity 134, member C
hsa-miR-519d	1	0	1	1	1	1	REEP3	receptor accessory protein 3
hsa-miR-519d	1	0	1	1	1	1	PHC3	polyhomeotic homolog 3 (Drosophila)
hsa-miR-519d	1	0	1	0	0	0	FAT3	FAT tumor suppressor homolog 3 (Drosophila)
hsa-miR-519d	1	0	1	0	1	1	ICMT	isoprenylcysteine carboxyl methyltransferase
hsa-miR-519d	1	0	1	0	1	1	NHS	Nance-Horan syndrome (congenital cataracts and dental anomalies)
hsa-miR-519d	1	0	1	1	1	1	ARL4C	ADP-ribosylation factor-like 4C
hsa-miR-519d	1	0	1	1	0	0	TBC1D10C	TBC1 domain family, member 10C
hsa-miR-519d	1	0	1	0	1	1	WDR82	WD repeat domain 82
hsa-miR-519d	1	0	1	1	1	1	C16orf70	chromosome 16 open reading frame 70
hsa-miR-519d	1	0	1	0	1	1	TMEM123	transmembrane protein 123
hsa-miR-519d	1	0	1	0	1	1	SEMA5A	sema domain, seven thrombospondin repeats (type 1 and type 1-like), transmembrane domain (TM) and short cytoplasmic domain, (semaphorin) 5A
hsa-miR-519d	1	0	1	0	1	1	ATP11A	ATPase, class VI, type 11A
hsa-miR-519d	1	0	1	0	1	1	E2F1	E2F transcription factor 1
hsa-miR-519d	1	0	1	1	1	1	LYST	lysosomal trafficking regulator
hsa-miR-519d	1	0	1	1	0	0	SLC29A2	solute carrier family 29 (nucleoside transporters), member 2
hsa-miR-519d	1	0	1	1	1	1	FRMD4A	FERM domain containing 4A
hsa-miR-519d	1	0	1	1	1	1	ZFAND4	zinc finger, AN1-type domain 4
hsa-miR-519d	1	0	1	1	1	1	CLIP4	CAP-GLY domain containing linker protein family, member 4
hsa-miR-519d	1	0	1	0	1	1	HDAC4	histone deacetylase 4
hsa-miR-519d	1	0	1	1	1	1	RNF38	ring finger protein 38
hsa-miR-519d	1	0	1	1	1	1	NIN	ninein (GSK3B interacting protein)
hsa-miR-519d	1	0	1	1	1	1	NAPEPLD	N-acyl phosphatidylethanolamine phospholipase D
hsa-miR-519d	1	0	1	0	1	1	KIAA0232	KIAA0232
hsa-miR-519d	1	0	1	0	0	0	MICAL3	microtubule associated monoxygenase, calponin and LIM domain containing 3
hsa-miR-519d	1	0	1	1	0	0	PIP4K2A	phosphatidylinositol-5-phosphate 4-kinase, type II, alpha
hsa-miR-519d	1	0	1	1	0	0	UBC	ubiquitin C
hsa-miR-519d	1	0	1	1	1	1	PDE3B	phosphodiesterase 3B, cGMP-inhibited
hsa-miR-519d	1	0	1	1	1	1	KIF23	kinesin family member 23
hsa-miR-519d	1	0	1	1	0	0	TBC1D17	TBC1 domain family, member 17
hsa-miR-519d	1	0	1	0	1	1	PPARA	peroxisome proliferator-activated receptor alpha
hsa-miR-519d	1	0	1	1	1	1	TRAPPC10	trafficking protein particle complex 10
hsa-miR-519d	1	0	1	1	1	1	PRR15	proline rich 15
hsa-miR-519d	1	0	1	1	1	1	RPS6KA5	ribosomal protein S6 kinase, 90kDa, polypeptide 5
hsa-miR-519d	1	0	1	0	1	1	USP46	ubiquitin specific peptidase 46
hsa-miR-519d	1	0	1	1	1	1	MAP3K14	mitogen-activated protein kinase kinase kinase 14
hsa-miR-519d	1	0	1	1	1	1	RAB30	RAB30, member RAS oncogene family
hsa-miR-519d	1	0	1	0	1	1	AKAP13	A kinase (PRKA) anchor protein 13
hsa-miR-519d	1	0	1	1	1	1	NEUROG2	neurogenin 2
hsa-miR-519d	1	0	1	1	1	1	USP28	ubiquitin specific peptidase 28
hsa-miR-519d	1	0	1	1	1	1	HAS2	hyaluronan synthase 2
hsa-miR-519d	1	0	1	1	1	1	PCYT1B	phosphate cytidylyltransferase 1, choline, beta
hsa-miR-519d	1	0	1	1	1	1	TOPORS	topoisomerase I binding, arginine/serine-rich, E3 ubiquitin protein ligase
hsa-miR-519d	1	0	1	1	1	1	LUZP1	leucine zipper protein 1
hsa-miR-519d	1	0	1	1	1	1	FXR1	fragile X mental retardation, autosomal homolog 1
hsa-miR-519d	1	0	1	1	1	1	HPS5	Hermansky-Pudlak syndrome 5
hsa-miR-519d	1	0	1	1	1	1	TSPAN9	tetraspanin 9
hsa-miR-519d	1	0	0	1	1	1	NKIRAS1	NFKB inhibitor interacting Ras-like 1
hsa-miR-519d	1	0	1	1	1	1	KAT2B	K(lysine) acetyltransferase 2B
hsa-miR-519d	1	0	1	1	1	1	CHD9	chromodomain helicase DNA binding protein 9
hsa-miR-519d	1	0	1	1	1	1	WAC	WW domain containing adaptor with coiled-coil
hsa-miR-519d	1	0	1	0	1	1	ODZ1	odz, odd Oz/ten-m homolog 1 (Drosophila)
hsa-miR-519d	1	0	1	0	1	1	TNRC6B	trinucleotide repeat containing 6B
hsa-miR-519d	1	0	1	1	1	1	LPGAT1	lysophosphatidylglycerol acyltransferase 1
hsa-miR-519d	1	0	1	0	1	1	PAPOLB	poly(A) polymerase beta (testis specific)
hsa-miR-519d	1	0	1	1	1	1	RASGEF1A	RasGEF domain family, member 1A
hsa-miR-519d	1	0	1	1	1	1	APCDD1	adenomatosis polyposis coli down-regulated 1
hsa-miR-519d	1	0	1	1	1	1	SALL1	sal-like 1 (Drosophila)
hsa-miR-519d	1	0	1	0	1	1	PLSCR4	phospholipid scramblase 4
hsa-miR-519d	1	0	1	1	1	1	KIF3B	kinesin family member 3B
hsa-miR-519d	1	0	1	0	1	1	SERTAD2	SERTA domain containing 2
hsa-miR-519d	1	0	1	0	1	1	KIAA0513	KIAA0513
hsa-miR-519d	1	0	1	1	1	1	RNF2	ring finger protein 2
hsa-miR-519d	1	0	1	1	1	1	TAOK3	TAO kinase 3
hsa-miR-519d	1	0	1	1	1	1	EREG	epiregulin
hsa-miR-519d	1	0	1	0	1	1	CAMTA2	calmodulin binding transcription activator 2
hsa-miR-519d	1	0	1	1	1	1	GDA	guanine deaminase
hsa-miR-519d	1	0	1	1	1	1	LHX8	LIM homeobox 8
hsa-miR-519d	1	0	1	0	1	1	PPP2R2A	protein phosphatase 2, regulatory subunit B, alpha
hsa-miR-519d	1	0	1	1	1	1	MARK4	MAP/microtubule affinity-regulating kinase 4
hsa-miR-519d	1	0	1	1	0	0	ANKIB1	ankyrin repeat and IBR domain containing 1
hsa-miR-519d	1	0	1	1	1	1	MAP3K5	mitogen-activated protein kinase kinase kinase 5
hsa-miR-519d	1	0	1	1	1	1	VEGFA	vascular endothelial growth factor A
hsa-miR-519d	1	0	1	0	1	1	PLXNA1	plexin A1
hsa-miR-519d	1	0	1	0	1	1	SEMA4G	sema domain, immunoglobulin domain (Ig), transmembrane domain (TM) and short cytoplasmic domain, (semaphorin) 4G
hsa-miR-519d	1	0	1	0	1	1	CNOT7	CCR4-NOT transcription complex, subunit 7
hsa-miR-519d	1	0	1	0	1	1	PKD2	polycystic kidney disease 2 (autosomal dominant)
hsa-miR-519d	1	0	1	1	1	1	WDFY2	WD repeat and FYVE domain containing 2
hsa-miR-519d	1	0	1	1	1	1	TNFSF11	tumor necrosis factor (ligand) superfamily, member 11
hsa-miR-519d	1	0	1	1	1	1	LIF	leukemia inhibitory factor
hsa-miR-519d	1	0	1	0	1	1	PKNOX1	PBX/knotted 1 homeobox 1
hsa-miR-519d	1	0	1	1	1	1	PDLIM5	PDZ and LIM domain 5
hsa-miR-519d	1	0	1	1	1	1	RRM2	ribonucleotide reductase M2
hsa-miR-519d	1	0	1	0	1	1	SLC16A9	solute carrier family 16, member 9 (monocarboxylic acid transporter 9)
hsa-miR-519d	1	0	1	1	1	1	AP3D1	adaptor-related protein complex 3, delta 1 subunit
hsa-miR-519d	1	0	1	1	1	1	ZNF236	zinc finger protein 236
hsa-miR-519d	1	0	1	1	1	1	NTN4	netrin 4
hsa-miR-519d	1	0	1	1	1	1	ANKRD12	ankyrin repeat domain 12
hsa-miR-519d	1	0	1	1	1	1	SHANK2	SH3 and multiple ankyrin repeat domains 2
hsa-miR-519d	1	0	1	1	1	1	SESN2	sestrin 2
hsa-miR-519d	1	0	1	1	1	1	EYA1	eyes absent homolog 1 (Drosophila)
hsa-miR-519d	1	0	1	1	1	1	RCOR1	REST corepressor 1
hsa-miR-519d	1	0	0	1	1	1	ZNF264	zinc finger protein 264
hsa-miR-519d	1	0	1	0	1	1	EIF2S1	eukaryotic translation initiation factor 2, subunit 1 alpha, 35kDa
hsa-miR-519d	1	0	1	1	1	1	ANKRD50	ankyrin repeat domain 50
hsa-miR-519d	1	0	1	1	1	1	RUFY2	RUN and FYVE domain containing 2
hsa-miR-519d	1	0	1	1	1	1	PTGFRN	prostaglandin F2 receptor negative regulator
hsa-miR-519d	1	0	1	1	1	1	ACPL2	acid phosphatase-like 2
hsa-miR-519d	1	0	1	0	1	1	TAL1	T-cell acute lymphocytic leukemia 1
hsa-miR-519d	1	0	1	1	1	1	PANX2	pannexin 2
hsa-miR-519d	1	0	1	1	1	1	SNX16	sorting nexin 16
hsa-miR-519d	1	0	1	1	1	1	DCAF8	DDB1 and CUL4 associated factor 8
hsa-miR-519d	1	0	1	1	1	1	PAK7	p21 protein (Cdc42/Rac)-activated kinase 7
hsa-miR-519d	1	0	1	0	1	1	ZNF70	zinc finger protein 70
hsa-miR-519d	1	0	1	1	1	1	WNK3	WNK lysine deficient protein kinase 3
hsa-miR-519d	1	0	1	1	0	0	ST6GALNAC6	ST6 (alpha-N-acetyl-neuraminyl-2,3-beta-galactosyl-1,3)-N-acetylgalactosaminide alpha-2,6-sialyltransferase 6
hsa-miR-519d	1	0	1	0	1	1	TAPT1	transmembrane anterior posterior transformation 1
hsa-miR-519d	1	0	1	1	1	1	GMCL1	germ cell-less, spermatogenesis associated 1
hsa-miR-519d	1	0	1	1	1	1	UGDH	UDP-glucose 6-dehydrogenase
hsa-miR-519d	1	0	1	0	1	1	FAM84B	family with sequence similarity 84, member B
hsa-miR-519d	1	0	1	1	1	1	RPS6KA3	ribosomal protein S6 kinase, 90kDa, polypeptide 3
hsa-miR-519d	1	0	1	0	1	1	CRAMP1L	Crm, cramped-like (Drosophila)
hsa-miR-519d	1	0	1	0	1	1	ZBTB47	zinc finger and BTB domain containing 47
hsa-miR-519d	1	0	1	0	1	1	USP32	ubiquitin specific peptidase 32
hsa-miR-519d	1	0	1	0	1	1	ANO6	anoctamin 6
hsa-miR-519d	1	0	1	1	1	1	HIF1A	hypoxia inducible factor 1, alpha subunit (basic helix-loop-helix transcription factor)
hsa-miR-519d	1	0	1	1	1	1	MAP3K11	mitogen-activated protein kinase kinase kinase 11
hsa-miR-519d	1	0	1	1	1	1	AFF1	AF4/FMR2 family, member 1
hsa-miR-519d	1	0	1	1	1	1	MSMO1	methylsterol monooxygenase 1
hsa-miR-519d	1	0	1	1	1	1	MARCH8	membrane-associated ring finger (C3HC4) 8, E3 ubiquitin protein ligase
hsa-miR-519d	1	0	1	0	1	1	FJX1	four jointed box 1 (Drosophila)
hsa-miR-519d	1	0	1	1	1	1	DLGAP2	discs, large (Drosophila) homolog-associated protein 2
hsa-miR-519d	1	0	1	1	1	1	WEE1	WEE1 homolog (S. pombe)
hsa-miR-519d	1	0	1	1	1	1	TRIP10	thyroid hormone receptor interactor 10
hsa-miR-519d	1	0	1	1	1	1	SMOC2	SPARC related modular calcium binding 2
hsa-miR-519d	1	0	1	1	1	1	MTF1	metal-regulatory transcription factor 1
hsa-miR-519d	1	0	0	1	1	1	HABP4	hyaluronan binding protein 4
hsa-miR-519d	1	0	1	1	1	1	C7orf43	chromosome 7 open reading frame 43
hsa-miR-519d	1	0	1	1	1	1	BRMS1L	breast cancer metastasis-suppressor 1-like
hsa-miR-519d	1	0	1	1	1	1	TRIP11	thyroid hormone receptor interactor 11
hsa-miR-519d	1	0	1	1	1	1	THRA	thyroid hormone receptor, alpha
hsa-miR-519d	1	0	1	1	0	0	IQSEC1	IQ motif and Sec7 domain 1
hsa-miR-519d	1	0	1	1	1	1	TNS1	tensin 1
hsa-miR-519d	1	0	0	1	1	1	PGP	phosphoglycolate phosphatase
hsa-miR-519d	1	0	1	1	1	1	PTPRJ	protein tyrosine phosphatase, receptor type, J
hsa-miR-519d	1	0	1	0	1	1	GNS	glucosamine (N-acetyl)-6-sulfatase
hsa-miR-519d	1	0	1	1	1	1	AHNAK	AHNAK nucleoprotein
hsa-miR-519d	1	0	1	1	1	1	PPP6C	protein phosphatase 6, catalytic subunit
hsa-miR-519d	1	0	1	1	1	1	OSR1	odd-skipped related 1 (Drosophila)
hsa-miR-519d	1	0	1	0	1	1	GALNT4	UDP-N-acetyl-alpha-D-galactosamine:polypeptide N-acetylgalactosaminyltransferase 4 (GalNAc-T4)
hsa-miR-519d	1	0	1	0	1	1	ACAP2	ArfGAP with coiled-coil, ankyrin repeat and PH domains 2
hsa-miR-519d	1	0	1	1	1	1	SOLH	small optic lobes homolog (Drosophila)
hsa-miR-519d	1	0	1	1	1	1	POU6F1	POU class 6 homeobox 1
hsa-miR-519d	1	0	1	1	1	1	NPAS3	neuronal PAS domain protein 3
hsa-miR-519d	1	0	0	1	1	1	MIER2	mesoderm induction early response 1, family member 2
hsa-miR-519d	1	0	1	1	1	1	BAMBI	BMP and activin membrane-bound inhibitor homolog (Xenopus laevis)
hsa-miR-519d	1	0	1	1	1	1	CSRNP3	cysteine-serine-rich nuclear protein 3
hsa-miR-519d	1	0	1	0	1	1	UBFD1	ubiquitin family domain containing 1
hsa-miR-519d	1	0	0	0	1	1	NANOS1	nanos homolog 1 (Drosophila)
hsa-miR-519d	1	0	0	1	1	1	FAM57A	family with sequence similarity 57, member A
hsa-miR-519d	1	0	1	1	1	1	MTERFD2	MTERF domain containing 2
hsa-miR-519d	1	0	1	1	1	1	COL4A3	collagen, type IV, alpha 3 (Goodpasture antigen)
hsa-miR-519d	1	0	1	1	1	1	C2orf69	chromosome 2 open reading frame 69
hsa-miR-519d	1	0	1	1	1	1	NPAT	nuclear protein, ataxia-telangiectasia locus
hsa-miR-519d	1	0	1	1	1	1	RASD1	RAS, dexamethasone-induced 1
hsa-miR-519d	1	0	1	1	1	1	FRMD6	FERM domain containing 6
hsa-miR-519d	1	0	1	1	1	1	LAPTM4A	lysosomal protein transmembrane 4 alpha
hsa-miR-519d	1	0	1	1	0	0	ABL2	v-abl Abelson murine leukemia viral oncogene homolog 2
hsa-miR-519d	1	0	1	1	1	1	ARSJ	arylsulfatase family, member J
hsa-miR-519d	1	0	1	1	1	1	COQ2	coenzyme Q2 homolog, prenyltransferase (yeast)
hsa-miR-519d	1	0	1	0	1	1	ST6GALNAC3	ST6 (alpha-N-acetyl-neuraminyl-2,3-beta-galactosyl-1,3)-N-acetylgalactosaminide alpha-2,6-sialyltransferase 3
hsa-miR-519d	1	0	1	1	1	1	LAMP5	lysosomal-associated membrane protein family, member 5
hsa-miR-519d	1	0	1	1	1	1	SOBP	sine oculis binding protein homolog (Drosophila)
hsa-miR-519d	1	0	1	1	0	0	TET3	tet methylcytosine dioxygenase 3
hsa-miR-519d	1	0	1	1	1	1	AFF4	AF4/FMR2 family, member 4
hsa-miR-519d	1	0	1	0	1	1	CHRM2	cholinergic receptor, muscarinic 2
hsa-miR-519d	1	0	1	1	0	0	GXYLT1	glucoside xylosyltransferase 1
hsa-miR-519d	1	0	1	1	1	1	ITPKB	inositol-trisphosphate 3-kinase B
hsa-miR-519d	1	0	1	1	1	1	IRF9	interferon regulatory factor 9
hsa-miR-519d	1	0	0	1	1	1	PDCD1LG2	programmed cell death 1 ligand 2
hsa-miR-519d	1	0	1	1	1	1	GNB5	guanine nucleotide binding protein (G protein), beta 5
hsa-miR-519d	1	0	1	1	1	1	APPL1	adaptor protein, phosphotyrosine interaction, PH domain and leucine zipper containing 1
hsa-miR-519d	1	0	1	0	1	1	C3orf70	chromosome 3 open reading frame 70
hsa-miR-519d	1	0	1	1	1	1	MID1	midline 1 (Opitz/BBB syndrome)
hsa-miR-519d	1	0	1	1	1	1	UBXN2A	UBX domain protein 2A
hsa-miR-519d	1	0	1	0	1	1	FAM19A1	family with sequence similarity 19 (chemokine (C-C motif)-like), member A1
hsa-miR-519d	1	0	1	1	1	1	PTPN21	protein tyrosine phosphatase, non-receptor type 21
hsa-miR-519d	1	0	1	0	1	1	MFAP3L	microfibrillar-associated protein 3-like
hsa-miR-519d	1	0	1	1	1	1	XYLT1	xylosyltransferase I
hsa-miR-519d	1	0	1	1	1	1	TIAM1	T-cell lymphoma invasion and metastasis 1
hsa-miR-519d	1	0	1	1	1	1	MFN2	mitofusin 2
hsa-miR-519d	1	0	1	1	1	1	NTRK2	neurotrophic tyrosine kinase, receptor, type 2
hsa-miR-519d	1	0	1	1	1	1	HSPA8	heat shock 70kDa protein 8
hsa-miR-519d	1	0	1	1	1	1	VASP	vasodilator-stimulated phosphoprotein
hsa-miR-519d	1	0	1	0	0	0	TADA2B	transcriptional adaptor 2B
hsa-miR-519d	1	0	0	1	1	1	MIDN	midnolin
hsa-miR-519d	1	0	1	1	1	1	ATP2B2	ATPase, Ca++ transporting, plasma membrane 2
hsa-miR-519d	1	0	1	1	1	1	NHLH1	nescient helix loop helix 1
hsa-miR-519d	1	0	1	1	1	1	ZNF148	zinc finger protein 148
hsa-miR-519d	1	0	1	1	1	1	EPB41	erythrocyte membrane protein band 4.1 (elliptocytosis 1, RH-linked)
hsa-miR-519d	1	0	1	1	1	1	TNFAIP1	tumor necrosis factor, alpha-induced protein 1 (endothelial)
hsa-miR-519d	1	0	1	1	1	1	FNDC3A	fibronectin type III domain containing 3A
hsa-miR-519d	1	0	1	1	1	1	FAM13A	family with sequence similarity 13, member A
hsa-miR-519d	1	0	1	0	1	1	LMO3	LIM domain only 3 (rhombotin-like 2)
hsa-miR-519d	1	0	1	1	1	1	MBD5	methyl-CpG binding domain protein 5
hsa-miR-519d	1	0	1	1	1	1	ZBTB7A	zinc finger and BTB domain containing 7A
hsa-miR-519d	1	0	1	1	1	1	SNX21	sorting nexin family member 21
hsa-miR-519d	1	0	1	1	1	1	TUSC2	tumor suppressor candidate 2
hsa-miR-519d	1	0	1	1	1	1	BTBD7	BTB (POZ) domain containing 7
hsa-miR-519d	1	0	1	1	1	1	CELSR2	cadherin, EGF LAG seven-pass G-type receptor 2 (flamingo homolog, Drosophila)
hsa-miR-519d	1	0	1	1	1	1	MMP2	matrix metallopeptidase 2 (gelatinase A, 72kDa gelatinase, 72kDa type IV collagenase)
hsa-miR-519d	1	0	1	1	1	1	PHLPP2	PH domain and leucine rich repeat protein phosphatase 2
hsa-miR-519d	1	0	1	1	1	1	KLF10	Kruppel-like factor 10
hsa-miR-519d	1	0	1	1	1	1	KLHL20	kelch-like 20 (Drosophila)
hsa-miR-519d	1	0	1	1	1	1	PFKP	phosphofructokinase, platelet
hsa-miR-519d	1	0	1	1	1	1	CASP7	caspase 7, apoptosis-related cysteine peptidase
hsa-miR-519d	1	0	0	0	1	1	ARHGAP1	Rho GTPase activating protein 1
hsa-miR-519d	1	0	1	1	1	1	EPHA5	EPH receptor A5
hsa-miR-519d	1	0	1	0	1	1	USP37	ubiquitin specific peptidase 37
hsa-miR-519d	1	0	1	1	1	1	CHIC1	cysteine-rich hydrophobic domain 1
hsa-miR-519d	1	0	1	1	1	1	RYBP	RING1 and YY1 binding protein
hsa-miR-519d	1	0	1	1	1	1	CRY2	cryptochrome 2 (photolyase-like)
hsa-miR-519d	1	0	1	1	1	1	ST8SIA3	ST8 alpha-N-acetyl-neuraminide alpha-2,8-sialyltransferase 3
hsa-miR-519d	1	0	1	1	1	1	TNFRSF21	tumor necrosis factor receptor superfamily, member 21
hsa-miR-519d	1	0	0	1	0	0	KRT81	keratin 81
hsa-miR-519d	1	0	1	1	1	1	HBP1	HMG-box transcription factor 1
hsa-miR-519d	1	0	1	0	1	1	PURB	purine-rich element binding protein B
hsa-miR-519d	1	0	1	1	1	1	RARB	retinoic acid receptor, beta
hsa-miR-519d	1	0	1	1	1	1	VASH2	vasohibin 2
hsa-miR-519d	1	0	1	0	1	1	FBXO48	F-box protein 48
hsa-miR-519d	1	0	1	1	1	1	SENP5	SUMO1/sentrin specific peptidase 5
hsa-miR-519d	1	0	1	1	1	1	SCN1A	sodium channel, voltage-gated, type I, alpha subunit
hsa-miR-519d	1	0	1	1	1	1	RNF128	ring finger protein 128, E3 ubiquitin protein ligase
hsa-miR-519d	1	0	1	1	1	1	LIMK1	LIM domain kinase 1
hsa-miR-519d	1	0	1	1	0	0	ADAMTSL2	ADAMTS-like 2
hsa-miR-519d	1	0	1	1	1	1	SLITRK2	SLIT and NTRK-like family, member 2
hsa-miR-519d	1	0	1	1	1	1	RAB11FIP5	RAB11 family interacting protein 5 (class I)
hsa-miR-519d	1	0	1	1	1	1	TBX3	T-box 3
hsa-miR-519d	1	0	1	1	1	1	IRF1	interferon regulatory factor 1
hsa-miR-519d	1	0	1	0	1	1	SLC5A3	solute carrier family 5 (sodium/myo-inositol cotransporter), member 3
hsa-miR-519d	1	0	1	1	1	1	TIMP2	TIMP metallopeptidase inhibitor 2
hsa-miR-519d	1	0	1	1	1	1	GOLGA1	golgin A1
hsa-miR-519d	1	0	1	1	1	1	NOL4	nucleolar protein 4
hsa-miR-519d	1	0	1	1	0	0	ZDHHC1	zinc finger, DHHC-type containing 1
hsa-miR-519d	1	0	1	1	1	1	RORC	RAR-related orphan receptor C
hsa-miR-519d	1	0	1	1	1	1	PIKFYVE	phosphoinositide kinase, FYVE finger containing
hsa-miR-519d	1	0	1	1	1	1	MAT2B	methionine adenosyltransferase II, beta
hsa-miR-519d	1	0	1	1	1	1	GAB1	GRB2-associated binding protein 1
hsa-miR-519d	1	0	1	1	1	1	RGMA	RGM domain family, member A
hsa-miR-519d	1	0	0	1	0	0	MPDZ	multiple PDZ domain protein
hsa-miR-519d	1	0	1	1	1	1	PCDHA5	protocadherin alpha 5
hsa-miR-519d	1	0	1	1	1	1	AKT3	v-akt murine thymoma viral oncogene homolog 3 (protein kinase B, gamma)
hsa-miR-519d	1	0	1	0	1	1	RAPGEF5	Rap guanine nucleotide exchange factor (GEF) 5
hsa-miR-519d	1	0	1	0	1	1	CNGB3	cyclic nucleotide gated channel beta 3
hsa-miR-519d	1	0	1	1	1	1	DYRK1A	dual-specificity tyrosine-(Y)-phosphorylation regulated kinase 1A
hsa-miR-519d	1	0	1	1	1	1	BICD2	bicaudal D homolog 2 (Drosophila)
hsa-miR-519d	1	0	1	1	1	1	PSD	pleckstrin and Sec7 domain containing
hsa-miR-519d	1	0	1	1	1	1	USP31	ubiquitin specific peptidase 31
hsa-miR-519d	1	0	1	0	1	1	ARHGAP35	Rho GTPase activating protein 35
hsa-miR-519d	1	0	1	1	1	1	TCF4	transcription factor 4
hsa-miR-519d	1	0	1	1	1	1	TSHZ3	teashirt zinc finger homeobox 3
hsa-miR-519d	1	0	1	0	1	1	NFAT5	nuclear factor of activated T-cells 5, tonicity-responsive
hsa-miR-519d	1	0	1	1	1	1	KPNA4	karyopherin alpha 4 (importin alpha 3)
hsa-miR-519d	1	0	1	1	1	1	TMEM64	transmembrane protein 64
hsa-miR-519d	1	0	1	1	1	1	PCDHA4	protocadherin alpha 4
hsa-miR-519d	1	0	1	0	1	1	KIAA0240	KIAA0240
hsa-miR-519d	1	0	0	1	1	1	FAIM2	Fas apoptotic inhibitory molecule 2
hsa-miR-519d	1	0	1	1	1	1	DERL2	derlin 2
hsa-miR-519d	1	0	1	1	1	1	PCDHA8	protocadherin alpha 8
hsa-miR-519d	1	0	1	1	1	1	SOCS6	suppressor of cytokine signaling 6
hsa-miR-519d	1	0	1	1	1	1	MLL4	myeloid/lymphoid or mixed-lineage leukemia 4
hsa-miR-519d	1	0	1	1	1	1	C1orf173	chromosome 1 open reading frame 173
hsa-miR-519d	1	0	1	1	1	1	KLHL12	kelch-like 12 (Drosophila)
hsa-miR-519d	1	0	1	1	1	1	ZNFX1	zinc finger, NFX1-type containing 1
hsa-miR-519d	1	0	1	1	1	1	SMAD7	SMAD family member 7
hsa-miR-519d	1	0	1	0	0	0	MSL1	male-specific lethal 1 homolog (Drosophila)
hsa-miR-519d	1	0	1	0	1	1	ADAR	adenosine deaminase, RNA-specific
hsa-miR-519d	1	0	1	1	1	1	ZFYVE9	zinc finger, FYVE domain containing 9
hsa-miR-519d	1	0	1	1	1	1	ORMDL3	ORM1-like 3 (S. cerevisiae)
hsa-miR-519d	1	0	1	1	1	1	RPS6KA2	ribosomal protein S6 kinase, 90kDa, polypeptide 2
hsa-miR-519d	1	0	1	1	1	1	PREX1	phosphatidylinositol-3,4,5-trisphosphate-dependent Rac exchange factor 1
hsa-miR-519d	1	0	1	1	1	1	RNF6	ring finger protein (C3H2C3 type) 6
hsa-miR-519d	1	0	1	1	1	1	CNN1	calponin 1, basic, smooth muscle
hsa-miR-519d	1	0	1	1	1	1	RAPH1	Ras association (RalGDS/AF-6) and pleckstrin homology domains 1
hsa-miR-519d	1	0	1	1	1	1	GCC2	GRIP and coiled-coil domain containing 2
hsa-miR-519d	1	0	1	1	1	1	FRS2	fibroblast growth factor receptor substrate 2
hsa-miR-519d	1	0	1	1	1	1	YPEL4	yippee-like 4 (Drosophila)
hsa-miR-519d	1	0	1	0	1	1	KIAA0664	KIAA0664
hsa-miR-519d	1	0	1	0	1	1	AP2B1	adaptor-related protein complex 2, beta 1 subunit
hsa-miR-519d	1	0	1	1	1	1	TTC39C	tetratricopeptide repeat domain 39C
hsa-miR-519d	1	0	1	1	1	1	TACC1	transforming, acidic coiled-coil containing protein 1
hsa-miR-519d	1	0	1	1	1	1	FAT2	FAT tumor suppressor homolog 2 (Drosophila)
hsa-miR-519d	1	0	1	0	1	1	PCDHA10	protocadherin alpha 10
hsa-miR-519d	1	0	1	1	1	1	SULF1	sulfatase 1
hsa-miR-519d	1	0	1	1	1	1	SRPK2	SRSF protein kinase 2
hsa-miR-519d	1	0	1	1	1	1	SLC9A2	solute carrier family 9, subfamily A (NHE2, cation proton antiporter 2), member 2
hsa-miR-519d	1	0	1	1	1	1	RB1CC1	RB1-inducible coiled-coil 1
hsa-miR-519d	1	0	1	1	1	1	CD69	CD69 molecule
hsa-miR-519d	1	0	1	0	1	1	PTEN	phosphatase and tensin homolog
hsa-miR-519d	1	0	1	1	1	1	ITGA4	integrin, alpha 4 (antigen CD49D, alpha 4 subunit of VLA-4 receptor)
hsa-miR-519d	1	0	1	0	1	1	MCL1	myeloid cell leukemia sequence 1 (BCL2-related)
hsa-miR-519d	1	0	1	1	1	1	PTPN4	protein tyrosine phosphatase, non-receptor type 4 (megakaryocyte)
hsa-miR-519d	1	0	1	1	1	1	TMEM168	transmembrane protein 168
hsa-miR-519d	1	0	1	1	1	1	CAMK2N1	calcium/calmodulin-dependent protein kinase II inhibitor 1
hsa-miR-519d	1	0	1	1	1	1	IKZF4	IKAROS family zinc finger 4 (Eos)
hsa-miR-519d	1	0	1	1	1	1	EFNB2	ephrin-B2
hsa-miR-519d	1	0	1	1	1	1	ZBTB44	zinc finger and BTB domain containing 44
hsa-miR-519d	1	0	1	1	1	1	CSGALNACT1	chondroitin sulfate N-acetylgalactosaminyltransferase 1
hsa-miR-519d	1	0	1	0	1	1	ATG14	autophagy related 14
hsa-miR-519d	1	0	1	1	1	1	SIKE1	suppressor of IKBKE 1
hsa-miR-519d	1	0	1	1	1	1	MAP7	microtubule-associated protein 7
hsa-miR-519d	1	0	1	1	1	1	PRRG1	proline rich Gla (G-carboxyglutamic acid) 1
hsa-miR-519d	1	0	1	1	1	1	SYNM	synemin, intermediate filament protein
hsa-miR-519d	1	0	1	1	1	1	TMEM245	transmembrane protein 245
hsa-miR-519d	1	0	1	1	1	1	CTDSPL2	CTD (carboxy-terminal domain, RNA polymerase II, polypeptide A) small phosphatase like 2
hsa-miR-519d	1	0	1	0	1	1	ACVR1B	activin A receptor, type IB
hsa-miR-519d	1	0	1	1	0	0	SLC17A7	solute carrier family 17 (sodium-dependent inorganic phosphate cotransporter), member 7
hsa-miR-519d	1	0	1	1	1	1	RBL2	retinoblastoma-like 2 (p130)
hsa-miR-519d	1	0	1	1	1	1	MED12L	mediator complex subunit 12-like
hsa-miR-519d	1	0	1	1	1	1	FBXO21	F-box protein 21
hsa-miR-519d	1	0	1	0	1	1	RAPGEF1	Rap guanine nucleotide exchange factor (GEF) 1
hsa-miR-519d	1	0	1	1	1	1	UNK	unkempt homolog (Drosophila)
hsa-miR-519d	1	0	1	1	1	1	NR4A2	nuclear receptor subfamily 4, group A, member 2
hsa-miR-519d	1	0	1	1	1	1	TRIM37	tripartite motif containing 37
hsa-miR-519d	1	0	1	1	1	1	ARL1	ADP-ribosylation factor-like 1
hsa-miR-519d	1	0	1	1	1	1	DMTF1	cyclin D binding myb-like transcription factor 1
hsa-miR-519d	1	0	1	1	1	1	CACUL1	CDK2-associated, cullin domain 1
hsa-miR-519d	1	0	1	1	1	1	PRKACB	protein kinase, cAMP-dependent, catalytic, beta
hsa-miR-519d	1	0	1	1	1	1	SUCO	SUN domain containing ossification factor
hsa-miR-519d	1	0	1	0	1	1	WIPF2	WAS/WASL interacting protein family, member 2
hsa-miR-519d	1	0	1	1	0	0	SLAIN2	SLAIN motif family, member 2
hsa-miR-519d	1	0	1	1	1	1	SH3BP5	SH3-domain binding protein 5 (BTK-associated)
hsa-miR-519d	1	0	1	1	1	1	FOXJ3	forkhead box J3
hsa-miR-519d	1	0	1	1	1	1	DUSP2	dual specificity phosphatase 2
hsa-miR-519d	1	0	1	1	1	1	E2F3	E2F transcription factor 3
hsa-miR-519d	1	0	1	1	1	1	PRDM12	PR domain containing 12
hsa-miR-519d	1	0	1	1	1	1	PRRX1	paired related homeobox 1
hsa-miR-519d	1	0	1	0	1	1	MAPK4	mitogen-activated protein kinase 4
hsa-miR-519d	1	0	1	1	1	1	FAM3C	family with sequence similarity 3, member C
hsa-miR-519d	1	0	1	1	1	1	ZNF362	zinc finger protein 362
hsa-miR-519d	1	0	1	1	0	0	TTC9	tetratricopeptide repeat domain 9
hsa-miR-519d	1	0	1	1	1	1	SFMBT1	Scm-like with four mbt domains 1
hsa-miR-519d	1	0	1	1	1	1	METAP1	methionyl aminopeptidase 1
hsa-miR-519d	1	0	1	1	1	1	CTSA	cathepsin A
hsa-miR-519d	1	0	1	1	1	1	UEVLD	UEV and lactate/malate dehyrogenase domains
hsa-miR-519d	1	0	1	1	1	1	CXCL14	chemokine (C-X-C motif) ligand 14
hsa-miR-519d	1	0	0	1	1	1	P2RX4	purinergic receptor P2X, ligand-gated ion channel, 4
hsa-miR-519d	1	0	1	1	1	1	DNAJB9	DnaJ (Hsp40) homolog, subfamily B, member 9
hsa-miR-519d	1	0	1	1	1	1	SYT7	synaptotagmin VII
hsa-miR-519d	1	0	1	0	1	1	BNIP3L	BCL2/adenovirus E1B 19kDa interacting protein 3-like
hsa-miR-519d	1	0	1	0	1	1	KIAA1147	KIAA1147
hsa-miR-519d	1	0	1	1	0	0	DSG4	desmoglein 4
hsa-miR-519d	1	0	1	1	1	1	EIF2C1	eukaryotic translation initiation factor 2C, 1
hsa-miR-519d	1	0	1	1	1	1	E2F5	E2F transcription factor 5, p130-binding
hsa-miR-519d	1	0	1	0	1	1	SMURF1	SMAD specific E3 ubiquitin protein ligase 1
hsa-miR-519d	1	0	0	1	0	0	SH2D5	SH2 domain containing 5
hsa-miR-519d	1	0	1	1	0	0	RPS6KA1	ribosomal protein S6 kinase, 90kDa, polypeptide 1
hsa-miR-519d	1	0	1	0	1	1	TBL1X	transducin (beta)-like 1X-linked
hsa-miR-519d	1	0	1	0	1	1	DIEXF	digestive organ expansion factor homolog (zebrafish)
hsa-miR-519d	1	0	1	1	1	1	FNBP1L	formin binding protein 1-like
hsa-miR-519d	1	0	1	1	1	1	KIAA1191	KIAA1191
hsa-miR-519d	1	0	1	1	1	1	PPP6R2	protein phosphatase 6, regulatory subunit 2
hsa-miR-519d	1	0	1	1	1	1	KLHL28	kelch-like 28 (Drosophila)
hsa-miR-519d	1	0	1	0	1	1	ACSL4	acyl-CoA synthetase long-chain family member 4
hsa-miR-519d	1	0	1	1	1	1	GBF1	golgi brefeldin A resistant guanine nucleotide exchange factor 1
hsa-miR-519d	1	0	1	1	1	1	HECTD2	HECT domain containing E3 ubiquitin protein ligase 2
hsa-miR-519d	1	0	1	0	1	1	PAFAH1B1	platelet-activating factor acetylhydrolase 1b, regulatory subunit 1 (45kDa)
hsa-miR-519d	1	0	1	0	1	1	FOXJ2	forkhead box J2
hsa-miR-519d	1	0	1	1	1	1	GPD2	glycerol-3-phosphate dehydrogenase 2 (mitochondrial)
hsa-miR-519d	1	0	1	1	1	1	MKLN1	muskelin 1, intracellular mediator containing kelch motifs
hsa-miR-519d	1	0	1	0	1	1	TRPS1	trichorhinophalangeal syndrome I
hsa-miR-519d	1	0	1	0	0	0	SRSF12	serine/arginine-rich splicing factor 12
hsa-miR-519d	1	0	1	0	1	1	ZRANB1	zinc finger, RAN-binding domain containing 1
hsa-miR-519d	1	0	1	1	1	1	WWC2	WW and C2 domain containing 2
hsa-miR-519d	1	0	1	1	1	1	SCAMP5	secretory carrier membrane protein 5
hsa-miR-519d	1	0	1	0	1	1	RBM15B	RNA binding motif protein 15B
hsa-miR-519d	1	0	1	1	1	1	PBX3	pre-B-cell leukemia homeobox 3
hsa-miR-519d	1	0	1	1	1	1	TMEM133	transmembrane protein 133
hsa-miR-519d	1	0	1	0	1	1	POLR3G	polymerase (RNA) III (DNA directed) polypeptide G (32kD)
hsa-miR-519d	1	0	1	1	1	1	TPPP	tubulin polymerization promoting protein
hsa-miR-519d	1	0	1	1	1	1	LIMA1	LIM domain and actin binding 1
hsa-miR-519d	1	0	1	1	1	1	WASF3	WAS protein family, member 3
hsa-miR-519d	1	0	1	1	1	1	DDHD1	DDHD domain containing 1
hsa-miR-519d	1	0	1	1	1	1	FBXO31	F-box protein 31
hsa-miR-519d	1	0	1	1	1	1	EGLN3	egl nine homolog 3 (C. elegans)
hsa-miR-519d	1	0	1	1	1	1	PLEKHO2	pleckstrin homology domain containing, family O member 2
hsa-miR-519d	1	0	1	1	1	1	B3GALT2	UDP-Gal:betaGlcNAc beta 1,3-galactosyltransferase, polypeptide 2
hsa-miR-519d	1	0	1	1	1	1	C11orf82	chromosome 11 open reading frame 82
hsa-miR-519d	1	0	1	1	1	1	ISM2	isthmin 2 homolog (zebrafish)
hsa-miR-519d	1	0	1	1	1	1	FBXL5	F-box and leucine-rich repeat protein 5
hsa-miR-519d	1	0	1	1	1	1	ZFYVE16	zinc finger, FYVE domain containing 16
hsa-miR-519d	1	0	0	0	1	1	FAM45A	family with sequence similarity 45, member A
hsa-miR-519d	1	0	1	1	1	1	ZNF697	zinc finger protein 697
hsa-miR-519d	1	0	1	0	1	1	TMX3	thioredoxin-related transmembrane protein 3
hsa-miR-519d	1	0	1	1	0	0	ADRA1B	adrenoceptor alpha 1B
hsa-miR-519d	1	0	1	0	1	1	DPYSL2	dihydropyrimidinase-like 2
hsa-miR-519d	1	0	1	1	1	1	SMOC1	SPARC related modular calcium binding 1
hsa-miR-519d	1	0	1	1	1	1	EGR3	early growth response 3
hsa-miR-519d	1	0	1	0	1	1	ZBTB9	zinc finger and BTB domain containing 9
hsa-miR-519d	1	0	1	0	1	1	XIAP	X-linked inhibitor of apoptosis
hsa-miR-519d	1	0	1	1	1	1	PEX5L	peroxisomal biogenesis factor 5-like
hsa-miR-519d	1	0	1	1	1	1	TNRC6A	trinucleotide repeat containing 6A
hsa-miR-519d	1	0	1	1	0	0	USP24	ubiquitin specific peptidase 24
hsa-miR-519d	1	0	1	0	1	1	GATAD2B	GATA zinc finger domain containing 2B
hsa-miR-519d	1	0	1	1	1	1	TSG101	tumor susceptibility gene 101
hsa-miR-519d	1	0	1	1	1	1	PAPOLA	poly(A) polymerase alpha
hsa-miR-519d	1	0	1	1	1	1	ACBD5	acyl-CoA binding domain containing 5
hsa-miR-519d	1	0	1	1	1	1	UPF3A	UPF3 regulator of nonsense transcripts homolog A (yeast)
hsa-miR-519d	1	0	1	1	1	1	BTG3	BTG family, member 3
hsa-miR-519d	1	0	1	1	1	1	CALD1	caldesmon 1
hsa-miR-519d	1	0	1	1	1	1	ITFG1	integrin alpha FG-GAP repeat containing 1
hsa-miR-519d	1	0	1	1	1	1	PCDHA2	protocadherin alpha 2
hsa-miR-519d	1	0	1	0	1	1	TMEM167A	transmembrane protein 167A
hsa-miR-519d	1	0	1	1	1	1	ARHGEF11	Rho guanine nucleotide exchange factor (GEF) 11
hsa-miR-519d	1	0	1	1	1	1	DRD1	dopamine receptor D1
hsa-miR-519d	1	0	1	1	1	1	TMEM25	transmembrane protein 25
hsa-miR-519d	1	0	1	0	1	1	CUL3	cullin 3
hsa-miR-519d	1	0	1	1	1	1	SLC30A7	solute carrier family 30 (zinc transporter), member 7
hsa-miR-519d	1	0	1	0	1	1	STC1	stanniocalcin 1
hsa-miR-519d	1	0	1	1	0	0	MAGI3	membrane associated guanylate kinase, WW and PDZ domain containing 3
hsa-miR-519d	1	0	1	1	1	1	RASSF2	Ras association (RalGDS/AF-6) domain family member 2
hsa-miR-519d	1	0	1	0	1	1	MTMR2	myotubularin related protein 2
hsa-miR-519d	1	0	1	0	1	1	SH3PXD2A	SH3 and PX domains 2A
hsa-miR-519d	1	0	1	1	1	1	SLC25A27	solute carrier family 25, member 27
hsa-miR-519d	1	0	1	1	1	1	PTPRO	protein tyrosine phosphatase, receptor type, O
hsa-miR-519d	1	0	1	0	0	0	TANC2	tetratricopeptide repeat, ankyrin repeat and coiled-coil containing 2
hsa-miR-519d	1	0	1	1	1	1	CCDC25	coiled-coil domain containing 25
hsa-miR-519d	1	0	1	1	1	1	SMAD6	SMAD family member 6
hsa-miR-519d	1	0	1	0	1	1	NUFIP2	nuclear fragile X mental retardation protein interacting protein 2
hsa-miR-519d	1	0	1	1	1	1	FOXK2	forkhead box K2
hsa-miR-519d	1	0	1	1	1	1	NKX2-2	NK2 homeobox 2
hsa-miR-519d	1	0	1	0	1	1	STYX	serine/threonine/tyrosine interacting protein
hsa-miR-519d	1	0	1	1	0	0	FASTK	Fas-activated serine/threonine kinase
hsa-miR-519d	1	0	1	1	1	1	CASP2	caspase 2, apoptosis-related cysteine peptidase
hsa-miR-519d	1	0	1	1	0	0	SLC45A4	solute carrier family 45, member 4
hsa-miR-519d	1	0	1	1	1	1	ZNF618	zinc finger protein 618
hsa-miR-519d	1	0	1	1	1	1	NUP35	nucleoporin 35kDa
hsa-miR-519d	1	0	1	1	1	1	KIAA0247	KIAA0247
hsa-miR-519d	1	0	1	1	1	1	RABEP1	rabaptin, RAB GTPase binding effector protein 1
hsa-miR-519d	1	0	1	0	1	1	CELF2	CUGBP, Elav-like family member 2
hsa-miR-519d	1	0	1	1	1	1	KCNJ10	potassium inwardly-rectifying channel, subfamily J, member 10
hsa-miR-519d	1	0	1	0	1	1	NCKAP5	NCK-associated protein 5
hsa-miR-519d	1	0	1	1	1	1	TRIM36	tripartite motif containing 36
hsa-miR-519d	1	0	1	1	1	1	SLC41A1	solute carrier family 41, member 1
hsa-miR-519d	1	0	1	1	1	1	ADAMTS5	ADAM metallopeptidase with thrombospondin type 1 motif, 5
hsa-miR-519d	1	0	1	1	1	1	SKI	v-ski sarcoma viral oncogene homolog (avian)
hsa-miR-519d	1	0	1	1	0	0	LDLRAP1	low density lipoprotein receptor adaptor protein 1
hsa-miR-519d	1	0	1	1	1	1	EGLN1	egl nine homolog 1 (C. elegans)
hsa-miR-519d	1	0	1	1	1	1	PTP4A2	protein tyrosine phosphatase type IVA, member 2
hsa-miR-519d	1	0	1	0	1	1	IP6K1	inositol hexakisphosphate kinase 1
hsa-miR-519d	1	0	1	1	1	1	HMGA2	high mobility group AT-hook 2
hsa-miR-519d	1	0	1	0	1	1	SPRY4	sprouty homolog 4 (Drosophila)
hsa-miR-519d	1	0	0	0	1	1	ARHGEF18	Rho/Rac guanine nucleotide exchange factor (GEF) 18
hsa-miR-519d	1	0	1	0	1	1	UBASH3B	ubiquitin associated and SH3 domain containing B
hsa-miR-519d	1	0	1	0	1	1	DCBLD2	discoidin, CUB and LCCL domain containing 2
hsa-miR-519d	1	0	1	0	1	1	SPOPL	speckle-type POZ protein-like
hsa-miR-519d	1	0	1	1	1	1	ZNF25	zinc finger protein 25
hsa-miR-519d	1	0	1	0	1	1	KLF3	Kruppel-like factor 3 (basic)
hsa-miR-519d	1	0	1	1	1	1	ABCC5	ATP-binding cassette, sub-family C (CFTR/MRP), member 5
hsa-miR-519d	1	0	1	0	1	1	PTPRT	protein tyrosine phosphatase, receptor type, T
hsa-miR-519d	0	0	1	1	1	1	PEG3	paternally expressed 3
hsa-miR-519d	1	0	1	0	1	1	KIAA0408	KIAA0408
hsa-miR-519d	1	0	1	1	1	1	NUPL1	nucleoporin like 1
hsa-miR-519d	1	0	1	1	1	1	RNGTT	RNA guanylyltransferase and 5'-phosphatase
hsa-miR-519d	0	0	1	1	0	0	ZNF862	zinc finger protein 862
hsa-miR-519d	0	0	1	1	1	1	L3MBTL1	l(3)mbt-like 1 (Drosophila)
hsa-miR-519d	1	0	1	1	1	1	DNM3	dynamin 3
hsa-miR-519d	0	0	1	1	0	0	FAM169A	family with sequence similarity 169, member A
hsa-miR-519d	1	0	1	1	1	1	UBR5	ubiquitin protein ligase E3 component n-recognin 5
hsa-miR-519d	1	0	1	0	0	0	KIAA0947	KIAA0947
hsa-miR-519d	0	0	1	1	1	1	AGTPBP1	ATP/GTP binding protein 1
hsa-miR-519d	1	0	1	1	0	0	KIAA1045	KIAA1045
hsa-miR-519d	1	0	1	0	1	1	GPR158	G protein-coupled receptor 158
hsa-miR-519d	0	0	1	1	1	1	CA10	carbonic anhydrase X
hsa-miR-519d	0	0	1	0	0	0	KIAA1383	KIAA1383
hsa-miR-519d	1	0	1	1	1	1	PPP6R3	protein phosphatase 6, regulatory subunit 3
hsa-miR-519d	1	0	1	1	1	1	AHCTF1	AT hook containing transcription factor 1
hsa-miR-519d	1	0	1	1	1	1	SH3TC2	SH3 domain and tetratricopeptide repeats 2
hsa-miR-519d	0	0	1	1	0	0	CIRH1A	cirrhosis, autosomal recessive 1A (cirhin)
hsa-miR-519d	0	0	1	1	1	1	NELL1	NEL-like 1 (chicken)
hsa-miR-519d	1	0	1	1	1	1	PAM	peptidylglycine alpha-amidating monooxygenase
hsa-miR-519d	1	0	1	1	1	1	KCNMA1	potassium large conductance calcium-activated channel, subfamily M, alpha member 1
hsa-miR-519d	1	0	1	1	1	1	UBE3A	ubiquitin protein ligase E3A
hsa-miR-519d	1	0	1	1	1	1	ADARB1	adenosine deaminase, RNA-specific, B1
hsa-miR-519d	0	0	1	1	1	1	SYBU	syntabulin (syntaxin-interacting)
hsa-miR-519d	0	0	1	0	1	1	ITPR1	inositol 1,4,5-trisphosphate receptor, type 1
hsa-miR-519d	0	0	1	1	1	1	NLRP3	NLR family, pyrin domain containing 3
hsa-miR-519d	0	0	1	1	0	0	KCNC3	potassium voltage-gated channel, Shaw-related subfamily, member 3
hsa-miR-519d	0	0	1	1	0	0	SMARCC2	SWI/SNF related, matrix associated, actin dependent regulator of chromatin, subfamily c, member 2
hsa-miR-519d	1	0	1	1	1	1	PHC1	polyhomeotic homolog 1 (Drosophila)
hsa-miR-519d	1	0	1	1	1	1	DTNA	dystrobrevin, alpha
hsa-miR-519d	1	0	1	1	0	0	CACNB1	calcium channel, voltage-dependent, beta 1 subunit
hsa-miR-519d	1	0	1	1	1	1	FMR1	fragile X mental retardation 1
hsa-miR-519d	0	0	1	1	1	1	TFRC	transferrin receptor (p90, CD71)
hsa-miR-519d	1	0	1	0	1	1	CHL1	cell adhesion molecule with homology to L1CAM (close homolog of L1)
hsa-miR-519d	1	0	1	1	1	1	SPTB	spectrin, beta, erythrocytic
hsa-miR-519d	0	0	1	1	0	0	IFT27	intraflagellar transport 27 homolog (Chlamydomonas)
hsa-miR-519d	0	0	1	1	1	1	RYR1	ryanodine receptor 1 (skeletal)
hsa-miR-519d	0	0	1	1	0	0	EIF4E2	eukaryotic translation initiation factor 4E family member 2
hsa-miR-519d	0	0	1	1	1	1	HLA-DQA1	major histocompatibility complex, class II, DQ alpha 1
hsa-miR-519d	1	0	1	1	0	0	GRIN2A	glutamate receptor, ionotropic, N-methyl D-aspartate 2A
hsa-miR-519d	1	0	1	1	1	1	SLC6A8	solute carrier family 6 (neurotransmitter transporter, creatine), member 8
hsa-miR-519d	1	0	1	1	1	1	PHLDB2	pleckstrin homology-like domain, family B, member 2
hsa-miR-519d	1	0	1	1	1	1	MEF2D	myocyte enhancer factor 2D
hsa-miR-519d	1	0	1	0	1	1	PDE4D	phosphodiesterase 4D, cAMP-specific
hsa-miR-519d	1	0	1	1	1	1	PCDH17	protocadherin 17
hsa-miR-519d	1	0	1	0	0	0	MAP3K1	mitogen-activated protein kinase kinase kinase 1, E3 ubiquitin protein ligase
hsa-miR-519d	0	0	1	1	1	1	SLC16A7	solute carrier family 16, member 7 (monocarboxylic acid transporter 2)
hsa-miR-519d	0	0	1	1	1	1	CYP4F3	cytochrome P450, family 4, subfamily F, polypeptide 3
hsa-miR-519d	1	0	1	1	1	1	AKAP9	A kinase (PRKA) anchor protein (yotiao) 9
hsa-miR-519d	0	0	1	1	1	1	PCBP4	poly(rC) binding protein 4
hsa-miR-519d	0	0	1	1	1	1	MSTO1	misato homolog 1 (Drosophila)
hsa-miR-519d	1	0	1	1	1	1	HP1BP3	heterochromatin protein 1, binding protein 3
hsa-miR-519d	0	0	1	0	1	1	CLEC5A	C-type lectin domain family 5, member A
hsa-miR-519d	1	0	1	1	1	1	STXBP6	syntaxin binding protein 6 (amisyn)
hsa-miR-519d	0	0	1	1	1	1	MPP6	membrane protein, palmitoylated 6 (MAGUK p55 subfamily member 6)
hsa-miR-519d	0	0	1	0	1	1	CLDN2	claudin 2
hsa-miR-519d	1	0	1	1	1	1	SENP7	SUMO1/sentrin specific peptidase 7
hsa-miR-519d	0	0	1	1	0	0	NCOA6	nuclear receptor coactivator 6
hsa-miR-519d	1	0	1	1	1	1	KCNMB2	potassium large conductance calcium-activated channel, subfamily M, beta member 2
hsa-miR-519d	0	0	1	1	1	1	SPG21	spastic paraplegia 21 (autosomal recessive, Mast syndrome)
hsa-miR-519d	0	0	1	1	1	1	CD28	CD28 molecule
hsa-miR-519d	1	0	1	1	1	1	OGT	O-linked N-acetylglucosamine (GlcNAc) transferase
hsa-miR-519d	1	0	1	1	0	0	TDRKH	tudor and KH domain containing
hsa-miR-519d	0	0	1	1	1	1	NKX3-1	NK3 homeobox 1
hsa-miR-519d	0	0	1	0	0	0	TIGD7	tigger transposable element derived 7
hsa-miR-519d	1	0	1	1	0	0	LMO2	LIM domain only 2 (rhombotin-like 1)
hsa-miR-519d	0	0	1	0	1	1	PRDM6	PR domain containing 6
hsa-miR-519d	0	0	1	0	1	1	ERBB2IP	erbb2 interacting protein
hsa-miR-519d	0	0	1	1	1	1	LRTOMT	leucine rich transmembrane and 0-methyltransferase domain containing
hsa-miR-519d	1	0	1	1	1	1	CHST9	carbohydrate (N-acetylgalactosamine 4-0) sulfotransferase 9
hsa-miR-519d	0	0	1	1	0	0	ZAN	zonadhesin
hsa-miR-519d	1	0	1	1	1	1	CALCOCO1	calcium binding and coiled-coil domain 1
hsa-miR-519d	0	0	1	1	1	1	CASP8	caspase 8, apoptosis-related cysteine peptidase
hsa-miR-519d	1	0	1	1	0	0	YTHDF2	YTH domain family, member 2
hsa-miR-519d	1	0	1	1	1	1	ZAK	sterile alpha motif and leucine zipper containing kinase AZK
hsa-miR-519d	1	0	1	1	1	1	NCOA5	nuclear receptor coactivator 5
hsa-miR-519d	0	0	1	1	1	1	CARD8	caspase recruitment domain family, member 8
hsa-miR-519d	1	0	1	0	1	1	CACNA1C	calcium channel, voltage-dependent, L type, alpha 1C subunit
hsa-miR-519d	0	0	1	0	0	0	CACNA2D3	calcium channel, voltage-dependent, alpha 2/delta subunit 3
hsa-miR-519d	0	0	1	1	1	1	RANBP17	RAN binding protein 17
hsa-miR-519d	0	0	1	1	0	0	KIF13A	kinesin family member 13A
hsa-miR-519d	0	0	1	1	1	1	STK33	serine/threonine kinase 33
hsa-miR-519d	1	0	1	1	1	1	PNISR	PNN-interacting serine/arginine-rich protein
hsa-miR-519d	1	0	1	1	1	1	NAV3	neuron navigator 3
hsa-miR-519d	1	0	1	1	1	1	AKAP2	A kinase (PRKA) anchor protein 2
hsa-miR-519d	0	0	1	1	1	1	UBE2Q2	ubiquitin-conjugating enzyme E2Q family member 2
hsa-miR-519d	1	0	1	1	1	1	BCAP29	B-cell receptor-associated protein 29
hsa-miR-519d	1	0	1	1	0	0	SALL2	sal-like 2 (Drosophila)
hsa-miR-519d	0	0	1	1	1	1	RSRC2	arginine/serine-rich coiled-coil 2
hsa-miR-519d	0	0	1	1	1	1	ABCG2	ATP-binding cassette, sub-family G (WHITE), member 2
hsa-miR-519d	1	0	1	1	1	1	HNRNPUL1	heterogeneous nuclear ribonucleoprotein U-like 1
hsa-miR-519d	0	0	1	1	0	0	KIRREL	kin of IRRE like (Drosophila)
hsa-miR-519d	0	0	1	0	0	0	DUXAP10	double homeobox A pseudogene 10
hsa-miR-519d	0	0	1	1	0	0	RPS15A	ribosomal protein S15a
hsa-miR-519d	0	0	1	1	1	1	VPRBP	Vpr (HIV-1) binding protein
hsa-miR-519d	0	0	1	0	0	0	MIRLET7BHG	MIRLET7B host gene (non-protein coding)
hsa-miR-519d	0	0	1	1	1	1	C14orf118	chromosome 14 open reading frame 118
hsa-miR-519d	0	0	1	1	1	1	CWF19L1	CWF19-like 1, cell cycle control (S. pombe)
hsa-miR-519d	1	0	1	1	1	1	DYRK2	dual-specificity tyrosine-(Y)-phosphorylation regulated kinase 2
hsa-miR-519d	1	0	1	0	1	1	ATP2B1	ATPase, Ca++ transporting, plasma membrane 1
hsa-miR-519d	0	0	1	1	1	1	PDE4DIP	phosphodiesterase 4D interacting protein
hsa-miR-519d	0	0	1	0	1	1	ATXN1L	ataxin 1-like
hsa-miR-519d	0	0	1	0	0	0	KIAA1671	KIAA1671
hsa-miR-519d	1	0	1	1	1	1	PHACTR4	phosphatase and actin regulator 4
hsa-miR-519d	0	0	1	0	0	0	ARHGEF28	Rho guanine nucleotide exchange factor (GEF) 28
hsa-miR-519d	0	0	1	0	1	1	HEMK1	HemK methyltransferase family member 1
hsa-miR-519d	0	0	1	1	1	1	MYEOV	myeloma overexpressed (in a subset of t(11;14) positive multiple myelomas)
hsa-miR-519d	1	0	1	1	0	0	UBXN7	UBX domain protein 7
hsa-miR-519d	0	0	1	0	0	0	NEURL1B	neuralized homolog 1B (Drosophila)
hsa-miR-519d	1	0	1	0	1	1	TOX3	TOX high mobility group box family member 3
hsa-miR-519d	1	0	1	1	1	1	LRP4	low density lipoprotein receptor-related protein 4
hsa-miR-519d	0	0	1	1	1	1	NETO2	neuropilin (NRP) and tolloid (TLL)-like 2
hsa-miR-519d	1	0	1	1	1	1	TMEM2	transmembrane protein 2
hsa-miR-519d	1	0	1	1	1	1	SLC38A1	solute carrier family 38, member 1
hsa-miR-519d	1	0	1	1	1	1	STRBP	spermatid perinuclear RNA binding protein
hsa-miR-519d	0	0	1	1	0	0	RTN4R	reticulon 4 receptor
hsa-miR-519d	1	0	1	1	1	1	SLAIN1	SLAIN motif family, member 1
hsa-miR-519d	0	0	1	1	0	0	FAM153B	family with sequence similarity 153, member B
hsa-miR-519d	0	0	1	0	0	0	CHST9-AS1	CHST9 antisense RNA 1
hsa-miR-519d	1	0	1	0	1	1	AP1G1	adaptor-related protein complex 1, gamma 1 subunit
hsa-miR-519d	0	0	1	0	0	0	LOC100131060	uncharacterized LOC100131060
hsa-miR-519d	0	0	1	0	0	0	FLJ30838	uncharacterized LOC400955
hsa-miR-519d	0	0	1	0	0	0	FLJ31104	uncharacterized LOC441072
hsa-miR-519d	1	0	1	1	1	1	SFXN2	sideroflexin 2
hsa-miR-519d	1	0	1	1	1	1	MAP3K7	mitogen-activated protein kinase kinase kinase 7
hsa-miR-519d	0	0	1	1	1	1	ANKRD36B	ankyrin repeat domain 36B
hsa-miR-519d	0	0	1	0	0	0	LOC441204	uncharacterized LOC441204
hsa-miR-519d	1	0	1	1	1	1	SORBS2	sorbin and SH3 domain containing 2
hsa-miR-519d	1	0	1	0	1	1	RABGEF1	RAB guanine nucleotide exchange factor (GEF) 1
hsa-miR-519d	0	0	1	0	0	0	MAGI1-IT1	MAGI1 intronic transcript 1 (non-protein coding)
hsa-miR-519d	0	0	1	1	1	1	XAF1	XIAP associated factor 1
hsa-miR-519d	0	0	1	0	1	1	THAP6	THAP domain containing 6
hsa-miR-519d	0	0	1	1	1	1	COPS5	COP9 constitutive photomorphogenic homolog subunit 5 (Arabidopsis)
hsa-miR-519d	0	0	1	0	1	1	ZNF498	zinc finger protein 498
hsa-miR-519d	0	0	1	1	1	1	PSME3	proteasome (prosome, macropain) activator subunit 3 (PA28 gamma; Ki)
hsa-miR-519d	0	0	1	0	0	0	FLJ32742	uncharacterized locus FLJ32742
hsa-miR-519d	1	0	1	1	0	0	ZBTB37	zinc finger and BTB domain containing 37
hsa-miR-519d	0	0	1	1	0	0	PTOV1	prostate tumor overexpressed 1
hsa-miR-519d	0	0	1	0	1	1	CCDC68	coiled-coil domain containing 68
hsa-miR-519d	0	0	1	0	0	0	LINC00301	long intergenic non-protein coding RNA 301
hsa-miR-519d	0	0	1	0	1	1	UHMK1	U2AF homology motif (UHM) kinase 1
hsa-miR-519d	0	0	1	1	0	0	TRIM41	tripartite motif containing 41
hsa-miR-519d	1	0	1	1	1	1	FAM73B	family with sequence similarity 73, member B
hsa-miR-519d	1	0	1	1	1	1	GANC	glucosidase, alpha; neutral C
hsa-miR-519d	0	0	1	0	1	1	CDHR3	cadherin-related family member 3
hsa-miR-519d	1	0	1	1	1	1	SIRT1	sirtuin 1
hsa-miR-519d	1	0	1	1	1	1	UBAP1	ubiquitin associated protein 1
hsa-miR-519d	0	0	1	1	0	0	CPAMD8	C3 and PZP-like, alpha-2-macroglobulin domain containing 8
hsa-miR-519d	1	0	1	1	1	1	PIP4K2C	phosphatidylinositol-5-phosphate 4-kinase, type II, gamma
hsa-miR-519d	0	0	1	1	1	1	STBD1	starch binding domain 1
hsa-miR-519d	1	0	1	1	1	1	AMMECR1	Alport syndrome, mental retardation, midface hypoplasia and elliptocytosis chromosomal region gene 1
hsa-miR-519d	0	0	1	0	0	0	LOC440910	uncharacterized LOC440910
hsa-miR-519d	1	0	1	1	1	1	FBXW2	F-box and WD repeat domain containing 2
hsa-miR-519d	1	0	1	1	1	1	GNG2	guanine nucleotide binding protein (G protein), gamma 2
hsa-miR-519d	0	0	1	1	1	1	NRBP1	nuclear receptor binding protein 1
hsa-miR-519d	0	0	1	1	0	0	AXDND1	axonemal dynein light chain domain containing 1
hsa-miR-519d	0	0	1	1	0	0	WBP1	WW domain binding protein 1
hsa-miR-519d	0	0	1	0	0	0	ZNF806	zinc finger protein 806
hsa-miR-519d	1	0	1	1	1	1	GALNTL2	UDP-N-acetyl-alpha-D-galactosamine:polypeptide N-acetylgalactosaminyltransferase-like 2
hsa-miR-519d	0	0	1	0	1	1	AGBL4	ATP/GTP binding protein-like 4
hsa-miR-519d	0	0	1	0	0	0	LOC285500	uncharacterized LOC285500
hsa-miR-519d	0	0	1	0	0	0	FLJ37798	uncharacterized LOC401264
hsa-miR-519d	0	0	1	1	1	1	LRRC34	leucine rich repeat containing 34
hsa-miR-519d	0	0	1	1	1	1	MYO6	myosin VI
hsa-miR-519d	1	0	1	1	1	1	SPATS2	spermatogenesis associated, serine-rich 2
hsa-miR-519d	0	0	1	0	0	0	LOC730101	uncharacterized LOC730101
hsa-miR-519d	0	0	1	1	1	1	VDAC1	voltage-dependent anion channel 1
hsa-miR-519d	1	0	1	1	1	1	FADS1	fatty acid desaturase 1
hsa-miR-519d	0	0	1	0	0	0	OTUD1	OTU domain containing 1
hsa-miR-519d	1	0	1	0	1	1	KBTBD8	kelch repeat and BTB (POZ) domain containing 8
hsa-miR-519d	0	0	1	1	1	1	ARMCX5	armadillo repeat containing, X-linked 5
hsa-miR-519d	0	0	1	1	1	1	ZNF513	zinc finger protein 513
hsa-miR-519d	0	0	1	1	0	0	CHCHD5	coiled-coil-helix-coiled-coil-helix domain containing 5
hsa-miR-519d	0	0	1	0	0	0	LOC400680	uncharacterized LOC400680
hsa-miR-519d	0	0	1	0	0	0	LINC00293	long intergenic non-protein coding RNA 293
hsa-miR-519d	0	0	1	0	0	0	LOC284385	uncharacterized LOC284385
hsa-miR-519d	1	0	1	1	1	1	HOOK1	hook homolog 1 (Drosophila)
hsa-miR-519d	0	0	1	0	0	0	LOC100130954	uncharacterized LOC100130954
hsa-miR-519d	0	0	1	1	1	1	CHCHD1	coiled-coil-helix-coiled-coil-helix domain containing 1
hsa-miR-519d	1	0	1	0	1	1	UNC5D	unc-5 homolog D (C. elegans)
hsa-miR-519d	0	0	1	1	0	0	FBXO18	F-box protein, helicase, 18
hsa-miR-519d	0	0	1	1	1	1	WDR64	WD repeat domain 64
hsa-miR-519d	0	0	1	1	0	0	MARS	methionyl-tRNA synthetase
hsa-miR-519d	0	0	1	0	1	1	FLJ41200	uncharacterized LOC401492
hsa-miR-519d	1	0	1	0	1	1	KCNK2	potassium channel, subfamily K, member 2
hsa-miR-519d	1	0	1	1	1	1	MBTD1	mbt domain containing 1
hsa-miR-519d	1	0	1	1	1	1	ABR	active BCR-related
hsa-miR-519d	1	0	1	1	1	1	XPO1	exportin 1 (CRM1 homolog, yeast)
hsa-miR-519d	1	0	1	1	1	1	HARS	histidyl-tRNA synthetase
hsa-miR-519d	0	0	1	1	1	1	ATPBD4	ATP binding domain 4
hsa-miR-519d	1	0	1	1	1	1	PIAS3	protein inhibitor of activated STAT, 3
hsa-miR-519d	0	0	1	1	1	1	MKX	mohawk homeobox
hsa-miR-519d	0	0	1	1	0	0	LOC442075	uncharacterized LOC442075
hsa-miR-519d	0	0	1	1	0	0	RPRD2	regulation of nuclear pre-mRNA domain containing 2
hsa-miR-519d	1	0	1	1	1	1	MACROD2	MACRO domain containing 2
hsa-miR-519d	1	0	1	1	1	1	LIN9	lin-9 homolog (C. elegans)
hsa-miR-519d	1	0	1	1	1	1	PLEKHB2	pleckstrin homology domain containing, family B (evectins) member 2
hsa-miR-519d	0	0	1	1	1	1	CCDC132	coiled-coil domain containing 132
hsa-miR-519d	1	0	1	1	0	0	LRRC73	leucine rich repeat containing 73
hsa-miR-519d	0	0	1	1	0	0	HS3ST5	heparan sulfate (glucosamine) 3-O-sulfotransferase 5
hsa-miR-519d	0	0	1	0	0	0	RPL23AP53	ribosomal protein L23a pseudogene 53
hsa-miR-519d	1	0	1	1	0	0	SLC30A3	solute carrier family 30 (zinc transporter), member 3
hsa-miR-519d	1	0	1	1	0	0	PTPN5	protein tyrosine phosphatase, non-receptor type 5 (striatum-enriched)
hsa-miR-519d	0	0	1	0	1	1	NPHP4	nephronophthisis 4
hsa-miR-519d	1	0	1	1	1	1	ENAH	enabled homolog (Drosophila)
hsa-miR-519d	1	0	1	0	1	1	NBR1	neighbor of BRCA1 gene 1
hsa-miR-519d	1	0	1	1	1	1	PDZD2	PDZ domain containing 2
hsa-miR-519d	0	0	1	0	0	0	IDO2	indoleamine 2,3-dioxygenase 2
hsa-miR-519d	1	0	1	1	1	1	ADAMTSL1	ADAMTS-like 1
hsa-miR-519d	0	0	1	1	1	1	TBX19	T-box 19
hsa-miR-519d	0	0	1	0	0	0	LOC100124692	maltase-glucoamylase (alpha-glucosidase) pseudogene
hsa-miR-519d	0	0	1	1	1	1	ZSCAN20	zinc finger and SCAN domain containing 20
hsa-miR-519d	1	0	1	0	0	0	ASXL3	additional sex combs like 3 (Drosophila)
hsa-miR-519d	0	0	1	0	0	0	AGAP9	ArfGAP with GTPase domain, ankyrin repeat and PH domain 9
hsa-miR-519d	0	0	1	1	1	1	AKTIP	AKT interacting protein
hsa-miR-519d	0	0	1	1	1	1	MSH2	mutS homolog 2, colon cancer, nonpolyposis type 1 (E. coli)
hsa-miR-519d	1	0	1	1	1	1	TRPM6	transient receptor potential cation channel, subfamily M, member 6
hsa-miR-519d	1	0	1	1	1	1	TBC1D15	TBC1 domain family, member 15
hsa-miR-519d	0	0	1	1	1	1	PSMG2	proteasome (prosome, macropain) assembly chaperone 2
hsa-miR-519d	1	0	1	1	1	1	NECAP1	NECAP endocytosis associated 1
hsa-miR-519d	0	0	1	1	1	1	KIDINS220	kinase D-interacting substrate, 220kDa
hsa-miR-519d	0	0	1	0	0	0	DNAJC5B	DnaJ (Hsp40) homolog, subfamily C, member 5 beta
hsa-miR-519d	0	0	1	1	1	1	MIOS	missing oocyte, meiosis regulator, homolog (Drosophila)
hsa-miR-519d	0	0	1	1	0	0	LRCH3	leucine-rich repeats and calponin homology (CH) domain containing 3
hsa-miR-519d	0	0	1	1	1	1	TAOK2	TAO kinase 2
hsa-miR-519d	1	0	1	1	1	1	EZR	ezrin
hsa-miR-519d	1	0	1	1	1	1	CTTNBP2NL	CTTNBP2 N-terminal like
hsa-miR-519d	0	0	1	1	1	1	SLC30A10	solute carrier family 30, member 10
hsa-miR-519d	1	0	1	0	0	0	BAHCC1	BAH domain and coiled-coil containing 1
hsa-miR-519d	0	0	1	1	1	1	ARL13B	ADP-ribosylation factor-like 13B
hsa-miR-519d	1	0	1	1	1	1	MIER1	mesoderm induction early response 1 homolog (Xenopus laevis)
hsa-miR-519d	0	0	1	0	0	0	ZNF720	zinc finger protein 720
hsa-miR-519d	1	0	1	0	1	1	HNRNPA3	heterogeneous nuclear ribonucleoprotein A3
hsa-miR-519d	0	0	1	1	1	1	SRSF11	serine/arginine-rich splicing factor 11
hsa-miR-519d	0	0	1	1	1	1	YAP1	Yes-associated protein 1
hsa-miR-519d	0	0	1	1	1	1	NEK9	NIMA (never in mitosis gene a)- related kinase 9
hsa-miR-519d	0	0	1	1	1	1	U2AF1	U2 small nuclear RNA auxiliary factor 1
hsa-miR-519d	1	0	1	1	1	1	EHMT1	euchromatic histone-lysine N-methyltransferase 1
hsa-miR-519d	0	0	1	1	1	1	TMEM138	transmembrane protein 138
hsa-miR-519d	1	0	1	0	1	1	GPCPD1	glycerophosphocholine phosphodiesterase GDE1 homolog (S. cerevisiae)
hsa-miR-519d	1	0	1	1	1	1	FAM126A	family with sequence similarity 126, member A
hsa-miR-519d	0	0	1	0	1	1	PLEKHM1P	pleckstrin homology domain containing, family M (with RUN domain) member 1 pseudogene
hsa-miR-519d	0	0	1	1	1	1	CCDC66	coiled-coil domain containing 66
hsa-miR-519d	0	0	1	1	1	1	C12orf50	chromosome 12 open reading frame 50
hsa-miR-519d	0	0	1	1	0	0	TMEM116	transmembrane protein 116
hsa-miR-519d	1	0	1	1	1	1	MARCH7	membrane-associated ring finger (C3HC4) 7, E3 ubiquitin protein ligase
hsa-miR-519d	0	0	1	1	1	1	BRD9	bromodomain containing 9
hsa-miR-519d	1	0	1	1	1	1	STXBP5	syntaxin binding protein 5 (tomosyn)
hsa-miR-519d	0	0	1	1	1	1	C8orf34	chromosome 8 open reading frame 34
hsa-miR-519d	1	0	1	1	1	1	MSANTD4	Myb/SANT-like DNA-binding domain containing 4 with coiled-coils
hsa-miR-519d	1	0	1	0	1	1	NR3C1	nuclear receptor subfamily 3, group C, member 1 (glucocorticoid receptor)
hsa-miR-519d	1	0	1	1	1	1	SET	SET nuclear oncogene
hsa-miR-519d	1	0	1	0	1	1	APOLD1	apolipoprotein L domain containing 1
hsa-miR-519d	1	0	1	1	1	1	PPP3CA	protein phosphatase 3, catalytic subunit, alpha isozyme
hsa-miR-519d	1	0	1	1	1	1	IKZF2	IKAROS family zinc finger 2 (Helios)
hsa-miR-519d	1	0	1	1	1	1	RCAN2	regulator of calcineurin 2
hsa-miR-519d	0	0	1	1	0	0	FAM176C	family with sequence similarity 176, member C
hsa-miR-519d	0	0	1	1	1	1	GPRASP1	G protein-coupled receptor associated sorting protein 1
hsa-miR-519d	1	0	1	1	1	1	MIPOL1	mirror-image polydactyly 1
hsa-miR-519d	1	0	1	1	1	1	SORCS1	sortilin-related VPS10 domain containing receptor 1
hsa-miR-519d	1	0	1	1	1	1	CNRIP1	cannabinoid receptor interacting protein 1
hsa-miR-519d	1	0	1	1	1	1	WDR26	WD repeat domain 26
hsa-miR-519d	1	0	1	1	1	1	BCL11A	B-cell CLL/lymphoma 11A (zinc finger protein)
hsa-miR-519d	1	0	1	1	1	1	PBRM1	polybromo 1
hsa-miR-519d	0	0	1	1	1	1	BCOR	BCL6 corepressor
hsa-miR-519d	0	0	1	1	1	1	GCOM1	GRINL1A complex locus 1
hsa-miR-519d	1	0	1	1	1	1	TAB3	TGF-beta activated kinase 1/MAP3K7 binding protein 3
hsa-miR-519d	0	0	1	1	0	0	PDZD11	PDZ domain containing 11
hsa-miR-519d	1	0	1	1	1	1	ANKRD11	ankyrin repeat domain 11
hsa-miR-519d	1	0	1	1	1	1	RBM24	RNA binding motif protein 24
hsa-miR-519d	1	0	1	1	1	1	MOG	myelin oligodendrocyte glycoprotein
hsa-miR-519d	0	0	1	1	1	1	KLK7	kallikrein-related peptidase 7
hsa-miR-519d	1	0	1	1	1	1	CYFIP1	cytoplasmic FMR1 interacting protein 1
hsa-miR-519d	1	0	1	1	1	1	QKI	QKI, KH domain containing, RNA binding
hsa-miR-519d	1	0	1	1	1	1	CD109	CD109 molecule
hsa-miR-519d	1	0	1	1	0	0	TAF4B	TAF4b RNA polymerase II, TATA box binding protein (TBP)-associated factor, 105kDa
hsa-miR-519d	0	0	1	1	1	1	IYD	iodotyrosine deiodinase
hsa-miR-519d	1	0	1	1	1	1	AMOT	angiomotin
hsa-miR-519d	0	0	1	1	1	1	SNX11	sorting nexin 11
hsa-miR-519d	0	0	1	1	1	1	TFG	TRK-fused gene
hsa-miR-519d	1	0	1	1	1	1	TSPAN14	tetraspanin 14
hsa-miR-519d	0	0	1	1	1	1	FTO	fat mass and obesity associated
hsa-miR-519d	1	0	1	0	1	1	CGGBP1	CGG triplet repeat binding protein 1
hsa-miR-519d	0	0	1	1	0	0	PNLIPRP1	pancreatic lipase-related protein 1
hsa-miR-519d	0	0	1	1	0	0	PRR11	proline rich 11
hsa-miR-519d	0	0	1	1	1	1	TMEM30A	transmembrane protein 30A
hsa-miR-519d	0	0	1	0	0	0	ATXN7L3B	ataxin 7-like 3B
hsa-miR-519d	1	0	1	1	0	0	BSCL2	Berardinelli-Seip congenital lipodystrophy 2 (seipin)
hsa-miR-519d	1	0	1	1	0	0	FA2H	fatty acid 2-hydroxylase
hsa-miR-519d	0	0	1	1	0	0	TCN2	transcobalamin II
hsa-miR-519d	0	0	1	1	1	1	GNL3L	guanine nucleotide binding protein-like 3 (nucleolar)-like
hsa-miR-519d	0	0	1	0	0	0	GRAMD1B	GRAM domain containing 1B
hsa-miR-519d	0	0	1	1	1	1	PCNP	PEST proteolytic signal containing nuclear protein
hsa-miR-519d	1	0	1	1	1	1	ETF1	eukaryotic translation termination factor 1
hsa-miR-519d	0	0	1	0	1	1	AHI1	Abelson helper integration site 1
hsa-miR-519d	0	0	1	1	0	0	ACAD10	acyl-CoA dehydrogenase family, member 10
hsa-miR-519d	0	0	1	0	0	0	KLHL15	kelch-like 15 (Drosophila)
hsa-miR-519d	0	0	1	0	0	0	NUDT16P1	nudix (nucleoside diphosphate linked moiety X)-type motif 16 pseudogene 1
hsa-miR-519d	0	0	1	1	0	0	MAST2	microtubule associated serine/threonine kinase 2
hsa-miR-519d	0	0	1	1	1	1	MBIP	MAP3K12 binding inhibitory protein 1
hsa-miR-519d	0	0	1	1	1	1	CSDE1	cold shock domain containing E1, RNA-binding
hsa-miR-519d	0	0	1	0	0	0	LOC100144602	uncharacterized LOC100144602
hsa-miR-519d	0	0	1	1	1	1	RDH11	retinol dehydrogenase 11 (all-trans/9-cis/11-cis)
hsa-miR-519d	0	0	1	0	0	0	FAM200B	family with sequence similarity 200, member B
hsa-miR-519d	0	0	1	0	1	1	CD99P1	CD99 molecule pseudogene 1
hsa-miR-519d	1	0	1	1	1	1	WHSC1	Wolf-Hirschhorn syndrome candidate 1
hsa-miR-519d	0	0	1	0	0	0	SNX29P2	sorting nexin 29 pseudogene 2
hsa-miR-519d	0	0	1	0	0	0	FLJ35390	uncharacterized LOC255031
hsa-miR-519d	1	0	1	1	1	1	NIPA1	non imprinted in Prader-Willi/Angelman syndrome 1
hsa-miR-519d	0	0	1	0	0	0	ZBED3-AS1	ZBED3 antisense RNA 1
hsa-miR-519d	0	0	1	1	1	1	MAP2	microtubule-associated protein 2
hsa-miR-519d	0	0	1	1	1	1	ZNF589	zinc finger protein 589
hsa-miR-519d	0	0	1	1	1	1	CASC1	cancer susceptibility candidate 1
hsa-miR-519d	1	0	1	0	1	1	NCAM1	neural cell adhesion molecule 1
hsa-miR-519d	0	0	1	0	0	0	C3orf55	chromosome 3 open reading frame 55
hsa-miR-519d	0	0	1	1	0	0	SWI5	SWI5 recombination repair homolog (yeast)
hsa-miR-519d	0	0	1	1	1	1	PIP5K1B	phosphatidylinositol-4-phosphate 5-kinase, type I, beta
hsa-miR-519d	1	0	1	1	1	1	ELAVL2	ELAV (embryonic lethal, abnormal vision, Drosophila)-like 2 (Hu antigen B)
hsa-miR-519d	1	0	1	1	1	1	MUM1L1	melanoma associated antigen (mutated) 1-like 1
hsa-miR-519d	1	0	1	1	1	1	RCOR3	REST corepressor 3
hsa-miR-519d	0	0	1	1	1	1	C7orf53	chromosome 7 open reading frame 53
hsa-miR-519d	0	0	1	1	1	1	SNX17	sorting nexin 17
hsa-miR-519d	1	0	1	1	1	1	DCLK2	doublecortin-like kinase 2
hsa-miR-519d	1	0	1	0	1	1	KCTD2	potassium channel tetramerisation domain containing 2
hsa-miR-519d	1	0	1	1	1	1	ATF7IP2	activating transcription factor 7 interacting protein 2
hsa-miR-519d	0	0	1	1	0	0	TNMD	tenomodulin
hsa-miR-519d	1	0	1	1	1	1	CUL1	cullin 1
hsa-miR-519d	1	0	1	0	1	1	DDX3Y	DEAD (Asp-Glu-Ala-Asp) box polypeptide 3, Y-linked
hsa-miR-519d	0	0	1	1	1	1	APBB1IP	amyloid beta (A4) precursor protein-binding, family B, member 1 interacting protein
hsa-miR-519d	0	0	1	1	0	0	PGS1	phosphatidylglycerophosphate synthase 1
hsa-miR-519d	1	0	1	1	1	1	ZEB2	zinc finger E-box binding homeobox 2
hsa-miR-519d	0	0	1	0	0	0	HOXA-AS2	HOXA cluster antisense RNA 2
hsa-miR-519d	0	0	1	1	1	1	CLEC12B	C-type lectin domain family 12, member B
hsa-miR-519d	1	0	1	1	1	1	LMO7	LIM domain 7
hsa-miR-519d	1	0	1	0	1	1	NEGR1	neuronal growth regulator 1
hsa-miR-519d	1	0	1	0	1	1	CPEB4	cytoplasmic polyadenylation element binding protein 4
hsa-miR-519d	0	0	1	0	0	0	LOC286184	uncharacterized LOC286184
hsa-miR-519d	1	0	1	1	1	1	SLC35F3	solute carrier family 35, member F3
hsa-miR-519d	0	0	1	0	0	0	LOC100134868	uncharacterized LOC100134868
hsa-miR-519d	0	0	1	1	1	1	SLTM	SAFB-like, transcription modulator
hsa-miR-519d	0	0	1	1	1	1	SLC14A1	solute carrier family 14 (urea transporter), member 1 (Kidd blood group)
hsa-miR-519d	1	0	1	1	1	1	BVES	blood vessel epicardial substance
hsa-miR-519d	0	0	1	1	0	0	SLC13A4	solute carrier family 13 (sodium/sulfate symporters), member 4
hsa-miR-519d	1	0	1	1	1	1	ARPP21	cAMP-regulated phosphoprotein, 21kDa
hsa-miR-519d	0	0	1	0	0	0	LOC154092	uncharacterized LOC154092
hsa-miR-519d	0	0	1	1	0	0	FAM159A	family with sequence similarity 159, member A
hsa-miR-519d	1	0	1	0	1	1	DCUN1D4	DCN1, defective in cullin neddylation 1, domain containing 4 (S. cerevisiae)
hsa-miR-519d	1	0	1	1	1	1	FKBP5	FK506 binding protein 5
hsa-miR-519d	0	0	1	0	1	1	C12orf74	chromosome 12 open reading frame 74
hsa-miR-519d	0	0	1	1	1	1	MICB	MHC class I polypeptide-related sequence B
hsa-miR-519d	1	0	1	1	1	1	AGAP3	ArfGAP with GTPase domain, ankyrin repeat and PH domain 3
hsa-miR-519d	1	0	1	1	1	1	RNF145	ring finger protein 145
hsa-miR-519d	0	0	1	1	1	1	MYO3A	myosin IIIA
hsa-miR-519d	1	0	1	1	1	1	MAMDC2	MAM domain containing 2
hsa-miR-519d	0	0	1	0	0	0	LOC283914	uncharacterized LOC283914
hsa-miR-519d	1	0	1	1	1	1	SENP1	SUMO1/sentrin specific peptidase 1
hsa-miR-519d	0	0	1	0	0	0	INHBA-AS1	INHBA antisense RNA 1
hsa-miR-519d	1	0	1	1	1	1	RTKN2	rhotekin 2
hsa-miR-519d	0	0	1	1	1	1	ZNF74	zinc finger protein 74
hsa-miR-519d	1	0	1	1	1	1	ANKRD46	ankyrin repeat domain 46
hsa-miR-519d	0	0	1	0	0	0	BMS1P6	BMS1 pseudogene 6
hsa-miR-519d	1	0	1	1	1	1	YWHAZ	tyrosine 3-monooxygenase/tryptophan 5-monooxygenase activation protein, zeta polypeptide
hsa-miR-519d	1	0	1	1	1	1	PCGF5	polycomb group ring finger 5
hsa-miR-519d	1	0	1	0	1	1	C14orf43	chromosome 14 open reading frame 43
hsa-miR-519d	1	0	1	1	1	1	ATP8B4	ATPase, class I, type 8B, member 4
hsa-miR-519d	0	0	1	1	0	0	AGAP11	ankyrin repeat and GTPase domain Arf GTPase activating protein 11
hsa-miR-519d	0	0	1	0	0	0	GNN	Grp94 neighboring nucleotidase pseudogene
hsa-miR-519d	0	0	1	1	1	1	ZNF333	zinc finger protein 333
hsa-miR-519d	0	0	1	0	0	0	LOC158435	uncharacterized LOC158435
hsa-miR-519d	0	0	1	1	0	0	PLAC1	placenta-specific 1
hsa-miR-519d	0	0	1	1	1	1	KCTD18	potassium channel tetramerisation domain containing 18
hsa-miR-519d	1	0	1	0	1	1	MAGIX	MAGI family member, X-linked
hsa-miR-519d	1	0	1	1	1	1	PDCD6IP	programmed cell death 6 interacting protein
hsa-miR-519d	1	0	1	1	1	1	SLC26A7	solute carrier family 26, member 7
hsa-miR-519d	1	0	1	1	1	1	MYEF2	myelin expression factor 2
hsa-miR-519d	0	0	1	1	1	1	AQPEP	laeverin
hsa-miR-519d	0	0	1	1	1	1	C21orf62	chromosome 21 open reading frame 62
hsa-miR-519d	1	0	1	1	0	0	CHTOP	chromatin target of PRMT1
hsa-miR-519d	0	0	1	1	1	1	SLC11A1	solute carrier family 11 (proton-coupled divalent metal ion transporters), member 1
hsa-miR-519d	1	0	1	1	1	1	USP47	ubiquitin specific peptidase 47
hsa-miR-519d	0	0	1	0	0	0	JPX	JPX transcript, XIST activator (non-protein coding)
hsa-miR-519d	1	0	1	1	1	1	OPCML	opioid binding protein/cell adhesion molecule-like
hsa-miR-519d	0	0	1	0	0	0	LINC00537	long intergenic non-protein coding RNA 537
hsa-miR-519d	1	0	1	1	1	1	ACVR2B	activin A receptor, type IIB
hsa-miR-519d	1	0	1	0	1	1	VANGL2	vang-like 2 (van gogh, Drosophila)
hsa-miR-519d	0	0	1	1	0	0	TMC1	transmembrane channel-like 1
hsa-miR-519d	0	0	1	0	0	0	GUSBP9	glucuronidase, beta pseudogene 9
hsa-miR-519d	0	0	1	1	1	1	CCDC126	coiled-coil domain containing 126
hsa-miR-519d	1	0	1	0	0	0	PWWP2A	PWWP domain containing 2A
hsa-miR-519d	1	0	1	1	1	1	SUV420H1	suppressor of variegation 4-20 homolog 1 (Drosophila)
hsa-miR-519d	1	0	1	0	1	1	BTBD3	BTB (POZ) domain containing 3
hsa-miR-519d	1	0	1	0	1	1	KIF5C	kinesin family member 5C
hsa-miR-519d	1	0	1	1	1	1	TET2	tet methylcytosine dioxygenase 2
hsa-miR-519d	1	0	1	1	1	1	PPP4R2	protein phosphatase 4, regulatory subunit 2
hsa-miR-519d	1	0	1	1	1	1	SLK	STE20-like kinase
hsa-miR-519d	0	0	1	0	0	0	LRRC37A11P	leucine rich repeat containing 37, member A11, pseudogene
hsa-miR-519d	1	0	1	0	1	1	CAMSAP2	calmodulin regulated spectrin-associated protein family, member 2
hsa-miR-519d	1	0	1	1	1	1	ANK2	ankyrin 2, neuronal
hsa-miR-519d	0	0	1	1	1	1	SLC22A23	solute carrier family 22, member 23
hsa-miR-519d	1	0	1	0	1	1	LHFPL3	lipoma HMGIC fusion partner-like 3
hsa-miR-519d	0	0	1	1	0	0	HSF4	heat shock transcription factor 4
hsa-miR-519d	0	0	1	0	0	0	FAM225B	family with sequence similarity 225, member B (non-protein coding)
hsa-miR-519d	0	0	1	0	0	0	SMA4	glucuronidase, beta pseudogene
hsa-miR-519d	0	0	1	1	0	0	TCHH	trichohyalin
hsa-miR-519d	0	0	1	0	0	0	FUT8-AS1	FUT8 antisense RNA 1
hsa-miR-519d	0	0	1	0	0	0	LOC100133207	uncharacterized LOC100133207
hsa-miR-519d	0	0	1	0	0	0	ADCY10P1	adenylate cyclase 10 (soluble) pseudogene 1
hsa-miR-519d	1	0	1	1	1	1	ATP2B4	ATPase, Ca++ transporting, plasma membrane 4
hsa-miR-519d	1	0	1	1	1	1	RAB7A	RAB7A, member RAS oncogene family
hsa-miR-519d	0	0	1	0	1	1	FEZ2	fasciculation and elongation protein zeta 2 (zygin II)
hsa-miR-519d	0	0	1	0	0	0	RGPD4	RANBP2-like and GRIP domain containing 4
hsa-miR-519d	1	0	1	1	1	1	SGCD	sarcoglycan, delta (35kDa dystrophin-associated glycoprotein)
hsa-miR-519d	1	0	1	1	0	0	CCDC30	coiled-coil domain containing 30
hsa-miR-519d	1	0	1	1	1	1	SLC35F1	solute carrier family 35, member F1
hsa-miR-519d	0	0	1	1	1	1	THSD4	thrombospondin, type I, domain containing 4
hsa-miR-519d	1	0	1	1	1	1	RORB	RAR-related orphan receptor B
hsa-miR-519d	0	0	1	1	1	1	PRR14L	proline rich 14-like
hsa-miR-519d	0	0	1	1	1	1	C5orf45	chromosome 5 open reading frame 45
hsa-miR-519d	0	0	1	1	1	1	PPP1R1C	protein phosphatase 1, regulatory (inhibitor) subunit 1C
hsa-miR-519d	1	0	1	1	1	1	S100PBP	S100P binding protein
hsa-miR-519d	1	0	1	1	1	1	EPS15	epidermal growth factor receptor pathway substrate 15
hsa-miR-519d	1	0	1	1	1	1	KLHL2	kelch-like 2, Mayven (Drosophila)
hsa-miR-519d	1	0	1	1	1	1	CYB5B	cytochrome b5 type B (outer mitochondrial membrane)
hsa-miR-519d	0	0	1	0	0	0	OVOS	ovostatin
hsa-miR-519d	0	0	1	1	1	1	CCNT2	cyclin T2
hsa-miR-519d	1	0	1	1	1	1	C5orf24	chromosome 5 open reading frame 24
hsa-miR-519d	0	0	1	1	1	1	DAZL	deleted in azoospermia-like
hsa-miR-519d	1	0	1	1	1	1	PGAP1	post-GPI attachment to proteins 1
hsa-miR-519d	0	0	1	1	1	1	ABCD3	ATP-binding cassette, sub-family D (ALD), member 3
hsa-miR-519d	0	0	1	1	1	1	SSFA2	sperm specific antigen 2
hsa-miR-519d	1	0	1	0	1	1	TBL1XR1	transducin (beta)-like 1 X-linked receptor 1
hsa-miR-519d	0	0	1	1	1	1	CDC123	cell division cycle 123 homolog (S. cerevisiae)
hsa-miR-519d	0	0	1	1	1	1	UPRT	uracil phosphoribosyltransferase (FUR1) homolog (S. cerevisiae)
hsa-miR-519d	0	0	1	1	0	0	TBC1D22A	TBC1 domain family, member 22A
hsa-miR-519d	0	0	1	1	1	1	IER3	immediate early response 3
hsa-miR-519d	1	0	1	1	1	1	RAP1A	RAP1A, member of RAS oncogene family
hsa-miR-519d	0	0	1	1	0	0	CCNDBP1	cyclin D-type binding-protein 1
hsa-miR-519d	0	0	1	1	1	1	ATP5F1	ATP synthase, H+ transporting, mitochondrial Fo complex, subunit B1
hsa-miR-519d	1	0	1	1	1	1	RASL12	RAS-like, family 12
hsa-miR-519d	0	0	1	1	1	1	TASP1	taspase, threonine aspartase, 1
hsa-miR-519d	1	0	1	1	1	1	CAAP1	caspase activity and apoptosis inhibitor 1
hsa-miR-519d	0	0	1	1	1	1	CD99	CD99 molecule
hsa-miR-519d	0	0	1	1	0	0	RPL7L1	ribosomal protein L7-like 1
hsa-miR-519d	0	0	1	1	0	0	CGRRF1	cell growth regulator with ring finger domain 1
hsa-miR-519d	1	0	1	1	1	1	DRAM2	DNA-damage regulated autophagy modulator 2
hsa-miR-519d	1	0	1	1	1	1	NTM	neurotrimin
hsa-miR-519d	0	0	1	1	1	1	GRAP2	GRB2-related adaptor protein 2
hsa-miR-519d	1	0	1	1	1	1	PCTP	phosphatidylcholine transfer protein
hsa-miR-519d	1	0	1	1	0	0	RNF24	ring finger protein 24
hsa-miR-519d	1	0	1	1	1	1	MTCH2	mitochondrial carrier 2
hsa-miR-519d	0	0	1	1	0	0	RNASEH2B	ribonuclease H2, subunit B
hsa-miR-519d	0	0	1	1	1	1	PEX19	peroxisomal biogenesis factor 19
hsa-miR-519d	0	0	1	1	1	1	TRMT61B	tRNA methyltransferase 61 homolog B (S. cerevisiae)
hsa-miR-519d	0	0	1	1	1	1	DEDD	death effector domain containing
hsa-miR-519d	1	0	1	1	1	1	PPP3CB	protein phosphatase 3, catalytic subunit, beta isozyme
hsa-miR-519d	1	0	1	1	1	1	FUBP3	far upstream element (FUSE) binding protein 3
hsa-miR-519d	0	0	1	1	1	1	CTSK	cathepsin K
hsa-miR-519d	1	0	1	1	1	1	SYAP1	synapse associated protein 1
hsa-miR-519d	1	0	1	1	1	1	RBBP7	retinoblastoma binding protein 7
hsa-miR-519d	1	0	1	1	1	1	ARHGEF40	Rho guanine nucleotide exchange factor (GEF) 40
hsa-miR-519d	0	0	1	1	1	1	FAM18B1	family with sequence similarity 18, member B1
hsa-miR-519d	0	0	1	1	0	0	OXA1L	oxidase (cytochrome c) assembly 1-like
hsa-miR-519d	1	0	1	1	1	1	HSPD1	heat shock 60kDa protein 1 (chaperonin)
hsa-miR-519d	0	0	1	1	0	0	GPC3	glypican 3
hsa-miR-519d	0	0	1	1	1	1	PLAC8	placenta-specific 8
hsa-miR-519d	1	0	1	0	1	1	CD47	CD47 molecule
hsa-miR-519d	1	0	1	1	0	0	RUNDC3A	RUN domain containing 3A
hsa-miR-519d	1	0	1	1	1	1	MAN1C1	mannosidase, alpha, class 1C, member 1
hsa-miR-519d	0	0	1	1	1	1	COMMD3	COMM domain containing 3
hsa-miR-519d	1	0	1	1	1	1	LHX9	LIM homeobox 9
hsa-miR-519d	0	0	1	1	1	1	C9orf3	chromosome 9 open reading frame 3
hsa-miR-519d	1	0	1	1	1	1	SLMAP	sarcolemma associated protein
hsa-miR-519d	0	0	1	1	1	1	CCP110	centriolar coiled coil protein 110kDa
hsa-miR-519d	0	0	1	1	1	1	ATG5	autophagy related 5
hsa-miR-519d	1	0	1	1	1	1	SNRK	SNF related kinase
hsa-miR-519d	1	0	1	1	1	1	TIPARP	TCDD-inducible poly(ADP-ribose) polymerase
hsa-miR-519d	1	0	1	1	1	1	ZFHX3	zinc finger homeobox 3
hsa-miR-519d	1	0	1	0	1	1	CBX7	chromobox homolog 7
hsa-miR-519d	0	0	1	1	1	1	PTGS1	prostaglandin-endoperoxide synthase 1 (prostaglandin G/H synthase and cyclooxygenase)
hsa-miR-519d	0	0	1	1	1	1	BBOX1	butyrobetaine (gamma), 2-oxoglutarate dioxygenase (gamma-butyrobetaine hydroxylase) 1
hsa-miR-519d	0	0	1	1	1	1	MARVELD2	MARVEL domain containing 2
hsa-miR-519d	0	0	1	1	1	1	EIF1AY	eukaryotic translation initiation factor 1A, Y-linked
hsa-miR-519d	0	0	1	1	0	0	CCNA1	cyclin A1
hsa-miR-519d	1	0	1	0	1	1	EPDR1	ependymin related protein 1 (zebrafish)
hsa-miR-519d	0	0	1	1	1	1	ALDH3B1	aldehyde dehydrogenase 3 family, member B1
hsa-miR-519d	1	0	1	1	1	1	MLL	myeloid/lymphoid or mixed-lineage leukemia (trithorax homolog, Drosophila)
hsa-miR-519d	0	0	1	1	0	0	INHBA	inhibin, beta A
hsa-miR-519d	1	0	1	0	1	1	BCL2	B-cell CLL/lymphoma 2
hsa-miR-519d	1	0	1	1	1	1	IGF1	insulin-like growth factor 1 (somatomedin C)
hsa-miR-519d	0	0	1	1	1	1	ELF1	E74-like factor 1 (ets domain transcription factor)
hsa-miR-519d	1	0	1	1	1	1	CD44	CD44 molecule (Indian blood group)
hsa-miR-519d	0	0	1	1	1	1	CD3G	CD3g molecule, gamma (CD3-TCR complex)
hsa-miR-519d	1	0	1	1	1	1	COL4A4	collagen, type IV, alpha 4
hsa-miR-519d	1	0	1	1	1	1	CPOX	coproporphyrinogen oxidase
hsa-miR-519d	1	0	1	1	1	1	CYP19A1	cytochrome P450, family 19, subfamily A, polypeptide 1
hsa-miR-519d	1	0	1	1	1	1	DMD	dystrophin
hsa-miR-519d	1	0	1	1	1	1	ESR1	estrogen receptor 1
hsa-miR-519d	1	0	1	1	1	1	GJA1	gap junction protein, alpha 1, 43kDa
hsa-miR-519d	1	0	1	1	1	1	GK	glycerol kinase
hsa-miR-519d	1	0	1	1	1	1	KCNA1	potassium voltage-gated channel, shaker-related subfamily, member 1 (episodic ataxia with myokymia)
hsa-miR-519d	1	0	1	1	1	1	LEP	leptin
hsa-miR-519d	0	0	1	1	1	1	MTR	5-methyltetrahydrofolate-homocysteine methyltransferase
hsa-miR-519d	0	0	1	1	1	1	NDP	Norrie disease (pseudoglioma)
hsa-miR-519d	1	0	1	1	1	1	PTH	parathyroid hormone
hsa-miR-519d	0	0	1	1	1	1	SRD5A2	steroid-5-alpha-reductase, alpha polypeptide 2 (3-oxo-5 alpha-steroid delta 4-dehydrogenase alpha 2)
hsa-miR-519d	0	0	1	1	0	0	APOB	apolipoprotein B (including Ag(x) antigen)
hsa-miR-519d	0	0	1	1	1	1	SLC25A20	solute carrier family 25 (carnitine/acylcarnitine translocase), member 20
hsa-miR-519d	1	0	1	0	1	1	CYBB	cytochrome b-245, beta polypeptide
hsa-miR-519d	1	0	1	1	1	1	HLCS	holocarboxylase synthetase (biotin-(proprionyl-CoA-carboxylase (ATP-hydrolysing)) ligase)
hsa-miR-519d	0	0	1	1	0	0	KEL	Kell blood group, metallo-endopeptidase
hsa-miR-519d	1	0	1	1	1	1	ATRX	alpha thalassemia/mental retardation syndrome X-linked
hsa-miR-519d	0	0	1	1	1	1	VHL	von Hippel-Lindau tumor suppressor, E3 ubiquitin protein ligase
hsa-miR-519d	1	0	1	1	1	1	FASLG	Fas ligand (TNF superfamily, member 6)
hsa-miR-519d	1	0	1	1	1	1	GABRB3	gamma-aminobutyric acid (GABA) A receptor, beta 3
hsa-miR-519d	1	0	1	1	1	1	GRM7	glutamate receptor, metabotropic 7
hsa-miR-519d	1	0	1	1	1	1	IGF1R	insulin-like growth factor 1 receptor
hsa-miR-519d	1	0	1	1	1	1	UGP2	UDP-glucose pyrophosphorylase 2
hsa-miR-519d	1	0	1	1	1	1	MIR22HG	MIR22 host gene (non-protein coding)
hsa-miR-519d	0	0	1	1	1	1	SMAD1	SMAD family member 1
hsa-miR-519d	1	0	1	1	1	1	KLHL31	kelch-like 31 (Drosophila)
hsa-miR-519d	1	0	1	1	1	1	RBMS3	RNA binding motif, single stranded interacting protein 3
hsa-miR-519d	0	0	1	1	1	1	CCDC144NL	coiled-coil domain containing 144 family, N-terminal like
hsa-miR-519d	0	0	1	1	1	1	ZCCHC16	zinc finger, CCHC domain containing 16
hsa-miR-519d	1	0	1	1	1	1	NRARP	NOTCH-regulated ankyrin repeat protein
hsa-miR-519d	1	0	1	0	1	1	LRRC55	leucine rich repeat containing 55
hsa-miR-519d	1	0	1	1	1	1	EDA	ectodysplasin A
hsa-miR-519d	0	0	1	1	1	1	SUMO1	SMT3 suppressor of mif two 3 homolog 1 (S. cerevisiae)
hsa-miR-519d	1	0	1	0	1	1	PDPN	podoplanin
hsa-miR-519d	0	0	1	1	1	1	APOBEC3F	apolipoprotein B mRNA editing enzyme, catalytic polypeptide-like 3F
hsa-miR-519d	0	0	1	1	1	1	SCP2	sterol carrier protein 2
hsa-miR-519d	1	0	1	1	1	1	BRWD1	bromodomain and WD repeat domain containing 1
hsa-miR-519d	0	0	1	1	1	1	TRIM13	tripartite motif containing 13
hsa-miR-519d	0	0	1	0	1	1	C3orf56	chromosome 3 open reading frame 56
hsa-miR-519d	1	0	1	1	1	1	CNOT4	CCR4-NOT transcription complex, subunit 4
hsa-miR-519d	1	0	1	0	1	1	C18orf25	chromosome 18 open reading frame 25
hsa-miR-519d	1	0	1	1	1	1	CTDSPL	CTD (carboxy-terminal domain, RNA polymerase II, polypeptide A) small phosphatase-like
hsa-miR-519d	0	0	1	1	1	1	CXCR4	chemokine (C-X-C motif) receptor 4
hsa-miR-519d	0	0	1	1	1	1	MXI1	MAX interactor 1
hsa-miR-519d	0	0	1	1	1	1	GCSAM	germinal center-associated, signaling and motility
hsa-miR-519d	0	0	1	1	1	1	SLC35D3	solute carrier family 35, member D3
hsa-miR-519d	1	0	1	1	1	1	SHE	Src homology 2 domain containing E
hsa-miR-519d	1	0	1	1	1	1	BCL2L15	BCL2-like 15
hsa-miR-519d	1	0	1	0	1	1	FYTTD1	forty-two-three domain containing 1
hsa-miR-519d	1	0	1	1	0	0	MCCD1	mitochondrial coiled-coil domain 1
hsa-miR-519d	0	0	1	1	1	1	BEX5	brain expressed, X-linked 5
hsa-miR-519d	0	0	1	1	0	0	SATL1	spermidine/spermine N1-acetyl transferase-like 1
hsa-miR-519d	1	0	1	0	1	1	ZKSCAN2	zinc finger with KRAB and SCAN domains 2
hsa-miR-519d	0	0	1	1	1	1	FAM53A	family with sequence similarity 53, member A
hsa-miR-519d	1	0	1	1	1	1	TRNP1	TMF1-regulated nuclear protein 1
hsa-miR-519d	1	0	1	1	1	1	KATNAL1	katanin p60 subunit A-like 1
hsa-miR-519d	1	0	1	0	1	1	GOPC	golgi-associated PDZ and coiled-coil motif containing
hsa-miR-519d	0	0	1	1	1	1	BTBD11	BTB (POZ) domain containing 11
hsa-miR-519d	0	0	1	1	1	1	POLR2M	polymerase (RNA) II (DNA directed) polypeptide M
hsa-miR-519d	0	0	1	0	1	1	TM2D2	TM2 domain containing 2
hsa-miR-519d	1	0	1	1	1	1	RGS7BP	regulator of G-protein signaling 7 binding protein
hsa-miR-519d	1	0	1	1	1	1	OPN5	opsin 5
hsa-miR-519d	1	0	1	1	1	1	CTNS	cystinosin, lysosomal cystine transporter
hsa-miR-519d	0	0	1	1	1	1	VSTM4	V-set and transmembrane domain containing 4
hsa-miR-519d	1	0	1	1	1	1	NPM1	nucleophosmin (nucleolar phosphoprotein B23, numatrin)
hsa-miR-519d	1	0	1	0	1	1	CDC42SE1	CDC42 small effector 1
hsa-miR-519d	0	0	1	0	0	0	FER1L6	fer-1-like 6 (C. elegans)
hsa-miR-519d	1	0	1	1	1	1	KIAA0317	KIAA0317
hsa-miR-519d	1	0	1	1	1	1	KCNC4	potassium voltage-gated channel, Shaw-related subfamily, member 4
hsa-miR-519d	0	0	1	1	1	1	MAP9	microtubule-associated protein 9
hsa-miR-519d	1	0	1	0	1	1	USP9X	ubiquitin specific peptidase 9, X-linked
hsa-miR-519d	0	0	1	1	1	1	MCHR2	melanin-concentrating hormone receptor 2
hsa-miR-519d	0	0	1	1	1	1	MST4	serine/threonine protein kinase MST4
hsa-miR-519d	0	0	1	1	0	0	TGFB1I1	transforming growth factor beta 1 induced transcript 1
hsa-miR-519d	1	0	1	1	1	1	ERBB4	v-erb-a erythroblastic leukemia viral oncogene homolog 4 (avian)
hsa-miR-519d	1	0	1	0	1	1	SRGAP2	SLIT-ROBO Rho GTPase activating protein 2
hsa-miR-519d	0	0	1	1	1	1	FAM22G	family with sequence similarity 22, member G
hsa-miR-519d	0	0	1	1	1	1	KLK5	kallikrein-related peptidase 5
hsa-miR-519d	0	0	1	1	1	1	XIRP2	xin actin-binding repeat containing 2
hsa-miR-519d	0	0	1	1	1	1	CNGA3	cyclic nucleotide gated channel alpha 3
hsa-miR-519d	1	0	1	1	1	1	DMP1	dentin matrix acidic phosphoprotein 1
hsa-miR-519d	1	0	1	1	1	1	LDB3	LIM domain binding 3
hsa-miR-519d	1	0	1	1	1	1	ZNF629	zinc finger protein 629
hsa-miR-519d	1	0	1	0	1	1	UNC13A	unc-13 homolog A (C. elegans)
hsa-miR-519d	0	0	1	1	1	1	HSF5	heat shock transcription factor family member 5
hsa-miR-519d	1	0	1	0	1	1	MEGF9	multiple EGF-like-domains 9
hsa-miR-519d	1	0	1	0	1	1	SCN3A	sodium channel, voltage-gated, type III, alpha subunit
hsa-miR-519d	1	0	1	0	1	1	KLF9	Kruppel-like factor 9
hsa-miR-519d	1	0	1	1	1	1	CAMK2D	calcium/calmodulin-dependent protein kinase II delta
hsa-miR-519d	1	0	1	0	1	1	CDK6	cyclin-dependent kinase 6
hsa-miR-519d	0	0	1	1	1	1	CHUK	conserved helix-loop-helix ubiquitous kinase
hsa-miR-519d	1	0	1	1	1	1	S1PR1	sphingosine-1-phosphate receptor 1
hsa-miR-519d	1	0	1	1	1	1	AQP4	aquaporin 4
hsa-miR-519d	1	0	1	1	1	1	ARF3	ADP-ribosylation factor 3
hsa-miR-519d	0	0	1	1	1	1	ATP12A	ATPase, H+/K+ transporting, nongastric, alpha polypeptide
hsa-miR-519d	1	0	1	1	1	1	BAAT	bile acid CoA: amino acid N-acyltransferase (glycine N-choloyltransferase)
hsa-miR-519d	0	0	1	1	1	1	BTN1A1	butyrophilin, subfamily 1, member A1
hsa-miR-519d	1	0	1	1	1	1	CBFB	core-binding factor, beta subunit
hsa-miR-519d	1	0	1	1	1	1	CDH11	cadherin 11, type 2, OB-cadherin (osteoblast)
hsa-miR-519d	1	0	1	1	1	1	CLCN4	chloride channel, voltage-sensitive 4
hsa-miR-519d	1	0	1	1	1	1	COL4A1	collagen, type IV, alpha 1
hsa-miR-519d	0	0	1	1	1	1	DLAT	dihydrolipoamide S-acetyltransferase
hsa-miR-519d	1	0	1	1	1	1	DR1	down-regulator of transcription 1, TBP-binding (negative cofactor 2)
hsa-miR-519d	1	0	1	1	1	1	GLRA2	glycine receptor, alpha 2
hsa-miR-519d	1	0	1	1	1	1	ISL1	ISL LIM homeobox 1
hsa-miR-519d	1	0	1	1	1	1	KCNA4	potassium voltage-gated channel, shaker-related subfamily, member 4
hsa-miR-519d	1	0	1	0	1	1	KIF3C	kinesin family member 3C
hsa-miR-519d	0	0	1	1	0	0	LALBA	lactalbumin, alpha-
hsa-miR-519d	1	0	1	0	1	1	LAMC1	laminin, gamma 1 (formerly LAMB2)
hsa-miR-519d	0	0	1	1	1	1	MMP3	matrix metallopeptidase 3 (stromelysin 1, progelatinase)
hsa-miR-519d	0	0	1	1	1	1	MTAP	methylthioadenosine phosphorylase
hsa-miR-519d	1	0	1	1	1	1	NPTX1	neuronal pentraxin I
hsa-miR-519d	0	0	1	0	1	1	OPHN1	oligophrenin 1
hsa-miR-519d	0	0	1	1	1	1	PAFAH1B2	platelet-activating factor acetylhydrolase 1b, catalytic subunit 2 (30kDa)
hsa-miR-519d	1	0	1	0	1	1	PCDHGC3	protocadherin gamma subfamily C, 3
hsa-miR-519d	0	0	1	1	1	1	PDE2A	phosphodiesterase 2A, cGMP-stimulated
hsa-miR-519d	1	0	1	1	0	0	PDGFB	platelet-derived growth factor beta polypeptide
hsa-miR-519d	0	0	1	1	1	1	PF4V1	platelet factor 4 variant 1
hsa-miR-519d	0	0	1	1	1	1	MAPK9	mitogen-activated protein kinase 9
hsa-miR-519d	1	0	1	0	1	1	SORT1	sortilin 1
hsa-miR-519d	0	0	1	1	1	1	SDC2	syndecan 2
hsa-miR-519d	1	0	1	1	1	1	SRSF2	serine/arginine-rich splicing factor 2
hsa-miR-519d	1	0	1	0	1	1	SLC6A1	solute carrier family 6 (neurotransmitter transporter, GABA), member 1
hsa-miR-519d	1	0	1	1	1	1	SMARCD2	SWI/SNF related, matrix associated, actin dependent regulator of chromatin, subfamily d, member 2
hsa-miR-519d	1	0	1	1	1	1	SSR2	signal sequence receptor, beta (translocon-associated protein beta)
hsa-miR-519d	1	0	1	1	1	1	STAC	SH3 and cysteine rich domain
hsa-miR-519d	0	0	1	1	1	1	SULT2A1	sulfotransferase family, cytosolic, 2A, dehydroepiandrosterone (DHEA)-preferring, member 1
hsa-miR-519d	1	0	1	1	1	1	TDG	thymine-DNA glycosylase
hsa-miR-519d	1	0	1	1	1	1	TEC	tec protein tyrosine kinase
hsa-miR-519d	1	0	1	1	1	1	TFAP2B	transcription factor AP-2 beta (activating enhancer binding protein 2 beta)
hsa-miR-519d	1	0	1	1	1	1	UBE2B	ubiquitin-conjugating enzyme E2B
hsa-miR-519d	1	0	1	1	1	1	YWHAH	tyrosine 3-monooxygenase/tryptophan 5-monooxygenase activation protein, eta polypeptide
hsa-miR-519d	0	0	1	1	1	1	ZNF137P	zinc finger protein 137, pseudogene
hsa-miR-519d	1	0	1	1	1	1	ADAM12	ADAM metallopeptidase domain 12
hsa-miR-519d	1	0	1	0	1	1	VAPA	VAMP (vesicle-associated membrane protein)-associated protein A, 33kDa
hsa-miR-519d	1	0	1	1	1	1	BHLHE40	basic helix-loop-helix family, member e40
hsa-miR-519d	0	0	1	1	1	1	KMO	kynurenine 3-monooxygenase (kynurenine 3-hydroxylase)
hsa-miR-519d	1	0	1	1	1	1	EXO1	exonuclease 1
hsa-miR-519d	1	0	1	0	1	1	PCDHGA12	protocadherin gamma subfamily A, 12
hsa-miR-519d	1	0	1	0	1	1	PCDHGB4	protocadherin gamma subfamily B, 4
hsa-miR-519d	1	0	1	0	1	1	TNKS	tankyrase, TRF1-interacting ankyrin-related ADP-ribose polymerase
hsa-miR-519d	0	0	1	1	1	1	JRKL	jerky homolog-like (mouse)
hsa-miR-519d	1	0	1	1	1	1	URI1	URI1, prefoldin-like chaperone
hsa-miR-519d	0	0	1	1	1	1	TRIM24	tripartite motif containing 24
hsa-miR-519d	1	0	1	0	1	1	CDK5R1	cyclin-dependent kinase 5, regulatory subunit 1 (p35)
hsa-miR-519d	0	0	1	1	1	1	RNF8	ring finger protein 8, E3 ubiquitin protein ligase
hsa-miR-519d	1	0	1	1	1	1	CTSS	cathepsin S
hsa-miR-519d	1	0	1	1	1	1	GMFB	glia maturation factor, beta
hsa-miR-519d	1	0	1	1	1	1	HNF4G	hepatocyte nuclear factor 4, gamma
hsa-miR-519d	0	0	1	1	1	1	LBP	lipopolysaccharide binding protein
hsa-miR-519d	1	0	1	0	1	1	CYTH3	cytohesin 3
hsa-miR-519d	0	0	1	1	1	1	CARTPT	CART prepropeptide
hsa-miR-519d	0	0	1	1	1	1	CDH1	cadherin 1, type 1, E-cadherin (epithelial)
hsa-miR-519d	0	0	1	1	1	1	COL12A1	collagen, type XII, alpha 1
hsa-miR-519d	0	0	1	1	1	1	FOXA1	forkhead box A1
hsa-miR-519d	1	0	1	0	1	1	SCN2B	sodium channel, voltage-gated, type II, beta subunit
hsa-miR-519d	1	0	1	1	1	1	WNT11	wingless-type MMTV integration site family, member 11
hsa-miR-519d	0	0	1	0	1	1	CXorf1	chromosome X open reading frame 1
hsa-miR-519d	1	0	1	1	1	1	STK17A	serine/threonine kinase 17a
hsa-miR-519d	1	0	1	1	1	1	B4GALT5	UDP-Gal:betaGlcNAc beta 1,4- galactosyltransferase, polypeptide 5
hsa-miR-519d	0	0	1	1	1	1	ATP6V1G1	ATPase, H+ transporting, lysosomal 13kDa, V1 subunit G1
hsa-miR-519d	1	0	1	1	1	1	GABRE	gamma-aminobutyric acid (GABA) A receptor, epsilon
hsa-miR-519d	1	0	1	1	1	1	ATXN3	ataxin 3
hsa-miR-519d	0	0	1	1	1	1	RGPD5	RANBP2-like and GRIP domain containing 5
hsa-miR-519d	1	0	1	1	1	1	HS3ST1	heparan sulfate (glucosamine) 3-O-sulfotransferase 1
hsa-miR-519d	1	0	1	1	1	1	BMI1	BMI1 polycomb ring finger oncogene
hsa-miR-519d	1	0	1	1	1	1	CRKL	v-crk sarcoma virus CT10 oncogene homolog (avian)-like
hsa-miR-519d	1	0	1	0	1	1	DLX6	distal-less homeobox 6
hsa-miR-519d	1	0	1	1	1	1	GABPB1	GA binding protein transcription factor, beta subunit 1
hsa-miR-519d	1	0	1	1	1	1	HAS3	hyaluronan synthase 3
hsa-miR-519d	1	0	1	0	1	1	PRKAB2	protein kinase, AMP-activated, beta 2 non-catalytic subunit
hsa-miR-519d	1	0	1	0	1	1	CCDC6	coiled-coil domain containing 6
hsa-miR-519d	1	0	1	1	1	1	MLF2	myeloid leukemia factor 2
hsa-miR-519d	1	0	1	1	1	1	MAFB	v-maf musculoaponeurotic fibrosarcoma oncogene homolog B (avian)
hsa-miR-519d	0	0	1	1	1	1	DNAJB6	DnaJ (Hsp40) homolog, subfamily B, member 6
hsa-miR-519d	1	0	1	1	1	1	LAMC2	laminin, gamma 2
hsa-miR-519d	0	0	1	0	1	1	LCP2	lymphocyte cytosolic protein 2 (SH2 domain containing leukocyte protein of 76kDa)
hsa-miR-519d	0	0	1	0	1	1	POU3F2	POU class 3 homeobox 2
hsa-miR-519d	1	0	1	1	1	1	RGS4	regulator of G-protein signaling 4
hsa-miR-519d	1	0	1	1	0	0	DPP3	dipeptidyl-peptidase 3
hsa-miR-519d	1	0	1	0	1	1	SPRY3	sprouty homolog 3 (Drosophila)
hsa-miR-519d	1	0	1	1	1	1	PURA	purine-rich element binding protein A
hsa-miR-519d	1	0	1	1	1	1	MAT2A	methionine adenosyltransferase II, alpha
hsa-miR-519d	0	0	1	1	0	0	PPYR1	pancreatic polypeptide receptor 1
hsa-miR-519d	1	0	1	1	1	1	HS3ST4	heparan sulfate (glucosamine) 3-O-sulfotransferase 4
hsa-miR-519d	0	0	1	1	1	1	TRDN	triadin
hsa-miR-519d	1	0	1	0	1	1	SCML2	sex comb on midleg-like 2 (Drosophila)
hsa-miR-519d	1	0	1	1	1	1	CAPZA2	capping protein (actin filament) muscle Z-line, alpha 2
hsa-miR-519d	0	0	1	1	1	1	CSF2RA	colony stimulating factor 2 receptor, alpha, low-affinity (granulocyte-macrophage)
hsa-miR-519d	0	0	1	1	1	1	PA2G4	proliferation-associated 2G4, 38kDa
hsa-miR-519d	1	0	1	0	1	1	PITPNA	phosphatidylinositol transfer protein, alpha
hsa-miR-519d	1	0	1	1	1	1	NXF1	nuclear RNA export factor 1
hsa-miR-519d	1	0	1	0	1	1	APPBP2	amyloid beta precursor protein (cytoplasmic tail) binding protein 2
hsa-miR-519d	0	0	1	1	1	1	HBXIP	hepatitis B virus x interacting protein
hsa-miR-519d	1	0	1	0	1	1	GNAI3	guanine nucleotide binding protein (G protein), alpha inhibiting activity polypeptide 3
hsa-miR-519d	1	0	1	0	1	1	NCOA2	nuclear receptor coactivator 2
hsa-miR-519d	1	0	1	1	1	1	CTCF	CCCTC-binding factor (zinc finger protein)
hsa-miR-519d	1	0	1	1	1	1	CORIN	corin, serine peptidase
hsa-miR-519d	1	0	1	1	1	1	SRSF10	serine/arginine-rich splicing factor 10
hsa-miR-519d	0	0	1	1	1	1	FGL2	fibrinogen-like 2
hsa-miR-519d	1	0	1	1	1	1	DIAPH2	diaphanous homolog 2 (Drosophila)
hsa-miR-519d	1	0	1	1	1	1	HIVEP2	human immunodeficiency virus type I enhancer binding protein 2
hsa-miR-519d	1	0	1	1	1	1	PPP1R1A	protein phosphatase 1, regulatory (inhibitor) subunit 1A
hsa-miR-519d	1	0	1	1	1	1	KAT6A	K(lysine) acetyltransferase 6A
hsa-miR-519d	1	0	1	1	1	1	CBX1	chromobox homolog 1
hsa-miR-519d	0	0	1	1	1	1	PKIA	protein kinase (cAMP-dependent, catalytic) inhibitor alpha
hsa-miR-519d	1	0	1	1	1	1	FERMT2	fermitin family member 2
hsa-miR-519d	1	0	1	1	1	1	RIT1	Ras-like without CAAX 1
hsa-miR-519d	1	0	1	1	1	1	SKP1	S-phase kinase-associated protein 1
hsa-miR-519d	1	0	1	0	1	1	SOX12	SRY (sex determining region Y)-box 12
hsa-miR-519d	1	0	1	0	1	1	WASF2	WAS protein family, member 2
hsa-miR-519d	0	0	1	1	1	1	RPP14	ribonuclease P/MRP 14kDa subunit
hsa-miR-519d	1	0	1	1	1	1	KAT7	K(lysine) acetyltransferase 7
hsa-miR-519d	1	0	1	1	1	1	ZNF81	zinc finger protein 81
hsa-miR-519d	0	0	1	0	1	1	ZXDB	zinc finger, X-linked, duplicated B
hsa-miR-519d	1	0	1	1	1	1	PALM2-AKAP2	PALM2-AKAP2 readthrough
hsa-miR-519d	1	0	1	0	1	1	CHP1	calcineurin-like EF hand protein 1
hsa-miR-519d	0	0	1	0	1	1	PAXIP1	PAX interacting (with transcription-activation domain) protein 1
hsa-miR-519d	1	0	1	1	1	1	CASC3	cancer susceptibility candidate 3
hsa-miR-519d	1	0	1	1	1	1	FBXL3	F-box and leucine-rich repeat protein 3
hsa-miR-519d	1	0	1	1	1	1	RABGAP1	RAB GTPase activating protein 1
hsa-miR-519d	1	0	1	1	1	1	MGAT4A	mannosyl (alpha-1,3-)-glycoprotein beta-1,4-N-acetylglucosaminyltransferase, isozyme A
hsa-miR-519d	1	0	1	1	1	1	HEY2	hairy/enhancer-of-split related with YRPW motif 2
hsa-miR-519d	1	0	1	0	1	1	PXDN	peroxidasin homolog (Drosophila)
hsa-miR-519d	1	0	1	0	1	1	G3BP2	GTPase activating protein (SH3 domain) binding protein 2
hsa-miR-519d	1	0	1	0	1	1	BLOC1S6	biogenesis of lysosomal organelles complex-1, subunit 6, pallidin
hsa-miR-519d	1	0	1	1	1	1	RGS17	regulator of G-protein signaling 17
hsa-miR-519d	0	0	1	0	1	1	TLL1	tolloid-like 1
hsa-miR-519d	1	0	1	1	1	1	TLL2	tolloid-like 2
hsa-miR-519d	1	0	1	1	1	1	YWHAG	tyrosine 3-monooxygenase/tryptophan 5-monooxygenase activation protein, gamma polypeptide
hsa-miR-519d	1	0	1	0	1	1	FLRT2	fibronectin leucine rich transmembrane protein 2
hsa-miR-519d	1	0	1	1	1	1	PADI1	peptidyl arginine deiminase, type I
hsa-miR-519d	0	0	1	1	1	1	ABT1	activator of basal transcription 1
hsa-miR-519d	0	0	1	1	1	1	UBQLN2	ubiquilin 2
hsa-miR-519d	0	0	1	0	1	1	EMR2	egf-like module containing, mucin-like, hormone receptor-like 2
hsa-miR-519d	1	0	1	1	1	1	SOCS5	suppressor of cytokine signaling 5
hsa-miR-519d	1	0	1	1	1	1	ASF1A	ASF1 anti-silencing function 1 homolog A (S. cerevisiae)
hsa-miR-519d	0	0	1	1	0	0	MCTS1	malignant T cell amplified sequence 1
hsa-miR-519d	0	0	1	1	1	1	CCDC113	coiled-coil domain containing 113
hsa-miR-519d	1	0	1	1	1	1	PATZ1	POZ (BTB) and AT hook containing zinc finger 1
hsa-miR-519d	0	0	1	1	1	1	DAPK2	death-associated protein kinase 2
hsa-miR-519d	1	0	1	1	1	1	SLC7A11	solute carrier family 7 (anionic amino acid transporter light chain, xc- system), member 11
hsa-miR-519d	0	0	1	1	1	1	LAMP3	lysosomal-associated membrane protein 3
hsa-miR-519d	0	0	1	1	1	1	TSPAN13	tetraspanin 13
hsa-miR-519d	1	0	1	1	1	1	RALGPS1	Ral GEF with PH domain and SH3 binding motif 1
hsa-miR-519d	0	0	1	0	1	1	EPM2AIP1	EPM2A (laforin) interacting protein 1
hsa-miR-519d	1	0	1	0	1	1	LPPR4	lipid phosphate phosphatase-related protein type 4
hsa-miR-519d	1	0	1	1	1	1	NUAK1	NUAK family, SNF1-like kinase, 1
hsa-miR-519d	1	0	1	1	1	1	ZBTB5	zinc finger and BTB domain containing 5
hsa-miR-519d	0	0	1	0	1	1	KIF14	kinesin family member 14
hsa-miR-519d	1	0	1	1	1	1	JOSD1	Josephin domain containing 1
hsa-miR-519d	1	0	1	1	1	1	CHSY1	chondroitin sulfate synthase 1
hsa-miR-519d	1	0	1	1	1	1	RAB21	RAB21, member RAS oncogene family
hsa-miR-519d	1	0	1	1	1	1	USP33	ubiquitin specific peptidase 33
hsa-miR-519d	1	0	1	1	1	1	SMG1	smg-1 homolog, phosphatidylinositol 3-kinase-related kinase (C. elegans)
hsa-miR-519d	1	0	1	1	1	1	GPD1L	glycerol-3-phosphate dehydrogenase 1-like
hsa-miR-519d	1	0	1	1	1	1	PDS5A	PDS5, regulator of cohesion maintenance, homolog A (S. cerevisiae)
hsa-miR-519d	1	0	1	1	1	1	RIMBP2	RIMS binding protein 2
hsa-miR-519d	1	0	1	1	1	1	PARM1	prostate androgen-regulated mucin-like protein 1
hsa-miR-519d	1	0	1	1	1	1	CNOT6	CCR4-NOT transcription complex, subunit 6
hsa-miR-519d	1	0	1	1	1	1	PNKD	paroxysmal nonkinesigenic dyskinesia
hsa-miR-519d	1	0	1	1	1	1	SLITRK5	SLIT and NTRK-like family, member 5
hsa-miR-519d	1	0	1	1	1	1	FAM155B	family with sequence similarity 155, member B
hsa-miR-519d	0	0	1	1	1	1	KRT76	keratin 76
hsa-miR-519d	1	0	1	0	1	1	TRIM33	tripartite motif containing 33
hsa-miR-519d	1	0	1	0	1	1	KLF13	Kruppel-like factor 13
hsa-miR-519d	0	0	1	1	1	1	SCCPDH	saccharopine dehydrogenase (putative)
hsa-miR-519d	0	0	1	1	1	1	MED31	mediator complex subunit 31
hsa-miR-519d	1	0	1	1	1	1	GOLT1B	golgi transport 1B
hsa-miR-519d	1	0	1	0	1	1	CNR1	cannabinoid receptor 1 (brain)
hsa-miR-519d	0	0	1	1	1	1	ZFR	zinc finger RNA binding protein
hsa-miR-519d	0	0	1	1	1	1	RAB10	RAB10, member RAS oncogene family
hsa-miR-519d	1	0	1	1	1	1	SUFU	suppressor of fused homolog (Drosophila)
hsa-miR-519d	1	0	1	1	1	1	VGLL3	vestigial like 3 (Drosophila)
hsa-miR-519d	1	0	1	1	1	1	TOB2	transducer of ERBB2, 2
hsa-miR-519d	0	0	1	1	1	1	FBXO40	F-box protein 40
hsa-miR-519d	0	0	1	1	0	0	SRRM2	serine/arginine repetitive matrix 2
hsa-miR-519d	0	0	1	1	1	1	CENPF	centromere protein F, 350/400kDa (mitosin)
hsa-miR-519d	1	0	1	1	1	1	PHF20	PHD finger protein 20
hsa-miR-519d	1	0	1	1	1	1	IER5	immediate early response 5
hsa-miR-519d	1	0	1	0	1	1	KLHL3	kelch-like 3 (Drosophila)
hsa-miR-519d	1	0	1	1	1	1	GALNT7	UDP-N-acetyl-alpha-D-galactosamine:polypeptide N-acetylgalactosaminyltransferase 7 (GalNAc-T7)
hsa-miR-519d	0	0	1	0	1	1	VEZT	vezatin, adherens junctions transmembrane protein
hsa-miR-519d	0	0	1	0	1	1	GIPC2	GIPC PDZ domain containing family, member 2
hsa-miR-519d	1	0	1	1	1	1	TBC1D8B	TBC1 domain family, member 8B (with GRAM domain)
hsa-miR-519d	0	0	1	1	1	1	SDHAF2	succinate dehydrogenase complex assembly factor 2
hsa-miR-519d	1	0	1	1	1	1	C9orf40	chromosome 9 open reading frame 40
hsa-miR-519d	0	0	1	1	1	1	GPATCH2	G patch domain containing 2
hsa-miR-519d	1	0	1	1	1	1	FAM178A	family with sequence similarity 178, member A
hsa-miR-519d	1	0	1	0	1	1	ARL8B	ADP-ribosylation factor-like 8B
hsa-miR-519d	1	0	1	1	1	1	LRRC20	leucine rich repeat containing 20
hsa-miR-519d	1	0	1	1	1	1	PI4K2B	phosphatidylinositol 4-kinase type 2 beta
hsa-miR-519d	1	0	1	1	1	1	KIAA1598	KIAA1598
hsa-miR-519d	0	0	1	1	1	1	TMEM144	transmembrane protein 144
hsa-miR-519d	1	0	1	0	1	1	LIN7C	lin-7 homolog C (C. elegans)
hsa-miR-519d	0	0	1	1	1	1	LAPTM4B	lysosomal protein transmembrane 4 beta
hsa-miR-519d	0	0	1	0	0	0	FAM45B	family with sequence similarity 45, member A pseudogene
hsa-miR-519d	1	0	1	1	1	1	ASH1L	ash1 (absent, small, or homeotic)-like (Drosophila)
hsa-miR-519d	1	0	1	1	1	1	NRP2	neuropilin 2
hsa-miR-519d	1	0	1	0	1	1	LRP1B	low density lipoprotein receptor-related protein 1B
hsa-miR-519d	0	0	1	1	0	0	H2AFY2	H2A histone family, member Y2
hsa-miR-519d	0	0	1	1	1	1	MYO5C	myosin VC
hsa-miR-519d	1	0	1	0	1	1	KLHL9	kelch-like 9 (Drosophila)
hsa-miR-519d	1	0	1	1	1	1	PCDHGA1	protocadherin gamma subfamily A, 1
hsa-miR-519d	1	0	1	0	1	1	PCDHGA10	protocadherin gamma subfamily A, 10
hsa-miR-519d	1	0	1	0	1	1	PCDHGA11	protocadherin gamma subfamily A, 11
hsa-miR-519d	1	0	1	1	1	1	PCDHGA2	protocadherin gamma subfamily A, 2
hsa-miR-519d	1	0	1	0	1	1	PCDHGA3	protocadherin gamma subfamily A, 3
hsa-miR-519d	1	0	1	0	1	1	PCDHGA4	protocadherin gamma subfamily A, 4
hsa-miR-519d	1	0	1	0	1	1	PCDHGA5	protocadherin gamma subfamily A, 5
hsa-miR-519d	1	0	1	0	1	1	PCDHGA6	protocadherin gamma subfamily A, 6
hsa-miR-519d	1	0	1	0	1	1	PCDHGA7	protocadherin gamma subfamily A, 7
hsa-miR-519d	1	0	1	0	1	1	PCDHGA9	protocadherin gamma subfamily A, 9
hsa-miR-519d	1	0	1	0	1	1	PCDHGB1	protocadherin gamma subfamily B, 1
hsa-miR-519d	1	0	1	0	1	1	PCDHGB2	protocadherin gamma subfamily B, 2
hsa-miR-519d	1	0	1	0	1	1	PCDHGB3	protocadherin gamma subfamily B, 3
hsa-miR-519d	1	0	1	0	1	1	PCDHGB5	protocadherin gamma subfamily B, 5
hsa-miR-519d	1	0	1	0	1	1	PCDHGB6	protocadherin gamma subfamily B, 6
hsa-miR-519d	1	0	1	0	1	1	PCDHGB7	protocadherin gamma subfamily B, 7
hsa-miR-519d	1	0	1	0	1	1	PCDHGC4	protocadherin gamma subfamily C, 4
hsa-miR-519d	1	0	1	0	1	1	PCDHGC5	protocadherin gamma subfamily C, 5
hsa-miR-519d	1	0	1	1	1	1	CRCT1	cysteine-rich C-terminal 1
hsa-miR-519d	1	0	1	1	1	1	EPB41L4B	erythrocyte membrane protein band 4.1 like 4B
hsa-miR-519d	1	0	1	1	1	1	ABCB9	ATP-binding cassette, sub-family B (MDR/TAP), member 9
hsa-miR-519d	1	0	1	1	1	1	PRDM8	PR domain containing 8
hsa-miR-519d	1	0	1	0	1	1	SLC17A6	solute carrier family 17 (sodium-dependent inorganic phosphate cotransporter), member 6
hsa-miR-519d	1	0	1	1	1	1	LYRM2	LYR motif containing 2
hsa-miR-519d	1	0	1	1	1	1	SLC24A3	solute carrier family 24 (sodium/potassium/calcium exchanger), member 3
hsa-miR-519d	0	0	1	1	1	1	SHROOM4	shroom family member 4
hsa-miR-519d	1	0	1	1	1	1	ZNF608	zinc finger protein 608
hsa-miR-519d	1	0	1	0	1	1	ZNF398	zinc finger protein 398
hsa-miR-519d	1	0	1	0	1	1	KLHDC5	kelch domain containing 5
hsa-miR-519d	1	0	1	1	1	1	KLHL14	kelch-like 14 (Drosophila)
hsa-miR-519d	0	0	1	0	1	1	TRMT5	tRNA methyltransferase 5 homolog (S. cerevisiae)
hsa-miR-519d	1	0	1	1	1	1	CNTN3	contactin 3 (plasmacytoma associated)
hsa-miR-519d	0	0	1	1	1	1	AQP9	aquaporin 9
hsa-miR-519d	1	0	1	0	1	1	RAP2A	RAP2A, member of RAS oncogene family
hsa-miR-519d	1	0	1	1	1	1	NEFH	neurofilament, heavy polypeptide
hsa-miR-519d	0	0	1	1	1	1	RNASEL	ribonuclease L (2',5'-oligoisoadenylate synthetase-dependent)
hsa-miR-519d	1	0	1	1	1	1	GRHL3	grainyhead-like 3 (Drosophila)
hsa-miR-519d	0	0	1	0	1	1	MS4A7	membrane-spanning 4-domains, subfamily A, member 7
hsa-miR-519d	1	0	1	0	1	1	TP53INP2	tumor protein p53 inducible nuclear protein 2
hsa-miR-519d	1	0	1	1	1	1	DMRT3	doublesex and mab-3 related transcription factor 3
hsa-miR-519d	1	0	1	1	1	1	CLCN6	chloride channel, voltage-sensitive 6
hsa-miR-519d	1	0	1	1	1	1	SLC5A7	solute carrier family 5 (choline transporter), member 7
hsa-miR-519d	0	0	1	0	1	1	CFL2	cofilin 2 (muscle)
hsa-miR-519d	0	0	1	0	1	1	SPCS3	signal peptidase complex subunit 3 homolog (S. cerevisiae)
hsa-miR-519d	0	0	1	1	0	0	C12orf44	chromosome 12 open reading frame 44
hsa-miR-519d	0	0	1	1	1	1	PGM5	phosphoglucomutase 5
hsa-miR-519d	1	0	1	0	1	1	GAN	gigaxonin
hsa-miR-519d	1	0	1	1	1	1	MRPL17	mitochondrial ribosomal protein L17
hsa-miR-519d	0	0	1	1	0	0	LIN7B	lin-7 homolog B (C. elegans)
hsa-miR-519d	0	0	1	1	0	0	KIF9	kinesin family member 9
hsa-miR-519d	0	0	1	1	1	1	SUSD1	sushi domain containing 1
hsa-miR-519d	1	0	1	1	1	1	SUDS3	suppressor of defective silencing 3 homolog (S. cerevisiae)
hsa-miR-519d	0	0	1	1	1	1	ACBD3	acyl-CoA binding domain containing 3
hsa-miR-519d	0	0	1	1	1	1	METTL4	methyltransferase like 4
hsa-miR-519d	0	0	1	0	1	1	CDCP1	CUB domain containing protein 1
hsa-miR-519d	0	0	1	1	1	1	AUNIP	aurora kinase A and ninein interacting protein
hsa-miR-519d	1	0	1	0	1	1	NOTCH2	notch 2
hsa-miR-519d	1	0	1	1	1	1	PSTPIP2	proline-serine-threonine phosphatase interacting protein 2
hsa-miR-519d	0	0	1	1	1	1	CEP70	centrosomal protein 70kDa
hsa-miR-519d	1	0	1	1	1	1	C10orf76	chromosome 10 open reading frame 76
hsa-miR-519d	0	0	1	1	1	1	RNF219	ring finger protein 219
hsa-miR-519d	0	0	1	1	1	1	LRRK1	leucine-rich repeat kinase 1
hsa-miR-519d	1	0	1	0	1	1	ZFHX4	zinc finger homeobox 4
hsa-miR-519d	0	0	1	1	1	1	SHCBP1	SHC SH2-domain binding protein 1
hsa-miR-519d	0	0	1	1	0	0	TMEM156	transmembrane protein 156
hsa-miR-519d	1	0	1	1	1	1	FBXO11	F-box protein 11
hsa-miR-519d	1	0	1	1	1	1	SLC35F5	solute carrier family 35, member F5
hsa-miR-519d	1	0	1	0	1	1	EDEM3	ER degradation enhancer, mannosidase alpha-like 3
hsa-miR-519d	0	0	1	0	1	1	PDGFD	platelet derived growth factor D
hsa-miR-519d	1	0	1	1	1	1	JHDM1D	jumonji C domain containing histone demethylase 1 homolog D (S. cerevisiae)
hsa-miR-519d	1	0	1	0	1	1	SETD7	SET domain containing (lysine methyltransferase) 7
hsa-miR-519d	1	0	1	1	1	1	SGPP1	sphingosine-1-phosphate phosphatase 1
hsa-miR-519d	1	0	1	1	1	1	C6orf62	chromosome 6 open reading frame 62
hsa-miR-519d	1	0	1	1	1	1	PPP1R14C	protein phosphatase 1, regulatory (inhibitor) subunit 14C
hsa-miR-519d	1	0	1	0	1	1	SH3BGRL2	SH3 domain binding glutamic acid-rich protein like 2
hsa-miR-519d	0	0	1	1	1	1	INHBE	inhibin, beta E
hsa-miR-519d	1	0	1	1	1	1	PCDHA9	protocadherin alpha 9
hsa-miR-519d	0	0	1	0	1	1	ENAM	enamelin
hsa-miR-519d	1	0	1	0	1	1	PCDHGA8	protocadherin gamma subfamily A, 8
hsa-miR-519d	0	0	1	1	1	1	KBTBD7	kelch repeat and BTB (POZ) domain containing 7
hsa-miR-519d	1	0	1	1	1	1	DSEL	dermatan sulfate epimerase-like
hsa-miR-519d	1	0	1	1	1	1	FAM175B	family with sequence similarity 175, member B
hsa-miR-519d	0	0	1	1	0	0	DCUN1D5	DCN1, defective in cullin neddylation 1, domain containing 5 (S. cerevisiae)
hsa-miR-519d	1	0	1	1	1	1	HOOK3	hook homolog 3 (Drosophila)
hsa-miR-519d	1	0	1	0	1	1	C5orf62	chromosome 5 open reading frame 62
hsa-miR-519d	1	0	1	1	1	1	TRIM55	tripartite motif containing 55
hsa-miR-519d	1	0	1	1	1	1	ADAM19	ADAM metallopeptidase domain 19
hsa-miR-519d	0	0	1	1	1	1	ARHGAP18	Rho GTPase activating protein 18
hsa-miR-519d	0	0	1	1	1	1	ZNF830	zinc finger protein 830
hsa-miR-519d	0	0	1	1	1	1	ZNF300	zinc finger protein 300
hsa-miR-519d	1	0	1	1	1	1	MAL2	mal, T-cell differentiation protein 2 (gene/pseudogene)
hsa-miR-519d	0	0	1	1	0	0	STK11IP	serine/threonine kinase 11 interacting protein
hsa-miR-519d	0	0	1	1	1	1	PLEKHG4B	pleckstrin homology domain containing, family G (with RhoGef domain) member 4B
hsa-miR-519d	0	0	1	1	0	0	BSND	Bartter syndrome, infantile, with sensorineural deafness (Barttin)
hsa-miR-519d	1	0	1	1	1	1	GCFC1	GC-rich sequence DNA-binding factor 1
hsa-miR-519d	0	0	1	1	1	1	ABCA10	ATP-binding cassette, sub-family A (ABC1), member 10
hsa-miR-519d	0	0	1	1	1	1	CLEC4D	C-type lectin domain family 4, member D
hsa-miR-519d	1	0	1	0	1	1	SOCS4	suppressor of cytokine signaling 4
hsa-miR-519d	1	0	1	1	1	1	BMPER	BMP binding endothelial regulator
hsa-miR-519d	0	0	1	1	1	1	RHOV	ras homolog family member V
hsa-miR-519d	0	0	1	1	1	1	RFX3	regulatory factor X, 3 (influences HLA class II expression)
hsa-miR-519d	1	0	1	1	1	1	GNPDA2	glucosamine-6-phosphate deaminase 2
hsa-miR-519d	0	0	1	0	1	1	SP140L	SP140 nuclear body protein-like
hsa-miR-519d	0	0	1	1	1	1	MRAP2	melanocortin 2 receptor accessory protein 2
hsa-miR-519d	0	0	1	1	1	1	CASC4	cancer susceptibility candidate 4
hsa-miR-519d	1	0	1	0	1	1	SP1	Sp1 transcription factor
hsa-miR-519d	0	0	1	1	1	1	SLC25A46	solute carrier family 25, member 46
hsa-miR-519d	1	0	1	1	1	1	CD200R1	CD200 receptor 1
hsa-miR-519d	0	0	1	1	1	1	SDR16C5	short chain dehydrogenase/reductase family 16C, member 5
hsa-miR-519d	1	0	1	1	1	1	RPIA	ribose 5-phosphate isomerase A
hsa-miR-519d	0	0	1	0	0	0	CAPN13	calpain 13
hsa-miR-519d	1	0	1	1	1	1	MAPK1IP1L	mitogen-activated protein kinase 1 interacting protein 1-like
hsa-miR-519d	1	0	1	1	1	1	TMEM182	transmembrane protein 182
hsa-miR-519d	1	0	1	1	1	1	FAM91A1	family with sequence similarity 91, member A1
hsa-miR-519d	0	0	1	0	1	1	PIGM	phosphatidylinositol glycan anchor biosynthesis, class M
hsa-miR-519d	0	0	1	1	0	0	TMEM217	transmembrane protein 217
hsa-miR-519d	1	0	1	1	1	1	SGMS1	sphingomyelin synthase 1
hsa-miR-519d	0	0	1	1	1	1	TTC30A	tetratricopeptide repeat domain 30A
hsa-miR-519d	0	0	1	1	1	1	TCEAL7	transcription elongation factor A (SII)-like 7
hsa-miR-519d	1	0	1	0	1	1	SYT11	synaptotagmin XI
hsa-miR-519d	0	0	1	1	1	1	MUC7	mucin 7, secreted
hsa-miR-519d	1	0	1	1	1	1	FAM123B	family with sequence similarity 123B
hsa-miR-519d	1	0	1	1	1	1	SLC16A14	solute carrier family 16, member 14 (monocarboxylic acid transporter 14)
hsa-miR-519d	1	0	1	0	1	1	TMEM154	transmembrane protein 154
hsa-miR-519d	0	0	1	1	1	1	MS4A6A	membrane-spanning 4-domains, subfamily A, member 6A
hsa-miR-519d	0	0	1	1	1	1	ZFP3	zinc finger protein 3 homolog (mouse)
hsa-miR-519d	0	0	1	1	1	1	FBXO39	F-box protein 39
hsa-miR-519d	1	0	1	0	1	1	ZCCHC24	zinc finger, CCHC domain containing 24
hsa-miR-519d	1	0	1	1	1	1	FNDC5	fibronectin type III domain containing 5
hsa-miR-519d	0	0	1	1	0	0	SCUBE1	signal peptide, CUB domain, EGF-like 1
hsa-miR-519d	1	0	1	1	1	1	MMGT1	membrane magnesium transporter 1
hsa-miR-519d	1	0	1	0	1	1	SREK1IP1	SREK1-interacting protein 1
hsa-miR-519d	0	0	1	1	1	1	SCARA5	scavenger receptor class A, member 5 (putative)
hsa-miR-519d	1	0	1	1	1	1	SCN4B	sodium channel, voltage-gated, type IV, beta subunit
hsa-miR-519d	1	0	1	1	1	1	PKHD1L1	polycystic kidney and hepatic disease 1 (autosomal recessive)-like 1
hsa-miR-519d	0	0	1	0	1	1	GATS	GATS, stromal antigen 3 opposite strand
hsa-miR-519d	1	0	1	1	1	1	CREM	cAMP responsive element modulator
hsa-miR-519d	1	0	1	1	1	1	PPP2R1B	protein phosphatase 2, regulatory subunit A, beta
hsa-miR-519d	1	0	1	1	1	1	BCL6B	B-cell CLL/lymphoma 6, member B
hsa-miR-519d	0	0	1	0	1	1	BAGE5	B melanoma antigen family, member 5
hsa-miR-519d	1	0	1	1	1	1	ADAT2	adenosine deaminase, tRNA-specific 2
hsa-miR-519d	1	0	1	1	1	1	FAM216B	family with sequence similarity 216, member B
hsa-miR-519d	1	0	1	1	1	1	BCL9L	B-cell CLL/lymphoma 9-like
hsa-miR-519d	1	0	1	0	1	1	C12orf36	chromosome 12 open reading frame 36
hsa-miR-519d	0	0	1	1	1	1	COX8C	cytochrome c oxidase subunit VIIIC
hsa-miR-519d	1	0	1	1	1	1	ASB7	ankyrin repeat and SOCS box containing 7
hsa-miR-519d	1	0	1	0	1	1	PTPLB	protein tyrosine phosphatase-like (proline instead of catalytic arginine), member b
hsa-miR-519d	0	0	1	1	1	1	EFCAB5	EF-hand calcium binding domain 5
hsa-miR-519d	0	0	1	1	0	0	PYHIN1	pyrin and HIN domain family, member 1
hsa-miR-519d	0	0	1	1	1	1	PTHLH	parathyroid hormone-like hormone
hsa-miR-519d	0	0	1	0	1	1	WASH3P	WAS protein family homolog 3 pseudogene
hsa-miR-519d	0	0	1	1	0	0	FOXD4L4	forkhead box D4-like 4
hsa-miR-519d	1	0	1	1	0	0	TCF7	transcription factor 7 (T-cell specific, HMG-box)
hsa-miR-519d	1	0	1	1	1	1	E2F7	E2F transcription factor 7
hsa-miR-519d	1	0	1	1	1	1	CYP4V2	cytochrome P450, family 4, subfamily V, polypeptide 2
hsa-miR-519d	0	0	1	0	1	1	C1orf220	chromosome 1 open reading frame 220
hsa-miR-519d	1	0	1	1	1	1	MAP6	microtubule-associated protein 6
hsa-miR-519d	1	0	1	1	1	1	XKRX	XK, Kell blood group complex subunit-related, X-linked
hsa-miR-519d	0	0	1	0	0	0	SNORD107	small nucleolar RNA, C/D box 107
hsa-miR-519d	0	0	1	1	0	0	SNRPN	small nuclear ribonucleoprotein polypeptide N
hsa-miR-519d	0	0	1	0	0	0	TTTY15	testis-specific transcript, Y-linked 15 (non-protein coding)
hsa-miR-519d	0	0	1	0	0	0	TPI1P2	triosephosphate isomerase 1 pseudogene 2
hsa-miR-519d	0	0	1	0	0	0	SUMO1P3	SUMO1 pseudogene 3
hsa-miR-519d	0	0	1	0	0	0	HNRNPA3P1	heterogeneous nuclear ribonucleoprotein A3 pseudogene 1
hsa-miR-519d	0	0	1	0	0	0	HYALP1	hyaluronoglucosaminidase pseudogene 1
hsa-miR-519d	0	0	1	0	0	0	AQP7P1	aquaporin 7 pseudogene 1
hsa-miR-519d	0	0	1	0	0	0	MALAT1	metastasis associated lung adenocarcinoma transcript 1 (non-protein coding)
hsa-miR-519d	0	0	1	0	0	0	SNORA30	small nucleolar RNA, H/ACA box 30
hsa-miR-519d	0	0	1	0	0	0	SNORA60	small nucleolar RNA, H/ACA box 60
hsa-miR-519d	0	0	1	0	0	0	EIF3IP1	eukaryotic translation initiation factor 3, subunit I pseudogene 1
hsa-miR-519d	0	0	1	0	0	0	NBR2	neighbor of BRCA1 gene 2 (non-protein coding)
hsa-miR-519d	0	0	1	0	0	0	HSP90AB2P	heat shock protein 90kDa alpha (cytosolic), class B member 2, pseudogene
hsa-miR-519d	0	0	1	0	0	0	GMCL1P1	germ cell-less, spermatogenesis associated 1 pseudogene 1
hsa-miR-519d	0	0	1	0	0	0	SNORD116-28	small nucleolar RNA, C/D box 116-28
hsa-miR-519d	0	0	1	1	0	0	TBL3	transducin (beta)-like 3
hsa-miR-519d	0	0	1	1	0	0	EPX	eosinophil peroxidase
hsa-miR-519d	0	0	1	1	0	0	MUC1	mucin 1, cell surface associated
hsa-miR-519d	0	0	1	1	0	0	RHBDD2	rhomboid domain containing 2
hsa-miR-519d	1	0	1	1	0	0	PLEKHG6	pleckstrin homology domain containing, family G (with RhoGef domain) member 6
hsa-miR-519d	0	0	1	1	0	0	C20orf43	chromosome 20 open reading frame 43
hsa-miR-519d	0	0	1	1	1	1	GRN	granulin
hsa-miR-519d	1	0	1	1	1	1	MASP1	mannan-binding lectin serine peptidase 1 (C4/C2 activating component of Ra-reactive factor)
hsa-miR-519d	0	0	0	1	0	0	RAPGEF3	Rap guanine nucleotide exchange factor (GEF) 3
hsa-miR-519d	0	0	1	1	1	1	KEAP1	kelch-like ECH-associated protein 1
hsa-miR-519d	0	0	0	1	0	0	DRD4	dopamine receptor D4
hsa-miR-519d	1	0	1	1	1	1	CDK13	cyclin-dependent kinase 13
hsa-miR-519d	0	0	0	1	0	0	TMEM38A	transmembrane protein 38A
hsa-miR-519d	0	0	0	1	1	1	FAP	fibroblast activation protein, alpha
hsa-miR-519d	0	0	0	1	0	0	RPL6	ribosomal protein L6
hsa-miR-519d	0	0	1	1	1	1	KRT23	keratin 23 (histone deacetylase inducible)
hsa-miR-519d	0	0	1	1	1	1	SNRPD3	small nuclear ribonucleoprotein D3 polypeptide 18kDa
hsa-miR-519d	0	0	0	1	0	0	HSCB	HscB iron-sulfur cluster co-chaperone homolog (E. coli)
hsa-miR-519d	0	0	0	1	1	1	ADSL	adenylosuccinate lyase
hsa-miR-519d	0	0	1	1	0	0	PSMC6	proteasome (prosome, macropain) 26S subunit, ATPase, 6
hsa-miR-519d	0	0	1	1	1	1	VRK1	vaccinia related kinase 1
hsa-miR-519d	0	0	1	1	1	1	PCK2	phosphoenolpyruvate carboxykinase 2 (mitochondrial)
hsa-miR-519d	0	0	0	1	1	1	DHODH	dihydroorotate dehydrogenase (quinone)
hsa-miR-519d	0	0	0	1	0	0	TNFRSF10A	tumor necrosis factor receptor superfamily, member 10a
hsa-miR-519d	0	0	0	1	0	0	PAF1	Paf1, RNA polymerase II associated factor, homolog (S. cerevisiae)
hsa-miR-519d	0	0	0	1	1	1	ZNF180	zinc finger protein 180
hsa-miR-519d	0	0	1	1	0	0	RNASEH2A	ribonuclease H2, subunit A
hsa-miR-519d	0	0	0	1	0	0	CPA2	carboxypeptidase A2 (pancreatic)
hsa-miR-519d	0	0	0	1	0	0	ABHD11	abhydrolase domain containing 11
hsa-miR-519d	1	0	1	1	1	1	LSM5	LSM5 homolog, U6 small nuclear RNA associated (S. cerevisiae)
hsa-miR-519d	0	0	0	1	0	0	MOGAT3	monoacylglycerol O-acyltransferase 3
hsa-miR-519d	0	0	1	1	0	0	KRT37	keratin 37
hsa-miR-519d	0	0	0	1	0	0	HSD17B1	hydroxysteroid (17-beta) dehydrogenase 1
hsa-miR-519d	0	0	1	1	0	0	CACNG1	calcium channel, voltage-dependent, gamma subunit 1
hsa-miR-519d	0	0	0	1	1	1	FAM20A	family with sequence similarity 20, member A
hsa-miR-519d	0	0	0	1	1	1	UNC93B1	unc-93 homolog B1 (C. elegans)
hsa-miR-519d	0	0	1	1	0	0	IL23A	interleukin 23, alpha subunit p19
hsa-miR-519d	0	0	1	1	1	1	MCM3	minichromosome maintenance complex component 3
hsa-miR-519d	0	0	1	1	1	1	GZMK	granzyme K (granzyme 3; tryptase II)
[truncated: 591 more rows]
