# Supplementary material for: Profiling of Selected MicroRNAs in Proliferative Eutopic Endometrium of Women with Ovarian Endometriosis
Source: Biomed Res Int. 2015 Aug 20;2015:760698. doi: 10.1155/2015/760698 (PMC4558423; doi:10.1155/2015/760698)
Supplement: Supplementary file 1 — Table I: The names of miRNAs significantly differentially expressed between eutopic endometrium of patients with endometriosis vs eutopic endometrium of patients without endometriosis. Table II: The associations between miRNA and mRNA, which presents detailed results of the search of six major databases i.e targetscan, tarbase, miranda, mirbase, mirtarget2 and pictar. [file 760698.f1.zip › 760698.f1/Table II/hsa-miR-520a-5p.tsv]

miR	targetscan	tarbase	miranda	mirbase	mirtarget2	pictar	GeneSymbol	GeneName
hsa-miR-520a-5p	1	0	1	1	1	1	ZFYVE16	zinc finger, FYVE domain containing 16
hsa-miR-520a-5p	1	0	1	1	0	0	RAPGEF2	Rap guanine nucleotide exchange factor (GEF) 2
hsa-miR-520a-5p	0	0	1	1	1	1	PPIP5K1	diphosphoinositol pentakisphosphate kinase 1
hsa-miR-520a-5p	1	0	1	0	1	1	PTPRT	protein tyrosine phosphatase, receptor type, T
hsa-miR-520a-5p	0	0	1	1	1	1	C2CD2L	C2CD2-like
hsa-miR-520a-5p	1	0	1	1	1	1	NUPL1	nucleoporin like 1
hsa-miR-520a-5p	1	0	1	1	0	0	SEC14L5	SEC14-like 5 (S. cerevisiae)
hsa-miR-520a-5p	1	0	1	0	1	1	MTSS1	metastasis suppressor 1
hsa-miR-520a-5p	0	0	1	1	0	0	RAP1GAP	RAP1 GTPase activating protein
hsa-miR-520a-5p	1	0	1	1	0	0	DENND4B	DENN/MADD domain containing 4B
hsa-miR-520a-5p	1	0	1	0	1	1	CEP350	centrosomal protein 350kDa
hsa-miR-520a-5p	0	0	1	1	1	1	NEU3	sialidase 3 (membrane sialidase)
hsa-miR-520a-5p	0	0	1	1	0	0	ZNF862	zinc finger protein 862
hsa-miR-520a-5p	1	0	1	0	1	1	CHST15	carbohydrate (N-acetylgalactosamine 4-sulfate 6-O) sulfotransferase 15
hsa-miR-520a-5p	1	0	1	1	1	1	HIPK1	homeodomain interacting protein kinase 1
hsa-miR-520a-5p	1	0	1	1	1	1	GIGYF2	GRB10 interacting GYF protein 2
hsa-miR-520a-5p	1	0	1	1	1	1	ANKRD17	ankyrin repeat domain 17
hsa-miR-520a-5p	1	0	1	0	1	1	RBM12	RNA binding motif protein 12
hsa-miR-520a-5p	1	0	1	1	1	1	CALCR	calcitonin receptor
hsa-miR-520a-5p	1	0	1	0	0	0	DTX4	deltex homolog 4 (Drosophila)
hsa-miR-520a-5p	0	0	1	1	1	1	TBC1D30	TBC1 domain family, member 30
hsa-miR-520a-5p	1	0	1	1	1	1	RPGRIP1L	RPGRIP1-like
hsa-miR-520a-5p	0	0	1	0	1	1	TP53TG3	TP53 target 3
hsa-miR-520a-5p	0	0	1	0	0	0	TP53TG3B	TP53 target 3B
hsa-miR-520a-5p	1	0	1	1	0	0	KIAA1045	KIAA1045
hsa-miR-520a-5p	1	0	1	1	1	1	FAM208A	family with sequence similarity 208, member A
hsa-miR-520a-5p	1	0	1	1	1	1	SMARCAD1	SWI/SNF-related, matrix-associated actin-dependent regulator of chromatin, subfamily a, containing DEAD/H box 1
hsa-miR-520a-5p	1	0	1	0	1	1	SRGAP3	SLIT-ROBO Rho GTPase activating protein 3
hsa-miR-520a-5p	1	0	1	1	0	0	KIAA1210	KIAA1210
hsa-miR-520a-5p	1	0	1	1	1	1	ATXN7L1	ataxin 7-like 1
hsa-miR-520a-5p	1	0	1	1	1	1	RIMKLB	ribosomal modification protein rimK-like family member B
hsa-miR-520a-5p	1	0	1	1	1	1	STK36	serine/threonine kinase 36
hsa-miR-520a-5p	0	0	1	1	1	1	KLHL13	kelch-like 13 (Drosophila)
hsa-miR-520a-5p	1	0	1	1	1	1	PCDH19	protocadherin 19
hsa-miR-520a-5p	1	0	1	1	1	1	SEMA6A	sema domain, transmembrane domain (TM), and cytoplasmic domain, (semaphorin) 6A
hsa-miR-520a-5p	1	0	1	1	0	0	CARNS1	carnosine synthase 1
hsa-miR-520a-5p	0	0	1	1	0	0	POLR3E	polymerase (RNA) III (DNA directed) polypeptide E (80kD)
hsa-miR-520a-5p	0	0	1	1	1	1	NLGN3	neuroligin 3
hsa-miR-520a-5p	0	0	1	0	0	0	NYAP2	neuronal tyrosine-phosphorylated phosphoinositide-3-kinase adaptor 2
hsa-miR-520a-5p	1	0	1	1	1	1	TOPORS	topoisomerase I binding, arginine/serine-rich, E3 ubiquitin protein ligase
hsa-miR-520a-5p	1	0	1	1	1	1	PPP6R3	protein phosphatase 6, regulatory subunit 3
hsa-miR-520a-5p	1	0	1	1	1	1	DENND1A	DENN/MADD domain containing 1A
hsa-miR-520a-5p	1	0	1	1	1	1	ZNF532	zinc finger protein 532
hsa-miR-520a-5p	0	0	1	0	1	1	SETD5	SET domain containing 5
hsa-miR-520a-5p	0	0	1	1	1	1	POC1B	POC1 centriolar protein homolog B (Chlamydomonas)
hsa-miR-520a-5p	1	0	1	1	1	1	IKZF4	IKAROS family zinc finger 4 (Eos)
hsa-miR-520a-5p	1	0	1	0	1	1	JPH4	junctophilin 4
hsa-miR-520a-5p	1	0	1	1	1	1	HNRPDL	heterogeneous nuclear ribonucleoprotein D-like
hsa-miR-520a-5p	0	0	1	0	0	0	KIAA1908	uncharacterized LOC114796
hsa-miR-520a-5p	0	0	1	1	0	0	SEC16B	SEC16 homolog B (S. cerevisiae)
hsa-miR-520a-5p	1	0	1	1	1	1	SH3TC2	SH3 domain and tetratricopeptide repeats 2
hsa-miR-520a-5p	1	0	1	0	1	1	RNF43	ring finger protein 43
hsa-miR-520a-5p	0	0	1	0	1	1	RASSF8	Ras association (RalGDS/AF-6) domain family (N-terminal) member 8
hsa-miR-520a-5p	1	0	1	1	1	1	SMEK1	SMEK homolog 1, suppressor of mek1 (Dictyostelium)
hsa-miR-520a-5p	1	0	1	1	1	1	C11orf57	chromosome 11 open reading frame 57
hsa-miR-520a-5p	0	0	1	1	0	0	KRTAP24-1	keratin associated protein 24-1
hsa-miR-520a-5p	0	0	1	1	1	1	IL7	interleukin 7
hsa-miR-520a-5p	0	0	1	1	0	0	DDB2	damage-specific DNA binding protein 2, 48kDa
hsa-miR-520a-5p	1	0	1	1	1	1	KCNMA1	potassium large conductance calcium-activated channel, subfamily M, alpha member 1
hsa-miR-520a-5p	1	0	1	0	1	1	BEND4	BEN domain containing 4
hsa-miR-520a-5p	0	0	1	1	1	1	BIRC5	baculoviral IAP repeat containing 5
hsa-miR-520a-5p	1	0	1	1	1	1	FAT2	FAT tumor suppressor homolog 2 (Drosophila)
hsa-miR-520a-5p	1	1	1	1	1	1	BACE1	beta-site APP-cleaving enzyme 1
hsa-miR-520a-5p	0	0	1	1	0	0	PTPRF	protein tyrosine phosphatase, receptor type, F
hsa-miR-520a-5p	0	0	1	1	1	1	FN1	fibronectin 1
hsa-miR-520a-5p	0	0	1	0	1	1	ACE2	angiotensin I converting enzyme (peptidyl-dipeptidase A) 2
hsa-miR-520a-5p	1	0	1	0	1	1	NFE2L2	nuclear factor (erythroid-derived 2)-like 2
hsa-miR-520a-5p	0	0	1	0	1	1	ATR	ataxia telangiectasia and Rad3 related
hsa-miR-520a-5p	0	0	1	0	1	1	ITPR1	inositol 1,4,5-trisphosphate receptor, type 1
hsa-miR-520a-5p	1	0	1	1	0	0	ELN	elastin
hsa-miR-520a-5p	1	0	1	1	1	1	PML	promyelocytic leukemia
hsa-miR-520a-5p	0	0	1	1	1	1	MAZ	MYC-associated zinc finger protein (purine-binding transcription factor)
hsa-miR-520a-5p	1	0	1	1	1	1	PHC1	polyhomeotic homolog 1 (Drosophila)
hsa-miR-520a-5p	0	0	1	0	1	1	DCAF11	DDB1 and CUL4 associated factor 11
hsa-miR-520a-5p	1	0	1	1	1	1	SLC8A1	solute carrier family 8 (sodium/calcium exchanger), member 1
hsa-miR-520a-5p	1	0	1	1	0	0	ADAM15	ADAM metallopeptidase domain 15
hsa-miR-520a-5p	0	0	1	1	1	1	DDX39B	DEAD (Asp-Glu-Ala-Asp) box polypeptide 39B
hsa-miR-520a-5p	0	0	1	1	1	1	DGKE	diacylglycerol kinase, epsilon 64kDa
hsa-miR-520a-5p	1	0	1	1	1	1	SATB2	SATB homeobox 2
hsa-miR-520a-5p	1	0	1	1	1	1	MAP4	microtubule-associated protein 4
hsa-miR-520a-5p	1	0	1	0	1	1	CDON	Cdon homolog (mouse)
hsa-miR-520a-5p	0	0	1	1	0	0	DNMT1	DNA (cytosine-5-)-methyltransferase 1
hsa-miR-520a-5p	1	0	1	1	1	1	ANK1	ankyrin 1, erythrocytic
hsa-miR-520a-5p	0	0	1	1	0	0	IGFBP2	insulin-like growth factor binding protein 2, 36kDa
hsa-miR-520a-5p	0	0	1	1	0	0	ITGA2B	integrin, alpha 2b (platelet glycoprotein IIb of IIb/IIIa complex, antigen CD41)
hsa-miR-520a-5p	0	0	1	1	1	1	STAU1	staufen, RNA binding protein, homolog 1 (Drosophila)
hsa-miR-520a-5p	0	0	1	1	0	0	BMP1	bone morphogenetic protein 1
hsa-miR-520a-5p	1	0	1	1	1	1	IPO8	importin 8
hsa-miR-520a-5p	0	0	1	1	1	1	IL10RA	interleukin 10 receptor, alpha
hsa-miR-520a-5p	0	0	1	1	1	1	HLA-DQA1	major histocompatibility complex, class II, DQ alpha 1
hsa-miR-520a-5p	1	0	1	1	1	1	OSBPL10	oxysterol binding protein-like 10
hsa-miR-520a-5p	0	0	1	1	0	0	TRIM27	tripartite motif containing 27
hsa-miR-520a-5p	1	0	1	1	1	1	FKBP5	FK506 binding protein 5
hsa-miR-520a-5p	0	0	1	1	1	1	CENPE	centromere protein E, 312kDa
hsa-miR-520a-5p	1	0	1	1	1	1	APC	adenomatous polyposis coli
hsa-miR-520a-5p	0	0	1	1	1	1	CELF1	CUGBP, Elav-like family member 1
hsa-miR-520a-5p	1	0	1	1	1	1	MYH10	myosin, heavy chain 10, non-muscle
hsa-miR-520a-5p	1	0	1	1	1	1	SDHC	succinate dehydrogenase complex, subunit C, integral membrane protein, 15kDa
hsa-miR-520a-5p	0	0	1	0	0	0	MIAT	myocardial infarction associated transcript (non-protein coding)
hsa-miR-520a-5p	1	0	1	1	1	1	DLGAP2	discs, large (Drosophila) homolog-associated protein 2
hsa-miR-520a-5p	0	0	1	1	0	0	SPTBN2	spectrin, beta, non-erythrocytic 2
hsa-miR-520a-5p	0	0	1	1	1	1	SESN1	sestrin 1
hsa-miR-520a-5p	1	0	1	1	1	1	SOCS2	suppressor of cytokine signaling 2
hsa-miR-520a-5p	0	0	1	1	1	1	CD84	CD84 molecule
hsa-miR-520a-5p	1	0	1	1	1	1	RBBP6	retinoblastoma binding protein 6
hsa-miR-520a-5p	0	0	1	1	1	1	NOL3	nucleolar protein 3 (apoptosis repressor with CARD domain)
hsa-miR-520a-5p	0	0	1	1	1	1	SC5DL	sterol-C5-desaturase (ERG3 delta-5-desaturase homolog, S. cerevisiae)-like
hsa-miR-520a-5p	1	0	1	1	1	1	CBFA2T2	core-binding factor, runt domain, alpha subunit 2; translocated to, 2
hsa-miR-520a-5p	0	0	1	1	1	1	PLEKHB1	pleckstrin homology domain containing, family B (evectins) member 1
hsa-miR-520a-5p	0	0	1	1	1	1	SH2D1A	SH2 domain containing 1A
hsa-miR-520a-5p	0	0	1	1	1	1	IL18BP	interleukin 18 binding protein
hsa-miR-520a-5p	0	0	1	1	0	0	EVL	Enah/Vasp-like
hsa-miR-520a-5p	1	0	1	1	1	1	KAT6B	K(lysine) acetyltransferase 6B
hsa-miR-520a-5p	1	0	1	0	1	1	SLC25A37	solute carrier family 25 (mitochondrial iron transporter), member 37
hsa-miR-520a-5p	0	0	1	1	1	1	CTNNAL1	catenin (cadherin-associated protein), alpha-like 1
hsa-miR-520a-5p	1	0	1	1	1	1	HMG20A	high mobility group 20A
hsa-miR-520a-5p	0	0	1	1	1	1	ZNF317	zinc finger protein 317
hsa-miR-520a-5p	0	0	1	1	1	1	HEPH	hephaestin
hsa-miR-520a-5p	1	0	1	1	1	1	ZNF202	zinc finger protein 202
hsa-miR-520a-5p	1	0	1	1	1	1	ANKRD13A	ankyrin repeat domain 13A
hsa-miR-520a-5p	0	0	1	0	1	1	PDP1	pyruvate dehyrogenase phosphatase catalytic subunit 1
hsa-miR-520a-5p	1	0	1	1	1	1	AGPAT3	1-acylglycerol-3-phosphate O-acyltransferase 3
hsa-miR-520a-5p	0	0	1	1	1	1	FAM114A2	family with sequence similarity 114, member A2
hsa-miR-520a-5p	1	0	1	1	1	1	TMEM242	transmembrane protein 242
hsa-miR-520a-5p	0	0	1	0	1	1	ZDHHC17	zinc finger, DHHC-type containing 17
hsa-miR-520a-5p	1	0	1	1	1	1	TACC2	transforming, acidic coiled-coil containing protein 2
hsa-miR-520a-5p	0	0	1	0	1	1	CLDN2	claudin 2
hsa-miR-520a-5p	0	0	1	1	1	1	CHPT1	choline phosphotransferase 1
hsa-miR-520a-5p	0	0	1	0	0	0	BPESC1	blepharophimosis, epicanthus inversus and ptosis, candidate 1 (non-protein coding)
hsa-miR-520a-5p	1	0	1	0	1	1	CSNK1G1	casein kinase 1, gamma 1
hsa-miR-520a-5p	1	0	1	1	1	1	OGT	O-linked N-acetylglucosamine (GlcNAc) transferase
hsa-miR-520a-5p	0	0	1	1	1	1	FASTKD2	FAST kinase domains 2
hsa-miR-520a-5p	1	0	1	1	1	1	PUM2	pumilio homolog 2 (Drosophila)
hsa-miR-520a-5p	0	0	1	1	1	1	ASUN	asunder, spermatogenesis regulator homolog (Drosphila)
hsa-miR-520a-5p	1	0	1	1	1	1	NRP1	neuropilin 1
hsa-miR-520a-5p	0	0	1	1	0	0	GHRHR	growth hormone releasing hormone receptor
hsa-miR-520a-5p	1	0	1	1	1	1	FASLG	Fas ligand (TNF superfamily, member 6)
hsa-miR-520a-5p	0	0	1	0	1	1	KANSL3	KAT8 regulatory NSL complex subunit 3
hsa-miR-520a-5p	1	0	1	1	1	1	FBXO31	F-box protein 31
hsa-miR-520a-5p	1	0	1	0	1	1	GLYR1	glyoxylate reductase 1 homolog (Arabidopsis)
hsa-miR-520a-5p	0	0	1	1	1	1	FCRL1	Fc receptor-like 1
hsa-miR-520a-5p	1	0	1	1	1	1	CALU	calumenin
hsa-miR-520a-5p	0	0	1	1	1	1	SLC6A15	solute carrier family 6 (neutral amino acid transporter), member 15
hsa-miR-520a-5p	1	0	1	1	1	1	BBC3	BCL2 binding component 3
hsa-miR-520a-5p	1	0	1	1	1	1	PBX3	pre-B-cell leukemia homeobox 3
hsa-miR-520a-5p	1	0	1	1	1	1	KCNIP2	Kv channel interacting protein 2
hsa-miR-520a-5p	1	0	1	0	1	1	WIPF2	WAS/WASL interacting protein family, member 2
hsa-miR-520a-5p	1	0	1	1	1	1	SON	SON DNA binding protein
hsa-miR-520a-5p	0	0	1	0	0	0	CLRN1-AS1	CLRN1 antisense RNA 1
hsa-miR-520a-5p	0	0	1	0	1	1	MYO3B	myosin IIIB
hsa-miR-520a-5p	1	0	1	1	1	1	NTRK2	neurotrophic tyrosine kinase, receptor, type 2
hsa-miR-520a-5p	0	0	1	1	0	0	CNKSR2	connector enhancer of kinase suppressor of Ras 2
hsa-miR-520a-5p	1	0	1	1	1	1	SLC35A4	solute carrier family 35, member A4
hsa-miR-520a-5p	0	0	1	1	1	1	PSRC1	proline/serine-rich coiled-coil 1
hsa-miR-520a-5p	1	0	1	1	0	0	FOXP2	forkhead box P2
hsa-miR-520a-5p	1	0	1	1	1	1	HNRNPU	heterogeneous nuclear ribonucleoprotein U (scaffold attachment factor A)
hsa-miR-520a-5p	0	0	1	1	0	0	TREML1	triggering receptor expressed on myeloid cells-like 1
hsa-miR-520a-5p	0	0	1	1	0	0	KLRD1	killer cell lectin-like receptor subfamily D, member 1
hsa-miR-520a-5p	1	0	1	1	1	1	AFF2	AF4/FMR2 family, member 2
hsa-miR-520a-5p	0	0	1	1	1	1	GNAS	GNAS complex locus
hsa-miR-520a-5p	1	0	1	1	1	1	VAMP7	vesicle-associated membrane protein 7
hsa-miR-520a-5p	1	0	1	1	1	1	SLAMF6	SLAM family member 6
hsa-miR-520a-5p	1	0	1	1	1	1	PALM2	paralemmin 2
hsa-miR-520a-5p	1	0	1	1	1	1	NRXN3	neurexin 3
hsa-miR-520a-5p	0	0	1	0	0	0	CASC2	cancer susceptibility candidate 2 (non-protein coding)
hsa-miR-520a-5p	1	0	1	1	1	1	PDE1B	phosphodiesterase 1B, calmodulin-dependent
hsa-miR-520a-5p	0	0	1	1	1	1	ZNF248	zinc finger protein 248
hsa-miR-520a-5p	0	0	1	1	1	1	SLC25A13	solute carrier family 25 (aspartate/glutamate carrier), member 13
hsa-miR-520a-5p	0	0	1	1	1	1	TAF1	TAF1 RNA polymerase II, TATA box binding protein (TBP)-associated factor, 250kDa
hsa-miR-520a-5p	0	0	1	1	0	0	ASAP3	ArfGAP with SH3 domain, ankyrin repeat and PH domain 3
hsa-miR-520a-5p	0	0	1	1	0	0	GPRC5C	G protein-coupled receptor, family C, group 5, member C
hsa-miR-520a-5p	1	0	1	1	1	1	AKAP2	A kinase (PRKA) anchor protein 2
hsa-miR-520a-5p	0	0	1	1	1	1	PARP16	poly (ADP-ribose) polymerase family, member 16
hsa-miR-520a-5p	0	0	1	0	0	0	TUG1	taurine upregulated 1 (non-protein coding)
hsa-miR-520a-5p	0	0	1	1	0	0	AP4B1	adaptor-related protein complex 4, beta 1 subunit
hsa-miR-520a-5p	0	0	1	0	1	1	EBF2	early B-cell factor 2
hsa-miR-520a-5p	1	0	1	1	1	1	MEIS2	Meis homeobox 2
hsa-miR-520a-5p	0	0	1	1	1	1	STOX2	storkhead box 2
hsa-miR-520a-5p	0	0	1	1	1	1	RNF220	ring finger protein 220
hsa-miR-520a-5p	1	0	1	1	1	1	CADM3	cell adhesion molecule 3
hsa-miR-520a-5p	1	0	1	1	1	1	EIF2C1	eukaryotic translation initiation factor 2C, 1
hsa-miR-520a-5p	1	0	1	1	1	1	ARMC8	armadillo repeat containing 8
hsa-miR-520a-5p	0	0	1	0	0	0	LINC00284	long intergenic non-protein coding RNA 284
hsa-miR-520a-5p	0	0	1	1	1	1	STAU2	staufen, RNA binding protein, homolog 2 (Drosophila)
hsa-miR-520a-5p	1	0	1	1	1	1	HNRNPUL1	heterogeneous nuclear ribonucleoprotein U-like 1
hsa-miR-520a-5p	0	0	1	1	1	1	SNCAIP	synuclein, alpha interacting protein
hsa-miR-520a-5p	0	0	1	1	1	1	CCPG1	cell cycle progression 1
hsa-miR-520a-5p	1	0	1	1	1	1	VASH2	vasohibin 2
hsa-miR-520a-5p	1	0	1	1	1	1	GALNT14	UDP-N-acetyl-alpha-D-galactosamine:polypeptide N-acetylgalactosaminyltransferase 14 (GalNAc-T14)
hsa-miR-520a-5p	0	0	1	0	0	0	LOC149134	uncharacterized LOC149134
hsa-miR-520a-5p	0	0	1	1	0	0	JMJD4	jumonji domain containing 4
hsa-miR-520a-5p	1	0	1	1	1	1	WDTC1	WD and tetratricopeptide repeats 1
hsa-miR-520a-5p	1	0	1	0	1	1	UBP1	upstream binding protein 1 (LBP-1a)
hsa-miR-520a-5p	0	0	1	0	0	0	LINC00475	long intergenic non-protein coding RNA 475
hsa-miR-520a-5p	1	0	1	1	1	1	BAZ2A	bromodomain adjacent to zinc finger domain, 2A
hsa-miR-520a-5p	1	0	1	0	1	1	C14orf101	chromosome 14 open reading frame 101
hsa-miR-520a-5p	1	0	1	1	1	1	CEP85	centrosomal protein 85kDa
hsa-miR-520a-5p	0	0	1	0	1	1	FLJ14186	uncharacterized LOC401149
hsa-miR-520a-5p	0	0	1	1	1	1	METTL7A	methyltransferase like 7A
hsa-miR-520a-5p	1	0	1	1	1	1	SCAF1	SR-related CTD-associated factor 1
hsa-miR-520a-5p	0	0	1	1	1	1	UNC13D	unc-13 homolog D (C. elegans)
hsa-miR-520a-5p	0	0	1	0	0	0	IFFO2	intermediate filament family orphan 2
hsa-miR-520a-5p	0	0	1	1	1	1	MUC12	mucin 12, cell surface associated
hsa-miR-520a-5p	1	0	1	0	1	1	ATP2B1	ATPase, Ca++ transporting, plasma membrane 1
hsa-miR-520a-5p	1	0	1	1	1	1	ABI3BP	ABI family, member 3 (NESH) binding protein
hsa-miR-520a-5p	1	0	1	0	1	1	REPIN1	replication initiator 1
hsa-miR-520a-5p	1	0	1	1	1	1	ARFGEF1	ADP-ribosylation factor guanine nucleotide-exchange factor 1 (brefeldin A-inhibited)
hsa-miR-520a-5p	1	0	1	1	1	1	TNRC6A	trinucleotide repeat containing 6A
hsa-miR-520a-5p	0	0	1	0	1	1	FLJ22447	uncharacterized LOC400221
hsa-miR-520a-5p	0	0	1	0	0	0	LINC00340	long intergenic non-protein coding RNA 340
hsa-miR-520a-5p	1	0	1	0	0	0	DTX2	deltex homolog 2 (Drosophila)
hsa-miR-520a-5p	1	0	1	1	1	1	HPS3	Hermansky-Pudlak syndrome 3
hsa-miR-520a-5p	1	0	1	1	0	0	UBXN7	UBX domain protein 7
hsa-miR-520a-5p	1	0	1	1	1	1	DCAF8	DDB1 and CUL4 associated factor 8
hsa-miR-520a-5p	0	0	1	1	1	1	GTF2H1	general transcription factor IIH, polypeptide 1, 62kDa
hsa-miR-520a-5p	1	0	1	1	1	1	RNF185	ring finger protein 185
hsa-miR-520a-5p	0	0	1	0	0	0	JAKMIP2-AS1	JAKMIP2 antisense RNA 1
hsa-miR-520a-5p	1	0	1	1	1	1	STRBP	spermatid perinuclear RNA binding protein
hsa-miR-520a-5p	0	0	1	0	0	0	NBLA00301	Nbla00301
hsa-miR-520a-5p	0	0	1	0	0	0	LOC254559	uncharacterized LOC254559
hsa-miR-520a-5p	0	0	1	0	0	0	LOC283508	uncharacterized LOC283508
hsa-miR-520a-5p	0	0	1	0	0	0	CHST9-AS1	CHST9 antisense RNA 1
hsa-miR-520a-5p	1	0	1	1	1	1	SGK1	serum/glucocorticoid regulated kinase 1
hsa-miR-520a-5p	0	0	1	1	1	1	FANCI	Fanconi anemia, complementation group I
hsa-miR-520a-5p	0	0	1	0	1	1	HDX	highly divergent homeobox
hsa-miR-520a-5p	0	0	1	0	0	0	FLJ30838	uncharacterized LOC400955
hsa-miR-520a-5p	0	0	1	1	1	1	CCND3	cyclin D3
hsa-miR-520a-5p	0	0	1	1	1	1	GLYATL1	glycine-N-acyltransferase-like 1
hsa-miR-520a-5p	0	0	1	0	0	0	LOC157273	uncharacterized LOC157273
hsa-miR-520a-5p	1	0	1	1	1	1	DIXDC1	DIX domain containing 1
hsa-miR-520a-5p	1	0	1	1	1	1	ZNF664	zinc finger protein 664
hsa-miR-520a-5p	0	0	1	1	0	0	ANXA11	annexin A11
hsa-miR-520a-5p	0	0	1	0	0	0	SEC14L2	SEC14-like 2 (S. cerevisiae)
hsa-miR-520a-5p	0	0	1	0	0	0	JPX	JPX transcript, XIST activator (non-protein coding)
hsa-miR-520a-5p	1	0	1	1	1	1	LMNA	lamin A/C
hsa-miR-520a-5p	1	0	1	1	0	0	SLC26A6	solute carrier family 26, member 6
hsa-miR-520a-5p	1	0	1	1	1	1	PPP1R3F	protein phosphatase 1, regulatory subunit 3F
hsa-miR-520a-5p	1	0	1	1	1	1	SCAMP5	secretory carrier membrane protein 5
hsa-miR-520a-5p	0	0	1	0	0	0	LOC284600	uncharacterized LOC284600
hsa-miR-520a-5p	1	0	1	1	1	1	CLCN5	chloride channel, voltage-sensitive 5
hsa-miR-520a-5p	1	0	1	1	1	1	SORBS2	sorbin and SH3 domain containing 2
hsa-miR-520a-5p	0	0	1	1	1	1	GNB2	guanine nucleotide binding protein (G protein), beta polypeptide 2
hsa-miR-520a-5p	0	0	1	0	0	0	LOC255187	hCG1980447
hsa-miR-520a-5p	1	0	1	0	1	1	RABGEF1	RAB guanine nucleotide exchange factor (GEF) 1
hsa-miR-520a-5p	0	0	1	1	1	1	COQ10A	coenzyme Q10 homolog A (S. cerevisiae)
hsa-miR-520a-5p	0	0	1	1	0	0	RELT	RELT tumor necrosis factor receptor
hsa-miR-520a-5p	1	0	1	0	1	1	PCGF3	polycomb group ring finger 3
hsa-miR-520a-5p	0	0	1	1	0	0	RGL3	ral guanine nucleotide dissociation stimulator-like 3
hsa-miR-520a-5p	1	0	1	1	1	1	TLE4	transducin-like enhancer of split 4 (E(sp1) homolog, Drosophila)
hsa-miR-520a-5p	1	0	1	1	1	1	MAP3K11	mitogen-activated protein kinase kinase kinase 11
hsa-miR-520a-5p	0	0	1	1	0	0	NXF2	nuclear RNA export factor 2
hsa-miR-520a-5p	0	0	1	1	0	0	HSD3B7	hydroxy-delta-5-steroid dehydrogenase, 3 beta- and steroid delta-isomerase 7
hsa-miR-520a-5p	1	0	1	0	1	1	BLOC1S6	biogenesis of lysosomal organelles complex-1, subunit 6, pallidin
hsa-miR-520a-5p	1	0	1	1	1	1	SEC22A	SEC22 vesicle trafficking protein homolog A (S. cerevisiae)
hsa-miR-520a-5p	0	0	1	0	1	1	CHURC1	churchill domain containing 1
hsa-miR-520a-5p	0	0	1	0	0	0	LOC285074	anaphase promoting complex subunit 1 pseudogene
hsa-miR-520a-5p	1	0	1	1	1	1	IST1	increased sodium tolerance 1 homolog (yeast)
hsa-miR-520a-5p	0	0	1	1	0	0	KRT86	keratin 86
hsa-miR-520a-5p	0	0	1	1	1	1	ZBTB26	zinc finger and BTB domain containing 26
hsa-miR-520a-5p	0	0	1	1	0	0	TRIM41	tripartite motif containing 41
hsa-miR-520a-5p	1	0	1	0	1	1	RNF165	ring finger protein 165
hsa-miR-520a-5p	1	0	1	1	1	1	PRRT2	proline-rich transmembrane protein 2
hsa-miR-520a-5p	0	0	1	1	1	1	SLC52A3	solute carrier family 52, riboflavin transporter, member 3
hsa-miR-520a-5p	0	0	1	0	0	0	SDHAP2	succinate dehydrogenase complex, subunit A, flavoprotein pseudogene 2
hsa-miR-520a-5p	0	0	1	1	0	0	NISCH	nischarin
hsa-miR-520a-5p	0	0	1	1	0	0	GHDC	GH3 domain containing
hsa-miR-520a-5p	0	0	1	1	0	0	LGR5	leucine-rich repeat containing G protein-coupled receptor 5
hsa-miR-520a-5p	1	0	1	1	1	1	PIP4K2C	phosphatidylinositol-5-phosphate 4-kinase, type II, gamma
hsa-miR-520a-5p	0	0	1	1	0	0	PIGO	phosphatidylinositol glycan anchor biosynthesis, class O
hsa-miR-520a-5p	0	0	1	1	1	1	STBD1	starch binding domain 1
hsa-miR-520a-5p	0	0	1	0	0	0	LOC643837	uncharacterized LOC643837
hsa-miR-520a-5p	1	0	1	1	1	1	AMMECR1	Alport syndrome, mental retardation, midface hypoplasia and elliptocytosis chromosomal region gene 1
hsa-miR-520a-5p	0	0	1	0	1	1	PIANP	PILR alpha associated neural protein
hsa-miR-520a-5p	1	0	1	1	1	1	FBXW2	F-box and WD repeat domain containing 2
hsa-miR-520a-5p	0	0	1	1	0	0	CDC25B	cell division cycle 25 homolog B (S. pombe)
hsa-miR-520a-5p	1	0	1	1	0	0	PHGDH	phosphoglycerate dehydrogenase
hsa-miR-520a-5p	1	0	1	1	0	0	TOE1	target of EGR1, member 1 (nuclear)
hsa-miR-520a-5p	0	0	1	1	1	1	PRKRA	protein kinase, interferon-inducible double stranded RNA dependent activator
hsa-miR-520a-5p	0	0	1	0	0	0	LOC283887	uncharacterized LOC283887
hsa-miR-520a-5p	1	0	1	1	1	1	SARM1	sterile alpha and TIR motif containing 1
hsa-miR-520a-5p	0	0	1	1	1	1	XPNPEP1	X-prolyl aminopeptidase (aminopeptidase P) 1, soluble
hsa-miR-520a-5p	0	0	1	1	1	1	LZTFL1	leucine zipper transcription factor-like 1
hsa-miR-520a-5p	1	0	1	1	1	1	SPTBN1	spectrin, beta, non-erythrocytic 1
hsa-miR-520a-5p	0	0	1	1	1	1	SLC16A1	solute carrier family 16, member 1 (monocarboxylic acid transporter 1)
hsa-miR-520a-5p	0	0	1	1	1	1	CYP11B1	cytochrome P450, family 11, subfamily B, polypeptide 1
hsa-miR-520a-5p	0	0	1	1	0	0	WBP1	WW domain binding protein 1
hsa-miR-520a-5p	0	0	1	0	0	0	PART1	prostate androgen-regulated transcript 1 (non-protein coding)
hsa-miR-520a-5p	0	0	1	0	1	1	KANSL2	KAT8 regulatory NSL complex subunit 2
hsa-miR-520a-5p	1	0	1	0	1	1	GATAD2B	GATA zinc finger domain containing 2B
hsa-miR-520a-5p	0	0	1	1	1	1	ATP6V1H	ATPase, H+ transporting, lysosomal 50/57kDa, V1 subunit H
hsa-miR-520a-5p	0	0	1	0	0	0	MYO1H	myosin IH
hsa-miR-520a-5p	1	0	1	1	1	1	GLT25D2	glycosyltransferase 25 domain containing 2
hsa-miR-520a-5p	0	0	1	1	1	1	RBM4B	RNA binding motif protein 4B
hsa-miR-520a-5p	0	0	1	0	0	0	LINC00486	long intergenic non-protein coding RNA 486
hsa-miR-520a-5p	0	0	1	1	0	0	ZNF185	zinc finger protein 185 (LIM domain)
hsa-miR-520a-5p	1	0	1	1	1	1	ATXN10	ataxin 10
hsa-miR-520a-5p	0	0	1	0	0	0	LOC730101	uncharacterized LOC730101
hsa-miR-520a-5p	0	0	1	1	1	1	AQP3	aquaporin 3 (Gill blood group)
hsa-miR-520a-5p	0	0	1	1	1	1	FUT11	fucosyltransferase 11 (alpha (1,3) fucosyltransferase)
hsa-miR-520a-5p	1	0	1	1	1	1	KCNIP3	Kv channel interacting protein 3, calsenilin
hsa-miR-520a-5p	0	0	1	0	1	1	NBPF3	neuroblastoma breakpoint family, member 3
hsa-miR-520a-5p	1	0	1	1	1	1	ANKRD10	ankyrin repeat domain 10
hsa-miR-520a-5p	1	0	1	1	1	1	PEA15	phosphoprotein enriched in astrocytes 15
hsa-miR-520a-5p	0	0	1	1	1	1	BAG1	BCL2-associated athanogene
hsa-miR-520a-5p	0	0	1	1	0	0	TRIM46	tripartite motif containing 46
hsa-miR-520a-5p	1	0	1	1	1	1	SLITRK2	SLIT and NTRK-like family, member 2
hsa-miR-520a-5p	0	0	1	0	0	0	ZNF815P	zinc finger protein 815, pseudogene
hsa-miR-520a-5p	0	0	1	0	0	0	FAM66C	family with sequence similarity 66, member C
hsa-miR-520a-5p	1	0	1	1	1	1	LRP8	low density lipoprotein receptor-related protein 8, apolipoprotein e receptor
hsa-miR-520a-5p	0	0	1	0	0	0	C1orf204	chromosome 1 open reading frame 204
hsa-miR-520a-5p	1	0	1	0	1	1	THRB	thyroid hormone receptor, beta
hsa-miR-520a-5p	1	0	1	1	1	1	SYT6	synaptotagmin VI
hsa-miR-520a-5p	1	0	1	1	1	1	CA12	carbonic anhydrase XII
hsa-miR-520a-5p	1	0	1	1	1	1	EPB41L1	erythrocyte membrane protein band 4.1-like 1
hsa-miR-520a-5p	0	0	1	1	0	0	TCEANC	transcription elongation factor A (SII) N-terminal and central domain containing
hsa-miR-520a-5p	0	0	1	1	0	0	ALPK1	alpha-kinase 1
hsa-miR-520a-5p	1	0	1	1	1	1	LCP1	lymphocyte cytosolic protein 1 (L-plastin)
hsa-miR-520a-5p	0	0	1	0	1	1	TNFAIP8	tumor necrosis factor, alpha-induced protein 8
hsa-miR-520a-5p	1	0	1	1	1	1	KL	klotho
hsa-miR-520a-5p	0	0	1	1	0	0	NUCB2	nucleobindin 2
hsa-miR-520a-5p	1	0	1	1	1	1	RAB11FIP4	RAB11 family interacting protein 4 (class II)
hsa-miR-520a-5p	0	0	1	1	1	1	PPFIBP2	PTPRF interacting protein, binding protein 2 (liprin beta 2)
hsa-miR-520a-5p	0	0	1	0	0	0	LINC00293	long intergenic non-protein coding RNA 293
hsa-miR-520a-5p	0	0	1	0	0	0	KIRREL3-AS3	KIRREL3 antisense RNA 3
hsa-miR-520a-5p	1	0	1	1	1	1	IGSF11	immunoglobulin superfamily, member 11
hsa-miR-520a-5p	1	0	1	1	1	1	LZTS2	leucine zipper, putative tumor suppressor 2
hsa-miR-520a-5p	0	0	1	1	0	0	TAPBPL	TAP binding protein-like
hsa-miR-520a-5p	0	0	1	1	1	1	ANKZF1	ankyrin repeat and zinc finger domain containing 1
hsa-miR-520a-5p	0	0	1	1	1	1	ARFGAP2	ADP-ribosylation factor GTPase activating protein 2
hsa-miR-520a-5p	0	0	1	0	0	0	LOC338579	ankyrin repeat domain-containing protein 30B pseudogene
hsa-miR-520a-5p	0	0	1	1	1	1	VWA3B	von Willebrand factor A domain containing 3B
hsa-miR-520a-5p	1	0	1	0	1	1	UNC5D	unc-5 homolog D (C. elegans)
hsa-miR-520a-5p	0	0	1	1	0	0	ZACN	zinc activated ligand-gated ion channel
hsa-miR-520a-5p	0	0	1	1	1	1	UPP2	uridine phosphorylase 2
hsa-miR-520a-5p	0	0	1	1	1	1	SLFN13	schlafen family member 13
hsa-miR-520a-5p	0	0	1	1	0	0	FBXO18	F-box protein, helicase, 18
hsa-miR-520a-5p	0	0	1	1	0	0	KIAA0146	KIAA0146
hsa-miR-520a-5p	1	0	1	1	0	0	WIZ	widely interspaced zinc finger motifs
hsa-miR-520a-5p	0	0	1	1	0	0	MARS	methionyl-tRNA synthetase
hsa-miR-520a-5p	0	0	1	0	1	1	PATE4	prostate and testis expressed 4
hsa-miR-520a-5p	0	0	1	0	1	1	FLJ41200	uncharacterized LOC401492
hsa-miR-520a-5p	1	0	1	1	1	1	PLEKHH1	pleckstrin homology domain containing, family H (with MyTH4 domain) member 1
hsa-miR-520a-5p	0	0	1	1	1	1	EXOC6	exocyst complex component 6
hsa-miR-520a-5p	1	0	1	1	1	1	MDGA2	MAM domain containing glycosylphosphatidylinositol anchor 2
hsa-miR-520a-5p	1	0	1	1	1	1	EGLN3	egl nine homolog 3 (C. elegans)
hsa-miR-520a-5p	0	0	1	1	1	1	RGS3	regulator of G-protein signaling 3
hsa-miR-520a-5p	0	0	1	1	0	0	TJAP1	tight junction associated protein 1 (peripheral)
hsa-miR-520a-5p	1	0	1	0	1	1	KCNK2	potassium channel, subfamily K, member 2
hsa-miR-520a-5p	0	0	1	1	1	1	FAM19A2	family with sequence similarity 19 (chemokine (C-C motif)-like), member A2
hsa-miR-520a-5p	0	0	1	0	0	0	LOC650368	asparagine-linked glycosylation 1-like pseudogene
hsa-miR-520a-5p	0	0	1	0	0	0	LOC285043	uncharacterized LOC285043
hsa-miR-520a-5p	1	0	1	1	1	1	GJC1	gap junction protein, gamma 1, 45kDa
hsa-miR-520a-5p	1	0	1	1	1	1	VPS54	vacuolar protein sorting 54 homolog (S. cerevisiae)
hsa-miR-520a-5p	1	0	1	1	1	1	ADIPOR1	adiponectin receptor 1
hsa-miR-520a-5p	0	0	1	1	0	0	PPP1R18	protein phosphatase 1, regulatory subunit 18
hsa-miR-520a-5p	0	0	1	1	1	1	ATPBD4	ATP binding domain 4
hsa-miR-520a-5p	1	0	1	1	1	1	ATXN7	ataxin 7
hsa-miR-520a-5p	1	0	1	1	1	1	PIAS3	protein inhibitor of activated STAT, 3
hsa-miR-520a-5p	1	0	1	1	1	1	DENND5B	DENN/MADD domain containing 5B
hsa-miR-520a-5p	1	0	1	1	1	1	SACS	spastic ataxia of Charlevoix-Saguenay (sacsin)
hsa-miR-520a-5p	0	0	1	0	0	0	LOC613266	uncharacterized LOC613266
hsa-miR-520a-5p	0	0	1	0	0	0	FAM95B1	family with sequence similarity 95, member B1
hsa-miR-520a-5p	0	0	1	1	0	0	RPRD2	regulation of nuclear pre-mRNA domain containing 2
hsa-miR-520a-5p	1	0	1	1	0	0	UBN2	ubinuclein 2
hsa-miR-520a-5p	0	0	1	1	1	1	EPPIN	epididymal peptidase inhibitor
hsa-miR-520a-5p	1	0	1	1	1	1	CSRNP3	cysteine-serine-rich nuclear protein 3
hsa-miR-520a-5p	1	0	1	1	1	1	PIK3R1	phosphoinositide-3-kinase, regulatory subunit 1 (alpha)
hsa-miR-520a-5p	0	0	1	1	0	0	CLDN4	claudin 4
hsa-miR-520a-5p	0	0	1	0	0	0	PLEKHD1	pleckstrin homology domain containing, family D (with coiled-coil domains) member 1
hsa-miR-520a-5p	1	0	1	1	1	1	DLG2	discs, large homolog 2 (Drosophila)
hsa-miR-520a-5p	1	0	1	1	0	0	LRRC73	leucine rich repeat containing 73
hsa-miR-520a-5p	1	0	1	1	1	1	ODF2	outer dense fiber of sperm tails 2
hsa-miR-520a-5p	0	0	1	1	0	0	HS3ST5	heparan sulfate (glucosamine) 3-O-sulfotransferase 5
hsa-miR-520a-5p	1	0	1	1	0	0	SNX30	sorting nexin family member 30
hsa-miR-520a-5p	1	0	1	1	1	1	TSHZ1	teashirt zinc finger homeobox 1
hsa-miR-520a-5p	1	0	1	0	1	1	ADIPOR2	adiponectin receptor 2
hsa-miR-520a-5p	1	0	1	1	0	0	MRVI1	murine retrovirus integration site 1 homolog
hsa-miR-520a-5p	0	0	1	0	0	0	LOC619207	scavenger receptor protein family member
hsa-miR-520a-5p	1	0	1	1	1	1	PHF17	PHD finger protein 17
hsa-miR-520a-5p	1	0	1	1	1	1	KANK4	KN motif and ankyrin repeat domains 4
hsa-miR-520a-5p	1	0	1	1	1	1	SLC26A9	solute carrier family 26, member 9
hsa-miR-520a-5p	0	0	1	1	1	1	CCDC78	coiled-coil domain containing 78
hsa-miR-520a-5p	1	0	1	1	1	1	RALGDS	ral guanine nucleotide dissociation stimulator
hsa-miR-520a-5p	0	0	1	1	0	0	GRINA	glutamate receptor, ionotropic, N-methyl D-aspartate-associated protein 1 (glutamate binding)
hsa-miR-520a-5p	0	0	1	1	0	0	AADACL3	arylacetamide deacetylase-like 3
hsa-miR-520a-5p	0	0	1	0	0	0	ERVFRD-2	endogenous retrovirus group FRD, member 2
hsa-miR-520a-5p	0	0	1	1	1	1	WDR69	WD repeat domain 69
hsa-miR-520a-5p	1	0	1	1	1	1	PLA2G15	phospholipase A2, group XV
hsa-miR-520a-5p	1	0	1	1	1	1	CROT	carnitine O-octanoyltransferase
hsa-miR-520a-5p	0	0	1	1	1	1	MCU	mitochondrial calcium uniporter
hsa-miR-520a-5p	0	0	1	0	0	0	FAM205B	transmembrane protein C9orf144B pseudogene
hsa-miR-520a-5p	1	0	1	0	1	1	KPNA6	karyopherin alpha 6 (importin alpha 7)
hsa-miR-520a-5p	0	0	1	1	1	1	ATXN2	ataxin 2
hsa-miR-520a-5p	0	0	1	1	1	1	ZNF662	zinc finger protein 662
hsa-miR-520a-5p	0	0	1	1	1	1	SHROOM3	shroom family member 3
hsa-miR-520a-5p	0	0	1	0	0	0	IDO2	indoleamine 2,3-dioxygenase 2
hsa-miR-520a-5p	1	0	1	1	1	1	ADAMTSL1	ADAMTS-like 1
hsa-miR-520a-5p	1	0	1	1	1	1	PHC2	polyhomeotic homolog 2 (Drosophila)
hsa-miR-520a-5p	0	0	1	0	0	0	FLJ26245	uncharacterized LOC400533
hsa-miR-520a-5p	0	0	1	1	0	0	HEATR8	HEAT repeat containing 8
hsa-miR-520a-5p	0	0	1	0	0	0	LOC390660	FLJ00317 protein
hsa-miR-520a-5p	0	0	1	0	1	1	GALNT13	UDP-N-acetyl-alpha-D-galactosamine:polypeptide N-acetylgalactosaminyltransferase 13 (GalNAc-T13)
hsa-miR-520a-5p	1	0	1	1	1	1	RNF111	ring finger protein 111
hsa-miR-520a-5p	0	0	1	1	1	1	ZNF346	zinc finger protein 346
hsa-miR-520a-5p	0	0	1	1	0	0	ZNF730	zinc finger protein 730
hsa-miR-520a-5p	0	0	1	1	0	0	DTHD1	death domain containing 1
hsa-miR-520a-5p	1	0	1	1	1	1	MAP2K4	mitogen-activated protein kinase kinase 4
hsa-miR-520a-5p	0	0	1	0	0	0	AGAP9	ArfGAP with GTPase domain, ankyrin repeat and PH domain 9
hsa-miR-520a-5p	1	0	1	1	1	1	SYS1	SYS1 Golgi-localized integral membrane protein homolog (S. cerevisiae)
hsa-miR-520a-5p	0	0	1	1	1	1	XRN2	5'-3' exoribonuclease 2
hsa-miR-520a-5p	1	0	1	1	1	1	SLC39A9	solute carrier family 39 (zinc transporter), member 9
hsa-miR-520a-5p	1	0	1	1	1	1	NME6	NME/NM23 nucleoside diphosphate kinase 6
hsa-miR-520a-5p	0	0	1	1	1	1	CRISP3	cysteine-rich secretory protein 3
hsa-miR-520a-5p	1	0	1	1	1	1	GATA6	GATA binding protein 6
hsa-miR-520a-5p	1	0	1	1	0	0	ATP13A3	ATPase type 13A3
hsa-miR-520a-5p	1	0	1	1	1	1	FAM135A	family with sequence similarity 135, member A
hsa-miR-520a-5p	1	0	1	1	1	1	CAMK2G	calcium/calmodulin-dependent protein kinase II gamma
hsa-miR-520a-5p	1	0	1	1	1	1	PHTF2	putative homeodomain transcription factor 2
hsa-miR-520a-5p	1	0	1	1	1	1	UPK1B	uroplakin 1B
hsa-miR-520a-5p	0	0	1	1	0	0	UFD1L	ubiquitin fusion degradation 1 like (yeast)
hsa-miR-520a-5p	0	0	1	1	1	1	RNF135	ring finger protein 135
hsa-miR-520a-5p	0	0	1	1	1	1	ENPP3	ectonucleotide pyrophosphatase/phosphodiesterase 3
hsa-miR-520a-5p	1	0	1	1	1	1	NOVA1	neuro-oncological ventral antigen 1
hsa-miR-520a-5p	1	0	1	1	1	1	AHCYL1	adenosylhomocysteinase-like 1
hsa-miR-520a-5p	1	0	1	1	1	1	TAB2	TGF-beta activated kinase 1/MAP3K7 binding protein 2
hsa-miR-520a-5p	1	0	1	1	1	1	GNB5	guanine nucleotide binding protein (G protein), beta 5
hsa-miR-520a-5p	0	0	1	0	0	0	POM121L8P	POM121 transmembrane nucleoporin-like 8 pseudogene
hsa-miR-520a-5p	0	0	1	1	0	0	RIMBP3	RIMS binding protein 3
hsa-miR-520a-5p	0	0	1	1	1	1	ARIH1	ariadne homolog, ubiquitin-conjugating enzyme E2 binding protein, 1 (Drosophila)
hsa-miR-520a-5p	0	0	1	1	1	1	KIDINS220	kinase D-interacting substrate, 220kDa
hsa-miR-520a-5p	0	0	1	1	1	1	GMEB2	glucocorticoid modulatory element binding protein 2
hsa-miR-520a-5p	0	0	1	0	0	0	KIAA0913	KIAA0913
hsa-miR-520a-5p	1	0	1	1	1	1	PREX1	phosphatidylinositol-3,4,5-trisphosphate-dependent Rac exchange factor 1
hsa-miR-520a-5p	0	0	1	1	1	1	PPA2	pyrophosphatase (inorganic) 2
hsa-miR-520a-5p	0	0	1	1	1	1	AQP6	aquaporin 6, kidney specific
hsa-miR-520a-5p	1	0	1	1	1	1	KIAA1033	KIAA1033
hsa-miR-520a-5p	0	0	1	1	0	0	DOPEY1	dopey family member 1
hsa-miR-520a-5p	1	0	1	1	1	1	CTTNBP2NL	CTTNBP2 N-terminal like
hsa-miR-520a-5p	0	0	1	0	0	0	RPL23AP82	ribosomal protein L23a pseudogene 82
hsa-miR-520a-5p	0	0	1	0	0	0	FAM66D	family with sequence similarity 66, member D
hsa-miR-520a-5p	0	0	1	0	0	0	LOC441204	uncharacterized LOC441204
hsa-miR-520a-5p	1	0	1	0	1	1	FAM19A1	family with sequence similarity 19 (chemokine (C-C motif)-like), member A1
hsa-miR-520a-5p	1	0	1	1	1	1	YTHDF3	YTH domain family, member 3
hsa-miR-520a-5p	1	0	1	1	1	1	LIMCH1	LIM and calponin homology domains 1
hsa-miR-520a-5p	1	0	1	1	1	1	MIER1	mesoderm induction early response 1 homolog (Xenopus laevis)
hsa-miR-520a-5p	0	0	1	1	1	1	FILIP1	filamin A interacting protein 1
hsa-miR-520a-5p	1	0	1	1	1	1	MTMR10	myotubularin related protein 10
hsa-miR-520a-5p	0	0	1	0	0	0	ZNF720	zinc finger protein 720
hsa-miR-520a-5p	1	0	1	1	1	1	NFX1	nuclear transcription factor, X-box binding 1
hsa-miR-520a-5p	0	0	1	1	1	1	TTC19	tetratricopeptide repeat domain 19
hsa-miR-520a-5p	1	0	1	1	1	1	TMEM182	transmembrane protein 182
hsa-miR-520a-5p	0	0	1	0	0	0	FAM225A	family with sequence similarity 225, member A (non-protein coding)
hsa-miR-520a-5p	0	0	1	1	1	1	AMIGO2	adhesion molecule with Ig-like domain 2
hsa-miR-520a-5p	0	0	1	1	1	1	INPP5B	inositol polyphosphate-5-phosphatase, 75kDa
hsa-miR-520a-5p	1	0	1	1	1	1	FAM126A	family with sequence similarity 126, member A
hsa-miR-520a-5p	0	0	1	1	1	1	CCDC14	coiled-coil domain containing 14
hsa-miR-520a-5p	0	0	1	0	0	0	C1RL-AS1	C1RL antisense RNA 1
hsa-miR-520a-5p	0	0	1	1	1	1	NFE2L1	nuclear factor (erythroid-derived 2)-like 1
hsa-miR-520a-5p	1	0	1	1	1	1	CEP164	centrosomal protein 164kDa
hsa-miR-520a-5p	0	0	1	1	1	1	KIAA1841	KIAA1841
hsa-miR-520a-5p	1	0	1	1	1	1	FAM63B	family with sequence similarity 63, member B
hsa-miR-520a-5p	0	0	1	1	1	1	SOAT1	sterol O-acyltransferase 1
hsa-miR-520a-5p	1	0	1	1	1	1	DIS3L2	DIS3 mitotic control homolog (S. cerevisiae)-like 2
hsa-miR-520a-5p	1	0	1	1	1	1	CAPRIN2	caprin family member 2
hsa-miR-520a-5p	1	0	1	1	1	1	MBD6	methyl-CpG binding domain protein 6
hsa-miR-520a-5p	1	0	1	1	1	1	CADM2	cell adhesion molecule 2
hsa-miR-520a-5p	1	0	1	1	1	1	TAZ	tafazzin
hsa-miR-520a-5p	1	0	1	1	1	1	FBXL5	F-box and leucine-rich repeat protein 5
hsa-miR-520a-5p	1	0	1	1	1	1	IKZF2	IKAROS family zinc finger 2 (Helios)
hsa-miR-520a-5p	0	0	1	1	0	0	ERAP2	endoplasmic reticulum aminopeptidase 2
hsa-miR-520a-5p	1	0	1	1	1	1	RCAN2	regulator of calcineurin 2
hsa-miR-520a-5p	0	0	1	1	1	1	CD209	CD209 molecule
hsa-miR-520a-5p	1	0	1	0	1	1	BDNF	brain-derived neurotrophic factor
hsa-miR-520a-5p	0	0	1	0	0	0	GRIK1-AS1	GRIK1 antisense RNA 1
hsa-miR-520a-5p	0	0	1	0	0	0	KGFLP1	fibroblast growth factor 7 pseudogene
hsa-miR-520a-5p	0	0	1	0	0	0	CR1L	complement component (3b/4b) receptor 1-like
hsa-miR-520a-5p	1	0	1	1	1	1	ANGPT1	angiopoietin 1
hsa-miR-520a-5p	1	0	1	1	1	1	USF2	upstream transcription factor 2, c-fos interacting
hsa-miR-520a-5p	1	0	1	1	1	1	RIC8B	resistance to inhibitors of cholinesterase 8 homolog B (C. elegans)
hsa-miR-520a-5p	1	0	1	0	1	1	NEDD4L	neural precursor cell expressed, developmentally down-regulated 4-like, E3 ubiquitin protein ligase
hsa-miR-520a-5p	0	0	1	1	1	1	IYD	iodotyrosine deiodinase
hsa-miR-520a-5p	0	0	1	1	0	0	GLYCTK	glycerate kinase
hsa-miR-520a-5p	0	0	1	0	0	0	MEG3	maternally expressed 3 (non-protein coding)
hsa-miR-520a-5p	1	0	1	1	1	1	GFRA2	GDNF family receptor alpha 2
hsa-miR-520a-5p	1	0	1	1	1	1	TAB3	TGF-beta activated kinase 1/MAP3K7 binding protein 3
hsa-miR-520a-5p	0	0	1	1	1	1	MFAP5	microfibrillar associated protein 5
hsa-miR-520a-5p	0	0	1	0	0	0	ZNFX1-AS1	ZNFX1 antisense RNA 1
hsa-miR-520a-5p	0	0	1	1	1	1	PROK2	prokineticin 2
hsa-miR-520a-5p	1	0	1	1	1	1	IQGAP2	IQ motif containing GTPase activating protein 2
hsa-miR-520a-5p	0	0	1	1	1	1	GCOM1	GRINL1A complex locus 1
hsa-miR-520a-5p	0	0	1	1	0	0	LRRC28	leucine rich repeat containing 28
hsa-miR-520a-5p	0	0	1	1	1	1	SLC22A12	solute carrier family 22 (organic anion/urate transporter), member 12
hsa-miR-520a-5p	1	0	1	1	1	1	TMCC2	transmembrane and coiled-coil domain family 2
hsa-miR-520a-5p	0	0	1	1	0	0	VSIG4	V-set and immunoglobulin domain containing 4
hsa-miR-520a-5p	1	0	1	1	1	1	FGD4	FYVE, RhoGEF and PH domain containing 4
hsa-miR-520a-5p	0	0	1	1	1	1	PAQR5	progestin and adipoQ receptor family member V
hsa-miR-520a-5p	1	0	1	1	1	1	FAM120A	family with sequence similarity 120A
hsa-miR-520a-5p	1	0	1	0	1	1	NHS	Nance-Horan syndrome (congenital cataracts and dental anomalies)
hsa-miR-520a-5p	1	0	1	1	1	1	ARHGAP20	Rho GTPase activating protein 20
hsa-miR-520a-5p	0	0	1	1	1	1	UGT2B4	UDP glucuronosyltransferase 2 family, polypeptide B4
hsa-miR-520a-5p	0	0	1	1	1	1	EHBP1	EH domain binding protein 1
hsa-miR-520a-5p	0	0	1	0	1	1	XKR5	XK, Kell blood group complex subunit-related family, member 5
hsa-miR-520a-5p	0	0	1	1	0	0	DHRS4	dehydrogenase/reductase (SDR family) member 4
hsa-miR-520a-5p	1	0	1	1	0	0	ZCCHC4	zinc finger, CCHC domain containing 4
hsa-miR-520a-5p	0	0	1	1	1	1	IL24	interleukin 24
hsa-miR-520a-5p	1	0	1	1	1	1	PLCH1	phospholipase C, eta 1
hsa-miR-520a-5p	1	0	1	1	1	1	RTN3	reticulon 3
hsa-miR-520a-5p	1	0	1	1	1	1	PFKFB4	6-phosphofructo-2-kinase/fructose-2,6-biphosphatase 4
hsa-miR-520a-5p	0	0	1	1	0	0	NBPF8	neuroblastoma breakpoint family, member 8
hsa-miR-520a-5p	1	0	1	1	1	1	TBC1D22B	TBC1 domain family, member 22B
hsa-miR-520a-5p	1	0	1	1	1	1	ZNF282	zinc finger protein 282
hsa-miR-520a-5p	0	0	1	1	1	1	IL23R	interleukin 23 receptor
hsa-miR-520a-5p	1	0	1	0	1	1	RASGRP1	RAS guanyl releasing protein 1 (calcium and DAG-regulated)
hsa-miR-520a-5p	1	0	1	1	1	1	AMOT	angiomotin
hsa-miR-520a-5p	0	0	1	1	1	1	SLC6A2	solute carrier family 6 (neurotransmitter transporter, noradrenalin), member 2
hsa-miR-520a-5p	1	0	1	1	1	1	PAFAH2	platelet-activating factor acetylhydrolase 2, 40kDa
hsa-miR-520a-5p	0	0	1	1	1	1	ENOPH1	enolase-phosphatase 1
hsa-miR-520a-5p	1	0	1	1	0	0	PPP4C	protein phosphatase 4, catalytic subunit
hsa-miR-520a-5p	0	0	1	1	1	1	C20orf24	chromosome 20 open reading frame 24
hsa-miR-520a-5p	0	0	1	1	1	1	WDR55	WD repeat domain 55
hsa-miR-520a-5p	1	0	1	1	1	1	HOXC13	homeobox C13
hsa-miR-520a-5p	0	0	1	1	1	1	MRRF	mitochondrial ribosome recycling factor
hsa-miR-520a-5p	0	0	1	1	1	1	TUFT1	tuftelin 1
hsa-miR-520a-5p	1	0	1	1	1	1	RIMS3	regulating synaptic membrane exocytosis 3
hsa-miR-520a-5p	1	0	1	1	1	1	NUMA1	nuclear mitotic apparatus protein 1
hsa-miR-520a-5p	1	0	1	1	1	1	SPRY2	sprouty homolog 2 (Drosophila)
hsa-miR-520a-5p	0	0	1	1	0	0	ZNF821	zinc finger protein 821
hsa-miR-520a-5p	1	0	1	1	1	1	POU2F2	POU class 2 homeobox 2
hsa-miR-520a-5p	1	0	1	1	0	0	ASRGL1	asparaginase like 1
hsa-miR-520a-5p	0	0	1	1	0	0	AGBL5	ATP/GTP binding protein-like 5
hsa-miR-520a-5p	0	0	1	1	1	1	ICA1	islet cell autoantigen 1, 69kDa
hsa-miR-520a-5p	1	0	1	1	1	1	HMGA1	high mobility group AT-hook 1
hsa-miR-520a-5p	0	0	1	1	1	1	TMEM30A	transmembrane protein 30A
hsa-miR-520a-5p	1	0	1	0	1	1	MINOS1	mitochondrial inner membrane organizing system 1
hsa-miR-520a-5p	1	0	1	0	1	1	TMEM39A	transmembrane protein 39A
hsa-miR-520a-5p	1	0	1	1	1	1	TRIM2	tripartite motif containing 2
hsa-miR-520a-5p	0	0	1	0	0	0	LRRC14	leucine rich repeat containing 14
hsa-miR-520a-5p	1	0	1	0	1	1	FNDC3B	fibronectin type III domain containing 3B
hsa-miR-520a-5p	0	0	1	1	0	0	KLHDC3	kelch domain containing 3
hsa-miR-520a-5p	1	0	1	1	0	0	CAPN12	calpain 12
hsa-miR-520a-5p	0	0	1	1	1	1	KEAP1	kelch-like ECH-associated protein 1
hsa-miR-520a-5p	0	0	1	1	1	1	DLX4	distal-less homeobox 4
hsa-miR-520a-5p	0	0	1	1	0	0	C8orf44	chromosome 8 open reading frame 44
hsa-miR-520a-5p	1	0	1	1	1	1	PRDM2	PR domain containing 2, with ZNF domain
hsa-miR-520a-5p	0	0	1	0	0	0	MGC21881	uncharacterized locus MGC21881
hsa-miR-520a-5p	0	0	1	0	0	0	NUDT16P1	nudix (nucleoside diphosphate linked moiety X)-type motif 16 pseudogene 1
hsa-miR-520a-5p	1	0	1	1	1	1	ZNF512	zinc finger protein 512
hsa-miR-520a-5p	0	0	1	1	0	0	DPY30	dpy-30 homolog (C. elegans)
hsa-miR-520a-5p	1	0	1	0	1	1	NECAB1	N-terminal EF-hand calcium binding protein 1
hsa-miR-520a-5p	0	0	1	1	1	1	FAM122C	family with sequence similarity 122C
hsa-miR-520a-5p	1	0	1	0	1	1	CYBRD1	cytochrome b reductase 1
hsa-miR-520a-5p	1	0	1	1	1	1	VTI1A	vesicle transport through interaction with t-SNAREs homolog 1A (yeast)
hsa-miR-520a-5p	1	0	1	1	1	1	ORMDL3	ORM1-like 3 (S. cerevisiae)
hsa-miR-520a-5p	0	0	1	1	0	0	ZDHHC6	zinc finger, DHHC-type containing 6
hsa-miR-520a-5p	1	0	1	1	1	1	ADPGK	ADP-dependent glucokinase
hsa-miR-520a-5p	1	0	1	1	1	1	SUZ12	suppressor of zeste 12 homolog (Drosophila)
hsa-miR-520a-5p	0	0	1	0	1	1	CD99P1	CD99 molecule pseudogene 1
hsa-miR-520a-5p	0	0	1	0	1	1	TMSB15B	thymosin beta 15B
hsa-miR-520a-5p	1	0	1	1	1	1	FAM222A	family with sequence similarity 222, member A
hsa-miR-520a-5p	0	0	1	0	1	1	ZNF718	zinc finger protein 718
hsa-miR-520a-5p	0	0	1	1	0	0	TMEM150B	transmembrane protein 150B
hsa-miR-520a-5p	1	0	1	0	1	1	BTF3L4	basic transcription factor 3-like 4
hsa-miR-520a-5p	0	0	1	1	1	1	SNX17	sorting nexin 17
hsa-miR-520a-5p	1	0	1	1	1	1	SCML4	sex comb on midleg-like 4 (Drosophila)
hsa-miR-520a-5p	0	0	1	0	0	0	NBR2	neighbor of BRCA1 gene 2 (non-protein coding)
hsa-miR-520a-5p	0	0	1	1	0	0	LYSMD2	LysM, putative peptidoglycan-binding, domain containing 2
hsa-miR-520a-5p	1	0	1	1	1	1	SPOCK2	sparc/osteonectin, cwcv and kazal-like domains proteoglycan (testican) 2
hsa-miR-520a-5p	1	0	1	1	1	1	ASPH	aspartate beta-hydroxylase
hsa-miR-520a-5p	1	0	1	1	1	1	VASP	vasodilator-stimulated phosphoprotein
hsa-miR-520a-5p	0	0	1	1	1	1	MAP2	microtubule-associated protein 2
hsa-miR-520a-5p	1	0	1	1	1	1	RSPO2	R-spondin 2
hsa-miR-520a-5p	0	0	1	1	1	1	C14orf105	chromosome 14 open reading frame 105
hsa-miR-520a-5p	0	0	1	1	1	1	SELP	selectin P (granule membrane protein 140kDa, antigen CD62)
hsa-miR-520a-5p	0	0	1	1	1	1	MLKL	mixed lineage kinase domain-like
hsa-miR-520a-5p	0	0	1	1	1	1	BIRC2	baculoviral IAP repeat containing 2
hsa-miR-520a-5p	0	0	1	1	1	1	KDM2B	lysine (K)-specific demethylase 2B
hsa-miR-520a-5p	1	0	1	0	1	1	NCAM1	neural cell adhesion molecule 1
hsa-miR-520a-5p	0	0	1	0	0	0	LOC100130950	uncharacterized LOC100130950
hsa-miR-520a-5p	1	0	1	1	1	1	PPARGC1A	peroxisome proliferator-activated receptor gamma, coactivator 1 alpha
hsa-miR-520a-5p	0	0	1	1	1	1	TFAM	transcription factor A, mitochondrial
hsa-miR-520a-5p	0	0	1	0	0	0	ZNF503-AS2	ZNF503 antisense RNA 2
hsa-miR-520a-5p	1	0	1	0	1	1	SV2B	synaptic vesicle glycoprotein 2B
hsa-miR-520a-5p	0	0	1	1	1	1	TMEM117	transmembrane protein 117
hsa-miR-520a-5p	0	0	1	1	1	1	LPAR1	lysophosphatidic acid receptor 1
hsa-miR-520a-5p	0	0	1	1	1	1	CTNNA3	catenin (cadherin-associated protein), alpha 3
hsa-miR-520a-5p	1	0	1	1	1	1	SULT4A1	sulfotransferase family 4A, member 1
hsa-miR-520a-5p	1	0	1	1	1	1	GABRA1	gamma-aminobutyric acid (GABA) A receptor, alpha 1
hsa-miR-520a-5p	0	0	1	0	0	0	LOC729307	uncharacterized LOC729307
hsa-miR-520a-5p	1	0	1	1	1	1	ZPLD1	zona pellucida-like domain containing 1
hsa-miR-520a-5p	0	0	1	1	0	0	TRIM69	tripartite motif containing 69
hsa-miR-520a-5p	0	0	1	0	0	0	ATP8B5P	ATPase, class I, type 8B, member 5, pseudogene
hsa-miR-520a-5p	0	0	1	0	1	1	FLJ25328	uncharacterized LOC148231
hsa-miR-520a-5p	1	0	1	1	1	1	PITPNB	phosphatidylinositol transfer protein, beta
hsa-miR-520a-5p	0	0	1	1	1	1	RBM42	RNA binding motif protein 42
hsa-miR-520a-5p	0	0	1	0	0	0	LOC643648	uncharacterized LOC643648
hsa-miR-520a-5p	1	0	1	1	1	1	FAM13A	family with sequence similarity 13, member A
hsa-miR-520a-5p	0	0	1	1	0	0	C9orf43	chromosome 9 open reading frame 43
hsa-miR-520a-5p	1	0	1	1	1	1	SIRPA	signal-regulatory protein alpha
hsa-miR-520a-5p	1	0	1	1	1	1	PLEKHA7	pleckstrin homology domain containing, family A member 7
hsa-miR-520a-5p	0	0	1	1	1	1	IL20RB	interleukin 20 receptor beta
hsa-miR-520a-5p	1	0	1	0	1	1	KCTD2	potassium channel tetramerisation domain containing 2
hsa-miR-520a-5p	1	0	1	1	1	1	FAM189B	family with sequence similarity 189, member B
hsa-miR-520a-5p	1	0	1	0	1	1	TBC1D2B	TBC1 domain family, member 2B
hsa-miR-520a-5p	0	0	1	1	0	0	ADAP2	ArfGAP with dual PH domains 2
hsa-miR-520a-5p	0	0	1	1	1	1	HEXA	hexosaminidase A (alpha polypeptide)
hsa-miR-520a-5p	0	0	1	1	1	1	ZNF337	zinc finger protein 337
hsa-miR-520a-5p	1	0	1	1	1	1	LPGAT1	lysophosphatidylglycerol acyltransferase 1
hsa-miR-520a-5p	0	0	1	1	1	1	EDA2R	ectodysplasin A2 receptor
hsa-miR-520a-5p	0	0	1	1	1	1	CLCNKA	chloride channel, voltage-sensitive Ka
hsa-miR-520a-5p	1	0	1	1	1	1	CTDSPL2	CTD (carboxy-terminal domain, RNA polymerase II, polypeptide A) small phosphatase like 2
hsa-miR-520a-5p	0	0	1	1	0	0	SNTG2	syntrophin, gamma 2
hsa-miR-520a-5p	1	0	1	1	1	1	DPP6	dipeptidyl-peptidase 6
hsa-miR-520a-5p	0	0	1	1	0	0	VPS8	vacuolar protein sorting 8 homolog (S. cerevisiae)
hsa-miR-520a-5p	0	0	1	1	1	1	FAM171B	family with sequence similarity 171, member B
hsa-miR-520a-5p	1	0	1	1	1	1	HECTD2	HECT domain containing E3 ubiquitin protein ligase 2
hsa-miR-520a-5p	1	0	1	1	1	1	MEIS1	Meis homeobox 1
hsa-miR-520a-5p	1	0	1	1	1	1	CEP128	centrosomal protein 128kDa
hsa-miR-520a-5p	0	0	1	0	0	0	LOC286184	uncharacterized LOC286184
hsa-miR-520a-5p	0	0	1	1	1	1	MTHFD2L	methylenetetrahydrofolate dehydrogenase (NADP+ dependent) 2-like
hsa-miR-520a-5p	1	0	1	1	1	1	WSCD2	WSC domain containing 2
hsa-miR-520a-5p	1	0	1	1	1	1	GALNT1	UDP-N-acetyl-alpha-D-galactosamine:polypeptide N-acetylgalactosaminyltransferase 1 (GalNAc-T1)
hsa-miR-520a-5p	0	0	1	0	0	0	ZBED5	zinc finger, BED-type containing 5
hsa-miR-520a-5p	0	0	1	1	0	0	H2AFZ	H2A histone family, member Z
hsa-miR-520a-5p	0	0	1	0	0	0	FLJ36000	uncharacterized FLJ36000
hsa-miR-520a-5p	1	0	1	1	1	1	FGFR2	fibroblast growth factor receptor 2
hsa-miR-520a-5p	1	0	1	1	1	1	NFYA	nuclear transcription factor Y, alpha
hsa-miR-520a-5p	0	0	1	0	0	0	USP32P1	ubiquitin specific peptidase 32 pseudogene 1
hsa-miR-520a-5p	1	0	1	0	1	1	LPHN3	latrophilin 3
hsa-miR-520a-5p	1	0	1	1	1	1	MARCKS	myristoylated alanine-rich protein kinase C substrate
hsa-miR-520a-5p	0	0	1	1	1	1	C11orf88	chromosome 11 open reading frame 88
hsa-miR-520a-5p	0	0	1	0	0	0	LOC221122	uncharacterized LOC221122
hsa-miR-520a-5p	0	0	1	1	1	1	SLC14A1	solute carrier family 14 (urea transporter), member 1 (Kidd blood group)
hsa-miR-520a-5p	0	0	1	1	1	1	FAM71F1	family with sequence similarity 71, member F1
hsa-miR-520a-5p	0	0	1	1	1	1	VPS35	vacuolar protein sorting 35 homolog (S. cerevisiae)
hsa-miR-520a-5p	1	0	1	1	1	1	ARPP21	cAMP-regulated phosphoprotein, 21kDa
hsa-miR-520a-5p	0	0	1	0	0	0	LOC154822	uncharacterized LOC154822
hsa-miR-520a-5p	0	0	1	1	0	0	PTGDS	prostaglandin D2 synthase 21kDa (brain)
hsa-miR-520a-5p	1	0	1	1	1	1	TNFSF4	tumor necrosis factor (ligand) superfamily, member 4
hsa-miR-520a-5p	0	0	1	1	1	1	GOLGA6L9	golgin A6 family-like 9
hsa-miR-520a-5p	0	0	1	1	1	1	COL22A1	collagen, type XXII, alpha 1
hsa-miR-520a-5p	0	0	1	1	1	1	FAM90A1	family with sequence similarity 90, member A1
hsa-miR-520a-5p	0	0	1	1	1	1	SH3GL3	SH3-domain GRB2-like 3
hsa-miR-520a-5p	0	0	1	0	0	0	DKFZp686O1327	uncharacterized LOC401014
hsa-miR-520a-5p	1	0	1	1	1	1	PLXND1	plexin D1
hsa-miR-520a-5p	1	0	1	1	1	1	AGAP3	ArfGAP with GTPase domain, ankyrin repeat and PH domain 3
hsa-miR-520a-5p	1	0	1	1	1	1	RNF145	ring finger protein 145
hsa-miR-520a-5p	0	0	1	1	1	1	MGC57346	uncharacterized LOC401884
hsa-miR-520a-5p	0	0	1	0	0	0	LOC283914	uncharacterized LOC283914
hsa-miR-520a-5p	0	0	1	0	1	1	IL33	interleukin 33
hsa-miR-520a-5p	0	0	1	0	0	0	LOC348120	uncharacterized LOC348120
hsa-miR-520a-5p	0	0	1	1	0	0	FKBP11	FK506 binding protein 11, 19 kDa
hsa-miR-520a-5p	0	0	1	0	0	0	WASH2P	WAS protein family homolog 2 pseudogene
hsa-miR-520a-5p	0	0	1	1	1	1	SGOL2	shugoshin-like 2 (S. pombe)
hsa-miR-520a-5p	0	0	1	1	1	1	INO80C	INO80 complex subunit C
hsa-miR-520a-5p	1	0	1	1	1	1	CLVS1	clavesin 1
hsa-miR-520a-5p	1	0	1	1	1	1	PELI1	pellino E3 ubiquitin protein ligase 1
hsa-miR-520a-5p	1	0	1	0	1	1	RNF182	ring finger protein 182
hsa-miR-520a-5p	0	0	1	0	1	1	ITGA1	integrin, alpha 1
hsa-miR-520a-5p	0	0	1	1	0	0	NLRC5	NLR family, CARD domain containing 5
hsa-miR-520a-5p	0	0	1	0	0	0	AURKAPS1	aurora kinase A pseudogene 1
hsa-miR-520a-5p	0	0	1	0	0	0	BMS1P6	BMS1 pseudogene 6
hsa-miR-520a-5p	1	0	1	1	1	1	ZFP91	zinc finger protein 91 homolog (mouse)
hsa-miR-520a-5p	1	0	1	1	1	1	YWHAZ	tyrosine 3-monooxygenase/tryptophan 5-monooxygenase activation protein, zeta polypeptide
hsa-miR-520a-5p	1	0	1	0	1	1	HDAC5	histone deacetylase 5
hsa-miR-520a-5p	1	0	1	1	1	1	SCUBE3	signal peptide, CUB domain, EGF-like 3
hsa-miR-520a-5p	0	0	1	0	0	0	AQP7P1	aquaporin 7 pseudogene 1
hsa-miR-520a-5p	0	0	1	1	1	1	GRIK5	glutamate receptor, ionotropic, kainate 5
hsa-miR-520a-5p	1	0	1	0	1	1	C14orf43	chromosome 14 open reading frame 43
hsa-miR-520a-5p	0	0	1	1	1	1	ZNF254	zinc finger protein 254
hsa-miR-520a-5p	0	0	1	1	1	1	MPP3	membrane protein, palmitoylated 3 (MAGUK p55 subfamily member 3)
hsa-miR-520a-5p	1	0	1	1	1	1	NCOA5	nuclear receptor coactivator 5
hsa-miR-520a-5p	0	0	1	1	0	0	WDR90	WD repeat domain 90
hsa-miR-520a-5p	1	0	1	1	1	1	ZSCAN29	zinc finger and SCAN domain containing 29
hsa-miR-520a-5p	0	0	1	1	0	0	PRR19	proline rich 19
hsa-miR-520a-5p	0	0	1	1	0	0	CERS4	ceramide synthase 4
hsa-miR-520a-5p	0	0	1	1	1	1	C10orf129	chromosome 10 open reading frame 129
hsa-miR-520a-5p	1	0	1	0	0	0	PRRT4	proline-rich transmembrane protein 4
hsa-miR-520a-5p	0	0	1	1	1	1	STAG1	stromal antigen 1
hsa-miR-520a-5p	0	0	1	1	1	1	ZNF33B	zinc finger protein 33B
hsa-miR-520a-5p	0	0	1	0	0	0	LINC00052	long intergenic non-protein coding RNA 52
hsa-miR-520a-5p	1	0	1	1	1	1	NRSN1	neurensin 1
hsa-miR-520a-5p	0	0	1	0	0	0	ZNF66P	zinc finger protein 66, pseudogene
hsa-miR-520a-5p	0	0	1	1	1	1	SLAMF1	signaling lymphocytic activation molecule family member 1
hsa-miR-520a-5p	1	0	1	1	1	1	SLC26A7	solute carrier family 26, member 7
hsa-miR-520a-5p	1	0	1	1	1	1	MAPKAPK3	mitogen-activated protein kinase-activated protein kinase 3
hsa-miR-520a-5p	1	0	1	1	1	1	PHACTR4	phosphatase and actin regulator 4
hsa-miR-520a-5p	1	0	1	1	1	1	SRPK2	SRSF protein kinase 2
hsa-miR-520a-5p	0	0	1	0	0	0	C17orf69	chromosome 17 open reading frame 69
hsa-miR-520a-5p	0	0	1	1	0	0	RELA	v-rel reticuloendotheliosis viral oncogene homolog A (avian)
hsa-miR-520a-5p	0	0	1	1	0	0	OCM	oncomodulin
hsa-miR-520a-5p	1	0	1	0	1	1	SLC7A2	solute carrier family 7 (cationic amino acid transporter, y+ system), member 2
hsa-miR-520a-5p	1	0	1	0	1	1	TGFBR1	transforming growth factor, beta receptor 1
hsa-miR-520a-5p	1	0	1	1	1	1	USP47	ubiquitin specific peptidase 47
hsa-miR-520a-5p	1	0	1	0	1	1	TMEM194A	transmembrane protein 194A
hsa-miR-520a-5p	0	0	1	0	0	0	LOC727849	golgin A2 pseudogene
hsa-miR-520a-5p	0	0	1	0	0	0	LOC727751	uncharacterized LOC727751
hsa-miR-520a-5p	0	0	1	0	0	0	AGSK1	golgin subfamily A member 2-like
hsa-miR-520a-5p	1	0	1	1	1	1	OPCML	opioid binding protein/cell adhesion molecule-like
hsa-miR-520a-5p	0	0	1	1	1	1	C3orf67	chromosome 3 open reading frame 67
hsa-miR-520a-5p	1	0	1	0	1	1	AMMECR1L	AMME chromosomal region gene 1-like
hsa-miR-520a-5p	0	0	1	1	0	0	DNHD1	dynein heavy chain domain 1
hsa-miR-520a-5p	0	0	1	0	0	0	LOC554249	uncharacterized LOC554249
hsa-miR-520a-5p	0	0	1	1	1	1	C1orf141	chromosome 1 open reading frame 141
hsa-miR-520a-5p	1	0	1	1	1	1	RHOBTB1	Rho-related BTB domain containing 1
hsa-miR-520a-5p	0	0	1	1	0	0	HERC2P3	hect domain and RLD 2 pseudogene 3
hsa-miR-520a-5p	1	0	1	1	1	1	STK38	serine/threonine kinase 38
hsa-miR-520a-5p	0	0	1	0	0	0	FRG1B	FSHD region gene 1 family, member B
hsa-miR-520a-5p	1	0	1	1	1	1	ST8SIA2	ST8 alpha-N-acetyl-neuraminide alpha-2,8-sialyltransferase 2
hsa-miR-520a-5p	1	0	1	1	1	1	ACVR2B	activin A receptor, type IIB
hsa-miR-520a-5p	0	0	1	0	0	0	FAM106A	family with sequence similarity 106, member A
hsa-miR-520a-5p	1	0	1	1	1	1	SYNJ1	synaptojanin 1
hsa-miR-520a-5p	1	0	1	1	1	1	OTUD5	OTU domain containing 5
hsa-miR-520a-5p	0	0	1	1	1	1	COL8A2	collagen, type VIII, alpha 2
hsa-miR-520a-5p	1	0	1	1	1	1	SLC36A2	solute carrier family 36 (proton/amino acid symporter), member 2
hsa-miR-520a-5p	1	0	1	1	0	0	HAND2	heart and neural crest derivatives expressed 2
hsa-miR-520a-5p	0	0	1	0	0	0	LOC441493	uncharacterized LOC441493
hsa-miR-520a-5p	0	0	1	0	0	0	LSAMP-AS3	LSAMP antisense RNA 3
hsa-miR-520a-5p	0	0	1	0	0	0	C5orf49	chromosome 5 open reading frame 49
hsa-miR-520a-5p	1	0	1	1	1	1	ZNF763	zinc finger protein 763
hsa-miR-520a-5p	0	0	1	1	1	1	MUC21	mucin 21, cell surface associated
hsa-miR-520a-5p	0	0	1	1	0	0	ZNF276	zinc finger protein 276
hsa-miR-520a-5p	1	0	1	0	1	1	RBM23	RNA binding motif protein 23
hsa-miR-520a-5p	0	0	1	1	0	0	BEAN1	brain expressed, associated with NEDD4, 1
hsa-miR-520a-5p	0	0	1	1	0	0	FMN1	formin 1
hsa-miR-520a-5p	1	0	1	1	1	1	PNISR	PNN-interacting serine/arginine-rich protein
hsa-miR-520a-5p	0	0	1	0	0	0	TPTEP1	transmembrane phosphatase with tensin homology pseudogene 1
hsa-miR-520a-5p	1	0	1	1	1	1	SUV420H1	suppressor of variegation 4-20 homolog 1 (Drosophila)
hsa-miR-520a-5p	0	0	1	1	0	0	SLC17A4	solute carrier family 17 (sodium phosphate), member 4
hsa-miR-520a-5p	1	0	1	0	1	1	KIF5C	kinesin family member 5C
hsa-miR-520a-5p	1	0	1	1	1	1	LARP1B	La ribonucleoprotein domain family, member 1B
hsa-miR-520a-5p	1	0	1	1	1	1	TET2	tet methylcytosine dioxygenase 2
hsa-miR-520a-5p	0	0	1	1	1	1	SMTNL2	smoothelin-like 2
hsa-miR-520a-5p	0	0	1	0	0	0	LRRC37A11P	leucine rich repeat containing 37, member A11, pseudogene
hsa-miR-520a-5p	0	0	1	1	1	1	UNC13B	unc-13 homolog B (C. elegans)
hsa-miR-520a-5p	0	0	1	1	0	0	PRAMEF10	PRAME family member 10
hsa-miR-520a-5p	0	0	1	1	0	0	RNF123	ring finger protein 123
hsa-miR-520a-5p	1	0	1	1	1	1	TMEM132B	transmembrane protein 132B
hsa-miR-520a-5p	1	0	1	1	1	1	PPP6R1	protein phosphatase 6, regulatory subunit 1
hsa-miR-520a-5p	1	0	1	1	1	1	CTSC	cathepsin C
hsa-miR-520a-5p	1	0	1	0	1	1	PRDM10	PR domain containing 10
hsa-miR-520a-5p	1	0	1	1	1	1	GRIA3	glutamate receptor, ionotropic, AMPA 3
hsa-miR-520a-5p	0	0	1	0	0	0	FAM74A1	family with sequence similarity 74, member A1
hsa-miR-520a-5p	0	0	1	0	0	0	CCT6P1	chaperonin containing TCP1, subunit 6 (zeta) pseudogene 1
hsa-miR-520a-5p	0	0	1	1	0	0	RGSL1	regulator of G-protein signaling like 1
hsa-miR-520a-5p	0	0	1	0	0	0	FAM74A4	family with sequence similarity 74, member A4
hsa-miR-520a-5p	0	0	1	1	0	0	PPAPDC1A	phosphatidic acid phosphatase type 2 domain containing 1A
hsa-miR-520a-5p	0	0	1	0	0	0	EEF1DP3	eukaryotic translation elongation factor 1 delta pseudogene 3
hsa-miR-520a-5p	0	0	1	0	1	1	GOLGA8G	golgin A8 family, member G
hsa-miR-520a-5p	1	0	1	1	1	1	ANK2	ankyrin 2, neuronal
hsa-miR-520a-5p	0	0	1	1	1	1	KANSL1L	KAT8 regulatory NSL complex subunit 1-like
hsa-miR-520a-5p	1	0	1	1	1	1	MEGF11	multiple EGF-like-domains 11
hsa-miR-520a-5p	1	0	1	1	1	1	COLQ	collagen-like tail subunit (single strand of homotrimer) of asymmetric acetylcholinesterase
hsa-miR-520a-5p	0	0	1	0	0	0	FAM225B	family with sequence similarity 225, member B (non-protein coding)
hsa-miR-520a-5p	1	0	1	1	1	1	TMEM218	transmembrane protein 218
hsa-miR-520a-5p	0	0	1	0	1	1	PDLIM4	PDZ and LIM domain 4
hsa-miR-520a-5p	0	0	1	1	1	1	TINF2	TERF1 (TRF1)-interacting nuclear factor 2
hsa-miR-520a-5p	0	0	1	1	1	1	CNIH	cornichon homolog (Drosophila)
hsa-miR-520a-5p	0	0	1	0	0	0	LINC00643	long intergenic non-protein coding RNA 643
hsa-miR-520a-5p	0	0	1	1	1	1	NCBP2	nuclear cap binding protein subunit 2, 20kDa
hsa-miR-520a-5p	1	0	1	1	0	0	RGS6	regulator of G-protein signaling 6
hsa-miR-520a-5p	1	0	1	1	1	1	SASH1	SAM and SH3 domain containing 1
hsa-miR-520a-5p	1	0	1	1	1	1	ATP2B4	ATPase, Ca++ transporting, plasma membrane 4
hsa-miR-520a-5p	0	0	1	0	1	1	AP1S2	adaptor-related protein complex 1, sigma 2 subunit
hsa-miR-520a-5p	1	0	1	0	1	1	NFIX	nuclear factor I/X (CCAAT-binding transcription factor)
hsa-miR-520a-5p	0	0	1	0	0	0	RGPD4	RANBP2-like and GRIP domain containing 4
hsa-miR-520a-5p	0	0	1	0	1	1	GPX8	glutathione peroxidase 8 (putative)
hsa-miR-520a-5p	0	0	1	1	0	0	EYS	eyes shut homolog (Drosophila)
hsa-miR-520a-5p	0	0	1	1	1	1	STAT2	signal transducer and activator of transcription 2, 113kDa
hsa-miR-520a-5p	1	0	1	1	1	1	SLC35F1	solute carrier family 35, member F1
hsa-miR-520a-5p	0	0	1	1	1	1	PSMA2	proteasome (prosome, macropain) subunit, alpha type, 2
hsa-miR-520a-5p	1	0	1	1	1	1	PRKRIR	protein-kinase, interferon-inducible double stranded RNA dependent inhibitor, repressor of (P58 repressor)
hsa-miR-520a-5p	0	0	1	1	1	1	COL6A3	collagen, type VI, alpha 3
hsa-miR-520a-5p	0	0	1	0	0	0	EML6	echinoderm microtubule associated protein like 6
hsa-miR-520a-5p	0	0	1	1	1	1	CC2D2A	coiled-coil and C2 domain containing 2A
hsa-miR-520a-5p	1	0	1	1	1	1	CGN	cingulin
hsa-miR-520a-5p	1	0	1	1	1	1	SLC39A13	solute carrier family 39 (zinc transporter), member 13
hsa-miR-520a-5p	0	0	1	0	1	1	THAP6	THAP domain containing 6
hsa-miR-520a-5p	0	0	1	1	1	1	PPP1R1C	protein phosphatase 1, regulatory (inhibitor) subunit 1C
hsa-miR-520a-5p	1	0	1	1	1	1	EPS15	epidermal growth factor receptor pathway substrate 15
hsa-miR-520a-5p	1	0	1	1	1	1	FOXP1	forkhead box P1
hsa-miR-520a-5p	1	0	1	1	1	1	RREB1	ras responsive element binding protein 1
hsa-miR-520a-5p	1	0	1	1	1	1	TSC22D3	TSC22 domain family, member 3
hsa-miR-520a-5p	1	0	1	1	1	1	PTPN3	protein tyrosine phosphatase, non-receptor type 3
hsa-miR-520a-5p	1	0	1	1	1	1	NFIB	nuclear factor I/B
hsa-miR-520a-5p	1	0	1	1	1	1	NAV1	neuron navigator 1
hsa-miR-520a-5p	1	0	1	1	1	1	POLA1	polymerase (DNA directed), alpha 1, catalytic subunit
hsa-miR-520a-5p	1	0	1	1	1	1	PGAP1	post-GPI attachment to proteins 1
hsa-miR-520a-5p	1	0	1	1	1	1	RECK	reversion-inducing-cysteine-rich protein with kazal motifs
hsa-miR-520a-5p	1	0	1	1	1	1	BZRAP1	benzodiazapine receptor (peripheral) associated protein 1
hsa-miR-520a-5p	1	0	1	1	1	1	CREB3L2	cAMP responsive element binding protein 3-like 2
hsa-miR-520a-5p	1	0	1	1	1	1	BSDC1	BSD domain containing 1
hsa-miR-520a-5p	0	0	1	0	1	1	GINS3	GINS complex subunit 3 (Psf3 homolog)
hsa-miR-520a-5p	0	0	1	0	1	1	CD59	CD59 molecule, complement regulatory protein
hsa-miR-520a-5p	1	0	1	1	1	1	AP2M1	adaptor-related protein complex 2, mu 1 subunit
hsa-miR-520a-5p	1	0	1	0	1	1	RNF144A	ring finger protein 144A
hsa-miR-520a-5p	1	0	1	1	1	1	CLU	clusterin
hsa-miR-520a-5p	0	0	1	1	1	1	SMYD5	SMYD family member 5
hsa-miR-520a-5p	0	0	1	0	0	0	AKR1A1	aldo-keto reductase family 1, member A1 (aldehyde reductase)
hsa-miR-520a-5p	0	0	1	0	0	0	RPS16P10	ribosomal protein S16 pseudogene 10
hsa-miR-520a-5p	0	0	1	1	0	0	APOA1BP	apolipoprotein A-I binding protein
hsa-miR-520a-5p	0	0	1	1	1	1	DGCR14	DiGeorge syndrome critical region gene 14
hsa-miR-520a-5p	0	0	1	1	0	0	TBC1D22A	TBC1 domain family, member 22A
hsa-miR-520a-5p	1	0	1	1	1	1	TARBP2	TAR (HIV-1) RNA binding protein 2
hsa-miR-520a-5p	0	0	1	0	0	0	LOC400768	uncharacterized LOC400768
hsa-miR-520a-5p	0	0	1	1	1	1	FEZ1	fasciculation and elongation protein zeta 1 (zygin I)
hsa-miR-520a-5p	0	0	1	1	0	0	URM1	ubiquitin related modifier 1
hsa-miR-520a-5p	0	0	1	1	0	0	TCEAL4	transcription elongation factor A (SII)-like 4
hsa-miR-520a-5p	0	0	1	1	1	1	NR2C2AP	nuclear receptor 2C2-associated protein
hsa-miR-520a-5p	0	0	1	0	0	0	COX4I2	cytochrome c oxidase subunit IV isoform 2 (lung)
hsa-miR-520a-5p	0	0	1	1	1	1	IER3	immediate early response 3
hsa-miR-520a-5p	0	0	1	1	0	0	TPST2	tyrosylprotein sulfotransferase 2
hsa-miR-520a-5p	0	0	1	1	1	1	COPS8	COP9 constitutive photomorphogenic homolog subunit 8 (Arabidopsis)
hsa-miR-520a-5p	1	0	1	1	1	1	ARL1	ADP-ribosylation factor-like 1
hsa-miR-520a-5p	1	0	1	0	1	1	SLCO2A1	solute carrier organic anion transporter family, member 2A1
hsa-miR-520a-5p	0	0	1	1	1	1	C1orf85	chromosome 1 open reading frame 85
hsa-miR-520a-5p	0	0	1	1	0	0	FCGRT	Fc fragment of IgG, receptor, transporter, alpha
hsa-miR-520a-5p	1	0	1	1	1	1	DOLPP1	dolichyl pyrophosphate phosphatase 1
hsa-miR-520a-5p	1	0	1	1	1	1	POLR2D	polymerase (RNA) II (DNA directed) polypeptide D
hsa-miR-520a-5p	0	0	1	1	0	0	MIF4GD	MIF4G domain containing
hsa-miR-520a-5p	0	0	1	1	0	0	CCNDBP1	cyclin D-type binding-protein 1
hsa-miR-520a-5p	1	0	1	1	1	1	FGF11	fibroblast growth factor 11
hsa-miR-520a-5p	0	0	1	1	1	1	HSPB8	heat shock 22kDa protein 8
hsa-miR-520a-5p	1	0	1	1	1	1	E2F3	E2F transcription factor 3
hsa-miR-520a-5p	0	0	1	1	1	1	BCL7B	B-cell CLL/lymphoma 7B
hsa-miR-520a-5p	1	0	1	1	1	1	HNRNPA1	heterogeneous nuclear ribonucleoprotein A1
hsa-miR-520a-5p	0	0	1	1	1	1	FAT1	FAT tumor suppressor homolog 1 (Drosophila)
hsa-miR-520a-5p	0	0	1	1	0	0	GTF2H4	general transcription factor IIH, polypeptide 4, 52kDa
hsa-miR-520a-5p	1	0	1	1	1	1	CAAP1	caspase activity and apoptosis inhibitor 1
hsa-miR-520a-5p	0	0	1	1	1	1	COPS7A	COP9 constitutive photomorphogenic homolog subunit 7A (Arabidopsis)
hsa-miR-520a-5p	0	0	1	1	1	1	FCGR3A	Fc fragment of IgG, low affinity IIIa, receptor (CD16a)
hsa-miR-520a-5p	0	0	1	1	1	1	FBXO4	F-box protein 4
hsa-miR-520a-5p	1	0	1	1	1	1	SMARCE1	SWI/SNF related, matrix associated, actin dependent regulator of chromatin, subfamily e, member 1
hsa-miR-520a-5p	0	0	1	0	1	1	C17orf108	chromosome 17 open reading frame 108
hsa-miR-520a-5p	0	0	1	1	1	1	SORD	sorbitol dehydrogenase
hsa-miR-520a-5p	0	0	1	0	0	0	TRIQK	triple QxxK/R motif containing
hsa-miR-520a-5p	0	0	1	0	1	1	EMX2	empty spiracles homeobox 2
hsa-miR-520a-5p	1	0	1	1	1	1	BAI3	brain-specific angiogenesis inhibitor 3
hsa-miR-520a-5p	0	0	1	1	0	0	IKBKG	inhibitor of kappa light polypeptide gene enhancer in B-cells, kinase gamma
hsa-miR-520a-5p	1	0	1	0	1	1	RPS6KB1	ribosomal protein S6 kinase, 70kDa, polypeptide 1
hsa-miR-520a-5p	0	0	1	1	0	0	GPSM3	G-protein signaling modulator 3
hsa-miR-520a-5p	0	0	1	1	1	1	STON1	stonin 1
hsa-miR-520a-5p	1	0	1	1	0	0	YPEL3	yippee-like 3 (Drosophila)
hsa-miR-520a-5p	0	0	1	1	0	0	HCRTR1	hypocretin (orexin) receptor 1
hsa-miR-520a-5p	0	0	1	0	1	1	WASH3P	WAS protein family homolog 3 pseudogene
hsa-miR-520a-5p	0	0	1	1	0	0	CXorf40A	chromosome X open reading frame 40A
hsa-miR-520a-5p	1	0	1	1	1	1	CCDC25	coiled-coil domain containing 25
hsa-miR-520a-5p	1	0	1	1	1	1	ARFIP2	ADP-ribosylation factor interacting protein 2
hsa-miR-520a-5p	0	0	1	1	0	0	MKS1	Meckel syndrome, type 1
hsa-miR-520a-5p	0	0	1	1	1	1	PIGC	phosphatidylinositol glycan anchor biosynthesis, class C
hsa-miR-520a-5p	1	0	1	1	1	1	TMEM245	transmembrane protein 245
hsa-miR-520a-5p	0	0	1	1	0	0	ATRAID	all-trans retinoic acid-induced differentiation factor
hsa-miR-520a-5p	0	0	1	1	1	1	NFATC4	nuclear factor of activated T-cells, cytoplasmic, calcineurin-dependent 4
hsa-miR-520a-5p	1	0	1	1	0	0	THY1	Thy-1 cell surface antigen
hsa-miR-520a-5p	0	0	1	1	0	0	C1orf31	chromosome 1 open reading frame 31
hsa-miR-520a-5p	0	0	1	1	1	1	CD3E	CD3e molecule, epsilon (CD3-TCR complex)
hsa-miR-520a-5p	0	0	1	1	1	1	SERP2	stress-associated endoplasmic reticulum protein family member 2
hsa-miR-520a-5p	1	0	1	1	1	1	ARNTL	aryl hydrocarbon receptor nuclear translocator-like
hsa-miR-520a-5p	0	0	1	1	1	1	BTF3	basic transcription factor 3
hsa-miR-520a-5p	0	0	1	1	1	1	DEDD	death effector domain containing
hsa-miR-520a-5p	1	0	1	1	1	1	CAMK2A	calcium/calmodulin-dependent protein kinase II alpha
hsa-miR-520a-5p	0	0	1	1	0	0	PLB1	phospholipase B1
hsa-miR-520a-5p	0	0	1	1	0	0	EXOSC8	exosome component 8
hsa-miR-520a-5p	0	0	1	1	1	1	TANK	TRAF family member-associated NFKB activator
hsa-miR-520a-5p	0	0	1	0	1	1	VSTM2A	V-set and transmembrane domain containing 2A
hsa-miR-520a-5p	0	0	1	0	1	1	RPL10	ribosomal protein L10
hsa-miR-520a-5p	1	0	1	1	1	1	DPF2	D4, zinc and double PHD fingers family 2
hsa-miR-520a-5p	1	0	1	1	1	1	ARL4A	ADP-ribosylation factor-like 4A
hsa-miR-520a-5p	0	0	1	1	0	0	PHPT1	phosphohistidine phosphatase 1
hsa-miR-520a-5p	0	0	1	1	1	1	TCTN3	tectonic family member 3
hsa-miR-520a-5p	0	0	1	1	1	1	GFM1	G elongation factor, mitochondrial 1
hsa-miR-520a-5p	1	0	1	0	1	1	GRAMD1A	GRAM domain containing 1A
hsa-miR-520a-5p	1	0	1	1	1	1	F11R	F11 receptor
hsa-miR-520a-5p	0	0	1	0	1	1	MAPKAPK5	mitogen-activated protein kinase-activated protein kinase 5
hsa-miR-520a-5p	1	0	1	1	1	1	ARHGEF40	Rho guanine nucleotide exchange factor (GEF) 40
hsa-miR-520a-5p	1	0	1	1	1	1	AZI2	5-azacytidine induced 2
hsa-miR-520a-5p	0	0	1	1	1	1	SAMD3	sterile alpha motif domain containing 3
hsa-miR-520a-5p	0	0	1	1	0	0	OXA1L	oxidase (cytochrome c) assembly 1-like
hsa-miR-520a-5p	1	0	1	1	1	1	VLDLR	very low density lipoprotein receptor
hsa-miR-520a-5p	0	0	1	1	0	0	TMEM41A	transmembrane protein 41A
hsa-miR-520a-5p	1	0	1	0	1	1	CD47	CD47 molecule
hsa-miR-520a-5p	0	0	1	0	0	0	CHEK2P2	checkpoint kinase 2 pseudogene 2
hsa-miR-520a-5p	0	0	1	1	1	1	INPP5K	inositol polyphosphate-5-phosphatase K
hsa-miR-520a-5p	0	0	1	0	1	1	SEPT7	septin 7
hsa-miR-520a-5p	0	0	1	0	0	0	LOC100132984	uncharacterized LOC100132984
hsa-miR-520a-5p	0	0	1	0	1	1	TSPAN7	tetraspanin 7
hsa-miR-520a-5p	0	0	1	1	0	0	FCGR2A	Fc fragment of IgG, low affinity IIa, receptor (CD32)
hsa-miR-520a-5p	1	0	1	1	1	1	ANKS6	ankyrin repeat and sterile alpha motif domain containing 6
hsa-miR-520a-5p	0	0	1	1	0	0	ISG20	interferon stimulated exonuclease gene 20kDa
hsa-miR-520a-5p	1	0	1	1	1	1	LGALSL	lectin, galactoside-binding-like
hsa-miR-520a-5p	1	0	1	1	1	1	STAG2	stromal antigen 2
hsa-miR-520a-5p	1	0	1	1	1	1	FBXW7	F-box and WD repeat domain containing 7, E3 ubiquitin protein ligase
hsa-miR-520a-5p	0	0	1	1	1	1	SYNE2	spectrin repeat containing, nuclear envelope 2
hsa-miR-520a-5p	0	0	1	0	0	0	LINC00661	long intergenic non-protein coding RNA 661
hsa-miR-520a-5p	0	0	1	0	0	0	MUC19	mucin 19, oligomeric
hsa-miR-520a-5p	1	0	1	0	1	1	MCFD2	multiple coagulation factor deficiency 2
hsa-miR-520a-5p	1	0	1	1	1	1	MAPK8IP3	mitogen-activated protein kinase 8 interacting protein 3
hsa-miR-520a-5p	0	0	1	0	0	0	DNAJC27-AS1	DNAJC27 antisense RNA 1
hsa-miR-520a-5p	1	0	1	0	1	1	CNTNAP2	contactin associated protein-like 2
hsa-miR-520a-5p	1	0	1	1	1	1	BCL2L1	BCL2-like 1
hsa-miR-520a-5p	0	0	1	1	0	0	TENC1	tensin like C1 domain containing phosphatase (tensin 2)
hsa-miR-520a-5p	0	0	1	0	0	0	LOC440518	golgin A2 pseudogene
hsa-miR-520a-5p	0	0	1	1	0	0	GOLGB1	golgin B1
hsa-miR-520a-5p	1	0	1	1	1	1	SP2	Sp2 transcription factor
hsa-miR-520a-5p	0	0	1	1	1	1	SLC39A14	solute carrier family 39 (zinc transporter), member 14
hsa-miR-520a-5p	1	0	1	1	1	1	METAP1	methionyl aminopeptidase 1
hsa-miR-520a-5p	1	0	1	1	1	1	NKX2-1	NK2 homeobox 1
hsa-miR-520a-5p	1	0	1	1	1	1	MAN2A2	mannosidase, alpha, class 2A, member 2
hsa-miR-520a-5p	0	0	1	1	1	1	ATF2	activating transcription factor 2
hsa-miR-520a-5p	1	0	1	1	1	1	QKI	QKI, KH domain containing, RNA binding
hsa-miR-520a-5p	1	0	1	1	1	1	ANKRD42	ankyrin repeat domain 42
hsa-miR-520a-5p	1	0	1	0	1	1	RBBP5	retinoblastoma binding protein 5
hsa-miR-520a-5p	0	0	1	1	1	1	HOOK2	hook homolog 2 (Drosophila)
hsa-miR-520a-5p	1	0	1	1	1	1	SLC4A8	solute carrier family 4, sodium bicarbonate cotransporter, member 8
hsa-miR-520a-5p	0	0	1	0	0	0	GPR144	G protein-coupled receptor 144
hsa-miR-520a-5p	1	0	1	0	1	1	STAT3	signal transducer and activator of transcription 3 (acute-phase response factor)
hsa-miR-520a-5p	0	0	1	0	1	1	OPRK1	opioid receptor, kappa 1
hsa-miR-520a-5p	1	0	1	0	1	1	BCL2	B-cell CLL/lymphoma 2
hsa-miR-520a-5p	0	0	1	1	1	1	NPR3	natriuretic peptide receptor C/guanylate cyclase C (atrionatriuretic peptide receptor C)
hsa-miR-520a-5p	0	0	1	1	1	1	ATP7A	ATPase, Cu++ transporting, alpha polypeptide
hsa-miR-520a-5p	1	0	1	1	1	1	COL4A3	collagen, type IV, alpha 3 (Goodpasture antigen)
hsa-miR-520a-5p	1	0	1	1	1	1	CYP19A1	cytochrome P450, family 19, subfamily A, polypeptide 1
hsa-miR-520a-5p	1	0	1	1	1	1	DMD	dystrophin
hsa-miR-520a-5p	1	0	1	1	1	1	ESR1	estrogen receptor 1
hsa-miR-520a-5p	1	0	1	1	1	1	GALC	galactosylceramidase
hsa-miR-520a-5p	1	0	1	0	1	1	ITGB3	integrin, beta 3 (platelet glycoprotein IIIa, antigen CD61)
hsa-miR-520a-5p	1	0	1	1	1	1	KCNA1	potassium voltage-gated channel, shaker-related subfamily, member 1 (episodic ataxia with myokymia)
hsa-miR-520a-5p	0	0	1	1	1	1	KRT12	keratin 12
hsa-miR-520a-5p	1	0	1	0	1	1	SGCB	sarcoglycan, beta (43kDa dystrophin-associated glycoprotein)
hsa-miR-520a-5p	0	0	1	0	1	1	MTTP	microsomal triglyceride transfer protein
hsa-miR-520a-5p	0	0	1	1	1	1	NDP	Norrie disease (pseudoglioma)
hsa-miR-520a-5p	1	0	1	0	1	1	PTEN	phosphatase and tensin homolog
hsa-miR-520a-5p	0	0	1	1	1	1	PTS	6-pyruvoyltetrahydropterin synthase
hsa-miR-520a-5p	1	0	1	1	1	1	RB1	retinoblastoma 1
hsa-miR-520a-5p	1	0	1	1	1	1	ATXN1	ataxin 1
hsa-miR-520a-5p	0	0	1	1	1	1	THBD	thrombomodulin
hsa-miR-520a-5p	0	0	1	1	1	1	CASR	calcium-sensing receptor
hsa-miR-520a-5p	1	0	1	0	1	1	PAFAH1B1	platelet-activating factor acetylhydrolase 1b, regulatory subunit 1 (45kDa)
hsa-miR-520a-5p	0	0	1	1	1	1	OXCT1	3-oxoacid CoA transferase 1
hsa-miR-520a-5p	1	0	1	0	1	1	PCSK1	proprotein convertase subtilisin/kexin type 1
hsa-miR-520a-5p	0	0	1	1	1	1	PECAM1	platelet/endothelial cell adhesion molecule 1
hsa-miR-520a-5p	0	0	1	1	1	1	ALPL	alkaline phosphatase, liver/bone/kidney
hsa-miR-520a-5p	0	0	1	1	1	1	CYP11B2	cytochrome P450, family 11, subfamily B, polypeptide 2
hsa-miR-520a-5p	1	0	1	1	1	1	PLP1	proteolipid protein 1
hsa-miR-520a-5p	0	0	1	1	1	1	RHO	rhodopsin
hsa-miR-520a-5p	1	0	1	1	1	1	DCX	doublecortin
hsa-miR-520a-5p	0	0	1	0	1	1	C8A	complement component 8, alpha polypeptide
hsa-miR-520a-5p	0	0	1	1	1	1	FCGR3B	Fc fragment of IgG, low affinity IIIb, receptor (CD16b)
hsa-miR-520a-5p	1	0	1	1	1	1	IL10	interleukin 10
hsa-miR-520a-5p	0	0	1	1	1	1	C7	complement component 7
hsa-miR-520a-5p	0	0	1	1	1	1	NOS1	nitric oxide synthase 1 (neuronal)
hsa-miR-520a-5p	1	0	1	0	1	1	ADRB1	adrenoceptor beta 1
hsa-miR-520a-5p	0	0	1	1	1	1	ALDH1B1	aldehyde dehydrogenase 1 family, member B1
hsa-miR-520a-5p	1	0	1	1	1	1	CSF1	colony stimulating factor 1 (macrophage)
hsa-miR-520a-5p	1	0	1	1	1	1	DRD2	dopamine receptor D2
hsa-miR-520a-5p	1	0	1	0	1	1	GABRA4	gamma-aminobutyric acid (GABA) A receptor, alpha 4
hsa-miR-520a-5p	0	0	1	1	1	1	GRIN2B	glutamate receptor, ionotropic, N-methyl D-aspartate 2B
hsa-miR-520a-5p	1	0	1	1	1	1	HTR4	5-hydroxytryptamine (serotonin) receptor 4, G protein-coupled
hsa-miR-520a-5p	1	0	1	1	1	1	IGF1R	insulin-like growth factor 1 receptor
hsa-miR-520a-5p	1	0	1	0	1	1	KCNJ2	potassium inwardly-rectifying channel, subfamily J, member 2
hsa-miR-520a-5p	0	0	1	1	0	0	MGP	matrix Gla protein
hsa-miR-520a-5p	1	0	1	1	1	1	PPP3R1	protein phosphatase 3, regulatory subunit B, alpha
hsa-miR-520a-5p	1	0	1	1	1	1	PTGER2	prostaglandin E receptor 2 (subtype EP2), 53kDa
hsa-miR-520a-5p	1	0	1	1	1	1	PTGER4	prostaglandin E receptor 4 (subtype EP4)
hsa-miR-520a-5p	0	0	1	1	1	1	PTGS2	prostaglandin-endoperoxide synthase 2 (prostaglandin G/H synthase and cyclooxygenase)
hsa-miR-520a-5p	1	0	1	0	1	1	GDF6	growth differentiation factor 6
hsa-miR-520a-5p	1	0	1	0	1	1	SPOPL	speckle-type POZ protein-like
hsa-miR-520a-5p	1	0	1	0	1	1	FLJ33360	FLJ33360 protein
hsa-miR-520a-5p	0	0	1	1	1	1	DDI1	DNA-damage inducible 1 homolog 1 (S. cerevisiae)
hsa-miR-520a-5p	1	0	1	1	1	1	TPD52L3	tumor protein D52-like 3
hsa-miR-520a-5p	0	0	1	0	0	0	KLK2	kallikrein-related peptidase 2
hsa-miR-520a-5p	1	0	1	0	1	1	RAB11FIP1	RAB11 family interacting protein 1 (class I)
hsa-miR-520a-5p	1	0	1	1	1	1	DNAJB12	DnaJ (Hsp40) homolog, subfamily B, member 12
hsa-miR-520a-5p	0	0	1	1	1	1	STAG3L1	stromal antigen 3-like 1
hsa-miR-520a-5p	1	0	1	0	1	1	SMAD2	SMAD family member 2
hsa-miR-520a-5p	0	0	1	1	0	0	C1orf95	chromosome 1 open reading frame 95
hsa-miR-520a-5p	0	0	1	1	1	1	SMAD1	SMAD family member 1
hsa-miR-520a-5p	1	0	1	1	1	1	KLHL31	kelch-like 31 (Drosophila)
hsa-miR-520a-5p	0	0	1	1	1	1	ATP5S	ATP synthase, H+ transporting, mitochondrial Fo complex, subunit s (factor B)
hsa-miR-520a-5p	1	0	1	0	1	1	BMF	Bcl2 modifying factor
hsa-miR-520a-5p	0	0	1	1	1	1	ALG11	asparagine-linked glycosylation 11, alpha-1,2-mannosyltransferase homolog (yeast)
hsa-miR-520a-5p	0	0	1	1	1	1	CCDC144NL	coiled-coil domain containing 144 family, N-terminal like
hsa-miR-520a-5p	0	0	1	1	1	1	CLEC2D	C-type lectin domain family 2, member D
hsa-miR-520a-5p	0	0	1	1	1	1	SP140	SP140 nuclear body protein
hsa-miR-520a-5p	1	0	1	0	1	1	LRRC55	leucine rich repeat containing 55
hsa-miR-520a-5p	0	0	1	0	1	1	FLJ46347	uncharacterized LOC389064
hsa-miR-520a-5p	0	0	1	1	0	0	KRTAP5-11	keratin associated protein 5-11
hsa-miR-520a-5p	0	0	1	1	0	0	MARCH2	membrane-associated ring finger (C3HC4) 2, E3 ubiquitin protein ligase
hsa-miR-520a-5p	1	0	1	1	1	1	PLCXD3	phosphatidylinositol-specific phospholipase C, X domain containing 3
hsa-miR-520a-5p	1	0	1	1	1	1	NFKBIZ	nuclear factor of kappa light polypeptide gene enhancer in B-cells inhibitor, zeta
hsa-miR-520a-5p	1	0	1	1	1	1	EDA	ectodysplasin A
hsa-miR-520a-5p	0	0	1	1	1	1	RYK	receptor-like tyrosine kinase
hsa-miR-520a-5p	0	0	1	1	1	1	MAPKAP1	mitogen-activated protein kinase associated protein 1
hsa-miR-520a-5p	1	0	1	1	1	1	TCEAL8	transcription elongation factor A (SII)-like 8
hsa-miR-520a-5p	1	0	1	1	0	0	SDC1	syndecan 1
hsa-miR-520a-5p	0	0	1	1	1	1	SCP2	sterol carrier protein 2
hsa-miR-520a-5p	1	0	1	1	1	1	NTRK3	neurotrophic tyrosine kinase, receptor, type 3
hsa-miR-520a-5p	1	0	1	1	1	1	IGSF3	immunoglobulin superfamily, member 3
hsa-miR-520a-5p	0	0	1	1	1	1	BUB3	budding uninhibited by benzimidazoles 3 homolog (yeast)
hsa-miR-520a-5p	1	0	1	0	1	1	CPLX2	complexin 2
hsa-miR-520a-5p	1	0	1	1	1	1	CTDSPL	CTD (carboxy-terminal domain, RNA polymerase II, polypeptide A) small phosphatase-like
hsa-miR-520a-5p	1	0	1	1	1	1	STEAP3	STEAP family member 3, metalloreductase
hsa-miR-520a-5p	0	0	1	1	1	1	MXRA7	matrix-remodelling associated 7
hsa-miR-520a-5p	1	0	1	0	1	1	KIAA2022	KIAA2022
hsa-miR-520a-5p	0	0	1	1	0	0	TCOF1	Treacher Collins-Franceschetti syndrome 1
hsa-miR-520a-5p	1	0	1	1	1	1	LPHN1	latrophilin 1
hsa-miR-520a-5p	0	0	1	1	1	1	FBXO47	F-box protein 47
hsa-miR-520a-5p	0	0	1	0	0	0	CD200R1L	CD200 receptor 1-like
hsa-miR-520a-5p	1	0	1	1	1	1	CUL4A	cullin 4A
hsa-miR-520a-5p	1	0	1	0	1	1	RCHY1	ring finger and CHY zinc finger domain containing 1, E3 ubiquitin protein ligase
hsa-miR-520a-5p	0	0	1	0	1	1	ZNF648	zinc finger protein 648
hsa-miR-520a-5p	1	0	1	0	1	1	FAM102B	family with sequence similarity 102, member B
hsa-miR-520a-5p	1	0	1	1	1	1	BCL2L15	BCL2-like 15
hsa-miR-520a-5p	1	0	1	1	1	1	FAM171A1	family with sequence similarity 171, member A1
hsa-miR-520a-5p	0	0	1	1	1	1	NCMAP	noncompact myelin associated protein
hsa-miR-520a-5p	0	0	1	1	0	0	SOHLH1	spermatogenesis and oogenesis specific basic helix-loop-helix 1
hsa-miR-520a-5p	0	0	1	0	1	1	GOLGA8E	golgin A8 family, member E
hsa-miR-520a-5p	0	0	1	1	0	0	KRTAP5-7	keratin associated protein 5-7
hsa-miR-520a-5p	0	0	1	0	1	1	LINC00596	long intergenic non-protein coding RNA 596
hsa-miR-520a-5p	1	0	1	1	1	1	SLC25A53	solute carrier family 25, member 53
hsa-miR-520a-5p	1	0	1	1	1	1	C12orf68	chromosome 12 open reading frame 68
hsa-miR-520a-5p	0	0	1	0	1	1	LINC00268	long intergenic non-protein coding RNA 268
hsa-miR-520a-5p	1	0	1	1	1	1	KATNAL1	katanin p60 subunit A-like 1
hsa-miR-520a-5p	0	0	1	1	0	0	RTKN	rhotekin
hsa-miR-520a-5p	1	0	1	1	1	1	PHF6	PHD finger protein 6
hsa-miR-520a-5p	0	0	1	1	1	1	RAB28	RAB28, member RAS oncogene family
hsa-miR-520a-5p	1	0	1	1	1	1	VMA21	VMA21 vacuolar H+-ATPase homolog (S. cerevisiae)
hsa-miR-520a-5p	0	0	1	1	1	1	ACTBL2	actin, beta-like 2
hsa-miR-520a-5p	0	0	1	1	0	0	POLR3H	polymerase (RNA) III (DNA directed) polypeptide H (22.9kD)
hsa-miR-520a-5p	1	0	1	1	1	1	PFKFB2	6-phosphofructo-2-kinase/fructose-2,6-biphosphatase 2
hsa-miR-520a-5p	1	0	1	0	1	1	BRCC3	BRCA1/BRCA2-containing complex, subunit 3
hsa-miR-520a-5p	1	0	1	1	1	1	ABCC5	ATP-binding cassette, sub-family C (CFTR/MRP), member 5
hsa-miR-520a-5p	1	0	1	0	1	1	RGAG4	retrotransposon gag domain containing 4
hsa-miR-520a-5p	1	0	1	1	1	1	KALRN	kalirin, RhoGEF kinase
hsa-miR-520a-5p	1	0	1	0	1	1	TNRC6B	trinucleotide repeat containing 6B
hsa-miR-520a-5p	1	0	1	0	1	1	CELF2	CUGBP, Elav-like family member 2
hsa-miR-520a-5p	1	0	1	0	1	1	CLLU1	chronic lymphocytic leukemia up-regulated 1
hsa-miR-520a-5p	1	0	1	1	1	1	UGGT1	UDP-glucose glycoprotein glucosyltransferase 1
hsa-miR-520a-5p	0	0	1	1	0	0	GRB7	growth factor receptor-bound protein 7
hsa-miR-520a-5p	1	0	1	0	1	1	MSRB3	methionine sulfoxide reductase B3
hsa-miR-520a-5p	1	0	1	1	1	1	NEK10	NIMA (never in mitosis gene a)- related kinase 10
hsa-miR-520a-5p	0	0	1	1	1	1	LYPD5	LY6/PLAUR domain containing 5
hsa-miR-520a-5p	1	0	1	1	1	1	CSNK1G3	casein kinase 1, gamma 3
hsa-miR-520a-5p	1	0	1	1	1	1	TMPO	thymopoietin
hsa-miR-520a-5p	0	0	1	1	1	1	SLC35A2	solute carrier family 35 (UDP-galactose transporter), member A2
hsa-miR-520a-5p	1	0	1	1	1	1	STK24	serine/threonine kinase 24
hsa-miR-520a-5p	1	0	1	1	1	1	MYCL1	v-myc myelocytomatosis viral oncogene homolog 1, lung carcinoma derived (avian)
hsa-miR-520a-5p	1	0	1	1	1	1	SAR1B	SAR1 homolog B (S. cerevisiae)
hsa-miR-520a-5p	0	0	1	1	0	0	C17orf47	chromosome 17 open reading frame 47
hsa-miR-520a-5p	0	0	1	0	1	1	FER1L6-AS1	FER1L6 antisense RNA 1
hsa-miR-520a-5p	1	0	1	0	1	1	CDC42SE1	CDC42 small effector 1
hsa-miR-520a-5p	0	0	1	1	1	1	SPATA6L	spermatogenesis associated 6-like
hsa-miR-520a-5p	1	0	1	1	1	1	KCNC4	potassium voltage-gated channel, Shaw-related subfamily, member 4
hsa-miR-520a-5p	1	0	1	1	1	1	PTGFR	prostaglandin F receptor (FP)
hsa-miR-520a-5p	1	0	1	0	1	1	CREBZF	CREB/ATF bZIP transcription factor
hsa-miR-520a-5p	1	0	1	1	1	1	CBLN3	cerebellin 3 precursor
hsa-miR-520a-5p	1	0	1	1	1	1	C3orf65	chromosome 3 open reading frame 65
hsa-miR-520a-5p	0	0	1	0	1	1	OPALIN	oligodendrocytic myelin paranodal and inner loop protein
hsa-miR-520a-5p	0	0	1	0	1	1	SCN3B	sodium channel, voltage-gated, type III, beta subunit
hsa-miR-520a-5p	0	0	1	1	1	1	MCHR2	melanin-concentrating hormone receptor 2
hsa-miR-520a-5p	1	0	1	1	1	1	NCALD	neurocalcin delta
hsa-miR-520a-5p	0	0	1	0	1	1	ABCE1	ATP-binding cassette, sub-family E (OABP), member 1
hsa-miR-520a-5p	1	0	1	1	1	1	HMGCLL1	3-hydroxymethyl-3-methylglutaryl-CoA lyase-like 1
hsa-miR-520a-5p	1	0	1	1	1	1	RUFY2	RUN and FYVE domain containing 2
hsa-miR-520a-5p	1	0	1	1	1	1	CEP85L	centrosomal protein 85kDa-like
hsa-miR-520a-5p	1	0	1	1	1	1	SLC9A6	solute carrier family 9, subfamily A (NHE6, cation proton antiporter 6), member 6
hsa-miR-520a-5p	0	0	1	1	1	1	TTC14	tetratricopeptide repeat domain 14
hsa-miR-520a-5p	1	0	1	0	1	1	SRGAP2	SLIT-ROBO Rho GTPase activating protein 2
hsa-miR-520a-5p	1	0	1	1	1	1	C5orf43	chromosome 5 open reading frame 43
hsa-miR-520a-5p	1	0	1	1	1	1	QSER1	glutamine and serine rich 1
hsa-miR-520a-5p	1	0	1	1	1	1	ATG9A	autophagy related 9A
hsa-miR-520a-5p	1	0	1	1	1	1	GRIA4	glutamate receptor, ionotropic, AMPA 4
hsa-miR-520a-5p	1	0	1	1	1	1	NCOR2	nuclear receptor corepressor 2
hsa-miR-520a-5p	1	0	1	1	1	1	PHF16	PHD finger protein 16
hsa-miR-520a-5p	1	0	1	1	1	1	PRR3	proline rich 3
hsa-miR-520a-5p	0	0	1	1	1	1	VCAM1	vascular cell adhesion molecule 1
hsa-miR-520a-5p	0	0	1	1	0	0	FAM127A	family with sequence similarity 127, member A
hsa-miR-520a-5p	1	0	1	0	1	1	FAM127C	family with sequence similarity 127, member C
hsa-miR-520a-5p	1	0	1	0	1	1	TRAPPC6B	trafficking protein particle complex 6B
hsa-miR-520a-5p	0	0	1	1	1	1	DIAPH1	diaphanous homolog 1 (Drosophila)
hsa-miR-520a-5p	1	0	1	1	1	1	CUL4B	cullin 4B
hsa-miR-520a-5p	1	0	1	0	1	1	FBXO41	F-box protein 41
hsa-miR-520a-5p	1	0	1	0	1	1	UNC13A	unc-13 homolog A (C. elegans)
hsa-miR-520a-5p	0	0	1	1	1	1	HSF5	heat shock transcription factor family member 5
hsa-miR-520a-5p	1	0	1	1	1	1	REPS2	RALBP1 associated Eps domain containing 2
hsa-miR-520a-5p	1	0	1	1	0	0	ASIC2	acid-sensing (proton-gated) ion channel 2
hsa-miR-520a-5p	1	0	1	0	1	1	CDK6	cyclin-dependent kinase 6
hsa-miR-520a-5p	1	0	1	1	1	1	CHD1	chromodomain helicase DNA binding protein 1
hsa-miR-520a-5p	1	0	1	0	1	1	CPD	carboxypeptidase D
hsa-miR-520a-5p	1	0	1	1	1	1	CREBL2	cAMP responsive element binding protein-like 2
hsa-miR-520a-5p	1	0	1	1	1	1	MAPK14	mitogen-activated protein kinase 14
hsa-miR-520a-5p	1	0	1	0	1	1	EFNB3	ephrin-B3
hsa-miR-520a-5p	1	0	1	1	1	1	ELAVL1	ELAV (embryonic lethal, abnormal vision, Drosophila)-like 1 (Hu antigen R)
hsa-miR-520a-5p	0	0	1	0	1	1	ELF5	E74-like factor 5 (ets domain transcription factor)
hsa-miR-520a-5p	1	0	1	1	1	1	EP300	E1A binding protein p300
hsa-miR-520a-5p	1	0	1	1	1	1	EREG	epiregulin
hsa-miR-520a-5p	1	0	1	1	1	1	NR6A1	nuclear receptor subfamily 6, group A, member 1
hsa-miR-520a-5p	1	0	1	0	1	1	GCNT2	glucosaminyl (N-acetyl) transferase 2, I-branching enzyme (I blood group)
hsa-miR-520a-5p	1	0	1	1	0	0	GDI1	GDP dissociation inhibitor 1
hsa-miR-520a-5p	1	0	1	1	1	1	NDST1	N-deacetylase/N-sulfotransferase (heparan glucosaminyl) 1
hsa-miR-520a-5p	1	0	1	1	1	1	IGFBP4	insulin-like growth factor binding protein 4
hsa-miR-520a-5p	0	0	1	1	0	0	APEH	N-acylaminoacyl-peptide hydrolase
hsa-miR-520a-5p	0	0	1	1	0	0	ARAF	v-raf murine sarcoma 3611 viral oncogene homolog
hsa-miR-520a-5p	1	0	1	1	1	1	ARF3	ADP-ribosylation factor 3
hsa-miR-520a-5p	1	0	1	0	1	1	ARNT	aryl hydrocarbon receptor nuclear translocator
hsa-miR-520a-5p	1	0	1	1	1	1	BNC1	basonuclin 1
hsa-miR-520a-5p	1	0	1	1	1	1	CALM2	calmodulin 2 (phosphorylase kinase, delta)
hsa-miR-520a-5p	1	0	1	0	1	1	CCND2	cyclin D2
hsa-miR-520a-5p	0	0	1	1	1	1	CD1D	CD1d molecule
hsa-miR-520a-5p	0	0	1	1	0	0	CD19	CD19 molecule
hsa-miR-520a-5p	1	0	1	1	1	1	CDH11	cadherin 11, type 2, OB-cadherin (osteoblast)
hsa-miR-520a-5p	1	0	1	1	1	1	CENPB	centromere protein B, 80kDa
hsa-miR-520a-5p	1	0	1	1	1	1	CLTB	clathrin, light chain B
hsa-miR-520a-5p	1	0	1	1	1	1	SLC31A1	solute carrier family 31 (copper transporters), member 1
hsa-miR-520a-5p	0	0	1	1	1	1	SLC31A2	solute carrier family 31 (copper transporters), member 2
hsa-miR-520a-5p	0	0	1	1	0	0	CPA1	carboxypeptidase A1 (pancreatic)
hsa-miR-520a-5p	1	0	1	1	0	0	DES	desmin
hsa-miR-520a-5p	0	0	1	1	1	1	DLAT	dihydrolipoamide S-acetyltransferase
hsa-miR-520a-5p	1	0	1	1	1	1	DUSP6	dual specificity phosphatase 6
hsa-miR-520a-5p	0	0	1	1	0	0	EDN2	endothelin 2
hsa-miR-520a-5p	0	0	1	1	1	1	GFAP	glial fibrillary acidic protein
hsa-miR-520a-5p	0	0	1	1	1	1	HOXA4	homeobox A4
hsa-miR-520a-5p	1	0	1	1	1	1	HOXD10	homeobox D10
hsa-miR-520a-5p	1	0	1	1	1	1	ITGA5	integrin, alpha 5 (fibronectin receptor, alpha polypeptide)
hsa-miR-520a-5p	0	0	1	1	0	0	EIF6	eukaryotic translation initiation factor 6
hsa-miR-520a-5p	1	0	1	1	1	1	KPNA3	karyopherin alpha 3 (importin alpha 4)
hsa-miR-520a-5p	1	0	1	1	1	1	IPO5	importin 5
hsa-miR-520a-5p	1	0	1	1	1	1	LIF	leukemia inhibitory factor
hsa-miR-520a-5p	1	0	1	1	1	1	M6PR	mannose-6-phosphate receptor (cation dependent)
hsa-miR-520a-5p	1	0	1	0	1	1	MXD1	MAX dimerization protein 1
hsa-miR-520a-5p	1	0	1	1	1	1	ADAM11	ADAM metallopeptidase domain 11
hsa-miR-520a-5p	1	0	1	1	1	1	MSR1	macrophage scavenger receptor 1
hsa-miR-520a-5p	0	0	1	1	1	1	MSX1	msh homeobox 1
hsa-miR-520a-5p	0	0	1	1	1	1	MTRR	5-methyltetrahydrofolate-homocysteine methyltransferase reductase
hsa-miR-520a-5p	1	0	1	1	1	1	PPP1R12B	protein phosphatase 1, regulatory subunit 12B
hsa-miR-520a-5p	0	0	1	1	1	1	NDUFC1	NADH dehydrogenase (ubiquinone) 1, subcomplex unknown, 1, 6kDa
hsa-miR-520a-5p	1	0	1	1	1	1	NPAT	nuclear protein, ataxia-telangiectasia locus
hsa-miR-520a-5p	1	0	1	1	1	1	OLR1	oxidized low density lipoprotein (lectin-like) receptor 1
hsa-miR-520a-5p	1	0	1	1	1	1	OSBP	oxysterol binding protein
hsa-miR-520a-5p	1	0	1	0	1	1	PAK2	p21 protein (Cdc42/Rac)-activated kinase 2
hsa-miR-520a-5p	1	0	1	1	1	1	PBX2	pre-B-cell leukemia homeobox 2
hsa-miR-520a-5p	0	0	1	1	0	0	PER1	period homolog 1 (Drosophila)
hsa-miR-520a-5p	0	0	1	1	1	1	PGC	progastricsin (pepsinogen C)
hsa-miR-520a-5p	0	0	1	1	1	1	PIK3C2B	phosphatidylinositol-4-phosphate 3-kinase, catalytic subunit type 2 beta
hsa-miR-520a-5p	1	0	1	1	1	1	PLAGL2	pleiomorphic adenoma gene-like 2
hsa-miR-520a-5p	1	0	1	1	1	1	PLCG1	phospholipase C, gamma 1
hsa-miR-520a-5p	1	0	1	1	1	1	PROX1	prospero homeobox 1
hsa-miR-520a-5p	1	0	1	1	1	1	RAD23B	RAD23 homolog B (S. cerevisiae)
hsa-miR-520a-5p	1	0	1	0	1	1	CCL22	chemokine (C-C motif) ligand 22
hsa-miR-520a-5p	0	0	1	1	1	1	SDC2	syndecan 2
hsa-miR-520a-5p	0	0	1	1	1	1	SMARCA1	SWI/SNF related, matrix associated, actin dependent regulator of chromatin, subfamily a, member 1
hsa-miR-520a-5p	1	0	1	1	1	1	SMARCD2	SWI/SNF related, matrix associated, actin dependent regulator of chromatin, subfamily d, member 2
hsa-miR-520a-5p	0	0	1	1	1	1	UAP1	UDP-N-acteylglucosamine pyrophosphorylase 1
hsa-miR-520a-5p	0	0	1	1	1	1	STAT6	signal transducer and activator of transcription 6, interleukin-4 induced
hsa-miR-520a-5p	0	0	1	1	1	1	SULT2A1	sulfotransferase family, cytosolic, 2A, dehydroepiandrosterone (DHEA)-preferring, member 1
hsa-miR-520a-5p	1	0	1	1	1	1	SVIL	supervillin
hsa-miR-520a-5p	1	0	1	0	1	1	TAL1	T-cell acute lymphocytic leukemia 1
hsa-miR-520a-5p	1	0	1	1	1	1	TFAP2B	transcription factor AP-2 beta (activating enhancer binding protein 2 beta)
hsa-miR-520a-5p	1	0	1	1	1	1	TGFB3	transforming growth factor, beta 3
hsa-miR-520a-5p	1	0	1	0	1	1	THBS1	thrombospondin 1
hsa-miR-520a-5p	1	0	1	0	1	1	TSPYL1	TSPY-like 1
hsa-miR-520a-5p	1	0	1	0	1	1	UBE2D2	ubiquitin-conjugating enzyme E2D 2
hsa-miR-520a-5p	1	0	1	1	1	1	UBE2D3	ubiquitin-conjugating enzyme E2D 3
hsa-miR-520a-5p	0	0	1	1	1	1	UBE2I	ubiquitin-conjugating enzyme E2I
hsa-miR-520a-5p	1	0	1	1	0	0	CLIP2	CAP-GLY domain containing linker protein 2
hsa-miR-520a-5p	1	0	1	1	1	1	ZNF131	zinc finger protein 131
hsa-miR-520a-5p	1	0	1	0	1	1	BSN	bassoon (presynaptic cytomatrix protein)
hsa-miR-520a-5p	1	0	1	1	1	1	DEK	DEK oncogene
hsa-miR-520a-5p	1	0	1	1	1	1	PDHX	pyruvate dehydrogenase complex, component X
hsa-miR-520a-5p	1	0	1	1	1	1	HMGA2	high mobility group AT-hook 2
hsa-miR-520a-5p	1	0	1	1	1	1	NRIP1	nuclear receptor interacting protein 1
hsa-miR-520a-5p	1	0	1	1	1	1	FZD7	frizzled family receptor 7
hsa-miR-520a-5p	0	0	1	1	0	0	FZD9	frizzled family receptor 9
hsa-miR-520a-5p	0	0	1	1	1	1	STX7	syntaxin 7
hsa-miR-520a-5p	1	0	1	1	1	1	DYRK2	dual-specificity tyrosine-(Y)-phosphorylation regulated kinase 2
hsa-miR-520a-5p	0	0	1	1	0	0	SEMA7A	semaphorin 7A, GPI membrane anchor (John Milton Hagen blood group)
hsa-miR-520a-5p	0	0	1	1	1	1	ITGA10	integrin, alpha 10
hsa-miR-520a-5p	0	0	1	1	0	0	DCHS1	dachsous 1 (Drosophila)
hsa-miR-520a-5p	1	0	1	0	1	1	IRS2	insulin receptor substrate 2
hsa-miR-520a-5p	1	0	1	1	1	1	NR5A2	nuclear receptor subfamily 5, group A, member 2
hsa-miR-520a-5p	0	0	1	1	1	1	TNFRSF11A	tumor necrosis factor receptor superfamily, member 11a, NFKB activator
hsa-miR-520a-5p	0	0	1	1	1	1	IL18R1	interleukin 18 receptor 1
hsa-miR-520a-5p	1	0	1	1	1	1	NRP2	neuropilin 2
hsa-miR-520a-5p	1	0	1	1	1	1	ALDH1A2	aldehyde dehydrogenase 1 family, member A2
hsa-miR-520a-5p	0	0	1	1	0	0	FCGBP	Fc fragment of IgG binding protein
hsa-miR-520a-5p	1	0	1	1	1	1	UBE2M	ubiquitin-conjugating enzyme E2M
hsa-miR-520a-5p	1	0	1	1	1	1	BCL2L2	BCL2-like 2
hsa-miR-520a-5p	0	0	1	1	1	1	TIMM8A	translocase of inner mitochondrial membrane 8 homolog A (yeast)
hsa-miR-520a-5p	0	0	1	1	1	1	GZMB	granzyme B (granzyme 2, cytotoxic T-lymphocyte-associated serine esterase 1)
hsa-miR-520a-5p	0	0	1	0	1	1	HABP2	hyaluronan binding protein 2
hsa-miR-520a-5p	1	0	1	1	1	1	PPP2CB	protein phosphatase 2, catalytic subunit, beta isozyme
hsa-miR-520a-5p	1	0	1	0	1	1	SLC1A2	solute carrier family 1 (glial high affinity glutamate transporter), member 2
hsa-miR-520a-5p	0	0	1	1	0	0	WNT2B	wingless-type MMTV integration site family, member 2B
hsa-miR-520a-5p	1	0	1	1	0	0	SYNGR3	synaptogyrin 3
hsa-miR-520a-5p	0	0	1	1	1	1	HOMER1	homer homolog 1 (Drosophila)
hsa-miR-520a-5p	1	0	1	1	1	1	SLC25A27	solute carrier family 25, member 27
hsa-miR-520a-5p	1	0	1	1	1	1	GDA	guanine deaminase
hsa-miR-520a-5p	1	0	1	0	1	1	ACVR1B	activin A receptor, type IB
hsa-miR-520a-5p	1	0	1	1	1	1	ARL3	ADP-ribosylation factor-like 3
hsa-miR-520a-5p	1	0	1	1	1	1	ASTN1	astrotactin 1
hsa-miR-520a-5p	1	0	1	1	1	1	DAG1	dystroglycan 1 (dystrophin-associated glycoprotein 1)
hsa-miR-520a-5p	1	0	1	1	1	1	EPHA2	EPH receptor A2
hsa-miR-520a-5p	1	0	1	1	1	1	EPHB2	EPH receptor B2
hsa-miR-520a-5p	1	0	1	0	1	1	ETV5	ets variant 5
hsa-miR-520a-5p	1	0	1	1	1	1	FUT8	fucosyltransferase 8 (alpha (1,6) fucosyltransferase)
hsa-miR-520a-5p	1	0	1	1	0	0	HOXC6	homeobox C6
hsa-miR-520a-5p	1	0	1	1	1	1	NAP1L1	nucleosome assembly protein 1-like 1
hsa-miR-520a-5p	0	0	1	0	1	1	POU4F2	POU class 4 homeobox 2
hsa-miR-520a-5p	1	0	1	1	1	1	RAB4A	RAB4A, member RAS oncogene family
hsa-miR-520a-5p	1	0	1	0	1	1	SCN2B	sodium channel, voltage-gated, type II, beta subunit
hsa-miR-520a-5p	0	0	1	1	1	1	TK2	thymidine kinase 2, mitochondrial
hsa-miR-520a-5p	1	0	1	0	1	1	WNT7A	wingless-type MMTV integration site family, member 7A
hsa-miR-520a-5p	1	0	1	1	1	1	WNT11	wingless-type MMTV integration site family, member 11
hsa-miR-520a-5p	0	0	1	1	1	1	PABPN1	poly(A) binding protein, nuclear 1
hsa-miR-520a-5p	0	0	1	1	0	0	C21orf33	chromosome 21 open reading frame 33
hsa-miR-520a-5p	1	0	1	1	1	1	BAP1	BRCA1 associated protein-1 (ubiquitin carboxy-terminal hydrolase)
hsa-miR-520a-5p	0	0	1	1	1	1	VNN1	vanin 1
hsa-miR-520a-5p	0	0	1	1	0	0	PRY	PTPN13-like, Y-linked
hsa-miR-520a-5p	1	0	1	1	1	1	MTMR6	myotubularin related protein 6
hsa-miR-520a-5p	1	0	1	1	1	1	MTMR7	myotubularin related protein 7
hsa-miR-520a-5p	0	0	1	0	1	1	CXorf1	chromosome X open reading frame 1
hsa-miR-520a-5p	1	0	1	1	1	1	MAP3K13	mitogen-activated protein kinase kinase kinase 13
hsa-miR-520a-5p	1	0	1	1	1	1	LARGE	like-glycosyltransferase
hsa-miR-520a-5p	1	0	1	1	1	1	STK17A	serine/threonine kinase 17a
hsa-miR-520a-5p	0	0	1	0	1	1	ADIPOQ	adiponectin, C1Q and collagen domain containing
hsa-miR-520a-5p	1	0	1	0	1	1	ARHGEF6	Rac/Cdc42 guanine nucleotide exchange factor (GEF) 6
hsa-miR-520a-5p	0	0	1	1	0	0	EIF4E2	eukaryotic translation initiation factor 4E family member 2
hsa-miR-520a-5p	1	0	1	1	1	1	ONECUT2	one cut homeobox 2
hsa-miR-520a-5p	1	0	1	1	1	1	TBPL1	TBP-like 1
hsa-miR-520a-5p	0	0	1	1	1	1	CLCA3P	chloride channel accessory 3, pseudogene
hsa-miR-520a-5p	1	0	1	1	1	1	SEC24C	SEC24 family, member C (S. cerevisiae)
hsa-miR-520a-5p	0	0	1	1	0	0	MMP9	matrix metallopeptidase 9 (gelatinase B, 92kDa gelatinase, 92kDa type IV collagenase)
hsa-miR-520a-5p	0	0	1	1	1	1	PSMD5	proteasome (prosome, macropain) 26S subunit, non-ATPase, 5
hsa-miR-520a-5p	1	0	1	1	1	1	KDM5A	lysine (K)-specific demethylase 5A
hsa-miR-520a-5p	1	0	1	0	1	1	SCD	stearoyl-CoA desaturase (delta-9-desaturase)
hsa-miR-520a-5p	1	0	1	0	1	1	SEL1L	sel-1 suppressor of lin-12-like (C. elegans)
hsa-miR-520a-5p	0	0	1	1	1	1	XYLB	xylulokinase homolog (H. influenzae)
hsa-miR-520a-5p	1	0	1	1	1	1	GFPT2	glutamine-fructose-6-phosphate transaminase 2
hsa-miR-520a-5p	1	0	1	1	1	1	HS3ST1	heparan sulfate (glucosamine) 3-O-sulfotransferase 1
hsa-miR-520a-5p	1	0	1	1	1	1	FOXN3	forkhead box N3
hsa-miR-520a-5p	1	0	1	1	1	1	NR2F6	nuclear receptor subfamily 2, group F, member 6
hsa-miR-520a-5p	0	0	1	0	1	1	FOSL2	FOS-like antigen 2
hsa-miR-520a-5p	1	0	1	1	1	1	GJA5	gap junction protein, alpha 5, 40kDa
hsa-miR-520a-5p	1	0	1	1	1	1	GPR3	G protein-coupled receptor 3
hsa-miR-520a-5p	1	0	1	1	1	1	GPR6	G protein-coupled receptor 6
hsa-miR-520a-5p	1	0	1	0	1	1	PRKCE	protein kinase C, epsilon
hsa-miR-520a-5p	1	0	1	1	1	1	RALA	v-ral simian leukemia viral oncogene homolog A (ras related)
hsa-miR-520a-5p	1	0	1	1	0	0	SALL2	sal-like 2 (Drosophila)
hsa-miR-520a-5p	1	0	1	0	1	1	CCDC6	coiled-coil domain containing 6
hsa-miR-520a-5p	0	0	1	1	1	1	FOSL1	FOS-like antigen 1
hsa-miR-520a-5p	1	0	1	1	1	1	AKT3	v-akt murine thymoma viral oncogene homolog 3 (protein kinase B, gamma)
hsa-miR-520a-5p	1	0	1	1	1	1	SCARB2	scavenger receptor class B, member 2
hsa-miR-520a-5p	0	0	1	1	0	0	DNAJC4	DnaJ (Hsp40) homolog, subfamily C, member 4
hsa-miR-520a-5p	0	0	1	1	0	0	LMNB1	lamin B1
hsa-miR-520a-5p	1	0	1	1	1	1	NHLH2	nescient helix loop helix 2
hsa-miR-520a-5p	1	0	1	1	1	1	RGS4	regulator of G-protein signaling 4
hsa-miR-520a-5p	0	0	1	1	1	1	TSPAN3	tetraspanin 3
hsa-miR-520a-5p	1	0	1	0	1	1	TSPAN2	tetraspanin 2
hsa-miR-520a-5p	0	0	1	1	1	1	RNF41	ring finger protein 41
hsa-miR-520a-5p	0	0	1	1	1	1	SLC17A2	solute carrier family 17 (sodium phosphate), member 2
hsa-miR-520a-5p	1	0	1	0	1	1	SPRY3	sprouty homolog 3 (Drosophila)
hsa-miR-520a-5p	1	0	1	1	1	1	EFS	embryonal Fyn-associated substrate
hsa-miR-520a-5p	1	0	1	1	1	1	MAN1A1	mannosidase, alpha, class 1A, member 1
hsa-miR-520a-5p	0	0	1	1	1	1	MFAP3	microfibrillar-associated protein 3
hsa-miR-520a-5p	1	0	1	1	1	1	MTF1	metal-regulatory transcription factor 1
hsa-miR-520a-5p	1	0	1	0	1	1	NAB1	NGFI-A binding protein 1 (EGR1 binding protein 1)
hsa-miR-520a-5p	1	0	1	1	1	1	PRCC	papillary renal cell carcinoma (translocation-associated)
hsa-miR-520a-5p	0	0	1	1	1	1	AKR1D1	aldo-keto reductase family 1, member D1 (delta 4-3-ketosteroid-5-beta-reductase)
hsa-miR-520a-5p	0	0	1	1	1	1	STK10	serine/threonine kinase 10
hsa-miR-520a-5p	1	0	1	1	1	1	LUC7L3	LUC7-like 3 (S. cerevisiae)
hsa-miR-520a-5p	1	0	1	1	1	1	CAPZA2	capping protein (actin filament) muscle Z-line, alpha 2
hsa-miR-520a-5p	0	0	1	1	1	1	CD28	CD28 molecule
hsa-miR-520a-5p	1	0	1	1	1	1	DYNC1LI2	dynein, cytoplasmic 1, light intermediate chain 2
hsa-miR-520a-5p	0	0	1	1	1	1	IRF6	interferon regulatory factor 6
hsa-miR-520a-5p	1	0	1	1	1	1	LASP1	LIM and SH3 protein 1
hsa-miR-520a-5p	0	0	1	1	1	1	OCM2	oncomodulin 2
hsa-miR-520a-5p	1	0	1	1	1	1	ORC2	origin recognition complex, subunit 2
hsa-miR-520a-5p	1	0	1	1	1	1	PDGFRA	platelet-derived growth factor receptor, alpha polypeptide
hsa-miR-520a-5p	0	0	1	1	1	1	PIK3CA	phosphatidylinositol-4,5-bisphosphate 3-kinase, catalytic subunit alpha
hsa-miR-520a-5p	1	0	1	0	1	1	PPP1R2	protein phosphatase 1, regulatory (inhibitor) subunit 2
hsa-miR-520a-5p	0	0	1	1	1	1	PPP2R5A	protein phosphatase 2, regulatory subunit B', alpha
hsa-miR-520a-5p	1	0	1	1	1	1	PPP2R5E	protein phosphatase 2, regulatory subunit B', epsilon isoform
hsa-miR-520a-5p	1	0	1	1	1	1	RANBP2	RAN binding protein 2
hsa-miR-520a-5p	1	0	1	1	1	1	STK4	serine/threonine kinase 4
hsa-miR-520a-5p	0	0	1	1	1	1	TNFAIP2	tumor necrosis factor, alpha-induced protein 2
hsa-miR-520a-5p	0	0	1	1	1	1	TYRO3	TYRO3 protein tyrosine kinase
hsa-miR-520a-5p	1	0	1	1	1	1	SMC1A	structural maintenance of chromosomes 1A
hsa-miR-520a-5p	1	0	1	1	1	1	ZER1	zer-1 homolog (C. elegans)
hsa-miR-520a-5p	1	0	1	1	1	1	ZNF238	zinc finger protein 238
hsa-miR-520a-5p	1	0	1	1	1	1	NXF1	nuclear RNA export factor 1
hsa-miR-520a-5p	1	0	1	1	1	1	VAT1	vesicle amine transport protein 1 homolog (T. californica)
hsa-miR-520a-5p	1	0	1	1	1	1	NEBL	nebulette
hsa-miR-520a-5p	0	0	1	1	1	1	CXCL13	chemokine (C-X-C motif) ligand 13
hsa-miR-520a-5p	1	0	1	1	1	1	PAIP1	poly(A) binding protein interacting protein 1
hsa-miR-520a-5p	0	0	1	1	0	0	STAMBP	STAM binding protein
hsa-miR-520a-5p	1	0	1	0	1	1	GNAI3	guanine nucleotide binding protein (G protein), alpha inhibiting activity polypeptide 3
hsa-miR-520a-5p	0	0	1	1	1	1	CLCA2	chloride channel accessory 2
hsa-miR-520a-5p	1	0	1	0	1	1	IGF2BP1	insulin-like growth factor 2 mRNA binding protein 1
hsa-miR-520a-5p	1	0	1	1	1	1	PLK2	polo-like kinase 2
hsa-miR-520a-5p	1	0	1	1	1	1	MAN1A2	mannosidase, alpha, class 1A, member 2
hsa-miR-520a-5p	1	0	1	1	1	1	DIAPH2	diaphanous homolog 2 (Drosophila)
hsa-miR-520a-5p	1	0	1	1	1	1	BTG2	BTG family, member 2
hsa-miR-520a-5p	1	0	1	1	1	1	ZBTB33	zinc finger and BTB domain containing 33
hsa-miR-520a-5p	0	0	1	1	0	0	HNRNPA0	heterogeneous nuclear ribonucleoprotein A0
hsa-miR-520a-5p	1	0	1	1	1	1	RAB35	RAB35, member RAS oncogene family
hsa-miR-520a-5p	1	0	1	0	1	1	SLC2A3	solute carrier family 2 (facilitated glucose transporter), member 3
hsa-miR-520a-5p	1	0	1	0	1	1	SOX12	SRY (sex determining region Y)-box 12
hsa-miR-520a-5p	1	0	1	1	1	1	ABHD2	abhydrolase domain containing 2
hsa-miR-520a-5p	1	0	1	1	1	1	ESM1	endothelial cell-specific molecule 1
hsa-miR-520a-5p	1	0	1	1	1	1	ADAMTS5	ADAM metallopeptidase with thrombospondin type 1 motif, 5
hsa-miR-520a-5p	0	0	1	1	1	1	CD160	CD160 molecule
hsa-miR-520a-5p	0	0	1	1	0	0	CDC42EP1	CDC42 effector protein (Rho GTPase binding) 1
hsa-miR-520a-5p	0	0	1	1	0	0	USF1	upstream transcription factor 1
hsa-miR-520a-5p	1	0	1	1	1	1	VCP	valosin containing protein
hsa-miR-520a-5p	0	0	1	0	1	1	ZXDB	zinc finger, X-linked, duplicated B
hsa-miR-520a-5p	1	0	1	0	1	1	PRSS23	protease, serine, 23
hsa-miR-520a-5p	1	0	1	1	1	1	PALM2-AKAP2	PALM2-AKAP2 readthrough
hsa-miR-520a-5p	1	0	1	1	1	1	DUSP10	dual specificity phosphatase 10
hsa-miR-520a-5p	1	0	1	1	1	1	KLF12	Kruppel-like factor 12
hsa-miR-520a-5p	0	0	1	1	1	1	STXBP3	syntaxin binding protein 3
hsa-miR-520a-5p	0	0	1	1	1	1	GABARAPL2	GABA(A) receptor-associated protein-like 2
hsa-miR-520a-5p	0	0	1	1	0	0	FOXE3	forkhead box E3
hsa-miR-520a-5p	0	0	1	1	1	1	HARS2	histidyl-tRNA synthetase 2, mitochondrial
hsa-miR-520a-5p	1	0	1	1	1	1	MGAT4A	mannosyl (alpha-1,3-)-glycoprotein beta-1,4-N-acetylglucosaminyltransferase, isozyme A
hsa-miR-520a-5p	1	0	1	1	1	1	MGEA5	meningioma expressed antigen 5 (hyaluronidase)
hsa-miR-520a-5p	0	0	1	1	1	1	SEPHS2	selenophosphate synthetase 2
hsa-miR-520a-5p	1	0	1	1	1	1	HEY2	hairy/enhancer-of-split related with YRPW motif 2
hsa-miR-520a-5p	1	0	1	1	1	1	KCNH4	potassium voltage-gated channel, subfamily H (eag-related), member 4
hsa-miR-520a-5p	1	0	1	1	1	1	KIF4A	kinesin family member 4A
hsa-miR-520a-5p	1	0	1	1	1	1	MAPRE1	microtubule-associated protein, RP/EB family, member 1
hsa-miR-520a-5p	1	0	1	1	1	1	MMD	monocyte to macrophage differentiation-associated
hsa-miR-520a-5p	0	0	1	1	1	1	TTC33	tetratricopeptide repeat domain 33
hsa-miR-520a-5p	1	0	1	1	1	1	TLL2	tolloid-like 2
hsa-miR-520a-5p	0	0	1	1	1	1	TCL6	T-cell leukemia/lymphoma 6 (non-protein coding)
hsa-miR-520a-5p	1	0	1	1	1	1	STK39	serine threonine kinase 39
hsa-miR-520a-5p	0	0	1	1	1	1	N6AMT1	N-6 adenine-specific DNA methyltransferase 1 (putative)
hsa-miR-520a-5p	0	0	1	1	0	0	KCNJ14	potassium inwardly-rectifying channel, subfamily J, member 14
hsa-miR-520a-5p	1	0	1	1	1	1	PADI1	peptidyl arginine deiminase, type I
hsa-miR-520a-5p	1	0	1	1	1	1	AK2	adenylate kinase 2
hsa-miR-520a-5p	1	0	1	1	1	1	WDR37	WD repeat domain 37
hsa-miR-520a-5p	1	0	1	0	1	1	C16orf72	chromosome 16 open reading frame 72
hsa-miR-520a-5p	1	0	1	1	1	1	VAMP1	vesicle-associated membrane protein 1 (synaptobrevin 1)
hsa-miR-520a-5p	1	0	1	0	1	1	LIMD1	LIM domains containing 1
hsa-miR-520a-5p	1	0	1	1	1	1	MAPRE2	microtubule-associated protein, RP/EB family, member 2
hsa-miR-520a-5p	1	0	1	1	1	1	SLC7A11	solute carrier family 7 (anionic amino acid transporter light chain, xc- system), member 11
hsa-miR-520a-5p	0	0	1	1	1	1	LAMP3	lysosomal-associated membrane protein 3
hsa-miR-520a-5p	1	0	1	1	1	1	ZBTB11	zinc finger and BTB domain containing 11
hsa-miR-520a-5p	1	0	1	1	1	1	AFF4	AF4/FMR2 family, member 4
hsa-miR-520a-5p	0	0	1	1	0	0	SIT1	signaling threshold regulating transmembrane adaptor 1
hsa-miR-520a-5p	1	0	1	1	1	1	TNFRSF21	tumor necrosis factor receptor superfamily, member 21
hsa-miR-520a-5p	1	0	1	1	1	1	RND1	Rho family GTPase 1
hsa-miR-520a-5p	1	0	1	1	1	1	CNOT2	CCR4-NOT transcription complex, subunit 2
hsa-miR-520a-5p	1	0	1	1	1	1	PCDH11X	protocadherin 11 X-linked
hsa-miR-520a-5p	1	0	1	1	1	1	OTX1	orthodenticle homeobox 1
hsa-miR-520a-5p	1	0	1	1	1	1	ERO1L	ERO1-like (S. cerevisiae)
hsa-miR-520a-5p	1	0	1	1	1	1	ZNF592	zinc finger protein 592
hsa-miR-520a-5p	1	0	1	1	1	1	GCC2	GRIP and coiled-coil domain containing 2
hsa-miR-520a-5p	1	0	1	0	1	1	TOX	thymocyte selection-associated high mobility group box
hsa-miR-520a-5p	1	0	1	0	1	1	MLEC	malectin
hsa-miR-520a-5p	1	0	1	0	1	1	KIAA0232	KIAA0232
hsa-miR-520a-5p	1	0	1	0	1	1	SERTAD2	SERTA domain containing 2
hsa-miR-520a-5p	1	0	1	1	1	1	DAZAP2	DAZ associated protein 2
hsa-miR-520a-5p	1	0	1	0	1	1	ARHGAP11A	Rho GTPase activating protein 11A
hsa-miR-520a-5p	1	0	1	1	0	0	ARHGEF17	Rho guanine nucleotide exchange factor (GEF) 17
hsa-miR-520a-5p	1	0	1	1	1	1	KIAA0753	KIAA0753
hsa-miR-520a-5p	1	0	1	1	1	1	SV2A	synaptic vesicle glycoprotein 2A
hsa-miR-520a-5p	1	0	1	1	1	1	CHSY1	chondroitin sulfate synthase 1
hsa-miR-520a-5p	1	0	1	1	1	1	PLEKHA6	pleckstrin homology domain containing, family A member 6
hsa-miR-520a-5p	1	0	1	1	1	1	SPAST	spastin
hsa-miR-520a-5p	1	0	1	1	1	1	SORCS3	sortilin-related VPS10 domain containing receptor 3
hsa-miR-520a-5p	1	0	1	0	1	1	WDFY3	WD repeat and FYVE domain containing 3
hsa-miR-520a-5p	1	0	1	1	1	1	SPEN	spen homolog, transcriptional regulator (Drosophila)
hsa-miR-520a-5p	1	0	1	1	1	1	PHLPP2	PH domain and leucine rich repeat protein phosphatase 2
hsa-miR-520a-5p	1	0	1	0	1	1	NMNAT2	nicotinamide nucleotide adenylyltransferase 2
hsa-miR-520a-5p	1	0	1	1	1	1	ERP44	endoplasmic reticulum protein 44
hsa-miR-520a-5p	1	0	1	0	1	1	PEG10	paternally expressed 10
hsa-miR-520a-5p	1	0	1	1	1	1	SMG1	smg-1 homolog, phosphatidylinositol 3-kinase-related kinase (C. elegans)
hsa-miR-520a-5p	1	0	1	1	1	1	ZCCHC14	zinc finger, CCHC domain containing 14
hsa-miR-520a-5p	1	0	1	1	1	1	RCOR1	REST corepressor 1
hsa-miR-520a-5p	0	0	1	1	1	1	FBXO28	F-box protein 28
hsa-miR-520a-5p	1	0	1	1	1	1	PLCB1	phospholipase C, beta 1 (phosphoinositide-specific)
hsa-miR-520a-5p	1	0	1	0	1	1	KIAA1024	KIAA1024
hsa-miR-520a-5p	0	0	1	1	1	1	POFUT2	protein O-fucosyltransferase 2
hsa-miR-520a-5p	1	0	1	1	1	1	CUX2	cut-like homeobox 2
hsa-miR-520a-5p	1	0	1	0	1	1	LARP1	La ribonucleoprotein domain family, member 1
hsa-miR-520a-5p	0	0	1	0	1	1	RRP8	ribosomal RNA processing 8, methyltransferase, homolog (yeast)
hsa-miR-520a-5p	1	0	1	1	1	1	MED13L	mediator complex subunit 13-like
hsa-miR-520a-5p	1	0	1	1	1	1	MOB4	MOB family member 4, phocein
hsa-miR-520a-5p	0	0	1	1	1	1	ANAPC13	anaphase promoting complex subunit 13
hsa-miR-520a-5p	1	0	1	1	1	1	PARM1	prostate androgen-regulated mucin-like protein 1
hsa-miR-520a-5p	0	0	1	1	0	0	PTPN23	protein tyrosine phosphatase, non-receptor type 23
hsa-miR-520a-5p	1	0	1	1	1	1	MAGI1	membrane associated guanylate kinase, WW and PDZ domain containing 1
hsa-miR-520a-5p	1	0	1	1	1	1	LTN1	listerin E3 ubiquitin protein ligase 1
hsa-miR-520a-5p	1	0	1	1	1	1	ABCA12	ATP-binding cassette, sub-family A (ABC1), member 12
hsa-miR-520a-5p	0	0	1	1	1	1	BRPF3	bromodomain and PHD finger containing, 3
hsa-miR-520a-5p	1	0	1	0	1	1	RRM2B	ribonucleotide reductase M2 B (TP53 inducible)
hsa-miR-520a-5p	1	0	1	0	1	1	TRIM33	tripartite motif containing 33
hsa-miR-520a-5p	0	0	1	1	1	1	SNX7	sorting nexin 7
hsa-miR-520a-5p	1	0	1	0	1	1	KLF13	Kruppel-like factor 13
hsa-miR-520a-5p	1	0	1	1	1	1	GOLT1B	golgi transport 1B
hsa-miR-520a-5p	0	0	1	1	1	1	HDGFRP3	hepatoma-derived growth factor, related protein 3
hsa-miR-520a-5p	0	0	1	1	1	1	DYNC1LI1	dynein, cytoplasmic 1, light intermediate chain 1
hsa-miR-520a-5p	1	0	1	1	1	1	VGLL3	vestigial like 3 (Drosophila)
hsa-miR-520a-5p	1	0	1	1	1	1	NLK	nemo-like kinase
hsa-miR-520a-5p	0	0	1	1	1	1	IMPG2	interphotoreceptor matrix proteoglycan 2
hsa-miR-520a-5p	1	0	1	0	1	1	HPCAL4	hippocalcin like 4
hsa-miR-520a-5p	1	0	1	1	1	1	TOB2	transducer of ERBB2, 2
hsa-miR-520a-5p	0	0	1	1	1	1	RAB23	RAB23, member RAS oncogene family
hsa-miR-520a-5p	0	0	1	1	1	1	FBXO40	F-box protein 40
hsa-miR-520a-5p	0	0	1	1	1	1	RSL24D1	ribosomal L24 domain containing 1
hsa-miR-520a-5p	1	0	1	1	1	1	RAB14	RAB14, member RAS oncogene family
hsa-miR-520a-5p	0	0	1	1	0	0	SRRM2	serine/arginine repetitive matrix 2
hsa-miR-520a-5p	1	0	1	1	1	1	RAPGEFL1	Rap guanine nucleotide exchange factor (GEF)-like 1
hsa-miR-520a-5p	0	0	1	1	0	0	GP6	glycoprotein VI (platelet)
hsa-miR-520a-5p	0	0	1	1	1	1	HSD17B7	hydroxysteroid (17-beta) dehydrogenase 7
hsa-miR-520a-5p	1	0	1	1	1	1	TRIAP1	TP53 regulated inhibitor of apoptosis 1
hsa-miR-520a-5p	0	0	1	1	1	1	UFC1	ubiquitin-fold modifier conjugating enzyme 1
hsa-miR-520a-5p	0	0	1	1	0	0	NCKIPSD	NCK interacting protein with SH3 domain
hsa-miR-520a-5p	1	0	1	1	1	1	IER5	immediate early response 5
hsa-miR-520a-5p	0	0	1	1	0	0	PCDH12	protocadherin 12
hsa-miR-520a-5p	1	0	1	1	1	1	ZNF644	zinc finger protein 644
hsa-miR-520a-5p	1	0	1	0	1	1	KLHL3	kelch-like 3 (Drosophila)
hsa-miR-520a-5p	1	0	1	0	1	1	UBE2Q1	ubiquitin-conjugating enzyme E2Q family member 1
hsa-miR-520a-5p	1	0	1	1	1	1	DIRAS2	DIRAS family, GTP-binding RAS-like 2
hsa-miR-520a-5p	1	0	1	1	1	1	ZNF280C	zinc finger protein 280C
hsa-miR-520a-5p	0	0	1	1	0	0	NDE1	nudE nuclear distribution E homolog 1 (A. nidulans)
hsa-miR-520a-5p	1	0	1	0	1	1	FAM46C	family with sequence similarity 46, member C
hsa-miR-520a-5p	0	0	1	1	0	0	PALMD	palmdelphin
hsa-miR-520a-5p	1	0	1	0	1	1	CHD7	chromodomain helicase DNA binding protein 7
hsa-miR-520a-5p	1	0	1	0	1	1	MARCH5	membrane-associated ring finger (C3HC4) 5
hsa-miR-520a-5p	0	0	1	1	1	1	SOHLH2	spermatogenesis and oogenesis specific basic helix-loop-helix 2
hsa-miR-520a-5p	1	0	1	1	1	1	HIF1AN	hypoxia inducible factor 1, alpha subunit inhibitor
hsa-miR-520a-5p	0	0	1	1	1	1	ANKHD1	ankyrin repeat and KH domain containing 1
hsa-miR-520a-5p	1	0	1	1	1	1	ATG2B	autophagy related 2B
hsa-miR-520a-5p	0	0	1	0	0	0	C19orf73	chromosome 19 open reading frame 73
hsa-miR-520a-5p	0	0	1	1	1	1	TMEM38B	transmembrane protein 38B
hsa-miR-520a-5p	0	0	1	0	1	1	GOLPH3L	golgi phosphoprotein 3-like
hsa-miR-520a-5p	0	0	1	1	1	1	TMLHE	trimethyllysine hydroxylase, epsilon
hsa-miR-520a-5p	1	0	1	1	1	1	LRRC20	leucine rich repeat containing 20
hsa-miR-520a-5p	1	0	1	1	1	1	UBA6	ubiquitin-like modifier activating enzyme 6
hsa-miR-520a-5p	1	0	1	0	1	1	SEPT11	septin 11
hsa-miR-520a-5p	1	0	1	1	1	1	RSBN1	round spermatid basic protein 1
hsa-miR-520a-5p	0	0	1	1	1	1	WDR33	WD repeat domain 33
hsa-miR-520a-5p	0	0	1	0	0	0	KDM3A	lysine (K)-specific demethylase 3A
hsa-miR-520a-5p	1	0	1	0	1	1	TMEM55A	transmembrane protein 55A
hsa-miR-520a-5p	1	0	1	1	1	1	GNG12	guanine nucleotide binding protein (G protein), gamma 12
hsa-miR-520a-5p	1	0	1	0	1	1	KLHL9	kelch-like 9 (Drosophila)
hsa-miR-520a-5p	1	0	1	1	0	0	HOXB6	homeobox B6
hsa-miR-520a-5p	1	0	1	1	1	1	KCTD5	potassium channel tetramerisation domain containing 5
hsa-miR-520a-5p	0	0	1	0	1	1	C11orf71	chromosome 11 open reading frame 71
hsa-miR-520a-5p	1	0	1	0	1	1	TMX3	thioredoxin-related transmembrane protein 3
hsa-miR-520a-5p	0	0	1	1	0	0	TOMM7	translocase of outer mitochondrial membrane 7 homolog (yeast)
hsa-miR-520a-5p	0	0	1	1	1	1	GNL3L	guanine nucleotide binding protein-like 3 (nucleolar)-like
hsa-miR-520a-5p	0	0	1	0	1	1	ARL15	ADP-ribosylation factor-like 15
hsa-miR-520a-5p	1	0	1	0	1	1	UBFD1	ubiquitin family domain containing 1
hsa-miR-520a-5p	0	0	1	1	1	1	KLHL4	kelch-like 4 (Drosophila)
hsa-miR-520a-5p	0	0	1	0	1	1	ZC3HAV1	zinc finger CCCH-type, antiviral 1
hsa-miR-520a-5p	1	0	1	0	1	1	SLAMF8	SLAM family member 8
hsa-miR-520a-5p	0	0	1	1	1	1	TMEM167B	transmembrane protein 167B
hsa-miR-520a-5p	1	0	1	1	1	1	SAR1A	SAR1 homolog A (S. cerevisiae)
hsa-miR-520a-5p	1	0	1	1	1	1	C5orf15	chromosome 5 open reading frame 15
hsa-miR-520a-5p	1	0	1	1	1	1	PAK7	p21 protein (Cdc42/Rac)-activated kinase 7
hsa-miR-520a-5p	1	0	1	0	1	1	CNNM1	cyclin M1
hsa-miR-520a-5p	1	0	1	0	1	1	EIF5A2	eukaryotic translation initiation factor 5A2
hsa-miR-520a-5p	1	0	1	1	1	1	EPHA8	EPH receptor A8
hsa-miR-520a-5p	0	0	1	1	1	1	S100A14	S100 calcium binding protein A14
hsa-miR-520a-5p	1	0	1	1	1	1	SLC24A3	solute carrier family 24 (sodium/potassium/calcium exchanger), member 3
hsa-miR-520a-5p	0	0	1	1	1	1	SHROOM4	shroom family member 4
hsa-miR-520a-5p	1	0	1	1	1	1	USP31	ubiquitin specific peptidase 31
hsa-miR-520a-5p	1	0	1	1	1	1	DLG3	discs, large homolog 3 (Drosophila)
hsa-miR-520a-5p	1	0	1	0	1	1	NUFIP2	nuclear fragile X mental retardation protein interacting protein 2
hsa-miR-520a-5p	1	0	1	0	1	1	ALPK3	alpha-kinase 3
hsa-miR-520a-5p	1	0	1	1	1	1	NLGN2	neuroligin 2
hsa-miR-520a-5p	1	0	1	1	1	1	KLHL14	kelch-like 14 (Drosophila)
hsa-miR-520a-5p	1	0	1	1	1	1	RANBP10	RAN binding protein 10
hsa-miR-520a-5p	1	0	1	0	1	1	RNF213	ring finger protein 213
hsa-miR-520a-5p	1	0	1	0	1	1	GPAM	glycerol-3-phosphate acyltransferase, mitochondrial
hsa-miR-520a-5p	1	0	1	1	1	1	NIN	ninein (GSK3B interacting protein)
hsa-miR-520a-5p	0	0	1	1	1	1	AQP9	aquaporin 9
hsa-miR-520a-5p	0	0	1	1	0	0	KRT34	keratin 34
hsa-miR-520a-5p	1	0	1	0	1	1	NMT1	N-myristoyltransferase 1
hsa-miR-520a-5p	1	0	1	1	0	0	SLC5A6	solute carrier family 5 (sodium-dependent vitamin transporter), member 6
hsa-miR-520a-5p	1	0	1	1	1	1	CLDN1	claudin 1
hsa-miR-520a-5p	0	0	1	1	1	1	PPA1	pyrophosphatase (inorganic) 1
hsa-miR-520a-5p	1	0	1	1	1	1	RTN1	reticulon 1
hsa-miR-520a-5p	0	0	1	1	1	1	LSM2	LSM2 homolog, U6 small nuclear RNA associated (S. cerevisiae)
hsa-miR-520a-5p	0	0	1	1	1	1	OSTC	oligosaccharyltransferase complex subunit
hsa-miR-520a-5p	1	0	1	1	1	1	FAM60A	family with sequence similarity 60, member A
hsa-miR-520a-5p	1	0	1	1	1	1	CDH22	cadherin 22, type 2
hsa-miR-520a-5p	1	0	1	1	1	1	SNX6	sorting nexin 6
hsa-miR-520a-5p	0	0	1	1	1	1	CHST6	carbohydrate (N-acetylglucosamine 6-O) sulfotransferase 6
hsa-miR-520a-5p	0	0	1	1	1	1	PRDM13	PR domain containing 13
hsa-miR-520a-5p	1	0	1	1	1	1	SENP2	SUMO1/sentrin/SMT3 specific peptidase 2
hsa-miR-520a-5p	1	0	1	1	1	1	OTX2	orthodenticle homeobox 2
hsa-miR-520a-5p	0	0	1	0	1	1	CFL2	cofilin 2 (muscle)
hsa-miR-520a-5p	0	0	1	1	0	0	C12orf44	chromosome 12 open reading frame 44
hsa-miR-520a-5p	0	0	1	1	1	1	NSUN3	NOP2/Sun domain family, member 3
hsa-miR-520a-5p	0	0	1	1	1	1	CLSPN	claspin
hsa-miR-520a-5p	1	0	1	1	1	1	ABCG4	ATP-binding cassette, sub-family G (WHITE), member 4
hsa-miR-520a-5p	0	0	1	1	1	1	NSD1	nuclear receptor binding SET domain protein 1
hsa-miR-520a-5p	1	0	1	1	1	1	HIF3A	hypoxia inducible factor 3, alpha subunit
hsa-miR-520a-5p	1	0	1	1	0	0	CDH24	cadherin 24, type 2
hsa-miR-520a-5p	1	0	1	1	1	1	TMEM168	transmembrane protein 168
hsa-miR-520a-5p	1	0	1	1	1	1	PRRX1	paired related homeobox 1
hsa-miR-520a-5p	1	0	1	1	1	1	C6orf106	chromosome 6 open reading frame 106
hsa-miR-520a-5p	0	0	1	1	1	1	OSBPL11	oxysterol binding protein-like 11
hsa-miR-520a-5p	1	0	1	1	1	1	YTHDC2	YTH domain containing 2
hsa-miR-520a-5p	1	0	1	0	1	1	BCL11B	B-cell CLL/lymphoma 11B (zinc finger protein)
hsa-miR-520a-5p	0	0	1	1	1	1	METTL1	methyltransferase like 1
hsa-miR-520a-5p	1	0	1	1	1	1	FOXL2	forkhead box L2
hsa-miR-520a-5p	1	0	1	1	0	0	UBE2Z	ubiquitin-conjugating enzyme E2Z
hsa-miR-520a-5p	1	0	1	1	1	1	GRAMD3	GRAM domain containing 3
hsa-miR-520a-5p	0	0	1	1	0	0	DDRGK1	DDRGK domain containing 1
hsa-miR-520a-5p	1	0	1	1	1	1	C1orf116	chromosome 1 open reading frame 116
hsa-miR-520a-5p	0	0	1	1	0	0	DHRS11	dehydrogenase/reductase (SDR family) member 11
hsa-miR-520a-5p	1	0	1	0	1	1	NOTCH2	notch 2
hsa-miR-520a-5p	1	0	1	1	1	1	LRRC2	leucine rich repeat containing 2
hsa-miR-520a-5p	1	0	1	1	1	1	GCC1	GRIP and coiled-coil domain containing 1
hsa-miR-520a-5p	0	0	1	1	0	0	EPS8L3	EPS8-like 3
hsa-miR-520a-5p	1	0	1	1	1	1	CDC73	cell division cycle 73, Paf1/RNA polymerase II complex component, homolog (S. cerevisiae)
hsa-miR-520a-5p	1	0	1	1	1	1	C10orf76	chromosome 10 open reading frame 76
hsa-miR-520a-5p	1	0	1	1	1	1	C3orf52	chromosome 3 open reading frame 52
hsa-miR-520a-5p	0	0	1	1	1	1	FN3KRP	fructosamine 3 kinase related protein
hsa-miR-520a-5p	0	0	1	1	1	1	LRRK1	leucine-rich repeat kinase 1
hsa-miR-520a-5p	0	0	1	1	1	1	GLT25D1	glycosyltransferase 25 domain containing 1
hsa-miR-520a-5p	0	0	1	0	1	1	C1orf115	chromosome 1 open reading frame 115
hsa-miR-520a-5p	0	0	1	1	1	1	ARMC5	armadillo repeat containing 5
hsa-miR-520a-5p	1	0	1	0	1	1	MOB3B	MOB kinase activator 3B
hsa-miR-520a-5p	0	0	1	1	1	1	RPAP2	RNA polymerase II associated protein 2
hsa-miR-520a-5p	1	0	1	1	0	0	SYNDIG1	synapse differentiation inducing 1
hsa-miR-520a-5p	0	0	1	1	0	0	NRSN2	neurensin 2
hsa-miR-520a-5p	1	0	1	1	1	1	KLHL18	kelch-like 18 (Drosophila)
hsa-miR-520a-5p	0	0	1	1	0	0	CENPT	centromere protein T
hsa-miR-520a-5p	1	0	1	1	1	1	RNF34	ring finger protein 34, E3 ubiquitin protein ligase
hsa-miR-520a-5p	1	0	1	0	1	1	EDEM3	ER degradation enhancer, mannosidase alpha-like 3
hsa-miR-520a-5p	1	0	1	1	1	1	CYB5B	cytochrome b5 type B (outer mitochondrial membrane)
hsa-miR-520a-5p	0	0	1	1	0	0	INTS5	integrator complex subunit 5
hsa-miR-520a-5p	1	0	1	1	1	1	JHDM1D	jumonji C domain containing histone demethylase 1 homolog D (S. cerevisiae)
hsa-miR-520a-5p	1	0	1	0	1	1	SETD7	SET domain containing (lysine methyltransferase) 7
hsa-miR-520a-5p	1	0	1	0	1	1	C1orf21	chromosome 1 open reading frame 21
hsa-miR-520a-5p	0	0	1	1	1	1	APOL2	apolipoprotein L, 2
hsa-miR-520a-5p	1	0	1	1	1	1	SNX27	sorting nexin family member 27
hsa-miR-520a-5p	1	0	1	0	1	1	SPRY4	sprouty homolog 4 (Drosophila)
hsa-miR-520a-5p	1	0	1	1	1	1	RAB1B	RAB1B, member RAS oncogene family
hsa-miR-520a-5p	0	0	1	1	1	1	SEH1L	SEH1-like (S. cerevisiae)
hsa-miR-520a-5p	1	0	1	1	0	0	TCF7L1	transcription factor 7-like 1 (T-cell specific, HMG-box)
hsa-miR-520a-5p	1	0	1	0	1	1	SH3BGRL2	SH3 domain binding glutamic acid-rich protein like 2
hsa-miR-520a-5p	1	0	1	0	1	1	ITCH	itchy E3 ubiquitin protein ligase
hsa-miR-520a-5p	1	0	1	1	1	1	CDH20	cadherin 20, type 2
hsa-miR-520a-5p	0	0	1	1	1	1	KRTAP3-2	keratin associated protein 3-2
hsa-miR-520a-5p	1	0	1	1	1	1	UTP15	UTP15, U3 small nucleolar ribonucleoprotein, homolog (S. cerevisiae)
hsa-miR-520a-5p	0	0	1	1	1	1	RNASEH2C	ribonuclease H2, subunit C
hsa-miR-520a-5p	1	0	1	1	1	1	ZDHHC18	zinc finger, DHHC-type containing 18
hsa-miR-520a-5p	0	0	1	0	1	1	LDOC1L	leucine zipper, down-regulated in cancer 1-like
hsa-miR-520a-5p	1	0	1	1	1	1	CAMKK1	calcium/calmodulin-dependent protein kinase kinase 1, alpha
hsa-miR-520a-5p	0	0	1	1	1	1	POLR3GL	polymerase (RNA) III (DNA directed) polypeptide G (32kD)-like
hsa-miR-520a-5p	1	0	1	1	1	1	POLDIP3	polymerase (DNA-directed), delta interacting protein 3
hsa-miR-520a-5p	0	0	1	1	0	0	NICN1	nicolin 1
hsa-miR-520a-5p	0	0	1	0	1	1	TMEM246	transmembrane protein 246
hsa-miR-520a-5p	0	0	1	1	1	1	C5orf4	chromosome 5 open reading frame 4
hsa-miR-520a-5p	0	0	1	0	1	1	MAK16	MAK16 homolog (S. cerevisiae)
hsa-miR-520a-5p	0	0	1	1	1	1	MAP1LC3A	microtubule-associated protein 1 light chain 3 alpha
hsa-miR-520a-5p	1	0	1	1	1	1	TTBK1	tau tubulin kinase 1
hsa-miR-520a-5p	1	0	1	1	1	1	HIATL1	hippocampus abundant transcript-like 1
hsa-miR-520a-5p	0	0	1	1	0	0	HINT2	histidine triad nucleotide binding protein 2
hsa-miR-520a-5p	1	0	1	1	1	1	PPP1R9B	protein phosphatase 1, regulatory subunit 9B
hsa-miR-520a-5p	0	0	1	1	1	1	HAVCR2	hepatitis A virus cellular receptor 2
hsa-miR-520a-5p	1	0	1	1	1	1	ARHGEF39	Rho guanine nucleotide exchange factor (GEF) 39
hsa-miR-520a-5p	0	0	1	1	1	1	FAM136A	family with sequence similarity 136, member A
hsa-miR-520a-5p	1	0	1	0	1	1	PPP1R15B	protein phosphatase 1, regulatory subunit 15B
hsa-miR-520a-5p	1	0	1	0	1	1	UBASH3B	ubiquitin associated and SH3 domain containing B
hsa-miR-520a-5p	0	0	1	0	1	1	PIGY	phosphatidylinositol glycan anchor biosynthesis, class Y
hsa-miR-520a-5p	1	0	1	1	1	1	MAP6	microtubule-associated protein 6
hsa-miR-520a-5p	1	0	1	0	1	1	EAF1	ELL associated factor 1
hsa-miR-520a-5p	1	0	1	0	1	1	FGF5	fibroblast growth factor 5
hsa-miR-520a-5p	1	0	1	0	1	1	PURB	purine-rich element binding protein B
hsa-miR-520a-5p	1	0	1	1	1	1	ADAM19	ADAM metallopeptidase domain 19
hsa-miR-520a-5p	0	0	1	1	0	0	GZMH	granzyme H (cathepsin G-like 2, protein h-CCPX)
hsa-miR-520a-5p	1	0	1	1	0	0	FCHSD1	FCH and double SH3 domains 1
hsa-miR-520a-5p	1	0	1	1	1	1	EPT1	ethanolaminephosphotransferase 1 (CDP-ethanolamine-specific)
hsa-miR-520a-5p	1	0	1	0	0	0	ANKRD40	ankyrin repeat domain 40
hsa-miR-520a-5p	0	0	1	1	1	1	ZNF300	zinc finger protein 300
hsa-miR-520a-5p	1	0	1	1	1	1	RCSD1	RCSD domain containing 1
hsa-miR-520a-5p	0	0	1	1	0	0	SIGLEC11	sialic acid binding Ig-like lectin 11
hsa-miR-520a-5p	1	0	1	1	1	1	MAL2	mal, T-cell differentiation protein 2 (gene/pseudogene)
hsa-miR-520a-5p	1	0	1	1	1	1	XKR4	XK, Kell blood group complex subunit-related family, member 4
hsa-miR-520a-5p	0	0	1	1	0	0	STK11IP	serine/threonine kinase 11 interacting protein
hsa-miR-520a-5p	1	0	1	1	1	1	SLITRK1	SLIT and NTRK-like family, member 1
hsa-miR-520a-5p	0	0	1	1	0	0	FAM46B	family with sequence similarity 46, member B
hsa-miR-520a-5p	0	0	1	1	0	0	TNFRSF13C	tumor necrosis factor receptor superfamily, member 13C
hsa-miR-520a-5p	0	0	1	1	0	0	APOA5	apolipoprotein A-V
hsa-miR-520a-5p	1	0	1	1	1	1	PFN2	profilin 2
hsa-miR-520a-5p	1	0	1	1	1	1	NAA15	N(alpha)-acetyltransferase 15, NatA auxiliary subunit
hsa-miR-520a-5p	1	0	1	0	1	1	ANTXR2	anthrax toxin receptor 2
hsa-miR-520a-5p	0	0	1	1	1	1	HIST1H2BK	histone cluster 1, H2bk
hsa-miR-520a-5p	1	0	1	1	1	1	C20orf112	chromosome 20 open reading frame 112
hsa-miR-520a-5p	0	0	1	1	1	1	C14orf126	chromosome 14 open reading frame 126
hsa-miR-520a-5p	1	0	1	0	1	1	STK35	serine/threonine kinase 35
hsa-miR-520a-5p	1	0	1	1	1	1	JDP2	Jun dimerization protein 2
hsa-miR-520a-5p	1	0	1	1	1	1	BMPER	BMP binding endothelial regulator
hsa-miR-520a-5p	1	0	1	1	1	1	ADAMTS19	ADAM metallopeptidase with thrombospondin type 1 motif, 19
hsa-miR-520a-5p	0	0	1	1	1	1	MRAP2	melanocortin 2 receptor accessory protein 2
hsa-miR-520a-5p	1	0	1	0	1	1	NUS1	nuclear undecaprenyl pyrophosphate synthase 1 homolog (S. cerevisiae)
hsa-miR-520a-5p	1	0	1	1	1	1	ICA1L	islet cell autoantigen 1,69kDa-like
hsa-miR-520a-5p	1	0	1	0	1	1	SP1	Sp1 transcription factor
hsa-miR-520a-5p	0	0	1	0	1	1	PRELID2	PRELI domain containing 2
hsa-miR-520a-5p	0	0	1	1	1	1	SDR16C5	short chain dehydrogenase/reductase family 16C, member 5
hsa-miR-520a-5p	1	0	1	1	1	1	TSTD2	thiosulfate sulfurtransferase (rhodanese)-like domain containing 2
hsa-miR-520a-5p	1	0	1	1	1	1	ATRN	attractin
hsa-miR-520a-5p	1	0	1	0	1	1	CNOT6L	CCR4-NOT transcription complex, subunit 6-like
hsa-miR-520a-5p	1	0	1	1	1	1	TEX261	testis expressed 261
hsa-miR-520a-5p	1	0	1	1	1	1	KCNH8	potassium voltage-gated channel, subfamily H (eag-related), member 8
hsa-miR-520a-5p	0	0	1	1	0	0	CMTM2	CKLF-like MARVEL transmembrane domain containing 2
hsa-miR-520a-5p	0	0	1	1	0	0	DHRS13	dehydrogenase/reductase (SDR family) member 13
hsa-miR-520a-5p	1	0	1	1	1	1	MBNL2	muscleblind-like splicing regulator 2
hsa-miR-520a-5p	0	0	1	1	0	0	PEBP4	phosphatidylethanolamine-binding protein 4
hsa-miR-520a-5p	0	0	1	1	1	1	TMEM106A	transmembrane protein 106A
hsa-miR-520a-5p	0	0	1	1	1	1	CD300LG	CD300 molecule-like family member g
hsa-miR-520a-5p	1	0	1	1	1	1	ZNF563	zinc finger protein 563
hsa-miR-520a-5p	0	0	1	1	1	1	APOBEC3F	apolipoprotein B mRNA editing enzyme, catalytic polypeptide-like 3F
hsa-miR-520a-5p	0	0	1	0	1	1	OSTCP1	oligosaccharyltransferase complex subunit pseudogene 1
hsa-miR-520a-5p	1	0	1	1	1	1	SEPT6	septin 6
hsa-miR-520a-5p	1	0	1	1	1	1	FAM110B	family with sequence similarity 110, member B
hsa-miR-520a-5p	0	0	1	0	1	1	CHKB	choline kinase beta
hsa-miR-520a-5p	1	0	1	1	1	1	TPM3	tropomyosin 3
hsa-miR-520a-5p	0	0	1	1	1	1	TCEAL7	transcription elongation factor A (SII)-like 7
hsa-miR-520a-5p	1	0	1	0	1	1	SYT11	synaptotagmin XI
hsa-miR-520a-5p	0	0	1	1	1	1	PM20D1	peptidase M20 domain containing 1
hsa-miR-520a-5p	0	0	1	0	1	1	HORMAD2	HORMA domain containing 2
hsa-miR-520a-5p	0	0	1	1	0	0	FAM81B	family with sequence similarity 81, member B
hsa-miR-520a-5p	0	0	1	1	1	1	RASEF	RAS and EF-hand domain containing
hsa-miR-520a-5p	1	0	1	0	1	1	TMTC2	transmembrane and tetratricopeptide repeat containing 2
hsa-miR-520a-5p	0	0	1	1	0	0	C2orf57	chromosome 2 open reading frame 57
hsa-miR-520a-5p	0	0	1	1	1	1	KHDRBS2	KH domain containing, RNA binding, signal transduction associated 2
hsa-miR-520a-5p	0	0	1	1	0	0	MS4A15	membrane-spanning 4-domains, subfamily A, member 15
hsa-miR-520a-5p	1	0	1	1	1	1	NXPH1	neurexophilin 1
hsa-miR-520a-5p	1	0	1	0	1	1	C7orf41	chromosome 7 open reading frame 41
hsa-miR-520a-5p	1	0	1	1	1	1	PDIK1L	PDLIM1 interacting kinase 1 like
hsa-miR-520a-5p	0	0	1	0	1	1	KBTBD6	kelch repeat and BTB (POZ) domain containing 6
hsa-miR-520a-5p	1	0	1	0	1	1	ST6GALNAC3	ST6 (alpha-N-acetyl-neuraminyl-2,3-beta-galactosyl-1,3)-N-acetylgalactosaminide alpha-2,6-sialyltransferase 3
hsa-miR-520a-5p	1	0	1	0	1	1	N4BP1	NEDD4 binding protein 1
hsa-miR-520a-5p	1	0	1	1	1	1	C15orf32	chromosome 15 open reading frame 32
hsa-miR-520a-5p	0	0	1	0	1	1	VGLL2	vestigial like 2 (Drosophila)
hsa-miR-520a-5p	1	0	1	1	1	1	HS6ST3	heparan sulfate 6-O-sulfotransferase 3
hsa-miR-520a-5p	1	0	1	0	1	1	MDGA1	MAM domain containing glycosylphosphatidylinositol anchor 1
hsa-miR-520a-5p	1	0	1	0	1	1	SEMA6D	sema domain, transmembrane domain (TM), and cytoplasmic domain, (semaphorin) 6D
hsa-miR-520a-5p	0	0	1	1	1	1	TEDDM1	transmembrane epididymal protein 1
hsa-miR-520a-5p	1	0	1	1	1	1	RDH10	retinol dehydrogenase 10 (all-trans)
hsa-miR-520a-5p	0	0	1	0	1	1	GTF2A1L	general transcription factor IIA, 1-like
hsa-miR-520a-5p	0	0	1	1	1	1	REXO1L1	REX1, RNA exonuclease 1 homolog (S. cerevisiae)-like 1
hsa-miR-520a-5p	0	0	1	0	1	1	CTAGE1	cutaneous T-cell lymphoma-associated antigen 1
hsa-miR-520a-5p	1	0	1	1	1	1	CNTD1	cyclin N-terminal domain containing 1
hsa-miR-520a-5p	0	0	1	1	1	1	KLF17	Kruppel-like factor 17
hsa-miR-520a-5p	1	0	1	1	1	1	FAM117B	family with sequence similarity 117, member B
hsa-miR-520a-5p	0	0	1	1	1	1	FNDC7	fibronectin type III domain containing 7
hsa-miR-520a-5p	0	0	1	1	1	1	C10orf107	chromosome 10 open reading frame 107
hsa-miR-520a-5p	1	0	1	0	1	1	RNF152	ring finger protein 152
hsa-miR-520a-5p	1	0	1	0	1	1	PGM2L1	phosphoglucomutase 2-like 1
hsa-miR-520a-5p	1	0	1	1	1	1	SLC9A9	solute carrier family 9, subfamily A (NHE9, cation proton antiporter 9), member 9
hsa-miR-520a-5p	1	0	1	1	1	1	ATG9B	autophagy related 9B
hsa-miR-520a-5p	1	0	1	1	1	1	XKR6	XK, Kell blood group complex subunit-related family, member 6
hsa-miR-520a-5p	0	0	1	1	1	1	C3orf38	chromosome 3 open reading frame 38
hsa-miR-520a-5p	1	0	1	1	1	1	RABL3	RAB, member of RAS oncogene family-like 3
hsa-miR-520a-5p	1	0	1	0	1	1	TMEM167A	transmembrane protein 167A
hsa-miR-520a-5p	1	0	1	0	1	1	FAM84B	family with sequence similarity 84, member B
hsa-miR-520a-5p	1	0	1	1	0	0	KRTAP11-1	keratin associated protein 11-1
hsa-miR-520a-5p	1	0	1	1	0	0	JPH2	junctophilin 2
hsa-miR-520a-5p	0	0	1	1	1	1	NLRP9	NLR family, pyrin domain containing 9
hsa-miR-520a-5p	1	0	1	1	1	1	INADL	InaD-like (Drosophila)
hsa-miR-520a-5p	0	0	1	1	0	0	NEK8	NIMA (never in mitosis gene a)- related kinase 8
hsa-miR-520a-5p	0	0	1	0	1	1	CDCP1	CUB domain containing protein 1
hsa-miR-520a-5p	0	0	1	1	1	1	ATPIF1	ATPase inhibitory factor 1
hsa-miR-520a-5p	1	0	1	0	1	1	IQGAP3	IQ motif containing GTPase activating protein 3
hsa-miR-520a-5p	0	0	1	1	1	1	MRPL52	mitochondrial ribosomal protein L52
hsa-miR-520a-5p	1	0	1	1	1	1	DCAF12L1	DDB1 and CUL4 associated factor 12-like 1
hsa-miR-520a-5p	0	0	1	1	1	1	CMTM4	CKLF-like MARVEL transmembrane domain containing 4
hsa-miR-520a-5p	0	0	1	0	1	1	SPATA12	spermatogenesis associated 12
hsa-miR-520a-5p	0	0	1	1	0	0	UBE2C	ubiquitin-conjugating enzyme E2C
hsa-miR-520a-5p	1	0	1	1	1	1	FAM216B	family with sequence similarity 216, member B
hsa-miR-520a-5p	1	0	1	0	1	1	C12orf36	chromosome 12 open reading frame 36
hsa-miR-520a-5p	0	0	1	1	1	1	C15orf38	chromosome 15 open reading frame 38
hsa-miR-520a-5p	1	0	1	1	1	1	SP8	Sp8 transcription factor
hsa-miR-520a-5p	1	0	1	0	1	1	RNF144B	ring finger protein 144B
hsa-miR-520a-5p	0	0	1	0	1	1	C16orf82	chromosome 16 open reading frame 82
hsa-miR-520a-5p	1	0	1	0	1	1	RIMS4	regulating synaptic membrane exocytosis 4
hsa-miR-520a-5p	1	0	1	1	1	1	ARRDC4	arrestin domain containing 4
hsa-miR-520a-5p	0	0	1	1	1	1	KIF24	kinesin family member 24
hsa-miR-520a-5p	1	0	1	1	1	1	ZBTB41	zinc finger and BTB domain containing 41
hsa-miR-520a-5p	1	0	1	1	1	1	ADAMTS6	ADAM metallopeptidase with thrombospondin type 1 motif, 6
hsa-miR-520a-5p	1	0	1	1	1	1	AQP1	aquaporin 1 (Colton blood group)
hsa-miR-520a-5p	0	0	1	1	1	1	UTS2D	urotensin 2 domain containing
hsa-miR-520a-5p	1	0	1	1	1	1	E2F6	E2F transcription factor 6
hsa-miR-520a-5p	1	0	1	1	1	1	GPRIN3	GPRIN family member 3
hsa-miR-520a-5p	0	0	1	1	0	0	TMEM173	transmembrane protein 173
hsa-miR-520a-5p	1	0	1	0	1	1	PTPLB	protein tyrosine phosphatase-like (proline instead of catalytic arginine), member b
hsa-miR-520a-5p	1	0	1	1	1	1	KCTD4	potassium channel tetramerisation domain containing 4
hsa-miR-520a-5p	1	0	1	0	1	1	NRK	Nik related kinase
hsa-miR-520a-5p	0	0	1	1	0	0	ITIH6	inter-alpha-trypsin inhibitor heavy chain family, member 6
hsa-miR-520a-5p	0	0	1	1	0	0	SPATA21	spermatogenesis associated 21
hsa-miR-520a-5p	1	0	1	0	1	1	FAM73A	family with sequence similarity 73, member A
hsa-miR-520a-5p	0	0	1	1	1	1	GJB7	gap junction protein, beta 7, 25kDa
hsa-miR-520a-5p	1	0	1	0	1	1	ZC3H6	zinc finger CCCH-type containing 6
hsa-miR-520a-5p	0	0	1	0	1	1	GYPE	glycophorin E (MNS blood group)
hsa-miR-520a-5p	1	0	1	1	1	1	PTGER3	prostaglandin E receptor 3 (subtype EP3)
hsa-miR-520a-5p	1	0	1	0	1	1	PRICKLE2	prickle homolog 2 (Drosophila)
hsa-miR-520a-5p	0	0	1	1	0	0	LENG9	leukocyte receptor cluster (LRC) member 9
hsa-miR-520a-5p	0	0	1	1	0	0	TEPP	testis, prostate and placenta expressed
hsa-miR-520a-5p	0	0	1	1	1	1	TMEM189	transmembrane protein 189
hsa-miR-520a-5p	0	0	1	1	1	1	ARHGAP27	Rho GTPase activating protein 27
hsa-miR-520a-5p	1	0	1	1	1	1	THRA	thyroid hormone receptor, alpha
hsa-miR-520a-5p	0	0	1	1	1	1	SFT2D2	SFT2 domain containing 2
hsa-miR-520a-5p	0	0	1	1	1	1	ILDR2	immunoglobulin-like domain containing receptor 2
hsa-miR-520a-5p	1	0	1	1	1	1	WWP2	WW domain containing E3 ubiquitin protein ligase 2
hsa-miR-520a-5p	1	0	1	1	1	1	BLOC1S5	biogenesis of lysosomal organelles complex-1, subunit 5, muted
hsa-miR-520a-5p	0	0	1	1	0	0	TRIM7	tripartite motif containing 7
hsa-miR-520a-5p	0	0	1	1	1	1	VIMP	VCP-interacting membrane protein
hsa-miR-520a-5p	1	0	1	1	1	1	ENSA	endosulfine alpha
hsa-miR-520a-5p	1	0	1	1	1	1	ATRNL1	attractin-like 1
hsa-miR-520a-5p	1	0	1	1	1	1	FAM43B	family with sequence similarity 43, member B
hsa-miR-520a-5p	1	0	1	1	0	0	TSEN54	tRNA splicing endonuclease 54 homolog (S. cerevisiae)
hsa-miR-520a-5p	1	0	1	1	1	1	SKIDA1	SKI/DACH domain containing 1
hsa-miR-520a-5p	0	0	1	1	0	0	TMPRSS11F	transmembrane protease, serine 11F
hsa-miR-520a-5p	0	0	1	1	1	1	C13orf35	chromosome 13 open reading frame 35
hsa-miR-520a-5p	1	0	1	1	1	1	C11orf87	chromosome 11 open reading frame 87
hsa-miR-520a-5p	0	0	1	1	1	1	PATE2	prostate and testis expressed 2
hsa-miR-520a-5p	0	0	1	0	0	0	RAB9BP1	RAB9B, member RAS oncogene family pseudogene 1
hsa-miR-520a-5p	0	0	1	0	0	0	HLA-H	major histocompatibility complex, class I, H (pseudogene)
hsa-miR-520a-5p	0	0	1	0	0	0	TTTY2	testis-specific transcript, Y-linked 2 (non-protein coding)
hsa-miR-520a-5p	0	0	1	0	0	0	TTTY19	testis-specific transcript, Y-linked 19 (non-protein coding)
hsa-miR-520a-5p	0	0	1	0	0	0	FAM224B	family with sequence similarity 224, member B (non-protein coding)
hsa-miR-520a-5p	0	0	1	0	0	0	TTTY4B	testis-specific transcript, Y-linked 4B (non-protein coding)
hsa-miR-520a-5p	0	0	1	0	0	0	DKFZP586I1420	uncharacterized protein DKFZp586I1420
hsa-miR-520a-5p	0	0	1	0	0	0	SUMO1P1	SUMO1 pseudogene 1
hsa-miR-520a-5p	0	0	1	0	0	0	RPL23AP32	ribosomal protein L23a pseudogene 32
hsa-miR-520a-5p	0	0	1	0	0	0	MSX2P1	msh homeobox 2 pseudogene 1
hsa-miR-520a-5p	0	0	1	0	0	0	RPS26P11	ribosomal protein S26 pseudogene 11
hsa-miR-520a-5p	0	0	1	0	0	0	SNORD96A	small nucleolar RNA, C/D box 96A
hsa-miR-520a-5p	0	0	1	0	0	0	TRIM78P	tripartite motif containing 78, pseudogene
hsa-miR-520a-5p	0	0	1	0	0	0	NUDT9P1	nudix (nucleoside diphosphate linked moiety X)-type motif 9 pseudogene 1
hsa-miR-520a-5p	0	0	1	0	0	0	PER4	period homolog 3 (Drosophila) pseudogene
hsa-miR-520a-5p	0	0	1	0	0	0	NEAT1	nuclear paraspeckle assembly transcript 1 (non-protein coding)
hsa-miR-520a-5p	0	0	1	0	0	0	MALAT1	metastasis associated lung adenocarcinoma transcript 1 (non-protein coding)
hsa-miR-520a-5p	0	0	1	0	0	0	RNASEH2CP1	ribonuclease H2, subunit C pseudogene 1
hsa-miR-520a-5p	0	0	1	0	0	0	HERC2P8	hect domain and RLD 2 pseudogene 8
hsa-miR-520a-5p	0	0	1	0	0	0	DUSP5P	dual specificity phosphatase 5 pseudogene
hsa-miR-520a-5p	0	0	1	0	0	0	PTPRVP	protein tyrosine phosphatase, receptor type, V, pseudogene
hsa-miR-520a-5p	0	0	1	0	0	0	SNX29P2	sorting nexin 29 pseudogene 2
hsa-miR-520a-5p	0	0	1	0	0	0	TCAM1P	testicular cell adhesion molecule 1 homolog (mouse), pseudogene
hsa-miR-520a-5p	0	0	1	0	0	0	SNORA23	small nucleolar RNA, H/ACA box 23
hsa-miR-520a-5p	0	0	1	0	0	0	SNORA26	small nucleolar RNA, H/ACA box 26
hsa-miR-520a-5p	0	0	1	0	0	0	SNORD111	small nucleolar RNA, C/D box 111
hsa-miR-520a-5p	1	0	1	1	0	0	HOXC5	homeobox C5
hsa-miR-520a-5p	0	0	1	0	0	0	HSP90B3P	heat shock protein 90kDa beta (Grp94), member 3, pseudogene
hsa-miR-520a-5p	0	0	1	0	0	0	GBP1P1	guanylate binding protein 1, interferon-inducible pseudogene 1
hsa-miR-520a-5p	0	0	1	0	0	0	MYADML	myeloid-associated differentiation marker-like (pseudogene)
hsa-miR-520a-5p	1	0	1	1	1	1	MLL	myeloid/lymphoid or mixed-lineage leukemia (trithorax homolog, Drosophila)
hsa-miR-520a-5p	0	0	1	1	0	0	TBL3	transducin (beta)-like 3
hsa-miR-520a-5p	1	0	1	1	0	0	KIAA1549L	KIAA1549-like
hsa-miR-520a-5p	0	0	1	0	0	0	MST1P9	macrophage stimulating 1 (hepatocyte growth factor-like) pseudogene 9
hsa-miR-520a-5p	0	0	1	1	1	1	CAST	calpastatin
hsa-miR-520a-5p	0	0	1	1	1	1	RXRB	retinoid X receptor, beta
hsa-miR-520a-5p	1	0	1	1	1	1	POU6F1	POU class 6 homeobox 1
hsa-miR-520a-5p	0	0	1	0	0	0	MUC5AC	mucin 5AC, oligomeric mucus/gel-forming
hsa-miR-520a-5p	0	0	1	1	0	0	GPR17	G protein-coupled receptor 17
hsa-miR-520a-5p	0	0	1	1	1	1	ARF5	ADP-ribosylation factor 5
hsa-miR-520a-5p	1	0	1	1	1	1	SEMA3F	sema domain, immunoglobulin domain (Ig), short basic domain, secreted, (semaphorin) 3F
hsa-miR-520a-5p	0	0	1	1	0	0	CCL26	chemokine (C-C motif) ligand 26
hsa-miR-520a-5p	0	0	1	1	0	0	USH1C	Usher syndrome 1C (autosomal recessive, severe)
hsa-miR-520a-5p	0	0	1	1	0	0	KIAA0100	KIAA0100
hsa-miR-520a-5p	1	0	1	1	1	1	GPR124	G protein-coupled receptor 124
hsa-miR-520a-5p	0	0	1	1	1	1	STYK1	serine/threonine/tyrosine kinase 1
hsa-miR-520a-5p	1	0	1	1	1	1	PRSS22	protease, serine, 22
hsa-miR-520a-5p	0	0	1	1	1	1	TNFRSF1A	tumor necrosis factor receptor superfamily, member 1A
hsa-miR-520a-5p	0	0	0	1	0	0	PRLH	prolactin releasing hormone
hsa-miR-520a-5p	0	0	1	1	0	0	LLGL2	lethal giant larvae homolog 2 (Drosophila)
hsa-miR-520a-5p	0	0	1	1	1	1	HEATR6	HEAT repeat containing 6
hsa-miR-520a-5p	0	0	0	1	1	1	FAP	fibroblast activation protein, alpha
hsa-miR-520a-5p	0	0	1	1	0	0	MOGAT2	monoacylglycerol O-acyltransferase 2
hsa-miR-520a-5p	0	0	0	1	1	1	ESF1	ESF1, nucleolar pre-rRNA processing protein, homolog (S. cerevisiae)
hsa-miR-520a-5p	0	0	0	1	1	1	RAB26	RAB26, member RAS oncogene family
hsa-miR-520a-5p	0	0	1	1	0	0	OCEL1	occludin/ELL domain containing 1
hsa-miR-520a-5p	0	0	0	1	0	0	ATP5D	ATP synthase, H+ transporting, mitochondrial F1 complex, delta subunit
hsa-miR-520a-5p	0	0	1	1	1	1	POLR2E	polymerase (RNA) II (DNA directed) polypeptide E, 25kDa
hsa-miR-520a-5p	0	0	1	1	0	0	SEC14L3	SEC14-like 3 (S. cerevisiae)
hsa-miR-520a-5p	0	0	1	1	1	1	LRP5L	low density lipoprotein receptor-related protein 5-like
hsa-miR-520a-5p	0	0	0	1	1	1	RHBDD3	rhomboid domain containing 3
hsa-miR-520a-5p	0	0	0	1	1	1	HMOX1	heme oxygenase (decycling) 1
hsa-miR-520a-5p	0	0	1	1	0	0	MCM5	minichromosome maintenance complex component 5
hsa-miR-520a-5p	1	0	1	1	1	1	PVALB	parvalbumin
hsa-miR-520a-5p	0	0	0	1	1	1	NME3	NME/NM23 nucleoside diphosphate kinase 3
hsa-miR-520a-5p	0	0	1	1	0	0	SLC38A7	solute carrier family 38, member 7
hsa-miR-520a-5p	0	0	1	1	0	0	STUB1	STIP1 homology and U-box containing protein 1, E3 ubiquitin protein ligase
hsa-miR-520a-5p	0	0	1	1	0	0	PPP1R37	protein phosphatase 1, regulatory subunit 37
hsa-miR-520a-5p	0	0	1	1	0	0	CKM	creatine kinase, muscle
hsa-miR-520a-5p	0	0	1	1	0	0	RNASEH2A	ribonuclease H2, subunit A
hsa-miR-520a-5p	0	0	0	1	0	0	POLR2I	polymerase (RNA) II (DNA directed) polypeptide I, 14.5kDa
hsa-miR-520a-5p	0	0	1	1	0	0	CCDC9	coiled-coil domain containing 9
hsa-miR-520a-5p	0	0	1	1	1	1	ATP5SL	ATP5S-like
hsa-miR-520a-5p	0	0	0	1	0	0	PLIN3	perilipin 3
hsa-miR-520a-5p	0	0	1	1	0	0	LIM2	lens intrinsic membrane protein 2, 19kDa
hsa-miR-520a-5p	0	0	1	1	0	0	WDR83OS	WD repeat domain 83 opposite strand
hsa-miR-520a-5p	0	0	0	1	0	0	ABHD11	abhydrolase domain containing 11
hsa-miR-520a-5p	0	0	0	1	0	0	BUD31	BUD31 homolog (S. cerevisiae)
hsa-miR-520a-5p	1	0	1	1	0	0	SLC25A39	solute carrier family 25, member 39
hsa-miR-520a-5p	1	0	1	1	1	1	GIT1	G protein-coupled receptor kinase interacting ArfGAP 1
hsa-miR-520a-5p	0	0	0	1	1	1	SUPT4H1	suppressor of Ty 4 homolog 1 (S. cerevisiae)
hsa-miR-520a-5p	1	0	0	1	1	1	WNT3	wingless-type MMTV integration site family, member 3
hsa-miR-520a-5p	0	0	1	1	1	1	CCL2	chemokine (C-C motif) ligand 2
hsa-miR-520a-5p	1	0	1	1	1	1	CCL1	chemokine (C-C motif) ligand 1
hsa-miR-520a-5p	1	0	1	1	1	1	ENDOU	endonuclease, polyU-specific
hsa-miR-520a-5p	0	0	1	1	1	1	TIMELESS	timeless homolog (Drosophila)
hsa-miR-520a-5p	1	0	1	1	1	1	FAM65B	family with sequence similarity 65, member B
hsa-miR-520a-5p	0	0	1	1	1	1	FBXO5	F-box protein 5
hsa-miR-520a-5p	0	0	1	1	1	1	FBXL4	F-box and leucine-rich repeat protein 4
hsa-miR-520a-5p	0	0	1	1	0	0	GMNN	geminin, DNA replication inhibitor
hsa-miR-520a-5p	0	0	1	1	1	1	HES1	hairy and enhancer of split 1, (Drosophila)
hsa-miR-520a-5p	1	0	1	1	1	1	TFPI	tissue factor pathway inhibitor (lipoprotein-associated coagulation inhibitor)
hsa-miR-520a-5p	0	0	0	1	0	0	REEP6	receptor accessory protein 6
hsa-miR-520a-5p	0	0	0	1	1	1	WNT6	wingless-type MMTV integration site family, member 6
hsa-miR-520a-5p	0	0	0	1	0	0	PROC	protein C (inactivator of coagulation factors Va and VIIIa)
hsa-miR-520a-5p	0	0	0	1	0	0	PRAMEF4	PRAME family member 4
hsa-miR-520a-5p	1	0	1	1	1	1	WARS2	tryptophanyl tRNA synthetase 2, mitochondrial
hsa-miR-520a-5p	0	0	1	1	1	1	HMGCL	3-hydroxymethyl-3-methylglutaryl-CoA lyase
hsa-miR-520a-5p	0	0	1	1	1	1	RARRES1	retinoic acid receptor responder (tazarotene induced) 1
hsa-miR-520a-5p	0	0	0	1	1	1	TNN	tenascin N
hsa-miR-520a-5p	0	0	1	1	1	1	EXOSC9	exosome component 9
hsa-miR-520a-5p	0	0	0	1	0	0	B9D2	B9 protein domain 2
hsa-miR-520a-5p	0	0	0	1	1	1	SLC35C2	solute carrier family 35, member C2
hsa-miR-520a-5p	0	0	0	1	0	0	GCNT7	glucosaminyl (N-acetyl) transferase family member 7
hsa-miR-520a-5p	0	0	1	1	0	0	ABCC10	ATP-binding cassette, sub-family C (CFTR/MRP), member 10
hsa-miR-520a-5p	0	0	1	1	0	0	MEA1	male-enhanced antigen 1
hsa-miR-520a-5p	1	0	1	1	1	1	OPN5	opsin 5
hsa-miR-520a-5p	0	0	0	1	1	1	BBS2	Bardet-Biedl syndrome 2
hsa-miR-520a-5p	0	0	0	1	1	1	TTF1	transcription termination factor, RNA polymerase I
hsa-miR-520a-5p	0	0	1	1	0	0	TRMT2B	tRNA methyltransferase 2 homolog B (S. cerevisiae)
hsa-miR-520a-5p	1	0	1	1	1	1	EML2	echinoderm microtubule associated protein like 2
hsa-miR-520a-5p	1	0	1	1	1	1	NECAB3	N-terminal EF-hand calcium binding protein 3
hsa-miR-520a-5p	0	0	1	1	0	0	SIX1	SIX homeobox 1
hsa-miR-520a-5p	0	0	0	1	0	0	COX7C	cytochrome c oxidase subunit VIIc
hsa-miR-520a-5p	0	0	0	1	1	1	RAC2	ras-related C3 botulinum toxin substrate 2 (rho family, small GTP binding protein Rac2)
hsa-miR-520a-5p	0	0	0	1	1	1	ARHGAP22	Rho GTPase activating protein 22
hsa-miR-520a-5p	0	0	0	1	0	0	KLK9	kallikrein-related peptidase 9
hsa-miR-520a-5p	1	0	1	1	1	1	MKNK2	MAP kinase interacting serine/threonine kinase 2
hsa-miR-520a-5p	0	0	1	1	1	1	C16orf62	chromosome 16 open reading frame 62
hsa-miR-520a-5p	0	0	0	1	0	0	LILRA2	leukocyte immunoglobulin-like receptor, subfamily A (with TM domain), member 2
hsa-miR-520a-5p	0	0	0	1	1	1	TDRD1	tudor domain containing 1
hsa-miR-520a-5p	0	0	1	1	1	1	ALG13	asparagine-linked glycosylation 13 homolog (S. cerevisiae)
hsa-miR-520a-5p	0	0	1	1	0	0	TMCO6	transmembrane and coiled-coil domains 6
hsa-miR-520a-5p	0	0	1	1	0	0	KRT5	keratin 5
hsa-miR-520a-5p	0	0	0	1	0	0	PRKCSH	protein kinase C substrate 80K-H
hsa-miR-520a-5p	0	0	0	1	1	1	BST2	bone marrow stromal cell antigen 2
hsa-miR-520a-5p	0	0	0	1	0	0	PGLS	6-phosphogluconolactonase
hsa-miR-520a-5p	0	0	1	1	1	1	NDUFA10	NADH dehydrogenase (ubiquinone) 1 alpha subcomplex, 10, 42kDa
hsa-miR-520a-5p	0	0	0	1	0	0	KLHDC7B	kelch domain containing 7B
hsa-miR-520a-5p	0	0	0	1	1	1	ZNF426	zinc finger protein 426
hsa-miR-520a-5p	0	0	0	1	0	0	GINS2	GINS complex subunit 2 (Psf2 homolog)
hsa-miR-520a-5p	0	0	1	1	1	1	PSMC3IP	PSMC3 interacting protein
hsa-miR-520a-5p	0	0	0	1	1	1	GAS2L2	growth arrest-specific 2 like 2
hsa-miR-520a-5p	0	0	1	1	0	0	RAMP1	receptor (G protein-coupled) activity modifying protein 1
hsa-miR-520a-5p	0	0	0	1	0	0	FTH1P19	ferritin, heavy polypeptide 1 pseudogene 19
hsa-miR-520a-5p	0	0	1	1	1	1	TRIM47	tripartite motif containing 47
hsa-miR-520a-5p	0	0	1	1	1	1	MTL5	metallothionein-like 5, testis-specific (tesmin)
hsa-miR-520a-5p	0	0	0	1	0	0	MYBPH	myosin binding protein H
hsa-miR-520a-5p	0	0	1	1	0	0	HSPBP1	HSPA (heat shock 70kDa) binding protein, cytoplasmic cochaperone 1
hsa-miR-520a-5p	0	0	1	1	0	0	LGALS12	lectin, galactoside-binding, soluble, 12
hsa-miR-520a-5p	1	0	1	1	1	1	E2F5	E2F transcription factor 5, p130-binding
hsa-miR-520a-5p	0	0	0	1	1	1	C14orf159	chromosome 14 open reading frame 159
hsa-miR-520a-5p	0	0	0	1	1	1	VRTN	vertebrae development homolog (pig)
hsa-miR-520a-5p	1	0	1	1	1	1	MBD2	methyl-CpG binding domain protein 2
hsa-miR-520a-5p	0	0	1	1	1	1	OASL	2'-5'-oligoadenylate synthetase-like
hsa-miR-520a-5p	0	0	0	1	1	1	CDK4	cyclin-dependent kinase 4
hsa-miR-520a-5p	0	0	1	1	0	0	KRT84	keratin 84
hsa-miR-520a-5p	1	0	1	1	1	1	NEK3	NIMA (never in mitosis gene a)-related kinase 3
hsa-miR-520a-5p	0	0	0	1	0	0	DDX56	DEAD (Asp-Glu-Ala-Asp) box helicase 56
hsa-miR-520a-5p	0	0	1	1	0	0	TTC5	tetratricopeptide repeat domain 5
hsa-miR-520a-5p	0	0	0	1	1	1	FGFBP2	fibroblast growth factor binding protein 2
hsa-miR-520a-5p	0	0	1	1	1	1	USP2	ubiquitin specific peptidase 2
hsa-miR-520a-5p	0	0	0	1	0	0	FDXACB1	ferredoxin-fold anticodon binding domain containing 1
hsa-miR-520a-5p	0	0	0	1	1	1	LRPPRC	leucine-rich pentatricopeptide repeat containing
hsa-miR-520a-5p	0	0	0	1	1	1	CYP2C9	cytochrome P450, family 2, subfamily C, polypeptide 9
hsa-miR-520a-5p	0	0	1	1	1	1	GUCY2C	guanylate cyclase 2C (heat stable enterotoxin receptor)
hsa-miR-520a-5p	0	0	0	1	0	0	MOCOS	molybdenum cofactor sulfurase
hsa-miR-520a-5p	0	0	1	1	0	0	ENOX1	ecto-NOX disulfide-thiol exchanger 1
hsa-miR-520a-5p	0	0	0	1	1	1	PALB2	partner and localizer of BRCA2
hsa-miR-520a-5p	0	0	0	1	0	0	AP3B2	adaptor-related protein complex 3, beta 2 subunit
hsa-miR-520a-5p	0	0	1	1	0	0	AARS	alanyl-tRNA synthetase
hsa-miR-520a-5p	0	0	0	1	1	1	VAC14	Vac14 homolog (S. cerevisiae)
hsa-miR-520a-5p	0	0	1	1	1	1	PSMD9	proteasome (prosome, macropain) 26S subunit, non-ATPase, 9
hsa-miR-520a-5p	0	0	1	1	1	1	TRIP4	thyroid hormone receptor interactor 4
hsa-miR-520a-5p	0	0	0	1	1	1	SERPINA10	serpin peptidase inhibitor, clade A (alpha-1 antiproteinase, antitrypsin), member 10
hsa-miR-520a-5p	0	0	0	1	0	0	MYOM2	myomesin (M-protein) 2, 165kDa
hsa-miR-520a-5p	0	0	1	1	1	1	SCPEP1	serine carboxypeptidase 1
hsa-miR-520a-5p	0	0	0	1	1	1	ALG1	asparagine-linked glycosylation 1, beta-1,4-mannosyltransferase homolog (S. cerevisiae)
hsa-miR-520a-5p	1	0	1	1	1	1	SLC46A1	solute carrier family 46 (folate transporter), member 1
hsa-miR-520a-5p	0	0	1	1	0	0	RGS9	regulator of G-protein signaling 9
hsa-miR-520a-5p	1	0	0	1	0	0	ISM1	isthmin 1 homolog (zebrafish)
hsa-miR-520a-5p	0	0	0	1	0	0	ATP4A	ATPase, H+/K+ exchanging, alpha polypeptide
hsa-miR-520a-5p	1	0	1	1	1	1	CELSR1	cadherin, EGF LAG seven-pass G-type receptor 1 (flamingo homolog, Drosophila)
hsa-miR-520a-5p	0	0	0	1	0	0	COPE	coatomer protein complex, subunit epsilon
hsa-miR-520a-5p	0	0	1	1	1	1	SCARF1	scavenger receptor class F, member 1
hsa-miR-520a-5p	0	0	1	1	1	1	GIPR	gastric inhibitory polypeptide receptor
hsa-miR-520a-5p	0	0	0	1	1	1	CLNS1A	chloride channel, nucleotide-sensitive, 1A
hsa-miR-520a-5p	0	0	1	1	1	1	TAF1B	TATA box binding protein (TBP)-associated factor, RNA polymerase I, B, 63kDa
hsa-miR-520a-5p	1	0	1	1	1	1	MAN1C1	mannosidase, alpha, class 1C, member 1
hsa-miR-520a-5p	0	0	1	1	1	1	HAT1	histone acetyltransferase 1
hsa-miR-520a-5p	0	0	0	1	1	1	GPSM2	G-protein signaling modulator 2
hsa-miR-520a-5p	0	0	1	1	1	1	CP	ceruloplasmin (ferroxidase)
hsa-miR-520a-5p	0	0	1	1	1	1	KRT24	keratin 24
hsa-miR-520a-5p	0	0	1	1	0	0	CAD	carbamoyl-phosphate synthetase 2, aspartate transcarbamylase, and dihydroorotase
hsa-miR-520a-5p	0	0	0	1	0	0	LYL1	lymphoblastic leukemia derived sequence 1
hsa-miR-520a-5p	0	0	0	1	0	0	THOC3	THO complex 3
hsa-miR-520a-5p	0	0	1	1	1	1	ST3GAL6	ST3 beta-galactoside alpha-2,3-sialyltransferase 6
hsa-miR-520a-5p	0	0	1	1	0	0	POR	P450 (cytochrome) oxidoreductase
hsa-miR-520a-5p	0	0	1	1	0	0	MCCC1	methylcrotonoyl-CoA carboxylase 1 (alpha)
hsa-miR-520a-5p	0	0	0	1	1	1	WBSCR22	Williams Beuren syndrome chromosome region 22
hsa-miR-520a-5p	0	0	1	1	0	0	SERGEF	secretion regulating guanine nucleotide exchange factor
hsa-miR-520a-5p	0	0	1	1	1	1	HYAL1	hyaluronoglucosaminidase 1
hsa-miR-520a-5p	0	0	1	1	0	0	FBXO7	F-box protein 7
hsa-miR-520a-5p	0	0	0	1	0	0	TTLL1	tubulin tyrosine ligase-like family, member 1
hsa-miR-520a-5p	0	0	1	1	0	0	B4GALNT3	beta-1,4-N-acetyl-galactosaminyl transferase 3
hsa-miR-520a-5p	1	0	1	1	1	1	ETNK1	ethanolamine kinase 1
hsa-miR-520a-5p	0	0	0	1	0	0	RBP5	retinol binding protein 5, cellular
hsa-miR-520a-5p	0	0	1	1	0	0	SUOX	sulfite oxidase
hsa-miR-520a-5p	0	0	1	1	1	1	RDH12	retinol dehydrogenase 12 (all-trans/9-cis/11-cis)
hsa-miR-520a-5p	1	0	1	1	1	1	CRTC3	CREB regulated transcription coactivator 3
hsa-miR-520a-5p	0	0	1	1	1	1	ITGAD	integrin, alpha D
hsa-miR-520a-5p	0	0	1	1	1	1	CDR2	cerebellar degeneration-related protein 2, 62kDa
hsa-miR-520a-5p	0	0	0	1	1	1	TRIM65	tripartite motif containing 65
hsa-miR-520a-5p	0	0	0	1	0	0	SSBP4	single stranded DNA binding protein 4
hsa-miR-520a-5p	0	0	1	1	1	1	DMWD	dystrophia myotonica, WD repeat containing
hsa-miR-520a-5p	0	0	1	1	1	1	SAE1	SUMO1 activating enzyme subunit 1
hsa-miR-520a-5p	0	0	0	1	0	0	FAM176B	family with sequence similarity 176, member B
hsa-miR-520a-5p	0	0	1	1	0	0	MPC2	mitochondrial pyruvate carrier 2
hsa-miR-520a-5p	0	0	0	1	0	0	DUSP27	dual specificity phosphatase 27 (putative)
hsa-miR-520a-5p	0	0	0	1	0	0	CAPN9	calpain 9
hsa-miR-520a-5p	0	0	0	1	1	1	C1orf35	chromosome 1 open reading frame 35
hsa-miR-520a-5p	0	0	0	1	0	0	ANKMY1	ankyrin repeat and MYND domain containing 1
hsa-miR-520a-5p	0	0	0	1	0	0	RQCD1	RCD1 required for cell differentiation1 homolog (S. pombe)
hsa-miR-520a-5p	1	0	1	1	1	1	CSRNP1	cysteine-serine-rich nuclear protein 1
hsa-miR-520a-5p	0	0	0	1	0	0	FERD3L	Fer3-like (Drosophila)
hsa-miR-520a-5p	1	0	1	1	1	1	FAM135B	family with sequence similarity 135, member B
hsa-miR-520a-5p	1	0	0	1	1	1	PPRC1	peroxisome proliferator-activated receptor gamma, coactivator-related 1
hsa-miR-520a-5p	0	0	0	1	0	0	GRIK4	glutamate receptor, ionotropic, kainate 4
hsa-miR-520a-5p	1	0	1	1	1	1	NINL	ninein-like
hsa-miR-520a-5p	0	0	0	1	1	1	MPZL2	myelin protein zero-like 2
hsa-miR-520a-5p	0	0	0	1	0	0	MYL9	myosin, light chain 9, regulatory
hsa-miR-520a-5p	0	0	1	1	0	0	PIGT	phosphatidylinositol glycan anchor biosynthesis, class T
hsa-miR-520a-5p	1	0	0	1	0	0	CDC42EP2	CDC42 effector protein (Rho GTPase binding) 2
hsa-miR-520a-5p	0	0	1	1	0	0	TBX6	T-box 6
hsa-miR-520a-5p	0	0	1	1	1	1	UHRF1BP1L	UHRF1 binding protein 1-like
hsa-miR-520a-5p	0	0	0	1	1	1	ACAD8	acyl-CoA dehydrogenase family, member 8
hsa-miR-520a-5p	1	0	1	1	1	1	VPS26B	vacuolar protein sorting 26 homolog B (S. pombe)
hsa-miR-520a-5p	0	0	0	1	1	1	JMY	junction mediating and regulatory protein, p53 cofactor
hsa-miR-520a-5p	0	0	1	1	1	1	ANKRD44	ankyrin repeat domain 44
hsa-miR-520a-5p	0	0	1	1	0	0	JAKMIP1	janus kinase and microtubule interacting protein 1
hsa-miR-520a-5p	0	0	1	1	1	1	TMEM87B	transmembrane protein 87B
hsa-miR-520a-5p	0	0	1	1	0	0	TMEM251	transmembrane protein 251
hsa-miR-520a-5p	0	0	0	1	0	0	C16orf74	chromosome 16 open reading frame 74
hsa-miR-520a-5p	1	0	1	1	1	1	ENAH	enabled homolog (Drosophila)
hsa-miR-520a-5p	0	0	0	1	1	1	ABCC3	ATP-binding cassette, sub-family C (CFTR/MRP), member 3
hsa-miR-520a-5p	0	0	1	1	0	0	TRMT44	tRNA methyltransferase 44 homolog (S. cerevisiae)
hsa-miR-520a-5p	0	0	0	1	0	0	SLC7A7	solute carrier family 7 (amino acid transporter light chain, y+L system), member 7
hsa-miR-520a-5p	0	0	1	1	0	0	NODAL	nodal homolog (mouse)
hsa-miR-520a-5p	1	0	1	1	1	1	RPUSD3	RNA pseudouridylate synthase domain containing 3
hsa-miR-520a-5p	1	0	1	1	1	1	RBM33	RNA binding motif protein 33
hsa-miR-520a-5p	0	0	0	1	0	0	TMED6	transmembrane emp24 protein transport domain containing 6
hsa-miR-520a-5p	1	0	1	1	0	0	WNT4	wingless-type MMTV integration site family, member 4
hsa-miR-520a-5p	0	0	1	1	1	1	CRYZL1	crystallin, zeta (quinone reductase)-like 1
hsa-miR-520a-5p	0	0	0	1	0	0	OGFR	opioid growth factor receptor
hsa-miR-520a-5p	0	0	1	1	0	0	GFRA4	GDNF family receptor alpha 4
hsa-miR-520a-5p	0	0	0	1	0	0	ACE	angiotensin I converting enzyme (peptidyl-dipeptidase A) 1
hsa-miR-520a-5p	0	0	0	1	0	0	PRKD2	protein kinase D2
hsa-miR-520a-5p	0	0	0	1	1	1	SSU72	SSU72 RNA polymerase II CTD phosphatase homolog (S. cerevisiae)
hsa-miR-520a-5p	0	0	0	1	1	1	HSF2BP	heat shock transcription factor 2 binding protein
hsa-miR-520a-5p	0	0	0	1	0	0	AIRE	autoimmune regulator
hsa-miR-520a-5p	0	0	0	1	0	0	FAM207A	family with sequence similarity 207, member A
hsa-miR-520a-5p	0	0	0	1	0	0	GPSM1	G-protein signaling modulator 1
hsa-miR-520a-5p	0	0	1	1	0	0	SHKBP1	SH3KBP1 binding protein 1
hsa-miR-520a-5p	0	0	0	1	0	0	AMICA1	adhesion molecule, interacts with CXADR antigen 1
hsa-miR-520a-5p	0	0	1	1	1	1	CD3G	CD3g molecule, gamma (CD3-TCR complex)
hsa-miR-520a-5p	0	0	1	1	0	0	ABCF3	ATP-binding cassette, sub-family F (GCN20), member 3
hsa-miR-520a-5p	0	0	1	1	1	1	BAX	BCL2-associated X protein
hsa-miR-520a-5p	0	0	1	1	1	1	IP6K3	inositol hexakisphosphate kinase 3
hsa-miR-520a-5p	0	0	1	1	0	0	SSRP1	structure specific recognition protein 1
hsa-miR-520a-5p	0	0	0	1	0	0	SSTR5	somatostatin receptor 5
hsa-miR-520a-5p	0	0	0	1	1	1	MEIOB	meiosis specific with OB domains
hsa-miR-520a-5p	0	0	1	1	0	0	PDZK1IP1	PDZK1 interacting protein 1
hsa-miR-520a-5p	1	0	1	1	1	1	ZNF2	zinc finger protein 2
hsa-miR-520a-5p	0	0	1	1	1	1	CCDC140	coiled-coil domain containing 140
hsa-miR-520a-5p	0	0	1	1	1	1	IWS1	IWS1 homolog (S. cerevisiae)
hsa-miR-520a-5p	1	0	1	1	1	1	FZD5	frizzled family receptor 5
hsa-miR-520a-5p	1	0	1	1	1	1	FBLN2	fibulin 2
hsa-miR-520a-5p	0	0	0	1	1	1	CLRN1	clarin 1
hsa-miR-520a-5p	0	0	1	1	1	1	MTMR14	myotubularin related protein 14
hsa-miR-520a-5p	0	0	0	1	0	0	POC1A	POC1 centriolar protein homolog A (Chlamydomonas)
hsa-miR-520a-5p	0	0	1	1	1	1	LEAP2	liver expressed antimicrobial peptide 2
hsa-miR-520a-5p	0	0	1	1	1	1	SAP30L	SAP30-like
hsa-miR-520a-5p	0	0	0	1	1	1	RP9	retinitis pigmentosa 9 (autosomal dominant)
hsa-miR-520a-5p	0	0	1	1	1	1	OSR2	odd-skipped related 2 (Drosophila)
hsa-miR-520a-5p	1	0	1	1	1	1	NLGN4Y	neuroligin 4, Y-linked
[truncated: 517 more rows]
