# Supplementary material for: Profiling of Selected MicroRNAs in Proliferative Eutopic Endometrium of Women with Ovarian Endometriosis
Source: Biomed Res Int. 2015 Aug 20;2015:760698. doi: 10.1155/2015/760698 (PMC4558423; doi:10.1155/2015/760698)
Supplement: Supplementary file 1 — Table I: The names of miRNAs significantly differentially expressed between eutopic endometrium of patients with endometriosis vs eutopic endometrium of patients without endometriosis. Table II: The associations between miRNA and mRNA, which presents detailed results of the search of six major databases i.e targetscan, tarbase, miranda, mirbase, mirtarget2 and pictar. [file 760698.f1.zip › 760698.f1/Table II/hsa-miR-520d-5p.tsv]

miR	targetscan	tarbase	miranda	mirbase	mirtarget2	pictar	GeneSymbol	GeneName
hsa-miR-520d-5p	1	0	1	1	1	1	PDZD2	PDZ domain containing 2
hsa-miR-520d-5p	0	0	1	1	1	1	PPIP5K1	diphosphoinositol pentakisphosphate kinase 1
hsa-miR-520d-5p	1	0	1	1	1	1	FAM65B	family with sequence similarity 65, member B
hsa-miR-520d-5p	1	0	1	1	1	1	ITM2C	integral membrane protein 2C
hsa-miR-520d-5p	1	0	1	0	1	1	PTPRT	protein tyrosine phosphatase, receptor type, T
hsa-miR-520d-5p	1	0	1	0	1	1	KIAA0408	KIAA0408
hsa-miR-520d-5p	1	0	1	1	1	1	NUPL1	nucleoporin like 1
hsa-miR-520d-5p	1	0	1	0	1	1	MTSS1	metastasis suppressor 1
hsa-miR-520d-5p	0	0	1	1	0	0	SIPA1L1	signal-induced proliferation-associated 1 like 1
hsa-miR-520d-5p	1	0	1	1	1	1	AUTS2	autism susceptibility candidate 2
hsa-miR-520d-5p	1	0	1	0	1	1	CEP350	centrosomal protein 350kDa
hsa-miR-520d-5p	0	0	1	1	1	1	NEU3	sialidase 3 (membrane sialidase)
hsa-miR-520d-5p	1	0	1	1	0	0	SUSD5	sushi domain containing 5
hsa-miR-520d-5p	0	0	1	1	0	0	ZNF862	zinc finger protein 862
hsa-miR-520d-5p	1	0	1	1	1	1	GPATCH8	G patch domain containing 8
hsa-miR-520d-5p	1	0	1	1	1	1	GREB1	growth regulation by estrogen in breast cancer 1
hsa-miR-520d-5p	1	0	1	1	1	1	KIF1B	kinesin family member 1B
hsa-miR-520d-5p	1	0	1	1	0	0	TBC1D12	TBC1 domain family, member 12
hsa-miR-520d-5p	1	0	1	0	0	0	HECTD4	HECT domain containing E3 ubiquitin protein ligase 4
hsa-miR-520d-5p	1	0	1	0	1	1	MFAP3L	microfibrillar-associated protein 3-like
hsa-miR-520d-5p	1	0	1	1	1	1	HIPK1	homeodomain interacting protein kinase 1
hsa-miR-520d-5p	1	0	1	1	1	1	GIGYF2	GRB10 interacting GYF protein 2
hsa-miR-520d-5p	1	0	1	1	1	1	SMOC2	SPARC related modular calcium binding 2
hsa-miR-520d-5p	1	0	1	0	1	1	DOCK4	dedicator of cytokinesis 4
hsa-miR-520d-5p	1	0	1	1	1	1	MATR3	matrin 3
hsa-miR-520d-5p	0	0	1	1	1	1	GPR116	G protein-coupled receptor 116
hsa-miR-520d-5p	1	0	1	0	1	1	RBM12	RNA binding motif protein 12
hsa-miR-520d-5p	1	0	1	1	1	1	LPHN2	latrophilin 2
hsa-miR-520d-5p	1	0	1	1	1	1	DNM3	dynamin 3
hsa-miR-520d-5p	1	0	1	1	1	1	WWC1	WW and C2 domain containing 1
hsa-miR-520d-5p	0	0	1	1	0	0	FAM169A	family with sequence similarity 169, member A
hsa-miR-520d-5p	0	0	1	1	1	1	WDR47	WD repeat domain 47
hsa-miR-520d-5p	1	0	1	1	1	1	UBR5	ubiquitin protein ligase E3 component n-recognin 5
hsa-miR-520d-5p	1	0	1	1	1	1	CPEB3	cytoplasmic polyadenylation element binding protein 3
hsa-miR-520d-5p	1	0	1	1	1	1	NLGN4Y	neuroligin 4, Y-linked
hsa-miR-520d-5p	1	0	1	1	1	1	C11orf9	chromosome 11 open reading frame 9
hsa-miR-520d-5p	1	0	1	1	1	1	NTNG1	netrin G1
hsa-miR-520d-5p	0	0	1	1	1	1	TBC1D30	TBC1 domain family, member 30
hsa-miR-520d-5p	1	0	1	1	1	1	PALLD	palladin, cytoskeletal associated protein
hsa-miR-520d-5p	1	0	1	1	1	1	RPGRIP1L	RPGRIP1-like
hsa-miR-520d-5p	1	0	1	1	1	1	FNBP4	formin binding protein 4
hsa-miR-520d-5p	1	0	1	1	0	0	KIAA1045	KIAA1045
hsa-miR-520d-5p	1	0	1	1	1	1	NLGN1	neuroligin 1
hsa-miR-520d-5p	1	0	1	0	1	1	ZNF507	zinc finger protein 507
hsa-miR-520d-5p	1	0	1	1	1	1	PHF8	PHD finger protein 8
hsa-miR-520d-5p	0	0	1	1	0	0	MUTYH	mutY homolog (E. coli)
hsa-miR-520d-5p	1	0	1	1	1	1	SMARCAD1	SWI/SNF-related, matrix-associated actin-dependent regulator of chromatin, subfamily a, containing DEAD/H box 1
hsa-miR-520d-5p	1	0	1	0	1	1	SRGAP3	SLIT-ROBO Rho GTPase activating protein 3
hsa-miR-520d-5p	1	0	1	1	0	0	KIAA1210	KIAA1210
hsa-miR-520d-5p	1	0	1	1	1	1	ZMIZ1	zinc finger, MIZ-type containing 1
hsa-miR-520d-5p	1	0	1	1	0	0	ATAD2B	ATPase family, AAA domain containing 2B
hsa-miR-520d-5p	1	0	1	1	1	1	MKL2	MKL/myocardin-like 2
hsa-miR-520d-5p	1	0	1	0	1	1	INTS2	integrator complex subunit 2
hsa-miR-520d-5p	0	0	1	1	1	1	TCF7L2	transcription factor 7-like 2 (T-cell specific, HMG-box)
hsa-miR-520d-5p	0	0	1	1	1	1	CA10	carbonic anhydrase X
hsa-miR-520d-5p	1	0	1	1	1	1	PCDH19	protocadherin 19
hsa-miR-520d-5p	1	0	1	0	1	1	KCTD16	potassium channel tetramerisation domain containing 16
hsa-miR-520d-5p	1	0	1	1	1	1	UNC79	unc-79 homolog (C. elegans)
hsa-miR-520d-5p	1	1	1	1	1	1	NFIA	nuclear factor I/A
hsa-miR-520d-5p	0	0	1	1	1	1	SCAPER	S-phase cyclin A-associated protein in the ER
hsa-miR-520d-5p	1	0	1	1	0	0	KIAA1462	KIAA1462
hsa-miR-520d-5p	1	0	1	1	1	1	BAZ2B	bromodomain adjacent to zinc finger domain, 2B
hsa-miR-520d-5p	0	0	1	1	1	1	NLGN3	neuroligin 3
hsa-miR-520d-5p	0	0	1	0	0	0	NYAP2	neuronal tyrosine-phosphorylated phosphoinositide-3-kinase adaptor 2
hsa-miR-520d-5p	1	0	1	1	1	1	FAM214B	family with sequence similarity 214, member B
hsa-miR-520d-5p	1	0	1	0	1	1	ZNF295	zinc finger protein 295
hsa-miR-520d-5p	1	0	1	0	1	1	LMO3	LIM domain only 3 (rhombotin-like 2)
hsa-miR-520d-5p	0	0	1	0	1	1	ZSWIM6	zinc finger, SWIM-type containing 6
hsa-miR-520d-5p	1	0	1	0	1	1	IGDCC4	immunoglobulin superfamily, DCC subclass, member 4
hsa-miR-520d-5p	1	0	1	1	1	1	PHF21A	PHD finger protein 21A
hsa-miR-520d-5p	1	0	1	1	1	1	DDHD1	DDHD domain containing 1
hsa-miR-520d-5p	0	0	1	0	1	1	SETD5	SET domain containing 5
hsa-miR-520d-5p	0	0	1	1	0	0	SLC22A16	solute carrier family 22 (organic cation/carnitine transporter), member 16
hsa-miR-520d-5p	1	0	1	1	1	1	LCOR	ligand dependent nuclear receptor corepressor
hsa-miR-520d-5p	0	0	1	1	0	0	FOCAD	focadhesin
hsa-miR-520d-5p	1	0	1	1	1	1	AHCTF1	AT hook containing transcription factor 1
hsa-miR-520d-5p	0	0	1	1	1	1	SLC11A2	solute carrier family 11 (proton-coupled divalent metal ion transporters), member 2
hsa-miR-520d-5p	1	0	1	1	1	1	NAV2	neuron navigator 2
hsa-miR-520d-5p	1	0	1	1	1	1	HNRPDL	heterogeneous nuclear ribonucleoprotein D-like
hsa-miR-520d-5p	1	0	1	1	1	1	CSMD3	CUB and Sushi multiple domains 3
hsa-miR-520d-5p	1	0	1	1	1	1	LSM14A	LSM14A, SCD6 homolog A (S. cerevisiae)
hsa-miR-520d-5p	0	0	1	1	0	0	TPGS2	tubulin polyglutamylase complex subunit 2
hsa-miR-520d-5p	1	0	1	1	1	1	ANKRD12	ankyrin repeat domain 12
hsa-miR-520d-5p	1	0	1	1	0	0	ZNF292	zinc finger protein 292
hsa-miR-520d-5p	1	0	1	1	0	0	ADC	arginine decarboxylase
hsa-miR-520d-5p	0	0	1	1	1	1	KIAA1967	KIAA1967
hsa-miR-520d-5p	1	0	1	1	1	1	SH3TC2	SH3 domain and tetratricopeptide repeats 2
hsa-miR-520d-5p	0	0	1	1	0	0	CIRH1A	cirrhosis, autosomal recessive 1A (cirhin)
hsa-miR-520d-5p	0	0	1	1	0	0	GOLT1A	golgi transport 1A
hsa-miR-520d-5p	1	0	1	0	0	0	RNF169	ring finger protein 169
hsa-miR-520d-5p	1	0	1	0	0	0	ZBTB34	zinc finger and BTB domain containing 34
hsa-miR-520d-5p	1	0	1	1	1	1	ACBD5	acyl-CoA binding domain containing 5
hsa-miR-520d-5p	0	0	1	1	1	1	MCF2	MCF.2 cell line derived transforming sequence
hsa-miR-520d-5p	1	0	1	1	1	1	RFX4	regulatory factor X, 4 (influences HLA class II expression)
hsa-miR-520d-5p	1	0	1	1	1	1	SMEK1	SMEK homolog 1, suppressor of mek1 (Dictyostelium)
hsa-miR-520d-5p	1	0	1	0	0	0	ZC3H12C	zinc finger CCCH-type containing 12C
hsa-miR-520d-5p	0	0	1	1	0	0	KRTAP24-1	keratin associated protein 24-1
hsa-miR-520d-5p	0	0	1	1	1	1	PMS1	PMS1 postmeiotic segregation increased 1 (S. cerevisiae)
hsa-miR-520d-5p	1	0	1	1	1	1	PAN3	PAN3 poly(A) specific ribonuclease subunit homolog (S. cerevisiae)
hsa-miR-520d-5p	1	0	1	0	1	1	BEND4	BEN domain containing 4
hsa-miR-520d-5p	0	0	1	1	1	1	ING4	inhibitor of growth family, member 4
hsa-miR-520d-5p	1	0	1	1	1	1	VLDLR	very low density lipoprotein receptor
hsa-miR-520d-5p	1	0	1	1	1	1	COL11A1	collagen, type XI, alpha 1
hsa-miR-520d-5p	1	0	1	1	1	1	DAPK1	death-associated protein kinase 1
hsa-miR-520d-5p	1	0	1	0	1	1	PCDHA13	protocadherin alpha 13
hsa-miR-520d-5p	1	0	1	1	1	1	PCDHA4	protocadherin alpha 4
hsa-miR-520d-5p	1	0	1	1	0	0	ELN	elastin
hsa-miR-520d-5p	1	0	1	1	1	1	MEF2A	myocyte enhancer factor 2A
hsa-miR-520d-5p	1	0	1	1	1	1	HMGB1	high mobility group box 1
hsa-miR-520d-5p	0	0	1	1	1	1	PTK2	PTK2 protein tyrosine kinase 2
hsa-miR-520d-5p	1	0	1	1	1	1	SYNCRIP	synaptotagmin binding, cytoplasmic RNA interacting protein
hsa-miR-520d-5p	1	0	1	1	1	1	RPS6KA2	ribosomal protein S6 kinase, 90kDa, polypeptide 2
hsa-miR-520d-5p	1	0	1	0	1	1	SLC6A6	solute carrier family 6 (neurotransmitter transporter, taurine), member 6
hsa-miR-520d-5p	1	0	1	1	1	1	E2F5	E2F transcription factor 5, p130-binding
hsa-miR-520d-5p	1	0	1	0	1	1	DPYSL2	dihydropyrimidinase-like 2
hsa-miR-520d-5p	0	0	1	1	1	1	TFRC	transferrin receptor (p90, CD71)
hsa-miR-520d-5p	1	0	1	1	1	1	EPHA7	EPH receptor A7
hsa-miR-520d-5p	1	0	1	0	1	1	CHL1	cell adhesion molecule with homology to L1CAM (close homolog of L1)
hsa-miR-520d-5p	1	0	1	0	1	1	CDON	Cdon homolog (mouse)
hsa-miR-520d-5p	1	0	1	1	1	1	NEO1	neogenin 1
hsa-miR-520d-5p	1	0	1	1	0	0	RGS6	regulator of G-protein signaling 6
hsa-miR-520d-5p	1	0	1	1	1	1	LIMA1	LIM domain and actin binding 1
hsa-miR-520d-5p	0	0	1	1	0	0	EIF4E2	eukaryotic translation initiation factor 4E family member 2
hsa-miR-520d-5p	1	0	1	1	1	1	GIT1	G protein-coupled receptor kinase interacting ArfGAP 1
hsa-miR-520d-5p	0	0	1	1	1	1	STAU1	staufen, RNA binding protein, homolog 1 (Drosophila)
hsa-miR-520d-5p	1	0	1	1	1	1	HNRNPK	heterogeneous nuclear ribonucleoprotein K
hsa-miR-520d-5p	1	0	1	1	1	1	DDX17	DEAD (Asp-Glu-Ala-Asp) box helicase 17
hsa-miR-520d-5p	1	0	1	0	1	1	TBL1X	transducin (beta)-like 1X-linked
hsa-miR-520d-5p	1	0	1	1	1	1	ARHGEF3	Rho guanine nucleotide exchange factor (GEF) 3
hsa-miR-520d-5p	1	0	1	1	1	1	COL24A1	collagen, type XXIV, alpha 1
hsa-miR-520d-5p	0	0	1	1	0	0	SLC22A8	solute carrier family 22 (organic anion transporter), member 8
hsa-miR-520d-5p	1	0	1	1	0	0	ARRB2	arrestin, beta 2
hsa-miR-520d-5p	0	0	1	1	1	1	RNF130	ring finger protein 130
hsa-miR-520d-5p	1	0	1	1	0	0	KAT5	K(lysine) acetyltransferase 5
hsa-miR-520d-5p	0	0	1	1	1	1	MYO9A	myosin IXA
hsa-miR-520d-5p	1	0	1	1	1	1	TEAD1	TEA domain family member 1 (SV40 transcriptional enhancer factor)
hsa-miR-520d-5p	1	0	1	1	1	1	OSBPL10	oxysterol binding protein-like 10
hsa-miR-520d-5p	0	0	1	1	0	0	TRIM27	tripartite motif containing 27
hsa-miR-520d-5p	1	0	1	1	1	1	GULP1	GULP, engulfment adaptor PTB domain containing 1
hsa-miR-520d-5p	1	0	1	1	1	1	ZFX	zinc finger protein, X-linked
hsa-miR-520d-5p	0	0	1	1	1	1	PLD1	phospholipase D1, phosphatidylcholine-specific
hsa-miR-520d-5p	1	0	1	0	1	1	PDE7B	phosphodiesterase 7B
hsa-miR-520d-5p	1	0	1	1	1	1	MEF2D	myocyte enhancer factor 2D
hsa-miR-520d-5p	1	0	1	0	1	1	MLL2	myeloid/lymphoid or mixed-lineage leukemia 2
hsa-miR-520d-5p	1	0	1	1	1	1	SLC4A4	solute carrier family 4, sodium bicarbonate cotransporter, member 4
hsa-miR-520d-5p	0	0	1	1	1	1	SESN1	sestrin 1
hsa-miR-520d-5p	1	0	1	1	1	1	MYT1L	myelin transcription factor 1-like
hsa-miR-520d-5p	0	0	1	0	0	0	PLD2	phospholipase D2
hsa-miR-520d-5p	1	0	1	0	0	0	MAP3K1	mitogen-activated protein kinase kinase kinase 1, E3 ubiquitin protein ligase
hsa-miR-520d-5p	1	0	1	1	1	1	MRAS	muscle RAS oncogene homolog
hsa-miR-520d-5p	0	0	1	1	1	1	KHDRBS3	KH domain containing, RNA binding, signal transduction associated 3
hsa-miR-520d-5p	1	0	1	1	1	1	PFKFB3	6-phosphofructo-2-kinase/fructose-2,6-biphosphatase 3
hsa-miR-520d-5p	1	0	1	1	1	1	MBNL2	muscleblind-like splicing regulator 2
hsa-miR-520d-5p	0	0	1	1	1	1	ZNF33A	zinc finger protein 33A
hsa-miR-520d-5p	1	0	1	1	1	1	NUDT4	nudix (nucleoside diphosphate linked moiety X)-type motif 4
hsa-miR-520d-5p	1	0	1	1	1	1	CBFA2T2	core-binding factor, runt domain, alpha subunit 2; translocated to, 2
hsa-miR-520d-5p	0	0	1	0	1	1	C2orf72	chromosome 2 open reading frame 72
hsa-miR-520d-5p	1	0	1	1	1	1	TP63	tumor protein p63
hsa-miR-520d-5p	1	0	1	1	1	1	UNC50	unc-50 homolog (C. elegans)
hsa-miR-520d-5p	1	0	1	1	1	1	AKAP9	A kinase (PRKA) anchor protein (yotiao) 9
hsa-miR-520d-5p	0	0	1	1	1	1	MINPP1	multiple inositol-polyphosphate phosphatase 1
hsa-miR-520d-5p	0	0	1	1	1	1	RGS7	regulator of G-protein signaling 7
hsa-miR-520d-5p	0	0	1	1	1	1	RER1	RER1 retention in endoplasmic reticulum 1 homolog (S. cerevisiae)
hsa-miR-520d-5p	0	0	1	1	1	1	PLEKHB1	pleckstrin homology domain containing, family B (evectins) member 1
hsa-miR-520d-5p	1	0	1	0	1	1	CD164	CD164 molecule, sialomucin
hsa-miR-520d-5p	0	0	1	1	0	0	RBM5	RNA binding motif protein 5
hsa-miR-520d-5p	1	0	1	1	1	1	KAT6B	K(lysine) acetyltransferase 6B
hsa-miR-520d-5p	0	0	1	1	0	0	ABRACL	ABRA C-terminal like
hsa-miR-520d-5p	0	0	1	1	1	1	COG6	component of oligomeric golgi complex 6
hsa-miR-520d-5p	1	0	1	0	1	1	CDK14	cyclin-dependent kinase 14
hsa-miR-520d-5p	1	0	1	1	1	1	HNRNPH3	heterogeneous nuclear ribonucleoprotein H3 (2H9)
hsa-miR-520d-5p	1	0	1	1	1	1	CAB39	calcium binding protein 39
hsa-miR-520d-5p	1	0	1	1	1	1	SORBS1	sorbin and SH3 domain containing 1
hsa-miR-520d-5p	1	0	1	1	1	1	ZBTB20	zinc finger and BTB domain containing 20
hsa-miR-520d-5p	0	0	1	0	1	1	CLEC5A	C-type lectin domain family 5, member A
hsa-miR-520d-5p	1	0	1	0	1	1	SLC34A2	solute carrier family 34 (sodium phosphate), member 2
hsa-miR-520d-5p	1	0	1	1	1	1	MYNN	myoneurin
hsa-miR-520d-5p	1	0	1	1	1	1	C14orf129	chromosome 14 open reading frame 129
hsa-miR-520d-5p	0	0	1	1	1	1	CNPPD1	cyclin Pas1/PHO80 domain containing 1
hsa-miR-520d-5p	1	0	1	1	1	1	USP15	ubiquitin specific peptidase 15
hsa-miR-520d-5p	1	0	1	1	1	1	ANKRD13A	ankyrin repeat domain 13A
hsa-miR-520d-5p	1	0	1	1	1	1	AGPAT3	1-acylglycerol-3-phosphate O-acyltransferase 3
hsa-miR-520d-5p	0	0	1	1	1	1	FAM114A2	family with sequence similarity 114, member A2
hsa-miR-520d-5p	0	0	1	1	1	1	MPP6	membrane protein, palmitoylated 6 (MAGUK p55 subfamily member 6)
hsa-miR-520d-5p	1	0	1	1	1	1	TACC2	transforming, acidic coiled-coil containing protein 2
hsa-miR-520d-5p	1	0	1	1	1	1	FBN2	fibrillin 2
hsa-miR-520d-5p	1	0	1	1	1	1	TSC22D2	TSC22 domain family, member 2
hsa-miR-520d-5p	1	0	1	1	1	1	SYDE1	synapse defective 1, Rho GTPase, homolog 1 (C. elegans)
hsa-miR-520d-5p	1	0	1	1	1	1	NXT2	nuclear transport factor 2-like export factor 2
hsa-miR-520d-5p	1	0	1	1	1	1	DESI2	desumoylating isopeptidase 2
hsa-miR-520d-5p	1	0	1	1	1	1	CALD1	caldesmon 1
hsa-miR-520d-5p	0	0	1	1	1	1	NKX3-1	NK3 homeobox 1
hsa-miR-520d-5p	0	0	1	1	1	1	BAX	BCL2-associated X protein
hsa-miR-520d-5p	0	0	1	0	0	0	TIGD7	tigger transposable element derived 7
hsa-miR-520d-5p	1	0	1	1	1	1	SH3GLB1	SH3-domain GRB2-like endophilin B1
hsa-miR-520d-5p	0	0	1	1	1	1	GOLGA6A	golgin A6 family, member A
hsa-miR-520d-5p	1	0	1	0	1	1	TRPS1	trichorhinophalangeal syndrome I
hsa-miR-520d-5p	1	0	1	1	1	1	PUM2	pumilio homolog 2 (Drosophila)
hsa-miR-520d-5p	0	0	1	0	1	1	ERBB2IP	erbb2 interacting protein
hsa-miR-520d-5p	1	0	1	1	1	1	VPS39	vacuolar protein sorting 39 homolog (S. cerevisiae)
hsa-miR-520d-5p	1	0	1	1	1	1	CALN1	calneuron 1
hsa-miR-520d-5p	0	0	1	1	0	0	RNF17	ring finger protein 17
hsa-miR-520d-5p	1	0	1	1	1	1	KLHL12	kelch-like 12 (Drosophila)
hsa-miR-520d-5p	1	0	1	1	1	1	CPEB1	cytoplasmic polyadenylation element binding protein 1
hsa-miR-520d-5p	0	0	1	1	0	0	FEZF2	FEZ family zinc finger 2
hsa-miR-520d-5p	1	0	1	1	1	1	CALU	calumenin
hsa-miR-520d-5p	0	0	1	1	1	1	SLC6A15	solute carrier family 6 (neutral amino acid transporter), member 15
hsa-miR-520d-5p	1	0	1	1	1	1	CASD1	CAS1 domain containing 1
hsa-miR-520d-5p	0	0	1	0	0	0	CLRN1-AS1	CLRN1 antisense RNA 1
hsa-miR-520d-5p	0	0	1	1	1	1	ORMDL1	ORM1-like 1 (S. cerevisiae)
hsa-miR-520d-5p	0	0	1	1	1	1	PPP1R1B	protein phosphatase 1, regulatory (inhibitor) subunit 1B
hsa-miR-520d-5p	1	0	1	1	0	0	SEPT8	septin 8
hsa-miR-520d-5p	1	0	1	1	1	1	RBFOX1	RNA binding protein, fox-1 homolog (C. elegans) 1
hsa-miR-520d-5p	1	0	1	1	1	1	HNRNPU	heterogeneous nuclear ribonucleoprotein U (scaffold attachment factor A)
hsa-miR-520d-5p	0	0	1	1	1	1	CSPG5	chondroitin sulfate proteoglycan 5 (neuroglycan C)
hsa-miR-520d-5p	1	0	1	1	1	1	F3	coagulation factor III (thromboplastin, tissue factor)
hsa-miR-520d-5p	1	0	1	1	1	1	LRRC7	leucine rich repeat containing 7
hsa-miR-520d-5p	1	0	1	0	1	1	NUDCD1	NudC domain containing 1
hsa-miR-520d-5p	0	0	1	1	1	1	TTLL11	tubulin tyrosine ligase-like family, member 11
hsa-miR-520d-5p	0	0	1	1	0	0	SVIP	small VCP/p97-interacting protein
hsa-miR-520d-5p	1	0	1	1	1	1	GPR64	G protein-coupled receptor 64
hsa-miR-520d-5p	0	0	1	1	1	1	ANKRD36B	ankyrin repeat domain 36B
hsa-miR-520d-5p	1	0	1	1	1	1	AFF2	AF4/FMR2 family, member 2
hsa-miR-520d-5p	1	0	1	1	1	1	PLAGL1	pleiomorphic adenoma gene-like 1
hsa-miR-520d-5p	1	0	1	1	0	0	ENTPD1	ectonucleoside triphosphate diphosphohydrolase 1
hsa-miR-520d-5p	0	0	1	1	1	1	C6orf48	chromosome 6 open reading frame 48
hsa-miR-520d-5p	1	0	1	1	1	1	SUCO	SUN domain containing ossification factor
hsa-miR-520d-5p	1	0	1	1	1	1	CACNA2D2	calcium channel, voltage-dependent, alpha 2/delta subunit 2
hsa-miR-520d-5p	0	0	1	1	1	1	CLDND1	claudin domain containing 1
hsa-miR-520d-5p	0	0	1	1	1	1	TCFL5	transcription factor-like 5 (basic helix-loop-helix)
hsa-miR-520d-5p	1	0	1	0	1	1	GRB10	growth factor receptor-bound protein 10
hsa-miR-520d-5p	1	0	1	1	1	1	SAV1	salvador homolog 1 (Drosophila)
hsa-miR-520d-5p	1	0	1	1	1	1	VAMP7	vesicle-associated membrane protein 7
hsa-miR-520d-5p	1	0	1	1	1	1	PALM2	paralemmin 2
hsa-miR-520d-5p	0	0	1	0	1	1	SRPK1	SRSF protein kinase 1
hsa-miR-520d-5p	1	0	1	1	1	1	PNISR	PNN-interacting serine/arginine-rich protein
hsa-miR-520d-5p	1	0	1	1	1	1	NAV3	neuron navigator 3
hsa-miR-520d-5p	0	0	1	1	1	1	TRDN	triadin
hsa-miR-520d-5p	1	0	1	1	1	1	NRXN3	neurexin 3
hsa-miR-520d-5p	0	0	1	1	1	1	ABLIM2	actin binding LIM protein family, member 2
hsa-miR-520d-5p	1	0	1	1	1	1	PPP1R9A	protein phosphatase 1, regulatory subunit 9A
hsa-miR-520d-5p	0	0	1	1	0	0	NHLRC2	NHL repeat containing 2
hsa-miR-520d-5p	0	0	1	1	1	1	ESRP1	epithelial splicing regulatory protein 1
hsa-miR-520d-5p	1	0	1	1	1	1	ENOX2	ecto-NOX disulfide-thiol exchanger 2
hsa-miR-520d-5p	0	0	1	1	1	1	PARP16	poly (ADP-ribose) polymerase family, member 16
hsa-miR-520d-5p	0	0	1	1	1	1	UBE2Q2	ubiquitin-conjugating enzyme E2Q family member 2
hsa-miR-520d-5p	0	0	1	0	0	0	TUG1	taurine upregulated 1 (non-protein coding)
hsa-miR-520d-5p	0	0	1	1	1	1	OLFM4	olfactomedin 4
hsa-miR-520d-5p	0	0	1	1	1	1	BANK1	B-cell scaffold protein with ankyrin repeats 1
hsa-miR-520d-5p	1	0	1	1	1	1	ARHGAP12	Rho GTPase activating protein 12
hsa-miR-520d-5p	1	0	1	1	1	1	ARGLU1	arginine and glutamate rich 1
hsa-miR-520d-5p	1	0	1	1	1	1	NIP7	nuclear import 7 homolog (S. cerevisiae)
hsa-miR-520d-5p	0	0	1	1	0	0	FAM64A	family with sequence similarity 64, member A
hsa-miR-520d-5p	1	0	1	1	1	1	HNRNPF	heterogeneous nuclear ribonucleoprotein F
hsa-miR-520d-5p	0	0	1	1	1	1	STOX2	storkhead box 2
hsa-miR-520d-5p	0	0	1	1	1	1	RNF220	ring finger protein 220
hsa-miR-520d-5p	1	0	1	1	1	1	EIF2C1	eukaryotic translation initiation factor 2C, 1
hsa-miR-520d-5p	1	0	1	1	1	1	PTBP3	polypyrimidine tract binding protein 3
hsa-miR-520d-5p	1	0	1	1	1	1	SLC38A2	solute carrier family 38, member 2
hsa-miR-520d-5p	0	0	1	1	1	1	PRPF39	PRP39 pre-mRNA processing factor 39 homolog (S. cerevisiae)
hsa-miR-520d-5p	1	0	1	1	1	1	MKLN1	muskelin 1, intracellular mediator containing kelch motifs
hsa-miR-520d-5p	1	0	1	1	1	1	ACER3	alkaline ceramidase 3
hsa-miR-520d-5p	1	0	1	1	1	1	MYO9B	myosin IXB
hsa-miR-520d-5p	1	0	1	1	1	1	INSIG2	insulin induced gene 2
hsa-miR-520d-5p	1	0	1	1	1	1	PGAP1	post-GPI attachment to proteins 1
hsa-miR-520d-5p	0	0	1	1	0	0	CCDC51	coiled-coil domain containing 51
hsa-miR-520d-5p	1	0	1	0	1	1	LIN28A	lin-28 homolog A (C. elegans)
hsa-miR-520d-5p	1	0	1	1	1	1	MON2	MON2 homolog (S. cerevisiae)
hsa-miR-520d-5p	0	0	1	0	0	0	DUXAP10	double homeobox A pseudogene 10
hsa-miR-520d-5p	1	0	1	1	1	1	S100PBP	S100P binding protein
hsa-miR-520d-5p	1	0	1	0	1	1	DCAF17	DDB1 and CUL4 associated factor 17
hsa-miR-520d-5p	0	0	1	1	1	1	VPRBP	Vpr (HIV-1) binding protein
hsa-miR-520d-5p	1	0	1	1	1	1	MACF1	microtubule-actin crosslinking factor 1
hsa-miR-520d-5p	0	0	1	1	0	0	BUB1	budding uninhibited by benzimidazoles 1 homolog (yeast)
hsa-miR-520d-5p	1	0	1	1	1	1	PHF20L1	PHD finger protein 20-like 1
hsa-miR-520d-5p	0	0	1	0	0	0	LOC284561	uncharacterized LOC284561
hsa-miR-520d-5p	1	0	1	1	1	1	PPFIA3	protein tyrosine phosphatase, receptor type, f polypeptide (PTPRF), interacting protein (liprin), alpha 3
hsa-miR-520d-5p	0	0	1	1	1	1	AMFR	autocrine motility factor receptor, E3 ubiquitin protein ligase
hsa-miR-520d-5p	0	0	1	0	1	1	FLJ14186	uncharacterized LOC401149
hsa-miR-520d-5p	0	0	1	0	0	0	IFFO2	intermediate filament family orphan 2
hsa-miR-520d-5p	1	0	1	1	1	1	DYRK2	dual-specificity tyrosine-(Y)-phosphorylation regulated kinase 2
hsa-miR-520d-5p	1	0	1	0	1	1	ATP2B1	ATPase, Ca++ transporting, plasma membrane 1
hsa-miR-520d-5p	1	0	1	1	1	1	ABHD3	abhydrolase domain containing 3
hsa-miR-520d-5p	0	0	1	1	1	1	EP400	E1A binding protein p400
hsa-miR-520d-5p	0	0	1	1	0	0	EIF4ENIF1	eukaryotic translation initiation factor 4E nuclear import factor 1
hsa-miR-520d-5p	1	0	1	0	1	1	MYO5B	myosin VB
hsa-miR-520d-5p	0	0	1	0	1	1	ATXN1L	ataxin 1-like
hsa-miR-520d-5p	0	0	1	0	0	0	KIAA1671	KIAA1671
hsa-miR-520d-5p	1	0	1	1	1	1	KANK1	KN motif and ankyrin repeat domains 1
hsa-miR-520d-5p	0	0	1	1	1	1	WDR67	WD repeat domain 67
hsa-miR-520d-5p	1	0	1	1	1	1	YPEL5	yippee-like 5 (Drosophila)
hsa-miR-520d-5p	0	0	1	0	1	1	HEMK1	HemK methyltransferase family member 1
hsa-miR-520d-5p	0	0	1	0	1	1	FLJ22447	uncharacterized LOC400221
hsa-miR-520d-5p	1	0	1	0	0	0	KIF26A	kinesin family member 26A
hsa-miR-520d-5p	0	0	1	0	1	1	FLJ22763	uncharacterized LOC401081
hsa-miR-520d-5p	1	0	1	1	0	0	MAGI3	membrane associated guanylate kinase, WW and PDZ domain containing 3
hsa-miR-520d-5p	0	0	1	1	1	1	ZBBX	zinc finger, B-box domain containing
hsa-miR-520d-5p	1	0	1	1	1	1	RNF185	ring finger protein 185
hsa-miR-520d-5p	1	0	1	1	1	1	GORASP2	golgi reassembly stacking protein 2, 55kDa
hsa-miR-520d-5p	1	0	1	1	1	1	FOXP1	forkhead box P1
hsa-miR-520d-5p	1	0	1	1	1	1	SEC63	SEC63 homolog (S. cerevisiae)
hsa-miR-520d-5p	1	0	1	1	1	1	FAM53C	family with sequence similarity 53, member C
hsa-miR-520d-5p	0	0	1	1	1	1	KDM2B	lysine (K)-specific demethylase 2B
hsa-miR-520d-5p	1	0	1	1	0	0	SLC44A2	solute carrier family 44, member 2
hsa-miR-520d-5p	1	0	1	1	1	1	NFASC	neurofascin
hsa-miR-520d-5p	0	0	1	1	0	0	FAM48A	family with sequence similarity 48, member A
hsa-miR-520d-5p	0	0	1	1	1	1	NETO2	neuropilin (NRP) and tolloid (TLL)-like 2
hsa-miR-520d-5p	0	0	1	1	1	1	DTL	denticleless E3 ubiquitin protein ligase homolog (Drosophila)
hsa-miR-520d-5p	1	0	1	1	1	1	GPD2	glycerol-3-phosphate dehydrogenase 2 (mitochondrial)
hsa-miR-520d-5p	1	0	1	1	1	1	STRBP	spermatid perinuclear RNA binding protein
hsa-miR-520d-5p	1	0	1	1	1	1	PPM1L	protein phosphatase, Mg2+/Mn2+ dependent, 1L
hsa-miR-520d-5p	1	0	1	1	1	1	TPM1	tropomyosin 1 (alpha)
hsa-miR-520d-5p	1	0	1	1	1	1	SULF1	sulfatase 1
hsa-miR-520d-5p	0	0	1	0	1	1	LOC152742	uncharacterized LOC152742
hsa-miR-520d-5p	0	0	1	1	1	1	SDK1	sidekick cell adhesion molecule 1
hsa-miR-520d-5p	1	0	1	0	1	1	RNF165	ring finger protein 165
hsa-miR-520d-5p	0	0	1	1	1	1	TP53I11	tumor protein p53 inducible protein 11
hsa-miR-520d-5p	1	0	1	1	1	1	SCAMP5	secretory carrier membrane protein 5
hsa-miR-520d-5p	1	0	1	1	1	1	CLCN5	chloride channel, voltage-sensitive 5
hsa-miR-520d-5p	1	0	1	1	1	1	SORBS2	sorbin and SH3 domain containing 2
hsa-miR-520d-5p	1	0	1	1	1	1	PUM1	pumilio homolog 1 (Drosophila)
hsa-miR-520d-5p	0	0	1	0	0	0	LOC255187	hCG1980447
hsa-miR-520d-5p	1	0	1	1	1	1	TPM3	tropomyosin 3
hsa-miR-520d-5p	1	0	1	1	1	1	PCMTD1	protein-L-isoaspartate (D-aspartate) O-methyltransferase domain containing 1
hsa-miR-520d-5p	0	0	1	1	1	1	COQ10A	coenzyme Q10 homolog A (S. cerevisiae)
hsa-miR-520d-5p	0	0	1	1	0	0	RELT	RELT tumor necrosis factor receptor
hsa-miR-520d-5p	1	0	1	1	1	1	MLLT6	myeloid/lymphoid or mixed-lineage leukemia (trithorax homolog, Drosophila); translocated to, 6
hsa-miR-520d-5p	0	0	1	1	0	0	RGL3	ral guanine nucleotide dissociation stimulator-like 3
hsa-miR-520d-5p	1	0	1	1	1	1	TLE4	transducin-like enhancer of split 4 (E(sp1) homolog, Drosophila)
hsa-miR-520d-5p	1	0	1	1	1	1	C20orf26	chromosome 20 open reading frame 26
hsa-miR-520d-5p	1	0	1	0	1	1	NCAM1	neural cell adhesion molecule 1
hsa-miR-520d-5p	1	0	1	1	1	1	SEC22A	SEC22 vesicle trafficking protein homolog A (S. cerevisiae)
hsa-miR-520d-5p	0	0	1	0	0	0	LINC00637	long intergenic non-protein coding RNA 637
hsa-miR-520d-5p	0	0	1	0	0	0	GTF3A	general transcription factor IIIA
hsa-miR-520d-5p	0	0	1	0	0	0	FLJ25363	uncharacterized LOC401082
hsa-miR-520d-5p	0	0	1	0	1	1	CCDC68	coiled-coil domain containing 68
hsa-miR-520d-5p	0	0	1	0	1	1	UHMK1	U2AF homology motif (UHM) kinase 1
hsa-miR-520d-5p	1	0	1	0	1	1	CLASP1	cytoplasmic linker associated protein 1
hsa-miR-520d-5p	0	0	1	0	1	1	CDHR3	cadherin-related family member 3
hsa-miR-520d-5p	0	0	1	1	1	1	PDZRN3	PDZ domain containing ring finger 3
hsa-miR-520d-5p	0	0	1	1	0	0	GPR19	G protein-coupled receptor 19
hsa-miR-520d-5p	1	0	1	1	1	1	SIRT1	sirtuin 1
hsa-miR-520d-5p	1	0	1	1	1	1	PAX6	paired box 6
hsa-miR-520d-5p	1	0	1	1	1	1	MYO1B	myosin IB
hsa-miR-520d-5p	0	0	1	0	1	1	CADM1	cell adhesion molecule 1
hsa-miR-520d-5p	0	0	1	1	1	1	PIK3C3	phosphatidylinositol 3-kinase, catalytic subunit type 3
hsa-miR-520d-5p	0	0	1	1	1	1	DYNC1I1	dynein, cytoplasmic 1, intermediate chain 1
hsa-miR-520d-5p	1	0	1	1	1	1	EGR2	early growth response 2
hsa-miR-520d-5p	1	0	1	1	1	1	AMMECR1	Alport syndrome, mental retardation, midface hypoplasia and elliptocytosis chromosomal region gene 1
hsa-miR-520d-5p	1	0	1	1	1	1	FBXW2	F-box and WD repeat domain containing 2
hsa-miR-520d-5p	1	0	1	1	1	1	TSN	translin
hsa-miR-520d-5p	1	0	1	1	1	1	LUC7L2	LUC7-like 2 (S. cerevisiae)
hsa-miR-520d-5p	0	0	1	1	0	0	HYAL2	hyaluronoglucosaminidase 2
hsa-miR-520d-5p	1	0	1	1	1	1	NASP	nuclear autoantigenic sperm protein (histone-binding)
hsa-miR-520d-5p	0	0	1	1	1	1	PRKRA	protein kinase, interferon-inducible double stranded RNA dependent activator
hsa-miR-520d-5p	0	0	1	1	1	1	XPNPEP1	X-prolyl aminopeptidase (aminopeptidase P) 1, soluble
hsa-miR-520d-5p	1	0	1	0	0	0	SH3RF3	SH3 domain containing ring finger 3
hsa-miR-520d-5p	0	0	1	1	1	1	SLC16A1	solute carrier family 16, member 1 (monocarboxylic acid transporter 1)
hsa-miR-520d-5p	1	0	1	1	1	1	SSH3	slingshot homolog 3 (Drosophila)
hsa-miR-520d-5p	0	0	1	1	0	0	WBP1	WW domain binding protein 1
hsa-miR-520d-5p	0	0	1	0	1	1	KANSL2	KAT8 regulatory NSL complex subunit 2
hsa-miR-520d-5p	0	0	1	0	0	0	ZNF806	zinc finger protein 806
hsa-miR-520d-5p	1	0	1	1	1	1	SIAH1	siah E3 ubiquitin protein ligase 1
hsa-miR-520d-5p	1	0	1	0	1	1	GATAD2B	GATA zinc finger domain containing 2B
hsa-miR-520d-5p	1	0	1	0	1	1	NCOA7	nuclear receptor coactivator 7
hsa-miR-520d-5p	0	0	1	0	1	1	AGBL4	ATP/GTP binding protein-like 4
hsa-miR-520d-5p	1	0	1	1	1	1	PTPRU	protein tyrosine phosphatase, receptor type, U
hsa-miR-520d-5p	0	0	1	1	1	1	TMEM170A	transmembrane protein 170A
hsa-miR-520d-5p	1	0	1	1	1	1	CPNE8	copine VIII
hsa-miR-520d-5p	1	0	1	1	1	1	RASGEF1A	RasGEF domain family, member 1A
hsa-miR-520d-5p	1	0	1	1	1	1	NDEL1	nudE nuclear distribution E homolog (A. nidulans)-like 1
hsa-miR-520d-5p	1	0	1	0	1	1	SLC39A11	solute carrier family 39 (metal ion transporter), member 11
hsa-miR-520d-5p	1	0	1	1	1	1	ANKRD46	ankyrin repeat domain 46
hsa-miR-520d-5p	0	0	1	1	1	1	MYO6	myosin VI
hsa-miR-520d-5p	1	0	1	1	1	1	ATXN10	ataxin 10
hsa-miR-520d-5p	0	0	1	1	1	1	SETD2	SET domain containing 2
hsa-miR-520d-5p	1	0	1	0	1	1	STC2	stanniocalcin 2
hsa-miR-520d-5p	0	0	1	1	1	1	VDAC1	voltage-dependent anion channel 1
hsa-miR-520d-5p	1	0	1	1	1	1	AMT	aminomethyltransferase
hsa-miR-520d-5p	0	0	1	1	1	1	ZMYM1	zinc finger, MYM-type 1
hsa-miR-520d-5p	1	0	1	1	1	1	SLITRK2	SLIT and NTRK-like family, member 2
hsa-miR-520d-5p	0	0	1	1	1	1	XRCC5	X-ray repair complementing defective repair in Chinese hamster cells 5 (double-strand-break rejoining)
hsa-miR-520d-5p	1	0	1	1	1	1	LRP8	low density lipoprotein receptor-related protein 8, apolipoprotein e receptor
hsa-miR-520d-5p	0	0	1	0	0	0	LOC643327	uncharacterized LOC643327
hsa-miR-520d-5p	1	0	1	0	1	1	THRB	thyroid hormone receptor, beta
hsa-miR-520d-5p	1	0	1	1	1	1	ETS2	v-ets erythroblastosis virus E26 oncogene homolog 2 (avian)
hsa-miR-520d-5p	1	0	1	1	1	1	EPB41L1	erythrocyte membrane protein band 4.1-like 1
hsa-miR-520d-5p	0	0	1	0	1	1	SWAP70	SWAP switching B-cell complex 70kDa subunit
hsa-miR-520d-5p	1	0	1	1	1	1	CAPN2	calpain 2, (m/II) large subunit
hsa-miR-520d-5p	1	0	1	0	1	1	YPEL2	yippee-like 2 (Drosophila)
hsa-miR-520d-5p	1	0	1	1	1	1	GOLGA8B	golgin A8 family, member B
hsa-miR-520d-5p	1	0	1	0	1	1	PRKAR1A	protein kinase, cAMP-dependent, regulatory, type I, alpha
hsa-miR-520d-5p	1	0	1	1	1	1	IGSF11	immunoglobulin superfamily, member 11
hsa-miR-520d-5p	0	0	1	1	0	0	DCBLD1	discoidin, CUB and LCCL domain containing 1
hsa-miR-520d-5p	1	0	1	1	1	1	IL20RA	interleukin 20 receptor, alpha
hsa-miR-520d-5p	0	0	1	1	1	1	FAM76A	family with sequence similarity 76, member A
hsa-miR-520d-5p	0	0	1	1	1	1	TRPM7	transient receptor potential cation channel, subfamily M, member 7
hsa-miR-520d-5p	1	0	1	1	1	1	NAP1L1	nucleosome assembly protein 1-like 1
hsa-miR-520d-5p	1	0	1	1	1	1	GLUD1	glutamate dehydrogenase 1
hsa-miR-520d-5p	1	0	1	1	1	1	CRMP1	collapsin response mediator protein 1
hsa-miR-520d-5p	1	0	1	1	1	1	WEE1	WEE1 homolog (S. pombe)
hsa-miR-520d-5p	1	0	1	1	1	1	SIK3	SIK family kinase 3
hsa-miR-520d-5p	0	0	1	1	0	0	PRICKLE1	prickle homolog 1 (Drosophila)
hsa-miR-520d-5p	0	0	1	1	1	1	GGA1	golgi-associated, gamma adaptin ear containing, ARF binding protein 1
hsa-miR-520d-5p	1	0	1	1	1	1	RPS6KC1	ribosomal protein S6 kinase, 52kDa, polypeptide 1
hsa-miR-520d-5p	1	0	1	1	1	1	PXN	paxillin
hsa-miR-520d-5p	0	0	1	1	0	0	DCLK3	doublecortin-like kinase 3
hsa-miR-520d-5p	1	0	1	1	1	1	CBLB	Cbl proto-oncogene, E3 ubiquitin protein ligase B
hsa-miR-520d-5p	1	0	1	1	1	1	TPRG1	tumor protein p63 regulated 1
hsa-miR-520d-5p	1	0	1	1	1	1	MDGA2	MAM domain containing glycosylphosphatidylinositol anchor 2
hsa-miR-520d-5p	0	0	1	1	1	1	FAM5B	family with sequence similarity 5, member B
hsa-miR-520d-5p	0	0	1	1	1	1	PCBP2	poly(rC) binding protein 2
hsa-miR-520d-5p	0	0	1	1	1	1	FAM19A2	family with sequence similarity 19 (chemokine (C-C motif)-like), member A2
hsa-miR-520d-5p	1	0	1	1	1	1	SBF2	SET binding factor 2
hsa-miR-520d-5p	1	0	1	1	1	1	EPAS1	endothelial PAS domain protein 1
hsa-miR-520d-5p	1	0	1	0	0	0	GPR137C	G protein-coupled receptor 137C
hsa-miR-520d-5p	1	0	1	1	1	1	DERL1	derlin 1
hsa-miR-520d-5p	1	0	1	1	1	1	CREBRF	CREB3 regulatory factor
hsa-miR-520d-5p	1	0	1	1	1	1	ADIPOR1	adiponectin receptor 1
hsa-miR-520d-5p	0	0	1	1	0	0	NUP85	nucleoporin 85kDa
hsa-miR-520d-5p	0	0	1	1	1	1	IDS	iduronate 2-sulfatase
hsa-miR-520d-5p	0	0	1	0	0	0	LINC00282	long intergenic non-protein coding RNA 282
hsa-miR-520d-5p	0	0	1	1	1	1	C3orf67	chromosome 3 open reading frame 67
hsa-miR-520d-5p	0	0	1	0	0	0	TMEM232	transmembrane protein 232
hsa-miR-520d-5p	1	0	1	1	1	1	METAP2	methionyl aminopeptidase 2
hsa-miR-520d-5p	1	0	1	1	1	1	SACS	spastic ataxia of Charlevoix-Saguenay (sacsin)
hsa-miR-520d-5p	0	0	1	1	1	1	SRPX	sushi-repeat containing protein, X-linked
hsa-miR-520d-5p	0	0	1	1	0	0	LOC442075	uncharacterized LOC442075
hsa-miR-520d-5p	1	0	1	1	1	1	KPNA1	karyopherin alpha 1 (importin alpha 5)
hsa-miR-520d-5p	1	0	1	0	0	0	MSL1	male-specific lethal 1 homolog (Drosophila)
hsa-miR-520d-5p	1	0	1	0	1	1	HECTD1	HECT domain containing E3 ubiquitin protein ligase 1
hsa-miR-520d-5p	1	0	1	1	1	1	DPY19L3	dpy-19-like 3 (C. elegans)
hsa-miR-520d-5p	0	0	1	1	1	1	RBM46	RNA binding motif protein 46
hsa-miR-520d-5p	1	0	1	1	1	1	TP53INP1	tumor protein p53 inducible nuclear protein 1
hsa-miR-520d-5p	1	0	1	1	1	1	MACROD2	MACRO domain containing 2
hsa-miR-520d-5p	1	0	1	1	1	1	CHD5	chromodomain helicase DNA binding protein 5
hsa-miR-520d-5p	0	0	1	1	0	0	C20orf141	chromosome 20 open reading frame 141
hsa-miR-520d-5p	1	0	1	1	0	0	ATXN7L3	ataxin 7-like 3
hsa-miR-520d-5p	1	0	1	1	1	1	CPNE2	copine II
hsa-miR-520d-5p	0	0	1	1	1	1	RBM39	RNA binding motif protein 39
hsa-miR-520d-5p	1	0	1	1	1	1	SACM1L	SAC1 suppressor of actin mutations 1-like (yeast)
hsa-miR-520d-5p	0	0	1	1	1	1	USP54	ubiquitin specific peptidase 54
hsa-miR-520d-5p	0	0	1	1	1	1	BDH1	3-hydroxybutyrate dehydrogenase, type 1
hsa-miR-520d-5p	0	0	1	1	0	0	LRP3	low density lipoprotein receptor-related protein 3
hsa-miR-520d-5p	1	0	1	0	1	1	GPR180	G protein-coupled receptor 180
hsa-miR-520d-5p	0	0	1	1	1	1	SZT2	seizure threshold 2 homolog (mouse)
hsa-miR-520d-5p	1	0	1	1	1	1	C14orf28	chromosome 14 open reading frame 28
hsa-miR-520d-5p	0	0	1	0	0	0	RPL23AP53	ribosomal protein L23a pseudogene 53
hsa-miR-520d-5p	0	0	1	1	1	1	MOBP	myelin-associated oligodendrocyte basic protein
hsa-miR-520d-5p	1	0	1	1	1	1	TSHZ1	teashirt zinc finger homeobox 1
hsa-miR-520d-5p	1	0	1	1	1	1	CLTC	clathrin, heavy chain (Hc)
hsa-miR-520d-5p	0	0	1	1	1	1	ARHGAP33	Rho GTPase activating protein 33
hsa-miR-520d-5p	1	0	1	1	0	0	PTPN5	protein tyrosine phosphatase, non-receptor type 5 (striatum-enriched)
hsa-miR-520d-5p	1	0	1	1	1	1	KANK4	KN motif and ankyrin repeat domains 4
hsa-miR-520d-5p	1	0	1	0	1	1	SP6	Sp6 transcription factor
hsa-miR-520d-5p	1	0	1	1	1	1	ZFP106	zinc finger protein 106 homolog (mouse)
hsa-miR-520d-5p	1	0	1	0	1	1	FNDC3B	fibronectin type III domain containing 3B
hsa-miR-520d-5p	1	0	1	1	1	1	AFAP1	actin filament associated protein 1
hsa-miR-520d-5p	1	0	1	0	1	1	YOD1	YOD1 OTU deubiquinating enzyme 1 homolog (S. cerevisiae)
hsa-miR-520d-5p	1	0	1	0	0	0	HK1	hexokinase 1
hsa-miR-520d-5p	0	0	1	1	1	1	CD160	CD160 molecule
hsa-miR-520d-5p	1	0	1	1	1	1	FBXO3	F-box protein 3
hsa-miR-520d-5p	1	0	1	0	0	0	SP7	Sp7 transcription factor
hsa-miR-520d-5p	1	0	1	1	1	1	BCAT1	branched chain amino-acid transaminase 1, cytosolic
hsa-miR-520d-5p	0	0	1	0	0	0	IGHD	immunoglobulin heavy constant delta
hsa-miR-520d-5p	1	0	1	1	1	1	PUS7	pseudouridylate synthase 7 homolog (S. cerevisiae)
hsa-miR-520d-5p	1	0	1	1	1	1	SDCBP	syndecan binding protein (syntenin)
hsa-miR-520d-5p	0	0	1	1	1	1	SHROOM3	shroom family member 3
hsa-miR-520d-5p	0	0	1	0	0	0	FLJ26245	uncharacterized LOC400533
hsa-miR-520d-5p	1	0	1	1	1	1	CD200	CD200 molecule
hsa-miR-520d-5p	0	0	1	1	1	1	TBX19	T-box 19
hsa-miR-520d-5p	1	0	1	0	1	1	GPC6	glypican 6
hsa-miR-520d-5p	1	0	1	1	1	1	GPD1	glycerol-3-phosphate dehydrogenase 1 (soluble)
hsa-miR-520d-5p	1	0	1	1	1	1	RNF111	ring finger protein 111
hsa-miR-520d-5p	0	0	1	1	1	1	ZSCAN20	zinc finger and SCAN domain containing 20
hsa-miR-520d-5p	0	0	1	1	1	1	SYPL2	synaptophysin-like 2
hsa-miR-520d-5p	0	0	1	1	1	1	PDE2A	phosphodiesterase 2A, cGMP-stimulated
hsa-miR-520d-5p	1	0	1	1	1	1	MAP2K4	mitogen-activated protein kinase kinase 4
hsa-miR-520d-5p	1	0	1	0	1	1	SEZ6	seizure related 6 homolog (mouse)
hsa-miR-520d-5p	0	0	1	0	1	1	PEX5	peroxisomal biogenesis factor 5
hsa-miR-520d-5p	0	0	1	1	1	1	C5orf28	chromosome 5 open reading frame 28
hsa-miR-520d-5p	0	0	1	1	1	1	IFRD1	interferon-related developmental regulator 1
hsa-miR-520d-5p	0	0	1	1	0	0	TARS2	threonyl-tRNA synthetase 2, mitochondrial (putative)
hsa-miR-520d-5p	1	0	1	1	1	1	TMEM25	transmembrane protein 25
hsa-miR-520d-5p	1	0	1	1	1	1	MEAF6	MYST/Esa1-associated factor 6
hsa-miR-520d-5p	1	0	1	1	1	1	PTPN2	protein tyrosine phosphatase, non-receptor type 2
hsa-miR-520d-5p	1	0	1	1	0	0	ZNF219	zinc finger protein 219
hsa-miR-520d-5p	1	0	1	1	1	1	COBLL1	COBL-like 1
hsa-miR-520d-5p	0	0	1	1	1	1	TBC1D3G	TBC1 domain family, member 3G
hsa-miR-520d-5p	0	0	1	1	1	1	RNF135	ring finger protein 135
hsa-miR-520d-5p	1	0	1	1	1	1	NCOA1	nuclear receptor coactivator 1
hsa-miR-520d-5p	0	0	1	1	0	0	TRIM69	tripartite motif containing 69
hsa-miR-520d-5p	0	0	1	1	1	1	PTPN20B	protein tyrosine phosphatase, non-receptor type 20B
hsa-miR-520d-5p	0	0	1	1	1	1	PTPN20A	protein tyrosine phosphatase, non-receptor type 20A
hsa-miR-520d-5p	1	0	1	1	1	1	NECAP1	NECAP endocytosis associated 1
hsa-miR-520d-5p	0	0	1	0	0	0	POM121L9P	POM121 transmembrane nucleoporin-like 9, pseudogene
hsa-miR-520d-5p	1	0	1	1	1	1	TAB2	TGF-beta activated kinase 1/MAP3K7 binding protein 2
hsa-miR-520d-5p	0	0	1	0	0	0	POM121L8P	POM121 transmembrane nucleoporin-like 8 pseudogene
hsa-miR-520d-5p	1	0	1	1	1	1	ARF6	ADP-ribosylation factor 6
hsa-miR-520d-5p	0	0	1	1	1	1	ARIH1	ariadne homolog, ubiquitin-conjugating enzyme E2 binding protein, 1 (Drosophila)
hsa-miR-520d-5p	1	0	1	1	1	1	FBXL17	F-box and leucine-rich repeat protein 17
hsa-miR-520d-5p	0	0	1	1	1	1	GMEB2	glucocorticoid modulatory element binding protein 2
hsa-miR-520d-5p	0	0	1	1	1	1	ZNF280D	zinc finger protein 280D
hsa-miR-520d-5p	0	0	1	0	1	1	TBC1D3F	TBC1 domain family, member 3F
hsa-miR-520d-5p	0	0	1	1	1	1	RHOT1	ras homolog family member T1
hsa-miR-520d-5p	1	0	1	1	1	1	GOLGA8A	golgin A8 family, member A
hsa-miR-520d-5p	1	0	1	1	1	1	NBEA	neurobeachin
hsa-miR-520d-5p	1	0	1	0	1	1	CEP170	centrosomal protein 170kDa
hsa-miR-520d-5p	1	0	1	1	1	1	GPBP1	GC-rich promoter binding protein 1
hsa-miR-520d-5p	0	0	1	1	0	0	DOPEY1	dopey family member 1
hsa-miR-520d-5p	1	0	1	0	1	1	GRIN3A	glutamate receptor, ionotropic, N-methyl-D-aspartate 3A
hsa-miR-520d-5p	0	0	1	0	0	0	FAM66D	family with sequence similarity 66, member D
hsa-miR-520d-5p	1	0	1	0	1	1	FAM19A1	family with sequence similarity 19 (chemokine (C-C motif)-like), member A1
hsa-miR-520d-5p	1	0	1	1	1	1	YTHDF3	YTH domain family, member 3
hsa-miR-520d-5p	1	0	1	1	1	1	MIER1	mesoderm induction early response 1 homolog (Xenopus laevis)
hsa-miR-520d-5p	1	0	1	1	1	1	KDM6A	lysine (K)-specific demethylase 6A
hsa-miR-520d-5p	0	0	1	1	1	1	BEND7	BEN domain containing 7
hsa-miR-520d-5p	1	0	1	1	1	1	FAM126B	family with sequence similarity 126, member B
hsa-miR-520d-5p	1	0	1	0	1	1	HNRNPA3	heterogeneous nuclear ribonucleoprotein A3
hsa-miR-520d-5p	0	0	1	1	1	1	SRSF11	serine/arginine-rich splicing factor 11
hsa-miR-520d-5p	1	0	1	1	0	0	USP24	ubiquitin specific peptidase 24
hsa-miR-520d-5p	1	0	1	1	1	1	MLL3	myeloid/lymphoid or mixed-lineage leukemia 3
hsa-miR-520d-5p	1	0	1	0	1	1	MPP5	membrane protein, palmitoylated 5 (MAGUK p55 subfamily member 5)
hsa-miR-520d-5p	1	0	1	0	1	1	STYX	serine/threonine/tyrosine interacting protein
hsa-miR-520d-5p	0	0	1	1	1	1	YAP1	Yes-associated protein 1
hsa-miR-520d-5p	1	0	1	1	0	0	PTAR1	protein prenyltransferase alpha subunit repeat containing 1
hsa-miR-520d-5p	1	0	1	0	1	1	MEF2C	myocyte enhancer factor 2C
hsa-miR-520d-5p	1	0	1	1	1	1	BPTF	bromodomain PHD finger transcription factor
hsa-miR-520d-5p	0	0	1	1	0	0	TMEM116	transmembrane protein 116
hsa-miR-520d-5p	0	0	1	1	1	1	NUSAP1	nucleolar and spindle associated protein 1
hsa-miR-520d-5p	1	0	1	1	1	1	ANP32E	acidic (leucine-rich) nuclear phosphoprotein 32 family, member E
hsa-miR-520d-5p	1	0	1	0	1	1	EXOC5	exocyst complex component 5
hsa-miR-520d-5p	1	0	1	1	1	1	ATAT1	alpha tubulin acetyltransferase 1
hsa-miR-520d-5p	1	0	1	1	1	1	IL17RD	interleukin 17 receptor D
hsa-miR-520d-5p	1	0	1	1	1	1	PRPF38B	PRP38 pre-mRNA processing factor 38 (yeast) domain containing B
hsa-miR-520d-5p	1	0	1	1	1	1	MBD6	methyl-CpG binding domain protein 6
hsa-miR-520d-5p	1	0	1	0	1	1	JAZF1	JAZF zinc finger 1
hsa-miR-520d-5p	1	0	1	0	0	0	XPNPEP3	X-prolyl aminopeptidase (aminopeptidase P) 3, putative
hsa-miR-520d-5p	1	0	1	1	1	1	RBM26	RNA binding motif protein 26
hsa-miR-520d-5p	1	0	1	1	1	1	RICTOR	RPTOR independent companion of MTOR, complex 2
hsa-miR-520d-5p	1	0	1	1	1	1	FAM76B	family with sequence similarity 76, member B
hsa-miR-520d-5p	0	0	1	1	1	1	AMOTL1	angiomotin like 1
hsa-miR-520d-5p	1	0	1	1	1	1	PPP3CA	protein phosphatase 3, catalytic subunit, alpha isozyme
hsa-miR-520d-5p	1	0	1	1	1	1	WDR44	WD repeat domain 44
hsa-miR-520d-5p	1	0	1	1	1	1	IKZF2	IKAROS family zinc finger 2 (Helios)
hsa-miR-520d-5p	1	0	1	1	1	1	CLIC5	chloride intracellular channel 5
hsa-miR-520d-5p	1	0	1	1	1	1	RCAN2	regulator of calcineurin 2
hsa-miR-520d-5p	1	0	1	1	1	1	DUSP16	dual specificity phosphatase 16
hsa-miR-520d-5p	0	0	1	1	1	1	CD209	CD209 molecule
hsa-miR-520d-5p	1	0	1	0	1	1	BDNF	brain-derived neurotrophic factor
hsa-miR-520d-5p	1	0	1	1	1	1	MIPOL1	mirror-image polydactyly 1
hsa-miR-520d-5p	0	0	1	0	0	0	KGFLP1	fibroblast growth factor 7 pseudogene
hsa-miR-520d-5p	1	0	1	1	1	1	SORCS1	sortilin-related VPS10 domain containing receptor 1
hsa-miR-520d-5p	1	0	1	1	1	1	KIAA0907	KIAA0907
hsa-miR-520d-5p	1	0	1	1	1	1	MARK4	MAP/microtubule affinity-regulating kinase 4
hsa-miR-520d-5p	0	0	1	1	1	1	MED19	mediator complex subunit 19
hsa-miR-520d-5p	0	0	1	1	1	1	CEP41	centrosomal protein 41kDa
hsa-miR-520d-5p	0	0	1	1	1	1	FAM181A	family with sequence similarity 181, member A
hsa-miR-520d-5p	1	0	1	1	1	1	RAI14	retinoic acid induced 14
hsa-miR-520d-5p	1	0	1	1	1	1	TAB3	TGF-beta activated kinase 1/MAP3K7 binding protein 3
hsa-miR-520d-5p	0	0	1	1	1	1	GCOM1	GRINL1A complex locus 1
hsa-miR-520d-5p	0	0	1	1	1	1	GON4L	gon-4-like (C. elegans)
hsa-miR-520d-5p	1	0	1	0	1	1	ST6GALNAC3	ST6 (alpha-N-acetyl-neuraminyl-2,3-beta-galactosyl-1,3)-N-acetylgalactosaminide alpha-2,6-sialyltransferase 3
hsa-miR-520d-5p	1	0	1	1	1	1	NLGN4X	neuroligin 4, X-linked
hsa-miR-520d-5p	1	0	1	1	1	1	P4HA2	prolyl 4-hydroxylase, alpha polypeptide II
hsa-miR-520d-5p	1	0	1	1	1	1	ECT2	epithelial cell transforming sequence 2 oncogene
hsa-miR-520d-5p	0	0	1	1	1	1	PTGR2	prostaglandin reductase 2
hsa-miR-520d-5p	1	0	1	1	1	1	SP3	Sp3 transcription factor
hsa-miR-520d-5p	1	0	1	0	1	1	NHS	Nance-Horan syndrome (congenital cataracts and dental anomalies)
hsa-miR-520d-5p	0	0	1	1	1	1	AICDA	activation-induced cytidine deaminase
hsa-miR-520d-5p	0	0	1	1	1	1	SMPD1	sphingomyelin phosphodiesterase 1, acid lysosomal
hsa-miR-520d-5p	1	0	1	1	1	1	PLCH1	phospholipase C, eta 1
hsa-miR-520d-5p	1	0	1	1	0	0	CDK8	cyclin-dependent kinase 8
hsa-miR-520d-5p	1	0	1	1	1	1	QKI	QKI, KH domain containing, RNA binding
hsa-miR-520d-5p	1	0	1	1	1	1	RAB40C	RAB40C, member RAS oncogene family
hsa-miR-520d-5p	1	0	1	1	1	1	PRKACB	protein kinase, cAMP-dependent, catalytic, beta
hsa-miR-520d-5p	1	0	1	1	1	1	TBC1D22B	TBC1 domain family, member 22B
hsa-miR-520d-5p	1	0	1	1	1	1	RPRD1A	regulation of nuclear pre-mRNA domain containing 1A
hsa-miR-520d-5p	1	0	1	0	1	1	FAM46A	family with sequence similarity 46, member A
hsa-miR-520d-5p	0	0	1	1	1	1	ZCCHC17	zinc finger, CCHC domain containing 17
hsa-miR-520d-5p	1	0	1	1	1	1	CPSF6	cleavage and polyadenylation specific factor 6, 68kDa
hsa-miR-520d-5p	0	0	1	1	1	1	PAFAH1B2	platelet-activating factor acetylhydrolase 1b, catalytic subunit 2 (30kDa)
hsa-miR-520d-5p	1	0	1	1	1	1	HOXC13	homeobox C13
hsa-miR-520d-5p	0	0	1	1	1	1	TUFT1	tuftelin 1
hsa-miR-520d-5p	0	0	1	1	1	1	BOD1	biorientation of chromosomes in cell division 1
hsa-miR-520d-5p	0	0	1	1	1	1	REXO2	REX2, RNA exonuclease 2 homolog (S. cerevisiae)
hsa-miR-520d-5p	1	0	1	0	1	1	DCAF10	DDB1 and CUL4 associated factor 10
hsa-miR-520d-5p	1	0	1	0	1	1	CGGBP1	CGG triplet repeat binding protein 1
hsa-miR-520d-5p	0	0	1	1	0	0	PNLIPRP1	pancreatic lipase-related protein 1
hsa-miR-520d-5p	0	0	1	1	1	1	ZNF589	zinc finger protein 589
hsa-miR-520d-5p	0	0	1	0	0	0	MGC13053	uncharacterized MGC13053
hsa-miR-520d-5p	1	0	1	0	1	1	C15orf41	chromosome 15 open reading frame 41
hsa-miR-520d-5p	0	0	1	1	0	0	WDR74	WD repeat domain 74
hsa-miR-520d-5p	0	0	1	1	0	0	CBX5	chromobox homolog 5
hsa-miR-520d-5p	1	0	1	1	1	1	TRIM39	tripartite motif containing 39
hsa-miR-520d-5p	1	0	1	1	1	1	CALM1	calmodulin 1 (phosphorylase kinase, delta)
hsa-miR-520d-5p	1	0	1	1	1	1	SHOX2	short stature homeobox 2
hsa-miR-520d-5p	0	0	1	1	0	0	PANK2	pantothenate kinase 2
hsa-miR-520d-5p	1	0	1	1	1	1	GSPT1	G1 to S phase transition 1
hsa-miR-520d-5p	1	0	1	0	1	1	TMEM39A	transmembrane protein 39A
hsa-miR-520d-5p	1	0	1	1	1	1	GRIA2	glutamate receptor, ionotropic, AMPA 2
hsa-miR-520d-5p	0	0	1	1	1	1	BBOX1	butyrobetaine (gamma), 2-oxoglutarate dioxygenase (gamma-butyrobetaine hydroxylase) 1
hsa-miR-520d-5p	0	0	1	1	1	1	TAF12	TAF12 RNA polymerase II, TATA box binding protein (TBP)-associated factor, 20kDa
hsa-miR-520d-5p	0	0	1	0	0	0	TPTEP1	transmembrane phosphatase with tensin homology pseudogene 1
hsa-miR-520d-5p	0	0	1	1	1	1	PCNP	PEST proteolytic signal containing nuclear protein
hsa-miR-520d-5p	0	0	1	1	1	1	KLHL29	kelch-like 29 (Drosophila)
hsa-miR-520d-5p	1	0	1	1	1	1	ETF1	eukaryotic translation termination factor 1
hsa-miR-520d-5p	0	0	1	0	0	0	LOC201651	arylacetamide deacetylase (esterase) pseudogene
hsa-miR-520d-5p	0	0	1	0	0	0	LOC729013	uncharacterized LOC729013
hsa-miR-520d-5p	0	0	1	1	0	0	MCCC2	methylcrotonoyl-CoA carboxylase 2 (beta)
hsa-miR-520d-5p	0	0	1	1	0	0	STAP1	signal transducing adaptor family member 1
hsa-miR-520d-5p	0	0	1	0	0	0	MGC21881	uncharacterized locus MGC21881
hsa-miR-520d-5p	0	0	1	0	0	0	KLHL15	kelch-like 15 (Drosophila)
hsa-miR-520d-5p	1	0	1	1	1	1	ZBTB38	zinc finger and BTB domain containing 38
hsa-miR-520d-5p	1	0	1	1	1	1	ZNF512	zinc finger protein 512
hsa-miR-520d-5p	0	0	1	0	1	1	ZNF37A	zinc finger protein 37A
hsa-miR-520d-5p	0	0	1	1	1	1	CMAS	cytidine monophosphate N-acetylneuraminic acid synthetase
hsa-miR-520d-5p	1	0	1	1	1	1	SREK1	splicing regulatory glutamine/lysine-rich protein 1
hsa-miR-520d-5p	1	0	1	1	1	1	ORMDL3	ORM1-like 3 (S. cerevisiae)
hsa-miR-520d-5p	0	0	1	1	0	0	NUP107	nucleoporin 107kDa
hsa-miR-520d-5p	1	0	1	1	1	1	ELF4	E74-like factor 4 (ets domain transcription factor)
hsa-miR-520d-5p	0	0	1	1	1	1	CSDE1	cold shock domain containing E1, RNA-binding
hsa-miR-520d-5p	1	0	1	1	1	1	WWC2	WW and C2 domain containing 2
hsa-miR-520d-5p	0	0	1	0	0	0	FAM200B	family with sequence similarity 200, member B
hsa-miR-520d-5p	1	0	1	1	1	1	ARHGEF9	Cdc42 guanine nucleotide exchange factor (GEF) 9
hsa-miR-520d-5p	1	0	1	1	1	1	SUZ12	suppressor of zeste 12 homolog (Drosophila)
hsa-miR-520d-5p	1	0	1	1	1	1	KIAA1217	KIAA1217
hsa-miR-520d-5p	1	0	1	1	1	1	MID1IP1	MID1 interacting protein 1
hsa-miR-520d-5p	0	0	1	0	1	1	TMSB15B	thymosin beta 15B
hsa-miR-520d-5p	0	0	1	1	1	1	HLA-G	major histocompatibility complex, class I, G
hsa-miR-520d-5p	1	0	1	0	1	1	BTF3L4	basic transcription factor 3-like 4
hsa-miR-520d-5p	0	0	1	1	0	0	LYSMD2	LysM, putative peptidoglycan-binding, domain containing 2
hsa-miR-520d-5p	1	0	1	1	1	1	SPRYD7	SPRY domain containing 7
hsa-miR-520d-5p	0	0	1	1	1	1	CDC42SE2	CDC42 small effector 2
hsa-miR-520d-5p	0	0	1	1	0	0	C16orf91	chromosome 16 open reading frame 91
hsa-miR-520d-5p	1	0	1	0	1	1	CDK19	cyclin-dependent kinase 19
hsa-miR-520d-5p	0	0	1	1	0	0	MEI1	meiosis inhibitor 1
hsa-miR-520d-5p	0	0	1	1	1	1	FAM221A	family with sequence similarity 221, member A
hsa-miR-520d-5p	0	0	1	0	0	0	LOC494141	mitochondrial carrier triple repeat 1 pseudogene
hsa-miR-520d-5p	1	0	1	1	1	1	FAM131A	family with sequence similarity 131, member A
hsa-miR-520d-5p	1	0	1	0	1	1	CERS3	ceramide synthase 3
hsa-miR-520d-5p	1	0	1	1	1	1	APPL2	adaptor protein, phosphotyrosine interaction, PH domain and leucine zipper containing 2
hsa-miR-520d-5p	0	0	1	1	0	0	PLSCR3	phospholipid scramblase 3
hsa-miR-520d-5p	1	0	1	1	1	1	SMYD2	SET and MYND domain containing 2
hsa-miR-520d-5p	0	0	1	1	1	1	CLK1	CDC-like kinase 1
hsa-miR-520d-5p	1	0	1	1	1	1	TMEM127	transmembrane protein 127
hsa-miR-520d-5p	0	0	1	0	1	1	PAPOLG	poly(A) polymerase gamma
hsa-miR-520d-5p	0	0	1	0	1	1	KIAA0895	KIAA0895
hsa-miR-520d-5p	1	0	1	0	0	0	KCNU1	potassium channel, subfamily U, member 1
hsa-miR-520d-5p	0	0	1	1	1	1	ASTN2	astrotactin 2
hsa-miR-520d-5p	0	0	1	1	1	1	PIK3AP1	phosphoinositide-3-kinase adaptor protein 1
hsa-miR-520d-5p	1	0	1	0	1	1	SV2B	synaptic vesicle glycoprotein 2B
hsa-miR-520d-5p	0	0	1	1	1	1	TMEM117	transmembrane protein 117
hsa-miR-520d-5p	1	0	1	1	1	1	EYA4	eyes absent homolog 4 (Drosophila)
hsa-miR-520d-5p	1	0	1	1	1	1	ELAVL2	ELAV (embryonic lethal, abnormal vision, Drosophila)-like 2 (Hu antigen B)
hsa-miR-520d-5p	0	0	1	1	0	0	AHSA2	AHA1, activator of heat shock 90kDa protein ATPase homolog 2 (yeast)
hsa-miR-520d-5p	0	0	1	1	1	1	AADAT	aminoadipate aminotransferase
hsa-miR-520d-5p	0	0	1	1	0	0	C7orf57	chromosome 7 open reading frame 57
hsa-miR-520d-5p	0	0	1	1	1	1	STAT4	signal transducer and activator of transcription 4
hsa-miR-520d-5p	0	0	1	1	0	0	TTC12	tetratricopeptide repeat domain 12
hsa-miR-520d-5p	0	0	1	1	1	1	UBXN1	UBX domain protein 1
hsa-miR-520d-5p	1	0	1	1	1	1	RAB5B	RAB5B, member RAS oncogene family
hsa-miR-520d-5p	0	0	1	0	0	0	FAM86JP	family with sequence similarity 86, member A pseudogene
hsa-miR-520d-5p	1	0	1	1	1	1	RHOBTB1	Rho-related BTB domain containing 1
hsa-miR-520d-5p	1	0	1	1	1	1	MAK	male germ cell-associated kinase
hsa-miR-520d-5p	1	0	1	0	1	1	KCTD2	potassium channel tetramerisation domain containing 2
hsa-miR-520d-5p	1	0	1	1	0	0	TMEM181	transmembrane protein 181
hsa-miR-520d-5p	1	0	1	1	1	1	PCDHA5	protocadherin alpha 5
hsa-miR-520d-5p	0	0	1	0	1	1	DKFZP434I0714	uncharacterized protein DKFZP434I0714
hsa-miR-520d-5p	0	0	1	1	1	1	EDA2R	ectodysplasin A2 receptor
hsa-miR-520d-5p	0	0	1	1	1	1	SLC6A16	solute carrier family 6, member 16
hsa-miR-520d-5p	0	0	1	1	0	0	C2orf80	chromosome 2 open reading frame 80
hsa-miR-520d-5p	0	0	1	1	1	1	SEC24D	SEC24 family, member D (S. cerevisiae)
hsa-miR-520d-5p	0	0	1	1	1	1	ARHGAP6	Rho GTPase activating protein 6
hsa-miR-520d-5p	0	0	1	1	1	1	UBE3D	ubiquitin protein ligase E3D
hsa-miR-520d-5p	1	0	1	1	1	1	DMD	dystrophin
hsa-miR-520d-5p	1	0	1	1	1	1	SMG7	smg-7 homolog, nonsense mediated mRNA decay factor (C. elegans)
hsa-miR-520d-5p	1	0	1	1	1	1	SLC35G1	solute carrier family 35, member G1
hsa-miR-520d-5p	0	0	1	1	1	1	FAM171B	family with sequence similarity 171, member B
hsa-miR-520d-5p	1	0	1	1	1	1	HECTD2	HECT domain containing E3 ubiquitin protein ligase 2
hsa-miR-520d-5p	1	0	1	1	1	1	ACVR1	activin A receptor, type I
hsa-miR-520d-5p	1	0	1	0	1	1	CLDN12	claudin 12
hsa-miR-520d-5p	1	0	1	0	1	1	NEGR1	neuronal growth regulator 1
hsa-miR-520d-5p	1	0	1	0	1	1	CPEB4	cytoplasmic polyadenylation element binding protein 4
hsa-miR-520d-5p	1	0	1	1	1	1	BNC2	basonuclin 2
hsa-miR-520d-5p	0	0	1	0	0	0	CYP4F35P	cytochrome P450, family 4, subfamily F, polypeptide 35, pseudogene
hsa-miR-520d-5p	1	0	1	1	1	1	FAM135B	family with sequence similarity 135, member B
hsa-miR-520d-5p	1	0	1	1	1	1	SOX6	SRY (sex determining region Y)-box 6
hsa-miR-520d-5p	1	0	1	1	1	1	CTBP2	C-terminal binding protein 2
hsa-miR-520d-5p	0	0	1	0	0	0	INHBA-AS1	INHBA antisense RNA 1
hsa-miR-520d-5p	1	0	1	1	1	1	DPP10	dipeptidyl-peptidase 10 (non-functional)
hsa-miR-520d-5p	1	0	1	1	1	1	PLS3	plastin 3
hsa-miR-520d-5p	0	0	1	1	0	0	CCDC152	coiled-coil domain containing 152
hsa-miR-520d-5p	1	0	1	1	1	1	FGFR2	fibroblast growth factor receptor 2
hsa-miR-520d-5p	1	0	1	1	1	1	NFYA	nuclear transcription factor Y, alpha
hsa-miR-520d-5p	1	0	1	0	1	1	LPHN3	latrophilin 3
hsa-miR-520d-5p	1	0	1	1	1	1	TIMP2	TIMP metallopeptidase inhibitor 2
hsa-miR-520d-5p	1	0	1	1	1	1	FOSB	FBJ murine osteosarcoma viral oncogene homolog B
hsa-miR-520d-5p	0	0	1	0	1	1	SRSF5	serine/arginine-rich splicing factor 5
hsa-miR-520d-5p	1	0	1	1	1	1	SLITRK3	SLIT and NTRK-like family, member 3
hsa-miR-520d-5p	1	0	1	1	1	1	BVES	blood vessel epicardial substance
hsa-miR-520d-5p	1	0	1	1	1	1	LEF1	lymphoid enhancer-binding factor 1
hsa-miR-520d-5p	1	0	1	1	1	1	INTS6	integrator complex subunit 6
hsa-miR-520d-5p	0	0	1	1	1	1	LRRC3B	leucine rich repeat containing 3B
hsa-miR-520d-5p	0	0	1	1	0	0	MTCH1	mitochondrial carrier 1
hsa-miR-520d-5p	1	0	1	1	1	1	UNC13C	unc-13 homolog C (C. elegans)
hsa-miR-520d-5p	0	0	1	1	1	1	SIAE	sialic acid acetylesterase
hsa-miR-520d-5p	1	0	1	1	1	1	ARPP21	cAMP-regulated phosphoprotein, 21kDa
hsa-miR-520d-5p	1	0	1	0	1	1	HSPA12A	heat shock 70kDa protein 12A
hsa-miR-520d-5p	0	0	1	1	1	1	C17orf104	chromosome 17 open reading frame 104
hsa-miR-520d-5p	0	0	1	1	1	1	MTHFD2L	methylenetetrahydrofolate dehydrogenase (NADP+ dependent) 2-like
hsa-miR-520d-5p	0	0	1	1	1	1	C4orf32	chromosome 4 open reading frame 32
hsa-miR-520d-5p	0	0	1	0	1	1	C11orf93	chromosome 11 open reading frame 93
hsa-miR-520d-5p	0	0	1	1	1	1	FAM90A1	family with sequence similarity 90, member A1
hsa-miR-520d-5p	0	0	1	0	0	0	MORC2-AS1	MORC2 antisense RNA 1
hsa-miR-520d-5p	1	0	1	1	1	1	ADD1	adducin 1 (alpha)
hsa-miR-520d-5p	0	0	1	0	0	0	LOC339260	uncharacterized LOC339260
hsa-miR-520d-5p	1	0	1	1	0	0	WNK1	WNK lysine deficient protein kinase 1
hsa-miR-520d-5p	1	0	1	1	1	1	AGAP3	ArfGAP with GTPase domain, ankyrin repeat and PH domain 3
hsa-miR-520d-5p	1	0	1	1	1	1	RNF145	ring finger protein 145
hsa-miR-520d-5p	0	0	1	1	1	1	C14orf45	chromosome 14 open reading frame 45
hsa-miR-520d-5p	1	0	1	0	1	1	PSD3	pleckstrin and Sec7 domain containing 3
hsa-miR-520d-5p	0	0	1	1	1	1	MYO3A	myosin IIIA
hsa-miR-520d-5p	1	0	1	1	1	1	MAMDC2	MAM domain containing 2
hsa-miR-520d-5p	1	0	1	1	1	1	SENP1	SUMO1/sentrin specific peptidase 1
hsa-miR-520d-5p	1	0	1	1	1	1	SF3B1	splicing factor 3b, subunit 1, 155kDa
hsa-miR-520d-5p	0	0	1	1	0	0	TOM1	target of myb1 (chicken)
hsa-miR-520d-5p	1	0	1	0	1	1	LYPD6	LY6/PLAUR domain containing 6
hsa-miR-520d-5p	0	0	1	0	0	0	LOC348120	uncharacterized LOC348120
hsa-miR-520d-5p	1	0	1	1	1	1	KIF2A	kinesin heavy chain member 2A
hsa-miR-520d-5p	1	0	1	1	0	0	TTC9	tetratricopeptide repeat domain 9
hsa-miR-520d-5p	1	0	1	1	1	1	RTKN2	rhotekin 2
hsa-miR-520d-5p	1	0	1	1	1	1	PELI1	pellino E3 ubiquitin protein ligase 1
hsa-miR-520d-5p	1	0	1	0	1	1	RNF182	ring finger protein 182
hsa-miR-520d-5p	1	0	1	0	1	1	CCNY	cyclin Y
hsa-miR-520d-5p	0	0	1	0	0	0	AURKAPS1	aurora kinase A pseudogene 1
hsa-miR-520d-5p	1	0	1	1	1	1	FNDC3A	fibronectin type III domain containing 3A
hsa-miR-520d-5p	1	0	1	0	1	1	SEMA4G	sema domain, immunoglobulin domain (Ig), transmembrane domain (TM) and short cytoplasmic domain, (semaphorin) 4G
hsa-miR-520d-5p	1	0	1	0	1	1	SMURF2	SMAD specific E3 ubiquitin protein ligase 2
hsa-miR-520d-5p	1	0	1	1	1	1	SCN5A	sodium channel, voltage-gated, type V, alpha subunit
hsa-miR-520d-5p	1	0	1	1	1	1	ZFP91	zinc finger protein 91 homolog (mouse)
hsa-miR-520d-5p	1	0	1	1	1	1	MKRN1	makorin ring finger protein 1
hsa-miR-520d-5p	0	0	1	1	1	1	LRRFIP2	leucine rich repeat (in FLII) interacting protein 2
hsa-miR-520d-5p	0	0	1	0	0	0	LINC00265	long intergenic non-protein coding RNA 265
hsa-miR-520d-5p	0	0	1	1	0	0	TINAG	tubulointerstitial nephritis antigen
hsa-miR-520d-5p	0	0	1	1	1	1	MPP3	membrane protein, palmitoylated 3 (MAGUK p55 subfamily member 3)
hsa-miR-520d-5p	1	0	1	1	1	1	KLHL28	kelch-like 28 (Drosophila)
hsa-miR-520d-5p	1	0	1	1	1	1	CCAR1	cell division cycle and apoptosis regulator 1
hsa-miR-520d-5p	0	0	1	1	0	0	GRIN2C	glutamate receptor, ionotropic, N-methyl D-aspartate 2C
hsa-miR-520d-5p	1	0	1	1	1	1	PRRG1	proline rich Gla (G-carboxyglutamic acid) 1
hsa-miR-520d-5p	0	0	1	0	0	0	SDHAP2	succinate dehydrogenase complex, subunit A, flavoprotein pseudogene 2
hsa-miR-520d-5p	1	0	1	1	1	1	CLK4	CDC-like kinase 4
hsa-miR-520d-5p	1	0	1	1	1	1	PDGFRA	platelet-derived growth factor receptor, alpha polypeptide
hsa-miR-520d-5p	0	0	1	0	0	0	SCAND2	SCAN domain containing 2 pseudogene
hsa-miR-520d-5p	1	0	1	1	1	1	RANBP9	RAN binding protein 9
hsa-miR-520d-5p	1	0	1	1	1	1	NIPBL	Nipped-B homolog (Drosophila)
hsa-miR-520d-5p	1	0	1	1	0	0	ANKIB1	ankyrin repeat and IBR domain containing 1
hsa-miR-520d-5p	0	0	1	1	1	1	PIM3	pim-3 oncogene
hsa-miR-520d-5p	0	0	1	1	1	1	ZNF333	zinc finger protein 333
hsa-miR-520d-5p	1	0	1	1	1	1	MYLK	myosin light chain kinase
hsa-miR-520d-5p	0	0	1	1	1	1	ZNF33B	zinc finger protein 33B
hsa-miR-520d-5p	1	0	1	1	1	1	LMO4	LIM domain only 4
hsa-miR-520d-5p	1	0	1	1	1	1	C18orf1	chromosome 18 open reading frame 1
hsa-miR-520d-5p	0	0	1	0	0	0	ZNF66P	zinc finger protein 66, pseudogene
hsa-miR-520d-5p	1	0	1	1	0	0	SNX18	sorting nexin 18
hsa-miR-520d-5p	0	0	1	0	0	0	PABPC1P2	poly(A) binding protein, cytoplasmic 1 pseudogene 2
hsa-miR-520d-5p	1	0	1	1	1	1	SLC26A7	solute carrier family 26, member 7
hsa-miR-520d-5p	1	0	1	1	1	1	SRPK2	SRSF protein kinase 2
hsa-miR-520d-5p	1	0	1	1	1	1	LINGO1	leucine rich repeat and Ig domain containing 1
hsa-miR-520d-5p	0	0	1	0	0	0	SPDYE8P	speedy homolog E8 (Xenopus laevis), pseudogene
hsa-miR-520d-5p	1	0	1	1	1	1	EED	embryonic ectoderm development
hsa-miR-520d-5p	1	0	1	0	1	1	SLC7A2	solute carrier family 7 (cationic amino acid transporter, y+ system), member 2
hsa-miR-520d-5p	1	0	1	1	0	0	CHTOP	chromatin target of PRMT1
hsa-miR-520d-5p	1	0	1	1	1	1	SCAF8	SR-related CTD-associated factor 8
hsa-miR-520d-5p	1	0	1	1	1	1	LRRC32	leucine rich repeat containing 32
hsa-miR-520d-5p	0	0	1	1	1	1	TSPAN8	tetraspanin 8
hsa-miR-520d-5p	1	0	1	0	1	1	TGFBR1	transforming growth factor, beta receptor 1
hsa-miR-520d-5p	1	0	1	1	1	1	USP47	ubiquitin specific peptidase 47
hsa-miR-520d-5p	1	0	1	0	1	1	MAP4K3	mitogen-activated protein kinase kinase kinase kinase 3
hsa-miR-520d-5p	1	0	1	0	1	1	TMEM194A	transmembrane protein 194A
hsa-miR-520d-5p	1	0	1	1	1	1	OPCML	opioid binding protein/cell adhesion molecule-like
hsa-miR-520d-5p	0	0	1	1	1	1	IRX5	iroquois homeobox 5
hsa-miR-520d-5p	1	0	1	1	1	1	NTRK2	neurotrophic tyrosine kinase, receptor, type 2
hsa-miR-520d-5p	1	0	1	0	1	1	AMMECR1L	AMME chromosomal region gene 1-like
hsa-miR-520d-5p	0	0	1	1	0	0	FAM98C	family with sequence similarity 98, member C
hsa-miR-520d-5p	0	0	1	1	1	1	C1orf141	chromosome 1 open reading frame 141
hsa-miR-520d-5p	1	0	1	0	1	1	PIK3R3	phosphoinositide-3-kinase, regulatory subunit 3 (gamma)
hsa-miR-520d-5p	1	0	1	1	1	1	STK38	serine/threonine kinase 38
hsa-miR-520d-5p	1	0	1	1	1	1	ST8SIA2	ST8 alpha-N-acetyl-neuraminide alpha-2,8-sialyltransferase 2
hsa-miR-520d-5p	1	0	1	1	1	1	ACVR2B	activin A receptor, type IIB
hsa-miR-520d-5p	0	0	1	0	0	0	FAM106A	family with sequence similarity 106, member A
hsa-miR-520d-5p	1	0	1	0	1	1	ARPP19	cAMP-regulated phosphoprotein, 19kDa
hsa-miR-520d-5p	0	0	1	1	1	1	CYP3A43	cytochrome P450, family 3, subfamily A, polypeptide 43
hsa-miR-520d-5p	1	0	1	0	1	1	MYBL1	v-myb myeloblastosis viral oncogene homolog (avian)-like 1
hsa-miR-520d-5p	1	0	1	1	1	1	ARFIP1	ADP-ribosylation factor interacting protein 1
hsa-miR-520d-5p	1	0	1	0	1	1	VANGL2	vang-like 2 (van gogh, Drosophila)
hsa-miR-520d-5p	1	0	1	0	1	1	CPEB2	cytoplasmic polyadenylation element binding protein 2
hsa-miR-520d-5p	0	0	1	0	0	0	LOC150577	uncharacterized LOC150577
hsa-miR-520d-5p	1	0	1	0	1	1	RBM23	RNA binding motif protein 23
hsa-miR-520d-5p	1	0	1	1	1	1	NR2F2	nuclear receptor subfamily 2, group F, member 2
hsa-miR-520d-5p	1	0	1	1	1	1	PTPRD	protein tyrosine phosphatase, receptor type, D
hsa-miR-520d-5p	1	0	1	0	1	1	DNAJC6	DnaJ (Hsp40) homolog, subfamily C, member 6
hsa-miR-520d-5p	1	0	1	1	1	1	CERS6	ceramide synthase 6
hsa-miR-520d-5p	1	0	1	1	1	1	SP4	Sp4 transcription factor
hsa-miR-520d-5p	1	0	1	0	1	1	ATP8A1	ATPase, aminophospholipid transporter (APLT), class I, type 8A, member 1
hsa-miR-520d-5p	0	0	1	1	1	1	TTLL5	tubulin tyrosine ligase-like family, member 5
hsa-miR-520d-5p	1	0	1	0	1	1	MAP3K9	mitogen-activated protein kinase kinase kinase 9
hsa-miR-520d-5p	1	0	1	1	1	1	SLK	STE20-like kinase
hsa-miR-520d-5p	0	0	1	1	1	1	ATXN2	ataxin 2
hsa-miR-520d-5p	1	0	1	1	1	1	NR3C2	nuclear receptor subfamily 3, group C, member 2
hsa-miR-520d-5p	0	0	1	0	0	0	MAGEL2	MAGE-like 2
hsa-miR-520d-5p	1	0	1	1	1	1	ITSN1	intersectin 1 (SH3 domain protein)
hsa-miR-520d-5p	1	0	1	1	1	1	KIAA0528	KIAA0528
hsa-miR-520d-5p	1	0	1	1	1	1	ST18	suppression of tumorigenicity 18 (breast carcinoma) (zinc finger protein)
hsa-miR-520d-5p	1	0	1	0	1	1	PRDM10	PR domain containing 10
hsa-miR-520d-5p	0	0	1	1	1	1	LRCH1	leucine-rich repeats and calponin homology (CH) domain containing 1
hsa-miR-520d-5p	1	0	1	1	1	1	OTUD4	OTU domain containing 4
hsa-miR-520d-5p	1	0	1	1	1	1	FKBP1A	FK506 binding protein 1A, 12kDa
hsa-miR-520d-5p	0	0	1	0	0	0	LGALS17A	Charcot-Leyden crystal protein pseudogene
hsa-miR-520d-5p	0	0	1	0	0	0	EEF1DP3	eukaryotic translation elongation factor 1 delta pseudogene 3
hsa-miR-520d-5p	0	0	1	0	1	1	GOLGA8G	golgin A8 family, member G
hsa-miR-520d-5p	1	0	1	0	1	1	CAMSAP2	calmodulin regulated spectrin-associated protein family, member 2
hsa-miR-520d-5p	1	0	1	1	1	1	JMJD1C	jumonji domain containing 1C
hsa-miR-520d-5p	1	0	1	1	1	1	ZEB2	zinc finger E-box binding homeobox 2
hsa-miR-520d-5p	1	0	1	1	1	1	TRAPPC8	trafficking protein particle complex 8
hsa-miR-520d-5p	1	0	1	1	1	1	CHIC1	cysteine-rich hydrophobic domain 1
hsa-miR-520d-5p	1	0	1	1	1	1	GPR68	G protein-coupled receptor 68
hsa-miR-520d-5p	0	0	1	1	1	1	ABCA8	ATP-binding cassette, sub-family A (ABC1), member 8
hsa-miR-520d-5p	1	0	1	0	1	1	FAM196A	family with sequence similarity 196, member A
hsa-miR-520d-5p	0	0	1	1	0	0	TCHH	trichohyalin
hsa-miR-520d-5p	1	0	1	1	1	1	TMEM218	transmembrane protein 218
hsa-miR-520d-5p	0	0	1	1	0	0	CCDC144A	coiled-coil domain containing 144A
hsa-miR-520d-5p	1	0	1	1	1	1	GOLGA5	golgin A5
hsa-miR-520d-5p	1	0	1	1	1	1	BTBD7	BTB (POZ) domain containing 7
hsa-miR-520d-5p	0	0	1	0	0	0	FLJ39632	uncharacterized LOC642477
hsa-miR-520d-5p	1	0	1	1	1	1	EIF5	eukaryotic translation initiation factor 5
hsa-miR-520d-5p	1	0	1	1	1	1	ERMAP	erythroblast membrane-associated protein (Scianna blood group)
hsa-miR-520d-5p	1	0	1	1	1	1	SASH1	SAM and SH3 domain containing 1
hsa-miR-520d-5p	0	0	1	0	0	0	DKFZp686D0853	uncharacterized LOC401613
hsa-miR-520d-5p	1	0	1	1	1	1	EPHA5	EPH receptor A5
hsa-miR-520d-5p	1	0	1	1	1	1	TRIM37	tripartite motif containing 37
hsa-miR-520d-5p	1	0	1	0	1	1	MTX3	metaxin 3
hsa-miR-520d-5p	1	0	1	1	1	1	FAM184A	family with sequence similarity 184, member A
hsa-miR-520d-5p	1	0	1	1	1	1	ETS1	v-ets erythroblastosis virus E26 oncogene homolog 1 (avian)
hsa-miR-520d-5p	0	0	1	0	1	1	ZNF498	zinc finger protein 498
hsa-miR-520d-5p	1	0	1	0	1	1	CLASP2	cytoplasmic linker associated protein 2
hsa-miR-520d-5p	0	0	1	1	0	0	TTC5	tetratricopeptide repeat domain 5
hsa-miR-520d-5p	1	0	1	1	1	1	TJP1	tight junction protein 1
hsa-miR-520d-5p	0	0	1	1	0	0	CDK5RAP2	CDK5 regulatory subunit associated protein 2
hsa-miR-520d-5p	0	0	1	1	1	1	PSMA2	proteasome (prosome, macropain) subunit, alpha type, 2
hsa-miR-520d-5p	1	0	1	0	1	1	FAM73A	family with sequence similarity 73, member A
hsa-miR-520d-5p	1	0	1	1	1	1	SMAD4	SMAD family member 4
hsa-miR-520d-5p	0	0	1	1	1	1	IPCEF1	interaction protein for cytohesin exchange factors 1
hsa-miR-520d-5p	1	0	1	0	1	1	GALNT4	UDP-N-acetyl-alpha-D-galactosamine:polypeptide N-acetylgalactosaminyltransferase 4 (GalNAc-T4)
hsa-miR-520d-5p	0	0	1	1	0	0	RPS24	ribosomal protein S24
hsa-miR-520d-5p	0	0	1	1	1	1	B4GALT4	UDP-Gal:betaGlcNAc beta 1,4- galactosyltransferase, polypeptide 4
hsa-miR-520d-5p	1	0	1	1	1	1	EPS15	epidermal growth factor receptor pathway substrate 15
hsa-miR-520d-5p	1	0	1	1	1	1	GTDC1	glycosyltransferase-like domain containing 1
hsa-miR-520d-5p	1	0	1	1	1	1	TC2N	tandem C2 domains, nuclear
hsa-miR-520d-5p	1	0	1	0	1	1	VPS36	vacuolar protein sorting 36 homolog (S. cerevisiae)
hsa-miR-520d-5p	1	0	1	1	1	1	CYB5B	cytochrome b5 type B (outer mitochondrial membrane)
hsa-miR-520d-5p	0	0	1	0	0	0	OVOS	ovostatin
hsa-miR-520d-5p	1	0	1	1	1	1	GDI2	GDP dissociation inhibitor 2
hsa-miR-520d-5p	1	0	1	1	1	1	NEDD9	neural precursor cell expressed, developmentally down-regulated 9
hsa-miR-520d-5p	1	0	1	1	1	1	HDAC1	histone deacetylase 1
hsa-miR-520d-5p	1	0	1	1	1	1	ZNF711	zinc finger protein 711
hsa-miR-520d-5p	1	0	1	1	1	1	DDAH1	dimethylarginine dimethylaminohydrolase 1
hsa-miR-520d-5p	0	0	1	1	1	1	CCNT2	cyclin T2
hsa-miR-520d-5p	1	0	1	0	1	1	TMEM184B	transmembrane protein 184B
hsa-miR-520d-5p	1	0	1	1	1	1	NFIB	nuclear factor I/B
hsa-miR-520d-5p	1	0	1	0	1	1	IGF2BP3	insulin-like growth factor 2 mRNA binding protein 3
hsa-miR-520d-5p	1	0	1	1	1	1	RDX	radixin
hsa-miR-520d-5p	0	0	1	1	1	1	DAZL	deleted in azoospermia-like
hsa-miR-520d-5p	1	0	1	1	1	1	TMEM135	transmembrane protein 135
hsa-miR-520d-5p	1	0	1	0	1	1	TBL1XR1	transducin (beta)-like 1 X-linked receptor 1
hsa-miR-520d-5p	1	0	1	1	1	1	LYST	lysosomal trafficking regulator
hsa-miR-520d-5p	1	0	1	1	1	1	DLG5	discs, large homolog 5 (Drosophila)
hsa-miR-520d-5p	1	0	1	1	1	1	CREB3L2	cAMP responsive element binding protein 3-like 2
hsa-miR-520d-5p	0	0	1	1	1	1	IPO11	importin 11
hsa-miR-520d-5p	1	0	1	1	1	1	BSDC1	BSD domain containing 1
hsa-miR-520d-5p	0	0	1	0	1	1	GINS3	GINS complex subunit 3 (Psf3 homolog)
hsa-miR-520d-5p	0	0	1	0	1	1	CD59	CD59 molecule, complement regulatory protein
hsa-miR-520d-5p	1	0	1	1	1	1	AP2M1	adaptor-related protein complex 2, mu 1 subunit
hsa-miR-520d-5p	1	0	1	1	1	1	SEL1L3	sel-1 suppressor of lin-12-like 3 (C. elegans)
hsa-miR-520d-5p	1	0	1	1	1	1	ARF1	ADP-ribosylation factor 1
hsa-miR-520d-5p	1	0	1	1	1	1	RSBN1L	round spermatid basic protein 1-like
hsa-miR-520d-5p	0	0	1	1	1	1	TBC1D10A	TBC1 domain family, member 10A
hsa-miR-520d-5p	1	0	1	1	1	1	TOM1L1	target of myb1 (chicken)-like 1
hsa-miR-520d-5p	0	0	1	1	1	1	CETN2	centrin, EF-hand protein, 2
hsa-miR-520d-5p	0	0	1	1	0	0	RNPS1	RNA binding protein S1, serine-rich domain
hsa-miR-520d-5p	1	0	1	1	1	1	MMAB	methylmalonic aciduria (cobalamin deficiency) cblB type
hsa-miR-520d-5p	0	0	1	1	1	1	ATP1B3	ATPase, Na+/K+ transporting, beta 3 polypeptide
hsa-miR-520d-5p	0	0	1	1	1	1	COPS8	COP9 constitutive photomorphogenic homolog subunit 8 (Arabidopsis)
hsa-miR-520d-5p	0	0	1	0	0	0	CMAHP	cytidine monophospho-N-acetylneuraminic acid hydroxylase, pseudogene
hsa-miR-520d-5p	1	0	1	1	1	1	PTN	pleiotrophin
hsa-miR-520d-5p	0	0	1	1	1	1	ADK	adenosine kinase
hsa-miR-520d-5p	1	0	1	1	1	1	SIX5	SIX homeobox 5
hsa-miR-520d-5p	1	0	1	0	1	1	BNIP3L	BCL2/adenovirus E1B 19kDa interacting protein 3-like
hsa-miR-520d-5p	0	0	1	1	1	1	FAT1	FAT tumor suppressor homolog 1 (Drosophila)
hsa-miR-520d-5p	1	0	1	1	1	1	ACTG1	actin, gamma 1
hsa-miR-520d-5p	1	0	1	0	1	1	PTPLAD1	protein tyrosine phosphatase-like A domain containing 1
hsa-miR-520d-5p	0	0	1	0	1	1	CD99P1	CD99 molecule pseudogene 1
hsa-miR-520d-5p	0	0	1	1	1	1	ZNF263	zinc finger protein 263
hsa-miR-520d-5p	0	0	1	1	1	1	CCDC91	coiled-coil domain containing 91
hsa-miR-520d-5p	0	0	1	1	1	1	STON1	stonin 1
hsa-miR-520d-5p	1	0	1	1	1	1	BAMBI	BMP and activin membrane-bound inhibitor homolog (Xenopus laevis)
hsa-miR-520d-5p	1	0	1	1	1	1	STK38L	serine/threonine kinase 38 like
hsa-miR-520d-5p	1	0	1	1	1	1	MTCH2	mitochondrial carrier 2
hsa-miR-520d-5p	1	0	1	1	1	1	TMEM245	transmembrane protein 245
hsa-miR-520d-5p	1	0	1	1	1	1	WIPF1	WAS/WASL interacting protein family, member 1
hsa-miR-520d-5p	0	0	1	1	0	0	C11orf68	chromosome 11 open reading frame 68
hsa-miR-520d-5p	0	0	1	1	1	1	SSB	Sjogren syndrome antigen B (autoantigen La)
hsa-miR-520d-5p	0	0	1	1	1	1	BMPR1A	bone morphogenetic protein receptor, type IA
hsa-miR-520d-5p	0	0	1	1	1	1	PDLIM1	PDZ and LIM domain 1
hsa-miR-520d-5p	0	0	1	1	1	1	HADHB	hydroxyacyl-CoA dehydrogenase/3-ketoacyl-CoA thiolase/enoyl-CoA hydratase (trifunctional protein), beta subunit
hsa-miR-520d-5p	1	0	1	1	1	1	BTBD10	BTB (POZ) domain containing 10
hsa-miR-520d-5p	1	0	1	1	1	1	MMP2	matrix metallopeptidase 2 (gelatinase A, 72kDa gelatinase, 72kDa type IV collagenase)
hsa-miR-520d-5p	1	0	1	1	1	1	PPP5C	protein phosphatase 5, catalytic subunit
hsa-miR-520d-5p	0	0	1	0	0	0	ZNF720	zinc finger protein 720
hsa-miR-520d-5p	1	0	1	1	1	1	LAMTOR3	late endosomal/lysosomal adaptor, MAPK and MTOR activator 3
hsa-miR-520d-5p	0	0	1	1	1	1	TFAM	transcription factor A, mitochondrial
hsa-miR-520d-5p	0	0	1	1	1	1	PEX19	peroxisomal biogenesis factor 19
hsa-miR-520d-5p	0	0	1	1	0	0	WDR43	WD repeat domain 43
hsa-miR-520d-5p	0	0	1	1	1	1	DEDD	death effector domain containing
hsa-miR-520d-5p	1	0	1	1	1	1	PPP3CB	protein phosphatase 3, catalytic subunit, beta isozyme
hsa-miR-520d-5p	0	0	1	1	1	1	CHEK1	checkpoint kinase 1
hsa-miR-520d-5p	0	0	1	1	1	1	TANK	TRAF family member-associated NFKB activator
hsa-miR-520d-5p	0	0	1	1	1	1	ODC1	ornithine decarboxylase 1
hsa-miR-520d-5p	1	0	1	0	1	1	NLN	neurolysin (metallopeptidase M3 family)
hsa-miR-520d-5p	1	0	1	1	1	1	YWHAQ	tyrosine 3-monooxygenase/tryptophan 5-monooxygenase activation protein, theta polypeptide
hsa-miR-520d-5p	0	0	1	1	1	1	RFT1	RFT1 homolog (S. cerevisiae)
hsa-miR-520d-5p	1	0	1	1	1	1	ARL4A	ADP-ribosylation factor-like 4A
hsa-miR-520d-5p	1	0	1	1	1	1	PFN2	profilin 2
hsa-miR-520d-5p	1	0	1	1	1	1	NFYB	nuclear transcription factor Y, beta
hsa-miR-520d-5p	0	0	1	1	1	1	RCN2	reticulocalbin 2, EF-hand calcium binding domain
hsa-miR-520d-5p	1	0	1	1	1	1	F11R	F11 receptor
hsa-miR-520d-5p	1	0	1	1	1	1	ARMC8	armadillo repeat containing 8
hsa-miR-520d-5p	1	0	1	1	1	1	PDCL	phosducin-like
hsa-miR-520d-5p	0	0	1	1	1	1	JAM2	junctional adhesion molecule 2
hsa-miR-520d-5p	1	0	1	1	1	1	RNF2	ring finger protein 2
hsa-miR-520d-5p	1	0	1	1	1	1	RALY	RNA binding protein, autoantigenic (hnRNP-associated with lethal yellow homolog (mouse))
hsa-miR-520d-5p	0	0	1	1	1	1	TBRG1	transforming growth factor beta regulator 1
hsa-miR-520d-5p	0	0	1	1	0	0	MAP2K5	mitogen-activated protein kinase kinase 5
hsa-miR-520d-5p	1	0	1	1	1	1	SRSF2	serine/arginine-rich splicing factor 2
hsa-miR-520d-5p	0	0	1	1	1	1	LGI1	leucine-rich, glioma inactivated 1
hsa-miR-520d-5p	0	0	1	1	1	1	PLAC8	placenta-specific 8
hsa-miR-520d-5p	1	0	1	0	1	1	CD47	CD47 molecule
hsa-miR-520d-5p	0	0	1	1	1	1	GATSL3	GATS protein-like 3
hsa-miR-520d-5p	0	0	1	1	1	1	ZNF397	zinc finger protein 397
hsa-miR-520d-5p	0	0	1	0	1	1	SEPT7	septin 7
hsa-miR-520d-5p	0	0	1	1	1	1	BEX4	brain expressed, X-linked 4
hsa-miR-520d-5p	0	0	1	1	1	1	OTOR	otoraplin
hsa-miR-520d-5p	1	0	1	1	1	1	MAN1C1	mannosidase, alpha, class 1C, member 1
hsa-miR-520d-5p	0	0	1	1	1	1	COPS4	COP9 constitutive photomorphogenic homolog subunit 4 (Arabidopsis)
hsa-miR-520d-5p	1	0	1	1	1	1	JUNB	jun B proto-oncogene
hsa-miR-520d-5p	0	0	1	1	1	1	TOP3B	topoisomerase (DNA) III beta
hsa-miR-520d-5p	0	0	1	1	1	1	C10orf2	chromosome 10 open reading frame 2
hsa-miR-520d-5p	1	0	1	1	1	1	SLMAP	sarcolemma associated protein
hsa-miR-520d-5p	0	0	1	0	0	0	MYSM1	Myb-like, SWIRM and MPN domains 1
hsa-miR-520d-5p	1	0	1	0	1	1	KIAA0240	KIAA0240
hsa-miR-520d-5p	0	0	1	0	0	0	LINC00661	long intergenic non-protein coding RNA 661
hsa-miR-520d-5p	1	0	1	0	1	1	OSBPL8	oxysterol binding protein-like 8
hsa-miR-520d-5p	1	0	1	1	1	1	SNRK	SNF related kinase
hsa-miR-520d-5p	1	0	1	1	0	0	POMGNT1	protein O-linked mannose beta1,2-N-acetylglucosaminyltransferase
hsa-miR-520d-5p	1	0	1	1	1	1	SLC39A10	solute carrier family 39 (zinc transporter), member 10
hsa-miR-520d-5p	1	0	1	0	1	1	ZNF652	zinc finger protein 652
hsa-miR-520d-5p	1	0	1	1	1	1	SLC30A7	solute carrier family 30 (zinc transporter), member 7
hsa-miR-520d-5p	1	0	1	1	1	1	ZFHX3	zinc finger homeobox 3
hsa-miR-520d-5p	1	0	1	1	1	1	PI15	peptidase inhibitor 15
hsa-miR-520d-5p	1	0	1	1	1	1	RBPMS	RNA binding protein with multiple splicing
hsa-miR-520d-5p	1	0	1	0	1	1	KLHDC10	kelch domain containing 10
hsa-miR-520d-5p	1	0	1	0	1	1	CBX7	chromobox homolog 7
hsa-miR-520d-5p	1	0	1	1	1	1	MOSPD1	motile sperm domain containing 1
hsa-miR-520d-5p	1	0	1	1	1	1	LGR4	leucine-rich repeat containing G protein-coupled receptor 4
hsa-miR-520d-5p	1	0	1	1	1	1	TNFAIP1	tumor necrosis factor, alpha-induced protein 1 (endothelial)
hsa-miR-520d-5p	1	0	1	1	1	1	SLC4A8	solute carrier family 4, sodium bicarbonate cotransporter, member 8
hsa-miR-520d-5p	0	0	1	1	1	1	ADPRH	ADP-ribosylarginine hydrolase
hsa-miR-520d-5p	1	0	1	1	1	1	ATP2B2	ATPase, Ca++ transporting, plasma membrane 2
hsa-miR-520d-5p	0	0	1	1	1	1	RFC1	replication factor C (activator 1) 1, 145kDa
hsa-miR-520d-5p	1	0	1	0	1	1	YES1	v-yes-1 Yamaguchi sarcoma viral oncogene homolog 1
hsa-miR-520d-5p	0	0	1	0	1	1	TGFB2	transforming growth factor, beta 2
hsa-miR-520d-5p	0	0	1	1	1	1	ELF1	E74-like factor 1 (ets domain transcription factor)
hsa-miR-520d-5p	0	0	1	1	0	0	ASPA	aspartoacylase
hsa-miR-520d-5p	0	0	1	1	1	1	ERCC8	excision repair cross-complementing rodent repair deficiency, complementation group 8
hsa-miR-520d-5p	1	0	1	1	1	1	COL1A2	collagen, type I, alpha 2
hsa-miR-520d-5p	1	0	1	1	1	1	COL3A1	collagen, type III, alpha 1
hsa-miR-520d-5p	1	0	1	1	1	1	COL4A3	collagen, type IV, alpha 3 (Goodpasture antigen)
hsa-miR-520d-5p	0	0	1	0	1	1	CYP1B1	cytochrome P450, family 1, subfamily B, polypeptide 1
hsa-miR-520d-5p	1	0	1	0	1	1	SLC26A2	solute carrier family 26 (sulfate transporter), member 2
hsa-miR-520d-5p	0	0	1	1	1	1	F11	coagulation factor XI
hsa-miR-520d-5p	0	0	1	1	1	1	F8	coagulation factor VIII, procoagulant component
hsa-miR-520d-5p	1	0	1	1	1	1	FBN1	fibrillin 1
hsa-miR-520d-5p	1	0	1	1	1	1	GK	glycerol kinase
hsa-miR-520d-5p	1	0	1	0	1	1	GLI3	GLI family zinc finger 3
hsa-miR-520d-5p	1	0	1	1	1	1	JAG1	jagged 1
hsa-miR-520d-5p	1	0	1	1	1	1	KCNA1	potassium voltage-gated channel, shaker-related subfamily, member 1 (episodic ataxia with myokymia)
hsa-miR-520d-5p	0	0	1	1	1	1	KRT12	keratin 12
hsa-miR-520d-5p	1	0	1	1	1	1	LEP	leptin
hsa-miR-520d-5p	1	0	1	1	1	1	MITF	microphthalmia-associated transcription factor
hsa-miR-520d-5p	0	0	1	1	1	1	MTM1	myotubularin 1
hsa-miR-520d-5p	1	0	1	1	1	1	NPC1	Niemann-Pick disease, type C1
hsa-miR-520d-5p	1	0	1	0	1	1	PTEN	phosphatase and tensin homolog
hsa-miR-520d-5p	1	0	1	1	1	1	RB1	retinoblastoma 1
hsa-miR-520d-5p	1	0	1	0	1	1	SCN4A	sodium channel, voltage-gated, type IV, alpha subunit
hsa-miR-520d-5p	1	0	1	1	1	1	SOX9	SRY (sex determining region Y)-box 9
hsa-miR-520d-5p	0	0	1	1	1	1	THBD	thrombomodulin
hsa-miR-520d-5p	1	0	1	0	1	1	COL5A2	collagen, type V, alpha 2
hsa-miR-520d-5p	1	0	1	0	1	1	CYBB	cytochrome b-245, beta polypeptide
hsa-miR-520d-5p	1	0	1	1	1	1	HLCS	holocarboxylase synthetase (biotin-(proprionyl-CoA-carboxylase (ATP-hydrolysing)) ligase)
hsa-miR-520d-5p	0	0	1	1	0	0	IAPP	islet amyloid polypeptide
hsa-miR-520d-5p	1	0	1	0	1	1	PAFAH1B1	platelet-activating factor acetylhydrolase 1b, regulatory subunit 1 (45kDa)
hsa-miR-520d-5p	1	0	1	1	0	0	NOTCH3	notch 3
hsa-miR-520d-5p	1	0	1	1	1	1	HNF1B	HNF1 homeobox B
hsa-miR-520d-5p	1	0	1	1	1	1	TWIST1	twist homolog 1 (Drosophila)
hsa-miR-520d-5p	1	0	1	1	1	1	ATRX	alpha thalassemia/mental retardation syndrome X-linked
hsa-miR-520d-5p	0	0	1	1	1	1	COL10A1	collagen, type X, alpha 1
hsa-miR-520d-5p	1	0	1	1	1	1	HOXD13	homeobox D13
hsa-miR-520d-5p	0	0	1	1	1	1	VHL	von Hippel-Lindau tumor suppressor, E3 ubiquitin protein ligase
hsa-miR-520d-5p	1	0	1	1	1	1	DCX	doublecortin
hsa-miR-520d-5p	1	0	1	1	1	1	IL1A	interleukin 1, alpha
hsa-miR-520d-5p	0	0	1	1	1	1	IL2	interleukin 2
hsa-miR-520d-5p	0	0	1	1	1	1	ADH4	alcohol dehydrogenase 4 (class II), pi polypeptide
hsa-miR-520d-5p	0	0	1	0	0	0	ADRA2C	adrenoceptor alpha 2C
hsa-miR-520d-5p	0	0	1	1	1	1	ALDH1A1	aldehyde dehydrogenase 1 family, member A1
hsa-miR-520d-5p	1	0	1	1	1	1	DIO2	deiodinase, iodothyronine, type II
hsa-miR-520d-5p	1	0	1	1	1	1	DRD1	dopamine receptor D1
hsa-miR-520d-5p	1	0	1	1	1	1	GABRB3	gamma-aminobutyric acid (GABA) A receptor, beta 3
hsa-miR-520d-5p	0	0	1	1	1	1	GLRB	glycine receptor, beta
hsa-miR-520d-5p	1	0	1	1	1	1	IGF1R	insulin-like growth factor 1 receptor
hsa-miR-520d-5p	0	0	1	1	1	1	IL1R1	interleukin 1 receptor, type I
hsa-miR-520d-5p	1	0	1	0	1	1	KCNJ2	potassium inwardly-rectifying channel, subfamily J, member 2
hsa-miR-520d-5p	0	0	1	1	1	1	MAOB	monoamine oxidase B
hsa-miR-520d-5p	0	0	1	1	0	0	NPY	neuropeptide Y
hsa-miR-520d-5p	1	0	1	1	0	0	PPIB	peptidylprolyl isomerase B (cyclophilin B)
hsa-miR-520d-5p	1	0	1	1	1	1	PPP3R1	protein phosphatase 3, regulatory subunit B, alpha
hsa-miR-520d-5p	1	0	1	1	1	1	PTGFR	prostaglandin F receptor (FP)
hsa-miR-520d-5p	1	0	1	1	1	1	RARB	retinoic acid receptor, beta
hsa-miR-520d-5p	0	0	1	1	1	1	TBC1D3C	TBC1 domain family, member 3C
hsa-miR-520d-5p	1	0	1	0	1	1	SMAD5	SMAD family member 5
hsa-miR-520d-5p	1	0	1	0	1	1	UBE2W	ubiquitin-conjugating enzyme E2W (putative)
hsa-miR-520d-5p	1	0	1	0	1	1	SPOPL	speckle-type POZ protein-like
hsa-miR-520d-5p	1	0	1	1	1	1	MTUS1	microtubule associated tumor suppressor 1
hsa-miR-520d-5p	1	0	1	1	1	1	FAM13C	family with sequence similarity 13, member C
hsa-miR-520d-5p	0	0	1	1	0	0	PAMR1	peptidase domain containing associated with muscle regeneration 1
hsa-miR-520d-5p	1	0	1	0	1	1	CLDN18	claudin 18
hsa-miR-520d-5p	1	0	1	0	1	1	SMAD2	SMAD family member 2
hsa-miR-520d-5p	1	0	1	1	1	1	LEPR	leptin receptor
hsa-miR-520d-5p	0	0	1	1	1	1	SP5	Sp5 transcription factor
hsa-miR-520d-5p	0	0	1	1	0	0	TXNDC8	thioredoxin domain containing 8 (spermatozoa)
hsa-miR-520d-5p	1	0	1	1	1	1	FBLN2	fibulin 2
hsa-miR-520d-5p	0	0	1	1	1	1	CCDC144NL	coiled-coil domain containing 144 family, N-terminal like
hsa-miR-520d-5p	1	0	1	0	1	1	LIN28B	lin-28 homolog B (C. elegans)
hsa-miR-520d-5p	1	0	1	1	1	1	EBF3	early B-cell factor 3
hsa-miR-520d-5p	1	0	1	1	1	1	PLCXD3	phosphatidylinositol-specific phospholipase C, X domain containing 3
hsa-miR-520d-5p	0	0	1	1	1	1	RYK	receptor-like tyrosine kinase
hsa-miR-520d-5p	0	0	1	1	0	0	RPS4X	ribosomal protein S4, X-linked
hsa-miR-520d-5p	1	0	1	0	1	1	GOSR1	golgi SNAP receptor complex member 1
hsa-miR-520d-5p	1	0	1	1	1	1	L3MBTL3	l(3)mbt-like 3 (Drosophila)
hsa-miR-520d-5p	0	0	1	1	1	1	IGIP	IgA-inducing protein homolog (Bos taurus)
hsa-miR-520d-5p	1	0	1	1	1	1	IGSF3	immunoglobulin superfamily, member 3
hsa-miR-520d-5p	1	0	1	1	1	1	BRWD1	bromodomain and WD repeat domain containing 1
hsa-miR-520d-5p	0	0	1	1	0	0	F8A3	coagulation factor VIII-associated 3
hsa-miR-520d-5p	1	0	1	1	1	1	LMBRD2	LMBR1 domain containing 2
hsa-miR-520d-5p	1	0	1	0	1	1	SS18	synovial sarcoma translocation, chromosome 18
hsa-miR-520d-5p	1	0	1	0	1	1	CPLX2	complexin 2
hsa-miR-520d-5p	1	0	1	1	1	1	ZDHHC9	zinc finger, DHHC-type containing 9
hsa-miR-520d-5p	1	0	1	0	1	1	KIAA2022	KIAA2022
hsa-miR-520d-5p	0	0	1	1	1	1	MXI1	MAX interactor 1
hsa-miR-520d-5p	1	0	1	1	1	1	FNIP1	folliculin interacting protein 1
hsa-miR-520d-5p	1	0	1	1	1	1	ZNF655	zinc finger protein 655
hsa-miR-520d-5p	1	0	1	0	1	1	ERMN	ermin, ERM-like protein
hsa-miR-520d-5p	1	0	1	1	1	1	SHE	Src homology 2 domain containing E
hsa-miR-520d-5p	0	0	1	0	1	1	LPPR5	lipid phosphate phosphatase-related protein type 5
hsa-miR-520d-5p	1	0	1	0	1	1	ZC3H12B	zinc finger CCCH-type containing 12B
hsa-miR-520d-5p	0	0	1	1	0	0	HES5	hairy and enhancer of split 5 (Drosophila)
hsa-miR-520d-5p	0	0	1	1	1	1	SAMD13	sterile alpha motif domain containing 13
hsa-miR-520d-5p	0	0	1	1	1	1	NCMAP	noncompact myelin associated protein
hsa-miR-520d-5p	1	0	1	1	1	1	ATP11C	ATPase, class VI, type 11C
hsa-miR-520d-5p	1	0	1	1	1	1	PDLIM5	PDZ and LIM domain 5
hsa-miR-520d-5p	1	0	1	1	1	1	PCGF6	polycomb group ring finger 6
hsa-miR-520d-5p	1	0	1	0	1	1	CREB5	cAMP responsive element binding protein 5
hsa-miR-520d-5p	0	0	1	1	0	0	PNLIPRP3	pancreatic lipase-related protein 3
hsa-miR-520d-5p	1	0	1	1	1	1	CTNNBIP1	catenin, beta interacting protein 1
hsa-miR-520d-5p	0	0	1	0	1	1	GOLGA8E	golgin A8 family, member E
hsa-miR-520d-5p	0	0	1	0	1	1	LINC00268	long intergenic non-protein coding RNA 268
hsa-miR-520d-5p	1	0	1	1	1	1	KCNMA1	potassium large conductance calcium-activated channel, subfamily M, alpha member 1
hsa-miR-520d-5p	1	0	1	1	1	1	RUNX2	runt-related transcription factor 2
hsa-miR-520d-5p	1	0	1	1	1	1	PHF6	PHD finger protein 6
hsa-miR-520d-5p	1	0	1	1	1	1	ZNF2	zinc finger protein 2
hsa-miR-520d-5p	1	0	1	1	1	1	ZHX1	zinc fingers and homeoboxes 1
hsa-miR-520d-5p	0	0	1	1	1	1	RAB28	RAB28, member RAS oncogene family
hsa-miR-520d-5p	0	0	1	1	1	1	ACTBL2	actin, beta-like 2
hsa-miR-520d-5p	0	0	1	1	1	1	VPS13A	vacuolar protein sorting 13 homolog A (S. cerevisiae)
hsa-miR-520d-5p	1	0	1	0	1	1	TFEC	transcription factor EC
hsa-miR-520d-5p	1	0	1	1	1	1	SERF2	small EDRK-rich factor 2
hsa-miR-520d-5p	1	0	1	0	1	1	GCH1	GTP cyclohydrolase 1
hsa-miR-520d-5p	1	0	1	0	1	1	TNRC6B	trinucleotide repeat containing 6B
hsa-miR-520d-5p	1	0	1	1	1	1	FNBP1L	formin binding protein 1-like
hsa-miR-520d-5p	0	0	1	1	1	1	SC5DL	sterol-C5-desaturase (ERG3 delta-5-desaturase homolog, S. cerevisiae)-like
hsa-miR-520d-5p	1	0	1	0	1	1	CLLU1	chronic lymphocytic leukemia up-regulated 1
hsa-miR-520d-5p	1	0	1	0	1	1	RAB12	RAB12, member RAS oncogene family
hsa-miR-520d-5p	1	0	1	1	1	1	RGS7BP	regulator of G-protein signaling 7 binding protein
hsa-miR-520d-5p	0	0	1	1	1	1	CIB4	calcium and integrin binding family member 4
hsa-miR-520d-5p	0	0	1	1	0	0	GRB7	growth factor receptor-bound protein 7
hsa-miR-520d-5p	1	0	1	0	1	1	MSRB3	methionine sulfoxide reductase B3
hsa-miR-520d-5p	1	0	1	1	1	1	YTHDC1	YTH domain containing 1
hsa-miR-520d-5p	0	0	1	1	1	1	CALML4	calmodulin-like 4
hsa-miR-520d-5p	1	0	1	1	1	1	CSNK1G3	casein kinase 1, gamma 3
hsa-miR-520d-5p	1	0	1	1	1	1	RCE1	RCE1 homolog, prenyl protein protease (S. cerevisiae)
hsa-miR-520d-5p	1	0	1	1	1	1	STK24	serine/threonine kinase 24
hsa-miR-520d-5p	1	0	1	1	1	1	PPM1B	protein phosphatase, Mg2+/Mn2+ dependent, 1B
hsa-miR-520d-5p	0	0	1	1	1	1	DYX1C1	dyslexia susceptibility 1 candidate 1
hsa-miR-520d-5p	1	0	1	1	1	1	SMOC1	SPARC related modular calcium binding 1
hsa-miR-520d-5p	1	0	1	0	1	1	RYR2	ryanodine receptor 2 (cardiac)
hsa-miR-520d-5p	1	0	1	1	1	1	USP14	ubiquitin specific peptidase 14 (tRNA-guanine transglycosylase)
hsa-miR-520d-5p	1	0	1	1	1	1	SCD5	stearoyl-CoA desaturase 5
hsa-miR-520d-5p	1	0	1	1	1	1	NPM1	nucleophosmin (nucleolar phosphoprotein B23, numatrin)
hsa-miR-520d-5p	1	0	1	1	1	1	DLX1	distal-less homeobox 1
hsa-miR-520d-5p	1	0	1	0	1	1	CDC42SE1	CDC42 small effector 1
hsa-miR-520d-5p	0	0	1	1	1	1	PRPS2	phosphoribosyl pyrophosphate synthetase 2
hsa-miR-520d-5p	0	0	1	1	1	1	ATAD3C	ATPase family, AAA domain containing 3C
hsa-miR-520d-5p	0	0	1	1	1	1	EFEMP1	EGF containing fibulin-like extracellular matrix protein 1
hsa-miR-520d-5p	1	0	1	0	1	1	GK5	glycerol kinase 5 (putative)
hsa-miR-520d-5p	1	0	1	0	1	1	CREBZF	CREB/ATF bZIP transcription factor
hsa-miR-520d-5p	1	0	1	1	1	1	CDC42	cell division cycle 42 (GTP binding protein, 25kDa)
hsa-miR-520d-5p	0	0	1	1	1	1	MDH1B	malate dehydrogenase 1B, NAD (soluble)
hsa-miR-520d-5p	1	0	1	1	1	1	CHN2	chimerin (chimaerin) 2
hsa-miR-520d-5p	1	0	1	1	1	1	MLLT4	myeloid/lymphoid or mixed-lineage leukemia (trithorax homolog, Drosophila); translocated to, 4
hsa-miR-520d-5p	0	0	1	1	0	0	MEOX1	mesenchyme homeobox 1
hsa-miR-520d-5p	1	0	1	1	1	1	TCERG1	transcription elongation regulator 1
hsa-miR-520d-5p	1	0	1	1	1	1	FAM3C	family with sequence similarity 3, member C
hsa-miR-520d-5p	1	0	1	0	1	1	FAM133B	family with sequence similarity 133, member B
hsa-miR-520d-5p	1	0	1	1	1	1	SPTSSB	serine palmitoyltransferase, small subunit B
hsa-miR-520d-5p	0	0	1	0	1	1	OPALIN	oligodendrocytic myelin paranodal and inner loop protein
hsa-miR-520d-5p	1	0	1	1	1	1	SCN2A	sodium channel, voltage-gated, type II, alpha subunit
hsa-miR-520d-5p	0	0	1	1	1	1	SPOCK3	sparc/osteonectin, cwcv and kazal-like domains proteoglycan (testican) 3
hsa-miR-520d-5p	0	0	1	1	1	1	MTHFD2	methylenetetrahydrofolate dehydrogenase (NADP+ dependent) 2, methenyltetrahydrofolate cyclohydrolase
hsa-miR-520d-5p	0	0	1	1	0	0	SPINK9	serine peptidase inhibitor, Kazal type 9
hsa-miR-520d-5p	1	0	1	1	1	1	MTMR12	myotubularin related protein 12
hsa-miR-520d-5p	1	0	1	1	1	1	FAM63B	family with sequence similarity 63, member B
hsa-miR-520d-5p	1	0	1	1	1	1	HEY1	hairy/enhancer-of-split related with YRPW motif 1
hsa-miR-520d-5p	1	0	1	1	1	1	GDAP1	ganglioside induced differentiation associated protein 1
hsa-miR-520d-5p	1	0	1	1	1	1	CYLD	cylindromatosis (turban tumor syndrome)
hsa-miR-520d-5p	1	0	1	1	1	1	GLIS3	GLIS family zinc finger 3
hsa-miR-520d-5p	0	0	1	1	1	1	PSPC1	paraspeckle component 1
hsa-miR-520d-5p	0	0	1	1	1	1	GEMIN8	gem (nuclear organelle) associated protein 8
hsa-miR-520d-5p	1	0	1	1	1	1	ZNF706	zinc finger protein 706
hsa-miR-520d-5p	1	0	1	1	1	1	FRS2	fibroblast growth factor receptor substrate 2
hsa-miR-520d-5p	1	0	1	1	1	1	KDM5A	lysine (K)-specific demethylase 5A
hsa-miR-520d-5p	0	0	1	1	1	1	TRAK1	trafficking protein, kinesin binding 1
hsa-miR-520d-5p	0	0	1	1	1	1	SEC24B	SEC24 family, member B (S. cerevisiae)
hsa-miR-520d-5p	1	0	1	0	1	1	TMEM237	transmembrane protein 237
hsa-miR-520d-5p	0	0	1	1	1	1	FAM22G	family with sequence similarity 22, member G
hsa-miR-520d-5p	1	0	1	0	1	1	SLC12A2	solute carrier family 12 (sodium/potassium/chloride transporters), member 2
hsa-miR-520d-5p	1	0	1	1	1	1	MZT1	mitotic spindle organizing protein 1
hsa-miR-520d-5p	1	0	1	1	1	1	METTL9	methyltransferase like 9
hsa-miR-520d-5p	1	0	1	1	1	1	ZNF436	zinc finger protein 436
hsa-miR-520d-5p	0	0	1	1	0	0	VPS37D	vacuolar protein sorting 37 homolog D (S. cerevisiae)
hsa-miR-520d-5p	0	0	1	1	1	1	VCAM1	vascular cell adhesion molecule 1
hsa-miR-520d-5p	0	0	1	1	0	0	FAM127A	family with sequence similarity 127, member A
hsa-miR-520d-5p	1	0	1	0	0	0	FAM127B	family with sequence similarity 127, member B
hsa-miR-520d-5p	1	0	1	0	1	1	FAM127C	family with sequence similarity 127, member C
hsa-miR-520d-5p	1	0	1	1	1	1	TMTC4	transmembrane and tetratricopeptide repeat containing 4
hsa-miR-520d-5p	1	0	1	1	1	1	CREBBP	CREB binding protein
hsa-miR-520d-5p	1	0	1	1	1	1	VAV3	vav 3 guanine nucleotide exchange factor
hsa-miR-520d-5p	1	0	1	1	1	1	SHANK3	SH3 and multiple ankyrin repeat domains 3
hsa-miR-520d-5p	1	0	1	0	1	1	THSD7B	thrombospondin, type I, domain containing 7B
hsa-miR-520d-5p	1	0	1	0	1	1	ODZ3	odz, odd Oz/ten-m homolog 3 (Drosophila)
hsa-miR-520d-5p	1	0	1	0	1	1	MEGF9	multiple EGF-like-domains 9
hsa-miR-520d-5p	0	0	1	1	0	0	OVOS2	ovostatin 2
hsa-miR-520d-5p	0	0	1	1	0	0	MEIG1	meiosis expressed gene 1 homolog (mouse)
hsa-miR-520d-5p	0	0	1	1	1	1	G6PC2	glucose-6-phosphatase, catalytic, 2
hsa-miR-520d-5p	1	0	1	0	1	1	PDE5A	phosphodiesterase 5A, cGMP-specific
hsa-miR-520d-5p	1	0	1	1	1	1	ADAM10	ADAM metallopeptidase domain 10
hsa-miR-520d-5p	1	0	1	1	1	1	ADCYAP1	adenylate cyclase activating polypeptide 1 (pituitary)
hsa-miR-520d-5p	1	0	1	1	1	1	PRDM1	PR domain containing 1, with ZNF domain
hsa-miR-520d-5p	1	0	1	0	1	1	BMPR2	bone morphogenetic protein receptor, type II (serine/threonine kinase)
hsa-miR-520d-5p	1	0	1	0	1	1	KLF9	Kruppel-like factor 9
hsa-miR-520d-5p	0	0	1	0	1	1	CAV2	caveolin 2
hsa-miR-520d-5p	0	0	1	1	0	0	CDC6	cell division cycle 6 homolog (S. cerevisiae)
hsa-miR-520d-5p	1	0	1	0	1	1	CDK6	cyclin-dependent kinase 6
hsa-miR-520d-5p	1	0	1	1	1	1	CHD2	chromodomain helicase DNA binding protein 2
hsa-miR-520d-5p	0	0	1	1	1	1	CHUK	conserved helix-loop-helix ubiquitous kinase
hsa-miR-520d-5p	0	0	1	1	0	0	CLDN4	claudin 4
hsa-miR-520d-5p	1	0	1	1	1	1	CTNND2	catenin (cadherin-associated protein), delta 2
hsa-miR-520d-5p	0	0	1	0	1	1	DOCK1	dedicator of cytokinesis 1
hsa-miR-520d-5p	1	0	1	1	1	1	DYRK1A	dual-specificity tyrosine-(Y)-phosphorylation regulated kinase 1A
hsa-miR-520d-5p	1	0	1	1	1	1	CELSR3	cadherin, EGF LAG seven-pass G-type receptor 3 (flamingo homolog, Drosophila)
hsa-miR-520d-5p	1	0	1	1	1	1	ELAVL1	ELAV (embryonic lethal, abnormal vision, Drosophila)-like 1 (Hu antigen R)
hsa-miR-520d-5p	1	0	1	1	1	1	EN1	engrailed homeobox 1
hsa-miR-520d-5p	1	0	1	1	1	1	EP300	E1A binding protein p300
hsa-miR-520d-5p	0	0	1	1	1	1	FRZB	frizzled-related protein
hsa-miR-520d-5p	1	0	1	0	1	1	B4GALT1	UDP-Gal:betaGlcNAc beta 1,4- galactosyltransferase, polypeptide 1
hsa-miR-520d-5p	1	0	1	1	1	1	GTF2B	general transcription factor IIB
hsa-miR-520d-5p	1	0	1	1	1	1	NDST1	N-deacetylase/N-sulfotransferase (heparan glucosaminyl) 1
hsa-miR-520d-5p	1	0	1	1	1	1	IRAK2	interleukin-1 receptor-associated kinase 2
hsa-miR-520d-5p	1	0	1	0	1	1	MPPED2	metallophosphoesterase domain containing 2
hsa-miR-520d-5p	1	0	1	1	1	1	ADRBK1	adrenergic, beta, receptor kinase 1
hsa-miR-520d-5p	1	0	1	1	1	1	AHNAK	AHNAK nucleoprotein
hsa-miR-520d-5p	1	0	1	1	1	1	ARF3	ADP-ribosylation factor 3
hsa-miR-520d-5p	1	0	1	0	1	1	ARNT	aryl hydrocarbon receptor nuclear translocator
hsa-miR-520d-5p	0	0	1	1	1	1	AXL	AXL receptor tyrosine kinase
hsa-miR-520d-5p	1	0	1	1	1	1	BCL6	B-cell CLL/lymphoma 6
hsa-miR-520d-5p	0	0	1	1	1	1	BTN1A1	butyrophilin, subfamily 1, member A1
hsa-miR-520d-5p	1	0	1	0	1	1	CCND2	cyclin D2
hsa-miR-520d-5p	0	0	1	1	0	0	CD19	CD19 molecule
hsa-miR-520d-5p	1	0	1	1	1	1	CDH2	cadherin 2, type 1, N-cadherin (neuronal)
hsa-miR-520d-5p	0	0	1	1	1	1	CDO1	cysteine dioxygenase, type I
hsa-miR-520d-5p	1	0	1	1	1	1	CLCN4	chloride channel, voltage-sensitive 4
hsa-miR-520d-5p	1	0	1	1	1	1	SLC31A1	solute carrier family 31 (copper transporters), member 1
hsa-miR-520d-5p	0	0	1	1	1	1	CPS1	carbamoyl-phosphate synthase 1, mitochondrial
hsa-miR-520d-5p	0	0	1	1	1	1	CSN2	casein beta
hsa-miR-520d-5p	0	0	1	1	1	1	GADD45A	growth arrest and DNA-damage-inducible, alpha
hsa-miR-520d-5p	1	0	1	1	1	1	HBEGF	heparin-binding EGF-like growth factor
hsa-miR-520d-5p	1	0	1	1	1	1	DUSP6	dual specificity phosphatase 6
hsa-miR-520d-5p	1	0	1	1	1	1	E2F3	E2F transcription factor 3
hsa-miR-520d-5p	1	0	1	1	1	1	EGR1	early growth response 1
hsa-miR-520d-5p	1	0	1	1	1	1	EIF4E	eukaryotic translation initiation factor 4E
hsa-miR-520d-5p	1	0	1	1	1	1	ENPEP	glutamyl aminopeptidase (aminopeptidase A)
hsa-miR-520d-5p	1	0	1	0	1	1	ETV6	ets variant 6
hsa-miR-520d-5p	1	0	1	1	1	1	FGF7	fibroblast growth factor 7
hsa-miR-520d-5p	1	0	1	0	1	1	FOXO1	forkhead box O1
hsa-miR-520d-5p	0	0	1	1	1	1	FLI1	Friend leukemia virus integration 1
hsa-miR-520d-5p	1	0	1	0	1	1	FUT4	fucosyltransferase 4 (alpha (1,3) fucosyltransferase, myeloid-specific)
hsa-miR-520d-5p	1	0	1	1	1	1	GAS1	growth arrest-specific 1
hsa-miR-520d-5p	1	0	1	0	1	1	GNAI1	guanine nucleotide binding protein (G protein), alpha inhibiting activity polypeptide 1
hsa-miR-520d-5p	0	0	1	1	1	1	GNB1	guanine nucleotide binding protein (G protein), beta polypeptide 1
hsa-miR-520d-5p	1	0	1	1	1	1	HNRNPA2B1	heterogeneous nuclear ribonucleoprotein A2/B1
hsa-miR-520d-5p	1	0	1	1	1	1	HOXB3	homeobox B3
hsa-miR-520d-5p	0	0	1	1	1	1	FOXN2	forkhead box N2
hsa-miR-520d-5p	1	0	1	1	1	1	ID1	inhibitor of DNA binding 1, dominant negative helix-loop-helix protein
hsa-miR-520d-5p	1	0	1	1	0	0	IHH	Indian hedgehog
hsa-miR-520d-5p	0	0	1	1	1	1	IL12B	interleukin 12B (natural killer cell stimulatory factor 2, cytotoxic lymphocyte maturation factor 2, p40)
hsa-miR-520d-5p	1	0	1	0	1	1	IRF2	interferon regulatory factor 2
hsa-miR-520d-5p	1	0	1	1	1	1	ITGA9	integrin, alpha 9
hsa-miR-520d-5p	1	0	1	1	1	1	ITGB8	integrin, beta 8
hsa-miR-520d-5p	1	0	1	1	1	1	ITPKB	inositol-trisphosphate 3-kinase B
hsa-miR-520d-5p	1	0	1	1	1	1	JUN	jun proto-oncogene
hsa-miR-520d-5p	0	0	1	1	1	1	KCNJ6	potassium inwardly-rectifying channel, subfamily J, member 6
hsa-miR-520d-5p	1	0	1	1	1	1	KDR	kinase insert domain receptor (a type III receptor tyrosine kinase)
hsa-miR-520d-5p	0	0	1	1	1	1	KLRC1	killer cell lectin-like receptor subfamily C, member 1
hsa-miR-520d-5p	0	0	1	1	1	1	KLRC2	killer cell lectin-like receptor subfamily C, member 2
hsa-miR-520d-5p	1	0	1	1	1	1	KPNA3	karyopherin alpha 3 (importin alpha 4)
hsa-miR-520d-5p	1	0	1	1	1	1	KPNA4	karyopherin alpha 4 (importin alpha 3)
hsa-miR-520d-5p	1	0	1	0	1	1	LAMC1	laminin, gamma 1 (formerly LAMB2)
hsa-miR-520d-5p	0	0	1	0	0	0	LRP5	low density lipoprotein receptor-related protein 5
hsa-miR-520d-5p	0	0	1	1	1	1	LUM	lumican
hsa-miR-520d-5p	1	0	1	0	1	1	MXD1	MAX dimerization protein 1
hsa-miR-520d-5p	1	0	1	1	1	1	MAFG	v-maf musculoaponeurotic fibrosarcoma oncogene homolog G (avian)
hsa-miR-520d-5p	1	0	1	1	1	1	MSN	moesin
hsa-miR-520d-5p	0	0	1	1	1	1	MYOD1	myogenic differentiation 1
hsa-miR-520d-5p	0	0	1	1	1	1	NOV	nephroblastoma overexpressed
hsa-miR-520d-5p	1	0	1	1	1	1	NPAS2	neuronal PAS domain protein 2
hsa-miR-520d-5p	1	0	1	1	1	1	NPTX1	neuronal pentraxin I
hsa-miR-520d-5p	0	0	1	1	0	0	NTSR1	neurotensin receptor 1 (high affinity)
hsa-miR-520d-5p	0	0	1	0	1	1	OPHN1	oligophrenin 1
hsa-miR-520d-5p	1	0	1	0	1	1	PAK2	p21 protein (Cdc42/Rac)-activated kinase 2
hsa-miR-520d-5p	1	0	1	1	1	1	PLAGL2	pleiomorphic adenoma gene-like 2
hsa-miR-520d-5p	1	0	1	0	1	1	POU3F1	POU class 3 homeobox 1
hsa-miR-520d-5p	1	0	1	1	1	1	PPP1CB	protein phosphatase 1, catalytic subunit, beta isozyme
hsa-miR-520d-5p	0	0	1	1	0	0	PPP1R8	protein phosphatase 1, regulatory subunit 8
hsa-miR-520d-5p	1	0	1	1	1	1	PPP2R1B	protein phosphatase 2, regulatory subunit A, beta
hsa-miR-520d-5p	1	0	1	1	1	1	PPP6C	protein phosphatase 6, catalytic subunit
hsa-miR-520d-5p	1	0	1	1	1	1	PRKAR2B	protein kinase, cAMP-dependent, regulatory, type II, beta
hsa-miR-520d-5p	1	0	1	0	1	1	PRKCA	protein kinase C, alpha
hsa-miR-520d-5p	1	0	1	1	1	1	MAPK6	mitogen-activated protein kinase 6
hsa-miR-520d-5p	0	0	1	1	1	1	MAP2K1	mitogen-activated protein kinase kinase 1
hsa-miR-520d-5p	1	0	1	1	1	1	PRPS1	phosphoribosyl pyrophosphate synthetase 1
hsa-miR-520d-5p	1	0	1	1	1	1	PTPRS	protein tyrosine phosphatase, receptor type, S
hsa-miR-520d-5p	1	0	1	0	1	1	RAB6A	RAB6A, member RAS oncogene family
hsa-miR-520d-5p	1	0	1	1	1	1	RAD23B	RAD23 homolog B (S. cerevisiae)
hsa-miR-520d-5p	1	0	1	0	1	1	SORT1	sortilin 1
hsa-miR-520d-5p	1	0	1	1	1	1	SALL1	sal-like 1 (Drosophila)
hsa-miR-520d-5p	0	0	1	1	1	1	XCL1	chemokine (C motif) ligand 1
hsa-miR-520d-5p	0	0	1	1	1	1	SDC2	syndecan 2
hsa-miR-520d-5p	1	0	1	1	1	1	SFRP4	secreted frizzled-related protein 4
hsa-miR-520d-5p	1	0	1	1	1	1	SHB	Src homology 2 domain containing adaptor protein B
hsa-miR-520d-5p	1	0	1	1	1	1	SNAI2	snail homolog 2 (Drosophila)
hsa-miR-520d-5p	1	0	1	1	1	1	SMARCD1	SWI/SNF related, matrix associated, actin dependent regulator of chromatin, subfamily d, member 1
hsa-miR-520d-5p	0	0	1	1	1	1	SNRPB2	small nuclear ribonucleoprotein polypeptide B
hsa-miR-520d-5p	0	0	1	1	0	0	SNRPC	small nuclear ribonucleoprotein polypeptide C
hsa-miR-520d-5p	1	0	1	0	1	1	SOX4	SRY (sex determining region Y)-box 4
hsa-miR-520d-5p	1	0	1	0	1	1	SOX11	SRY (sex determining region Y)-box 11
hsa-miR-520d-5p	1	0	1	1	1	1	SRF	serum response factor (c-fos serum response element-binding transcription factor)
hsa-miR-520d-5p	0	0	1	1	1	1	STAT5A	signal transducer and activator of transcription 5A
hsa-miR-520d-5p	0	0	1	1	1	1	STIM1	stromal interaction molecule 1
hsa-miR-520d-5p	0	0	1	1	1	1	XCL2	chemokine (C motif) ligand 2
hsa-miR-520d-5p	1	0	1	1	1	1	TAF4	TAF4 RNA polymerase II, TATA box binding protein (TBP)-associated factor, 135kDa
hsa-miR-520d-5p	1	0	1	0	1	1	TAL1	T-cell acute lymphocytic leukemia 1
hsa-miR-520d-5p	0	0	1	0	1	1	TCEB3	transcription elongation factor B (SIII), polypeptide 3 (110kDa, elongin A)
hsa-miR-520d-5p	1	0	1	1	1	1	TFAP4	transcription factor AP-4 (activating enhancer binding protein 4)
hsa-miR-520d-5p	1	0	1	1	1	1	TGFB3	transforming growth factor, beta 3
hsa-miR-520d-5p	1	0	1	0	1	1	THBS1	thrombospondin 1
hsa-miR-520d-5p	1	0	1	1	1	1	TIAM1	T-cell lymphoma invasion and metastasis 1
hsa-miR-520d-5p	1	0	1	0	1	1	SEC62	SEC62 homolog (S. cerevisiae)
hsa-miR-520d-5p	1	0	1	1	1	1	TOP1	topoisomerase (DNA) I
hsa-miR-520d-5p	0	0	1	1	1	1	TTK	TTK protein kinase
hsa-miR-520d-5p	0	0	1	1	0	0	HIRA	HIR histone cell cycle regulation defective homolog A (S. cerevisiae)
hsa-miR-520d-5p	1	0	1	1	1	1	UBE2D3	ubiquitin-conjugating enzyme E2D 3
hsa-miR-520d-5p	1	0	1	1	1	1	UBE2N	ubiquitin-conjugating enzyme E2N
hsa-miR-520d-5p	1	0	1	1	1	1	YY1	YY1 transcription factor
hsa-miR-520d-5p	0	0	1	0	1	1	ZFY	zinc finger protein, Y-linked
hsa-miR-520d-5p	1	0	1	0	1	1	ZIC1	Zic family member 1
hsa-miR-520d-5p	1	0	1	1	1	1	ZIC3	Zic family member 3
hsa-miR-520d-5p	1	0	1	1	1	1	HMGA2	high mobility group AT-hook 2
hsa-miR-520d-5p	1	0	1	1	1	1	NRIP1	nuclear receptor interacting protein 1
hsa-miR-520d-5p	0	0	1	1	1	1	PIP5K1A	phosphatidylinositol-4-phosphate 5-kinase, type I, alpha
hsa-miR-520d-5p	0	0	1	1	1	1	SOAT2	sterol O-acyltransferase 2
hsa-miR-520d-5p	0	0	1	1	1	1	PEX3	peroxisomal biogenesis factor 3
hsa-miR-520d-5p	0	0	1	1	1	1	ITGA10	integrin, alpha 10
hsa-miR-520d-5p	1	0	1	1	0	0	TCAP	titin-cap (telethonin)
hsa-miR-520d-5p	1	0	1	1	1	1	TNFSF11	tumor necrosis factor (ligand) superfamily, member 11
hsa-miR-520d-5p	0	0	1	1	1	1	SLC25A12	solute carrier family 25 (aspartate/glutamate carrier), member 12
hsa-miR-520d-5p	1	0	1	0	1	1	TNKS	tankyrase, TRF1-interacting ankyrin-related ADP-ribose polymerase
hsa-miR-520d-5p	1	0	1	0	1	1	IRS2	insulin receptor substrate 2
hsa-miR-520d-5p	0	0	1	1	0	0	EIF3F	eukaryotic translation initiation factor 3, subunit F
hsa-miR-520d-5p	1	0	1	1	1	1	NR5A2	nuclear receptor subfamily 5, group A, member 2
hsa-miR-520d-5p	0	0	1	1	1	1	SUCLA2	succinate-CoA ligase, ADP-forming, beta subunit
hsa-miR-520d-5p	0	0	1	1	1	1	TRIM24	tripartite motif containing 24
hsa-miR-520d-5p	1	0	1	1	1	1	IQGAP1	IQ motif containing GTPase activating protein 1
hsa-miR-520d-5p	1	0	1	1	1	1	KAT2B	K(lysine) acetyltransferase 2B
hsa-miR-520d-5p	0	0	1	1	1	1	PRPF4B	PRP4 pre-mRNA processing factor 4 homolog B (yeast)
hsa-miR-520d-5p	1	0	1	0	1	1	ST13	suppression of tumorigenicity 13 (colon carcinoma) (Hsp70 interacting protein)
hsa-miR-520d-5p	1	0	1	1	1	1	KALRN	kalirin, RhoGEF kinase
hsa-miR-520d-5p	0	0	1	1	1	1	RNF8	ring finger protein 8, E3 ubiquitin protein ligase
hsa-miR-520d-5p	0	0	1	1	1	1	UBA3	ubiquitin-like modifier activating enzyme 3
hsa-miR-520d-5p	1	0	1	1	1	1	BTAF1	BTAF1 RNA polymerase II, B-TFIID transcription factor-associated, 170kDa (Mot1 homolog, S. cerevisiae)
hsa-miR-520d-5p	1	0	1	1	1	1	ACOX1	acyl-CoA oxidase 1, palmitoyl
hsa-miR-520d-5p	1	0	1	0	1	1	PLK3	polo-like kinase 3
hsa-miR-520d-5p	1	0	1	1	1	1	CTSS	cathepsin S
hsa-miR-520d-5p	1	0	1	0	1	1	E2F2	E2F transcription factor 2
hsa-miR-520d-5p	1	0	1	1	1	1	GMFB	glia maturation factor, beta
hsa-miR-520d-5p	1	0	1	1	1	1	PPP2CB	protein phosphatase 2, catalytic subunit, beta isozyme
hsa-miR-520d-5p	1	0	1	0	1	1	SLC1A2	solute carrier family 1 (glial high affinity glutamate transporter), member 2
hsa-miR-520d-5p	0	0	1	0	1	1	SLC1A3	solute carrier family 1 (glial high affinity glutamate transporter), member 3
hsa-miR-520d-5p	1	0	1	1	1	1	SOCS6	suppressor of cytokine signaling 6
hsa-miR-520d-5p	0	0	1	1	1	1	SEP15	15 kDa selenoprotein
hsa-miR-520d-5p	1	0	1	0	1	1	AKAP6	A kinase (PRKA) anchor protein 6
hsa-miR-520d-5p	0	0	1	0	1	1	CYTIP	cytohesin 1 interacting protein
hsa-miR-520d-5p	0	0	1	1	1	1	CBLN1	cerebellin 1 precursor
hsa-miR-520d-5p	1	0	1	1	1	1	DACH1	dachshund homolog 1 (Drosophila)
hsa-miR-520d-5p	1	0	1	1	1	1	DBN1	drebrin 1
hsa-miR-520d-5p	1	0	1	1	1	1	EGR3	early growth response 3
hsa-miR-520d-5p	1	0	1	0	1	1	FGF5	fibroblast growth factor 5
hsa-miR-520d-5p	1	0	1	0	1	1	ARHGAP35	Rho GTPase activating protein 35
hsa-miR-520d-5p	0	0	1	1	1	1	HOXB7	homeobox B7
hsa-miR-520d-5p	0	0	1	0	1	1	KCNQ3	potassium voltage-gated channel, KQT-like subfamily, member 3
hsa-miR-520d-5p	1	0	1	1	1	1	KIF11	kinesin family member 11
hsa-miR-520d-5p	1	0	1	1	0	0	ROR2	receptor tyrosine kinase-like orphan receptor 2
hsa-miR-520d-5p	0	0	1	1	1	1	CDK2AP1	cyclin-dependent kinase 2 associated protein 1
hsa-miR-520d-5p	1	0	1	1	1	1	RAB11A	RAB11A, member RAS oncogene family
hsa-miR-520d-5p	0	0	1	1	1	1	RRP9	ribosomal RNA processing 9, small subunit (SSU) processome component, homolog (yeast)
hsa-miR-520d-5p	0	0	1	0	1	1	CXorf1	chromosome X open reading frame 1
hsa-miR-520d-5p	1	0	1	1	1	1	MAP3K13	mitogen-activated protein kinase kinase kinase 13
hsa-miR-520d-5p	1	0	1	1	1	1	DCLK1	doublecortin-like kinase 1
hsa-miR-520d-5p	1	0	1	1	1	1	XPR1	xenotropic and polytropic retrovirus receptor 1
hsa-miR-520d-5p	0	0	1	1	1	1	MTA2	metastasis associated 1 family, member 2
hsa-miR-520d-5p	1	0	1	1	1	1	RPS6KA5	ribosomal protein S6 kinase, 90kDa, polypeptide 5
hsa-miR-520d-5p	1	0	1	1	1	1	B4GALT5	UDP-Gal:betaGlcNAc beta 1,4- galactosyltransferase, polypeptide 5
hsa-miR-520d-5p	1	0	1	1	1	1	KIF3B	kinesin family member 3B
hsa-miR-520d-5p	1	0	1	1	1	1	ZFYVE9	zinc finger, FYVE domain containing 9
hsa-miR-520d-5p	0	0	1	1	1	1	TJP2	tight junction protein 2
hsa-miR-520d-5p	1	0	1	1	1	1	ONECUT2	one cut homeobox 2
hsa-miR-520d-5p	0	0	1	1	1	1	ATP6V1G1	ATPase, H+ transporting, lysosomal 13kDa, V1 subunit G1
hsa-miR-520d-5p	1	0	1	0	1	1	DOCK3	dedicator of cytokinesis 3
hsa-miR-520d-5p	1	0	1	1	1	1	GABRE	gamma-aminobutyric acid (GABA) A receptor, epsilon
hsa-miR-520d-5p	1	0	1	1	1	1	JARID2	jumonji, AT rich interactive domain 2
hsa-miR-520d-5p	1	0	1	1	1	1	KCNJ8	potassium inwardly-rectifying channel, subfamily J, member 8
hsa-miR-520d-5p	1	0	1	0	1	1	KIF5A	kinesin family member 5A
hsa-miR-520d-5p	1	0	1	0	1	1	KRAS	v-Ki-ras2 Kirsten rat sarcoma viral oncogene homolog
hsa-miR-520d-5p	0	0	1	1	1	1	PRCP	prolylcarboxypeptidase (angiotensinase C)
hsa-miR-520d-5p	0	0	1	1	1	1	PTH2R	parathyroid hormone 2 receptor
hsa-miR-520d-5p	0	0	1	1	0	0	RAPSN	receptor-associated protein of the synapse
hsa-miR-520d-5p	1	0	1	0	1	1	SEL1L	sel-1 suppressor of lin-12-like (C. elegans)
hsa-miR-520d-5p	1	0	1	1	1	1	TLE1	transducin-like enhancer of split 1 (E(sp1) homolog, Drosophila)
hsa-miR-520d-5p	1	0	1	1	1	1	OXSR1	oxidative-stress responsive 1
hsa-miR-520d-5p	1	0	1	0	1	1	NUP153	nucleoporin 153kDa
hsa-miR-520d-5p	1	0	1	1	0	0	BCL3	B-cell CLL/lymphoma 3
hsa-miR-520d-5p	1	0	1	1	1	1	BMI1	BMI1 polycomb ring finger oncogene
hsa-miR-520d-5p	1	0	1	0	1	1	CALM3	calmodulin 3 (phosphorylase kinase, delta)
hsa-miR-520d-5p	1	0	1	0	1	1	CEBPD	CCAAT/enhancer binding protein (C/EBP), delta
hsa-miR-520d-5p	1	0	1	1	1	1	FOXN3	forkhead box N3
hsa-miR-520d-5p	1	0	1	1	1	1	DCC	deleted in colorectal carcinoma
hsa-miR-520d-5p	1	0	1	0	1	1	DLX6	distal-less homeobox 6
hsa-miR-520d-5p	0	0	1	0	1	1	EPHA3	EPH receptor A3
hsa-miR-520d-5p	1	0	1	1	1	1	GABPB1	GA binding protein transcription factor, beta subunit 1
hsa-miR-520d-5p	0	0	1	1	0	0	GNL1	guanine nucleotide binding protein-like 1
hsa-miR-520d-5p	1	0	1	1	1	1	GPM6A	glycoprotein M6A
hsa-miR-520d-5p	0	0	1	1	1	1	PDIA3	protein disulfide isomerase family A, member 3
hsa-miR-520d-5p	0	0	1	1	1	1	H1F0	H1 histone family, member 0
hsa-miR-520d-5p	1	0	1	1	0	0	JUND	jun D proto-oncogene
hsa-miR-520d-5p	0	0	1	1	1	1	NUP98	nucleoporin 98kDa
hsa-miR-520d-5p	0	0	1	1	1	1	PPP1R3C	protein phosphatase 1, regulatory subunit 3C
hsa-miR-520d-5p	1	0	1	0	1	1	PRKAB2	protein kinase, AMP-activated, beta 2 non-catalytic subunit
hsa-miR-520d-5p	1	0	1	0	1	1	PRKCE	protein kinase C, epsilon
hsa-miR-520d-5p	1	0	1	1	0	0	SALL2	sal-like 2 (Drosophila)
hsa-miR-520d-5p	0	0	1	1	1	1	SEPP1	selenoprotein P, plasma, 1
hsa-miR-520d-5p	0	0	1	1	1	1	SKIL	SKI-like oncogene
hsa-miR-520d-5p	1	0	1	0	1	1	CCDC6	coiled-coil domain containing 6
hsa-miR-520d-5p	0	0	1	1	1	1	FOSL1	FOS-like antigen 1
hsa-miR-520d-5p	0	0	1	1	1	1	PAPSS1	3'-phosphoadenosine 5'-phosphosulfate synthase 1
hsa-miR-520d-5p	0	0	1	1	1	1	SMC3	structural maintenance of chromosomes 3
hsa-miR-520d-5p	1	0	1	1	1	1	GABBR2	gamma-aminobutyric acid (GABA) B receptor, 2
hsa-miR-520d-5p	1	0	1	0	0	0	FRAT1	frequently rearranged in advanced T-cell lymphomas
hsa-miR-520d-5p	1	0	1	1	1	1	ITGA3	integrin, alpha 3 (antigen CD49C, alpha 3 subunit of VLA-3 receptor)
hsa-miR-520d-5p	1	0	1	1	1	1	ABCA1	ATP-binding cassette, sub-family A (ABC1), member 1
hsa-miR-520d-5p	0	0	1	1	1	1	HES1	hairy and enhancer of split 1, (Drosophila)
hsa-miR-520d-5p	1	0	1	1	1	1	INSIG1	insulin induced gene 1
hsa-miR-520d-5p	0	0	1	1	1	1	CCL8	chemokine (C-C motif) ligand 8
hsa-miR-520d-5p	1	0	1	1	1	1	LHFP	lipoma HMGIC fusion partner
hsa-miR-520d-5p	0	0	1	1	1	1	TXNDC9	thioredoxin domain containing 9
hsa-miR-520d-5p	1	0	1	1	1	1	PRKD3	protein kinase D3
hsa-miR-520d-5p	1	0	1	0	1	1	DCAF7	DDB1 and CUL4 associated factor 7
hsa-miR-520d-5p	1	0	1	1	1	1	SRRM1	serine/arginine repetitive matrix 1
hsa-miR-520d-5p	1	0	1	0	1	1	SPRY3	sprouty homolog 3 (Drosophila)
hsa-miR-520d-5p	1	0	1	1	1	1	MAN1A1	mannosidase, alpha, class 1A, member 1
hsa-miR-520d-5p	1	0	1	1	1	1	MAT2A	methionine adenosyltransferase II, alpha
hsa-miR-520d-5p	1	0	1	1	1	1	MEOX2	mesenchyme homeobox 2
hsa-miR-520d-5p	0	0	1	1	1	1	MFAP3	microfibrillar-associated protein 3
hsa-miR-520d-5p	1	0	1	1	1	1	FOXO4	forkhead box O4
hsa-miR-520d-5p	1	0	1	1	1	1	MTF1	metal-regulatory transcription factor 1
hsa-miR-520d-5p	1	0	1	1	1	1	LIPG	lipase, endothelial
hsa-miR-520d-5p	1	0	1	1	1	1	CDC42BPB	CDC42 binding protein kinase beta (DMPK-like)
hsa-miR-520d-5p	1	0	1	0	1	1	HDAC4	histone deacetylase 4
hsa-miR-520d-5p	1	0	1	1	1	1	SPON1	spondin 1, extracellular matrix protein
hsa-miR-520d-5p	1	0	1	1	1	1	TMEM50B	transmembrane protein 50B
hsa-miR-520d-5p	1	0	1	1	1	1	CAPZA1	capping protein (actin filament) muscle Z-line, alpha 1
hsa-miR-520d-5p	1	0	1	1	1	1	NCK1	NCK adaptor protein 1
hsa-miR-520d-5p	1	0	1	1	1	1	NEFL	neurofilament, light polypeptide
hsa-miR-520d-5p	1	0	1	1	1	1	NR4A2	nuclear receptor subfamily 4, group A, member 2
hsa-miR-520d-5p	1	0	1	1	1	1	ENPP1	ectonucleotide pyrophosphatase/phosphodiesterase 1
hsa-miR-520d-5p	1	0	1	1	1	1	PFKFB2	6-phosphofructo-2-kinase/fructose-2,6-biphosphatase 2
hsa-miR-520d-5p	1	0	1	0	1	1	PPP1R2	protein phosphatase 1, regulatory (inhibitor) subunit 2
hsa-miR-520d-5p	0	0	1	1	1	1	PPP2R5A	protein phosphatase 2, regulatory subunit B', alpha
hsa-miR-520d-5p	1	0	1	1	1	1	PRKAA1	protein kinase, AMP-activated, alpha 1 catalytic subunit
hsa-miR-520d-5p	1	0	1	1	1	1	PRKAB1	protein kinase, AMP-activated, beta 1 non-catalytic subunit
hsa-miR-520d-5p	1	0	1	1	1	1	PKN2	protein kinase N2
hsa-miR-520d-5p	1	0	1	1	1	1	RANBP2	RAN binding protein 2
hsa-miR-520d-5p	1	0	1	0	1	1	SRSF6	serine/arginine-rich splicing factor 6
hsa-miR-520d-5p	0	0	1	1	1	1	TNFAIP2	tumor necrosis factor, alpha-induced protein 2
hsa-miR-520d-5p	0	0	1	1	1	1	PGRMC2	progesterone receptor membrane component 2
hsa-miR-520d-5p	1	0	1	1	1	1	TUBGCP3	tubulin, gamma complex associated protein 3
hsa-miR-520d-5p	0	0	1	1	1	1	UBE2E3	ubiquitin-conjugating enzyme E2E 3
hsa-miR-520d-5p	1	0	1	1	1	1	NXF1	nuclear RNA export factor 1
hsa-miR-520d-5p	1	0	1	0	1	1	APPBP2	amyloid beta precursor protein (cytoplasmic tail) binding protein 2
hsa-miR-520d-5p	1	0	1	1	1	1	NEBL	nebulette
hsa-miR-520d-5p	1	0	1	1	1	1	ANP32B	acidic (leucine-rich) nuclear phosphoprotein 32 family, member B
hsa-miR-520d-5p	0	0	1	1	1	1	HBXIP	hepatitis B virus x interacting protein
hsa-miR-520d-5p	1	0	1	0	1	1	GNAI3	guanine nucleotide binding protein (G protein), alpha inhibiting activity polypeptide 3
hsa-miR-520d-5p	1	0	1	0	1	1	PTPRE	protein tyrosine phosphatase, receptor type, E
hsa-miR-520d-5p	0	0	1	0	1	1	SLC16A2	solute carrier family 16, member 2 (thyroid hormone transporter)
hsa-miR-520d-5p	0	0	1	1	1	1	CLCA2	chloride channel accessory 2
hsa-miR-520d-5p	1	0	1	1	1	1	KHDRBS1	KH domain containing, RNA binding, signal transduction associated 1
hsa-miR-520d-5p	1	0	1	0	1	1	API5	apoptosis inhibitor 5
hsa-miR-520d-5p	0	0	1	1	0	0	SLC12A7	solute carrier family 12 (potassium/chloride transporters), member 7
hsa-miR-520d-5p	1	0	1	1	1	1	SRSF10	serine/arginine-rich splicing factor 10
hsa-miR-520d-5p	1	0	1	1	1	1	ZBTB6	zinc finger and BTB domain containing 6
hsa-miR-520d-5p	1	0	1	1	1	1	MMP24	matrix metallopeptidase 24 (membrane-inserted)
hsa-miR-520d-5p	1	0	1	1	1	1	HIVEP2	human immunodeficiency virus type I enhancer binding protein 2
hsa-miR-520d-5p	1	0	1	1	0	0	PSKH1	protein serine kinase H1
hsa-miR-520d-5p	1	0	1	1	1	1	SNTB2	syntrophin, beta 2 (dystrophin-associated protein A1, 59kDa, basic component 2)
hsa-miR-520d-5p	0	0	1	1	1	1	SYPL1	synaptophysin-like 1
hsa-miR-520d-5p	1	0	1	0	1	1	SYNGAP1	synaptic Ras GTPase activating protein 1
hsa-miR-520d-5p	1	0	1	1	1	1	PRDX3	peroxiredoxin 3
hsa-miR-520d-5p	1	0	1	1	1	1	SF3A3	splicing factor 3a, subunit 3, 60kDa
hsa-miR-520d-5p	0	0	1	1	0	0	HNRNPA0	heterogeneous nuclear ribonucleoprotein A0
hsa-miR-520d-5p	0	0	1	1	1	1	RAB40B	RAB40B, member RAS oncogene family
hsa-miR-520d-5p	0	0	1	1	1	1	PKIA	protein kinase (cAMP-dependent, catalytic) inhibitor alpha
hsa-miR-520d-5p	0	0	1	1	1	1	TMED10	transmembrane emp24-like trafficking protein 10 (yeast)
hsa-miR-520d-5p	0	0	1	1	1	1	HOXA7	homeobox A7
hsa-miR-520d-5p	1	0	1	1	1	1	PRRX1	paired related homeobox 1
hsa-miR-520d-5p	0	0	1	0	1	1	PSG1	pregnancy specific beta-1-glycoprotein 1
hsa-miR-520d-5p	0	0	1	1	1	1	RLN1	relaxin 1
hsa-miR-520d-5p	1	0	1	1	1	1	RP2	retinitis pigmentosa 2 (X-linked recessive)
hsa-miR-520d-5p	0	0	1	1	1	1	SNRPD1	small nuclear ribonucleoprotein D1 polypeptide 16kDa
hsa-miR-520d-5p	0	0	1	1	0	0	RNF113A	ring finger protein 113A
hsa-miR-520d-5p	1	0	1	1	1	1	NR4A3	nuclear receptor subfamily 4, group A, member 3
hsa-miR-520d-5p	1	0	1	0	1	1	WASF2	WAS protein family, member 2
hsa-miR-520d-5p	1	0	1	1	1	1	ABHD2	abhydrolase domain containing 2
hsa-miR-520d-5p	1	0	1	1	1	1	ADAMTS5	ADAM metallopeptidase with thrombospondin type 1 motif, 5
hsa-miR-520d-5p	1	0	1	1	1	1	UBL3	ubiquitin-like 3
hsa-miR-520d-5p	1	0	1	1	1	1	TMF1	TATA element modulatory factor 1
hsa-miR-520d-5p	1	0	1	1	1	1	ZIC2	Zic family member 2
hsa-miR-520d-5p	1	0	1	1	1	1	ZNF81	zinc finger protein 81
hsa-miR-520d-5p	1	0	1	1	1	1	VEZF1	vascular endothelial zinc finger 1
hsa-miR-520d-5p	0	0	1	0	1	1	ZXDB	zinc finger, X-linked, duplicated B
hsa-miR-520d-5p	0	0	1	1	0	0	SLC14A2	solute carrier family 14 (urea transporter), member 2
hsa-miR-520d-5p	1	0	1	0	1	1	PRSS23	protease, serine, 23
hsa-miR-520d-5p	1	0	1	1	1	1	ERLIN2	ER lipid raft associated 2
hsa-miR-520d-5p	1	0	1	0	1	1	CHP1	calcineurin-like EF hand protein 1
hsa-miR-520d-5p	0	0	1	1	1	1	STXBP3	syntaxin binding protein 3
hsa-miR-520d-5p	1	0	1	1	1	1	CBX3	chromobox homolog 3
hsa-miR-520d-5p	1	0	1	1	1	1	ZNF236	zinc finger protein 236
hsa-miR-520d-5p	1	0	1	1	1	1	TARDBP	TAR DNA binding protein
hsa-miR-520d-5p	1	0	1	1	1	1	ICOS	inducible T-cell co-stimulator
hsa-miR-520d-5p	1	0	1	1	1	1	APPL1	adaptor protein, phosphotyrosine interaction, PH domain and leucine zipper containing 1
hsa-miR-520d-5p	0	0	1	1	1	1	CHIC2	cysteine-rich hydrophobic domain 2
hsa-miR-520d-5p	1	0	1	1	1	1	FBXL3	F-box and leucine-rich repeat protein 3
hsa-miR-520d-5p	0	0	1	1	1	1	HARS2	histidyl-tRNA synthetase 2, mitochondrial
hsa-miR-520d-5p	1	0	1	1	1	1	MGEA5	meningioma expressed antigen 5 (hyaluronidase)
hsa-miR-520d-5p	1	0	1	1	1	1	RYBP	RING1 and YY1 binding protein
hsa-miR-520d-5p	0	0	1	1	0	0	SNW1	SNW domain containing 1
hsa-miR-520d-5p	1	0	1	1	1	1	RHOQ	ras homolog family member Q
hsa-miR-520d-5p	1	0	1	1	1	1	HEY2	hairy/enhancer-of-split related with YRPW motif 2
hsa-miR-520d-5p	1	0	1	1	1	1	HS2ST1	heparan sulfate 2-O-sulfotransferase 1
hsa-miR-520d-5p	1	0	1	0	1	1	PXDN	peroxidasin homolog (Drosophila)
hsa-miR-520d-5p	1	0	1	0	1	1	G3BP2	GTPase activating protein (SH3 domain) binding protein 2
hsa-miR-520d-5p	1	0	1	1	1	1	KIN	KIN, antigenic determinant of recA protein homolog (mouse)
hsa-miR-520d-5p	1	0	1	1	1	1	MMD	monocyte to macrophage differentiation-associated
hsa-miR-520d-5p	1	0	1	1	1	1	NUFIP1	nuclear fragile X mental retardation protein interacting protein 1
hsa-miR-520d-5p	1	0	1	0	1	1	BLOC1S6	biogenesis of lysosomal organelles complex-1, subunit 6, pallidin
hsa-miR-520d-5p	0	0	1	0	1	1	TLL1	tolloid-like 1
hsa-miR-520d-5p	0	0	1	1	1	1	UCK2	uridine-cytidine kinase 2
hsa-miR-520d-5p	1	0	1	0	1	1	FLRT2	fibronectin leucine rich transmembrane protein 2
hsa-miR-520d-5p	1	0	1	1	1	1	PPARGC1A	peroxisome proliferator-activated receptor gamma, coactivator 1 alpha
hsa-miR-520d-5p	0	0	1	1	0	0	FLRT1	fibronectin leucine rich transmembrane protein 1
hsa-miR-520d-5p	1	0	1	1	1	1	SLC25A24	solute carrier family 25 (mitochondrial carrier; phosphate carrier), member 24
hsa-miR-520d-5p	0	0	1	0	1	1	EMR2	egf-like module containing, mucin-like, hormone receptor-like 2
hsa-miR-520d-5p	1	0	1	1	1	1	LAMP2	lysosomal-associated membrane protein 2
hsa-miR-520d-5p	1	0	1	1	1	1	WDR37	WD repeat domain 37
hsa-miR-520d-5p	1	0	1	0	1	1	OSTM1	osteopetrosis associated transmembrane protein 1
hsa-miR-520d-5p	1	0	1	0	1	1	CHMP2B	charged multivesicular body protein 2B
hsa-miR-520d-5p	1	0	1	0	1	1	C16orf72	chromosome 16 open reading frame 72
hsa-miR-520d-5p	0	0	1	1	1	1	NUDT5	nudix (nucleoside diphosphate linked moiety X)-type motif 5
hsa-miR-520d-5p	0	0	1	1	1	1	TM4SF1	transmembrane 4 L six family member 1
hsa-miR-520d-5p	1	0	1	1	1	1	C11orf58	chromosome 11 open reading frame 58
hsa-miR-520d-5p	1	0	1	1	1	1	MAPRE2	microtubule-associated protein, RP/EB family, member 2
hsa-miR-520d-5p	0	0	1	1	1	1	IL1RAPL1	interleukin 1 receptor accessory protein-like 1
hsa-miR-520d-5p	0	0	1	1	0	0	OLFM1	olfactomedin 1
hsa-miR-520d-5p	1	0	1	1	0	0	BRD4	bromodomain containing 4
hsa-miR-520d-5p	1	0	1	1	1	1	LEMD3	LEM domain containing 3
hsa-miR-520d-5p	1	0	1	1	1	1	PATZ1	POZ (BTB) and AT hook containing zinc finger 1
hsa-miR-520d-5p	1	0	1	1	1	1	CORO1C	coronin, actin binding protein, 1C
hsa-miR-520d-5p	1	0	1	1	1	1	SLC7A11	solute carrier family 7 (anionic amino acid transporter light chain, xc- system), member 11
hsa-miR-520d-5p	0	0	1	0	1	1	EID1	EP300 interacting inhibitor of differentiation 1
hsa-miR-520d-5p	0	0	1	1	1	1	ZNF318	zinc finger protein 318
hsa-miR-520d-5p	1	0	1	1	1	1	LHX6	LIM homeobox 6
hsa-miR-520d-5p	1	0	1	0	1	1	RNF11	ring finger protein 11
hsa-miR-520d-5p	0	0	1	1	1	1	LAMP3	lysosomal-associated membrane protein 3
hsa-miR-520d-5p	0	0	1	1	1	1	TSPAN13	tetraspanin 13
hsa-miR-520d-5p	0	0	1	1	1	1	CLUL1	clusterin-like 1 (retinal)
hsa-miR-520d-5p	1	0	1	1	1	1	DKK2	dickkopf 2 homolog (Xenopus laevis)
hsa-miR-520d-5p	1	0	1	1	1	1	AFF4	AF4/FMR2 family, member 4
hsa-miR-520d-5p	1	0	1	1	1	1	SERP1	stress-associated endoplasmic reticulum protein 1
hsa-miR-520d-5p	1	0	1	1	1	1	TNFRSF21	tumor necrosis factor receptor superfamily, member 21
hsa-miR-520d-5p	1	0	1	1	1	1	PDCD4	programmed cell death 4 (neoplastic transformation inhibitor)
hsa-miR-520d-5p	1	0	1	1	1	1	KLHL20	kelch-like 20 (Drosophila)
hsa-miR-520d-5p	0	0	1	1	1	1	LSM3	LSM3 homolog, U6 small nuclear RNA associated (S. cerevisiae)
hsa-miR-520d-5p	1	0	1	1	1	1	CNOT2	CCR4-NOT transcription complex, subunit 2
hsa-miR-520d-5p	0	0	1	1	1	1	ARFGAP3	ADP-ribosylation factor GTPase activating protein 3
hsa-miR-520d-5p	1	0	1	1	1	1	ERO1L	ERO1-like (S. cerevisiae)
hsa-miR-520d-5p	1	0	1	1	1	1	SLC40A1	solute carrier family 40 (iron-regulated transporter), member 1
hsa-miR-520d-5p	0	0	1	1	1	1	SOX8	SRY (sex determining region Y)-box 8
hsa-miR-520d-5p	1	0	1	1	1	1	EHD3	EH-domain containing 3
hsa-miR-520d-5p	0	0	1	1	1	1	PSME4	proteasome (prosome, macropain) activator subunit 4
hsa-miR-520d-5p	1	0	1	0	1	1	SH3PXD2A	SH3 and PX domains 2A
hsa-miR-520d-5p	1	0	1	1	1	1	RALGPS1	Ral GEF with PH domain and SH3 binding motif 1
hsa-miR-520d-5p	1	0	1	0	1	1	BZW1	basic leucine zipper and W2 domains 1
hsa-miR-520d-5p	1	0	1	0	1	1	EDEM1	ER degradation enhancer, mannosidase alpha-like 1
hsa-miR-520d-5p	1	0	1	1	1	1	ULK2	unc-51-like kinase 2 (C. elegans)
hsa-miR-520d-5p	1	0	1	0	1	1	TOX	thymocyte selection-associated high mobility group box
hsa-miR-520d-5p	1	0	1	0	1	1	MLEC	malectin
hsa-miR-520d-5p	1	0	1	1	1	1	SPCS2	signal peptidase complex subunit 2 homolog (S. cerevisiae)
hsa-miR-520d-5p	1	0	1	0	1	1	SERTAD2	SERTA domain containing 2
hsa-miR-520d-5p	0	0	1	0	1	1	DHCR24	24-dehydrocholesterol reductase
hsa-miR-520d-5p	0	0	1	0	1	1	EPM2AIP1	EPM2A (laforin) interacting protein 1
hsa-miR-520d-5p	1	0	1	0	1	1	PJA2	praja ring finger 2, E3 ubiquitin protein ligase
hsa-miR-520d-5p	1	0	1	1	1	1	TOMM70A	translocase of outer mitochondrial membrane 70 homolog A (S. cerevisiae)
hsa-miR-520d-5p	1	0	1	1	1	1	TBC1D4	TBC1 domain family, member 4
hsa-miR-520d-5p	1	0	1	1	1	1	HELZ	helicase with zinc finger
hsa-miR-520d-5p	0	0	1	1	1	1	ADNP2	ADNP homeobox 2
hsa-miR-520d-5p	1	0	1	1	1	1	CHSY1	chondroitin sulfate synthase 1
hsa-miR-520d-5p	1	0	1	0	1	1	ICK	intestinal cell (MAK-like) kinase
hsa-miR-520d-5p	1	0	1	1	1	1	SPAST	spastin
hsa-miR-520d-5p	1	0	1	1	1	1	DIP2C	DIP2 disco-interacting protein 2 homolog C (Drosophila)
hsa-miR-520d-5p	1	0	1	1	1	1	SORCS3	sortilin-related VPS10 domain containing receptor 3
hsa-miR-520d-5p	1	0	1	0	1	1	WDFY3	WD repeat and FYVE domain containing 3
hsa-miR-520d-5p	1	0	1	1	1	1	RAB21	RAB21, member RAS oncogene family
hsa-miR-520d-5p	1	0	1	1	1	1	SPEN	spen homolog, transcriptional regulator (Drosophila)
hsa-miR-520d-5p	1	0	1	1	1	1	FBXO21	F-box protein 21
hsa-miR-520d-5p	0	0	1	1	1	1	MYO16	myosin XVI
hsa-miR-520d-5p	1	0	1	0	1	1	PDS5B	PDS5, regulator of cohesion maintenance, homolog B (S. cerevisiae)
hsa-miR-520d-5p	1	0	1	0	1	1	NMNAT2	nicotinamide nucleotide adenylyltransferase 2
hsa-miR-520d-5p	1	0	1	0	1	1	ZNF609	zinc finger protein 609
hsa-miR-520d-5p	0	0	1	1	0	0	NUP205	nucleoporin 205kDa
hsa-miR-520d-5p	1	0	1	1	1	1	RTF1	Rtf1, Paf1/RNA polymerase II complex component, homolog (S. cerevisiae)
hsa-miR-520d-5p	1	0	1	1	1	1	GPD1L	glycerol-3-phosphate dehydrogenase 1-like
hsa-miR-520d-5p	0	0	1	1	1	1	ARL6IP1	ADP-ribosylation factor-like 6 interacting protein 1
hsa-miR-520d-5p	1	0	1	1	1	1	PRRC2C	proline-rich coiled-coil 2C
hsa-miR-520d-5p	1	0	1	1	1	1	SIK2	salt-inducible kinase 2
hsa-miR-520d-5p	1	0	1	1	1	1	NUP160	nucleoporin 160kDa
hsa-miR-520d-5p	1	0	1	1	1	1	PHF15	PHD finger protein 15
hsa-miR-520d-5p	1	0	1	0	1	1	ARHGEF12	Rho guanine nucleotide exchange factor (GEF) 12
hsa-miR-520d-5p	1	0	1	0	1	1	LARP1	La ribonucleoprotein domain family, member 1
hsa-miR-520d-5p	1	0	1	0	1	1	SRGAP2	SLIT-ROBO Rho GTPase activating protein 2
hsa-miR-520d-5p	0	0	1	0	1	1	ZDHHC17	zinc finger, DHHC-type containing 17
hsa-miR-520d-5p	0	0	1	1	1	1	ADNP	activity-dependent neuroprotector homeobox
hsa-miR-520d-5p	1	0	1	1	1	1	RIMBP2	RIMS binding protein 2
hsa-miR-520d-5p	1	0	1	1	1	1	MORC3	MORC family CW-type zinc finger 3
hsa-miR-520d-5p	0	0	1	0	1	1	TMEM158	transmembrane protein 158 (gene/pseudogene)
hsa-miR-520d-5p	1	0	1	1	1	1	CNOT6	CCR4-NOT transcription complex, subunit 6
hsa-miR-520d-5p	1	0	1	1	1	1	CNRIP1	cannabinoid receptor interacting protein 1
hsa-miR-520d-5p	0	0	1	1	1	1	SOSTDC1	sclerostin domain containing 1
hsa-miR-520d-5p	1	0	1	1	1	1	SYF2	SYF2 homolog, RNA splicing factor (S. cerevisiae)
hsa-miR-520d-5p	1	0	1	1	1	1	KIAA1429	KIAA1429
hsa-miR-520d-5p	1	0	1	0	1	1	OSBPL3	oxysterol binding protein-like 3
hsa-miR-520d-5p	1	0	1	0	1	1	GLCE	glucuronic acid epimerase
hsa-miR-520d-5p	1	0	1	1	1	1	LTN1	listerin E3 ubiquitin protein ligase 1
hsa-miR-520d-5p	1	0	1	0	1	1	PPP1R16B	protein phosphatase 1, regulatory subunit 16B
hsa-miR-520d-5p	0	0	1	1	1	1	TES	testis derived transcript (3 LIM domains)
hsa-miR-520d-5p	0	0	1	1	1	1	RSL1D1	ribosomal L1 domain containing 1
hsa-miR-520d-5p	0	0	1	1	0	0	DESI1	desumoylating isopeptidase 1
hsa-miR-520d-5p	1	0	1	0	1	1	RRM2B	ribonucleotide reductase M2 B (TP53 inducible)
hsa-miR-520d-5p	0	0	1	1	1	1	POMP	proteasome maturation protein
hsa-miR-520d-5p	0	0	1	1	1	1	NOP58	NOP58 ribonucleoprotein homolog (yeast)
hsa-miR-520d-5p	1	0	1	0	1	1	KLF13	Kruppel-like factor 13
hsa-miR-520d-5p	0	0	1	1	1	1	SCCPDH	saccharopine dehydrogenase (putative)
hsa-miR-520d-5p	1	0	1	1	1	1	UBE2J1	ubiquitin-conjugating enzyme E2, J1
hsa-miR-520d-5p	0	0	1	1	1	1	APH1A	anterior pharynx defective 1 homolog A (C. elegans)
hsa-miR-520d-5p	1	0	1	1	1	1	SLMO2	slowmo homolog 2 (Drosophila)
hsa-miR-520d-5p	1	0	1	1	1	1	RRP15	ribosomal RNA processing 15 homolog (S. cerevisiae)
hsa-miR-520d-5p	0	0	1	1	1	1	MED31	mediator complex subunit 31
hsa-miR-520d-5p	1	0	1	1	1	1	GOLT1B	golgi transport 1B
hsa-miR-520d-5p	1	0	1	0	1	1	CNR1	cannabinoid receptor 1 (brain)
hsa-miR-520d-5p	1	0	1	0	1	1	WNT16	wingless-type MMTV integration site family, member 16
hsa-miR-520d-5p	0	0	1	1	1	1	ZFR	zinc finger RNA binding protein
hsa-miR-520d-5p	1	0	1	1	1	1	SUFU	suppressor of fused homolog (Drosophila)
hsa-miR-520d-5p	0	0	1	1	0	0	CRNN	cornulin
hsa-miR-520d-5p	1	0	1	1	1	1	VGLL3	vestigial like 3 (Drosophila)
hsa-miR-520d-5p	1	0	1	1	1	1	CYB5R4	cytochrome b5 reductase 4
hsa-miR-520d-5p	1	0	1	1	1	1	NLK	nemo-like kinase
hsa-miR-520d-5p	0	0	1	1	1	1	EMCN	endomucin
hsa-miR-520d-5p	1	0	1	1	1	1	AKAP11	A kinase (PRKA) anchor protein 11
hsa-miR-520d-5p	1	0	1	1	1	1	RNF138	ring finger protein 138, E3 ubiquitin protein ligase
hsa-miR-520d-5p	1	0	1	1	1	1	TOB2	transducer of ERBB2, 2
hsa-miR-520d-5p	0	0	1	1	1	1	CDH9	cadherin 9, type 2 (T1-cadherin)
hsa-miR-520d-5p	1	0	1	1	1	1	CMPK1	cytidine monophosphate (UMP-CMP) kinase 1, cytosolic
hsa-miR-520d-5p	1	0	1	1	1	1	ARID4B	AT rich interactive domain 4B (RBP1-like)
hsa-miR-520d-5p	1	0	1	1	1	1	VTA1	Vps20-associated 1 homolog (S. cerevisiae)
hsa-miR-520d-5p	1	0	1	1	1	1	DNAJC27	DnaJ (Hsp40) homolog, subfamily C, member 27
hsa-miR-520d-5p	1	0	1	1	1	1	CYP39A1	cytochrome P450, family 39, subfamily A, polypeptide 1
hsa-miR-520d-5p	1	0	1	0	1	1	FZD3	frizzled family receptor 3
hsa-miR-520d-5p	1	0	1	1	1	1	SIX4	SIX homeobox 4
hsa-miR-520d-5p	1	0	1	1	1	1	GALNT7	UDP-N-acetyl-alpha-D-galactosamine:polypeptide N-acetylgalactosaminyltransferase 7 (GalNAc-T7)
hsa-miR-520d-5p	1	0	1	1	1	1	MDM1	Mdm1 nuclear protein homolog (mouse)
hsa-miR-520d-5p	0	0	1	1	1	1	POLE3	polymerase (DNA directed), epsilon 3, accessory subunit
hsa-miR-520d-5p	0	0	1	1	1	1	CYTH2	cytohesin 2
hsa-miR-520d-5p	1	0	1	1	1	1	PLXNA3	plexin A3
hsa-miR-520d-5p	0	0	1	1	1	1	NKRF	NFKB repressing factor
hsa-miR-520d-5p	1	0	1	1	1	1	GRID1	glutamate receptor, ionotropic, delta 1
hsa-miR-520d-5p	1	0	1	1	1	1	DIRAS2	DIRAS family, GTP-binding RAS-like 2
hsa-miR-520d-5p	1	0	1	1	1	1	TET2	tet methylcytosine dioxygenase 2
hsa-miR-520d-5p	1	0	1	1	1	1	HAUS6	HAUS augmin-like complex, subunit 6
hsa-miR-520d-5p	0	0	1	0	1	1	GIPC2	GIPC PDZ domain containing family, member 2
hsa-miR-520d-5p	0	0	1	1	1	1	ERCC6L	excision repair cross-complementing rodent repair deficiency, complementation group 6-like
hsa-miR-520d-5p	1	0	1	1	1	1	GDAP2	ganglioside induced differentiation associated protein 2
hsa-miR-520d-5p	1	0	1	0	1	1	FAM46C	family with sequence similarity 46, member C
hsa-miR-520d-5p	0	0	1	0	1	1	THUMPD1	THUMP domain containing 1
hsa-miR-520d-5p	1	0	1	0	1	1	DCAF16	DDB1 and CUL4 associated factor 16
hsa-miR-520d-5p	1	0	1	1	1	1	LPPR1	lipid phosphate phosphatase-related protein type 1
hsa-miR-520d-5p	1	0	1	1	1	1	CASZ1	castor zinc finger 1
hsa-miR-520d-5p	1	0	1	1	1	1	ELOVL2	ELOVL fatty acid elongase 2
hsa-miR-520d-5p	0	0	1	1	1	1	WHSC1L1	Wolf-Hirschhorn syndrome candidate 1-like 1
hsa-miR-520d-5p	1	0	1	0	1	1	CHD7	chromodomain helicase DNA binding protein 7
hsa-miR-520d-5p	1	0	1	1	1	1	IMPAD1	inositol monophosphatase domain containing 1
hsa-miR-520d-5p	1	0	1	1	1	1	RNF125	ring finger protein 125, E3 ubiquitin protein ligase
hsa-miR-520d-5p	0	0	1	1	1	1	SDHAF2	succinate dehydrogenase complex assembly factor 2
hsa-miR-520d-5p	1	0	1	1	1	1	FAM120C	family with sequence similarity 120C
hsa-miR-520d-5p	0	0	1	1	1	1	ACSM5	acyl-CoA synthetase medium-chain family member 5
hsa-miR-520d-5p	0	0	1	1	1	1	FKBP14	FK506 binding protein 14, 22 kDa
hsa-miR-520d-5p	1	0	1	1	1	1	ZNHIT6	zinc finger, HIT-type containing 6
hsa-miR-520d-5p	0	0	1	1	1	1	IWS1	IWS1 homolog (S. cerevisiae)
hsa-miR-520d-5p	1	0	1	0	1	1	CCDC88A	coiled-coil domain containing 88A
hsa-miR-520d-5p	1	0	1	1	1	1	FIGN	fidgetin
hsa-miR-520d-5p	1	0	1	1	0	0	GSPT2	G1 to S phase transition 2
hsa-miR-520d-5p	0	0	1	1	0	0	WDR11	WD repeat domain 11
hsa-miR-520d-5p	1	0	1	1	1	1	FAM178A	family with sequence similarity 178, member A
hsa-miR-520d-5p	0	0	1	1	1	1	TMLHE	trimethyllysine hydroxylase, epsilon
hsa-miR-520d-5p	1	0	1	0	1	1	PARVA	parvin, alpha
hsa-miR-520d-5p	1	0	1	1	1	1	C20orf20	chromosome 20 open reading frame 20
hsa-miR-520d-5p	1	0	1	1	1	1	ZNF654	zinc finger protein 654
hsa-miR-520d-5p	1	0	1	1	1	1	FGD6	FYVE, RhoGEF and PH domain containing 6
hsa-miR-520d-5p	1	0	1	1	1	1	AGPAT5	1-acylglycerol-3-phosphate O-acyltransferase 5 (lysophosphatidic acid acyltransferase, epsilon)
hsa-miR-520d-5p	1	0	1	1	1	1	RSBN1	round spermatid basic protein 1
hsa-miR-520d-5p	1	0	1	1	1	1	DRAM1	DNA-damage regulated autophagy modulator 1
hsa-miR-520d-5p	0	0	1	1	1	1	STK32B	serine/threonine kinase 32B
hsa-miR-520d-5p	0	0	1	1	0	0	C17orf79	chromosome 17 open reading frame 79
hsa-miR-520d-5p	1	0	1	0	1	1	FOXJ2	forkhead box J2
hsa-miR-520d-5p	0	0	1	1	1	1	SLC22A15	solute carrier family 22, member 15
hsa-miR-520d-5p	1	0	1	1	1	1	RRN3	RRN3 RNA polymerase I transcription factor homolog (S. cerevisiae)
hsa-miR-520d-5p	1	0	1	1	1	1	PAG1	phosphoprotein associated with glycosphingolipid microdomains 1
hsa-miR-520d-5p	0	0	1	1	1	1	VIMP	VCP-interacting membrane protein
hsa-miR-520d-5p	0	0	1	0	0	0	FAM45B	family with sequence similarity 45, member A pseudogene
hsa-miR-520d-5p	1	0	1	1	1	1	ASH1L	ash1 (absent, small, or homeotic)-like (Drosophila)
hsa-miR-520d-5p	1	0	1	1	1	1	LRRC59	leucine rich repeat containing 59
hsa-miR-520d-5p	1	0	1	0	1	1	LRP1B	low density lipoprotein receptor-related protein 1B
hsa-miR-520d-5p	1	0	1	1	1	1	ETNK1	ethanolamine kinase 1
hsa-miR-520d-5p	0	0	1	1	1	1	GOLGA6B	golgin A6 family, member B
hsa-miR-520d-5p	0	0	1	1	0	0	THSD1	thrombospondin, type I, domain containing 1
hsa-miR-520d-5p	1	0	1	1	1	1	MLL5	myeloid/lymphoid or mixed-lineage leukemia 5 (trithorax homolog, Drosophila)
hsa-miR-520d-5p	1	0	1	0	1	1	MAML3	mastermind-like 3 (Drosophila)
hsa-miR-520d-5p	1	0	1	0	1	1	PCDHAC1	protocadherin alpha subfamily C, 1
hsa-miR-520d-5p	1	0	1	0	1	1	PCDHAC2	protocadherin alpha subfamily C, 2
hsa-miR-520d-5p	1	0	1	1	1	1	PCDHA1	protocadherin alpha 1
hsa-miR-520d-5p	1	0	1	0	1	1	PCDHA10	protocadherin alpha 10
hsa-miR-520d-5p	1	0	1	0	1	1	PCDHA11	protocadherin alpha 11
hsa-miR-520d-5p	1	0	1	0	1	1	PCDHA12	protocadherin alpha 12
hsa-miR-520d-5p	1	0	1	1	1	1	PCDHA2	protocadherin alpha 2
hsa-miR-520d-5p	1	0	1	1	1	1	PCDHA3	protocadherin alpha 3
hsa-miR-520d-5p	1	0	1	1	1	1	PCDHA6	protocadherin alpha 6
hsa-miR-520d-5p	1	0	1	0	1	1	PCDHA7	protocadherin alpha 7
hsa-miR-520d-5p	1	0	1	1	1	1	PCDHA8	protocadherin alpha 8
hsa-miR-520d-5p	0	0	1	1	1	1	TERF2IP	telomeric repeat binding factor 2, interacting protein
hsa-miR-520d-5p	1	0	1	1	1	1	SASH3	SAM and SH3 domain containing 3
hsa-miR-520d-5p	1	0	1	1	1	1	KCTD5	potassium channel tetramerisation domain containing 5
hsa-miR-520d-5p	0	0	1	1	1	1	RIN2	Ras and Rab interactor 2
hsa-miR-520d-5p	0	0	1	1	1	1	GNL3L	guanine nucleotide binding protein-like 3 (nucleolar)-like
hsa-miR-520d-5p	0	0	1	0	1	1	ARL15	ADP-ribosylation factor-like 15
hsa-miR-520d-5p	1	0	1	0	1	1	UBFD1	ubiquitin family domain containing 1
hsa-miR-520d-5p	0	0	1	1	1	1	FMN2	formin 2
hsa-miR-520d-5p	0	0	1	0	1	1	ZC3HAV1	zinc finger CCCH-type, antiviral 1
hsa-miR-520d-5p	1	0	1	0	1	1	SLAMF8	SLAM family member 8
hsa-miR-520d-5p	0	0	1	1	1	1	UBQLN4	ubiquilin 4
hsa-miR-520d-5p	1	0	1	1	1	1	CCDC47	coiled-coil domain containing 47
hsa-miR-520d-5p	0	0	1	1	1	1	TOMM22	translocase of outer mitochondrial membrane 22 homolog (yeast)
hsa-miR-520d-5p	1	0	1	1	0	0	SLC17A7	solute carrier family 17 (sodium-dependent inorganic phosphate cotransporter), member 7
hsa-miR-520d-5p	0	0	1	1	1	1	CXCR7	chemokine (C-X-C motif) receptor 7
hsa-miR-520d-5p	1	0	1	1	1	1	PAK7	p21 protein (Cdc42/Rac)-activated kinase 7
hsa-miR-520d-5p	1	0	1	0	1	1	SLC17A6	solute carrier family 17 (sodium-dependent inorganic phosphate cotransporter), member 6
hsa-miR-520d-5p	0	0	1	1	1	1	CYSLTR2	cysteinyl leukotriene receptor 2
hsa-miR-520d-5p	1	0	1	1	1	1	PCDH9	protocadherin 9
hsa-miR-520d-5p	1	0	1	1	0	0	JPH2	junctophilin 2
hsa-miR-520d-5p	1	0	1	1	1	1	PTGFRN	prostaglandin F2 receptor negative regulator
hsa-miR-520d-5p	0	0	1	1	1	1	FGF23	fibroblast growth factor 23
hsa-miR-520d-5p	1	0	1	1	1	1	RAB22A	RAB22A, member RAS oncogene family
hsa-miR-520d-5p	0	0	1	1	1	1	SHROOM4	shroom family member 4
hsa-miR-520d-5p	1	0	1	1	1	1	USP31	ubiquitin specific peptidase 31
hsa-miR-520d-5p	0	0	1	0	1	1	XPO5	exportin 5
hsa-miR-520d-5p	1	0	1	1	1	1	ARHGAP31	Rho GTPase activating protein 31
hsa-miR-520d-5p	1	0	1	0	1	1	KLHDC5	kelch domain containing 5
hsa-miR-520d-5p	1	0	1	1	1	1	SIPA1L2	signal-induced proliferation-associated 1 like 2
hsa-miR-520d-5p	1	0	1	0	1	1	KIAA1456	KIAA1456
hsa-miR-520d-5p	1	0	1	1	1	1	RANBP10	RAN binding protein 10
hsa-miR-520d-5p	1	0	1	1	1	1	TSHZ3	teashirt zinc finger homeobox 3
hsa-miR-520d-5p	1	0	1	1	1	1	NIN	ninein (GSK3B interacting protein)
hsa-miR-520d-5p	1	0	1	0	1	1	USP37	ubiquitin specific peptidase 37
hsa-miR-520d-5p	0	0	1	1	1	1	PPP4R4	protein phosphatase 4, regulatory subunit 4
hsa-miR-520d-5p	1	0	1	1	1	1	RET	ret proto-oncogene
hsa-miR-520d-5p	0	0	1	1	1	1	GNAO1	guanine nucleotide binding protein (G protein), alpha activating activity polypeptide O
hsa-miR-520d-5p	0	0	1	1	1	1	TLX3	T-cell leukemia homeobox 3
hsa-miR-520d-5p	1	0	1	1	1	1	HCN1	hyperpolarization activated cyclic nucleotide-gated potassium channel 1
hsa-miR-520d-5p	1	0	1	1	1	1	MTMR3	myotubularin related protein 3
hsa-miR-520d-5p	1	0	1	1	1	1	TMSB4X	thymosin beta 4, X-linked
hsa-miR-520d-5p	0	0	1	1	1	1	COL14A1	collagen, type XIV, alpha 1
hsa-miR-520d-5p	1	0	1	1	1	1	ADCY1	adenylate cyclase 1 (brain)
hsa-miR-520d-5p	0	0	1	1	1	1	RNASEL	ribonuclease L (2',5'-oligoisoadenylate synthetase-dependent)
hsa-miR-520d-5p	1	0	1	0	1	1	TMX4	thioredoxin-related transmembrane protein 4
hsa-miR-520d-5p	0	0	1	1	0	0	TRIB3	tribbles homolog 3 (Drosophila)
hsa-miR-520d-5p	0	0	1	0	1	1	MS4A7	membrane-spanning 4-domains, subfamily A, member 7
hsa-miR-520d-5p	1	0	1	1	1	1	RPRD1B	regulation of nuclear pre-mRNA domain containing 1B
hsa-miR-520d-5p	0	0	1	1	1	1	INIP	INTS3 and NABP interacting protein
hsa-miR-520d-5p	1	0	1	1	1	1	NTN4	netrin 4
hsa-miR-520d-5p	1	0	1	1	1	1	FAM60A	family with sequence similarity 60, member A
hsa-miR-520d-5p	1	0	1	1	1	1	PELI2	pellino E3 ubiquitin protein ligase family member 2
hsa-miR-520d-5p	0	0	1	1	0	0	FCGR2A	Fc fragment of IgG, low affinity IIa, receptor (CD32)
hsa-miR-520d-5p	1	0	1	1	1	1	TRIB2	tribbles homolog 2 (Drosophila)
hsa-miR-520d-5p	0	0	1	1	0	0	IL21	interleukin 21
hsa-miR-520d-5p	0	0	1	0	1	1	SPCS3	signal peptidase complex subunit 3 homolog (S. cerevisiae)
hsa-miR-520d-5p	0	0	1	1	1	1	PGM5	phosphoglucomutase 5
hsa-miR-520d-5p	0	0	1	1	0	0	TMSB15A	thymosin beta 15a
hsa-miR-520d-5p	1	0	1	1	1	1	TIA1	TIA1 cytotoxic granule-associated RNA binding protein
hsa-miR-520d-5p	1	0	1	0	1	1	GAN	gigaxonin
hsa-miR-520d-5p	1	0	1	0	1	1	CSNK1G1	casein kinase 1, gamma 1
hsa-miR-520d-5p	1	0	1	1	1	1	EGLN1	egl nine homolog 1 (C. elegans)
hsa-miR-520d-5p	0	0	1	1	0	0	ABHD4	abhydrolase domain containing 4
hsa-miR-520d-5p	1	0	1	1	1	1	CLSTN2	calsyntenin 2
hsa-miR-520d-5p	1	0	1	1	1	1	XYLT1	xylosyltransferase I
hsa-miR-520d-5p	1	0	1	1	1	1	XYLT2	xylosyltransferase II
hsa-miR-520d-5p	0	0	1	0	1	1	SLC13A1	solute carrier family 13 (sodium/sulfate symporters), member 1
hsa-miR-520d-5p	1	0	1	0	1	1	HOXC8	homeobox C8
hsa-miR-520d-5p	0	0	1	0	1	1	EBF2	early B-cell factor 2
hsa-miR-520d-5p	1	0	1	1	1	1	C6orf106	chromosome 6 open reading frame 106
hsa-miR-520d-5p	0	0	1	1	1	1	OSBPL11	oxysterol binding protein-like 11
hsa-miR-520d-5p	0	0	1	1	1	1	METTL4	methyltransferase like 4
hsa-miR-520d-5p	1	0	1	1	1	1	RFX7	regulatory factor X, 7
hsa-miR-520d-5p	1	0	1	1	1	1	SOWAHC	sosondowah ankyrin repeat domain family member C
hsa-miR-520d-5p	1	0	1	1	1	1	HOXB8	homeobox B8
hsa-miR-520d-5p	1	0	1	1	1	1	NEUROG2	neurogenin 2
hsa-miR-520d-5p	0	0	1	1	0	0	DCTN3	dynactin 3 (p22)
hsa-miR-520d-5p	1	0	1	1	1	1	HOXD1	homeobox D1
hsa-miR-520d-5p	0	0	1	1	1	1	AKIRIN1	akirin 1
hsa-miR-520d-5p	1	0	1	1	1	1	DHX40	DEAH (Asp-Glu-Ala-His) box polypeptide 40
hsa-miR-520d-5p	0	0	1	1	1	1	STEAP4	STEAP family member 4
hsa-miR-520d-5p	0	0	1	1	1	1	GALNT12	UDP-N-acetyl-alpha-D-galactosamine:polypeptide N-acetylgalactosaminyltransferase 12 (GalNAc-T12)
hsa-miR-520d-5p	0	0	1	1	1	1	E2F8	E2F transcription factor 8
hsa-miR-520d-5p	0	0	1	1	1	1	BBS10	Bardet-Biedl syndrome 10
hsa-miR-520d-5p	0	0	1	1	1	1	SNIP1	Smad nuclear interacting protein 1
hsa-miR-520d-5p	1	0	1	1	1	1	PIP4K2C	phosphatidylinositol-5-phosphate 4-kinase, type II, gamma
hsa-miR-520d-5p	0	0	1	1	0	0	RNF122	ring finger protein 122
hsa-miR-520d-5p	0	0	1	1	1	1	RPAP2	RNA polymerase II associated protein 2
hsa-miR-520d-5p	1	0	1	1	1	1	L2HGDH	L-2-hydroxyglutarate dehydrogenase
hsa-miR-520d-5p	0	0	1	1	1	1	ESRP2	epithelial splicing regulatory protein 2
hsa-miR-520d-5p	1	0	1	0	1	1	VCPIP1	valosin containing protein (p97)/p47 complex interacting protein 1
hsa-miR-520d-5p	1	0	1	1	1	1	NAA50	N(alpha)-acetyltransferase 50, NatE catalytic subunit
hsa-miR-520d-5p	1	0	1	1	1	1	TRIB1	tribbles homolog 1 (Drosophila)
hsa-miR-520d-5p	1	0	1	1	1	1	TNKS2	tankyrase, TRF1-interacting ankyrin-related ADP-ribose polymerase 2
hsa-miR-520d-5p	1	0	1	1	1	1	JHDM1D	jumonji C domain containing histone demethylase 1 homolog D (S. cerevisiae)
hsa-miR-520d-5p	1	0	1	1	1	1	HOXA3	homeobox A3
hsa-miR-520d-5p	1	0	1	1	1	1	PTPRO	protein tyrosine phosphatase, receptor type, O
hsa-miR-520d-5p	0	0	1	1	1	1	BCL2L14	BCL2-like 14 (apoptosis facilitator)
hsa-miR-520d-5p	1	0	1	1	1	1	ITFG1	integrin alpha FG-GAP repeat containing 1
hsa-miR-520d-5p	1	0	1	0	1	1	C1orf21	chromosome 1 open reading frame 21
hsa-miR-520d-5p	1	0	1	1	1	1	PDRG1	p53 and DNA-damage regulated 1
hsa-miR-520d-5p	1	0	1	1	1	1	MAP4	microtubule-associated protein 4
hsa-miR-520d-5p	1	0	1	1	1	1	TRIM8	tripartite motif containing 8
hsa-miR-520d-5p	1	0	1	0	1	1	LBH	limb bud and heart development homolog (mouse)
hsa-miR-520d-5p	1	0	1	1	1	1	SNX27	sorting nexin family member 27
hsa-miR-520d-5p	1	0	1	1	1	1	TIGD6	tigger transposable element derived 6
hsa-miR-520d-5p	1	0	1	0	1	1	SPRY4	sprouty homolog 4 (Drosophila)
hsa-miR-520d-5p	0	0	1	1	1	1	SEH1L	SEH1-like (S. cerevisiae)
hsa-miR-520d-5p	0	0	1	1	1	1	TEX15	testis expressed 15
hsa-miR-520d-5p	1	0	1	1	1	1	DNAL1	dynein, axonemal, light chain 1
hsa-miR-520d-5p	1	0	1	1	1	1	FAM103A1	family with sequence similarity 103, member A1
hsa-miR-520d-5p	1	0	1	1	1	1	CRISPLD1	cysteine-rich secretory protein LCCL domain containing 1
hsa-miR-520d-5p	1	0	1	0	1	1	SH3BGRL2	SH3 domain binding glutamic acid-rich protein like 2
hsa-miR-520d-5p	1	0	1	0	1	1	ITCH	itchy E3 ubiquitin protein ligase
hsa-miR-520d-5p	1	0	1	1	1	1	PCDHA9	protocadherin alpha 9
hsa-miR-520d-5p	0	0	1	0	1	1	ENAM	enamelin
hsa-miR-520d-5p	1	0	1	1	1	1	TMEM133	transmembrane protein 133
hsa-miR-520d-5p	1	0	1	0	1	1	FAM172A	family with sequence similarity 172, member A
hsa-miR-520d-5p	1	0	1	0	1	1	SRSF8	serine/arginine-rich splicing factor 8
hsa-miR-520d-5p	1	0	1	1	1	1	OTP	orthopedia homeobox
hsa-miR-520d-5p	0	0	1	0	1	1	RAB6C	RAB6C, member RAS oncogene family
hsa-miR-520d-5p	1	0	1	1	1	1	FBXO30	F-box protein 30
hsa-miR-520d-5p	1	0	1	1	1	1	SON	SON DNA binding protein
hsa-miR-520d-5p	1	0	1	1	1	1	ARID5B	AT rich interactive domain 5B (MRF1-like)
hsa-miR-520d-5p	1	0	1	1	1	1	SLITRK6	SLIT and NTRK-like family, member 6
hsa-miR-520d-5p	0	0	1	1	1	1	FAM96A	family with sequence similarity 96, member A
hsa-miR-520d-5p	1	0	1	1	1	1	MEX3B	mex-3 homolog B (C. elegans)
hsa-miR-520d-5p	0	0	1	1	1	1	ZMYND12	zinc finger, MYND-type containing 12
hsa-miR-520d-5p	1	0	1	1	0	0	MAF1	MAF1 homolog (S. cerevisiae)
hsa-miR-520d-5p	0	0	1	0	1	1	LDOC1L	leucine zipper, down-regulated in cancer 1-like
hsa-miR-520d-5p	1	0	1	1	1	1	ING5	inhibitor of growth family, member 5
hsa-miR-520d-5p	1	0	1	1	1	1	HOOK3	hook homolog 3 (Drosophila)
hsa-miR-520d-5p	0	0	1	1	1	1	CHAMP1	chromosome alignment maintaining phosphoprotein 1
hsa-miR-520d-5p	1	0	1	1	1	1	PARD6B	par-6 partitioning defective 6 homolog beta (C. elegans)
hsa-miR-520d-5p	0	0	1	1	1	1	FNDC1	fibronectin type III domain containing 1
hsa-miR-520d-5p	1	0	1	1	1	1	GPR124	G protein-coupled receptor 124
hsa-miR-520d-5p	1	0	1	1	1	1	ARHGEF39	Rho guanine nucleotide exchange factor (GEF) 39
hsa-miR-520d-5p	1	0	1	0	1	1	PPP1R15B	protein phosphatase 1, regulatory subunit 15B
hsa-miR-520d-5p	1	0	1	0	1	1	LACTB	lactamase, beta
hsa-miR-520d-5p	1	0	1	0	1	1	UBASH3B	ubiquitin associated and SH3 domain containing B
hsa-miR-520d-5p	1	0	1	1	1	1	AJUBA	ajuba LIM protein
hsa-miR-520d-5p	0	0	1	1	1	1	TRIM4	tripartite motif containing 4
hsa-miR-520d-5p	0	0	1	0	1	1	TSLP	thymic stromal lymphopoietin
hsa-miR-520d-5p	0	0	1	1	1	1	DMRTC1	DMRT-like family C1
hsa-miR-520d-5p	1	0	1	1	1	1	HIAT1	hippocampus abundant transcript 1
hsa-miR-520d-5p	0	0	1	1	1	1	RBM18	RNA binding motif protein 18
hsa-miR-520d-5p	1	0	1	1	1	1	C5orf30	chromosome 5 open reading frame 30
hsa-miR-520d-5p	1	0	1	0	1	1	PURB	purine-rich element binding protein B
hsa-miR-520d-5p	1	0	1	1	1	1	COL4A5	collagen, type IV, alpha 5
hsa-miR-520d-5p	1	0	1	1	1	1	SSH2	slingshot homolog 2 (Drosophila)
hsa-miR-520d-5p	1	0	1	1	1	1	TANC1	tetratricopeptide repeat, ankyrin repeat and coiled-coil containing 1
hsa-miR-520d-5p	1	0	1	1	1	1	EPT1	ethanolaminephosphotransferase 1 (CDP-ethanolamine-specific)
hsa-miR-520d-5p	1	0	1	1	1	1	SYS1	SYS1 Golgi-localized integral membrane protein homolog (S. cerevisiae)
hsa-miR-520d-5p	1	0	1	1	1	1	LUZP1	leucine zipper protein 1
hsa-miR-520d-5p	1	0	1	0	0	0	ANKRD40	ankyrin repeat domain 40
hsa-miR-520d-5p	0	0	1	1	1	1	NACC1	nucleus accumbens associated 1, BEN and BTB (POZ) domain containing
hsa-miR-520d-5p	0	0	1	1	1	1	LENG8	leukocyte receptor cluster (LRC) member 8
hsa-miR-520d-5p	1	0	1	0	1	1	FAM129A	family with sequence similarity 129, member A
hsa-miR-520d-5p	0	0	1	0	1	1	ZNF518B	zinc finger protein 518B
hsa-miR-520d-5p	1	0	1	1	1	1	NAA15	N(alpha)-acetyltransferase 15, NatA auxiliary subunit
hsa-miR-520d-5p	0	0	1	1	1	1	CCNE2	cyclin E2
hsa-miR-520d-5p	1	0	1	1	1	1	GCFC1	GC-rich sequence DNA-binding factor 1
hsa-miR-520d-5p	0	0	1	1	1	1	BCCIP	BRCA2 and CDKN1A interacting protein
hsa-miR-520d-5p	0	0	1	1	1	1	CTCFL	CCCTC-binding factor (zinc finger protein)-like
hsa-miR-520d-5p	0	0	1	1	1	1	PABPC5	poly(A) binding protein, cytoplasmic 5
hsa-miR-520d-5p	1	0	1	0	1	1	SOCS4	suppressor of cytokine signaling 4
hsa-miR-520d-5p	0	0	1	1	0	0	DGUOK	deoxyguanosine kinase
hsa-miR-520d-5p	0	0	1	1	1	1	COLEC12	collectin sub-family member 12
hsa-miR-520d-5p	0	0	1	1	1	1	ATP6V1G2	ATPase, H+ transporting, lysosomal 13kDa, V1 subunit G2
hsa-miR-520d-5p	1	0	1	1	1	1	PRRC1	proline-rich coiled-coil 1
hsa-miR-520d-5p	1	0	1	1	1	1	ZAK	sterile alpha motif and leucine zipper containing kinase AZK
hsa-miR-520d-5p	1	0	1	1	1	1	SPTSSA	serine palmitoyltransferase, small subunit A
hsa-miR-520d-5p	1	0	1	1	1	1	PANK1	pantothenate kinase 1
hsa-miR-520d-5p	1	0	1	1	1	1	FAM122A	family with sequence similarity 122A
hsa-miR-520d-5p	1	0	1	1	0	0	PKDCC	protein kinase domain containing, cytoplasmic homolog (mouse)
hsa-miR-520d-5p	0	0	1	1	1	1	CASC4	cancer susceptibility candidate 4
hsa-miR-520d-5p	1	0	1	1	1	1	GLCCI1	glucocorticoid induced transcript 1
hsa-miR-520d-5p	1	0	1	1	1	1	KCTD12	potassium channel tetramerisation domain containing 12
hsa-miR-520d-5p	1	0	1	0	1	1	SP1	Sp1 transcription factor
hsa-miR-520d-5p	0	0	1	1	1	1	TAF8	TAF8 RNA polymerase II, TATA box binding protein (TBP)-associated factor, 43kDa
hsa-miR-520d-5p	0	0	1	1	0	0	MAGEE2	melanoma antigen family E, 2
hsa-miR-520d-5p	1	0	1	1	1	1	MSR1	macrophage scavenger receptor 1
hsa-miR-520d-5p	1	0	1	0	1	1	FCHO2	FCH domain only 2
hsa-miR-520d-5p	0	0	1	1	1	1	PPIL4	peptidylprolyl isomerase (cyclophilin)-like 4
hsa-miR-520d-5p	1	0	1	1	1	1	PPTC7	PTC7 protein phosphatase homolog (S. cerevisiae)
hsa-miR-520d-5p	0	0	1	1	1	1	CASC5	cancer susceptibility candidate 5
hsa-miR-520d-5p	1	0	1	0	1	1	CNOT6L	CCR4-NOT transcription complex, subunit 6-like
hsa-miR-520d-5p	0	0	1	1	1	1	L3HYPDH	L-3-hydroxyproline dehydratase (trans-)
hsa-miR-520d-5p	0	0	1	1	1	1	C15orf40	chromosome 15 open reading frame 40
hsa-miR-520d-5p	1	0	1	1	1	1	TMEM182	transmembrane protein 182
hsa-miR-520d-5p	0	0	1	1	1	1	SLC23A3	solute carrier family 23 (nucleobase transporters), member 3
hsa-miR-520d-5p	0	0	1	1	1	1	ZFC3H1	zinc finger, C3H1-type containing
hsa-miR-520d-5p	0	0	1	1	1	1	DACT3	dapper, antagonist of beta-catenin, homolog 3 (Xenopus laevis)
hsa-miR-520d-5p	0	0	1	0	1	1	PIGM	phosphatidylinositol glycan anchor biosynthesis, class M
hsa-miR-520d-5p	0	0	1	1	0	0	C10orf35	chromosome 10 open reading frame 35
hsa-miR-520d-5p	0	0	1	1	1	1	LRTOMT	leucine rich transmembrane and 0-methyltransferase domain containing
hsa-miR-520d-5p	1	0	1	1	1	1	ZNF396	zinc finger protein 396
hsa-miR-520d-5p	1	0	1	0	1	1	MTPN	myotrophin
hsa-miR-520d-5p	1	0	1	1	1	1	SGMS1	sphingomyelin synthase 1
hsa-miR-520d-5p	1	0	1	1	1	1	FAM110B	family with sequence similarity 110, member B
hsa-miR-520d-5p	1	0	1	1	1	1	BOD1L1	biorientation of chromosomes in cell division 1-like 1
hsa-miR-520d-5p	1	0	1	1	1	1	UBTD2	ubiquitin domain containing 2
hsa-miR-520d-5p	1	0	1	1	1	1	POGLUT1	protein O-glucosyltransferase 1
hsa-miR-520d-5p	1	0	1	1	1	1	LSM12	LSM12 homolog (S. cerevisiae)
hsa-miR-520d-5p	1	0	1	1	1	1	TMEM178A	transmembrane protein 178A
hsa-miR-520d-5p	0	0	1	1	1	1	RDH12	retinol dehydrogenase 12 (all-trans/9-cis/11-cis)
hsa-miR-520d-5p	1	0	1	1	1	1	CEP128	centrosomal protein 128kDa
hsa-miR-520d-5p	1	0	1	1	1	1	FAM81A	family with sequence similarity 81, member A
hsa-miR-520d-5p	1	0	1	1	1	1	ZNF583	zinc finger protein 583
hsa-miR-520d-5p	1	0	1	1	1	1	ZNF362	zinc finger protein 362
hsa-miR-520d-5p	1	0	1	0	1	1	MOSPD2	motile sperm domain containing 2
hsa-miR-520d-5p	1	0	1	0	1	1	DCP2	DCP2 decapping enzyme homolog (S. cerevisiae)
hsa-miR-520d-5p	1	0	1	0	1	1	ARID2	AT rich interactive domain 2 (ARID, RFX-like)
hsa-miR-520d-5p	1	0	1	1	1	1	UBE2E2	ubiquitin-conjugating enzyme E2E 2
hsa-miR-520d-5p	1	0	1	1	1	1	TCTEX1D1	Tctex1 domain containing 1
hsa-miR-520d-5p	1	0	1	1	1	1	HEPACAM	hepatic and glial cell adhesion molecule
hsa-miR-520d-5p	1	0	1	1	1	1	BEND6	BEN domain containing 6
hsa-miR-520d-5p	1	0	1	0	1	1	C7orf41	chromosome 7 open reading frame 41
hsa-miR-520d-5p	1	0	1	1	1	1	PDIK1L	PDLIM1 interacting kinase 1 like
hsa-miR-520d-5p	1	0	1	1	1	1	FAS	Fas (TNF receptor superfamily, member 6)
hsa-miR-520d-5p	0	0	1	0	1	1	KBTBD6	kelch repeat and BTB (POZ) domain containing 6
hsa-miR-520d-5p	1	0	1	1	1	1	CEP120	centrosomal protein 120kDa
hsa-miR-520d-5p	0	0	1	0	1	1	LIX1	Lix1 homolog (chicken)
hsa-miR-520d-5p	0	0	1	1	0	0	ZDHHC20	zinc finger, DHHC-type containing 20
hsa-miR-520d-5p	0	0	1	1	1	1	COL6A5	collagen, type VI, alpha 5
hsa-miR-520d-5p	1	0	1	1	1	1	TMEM161B	transmembrane protein 161B
hsa-miR-520d-5p	1	0	1	0	1	1	TAPT1	transmembrane anterior posterior transformation 1
hsa-miR-520d-5p	0	0	1	1	1	1	CAMK1D	calcium/calmodulin-dependent protein kinase ID
hsa-miR-520d-5p	1	0	1	0	1	1	SEMA6D	sema domain, transmembrane domain (TM), and cytoplasmic domain, (semaphorin) 6D
hsa-miR-520d-5p	0	0	1	1	1	1	REXO1L1	REX1, RNA exonuclease 1 homolog (S. cerevisiae)-like 1
hsa-miR-520d-5p	0	0	1	1	0	0	SLITRK4	SLIT and NTRK-like family, member 4
hsa-miR-520d-5p	1	0	1	1	1	1	MMGT1	membrane magnesium transporter 1
hsa-miR-520d-5p	0	0	1	1	1	1	SLC25A26	solute carrier family 25 (S-adenosylmethionine carrier), member 26
hsa-miR-520d-5p	0	0	1	1	1	1	C4orf33	chromosome 4 open reading frame 33
hsa-miR-520d-5p	1	0	1	1	1	1	TTBK2	tau tubulin kinase 2
hsa-miR-520d-5p	1	0	1	1	1	1	CCDC117	coiled-coil domain containing 117
hsa-miR-520d-5p	0	0	1	1	0	0	REM2	RAS (RAD and GEM)-like GTP binding 2
hsa-miR-520d-5p	1	0	1	0	1	1	GABRG1	gamma-aminobutyric acid (GABA) A receptor, gamma 1
hsa-miR-520d-5p	1	0	1	0	1	1	PGM2L1	phosphoglucomutase 2-like 1
hsa-miR-520d-5p	1	0	1	1	1	1	DIP2B	DIP2 disco-interacting protein 2 homolog B (Drosophila)
hsa-miR-520d-5p	0	0	1	1	1	1	SIGLECL1	SIGLEC family like 1
hsa-miR-520d-5p	1	0	1	1	1	1	RIMKLA	ribosomal modification protein rimK-like family member A
hsa-miR-520d-5p	1	0	1	1	1	1	PPIL6	peptidylprolyl isomerase (cyclophilin)-like 6
hsa-miR-520d-5p	0	0	1	1	1	1	FAM133A	family with sequence similarity 133, member A
hsa-miR-520d-5p	0	0	1	1	1	1	FUNDC1	FUN14 domain containing 1
hsa-miR-520d-5p	1	0	1	0	1	1	SREK1IP1	SREK1-interacting protein 1
hsa-miR-520d-5p	0	0	1	1	0	0	KRTCAP2	keratinocyte associated protein 2
hsa-miR-520d-5p	0	0	1	1	1	1	C14orf79	chromosome 14 open reading frame 79
hsa-miR-520d-5p	0	0	1	1	1	1	CCDC50	coiled-coil domain containing 50
hsa-miR-520d-5p	1	0	1	0	1	1	FAM84B	family with sequence similarity 84, member B
hsa-miR-520d-5p	1	0	1	1	1	1	UBR1	ubiquitin protein ligase E3 component n-recognin 1
hsa-miR-520d-5p	1	0	1	1	1	1	C4orf34	chromosome 4 open reading frame 34
hsa-miR-520d-5p	1	0	1	1	0	0	TCERG1L	transcription elongation regulator 1-like
hsa-miR-520d-5p	1	0	1	1	1	1	SYT9	synaptotagmin IX
hsa-miR-520d-5p	1	0	1	1	1	1	ZADH2	zinc binding alcohol dehydrogenase domain containing 2
hsa-miR-520d-5p	1	0	1	1	1	1	PPAP2B	phosphatidic acid phosphatase type 2B
hsa-miR-520d-5p	1	0	1	1	1	1	STX12	syntaxin 12
hsa-miR-520d-5p	1	0	1	1	1	1	LRRTM3	leucine rich repeat transmembrane neuronal 3
hsa-miR-520d-5p	0	0	1	1	1	1	SESTD1	SEC14 and spectrin domains 1
hsa-miR-520d-5p	0	0	1	1	1	1	HSD17B13	hydroxysteroid (17-beta) dehydrogenase 13
hsa-miR-520d-5p	1	0	1	1	1	1	MB21D2	Mab-21 domain containing 2
hsa-miR-520d-5p	1	0	1	1	1	1	TMEM26	transmembrane protein 26
hsa-miR-520d-5p	0	0	1	1	1	1	STXBP4	syntaxin binding protein 4
hsa-miR-520d-5p	1	0	1	1	1	1	PPP2R5C	protein phosphatase 2, regulatory subunit B', gamma
hsa-miR-520d-5p	1	0	1	1	1	1	MTDH	metadherin
hsa-miR-520d-5p	1	0	1	0	1	1	ARL5B	ADP-ribosylation factor-like 5B
hsa-miR-520d-5p	0	0	1	1	1	1	CMTM4	CKLF-like MARVEL transmembrane domain containing 4
hsa-miR-520d-5p	1	0	1	1	0	0	KCTD13	potassium channel tetramerisation domain containing 13
hsa-miR-520d-5p	0	0	1	1	1	1	NPAS4	neuronal PAS domain protein 4
hsa-miR-520d-5p	0	0	1	0	1	1	ZNF445	zinc finger protein 445
hsa-miR-520d-5p	0	0	1	1	0	0	KRT25	keratin 25
hsa-miR-520d-5p	1	0	1	1	1	1	CREM	cAMP responsive element modulator
hsa-miR-520d-5p	0	0	1	1	1	1	CCDC67	coiled-coil domain containing 67
hsa-miR-520d-5p	0	0	1	0	1	1	HCG27	HLA complex group 27 (non-protein coding)
hsa-miR-520d-5p	0	0	1	1	1	1	USP12	ubiquitin specific peptidase 12
hsa-miR-520d-5p	0	0	1	1	1	1	TMPRSS11B	transmembrane protease, serine 11B
hsa-miR-520d-5p	1	0	1	1	1	1	ADAT2	adenosine deaminase, tRNA-specific 2
hsa-miR-520d-5p	0	0	1	1	1	1	C1QL2	complement component 1, q subcomponent-like 2
hsa-miR-520d-5p	0	0	1	0	1	1	TMED4	transmembrane emp24 protein transport domain containing 4
hsa-miR-520d-5p	1	0	1	1	1	1	SP8	Sp8 transcription factor
hsa-miR-520d-5p	1	0	1	1	1	1	FAM101B	family with sequence similarity 101, member B
hsa-miR-520d-5p	0	0	1	1	1	1	ZNF326	zinc finger protein 326
hsa-miR-520d-5p	1	0	1	0	1	1	TMSB4XP8	thymosin beta 4, X-linked pseudogene 8
hsa-miR-520d-5p	1	0	1	1	1	1	ARRDC4	arrestin domain containing 4
hsa-miR-520d-5p	1	0	1	1	1	1	SPTY2D1	SPT2, Suppressor of Ty, domain containing 1 (S. cerevisiae)
hsa-miR-520d-5p	1	0	1	1	1	1	TMEM65	transmembrane protein 65
hsa-miR-520d-5p	1	0	1	0	1	1	SLC16A9	solute carrier family 16, member 9 (monocarboxylic acid transporter 9)
[truncated: 800 more rows]
