# Supplementary material for: Profiling of Selected MicroRNAs in Proliferative Eutopic Endometrium of Women with Ovarian Endometriosis
Source: Biomed Res Int. 2015 Aug 20;2015:760698. doi: 10.1155/2015/760698 (PMC4558423; doi:10.1155/2015/760698)
Supplement: Supplementary file 1 — Table I: The names of miRNAs significantly differentially expressed between eutopic endometrium of patients with endometriosis vs eutopic endometrium of patients without endometriosis. Table II: The associations between miRNA and mRNA, which presents detailed results of the search of six major databases i.e targetscan, tarbase, miranda, mirbase, mirtarget2 and pictar. [file 760698.f1.zip › 760698.f1/Table II/hsa-miR-520f.tsv]

miR	targetscan	tarbase	miranda	mirbase	mirtarget2	pictar	GeneSymbol	GeneName
hsa-miR-520f	1	0	1	0	1	1	KIAA0355	KIAA0355
hsa-miR-520f	1	0	1	1	1	1	ABCC5	ATP-binding cassette, sub-family C (CFTR/MRP), member 5
hsa-miR-520f	1	0	1	0	1	1	PTPRT	protein tyrosine phosphatase, receptor type, T
hsa-miR-520f	0	0	1	1	1	1	C2CD2L	C2CD2-like
hsa-miR-520f	0	0	1	1	1	1	PEG3	paternally expressed 3
hsa-miR-520f	1	0	1	1	0	0	DENND4B	DENN/MADD domain containing 4B
hsa-miR-520f	1	0	1	0	1	1	CEP350	centrosomal protein 350kDa
hsa-miR-520f	1	0	1	1	1	1	RNGTT	RNA guanylyltransferase and 5'-phosphatase
hsa-miR-520f	0	0	1	1	0	0	ZNF862	zinc finger protein 862
hsa-miR-520f	1	0	1	1	1	1	GREB1	growth regulation by estrogen in breast cancer 1
hsa-miR-520f	1	0	1	1	1	1	SLC4A7	solute carrier family 4, sodium bicarbonate cotransporter, member 7
hsa-miR-520f	1	0	1	1	1	1	HIPK1	homeodomain interacting protein kinase 1
hsa-miR-520f	0	0	1	1	0	0	FAM169A	family with sequence similarity 169, member A
hsa-miR-520f	1	0	1	1	1	1	RNMT	RNA (guanine-7-) methyltransferase
hsa-miR-520f	1	0	1	0	0	0	DTX4	deltex homolog 4 (Drosophila)
hsa-miR-520f	1	0	1	1	1	1	CPEB3	cytoplasmic polyadenylation element binding protein 3
hsa-miR-520f	1	0	1	1	1	1	RGL1	ral guanine nucleotide dissociation stimulator-like 1
hsa-miR-520f	0	0	1	1	1	1	TBC1D30	TBC1 domain family, member 30
hsa-miR-520f	1	0	1	1	0	0	FRMD4B	FERM domain containing 4B
hsa-miR-520f	1	0	1	1	1	1	FOXJ3	forkhead box J3
hsa-miR-520f	1	0	1	0	1	1	GPR158	G protein-coupled receptor 158
hsa-miR-520f	1	0	1	1	1	1	RIMKLB	ribosomal modification protein rimK-like family member B
hsa-miR-520f	1	0	1	1	1	1	MKL2	MKL/myocardin-like 2
hsa-miR-520f	1	0	1	1	1	1	PCDH19	protocadherin 19
hsa-miR-520f	1	0	1	0	1	1	KCTD16	potassium channel tetramerisation domain containing 16
hsa-miR-520f	1	0	1	1	0	0	CARNS1	carnosine synthase 1
hsa-miR-520f	0	0	1	0	1	1	KIAA1468	KIAA1468
hsa-miR-520f	1	0	1	1	1	1	BAZ2B	bromodomain adjacent to zinc finger domain, 2B
hsa-miR-520f	1	0	1	1	1	1	FAM214B	family with sequence similarity 214, member B
hsa-miR-520f	1	0	1	0	1	1	LMO3	LIM domain only 3 (rhombotin-like 2)
hsa-miR-520f	1	0	1	1	1	1	ZNF532	zinc finger protein 532
hsa-miR-520f	0	0	1	0	0	0	TTC28-AS1	TTC28 antisense RNA 1
hsa-miR-520f	0	0	1	1	0	0	PFDN5	prefoldin subunit 5
hsa-miR-520f	1	0	1	1	1	1	LCOR	ligand dependent nuclear receptor corepressor
hsa-miR-520f	1	0	1	0	1	1	JPH4	junctophilin 4
hsa-miR-520f	1	0	1	1	1	1	HNRPDL	heterogeneous nuclear ribonucleoprotein D-like
hsa-miR-520f	1	0	1	1	0	0	ADC	arginine decarboxylase
hsa-miR-520f	1	0	1	1	1	1	SH3TC2	SH3 domain and tetratricopeptide repeats 2
hsa-miR-520f	0	0	1	1	0	0	CIRH1A	cirrhosis, autosomal recessive 1A (cirhin)
hsa-miR-520f	1	0	1	0	0	0	FAT3	FAT tumor suppressor homolog 3 (Drosophila)
hsa-miR-520f	1	0	1	0	1	1	RNF43	ring finger protein 43
hsa-miR-520f	1	0	1	0	0	0	ZBTB34	zinc finger and BTB domain containing 34
hsa-miR-520f	1	0	1	1	1	1	ACBD5	acyl-CoA binding domain containing 5
hsa-miR-520f	1	0	1	1	1	1	FHOD3	formin homology 2 domain containing 3
hsa-miR-520f	1	0	1	1	1	1	RFX4	regulatory factor X, 4 (influences HLA class II expression)
hsa-miR-520f	1	0	1	1	1	1	UBR3	ubiquitin protein ligase E3 component n-recognin 3 (putative)
hsa-miR-520f	1	0	1	1	1	1	PAN3	PAN3 poly(A) specific ribonuclease subunit homolog (S. cerevisiae)
hsa-miR-520f	1	0	1	1	1	1	KCNMA1	potassium large conductance calcium-activated channel, subfamily M, alpha member 1
hsa-miR-520f	1	1	1	1	1	1	BACE1	beta-site APP-cleaving enzyme 1
hsa-miR-520f	0	0	1	1	0	0	APH1B	anterior pharynx defective 1 homolog B (C. elegans)
hsa-miR-520f	0	0	1	1	1	1	DOCK8	dedicator of cytokinesis 8
hsa-miR-520f	1	0	1	0	1	1	CCDC88A	coiled-coil domain containing 88A
hsa-miR-520f	1	0	1	1	1	1	VLDLR	very low density lipoprotein receptor
hsa-miR-520f	0	0	1	1	0	0	GAK	cyclin G associated kinase
hsa-miR-520f	0	0	1	0	1	1	ITPR1	inositol 1,4,5-trisphosphate receptor, type 1
hsa-miR-520f	1	0	1	1	1	1	BACH2	BTB and CNC homology 1, basic leucine zipper transcription factor 2
hsa-miR-520f	0	0	1	1	1	1	NLRP3	NLR family, pyrin domain containing 3
hsa-miR-520f	1	0	1	0	1	1	PCDHA13	protocadherin alpha 13
hsa-miR-520f	1	0	1	1	1	1	PCDHA4	protocadherin alpha 4
hsa-miR-520f	1	0	1	1	1	1	RPS6KA3	ribosomal protein S6 kinase, 90kDa, polypeptide 3
hsa-miR-520f	0	0	1	1	1	1	DNM1L	dynamin 1-like
hsa-miR-520f	1	0	1	1	1	1	DTNA	dystrobrevin, alpha
hsa-miR-520f	1	0	1	1	1	1	EIF4G3	eukaryotic translation initiation factor 4 gamma, 3
hsa-miR-520f	1	0	1	0	1	1	PLAG1	pleiomorphic adenoma gene 1
hsa-miR-520f	0	0	1	1	1	1	DGKI	diacylglycerol kinase, iota
hsa-miR-520f	1	0	1	1	1	1	PRKACB	protein kinase, cAMP-dependent, catalytic, beta
hsa-miR-520f	1	0	1	1	1	1	DMTF1	cyclin D binding myb-like transcription factor 1
hsa-miR-520f	0	0	1	0	1	1	NPY1R	neuropeptide Y receptor Y1
hsa-miR-520f	1	0	1	1	1	1	REV3L	REV3-like, polymerase (DNA directed), zeta, catalytic subunit
hsa-miR-520f	1	0	1	1	1	1	EPHA7	EPH receptor A7
hsa-miR-520f	1	0	1	1	1	1	TWF1	twinfilin, actin-binding protein, homolog 1 (Drosophila)
hsa-miR-520f	1	0	1	1	1	1	PPFIA1	protein tyrosine phosphatase, receptor type, f polypeptide (PTPRF), interacting protein (liprin), alpha 1
hsa-miR-520f	1	0	1	0	1	1	CHL1	cell adhesion molecule with homology to L1CAM (close homolog of L1)
hsa-miR-520f	1	0	1	1	1	1	EPHA5	EPH receptor A5
hsa-miR-520f	1	0	1	1	1	1	AEBP2	AE binding protein 2
hsa-miR-520f	1	0	1	1	1	1	ANK1	ankyrin 1, erythrocytic
hsa-miR-520f	0	0	1	1	0	0	IFT27	intraflagellar transport 27 homolog (Chlamydomonas)
hsa-miR-520f	0	0	1	1	1	1	RYR1	ryanodine receptor 1 (skeletal)
hsa-miR-520f	1	0	1	1	1	1	MINK1	misshapen-like kinase 1
hsa-miR-520f	1	0	1	1	1	1	MYO5A	myosin VA (heavy chain 12, myoxin)
hsa-miR-520f	1	0	1	1	1	1	PDLIM5	PDZ and LIM domain 5
hsa-miR-520f	0	0	1	1	0	0	CFLAR	CASP8 and FADD-like apoptosis regulator
hsa-miR-520f	0	0	1	1	1	1	IL10RA	interleukin 10 receptor, alpha
hsa-miR-520f	0	0	1	1	1	1	HLA-DQA1	major histocompatibility complex, class II, DQ alpha 1
hsa-miR-520f	1	0	1	1	1	1	CD40	CD40 molecule, TNF receptor superfamily member 5
hsa-miR-520f	1	0	1	1	1	1	ARHGEF3	Rho guanine nucleotide exchange factor (GEF) 3
hsa-miR-520f	0	0	1	1	1	1	ELOVL5	ELOVL fatty acid elongase 5
hsa-miR-520f	1	0	1	0	1	1	ADD3	adducin 3 (gamma)
hsa-miR-520f	1	0	1	1	1	1	HMGA2	high mobility group AT-hook 2
hsa-miR-520f	1	0	1	1	1	1	TEAD1	TEA domain family member 1 (SV40 transcriptional enhancer factor)
hsa-miR-520f	1	0	1	1	1	1	OSBPL10	oxysterol binding protein-like 10
hsa-miR-520f	1	0	1	1	1	1	GULP1	GULP, engulfment adaptor PTB domain containing 1
hsa-miR-520f	1	0	1	0	1	1	CAV1	caveolin 1, caveolae protein, 22kDa
hsa-miR-520f	1	0	1	1	1	1	APC	adenomatous polyposis coli
hsa-miR-520f	1	0	1	1	1	1	PICALM	phosphatidylinositol binding clathrin assembly protein
hsa-miR-520f	1	0	1	1	1	1	STX16	syntaxin 16
hsa-miR-520f	0	0	1	0	0	0	ZNRD1-AS1	ZNRD1 antisense RNA 1
hsa-miR-520f	1	0	1	0	0	0	MAP3K1	mitogen-activated protein kinase kinase kinase 1, E3 ubiquitin protein ligase
hsa-miR-520f	0	0	1	1	0	0	BMX	BMX non-receptor tyrosine kinase
hsa-miR-520f	1	0	1	1	1	1	MBNL2	muscleblind-like splicing regulator 2
hsa-miR-520f	1	0	1	1	1	1	ERLIN1	ER lipid raft associated 1
hsa-miR-520f	0	0	1	1	1	1	TEX30	testis expressed 30
hsa-miR-520f	1	0	1	1	1	1	TMEM159	transmembrane protein 159
hsa-miR-520f	1	0	1	1	1	1	TP63	tumor protein p63
hsa-miR-520f	1	0	1	0	1	1	CELF2	CUGBP, Elav-like family member 2
hsa-miR-520f	0	0	1	1	1	1	PCBP4	poly(rC) binding protein 4
hsa-miR-520f	0	0	1	1	1	1	PLEKHB1	pleckstrin homology domain containing, family B (evectins) member 1
hsa-miR-520f	0	0	1	1	0	0	FAM48A	family with sequence similarity 48, member A
hsa-miR-520f	1	0	1	1	1	1	GLS	glutaminase
hsa-miR-520f	0	0	1	1	1	1	SH2D1A	SH2 domain containing 1A
hsa-miR-520f	0	0	1	1	1	1	IL18BP	interleukin 18 binding protein
hsa-miR-520f	1	0	1	0	0	0	PPME1	protein phosphatase methylesterase 1
hsa-miR-520f	1	0	1	1	1	1	HP1BP3	heterochromatin protein 1, binding protein 3
hsa-miR-520f	0	0	1	1	1	1	DCAF6	DDB1 and CUL4 associated factor 6
hsa-miR-520f	1	0	1	1	1	1	NF2	neurofibromin 2 (merlin)
hsa-miR-520f	0	0	1	1	1	1	FAM35A	family with sequence similarity 35, member A
hsa-miR-520f	0	0	1	0	1	1	CLEC5A	C-type lectin domain family 5, member A
hsa-miR-520f	1	0	1	1	1	1	C16orf70	chromosome 16 open reading frame 70
hsa-miR-520f	0	0	1	1	0	0	GLT8D1	glycosyltransferase 8 domain containing 1
hsa-miR-520f	0	0	1	1	0	0	FXYD5	FXYD domain containing ion transport regulator 5
hsa-miR-520f	1	0	1	1	1	1	C3orf18	chromosome 3 open reading frame 18
hsa-miR-520f	0	0	1	1	1	1	SLCO2B1	solute carrier organic anion transporter family, member 2B1
hsa-miR-520f	0	0	1	1	1	1	HERPUD1	homocysteine-inducible, endoplasmic reticulum stress-inducible, ubiquitin-like domain member 1
hsa-miR-520f	1	0	1	1	0	0	TDRKH	tudor and KH domain containing
hsa-miR-520f	1	0	1	1	1	1	RSF1	remodeling and spacing factor 1
hsa-miR-520f	1	0	1	1	1	1	C21orf91	chromosome 21 open reading frame 91
hsa-miR-520f	0	0	1	1	1	1	DAZ2	deleted in azoospermia 2
hsa-miR-520f	0	0	1	0	1	1	DAZ3	deleted in azoospermia 3
hsa-miR-520f	1	0	1	1	1	1	SH3GLB1	SH3-domain GRB2-like endophilin B1
hsa-miR-520f	1	0	1	0	1	1	TRPS1	trichorhinophalangeal syndrome I
hsa-miR-520f	0	0	1	1	1	1	RANGRF	RAN guanine nucleotide release factor
hsa-miR-520f	0	0	1	0	1	1	KANSL3	KAT8 regulatory NSL complex subunit 3
hsa-miR-520f	1	0	1	1	1	1	FBXO31	F-box protein 31
hsa-miR-520f	1	0	1	1	0	0	ZBTB37	zinc finger and BTB domain containing 37
hsa-miR-520f	1	0	1	1	1	1	LETMD1	LETM1 domain containing 1
hsa-miR-520f	0	0	1	1	0	0	TTTY7	testis-specific transcript, Y-linked 7 (non-protein coding)
hsa-miR-520f	0	0	1	1	0	0	ZAN	zonadhesin
hsa-miR-520f	0	0	1	1	1	1	SLC6A15	solute carrier family 6 (neutral amino acid transporter), member 15
hsa-miR-520f	1	0	1	1	1	1	PBX3	pre-B-cell leukemia homeobox 3
hsa-miR-520f	1	0	1	0	1	1	WIPF2	WAS/WASL interacting protein family, member 2
hsa-miR-520f	1	0	1	1	1	1	LARP4	La ribonucleoprotein domain family, member 4
hsa-miR-520f	0	0	1	0	0	0	NBPF10	neuroblastoma breakpoint family, member 10
hsa-miR-520f	0	0	1	1	1	1	OLFM3	olfactomedin 3
hsa-miR-520f	0	0	1	1	0	0	SNRPN	small nuclear ribonucleoprotein polypeptide N
hsa-miR-520f	1	0	1	1	0	0	YTHDF2	YTH domain family, member 2
hsa-miR-520f	1	0	1	1	1	1	RBFOX1	RNA binding protein, fox-1 homolog (C. elegans) 1
hsa-miR-520f	1	0	1	1	0	0	FOXP2	forkhead box P2
hsa-miR-520f	0	0	1	1	0	0	SLC6A13	solute carrier family 6 (neurotransmitter transporter, GABA), member 13
hsa-miR-520f	0	0	1	1	1	1	LGI1	leucine-rich, glioma inactivated 1
hsa-miR-520f	1	0	1	1	1	1	F3	coagulation factor III (thromboplastin, tissue factor)
hsa-miR-520f	0	0	1	1	1	1	PTK7	PTK7 protein tyrosine kinase 7
hsa-miR-520f	1	0	1	1	1	1	AFF2	AF4/FMR2 family, member 2
hsa-miR-520f	1	0	1	1	1	1	PLAGL1	pleiomorphic adenoma gene-like 1
hsa-miR-520f	1	0	1	1	1	1	FLNC	filamin C, gamma
hsa-miR-520f	1	0	1	1	1	1	ILF3	interleukin enhancer binding factor 3, 90kDa
hsa-miR-520f	0	0	1	0	0	0	CACNA2D3	calcium channel, voltage-dependent, alpha 2/delta subunit 3
hsa-miR-520f	1	0	1	1	1	1	PALM2	paralemmin 2
hsa-miR-520f	0	0	1	0	1	1	SRPK1	SRSF protein kinase 1
hsa-miR-520f	1	0	1	1	1	1	EMID2	EMI domain containing 2
hsa-miR-520f	1	0	1	1	1	1	NFYA	nuclear transcription factor Y, alpha
hsa-miR-520f	1	0	1	1	1	1	NAV3	neuron navigator 3
hsa-miR-520f	0	0	1	1	1	1	TRDN	triadin
hsa-miR-520f	0	0	1	1	0	0	MBD1	methyl-CpG binding domain protein 1
hsa-miR-520f	1	0	1	1	1	1	ARL4C	ADP-ribosylation factor-like 4C
hsa-miR-520f	1	0	1	1	1	1	SYT14	synaptotagmin XIV
hsa-miR-520f	0	0	1	1	1	1	DBR1	debranching enzyme homolog 1 (S. cerevisiae)
hsa-miR-520f	0	0	1	1	1	1	UBE2Q2	ubiquitin-conjugating enzyme E2Q family member 2
hsa-miR-520f	0	0	1	0	0	0	TUG1	taurine upregulated 1 (non-protein coding)
hsa-miR-520f	0	0	1	0	0	0	RNF31	ring finger protein 31
hsa-miR-520f	0	0	1	0	1	1	EBF2	early B-cell factor 2
hsa-miR-520f	0	0	1	1	1	1	STOX2	storkhead box 2
hsa-miR-520f	1	0	1	1	1	1	SENP6	SUMO1/sentrin specific peptidase 6
hsa-miR-520f	1	0	1	1	1	1	RIC8B	resistance to inhibitors of cholinesterase 8 homolog B (C. elegans)
hsa-miR-520f	0	0	1	1	1	1	ARAP3	ArfGAP with RhoGAP domain, ankyrin repeat and PH domain 3
hsa-miR-520f	1	0	1	1	1	1	SLC38A2	solute carrier family 38, member 2
hsa-miR-520f	1	0	1	1	1	1	ARMC8	armadillo repeat containing 8
hsa-miR-520f	0	0	1	1	1	1	CXXC5	CXXC finger protein 5
hsa-miR-520f	0	0	1	1	1	1	RSRC2	arginine/serine-rich coiled-coil 2
hsa-miR-520f	0	0	1	1	1	1	ABCG2	ATP-binding cassette, sub-family G (WHITE), member 2
hsa-miR-520f	0	0	1	1	0	0	C17orf53	chromosome 17 open reading frame 53
hsa-miR-520f	1	0	1	1	1	1	INSIG2	insulin induced gene 2
hsa-miR-520f	1	0	1	1	1	1	C12orf23	chromosome 12 open reading frame 23
hsa-miR-520f	0	0	1	1	1	1	CCPG1	cell cycle progression 1
hsa-miR-520f	1	0	1	1	1	1	MAEA	macrophage erythroblast attacher
hsa-miR-520f	0	0	1	1	1	1	ARMC5	armadillo repeat containing 5
hsa-miR-520f	1	0	1	1	1	1	PHF20L1	PHD finger protein 20-like 1
hsa-miR-520f	1	0	1	1	1	1	POMT2	protein-O-mannosyltransferase 2
hsa-miR-520f	1	0	1	1	1	1	RAB11FIP5	RAB11 family interacting protein 5 (class I)
hsa-miR-520f	1	0	1	0	1	1	C14orf101	chromosome 14 open reading frame 101
hsa-miR-520f	0	0	1	0	1	1	FLJ14186	uncharacterized LOC401149
hsa-miR-520f	1	0	1	1	1	1	ZNF385A	zinc finger protein 385A
hsa-miR-520f	0	0	1	0	1	1	ATXN1L	ataxin 1-like
hsa-miR-520f	1	0	1	1	1	1	TAF7L	TAF7-like RNA polymerase II, TATA box binding protein (TBP)-associated factor, 50kDa
hsa-miR-520f	0	0	1	0	0	0	LOC729852	uncharacterized LOC729852
hsa-miR-520f	0	0	1	1	1	1	PLEKHS1	pleckstrin homology domain containing, family S member 1
hsa-miR-520f	1	0	1	1	1	1	MARK1	MAP/microtubule affinity-regulating kinase 1
hsa-miR-520f	0	0	1	0	1	1	TWSG1	twisted gastrulation homolog 1 (Drosophila)
hsa-miR-520f	0	0	1	1	1	1	NETO2	neuropilin (NRP) and tolloid (TLL)-like 2
hsa-miR-520f	1	0	1	1	1	1	ZNF462	zinc finger protein 462
hsa-miR-520f	1	0	1	0	1	1	ZKSCAN1	zinc finger with KRAB and SCAN domains 1
hsa-miR-520f	0	0	1	1	1	1	RAB37	RAB37, member RAS oncogene family
hsa-miR-520f	1	0	1	1	1	1	C7orf43	chromosome 7 open reading frame 43
hsa-miR-520f	0	0	1	0	0	0	LOC283508	uncharacterized LOC283508
hsa-miR-520f	0	0	1	1	1	1	PRR5L	proline rich 5 like
hsa-miR-520f	0	0	1	1	1	1	C8orf46	chromosome 8 open reading frame 46
hsa-miR-520f	1	0	1	1	1	1	SGK1	serum/glucocorticoid regulated kinase 1
hsa-miR-520f	0	0	1	1	1	1	TOX2	TOX high mobility group box family member 2
hsa-miR-520f	0	0	1	0	0	0	LOC154092	uncharacterized LOC154092
hsa-miR-520f	1	0	1	1	0	0	SPEG	SPEG complex locus
hsa-miR-520f	0	0	1	0	0	0	LOC401242	uncharacterized LOC401242
hsa-miR-520f	1	0	1	1	1	1	SFXN2	sideroflexin 2
hsa-miR-520f	0	0	1	0	0	0	FLJ12825	uncharacterized LOC440101
hsa-miR-520f	0	0	1	0	0	0	LOC441204	uncharacterized LOC441204
hsa-miR-520f	0	0	1	0	0	0	LOC255187	hCG1980447
hsa-miR-520f	0	0	1	1	1	1	DST	dystonin
hsa-miR-520f	1	0	1	1	0	0	QARS	glutaminyl-tRNA synthetase
hsa-miR-520f	0	0	1	1	0	0	COMMD4	COMM domain containing 4
hsa-miR-520f	0	0	1	0	0	0	TUBA3FP	tubulin, alpha 3f, pseudogene
hsa-miR-520f	0	0	1	0	0	0	LOC100125918	uncharacterized LOC100125918
hsa-miR-520f	0	0	1	1	1	1	MS4A14	membrane-spanning 4-domains, subfamily A, member 14
hsa-miR-520f	0	0	1	1	1	1	ZBTB26	zinc finger and BTB domain containing 26
hsa-miR-520f	0	0	1	1	1	1	RANBP17	RAN binding protein 17
hsa-miR-520f	0	0	1	0	1	1	CHURC1	churchill domain containing 1
hsa-miR-520f	0	0	1	1	0	0	FAM156A	family with sequence similarity 156, member A
hsa-miR-520f	1	0	1	1	1	1	ANKRD29	ankyrin repeat domain 29
hsa-miR-520f	1	0	1	1	1	1	IST1	increased sodium tolerance 1 homolog (yeast)
hsa-miR-520f	0	0	1	1	0	0	CD320	CD320 molecule
hsa-miR-520f	1	0	1	1	1	1	C6orf89	chromosome 6 open reading frame 89
hsa-miR-520f	0	0	1	0	1	1	CCDC68	coiled-coil domain containing 68
hsa-miR-520f	1	0	1	1	0	0	HS6ST1	heparan sulfate 6-O-sulfotransferase 1
hsa-miR-520f	0	0	1	0	1	1	UHMK1	U2AF homology motif (UHM) kinase 1
hsa-miR-520f	0	0	1	1	0	0	MRPL46	mitochondrial ribosomal protein L46
hsa-miR-520f	0	0	1	1	1	1	ZFAND2B	zinc finger, AN1-type domain 2B
hsa-miR-520f	0	0	1	1	0	0	CPAMD8	C3 and PZP-like, alpha-2-macroglobulin domain containing 8
hsa-miR-520f	1	0	1	1	1	1	BOC	Boc homolog (mouse)
hsa-miR-520f	0	0	1	0	0	0	LOC152225	uncharacterized LOC152225
hsa-miR-520f	0	0	1	1	1	1	STBD1	starch binding domain 1
hsa-miR-520f	0	0	1	1	1	1	KBTBD4	kelch repeat and BTB (POZ) domain containing 4
hsa-miR-520f	1	0	1	1	1	1	FBXW2	F-box and WD repeat domain containing 2
hsa-miR-520f	1	0	1	1	1	1	TSN	translin
hsa-miR-520f	1	0	1	1	1	1	LUC7L2	LUC7-like 2 (S. cerevisiae)
hsa-miR-520f	0	0	1	1	1	1	NRCAM	neuronal cell adhesion molecule
hsa-miR-520f	1	0	1	1	1	1	GNG2	guanine nucleotide binding protein (G protein), gamma 2
hsa-miR-520f	0	0	1	1	0	0	APOBEC3G	apolipoprotein B mRNA editing enzyme, catalytic polypeptide-like 3G
hsa-miR-520f	0	0	1	1	0	0	CDC25B	cell division cycle 25 homolog B (S. pombe)
hsa-miR-520f	0	0	1	0	1	1	SSPN	sarcospan
hsa-miR-520f	0	0	1	1	1	1	STAMBPL1	STAM binding protein-like 1
hsa-miR-520f	1	0	1	1	1	1	GPD2	glycerol-3-phosphate dehydrogenase 2 (mitochondrial)
hsa-miR-520f	0	0	1	1	1	1	AP5S1	adaptor-related protein complex 5, sigma 1 subunit
hsa-miR-520f	0	0	1	0	0	0	LOC283887	uncharacterized LOC283887
hsa-miR-520f	0	0	1	1	0	0	METTL3	methyltransferase like 3
hsa-miR-520f	1	0	1	1	1	1	SPTBN1	spectrin, beta, non-erythrocytic 1
hsa-miR-520f	0	0	1	1	1	1	TGFBI	transforming growth factor, beta-induced, 68kDa
hsa-miR-520f	0	0	1	1	1	1	CYP11B1	cytochrome P450, family 11, subfamily B, polypeptide 1
hsa-miR-520f	0	0	1	1	0	0	WBP1	WW domain binding protein 1
hsa-miR-520f	1	0	1	1	1	1	KCND1	potassium voltage-gated channel, Shal-related subfamily, member 1
hsa-miR-520f	0	0	1	1	1	1	NSRP1	nuclear speckle splicing regulatory protein 1
hsa-miR-520f	1	0	1	1	1	1	KLC2	kinesin light chain 2
hsa-miR-520f	1	0	1	1	1	1	SIAH1	siah E3 ubiquitin protein ligase 1
hsa-miR-520f	1	0	1	0	1	1	GATAD2B	GATA zinc finger domain containing 2B
hsa-miR-520f	0	0	1	1	1	1	NMD3	NMD3 homolog (S. cerevisiae)
hsa-miR-520f	0	0	1	0	0	0	FLJ37505	uncharacterized LOC400087
hsa-miR-520f	0	0	1	0	1	1	AGBL4	ATP/GTP binding protein-like 4
hsa-miR-520f	1	0	1	1	1	1	LPPR2	lipid phosphate phosphatase-related protein type 2
hsa-miR-520f	1	0	1	1	1	1	CPNE8	copine VIII
hsa-miR-520f	1	0	1	1	1	1	TBC1D20	TBC1 domain family, member 20
hsa-miR-520f	1	0	1	1	1	1	KLF4	Kruppel-like factor 4 (gut)
hsa-miR-520f	1	0	1	1	1	1	RASGEF1A	RasGEF domain family, member 1A
hsa-miR-520f	0	0	1	0	0	0	LINC00486	long intergenic non-protein coding RNA 486
hsa-miR-520f	0	0	1	1	1	1	CHRM5	cholinergic receptor, muscarinic 5
hsa-miR-520f	0	0	1	0	0	0	LOC730101	uncharacterized LOC730101
hsa-miR-520f	1	0	1	1	1	1	SPATS2	spermatogenesis associated, serine-rich 2
hsa-miR-520f	1	0	1	1	1	1	ZC3H11A	zinc finger CCCH-type containing 11A
hsa-miR-520f	1	0	1	0	1	1	CLIC4	chloride intracellular channel 4
hsa-miR-520f	1	0	1	1	1	1	EPB41L4A	erythrocyte membrane protein band 4.1 like 4A
hsa-miR-520f	1	0	1	1	1	1	ACSL1	acyl-CoA synthetase long-chain family member 1
hsa-miR-520f	0	0	1	1	0	0	CXorf56	chromosome X open reading frame 56
hsa-miR-520f	1	0	1	1	1	1	CRTC2	CREB regulated transcription coactivator 2
hsa-miR-520f	0	0	1	1	0	0	ASCC1	activating signal cointegrator 1 complex subunit 1
hsa-miR-520f	1	0	1	0	1	1	KBTBD8	kelch repeat and BTB (POZ) domain containing 8
hsa-miR-520f	1	0	1	1	1	1	CCDC141	coiled-coil domain containing 141
hsa-miR-520f	0	0	1	0	1	1	TNFAIP8	tumor necrosis factor, alpha-induced protein 8
hsa-miR-520f	0	0	1	0	0	0	LRRC69	leucine rich repeat containing 69
hsa-miR-520f	0	0	1	1	1	1	FAM217A	family with sequence similarity 217, member A
hsa-miR-520f	0	0	1	0	0	0	LINC00293	long intergenic non-protein coding RNA 293
hsa-miR-520f	1	0	1	1	1	1	HOOK1	hook homolog 1 (Drosophila)
hsa-miR-520f	1	0	1	1	0	0	DNM2	dynamin 2
hsa-miR-520f	0	0	1	1	1	1	ARFGAP2	ADP-ribosylation factor GTPase activating protein 2
hsa-miR-520f	1	0	1	1	1	1	LARP1B	La ribonucleoprotein domain family, member 1B
hsa-miR-520f	1	0	1	0	1	1	UNC5D	unc-5 homolog D (C. elegans)
hsa-miR-520f	0	0	1	1	0	0	SLC14A2	solute carrier family 14 (urea transporter), member 2
hsa-miR-520f	0	0	1	1	0	0	KIAA0146	KIAA0146
hsa-miR-520f	1	0	1	1	1	1	AGAP2	ArfGAP with GTPase domain, ankyrin repeat and PH domain 2
hsa-miR-520f	0	0	1	1	0	0	PRICKLE1	prickle homolog 1 (Drosophila)
hsa-miR-520f	0	0	1	1	0	0	YSK4	YSK4 Sps1/Ste20-related kinase homolog (S. cerevisiae)
hsa-miR-520f	0	0	1	1	0	0	CFP	complement factor properdin
hsa-miR-520f	1	0	1	1	1	1	ZNF25	zinc finger protein 25
hsa-miR-520f	1	0	1	1	1	1	ZNF275	zinc finger protein 275
hsa-miR-520f	0	0	1	1	0	0	DCLK3	doublecortin-like kinase 3
hsa-miR-520f	1	0	1	1	1	1	FGD5	FYVE, RhoGEF and PH domain containing 5
hsa-miR-520f	1	0	1	1	1	1	PLEKHH1	pleckstrin homology domain containing, family H (with MyTH4 domain) member 1
hsa-miR-520f	1	0	1	1	1	1	MDGA2	MAM domain containing glycosylphosphatidylinositol anchor 2
hsa-miR-520f	1	0	1	1	1	1	EGLN3	egl nine homolog 3 (C. elegans)
hsa-miR-520f	0	0	1	0	0	0	LGALS17A	Charcot-Leyden crystal protein pseudogene
hsa-miR-520f	1	0	1	1	1	1	EPAS1	endothelial PAS domain protein 1
hsa-miR-520f	1	0	1	0	0	0	GPR137C	G protein-coupled receptor 137C
hsa-miR-520f	1	0	1	1	0	0	KCNC1	potassium voltage-gated channel, Shaw-related subfamily, member 1
hsa-miR-520f	0	0	1	1	0	0	PPP1R18	protein phosphatase 1, regulatory subunit 18
hsa-miR-520f	0	0	1	1	1	1	C3orf67	chromosome 3 open reading frame 67
hsa-miR-520f	0	0	1	1	1	1	KANSL1L	KAT8 regulatory NSL complex subunit 1-like
hsa-miR-520f	1	0	1	1	1	1	C11orf30	chromosome 11 open reading frame 30
hsa-miR-520f	0	0	1	1	0	0	GABRA2	gamma-aminobutyric acid (GABA) A receptor, alpha 2
hsa-miR-520f	1	0	1	1	1	1	RGMA	RGM domain family, member A
hsa-miR-520f	1	0	1	1	1	1	DENND5B	DENN/MADD domain containing 5B
hsa-miR-520f	0	0	1	1	1	1	MKX	mohawk homeobox
hsa-miR-520f	0	0	1	1	1	1	DENND5A	DENN/MADD domain containing 5A
hsa-miR-520f	0	0	1	0	0	0	LOC613266	uncharacterized LOC613266
hsa-miR-520f	1	0	1	1	1	1	KPNA1	karyopherin alpha 1 (importin alpha 5)
hsa-miR-520f	1	0	1	0	0	0	MSL1	male-specific lethal 1 homolog (Drosophila)
hsa-miR-520f	0	0	1	1	0	0	RPRD2	regulation of nuclear pre-mRNA domain containing 2
hsa-miR-520f	0	0	1	1	1	1	RBM46	RNA binding motif protein 46
hsa-miR-520f	1	0	1	1	0	0	UBN2	ubinuclein 2
hsa-miR-520f	1	0	1	1	1	1	FAM122B	family with sequence similarity 122B
hsa-miR-520f	1	0	1	1	0	0	ATXN7L3	ataxin 7-like 3
hsa-miR-520f	0	0	1	1	1	1	C18orf54	chromosome 18 open reading frame 54
hsa-miR-520f	1	0	1	1	1	1	LRIG1	leucine-rich repeats and immunoglobulin-like domains 1
hsa-miR-520f	1	0	1	1	1	1	DLG2	discs, large homolog 2 (Drosophila)
hsa-miR-520f	1	0	1	0	1	1	GPR180	G protein-coupled receptor 180
hsa-miR-520f	0	0	1	1	0	0	TMEM151B	transmembrane protein 151B
hsa-miR-520f	0	0	1	0	0	0	RPL23AP53	ribosomal protein L23a pseudogene 53
hsa-miR-520f	0	0	1	1	1	1	KLC4	kinesin light chain 4
hsa-miR-520f	1	0	1	1	1	1	MKRN1	makorin ring finger protein 1
hsa-miR-520f	0	0	1	0	0	0	LOC100127955	uncharacterized LOC100127955
hsa-miR-520f	0	0	1	1	0	0	FAM54B	family with sequence similarity 54, member B
hsa-miR-520f	1	0	1	1	1	1	ENAH	enabled homolog (Drosophila)
hsa-miR-520f	1	0	1	1	1	1	RALB	v-ral simian leukemia viral oncogene homolog B (ras related; GTP binding protein)
hsa-miR-520f	1	0	1	1	1	1	CXorf23	chromosome X open reading frame 23
hsa-miR-520f	1	0	1	1	1	1	CROT	carnitine O-octanoyltransferase
hsa-miR-520f	1	0	1	0	1	1	CAPRIN1	cell cycle associated protein 1
hsa-miR-520f	0	0	1	0	0	0	FAM71E2	family with sequence similarity 71, member E2
hsa-miR-520f	1	0	1	0	1	1	YOD1	YOD1 OTU deubiquinating enzyme 1 homolog (S. cerevisiae)
hsa-miR-520f	0	0	1	1	1	1	MCU	mitochondrial calcium uniporter
hsa-miR-520f	0	0	1	0	0	0	LRRC9	leucine rich repeat containing 9
hsa-miR-520f	0	0	1	1	0	0	TMEM136	transmembrane protein 136
hsa-miR-520f	1	0	1	1	1	1	SLC12A6	solute carrier family 12 (potassium/chloride transporters), member 6
hsa-miR-520f	1	0	1	0	1	1	KDM2A	lysine (K)-specific demethylase 2A
hsa-miR-520f	0	0	1	0	0	0	AFG3L1P	AFG3 ATPase family gene 3-like 1 (S. cerevisiae), pseudogene
hsa-miR-520f	1	0	1	1	1	1	KCTD12	potassium channel tetramerisation domain containing 12
hsa-miR-520f	1	0	1	1	1	1	FRYL	FRY-like
hsa-miR-520f	1	0	1	0	1	1	KPNA6	karyopherin alpha 6 (importin alpha 7)
hsa-miR-520f	0	0	1	1	1	1	ATXN2	ataxin 2
hsa-miR-520f	0	0	1	0	0	0	EMBP1	embigin pseudogene 1
hsa-miR-520f	1	0	1	1	1	1	ADAMTSL1	ADAMTS-like 1
hsa-miR-520f	1	0	1	0	1	1	CYB561D1	cytochrome b-561 domain containing 1
hsa-miR-520f	1	0	1	1	1	1	CSNK1D	casein kinase 1, delta
hsa-miR-520f	1	0	1	1	1	1	SYDE1	synapse defective 1, Rho GTPase, homolog 1 (C. elegans)
hsa-miR-520f	1	0	1	1	1	1	CHMP3	charged multivesicular body protein 3
hsa-miR-520f	0	0	1	1	0	0	HEATR8	HEAT repeat containing 8
hsa-miR-520f	0	0	1	0	0	0	LOC494141	mitochondrial carrier triple repeat 1 pseudogene
hsa-miR-520f	0	0	1	0	0	0	LOC390660	FLJ00317 protein
hsa-miR-520f	1	0	1	0	1	1	ESRRG	estrogen-related receptor gamma
hsa-miR-520f	0	0	1	1	1	1	ZNF680	zinc finger protein 680
hsa-miR-520f	1	0	1	1	1	1	MAP3K14	mitogen-activated protein kinase kinase kinase 14
hsa-miR-520f	0	0	1	1	0	0	DTHD1	death domain containing 1
hsa-miR-520f	1	0	1	1	1	1	LRRK2	leucine-rich repeat kinase 2
hsa-miR-520f	0	0	1	0	0	0	AGAP9	ArfGAP with GTPase domain, ankyrin repeat and PH domain 9
hsa-miR-520f	1	0	1	1	1	1	RPS6KA4	ribosomal protein S6 kinase, 90kDa, polypeptide 4
hsa-miR-520f	1	0	1	1	1	1	CYYR1	cysteine/tyrosine-rich 1
hsa-miR-520f	0	0	1	1	1	1	C5orf28	chromosome 5 open reading frame 28
hsa-miR-520f	1	0	1	1	1	1	LUC7L3	LUC7-like 3 (S. cerevisiae)
hsa-miR-520f	1	0	1	1	1	1	NOVA1	neuro-oncological ventral antigen 1
hsa-miR-520f	1	0	1	0	1	1	TEAD3	TEA domain family member 3
hsa-miR-520f	1	0	1	1	1	1	AHCYL1	adenosylhomocysteinase-like 1
hsa-miR-520f	0	0	1	0	0	0	PART1	prostate androgen-regulated transcript 1 (non-protein coding)
hsa-miR-520f	1	0	1	1	1	1	NECAP1	NECAP endocytosis associated 1
hsa-miR-520f	0	0	1	1	0	0	FAAH	fatty acid amide hydrolase
hsa-miR-520f	0	0	1	0	1	1	NEK1	NIMA (never in mitosis gene a)-related kinase 1
hsa-miR-520f	0	0	1	1	0	0	KAT8	K(lysine) acetyltransferase 8
hsa-miR-520f	0	0	1	1	0	0	NEK7	NIMA (never in mitosis gene a)-related kinase 7
hsa-miR-520f	0	0	1	1	0	0	PLK1S1	polo-like kinase 1 substrate 1
hsa-miR-520f	0	0	1	0	0	0	POM121L8P	POM121 transmembrane nucleoporin-like 8 pseudogene
hsa-miR-520f	1	0	1	1	1	1	ARF6	ADP-ribosylation factor 6
hsa-miR-520f	0	0	1	1	0	0	FAM153B	family with sequence similarity 153, member B
hsa-miR-520f	0	0	1	1	1	1	ARIH1	ariadne homolog, ubiquitin-conjugating enzyme E2 binding protein, 1 (Drosophila)
hsa-miR-520f	0	0	1	1	0	0	MSH5	mutS homolog 5 (E. coli)
hsa-miR-520f	0	0	1	1	0	0	SAPCD1	suppressor APC domain containing 1
hsa-miR-520f	0	0	1	1	1	1	GFAP	glial fibrillary acidic protein
hsa-miR-520f	1	0	1	0	1	1	DCDC2	doublecortin domain containing 2
hsa-miR-520f	0	0	1	1	1	1	KIDINS220	kinase D-interacting substrate, 220kDa
hsa-miR-520f	0	0	1	0	0	0	KIAA0913	KIAA0913
hsa-miR-520f	1	0	1	0	1	1	GPR85	G protein-coupled receptor 85
hsa-miR-520f	0	0	1	1	1	1	SLC30A10	solute carrier family 30, member 10
hsa-miR-520f	1	0	1	0	1	1	GRIN3A	glutamate receptor, ionotropic, N-methyl-D-aspartate 3A
hsa-miR-520f	1	0	1	0	1	1	FAM19A1	family with sequence similarity 19 (chemokine (C-C motif)-like), member A1
hsa-miR-520f	0	0	1	1	1	1	ARL13B	ADP-ribosylation factor-like 13B
hsa-miR-520f	1	0	1	1	1	1	SLC30A8	solute carrier family 30 (zinc transporter), member 8
hsa-miR-520f	1	0	1	1	1	1	YTHDF3	YTH domain family, member 3
hsa-miR-520f	1	0	1	1	1	1	MIER1	mesoderm induction early response 1 homolog (Xenopus laevis)
hsa-miR-520f	0	0	1	1	1	1	BEND7	BEN domain containing 7
hsa-miR-520f	0	0	1	1	1	1	EGFLAM	EGF-like, fibronectin type III and laminin G domains
hsa-miR-520f	1	0	1	1	0	0	USP24	ubiquitin specific peptidase 24
hsa-miR-520f	0	0	1	1	1	1	TTC19	tetratricopeptide repeat domain 19
hsa-miR-520f	1	0	1	1	1	1	RNF180	ring finger protein 180
hsa-miR-520f	0	0	1	1	1	1	YAP1	Yes-associated protein 1
hsa-miR-520f	0	0	1	1	1	1	NEK9	NIMA (never in mitosis gene a)- related kinase 9
hsa-miR-520f	0	0	1	1	1	1	CCDC125	coiled-coil domain containing 125
hsa-miR-520f	0	0	1	1	1	1	U2AF1	U2 small nuclear RNA auxiliary factor 1
hsa-miR-520f	0	0	1	0	0	0	FAM225A	family with sequence similarity 225, member A (non-protein coding)
hsa-miR-520f	1	0	1	1	1	1	FBXO3	F-box protein 3
hsa-miR-520f	1	0	1	1	1	1	EHMT1	euchromatic histone-lysine N-methyltransferase 1
hsa-miR-520f	0	0	1	1	1	1	CCDC132	coiled-coil domain containing 132
hsa-miR-520f	0	0	1	0	1	1	PAPD4	PAP associated domain containing 4
hsa-miR-520f	1	0	1	1	1	1	LPP	LIM domain containing preferred translocation partner in lipoma
hsa-miR-520f	1	0	1	0	1	1	MEF2C	myocyte enhancer factor 2C
hsa-miR-520f	0	0	1	1	1	1	NARG2	NMDA receptor regulated 2
hsa-miR-520f	0	0	1	1	1	1	CCDC66	coiled-coil domain containing 66
hsa-miR-520f	0	0	1	1	0	0	FCRL3	Fc receptor-like 3
hsa-miR-520f	0	0	1	1	1	1	NFE2L1	nuclear factor (erythroid-derived 2)-like 1
hsa-miR-520f	1	0	1	1	1	1	CEP164	centrosomal protein 164kDa
hsa-miR-520f	1	0	1	1	1	1	NRP1	neuropilin 1
hsa-miR-520f	0	0	1	1	1	1	SLC30A5	solute carrier family 30 (zinc transporter), member 5
hsa-miR-520f	0	0	1	1	1	1	CAND1	cullin-associated and neddylation-dissociated 1
hsa-miR-520f	1	0	1	1	1	1	IL17RD	interleukin 17 receptor D
hsa-miR-520f	1	0	1	1	1	1	ANKRD12	ankyrin repeat domain 12
hsa-miR-520f	1	0	1	1	1	1	SLC24A4	solute carrier family 24 (sodium/potassium/calcium exchanger), member 4
hsa-miR-520f	1	0	1	0	1	1	JAZF1	JAZF zinc finger 1
hsa-miR-520f	1	0	1	1	1	1	CADM2	cell adhesion molecule 2
hsa-miR-520f	1	0	1	1	1	1	C1orf131	chromosome 1 open reading frame 131
hsa-miR-520f	1	0	1	1	1	1	RICTOR	RPTOR independent companion of MTOR, complex 2
hsa-miR-520f	1	0	1	1	1	1	TSHZ3	teashirt zinc finger homeobox 3
hsa-miR-520f	1	0	1	1	1	1	RNF38	ring finger protein 38
hsa-miR-520f	0	0	1	1	0	0	TMEM134	transmembrane protein 134
hsa-miR-520f	1	0	1	1	1	1	IKZF2	IKAROS family zinc finger 2 (Helios)
hsa-miR-520f	0	0	1	0	0	0	PMCHL1	pro-melanin-concentrating hormone-like 1, pseudogene
hsa-miR-520f	0	0	1	0	0	0	PMCHL2	pro-melanin-concentrating hormone-like 2, pseudogene
hsa-miR-520f	0	0	1	0	1	1	STEAP2	STEAP family member 2, metalloreductase
hsa-miR-520f	0	0	1	1	1	1	KLHL7	kelch-like 7 (Drosophila)
hsa-miR-520f	0	0	1	1	1	1	LGALS8	lectin, galactoside-binding, soluble, 8
hsa-miR-520f	1	0	1	1	1	1	TACC1	transforming, acidic coiled-coil containing protein 1
hsa-miR-520f	0	0	1	0	0	0	KGFLP1	fibroblast growth factor 7 pseudogene
hsa-miR-520f	1	0	1	1	1	1	ANGPT1	angiopoietin 1
hsa-miR-520f	1	0	1	1	1	1	CNRIP1	cannabinoid receptor interacting protein 1
hsa-miR-520f	1	0	1	1	1	1	WDR26	WD repeat domain 26
hsa-miR-520f	1	0	1	1	1	1	BCL11A	B-cell CLL/lymphoma 11A (zinc finger protein)
hsa-miR-520f	0	0	1	1	1	1	CCDC83	coiled-coil domain containing 83
hsa-miR-520f	1	0	1	1	1	1	PBRM1	polybromo 1
hsa-miR-520f	1	0	1	1	1	1	LAMA3	laminin, alpha 3
hsa-miR-520f	0	0	1	1	1	1	GCOM1	GRINL1A complex locus 1
hsa-miR-520f	1	0	1	1	1	1	TAB3	TGF-beta activated kinase 1/MAP3K7 binding protein 3
hsa-miR-520f	1	0	1	1	1	1	CAMTA1	calmodulin binding transcription activator 1
hsa-miR-520f	1	0	1	1	1	1	TMCC2	transmembrane and coiled-coil domain family 2
hsa-miR-520f	0	0	1	1	1	1	KDELC2	KDEL (Lys-Asp-Glu-Leu) containing 2
hsa-miR-520f	0	0	1	1	1	1	TNFRSF19	tumor necrosis factor receptor superfamily, member 19
hsa-miR-520f	1	0	1	1	1	1	SSX2IP	synovial sarcoma, X breakpoint 2 interacting protein
hsa-miR-520f	0	0	1	1	1	1	POTEG	POTE ankyrin domain family, member G
hsa-miR-520f	1	0	1	1	1	1	MECP2	methyl CpG binding protein 2 (Rett syndrome)
hsa-miR-520f	1	0	1	1	1	1	RBM24	RNA binding motif protein 24
hsa-miR-520f	1	0	1	1	0	0	ADAM15	ADAM metallopeptidase domain 15
hsa-miR-520f	0	0	1	1	1	1	C9orf78	chromosome 9 open reading frame 78
hsa-miR-520f	1	0	1	1	0	0	CDK8	cyclin-dependent kinase 8
hsa-miR-520f	1	0	1	1	1	1	QKI	QKI, KH domain containing, RNA binding
hsa-miR-520f	1	0	1	1	1	1	CD109	CD109 molecule
hsa-miR-520f	0	0	1	1	0	0	NBPF8	neuroblastoma breakpoint family, member 8
hsa-miR-520f	0	0	1	1	0	0	ARMC9	armadillo repeat containing 9
hsa-miR-520f	1	0	1	1	1	1	AMOT	angiomotin
hsa-miR-520f	0	0	1	0	0	0	GBAP1	glucosidase, beta, acid pseudogene 1
hsa-miR-520f	1	0	1	0	1	1	FAM46A	family with sequence similarity 46, member A
hsa-miR-520f	1	0	1	1	1	1	TMUB2	transmembrane and ubiquitin-like domain containing 2
hsa-miR-520f	0	0	1	1	1	1	C20orf24	chromosome 20 open reading frame 24
hsa-miR-520f	1	0	1	1	1	1	TSPAN14	tetraspanin 14
hsa-miR-520f	1	0	1	1	0	0	POLR3D	polymerase (RNA) III (DNA directed) polypeptide D, 44kDa
hsa-miR-520f	1	0	1	1	1	1	TSEN34	tRNA splicing endonuclease 34 homolog (S. cerevisiae)
hsa-miR-520f	1	0	1	1	1	1	SEC23B	Sec23 homolog B (S. cerevisiae)
hsa-miR-520f	1	0	1	1	1	1	KIAA1191	KIAA1191
hsa-miR-520f	1	0	1	0	1	1	DDX3X	DEAD (Asp-Glu-Ala-Asp) box polypeptide 3, X-linked
hsa-miR-520f	1	0	1	1	1	1	LMBR1L	limb region 1 homolog (mouse)-like
hsa-miR-520f	0	0	1	1	0	0	PRR11	proline rich 11
hsa-miR-520f	1	0	1	1	1	1	SHOX2	short stature homeobox 2
hsa-miR-520f	0	0	1	1	1	1	TMEM30A	transmembrane protein 30A
hsa-miR-520f	1	0	1	1	1	1	GRIA2	glutamate receptor, ionotropic, AMPA 2
hsa-miR-520f	1	0	1	1	1	1	SLC46A1	solute carrier family 46 (folate transporter), member 1
hsa-miR-520f	0	0	1	0	1	1	GDE1	glycerophosphodiester phosphodiesterase 1
hsa-miR-520f	1	0	1	1	1	1	GDAP2	ganglioside induced differentiation associated protein 2
hsa-miR-520f	0	0	1	1	1	1	H2AFY	H2A histone family, member Y
hsa-miR-520f	0	0	1	1	1	1	PCNP	PEST proteolytic signal containing nuclear protein
hsa-miR-520f	1	0	1	1	1	1	ETF1	eukaryotic translation termination factor 1
hsa-miR-520f	1	0	1	1	1	1	PAPOLA	poly(A) polymerase alpha
hsa-miR-520f	0	0	1	0	0	0	KLHL15	kelch-like 15 (Drosophila)
hsa-miR-520f	1	0	1	1	1	1	ZNF512	zinc finger protein 512
hsa-miR-520f	0	0	1	1	0	0	MAST2	microtubule associated serine/threonine kinase 2
hsa-miR-520f	0	0	1	0	1	1	ZNF37A	zinc finger protein 37A
hsa-miR-520f	1	0	1	0	1	1	CYBRD1	cytochrome b reductase 1
hsa-miR-520f	1	0	1	1	1	1	WIPI2	WD repeat domain, phosphoinositide interacting 2
hsa-miR-520f	1	0	1	1	1	1	ELF4	E74-like factor 4 (ets domain transcription factor)
hsa-miR-520f	1	0	1	1	0	0	USP53	ubiquitin specific peptidase 53
hsa-miR-520f	0	0	1	1	0	0	ZBTB32	zinc finger and BTB domain containing 32
hsa-miR-520f	0	0	1	0	0	0	FAM200B	family with sequence similarity 200, member B
hsa-miR-520f	1	0	1	1	1	1	ARHGEF9	Cdc42 guanine nucleotide exchange factor (GEF) 9
hsa-miR-520f	1	0	1	1	1	1	SUZ12	suppressor of zeste 12 homolog (Drosophila)
hsa-miR-520f	1	0	1	1	1	1	SUV420H2	suppressor of variegation 4-20 homolog 2 (Drosophila)
hsa-miR-520f	1	0	1	1	1	1	ZMAT4	zinc finger, matrin-type 4
hsa-miR-520f	1	0	1	1	1	1	FAM222A	family with sequence similarity 222, member A
hsa-miR-520f	0	0	1	1	0	0	PTPMT1	protein tyrosine phosphatase, mitochondrial 1
hsa-miR-520f	1	0	1	0	1	1	BTF3L4	basic transcription factor 3-like 4
hsa-miR-520f	1	0	1	0	1	1	ARHGAP26	Rho GTPase activating protein 26
hsa-miR-520f	0	0	1	0	0	0	LOC728196	uncharacterized LOC728196
hsa-miR-520f	0	0	1	1	0	0	CA5BP1	carbonic anhydrase VB pseudogene 1
hsa-miR-520f	0	0	1	0	0	0	LOC284260	uncharacterized LOC284260
hsa-miR-520f	0	0	1	1	1	1	RNF103	ring finger protein 103
hsa-miR-520f	1	0	1	1	1	1	BEND6	BEN domain containing 6
hsa-miR-520f	0	0	1	0	0	0	DPY19L2P2	dpy-19-like 2 pseudogene 2 (C. elegans)
hsa-miR-520f	0	0	1	1	0	0	C16orf91	chromosome 16 open reading frame 91
hsa-miR-520f	1	0	1	0	1	1	CDK19	cyclin-dependent kinase 19
hsa-miR-520f	1	0	1	1	1	1	NIPA1	non imprinted in Prader-Willi/Angelman syndrome 1
hsa-miR-520f	0	0	1	0	0	0	TRAV20	T cell receptor alpha variable 20
hsa-miR-520f	0	0	1	1	0	0	TRO	trophinin
hsa-miR-520f	0	0	1	1	1	1	MAP2	microtubule-associated protein 2
hsa-miR-520f	1	0	1	1	1	1	RSPO2	R-spondin 2
hsa-miR-520f	1	0	1	1	1	1	SMYD2	SET and MYND domain containing 2
hsa-miR-520f	1	0	1	1	1	1	UHRF2	ubiquitin-like with PHD and ring finger domains 2, E3 ubiquitin protein ligase
hsa-miR-520f	0	0	1	1	1	1	CASC1	cancer susceptibility candidate 1
hsa-miR-520f	0	0	1	0	1	1	VEZT	vezatin, adherens junctions transmembrane protein
hsa-miR-520f	1	0	1	0	0	0	KCNU1	potassium channel, subfamily U, member 1
hsa-miR-520f	0	0	1	0	0	0	ANKRD19P	ankyrin repeat domain 19, pseudogene
hsa-miR-520f	0	0	1	1	1	1	LRMP	lymphoid-restricted membrane protein
hsa-miR-520f	0	0	1	1	1	1	PDSS2	prenyl (decaprenyl) diphosphate synthase, subunit 2
hsa-miR-520f	0	0	1	1	1	1	SLC51A	solute carrier family 51, alpha subunit
hsa-miR-520f	1	0	1	0	1	1	PSMF1	proteasome (prosome, macropain) inhibitor subunit 1 (PI31)
hsa-miR-520f	0	0	1	1	0	0	SWI5	SWI5 recombination repair homolog (yeast)
hsa-miR-520f	0	0	1	1	1	1	PIK3AP1	phosphoinositide-3-kinase adaptor protein 1
hsa-miR-520f	1	0	1	0	1	1	SV2B	synaptic vesicle glycoprotein 2B
hsa-miR-520f	0	0	1	0	1	1	MYO7A	myosin VIIA
hsa-miR-520f	0	0	1	1	1	1	CCP110	centriolar coiled coil protein 110kDa
hsa-miR-520f	0	0	1	0	0	0	C20orf62	chromosome 20 open reading frame 62
hsa-miR-520f	1	0	1	1	1	1	GABRA1	gamma-aminobutyric acid (GABA) A receptor, alpha 1
hsa-miR-520f	1	0	1	1	1	1	MUM1L1	melanoma associated antigen (mutated) 1-like 1
hsa-miR-520f	1	0	1	1	1	1	RCOR3	REST corepressor 3
hsa-miR-520f	0	0	1	0	0	0	CFL1P1	cofilin 1 (non-muscle) pseudogene 1
hsa-miR-520f	1	0	1	1	1	1	C5orf25	chromosome 5 open reading frame 25
hsa-miR-520f	0	0	1	0	0	0	LOC643648	uncharacterized LOC643648
hsa-miR-520f	0	0	1	1	1	1	UBXN1	UBX domain protein 1
hsa-miR-520f	1	0	1	1	1	1	RAB5B	RAB5B, member RAS oncogene family
hsa-miR-520f	1	0	1	1	1	1	SIRPA	signal-regulatory protein alpha
hsa-miR-520f	0	0	1	0	0	0	BCAS3	breast carcinoma amplified sequence 3
hsa-miR-520f	0	0	1	0	0	0	LINC00238	long intergenic non-protein coding RNA 238
hsa-miR-520f	1	0	1	1	1	1	PCDHA5	protocadherin alpha 5
hsa-miR-520f	0	0	1	0	0	0	NBR2	neighbor of BRCA1 gene 2 (non-protein coding)
hsa-miR-520f	1	0	1	1	1	1	LPGAT1	lysophosphatidylglycerol acyltransferase 1
hsa-miR-520f	1	0	1	1	1	1	ZZZ3	zinc finger, ZZ-type containing 3
hsa-miR-520f	0	0	1	0	0	0	TMPRSS12	transmembrane (C-terminal) protease, serine 12
hsa-miR-520f	0	0	1	0	1	1	KSR1	kinase suppressor of ras 1
hsa-miR-520f	1	0	1	1	1	1	ZEB2	zinc finger E-box binding homeobox 2
hsa-miR-520f	0	0	1	1	1	1	C6	complement component 6
hsa-miR-520f	0	0	1	0	0	0	LOC339862	uncharacterized LOC339862
hsa-miR-520f	0	0	1	1	1	1	SNAPC3	small nuclear RNA activating complex, polypeptide 3, 50kDa
hsa-miR-520f	1	0	1	1	1	1	PEX5L	peroxisomal biogenesis factor 5-like
hsa-miR-520f	1	0	1	1	1	1	LHX8	LIM homeobox 8
hsa-miR-520f	1	0	1	1	1	1	LMO7	LIM domain 7
hsa-miR-520f	0	0	1	1	1	1	FAM171B	family with sequence similarity 171, member B
hsa-miR-520f	0	0	1	1	1	1	TADA1	transcriptional adaptor 1
hsa-miR-520f	0	0	1	0	0	0	LOC654433	uncharacterized LOC654433
hsa-miR-520f	1	0	1	1	0	0	RASGEF1B	RasGEF domain family, member 1B
hsa-miR-520f	1	0	1	1	1	1	BNC2	basonuclin 2
hsa-miR-520f	0	0	1	0	0	0	CYP4F35P	cytochrome P450, family 4, subfamily F, polypeptide 35, pseudogene
hsa-miR-520f	0	0	1	1	0	0	HSPA14	heat shock 70kDa protein 14
hsa-miR-520f	0	0	1	1	0	0	COX4I1	cytochrome c oxidase subunit IV isoform 1
hsa-miR-520f	0	0	1	0	0	0	LOC401074	uncharacterized LOC401074
hsa-miR-520f	0	0	1	1	1	1	FBXL4	F-box and leucine-rich repeat protein 4
hsa-miR-520f	0	0	1	1	1	1	SLC14A1	solute carrier family 14 (urea transporter), member 1 (Kidd blood group)
hsa-miR-520f	1	0	1	1	1	1	DACH2	dachshund homolog 2 (Drosophila)
hsa-miR-520f	0	0	1	1	1	1	ZFP90	zinc finger protein 90 homolog (mouse)
hsa-miR-520f	1	0	1	1	1	1	SLITRK3	SLIT and NTRK-like family, member 3
hsa-miR-520f	1	0	1	1	1	1	INTS6	integrator complex subunit 6
hsa-miR-520f	0	0	1	1	0	0	KLK8	kallikrein-related peptidase 8
hsa-miR-520f	0	0	1	0	1	1	FAM13B	family with sequence similarity 13, member B
hsa-miR-520f	0	0	1	1	1	1	VPS35	vacuolar protein sorting 35 homolog (S. cerevisiae)
hsa-miR-520f	1	0	1	1	1	1	FAM123A	family with sequence similarity 123A
hsa-miR-520f	1	0	1	0	1	1	HSPA12A	heat shock 70kDa protein 12A
hsa-miR-520f	1	0	1	1	1	1	ROCK1	Rho-associated, coiled-coil containing protein kinase 1
hsa-miR-520f	0	0	1	0	1	1	C11orf93	chromosome 11 open reading frame 93
hsa-miR-520f	0	0	1	1	0	0	PLB1	phospholipase B1
hsa-miR-520f	1	0	1	0	1	1	USP6NL	USP6 N-terminal like
hsa-miR-520f	1	0	1	1	1	1	ADD1	adducin 1 (alpha)
hsa-miR-520f	0	0	1	0	0	0	LOC338579	ankyrin repeat domain-containing protein 30B pseudogene
hsa-miR-520f	0	0	1	0	0	0	LOC157381	uncharacterized LOC157381
hsa-miR-520f	1	0	1	1	1	1	ARHGAP30	Rho GTPase activating protein 30
hsa-miR-520f	0	0	1	0	0	0	DKFZp686O1327	uncharacterized LOC401014
hsa-miR-520f	0	0	1	0	0	0	FAM27E3	family with sequence similarity 27, member E3
hsa-miR-520f	1	0	1	1	1	1	RNF145	ring finger protein 145
hsa-miR-520f	1	0	1	0	1	1	PSD3	pleckstrin and Sec7 domain containing 3
hsa-miR-520f	1	0	1	1	1	1	MAMDC2	MAM domain containing 2
hsa-miR-520f	1	0	1	1	1	1	SENP1	SUMO1/sentrin specific peptidase 1
hsa-miR-520f	1	0	1	1	1	1	SON	SON DNA binding protein
hsa-miR-520f	1	0	1	0	1	1	LYPD6	LY6/PLAUR domain containing 6
hsa-miR-520f	0	0	1	1	0	0	ANKAR	ankyrin and armadillo repeat containing
hsa-miR-520f	0	0	1	0	0	0	LOC348120	uncharacterized LOC348120
hsa-miR-520f	1	0	1	1	1	1	BRD1	bromodomain containing 1
hsa-miR-520f	0	0	1	1	0	0	CSF1R	colony stimulating factor 1 receptor
hsa-miR-520f	0	0	1	0	0	0	LOC729678	uncharacterized LOC729678
hsa-miR-520f	1	0	1	0	1	1	ZNF800	zinc finger protein 800
hsa-miR-520f	1	0	1	1	1	1	RTKN2	rhotekin 2
hsa-miR-520f	0	0	1	0	1	1	ITGA1	integrin, alpha 1
hsa-miR-520f	1	0	1	1	1	1	ANKRD46	ankyrin repeat domain 46
hsa-miR-520f	1	0	1	1	1	1	MBNL1	muscleblind-like splicing regulator 1
hsa-miR-520f	1	0	1	1	1	1	FNDC3A	fibronectin type III domain containing 3A
hsa-miR-520f	1	0	1	1	1	1	LIMD2	LIM domain containing 2
hsa-miR-520f	1	0	1	1	1	1	YWHAZ	tyrosine 3-monooxygenase/tryptophan 5-monooxygenase activation protein, zeta polypeptide
hsa-miR-520f	1	0	1	1	1	1	PCGF5	polycomb group ring finger 5
hsa-miR-520f	0	0	1	1	0	0	EDC4	enhancer of mRNA decapping 4
hsa-miR-520f	0	0	1	0	0	0	LINC00265	long intergenic non-protein coding RNA 265
hsa-miR-520f	0	0	1	1	0	0	LYZL6	lysozyme-like 6
hsa-miR-520f	1	0	1	1	1	1	SOX5	SRY (sex determining region Y)-box 5
hsa-miR-520f	0	0	1	0	0	0	LOC550643	uncharacterized LOC550643
hsa-miR-520f	1	0	1	1	1	1	MTMR10	myotubularin related protein 10
hsa-miR-520f	1	0	1	1	0	0	MANEAL	mannosidase, endo-alpha-like
hsa-miR-520f	1	0	1	1	1	1	NIPBL	Nipped-B homolog (Drosophila)
hsa-miR-520f	0	0	1	0	0	0	GNN	Grp94 neighboring nucleotidase pseudogene
hsa-miR-520f	0	0	1	1	1	1	SCLT1	sodium channel and clathrin linker 1
hsa-miR-520f	0	0	1	1	1	1	ZNF333	zinc finger protein 333
hsa-miR-520f	1	0	1	1	1	1	EIF4G2	eukaryotic translation initiation factor 4 gamma, 2
hsa-miR-520f	0	0	1	1	1	1	TRIM6	tripartite motif containing 6
hsa-miR-520f	1	0	1	1	1	1	LMO4	LIM domain only 4
hsa-miR-520f	1	0	1	1	1	1	C18orf1	chromosome 18 open reading frame 1
hsa-miR-520f	1	0	1	1	1	1	AP3M1	adaptor-related protein complex 3, mu 1 subunit
hsa-miR-520f	1	0	1	1	1	1	NRSN1	neurensin 1
hsa-miR-520f	1	0	1	1	1	1	FAM129B	family with sequence similarity 129, member B
hsa-miR-520f	0	0	1	0	1	1	ANKS1B	ankyrin repeat and sterile alpha motif domain containing 1B
hsa-miR-520f	0	0	1	1	1	1	TTLL9	tubulin tyrosine ligase-like family, member 9
hsa-miR-520f	0	0	1	0	0	0	SPDYE8P	speedy homolog E8 (Xenopus laevis), pseudogene
hsa-miR-520f	0	0	1	1	0	0	RELA	v-rel reticuloendotheliosis viral oncogene homolog A (avian)
hsa-miR-520f	0	0	1	1	0	0	CYP4F30P	cytochrome P450, family 4, subfamily F, polypeptide 30, pseudogene
hsa-miR-520f	1	0	1	0	1	1	HMGB3	high mobility group box 3
hsa-miR-520f	0	0	1	0	0	0	ULK4P1	unc-51-like kinase 4 (C. elegans) pseudogene 1
hsa-miR-520f	1	0	1	1	1	1	USP47	ubiquitin specific peptidase 47
hsa-miR-520f	1	0	1	0	1	1	TMEM194A	transmembrane protein 194A
hsa-miR-520f	0	0	1	0	0	0	ULK4P3	unc-51-like kinase 4 (C. elegans) pseudogene 3
hsa-miR-520f	1	0	1	1	1	1	OPCML	opioid binding protein/cell adhesion molecule-like
hsa-miR-520f	1	0	1	1	1	1	WNT5A	wingless-type MMTV integration site family, member 5A
hsa-miR-520f	0	0	1	0	0	0	TBC1D25	TBC1 domain family, member 25
hsa-miR-520f	1	0	1	1	0	0	SLC45A4	solute carrier family 45, member 4
hsa-miR-520f	1	0	1	1	1	1	FMNL3	formin-like 3
hsa-miR-520f	1	0	1	1	1	1	ZMYND11	zinc finger, MYND-type containing 11
hsa-miR-520f	1	0	1	0	1	1	PIK3R3	phosphoinositide-3-kinase, regulatory subunit 3 (gamma)
hsa-miR-520f	1	0	1	1	1	1	ST8SIA2	ST8 alpha-N-acetyl-neuraminide alpha-2,8-sialyltransferase 2
hsa-miR-520f	1	0	1	0	1	1	LRRTM4	leucine rich repeat transmembrane neuronal 4
hsa-miR-520f	1	0	1	1	1	1	SYNJ1	synaptojanin 1
hsa-miR-520f	0	0	1	1	1	1	XG	Xg blood group
hsa-miR-520f	0	0	1	0	1	1	TCAIM	T cell activation inhibitor, mitochondrial
hsa-miR-520f	0	0	1	1	0	0	PNMA5	paraneoplastic Ma antigen family member 5
hsa-miR-520f	0	0	1	1	0	0	FBXO16	F-box protein 16
hsa-miR-520f	1	0	1	1	1	1	ARFIP1	ADP-ribosylation factor interacting protein 1
hsa-miR-520f	1	0	1	0	1	1	VANGL2	vang-like 2 (van gogh, Drosophila)
hsa-miR-520f	0	0	1	1	0	0	TMC1	transmembrane channel-like 1
hsa-miR-520f	1	0	1	1	0	0	KIAA1644	KIAA1644
hsa-miR-520f	1	0	1	1	1	1	GABRB2	gamma-aminobutyric acid (GABA) A receptor, beta 2
hsa-miR-520f	1	0	1	1	1	1	ZNF763	zinc finger protein 763
hsa-miR-520f	1	0	1	1	1	1	PTPRD	protein tyrosine phosphatase, receptor type, D
hsa-miR-520f	0	0	1	1	0	0	TMEM95	transmembrane protein 95
hsa-miR-520f	1	0	1	1	1	1	PNISR	PNN-interacting serine/arginine-rich protein
hsa-miR-520f	1	0	1	1	1	1	SUV420H1	suppressor of variegation 4-20 homolog 1 (Drosophila)
hsa-miR-520f	1	0	1	0	1	1	BTBD3	BTB (POZ) domain containing 3
hsa-miR-520f	1	0	1	0	1	1	ATP8A1	ATPase, aminophospholipid transporter (APLT), class I, type 8A, member 1
hsa-miR-520f	1	0	1	0	1	1	KIF5C	kinesin family member 5C
hsa-miR-520f	1	0	1	1	1	1	TET2	tet methylcytosine dioxygenase 2
hsa-miR-520f	0	0	1	1	1	1	RASAL2	RAS protein activator like 2
hsa-miR-520f	1	0	1	1	1	1	PPP4R2	protein phosphatase 4, regulatory subunit 2
hsa-miR-520f	0	0	1	0	0	0	LRRC37A11P	leucine rich repeat containing 37, member A11, pseudogene
hsa-miR-520f	1	0	1	1	1	1	NR3C2	nuclear receptor subfamily 3, group C, member 2
hsa-miR-520f	1	0	1	1	1	1	SHANK2	SH3 and multiple ankyrin repeat domains 2
hsa-miR-520f	1	0	1	1	1	1	SLMAP	sarcolemma associated protein
hsa-miR-520f	1	0	1	1	1	1	KIAA0528	KIAA0528
hsa-miR-520f	1	0	1	0	1	1	PRDM10	PR domain containing 10
hsa-miR-520f	0	0	1	1	1	1	LRCH1	leucine-rich repeats and calponin homology (CH) domain containing 1
hsa-miR-520f	0	0	1	0	0	0	LINC00266-1	long intergenic non-protein coding RNA 266-1
hsa-miR-520f	1	0	1	0	1	1	CAMSAP2	calmodulin regulated spectrin-associated protein family, member 2
hsa-miR-520f	1	0	1	1	1	1	ANK2	ankyrin 2, neuronal
hsa-miR-520f	0	0	1	1	1	1	SLC22A23	solute carrier family 22, member 23
hsa-miR-520f	0	0	1	0	0	0	FAM225B	family with sequence similarity 225, member B (non-protein coding)
hsa-miR-520f	0	0	1	1	0	0	CCDC144A	coiled-coil domain containing 144A
hsa-miR-520f	0	0	1	0	0	0	FUT8-AS1	FUT8 antisense RNA 1
hsa-miR-520f	0	0	1	1	0	0	EFCAB11	EF-hand calcium binding domain 11
hsa-miR-520f	0	0	1	0	0	0	TMED8	transmembrane emp24 protein transport domain containing 8
hsa-miR-520f	1	0	1	1	1	1	ATP2B4	ATPase, Ca++ transporting, plasma membrane 4
hsa-miR-520f	1	0	1	1	1	1	RBL2	retinoblastoma-like 2 (p130)
hsa-miR-520f	0	0	1	1	1	1	KBTBD12	kelch repeat and BTB (POZ) domain containing 12
hsa-miR-520f	1	0	1	1	1	1	SGCD	sarcoglycan, delta (35kDa dystrophin-associated glycoprotein)
hsa-miR-520f	1	0	1	1	1	1	CCNG1	cyclin G1
hsa-miR-520f	1	0	1	0	1	1	TNFRSF10B	tumor necrosis factor receptor superfamily, member 10b
hsa-miR-520f	0	0	1	1	1	1	APTX	aprataxin
hsa-miR-520f	0	0	1	1	0	0	NHLRC2	NHL repeat containing 2
hsa-miR-520f	1	0	1	1	1	1	TJP1	tight junction protein 1
hsa-miR-520f	0	0	1	1	1	1	VCAN	versican
hsa-miR-520f	0	0	1	1	1	1	PSMA2	proteasome (prosome, macropain) subunit, alpha type, 2
hsa-miR-520f	1	0	1	1	1	1	C12orf4	chromosome 12 open reading frame 4
hsa-miR-520f	1	0	1	0	0	0	TADA2B	transcriptional adaptor 2B
hsa-miR-520f	1	0	1	1	1	1	MASP1	mannan-binding lectin serine peptidase 1 (C4/C2 activating component of Ra-reactive factor)
hsa-miR-520f	0	0	1	1	1	1	PRR14L	proline rich 14-like
hsa-miR-520f	1	0	1	1	1	1	PRDM2	PR domain containing 2, with ZNF domain
hsa-miR-520f	0	0	1	0	0	0	SMG1P1	smg-1 homolog, phosphatidylinositol 3-kinase-related kinase pseudogene 1
hsa-miR-520f	0	0	1	1	1	1	MLIP	muscular LMNA-interacting protein
hsa-miR-520f	0	0	1	0	1	1	THAP6	THAP domain containing 6
hsa-miR-520f	0	0	1	1	1	1	FAM9C	family with sequence similarity 9, member C
hsa-miR-520f	0	0	1	1	1	1	PPP1R1C	protein phosphatase 1, regulatory (inhibitor) subunit 1C
hsa-miR-520f	1	0	1	1	1	1	VPS26A	vacuolar protein sorting 26 homolog A (S. pombe)
hsa-miR-520f	1	0	1	1	1	1	PHC3	polyhomeotic homolog 3 (Drosophila)
hsa-miR-520f	0	0	1	0	1	1	MYO3B	myosin IIIB
hsa-miR-520f	0	0	1	0	1	1	B3GALTL	beta 1,3-galactosyltransferase-like
hsa-miR-520f	0	0	1	0	0	0	OVOS	ovostatin
hsa-miR-520f	1	0	1	1	1	1	PTPN3	protein tyrosine phosphatase, non-receptor type 3
hsa-miR-520f	1	0	1	1	1	1	NFIB	nuclear factor I/B
hsa-miR-520f	1	0	1	1	1	1	NAV1	neuron navigator 1
hsa-miR-520f	1	0	1	1	1	1	C5orf24	chromosome 5 open reading frame 24
hsa-miR-520f	1	0	1	1	1	1	RDX	radixin
hsa-miR-520f	0	0	1	1	1	1	DAZL	deleted in azoospermia-like
hsa-miR-520f	1	0	1	1	1	1	TMEM135	transmembrane protein 135
hsa-miR-520f	1	0	1	1	1	1	BZRAP1	benzodiazapine receptor (peripheral) associated protein 1
hsa-miR-520f	1	0	1	0	1	1	TBL1XR1	transducin (beta)-like 1 X-linked receptor 1
hsa-miR-520f	1	0	1	1	1	1	LYST	lysosomal trafficking regulator
hsa-miR-520f	1	0	1	1	1	1	HIC2	hypermethylated in cancer 2
hsa-miR-520f	0	0	1	0	1	1	GINS3	GINS complex subunit 3 (Psf3 homolog)
hsa-miR-520f	0	0	1	1	1	1	HPGD	hydroxyprostaglandin dehydrogenase 15-(NAD)
hsa-miR-520f	1	0	1	0	0	0	PLSCR5	phospholipid scramblase family, member 5
hsa-miR-520f	1	0	1	0	1	1	RNF144A	ring finger protein 144A
hsa-miR-520f	0	0	1	1	1	1	SMYD5	SMYD family member 5
hsa-miR-520f	1	0	1	1	1	1	ARF1	ADP-ribosylation factor 1
hsa-miR-520f	1	0	1	1	1	1	RSBN1L	round spermatid basic protein 1-like
hsa-miR-520f	1	0	1	1	1	1	ARPC1B	actin related protein 2/3 complex, subunit 1B, 41kDa
hsa-miR-520f	0	0	1	1	0	0	TMEM62	transmembrane protein 62
hsa-miR-520f	1	0	1	1	1	1	ERI3	ERI1 exoribonuclease family member 3
hsa-miR-520f	1	0	1	1	1	1	NME4	NME/NM23 nucleoside diphosphate kinase 4
hsa-miR-520f	0	0	1	1	1	1	PACRGL	PARK2 co-regulated-like
hsa-miR-520f	0	0	1	0	0	0	ARRDC1	arrestin domain containing 1
hsa-miR-520f	0	0	1	1	0	0	CCNDBP1	cyclin D-type binding-protein 1
hsa-miR-520f	1	0	1	0	1	1	BNIP3L	BCL2/adenovirus E1B 19kDa interacting protein 3-like
hsa-miR-520f	1	0	1	1	0	0	ELOVL1	ELOVL fatty acid elongase 1
hsa-miR-520f	0	0	1	1	1	1	BCL7B	B-cell CLL/lymphoma 7B
hsa-miR-520f	1	0	1	1	0	0	STX5	syntaxin 5
hsa-miR-520f	0	0	1	1	1	1	MTCP1	mature T-cell proliferation 1
hsa-miR-520f	0	0	1	1	0	0	RPL7L1	ribosomal protein L7-like 1
hsa-miR-520f	0	0	1	0	1	1	IGF2-AS	IGF2 antisense RNA
hsa-miR-520f	0	0	1	0	1	1	EMX2	empty spiracles homeobox 2
hsa-miR-520f	1	0	1	1	1	1	UPF3A	UPF3 regulator of nonsense transcripts homolog A (yeast)
hsa-miR-520f	0	0	1	1	1	1	CCDC91	coiled-coil domain containing 91
hsa-miR-520f	1	0	1	1	1	1	BAI3	brain-specific angiogenesis inhibitor 3
hsa-miR-520f	0	0	1	0	1	1	PDCD5	programmed cell death 5
hsa-miR-520f	1	0	1	1	0	0	RNF24	ring finger protein 24
hsa-miR-520f	1	0	1	1	1	1	CCDC25	coiled-coil domain containing 25
hsa-miR-520f	1	0	1	1	1	1	STK38L	serine/threonine kinase 38 like
hsa-miR-520f	0	0	1	1	1	1	EIF3J	eukaryotic translation initiation factor 3, subunit J
hsa-miR-520f	0	0	1	0	0	0	LOC150568	uncharacterized LOC150568
hsa-miR-520f	0	0	1	0	0	0	MEG3	maternally expressed 3 (non-protein coding)
hsa-miR-520f	0	0	1	1	0	0	NRSN2	neurensin 2
hsa-miR-520f	0	0	1	1	1	1	BMPR1A	bone morphogenetic protein receptor, type IA
hsa-miR-520f	0	0	1	0	1	1	SRSF5	serine/arginine-rich splicing factor 5
hsa-miR-520f	0	0	1	0	0	0	LOC100130353	hippocampus abundant transcript-like 1 pseudogene
hsa-miR-520f	0	0	1	1	1	1	SERP2	stress-associated endoplasmic reticulum protein family member 2
hsa-miR-520f	1	0	1	1	1	1	TLK2	tousled-like kinase 2
hsa-miR-520f	1	0	1	1	1	1	HN1	hematological and neurological expressed 1
hsa-miR-520f	0	0	1	1	0	0	RGS9	regulator of G-protein signaling 9
hsa-miR-520f	0	0	1	1	0	0	XRCC6	X-ray repair complementing defective repair in Chinese hamster cells 6
hsa-miR-520f	0	0	1	0	1	1	VSTM2A	V-set and transmembrane domain containing 2A
hsa-miR-520f	1	0	1	1	1	1	YWHAQ	tyrosine 3-monooxygenase/tryptophan 5-monooxygenase activation protein, theta polypeptide
hsa-miR-520f	1	0	1	1	1	1	ARL4A	ADP-ribosylation factor-like 4A
hsa-miR-520f	1	0	1	1	1	1	SYAP1	synapse associated protein 1
hsa-miR-520f	1	0	1	1	1	1	ATAT1	alpha tubulin acetyltransferase 1
hsa-miR-520f	1	0	1	1	1	1	BAALC	brain and acute leukemia, cytoplasmic
hsa-miR-520f	1	0	1	1	1	1	PFN2	profilin 2
hsa-miR-520f	0	0	1	1	1	1	FAM18B1	family with sequence similarity 18, member B1
hsa-miR-520f	0	0	1	1	0	0	GPC3	glypican 3
hsa-miR-520f	1	0	1	1	1	1	RALY	RNA binding protein, autoantigenic (hnRNP-associated with lethal yellow homolog (mouse))
hsa-miR-520f	0	0	1	1	1	1	HS3ST2	heparan sulfate (glucosamine) 3-O-sulfotransferase 2
hsa-miR-520f	1	0	1	1	1	1	DNAJA2	DnaJ (Hsp40) homolog, subfamily A, member 2
hsa-miR-520f	0	0	1	1	1	1	PLAC8	placenta-specific 8
hsa-miR-520f	1	0	1	0	1	1	CD47	CD47 molecule
hsa-miR-520f	1	0	1	1	1	1	RUNX1	runt-related transcription factor 1
hsa-miR-520f	1	0	1	1	0	0	FOXO3	forkhead box O3
hsa-miR-520f	0	0	1	1	1	1	ZNF75D	zinc finger protein 75D
hsa-miR-520f	1	0	1	1	1	1	TMEM66	transmembrane protein 66
hsa-miR-520f	1	0	1	1	1	1	MED1	mediator complex subunit 1
hsa-miR-520f	0	0	1	1	1	1	BDH1	3-hydroxybutyrate dehydrogenase, type 1
hsa-miR-520f	1	0	1	1	1	1	RND3	Rho family GTPase 3
hsa-miR-520f	1	0	1	0	1	1	KIAA0240	KIAA0240
hsa-miR-520f	0	0	1	0	0	0	FAM47E	family with sequence similarity 47, member E
hsa-miR-520f	1	0	1	1	1	1	STAG2	stromal antigen 2
hsa-miR-520f	0	0	1	1	1	1	SYNE2	spectrin repeat containing, nuclear envelope 2
hsa-miR-520f	1	0	1	1	1	1	HECW2	HECT, C2 and WW domain containing E3 ubiquitin protein ligase 2
hsa-miR-520f	0	0	1	0	0	0	MUC19	mucin 19, oligomeric
hsa-miR-520f	1	0	1	0	1	1	OSBPL8	oxysterol binding protein-like 8
hsa-miR-520f	0	0	1	0	1	1	HDAC9	histone deacetylase 9
hsa-miR-520f	1	0	1	1	1	1	SNRK	SNF related kinase
hsa-miR-520f	1	0	1	1	1	1	TIPARP	TCDD-inducible poly(ADP-ribose) polymerase
hsa-miR-520f	0	0	1	0	0	0	DNAJC27-AS1	DNAJC27 antisense RNA 1
hsa-miR-520f	1	0	1	1	1	1	SLC16A12	solute carrier family 16, member 12 (monocarboxylic acid transporter 12)
hsa-miR-520f	0	0	1	1	0	0	STK25	serine/threonine kinase 25
hsa-miR-520f	1	0	1	1	1	1	ZFHX3	zinc finger homeobox 3
hsa-miR-520f	1	0	1	1	1	1	RBPJ	recombination signal binding protein for immunoglobulin kappa J region
hsa-miR-520f	0	0	1	1	1	1	MOBP	myelin-associated oligodendrocyte basic protein
hsa-miR-520f	1	0	1	1	1	1	METAP1	methionyl aminopeptidase 1
hsa-miR-520f	1	0	1	1	1	1	RB1CC1	RB1-inducible coiled-coil 1
hsa-miR-520f	0	0	1	1	1	1	GPR34	G protein-coupled receptor 34
hsa-miR-520f	0	0	1	1	1	1	PTGS1	prostaglandin-endoperoxide synthase 1 (prostaglandin G/H synthase and cyclooxygenase)
hsa-miR-520f	0	0	1	1	0	0	SPATA20	spermatogenesis associated 20
hsa-miR-520f	0	0	1	1	1	1	CD274	CD274 molecule
hsa-miR-520f	0	0	1	1	1	1	BBOX1	butyrobetaine (gamma), 2-oxoglutarate dioxygenase (gamma-butyrobetaine hydroxylase) 1
hsa-miR-520f	0	0	1	1	1	1	C1orf27	chromosome 1 open reading frame 27
hsa-miR-520f	1	0	1	1	1	1	ITSN1	intersectin 1 (SH3 domain protein)
hsa-miR-520f	0	0	1	1	1	1	TNFSF10	tumor necrosis factor (ligand) superfamily, member 10
hsa-miR-520f	0	0	1	1	0	0	CCNA1	cyclin A1
hsa-miR-520f	0	0	1	1	0	0	SLCO3A1	solute carrier organic anion transporter family, member 3A1
hsa-miR-520f	1	0	1	1	1	1	LGR4	leucine-rich repeat containing G protein-coupled receptor 4
hsa-miR-520f	1	0	1	1	1	1	TNFAIP1	tumor necrosis factor, alpha-induced protein 1 (endothelial)
hsa-miR-520f	0	0	1	1	1	1	AKAP17A	A kinase (PRKA) anchor protein 17A
hsa-miR-520f	1	0	1	1	1	1	MLL	myeloid/lymphoid or mixed-lineage leukemia (trithorax homolog, Drosophila)
hsa-miR-520f	1	0	1	1	1	1	ATP2B2	ATPase, Ca++ transporting, plasma membrane 2
hsa-miR-520f	1	0	1	1	1	1	AFF1	AF4/FMR2 family, member 1
hsa-miR-520f	0	0	1	1	0	0	SUOX	sulfite oxidase
hsa-miR-520f	0	0	1	1	0	0	HLA-DQB1	major histocompatibility complex, class II, DQ beta 1
hsa-miR-520f	1	0	1	0	1	1	BCL2	B-cell CLL/lymphoma 2
hsa-miR-520f	1	0	1	1	1	1	IGF1	insulin-like growth factor 1 (somatomedin C)
hsa-miR-520f	0	0	1	1	1	1	ATP7A	ATPase, Cu++ transporting, alpha polypeptide
hsa-miR-520f	1	0	1	1	1	1	CPOX	coproporphyrinogen oxidase
hsa-miR-520f	0	0	1	1	1	1	DPYD	dihydropyrimidine dehydrogenase
hsa-miR-520f	1	0	1	0	1	1	SLC26A2	solute carrier family 26 (sulfate transporter), member 2
hsa-miR-520f	1	0	1	1	1	1	F13A1	coagulation factor XIII, A1 polypeptide
hsa-miR-520f	1	0	1	1	1	1	FBN1	fibrillin 1
hsa-miR-520f	0	0	1	1	0	0	GBA	glucosidase, beta, acid
hsa-miR-520f	1	0	1	0	1	1	GHR	growth hormone receptor
hsa-miR-520f	1	0	1	1	1	1	KCNA1	potassium voltage-gated channel, shaker-related subfamily, member 1 (episodic ataxia with myokymia)
hsa-miR-520f	1	0	1	1	1	1	LEP	leptin
hsa-miR-520f	0	0	1	1	1	1	MAOA	monoamine oxidase A
hsa-miR-520f	1	0	1	1	1	1	OCRL	oculocerebrorenal syndrome of Lowe
hsa-miR-520f	1	0	1	1	1	1	ATXN1	ataxin 1
hsa-miR-520f	1	0	1	1	1	1	SOX9	SRY (sex determining region Y)-box 9
hsa-miR-520f	0	0	1	1	0	0	APOB	apolipoprotein B (including Ag(x) antigen)
hsa-miR-520f	0	0	1	1	1	1	SLC25A20	solute carrier family 25 (carnitine/acylcarnitine translocase), member 20
hsa-miR-520f	1	0	1	0	1	1	CYBB	cytochrome b-245, beta polypeptide
hsa-miR-520f	1	0	1	1	1	1	HLCS	holocarboxylase synthetase (biotin-(proprionyl-CoA-carboxylase (ATP-hydrolysing)) ligase)
hsa-miR-520f	0	0	1	1	1	1	LTBP2	latent transforming growth factor beta binding protein 2
hsa-miR-520f	1	0	1	1	1	1	SLC26A4	solute carrier family 26, member 4
hsa-miR-520f	1	0	1	1	1	1	APP	amyloid beta (A4) precursor protein
hsa-miR-520f	1	0	1	1	1	1	AQP2	aquaporin 2 (collecting duct)
hsa-miR-520f	1	0	1	1	1	1	ATRX	alpha thalassemia/mental retardation syndrome X-linked
hsa-miR-520f	1	0	1	1	1	1	PLP1	proteolipid protein 1
hsa-miR-520f	0	0	1	1	1	1	VHL	von Hippel-Lindau tumor suppressor, E3 ubiquitin protein ligase
hsa-miR-520f	0	0	1	1	1	1	CRX	cone-rod homeobox
hsa-miR-520f	1	0	1	1	1	1	DCX	doublecortin
hsa-miR-520f	1	0	1	1	1	1	CD44	CD44 molecule (Indian blood group)
hsa-miR-520f	1	0	1	1	1	1	FASLG	Fas ligand (TNF superfamily, member 6)
hsa-miR-520f	1	0	1	0	1	1	CACNA1E	calcium channel, voltage-dependent, R type, alpha 1E subunit
hsa-miR-520f	1	0	1	1	1	1	CSF1	colony stimulating factor 1 (macrophage)
hsa-miR-520f	0	0	1	1	1	1	EPO	erythropoietin
hsa-miR-520f	1	0	1	0	1	1	GABRA4	gamma-aminobutyric acid (GABA) A receptor, alpha 4
hsa-miR-520f	0	0	1	1	1	1	GABRA5	gamma-aminobutyric acid (GABA) A receptor, alpha 5
hsa-miR-520f	1	0	1	1	0	0	GRIK3	glutamate receptor, ionotropic, kainate 3
hsa-miR-520f	1	0	1	1	0	0	GRIN2A	glutamate receptor, ionotropic, N-methyl D-aspartate 2A
hsa-miR-520f	1	0	1	0	1	1	KCNJ2	potassium inwardly-rectifying channel, subfamily J, member 2
hsa-miR-520f	1	0	1	1	1	1	MME	membrane metallo-endopeptidase
hsa-miR-520f	1	0	1	1	1	1	PPP3R1	protein phosphatase 3, regulatory subunit B, alpha
hsa-miR-520f	1	0	1	1	1	1	PTGFR	prostaglandin F receptor (FP)
hsa-miR-520f	0	0	1	1	1	1	PTGS2	prostaglandin-endoperoxide synthase 2 (prostaglandin G/H synthase and cyclooxygenase)
hsa-miR-520f	1	0	1	1	1	1	RARA	retinoic acid receptor, alpha
hsa-miR-520f	1	0	1	1	1	1	RARB	retinoic acid receptor, beta
hsa-miR-520f	1	0	1	0	1	1	SPOPL	speckle-type POZ protein-like
hsa-miR-520f	1	0	1	1	1	1	FARP1	FERM, RhoGEF (ARHGEF) and pleckstrin domain protein 1 (chondrocyte-derived)
hsa-miR-520f	1	0	1	1	1	1	TPD52L3	tumor protein D52-like 3
hsa-miR-520f	1	0	1	1	1	1	LCLAT1	lysocardiolipin acyltransferase 1
hsa-miR-520f	0	0	1	1	0	0	PMS2P3	postmeiotic segregation increased 2 pseudogene 3
hsa-miR-520f	0	0	1	0	1	1	POTEH	POTE ankyrin domain family, member H
hsa-miR-520f	0	0	1	1	1	1	CCDC144NL	coiled-coil domain containing 144 family, N-terminal like
hsa-miR-520f	1	0	1	0	1	1	LIN28B	lin-28 homolog B (C. elegans)
hsa-miR-520f	1	0	1	0	1	1	LRRC55	leucine rich repeat containing 55
hsa-miR-520f	0	0	1	1	1	1	DAZ4	deleted in azoospermia 4
hsa-miR-520f	1	0	1	0	1	1	YPEL2	yippee-like 2 (Drosophila)
hsa-miR-520f	1	0	1	1	1	1	EBF3	early B-cell factor 3
hsa-miR-520f	0	0	1	1	1	1	SUMO1	SMT3 suppressor of mif two 3 homolog 1 (S. cerevisiae)
hsa-miR-520f	1	0	1	1	0	0	RPS6KA1	ribosomal protein S6 kinase, 90kDa, polypeptide 1
hsa-miR-520f	1	0	1	1	1	1	IGSF3	immunoglobulin superfamily, member 3
hsa-miR-520f	1	0	1	1	1	1	BRWD1	bromodomain and WD repeat domain containing 1
hsa-miR-520f	0	0	1	0	1	1	C3orf56	chromosome 3 open reading frame 56
hsa-miR-520f	0	0	1	1	1	1	UACA	uveal autoantigen with coiled-coil domains and ankyrin repeats
hsa-miR-520f	0	0	1	1	1	1	FAM154B	family with sequence similarity 154, member B
hsa-miR-520f	1	0	1	0	1	1	KIAA2022	KIAA2022
hsa-miR-520f	0	0	1	1	0	0	TMCO2	transmembrane and coiled-coil domains 2
hsa-miR-520f	0	0	1	1	1	1	GCSAM	germinal center-associated, signaling and motility
hsa-miR-520f	1	0	1	0	1	1	ERMN	ermin, ERM-like protein
hsa-miR-520f	1	0	1	1	1	1	SHE	Src homology 2 domain containing E
hsa-miR-520f	0	0	1	1	1	1	SPIN3	spindlin family, member 3
hsa-miR-520f	1	0	1	0	1	1	FAM102B	family with sequence similarity 102, member B
hsa-miR-520f	1	0	1	1	1	1	BCL2L15	BCL2-like 15
hsa-miR-520f	1	0	1	0	1	1	CREB5	cAMP responsive element binding protein 5
hsa-miR-520f	1	0	1	1	0	0	MCCD1	mitochondrial coiled-coil domain 1
hsa-miR-520f	0	0	1	1	0	0	PNLIPRP3	pancreatic lipase-related protein 3
hsa-miR-520f	0	0	1	0	1	1	ERVMER61-1	endogenous retrovirus group MER61, member 1
hsa-miR-520f	1	0	1	1	1	1	GOSR2	golgi SNAP receptor complex member 2
hsa-miR-520f	1	0	1	0	1	1	RGMB	RGM domain family, member B
hsa-miR-520f	1	0	1	0	1	1	ZKSCAN2	zinc finger with KRAB and SCAN domains 2
hsa-miR-520f	1	0	1	1	1	1	UBE2NL	ubiquitin-conjugating enzyme E2N-like
hsa-miR-520f	0	0	1	1	1	1	FAM53A	family with sequence similarity 53, member A
hsa-miR-520f	1	0	1	0	1	1	FIGNL2	fidgetin-like 2
hsa-miR-520f	0	0	1	1	1	1	LDLRAD2	low density lipoprotein receptor class A domain containing 2
hsa-miR-520f	1	0	1	0	1	1	SYT14L	synaptotagmin XIV-like
hsa-miR-520f	1	0	1	1	1	1	RUNX2	runt-related transcription factor 2
hsa-miR-520f	1	0	1	1	1	1	PHF6	PHD finger protein 6
hsa-miR-520f	1	0	1	1	1	1	ZNF2	zinc finger protein 2
hsa-miR-520f	0	0	1	1	1	1	USP1	ubiquitin specific peptidase 1
hsa-miR-520f	1	0	1	1	1	1	ZHX1	zinc fingers and homeoboxes 1
hsa-miR-520f	1	0	1	1	1	1	VMA21	VMA21 vacuolar H+-ATPase homolog (S. cerevisiae)
hsa-miR-520f	1	0	1	1	1	1	NTRK2	neurotrophic tyrosine kinase, receptor, type 2
hsa-miR-520f	0	0	1	1	1	1	POLR2M	polymerase (RNA) II (DNA directed) polypeptide M
hsa-miR-520f	1	0	1	0	1	1	RGAG4	retrotransposon gag domain containing 4
hsa-miR-520f	0	0	1	1	1	1	LRRC66	leucine rich repeat containing 66
hsa-miR-520f	1	0	1	0	1	1	TNRC6B	trinucleotide repeat containing 6B
hsa-miR-520f	1	0	1	1	1	1	TGFBR2	transforming growth factor, beta receptor II (70/80kDa)
hsa-miR-520f	0	0	1	1	1	1	SC5DL	sterol-C5-desaturase (ERG3 delta-5-desaturase homolog, S. cerevisiae)-like
hsa-miR-520f	1	0	1	0	1	1	CLLU1	chronic lymphocytic leukemia up-regulated 1
hsa-miR-520f	1	0	1	1	1	1	TPD52	tumor protein D52
hsa-miR-520f	1	0	1	0	1	1	C3orf70	chromosome 3 open reading frame 70
hsa-miR-520f	1	0	1	0	1	1	ANO6	anoctamin 6
hsa-miR-520f	0	0	1	1	0	0	RPS27	ribosomal protein S27
hsa-miR-520f	1	0	1	0	1	1	MSRB3	methionine sulfoxide reductase B3
hsa-miR-520f	1	0	1	1	1	1	YTHDC1	YTH domain containing 1
hsa-miR-520f	0	0	1	0	1	1	STXBP1	syntaxin binding protein 1
hsa-miR-520f	1	0	1	1	1	1	KLF10	Kruppel-like factor 10
hsa-miR-520f	1	0	1	1	1	1	MAGI1	membrane associated guanylate kinase, WW and PDZ domain containing 1
hsa-miR-520f	1	0	1	1	1	1	SAR1B	SAR1 homolog B (S. cerevisiae)
hsa-miR-520f	1	0	1	1	1	1	ZNF704	zinc finger protein 704
hsa-miR-520f	0	0	1	1	1	1	C18orf62	chromosome 18 open reading frame 62
hsa-miR-520f	1	0	1	1	1	1	PDE4B	phosphodiesterase 4B, cAMP-specific
hsa-miR-520f	1	0	1	1	1	1	NPM1	nucleophosmin (nucleolar phosphoprotein B23, numatrin)
hsa-miR-520f	0	0	1	0	0	0	CEACAM16	carcinoembryonic antigen-related cell adhesion molecule 16
hsa-miR-520f	0	0	1	1	1	1	EFEMP1	EGF containing fibulin-like extracellular matrix protein 1
hsa-miR-520f	1	0	1	1	1	1	AP1S3	adaptor-related protein complex 1, sigma 3 subunit
hsa-miR-520f	1	0	1	1	1	1	KREMEN1	kringle containing transmembrane protein 1
hsa-miR-520f	0	0	1	0	1	1	C15orf56	chromosome 15 open reading frame 56
hsa-miR-520f	0	0	1	1	1	1	ANKRD55	ankyrin repeat domain 55
hsa-miR-520f	1	0	1	1	1	1	SPTSSB	serine palmitoyltransferase, small subunit B
hsa-miR-520f	0	0	1	0	1	1	OPALIN	oligodendrocytic myelin paranodal and inner loop protein
hsa-miR-520f	1	0	1	1	1	1	SCN2A	sodium channel, voltage-gated, type II, alpha subunit
hsa-miR-520f	1	0	1	0	1	1	CD83	CD83 molecule
hsa-miR-520f	1	0	1	0	1	1	DCUN1D4	DCN1, defective in cullin neddylation 1, domain containing 4 (S. cerevisiae)
hsa-miR-520f	1	0	1	1	1	1	GDAP1	ganglioside induced differentiation associated protein 1
hsa-miR-520f	1	0	1	1	1	1	CYLD	cylindromatosis (turban tumor syndrome)
hsa-miR-520f	1	0	1	1	1	1	GLIS3	GLIS family zinc finger 3
hsa-miR-520f	1	0	1	1	1	1	ZC2HC1C	zinc finger, C2HC-type containing 1C
hsa-miR-520f	1	0	1	1	1	1	C2orf88	chromosome 2 open reading frame 88
hsa-miR-520f	1	0	1	0	1	1	TMEM237	transmembrane protein 237
hsa-miR-520f	1	0	1	1	1	1	SLA	Src-like-adaptor
hsa-miR-520f	0	0	1	0	1	1	SSTR1	somatostatin receptor 1
hsa-miR-520f	0	0	1	1	1	1	TUBG1	tubulin, gamma 1
hsa-miR-520f	1	0	1	1	1	1	UBTF	upstream binding transcription factor, RNA polymerase I
hsa-miR-520f	1	0	1	0	1	1	SLC7A6	solute carrier family 7 (amino acid transporter light chain, y+L system), member 6
hsa-miR-520f	1	0	1	1	1	1	ZNF436	zinc finger protein 436
hsa-miR-520f	1	0	1	1	1	1	PDE11A	phosphodiesterase 11A
hsa-miR-520f	1	0	1	1	1	1	IRF2BP2	interferon regulatory factor 2 binding protein 2
hsa-miR-520f	1	0	1	1	1	1	ALG9	asparagine-linked glycosylation 9, alpha-1,2-mannosyltransferase homolog (S. cerevisiae)
hsa-miR-520f	0	0	1	1	1	1	VCAM1	vascular cell adhesion molecule 1
hsa-miR-520f	0	0	1	1	0	0	CFC1B	cripto, FRL-1, cryptic family 1B
hsa-miR-520f	1	0	1	1	1	1	DMP1	dentin matrix acidic phosphoprotein 1
hsa-miR-520f	1	0	1	1	1	1	ZNF629	zinc finger protein 629
hsa-miR-520f	0	0	1	1	1	1	HSF5	heat shock transcription factor family member 5
hsa-miR-520f	0	0	1	1	1	1	TMEM202	transmembrane protein 202
hsa-miR-520f	1	0	1	0	1	1	MEGF9	multiple EGF-like-domains 9
hsa-miR-520f	1	0	1	1	1	1	MGA	MAX gene associated
hsa-miR-520f	1	0	1	1	1	1	ASIC1	acid-sensing (proton-gated) ion channel 1
hsa-miR-520f	1	0	1	1	1	1	ADCY9	adenylate cyclase 9
hsa-miR-520f	1	0	1	1	1	1	ADCYAP1	adenylate cyclase activating polypeptide 1 (pituitary)
hsa-miR-520f	1	0	1	0	1	1	XIAP	X-linked inhibitor of apoptosis
hsa-miR-520f	1	0	1	0	1	1	BACH1	BTB and CNC homology 1, basic leucine zipper transcription factor 1
hsa-miR-520f	1	0	1	0	1	1	BMPR2	bone morphogenetic protein receptor, type II (serine/threonine kinase)
hsa-miR-520f	1	0	1	0	1	1	KLF9	Kruppel-like factor 9
hsa-miR-520f	1	0	1	0	1	1	CPD	carboxypeptidase D
hsa-miR-520f	1	0	1	1	1	1	CREBL2	cAMP responsive element binding protein-like 2
hsa-miR-520f	1	0	1	1	1	1	S1PR1	sphingosine-1-phosphate receptor 1
hsa-miR-520f	1	0	1	1	1	1	EIF1AX	eukaryotic translation initiation factor 1A, X-linked
hsa-miR-520f	0	0	1	0	1	1	CXCL1	chemokine (C-X-C motif) ligand 1 (melanoma growth stimulating activity, alpha)
hsa-miR-520f	1	0	1	1	1	1	IRAK2	interleukin-1 receptor-associated kinase 2
hsa-miR-520f	1	0	1	1	1	1	AK2	adenylate kinase 2
hsa-miR-520f	0	0	1	1	1	1	AXL	AXL receptor tyrosine kinase
hsa-miR-520f	1	0	1	0	1	1	CCND2	cyclin D2
hsa-miR-520f	0	0	1	1	1	1	CD1D	CD1d molecule
hsa-miR-520f	1	0	1	1	1	1	CDC25A	cell division cycle 25 homolog A (S. pombe)
hsa-miR-520f	1	0	1	1	1	1	CDH2	cadherin 2, type 1, N-cadherin (neuronal)
hsa-miR-520f	0	0	1	1	1	1	SLC31A2	solute carrier family 31 (copper transporters), member 2
hsa-miR-520f	0	0	1	1	1	1	COX7B	cytochrome c oxidase subunit VIIb
hsa-miR-520f	0	0	1	1	1	1	DLAT	dihydrolipoamide S-acetyltransferase
hsa-miR-520f	1	0	1	1	1	1	DPP4	dipeptidyl-peptidase 4
hsa-miR-520f	1	0	1	1	1	1	DSC3	desmocollin 3
hsa-miR-520f	0	0	1	1	1	1	DSG1	desmoglein 1
hsa-miR-520f	1	0	1	1	1	1	E2F3	E2F transcription factor 3
hsa-miR-520f	0	0	1	1	1	1	EDNRA	endothelin receptor type A
hsa-miR-520f	1	0	1	1	1	1	ENPEP	glutamyl aminopeptidase (aminopeptidase A)
hsa-miR-520f	1	0	1	1	1	1	FGF9	fibroblast growth factor 9 (glia-activating factor)
hsa-miR-520f	0	0	1	1	1	1	FLI1	Friend leukemia virus integration 1
hsa-miR-520f	1	0	1	1	1	1	FRK	fyn-related kinase
hsa-miR-520f	1	0	1	1	1	1	HNRNPA2B1	heterogeneous nuclear ribonucleoprotein A2/B1
hsa-miR-520f	1	0	1	1	1	1	TNC	tenascin C
hsa-miR-520f	0	0	1	1	1	1	IL6ST	interleukin 6 signal transducer (gp130, oncostatin M receptor)
hsa-miR-520f	0	0	1	1	1	1	IL17A	interleukin 17A
hsa-miR-520f	1	0	1	0	1	1	IRF2	interferon regulatory factor 2
hsa-miR-520f	1	0	1	1	1	1	ISL1	ISL LIM homeobox 1
hsa-miR-520f	1	0	1	1	1	1	ITGA9	integrin, alpha 9
hsa-miR-520f	1	0	1	1	1	1	ITGB8	integrin, beta 8
hsa-miR-520f	1	0	1	1	1	1	ITPR2	inositol 1,4,5-trisphosphate receptor, type 2
hsa-miR-520f	1	0	1	1	1	1	JAG2	jagged 2
hsa-miR-520f	1	0	1	1	1	1	KCNJ3	potassium inwardly-rectifying channel, subfamily J, member 3
hsa-miR-520f	1	0	1	1	1	1	KPNB1	karyopherin (importin) beta 1
hsa-miR-520f	0	0	1	1	1	1	MMP7	matrix metallopeptidase 7 (matrilysin, uterine)
hsa-miR-520f	1	0	1	1	1	1	NDN	necdin homolog (mouse)
hsa-miR-520f	0	0	1	1	1	1	NOV	nephroblastoma overexpressed
hsa-miR-520f	1	0	1	1	1	1	NPTX1	neuronal pentraxin I
hsa-miR-520f	0	0	1	1	1	1	OMG	oligodendrocyte myelin glycoprotein
hsa-miR-520f	1	0	1	1	1	1	FURIN	furin (paired basic amino acid cleaving enzyme)
hsa-miR-520f	1	0	1	1	1	1	PCSK6	proprotein convertase subtilisin/kexin type 6
hsa-miR-520f	1	0	1	0	1	1	PAK2	p21 protein (Cdc42/Rac)-activated kinase 2
hsa-miR-520f	1	0	1	1	1	1	PAWR	PRKC, apoptosis, WT1, regulator
hsa-miR-520f	1	0	1	1	0	0	PDGFB	platelet-derived growth factor beta polypeptide
hsa-miR-520f	1	0	1	1	1	1	PLAGL2	pleiomorphic adenoma gene-like 2
hsa-miR-520f	0	0	1	0	1	1	PMP2	peripheral myelin protein 2
hsa-miR-520f	0	0	1	1	1	1	PPP1R3A	protein phosphatase 1, regulatory subunit 3A
hsa-miR-520f	1	0	1	1	1	1	PPP2R3A	protein phosphatase 2, regulatory subunit B'', alpha
hsa-miR-520f	0	0	1	1	0	0	PRPSAP1	phosphoribosyl pyrophosphate synthetase-associated protein 1
hsa-miR-520f	0	0	1	1	0	0	PSMC6	proteasome (prosome, macropain) 26S subunit, ATPase, 6
hsa-miR-520f	1	0	1	1	1	1	PVALB	parvalbumin
hsa-miR-520f	1	0	1	1	1	1	PVRL1	poliovirus receptor-related 1 (herpesvirus entry mediator C)
hsa-miR-520f	1	0	1	1	1	1	ARID4A	AT rich interactive domain 4A (RBP1-like)
hsa-miR-520f	1	0	1	1	1	1	RBL1	retinoblastoma-like 1 (p107)
hsa-miR-520f	1	0	1	1	0	0	RORA	RAR-related orphan receptor A
hsa-miR-520f	1	0	1	0	1	1	CCL22	chemokine (C-C motif) ligand 22
hsa-miR-520f	0	0	1	1	1	1	XCL1	chemokine (C motif) ligand 1
hsa-miR-520f	0	0	1	1	1	1	SH3BGRL	SH3 domain binding glutamic acid-rich protein like
hsa-miR-520f	1	0	1	0	1	1	SLC6A1	solute carrier family 6 (neurotransmitter transporter, GABA), member 1
hsa-miR-520f	1	0	1	0	1	1	SOX11	SRY (sex determining region Y)-box 11
hsa-miR-520f	0	0	1	1	1	1	SRP54	signal recognition particle 54kDa
hsa-miR-520f	1	0	1	1	1	1	STAC	SH3 and cysteine rich domain
hsa-miR-520f	0	0	1	1	1	1	STAT5A	signal transducer and activator of transcription 5A
hsa-miR-520f	0	0	1	1	1	1	STRN	striatin, calmodulin binding protein
hsa-miR-520f	0	0	1	1	1	1	SUPT6H	suppressor of Ty 6 homolog (S. cerevisiae)
hsa-miR-520f	0	0	1	1	1	1	XCL2	chemokine (C motif) ligand 2
hsa-miR-520f	0	0	1	0	1	1	TCEA3	transcription elongation factor A (SII), 3
hsa-miR-520f	1	0	1	1	1	1	TFAP4	transcription factor AP-4 (activating enhancer binding protein 4)
hsa-miR-520f	1	0	1	1	1	1	LEFTY2	left-right determination factor 2
hsa-miR-520f	1	0	1	0	1	1	THBS1	thrombospondin 1
hsa-miR-520f	1	0	1	1	1	1	TRAPPC10	trafficking protein particle complex 10
hsa-miR-520f	1	0	1	1	1	1	NR2C2	nuclear receptor subfamily 2, group C, member 2
hsa-miR-520f	1	0	1	1	1	1	UBE2B	ubiquitin-conjugating enzyme E2B
hsa-miR-520f	1	0	1	1	1	1	UBE2N	ubiquitin-conjugating enzyme E2N
hsa-miR-520f	0	0	1	1	1	1	UBE2V2	ubiquitin-conjugating enzyme E2 variant 2
hsa-miR-520f	1	0	1	1	1	1	PAX8	paired box 8
hsa-miR-520f	1	0	1	1	1	1	PDHX	pyruvate dehydrogenase complex, component X
hsa-miR-520f	1	0	1	1	1	1	FZD7	frizzled family receptor 7
hsa-miR-520f	0	0	1	1	0	0	DUSP11	dual specificity phosphatase 11 (RNA/RNP complex 1-interacting)
hsa-miR-520f	1	0	1	0	1	1	CUL3	cullin 3
hsa-miR-520f	1	0	1	1	1	1	CILP	cartilage intermediate layer protein, nucleotide pyrophosphohydrolase
hsa-miR-520f	0	0	1	0	1	1	GCM1	glial cells missing homolog 1 (Drosophila)
hsa-miR-520f	1	0	1	1	1	1	BARX2	BARX homeobox 2
hsa-miR-520f	1	0	1	1	1	1	EXO1	exonuclease 1
hsa-miR-520f	0	0	1	1	1	1	JRKL	jerky homolog-like (mouse)
hsa-miR-520f	0	0	1	1	1	1	SNX4	sorting nexin 4
hsa-miR-520f	1	0	1	1	1	1	ADAM9	ADAM metallopeptidase domain 9
hsa-miR-520f	1	0	1	1	1	1	SNAP23	synaptosomal-associated protein, 23kDa
hsa-miR-520f	0	0	1	1	1	1	SCEL	sciellin
hsa-miR-520f	1	0	1	1	1	1	KAT2B	K(lysine) acetyltransferase 2B
hsa-miR-520f	0	0	1	1	1	1	MPZL1	myelin protein zero-like 1
hsa-miR-520f	0	0	1	1	1	1	RNF8	ring finger protein 8, E3 ubiquitin protein ligase
hsa-miR-520f	0	0	1	1	0	0	CCRL2	chemokine (C-C motif) receptor-like 2
hsa-miR-520f	0	0	1	1	0	0	GPX5	glutathione peroxidase 5 (epididymal androgen-related protein)
hsa-miR-520f	1	0	1	1	1	1	CTSS	cathepsin S
hsa-miR-520f	1	0	1	0	1	1	DGKB	diacylglycerol kinase, beta 90kDa
hsa-miR-520f	0	0	1	1	1	1	LBP	lipopolysaccharide binding protein
hsa-miR-520f	0	0	1	1	1	1	SLC1A1	solute carrier family 1 (neuronal/epithelial high affinity glutamate transporter, system Xag), member 1
hsa-miR-520f	1	0	1	1	1	1	GDA	guanine deaminase
hsa-miR-520f	0	0	1	1	0	0	BAD	BCL2-associated agonist of cell death
hsa-miR-520f	1	0	1	1	1	1	COX11	COX11 cytochrome c oxidase assembly homolog (yeast)
hsa-miR-520f	1	0	1	1	1	1	CREB1	cAMP responsive element binding protein 1
hsa-miR-520f	1	0	1	1	1	1	ATF6B	activating transcription factor 6 beta
hsa-miR-520f	1	0	1	1	1	1	DACH1	dachshund homolog 1 (Drosophila)
hsa-miR-520f	1	0	1	1	1	1	DUSP5	dual specificity phosphatase 5
hsa-miR-520f	1	0	1	1	1	1	EPS8	epidermal growth factor receptor pathway substrate 8
hsa-miR-520f	1	0	1	1	0	0	ERH	enhancer of rudimentary homolog (Drosophila)
hsa-miR-520f	0	0	1	0	1	1	GALNT3	UDP-N-acetyl-alpha-D-galactosamine:polypeptide N-acetylgalactosaminyltransferase 3 (GalNAc-T3)
hsa-miR-520f	1	0	1	0	1	1	SCN2B	sodium channel, voltage-gated, type II, beta subunit
hsa-miR-520f	1	0	1	1	1	1	RAB11A	RAB11A, member RAS oncogene family
hsa-miR-520f	0	0	1	1	0	0	MAP3K6	mitogen-activated protein kinase kinase kinase 6
hsa-miR-520f	0	0	1	0	0	0	XKRY	XK, Kell blood group complex subunit-related, Y-linked
hsa-miR-520f	1	0	1	1	1	1	RABEP1	rabaptin, RAB GTPase binding effector protein 1
hsa-miR-520f	0	0	1	0	1	1	CXorf1	chromosome X open reading frame 1
hsa-miR-520f	1	0	1	1	1	1	STK17A	serine/threonine kinase 17a
hsa-miR-520f	1	0	1	0	1	1	VAMP3	vesicle-associated membrane protein 3 (cellubrevin)
hsa-miR-520f	1	0	1	1	1	1	KIF3B	kinesin family member 3B
hsa-miR-520f	1	0	1	0	1	1	CDYL	chromodomain protein, Y-like
hsa-miR-520f	1	0	1	1	1	1	ONECUT2	one cut homeobox 2
hsa-miR-520f	1	0	1	1	1	1	KIF23	kinesin family member 23
hsa-miR-520f	1	0	1	1	1	1	CXCL14	chemokine (C-X-C motif) ligand 14
hsa-miR-520f	0	0	1	1	1	1	CALB1	calbindin 1, 28kDa
hsa-miR-520f	1	0	1	1	1	1	GABRE	gamma-aminobutyric acid (GABA) A receptor, epsilon
hsa-miR-520f	0	0	1	1	1	1	PTH2R	parathyroid hormone 2 receptor
hsa-miR-520f	1	0	1	1	1	1	KDM5A	lysine (K)-specific demethylase 5A
hsa-miR-520f	1	0	1	0	1	1	SEL1L	sel-1 suppressor of lin-12-like (C. elegans)
hsa-miR-520f	0	0	1	1	0	0	SLC17A1	solute carrier family 17 (sodium phosphate), member 1
hsa-miR-520f	1	0	1	1	1	1	OXSR1	oxidative-stress responsive 1
hsa-miR-520f	1	0	1	1	1	1	MED13	mediator complex subunit 13
hsa-miR-520f	1	0	1	1	1	1	BMI1	BMI1 polycomb ring finger oncogene
hsa-miR-520f	1	0	1	1	1	1	CBL	Cbl proto-oncogene, E3 ubiquitin protein ligase
hsa-miR-520f	1	0	1	1	1	1	CRKL	v-crk sarcoma virus CT10 oncogene homolog (avian)-like
hsa-miR-520f	0	0	1	1	1	1	CSTA	cystatin A (stefin A)
hsa-miR-520f	1	0	1	0	1	1	DLX6	distal-less homeobox 6
hsa-miR-520f	0	0	1	0	1	1	FOSL2	FOS-like antigen 2
hsa-miR-520f	1	0	1	1	1	1	GABPB1	GA binding protein transcription factor, beta subunit 1
hsa-miR-520f	1	0	1	1	1	1	GAS2	growth arrest-specific 2
hsa-miR-520f	0	0	1	1	1	1	MSTN	myostatin
hsa-miR-520f	1	0	1	1	1	1	GJA5	gap junction protein, alpha 5, 40kDa
hsa-miR-520f	1	0	1	1	1	1	NCL	nucleolin
hsa-miR-520f	1	0	1	1	0	0	NNAT	neuronatin
hsa-miR-520f	1	0	1	0	1	1	PRKAB2	protein kinase, AMP-activated, beta 2 non-catalytic subunit
hsa-miR-520f	1	0	1	0	1	1	CCDC6	coiled-coil domain containing 6
hsa-miR-520f	1	0	1	1	1	1	AKT3	v-akt murine thymoma viral oncogene homolog 3 (protein kinase B, gamma)
hsa-miR-520f	1	0	1	1	1	1	ABCA1	ATP-binding cassette, sub-family A (ABC1), member 1
hsa-miR-520f	1	0	1	1	1	1	SCARB2	scavenger receptor class B, member 2
hsa-miR-520f	0	0	1	1	0	0	LMNB1	lamin B1
hsa-miR-520f	1	0	1	1	1	1	MYF5	myogenic factor 5
hsa-miR-520f	0	0	1	0	1	1	POU3F2	POU class 3 homeobox 2
hsa-miR-520f	1	0	1	1	1	1	SYT1	synaptotagmin I
hsa-miR-520f	1	0	1	1	1	1	ST8SIA4	ST8 alpha-N-acetyl-neuraminide alpha-2,8-sialyltransferase 4
hsa-miR-520f	0	0	1	1	0	0	SNURF	SNRPN upstream reading frame
hsa-miR-520f	0	0	1	1	1	1	GPR52	G protein-coupled receptor 52
hsa-miR-520f	1	0	1	1	1	1	NAMPT	nicotinamide phosphoribosyltransferase
hsa-miR-520f	1	0	1	0	1	1	SPRY3	sprouty homolog 3 (Drosophila)
hsa-miR-520f	0	0	1	0	1	1	STAM2	signal transducing adaptor molecule (SH3 domain and ITAM motif) 2
hsa-miR-520f	1	0	1	1	1	1	MAT2A	methionine adenosyltransferase II, alpha
hsa-miR-520f	0	0	1	1	1	1	MFAP3	microfibrillar-associated protein 3
hsa-miR-520f	1	0	1	1	1	1	MTF1	metal-regulatory transcription factor 1
hsa-miR-520f	1	0	1	1	1	1	RNF6	ring finger protein (C3H2C3 type) 6
hsa-miR-520f	0	0	1	1	1	1	UQCRFS1	ubiquinol-cytochrome c reductase, Rieske iron-sulfur polypeptide 1
hsa-miR-520f	1	0	1	1	1	1	HS3ST4	heparan sulfate (glucosamine) 3-O-sulfotransferase 4
hsa-miR-520f	1	0	1	1	0	0	AGFG2	ArfGAP with FG repeats 2
hsa-miR-520f	1	0	1	1	1	1	IRF9	interferon regulatory factor 9
hsa-miR-520f	1	0	1	1	1	1	SPON1	spondin 1, extracellular matrix protein
hsa-miR-520f	1	0	1	1	1	1	DAGLA	diacylglycerol lipase, alpha
hsa-miR-520f	1	0	1	1	1	1	TMEM50B	transmembrane protein 50B
hsa-miR-520f	1	0	1	1	1	1	CAPZA1	capping protein (actin filament) muscle Z-line, alpha 1
hsa-miR-520f	1	0	1	1	1	1	CAPZA2	capping protein (actin filament) muscle Z-line, alpha 2
hsa-miR-520f	1	0	1	1	1	1	DNAJB1	DnaJ (Hsp40) homolog, subfamily B, member 1
hsa-miR-520f	0	0	1	1	1	1	IRF6	interferon regulatory factor 6
hsa-miR-520f	0	0	1	1	1	1	NKX3-1	NK3 homeobox 1
hsa-miR-520f	1	0	1	1	1	1	NR4A2	nuclear receptor subfamily 4, group A, member 2
hsa-miR-520f	0	0	1	0	1	1	OAS3	2'-5'-oligoadenylate synthetase 3, 100kDa
hsa-miR-520f	1	0	1	1	1	1	PDGFRA	platelet-derived growth factor receptor, alpha polypeptide
hsa-miR-520f	1	0	1	1	1	1	POU4F1	POU class 4 homeobox 1
hsa-miR-520f	1	0	1	1	1	1	PPP2R5E	protein phosphatase 2, regulatory subunit B', epsilon isoform
hsa-miR-520f	1	0	1	1	1	1	PKN2	protein kinase N2
hsa-miR-520f	1	0	1	1	1	1	STK4	serine/threonine kinase 4
hsa-miR-520f	1	0	1	1	1	1	SMC1A	structural maintenance of chromosomes 1A
hsa-miR-520f	0	0	1	1	1	1	PIBF1	progesterone immunomodulatory binding factor 1
hsa-miR-520f	1	0	1	0	1	1	APPBP2	amyloid beta precursor protein (cytoplasmic tail) binding protein 2
hsa-miR-520f	1	0	1	1	1	1	SPTLC1	serine palmitoyltransferase, long chain base subunit 1
hsa-miR-520f	0	0	1	1	0	0	GNLY	granulysin
hsa-miR-520f	1	0	1	1	1	1	DYNLT3	dynein, light chain, Tctex-type 3
hsa-miR-520f	0	0	1	1	1	1	CACNG3	calcium channel, voltage-dependent, gamma subunit 3
hsa-miR-520f	1	0	1	0	1	1	NCOA2	nuclear receptor coactivator 2
hsa-miR-520f	1	0	1	0	1	1	IGF2BP1	insulin-like growth factor 2 mRNA binding protein 1
hsa-miR-520f	1	0	1	1	1	1	KHDRBS1	KH domain containing, RNA binding, signal transduction associated 1
hsa-miR-520f	1	0	1	0	1	1	MAP4K5	mitogen-activated protein kinase kinase kinase kinase 5
hsa-miR-520f	1	0	1	1	1	1	CORIN	corin, serine peptidase
hsa-miR-520f	1	0	1	1	1	1	MAP3K2	mitogen-activated protein kinase kinase kinase 2
hsa-miR-520f	1	0	1	1	1	1	SRSF10	serine/arginine-rich splicing factor 10
hsa-miR-520f	0	0	1	1	1	1	PPP1R17	protein phosphatase 1, regulatory subunit 17
hsa-miR-520f	1	0	1	1	1	1	MMP24	matrix metallopeptidase 24 (membrane-inserted)
hsa-miR-520f	1	0	1	1	1	1	DIAPH2	diaphanous homolog 2 (Drosophila)
hsa-miR-520f	1	0	1	1	1	1	KAT6A	K(lysine) acetyltransferase 6A
hsa-miR-520f	0	0	1	1	1	1	MSL3	male-specific lethal 3 homolog (Drosophila)
hsa-miR-520f	0	0	1	1	1	1	SERINC3	serine incorporator 3
hsa-miR-520f	0	0	1	1	1	1	PKIA	protein kinase (cAMP-dependent, catalytic) inhibitor alpha
hsa-miR-520f	1	0	1	1	1	1	RP2	retinitis pigmentosa 2 (X-linked recessive)
hsa-miR-520f	1	0	1	0	1	1	SLC5A3	solute carrier family 5 (sodium/myo-inositol cotransporter), member 3
hsa-miR-520f	1	0	1	0	1	1	SOX12	SRY (sex determining region Y)-box 12
hsa-miR-520f	1	0	1	1	1	1	NR4A3	nuclear receptor subfamily 4, group A, member 3
hsa-miR-520f	1	0	1	1	1	1	ABHD2	abhydrolase domain containing 2
hsa-miR-520f	1	0	1	1	1	1	ADAMTS5	ADAM metallopeptidase with thrombospondin type 1 motif, 5
hsa-miR-520f	1	0	1	1	1	1	UBL3	ubiquitin-like 3
hsa-miR-520f	1	0	1	1	1	1	TMF1	TATA element modulatory factor 1
hsa-miR-520f	1	0	1	1	1	1	ZNF81	zinc finger protein 81
hsa-miR-520f	1	0	1	0	1	1	PRSS23	protease, serine, 23
hsa-miR-520f	1	0	1	1	1	1	ERLIN2	ER lipid raft associated 2
hsa-miR-520f	1	0	1	1	1	1	HPS5	Hermansky-Pudlak syndrome 5
hsa-miR-520f	1	0	1	1	1	1	KLF12	Kruppel-like factor 12
hsa-miR-520f	1	0	1	1	1	1	TARDBP	TAR DNA binding protein
hsa-miR-520f	1	0	1	1	1	1	ELL2	elongation factor, RNA polymerase II, 2
hsa-miR-520f	1	0	1	0	1	1	ZFPM2	zinc finger protein, multitype 2
hsa-miR-520f	1	0	1	1	1	1	APPL1	adaptor protein, phosphotyrosine interaction, PH domain and leucine zipper containing 1
hsa-miR-520f	1	0	1	1	1	1	RABGAP1	RAB GTPase activating protein 1
hsa-miR-520f	1	0	1	1	1	1	MGAT4A	mannosyl (alpha-1,3-)-glycoprotein beta-1,4-N-acetylglucosaminyltransferase, isozyme A
hsa-miR-520f	1	0	1	1	1	1	RYBP	RING1 and YY1 binding protein
hsa-miR-520f	1	0	1	1	1	1	RHOQ	ras homolog family member Q
hsa-miR-520f	1	0	1	1	1	1	HEY2	hairy/enhancer-of-split related with YRPW motif 2
hsa-miR-520f	1	0	1	1	1	1	LAMP5	lysosomal-associated membrane protein family, member 5
hsa-miR-520f	1	0	1	1	1	1	HS2ST1	heparan sulfate 2-O-sulfotransferase 1
hsa-miR-520f	1	0	1	1	1	1	KCNE1L	KCNE1-like
hsa-miR-520f	1	0	1	0	1	1	GAB2	GRB2-associated binding protein 2
hsa-miR-520f	1	0	1	1	1	1	LDOC1	leucine zipper, down-regulated in cancer 1
hsa-miR-520f	1	0	1	0	1	1	MYCBP	c-myc binding protein
hsa-miR-520f	0	0	1	1	1	1	DNAJC15	DnaJ (Hsp40) homolog, subfamily C, member 15
hsa-miR-520f	1	0	1	1	1	1	SLC30A4	solute carrier family 30 (zinc transporter), member 4
hsa-miR-520f	0	0	1	1	0	0	KCNJ14	potassium inwardly-rectifying channel, subfamily J, member 14
hsa-miR-520f	0	0	1	1	0	0	ZDHHC8	zinc finger, DHHC-type containing 8
hsa-miR-520f	1	0	1	1	1	1	LRP12	low density lipoprotein receptor-related protein 12
hsa-miR-520f	0	0	1	0	1	1	EMR2	egf-like module containing, mucin-like, hormone receptor-like 2
hsa-miR-520f	1	0	1	1	1	1	BAZ1A	bromodomain adjacent to zinc finger domain, 1A
hsa-miR-520f	1	0	1	1	1	1	SOCS5	suppressor of cytokine signaling 5
hsa-miR-520f	1	0	1	1	1	1	WDR37	WD repeat domain 37
hsa-miR-520f	1	0	1	0	1	1	OSTM1	osteopetrosis associated transmembrane protein 1
hsa-miR-520f	0	0	1	1	1	1	METTL7A	methyltransferase like 7A
hsa-miR-520f	0	0	1	1	0	0	MCTS1	malignant T cell amplified sequence 1
hsa-miR-520f	1	0	1	1	1	1	ZBTB44	zinc finger and BTB domain containing 44
hsa-miR-520f	0	0	1	1	1	1	CCDC113	coiled-coil domain containing 113
hsa-miR-520f	1	0	1	0	1	1	ODZ1	odz, odd Oz/ten-m homolog 1 (Drosophila)
hsa-miR-520f	1	0	1	1	1	1	C11orf58	chromosome 11 open reading frame 58
hsa-miR-520f	0	0	1	1	1	1	CAPN6	calpain 6
hsa-miR-520f	0	0	1	1	1	1	TRAM1	translocation associated membrane protein 1
hsa-miR-520f	1	0	1	1	1	1	MTCH2	mitochondrial carrier 2
hsa-miR-520f	1	0	1	1	1	1	LHX6	LIM homeobox 6
hsa-miR-520f	0	0	1	1	0	0	PKD2L2	polycystic kidney disease 2-like 2
hsa-miR-520f	0	0	1	1	1	1	LAMP3	lysosomal-associated membrane protein 3
hsa-miR-520f	0	0	1	1	1	1	CLUL1	clusterin-like 1 (retinal)
hsa-miR-520f	1	0	1	1	1	1	ZBTB11	zinc finger and BTB domain containing 11
hsa-miR-520f	1	0	1	1	1	1	AFF4	AF4/FMR2 family, member 4
hsa-miR-520f	1	0	1	1	1	1	OTX1	orthodenticle homeobox 1
hsa-miR-520f	1	0	1	1	1	1	VSX1	visual system homeobox 1
hsa-miR-520f	1	0	1	1	1	1	RALGPS1	Ral GEF with PH domain and SH3 binding motif 1
hsa-miR-520f	1	0	1	1	1	1	KDM4A	lysine (K)-specific demethylase 4A
hsa-miR-520f	1	0	1	0	1	1	EDEM1	ER degradation enhancer, mannosidase alpha-like 1
hsa-miR-520f	0	0	1	1	1	1	VPRBP	Vpr (HIV-1) binding protein
hsa-miR-520f	1	0	1	0	1	1	TOX	thymocyte selection-associated high mobility group box
hsa-miR-520f	1	0	1	0	1	1	MLEC	malectin
hsa-miR-520f	1	0	1	1	1	1	RASSF2	Ras association (RalGDS/AF-6) domain family member 2
hsa-miR-520f	1	0	1	0	1	1	SERTAD2	SERTA domain containing 2
hsa-miR-520f	1	0	1	0	1	1	KIAA0494	KIAA0494
hsa-miR-520f	1	0	1	1	0	0	ARHGEF17	Rho guanine nucleotide exchange factor (GEF) 17
hsa-miR-520f	0	0	1	1	1	1	TOX4	TOX high mobility group box family member 4
hsa-miR-520f	1	0	1	0	1	1	LPPR4	lipid phosphate phosphatase-related protein type 4
hsa-miR-520f	1	0	1	1	0	0	IQSEC1	IQ motif and Sec7 domain 1
hsa-miR-520f	1	0	1	1	1	1	MFN2	mitofusin 2
hsa-miR-520f	1	0	1	0	1	1	RAB11FIP2	RAB11 family interacting protein 2 (class I)
hsa-miR-520f	1	0	1	1	1	1	PHLPP2	PH domain and leucine rich repeat protein phosphatase 2
hsa-miR-520f	1	0	1	0	1	1	ZNF609	zinc finger protein 609
hsa-miR-520f	1	0	1	1	1	1	HECW1	HECT, C2 and WW domain containing E3 ubiquitin protein ligase 1
hsa-miR-520f	1	0	1	0	1	1	PEG10	paternally expressed 10
hsa-miR-520f	1	0	1	1	1	1	TAB2	TGF-beta activated kinase 1/MAP3K7 binding protein 2
hsa-miR-520f	1	0	1	1	1	1	PLCB1	phospholipase C, beta 1 (phosphoinositide-specific)
hsa-miR-520f	1	0	1	1	1	1	MYO1D	myosin ID
hsa-miR-520f	1	0	1	1	1	1	ANKS1A	ankyrin repeat and sterile alpha motif domain containing 1A
hsa-miR-520f	1	0	1	1	1	1	CUX2	cut-like homeobox 2
hsa-miR-520f	1	0	1	1	1	1	DNAJC13	DnaJ (Hsp40) homolog, subfamily C, member 13
hsa-miR-520f	1	0	1	1	1	1	PHF15	PHD finger protein 15
hsa-miR-520f	1	0	1	1	1	1	MED13L	mediator complex subunit 13-like
hsa-miR-520f	0	0	1	0	1	1	ZDHHC17	zinc finger, DHHC-type containing 17
hsa-miR-520f	1	0	1	1	1	1	ASXL1	additional sex combs like 1 (Drosophila)
hsa-miR-520f	1	0	1	1	1	1	ZFYVE26	zinc finger, FYVE domain containing 26
hsa-miR-520f	1	0	1	1	1	1	DSTYK	dual serine/threonine and tyrosine protein kinase
hsa-miR-520f	0	0	1	1	1	1	BRI3	brain protein I3
hsa-miR-520f	1	0	1	1	1	1	MOB4	MOB family member 4, phocein
hsa-miR-520f	1	0	1	1	1	1	PARM1	prostate androgen-regulated mucin-like protein 1
hsa-miR-520f	1	0	1	1	1	1	CAMSAP1	calmodulin regulated spectrin-associated protein 1
hsa-miR-520f	1	0	1	1	1	1	CNOT6	CCR4-NOT transcription complex, subunit 6
hsa-miR-520f	0	0	1	1	1	1	KBTBD2	kelch repeat and BTB (POZ) domain containing 2
hsa-miR-520f	0	0	1	1	1	1	TMEM87A	transmembrane protein 87A
hsa-miR-520f	1	0	1	0	1	1	OSBPL3	oxysterol binding protein-like 3
hsa-miR-520f	1	0	1	1	1	1	LTN1	listerin E3 ubiquitin protein ligase 1
hsa-miR-520f	0	0	1	1	1	1	C10orf12	chromosome 10 open reading frame 12
hsa-miR-520f	1	0	1	1	0	0	COL5A3	collagen, type V, alpha 3
hsa-miR-520f	1	0	1	1	1	1	CDC40	cell division cycle 40 homolog (S. cerevisiae)
hsa-miR-520f	1	0	1	0	1	1	KLF13	Kruppel-like factor 13
hsa-miR-520f	1	0	1	1	1	1	UBE2J1	ubiquitin-conjugating enzyme E2, J1
hsa-miR-520f	1	0	1	1	1	1	DERL2	derlin 2
hsa-miR-520f	0	0	1	1	1	1	MED31	mediator complex subunit 31
hsa-miR-520f	1	0	1	1	1	1	GOLT1B	golgi transport 1B
hsa-miR-520f	0	0	1	1	1	1	HDGFRP3	hepatoma-derived growth factor, related protein 3
hsa-miR-520f	0	0	1	1	1	1	RAB10	RAB10, member RAS oncogene family
hsa-miR-520f	0	0	1	1	0	0	CPQ	carboxypeptidase Q
hsa-miR-520f	0	0	1	1	1	1	DYNC1LI1	dynein, cytoplasmic 1, light intermediate chain 1
hsa-miR-520f	1	0	1	1	1	1	VGLL3	vestigial like 3 (Drosophila)
hsa-miR-520f	1	0	1	1	1	1	SNX9	sorting nexin 9
hsa-miR-520f	1	0	1	1	1	1	CYB5R4	cytochrome b5 reductase 4
hsa-miR-520f	0	0	1	1	1	1	ACSL5	acyl-CoA synthetase long-chain family member 5
hsa-miR-520f	0	0	1	1	1	1	CDH9	cadherin 9, type 2 (T1-cadherin)
hsa-miR-520f	0	0	1	1	1	1	FBXO40	F-box protein 40
hsa-miR-520f	0	0	1	1	1	1	CENPF	centromere protein F, 350/400kDa (mitosin)
hsa-miR-520f	1	0	1	1	1	1	ARID4B	AT rich interactive domain 4B (RBP1-like)
hsa-miR-520f	1	0	1	0	1	1	CRIM1	cysteine rich transmembrane BMP regulator 1 (chordin-like)
hsa-miR-520f	0	0	1	0	1	1	ERAP1	endoplasmic reticulum aminopeptidase 1
hsa-miR-520f	1	0	1	0	1	1	RAB8B	RAB8B, member RAS oncogene family
hsa-miR-520f	1	0	1	1	1	1	DNAJC27	DnaJ (Hsp40) homolog, subfamily C, member 27
hsa-miR-520f	1	0	1	1	1	1	IER5	immediate early response 5
hsa-miR-520f	1	0	1	1	1	1	MEX3C	mex-3 homolog C (C. elegans)
hsa-miR-520f	1	0	1	1	1	1	SIX4	SIX homeobox 4
hsa-miR-520f	1	0	1	1	1	1	GALNT7	UDP-N-acetyl-alpha-D-galactosamine:polypeptide N-acetylgalactosaminyltransferase 7 (GalNAc-T7)
hsa-miR-520f	1	0	1	1	1	1	ARID1B	AT rich interactive domain 1B (SWI1-like)
hsa-miR-520f	1	0	1	0	1	1	ZRANB1	zinc finger, RAN-binding domain containing 1
hsa-miR-520f	1	0	1	0	1	1	EIF2C4	eukaryotic translation initiation factor 2C, 4
hsa-miR-520f	1	0	1	0	1	1	KCTD9	potassium channel tetramerisation domain containing 9
hsa-miR-520f	1	0	1	0	1	1	FAM46C	family with sequence similarity 46, member C
hsa-miR-520f	0	0	1	0	1	1	THUMPD1	THUMP domain containing 1
hsa-miR-520f	1	0	1	0	1	1	UHRF1BP1	UHRF1 binding protein 1
hsa-miR-520f	1	0	1	1	1	1	UBE2R2	ubiquitin-conjugating enzyme E2R 2
hsa-miR-520f	1	0	1	0	1	1	MARCH5	membrane-associated ring finger (C3HC4) 5
hsa-miR-520f	0	0	1	1	1	1	SCYL2	SCY1-like 2 (S. cerevisiae)
hsa-miR-520f	1	0	1	0	1	1	KIF26B	kinesin family member 26B
hsa-miR-520f	1	0	1	1	1	1	FIGN	fidgetin
hsa-miR-520f	0	0	1	1	0	0	CEP55	centrosomal protein 55kDa
hsa-miR-520f	0	0	1	1	1	1	RCBTB1	regulator of chromosome condensation (RCC1) and BTB (POZ) domain containing protein 1
hsa-miR-520f	1	0	1	1	1	1	LRRC20	leucine rich repeat containing 20
hsa-miR-520f	0	0	1	1	1	1	TRIM62	tripartite motif containing 62
hsa-miR-520f	1	0	1	0	1	1	PARVA	parvin, alpha
hsa-miR-520f	0	0	1	1	1	1	QRSL1	glutaminyl-tRNA synthase (glutamine-hydrolyzing)-like 1
hsa-miR-520f	1	0	1	1	1	1	ZNF654	zinc finger protein 654
hsa-miR-520f	1	0	1	1	1	1	SPTLC3	serine palmitoyltransferase, long chain base subunit 3
hsa-miR-520f	1	0	1	1	1	1	DRAM1	DNA-damage regulated autophagy modulator 1
hsa-miR-520f	0	0	1	1	0	0	ADCY10	adenylate cyclase 10 (soluble)
hsa-miR-520f	0	0	1	0	0	0	FAM45B	family with sequence similarity 45, member A pseudogene
hsa-miR-520f	1	0	1	1	1	1	ASH1L	ash1 (absent, small, or homeotic)-like (Drosophila)
hsa-miR-520f	1	0	1	1	1	1	LRRC59	leucine rich repeat containing 59
hsa-miR-520f	1	0	1	1	1	1	NRP2	neuropilin 2
hsa-miR-520f	0	0	1	1	0	0	GABRQ	gamma-aminobutyric acid (GABA) A receptor, theta
hsa-miR-520f	1	0	1	1	1	1	CAMK2N1	calcium/calmodulin-dependent protein kinase II inhibitor 1
hsa-miR-520f	1	0	1	0	1	1	SMPD3	sphingomyelin phosphodiesterase 3, neutral membrane (neutral sphingomyelinase II)
hsa-miR-520f	1	0	1	1	1	1	MLL5	myeloid/lymphoid or mixed-lineage leukemia 5 (trithorax homolog, Drosophila)
hsa-miR-520f	1	0	1	0	1	1	PCDHAC1	protocadherin alpha subfamily C, 1
hsa-miR-520f	1	0	1	0	1	1	PCDHAC2	protocadherin alpha subfamily C, 2
hsa-miR-520f	1	0	1	1	1	1	PCDHA1	protocadherin alpha 1
hsa-miR-520f	1	0	1	0	1	1	PCDHA10	protocadherin alpha 10
hsa-miR-520f	1	0	1	0	1	1	PCDHA11	protocadherin alpha 11
hsa-miR-520f	1	0	1	0	1	1	PCDHA12	protocadherin alpha 12
hsa-miR-520f	1	0	1	1	1	1	PCDHA2	protocadherin alpha 2
hsa-miR-520f	1	0	1	1	1	1	PCDHA3	protocadherin alpha 3
hsa-miR-520f	1	0	1	1	1	1	PCDHA6	protocadherin alpha 6
hsa-miR-520f	1	0	1	0	1	1	PCDHA7	protocadherin alpha 7
hsa-miR-520f	1	0	1	1	1	1	PCDHA8	protocadherin alpha 8
hsa-miR-520f	0	0	1	1	1	1	NPAP1	nuclear pore associated protein 1
hsa-miR-520f	1	0	1	1	1	1	SASH3	SAM and SH3 domain containing 3
hsa-miR-520f	1	0	1	0	1	1	FAM190B	family with sequence similarity 190, member B
hsa-miR-520f	1	0	1	0	1	1	TMX3	thioredoxin-related transmembrane protein 3
hsa-miR-520f	1	0	1	0	1	1	CCDC93	coiled-coil domain containing 93
hsa-miR-520f	1	0	1	1	1	1	DENND1B	DENN/MADD domain containing 1B
hsa-miR-520f	0	0	1	1	1	1	GNL3L	guanine nucleotide binding protein-like 3 (nucleolar)-like
hsa-miR-520f	1	0	1	1	1	1	DLL4	delta-like 4 (Drosophila)
hsa-miR-520f	1	0	1	1	1	1	PLEKHA3	pleckstrin homology domain containing, family A (phosphoinositide binding specific) member 3
hsa-miR-520f	1	0	1	0	1	1	CNGB3	cyclic nucleotide gated channel beta 3
hsa-miR-520f	1	0	1	1	1	1	HOXA5	homeobox A5
hsa-miR-520f	1	0	1	0	1	1	UBFD1	ubiquitin family domain containing 1
hsa-miR-520f	1	0	1	1	1	1	CYP26B1	cytochrome P450, family 26, subfamily B, polypeptide 1
hsa-miR-520f	1	0	1	0	1	1	PAPOLB	poly(A) polymerase beta (testis specific)
hsa-miR-520f	1	0	1	1	1	1	FEM1C	fem-1 homolog c (C. elegans)
hsa-miR-520f	1	0	1	1	1	1	CCDC47	coiled-coil domain containing 47
hsa-miR-520f	1	0	1	1	1	1	C5orf15	chromosome 5 open reading frame 15
hsa-miR-520f	1	0	1	1	1	1	PRDM8	PR domain containing 8
hsa-miR-520f	1	0	1	1	0	0	SLC17A7	solute carrier family 17 (sodium-dependent inorganic phosphate cotransporter), member 7
hsa-miR-520f	1	0	1	0	1	1	MNT	MAX binding protein
hsa-miR-520f	1	0	1	1	1	1	PAK7	p21 protein (Cdc42/Rac)-activated kinase 7
hsa-miR-520f	0	0	1	1	1	1	CYSLTR2	cysteinyl leukotriene receptor 2
hsa-miR-520f	1	0	1	0	1	1	EIF5A2	eukaryotic translation initiation factor 5A2
hsa-miR-520f	1	0	1	1	1	1	PCDH9	protocadherin 9
hsa-miR-520f	0	0	1	1	1	1	PLXDC1	plexin domain containing 1
hsa-miR-520f	1	0	1	1	1	1	LYRM2	LYR motif containing 2
hsa-miR-520f	1	0	1	0	1	1	ADCY2	adenylate cyclase 2 (brain)
hsa-miR-520f	1	0	1	1	1	1	JPH1	junctophilin 1
hsa-miR-520f	1	0	1	1	1	1	RAB22A	RAB22A, member RAS oncogene family
hsa-miR-520f	1	0	1	1	1	1	SLC24A3	solute carrier family 24 (sodium/potassium/calcium exchanger), member 3
hsa-miR-520f	1	0	1	0	1	1	FAM40B	family with sequence similarity 40, member B
hsa-miR-520f	0	0	1	1	1	1	SHROOM4	shroom family member 4
hsa-miR-520f	1	0	1	1	1	1	MIB1	mindbomb E3 ubiquitin protein ligase 1
hsa-miR-520f	1	0	1	0	1	1	KLHDC5	kelch domain containing 5
hsa-miR-520f	1	0	1	1	1	1	SIPA1L2	signal-induced proliferation-associated 1 like 2
hsa-miR-520f	0	0	1	1	1	1	MARCH4	membrane-associated ring finger (C3HC4) 4, E3 ubiquitin protein ligase
hsa-miR-520f	1	0	1	0	1	1	WDFY1	WD repeat and FYVE domain containing 1
hsa-miR-520f	1	0	1	1	1	1	RANBP10	RAN binding protein 10
hsa-miR-520f	1	0	1	1	1	1	KIAA1467	KIAA1467
hsa-miR-520f	1	0	1	1	1	1	CNTN3	contactin 3 (plasmacytoma associated)
hsa-miR-520f	1	0	1	0	1	1	GPAM	glycerol-3-phosphate acyltransferase, mitochondrial
hsa-miR-520f	1	0	1	1	1	1	NIN	ninein (GSK3B interacting protein)
hsa-miR-520f	1	0	1	1	1	1	FAM160B1	family with sequence similarity 160, member B1
hsa-miR-520f	0	0	1	1	1	1	AQP9	aquaporin 9
hsa-miR-520f	1	0	1	1	1	1	LEFTY1	left-right determination factor 1
hsa-miR-520f	1	0	1	0	1	1	RAP2A	RAP2A, member of RAS oncogene family
hsa-miR-520f	1	0	1	1	1	1	ZNFX1	zinc finger, NFX1-type containing 1
hsa-miR-520f	0	0	1	1	0	0	HIST1H2BB	histone cluster 1, H2bb
hsa-miR-520f	1	0	1	1	1	1	MTMR3	myotubularin related protein 3
hsa-miR-520f	1	0	1	1	1	1	NTN4	netrin 4
hsa-miR-520f	1	0	1	0	0	0	RRAGD	Ras-related GTP binding D
hsa-miR-520f	1	0	1	1	1	1	CLCN6	chloride channel, voltage-sensitive 6
hsa-miR-520f	0	0	1	0	1	1	CFL2	cofilin 2 (muscle)
hsa-miR-520f	0	0	1	1	1	1	MS4A1	membrane-spanning 4-domains, subfamily A, member 1
hsa-miR-520f	1	0	1	0	1	1	MCL1	myeloid cell leukemia sequence 1 (BCL2-related)
hsa-miR-520f	1	0	1	1	0	0	HAND2	heart and neural crest derivatives expressed 2
hsa-miR-520f	1	0	1	1	1	1	EGLN1	egl nine homolog 1 (C. elegans)
hsa-miR-520f	1	0	1	1	1	1	PIEZO2	piezo-type mechanosensitive ion channel component 2
hsa-miR-520f	1	0	1	1	1	1	TXNDC5	thioredoxin domain containing 5 (endoplasmic reticulum)
hsa-miR-520f	0	0	1	1	1	1	PERP	PERP, TP53 apoptosis effector
hsa-miR-520f	0	0	1	1	0	0	POPDC2	popeye domain containing 2
hsa-miR-520f	1	0	1	1	1	1	XYLT1	xylosyltransferase I
hsa-miR-520f	0	0	1	1	1	1	TCTA	T-cell leukemia translocation altered
hsa-miR-520f	0	0	1	1	1	1	GLIPR2	GLI pathogenesis-related 2
hsa-miR-520f	1	0	1	1	1	1	HIF3A	hypoxia inducible factor 3, alpha subunit
hsa-miR-520f	0	0	1	1	1	1	HHIP	hedgehog interacting protein
hsa-miR-520f	1	0	1	1	1	1	TMEM168	transmembrane protein 168
hsa-miR-520f	0	0	1	1	1	1	SUSD1	sushi domain containing 1
hsa-miR-520f	1	0	1	1	1	1	SUDS3	suppressor of defective silencing 3 homolog (S. cerevisiae)
hsa-miR-520f	1	0	1	1	1	1	PRRX1	paired related homeobox 1
hsa-miR-520f	1	0	1	1	1	1	NEUROD6	neuronal differentiation 6
hsa-miR-520f	0	0	1	1	1	1	ACBD3	acyl-CoA binding domain containing 3
hsa-miR-520f	0	0	1	1	1	1	SFXN1	sideroflexin 1
hsa-miR-520f	1	0	1	1	1	1	YTHDC2	YTH domain containing 2
hsa-miR-520f	1	0	1	0	1	1	USP46	ubiquitin specific peptidase 46
hsa-miR-520f	0	0	1	1	1	1	METTL4	methyltransferase like 4
hsa-miR-520f	1	0	1	1	1	1	RFX7	regulatory factor X, 7
hsa-miR-520f	1	0	1	0	1	1	BCL11B	B-cell CLL/lymphoma 11B (zinc finger protein)
hsa-miR-520f	1	0	1	1	1	1	SOWAHC	sosondowah ankyrin repeat domain family member C
hsa-miR-520f	0	0	1	1	1	1	WDR77	WD repeat domain 77
hsa-miR-520f	1	0	1	0	1	1	NOTCH2	notch 2
hsa-miR-520f	0	0	1	1	1	1	LPAL2	lipoprotein, Lp(a)-like 2, pseudogene
hsa-miR-520f	1	0	1	1	1	1	HOXD1	homeobox D1
hsa-miR-520f	1	0	1	1	1	1	C10orf76	chromosome 10 open reading frame 76
hsa-miR-520f	0	0	1	1	1	1	RNF219	ring finger protein 219
hsa-miR-520f	1	0	1	1	1	1	PGBD5	piggyBac transposable element derived 5
hsa-miR-520f	1	0	1	1	1	1	ARSJ	arylsulfatase family, member J
hsa-miR-520f	1	0	1	1	1	1	DHX40	DEAH (Asp-Glu-Ala-His) box polypeptide 40
hsa-miR-520f	0	0	1	1	1	1	LRRK1	leucine-rich repeat kinase 1
hsa-miR-520f	1	0	1	1	1	1	C15orf29	chromosome 15 open reading frame 29
hsa-miR-520f	1	0	1	0	1	1	ZFHX4	zinc finger homeobox 4
hsa-miR-520f	1	0	1	1	0	0	CCDC48	coiled-coil domain containing 48
hsa-miR-520f	0	0	1	1	1	1	AGBL2	ATP/GTP binding protein-like 2
hsa-miR-520f	0	0	1	1	1	1	SNX22	sorting nexin 22
hsa-miR-520f	0	0	1	1	1	1	ZNF767	zinc finger family member 767
hsa-miR-520f	1	0	1	1	1	1	CPED1	cadherin-like and PC-esterase domain containing 1
hsa-miR-520f	0	0	1	1	1	1	ESRP2	epithelial splicing regulatory protein 2
hsa-miR-520f	1	0	1	1	1	1	KLHL18	kelch-like 18 (Drosophila)
hsa-miR-520f	0	0	1	1	0	0	BAIAP2L2	BAI1-associated protein 2-like 2
hsa-miR-520f	1	0	1	1	1	1	HKDC1	hexokinase domain containing 1
hsa-miR-520f	1	0	1	1	1	1	FBXO11	F-box protein 11
hsa-miR-520f	1	0	1	1	1	1	SLC35F5	solute carrier family 35, member F5
hsa-miR-520f	1	0	1	0	1	1	EDEM3	ER degradation enhancer, mannosidase alpha-like 3
hsa-miR-520f	0	0	1	0	1	1	PDGFD	platelet derived growth factor D
hsa-miR-520f	1	0	1	1	1	1	CYB5B	cytochrome b5 type B (outer mitochondrial membrane)
hsa-miR-520f	1	0	1	0	1	1	TET1	tet methylcytosine dioxygenase 1
hsa-miR-520f	1	0	1	1	1	1	JHDM1D	jumonji C domain containing histone demethylase 1 homolog D (S. cerevisiae)
hsa-miR-520f	1	0	1	0	1	1	SETD7	SET domain containing (lysine methyltransferase) 7
hsa-miR-520f	1	0	1	1	1	1	TMX1	thioredoxin-related transmembrane protein 1
hsa-miR-520f	1	0	1	1	1	1	TUBB1	tubulin, beta 1 class VI
hsa-miR-520f	1	0	1	1	1	1	SYNC	syncoilin, intermediate filament protein
hsa-miR-520f	1	0	1	1	1	1	ITFG1	integrin alpha FG-GAP repeat containing 1
hsa-miR-520f	1	0	1	0	1	1	C1orf21	chromosome 1 open reading frame 21
hsa-miR-520f	0	0	1	1	1	1	APOL2	apolipoprotein L, 2
hsa-miR-520f	1	0	1	1	1	1	PPP1R14C	protein phosphatase 1, regulatory (inhibitor) subunit 14C
hsa-miR-520f	0	0	1	1	1	1	SPACA1	sperm acrosome associated 1
hsa-miR-520f	0	0	1	1	1	1	SEH1L	SEH1-like (S. cerevisiae)
hsa-miR-520f	1	0	1	0	1	1	TMEM47	transmembrane protein 47
hsa-miR-520f	0	0	1	1	1	1	INHBE	inhibin, beta E
hsa-miR-520f	1	0	1	1	1	1	PCDHA9	protocadherin alpha 9
hsa-miR-520f	1	0	1	1	0	0	SPATA16	spermatogenesis associated 16
hsa-miR-520f	1	0	1	1	1	1	OTP	orthopedia homeobox
hsa-miR-520f	0	0	1	1	1	1	ARMC2	armadillo repeat containing 2
hsa-miR-520f	1	0	1	1	1	1	FBXO30	F-box protein 30
hsa-miR-520f	1	0	1	1	1	1	ANTXR1	anthrax toxin receptor 1
hsa-miR-520f	0	0	1	0	1	1	LDOC1L	leucine zipper, down-regulated in cancer 1-like
hsa-miR-520f	1	0	1	1	1	1	CAMKK1	calcium/calmodulin-dependent protein kinase kinase 1, alpha
hsa-miR-520f	1	0	1	1	1	1	BRMS1L	breast cancer metastasis-suppressor 1-like
hsa-miR-520f	0	0	1	1	0	0	C3orf26	chromosome 3 open reading frame 26
hsa-miR-520f	1	0	1	1	1	1	HOOK3	hook homolog 3 (Drosophila)
hsa-miR-520f	0	0	1	1	0	0	CFC1	cripto, FRL-1, cryptic family 1
hsa-miR-520f	0	0	1	1	1	1	ADTRP	androgen-dependent TFPI-regulating protein
hsa-miR-520f	1	0	1	1	0	0	ORAI1	ORAI calcium release-activated calcium modulator 1
hsa-miR-520f	1	0	1	0	1	1	UBASH3B	ubiquitin associated and SH3 domain containing B
hsa-miR-520f	1	0	1	1	1	1	ARHGAP19	Rho GTPase activating protein 19
hsa-miR-520f	0	0	1	1	1	1	TRIM4	tripartite motif containing 4
hsa-miR-520f	0	0	1	0	1	1	TSLP	thymic stromal lymphopoietin
hsa-miR-520f	0	0	1	1	0	0	MUC13	mucin 13, cell surface associated
hsa-miR-520f	1	0	1	1	1	1	TRIM55	tripartite motif containing 55
hsa-miR-520f	1	0	1	1	0	0	DMRTB1	DMRT-like family B with proline-rich C-terminal, 1
hsa-miR-520f	1	0	1	1	1	1	C5orf30	chromosome 5 open reading frame 30
hsa-miR-520f	1	0	1	0	1	1	PURB	purine-rich element binding protein B
hsa-miR-520f	1	0	1	1	1	1	TP53INP1	tumor protein p53 inducible nuclear protein 1
hsa-miR-520f	1	0	1	1	0	0	C22orf32	chromosome 22 open reading frame 32
hsa-miR-520f	1	0	1	1	1	1	EPT1	ethanolaminephosphotransferase 1 (CDP-ethanolamine-specific)
hsa-miR-520f	0	0	1	1	1	1	ARHGAP18	Rho GTPase activating protein 18
hsa-miR-520f	1	0	1	1	1	1	SLITRK1	SLIT and NTRK-like family, member 1
hsa-miR-520f	1	0	1	0	1	1	FAM129A	family with sequence similarity 129, member A
hsa-miR-520f	0	0	1	1	0	0	APOA5	apolipoprotein A-V
hsa-miR-520f	1	0	1	1	1	1	TRIM9	tripartite motif containing 9
hsa-miR-520f	1	0	1	1	1	1	MED12L	mediator complex subunit 12-like
hsa-miR-520f	0	0	1	1	0	0	THEM4	thioesterase superfamily member 4
hsa-miR-520f	0	0	1	1	1	1	IP6K3	inositol hexakisphosphate kinase 3
hsa-miR-520f	0	0	1	1	1	1	CDKN2B	cyclin-dependent kinase inhibitor 2B (p15, inhibits CDK4)
hsa-miR-520f	0	0	1	1	1	1	CLEC4D	C-type lectin domain family 4, member D
hsa-miR-520f	0	0	1	1	1	1	SELM	selenoprotein M
hsa-miR-520f	1	0	1	1	1	1	SLC44A1	solute carrier family 44, member 1
hsa-miR-520f	0	0	1	1	1	1	HIST1H2BK	histone cluster 1, H2bk
hsa-miR-520f	1	0	1	1	1	1	ZNF280B	zinc finger protein 280B
hsa-miR-520f	0	0	1	1	1	1	COLEC12	collectin sub-family member 12
hsa-miR-520f	1	0	1	1	1	1	KLHL6	kelch-like 6 (Drosophila)
hsa-miR-520f	0	0	1	1	0	0	COX7B2	cytochrome c oxidase subunit VIIb2
hsa-miR-520f	0	0	1	0	1	1	PAQR8	progestin and adipoQ receptor family member VIII
hsa-miR-520f	0	0	1	1	1	1	PATE1	prostate and testis expressed 1
hsa-miR-520f	0	0	1	0	1	1	SP140L	SP140 nuclear body protein-like
hsa-miR-520f	0	0	1	1	1	1	CASC4	cancer susceptibility candidate 4
hsa-miR-520f	1	0	1	0	1	1	SP1	Sp1 transcription factor
hsa-miR-520f	0	0	1	1	1	1	ADAMTS17	ADAM metallopeptidase with thrombospondin type 1 motif, 17
hsa-miR-520f	1	0	1	1	1	1	RPIA	ribose 5-phosphate isomerase A
hsa-miR-520f	0	0	1	0	0	0	CAPN13	calpain 13
hsa-miR-520f	1	0	1	1	1	1	TEX261	testis expressed 261
hsa-miR-520f	0	0	1	1	0	0	LINC00477	long intergenic non-protein coding RNA 477
hsa-miR-520f	1	0	1	1	1	1	ZMAT2	zinc finger, matrin-type 2
hsa-miR-520f	0	0	1	1	0	0	PRKCDBP	protein kinase C, delta binding protein
hsa-miR-520f	0	0	1	1	1	1	DACT3	dapper, antagonist of beta-catenin, homolog 3 (Xenopus laevis)
hsa-miR-520f	1	0	1	0	1	1	ZBTB47	zinc finger and BTB domain containing 47
hsa-miR-520f	0	0	1	1	0	0	SFT2D1	SFT2 domain containing 1
hsa-miR-520f	0	0	1	1	1	1	APOBEC3F	apolipoprotein B mRNA editing enzyme, catalytic polypeptide-like 3F
hsa-miR-520f	0	0	1	1	0	0	IL27	interleukin 27
hsa-miR-520f	1	0	1	1	1	1	ZNF396	zinc finger protein 396
hsa-miR-520f	1	0	1	1	1	1	SEPT6	septin 6
hsa-miR-520f	0	0	1	1	1	1	CHMP4C	charged multivesicular body protein 4C
hsa-miR-520f	1	0	1	1	1	1	POGLUT1	protein O-glucosyltransferase 1
hsa-miR-520f	0	0	1	1	1	1	DEPDC4	DEP domain containing 4
hsa-miR-520f	0	0	1	1	1	1	ERP27	endoplasmic reticulum protein 27
hsa-miR-520f	1	0	1	1	1	1	FAM123B	family with sequence similarity 123B
hsa-miR-520f	0	0	1	0	1	1	KBTBD3	kelch repeat and BTB (POZ) domain containing 3
hsa-miR-520f	0	0	1	0	1	1	HORMAD2	HORMA domain containing 2
hsa-miR-520f	0	0	1	1	1	1	DUSP18	dual specificity phosphatase 18
hsa-miR-520f	0	0	1	1	1	1	ENTHD1	ENTH domain containing 1
hsa-miR-520f	1	0	1	1	1	1	SLC16A14	solute carrier family 16, member 14 (monocarboxylic acid transporter 14)
hsa-miR-520f	1	0	1	1	1	1	C7orf60	chromosome 7 open reading frame 60
hsa-miR-520f	0	0	1	1	1	1	ATP6V0D2	ATPase, H+ transporting, lysosomal 38kDa, V0 subunit d2
hsa-miR-520f	1	0	1	0	1	1	TMTC2	transmembrane and tetratricopeptide repeat containing 2
hsa-miR-520f	1	0	1	1	1	1	SPRED1	sprouty-related, EVH1 domain containing 1
hsa-miR-520f	1	0	1	1	1	1	UBE2E2	ubiquitin-conjugating enzyme E2E 2
hsa-miR-520f	0	0	1	1	1	1	RALGPS2	Ral GEF with PH domain and SH3 binding motif 2
hsa-miR-520f	1	0	1	0	1	1	TMEM154	transmembrane protein 154
hsa-miR-520f	0	0	1	1	1	1	LINC00518	long intergenic non-protein coding RNA 518
hsa-miR-520f	1	0	1	0	1	1	C7orf41	chromosome 7 open reading frame 41
hsa-miR-520f	1	0	1	1	1	1	PDIK1L	PDLIM1 interacting kinase 1 like
hsa-miR-520f	0	0	1	0	1	1	KBTBD6	kelch repeat and BTB (POZ) domain containing 6
hsa-miR-520f	0	0	1	1	1	1	DGKH	diacylglycerol kinase, eta
hsa-miR-520f	1	0	1	0	1	1	ST6GALNAC3	ST6 (alpha-N-acetyl-neuraminyl-2,3-beta-galactosyl-1,3)-N-acetylgalactosaminide alpha-2,6-sialyltransferase 3
hsa-miR-520f	0	0	1	1	1	1	TMEM74	transmembrane protein 74
hsa-miR-520f	1	0	1	0	1	1	KDM1B	lysine (K)-specific demethylase 1B
hsa-miR-520f	0	0	1	1	0	0	ZDHHC20	zinc finger, DHHC-type containing 20
hsa-miR-520f	1	0	1	1	1	1	ERI1	exoribonuclease 1
hsa-miR-520f	1	0	1	1	1	1	HS6ST3	heparan sulfate 6-O-sulfotransferase 3
hsa-miR-520f	1	0	1	0	1	1	MDGA1	MAM domain containing glycosylphosphatidylinositol anchor 1
hsa-miR-520f	1	0	1	1	1	1	CREBRF	CREB3 regulatory factor
hsa-miR-520f	1	0	1	1	1	1	LCORL	ligand dependent nuclear receptor corepressor-like
hsa-miR-520f	1	0	1	1	1	1	C2orf69	chromosome 2 open reading frame 69
hsa-miR-520f	0	0	1	0	1	1	RTP1	receptor (chemosensory) transporter protein 1
hsa-miR-520f	1	0	1	1	1	1	CACUL1	CDK2-associated, cullin domain 1
hsa-miR-520f	0	0	1	1	1	1	CDY1	chromodomain protein, Y-linked, 1
hsa-miR-520f	0	0	1	1	1	1	ZFP91-CNTF	ZFP91-CNTF readthrough (non-protein coding)
hsa-miR-520f	1	0	1	1	1	1	RC3H1	ring finger and CCCH-type domains 1
hsa-miR-520f	0	0	1	1	1	1	CATSPER2	cation channel, sperm associated 2
hsa-miR-520f	1	0	1	0	1	1	KLHDC1	kelch domain containing 1
hsa-miR-520f	0	0	1	1	1	1	REXO1L1	REX1, RNA exonuclease 1 homolog (S. cerevisiae)-like 1
hsa-miR-520f	0	0	1	1	0	0	SPRR4	small proline-rich protein 4
hsa-miR-520f	1	0	1	1	1	1	MOB1B	MOB kinase activator 1B
hsa-miR-520f	1	0	1	1	1	1	MMGT1	membrane magnesium transporter 1
hsa-miR-520f	1	0	1	1	1	1	FAM117B	family with sequence similarity 117, member B
hsa-miR-520f	0	0	1	0	1	1	NBPF15	neuroblastoma breakpoint family, member 15
hsa-miR-520f	0	0	1	1	1	1	C3orf38	chromosome 3 open reading frame 38
hsa-miR-520f	1	0	1	0	1	1	SREK1IP1	SREK1-interacting protein 1
hsa-miR-520f	0	0	1	1	1	1	CD300LB	CD300 molecule-like family member b
hsa-miR-520f	1	0	1	1	1	1	PRR15	proline rich 15
hsa-miR-520f	1	0	1	1	0	0	JPH2	junctophilin 2
hsa-miR-520f	0	0	1	1	1	1	NLRP9	NLR family, pyrin domain containing 9
hsa-miR-520f	1	0	1	1	1	1	PPAP2B	phosphatidic acid phosphatase type 2B
hsa-miR-520f	1	0	1	1	1	1	PKHD1L1	polycystic kidney and hepatic disease 1 (autosomal recessive)-like 1
hsa-miR-520f	0	0	1	1	1	1	CMTM4	CKLF-like MARVEL transmembrane domain containing 4
hsa-miR-520f	0	0	1	1	1	1	FBXO27	F-box protein 27
hsa-miR-520f	0	0	1	0	1	1	SLCO4C1	solute carrier organic anion transporter family, member 4C1
hsa-miR-520f	0	0	1	1	1	1	LYRM7	Lyrm7 homolog (mouse)
hsa-miR-520f	0	0	1	1	0	0	APOBEC3H	apolipoprotein B mRNA editing enzyme, catalytic polypeptide-like 3H
hsa-miR-520f	0	0	1	1	0	0	DCDC1	doublecortin domain containing 1
hsa-miR-520f	1	0	1	1	1	1	TMED7	transmembrane emp24 protein transport domain containing 7
hsa-miR-520f	1	0	1	1	1	1	BCL6B	B-cell CLL/lymphoma 6, member B
hsa-miR-520f	1	0	1	1	1	1	ZSCAN22	zinc finger and SCAN domain containing 22
hsa-miR-520f	0	0	1	0	1	1	BAGE5	B melanoma antigen family, member 5
hsa-miR-520f	0	0	1	1	1	1	USP12	ubiquitin specific peptidase 12
hsa-miR-520f	0	0	1	1	1	1	TMPRSS11B	transmembrane protease, serine 11B
hsa-miR-520f	1	0	1	0	1	1	C12orf36	chromosome 12 open reading frame 36
hsa-miR-520f	0	0	1	1	1	1	C2orf48	chromosome 2 open reading frame 48
hsa-miR-520f	0	0	1	0	1	1	C16orf82	chromosome 16 open reading frame 82
hsa-miR-520f	0	0	1	0	1	1	NBPF11	neuroblastoma breakpoint family, member 11
hsa-miR-520f	0	0	1	1	1	1	ZNF804A	zinc finger protein 804A
hsa-miR-520f	1	0	1	0	1	1	SLC16A9	solute carrier family 16, member 9 (monocarboxylic acid transporter 9)
hsa-miR-520f	1	0	1	1	1	1	ZBTB41	zinc finger and BTB domain containing 41
hsa-miR-520f	1	0	1	1	1	1	ASB7	ankyrin repeat and SOCS box containing 7
hsa-miR-520f	1	0	1	0	1	1	PTPLB	protein tyrosine phosphatase-like (proline instead of catalytic arginine), member b
hsa-miR-520f	1	0	1	1	1	1	KCTD4	potassium channel tetramerisation domain containing 4
hsa-miR-520f	0	0	1	0	1	1	ANKRD45	ankyrin repeat domain 45
hsa-miR-520f	1	0	1	0	1	1	ZC3H6	zinc finger CCCH-type containing 6
hsa-miR-520f	1	0	1	1	1	1	PTGER3	prostaglandin E receptor 3 (subtype EP3)
hsa-miR-520f	1	0	1	0	1	1	PRICKLE2	prickle homolog 2 (Drosophila)
hsa-miR-520f	1	0	1	0	1	1	SS18L1	synovial sarcoma translocation gene on chromosome 18-like 1
hsa-miR-520f	1	0	1	1	1	1	NAPEPLD	N-acyl phosphatidylethanolamine phospholipase D
hsa-miR-520f	0	0	1	1	0	0	C9orf169	chromosome 9 open reading frame 169
hsa-miR-520f	0	0	1	1	0	0	FOXD4L4	forkhead box D4-like 4
hsa-miR-520f	0	0	1	1	1	1	PFN4	profilin family, member 4
hsa-miR-520f	0	0	1	0	0	0	RPL23AP82	ribosomal protein L23a pseudogene 82
hsa-miR-520f	0	0	1	1	1	1	SHC4	SHC (Src homology 2 domain containing) family, member 4
hsa-miR-520f	0	0	1	1	1	1	ZRANB2	zinc finger, RAN-binding domain containing 2
hsa-miR-520f	1	0	1	0	1	1	MBLAC2	metallo-beta-lactamase domain containing 2
hsa-miR-520f	0	0	1	1	1	1	SERTM1	serine-rich and transmembrane domain containing 1
hsa-miR-520f	0	0	1	1	1	1	CCDC18	coiled-coil domain containing 18
hsa-miR-520f	0	0	1	1	1	1	ZNF474	zinc finger protein 474
hsa-miR-520f	1	0	1	1	1	1	TNFAIP8L3	tumor necrosis factor, alpha-induced protein 8-like 3
hsa-miR-520f	0	0	1	1	0	0	TMPRSS11F	transmembrane protease, serine 11F
hsa-miR-520f	0	0	1	0	1	1	C11orf92	chromosome 11 open reading frame 92
hsa-miR-520f	0	0	1	1	1	1	C13orf35	chromosome 13 open reading frame 35
hsa-miR-520f	1	0	1	1	1	1	TEX19	testis expressed 19
hsa-miR-520f	1	0	1	1	1	1	ADAMTSL3	ADAMTS-like 3
hsa-miR-520f	0	0	1	0	1	1	FSD1L	fibronectin type III and SPRY domain containing 1-like
hsa-miR-520f	0	0	1	1	1	1	DFFA	DNA fragmentation factor, 45kDa, alpha polypeptide
hsa-miR-520f	1	0	1	1	1	1	RAPH1	Ras association (RalGDS/AF-6) and pleckstrin homology domains 1
hsa-miR-520f	0	0	1	0	0	0	ANXA2P3	annexin A2 pseudogene 3
hsa-miR-520f	0	0	1	0	0	0	TTTY2	testis-specific transcript, Y-linked 2 (non-protein coding)
hsa-miR-520f	0	0	1	0	0	0	TTTY1	testis-specific transcript, Y-linked 1 (non-protein coding)
hsa-miR-520f	0	0	1	0	0	0	TTTY22	testis-specific transcript, Y-linked 22 (non-protein coding)
hsa-miR-520f	0	0	1	0	0	0	RNY5	RNA, Ro-associated Y5
hsa-miR-520f	0	0	1	0	0	0	DKFZP586I1420	uncharacterized protein DKFZp586I1420
hsa-miR-520f	0	0	1	0	0	0	FTH1P2	ferritin, heavy polypeptide 1 pseudogene 2
hsa-miR-520f	0	0	1	0	0	0	FTH1P12	ferritin, heavy polypeptide 1 pseudogene 12
hsa-miR-520f	0	0	1	0	0	0	COX6B1P1	cytochrome c oxidase subunit VIb polypeptide 1 (ubiquitous) pseudogene 1
hsa-miR-520f	0	0	1	0	0	0	DEFB122	defensin, beta 122 (pseudogene)
hsa-miR-520f	0	0	1	0	0	0	RPL29P2	ribosomal protein L29 pseudogene 2
hsa-miR-520f	0	0	1	0	0	0	LOC374443	C-type lectin domain family 2, member D pseudogene
hsa-miR-520f	0	0	1	0	0	0	DUSP5P	dual specificity phosphatase 5 pseudogene
hsa-miR-520f	0	0	1	0	0	0	SNORA74A	small nucleolar RNA, H/ACA box 74A
hsa-miR-520f	0	0	1	0	0	0	SNX29P2	sorting nexin 29 pseudogene 2
hsa-miR-520f	0	0	1	0	0	0	HSP90AB2P	heat shock protein 90kDa alpha (cytosolic), class B member 2, pseudogene
hsa-miR-520f	0	0	1	0	0	0	GMCL1P1	germ cell-less, spermatogenesis associated 1 pseudogene 1
hsa-miR-520f	1	0	1	1	1	1	CTNNA1	catenin (cadherin-associated protein), alpha 1, 102kDa
hsa-miR-520f	1	0	1	1	1	1	ZNF238	zinc finger protein 238
hsa-miR-520f	1	0	1	1	1	1	POU2F2	POU class 2 homeobox 2
hsa-miR-520f	1	0	1	1	1	1	HS3ST1	heparan sulfate (glucosamine) 3-O-sulfotransferase 1
hsa-miR-520f	0	0	0	1	0	0	QPCTL	glutaminyl-peptide cyclotransferase-like
hsa-miR-520f	0	0	1	1	1	1	INMT	indolethylamine N-methyltransferase
hsa-miR-520f	0	0	0	1	0	0	SCTR	secretin receptor
hsa-miR-520f	0	0	1	1	1	1	NSMAF	neutral sphingomyelinase (N-SMase) activation associated factor
hsa-miR-520f	0	0	1	1	1	1	CD22	CD22 molecule
hsa-miR-520f	0	0	0	1	0	0	KRT14	keratin 14
hsa-miR-520f	0	0	0	1	1	1	KRT20	keratin 20
hsa-miR-520f	0	0	0	1	0	0	RAPGEF3	Rap guanine nucleotide exchange factor (GEF) 3
hsa-miR-520f	0	0	1	1	0	0	ALPK1	alpha-kinase 1
hsa-miR-520f	0	0	0	1	0	0	CETP	cholesteryl ester transfer protein, plasma
hsa-miR-520f	0	0	1	1	1	1	SPG21	spastic paraplegia 21 (autosomal recessive, Mast syndrome)
hsa-miR-520f	1	0	1	1	1	1	MYO15A	myosin XVA
hsa-miR-520f	0	0	0	1	0	0	MYL6B	myosin, light chain 6B, alkali, smooth muscle and non-muscle
hsa-miR-520f	0	0	1	1	1	1	TMEM14A	transmembrane protein 14A
hsa-miR-520f	0	0	1	1	1	1	LRP5L	low density lipoprotein receptor-related protein 5-like
hsa-miR-520f	0	0	1	1	1	1	C22orf28	chromosome 22 open reading frame 28
hsa-miR-520f	1	0	1	1	1	1	SUN2	Sad1 and UNC84 domain containing 2
hsa-miR-520f	0	0	0	1	0	0	LMF2	lipase maturation factor 2
hsa-miR-520f	0	0	1	1	1	1	IL2RB	interleukin 2 receptor, beta
hsa-miR-520f	0	0	1	1	0	0	HDAC10	histone deacetylase 10
hsa-miR-520f	1	0	1	1	1	1	COCH	coagulation factor C homolog, cochlin (Limulus polyphemus)
hsa-miR-520f	0	0	1	1	0	0	CRYM	crystallin, mu
hsa-miR-520f	0	0	1	1	1	1	RP1	retinitis pigmentosa 1 (autosomal dominant)
hsa-miR-520f	0	0	0	1	0	0	PAF1	Paf1, RNA polymerase II associated factor, homolog (S. cerevisiae)
hsa-miR-520f	0	0	0	1	1	1	ZNF180	zinc finger protein 180
hsa-miR-520f	0	0	1	1	0	0	CKM	creatine kinase, muscle
hsa-miR-520f	0	0	0	1	1	1	POP4	processing of precursor 4, ribonuclease P/MRP subunit (S. cerevisiae)
hsa-miR-520f	0	0	1	1	1	1	MPP6	membrane protein, palmitoylated 6 (MAGUK p55 subfamily member 6)
hsa-miR-520f	0	0	1	1	0	0	RBM28	RNA binding motif protein 28
hsa-miR-520f	1	0	1	1	1	1	LSM5	LSM5 homolog, U6 small nuclear RNA associated (S. cerevisiae)
hsa-miR-520f	0	0	0	1	0	0	MOGAT3	monoacylglycerol O-acyltransferase 3
hsa-miR-520f	0	0	1	1	0	0	C5	complement component 5
hsa-miR-520f	1	0	1	1	1	1	PPIF	peptidylprolyl isomerase F
hsa-miR-520f	0	0	1	1	0	0	CRYBA1	crystallin, beta A1
hsa-miR-520f	1	0	1	1	1	1	PEX12	peroxisomal biogenesis factor 12
hsa-miR-520f	0	0	1	1	1	1	PF4V1	platelet factor 4 variant 1
hsa-miR-520f	1	0	1	1	1	1	WFS1	Wolfram syndrome 1 (wolframin)
hsa-miR-520f	0	0	1	1	1	1	GAR1	GAR1 ribonucleoprotein homolog (yeast)
hsa-miR-520f	0	0	1	1	1	1	PUS3	pseudouridylate synthase 3
hsa-miR-520f	0	0	1	1	1	1	PANX1	pannexin 1
hsa-miR-520f	0	0	1	1	0	0	CLEC4A	C-type lectin domain family 4, member A
hsa-miR-520f	0	0	1	1	1	1	MCM3	minichromosome maintenance complex component 3
hsa-miR-520f	0	0	0	1	0	0	KIF6	kinesin family member 6
hsa-miR-520f	0	0	1	1	1	1	AGXT2	alanine--glyoxylate aminotransferase 2
hsa-miR-520f	0	0	0	1	1	1	HRH2	histamine receptor H2
hsa-miR-520f	1	0	1	1	1	1	TUSC2	tumor suppressor candidate 2
hsa-miR-520f	0	0	0	1	1	1	AADAC	arylacetamide deacetylase
hsa-miR-520f	0	0	1	1	1	1	SLC11A1	solute carrier family 11 (proton-coupled divalent metal ion transporters), member 1
hsa-miR-520f	0	0	1	1	1	1	ODC1	ornithine decarboxylase 1
hsa-miR-520f	0	0	1	1	0	0	FAM82A1	family with sequence similarity 82, member A1
hsa-miR-520f	0	0	1	1	0	0	PRAMEF10	PRAME family member 10
hsa-miR-520f	0	0	0	1	0	0	PRAMEF4	PRAME family member 4
hsa-miR-520f	0	0	0	1	0	0	OSCP1	organic solute carrier partner 1
hsa-miR-520f	0	0	0	1	0	0	NT5C1A	5'-nucleotidase, cytosolic IA
hsa-miR-520f	0	0	0	1	0	0	AKR7A2	aldo-keto reductase family 7, member A2 (aflatoxin aldehyde reductase)
hsa-miR-520f	0	0	1	1	1	1	ATP6V0B	ATPase, H+ transporting, lysosomal 21kDa, V0 subunit b
hsa-miR-520f	0	0	1	1	1	1	TTR	transthyretin
hsa-miR-520f	0	0	0	1	0	0	C2orf40	chromosome 2 open reading frame 40
hsa-miR-520f	0	0	1	1	1	1	NPC2	Niemann-Pick disease, type C2
hsa-miR-520f	0	0	0	1	1	1	TNN	tenascin N
hsa-miR-520f	0	0	1	1	1	1	CCDC77	coiled-coil domain containing 77
hsa-miR-520f	0	0	1	1	1	1	POLM	polymerase (DNA directed), mu
hsa-miR-520f	0	0	1	1	1	1	DYNLL1	dynein, light chain, LC8-type 1
hsa-miR-520f	0	0	1	1	0	0	STX10	syntaxin 10
hsa-miR-520f	1	0	1	1	0	0	C19orf43	chromosome 19 open reading frame 43
hsa-miR-520f	0	0	0	1	1	1	TTC21B	tetratricopeptide repeat domain 21B
hsa-miR-520f	0	0	0	1	0	0	PEPD	peptidase D
hsa-miR-520f	0	0	1	1	0	0	MEA1	male-enhanced antigen 1
hsa-miR-520f	0	0	1	1	1	1	MRPS7	mitochondrial ribosomal protein S7
hsa-miR-520f	0	0	1	1	1	1	CST8	cystatin 8 (cystatin-related epididymal specific)
hsa-miR-520f	0	0	1	1	1	1	DSTN	destrin (actin depolymerizing factor)
hsa-miR-520f	1	0	1	1	1	1	HIVEP3	human immunodeficiency virus type I enhancer binding protein 3
hsa-miR-520f	0	0	1	1	0	0	YEATS4	YEATS domain containing 4
hsa-miR-520f	0	0	1	1	1	1	GNG11	guanine nucleotide binding protein (G protein), gamma 11
hsa-miR-520f	0	0	1	1	0	0	GCAT	glycine C-acetyltransferase
hsa-miR-520f	0	0	1	1	0	0	CHRNA10	cholinergic receptor, nicotinic, alpha 10 (neuronal)
hsa-miR-520f	0	0	0	1	1	1	LILRA3	leukocyte immunoglobulin-like receptor, subfamily A (without TM domain), member 3
hsa-miR-520f	0	0	0	1	0	0	PDGFRL	platelet-derived growth factor receptor-like
hsa-miR-520f	0	0	1	1	1	1	SPAG1	sperm associated antigen 1
hsa-miR-520f	0	0	1	1	1	1	KIF16B	kinesin family member 16B
hsa-miR-520f	1	0	1	1	1	1	KCNA5	potassium voltage-gated channel, shaker-related subfamily, member 5
hsa-miR-520f	1	0	1	1	1	1	CNN1	calponin 1, basic, smooth muscle
hsa-miR-520f	1	0	0	1	0	0	SAFB2	scaffold attachment factor B2
hsa-miR-520f	0	0	1	1	1	1	MRPL34	mitochondrial ribosomal protein L34
hsa-miR-520f	0	0	0	1	1	1	ACSBG2	acyl-CoA synthetase bubblegum family member 2
hsa-miR-520f	1	0	1	1	0	0	MAP3K10	mitogen-activated protein kinase kinase kinase 10
hsa-miR-520f	1	0	1	1	1	1	SLC7A10	solute carrier family 7 (neutral amino acid transporter light chain, asc system), member 10
hsa-miR-520f	0	0	1	1	1	1	DEFB118	defensin, beta 118
hsa-miR-520f	0	0	1	1	1	1	PSMC3IP	PSMC3 interacting protein
hsa-miR-520f	0	0	1	1	1	1	CHD1L	chromodomain helicase DNA binding protein 1-like
hsa-miR-520f	0	0	1	1	0	0	C19orf40	chromosome 19 open reading frame 40
hsa-miR-520f	1	0	1	1	1	1	ACTR10	actin-related protein 10 homolog (S. cerevisiae)
hsa-miR-520f	1	0	0	1	1	1	ZNF700	zinc finger protein 700
hsa-miR-520f	1	0	1	1	1	1	RAN	RAN, member RAS oncogene family
hsa-miR-520f	1	0	1	1	0	0	EEFSEC	eukaryotic elongation factor, selenocysteine-tRNA-specific
hsa-miR-520f	0	0	0	1	1	1	APCS	amyloid P component, serum
hsa-miR-520f	0	0	1	1	0	0	ZSWIM3	zinc finger, SWIM-type containing 3
hsa-miR-520f	0	0	1	1	1	1	BHMT2	betaine--homocysteine S-methyltransferase 2
hsa-miR-520f	0	0	0	1	0	0	ZBED3	zinc finger, BED-type containing 3
hsa-miR-520f	0	0	0	1	0	0	MYBPH	myosin binding protein H
hsa-miR-520f	0	0	1	1	1	1	MED10	mediator complex subunit 10
hsa-miR-520f	0	0	1	1	1	1	IMPA1	inositol(myo)-1(or 4)-monophosphatase 1
hsa-miR-520f	1	0	1	1	1	1	IER3IP1	immediate early response 3 interacting protein 1
hsa-miR-520f	0	0	1	1	1	1	IL5RA	interleukin 5 receptor, alpha
hsa-miR-520f	1	0	1	1	1	1	C7orf23	chromosome 7 open reading frame 23
hsa-miR-520f	1	0	1	1	1	1	PRRG4	proline rich Gla (G-carboxyglutamic acid) 4 (transmembrane)
hsa-miR-520f	0	0	1	1	1	1	RDH5	retinol dehydrogenase 5 (11-cis/9-cis)
hsa-miR-520f	0	0	1	1	0	0	KRT85	keratin 85
hsa-miR-520f	0	0	0	1	0	0	MDM2	Mdm2, p53 E3 ubiquitin protein ligase homolog (mouse)
hsa-miR-520f	0	0	0	1	0	0	FBXL8	F-box and leucine-rich repeat protein 8
hsa-miR-520f	0	0	1	1	1	1	REV1	REV1, polymerase (DNA directed)
hsa-miR-520f	1	0	1	1	1	1	CKAP4	cytoskeleton-associated protein 4
hsa-miR-520f	0	0	1	1	1	1	NUPL2	nucleoporin like 2
hsa-miR-520f	0	0	0	1	0	0	DDX56	DEAD (Asp-Glu-Ala-Asp) box helicase 56
hsa-miR-520f	0	0	0	1	0	0	C6orf15	chromosome 6 open reading frame 15
hsa-miR-520f	1	0	1	1	1	1	SORL1	sortilin-related receptor, L(DLR class) A repeats containing
hsa-miR-520f	0	0	1	1	0	0	BUD13	BUD13 homolog (S. cerevisiae)
hsa-miR-520f	1	0	1	1	1	1	ARHGAP20	Rho GTPase activating protein 20
hsa-miR-520f	0	0	0	1	1	1	BCL2L10	BCL2-like 10 (apoptosis facilitator)
hsa-miR-520f	0	0	1	1	1	1	SIX3	SIX homeobox 3
hsa-miR-520f	0	0	0	1	1	1	CYP2C9	cytochrome P450, family 2, subfamily C, polypeptide 9
hsa-miR-520f	0	0	1	1	1	1	DIRC2	disrupted in renal carcinoma 2
hsa-miR-520f	1	0	1	1	1	1	NOL4	nucleolar protein 4
hsa-miR-520f	0	0	1	1	0	0	ARG2	arginase, type II
hsa-miR-520f	0	0	0	1	0	0	IL17B	interleukin 17B
hsa-miR-520f	0	0	1	1	1	1	CSNK1A1	casein kinase 1, alpha 1
hsa-miR-520f	0	0	1	1	1	1	HERC1	HECT and RLD domain containing E3 ubiquitin protein ligase family member 1
hsa-miR-520f	0	0	1	1	1	1	FLT4	fms-related tyrosine kinase 4
hsa-miR-520f	0	0	0	1	1	1	SERPINA10	serpin peptidase inhibitor, clade A (alpha-1 antiproteinase, antitrypsin), member 10
hsa-miR-520f	0	0	1	1	1	1	SCPEP1	serine carboxypeptidase 1
hsa-miR-520f	0	0	1	1	0	0	PKMYT1	protein kinase, membrane associated tyrosine/threonine 1
hsa-miR-520f	0	0	0	1	1	1	RPE65	retinal pigment epithelium-specific protein 65kDa
hsa-miR-520f	1	0	1	1	1	1	SORCS1	sortilin-related VPS10 domain containing receptor 1
hsa-miR-520f	0	0	0	1	0	0	ILVBL	ilvB (bacterial acetolactate synthase)-like
hsa-miR-520f	0	0	0	1	1	1	FOXRED1	FAD-dependent oxidoreductase domain containing 1
hsa-miR-520f	0	0	1	1	0	0	LTK	leukocyte receptor tyrosine kinase
hsa-miR-520f	0	0	1	1	0	0	LPXN	leupaxin
hsa-miR-520f	1	0	0	1	0	0	SOS1	son of sevenless homolog 1 (Drosophila)
hsa-miR-520f	0	0	1	1	1	1	TAF12	TAF12 RNA polymerase II, TATA box binding protein (TBP)-associated factor, 20kDa
hsa-miR-520f	0	0	0	1	0	0	LCAT	lecithin-cholesterol acyltransferase
hsa-miR-520f	0	0	0	1	1	1	FARP2	FERM, RhoGEF and pleckstrin domain protein 2
hsa-miR-520f	0	0	1	1	0	0	NDST4	N-deacetylase/N-sulfotransferase (heparan glucosaminyl) 4
hsa-miR-520f	0	0	1	1	0	0	PHRF1	PHD and ring finger domains 1
hsa-miR-520f	0	0	0	1	0	0	FGF10	fibroblast growth factor 10
hsa-miR-520f	0	0	1	1	1	1	FASTKD3	FAST kinase domains 3
hsa-miR-520f	0	0	1	1	0	0	GPN1	GPN-loop GTPase 1
hsa-miR-520f	1	0	1	1	1	1	TBC1D19	TBC1 domain family, member 19
hsa-miR-520f	0	0	1	1	0	0	FETUB	fetuin B
hsa-miR-520f	0	0	0	1	1	1	CASP6	caspase 6, apoptosis-related cysteine peptidase
hsa-miR-520f	1	0	0	1	0	0	MRPL22	mitochondrial ribosomal protein L22
hsa-miR-520f	0	0	1	1	0	0	RPL24	ribosomal protein L24
hsa-miR-520f	1	0	1	1	1	1	SEMA3C	sema domain, immunoglobulin domain (Ig), short basic domain, secreted, (semaphorin) 3C
hsa-miR-520f	0	0	1	1	1	1	TAX1BP1	Tax1 (human T-cell leukemia virus type I) binding protein 1
hsa-miR-520f	0	0	0	1	1	1	POLA2	polymerase (DNA directed), alpha 2, accessory subunit
hsa-miR-520f	0	0	0	1	1	1	WBSCR22	Williams Beuren syndrome chromosome region 22
hsa-miR-520f	0	0	1	1	1	1	DIDO1	death inducer-obliterator 1
hsa-miR-520f	0	0	0	1	0	0	TTLL1	tubulin tyrosine ligase-like family, member 1
hsa-miR-520f	0	0	1	1	0	0	OVOS2	ovostatin 2
hsa-miR-520f	0	0	1	1	0	0	SYCP3	synaptonemal complex protein 3
hsa-miR-520f	1	0	0	1	1	1	SLC46A3	solute carrier family 46, member 3
hsa-miR-520f	0	0	0	1	0	0	KRT71	keratin 71
hsa-miR-520f	0	0	1	1	1	1	EMC4	ER membrane protein complex subunit 4
hsa-miR-520f	0	0	1	1	1	1	SLC27A2	solute carrier family 27 (fatty acid transporter), member 2
hsa-miR-520f	0	0	1	1	0	0	GTF2A2	general transcription factor IIA, 2, 12kDa
hsa-miR-520f	1	0	1	1	1	1	CRTC3	CREB regulated transcription coactivator 3
hsa-miR-520f	0	0	0	1	0	0	ADAD2	adenosine deaminase domain containing 2
hsa-miR-520f	0	0	1	1	1	1	PHF12	PHD finger protein 12
hsa-miR-520f	0	0	1	1	0	0	SPATA22	spermatogenesis associated 22
hsa-miR-520f	0	0	0	1	0	0	EIF4A3	eukaryotic translation initiation factor 4A3
hsa-miR-520f	0	0	0	1	0	0	SLC39A3	solute carrier family 39 (zinc transporter), member 3
hsa-miR-520f	0	0	1	1	0	0	KLHDC4	kelch domain containing 4
hsa-miR-520f	0	0	1	1	0	0	RPL13A	ribosomal protein L13a
hsa-miR-520f	0	0	1	1	0	0	WRAP73	WD repeat containing, antisense to TP73
hsa-miR-520f	0	0	1	1	0	0	MPC2	mitochondrial pyruvate carrier 2
hsa-miR-520f	0	0	1	1	1	1	SFT2D2	SFT2 domain containing 2
hsa-miR-520f	0	0	1	1	1	1	UAP1	UDP-N-acteylglucosamine pyrophosphorylase 1
hsa-miR-520f	0	0	1	1	1	1	FCRL4	Fc receptor-like 4
hsa-miR-520f	1	0	0	1	0	0	SF3B4	splicing factor 3b, subunit 4, 49kDa
hsa-miR-520f	0	0	1	1	1	1	ZNF300	zinc finger protein 300
hsa-miR-520f	0	0	0	1	1	1	EPHA1	EPH receptor A1
hsa-miR-520f	0	0	0	1	0	0	LYN	v-yes-1 Yamaguchi sarcoma viral related oncogene homolog
hsa-miR-520f	0	0	1	1	1	1	RGS20	regulator of G-protein signaling 20
hsa-miR-520f	0	0	1	1	1	1	C9orf3	chromosome 9 open reading frame 3
hsa-miR-520f	1	0	1	1	1	1	FAM13C	family with sequence similarity 13, member C
hsa-miR-520f	0	0	1	1	0	0	FUOM	fucose mutarotase
hsa-miR-520f	0	0	0	1	1	1	AIP	aryl hydrocarbon receptor interacting protein
hsa-miR-520f	0	0	0	1	0	0	GPHA2	glycoprotein hormone alpha 2
hsa-miR-520f	0	0	1	1	1	1	SIRPB1	signal-regulatory protein beta 1
hsa-miR-520f	1	0	1	1	1	1	TMEM218	transmembrane protein 218
hsa-miR-520f	0	0	1	1	1	1	TEX12	testis expressed 12
hsa-miR-520f	1	0	1	1	1	1	KCNA6	potassium voltage-gated channel, shaker-related subfamily, member 6
hsa-miR-520f	1	0	1	1	0	0	GXYLT1	glucoside xylosyltransferase 1
hsa-miR-520f	0	0	1	1	0	0	NARS2	asparaginyl-tRNA synthetase 2, mitochondrial (putative)
hsa-miR-520f	0	0	1	1	1	1	PIGF	phosphatidylinositol glycan anchor biosynthesis, class F
hsa-miR-520f	1	0	1	1	1	1	PTH	parathyroid hormone
hsa-miR-520f	0	0	0	1	1	1	JMY	junction mediating and regulatory protein, p53 cofactor
hsa-miR-520f	0	0	0	1	0	0	IGSF10	immunoglobulin superfamily, member 10
hsa-miR-520f	0	0	1	1	0	0	NUBP1	nucleotide binding protein 1
hsa-miR-520f	0	0	1	1	1	1	CCDC148	coiled-coil domain containing 148
hsa-miR-520f	0	0	0	1	0	0	SPACA7	sperm acrosome associated 7
hsa-miR-520f	0	0	1	1	0	0	ABCA6	ATP-binding cassette, sub-family A (ABC1), member 6
hsa-miR-520f	0	0	0	1	1	1	UCHL1	ubiquitin carboxyl-terminal esterase L1 (ubiquitin thiolesterase)
hsa-miR-520f	0	0	0	1	1	1	HHIPL2	HHIP-like 2
hsa-miR-520f	0	0	0	1	0	0	GSTA5	glutathione S-transferase alpha 5
hsa-miR-520f	0	0	0	1	1	1	ABCC3	ATP-binding cassette, sub-family C (CFTR/MRP), member 3
hsa-miR-520f	0	0	0	1	0	0	MED7	mediator complex subunit 7
hsa-miR-520f	1	0	1	1	1	1	ATAD2	ATPase family, AAA domain containing 2
hsa-miR-520f	0	0	1	1	1	1	TTLL3	tubulin tyrosine ligase-like family, member 3
hsa-miR-520f	0	0	1	1	0	0	ARPC4	actin related protein 2/3 complex, subunit 4, 20kDa
hsa-miR-520f	0	0	0	1	0	0	TSPY8	testis specific protein, Y-linked 8
hsa-miR-520f	0	0	0	1	1	1	LYZL4	lysozyme-like 4
hsa-miR-520f	0	0	1	1	1	1	KBTBD5	kelch repeat and BTB (POZ) domain containing 5
hsa-miR-520f	0	0	0	1	1	1	WDR66	WD repeat domain 66
hsa-miR-520f	0	0	1	1	1	1	CRYZL1	crystallin, zeta (quinone reductase)-like 1
hsa-miR-520f	0	0	1	1	0	0	TNFRSF13C	tumor necrosis factor receptor superfamily, member 13C
hsa-miR-520f	0	0	0	1	1	1	AP1M1	adaptor-related protein complex 1, mu 1 subunit
hsa-miR-520f	0	0	0	1	0	0	TFF3	trefoil factor 3 (intestinal)
hsa-miR-520f	0	0	1	1	1	1	ZNF250	zinc finger protein 250
hsa-miR-520f	0	0	1	1	0	0	YDJC	YdjC homolog (bacterial)
hsa-miR-520f	0	0	0	1	0	0	CDK3	cyclin-dependent kinase 3
hsa-miR-520f	0	0	0	1	0	0	CCL23	chemokine (C-C motif) ligand 23
hsa-miR-520f	0	0	1	1	0	0	KRT83	keratin 83
hsa-miR-520f	0	0	1	1	0	0	PHF7	PHD finger protein 7
hsa-miR-520f	0	0	1	1	0	0	ZFPL1	zinc finger protein-like 1
hsa-miR-520f	0	0	0	1	0	0	CCDC74A	coiled-coil domain containing 74A
hsa-miR-520f	0	0	1	1	0	0	TMOD4	tropomodulin 4 (muscle)
hsa-miR-520f	0	0	1	1	1	1	ATP1A1	ATPase, Na+/K+ transporting, alpha 1 polypeptide
hsa-miR-520f	0	0	1	1	1	1	PROK2	prokineticin 2
hsa-miR-520f	0	0	0	1	0	0	GLB1L	galactosidase, beta 1-like
hsa-miR-520f	0	0	1	1	0	0	CPA3	carboxypeptidase A3 (mast cell)
hsa-miR-520f	0	0	0	1	1	1	ZNF502	zinc finger protein 502
hsa-miR-520f	0	0	0	1	1	1	ZNF35	zinc finger protein 35
hsa-miR-520f	0	0	0	1	0	0	UCN	urocortin
hsa-miR-520f	0	0	0	1	1	1	DNALI1	dynein, axonemal, light intermediate chain 1
hsa-miR-520f	0	0	1	1	0	0	IL3	interleukin 3 (colony-stimulating factor, multiple)
hsa-miR-520f	0	0	1	1	0	0	DCBLD1	discoidin, CUB and LCCL domain containing 1
hsa-miR-520f	0	0	0	1	0	0	PHKG1	phosphorylase kinase, gamma 1 (muscle)
hsa-miR-520f	0	0	1	1	0	0	DCAF13	DDB1 and CUL4 associated factor 13
hsa-miR-520f	0	0	0	1	0	0	OR1Q1	olfactory receptor, family 1, subfamily Q, member 1
hsa-miR-520f	0	0	0	1	0	0	SNAPC4	small nuclear RNA activating complex, polypeptide 4, 190kDa
hsa-miR-520f	0	0	1	1	1	1	BCL2L14	BCL2-like 14 (apoptosis facilitator)
hsa-miR-520f	0	0	1	1	1	1	STOX1	storkhead box 1
hsa-miR-520f	0	0	0	1	0	0	IFI27L1	interferon, alpha-inducible protein 27-like 1
hsa-miR-520f	0	0	0	1	0	0	C16orf78	chromosome 16 open reading frame 78
hsa-miR-520f	1	0	1	1	0	0	CDH8	cadherin 8, type 2
hsa-miR-520f	0	0	1	1	0	0	C16orf46	chromosome 16 open reading frame 46
hsa-miR-520f	0	0	0	1	1	1	ALG8	asparagine-linked glycosylation 8, alpha-1,3-glucosyltransferase homolog (S. cerevisiae)
hsa-miR-520f	0	0	0	1	1	1	WWOX	WW domain containing oxidoreductase
hsa-miR-520f	0	0	0	1	0	0	IQCD	IQ motif containing D
hsa-miR-520f	0	0	1	1	1	1	MMP3	matrix metallopeptidase 3 (stromelysin 1, progelatinase)
hsa-miR-520f	0	0	0	1	0	0	GPR182	G protein-coupled receptor 182
hsa-miR-520f	0	0	1	1	1	1	MS4A6E	membrane-spanning 4-domains, subfamily A, member 6E
hsa-miR-520f	0	0	1	1	0	0	GNGT2	guanine nucleotide binding protein (G protein), gamma transducing activity polypeptide 2
hsa-miR-520f	0	0	0	1	0	0	MMP26	matrix metallopeptidase 26
hsa-miR-520f	0	0	0	1	1	1	ZNF528	zinc finger protein 528
hsa-miR-520f	0	0	0	1	0	0	ZNF578	zinc finger protein 578
hsa-miR-520f	0	0	0	1	1	1	PLIN4	perilipin 4
hsa-miR-520f	0	0	1	1	1	1	ZNF558	zinc finger protein 558
hsa-miR-520f	0	0	1	1	0	0	CDK2AP2	cyclin-dependent kinase 2 associated protein 2
hsa-miR-520f	0	0	0	1	1	1	ZNF443	zinc finger protein 443
hsa-miR-520f	1	0	0	1	0	0	ZNF597	zinc finger protein 597
hsa-miR-520f	0	0	1	1	0	0	SAC3D1	SAC3 domain containing 1
hsa-miR-520f	0	0	0	1	0	0	P2RY12	purinergic receptor P2Y, G-protein coupled, 12
hsa-miR-520f	0	0	0	1	0	0	IARS2	isoleucyl-tRNA synthetase 2, mitochondrial
hsa-miR-520f	0	0	1	1	0	0	SNRPB	small nuclear ribonucleoprotein polypeptides B and B1
hsa-miR-520f	1	0	1	1	1	1	ODF2	outer dense fiber of sperm tails 2
hsa-miR-520f	0	0	1	1	0	0	COPS6	COP9 constitutive photomorphogenic homolog subunit 6 (Arabidopsis)
hsa-miR-520f	0	0	0	1	1	1	GPR37	G protein-coupled receptor 37 (endothelin receptor type B-like)
hsa-miR-520f	1	0	1	1	1	1	ZNF439	zinc finger protein 439
hsa-miR-520f	0	0	0	1	0	0	EXOSC10	exosome component 10
hsa-miR-520f	0	0	0	1	0	0	RNMTL1	RNA methyltransferase like 1
hsa-miR-520f	0	0	0	1	1	1	CDKN2A	cyclin-dependent kinase inhibitor 2A
hsa-miR-520f	0	0	0	1	1	1	TACR3	tachykinin receptor 3
hsa-miR-520f	0	0	0	1	0	0	OR2AT4	olfactory receptor, family 2, subfamily AT, member 4
hsa-miR-520f	0	0	0	1	0	0	OR1M1	olfactory receptor, family 1, subfamily M, member 1
hsa-miR-520f	0	0	1	1	0	0	CD2BP2	CD2 (cytoplasmic tail) binding protein 2
hsa-miR-520f	0	0	0	1	1	1	DDX54	DEAD (Asp-Glu-Ala-Asp) box polypeptide 54
hsa-miR-520f	1	0	1	1	1	1	CDCA7	cell division cycle associated 7
hsa-miR-520f	0	0	1	1	0	0	FAM195A	family with sequence similarity 195, member A
hsa-miR-520f	0	0	1	1	1	1	ZNF80	zinc finger protein 80
hsa-miR-520f	0	0	0	1	0	0	RNASE8	ribonuclease, RNase A family, 8
hsa-miR-520f	0	0	0	1	0	0	PLA2G1B	phospholipase A2, group IB (pancreas)
hsa-miR-520f	0	0	1	1	1	1	HLA-DPB1	major histocompatibility complex, class II, DP beta 1
hsa-miR-520f	0	0	1	1	1	1	APOBEC4	apolipoprotein B mRNA editing enzyme, catalytic polypeptide-like 4 (putative)
hsa-miR-520f	0	0	1	1	1	1	BTK	Bruton agammaglobulinemia tyrosine kinase
hsa-miR-520f	0	0	1	1	1	1	TAOK2	TAO kinase 2
hsa-miR-520f	0	0	1	1	0	0	CYP2W1	cytochrome P450, family 2, subfamily W, polypeptide 1
hsa-miR-520f	0	0	1	1	1	1	ACAD9	acyl-CoA dehydrogenase family, member 9
hsa-miR-520f	1	0	1	1	1	1	TMEM9B	TMEM9 domain family, member B
hsa-miR-520f	0	0	1	1	0	0	SCUBE2	signal peptide, CUB domain, EGF-like 2
hsa-miR-520f	0	0	1	1	1	1	PPARG	peroxisome proliferator-activated receptor gamma
hsa-miR-520f	0	0	1	1	0	0	UTP23	UTP23, small subunit (SSU) processome component, homolog (yeast)
hsa-miR-520f	0	0	1	1	1	1	CD36	CD36 molecule (thrombospondin receptor)
hsa-miR-520f	0	0	0	1	0	0	CA5A	carbonic anhydrase VA, mitochondrial
hsa-miR-520f	0	0	0	1	1	1	ATP6V0A4	ATPase, H+ transporting, lysosomal V0 subunit a4
hsa-miR-520f	0	0	1	1	1	1	CCS	copper chaperone for superoxide dismutase
hsa-miR-520f	1	0	0	1	1	1	XXYLT1	xyloside xylosyltransferase 1
hsa-miR-520f	0	0	1	1	0	0	ZDHHC24	zinc finger, DHHC-type containing 24
hsa-miR-520f	0	0	0	1	0	0	CCDC74B	coiled-coil domain containing 74B
hsa-miR-520f	1	0	1	1	0	0	CSRP2	cysteine and glycine-rich protein 2
hsa-miR-520f	0	0	1	1	1	1	MAP9	microtubule-associated protein 9
hsa-miR-520f	0	0	0	1	0	0	DAK	dihydroxyacetone kinase 2 homolog (S. cerevisiae)
hsa-miR-520f	0	0	1	1	1	1	RPL13	ribosomal protein L13
hsa-miR-520f	0	0	1	1	1	1	C12orf66	chromosome 12 open reading frame 66
hsa-miR-520f	0	0	1	1	0	0	KRT25	keratin 25
hsa-miR-520f	0	0	1	1	1	1	HOXD8	homeobox D8
hsa-miR-520f	0	0	1	1	1	1	RMND5B	required for meiotic nuclear division 5 homolog B (S. cerevisiae)
hsa-miR-520f	0	0	0	1	0	0	FAM20C	family with sequence similarity 20, member C
hsa-miR-520f	0	0	1	1	1	1	ESRP1	epithelial splicing regulatory protein 1
hsa-miR-520f	1	0	1	1	1	1	AKAP2	A kinase (PRKA) anchor protein 2
hsa-miR-520f	1	0	1	1	1	1	PALM2-AKAP2	PALM2-AKAP2 readthrough
hsa-miR-520f	0	0	1	1	1	1	TSEN2	tRNA splicing endonuclease 2 homolog (S. cerevisiae)
hsa-miR-520f	0	0	0	1	1	1	ZNF354C	zinc finger protein 354C
hsa-miR-520f	0	0	1	1	0	0	ARL6IP4	ADP-ribosylation-like factor 6 interacting protein 4
hsa-miR-520f	1	0	1	1	1	1	COL4A3	collagen, type IV, alpha 3 (Goodpasture antigen)
hsa-miR-520f	0	0	1	1	1	1	SCIMP	SLP adaptor and CSK interacting membrane protein
hsa-miR-520f	0	0	1	1	0	0	C7orf63	chromosome 7 open reading frame 63
hsa-miR-520f	0	0	0	1	0	0	LOC100132025	transmembrane domain-containing protein ENSP00000320207-like
hsa-miR-520f	1	0	1	1	1	1	SOX6	SRY (sex determining region Y)-box 6
hsa-miR-520f	0	0	1	1	1	1	VRK3	vaccinia related kinase 3
hsa-miR-520f	0	0	0	1	0	0	OR52E4	olfactory receptor, family 52, subfamily E, member 4
hsa-miR-520f	0	0	0	1	0	0	STAG3	stromal antigen 3
hsa-miR-520f	0	0	0	1	0	0	RRH	retinal pigment epithelium-derived rhodopsin homolog
hsa-miR-520f	1	0	1	1	1	1	CC2D1A	coiled-coil and C2 domain containing 1A
hsa-miR-520f	0	0	1	1	0	0	RNF168	ring finger protein 168, E3 ubiquitin protein ligase
hsa-miR-520f	0	0	1	1	1	1	ZNF318	zinc finger protein 318
hsa-miR-520f	0	0	1	1	1	1	MBIP	MAP3K12 binding inhibitory protein 1
hsa-miR-520f	1	0	1	1	1	1	DIP2A	DIP2 disco-interacting protein 2 homolog A (Drosophila)
hsa-miR-520f	0	0	1	1	1	1	ZFP3	zinc finger protein 3 homolog (mouse)
hsa-miR-520f	0	0	1	1	0	0	PTPN6	protein tyrosine phosphatase, non-receptor type 6
hsa-miR-520f	1	0	1	1	1	1	SH3BGRL3	SH3 domain binding glutamic acid-rich protein like 3
hsa-miR-520f	1	0	1	1	1	1	ARL4D	ADP-ribosylation factor-like 4D
hsa-miR-520f	0	0	0	1	0	0	AMIGO3	adhesion molecule with Ig-like domain 3
hsa-miR-520f	0	0	0	1	0	0	OR4F21	olfactory receptor, family 4, subfamily F, member 21
hsa-miR-520f	0	0	1	1	1	1	CIRBP	cold inducible RNA binding protein
hsa-miR-520f	0	0	1	1	1	1	FBXO39	F-box protein 39
hsa-miR-520f	1	0	1	1	1	1	IFT20	intraflagellar transport 20 homolog (Chlamydomonas)
hsa-miR-520f	0	0	1	1	0	0	RUVBL1	RuvB-like 1 (E. coli)
hsa-miR-520f	0	0	0	1	1	1	ZNF18	zinc finger protein 18
hsa-miR-520f	0	0	0	1	1	1	MTHFSD	methenyltetrahydrofolate synthetase domain containing
hsa-miR-520f	1	0	1	1	0	0	WDR45	WD repeat domain 45
hsa-miR-520f	0	0	0	1	0	0	LRRC61	leucine rich repeat containing 61
hsa-miR-520f	1	0	1	1	1	1	DDHD1	DDHD domain containing 1
hsa-miR-520f	0	0	1	1	1	1	ZNF513	zinc finger protein 513
hsa-miR-520f	0	0	1	1	1	1	PRMT5	protein arginine methyltransferase 5
hsa-miR-520f	0	0	1	1	1	1	FAM153C	family with sequence similarity 153, member C, pseudogene
hsa-miR-520f	0	0	1	1	1	1	C8orf34	chromosome 8 open reading frame 34
hsa-miR-520f	0	0	1	1	1	1	RAD1	RAD1 homolog (S. pombe)
hsa-miR-520f	0	0	1	1	1	1	MARVELD2	MARVEL domain containing 2
hsa-miR-520f	0	0	1	1	0	0	CIZ1	CDKN1A interacting zinc finger protein 1
hsa-miR-520f	0	0	0	1	1	1	C14orf177	chromosome 14 open reading frame 177
hsa-miR-520f	1	0	1	1	1	1	PDXDC1	pyridoxal-dependent decarboxylase domain containing 1
hsa-miR-520f	1	0	1	1	1	1	ZNF562	zinc finger protein 562
hsa-miR-520f	1	0	0	1	0	0	ATP13A2	ATPase type 13A2
hsa-miR-520f	0	0	0	1	1	1	ZNF274	zinc finger protein 274
hsa-miR-520f	1	0	1	1	1	1	SSBP3	single stranded DNA binding protein 3
hsa-miR-520f	0	0	0	1	0	0	OR4F29	olfactory receptor, family 4, subfamily F, member 29
hsa-miR-520f	0	0	1	1	0	0	NT5DC4	5'-nucleotidase domain containing 4
hsa-miR-520f	1	0	1	1	1	1	EYA2	eyes absent homolog 2 (Drosophila)
hsa-miR-520f	0	0	1	1	0	0	GAS6	growth arrest-specific 6
hsa-miR-520f	0	0	1	1	1	1	SMYD3	SET and MYND domain containing 3
[truncated: 439 more rows]
