# Supplementary material for: Profiling of Selected MicroRNAs in Proliferative Eutopic Endometrium of Women with Ovarian Endometriosis
Source: Biomed Res Int. 2015 Aug 20;2015:760698. doi: 10.1155/2015/760698 (PMC4558423; doi:10.1155/2015/760698)
Supplement: Supplementary file 1 — Table I: The names of miRNAs significantly differentially expressed between eutopic endometrium of patients with endometriosis vs eutopic endometrium of patients without endometriosis. Table II: The associations between miRNA and mRNA, which presents detailed results of the search of six major databases i.e targetscan, tarbase, miranda, mirbase, mirtarget2 and pictar. [file 760698.f1.zip › 760698.f1/Table II/hsa-miR-520g.tsv]

miR	targetscan	tarbase	miranda	mirbase	mirtarget2	pictar	GeneSymbol	GeneName
hsa-miR-520g	1	0	1	1	1	1	PLAU	plasminogen activator, urokinase
hsa-miR-520g	0	0	1	1	1	1	MKNK1	MAP kinase interacting serine/threonine kinase 1
hsa-miR-520g	1	0	1	1	1	1	CHD9	chromodomain helicase DNA binding protein 9
hsa-miR-520g	1	0	1	1	1	1	MCF2L	MCF.2 cell line derived transforming sequence-like
hsa-miR-520g	1	0	1	1	1	1	PRUNE2	prune homolog 2 (Drosophila)
hsa-miR-520g	0	0	1	1	1	1	PPIP5K1	diphosphoinositol pentakisphosphate kinase 1
hsa-miR-520g	0	0	1	1	1	1	BAI2	brain-specific angiogenesis inhibitor 2
hsa-miR-520g	1	0	1	1	1	1	ABCC5	ATP-binding cassette, sub-family C (CFTR/MRP), member 5
hsa-miR-520g	0	0	1	1	1	1	PEG3	paternally expressed 3
hsa-miR-520g	1	0	1	1	1	1	NUPL1	nucleoporin like 1
hsa-miR-520g	1	0	1	0	1	1	NEDD4L	neural precursor cell expressed, developmentally down-regulated 4-like, E3 ubiquitin protein ligase
hsa-miR-520g	1	0	1	1	1	1	RNGTT	RNA guanylyltransferase and 5'-phosphatase
hsa-miR-520g	1	0	1	1	1	1	IQSEC2	IQ motif and Sec7 domain 2
hsa-miR-520g	0	0	1	1	0	0	ZNF862	zinc finger protein 862
hsa-miR-520g	1	0	1	1	1	1	GPATCH8	G patch domain containing 8
hsa-miR-520g	1	0	1	1	0	0	TBC1D12	TBC1 domain family, member 12
hsa-miR-520g	1	0	1	1	1	1	GIGYF2	GRB10 interacting GYF protein 2
hsa-miR-520g	0	0	1	1	1	1	L3MBTL1	l(3)mbt-like 1 (Drosophila)
hsa-miR-520g	1	0	1	1	1	1	SMOC2	SPARC related modular calcium binding 2
hsa-miR-520g	1	0	1	1	1	1	TP63	tumor protein p63
hsa-miR-520g	1	0	1	0	1	1	SNX13	sorting nexin 13
hsa-miR-520g	1	0	1	0	1	1	DOCK4	dedicator of cytokinesis 4
hsa-miR-520g	1	0	1	1	1	1	MATR3	matrin 3
hsa-miR-520g	1	0	1	0	1	1	RBM12	RNA binding motif protein 12
hsa-miR-520g	1	0	1	1	1	1	LPHN2	latrophilin 2
hsa-miR-520g	0	0	1	1	0	0	FAM169A	family with sequence similarity 169, member A
hsa-miR-520g	1	0	1	1	1	1	UBR5	ubiquitin protein ligase E3 component n-recognin 5
hsa-miR-520g	1	0	1	1	1	1	CDK12	cyclin-dependent kinase 12
hsa-miR-520g	1	0	1	1	1	1	CPEB3	cytoplasmic polyadenylation element binding protein 3
hsa-miR-520g	1	0	1	0	0	0	KIAA0947	KIAA0947
hsa-miR-520g	1	0	1	1	1	1	CIT	citron (rho-interacting, serine/threonine kinase 21)
hsa-miR-520g	1	0	1	1	1	1	RGL1	ral guanine nucleotide dissociation stimulator-like 1
hsa-miR-520g	0	0	1	1	0	0	FAM149B1	family with sequence similarity 149, member B1
hsa-miR-520g	1	0	1	1	1	1	NTNG1	netrin G1
hsa-miR-520g	1	0	1	1	0	0	KIAA1045	KIAA1045
hsa-miR-520g	1	0	1	0	1	1	SRGAP3	SLIT-ROBO Rho GTPase activating protein 3
hsa-miR-520g	0	0	1	1	0	0	ZC4H2	zinc finger, C4H2 domain containing
hsa-miR-520g	1	0	1	1	0	0	KIAA1210	KIAA1210
hsa-miR-520g	1	0	1	1	1	1	RIMKLB	ribosomal modification protein rimK-like family member B
hsa-miR-520g	1	0	1	1	0	0	ATAD2B	ATPase family, AAA domain containing 2B
hsa-miR-520g	1	0	1	1	1	1	MKL2	MKL/myocardin-like 2
hsa-miR-520g	1	0	1	0	1	1	ANKFY1	ankyrin repeat and FYVE domain containing 1
hsa-miR-520g	0	0	1	1	1	1	CA10	carbonic anhydrase X
hsa-miR-520g	1	0	1	0	0	0	ODZ4	odz, odd Oz/ten-m homolog 4 (Drosophila)
hsa-miR-520g	1	0	1	1	1	1	PCDH19	protocadherin 19
hsa-miR-520g	1	0	1	1	0	0	KIAA1462	KIAA1462
hsa-miR-520g	1	0	1	0	1	1	SEMA6D	sema domain, transmembrane domain (TM), and cytoplasmic domain, (semaphorin) 6D
hsa-miR-520g	1	0	1	0	1	1	LMO3	LIM domain only 3 (rhombotin-like 2)
hsa-miR-520g	1	0	1	1	1	1	INADL	InaD-like (Drosophila)
hsa-miR-520g	0	0	1	0	1	1	FBRSL1	fibrosin-like 1
hsa-miR-520g	1	0	1	1	0	0	MAGI3	membrane associated guanylate kinase, WW and PDZ domain containing 3
hsa-miR-520g	1	0	1	0	0	0	TANC2	tetratricopeptide repeat, ankyrin repeat and coiled-coil containing 2
hsa-miR-520g	1	0	1	1	1	1	PER3	period homolog 3 (Drosophila)
hsa-miR-520g	0	0	1	0	0	0	TTC28-AS1	TTC28 antisense RNA 1
hsa-miR-520g	1	0	1	1	0	0	SEMA4C	sema domain, immunoglobulin domain (Ig), transmembrane domain (TM) and short cytoplasmic domain, (semaphorin) 4C
hsa-miR-520g	0	0	1	1	1	1	SPEF2	sperm flagellar 2
hsa-miR-520g	1	0	1	0	1	1	RIMS1	regulating synaptic membrane exocytosis 1
hsa-miR-520g	1	0	1	1	1	1	IKZF4	IKAROS family zinc finger 4 (Eos)
hsa-miR-520g	1	0	1	1	1	1	CDK13	cyclin-dependent kinase 13
hsa-miR-520g	1	0	1	1	1	1	LCOR	ligand dependent nuclear receptor corepressor
hsa-miR-520g	0	0	1	1	1	1	UNC80	unc-80 homolog (C. elegans)
hsa-miR-520g	1	0	1	1	1	1	AHCTF1	AT hook containing transcription factor 1
hsa-miR-520g	0	0	1	1	1	1	SLC11A2	solute carrier family 11 (proton-coupled divalent metal ion transporters), member 2
hsa-miR-520g	1	0	1	1	1	1	NAV2	neuron navigator 2
hsa-miR-520g	1	0	1	1	1	1	CSMD3	CUB and Sushi multiple domains 3
hsa-miR-520g	0	0	1	0	0	0	MYSM1	Myb-like, SWIRM and MPN domains 1
hsa-miR-520g	1	0	1	1	1	1	MAT2B	methionine adenosyltransferase II, beta
hsa-miR-520g	1	0	1	1	1	1	ANKRD12	ankyrin repeat domain 12
hsa-miR-520g	1	0	1	1	0	0	ZNF292	zinc finger protein 292
hsa-miR-520g	1	0	1	1	1	1	SH3TC2	SH3 domain and tetratricopeptide repeats 2
hsa-miR-520g	0	0	1	1	0	0	CIRH1A	cirrhosis, autosomal recessive 1A (cirhin)
hsa-miR-520g	1	0	1	0	0	0	RNF169	ring finger protein 169
hsa-miR-520g	1	0	1	0	0	0	ZBTB34	zinc finger and BTB domain containing 34
hsa-miR-520g	1	0	1	1	1	1	ACBD5	acyl-CoA binding domain containing 5
hsa-miR-520g	0	0	1	0	1	1	RASSF8	Ras association (RalGDS/AF-6) domain family (N-terminal) member 8
hsa-miR-520g	1	0	1	1	1	1	RFX4	regulatory factor X, 4 (influences HLA class II expression)
hsa-miR-520g	0	0	1	1	0	0	ANKRD18A	ankyrin repeat domain 18A
hsa-miR-520g	1	0	1	0	0	0	ZC3H12C	zinc finger CCCH-type containing 12C
hsa-miR-520g	1	0	1	1	1	1	C11orf57	chromosome 11 open reading frame 57
hsa-miR-520g	0	0	1	1	1	1	PAK3	p21 protein (Cdc42/Rac)-activated kinase 3
hsa-miR-520g	1	0	1	0	1	1	LIN54	lin-54 homolog (C. elegans)
hsa-miR-520g	0	0	1	0	0	0	TIFAB	TRAF-interacting protein with forkhead-associated domain, family member B
hsa-miR-520g	1	1	1	1	1	1	BACE1	beta-site APP-cleaving enzyme 1
hsa-miR-520g	0	0	1	1	1	1	F9	coagulation factor IX
hsa-miR-520g	1	0	1	1	1	1	UBE3A	ubiquitin protein ligase E3A
hsa-miR-520g	0	0	1	1	1	1	CAST	calpastatin
hsa-miR-520g	1	0	1	1	1	1	VLDLR	very low density lipoprotein receptor
hsa-miR-520g	0	0	1	1	1	1	ATP7A	ATPase, Cu++ transporting, alpha polypeptide
hsa-miR-520g	1	0	1	1	1	1	COL11A1	collagen, type XI, alpha 1
hsa-miR-520g	1	0	1	1	1	1	SHC1	SHC (Src homology 2 domain containing) transforming protein 1
hsa-miR-520g	0	0	1	0	1	1	ITPR1	inositol 1,4,5-trisphosphate receptor, type 1
hsa-miR-520g	1	0	1	1	1	1	OSBPL6	oxysterol binding protein-like 6
hsa-miR-520g	1	0	1	0	1	1	PCDHA13	protocadherin alpha 13
hsa-miR-520g	1	0	1	1	1	1	PCDHA4	protocadherin alpha 4
hsa-miR-520g	0	0	1	1	0	0	KCNC3	potassium voltage-gated channel, Shaw-related subfamily, member 3
hsa-miR-520g	1	0	1	1	1	1	RPS6KA3	ribosomal protein S6 kinase, 90kDa, polypeptide 3
hsa-miR-520g	1	0	1	1	1	1	PHC1	polyhomeotic homolog 1 (Drosophila)
hsa-miR-520g	0	0	1	1	1	1	PTK2	PTK2 protein tyrosine kinase 2
hsa-miR-520g	1	0	1	1	1	1	EIF4G3	eukaryotic translation initiation factor 4 gamma, 3
hsa-miR-520g	1	0	1	0	1	1	PLAG1	pleiomorphic adenoma gene 1
hsa-miR-520g	1	0	1	1	1	1	FMR1	fragile X mental retardation 1
hsa-miR-520g	1	0	1	0	1	1	DPYSL2	dihydropyrimidinase-like 2
hsa-miR-520g	1	0	1	1	1	1	DMTF1	cyclin D binding myb-like transcription factor 1
hsa-miR-520g	0	0	1	0	1	1	NPY1R	neuropeptide Y receptor Y1
hsa-miR-520g	0	0	1	1	1	1	TFRC	transferrin receptor (p90, CD71)
hsa-miR-520g	1	0	1	1	1	1	REV3L	REV3-like, polymerase (DNA directed), zeta, catalytic subunit
hsa-miR-520g	0	0	1	1	1	1	DGKE	diacylglycerol kinase, epsilon 64kDa
hsa-miR-520g	1	0	1	1	1	1	SATB2	SATB homeobox 2
hsa-miR-520g	1	0	1	1	1	1	NEO1	neogenin 1
hsa-miR-520g	0	0	1	1	0	0	DNMT1	DNA (cytosine-5-)-methyltransferase 1
hsa-miR-520g	0	0	1	1	0	0	IFT27	intraflagellar transport 27 homolog (Chlamydomonas)
hsa-miR-520g	0	0	1	1	1	1	RYR1	ryanodine receptor 1 (skeletal)
hsa-miR-520g	1	0	1	1	1	1	LIMA1	LIM domain and actin binding 1
hsa-miR-520g	0	0	1	1	1	1	GPM6B	glycoprotein M6B
hsa-miR-520g	0	0	1	1	0	0	ITGA2B	integrin, alpha 2b (platelet glycoprotein IIb of IIb/IIIa complex, antigen CD41)
hsa-miR-520g	1	0	1	0	1	1	TBL1X	transducin (beta)-like 1X-linked
hsa-miR-520g	0	0	1	1	1	1	HLA-DQA1	major histocompatibility complex, class II, DQ alpha 1
hsa-miR-520g	1	0	1	1	1	1	EPB41	erythrocyte membrane protein band 4.1 (elliptocytosis 1, RH-linked)
hsa-miR-520g	1	0	1	1	1	1	ARHGEF3	Rho guanine nucleotide exchange factor (GEF) 3
hsa-miR-520g	1	0	1	1	0	0	GRIN2A	glutamate receptor, ionotropic, N-methyl D-aspartate 2A
hsa-miR-520g	1	0	1	1	1	1	HMGA2	high mobility group AT-hook 2
hsa-miR-520g	1	0	1	1	1	1	TEAD1	TEA domain family member 1 (SV40 transcriptional enhancer factor)
hsa-miR-520g	1	0	1	1	1	1	OSBPL10	oxysterol binding protein-like 10
hsa-miR-520g	1	0	1	1	1	1	GULP1	GULP, engulfment adaptor PTB domain containing 1
hsa-miR-520g	1	0	1	1	1	1	ZFX	zinc finger protein, X-linked
hsa-miR-520g	1	0	1	1	1	1	PHLDB2	pleckstrin homology-like domain, family B, member 2
hsa-miR-520g	0	0	1	1	1	1	SPP1	secreted phosphoprotein 1
hsa-miR-520g	1	0	1	0	1	1	PDE7B	phosphodiesterase 7B
hsa-miR-520g	1	0	1	1	1	1	MEF2D	myocyte enhancer factor 2D
hsa-miR-520g	1	0	1	1	1	1	SDHC	succinate dehydrogenase complex, subunit C, integral membrane protein, 15kDa
hsa-miR-520g	0	0	1	1	1	1	PON2	paraoxonase 2
hsa-miR-520g	1	0	1	1	1	1	ENTPD4	ectonucleoside triphosphate diphosphohydrolase 4
hsa-miR-520g	1	0	1	1	1	1	MID1	midline 1 (Opitz/BBB syndrome)
hsa-miR-520g	1	0	1	1	1	1	MYT1L	myelin transcription factor 1-like
hsa-miR-520g	1	0	1	0	1	1	CELF2	CUGBP, Elav-like family member 2
hsa-miR-520g	1	0	1	1	1	1	SOCS2	suppressor of cytokine signaling 2
hsa-miR-520g	1	0	1	0	0	0	MAP3K1	mitogen-activated protein kinase kinase kinase 1, E3 ubiquitin protein ligase
hsa-miR-520g	1	0	1	1	1	1	POLQ	polymerase (DNA directed), theta
hsa-miR-520g	1	0	1	1	1	1	SHOC2	soc-2 suppressor of clear homolog (C. elegans)
hsa-miR-520g	0	0	1	1	1	1	SC5DL	sterol-C5-desaturase (ERG3 delta-5-desaturase homolog, S. cerevisiae)-like
hsa-miR-520g	1	0	1	1	1	1	USP3	ubiquitin specific peptidase 3
hsa-miR-520g	0	0	1	0	0	0	C3orf79	chromosome 3 open reading frame 79
hsa-miR-520g	1	0	1	1	1	1	VAPB	VAMP (vesicle-associated membrane protein)-associated protein B and C
hsa-miR-520g	0	0	1	1	1	1	RGS7	regulator of G-protein signaling 7
hsa-miR-520g	0	0	1	1	1	1	PLEKHB1	pleckstrin homology domain containing, family B (evectins) member 1
hsa-miR-520g	1	0	1	1	1	1	RABEP1	rabaptin, RAB GTPase binding effector protein 1
hsa-miR-520g	0	0	1	1	1	1	SH2D1A	SH2 domain containing 1A
hsa-miR-520g	0	0	1	1	0	0	RBM5	RNA binding motif protein 5
hsa-miR-520g	0	0	1	1	1	1	TIAM2	T-cell lymphoma invasion and metastasis 2
hsa-miR-520g	1	0	1	1	1	1	PRUNE	prune homolog (Drosophila)
hsa-miR-520g	0	0	1	0	0	0	RPH3AL	rabphilin 3A-like (without C2 domains)
hsa-miR-520g	1	0	1	0	1	1	WDR82	WD repeat domain 82
hsa-miR-520g	0	0	1	0	1	1	CLEC5A	C-type lectin domain family 5, member A
hsa-miR-520g	1	0	1	1	1	1	HMG20A	high mobility group 20A
hsa-miR-520g	1	0	1	0	1	1	SLC34A2	solute carrier family 34 (sodium phosphate), member 2
hsa-miR-520g	1	0	1	1	1	1	MYNN	myoneurin
hsa-miR-520g	0	0	1	1	1	1	HEPH	hephaestin
hsa-miR-520g	1	0	1	1	1	1	C14orf129	chromosome 14 open reading frame 129
hsa-miR-520g	1	0	1	1	1	1	USP15	ubiquitin specific peptidase 15
hsa-miR-520g	0	0	1	1	0	0	ANGPTL4	angiopoietin-like 4
hsa-miR-520g	1	0	1	0	0	0	PRPF40A	PRP40 pre-mRNA processing factor 40 homolog A (S. cerevisiae)
hsa-miR-520g	1	0	1	1	1	1	HBS1L	HBS1-like (S. cerevisiae)
hsa-miR-520g	1	0	1	1	1	1	TSC22D2	TSC22 domain family, member 2
hsa-miR-520g	0	0	1	1	1	1	CSNK1A1	casein kinase 1, alpha 1
hsa-miR-520g	0	0	1	1	1	1	CD28	CD28 molecule
hsa-miR-520g	1	0	1	1	0	0	TDRKH	tudor and KH domain containing
hsa-miR-520g	1	0	1	1	1	1	C21orf91	chromosome 21 open reading frame 91
hsa-miR-520g	0	0	1	1	1	1	NKX3-1	NK3 homeobox 1
hsa-miR-520g	0	0	1	1	1	1	DOCK10	dedicator of cytokinesis 10
hsa-miR-520g	1	0	1	1	0	0	LMO2	LIM domain only 2 (rhombotin-like 1)
hsa-miR-520g	0	0	1	1	1	1	GOLGA6A	golgin A6 family, member A
hsa-miR-520g	1	0	1	0	1	1	TRPS1	trichorhinophalangeal syndrome I
hsa-miR-520g	1	0	1	1	1	1	PUM2	pumilio homolog 2 (Drosophila)
hsa-miR-520g	0	0	1	0	1	1	ERBB2IP	erbb2 interacting protein
hsa-miR-520g	0	0	1	0	0	0	LOC645355	uncharacterized LOC645355
hsa-miR-520g	0	0	1	1	1	1	PARP9	poly (ADP-ribose) polymerase family, member 9
hsa-miR-520g	1	0	1	1	0	0	ZBTB37	zinc finger and BTB domain containing 37
hsa-miR-520g	1	0	1	1	0	0	CANT1	calcium activated nucleotidase 1
hsa-miR-520g	1	0	1	1	1	1	CHST9	carbohydrate (N-acetylgalactosamine 4-0) sulfotransferase 9
hsa-miR-520g	0	0	1	1	0	0	ZAN	zonadhesin
hsa-miR-520g	1	0	1	1	1	1	BIVM	basic, immunoglobulin-like variable motif containing
hsa-miR-520g	1	0	1	1	1	1	CALU	calumenin
hsa-miR-520g	1	0	1	1	1	1	PBX3	pre-B-cell leukemia homeobox 3
hsa-miR-520g	1	0	1	1	1	1	CASD1	CAS1 domain containing 1
hsa-miR-520g	1	0	1	0	1	1	WIPF2	WAS/WASL interacting protein family, member 2
hsa-miR-520g	1	0	1	1	1	1	LARP4	La ribonucleoprotein domain family, member 4
hsa-miR-520g	0	0	1	0	0	0	NBPF10	neuroblastoma breakpoint family, member 10
hsa-miR-520g	0	0	1	1	1	1	CASP8	caspase 8, apoptosis-related cysteine peptidase
hsa-miR-520g	0	0	1	1	1	1	RAPGEF6	Rap guanine nucleotide exchange factor (GEF) 6
hsa-miR-520g	1	0	1	1	1	1	MAGI1	membrane associated guanylate kinase, WW and PDZ domain containing 1
hsa-miR-520g	0	0	1	1	0	0	ELP2	elongator acetyltransferase complex subunit 2
hsa-miR-520g	0	0	1	0	0	0	RMST	rhabdomyosarcoma 2 associated transcript (non-protein coding)
hsa-miR-520g	1	0	1	1	0	0	YTHDF2	YTH domain family, member 2
hsa-miR-520g	1	0	1	1	0	0	XRRA1	X-ray radiation resistance associated 1
hsa-miR-520g	1	0	1	1	0	0	SEPT8	septin 8
hsa-miR-520g	0	0	1	1	0	0	RASGEF1C	RasGEF domain family, member 1C
hsa-miR-520g	1	0	1	1	1	1	CPNE4	copine IV
hsa-miR-520g	1	0	1	1	1	1	ZAK	sterile alpha motif and leucine zipper containing kinase AZK
hsa-miR-520g	1	0	1	1	1	1	WAPAL	wings apart-like homolog (Drosophila)
hsa-miR-520g	1	0	1	1	1	1	F3	coagulation factor III (thromboplastin, tissue factor)
hsa-miR-520g	0	0	1	1	1	1	CARD8	caspase recruitment domain family, member 8
hsa-miR-520g	1	0	1	1	1	1	PTBP2	polypyrimidine tract binding protein 2
hsa-miR-520g	1	0	1	0	1	1	IL1RAP	interleukin 1 receptor accessory protein
hsa-miR-520g	1	0	1	1	1	1	AFF2	AF4/FMR2 family, member 2
hsa-miR-520g	0	0	1	1	1	1	GNAS	GNAS complex locus
hsa-miR-520g	1	0	1	0	1	1	CACNA1C	calcium channel, voltage-dependent, L type, alpha 1C subunit
hsa-miR-520g	0	0	1	1	1	1	CLDND1	claudin domain containing 1
hsa-miR-520g	0	0	1	1	1	1	TCFL5	transcription factor-like 5 (basic helix-loop-helix)
hsa-miR-520g	0	0	1	0	0	0	CACNA2D3	calcium channel, voltage-dependent, alpha 2/delta subunit 3
hsa-miR-520g	0	0	1	1	0	0	KIF13A	kinesin family member 13A
hsa-miR-520g	1	0	1	1	1	1	VAMP7	vesicle-associated membrane protein 7
hsa-miR-520g	0	0	1	1	1	1	STK33	serine/threonine kinase 33
hsa-miR-520g	1	0	1	1	1	1	PALM2	paralemmin 2
hsa-miR-520g	0	0	1	0	1	1	SRPK1	SRSF protein kinase 1
hsa-miR-520g	1	0	1	1	1	1	ARL4C	ADP-ribosylation factor-like 4C
hsa-miR-520g	0	0	1	1	1	1	DEPDC5	DEP domain containing 5
hsa-miR-520g	0	0	1	1	1	1	ABLIM2	actin binding LIM protein family, member 2
hsa-miR-520g	1	0	1	1	1	1	PPP1R9A	protein phosphatase 1, regulatory subunit 9A
hsa-miR-520g	1	0	1	1	1	1	AKAP2	A kinase (PRKA) anchor protein 2
hsa-miR-520g	0	0	1	1	1	1	UBE2Q2	ubiquitin-conjugating enzyme E2Q family member 2
hsa-miR-520g	0	0	1	1	1	1	OLFM4	olfactomedin 4
hsa-miR-520g	1	0	1	1	1	1	BCAP29	B-cell receptor-associated protein 29
hsa-miR-520g	1	0	1	1	1	1	ZNF691	zinc finger protein 691
hsa-miR-520g	1	0	1	1	1	1	HNRNPF	heterogeneous nuclear ribonucleoprotein F
hsa-miR-520g	0	0	1	1	1	1	STOX2	storkhead box 2
hsa-miR-520g	1	0	1	1	1	1	EIF2C1	eukaryotic translation initiation factor 2C, 1
hsa-miR-520g	1	0	1	1	1	1	PTBP3	polypyrimidine tract binding protein 3
hsa-miR-520g	1	0	1	1	1	1	ARMC8	armadillo repeat containing 8
hsa-miR-520g	0	0	1	1	1	1	RSRC2	arginine/serine-rich coiled-coil 2
hsa-miR-520g	0	0	1	1	1	1	ABCG2	ATP-binding cassette, sub-family G (WHITE), member 2
hsa-miR-520g	0	0	1	1	0	0	ANAPC7	anaphase promoting complex subunit 7
hsa-miR-520g	0	0	1	1	1	1	SNCAIP	synuclein, alpha interacting protein
hsa-miR-520g	0	0	1	1	0	0	KIRREL	kin of IRRE like (Drosophila)
hsa-miR-520g	0	0	1	0	0	0	SOX2-OT	SOX2 overlapping transcript (non-protein coding)
hsa-miR-520g	0	0	1	1	0	0	RPS15A	ribosomal protein S15a
hsa-miR-520g	1	0	1	1	0	0	FASTK	Fas-activated serine/threonine kinase
hsa-miR-520g	1	0	1	1	1	1	STARD7	StAR-related lipid transfer (START) domain containing 7
hsa-miR-520g	0	0	1	1	1	1	LRRN1	leucine rich repeat neuronal 1
hsa-miR-520g	1	0	1	1	1	1	MACF1	microtubule-actin crosslinking factor 1
hsa-miR-520g	0	0	1	0	0	0	MIRLET7BHG	MIRLET7B host gene (non-protein coding)
hsa-miR-520g	0	0	1	1	1	1	C14orf118	chromosome 14 open reading frame 118
hsa-miR-520g	0	0	1	1	0	0	BUB1	budding uninhibited by benzimidazoles 1 homolog (yeast)
hsa-miR-520g	0	0	1	1	1	1	CXorf57	chromosome X open reading frame 57
hsa-miR-520g	1	0	1	1	1	1	FAM131A	family with sequence similarity 131, member A
hsa-miR-520g	1	0	1	1	1	1	ZNF385A	zinc finger protein 385A
hsa-miR-520g	0	0	1	0	0	0	IFFO2	intermediate filament family orphan 2
hsa-miR-520g	1	0	1	0	1	1	ATP2B1	ATPase, Ca++ transporting, plasma membrane 1
hsa-miR-520g	0	0	1	1	1	1	EP400	E1A binding protein p400
hsa-miR-520g	1	0	1	1	1	1	GBF1	golgi brefeldin A resistant guanine nucleotide exchange factor 1
hsa-miR-520g	1	0	1	0	1	1	MYO5B	myosin VB
hsa-miR-520g	0	0	1	1	1	1	CNOT8	CCR4-NOT transcription complex, subunit 8
hsa-miR-520g	0	0	1	0	0	0	KIAA1671	KIAA1671
hsa-miR-520g	1	0	1	1	1	1	PHACTR4	phosphatase and actin regulator 4
hsa-miR-520g	0	0	1	1	1	1	WDR67	WD repeat domain 67
hsa-miR-520g	1	0	1	1	1	1	TNRC6A	trinucleotide repeat containing 6A
hsa-miR-520g	1	0	1	1	1	1	DENND4C	DENN/MADD domain containing 4C
hsa-miR-520g	1	0	1	1	1	1	NAA30	N(alpha)-acetyltransferase 30, NatC catalytic subunit
hsa-miR-520g	1	0	1	1	0	0	UBXN7	UBX domain protein 7
hsa-miR-520g	1	0	1	1	0	0	SLAIN2	SLAIN motif family, member 2
hsa-miR-520g	1	0	1	1	1	1	DCAF8	DDB1 and CUL4 associated factor 8
hsa-miR-520g	1	0	1	0	1	1	TOX3	TOX high mobility group box family member 3
hsa-miR-520g	0	0	1	0	0	0	LOC729852	uncharacterized LOC729852
hsa-miR-520g	1	0	1	1	1	1	LRP4	low density lipoprotein receptor-related protein 4
hsa-miR-520g	0	0	1	1	1	1	C1orf101	chromosome 1 open reading frame 101
hsa-miR-520g	0	0	1	1	1	1	DUSP14	dual specificity phosphatase 14
hsa-miR-520g	1	0	1	1	1	1	FOXP1	forkhead box P1
hsa-miR-520g	1	0	1	1	1	1	SEC63	SEC63 homolog (S. cerevisiae)
hsa-miR-520g	0	0	1	1	1	1	KDM2B	lysine (K)-specific demethylase 2B
hsa-miR-520g	1	0	1	1	1	1	SLC38A1	solute carrier family 38, member 1
hsa-miR-520g	1	0	1	1	1	1	GPD2	glycerol-3-phosphate dehydrogenase 2 (mitochondrial)
hsa-miR-520g	1	0	1	1	1	1	ZNF462	zinc finger protein 462
hsa-miR-520g	0	0	1	1	1	1	FAM107A	family with sequence similarity 107, member A
hsa-miR-520g	1	0	1	1	0	0	C15orf27	chromosome 15 open reading frame 27
hsa-miR-520g	1	0	1	1	1	1	C7orf43	chromosome 7 open reading frame 43
hsa-miR-520g	0	0	1	0	0	0	LOC254559	uncharacterized LOC254559
hsa-miR-520g	0	0	1	1	0	0	FAM153B	family with sequence similarity 153, member B
hsa-miR-520g	0	0	1	1	1	1	PRR5L	proline rich 5 like
hsa-miR-520g	1	0	1	0	1	1	AP1G1	adaptor-related protein complex 1, gamma 1 subunit
hsa-miR-520g	1	0	1	1	1	1	TPM1	tropomyosin 1 (alpha)
hsa-miR-520g	0	0	1	1	1	1	GABRP	gamma-aminobutyric acid (GABA) A receptor, pi
hsa-miR-520g	0	0	1	0	0	0	FLJ30838	uncharacterized LOC400955
hsa-miR-520g	0	0	1	0	0	0	LOC401242	uncharacterized LOC401242
hsa-miR-520g	0	0	1	0	0	0	FLJ31104	uncharacterized LOC441072
hsa-miR-520g	1	0	1	1	1	1	MAP3K7	mitogen-activated protein kinase kinase kinase 7
hsa-miR-520g	1	0	1	1	1	1	TMTC1	transmembrane and tetratricopeptide repeat containing 1
hsa-miR-520g	0	0	1	1	1	1	ANKRD36B	ankyrin repeat domain 36B
hsa-miR-520g	1	0	1	1	1	1	PPP1R3F	protein phosphatase 1, regulatory subunit 3F
hsa-miR-520g	1	0	1	1	1	1	ZIC4	Zic family member 4
hsa-miR-520g	1	0	1	1	1	1	CLCN5	chloride channel, voltage-sensitive 5
hsa-miR-520g	0	0	1	0	1	1	SNRNP48	small nuclear ribonucleoprotein 48kDa (U11/U12)
hsa-miR-520g	0	0	1	1	1	1	XAF1	XIAP associated factor 1
hsa-miR-520g	1	0	1	1	1	1	GORASP1	golgi reassembly stacking protein 1, 65kDa
hsa-miR-520g	1	0	1	1	1	1	HMGB1	high mobility group box 1
hsa-miR-520g	0	0	1	1	1	1	PSME3	proteasome (prosome, macropain) activator subunit 3 (PA28 gamma; Ki)
hsa-miR-520g	1	0	1	1	1	1	TLE4	transducin-like enhancer of split 4 (E(sp1) homolog, Drosophila)
hsa-miR-520g	0	0	1	1	0	0	NXF2	nuclear RNA export factor 2
hsa-miR-520g	1	0	1	0	1	1	PLEKHA1	pleckstrin homology domain containing, family A (phosphoinositide binding specific) member 1
hsa-miR-520g	1	0	1	0	1	1	NCAM1	neural cell adhesion molecule 1
hsa-miR-520g	1	0	1	1	1	1	ANKRD29	ankyrin repeat domain 29
hsa-miR-520g	1	0	1	1	1	1	IST1	increased sodium tolerance 1 homolog (yeast)
hsa-miR-520g	0	0	1	1	0	0	CERS5	ceramide synthase 5
hsa-miR-520g	0	0	1	0	0	0	LINC00301	long intergenic non-protein coding RNA 301
hsa-miR-520g	0	0	1	1	0	0	TRIM41	tripartite motif containing 41
hsa-miR-520g	1	0	1	1	1	1	FAM73B	family with sequence similarity 73, member B
hsa-miR-520g	0	0	1	1	1	1	ROBO4	roundabout, axon guidance receptor, homolog 4 (Drosophila)
hsa-miR-520g	0	0	1	1	1	1	PKIB	protein kinase (cAMP-dependent, catalytic) inhibitor beta
hsa-miR-520g	0	0	1	0	1	1	CDHR3	cadherin-related family member 3
hsa-miR-520g	1	0	1	1	1	1	MYO1B	myosin IB
hsa-miR-520g	0	0	1	1	0	0	NISCH	nischarin
hsa-miR-520g	0	0	1	1	0	0	CPAMD8	C3 and PZP-like, alpha-2-macroglobulin domain containing 8
hsa-miR-520g	0	0	1	1	1	1	PINK1	PTEN induced putative kinase 1
hsa-miR-520g	0	0	1	1	0	0	LGR5	leucine-rich repeat containing G protein-coupled receptor 5
hsa-miR-520g	1	0	1	1	1	1	PIP4K2C	phosphatidylinositol-5-phosphate 4-kinase, type II, gamma
hsa-miR-520g	1	0	1	1	1	1	TLK1	tousled-like kinase 1
hsa-miR-520g	0	0	1	1	1	1	STBD1	starch binding domain 1
hsa-miR-520g	0	0	1	0	0	0	SEC14L2	SEC14-like 2 (S. cerevisiae)
hsa-miR-520g	1	0	1	1	1	1	AMMECR1	Alport syndrome, mental retardation, midface hypoplasia and elliptocytosis chromosomal region gene 1
hsa-miR-520g	0	0	1	0	0	0	LOC440910	uncharacterized LOC440910
hsa-miR-520g	1	0	1	1	1	1	FBXW2	F-box and WD repeat domain containing 2
hsa-miR-520g	1	0	1	1	1	1	TSN	translin
hsa-miR-520g	0	0	1	0	0	0	KIAA1430	KIAA1430
hsa-miR-520g	0	0	1	1	1	1	HNRNPH1	heterogeneous nuclear ribonucleoprotein H1 (H)
hsa-miR-520g	0	0	1	1	1	1	NRBP1	nuclear receptor binding protein 1
hsa-miR-520g	1	0	1	1	1	1	IVNS1ABP	influenza virus NS1A binding protein
hsa-miR-520g	0	0	1	1	1	1	WT1	Wilms tumor 1
hsa-miR-520g	0	0	1	1	0	0	AXDND1	axonemal dynein light chain domain containing 1
hsa-miR-520g	0	0	1	1	1	1	LZTFL1	leucine zipper transcription factor-like 1
hsa-miR-520g	1	0	1	1	1	1	SPTBN1	spectrin, beta, non-erythrocytic 1
hsa-miR-520g	0	0	1	1	1	1	SLC16A1	solute carrier family 16, member 1 (monocarboxylic acid transporter 1)
hsa-miR-520g	0	0	1	1	1	1	C19orf47	chromosome 19 open reading frame 47
hsa-miR-520g	0	0	1	1	0	0	WBP1	WW domain binding protein 1
hsa-miR-520g	0	0	1	1	1	1	SPOCK1	sparc/osteonectin, cwcv and kazal-like domains proteoglycan (testican) 1
hsa-miR-520g	0	0	1	0	0	0	PART1	prostate androgen-regulated transcript 1 (non-protein coding)
hsa-miR-520g	1	0	1	1	1	1	SNAP25	synaptosomal-associated protein, 25kDa
hsa-miR-520g	0	0	1	0	0	0	ZNF806	zinc finger protein 806
hsa-miR-520g	1	0	1	0	1	1	GATAD2B	GATA zinc finger domain containing 2B
hsa-miR-520g	1	0	1	0	1	1	NCOA7	nuclear receptor coactivator 7
hsa-miR-520g	0	0	1	0	0	0	LINC00340	long intergenic non-protein coding RNA 340
hsa-miR-520g	1	0	1	1	1	1	GALNTL2	UDP-N-acetyl-alpha-D-galactosamine:polypeptide N-acetylgalactosaminyltransferase-like 2
hsa-miR-520g	0	0	1	1	0	0	TMEM108	transmembrane protein 108
hsa-miR-520g	1	0	1	1	1	1	KLF4	Kruppel-like factor 4 (gut)
hsa-miR-520g	1	0	1	1	1	1	TMEM100	transmembrane protein 100
hsa-miR-520g	0	0	1	1	1	1	GPR115	G protein-coupled receptor 115
hsa-miR-520g	0	0	1	1	1	1	CHI3L1	chitinase 3-like 1 (cartilage glycoprotein-39)
hsa-miR-520g	1	0	1	1	1	1	FAM222B	family with sequence similarity 222, member B
hsa-miR-520g	1	0	1	1	1	1	SPATS2	spermatogenesis associated, serine-rich 2
hsa-miR-520g	0	0	1	0	0	0	LOC284577	uncharacterized LOC284577
hsa-miR-520g	0	0	1	0	0	0	LOC730101	uncharacterized LOC730101
hsa-miR-520g	1	0	1	1	1	1	CS	citrate synthase
hsa-miR-520g	0	0	1	1	1	1	VDAC1	voltage-dependent anion channel 1
hsa-miR-520g	0	0	1	0	0	0	ZNF815P	zinc finger protein 815, pseudogene
hsa-miR-520g	0	0	1	0	0	0	OTUD1	OTU domain containing 1
hsa-miR-520g	1	0	1	1	1	1	LRP8	low density lipoprotein receptor-related protein 8, apolipoprotein e receptor
hsa-miR-520g	0	0	1	0	0	0	LOC643327	uncharacterized LOC643327
hsa-miR-520g	1	0	1	0	1	1	THRB	thyroid hormone receptor, beta
hsa-miR-520g	0	0	1	1	1	1	IL17RE	interleukin 17 receptor E
hsa-miR-520g	1	0	1	1	1	1	CCDC141	coiled-coil domain containing 141
hsa-miR-520g	1	0	1	1	1	1	STIM2	stromal interaction molecule 2
hsa-miR-520g	0	0	1	1	0	0	TCEANC	transcription elongation factor A (SII) N-terminal and central domain containing
hsa-miR-520g	1	0	1	1	1	1	CAPN2	calpain 2, (m/II) large subunit
hsa-miR-520g	0	0	1	0	0	0	LOC400680	uncharacterized LOC400680
hsa-miR-520g	1	0	1	1	1	1	RAB11FIP4	RAB11 family interacting protein 4 (class II)
hsa-miR-520g	1	0	1	0	1	1	AGFG1	ArfGAP with FG repeats 1
hsa-miR-520g	0	0	1	0	0	0	LINC00293	long intergenic non-protein coding RNA 293
hsa-miR-520g	1	0	1	1	1	1	NSUN4	NOP2/Sun domain family, member 4
hsa-miR-520g	0	0	1	0	0	0	LOC285626	uncharacterized LOC285626
hsa-miR-520g	1	0	1	1	1	1	GOLGA8B	golgin A8 family, member B
hsa-miR-520g	0	0	1	1	1	1	RBM4	RNA binding motif protein 4
hsa-miR-520g	0	0	1	0	0	0	LOC284385	uncharacterized LOC284385
hsa-miR-520g	1	0	1	1	1	1	HOOK1	hook homolog 1 (Drosophila)
hsa-miR-520g	1	0	1	1	1	1	VAV3	vav 3 guanine nucleotide exchange factor
hsa-miR-520g	1	0	1	1	1	1	ST7L	suppression of tumorigenicity 7 like
hsa-miR-520g	0	0	1	1	1	1	POLR1D	polymerase (RNA) I polypeptide D, 16kDa
hsa-miR-520g	1	0	1	1	1	1	ZCCHC2	zinc finger, CCHC domain containing 2
hsa-miR-520g	0	0	1	1	0	0	ZNF283	zinc finger protein 283
hsa-miR-520g	0	0	1	0	0	0	LOC100130954	uncharacterized LOC100130954
hsa-miR-520g	0	0	1	1	1	1	C1orf114	chromosome 1 open reading frame 114
hsa-miR-520g	1	0	1	0	1	1	UNC5D	unc-5 homolog D (C. elegans)
hsa-miR-520g	0	0	1	1	1	1	GPR128	G protein-coupled receptor 128
hsa-miR-520g	0	0	1	1	0	0	KIAA0146	KIAA0146
hsa-miR-520g	1	0	1	1	1	1	WEE1	WEE1 homolog (S. pombe)
hsa-miR-520g	1	0	1	1	1	1	BCL6B	B-cell CLL/lymphoma 6, member B
hsa-miR-520g	0	0	1	1	0	0	MARS	methionyl-tRNA synthetase
hsa-miR-520g	1	0	1	1	1	1	ZBTB4	zinc finger and BTB domain containing 4
hsa-miR-520g	0	0	1	1	1	1	GFI1	growth factor independent 1 transcription repressor
hsa-miR-520g	1	0	1	1	1	1	FGD5	FYVE, RhoGEF and PH domain containing 5
hsa-miR-520g	0	0	1	0	1	1	FLJ41200	uncharacterized LOC401492
hsa-miR-520g	0	0	1	1	1	1	RGS3	regulator of G-protein signaling 3
hsa-miR-520g	1	0	1	0	1	1	KCNK2	potassium channel, subfamily K, member 2
hsa-miR-520g	0	0	1	0	0	0	TMPRSS11BNL	TMPRSS11B N terminal-like
hsa-miR-520g	0	0	1	1	1	1	FAM19A2	family with sequence similarity 19 (chemokine (C-C motif)-like), member A2
hsa-miR-520g	1	0	1	1	1	1	EPAS1	endothelial PAS domain protein 1
hsa-miR-520g	1	0	1	0	0	0	GPR137C	G protein-coupled receptor 137C
hsa-miR-520g	1	0	1	1	1	1	SMAP1	small ArfGAP 1
hsa-miR-520g	1	0	1	1	0	0	KCNC1	potassium voltage-gated channel, Shaw-related subfamily, member 1
hsa-miR-520g	1	0	1	1	1	1	ADIPOR1	adiponectin receptor 1
hsa-miR-520g	0	0	1	0	1	1	NAIP	NLR family, apoptosis inhibitory protein
hsa-miR-520g	1	0	1	0	1	1	TTYH3	tweety homolog 3 (Drosophila)
hsa-miR-520g	1	0	1	1	1	1	ERBB3	v-erb-b2 erythroblastic leukemia viral oncogene homolog 3 (avian)
hsa-miR-520g	1	0	1	1	1	1	UBA2	ubiquitin-like modifier activating enzyme 2
hsa-miR-520g	0	0	1	1	1	1	ATPBD4	ATP binding domain 4
hsa-miR-520g	1	0	1	1	1	1	C11orf30	chromosome 11 open reading frame 30
hsa-miR-520g	1	0	1	1	1	1	RGMA	RGM domain family, member A
hsa-miR-520g	1	0	1	1	1	1	DENND5B	DENN/MADD domain containing 5B
hsa-miR-520g	1	0	1	1	1	1	C15orf52	chromosome 15 open reading frame 52
hsa-miR-520g	0	0	1	1	1	1	CTPS2	CTP synthase 2
hsa-miR-520g	0	0	1	1	1	1	MKX	mohawk homeobox
hsa-miR-520g	1	0	1	1	1	1	KPNA1	karyopherin alpha 1 (importin alpha 5)
hsa-miR-520g	1	0	1	0	0	0	MSL1	male-specific lethal 1 homolog (Drosophila)
hsa-miR-520g	0	0	1	1	1	1	PLOD2	procollagen-lysine, 2-oxoglutarate 5-dioxygenase 2
hsa-miR-520g	0	0	1	1	0	0	RPRD2	regulation of nuclear pre-mRNA domain containing 2
hsa-miR-520g	1	0	1	1	1	1	TP53INP1	tumor protein p53 inducible nuclear protein 1
hsa-miR-520g	0	0	1	1	0	0	C20orf141	chromosome 20 open reading frame 141
hsa-miR-520g	0	0	1	1	0	0	FSIP2	fibrous sheath interacting protein 2
hsa-miR-520g	1	0	1	1	1	1	CPNE2	copine II
hsa-miR-520g	1	0	1	1	1	1	PIK3R1	phosphoinositide-3-kinase, regulatory subunit 1 (alpha)
hsa-miR-520g	0	0	1	1	1	1	C18orf54	chromosome 18 open reading frame 54
hsa-miR-520g	1	0	1	1	1	1	DLG2	discs, large homolog 2 (Drosophila)
hsa-miR-520g	0	0	1	0	0	0	RPL23AP53	ribosomal protein L23a pseudogene 53
hsa-miR-520g	1	0	1	1	1	1	MKRN1	makorin ring finger protein 1
hsa-miR-520g	1	0	1	1	1	1	CLTC	clathrin, heavy chain (Hc)
hsa-miR-520g	0	0	1	1	0	0	FAM54B	family with sequence similarity 54, member B
hsa-miR-520g	1	0	1	0	1	1	ADIPOR2	adiponectin receptor 2
hsa-miR-520g	1	0	1	1	0	0	SLC30A3	solute carrier family 30 (zinc transporter), member 3
hsa-miR-520g	1	0	1	1	0	0	PTPN5	protein tyrosine phosphatase, non-receptor type 5 (striatum-enriched)
hsa-miR-520g	0	0	1	0	1	1	NPHP4	nephronophthisis 4
hsa-miR-520g	0	0	1	1	1	1	ERI2	ERI1 exoribonuclease family member 2
hsa-miR-520g	1	0	1	1	1	1	ENAH	enabled homolog (Drosophila)
hsa-miR-520g	0	0	1	1	0	0	SLC22A25	solute carrier family 22, member 25
hsa-miR-520g	1	0	1	0	1	1	SP6	Sp6 transcription factor
hsa-miR-520g	1	0	1	1	1	1	EYA1	eyes absent homolog 1 (Drosophila)
hsa-miR-520g	1	0	1	0	1	1	FNDC3B	fibronectin type III domain containing 3B
hsa-miR-520g	0	0	1	0	0	0	ERVFRD-2	endogenous retrovirus group FRD, member 2
hsa-miR-520g	1	0	1	1	1	1	AFAP1	actin filament associated protein 1
hsa-miR-520g	1	0	1	0	1	1	YOD1	YOD1 OTU deubiquinating enzyme 1 homolog (S. cerevisiae)
hsa-miR-520g	0	0	1	0	0	0	FAM205B	transmembrane protein C9orf144B pseudogene
hsa-miR-520g	0	0	1	0	0	0	FLJ46361	deleted in malignant brain tumors 1 pseudogene
hsa-miR-520g	1	0	1	0	1	1	KDM2A	lysine (K)-specific demethylase 2A
hsa-miR-520g	1	0	1	0	1	1	NBR1	neighbor of BRCA1 gene 1
hsa-miR-520g	0	0	1	1	1	1	ATXN2	ataxin 2
hsa-miR-520g	1	0	1	1	1	1	PDZD2	PDZ domain containing 2
hsa-miR-520g	1	0	1	1	1	1	ADAMTSL1	ADAMTS-like 1
hsa-miR-520g	0	0	1	1	0	0	HEATR8	HEAT repeat containing 8
hsa-miR-520g	1	0	1	1	0	0	PPP1R36	protein phosphatase 1, regulatory subunit 36
hsa-miR-520g	0	0	1	0	0	0	LOC494141	mitochondrial carrier triple repeat 1 pseudogene
hsa-miR-520g	0	0	1	0	1	1	GALNT13	UDP-N-acetyl-alpha-D-galactosamine:polypeptide N-acetylgalactosaminyltransferase 13 (GalNAc-T13)
hsa-miR-520g	1	0	1	1	1	1	RNF111	ring finger protein 111
hsa-miR-520g	1	0	1	1	1	1	WTAP	Wilms tumor 1 associated protein
hsa-miR-520g	1	0	1	1	1	1	SMAD7	SMAD family member 7
hsa-miR-520g	0	0	1	1	1	1	ZSCAN20	zinc finger and SCAN domain containing 20
hsa-miR-520g	1	0	1	1	1	1	MAP3K14	mitogen-activated protein kinase kinase kinase 14
hsa-miR-520g	0	0	1	1	1	1	ZNF346	zinc finger protein 346
hsa-miR-520g	1	0	1	1	1	1	MAP2K4	mitogen-activated protein kinase kinase 4
hsa-miR-520g	1	0	1	0	1	1	ZNF607	zinc finger protein 607
hsa-miR-520g	0	0	1	0	0	0	AGAP9	ArfGAP with GTPase domain, ankyrin repeat and PH domain 9
hsa-miR-520g	0	0	1	1	1	1	XRN2	5'-3' exoribonuclease 2
hsa-miR-520g	0	0	1	1	1	1	AKTIP	AKT interacting protein
hsa-miR-520g	0	0	1	1	1	1	FANCC	Fanconi anemia, complementation group C
hsa-miR-520g	1	0	1	0	1	1	TMEM106B	transmembrane protein 106B
hsa-miR-520g	0	0	1	1	1	1	MSH2	mutS homolog 2, colon cancer, nonpolyposis type 1 (E. coli)
hsa-miR-520g	1	0	1	0	1	1	SEZ6	seizure related 6 homolog (mouse)
hsa-miR-520g	0	0	1	0	1	1	PEX5	peroxisomal biogenesis factor 5
hsa-miR-520g	1	0	1	1	1	1	TRPM6	transient receptor potential cation channel, subfamily M, member 6
hsa-miR-520g	1	0	1	1	1	1	TBC1D15	TBC1 domain family, member 15
hsa-miR-520g	1	0	1	1	1	1	PTPN2	protein tyrosine phosphatase, non-receptor type 2
hsa-miR-520g	1	0	1	1	0	0	ABLIM3	actin binding LIM protein family, member 3
hsa-miR-520g	1	0	1	1	1	1	COBLL1	COBL-like 1
hsa-miR-520g	1	0	1	1	1	1	WDR20	WD repeat domain 20
hsa-miR-520g	1	0	1	1	1	1	PHTF2	putative homeodomain transcription factor 2
hsa-miR-520g	0	0	1	1	1	1	PUS7L	pseudouridylate synthase 7 homolog (S. cerevisiae)-like
hsa-miR-520g	1	0	1	1	1	1	NCOA1	nuclear receptor coactivator 1
hsa-miR-520g	1	0	1	1	1	1	APBB2	amyloid beta (A4) precursor protein-binding, family B, member 2
hsa-miR-520g	0	0	1	1	0	0	FAAH	fatty acid amide hydrolase
hsa-miR-520g	1	0	1	1	1	1	NPAS3	neuronal PAS domain protein 3
hsa-miR-520g	1	0	1	1	1	1	TAB2	TGF-beta activated kinase 1/MAP3K7 binding protein 2
hsa-miR-520g	1	0	1	1	1	1	ARF6	ADP-ribosylation factor 6
hsa-miR-520g	1	0	1	0	1	1	DCDC2	doublecortin domain containing 2
hsa-miR-520g	1	0	1	1	1	1	FBXL17	F-box and leucine-rich repeat protein 17
hsa-miR-520g	0	0	1	1	1	1	KIDINS220	kinase D-interacting substrate, 220kDa
hsa-miR-520g	0	0	1	0	0	0	DNAJC5B	DnaJ (Hsp40) homolog, subfamily C, member 5 beta
hsa-miR-520g	1	0	1	1	1	1	SLC25A36	solute carrier family 25 (pyrimidine nucleotide carrier ), member 36
hsa-miR-520g	1	0	1	1	1	1	GOLGA8A	golgin A8 family, member A
hsa-miR-520g	0	0	1	1	1	1	TAOK2	TAO kinase 2
hsa-miR-520g	1	0	1	1	1	1	NBEA	neurobeachin
hsa-miR-520g	1	0	1	1	1	1	CTTNBP2NL	CTTNBP2 N-terminal like
hsa-miR-520g	0	0	1	1	1	1	SLC30A10	solute carrier family 30, member 10
hsa-miR-520g	1	0	1	0	1	1	GRIN3A	glutamate receptor, ionotropic, N-methyl-D-aspartate 3A
hsa-miR-520g	1	0	1	0	1	1	FAM19A1	family with sequence similarity 19 (chemokine (C-C motif)-like), member A1
hsa-miR-520g	1	0	1	1	1	1	YTHDF3	YTH domain family, member 3
hsa-miR-520g	1	0	1	1	1	1	MIER1	mesoderm induction early response 1 homolog (Xenopus laevis)
hsa-miR-520g	0	0	1	0	1	1	GAB3	GRB2-associated binding protein 3
hsa-miR-520g	1	0	1	1	1	1	MTMR10	myotubularin related protein 10
hsa-miR-520g	0	0	1	0	0	0	ZNF720	zinc finger protein 720
hsa-miR-520g	1	0	1	1	1	1	FAM126B	family with sequence similarity 126, member B
hsa-miR-520g	1	0	1	0	1	1	HNRNPA3	heterogeneous nuclear ribonucleoprotein A3
hsa-miR-520g	1	0	1	1	0	0	USP24	ubiquitin specific peptidase 24
hsa-miR-520g	0	0	1	1	1	1	MYPN	myopalladin
hsa-miR-520g	1	0	1	1	1	1	PRRC1	proline-rich coiled-coil 1
hsa-miR-520g	0	0	1	1	1	1	YAP1	Yes-associated protein 1
hsa-miR-520g	0	0	1	1	1	1	NEK9	NIMA (never in mitosis gene a)- related kinase 9
hsa-miR-520g	1	0	1	1	0	0	ZBTB49	zinc finger and BTB domain containing 49
hsa-miR-520g	1	0	1	1	1	1	POU6F1	POU class 6 homeobox 1
hsa-miR-520g	1	0	1	1	1	1	SBF2	SET binding factor 2
hsa-miR-520g	0	0	1	1	1	1	INPP5B	inositol polyphosphate-5-phosphatase, 75kDa
hsa-miR-520g	1	0	1	0	1	1	GPCPD1	glycerophosphocholine phosphodiesterase GDE1 homolog (S. cerevisiae)
hsa-miR-520g	1	0	1	0	1	1	MEF2C	myocyte enhancer factor 2C
hsa-miR-520g	0	0	1	1	1	1	C12orf50	chromosome 12 open reading frame 50
hsa-miR-520g	0	0	1	0	0	0	EPHA1-AS1	EPHA1 antisense RNA 1
hsa-miR-520g	1	0	1	1	1	1	ANP32E	acidic (leucine-rich) nuclear phosphoprotein 32 family, member E
hsa-miR-520g	1	0	1	1	1	1	ATAT1	alpha tubulin acetyltransferase 1
hsa-miR-520g	1	0	1	1	1	1	IL17RD	interleukin 17 receptor D
hsa-miR-520g	1	0	1	1	1	1	SLC24A4	solute carrier family 24 (sodium/potassium/calcium exchanger), member 4
hsa-miR-520g	1	0	1	0	1	1	JAZF1	JAZF zinc finger 1
hsa-miR-520g	1	0	1	1	1	1	C1orf131	chromosome 1 open reading frame 131
hsa-miR-520g	1	0	1	1	1	1	MSANTD4	Myb/SANT-like DNA-binding domain containing 4 with coiled-coils
hsa-miR-520g	0	0	1	0	1	1	SYNPO2	synaptopodin 2
hsa-miR-520g	1	0	1	0	1	1	PATL1	protein associated with topoisomerase II homolog 1 (yeast)
hsa-miR-520g	1	0	1	1	1	1	SET	SET nuclear oncogene
hsa-miR-520g	1	0	1	1	1	1	FBXL5	F-box and leucine-rich repeat protein 5
hsa-miR-520g	1	0	1	1	1	1	TSHZ3	teashirt zinc finger homeobox 3
hsa-miR-520g	1	0	1	1	1	1	PPP3CA	protein phosphatase 3, catalytic subunit, alpha isozyme
hsa-miR-520g	1	0	1	1	1	1	RNF38	ring finger protein 38
hsa-miR-520g	1	0	1	1	1	1	MIPOL1	mirror-image polydactyly 1
hsa-miR-520g	1	0	1	1	1	1	MARK4	MAP/microtubule affinity-regulating kinase 4
hsa-miR-520g	1	0	1	1	1	1	ANGPT1	angiopoietin 1
hsa-miR-520g	1	0	1	1	1	1	WDR26	WD repeat domain 26
hsa-miR-520g	0	0	1	1	1	1	CCDC83	coiled-coil domain containing 83
hsa-miR-520g	0	0	1	1	1	1	IYD	iodotyrosine deiodinase
hsa-miR-520g	1	0	1	1	1	1	PBRM1	polybromo 1
hsa-miR-520g	1	0	1	1	1	1	LAMA3	laminin, alpha 3
hsa-miR-520g	0	0	1	0	0	0	TAG	tumor antigen gene
hsa-miR-520g	1	0	1	1	1	1	TAB3	TGF-beta activated kinase 1/MAP3K7 binding protein 3
hsa-miR-520g	1	0	1	1	1	1	CAMTA1	calmodulin binding transcription activator 1
hsa-miR-520g	0	0	1	1	1	1	GCOM1	GRINL1A complex locus 1
hsa-miR-520g	0	0	1	0	1	1	ANKS1B	ankyrin repeat and sterile alpha motif domain containing 1B
hsa-miR-520g	0	0	1	1	0	0	LRRC39	leucine rich repeat containing 39
hsa-miR-520g	0	0	1	1	1	1	SLC22A15	solute carrier family 22, member 15
hsa-miR-520g	1	0	1	1	1	1	LRRTM3	leucine rich repeat transmembrane neuronal 3
hsa-miR-520g	1	0	1	1	1	1	NLGN4X	neuroligin 4, X-linked
hsa-miR-520g	0	0	1	1	0	0	GLIPR1L1	GLI pathogenesis-related 1 like 1
hsa-miR-520g	1	0	1	0	1	1	ANKRD28	ankyrin repeat domain 28
hsa-miR-520g	1	0	1	1	1	1	GLRA2	glycine receptor, alpha 2
hsa-miR-520g	1	0	1	1	1	1	SP3	Sp3 transcription factor
hsa-miR-520g	1	0	1	0	1	1	NHS	Nance-Horan syndrome (congenital cataracts and dental anomalies)
hsa-miR-520g	0	0	1	1	1	1	POTEG	POTE ankyrin domain family, member G
hsa-miR-520g	0	0	1	1	0	0	SH2D6	SH2 domain containing 6
hsa-miR-520g	1	0	1	1	1	1	ANKRD11	ankyrin repeat domain 11
hsa-miR-520g	0	0	1	1	0	0	ART3	ADP-ribosyltransferase 3
hsa-miR-520g	0	0	1	1	1	1	FCRLB	Fc receptor-like B
hsa-miR-520g	1	0	1	1	1	1	RIF1	RAP1 interacting factor homolog (yeast)
hsa-miR-520g	0	0	1	1	1	1	RHD	Rh blood group, D antigen
hsa-miR-520g	0	0	1	1	1	1	KCNJ13	potassium inwardly-rectifying channel, subfamily J, member 13
hsa-miR-520g	0	0	1	1	0	0	NBPF8	neuroblastoma breakpoint family, member 8
hsa-miR-520g	1	0	1	1	1	1	AMOT	angiomotin
hsa-miR-520g	0	0	1	0	1	1	MIS12	MIS12, MIND kinetochore complex component, homolog (S. pombe)
hsa-miR-520g	0	0	1	1	0	0	TMEM116	transmembrane protein 116
hsa-miR-520g	1	0	1	0	1	1	FAM46A	family with sequence similarity 46, member A
hsa-miR-520g	1	0	1	1	1	1	CPSF6	cleavage and polyadenylation specific factor 6, 68kDa
hsa-miR-520g	0	0	1	1	1	1	SNX11	sorting nexin 11
hsa-miR-520g	0	0	1	1	0	0	DGUOK	deoxyguanosine kinase
hsa-miR-520g	1	0	1	1	1	1	PAFAH2	platelet-activating factor acetylhydrolase 2, 40kDa
hsa-miR-520g	0	0	1	1	0	0	ANXA5	annexin A5
hsa-miR-520g	0	0	1	1	1	1	TFG	TRK-fused gene
hsa-miR-520g	1	0	1	1	1	1	ANKRD10	ankyrin repeat domain 10
hsa-miR-520g	0	0	1	1	1	1	PAFAH1B2	platelet-activating factor acetylhydrolase 1b, catalytic subunit 2 (30kDa)
hsa-miR-520g	1	0	1	1	1	1	TMUB2	transmembrane and ubiquitin-like domain containing 2
hsa-miR-520g	1	0	1	1	1	1	MYCN	v-myc myelocytomatosis viral related oncogene, neuroblastoma derived (avian)
hsa-miR-520g	1	0	1	0	1	1	DPYSL5	dihydropyrimidinase-like 5
hsa-miR-520g	1	0	1	1	1	1	TSPAN14	tetraspanin 14
hsa-miR-520g	1	0	1	0	1	1	DCAF10	DDB1 and CUL4 associated factor 10
hsa-miR-520g	1	0	1	1	0	0	DHDDS	dehydrodolichyl diphosphate synthase
hsa-miR-520g	1	0	1	0	1	1	CGGBP1	CGG triplet repeat binding protein 1
hsa-miR-520g	0	0	1	1	0	0	PNLIPRP1	pancreatic lipase-related protein 1
hsa-miR-520g	0	0	1	1	1	1	NUPL2	nucleoporin like 2
hsa-miR-520g	0	0	1	1	0	0	WDR74	WD repeat domain 74
hsa-miR-520g	1	0	1	1	1	1	TRIM39	tripartite motif containing 39
hsa-miR-520g	1	0	1	0	1	1	DDX3X	DEAD (Asp-Glu-Ala-Asp) box polypeptide 3, X-linked
hsa-miR-520g	1	0	1	0	0	0	YLPM1	YLP motif containing 1
hsa-miR-520g	0	0	1	1	1	1	DPYD	dihydropyrimidine dehydrogenase
hsa-miR-520g	0	0	1	1	0	0	PRR11	proline rich 11
hsa-miR-520g	1	0	1	1	1	1	SHOX2	short stature homeobox 2
hsa-miR-520g	0	0	1	1	0	0	C11orf74	chromosome 11 open reading frame 74
hsa-miR-520g	1	0	1	1	1	1	ATP6AP2	ATPase, H+ transporting, lysosomal accessory protein 2
hsa-miR-520g	1	0	1	1	0	0	FA2H	fatty acid 2-hydroxylase
hsa-miR-520g	0	0	1	1	0	0	TCN2	transcobalamin II
hsa-miR-520g	0	0	1	0	0	0	GRAMD1B	GRAM domain containing 1B
hsa-miR-520g	0	0	1	0	0	0	TPTEP1	transmembrane phosphatase with tensin homology pseudogene 1
hsa-miR-520g	1	0	1	0	1	1	GUCY1A3	guanylate cyclase 1, soluble, alpha 3
hsa-miR-520g	1	0	1	1	1	1	GDA	guanine deaminase
hsa-miR-520g	1	0	1	1	1	1	GDAP2	ganglioside induced differentiation associated protein 2
hsa-miR-520g	1	0	1	1	1	1	RBM7	RNA binding motif protein 7
hsa-miR-520g	0	0	1	1	0	0	HAVCR1	hepatitis A virus cellular receptor 1
hsa-miR-520g	0	0	1	1	1	1	PCNP	PEST proteolytic signal containing nuclear protein
hsa-miR-520g	1	0	1	1	1	1	ETF1	eukaryotic translation termination factor 1
hsa-miR-520g	0	0	1	1	0	0	MCCC2	methylcrotonoyl-CoA carboxylase 2 (beta)
hsa-miR-520g	1	0	1	1	1	1	PAPOLA	poly(A) polymerase alpha
hsa-miR-520g	0	0	1	0	0	0	KLHL15	kelch-like 15 (Drosophila)
hsa-miR-520g	1	0	1	1	1	1	ZBTB38	zinc finger and BTB domain containing 38
hsa-miR-520g	0	0	1	0	0	0	NUDT16P1	nudix (nucleoside diphosphate linked moiety X)-type motif 16 pseudogene 1
hsa-miR-520g	1	0	1	1	1	1	ZNF512	zinc finger protein 512
hsa-miR-520g	0	0	1	1	1	1	C1QTNF3	C1q and tumor necrosis factor related protein 3
hsa-miR-520g	1	0	1	1	1	1	FAM176A	family with sequence similarity 176, member A
hsa-miR-520g	0	0	1	1	1	1	CMAS	cytidine monophosphate N-acetylneuraminic acid synthetase
hsa-miR-520g	1	0	1	1	1	1	FAM199X	family with sequence similarity 199, X-linked
hsa-miR-520g	0	0	1	1	1	1	MBIP	MAP3K12 binding inhibitory protein 1
hsa-miR-520g	1	0	1	0	1	1	CYBRD1	cytochrome b reductase 1
hsa-miR-520g	1	0	1	1	0	0	USP53	ubiquitin specific peptidase 53
hsa-miR-520g	0	0	1	1	1	1	CSDE1	cold shock domain containing E1, RNA-binding
hsa-miR-520g	0	0	1	1	1	1	RDH11	retinol dehydrogenase 11 (all-trans/9-cis/11-cis)
hsa-miR-520g	0	0	1	0	0	0	FAM200B	family with sequence similarity 200, member B
hsa-miR-520g	1	0	1	1	1	1	ARHGEF9	Cdc42 guanine nucleotide exchange factor (GEF) 9
hsa-miR-520g	1	0	1	1	1	1	SUZ12	suppressor of zeste 12 homolog (Drosophila)
hsa-miR-520g	0	0	1	1	1	1	SRP19	signal recognition particle 19kDa
hsa-miR-520g	0	0	1	0	0	0	WDFY3-AS2	WDFY3 antisense RNA 2
hsa-miR-520g	0	0	1	0	1	1	CD99P1	CD99 molecule pseudogene 1
hsa-miR-520g	1	0	1	1	1	1	SPTLC3	serine palmitoyltransferase, long chain base subunit 3
hsa-miR-520g	0	0	1	1	1	1	TMEM40	transmembrane protein 40
hsa-miR-520g	1	0	1	0	1	1	ARHGAP26	Rho GTPase activating protein 26
hsa-miR-520g	0	0	1	1	0	0	C6orf130	chromosome 6 open reading frame 130
hsa-miR-520g	0	0	1	0	0	0	FAM92A1P2	family with sequence similarity 92, member A3
hsa-miR-520g	0	0	1	1	0	0	LYSMD2	LysM, putative peptidoglycan-binding, domain containing 2
hsa-miR-520g	1	0	1	1	0	0	TET3	tet methylcytosine dioxygenase 3
hsa-miR-520g	0	0	1	1	1	1	CDC42SE2	CDC42 small effector 2
hsa-miR-520g	1	0	1	1	1	1	SPOCK2	sparc/osteonectin, cwcv and kazal-like domains proteoglycan (testican) 2
hsa-miR-520g	1	0	1	1	1	1	RACGAP1	Rac GTPase activating protein 1
hsa-miR-520g	0	0	1	0	0	0	SNX29P2	sorting nexin 29 pseudogene 2
hsa-miR-520g	0	0	1	0	0	0	FLJ35390	uncharacterized LOC255031
hsa-miR-520g	1	0	1	1	1	1	ASPH	aspartate beta-hydroxylase
hsa-miR-520g	0	0	1	1	1	1	TLR4	toll-like receptor 4
hsa-miR-520g	1	0	1	1	1	1	SPG20	spastic paraplegia 20 (Troyer syndrome)
hsa-miR-520g	1	0	1	1	1	1	EPHA4	EPH receptor A4
hsa-miR-520g	1	0	1	0	1	1	CERS3	ceramide synthase 3
hsa-miR-520g	1	0	1	1	1	1	RSPO2	R-spondin 2
hsa-miR-520g	0	0	1	1	1	1	SELP	selectin P (granule membrane protein 140kDa, antigen CD62)
hsa-miR-520g	0	0	1	1	1	1	ZNF589	zinc finger protein 589
hsa-miR-520g	1	0	1	1	1	1	UHRF2	ubiquitin-like with PHD and ring finger domains 2, E3 ubiquitin protein ligase
hsa-miR-520g	0	0	1	0	1	1	PAPOLG	poly(A) polymerase gamma
hsa-miR-520g	0	0	1	0	0	0	C3orf55	chromosome 3 open reading frame 55
hsa-miR-520g	0	0	1	1	1	1	PDSS2	prenyl (decaprenyl) diphosphate synthase, subunit 2
hsa-miR-520g	0	0	1	0	0	0	LOC100130950	uncharacterized LOC100130950
hsa-miR-520g	1	0	1	0	1	1	PSMF1	proteasome (prosome, macropain) inhibitor subunit 1 (PI31)
hsa-miR-520g	0	0	1	1	0	0	SWI5	SWI5 recombination repair homolog (yeast)
hsa-miR-520g	0	0	1	1	1	1	PIP5K1B	phosphatidylinositol-4-phosphate 5-kinase, type I, beta
hsa-miR-520g	1	0	1	1	1	1	ELAVL2	ELAV (embryonic lethal, abnormal vision, Drosophila)-like 2 (Hu antigen B)
hsa-miR-520g	0	0	1	1	0	0	AHSA2	AHA1, activator of heat shock 90kDa protein ATPase homolog 2 (yeast)
hsa-miR-520g	1	0	1	1	1	1	MUM1L1	melanoma associated antigen (mutated) 1-like 1
hsa-miR-520g	0	0	1	0	1	1	FLJ25328	uncharacterized LOC148231
hsa-miR-520g	0	0	1	1	0	0	KIAA1324	KIAA1324
hsa-miR-520g	1	0	1	1	1	1	BRD3	bromodomain containing 3
hsa-miR-520g	1	0	1	1	1	1	PMAIP1	phorbol-12-myristate-13-acetate-induced protein 1
hsa-miR-520g	1	0	1	1	1	1	DCLK2	doublecortin-like kinase 2
hsa-miR-520g	1	0	1	1	1	1	RAB5B	RAB5B, member RAS oncogene family
hsa-miR-520g	0	0	1	1	1	1	SNAP47	synaptosomal-associated protein, 47kDa
hsa-miR-520g	1	0	1	1	1	1	RHOBTB1	Rho-related BTB domain containing 1
hsa-miR-520g	0	0	1	0	1	1	TTC23L	tetratricopeptide repeat domain 23-like
hsa-miR-520g	0	0	1	1	0	0	WASIR2	WASH and IL9R antisense RNA 2
hsa-miR-520g	1	0	1	1	1	1	FAM13A	family with sequence similarity 13, member A
hsa-miR-520g	0	0	1	0	0	0	BCAS3	breast carcinoma amplified sequence 3
hsa-miR-520g	1	0	1	1	1	1	HMGCR	3-hydroxy-3-methylglutaryl-CoA reductase
hsa-miR-520g	1	0	1	1	1	1	PCDHA5	protocadherin alpha 5
hsa-miR-520g	1	0	1	1	1	1	ATF7IP2	activating transcription factor 7 interacting protein 2
hsa-miR-520g	1	0	1	1	1	1	CUL1	cullin 1
hsa-miR-520g	1	0	1	1	1	1	LPGAT1	lysophosphatidylglycerol acyltransferase 1
hsa-miR-520g	1	0	1	1	1	1	CLK4	CDC-like kinase 4
hsa-miR-520g	0	0	1	1	1	1	EDA2R	ectodysplasin A2 receptor
hsa-miR-520g	0	0	1	0	1	1	KSR1	kinase suppressor of ras 1
hsa-miR-520g	0	0	1	1	1	1	APBB1IP	amyloid beta (A4) precursor protein-binding, family B, member 1 interacting protein
hsa-miR-520g	1	0	1	1	1	1	CTDSPL2	CTD (carboxy-terminal domain, RNA polymerase II, polypeptide A) small phosphatase like 2
hsa-miR-520g	0	0	1	0	0	0	LOC339862	uncharacterized LOC339862
hsa-miR-520g	0	0	1	0	0	0	C12orf77	chromosome 12 open reading frame 77
hsa-miR-520g	0	0	1	0	0	0	HOXA-AS2	HOXA cluster antisense RNA 2
hsa-miR-520g	0	0	1	1	0	0	VPS8	vacuolar protein sorting 8 homolog (S. cerevisiae)
hsa-miR-520g	1	0	1	1	1	1	ZNF618	zinc finger protein 618
hsa-miR-520g	0	0	1	1	0	0	IQUB	IQ motif and ubiquitin domain containing
hsa-miR-520g	0	0	1	0	0	0	FAM201A	family with sequence similarity 201, member A
hsa-miR-520g	0	0	1	0	1	1	C9orf57	chromosome 9 open reading frame 57
hsa-miR-520g	0	0	1	0	0	0	LINC00642	long intergenic non-protein coding RNA 642
hsa-miR-520g	1	0	1	1	1	1	LHX8	LIM homeobox 8
hsa-miR-520g	1	0	1	1	1	1	HECTD2	HECT domain containing E3 ubiquitin protein ligase 2
hsa-miR-520g	1	0	1	1	1	1	MEIS1	Meis homeobox 1
hsa-miR-520g	1	0	1	1	1	1	ACVR1	activin A receptor, type I
hsa-miR-520g	1	0	1	0	1	1	CPEB4	cytoplasmic polyadenylation element binding protein 4
hsa-miR-520g	1	0	1	1	1	1	BNC2	basonuclin 2
hsa-miR-520g	0	0	1	0	0	0	CYP4F35P	cytochrome P450, family 4, subfamily F, polypeptide 35, pseudogene
hsa-miR-520g	0	0	1	1	1	1	FAM71F1	family with sequence similarity 71, member F1
hsa-miR-520g	0	0	1	0	0	0	LOC286184	uncharacterized LOC286184
hsa-miR-520g	0	0	1	0	0	0	CRYBB2P1	crystallin, beta B2 pseudogene 1
hsa-miR-520g	1	0	1	0	1	1	MPP5	membrane protein, palmitoylated 5 (MAGUK p55 subfamily member 5)
hsa-miR-520g	1	0	1	0	1	1	KIAA0930	KIAA0930
hsa-miR-520g	1	0	1	1	1	1	GALNT1	UDP-N-acetyl-alpha-D-galactosamine:polypeptide N-acetylgalactosaminyltransferase 1 (GalNAc-T1)
hsa-miR-520g	0	0	1	0	0	0	FLJ36000	uncharacterized FLJ36000
hsa-miR-520g	1	0	1	1	1	1	FGFR2	fibroblast growth factor receptor 2
hsa-miR-520g	1	0	1	1	1	1	NFYA	nuclear transcription factor Y, alpha
hsa-miR-520g	0	0	1	0	0	0	LINC00326	long intergenic non-protein coding RNA 326
hsa-miR-520g	1	0	1	1	1	1	MARCKS	myristoylated alanine-rich protein kinase C substrate
hsa-miR-520g	0	0	1	1	1	1	C11orf88	chromosome 11 open reading frame 88
hsa-miR-520g	0	0	1	1	1	1	SLTM	SAFB-like, transcription modulator
hsa-miR-520g	0	0	1	1	1	1	SLC14A1	solute carrier family 14 (urea transporter), member 1 (Kidd blood group)
hsa-miR-520g	0	0	1	0	1	1	LINC00634	long intergenic non-protein coding RNA 634
hsa-miR-520g	1	0	1	1	1	1	DACH2	dachshund homolog 2 (Drosophila)
hsa-miR-520g	1	0	1	1	1	1	SLITRK3	SLIT and NTRK-like family, member 3
hsa-miR-520g	1	0	1	1	1	1	INTS6	integrator complex subunit 6
hsa-miR-520g	1	0	1	1	1	1	UNC13C	unc-13 homolog C (C. elegans)
hsa-miR-520g	0	0	1	1	1	1	PCMTD2	protein-L-isoaspartate (D-aspartate) O-methyltransferase domain containing 2
hsa-miR-520g	1	0	1	0	1	1	KIAA0430	KIAA0430
hsa-miR-520g	0	0	1	0	1	1	FAM13B	family with sequence similarity 13, member B
hsa-miR-520g	0	0	1	0	0	0	LOC154092	uncharacterized LOC154092
hsa-miR-520g	0	0	1	1	0	0	FAM159A	family with sequence similarity 159, member A
hsa-miR-520g	1	0	1	0	1	1	DCUN1D4	DCN1, defective in cullin neddylation 1, domain containing 4 (S. cerevisiae)
hsa-miR-520g	1	0	1	0	1	1	TNFAIP3	tumor necrosis factor, alpha-induced protein 3
hsa-miR-520g	1	0	1	1	1	1	ROCK1	Rho-associated, coiled-coil containing protein kinase 1
hsa-miR-520g	0	0	1	1	1	1	GOLGA6L9	golgin A6 family-like 9
hsa-miR-520g	1	0	1	1	1	1	CLOCK	clock homolog (mouse)
hsa-miR-520g	0	0	1	1	1	1	MTHFD2L	methylenetetrahydrofolate dehydrogenase (NADP+ dependent) 2-like
hsa-miR-520g	0	0	1	1	1	1	C4orf32	chromosome 4 open reading frame 32
hsa-miR-520g	0	0	1	1	1	1	STARD4	StAR-related lipid transfer (START) domain containing 4
hsa-miR-520g	0	0	1	0	1	1	C12orf74	chromosome 12 open reading frame 74
hsa-miR-520g	0	0	1	1	1	1	STRADA	STE20-related kinase adaptor alpha
hsa-miR-520g	1	0	1	1	1	1	PLXND1	plexin D1
hsa-miR-520g	1	0	1	1	0	0	WNK1	WNK lysine deficient protein kinase 1
hsa-miR-520g	1	0	1	1	1	1	RNF145	ring finger protein 145
hsa-miR-520g	1	0	1	0	1	1	PSD3	pleckstrin and Sec7 domain containing 3
hsa-miR-520g	0	0	1	0	0	0	LOC283914	uncharacterized LOC283914
hsa-miR-520g	1	0	1	1	1	1	ZFAND4	zinc finger, AN1-type domain 4
hsa-miR-520g	1	0	1	1	1	1	PCYT1B	phosphate cytidylyltransferase 1, choline, beta
hsa-miR-520g	1	0	1	1	1	1	SENP1	SUMO1/sentrin specific peptidase 1
hsa-miR-520g	1	0	1	1	1	1	SF3B1	splicing factor 3b, subunit 1, 155kDa
hsa-miR-520g	1	0	1	0	1	1	LYPD6	LY6/PLAUR domain containing 6
hsa-miR-520g	0	0	1	0	0	0	INHBA-AS1	INHBA antisense RNA 1
hsa-miR-520g	0	0	1	0	0	0	LOC348120	uncharacterized LOC348120
hsa-miR-520g	0	0	1	0	0	0	DPY19L2P4	dpy-19-like 2 pseudogene 4 (C. elegans)
hsa-miR-520g	0	0	1	0	1	1	LOC338758	uncharacterized LOC338758
hsa-miR-520g	1	0	1	1	1	1	BRD1	bromodomain containing 1
hsa-miR-520g	1	0	1	1	1	1	KIF2A	kinesin heavy chain member 2A
hsa-miR-520g	1	0	1	0	1	1	ZNF800	zinc finger protein 800
hsa-miR-520g	0	0	1	1	0	0	FKBP11	FK506 binding protein 11, 19 kDa
hsa-miR-520g	1	0	1	1	1	1	PTPRG	protein tyrosine phosphatase, receptor type, G
hsa-miR-520g	1	0	1	1	1	1	CLVS1	clavesin 1
hsa-miR-520g	1	0	1	0	1	1	ARHGAP5	Rho GTPase activating protein 5
hsa-miR-520g	1	0	1	1	1	1	ANKRD46	ankyrin repeat domain 46
hsa-miR-520g	0	0	1	0	0	0	AURKAPS1	aurora kinase A pseudogene 1
hsa-miR-520g	1	0	1	1	1	1	FNDC3A	fibronectin type III domain containing 3A
hsa-miR-520g	0	0	1	0	0	0	BMS1P6	BMS1 pseudogene 6
hsa-miR-520g	0	0	1	1	1	1	LINC00086	long intergenic non-protein coding RNA 86
hsa-miR-520g	0	0	1	1	0	0	GPRASP2	G protein-coupled receptor associated sorting protein 2
hsa-miR-520g	1	0	1	1	1	1	ZFP91	zinc finger protein 91 homolog (mouse)
hsa-miR-520g	0	0	1	1	1	1	RHOT1	ras homolog family member T1
hsa-miR-520g	1	0	1	1	1	1	BZW2	basic leucine zipper and W2 domains 2
hsa-miR-520g	1	0	1	1	1	1	SCUBE3	signal peptide, CUB domain, EGF-like 3
hsa-miR-520g	1	0	1	0	1	1	C14orf43	chromosome 14 open reading frame 43
hsa-miR-520g	0	0	1	1	0	0	HIST1H3E	histone cluster 1, H3e
hsa-miR-520g	0	0	1	1	1	1	LRRFIP2	leucine rich repeat (in FLII) interacting protein 2
hsa-miR-520g	0	0	1	1	1	1	ZNF254	zinc finger protein 254
hsa-miR-520g	1	0	1	1	1	1	KLHL28	kelch-like 28 (Drosophila)
hsa-miR-520g	0	0	1	1	1	1	ZNF365	zinc finger protein 365
hsa-miR-520g	1	0	1	0	1	1	C7orf41	chromosome 7 open reading frame 41
hsa-miR-520g	1	0	1	1	1	1	SCOC	short coiled-coil protein
hsa-miR-520g	0	0	1	1	0	0	AGAP11	ankyrin repeat and GTPase domain Arf GTPase activating protein 11
hsa-miR-520g	0	0	1	1	0	0	PDSS1	prenyl (decaprenyl) diphosphate synthase, subunit 1
hsa-miR-520g	1	0	1	1	1	1	ANXA4	annexin A4
hsa-miR-520g	1	0	1	1	1	1	NIPBL	Nipped-B homolog (Drosophila)
hsa-miR-520g	0	0	1	1	1	1	STAG1	stromal antigen 1
hsa-miR-520g	1	0	1	1	1	1	ADCY6	adenylate cyclase 6
hsa-miR-520g	0	0	1	1	1	1	ZNF33B	zinc finger protein 33B
hsa-miR-520g	1	0	1	1	1	1	EIF4G2	eukaryotic translation initiation factor 4 gamma, 2
hsa-miR-520g	1	0	1	1	1	1	VTCN1	V-set domain containing T cell activation inhibitor 1
hsa-miR-520g	0	0	1	1	1	1	ATP2A2	ATPase, Ca++ transporting, cardiac muscle, slow twitch 2
hsa-miR-520g	1	0	1	1	1	1	ZNF449	zinc finger protein 449
hsa-miR-520g	0	0	1	1	0	0	PLAC1	placenta-specific 1
hsa-miR-520g	1	0	1	1	1	1	GRHL1	grainyhead-like 1 (Drosophila)
hsa-miR-520g	0	0	1	1	1	1	KCTD18	potassium channel tetramerisation domain containing 18
hsa-miR-520g	1	0	1	0	1	1	MAGIX	MAGI family member, X-linked
hsa-miR-520g	0	0	1	0	0	0	ZNF66P	zinc finger protein 66, pseudogene
hsa-miR-520g	1	0	1	1	1	1	SLC26A7	solute carrier family 26, member 7
hsa-miR-520g	1	0	1	1	1	1	MAPKAPK3	mitogen-activated protein kinase-activated protein kinase 3
hsa-miR-520g	1	0	1	1	1	1	MYEF2	myelin expression factor 2
hsa-miR-520g	1	0	1	1	1	1	LINGO1	leucine rich repeat and Ig domain containing 1
hsa-miR-520g	0	0	1	0	0	0	PTGER4P2	prostaglandin E receptor 4 (subtype EP4) pseudogene 2
hsa-miR-520g	1	0	1	1	1	1	ANLN	anillin, actin binding protein
hsa-miR-520g	0	0	1	1	1	1	MSTO1	misato homolog 1 (Drosophila)
hsa-miR-520g	1	0	1	1	1	1	EEF1A1	eukaryotic translation elongation factor 1 alpha 1
hsa-miR-520g	0	0	1	0	0	0	AQP7P2	aquaporin 7 pseudogene 2
hsa-miR-520g	1	0	1	0	1	1	HMGB3	high mobility group box 3
hsa-miR-520g	0	0	1	1	1	1	SLC11A1	solute carrier family 11 (proton-coupled divalent metal ion transporters), member 1
hsa-miR-520g	1	0	1	0	1	1	TGFBR1	transforming growth factor, beta receptor 1
hsa-miR-520g	1	0	1	1	1	1	USP47	ubiquitin specific peptidase 47
hsa-miR-520g	0	0	1	0	0	0	JPX	JPX transcript, XIST activator (non-protein coding)
hsa-miR-520g	0	0	1	1	1	1	CTXN3	cortexin 3
hsa-miR-520g	1	0	1	1	1	1	AGGF1	angiogenic factor with G patch and FHA domains 1
hsa-miR-520g	1	0	1	1	1	1	WBP1L	WW domain binding protein 1-like
hsa-miR-520g	0	0	1	0	1	1	SH3RF2	SH3 domain containing ring finger 2
hsa-miR-520g	0	0	1	1	0	0	EBNA1BP2	EBNA1 binding protein 2
hsa-miR-520g	1	0	1	1	1	1	OPCML	opioid binding protein/cell adhesion molecule-like
hsa-miR-520g	0	0	1	0	0	0	ABCC6P1	ATP-binding cassette, sub-family C, member 6 pseudogene 1
hsa-miR-520g	1	0	1	0	1	1	AMMECR1L	AMME chromosomal region gene 1-like
hsa-miR-520g	0	0	1	0	0	0	LINC00537	long intergenic non-protein coding RNA 537
hsa-miR-520g	0	0	1	1	0	0	ZNF703	zinc finger protein 703
hsa-miR-520g	1	0	1	1	0	0	SLC45A4	solute carrier family 45, member 4
hsa-miR-520g	1	0	1	1	1	1	SYNE1	spectrin repeat containing, nuclear envelope 1
hsa-miR-520g	0	0	1	1	0	0	TMX2	thioredoxin-related transmembrane protein 2
hsa-miR-520g	1	0	1	1	1	1	ARHGAP44	Rho GTPase activating protein 44
hsa-miR-520g	0	0	1	1	0	0	HERC2P3	hect domain and RLD 2 pseudogene 3
hsa-miR-520g	1	0	1	1	1	1	STK38	serine/threonine kinase 38
hsa-miR-520g	0	0	1	0	0	0	FRG1B	FSHD region gene 1 family, member B
hsa-miR-520g	0	0	1	1	1	1	NELL1	NEL-like 1 (chicken)
hsa-miR-520g	1	0	1	1	1	1	ST8SIA2	ST8 alpha-N-acetyl-neuraminide alpha-2,8-sialyltransferase 2
hsa-miR-520g	1	0	1	1	1	1	ACVR2B	activin A receptor, type IIB
hsa-miR-520g	0	0	1	1	1	1	KLRF1	killer cell lectin-like receptor subfamily F, member 1
hsa-miR-520g	0	0	1	1	1	1	C7orf10	chromosome 7 open reading frame 10
hsa-miR-520g	0	0	1	0	0	0	FAM106A	family with sequence similarity 106, member A
hsa-miR-520g	0	0	1	1	1	1	CYP3A43	cytochrome P450, family 3, subfamily A, polypeptide 43
hsa-miR-520g	1	0	1	1	1	1	SLC36A2	solute carrier family 36 (proton/amino acid symporter), member 2
hsa-miR-520g	1	0	1	0	1	1	VANGL2	vang-like 2 (van gogh, Drosophila)
hsa-miR-520g	1	0	1	0	1	1	CPEB2	cytoplasmic polyadenylation element binding protein 2
hsa-miR-520g	0	0	1	1	0	0	TMC1	transmembrane channel-like 1
hsa-miR-520g	0	0	1	0	0	0	GUSBP9	glucuronidase, beta pseudogene 9
hsa-miR-520g	0	0	1	1	1	1	CCDC126	coiled-coil domain containing 126
hsa-miR-520g	0	0	1	0	0	0	LOC150577	uncharacterized LOC150577
hsa-miR-520g	1	0	1	1	1	1	PTPRD	protein tyrosine phosphatase, receptor type, D
hsa-miR-520g	0	0	1	1	1	1	TTN	titin
hsa-miR-520g	1	0	1	1	1	1	SUV420H1	suppressor of variegation 4-20 homolog 1 (Drosophila)
hsa-miR-520g	1	0	1	1	1	1	CERS6	ceramide synthase 6
hsa-miR-520g	1	0	1	1	1	1	SP4	Sp4 transcription factor
hsa-miR-520g	1	0	1	0	1	1	BTBD3	BTB (POZ) domain containing 3
hsa-miR-520g	1	0	1	0	1	1	KIF5C	kinesin family member 5C
hsa-miR-520g	1	0	1	1	1	1	HNRNPR	heterogeneous nuclear ribonucleoprotein R
hsa-miR-520g	1	0	1	1	1	1	TET2	tet methylcytosine dioxygenase 2
hsa-miR-520g	1	0	1	0	1	1	MAP3K9	mitogen-activated protein kinase kinase kinase 9
hsa-miR-520g	1	0	1	1	1	1	SLK	STE20-like kinase
hsa-miR-520g	0	0	1	0	0	0	LRRC37A11P	leucine rich repeat containing 37, member A11, pseudogene
hsa-miR-520g	1	0	1	1	1	1	NR3C2	nuclear receptor subfamily 3, group C, member 2
hsa-miR-520g	0	0	1	1	0	0	RNF123	ring finger protein 123
hsa-miR-520g	0	0	1	1	1	1	LRCH1	leucine-rich repeats and calponin homology (CH) domain containing 1
hsa-miR-520g	0	0	1	1	1	1	ZNF621	zinc finger protein 621
hsa-miR-520g	1	0	1	1	1	1	TMEM64	transmembrane protein 64
hsa-miR-520g	0	0	1	1	1	1	C14orf105	chromosome 14 open reading frame 105
hsa-miR-520g	1	0	1	0	1	1	PRDM10	PR domain containing 10
hsa-miR-520g	0	0	1	0	0	0	LINC00661	long intergenic non-protein coding RNA 661
hsa-miR-520g	1	0	1	1	1	1	OTUD4	OTU domain containing 4
hsa-miR-520g	1	0	1	1	1	1	FKBP1A	FK506 binding protein 1A, 12kDa
hsa-miR-520g	1	0	1	0	1	1	CAMSAP2	calmodulin regulated spectrin-associated protein family, member 2
hsa-miR-520g	1	0	1	1	1	1	ANK2	ankyrin 2, neuronal
hsa-miR-520g	0	0	1	1	1	1	RNF14	ring finger protein 14
hsa-miR-520g	1	0	1	1	1	1	CHIC1	cysteine-rich hydrophobic domain 1
hsa-miR-520g	0	0	1	1	1	1	SLC22A23	solute carrier family 22, member 23
hsa-miR-520g	0	0	1	1	1	1	ABCA8	ATP-binding cassette, sub-family A (ABC1), member 8
hsa-miR-520g	0	0	1	0	0	0	FAM225B	family with sequence similarity 225, member B (non-protein coding)
hsa-miR-520g	0	0	1	1	1	1	MAPK8	mitogen-activated protein kinase 8
hsa-miR-520g	0	0	1	0	0	0	SMA4	glucuronidase, beta pseudogene
hsa-miR-520g	0	0	1	1	0	0	TCHH	trichohyalin
hsa-miR-520g	1	0	1	1	1	1	TMEM218	transmembrane protein 218
hsa-miR-520g	0	0	1	1	0	0	CCDC144A	coiled-coil domain containing 144A
hsa-miR-520g	0	0	1	1	1	1	PRKAR2A	protein kinase, cAMP-dependent, regulatory, type II, alpha
hsa-miR-520g	1	0	1	0	1	1	PDE4D	phosphodiesterase 4D, cAMP-specific
hsa-miR-520g	0	0	1	0	0	0	FUT8-AS1	FUT8 antisense RNA 1
hsa-miR-520g	1	0	1	1	1	1	EXD2	exonuclease 3'-5' domain containing 2
hsa-miR-520g	1	0	1	0	1	1	TTC7B	tetratricopeptide repeat domain 7B
hsa-miR-520g	0	0	1	0	0	0	LOC100133207	uncharacterized LOC100133207
hsa-miR-520g	1	0	1	1	1	1	GOLGA5	golgin A5
hsa-miR-520g	1	0	1	1	1	1	BTBD7	BTB (POZ) domain containing 7
hsa-miR-520g	1	0	1	1	1	1	EIF5	eukaryotic translation initiation factor 5
hsa-miR-520g	0	0	1	0	0	0	ADCY10P1	adenylate cyclase 10 (soluble) pseudogene 1
hsa-miR-520g	1	0	1	0	1	1	SEMA4B	sema domain, immunoglobulin domain (Ig), transmembrane domain (TM) and short cytoplasmic domain, (semaphorin) 4B
hsa-miR-520g	1	0	1	1	1	1	RBL2	retinoblastoma-like 2 (p130)
hsa-miR-520g	1	0	1	1	1	1	MIER3	mesoderm induction early response 1, family member 3
hsa-miR-520g	0	0	1	0	0	0	RGPD4	RANBP2-like and GRIP domain containing 4
hsa-miR-520g	1	0	1	1	1	1	EPHA5	EPH receptor A5
hsa-miR-520g	0	0	1	1	1	1	SLC12A8	solute carrier family 12 (potassium/chloride transporters), member 8
hsa-miR-520g	1	0	1	0	1	1	TNFRSF10B	tumor necrosis factor receptor superfamily, member 10b
hsa-miR-520g	1	0	1	1	1	1	ETS1	v-ets erythroblastosis virus E26 oncogene homolog 1 (avian)
hsa-miR-520g	0	0	1	0	0	0	ZNF542	zinc finger protein 542
hsa-miR-520g	1	0	1	0	1	1	CLASP2	cytoplasmic linker associated protein 2
hsa-miR-520g	1	0	1	1	1	1	SLC35F1	solute carrier family 35, member F1
hsa-miR-520g	1	0	1	1	1	1	TGOLN2	trans-golgi network protein 2
hsa-miR-520g	0	0	1	1	1	1	PSMA2	proteasome (prosome, macropain) subunit, alpha type, 2
hsa-miR-520g	1	0	1	0	1	1	GALNT4	UDP-N-acetyl-alpha-D-galactosamine:polypeptide N-acetylgalactosaminyltransferase 4 (GalNAc-T4)
hsa-miR-520g	0	0	1	1	1	1	PRR14L	proline rich 14-like
hsa-miR-520g	0	0	1	1	1	1	C5orf45	chromosome 5 open reading frame 45
hsa-miR-520g	1	0	1	1	0	0	CECR2	cat eye syndrome chromosome region, candidate 2
hsa-miR-520g	0	0	1	1	1	1	ADH1B	alcohol dehydrogenase 1B (class I), beta polypeptide
hsa-miR-520g	0	0	1	0	1	1	THAP6	THAP domain containing 6
hsa-miR-520g	0	0	1	1	1	1	PPP1R1C	protein phosphatase 1, regulatory (inhibitor) subunit 1C
hsa-miR-520g	1	0	1	1	0	0	KIAA0226	KIAA0226
hsa-miR-520g	1	0	1	1	1	1	TLN2	talin 2
hsa-miR-520g	1	0	1	1	1	1	S100PBP	S100P binding protein
hsa-miR-520g	1	0	1	1	1	1	KLHL2	kelch-like 2, Mayven (Drosophila)
hsa-miR-520g	0	0	1	0	1	1	MYO3B	myosin IIIB
hsa-miR-520g	1	0	1	1	1	1	CYB5B	cytochrome b5 type B (outer mitochondrial membrane)
hsa-miR-520g	0	0	1	0	0	0	OVOS	ovostatin
hsa-miR-520g	1	0	1	1	1	1	CASP7	caspase 7, apoptosis-related cysteine peptidase
hsa-miR-520g	1	0	1	1	1	1	NEDD9	neural precursor cell expressed, developmentally down-regulated 9
hsa-miR-520g	0	0	1	1	1	1	CCNT2	cyclin T2
hsa-miR-520g	1	0	1	1	1	1	PTPN3	protein tyrosine phosphatase, non-receptor type 3
hsa-miR-520g	1	0	1	1	1	1	NFIB	nuclear factor I/B
hsa-miR-520g	1	0	1	1	1	1	ZKSCAN5	zinc finger with KRAB and SCAN domains 5
hsa-miR-520g	1	0	1	1	1	1	PTER	phosphotriesterase related
hsa-miR-520g	0	0	1	1	1	1	ABCD3	ATP-binding cassette, sub-family D (ALD), member 3
hsa-miR-520g	0	0	1	1	1	1	THSD4	thrombospondin, type I, domain containing 4
hsa-miR-520g	0	0	1	1	0	0	ALS2CR11	amyotrophic lateral sclerosis 2 (juvenile) chromosome region, candidate 11
hsa-miR-520g	1	0	1	1	1	1	HIF1A	hypoxia inducible factor 1, alpha subunit (basic helix-loop-helix transcription factor)
hsa-miR-520g	0	0	1	1	1	1	KIAA1328	KIAA1328
hsa-miR-520g	1	0	1	0	1	1	TBL1XR1	transducin (beta)-like 1 X-linked receptor 1
hsa-miR-520g	1	0	1	0	1	1	C1orf21	chromosome 1 open reading frame 21
hsa-miR-520g	0	0	1	0	0	0	ANKRD62	ankyrin repeat domain 62
hsa-miR-520g	1	0	1	1	1	1	SIN3A	SIN3 transcription regulator homolog A (yeast)
hsa-miR-520g	1	0	1	1	1	1	HIC2	hypermethylated in cancer 2
hsa-miR-520g	1	0	1	1	1	1	PGGT1B	protein geranylgeranyltransferase type I, beta subunit
hsa-miR-520g	1	0	1	0	1	1	RNF144A	ring finger protein 144A
hsa-miR-520g	0	0	1	1	1	1	CDC123	cell division cycle 123 homolog (S. cerevisiae)
hsa-miR-520g	0	0	1	1	1	1	CCS	copper chaperone for superoxide dismutase
hsa-miR-520g	0	0	1	1	1	1	APEX1	APEX nuclease (multifunctional DNA repair enzyme) 1
hsa-miR-520g	0	0	1	1	0	0	TBC1D22A	TBC1 domain family, member 22A
hsa-miR-520g	0	0	1	0	0	0	LOC400768	uncharacterized LOC400768
hsa-miR-520g	0	0	1	1	0	0	URM1	ubiquitin related modifier 1
hsa-miR-520g	1	0	1	0	1	1	OLA1	Obg-like ATPase 1
hsa-miR-520g	1	0	1	1	1	1	ERI3	ERI1 exoribonuclease family member 3
hsa-miR-520g	0	0	1	1	1	1	SLCO1C1	solute carrier organic anion transporter family, member 1C1
hsa-miR-520g	0	0	1	1	1	1	IER3	immediate early response 3
hsa-miR-520g	0	0	1	1	1	1	RTCA	RNA 3'-terminal phosphate cyclase
hsa-miR-520g	0	0	1	1	1	1	COPS8	COP9 constitutive photomorphogenic homolog subunit 8 (Arabidopsis)
hsa-miR-520g	0	0	1	0	0	0	CMAHP	cytidine monophospho-N-acetylneuraminic acid hydroxylase, pseudogene
hsa-miR-520g	0	0	1	1	1	1	BTF3	basic transcription factor 3
hsa-miR-520g	0	0	1	1	1	1	PISD	phosphatidylserine decarboxylase
hsa-miR-520g	1	0	1	1	1	1	ANXA2	annexin A2
hsa-miR-520g	0	0	1	0	0	0	PRMT1	protein arginine methyltransferase 1
hsa-miR-520g	0	0	1	1	1	1	ERLEC1	endoplasmic reticulum lectin 1
hsa-miR-520g	1	0	1	1	1	1	FGF11	fibroblast growth factor 11
hsa-miR-520g	1	0	1	0	1	1	BNIP3L	BCL2/adenovirus E1B 19kDa interacting protein 3-like
hsa-miR-520g	0	0	1	1	1	1	FAT1	FAT tumor suppressor homolog 1 (Drosophila)
hsa-miR-520g	1	0	1	1	1	1	SSR1	signal sequence receptor, alpha
hsa-miR-520g	0	0	1	0	0	0	SBDSP1	Shwachman-Bodian-Diamond syndrome pseudogene 1
hsa-miR-520g	0	0	1	1	0	0	RPL7L1	ribosomal protein L7-like 1
hsa-miR-520g	0	0	1	1	0	0	CGRRF1	cell growth regulator with ring finger domain 1
hsa-miR-520g	1	0	1	1	1	1	NTM	neurotrimin
hsa-miR-520g	1	0	1	1	1	1	UPF3A	UPF3 regulator of nonsense transcripts homolog A (yeast)
hsa-miR-520g	0	0	1	1	1	1	CCDC115	coiled-coil domain containing 115
hsa-miR-520g	0	0	1	1	0	0	WISP2	WNT1 inducible signaling pathway protein 2
hsa-miR-520g	0	0	1	1	1	1	GRAP2	GRB2-related adaptor protein 2
hsa-miR-520g	0	0	1	1	1	1	C19orf12	chromosome 19 open reading frame 12
hsa-miR-520g	0	0	1	1	1	1	STON1	stonin 1
hsa-miR-520g	0	0	1	1	0	0	CXorf40A	chromosome X open reading frame 40A
hsa-miR-520g	1	0	1	1	1	1	LYPLA2	lysophospholipase II
hsa-miR-520g	1	0	1	1	0	0	RNF24	ring finger protein 24
hsa-miR-520g	1	0	1	1	1	1	CCDC25	coiled-coil domain containing 25
hsa-miR-520g	1	0	1	0	1	1	KIAA0494	KIAA0494
hsa-miR-520g	1	0	1	1	1	1	MTCH2	mitochondrial carrier 2
hsa-miR-520g	0	0	1	1	0	0	C11orf73	chromosome 11 open reading frame 73
hsa-miR-520g	0	0	1	1	1	1	EIF3J	eukaryotic translation initiation factor 3, subunit J
hsa-miR-520g	1	0	1	1	1	1	TMEM245	transmembrane protein 245
hsa-miR-520g	1	0	1	0	1	1	PLK3	polo-like kinase 3
hsa-miR-520g	1	0	1	1	1	1	WIPF1	WAS/WASL interacting protein family, member 1
hsa-miR-520g	1	0	1	1	1	1	PTBP1	polypyrimidine tract binding protein 1
hsa-miR-520g	0	0	1	1	1	1	TOX4	TOX high mobility group box family member 4
hsa-miR-520g	1	0	1	1	1	1	MMP2	matrix metallopeptidase 2 (gelatinase A, 72kDa gelatinase, 72kDa type IV collagenase)
hsa-miR-520g	1	0	1	1	1	1	KCNIP4	Kv channel interacting protein 4
hsa-miR-520g	1	0	1	1	0	0	FAT4	FAT tumor suppressor homolog 4 (Drosophila)
hsa-miR-520g	0	0	1	1	1	1	PEX19	peroxisomal biogenesis factor 19
hsa-miR-520g	0	0	1	1	0	0	WDR43	WD repeat domain 43
hsa-miR-520g	0	0	1	1	1	1	DEDD	death effector domain containing
hsa-miR-520g	1	0	1	1	1	1	PPP3CB	protein phosphatase 3, catalytic subunit, beta isozyme
hsa-miR-520g	0	0	1	1	0	0	NARF	nuclear prelamin A recognition factor
hsa-miR-520g	1	0	1	1	1	1	HN1	hematological and neurological expressed 1
hsa-miR-520g	1	0	1	1	1	1	FUBP3	far upstream element (FUSE) binding protein 3
hsa-miR-520g	1	0	1	1	1	1	ARL4A	ADP-ribosylation factor-like 4A
hsa-miR-520g	0	0	1	1	1	1	FKBP1B	FK506 binding protein 1B, 12.6 kDa
hsa-miR-520g	1	0	1	1	1	1	SYAP1	synapse associated protein 1
hsa-miR-520g	0	0	1	1	1	1	XBP1	X-box binding protein 1
hsa-miR-520g	1	0	1	1	1	1	BAALC	brain and acute leukemia, cytoplasmic
hsa-miR-520g	0	0	1	1	1	1	LDHA	lactate dehydrogenase A
hsa-miR-520g	1	0	1	1	1	1	PFN2	profilin 2
hsa-miR-520g	1	0	1	1	1	1	NFYB	nuclear transcription factor Y, beta
hsa-miR-520g	0	0	1	1	1	1	RCN2	reticulocalbin 2, EF-hand calcium binding domain
hsa-miR-520g	1	0	1	1	1	1	ARHGEF40	Rho guanine nucleotide exchange factor (GEF) 40
hsa-miR-520g	0	0	1	1	1	1	FAM18B1	family with sequence similarity 18, member B1
hsa-miR-520g	0	0	1	1	0	0	GPC3	glypican 3
hsa-miR-520g	1	0	1	1	1	1	TRAPPC3	trafficking protein particle complex 3
hsa-miR-520g	1	0	1	0	1	1	CD47	CD47 molecule
hsa-miR-520g	1	0	1	1	1	1	RUNX1	runt-related transcription factor 1
hsa-miR-520g	0	0	1	1	1	1	GATSL3	GATS protein-like 3
hsa-miR-520g	1	0	1	1	0	0	RUNDC3A	RUN domain containing 3A
hsa-miR-520g	1	0	1	1	1	1	ATPAF1	ATP synthase mitochondrial F1 complex assembly factor 1
hsa-miR-520g	1	0	1	1	1	1	TIPRL	TIP41, TOR signaling pathway regulator-like (S. cerevisiae)
hsa-miR-520g	1	0	1	1	1	1	MYT1	myelin transcription factor 1
hsa-miR-520g	0	0	1	1	1	1	COPS4	COP9 constitutive photomorphogenic homolog subunit 4 (Arabidopsis)
hsa-miR-520g	0	0	1	1	1	1	COMMD3	COMM domain containing 3
hsa-miR-520g	1	0	1	1	1	1	LGALSL	lectin, galactoside-binding-like
hsa-miR-520g	0	0	1	1	1	1	C10orf2	chromosome 10 open reading frame 2
hsa-miR-520g	1	0	1	1	1	1	RND3	Rho family GTPase 3
hsa-miR-520g	0	0	1	1	1	1	C9orf3	chromosome 9 open reading frame 3
hsa-miR-520g	1	0	1	1	1	1	SLMAP	sarcolemma associated protein
hsa-miR-520g	0	0	1	1	0	0	DUSP11	dual specificity phosphatase 11 (RNA/RNP complex 1-interacting)
hsa-miR-520g	0	0	1	0	0	0	FAM47E	family with sequence similarity 47, member E
hsa-miR-520g	0	0	1	1	1	1	UPRT	uracil phosphoribosyltransferase (FUR1) homolog (S. cerevisiae)
hsa-miR-520g	1	0	1	0	1	1	MEGF10	multiple EGF-like-domains 10
hsa-miR-520g	1	0	1	1	1	1	KIAA2018	KIAA2018
hsa-miR-520g	0	0	1	1	0	0	GSTT2	glutathione S-transferase theta 2
hsa-miR-520g	1	0	1	1	1	1	ZFHX3	zinc finger homeobox 3
hsa-miR-520g	0	0	1	1	1	1	MOBP	myelin-associated oligodendrocyte basic protein
hsa-miR-520g	1	0	1	1	1	1	METAP1	methionyl aminopeptidase 1
hsa-miR-520g	1	0	1	1	1	1	SEC14L1	SEC14-like 1 (S. cerevisiae)
hsa-miR-520g	0	0	1	1	1	1	PARP14	poly (ADP-ribose) polymerase family, member 14
hsa-miR-520g	0	0	1	1	0	0	SPATA20	spermatogenesis associated 20
hsa-miR-520g	1	0	1	1	1	1	MOSPD1	motile sperm domain containing 1
hsa-miR-520g	0	0	1	0	0	0	FAM92A1	family with sequence similarity 92, member A1
hsa-miR-520g	0	0	1	1	1	1	MARVELD2	MARVEL domain containing 2
hsa-miR-520g	0	0	1	0	0	0	POM121L8P	POM121 transmembrane nucleoporin-like 8 pseudogene
hsa-miR-520g	0	0	1	0	0	0	PILRB	paired immunoglobin-like type 2 receptor beta
hsa-miR-520g	0	0	1	1	0	0	CCNA1	cyclin A1
hsa-miR-520g	1	0	1	0	1	1	RBBP5	retinoblastoma binding protein 5
hsa-miR-520g	1	0	1	0	1	1	DCBLD2	discoidin, CUB and LCCL domain containing 2
hsa-miR-520g	1	0	1	1	1	1	TNFAIP1	tumor necrosis factor, alpha-induced protein 1 (endothelial)
hsa-miR-520g	1	0	1	0	1	1	EPDR1	ependymin related protein 1 (zebrafish)
hsa-miR-520g	0	0	1	1	1	1	ALDH3B1	aldehyde dehydrogenase 3 family, member B1
hsa-miR-520g	1	0	1	1	1	1	MLL	myeloid/lymphoid or mixed-lineage leukemia (trithorax homolog, Drosophila)
hsa-miR-520g	1	0	1	1	1	1	ATP2B2	ATPase, Ca++ transporting, plasma membrane 2
hsa-miR-520g	1	0	1	1	1	1	AFF1	AF4/FMR2 family, member 1
hsa-miR-520g	1	0	1	1	1	1	CCNG2	cyclin G2
hsa-miR-520g	1	0	1	0	1	1	BCL2	B-cell CLL/lymphoma 2
hsa-miR-520g	0	0	1	1	1	1	CD3G	CD3g molecule, gamma (CD3-TCR complex)
hsa-miR-520g	1	0	1	1	1	1	COL4A4	collagen, type IV, alpha 4
hsa-miR-520g	1	0	1	1	1	1	DMD	dystrophin
hsa-miR-520g	1	0	1	1	1	1	ESR1	estrogen receptor 1
hsa-miR-520g	1	0	1	1	1	1	F13A1	coagulation factor XIII, A1 polypeptide
hsa-miR-520g	1	0	1	1	1	1	FBN1	fibrillin 1
hsa-miR-520g	0	0	1	0	1	1	MS4A2	membrane-spanning 4-domains, subfamily A, member 2
hsa-miR-520g	1	0	1	1	1	1	GJA1	gap junction protein, alpha 1, 43kDa
hsa-miR-520g	1	0	1	1	1	1	GK	glycerol kinase
hsa-miR-520g	0	0	1	1	1	1	GLDC	glycine dehydrogenase (decarboxylating)
hsa-miR-520g	0	0	1	1	0	0	GP1BA	glycoprotein Ib (platelet), alpha polypeptide
hsa-miR-520g	1	0	1	0	1	1	ITGB3	integrin, beta 3 (platelet glycoprotein IIIa, antigen CD61)
hsa-miR-520g	1	0	1	1	1	1	KCNA1	potassium voltage-gated channel, shaker-related subfamily, member 1 (episodic ataxia with myokymia)
hsa-miR-520g	1	0	1	1	1	1	LEP	leptin
hsa-miR-520g	1	0	1	0	1	1	SGCB	sarcoglycan, beta (43kDa dystrophin-associated glycoprotein)
hsa-miR-520g	0	0	1	1	1	1	NDP	Norrie disease (pseudoglioma)
hsa-miR-520g	1	0	1	1	1	1	OCRL	oculocerebrorenal syndrome of Lowe
hsa-miR-520g	1	0	1	0	1	1	PTEN	phosphatase and tensin homolog
hsa-miR-520g	1	0	1	1	1	1	RB1	retinoblastoma 1
hsa-miR-520g	1	0	1	1	1	1	ATXN1	ataxin 1
hsa-miR-520g	1	0	1	1	1	1	TIMP3	TIMP metallopeptidase inhibitor 3
hsa-miR-520g	0	0	1	1	0	0	APOB	apolipoprotein B (including Ag(x) antigen)
hsa-miR-520g	0	0	1	1	1	1	SLC25A20	solute carrier family 25 (carnitine/acylcarnitine translocase), member 20
hsa-miR-520g	1	1	1	1	1	1	CDKN1A	cyclin-dependent kinase inhibitor 1A (p21, Cip1)
hsa-miR-520g	1	0	1	1	1	1	CHM	choroideremia (Rab escort protein 1)
hsa-miR-520g	1	0	1	0	1	1	CYBB	cytochrome b-245, beta polypeptide
hsa-miR-520g	1	0	1	1	1	1	HLCS	holocarboxylase synthetase (biotin-(proprionyl-CoA-carboxylase (ATP-hydrolysing)) ligase)
hsa-miR-520g	1	0	1	1	1	1	TEK	TEK tyrosine kinase, endothelial
hsa-miR-520g	1	0	1	1	1	1	AMPD3	adenosine monophosphate deaminase 3
hsa-miR-520g	1	0	1	1	1	1	APP	amyloid beta (A4) precursor protein
hsa-miR-520g	1	0	1	1	1	1	AQP2	aquaporin 2 (collecting duct)
hsa-miR-520g	1	0	1	1	1	1	ATRX	alpha thalassemia/mental retardation syndrome X-linked
hsa-miR-520g	1	0	1	1	1	1	MPZ	myelin protein zero
hsa-miR-520g	0	0	1	1	1	1	VHL	von Hippel-Lindau tumor suppressor, E3 ubiquitin protein ligase
hsa-miR-520g	0	0	1	1	1	1	WRN	Werner syndrome, RecQ helicase-like
hsa-miR-520g	1	0	1	1	1	1	DCX	doublecortin
hsa-miR-520g	0	0	1	1	1	1	IL5RA	interleukin 5 receptor, alpha
hsa-miR-520g	1	0	1	1	1	1	IL1A	interleukin 1, alpha
hsa-miR-520g	1	0	1	1	1	1	CXCL12	chemokine (C-X-C motif) ligand 12
hsa-miR-520g	1	0	1	1	1	1	CD44	CD44 molecule (Indian blood group)
hsa-miR-520g	1	0	1	1	1	1	FASLG	Fas ligand (TNF superfamily, member 6)
hsa-miR-520g	1	0	1	1	0	0	ADRA1B	adrenoceptor alpha 1B
hsa-miR-520g	0	0	1	1	0	0	FOLR1	folate receptor 1 (adult)
hsa-miR-520g	1	0	1	0	1	1	GABRA4	gamma-aminobutyric acid (GABA) A receptor, alpha 4
hsa-miR-520g	1	0	1	1	1	1	GABRB3	gamma-aminobutyric acid (GABA) A receptor, beta 3
hsa-miR-520g	1	0	1	1	1	1	GAD1	glutamate decarboxylase 1 (brain, 67kDa)
hsa-miR-520g	0	0	1	1	1	1	GAD2	glutamate decarboxylase 2 (pancreatic islets and brain, 65kDa)
hsa-miR-520g	1	0	1	1	1	1	GRM7	glutamate receptor, metabotropic 7
hsa-miR-520g	0	0	1	1	1	1	IL5	interleukin 5 (colony-stimulating factor, eosinophil)
hsa-miR-520g	1	0	1	1	1	1	PPP3R1	protein phosphatase 3, regulatory subunit B, alpha
hsa-miR-520g	1	0	1	1	1	1	RARB	retinoic acid receptor, beta
hsa-miR-520g	1	0	1	0	1	1	UBE2W	ubiquitin-conjugating enzyme E2W (putative)
hsa-miR-520g	1	0	1	1	1	1	UGP2	UDP-glucose pyrophosphorylase 2
hsa-miR-520g	1	0	1	0	1	1	SPOPL	speckle-type POZ protein-like
hsa-miR-520g	1	0	1	1	1	1	ATP1B1	ATPase, Na+/K+ transporting, beta 1 polypeptide
hsa-miR-520g	0	0	1	0	0	0	C10orf55	chromosome 10 open reading frame 55
hsa-miR-520g	1	0	1	1	1	1	FAM13C	family with sequence similarity 13, member C
hsa-miR-520g	1	0	1	1	1	1	LCLAT1	lysocardiolipin acyltransferase 1
hsa-miR-520g	1	0	1	1	1	1	GATA3	GATA binding protein 3
hsa-miR-520g	1	0	1	1	1	1	C1orf173	chromosome 1 open reading frame 173
hsa-miR-520g	0	0	1	1	1	1	C11orf49	chromosome 11 open reading frame 49
hsa-miR-520g	1	0	1	1	1	1	LEPR	leptin receptor
hsa-miR-520g	1	0	1	1	1	1	HMGXB4	HMG box domain containing 4
hsa-miR-520g	1	0	1	1	1	1	TMEM200B	transmembrane protein 200B
hsa-miR-520g	1	0	1	1	1	1	KLHL31	kelch-like 31 (Drosophila)
hsa-miR-520g	1	0	1	0	1	1	BMF	Bcl2 modifying factor
hsa-miR-520g	0	0	1	1	1	1	CCDC144NL	coiled-coil domain containing 144 family, N-terminal like
hsa-miR-520g	0	0	1	1	1	1	ZCCHC16	zinc finger, CCHC domain containing 16
hsa-miR-520g	1	0	1	0	1	1	LIN28B	lin-28 homolog B (C. elegans)
hsa-miR-520g	0	0	1	1	1	1	DBX2	developing brain homeobox 2
hsa-miR-520g	0	0	1	1	1	1	FRG2	FSHD region gene 2
hsa-miR-520g	0	0	1	0	1	1	FLJ46347	uncharacterized LOC389064
hsa-miR-520g	1	0	1	0	1	1	YPEL2	yippee-like 2 (Drosophila)
hsa-miR-520g	1	0	1	1	1	1	EBF3	early B-cell factor 3
hsa-miR-520g	1	0	1	1	1	1	PLCXD3	phosphatidylinositol-specific phospholipase C, X domain containing 3
hsa-miR-520g	1	0	1	1	1	1	NFKBIZ	nuclear factor of kappa light polypeptide gene enhancer in B-cells inhibitor, zeta
hsa-miR-520g	1	0	1	1	1	1	EDA	ectodysplasin A
hsa-miR-520g	1	0	1	0	1	1	IP6K1	inositol hexakisphosphate kinase 1
hsa-miR-520g	0	0	1	1	1	1	MAPKAP1	mitogen-activated protein kinase associated protein 1
hsa-miR-520g	1	0	1	0	1	1	PDPN	podoplanin
hsa-miR-520g	1	0	1	1	0	0	RPS6KA1	ribosomal protein S6 kinase, 90kDa, polypeptide 1
hsa-miR-520g	0	0	1	1	1	1	APOBEC3F	apolipoprotein B mRNA editing enzyme, catalytic polypeptide-like 3F
hsa-miR-520g	1	0	1	1	0	0	SDC1	syndecan 1
hsa-miR-520g	1	0	1	0	1	1	GOSR1	golgi SNAP receptor complex member 1
hsa-miR-520g	0	0	1	1	1	1	SCP2	sterol carrier protein 2
hsa-miR-520g	1	0	1	1	1	1	IGSF3	immunoglobulin superfamily, member 3
hsa-miR-520g	1	0	1	1	1	1	BRWD1	bromodomain and WD repeat domain containing 1
hsa-miR-520g	1	0	1	1	1	1	EI24	etoposide induced 2.4 mRNA
hsa-miR-520g	0	0	1	1	1	1	TRIM13	tripartite motif containing 13
hsa-miR-520g	0	0	1	0	1	1	C3orf56	chromosome 3 open reading frame 56
hsa-miR-520g	1	0	1	0	1	1	SS18	synovial sarcoma translocation, chromosome 18
hsa-miR-520g	1	0	1	1	1	1	ZDHHC9	zinc finger, DHHC-type containing 9
hsa-miR-520g	0	0	1	1	1	1	CCDC73	coiled-coil domain containing 73
hsa-miR-520g	1	0	1	1	1	1	CTDSPL	CTD (carboxy-terminal domain, RNA polymerase II, polypeptide A) small phosphatase-like
hsa-miR-520g	1	0	1	0	1	1	KIAA2022	KIAA2022
hsa-miR-520g	0	0	1	1	1	1	MXI1	MAX interactor 1
hsa-miR-520g	1	0	1	1	1	1	EML1	echinoderm microtubule associated protein like 1
hsa-miR-520g	0	0	1	1	1	1	FBXO47	F-box protein 47
hsa-miR-520g	1	0	1	1	1	1	CUL4A	cullin 4A
hsa-miR-520g	0	0	1	1	0	0	ARMCX6	armadillo repeat containing, X-linked 6
hsa-miR-520g	1	0	1	0	1	1	PM20D2	peptidase M20 domain containing 2
hsa-miR-520g	0	0	1	1	1	1	SPIN3	spindlin family, member 3
hsa-miR-520g	0	0	1	1	1	1	SERP2	stress-associated endoplasmic reticulum protein family member 2
hsa-miR-520g	0	0	1	1	1	1	MUC21	mucin 21, cell surface associated
hsa-miR-520g	0	0	1	1	1	1	NCMAP	noncompact myelin associated protein
hsa-miR-520g	1	0	1	1	1	1	PCGF6	polycomb group ring finger 6
hsa-miR-520g	1	0	1	0	1	1	CREB5	cAMP responsive element binding protein 5
hsa-miR-520g	0	0	1	0	1	1	C9orf106	chromosome 9 open reading frame 106
hsa-miR-520g	0	0	1	0	1	1	LINC00596	long intergenic non-protein coding RNA 596
hsa-miR-520g	1	0	1	0	1	1	RGMB	RGM domain family, member B
hsa-miR-520g	1	0	1	1	1	1	DISC1	disrupted in schizophrenia 1
hsa-miR-520g	1	0	1	1	1	1	PABPC1L2A	poly(A) binding protein, cytoplasmic 1-like 2A
hsa-miR-520g	0	0	1	1	1	1	BEX5	brain expressed, X-linked 5
hsa-miR-520g	1	0	1	0	1	1	ZKSCAN2	zinc finger with KRAB and SCAN domains 2
hsa-miR-520g	0	0	1	1	1	1	FAM53A	family with sequence similarity 53, member A
hsa-miR-520g	1	0	1	1	1	1	C12orf68	chromosome 12 open reading frame 68
hsa-miR-520g	0	0	1	0	1	1	LINC00268	long intergenic non-protein coding RNA 268
hsa-miR-520g	1	0	1	0	1	1	SYT14L	synaptotagmin XIV-like
hsa-miR-520g	1	0	1	1	1	1	KATNAL1	katanin p60 subunit A-like 1
hsa-miR-520g	1	0	1	1	1	1	KCNMA1	potassium large conductance calcium-activated channel, subfamily M, alpha member 1
hsa-miR-520g	1	0	1	1	1	1	RUNX2	runt-related transcription factor 2
hsa-miR-520g	1	0	1	1	1	1	PHF6	PHD finger protein 6
hsa-miR-520g	1	0	1	1	1	1	MSMO1	methylsterol monooxygenase 1
hsa-miR-520g	1	0	1	0	1	1	GOPC	golgi-associated PDZ and coiled-coil motif containing
hsa-miR-520g	0	0	1	1	1	1	DNTT	deoxynucleotidyltransferase, terminal
hsa-miR-520g	0	0	1	0	1	1	TMEM30B	transmembrane protein 30B
hsa-miR-520g	0	0	1	1	0	0	CXorf61	chromosome X open reading frame 61
hsa-miR-520g	0	0	1	1	1	1	RAB28	RAB28, member RAS oncogene family
hsa-miR-520g	1	0	1	0	1	1	BRCC3	BRCA1/BRCA2-containing complex, subunit 3
hsa-miR-520g	1	0	1	1	1	1	SERBP1	SERPINE1 mRNA binding protein 1
hsa-miR-520g	1	0	1	1	1	1	CANX	calnexin
hsa-miR-520g	1	0	1	1	1	1	KALRN	kalirin, RhoGEF kinase
hsa-miR-520g	1	0	1	0	1	1	TNRC6B	trinucleotide repeat containing 6B
hsa-miR-520g	1	0	1	1	1	1	TGFBR2	transforming growth factor, beta receptor II (70/80kDa)
hsa-miR-520g	1	0	1	1	1	1	FNBP1L	formin binding protein 1-like
hsa-miR-520g	0	0	1	0	0	0	CSN1S1	casein alpha s1
hsa-miR-520g	0	0	1	1	0	0	KPRP	keratinocyte proline-rich protein
hsa-miR-520g	1	0	1	0	1	1	CLLU1	chronic lymphocytic leukemia up-regulated 1
hsa-miR-520g	1	0	1	0	1	1	RAB12	RAB12, member RAS oncogene family
hsa-miR-520g	1	0	1	0	1	1	ANO6	anoctamin 6
hsa-miR-520g	1	0	1	1	1	1	VEGFA	vascular endothelial growth factor A
hsa-miR-520g	1	0	1	1	1	1	FAM108B1	family with sequence similarity 108, member B1
hsa-miR-520g	0	0	1	1	0	0	GRB7	growth factor receptor-bound protein 7
hsa-miR-520g	1	0	1	1	1	1	OPN5	opsin 5
hsa-miR-520g	1	0	1	0	1	1	SAMD5	sterile alpha motif domain containing 5
hsa-miR-520g	1	0	1	1	1	1	CTNS	cystinosin, lysosomal cystine transporter
hsa-miR-520g	1	0	1	1	1	1	RCE1	RCE1 homolog, prenyl protein protease (S. cerevisiae)
hsa-miR-520g	1	0	1	1	1	1	KLF10	Kruppel-like factor 10
hsa-miR-520g	1	0	1	1	1	1	TMPO	thymopoietin
hsa-miR-520g	1	0	1	1	1	1	SAR1B	SAR1 homolog B (S. cerevisiae)
hsa-miR-520g	0	0	1	1	1	1	TRAF5	TNF receptor-associated factor 5
hsa-miR-520g	0	0	1	1	1	1	KCNIP1	Kv channel interacting protein 1
hsa-miR-520g	1	0	1	0	1	1	RYR3	ryanodine receptor 3
hsa-miR-520g	1	0	1	0	1	1	ARL5A	ADP-ribosylation factor-like 5A
hsa-miR-520g	1	0	1	1	1	1	SCD5	stearoyl-CoA desaturase 5
hsa-miR-520g	0	0	1	1	1	1	ATAD3C	ATPase family, AAA domain containing 3C
hsa-miR-520g	1	0	1	1	1	1	ELMO1	engulfment and cell motility 1
hsa-miR-520g	1	0	1	0	1	1	GK5	glycerol kinase 5 (putative)
hsa-miR-520g	1	0	1	1	1	1	KCNC4	potassium voltage-gated channel, Shaw-related subfamily, member 4
hsa-miR-520g	1	0	1	0	1	1	CCNL2	cyclin L2
hsa-miR-520g	0	0	1	1	1	1	MAP9	microtubule-associated protein 9
hsa-miR-520g	1	0	1	0	1	1	USP9X	ubiquitin specific peptidase 9, X-linked
hsa-miR-520g	1	0	1	0	1	1	CREBZF	CREB/ATF bZIP transcription factor
hsa-miR-520g	1	0	1	1	0	0	ANKRD34A	ankyrin repeat domain 34A
hsa-miR-520g	1	0	1	1	1	1	ZNF384	zinc finger protein 384
hsa-miR-520g	1	0	1	1	1	1	CHN2	chimerin (chimaerin) 2
hsa-miR-520g	1	0	1	1	1	1	MLLT4	myeloid/lymphoid or mixed-lineage leukemia (trithorax homolog, Drosophila); translocated to, 4
hsa-miR-520g	0	0	1	1	0	0	MEOX1	mesenchyme homeobox 1
hsa-miR-520g	1	0	1	1	1	1	TCERG1	transcription elongation regulator 1
hsa-miR-520g	1	0	1	0	1	1	FAM133B	family with sequence similarity 133, member B
hsa-miR-520g	0	0	1	0	1	1	OPALIN	oligodendrocytic myelin paranodal and inner loop protein
hsa-miR-520g	1	0	1	1	1	1	SCN2A	sodium channel, voltage-gated, type II, alpha subunit
hsa-miR-520g	0	0	1	0	1	1	SCN3B	sodium channel, voltage-gated, type III, beta subunit
hsa-miR-520g	0	0	1	1	1	1	MTHFD2	methylenetetrahydrofolate dehydrogenase (NADP+ dependent) 2, methenyltetrahydrofolate cyclohydrolase
hsa-miR-520g	0	0	1	1	0	0	RHBDD2	rhomboid domain containing 2
hsa-miR-520g	0	0	1	1	1	1	ZXDC	ZXD family zinc finger C
hsa-miR-520g	1	0	1	1	1	1	HEY1	hairy/enhancer-of-split related with YRPW motif 1
hsa-miR-520g	1	0	1	1	1	1	GDAP1	ganglioside induced differentiation associated protein 1
hsa-miR-520g	1	0	1	1	1	1	CYLD	cylindromatosis (turban tumor syndrome)
hsa-miR-520g	1	0	1	1	1	1	CEP63	centrosomal protein 63kDa
hsa-miR-520g	1	0	1	1	1	1	GLIS3	GLIS family zinc finger 3
hsa-miR-520g	0	0	1	1	1	1	PSPC1	paraspeckle component 1
hsa-miR-520g	1	0	1	1	1	1	ZC2HC1C	zinc finger, C2HC-type containing 1C
hsa-miR-520g	1	0	1	1	1	1	PABPC1L2B	poly(A) binding protein, cytoplasmic 1-like 2B
hsa-miR-520g	1	0	1	1	1	1	C2orf88	chromosome 2 open reading frame 88
hsa-miR-520g	1	0	1	1	1	1	NSL1	NSL1, MIND kinetochore complex component, homolog (S. cerevisiae)
hsa-miR-520g	1	0	1	1	1	1	ERBB4	v-erb-a erythroblastic leukemia viral oncogene homolog 4 (avian)
hsa-miR-520g	1	0	1	0	1	1	SRGAP2	SLIT-ROBO Rho GTPase activating protein 2
hsa-miR-520g	0	0	1	1	1	1	FAM22G	family with sequence similarity 22, member G
hsa-miR-520g	1	0	1	1	1	1	SLA	Src-like-adaptor
hsa-miR-520g	1	0	1	1	1	1	HS6ST2	heparan sulfate 6-O-sulfotransferase 2
hsa-miR-520g	1	0	1	1	1	1	ZNF436	zinc finger protein 436
hsa-miR-520g	1	0	1	1	1	1	PDE11A	phosphodiesterase 11A
hsa-miR-520g	1	0	1	1	1	1	ATG9A	autophagy related 9A
hsa-miR-520g	1	0	1	1	1	1	IRF2BP2	interferon regulatory factor 2 binding protein 2
hsa-miR-520g	1	0	1	0	1	1	UBXN2B	UBX domain protein 2B
hsa-miR-520g	1	0	1	1	1	1	N4BP2L1	NEDD4 binding protein 2-like 1
hsa-miR-520g	1	0	1	1	1	1	ITGA6	integrin, alpha 6
hsa-miR-520g	1	0	1	1	1	1	DMP1	dentin matrix acidic phosphoprotein 1
hsa-miR-520g	1	0	1	1	1	1	LDB3	LIM domain binding 3
hsa-miR-520g	1	0	1	0	1	1	FBXO41	F-box protein 41
hsa-miR-520g	1	0	1	0	1	1	UNC13A	unc-13 homolog A (C. elegans)
hsa-miR-520g	1	0	1	0	1	1	CCDC85A	coiled-coil domain containing 85A
hsa-miR-520g	0	0	1	1	1	1	HSF5	heat shock transcription factor family member 5
hsa-miR-520g	0	0	1	1	1	1	TMEM202	transmembrane protein 202
hsa-miR-520g	1	0	1	1	1	1	ZNF697	zinc finger protein 697
hsa-miR-520g	1	0	1	0	1	1	MEGF9	multiple EGF-like-domains 9
hsa-miR-520g	0	0	1	1	1	1	TBX18	T-box 18
hsa-miR-520g	1	0	1	1	1	1	UNC119B	unc-119 homolog B (C. elegans)
hsa-miR-520g	1	0	1	1	1	1	MGA	MAX gene associated
hsa-miR-520g	0	0	1	1	0	0	GSTT2B	glutathione S-transferase theta 2B (gene/pseudogene)
hsa-miR-520g	1	0	1	1	1	1	REPS2	RALBP1 associated Eps domain containing 2
hsa-miR-520g	1	0	1	0	1	1	SCN3A	sodium channel, voltage-gated, type III, alpha subunit
hsa-miR-520g	0	0	1	0	1	1	ALOX15	arachidonate 15-lipoxygenase
hsa-miR-520g	0	0	1	1	1	1	AMELY	amelogenin, Y-linked
hsa-miR-520g	1	0	1	0	1	1	BMPR2	bone morphogenetic protein receptor, type II (serine/threonine kinase)
hsa-miR-520g	1	0	1	0	1	1	KLF9	Kruppel-like factor 9
hsa-miR-520g	1	0	1	1	1	1	CAMK2D	calcium/calmodulin-dependent protein kinase II delta
hsa-miR-520g	0	0	1	1	0	0	CDC6	cell division cycle 6 homolog (S. cerevisiae)
hsa-miR-520g	1	0	1	0	1	1	CDK6	cyclin-dependent kinase 6
hsa-miR-520g	0	0	1	1	1	1	CHUK	conserved helix-loop-helix ubiquitous kinase
hsa-miR-520g	1	0	1	1	1	1	CNN1	calponin 1, basic, smooth muscle
hsa-miR-520g	1	0	1	0	1	1	CPD	carboxypeptidase D
hsa-miR-520g	1	0	1	1	1	1	CREBL2	cAMP responsive element binding protein-like 2
hsa-miR-520g	1	0	1	1	1	1	MAPK14	mitogen-activated protein kinase 14
hsa-miR-520g	0	0	1	1	1	1	CSTF3	cleavage stimulation factor, 3' pre-RNA, subunit 3, 77kDa
hsa-miR-520g	1	0	1	1	1	1	CTNND2	catenin (cadherin-associated protein), delta 2
hsa-miR-520g	0	0	1	1	1	1	DARS	aspartyl-tRNA synthetase
hsa-miR-520g	0	0	1	1	0	0	DECR1	2,4-dienoyl CoA reductase 1, mitochondrial
hsa-miR-520g	1	0	1	1	1	1	DYRK1A	dual-specificity tyrosine-(Y)-phosphorylation regulated kinase 1A
hsa-miR-520g	1	0	1	1	1	1	S1PR1	sphingosine-1-phosphate receptor 1
hsa-miR-520g	1	0	1	1	1	1	CELSR3	cadherin, EGF LAG seven-pass G-type receptor 3 (flamingo homolog, Drosophila)
hsa-miR-520g	1	0	1	1	1	1	CELSR2	cadherin, EGF LAG seven-pass G-type receptor 2 (flamingo homolog, Drosophila)
hsa-miR-520g	0	0	1	0	1	1	EMP1	epithelial membrane protein 1
hsa-miR-520g	1	0	1	1	1	1	EN2	engrailed homeobox 2
hsa-miR-520g	1	0	1	1	1	1	EREG	epiregulin
hsa-miR-520g	0	0	1	1	0	0	FABP5	fatty acid binding protein 5 (psoriasis-associated)
hsa-miR-520g	1	0	1	1	1	1	FOXF2	forkhead box F2
hsa-miR-520g	1	0	1	1	1	1	FOXC1	forkhead box C1
hsa-miR-520g	0	0	1	1	1	1	FRZB	frizzled-related protein
hsa-miR-520g	1	0	1	0	1	1	GCNT2	glucosaminyl (N-acetyl) transferase 2, I-branching enzyme (I blood group)
hsa-miR-520g	1	0	1	1	1	1	ID4	inhibitor of DNA binding 4, dominant negative helix-loop-helix protein
hsa-miR-520g	1	0	1	1	1	1	ADD2	adducin 2 (beta)
hsa-miR-520g	1	0	1	0	1	1	ARCN1	archain 1
hsa-miR-520g	0	0	1	1	1	1	RHOA	ras homolog family member A
hsa-miR-520g	1	0	1	0	1	1	ATP1B2	ATPase, Na+/K+ transporting, beta 2 polypeptide
hsa-miR-520g	0	0	1	1	0	0	BICD1	bicaudal D homolog 1 (Drosophila)
hsa-miR-520g	0	0	1	1	0	0	BMP6	bone morphogenetic protein 6
hsa-miR-520g	1	0	1	0	1	1	CCND2	cyclin D2
hsa-miR-520g	0	0	1	1	1	1	CD1D	CD1d molecule
hsa-miR-520g	0	0	1	1	0	0	CDKN2D	cyclin-dependent kinase inhibitor 2D (p19, inhibits CDK4)
hsa-miR-520g	0	0	1	1	1	1	CDO1	cysteine dioxygenase, type I
hsa-miR-520g	0	0	1	1	1	1	CKS1B	CDC28 protein kinase regulatory subunit 1B
hsa-miR-520g	1	0	1	1	1	1	CLCN3	chloride channel, voltage-sensitive 3
hsa-miR-520g	1	0	1	1	1	1	COL4A1	collagen, type IV, alpha 1
hsa-miR-520g	1	0	1	0	1	1	COL19A1	collagen, type XIX, alpha 1
hsa-miR-520g	1	0	1	1	1	1	SLC31A1	solute carrier family 31 (copper transporters), member 1
hsa-miR-520g	0	0	1	1	1	1	DLAT	dihydrolipoamide S-acetyltransferase
hsa-miR-520g	1	0	1	1	1	1	DSC3	desmocollin 3
hsa-miR-520g	1	0	1	1	1	1	DUSP6	dual specificity phosphatase 6
hsa-miR-520g	1	0	1	1	1	1	EIF4E	eukaryotic translation initiation factor 4E
hsa-miR-520g	1	0	1	1	1	1	FBN2	fibrillin 2
hsa-miR-520g	1	0	1	0	1	1	FOXO1	forkhead box O1
hsa-miR-520g	1	0	1	1	1	1	GBP1	guanylate binding protein 1, interferon-inducible
hsa-miR-520g	1	0	1	1	1	1	GOLGA1	golgin A1
hsa-miR-520g	1	0	1	1	1	1	GRB2	growth factor receptor-bound protein 2
hsa-miR-520g	1	0	1	1	1	1	HNRNPA2B1	heterogeneous nuclear ribonucleoprotein A2/B1
hsa-miR-520g	1	0	1	1	1	1	ISL1	ISL LIM homeobox 1
hsa-miR-520g	0	0	1	0	1	1	ITGAV	integrin, alpha V
hsa-miR-520g	1	0	1	1	1	1	ITPKB	inositol-trisphosphate 3-kinase B
hsa-miR-520g	1	0	1	1	1	1	ITPR2	inositol 1,4,5-trisphosphate receptor, type 2
hsa-miR-520g	1	0	1	1	1	1	JAG2	jagged 2
hsa-miR-520g	1	0	1	1	1	1	JAK1	Janus kinase 1
hsa-miR-520g	1	0	1	1	1	1	KCNA4	potassium voltage-gated channel, shaker-related subfamily, member 4
hsa-miR-520g	1	0	1	1	1	1	KCNJ10	potassium inwardly-rectifying channel, subfamily J, member 10
hsa-miR-520g	1	0	1	1	1	1	KPNA3	karyopherin alpha 3 (importin alpha 4)
hsa-miR-520g	1	0	1	1	1	1	KPNA4	karyopherin alpha 4 (importin alpha 3)
hsa-miR-520g	0	0	1	1	1	1	KPNA5	karyopherin alpha 5 (importin alpha 6)
hsa-miR-520g	1	0	1	1	1	1	IPO5	importin 5
hsa-miR-520g	0	0	1	1	0	0	LALBA	lactalbumin, alpha-
hsa-miR-520g	1	0	1	0	1	1	LAMC1	laminin, gamma 1 (formerly LAMB2)
hsa-miR-520g	0	0	1	1	0	0	LECT2	leukocyte cell-derived chemotaxin 2
hsa-miR-520g	1	0	1	1	1	1	LIFR	leukemia inhibitory factor receptor alpha
hsa-miR-520g	1	0	1	1	1	1	LIMK1	LIM domain kinase 1
hsa-miR-520g	0	0	1	1	1	1	LOX	lysyl oxidase
hsa-miR-520g	1	0	1	1	1	1	M6PR	mannose-6-phosphate receptor (cation dependent)
hsa-miR-520g	1	0	1	0	1	1	MXD1	MAX dimerization protein 1
hsa-miR-520g	1	0	1	1	1	1	MAX	MYC associated factor X
hsa-miR-520g	1	0	1	1	1	1	ME1	malic enzyme 1, NADP(+)-dependent, cytosolic
hsa-miR-520g	0	0	1	1	1	1	MTAP	methylthioadenosine phosphorylase
hsa-miR-520g	0	0	1	1	1	1	NOV	nephroblastoma overexpressed
hsa-miR-520g	1	0	1	1	1	1	NPAS2	neuronal PAS domain protein 2
hsa-miR-520g	1	0	1	1	1	1	NPTX1	neuronal pentraxin I
hsa-miR-520g	1	0	1	0	1	1	NRAS	neuroblastoma RAS viral (v-ras) oncogene homolog
hsa-miR-520g	0	0	1	0	1	1	OPHN1	oligophrenin 1
hsa-miR-520g	1	0	1	1	1	1	OSBP	oxysterol binding protein
hsa-miR-520g	1	0	1	1	1	1	FURIN	furin (paired basic amino acid cleaving enzyme)
hsa-miR-520g	1	0	1	0	1	1	PAK2	p21 protein (Cdc42/Rac)-activated kinase 2
hsa-miR-520g	1	0	1	0	1	1	PCDHGC3	protocadherin gamma subfamily C, 3
hsa-miR-520g	1	0	1	0	1	1	CDK17	cyclin-dependent kinase 17
hsa-miR-520g	0	0	1	1	1	1	SERPINB8	serpin peptidase inhibitor, clade B (ovalbumin), member 8
hsa-miR-520g	0	0	1	1	1	1	PIK3C2B	phosphatidylinositol-4-phosphate 3-kinase, catalytic subunit type 2 beta
hsa-miR-520g	0	0	1	1	1	1	PITX1	paired-like homeodomain 1
hsa-miR-520g	1	0	1	1	1	1	PLAGL2	pleiomorphic adenoma gene-like 2
hsa-miR-520g	1	0	1	0	0	0	PPP1R10	protein phosphatase 1, regulatory subunit 10
hsa-miR-520g	1	0	1	0	1	1	PPP2R2A	protein phosphatase 2, regulatory subunit B, alpha
hsa-miR-520g	1	0	1	1	1	1	PPP6C	protein phosphatase 6, catalytic subunit
hsa-miR-520g	0	0	1	1	1	1	PRKCB	protein kinase C, beta
hsa-miR-520g	0	0	1	1	1	1	MAPK9	mitogen-activated protein kinase 9
hsa-miR-520g	0	0	1	1	1	1	MAP2K1	mitogen-activated protein kinase kinase 1
hsa-miR-520g	1	0	1	1	1	1	PTPRO	protein tyrosine phosphatase, receptor type, O
hsa-miR-520g	1	0	1	1	1	1	RAD23B	RAD23 homolog B (S. cerevisiae)
hsa-miR-520g	1	0	1	0	1	1	RAP2B	RAP2B, member of RAS oncogene family
hsa-miR-520g	1	0	1	1	1	1	RBL1	retinoblastoma-like 1 (p107)
hsa-miR-520g	0	0	1	1	1	1	RGS2	regulator of G-protein signaling 2, 24kDa
hsa-miR-520g	1	0	1	1	1	1	SALL1	sal-like 1 (Drosophila)
hsa-miR-520g	0	0	1	0	1	1	CXCL5	chemokine (C-X-C motif) ligand 5
hsa-miR-520g	0	0	1	1	1	1	SDC2	syndecan 2
hsa-miR-520g	1	0	1	0	1	1	ST6GAL1	ST6 beta-galactosamide alpha-2,6-sialyltranferase 1
hsa-miR-520g	1	0	1	1	1	1	SLC9A2	solute carrier family 9, subfamily A (NHE2, cation proton antiporter 2), member 2
hsa-miR-520g	0	0	1	1	1	1	SMARCA1	SWI/SNF related, matrix associated, actin dependent regulator of chromatin, subfamily a, member 1
hsa-miR-520g	1	0	1	1	1	1	SMARCC1	SWI/SNF related, matrix associated, actin dependent regulator of chromatin, subfamily c, member 1
hsa-miR-520g	1	0	1	1	1	1	SMARCD2	SWI/SNF related, matrix associated, actin dependent regulator of chromatin, subfamily d, member 2
hsa-miR-520g	1	0	1	1	1	1	SORL1	sortilin-related receptor, L(DLR class) A repeats containing
hsa-miR-520g	1	0	1	0	1	1	SOX11	SRY (sex determining region Y)-box 11
hsa-miR-520g	0	0	1	0	1	1	TRIM21	tripartite motif containing 21
hsa-miR-520g	1	0	1	1	1	1	SSR2	signal sequence receptor, beta (translocon-associated protein beta)
hsa-miR-520g	0	0	1	1	0	0	SSRP1	structure specific recognition protein 1
hsa-miR-520g	1	0	1	1	1	1	STAC	SH3 and cysteine rich domain
hsa-miR-520g	0	0	1	1	1	1	STIM1	stromal interaction molecule 1
hsa-miR-520g	0	0	1	1	1	1	SULT2A1	sulfotransferase family, cytosolic, 2A, dehydroepiandrosterone (DHEA)-preferring, member 1
hsa-miR-520g	1	0	1	1	1	1	TDG	thymine-DNA glycosylase
hsa-miR-520g	1	0	1	1	1	1	TEC	tec protein tyrosine kinase
hsa-miR-520g	1	0	1	1	1	1	TFAP2B	transcription factor AP-2 beta (activating enhancer binding protein 2 beta)
hsa-miR-520g	1	0	1	1	1	1	TFAP2C	transcription factor AP-2 gamma (activating enhancer binding protein 2 gamma)
hsa-miR-520g	1	0	1	1	1	1	TOP1	topoisomerase (DNA) I
hsa-miR-520g	1	0	1	1	1	1	NR2C2	nuclear receptor subfamily 2, group C, member 2
hsa-miR-520g	1	0	1	1	0	0	CLIP2	CAP-GLY domain containing linker protein 2
hsa-miR-520g	1	0	1	1	1	1	YY1	YY1 transcription factor
hsa-miR-520g	0	0	1	0	1	1	ZFY	zinc finger protein, Y-linked
hsa-miR-520g	1	0	1	0	1	1	ZIC1	Zic family member 1
hsa-miR-520g	0	0	1	1	1	1	ZNF137P	zinc finger protein 137, pseudogene
hsa-miR-520g	1	0	1	1	1	1	KCNAB1	potassium voltage-gated channel, shaker-related subfamily, beta member 1
hsa-miR-520g	1	0	1	1	1	1	NRIP1	nuclear receptor interacting protein 1
hsa-miR-520g	0	0	1	0	0	0	HIST1H2AL	histone cluster 1, H2al
hsa-miR-520g	1	0	1	1	1	1	EEA1	early endosome antigen 1
hsa-miR-520g	1	0	1	0	1	1	VAPA	VAMP (vesicle-associated membrane protein)-associated protein A, 33kDa
hsa-miR-520g	1	0	1	1	1	1	DYRK2	dual-specificity tyrosine-(Y)-phosphorylation regulated kinase 2
hsa-miR-520g	1	0	1	0	1	1	CUL3	cullin 3
hsa-miR-520g	0	0	1	1	1	1	AGPS	alkylglycerone phosphate synthase
hsa-miR-520g	1	0	1	1	1	1	EXO1	exonuclease 1
hsa-miR-520g	1	0	1	1	1	1	TNFSF11	tumor necrosis factor (ligand) superfamily, member 11
hsa-miR-520g	1	0	1	0	1	1	PCDHGA12	protocadherin gamma subfamily A, 12
hsa-miR-520g	1	0	1	0	1	1	PCDHGB4	protocadherin gamma subfamily B, 4
hsa-miR-520g	1	0	1	0	1	1	TNKS	tankyrase, TRF1-interacting ankyrin-related ADP-ribose polymerase
hsa-miR-520g	0	0	1	1	1	1	JRKL	jerky homolog-like (mouse)
hsa-miR-520g	1	0	1	1	1	1	URI1	URI1, prefoldin-like chaperone
hsa-miR-520g	1	0	1	1	1	1	NR5A2	nuclear receptor subfamily 5, group A, member 2
hsa-miR-520g	1	0	1	1	1	1	SNAP23	synaptosomal-associated protein, 23kDa
hsa-miR-520g	0	0	1	1	1	1	FPGT	fucose-1-phosphate guanylyltransferase
hsa-miR-520g	1	0	1	1	1	1	PEX11B	peroxisomal biogenesis factor 11 beta
hsa-miR-520g	1	0	1	1	1	1	FGF18	fibroblast growth factor 18
hsa-miR-520g	1	0	1	0	1	1	CDK5R1	cyclin-dependent kinase 5, regulatory subunit 1 (p35)
hsa-miR-520g	0	0	1	1	1	1	HERC1	HECT and RLD domain containing E3 ubiquitin protein ligase family member 1
hsa-miR-520g	0	0	1	1	1	1	RNF8	ring finger protein 8, E3 ubiquitin protein ligase
hsa-miR-520g	1	0	1	0	1	1	SEMA5A	sema domain, seven thrombospondin repeats (type 1 and type 1-like), transmembrane domain (TM) and short cytoplasmic domain, (semaphorin) 5A
hsa-miR-520g	1	0	1	1	1	1	BTAF1	BTAF1 RNA polymerase II, B-TFIID transcription factor-associated, 170kDa (Mot1 homolog, S. cerevisiae)
hsa-miR-520g	0	0	1	1	1	1	GJB2	gap junction protein, beta 2, 26kDa
hsa-miR-520g	1	0	1	1	1	1	BCL2L2	BCL2-like 2
hsa-miR-520g	1	0	1	1	1	1	CTSS	cathepsin S
hsa-miR-520g	1	0	1	1	1	1	EFNB2	ephrin-B2
hsa-miR-520g	1	0	1	0	1	1	EIF2S1	eukaryotic translation initiation factor 2, subunit 1 alpha, 35kDa
hsa-miR-520g	1	0	1	1	1	1	FGF12	fibroblast growth factor 12
hsa-miR-520g	0	0	1	1	1	1	FLT3	fms-related tyrosine kinase 3
hsa-miR-520g	1	0	1	1	1	1	GMFB	glia maturation factor, beta
hsa-miR-520g	1	0	1	1	1	1	HNF4G	hepatocyte nuclear factor 4, gamma
hsa-miR-520g	1	0	1	0	1	1	SLC1A2	solute carrier family 1 (glial high affinity glutamate transporter), member 2
hsa-miR-520g	0	0	1	0	1	1	SLC1A3	solute carrier family 1 (glial high affinity glutamate transporter), member 3
hsa-miR-520g	0	0	1	1	1	1	SNRPD3	small nuclear ribonucleoprotein D3 polypeptide 18kDa
hsa-miR-520g	1	0	1	1	1	1	SEMA3F	sema domain, immunoglobulin domain (Ig), short basic domain, secreted, (semaphorin) 3F
hsa-miR-520g	1	0	1	0	1	1	MED14	mediator complex subunit 14
hsa-miR-520g	1	0	1	1	1	1	SOCS6	suppressor of cytokine signaling 6
hsa-miR-520g	1	0	1	0	1	1	AKAP6	A kinase (PRKA) anchor protein 6
hsa-miR-520g	1	0	1	1	1	1	SLC25A27	solute carrier family 25, member 27
hsa-miR-520g	1	0	1	1	1	1	ASTN1	astrotactin 1
hsa-miR-520g	1	0	1	1	1	1	COX11	COX11 cytochrome c oxidase assembly homolog (yeast)
hsa-miR-520g	1	0	1	1	1	1	DAG1	dystroglycan 1 (dystrophin-associated glycoprotein 1)
hsa-miR-520g	1	0	1	1	1	1	DBN1	drebrin 1
hsa-miR-520g	1	0	1	1	1	1	DUSP1	dual specificity phosphatase 1
hsa-miR-520g	1	0	1	1	1	1	DUSP5	dual specificity phosphatase 5
hsa-miR-520g	1	0	1	1	1	1	EFNB1	ephrin-B1
hsa-miR-520g	1	0	1	1	1	1	EGR3	early growth response 3
hsa-miR-520g	1	0	1	1	1	1	EPHB2	EPH receptor B2
hsa-miR-520g	1	0	1	1	0	0	ERH	enhancer of rudimentary homolog (Drosophila)
hsa-miR-520g	1	0	1	0	1	1	GALNT2	UDP-N-acetyl-alpha-D-galactosamine:polypeptide N-acetylgalactosaminyltransferase 2 (GalNAc-T2)
hsa-miR-520g	1	0	1	1	1	1	KIF11	kinesin family member 11
hsa-miR-520g	1	0	1	1	1	1	LRP2	low density lipoprotein receptor-related protein 2
hsa-miR-520g	1	0	1	0	1	1	PKNOX1	PBX/knotted 1 homeobox 1
hsa-miR-520g	0	0	1	0	1	1	POU4F2	POU class 4 homeobox 2
hsa-miR-520g	1	0	1	1	1	1	RAB5C	RAB5C, member RAS oncogene family
hsa-miR-520g	1	0	1	1	1	1	CDC23	cell division cycle 23 homolog (S. cerevisiae)
hsa-miR-520g	1	0	1	1	1	1	RAB11A	RAB11A, member RAS oncogene family
hsa-miR-520g	0	0	1	1	0	0	MAP3K6	mitogen-activated protein kinase kinase kinase 6
hsa-miR-520g	0	0	1	0	1	1	CXorf1	chromosome X open reading frame 1
hsa-miR-520g	1	0	1	1	1	1	SCAF11	SR-related CTD-associated factor 11
hsa-miR-520g	1	0	1	1	1	1	MAP3K13	mitogen-activated protein kinase kinase kinase 13
hsa-miR-520g	1	0	1	0	1	1	MAPKAPK2	mitogen-activated protein kinase-activated protein kinase 2
hsa-miR-520g	1	0	1	1	1	1	STK17A	serine/threonine kinase 17a
hsa-miR-520g	1	0	1	1	1	1	KIF3B	kinesin family member 3B
hsa-miR-520g	1	0	1	1	1	1	MED26	mediator complex subunit 26
hsa-miR-520g	1	0	1	1	1	1	HOMER2	homer homolog 2 (Drosophila)
hsa-miR-520g	1	0	1	1	1	1	ONECUT2	one cut homeobox 2
hsa-miR-520g	1	0	1	0	1	1	SPTLC2	serine palmitoyltransferase, long chain base subunit 2
hsa-miR-520g	1	0	1	1	1	1	CXCL14	chemokine (C-X-C motif) ligand 14
hsa-miR-520g	1	0	1	0	1	1	DOCK3	dedicator of cytokinesis 3
hsa-miR-520g	0	0	1	0	1	1	DSC2	desmocollin 2
hsa-miR-520g	0	0	1	1	1	1	EPYC	epiphycan
hsa-miR-520g	1	0	1	1	1	1	GABRE	gamma-aminobutyric acid (GABA) A receptor, epsilon
hsa-miR-520g	0	0	1	1	1	1	JAK2	Janus kinase 2
hsa-miR-520g	1	0	1	1	1	1	JARID2	jumonji, AT rich interactive domain 2
hsa-miR-520g	1	0	1	1	1	1	ATXN3	ataxin 3
hsa-miR-520g	0	0	1	1	1	1	PRCP	prolylcarboxypeptidase (angiotensinase C)
hsa-miR-520g	0	0	1	1	1	1	RGPD5	RANBP2-like and GRIP domain containing 5
hsa-miR-520g	1	0	1	0	1	1	SCD	stearoyl-CoA desaturase (delta-9-desaturase)
hsa-miR-520g	1	0	1	1	1	1	TLE1	transducin-like enhancer of split 1 (E(sp1) homolog, Drosophila)
hsa-miR-520g	1	0	1	1	1	1	GFPT2	glutamine-fructose-6-phosphate transaminase 2
hsa-miR-520g	1	0	1	1	1	1	WDR1	WD repeat domain 1
hsa-miR-520g	1	0	1	1	1	1	HS3ST1	heparan sulfate (glucosamine) 3-O-sulfotransferase 1
hsa-miR-520g	1	0	1	0	1	1	DLX6	distal-less homeobox 6
hsa-miR-520g	1	0	1	0	1	1	E2F1	E2F transcription factor 1
hsa-miR-520g	1	0	1	1	1	1	GABPB1	GA binding protein transcription factor, beta subunit 1
hsa-miR-520g	1	0	1	1	1	1	GFRA1	GDNF family receptor alpha 1
hsa-miR-520g	1	0	1	1	1	1	GPR6	G protein-coupled receptor 6
hsa-miR-520g	0	0	1	1	1	1	PDIA3	protein disulfide isomerase family A, member 3
hsa-miR-520g	1	0	1	1	1	1	HAS3	hyaluronan synthase 3
hsa-miR-520g	1	0	1	0	1	1	PRKAB2	protein kinase, AMP-activated, beta 2 non-catalytic subunit
hsa-miR-520g	0	0	1	1	1	1	SEPP1	selenoprotein P, plasma, 1
hsa-miR-520g	0	0	1	1	1	1	MALL	mal, T-cell differentiation protein-like
hsa-miR-520g	1	0	1	0	1	1	CCDC6	coiled-coil domain containing 6
hsa-miR-520g	1	0	1	1	1	1	MLF2	myeloid leukemia factor 2
hsa-miR-520g	1	0	1	1	1	1	AKT3	v-akt murine thymoma viral oncogene homolog 3 (protein kinase B, gamma)
hsa-miR-520g	1	0	1	0	0	0	FRAT1	frequently rearranged in advanced T-cell lymphomas
hsa-miR-520g	0	0	1	1	1	1	DNAJB6	DnaJ (Hsp40) homolog, subfamily B, member 6
hsa-miR-520g	1	0	1	1	1	1	ABCA1	ATP-binding cassette, sub-family A (ABC1), member 1
hsa-miR-520g	1	0	1	1	1	1	LAMP1	lysosomal-associated membrane protein 1
hsa-miR-520g	0	0	1	1	0	0	LMNB1	lamin B1
hsa-miR-520g	1	0	1	1	1	1	LNPEP	leucyl/cystinyl aminopeptidase
hsa-miR-520g	1	0	1	1	1	1	MAB21L1	mab-21-like 1 (C. elegans)
hsa-miR-520g	1	0	1	1	1	1	SMAD6	SMAD family member 6
hsa-miR-520g	1	0	1	1	1	1	NHLH1	nescient helix loop helix 1
hsa-miR-520g	0	0	1	0	1	1	POU3F2	POU class 3 homeobox 2
hsa-miR-520g	0	0	1	1	1	1	CCL8	chemokine (C-C motif) ligand 8
hsa-miR-520g	0	0	1	1	1	1	SRSF4	serine/arginine-rich splicing factor 4
hsa-miR-520g	1	0	1	1	1	1	ST8SIA4	ST8 alpha-N-acetyl-neuraminide alpha-2,8-sialyltransferase 4
hsa-miR-520g	1	0	1	1	1	1	CTDSP2	CTD (carboxy-terminal domain, RNA polymerase II, polypeptide A) small phosphatase 2
hsa-miR-520g	1	0	1	1	1	1	ACTR1A	ARP1 actin-related protein 1 homolog A, centractin alpha (yeast)
hsa-miR-520g	1	0	1	0	1	1	CLEC3A	C-type lectin domain family 3, member A
hsa-miR-520g	0	0	1	1	0	0	PLXNC1	plexin C1
hsa-miR-520g	1	0	1	0	1	1	SPRY3	sprouty homolog 3 (Drosophila)
hsa-miR-520g	1	0	1	1	1	1	PURA	purine-rich element binding protein A
hsa-miR-520g	1	0	1	1	1	1	BET1	blocked early in transport 1 homolog (S. cerevisiae)
hsa-miR-520g	1	0	1	1	1	1	GOLGA3	golgin A3
hsa-miR-520g	1	0	1	0	1	1	SMAD3	SMAD family member 3
hsa-miR-520g	1	0	1	1	1	1	MAT2A	methionine adenosyltransferase II, alpha
hsa-miR-520g	1	0	1	1	1	1	MAP3K5	mitogen-activated protein kinase kinase kinase 5
hsa-miR-520g	1	0	1	1	1	1	MMP16	matrix metallopeptidase 16 (membrane-inserted)
hsa-miR-520g	1	0	1	1	1	1	MTF1	metal-regulatory transcription factor 1
hsa-miR-520g	1	0	1	0	1	1	NAB1	NGFI-A binding protein 1 (EGR1 binding protein 1)
hsa-miR-520g	0	0	1	1	0	0	PPYR1	pancreatic polypeptide receptor 1
hsa-miR-520g	1	0	1	1	1	1	RNF6	ring finger protein (C3H2C3 type) 6
hsa-miR-520g	0	0	1	1	1	1	TSC22D1	TSC22 domain family, member 1
hsa-miR-520g	1	0	1	1	1	1	HS3ST4	heparan sulfate (glucosamine) 3-O-sulfotransferase 4
hsa-miR-520g	1	0	1	1	1	1	SEMA3A	sema domain, immunoglobulin domain (Ig), short basic domain, secreted, (semaphorin) 3A
hsa-miR-520g	1	0	1	1	1	1	IRF9	interferon regulatory factor 9
hsa-miR-520g	1	0	1	0	1	1	SCML2	sex comb on midleg-like 2 (Drosophila)
hsa-miR-520g	1	0	1	1	1	1	CAPZA2	capping protein (actin filament) muscle Z-line, alpha 2
hsa-miR-520g	0	0	1	1	1	1	CSF2RA	colony stimulating factor 2 receptor, alpha, low-affinity (granulocyte-macrophage)
hsa-miR-520g	1	0	1	1	1	1	NEUROD2	neuronal differentiation 2
hsa-miR-520g	1	0	1	1	1	1	NR4A2	nuclear receptor subfamily 4, group A, member 2
hsa-miR-520g	0	0	1	1	1	1	PRKCH	protein kinase C, eta
hsa-miR-520g	1	0	1	1	1	1	PKN2	protein kinase N2
hsa-miR-520g	1	0	1	1	1	1	TIMM17A	translocase of inner mitochondrial membrane 17 homolog A (yeast)
hsa-miR-520g	1	0	1	1	1	1	ZNF238	zinc finger protein 238
hsa-miR-520g	0	0	1	1	1	1	UBE2E3	ubiquitin-conjugating enzyme E2E 3
hsa-miR-520g	1	0	1	0	1	1	APPBP2	amyloid beta precursor protein (cytoplasmic tail) binding protein 2
hsa-miR-520g	1	0	1	1	1	1	NEBL	nebulette
hsa-miR-520g	0	0	1	1	1	1	HBXIP	hepatitis B virus x interacting protein
hsa-miR-520g	1	0	1	0	1	1	POLR3G	polymerase (RNA) III (DNA directed) polypeptide G (32kD)
hsa-miR-520g	1	0	1	1	1	1	TXNIP	thioredoxin interacting protein
hsa-miR-520g	1	0	1	0	1	1	GNAI3	guanine nucleotide binding protein (G protein), alpha inhibiting activity polypeptide 3
hsa-miR-520g	0	0	1	0	1	1	SLC16A2	solute carrier family 16, member 2 (thyroid hormone transporter)
hsa-miR-520g	1	0	1	0	1	1	IGF2BP1	insulin-like growth factor 2 mRNA binding protein 1
hsa-miR-520g	1	0	1	1	1	1	KHDRBS1	KH domain containing, RNA binding, signal transduction associated 1
hsa-miR-520g	1	0	1	1	1	1	CTCF	CCCTC-binding factor (zinc finger protein)
hsa-miR-520g	0	0	1	1	1	1	CD226	CD226 molecule
hsa-miR-520g	1	0	1	0	1	1	MAP4K5	mitogen-activated protein kinase kinase kinase kinase 5
hsa-miR-520g	1	0	1	1	1	1	CORIN	corin, serine peptidase
hsa-miR-520g	1	0	1	1	1	1	MAP3K2	mitogen-activated protein kinase kinase kinase 2
hsa-miR-520g	1	0	1	1	1	1	SRSF10	serine/arginine-rich splicing factor 10
hsa-miR-520g	1	0	1	1	1	1	ZBTB6	zinc finger and BTB domain containing 6
hsa-miR-520g	0	0	1	1	1	1	FGL2	fibrinogen-like 2
hsa-miR-520g	1	0	1	1	1	1	MMP24	matrix metallopeptidase 24 (membrane-inserted)
hsa-miR-520g	0	0	1	0	1	1	SUB1	SUB1 homolog (S. cerevisiae)
hsa-miR-520g	1	0	1	1	1	1	DIAPH2	diaphanous homolog 2 (Drosophila)
hsa-miR-520g	0	0	1	1	1	1	SSFA2	sperm specific antigen 2
hsa-miR-520g	0	0	1	1	0	0	TALDO1	transaldolase 1
hsa-miR-520g	1	0	1	1	1	1	BTG2	BTG family, member 2
hsa-miR-520g	1	0	1	1	1	1	KAT6A	K(lysine) acetyltransferase 6A
hsa-miR-520g	1	0	1	1	1	1	PRDX3	peroxiredoxin 3
hsa-miR-520g	0	0	1	1	0	0	HNRNPA0	heterogeneous nuclear ribonucleoprotein A0
hsa-miR-520g	1	0	1	1	1	1	CBX1	chromobox homolog 1
hsa-miR-520g	0	0	1	1	1	1	PKIA	protein kinase (cAMP-dependent, catalytic) inhibitor alpha
hsa-miR-520g	0	0	1	1	1	1	TMED10	transmembrane emp24-like trafficking protein 10 (yeast)
hsa-miR-520g	1	0	1	1	1	1	FERMT2	fermitin family member 2
hsa-miR-520g	0	0	1	1	0	0	CCNI	cyclin I
hsa-miR-520g	1	0	1	1	1	1	RAB35	RAB35, member RAS oncogene family
hsa-miR-520g	0	0	1	1	1	1	HOXD3	homeobox D3
hsa-miR-520g	1	0	1	1	1	1	RIT1	Ras-like without CAAX 1
hsa-miR-520g	1	0	1	1	1	1	SCN1A	sodium channel, voltage-gated, type I, alpha subunit
hsa-miR-520g	1	0	1	1	1	1	SKP1	S-phase kinase-associated protein 1
hsa-miR-520g	1	0	1	0	1	1	SLC2A3	solute carrier family 2 (facilitated glucose transporter), member 3
hsa-miR-520g	1	0	1	0	1	1	SOX12	SRY (sex determining region Y)-box 12
hsa-miR-520g	1	0	1	1	1	1	NR4A3	nuclear receptor subfamily 4, group A, member 3
hsa-miR-520g	1	0	1	0	1	1	WASF2	WAS protein family, member 2
hsa-miR-520g	1	0	1	1	1	1	ABHD2	abhydrolase domain containing 2
hsa-miR-520g	1	0	1	1	1	1	SOX30	SRY (sex determining region Y)-box 30
hsa-miR-520g	1	0	1	1	1	1	ADAMTS5	ADAM metallopeptidase with thrombospondin type 1 motif, 5
hsa-miR-520g	1	0	1	1	1	1	KAT7	K(lysine) acetyltransferase 7
hsa-miR-520g	1	0	1	1	1	1	SOX21	SRY (sex determining region Y)-box 21
hsa-miR-520g	1	0	1	1	1	1	VEZF1	vascular endothelial zinc finger 1
hsa-miR-520g	0	0	1	0	1	1	ZXDB	zinc finger, X-linked, duplicated B
hsa-miR-520g	1	0	1	1	1	1	PALM2-AKAP2	PALM2-AKAP2 readthrough
hsa-miR-520g	1	0	1	1	1	1	KLF12	Kruppel-like factor 12
hsa-miR-520g	1	0	1	1	1	1	TUSC2	tumor suppressor candidate 2
hsa-miR-520g	1	0	1	1	1	1	APPL1	adaptor protein, phosphotyrosine interaction, PH domain and leucine zipper containing 1
hsa-miR-520g	1	0	1	1	1	1	FBXL2	F-box and leucine-rich repeat protein 2
hsa-miR-520g	1	0	1	1	1	1	FBXL3	F-box and leucine-rich repeat protein 3
hsa-miR-520g	1	0	1	0	1	1	FZD4	frizzled family receptor 4
hsa-miR-520g	1	0	1	1	1	1	RABGAP1	RAB GTPase activating protein 1
hsa-miR-520g	1	0	1	1	1	1	MGAT4A	mannosyl (alpha-1,3-)-glycoprotein beta-1,4-N-acetylglucosaminyltransferase, isozyme A
hsa-miR-520g	1	0	1	1	1	1	MGEA5	meningioma expressed antigen 5 (hyaluronidase)
hsa-miR-520g	0	0	1	1	1	1	RAB3GAP1	RAB3 GTPase activating protein subunit 1 (catalytic)
hsa-miR-520g	1	0	1	1	1	1	RYBP	RING1 and YY1 binding protein
hsa-miR-520g	0	0	1	1	0	0	SNW1	SNW domain containing 1
hsa-miR-520g	1	0	1	1	1	1	RHOQ	ras homolog family member Q
hsa-miR-520g	1	0	1	1	1	1	KCND2	potassium voltage-gated channel, Shal-related subfamily, member 2
hsa-miR-520g	1	0	1	0	1	1	ACAP2	ArfGAP with coiled-coil, ankyrin repeat and PH domains 2
hsa-miR-520g	1	0	1	0	1	1	PXDN	peroxidasin homolog (Drosophila)
hsa-miR-520g	1	0	1	0	1	1	RAPGEF5	Rap guanine nucleotide exchange factor (GEF) 5
hsa-miR-520g	1	0	1	0	1	1	G3BP2	GTPase activating protein (SH3 domain) binding protein 2
hsa-miR-520g	1	0	1	1	1	1	MAPRE1	microtubule-associated protein, RP/EB family, member 1
hsa-miR-520g	1	0	1	0	1	1	MYCBP	c-myc binding protein
hsa-miR-520g	1	0	1	0	1	1	MYO10	myosin X
hsa-miR-520g	1	0	1	0	1	1	BLOC1S6	biogenesis of lysosomal organelles complex-1, subunit 6, pallidin
hsa-miR-520g	0	0	1	0	1	1	TLL1	tolloid-like 1
hsa-miR-520g	1	0	1	1	1	1	TRPC5	transient receptor potential cation channel, subfamily C, member 5
hsa-miR-520g	1	0	1	0	1	1	FLRT2	fibronectin leucine rich transmembrane protein 2
hsa-miR-520g	1	0	1	1	1	1	CLCF1	cardiotrophin-like cytokine factor 1
hsa-miR-520g	0	0	1	1	0	0	LGALS13	lectin, galactoside-binding, soluble, 13
hsa-miR-520g	1	0	1	1	1	1	FLRT3	fibronectin leucine rich transmembrane protein 3
hsa-miR-520g	1	0	1	1	1	1	PADI1	peptidyl arginine deiminase, type I
hsa-miR-520g	0	0	1	1	1	1	ABT1	activator of basal transcription 1
hsa-miR-520g	0	0	1	1	1	1	SERTAD1	SERTA domain containing 1
hsa-miR-520g	1	0	1	1	1	1	LRP12	low density lipoprotein receptor-related protein 12
hsa-miR-520g	0	0	1	0	1	1	EMR2	egf-like module containing, mucin-like, hormone receptor-like 2
hsa-miR-520g	1	0	1	1	1	1	LAMP2	lysosomal-associated membrane protein 2
hsa-miR-520g	1	0	1	1	1	1	WDR37	WD repeat domain 37
hsa-miR-520g	0	0	1	1	0	0	MCTS1	malignant T cell amplified sequence 1
hsa-miR-520g	1	0	1	0	1	1	C16orf72	chromosome 16 open reading frame 72
hsa-miR-520g	1	0	1	1	1	1	ZBTB44	zinc finger and BTB domain containing 44
hsa-miR-520g	0	0	1	1	1	1	CCDC113	coiled-coil domain containing 113
hsa-miR-520g	1	0	1	0	1	1	ODZ1	odz, odd Oz/ten-m homolog 1 (Drosophila)
hsa-miR-520g	1	0	1	1	1	1	LEMD3	LEM domain containing 3
hsa-miR-520g	1	0	1	1	1	1	CORO1C	coronin, actin binding protein, 1C
hsa-miR-520g	1	0	1	1	1	1	SLC7A11	solute carrier family 7 (anionic amino acid transporter light chain, xc- system), member 11
hsa-miR-520g	0	0	1	1	1	1	ZNF318	zinc finger protein 318
hsa-miR-520g	1	0	1	1	1	1	LHX6	LIM homeobox 6
hsa-miR-520g	1	0	1	0	1	1	RNF11	ring finger protein 11
hsa-miR-520g	1	0	1	0	1	1	DIEXF	digestive organ expansion factor homolog (zebrafish)
hsa-miR-520g	0	0	1	0	1	1	VPS41	vacuolar protein sorting 41 homolog (S. cerevisiae)
hsa-miR-520g	0	0	1	1	1	1	LAMP3	lysosomal-associated membrane protein 3
hsa-miR-520g	0	0	1	1	1	1	TAF5L	TAF5-like RNA polymerase II, p300/CBP-associated factor (PCAF)-associated factor, 65kDa
hsa-miR-520g	1	0	1	1	1	1	AFF4	AF4/FMR2 family, member 4
hsa-miR-520g	1	0	1	1	1	1	SERP1	stress-associated endoplasmic reticulum protein 1
hsa-miR-520g	1	0	1	1	1	1	TNFRSF21	tumor necrosis factor receptor superfamily, member 21
hsa-miR-520g	1	0	1	1	1	1	VSX1	visual system homeobox 1
hsa-miR-520g	1	0	1	1	1	1	EHD3	EH-domain containing 3
hsa-miR-520g	1	0	1	0	1	1	ATP11B	ATPase, class VI, type 11B
hsa-miR-520g	0	0	1	1	1	1	HOXC4	homeobox C4
hsa-miR-520g	1	0	1	1	1	1	ZNF592	zinc finger protein 592
hsa-miR-520g	1	0	1	0	1	1	SH3PXD2A	SH3 and PX domains 2A
hsa-miR-520g	1	0	1	1	1	1	GCC2	GRIP and coiled-coil domain containing 2
hsa-miR-520g	1	0	1	1	1	1	RALGPS1	Ral GEF with PH domain and SH3 binding motif 1
hsa-miR-520g	1	0	1	0	1	1	BZW1	basic leucine zipper and W2 domains 1
hsa-miR-520g	1	0	1	1	1	1	TBKBP1	TBK1 binding protein 1
hsa-miR-520g	1	0	1	1	1	1	RASSF2	Ras association (RalGDS/AF-6) domain family member 2
hsa-miR-520g	1	0	1	0	1	1	SERTAD2	SERTA domain containing 2
hsa-miR-520g	1	0	1	0	1	1	MAML1	mastermind-like 1 (Drosophila)
hsa-miR-520g	1	0	1	1	1	1	MRPL19	mitochondrial ribosomal protein L19
hsa-miR-520g	0	0	1	1	1	1	KIAA0141	KIAA0141
hsa-miR-520g	1	0	1	1	1	1	KIAA0753	KIAA0753
hsa-miR-520g	0	0	1	0	1	1	EPM2AIP1	EPM2A (laforin) interacting protein 1
hsa-miR-520g	1	0	1	1	1	1	NUAK1	NUAK family, SNF1-like kinase, 1
hsa-miR-520g	1	0	1	0	1	1	SV2B	synaptic vesicle glycoprotein 2B
hsa-miR-520g	1	0	1	1	1	1	FAM20B	family with sequence similarity 20, member B
hsa-miR-520g	1	0	1	1	0	0	IQSEC1	IQ motif and Sec7 domain 1
hsa-miR-520g	1	0	1	1	1	1	ZBTB5	zinc finger and BTB domain containing 5
hsa-miR-520g	0	0	1	0	1	1	KIF14	kinesin family member 14
hsa-miR-520g	1	0	1	0	1	1	ICK	intestinal cell (MAK-like) kinase
hsa-miR-520g	1	0	1	0	1	1	ZBTB1	zinc finger and BTB domain containing 1
hsa-miR-520g	1	0	1	0	1	1	WDFY3	WD repeat and FYVE domain containing 3
hsa-miR-520g	1	0	1	1	1	1	RAB21	RAB21, member RAS oncogene family
hsa-miR-520g	1	0	1	1	1	1	PHLPP2	PH domain and leucine rich repeat protein phosphatase 2
hsa-miR-520g	1	0	1	0	1	1	PDS5B	PDS5, regulator of cohesion maintenance, homolog B (S. cerevisiae)
hsa-miR-520g	1	0	1	1	1	1	PIKFYVE	phosphoinositide kinase, FYVE finger containing
hsa-miR-520g	1	0	1	0	1	1	PEG10	paternally expressed 10
hsa-miR-520g	1	0	1	1	0	0	CIC	capicua homolog (Drosophila)
hsa-miR-520g	1	0	1	1	1	1	TBC1D9	TBC1 domain family, member 9 (with GRAM domain)
hsa-miR-520g	1	0	1	1	1	1	RTF1	Rtf1, Paf1/RNA polymerase II complex component, homolog (S. cerevisiae)
hsa-miR-520g	0	0	1	1	1	1	FBXO28	F-box protein 28
hsa-miR-520g	1	0	1	1	1	1	PLCB1	phospholipase C, beta 1 (phosphoinositide-specific)
hsa-miR-520g	1	0	1	1	1	1	MYO1D	myosin ID
hsa-miR-520g	1	0	1	1	1	1	PDS5A	PDS5, regulator of cohesion maintenance, homolog A (S. cerevisiae)
hsa-miR-520g	1	0	1	1	1	1	ARAP2	ArfGAP with RhoGAP domain, ankyrin repeat and PH domain 2
hsa-miR-520g	1	0	1	1	1	1	ANKS1A	ankyrin repeat and sterile alpha motif domain containing 1A
hsa-miR-520g	1	0	1	1	1	1	DNAJC13	DnaJ (Hsp40) homolog, subfamily C, member 13
hsa-miR-520g	1	0	1	1	1	1	SYNM	synemin, intermediate filament protein
hsa-miR-520g	1	0	1	1	1	1	PHF15	PHD finger protein 15
hsa-miR-520g	1	0	1	0	1	1	KHNYN	KH and NYN domain containing
hsa-miR-520g	1	0	1	0	1	1	ARHGEF12	Rho guanine nucleotide exchange factor (GEF) 12
hsa-miR-520g	1	0	1	1	1	1	MED13L	mediator complex subunit 13-like
hsa-miR-520g	1	0	1	1	1	1	ASXL1	additional sex combs like 1 (Drosophila)
hsa-miR-520g	1	0	1	1	1	1	ZFYVE26	zinc finger, FYVE domain containing 26
hsa-miR-520g	1	0	1	1	1	1	RIMBP2	RIMS binding protein 2
hsa-miR-520g	1	0	1	1	1	1	DSTYK	dual serine/threonine and tyrosine protein kinase
hsa-miR-520g	0	0	1	1	1	1	NBPF14	neuroblastoma breakpoint family, member 14
hsa-miR-520g	1	0	1	1	1	1	MOB4	MOB family member 4, phocein
hsa-miR-520g	1	0	1	1	1	1	PARM1	prostate androgen-regulated mucin-like protein 1
hsa-miR-520g	1	0	1	1	1	1	RNF19A	ring finger protein 19A, E3 ubiquitin protein ligase
hsa-miR-520g	0	0	1	0	1	1	TMEM158	transmembrane protein 158 (gene/pseudogene)
hsa-miR-520g	1	0	1	1	1	1	CNOT6	CCR4-NOT transcription complex, subunit 6
hsa-miR-520g	1	0	1	1	1	1	SYF2	SYF2 homolog, RNA splicing factor (S. cerevisiae)
hsa-miR-520g	1	0	1	1	1	1	PNKD	paroxysmal nonkinesigenic dyskinesia
hsa-miR-520g	0	0	1	1	0	0	TSKU	tsukushi small leucine rich proteoglycan homolog (Xenopus laevis)
hsa-miR-520g	1	0	1	0	1	1	GLCE	glucuronic acid epimerase
hsa-miR-520g	1	0	1	0	1	1	ERC2	ELKS/RAB6-interacting/CAST family member 2
hsa-miR-520g	1	0	1	1	1	1	FAM155B	family with sequence similarity 155, member B
hsa-miR-520g	1	0	1	1	1	1	AZIN1	antizyme inhibitor 1
hsa-miR-520g	1	0	1	1	1	1	ST8SIA3	ST8 alpha-N-acetyl-neuraminide alpha-2,8-sialyltransferase 3
hsa-miR-520g	1	0	1	0	1	1	TRIM33	tripartite motif containing 33
hsa-miR-520g	1	0	1	1	1	1	TXNDC12	thioredoxin domain containing 12 (endoplasmic reticulum)
hsa-miR-520g	1	0	1	1	1	1	UBE2J1	ubiquitin-conjugating enzyme E2, J1
hsa-miR-520g	1	0	1	1	1	1	DERL2	derlin 2
hsa-miR-520g	0	0	1	1	1	1	MRPS23	mitochondrial ribosomal protein S23
hsa-miR-520g	1	0	1	0	1	1	CNR1	cannabinoid receptor 1 (brain)
hsa-miR-520g	0	0	1	1	1	1	ZFR	zinc finger RNA binding protein
hsa-miR-520g	0	0	1	1	1	1	RAB10	RAB10, member RAS oncogene family
hsa-miR-520g	0	0	1	1	0	0	CPQ	carboxypeptidase Q
hsa-miR-520g	0	0	1	1	0	0	WDR83OS	WD repeat domain 83 opposite strand
hsa-miR-520g	1	0	1	1	1	1	VGLL3	vestigial like 3 (Drosophila)
hsa-miR-520g	1	0	1	1	1	1	NLK	nemo-like kinase
hsa-miR-520g	1	0	1	1	1	1	AKAP11	A kinase (PRKA) anchor protein 11
hsa-miR-520g	0	0	1	1	1	1	RSL24D1	ribosomal L24 domain containing 1
hsa-miR-520g	1	0	1	1	1	1	CMPK1	cytidine monophosphate (UMP-CMP) kinase 1, cytosolic
hsa-miR-520g	1	0	1	1	1	1	RAB14	RAB14, member RAS oncogene family
hsa-miR-520g	0	0	1	1	0	0	SRRM2	serine/arginine repetitive matrix 2
hsa-miR-520g	0	0	1	1	1	1	CENPF	centromere protein F, 350/400kDa (mitosin)
hsa-miR-520g	1	0	1	1	1	1	ARID4B	AT rich interactive domain 4B (RBP1-like)
hsa-miR-520g	1	0	1	1	1	1	LUC7L3	LUC7-like 3 (S. cerevisiae)
hsa-miR-520g	1	0	1	1	1	1	C20orf111	chromosome 20 open reading frame 111
hsa-miR-520g	1	0	1	1	1	1	VTA1	Vps20-associated 1 homolog (S. cerevisiae)
hsa-miR-520g	1	0	1	0	1	1	RAB8B	RAB8B, member RAS oncogene family
hsa-miR-520g	1	0	1	1	1	1	DNAJC27	DnaJ (Hsp40) homolog, subfamily C, member 27
hsa-miR-520g	1	0	1	1	1	1	CYP39A1	cytochrome P450, family 39, subfamily A, polypeptide 1
hsa-miR-520g	0	0	1	1	1	1	USP18	ubiquitin specific peptidase 18
hsa-miR-520g	1	0	1	0	1	1	KLHL3	kelch-like 3 (Drosophila)
hsa-miR-520g	1	0	1	1	1	1	GALNT7	UDP-N-acetyl-alpha-D-galactosamine:polypeptide N-acetylgalactosaminyltransferase 7 (GalNAc-T7)
hsa-miR-520g	1	0	1	1	1	1	MDM1	Mdm1 nuclear protein homolog (mouse)
hsa-miR-520g	0	0	1	1	1	1	RAB39A	RAB39A, member RAS oncogene family
hsa-miR-520g	1	0	1	0	1	1	UBE2Q1	ubiquitin-conjugating enzyme E2Q family member 1
hsa-miR-520g	0	0	1	0	1	1	TRIM44	tripartite motif containing 44
hsa-miR-520g	1	0	1	1	1	1	ZC3H7B	zinc finger CCCH-type containing 7B
hsa-miR-520g	0	0	1	0	1	1	VEZT	vezatin, adherens junctions transmembrane protein
hsa-miR-520g	1	0	1	0	1	1	EIF2C4	eukaryotic translation initiation factor 2C, 4
hsa-miR-520g	0	0	1	1	1	1	LRRC16A	leucine rich repeat containing 16A
hsa-miR-520g	0	0	1	1	1	1	DYM	dymeclin
hsa-miR-520g	0	0	1	0	1	1	GIPC2	GIPC PDZ domain containing family, member 2
hsa-miR-520g	0	0	1	1	1	1	ERCC6L	excision repair cross-complementing rodent repair deficiency, complementation group 6-like
hsa-miR-520g	0	0	1	1	1	1	MTMR8	myotubularin related protein 8
hsa-miR-520g	1	0	1	0	1	1	FAM46C	family with sequence similarity 46, member C
hsa-miR-520g	1	0	1	1	1	1	TBC1D8B	TBC1 domain family, member 8B (with GRAM domain)
hsa-miR-520g	1	0	1	1	1	1	LPPR1	lipid phosphate phosphatase-related protein type 1
hsa-miR-520g	1	0	1	1	1	1	ALKBH5	alkB, alkylation repair homolog 5 (E. coli)
hsa-miR-520g	0	0	1	1	1	1	NCAPG2	non-SMC condensin II complex, subunit G2
hsa-miR-520g	1	0	1	0	1	1	CHD7	chromodomain helicase DNA binding protein 7
hsa-miR-520g	1	0	1	1	1	1	RNF125	ring finger protein 125, E3 ubiquitin protein ligase
hsa-miR-520g	0	0	1	1	1	1	SDHAF2	succinate dehydrogenase complex assembly factor 2
hsa-miR-520g	1	0	1	1	1	1	CDC37L1	cell division cycle 37 homolog (S. cerevisiae)-like 1
hsa-miR-520g	1	0	1	1	1	1	C9orf40	chromosome 9 open reading frame 40
hsa-miR-520g	1	0	1	1	1	1	IFT57	intraflagellar transport 57 homolog (Chlamydomonas)
hsa-miR-520g	1	0	1	1	1	1	ARGLU1	arginine and glutamate rich 1
hsa-miR-520g	1	0	1	0	1	1	KIF26B	kinesin family member 26B
hsa-miR-520g	1	0	1	1	1	1	FIGN	fidgetin
hsa-miR-520g	1	0	1	1	1	1	FAM178A	family with sequence similarity 178, member A
hsa-miR-520g	1	0	1	0	1	1	MSL2	male-specific lethal 2 homolog (Drosophila)
hsa-miR-520g	0	0	1	1	1	1	SEC61A2	Sec61 alpha 2 subunit (S. cerevisiae)
hsa-miR-520g	1	0	1	1	1	1	RPRD1A	regulation of nuclear pre-mRNA domain containing 1A
hsa-miR-520g	1	0	1	0	1	1	PARVA	parvin, alpha
hsa-miR-520g	1	0	1	1	1	1	UBA6	ubiquitin-like modifier activating enzyme 6
hsa-miR-520g	0	0	1	1	1	1	AP5M1	adaptor-related protein complex 5, mu 1 subunit
hsa-miR-520g	1	0	1	1	1	1	ASXL2	additional sex combs like 2 (Drosophila)
hsa-miR-520g	0	0	1	1	1	1	IMP3	IMP3, U3 small nucleolar ribonucleoprotein, homolog (yeast)
hsa-miR-520g	1	0	1	1	1	1	PI4K2B	phosphatidylinositol 4-kinase type 2 beta
hsa-miR-520g	1	0	1	0	1	1	LIN7C	lin-7 homolog C (C. elegans)
hsa-miR-520g	1	0	1	1	1	1	RSBN1	round spermatid basic protein 1
hsa-miR-520g	1	0	1	0	1	1	FOXJ2	forkhead box J2
hsa-miR-520g	1	0	1	1	1	1	EPB41L4B	erythrocyte membrane protein band 4.1 like 4B
hsa-miR-520g	1	0	1	1	1	1	RRN3	RRN3 RNA polymerase I transcription factor homolog (S. cerevisiae)
hsa-miR-520g	0	0	1	1	1	1	BDP1	B double prime 1, subunit of RNA polymerase III transcription initiation factor IIIB
hsa-miR-520g	0	0	1	0	0	0	KDM3A	lysine (K)-specific demethylase 3A
hsa-miR-520g	1	0	1	1	1	1	PAG1	phosphoprotein associated with glycosphingolipid microdomains 1
hsa-miR-520g	1	0	1	1	1	1	ASH1L	ash1 (absent, small, or homeotic)-like (Drosophila)
hsa-miR-520g	1	0	1	1	1	1	STRADB	STE20-related kinase adaptor beta
hsa-miR-520g	1	0	1	1	1	1	CAMK2N1	calcium/calmodulin-dependent protein kinase II inhibitor 1
hsa-miR-520g	1	0	1	1	1	1	SLC16A10	solute carrier family 16, member 10 (aromatic amino acid transporter)
hsa-miR-520g	0	0	1	1	0	0	MESP1	mesoderm posterior 1 homolog (mouse)
hsa-miR-520g	1	0	1	1	1	1	KIAA1199	KIAA1199
hsa-miR-520g	1	0	1	1	1	1	CDCA7L	cell division cycle associated 7-like
hsa-miR-520g	0	0	1	1	1	1	MYO5C	myosin VC
hsa-miR-520g	1	0	1	0	1	1	PCDHAC1	protocadherin alpha subfamily C, 1
hsa-miR-520g	1	0	1	0	1	1	PCDHAC2	protocadherin alpha subfamily C, 2
hsa-miR-520g	1	0	1	1	1	1	PCDHA1	protocadherin alpha 1
hsa-miR-520g	1	0	1	0	1	1	PCDHA10	protocadherin alpha 10
hsa-miR-520g	1	0	1	0	1	1	PCDHA11	protocadherin alpha 11
hsa-miR-520g	1	0	1	0	1	1	PCDHA12	protocadherin alpha 12
hsa-miR-520g	1	0	1	1	1	1	PCDHA2	protocadherin alpha 2
hsa-miR-520g	1	0	1	1	1	1	PCDHA3	protocadherin alpha 3
hsa-miR-520g	1	0	1	1	1	1	PCDHA6	protocadherin alpha 6
hsa-miR-520g	1	0	1	0	1	1	PCDHA7	protocadherin alpha 7
hsa-miR-520g	1	0	1	1	1	1	PCDHA8	protocadherin alpha 8
hsa-miR-520g	1	0	1	1	1	1	PCDHGA1	protocadherin gamma subfamily A, 1
hsa-miR-520g	1	0	1	0	1	1	PCDHGA10	protocadherin gamma subfamily A, 10
hsa-miR-520g	1	0	1	0	1	1	PCDHGA11	protocadherin gamma subfamily A, 11
hsa-miR-520g	1	0	1	1	1	1	PCDHGA2	protocadherin gamma subfamily A, 2
hsa-miR-520g	1	0	1	0	1	1	PCDHGA3	protocadherin gamma subfamily A, 3
hsa-miR-520g	1	0	1	0	1	1	PCDHGA4	protocadherin gamma subfamily A, 4
hsa-miR-520g	1	0	1	0	1	1	PCDHGA5	protocadherin gamma subfamily A, 5
hsa-miR-520g	1	0	1	0	1	1	PCDHGA6	protocadherin gamma subfamily A, 6
hsa-miR-520g	1	0	1	0	1	1	PCDHGA7	protocadherin gamma subfamily A, 7
hsa-miR-520g	1	0	1	0	1	1	PCDHGA9	protocadherin gamma subfamily A, 9
hsa-miR-520g	1	0	1	0	1	1	PCDHGB1	protocadherin gamma subfamily B, 1
hsa-miR-520g	1	0	1	0	1	1	PCDHGB2	protocadherin gamma subfamily B, 2
hsa-miR-520g	1	0	1	0	1	1	PCDHGB3	protocadherin gamma subfamily B, 3
hsa-miR-520g	1	0	1	0	1	1	PCDHGB5	protocadherin gamma subfamily B, 5
hsa-miR-520g	1	0	1	0	1	1	PCDHGB6	protocadherin gamma subfamily B, 6
hsa-miR-520g	1	0	1	0	1	1	PCDHGB7	protocadherin gamma subfamily B, 7
hsa-miR-520g	1	0	1	0	1	1	PCDHGC4	protocadherin gamma subfamily C, 4
hsa-miR-520g	1	0	1	0	1	1	PCDHGC5	protocadherin gamma subfamily C, 5
hsa-miR-520g	0	0	1	1	1	1	TERF2IP	telomeric repeat binding factor 2, interacting protein
hsa-miR-520g	1	0	1	0	1	1	FAM190B	family with sequence similarity 190, member B
hsa-miR-520g	1	0	1	0	1	1	TMX3	thioredoxin-related transmembrane protein 3
hsa-miR-520g	1	0	1	1	1	1	DENND1B	DENN/MADD domain containing 1B
hsa-miR-520g	0	0	1	0	1	1	MRPL50	mitochondrial ribosomal protein L50
hsa-miR-520g	1	0	1	1	1	1	CRCT1	cysteine-rich C-terminal 1
hsa-miR-520g	0	0	1	1	1	1	GNL3L	guanine nucleotide binding protein-like 3 (nucleolar)-like
hsa-miR-520g	1	0	1	0	1	1	CCNJ	cyclin J
hsa-miR-520g	1	0	1	1	1	1	PLEKHA3	pleckstrin homology domain containing, family A (phosphoinositide binding specific) member 3
hsa-miR-520g	1	0	1	0	1	1	CNGB3	cyclic nucleotide gated channel beta 3
hsa-miR-520g	1	0	1	0	1	1	UBFD1	ubiquitin family domain containing 1
hsa-miR-520g	1	0	1	1	1	1	ABCB9	ATP-binding cassette, sub-family B (MDR/TAP), member 9
hsa-miR-520g	0	0	1	1	1	1	RPRM	reprimo, TP53 dependent G2 arrest mediator candidate
hsa-miR-520g	1	0	1	1	1	1	CYP26B1	cytochrome P450, family 26, subfamily B, polypeptide 1
hsa-miR-520g	1	0	1	1	1	1	C8orf4	chromosome 8 open reading frame 4
hsa-miR-520g	1	0	1	0	1	1	SLC17A6	solute carrier family 17 (sodium-dependent inorganic phosphate cotransporter), member 6
hsa-miR-520g	1	0	1	0	1	1	EIF5A2	eukaryotic translation initiation factor 5A2
hsa-miR-520g	0	0	1	1	1	1	EPPIN	epididymal peptidase inhibitor
hsa-miR-520g	0	0	1	1	0	0	LYRM4	LYR motif containing 4
hsa-miR-520g	1	0	1	1	1	1	PTGFRN	prostaglandin F2 receptor negative regulator
hsa-miR-520g	1	0	1	1	1	1	LYRM2	LYR motif containing 2
hsa-miR-520g	1	0	1	0	1	1	DCUN1D1	DCN1, defective in cullin neddylation 1, domain containing 1 (S. cerevisiae)
hsa-miR-520g	1	0	1	1	1	1	RAB22A	RAB22A, member RAS oncogene family
hsa-miR-520g	1	0	1	1	1	1	SLC24A3	solute carrier family 24 (sodium/potassium/calcium exchanger), member 3
hsa-miR-520g	1	0	1	0	1	1	FAM40B	family with sequence similarity 40, member B
hsa-miR-520g	0	0	1	1	1	1	SHROOM4	shroom family member 4
hsa-miR-520g	1	0	1	1	1	1	USP31	ubiquitin specific peptidase 31
hsa-miR-520g	1	0	1	1	1	1	ZNF608	zinc finger protein 608
hsa-miR-520g	1	0	1	0	1	1	NUFIP2	nuclear fragile X mental retardation protein interacting protein 2
hsa-miR-520g	1	0	1	0	1	1	ALPK3	alpha-kinase 3
hsa-miR-520g	1	0	1	1	1	1	NCEH1	neutral cholesterol ester hydrolase 1
hsa-miR-520g	0	0	1	1	1	1	ARRDC3	arrestin domain containing 3
hsa-miR-520g	1	0	1	1	1	1	KLHL14	kelch-like 14 (Drosophila)
hsa-miR-520g	0	0	1	0	1	1	SYT13	synaptotagmin XIII
hsa-miR-520g	1	0	1	0	1	1	WDFY1	WD repeat and FYVE domain containing 1
hsa-miR-520g	1	0	1	1	1	1	HOMEZ	homeobox and leucine zipper encoding
hsa-miR-520g	1	0	1	0	1	1	KIAA1456	KIAA1456
hsa-miR-520g	1	0	1	1	1	1	KIAA1467	KIAA1467
hsa-miR-520g	1	0	1	1	1	1	CNTN3	contactin 3 (plasmacytoma associated)
hsa-miR-520g	1	0	1	1	1	1	NIN	ninein (GSK3B interacting protein)
hsa-miR-520g	1	0	1	0	1	1	USP37	ubiquitin specific peptidase 37
hsa-miR-520g	1	0	1	1	1	1	FAM160B1	family with sequence similarity 160, member B1
hsa-miR-520g	1	0	1	1	1	1	ZNFX1	zinc finger, NFX1-type containing 1
hsa-miR-520g	1	0	1	1	1	1	HCN1	hyperpolarization activated cyclic nucleotide-gated potassium channel 1
hsa-miR-520g	1	0	1	1	1	1	MTMR3	myotubularin related protein 3
hsa-miR-520g	0	0	1	1	1	1	COL14A1	collagen, type XIV, alpha 1
hsa-miR-520g	0	0	1	1	1	1	RNASEL	ribonuclease L (2',5'-oligoisoadenylate synthetase-dependent)
hsa-miR-520g	1	0	1	1	1	1	GRHL3	grainyhead-like 3 (Drosophila)
hsa-miR-520g	0	0	1	0	1	1	MS4A7	membrane-spanning 4-domains, subfamily A, member 7
hsa-miR-520g	1	0	1	0	1	1	TP53INP2	tumor protein p53 inducible nuclear protein 2
hsa-miR-520g	1	0	1	1	1	1	FAM60A	family with sequence similarity 60, member A
hsa-miR-520g	1	0	1	1	1	1	PRDM12	PR domain containing 12
hsa-miR-520g	0	0	1	0	1	1	CFL2	cofilin 2 (muscle)
hsa-miR-520g	1	0	1	1	1	1	DMRT1	doublesex and mab-3 related transcription factor 1
hsa-miR-520g	1	0	1	0	1	1	MCL1	myeloid cell leukemia sequence 1 (BCL2-related)
hsa-miR-520g	1	0	1	1	1	1	NAP1L2	nucleosome assembly protein 1-like 2
hsa-miR-520g	0	0	1	1	1	1	PGM5	phosphoglucomutase 5
hsa-miR-520g	1	0	1	1	1	1	SEC24A	SEC24 family, member A (S. cerevisiae)
hsa-miR-520g	1	0	1	1	1	1	EGLN1	egl nine homolog 1 (C. elegans)
hsa-miR-520g	1	0	1	1	1	1	SNX16	sorting nexin 16
hsa-miR-520g	1	0	1	1	1	1	ABCG4	ATP-binding cassette, sub-family G (WHITE), member 4
hsa-miR-520g	0	0	1	1	0	0	KIF9	kinesin family member 9
hsa-miR-520g	0	0	1	1	0	0	EDDM3B	epididymal protein 3B
hsa-miR-520g	1	0	1	1	1	1	TMEM168	transmembrane protein 168
hsa-miR-520g	0	0	1	1	0	0	CSH2	chorionic somatomammotropin hormone 2
hsa-miR-520g	1	0	1	1	1	1	PRRX1	paired related homeobox 1
hsa-miR-520g	1	0	1	1	1	1	C16orf58	chromosome 16 open reading frame 58
hsa-miR-520g	1	0	1	1	1	1	C6orf106	chromosome 6 open reading frame 106
hsa-miR-520g	1	0	1	0	1	1	MAP1LC3B	microtubule-associated protein 1 light chain 3 beta
hsa-miR-520g	1	0	1	0	1	1	USP46	ubiquitin specific peptidase 46
hsa-miR-520g	0	0	1	1	1	1	METTL4	methyltransferase like 4
hsa-miR-520g	1	0	1	0	1	1	BCL11B	B-cell CLL/lymphoma 11B (zinc finger protein)
hsa-miR-520g	1	0	1	1	1	1	REEP1	receptor accessory protein 1
hsa-miR-520g	1	0	1	1	1	1	FOXL2	forkhead box L2
hsa-miR-520g	1	0	1	1	1	1	NEUROG2	neurogenin 2
hsa-miR-520g	1	0	1	1	1	1	C7orf23	chromosome 7 open reading frame 23
hsa-miR-520g	0	0	1	1	0	0	IRX3	iroquois homeobox 3
hsa-miR-520g	1	0	1	0	1	1	NOTCH2	notch 2
hsa-miR-520g	0	0	1	1	1	1	CEP70	centrosomal protein 70kDa
hsa-miR-520g	1	0	1	1	1	1	NKAIN1	Na+/K+ transporting ATPase interacting 1
hsa-miR-520g	1	0	1	1	1	1	CDC73	cell division cycle 73, Paf1/RNA polymerase II complex component, homolog (S. cerevisiae)
hsa-miR-520g	1	0	1	1	1	1	C10orf76	chromosome 10 open reading frame 76
hsa-miR-520g	1	0	1	1	1	1	PGBD5	piggyBac transposable element derived 5
hsa-miR-520g	1	0	1	0	1	1	PLEKHF2	pleckstrin homology domain containing, family F (with FYVE domain) member 2
hsa-miR-520g	0	0	1	1	1	1	GALNT12	UDP-N-acetyl-alpha-D-galactosamine:polypeptide N-acetylgalactosaminyltransferase 12 (GalNAc-T12)
hsa-miR-520g	1	0	1	1	1	1	C15orf29	chromosome 15 open reading frame 29
hsa-miR-520g	1	0	1	0	1	1	ZFHX4	zinc finger homeobox 4
hsa-miR-520g	1	0	1	0	1	1	MOB3B	MOB kinase activator 3B
hsa-miR-520g	1	0	1	1	1	1	L2HGDH	L-2-hydroxyglutarate dehydrogenase
hsa-miR-520g	0	0	1	1	1	1	DOCK5	dedicator of cytokinesis 5
hsa-miR-520g	0	0	1	1	0	0	TMEM156	transmembrane protein 156
hsa-miR-520g	1	0	1	1	1	1	KLHL18	kelch-like 18 (Drosophila)
hsa-miR-520g	0	0	1	1	1	1	ZNF606	zinc finger protein 606
hsa-miR-520g	1	0	1	1	1	1	NAA50	N(alpha)-acetyltransferase 50, NatE catalytic subunit
hsa-miR-520g	1	0	1	1	1	1	SLC35F5	solute carrier family 35, member F5
hsa-miR-520g	1	0	1	0	1	1	EDEM3	ER degradation enhancer, mannosidase alpha-like 3
hsa-miR-520g	0	0	1	0	1	1	PDGFD	platelet derived growth factor D
hsa-miR-520g	1	0	1	0	1	1	TET1	tet methylcytosine dioxygenase 1
hsa-miR-520g	1	0	1	1	1	1	JHDM1D	jumonji C domain containing histone demethylase 1 homolog D (S. cerevisiae)
hsa-miR-520g	1	0	1	1	1	1	NRBF2	nuclear receptor binding factor 2
hsa-miR-520g	1	0	1	1	1	1	ITFG1	integrin alpha FG-GAP repeat containing 1
hsa-miR-520g	1	0	1	0	1	1	VOPP1	vesicular, overexpressed in cancer, prosurvival protein 1
hsa-miR-520g	1	0	1	1	1	1	ANKRD13C	ankyrin repeat domain 13C
hsa-miR-520g	1	0	1	1	1	1	MAP4	microtubule-associated protein 4
hsa-miR-520g	1	0	1	1	1	1	TRIM8	tripartite motif containing 8
hsa-miR-520g	1	0	1	0	1	1	LBH	limb bud and heart development homolog (mouse)
hsa-miR-520g	1	0	1	1	1	1	C6orf62	chromosome 6 open reading frame 62
hsa-miR-520g	1	0	1	1	1	1	PPP1R14C	protein phosphatase 1, regulatory (inhibitor) subunit 14C
hsa-miR-520g	0	0	1	1	1	1	SPACA1	sperm acrosome associated 1
hsa-miR-520g	1	0	1	0	1	1	SPRY4	sprouty homolog 4 (Drosophila)
hsa-miR-520g	1	0	1	1	1	1	RAB1B	RAB1B, member RAS oncogene family
hsa-miR-520g	1	0	1	1	1	1	TEX14	testis expressed 14
hsa-miR-520g	1	0	1	0	1	1	RAB33B	RAB33B, member RAS oncogene family
hsa-miR-520g	1	0	1	0	1	1	TMEM47	transmembrane protein 47
hsa-miR-520g	1	0	1	0	1	1	SH3BGRL2	SH3 domain binding glutamic acid-rich protein like 2
hsa-miR-520g	1	0	1	1	1	1	PCDHA9	protocadherin alpha 9
hsa-miR-520g	0	0	1	0	1	1	ENAM	enamelin
hsa-miR-520g	0	0	1	0	0	0	KRTAP3-1	keratin associated protein 3-1
hsa-miR-520g	1	0	1	1	1	1	TMEM133	transmembrane protein 133
hsa-miR-520g	1	0	1	0	1	1	PCDHGA8	protocadherin gamma subfamily A, 8
hsa-miR-520g	0	0	1	0	1	1	RAB6C	RAB6C, member RAS oncogene family
hsa-miR-520g	1	0	1	1	1	1	DSEL	dermatan sulfate epimerase-like
hsa-miR-520g	0	0	1	1	1	1	RNASEH2C	ribonuclease H2, subunit C
hsa-miR-520g	1	0	1	0	1	1	FAR1	fatty acyl CoA reductase 1
hsa-miR-520g	1	0	1	1	0	0	MAF1	MAF1 homolog (S. cerevisiae)
hsa-miR-520g	1	0	1	1	1	1	CAMKK1	calcium/calmodulin-dependent protein kinase kinase 1, alpha
hsa-miR-520g	1	0	1	1	1	1	BRMS1L	breast cancer metastasis-suppressor 1-like
hsa-miR-520g	1	0	1	1	1	1	DNAJC14	DnaJ (Hsp40) homolog, subfamily C, member 14
hsa-miR-520g	1	0	1	1	1	1	HOOK3	hook homolog 3 (Drosophila)
hsa-miR-520g	1	0	1	1	1	1	PARD6B	par-6 partitioning defective 6 homolog beta (C. elegans)
hsa-miR-520g	1	0	1	1	0	0	ORAI1	ORAI calcium release-activated calcium modulator 1
hsa-miR-520g	1	0	1	1	1	1	JAM3	junctional adhesion molecule 3
hsa-miR-520g	1	0	1	0	1	1	PPP1R15B	protein phosphatase 1, regulatory subunit 15B
hsa-miR-520g	1	0	1	1	1	1	AJUBA	ajuba LIM protein
hsa-miR-520g	1	0	1	1	1	1	ARHGAP19	Rho GTPase activating protein 19
hsa-miR-520g	1	0	1	0	1	1	C5orf62	chromosome 5 open reading frame 62
hsa-miR-520g	0	0	1	0	1	1	TSLP	thymic stromal lymphopoietin
hsa-miR-520g	0	0	1	1	1	1	DMRTC1	DMRT-like family C1
hsa-miR-520g	1	0	1	1	1	1	HIAT1	hippocampus abundant transcript 1
hsa-miR-520g	1	0	1	0	1	1	EAF1	ELL associated factor 1
hsa-miR-520g	0	0	1	1	1	1	CABS1	calcium-binding protein, spermatid-specific 1
hsa-miR-520g	1	0	1	1	1	1	C5orf30	chromosome 5 open reading frame 30
hsa-miR-520g	1	0	1	0	1	1	PURB	purine-rich element binding protein B
hsa-miR-520g	1	0	1	1	1	1	ADAM19	ADAM metallopeptidase domain 19
hsa-miR-520g	1	0	1	0	1	1	FAM125B	family with sequence similarity 125, member B
hsa-miR-520g	1	0	1	1	1	1	EPT1	ethanolaminephosphotransferase 1 (CDP-ethanolamine-specific)
hsa-miR-520g	0	0	1	1	1	1	ARHGAP18	Rho GTPase activating protein 18
hsa-miR-520g	0	0	1	1	1	1	ZNF830	zinc finger protein 830
hsa-miR-520g	0	0	1	1	1	1	ZNF300	zinc finger protein 300
hsa-miR-520g	0	0	1	1	0	0	SIGLEC11	sialic acid binding Ig-like lectin 11
hsa-miR-520g	0	0	1	1	0	0	PGLYRP2	peptidoglycan recognition protein 2
hsa-miR-520g	0	0	1	1	1	1	PLEKHG4B	pleckstrin homology domain containing, family G (with RhoGef domain) member 4B
hsa-miR-520g	1	0	1	0	1	1	TMEM123	transmembrane protein 123
hsa-miR-520g	0	0	1	1	0	0	FAM46B	family with sequence similarity 46, member B
hsa-miR-520g	1	0	1	0	1	1	FAM129A	family with sequence similarity 129, member A
hsa-miR-520g	1	0	1	1	1	1	TRIM9	tripartite motif containing 9
hsa-miR-520g	1	0	1	1	0	0	AP1S1	adaptor-related protein complex 1, sigma 1 subunit
hsa-miR-520g	0	0	1	1	0	0	BSND	Bartter syndrome, infantile, with sensorineural deafness (Barttin)
hsa-miR-520g	0	0	1	1	1	1	CCNE2	cyclin E2
hsa-miR-520g	0	0	1	1	1	1	CLEC4D	C-type lectin domain family 4, member D
hsa-miR-520g	0	0	1	1	0	0	TCEAL2	transcription elongation factor A (SII)-like 2
hsa-miR-520g	1	0	1	1	1	1	SEPT4	septin 4
hsa-miR-520g	1	0	1	1	1	1	KCNE4	potassium voltage-gated channel, Isk-related family, member 4
hsa-miR-520g	1	0	1	1	1	1	ZNF280B	zinc finger protein 280B
hsa-miR-520g	1	0	1	0	1	1	STK35	serine/threonine kinase 35
hsa-miR-520g	1	0	1	0	1	1	SOCS4	suppressor of cytokine signaling 4
hsa-miR-520g	0	0	1	1	1	1	RHOV	ras homolog family member V
hsa-miR-520g	1	0	1	1	1	1	PANK1	pantothenate kinase 1
hsa-miR-520g	1	0	1	1	1	1	FAM122A	family with sequence similarity 122A
hsa-miR-520g	0	0	1	0	1	1	SP140L	SP140 nuclear body protein-like
hsa-miR-520g	0	0	1	1	1	1	CASC4	cancer susceptibility candidate 4
hsa-miR-520g	1	0	1	1	1	1	GLCCI1	glucocorticoid induced transcript 1
hsa-miR-520g	1	0	1	0	1	1	SP1	Sp1 transcription factor
hsa-miR-520g	0	0	1	1	1	1	MPLKIP	M-phase specific PLK1 interacting protein
hsa-miR-520g	0	0	1	1	1	1	SDR16C5	short chain dehydrogenase/reductase family 16C, member 5
hsa-miR-520g	1	0	1	1	1	1	BACE2	beta-site APP-cleaving enzyme 2
hsa-miR-520g	1	0	1	1	1	1	ARX	aristaless related homeobox
hsa-miR-520g	1	0	1	1	1	1	RPIA	ribose 5-phosphate isomerase A
hsa-miR-520g	0	0	1	0	0	0	CAPN13	calpain 13
hsa-miR-520g	1	0	1	1	1	1	MAPK1IP1L	mitogen-activated protein kinase 1 interacting protein 1-like
hsa-miR-520g	1	0	1	1	1	1	TEX261	testis expressed 261
hsa-miR-520g	0	0	1	1	0	0	MBD3L2	methyl-CpG binding domain protein 3-like 2
hsa-miR-520g	1	0	1	1	1	1	TMEM182	transmembrane protein 182
hsa-miR-520g	0	0	1	1	1	1	SESN3	sestrin 3
hsa-miR-520g	0	0	1	1	1	1	ZNF558	zinc finger protein 558
hsa-miR-520g	1	0	1	1	1	1	MBNL2	muscleblind-like splicing regulator 2
hsa-miR-520g	1	0	1	1	1	1	FAM91A1	family with sequence similarity 91, member A1
hsa-miR-520g	0	0	1	1	1	1	SLFN5	schlafen family member 5
hsa-miR-520g	1	0	1	1	1	1	YPEL4	yippee-like 4 (Drosophila)
hsa-miR-520g	0	0	1	1	0	0	GLYATL2	glycine-N-acyltransferase-like 2
hsa-miR-520g	1	0	1	0	1	1	ZBTB47	zinc finger and BTB domain containing 47
hsa-miR-520g	0	0	1	0	1	1	PIGM	phosphatidylinositol glycan anchor biosynthesis, class M
hsa-miR-520g	0	0	1	1	0	0	FANK1	fibronectin type III and ankyrin repeat domains 1
hsa-miR-520g	0	0	1	0	1	1	DDIT4L	DNA-damage-inducible transcript 4-like
hsa-miR-520g	1	0	1	1	1	1	LPIN1	lipin 1
hsa-miR-520g	1	0	1	1	1	1	ZNF396	zinc finger protein 396
hsa-miR-520g	1	0	1	1	1	1	SEPT6	septin 6
hsa-miR-520g	1	0	1	1	1	1	FAM110B	family with sequence similarity 110, member B
hsa-miR-520g	0	0	1	1	1	1	DEFB106A	defensin, beta 106A
hsa-miR-520g	0	0	1	0	1	1	CHKB	choline kinase beta
hsa-miR-520g	1	0	1	0	1	1	SYT11	synaptotagmin XI
hsa-miR-520g	0	0	1	1	1	1	CDYL2	chromodomain protein, Y-like 2
hsa-miR-520g	1	0	1	1	1	1	FAM123B	family with sequence similarity 123B
hsa-miR-520g	1	0	1	1	1	1	CEP128	centrosomal protein 128kDa
hsa-miR-520g	1	0	1	1	1	1	ZNF583	zinc finger protein 583
hsa-miR-520g	1	0	1	1	1	1	ZNF362	zinc finger protein 362
hsa-miR-520g	0	0	1	0	1	1	HORMAD2	HORMA domain containing 2
hsa-miR-520g	1	0	1	1	1	1	SLC16A14	solute carrier family 16, member 14 (monocarboxylic acid transporter 14)
hsa-miR-520g	1	0	1	1	1	1	C7orf60	chromosome 7 open reading frame 60
hsa-miR-520g	1	0	1	0	1	1	TMTC2	transmembrane and tetratricopeptide repeat containing 2
hsa-miR-520g	1	0	1	1	1	1	SPRED1	sprouty-related, EVH1 domain containing 1
hsa-miR-520g	0	0	1	1	0	0	RNF168	ring finger protein 168, E3 ubiquitin protein ligase
hsa-miR-520g	1	0	1	0	1	1	DCP2	DCP2 decapping enzyme homolog (S. cerevisiae)
hsa-miR-520g	1	0	1	0	1	1	ZBTB9	zinc finger and BTB domain containing 9
hsa-miR-520g	1	0	1	1	1	1	NXPH1	neurexophilin 1
hsa-miR-520g	1	0	1	1	1	1	PDIK1L	PDLIM1 interacting kinase 1 like
hsa-miR-520g	1	0	1	1	1	1	FAS	Fas (TNF receptor superfamily, member 6)
hsa-miR-520g	0	0	1	1	1	1	ZFP3	zinc finger protein 3 homolog (mouse)
hsa-miR-520g	1	0	1	1	1	1	IQCK	IQ motif containing K
hsa-miR-520g	0	0	1	1	1	1	FBXO39	F-box protein 39
hsa-miR-520g	0	0	1	1	1	1	BEND2	BEN domain containing 2
hsa-miR-520g	1	0	1	1	1	1	TMEM161B	transmembrane protein 161B
hsa-miR-520g	1	0	1	0	1	1	TAPT1	transmembrane anterior posterior transformation 1
[truncated: 810 more rows]
