# Supplementary material for: Profiling of Selected MicroRNAs in Proliferative Eutopic Endometrium of Women with Ovarian Endometriosis
Source: Biomed Res Int. 2015 Aug 20;2015:760698. doi: 10.1155/2015/760698 (PMC4558423; doi:10.1155/2015/760698)
Supplement: Supplementary file 1 — Table I: The names of miRNAs significantly differentially expressed between eutopic endometrium of patients with endometriosis vs eutopic endometrium of patients without endometriosis. Table II: The associations between miRNA and mRNA, which presents detailed results of the search of six major databases i.e targetscan, tarbase, miranda, mirbase, mirtarget2 and pictar. [file 760698.f1.zip › 760698.f1/Table II/hsa-miR-524-3p.tsv]

miR	targetscan	tarbase	miranda	mirbase	mirtarget2	pictar	GeneSymbol	GeneName
hsa-miR-524-3p	1	0	1	0	1	1	PTPRT	protein tyrosine phosphatase, receptor type, T
hsa-miR-524-3p	1	0	1	1	0	0	SEC14L5	SEC14-like 5 (S. cerevisiae)
hsa-miR-524-3p	1	0	1	1	1	1	NRXN1	neurexin 1
hsa-miR-524-3p	1	0	1	0	1	1	SNX13	sorting nexin 13
hsa-miR-524-3p	1	0	1	0	0	0	KIAA0947	KIAA0947
hsa-miR-524-3p	1	0	1	1	1	1	ASAP1	ArfGAP with SH3 domain, ankyrin repeat and PH domain 1
hsa-miR-524-3p	1	0	1	1	0	0	EBF4	early B-cell factor 4
hsa-miR-524-3p	0	0	1	1	0	0	ISLR2	immunoglobulin superfamily containing leucine-rich repeat 2
hsa-miR-524-3p	0	0	1	1	0	0	TMEM132A	transmembrane protein 132A
hsa-miR-524-3p	1	0	1	0	0	0	TANC2	tetratricopeptide repeat, ankyrin repeat and coiled-coil containing 2
hsa-miR-524-3p	0	0	1	1	1	1	SPEF2	sperm flagellar 2
hsa-miR-524-3p	1	0	1	1	1	1	NPAS3	neuronal PAS domain protein 3
hsa-miR-524-3p	0	0	1	1	0	0	SEC16B	SEC16 homolog B (S. cerevisiae)
hsa-miR-524-3p	1	0	1	1	1	1	SH3TC2	SH3 domain and tetratricopeptide repeats 2
hsa-miR-524-3p	1	0	1	0	0	0	ZBTB34	zinc finger and BTB domain containing 34
hsa-miR-524-3p	0	0	1	1	0	0	UMODL1	uromodulin-like 1
hsa-miR-524-3p	0	0	1	1	0	0	PTPRF	protein tyrosine phosphatase, receptor type, F
hsa-miR-524-3p	1	0	1	1	1	1	DAPK1	death-associated protein kinase 1
hsa-miR-524-3p	0	0	1	1	1	1	DGKE	diacylglycerol kinase, epsilon 64kDa
hsa-miR-524-3p	1	0	1	1	1	1	TBX2	T-box 2
hsa-miR-524-3p	0	0	1	1	1	1	ACO1	aconitase 1, soluble
hsa-miR-524-3p	0	0	1	1	0	0	IGFBP2	insulin-like growth factor binding protein 2, 36kDa
hsa-miR-524-3p	1	0	1	1	1	1	TEAD1	TEA domain family member 1 (SV40 transcriptional enhancer factor)
hsa-miR-524-3p	1	0	1	1	1	1	MYH10	myosin, heavy chain 10, non-muscle
hsa-miR-524-3p	0	0	1	0	0	0	TRPC2	transient receptor potential cation channel, subfamily C, member 2, pseudogene
hsa-miR-524-3p	1	0	1	1	1	1	DLGAP2	discs, large (Drosophila) homolog-associated protein 2
hsa-miR-524-3p	1	0	1	0	1	1	PDE4D	phosphodiesterase 4D, cAMP-specific
hsa-miR-524-3p	1	0	1	0	1	1	CD164	CD164 molecule, sialomucin
hsa-miR-524-3p	1	0	1	1	1	1	EDNRB	endothelin receptor type B
hsa-miR-524-3p	0	0	1	0	1	1	CLEC5A	C-type lectin domain family 5, member A
hsa-miR-524-3p	0	0	1	1	0	0	ANGPTL4	angiopoietin-like 4
hsa-miR-524-3p	0	0	1	1	1	1	NBPF14	neuroblastoma breakpoint family, member 14
hsa-miR-524-3p	0	0	1	1	0	0	FXYD5	FXYD domain containing ion transport regulator 5
hsa-miR-524-3p	1	0	1	1	1	1	ATP2C1	ATPase, Ca++ transporting, type 2C, member 1
hsa-miR-524-3p	0	0	1	1	0	0	ZAN	zonadhesin
hsa-miR-524-3p	1	0	1	1	1	1	PBX3	pre-B-cell leukemia homeobox 3
hsa-miR-524-3p	1	0	1	0	1	1	WIPF2	WAS/WASL interacting protein family, member 2
hsa-miR-524-3p	1	0	1	1	1	1	CALCOCO1	calcium binding and coiled-coil domain 1
hsa-miR-524-3p	0	0	1	0	0	0	NBPF10	neuroblastoma breakpoint family, member 10
hsa-miR-524-3p	1	0	1	1	1	1	RCAN1	regulator of calcineurin 1
hsa-miR-524-3p	0	0	1	0	0	0	MYO15B	myosin XVB pseudogene
hsa-miR-524-3p	1	0	1	1	1	1	HNRNPU	heterogeneous nuclear ribonucleoprotein U (scaffold attachment factor A)
hsa-miR-524-3p	1	0	1	1	1	1	PTBP2	polypyrimidine tract binding protein 2
hsa-miR-524-3p	1	0	1	0	1	1	GRB10	growth factor receptor-bound protein 10
hsa-miR-524-3p	0	0	1	0	0	0	TOMM6	translocase of outer mitochondrial membrane 6 homolog (yeast)
hsa-miR-524-3p	1	0	1	1	1	1	AKAP2	A kinase (PRKA) anchor protein 2
hsa-miR-524-3p	1	0	1	0	1	1	NFAT5	nuclear factor of activated T-cells 5, tonicity-responsive
hsa-miR-524-3p	0	0	1	1	0	0	CYP2W1	cytochrome P450, family 2, subfamily W, polypeptide 1
hsa-miR-524-3p	1	0	1	1	1	1	RIC8B	resistance to inhibitors of cholinesterase 8 homolog B (C. elegans)
hsa-miR-524-3p	1	0	1	1	1	1	PTBP3	polypyrimidine tract binding protein 3
hsa-miR-524-3p	1	0	1	1	1	1	ZNF395	zinc finger protein 395
hsa-miR-524-3p	0	0	1	1	1	1	STAU2	staufen, RNA binding protein, homolog 2 (Drosophila)
hsa-miR-524-3p	0	0	1	1	0	0	MLST8	MTOR associated protein, LST8 homolog (S. cerevisiae)
hsa-miR-524-3p	0	0	1	1	0	0	JMJD4	jumonji domain containing 4
hsa-miR-524-3p	0	0	1	0	0	0	LOC284561	uncharacterized LOC284561
hsa-miR-524-3p	0	0	1	1	1	1	EPG5	ectopic P-granules autophagy protein 5 homolog (C. elegans)
hsa-miR-524-3p	0	0	1	0	0	0	LOC286059	tumor necrosis factor receptor superfamily, member 10d, decoy with truncated death domain pseudogene
hsa-miR-524-3p	1	0	1	1	1	1	KANK1	KN motif and ankyrin repeat domains 1
hsa-miR-524-3p	0	0	1	1	1	1	MFSD7	major facilitator superfamily domain containing 7
hsa-miR-524-3p	0	0	1	0	0	0	A1BG-AS1	A1BG antisense RNA 1
hsa-miR-524-3p	1	0	1	1	1	1	TMEM2	transmembrane protein 2
hsa-miR-524-3p	1	0	1	1	1	1	FRMD6	FERM domain containing 6
hsa-miR-524-3p	0	0	1	1	1	1	SDK1	sidekick cell adhesion molecule 1
hsa-miR-524-3p	0	0	1	1	0	0	CHRM3	cholinergic receptor, muscarinic 3
hsa-miR-524-3p	1	0	1	0	1	1	PCGF3	polycomb group ring finger 3
hsa-miR-524-3p	1	0	1	1	0	0	GBA2	glucosidase, beta (bile acid) 2
hsa-miR-524-3p	1	0	1	1	1	1	BLCAP	bladder cancer associated protein
hsa-miR-524-3p	1	0	1	0	1	1	RNF165	ring finger protein 165
hsa-miR-524-3p	0	0	1	1	0	0	NISCH	nischarin
hsa-miR-524-3p	1	0	1	1	1	1	NDFIP1	Nedd4 family interacting protein 1
hsa-miR-524-3p	1	0	1	1	1	1	WDR20	WD repeat domain 20
hsa-miR-524-3p	1	0	1	1	1	1	TSN	translin
hsa-miR-524-3p	0	0	1	1	0	0	NDUFA4L2	NADH dehydrogenase (ubiquinone) 1 alpha subcomplex, 4-like 2
hsa-miR-524-3p	0	0	1	1	0	0	WBP1	WW domain binding protein 1
hsa-miR-524-3p	1	0	1	0	1	1	GATAD2B	GATA zinc finger domain containing 2B
hsa-miR-524-3p	0	0	1	0	1	1	AGBL4	ATP/GTP binding protein-like 4
hsa-miR-524-3p	1	0	1	1	1	1	CNEP1R1	CTD nuclear envelope phosphatase 1 regulatory subunit 1
hsa-miR-524-3p	1	0	1	1	1	1	SPATS2	spermatogenesis associated, serine-rich 2
hsa-miR-524-3p	1	0	1	1	0	0	FBRS	fibrosin
hsa-miR-524-3p	0	0	1	1	1	1	POLR1D	polymerase (RNA) I polypeptide D, 16kDa
hsa-miR-524-3p	0	0	1	1	0	0	FBXO16	F-box protein 16
hsa-miR-524-3p	0	0	1	1	1	1	FAM76A	family with sequence similarity 76, member A
hsa-miR-524-3p	1	0	1	1	0	0	DGCR6	DiGeorge syndrome critical region gene 6
hsa-miR-524-3p	0	0	1	1	0	0	KIAA0146	KIAA0146
hsa-miR-524-3p	0	0	1	1	0	0	MARS	methionyl-tRNA synthetase
hsa-miR-524-3p	0	0	1	1	1	1	C2orf91	chromosome 2 open reading frame 91
hsa-miR-524-3p	1	0	1	1	1	1	DLGAP4	discs, large (Drosophila) homolog-associated protein 4
hsa-miR-524-3p	1	0	1	1	1	1	KPNA1	karyopherin alpha 1 (importin alpha 5)
hsa-miR-524-3p	0	0	1	0	1	1	CTBP1-AS1	CTBP1 antisense RNA 1
hsa-miR-524-3p	1	0	1	1	1	1	SACM1L	SAC1 suppressor of actin mutations 1-like (yeast)
hsa-miR-524-3p	0	0	1	1	0	0	SPATS1	spermatogenesis associated, serine-rich 1
hsa-miR-524-3p	0	0	1	0	0	0	LOC100127955	uncharacterized LOC100127955
hsa-miR-524-3p	0	0	1	1	0	0	NCF1	neutrophil cytosolic factor 1
hsa-miR-524-3p	1	0	1	1	1	1	SLC12A6	solute carrier family 12 (potassium/chloride transporters), member 6
hsa-miR-524-3p	0	0	1	1	1	1	RAB13	RAB13, member RAS oncogene family
hsa-miR-524-3p	0	0	1	1	0	0	C9orf96	chromosome 9 open reading frame 96
hsa-miR-524-3p	1	0	1	1	0	0	ZNF219	zinc finger protein 219
hsa-miR-524-3p	1	0	1	1	1	1	DUSP3	dual specificity phosphatase 3
hsa-miR-524-3p	0	0	1	1	1	1	TTLL3	tubulin tyrosine ligase-like family, member 3
hsa-miR-524-3p	0	0	1	1	0	0	RIMBP3	RIMS binding protein 3
hsa-miR-524-3p	0	0	1	0	0	0	KIAA0913	KIAA0913
hsa-miR-524-3p	0	0	1	0	0	0	FAM66D	family with sequence similarity 66, member D
hsa-miR-524-3p	0	0	1	0	1	1	GAB3	GRB2-associated binding protein 3
hsa-miR-524-3p	0	0	1	1	1	1	EGFLAM	EGF-like, fibronectin type III and laminin G domains
hsa-miR-524-3p	1	0	1	0	1	1	STYX	serine/threonine/tyrosine interacting protein
hsa-miR-524-3p	0	0	1	1	1	1	YAP1	Yes-associated protein 1
hsa-miR-524-3p	0	0	1	0	0	0	EPHA1-AS1	EPHA1 antisense RNA 1
hsa-miR-524-3p	1	0	1	1	1	1	MARCH7	membrane-associated ring finger (C3HC4) 7, E3 ubiquitin protein ligase
hsa-miR-524-3p	1	0	1	1	1	1	PRPF38B	PRP38 pre-mRNA processing factor 38 (yeast) domain containing B
hsa-miR-524-3p	1	0	1	1	0	0	KIAA0895L	KIAA0895-like
hsa-miR-524-3p	1	0	1	0	1	1	NR3C1	nuclear receptor subfamily 3, group C, member 1 (glucocorticoid receptor)
hsa-miR-524-3p	0	0	1	1	0	0	DNAH1	dynein, axonemal, heavy chain 1
hsa-miR-524-3p	0	0	1	1	0	0	LRRC28	leucine rich repeat containing 28
hsa-miR-524-3p	0	0	1	0	0	0	PTPRVP	protein tyrosine phosphatase, receptor type, V, pseudogene
hsa-miR-524-3p	1	0	1	1	0	0	PLXNB3	plexin B3
hsa-miR-524-3p	0	0	1	1	1	1	PTDSS1	phosphatidylserine synthase 1
hsa-miR-524-3p	1	0	1	1	1	1	HOXC13	homeobox C13
hsa-miR-524-3p	1	0	1	1	1	1	TSPAN14	tetraspanin 14
hsa-miR-524-3p	1	0	1	1	0	0	DHDDS	dehydrodolichyl diphosphate synthase
hsa-miR-524-3p	1	0	1	1	1	1	SMO	smoothened, frizzled family receptor
hsa-miR-524-3p	1	0	1	1	1	1	MBNL1	muscleblind-like splicing regulator 1
hsa-miR-524-3p	0	0	1	1	1	1	SEMG1	semenogelin I
hsa-miR-524-3p	0	0	1	1	0	0	RBM14	RNA binding motif protein 14
hsa-miR-524-3p	1	0	1	1	1	1	KCNMA1	potassium large conductance calcium-activated channel, subfamily M, alpha member 1
hsa-miR-524-3p	0	0	1	0	0	0	LRRC14	leucine rich repeat containing 14
hsa-miR-524-3p	1	0	1	1	1	1	PRDM2	PR domain containing 2, with ZNF domain
hsa-miR-524-3p	0	0	1	1	1	1	EAF2	ELL associated factor 2
hsa-miR-524-3p	1	0	1	1	1	1	PAPOLA	poly(A) polymerase alpha
hsa-miR-524-3p	0	0	1	1	1	1	CSDE1	cold shock domain containing E1, RNA-binding
hsa-miR-524-3p	0	0	1	1	1	1	TARP	TCR gamma alternate reading frame protein
hsa-miR-524-3p	1	0	1	1	1	1	UHRF2	ubiquitin-like with PHD and ring finger domains 2, E3 ubiquitin protein ligase
hsa-miR-524-3p	1	0	1	1	1	1	TAF15	TAF15 RNA polymerase II, TATA box binding protein (TBP)-associated factor, 68kDa
hsa-miR-524-3p	1	0	1	1	1	1	RAB5B	RAB5B, member RAS oncogene family
hsa-miR-524-3p	1	0	1	1	0	0	FAM150B	family with sequence similarity 150, member B
hsa-miR-524-3p	0	0	1	1	1	1	ZNF337	zinc finger protein 337
hsa-miR-524-3p	0	0	1	1	1	1	PIK3CG	phosphatidylinositol-4,5-bisphosphate 3-kinase, catalytic subunit gamma
hsa-miR-524-3p	0	0	1	1	1	1	SNAPC3	small nuclear RNA activating complex, polypeptide 3, 50kDa
hsa-miR-524-3p	1	0	1	0	1	1	NEGR1	neuronal growth regulator 1
hsa-miR-524-3p	1	0	1	0	1	1	LPHN3	latrophilin 3
hsa-miR-524-3p	1	0	1	1	0	0	HES7	hairy and enhancer of split 7 (Drosophila)
hsa-miR-524-3p	0	0	1	0	1	1	HSBP1L1	heat shock factor binding protein 1-like 1
hsa-miR-524-3p	1	0	1	1	1	1	SLITRK3	SLIT and NTRK-like family, member 3
hsa-miR-524-3p	0	0	1	1	0	0	AQP12B	aquaporin 12B
hsa-miR-524-3p	1	0	1	1	1	1	PRRG1	proline rich Gla (G-carboxyglutamic acid) 1
hsa-miR-524-3p	1	0	1	1	1	1	AGAP3	ArfGAP with GTPase domain, ankyrin repeat and PH domain 3
hsa-miR-524-3p	0	0	1	1	1	1	MGC57346	uncharacterized LOC401884
hsa-miR-524-3p	0	0	1	1	0	0	TOM1	target of myb1 (chicken)
hsa-miR-524-3p	1	0	1	1	1	1	ANGPTL1	angiopoietin-like 1
hsa-miR-524-3p	0	0	1	1	1	1	LINC00086	long intergenic non-protein coding RNA 86
hsa-miR-524-3p	0	0	1	1	1	1	HLA-DQA1	major histocompatibility complex, class II, DQ alpha 1
hsa-miR-524-3p	1	0	1	1	1	1	SCUBE3	signal peptide, CUB domain, EGF-like 3
hsa-miR-524-3p	0	0	1	1	0	0	HIST1H3E	histone cluster 1, H3e
hsa-miR-524-3p	0	0	1	1	0	0	LY6H	lymphocyte antigen 6 complex, locus H
hsa-miR-524-3p	0	0	1	1	0	0	GRIN2C	glutamate receptor, ionotropic, N-methyl D-aspartate 2C
hsa-miR-524-3p	1	0	1	1	1	1	GTDC1	glycosyltransferase-like domain containing 1
hsa-miR-524-3p	0	0	1	1	1	1	SCLT1	sodium channel and clathrin linker 1
hsa-miR-524-3p	0	0	1	1	0	0	CELF3	CUGBP, Elav-like family member 3
hsa-miR-524-3p	1	0	1	1	1	1	SULF1	sulfatase 1
hsa-miR-524-3p	0	0	1	0	0	0	CHADL	chondroadherin-like
hsa-miR-524-3p	0	0	1	1	0	0	NDUFAF2	NADH dehydrogenase (ubiquinone) complex I, assembly factor 2
hsa-miR-524-3p	0	0	1	0	0	0	LOC100147773	uncharacterized LOC100147773
hsa-miR-524-3p	0	0	1	1	1	1	TNFSF12	tumor necrosis factor (ligand) superfamily, member 12
hsa-miR-524-3p	0	0	1	0	0	0	TRGV9	T cell receptor gamma variable 9
hsa-miR-524-3p	0	0	1	1	1	1	IRX5	iroquois homeobox 5
hsa-miR-524-3p	0	0	1	0	0	0	C17orf89	chromosome 17 open reading frame 89
hsa-miR-524-3p	1	0	1	1	1	1	ZBTB7A	zinc finger and BTB domain containing 7A
hsa-miR-524-3p	1	0	1	1	1	1	GTF2I	general transcription factor IIi
hsa-miR-524-3p	0	0	1	1	0	0	RIPPLY1	ripply1 homolog (zebrafish)
hsa-miR-524-3p	1	0	1	1	1	1	NR3C2	nuclear receptor subfamily 3, group C, member 2
hsa-miR-524-3p	0	0	1	1	0	0	RGSL1	regulator of G-protein signaling like 1
hsa-miR-524-3p	0	0	1	1	1	1	ZNF189	zinc finger protein 189
hsa-miR-524-3p	1	0	1	1	1	1	CHIC1	cysteine-rich hydrophobic domain 1
hsa-miR-524-3p	0	0	1	0	0	0	FUT8-AS1	FUT8 antisense RNA 1
hsa-miR-524-3p	0	0	1	0	0	0	MEG3	maternally expressed 3 (non-protein coding)
hsa-miR-524-3p	1	0	1	1	1	1	CHGA	chromogranin A (parathyroid secretory protein 1)
hsa-miR-524-3p	1	0	1	1	1	1	BTBD7	BTB (POZ) domain containing 7
hsa-miR-524-3p	1	0	1	1	1	1	ETS1	v-ets erythroblastosis virus E26 oncogene homolog 1 (avian)
hsa-miR-524-3p	1	0	1	1	1	1	SPPL3	signal peptide peptidase like 3
hsa-miR-524-3p	0	0	1	0	0	0	LOC286299	uncharacterized LOC286299
hsa-miR-524-3p	0	0	1	0	1	1	IDO1	indoleamine 2,3-dioxygenase 1
hsa-miR-524-3p	0	0	1	0	0	0	LOC401127	WD repeat domain 5 pseudogene
hsa-miR-524-3p	0	0	1	1	1	1	SEC22C	SEC22 vesicle trafficking protein homolog C (S. cerevisiae)
hsa-miR-524-3p	0	0	1	1	0	0	GTF2H4	general transcription factor IIH, polypeptide 4, 52kDa
hsa-miR-524-3p	1	0	1	1	1	1	E2F5	E2F transcription factor 5, p130-binding
hsa-miR-524-3p	0	0	1	1	0	0	DNAJB2	DnaJ (Hsp40) homolog, subfamily B, member 2
hsa-miR-524-3p	0	0	1	1	1	1	ASCC2	activating signal cointegrator 1 complex subunit 2
hsa-miR-524-3p	0	0	1	1	1	1	ZC3HC1	zinc finger, C3HC-type containing 1
hsa-miR-524-3p	0	0	1	1	0	0	CDK2AP2	cyclin-dependent kinase 2 associated protein 2
hsa-miR-524-3p	0	0	1	1	0	0	CCDC22	coiled-coil domain containing 22
hsa-miR-524-3p	0	0	1	0	1	1	SUMO2	SMT3 suppressor of mif two 3 homolog 2 (S. cerevisiae)
hsa-miR-524-3p	0	0	1	1	0	0	AATF	apoptosis antagonizing transcription factor
hsa-miR-524-3p	1	0	1	1	0	0	ATP6V1B2	ATPase, H+ transporting, lysosomal 56/58kDa, V1 subunit B2
hsa-miR-524-3p	0	0	1	1	1	1	HOXC9	homeobox C9
hsa-miR-524-3p	0	0	1	1	0	0	TUSC3	tumor suppressor candidate 3
hsa-miR-524-3p	0	0	1	1	1	1	APOPT1	apoptogenic 1, mitochondrial
hsa-miR-524-3p	0	0	1	0	0	0	FAM92A1	family with sequence similarity 92, member A1
hsa-miR-524-3p	1	0	1	1	1	1	DNAJC16	DnaJ (Hsp40) homolog, subfamily C, member 16
hsa-miR-524-3p	1	0	1	1	1	1	QKI	QKI, KH domain containing, RNA binding
hsa-miR-524-3p	0	0	1	1	1	1	CCKBR	cholecystokinin B receptor
hsa-miR-524-3p	1	0	1	1	0	0	LGSN	lengsin, lens protein with glutamine synthetase domain
hsa-miR-524-3p	1	0	1	1	1	1	IRF1	interferon regulatory factor 1
hsa-miR-524-3p	0	0	1	0	0	0	GPR144	G protein-coupled receptor 144
hsa-miR-524-3p	0	0	1	1	1	1	ATP7A	ATPase, Cu++ transporting, alpha polypeptide
hsa-miR-524-3p	1	0	1	0	1	1	SLC26A2	solute carrier family 26 (sulfate transporter), member 2
hsa-miR-524-3p	1	0	1	1	1	1	MITF	microphthalmia-associated transcription factor
hsa-miR-524-3p	0	0	1	1	1	1	PLEC	plectin
hsa-miR-524-3p	0	0	1	1	0	0	AK1	adenylate kinase 1
hsa-miR-524-3p	0	0	1	0	1	1	CCR5	chemokine (C-C motif) receptor 5 (gene/pseudogene)
hsa-miR-524-3p	0	0	1	1	1	1	CRAT	carnitine O-acetyltransferase
hsa-miR-524-3p	1	0	1	1	1	1	IGF2R	insulin-like growth factor 2 receptor
hsa-miR-524-3p	1	0	1	0	1	1	SMAD5	SMAD family member 5
hsa-miR-524-3p	1	0	1	0	1	1	ARHGEF37	Rho guanine nucleotide exchange factor (GEF) 37
hsa-miR-524-3p	1	0	1	1	1	1	PLCXD3	phosphatidylinositol-specific phospholipase C, X domain containing 3
hsa-miR-524-3p	1	0	1	0	1	1	IP6K1	inositol hexakisphosphate kinase 1
hsa-miR-524-3p	1	0	1	1	0	0	RPS6KA1	ribosomal protein S6 kinase, 90kDa, polypeptide 1
hsa-miR-524-3p	1	0	1	1	1	1	CTDSPL	CTD (carboxy-terminal domain, RNA polymerase II, polypeptide A) small phosphatase-like
hsa-miR-524-3p	0	0	1	1	1	1	FAM53A	family with sequence similarity 53, member A
hsa-miR-524-3p	0	0	1	1	1	1	C2orf68	chromosome 2 open reading frame 68
hsa-miR-524-3p	1	0	1	1	1	1	RCE1	RCE1 homolog, prenyl protein protease (S. cerevisiae)
hsa-miR-524-3p	1	0	1	1	1	1	MYCL1	v-myc myelocytomatosis viral oncogene homolog 1, lung carcinoma derived (avian)
hsa-miR-524-3p	1	0	1	0	1	1	SRGAP3	SLIT-ROBO Rho GTPase activating protein 3
hsa-miR-524-3p	0	0	1	1	1	1	FAM134B	family with sequence similarity 134, member B
hsa-miR-524-3p	1	0	1	0	1	1	RYR2	ryanodine receptor 2 (cardiac)
hsa-miR-524-3p	1	0	1	1	1	1	NCALD	neurocalcin delta
hsa-miR-524-3p	0	0	1	1	1	1	NUPR1	nuclear protein, transcriptional regulator, 1
hsa-miR-524-3p	0	0	1	0	1	1	WTH3DI	RAB6C-like
hsa-miR-524-3p	0	0	1	1	0	0	LMTK3	lemur tyrosine kinase 3
hsa-miR-524-3p	1	0	1	1	1	1	MYO1C	myosin IC
hsa-miR-524-3p	0	0	1	1	1	1	TNFSF8	tumor necrosis factor (ligand) superfamily, member 8
hsa-miR-524-3p	0	0	1	1	0	0	DIO3	deiodinase, iodothyronine, type III
hsa-miR-524-3p	1	0	1	0	1	1	EFNB3	ephrin-B3
hsa-miR-524-3p	1	0	1	0	1	1	B4GALT1	UDP-Gal:betaGlcNAc beta 1,4- galactosyltransferase, polypeptide 1
hsa-miR-524-3p	1	0	1	1	1	1	ADRBK1	adrenergic, beta, receptor kinase 1
hsa-miR-524-3p	1	0	1	1	1	1	EGR1	early growth response 1
hsa-miR-524-3p	0	0	1	1	0	0	GJA4	gap junction protein, alpha 4, 37kDa
hsa-miR-524-3p	0	0	1	1	0	0	GPX3	glutathione peroxidase 3 (plasma)
hsa-miR-524-3p	0	0	1	0	1	1	GYPA	glycophorin A (MNS blood group)
hsa-miR-524-3p	1	0	1	1	0	0	INHBB	inhibin, beta B
hsa-miR-524-3p	1	0	1	1	1	1	KCNA5	potassium voltage-gated channel, shaker-related subfamily, member 5
hsa-miR-524-3p	1	0	1	1	1	1	KPNB1	karyopherin (importin) beta 1
hsa-miR-524-3p	0	0	1	1	0	0	KRT85	keratin 85
hsa-miR-524-3p	1	0	1	1	1	1	ME1	malic enzyme 1, NADP(+)-dependent, cytosolic
hsa-miR-524-3p	0	0	1	0	1	1	CXCL9	chemokine (C-X-C motif) ligand 9
hsa-miR-524-3p	1	0	1	1	1	1	NPAT	nuclear protein, ataxia-telangiectasia locus
hsa-miR-524-3p	1	0	1	0	1	1	NRAS	neuroblastoma RAS viral (v-ras) oncogene homolog
hsa-miR-524-3p	1	0	1	1	1	1	OSBP	oxysterol binding protein
hsa-miR-524-3p	1	0	1	0	0	0	PPP1R10	protein phosphatase 1, regulatory subunit 10
hsa-miR-524-3p	0	0	1	1	0	0	SLIT1	slit homolog 1 (Drosophila)
hsa-miR-524-3p	0	0	1	1	1	1	STRN	striatin, calmodulin binding protein
hsa-miR-524-3p	1	0	1	1	1	1	SYN2	synapsin II
hsa-miR-524-3p	1	0	1	1	1	1	TAF4	TAF4 RNA polymerase II, TATA box binding protein (TBP)-associated factor, 135kDa
hsa-miR-524-3p	1	0	1	1	1	1	TFAP2B	transcription factor AP-2 beta (activating enhancer binding protein 2 beta)
hsa-miR-524-3p	1	0	1	0	1	1	BSN	bassoon (presynaptic cytomatrix protein)
hsa-miR-524-3p	0	0	1	1	0	0	HIST1H2BC	histone cluster 1, H2bc
hsa-miR-524-3p	1	0	1	1	1	1	BARX2	BARX homeobox 2
hsa-miR-524-3p	0	0	1	1	1	1	SLC25A12	solute carrier family 25 (aspartate/glutamate carrier), member 12
hsa-miR-524-3p	0	0	1	1	1	1	TNFSF13	tumor necrosis factor (ligand) superfamily, member 13
hsa-miR-524-3p	1	0	1	1	1	1	NRP2	neuropilin 2
hsa-miR-524-3p	0	0	1	1	1	1	PRPF4B	PRP4 pre-mRNA processing factor 4 homolog B (yeast)
hsa-miR-524-3p	0	0	1	0	1	1	HABP2	hyaluronan binding protein 2
hsa-miR-524-3p	1	0	1	1	1	1	DAG1	dystroglycan 1 (dystrophin-associated glycoprotein 1)
hsa-miR-524-3p	1	0	1	1	1	1	EFNB1	ephrin-B1
hsa-miR-524-3p	1	0	1	1	0	0	HOXC6	homeobox C6
hsa-miR-524-3p	1	0	1	1	1	1	ONECUT2	one cut homeobox 2
hsa-miR-524-3p	1	0	1	1	1	1	FXR2	fragile X mental retardation, autosomal homolog 2
hsa-miR-524-3p	1	0	1	1	1	1	HAS3	hyaluronan synthase 3
hsa-miR-524-3p	0	0	1	1	1	1	ST5	suppression of tumorigenicity 5
hsa-miR-524-3p	1	0	1	1	1	1	ABCA1	ATP-binding cassette, sub-family A (ABC1), member 1
hsa-miR-524-3p	1	0	1	1	1	1	HOXA1	homeobox A1
hsa-miR-524-3p	0	0	1	1	1	1	HES1	hairy and enhancer of split 1, (Drosophila)
hsa-miR-524-3p	1	0	1	1	1	1	MAT2A	methionine adenosyltransferase II, alpha
hsa-miR-524-3p	1	0	1	1	1	1	PKN2	protein kinase N2
hsa-miR-524-3p	1	0	1	1	1	1	ITSN2	intersectin 2
hsa-miR-524-3p	1	0	1	1	1	1	TLN1	talin 1
hsa-miR-524-3p	1	0	1	1	1	1	NEBL	nebulette
hsa-miR-524-3p	1	0	1	0	1	1	GNAI3	guanine nucleotide binding protein (G protein), alpha inhibiting activity polypeptide 3
hsa-miR-524-3p	1	0	1	0	1	1	IGF2BP1	insulin-like growth factor 2 mRNA binding protein 1
hsa-miR-524-3p	1	0	1	1	1	1	NR4A3	nuclear receptor subfamily 4, group A, member 3
hsa-miR-524-3p	1	0	1	1	1	1	PALM2-AKAP2	PALM2-AKAP2 readthrough
hsa-miR-524-3p	1	0	1	1	0	0	GRIN1	glutamate receptor, ionotropic, N-methyl D-aspartate 1
hsa-miR-524-3p	0	0	1	1	1	1	KLRK1	killer cell lectin-like receptor subfamily K, member 1
hsa-miR-524-3p	0	0	1	1	0	0	LTB	lymphotoxin beta (TNF superfamily, member 3)
hsa-miR-524-3p	0	0	1	1	1	1	FOXI1	forkhead box I1
hsa-miR-524-3p	1	0	1	0	1	1	FZD4	frizzled family receptor 4
hsa-miR-524-3p	1	0	1	1	1	1	RHOQ	ras homolog family member Q
hsa-miR-524-3p	1	0	1	0	1	1	MYO10	myosin X
hsa-miR-524-3p	1	0	1	1	1	1	STK39	serine threonine kinase 39
hsa-miR-524-3p	1	0	1	1	1	1	AK2	adenylate kinase 2
hsa-miR-524-3p	1	0	1	1	1	1	ZBTB11	zinc finger and BTB domain containing 11
hsa-miR-524-3p	1	0	1	1	1	1	SERP1	stress-associated endoplasmic reticulum protein 1
hsa-miR-524-3p	1	0	1	0	1	1	EDEM1	ER degradation enhancer, mannosidase alpha-like 1
hsa-miR-524-3p	0	0	1	1	1	1	VPRBP	Vpr (HIV-1) binding protein
hsa-miR-524-3p	1	0	1	0	1	1	MLEC	malectin
hsa-miR-524-3p	1	0	1	0	1	1	SERTAD2	SERTA domain containing 2
hsa-miR-524-3p	1	0	1	1	1	1	DAZAP2	DAZ associated protein 2
hsa-miR-524-3p	1	0	1	1	0	0	CIC	capicua homolog (Drosophila)
hsa-miR-524-3p	1	0	1	1	1	1	TBC1D9	TBC1 domain family, member 9 (with GRAM domain)
hsa-miR-524-3p	0	0	1	1	1	1	DOCK9	dedicator of cytokinesis 9
hsa-miR-524-3p	1	0	1	1	1	1	SLITRK5	SLIT and NTRK-like family, member 5
hsa-miR-524-3p	1	0	1	0	1	1	PPP1R16B	protein phosphatase 1, regulatory subunit 16B
hsa-miR-524-3p	0	0	1	1	1	1	CCDC69	coiled-coil domain containing 69
hsa-miR-524-3p	0	0	1	1	1	1	C10orf12	chromosome 10 open reading frame 12
hsa-miR-524-3p	1	0	1	1	1	1	ABCA12	ATP-binding cassette, sub-family A (ABC1), member 12
hsa-miR-524-3p	0	0	1	1	1	1	RSL24D1	ribosomal L24 domain containing 1
hsa-miR-524-3p	0	0	1	1	1	1	BET1L	blocked early in transport 1 homolog (S. cerevisiae)-like
hsa-miR-524-3p	1	0	1	1	1	1	PLXNA3	plexin A3
hsa-miR-524-3p	1	0	1	1	1	1	FBXO34	F-box protein 34
hsa-miR-524-3p	0	0	1	1	1	1	NPAP1	nuclear pore associated protein 1
hsa-miR-524-3p	1	0	1	1	0	0	JPH2	junctophilin 2
hsa-miR-524-3p	0	0	1	1	1	1	SHROOM4	shroom family member 4
hsa-miR-524-3p	1	0	1	1	1	1	ZNF608	zinc finger protein 608
hsa-miR-524-3p	1	0	1	1	1	1	RANBP10	RAN binding protein 10
hsa-miR-524-3p	1	0	1	0	1	1	GPAM	glycerol-3-phosphate acyltransferase, mitochondrial
hsa-miR-524-3p	0	0	1	1	1	1	TLX3	T-cell leukemia homeobox 3
hsa-miR-524-3p	0	0	1	1	1	1	RNASEL	ribonuclease L (2',5'-oligoisoadenylate synthetase-dependent)
hsa-miR-524-3p	1	0	1	1	1	1	GNB4	guanine nucleotide binding protein (G protein), beta polypeptide 4
hsa-miR-524-3p	1	0	1	1	1	1	ATP2B3	ATPase, Ca++ transporting, plasma membrane 3
hsa-miR-524-3p	1	0	1	1	1	1	GPR88	G protein-coupled receptor 88
hsa-miR-524-3p	1	0	1	1	1	1	FAM160B2	family with sequence similarity 160, member B2
hsa-miR-524-3p	0	0	1	1	1	1	OSBPL11	oxysterol binding protein-like 11
hsa-miR-524-3p	1	0	1	1	1	1	EBF1	early B-cell factor 1
hsa-miR-524-3p	0	0	1	1	1	1	GGNBP2	gametogenetin binding protein 2
hsa-miR-524-3p	1	0	1	1	1	1	MCF2L	MCF.2 cell line derived transforming sequence-like
hsa-miR-524-3p	1	0	1	1	1	1	FAM117A	family with sequence similarity 117, member A
hsa-miR-524-3p	1	0	1	1	1	1	SNX27	sorting nexin family member 27
hsa-miR-524-3p	1	0	1	0	1	1	THAP2	THAP domain containing, apoptosis associated protein 2
hsa-miR-524-3p	1	0	1	1	1	1	OTP	orthopedia homeobox
hsa-miR-524-3p	0	0	1	1	1	1	MAGT1	magnesium transporter 1
hsa-miR-524-3p	0	0	1	0	1	1	RAB6C	RAB6C, member RAS oncogene family
hsa-miR-524-3p	1	0	1	1	1	1	EPT1	ethanolaminephosphotransferase 1 (CDP-ethanolamine-specific)
hsa-miR-524-3p	0	0	1	1	1	1	NACC1	nucleus accumbens associated 1, BEN and BTB (POZ) domain containing
hsa-miR-524-3p	1	0	1	1	1	1	NAA15	N(alpha)-acetyltransferase 15, NatA auxiliary subunit
hsa-miR-524-3p	1	0	1	0	1	1	STK35	serine/threonine kinase 35
hsa-miR-524-3p	1	0	1	1	1	1	FAM122A	family with sequence similarity 122A
hsa-miR-524-3p	1	0	1	1	1	1	ICA1L	islet cell autoantigen 1,69kDa-like
hsa-miR-524-3p	0	0	1	1	1	1	SLC25A46	solute carrier family 25, member 46
hsa-miR-524-3p	1	0	1	1	1	1	FAM91A1	family with sequence similarity 91, member A1
hsa-miR-524-3p	1	0	1	1	1	1	ANKRD23	ankyrin repeat domain 23
hsa-miR-524-3p	0	0	1	1	0	0	TCEB3C	transcription elongation factor B polypeptide 3C (elongin A3)
hsa-miR-524-3p	0	0	1	1	0	0	TIGD3	tigger transposable element derived 3
hsa-miR-524-3p	1	0	1	1	1	1	SEPT6	septin 6
hsa-miR-524-3p	1	0	1	1	1	1	NAP1L5	nucleosome assembly protein 1-like 5
hsa-miR-524-3p	1	0	1	1	1	1	POM121	POM121 transmembrane nucleoporin
hsa-miR-524-3p	0	0	1	1	1	1	TNFSF12-TNFSF13	TNFSF12-TNFSF13 readthrough
hsa-miR-524-3p	0	0	1	1	1	1	KCNH5	potassium voltage-gated channel, subfamily H (eag-related), member 5
hsa-miR-524-3p	0	0	1	1	0	0	SLITRK4	SLIT and NTRK-like family, member 4
hsa-miR-524-3p	1	0	1	0	1	1	KSR2	kinase suppressor of ras 2
hsa-miR-524-3p	0	0	1	1	1	1	CLEC14A	C-type lectin domain family 14, member A
hsa-miR-524-3p	0	0	1	1	1	1	SESTD1	SEC14 and spectrin domains 1
hsa-miR-524-3p	1	0	1	1	1	1	TMEM26	transmembrane protein 26
hsa-miR-524-3p	0	0	1	0	1	1	SLCO4C1	solute carrier organic anion transporter family, member 4C1
hsa-miR-524-3p	0	0	1	0	1	1	PITPNC1	phosphatidylinositol transfer protein, cytoplasmic 1
hsa-miR-524-3p	1	0	1	1	1	1	ADAT2	adenosine deaminase, tRNA-specific 2
hsa-miR-524-3p	1	0	1	1	1	1	TMEM229B	transmembrane protein 229B
hsa-miR-524-3p	1	0	1	1	1	1	SUMF1	sulfatase modifying factor 1
hsa-miR-524-3p	1	0	1	1	1	1	ADAMTS6	ADAM metallopeptidase with thrombospondin type 1 motif, 6
hsa-miR-524-3p	0	0	1	1	1	1	COL18A1-AS1	COL18A1 antisense RNA 1
hsa-miR-524-3p	0	0	1	1	1	1	SHC4	SHC (Src homology 2 domain containing) family, member 4
hsa-miR-524-3p	0	0	1	0	1	1	TP73-AS1	TP73 antisense RNA 1
hsa-miR-524-3p	0	0	1	0	1	1	C1orf220	chromosome 1 open reading frame 220
hsa-miR-524-3p	0	0	1	0	0	0	GTF2IP1	general transcription factor IIi, pseudogene 1
hsa-miR-524-3p	0	0	1	0	0	0	RPL29P2	ribosomal protein L29 pseudogene 2
hsa-miR-524-3p	0	0	1	0	0	0	HOXA11-AS	HOXA11 antisense RNA
hsa-miR-524-3p	0	0	1	0	0	0	MALAT1	metastasis associated lung adenocarcinoma transcript 1 (non-protein coding)
hsa-miR-524-3p	0	0	1	0	0	0	SNORA60	small nucleolar RNA, H/ACA box 60
hsa-miR-524-3p	0	0	0	1	0	0	KRT33A	keratin 33A
hsa-miR-524-3p	0	0	0	1	1	1	ABHD5	abhydrolase domain containing 5
hsa-miR-524-3p	0	0	0	1	0	0	TARBP1	TAR (HIV-1) RNA binding protein 1
hsa-miR-524-3p	0	0	1	1	1	1	GRN	granulin
hsa-miR-524-3p	0	0	1	1	1	1	HEBP2	heme binding protein 2
hsa-miR-524-3p	0	0	1	1	1	1	CREB3L3	cAMP responsive element binding protein 3-like 3
hsa-miR-524-3p	0	0	0	1	0	0	FAM50A	family with sequence similarity 50, member A
hsa-miR-524-3p	1	0	1	1	1	1	KDM4B	lysine (K)-specific demethylase 4B
hsa-miR-524-3p	1	0	1	1	1	1	PRSS22	protease, serine, 22
hsa-miR-524-3p	0	0	0	1	0	0	DRD4	dopamine receptor D4
hsa-miR-524-3p	0	0	0	1	0	0	GMIP	GEM interacting protein
hsa-miR-524-3p	0	0	1	1	1	1	CHRD	chordin
hsa-miR-524-3p	0	0	1	1	0	0	GLG1	golgi glycoprotein 1
hsa-miR-524-3p	0	0	0	1	1	1	LAMB4	laminin, beta 4
hsa-miR-524-3p	0	0	0	1	0	0	GSTA3	glutathione S-transferase alpha 3
hsa-miR-524-3p	0	0	0	1	0	0	TMED1	transmembrane emp24 protein transport domain containing 1
hsa-miR-524-3p	0	0	0	1	0	0	CATSPERG	catsper channel auxiliary subunit gamma
hsa-miR-524-3p	1	0	1	1	1	1	PATZ1	POZ (BTB) and AT hook containing zinc finger 1
hsa-miR-524-3p	0	0	1	1	0	0	GSTZ1	glutathione S-transferase zeta 1
hsa-miR-524-3p	0	0	1	1	0	0	IDH3G	isocitrate dehydrogenase 3 (NAD+) gamma
hsa-miR-524-3p	0	0	0	1	0	0	RENBP	renin binding protein
hsa-miR-524-3p	0	0	0	1	0	0	CCL17	chemokine (C-C motif) ligand 17
hsa-miR-524-3p	0	0	1	1	0	0	CTSH	cathepsin H
hsa-miR-524-3p	0	0	1	1	1	1	FGL1	fibrinogen-like 1
hsa-miR-524-3p	1	0	1	1	1	1	SNRNP70	small nuclear ribonucleoprotein 70kDa (U1)
hsa-miR-524-3p	0	0	0	1	0	0	CCDC130	coiled-coil domain containing 130
hsa-miR-524-3p	0	0	0	1	1	1	TGFB1	transforming growth factor, beta 1
hsa-miR-524-3p	0	0	1	1	1	1	GCDH	glutaryl-CoA dehydrogenase
hsa-miR-524-3p	0	0	1	1	0	0	PSENEN	presenilin enhancer 2 homolog (C. elegans)
hsa-miR-524-3p	0	0	0	1	0	0	GAPDHS	glyceraldehyde-3-phosphate dehydrogenase, spermatogenic
hsa-miR-524-3p	0	0	1	1	0	0	DLX5	distal-less homeobox 5
hsa-miR-524-3p	1	0	1	1	1	1	LSM5	LSM5 homolog, U6 small nuclear RNA associated (S. cerevisiae)
hsa-miR-524-3p	0	0	1	1	0	0	PLOD3	procollagen-lysine, 2-oxoglutarate 5-dioxygenase 3
hsa-miR-524-3p	1	0	1	1	1	1	VIM	vimentin
hsa-miR-524-3p	1	0	1	1	0	0	SLC25A39	solute carrier family 25, member 39
hsa-miR-524-3p	0	0	0	1	1	1	SUPT4H1	suppressor of Ty 4 homolog 1 (S. cerevisiae)
hsa-miR-524-3p	1	0	0	1	1	1	WNT3	wingless-type MMTV integration site family, member 3
hsa-miR-524-3p	0	0	0	1	0	0	HSD17B1	hydroxysteroid (17-beta) dehydrogenase 1
hsa-miR-524-3p	0	0	0	1	0	0	RCVRN	recoverin
hsa-miR-524-3p	0	0	1	1	1	1	GAR1	GAR1 ribonucleoprotein homolog (yeast)
hsa-miR-524-3p	0	0	1	1	1	1	PUS3	pseudouridylate synthase 3
hsa-miR-524-3p	0	0	1	1	1	1	CCDC86	coiled-coil domain containing 86
hsa-miR-524-3p	0	0	1	1	0	0	MVK	mevalonate kinase
hsa-miR-524-3p	0	0	0	1	0	0	MYF6	myogenic factor 6 (herculin)
hsa-miR-524-3p	1	0	1	1	1	1	ELK3	ELK3, ETS-domain protein (SRF accessory protein 2)
hsa-miR-524-3p	0	0	0	1	0	0	OGFOD2	2-oxoglutarate and iron-dependent oxygenase domain containing 2
hsa-miR-524-3p	0	0	1	1	0	0	H2AFJ	H2A histone family, member J
hsa-miR-524-3p	0	0	0	1	1	1	GNB3	guanine nucleotide binding protein (G protein), beta polypeptide 3
hsa-miR-524-3p	1	0	1	1	1	1	SNX3	sorting nexin 3
hsa-miR-524-3p	1	0	1	1	0	0	APBB3	amyloid beta (A4) precursor protein-binding, family B, member 3
hsa-miR-524-3p	0	0	1	1	1	1	AGXT2	alanine--glyoxylate aminotransferase 2
hsa-miR-524-3p	0	0	1	1	0	0	MLH1	mutL homolog 1, colon cancer, nonpolyposis type 2 (E. coli)
hsa-miR-524-3p	0	0	0	1	0	0	VAX2	ventral anterior homeobox 2
hsa-miR-524-3p	0	0	1	1	0	0	COLEC11	collectin sub-family member 11
hsa-miR-524-3p	0	0	1	1	0	0	PPP3CC	protein phosphatase 3, catalytic subunit, gamma isozyme
hsa-miR-524-3p	1	0	1	1	1	1	ACHE	acetylcholinesterase
hsa-miR-524-3p	0	0	1	1	1	1	HOXA7	homeobox A7
hsa-miR-524-3p	0	0	0	1	0	0	ARHGAP40	Rho GTPase activating protein 40
hsa-miR-524-3p	0	0	1	1	0	0	LIPE	lipase, hormone-sensitive
hsa-miR-524-3p	1	0	1	1	1	1	LYPD3	LY6/PLAUR domain containing 3
hsa-miR-524-3p	0	0	0	1	0	0	HIST1H1A	histone cluster 1, H1a
hsa-miR-524-3p	0	0	1	1	0	0	TREM1	triggering receptor expressed on myeloid cells 1
hsa-miR-524-3p	1	0	1	1	1	1	SPHK2	sphingosine kinase 2
hsa-miR-524-3p	1	0	1	1	1	1	VASP	vasodilator-stimulated phosphoprotein
hsa-miR-524-3p	1	0	1	1	1	1	RALY	RNA binding protein, autoantigenic (hnRNP-associated with lethal yellow homolog (mouse))
hsa-miR-524-3p	0	0	1	1	1	1	RRAS	related RAS viral (r-ras) oncogene homolog
hsa-miR-524-3p	1	0	0	1	0	0	PRR12	proline rich 12
hsa-miR-524-3p	0	0	1	1	1	1	DLGAP5	discs, large (Drosophila) homolog-associated protein 5
hsa-miR-524-3p	0	0	0	1	0	0	TAS2R5	taste receptor, type 2, member 5
hsa-miR-524-3p	0	0	1	1	0	0	GCAT	glycine C-acetyltransferase
hsa-miR-524-3p	1	0	1	1	0	0	SDF2L1	stromal cell-derived factor 2-like 1
hsa-miR-524-3p	1	0	1	1	1	1	USP6	ubiquitin specific peptidase 6 (Tre-2 oncogene)
hsa-miR-524-3p	0	0	0	1	1	1	AP1M2	adaptor-related protein complex 1, mu 2 subunit
hsa-miR-524-3p	1	0	0	1	1	1	SBNO2	strawberry notch homolog 2 (Drosophila)
hsa-miR-524-3p	1	0	1	1	1	1	KLF16	Kruppel-like factor 16
hsa-miR-524-3p	0	0	0	1	0	0	TMEM8A	transmembrane protein 8A
hsa-miR-524-3p	0	0	1	1	1	1	CLSPN	claspin
hsa-miR-524-3p	0	0	1	1	0	0	CERS4	ceramide synthase 4
hsa-miR-524-3p	0	0	1	1	0	0	LILRA1	leukocyte immunoglobulin-like receptor, subfamily A (with TM domain), member 1
hsa-miR-524-3p	0	0	0	1	0	0	GAMT	guanidinoacetate N-methyltransferase
hsa-miR-524-3p	1	0	1	1	1	1	ARPC1B	actin related protein 2/3 complex, subunit 1B, 41kDa
hsa-miR-524-3p	0	0	0	1	1	1	LSM4	LSM4 homolog, U6 small nuclear RNA associated (S. cerevisiae)
hsa-miR-524-3p	1	0	1	1	0	0	JUND	jun D proto-oncogene
hsa-miR-524-3p	0	0	0	1	0	0	FAM22F	family with sequence similarity 22, member F
hsa-miR-524-3p	0	0	1	1	0	0	C19orf40	chromosome 19 open reading frame 40
hsa-miR-524-3p	1	0	1	1	0	0	WBP2	WW domain binding protein 2
hsa-miR-524-3p	0	0	1	1	1	1	ERAL1	Era G-protein-like 1 (E. coli)
hsa-miR-524-3p	0	0	0	1	0	0	HSPA12B	heat shock 70kD protein 12B
hsa-miR-524-3p	0	0	0	1	0	0	RHBG	Rh family, B glycoprotein (gene/pseudogene)
hsa-miR-524-3p	0	0	0	1	0	0	PEMT	phosphatidylethanolamine N-methyltransferase
hsa-miR-524-3p	0	0	1	1	0	0	TEX13A	testis expressed 13A
hsa-miR-524-3p	1	0	1	1	0	0	CSNK1G2	casein kinase 1, gamma 2
hsa-miR-524-3p	0	0	1	1	0	0	KRBA1	KRAB-A domain containing 1
hsa-miR-524-3p	1	0	1	1	1	1	APLNR	apelin receptor
hsa-miR-524-3p	1	0	0	1	1	1	USP30	ubiquitin specific peptidase 30
hsa-miR-524-3p	1	0	0	1	0	0	POM121C	POM121 transmembrane nucleoporin C
hsa-miR-524-3p	0	0	1	1	1	1	MRAP2	melanocortin 2 receptor accessory protein 2
hsa-miR-524-3p	0	0	1	1	0	0	ITGA7	integrin, alpha 7
hsa-miR-524-3p	0	0	0	1	0	0	SMPD2	sphingomyelin phosphodiesterase 2, neutral membrane (neutral sphingomyelinase)
hsa-miR-524-3p	0	0	1	1	1	1	EGR4	early growth response 4
hsa-miR-524-3p	0	0	0	1	1	1	BCMO1	beta-carotene 15,15'-monooxygenase 1
hsa-miR-524-3p	0	0	0	1	0	0	FBXL8	F-box and leucine-rich repeat protein 8
hsa-miR-524-3p	0	0	1	1	1	1	REV1	REV1, polymerase (DNA directed)
hsa-miR-524-3p	0	0	1	1	0	0	CFC1	cripto, FRL-1, cryptic family 1
hsa-miR-524-3p	0	0	1	1	1	1	MRPS18B	mitochondrial ribosomal protein S18B
hsa-miR-524-3p	0	0	1	1	1	1	CCDC90B	coiled-coil domain containing 90B
hsa-miR-524-3p	0	0	1	1	1	1	USP2	ubiquitin specific peptidase 2
hsa-miR-524-3p	0	0	1	1	0	0	NOX5	NADPH oxidase, EF-hand calcium binding domain 5
hsa-miR-524-3p	0	0	0	1	1	1	BCL2L10	BCL2-like 10 (apoptosis facilitator)
hsa-miR-524-3p	0	0	1	1	0	0	IRAK3	interleukin-1 receptor-associated kinase 3
hsa-miR-524-3p	0	0	1	1	1	1	SPECC1	sperm antigen with calponin homology and coiled-coil domains 1
hsa-miR-524-3p	1	0	0	1	1	1	SCARB1	scavenger receptor class B, member 1
hsa-miR-524-3p	0	0	1	1	1	1	SLC6A4	solute carrier family 6 (neurotransmitter transporter, serotonin), member 4
hsa-miR-524-3p	0	0	0	1	0	0	TRPV4	transient receptor potential cation channel, subfamily V, member 4
hsa-miR-524-3p	0	0	1	1	1	1	SPPL2A	signal peptide peptidase like 2A
hsa-miR-524-3p	0	0	1	1	0	0	APH1B	anterior pharynx defective 1 homolog B (C. elegans)
hsa-miR-524-3p	0	0	1	1	1	1	ANXA13	annexin A13
hsa-miR-524-3p	0	0	1	1	1	1	RHBDF1	rhomboid 5 homolog 1 (Drosophila)
hsa-miR-524-3p	0	0	0	1	0	0	ATP4A	ATPase, H+/K+ exchanging, alpha polypeptide
hsa-miR-524-3p	0	0	1	1	0	0	ZBTB32	zinc finger and BTB domain containing 32
hsa-miR-524-3p	1	0	1	1	1	1	ZNF532	zinc finger protein 532
hsa-miR-524-3p	0	0	1	1	1	1	PRDX1	peroxiredoxin 1
hsa-miR-524-3p	0	0	1	1	0	0	TMEM59L	transmembrane protein 59-like
hsa-miR-524-3p	1	0	1	1	1	1	SAMHD1	SAM domain and HD domain 1
hsa-miR-524-3p	0	0	0	1	1	1	MAP2K2	mitogen-activated protein kinase kinase 2
hsa-miR-524-3p	1	0	0	1	1	1	UHRF1	ubiquitin-like with PHD and ring finger domains 1
hsa-miR-524-3p	0	0	0	1	0	0	GNA15	guanine nucleotide binding protein (G protein), alpha 15 (Gq class)
hsa-miR-524-3p	0	0	1	1	0	0	NXF5	nuclear RNA export factor 5
hsa-miR-524-3p	0	0	1	1	0	0	ASPA	aspartoacylase
hsa-miR-524-3p	0	0	0	1	0	0	TTC40	tetratricopeptide repeat domain 40
hsa-miR-524-3p	0	0	1	1	1	1	TOLLIP	toll interacting protein
hsa-miR-524-3p	1	0	1	1	0	0	ARHGEF17	Rho guanine nucleotide exchange factor (GEF) 17
hsa-miR-524-3p	0	0	0	1	0	0	NDUFS3	NADH dehydrogenase (ubiquinone) Fe-S protein 3, 30kDa (NADH-coenzyme Q reductase)
hsa-miR-524-3p	0	0	0	1	0	0	CAPG	capping protein (actin filament), gelsolin-like
hsa-miR-524-3p	0	0	1	1	1	1	CHIC2	cysteine-rich hydrophobic domain 2
hsa-miR-524-3p	0	0	0	1	0	0	GPR108	G protein-coupled receptor 108
hsa-miR-524-3p	1	0	1	1	0	0	CHST10	carbohydrate sulfotransferase 10
hsa-miR-524-3p	1	0	1	1	1	1	FAM13A	family with sequence similarity 13, member A
hsa-miR-524-3p	1	0	1	1	1	1	GRIA3	glutamate receptor, ionotropic, AMPA 3
hsa-miR-524-3p	0	0	1	1	1	1	KRT24	keratin 24
hsa-miR-524-3p	0	0	0	1	0	0	TYK2	tyrosine kinase 2
hsa-miR-524-3p	0	0	1	1	1	1	CCDC99	coiled-coil domain containing 99
hsa-miR-524-3p	0	0	1	1	1	1	PITX1	paired-like homeodomain 1
hsa-miR-524-3p	0	0	1	1	0	0	MCCC1	methylcrotonoyl-CoA carboxylase 1 (alpha)
hsa-miR-524-3p	0	0	1	1	1	1	CPT1A	carnitine palmitoyltransferase 1A (liver)
hsa-miR-524-3p	0	0	1	1	1	1	MYO3A	myosin IIIA
hsa-miR-524-3p	0	0	0	1	0	0	HPX	hemopexin
hsa-miR-524-3p	0	0	1	1	0	0	NDUFA9	NADH dehydrogenase (ubiquinone) 1 alpha subcomplex, 9, 39kDa
hsa-miR-524-3p	0	0	0	1	0	0	CD27	CD27 molecule
hsa-miR-524-3p	0	0	1	1	0	0	FOXN4	forkhead box N4
hsa-miR-524-3p	1	0	1	1	1	1	MAP3K12	mitogen-activated protein kinase kinase kinase 12
hsa-miR-524-3p	0	0	1	1	1	1	EMC4	ER membrane protein complex subunit 4
hsa-miR-524-3p	1	0	1	1	0	0	SCAMP2	secretory carrier membrane protein 2
hsa-miR-524-3p	0	0	1	1	0	0	COPS3	COP9 constitutive photomorphogenic homolog subunit 3 (Arabidopsis)
hsa-miR-524-3p	1	0	1	1	0	0	G6PC3	glucose 6 phosphatase, catalytic, 3
hsa-miR-524-3p	1	0	1	1	1	1	FAM59A	family with sequence similarity 59, member A
hsa-miR-524-3p	0	0	1	1	0	0	NT5C3L	5'-nucleotidase, cytosolic III-like
hsa-miR-524-3p	0	0	0	1	1	1	LILRA6	leukocyte immunoglobulin-like receptor, subfamily A (with TM domain), member 6
hsa-miR-524-3p	0	0	0	1	0	0	ECSIT	ECSIT homolog (Drosophila)
hsa-miR-524-3p	0	0	1	1	0	0	KLHDC4	kelch domain containing 4
hsa-miR-524-3p	0	0	1	1	0	0	CLEC4F	C-type lectin domain family 4, member F
hsa-miR-524-3p	0	0	1	1	1	1	UPF3B	UPF3 regulator of nonsense transcripts homolog B (yeast)
hsa-miR-524-3p	0	0	0	1	1	1	STAR	steroidogenic acute regulatory protein
hsa-miR-524-3p	0	0	1	1	1	1	PLIN2	perilipin 2
hsa-miR-524-3p	0	0	0	1	0	0	PNPLA7	patatin-like phospholipase domain containing 7
hsa-miR-524-3p	0	0	0	1	0	0	WDR85	WD repeat domain 85
hsa-miR-524-3p	0	0	1	1	1	1	SLC43A1	solute carrier family 43, member 1
hsa-miR-524-3p	0	0	1	1	0	0	WDR74	WD repeat domain 74
hsa-miR-524-3p	1	0	1	1	1	1	NINL	ninein-like
hsa-miR-524-3p	0	0	1	1	1	1	HIRIP3	HIRA interacting protein 3
hsa-miR-524-3p	0	0	0	1	0	0	TMCO3	transmembrane and coiled-coil domains 3
hsa-miR-524-3p	1	0	0	1	1	1	NCAPD3	non-SMC condensin II complex, subunit D3
hsa-miR-524-3p	0	0	1	1	0	0	CFC1B	cripto, FRL-1, cryptic family 1B
hsa-miR-524-3p	0	0	0	1	0	0	C16orf74	chromosome 16 open reading frame 74
hsa-miR-524-3p	0	0	1	1	1	1	NEIL2	nei endonuclease VIII-like 2 (E. coli)
hsa-miR-524-3p	0	0	0	1	0	0	GSTA5	glutathione S-transferase alpha 5
hsa-miR-524-3p	0	0	1	1	0	0	MAGED4	melanoma antigen family D, 4
hsa-miR-524-3p	0	0	1	1	1	1	AKR1B1	aldo-keto reductase family 1, member B1 (aldose reductase)
hsa-miR-524-3p	0	0	0	1	1	1	NTAN1	N-terminal asparagine amidase
hsa-miR-524-3p	0	0	0	1	1	1	LYZL4	lysozyme-like 4
hsa-miR-524-3p	0	0	1	1	1	1	KBTBD5	kelch repeat and BTB (POZ) domain containing 5
hsa-miR-524-3p	1	0	1	1	1	1	NRG1	neuregulin 1
hsa-miR-524-3p	0	0	1	1	0	0	DHRS1	dehydrogenase/reductase (SDR family) member 1
hsa-miR-524-3p	0	0	0	1	1	1	COQ5	coenzyme Q5 homolog, methyltransferase (S. cerevisiae)
hsa-miR-524-3p	0	0	1	1	0	0	TMSB15A	thymosin beta 15a
hsa-miR-524-3p	0	0	1	1	1	1	C2orf29	chromosome 2 open reading frame 29
hsa-miR-524-3p	0	0	1	1	1	1	C2orf62	chromosome 2 open reading frame 62
hsa-miR-524-3p	0	0	0	1	0	0	CDH15	cadherin 15, type 1, M-cadherin (myotubule)
hsa-miR-524-3p	0	0	1	1	0	0	SLC45A1	solute carrier family 45, member 1
hsa-miR-524-3p	1	0	1	1	0	0	WNT4	wingless-type MMTV integration site family, member 4
hsa-miR-524-3p	0	0	1	1	0	0	ARAF	v-raf murine sarcoma 3611 viral oncogene homolog
hsa-miR-524-3p	0	0	1	1	1	1	SNF8	SNF8, ESCRT-II complex subunit, homolog (S. cerevisiae)
hsa-miR-524-3p	1	0	1	1	0	0	SHF	Src homology 2 domain containing F
hsa-miR-524-3p	0	0	1	1	0	0	LRRC36	leucine rich repeat containing 36
hsa-miR-524-3p	0	0	1	1	0	0	TNFRSF13C	tumor necrosis factor receptor superfamily, member 13C
hsa-miR-524-3p	0	0	0	1	0	0	PRKD2	protein kinase D2
hsa-miR-524-3p	0	0	0	1	1	1	AP1M1	adaptor-related protein complex 1, mu 1 subunit
hsa-miR-524-3p	0	0	0	1	0	0	LILRA4	leukocyte immunoglobulin-like receptor, subfamily A (with TM domain), member 4
hsa-miR-524-3p	0	0	0	1	0	0	TMEM190	transmembrane protein 190
hsa-miR-524-3p	0	0	0	1	1	1	PHLDB3	pleckstrin homology-like domain, family B, member 3
hsa-miR-524-3p	0	0	1	1	0	0	NLRX1	NLR family member X1
hsa-miR-524-3p	1	0	1	1	0	0	IER2	immediate early response 2
hsa-miR-524-3p	1	0	1	1	0	0	CELF5	CUGBP, Elav-like family member 5
hsa-miR-524-3p	0	0	1	1	1	1	BAX	BCL2-associated X protein
hsa-miR-524-3p	1	0	1	1	1	1	NAGS	N-acetylglutamate synthase
hsa-miR-524-3p	0	0	1	1	0	0	MYL6	myosin, light chain 6, alkali, smooth muscle and non-muscle
hsa-miR-524-3p	0	0	1	1	0	0	KRT83	keratin 83
hsa-miR-524-3p	0	0	1	1	1	1	ZNF653	zinc finger protein 653
hsa-miR-524-3p	0	0	1	1	0	0	CCDC42	coiled-coil domain containing 42
hsa-miR-524-3p	0	0	0	1	0	0	NTN3	netrin 3
hsa-miR-524-3p	0	0	1	1	1	1	UBXN1	UBX domain protein 1
hsa-miR-524-3p	1	0	1	1	1	1	NXF1	nuclear RNA export factor 1
hsa-miR-524-3p	1	0	1	1	0	0	C11orf84	chromosome 11 open reading frame 84
hsa-miR-524-3p	0	0	1	1	1	1	MEGF6	multiple EGF-like-domains 6
hsa-miR-524-3p	0	0	0	1	1	1	FAM228A	family with sequence similarity 228, member A
hsa-miR-524-3p	1	0	0	1	1	1	MRPS18C	mitochondrial ribosomal protein S18C
hsa-miR-524-3p	0	0	1	1	1	1	ATP1A1	ATPase, Na+/K+ transporting, alpha 1 polypeptide
hsa-miR-524-3p	1	0	0	1	1	1	EOMES	eomesodermin
hsa-miR-524-3p	0	0	1	1	0	0	TMEM41A	transmembrane protein 41A
hsa-miR-524-3p	0	0	1	1	0	0	GRM2	glutamate receptor, metabotropic 2
hsa-miR-524-3p	0	0	0	1	0	0	AGXT2L1	alanine-glyoxylate aminotransferase 2-like 1
hsa-miR-524-3p	0	0	0	1	1	1	CCDC127	coiled-coil domain containing 127
hsa-miR-524-3p	0	0	1	1	1	1	ANKHD1	ankyrin repeat and KH domain containing 1
hsa-miR-524-3p	0	0	1	1	0	0	EIF4EBP3	eukaryotic translation initiation factor 4E binding protein 3
hsa-miR-524-3p	0	0	1	1	0	0	ANKHD1-EIF4EBP3	ANKHD1-EIF4EBP3 readthrough
hsa-miR-524-3p	0	0	0	1	0	0	NOS3	nitric oxide synthase 3 (endothelial cell)
hsa-miR-524-3p	0	0	1	1	1	1	RPP25L	ribonuclease P/MRP 25kDa subunit-like
hsa-miR-524-3p	0	0	1	1	0	0	CCDC171	coiled-coil domain containing 171
hsa-miR-524-3p	0	0	1	1	0	0	WNK2	WNK lysine deficient protein kinase 2
hsa-miR-524-3p	0	0	1	1	1	1	TRMT10B	tRNA methyltransferase 10 homolog B (S. cerevisiae)
hsa-miR-524-3p	1	0	1	1	1	1	ARHGEF40	Rho guanine nucleotide exchange factor (GEF) 40
hsa-miR-524-3p	0	0	1	1	0	0	PACSIN3	protein kinase C and casein kinase substrate in neurons 3
hsa-miR-524-3p	0	0	1	1	1	1	GLB1L3	galactosidase, beta 1-like 3
hsa-miR-524-3p	1	0	1	1	1	1	COX11	COX11 cytochrome c oxidase assembly homolog (yeast)
hsa-miR-524-3p	0	0	1	1	1	1	PPFIBP2	PTPRF interacting protein, binding protein 2 (liprin beta 2)
hsa-miR-524-3p	0	0	1	1	0	0	CYB5R2	cytochrome b5 reductase 2
hsa-miR-524-3p	0	0	1	1	0	0	PLD4	phospholipase D family, member 4
hsa-miR-524-3p	1	0	1	1	0	0	TNXB	tenascin XB
hsa-miR-524-3p	0	0	0	1	0	0	SLC38A8	solute carrier family 38, member 8
hsa-miR-524-3p	1	0	1	1	1	1	FAM199X	family with sequence similarity 199, X-linked
hsa-miR-524-3p	1	0	1	1	1	1	ZNF592	zinc finger protein 592
hsa-miR-524-3p	0	0	1	1	1	1	MYH11	myosin, heavy chain 11, smooth muscle
hsa-miR-524-3p	0	0	1	1	0	0	SCG5	secretogranin V (7B2 protein)
hsa-miR-524-3p	0	0	1	1	0	0	CCNDBP1	cyclin D-type binding-protein 1
hsa-miR-524-3p	0	0	1	1	1	1	HERPUD1	homocysteine-inducible, endoplasmic reticulum stress-inducible, ubiquitin-like domain member 1
hsa-miR-524-3p	0	0	1	1	0	0	LALBA	lactalbumin, alpha-
hsa-miR-524-3p	1	0	1	1	1	1	WNT10B	wingless-type MMTV integration site family, member 10B
hsa-miR-524-3p	0	0	0	1	0	0	HSD11B1L	hydroxysteroid (11-beta) dehydrogenase 1-like
hsa-miR-524-3p	0	0	0	1	1	1	ZNF577	zinc finger protein 577
hsa-miR-524-3p	0	0	0	1	0	0	SPSB3	splA/ryanodine receptor domain and SOCS box containing 3
hsa-miR-524-3p	0	0	0	1	0	0	E4F1	E4F transcription factor 1
hsa-miR-524-3p	0	0	0	1	0	0	LTBP3	latent transforming growth factor beta binding protein 3
hsa-miR-524-3p	0	0	1	1	0	0	KARS	lysyl-tRNA synthetase
hsa-miR-524-3p	0	0	0	1	0	0	C1QTNF4	C1q and tumor necrosis factor related protein 4
hsa-miR-524-3p	0	0	1	1	1	1	WIBG	within bgcn homolog (Drosophila)
hsa-miR-524-3p	1	0	1	1	1	1	NEUROD2	neuronal differentiation 2
hsa-miR-524-3p	0	0	1	1	1	1	CTLA4	cytotoxic T-lymphocyte-associated protein 4
hsa-miR-524-3p	1	0	1	1	0	0	ZCCHC4	zinc finger, CCHC domain containing 4
hsa-miR-524-3p	1	0	1	1	1	1	UBTF	upstream binding transcription factor, RNA polymerase I
hsa-miR-524-3p	0	0	1	1	0	0	RPS9	ribosomal protein S9
hsa-miR-524-3p	0	0	0	1	0	0	GSX1	GS homeobox 1
hsa-miR-524-3p	1	0	1	1	0	0	RAB24	RAB24, member RAS oncogene family
hsa-miR-524-3p	0	0	1	1	0	0	KREMEN2	kringle containing transmembrane protein 2
hsa-miR-524-3p	1	0	1	1	1	1	TMC7	transmembrane channel-like 7
hsa-miR-524-3p	0	0	0	1	0	0	RNMTL1	RNA methyltransferase like 1
hsa-miR-524-3p	0	0	1	1	0	0	RNASE2	ribonuclease, RNase A family, 2 (liver, eosinophil-derived neurotoxin)
hsa-miR-524-3p	0	0	0	1	0	0	PTCRA	pre T-cell antigen receptor alpha
hsa-miR-524-3p	0	0	0	1	1	1	NECAB2	N-terminal EF-hand calcium binding protein 2
hsa-miR-524-3p	1	0	1	1	1	1	GRM5	glutamate receptor, metabotropic 5
hsa-miR-524-3p	1	0	1	1	1	1	ONECUT1	one cut homeobox 1
hsa-miR-524-3p	0	0	1	1	1	1	SMOX	spermine oxidase
hsa-miR-524-3p	0	0	1	1	0	0	USP19	ubiquitin specific peptidase 19
hsa-miR-524-3p	1	0	1	1	1	1	TRIM56	tripartite motif containing 56
hsa-miR-524-3p	0	0	1	1	0	0	CYHR1	cysteine/histidine-rich 1
hsa-miR-524-3p	0	0	1	1	0	0	RNF181	ring finger protein 181
hsa-miR-524-3p	0	0	1	1	0	0	RGS12	regulator of G-protein signaling 12
hsa-miR-524-3p	0	0	0	1	1	1	LRRC45	leucine rich repeat containing 45
hsa-miR-524-3p	1	0	1	1	1	1	CDCA7	cell division cycle associated 7
hsa-miR-524-3p	0	0	1	1	1	1	RAC3	ras-related C3 botulinum toxin substrate 3 (rho family, small GTP binding protein Rac3)
hsa-miR-524-3p	0	0	0	1	1	1	ZIK1	zinc finger protein interacting with K protein 1 homolog (mouse)
hsa-miR-524-3p	0	0	0	1	0	0	AGXT	alanine-glyoxylate aminotransferase
hsa-miR-524-3p	0	0	1	1	0	0	DNAI2	dynein, axonemal, intermediate chain 2
hsa-miR-524-3p	0	0	0	1	0	0	THOP1	thimet oligopeptidase 1
hsa-miR-524-3p	0	0	1	1	1	1	HLA-DPB1	major histocompatibility complex, class II, DP beta 1
hsa-miR-524-3p	0	0	1	1	0	0	SIPA1	signal-induced proliferation-associated 1
hsa-miR-524-3p	0	0	0	1	0	0	PHYHD1	phytanoyl-CoA dioxygenase domain containing 1
hsa-miR-524-3p	1	0	1	1	1	1	CTBP2	C-terminal binding protein 2
hsa-miR-524-3p	0	0	1	1	0	0	LMAN1L	lectin, mannose-binding, 1 like
hsa-miR-524-3p	0	0	1	1	1	1	TRMT10C	tRNA methyltransferase 10 homolog C (S. cerevisiae)
hsa-miR-524-3p	1	0	0	1	1	1	ELF3	E74-like factor 3 (ets domain transcription factor, epithelial-specific )
hsa-miR-524-3p	0	0	1	1	0	0	ARPC4	actin related protein 2/3 complex, subunit 4, 20kDa
hsa-miR-524-3p	1	0	1	1	1	1	VANGL1	vang-like 1 (van gogh, Drosophila)
hsa-miR-524-3p	1	0	1	1	0	0	LRCH4	leucine-rich repeats and calponin homology (CH) domain containing 4
hsa-miR-524-3p	0	0	1	1	0	0	SLC4A2	solute carrier family 4, anion exchanger, member 2 (erythrocyte membrane protein band 3-like 1)
hsa-miR-524-3p	1	0	1	1	1	1	TBC1D8B	TBC1 domain family, member 8B (with GRAM domain)
hsa-miR-524-3p	1	0	1	1	1	1	FGFR1	fibroblast growth factor receptor 1
hsa-miR-524-3p	0	0	1	1	0	0	RNASET2	ribonuclease T2
hsa-miR-524-3p	1	0	1	1	1	1	ANKRD10	ankyrin repeat domain 10
hsa-miR-524-3p	0	0	0	1	1	1	LSP1	lymphocyte-specific protein 1
hsa-miR-524-3p	0	0	0	1	1	1	USP36	ubiquitin specific peptidase 36
hsa-miR-524-3p	1	0	1	1	0	0	HOXC5	homeobox C5
hsa-miR-524-3p	1	0	1	1	0	0	B3GAT1	beta-1,3-glucuronyltransferase 1 (glucuronosyltransferase P)
hsa-miR-524-3p	0	0	1	1	0	0	C11orf68	chromosome 11 open reading frame 68
hsa-miR-524-3p	0	0	1	1	1	1	PRCP	prolylcarboxypeptidase (angiotensinase C)
hsa-miR-524-3p	0	0	0	1	1	1	C17orf101	chromosome 17 open reading frame 101
hsa-miR-524-3p	1	0	1	1	1	1	CYFIP1	cytoplasmic FMR1 interacting protein 1
hsa-miR-524-3p	0	0	1	1	0	0	SLC29A1	solute carrier family 29 (nucleoside transporters), member 1
hsa-miR-524-3p	0	0	0	1	1	1	SLC15A1	solute carrier family 15 (oligopeptide transporter), member 1
hsa-miR-524-3p	1	0	1	1	1	1	TRIP10	thyroid hormone receptor interactor 10
hsa-miR-524-3p	0	0	1	1	0	0	MON1A	MON1 homolog A (yeast)
hsa-miR-524-3p	0	0	1	1	0	0	NDUFS7	NADH dehydrogenase (ubiquinone) Fe-S protein 7, 20kDa (NADH-coenzyme Q reductase)
hsa-miR-524-3p	0	0	1	1	0	0	MPRIP	myosin phosphatase Rho interacting protein
hsa-miR-524-3p	1	0	1	1	1	1	UPF2	UPF2 regulator of nonsense transcripts homolog (yeast)
hsa-miR-524-3p	0	0	1	1	0	0	KCNH6	potassium voltage-gated channel, subfamily H (eag-related), member 6
hsa-miR-524-3p	0	0	1	1	0	0	COPG1	coatomer protein complex, subunit gamma 1
hsa-miR-524-3p	0	0	1	1	1	1	MMP1	matrix metallopeptidase 1 (interstitial collagenase)
hsa-miR-524-3p	0	0	1	1	0	0	FZD2	frizzled family receptor 2
hsa-miR-524-3p	0	0	0	1	1	1	ODF3L2	outer dense fiber of sperm tails 3-like 2
hsa-miR-524-3p	0	0	0	1	0	0	OS9	osteosarcoma amplified 9, endoplasmic reticulum lectin
hsa-miR-524-3p	0	0	1	1	0	0	LCN15	lipocalin 15
hsa-miR-524-3p	0	0	1	1	0	0	FAM89B	family with sequence similarity 89, member B
hsa-miR-524-3p	1	0	0	1	0	0	APBA3	amyloid beta (A4) precursor protein-binding, family A, member 3
hsa-miR-524-3p	1	0	1	1	1	1	KLC2	kinesin light chain 2
hsa-miR-524-3p	0	0	0	1	0	0	FAM125A	family with sequence similarity 125, member A
hsa-miR-524-3p	0	0	1	1	0	0	ASCC1	activating signal cointegrator 1 complex subunit 1
hsa-miR-524-3p	1	0	1	1	1	1	EGR3	early growth response 3
hsa-miR-524-3p	0	0	0	1	1	1	S100Z	S100 calcium binding protein Z
hsa-miR-524-3p	0	0	1	1	1	1	TTC27	tetratricopeptide repeat domain 27
hsa-miR-524-3p	0	0	1	1	0	0	RNF168	ring finger protein 168, E3 ubiquitin protein ligase
hsa-miR-524-3p	0	0	1	1	0	0	MAMSTR	MEF2 activating motif and SAP domain containing transcriptional regulator
hsa-miR-524-3p	0	0	1	1	1	1	ZNF318	zinc finger protein 318
hsa-miR-524-3p	0	0	1	1	0	0	DGKZ	diacylglycerol kinase, zeta
hsa-miR-524-3p	0	0	1	1	0	0	TMC8	transmembrane channel-like 8
hsa-miR-524-3p	1	0	1	1	1	1	SLC25A42	solute carrier family 25, member 42
hsa-miR-524-3p	1	0	0	1	1	1	TTC7A	tetratricopeptide repeat domain 7A
hsa-miR-524-3p	1	0	1	1	0	0	UBASH3A	ubiquitin associated and SH3 domain containing A
hsa-miR-524-3p	0	0	0	1	0	0	CHST13	carbohydrate (chondroitin 4) sulfotransferase 13
hsa-miR-524-3p	0	0	1	1	1	1	OR2C3	olfactory receptor, family 2, subfamily C, member 3
hsa-miR-524-3p	0	0	1	1	1	1	GALNT11	UDP-N-acetyl-alpha-D-galactosamine:polypeptide N-acetylgalactosaminyltransferase 11 (GalNAc-T11)
hsa-miR-524-3p	0	0	0	1	0	0	TIGD5	tigger transposable element derived 5
hsa-miR-524-3p	0	0	1	1	0	0	CD151	CD151 molecule (Raph blood group)
hsa-miR-524-3p	1	0	1	1	1	1	EHD3	EH-domain containing 3
hsa-miR-524-3p	0	0	0	1	0	0	FAM3A	family with sequence similarity 3, member A
hsa-miR-524-3p	0	0	0	1	0	0	UFSP1	UFM1-specific peptidase 1 (non-functional)
hsa-miR-524-3p	0	0	1	1	0	0	ACADVL	acyl-CoA dehydrogenase, very long chain
hsa-miR-524-3p	0	0	0	1	1	1	MTHFSD	methenyltetrahydrofolate synthetase domain containing
hsa-miR-524-3p	1	0	0	1	0	0	HIC1	hypermethylated in cancer 1
hsa-miR-524-3p	1	0	1	1	1	1	OPA3	optic atrophy 3 (autosomal recessive, with chorea and spastic paraplegia)
hsa-miR-524-3p	0	0	0	1	0	0	TMEM102	transmembrane protein 102
hsa-miR-524-3p	0	0	0	1	0	0	SPHK1	sphingosine kinase 1
hsa-miR-524-3p	0	0	0	1	0	0	ACSS1	acyl-CoA synthetase short-chain family member 1
hsa-miR-524-3p	1	0	1	1	1	1	PLEKHO2	pleckstrin homology domain containing, family O member 2
hsa-miR-524-3p	0	0	1	1	1	1	USP39	ubiquitin specific peptidase 39
hsa-miR-524-3p	0	0	1	1	1	1	CPN2	carboxypeptidase N, polypeptide 2
hsa-miR-524-3p	1	0	1	1	1	1	ST8SIA3	ST8 alpha-N-acetyl-neuraminide alpha-2,8-sialyltransferase 3
hsa-miR-524-3p	0	0	0	1	0	0	LINC00174	long intergenic non-protein coding RNA 174
hsa-miR-524-3p	0	0	1	1	1	1	TSC22D1	TSC22 domain family, member 1
hsa-miR-524-3p	0	0	0	1	1	1	C21orf2	chromosome 21 open reading frame 2
hsa-miR-524-3p	0	0	1	1	0	0	FAM203A	family with sequence similarity 203, member A
hsa-miR-524-3p	1	0	1	1	0	0	TRAF7	TNF receptor-associated factor 7, E3 ubiquitin protein ligase
hsa-miR-524-3p	1	0	0	1	1	1	PLEKHJ1	pleckstrin homology domain containing, family J member 1
hsa-miR-524-3p	0	0	1	1	1	1	RBBP8	retinoblastoma binding protein 8
hsa-miR-524-3p	0	0	0	1	0	0	PRM3	protamine 3
hsa-miR-524-3p	0	0	1	1	1	1	DNAH8	dynein, axonemal, heavy chain 8
hsa-miR-524-3p	0	0	0	1	0	0	OXCT2	3-oxoacid CoA transferase 2
hsa-miR-524-3p	0	0	1	1	1	1	HIST2H2BE	histone cluster 2, H2be
hsa-miR-524-3p	0	0	1	1	1	1	FFAR3	free fatty acid receptor 3
hsa-miR-524-3p	0	0	0	1	1	1	KCNK12	potassium channel, subfamily K, member 12
hsa-miR-524-3p	1	0	0	1	1	1	SSTR3	somatostatin receptor 3
hsa-miR-524-3p	1	0	0	1	1	1	SIRT7	sirtuin 7
hsa-miR-524-3p	1	0	1	1	1	1	PPP2R5C	protein phosphatase 2, regulatory subunit B', gamma
hsa-miR-524-3p	1	0	1	1	1	1	BACE2	beta-site APP-cleaving enzyme 2
hsa-miR-524-3p	0	0	1	1	1	1	PPP4R4	protein phosphatase 4, regulatory subunit 4
hsa-miR-524-3p	0	0	1	1	0	0	DHX30	DEAH (Asp-Glu-Ala-His) box polypeptide 30
hsa-miR-524-3p	1	0	1	1	1	1	SEPT9	septin 9
hsa-miR-524-3p	1	0	1	1	1	1	C11orf82	chromosome 11 open reading frame 82
hsa-miR-524-3p	0	0	0	1	1	1	SERPINA5	serpin peptidase inhibitor, clade A (alpha-1 antiproteinase, antitrypsin), member 5
hsa-miR-524-3p	0	0	0	1	1	1	SIVA1	SIVA1, apoptosis-inducing factor
hsa-miR-524-3p	0	0	1	1	1	1	PPP1R27	protein phosphatase 1, regulatory subunit 27
hsa-miR-524-3p	1	0	1	1	0	0	HDDC3	HD domain containing 3
hsa-miR-524-3p	0	0	0	1	0	0	NSUN5P1	NOP2/Sun domain family, member 5 pseudogene 1
hsa-miR-524-3p	0	0	0	1	0	0	OR56A4	olfactory receptor, family 56, subfamily A, member 4
hsa-miR-524-3p	1	0	1	1	1	1	ANKRD11	ankyrin repeat domain 11
hsa-miR-524-3p	0	0	0	1	1	1	SLC37A4	solute carrier family 37 (glucose-6-phosphate transporter), member 4
hsa-miR-524-3p	0	0	0	1	1	1	IL3RA	interleukin 3 receptor, alpha (low affinity)
hsa-miR-524-3p	0	0	0	1	0	0	PCYT2	phosphate cytidylyltransferase 2, ethanolamine
hsa-miR-524-3p	0	0	1	1	1	1	XKR3	XK, Kell blood group complex subunit-related family, member 3
hsa-miR-524-3p	0	0	1	1	1	1	TAB1	TGF-beta activated kinase 1/MAP3K7 binding protein 1
hsa-miR-524-3p	0	0	0	1	0	0	RIMBP3C	RIMS binding protein 3C
hsa-miR-524-3p	0	0	1	1	0	0	SOCS1	suppressor of cytokine signaling 1
hsa-miR-524-3p	0	0	0	1	1	1	EMILIN3	elastin microfibril interfacer 3
hsa-miR-524-3p	0	0	1	1	1	1	TPRN	taperin
hsa-miR-524-3p	0	0	1	1	0	0	TAS1R1	taste receptor, type 1, member 1
hsa-miR-524-3p	1	0	1	1	0	0	TSEN54	tRNA splicing endonuclease 54 homolog (S. cerevisiae)
hsa-miR-524-3p	0	0	1	1	1	1	ZNF137P	zinc finger protein 137, pseudogene
hsa-miR-524-3p	0	0	1	1	0	0	TMEM179B	transmembrane protein 179B
hsa-miR-524-3p	0	0	0	1	1	1	SH3BGR	SH3 domain binding glutamic acid-rich protein
hsa-miR-524-3p	0	0	0	1	0	0	H1FX	H1 histone family, member X
hsa-miR-524-3p	0	0	0	1	0	0	POLR3C	polymerase (RNA) III (DNA directed) polypeptide C (62kD)
hsa-miR-524-3p	0	0	1	1	0	0	PSMB5	proteasome (prosome, macropain) subunit, beta type, 5
hsa-miR-524-3p	0	0	1	1	1	1	PDE2A	phosphodiesterase 2A, cGMP-stimulated
hsa-miR-524-3p	0	0	1	1	0	0	TMEM150A	transmembrane protein 150A
hsa-miR-524-3p	0	0	1	1	1	1	KLC1	kinesin light chain 1
hsa-miR-524-3p	0	0	0	1	0	0	FAM203B	family with sequence similarity 203, member B
hsa-miR-524-3p	0	0	1	1	1	1	C9orf85	chromosome 9 open reading frame 85
hsa-miR-524-3p	0	0	0	1	1	1	RAX	retina and anterior neural fold homeobox
hsa-miR-524-3p	0	0	0	1	1	1	CMTM7	CKLF-like MARVEL transmembrane domain containing 7
hsa-miR-524-3p	0	0	1	1	0	0	IGFN1	immunoglobulin-like and fibronectin type III domain containing 1
hsa-miR-524-3p	0	0	0	1	0	0	WDR25	WD repeat domain 25
hsa-miR-524-3p	0	0	1	1	0	0	MAGED4B	melanoma antigen family D, 4B
hsa-miR-524-3p	1	0	1	1	1	1	SLITRK2	SLIT and NTRK-like family, member 2
hsa-miR-524-3p	1	0	1	1	1	1	SPTB	spectrin, beta, erythrocytic
hsa-miR-524-3p	0	0	1	1	0	0	KATNA1	katanin p60 (ATPase containing) subunit A 1
hsa-miR-524-3p	0	0	1	1	1	1	IFRD2	interferon-related developmental regulator 2
hsa-miR-524-3p	0	0	0	1	1	1	TBCD	tubulin folding cofactor D
hsa-miR-524-3p	0	0	0	1	0	0	FTSJ3	FtsJ homolog 3 (E. coli)
hsa-miR-524-3p	0	0	0	1	1	1	PCID2	PCI domain containing 2
hsa-miR-524-3p	1	0	1	1	0	0	ZBTB49	zinc finger and BTB domain containing 49
hsa-miR-524-3p	1	0	1	1	0	0	NRL	neural retina leucine zipper
hsa-miR-524-3p	1	0	1	1	1	1	HNRNPF	heterogeneous nuclear ribonucleoprotein F
hsa-miR-524-3p	1	0	1	1	1	1	ZNF385A	zinc finger protein 385A
hsa-miR-524-3p	0	0	0	1	1	1	ELAC2	elaC homolog 2 (E. coli)
hsa-miR-524-3p	1	0	0	1	0	0	LRFN2	leucine rich repeat and fibronectin type III domain containing 2
hsa-miR-524-3p	0	0	1	1	1	1	SNRPE	small nuclear ribonucleoprotein polypeptide E
hsa-miR-524-3p	0	0	1	1	1	1	MMP28	matrix metallopeptidase 28
hsa-miR-524-3p	0	0	0	1	0	0	CATSPER4	cation channel, sperm associated 4
hsa-miR-524-3p	1	0	1	1	1	1	TRIM9	tripartite motif containing 9
hsa-miR-524-3p	0	0	0	1	0	0	DUSP21	dual specificity phosphatase 21
hsa-miR-524-3p	0	0	0	1	0	0	NOSIP	nitric oxide synthase interacting protein
hsa-miR-524-3p	0	0	0	1	0	0	GFI1B	growth factor independent 1B transcription repressor
hsa-miR-524-3p	0	0	1	1	1	1	ADAM33	ADAM metallopeptidase domain 33
hsa-miR-524-3p	0	0	0	1	0	0	DUSP15	dual specificity phosphatase 15
hsa-miR-524-3p	0	0	1	1	1	1	HRH3	histamine receptor H3
hsa-miR-524-3p	0	0	1	1	0	0	PGM1	phosphoglucomutase 1
hsa-miR-524-3p	0	0	1	1	0	0	CYB5A	cytochrome b5 type A (microsomal)
hsa-miR-524-3p	0	0	1	1	0	0	GOLGB1	golgin B1
hsa-miR-524-3p	1	0	1	1	1	1	RILPL1	Rab interacting lysosomal protein-like 1
hsa-miR-524-3p	1	0	1	1	1	1	VAPB	VAMP (vesicle-associated membrane protein)-associated protein B and C
hsa-miR-524-3p	0	0	1	1	0	0	GSN	gelsolin
hsa-miR-524-3p	1	0	1	1	1	1	NASP	nuclear autoantigenic sperm protein (histone-binding)
hsa-miR-524-3p	0	0	0	1	0	0	WDR86	WD repeat domain 86
hsa-miR-524-3p	0	0	0	1	0	0	IGFL3	IGF-like family member 3
hsa-miR-524-3p	0	0	0	1	1	1	DPH5	DPH5 homolog (S. cerevisiae)
hsa-miR-524-3p	1	0	1	1	1	1	YTHDF1	YTH domain family, member 1
hsa-miR-524-3p	0	0	1	1	0	0	MCM7	minichromosome maintenance complex component 7
hsa-miR-524-3p	1	0	1	1	1	1	TTC26	tetratricopeptide repeat domain 26
hsa-miR-524-3p	0	0	0	1	0	0	SOWAHD	sosondowah ankyrin repeat domain family member D
hsa-miR-524-3p	0	0	1	1	0	0	OSGIN1	oxidative stress induced growth inhibitor 1
hsa-miR-524-3p	1	0	1	1	0	0	TH1L	TH1-like (Drosophila)
hsa-miR-524-3p	1	0	1	1	0	0	CACNB1	calcium channel, voltage-dependent, beta 1 subunit
hsa-miR-524-3p	0	0	1	1	1	1	FLYWCH1	FLYWCH-type zinc finger 1
hsa-miR-524-3p	0	0	0	1	0	0	FCER2	Fc fragment of IgE, low affinity II, receptor for (CD23)
hsa-miR-524-3p	0	0	1	1	1	1	TJP2	tight junction protein 2
hsa-miR-524-3p	0	0	1	1	1	1	AGTR1	angiotensin II receptor, type 1
hsa-miR-524-3p	0	0	1	1	1	1	HADH	hydroxyacyl-CoA dehydrogenase
hsa-miR-524-3p	1	0	1	1	1	1	FAM184A	family with sequence similarity 184, member A
hsa-miR-524-3p	0	0	0	1	1	1	COL17A1	collagen, type XVII, alpha 1
hsa-miR-524-3p	1	0	1	1	1	1	DMPK	dystrophia myotonica-protein kinase
hsa-miR-524-3p	1	0	1	1	1	1	CRKL	v-crk sarcoma virus CT10 oncogene homolog (avian)-like
hsa-miR-524-3p	0	0	0	1	0	0	EXOC3L1	exocyst complex component 3-like 1
hsa-miR-524-3p	1	0	1	1	0	0	ADAMTSL2	ADAMTS-like 2
hsa-miR-524-3p	0	0	0	1	0	0	H2AFB2	H2A histone family, member B2
hsa-miR-524-3p	1	0	0	1	0	0	ARHGEF1	Rho guanine nucleotide exchange factor (GEF) 1
hsa-miR-524-3p	1	0	1	1	1	1	TWIST1	twist homolog 1 (Drosophila)
hsa-miR-524-3p	0	0	0	1	0	0	ENTPD2	ectonucleoside triphosphate diphosphohydrolase 2
hsa-miR-524-3p	0	0	0	1	1	1	ARSG	arylsulfatase G
hsa-miR-524-3p	0	0	1	1	0	0	CASP4	caspase 4, apoptosis-related cysteine peptidase
hsa-miR-524-3p	0	0	0	1	0	0	TRIM17	tripartite motif containing 17
hsa-miR-524-3p	0	0	1	1	1	1	CHCHD8	coiled-coil-helix-coiled-coil-helix domain containing 8
hsa-miR-524-3p	0	0	1	1	1	1	C3orf27	chromosome 3 open reading frame 27
hsa-miR-524-3p	0	0	1	1	0	0	CEP250	centrosomal protein 250kDa
hsa-miR-524-3p	0	0	0	1	1	1	GTF3C1	general transcription factor IIIC, polypeptide 1, alpha 220kDa
hsa-miR-524-3p	0	0	1	1	0	0	FAM149A	family with sequence similarity 149, member A
hsa-miR-524-3p	1	0	1	1	1	1	ARIH2	ariadne homolog 2 (Drosophila)
hsa-miR-524-3p	0	0	1	1	0	0	ACOX3	acyl-CoA oxidase 3, pristanoyl
hsa-miR-524-3p	0	0	0	1	1	1	MYOM1	myomesin 1, 185kDa
hsa-miR-524-3p	1	0	1	1	0	0	C10orf137	chromosome 10 open reading frame 137
hsa-miR-524-3p	1	0	1	1	0	0	ADAM15	ADAM metallopeptidase domain 15
hsa-miR-524-3p	0	0	1	1	0	0	GUCA2A	guanylate cyclase activator 2A (guanylin)
hsa-miR-524-3p	0	0	0	1	0	0	RIMBP3B	RIMS binding protein 3B
hsa-miR-524-3p	0	0	0	1	0	0	HHIPL1	HHIP-like 1
hsa-miR-524-3p	1	0	1	1	0	0	PRRC2B	proline-rich coiled-coil 2B
hsa-miR-524-3p	1	0	1	1	1	1	MDGA2	MAM domain containing glycosylphosphatidylinositol anchor 2
hsa-miR-524-3p	0	0	1	1	0	0	CCRL2	chemokine (C-C motif) receptor-like 2
hsa-miR-524-3p	0	0	0	1	0	0	C7orf50	chromosome 7 open reading frame 50
hsa-miR-524-3p	0	0	1	1	1	1	TMEM170A	transmembrane protein 170A
hsa-miR-524-3p	0	0	1	1	1	1	PSEN1	presenilin 1
hsa-miR-524-3p	0	0	1	1	0	0	HYAL2	hyaluronoglucosaminidase 2
hsa-miR-524-3p	1	0	1	1	1	1	EPHB4	EPH receptor B4
hsa-miR-524-3p	0	0	1	1	1	1	C1orf177	chromosome 1 open reading frame 177
hsa-miR-524-3p	0	0	0	1	0	0	BCKDHA	branched chain keto acid dehydrogenase E1, alpha polypeptide
hsa-miR-524-3p	0	0	1	1	0	0	TMEM91	transmembrane protein 91
hsa-miR-524-3p	1	0	1	1	1	1	PAK4	p21 protein (Cdc42/Rac)-activated kinase 4
hsa-miR-524-3p	0	0	0	1	1	1	SUSD2	sushi domain containing 2
hsa-miR-524-3p	0	0	1	1	0	0	C19orf60	chromosome 19 open reading frame 60
hsa-miR-524-3p	1	0	1	1	1	1	QSOX2	quiescin Q6 sulfhydryl oxidase 2
hsa-miR-524-3p	0	0	0	1	0	0	SAPCD2	suppressor APC domain containing 2
hsa-miR-524-3p	0	0	0	1	0	0	C17orf80	chromosome 17 open reading frame 80
hsa-miR-524-3p	0	0	0	1	1	1	C20orf166-AS1	C20orf166 antisense RNA 1
hsa-miR-524-3p	0	0	1	1	1	1	PRICKLE4	prickle homolog 4 (Drosophila)
hsa-miR-524-3p	0	0	0	1	0	0	OFCC1	orofacial cleft 1 candidate 1
hsa-miR-524-3p	0	0	1	1	1	1	PCBP2	poly(rC) binding protein 2
hsa-miR-524-3p	0	0	1	1	1	1	RYR1	ryanodine receptor 1 (skeletal)
hsa-miR-524-3p	1	0	1	1	1	1	NUMA1	nuclear mitotic apparatus protein 1
hsa-miR-524-3p	0	0	1	1	0	0	NIF3L1	NIF3 NGG1 interacting factor 3-like 1 (S. cerevisiae)
hsa-miR-524-3p	1	0	1	1	0	0	EFNA4	ephrin-A4
hsa-miR-524-3p	1	0	1	1	1	1	MDK	midkine (neurite growth-promoting factor 2)
hsa-miR-524-3p	0	0	1	1	0	0	HKR1	HKR1, GLI-Kruppel zinc finger family member
hsa-miR-524-3p	0	0	0	1	0	0	PYY	peptide YY
hsa-miR-524-3p	0	0	0	1	0	0	CYP2D6	cytochrome P450, family 2, subfamily D, polypeptide 6
hsa-miR-524-3p	0	0	1	1	0	0	CLDN7	claudin 7
hsa-miR-524-3p	0	0	1	1	1	1	PARP9	poly (ADP-ribose) polymerase family, member 9
hsa-miR-524-3p	0	0	0	1	0	0	OR5B21	olfactory receptor, family 5, subfamily B, member 21
hsa-miR-524-3p	1	0	1	1	1	1	DIS3L2	DIS3 mitotic control homolog (S. cerevisiae)-like 2
hsa-miR-524-3p	1	0	1	1	1	1	SCN2A	sodium channel, voltage-gated, type II, alpha subunit
hsa-miR-524-3p	1	0	1	1	1	1	P4HA2	prolyl 4-hydroxylase, alpha polypeptide II
hsa-miR-524-3p	0	0	1	1	0	0	NPSR1	neuropeptide S receptor 1
hsa-miR-524-3p	0	0	1	1	0	0	NTNG2	netrin G2
hsa-miR-524-3p	0	0	0	1	1	1	FAM217B	family with sequence similarity 217, member B
hsa-miR-524-3p	0	0	0	1	0	0	PPP1R13L	protein phosphatase 1, regulatory subunit 13 like
hsa-miR-524-3p	0	0	1	1	1	1	PTPLA	protein tyrosine phosphatase-like (proline instead of catalytic arginine), member A
hsa-miR-524-3p	0	0	0	1	1	1	ZNF438	zinc finger protein 438
hsa-miR-524-3p	0	0	0	1	1	1	ECI2	enoyl-CoA delta isomerase 2
hsa-miR-524-3p	0	0	0	1	0	0	KRT19	keratin 19
hsa-miR-524-3p	0	0	1	1	0	0	TXNRD2	thioredoxin reductase 2
hsa-miR-524-3p	0	0	0	1	1	1	KRTAP5-9	keratin associated protein 5-9
hsa-miR-524-3p	0	0	0	1	1	1	MOK	MOK protein kinase
hsa-miR-524-3p	0	0	1	1	1	1	MTCP1	mature T-cell proliferation 1
hsa-miR-524-3p	0	0	0	1	0	0	GUK1	guanylate kinase 1
hsa-miR-524-3p	0	0	1	1	1	1	THBS2	thrombospondin 2
hsa-miR-524-3p	1	0	1	1	1	1	WDR26	WD repeat domain 26
hsa-miR-524-3p	0	0	0	1	0	0	C4BPA	complement component 4 binding protein, alpha
hsa-miR-524-3p	1	0	1	1	1	1	NFASC	neurofascin
hsa-miR-524-3p	0	0	0	1	1	1	LAD1	ladinin 1
hsa-miR-524-3p	1	0	1	1	1	1	SASH1	SAM and SH3 domain containing 1
hsa-miR-524-3p	0	0	1	1	0	0	RGS8	regulator of G-protein signaling 8
hsa-miR-524-3p	0	0	0	1	1	1	QSOX1	quiescin Q6 sulfhydryl oxidase 1
hsa-miR-524-3p	1	0	1	1	1	1	TOR3A	torsin family 3, member A
hsa-miR-524-3p	1	0	1	1	1	1	SCYL3	SCY1-like 3 (S. cerevisiae)
hsa-miR-524-3p	0	0	1	1	1	1	CRP	C-reactive protein, pentraxin-related
hsa-miR-524-3p	0	0	1	1	0	0	CLVS2	clavesin 2
hsa-miR-524-3p	0	0	1	1	0	0	PMVK	phosphomevalonate kinase
hsa-miR-524-3p	0	0	1	1	1	1	C1orf43	chromosome 1 open reading frame 43
hsa-miR-524-3p	0	0	1	1	1	1	ECHS1	enoyl CoA hydratase, short chain, 1, mitochondrial
hsa-miR-524-3p	0	0	1	1	0	0	S100A1	S100 calcium binding protein A1
hsa-miR-524-3p	0	0	0	1	1	1	FIG4	FIG4 homolog, SAC1 lipid phosphatase domain containing (S. cerevisiae)
hsa-miR-524-3p	0	0	1	1	1	1	PRDM13	PR domain containing 13
hsa-miR-524-3p	0	0	0	1	0	0	ACP6	acid phosphatase 6, lysophosphatidic
hsa-miR-524-3p	1	0	1	1	1	1	ABLIM1	actin binding LIM protein 1
hsa-miR-524-3p	0	0	1	1	1	1	POLR3GL	polymerase (RNA) III (DNA directed) polypeptide G (32kD)-like
hsa-miR-524-3p	0	0	0	1	1	1	WDR3	WD repeat domain 3
hsa-miR-524-3p	0	0	0	1	0	0	H2AFB3	H2A histone family, member B3
hsa-miR-524-3p	0	0	0	1	1	1	GABRR1	gamma-aminobutyric acid (GABA) A receptor, rho 1
hsa-miR-524-3p	1	0	1	1	1	1	RNGTT	RNA guanylyltransferase and 5'-phosphatase
hsa-miR-524-3p	1	0	1	1	1	1	MPP1	membrane protein, palmitoylated 1, 55kDa
hsa-miR-524-3p	0	0	1	1	1	1	UBL4A	ubiquitin-like 4A
hsa-miR-524-3p	0	0	0	1	0	0	ABHD16B	abhydrolase domain containing 16B
hsa-miR-524-3p	0	0	1	1	0	0	PITX3	paired-like homeodomain 3
hsa-miR-524-3p	0	0	0	1	1	1	HENMT1	HEN1 methyltransferase homolog 1 (Arabidopsis)
hsa-miR-524-3p	0	0	1	1	0	0	AVPR2	arginine vasopressin receptor 2
hsa-miR-524-3p	0	0	0	1	0	0	SRPK3	SRSF protein kinase 3
hsa-miR-524-3p	0	0	1	1	1	1	NPM3	nucleophosmin/nucleoplasmin 3
hsa-miR-524-3p	0	0	0	1	0	0	HAUS7	HAUS augmin-like complex, subunit 7
hsa-miR-524-3p	1	0	1	1	1	1	LMO4	LIM domain only 4
hsa-miR-524-3p	0	0	1	1	0	0	AVPI1	arginine vasopressin-induced 1
hsa-miR-524-3p	0	0	1	1	0	0	IFI44	interferon-induced protein 44
hsa-miR-524-3p	1	0	1	1	1	1	LRRC1	leucine rich repeat containing 1
hsa-miR-524-3p	1	0	1	1	0	0	EFHC1	EF-hand domain (C-terminal) containing 1
hsa-miR-524-3p	0	0	0	1	0	0	TMEM61	transmembrane protein 61
hsa-miR-524-3p	0	0	0	1	1	1	TTC22	tetratricopeptide repeat domain 22
hsa-miR-524-3p	0	0	1	1	1	1	NKAP	NFKB activating protein
hsa-miR-524-3p	0	0	1	1	0	0	ENTPD8	ectonucleoside triphosphate diphosphohydrolase 8
hsa-miR-524-3p	0	0	0	1	0	0	KIAA1984	KIAA1984
hsa-miR-524-3p	0	0	0	1	0	0	TMEM141	transmembrane protein 141
hsa-miR-524-3p	1	0	1	1	1	1	WDR44	WD repeat domain 44
hsa-miR-524-3p	0	0	1	1	1	1	CH25H	cholesterol 25-hydroxylase
hsa-miR-524-3p	0	0	1	1	0	0	ADAMTS13	ADAM metallopeptidase with thrombospondin type 1 motif, 13
hsa-miR-524-3p	0	0	1	1	1	1	MED22	mediator complex subunit 22
hsa-miR-524-3p	0	0	0	1	1	1	TMEM69	transmembrane protein 69
hsa-miR-524-3p	1	0	1	1	1	1	RALGDS	ral guanine nucleotide dissociation stimulator
hsa-miR-524-3p	0	0	1	1	0	0	GTF3C5	general transcription factor IIIC, polypeptide 5, 63kDa
hsa-miR-524-3p	0	0	1	1	1	1	C10orf57	chromosome 10 open reading frame 57
hsa-miR-524-3p	1	0	1	1	1	1	AIF1L	allograft inflammatory factor 1-like
hsa-miR-524-3p	1	0	1	1	1	1	RIMS3	regulating synaptic membrane exocytosis 3
hsa-miR-524-3p	0	0	1	1	1	1	NXF3	nuclear RNA export factor 3
hsa-miR-524-3p	0	0	0	1	0	0	SEMG2	semenogelin II
hsa-miR-524-3p	1	0	1	1	1	1	TOMM34	translocase of outer mitochondrial membrane 34
hsa-miR-524-3p	0	0	1	1	1	1	CCND3	cyclin D3
hsa-miR-524-3p	1	0	1	1	0	0	ST6GALNAC6	ST6 (alpha-N-acetyl-neuraminyl-2,3-beta-galactosyl-1,3)-N-acetylgalactosaminide alpha-2,6-sialyltransferase 6
hsa-miR-524-3p	0	0	1	1	0	0	FPGS	folylpolyglutamate synthase
hsa-miR-524-3p	0	0	1	1	0	0	C10orf35	chromosome 10 open reading frame 35
hsa-miR-524-3p	0	0	0	1	1	1	TSPAN15	tetraspanin 15
hsa-miR-524-3p	0	0	0	1	1	1	TBX22	T-box 22
hsa-miR-524-3p	0	0	1	1	1	1	SLC2A8	solute carrier family 2 (facilitated glucose transporter), member 8
hsa-miR-524-3p	1	0	1	1	1	1	PHC2	polyhomeotic homolog 2 (Drosophila)
hsa-miR-524-3p	1	0	0	1	1	1	VSTM2L	V-set and transmembrane domain containing 2 like
hsa-miR-524-3p	1	0	1	1	1	1	KIAA1522	KIAA1522
hsa-miR-524-3p	1	0	1	1	1	1	NR6A1	nuclear receptor subfamily 6, group A, member 1
hsa-miR-524-3p	0	0	1	1	1	1	FBXO36	F-box protein 36
hsa-miR-524-3p	0	0	1	1	1	1	BAI2	brain-specific angiogenesis inhibitor 2
hsa-miR-524-3p	0	0	1	1	0	0	HCRTR1	hypocretin (orexin) receptor 1
hsa-miR-524-3p	0	0	0	1	0	0	SERINC2	serine incorporator 2
hsa-miR-524-3p	0	0	0	1	0	0	SMPDL3B	sphingomyelin phosphodiesterase, acid-like 3B
hsa-miR-524-3p	1	0	1	1	1	1	PRKG1	protein kinase, cGMP-dependent, type I
hsa-miR-524-3p	0	0	1	1	0	0	AHDC1	AT hook, DNA binding motif, containing 1
hsa-miR-524-3p	0	0	0	1	0	0	HDHD3	haloacid dehalogenase-like hydrolase domain containing 3
hsa-miR-524-3p	0	0	1	1	1	1	AUNIP	aurora kinase A and ninein interacting protein
hsa-miR-524-3p	1	0	1	1	1	1	IL28RA	interleukin 28 receptor, alpha (interferon, lambda receptor)
hsa-miR-524-3p	0	0	1	1	0	0	FRRS1L	ferric-chelate reductase 1-like
hsa-miR-524-3p	0	0	1	1	0	0	WDR46	WD repeat domain 46
hsa-miR-524-3p	1	0	1	1	0	0	RNF5	ring finger protein 5, E3 ubiquitin protein ligase
hsa-miR-524-3p	0	0	0	1	1	1	TBXA2R	thromboxane A2 receptor
hsa-miR-524-3p	0	0	1	1	1	1	FAM22G	family with sequence similarity 22, member G
hsa-miR-524-3p	1	0	0	1	1	1	HABP4	hyaluronan binding protein 4
hsa-miR-524-3p	1	0	1	1	1	1	METTL8	methyltransferase like 8
hsa-miR-524-3p	0	0	0	1	0	0	RSG1	REM2 and RAB-like small GTPase 1
hsa-miR-524-3p	1	0	1	1	1	1	C20orf112	chromosome 20 open reading frame 112
hsa-miR-524-3p	0	0	0	1	1	1	SYK	spleen tyrosine kinase
hsa-miR-524-3p	0	0	1	1	1	1	ING1	inhibitor of growth family, member 1
hsa-miR-524-3p	1	0	1	1	0	0	MCCD1	mitochondrial coiled-coil domain 1
hsa-miR-524-3p	0	0	1	1	0	0	PLP2	proteolipid protein 2 (colonic epithelium-enriched)
hsa-miR-524-3p	1	0	0	1	1	1	PRAF2	PRA1 domain family, member 2
hsa-miR-524-3p	0	0	0	1	1	1	FLOT1	flotillin 1
hsa-miR-524-3p	0	0	0	1	1	1	GPR183	G protein-coupled receptor 183
hsa-miR-524-3p	1	0	1	1	1	1	TLE4	transducin-like enhancer of split 4 (E(sp1) homolog, Drosophila)
hsa-miR-524-3p	1	0	1	1	0	0	PIP4K2A	phosphatidylinositol-5-phosphate 4-kinase, type II, alpha
hsa-miR-524-3p	0	0	1	1	0	0	RPP21	ribonuclease P/MRP 21kDa subunit
hsa-miR-524-3p	0	0	1	1	0	0	YIF1A	Yip1 interacting factor homolog A (S. cerevisiae)
hsa-miR-524-3p	1	0	1	1	0	0	DNAJC1	DnaJ (Hsp40) homolog, subfamily C, member 1
hsa-miR-524-3p	1	0	1	1	1	1	TRPM3	transient receptor potential cation channel, subfamily M, member 3
hsa-miR-524-3p	1	0	1	1	0	0	ARHGAP39	Rho GTPase activating protein 39
hsa-miR-524-3p	1	0	1	1	1	1	TGOLN2	trans-golgi network protein 2
hsa-miR-524-3p	0	0	0	1	0	0	GPR157	G protein-coupled receptor 157
hsa-miR-524-3p	0	0	1	1	0	0	SLC2A5	solute carrier family 2 (facilitated glucose/fructose transporter), member 5
hsa-miR-524-3p	0	0	1	1	0	0	CCDC114	coiled-coil domain containing 114
hsa-miR-524-3p	0	0	0	1	0	0	FRMPD1	FERM and PDZ domain containing 1
hsa-miR-524-3p	0	0	0	1	1	1	GRHPR	glyoxylate reductase/hydroxypyruvate reductase
hsa-miR-524-3p	0	0	0	1	0	0	ACOT7	acyl-CoA thioesterase 7
hsa-miR-524-3p	0	0	0	1	0	0	ASB10	ankyrin repeat and SOCS box containing 10
hsa-miR-524-3p	1	0	1	1	1	1	MRS2	MRS2 magnesium homeostasis factor homolog (S. cerevisiae)
hsa-miR-524-3p	0	0	1	1	0	0	HES5	hairy and enhancer of split 5 (Drosophila)
hsa-miR-524-3p	1	0	1	1	1	1	FAM107B	family with sequence similarity 107, member B
hsa-miR-524-3p	0	0	1	1	1	1	ITM2B	integral membrane protein 2B
hsa-miR-524-3p	1	0	1	1	0	0	PRKCZ	protein kinase C, zeta
hsa-miR-524-3p	0	0	0	1	1	1	GDF9	growth differentiation factor 9
hsa-miR-524-3p	0	0	1	1	0	0	CDKL4	cyclin-dependent kinase-like 4
hsa-miR-524-3p	0	0	1	1	1	1	CAMK1D	calcium/calmodulin-dependent protein kinase ID
hsa-miR-524-3p	1	0	1	1	1	1	ARX	aristaless related homeobox
hsa-miR-524-3p	0	0	1	1	1	1	B3GALT6	UDP-Gal:betaGal beta 1,3-galactosyltransferase polypeptide 6
hsa-miR-524-3p	1	0	1	1	1	1	HIVEP1	human immunodeficiency virus type I enhancer binding protein 1
hsa-miR-524-3p	1	0	1	1	1	1	ASPH	aspartate beta-hydroxylase
hsa-miR-524-3p	0	0	0	1	0	0	KLHL34	kelch-like 34 (Drosophila)
hsa-miR-524-3p	0	0	1	1	0	0	TRPC4	transient receptor potential cation channel, subfamily C, member 4
hsa-miR-524-3p	0	0	1	1	1	1	NRBP1	nuclear receptor binding protein 1
hsa-miR-524-3p	0	0	1	1	1	1	RS1	retinoschisin 1
hsa-miR-524-3p	0	0	1	1	0	0	SLC4A11	solute carrier family 4, sodium borate transporter, member 11
hsa-miR-524-3p	0	0	1	1	0	0	EXOC3L4	exocyst complex component 3-like 4
hsa-miR-524-3p	0	0	0	1	0	0	S100G	S100 calcium binding protein G
hsa-miR-524-3p	1	0	0	1	1	1	PRDM15	PR domain containing 15
hsa-miR-524-3p	1	0	1	1	1	1	ADRA1A	adrenoceptor alpha 1A
hsa-miR-524-3p	1	0	1	1	1	1	TMSB4X	thymosin beta 4, X-linked
hsa-miR-524-3p	0	0	0	1	0	0	HADHA	hydroxyacyl-CoA dehydrogenase/3-ketoacyl-CoA thiolase/enoyl-CoA hydratase (trifunctional protein), alpha subunit
hsa-miR-524-3p	1	0	0	1	1	1	SLC46A3	solute carrier family 46, member 3
hsa-miR-524-3p	0	0	1	1	0	0	ESRRB	estrogen-related receptor beta
hsa-miR-524-3p	0	0	0	1	1	1	ASGR1	asialoglycoprotein receptor 1
hsa-miR-524-3p	0	0	1	1	0	0	MUC16	mucin 16, cell surface associated
hsa-miR-524-3p	1	0	1	1	1	1	TEC	tec protein tyrosine kinase
hsa-miR-524-3p	0	0	1	1	1	1	NT5C3	5'-nucleotidase, cytosolic III
hsa-miR-524-3p	0	0	1	1	1	1	SIRPB2	signal-regulatory protein beta 2
hsa-miR-524-3p	0	0	1	1	0	0	EIF3L	eukaryotic translation initiation factor 3, subunit L
hsa-miR-524-3p	1	0	1	1	1	1	RCL1	RNA terminal phosphate cyclase-like 1
hsa-miR-524-3p	0	0	0	1	0	0	KRTAP5-1	keratin associated protein 5-1
hsa-miR-524-3p	0	0	1	1	0	0	RBCK1	RanBP-type and C3HC4-type zinc finger containing 1
hsa-miR-524-3p	0	0	0	1	0	0	ZNF316	zinc finger protein 316
hsa-miR-524-3p	0	0	0	1	1	1	OLIG1	oligodendrocyte transcription factor 1
hsa-miR-524-3p	1	0	1	1	1	1	AFAP1	actin filament associated protein 1
hsa-miR-524-3p	1	0	1	1	1	1	KCNA1	potassium voltage-gated channel, shaker-related subfamily, member 1 (episodic ataxia with myokymia)
hsa-miR-524-3p	1	0	1	1	1	1	DSEL	dermatan sulfate epimerase-like
hsa-miR-524-3p	0	0	0	1	0	0	IGLL3P	immunoglobulin lambda-like polypeptide 3, pseudogene
hsa-miR-524-3p	0	0	1	1	0	0	DHRS4L2	dehydrogenase/reductase (SDR family) member 4 like 2
hsa-miR-524-3p	0	0	1	1	0	0	OTUD7A	OTU domain containing 7A
hsa-miR-524-3p	1	0	1	1	1	1	NME4	NME/NM23 nucleoside diphosphate kinase 4
hsa-miR-524-3p	1	0	1	1	1	1	IMPA2	inositol(myo)-1(or 4)-monophosphatase 2
hsa-miR-524-3p	0	0	0	1	0	0	TMEM200C	transmembrane protein 200C
hsa-miR-524-3p	1	0	1	1	1	1	COLQ	collagen-like tail subunit (single strand of homotrimer) of asymmetric acetylcholinesterase
hsa-miR-524-3p	0	0	0	1	1	1	MRPL2	mitochondrial ribosomal protein L2
hsa-miR-524-3p	0	0	0	1	1	1	SIRT3	sirtuin 3
hsa-miR-524-3p	1	0	1	1	1	1	KCNJ10	potassium inwardly-rectifying channel, subfamily J, member 10
hsa-miR-524-3p	0	0	1	0	1	1	ZC3HAV1	zinc finger CCCH-type, antiviral 1
