# Supplementary material for: Profiling of Selected MicroRNAs in Proliferative Eutopic Endometrium of Women with Ovarian Endometriosis
Source: Biomed Res Int. 2015 Aug 20;2015:760698. doi: 10.1155/2015/760698 (PMC4558423; doi:10.1155/2015/760698)
Supplement: Supplementary file 1 — Table I: The names of miRNAs significantly differentially expressed between eutopic endometrium of patients with endometriosis vs eutopic endometrium of patients without endometriosis. Table II: The associations between miRNA and mRNA, which presents detailed results of the search of six major databases i.e targetscan, tarbase, miranda, mirbase, mirtarget2 and pictar. [file 760698.f1.zip › 760698.f1/Table II/hsa-miR-524-5p.tsv]

miR	targetscan	tarbase	miranda	mirbase	mirtarget2	pictar	GeneSymbol	GeneName
hsa-miR-524-5p	1	0	1	1	1	1	PDZD2	PDZ domain containing 2
hsa-miR-524-5p	1	0	1	1	1	1	CHD9	chromodomain helicase DNA binding protein 9
hsa-miR-524-5p	1	0	1	1	0	0	RAPGEF2	Rap guanine nucleotide exchange factor (GEF) 2
hsa-miR-524-5p	1	0	1	0	1	1	KIAA0355	KIAA0355
hsa-miR-524-5p	0	0	1	1	1	1	PPIP5K1	diphosphoinositol pentakisphosphate kinase 1
hsa-miR-524-5p	1	0	1	1	1	1	FAM65B	family with sequence similarity 65, member B
hsa-miR-524-5p	1	0	1	1	1	1	ITM2C	integral membrane protein 2C
hsa-miR-524-5p	1	0	1	0	1	1	PTPRT	protein tyrosine phosphatase, receptor type, T
hsa-miR-524-5p	1	0	1	0	1	1	KIAA0408	KIAA0408
hsa-miR-524-5p	1	0	1	1	1	1	NUPL1	nucleoporin like 1
hsa-miR-524-5p	1	0	1	0	1	1	MTSS1	metastasis suppressor 1
hsa-miR-524-5p	1	0	1	1	1	1	PPIP5K2	diphosphoinositol pentakisphosphate kinase 2
hsa-miR-524-5p	0	0	1	1	0	0	SIPA1L1	signal-induced proliferation-associated 1 like 1
hsa-miR-524-5p	1	0	1	1	1	1	AUTS2	autism susceptibility candidate 2
hsa-miR-524-5p	1	0	1	0	1	1	CEP350	centrosomal protein 350kDa
hsa-miR-524-5p	0	0	1	1	1	1	NEU3	sialidase 3 (membrane sialidase)
hsa-miR-524-5p	1	0	1	1	0	0	SUSD5	sushi domain containing 5
hsa-miR-524-5p	0	0	1	1	0	0	ZNF862	zinc finger protein 862
hsa-miR-524-5p	1	0	1	1	1	1	GPATCH8	G patch domain containing 8
hsa-miR-524-5p	1	0	1	1	0	0	PCLO	piccolo (presynaptic cytomatrix protein)
hsa-miR-524-5p	1	0	1	1	1	1	GREB1	growth regulation by estrogen in breast cancer 1
hsa-miR-524-5p	1	0	1	1	1	1	KIF1B	kinesin family member 1B
hsa-miR-524-5p	1	0	1	1	0	0	TBC1D12	TBC1 domain family, member 12
hsa-miR-524-5p	1	0	1	1	1	1	SLC4A7	solute carrier family 4, sodium bicarbonate cotransporter, member 7
hsa-miR-524-5p	1	0	1	0	0	0	HECTD4	HECT domain containing E3 ubiquitin protein ligase 4
hsa-miR-524-5p	1	0	1	1	1	1	HIPK1	homeodomain interacting protein kinase 1
hsa-miR-524-5p	1	0	1	1	1	1	GIGYF2	GRB10 interacting GYF protein 2
hsa-miR-524-5p	1	0	1	1	1	1	SMOC2	SPARC related modular calcium binding 2
hsa-miR-524-5p	1	0	1	0	1	1	DOCK4	dedicator of cytokinesis 4
hsa-miR-524-5p	1	0	1	1	1	1	MATR3	matrin 3
hsa-miR-524-5p	0	0	1	1	1	1	GPR116	G protein-coupled receptor 116
hsa-miR-524-5p	1	0	1	0	1	1	RBM12	RNA binding motif protein 12
hsa-miR-524-5p	1	0	1	1	1	1	LPHN2	latrophilin 2
hsa-miR-524-5p	1	0	1	1	1	1	DNM3	dynamin 3
hsa-miR-524-5p	1	0	1	1	1	1	WWC1	WW and C2 domain containing 1
hsa-miR-524-5p	0	0	1	1	0	0	FAM169A	family with sequence similarity 169, member A
hsa-miR-524-5p	0	0	1	1	1	1	WDR47	WD repeat domain 47
hsa-miR-524-5p	1	0	1	1	1	1	UBR5	ubiquitin protein ligase E3 component n-recognin 5
hsa-miR-524-5p	1	0	1	1	1	1	ARHGEF15	Rho guanine nucleotide exchange factor (GEF) 15
hsa-miR-524-5p	1	0	1	1	1	1	CPEB3	cytoplasmic polyadenylation element binding protein 3
hsa-miR-524-5p	1	0	1	1	1	1	NLGN4Y	neuroligin 4, Y-linked
hsa-miR-524-5p	1	0	1	1	1	1	C11orf9	chromosome 11 open reading frame 9
hsa-miR-524-5p	1	0	1	1	1	1	RGL1	ral guanine nucleotide dissociation stimulator-like 1
hsa-miR-524-5p	1	0	1	1	1	1	NTNG1	netrin G1
hsa-miR-524-5p	0	0	1	1	1	1	TBC1D30	TBC1 domain family, member 30
hsa-miR-524-5p	1	0	1	1	1	1	PALLD	palladin, cytoskeletal associated protein
hsa-miR-524-5p	1	0	1	1	1	1	CNOT1	CCR4-NOT transcription complex, subunit 1
hsa-miR-524-5p	1	0	1	1	1	1	FNBP4	formin binding protein 4
hsa-miR-524-5p	1	0	1	1	0	0	KIAA1045	KIAA1045
hsa-miR-524-5p	1	0	1	1	1	1	NLGN1	neuroligin 1
hsa-miR-524-5p	1	0	1	0	1	1	ZNF507	zinc finger protein 507
hsa-miR-524-5p	1	0	1	1	1	1	PHF8	PHD finger protein 8
hsa-miR-524-5p	0	0	1	1	0	0	MUTYH	mutY homolog (E. coli)
hsa-miR-524-5p	1	0	1	1	1	1	SMARCAD1	SWI/SNF-related, matrix-associated actin-dependent regulator of chromatin, subfamily a, containing DEAD/H box 1
hsa-miR-524-5p	1	0	1	0	1	1	SRGAP3	SLIT-ROBO Rho GTPase activating protein 3
hsa-miR-524-5p	1	0	1	1	0	0	KIAA1210	KIAA1210
hsa-miR-524-5p	1	0	1	1	1	1	ATXN7L1	ataxin 7-like 1
hsa-miR-524-5p	1	0	1	1	1	1	ZMIZ1	zinc finger, MIZ-type containing 1
hsa-miR-524-5p	1	0	1	1	0	0	ATAD2B	ATPase family, AAA domain containing 2B
hsa-miR-524-5p	1	0	1	1	1	1	MKL2	MKL/myocardin-like 2
hsa-miR-524-5p	0	0	1	1	1	1	FSTL5	follistatin-like 5
hsa-miR-524-5p	1	0	1	0	1	1	INTS2	integrator complex subunit 2
hsa-miR-524-5p	0	0	1	1	1	1	TCF7L2	transcription factor 7-like 2 (T-cell specific, HMG-box)
hsa-miR-524-5p	0	0	1	1	1	1	CA10	carbonic anhydrase X
hsa-miR-524-5p	1	0	1	0	0	0	NYNRIN	NYN domain and retroviral integrase containing
hsa-miR-524-5p	1	0	1	1	1	1	PCDH19	protocadherin 19
hsa-miR-524-5p	1	0	1	0	1	1	KCTD16	potassium channel tetramerisation domain containing 16
hsa-miR-524-5p	1	0	1	1	1	1	ATP2C1	ATPase, Ca++ transporting, type 2C, member 1
hsa-miR-524-5p	1	0	1	1	1	1	TAOK1	TAO kinase 1
hsa-miR-524-5p	1	0	1	1	1	1	LRRC7	leucine rich repeat containing 7
hsa-miR-524-5p	1	0	1	1	1	1	UNC79	unc-79 homolog (C. elegans)
hsa-miR-524-5p	1	1	1	1	1	1	NFIA	nuclear factor I/A
hsa-miR-524-5p	0	0	1	1	1	1	SCAPER	S-phase cyclin A-associated protein in the ER
hsa-miR-524-5p	1	0	1	1	0	0	KIAA1462	KIAA1462
hsa-miR-524-5p	1	0	1	1	1	1	BAZ2B	bromodomain adjacent to zinc finger domain, 2B
hsa-miR-524-5p	0	0	1	1	1	1	NLGN3	neuroligin 3
hsa-miR-524-5p	0	0	1	0	0	0	NYAP2	neuronal tyrosine-phosphorylated phosphoinositide-3-kinase adaptor 2
hsa-miR-524-5p	1	0	1	1	1	1	FAM214B	family with sequence similarity 214, member B
hsa-miR-524-5p	1	0	1	0	1	1	ZNF295	zinc finger protein 295
hsa-miR-524-5p	1	0	1	0	1	1	LMO3	LIM domain only 3 (rhombotin-like 2)
hsa-miR-524-5p	0	0	1	0	1	1	ZSWIM6	zinc finger, SWIM-type containing 6
hsa-miR-524-5p	1	0	1	0	1	1	IGDCC4	immunoglobulin superfamily, DCC subclass, member 4
hsa-miR-524-5p	1	0	1	0	0	0	TANC2	tetratricopeptide repeat, ankyrin repeat and coiled-coil containing 2
hsa-miR-524-5p	1	0	1	1	1	1	PHF21A	PHD finger protein 21A
hsa-miR-524-5p	1	0	1	1	1	1	DDHD1	DDHD domain containing 1
hsa-miR-524-5p	0	0	1	0	1	1	SETD5	SET domain containing 5
hsa-miR-524-5p	0	0	1	1	0	0	SLC22A16	solute carrier family 22 (organic cation/carnitine transporter), member 16
hsa-miR-524-5p	1	0	1	1	1	1	CDK13	cyclin-dependent kinase 13
hsa-miR-524-5p	1	0	1	1	1	1	LCOR	ligand dependent nuclear receptor corepressor
hsa-miR-524-5p	0	0	1	1	0	0	FOCAD	focadhesin
hsa-miR-524-5p	1	0	1	1	1	1	AHCTF1	AT hook containing transcription factor 1
hsa-miR-524-5p	0	0	1	1	1	1	SLC11A2	solute carrier family 11 (proton-coupled divalent metal ion transporters), member 2
hsa-miR-524-5p	1	0	1	1	1	1	NAV2	neuron navigator 2
hsa-miR-524-5p	1	0	1	1	1	1	CSRNP1	cysteine-serine-rich nuclear protein 1
hsa-miR-524-5p	1	0	1	1	1	1	HNRPDL	heterogeneous nuclear ribonucleoprotein D-like
hsa-miR-524-5p	1	0	1	1	1	1	CSMD3	CUB and Sushi multiple domains 3
hsa-miR-524-5p	0	0	1	1	0	0	SEC16B	SEC16 homolog B (S. cerevisiae)
hsa-miR-524-5p	1	0	1	1	1	1	LSM14A	LSM14A, SCD6 homolog A (S. cerevisiae)
hsa-miR-524-5p	0	0	1	1	0	0	TPGS2	tubulin polyglutamylase complex subunit 2
hsa-miR-524-5p	1	0	1	1	1	1	ANKRD12	ankyrin repeat domain 12
hsa-miR-524-5p	1	0	1	1	1	1	POGZ	pogo transposable element with ZNF domain
hsa-miR-524-5p	1	0	1	1	0	0	ZNF292	zinc finger protein 292
hsa-miR-524-5p	1	0	1	1	0	0	ADC	arginine decarboxylase
hsa-miR-524-5p	0	0	1	1	1	1	KIAA1967	KIAA1967
hsa-miR-524-5p	1	0	1	1	1	1	SH3TC2	SH3 domain and tetratricopeptide repeats 2
hsa-miR-524-5p	0	0	1	1	0	0	CIRH1A	cirrhosis, autosomal recessive 1A (cirhin)
hsa-miR-524-5p	0	0	1	1	0	0	GOLT1A	golgi transport 1A
hsa-miR-524-5p	0	0	1	1	0	0	SLC22A10	solute carrier family 22, member 10
hsa-miR-524-5p	1	0	1	0	0	0	RNF169	ring finger protein 169
hsa-miR-524-5p	1	0	1	0	0	0	ZBTB34	zinc finger and BTB domain containing 34
hsa-miR-524-5p	1	0	1	1	1	1	ACBD5	acyl-CoA binding domain containing 5
hsa-miR-524-5p	0	0	1	1	1	1	MCF2	MCF.2 cell line derived transforming sequence
hsa-miR-524-5p	1	0	1	1	1	1	SMEK1	SMEK homolog 1, suppressor of mek1 (Dictyostelium)
hsa-miR-524-5p	1	0	1	0	0	0	ZC3H12C	zinc finger CCCH-type containing 12C
hsa-miR-524-5p	0	0	1	1	0	0	KRTAP24-1	keratin associated protein 24-1
hsa-miR-524-5p	1	0	1	1	1	1	TRPM3	transient receptor potential cation channel, subfamily M, member 3
hsa-miR-524-5p	0	0	1	1	1	1	PMS1	PMS1 postmeiotic segregation increased 1 (S. cerevisiae)
hsa-miR-524-5p	1	0	1	1	1	1	PAN3	PAN3 poly(A) specific ribonuclease subunit homolog (S. cerevisiae)
hsa-miR-524-5p	1	0	1	0	1	1	LIN54	lin-54 homolog (C. elegans)
hsa-miR-524-5p	0	0	1	1	0	0	SGCE	sarcoglycan, epsilon
hsa-miR-524-5p	1	0	1	0	1	1	BEND4	BEN domain containing 4
hsa-miR-524-5p	0	0	1	1	1	1	ING4	inhibitor of growth family, member 4
hsa-miR-524-5p	1	0	1	1	1	1	VLDLR	very low density lipoprotein receptor
hsa-miR-524-5p	0	0	1	1	1	1	ATP7A	ATPase, Cu++ transporting, alpha polypeptide
hsa-miR-524-5p	1	0	1	0	1	1	LRBA	LPS-responsive vesicle trafficking, beach and anchor containing
hsa-miR-524-5p	1	0	1	1	1	1	COL11A1	collagen, type XI, alpha 1
hsa-miR-524-5p	1	0	1	1	1	1	DAPK1	death-associated protein kinase 1
hsa-miR-524-5p	1	0	1	0	1	1	PCDHA13	protocadherin alpha 13
hsa-miR-524-5p	1	0	1	1	1	1	PCDHA4	protocadherin alpha 4
hsa-miR-524-5p	0	0	1	1	0	0	TNNI3K	TNNI3 interacting kinase
hsa-miR-524-5p	1	0	1	1	0	0	ELN	elastin
hsa-miR-524-5p	1	0	1	1	1	1	MEF2A	myocyte enhancer factor 2A
hsa-miR-524-5p	1	0	1	1	1	1	HMGB1	high mobility group box 1
hsa-miR-524-5p	0	0	1	1	1	1	PTK2	PTK2 protein tyrosine kinase 2
hsa-miR-524-5p	1	0	1	1	1	1	SYNCRIP	synaptotagmin binding, cytoplasmic RNA interacting protein
hsa-miR-524-5p	1	0	1	1	1	1	DTNA	dystrobrevin, alpha
hsa-miR-524-5p	1	0	1	1	1	1	RPS6KA2	ribosomal protein S6 kinase, 90kDa, polypeptide 2
hsa-miR-524-5p	1	0	1	0	1	1	PLAG1	pleiomorphic adenoma gene 1
hsa-miR-524-5p	1	0	1	1	1	1	RASSF5	Ras association (RalGDS/AF-6) domain family member 5
hsa-miR-524-5p	1	0	1	0	1	1	SLC6A6	solute carrier family 6 (neurotransmitter transporter, taurine), member 6
hsa-miR-524-5p	1	0	1	1	0	0	CACNB1	calcium channel, voltage-dependent, beta 1 subunit
hsa-miR-524-5p	1	0	1	1	1	1	E2F5	E2F transcription factor 5, p130-binding
hsa-miR-524-5p	1	0	1	1	1	1	FMR1	fragile X mental retardation 1
hsa-miR-524-5p	1	0	1	1	1	1	PRKACB	protein kinase, cAMP-dependent, catalytic, beta
hsa-miR-524-5p	1	0	1	0	1	1	DPYSL2	dihydropyrimidinase-like 2
hsa-miR-524-5p	1	0	1	0	1	1	ETV1	ets variant 1
hsa-miR-524-5p	0	0	1	1	1	1	TFRC	transferrin receptor (p90, CD71)
hsa-miR-524-5p	1	0	1	1	1	1	EPHA7	EPH receptor A7
hsa-miR-524-5p	1	0	1	0	1	1	CHL1	cell adhesion molecule with homology to L1CAM (close homolog of L1)
hsa-miR-524-5p	0	0	1	1	1	1	DGKE	diacylglycerol kinase, epsilon 64kDa
hsa-miR-524-5p	1	0	1	0	1	1	CDON	Cdon homolog (mouse)
hsa-miR-524-5p	1	0	1	1	1	1	NEO1	neogenin 1
hsa-miR-524-5p	1	0	1	1	0	0	RGS6	regulator of G-protein signaling 6
hsa-miR-524-5p	1	0	1	1	1	1	LIMA1	LIM domain and actin binding 1
hsa-miR-524-5p	0	0	1	1	0	0	EIF4E2	eukaryotic translation initiation factor 4E family member 2
hsa-miR-524-5p	1	0	1	1	1	1	PDLIM5	PDZ and LIM domain 5
hsa-miR-524-5p	1	0	1	1	1	1	GIT1	G protein-coupled receptor kinase interacting ArfGAP 1
hsa-miR-524-5p	0	0	1	1	1	1	STAU1	staufen, RNA binding protein, homolog 1 (Drosophila)
hsa-miR-524-5p	1	0	1	1	1	1	HNRNPK	heterogeneous nuclear ribonucleoprotein K
hsa-miR-524-5p	1	0	1	1	1	1	DDX17	DEAD (Asp-Glu-Ala-Asp) box helicase 17
hsa-miR-524-5p	1	0	1	0	1	1	TBL1X	transducin (beta)-like 1X-linked
hsa-miR-524-5p	1	0	1	1	1	1	ARHGEF3	Rho guanine nucleotide exchange factor (GEF) 3
hsa-miR-524-5p	1	0	1	1	1	1	PTPRK	protein tyrosine phosphatase, receptor type, K
hsa-miR-524-5p	1	0	1	1	1	1	COL24A1	collagen, type XXIV, alpha 1
hsa-miR-524-5p	0	0	1	1	1	1	HNRNPM	heterogeneous nuclear ribonucleoprotein M
hsa-miR-524-5p	0	0	1	1	1	1	RNF130	ring finger protein 130
hsa-miR-524-5p	1	0	1	1	0	0	KAT5	K(lysine) acetyltransferase 5
hsa-miR-524-5p	0	0	1	1	1	1	MYO9A	myosin IXA
hsa-miR-524-5p	1	0	1	1	1	1	TEAD1	TEA domain family member 1 (SV40 transcriptional enhancer factor)
hsa-miR-524-5p	1	0	1	1	1	1	OSBPL10	oxysterol binding protein-like 10
hsa-miR-524-5p	0	0	1	1	0	0	TRIM27	tripartite motif containing 27
hsa-miR-524-5p	1	0	1	1	1	1	GULP1	GULP, engulfment adaptor PTB domain containing 1
hsa-miR-524-5p	1	0	1	1	1	1	ZFX	zinc finger protein, X-linked
hsa-miR-524-5p	0	0	1	1	1	1	PLD1	phospholipase D1, phosphatidylcholine-specific
hsa-miR-524-5p	1	0	1	0	1	1	PDE7B	phosphodiesterase 7B
hsa-miR-524-5p	1	0	1	1	1	1	MEF2D	myocyte enhancer factor 2D
hsa-miR-524-5p	1	0	1	1	1	1	PDLIM3	PDZ and LIM domain 3
hsa-miR-524-5p	0	0	1	1	1	1	HDAC3	histone deacetylase 3
hsa-miR-524-5p	1	0	1	0	1	1	MLL2	myeloid/lymphoid or mixed-lineage leukemia 2
hsa-miR-524-5p	1	0	1	1	1	1	SLC4A4	solute carrier family 4, sodium bicarbonate cotransporter, member 4
hsa-miR-524-5p	0	0	1	1	1	1	SESN1	sestrin 1
hsa-miR-524-5p	1	0	1	1	1	1	MYT1L	myelin transcription factor 1-like
hsa-miR-524-5p	0	0	1	0	0	0	PLD2	phospholipase D2
hsa-miR-524-5p	1	0	1	0	0	0	MAP3K1	mitogen-activated protein kinase kinase kinase 1, E3 ubiquitin protein ligase
hsa-miR-524-5p	1	0	1	1	1	1	MRAS	muscle RAS oncogene homolog
hsa-miR-524-5p	0	0	1	1	1	1	KHDRBS3	KH domain containing, RNA binding, signal transduction associated 3
hsa-miR-524-5p	0	0	1	1	1	1	CD84	CD84 molecule
hsa-miR-524-5p	1	0	1	1	1	1	PFKFB3	6-phosphofructo-2-kinase/fructose-2,6-biphosphatase 3
hsa-miR-524-5p	1	0	1	1	1	1	MBNL2	muscleblind-like splicing regulator 2
hsa-miR-524-5p	0	0	1	1	1	1	ZNF33A	zinc finger protein 33A
hsa-miR-524-5p	1	0	1	1	1	1	NUDT4	nudix (nucleoside diphosphate linked moiety X)-type motif 4
hsa-miR-524-5p	0	0	1	1	1	1	SC5DL	sterol-C5-desaturase (ERG3 delta-5-desaturase homolog, S. cerevisiae)-like
hsa-miR-524-5p	1	0	1	1	1	1	CBFA2T2	core-binding factor, runt domain, alpha subunit 2; translocated to, 2
hsa-miR-524-5p	0	0	1	0	1	1	C2orf72	chromosome 2 open reading frame 72
hsa-miR-524-5p	1	0	1	1	1	1	TP63	tumor protein p63
hsa-miR-524-5p	1	0	1	1	1	1	UNC50	unc-50 homolog (C. elegans)
hsa-miR-524-5p	1	0	1	1	1	1	AKAP9	A kinase (PRKA) anchor protein (yotiao) 9
hsa-miR-524-5p	0	0	1	1	1	1	MINPP1	multiple inositol-polyphosphate phosphatase 1
hsa-miR-524-5p	0	0	1	1	1	1	RGS7	regulator of G-protein signaling 7
hsa-miR-524-5p	0	0	1	1	1	1	RER1	RER1 retention in endoplasmic reticulum 1 homolog (S. cerevisiae)
hsa-miR-524-5p	0	0	1	1	1	1	PLEKHB1	pleckstrin homology domain containing, family B (evectins) member 1
hsa-miR-524-5p	1	0	1	0	1	1	CD164	CD164 molecule, sialomucin
hsa-miR-524-5p	0	0	1	1	0	0	RBM5	RNA binding motif protein 5
hsa-miR-524-5p	0	0	1	1	1	1	EIF2A	eukaryotic translation initiation factor 2A, 65kDa
hsa-miR-524-5p	1	0	1	1	1	1	KAT6B	K(lysine) acetyltransferase 6B
hsa-miR-524-5p	0	0	1	1	1	1	CSAD	cysteine sulfinic acid decarboxylase
hsa-miR-524-5p	0	0	1	1	0	0	ABRACL	ABRA C-terminal like
hsa-miR-524-5p	0	0	1	1	1	1	COG6	component of oligomeric golgi complex 6
hsa-miR-524-5p	1	0	1	0	1	1	CDK14	cyclin-dependent kinase 14
hsa-miR-524-5p	0	0	1	1	1	1	TIAM2	T-cell lymphoma invasion and metastasis 2
hsa-miR-524-5p	1	0	1	0	1	1	WDR82	WD repeat domain 82
hsa-miR-524-5p	1	0	1	1	1	1	HNRNPH3	heterogeneous nuclear ribonucleoprotein H3 (2H9)
hsa-miR-524-5p	1	0	1	1	1	1	CAB39	calcium binding protein 39
hsa-miR-524-5p	1	0	1	1	1	1	SORBS1	sorbin and SH3 domain containing 1
hsa-miR-524-5p	1	0	1	1	1	1	ZBTB20	zinc finger and BTB domain containing 20
hsa-miR-524-5p	0	0	1	0	1	1	CLEC5A	C-type lectin domain family 5, member A
hsa-miR-524-5p	1	0	1	0	1	1	SLC34A2	solute carrier family 34 (sodium phosphate), member 2
hsa-miR-524-5p	1	0	1	1	1	1	MYNN	myoneurin
hsa-miR-524-5p	1	0	1	1	1	1	C14orf129	chromosome 14 open reading frame 129
hsa-miR-524-5p	0	0	1	1	1	1	CNPPD1	cyclin Pas1/PHO80 domain containing 1
hsa-miR-524-5p	1	0	1	1	1	1	USP15	ubiquitin specific peptidase 15
hsa-miR-524-5p	1	0	1	1	1	1	ANKRD13A	ankyrin repeat domain 13A
hsa-miR-524-5p	1	0	1	1	1	1	AGPAT3	1-acylglycerol-3-phosphate O-acyltransferase 3
hsa-miR-524-5p	0	0	1	1	1	1	FAM114A2	family with sequence similarity 114, member A2
hsa-miR-524-5p	0	0	1	1	1	1	MPP6	membrane protein, palmitoylated 6 (MAGUK p55 subfamily member 6)
hsa-miR-524-5p	1	0	1	1	1	1	TACC2	transforming, acidic coiled-coil containing protein 2
hsa-miR-524-5p	1	0	1	1	1	1	SEPT9	septin 9
hsa-miR-524-5p	1	0	1	1	1	1	FBN2	fibrillin 2
hsa-miR-524-5p	0	0	1	1	1	1	SLC39A8	solute carrier family 39 (zinc transporter), member 8
hsa-miR-524-5p	1	0	1	1	1	1	SENP7	SUMO1/sentrin specific peptidase 7
hsa-miR-524-5p	1	0	1	1	1	1	TSC22D2	TSC22 domain family, member 2
hsa-miR-524-5p	1	0	1	1	1	1	KCNMB2	potassium large conductance calcium-activated channel, subfamily M, beta member 2
hsa-miR-524-5p	1	0	1	1	1	1	NXT2	nuclear transport factor 2-like export factor 2
hsa-miR-524-5p	0	0	1	1	1	1	SLC30A5	solute carrier family 30 (zinc transporter), member 5
hsa-miR-524-5p	1	0	1	1	1	1	DESI2	desumoylating isopeptidase 2
hsa-miR-524-5p	1	0	1	1	1	1	CALD1	caldesmon 1
hsa-miR-524-5p	0	0	1	1	1	1	NKX3-1	NK3 homeobox 1
hsa-miR-524-5p	0	0	1	1	1	1	BAX	BCL2-associated X protein
hsa-miR-524-5p	0	0	1	1	1	1	DOCK10	dedicator of cytokinesis 10
hsa-miR-524-5p	0	0	1	0	0	0	TIGD7	tigger transposable element derived 7
hsa-miR-524-5p	1	0	1	1	1	1	SH3GLB1	SH3-domain GRB2-like endophilin B1
hsa-miR-524-5p	0	0	1	1	1	1	GOLGA6A	golgin A6 family, member A
hsa-miR-524-5p	1	0	1	0	1	1	TRPS1	trichorhinophalangeal syndrome I
hsa-miR-524-5p	1	0	1	1	1	1	ERGIC1	endoplasmic reticulum-golgi intermediate compartment (ERGIC) 1
hsa-miR-524-5p	1	0	1	1	1	1	PUM2	pumilio homolog 2 (Drosophila)
hsa-miR-524-5p	0	0	1	0	1	1	ERBB2IP	erbb2 interacting protein
hsa-miR-524-5p	1	0	1	1	1	1	VPS39	vacuolar protein sorting 39 homolog (S. cerevisiae)
hsa-miR-524-5p	1	0	1	1	1	1	CALN1	calneuron 1
hsa-miR-524-5p	0	0	1	1	0	0	RNF17	ring finger protein 17
hsa-miR-524-5p	1	0	1	1	1	1	KLHL12	kelch-like 12 (Drosophila)
hsa-miR-524-5p	1	0	1	1	1	1	CPEB1	cytoplasmic polyadenylation element binding protein 1
hsa-miR-524-5p	0	0	1	1	0	0	FEZF2	FEZ family zinc finger 2
hsa-miR-524-5p	1	0	1	1	1	1	CALU	calumenin
hsa-miR-524-5p	0	0	1	1	1	1	SLC6A15	solute carrier family 6 (neutral amino acid transporter), member 15
hsa-miR-524-5p	1	0	1	1	1	1	CASD1	CAS1 domain containing 1
hsa-miR-524-5p	1	0	1	1	1	1	NF2	neurofibromin 2 (merlin)
hsa-miR-524-5p	1	0	1	0	1	1	WIPF2	WAS/WASL interacting protein family, member 2
hsa-miR-524-5p	0	0	1	0	0	0	CLRN1-AS1	CLRN1 antisense RNA 1
hsa-miR-524-5p	0	0	1	1	1	1	ORMDL1	ORM1-like 1 (S. cerevisiae)
hsa-miR-524-5p	1	0	1	1	1	1	NTRK2	neurotrophic tyrosine kinase, receptor, type 2
hsa-miR-524-5p	1	0	1	1	1	1	PSIP1	PC4 and SFRS1 interacting protein 1
hsa-miR-524-5p	0	0	1	1	1	1	PPP1R1B	protein phosphatase 1, regulatory (inhibitor) subunit 1B
hsa-miR-524-5p	1	0	1	1	0	0	XRRA1	X-ray radiation resistance associated 1
hsa-miR-524-5p	1	0	1	1	0	0	SEPT8	septin 8
hsa-miR-524-5p	1	0	1	1	1	1	RBFOX1	RNA binding protein, fox-1 homolog (C. elegans) 1
hsa-miR-524-5p	1	0	1	1	1	1	HNRNPU	heterogeneous nuclear ribonucleoprotein U (scaffold attachment factor A)
hsa-miR-524-5p	0	0	1	1	1	1	CSPG5	chondroitin sulfate proteoglycan 5 (neuroglycan C)
hsa-miR-524-5p	1	0	1	1	0	0	FOXP2	forkhead box P2
hsa-miR-524-5p	1	0	1	1	1	1	F3	coagulation factor III (thromboplastin, tissue factor)
hsa-miR-524-5p	0	0	1	1	1	1	CARD8	caspase recruitment domain family, member 8
hsa-miR-524-5p	1	0	1	0	1	1	NUDCD1	NudC domain containing 1
hsa-miR-524-5p	0	0	1	1	1	1	TTLL11	tubulin tyrosine ligase-like family, member 11
hsa-miR-524-5p	0	0	1	1	0	0	SVIP	small VCP/p97-interacting protein
hsa-miR-524-5p	1	0	1	1	1	1	GPR64	G protein-coupled receptor 64
hsa-miR-524-5p	0	0	1	1	1	1	ANKRD36B	ankyrin repeat domain 36B
hsa-miR-524-5p	1	0	1	1	1	1	AFF2	AF4/FMR2 family, member 2
hsa-miR-524-5p	1	0	1	1	1	1	PLAGL1	pleiomorphic adenoma gene-like 1
hsa-miR-524-5p	0	0	1	1	0	0	CLDN7	claudin 7
hsa-miR-524-5p	1	0	1	0	1	1	DICER1	dicer 1, ribonuclease type III
hsa-miR-524-5p	1	0	1	1	0	0	ENTPD1	ectonucleoside triphosphate diphosphohydrolase 1
hsa-miR-524-5p	1	0	1	0	1	1	CACNA1C	calcium channel, voltage-dependent, L type, alpha 1C subunit
hsa-miR-524-5p	0	0	1	1	1	1	C6orf48	chromosome 6 open reading frame 48
hsa-miR-524-5p	1	0	1	1	1	1	SUCO	SUN domain containing ossification factor
hsa-miR-524-5p	1	0	1	1	1	1	CACNA2D2	calcium channel, voltage-dependent, alpha 2/delta subunit 2
hsa-miR-524-5p	0	0	1	1	1	1	CLDND1	claudin domain containing 1
hsa-miR-524-5p	0	0	1	1	1	1	TCFL5	transcription factor-like 5 (basic helix-loop-helix)
hsa-miR-524-5p	1	0	1	0	1	1	GRB10	growth factor receptor-bound protein 10
hsa-miR-524-5p	0	0	1	1	1	1	CHST11	carbohydrate (chondroitin 4) sulfotransferase 11
hsa-miR-524-5p	1	0	1	1	1	1	SAV1	salvador homolog 1 (Drosophila)
hsa-miR-524-5p	1	0	1	1	1	1	VAMP7	vesicle-associated membrane protein 7
hsa-miR-524-5p	1	0	1	1	1	1	PALM2	paralemmin 2
hsa-miR-524-5p	0	0	1	0	1	1	SRPK1	SRSF protein kinase 1
hsa-miR-524-5p	1	0	1	1	1	1	PNISR	PNN-interacting serine/arginine-rich protein
hsa-miR-524-5p	1	0	1	1	1	1	NAV3	neuron navigator 3
hsa-miR-524-5p	0	0	1	1	1	1	TRDN	triadin
hsa-miR-524-5p	1	0	1	1	1	1	NRXN3	neurexin 3
hsa-miR-524-5p	1	0	1	1	1	1	ARL4C	ADP-ribosylation factor-like 4C
hsa-miR-524-5p	1	0	1	1	1	1	MYB	v-myb myeloblastosis viral oncogene homolog (avian)
hsa-miR-524-5p	0	0	1	1	1	1	ABLIM2	actin binding LIM protein family, member 2
hsa-miR-524-5p	1	0	1	1	1	1	PPP1R9A	protein phosphatase 1, regulatory subunit 9A
hsa-miR-524-5p	0	0	1	1	0	0	NHLRC2	NHL repeat containing 2
hsa-miR-524-5p	0	0	1	1	1	1	ESRP1	epithelial splicing regulatory protein 1
hsa-miR-524-5p	1	0	1	1	1	1	ENOX2	ecto-NOX disulfide-thiol exchanger 2
hsa-miR-524-5p	0	0	1	1	0	0	ENY2	enhancer of yellow 2 homolog (Drosophila)
hsa-miR-524-5p	0	0	1	1	1	1	PARP16	poly (ADP-ribose) polymerase family, member 16
hsa-miR-524-5p	0	0	1	1	1	1	UBE2Q2	ubiquitin-conjugating enzyme E2Q family member 2
hsa-miR-524-5p	0	0	1	0	0	0	TUG1	taurine upregulated 1 (non-protein coding)
hsa-miR-524-5p	0	0	1	1	1	1	OLFM4	olfactomedin 4
hsa-miR-524-5p	0	0	1	1	1	1	BANK1	B-cell scaffold protein with ankyrin repeats 1
hsa-miR-524-5p	1	0	1	1	1	1	ARHGAP12	Rho GTPase activating protein 12
hsa-miR-524-5p	1	0	1	1	1	1	ARGLU1	arginine and glutamate rich 1
hsa-miR-524-5p	0	0	1	1	0	0	MANSC1	MANSC domain containing 1
hsa-miR-524-5p	0	0	1	1	0	0	FAM64A	family with sequence similarity 64, member A
hsa-miR-524-5p	1	0	1	1	1	1	HNRNPF	heterogeneous nuclear ribonucleoprotein F
hsa-miR-524-5p	0	0	1	1	1	1	STOX2	storkhead box 2
hsa-miR-524-5p	0	0	1	1	1	1	RNF220	ring finger protein 220
hsa-miR-524-5p	1	0	1	1	1	1	EIF2C1	eukaryotic translation initiation factor 2C, 1
hsa-miR-524-5p	1	0	1	1	1	1	PTBP3	polypyrimidine tract binding protein 3
hsa-miR-524-5p	1	0	1	1	1	1	SLC38A2	solute carrier family 38, member 2
hsa-miR-524-5p	0	0	1	1	1	1	PRPF39	PRP39 pre-mRNA processing factor 39 homolog (S. cerevisiae)
hsa-miR-524-5p	1	0	1	1	1	1	MKLN1	muskelin 1, intracellular mediator containing kelch motifs
hsa-miR-524-5p	1	0	1	1	1	1	ACER3	alkaline ceramidase 3
hsa-miR-524-5p	1	0	1	1	1	1	MYO9B	myosin IXB
hsa-miR-524-5p	1	0	1	1	1	1	INSIG2	insulin induced gene 2
hsa-miR-524-5p	0	0	1	1	1	1	SNCAIP	synuclein, alpha interacting protein
hsa-miR-524-5p	1	0	1	1	1	1	PGAP1	post-GPI attachment to proteins 1
hsa-miR-524-5p	0	0	1	1	0	0	CCDC51	coiled-coil domain containing 51
hsa-miR-524-5p	1	0	1	0	1	1	LIN28A	lin-28 homolog A (C. elegans)
hsa-miR-524-5p	1	0	1	1	1	1	MON2	MON2 homolog (S. cerevisiae)
hsa-miR-524-5p	0	0	1	0	0	0	SOX2-OT	SOX2 overlapping transcript (non-protein coding)
hsa-miR-524-5p	0	0	1	0	0	0	DUXAP10	double homeobox A pseudogene 10
hsa-miR-524-5p	1	0	1	1	1	1	S100PBP	S100P binding protein
hsa-miR-524-5p	1	0	1	0	1	1	DCAF17	DDB1 and CUL4 associated factor 17
hsa-miR-524-5p	0	0	1	1	1	1	VPRBP	Vpr (HIV-1) binding protein
hsa-miR-524-5p	1	0	1	1	1	1	MACF1	microtubule-actin crosslinking factor 1
hsa-miR-524-5p	0	0	1	1	0	0	BUB1	budding uninhibited by benzimidazoles 1 homolog (yeast)
hsa-miR-524-5p	1	0	1	1	1	1	USP33	ubiquitin specific peptidase 33
hsa-miR-524-5p	1	0	1	1	1	1	PHF20L1	PHD finger protein 20-like 1
hsa-miR-524-5p	0	0	1	0	0	0	LOC284561	uncharacterized LOC284561
hsa-miR-524-5p	1	0	1	1	1	1	PPFIA3	protein tyrosine phosphatase, receptor type, f polypeptide (PTPRF), interacting protein (liprin), alpha 3
hsa-miR-524-5p	0	0	1	1	1	1	AMFR	autocrine motility factor receptor, E3 ubiquitin protein ligase
hsa-miR-524-5p	0	0	1	0	1	1	FLJ14186	uncharacterized LOC401149
hsa-miR-524-5p	1	0	1	1	1	1	COPS7B	COP9 constitutive photomorphogenic homolog subunit 7B (Arabidopsis)
hsa-miR-524-5p	1	0	1	0	0	0	ZDBF2	zinc finger, DBF-type containing 2
hsa-miR-524-5p	0	0	1	0	0	0	IFFO2	intermediate filament family orphan 2
hsa-miR-524-5p	1	0	1	1	1	1	DYRK2	dual-specificity tyrosine-(Y)-phosphorylation regulated kinase 2
hsa-miR-524-5p	1	0	1	0	1	1	ATP2B1	ATPase, Ca++ transporting, plasma membrane 1
hsa-miR-524-5p	1	0	1	1	1	1	ABHD3	abhydrolase domain containing 3
hsa-miR-524-5p	0	0	1	1	1	1	EP400	E1A binding protein p400
hsa-miR-524-5p	0	0	1	1	0	0	EIF4ENIF1	eukaryotic translation initiation factor 4E nuclear import factor 1
hsa-miR-524-5p	1	0	1	0	1	1	MYO5B	myosin VB
hsa-miR-524-5p	0	0	1	0	1	1	ATXN1L	ataxin 1-like
hsa-miR-524-5p	0	0	1	0	0	0	KIAA1671	KIAA1671
hsa-miR-524-5p	1	0	1	1	1	1	KANK1	KN motif and ankyrin repeat domains 1
hsa-miR-524-5p	0	0	1	1	1	1	WDR67	WD repeat domain 67
hsa-miR-524-5p	1	0	1	1	1	1	YPEL5	yippee-like 5 (Drosophila)
hsa-miR-524-5p	1	0	1	1	1	1	NAA30	N(alpha)-acetyltransferase 30, NatC catalytic subunit
hsa-miR-524-5p	1	0	1	0	1	1	ZCCHC3	zinc finger, CCHC domain containing 3
hsa-miR-524-5p	0	0	1	1	0	0	STPG1	sperm-tail PG-rich repeat containing 1
hsa-miR-524-5p	0	0	1	0	1	1	HEMK1	HemK methyltransferase family member 1
hsa-miR-524-5p	0	0	1	0	1	1	FLJ22447	uncharacterized LOC400221
hsa-miR-524-5p	1	0	1	0	0	0	KIF26A	kinesin family member 26A
hsa-miR-524-5p	0	0	1	0	1	1	FLJ22763	uncharacterized LOC401081
hsa-miR-524-5p	1	0	1	1	0	0	MAGI3	membrane associated guanylate kinase, WW and PDZ domain containing 3
hsa-miR-524-5p	0	0	1	1	1	1	ZBBX	zinc finger, B-box domain containing
hsa-miR-524-5p	1	0	1	1	1	1	RNF185	ring finger protein 185
hsa-miR-524-5p	0	0	1	1	1	1	PLEKHS1	pleckstrin homology domain containing, family S member 1
hsa-miR-524-5p	1	0	1	1	1	1	GORASP2	golgi reassembly stacking protein 2, 55kDa
hsa-miR-524-5p	1	0	1	1	1	1	FOXP1	forkhead box P1
hsa-miR-524-5p	1	0	1	1	1	1	SEC63	SEC63 homolog (S. cerevisiae)
hsa-miR-524-5p	1	0	1	1	1	1	FAM53C	family with sequence similarity 53, member C
hsa-miR-524-5p	0	0	1	1	1	1	KDM2B	lysine (K)-specific demethylase 2B
hsa-miR-524-5p	1	0	1	1	1	1	MARK1	MAP/microtubule affinity-regulating kinase 1
hsa-miR-524-5p	1	0	1	1	0	0	SLC44A2	solute carrier family 44, member 2
hsa-miR-524-5p	1	0	1	1	1	1	NFASC	neurofascin
hsa-miR-524-5p	0	0	1	1	1	1	NETO2	neuropilin (NRP) and tolloid (TLL)-like 2
hsa-miR-524-5p	0	0	1	1	1	1	DTL	denticleless E3 ubiquitin protein ligase homolog (Drosophila)
hsa-miR-524-5p	1	0	1	1	1	1	GPD2	glycerol-3-phosphate dehydrogenase 2 (mitochondrial)
hsa-miR-524-5p	1	0	1	1	1	1	STRBP	spermatid perinuclear RNA binding protein
hsa-miR-524-5p	0	0	1	0	0	0	LOC283508	uncharacterized LOC283508
hsa-miR-524-5p	1	0	1	1	1	1	PPM1L	protein phosphatase, Mg2+/Mn2+ dependent, 1L
hsa-miR-524-5p	1	0	1	1	1	1	TPM1	tropomyosin 1 (alpha)
hsa-miR-524-5p	0	0	1	0	1	1	HDX	highly divergent homeobox
hsa-miR-524-5p	0	0	1	0	0	0	FLJ30838	uncharacterized LOC400955
hsa-miR-524-5p	0	0	1	1	1	1	OPTN	optineurin
hsa-miR-524-5p	0	0	1	1	1	1	BCAR3	breast cancer anti-estrogen resistance 3
hsa-miR-524-5p	1	0	1	1	1	1	SULF1	sulfatase 1
hsa-miR-524-5p	0	0	1	0	1	1	LOC152742	uncharacterized LOC152742
hsa-miR-524-5p	1	0	1	1	1	1	FRMD6	FERM domain containing 6
hsa-miR-524-5p	0	0	1	1	1	1	TTC19	tetratricopeptide repeat domain 19
hsa-miR-524-5p	1	0	1	0	1	1	RAB1A	RAB1A, member RAS oncogene family
hsa-miR-524-5p	1	0	1	1	0	0	MEPCE	methylphosphate capping enzyme
hsa-miR-524-5p	0	0	1	1	1	1	SDK1	sidekick cell adhesion molecule 1
hsa-miR-524-5p	1	0	1	0	1	1	RNF165	ring finger protein 165
hsa-miR-524-5p	1	0	1	0	1	1	PTPRE	protein tyrosine phosphatase, receptor type, E
hsa-miR-524-5p	1	0	1	1	1	1	PPP1R3F	protein phosphatase 1, regulatory subunit 3F
hsa-miR-524-5p	0	0	1	1	1	1	TP53I11	tumor protein p53 inducible protein 11
hsa-miR-524-5p	1	0	1	1	1	1	SCAMP5	secretory carrier membrane protein 5
hsa-miR-524-5p	1	0	1	1	1	1	CLCN5	chloride channel, voltage-sensitive 5
hsa-miR-524-5p	1	0	1	1	1	1	SORBS2	sorbin and SH3 domain containing 2
hsa-miR-524-5p	1	0	1	1	1	1	PUM1	pumilio homolog 1 (Drosophila)
hsa-miR-524-5p	0	0	1	0	0	0	LOC255187	hCG1980447
hsa-miR-524-5p	1	0	1	1	1	1	TPM3	tropomyosin 3
hsa-miR-524-5p	1	0	1	1	1	1	PCMTD1	protein-L-isoaspartate (D-aspartate) O-methyltransferase domain containing 1
hsa-miR-524-5p	0	0	1	1	1	1	COQ10A	coenzyme Q10 homolog A (S. cerevisiae)
hsa-miR-524-5p	0	0	1	1	0	0	RELT	RELT tumor necrosis factor receptor
hsa-miR-524-5p	1	0	1	1	1	1	MLLT6	myeloid/lymphoid or mixed-lineage leukemia (trithorax homolog, Drosophila); translocated to, 6
hsa-miR-524-5p	0	0	1	1	1	1	ZMIZ2	zinc finger, MIZ-type containing 2
hsa-miR-524-5p	0	0	1	1	0	0	RGL3	ral guanine nucleotide dissociation stimulator-like 3
hsa-miR-524-5p	1	0	1	1	1	1	TLE4	transducin-like enhancer of split 4 (E(sp1) homolog, Drosophila)
hsa-miR-524-5p	1	0	1	1	1	1	C20orf26	chromosome 20 open reading frame 26
hsa-miR-524-5p	0	0	1	1	0	0	NXF2	nuclear RNA export factor 2
hsa-miR-524-5p	0	0	1	1	0	0	DMRTC2	DMRT-like family C2
hsa-miR-524-5p	1	0	1	0	1	1	NCAM1	neural cell adhesion molecule 1
hsa-miR-524-5p	1	0	1	1	1	1	SEC22A	SEC22 vesicle trafficking protein homolog A (S. cerevisiae)
hsa-miR-524-5p	0	0	1	1	0	0	PTOV1	prostate tumor overexpressed 1
hsa-miR-524-5p	0	0	1	0	0	0	LINC00637	long intergenic non-protein coding RNA 637
hsa-miR-524-5p	0	0	1	0	0	0	GTF3A	general transcription factor IIIA
hsa-miR-524-5p	0	0	1	1	0	0	CERS5	ceramide synthase 5
hsa-miR-524-5p	0	0	1	1	1	1	ZBTB26	zinc finger and BTB domain containing 26
hsa-miR-524-5p	0	0	1	0	0	0	FLJ25363	uncharacterized LOC401082
hsa-miR-524-5p	0	0	1	0	1	1	CCDC68	coiled-coil domain containing 68
hsa-miR-524-5p	0	0	1	0	1	1	UHMK1	U2AF homology motif (UHM) kinase 1
hsa-miR-524-5p	0	0	1	1	0	0	GRIP2	glutamate receptor interacting protein 2
hsa-miR-524-5p	0	0	1	1	1	1	KIDINS220	kinase D-interacting substrate, 220kDa
hsa-miR-524-5p	1	0	1	1	1	1	HLF	hepatic leukemia factor
hsa-miR-524-5p	1	0	1	0	1	1	CLASP1	cytoplasmic linker associated protein 1
hsa-miR-524-5p	0	0	1	0	1	1	CDHR3	cadherin-related family member 3
hsa-miR-524-5p	0	0	1	1	1	1	PDZRN3	PDZ domain containing ring finger 3
hsa-miR-524-5p	0	0	1	1	0	0	GPR19	G protein-coupled receptor 19
hsa-miR-524-5p	1	0	1	1	1	1	SIRT1	sirtuin 1
hsa-miR-524-5p	1	0	1	1	1	1	PAX6	paired box 6
hsa-miR-524-5p	1	0	1	1	1	1	MYO1B	myosin IB
hsa-miR-524-5p	0	0	1	0	1	1	CADM1	cell adhesion molecule 1
hsa-miR-524-5p	1	0	1	1	1	1	PIP4K2C	phosphatidylinositol-5-phosphate 4-kinase, type II, gamma
hsa-miR-524-5p	0	0	1	1	1	1	PIK3C3	phosphatidylinositol 3-kinase, catalytic subunit type 3
hsa-miR-524-5p	0	0	1	1	1	1	DYNC1I1	dynein, cytoplasmic 1, intermediate chain 1
hsa-miR-524-5p	1	0	1	1	1	1	EGR2	early growth response 2
hsa-miR-524-5p	1	0	1	1	1	1	AMMECR1	Alport syndrome, mental retardation, midface hypoplasia and elliptocytosis chromosomal region gene 1
hsa-miR-524-5p	1	0	1	1	1	1	SUPT16H	suppressor of Ty 16 homolog (S. cerevisiae)
hsa-miR-524-5p	1	0	1	1	1	1	FBXW2	F-box and WD repeat domain containing 2
hsa-miR-524-5p	1	0	1	1	1	1	TSN	translin
hsa-miR-524-5p	1	0	1	1	1	1	LUC7L2	LUC7-like 2 (S. cerevisiae)
hsa-miR-524-5p	0	0	1	1	1	1	NRCAM	neuronal cell adhesion molecule
hsa-miR-524-5p	1	0	1	1	1	1	NASP	nuclear autoantigenic sperm protein (histone-binding)
hsa-miR-524-5p	0	0	1	1	1	1	PRKRA	protein kinase, interferon-inducible double stranded RNA dependent activator
hsa-miR-524-5p	0	0	1	1	0	0	ARPC2	actin related protein 2/3 complex, subunit 2, 34kDa
hsa-miR-524-5p	1	0	1	0	0	0	SH3RF3	SH3 domain containing ring finger 3
hsa-miR-524-5p	0	0	1	1	1	1	SLC16A1	solute carrier family 16, member 1 (monocarboxylic acid transporter 1)
hsa-miR-524-5p	1	0	1	1	1	1	SSH3	slingshot homolog 3 (Drosophila)
hsa-miR-524-5p	0	0	1	1	0	0	WBP1	WW domain binding protein 1
hsa-miR-524-5p	0	0	1	0	1	1	KANSL2	KAT8 regulatory NSL complex subunit 2
hsa-miR-524-5p	1	0	1	1	1	1	SNAP25	synaptosomal-associated protein, 25kDa
hsa-miR-524-5p	0	0	1	0	0	0	ZNF806	zinc finger protein 806
hsa-miR-524-5p	1	0	1	1	1	1	SIAH1	siah E3 ubiquitin protein ligase 1
hsa-miR-524-5p	1	0	1	0	1	1	GATAD2B	GATA zinc finger domain containing 2B
hsa-miR-524-5p	0	0	1	1	1	1	RBM25	RNA binding motif protein 25
hsa-miR-524-5p	1	0	1	0	1	1	NCOA7	nuclear receptor coactivator 7
hsa-miR-524-5p	0	0	1	0	1	1	AGBL4	ATP/GTP binding protein-like 4
hsa-miR-524-5p	1	0	1	1	1	1	PTPRU	protein tyrosine phosphatase, receptor type, U
hsa-miR-524-5p	0	0	1	1	1	1	TMEM170A	transmembrane protein 170A
hsa-miR-524-5p	1	0	1	1	1	1	CPNE8	copine VIII
hsa-miR-524-5p	1	0	1	1	1	1	NDEL1	nudE nuclear distribution E homolog (A. nidulans)-like 1
hsa-miR-524-5p	1	0	1	0	1	1	SLC39A11	solute carrier family 39 (metal ion transporter), member 11
hsa-miR-524-5p	1	0	1	1	1	1	ANKRD46	ankyrin repeat domain 46
hsa-miR-524-5p	1	0	1	1	1	1	CTNNB1	catenin (cadherin-associated protein), beta 1, 88kDa
hsa-miR-524-5p	0	0	1	1	1	1	MYO6	myosin VI
hsa-miR-524-5p	1	0	1	0	1	1	UVRAG	UV radiation resistance associated gene
hsa-miR-524-5p	0	0	1	1	1	1	SETD2	SET domain containing 2
hsa-miR-524-5p	0	0	1	0	1	1	NBPF3	neuroblastoma breakpoint family, member 3
hsa-miR-524-5p	1	0	1	1	1	1	ANKRD10	ankyrin repeat domain 10
hsa-miR-524-5p	1	0	1	0	1	1	STC2	stanniocalcin 2
hsa-miR-524-5p	1	0	1	1	1	1	PEA15	phosphoprotein enriched in astrocytes 15
hsa-miR-524-5p	0	0	1	1	1	1	VDAC1	voltage-dependent anion channel 1
hsa-miR-524-5p	1	0	1	1	1	1	AMT	aminomethyltransferase
hsa-miR-524-5p	1	0	1	1	1	1	FAM98A	family with sequence similarity 98, member A
hsa-miR-524-5p	0	0	1	1	1	1	ZMYM1	zinc finger, MYM-type 1
hsa-miR-524-5p	1	0	1	1	1	1	SLITRK2	SLIT and NTRK-like family, member 2
hsa-miR-524-5p	0	0	1	0	1	1	FLJ39080	uncharacterized LOC441355
hsa-miR-524-5p	0	0	1	1	1	1	XRCC5	X-ray repair complementing defective repair in Chinese hamster cells 5 (double-strand-break rejoining)
hsa-miR-524-5p	1	0	1	1	1	1	LRP8	low density lipoprotein receptor-related protein 8, apolipoprotein e receptor
hsa-miR-524-5p	0	0	1	0	0	0	LOC643327	uncharacterized LOC643327
hsa-miR-524-5p	1	0	1	0	1	1	THRB	thyroid hormone receptor, beta
hsa-miR-524-5p	1	0	1	1	1	1	ETS2	v-ets erythroblastosis virus E26 oncogene homolog 2 (avian)
hsa-miR-524-5p	1	0	1	1	1	1	EPB41L1	erythrocyte membrane protein band 4.1-like 1
hsa-miR-524-5p	0	0	1	0	0	0	LOC401463	uncharacterized LOC401463
hsa-miR-524-5p	0	0	1	1	0	0	ALPK1	alpha-kinase 1
hsa-miR-524-5p	1	0	1	1	1	1	CAPN2	calpain 2, (m/II) large subunit
hsa-miR-524-5p	1	0	1	0	1	1	YPEL2	yippee-like 2 (Drosophila)
hsa-miR-524-5p	0	0	1	0	0	0	LOC400680	uncharacterized LOC400680
hsa-miR-524-5p	1	0	1	1	1	1	GOLGA8B	golgin A8 family, member B
hsa-miR-524-5p	1	0	1	0	1	1	PRKAR1A	protein kinase, cAMP-dependent, regulatory, type I, alpha
hsa-miR-524-5p	1	0	1	1	1	1	IGSF11	immunoglobulin superfamily, member 11
hsa-miR-524-5p	0	0	1	1	1	1	ATP9B	ATPase, class II, type 9B
hsa-miR-524-5p	1	0	1	1	1	1	CHD6	chromodomain helicase DNA binding protein 6
hsa-miR-524-5p	0	0	1	1	0	0	DCBLD1	discoidin, CUB and LCCL domain containing 1
hsa-miR-524-5p	1	0	1	1	1	1	IL20RA	interleukin 20 receptor, alpha
hsa-miR-524-5p	0	0	1	1	1	1	FAM76A	family with sequence similarity 76, member A
hsa-miR-524-5p	0	0	1	1	1	1	TRPM7	transient receptor potential cation channel, subfamily M, member 7
hsa-miR-524-5p	1	0	1	1	1	1	NAP1L1	nucleosome assembly protein 1-like 1
hsa-miR-524-5p	1	0	1	1	1	1	GLUD1	glutamate dehydrogenase 1
hsa-miR-524-5p	1	0	1	1	1	1	CRMP1	collapsin response mediator protein 1
hsa-miR-524-5p	1	0	1	1	1	1	WEE1	WEE1 homolog (S. pombe)
hsa-miR-524-5p	1	0	1	1	1	1	SIK3	SIK family kinase 3
hsa-miR-524-5p	0	0	1	1	1	1	ZNF182	zinc finger protein 182
hsa-miR-524-5p	0	0	1	1	0	0	PRICKLE1	prickle homolog 1 (Drosophila)
hsa-miR-524-5p	1	0	1	1	1	1	RPS6KC1	ribosomal protein S6 kinase, 52kDa, polypeptide 1
hsa-miR-524-5p	0	0	1	1	0	0	MX2	myxovirus (influenza virus) resistance 2 (mouse)
hsa-miR-524-5p	1	0	1	1	1	1	PXN	paxillin
hsa-miR-524-5p	1	0	1	1	1	1	ZNF275	zinc finger protein 275
hsa-miR-524-5p	0	0	1	1	0	0	DCLK3	doublecortin-like kinase 3
hsa-miR-524-5p	0	0	1	1	1	1	FRMD5	FERM domain containing 5
hsa-miR-524-5p	1	0	1	1	1	1	CBLB	Cbl proto-oncogene, E3 ubiquitin protein ligase B
hsa-miR-524-5p	1	0	1	1	1	1	TPRG1	tumor protein p63 regulated 1
hsa-miR-524-5p	1	0	1	1	1	1	MDGA2	MAM domain containing glycosylphosphatidylinositol anchor 2
hsa-miR-524-5p	0	0	1	1	1	1	FAM5B	family with sequence similarity 5, member B
hsa-miR-524-5p	1	0	1	1	1	1	EGLN3	egl nine homolog 3 (C. elegans)
hsa-miR-524-5p	0	0	1	1	1	1	PCBP2	poly(rC) binding protein 2
hsa-miR-524-5p	0	0	1	1	1	1	FAM19A2	family with sequence similarity 19 (chemokine (C-C motif)-like), member A2
hsa-miR-524-5p	1	0	1	1	1	1	SBF2	SET binding factor 2
hsa-miR-524-5p	1	0	1	1	1	1	EPAS1	endothelial PAS domain protein 1
hsa-miR-524-5p	1	0	1	0	0	0	GPR137C	G protein-coupled receptor 137C
hsa-miR-524-5p	0	0	1	1	1	1	ANKRD44	ankyrin repeat domain 44
hsa-miR-524-5p	1	0	1	1	1	1	DERL1	derlin 1
hsa-miR-524-5p	1	0	1	1	1	1	CREBRF	CREB3 regulatory factor
hsa-miR-524-5p	1	0	1	1	1	1	GJC1	gap junction protein, gamma 1, 45kDa
hsa-miR-524-5p	0	0	1	1	0	0	C20orf27	chromosome 20 open reading frame 27
hsa-miR-524-5p	1	0	1	1	1	1	ADIPOR1	adiponectin receptor 1
hsa-miR-524-5p	0	0	1	1	0	0	NUP85	nucleoporin 85kDa
hsa-miR-524-5p	1	0	1	1	1	1	DAB2IP	DAB2 interacting protein
hsa-miR-524-5p	0	0	1	1	1	1	IDS	iduronate 2-sulfatase
hsa-miR-524-5p	0	0	1	0	0	0	LINC00282	long intergenic non-protein coding RNA 282
hsa-miR-524-5p	1	0	1	1	1	1	CORO2B	coronin, actin binding protein, 2B
hsa-miR-524-5p	1	0	1	0	1	1	CNTN2	contactin 2 (axonal)
hsa-miR-524-5p	1	0	1	1	1	1	NAPB	N-ethylmaleimide-sensitive factor attachment protein, beta
hsa-miR-524-5p	0	0	1	1	1	1	C3orf67	chromosome 3 open reading frame 67
hsa-miR-524-5p	0	0	1	1	1	1	ATPBD4	ATP binding domain 4
hsa-miR-524-5p	1	0	1	1	1	1	C17orf85	chromosome 17 open reading frame 85
hsa-miR-524-5p	0	0	1	0	0	0	TMEM232	transmembrane protein 232
hsa-miR-524-5p	1	0	1	1	1	1	PIAS3	protein inhibitor of activated STAT, 3
hsa-miR-524-5p	1	0	1	1	1	1	METAP2	methionyl aminopeptidase 2
hsa-miR-524-5p	1	0	1	1	1	1	SACS	spastic ataxia of Charlevoix-Saguenay (sacsin)
hsa-miR-524-5p	0	0	1	1	1	1	SRPX	sushi-repeat containing protein, X-linked
hsa-miR-524-5p	0	0	1	1	0	0	LOC442075	uncharacterized LOC442075
hsa-miR-524-5p	0	0	1	0	0	0	LOC613266	uncharacterized LOC613266
hsa-miR-524-5p	1	0	1	1	1	1	KPNA1	karyopherin alpha 1 (importin alpha 5)
hsa-miR-524-5p	1	0	1	0	0	0	MSL1	male-specific lethal 1 homolog (Drosophila)
hsa-miR-524-5p	0	0	1	1	1	1	PLOD2	procollagen-lysine, 2-oxoglutarate 5-dioxygenase 2
hsa-miR-524-5p	1	0	1	0	1	1	HECTD1	HECT domain containing E3 ubiquitin protein ligase 1
hsa-miR-524-5p	1	0	1	1	1	1	DPY19L3	dpy-19-like 3 (C. elegans)
hsa-miR-524-5p	0	0	1	0	0	0	FAM95B1	family with sequence similarity 95, member B1
hsa-miR-524-5p	0	0	1	1	1	1	RBM46	RNA binding motif protein 46
hsa-miR-524-5p	1	0	1	1	1	1	TP53INP1	tumor protein p53 inducible nuclear protein 1
hsa-miR-524-5p	1	0	1	1	1	1	MACROD2	MACRO domain containing 2
hsa-miR-524-5p	1	0	1	1	0	0	UBN2	ubinuclein 2
hsa-miR-524-5p	1	0	1	1	1	1	CHD5	chromodomain helicase DNA binding protein 5
hsa-miR-524-5p	0	0	1	1	0	0	C20orf141	chromosome 20 open reading frame 141
hsa-miR-524-5p	1	0	1	1	0	0	ATXN7L3	ataxin 7-like 3
hsa-miR-524-5p	1	0	1	1	1	1	CPNE2	copine II
hsa-miR-524-5p	0	0	1	1	1	1	RBM39	RNA binding motif protein 39
hsa-miR-524-5p	1	0	1	1	1	1	LIN9	lin-9 homolog (C. elegans)
hsa-miR-524-5p	1	0	1	0	1	1	PLEKHH2	pleckstrin homology domain containing, family H (with MyTH4 domain) member 2
hsa-miR-524-5p	1	0	1	1	1	1	SACM1L	SAC1 suppressor of actin mutations 1-like (yeast)
hsa-miR-524-5p	0	0	1	1	1	1	USP54	ubiquitin specific peptidase 54
hsa-miR-524-5p	0	0	1	1	1	1	BDH1	3-hydroxybutyrate dehydrogenase, type 1
hsa-miR-524-5p	0	0	1	1	0	0	LRP3	low density lipoprotein receptor-related protein 3
hsa-miR-524-5p	1	0	1	1	1	1	MTOR	mechanistic target of rapamycin (serine/threonine kinase)
hsa-miR-524-5p	1	0	1	0	1	1	GPR180	G protein-coupled receptor 180
hsa-miR-524-5p	0	0	1	0	0	0	HNRNPKP3	heterogeneous nuclear ribonucleoprotein K pseudogene 3
hsa-miR-524-5p	0	0	1	1	0	0	HS3ST5	heparan sulfate (glucosamine) 3-O-sulfotransferase 5
hsa-miR-524-5p	0	0	1	1	1	1	SZT2	seizure threshold 2 homolog (mouse)
hsa-miR-524-5p	1	0	1	1	1	1	C14orf28	chromosome 14 open reading frame 28
hsa-miR-524-5p	0	0	1	0	0	0	RPL23AP53	ribosomal protein L23a pseudogene 53
hsa-miR-524-5p	1	0	1	1	1	1	MKRN1	makorin ring finger protein 1
hsa-miR-524-5p	0	0	1	1	1	1	MOBP	myelin-associated oligodendrocyte basic protein
hsa-miR-524-5p	1	0	1	1	1	1	TSHZ1	teashirt zinc finger homeobox 1
hsa-miR-524-5p	0	0	1	0	0	0	LOC100127955	uncharacterized LOC100127955
hsa-miR-524-5p	0	0	1	1	1	1	ARHGAP33	Rho GTPase activating protein 33
hsa-miR-524-5p	1	0	1	1	0	0	PTPN5	protein tyrosine phosphatase, non-receptor type 5 (striatum-enriched)
hsa-miR-524-5p	1	0	1	0	1	1	KIAA0182	KIAA0182
hsa-miR-524-5p	1	0	1	1	1	1	KANK4	KN motif and ankyrin repeat domains 4
hsa-miR-524-5p	1	0	1	0	1	1	SP6	Sp6 transcription factor
hsa-miR-524-5p	1	0	1	1	1	1	ZFP106	zinc finger protein 106 homolog (mouse)
hsa-miR-524-5p	1	0	1	0	1	1	FNDC3B	fibronectin type III domain containing 3B
hsa-miR-524-5p	1	0	1	1	1	1	AFAP1	actin filament associated protein 1
hsa-miR-524-5p	1	0	1	0	1	1	YOD1	YOD1 OTU deubiquinating enzyme 1 homolog (S. cerevisiae)
hsa-miR-524-5p	1	0	1	0	0	0	HK1	hexokinase 1
hsa-miR-524-5p	0	0	1	1	1	1	CD160	CD160 molecule
hsa-miR-524-5p	1	0	1	1	1	1	FBXO3	F-box protein 3
hsa-miR-524-5p	1	0	1	0	0	0	SP7	Sp7 transcription factor
hsa-miR-524-5p	1	0	1	1	1	1	BCAT1	branched chain amino-acid transaminase 1, cytosolic
hsa-miR-524-5p	0	0	1	0	0	0	IGHD	immunoglobulin heavy constant delta
hsa-miR-524-5p	1	0	1	1	1	1	PUS7	pseudouridylate synthase 7 homolog (S. cerevisiae)
hsa-miR-524-5p	1	0	1	1	1	1	SDCBP	syndecan binding protein (syntenin)
hsa-miR-524-5p	0	0	1	1	1	1	SHROOM3	shroom family member 3
hsa-miR-524-5p	0	0	1	0	0	0	FLJ26245	uncharacterized LOC400533
hsa-miR-524-5p	0	0	1	1	1	1	TBX19	T-box 19
hsa-miR-524-5p	1	0	1	0	1	1	GPC6	glypican 6
hsa-miR-524-5p	1	0	1	1	1	1	GPD1	glycerol-3-phosphate dehydrogenase 1 (soluble)
hsa-miR-524-5p	1	0	1	0	1	1	RXRA	retinoid X receptor, alpha
hsa-miR-524-5p	0	0	1	0	1	1	RUFY4	RUN and FYVE domain containing 4
hsa-miR-524-5p	1	0	1	1	1	1	RNF111	ring finger protein 111
hsa-miR-524-5p	0	0	1	1	1	1	ZSCAN20	zinc finger and SCAN domain containing 20
hsa-miR-524-5p	0	0	1	1	1	1	SYPL2	synaptophysin-like 2
hsa-miR-524-5p	0	0	1	1	0	0	C3orf20	chromosome 3 open reading frame 20
hsa-miR-524-5p	0	0	1	1	1	1	PDE2A	phosphodiesterase 2A, cGMP-stimulated
hsa-miR-524-5p	1	0	1	1	1	1	LRRK2	leucine-rich repeat kinase 2
hsa-miR-524-5p	1	0	1	1	1	1	MAP2K4	mitogen-activated protein kinase kinase 4
hsa-miR-524-5p	1	0	1	1	1	1	TAP2	transporter 2, ATP-binding cassette, sub-family B (MDR/TAP)
hsa-miR-524-5p	0	0	1	1	1	1	AGPAT9	1-acylglycerol-3-phosphate O-acyltransferase 9
hsa-miR-524-5p	1	0	1	1	1	1	CYYR1	cysteine/tyrosine-rich 1
hsa-miR-524-5p	1	0	1	0	1	1	SEZ6	seizure related 6 homolog (mouse)
hsa-miR-524-5p	0	0	1	0	1	1	PEX5	peroxisomal biogenesis factor 5
hsa-miR-524-5p	0	0	1	1	1	1	C5orf28	chromosome 5 open reading frame 28
hsa-miR-524-5p	1	0	1	1	1	1	TBC1D15	TBC1 domain family, member 15
hsa-miR-524-5p	0	0	1	1	1	1	IFRD1	interferon-related developmental regulator 1
hsa-miR-524-5p	0	0	1	1	0	0	TARS2	threonyl-tRNA synthetase 2, mitochondrial (putative)
hsa-miR-524-5p	1	0	1	1	1	1	TMEM25	transmembrane protein 25
hsa-miR-524-5p	1	0	1	1	1	1	MEAF6	MYST/Esa1-associated factor 6
hsa-miR-524-5p	1	0	1	1	1	1	PTPN2	protein tyrosine phosphatase, non-receptor type 2
hsa-miR-524-5p	1	0	1	1	0	0	ZNF219	zinc finger protein 219
hsa-miR-524-5p	1	0	1	1	1	1	COBLL1	COBL-like 1
hsa-miR-524-5p	0	0	1	1	1	1	TBC1D3G	TBC1 domain family, member 3G
hsa-miR-524-5p	0	0	1	1	1	1	RNF135	ring finger protein 135
hsa-miR-524-5p	1	0	1	1	1	1	NCOA1	nuclear receptor coactivator 1
hsa-miR-524-5p	1	0	1	1	1	1	NOVA1	neuro-oncological ventral antigen 1
hsa-miR-524-5p	0	0	1	1	0	0	TRIM69	tripartite motif containing 69
hsa-miR-524-5p	0	0	1	1	1	1	PTPN20B	protein tyrosine phosphatase, non-receptor type 20B
hsa-miR-524-5p	0	0	1	1	1	1	PTPN20A	protein tyrosine phosphatase, non-receptor type 20A
hsa-miR-524-5p	0	0	1	0	0	0	PART1	prostate androgen-regulated transcript 1 (non-protein coding)
hsa-miR-524-5p	1	0	1	1	1	1	NECAP1	NECAP endocytosis associated 1
hsa-miR-524-5p	0	0	1	1	0	0	NEK7	NIMA (never in mitosis gene a)-related kinase 7
hsa-miR-524-5p	0	0	1	1	1	1	TFDP2	transcription factor Dp-2 (E2F dimerization partner 2)
hsa-miR-524-5p	0	0	1	0	0	0	POM121L9P	POM121 transmembrane nucleoporin-like 9, pseudogene
hsa-miR-524-5p	1	0	1	1	1	1	TAB2	TGF-beta activated kinase 1/MAP3K7 binding protein 2
hsa-miR-524-5p	0	0	1	0	0	0	POM121L8P	POM121 transmembrane nucleoporin-like 8 pseudogene
hsa-miR-524-5p	1	0	1	1	1	1	ARF6	ADP-ribosylation factor 6
hsa-miR-524-5p	0	0	1	1	1	1	ARIH1	ariadne homolog, ubiquitin-conjugating enzyme E2 binding protein, 1 (Drosophila)
hsa-miR-524-5p	1	0	1	1	1	1	FBXL17	F-box and leucine-rich repeat protein 17
hsa-miR-524-5p	0	0	1	1	1	1	GMEB2	glucocorticoid modulatory element binding protein 2
hsa-miR-524-5p	0	0	1	1	1	1	ZNF280D	zinc finger protein 280D
hsa-miR-524-5p	0	0	1	0	1	1	TBC1D3F	TBC1 domain family, member 3F
hsa-miR-524-5p	0	0	1	1	1	1	RHOT1	ras homolog family member T1
hsa-miR-524-5p	1	0	1	1	1	1	GOLGA8A	golgin A8 family, member A
hsa-miR-524-5p	1	0	1	1	1	1	NBEA	neurobeachin
hsa-miR-524-5p	1	0	1	0	1	1	GPR85	G protein-coupled receptor 85
hsa-miR-524-5p	1	0	1	0	1	1	CEP170	centrosomal protein 170kDa
hsa-miR-524-5p	1	0	1	1	1	1	GPBP1	GC-rich promoter binding protein 1
hsa-miR-524-5p	0	0	1	1	0	0	DOPEY1	dopey family member 1
hsa-miR-524-5p	1	0	1	0	1	1	GRIN3A	glutamate receptor, ionotropic, N-methyl-D-aspartate 3A
hsa-miR-524-5p	0	0	1	0	0	0	FAM66D	family with sequence similarity 66, member D
hsa-miR-524-5p	0	0	1	1	1	1	IDH3A	isocitrate dehydrogenase 3 (NAD+) alpha
hsa-miR-524-5p	1	0	1	0	1	1	FAM19A1	family with sequence similarity 19 (chemokine (C-C motif)-like), member A1
hsa-miR-524-5p	1	0	1	1	1	1	YTHDF3	YTH domain family, member 3
hsa-miR-524-5p	1	0	1	1	1	1	MIER1	mesoderm induction early response 1 homolog (Xenopus laevis)
hsa-miR-524-5p	1	0	1	1	1	1	KDM6A	lysine (K)-specific demethylase 6A
hsa-miR-524-5p	0	0	1	1	1	1	BEND7	BEN domain containing 7
hsa-miR-524-5p	1	0	1	1	1	1	FAM126B	family with sequence similarity 126, member B
hsa-miR-524-5p	1	0	1	0	1	1	HNRNPA3	heterogeneous nuclear ribonucleoprotein A3
hsa-miR-524-5p	0	0	1	1	1	1	SRSF11	serine/arginine-rich splicing factor 11
hsa-miR-524-5p	1	0	1	1	1	1	CHMP7	charged multivesicular body protein 7
hsa-miR-524-5p	1	0	1	1	0	0	USP24	ubiquitin specific peptidase 24
hsa-miR-524-5p	1	0	1	1	1	1	MLL3	myeloid/lymphoid or mixed-lineage leukemia 3
hsa-miR-524-5p	1	0	1	0	1	1	MPP5	membrane protein, palmitoylated 5 (MAGUK p55 subfamily member 5)
hsa-miR-524-5p	1	0	1	0	1	1	STYX	serine/threonine/tyrosine interacting protein
hsa-miR-524-5p	0	0	1	1	1	1	YAP1	Yes-associated protein 1
hsa-miR-524-5p	0	0	1	1	1	1	U2AF1	U2 small nuclear RNA auxiliary factor 1
hsa-miR-524-5p	1	0	1	1	0	0	PTAR1	protein prenyltransferase alpha subunit repeat containing 1
hsa-miR-524-5p	0	0	1	0	1	1	PAPD4	PAP associated domain containing 4
hsa-miR-524-5p	1	0	1	0	1	1	MEF2C	myocyte enhancer factor 2C
hsa-miR-524-5p	1	0	1	1	1	1	SOX6	SRY (sex determining region Y)-box 6
hsa-miR-524-5p	1	0	1	1	1	1	BPTF	bromodomain PHD finger transcription factor
hsa-miR-524-5p	0	0	1	1	0	0	TMEM116	transmembrane protein 116
hsa-miR-524-5p	0	0	1	1	0	0	LRRN2	leucine rich repeat neuronal 2
hsa-miR-524-5p	1	0	1	1	1	1	NRP1	neuropilin 1
hsa-miR-524-5p	0	0	1	1	1	1	NUSAP1	nucleolar and spindle associated protein 1
hsa-miR-524-5p	1	0	1	1	1	1	ANP32E	acidic (leucine-rich) nuclear phosphoprotein 32 family, member E
hsa-miR-524-5p	1	0	1	0	1	1	EXOC5	exocyst complex component 5
hsa-miR-524-5p	1	0	1	1	1	1	ATAT1	alpha tubulin acetyltransferase 1
hsa-miR-524-5p	1	0	1	1	1	1	IL17RD	interleukin 17 receptor D
hsa-miR-524-5p	1	0	1	1	1	1	PRPF38B	PRP38 pre-mRNA processing factor 38 (yeast) domain containing B
hsa-miR-524-5p	1	0	1	1	1	1	MBD6	methyl-CpG binding domain protein 6
hsa-miR-524-5p	1	0	1	0	1	1	JAZF1	JAZF zinc finger 1
hsa-miR-524-5p	1	0	1	0	0	0	XPNPEP3	X-prolyl aminopeptidase (aminopeptidase P) 3, putative
hsa-miR-524-5p	1	0	1	1	1	1	RBM26	RNA binding motif protein 26
hsa-miR-524-5p	1	0	1	1	1	1	RICTOR	RPTOR independent companion of MTOR, complex 2
hsa-miR-524-5p	1	0	1	1	1	1	FAM76B	family with sequence similarity 76, member B
hsa-miR-524-5p	1	0	1	1	1	1	AP1AR	adaptor-related protein complex 1 associated regulatory protein
hsa-miR-524-5p	1	0	1	0	1	1	PHYHIPL	phytanoyl-CoA 2-hydroxylase interacting protein-like
hsa-miR-524-5p	1	0	1	1	1	1	TSHZ3	teashirt zinc finger homeobox 3
hsa-miR-524-5p	1	0	1	1	1	1	PPP3CA	protein phosphatase 3, catalytic subunit, alpha isozyme
hsa-miR-524-5p	1	0	1	1	1	1	WDR44	WD repeat domain 44
hsa-miR-524-5p	1	0	1	1	1	1	IKZF2	IKAROS family zinc finger 2 (Helios)
hsa-miR-524-5p	1	0	1	1	1	1	CLIC5	chloride intracellular channel 5
hsa-miR-524-5p	1	0	1	1	1	1	RCAN2	regulator of calcineurin 2
hsa-miR-524-5p	1	0	1	1	1	1	DUSP16	dual specificity phosphatase 16
hsa-miR-524-5p	0	0	1	1	1	1	CD209	CD209 molecule
hsa-miR-524-5p	1	0	1	0	1	1	BDNF	brain-derived neurotrophic factor
hsa-miR-524-5p	1	0	1	1	1	1	MIPOL1	mirror-image polydactyly 1
hsa-miR-524-5p	0	0	1	0	0	0	KGFLP1	fibroblast growth factor 7 pseudogene
hsa-miR-524-5p	1	0	1	1	1	1	SORCS1	sortilin-related VPS10 domain containing receptor 1
hsa-miR-524-5p	1	0	1	1	1	1	KIAA0907	KIAA0907
hsa-miR-524-5p	1	0	1	1	1	1	MARK4	MAP/microtubule affinity-regulating kinase 4
hsa-miR-524-5p	0	0	1	1	1	1	MED19	mediator complex subunit 19
hsa-miR-524-5p	0	0	1	1	1	1	CYP4B1	cytochrome P450, family 4, subfamily B, polypeptide 1
hsa-miR-524-5p	0	0	1	1	1	1	SHPRH	SNF2 histone linker PHD RING helicase, E3 ubiquitin protein ligase
hsa-miR-524-5p	0	0	1	1	1	1	CEP41	centrosomal protein 41kDa
hsa-miR-524-5p	1	0	1	1	1	1	WDR26	WD repeat domain 26
hsa-miR-524-5p	0	0	1	1	1	1	FAM181A	family with sequence similarity 181, member A
hsa-miR-524-5p	1	0	1	1	1	1	PBRM1	polybromo 1
hsa-miR-524-5p	1	0	1	1	1	1	PNRC1	proline-rich nuclear receptor coactivator 1
hsa-miR-524-5p	1	0	1	1	1	1	RAI14	retinoic acid induced 14
hsa-miR-524-5p	1	0	1	1	1	1	TAB3	TGF-beta activated kinase 1/MAP3K7 binding protein 3
hsa-miR-524-5p	0	0	1	1	1	1	GCOM1	GRINL1A complex locus 1
hsa-miR-524-5p	0	0	1	1	1	1	GON4L	gon-4-like (C. elegans)
hsa-miR-524-5p	1	0	1	1	1	1	CAMTA1	calmodulin binding transcription activator 1
hsa-miR-524-5p	1	0	1	0	1	1	DLEU7	deleted in lymphocytic leukemia, 7
hsa-miR-524-5p	1	0	1	0	1	1	ST6GALNAC3	ST6 (alpha-N-acetyl-neuraminyl-2,3-beta-galactosyl-1,3)-N-acetylgalactosaminide alpha-2,6-sialyltransferase 3
hsa-miR-524-5p	1	0	1	1	1	1	NLGN4X	neuroligin 4, X-linked
hsa-miR-524-5p	0	0	1	1	1	1	TNFRSF19	tumor necrosis factor receptor superfamily, member 19
hsa-miR-524-5p	1	0	1	1	1	1	P4HA2	prolyl 4-hydroxylase, alpha polypeptide II
hsa-miR-524-5p	1	0	1	1	1	1	ECT2	epithelial cell transforming sequence 2 oncogene
hsa-miR-524-5p	0	0	1	1	1	1	PTGR2	prostaglandin reductase 2
hsa-miR-524-5p	1	0	1	1	1	1	SP3	Sp3 transcription factor
hsa-miR-524-5p	1	0	1	0	1	1	NHS	Nance-Horan syndrome (congenital cataracts and dental anomalies)
hsa-miR-524-5p	1	0	1	1	1	1	ARHGAP20	Rho GTPase activating protein 20
hsa-miR-524-5p	0	0	1	1	1	1	AICDA	activation-induced cytidine deaminase
hsa-miR-524-5p	1	0	1	1	1	1	MECP2	methyl CpG binding protein 2 (Rett syndrome)
hsa-miR-524-5p	0	0	1	1	0	0	PAOX	polyamine oxidase (exo-N4-amino)
hsa-miR-524-5p	1	0	1	0	1	1	LRAT	lecithin retinol acyltransferase (phosphatidylcholine--retinol O-acyltransferase)
hsa-miR-524-5p	1	0	1	1	1	1	CHRDL1	chordin-like 1
hsa-miR-524-5p	0	0	1	1	1	1	SMPD1	sphingomyelin phosphodiesterase 1, acid lysosomal
hsa-miR-524-5p	1	0	1	1	1	1	PLCH1	phospholipase C, eta 1
hsa-miR-524-5p	1	0	1	1	0	0	CDK8	cyclin-dependent kinase 8
hsa-miR-524-5p	1	0	1	1	1	1	QKI	QKI, KH domain containing, RNA binding
hsa-miR-524-5p	1	0	1	1	1	1	RAB40C	RAB40C, member RAS oncogene family
hsa-miR-524-5p	1	0	1	1	0	0	TRPC3	transient receptor potential cation channel, subfamily C, member 3
hsa-miR-524-5p	1	0	1	1	1	1	TBC1D22B	TBC1 domain family, member 22B
hsa-miR-524-5p	1	0	1	0	1	1	RASGRP1	RAS guanyl releasing protein 1 (calcium and DAG-regulated)
hsa-miR-524-5p	0	0	1	1	1	1	IYD	iodotyrosine deiodinase
hsa-miR-524-5p	1	0	1	1	1	1	AMOT	angiomotin
hsa-miR-524-5p	1	0	1	1	1	1	RPRD1A	regulation of nuclear pre-mRNA domain containing 1A
hsa-miR-524-5p	1	0	1	0	1	1	FAM46A	family with sequence similarity 46, member A
hsa-miR-524-5p	0	0	1	1	1	1	ZCCHC17	zinc finger, CCHC domain containing 17
hsa-miR-524-5p	1	0	1	1	1	1	CPSF6	cleavage and polyadenylation specific factor 6, 68kDa
hsa-miR-524-5p	0	0	1	1	1	1	PAFAH1B2	platelet-activating factor acetylhydrolase 1b, catalytic subunit 2 (30kDa)
hsa-miR-524-5p	1	0	1	1	1	1	TMUB2	transmembrane and ubiquitin-like domain containing 2
hsa-miR-524-5p	1	0	1	1	1	1	HOXC13	homeobox C13
hsa-miR-524-5p	0	0	1	1	1	1	TUFT1	tuftelin 1
hsa-miR-524-5p	0	0	1	1	1	1	BOD1	biorientation of chromosomes in cell division 1
hsa-miR-524-5p	0	0	1	1	1	1	REXO2	REX2, RNA exonuclease 2 homolog (S. cerevisiae)
hsa-miR-524-5p	1	0	1	0	1	1	DCAF10	DDB1 and CUL4 associated factor 10
hsa-miR-524-5p	1	0	1	1	1	1	SPRY2	sprouty homolog 2 (Drosophila)
hsa-miR-524-5p	1	0	1	1	1	1	LEPREL1	leprecan-like 1
hsa-miR-524-5p	0	0	1	1	1	1	ANAPC1	anaphase promoting complex subunit 1
hsa-miR-524-5p	1	0	1	0	1	1	CGGBP1	CGG triplet repeat binding protein 1
hsa-miR-524-5p	0	0	1	1	0	0	PNLIPRP1	pancreatic lipase-related protein 1
hsa-miR-524-5p	0	0	1	1	1	1	ZNF589	zinc finger protein 589
hsa-miR-524-5p	0	0	1	0	0	0	MGC13053	uncharacterized MGC13053
hsa-miR-524-5p	1	0	1	0	1	1	C15orf41	chromosome 15 open reading frame 41
hsa-miR-524-5p	0	0	1	1	0	0	WDR74	WD repeat domain 74
hsa-miR-524-5p	0	0	1	1	0	0	CBX5	chromobox homolog 5
hsa-miR-524-5p	1	0	1	1	1	1	TRIM39	tripartite motif containing 39
hsa-miR-524-5p	1	0	1	0	1	1	DDX3X	DEAD (Asp-Glu-Ala-Asp) box polypeptide 3, X-linked
hsa-miR-524-5p	1	0	1	1	1	1	CALM1	calmodulin 1 (phosphorylase kinase, delta)
hsa-miR-524-5p	1	0	1	1	1	1	SHOX2	short stature homeobox 2
hsa-miR-524-5p	0	0	1	1	0	0	PANK2	pantothenate kinase 2
hsa-miR-524-5p	1	0	1	1	1	1	GSPT1	G1 to S phase transition 1
hsa-miR-524-5p	1	0	1	0	1	1	TMEM39A	transmembrane protein 39A
hsa-miR-524-5p	1	0	1	1	1	1	GRIA2	glutamate receptor, ionotropic, AMPA 2
hsa-miR-524-5p	0	0	1	1	1	1	BBOX1	butyrobetaine (gamma), 2-oxoglutarate dioxygenase (gamma-butyrobetaine hydroxylase) 1
hsa-miR-524-5p	0	0	1	1	1	1	TAF12	TAF12 RNA polymerase II, TATA box binding protein (TBP)-associated factor, 20kDa
hsa-miR-524-5p	0	0	1	0	0	0	TPTEP1	transmembrane phosphatase with tensin homology pseudogene 1
hsa-miR-524-5p	1	0	1	1	1	1	RBM7	RNA binding motif protein 7
hsa-miR-524-5p	0	0	1	1	1	1	PCNP	PEST proteolytic signal containing nuclear protein
hsa-miR-524-5p	0	0	1	1	1	1	KLHL29	kelch-like 29 (Drosophila)
hsa-miR-524-5p	1	0	1	1	1	1	ETF1	eukaryotic translation termination factor 1
hsa-miR-524-5p	0	0	1	0	0	0	LOC729013	uncharacterized LOC729013
hsa-miR-524-5p	0	0	1	1	0	0	STAP1	signal transducing adaptor family member 1
hsa-miR-524-5p	0	0	1	0	0	0	MGC21881	uncharacterized locus MGC21881
hsa-miR-524-5p	0	0	1	0	0	0	KLHL15	kelch-like 15 (Drosophila)
hsa-miR-524-5p	1	0	1	1	1	1	ZBTB38	zinc finger and BTB domain containing 38
hsa-miR-524-5p	1	0	1	1	1	1	ZNF512	zinc finger protein 512
hsa-miR-524-5p	0	0	1	0	1	1	ZNF37A	zinc finger protein 37A
hsa-miR-524-5p	1	0	1	0	1	1	NR1D2	nuclear receptor subfamily 1, group D, member 2
hsa-miR-524-5p	0	0	1	1	1	1	CMAS	cytidine monophosphate N-acetylneuraminic acid synthetase
hsa-miR-524-5p	1	0	1	0	1	1	CYBRD1	cytochrome b reductase 1
hsa-miR-524-5p	1	0	1	1	1	1	NRF1	nuclear respiratory factor 1
hsa-miR-524-5p	1	0	1	1	1	1	SREK1	splicing regulatory glutamine/lysine-rich protein 1
hsa-miR-524-5p	1	0	1	1	1	1	ORMDL3	ORM1-like 3 (S. cerevisiae)
hsa-miR-524-5p	0	0	1	1	0	0	NUP107	nucleoporin 107kDa
hsa-miR-524-5p	1	0	1	1	1	1	ELF4	E74-like factor 4 (ets domain transcription factor)
hsa-miR-524-5p	0	0	1	1	1	1	CSDE1	cold shock domain containing E1, RNA-binding
hsa-miR-524-5p	1	0	1	1	1	1	WWC2	WW and C2 domain containing 2
hsa-miR-524-5p	0	0	1	0	0	0	FAM200B	family with sequence similarity 200, member B
hsa-miR-524-5p	1	0	1	1	1	1	ARHGEF9	Cdc42 guanine nucleotide exchange factor (GEF) 9
hsa-miR-524-5p	1	0	1	1	1	1	SUZ12	suppressor of zeste 12 homolog (Drosophila)
hsa-miR-524-5p	1	0	1	1	1	1	KIAA1217	KIAA1217
hsa-miR-524-5p	1	0	1	1	1	1	MID1IP1	MID1 interacting protein 1
hsa-miR-524-5p	0	0	1	1	1	1	HLA-G	major histocompatibility complex, class I, G
hsa-miR-524-5p	1	0	1	0	1	1	BTF3L4	basic transcription factor 3-like 4
hsa-miR-524-5p	0	0	1	1	0	0	LYSMD2	LysM, putative peptidoglycan-binding, domain containing 2
hsa-miR-524-5p	0	0	1	1	0	0	SLC22A9	solute carrier family 22 (organic anion transporter), member 9
hsa-miR-524-5p	0	0	1	1	1	1	ZCCHC10	zinc finger, CCHC domain containing 10
hsa-miR-524-5p	0	0	1	1	1	1	CDC42SE2	CDC42 small effector 2
hsa-miR-524-5p	0	0	1	1	0	0	C16orf91	chromosome 16 open reading frame 91
hsa-miR-524-5p	1	0	1	0	1	1	CDK19	cyclin-dependent kinase 19
hsa-miR-524-5p	0	0	1	1	0	0	MEI1	meiosis inhibitor 1
hsa-miR-524-5p	0	0	1	1	1	1	FAM221A	family with sequence similarity 221, member A
hsa-miR-524-5p	1	0	1	1	1	1	FAM131A	family with sequence similarity 131, member A
hsa-miR-524-5p	0	0	1	1	1	1	MAP2	microtubule-associated protein 2
hsa-miR-524-5p	0	0	1	1	0	0	SPERT	spermatid associated
hsa-miR-524-5p	0	0	1	1	1	1	HS1BP3	HCLS1 binding protein 3
hsa-miR-524-5p	1	0	1	1	1	1	APPL2	adaptor protein, phosphotyrosine interaction, PH domain and leucine zipper containing 2
hsa-miR-524-5p	0	0	1	1	1	1	SELP	selectin P (granule membrane protein 140kDa, antigen CD62)
hsa-miR-524-5p	0	0	1	1	0	0	PLSCR3	phospholipid scramblase 3
hsa-miR-524-5p	1	0	1	1	1	1	SMYD2	SET and MYND domain containing 2
hsa-miR-524-5p	0	0	1	1	1	1	CLK1	CDC-like kinase 1
hsa-miR-524-5p	1	0	1	1	1	1	TMEM127	transmembrane protein 127
hsa-miR-524-5p	0	0	1	0	1	1	PAPOLG	poly(A) polymerase gamma
hsa-miR-524-5p	0	0	1	0	1	1	KIAA0895	KIAA0895
hsa-miR-524-5p	1	0	1	1	1	1	HTR2C	5-hydroxytryptamine (serotonin) receptor 2C, G protein-coupled
hsa-miR-524-5p	1	0	1	0	0	0	KCNU1	potassium channel, subfamily U, member 1
hsa-miR-524-5p	0	0	1	1	1	1	ASTN2	astrotactin 2
hsa-miR-524-5p	0	0	1	1	1	1	SEMA3D	sema domain, immunoglobulin domain (Ig), short basic domain, secreted, (semaphorin) 3D
hsa-miR-524-5p	0	0	1	1	1	1	SLC51A	solute carrier family 51, alpha subunit
hsa-miR-524-5p	1	0	1	1	1	1	PPARGC1A	peroxisome proliferator-activated receptor gamma, coactivator 1 alpha
hsa-miR-524-5p	1	0	1	0	1	1	PSMF1	proteasome (prosome, macropain) inhibitor subunit 1 (PI31)
hsa-miR-524-5p	0	0	1	1	1	1	PIK3AP1	phosphoinositide-3-kinase adaptor protein 1
hsa-miR-524-5p	1	0	1	0	1	1	SV2B	synaptic vesicle glycoprotein 2B
hsa-miR-524-5p	0	0	1	1	1	1	TMEM117	transmembrane protein 117
hsa-miR-524-5p	1	0	1	1	1	1	MLLT3	myeloid/lymphoid or mixed-lineage leukemia (trithorax homolog, Drosophila); translocated to, 3
hsa-miR-524-5p	1	0	1	1	1	1	EYA4	eyes absent homolog 4 (Drosophila)
hsa-miR-524-5p	1	0	1	1	1	1	ELAVL2	ELAV (embryonic lethal, abnormal vision, Drosophila)-like 2 (Hu antigen B)
hsa-miR-524-5p	0	0	1	1	0	0	AHSA2	AHA1, activator of heat shock 90kDa protein ATPase homolog 2 (yeast)
hsa-miR-524-5p	0	0	1	1	1	1	AADAT	aminoadipate aminotransferase
hsa-miR-524-5p	1	0	1	1	0	0	FAM83F	family with sequence similarity 83, member F
hsa-miR-524-5p	0	0	1	1	1	1	STAT4	signal transducer and activator of transcription 4
hsa-miR-524-5p	1	0	1	1	1	1	SPATS2	spermatogenesis associated, serine-rich 2
hsa-miR-524-5p	0	0	1	1	1	1	UBXN1	UBX domain protein 1
hsa-miR-524-5p	1	0	1	1	1	1	RAB5B	RAB5B, member RAS oncogene family
hsa-miR-524-5p	0	0	1	0	0	0	FAM86JP	family with sequence similarity 86, member A pseudogene
hsa-miR-524-5p	1	0	1	1	1	1	RHOBTB1	Rho-related BTB domain containing 1
hsa-miR-524-5p	1	0	1	1	1	1	MAK	male germ cell-associated kinase
hsa-miR-524-5p	0	0	1	1	1	1	IL20RB	interleukin 20 receptor beta
hsa-miR-524-5p	1	0	1	0	1	1	KCTD2	potassium channel tetramerisation domain containing 2
hsa-miR-524-5p	1	0	1	1	0	0	TMEM181	transmembrane protein 181
hsa-miR-524-5p	1	0	1	1	1	1	PCDHA5	protocadherin alpha 5
hsa-miR-524-5p	0	0	1	0	1	1	DKFZP434I0714	uncharacterized protein DKFZP434I0714
hsa-miR-524-5p	0	0	1	1	1	1	EDA2R	ectodysplasin A2 receptor
hsa-miR-524-5p	1	0	1	0	1	1	DDX3Y	DEAD (Asp-Glu-Ala-Asp) box polypeptide 3, Y-linked
hsa-miR-524-5p	0	0	1	1	1	1	SLC6A16	solute carrier family 6, member 16
hsa-miR-524-5p	1	0	1	1	1	1	ZEB2	zinc finger E-box binding homeobox 2
hsa-miR-524-5p	0	0	1	1	0	0	C2orf80	chromosome 2 open reading frame 80
hsa-miR-524-5p	0	0	1	1	1	1	SEC24D	SEC24 family, member D (S. cerevisiae)
hsa-miR-524-5p	0	0	1	1	1	1	ARHGAP6	Rho GTPase activating protein 6
hsa-miR-524-5p	1	0	1	1	1	1	ZNF618	zinc finger protein 618
hsa-miR-524-5p	0	0	1	1	1	1	UBE3D	ubiquitin protein ligase E3D
hsa-miR-524-5p	1	0	1	1	1	1	DMD	dystrophin
hsa-miR-524-5p	1	0	1	1	1	1	SMG7	smg-7 homolog, nonsense mediated mRNA decay factor (C. elegans)
hsa-miR-524-5p	1	0	1	1	1	1	SLC35G1	solute carrier family 35, member G1
hsa-miR-524-5p	0	0	1	1	1	1	FAM171B	family with sequence similarity 171, member B
hsa-miR-524-5p	1	0	1	1	1	1	HECTD2	HECT domain containing E3 ubiquitin protein ligase 2
hsa-miR-524-5p	1	0	1	1	1	1	MEIS1	Meis homeobox 1
hsa-miR-524-5p	1	0	1	1	1	1	ACVR1	activin A receptor, type I
hsa-miR-524-5p	1	0	1	0	1	1	CLDN12	claudin 12
hsa-miR-524-5p	1	0	1	0	1	1	NEGR1	neuronal growth regulator 1
hsa-miR-524-5p	1	0	1	0	1	1	CPEB4	cytoplasmic polyadenylation element binding protein 4
hsa-miR-524-5p	1	0	1	1	1	1	BNC2	basonuclin 2
hsa-miR-524-5p	0	0	1	0	0	0	CYP4F35P	cytochrome P450, family 4, subfamily F, polypeptide 35, pseudogene
hsa-miR-524-5p	1	0	1	1	1	1	FAM135B	family with sequence similarity 135, member B
hsa-miR-524-5p	1	0	1	1	1	1	CTBP2	C-terminal binding protein 2
hsa-miR-524-5p	0	0	1	0	0	0	INHBA-AS1	INHBA antisense RNA 1
hsa-miR-524-5p	1	0	1	1	1	1	WSCD2	WSC domain containing 2
hsa-miR-524-5p	1	0	1	1	1	1	DPP10	dipeptidyl-peptidase 10 (non-functional)
hsa-miR-524-5p	1	0	1	1	1	1	PLS3	plastin 3
hsa-miR-524-5p	0	0	1	1	0	0	CCDC152	coiled-coil domain containing 152
hsa-miR-524-5p	1	0	1	1	1	1	FGFR2	fibroblast growth factor receptor 2
hsa-miR-524-5p	1	0	1	1	1	1	NFYA	nuclear transcription factor Y, alpha
hsa-miR-524-5p	1	0	1	0	1	1	LPHN3	latrophilin 3
hsa-miR-524-5p	0	0	1	0	0	0	LOC401074	uncharacterized LOC401074
hsa-miR-524-5p	1	0	1	1	1	1	TIMP2	TIMP metallopeptidase inhibitor 2
hsa-miR-524-5p	0	0	1	0	1	1	SRSF5	serine/arginine-rich splicing factor 5
hsa-miR-524-5p	1	0	1	1	1	1	DACH2	dachshund homolog 2 (Drosophila)
hsa-miR-524-5p	1	0	1	1	1	1	SLITRK3	SLIT and NTRK-like family, member 3
hsa-miR-524-5p	1	0	1	1	1	1	BVES	blood vessel epicardial substance
hsa-miR-524-5p	0	0	1	1	1	1	PRRT3	proline-rich transmembrane protein 3
hsa-miR-524-5p	1	0	1	1	1	1	LEF1	lymphoid enhancer-binding factor 1
hsa-miR-524-5p	1	0	1	1	1	1	INTS6	integrator complex subunit 6
hsa-miR-524-5p	0	0	1	1	1	1	LRRC3B	leucine rich repeat containing 3B
hsa-miR-524-5p	0	0	1	1	0	0	MTCH1	mitochondrial carrier 1
hsa-miR-524-5p	1	0	1	1	1	1	UNC13C	unc-13 homolog C (C. elegans)
hsa-miR-524-5p	0	0	1	1	1	1	SIAE	sialic acid acetylesterase
hsa-miR-524-5p	1	0	1	1	1	1	ARPP21	cAMP-regulated phosphoprotein, 21kDa
hsa-miR-524-5p	1	0	1	0	1	1	HSPA12A	heat shock 70kDa protein 12A
hsa-miR-524-5p	0	0	1	1	0	0	GRM2	glutamate receptor, metabotropic 2
hsa-miR-524-5p	0	0	1	1	1	1	C17orf104	chromosome 17 open reading frame 104
hsa-miR-524-5p	1	0	1	1	1	1	ROCK1	Rho-associated, coiled-coil containing protein kinase 1
hsa-miR-524-5p	0	0	1	1	1	1	ZNF568	zinc finger protein 568
hsa-miR-524-5p	0	0	1	1	1	1	MTHFD2L	methylenetetrahydrofolate dehydrogenase (NADP+ dependent) 2-like
hsa-miR-524-5p	0	0	1	1	1	1	C4orf32	chromosome 4 open reading frame 32
hsa-miR-524-5p	0	0	1	0	1	1	C11orf93	chromosome 11 open reading frame 93
hsa-miR-524-5p	0	0	1	1	1	1	FAM90A1	family with sequence similarity 90, member A1
hsa-miR-524-5p	0	0	1	0	0	0	MORC2-AS1	MORC2 antisense RNA 1
hsa-miR-524-5p	1	0	1	1	1	1	ADD1	adducin 1 (alpha)
hsa-miR-524-5p	0	0	1	0	0	0	MORF4L2-AS1	MORF4L2 antisense RNA 1
hsa-miR-524-5p	0	0	1	0	0	0	LOC339260	uncharacterized LOC339260
hsa-miR-524-5p	1	0	1	1	0	0	WNK1	WNK lysine deficient protein kinase 1
hsa-miR-524-5p	1	0	1	1	1	1	AGAP3	ArfGAP with GTPase domain, ankyrin repeat and PH domain 3
hsa-miR-524-5p	0	0	1	0	0	0	FAM27E3	family with sequence similarity 27, member E3
hsa-miR-524-5p	1	0	1	1	1	1	RNF145	ring finger protein 145
hsa-miR-524-5p	0	0	1	1	1	1	C14orf45	chromosome 14 open reading frame 45
hsa-miR-524-5p	1	0	1	0	1	1	PSD3	pleckstrin and Sec7 domain containing 3
hsa-miR-524-5p	0	0	1	1	1	1	MYO3A	myosin IIIA
hsa-miR-524-5p	1	0	1	1	1	1	MAMDC2	MAM domain containing 2
hsa-miR-524-5p	1	0	1	1	1	1	SENP1	SUMO1/sentrin specific peptidase 1
hsa-miR-524-5p	1	0	1	1	1	1	SF3B1	splicing factor 3b, subunit 1, 155kDa
hsa-miR-524-5p	0	0	1	1	0	0	TOM1	target of myb1 (chicken)
hsa-miR-524-5p	1	0	1	0	0	0	MICAL3	microtubule associated monoxygenase, calponin and LIM domain containing 3
hsa-miR-524-5p	1	0	1	0	1	1	LYPD6	LY6/PLAUR domain containing 6
hsa-miR-524-5p	0	0	1	0	0	0	LOC348120	uncharacterized LOC348120
hsa-miR-524-5p	0	0	1	0	1	1	LOC338758	uncharacterized LOC338758
hsa-miR-524-5p	1	0	1	1	1	1	KIF2A	kinesin heavy chain member 2A
hsa-miR-524-5p	1	0	1	1	0	0	TTC9	tetratricopeptide repeat domain 9
hsa-miR-524-5p	1	0	1	1	1	1	RTKN2	rhotekin 2
hsa-miR-524-5p	1	0	1	1	1	1	PELI1	pellino E3 ubiquitin protein ligase 1
hsa-miR-524-5p	1	0	1	0	1	1	RNF182	ring finger protein 182
hsa-miR-524-5p	1	0	1	0	1	1	ARHGAP5	Rho GTPase activating protein 5
hsa-miR-524-5p	1	0	1	0	1	1	CCNY	cyclin Y
hsa-miR-524-5p	0	0	1	0	0	0	AURKAPS1	aurora kinase A pseudogene 1
hsa-miR-524-5p	1	0	1	1	1	1	FNDC3A	fibronectin type III domain containing 3A
hsa-miR-524-5p	1	0	1	0	1	1	SEMA4G	sema domain, immunoglobulin domain (Ig), transmembrane domain (TM) and short cytoplasmic domain, (semaphorin) 4G
hsa-miR-524-5p	1	0	1	0	1	1	SMURF2	SMAD specific E3 ubiquitin protein ligase 2
hsa-miR-524-5p	1	0	1	1	1	1	SCN5A	sodium channel, voltage-gated, type V, alpha subunit
hsa-miR-524-5p	1	0	1	1	1	1	ZFP91	zinc finger protein 91 homolog (mouse)
hsa-miR-524-5p	0	0	1	1	1	1	LRRFIP2	leucine rich repeat (in FLII) interacting protein 2
hsa-miR-524-5p	0	0	1	0	0	0	LINC00265	long intergenic non-protein coding RNA 265
hsa-miR-524-5p	0	0	1	1	0	0	TINAG	tubulointerstitial nephritis antigen
hsa-miR-524-5p	0	0	1	1	1	1	RPAP3	RNA polymerase II associated protein 3
hsa-miR-524-5p	0	0	1	1	1	1	MPP3	membrane protein, palmitoylated 3 (MAGUK p55 subfamily member 3)
hsa-miR-524-5p	1	0	1	1	1	1	KLHL28	kelch-like 28 (Drosophila)
hsa-miR-524-5p	1	0	1	1	1	1	CCAR1	cell division cycle and apoptosis regulator 1
hsa-miR-524-5p	0	0	1	1	0	0	GRIN2C	glutamate receptor, ionotropic, N-methyl D-aspartate 2C
hsa-miR-524-5p	1	0	1	1	1	1	PRRG1	proline rich Gla (G-carboxyglutamic acid) 1
hsa-miR-524-5p	0	0	1	0	0	0	SDHAP2	succinate dehydrogenase complex, subunit A, flavoprotein pseudogene 2
hsa-miR-524-5p	0	0	1	1	1	1	B4GALT4	UDP-Gal:betaGlcNAc beta 1,4- galactosyltransferase, polypeptide 4
hsa-miR-524-5p	1	0	1	1	1	1	CLK4	CDC-like kinase 4
hsa-miR-524-5p	1	0	1	1	1	1	PDGFRA	platelet-derived growth factor receptor, alpha polypeptide
hsa-miR-524-5p	0	0	1	0	0	0	SCAND2	SCAN domain containing 2 pseudogene
hsa-miR-524-5p	1	0	1	1	1	1	RANBP9	RAN binding protein 9
hsa-miR-524-5p	1	0	1	1	1	1	NIPBL	Nipped-B homolog (Drosophila)
hsa-miR-524-5p	1	0	1	1	0	0	ANKIB1	ankyrin repeat and IBR domain containing 1
hsa-miR-524-5p	0	0	1	1	1	1	PIM3	pim-3 oncogene
hsa-miR-524-5p	0	0	1	1	1	1	ZNF333	zinc finger protein 333
hsa-miR-524-5p	1	0	1	1	1	1	MYLK	myosin light chain kinase
hsa-miR-524-5p	0	0	1	1	1	1	ZNF33B	zinc finger protein 33B
hsa-miR-524-5p	1	0	1	1	1	1	LMO4	LIM domain only 4
hsa-miR-524-5p	1	0	1	1	1	1	C18orf1	chromosome 18 open reading frame 1
hsa-miR-524-5p	0	0	1	1	1	1	KCTD18	potassium channel tetramerisation domain containing 18
hsa-miR-524-5p	0	0	1	0	0	0	ZNF66P	zinc finger protein 66, pseudogene
hsa-miR-524-5p	1	0	1	1	0	0	SNX18	sorting nexin 18
hsa-miR-524-5p	0	0	1	0	0	0	PABPC1P2	poly(A) binding protein, cytoplasmic 1 pseudogene 2
hsa-miR-524-5p	1	0	1	1	1	1	SLC26A7	solute carrier family 26, member 7
hsa-miR-524-5p	1	0	1	1	1	1	SRPK2	SRSF protein kinase 2
hsa-miR-524-5p	1	0	1	1	1	1	LINGO1	leucine rich repeat and Ig domain containing 1
hsa-miR-524-5p	0	0	1	0	0	0	SPDYE8P	speedy homolog E8 (Xenopus laevis), pseudogene
hsa-miR-524-5p	1	0	1	1	1	1	EED	embryonic ectoderm development
hsa-miR-524-5p	1	0	1	0	1	1	SLC7A2	solute carrier family 7 (cationic amino acid transporter, y+ system), member 2
hsa-miR-524-5p	0	0	1	0	0	0	FOXN3-AS2	FOXN3 antisense RNA 2
hsa-miR-524-5p	1	0	1	1	0	0	CHTOP	chromatin target of PRMT1
hsa-miR-524-5p	1	0	1	1	1	1	SCAF8	SR-related CTD-associated factor 8
hsa-miR-524-5p	1	0	1	1	1	1	LRRC32	leucine rich repeat containing 32
hsa-miR-524-5p	0	0	1	1	1	1	TSPAN8	tetraspanin 8
hsa-miR-524-5p	1	0	1	0	1	1	HMGB3	high mobility group box 3
hsa-miR-524-5p	1	0	1	0	1	1	TGFBR1	transforming growth factor, beta receptor 1
hsa-miR-524-5p	1	0	1	1	1	1	USP47	ubiquitin specific peptidase 47
hsa-miR-524-5p	1	0	1	0	1	1	MAP4K3	mitogen-activated protein kinase kinase kinase kinase 3
hsa-miR-524-5p	1	0	1	1	1	1	FARP1	FERM, RhoGEF (ARHGEF) and pleckstrin domain protein 1 (chondrocyte-derived)
hsa-miR-524-5p	1	0	1	0	1	1	TMEM194A	transmembrane protein 194A
hsa-miR-524-5p	1	0	1	1	1	1	CTBP1	C-terminal binding protein 1
hsa-miR-524-5p	0	0	1	0	0	0	LOC440416	uncharacterized LOC440416
hsa-miR-524-5p	1	0	1	1	1	1	C1orf173	chromosome 1 open reading frame 173
hsa-miR-524-5p	0	0	1	1	1	1	IRX5	iroquois homeobox 5
hsa-miR-524-5p	1	0	1	0	1	1	AMMECR1L	AMME chromosomal region gene 1-like
hsa-miR-524-5p	0	0	1	1	0	0	FAM98C	family with sequence similarity 98, member C
hsa-miR-524-5p	1	0	1	1	1	1	ZBTB7A	zinc finger and BTB domain containing 7A
hsa-miR-524-5p	0	0	1	1	0	0	ZNF703	zinc finger protein 703
hsa-miR-524-5p	0	0	1	1	1	1	C1orf141	chromosome 1 open reading frame 141
hsa-miR-524-5p	1	0	1	0	1	1	PIK3R3	phosphoinositide-3-kinase, regulatory subunit 3 (gamma)
hsa-miR-524-5p	1	0	1	1	1	1	STK38	serine/threonine kinase 38
hsa-miR-524-5p	1	0	1	1	1	1	ST8SIA2	ST8 alpha-N-acetyl-neuraminide alpha-2,8-sialyltransferase 2
hsa-miR-524-5p	1	0	1	1	1	1	ACVR2B	activin A receptor, type IIB
hsa-miR-524-5p	0	0	1	0	0	0	ABCA11P	ATP-binding cassette, sub-family A (ABC1), member 11, pseudogene
hsa-miR-524-5p	1	0	1	0	1	1	LRRTM4	leucine rich repeat transmembrane neuronal 4
hsa-miR-524-5p	0	0	1	0	0	0	FAM106A	family with sequence similarity 106, member A
hsa-miR-524-5p	1	0	1	0	1	1	ARPP19	cAMP-regulated phosphoprotein, 19kDa
hsa-miR-524-5p	0	0	1	1	1	1	CYP3A43	cytochrome P450, family 3, subfamily A, polypeptide 43
hsa-miR-524-5p	1	0	1	0	1	1	MYBL1	v-myb myeloblastosis viral oncogene homolog (avian)-like 1
hsa-miR-524-5p	1	0	1	1	1	1	ARFIP1	ADP-ribosylation factor interacting protein 1
hsa-miR-524-5p	1	0	1	0	1	1	VANGL2	vang-like 2 (van gogh, Drosophila)
hsa-miR-524-5p	1	0	1	0	1	1	CPEB2	cytoplasmic polyadenylation element binding protein 2
hsa-miR-524-5p	0	0	1	0	0	0	LSAMP-AS3	LSAMP antisense RNA 3
hsa-miR-524-5p	0	0	1	1	1	1	SPHKAP	SPHK1 interactor, AKAP domain containing
hsa-miR-524-5p	0	0	1	0	0	0	LOC150577	uncharacterized LOC150577
hsa-miR-524-5p	1	0	1	1	1	1	GABRB2	gamma-aminobutyric acid (GABA) A receptor, beta 2
hsa-miR-524-5p	0	0	1	0	0	0	FAM71F2	family with sequence similarity 71, member F2
hsa-miR-524-5p	1	0	1	0	1	1	RBM23	RNA binding motif protein 23
hsa-miR-524-5p	1	0	1	1	1	1	NR2F2	nuclear receptor subfamily 2, group F, member 2
hsa-miR-524-5p	1	0	1	1	1	1	PTPRD	protein tyrosine phosphatase, receptor type, D
hsa-miR-524-5p	1	0	1	0	1	1	DNAJC6	DnaJ (Hsp40) homolog, subfamily C, member 6
hsa-miR-524-5p	1	0	1	1	1	1	CERS6	ceramide synthase 6
hsa-miR-524-5p	1	0	1	1	1	1	SP4	Sp4 transcription factor
hsa-miR-524-5p	1	0	1	0	1	1	ATP8A1	ATPase, aminophospholipid transporter (APLT), class I, type 8A, member 1
hsa-miR-524-5p	1	0	1	0	1	1	KIF5C	kinesin family member 5C
hsa-miR-524-5p	0	0	1	1	1	1	TTLL5	tubulin tyrosine ligase-like family, member 5
hsa-miR-524-5p	1	0	1	1	1	1	SLK	STE20-like kinase
hsa-miR-524-5p	0	0	1	1	1	1	ATXN2	ataxin 2
hsa-miR-524-5p	1	0	1	1	1	1	NR3C2	nuclear receptor subfamily 3, group C, member 2
hsa-miR-524-5p	0	0	1	0	0	0	MAGEL2	MAGE-like 2
hsa-miR-524-5p	1	0	1	1	1	1	PAX3	paired box 3
hsa-miR-524-5p	1	0	1	1	1	1	ITSN1	intersectin 1 (SH3 domain protein)
hsa-miR-524-5p	1	0	1	1	1	1	KIAA0528	KIAA0528
hsa-miR-524-5p	1	0	1	1	1	1	ST18	suppression of tumorigenicity 18 (breast carcinoma) (zinc finger protein)
hsa-miR-524-5p	1	0	1	0	1	1	PRDM10	PR domain containing 10
hsa-miR-524-5p	0	0	1	1	1	1	LRCH1	leucine-rich repeats and calponin homology (CH) domain containing 1
hsa-miR-524-5p	1	0	1	1	1	1	OTUD4	OTU domain containing 4
hsa-miR-524-5p	1	0	1	1	1	1	FKBP1A	FK506 binding protein 1A, 12kDa
hsa-miR-524-5p	1	0	1	1	0	0	RASGEF1B	RasGEF domain family, member 1B
hsa-miR-524-5p	0	0	1	0	0	0	LGALS17A	Charcot-Leyden crystal protein pseudogene
hsa-miR-524-5p	0	0	1	0	0	0	EEF1DP3	eukaryotic translation elongation factor 1 delta pseudogene 3
hsa-miR-524-5p	0	0	1	0	1	1	GOLGA8G	golgin A8 family, member G
hsa-miR-524-5p	1	0	1	0	1	1	CAMSAP2	calmodulin regulated spectrin-associated protein family, member 2
hsa-miR-524-5p	0	0	1	1	0	0	SAFB	scaffold attachment factor B
hsa-miR-524-5p	1	0	1	1	1	1	JMJD1C	jumonji domain containing 1C
hsa-miR-524-5p	1	0	1	1	1	1	TRAPPC8	trafficking protein particle complex 8
hsa-miR-524-5p	1	0	1	1	1	1	CHIC1	cysteine-rich hydrophobic domain 1
hsa-miR-524-5p	1	0	1	1	1	1	GPR68	G protein-coupled receptor 68
hsa-miR-524-5p	1	0	1	1	1	1	MLLT10	myeloid/lymphoid or mixed-lineage leukemia (trithorax homolog, Drosophila); translocated to, 10
hsa-miR-524-5p	0	0	1	1	1	1	ABCA8	ATP-binding cassette, sub-family A (ABC1), member 8
hsa-miR-524-5p	0	0	1	0	0	0	FAM225B	family with sequence similarity 225, member B (non-protein coding)
hsa-miR-524-5p	1	0	1	0	1	1	NFAT5	nuclear factor of activated T-cells 5, tonicity-responsive
hsa-miR-524-5p	1	0	1	0	1	1	FAM196A	family with sequence similarity 196, member A
hsa-miR-524-5p	0	0	1	1	0	0	TCHH	trichohyalin
hsa-miR-524-5p	1	0	1	1	1	1	TMEM218	transmembrane protein 218
hsa-miR-524-5p	0	0	1	1	0	0	CCDC144A	coiled-coil domain containing 144A
hsa-miR-524-5p	0	0	1	1	1	1	PRKAR2A	protein kinase, cAMP-dependent, regulatory, type II, alpha
hsa-miR-524-5p	0	0	1	1	1	1	TINF2	TERF1 (TRF1)-interacting nuclear factor 2
hsa-miR-524-5p	1	0	1	1	1	1	NUMB	numb homolog (Drosophila)
hsa-miR-524-5p	0	0	1	1	1	1	CNIH	cornichon homolog (Drosophila)
hsa-miR-524-5p	1	0	1	1	1	1	GOLGA5	golgin A5
hsa-miR-524-5p	1	0	1	1	1	1	BTBD7	BTB (POZ) domain containing 7
hsa-miR-524-5p	0	0	1	0	0	0	FLJ39632	uncharacterized LOC642477
hsa-miR-524-5p	1	0	1	1	1	1	EIF5	eukaryotic translation initiation factor 5
hsa-miR-524-5p	1	0	1	1	1	1	ERMAP	erythroblast membrane-associated protein (Scianna blood group)
hsa-miR-524-5p	0	0	1	1	1	1	C10orf82	chromosome 10 open reading frame 82
hsa-miR-524-5p	1	0	1	1	1	1	SASH1	SAM and SH3 domain containing 1
hsa-miR-524-5p	0	0	1	0	0	0	DKFZp686D0853	uncharacterized LOC401613
hsa-miR-524-5p	1	0	1	1	1	1	RBL2	retinoblastoma-like 2 (p130)
hsa-miR-524-5p	1	0	1	1	1	1	RAB7A	RAB7A, member RAS oncogene family
hsa-miR-524-5p	0	0	1	1	1	1	KBTBD12	kelch repeat and BTB (POZ) domain containing 12
hsa-miR-524-5p	1	0	1	1	1	1	EPHA5	EPH receptor A5
hsa-miR-524-5p	1	0	1	1	1	1	TRIM37	tripartite motif containing 37
hsa-miR-524-5p	1	0	1	0	1	1	MTX3	metaxin 3
hsa-miR-524-5p	1	0	1	1	1	1	FAM184A	family with sequence similarity 184, member A
hsa-miR-524-5p	1	0	1	1	1	1	ETS1	v-ets erythroblastosis virus E26 oncogene homolog 1 (avian)
hsa-miR-524-5p	0	0	1	0	1	1	ZNF498	zinc finger protein 498
hsa-miR-524-5p	1	0	1	0	1	1	CLASP2	cytoplasmic linker associated protein 2
hsa-miR-524-5p	0	0	1	1	0	0	TTC5	tetratricopeptide repeat domain 5
hsa-miR-524-5p	0	0	1	1	1	1	KLHL8	kelch-like 8 (Drosophila)
hsa-miR-524-5p	1	0	1	1	1	1	TJP1	tight junction protein 1
hsa-miR-524-5p	0	0	1	1	0	0	CDK5RAP2	CDK5 regulatory subunit associated protein 2
hsa-miR-524-5p	0	0	1	1	1	1	PSMA2	proteasome (prosome, macropain) subunit, alpha type, 2
hsa-miR-524-5p	1	0	1	0	1	1	FAM73A	family with sequence similarity 73, member A
hsa-miR-524-5p	1	0	1	1	1	1	SMAD4	SMAD family member 4
hsa-miR-524-5p	1	0	1	1	1	1	MASP1	mannan-binding lectin serine peptidase 1 (C4/C2 activating component of Ra-reactive factor)
hsa-miR-524-5p	1	0	1	0	1	1	GALNT4	UDP-N-acetyl-alpha-D-galactosamine:polypeptide N-acetylgalactosaminyltransferase 4 (GalNAc-T4)
hsa-miR-524-5p	0	0	1	1	0	0	RPS24	ribosomal protein S24
hsa-miR-524-5p	0	0	1	1	1	1	PRR14L	proline rich 14-like
hsa-miR-524-5p	1	0	1	1	0	0	RBM27	RNA binding motif protein 27
hsa-miR-524-5p	1	0	1	1	1	1	SLC39A13	solute carrier family 39 (zinc transporter), member 13
hsa-miR-524-5p	0	0	1	1	1	1	PPP1R1C	protein phosphatase 1, regulatory (inhibitor) subunit 1C
hsa-miR-524-5p	1	0	1	1	1	1	VPS26A	vacuolar protein sorting 26 homolog A (S. pombe)
hsa-miR-524-5p	1	0	1	1	1	1	GTDC1	glycosyltransferase-like domain containing 1
hsa-miR-524-5p	1	0	1	1	1	1	TC2N	tandem C2 domains, nuclear
hsa-miR-524-5p	1	0	1	0	1	1	VPS36	vacuolar protein sorting 36 homolog (S. cerevisiae)
hsa-miR-524-5p	1	0	1	1	1	1	TSC22D3	TSC22 domain family, member 3
hsa-miR-524-5p	1	0	1	1	1	1	CYB5B	cytochrome b5 type B (outer mitochondrial membrane)
hsa-miR-524-5p	0	0	1	0	0	0	OVOS	ovostatin
hsa-miR-524-5p	0	0	1	1	1	1	TMEM48	transmembrane protein 48
hsa-miR-524-5p	1	0	1	1	1	1	GDI2	GDP dissociation inhibitor 2
hsa-miR-524-5p	1	0	1	1	1	1	NEDD9	neural precursor cell expressed, developmentally down-regulated 9
hsa-miR-524-5p	1	0	1	1	1	1	HDAC1	histone deacetylase 1
hsa-miR-524-5p	1	0	1	1	1	1	ZNF711	zinc finger protein 711
hsa-miR-524-5p	1	0	1	1	1	1	DDAH1	dimethylarginine dimethylaminohydrolase 1
hsa-miR-524-5p	0	0	1	1	1	1	CCNT2	cyclin T2
hsa-miR-524-5p	1	0	1	1	1	1	PTPN3	protein tyrosine phosphatase, non-receptor type 3
hsa-miR-524-5p	1	0	1	0	1	1	TMEM184B	transmembrane protein 184B
hsa-miR-524-5p	1	0	1	1	1	1	NFIB	nuclear factor I/B
hsa-miR-524-5p	1	0	1	0	1	1	IGF2BP3	insulin-like growth factor 2 mRNA binding protein 3
hsa-miR-524-5p	1	0	1	1	1	1	RDX	radixin
hsa-miR-524-5p	0	0	1	1	1	1	DAZL	deleted in azoospermia-like
hsa-miR-524-5p	1	0	1	1	1	1	TMEM135	transmembrane protein 135
hsa-miR-524-5p	1	0	1	1	1	1	BZRAP1	benzodiazapine receptor (peripheral) associated protein 1
hsa-miR-524-5p	1	0	1	0	1	1	TBL1XR1	transducin (beta)-like 1 X-linked receptor 1
hsa-miR-524-5p	1	0	1	1	1	1	SGK3	serum/glucocorticoid regulated kinase family, member 3
hsa-miR-524-5p	1	0	1	1	1	1	LYST	lysosomal trafficking regulator
hsa-miR-524-5p	1	0	1	1	1	1	DLG5	discs, large homolog 5 (Drosophila)
hsa-miR-524-5p	1	0	1	1	1	1	CREB3L2	cAMP responsive element binding protein 3-like 2
hsa-miR-524-5p	0	0	1	1	1	1	IPO11	importin 11
hsa-miR-524-5p	1	0	1	1	1	1	HIC2	hypermethylated in cancer 2
hsa-miR-524-5p	1	0	1	1	1	1	BSDC1	BSD domain containing 1
hsa-miR-524-5p	0	0	1	0	1	1	GINS3	GINS complex subunit 3 (Psf3 homolog)
hsa-miR-524-5p	0	0	1	0	0	0	LINC00341	long intergenic non-protein coding RNA 341
hsa-miR-524-5p	1	0	1	1	1	1	AP2M1	adaptor-related protein complex 2, mu 1 subunit
hsa-miR-524-5p	1	0	1	1	1	1	SEL1L3	sel-1 suppressor of lin-12-like 3 (C. elegans)
hsa-miR-524-5p	1	0	1	1	0	0	SMARCA2	SWI/SNF related, matrix associated, actin dependent regulator of chromatin, subfamily a, member 2
hsa-miR-524-5p	1	0	1	1	1	1	ARF1	ADP-ribosylation factor 1
hsa-miR-524-5p	1	0	1	1	1	1	RSBN1L	round spermatid basic protein 1-like
hsa-miR-524-5p	1	0	1	1	1	1	TOM1L1	target of myb1 (chicken)-like 1
hsa-miR-524-5p	0	0	1	1	1	1	CETN2	centrin, EF-hand protein, 2
hsa-miR-524-5p	0	0	1	1	1	1	CRISPLD2	cysteine-rich secretory protein LCCL domain containing 2
hsa-miR-524-5p	0	0	1	1	0	0	RNPS1	RNA binding protein S1, serine-rich domain
hsa-miR-524-5p	1	0	1	1	1	1	MMAB	methylmalonic aciduria (cobalamin deficiency) cblB type
hsa-miR-524-5p	0	0	1	1	0	0	TMEM62	transmembrane protein 62
hsa-miR-524-5p	1	0	1	1	1	1	CLDN11	claudin 11
hsa-miR-524-5p	0	0	1	1	1	1	ATP1B3	ATPase, Na+/K+ transporting, beta 3 polypeptide
hsa-miR-524-5p	0	0	1	1	1	1	COPS8	COP9 constitutive photomorphogenic homolog subunit 8 (Arabidopsis)
hsa-miR-524-5p	0	0	1	0	0	0	CMAHP	cytidine monophospho-N-acetylneuraminic acid hydroxylase, pseudogene
hsa-miR-524-5p	1	0	1	1	1	1	PTN	pleiotrophin
hsa-miR-524-5p	0	0	1	1	1	1	ADK	adenosine kinase
hsa-miR-524-5p	1	0	1	1	1	1	RAP1A	RAP1A, member of RAS oncogene family
hsa-miR-524-5p	1	0	1	1	1	1	SIX5	SIX homeobox 5
hsa-miR-524-5p	1	0	1	0	1	1	BNIP3L	BCL2/adenovirus E1B 19kDa interacting protein 3-like
hsa-miR-524-5p	0	0	1	1	1	1	FAT1	FAT tumor suppressor homolog 1 (Drosophila)
hsa-miR-524-5p	1	0	1	1	1	1	ACTG1	actin, gamma 1
hsa-miR-524-5p	1	0	1	1	1	1	SSR1	signal sequence receptor, alpha
hsa-miR-524-5p	1	0	1	0	1	1	PTPLAD1	protein tyrosine phosphatase-like A domain containing 1
hsa-miR-524-5p	0	0	1	0	1	1	CD99P1	CD99 molecule pseudogene 1
hsa-miR-524-5p	0	0	1	1	1	1	ZNF263	zinc finger protein 263
hsa-miR-524-5p	0	0	1	1	1	1	CCDC91	coiled-coil domain containing 91
hsa-miR-524-5p	0	0	1	1	0	0	ZFYVE19	zinc finger, FYVE domain containing 19
hsa-miR-524-5p	0	0	1	1	1	1	STON1	stonin 1
hsa-miR-524-5p	1	0	1	1	1	1	BAMBI	BMP and activin membrane-bound inhibitor homolog (Xenopus laevis)
hsa-miR-524-5p	1	0	1	1	1	1	STK38L	serine/threonine kinase 38 like
hsa-miR-524-5p	1	0	1	1	1	1	MTCH2	mitochondrial carrier 2
hsa-miR-524-5p	1	0	1	1	1	1	TMEM245	transmembrane protein 245
hsa-miR-524-5p	1	0	1	1	1	1	WIPF1	WAS/WASL interacting protein family, member 1
hsa-miR-524-5p	0	0	1	0	0	0	LOC150568	uncharacterized LOC150568
hsa-miR-524-5p	0	0	1	1	0	0	C11orf68	chromosome 11 open reading frame 68
hsa-miR-524-5p	1	0	1	1	1	1	PIAS1	protein inhibitor of activated STAT, 1
hsa-miR-524-5p	0	0	1	1	1	1	SSB	Sjogren syndrome antigen B (autoantigen La)
hsa-miR-524-5p	1	0	1	1	1	1	TMEM66	transmembrane protein 66
hsa-miR-524-5p	0	0	1	1	1	1	BMPR1A	bone morphogenetic protein receptor, type IA
hsa-miR-524-5p	0	0	1	1	1	1	PDLIM1	PDZ and LIM domain 1
hsa-miR-524-5p	0	0	1	1	1	1	HADHB	hydroxyacyl-CoA dehydrogenase/3-ketoacyl-CoA thiolase/enoyl-CoA hydratase (trifunctional protein), beta subunit
hsa-miR-524-5p	1	0	1	1	1	1	BTBD10	BTB (POZ) domain containing 10
hsa-miR-524-5p	1	0	1	1	1	1	MMP2	matrix metallopeptidase 2 (gelatinase A, 72kDa gelatinase, 72kDa type IV collagenase)
hsa-miR-524-5p	1	0	1	1	1	1	PPP5C	protein phosphatase 5, catalytic subunit
hsa-miR-524-5p	1	0	1	1	1	1	KCNIP4	Kv channel interacting protein 4
hsa-miR-524-5p	0	0	1	0	0	0	ZNF720	zinc finger protein 720
hsa-miR-524-5p	1	0	1	1	1	1	LAMTOR3	late endosomal/lysosomal adaptor, MAPK and MTOR activator 3
hsa-miR-524-5p	0	0	1	1	1	1	TFAM	transcription factor A, mitochondrial
hsa-miR-524-5p	1	0	1	1	1	1	ARNTL	aryl hydrocarbon receptor nuclear translocator-like
hsa-miR-524-5p	0	0	1	1	1	1	PEX19	peroxisomal biogenesis factor 19
hsa-miR-524-5p	0	0	1	1	0	0	WDR43	WD repeat domain 43
hsa-miR-524-5p	0	0	1	1	1	1	SMNDC1	survival motor neuron domain containing 1
hsa-miR-524-5p	0	0	1	1	1	1	DEDD	death effector domain containing
hsa-miR-524-5p	1	0	1	1	1	1	PPP3CB	protein phosphatase 3, catalytic subunit, beta isozyme
hsa-miR-524-5p	0	0	1	1	1	1	CHEK1	checkpoint kinase 1
hsa-miR-524-5p	0	0	1	1	1	1	TANK	TRAF family member-associated NFKB activator
hsa-miR-524-5p	0	0	1	1	0	0	NARF	nuclear prelamin A recognition factor
hsa-miR-524-5p	0	0	1	1	1	1	ODC1	ornithine decarboxylase 1
hsa-miR-524-5p	1	0	1	0	1	1	NLN	neurolysin (metallopeptidase M3 family)
hsa-miR-524-5p	1	0	1	1	1	1	ZNF562	zinc finger protein 562
hsa-miR-524-5p	1	0	1	1	1	1	YWHAQ	tyrosine 3-monooxygenase/tryptophan 5-monooxygenase activation protein, theta polypeptide
hsa-miR-524-5p	1	0	1	1	1	1	ARL4A	ADP-ribosylation factor-like 4A
hsa-miR-524-5p	1	0	1	1	1	1	PFN2	profilin 2
hsa-miR-524-5p	1	0	1	1	1	1	CNBP	CCHC-type zinc finger, nucleic acid binding protein
hsa-miR-524-5p	1	0	1	1	1	1	NFYB	nuclear transcription factor Y, beta
hsa-miR-524-5p	0	0	1	1	1	1	RCN2	reticulocalbin 2, EF-hand calcium binding domain
hsa-miR-524-5p	1	0	1	1	1	1	F11R	F11 receptor
hsa-miR-524-5p	1	0	1	1	1	1	ARMC8	armadillo repeat containing 8
hsa-miR-524-5p	1	0	1	1	1	1	LAPTM4A	lysosomal protein transmembrane 4 alpha
hsa-miR-524-5p	1	0	1	1	1	1	PDCL	phosducin-like
hsa-miR-524-5p	0	0	1	1	1	1	JAM2	junctional adhesion molecule 2
hsa-miR-524-5p	1	0	1	1	1	1	RNF2	ring finger protein 2
hsa-miR-524-5p	1	0	1	1	1	1	RALY	RNA binding protein, autoantigenic (hnRNP-associated with lethal yellow homolog (mouse))
hsa-miR-524-5p	0	0	1	1	1	1	TBRG1	transforming growth factor beta regulator 1
hsa-miR-524-5p	0	0	1	1	0	0	MAP2K5	mitogen-activated protein kinase kinase 5
hsa-miR-524-5p	0	0	1	1	1	1	TSEN15	tRNA splicing endonuclease 15 homolog (S. cerevisiae)
hsa-miR-524-5p	1	0	1	1	1	1	SRSF2	serine/arginine-rich splicing factor 2
hsa-miR-524-5p	0	0	1	1	1	1	LGI1	leucine-rich, glioma inactivated 1
hsa-miR-524-5p	0	0	1	1	1	1	PLAC8	placenta-specific 8
hsa-miR-524-5p	0	0	1	1	0	0	RAMP2	receptor (G protein-coupled) activity modifying protein 2
hsa-miR-524-5p	1	0	1	0	1	1	CD47	CD47 molecule
hsa-miR-524-5p	0	0	1	1	1	1	GATSL3	GATS protein-like 3
hsa-miR-524-5p	0	0	1	1	1	1	ZNF397	zinc finger protein 397
hsa-miR-524-5p	0	0	1	0	1	1	SEPT7	septin 7
hsa-miR-524-5p	1	0	1	1	1	1	TIPRL	TIP41, TOR signaling pathway regulator-like (S. cerevisiae)
hsa-miR-524-5p	0	0	1	1	1	1	BEX4	brain expressed, X-linked 4
hsa-miR-524-5p	0	0	1	1	1	1	OTOR	otoraplin
hsa-miR-524-5p	1	0	1	1	1	1	MAN1C1	mannosidase, alpha, class 1C, member 1
hsa-miR-524-5p	0	0	1	1	1	1	COPS4	COP9 constitutive photomorphogenic homolog subunit 4 (Arabidopsis)
hsa-miR-524-5p	1	0	1	1	1	1	JUNB	jun B proto-oncogene
hsa-miR-524-5p	0	0	1	1	1	1	ZFAND1	zinc finger, AN1-type domain 1
hsa-miR-524-5p	0	0	1	1	0	0	RAE1	RAE1 RNA export 1 homolog (S. pombe)
hsa-miR-524-5p	0	0	1	1	1	1	TOP3B	topoisomerase (DNA) III beta
hsa-miR-524-5p	0	0	1	1	1	1	C10orf2	chromosome 10 open reading frame 2
hsa-miR-524-5p	1	0	1	1	1	1	SLMAP	sarcolemma associated protein
hsa-miR-524-5p	0	0	1	0	0	0	MYSM1	Myb-like, SWIRM and MPN domains 1
hsa-miR-524-5p	1	0	1	0	1	1	KIAA0240	KIAA0240
hsa-miR-524-5p	1	0	1	1	1	1	STAG2	stromal antigen 2
hsa-miR-524-5p	0	0	1	0	0	0	LOC731789	uncharacterized LOC731789
hsa-miR-524-5p	1	0	1	0	1	1	BTRC	beta-transducin repeat containing E3 ubiquitin protein ligase
hsa-miR-524-5p	0	0	1	1	1	1	ATG5	autophagy related 5
hsa-miR-524-5p	0	0	1	0	0	0	LINC00661	long intergenic non-protein coding RNA 661
hsa-miR-524-5p	1	0	1	1	1	1	KIAA2018	KIAA2018
hsa-miR-524-5p	1	0	1	0	1	1	PTP4A1	protein tyrosine phosphatase type IVA, member 1
hsa-miR-524-5p	1	0	1	0	1	1	XRN1	5'-3' exoribonuclease 1
hsa-miR-524-5p	1	0	1	0	1	1	OSBPL8	oxysterol binding protein-like 8
hsa-miR-524-5p	1	0	1	1	1	1	SNRK	SNF related kinase
hsa-miR-524-5p	1	0	1	1	0	0	POMGNT1	protein O-linked mannose beta1,2-N-acetylglucosaminyltransferase
hsa-miR-524-5p	1	0	1	1	1	1	SLC39A10	solute carrier family 39 (zinc transporter), member 10
hsa-miR-524-5p	1	0	1	0	1	1	ZNF652	zinc finger protein 652
hsa-miR-524-5p	1	0	1	1	1	1	BCL2L1	BCL2-like 1
hsa-miR-524-5p	1	0	1	1	1	1	SLC30A7	solute carrier family 30 (zinc transporter), member 7
hsa-miR-524-5p	0	0	1	1	1	1	MSS51	MSS51 mitochondrial translational activator homolog (S. cerevisiae)
hsa-miR-524-5p	1	0	1	1	1	1	ZFHX3	zinc finger homeobox 3
hsa-miR-524-5p	1	0	1	1	1	1	PI15	peptidase inhibitor 15
hsa-miR-524-5p	1	0	1	0	1	1	EFR3A	EFR3 homolog A (S. cerevisiae)
hsa-miR-524-5p	1	0	1	1	1	1	RBPMS	RNA binding protein with multiple splicing
hsa-miR-524-5p	1	0	1	0	1	1	KLHDC10	kelch domain containing 10
hsa-miR-524-5p	1	0	1	0	1	1	CBX7	chromobox homolog 7
hsa-miR-524-5p	1	0	1	1	1	1	MOSPD1	motile sperm domain containing 1
hsa-miR-524-5p	1	0	1	0	1	1	RBBP5	retinoblastoma binding protein 5
hsa-miR-524-5p	1	0	1	1	1	1	LGR4	leucine-rich repeat containing G protein-coupled receptor 4
hsa-miR-524-5p	1	0	1	1	1	1	TNFAIP1	tumor necrosis factor, alpha-induced protein 1 (endothelial)
hsa-miR-524-5p	1	0	1	1	1	1	SLC4A8	solute carrier family 4, sodium bicarbonate cotransporter, member 8
hsa-miR-524-5p	0	0	1	1	1	1	ADPRH	ADP-ribosylarginine hydrolase
hsa-miR-524-5p	1	0	1	1	1	1	ATP2B2	ATPase, Ca++ transporting, plasma membrane 2
hsa-miR-524-5p	0	0	1	1	1	1	RFC1	replication factor C (activator 1) 1, 145kDa
hsa-miR-524-5p	1	0	1	1	1	1	RALBP1	ralA binding protein 1
hsa-miR-524-5p	1	0	1	0	1	1	YES1	v-yes-1 Yamaguchi sarcoma viral oncogene homolog 1
hsa-miR-524-5p	0	0	1	0	1	1	TGFB2	transforming growth factor, beta 2
hsa-miR-524-5p	1	0	1	1	1	1	ELK1	ELK1, member of ETS oncogene family
hsa-miR-524-5p	0	0	1	1	1	1	CD55	CD55 molecule, decay accelerating factor for complement (Cromer blood group)
hsa-miR-524-5p	0	0	1	1	1	1	ELF1	E74-like factor 1 (ets domain transcription factor)
hsa-miR-524-5p	0	0	1	1	0	0	ASPA	aspartoacylase
hsa-miR-524-5p	0	0	1	1	1	1	CA2	carbonic anhydrase II
hsa-miR-524-5p	0	0	1	1	1	1	ERCC8	excision repair cross-complementing rodent repair deficiency, complementation group 8
hsa-miR-524-5p	1	0	1	1	1	1	COL1A2	collagen, type I, alpha 2
hsa-miR-524-5p	1	0	1	1	1	1	COL3A1	collagen, type III, alpha 1
hsa-miR-524-5p	1	0	1	1	1	1	COL4A3	collagen, type IV, alpha 3 (Goodpasture antigen)
hsa-miR-524-5p	1	0	1	1	1	1	COL4A4	collagen, type IV, alpha 4
hsa-miR-524-5p	0	0	1	0	1	1	CYP1B1	cytochrome P450, family 1, subfamily B, polypeptide 1
hsa-miR-524-5p	1	0	1	0	1	1	SLC26A2	solute carrier family 26 (sulfate transporter), member 2
hsa-miR-524-5p	1	0	1	1	1	1	ESR1	estrogen receptor 1
hsa-miR-524-5p	0	0	1	1	1	1	F11	coagulation factor XI
hsa-miR-524-5p	0	0	1	1	1	1	F8	coagulation factor VIII, procoagulant component
hsa-miR-524-5p	1	0	1	1	1	1	FBN1	fibrillin 1
hsa-miR-524-5p	1	0	1	1	1	1	GJA1	gap junction protein, alpha 1, 43kDa
hsa-miR-524-5p	1	0	1	1	1	1	GK	glycerol kinase
hsa-miR-524-5p	1	0	1	0	1	1	GLI3	GLI family zinc finger 3
hsa-miR-524-5p	0	0	1	1	1	1	GLDC	glycine dehydrogenase (decarboxylating)
hsa-miR-524-5p	1	0	1	1	1	1	JAG1	jagged 1
hsa-miR-524-5p	1	0	1	1	1	1	KCNA1	potassium voltage-gated channel, shaker-related subfamily, member 1 (episodic ataxia with myokymia)
hsa-miR-524-5p	0	0	1	1	1	1	KRT12	keratin 12
hsa-miR-524-5p	1	0	1	1	1	1	LEP	leptin
hsa-miR-524-5p	1	0	1	1	1	1	MITF	microphthalmia-associated transcription factor
hsa-miR-524-5p	0	0	1	1	1	1	MTM1	myotubularin 1
hsa-miR-524-5p	1	0	1	1	1	1	NPC1	Niemann-Pick disease, type C1
hsa-miR-524-5p	1	0	1	0	1	1	PKD2	polycystic kidney disease 2 (autosomal dominant)
hsa-miR-524-5p	1	0	1	0	1	1	PTEN	phosphatase and tensin homolog
hsa-miR-524-5p	1	0	1	1	1	1	RB1	retinoblastoma 1
hsa-miR-524-5p	1	0	1	1	1	1	ATXN1	ataxin 1
hsa-miR-524-5p	1	0	1	0	1	1	SCN4A	sodium channel, voltage-gated, type IV, alpha subunit
hsa-miR-524-5p	1	0	1	1	1	1	SOX9	SRY (sex determining region Y)-box 9
hsa-miR-524-5p	0	0	1	1	1	1	STS	steroid sulfatase (microsomal), isozyme S
hsa-miR-524-5p	0	0	1	1	1	1	THBD	thrombomodulin
hsa-miR-524-5p	1	0	1	0	1	1	COL5A2	collagen, type V, alpha 2
hsa-miR-524-5p	1	0	1	0	1	1	CYBB	cytochrome b-245, beta polypeptide
hsa-miR-524-5p	1	0	1	1	1	1	HLCS	holocarboxylase synthetase (biotin-(proprionyl-CoA-carboxylase (ATP-hydrolysing)) ligase)
hsa-miR-524-5p	0	0	1	1	0	0	IAPP	islet amyloid polypeptide
hsa-miR-524-5p	0	0	1	1	1	1	LTBP2	latent transforming growth factor beta binding protein 2
hsa-miR-524-5p	1	0	1	0	1	1	PAFAH1B1	platelet-activating factor acetylhydrolase 1b, regulatory subunit 1 (45kDa)
hsa-miR-524-5p	1	0	1	1	0	0	NOTCH3	notch 3
hsa-miR-524-5p	1	0	1	1	1	1	HNF1B	HNF1 homeobox B
hsa-miR-524-5p	1	0	1	1	1	1	TWIST1	twist homolog 1 (Drosophila)
hsa-miR-524-5p	1	0	1	1	1	1	ATRX	alpha thalassemia/mental retardation syndrome X-linked
hsa-miR-524-5p	0	0	1	1	1	1	COL10A1	collagen, type X, alpha 1
hsa-miR-524-5p	1	0	1	1	1	1	HOXD13	homeobox D13
hsa-miR-524-5p	0	0	1	1	1	1	VHL	von Hippel-Lindau tumor suppressor, E3 ubiquitin protein ligase
hsa-miR-524-5p	0	0	1	1	1	1	WRN	Werner syndrome, RecQ helicase-like
hsa-miR-524-5p	1	0	1	1	1	1	DCX	doublecortin
hsa-miR-524-5p	1	0	1	1	1	1	IL1A	interleukin 1, alpha
hsa-miR-524-5p	0	0	1	1	1	1	IL2	interleukin 2
hsa-miR-524-5p	0	0	1	1	1	1	ADH4	alcohol dehydrogenase 4 (class II), pi polypeptide
hsa-miR-524-5p	0	0	1	0	0	0	ADRA2C	adrenoceptor alpha 2C
hsa-miR-524-5p	0	0	1	1	1	1	ALDH1A1	aldehyde dehydrogenase 1 family, member A1
hsa-miR-524-5p	1	0	1	1	1	1	DIO2	deiodinase, iodothyronine, type II
hsa-miR-524-5p	1	0	1	1	1	1	DRD1	dopamine receptor D1
hsa-miR-524-5p	1	0	1	1	1	1	GABRB3	gamma-aminobutyric acid (GABA) A receptor, beta 3
hsa-miR-524-5p	0	0	1	1	1	1	GLRB	glycine receptor, beta
hsa-miR-524-5p	1	0	1	1	1	1	IGF1R	insulin-like growth factor 1 receptor
hsa-miR-524-5p	0	0	1	1	1	1	IL1R1	interleukin 1 receptor, type I
hsa-miR-524-5p	1	0	1	0	1	1	KCNJ2	potassium inwardly-rectifying channel, subfamily J, member 2
hsa-miR-524-5p	0	0	1	1	1	1	MAOB	monoamine oxidase B
hsa-miR-524-5p	0	0	1	1	0	0	NPY	neuropeptide Y
hsa-miR-524-5p	1	0	1	1	1	1	PPP3R1	protein phosphatase 3, regulatory subunit B, alpha
hsa-miR-524-5p	1	0	1	1	1	1	PTGER2	prostaglandin E receptor 2 (subtype EP2), 53kDa
hsa-miR-524-5p	1	0	1	1	1	1	PTGFR	prostaglandin F receptor (FP)
hsa-miR-524-5p	0	0	1	1	1	1	PTGS2	prostaglandin-endoperoxide synthase 2 (prostaglandin G/H synthase and cyclooxygenase)
hsa-miR-524-5p	1	0	1	1	1	1	RARB	retinoic acid receptor, beta
hsa-miR-524-5p	0	0	1	1	1	1	TBC1D3C	TBC1 domain family, member 3C
hsa-miR-524-5p	1	0	1	0	1	1	SMAD5	SMAD family member 5
hsa-miR-524-5p	1	0	1	0	1	1	UBE2W	ubiquitin-conjugating enzyme E2W (putative)
hsa-miR-524-5p	0	0	1	0	1	1	ZDHHC13	zinc finger, DHHC-type containing 13
hsa-miR-524-5p	1	0	1	1	1	1	MTUS1	microtubule associated tumor suppressor 1
hsa-miR-524-5p	1	0	1	1	1	1	FAM13C	family with sequence similarity 13, member C
hsa-miR-524-5p	0	0	1	1	0	0	PAMR1	peptidase domain containing associated with muscle regeneration 1
hsa-miR-524-5p	1	0	1	0	1	1	CLDN18	claudin 18
hsa-miR-524-5p	1	0	1	0	1	1	SMAD2	SMAD family member 2
hsa-miR-524-5p	1	0	1	1	1	1	LEPR	leptin receptor
hsa-miR-524-5p	0	0	1	1	1	1	SP5	Sp5 transcription factor
hsa-miR-524-5p	0	0	1	1	0	0	TXNDC8	thioredoxin domain containing 8 (spermatozoa)
hsa-miR-524-5p	0	0	1	1	1	1	TSPYL6	TSPY-like 6
hsa-miR-524-5p	0	0	1	1	1	1	CCDC144NL	coiled-coil domain containing 144 family, N-terminal like
hsa-miR-524-5p	1	0	1	0	1	1	LIN28B	lin-28 homolog B (C. elegans)
hsa-miR-524-5p	0	0	1	0	1	1	FLJ46347	uncharacterized LOC389064
hsa-miR-524-5p	1	0	1	1	1	1	EBF3	early B-cell factor 3
hsa-miR-524-5p	1	0	1	1	1	1	PLCXD3	phosphatidylinositol-specific phospholipase C, X domain containing 3
hsa-miR-524-5p	0	0	1	1	1	1	SUMO1	SMT3 suppressor of mif two 3 homolog 1 (S. cerevisiae)
hsa-miR-524-5p	0	0	1	1	1	1	RYK	receptor-like tyrosine kinase
hsa-miR-524-5p	0	0	1	1	0	0	RPS4X	ribosomal protein S4, X-linked
hsa-miR-524-5p	1	0	1	0	1	1	GOSR1	golgi SNAP receptor complex member 1
hsa-miR-524-5p	1	0	1	1	1	1	L3MBTL3	l(3)mbt-like 3 (Drosophila)
hsa-miR-524-5p	0	0	1	1	1	1	IGIP	IgA-inducing protein homolog (Bos taurus)
hsa-miR-524-5p	1	0	1	1	1	1	IGSF3	immunoglobulin superfamily, member 3
hsa-miR-524-5p	1	0	1	1	1	1	BRWD1	bromodomain and WD repeat domain containing 1
hsa-miR-524-5p	0	0	1	1	0	0	F8A3	coagulation factor VIII-associated 3
hsa-miR-524-5p	1	0	1	1	1	1	LMBRD2	LMBR1 domain containing 2
hsa-miR-524-5p	1	0	1	0	1	1	SS18	synovial sarcoma translocation, chromosome 18
hsa-miR-524-5p	1	0	1	0	1	1	CPLX2	complexin 2
hsa-miR-524-5p	1	0	1	1	1	1	ZDHHC9	zinc finger, DHHC-type containing 9
hsa-miR-524-5p	0	0	1	1	1	1	FAM154B	family with sequence similarity 154, member B
hsa-miR-524-5p	1	0	1	0	1	1	C18orf25	chromosome 18 open reading frame 25
hsa-miR-524-5p	1	0	1	1	1	1	UMOD	uromodulin
hsa-miR-524-5p	0	0	1	1	1	1	CCDC73	coiled-coil domain containing 73
hsa-miR-524-5p	1	0	1	0	1	1	KIAA2022	KIAA2022
hsa-miR-524-5p	0	0	1	1	1	1	MXI1	MAX interactor 1
hsa-miR-524-5p	1	0	1	1	1	1	FNIP1	folliculin interacting protein 1
hsa-miR-524-5p	1	0	1	1	1	1	ZNF655	zinc finger protein 655
hsa-miR-524-5p	1	0	1	0	1	1	ERMN	ermin, ERM-like protein
hsa-miR-524-5p	1	0	1	1	1	1	ARHGAP28	Rho GTPase activating protein 28
hsa-miR-524-5p	1	0	1	1	1	1	SHE	Src homology 2 domain containing E
hsa-miR-524-5p	0	0	1	0	1	1	LPPR5	lipid phosphate phosphatase-related protein type 5
hsa-miR-524-5p	1	0	1	0	1	1	ZC3H12B	zinc finger CCCH-type containing 12B
hsa-miR-524-5p	1	0	1	0	1	1	C6orf222	chromosome 6 open reading frame 222
hsa-miR-524-5p	1	0	1	1	1	1	FAM171A1	family with sequence similarity 171, member A1
hsa-miR-524-5p	0	0	1	1	0	0	HES5	hairy and enhancer of split 5 (Drosophila)
hsa-miR-524-5p	0	0	1	1	1	1	SAMD13	sterile alpha motif domain containing 13
hsa-miR-524-5p	0	0	1	1	1	1	NCMAP	noncompact myelin associated protein
hsa-miR-524-5p	1	0	1	1	1	1	ATP11C	ATPase, class VI, type 11C
hsa-miR-524-5p	0	0	1	1	1	1	ZMAT1	zinc finger, matrin-type 1
hsa-miR-524-5p	1	0	1	1	1	1	PCGF6	polycomb group ring finger 6
hsa-miR-524-5p	1	0	1	0	1	1	CREB5	cAMP responsive element binding protein 5
hsa-miR-524-5p	1	0	1	1	1	1	CTNNBIP1	catenin, beta interacting protein 1
hsa-miR-524-5p	0	0	1	0	1	1	GOLGA8E	golgin A8 family, member E
hsa-miR-524-5p	0	0	1	1	0	0	RGR	retinal G protein coupled receptor
hsa-miR-524-5p	1	0	1	1	1	1	SLC25A53	solute carrier family 25, member 53
hsa-miR-524-5p	0	0	1	1	1	1	C9orf152	chromosome 9 open reading frame 152
hsa-miR-524-5p	1	0	1	1	1	1	H3F3C	H3 histone, family 3C
hsa-miR-524-5p	0	0	1	0	1	1	LINC00268	long intergenic non-protein coding RNA 268
hsa-miR-524-5p	1	0	1	0	1	1	SYT14L	synaptotagmin XIV-like
hsa-miR-524-5p	1	0	1	1	1	1	KCNMA1	potassium large conductance calcium-activated channel, subfamily M, alpha member 1
hsa-miR-524-5p	1	0	1	1	1	1	RUNX2	runt-related transcription factor 2
hsa-miR-524-5p	1	0	1	1	1	1	PHF6	PHD finger protein 6
hsa-miR-524-5p	1	0	1	1	1	1	ZNF2	zinc finger protein 2
hsa-miR-524-5p	0	0	1	1	1	1	USP1	ubiquitin specific peptidase 1
hsa-miR-524-5p	0	0	1	1	0	0	ALDH18A1	aldehyde dehydrogenase 18 family, member A1
hsa-miR-524-5p	1	0	1	1	1	1	ZHX1	zinc fingers and homeoboxes 1
hsa-miR-524-5p	0	0	1	1	1	1	RAB28	RAB28, member RAS oncogene family
hsa-miR-524-5p	0	0	1	1	1	1	ACTBL2	actin, beta-like 2
hsa-miR-524-5p	0	0	1	1	1	1	VPS13A	vacuolar protein sorting 13 homolog A (S. cerevisiae)
hsa-miR-524-5p	1	0	1	1	1	1	PFKFB2	6-phosphofructo-2-kinase/fructose-2,6-biphosphatase 2
hsa-miR-524-5p	1	0	1	0	1	1	TFEC	transcription factor EC
hsa-miR-524-5p	1	0	1	1	1	1	SERF2	small EDRK-rich factor 2
hsa-miR-524-5p	1	0	1	0	1	1	GCH1	GTP cyclohydrolase 1
hsa-miR-524-5p	1	0	1	1	1	1	CANX	calnexin
hsa-miR-524-5p	1	0	1	0	1	1	TNRC6B	trinucleotide repeat containing 6B
hsa-miR-524-5p	1	0	1	1	1	1	FNBP1L	formin binding protein 1-like
hsa-miR-524-5p	1	0	1	0	1	1	CLLU1	chronic lymphocytic leukemia up-regulated 1
hsa-miR-524-5p	1	0	1	0	1	1	RAB12	RAB12, member RAS oncogene family
hsa-miR-524-5p	1	0	1	1	1	1	RGS7BP	regulator of G-protein signaling 7 binding protein
hsa-miR-524-5p	0	0	1	1	1	1	CIB4	calcium and integrin binding family member 4
hsa-miR-524-5p	0	0	1	1	0	0	GRB7	growth factor receptor-bound protein 7
hsa-miR-524-5p	1	0	1	0	1	1	MSRB3	methionine sulfoxide reductase B3
hsa-miR-524-5p	1	0	1	1	1	1	YTHDC1	YTH domain containing 1
hsa-miR-524-5p	0	0	1	1	1	1	CALML4	calmodulin-like 4
hsa-miR-524-5p	0	0	1	1	1	1	VSTM4	V-set and transmembrane domain containing 4
hsa-miR-524-5p	1	0	1	1	1	1	CSNK1G3	casein kinase 1, gamma 3
hsa-miR-524-5p	1	0	1	1	1	1	RCE1	RCE1 homolog, prenyl protein protease (S. cerevisiae)
hsa-miR-524-5p	1	0	1	1	1	1	STK24	serine/threonine kinase 24
hsa-miR-524-5p	1	0	1	0	1	1	MINOS1	mitochondrial inner membrane organizing system 1
hsa-miR-524-5p	1	0	1	0	1	1	GPR126	G protein-coupled receptor 126
hsa-miR-524-5p	1	0	1	1	1	1	PPM1B	protein phosphatase, Mg2+/Mn2+ dependent, 1B
hsa-miR-524-5p	0	0	1	1	1	1	DYX1C1	dyslexia susceptibility 1 candidate 1
hsa-miR-524-5p	1	0	1	1	1	1	SMOC1	SPARC related modular calcium binding 1
hsa-miR-524-5p	1	0	1	0	1	1	RYR2	ryanodine receptor 2 (cardiac)
hsa-miR-524-5p	1	0	1	1	1	1	ACPL2	acid phosphatase-like 2
hsa-miR-524-5p	1	0	1	1	1	1	USP14	ubiquitin specific peptidase 14 (tRNA-guanine transglycosylase)
hsa-miR-524-5p	1	0	1	1	1	1	SCD5	stearoyl-CoA desaturase 5
hsa-miR-524-5p	1	0	1	1	1	1	NPM1	nucleophosmin (nucleolar phosphoprotein B23, numatrin)
hsa-miR-524-5p	1	0	1	1	1	1	DLX1	distal-less homeobox 1
hsa-miR-524-5p	1	0	1	0	1	1	CDC42SE1	CDC42 small effector 1
hsa-miR-524-5p	0	0	1	1	1	1	PRPS2	phosphoribosyl pyrophosphate synthetase 2
hsa-miR-524-5p	0	0	1	0	1	1	RGS21	regulator of G-protein signaling 21
hsa-miR-524-5p	0	0	1	1	1	1	ATAD3C	ATPase family, AAA domain containing 3C
hsa-miR-524-5p	0	0	1	1	1	1	EFEMP1	EGF containing fibulin-like extracellular matrix protein 1
hsa-miR-524-5p	1	0	1	1	1	1	ELMO1	engulfment and cell motility 1
hsa-miR-524-5p	1	0	1	0	1	1	GK5	glycerol kinase 5 (putative)
hsa-miR-524-5p	1	0	1	0	1	1	USP9X	ubiquitin specific peptidase 9, X-linked
hsa-miR-524-5p	1	0	1	0	1	1	CREBZF	CREB/ATF bZIP transcription factor
hsa-miR-524-5p	1	0	1	1	1	1	CBLN3	cerebellin 3 precursor
hsa-miR-524-5p	1	0	1	1	1	1	CDC42	cell division cycle 42 (GTP binding protein, 25kDa)
hsa-miR-524-5p	0	0	1	1	1	1	MDH1B	malate dehydrogenase 1B, NAD (soluble)
hsa-miR-524-5p	1	0	1	1	1	1	CHN2	chimerin (chimaerin) 2
hsa-miR-524-5p	1	0	1	1	1	1	MLLT4	myeloid/lymphoid or mixed-lineage leukemia (trithorax homolog, Drosophila); translocated to, 4
hsa-miR-524-5p	0	0	1	1	0	0	MEOX1	mesenchyme homeobox 1
hsa-miR-524-5p	1	0	1	1	1	1	TCERG1	transcription elongation regulator 1
hsa-miR-524-5p	1	0	1	1	1	1	FAM3C	family with sequence similarity 3, member C
hsa-miR-524-5p	1	0	1	0	1	1	FAM133B	family with sequence similarity 133, member B
hsa-miR-524-5p	1	0	1	1	1	1	SPTSSB	serine palmitoyltransferase, small subunit B
hsa-miR-524-5p	0	0	1	0	1	1	OPALIN	oligodendrocytic myelin paranodal and inner loop protein
hsa-miR-524-5p	0	0	1	1	1	1	MLH3	mutL homolog 3 (E. coli)
hsa-miR-524-5p	1	0	1	1	1	1	SCN2A	sodium channel, voltage-gated, type II, alpha subunit
hsa-miR-524-5p	0	0	1	1	1	1	SPOCK3	sparc/osteonectin, cwcv and kazal-like domains proteoglycan (testican) 3
hsa-miR-524-5p	0	0	1	1	1	1	MTHFD2	methylenetetrahydrofolate dehydrogenase (NADP+ dependent) 2, methenyltetrahydrofolate cyclohydrolase
hsa-miR-524-5p	0	0	1	1	0	0	SPINK9	serine peptidase inhibitor, Kazal type 9
hsa-miR-524-5p	1	0	1	1	1	1	MTMR12	myotubularin related protein 12
hsa-miR-524-5p	1	0	1	1	1	1	FAM63B	family with sequence similarity 63, member B
hsa-miR-524-5p	1	0	1	1	1	1	HEY1	hairy/enhancer-of-split related with YRPW motif 1
hsa-miR-524-5p	1	0	1	1	1	1	GDAP1	ganglioside induced differentiation associated protein 1
hsa-miR-524-5p	1	0	1	1	1	1	CYLD	cylindromatosis (turban tumor syndrome)
hsa-miR-524-5p	1	0	1	1	1	1	GLIS3	GLIS family zinc finger 3
hsa-miR-524-5p	0	0	1	1	1	1	PSPC1	paraspeckle component 1
hsa-miR-524-5p	1	0	1	1	1	1	ST3GAL5	ST3 beta-galactoside alpha-2,3-sialyltransferase 5
hsa-miR-524-5p	0	0	1	1	1	1	MST4	serine/threonine protein kinase MST4
hsa-miR-524-5p	0	0	1	1	1	1	GEMIN8	gem (nuclear organelle) associated protein 8
hsa-miR-524-5p	1	0	1	1	1	1	C2orf88	chromosome 2 open reading frame 88
hsa-miR-524-5p	1	0	1	1	1	1	SLC9A6	solute carrier family 9, subfamily A (NHE6, cation proton antiporter 6), member 6
hsa-miR-524-5p	1	0	1	1	1	1	FRS2	fibroblast growth factor receptor substrate 2
hsa-miR-524-5p	0	0	1	1	1	1	TTC14	tetratricopeptide repeat domain 14
hsa-miR-524-5p	1	0	1	1	1	1	KDM5A	lysine (K)-specific demethylase 5A
hsa-miR-524-5p	0	0	1	1	1	1	TRAK1	trafficking protein, kinesin binding 1
hsa-miR-524-5p	0	0	1	1	1	1	SEC24B	SEC24 family, member B (S. cerevisiae)
hsa-miR-524-5p	1	0	1	0	1	1	SRGAP2	SLIT-ROBO Rho GTPase activating protein 2
hsa-miR-524-5p	1	0	1	0	1	1	TMEM237	transmembrane protein 237
hsa-miR-524-5p	0	0	1	1	1	1	FAM22G	family with sequence similarity 22, member G
hsa-miR-524-5p	1	0	1	0	1	1	SLC12A2	solute carrier family 12 (sodium/potassium/chloride transporters), member 2
hsa-miR-524-5p	0	0	1	0	1	1	TOP2A	topoisomerase (DNA) II alpha 170kDa
hsa-miR-524-5p	1	0	1	1	1	1	MZT1	mitotic spindle organizing protein 1
hsa-miR-524-5p	1	0	1	1	1	1	QSER1	glutamine and serine rich 1
hsa-miR-524-5p	1	0	1	1	1	1	METTL9	methyltransferase like 9
hsa-miR-524-5p	1	0	1	1	1	1	ZNF436	zinc finger protein 436
hsa-miR-524-5p	1	0	1	1	1	1	PDE11A	phosphodiesterase 11A
hsa-miR-524-5p	1	0	1	1	1	1	PHF16	PHD finger protein 16
hsa-miR-524-5p	1	0	1	1	1	1	PRR3	proline rich 3
hsa-miR-524-5p	0	0	1	1	0	0	VPS37D	vacuolar protein sorting 37 homolog D (S. cerevisiae)
hsa-miR-524-5p	0	0	1	1	1	1	VCAM1	vascular cell adhesion molecule 1
hsa-miR-524-5p	0	0	1	1	0	0	FAM127A	family with sequence similarity 127, member A
hsa-miR-524-5p	1	0	1	0	0	0	FAM127B	family with sequence similarity 127, member B
hsa-miR-524-5p	1	0	1	0	1	1	FAM127C	family with sequence similarity 127, member C
hsa-miR-524-5p	1	0	1	0	1	1	TRAPPC6B	trafficking protein particle complex 6B
hsa-miR-524-5p	1	0	1	1	1	1	TMTC4	transmembrane and tetratricopeptide repeat containing 4
hsa-miR-524-5p	1	0	1	1	1	1	CASZ1	castor zinc finger 1
hsa-miR-524-5p	1	0	1	1	1	1	CREBBP	CREB binding protein
hsa-miR-524-5p	1	0	1	1	1	1	VAV3	vav 3 guanine nucleotide exchange factor
hsa-miR-524-5p	1	0	1	1	1	1	DMP1	dentin matrix acidic phosphoprotein 1
hsa-miR-524-5p	1	0	1	1	1	1	LDB3	LIM domain binding 3
hsa-miR-524-5p	1	0	1	1	1	1	SHANK3	SH3 and multiple ankyrin repeat domains 3
hsa-miR-524-5p	1	0	1	0	1	1	THSD7B	thrombospondin, type I, domain containing 7B
hsa-miR-524-5p	1	0	1	0	1	1	ODZ3	odz, odd Oz/ten-m homolog 3 (Drosophila)
hsa-miR-524-5p	1	0	1	0	1	1	MEGF9	multiple EGF-like-domains 9
hsa-miR-524-5p	0	0	1	1	0	0	OVOS2	ovostatin 2
hsa-miR-524-5p	0	0	1	0	1	1	ISCA1P1	iron-sulfur cluster assembly 1 homolog (S. cerevisiae) pseudogene 1
hsa-miR-524-5p	0	0	1	1	0	0	MEIG1	meiosis expressed gene 1 homolog (mouse)
hsa-miR-524-5p	0	0	1	1	1	1	G6PC2	glucose-6-phosphatase, catalytic, 2
hsa-miR-524-5p	1	0	1	0	1	1	PDE5A	phosphodiesterase 5A, cGMP-specific
hsa-miR-524-5p	1	0	1	1	1	1	ADAM10	ADAM metallopeptidase domain 10
hsa-miR-524-5p	1	0	1	1	1	1	ADCYAP1	adenylate cyclase activating polypeptide 1 (pituitary)
hsa-miR-524-5p	1	0	1	0	1	1	XIAP	X-linked inhibitor of apoptosis
hsa-miR-524-5p	1	0	1	1	1	1	PRDM1	PR domain containing 1, with ZNF domain
hsa-miR-524-5p	1	0	1	0	1	1	BMPR2	bone morphogenetic protein receptor, type II (serine/threonine kinase)
hsa-miR-524-5p	1	0	1	0	1	1	KLF9	Kruppel-like factor 9
hsa-miR-524-5p	0	0	1	0	1	1	CAV2	caveolin 2
hsa-miR-524-5p	0	0	1	1	0	0	CDC6	cell division cycle 6 homolog (S. cerevisiae)
hsa-miR-524-5p	1	0	1	0	1	1	CDK6	cyclin-dependent kinase 6
hsa-miR-524-5p	1	0	1	1	1	1	CHD2	chromodomain helicase DNA binding protein 2
hsa-miR-524-5p	0	0	1	1	1	1	CHUK	conserved helix-loop-helix ubiquitous kinase
hsa-miR-524-5p	0	0	1	1	1	1	CLIC2	chloride intracellular channel 2
hsa-miR-524-5p	1	0	1	0	1	1	CPD	carboxypeptidase D
hsa-miR-524-5p	1	0	1	1	1	1	CTNND2	catenin (cadherin-associated protein), delta 2
hsa-miR-524-5p	0	0	1	0	1	1	DOCK1	dedicator of cytokinesis 1
hsa-miR-524-5p	1	0	1	1	1	1	DYRK1A	dual-specificity tyrosine-(Y)-phosphorylation regulated kinase 1A
hsa-miR-524-5p	1	0	1	1	1	1	S1PR1	sphingosine-1-phosphate receptor 1
hsa-miR-524-5p	1	0	1	1	1	1	CELSR3	cadherin, EGF LAG seven-pass G-type receptor 3 (flamingo homolog, Drosophila)
hsa-miR-524-5p	1	0	1	1	1	1	EIF1AX	eukaryotic translation initiation factor 1A, X-linked
hsa-miR-524-5p	1	0	1	1	1	1	ELAVL1	ELAV (embryonic lethal, abnormal vision, Drosophila)-like 1 (Hu antigen R)
hsa-miR-524-5p	1	0	1	0	1	1	ELAVL3	ELAV (embryonic lethal, abnormal vision, Drosophila)-like 3 (Hu antigen C)
hsa-miR-524-5p	1	0	1	1	1	1	EN1	engrailed homeobox 1
hsa-miR-524-5p	1	0	1	1	1	1	EP300	E1A binding protein p300
hsa-miR-524-5p	1	0	1	1	1	1	GPC4	glypican 4
hsa-miR-524-5p	1	0	1	1	1	1	FOXC1	forkhead box C1
hsa-miR-524-5p	0	0	1	1	1	1	FRZB	frizzled-related protein
hsa-miR-524-5p	1	0	1	0	1	1	B4GALT1	UDP-Gal:betaGlcNAc beta 1,4- galactosyltransferase, polypeptide 1
hsa-miR-524-5p	1	0	1	1	1	1	GTF2B	general transcription factor IIB
hsa-miR-524-5p	1	0	1	1	1	1	NDST1	N-deacetylase/N-sulfotransferase (heparan glucosaminyl) 1
hsa-miR-524-5p	1	0	1	1	1	1	ID4	inhibitor of DNA binding 4, dominant negative helix-loop-helix protein
hsa-miR-524-5p	0	0	1	1	1	1	IL13RA1	interleukin 13 receptor, alpha 1
hsa-miR-524-5p	1	0	1	1	1	1	IRAK2	interleukin-1 receptor-associated kinase 2
hsa-miR-524-5p	1	0	1	0	1	1	MPPED2	metallophosphoesterase domain containing 2
hsa-miR-524-5p	1	0	1	1	1	1	ADRBK1	adrenergic, beta, receptor kinase 1
hsa-miR-524-5p	1	0	1	1	1	1	AHNAK	AHNAK nucleoprotein
hsa-miR-524-5p	1	0	1	0	1	1	ARNT	aryl hydrocarbon receptor nuclear translocator
hsa-miR-524-5p	0	0	1	1	1	1	AXL	AXL receptor tyrosine kinase
hsa-miR-524-5p	1	0	1	1	1	1	BCL6	B-cell CLL/lymphoma 6
hsa-miR-524-5p	0	0	1	1	1	1	BTN1A1	butyrophilin, subfamily 1, member A1
hsa-miR-524-5p	1	0	1	1	1	1	CBFB	core-binding factor, beta subunit
hsa-miR-524-5p	1	0	1	0	1	1	CCND2	cyclin D2
hsa-miR-524-5p	0	0	1	1	0	0	CD19	CD19 molecule
hsa-miR-524-5p	1	0	1	1	1	1	CDH2	cadherin 2, type 1, N-cadherin (neuronal)
hsa-miR-524-5p	0	0	1	1	1	1	CDO1	cysteine dioxygenase, type I
hsa-miR-524-5p	1	0	1	1	1	1	CLCN4	chloride channel, voltage-sensitive 4
hsa-miR-524-5p	1	0	1	1	1	1	COL15A1	collagen, type XV, alpha 1
hsa-miR-524-5p	1	0	1	1	1	1	SLC31A1	solute carrier family 31 (copper transporters), member 1
hsa-miR-524-5p	0	0	1	1	1	1	CSN2	casein beta
hsa-miR-524-5p	0	0	1	1	1	1	GADD45A	growth arrest and DNA-damage-inducible, alpha
hsa-miR-524-5p	1	0	1	1	1	1	HBEGF	heparin-binding EGF-like growth factor
hsa-miR-524-5p	1	0	1	1	1	1	DUSP6	dual specificity phosphatase 6
hsa-miR-524-5p	1	0	1	1	1	1	E2F3	E2F transcription factor 3
hsa-miR-524-5p	1	0	1	1	1	1	EGR1	early growth response 1
hsa-miR-524-5p	1	0	1	1	1	1	EIF4E	eukaryotic translation initiation factor 4E
hsa-miR-524-5p	1	0	1	1	1	1	ENPEP	glutamyl aminopeptidase (aminopeptidase A)
hsa-miR-524-5p	1	0	1	0	1	1	ETV6	ets variant 6
hsa-miR-524-5p	1	0	1	1	1	1	FGF7	fibroblast growth factor 7
hsa-miR-524-5p	1	0	1	0	1	1	FOXO1	forkhead box O1
hsa-miR-524-5p	0	0	1	1	1	1	FLI1	Friend leukemia virus integration 1
hsa-miR-524-5p	1	0	1	0	1	1	FUT4	fucosyltransferase 4 (alpha (1,3) fucosyltransferase, myeloid-specific)
hsa-miR-524-5p	0	0	1	1	1	1	FYN	FYN oncogene related to SRC, FGR, YES
hsa-miR-524-5p	1	0	1	1	1	1	GAS1	growth arrest-specific 1
hsa-miR-524-5p	1	0	1	0	1	1	GNAI1	guanine nucleotide binding protein (G protein), alpha inhibiting activity polypeptide 1
hsa-miR-524-5p	1	0	1	1	1	1	GNAL	guanine nucleotide binding protein (G protein), alpha activating activity polypeptide, olfactory type
hsa-miR-524-5p	0	0	1	1	1	1	GNB1	guanine nucleotide binding protein (G protein), beta polypeptide 1
hsa-miR-524-5p	1	0	1	1	1	1	GOLGA1	golgin A1
hsa-miR-524-5p	1	0	1	1	1	1	CXCL2	chemokine (C-X-C motif) ligand 2
hsa-miR-524-5p	1	0	1	1	1	1	HNRNPA2B1	heterogeneous nuclear ribonucleoprotein A2/B1
hsa-miR-524-5p	1	0	1	1	1	1	HOXB3	homeobox B3
hsa-miR-524-5p	0	0	1	1	1	1	FOXN2	forkhead box N2
hsa-miR-524-5p	1	0	1	1	1	1	ID1	inhibitor of DNA binding 1, dominant negative helix-loop-helix protein
hsa-miR-524-5p	1	0	1	1	0	0	IHH	Indian hedgehog
hsa-miR-524-5p	0	0	1	1	1	1	IL12B	interleukin 12B (natural killer cell stimulatory factor 2, cytotoxic lymphocyte maturation factor 2, p40)
hsa-miR-524-5p	1	0	1	1	1	1	ITGA9	integrin, alpha 9
hsa-miR-524-5p	0	0	1	0	1	1	ITGAV	integrin, alpha V
hsa-miR-524-5p	1	0	1	1	1	1	ITGB8	integrin, beta 8
hsa-miR-524-5p	1	0	1	1	1	1	ITPKB	inositol-trisphosphate 3-kinase B
hsa-miR-524-5p	1	0	1	1	1	1	JAG2	jagged 2
hsa-miR-524-5p	1	0	1	1	1	1	JUN	jun proto-oncogene
hsa-miR-524-5p	1	0	1	1	1	1	KCNA5	potassium voltage-gated channel, shaker-related subfamily, member 5
hsa-miR-524-5p	0	0	1	1	1	1	KCNJ6	potassium inwardly-rectifying channel, subfamily J, member 6
hsa-miR-524-5p	0	0	1	1	1	1	KCNK1	potassium channel, subfamily K, member 1
hsa-miR-524-5p	1	0	1	1	1	1	KDR	kinase insert domain receptor (a type III receptor tyrosine kinase)
hsa-miR-524-5p	0	0	1	1	1	1	KLRC1	killer cell lectin-like receptor subfamily C, member 1
hsa-miR-524-5p	0	0	1	1	1	1	KLRC2	killer cell lectin-like receptor subfamily C, member 2
hsa-miR-524-5p	1	0	1	1	1	1	KPNA3	karyopherin alpha 3 (importin alpha 4)
hsa-miR-524-5p	1	0	1	1	1	1	KPNA4	karyopherin alpha 4 (importin alpha 3)
hsa-miR-524-5p	1	0	1	0	1	1	LAMC1	laminin, gamma 1 (formerly LAMB2)
hsa-miR-524-5p	0	0	1	0	0	0	LRP5	low density lipoprotein receptor-related protein 5
hsa-miR-524-5p	0	0	1	1	1	1	LUM	lumican
hsa-miR-524-5p	0	0	1	1	1	1	TACSTD2	tumor-associated calcium signal transducer 2
hsa-miR-524-5p	1	0	1	0	1	1	MXD1	MAX dimerization protein 1
hsa-miR-524-5p	1	0	1	1	1	1	MAFG	v-maf musculoaponeurotic fibrosarcoma oncogene homolog G (avian)
hsa-miR-524-5p	0	0	1	1	1	1	MSH3	mutS homolog 3 (E. coli)
hsa-miR-524-5p	1	0	1	1	1	1	MSN	moesin
hsa-miR-524-5p	0	0	1	1	0	0	MYOG	myogenin (myogenic factor 4)
hsa-miR-524-5p	0	0	1	1	1	1	NOV	nephroblastoma overexpressed
hsa-miR-524-5p	1	0	1	1	1	1	NPAS2	neuronal PAS domain protein 2
hsa-miR-524-5p	1	0	1	1	1	1	NPTX1	neuronal pentraxin I
hsa-miR-524-5p	0	0	1	1	0	0	NTSR1	neurotensin receptor 1 (high affinity)
hsa-miR-524-5p	0	0	1	0	1	1	OPHN1	oligophrenin 1
hsa-miR-524-5p	1	0	1	1	1	1	FURIN	furin (paired basic amino acid cleaving enzyme)
hsa-miR-524-5p	1	0	1	0	1	1	PAK2	p21 protein (Cdc42/Rac)-activated kinase 2
hsa-miR-524-5p	1	0	1	0	1	1	PAPPA	pregnancy-associated plasma protein A, pappalysin 1
hsa-miR-524-5p	1	0	1	0	1	1	CDK17	cyclin-dependent kinase 17
hsa-miR-524-5p	0	0	1	1	1	1	PIK3C2B	phosphatidylinositol-4-phosphate 3-kinase, catalytic subunit type 2 beta
hsa-miR-524-5p	1	0	1	1	1	1	PLAGL2	pleiomorphic adenoma gene-like 2
hsa-miR-524-5p	0	0	1	0	1	1	PLN	phospholamban
hsa-miR-524-5p	1	0	1	0	1	1	POU3F1	POU class 3 homeobox 1
hsa-miR-524-5p	1	0	1	1	1	1	PPP1CB	protein phosphatase 1, catalytic subunit, beta isozyme
hsa-miR-524-5p	0	0	1	1	0	0	PPP1R8	protein phosphatase 1, regulatory subunit 8
hsa-miR-524-5p	1	0	1	1	1	1	PPP2R1B	protein phosphatase 2, regulatory subunit A, beta
hsa-miR-524-5p	1	0	1	1	1	1	PPP6C	protein phosphatase 6, catalytic subunit
hsa-miR-524-5p	1	0	1	1	1	1	PRKAR2B	protein kinase, cAMP-dependent, regulatory, type II, beta
hsa-miR-524-5p	1	0	1	0	1	1	PRKCA	protein kinase C, alpha
hsa-miR-524-5p	1	0	1	1	1	1	MAPK6	mitogen-activated protein kinase 6
hsa-miR-524-5p	0	0	1	1	1	1	MAP2K1	mitogen-activated protein kinase kinase 1
hsa-miR-524-5p	1	0	1	1	1	1	PRPS1	phosphoribosyl pyrophosphate synthetase 1
hsa-miR-524-5p	1	0	1	1	1	1	PTPRS	protein tyrosine phosphatase, receptor type, S
hsa-miR-524-5p	1	0	1	1	1	1	RAD23B	RAD23 homolog B (S. cerevisiae)
hsa-miR-524-5p	1	0	1	1	1	1	RBL1	retinoblastoma-like 1 (p107)
hsa-miR-524-5p	1	0	1	0	1	1	SORT1	sortilin 1
hsa-miR-524-5p	1	0	1	1	1	1	SALL1	sal-like 1 (Drosophila)
hsa-miR-524-5p	0	0	1	0	1	1	CXCL5	chemokine (C-X-C motif) ligand 5
hsa-miR-524-5p	0	0	1	1	1	1	XCL1	chemokine (C motif) ligand 1
hsa-miR-524-5p	0	0	1	1	1	1	SDC2	syndecan 2
hsa-miR-524-5p	1	0	1	1	1	1	SFRP4	secreted frizzled-related protein 4
hsa-miR-524-5p	1	0	1	1	1	1	SHB	Src homology 2 domain containing adaptor protein B
hsa-miR-524-5p	1	0	1	1	1	1	SNAI2	snail homolog 2 (Drosophila)
hsa-miR-524-5p	1	0	1	1	1	1	SMARCC1	SWI/SNF related, matrix associated, actin dependent regulator of chromatin, subfamily c, member 1
hsa-miR-524-5p	1	0	1	1	1	1	SMARCD1	SWI/SNF related, matrix associated, actin dependent regulator of chromatin, subfamily d, member 1
hsa-miR-524-5p	0	0	1	1	1	1	SNRPB2	small nuclear ribonucleoprotein polypeptide B
hsa-miR-524-5p	0	0	1	1	0	0	SNRPC	small nuclear ribonucleoprotein polypeptide C
hsa-miR-524-5p	1	0	1	0	1	1	SOX4	SRY (sex determining region Y)-box 4
hsa-miR-524-5p	1	0	1	0	1	1	SOX11	SRY (sex determining region Y)-box 11
hsa-miR-524-5p	0	0	1	1	1	1	SP100	SP100 nuclear antigen
hsa-miR-524-5p	1	0	1	1	1	1	SRF	serum response factor (c-fos serum response element-binding transcription factor)
hsa-miR-524-5p	0	0	1	1	1	1	STAT5A	signal transducer and activator of transcription 5A
hsa-miR-524-5p	0	0	1	1	1	1	STIM1	stromal interaction molecule 1
hsa-miR-524-5p	0	0	1	1	1	1	XCL2	chemokine (C motif) ligand 2
hsa-miR-524-5p	1	0	1	1	1	1	TAF4	TAF4 RNA polymerase II, TATA box binding protein (TBP)-associated factor, 135kDa
hsa-miR-524-5p	1	0	1	0	1	1	TAL1	T-cell acute lymphocytic leukemia 1
hsa-miR-524-5p	0	0	1	0	1	1	TCEB3	transcription elongation factor B (SIII), polypeptide 3 (110kDa, elongin A)
hsa-miR-524-5p	1	0	1	1	1	1	TFAP4	transcription factor AP-4 (activating enhancer binding protein 4)
hsa-miR-524-5p	1	0	1	1	1	1	TGFB3	transforming growth factor, beta 3
hsa-miR-524-5p	1	0	1	0	1	1	THBS1	thrombospondin 1
hsa-miR-524-5p	1	0	1	1	1	1	TIAM1	T-cell lymphoma invasion and metastasis 1
hsa-miR-524-5p	1	0	1	0	1	1	SEC62	SEC62 homolog (S. cerevisiae)
hsa-miR-524-5p	1	0	1	1	1	1	TRAPPC10	trafficking protein particle complex 10
hsa-miR-524-5p	1	0	1	1	1	1	TOP1	topoisomerase (DNA) I
hsa-miR-524-5p	0	0	1	1	1	1	TPR	translocated promoter region, nuclear basket protein
hsa-miR-524-5p	0	0	1	1	1	1	TTK	TTK protein kinase
hsa-miR-524-5p	0	0	1	1	0	0	HIRA	HIR histone cell cycle regulation defective homolog A (S. cerevisiae)
hsa-miR-524-5p	1	0	1	1	1	1	UBE2D3	ubiquitin-conjugating enzyme E2D 3
hsa-miR-524-5p	1	0	1	0	1	1	UBE2L3	ubiquitin-conjugating enzyme E2L 3
hsa-miR-524-5p	1	0	1	1	1	1	UBE2N	ubiquitin-conjugating enzyme E2N
hsa-miR-524-5p	1	0	1	1	1	1	YY1	YY1 transcription factor
hsa-miR-524-5p	0	0	1	0	1	1	ZFY	zinc finger protein, Y-linked
hsa-miR-524-5p	1	0	1	0	1	1	ZIC1	Zic family member 1
hsa-miR-524-5p	1	0	1	1	1	1	ZIC3	Zic family member 3
hsa-miR-524-5p	1	0	1	1	1	1	DEK	DEK oncogene
hsa-miR-524-5p	1	0	1	1	1	1	HMGA2	high mobility group AT-hook 2
hsa-miR-524-5p	0	0	1	1	1	1	PIP5K1A	phosphatidylinositol-4-phosphate 5-kinase, type I, alpha
hsa-miR-524-5p	1	0	1	1	1	1	EEA1	early endosome antigen 1
hsa-miR-524-5p	1	0	1	0	1	1	VAPA	VAMP (vesicle-associated membrane protein)-associated protein A, 33kDa
hsa-miR-524-5p	0	0	1	1	1	1	SOAT2	sterol O-acyltransferase 2
hsa-miR-524-5p	1	0	1	0	1	1	CUL3	cullin 3
hsa-miR-524-5p	0	0	1	1	1	1	PEX3	peroxisomal biogenesis factor 3
hsa-miR-524-5p	0	0	1	1	1	1	ITGA10	integrin, alpha 10
hsa-miR-524-5p	1	0	1	1	0	0	TCAP	titin-cap (telethonin)
hsa-miR-524-5p	1	0	1	1	1	1	TNFSF11	tumor necrosis factor (ligand) superfamily, member 11
hsa-miR-524-5p	0	0	1	1	1	1	SLC25A12	solute carrier family 25 (aspartate/glutamate carrier), member 12
hsa-miR-524-5p	1	0	1	0	1	1	TNKS	tankyrase, TRF1-interacting ankyrin-related ADP-ribose polymerase
hsa-miR-524-5p	1	0	1	0	1	1	IRS2	insulin receptor substrate 2
hsa-miR-524-5p	0	0	1	1	0	0	EIF3F	eukaryotic translation initiation factor 3, subunit F
hsa-miR-524-5p	1	0	1	1	1	1	NR5A2	nuclear receptor subfamily 5, group A, member 2
hsa-miR-524-5p	0	0	1	1	1	1	SUCLA2	succinate-CoA ligase, ADP-forming, beta subunit
hsa-miR-524-5p	0	0	1	1	1	1	TRIM24	tripartite motif containing 24
hsa-miR-524-5p	1	0	1	1	1	1	FGF18	fibroblast growth factor 18
hsa-miR-524-5p	1	0	1	1	1	1	IQGAP1	IQ motif containing GTPase activating protein 1
hsa-miR-524-5p	1	0	1	1	1	1	KAT2B	K(lysine) acetyltransferase 2B
hsa-miR-524-5p	0	0	1	1	1	1	PRPF4B	PRP4 pre-mRNA processing factor 4 homolog B (yeast)
hsa-miR-524-5p	0	0	1	1	1	1	TIMELESS	timeless homolog (Drosophila)
hsa-miR-524-5p	1	0	1	0	1	1	ST13	suppression of tumorigenicity 13 (colon carcinoma) (Hsp70 interacting protein)
hsa-miR-524-5p	1	0	1	1	1	1	KALRN	kalirin, RhoGEF kinase
hsa-miR-524-5p	0	0	1	1	1	1	UBA3	ubiquitin-like modifier activating enzyme 3
hsa-miR-524-5p	1	0	1	1	1	1	BTAF1	BTAF1 RNA polymerase II, B-TFIID transcription factor-associated, 170kDa (Mot1 homolog, S. cerevisiae)
hsa-miR-524-5p	1	0	1	1	1	1	ACOX1	acyl-CoA oxidase 1, palmitoyl
hsa-miR-524-5p	1	0	1	1	1	1	BCL2L2	BCL2-like 2
hsa-miR-524-5p	1	0	1	1	1	1	CTSS	cathepsin S
hsa-miR-524-5p	1	0	1	0	1	1	E2F2	E2F transcription factor 2
hsa-miR-524-5p	1	0	1	1	1	1	FGF12	fibroblast growth factor 12
hsa-miR-524-5p	1	0	1	1	1	1	FGF13	fibroblast growth factor 13
hsa-miR-524-5p	1	0	1	1	1	1	GMFB	glia maturation factor, beta
hsa-miR-524-5p	1	0	1	1	1	1	PPP2CB	protein phosphatase 2, catalytic subunit, beta isozyme
hsa-miR-524-5p	1	0	1	0	1	1	SLC1A2	solute carrier family 1 (glial high affinity glutamate transporter), member 2
hsa-miR-524-5p	0	0	1	0	1	1	SLC1A3	solute carrier family 1 (glial high affinity glutamate transporter), member 3
hsa-miR-524-5p	0	0	1	1	0	0	WNT2B	wingless-type MMTV integration site family, member 2B
hsa-miR-524-5p	1	0	1	1	1	1	SOCS6	suppressor of cytokine signaling 6
hsa-miR-524-5p	0	0	1	1	1	1	SEP15	15 kDa selenoprotein
hsa-miR-524-5p	1	0	1	0	1	1	AKAP6	A kinase (PRKA) anchor protein 6
hsa-miR-524-5p	0	0	1	0	1	1	CYTIP	cytohesin 1 interacting protein
hsa-miR-524-5p	1	0	1	1	1	1	GDA	guanine deaminase
hsa-miR-524-5p	1	0	1	0	1	1	ACVR1B	activin A receptor, type IB
hsa-miR-524-5p	1	0	1	1	1	1	BNIP2	BCL2/adenovirus E1B 19kDa interacting protein 2
hsa-miR-524-5p	0	0	1	1	1	1	CBLN1	cerebellin 1 precursor
hsa-miR-524-5p	1	0	1	1	1	1	DACH1	dachshund homolog 1 (Drosophila)
hsa-miR-524-5p	1	0	1	1	1	1	DBN1	drebrin 1
hsa-miR-524-5p	1	0	1	1	1	1	EGR3	early growth response 3
hsa-miR-524-5p	1	0	1	1	0	0	ERH	enhancer of rudimentary homolog (Drosophila)
hsa-miR-524-5p	1	0	1	0	1	1	ACSL4	acyl-CoA synthetase long-chain family member 4
hsa-miR-524-5p	1	0	1	0	1	1	FGF5	fibroblast growth factor 5
hsa-miR-524-5p	1	0	1	0	1	1	FOXD1	forkhead box D1
hsa-miR-524-5p	1	0	1	0	1	1	ARHGAP35	Rho GTPase activating protein 35
hsa-miR-524-5p	0	0	1	1	1	1	HOXB7	homeobox B7
hsa-miR-524-5p	0	0	1	0	1	1	KCNQ3	potassium voltage-gated channel, KQT-like subfamily, member 3
hsa-miR-524-5p	1	0	1	1	1	1	KIF11	kinesin family member 11
hsa-miR-524-5p	1	0	1	1	0	0	ROR2	receptor tyrosine kinase-like orphan receptor 2
hsa-miR-524-5p	1	0	1	0	1	1	PKNOX1	PBX/knotted 1 homeobox 1
hsa-miR-524-5p	0	0	1	0	1	1	POU4F2	POU class 4 homeobox 2
hsa-miR-524-5p	1	0	1	0	1	1	SCN2B	sodium channel, voltage-gated, type II, beta subunit
hsa-miR-524-5p	1	0	1	1	1	1	WNT11	wingless-type MMTV integration site family, member 11
hsa-miR-524-5p	0	0	1	1	1	1	CDK2AP1	cyclin-dependent kinase 2 associated protein 1
hsa-miR-524-5p	1	0	1	1	1	1	RAB11A	RAB11A, member RAS oncogene family
hsa-miR-524-5p	1	0	1	1	1	1	MTMR4	myotubularin related protein 4
hsa-miR-524-5p	0	0	1	1	1	1	RRP9	ribosomal RNA processing 9, small subunit (SSU) processome component, homolog (yeast)
hsa-miR-524-5p	0	0	1	0	1	1	CXorf1	chromosome X open reading frame 1
hsa-miR-524-5p	1	0	1	1	1	1	MAP3K13	mitogen-activated protein kinase kinase kinase 13
hsa-miR-524-5p	0	0	1	1	1	1	SLC33A1	solute carrier family 33 (acetyl-CoA transporter), member 1
hsa-miR-524-5p	1	0	1	1	1	1	DCLK1	doublecortin-like kinase 1
hsa-miR-524-5p	1	0	1	1	1	1	XPR1	xenotropic and polytropic retrovirus receptor 1
hsa-miR-524-5p	0	0	1	1	1	1	MTA2	metastasis associated 1 family, member 2
hsa-miR-524-5p	1	0	1	1	1	1	RPS6KA5	ribosomal protein S6 kinase, 90kDa, polypeptide 5
hsa-miR-524-5p	1	0	1	1	1	1	NREP	neuronal regeneration related protein homolog (rat)
hsa-miR-524-5p	1	0	1	1	1	1	MED1	mediator complex subunit 1
hsa-miR-524-5p	1	0	1	1	1	1	B4GALT5	UDP-Gal:betaGlcNAc beta 1,4- galactosyltransferase, polypeptide 5
hsa-miR-524-5p	1	0	1	0	1	1	VAMP3	vesicle-associated membrane protein 3 (cellubrevin)
hsa-miR-524-5p	1	0	1	1	1	1	KIF3B	kinesin family member 3B
hsa-miR-524-5p	1	0	1	1	1	1	ZFYVE9	zinc finger, FYVE domain containing 9
hsa-miR-524-5p	0	0	1	1	1	1	TJP2	tight junction protein 2
hsa-miR-524-5p	1	0	1	0	1	1	CDYL	chromodomain protein, Y-like
hsa-miR-524-5p	1	0	1	0	1	1	SPTLC2	serine palmitoyltransferase, long chain base subunit 2
hsa-miR-524-5p	0	0	1	1	1	1	ITM2A	integral membrane protein 2A
hsa-miR-524-5p	1	0	1	1	1	1	VPS4B	vacuolar protein sorting 4 homolog B (S. cerevisiae)
hsa-miR-524-5p	1	0	1	1	1	1	CXCL14	chemokine (C-X-C motif) ligand 14
hsa-miR-524-5p	0	0	1	1	1	1	ATP6V1G1	ATPase, H+ transporting, lysosomal 13kDa, V1 subunit G1
hsa-miR-524-5p	1	0	1	0	1	1	SEC22B	SEC22 vesicle trafficking protein homolog B (S. cerevisiae) (gene/pseudogene)
hsa-miR-524-5p	1	0	1	1	1	1	ZFP36L1	zinc finger protein 36, C3H type-like 1
hsa-miR-524-5p	0	0	1	0	0	0	CDK5	cyclin-dependent kinase 5
hsa-miR-524-5p	1	0	1	1	1	1	GABRE	gamma-aminobutyric acid (GABA) A receptor, epsilon
hsa-miR-524-5p	1	0	1	1	1	1	JARID2	jumonji, AT rich interactive domain 2
hsa-miR-524-5p	1	0	1	1	1	1	KCNJ8	potassium inwardly-rectifying channel, subfamily J, member 8
hsa-miR-524-5p	1	0	1	0	1	1	KIF5A	kinesin family member 5A
hsa-miR-524-5p	1	0	1	0	1	1	KRAS	v-Ki-ras2 Kirsten rat sarcoma viral oncogene homolog
hsa-miR-524-5p	0	0	1	1	1	1	PRCP	prolylcarboxypeptidase (angiotensinase C)
hsa-miR-524-5p	0	0	1	1	1	1	PTH2R	parathyroid hormone 2 receptor
hsa-miR-524-5p	0	0	1	1	0	0	RAPSN	receptor-associated protein of the synapse
hsa-miR-524-5p	1	0	1	0	1	1	SCD	stearoyl-CoA desaturase (delta-9-desaturase)
hsa-miR-524-5p	1	0	1	0	1	1	SEL1L	sel-1 suppressor of lin-12-like (C. elegans)
hsa-miR-524-5p	1	0	1	1	1	1	SFPQ	splicing factor proline/glutamine-rich
hsa-miR-524-5p	1	0	1	1	1	1	TLE1	transducin-like enhancer of split 1 (E(sp1) homolog, Drosophila)
hsa-miR-524-5p	1	0	1	1	1	1	OXSR1	oxidative-stress responsive 1
hsa-miR-524-5p	1	0	1	1	1	1	FGF19	fibroblast growth factor 19
hsa-miR-524-5p	1	0	1	1	1	1	MED13	mediator complex subunit 13
hsa-miR-524-5p	1	0	1	0	1	1	NUP153	nucleoporin 153kDa
hsa-miR-524-5p	1	0	1	1	0	0	BCL3	B-cell CLL/lymphoma 3
hsa-miR-524-5p	1	0	1	1	1	1	BMI1	BMI1 polycomb ring finger oncogene
hsa-miR-524-5p	1	0	1	0	1	1	CALM3	calmodulin 3 (phosphorylase kinase, delta)
hsa-miR-524-5p	1	0	1	0	1	1	CEBPD	CCAAT/enhancer binding protein (C/EBP), delta
hsa-miR-524-5p	1	0	1	1	1	1	FOXN3	forkhead box N3
hsa-miR-524-5p	1	0	1	1	1	1	DCC	deleted in colorectal carcinoma
hsa-miR-524-5p	1	0	1	0	1	1	DLX6	distal-less homeobox 6
hsa-miR-524-5p	0	0	1	0	1	1	EPHA3	EPH receptor A3
hsa-miR-524-5p	0	0	1	0	1	1	FOSL2	FOS-like antigen 2
hsa-miR-524-5p	1	0	1	1	1	1	GABPB1	GA binding protein transcription factor, beta subunit 1
hsa-miR-524-5p	0	0	1	1	0	0	GNL1	guanine nucleotide binding protein-like 1
hsa-miR-524-5p	1	0	1	1	1	1	GPM6A	glycoprotein M6A
hsa-miR-524-5p	0	0	1	1	1	1	PDIA3	protein disulfide isomerase family A, member 3
hsa-miR-524-5p	0	0	1	1	1	1	GRPR	gastrin-releasing peptide receptor
hsa-miR-524-5p	0	0	1	1	1	1	H1F0	H1 histone family, member 0
hsa-miR-524-5p	1	0	1	1	1	1	H3F3B	H3 histone, family 3B (H3.3B)
hsa-miR-524-5p	1	0	1	1	0	0	JUND	jun D proto-oncogene
hsa-miR-524-5p	1	0	1	1	1	1	NEFM	neurofilament, medium polypeptide
hsa-miR-524-5p	0	0	1	1	1	1	NUP98	nucleoporin 98kDa
hsa-miR-524-5p	0	0	1	1	1	1	PPP1R3C	protein phosphatase 1, regulatory subunit 3C
hsa-miR-524-5p	1	0	1	0	1	1	PRKAB2	protein kinase, AMP-activated, beta 2 non-catalytic subunit
hsa-miR-524-5p	1	0	1	0	1	1	PRKCE	protein kinase C, epsilon
hsa-miR-524-5p	1	0	1	1	0	0	SALL2	sal-like 2 (Drosophila)
hsa-miR-524-5p	0	0	1	1	1	1	SEPP1	selenoprotein P, plasma, 1
hsa-miR-524-5p	0	0	1	1	1	1	SKIL	SKI-like oncogene
hsa-miR-524-5p	1	0	1	0	1	1	CCDC6	coiled-coil domain containing 6
hsa-miR-524-5p	0	0	1	1	1	1	FOSL1	FOS-like antigen 1
hsa-miR-524-5p	0	0	1	1	1	1	PAPSS1	3'-phosphoadenosine 5'-phosphosulfate synthase 1
hsa-miR-524-5p	0	0	1	1	1	1	SMC3	structural maintenance of chromosomes 3
hsa-miR-524-5p	1	0	1	1	1	1	GABBR2	gamma-aminobutyric acid (GABA) B receptor, 2
hsa-miR-524-5p	1	0	1	0	0	0	FRAT1	frequently rearranged in advanced T-cell lymphomas
hsa-miR-524-5p	1	0	1	1	1	1	ITGA3	integrin, alpha 3 (antigen CD49C, alpha 3 subunit of VLA-3 receptor)
hsa-miR-524-5p	1	0	1	1	1	1	ABCA1	ATP-binding cassette, sub-family A (ABC1), member 1
hsa-miR-524-5p	1	0	1	1	1	1	MNX1	motor neuron and pancreas homeobox 1
hsa-miR-524-5p	0	0	1	1	1	1	HES1	hairy and enhancer of split 1, (Drosophila)
hsa-miR-524-5p	1	0	1	1	1	1	INSIG1	insulin induced gene 1
hsa-miR-524-5p	1	0	1	1	1	1	NHLH2	nescient helix loop helix 2
hsa-miR-524-5p	0	0	1	1	1	1	CCL8	chemokine (C-C motif) ligand 8
hsa-miR-524-5p	1	0	1	1	1	1	ARPC5	actin related protein 2/3 complex, subunit 5, 16kDa
hsa-miR-524-5p	1	0	1	1	1	1	LHFP	lipoma HMGIC fusion partner
hsa-miR-524-5p	0	0	1	1	1	1	TXNDC9	thioredoxin domain containing 9
hsa-miR-524-5p	0	0	1	1	1	1	KLRG1	killer cell lectin-like receptor subfamily G, member 1
hsa-miR-524-5p	1	0	1	1	1	1	PRKD3	protein kinase D3
hsa-miR-524-5p	1	0	1	0	1	1	DCAF7	DDB1 and CUL4 associated factor 7
hsa-miR-524-5p	1	0	1	1	1	1	SRRM1	serine/arginine repetitive matrix 1
hsa-miR-524-5p	1	0	1	0	1	1	SPRY3	sprouty homolog 3 (Drosophila)
hsa-miR-524-5p	1	0	1	1	1	1	SPRY1	sprouty homolog 1, antagonist of FGF signaling (Drosophila)
hsa-miR-524-5p	1	0	1	1	1	1	MAN1A1	mannosidase, alpha, class 1A, member 1
hsa-miR-524-5p	1	0	1	1	1	1	MEOX2	mesenchyme homeobox 2
hsa-miR-524-5p	0	0	1	1	1	1	MFAP3	microfibrillar-associated protein 3
hsa-miR-524-5p	1	0	1	1	1	1	FOXO4	forkhead box O4
hsa-miR-524-5p	1	0	1	1	1	1	MTF1	metal-regulatory transcription factor 1
hsa-miR-524-5p	1	0	1	0	1	1	NAB1	NGFI-A binding protein 1 (EGR1 binding protein 1)
hsa-miR-524-5p	1	0	1	1	1	1	LIPG	lipase, endothelial
hsa-miR-524-5p	1	0	1	1	1	1	CDC42BPB	CDC42 binding protein kinase beta (DMPK-like)
hsa-miR-524-5p	1	0	1	0	1	1	HDAC4	histone deacetylase 4
hsa-miR-524-5p	1	0	1	1	1	1	CITED2	Cbp/p300-interacting transactivator, with Glu/Asp-rich carboxy-terminal domain, 2
hsa-miR-524-5p	1	0	1	1	1	1	SPON1	spondin 1, extracellular matrix protein
hsa-miR-524-5p	1	0	1	1	1	1	TMEM50B	transmembrane protein 50B
hsa-miR-524-5p	1	0	1	1	1	1	CAPZA1	capping protein (actin filament) muscle Z-line, alpha 1
hsa-miR-524-5p	1	0	1	1	1	1	NCK1	NCK adaptor protein 1
hsa-miR-524-5p	1	0	1	1	1	1	NEFL	neurofilament, light polypeptide
hsa-miR-524-5p	1	0	1	1	1	1	NEUROG1	neurogenin 1
hsa-miR-524-5p	1	0	1	1	1	1	NR4A2	nuclear receptor subfamily 4, group A, member 2
hsa-miR-524-5p	1	0	1	1	1	1	ENPP1	ectonucleotide pyrophosphatase/phosphodiesterase 1
hsa-miR-524-5p	0	0	1	1	0	0	PNOC	prepronociceptin
hsa-miR-524-5p	1	0	1	1	1	1	POU4F1	POU class 4 homeobox 1
hsa-miR-524-5p	1	0	1	0	1	1	PPP1R2	protein phosphatase 1, regulatory (inhibitor) subunit 2
hsa-miR-524-5p	0	0	1	1	1	1	PPP2R5A	protein phosphatase 2, regulatory subunit B', alpha
hsa-miR-524-5p	1	0	1	1	1	1	PRKAA1	protein kinase, AMP-activated, alpha 1 catalytic subunit
hsa-miR-524-5p	1	0	1	1	1	1	PRKAB1	protein kinase, AMP-activated, beta 1 non-catalytic subunit
hsa-miR-524-5p	1	0	1	1	1	1	PKN2	protein kinase N2
hsa-miR-524-5p	1	0	1	1	1	1	RANBP2	RAN binding protein 2
hsa-miR-524-5p	1	0	1	0	1	1	SRSF6	serine/arginine-rich splicing factor 6
hsa-miR-524-5p	0	0	1	1	1	1	TNFAIP2	tumor necrosis factor, alpha-induced protein 2
hsa-miR-524-5p	0	0	1	1	1	1	PGRMC2	progesterone receptor membrane component 2
hsa-miR-524-5p	1	0	1	1	1	1	TUBGCP3	tubulin, gamma complex associated protein 3
hsa-miR-524-5p	0	0	1	1	1	1	SLC30A9	solute carrier family 30 (zinc transporter), member 9
hsa-miR-524-5p	1	0	1	1	1	1	ZNF238	zinc finger protein 238
hsa-miR-524-5p	0	0	1	1	1	1	UBE2E3	ubiquitin-conjugating enzyme E2E 3
hsa-miR-524-5p	1	0	1	1	1	1	NXF1	nuclear RNA export factor 1
hsa-miR-524-5p	1	0	1	1	1	1	SEC23A	Sec23 homolog A (S. cerevisiae)
hsa-miR-524-5p	1	0	1	0	1	1	APPBP2	amyloid beta precursor protein (cytoplasmic tail) binding protein 2
hsa-miR-524-5p	1	0	1	1	1	1	NEBL	nebulette
hsa-miR-524-5p	1	0	1	1	1	1	ANP32B	acidic (leucine-rich) nuclear phosphoprotein 32 family, member B
hsa-miR-524-5p	0	0	1	1	1	1	HBXIP	hepatitis B virus x interacting protein
hsa-miR-524-5p	0	0	1	1	0	0	STAMBP	STAM binding protein
hsa-miR-524-5p	1	0	1	0	1	1	GNAI3	guanine nucleotide binding protein (G protein), alpha inhibiting activity polypeptide 3
hsa-miR-524-5p	0	0	1	0	1	1	SLC16A2	solute carrier family 16, member 2 (thyroid hormone transporter)
hsa-miR-524-5p	1	0	1	1	1	1	ELL	elongation factor RNA polymerase II
hsa-miR-524-5p	1	0	1	0	1	1	IGF2BP1	insulin-like growth factor 2 mRNA binding protein 1
hsa-miR-524-5p	1	0	1	1	1	1	KHDRBS1	KH domain containing, RNA binding, signal transduction associated 1
hsa-miR-524-5p	1	0	1	0	1	1	API5	apoptosis inhibitor 5
hsa-miR-524-5p	0	0	1	1	0	0	SLC12A7	solute carrier family 12 (potassium/chloride transporters), member 7
hsa-miR-524-5p	1	0	1	1	1	1	SRSF10	serine/arginine-rich splicing factor 10
hsa-miR-524-5p	1	0	1	1	1	1	ZBTB6	zinc finger and BTB domain containing 6
hsa-miR-524-5p	1	0	1	1	1	1	PGRMC1	progesterone receptor membrane component 1
hsa-miR-524-5p	1	0	1	1	1	1	MMP24	matrix metallopeptidase 24 (membrane-inserted)
hsa-miR-524-5p	1	0	1	1	1	1	MAN1A2	mannosidase, alpha, class 1A, member 2
hsa-miR-524-5p	1	0	1	1	1	1	SPIN1	spindlin 1
hsa-miR-524-5p	1	0	1	1	1	1	HIVEP2	human immunodeficiency virus type I enhancer binding protein 2
hsa-miR-524-5p	1	0	1	1	0	0	PSKH1	protein serine kinase H1
hsa-miR-524-5p	1	0	1	1	1	1	SNTB2	syntrophin, beta 2 (dystrophin-associated protein A1, 59kDa, basic component 2)
hsa-miR-524-5p	0	0	1	1	1	1	SSFA2	sperm specific antigen 2
hsa-miR-524-5p	0	0	1	1	1	1	SYPL1	synaptophysin-like 1
hsa-miR-524-5p	1	0	1	0	1	1	SYNGAP1	synaptic Ras GTPase activating protein 1
hsa-miR-524-5p	1	0	1	1	1	1	PRDX3	peroxiredoxin 3
hsa-miR-524-5p	1	0	1	1	1	1	SF3A3	splicing factor 3a, subunit 3, 60kDa
hsa-miR-524-5p	0	0	1	1	0	0	HNRNPA0	heterogeneous nuclear ribonucleoprotein A0
hsa-miR-524-5p	0	0	1	1	1	1	RAB40B	RAB40B, member RAS oncogene family
hsa-miR-524-5p	0	0	1	1	1	1	TMED10	transmembrane emp24-like trafficking protein 10 (yeast)
hsa-miR-524-5p	0	0	1	1	1	1	HOXA7	homeobox A7
hsa-miR-524-5p	1	0	1	1	1	1	PRRX1	paired related homeobox 1
hsa-miR-524-5p	0	0	1	0	1	1	PSG1	pregnancy specific beta-1-glycoprotein 1
hsa-miR-524-5p	0	0	1	1	1	1	RLN1	relaxin 1
hsa-miR-524-5p	1	0	1	1	1	1	RP2	retinitis pigmentosa 2 (X-linked recessive)
hsa-miR-524-5p	0	0	1	1	1	1	TAF5	TAF5 RNA polymerase II, TATA box binding protein (TBP)-associated factor, 100kDa
hsa-miR-524-5p	0	0	1	1	0	0	RNF113A	ring finger protein 113A
hsa-miR-524-5p	1	0	1	1	1	1	NR4A3	nuclear receptor subfamily 4, group A, member 3
hsa-miR-524-5p	1	0	1	0	1	1	WASF2	WAS protein family, member 2
hsa-miR-524-5p	1	0	1	1	1	1	ABHD2	abhydrolase domain containing 2
hsa-miR-524-5p	1	0	1	1	1	1	ADAMTS5	ADAM metallopeptidase with thrombospondin type 1 motif, 5
hsa-miR-524-5p	1	0	1	1	1	1	FSTL1	follistatin-like 1
hsa-miR-524-5p	1	0	1	1	1	1	TMF1	TATA element modulatory factor 1
hsa-miR-524-5p	1	0	1	1	1	1	ZIC2	Zic family member 2
hsa-miR-524-5p	1	0	1	1	1	1	ZNF81	zinc finger protein 81
hsa-miR-524-5p	1	0	1	1	1	1	VEZF1	vascular endothelial zinc finger 1
hsa-miR-524-5p	0	0	1	0	1	1	ZXDB	zinc finger, X-linked, duplicated B
hsa-miR-524-5p	0	0	1	1	0	0	SLC14A2	solute carrier family 14 (urea transporter), member 2
hsa-miR-524-5p	1	0	1	0	1	1	PRSS23	protease, serine, 23
hsa-miR-524-5p	1	0	1	1	1	1	ERLIN2	ER lipid raft associated 2
hsa-miR-524-5p	0	0	1	1	1	1	MRPL3	mitochondrial ribosomal protein L3
hsa-miR-524-5p	1	0	1	0	1	1	CHP1	calcineurin-like EF hand protein 1
hsa-miR-524-5p	1	0	1	1	1	1	KLF12	Kruppel-like factor 12
hsa-miR-524-5p	0	0	1	1	1	1	STXBP3	syntaxin binding protein 3
hsa-miR-524-5p	1	0	1	1	1	1	CBX3	chromobox homolog 3
hsa-miR-524-5p	1	0	1	1	1	1	ZNF236	zinc finger protein 236
hsa-miR-524-5p	0	0	1	0	1	1	AP4E1	adaptor-related protein complex 4, epsilon 1 subunit
hsa-miR-524-5p	1	0	1	1	1	1	CASC3	cancer susceptibility candidate 3
hsa-miR-524-5p	1	0	1	1	1	1	TARDBP	TAR DNA binding protein
hsa-miR-524-5p	0	0	1	1	1	1	FRAT2	frequently rearranged in advanced T-cell lymphomas 2
hsa-miR-524-5p	1	0	1	1	1	1	ICOS	inducible T-cell co-stimulator
hsa-miR-524-5p	1	0	1	1	1	1	APPL1	adaptor protein, phosphotyrosine interaction, PH domain and leucine zipper containing 1
hsa-miR-524-5p	1	0	1	1	1	1	FBXL3	F-box and leucine-rich repeat protein 3
hsa-miR-524-5p	0	0	1	1	1	1	HARS2	histidyl-tRNA synthetase 2, mitochondrial
hsa-miR-524-5p	1	0	1	1	1	1	MGEA5	meningioma expressed antigen 5 (hyaluronidase)
hsa-miR-524-5p	1	0	1	1	1	1	RYBP	RING1 and YY1 binding protein
hsa-miR-524-5p	0	0	1	1	0	0	SNW1	SNW domain containing 1
hsa-miR-524-5p	1	0	1	1	1	1	RHOQ	ras homolog family member Q
hsa-miR-524-5p	1	0	1	1	1	1	HEY2	hairy/enhancer-of-split related with YRPW motif 2
hsa-miR-524-5p	1	0	1	1	1	1	HS2ST1	heparan sulfate 2-O-sulfotransferase 1
hsa-miR-524-5p	1	0	1	1	1	1	KCND2	potassium voltage-gated channel, Shal-related subfamily, member 2
hsa-miR-524-5p	1	0	1	0	1	1	ACAP2	ArfGAP with coiled-coil, ankyrin repeat and PH domains 2
hsa-miR-524-5p	1	0	1	0	1	1	PXDN	peroxidasin homolog (Drosophila)
hsa-miR-524-5p	1	0	1	0	1	1	G3BP2	GTPase activating protein (SH3 domain) binding protein 2
hsa-miR-524-5p	1	0	1	1	1	1	KIN	KIN, antigenic determinant of recA protein homolog (mouse)
hsa-miR-524-5p	1	0	1	1	1	1	LSM5	LSM5 homolog, U6 small nuclear RNA associated (S. cerevisiae)
hsa-miR-524-5p	1	0	1	1	1	1	MMD	monocyte to macrophage differentiation-associated
hsa-miR-524-5p	1	0	1	0	1	1	MYO10	myosin X
hsa-miR-524-5p	1	0	1	1	1	1	NNT	nicotinamide nucleotide transhydrogenase
hsa-miR-524-5p	1	0	1	1	1	1	NUFIP1	nuclear fragile X mental retardation protein interacting protein 1
hsa-miR-524-5p	1	0	1	0	1	1	BLOC1S6	biogenesis of lysosomal organelles complex-1, subunit 6, pallidin
hsa-miR-524-5p	0	0	1	0	1	1	TLL1	tolloid-like 1
hsa-miR-524-5p	0	0	1	1	1	1	UCK2	uridine-cytidine kinase 2
hsa-miR-524-5p	1	0	1	0	1	1	FLRT2	fibronectin leucine rich transmembrane protein 2
hsa-miR-524-5p	1	0	1	1	1	1	SLC25A24	solute carrier family 25 (mitochondrial carrier; phosphate carrier), member 24
hsa-miR-524-5p	1	0	1	1	1	1	LAMP2	lysosomal-associated membrane protein 2
hsa-miR-524-5p	1	0	1	1	1	1	WDR37	WD repeat domain 37
hsa-miR-524-5p	1	0	1	0	1	1	OSTM1	osteopetrosis associated transmembrane protein 1
hsa-miR-524-5p	0	0	1	1	1	1	METTL7A	methyltransferase like 7A
hsa-miR-524-5p	1	0	1	0	1	1	CHMP2B	charged multivesicular body protein 2B
hsa-miR-524-5p	0	0	1	1	1	1	NUDT5	nudix (nucleoside diphosphate linked moiety X)-type motif 5
hsa-miR-524-5p	1	0	1	1	1	1	ZBTB44	zinc finger and BTB domain containing 44
hsa-miR-524-5p	0	0	1	1	1	1	TM4SF1	transmembrane 4 L six family member 1
hsa-miR-524-5p	0	0	1	0	1	1	ADAMTS3	ADAM metallopeptidase with thrombospondin type 1 motif, 3
hsa-miR-524-5p	1	0	1	1	1	1	C11orf58	chromosome 11 open reading frame 58
hsa-miR-524-5p	1	0	1	1	1	1	MAPRE2	microtubule-associated protein, RP/EB family, member 2
hsa-miR-524-5p	0	0	1	1	1	1	IL1RAPL1	interleukin 1 receptor accessory protein-like 1
hsa-miR-524-5p	0	0	1	1	0	0	OLFM1	olfactomedin 1
hsa-miR-524-5p	0	0	1	1	1	1	DNAJC8	DnaJ (Hsp40) homolog, subfamily C, member 8
hsa-miR-524-5p	1	0	1	1	0	0	BRD4	bromodomain containing 4
hsa-miR-524-5p	1	0	1	1	1	1	LEMD3	LEM domain containing 3
hsa-miR-524-5p	1	0	1	1	1	1	PATZ1	POZ (BTB) and AT hook containing zinc finger 1
hsa-miR-524-5p	1	0	1	1	1	1	CORO1C	coronin, actin binding protein, 1C
hsa-miR-524-5p	1	0	1	1	1	1	SLC7A11	solute carrier family 7 (anionic amino acid transporter light chain, xc- system), member 11
hsa-miR-524-5p	0	0	1	0	1	1	EID1	EP300 interacting inhibitor of differentiation 1
hsa-miR-524-5p	1	0	1	0	1	1	FJX1	four jointed box 1 (Drosophila)
hsa-miR-524-5p	0	0	1	1	1	1	ZNF318	zinc finger protein 318
hsa-miR-524-5p	1	0	1	1	1	1	LHX6	LIM homeobox 6
hsa-miR-524-5p	1	0	1	0	1	1	RNF11	ring finger protein 11
hsa-miR-524-5p	1	0	1	0	1	1	DIEXF	digestive organ expansion factor homolog (zebrafish)
hsa-miR-524-5p	0	0	1	1	1	1	LAMP3	lysosomal-associated membrane protein 3
hsa-miR-524-5p	0	0	1	1	1	1	TSPAN13	tetraspanin 13
hsa-miR-524-5p	0	0	1	1	1	1	CLUL1	clusterin-like 1 (retinal)
hsa-miR-524-5p	1	0	1	1	1	1	DKK2	dickkopf 2 homolog (Xenopus laevis)
hsa-miR-524-5p	1	0	1	1	1	1	AFF4	AF4/FMR2 family, member 4
hsa-miR-524-5p	1	0	1	1	1	1	SERP1	stress-associated endoplasmic reticulum protein 1
hsa-miR-524-5p	1	0	1	1	1	1	PDCD4	programmed cell death 4 (neoplastic transformation inhibitor)
hsa-miR-524-5p	1	0	1	1	1	1	KLHL20	kelch-like 20 (Drosophila)
hsa-miR-524-5p	0	0	1	1	1	1	LSM3	LSM3 homolog, U6 small nuclear RNA associated (S. cerevisiae)
hsa-miR-524-5p	0	0	1	1	1	1	GOLIM4	golgi integral membrane protein 4
hsa-miR-524-5p	1	0	1	1	1	1	CNOT2	CCR4-NOT transcription complex, subunit 2
hsa-miR-524-5p	0	0	1	1	1	1	ARFGAP3	ADP-ribosylation factor GTPase activating protein 3
hsa-miR-524-5p	1	0	1	1	1	1	ERO1L	ERO1-like (S. cerevisiae)
hsa-miR-524-5p	1	0	1	1	1	1	SLC40A1	solute carrier family 40 (iron-regulated transporter), member 1
hsa-miR-524-5p	0	0	1	1	1	1	SOX8	SRY (sex determining region Y)-box 8
hsa-miR-524-5p	1	0	1	1	1	1	VSX1	visual system homeobox 1
hsa-miR-524-5p	1	0	1	1	1	1	EHD3	EH-domain containing 3
hsa-miR-524-5p	0	0	1	1	1	1	PSME4	proteasome (prosome, macropain) activator subunit 4
hsa-miR-524-5p	1	0	1	0	1	1	SH3PXD2A	SH3 and PX domains 2A
hsa-miR-524-5p	1	0	1	1	1	1	RALGPS1	Ral GEF with PH domain and SH3 binding motif 1
hsa-miR-524-5p	1	0	1	0	1	1	BZW1	basic leucine zipper and W2 domains 1
hsa-miR-524-5p	1	0	1	0	1	1	EDEM1	ER degradation enhancer, mannosidase alpha-like 1
hsa-miR-524-5p	1	0	1	1	1	1	ULK2	unc-51-like kinase 2 (C. elegans)
hsa-miR-524-5p	0	0	1	1	1	1	AQR	aquarius homolog (mouse)
hsa-miR-524-5p	0	0	1	1	0	0	SETD1A	SET domain containing 1A
hsa-miR-524-5p	0	0	1	1	1	1	ZNF536	zinc finger protein 536
hsa-miR-524-5p	1	0	1	0	1	1	TOX	thymocyte selection-associated high mobility group box
hsa-miR-524-5p	1	0	1	0	1	1	MLEC	malectin
hsa-miR-524-5p	1	0	1	1	1	1	SPCS2	signal peptidase complex subunit 2 homolog (S. cerevisiae)
hsa-miR-524-5p	1	0	1	0	1	1	SERTAD2	SERTA domain containing 2
hsa-miR-524-5p	0	0	1	0	1	1	DHCR24	24-dehydrocholesterol reductase
hsa-miR-524-5p	0	0	1	0	1	1	EPM2AIP1	EPM2A (laforin) interacting protein 1
hsa-miR-524-5p	1	0	1	0	1	1	PJA2	praja ring finger 2, E3 ubiquitin protein ligase
hsa-miR-524-5p	1	0	1	1	1	1	TOMM70A	translocase of outer mitochondrial membrane 70 homolog A (S. cerevisiae)
hsa-miR-524-5p	1	0	1	1	1	1	TBC1D4	TBC1 domain family, member 4
hsa-miR-524-5p	1	0	1	0	1	1	LPPR4	lipid phosphate phosphatase-related protein type 4
hsa-miR-524-5p	1	0	1	1	1	1	HELZ	helicase with zinc finger
hsa-miR-524-5p	1	0	1	1	1	1	RHOBTB3	Rho-related BTB domain containing 3
hsa-miR-524-5p	0	0	1	1	1	1	ADNP2	ADNP homeobox 2
hsa-miR-524-5p	1	0	1	1	1	1	CHSY1	chondroitin sulfate synthase 1
hsa-miR-524-5p	1	0	1	0	1	1	ICK	intestinal cell (MAK-like) kinase
hsa-miR-524-5p	1	0	1	1	1	1	PLEKHA6	pleckstrin homology domain containing, family A member 6
hsa-miR-524-5p	1	0	1	1	1	1	SPAST	spastin
hsa-miR-524-5p	1	0	1	1	1	1	DIP2C	DIP2 disco-interacting protein 2 homolog C (Drosophila)
hsa-miR-524-5p	1	0	1	1	1	1	SORCS3	sortilin-related VPS10 domain containing receptor 3
hsa-miR-524-5p	1	0	1	0	1	1	WDFY3	WD repeat and FYVE domain containing 3
hsa-miR-524-5p	1	0	1	1	1	1	RAB21	RAB21, member RAS oncogene family
hsa-miR-524-5p	1	0	1	1	1	1	SPEN	spen homolog, transcriptional regulator (Drosophila)
hsa-miR-524-5p	1	0	1	1	1	1	FBXO21	F-box protein 21
hsa-miR-524-5p	0	0	1	1	1	1	MYO16	myosin XVI
hsa-miR-524-5p	1	0	1	0	1	1	PDS5B	PDS5, regulator of cohesion maintenance, homolog B (S. cerevisiae)
hsa-miR-524-5p	1	0	1	0	1	1	NMNAT2	nicotinamide nucleotide adenylyltransferase 2
hsa-miR-524-5p	1	0	1	0	1	1	ZNF609	zinc finger protein 609
hsa-miR-524-5p	0	0	1	1	1	1	KDM4C	lysine (K)-specific demethylase 4C
[truncated: 1,190 more rows]
