# Supplementary material for: Profiling of Selected MicroRNAs in Proliferative Eutopic Endometrium of Women with Ovarian Endometriosis
Source: Biomed Res Int. 2015 Aug 20;2015:760698. doi: 10.1155/2015/760698 (PMC4558423; doi:10.1155/2015/760698)
Supplement: Supplementary file 1 — Table I: The names of miRNAs significantly differentially expressed between eutopic endometrium of patients with endometriosis vs eutopic endometrium of patients without endometriosis. Table II: The associations between miRNA and mRNA, which presents detailed results of the search of six major databases i.e targetscan, tarbase, miranda, mirbase, mirtarget2 and pictar. [file 760698.f1.zip › 760698.f1/Table II/hsa-miR-525-3p.tsv]

miR	targetscan	tarbase	miranda	mirbase	mirtarget2	pictar	GeneSymbol	GeneName
hsa-miR-525-3p	1	0	1	1	0	0	SEC14L5	SEC14-like 5 (S. cerevisiae)
hsa-miR-525-3p	1	0	1	1	1	1	NRXN1	neurexin 1
hsa-miR-525-3p	1	0	1	0	1	1	SNX13	sorting nexin 13
hsa-miR-525-3p	1	0	1	0	0	0	KIAA0947	KIAA0947
hsa-miR-525-3p	1	0	1	1	1	1	ASAP1	ArfGAP with SH3 domain, ankyrin repeat and PH domain 1
hsa-miR-525-3p	1	0	1	1	0	0	EBF4	early B-cell factor 4
hsa-miR-525-3p	0	0	1	1	0	0	ISLR2	immunoglobulin superfamily containing leucine-rich repeat 2
hsa-miR-525-3p	0	0	1	1	0	0	TMEM132A	transmembrane protein 132A
hsa-miR-525-3p	1	0	1	1	0	0	NCKAP5L	NCK-associated protein 5-like
hsa-miR-525-3p	1	0	1	0	0	0	TANC2	tetratricopeptide repeat, ankyrin repeat and coiled-coil containing 2
hsa-miR-525-3p	0	0	1	1	1	1	SPEF2	sperm flagellar 2
hsa-miR-525-3p	1	0	1	1	1	1	NPAS3	neuronal PAS domain protein 3
hsa-miR-525-3p	0	0	1	1	0	0	SEC16B	SEC16 homolog B (S. cerevisiae)
hsa-miR-525-3p	1	0	1	1	1	1	SH3TC2	SH3 domain and tetratricopeptide repeats 2
hsa-miR-525-3p	1	0	1	0	0	0	ZBTB34	zinc finger and BTB domain containing 34
hsa-miR-525-3p	0	0	1	1	0	0	UMODL1	uromodulin-like 1
hsa-miR-525-3p	0	0	1	1	1	1	BIRC5	baculoviral IAP repeat containing 5
hsa-miR-525-3p	0	0	1	1	0	0	PTPRF	protein tyrosine phosphatase, receptor type, F
hsa-miR-525-3p	1	0	1	1	1	1	BACH2	BTB and CNC homology 1, basic leucine zipper transcription factor 2
hsa-miR-525-3p	0	0	1	1	1	1	DGKE	diacylglycerol kinase, epsilon 64kDa
hsa-miR-525-3p	1	0	1	1	1	1	TBX2	T-box 2
hsa-miR-525-3p	0	0	1	1	1	1	ACO1	aconitase 1, soluble
hsa-miR-525-3p	0	0	1	1	0	0	IGFBP2	insulin-like growth factor binding protein 2, 36kDa
hsa-miR-525-3p	1	0	1	1	1	1	TEAD1	TEA domain family member 1 (SV40 transcriptional enhancer factor)
hsa-miR-525-3p	1	0	1	1	1	1	MYH10	myosin, heavy chain 10, non-muscle
hsa-miR-525-3p	0	0	1	0	0	0	TRPC2	transient receptor potential cation channel, subfamily C, member 2, pseudogene
hsa-miR-525-3p	1	0	1	1	1	1	DLGAP2	discs, large (Drosophila) homolog-associated protein 2
hsa-miR-525-3p	1	0	1	0	1	1	CD164	CD164 molecule, sialomucin
hsa-miR-525-3p	1	0	1	1	1	1	EDNRB	endothelin receptor type B
hsa-miR-525-3p	0	0	1	1	1	1	NBPF14	neuroblastoma breakpoint family, member 14
hsa-miR-525-3p	0	0	1	1	0	0	FXYD5	FXYD domain containing ion transport regulator 5
hsa-miR-525-3p	1	0	1	1	1	1	ATP2C1	ATPase, Ca++ transporting, type 2C, member 1
hsa-miR-525-3p	1	0	1	0	1	1	TAPT1	transmembrane anterior posterior transformation 1
hsa-miR-525-3p	1	0	1	0	1	1	PARP11	poly (ADP-ribose) polymerase family, member 11
hsa-miR-525-3p	0	0	1	1	0	0	ZAN	zonadhesin
hsa-miR-525-3p	1	0	1	0	1	1	USP32	ubiquitin specific peptidase 32
hsa-miR-525-3p	1	0	1	1	1	1	PBX3	pre-B-cell leukemia homeobox 3
hsa-miR-525-3p	1	0	1	0	1	1	WIPF2	WAS/WASL interacting protein family, member 2
hsa-miR-525-3p	1	0	1	1	1	1	CALCOCO1	calcium binding and coiled-coil domain 1
hsa-miR-525-3p	0	0	1	0	0	0	NBPF10	neuroblastoma breakpoint family, member 10
hsa-miR-525-3p	1	0	1	1	1	1	RCAN1	regulator of calcineurin 1
hsa-miR-525-3p	0	0	1	0	0	0	MYO15B	myosin XVB pseudogene
hsa-miR-525-3p	1	0	1	0	1	1	CACNA1C	calcium channel, voltage-dependent, L type, alpha 1C subunit
hsa-miR-525-3p	1	0	1	0	1	1	GRB10	growth factor receptor-bound protein 10
hsa-miR-525-3p	0	0	1	0	0	0	TOMM6	translocase of outer mitochondrial membrane 6 homolog (yeast)
hsa-miR-525-3p	1	0	1	1	1	1	AKAP2	A kinase (PRKA) anchor protein 2
hsa-miR-525-3p	1	0	1	0	1	1	NFAT5	nuclear factor of activated T-cells 5, tonicity-responsive
hsa-miR-525-3p	0	0	1	1	0	0	CYP2W1	cytochrome P450, family 2, subfamily W, polypeptide 1
hsa-miR-525-3p	1	0	1	1	1	1	RIC8B	resistance to inhibitors of cholinesterase 8 homolog B (C. elegans)
hsa-miR-525-3p	1	0	1	1	1	1	ZNF395	zinc finger protein 395
hsa-miR-525-3p	0	0	1	1	1	1	STAU2	staufen, RNA binding protein, homolog 2 (Drosophila)
hsa-miR-525-3p	0	0	1	1	0	0	MLST8	MTOR associated protein, LST8 homolog (S. cerevisiae)
hsa-miR-525-3p	0	0	1	1	0	0	JMJD4	jumonji domain containing 4
hsa-miR-525-3p	0	0	1	0	0	0	LOC284561	uncharacterized LOC284561
hsa-miR-525-3p	0	0	1	1	1	1	EPG5	ectopic P-granules autophagy protein 5 homolog (C. elegans)
hsa-miR-525-3p	0	0	1	0	0	0	LOC286059	tumor necrosis factor receptor superfamily, member 10d, decoy with truncated death domain pseudogene
hsa-miR-525-3p	1	0	1	1	1	1	KANK1	KN motif and ankyrin repeat domains 1
hsa-miR-525-3p	0	0	1	1	1	1	MFSD7	major facilitator superfamily domain containing 7
hsa-miR-525-3p	0	0	1	0	0	0	A1BG-AS1	A1BG antisense RNA 1
hsa-miR-525-3p	1	0	1	1	1	1	TMEM2	transmembrane protein 2
hsa-miR-525-3p	0	0	1	1	0	0	HAGHL	hydroxyacylglutathione hydrolase-like
hsa-miR-525-3p	1	0	1	1	1	1	FRMD6	FERM domain containing 6
hsa-miR-525-3p	0	0	1	1	1	1	SDK1	sidekick cell adhesion molecule 1
hsa-miR-525-3p	0	0	1	1	0	0	CHRM3	cholinergic receptor, muscarinic 3
hsa-miR-525-3p	0	0	1	1	0	0	AARSD1	alanyl-tRNA synthetase domain containing 1
hsa-miR-525-3p	1	0	1	0	1	1	PCGF3	polycomb group ring finger 3
hsa-miR-525-3p	0	0	1	1	0	0	TRIM41	tripartite motif containing 41
hsa-miR-525-3p	1	0	1	1	1	1	BLCAP	bladder cancer associated protein
hsa-miR-525-3p	1	0	1	0	1	1	RNF165	ring finger protein 165
hsa-miR-525-3p	0	0	1	1	0	0	NISCH	nischarin
hsa-miR-525-3p	1	0	1	1	1	1	NDFIP1	Nedd4 family interacting protein 1
hsa-miR-525-3p	1	0	1	1	1	1	WDR20	WD repeat domain 20
hsa-miR-525-3p	0	0	1	0	0	0	LOC440910	uncharacterized LOC440910
hsa-miR-525-3p	1	0	1	1	1	1	TSN	translin
hsa-miR-525-3p	0	0	1	1	0	0	NDUFA4L2	NADH dehydrogenase (ubiquinone) 1 alpha subcomplex, 4-like 2
hsa-miR-525-3p	0	0	1	1	0	0	WBP1	WW domain binding protein 1
hsa-miR-525-3p	1	0	1	1	1	1	KLC2	kinesin light chain 2
hsa-miR-525-3p	1	0	1	0	1	1	GATAD2B	GATA zinc finger domain containing 2B
hsa-miR-525-3p	0	0	1	0	1	1	AGBL4	ATP/GTP binding protein-like 4
hsa-miR-525-3p	1	0	1	1	1	1	CNEP1R1	CTD nuclear envelope phosphatase 1 regulatory subunit 1
hsa-miR-525-3p	1	0	1	1	1	1	SPATS2	spermatogenesis associated, serine-rich 2
hsa-miR-525-3p	1	0	1	1	1	1	SLITRK2	SLIT and NTRK-like family, member 2
hsa-miR-525-3p	1	0	1	1	1	1	IGSF11	immunoglobulin superfamily, member 11
hsa-miR-525-3p	0	0	1	1	1	1	POLR1D	polymerase (RNA) I polypeptide D, 16kDa
hsa-miR-525-3p	0	0	1	1	0	0	FBXO16	F-box protein 16
hsa-miR-525-3p	0	0	1	1	1	1	FAM76A	family with sequence similarity 76, member A
hsa-miR-525-3p	1	0	1	1	0	0	DGCR6	DiGeorge syndrome critical region gene 6
hsa-miR-525-3p	0	0	1	1	0	0	KIAA0146	KIAA0146
hsa-miR-525-3p	0	0	1	1	0	0	MARS	methionyl-tRNA synthetase
hsa-miR-525-3p	0	0	1	1	1	1	BTN2A2	butyrophilin, subfamily 2, member A2
hsa-miR-525-3p	1	0	1	1	1	1	ERBB3	v-erb-b2 erythroblastic leukemia viral oncogene homolog 3 (avian)
hsa-miR-525-3p	0	0	1	1	1	1	C2orf91	chromosome 2 open reading frame 91
hsa-miR-525-3p	0	0	1	1	1	1	MKX	mohawk homeobox
hsa-miR-525-3p	1	0	1	1	1	1	DLGAP4	discs, large (Drosophila) homolog-associated protein 4
hsa-miR-525-3p	1	0	1	1	1	1	KPNA1	karyopherin alpha 1 (importin alpha 5)
hsa-miR-525-3p	1	0	1	1	1	1	SIKE1	suppressor of IKBKE 1
hsa-miR-525-3p	1	0	1	1	1	1	SACM1L	SAC1 suppressor of actin mutations 1-like (yeast)
hsa-miR-525-3p	0	0	1	1	0	0	SPATS1	spermatogenesis associated, serine-rich 1
hsa-miR-525-3p	0	0	1	0	0	0	LOC100127955	uncharacterized LOC100127955
hsa-miR-525-3p	1	0	1	0	1	1	SP6	Sp6 transcription factor
hsa-miR-525-3p	0	0	1	1	0	0	NCF1	neutrophil cytosolic factor 1
hsa-miR-525-3p	0	0	1	1	0	0	C1orf86	chromosome 1 open reading frame 86
hsa-miR-525-3p	1	0	1	1	1	1	SLC12A6	solute carrier family 12 (potassium/chloride transporters), member 6
hsa-miR-525-3p	0	0	1	1	1	1	RAB13	RAB13, member RAS oncogene family
hsa-miR-525-3p	1	0	1	1	1	1	PPP2R5C	protein phosphatase 2, regulatory subunit B', gamma
hsa-miR-525-3p	0	0	1	1	0	0	C9orf96	chromosome 9 open reading frame 96
hsa-miR-525-3p	1	0	1	1	1	1	PHTF2	putative homeodomain transcription factor 2
hsa-miR-525-3p	1	0	1	1	1	1	DUSP3	dual specificity phosphatase 3
hsa-miR-525-3p	0	0	1	1	1	1	TTLL3	tubulin tyrosine ligase-like family, member 3
hsa-miR-525-3p	1	0	1	1	1	1	TAB2	TGF-beta activated kinase 1/MAP3K7 binding protein 2
hsa-miR-525-3p	0	0	1	1	0	0	RIMBP3	RIMS binding protein 3
hsa-miR-525-3p	0	0	1	0	0	0	DNAJC5B	DnaJ (Hsp40) homolog, subfamily C, member 5 beta
hsa-miR-525-3p	0	0	1	0	0	0	KIAA0913	KIAA0913
hsa-miR-525-3p	0	0	1	1	0	0	LRCH3	leucine-rich repeats and calponin homology (CH) domain containing 3
hsa-miR-525-3p	1	0	1	1	1	1	KIAA1033	KIAA1033
hsa-miR-525-3p	0	0	1	0	0	0	FAM66D	family with sequence similarity 66, member D
hsa-miR-525-3p	0	0	1	0	1	1	GAB3	GRB2-associated binding protein 3
hsa-miR-525-3p	1	0	1	0	1	1	STYX	serine/threonine/tyrosine interacting protein
hsa-miR-525-3p	0	0	1	1	1	1	YAP1	Yes-associated protein 1
hsa-miR-525-3p	1	0	1	1	1	1	MARCH7	membrane-associated ring finger (C3HC4) 7, E3 ubiquitin protein ligase
hsa-miR-525-3p	1	0	1	1	1	1	PRPF38B	PRP38 pre-mRNA processing factor 38 (yeast) domain containing B
hsa-miR-525-3p	1	0	1	1	0	0	KIAA0895L	KIAA0895-like
hsa-miR-525-3p	1	0	1	0	1	1	NR3C1	nuclear receptor subfamily 3, group C, member 1 (glucocorticoid receptor)
hsa-miR-525-3p	0	0	1	0	1	1	SYNPO2	synaptopodin 2
hsa-miR-525-3p	0	0	1	1	0	0	DNAH1	dynein, axonemal, heavy chain 1
hsa-miR-525-3p	1	0	1	1	1	1	BCL11A	B-cell CLL/lymphoma 11A (zinc finger protein)
hsa-miR-525-3p	0	0	1	0	0	0	PTPRVP	protein tyrosine phosphatase, receptor type, V, pseudogene
hsa-miR-525-3p	1	0	1	1	0	0	PLXNB3	plexin B3
hsa-miR-525-3p	0	0	1	1	1	1	PTDSS1	phosphatidylserine synthase 1
hsa-miR-525-3p	1	0	1	1	1	1	TSPAN14	tetraspanin 14
hsa-miR-525-3p	1	0	1	1	0	0	DHDDS	dehydrodolichyl diphosphate synthase
hsa-miR-525-3p	1	0	1	1	1	1	MBNL1	muscleblind-like splicing regulator 1
hsa-miR-525-3p	0	0	1	1	1	1	SEMG1	semenogelin I
hsa-miR-525-3p	0	0	1	1	0	0	RBM14	RNA binding motif protein 14
hsa-miR-525-3p	1	0	1	1	1	1	KCNMA1	potassium large conductance calcium-activated channel, subfamily M, alpha member 1
hsa-miR-525-3p	0	0	1	0	0	0	LRRC14	leucine rich repeat containing 14
hsa-miR-525-3p	0	0	1	1	1	1	PSEN1	presenilin 1
hsa-miR-525-3p	0	0	1	1	1	1	EAF2	ELL associated factor 2
hsa-miR-525-3p	1	0	1	1	1	1	PAPOLA	poly(A) polymerase alpha
hsa-miR-525-3p	0	0	1	0	0	0	NUDT16P1	nudix (nucleoside diphosphate linked moiety X)-type motif 16 pseudogene 1
hsa-miR-525-3p	0	0	1	1	1	1	CSDE1	cold shock domain containing E1, RNA-binding
hsa-miR-525-3p	0	0	1	0	0	0	LOC100130950	uncharacterized LOC100130950
hsa-miR-525-3p	1	0	1	1	1	1	RAB5B	RAB5B, member RAS oncogene family
hsa-miR-525-3p	1	0	1	1	1	1	CRKL	v-crk sarcoma virus CT10 oncogene homolog (avian)-like
hsa-miR-525-3p	1	0	1	1	0	0	FAM150B	family with sequence similarity 150, member B
hsa-miR-525-3p	0	0	1	1	1	1	ZNF337	zinc finger protein 337
hsa-miR-525-3p	0	0	1	1	1	1	PIK3CG	phosphatidylinositol-4,5-bisphosphate 3-kinase, catalytic subunit gamma
hsa-miR-525-3p	0	0	1	1	1	1	SNAPC3	small nuclear RNA activating complex, polypeptide 3, 50kDa
hsa-miR-525-3p	0	0	1	1	1	1	FAM171B	family with sequence similarity 171, member B
hsa-miR-525-3p	1	0	1	0	1	1	NEGR1	neuronal growth regulator 1
hsa-miR-525-3p	0	0	1	0	0	0	FLJ36000	uncharacterized FLJ36000
hsa-miR-525-3p	0	0	1	0	0	0	USP32P1	ubiquitin specific peptidase 32 pseudogene 1
hsa-miR-525-3p	1	0	1	0	1	1	LPHN3	latrophilin 3
hsa-miR-525-3p	1	0	1	1	0	0	HES7	hairy and enhancer of split 7 (Drosophila)
hsa-miR-525-3p	0	0	1	0	1	1	HSBP1L1	heat shock factor binding protein 1-like 1
hsa-miR-525-3p	1	0	1	1	1	1	SLITRK3	SLIT and NTRK-like family, member 3
hsa-miR-525-3p	0	0	1	1	0	0	AQP12B	aquaporin 12B
hsa-miR-525-3p	1	0	1	1	1	1	PRRG1	proline rich Gla (G-carboxyglutamic acid) 1
hsa-miR-525-3p	0	0	1	0	0	0	LOC338579	ankyrin repeat domain-containing protein 30B pseudogene
hsa-miR-525-3p	0	0	1	1	1	1	STRADA	STE20-related kinase adaptor alpha
hsa-miR-525-3p	1	0	1	1	1	1	AGAP3	ArfGAP with GTPase domain, ankyrin repeat and PH domain 3
hsa-miR-525-3p	1	0	1	1	1	1	SON	SON DNA binding protein
hsa-miR-525-3p	0	0	1	1	0	0	TOM1	target of myb1 (chicken)
hsa-miR-525-3p	0	0	1	1	1	1	LINC00086	long intergenic non-protein coding RNA 86
hsa-miR-525-3p	1	0	1	1	1	1	SCUBE3	signal peptide, CUB domain, EGF-like 3
hsa-miR-525-3p	0	0	1	1	0	0	HIST1H3E	histone cluster 1, H3e
hsa-miR-525-3p	0	0	1	1	0	0	GRIN2C	glutamate receptor, ionotropic, N-methyl D-aspartate 2C
hsa-miR-525-3p	1	0	1	1	1	1	ZEB2	zinc finger E-box binding homeobox 2
hsa-miR-525-3p	1	0	1	1	1	1	GTDC1	glycosyltransferase-like domain containing 1
hsa-miR-525-3p	0	0	1	1	1	1	SCLT1	sodium channel and clathrin linker 1
hsa-miR-525-3p	1	0	1	1	1	1	GANAB	glucosidase, alpha; neutral AB
hsa-miR-525-3p	0	0	1	1	1	1	SLAMF1	signaling lymphocytic activation molecule family member 1
hsa-miR-525-3p	1	0	1	1	1	1	SULF1	sulfatase 1
hsa-miR-525-3p	0	0	1	0	0	0	CHADL	chondroadherin-like
hsa-miR-525-3p	0	0	1	1	0	0	NDUFAF2	NADH dehydrogenase (ubiquinone) complex I, assembly factor 2
hsa-miR-525-3p	1	0	1	0	1	1	TGFBR1	transforming growth factor, beta receptor 1
hsa-miR-525-3p	0	0	1	0	0	0	LOC100147773	uncharacterized LOC100147773
hsa-miR-525-3p	0	0	1	1	1	1	TNFSF12	tumor necrosis factor (ligand) superfamily, member 12
hsa-miR-525-3p	0	0	1	1	1	1	IRX5	iroquois homeobox 5
hsa-miR-525-3p	1	0	1	0	1	1	AMMECR1L	AMME chromosomal region gene 1-like
hsa-miR-525-3p	0	0	1	0	0	0	C17orf89	chromosome 17 open reading frame 89
hsa-miR-525-3p	0	0	1	0	0	0	LINC00537	long intergenic non-protein coding RNA 537
hsa-miR-525-3p	0	0	1	1	0	0	DNHD1	dynein heavy chain domain 1
hsa-miR-525-3p	1	0	1	1	1	1	ZBTB7A	zinc finger and BTB domain containing 7A
hsa-miR-525-3p	1	0	1	1	1	1	STK38	serine/threonine kinase 38
hsa-miR-525-3p	1	0	1	1	1	1	GTF2I	general transcription factor IIi
hsa-miR-525-3p	1	0	1	1	1	1	NR3C2	nuclear receptor subfamily 3, group C, member 2
hsa-miR-525-3p	0	0	1	1	0	0	RNF123	ring finger protein 123
hsa-miR-525-3p	0	0	1	1	0	0	RGSL1	regulator of G-protein signaling like 1
hsa-miR-525-3p	0	0	1	1	1	1	ZNF189	zinc finger protein 189
hsa-miR-525-3p	1	0	1	1	1	1	CHIC1	cysteine-rich hydrophobic domain 1
hsa-miR-525-3p	0	0	1	0	0	0	MEG3	maternally expressed 3 (non-protein coding)
hsa-miR-525-3p	1	0	1	1	1	1	CHGA	chromogranin A (parathyroid secretory protein 1)
hsa-miR-525-3p	1	0	1	1	1	1	BTBD7	BTB (POZ) domain containing 7
hsa-miR-525-3p	1	0	1	1	1	1	ETS1	v-ets erythroblastosis virus E26 oncogene homolog 1 (avian)
hsa-miR-525-3p	1	0	1	1	1	1	SPPL3	signal peptide peptidase like 3
hsa-miR-525-3p	1	0	1	1	1	1	USP6	ubiquitin specific peptidase 6 (Tre-2 oncogene)
hsa-miR-525-3p	0	0	1	0	1	1	IDO1	indoleamine 2,3-dioxygenase 1
hsa-miR-525-3p	0	0	1	0	0	0	LOC401127	WD repeat domain 5 pseudogene
hsa-miR-525-3p	0	0	1	1	1	1	UPRT	uracil phosphoribosyltransferase (FUR1) homolog (S. cerevisiae)
hsa-miR-525-3p	0	0	1	1	1	1	SEC22C	SEC22 vesicle trafficking protein homolog C (S. cerevisiae)
hsa-miR-525-3p	0	0	1	1	0	0	GTF2H4	general transcription factor IIH, polypeptide 4, 52kDa
hsa-miR-525-3p	1	0	1	1	1	1	E2F5	E2F transcription factor 5, p130-binding
hsa-miR-525-3p	0	0	1	1	0	0	DNAJB2	DnaJ (Hsp40) homolog, subfamily B, member 2
hsa-miR-525-3p	0	0	1	1	1	1	ASCC2	activating signal cointegrator 1 complex subunit 2
hsa-miR-525-3p	0	0	1	1	1	1	ZC3HC1	zinc finger, C3HC-type containing 1
hsa-miR-525-3p	0	0	1	1	0	0	CDK2AP2	cyclin-dependent kinase 2 associated protein 2
hsa-miR-525-3p	0	0	1	1	1	1	KLC1	kinesin light chain 1
hsa-miR-525-3p	0	0	1	1	0	0	CCDC22	coiled-coil domain containing 22
hsa-miR-525-3p	0	0	1	1	1	1	PEX19	peroxisomal biogenesis factor 19
hsa-miR-525-3p	0	0	1	0	1	1	SUMO2	SMT3 suppressor of mif two 3 homolog 2 (S. cerevisiae)
hsa-miR-525-3p	0	0	1	1	0	0	AATF	apoptosis antagonizing transcription factor
hsa-miR-525-3p	1	0	1	1	0	0	ATP6V1B2	ATPase, H+ transporting, lysosomal 56/58kDa, V1 subunit B2
hsa-miR-525-3p	0	0	1	1	1	1	HOXC9	homeobox C9
hsa-miR-525-3p	0	0	1	1	0	0	TUSC3	tumor suppressor candidate 3
hsa-miR-525-3p	1	0	1	1	0	0	LMAN2	lectin, mannose-binding 2
hsa-miR-525-3p	0	0	1	0	0	0	ZNF674-AS1	ZNF674 antisense RNA 1
hsa-miR-525-3p	0	0	1	1	1	1	APOPT1	apoptogenic 1, mitochondrial
hsa-miR-525-3p	0	0	1	0	0	0	FAM92A1	family with sequence similarity 92, member A1
hsa-miR-525-3p	0	0	1	1	1	1	SPECC1	sperm antigen with calponin homology and coiled-coil domains 1
hsa-miR-525-3p	1	0	1	1	1	1	DNAJC16	DnaJ (Hsp40) homolog, subfamily C, member 16
hsa-miR-525-3p	1	0	1	1	1	1	KIAA2018	KIAA2018
hsa-miR-525-3p	1	0	1	1	1	1	RB1CC1	RB1-inducible coiled-coil 1
hsa-miR-525-3p	1	0	1	1	1	1	QKI	QKI, KH domain containing, RNA binding
hsa-miR-525-3p	0	0	1	1	1	1	CCKBR	cholecystokinin B receptor
hsa-miR-525-3p	1	0	1	1	0	0	LGSN	lengsin, lens protein with glutamine synthetase domain
hsa-miR-525-3p	0	0	1	1	1	1	MARVELD2	MARVEL domain containing 2
hsa-miR-525-3p	1	0	1	1	1	1	IRF1	interferon regulatory factor 1
hsa-miR-525-3p	0	0	1	0	0	0	GPR144	G protein-coupled receptor 144
hsa-miR-525-3p	0	0	1	1	1	1	ATP7A	ATPase, Cu++ transporting, alpha polypeptide
hsa-miR-525-3p	1	0	1	0	1	1	SLC26A2	solute carrier family 26 (sulfate transporter), member 2
hsa-miR-525-3p	1	0	1	1	1	1	JAG1	jagged 1
hsa-miR-525-3p	1	0	1	1	1	1	MITF	microphthalmia-associated transcription factor
hsa-miR-525-3p	0	0	1	1	1	1	XDH	xanthine dehydrogenase
hsa-miR-525-3p	0	0	1	0	1	1	CCR5	chemokine (C-C motif) receptor 5 (gene/pseudogene)
hsa-miR-525-3p	1	0	1	1	1	1	GAD1	glutamate decarboxylase 1 (brain, 67kDa)
hsa-miR-525-3p	1	0	1	1	1	1	IGF2R	insulin-like growth factor 2 receptor
hsa-miR-525-3p	1	0	1	0	1	1	SMAD5	SMAD family member 5
hsa-miR-525-3p	1	0	1	1	1	1	PLCXD3	phosphatidylinositol-specific phospholipase C, X domain containing 3
hsa-miR-525-3p	1	0	1	0	1	1	IP6K1	inositol hexakisphosphate kinase 1
hsa-miR-525-3p	1	0	1	1	0	0	RPS6KA1	ribosomal protein S6 kinase, 90kDa, polypeptide 1
hsa-miR-525-3p	1	0	1	1	1	1	CTDSPL	CTD (carboxy-terminal domain, RNA polymerase II, polypeptide A) small phosphatase-like
hsa-miR-525-3p	1	0	1	1	1	1	FAM171A1	family with sequence similarity 171, member A1
hsa-miR-525-3p	0	0	1	1	1	1	NCMAP	noncompact myelin associated protein
hsa-miR-525-3p	0	0	1	1	1	1	FAM53A	family with sequence similarity 53, member A
hsa-miR-525-3p	0	0	1	1	1	1	C2orf68	chromosome 2 open reading frame 68
hsa-miR-525-3p	1	0	1	1	1	1	PHF6	PHD finger protein 6
hsa-miR-525-3p	1	0	1	1	1	1	KCTD21	potassium channel tetramerisation domain containing 21
hsa-miR-525-3p	1	0	1	1	1	1	MYCL1	v-myc myelocytomatosis viral oncogene homolog 1, lung carcinoma derived (avian)
hsa-miR-525-3p	1	0	1	0	1	1	SRGAP3	SLIT-ROBO Rho GTPase activating protein 3
hsa-miR-525-3p	1	0	1	0	1	1	RYR2	ryanodine receptor 2 (cardiac)
hsa-miR-525-3p	1	0	1	1	1	1	NCALD	neurocalcin delta
hsa-miR-525-3p	0	0	1	1	1	1	NUPR1	nuclear protein, transcriptional regulator, 1
hsa-miR-525-3p	1	0	1	1	1	1	KDM5A	lysine (K)-specific demethylase 5A
hsa-miR-525-3p	0	0	1	0	1	1	SSTR1	somatostatin receptor 1
hsa-miR-525-3p	0	0	1	0	1	1	WTH3DI	RAB6C-like
hsa-miR-525-3p	1	0	1	0	0	0	FAM127B	family with sequence similarity 127, member B
hsa-miR-525-3p	0	0	1	1	0	0	LMTK3	lemur tyrosine kinase 3
hsa-miR-525-3p	0	0	1	1	0	0	PRKDC	protein kinase, DNA-activated, catalytic polypeptide
hsa-miR-525-3p	0	0	1	1	1	1	PLIN2	perilipin 2
hsa-miR-525-3p	0	0	1	1	1	1	TNFSF8	tumor necrosis factor (ligand) superfamily, member 8
hsa-miR-525-3p	1	0	1	0	1	1	EFNB3	ephrin-B3
hsa-miR-525-3p	1	0	1	0	1	1	B4GALT1	UDP-Gal:betaGlcNAc beta 1,4- galactosyltransferase, polypeptide 1
hsa-miR-525-3p	1	0	1	1	1	1	ADRBK1	adrenergic, beta, receptor kinase 1
hsa-miR-525-3p	1	0	1	1	1	1	EGR1	early growth response 1
hsa-miR-525-3p	0	0	1	1	0	0	GJA4	gap junction protein, alpha 4, 37kDa
hsa-miR-525-3p	0	0	1	1	0	0	GPX3	glutathione peroxidase 3 (plasma)
hsa-miR-525-3p	0	0	1	0	1	1	GYPA	glycophorin A (MNS blood group)
hsa-miR-525-3p	1	0	1	1	0	0	INHBB	inhibin, beta B
hsa-miR-525-3p	1	0	1	1	1	1	KCNA5	potassium voltage-gated channel, shaker-related subfamily, member 5
hsa-miR-525-3p	1	0	1	1	1	1	KCNA6	potassium voltage-gated channel, shaker-related subfamily, member 6
hsa-miR-525-3p	1	0	1	1	1	1	KPNB1	karyopherin (importin) beta 1
hsa-miR-525-3p	0	0	1	1	0	0	KRT85	keratin 85
hsa-miR-525-3p	1	0	1	1	1	1	ADAM11	ADAM metallopeptidase domain 11
hsa-miR-525-3p	1	0	1	1	1	1	ME1	malic enzyme 1, NADP(+)-dependent, cytosolic
hsa-miR-525-3p	1	0	1	1	1	1	NPAT	nuclear protein, ataxia-telangiectasia locus
hsa-miR-525-3p	1	0	1	0	1	1	NRAS	neuroblastoma RAS viral (v-ras) oncogene homolog
hsa-miR-525-3p	1	0	1	1	1	1	OSBP	oxysterol binding protein
hsa-miR-525-3p	0	0	1	1	1	1	PDE2A	phosphodiesterase 2A, cGMP-stimulated
hsa-miR-525-3p	0	0	1	1	1	1	PIM1	pim-1 oncogene
hsa-miR-525-3p	0	0	1	1	0	0	PLP2	proteolipid protein 2 (colonic epithelium-enriched)
hsa-miR-525-3p	1	0	1	0	0	0	PPP1R10	protein phosphatase 1, regulatory subunit 10
hsa-miR-525-3p	0	0	1	0	0	0	PSMB10	proteasome (prosome, macropain) subunit, beta type, 10
hsa-miR-525-3p	0	0	1	1	0	0	SLIT1	slit homolog 1 (Drosophila)
hsa-miR-525-3p	0	0	1	1	1	1	STRN	striatin, calmodulin binding protein
hsa-miR-525-3p	1	0	1	1	1	1	TFAP2B	transcription factor AP-2 beta (activating enhancer binding protein 2 beta)
hsa-miR-525-3p	1	0	1	1	1	1	VAV2	vav 2 guanine nucleotide exchange factor
hsa-miR-525-3p	1	0	1	0	1	1	BSN	bassoon (presynaptic cytomatrix protein)
hsa-miR-525-3p	0	0	1	1	0	0	HIST1H2BC	histone cluster 1, H2bc
hsa-miR-525-3p	1	0	1	1	1	1	BARX2	BARX homeobox 2
hsa-miR-525-3p	0	0	1	1	1	1	SLC25A12	solute carrier family 25 (aspartate/glutamate carrier), member 12
hsa-miR-525-3p	0	0	1	1	1	1	TNFSF13	tumor necrosis factor (ligand) superfamily, member 13
hsa-miR-525-3p	0	0	1	1	1	1	PRPF4B	PRP4 pre-mRNA processing factor 4 homolog B (yeast)
hsa-miR-525-3p	0	0	1	0	1	1	HABP2	hyaluronan binding protein 2
hsa-miR-525-3p	1	0	1	0	1	1	AKAP6	A kinase (PRKA) anchor protein 6
hsa-miR-525-3p	1	0	1	1	1	1	DAG1	dystroglycan 1 (dystrophin-associated glycoprotein 1)
hsa-miR-525-3p	1	0	1	1	1	1	DLX2	distal-less homeobox 2
hsa-miR-525-3p	1	0	1	1	1	1	EFNB1	ephrin-B1
hsa-miR-525-3p	1	0	1	1	0	0	HOXC6	homeobox C6
hsa-miR-525-3p	1	0	1	1	1	1	BZRAP1	benzodiazapine receptor (peripheral) associated protein 1
hsa-miR-525-3p	1	0	1	0	1	1	VAMP3	vesicle-associated membrane protein 3 (cellubrevin)
hsa-miR-525-3p	1	0	1	1	1	1	FXR2	fragile X mental retardation, autosomal homolog 2
hsa-miR-525-3p	1	0	1	1	1	1	HAS3	hyaluronan synthase 3
hsa-miR-525-3p	1	0	1	1	1	1	ABCA1	ATP-binding cassette, sub-family A (ABC1), member 1
hsa-miR-525-3p	0	0	1	1	1	1	HES1	hairy and enhancer of split 1, (Drosophila)
hsa-miR-525-3p	1	0	1	1	1	1	MAT2A	methionine adenosyltransferase II, alpha
hsa-miR-525-3p	1	0	1	1	1	1	TMEM50B	transmembrane protein 50B
hsa-miR-525-3p	1	0	1	1	1	1	PKN2	protein kinase N2
hsa-miR-525-3p	1	0	1	0	1	1	GNAI3	guanine nucleotide binding protein (G protein), alpha inhibiting activity polypeptide 3
hsa-miR-525-3p	1	0	1	0	1	1	IGF2BP1	insulin-like growth factor 2 mRNA binding protein 1
hsa-miR-525-3p	1	0	1	1	1	1	NR4A3	nuclear receptor subfamily 4, group A, member 3
hsa-miR-525-3p	1	0	1	1	1	1	PALM2-AKAP2	PALM2-AKAP2 readthrough
hsa-miR-525-3p	1	0	1	1	0	0	GRIN1	glutamate receptor, ionotropic, N-methyl D-aspartate 1
hsa-miR-525-3p	0	0	1	1	1	1	C3orf27	chromosome 3 open reading frame 27
hsa-miR-525-3p	0	0	1	1	1	1	KLRK1	killer cell lectin-like receptor subfamily K, member 1
hsa-miR-525-3p	0	0	1	1	1	1	FOXI1	forkhead box I1
hsa-miR-525-3p	1	0	1	0	1	1	FZD4	frizzled family receptor 4
hsa-miR-525-3p	1	0	1	1	1	1	RHOQ	ras homolog family member Q
hsa-miR-525-3p	1	0	1	0	1	1	MYO10	myosin X
hsa-miR-525-3p	1	0	1	1	1	1	STK39	serine threonine kinase 39
hsa-miR-525-3p	0	0	1	1	1	1	N6AMT1	N-6 adenine-specific DNA methyltransferase 1 (putative)
hsa-miR-525-3p	1	0	1	1	1	1	AK2	adenylate kinase 2
hsa-miR-525-3p	1	0	1	1	1	1	SOCS5	suppressor of cytokine signaling 5
hsa-miR-525-3p	1	0	1	0	1	1	LIMD1	LIM domains containing 1
hsa-miR-525-3p	1	0	1	1	1	1	ZBTB11	zinc finger and BTB domain containing 11
hsa-miR-525-3p	1	0	1	0	1	1	EDEM1	ER degradation enhancer, mannosidase alpha-like 1
hsa-miR-525-3p	1	0	1	1	1	1	DAZAP2	DAZ associated protein 2
hsa-miR-525-3p	1	0	1	1	1	1	SV2A	synaptic vesicle glycoprotein 2A
hsa-miR-525-3p	1	0	1	0	1	1	ZBTB40	zinc finger and BTB domain containing 40
hsa-miR-525-3p	1	0	1	1	0	0	CIC	capicua homolog (Drosophila)
hsa-miR-525-3p	1	0	1	1	1	1	TBC1D9	TBC1 domain family, member 9 (with GRAM domain)
hsa-miR-525-3p	1	0	1	0	1	1	LARP4B	La ribonucleoprotein domain family, member 4B
hsa-miR-525-3p	0	0	1	1	1	1	FBXO28	F-box protein 28
hsa-miR-525-3p	0	0	1	1	1	1	DOCK9	dedicator of cytokinesis 9
hsa-miR-525-3p	1	0	1	1	1	1	SLITRK5	SLIT and NTRK-like family, member 5
hsa-miR-525-3p	1	0	1	0	1	1	PPP1R16B	protein phosphatase 1, regulatory subunit 16B
hsa-miR-525-3p	0	0	1	1	1	1	CCDC69	coiled-coil domain containing 69
hsa-miR-525-3p	0	0	1	1	1	1	C10orf12	chromosome 10 open reading frame 12
hsa-miR-525-3p	0	0	1	1	1	1	RSL24D1	ribosomal L24 domain containing 1
hsa-miR-525-3p	1	0	1	1	1	1	RAPGEFL1	Rap guanine nucleotide exchange factor (GEF)-like 1
hsa-miR-525-3p	0	0	1	1	1	1	BET1L	blocked early in transport 1 homolog (S. cerevisiae)-like
hsa-miR-525-3p	1	0	1	1	1	1	FBXO34	F-box protein 34
hsa-miR-525-3p	1	0	1	1	1	1	FAM178A	family with sequence similarity 178, member A
hsa-miR-525-3p	1	0	1	1	1	1	UBA6	ubiquitin-like modifier activating enzyme 6
hsa-miR-525-3p	0	0	1	1	1	1	NPAP1	nuclear pore associated protein 1
hsa-miR-525-3p	1	0	1	1	1	1	PCDH9	protocadherin 9
hsa-miR-525-3p	0	0	1	1	1	1	SHROOM4	shroom family member 4
hsa-miR-525-3p	1	0	1	1	1	1	ZNF608	zinc finger protein 608
hsa-miR-525-3p	1	0	1	1	1	1	RANBP10	RAN binding protein 10
hsa-miR-525-3p	1	0	1	0	1	1	GPAM	glycerol-3-phosphate acyltransferase, mitochondrial
hsa-miR-525-3p	0	0	1	1	1	1	TLX3	T-cell leukemia homeobox 3
hsa-miR-525-3p	0	0	1	1	1	1	PRDM13	PR domain containing 13
hsa-miR-525-3p	1	0	1	1	1	1	GNB4	guanine nucleotide binding protein (G protein), beta polypeptide 4
hsa-miR-525-3p	1	0	1	1	1	1	ATP2B3	ATPase, Ca++ transporting, plasma membrane 3
hsa-miR-525-3p	1	0	1	1	1	1	GPR88	G protein-coupled receptor 88
hsa-miR-525-3p	1	0	1	1	1	1	FAM160B2	family with sequence similarity 160, member B2
hsa-miR-525-3p	0	0	1	1	1	1	OSBPL11	oxysterol binding protein-like 11
hsa-miR-525-3p	1	0	1	1	1	1	RFX7	regulatory factor X, 7
hsa-miR-525-3p	1	0	1	0	1	1	BCL11B	B-cell CLL/lymphoma 11B (zinc finger protein)
hsa-miR-525-3p	1	0	1	1	1	1	EBF1	early B-cell factor 1
hsa-miR-525-3p	0	0	1	1	1	1	GGNBP2	gametogenetin binding protein 2
hsa-miR-525-3p	1	0	1	1	1	1	L2HGDH	L-2-hydroxyglutarate dehydrogenase
hsa-miR-525-3p	1	0	1	1	1	1	MCF2L	MCF.2 cell line derived transforming sequence-like
hsa-miR-525-3p	1	0	1	0	1	1	SRCIN1	SRC kinase signaling inhibitor 1
hsa-miR-525-3p	1	0	1	1	1	1	FAM117A	family with sequence similarity 117, member A
hsa-miR-525-3p	1	0	1	1	1	1	SNX27	sorting nexin family member 27
hsa-miR-525-3p	1	0	1	0	1	1	THAP2	THAP domain containing, apoptosis associated protein 2
hsa-miR-525-3p	1	0	1	1	1	1	OTP	orthopedia homeobox
hsa-miR-525-3p	0	0	1	1	1	1	MAGT1	magnesium transporter 1
hsa-miR-525-3p	0	0	1	0	1	1	RAB6C	RAB6C, member RAS oncogene family
hsa-miR-525-3p	1	0	1	1	1	1	ANTXR1	anthrax toxin receptor 1
hsa-miR-525-3p	1	0	1	1	1	1	SLITRK6	SLIT and NTRK-like family, member 6
hsa-miR-525-3p	1	0	1	1	1	1	GLIS2	GLIS family zinc finger 2
hsa-miR-525-3p	1	0	1	1	1	1	ADAM19	ADAM metallopeptidase domain 19
hsa-miR-525-3p	0	0	1	1	1	1	NACC1	nucleus accumbens associated 1, BEN and BTB (POZ) domain containing
hsa-miR-525-3p	1	0	1	1	1	1	NAA15	N(alpha)-acetyltransferase 15, NatA auxiliary subunit
hsa-miR-525-3p	1	0	1	1	1	1	BTN2A1	butyrophilin, subfamily 2, member A1
hsa-miR-525-3p	1	0	1	1	1	1	FAM122A	family with sequence similarity 122A
hsa-miR-525-3p	1	0	1	1	1	1	ICA1L	islet cell autoantigen 1,69kDa-like
hsa-miR-525-3p	0	0	1	1	1	1	SLC25A46	solute carrier family 25, member 46
hsa-miR-525-3p	1	0	1	1	1	1	FAM91A1	family with sequence similarity 91, member A1
hsa-miR-525-3p	0	0	1	1	1	1	SLFN5	schlafen family member 5
hsa-miR-525-3p	1	0	1	1	1	1	ANKRD23	ankyrin repeat domain 23
hsa-miR-525-3p	0	0	1	1	0	0	TCEB3C	transcription elongation factor B polypeptide 3C (elongin A3)
hsa-miR-525-3p	0	0	1	1	0	0	TIGD3	tigger transposable element derived 3
hsa-miR-525-3p	1	0	1	1	1	1	SEPT6	septin 6
hsa-miR-525-3p	1	0	1	1	1	1	UBTD2	ubiquitin domain containing 2
hsa-miR-525-3p	1	0	1	1	0	0	C9orf41	chromosome 9 open reading frame 41
hsa-miR-525-3p	1	0	1	1	1	1	NAP1L5	nucleosome assembly protein 1-like 5
hsa-miR-525-3p	1	0	1	1	1	1	POM121	POM121 transmembrane nucleoporin
hsa-miR-525-3p	0	0	1	1	1	1	TNFSF12-TNFSF13	TNFSF12-TNFSF13 readthrough
hsa-miR-525-3p	0	0	1	1	1	1	KCNH5	potassium voltage-gated channel, subfamily H (eag-related), member 5
hsa-miR-525-3p	0	0	1	1	0	0	SLITRK4	SLIT and NTRK-like family, member 4
hsa-miR-525-3p	1	0	1	1	1	1	FAM117B	family with sequence similarity 117, member B
hsa-miR-525-3p	1	0	1	0	1	1	KSR2	kinase suppressor of ras 2
hsa-miR-525-3p	0	0	1	1	1	1	CLEC14A	C-type lectin domain family 14, member A
hsa-miR-525-3p	0	0	1	1	1	1	SESTD1	SEC14 and spectrin domains 1
hsa-miR-525-3p	1	0	1	1	1	1	TMEM26	transmembrane protein 26
hsa-miR-525-3p	0	0	1	0	1	1	SLCO4C1	solute carrier organic anion transporter family, member 4C1
hsa-miR-525-3p	0	0	1	0	1	1	PITPNC1	phosphatidylinositol transfer protein, cytoplasmic 1
hsa-miR-525-3p	1	0	1	1	1	1	ADAT2	adenosine deaminase, tRNA-specific 2
hsa-miR-525-3p	1	0	1	1	1	1	TMEM229B	transmembrane protein 229B
hsa-miR-525-3p	1	0	1	1	1	1	BCL9L	B-cell CLL/lymphoma 9-like
hsa-miR-525-3p	1	0	1	1	1	1	SUMF1	sulfatase modifying factor 1
hsa-miR-525-3p	1	0	1	1	1	1	SPTY2D1	SPT2, Suppressor of Ty, domain containing 1 (S. cerevisiae)
hsa-miR-525-3p	1	0	1	1	1	1	ADAMTS6	ADAM metallopeptidase with thrombospondin type 1 motif, 6
hsa-miR-525-3p	1	0	1	1	1	1	E2F7	E2F transcription factor 7
hsa-miR-525-3p	0	0	1	0	1	1	TP73-AS1	TP73 antisense RNA 1
hsa-miR-525-3p	0	0	1	0	0	0	GTF2IP1	general transcription factor IIi, pseudogene 1
hsa-miR-525-3p	0	0	1	0	0	0	MSX2P1	msh homeobox 2 pseudogene 1
hsa-miR-525-3p	0	0	1	0	0	0	HOXA11-AS	HOXA11 antisense RNA
hsa-miR-525-3p	0	0	1	0	0	0	MALAT1	metastasis associated lung adenocarcinoma transcript 1 (non-protein coding)
hsa-miR-525-3p	0	0	1	0	0	0	SNORA60	small nucleolar RNA, H/ACA box 60
hsa-miR-525-3p	0	0	1	0	0	0	HSP90AB2P	heat shock protein 90kDa alpha (cytosolic), class B member 2, pseudogene
hsa-miR-525-3p	0	0	1	1	0	0	GPR17	G protein-coupled receptor 17
hsa-miR-525-3p	0	0	1	1	0	0	CD79B	CD79b molecule, immunoglobulin-associated beta
hsa-miR-525-3p	0	0	0	1	0	0	KRT33A	keratin 33A
hsa-miR-525-3p	0	0	0	1	1	1	ABHD5	abhydrolase domain containing 5
hsa-miR-525-3p	0	0	0	1	0	0	TARBP1	TAR (HIV-1) RNA binding protein 1
hsa-miR-525-3p	0	0	0	1	0	0	BEST2	bestrophin 2
hsa-miR-525-3p	0	0	1	1	1	1	GRN	granulin
hsa-miR-525-3p	1	0	1	1	1	1	PPP1R3F	protein phosphatase 1, regulatory subunit 3F
hsa-miR-525-3p	0	0	1	1	1	1	HEBP2	heme binding protein 2
hsa-miR-525-3p	0	0	1	1	1	1	CREB3L3	cAMP responsive element binding protein 3-like 3
hsa-miR-525-3p	0	0	1	1	0	0	LMCD1	LIM and cysteine-rich domains 1
hsa-miR-525-3p	0	0	0	1	0	0	FAM50A	family with sequence similarity 50, member A
hsa-miR-525-3p	1	0	1	1	1	1	KDM4B	lysine (K)-specific demethylase 4B
hsa-miR-525-3p	0	0	0	1	0	0	ACTL6B	actin-like 6B
hsa-miR-525-3p	1	0	1	1	1	1	PRSS22	protease, serine, 22
hsa-miR-525-3p	0	0	0	1	0	0	DRD4	dopamine receptor D4
hsa-miR-525-3p	0	0	0	1	1	1	C12orf5	chromosome 12 open reading frame 5
hsa-miR-525-3p	0	0	1	1	0	0	SIRT4	sirtuin 4
hsa-miR-525-3p	0	0	1	1	1	1	CHRD	chordin
hsa-miR-525-3p	0	0	0	1	1	1	LAMB4	laminin, beta 4
hsa-miR-525-3p	0	0	0	1	0	0	TMED1	transmembrane emp24 protein transport domain containing 1
hsa-miR-525-3p	0	0	0	1	0	0	CATSPERG	catsper channel auxiliary subunit gamma
hsa-miR-525-3p	0	0	0	1	1	1	SERPIND1	serpin peptidase inhibitor, clade D (heparin cofactor), member 1
hsa-miR-525-3p	1	0	1	1	1	1	PATZ1	POZ (BTB) and AT hook containing zinc finger 1
hsa-miR-525-3p	0	0	0	1	0	0	LMF2	lipase maturation factor 2
hsa-miR-525-3p	0	0	1	1	0	0	MCM5	minichromosome maintenance complex component 5
hsa-miR-525-3p	0	0	1	1	0	0	GSTZ1	glutathione S-transferase zeta 1
hsa-miR-525-3p	1	0	0	1	0	0	ZNF516	zinc finger protein 516
hsa-miR-525-3p	0	0	1	1	0	0	CTSH	cathepsin H
hsa-miR-525-3p	0	0	0	1	0	0	VPS18	vacuolar protein sorting 18 homolog (S. cerevisiae)
hsa-miR-525-3p	0	0	1	1	1	1	FGL1	fibrinogen-like 1
hsa-miR-525-3p	1	0	1	1	1	1	SNRNP70	small nuclear ribonucleoprotein 70kDa (U1)
hsa-miR-525-3p	0	0	0	1	1	1	PEX11G	peroxisomal biogenesis factor 11 gamma
hsa-miR-525-3p	0	0	0	1	0	0	CCDC130	coiled-coil domain containing 130
hsa-miR-525-3p	0	0	0	1	1	1	TGFB1	transforming growth factor, beta 1
hsa-miR-525-3p	0	0	1	1	1	1	GCDH	glutaryl-CoA dehydrogenase
hsa-miR-525-3p	0	0	1	1	0	0	PSENEN	presenilin enhancer 2 homolog (C. elegans)
hsa-miR-525-3p	0	0	1	1	0	0	DLX5	distal-less homeobox 5
hsa-miR-525-3p	1	0	1	1	1	1	LSM5	LSM5 homolog, U6 small nuclear RNA associated (S. cerevisiae)
hsa-miR-525-3p	0	0	1	1	0	0	PLOD3	procollagen-lysine, 2-oxoglutarate 5-dioxygenase 3
hsa-miR-525-3p	0	0	0	1	0	0	ZNF688	zinc finger protein 688
hsa-miR-525-3p	0	0	0	1	1	1	ZNF785	zinc finger protein 785
hsa-miR-525-3p	1	0	1	1	1	1	VIM	vimentin
hsa-miR-525-3p	1	0	1	1	0	0	SLC25A39	solute carrier family 25, member 39
hsa-miR-525-3p	0	0	0	1	1	1	SUPT4H1	suppressor of Ty 4 homolog 1 (S. cerevisiae)
hsa-miR-525-3p	1	0	0	1	1	1	WNT3	wingless-type MMTV integration site family, member 3
hsa-miR-525-3p	0	0	0	1	0	0	HSD17B1	hydroxysteroid (17-beta) dehydrogenase 1
hsa-miR-525-3p	0	0	1	1	1	1	PUS3	pseudouridylate synthase 3
hsa-miR-525-3p	0	0	1	1	1	1	CCDC86	coiled-coil domain containing 86
hsa-miR-525-3p	0	0	1	1	0	0	MVK	mevalonate kinase
hsa-miR-525-3p	0	0	0	1	0	0	MYF6	myogenic factor 6 (herculin)
hsa-miR-525-3p	1	0	1	1	1	1	ELK3	ELK3, ETS-domain protein (SRF accessory protein 2)
hsa-miR-525-3p	0	0	0	1	0	0	OGFOD2	2-oxoglutarate and iron-dependent oxygenase domain containing 2
hsa-miR-525-3p	0	0	1	1	0	0	H2AFJ	H2A histone family, member J
hsa-miR-525-3p	0	0	0	1	1	1	GNB3	guanine nucleotide binding protein (G protein), beta polypeptide 3
hsa-miR-525-3p	1	0	1	1	1	1	SNX3	sorting nexin 3
hsa-miR-525-3p	0	0	1	1	1	1	LY86	lymphocyte antigen 86
hsa-miR-525-3p	1	0	1	1	0	0	APBB3	amyloid beta (A4) precursor protein-binding, family B, member 3
hsa-miR-525-3p	0	0	1	1	1	1	AGXT2	alanine--glyoxylate aminotransferase 2
hsa-miR-525-3p	0	0	1	1	0	0	MLH1	mutL homolog 1, colon cancer, nonpolyposis type 2 (E. coli)
hsa-miR-525-3p	1	0	1	1	1	1	TEX14	testis expressed 14
hsa-miR-525-3p	1	0	1	1	1	1	ACHE	acetylcholinesterase
hsa-miR-525-3p	0	0	1	1	1	1	HOXA7	homeobox A7
hsa-miR-525-3p	0	0	0	1	0	0	ARHGAP40	Rho GTPase activating protein 40
hsa-miR-525-3p	1	0	1	1	0	0	NAGK	N-acetylglucosamine kinase
hsa-miR-525-3p	0	0	1	1	0	0	LIPE	lipase, hormone-sensitive
hsa-miR-525-3p	0	0	1	1	0	0	TREM1	triggering receptor expressed on myeloid cells 1
hsa-miR-525-3p	0	0	0	1	0	0	PSPN	persephin
hsa-miR-525-3p	1	0	1	1	1	1	RALY	RNA binding protein, autoantigenic (hnRNP-associated with lethal yellow homolog (mouse))
hsa-miR-525-3p	0	0	1	1	1	1	RRAS	related RAS viral (r-ras) oncogene homolog
hsa-miR-525-3p	1	0	0	1	0	0	PRR12	proline rich 12
hsa-miR-525-3p	0	0	0	1	0	0	TAS2R5	taste receptor, type 2, member 5
hsa-miR-525-3p	0	0	1	1	0	0	TUBGCP6	tubulin, gamma complex associated protein 6
hsa-miR-525-3p	0	0	1	1	0	0	GCAT	glycine C-acetyltransferase
hsa-miR-525-3p	1	0	1	1	0	0	SDF2L1	stromal cell-derived factor 2-like 1
hsa-miR-525-3p	0	0	0	1	1	1	AP1M2	adaptor-related protein complex 1, mu 2 subunit
hsa-miR-525-3p	1	0	0	1	1	1	SBNO2	strawberry notch homolog 2 (Drosophila)
hsa-miR-525-3p	1	0	1	1	1	1	KLF16	Kruppel-like factor 16
hsa-miR-525-3p	0	0	0	1	0	0	TMEM8A	transmembrane protein 8A
hsa-miR-525-3p	0	0	1	1	0	0	CERS4	ceramide synthase 4
hsa-miR-525-3p	0	0	1	1	0	0	LILRA1	leukocyte immunoglobulin-like receptor, subfamily A (with TM domain), member 1
hsa-miR-525-3p	0	0	0	1	0	0	GAMT	guanidinoacetate N-methyltransferase
hsa-miR-525-3p	1	0	1	1	1	1	ARPC1B	actin related protein 2/3 complex, subunit 1B, 41kDa
hsa-miR-525-3p	0	0	0	1	1	1	LSM4	LSM4 homolog, U6 small nuclear RNA associated (S. cerevisiae)
hsa-miR-525-3p	1	0	1	1	0	0	JUND	jun D proto-oncogene
hsa-miR-525-3p	0	0	1	1	0	0	SAG	S-antigen; retina and pineal gland (arrestin)
hsa-miR-525-3p	1	0	1	1	1	1	MNX1	motor neuron and pancreas homeobox 1
hsa-miR-525-3p	0	0	0	1	0	0	FAM22F	family with sequence similarity 22, member F
hsa-miR-525-3p	0	0	1	1	0	0	C19orf40	chromosome 19 open reading frame 40
hsa-miR-525-3p	1	0	1	1	0	0	WBP2	WW domain binding protein 2
hsa-miR-525-3p	0	0	0	1	0	0	HSPA12B	heat shock 70kD protein 12B
hsa-miR-525-3p	0	0	0	1	0	0	RHBG	Rh family, B glycoprotein (gene/pseudogene)
hsa-miR-525-3p	0	0	0	1	0	0	PEMT	phosphatidylethanolamine N-methyltransferase
hsa-miR-525-3p	0	0	1	1	0	0	TEX13A	testis expressed 13A
hsa-miR-525-3p	1	0	1	1	1	1	FAM104A	family with sequence similarity 104, member A
hsa-miR-525-3p	1	0	1	1	0	0	CSNK1G2	casein kinase 1, gamma 2
hsa-miR-525-3p	1	0	0	1	0	0	PI4KA	phosphatidylinositol 4-kinase, catalytic, alpha
hsa-miR-525-3p	0	0	1	1	0	0	KRBA1	KRAB-A domain containing 1
hsa-miR-525-3p	0	0	1	1	0	0	FAM127A	family with sequence similarity 127, member A
hsa-miR-525-3p	1	0	1	1	1	1	APLNR	apelin receptor
hsa-miR-525-3p	1	0	0	1	1	1	USP30	ubiquitin specific peptidase 30
hsa-miR-525-3p	0	0	1	1	1	1	HRK	harakiri, BCL2 interacting protein (contains only BH3 domain)
hsa-miR-525-3p	0	0	1	1	1	1	MRAP2	melanocortin 2 receptor accessory protein 2
hsa-miR-525-3p	0	0	1	1	0	0	ITGA7	integrin, alpha 7
hsa-miR-525-3p	0	0	0	1	0	0	SMPD2	sphingomyelin phosphodiesterase 2, neutral membrane (neutral sphingomyelinase)
hsa-miR-525-3p	0	0	1	1	1	1	EGR4	early growth response 4
hsa-miR-525-3p	0	0	0	1	1	1	BCMO1	beta-carotene 15,15'-monooxygenase 1
hsa-miR-525-3p	0	0	0	1	0	0	FBXL8	F-box and leucine-rich repeat protein 8
hsa-miR-525-3p	0	0	1	1	1	1	REV1	REV1, polymerase (DNA directed)
hsa-miR-525-3p	0	0	1	1	0	0	CFC1	cripto, FRL-1, cryptic family 1
hsa-miR-525-3p	0	0	1	1	1	1	MRPS18B	mitochondrial ribosomal protein S18B
hsa-miR-525-3p	0	0	1	1	1	1	CCDC90B	coiled-coil domain containing 90B
hsa-miR-525-3p	0	0	1	1	1	1	USP2	ubiquitin specific peptidase 2
hsa-miR-525-3p	0	0	1	1	0	0	NOX5	NADPH oxidase, EF-hand calcium binding domain 5
hsa-miR-525-3p	0	0	1	1	0	0	TMEM62	transmembrane protein 62
hsa-miR-525-3p	0	0	0	1	1	1	BCL2L10	BCL2-like 10 (apoptosis facilitator)
hsa-miR-525-3p	0	0	1	1	0	0	IRAK3	interleukin-1 receptor-associated kinase 3
hsa-miR-525-3p	1	0	0	1	1	1	SCARB1	scavenger receptor class B, member 1
hsa-miR-525-3p	0	0	1	1	1	1	SLC6A4	solute carrier family 6 (neurotransmitter transporter, serotonin), member 4
hsa-miR-525-3p	0	0	0	1	0	0	TRPV4	transient receptor potential cation channel, subfamily V, member 4
hsa-miR-525-3p	0	0	1	1	1	1	PFDN1	prefoldin subunit 1
hsa-miR-525-3p	0	0	1	1	1	1	SPPL2A	signal peptide peptidase like 2A
hsa-miR-525-3p	0	0	1	1	0	0	APH1B	anterior pharynx defective 1 homolog B (C. elegans)
hsa-miR-525-3p	0	0	1	1	1	1	RHBDF1	rhomboid 5 homolog 1 (Drosophila)
hsa-miR-525-3p	0	0	1	1	0	0	DNAH9	dynein, axonemal, heavy chain 9
hsa-miR-525-3p	0	0	0	1	0	0	ATP4A	ATPase, H+/K+ exchanging, alpha polypeptide
hsa-miR-525-3p	0	0	1	1	0	0	ZBTB32	zinc finger and BTB domain containing 32
hsa-miR-525-3p	0	0	1	1	0	0	TMEM59L	transmembrane protein 59-like
hsa-miR-525-3p	1	0	1	1	1	1	SAMHD1	SAM domain and HD domain 1
hsa-miR-525-3p	0	0	0	1	0	0	C19orf10	chromosome 19 open reading frame 10
hsa-miR-525-3p	0	0	0	1	1	1	MAP2K2	mitogen-activated protein kinase kinase 2
hsa-miR-525-3p	0	0	0	1	0	0	GNA15	guanine nucleotide binding protein (G protein), alpha 15 (Gq class)
hsa-miR-525-3p	0	0	1	1	0	0	NXF5	nuclear RNA export factor 5
hsa-miR-525-3p	0	0	1	1	0	0	ASPA	aspartoacylase
hsa-miR-525-3p	0	0	0	1	0	0	TTC40	tetratricopeptide repeat domain 40
hsa-miR-525-3p	0	0	1	1	1	1	SLC25A17	solute carrier family 25 (mitochondrial carrier; peroxisomal membrane protein, 34kDa), member 17
hsa-miR-525-3p	0	0	0	1	0	0	DBH	dopamine beta-hydroxylase (dopamine beta-monooxygenase)
hsa-miR-525-3p	0	0	1	1	1	1	TOLLIP	toll interacting protein
hsa-miR-525-3p	1	0	1	1	0	0	ARHGEF17	Rho guanine nucleotide exchange factor (GEF) 17
hsa-miR-525-3p	0	0	1	1	1	1	EPCAM	epithelial cell adhesion molecule
hsa-miR-525-3p	0	0	0	1	0	0	NDUFS3	NADH dehydrogenase (ubiquinone) Fe-S protein 3, 30kDa (NADH-coenzyme Q reductase)
hsa-miR-525-3p	0	0	0	1	0	0	CAPG	capping protein (actin filament), gelsolin-like
hsa-miR-525-3p	0	0	0	1	1	1	GTF3C3	general transcription factor IIIC, polypeptide 3, 102kDa
hsa-miR-525-3p	0	0	0	1	1	1	PET112	PET112 homolog (yeast)
hsa-miR-525-3p	1	0	1	1	0	0	CHST10	carbohydrate sulfotransferase 10
hsa-miR-525-3p	1	0	1	1	1	1	FAM13A	family with sequence similarity 13, member A
hsa-miR-525-3p	1	0	1	1	1	1	GRIA3	glutamate receptor, ionotropic, AMPA 3
hsa-miR-525-3p	0	0	1	1	0	0	ADAM23	ADAM metallopeptidase domain 23
hsa-miR-525-3p	0	0	1	1	1	1	KRT24	keratin 24
hsa-miR-525-3p	1	0	1	1	1	1	MGLL	monoglyceride lipase
hsa-miR-525-3p	0	0	1	1	1	1	CCDC99	coiled-coil domain containing 99
hsa-miR-525-3p	0	0	1	1	1	1	PITX1	paired-like homeodomain 1
hsa-miR-525-3p	0	0	1	1	0	0	MCCC1	methylcrotonoyl-CoA carboxylase 1 (alpha)
hsa-miR-525-3p	0	0	1	1	1	1	CPT1A	carnitine palmitoyltransferase 1A (liver)
hsa-miR-525-3p	0	0	0	1	1	1	PMS2	PMS2 postmeiotic segregation increased 2 (S. cerevisiae)
hsa-miR-525-3p	0	0	1	1	1	1	MYO3A	myosin IIIA
hsa-miR-525-3p	1	0	0	1	0	0	PIK3C2A	phosphatidylinositol-4-phosphate 3-kinase, catalytic subunit type 2 alpha
hsa-miR-525-3p	0	0	0	1	0	0	HPX	hemopexin
hsa-miR-525-3p	0	0	1	1	0	0	NDUFA9	NADH dehydrogenase (ubiquinone) 1 alpha subcomplex, 9, 39kDa
hsa-miR-525-3p	0	0	0	1	0	0	CD27	CD27 molecule
hsa-miR-525-3p	0	0	1	1	0	0	FOXN4	forkhead box N4
hsa-miR-525-3p	1	0	1	1	1	1	MAP3K12	mitogen-activated protein kinase kinase kinase 12
hsa-miR-525-3p	1	0	1	1	0	0	SCAMP2	secretory carrier membrane protein 2
hsa-miR-525-3p	0	0	0	1	0	0	SEPT12	septin 12
hsa-miR-525-3p	1	0	1	1	1	1	FAM59A	family with sequence similarity 59, member A
hsa-miR-525-3p	1	0	1	1	1	1	NPC1	Niemann-Pick disease, type C1
hsa-miR-525-3p	0	0	1	1	0	0	NT5C3L	5'-nucleotidase, cytosolic III-like
hsa-miR-525-3p	0	0	0	1	1	1	LILRA6	leukocyte immunoglobulin-like receptor, subfamily A (with TM domain), member 6
hsa-miR-525-3p	0	0	0	1	0	0	ECSIT	ECSIT homolog (Drosophila)
hsa-miR-525-3p	0	0	1	1	0	0	KLHDC4	kelch domain containing 4
hsa-miR-525-3p	0	0	1	1	1	1	SFT2D2	SFT2 domain containing 2
hsa-miR-525-3p	1	0	1	1	0	0	ADAM15	ADAM metallopeptidase domain 15
hsa-miR-525-3p	0	0	1	1	0	0	CLEC4F	C-type lectin domain family 4, member F
hsa-miR-525-3p	0	0	1	1	0	0	AHSG	alpha-2-HS-glycoprotein
hsa-miR-525-3p	0	0	1	1	1	1	UPF3B	UPF3 regulator of nonsense transcripts homolog B (yeast)
hsa-miR-525-3p	1	0	1	1	1	1	FAM135B	family with sequence similarity 135, member B
hsa-miR-525-3p	1	0	1	1	1	1	ADAMTSL1	ADAMTS-like 1
hsa-miR-525-3p	0	0	0	1	0	0	WDR85	WD repeat domain 85
hsa-miR-525-3p	0	0	1	1	1	1	SLC43A1	solute carrier family 43, member 1
hsa-miR-525-3p	0	0	1	1	0	0	WDR74	WD repeat domain 74
hsa-miR-525-3p	1	0	1	1	1	1	NINL	ninein-like
hsa-miR-525-3p	0	0	0	1	0	0	TMCO3	transmembrane and coiled-coil domains 3
hsa-miR-525-3p	1	0	0	1	1	1	NCAPD3	non-SMC condensin II complex, subunit D3
hsa-miR-525-3p	0	0	1	1	0	0	CFC1B	cripto, FRL-1, cryptic family 1B
hsa-miR-525-3p	0	0	0	1	0	0	C16orf74	chromosome 16 open reading frame 74
hsa-miR-525-3p	0	0	1	1	1	1	NEIL2	nei endonuclease VIII-like 2 (E. coli)
hsa-miR-525-3p	0	0	0	1	1	1	ABCC3	ATP-binding cassette, sub-family C (CFTR/MRP), member 3
hsa-miR-525-3p	0	0	1	1	1	1	AKR1B1	aldo-keto reductase family 1, member B1 (aldose reductase)
hsa-miR-525-3p	0	0	0	1	1	1	LYZL4	lysozyme-like 4
hsa-miR-525-3p	0	0	1	1	1	1	KBTBD5	kelch repeat and BTB (POZ) domain containing 5
hsa-miR-525-3p	0	0	1	1	0	0	DHRS1	dehydrogenase/reductase (SDR family) member 1
hsa-miR-525-3p	0	0	0	1	1	1	COQ5	coenzyme Q5 homolog, methyltransferase (S. cerevisiae)
hsa-miR-525-3p	0	0	1	1	0	0	TMSB15A	thymosin beta 15a
hsa-miR-525-3p	0	0	1	1	1	1	C2orf29	chromosome 2 open reading frame 29
hsa-miR-525-3p	0	0	1	1	1	1	C2orf62	chromosome 2 open reading frame 62
hsa-miR-525-3p	0	0	1	1	1	1	ZFAND2B	zinc finger, AN1-type domain 2B
hsa-miR-525-3p	1	0	1	1	0	0	WNT4	wingless-type MMTV integration site family, member 4
hsa-miR-525-3p	0	0	1	1	0	0	ARAF	v-raf murine sarcoma 3611 viral oncogene homolog
hsa-miR-525-3p	0	0	1	1	1	1	SNF8	SNF8, ESCRT-II complex subunit, homolog (S. cerevisiae)
hsa-miR-525-3p	1	0	1	1	0	0	SHF	Src homology 2 domain containing F
hsa-miR-525-3p	0	0	1	1	0	0	LRRC36	leucine rich repeat containing 36
hsa-miR-525-3p	0	0	1	1	0	0	TNFRSF13C	tumor necrosis factor receptor superfamily, member 13C
hsa-miR-525-3p	0	0	0	1	0	0	PRKD2	protein kinase D2
hsa-miR-525-3p	0	0	0	1	1	1	AP1M1	adaptor-related protein complex 1, mu 1 subunit
hsa-miR-525-3p	0	0	1	1	0	0	CRYAA	crystallin, alpha A
hsa-miR-525-3p	0	0	0	1	0	0	LILRA4	leukocyte immunoglobulin-like receptor, subfamily A (with TM domain), member 4
hsa-miR-525-3p	0	0	0	1	0	0	TMEM190	transmembrane protein 190
hsa-miR-525-3p	0	0	0	1	1	1	PHLDB3	pleckstrin homology-like domain, family B, member 3
hsa-miR-525-3p	0	0	1	1	0	0	NLRX1	NLR family member X1
hsa-miR-525-3p	1	0	1	1	0	0	IER2	immediate early response 2
hsa-miR-525-3p	1	0	1	1	0	0	CELF5	CUGBP, Elav-like family member 5
hsa-miR-525-3p	0	0	1	1	1	1	BAX	BCL2-associated X protein
hsa-miR-525-3p	1	0	1	1	1	1	NAGS	N-acetylglutamate synthase
hsa-miR-525-3p	0	0	1	1	0	0	KRT83	keratin 83
hsa-miR-525-3p	0	0	1	1	1	1	ZNF653	zinc finger protein 653
hsa-miR-525-3p	0	0	1	1	0	0	CCDC42	coiled-coil domain containing 42
hsa-miR-525-3p	0	0	0	1	0	0	NTN3	netrin 3
hsa-miR-525-3p	0	0	1	1	1	1	UBXN1	UBX domain protein 1
hsa-miR-525-3p	1	0	1	1	0	0	C11orf84	chromosome 11 open reading frame 84
hsa-miR-525-3p	0	0	1	1	0	0	PDZK1IP1	PDZK1 interacting protein 1
hsa-miR-525-3p	0	0	1	1	1	1	MEGF6	multiple EGF-like-domains 6
hsa-miR-525-3p	0	0	0	1	1	1	FAM228A	family with sequence similarity 228, member A
hsa-miR-525-3p	1	0	0	1	1	1	MRPS18C	mitochondrial ribosomal protein S18C
hsa-miR-525-3p	0	0	1	1	1	1	ATP1A1	ATPase, Na+/K+ transporting, alpha 1 polypeptide
hsa-miR-525-3p	1	0	0	1	1	1	EOMES	eomesodermin
hsa-miR-525-3p	0	0	0	1	0	0	ITGB5	integrin, beta 5
hsa-miR-525-3p	0	0	1	1	0	0	TMEM41A	transmembrane protein 41A
hsa-miR-525-3p	0	0	1	1	0	0	CCDC36	coiled-coil domain containing 36
hsa-miR-525-3p	0	0	1	1	0	0	GRM2	glutamate receptor, metabotropic 2
hsa-miR-525-3p	0	0	0	1	0	0	AGXT2L1	alanine-glyoxylate aminotransferase 2-like 1
hsa-miR-525-3p	0	0	1	1	0	0	ANXA5	annexin A5
hsa-miR-525-3p	0	0	0	1	1	1	CCDC127	coiled-coil domain containing 127
hsa-miR-525-3p	0	0	0	1	0	0	NOS3	nitric oxide synthase 3 (endothelial cell)
hsa-miR-525-3p	0	0	1	1	1	1	RPP25L	ribonuclease P/MRP 25kDa subunit-like
hsa-miR-525-3p	0	0	1	1	0	0	CCDC171	coiled-coil domain containing 171
hsa-miR-525-3p	0	0	1	1	1	1	SLC7A3	solute carrier family 7 (cationic amino acid transporter, y+ system), member 3
hsa-miR-525-3p	0	0	1	1	0	0	PACSIN3	protein kinase C and casein kinase substrate in neurons 3
hsa-miR-525-3p	0	0	1	1	1	1	GLB1L3	galactosidase, beta 1-like 3
hsa-miR-525-3p	0	0	1	1	1	1	PPFIBP2	PTPRF interacting protein, binding protein 2 (liprin beta 2)
hsa-miR-525-3p	0	0	1	1	0	0	CYB5R2	cytochrome b5 reductase 2
hsa-miR-525-3p	0	0	1	1	0	0	PLD4	phospholipase D family, member 4
hsa-miR-525-3p	1	0	1	1	0	0	TNXB	tenascin XB
hsa-miR-525-3p	1	0	1	1	1	1	ZNF592	zinc finger protein 592
hsa-miR-525-3p	0	0	1	1	1	1	MYH11	myosin, heavy chain 11, smooth muscle
hsa-miR-525-3p	0	0	1	1	0	0	SCG5	secretogranin V (7B2 protein)
hsa-miR-525-3p	0	0	1	1	0	0	CCNDBP1	cyclin D-type binding-protein 1
hsa-miR-525-3p	0	0	1	1	1	1	HERPUD1	homocysteine-inducible, endoplasmic reticulum stress-inducible, ubiquitin-like domain member 1
hsa-miR-525-3p	0	0	0	1	1	1	ZNF91	zinc finger protein 91
hsa-miR-525-3p	0	0	1	1	0	0	LALBA	lactalbumin, alpha-
hsa-miR-525-3p	1	0	1	1	1	1	WNT10B	wingless-type MMTV integration site family, member 10B
hsa-miR-525-3p	0	0	0	1	0	0	HSD11B1L	hydroxysteroid (11-beta) dehydrogenase 1-like
hsa-miR-525-3p	0	0	0	1	1	1	ZNF577	zinc finger protein 577
hsa-miR-525-3p	0	0	0	1	0	0	E4F1	E4F transcription factor 1
hsa-miR-525-3p	0	0	0	1	0	0	LTBP3	latent transforming growth factor beta binding protein 3
hsa-miR-525-3p	0	0	1	1	0	0	KARS	lysyl-tRNA synthetase
hsa-miR-525-3p	0	0	0	1	0	0	C1QTNF4	C1q and tumor necrosis factor related protein 4
hsa-miR-525-3p	0	0	1	1	1	1	WIBG	within bgcn homolog (Drosophila)
hsa-miR-525-3p	1	0	1	1	1	1	UBTF	upstream binding transcription factor, RNA polymerase I
hsa-miR-525-3p	0	0	1	1	0	0	RPS9	ribosomal protein S9
hsa-miR-525-3p	0	0	0	1	0	0	GSX1	GS homeobox 1
hsa-miR-525-3p	1	0	1	1	0	0	RAB24	RAB24, member RAS oncogene family
hsa-miR-525-3p	0	0	1	1	0	0	KREMEN2	kringle containing transmembrane protein 2
hsa-miR-525-3p	0	0	1	1	1	1	H2AFY	H2A histone family, member Y
hsa-miR-525-3p	1	0	1	1	1	1	TMC7	transmembrane channel-like 7
hsa-miR-525-3p	0	0	0	1	0	0	RNMTL1	RNA methyltransferase like 1
hsa-miR-525-3p	1	0	1	1	1	1	TTC39C	tetratricopeptide repeat domain 39C
hsa-miR-525-3p	0	0	1	1	0	0	RNASE2	ribonuclease, RNase A family, 2 (liver, eosinophil-derived neurotoxin)
hsa-miR-525-3p	0	0	0	1	0	0	PTCRA	pre T-cell antigen receptor alpha
hsa-miR-525-3p	0	0	0	1	1	1	NECAB2	N-terminal EF-hand calcium binding protein 2
hsa-miR-525-3p	1	0	1	1	1	1	ONECUT1	one cut homeobox 1
hsa-miR-525-3p	0	0	1	1	1	1	SMOX	spermine oxidase
hsa-miR-525-3p	0	0	1	1	1	1	ATF5	activating transcription factor 5
hsa-miR-525-3p	0	0	1	1	0	0	CYHR1	cysteine/histidine-rich 1
hsa-miR-525-3p	0	0	1	1	0	0	RNF181	ring finger protein 181
hsa-miR-525-3p	0	0	1	1	0	0	RGS12	regulator of G-protein signaling 12
hsa-miR-525-3p	0	0	0	1	1	1	LRRC45	leucine rich repeat containing 45
hsa-miR-525-3p	0	0	1	1	1	1	RAC3	ras-related C3 botulinum toxin substrate 3 (rho family, small GTP binding protein Rac3)
hsa-miR-525-3p	0	0	1	1	0	0	SPRR1A	small proline-rich protein 1A
hsa-miR-525-3p	0	0	0	1	1	1	ZIK1	zinc finger protein interacting with K protein 1 homolog (mouse)
hsa-miR-525-3p	0	0	0	1	0	0	AGXT	alanine-glyoxylate aminotransferase
hsa-miR-525-3p	0	0	1	1	0	0	DNAI2	dynein, axonemal, intermediate chain 2
hsa-miR-525-3p	0	0	0	1	0	0	THOP1	thimet oligopeptidase 1
hsa-miR-525-3p	1	0	1	1	1	1	TMEM110	transmembrane protein 110
hsa-miR-525-3p	0	0	1	1	0	0	MUSTN1	musculoskeletal, embryonic nuclear protein 1
hsa-miR-525-3p	0	0	0	1	0	0	PHYHD1	phytanoyl-CoA dioxygenase domain containing 1
hsa-miR-525-3p	1	0	1	1	1	1	CTBP2	C-terminal binding protein 2
hsa-miR-525-3p	0	0	1	1	1	1	TRMT10C	tRNA methyltransferase 10 homolog C (S. cerevisiae)
hsa-miR-525-3p	1	0	0	1	1	1	ELF3	E74-like factor 3 (ets domain transcription factor, epithelial-specific )
hsa-miR-525-3p	1	0	1	1	0	0	LRCH4	leucine-rich repeats and calponin homology (CH) domain containing 4
hsa-miR-525-3p	0	0	1	1	0	0	SLC4A2	solute carrier family 4, anion exchanger, member 2 (erythrocyte membrane protein band 3-like 1)
hsa-miR-525-3p	1	0	1	1	1	1	TBC1D8B	TBC1 domain family, member 8B (with GRAM domain)
hsa-miR-525-3p	1	0	1	1	1	1	FGFR1	fibroblast growth factor receptor 1
hsa-miR-525-3p	0	0	1	1	0	0	RNASET2	ribonuclease T2
hsa-miR-525-3p	0	0	0	1	1	1	LSP1	lymphocyte-specific protein 1
hsa-miR-525-3p	0	0	1	1	0	0	UBQLN3	ubiquilin 3
hsa-miR-525-3p	0	0	1	1	1	1	TNK1	tyrosine kinase, non-receptor, 1
hsa-miR-525-3p	1	0	1	1	0	0	B3GAT1	beta-1,3-glucuronyltransferase 1 (glucuronosyltransferase P)
hsa-miR-525-3p	0	0	1	1	1	1	PRCP	prolylcarboxypeptidase (angiotensinase C)
hsa-miR-525-3p	0	0	0	1	1	1	C17orf101	chromosome 17 open reading frame 101
hsa-miR-525-3p	1	0	1	1	1	1	CYFIP1	cytoplasmic FMR1 interacting protein 1
hsa-miR-525-3p	0	0	1	1	0	0	SLC29A1	solute carrier family 29 (nucleoside transporters), member 1
hsa-miR-525-3p	0	0	1	1	0	0	DHRS4	dehydrogenase/reductase (SDR family) member 4
hsa-miR-525-3p	0	0	0	1	1	1	SLC15A1	solute carrier family 15 (oligopeptide transporter), member 1
hsa-miR-525-3p	1	0	1	1	1	1	TRIP10	thyroid hormone receptor interactor 10
hsa-miR-525-3p	0	0	1	1	0	0	MON1A	MON1 homolog A (yeast)
hsa-miR-525-3p	0	0	1	1	0	0	NDUFS7	NADH dehydrogenase (ubiquinone) Fe-S protein 7, 20kDa (NADH-coenzyme Q reductase)
hsa-miR-525-3p	0	0	1	1	0	0	MPRIP	myosin phosphatase Rho interacting protein
hsa-miR-525-3p	0	0	0	1	0	0	DEFB103A	defensin, beta 103A
hsa-miR-525-3p	0	0	1	1	1	1	LOH12CR1	loss of heterozygosity, 12, chromosomal region 1
hsa-miR-525-3p	0	0	1	1	0	0	KCNH6	potassium voltage-gated channel, subfamily H (eag-related), member 6
hsa-miR-525-3p	0	0	1	1	0	0	COPG1	coatomer protein complex, subunit gamma 1
hsa-miR-525-3p	0	0	1	1	0	0	FZD2	frizzled family receptor 2
hsa-miR-525-3p	0	0	0	1	0	0	OS9	osteosarcoma amplified 9, endoplasmic reticulum lectin
hsa-miR-525-3p	0	0	1	1	0	0	LCN15	lipocalin 15
hsa-miR-525-3p	0	0	1	1	0	0	FAM89B	family with sequence similarity 89, member B
hsa-miR-525-3p	0	0	1	1	1	1	LRRC31	leucine rich repeat containing 31
hsa-miR-525-3p	1	0	0	1	0	0	APBA3	amyloid beta (A4) precursor protein-binding, family A, member 3
hsa-miR-525-3p	0	0	0	1	0	0	OR52E4	olfactory receptor, family 52, subfamily E, member 4
hsa-miR-525-3p	0	0	0	1	0	0	FAM125A	family with sequence similarity 125, member A
hsa-miR-525-3p	0	0	1	1	0	0	ASCC1	activating signal cointegrator 1 complex subunit 1
hsa-miR-525-3p	0	0	1	1	1	1	MSRA	methionine sulfoxide reductase A
hsa-miR-525-3p	0	0	0	1	1	1	S100Z	S100 calcium binding protein Z
hsa-miR-525-3p	0	0	1	1	1	1	TTC27	tetratricopeptide repeat domain 27
hsa-miR-525-3p	0	0	1	1	0	0	RNF168	ring finger protein 168, E3 ubiquitin protein ligase
hsa-miR-525-3p	0	0	1	1	1	1	CRAT	carnitine O-acetyltransferase
hsa-miR-525-3p	0	0	1	1	0	0	MAMSTR	MEF2 activating motif and SAP domain containing transcriptional regulator
hsa-miR-525-3p	0	0	0	1	0	0	DEFB103B	defensin, beta 103B
hsa-miR-525-3p	0	0	1	1	1	1	ZNF318	zinc finger protein 318
hsa-miR-525-3p	0	0	1	1	0	0	DGKZ	diacylglycerol kinase, zeta
hsa-miR-525-3p	1	0	1	1	1	1	SLC25A42	solute carrier family 25, member 42
hsa-miR-525-3p	1	0	0	1	1	1	TTC7A	tetratricopeptide repeat domain 7A
hsa-miR-525-3p	1	0	1	1	0	0	UBASH3A	ubiquitin associated and SH3 domain containing A
hsa-miR-525-3p	0	0	0	1	0	0	CHST13	carbohydrate (chondroitin 4) sulfotransferase 13
hsa-miR-525-3p	0	0	0	1	1	1	ZNF454	zinc finger protein 454
hsa-miR-525-3p	0	0	1	1	1	1	ASPRV1	aspartic peptidase, retroviral-like 1
hsa-miR-525-3p	1	0	1	1	1	1	BAIAP2	BAI1-associated protein 2
hsa-miR-525-3p	1	0	1	1	0	0	SENP3	SUMO1/sentrin/SMT3 specific peptidase 3
hsa-miR-525-3p	0	0	0	1	0	0	TIGD5	tigger transposable element derived 5
hsa-miR-525-3p	0	0	1	1	0	0	CD151	CD151 molecule (Raph blood group)
hsa-miR-525-3p	1	0	1	1	1	1	EHD3	EH-domain containing 3
hsa-miR-525-3p	0	0	0	1	0	0	FAM3A	family with sequence similarity 3, member A
hsa-miR-525-3p	0	0	0	1	0	0	TRIM75	tripartite motif containing 75
hsa-miR-525-3p	0	0	1	1	0	0	ACADVL	acyl-CoA dehydrogenase, very long chain
hsa-miR-525-3p	0	0	0	1	1	1	MTHFSD	methenyltetrahydrofolate synthetase domain containing
hsa-miR-525-3p	0	0	1	1	0	0	TMC6	transmembrane channel-like 6
hsa-miR-525-3p	1	0	1	1	1	1	OPA3	optic atrophy 3 (autosomal recessive, with chorea and spastic paraplegia)
hsa-miR-525-3p	1	0	1	1	1	1	TPM3	tropomyosin 3
hsa-miR-525-3p	0	0	0	1	0	0	TMEM102	transmembrane protein 102
hsa-miR-525-3p	0	0	0	1	0	0	SPHK1	sphingosine kinase 1
hsa-miR-525-3p	0	0	1	1	1	1	USP39	ubiquitin specific peptidase 39
hsa-miR-525-3p	0	0	1	1	1	1	CPN2	carboxypeptidase N, polypeptide 2
hsa-miR-525-3p	0	0	1	1	1	1	PRX	periaxin
hsa-miR-525-3p	0	0	0	1	0	0	LINC00174	long intergenic non-protein coding RNA 174
hsa-miR-525-3p	0	0	1	1	1	1	TSC22D1	TSC22 domain family, member 1
hsa-miR-525-3p	0	0	0	1	1	1	C21orf2	chromosome 21 open reading frame 2
hsa-miR-525-3p	0	0	1	1	0	0	FAM203A	family with sequence similarity 203, member A
hsa-miR-525-3p	1	0	1	1	0	0	TRAF7	TNF receptor-associated factor 7, E3 ubiquitin protein ligase
hsa-miR-525-3p	1	0	0	1	1	1	SSH1	slingshot homolog 1 (Drosophila)
hsa-miR-525-3p	1	0	0	1	1	1	PLEKHJ1	pleckstrin homology domain containing, family J member 1
hsa-miR-525-3p	1	0	1	1	1	1	TNKS1BP1	tankyrase 1 binding protein 1, 182kDa
hsa-miR-525-3p	1	0	1	1	1	1	PPP6R1	protein phosphatase 6, regulatory subunit 1
hsa-miR-525-3p	0	0	0	1	0	0	NOC2L	nucleolar complex associated 2 homolog (S. cerevisiae)
hsa-miR-525-3p	0	0	1	1	1	1	RBBP8	retinoblastoma binding protein 8
hsa-miR-525-3p	0	0	0	1	0	0	PRM3	protamine 3
hsa-miR-525-3p	0	0	0	1	0	0	OXCT2	3-oxoacid CoA transferase 2
hsa-miR-525-3p	0	0	1	1	1	1	FFAR3	free fatty acid receptor 3
hsa-miR-525-3p	0	0	0	1	1	1	KCNK12	potassium channel, subfamily K, member 12
hsa-miR-525-3p	0	0	0	1	0	0	TSPAN10	tetraspanin 10
hsa-miR-525-3p	1	0	1	1	1	1	BACE2	beta-site APP-cleaving enzyme 2
hsa-miR-525-3p	0	0	1	1	1	1	PPP4R4	protein phosphatase 4, regulatory subunit 4
hsa-miR-525-3p	0	0	1	1	0	0	DHX30	DEAH (Asp-Glu-Ala-His) box polypeptide 30
hsa-miR-525-3p	1	0	1	1	1	1	SEPT9	septin 9
hsa-miR-525-3p	1	0	1	1	1	1	C11orf82	chromosome 11 open reading frame 82
hsa-miR-525-3p	0	0	1	1	1	1	MOB2	MOB kinase activator 2
hsa-miR-525-3p	0	0	0	1	1	1	SIVA1	SIVA1, apoptosis-inducing factor
hsa-miR-525-3p	0	0	1	1	1	1	PPP1R27	protein phosphatase 1, regulatory subunit 27
hsa-miR-525-3p	1	0	1	1	0	0	HDDC3	HD domain containing 3
hsa-miR-525-3p	0	0	0	1	0	0	NSUN5P1	NOP2/Sun domain family, member 5 pseudogene 1
hsa-miR-525-3p	0	0	0	1	0	0	OR56A4	olfactory receptor, family 56, subfamily A, member 4
hsa-miR-525-3p	0	0	0	1	1	1	SLC37A4	solute carrier family 37 (glucose-6-phosphate transporter), member 4
hsa-miR-525-3p	0	0	1	1	1	1	XKR3	XK, Kell blood group complex subunit-related family, member 3
hsa-miR-525-3p	0	0	1	1	1	1	TAB1	TGF-beta activated kinase 1/MAP3K7 binding protein 1
hsa-miR-525-3p	0	0	0	1	0	0	RIMBP3C	RIMS binding protein 3C
hsa-miR-525-3p	1	0	1	1	1	1	OLFML2A	olfactomedin-like 2A
hsa-miR-525-3p	1	0	1	1	1	1	JAG2	jagged 2
hsa-miR-525-3p	0	0	1	1	0	0	SOCS1	suppressor of cytokine signaling 1
hsa-miR-525-3p	0	0	0	1	1	1	EMILIN3	elastin microfibril interfacer 3
hsa-miR-525-3p	0	0	1	1	1	1	TPRN	taperin
hsa-miR-525-3p	0	0	1	1	0	0	TAS1R1	taste receptor, type 1, member 1
hsa-miR-525-3p	1	0	1	1	0	0	TSEN54	tRNA splicing endonuclease 54 homolog (S. cerevisiae)
hsa-miR-525-3p	0	0	1	1	1	1	ZNF137P	zinc finger protein 137, pseudogene
hsa-miR-525-3p	0	0	0	1	1	1	SH3BGR	SH3 domain binding glutamic acid-rich protein
hsa-miR-525-3p	0	0	0	1	0	0	H1FX	H1 histone family, member X
hsa-miR-525-3p	0	0	1	1	0	0	PSMB5	proteasome (prosome, macropain) subunit, beta type, 5
hsa-miR-525-3p	0	0	1	1	0	0	TMEM150A	transmembrane protein 150A
hsa-miR-525-3p	0	0	1	1	0	0	PFDN5	prefoldin subunit 5
hsa-miR-525-3p	0	0	1	1	1	1	INO80C	INO80 complex subunit C
hsa-miR-525-3p	0	0	0	1	0	0	FAM203B	family with sequence similarity 203, member B
hsa-miR-525-3p	0	0	1	1	1	1	C9orf85	chromosome 9 open reading frame 85
hsa-miR-525-3p	0	0	0	1	1	1	CMTM7	CKLF-like MARVEL transmembrane domain containing 7
hsa-miR-525-3p	0	0	1	1	1	1	CCDC73	coiled-coil domain containing 73
hsa-miR-525-3p	0	0	0	1	0	0	WDR25	WD repeat domain 25
hsa-miR-525-3p	0	0	1	1	0	0	C2orf53	chromosome 2 open reading frame 53
hsa-miR-525-3p	1	0	1	1	1	1	SPTB	spectrin, beta, erythrocytic
hsa-miR-525-3p	0	0	1	1	0	0	KATNA1	katanin p60 (ATPase containing) subunit A 1
hsa-miR-525-3p	0	0	1	1	1	1	IFRD2	interferon-related developmental regulator 2
hsa-miR-525-3p	0	0	0	1	1	1	TBCD	tubulin folding cofactor D
hsa-miR-525-3p	0	0	0	1	0	0	FTSJ3	FtsJ homolog 3 (E. coli)
hsa-miR-525-3p	0	0	0	1	1	1	PCID2	PCI domain containing 2
hsa-miR-525-3p	1	0	1	1	1	1	CAPN3	calpain 3, (p94)
hsa-miR-525-3p	0	0	1	1	0	0	IL1F10	interleukin 1 family, member 10 (theta)
hsa-miR-525-3p	1	0	1	1	0	0	ZBTB49	zinc finger and BTB domain containing 49
hsa-miR-525-3p	1	0	1	1	0	0	NRL	neural retina leucine zipper
hsa-miR-525-3p	1	0	1	1	1	1	HNRNPF	heterogeneous nuclear ribonucleoprotein F
hsa-miR-525-3p	0	0	0	1	1	1	ELAC2	elaC homolog 2 (E. coli)
hsa-miR-525-3p	1	0	0	1	0	0	LRFN2	leucine rich repeat and fibronectin type III domain containing 2
hsa-miR-525-3p	0	0	1	1	1	1	SNRPE	small nuclear ribonucleoprotein polypeptide E
hsa-miR-525-3p	0	0	1	1	1	1	MMP28	matrix metallopeptidase 28
hsa-miR-525-3p	0	0	0	1	0	0	DUSP21	dual specificity phosphatase 21
hsa-miR-525-3p	0	0	0	1	0	0	NOSIP	nitric oxide synthase interacting protein
hsa-miR-525-3p	0	0	1	1	1	1	ADAM33	ADAM metallopeptidase domain 33
hsa-miR-525-3p	0	0	0	1	0	0	DUSP15	dual specificity phosphatase 15
hsa-miR-525-3p	0	0	1	1	1	1	HRH3	histamine receptor H3
hsa-miR-525-3p	0	0	1	1	0	0	PGM1	phosphoglucomutase 1
hsa-miR-525-3p	0	0	1	1	0	0	ANXA8L2	annexin A8-like 2
hsa-miR-525-3p	0	0	1	1	1	1	NRG2	neuregulin 2
hsa-miR-525-3p	0	0	1	1	0	0	CYB5A	cytochrome b5 type A (microsomal)
hsa-miR-525-3p	1	0	1	1	1	1	RILPL1	Rab interacting lysosomal protein-like 1
hsa-miR-525-3p	1	0	1	1	0	0	PFKM	phosphofructokinase, muscle
hsa-miR-525-3p	1	0	1	1	1	1	VAPB	VAMP (vesicle-associated membrane protein)-associated protein B and C
hsa-miR-525-3p	0	0	1	1	0	0	GSN	gelsolin
hsa-miR-525-3p	0	0	0	1	0	0	WDR86	WD repeat domain 86
hsa-miR-525-3p	1	0	1	1	1	1	NAPEPLD	N-acyl phosphatidylethanolamine phospholipase D
hsa-miR-525-3p	0	0	1	1	0	0	BRE	brain and reproductive organ-expressed (TNFRSF1A modulator)
hsa-miR-525-3p	0	0	0	1	1	1	DPH5	DPH5 homolog (S. cerevisiae)
hsa-miR-525-3p	0	0	0	1	0	0	PODXL2	podocalyxin-like 2
hsa-miR-525-3p	0	0	1	1	0	0	D2HGDH	D-2-hydroxyglutarate dehydrogenase
hsa-miR-525-3p	0	0	1	1	0	0	GPRC5C	G protein-coupled receptor, family C, group 5, member C
hsa-miR-525-3p	0	0	1	1	0	0	LY6H	lymphocyte antigen 6 complex, locus H
hsa-miR-525-3p	1	0	1	1	1	1	YTHDF1	YTH domain family, member 1
hsa-miR-525-3p	1	0	1	1	1	1	TTC26	tetratricopeptide repeat domain 26
hsa-miR-525-3p	1	0	1	1	1	1	UBAP2L	ubiquitin associated protein 2-like
hsa-miR-525-3p	0	0	0	1	0	0	SOWAHD	sosondowah ankyrin repeat domain family member D
hsa-miR-525-3p	0	0	1	1	0	0	OSGIN1	oxidative stress induced growth inhibitor 1
hsa-miR-525-3p	1	0	1	1	0	0	TH1L	TH1-like (Drosophila)
hsa-miR-525-3p	0	0	1	1	1	1	FLYWCH1	FLYWCH-type zinc finger 1
hsa-miR-525-3p	0	0	0	1	0	0	LPAR6	lysophosphatidic acid receptor 6
hsa-miR-525-3p	0	0	1	1	1	1	TRAF6	TNF receptor-associated factor 6, E3 ubiquitin protein ligase
hsa-miR-525-3p	0	0	1	1	1	1	POFUT2	protein O-fucosyltransferase 2
hsa-miR-525-3p	0	0	1	1	1	1	PQLC1	PQ loop repeat containing 1
hsa-miR-525-3p	0	0	1	1	1	1	HADH	hydroxyacyl-CoA dehydrogenase
hsa-miR-525-3p	0	0	0	1	1	1	COL17A1	collagen, type XVII, alpha 1
hsa-miR-525-3p	1	0	1	1	1	1	DMPK	dystrophia myotonica-protein kinase
hsa-miR-525-3p	0	0	0	1	0	0	EXOC3L1	exocyst complex component 3-like 1
hsa-miR-525-3p	0	0	0	1	0	0	C9orf131	chromosome 9 open reading frame 131
hsa-miR-525-3p	1	0	1	1	0	0	ADAMTSL2	ADAMTS-like 2
hsa-miR-525-3p	1	0	0	1	0	0	ARHGEF1	Rho guanine nucleotide exchange factor (GEF) 1
hsa-miR-525-3p	0	0	0	1	0	0	ENTPD2	ectonucleoside triphosphate diphosphohydrolase 2
hsa-miR-525-3p	0	0	0	1	1	1	ARSG	arylsulfatase G
hsa-miR-525-3p	0	0	0	1	0	0	PDE4C	phosphodiesterase 4C, cAMP-specific
hsa-miR-525-3p	0	0	0	1	0	0	TRIM17	tripartite motif containing 17
hsa-miR-525-3p	0	0	1	1	1	1	CHCHD8	coiled-coil-helix-coiled-coil-helix domain containing 8
hsa-miR-525-3p	0	0	1	1	0	0	BTG4	B-cell translocation gene 4
hsa-miR-525-3p	0	0	1	1	0	0	CEP250	centrosomal protein 250kDa
hsa-miR-525-3p	0	0	0	1	0	0	MYOCD	myocardin
hsa-miR-525-3p	0	0	0	1	1	1	GTF3C1	general transcription factor IIIC, polypeptide 1, alpha 220kDa
hsa-miR-525-3p	0	0	1	1	0	0	FAM149A	family with sequence similarity 149, member A
hsa-miR-525-3p	1	0	1	1	1	1	ARIH2	ariadne homolog 2 (Drosophila)
hsa-miR-525-3p	0	0	1	1	0	0	ACOX3	acyl-CoA oxidase 3, pristanoyl
hsa-miR-525-3p	0	0	0	1	1	1	MYOM1	myomesin 1, 185kDa
hsa-miR-525-3p	0	0	1	1	1	1	TPCN2	two pore segment channel 2
hsa-miR-525-3p	1	0	1	1	0	0	C10orf137	chromosome 10 open reading frame 137
hsa-miR-525-3p	0	0	0	1	1	1	FIGNL1	fidgetin-like 1
hsa-miR-525-3p	0	0	1	1	0	0	GUCA2A	guanylate cyclase activator 2A (guanylin)
hsa-miR-525-3p	0	0	0	1	0	0	RIMBP3B	RIMS binding protein 3B
hsa-miR-525-3p	0	0	0	1	0	0	HHIPL1	HHIP-like 1
hsa-miR-525-3p	1	0	1	1	0	0	PRRC2B	proline-rich coiled-coil 2B
hsa-miR-525-3p	0	0	0	1	0	0	C7orf50	chromosome 7 open reading frame 50
hsa-miR-525-3p	0	0	1	1	1	1	TMEM170A	transmembrane protein 170A
hsa-miR-525-3p	0	0	1	1	0	0	ANXA8	annexin A8
hsa-miR-525-3p	0	0	1	1	0	0	HYAL2	hyaluronoglucosaminidase 2
hsa-miR-525-3p	0	0	0	1	0	0	ANXA8L1	annexin A8-like 1
hsa-miR-525-3p	1	0	1	1	1	1	EPHB4	EPH receptor B4
hsa-miR-525-3p	0	0	1	1	1	1	C1orf177	chromosome 1 open reading frame 177
hsa-miR-525-3p	0	0	0	1	0	0	BCKDHA	branched chain keto acid dehydrogenase E1, alpha polypeptide
hsa-miR-525-3p	0	0	1	1	0	0	TMEM91	transmembrane protein 91
hsa-miR-525-3p	0	0	0	1	1	1	SUSD2	sushi domain containing 2
hsa-miR-525-3p	1	0	1	1	1	1	QSOX2	quiescin Q6 sulfhydryl oxidase 2
hsa-miR-525-3p	0	0	1	1	0	0	FAM3D	family with sequence similarity 3, member D
hsa-miR-525-3p	0	0	0	1	0	0	C17orf80	chromosome 17 open reading frame 80
hsa-miR-525-3p	0	0	0	1	1	1	C20orf166-AS1	C20orf166 antisense RNA 1
hsa-miR-525-3p	0	0	1	1	1	1	PRICKLE4	prickle homolog 4 (Drosophila)
hsa-miR-525-3p	0	0	0	1	0	0	TPGS1	tubulin polyglutamylase complex subunit 1
hsa-miR-525-3p	0	0	0	1	0	0	OFCC1	orofacial cleft 1 candidate 1
hsa-miR-525-3p	0	0	1	1	1	1	RYR1	ryanodine receptor 1 (skeletal)
hsa-miR-525-3p	1	0	1	1	1	1	NUMA1	nuclear mitotic apparatus protein 1
hsa-miR-525-3p	0	0	1	1	0	0	NIF3L1	NIF3 NGG1 interacting factor 3-like 1 (S. cerevisiae)
hsa-miR-525-3p	1	0	1	1	0	0	EFNA4	ephrin-A4
hsa-miR-525-3p	1	0	1	1	1	1	MDK	midkine (neurite growth-promoting factor 2)
hsa-miR-525-3p	0	0	0	1	0	0	CYP2D6	cytochrome P450, family 2, subfamily D, polypeptide 6
hsa-miR-525-3p	0	0	1	1	0	0	AXDND1	axonemal dynein light chain domain containing 1
hsa-miR-525-3p	0	0	1	1	1	1	PARP9	poly (ADP-ribose) polymerase family, member 9
hsa-miR-525-3p	1	0	1	1	1	1	DIS3L2	DIS3 mitotic control homolog (S. cerevisiae)-like 2
hsa-miR-525-3p	1	0	1	1	1	1	P4HA2	prolyl 4-hydroxylase, alpha polypeptide II
hsa-miR-525-3p	0	0	1	1	0	0	NPSR1	neuropeptide S receptor 1
hsa-miR-525-3p	1	0	1	1	1	1	SLC6A9	solute carrier family 6 (neurotransmitter transporter, glycine), member 9
hsa-miR-525-3p	0	0	1	1	0	0	NTNG2	netrin G2
hsa-miR-525-3p	0	0	0	1	1	1	FAM217B	family with sequence similarity 217, member B
hsa-miR-525-3p	1	0	1	1	1	1	NTRK3	neurotrophic tyrosine kinase, receptor, type 3
hsa-miR-525-3p	0	0	0	1	0	0	PPP1R13L	protein phosphatase 1, regulatory subunit 13 like
hsa-miR-525-3p	1	0	0	1	0	0	ABTB1	ankyrin repeat and BTB (POZ) domain containing 1
hsa-miR-525-3p	1	0	1	1	0	0	KAZN	kazrin, periplakin interacting protein
hsa-miR-525-3p	0	0	1	1	1	1	PTPLA	protein tyrosine phosphatase-like (proline instead of catalytic arginine), member A
hsa-miR-525-3p	1	0	1	1	1	1	RCSD1	RCSD domain containing 1
hsa-miR-525-3p	0	0	0	1	0	0	KRT19	keratin 19
hsa-miR-525-3p	0	0	1	1	0	0	TXNRD2	thioredoxin reductase 2
hsa-miR-525-3p	0	0	0	1	1	1	KRTAP5-9	keratin associated protein 5-9
hsa-miR-525-3p	0	0	0	1	1	1	MOK	MOK protein kinase
hsa-miR-525-3p	1	0	1	1	1	1	HNRNPU	heterogeneous nuclear ribonucleoprotein U (scaffold attachment factor A)
hsa-miR-525-3p	0	0	0	1	0	0	GNG4	guanine nucleotide binding protein (G protein), gamma 4
hsa-miR-525-3p	0	0	1	1	0	0	HIST3H2A	histone cluster 3, H2a
hsa-miR-525-3p	0	0	0	1	0	0	GUK1	guanylate kinase 1
hsa-miR-525-3p	0	0	1	1	0	0	PSEN2	presenilin 2 (Alzheimer disease 4)
hsa-miR-525-3p	0	0	0	1	0	0	C4BPA	complement component 4 binding protein, alpha
hsa-miR-525-3p	0	0	1	1	1	1	IL24	interleukin 24
hsa-miR-525-3p	0	0	0	1	1	1	LAD1	ladinin 1
hsa-miR-525-3p	0	0	0	1	0	0	ULBP3	UL16 binding protein 3
hsa-miR-525-3p	0	0	1	1	0	0	RGS8	regulator of G-protein signaling 8
hsa-miR-525-3p	0	0	0	1	1	1	QSOX1	quiescin Q6 sulfhydryl oxidase 1
hsa-miR-525-3p	1	0	1	1	1	1	TOR3A	torsin family 3, member A
hsa-miR-525-3p	1	0	1	1	0	0	REPS1	RALBP1 associated Eps domain containing 1
hsa-miR-525-3p	0	0	0	1	1	1	GPA33	glycoprotein A33 (transmembrane)
hsa-miR-525-3p	1	0	1	1	1	1	RGS4	regulator of G-protein signaling 4
hsa-miR-525-3p	0	0	1	1	1	1	CRP	C-reactive protein, pentraxin-related
hsa-miR-525-3p	0	0	1	1	0	0	PMVK	phosphomevalonate kinase
hsa-miR-525-3p	1	0	1	1	1	1	FAM184A	family with sequence similarity 184, member A
hsa-miR-525-3p	0	0	1	1	1	1	C1orf43	chromosome 1 open reading frame 43
hsa-miR-525-3p	0	0	1	1	1	1	PDSS2	prenyl (decaprenyl) diphosphate synthase, subunit 2
hsa-miR-525-3p	0	0	1	1	0	0	NBPF9	neuroblastoma breakpoint family, member 9
hsa-miR-525-3p	0	0	0	1	0	0	ACP6	acid phosphatase 6, lysophosphatidic
hsa-miR-525-3p	0	0	1	1	1	1	POLR3GL	polymerase (RNA) III (DNA directed) polypeptide G (32kD)-like
hsa-miR-525-3p	1	0	1	1	1	1	SCAF11	SR-related CTD-associated factor 11
hsa-miR-525-3p	0	0	0	1	1	1	GABRR1	gamma-aminobutyric acid (GABA) A receptor, rho 1
hsa-miR-525-3p	1	0	1	1	1	1	MPP1	membrane protein, palmitoylated 1, 55kDa
hsa-miR-525-3p	0	0	1	1	1	1	UBL4A	ubiquitin-like 4A
hsa-miR-525-3p	0	0	0	1	0	0	CALHM3	calcium homeostasis modulator 3
hsa-miR-525-3p	0	0	0	1	0	0	ABHD16B	abhydrolase domain containing 16B
hsa-miR-525-3p	0	0	1	1	0	0	PITX3	paired-like homeodomain 3
hsa-miR-525-3p	0	0	0	1	1	1	HENMT1	HEN1 methyltransferase homolog 1 (Arabidopsis)
hsa-miR-525-3p	0	0	0	1	0	0	SRPK3	SRSF protein kinase 3
hsa-miR-525-3p	0	0	1	1	1	1	NPM3	nucleophosmin/nucleoplasmin 3
hsa-miR-525-3p	1	0	1	1	1	1	CDC14A	CDC14 cell division cycle 14 homolog A (S. cerevisiae)
hsa-miR-525-3p	0	0	0	1	0	0	HAUS7	HAUS augmin-like complex, subunit 7
hsa-miR-525-3p	0	0	1	1	0	0	AVPI1	arginine vasopressin-induced 1
hsa-miR-525-3p	0	0	1	1	0	0	IFI44	interferon-induced protein 44
hsa-miR-525-3p	1	0	1	1	1	1	LRRC1	leucine rich repeat containing 1
hsa-miR-525-3p	1	0	1	1	0	0	EFHC1	EF-hand domain (C-terminal) containing 1
hsa-miR-525-3p	0	0	0	1	0	0	TMEM61	transmembrane protein 61
hsa-miR-525-3p	0	0	0	1	1	1	TTC22	tetratricopeptide repeat domain 22
hsa-miR-525-3p	0	0	1	1	1	1	NKAP	NFKB activating protein
hsa-miR-525-3p	0	0	0	1	0	0	C9orf37	chromosome 9 open reading frame 37
hsa-miR-525-3p	0	0	0	1	0	0	PNPLA7	patatin-like phospholipase domain containing 7
hsa-miR-525-3p	0	0	1	1	0	0	ENTPD8	ectonucleoside triphosphate diphosphohydrolase 8
hsa-miR-525-3p	0	0	0	1	0	0	NPDC1	neural proliferation, differentiation and control, 1
hsa-miR-525-3p	0	0	0	1	0	0	KIAA1984	KIAA1984
hsa-miR-525-3p	0	0	0	1	0	0	TMEM141	transmembrane protein 141
hsa-miR-525-3p	0	0	1	1	1	1	MED22	mediator complex subunit 22
hsa-miR-525-3p	0	0	0	1	0	0	GBGT1	globoside alpha-1,3-N-acetylgalactosaminyltransferase 1
hsa-miR-525-3p	1	0	1	1	1	1	RALGDS	ral guanine nucleotide dissociation stimulator
hsa-miR-525-3p	0	0	1	1	0	0	GTF3C5	general transcription factor IIIC, polypeptide 5, 63kDa
hsa-miR-525-3p	0	0	1	1	1	1	C10orf57	chromosome 10 open reading frame 57
hsa-miR-525-3p	1	0	1	1	1	1	AIF1L	allograft inflammatory factor 1-like
hsa-miR-525-3p	1	0	1	1	1	1	RIMS3	regulating synaptic membrane exocytosis 3
hsa-miR-525-3p	0	0	1	1	1	1	NXF3	nuclear RNA export factor 3
hsa-miR-525-3p	0	0	0	1	0	0	SEMG2	semenogelin II
hsa-miR-525-3p	0	0	0	1	1	1	WFDC12	WAP four-disulfide core domain 12
hsa-miR-525-3p	1	0	1	1	1	1	TOMM34	translocase of outer mitochondrial membrane 34
hsa-miR-525-3p	0	0	1	1	0	0	URM1	ubiquitin related modifier 1
hsa-miR-525-3p	0	0	1	1	1	1	CCND3	cyclin D3
hsa-miR-525-3p	1	0	1	1	0	0	ST6GALNAC6	ST6 (alpha-N-acetyl-neuraminyl-2,3-beta-galactosyl-1,3)-N-acetylgalactosaminide alpha-2,6-sialyltransferase 6
hsa-miR-525-3p	0	0	1	1	0	0	AK1	adenylate kinase 1
hsa-miR-525-3p	0	0	1	1	0	0	FPGS	folylpolyglutamate synthase
hsa-miR-525-3p	0	0	1	1	0	0	C10orf35	chromosome 10 open reading frame 35
hsa-miR-525-3p	0	0	0	1	1	1	TSPAN15	tetraspanin 15
hsa-miR-525-3p	0	0	0	1	1	1	TBX22	T-box 22
hsa-miR-525-3p	0	0	1	1	1	1	SLC2A8	solute carrier family 2 (facilitated glucose transporter), member 8
hsa-miR-525-3p	1	0	1	1	1	1	PHC2	polyhomeotic homolog 2 (Drosophila)
hsa-miR-525-3p	1	0	0	1	1	1	VSTM2L	V-set and transmembrane domain containing 2 like
hsa-miR-525-3p	1	0	1	1	1	1	NR6A1	nuclear receptor subfamily 6, group A, member 1
hsa-miR-525-3p	0	0	1	1	1	1	FBXO36	F-box protein 36
hsa-miR-525-3p	0	0	1	1	1	1	BAI2	brain-specific angiogenesis inhibitor 2
hsa-miR-525-3p	0	0	1	1	0	0	HCRTR1	hypocretin (orexin) receptor 1
hsa-miR-525-3p	0	0	0	1	0	0	SERINC2	serine incorporator 2
hsa-miR-525-3p	1	0	0	1	1	1	CNTRL	centriolin
hsa-miR-525-3p	0	0	0	1	0	0	SMPDL3B	sphingomyelin phosphodiesterase, acid-like 3B
hsa-miR-525-3p	1	0	1	1	1	1	EPB41L1	erythrocyte membrane protein band 4.1-like 1
hsa-miR-525-3p	1	0	1	1	1	1	PRKG1	protein kinase, cGMP-dependent, type I
hsa-miR-525-3p	0	0	0	1	0	0	SLC18A3	solute carrier family 18 (vesicular acetylcholine), member 3
hsa-miR-525-3p	0	0	0	1	0	0	HDHD3	haloacid dehalogenase-like hydrolase domain containing 3
hsa-miR-525-3p	0	0	0	1	0	0	FAM110D	family with sequence similarity 110, member D
hsa-miR-525-3p	0	0	1	1	1	1	AUNIP	aurora kinase A and ninein interacting protein
hsa-miR-525-3p	0	0	1	1	1	1	FAM21C	family with sequence similarity 21, member C
hsa-miR-525-3p	1	0	1	1	1	1	IL28RA	interleukin 28 receptor, alpha (interferon, lambda receptor)
hsa-miR-525-3p	0	0	0	1	0	0	KIFC1	kinesin family member C1
hsa-miR-525-3p	0	0	1	1	0	0	FRRS1L	ferric-chelate reductase 1-like
hsa-miR-525-3p	0	0	0	1	1	1	C1QC	complement component 1, q subcomponent, C chain
hsa-miR-525-3p	1	0	1	1	0	0	RNF5	ring finger protein 5, E3 ubiquitin protein ligase
hsa-miR-525-3p	0	0	1	1	1	1	CAPZB	capping protein (actin filament) muscle Z-line, beta
hsa-miR-525-3p	0	0	0	1	1	1	TBXA2R	thromboxane A2 receptor
hsa-miR-525-3p	0	0	1	1	1	1	FAM22G	family with sequence similarity 22, member G
hsa-miR-525-3p	1	0	1	1	1	1	METTL8	methyltransferase like 8
hsa-miR-525-3p	0	0	0	1	0	0	RSG1	REM2 and RAB-like small GTPase 1
hsa-miR-525-3p	1	0	1	1	1	1	C20orf112	chromosome 20 open reading frame 112
hsa-miR-525-3p	0	0	1	1	0	0	AUH	AU RNA binding protein/enoyl-CoA hydratase
hsa-miR-525-3p	0	0	1	1	1	1	ING1	inhibitor of growth family, member 1
hsa-miR-525-3p	1	0	1	1	1	1	COL4A1	collagen, type IV, alpha 1
hsa-miR-525-3p	1	0	1	1	0	0	MCCD1	mitochondrial coiled-coil domain 1
hsa-miR-525-3p	1	0	0	1	1	1	PRAF2	PRA1 domain family, member 2
hsa-miR-525-3p	1	0	0	1	0	0	NRM	nurim (nuclear envelope membrane protein)
hsa-miR-525-3p	1	0	1	1	1	1	TLE4	transducin-like enhancer of split 4 (E(sp1) homolog, Drosophila)
hsa-miR-525-3p	1	0	1	1	0	0	PIP4K2A	phosphatidylinositol-5-phosphate 4-kinase, type II, alpha
hsa-miR-525-3p	0	0	1	1	0	0	YIF1A	Yip1 interacting factor homolog A (S. cerevisiae)
hsa-miR-525-3p	0	0	0	1	0	0	POLD1	polymerase (DNA directed), delta 1, catalytic subunit
hsa-miR-525-3p	1	0	1	1	0	0	DNAJC1	DnaJ (Hsp40) homolog, subfamily C, member 1
hsa-miR-525-3p	0	0	1	1	1	1	GFAP	glial fibrillary acidic protein
hsa-miR-525-3p	0	0	1	1	1	1	APITD1	apoptosis-inducing, TAF9-like domain 1
hsa-miR-525-3p	0	0	1	1	1	1	CORT	cortistatin
hsa-miR-525-3p	1	0	1	1	1	1	TRPM3	transient receptor potential cation channel, subfamily M, member 3
hsa-miR-525-3p	0	0	1	1	1	1	LZIC	leucine zipper and CTNNBIP1 domain containing
hsa-miR-525-3p	0	0	1	1	1	1	TJP2	tight junction protein 2
hsa-miR-525-3p	1	0	1	1	0	0	ARHGAP39	Rho GTPase activating protein 39
hsa-miR-525-3p	0	0	0	1	0	0	GPR157	G protein-coupled receptor 157
hsa-miR-525-3p	0	0	1	1	0	0	SLC2A5	solute carrier family 2 (facilitated glucose/fructose transporter), member 5
hsa-miR-525-3p	0	0	1	1	0	0	CCDC114	coiled-coil domain containing 114
hsa-miR-525-3p	0	0	1	1	1	1	CNTNAP3	contactin associated protein-like 3
hsa-miR-525-3p	1	0	1	1	1	1	HIF3A	hypoxia inducible factor 3, alpha subunit
hsa-miR-525-3p	0	0	1	1	0	0	BANF2	barrier to autointegration factor 2
hsa-miR-525-3p	0	0	0	1	0	0	ACOT7	acyl-CoA thioesterase 7
hsa-miR-525-3p	0	0	0	1	0	0	ASB10	ankyrin repeat and SOCS box containing 10
hsa-miR-525-3p	1	0	1	1	0	0	GBA2	glucosidase, beta (bile acid) 2
hsa-miR-525-3p	0	0	0	1	1	1	GPLD1	glycosylphosphatidylinositol specific phospholipase D1
hsa-miR-525-3p	1	0	1	1	1	1	MRS2	MRS2 magnesium homeostasis factor homolog (S. cerevisiae)
hsa-miR-525-3p	0	0	0	1	0	0	APRT	adenine phosphoribosyltransferase
hsa-miR-525-3p	0	0	1	1	0	0	HES5	hairy and enhancer of split 5 (Drosophila)
hsa-miR-525-3p	1	0	1	1	1	1	FAM107B	family with sequence similarity 107, member B
hsa-miR-525-3p	1	0	1	1	1	1	VCP	valosin containing protein
hsa-miR-525-3p	0	0	1	1	0	0	FANCG	Fanconi anemia, complementation group G
hsa-miR-525-3p	0	0	0	1	1	1	GDF9	growth differentiation factor 9
hsa-miR-525-3p	0	0	1	1	1	1	CAMK1D	calcium/calmodulin-dependent protein kinase ID
hsa-miR-525-3p	0	0	1	1	1	1	PRR5L	proline rich 5 like
hsa-miR-525-3p	1	0	1	1	1	1	ARX	aristaless related homeobox
hsa-miR-525-3p	0	0	1	1	1	1	B3GALT6	UDP-Gal:betaGal beta 1,3-galactosyltransferase polypeptide 6
hsa-miR-525-3p	0	0	1	1	0	0	FAM65A	family with sequence similarity 65, member A
hsa-miR-525-3p	1	0	1	1	1	1	HIVEP1	human immunodeficiency virus type I enhancer binding protein 1
hsa-miR-525-3p	1	0	1	1	1	1	ASPH	aspartate beta-hydroxylase
hsa-miR-525-3p	0	0	0	1	0	0	KLHL34	kelch-like 34 (Drosophila)
hsa-miR-525-3p	0	0	1	1	1	1	BAG1	BCL2-associated athanogene
hsa-miR-525-3p	0	0	1	1	1	1	PCBP2	poly(rC) binding protein 2
hsa-miR-525-3p	0	0	1	1	1	1	RS1	retinoschisin 1
hsa-miR-525-3p	0	0	1	1	0	0	SLC4A11	solute carrier family 4, sodium borate transporter, member 11
hsa-miR-525-3p	0	0	1	1	0	0	EXOC3L4	exocyst complex component 3-like 4
hsa-miR-525-3p	0	0	0	1	1	1	ECI2	enoyl-CoA delta isomerase 2
hsa-miR-525-3p	0	0	0	1	0	0	S100G	S100 calcium binding protein G
hsa-miR-525-3p	0	0	0	1	0	0	HADHA	hydroxyacyl-CoA dehydrogenase/3-ketoacyl-CoA thiolase/enoyl-CoA hydratase (trifunctional protein), alpha subunit
hsa-miR-525-3p	1	0	0	1	1	1	SLC46A3	solute carrier family 46, member 3
hsa-miR-525-3p	0	0	1	1	0	0	ESRRB	estrogen-related receptor beta
hsa-miR-525-3p	0	0	0	1	1	1	ASGR1	asialoglycoprotein receptor 1
hsa-miR-525-3p	0	0	1	1	0	0	MUC16	mucin 16, cell surface associated
hsa-miR-525-3p	0	0	0	1	0	0	PP13004	uncharacterized LOC402481
hsa-miR-525-3p	1	0	1	1	1	1	TEC	tec protein tyrosine kinase
hsa-miR-525-3p	0	0	1	1	1	1	NT5C3	5'-nucleotidase, cytosolic III
hsa-miR-525-3p	0	0	1	1	0	0	BAIAP2L2	BAI1-associated protein 2-like 2
hsa-miR-525-3p	0	0	1	1	0	0	EIF3L	eukaryotic translation initiation factor 3, subunit L
hsa-miR-525-3p	1	0	1	1	1	1	RCL1	RNA terminal phosphate cyclase-like 1
hsa-miR-525-3p	0	0	0	1	0	0	KRTAP5-1	keratin associated protein 5-1
hsa-miR-525-3p	0	0	1	1	0	0	RBCK1	RanBP-type and C3HC4-type zinc finger containing 1
hsa-miR-525-3p	1	0	1	1	0	0	FSCN1	fascin homolog 1, actin-bundling protein (Strongylocentrotus purpuratus)
hsa-miR-525-3p	1	0	1	1	1	1	AFAP1	actin filament associated protein 1
hsa-miR-525-3p	1	0	1	1	1	1	KCNA1	potassium voltage-gated channel, shaker-related subfamily, member 1 (episodic ataxia with myokymia)
hsa-miR-525-3p	0	0	1	1	0	0	FAM176C	family with sequence similarity 176, member C
hsa-miR-525-3p	1	0	1	1	1	1	DSEL	dermatan sulfate epimerase-like
hsa-miR-525-3p	0	0	0	1	0	0	IGLL3P	immunoglobulin lambda-like polypeptide 3, pseudogene
hsa-miR-525-3p	0	0	1	1	0	0	DHRS4L2	dehydrogenase/reductase (SDR family) member 4 like 2
hsa-miR-525-3p	0	0	1	1	0	0	OTUD7A	OTU domain containing 7A
hsa-miR-525-3p	1	0	1	1	1	1	NME4	NME/NM23 nucleoside diphosphate kinase 4
hsa-miR-525-3p	1	0	1	1	1	1	IMPA2	inositol(myo)-1(or 4)-monophosphatase 2
hsa-miR-525-3p	0	0	0	1	0	0	TMEM200C	transmembrane protein 200C
hsa-miR-525-3p	0	0	1	1	1	1	GTPBP8	GTP-binding protein 8 (putative)
hsa-miR-525-3p	0	0	0	1	1	1	MRPL2	mitochondrial ribosomal protein L2
hsa-miR-525-3p	0	0	0	1	0	0	UFSP1	UFM1-specific peptidase 1 (non-functional)
hsa-miR-525-3p	0	0	0	1	1	1	SIRT3	sirtuin 3
hsa-miR-525-3p	1	0	1	1	1	1	KCNJ10	potassium inwardly-rectifying channel, subfamily J, member 10
hsa-miR-525-3p	0	0	1	0	1	1	ZC3HAV1	zinc finger CCCH-type, antiviral 1
